# Supplementary material for: Identification of diagnostic biomarkers and potential therapeutic drugs in focal segmental glomerulosclerosis with metabolic syndrome by integrating bioinformatics and machine learning
Source: Research Square preprint supplement (doi:10.21203/rs.3.rs-5609059/v1), 2024-12-24
Supplement: Supplementary file 1 [file 133 common genes between FSGS and MS.pdf › 附件/133 common genes between FSGS and MS.pdf]

MS (Limma) | FSGS (WGCNA)

CLDND2

MORC2-AS1

ZNF773

ZNF763

TMEM158

LLPH

CROCCP2

SPRR2E

CX3CR1

ZBTB21

BEX1

BEGAIN

GZMH

EEFSEC

THY1

NXNL1

CCDC148

C12orf60

NGF

TRPC6

TBX2

PI16

FZD1

PLAU

CCR1

CYP2D6

NBPF4

MYH8

SLC35E4

REEP2

RTN4R

DLG2

CACNG4

USP28

LSMEM1

CDIPTOSP

XIRP1

PODN

CDS1

APOA2

CCL4L2

GTF2H1

CAMP

C1QTNF7

SPRY2

OR52B2

PGLYRP1

OR3A1

C5orf38

CCL2

KIF12  
UBE2Q2P1  
PTX4  
ARMCX1  
CDC42EP5  
RBP2  
POM121L10P  
LCORL  
RSP04  
FAM161B  
C11orf49  
CFH  
FUT5  
KRTAP10-5  
PTMAP11  
IL17B  
ARSJ  
NACAD  
SYN1  
OR4C3  
ZNF497  
MED11  
HMGB3P1  
CDC42EP1  
PDK1  
NANOG  
CNGA3  
SNORD55  
SNORD38B  
RELN  
RNF217  
CXCL3  
TSSK2  
HOXA13  
ZNF595  
ZNF184  
GAL  
THTPA  
KRT79  
CDY2B  
FFAR2  
CLMP  
RLN3  
OR3A2  
COL1A1  
FOXE3  
ANKRD33B  
ESR2  
OR13J1  
ZACN  
COL8A1

DEFA3  
ZDHC11B  
MLPH  
STAT3  
ZFPM2  
ZNF442  
UGT2A1  
KRT86  
TPPP  
LMCD1  
SDR16C6P  
HOXC4  
CCNI2  
CDK18  
TMEM53  
IFI27  
GUCY2EP  
GNAT2  
MMP13  
CATSPER3  
LHFPL1  
KCNA6  
RPS6KA6  
SNORD101  
KLF4  
ZNF623  
OTUB2  
IFNA14  
KCNRG  
ZFAT  
ZNF585B  
ARHGEF10L
