# Supplementary material for: Identification of diagnostic biomarkers and potential therapeutic drugs in focal segmental glomerulosclerosis with metabolic syndrome by integrating bioinformatics and machine learning
Source: Research Square preprint supplement (doi:10.21203/rs.3.rs-5609059/v1), 2024-12-24
Supplement: Supplementary file 2 [file GSE200828_series_matrix.pdf › 附件/GSE200828_series_matrix.pdf]

| ID_REF    | GSM604456 | GSM604456 | GSM604456 | GSM604456 | GSM604457 | GSM604457 | GSM604457 | GSM604457 |
|-----------|-----------|-----------|-----------|-----------|-----------|-----------|-----------|-----------|
| 100009613 | 1. 683867 | 1. 967026 | 1. 787918 | 2. 165141 | 1. 507901 | 2. 257884 | 1. 552113 | 1. 980685 |
| 100009676 | 3. 273705 | 3. 275655 | 3. 643978 | 4. 19189  | 2. 311643 | 3. 916177 | 4. 181605 | 2. 870254 |
| 10000_at  | 8. 410002 | 8. 610604 | 8. 095397 | 8. 447874 | 8. 058139 | 8. 241658 | 8. 397262 | 8. 487212 |
| 10001_at  | 6. 883883 | 5. 972018 | 7. 049616 | 5. 916534 | 6. 127883 | 6. 748456 | 5. 976208 | 6. 653191 |
| 10002_at  | 1. 355596 | 1. 523501 | 1. 597915 | 1. 56114  | 2. 808518 | 2. 877596 | 2. 305857 | 1. 567992 |
| 100033413 | 1. 550519 | 1. 172025 | 0. 757616 | 3. 109847 | 1. 362608 | 2. 300017 | 1. 392641 | 1. 621036 |
| 100033422 | 1. 78916  | 2. 320114 | 1. 738808 | 2. 115306 | 0. 798853 | 1. 561624 | 1. 60793  | 1. 214503 |
| 100033423 | 2. 268402 | 1. 02457  | 1. 259218 | 1. 303108 | 1. 452028 | 1. 073351 | 1. 983887 | 1. 054905 |
| 100033424 | 0. 746352 | 0. 965708 | 1. 473788 | 1. 307595 | 1. 679859 | 2. 216947 | 1. 253192 | 2. 213755 |
| 100033425 | 0. 473733 | 0. 708253 | 2. 569184 | 0. 693977 | 1. 270882 | 0. 958685 | 0. 984912 | 4. 661085 |
| 100033426 | 5. 679273 | 5. 245535 | 6. 357443 | 4. 557711 | 2. 714172 | 4. 293686 | 4. 552993 | 3. 509654 |
| 100033427 | 7. 451935 | 6. 30166  | 7. 249374 | 7. 510639 | 5. 195028 | 6. 760265 | 7. 090078 | 6. 015462 |
| 100033428 | 1. 668074 | 1. 044367 | 1. 093224 | 2. 569368 | 1. 723987 | 1. 351016 | 2. 424432 | 2. 400923 |
| 100033430 | 1. 688032 | 0. 823141 | 1. 125586 | 0. 921054 | 1. 87503  | 0. 693796 | 0. 851023 | 1. 356619 |
| 100033431 | 5. 098598 | 3. 037123 | 4. 191639 | 4. 714453 | 3. 747239 | 4. 462291 | 3. 82081  | 1. 935038 |
| 100033432 | 4. 474366 | 5. 558036 | 5. 92567  | 4. 230307 | 3. 772366 | 5. 100204 | 2. 045071 | 4. 871377 |
| 100033434 | 1. 486412 | 1. 405347 | 1. 294778 | 1. 540297 | 1. 478681 | 1. 726785 | 2. 335003 | 1. 16594  |
| 100033435 | 2. 486459 | 2. 372659 | 0. 613619 | 0. 459154 | 0. 581549 | 2. 370465 | 4. 004593 | 0. 960513 |
| 100033436 | 0. 930536 | 0. 645342 | 2. 652374 | 0. 880071 | 1. 504861 | 0. 932077 | 1. 982751 | 0. 768771 |
| 100033437 | 0. 567905 | 0. 919146 | 0. 698956 | 0. 527475 | 1. 167168 | 1. 058418 | 0. 672941 | 0. 979384 |
| 100033438 | 1. 533867 | 1. 205038 | 2. 427203 | 0. 9255   | 1. 253151 | 1. 819448 | 0. 889333 | 2. 124526 |
| 100033439 | 3. 226341 | 1. 518069 | 0. 758304 | 1. 107058 | 2. 038052 | 2. 469705 | 2. 227239 | 1. 589708 |
| 100033440 | 1. 090542 | 1. 023342 | 0. 684142 | 0. 711705 | 0. 983357 | 0. 48559  | 2. 096976 | 0. 950772 |
| 100033441 | 0. 638865 | 0. 668291 | 0. 921768 | 0. 849744 | 0. 823994 | 0. 474222 | 0. 931563 | 1. 846306 |
| 100033445 | 0. 905201 | 0. 70341  | 1. 093553 | 0. 629511 | 1. 463675 | 0. 955841 | 0. 58947  | 1. 203791 |
| 100033447 | 1. 089155 | 0. 802543 | 0. 368467 | 0. 75586  | 1. 229987 | 1. 139344 | 0. 615002 | 1. 048436 |
| 100033451 | 0. 909765 | 0. 655151 | 0. 695049 | 0. 786411 | 0. 695413 | 0. 708973 | 0. 882833 | 0. 736512 |
| 100033453 | 0. 640654 | 0. 760864 | 1. 218792 | 0. 935439 | 1. 280027 | 1. 515524 | 0. 956256 | 1. 138074 |
| 100033603 | 0. 90688  | 0. 739622 | 1. 182352 | 0. 734395 | 0. 887993 | 0. 590738 | 0. 775782 | 0. 935963 |
| 100033801 | 0. 736736 | 0. 959375 | 1. 384498 | 1. 154043 | 0. 929652 | 0. 919863 | 1. 654735 | 1. 960895 |
| 100033804 | 0. 552523 | 0. 765911 | 1. 074772 | 0. 81241  | 1. 025625 | 0. 809067 | 0. 52591  | 1. 19994  |
| 100033805 | 0. 819178 | 1. 087865 | 0. 944303 | 0. 868799 | 0. 893771 | 0. 758045 | 0. 798713 | 1. 070132 |
| 100033806 | 1. 229117 | 0. 902139 | 3. 040124 | 1. 754106 | 1. 799964 | 1. 345263 | 2. 187083 | 1. 183247 |
| 100033807 | 1. 092878 | 0. 601062 | 1. 07836  | 0. 90642  | 0. 916748 | 0. 90811  | 2. 457214 | 0. 872526 |
| 100033808 | 1. 341608 | 1. 107343 | 1. 206841 | 0. 725511 | 0. 951459 | 0. 81906  | 0. 471159 | 1. 046433 |
| 100033809 | 0. 857732 | 0. 656404 | 0. 906391 | 0. 816217 | 1. 956187 | 0. 714779 | 0. 932999 | 1. 002946 |
| 100033811 | 0. 63359  | 0. 930584 | 0. 704183 | 0. 705772 | 1. 008825 | 0. 776808 | 0. 712332 | 1. 369298 |
| 100033812 | 0. 750727 | 0. 776584 | 0. 654498 | 1. 227691 | 2. 148425 | 0. 686046 | 0. 715103 | 0. 785626 |
| 100033813 | 0. 74018  | 0. 588473 | 1. 056921 | 0. 625428 | 0. 641118 | 2. 020598 | 0. 668261 | 1. 10411  |
| 100033814 | 0. 794299 | 0. 550845 | 0. 753717 | 0. 785119 | 0. 790091 | 1. 414833 | 0. 66895  | 0. 736398 |
| 100033815 | 1. 465002 | 0. 806922 | 0. 984379 | 1. 213822 | 2. 024064 | 1. 336293 | 0. 600838 | 1. 557444 |
| 100033820 | 2. 798337 | 0. 977141 | 1. 66712  | 1. 765997 | 1. 944012 | 2. 881181 | 1. 504153 | 1. 167907 |
| 100033821 | 0. 673743 | 0. 985478 | 2. 773838 | 0. 985228 | 0. 786309 | 3. 234713 | 0. 974527 | 1. 348258 |
| 100033822 | 0. 848969 | 1. 062824 | 0. 778692 | 0. 653311 | 1. 307433 | 0. 856013 | 1. 941092 | 1. 05167  |
| 100036563 | 2. 089485 | 1. 367568 | 2. 256507 | 0. 874333 | 1. 153093 | 1. 554549 | 1. 075643 | 1. 710555 |
| 100036564 | 1. 017397 | 1. 15671  | 1. 667988 | 1. 318405 | 1. 858776 | 0. 981369 | 1. 683581 | 0. 988057 |
| 100036565 | 1. 500429 | 0. 354251 | 0. 723475 | 0. 685175 | 0. 709545 | 1. 19479  | 0. 722237 | 0. 827731 |
| 100036566 | 0. 935773 | 2. 088302 | 0. 744928 | 0. 720485 | 0. 932316 | 1. 09159  | 2. 738736 | 1. 299257 |
| 100037417 | 4. 263425 | 5. 612269 | 4. 835189 | 3. 809781 | 4. 139499 | 3. 952508 | 3. 753095 | 4. 210847 |
| 100038246 | 2. 185401 | 1. 973687 | 3. 001517 | 2. 585259 | 2. 98286  | 3. 772319 | 2. 352448 | 2. 20035  |

10003\_at 1.852048 2.752559 2.864216 2.05492 2.336424 0.790286 3.273542 1.344997  
100048912 1.386304 1.917747 2.027678 1.319684 1.934337 1.613701 1.784486 1.082243  
100049587 5.419751 6.26383 6.139433 7.293246 2.094284 5.103542 4.632532 5.398298  
10004\_at 4.888776 3.728381 3.346096 3.43098 2.372198 4.906969 4.485554 3.342798  
10005\_at 6.605243 6.109686 6.18914 5.435703 6.004455 5.34678 5.671871 5.46197  
10006\_at 8.935973 8.648229 9.0335 8.580181 8.572219 8.249428 8.374081 8.694837  
100073347 1.486126 1.129849 1.03996 1.049382 1.724153 1.33093 0.976389 1.298646  
10007\_at 4.782787 4.058158 4.111487 3.998614 4.809978 4.592802 4.068045 4.225209  
10008\_at 4.037877 3.798335 4.38916 4.274561 3.816577 3.340391 4.136593 4.250523  
10009363C 9.407144 8.924226 8.603007 8.627583 8.056543 8.727723 8.22588 8.053465  
100093698 1.576591 1.465953 1.42638 1.650126 1.739594 1.316814 1.402678 1.819184  
10009\_at 4.702043 5.041195 4.851033 5.390847 4.833694 4.905774 5.376081 4.631385  
1000\_at 5.173458 5.334613 5.083706 5.474745 5.246605 6.481745 4.849803 5.243577  
100101266 4.65491 3.079259 3.06362 2.136355 4.023349 3.638386 1.058129 2.111285  
100101467 3.324021 3.899483 3.368861 3.72827 3.480402 3.277216 3.304644 4.500703  
10010149C 2.168651 5.498821 4.435276 4.099947 3.150528 3.501736 3.068425 4.983544  
100101938 1.006131 1.098823 1.047736 0.804876 0.922621 1.398646 1.181835 1.121534  
10010\_at 5.491794 5.513572 5.427838 5.071511 4.959877 4.7976 4.708311 5.922976  
100113378 1.186543 0.830724 0.990433 0.609661 0.69974 0.98066 0.919919 1.258781  
100113379 1.383044 1.125924 0.752573 1.105112 2.751035 1.108392 0.968685 0.975196  
100113381 2.10742 1.889312 1.496696 0.983394 1.722887 1.619975 1.411017 1.729414  
100113382 3.330335 5.240551 3.03615 2.588927 2.648317 2.529954 3.389325 2.757155  
100113384 1.115148 2.186885 1.352364 0.963357 1.430218 1.152918 1.110866 0.940921  
100113386 3.525677 3.437802 3.949092 3.798948 4.901998 3.749545 3.433238 3.882054  
100113389 1.163186 1.186944 1.044403 0.837942 1.738718 1.120482 2.008676 1.596402  
100113391 1.793115 0.915146 1.38245 0.765463 1.393996 2.138737 1.279715 1.553613  
100113392 0.709089 1.188295 1.007607 0.744606 3.065647 0.899706 2.402505 1.500347  
100113393 1.360225 0.820342 0.979683 0.828344 2.259458 1.190001 0.735561 1.267607  
100113402 1.28735 0.780141 1.363359 0.973392 0.977169 1.147735 1.157075 0.863585  
100113403 1.944247 1.586982 1.677478 1.91776 3.249623 1.82121 2.036295 1.681563  
100113404 1.421388 0.720529 1.613823 0.852447 1.414771 0.738785 1.584752 1.203479  
100113407 3.792396 4.407441 4.704289 3.742192 3.435844 4.290949 5.219655 3.366624  
10011\_at 4.791014 4.581344 4.268007 4.439074 3.776414 5.234264 4.102649 4.74818  
100124412 3.508612 3.348021 1.99738 2.408872 4.397075 2.664316 2.597727 3.760853  
100124516 1.45641 1.585141 0.798355 0.835468 1.278452 1.336613 0.966414 1.925  
100124533 2.162397 2.014466 1.621746 2.871185 2.275874 1.488921 2.075131 2.141447  
100124534 2.584536 0.754481 2.312354 0.961871 1.598537 1.121496 3.166078 1.025636  
100124535 1.223867 1.639449 0.867905 1.369327 0.938664 1.748309 1.476978 0.841432  
100124536 4.080744 1.714379 1.716757 1.727371 1.276037 2.934352 5.25003 7.379777  
100124537 1.636942 2.507393 2.058504 2.263561 2.901008 1.185483 1.540368 2.79749  
100124538 0.875262 1.158703 0.736021 1.277353 3.168886 1.108551 0.957927 1.515639  
100124539 3.418606 4.204417 4.311669 3.746569 3.955596 4.292378 3.463338 4.497519  
10012454C 0.81399 1.87284 1.016624 0.923544 0.870183 1.714067 0.621636 2.061073  
10012470C 1.240389 1.483309 1.119929 1.820573 1.408017 1.993208 2.495709 1.221963  
100125288 2.400409 2.952792 2.322594 2.498908 2.101789 3.018704 3.370032 3.367363  
100125556 1.454466 1.61926 1.378458 1.068504 1.38867 1.783463 1.526247 2.130161  
10012627C 1.993183 2.758411 2.520192 2.502342 2.57646 2.200716 2.272266 2.463559  
100126296 2.61647 3.733647 3.030667 2.988967 3.857586 1.788673 3.471566 3.12827  
100126297 1.25668 1.157165 0.71911 1.067842 1.194962 1.892686 1.057697 0.73328  
100126299 3.127361 4.532745 4.024291 3.881847 1.29066 5.108535 2.984236 3.583986  
100126302 0.988057 1.734804 0.893016 1.349907 1.31101 0.768436 0.955729 1.242391

100126303 1. 164614 1. 404544 1. 288895 0. 828989 1. 72771 1. 252579 1. 080545 1. 998762  
100126304 0. 922398 0. 906412 1. 617199 0. 854843 1. 141126 0. 766341 0. 959243 0. 906783  
100126306 0. 934544 1. 118465 1. 770333 1. 089877 1. 667928 2. 667909 3. 597741 2. 726105  
100126307 2. 407231 1. 378895 1. 372477 0. 776158 1. 344007 1. 496659 1. 355035 1. 015282  
100126308 2. 423747 3. 088364 2. 870509 3. 127913 2. 917311 3. 215786 2. 726167 2. 526992  
100126309 1. 29911 1. 385675 1. 670159 1. 07067 1. 51213 1. 256662 1. 414227 1. 487514  
100126310 1. 362633 1. 116464 1. 242809 1. 01862 1. 377236 1. 318439 2. 36021 1. 756134  
100126313 1. 234306 2. 282587 2. 118359 1. 380481 2. 195945 2. 508827 3. 196268 2. 393037  
100126314 1. 176941 3. 320903 2. 017943 1. 688079 3. 200827 2. 004529 2. 649406 3. 180055  
100126315 3. 088521 2. 078146 1. 633343 1. 993806 1. 936555 2. 112741 1. 975107 1. 498781  
100126316 1. 00056 1. 248264 1. 070066 0. 81539 1. 172998 1. 609641 1. 358248 1. 911131  
100126317 0. 786349 0. 7211 0. 946105 0. 852408 1. 340171 1. 185386 2. 395542 0. 966469  
100126318 0. 855738 1. 427779 1. 029842 1. 672596 1. 33195 0. 903207 1. 757732 1. 059947  
100126319 1. 944276 1. 511729 1. 485623 1. 412327 1. 966551 1. 886834 2. 889431 1. 658759  
100126320 1. 578023 1. 380167 1. 521817 1. 289027 1. 505526 1. 359523 1. 187851 1. 543974  
100126323 1. 472439 2. 640368 1. 646958 1. 219044 2. 580546 1. 285386 1. 762268 1. 483654  
100126324 1. 31879 1. 266959 0. 917437 1. 040412 1. 315157 0. 889959 1. 614449 1. 18335  
100126326 1. 72414 1. 421923 1. 195896 2. 132437 1. 775032 3. 70927 2. 719784 2. 897936  
100126327 1. 486201 1. 140173 1. 128232 1. 277935 2. 595894 0. 92067 1. 424554 1. 666705  
100126329 4. 510603 3. 808651 4. 048757 4. 623465 4. 182856 5. 099641 5. 389599 4. 024714  
100126331 1. 201378 1. 509081 1. 374514 1. 311905 1. 177846 1. 195208 0. 993251 1. 694951  
100126332 4. 10773 5. 079087 5. 098528 4. 943152 5. 71574 4. 686998 4. 83007 4. 944036  
100126333 2. 001731 1. 954187 1. 612421 1. 515422 1. 405439 2. 305724 2. 236189 1. 76376  
100126334 1. 495125 1. 800124 2. 017874 1. 636574 1. 937688 1. 254007 0. 733394 2. 089844  
100126335 1. 669848 1. 210156 1. 135427 0. 915592 1. 830008 1. 146384 1. 671975 1. 202873  
100126336 0. 801798 0. 736121 1. 159708 0. 507086 1. 149545 1. 277897 0. 728741 0. 92541  
100126337 1. 434219 1. 577726 1. 869262 0. 708967 3. 080839 1. 491142 1. 104732 1. 650785  
100126340 1. 415276 0. 861915 1. 795248 0. 68179 1. 671423 0. 90488 1. 075505 1. 527016  
100126341 2. 005838 2. 343803 2. 325677 2. 834853 1. 63005 1. 736754 2. 279857 2. 155167  
100126342 1. 281972 1. 872976 1. 237432 2. 002025 1. 900907 1. 34123 2. 197741 1. 134211  
100126343 1. 019419 3. 256726 0. 839186 1. 145128 1. 374694 1. 29034 1. 459991 1. 503891  
100126345 1. 770185 1. 193356 1. 482812 0. 659684 1. 57089 0. 945852 1. 356724 1. 234086  
100126346 1. 516589 2. 047686 1. 328073 1. 127902 2. 049558 2. 247473 0. 837057 2. 456734  
100126347 1. 017915 1. 383326 1. 252496 0. 8133 1. 691163 1. 344726 1. 975374 0. 885746  
100126348 2. 146525 1. 955185 2. 389979 2. 34894 2. 148864 1. 758263 2. 505489 1. 909718  
100126349 1. 426544 1. 772505 0. 856212 1. 103726 1. 385615 1. 173279 2. 218518 2. 467107  
100126350 2. 94362 3. 289316 3. 792465 2. 907106 3. 233687 3. 475851 3. 675115 3. 168473  
100126355 1. 475738 1. 215768 1. 290363 1. 914987 1. 668072 1. 353578 0. 874546 3. 078298  
100126356 1. 309211 4. 686379 2. 195692 3. 750819 3. 640628 2. 78699 2. 955409 0. 879938  
100126447 1. 118773 1. 264754 1. 07965 1. 16091 1. 128008 1. 006657 0. 880878 1. 675625  
100126693 1. 137145 1. 293482 1. 227615 1. 299984 1. 237996 1. 214092 2. 389858 1. 432218  
100126780 3. 308207 4. 040826 3. 624461 4. 514457 5. 053315 3. 555712 4. 522479 4. 167697  
100126781 2. 072126 2. 93984 4. 461824 4. 402647 2. 739329 2. 802872 3. 291352 2. 851948  
100126784 1. 685591 1. 979194 2. 148638 2. 246783 1. 882563 2. 061727 2. 032625 1. 874929  
100126791 2. 973234 2. 749315 2. 310628 1. 946336 1. 809414 3. 997809 2. 035074 2. 797858  
100126793 1. 964948 2. 099327 2. 604993 2. 621512 3. 042305 2. 209426 1. 56216 1. 985012  
100127206 1. 436484 1. 542095 2. 050202 1. 235915 3. 652459 1. 671383 3. 394053 1. 807396  
100127888 2. 401721 1. 858985 2. 030225 1. 776423 2. 210839 1. 966009 2. 402002 1. 813197  
100127889 1. 256021 1. 233599 1. 829121 1. 114884 1. 024132 0. 951083 1. 250337 1. 066412  
100127967 1. 362693 1. 101508 0. 935878 0. 997424 1. 774603 1. 422291 0. 878647 0. 864797  
100127974 1. 637784 1. 634056 1. 719857 1. 956524 2. 376464 2. 060047 2. 222979 1. 592838

100127983 5. 125934 4. 501319 3. 540977 4. 285421 3. 672049 4. 471093 3. 871585 5. 28388  
100128002 1. 567847 2. 353196 1. 948997 3. 378508 3. 906253 1. 986875 1. 708699 2. 036169  
100128023 1. 939639 1. 886394 1. 948955 1. 514685 1. 974454 1. 737607 1. 80772 1. 838551  
100128025 1. 317617 1. 107416 1. 732235 1. 579315 1. 606766 2. 081155 1. 358885 1. 218982  
100128054 2. 887435 1. 626984 2. 655711 2. 142794 4. 152335 1. 805061 1. 374616 1. 866033  
100128055 3. 341576 2. 568048 2. 827335 3. 553592 3. 650375 3. 672156 3. 598343 2. 859327  
100128071 2. 830281 3. 708369 4. 363244 4. 460838 3. 759258 4. 158277 4. 451264 4. 388434  
100128076 2. 334252 2. 322843 2. 205542 1. 586919 1. 031881 1. 457063 2. 256188 1. 149542  
100128081 1. 89531 1. 841048 2. 692929 2. 429784 1. 995012 2. 069932 2. 474293 2. 738771  
100128098 1. 399934 1. 355876 2. 204072 1. 183501 1. 572596 1. 322816 1. 889424 2. 218871  
100128108 4. 859325 4. 862697 4. 362118 3. 089343 3. 335733 2. 559212 1. 598504 4. 980307  
100128124 1. 980212 1. 626665 1. 910781 1. 453495 1. 687476 1. 702843 2. 744523 2. 110275  
100128126 2. 244198 3. 094773 2. 764156 2. 121892 1. 984792 1. 9779 2. 340716 2. 588166  
100128127 4. 215747 3. 834603 4. 531942 3. 778679 5. 221269 4. 274927 3. 521596 4. 171353  
100128139 1. 518912 1. 238963 0. 992103 2. 313842 1. 357947 1. 839571 1. 747398 1. 375308  
100128164 1. 054916 1. 168091 1. 970772 1. 249577 2. 257096 1. 865542 1. 061353 0. 841232  
100128176 1. 488087 1. 507791 1. 580686 1. 442205 2. 042869 2. 161813 1. 215814 1. 55254  
100128191 4. 61065 3. 806923 4. 100378 4. 969702 3. 718889 4. 849929 6. 585328 3. 777662  
100128233 1. 394824 1. 523485 0. 944768 1. 728183 1. 576467 1. 836874 1. 913539 2. 104732  
100128239 2. 437243 2. 942777 2. 310687 3. 103798 3. 408935 2. 56964 1. 940417 2. 489802  
100128252 6. 855517 7. 277213 7. 036088 6. 981983 7. 494334 6. 56164 7. 013067 7. 67197  
100128264 1. 511878 1. 389464 1. 417016 1. 415307 2. 301393 2. 054299 1. 258632 2. 197795  
100128285 4. 486868 4. 453125 3. 754362 4. 168213 2. 908473 3. 918883 5. 612179 3. 671382  
100128288 1. 640229 3. 555085 3. 969585 3. 693429 2. 991979 1. 299398 2. 816844 4. 092249  
100128292 1. 614832 1. 886062 1. 875067 1. 899409 2. 227545 2. 556396 2. 447887 2. 015439  
100128317 1. 581858 1. 107045 1. 158987 1. 341632 1. 416199 1. 187913 1. 616361 1. 422496  
100128325 3. 116784 2. 418622 4. 138309 3. 050541 3. 813471 2. 549905 2. 219994 3. 519232  
100128327 1. 707303 2. 130965 1. 687421 1. 661666 1. 681555 1. 514353 1. 297026 2. 625466  
100128338 4. 291714 4. 672841 4. 401753 5. 20369 4. 703443 4. 608316 4. 060088 3. 339102  
100128340 1. 583565 2. 029613 1. 394549 2. 516686 1. 720192 1. 032666 1. 813956 1. 903094  
100128361 4. 082953 2. 945887 3. 943942 3. 892944 3. 585157 3. 780939 4. 065482 3. 420546  
100128364 4. 568788 4. 457095 2. 878666 3. 044946 2. 658099 3. 930835 2. 955235 2. 604734  
100128374 2. 105695 2. 035778 1. 935287 1. 902386 1. 751773 2. 273579 2. 532363 1. 399888  
100128378 3. 219091 1. 373526 1. 975875 1. 81254 1. 596768 1. 508818 1. 312928 1. 608431  
100128398 4. 126073 3. 580177 4. 432793 3. 036788 4. 833092 5. 375632 4. 984954 3. 356873  
100128420 1. 802662 1. 905346 0. 83116 1. 527021 1. 992105 1. 684651 1. 274817 1. 190864  
100128494 4. 924393 4. 907331 4. 711949 5. 680457 4. 977083 4. 900424 4. 835519 5. 474973  
100128496 1. 549815 1. 191447 1. 151264 0. 812479 1. 45528 0. 974421 1. 190035 1. 323159  
100128505 1. 00275 1. 022765 1. 188894 1. 241185 1. 375715 1. 378383 1. 363885 1. 183709  
100128511 4. 550052 5. 350751 5. 02879 4. 768536 3. 150774 4. 284339 4. 16061 3. 266793  
100128531 4. 117668 3. 283097 2. 590172 4. 587498 4. 015138 2. 795591 2. 449518 2. 691502  
100128554 0. 953513 1. 293433 1. 33012 1. 657107 1. 414976 1. 949574 1. 770363 1. 339638  
100128560 1. 71893 1. 374936 1. 215297 2. 289666 2. 893998 1. 541278 1. 245771 2. 484356  
100128569 2. 61697 3. 357149 3. 250582 3. 58496 2. 336683 4. 197187 4. 107898 2. 78131  
100128573 1. 257022 1. 956848 2. 369987 1. 953736 3. 060734 2. 454366 1. 61564 1. 738018  
100128590 1. 521419 2. 342014 1. 390293 1. 551454 2. 001195 1. 434158 1. 301563 1. 326869  
100128593 2. 402727 1. 798966 2. 029869 1. 456143 2. 13367 1. 026812 1. 387958 2. 746876  
100128640 2. 042156 1. 443458 1. 523862 1. 834036 1. 816261 3. 411693 2. 610967 2. 111602  
100128653 2. 130253 1. 92577 2. 383319 1. 95145 1. 899125 2. 997458 1. 9365 1. 486848  
100128675 1. 692988 1. 401107 1. 052853 2. 18659 1. 669128 2. 283042 2. 027976 1. 70936  
100128682 2. 019944 1. 783118 1. 884746 1. 977022 2. 466057 1. 9634 1. 685261 1. 839829



100128714 2. 702115 1. 065854 1. 31685 2. 645047 1. 426952 2. 108496 1. 661202 2. 060177  
100128731 9. 745767 9. 807223 9. 893501 9. 977159 9. 766798 9. 507407 9. 925243 9. 619891  
100128750 4. 342286 3. 772201 2. 290581 3. 300483 3. 900391 3. 147326 2. 589314 4. 860622  
100128770 1. 182852 1. 654285 1. 371049 1. 948473 1. 647077 1. 401793 1. 418043 1. 779199  
100128782 2. 775956 3. 238587 2. 722596 1. 646715 1. 867883 3. 42175 2. 020608 2. 108661  
100128787 2. 068985 1. 362141 1. 413364 1. 632837 2. 009623 2. 765034 2. 042511 2. 058526  
100128788 3. 154847 1. 907277 2. 237709 2. 221321 1. 743303 1. 318499 1. 63212 3. 793351  
100128811 2. 403623 2. 60145 2. 688272 2. 471954 2. 215756 2. 336397 2. 567568 2. 532484  
100128818 2. 575749 3. 526051 2. 533248 2. 543545 3. 966869 2. 750305 3. 100024 2. 34558  
100128822 4. 782124 4. 38611 3. 41045 5. 161789 3. 280783 3. 177412 4. 273768 4. 780594  
100128830 1. 39627 1. 841445 2. 047983 1. 905044 2. 514214 2. 0577 2. 615349 1. 747546  
100128881 2. 865406 2. 843119 3. 264848 2. 594754 1. 83667 2. 675676 3. 971565 2. 117305  
100128885 1. 326199 1. 937041 1. 268833 1. 449552 1. 862604 1. 822236 2. 001167 1. 209805  
100128890 1. 29836 2. 761579 3. 328918 1. 949867 2. 587935 2. 357297 2. 021138 3. 813448  
100128893 2. 195309 1. 523532 1. 447871 1. 693999 2. 648656 2. 084859 1. 837654 1. 588556  
100128905 2. 430656 2. 26629 2. 294998 2. 062192 2. 074572 2. 00934 2. 608339 2. 066213  
100128908 3. 184083 2. 13528 2. 221004 2. 062851 2. 189275 1. 74986 1. 616961 1. 987474  
100128927 2. 613787 2. 245563 1. 515951 2. 178135 1. 713138 4. 107317 2. 455549 1. 204837  
100128946 2. 291278 2. 223945 2. 306086 2. 336167 2. 102486 1. 998213 3. 042089 3. 307378  
100128966 1. 084828 1. 576583 1. 03895 1. 05872 1. 249888 1. 265826 1. 751164 0. 663747  
100128977 0. 956791 1. 433182 1. 090984 0. 904999 1. 061012 1. 101872 1. 085918 0. 963876  
100128993 2. 605844 3. 482228 3. 269937 2. 970473 2. 816404 2. 417849 2. 328112 3. 17983  
100128998 3. 057065 4. 517907 2. 995899 3. 367247 3. 081901 3. 141469 3. 047403 3. 998829  
100129027 3. 373952 3. 574204 3. 967515 3. 578471 3. 216556 4. 061307 3. 818699 3. 927928  
100129034 5. 249413 5. 276262 5. 04227 5. 343867 6. 264421 5. 554617 4. 954267 4. 119439  
100129046 2. 862281 3. 313023 2. 390141 3. 682599 2. 31463 2. 845701 3. 70422 2. 82647  
100129055 0. 771249 1. 236364 1. 550152 1. 291271 1. 108943 1. 001309 1. 337976 1. 071229  
100129066 1. 856728 1. 775545 1. 923974 1. 919299 1. 980268 2. 57028 1. 663696 1. 781299  
100129075 2. 164134 1. 592872 1. 883077 3. 69492 1. 617224 1. 21907 1. 254174 1. 777075  
100129083 4. 388217 3. 366665 3. 285175 4. 354918 3. 043951 2. 816453 4. 032704 2. 138319  
100129094 2. 265172 2. 19778 2. 300883 1. 885097 2. 21858 2. 57465 2. 222018 2. 892995  
100129098 1. 995832 2. 229755 2. 01896 2. 22711 2. 59007 2. 936634 2. 339155 1. 715598  
100129128 2. 84115 2. 97839 3. 243323 2. 356339 3. 523212 2. 381991 2. 736727 2. 853476  
100129138 2. 076335 1. 957118 2. 451939 1. 585711 1. 444357 2. 595951 1. 379544 1. 716605  
100129148 7. 09637 7. 201848 6. 66439 7. 035667 6. 803256 7. 087364 6. 707212 7. 526673  
100129175 1. 249225 1. 411002 1. 481562 1. 409787 1. 281725 1. 658875 1. 530817 1. 127136  
100129195 4. 054754 4. 109159 4. 240874 3. 436777 3. 575159 3. 779905 3. 619514 3. 277587  
100129196 2. 671016 2. 598908 2. 663796 1. 889036 2. 822524 2. 704997 2. 99828 2. 557066  
100129203 2. 049574 1. 66367 1. 953324 1. 988611 1. 893126 1. 470233 1. 082565 1. 658401  
100129213 1. 596192 2. 101728 1. 669987 1. 403967 2. 548037 1. 259095 2. 156595 1. 371545  
100129215 2. 405017 2. 163309 2. 629286 2. 727218 2. 085809 3. 214588 2. 254908 2. 011199  
100129223 1. 845175 1. 951797 1. 468921 1. 650466 1. 941921 1. 506375 1. 611989 1. 747589  
100129250 4. 646218 4. 58656 4. 374914 4. 406233 4. 861118 3. 929815 4. 356073 3. 703078  
100129269 1. 135286 1. 630734 1. 823378 1. 406405 1. 460823 1. 729284 1. 984586 1. 614654  
100129271 2. 239391 2. 026279 2. 580349 1. 880337 2. 174308 1. 873779 1. 731551 1. 926983  
100129278 0. 842366 1. 680002 1. 228641 1. 165624 1. 216719 0. 792087 1. 551153 0. 74369  
100129316 1. 772433 2. 125889 2. 309186 2. 306951 2. 254064 1. 535709 1. 82341 1. 79444  
100129345 0. 998364 0. 822873 0. 79717 0. 673463 0. 981753 1. 060863 1. 615689 1. 045154  
100129354 1. 619538 1. 767952 2. 206303 2. 185236 1. 942763 1. 926984 1. 788445 1. 579443  
100129361 7. 104609 7. 599083 6. 710289 6. 519421 6. 522201 7. 216371 6. 768372 6. 982123  
100129385 1. 958806 0. 736705 1. 520249 0. 960488 1. 488799 1. 499157 2. 281207 1. 82019

100129387 4. 284694 4. 963099 4. 174113 4. 368001 3. 956552 4. 219714 2. 862647 4. 426558  
100129424 2. 807012 2. 274963 2. 554142 4. 170135 3. 242048 2. 633734 1. 179086 1. 317348  
100129427 2. 212788 2. 739449 2. 185213 2. 585871 2. 805779 2. 690179 2. 207373 2. 740381  
100129434 2. 22374 2. 647028 3. 630913 2. 825734 3. 241938 3. 392425 3. 504209 3. 069254  
100129455 2. 423825 2. 331131 1. 731317 2. 167608 1. 301221 1. 446938 1. 7966 1. 840737  
100129460 2. 609917 3. 083621 2. 595394 2. 424987 4. 209151 2. 941112 3. 880547 4. 026469  
100129461 2. 14726 2. 167322 3. 34157 1. 966853 3. 796289 2. 17338 2. 558747 2. 352731  
100129464 1. 494877 1. 105114 2. 029289 1. 426056 2. 179802 1. 557669 1. 376623 0. 839055  
100129473 1. 545901 2. 363956 1. 691592 1. 859867 1. 959439 1. 401443 1. 878426 1. 712307  
100129476 2. 558136 2. 805633 1. 855618 2. 901827 2. 741998 3. 198672 3. 061913 2. 188992  
100129480 1. 542874 1. 684637 1. 384462 1. 396724 1. 304821 1. 59164 1. 970114 1. 380472  
100129482 4. 737509 4. 92861 5. 313381 4. 716993 5. 950904 5. 096699 5. 615801 5. 392524  
100129503 2. 697772 2. 310141 2. 991465 2. 290419 2. 37163 2. 698443 2. 767797 2. 296333  
100129516 3. 425097 2. 206603 4. 450858 3. 403717 4. 342707 2. 78268 3. 521891 3. 891592  
100129518 0. 846955 1. 186006 0. 961936 1. 522089 2. 021574 3. 195112 1. 809928 1. 166327  
100129520 1. 357304 1. 317547 1. 273025 1. 508612 1. 473921 1. 569689 1. 818661 2. 089141  
100129534 2. 031829 1. 819292 3. 142722 2. 83564 1. 955879 2. 379704 2. 280938 3. 17386  
100129543 1. 649852 1. 583703 1. 819257 2. 935786 1. 885025 0. 992155 2. 766276 3. 58292  
100129550 3. 598464 5. 113303 4. 560849 5. 230693 5. 676935 3. 829464 3. 927274 5. 169444  
100129583 3. 497599 3. 645249 3. 595926 3. 529524 3. 147255 3. 087737 1. 991054 3. 742773  
100129597 1. 112278 1. 67625 1. 489214 1. 334576 1. 498477 2. 116694 1. 654389 1. 101898  
100129603 1. 233245 1. 515441 1. 498817 1. 353567 1. 351184 1. 35582 1. 649151 1. 441524  
100129617 2. 032111 2. 891984 2. 522721 2. 881042 3. 232362 2. 374978 3. 035859 2. 746078  
100129620 1. 702322 1. 418371 1. 519231 0. 825214 1. 386493 1. 315954 1. 640114 1. 996898  
100129636 1. 725388 1. 552415 1. 246695 1. 224065 1. 306798 1. 292482 1. 497033 1. 36303  
100129637 3. 468968 3. 539189 3. 610689 2. 188369 2. 520364 3. 959505 2. 655657 2. 335597  
100129654 2. 849328 1. 69644 1. 959576 1. 916047 1. 833981 1. 728514 2. 563003 2. 45498  
100129662 2. 790294 2. 180868 2. 064604 1. 24397 1. 482494 1. 180385 0. 489632 1. 785974  
100129669 1. 520797 1. 426007 1. 407823 1. 087941 2. 264095 1. 095415 1. 524569 1. 315979  
100129697 3. 269198 3. 314443 4. 227539 4. 222861 6. 090875 2. 9142 3. 852657 2. 197223  
100129716 3. 285305 3. 617688 2. 473871 2. 61606 3. 081363 2. 129166 2. 652189 3. 108015  
100129722 2. 679299 2. 884633 2. 373274 2. 907887 2. 805086 2. 163279 2. 403513 2. 143903  
100129726 2. 045421 2. 066467 1. 706663 2. 07113 1. 905532 1. 272437 1. 500511 2. 222246  
100129781 3. 099563 3. 572198 3. 30429 4. 041125 2. 891413 2. 942307 2. 33798 2. 802669  
100129792 2. 169507 3. 568192 2. 376184 3. 15567 2. 460307 2. 632883 1. 987255 2. 943605  
100129794 3. 86883 2. 315097 3. 295002 3. 563878 2. 511312 2. 354156 2. 776355 3. 686143  
100129800 0. 809207 1. 683801 0. 817061 1. 05647 1. 153192 1. 480273 0. 616604 1. 286359  
100129827 1. 303426 1. 614433 2. 163678 2. 406394 2. 976047 2. 025234 2. 286341 1. 597886  
100129836 2. 54121 1. 982513 2. 131514 2. 923515 1. 57358 1. 458484 1. 981024 1. 856715  
100129842 5. 274125 4. 573669 6. 005561 4. 880916 5. 194641 4. 379154 4. 599009 5. 072341  
100129845 2. 178653 1. 103399 2. 542226 2. 001442 1. 746954 1. 730874 2. 074124 2. 632796  
100129858 2. 996289 1. 970238 2. 856465 2. 572473 2. 449456 2. 186339 2. 73431 3. 642215  
100129917 2. 316398 3. 751747 3. 355068 4. 235809 1. 601761 1. 723466 1. 318664 2. 232382  
100129924 1. 980208 2. 570155 2. 29179 2. 001728 2. 775673 2. 057772 2. 079171 2. 171652  
100129931 2. 937622 2. 612095 3. 456427 2. 621625 3. 551628 3. 286282 3. 501593 2. 751224  
100129935 1. 08344 1. 471601 1. 38444 1. 142856 2. 498485 1. 545805 1. 05052 2. 008632  
100129940 1. 777062 1. 87465 1. 481621 1. 351875 1. 872612 2. 038651 1. 645003 1. 7926  
100129961 4. 418821 3. 812325 4. 421392 3. 878012 4. 052497 4. 136174 3. 867132 3. 937272  
100129973 2. 419201 2. 510214 2. 215352 2. 857 2. 852875 2. 778347 3. 008717 2. 767601  
100130015 4. 113413 4. 050428 3. 733949 3. 970514 2. 913925 4. 192033 3. 093182 4. 155036  
100130017 1. 37937 1. 41194 1. 303307 1. 237304 0. 903036 1. 310226 1. 351058 1. 447203

100130083 2. 997971 1. 95679 2. 613936 2. 142016 1. 414703 1. 756303 2. 677377 2. 95342  
100130093 4. 777245 3. 461699 4. 609317 3. 591296 3. 125776 3. 805848 3. 150471 3. 940784  
100130097 2. 873605 2. 811272 2. 128711 1. 530045 1. 567044 1. 771103 2. 781147 1. 642427  
100130100 1. 454047 1. 367595 1. 195925 1. 660968 2. 387627 1. 77152 1. 36549 1. 913873  
100130148 2. 526136 2. 281737 2. 610256 2. 385061 1. 891072 2. 025081 1. 90759 2. 143173  
100130155 1. 460532 1. 610293 1. 235493 1. 477525 1. 54534 1. 573836 1. 541316 1. 658219  
100130197 1. 290323 1. 409772 1. 227028 1. 205737 1. 269135 1. 03315 1. 843708 1. 133685  
100130231 1. 523313 1. 300095 0. 996858 1. 033466 1. 11147 1. 85088 1. 669132 1. 61196  
100130238 1. 623445 1. 71815 1. 643537 1. 444131 1. 961285 2. 081058 1. 242839 2. 002901  
100130249 1. 778278 1. 116587 1. 908457 1. 30561 1. 756001 1. 199709 1. 327539 2. 724671  
100130264 1. 622012 1. 985126 1. 617751 1. 847313 1. 987631 1. 824242 1. 552418 1. 523273  
100130274 1. 381534 2. 417918 2. 220083 2. 170056 2. 929581 1. 950476 2. 033844 2. 124003  
100130275 1. 583382 1. 041782 1. 613353 1. 735468 1. 237219 3. 127096 2. 403166 1. 721759  
100130285 2. 895843 3. 741932 3. 812939 4. 687481 5. 052982 3. 649737 3. 433344 3. 086264  
100130298 1. 48231 1. 020758 1. 753728 1. 161233 1. 449767 1. 744427 0. 979467 1. 372063  
100130301 1. 005773 1. 191084 0. 999629 1. 19224 1. 398005 1. 425415 0. 798203 2. 862403  
100130302 2. 628149 3. 053418 1. 273974 2. 405745 2. 347956 1. 153262 2. 005451 2. 069153  
100130311 2. 908865 2. 702264 3. 181715 2. 908865 2. 840935 2. 396875 2. 564154 2. 785732  
100130331 1. 808726 1. 811454 1. 933926 1. 928275 1. 871157 1. 758803 1. 767589 2. 008576  
100130342 1. 607442 2. 82978 0. 99197 0. 775602 1. 299382 1. 236305 1. 613591 1. 429589  
100130348 1. 199998 1. 411606 1. 734257 1. 703114 1. 584877 2. 182382 1. 959689 1. 641095  
100130357 1. 929852 1. 602461 1. 285806 1. 674859 1. 246621 2. 286727 2. 292048 1. 942657  
100130370 2. 493264 3. 135273 3. 274092 3. 318615 3. 335149 3. 503758 2. 551704 2. 946539  
100130373 1. 761625 1. 890816 2. 191183 2. 066418 1. 977013 2. 120096 1. 99345 1. 528099  
100130386 1. 633061 2. 187003 1. 372977 1. 05921 1. 998958 1. 535334 1. 316812 1. 245481  
100130417 1. 395957 0. 879783 2. 359553 1. 906525 2. 250305 1. 475136 2. 937964 1. 636346  
100130418 2. 205419 2. 506321 2. 18296 1. 810205 2. 895997 2. 917233 3. 378246 2. 75632  
100130449 1. 086448 1. 365992 1. 623037 1. 743403 1. 422766 1. 473735 2. 592678 1. 481117  
100130451 3. 262205 0. 981103 1. 976854 4. 379544 1. 511958 1. 517006 1. 692406 3. 205211  
100130452 1. 427541 1. 449771 1. 180315 1. 719082 1. 76466 1. 74784 1. 306853 1. 904514  
100130458 1. 280258 1. 522369 1. 354308 1. 117089 1. 097105 1. 109478 1. 903834 2. 296684  
100130476 1. 419421 1. 174879 1. 048137 1. 204958 1. 656929 0. 795554 1. 174693 1. 596272  
100130480 1. 769304 1. 801843 2. 247691 2. 0826 1. 822217 1. 801043 1. 384586 1. 609623  
100130502 1. 633533 1. 475359 2. 308106 1. 977737 2. 510712 2. 77389 2. 410614 2. 003475  
100130519 2. 058105 2. 700143 3. 123276 1. 916146 2. 283908 1. 547658 2. 072454 2. 676637  
100130520 2. 361202 1. 617045 3. 695643 2. 083098 2. 130578 2. 080229 3. 532804 1. 912681  
100130522 3. 245843 3. 63313 3. 073352 3. 747139 2. 950406 3. 430775 3. 175505 3. 998186  
100130539 1. 405682 1. 646125 1. 509168 1. 310402 2. 003645 1. 832737 1. 911965 2. 27368  
100130548 1. 479257 1. 901243 1. 232116 1. 530483 2. 19956 1. 166455 1. 862802 1. 658769  
100130557 2. 435374 2. 776643 2. 828973 2. 940924 3. 321829 1. 883369 1. 836247 3. 264304  
100130581 2. 092308 2. 843914 2. 910718 3. 091187 2. 582921 2. 217088 3. 587105 2. 703158  
100130587 1. 717888 1. 926156 1. 658143 1. 674614 1. 997431 2. 214999 1. 58191 3. 074221  
100130613 1. 412431 1. 417277 1. 694572 1. 577508 2. 408579 1. 651377 1. 742475 1. 594953  
100130673 1. 209627 1. 103149 1. 597509 1. 088263 2. 159807 1. 506612 1. 759631 1. 678612  
100130691 4. 023183 2. 864875 3. 541408 5. 176412 3. 215809 3. 840225 3. 440047 3. 581189  
100130698 1. 496322 1. 621166 1. 515952 1. 652322 1. 674413 1. 280802 2. 28482 1. 407998  
100130700 3. 1508 3. 496202 4. 105548 3. 380122 2. 969689 3. 503282 3. 322733 2. 938769  
100130705 1. 463358 2. 15103 2. 648385 2. 172978 2. 932345 1. 78505 2. 506518 1. 785148  
100130717 2. 255413 2. 096804 2. 50094 2. 273443 2. 47861 2. 421049 2. 493672 1. 834087  
100130733 5. 804463 5. 193674 5. 580374 5. 071805 5. 793568 5. 989415 5. 570875 6. 098201  
100130742 0. 993575 1. 038177 2. 623034 1. 180834 1. 046983 0. 865619 2. 411993 1. 069359

100130771 0.77064 1.234212 1.219116 1.026414 1.478926 2.848678 1.356468 1.245902  
100130776 3.889128 2.782804 3.834521 3.548107 3.595343 4.147902 3.482272 3.523496  
100130827 3.477692 2.748135 2.421737 3.47961 3.075362 3.416024 2.460887 2.999296  
100130855 2.745246 1.984977 1.815511 1.509576 2.533621 2.478093 1.880557 1.593389  
100130872 2.851099 2.072316 1.049274 1.903627 1.177691 2.341081 3.254627 1.260866  
100130876 2.570525 3.904538 2.742059 3.250049 2.578072 2.459273 4.406313 3.160514  
100130880 2.059448 1.891477 1.484281 1.642866 1.388792 1.583727 1.934862 1.901318  
100130887 2.66347 2.797812 1.572874 2.874492 2.299536 1.144132 1.851571 2.517685  
100130889 1.261542 2.019047 1.388516 1.728463 1.397919 1.737548 1.992053 3.284433  
100130890 6.008219 6.529829 6.135284 6.268677 5.45685 5.545299 5.187839 4.913919  
100130894 3.603177 2.900409 3.796618 3.264898 2.499007 4.048654 3.769542 3.722125  
100130899 2.634022 1.896422 2.636499 3.686268 3.300614 2.412638 1.523102 2.89279  
100130933 3.209455 3.628087 1.721805 2.572848 4.641191 3.065193 3.491963 2.962226  
100130934 1.47625 0.848242 1.156295 1.382777 1.712161 1.112478 1.513176 1.172535  
100130935 2.104344 1.047875 1.06916 1.195468 1.869552 3.250339 1.684266 0.79417  
100130938 1.906067 3.039439 1.072876 1.6222 1.94109 4.41121 2.318707 2.620079  
100130950 3.163831 1.896244 1.842433 1.729794 2.210149 2.394899 2.625902 2.422788  
100130954 1.866789 1.814174 1.213663 1.882229 1.337939 2.280378 1.891221 1.115409  
100130958 2.32219 1.764082 1.364569 1.475392 1.478818 1.114813 1.381434 1.175394  
100130964 1.234818 1.442598 1.406413 1.381908 0.857 1.338179 1.77615 1.572083  
100130967 1.772313 1.779656 1.94804 1.424745 1.576175 1.169883 1.694419 1.69005  
100130987 4.035498 2.975357 3.593941 3.408276 3.216195 2.763148 5.127343 2.439505  
100130988 1.363195 1.736593 1.568134 1.835306 1.783947 1.650769 1.577992 1.837182  
100130992 3.326788 3.642844 2.430994 1.818533 3.604954 1.468718 3.17303 2.610328  
100131017 2.741324 2.997593 2.989757 3.245734 3.254769 2.804508 3.202548 2.890056  
100131047 1.835193 1.38913 1.689983 1.578341 1.791466 2.516097 1.455098 1.438127  
100131060 2.742418 2.549772 2.462775 2.044207 2.214667 2.14371 2.666815 2.73542  
100131067 2.832345 3.279479 2.928971 3.093427 4.140967 3.242959 3.226796 3.982244  
100131089 2.160478 3.286761 1.525056 1.430194 1.671841 1.190154 1.72232 1.484414  
100131094 2.466804 3.069997 2.088889 2.868657 2.166298 2.354214 2.486914 2.195264  
100131096 2.957705 4.645172 4.41108 4.385283 4.984638 3.076514 4.540355 3.919681  
100131107 2.372159 1.754676 2.094269 1.482574 2.916398 3.374211 1.443351 4.052304  
100131117 3.29126 2.333882 1.781482 2.329373 1.273212 2.121796 1.311114 3.149225  
100131137 1.461455 1.488519 1.358669 1.162898 1.850721 1.71942 1.829658 1.706897  
100131138 2.666013 1.768502 1.111614 1.117247 2.890762 2.669247 1.577195 2.174613  
100131176 4.006607 2.923893 3.801638 2.876033 3.041053 3.681799 2.565592 3.02967  
100131187 7.320374 6.599656 6.560788 6.414206 7.078442 6.850957 6.105703 6.594833  
100131193 2.217161 1.950329 2.374398 3.380562 2.633215 2.358245 1.964427 2.199101  
100131205 8.014441 7.633543 7.120301 7.897548 7.534805 7.777348 6.704889 7.165129  
100131208 1.936924 1.406147 1.177978 1.830318 1.846669 2.737796 2.724804 1.403243  
100131211 3.08271 4.3365 4.387343 4.482964 4.791941 3.168295 3.827476 4.300052  
100131213 2.136239 2.314827 1.890731 2.098292 1.892021 3.183341 2.749374 2.076729  
100131234 3.290577 2.288777 1.790696 1.271236 1.84703 2.221215 2.313889 2.547105  
100131244 3.355476 3.56129 2.951093 3.784839 4.247252 3.30157 3.35403 4.075382  
100131257 1.745736 1.358713 2.317288 1.140388 1.841356 1.204444 1.648115 2.423955  
100131270 2.560996 2.843272 3.261122 0.269579 2.518985 2.690207 2.332157 2.529666  
100131289 1.877186 2.312701 1.477774 3.057639 2.650712 2.046331 2.957376 2.581687  
100131315 2.02277 2.765057 2.635932 3.201677 4.141213 2.8072 2.204461 3.24152  
100131320 3.131084 1.569672 2.699843 3.926627 5.913674 1.639756 2.662331 2.436618  
100131347 2.235623 2.170721 1.234286 1.914227 1.268321 1.468714 1.452008 1.728191  
100131366 1.915959 1.401817 1.29558 1.034042 1.677636 1.021947 1.03067 1.501727

100131372 2. 459921 2. 564378 2. 501531 2. 113127 2. 474226 1. 841079 2. 474737 2. 072945  
100131378 2. 950155 3. 16069 2. 372055 2. 744104 3. 917761 2. 879055 2. 599096 2. 446559  
100131390 1. 964859 2. 931058 2. 483192 1. 058121 2. 567595 2. 928525 2. 788775 2. 801012  
100131395 2. 254129 1. 823083 2. 198751 2. 095913 2. 075381 1. 782838 2. 26411 2. 390036  
100131434 4. 152939 2. 510496 2. 332454 2. 582901 2. 516166 2. 579647 2. 166493 2. 902672  
100131439 0. 697479 1. 959688 1. 146109 0. 968954 2. 758492 1. 147423 1. 838792 0. 968427  
100131454 1. 493739 1. 004109 1. 323788 1. 334407 1. 657892 1. 241378 1. 584109 1. 356965  
100131472 2. 588144 2. 553119 2. 272086 2. 842159 3. 40649 2. 296186 3. 276235 2. 004386  
100131496 2. 011469 1. 544245 1. 69909 1. 705903 2. 652959 2. 945724 1. 824923 1. 537777  
100131530 2. 257524 2. 775247 2. 650984 3. 39659 3. 278854 1. 82747 1. 604814 1. 463299  
100131532 1. 569426 1. 642789 1. 457783 1. 68167 1. 665047 1. 778787 1. 481631 1. 670465  
100131539 2. 572463 2. 69666 2. 578223 3. 032262 2. 373834 3. 586008 3. 919188 2. 81143  
100131551 1. 705451 1. 517864 2. 007429 1. 9269 1. 483458 1. 170313 1. 911432 1. 856581  
100131561 2. 015357 2. 870992 1. 330645 1. 371342 1. 709573 1. 770722 1. 509471 2. 636876  
100131564 4. 74719 4. 388609 4. 430382 5. 791815 1. 708792 4. 755391 4. 640526 4. 088615  
100131635 1. 16851 1. 003217 1. 93628 1. 184362 1. 020389 1. 310924 2. 167989 1. 775277  
100131655 3. 588673 3. 734447 3. 492663 2. 700436 3. 186479 3. 557486 4. 006109 2. 423277  
100131691 2. 997756 3. 243099 2. 827319 2. 059019 2. 87265 3. 336145 2. 53981 3. 624523  
100131726 1. 689511 3. 087956 2. 559186 2. 017192 2. 978155 2. 33677 2. 781674 2. 061816  
100131733 2. 202309 2. 007887 2. 424515 1. 745896 2. 147115 1. 941075 2. 825199 2. 191281  
100131755 2. 421283 2. 384381 2. 452014 2. 394316 2. 416972 2. 421798 2. 26429 2. 57497  
100131801 5. 254544 6. 171744 6. 311682 6. 068774 6. 905828 6. 406828 6. 663667 6. 045791  
100131814 3. 547483 5. 675541 5. 002233 4. 395132 3. 541423 5. 014259 4. 244157 4. 525976  
100131816 1. 636648 1. 621068 1. 371451 1. 805502 1. 644685 1. 404787 1. 824365 1. 923907  
100131825 3. 491418 3. 74756 2. 8379 3. 178161 2. 912546 3. 528853 3. 041001 3. 840025  
100131827 5. 168391 4. 308955 4. 22252 5. 19871 5. 00882 5. 548221 4. 265898 4. 962544  
100131897 4. 134486 5. 177173 5. 212388 5. 301878 4. 88855 3. 512959 5. 684044 2. 596319  
100131902 1. 271154 0. 979137 1. 576097 1. 661346 1. 26571 1. 378572 1. 888813 1. 062969  
100131980 0. 415953 3. 13433 0. 541426 3. 319064 4. 105396 1. 518659 0. 728242 0. 685508  
100131998 2. 319529 3. 456299 3. 020032 2. 71401 3. 077866 2. 667489 4. 17888 2. 829034  
100132074 3. 041173 3. 603851 3. 779825 3. 200705 4. 103403 3. 470398 4. 098451 2. 951377  
100132077 1. 054305 1. 346425 0. 967849 1. 257718 1. 615767 1. 240284 1. 139274 1. 532095  
100132078 1. 395074 1. 361714 1. 407412 1. 134107 1. 119641 1. 008937 1. 39219 1. 505281  
100132111 1. 292731 2. 272247 1. 601352 1. 266569 1. 458552 1. 449634 1. 18859 1. 435419  
100132116 2. 111013 3. 293349 2. 335303 2. 044031 2. 978085 2. 214057 1. 901265 1. 769932  
100132146 3. 110618 1. 774252 2. 836544 1. 322577 2. 278852 1. 778726 2. 327094 1. 69125  
100132163 6. 052393 5. 624525 4. 198629 3. 748154 4. 163331 4. 970786 3. 03847 6. 063374  
100132169 3. 372486 3. 980606 4. 289705 5. 302722 4. 852132 5. 543002 3. 336778 5. 173955  
100132174 1. 857299 1. 295111 1. 543134 1. 559005 1. 443361 1. 539243 1. 921946 1. 955988  
100132215 2. 600975 2. 477984 1. 544325 2. 047167 2. 625757 2. 709874 2. 554096 2. 352991  
100132249 2. 090686 2. 133124 1. 731608 1. 932522 2. 297954 1. 708068 0. 949293 0. 932959  
100132273 2. 161022 3. 114883 2. 456826 3. 588189 3. 102016 2. 3916 1. 254065 2. 096624  
100132288 3. 488788 3. 790629 3. 265055 3. 135343 2. 537043 3. 244988 3. 517687 1. 978568  
100132341 2. 80485 3. 21704 2. 334176 2. 650941 3. 523265 3. 324489 2. 724151 2. 337275  
100132352 5. 87962 7. 027177 6. 582493 6. 572667 5. 104681 6. 865728 6. 207645 7. 212069  
100132354 1. 598019 2. 01127 1. 916978 2. 273972 3. 333188 1. 889359 1. 949119 1. 809685  
100132356 3. 849803 3. 219834 3. 618467 3. 836863 1. 865734 2. 496833 2. 362018 2. 48102  
100132386 2. 202499 1. 371009 1. 507942 1. 649007 2. 26556 1. 149282 2. 725944 2. 039622  
100132396 1. 716686 4. 543655 3. 66967 1. 979367 2. 020037 2. 979197 2. 146102 5. 145785  
100132463 1. 97489 1. 689517 1. 223976 1. 731269 1. 64069 1. 595802 1. 195427 1. 70569  
100132464 3. 403381 3. 253375 4. 50041 4. 095546 3. 748343 3. 638199 3. 279838 3. 204927

100132476 0.533039 1.25407 1.34757 1.136383 1.27992 0.921139 0.674133 1.332384  
100132526 1.854899 2.125998 1.605498 2.725198 1.797158 2.283267 1.971562 2.076746  
100132529 1.46814 1.424431 1.692477 1.709615 2.36478 2.363357 2.015287 1.957452  
100132594 2.954585 3.655134 2.115549 4.284219 2.936772 2.64159 1.840729 3.152941  
100132596 0.816068 1.566862 1.403807 1.580125 1.987378 1.577852 0.700283 2.501056  
100132618 2.371029 2.191756 1.827052 2.019699 1.942127 2.232868 2.517164 2.012389  
100132677 0.845665 1.001241 1.36688 1.196454 1.347242 0.971882 1.055143 1.516085  
100132707 6.50087 6.363127 6.20843 6.426352 5.827816 6.659298 5.629689 6.336559  
100132708 0.462358 0.662193 0.656125 0.886823 3.021 0.728067 1.845361 1.366347  
100132724 3.273244 1.92689 2.771763 1.197075 2.402037 1.590872 1.184599 1.392766  
100132731 1.666993 2.019508 1.689686 1.731585 2.544873 1.349415 1.458685 3.1691  
100132735 1.259583 1.039185 1.536043 1.371812 3.461349 1.214001 1.2617 0.941119  
100132774 2.783828 1.542377 2.455978 2.270735 2.9435 2.052096 2.234652 1.735727  
100132781 1.692011 1.39409 1.183768 1.096192 1.212582 0.961735 2.122992 1.956836  
100132813 2.26385 2.839145 2.521939 2.506925 2.247379 2.495298 2.707296 2.520148  
100132815 3.70301 3.080063 2.746261 4.633793 3.0746 2.946645 6.269883 3.37775  
100132831 1.27611 1.936493 1.383407 1.696282 1.831302 1.742203 2.02697 2.006622  
100132891 3.826501 4.372347 3.05009 4.2125 3.557648 4.603003 3.094103 3.757744  
100132911 2.254367 3.456937 1.873684 2.902247 3.682197 2.302946 3.548696 4.211423  
100132916 1.408291 1.717013 1.909363 1.832706 1.751853 2.325911 0.966777 1.911021  
100132963 1.538154 1.381862 1.785363 1.655863 1.941962 1.870292 1.253009 1.911908  
100132979 3.149365 2.279615 3.52084 2.085386 2.991203 1.414334 2.440611 3.151751  
100132987 2.068711 2.317794 1.899999 2.581877 1.657823 2.133732 3.621709 1.613786  
100133050 2.643825 1.602293 0.958166 1.440144 0.702971 2.302504 1.553971 1.456084  
100133077 2.78439 2.221486 1.269181 1.64606 3.258337 1.675861 2.30606 3.240098  
100133123 1.765587 1.460652 1.408932 1.601768 2.135325 1.259152 2.279144 2.253512  
100133161 4.293505 3.960362 4.150084 4.075704 4.38343 4.268819 3.505499 3.822914  
100133172 2.035427 1.227948 3.695201 1.834369 1.46389 5.903288 3.335598 2.250134  
100133182 3.734034 3.553119 2.847337 7.854464 2.844701 6.887054 3.337153 5.290612  
100133205 4.13616 3.566488 2.89701 2.676574 2.403779 1.453784 2.56446 4.659415  
100133234 1.694112 1.888342 1.520192 1.229948 2.151524 1.790702 1.017722 1.34291  
100133286 1.232283 1.936885 1.857293 1.417975 1.668594 1.364675 2.106917 1.336796  
100133308 1.473306 3.140511 1.138334 1.027455 1.196333 1.405374 1.703767 1.061939  
100133311 2.116396 1.716226 1.557221 2.122897 1.7445 1.578683 2.161499 1.836277  
100133315 2.812132 1.914618 3.159471 4.753256 2.315036 2.276807 2.759686 5.728758  
100133331 6.823529 7.332985 6.710219 7.975968 7.410243 6.896711 7.468603 7.221306  
100133445 4.124614 3.503334 2.764 3.350928 3.111723 2.763326 3.007275 3.131787  
100133461 1.682332 1.61049 1.966869 1.119792 1.935665 1.821874 2.313876 2.020212  
100133545 2.018011 2.228025 3.872866 3.005019 3.200201 1.652963 2.324787 3.71761  
100133612 2.041676 2.343737 1.947045 2.820452 2.068597 2.368662 1.787417 2.194716  
100133669 3.525449 2.741746 2.257207 1.688936 2.251781 2.490182 2.516299 2.071981  
100133746 1.849952 1.521923 2.192561 1.021835 1.418219 2.463395 2.464969 3.713206  
100133957 3.70649 2.58029 5.021708 3.830905 2.092722 3.478745 3.510101 2.712911  
100133985 2.553871 2.558811 3.153225 2.403649 4.40493 3.817343 1.704458 3.216233  
100133991 2.058652 3.054674 3.194954 2.586186 2.605581 3.434129 2.662101 3.423005  
100134015 3.134214 3.0984 2.616864 2.811712 2.914293 2.342539 2.764209 2.65886  
100134040 1.911196 2.174393 1.104032 0.548186 0.930683 1.082491 0.530123 1.690208  
100134229 1.934736 2.571554 2.451635 2.794441 2.342082 2.086285 2.078824 2.088211  
100134259 1.535493 1.488587 0.922956 1.347605 1.70471 1.459855 1.962919 1.615213  
100134368 1.43531 1.882203 1.543813 1.898328 2.204502 2.224194 0.898236 1.827695  
100134391 1.541274 1.571974 2.07136 2.010073 2.1772 1.860345 1.939344 1.601956

100134713 2. 21846 2. 857981 2. 122401 2. 793179 2. 312555 3. 305177 2. 780337 2. 595191  
100134869 3. 631885 1. 988292 4. 367275 3. 010841 2. 555255 2. 516346 2. 273982 3. 608967  
10013\_at 5. 302409 5. 367254 5. 011216 4. 671758 5. 226245 5. 285201 4. 665011 5. 294288  
100141515 2. 613237 2. 697809 3. 057318 3. 021128 2. 602532 2. 510205 3. 069418 3. 271855  
100144595 0. 897311 1. 212178 1. 150312 0. 98217 1. 233441 1. 133308 0. 946444 1. 240592  
100144596 1. 797675 1. 823125 2. 035644 2. 01662 1. 864178 1. 776375 1. 932499 1. 939076  
100144597 1. 558161 1. 634864 1. 427553 1. 380516 1. 864321 2. 430786 2. 726718 1. 380615  
100144602 2. 375492 2. 168864 2. 530497 2. 025448 3. 710009 2. 331708 2. 305828 2. 417287  
100144603 3. 304279 3. 37981 3. 449501 3. 184958 2. 355641 4. 074126 3. 425012 3. 864907  
100144604 0. 812981 1. 965136 1. 168695 0. 553828 1. 687992 1. 271405 1. 475617 1. 906264  
100144748 2. 092658 2. 32537 1. 557731 1. 526109 1. 918819 2. 311772 2. 668785 3. 064799  
100147773 1. 653903 1. 100586 1. 36659 0. 993948 1. 158429 1. 329902 1. 656119 1. 51879  
10014\_at 6. 984524 6. 073054 5. 428051 6. 131455 4. 857861 5. 139671 6. 00372 5. 005279  
100151643 2. 223308 1. 836558 1. 810232 1. 932605 2. 695815 2. 036067 1. 563342 2. 4104  
100151683 3. 385762 3. 826061 0. 836202 3. 132288 1. 173584 2. 989103 1. 354916 1. 623186  
100158262 1. 432176 1. 799644 5. 789825 4. 512659 0. 707189 5. 823507 1. 527438 5. 144615  
10015\_at 7. 205014 6. 923688 6. 858129 6. 04509 7. 007931 6. 609996 6. 955291 7. 055935  
100169752 1. 681429 1. 916182 1. 830037 2. 004233 1. 896517 1. 887433 2. 148484 1. 314272  
100169851 1. 792408 1. 396318 1. 581303 1. 239685 2. 158257 1. 323697 1. 490352 1. 377816  
100169890 4. 704087 4. 902463 5. 015147 5. 448176 5. 926082 5. 389833 4. 96252 5. 128034  
100169989 1. 515348 1. 113258 1. 379731 1. 020104 1. 344825 1. 452983 1. 110128 0. 858064  
10016\_at 7. 081376 7. 726083 7. 635322 7. 698232 7. 370303 7. 9087 7. 2755 7. 92438  
100170222 2. 658664 3. 280837 2. 96374 2. 842695 3. 318461 3. 500726 6. 9843 4. 721088  
100170227 2. 822963 2. 138729 2. 333886 1. 962422 0. 565222 2. 592716 2. 531261 2. 862661  
100170228 3. 585308 3. 096948 2. 701255 2. 47609 3. 451225 2. 275097 3. 250254 2. 986875  
100170229 3. 468495 3. 207107 3. 39592 3. 505842 4. 39291 3. 570275 4. 334735 3. 711828  
100170765 2. 319835 3. 597229 3. 138959 1. 650137 3. 066991 3. 101628 1. 522795 1. 780849  
100170841 1. 90024 2. 356119 2. 57712 2. 061324 3. 057797 1. 986122 1. 868002 2. 523881  
10017\_at 1. 924862 1. 215066 1. 746666 0. 943697 2. 383762 1. 188795 1. 239647 1. 617792  
100187716 1. 360603 1. 934347 1. 437261 1. 139217 3. 638604 2. 990323 3. 445542 2. 707279  
100188893 8. 642115 8. 555253 8. 167599 8. 093144 8. 494987 8. 465962 8. 368495 8. 947647  
100188917 2. 435617 2. 688966 2. 323942 1. 604827 3. 002959 1. 789122 2. 161524 2. 672337  
100188947 1. 620435 2. 621827 1. 905361 0. 987185 1. 419098 1. 249008 1. 260074 2. 021695  
100188949 1. 928111 2. 035899 2. 465837 2. 168127 3. 103728 2. 712218 2. 417271 2. 591086  
100188953 1. 187699 1. 530269 1. 497581 1. 368228 1. 950589 2. 100877 2. 1761 1. 763341  
100188954 3. 828904 3. 993953 3. 400691 3. 376924 3. 770453 4. 079956 4. 715716 3. 505839  
100189589 1. 511102 1. 215266 0. 969192 1. 076476 3. 582502 1. 460509 1. 752422 1. 692097  
10018\_at 3. 022003 3. 118323 3. 184947 2. 641544 3. 181516 2. 733454 2. 779873 2. 975206  
100190938 4. 211203 3. 393774 3. 734521 3. 975919 5. 113371 3. 045369 5. 055815 3. 813905  
100190939 6. 267741 7. 156795 5. 548541 5. 918784 3. 283779 7. 425897 7. 020889 6. 821666  
100190940 0. 968599 1. 611861 1. 248221 1. 508689 2. 815681 2. 183376 1. 997323 2. 059695  
100190949 1. 906382 1. 669791 1. 559306 1. 305347 1. 85671 1. 169179 1. 592261 1. 669014  
100191040 2. 830779 3. 169637 2. 883977 3. 209055 3. 163266 3. 261683 2. 244077 3. 283161  
100192204 3. 264975 2. 656674 2. 899691 2. 683988 2. 26464 3. 205497 2. 762272 2. 847972  
100192378 1. 497595 1. 442489 1. 108795 1. 031354 2. 263148 0. 972126 1. 598444 0. 906306  
100192379 1. 695674 1. 629888 1. 362367 2. 32408 1. 342053 1. 027361 1. 498054 1. 387771  
100192386 2. 228019 1. 846343 1. 74827 2. 417893 3. 391921 3. 236636 2. 330958 2. 655708  
100192420 1. 046424 1. 323154 1. 168589 1. 307104 1. 581246 1. 246922 1. 034254 1. 458818  
100192426 1. 624911 2. 583181 3. 615393 2. 411488 2. 224644 2. 369157 2. 275147 3. 526581  
10019\_at 4. 954015 5. 381791 4. 335343 5. 31215 5. 162723 4. 905074 4. 991709 3. 707278  
1001\_at 2. 701069 2. 678527 3. 407887 2. 779503 3. 490205 2. 72832 1. 682033 1. 808485

10020\_at 4. 578724 5. 441347 5. 648136 4. 485181 4. 859654 5. 396463 5. 799033 5. 130452  
100216001 1. 150029 1. 125278 1. 410518 2. 699058 1. 866609 1. 559422 1. 488194 0. 725635  
100216479 2. 266739 1. 402918 5. 509527 1. 387621 2. 394487 2. 484982 3. 703114 2. 482015  
100216545 3. 919376 3. 838554 4. 976224 2. 734778 2. 12457 4. 59703 3. 875289 3. 073041  
100216546 3. 131673 3. 35994 3. 782183 2. 717054 3. 331154 2. 241302 2. 592656 4. 039783  
10021\_at 2. 717777 3. 558772 3. 572832 4. 105144 4. 018085 3. 891186 3. 084251 3. 248105  
10022\_at 1. 300482 1. 231756 0. 994957 1. 068766 1. 97994 1. 987158 1. 876028 1. 274829  
100233209 2. 209816 2. 17088 1. 571347 1. 410978 2. 829682 4. 421438 1. 824399 1. 190223  
10023\_at 4. 069118 4. 515856 3. 800372 3. 347877 4. 295464 4. 570461 4. 7783 4. 043384  
100240728 4. 629796 1. 517711 1. 090616 1. 500712 1. 453233 1. 203419 4. 249913 3. 163238  
100240734 4. 275503 1. 778232 4. 86239 3. 077855 4. 730682 3. 988942 2. 513451 2. 926626  
100240735 5. 772121 6. 293686 6. 224015 5. 645541 5. 329712 6. 588185 4. 299559 5. 208138  
10024\_at 1. 723433 2. 523334 2. 246679 2. 624546 2. 147167 2. 984176 2. 126973 2. 602044  
10025\_at 5. 437797 4. 746419 5. 295389 5. 219745 4. 71425 5. 962727 5. 601654 4. 722404  
100268168 1. 645941 1. 27581 1. 932214 1. 966307 1. 614938 3. 358992 2. 372922 2. 387977  
10026\_at 7. 018448 7. 133866 7. 746399 7. 530465 7. 480758 7. 60773 7. 682928 7. 513707  
100270679 1. 955252 1. 870497 1. 600107 1. 551209 2. 383745 2. 467369 2. 027504 2. 257214  
100270680 1. 893137 1. 871789 1. 508169 1. 394176 2. 167984 2. 246918 1. 688755 1. 820101  
100270746 3. 512781 2. 172412 3. 098739 3. 852561 2. 966655 3. 93064 2. 942129 3. 264296  
100270804 3. 06758 2. 79582 3. 187832 2. 773295 2. 454758 3. 22342 2. 519562 3. 443395  
100271702 1. 376239 1. 55251 1. 661755 1. 985158 1. 738813 1. 714692 1. 599141 1. 735444  
100271715 2. 723095 2. 919869 2. 883107 2. 559783 1. 994696 1. 678691 1. 792993 2. 385524  
100271722 3. 108647 4. 801699 1. 655337 1. 698995 2. 282441 1. 541882 1. 667241 1. 969856  
100271832 1. 719822 1. 311921 1. 042838 1. 428653 1. 298095 2. 548817 1. 322907 1. 554581  
100271836 5. 661091 3. 264344 4. 293663 4. 888353 2. 826739 5. 852645 4. 744221 5. 259684  
100271846 1. 525164 1. 795143 1. 267829 1. 38485 1. 739808 1. 133653 1. 525164 1. 680191  
100271927 2. 436579 2. 128083 5. 712506 2. 881791 5. 378864 1. 166964 3. 976096 5. 043534  
100272147 8. 325808 8. 063386 7. 725065 7. 221023 7. 25839 7. 537082 7. 763555 7. 826133  
100272217 1. 90639 2. 071992 1. 598949 1. 398264 1. 900107 1. 417782 1. 090086 1. 627201  
100272228 3. 048655 2. 9669 2. 32904 2. 341856 2. 087945 2. 374436 2. 255391 3. 697916  
100286844 1. 971043 1. 295886 2. 266205 2. 203824 3. 021588 2. 669161 3. 070612 3. 821751  
100286906 1. 190973 2. 012733 1. 353083 1. 452741 1. 980056 1. 623778 1. 70665 1. 331389  
100286938 3. 082583 3. 142724 2. 489437 3. 629889 3. 661844 3. 672053 2. 251627 3. 377999  
100286979 2. 83216 2. 045076 1. 213158 1. 834308 3. 261298 0. 966118 1. 296959 2. 797228  
100287010 1. 569793 1. 192786 1. 721659 1. 060242 1. 757139 1. 412851 1. 663454 1. 936339  
100287015 3. 807847 3. 817936 3. 37966 3. 86777 3. 597512 3. 395108 3. 075434 3. 945977  
100287029 3. 330499 1. 877154 2. 968875 4. 075381 1. 32166 1. 434593 3. 62794 2. 884009  
100287036 2. 981607 2. 074671 2. 243256 2. 115109 2. 019507 2. 442395 2. 46742 2. 047111  
100287042 3. 603726 3. 073279 3. 164594 3. 102717 4. 215532 3. 39597 2. 102313 3. 030046  
100287072 1. 376808 1. 021072 1. 326529 1. 145002 2. 117968 1. 272244 1. 990753 1. 881874  
100287082 1. 088895 1. 319624 1. 440965 1. 431485 1. 280678 1. 026627 1. 500319 1. 113303  
100287098 3. 917293 3. 869323 3. 988965 3. 427558 3. 826493 3. 807419 3. 826493 3. 923739  
100287114 1. 971446 2. 052884 1. 724726 2. 376897 2. 37527 1. 584053 2. 128524 1. 692541  
100287144 2. 228918 2. 663481 2. 260521 2. 369026 3. 235382 2. 650003 3. 821152 2. 23786  
100287166 3. 424597 3. 3092 3. 505179 3. 138958 2. 548673 3. 128641 3. 203034 2. 506796  
100287171 6. 750247 6. 192696 7. 150024 6. 083993 5. 679097 6. 227912 4. 982038 6. 299874  
100287175 1. 98119 1. 96358 2. 378648 2. 356073 1. 881787 1. 2873 2. 268609 1. 949504  
100287177 2. 314547 2. 094037 2. 548844 2. 043994 2. 208218 1. 608346 2. 935191 2. 405641  
100287216 1. 801509 2. 246268 2. 353844 2. 076498 2. 127929 1. 930645 1. 556436 1. 809934  
100287225 1. 315395 0. 948115 1. 818777 1. 456879 1. 83253 2. 165686 1. 928505 0. 990886  
100287226 1. 173991 0. 75561 1. 38796 0. 908941 1. 464726 1. 23023 1. 42169 0. 806135



100287227 1. 713182 1. 828663 2. 289393 1. 344524 1. 615195 1. 90761 1. 91975 2. 420137  
100287284 3. 537781 3. 702076 3. 637168 2. 48146 2. 171539 3. 7596 2. 085163 4. 816038  
100287314 2. 210602 2. 284145 3. 048904 1. 47305 2. 283726 3. 136449 2. 056844 2. 068739  
100287362 2. 147082 2. 018464 2. 390237 1. 968901 2. 003573 2. 412443 2. 325649 1. 694851  
100287366 2. 514294 2. 3543 1. 852692 1. 466297 2. 526726 2. 079879 1. 531833 1. 455098  
100287387 2. 472558 2. 467454 3. 223492 2. 859336 2. 626593 2. 610996 2. 596563 2. 992451  
100287413 1. 30873 1. 629273 1. 992076 1. 722921 1. 867167 2. 402528 1. 783205 1. 890123  
100287477 2. 356609 1. 74849 1. 74849 1. 226065 2. 054539 2. 799609 2. 070183 2. 481738  
100287482 3. 061772 2. 087027 2. 312213 1. 896748 1. 627233 1. 793222 2. 22296 1. 805924  
100287497 2. 813269 2. 493918 2. 50845 1. 489668 2. 580649 3. 733858 2. 654531 2. 228377  
100287559 1. 910086 1. 30357 1. 807115 1. 346705 1. 997028 1. 260267 1. 01582 1. 485712  
100287569 2. 356568 2. 027172 1. 699401 1. 86439 2. 592457 2. 184452 1. 963049 2. 738712  
100287592 1. 881579 1. 51139 1. 7771 2. 030725 1. 501731 2. 287904 2. 241921 1. 533171  
100287616 2. 353091 2. 5291 4. 161965 3. 053693 2. 986501 3. 895488 3. 706516 3. 832655  
100287632 0. 948556 1. 32759 0. 907589 1. 012256 1. 200479 0. 824041 0. 875915 1. 592805  
100287639 1. 786187 1. 198216 1. 39799 2. 588377 1. 492192 1. 767746 1. 845432 1. 383269  
100287651 0. 954919 1. 108063 1. 242078 1. 272024 1. 148227 1. 426358 1. 554001 1. 34283  
100287718 1. 064257 1. 129875 2. 385338 1. 442535 1. 742198 1. 536537 1. 243158 1. 302989  
100287722 1. 949353 1. 81073 1. 953923 1. 892996 3. 411895 1. 930786 2. 382277 2. 044991  
100287765 2. 773779 3. 129473 2. 900648 2. 321294 2. 734198 2. 608654 3. 301873 3. 133352  
100287792 2. 113857 1. 320996 1. 49512 1. 295555 1. 585974 1. 766549 1. 470439 1. 348039  
100287808 2. 195902 2. 465406 1. 601896 1. 936701 2. 389008 1. 420519 3. 393681 2. 22811  
100287814 1. 689179 1. 75631 2. 071458 1. 824101 2. 233736 2. 287397 2. 000044 1. 762643  
100287834 1. 650734 1. 25889 1. 564927 0. 903893 1. 954604 0. 88789 1. 407352 1. 057643  
100287846 4. 187757 3. 394722 4. 840849 3. 688267 2. 464562 4. 321202 3. 321002 4. 380145  
100287852 1. 405767 1. 692329 2. 599545 1. 202773 1. 117187 1. 623903 1. 138208 2. 067667  
100287879 2. 398548 2. 606164 2. 046817 1. 887093 2. 955212 3. 465324 2. 269693 2. 069475  
100287896 4. 944367 5. 387746 5. 001206 5. 201983 4. 415096 5. 852066 5. 328778 5. 830777  
100287898 2. 143114 2. 869317 2. 951581 3. 39031 2. 463287 2. 645122 3. 099672 2. 215005  
100287902 3. 674953 4. 033571 3. 081554 3. 157076 3. 52642 3. 576872 3. 862128 3. 726927  
100287932 7. 957981 7. 372641 7. 539925 7. 266697 7. 520407 7. 244746 6. 858405 8. 100039  
100287934 2. 469818 3. 122915 4. 343285 2. 761436 3. 669728 3. 393042 4. 757793 3. 729527  
100287944 1. 44349 0. 949953 1. 743403 1. 308961 1. 554145 2. 241181 1. 512109 2. 401496  
100287948 1. 551764 2. 818545 1. 643065 2. 353679 1. 623262 1. 665 1. 795427 1. 807837  
100288069 1. 006426 3. 743623 3. 072976 3. 233279 2. 800127 5. 448374 2. 20455 4. 272557  
100288077 2. 778751 2. 820823 3. 375815 2. 532907 4. 005548 3. 166742 3. 573692 3. 109125  
100288079 1. 555131 1. 044307 0. 876254 1. 161562 1. 936848 1. 345274 1. 754165 0. 575039  
100288102 4. 860483 5. 44253 4. 427593 3. 341402 3. 828342 3. 020941 5. 289887 4. 06259  
100288122 2. 420144 2. 649917 2. 847696 2. 346704 2. 473436 1. 77507 2. 14492 2. 191413  
100288123 2. 764621 2. 987746 3. 553206 3. 588117 3. 355635 3. 566506 3. 316241 2. 965888  
100288152 2. 70467 3. 220338 1. 764987 2. 389 3. 310359 3. 148375 3. 78752 2. 678509  
100288175 2. 064894 1. 989902 2. 198928 2. 178427 1. 844698 1. 878092 1. 766988 1. 811189  
100288181 3. 819947 1. 754516 1. 983219 1. 995567 1. 61907 2. 678481 1. 964926 1. 876811  
100288198 3. 974374 3. 474962 3. 567113 3. 303393 2. 767896 2. 907911 3. 711226 3. 910266  
100288287 0. 956182 1. 136874 1. 350683 1. 055655 1. 01816 1. 205465 1. 055006 0. 878938  
100288323 0. 854222 1. 195033 0. 93127 0. 783512 0. 909979 0. 899413 2. 262506 1. 188016  
100288346 2. 042945 2. 318187 2. 365743 2. 398859 1. 725097 2. 269522 3. 216575 2. 202004  
100288413 3. 492943 4. 317012 4. 990481 2. 949624 2. 509574 3. 70195 4. 898872 3. 332949  
100288428 2. 672493 1. 766443 3. 628161 2. 526535 2. 558888 2. 377158 2. 050439 1. 545307  
100288432 3. 089917 3. 897611 3. 591085 3. 302268 2. 946372 4. 581104 4. 200808 2. 583422  
100288485 1. 368926 1. 646319 1. 434055 1. 097816 1. 45756 1. 610911 1. 182522 1. 859054

100288486 3.64157 2.840205 3.533596 2.35679 2.360456 2.676068 3.030564 1.997602  
100288524 3.51389 3.159908 3.883768 3.707135 4.219554 3.414218 4.119802 3.912674  
100288637 1.634433 1.606782 1.766259 2.648628 1.953259 2.558129 2.600364 1.759012  
100288687 0.699811 1.227882 2.066325 0.894062 1.080863 1.134713 2.57732 3.264429  
100288730 3.771331 3.72477 4.188448 3.713202 4.341275 3.697019 4.064243 4.527386  
100288748 2.077663 0.874272 1.223821 1.242153 2.386816 0.866125 1.697537 1.325714  
100288778 7.342383 2.929147 5.372271 4.889568 6.114786 6.785136 5.009229 4.626787  
100288797 3.174718 3.649447 2.779739 2.915422 3.79113 2.385101 2.800226 3.150172  
100288798 2.595449 0.977892 2.506769 1.599915 2.763052 2.950488 1.975751 2.463408  
100288801 0.910353 2.054096 2.045845 2.372788 3.020801 2.15968 1.238389 1.763761  
100288814 1.762023 2.907261 1.949467 1.426139 1.440382 2.475582 2.426148 1.951217  
100288831 1.904641 1.091863 1.360982 1.372782 2.235093 1.921934 1.620095 2.406689  
100288842 1.509318 2.694338 3.175031 4.879689 1.059151 2.755408 1.955072 2.003052  
100288846 2.686703 1.848689 2.976382 2.24088 2.563404 2.24088 3.12045 2.417355  
100288866 2.041765 1.625022 2.857787 2.026097 1.831922 1.745606 2.480642 1.986216  
100288911 6.395596 7.002362 6.185789 6.32932 5.575244 6.660361 7.240069 6.186793  
100288974 1.185259 0.634469 1.457829 1.489501 0.358816 2.05011 0.795084 0.506248  
100289017 1.409334 1.335621 1.517571 0.979193 1.15355 1.070875 1.848907 2.41718  
100289019 2.660948 2.068392 2.546266 3.18325 2.199145 3.254966 2.200052 1.620261  
100289092 2.596006 2.246875 1.760836 1.919386 2.793048 2.14111 2.363393 1.867222  
100289098 2.407821 3.36649 3.935442 2.304734 3.92198 3.165103 3.207534 3.425214  
100289137 5.428574 3.854435 3.763972 3.816562 4.839881 6.262663 4.069391 4.839881  
100289178 2.997771 3.63603 2.413172 3.428721 4.129054 3.38926 3.342239 3.617067  
100289187 1.919443 1.911364 1.99655 2.11725 2.211292 2.587326 2.098965 2.767394  
100289211 1.274316 1.35928 1.127142 1.041276 1.481098 1.924869 1.537922 1.326905  
100289230 2.725119 3.158064 3.40935 3.513879 2.726787 2.216245 2.348097 3.99628  
100289255 1.358599 2.427679 1.771856 2.140177 2.226223 1.709248 1.485705 1.594486  
100289274 4.322591 4.448832 3.491832 2.995504 3.495561 2.779684 3.817503 4.120321  
100289333 4.596733 5.937795 4.218045 3.682485 4.409752 3.590338 4.542936 3.704384  
100289341 3.657706 2.8993 3.331494 4.682976 2.26061 4.083986 2.993224 1.938575  
100289361 4.85093 4.030971 2.638992 3.944891 3.790927 4.674337 2.282375 3.024161  
100289373 2.227226 1.984865 2.194833 2.519621 2.041853 1.296129 2.178281 1.695164  
100289388 2.203491 1.155656 2.071956 1.724211 2.379434 1.146859 1.484416 1.063741  
100289410 1.762228 2.545681 2.255901 1.708437 2.267045 1.734321 1.574394 1.53504  
100289455 2.111572 2.353316 3.37507 2.763722 1.624979 2.255743 1.670587 2.995748  
100289462 1.11695 1.520825 1.952818 1.168797 2.432854 2.358946 2.584221 2.668882  
100289473 1.613429 1.502796 1.698466 1.79719 1.164518 1.777897 1.67606 1.007734  
100289495 3.235629 2.781997 2.746205 2.404454 2.384892 1.872373 3.958323 3.229526  
100289509 2.524196 2.170941 1.731362 1.913393 2.084439 1.829605 1.76492 2.030778  
100289511 3.05617 3.293709 3.328494 3.38372 3.606931 3.160939 3.933979 3.226582  
100289580 3.458778 2.944806 3.100135 3.155359 2.487442 3.918013 3.533944 3.127986  
100289635 5.281017 4.232464 4.10503 4.584528 5.59941 4.690259 5.412873 6.304791  
100289650 1.214506 1.094319 1.51915 1.059922 1.776819 2.251774 1.147803 1.740395  
100289656 1.419812 1.007869 0.927485 1.317144 1.29746 1.292319 0.942461 1.016273  
100289673 1.4324 1.587329 2.522449 1.445393 2.121931 1.653707 2.007912 2.191367  
100289678 2.016021 2.196678 2.030166 1.995651 2.102324 2.133021 2.19581 1.882357  
100292680 1.195427 1.590365 1.599702 1.853277 3.603975 1.471214 1.93466 2.075453  
100293516 2.85233 3.642496 3.799148 4.104149 3.913148 3.409785 3.376103 3.017931  
100293612 1.900346 1.585934 1.347099 1.6705 1.528747 1.434237 1.660444 1.313771  
100293704 4.151637 4.474349 2.799919 2.609914 2.928027 1.860781 3.331239 3.004015  
100294145 4.761279 3.991864 4.537327 4.64663 5.662168 5.165079 4.575922 4.393163

100294362 2. 060494 2. 848782 2. 709365 2. 480783 2. 686765 2. 385369 2. 447608 2. 864829  
100294720 2. 353878 2. 004222 1. 754316 1. 81348 2. 016625 2. 649361 1. 977938 1. 346649  
1002\_at 2. 060097 2. 131219 1. 670721 2. 267902 2. 709965 1. 902799 2. 206818 2. 425176  
100302112 1. 486036 0. 956741 1. 063499 1. 262598 1. 251779 0. 645035 1. 262598 1. 300367  
100302113 2. 222493 1. 631697 1. 940262 3. 392531 2. 370896 3. 195069 2. 643136 2. 276745  
100302114 0. 776013 5. 179415 1. 580504 0. 970677 1. 280132 1. 229327 1. 425054 1. 220249  
100302115 2. 283489 2. 747714 1. 847117 2. 034475 2. 028785 1. 93405 1. 262588 1. 629057  
100302116 0. 926583 1. 487631 1. 03588 0. 754106 0. 917892 1. 417782 1. 020832 1. 816004  
100302117 1. 083168 1. 387358 1. 035106 1. 152891 1. 92582 1. 282727 1. 766689 1. 260575  
100302118 1. 67408 2. 070615 1. 213526 1. 861878 2. 010028 1. 937736 1. 175296 1. 560951  
100302119 5. 1872 5. 594561 5. 221513 5. 704001 5. 200164 5. 185787 5. 168335 4. 815533  
100302121 0. 76214 1. 477272 1. 167758 0. 9316 1. 672203 1. 704685 1. 756133 2. 802734  
100302122 2. 563752 1. 14637 1. 377507 0. 872723 1. 273997 1. 59375 1. 06491 1. 963738  
100302123 0. 999853 0. 969053 0. 795748 0. 668974 0. 840237 2. 189667 1. 47708 1. 000173  
100302124 0. 754703 1. 367133 1. 131146 1. 544378 1. 332311 1. 157126 0. 985976 1. 608182  
100302125 0. 904756 0. 960858 1. 13404 0. 931156 1. 143765 1. 328765 1. 377189 2. 358974  
100302126 1. 328766 1. 135732 2. 115477 0. 973139 1. 69104 1. 304336 1. 103754 2. 13424  
100302128 1. 71416 0. 95322 0. 777532 2. 518555 1. 47866 2. 169021 2. 364489 1. 890514  
100302130 0. 772089 1. 846052 1. 098781 1. 411695 0. 777699 0. 965937 1. 689556 1. 225476  
100302131 0. 938722 0. 652324 0. 810956 0. 810956 0. 808686 0. 746268 0. 926137 1. 135994  
100302134 1. 18238 1. 132974 0. 326952 1. 050136 1. 007765 1. 5698 1. 834658 1. 571185  
100302135 1. 795874 3. 67747 3. 093918 5. 214293 4. 83151 3. 749035 1. 375779 1. 915086  
100302136 1. 519192 1. 069628 0. 964723 0. 83402 1. 321867 1. 522711 1. 238008 0. 882042  
100302137 1. 497564 2. 340818 1. 001872 1. 355449 1. 557721 1. 596562 2. 552114 1. 352374  
100302138 1. 191748 1. 213418 2. 214039 2. 087898 2. 08254 1. 581298 2. 173467 2. 497362  
100302139 0. 825389 0. 893423 0. 868014 1. 008436 0. 62792 0. 579823 1. 179776 1. 614355  
100302140 3. 317576 1. 814625 1. 691404 1. 965469 2. 157341 2. 346661 2. 778365 2. 34271  
100302141 4. 405323 3. 575002 2. 275175 4. 112554 2. 981347 2. 442683 4. 383488 3. 823505  
100302142 1. 345439 1. 736682 2. 224389 1. 988551 1. 597166 3. 245742 1. 576124 1. 980251  
100302144 1. 636713 1. 331782 1. 562738 1. 295555 1. 69267 1. 216416 1. 746682 2. 194506  
100302145 2. 789122 4. 291164 3. 313325 4. 381464 5. 444066 4. 976432 4. 712951 1. 397308  
100302146 0. 804533 0. 821513 0. 72307 0. 694959 1. 742042 0. 863977 1. 034676 1. 111918  
100302147 1. 390973 0. 81273 1. 147057 1. 289253 1. 604958 0. 677834 1. 016403 0. 753114  
100302148 0. 795202 1. 801225 0. 960306 0. 889476 1. 226634 0. 572702 1. 011456 1. 125226  
100302149 3. 25634 1. 212177 2. 757439 2. 700373 2. 109649 2. 174592 3. 49074 3. 847109  
100302150 2. 73417 2. 215491 2. 316334 3. 47316 2. 845263 2. 732054 2. 546809 2. 098696  
100302153 1. 319719 1. 902878 1. 870851 1. 150396 1. 521636 1. 175453 2. 204056 2. 128898  
100302155 2. 088928 1. 146986 1. 208847 1. 08942 1. 283789 0. 850682 1. 495458 2. 023178  
100302156 4. 09947 4. 216547 3. 745082 3. 993247 4. 122423 5. 768637 2. 939783 5. 331416  
100302157 0. 695156 0. 852355 1. 472966 0. 503589 0. 997367 0. 662633 1. 054569 1. 123566  
100302158 2. 323852 3. 471078 2. 610613 3. 106748 3. 010213 3. 194579 2. 136162 4. 111186  
100302159 1. 018362 0. 938568 0. 867959 1. 401916 1. 906476 0. 859713 1. 005383 0. 626834  
100302161 1. 478316 3. 587492 3. 703319 3. 331726 3. 379146 3. 042734 2. 773391 3. 319003  
100302163 1. 648302 1. 521997 1. 39899 1. 607678 4. 596191 1. 29027 2. 089636 2. 164994  
100302164 3. 329313 3. 380805 3. 413403 2. 997591 2. 633456 3. 091575 2. 894825 3. 03258  
100302166 1. 77135 1. 415377 0. 89354 0. 94318 2. 102543 0. 784596 1. 200756 0. 895579  
100302169 1. 138217 1. 199789 1. 982139 0. 801449 1. 461348 1. 275462 1. 895797 1. 078505  
100302170 1. 198675 1. 062817 0. 87418 0. 848079 1. 421278 0. 804243 1. 024551 1. 632844  
100302171 1. 223721 1. 500473 1. 183536 1. 58137 1. 507283 1. 530039 1. 220139 1. 75812  
100302172 1. 615172 1. 497613 0. 675659 1. 106829 0. 783218 0. 955394 1. 339113 1. 148021  
100302175 1. 208637 1. 427585 1. 542428 2. 192336 1. 471352 1. 796172 1. 819639 1. 082274

|           |          |          |          |          |          |          |          |          |
|-----------|----------|----------|----------|----------|----------|----------|----------|----------|
| 100302177 | 2.890141 | 2.963412 | 2.3795   | 3.584614 | 3.207219 | 3.403067 | 2.899605 | 3.113846 |
| 100302178 | 1.35952  | 1.125099 | 1.156256 | 0.968725 | 1.854502 | 1.332255 | 1.535064 | 1.968193 |
| 100302179 | 1.583859 | 1.605351 | 2.579662 | 1.54491  | 1.507556 | 1.848904 | 1.136318 | 1.11387  |
| 100302181 | 2.125235 | 2.140753 | 1.638882 | 1.742072 | 1.978162 | 2.757542 | 2.060563 | 1.848628 |
| 100302182 | 0.47568  | 0.777235 | 0.666702 | 0.616652 | 0.968474 | 1.338296 | 1.265703 | 1.114818 |
| 100302184 | 1.118175 | 1.402088 | 1.202382 | 1.515362 | 1.379105 | 1.792652 | 1.648561 | 1.314721 |
| 100302185 | 0.974247 | 1.014223 | 1.008557 | 0.931117 | 1.128043 | 0.826198 | 1.182971 | 1.013447 |
| 100302186 | 2.219396 | 1.050513 | 1.687984 | 1.052205 | 1.904811 | 3.132977 | 1.230427 | 1.495738 |
| 100302187 | 0.792525 | 0.785048 | 1.028077 | 0.620679 | 1.58938  | 0.664723 | 0.926902 | 0.988702 |
| 100302188 | 1.75568  | 1.264654 | 1.756349 | 1.416792 | 2.895231 | 1.374094 | 1.325366 | 1.985699 |
| 100302190 | 4.031497 | 5.266786 | 6.053539 | 5.322929 | 5.075045 | 5.918387 | 5.01465  | 5.794929 |
| 100302191 | 1.279199 | 0.908357 | 1.770525 | 1.467172 | 1.129541 | 1.073815 | 1.467172 | 1.15628  |
| 100302192 | 1.124357 | 0.974657 | 1.975509 | 1.03759  | 1.352286 | 0.863146 | 0.755339 | 1.07259  |
| 100302193 | 1.229697 | 0.909228 | 1.565592 | 0.825646 | 1.69583  | 1.545397 | 2.497127 | 0.344964 |
| 100302195 | 1.099276 | 1.268356 | 1.141116 | 1.343422 | 1.153409 | 0.958623 | 2.009506 | 1.123614 |
| 100302202 | 1.674632 | 1.89987  | 1.78274  | 2.292361 | 1.835611 | 1.461617 | 1.66778  | 1.035466 |
| 100302203 | 0.649917 | 1.24822  | 1.466037 | 1.507261 | 0.856207 | 2.06514  | 0.867756 | 1.12441  |
| 100302204 | 2.235596 | 0.73991  | 2.195288 | 2.239286 | 1.467725 | 1.401392 | 4.363938 | 2.698924 |
| 100302205 | 2.221277 | 2.209935 | 1.230024 | 2.001323 | 2.076063 | 0.904963 | 1.100387 | 1.967944 |
| 100302208 | 2.259862 | 1.528003 | 1.217072 | 1.305119 | 1.670533 | 1.135276 | 1.758592 | 1.172084 |
| 100302209 | 1.108826 | 0.634088 | 0.698544 | 1.167655 | 0.94188  | 1.725611 | 0.685331 | 1.207538 |
| 100302211 | 1.616568 | 2.755584 | 1.070897 | 1.662285 | 1.842078 | 0.566857 | 1.204608 | 2.789312 |
| 100302212 | 1.277489 | 1.016593 | 1.328666 | 1.535123 | 1.073017 | 1.488435 | 1.329989 | 1.314181 |
| 100302217 | 1.613752 | 1.390173 | 0.836116 | 1.09174  | 1.871109 | 1.467658 | 0.994842 | 1.360235 |
| 100302219 | 1.167659 | 0.747047 | 0.885745 | 0.836738 | 2.333386 | 0.709839 | 0.723936 | 1.052895 |
| 100302220 | 1.50715  | 1.272421 | 1.281097 | 1.269039 | 1.674231 | 2.187075 | 3.075297 | 1.726784 |
| 100302222 | 1.601425 | 1.794898 | 2.600827 | 2.142531 | 2.390761 | 2.31437  | 1.82453  | 3.253122 |
| 100302223 | 0.755582 | 0.804698 | 0.869507 | 1.161933 | 1.026213 | 0.981056 | 0.888065 | 1.016145 |
| 100302225 | 0.873762 | 1.160889 | 0.851495 | 0.795219 | 1.142433 | 0.802037 | 1.761789 | 1.586492 |
| 100302226 | 4.201976 | 5.301356 | 5.25951  | 5.383817 | 4.990103 | 3.070443 | 4.107672 | 4.558747 |
| 100302227 | 1.406572 | 0.885651 | 0.81065  | 1.34978  | 1.195862 | 2.210897 | 0.760729 | 1.349519 |
| 100302228 | 0.555382 | 1.0233   | 0.797414 | 0.738879 | 1.145213 | 1.42965  | 0.736071 | 1.110658 |
| 100302229 | 2.822601 | 3.421609 | 3.915384 | 3.734393 | 4.614172 | 4.577376 | 3.537978 | 3.946319 |
| 100302232 | 2.843862 | 2.938976 | 3.689306 | 2.813907 | 3.960179 | 3.295042 | 2.293939 | 3.283946 |
| 100302235 | 1.639664 | 0.940706 | 1.115617 | 1.321547 | 2.067304 | 1.64138  | 1.242794 | 1.492331 |
| 100302236 | 2.470367 | 2.374988 | 2.664203 | 1.647979 | 2.980693 | 2.038385 | 1.502094 | 2.003882 |
| 100302238 | 1.718892 | 1.484268 | 1.412391 | 1.398345 | 1.714202 | 1.08054  | 1.566895 | 3.009387 |
| 100302240 | 2.981243 | 3.149184 | 3.018301 | 4.041141 | 3.62393  | 2.659226 | 2.670677 | 3.227497 |
| 100302242 | 1.553058 | 2.172068 | 3.187507 | 1.930665 | 1.615411 | 2.075119 | 2.449212 | 2.483079 |
| 100302246 | 3.594434 | 3.534422 | 3.900005 | 3.070764 | 3.206274 | 3.412021 | 3.542195 | 2.608629 |
| 100302250 | 1.211652 | 1.524016 | 0.90692  | 1.626355 | 1.137842 | 0.926964 | 1.418454 | 1.314577 |
| 100302251 | 1.165779 | 1.035382 | 1.04862  | 1.582697 | 1.172458 | 1.278433 | 1.503732 | 0.9633   |
| 100302254 | 9.006694 | 8.675037 | 8.823439 | 9.409461 | 8.326832 | 9.50204  | 8.780407 | 8.024994 |
| 100302255 | 2.150542 | 1.292697 | 1.150251 | 1.015028 | 1.060536 | 1.083833 | 0.911434 | 2.386939 |
| 100302256 | 1.169583 | 2.897406 | 2.831186 | 2.107317 | 2.017624 | 2.610242 | 1.950265 | 3.937822 |
| 100302257 | 2.767679 | 1.829928 | 1.579813 | 1.822521 | 1.829928 | 2.531274 | 1.992743 | 1.654402 |
| 100302259 | 2.115643 | 3.128191 | 2.757116 | 3.265366 | 2.772771 | 2.67923  | 2.296936 | 3.44377  |
| 100302261 | 6.430734 | 6.302738 | 6.409691 | 6.043837 | 6.20513  | 5.765131 | 5.767322 | 6.047211 |
| 100302263 | 4.29899  | 3.67899  | 4.818787 | 3.930931 | 2.781285 | 4.019365 | 4.927489 | 4.575138 |
| 100302265 | 1.686857 | 1.151305 | 0.904987 | 0.910449 | 1.872738 | 0.794205 | 1.011072 | 1.406803 |
| 100302270 | 2.321976 | 1.579631 | 0.945006 | 1.351177 | 1.663486 | 1.436243 | 1.580365 | 2.216905 |

100302273 5. 241238 5. 919672 4. 365641 5. 033228 0. 743995 4. 041287 2. 86406 3. 434774  
100302274 2. 888753 2. 892701 3. 720621 2. 501982 2. 028367 2. 440869 3. 803067 2. 083756  
100302275 1. 07126 1. 77642 0. 616424 0. 975664 0. 736625 0. 683382 1. 037109 1. 42431  
100302276 1. 579767 1. 276679 0. 873147 3. 150883 1. 137909 1. 756046 0. 810483 1. 480498  
100302277 3. 360831 4. 16166 2. 771439 4. 952172 3. 535421 4. 466719 4. 21859 6. 255559  
100302279 1. 197859 1. 167769 1. 162401 0. 974967 1. 025555 1. 525956 3. 266952 1. 321508  
100302280 3. 381855 3. 381855 3. 529202 3. 096297 3. 949652 3. 550172 4. 007426 4. 115919  
100302281 1. 7569 1. 798136 1. 315863 1. 389022 1. 885971 1. 707009 1. 520353 2. 159674  
100302282 4. 334699 4. 698787 4. 956618 3. 966254 5. 179299 4. 686218 2. 535151 5. 495977  
100302283 1. 991659 4. 413995 2. 836975 4. 147387 4. 112341 2. 806742 4. 043127 3. 45693  
100302287 1. 0978 0. 976041 1. 690171 0. 574696 1. 023347 1. 482226 1. 527459 2. 567571  
100302289 1. 347444 1. 837303 2. 601744 1. 873914 2. 757302 2. 193608 1. 583821 1. 60944  
100302401 1. 851748 2. 435187 1. 690882 1. 753599 1. 586876 2. 112356 2. 000568 2. 655252  
100302640 3. 093987 2. 00106 3. 188098 3. 348623 2. 626724 2. 709309 2. 345449 2. 060431  
100302650 2. 281563 1. 636741 1. 62477 1. 833541 2. 051976 1. 734389 1. 503578 2. 169335  
100302691 1. 527628 1. 730866 1. 741589 1. 82479 2. 044136 2. 139825 1. 741589 1. 969179  
100302692 5. 139255 5. 367114 6. 266512 5. 054138 3. 707779 4. 93305 4. 897883 5. 186928  
100302739 5. 619189 4. 654957 6. 134099 6. 161047 4. 959523 5. 943973 4. 093769 5. 197477  
100302740 1. 881856 1. 770806 1. 51463 1. 140362 1. 667522 1. 795678 1. 626532 1. 396075  
100302743 4. 848067 3. 827534 4. 393708 4. 500003 1. 995726 4. 493655 4. 622434 3. 083841  
100303491 5. 674058 6. 232601 5. 900093 5. 386669 6. 855256 5. 981233 5. 088887 5. 288202  
100303728 1. 900964 2. 514213 2. 184389 2. 904045 2. 060943 1. 962563 2. 791907 1. 873166  
100303749 1. 759885 4. 003716 2. 601431 5. 488032 2. 843814 2. 390951 2. 639694 2. 88412  
100303755 4. 214329 5. 014862 4. 478868 3. 916639 4. 295818 5. 054958 4. 176539 5. 565622  
100306951 5. 894789 5. 492587 5. 632968 5. 890058 4. 415484 7. 663523 5. 040137 5. 28481  
100306975 0. 903679 1. 879546 1. 826928 0. 979488 0. 946799 0. 850086 0. 787297 1. 160138  
100309464 1. 199106 1. 180114 1. 494451 0. 926137 0. 953488 1. 425617 1. 118892 1. 821179  
100310846 1. 801458 1. 916195 1. 840617 2. 088635 2. 164776 2. 418778 1. 8804 2. 330805  
100313769 0. 922747 0. 648518 0. 783203 0. 775257 0. 95209 0. 47183 1. 814362 0. 635364  
100313770 1. 772693 0. 79828 3. 627491 1. 00105 5. 671788 4. 521803 1. 129204 1. 062504  
100313771 1. 484306 1. 084665 1. 039808 0. 883305 4. 57723 1. 579866 0. 908353 1. 288413  
100313772 1. 180537 0. 763587 1. 945639 1. 151439 1. 860806 2. 672498 1. 523864 2. 114648  
100313774 1. 154384 1. 172612 1. 55716 0. 896937 1. 348802 1. 979959 1. 415836 0. 858302  
100313777 1. 667991 0. 849551 1. 139528 1. 875873 0. 966007 1. 126481 1. 203199 1. 401194  
100313778 1. 480094 1. 091854 0. 973088 0. 766011 1. 336251 0. 728413 0. 820117 0. 901728  
100313779 1. 347902 2. 316712 2. 522568 1. 842576 2. 571345 1. 748207 1. 532567 3. 560819  
100313780 2. 814912 3. 452358 2. 702547 3. 940788 2. 389305 2. 976683 2. 097932 2. 03965  
100313822 0. 986825 0. 91715 1. 044931 1. 010597 1. 127034 1. 345072 0. 92718 0. 899543  
100313824 4. 335805 4. 281802 4. 13433 3. 897231 3. 610185 4. 252477 4. 640532 4. 192612  
100313829 1. 321649 1. 297632 0. 8437 1. 18509 1. 614996 2. 628695 2. 087205 1. 26524  
100313830 2. 674136 0. 985458 1. 207194 0. 366971 1. 728565 3. 527991 0. 381478 4. 432899  
100313838 1. 22812 1. 422747 1. 735703 1. 302069 1. 327454 1. 704733 1. 421602 1. 637795  
100313839 1. 177537 1. 014943 1. 503242 1. 424709 1. 196191 1. 621679 2. 476875 1. 211359  
100313840 0. 955313 1. 257655 0. 972423 1. 220105 0. 873536 0. 975317 1. 16912 0. 964234  
100313841 1. 326908 0. 981235 1. 112485 0. 496233 2. 586093 1. 016865 1. 065563 2. 18415  
100313842 4. 098697 2. 08828 2. 284499 4. 016995 4. 622654 1. 865781 1. 538284 2. 274912  
100313843 1. 775995 3. 123502 1. 900459 1. 930584 1. 52651 2. 12006 1. 644314 3. 83304  
100313886 1. 239736 2. 261557 1. 446829 1. 571836 2. 052746 1. 62235 1. 503132 1. 80007  
100313892 1. 724705 1. 305577 1. 375247 0. 799836 0. 888581 1. 28981 1. 678006 1. 185994  
100313896 0. 895438 2. 462459 0. 572995 1. 259415 0. 799245 3. 875051 2. 134685 1. 007267  
100313914 1. 007256 1. 493005 1. 156778 0. 794728 1. 189109 0. 68811 1. 136509 1. 345663

|           |          |          |          |          |          |          |          |          |
|-----------|----------|----------|----------|----------|----------|----------|----------|----------|
| 100313921 | 0.97169  | 1.063893 | 1.319459 | 1.009484 | 0.888095 | 1.554278 | 1.635442 | 0.951883 |
| 100313923 | 2.465088 | 2.535756 | 2.194906 | 1.702201 | 2.617583 | 2.646094 | 2.240373 | 2.32213  |
| 100313938 | 1.02666  | 1.422239 | 0.605216 | 0.793807 | 0.721253 | 0.47892  | 1.234264 | 1.341913 |
| 100316868 | 1.702101 | 2.073625 | 2.663096 | 1.183113 | 2.249053 | 1.819602 | 1.632205 | 1.430186 |
| 100316904 | 3.567536 | 3.673383 | 3.873068 | 3.921372 | 3.577748 | 3.813603 | 2.618164 | 3.40644  |
| 100329109 | 4.798457 | 5.342807 | 4.896008 | 5.051731 | 5.141143 | 4.541634 | 5.315751 | 3.486145 |
| 100329135 | 1.620883 | 1.699523 | 1.167559 | 1.090437 | 1.424395 | 0.959421 | 1.261972 | 1.124304 |
| 100335030 | 1.417077 | 1.419782 | 1.122318 | 1.658062 | 1.106047 | 2.530215 | 1.903389 | 1.828668 |
| 100337591 | 1.39411  | 1.045079 | 1.046002 | 1.109568 | 2.11177  | 1.874532 | 1.430037 | 1.378618 |
| 100337616 | 0.596552 | 0.657011 | 0.794655 | 0.959592 | 1.265523 | 1.971647 | 0.925624 | 0.885582 |
| 100359394 | 1.859019 | 1.501094 | 1.548451 | 1.255397 | 1.8383   | 1.758869 | 1.630855 | 1.568747 |
| 10036_at  | 2.895331 | 3.639492 | 2.356504 | 3.912151 | 3.509937 | 4.151841 | 3.139201 | 3.720927 |
| 100379132 | 1.94225  | 5.757292 | 4.513345 | 6.661466 | 3.67196  | 3.99379  | 1.555226 | 3.479353 |
| 100379141 | 1.915152 | 1.576932 | 1.513098 | 1.935983 | 2.989703 | 1.376015 | 1.416469 | 2.794813 |
| 100379174 | 1.97314  | 1.465435 | 1.902723 | 1.475012 | 1.342432 | 1.428206 | 1.353547 | 1.607393 |
| 100379220 | 1.143223 | 0.939313 | 1.224676 | 0.91458  | 1.907897 | 1.222495 | 0.846495 | 1.083672 |
| 100379224 | 1.906989 | 2.655816 | 3.20854  | 3.413741 | 2.472344 | 2.944056 | 4.106357 | 3.261464 |
| 100379249 | 3.150761 | 2.413462 | 2.454526 | 4.444071 | 3.02356  | 3.551527 | 4.223949 | 2.718245 |
| 100379250 | 1.150149 | 1.708296 | 1.006626 | 0.866858 | 2.042742 | 1.199084 | 0.9543   | 1.130642 |
| 100379251 | 1.936983 | 1.413133 | 3.077023 | 1.521643 | 2.314287 | 1.668051 | 2.097068 | 2.276639 |
| 100379345 | 1.760202 | 1.77304  | 1.519821 | 1.947526 | 4.061076 | 2.713849 | 1.302044 | 4.323011 |
| 100379571 | 5.747747 | 7.239372 | 6.766683 | 6.45569  | 6.165447 | 6.363214 | 7.073979 | 6.379778 |
| 100379661 | 2.10992  | 1.647421 | 2.13087  | 1.663567 | 1.485372 | 1.624774 | 2.275345 | 1.633527 |
| 100381270 | 6.427015 | 6.691511 | 6.829187 | 6.734627 | 7.199449 | 6.660859 | 7.201939 | 7.052502 |
| 10038_at  | 6.914098 | 6.447584 | 6.021383 | 5.649765 | 6.819744 | 6.069843 | 5.428622 | 6.416531 |
| 10039_at  | 5.556924 | 4.565648 | 5.630538 | 4.894385 | 4.506682 | 5.48697  | 5.449032 | 4.994881 |
| 1003_at   | 7.303109 | 7.064964 | 7.321608 | 7.857903 | 7.196764 | 7.665764 | 7.701662 | 6.715655 |
| 10040_at  | 7.290764 | 7.049699 | 7.470616 | 7.267193 | 7.402879 | 7.083883 | 6.897736 | 7.298708 |
| 100422737 | 5.36079  | 3.231551 | 4.884003 | 3.368599 | 4.759146 | 4.017783 | 2.762229 | 5.188448 |
| 100422823 | 1.594121 | 1.753148 | 1.744597 | 1.296912 | 2.358288 | 2.761097 | 0.659033 | 1.017084 |
| 100422825 | 2.387158 | 2.587749 | 2.140809 | 2.546619 | 2.670293 | 2.091755 | 2.173377 | 1.186351 |
| 100422826 | 1.72775  | 2.526693 | 1.467039 | 2.679855 | 2.691504 | 1.719239 | 1.563592 | 2.435908 |
| 100422827 | 0.740951 | 0.821785 | 0.852272 | 1.961781 | 2.113171 | 0.93419  | 1.312624 | 2.292751 |
| 100422828 | 1.577748 | 0.929022 | 1.002716 | 1.49383  | 2.292622 | 1.112919 | 1.358823 | 1.200442 |
| 100422829 | 1.612982 | 1.650194 | 1.477538 | 1.344044 | 1.577882 | 1.865723 | 1.564343 | 1.891353 |
| 100422832 | 1.222331 | 1.554764 | 3.082145 | 2.569672 | 2.096743 | 3.132293 | 2.244917 | 1.769805 |
| 100422833 | 0.90342  | 0.717446 | 1.699575 | 1.392554 | 2.649709 | 2.327891 | 1.371646 | 0.725622 |
| 100422835 | 1.53761  | 1.530425 | 1.717584 | 1.512883 | 1.701573 | 1.240919 | 2.243397 | 1.522869 |
| 100422837 | 1.042675 | 1.096375 | 1.426537 | 0.828131 | 1.294986 | 1.143508 | 1.603517 | 0.943577 |
| 100422839 | 1.169682 | 0.737242 | 0.801306 | 0.910617 | 1.564083 | 1.558025 | 1.0025   | 1.259302 |
| 100422840 | 1.360961 | 0.977493 | 0.808827 | 0.957432 | 1.48585  | 1.261363 | 1.026478 | 0.835492 |
| 100422841 | 0.948001 | 1.121521 | 1.089475 | 1.325538 | 2.320402 | 0.913023 | 1.334334 | 0.822517 |
| 100422842 | 1.662755 | 5.463508 | 0.821955 | 0.732664 | 2.611737 | 0.92748  | 2.262491 | 0.888005 |
| 100422843 | 2.774877 | 2.503007 | 2.494826 | 2.392038 | 3.039854 | 3.696137 | 3.630902 | 3.434528 |
| 100422846 | 1.250326 | 2.104747 | 1.422755 | 1.958034 | 1.424374 | 1.73424  | 1.025386 | 1.524883 |
| 100422847 | 1.091006 | 1.218416 | 0.931942 | 2.091919 | 1.886577 | 2.282047 | 1.16362  | 1.281494 |
| 100422849 | 2.698846 | 0.545999 | 1.683692 | 1.844381 | 3.040951 | 1.149267 | 1.071273 | 0.771284 |
| 100422850 | 1.771734 | 3.143546 | 2.774921 | 4.584942 | 1.837791 | 2.595792 | 2.816101 | 1.567043 |
| 100422851 | 3.868072 | 4.250726 | 4.2138   | 3.648566 | 4.29506  | 5.647477 | 4.183961 | 2.956373 |
| 100422853 | 2.882758 | 2.865036 | 3.377273 | 3.104057 | 3.695086 | 2.95639  | 3.848318 | 2.450589 |
| 100422854 | 2.20224  | 1.921561 | 0.911438 | 1.751422 | 1.552915 | 1.944861 | 2.408893 | 2.874215 |

100422855 2. 204053 0. 673456 1. 256499 1. 188172 1. 241563 2. 400402 0. 877488 1. 322291  
100422856 1. 662496 1. 101717 1. 4523 1. 263137 1. 511047 1. 891608 1. 76916 1. 852572  
100422857 1. 166088 1. 467024 0. 709689 0. 953705 0. 78378 1. 026947 1. 199909 1. 022851  
100422859 1. 725878 1. 297367 1. 080571 1. 297072 1. 721891 1. 864593 0. 92591 1. 204966  
100422860 1. 334934 1. 071157 0. 758583 0. 961083 1. 1981 1. 071014 1. 105057 2. 263928  
100422861 2. 769325 1. 871613 2. 671186 2. 155827 2. 518617 1. 973824 2. 134906 2. 911207  
100422862 0. 916059 0. 928593 0. 902714 1. 388701 1. 371974 0. 880706 1. 566326 1. 301962  
100422863 1. 668329 1. 400357 1. 095233 1. 43771 2. 095425 1. 743021 1. 288975 1. 269823  
100422864 0. 79866 0. 678119 0. 964152 0. 617998 0. 86428 0. 866284 2. 475734 2. 819806  
100422865 1. 006381 0. 808617 1. 0301 0. 816013 3. 815579 0. 687803 1. 573655 1. 205821  
100422866 0. 925995 0. 727044 1. 08193 0. 763357 1. 423394 1. 123074 2. 351885 1. 59243  
100422867 1. 052582 2. 944274 1. 391626 1. 050737 2. 389832 1. 061978 2. 037556 1. 493859  
100422868 1. 226452 1. 80156 2. 125703 1. 48924 1. 647797 2. 108577 3. 770035 2. 719416  
100422869 0. 977898 1. 094993 0. 804774 0. 891607 1. 485877 0. 960833 1. 382035 1. 358887  
100422871 1. 126598 0. 817412 2. 192063 0. 724572 1. 244523 1. 104626 1. 193155 2. 913516  
100422873 3. 067063 3. 255839 2. 201803 3. 12297 2. 988742 2. 202778 3. 057585 2. 863334  
100422874 2. 326706 2. 948035 1. 462753 3. 117817 1. 716738 1. 926542 1. 916421 3. 237608  
100422875 1. 795793 3. 501474 2. 246361 1. 663403 1. 715588 2. 180198 2. 491802 2. 429223  
100422876 1. 404129 1. 130054 1. 47809 1. 556939 1. 464788 1. 521452 1. 244578 2. 611021  
100422877 1. 068025 0. 747919 1. 132677 0. 888401 2. 345125 1. 184773 1. 239271 1. 224243  
100422878 1. 706442 2. 937818 1. 980201 4. 774246 1. 277014 1. 524844 1. 45499 2. 82567  
100422879 1. 877077 0. 999691 2. 242312 0. 948374 1. 218845 2. 640495 1. 962546 1. 54586  
100422880 1. 199915 1. 226177 2. 62615 1. 70865 2. 036245 3. 131281 3. 153745 2. 918036  
100422881 1. 260246 1. 023007 1. 366444 1. 829262 0. 916159 1. 299504 1. 115444 1. 30816  
100422882 4. 309113 5. 714808 5. 218695 5. 653412 2. 380664 1. 526782 3. 904679 2. 408428  
100422883 0. 921434 1. 313207 1. 092124 1. 907828 1. 648835 0. 665688 0. 917787 1. 475887  
100422887 0. 994914 1. 133448 1. 012871 0. 882814 1. 708084 0. 670789 0. 948382 1. 024881  
100422888 1. 220786 0. 981455 0. 978249 0. 753859 1. 275369 1. 216199 1. 031529 0. 837107  
100422889 2. 350255 1. 451195 2. 723932 3. 609018 1. 874385 3. 081146 1. 674151 1. 208834  
100422890 0. 838526 0. 685525 1. 47729 1. 026162 1. 856553 1. 528275 0. 890273 1. 073985  
100422891 1. 76613 1. 699676 1. 452626 1. 341686 1. 382794 1. 316938 2. 145924 1. 39089  
100422892 1. 904411 2. 835353 2. 060704 2. 784978 2. 423134 2. 233689 1. 937945 2. 674387  
100422895 2. 582103 3. 36223 2. 606097 2. 30006 2. 206809 1. 973629 2. 253255 3. 482123  
100422896 1. 952955 1. 00154 0. 911168 0. 887305 2. 458373 1. 111158 1. 072496 0. 778206  
100422897 0. 751807 0. 621263 1. 590211 0. 781738 1. 120381 1. 778084 1. 520159 1. 180982  
100422898 1. 488262 1. 813256 1. 817316 1. 127974 2. 414516 1. 144568 0. 561027 1. 588732  
100422899 2. 34895 2. 820342 2. 787463 2. 381505 3. 831634 2. 756945 2. 96296 1. 880117  
100422900 1. 067983 0. 827366 0. 930674 0. 938764 2. 295581 0. 774857 0. 584206 1. 10248  
100422901 1. 758318 2. 450878 1. 829317 3. 8546 1. 476303 2. 125015 1. 531074 3. 195294  
100422902 1. 226169 1. 638265 1. 47853 1. 030744 2. 364863 1. 33232 1. 411424 1. 692948  
100422903 2. 229461 3. 185756 2. 407595 3. 375198 2. 312428 2. 791561 2. 675732 2. 602864  
100422904 2. 26557 2. 305372 2. 306055 2. 201833 2. 385179 2. 035726 2. 199936 2. 01687  
100422905 1. 846417 2. 225308 1. 452932 2. 689332 2. 481568 1. 341881 1. 262752 1. 660983  
100422908 0. 916736 1. 503638 2. 123611 1. 486638 1. 287965 0. 991343 1. 236826 1. 657643  
100422909 1. 769835 1. 036703 3. 970838 4. 602852 4. 017837 1. 444426 2. 514533 1. 307964  
100422910 1. 956925 0. 987226 1. 618589 0. 654406 1. 195847 3. 81632 1. 476331 1. 904202  
100422911 2. 590753 2. 72122 2. 143137 1. 805681 3. 548371 1. 896856 3. 478333 2. 313983  
100422912 1. 353682 1. 114591 2. 433505 2. 182446 2. 115173 1. 487188 1. 765461 1. 822374  
100422913 1. 626545 2. 456366 2. 695055 2. 091066 1. 598778 1. 2319 2. 600213 1. 106022  
100422914 0. 932125 0. 898164 1. 982197 0. 862399 1. 627079 1. 757389 2. 127311 1. 26719  
100422915 2. 541292 2. 715946 3. 279956 3. 042124 3. 040129 2. 805695 2. 846215 3. 100135

100422916 1. 291205 1. 418285 0. 986517 0. 861615 1. 673393 1. 099721 0. 914705 0. 933449  
100422918 1. 034093 1. 311514 0. 835937 0. 782467 1. 373767 0. 928602 0. 750715 1. 16197  
100422920 0. 936029 0. 900368 0. 98092 0. 862586 1. 129858 1. 033651 1. 115299 0. 885084  
100422923 0. 937454 1. 44991 1. 534392 1. 131362 1. 86631 1. 109501 2. 230424 1. 774522  
100422924 1. 149154 1. 395048 1. 247917 1. 395138 2. 522534 1. 503127 0. 974412 2. 421136  
100422926 3. 981018 2. 623557 3. 056275 1. 729841 3. 982366 3. 779332 2. 715102 2. 466631  
100422928 4. 037986 1. 029869 2. 022412 2. 19039 1. 717258 2. 102908 1. 956543 1. 473041  
100422929 1. 19738 1. 19318 1. 199619 1. 089849 0. 655055 1. 214222 2. 134275 0. 847828  
100422930 2. 221559 3. 99243 2. 778053 1. 416893 2. 154276 2. 495947 2. 45097 2. 220254  
100422931 4. 284151 5. 325298 4. 759548 4. 831691 5. 101774 5. 0718 3. 922689 4. 438655  
100422932 1. 375996 1. 233855 1. 861172 0. 984943 2. 534572 1. 205376 1. 647355 1. 65538  
100422934 2. 639332 3. 028912 4. 37839 2. 030318 2. 514961 1. 752391 1. 962111 4. 007888  
100422937 5. 36064 5. 030051 6. 056196 3. 917529 2. 569456 4. 239012 4. 510915 3. 96138  
100422940 1. 022832 0. 997471 2. 275164 0. 921599 1. 474206 0. 96362 3. 334236 1. 066649  
100422941 0. 898391 0. 81542 0. 753769 0. 828405 0. 762758 0. 989608 1. 384696 1. 265798  
100422943 1. 274223 1. 289128 1. 383674 1. 460731 2. 682015 1. 754986 1. 629963 2. 618028  
100422944 1. 70643 1. 979863 1. 83164 1. 581308 2. 042186 1. 766365 2. 134172 1. 79066  
100422945 2. 048342 1. 610128 2. 021067 3. 323332 2. 130111 1. 475418 2. 586862 2. 048342  
100422946 2. 062143 1. 654152 2. 934918 2. 286751 2. 249122 2. 043635 2. 953554 1. 490491  
100422947 1. 799749 1. 730213 1. 984974 1. 474216 1. 368557 1. 624989 1. 29002 1. 381095  
100422951 0. 968235 1. 219475 1. 095401 1. 013267 1. 131479 1. 572262 1. 403447 2. 124756  
100422953 0. 834239 1. 110504 1. 564107 1. 104768 1. 968954 0. 899144 1. 299075 1. 402139  
100422954 1. 419572 2. 814993 2. 305841 2. 772017 1. 972457 1. 003374 1. 637274 1. 466534  
100422955 4. 905952 3. 736917 3. 084887 5. 380583 4. 009751 2. 103523 5. 676264 1. 034932  
100422959 2. 473324 3. 123022 3. 813215 2. 525366 2. 751849 1. 650294 2. 606962 3. 773398  
100422963 2. 845931 2. 450658 2. 906945 2. 159146 2. 690604 3. 126213 3. 037075 2. 710368  
100422964 2. 861485 2. 201525 2. 132769 2. 565562 2. 249477 2. 98404 2. 570714 3. 271556  
100422965 1. 709019 3. 420687 3. 718483 2. 193514 4. 655829 1. 339718 1. 544481 4. 079688  
100422966 1. 789751 0. 918203 1. 83346 1. 672628 2. 372434 1. 1278 2. 141725 2. 034966  
100422967 0. 81115 1. 141593 1. 27386 0. 808716 1. 231229 1. 189069 1. 251858 1. 35078  
100422968 2. 005015 1. 436033 0. 856712 0. 849693 1. 486994 1. 492856 1. 70462 1. 274783  
100422969 1. 16339 3. 1827 1. 137158 2. 612665 4. 502301 1. 444906 2. 885917 3. 015637  
100422971 3. 441455 2. 662392 1. 448419 3. 135756 2. 44564 2. 985555 1. 229713 2. 892353  
100422973 0. 86394 0. 705957 1. 15491 1. 089816 1. 820657 1. 06775 1. 129473 1. 205531  
100422974 3. 761966 4. 441841 4. 327228 4. 86459 4. 396023 4. 164189 3. 53528 4. 552046  
100422975 3. 882303 3. 7181 2. 779501 1. 149069 1. 027632 3. 759486 1. 151193 1. 658566  
100422976 3. 083831 2. 154264 3. 900441 1. 934771 6. 02065 5. 515904 3. 274197 2. 921464  
100422979 4. 912271 4. 123922 3. 441329 3. 695295 3. 362617 4. 948656 4. 271858 1. 801207  
100422981 0. 76359 1. 261437 1. 004972 0. 748661 1. 637978 1. 299133 1. 063575 0. 962966  
100422982 1. 240058 0. 970215 1. 033502 0. 952321 0. 919751 0. 943673 0. 935876 1. 062983  
100422983 3. 041179 3. 204024 2. 891821 2. 661336 3. 573726 3. 041125 2. 593274 2. 711046  
100422984 0. 689669 0. 836737 0. 67022 0. 893727 1. 337443 1. 022763 0. 853516 0. 928405  
100422986 2. 99571 2. 453649 4. 219885 3. 316653 2. 088749 3. 082313 3. 198727 4. 175094  
100422987 0. 937105 0. 868725 1. 301025 0. 545612 1. 528305 0. 833903 1. 016826 0. 850172  
100422988 1. 081401 0. 608473 0. 774405 0. 621846 0. 919683 0. 795877 1. 261353 0. 770913  
100422989 3. 891013 4. 015062 3. 698241 4. 039635 3. 137907 4. 732629 3. 999024 3. 232083  
100422990 1. 104635 1. 302955 1. 225764 1. 095633 2. 130849 1. 143998 1. 269054 1. 53207  
100422991 3. 866826 3. 031632 3. 602698 3. 89393 2. 98905 3. 628671 4. 311344 1. 814414  
100422992 4. 771284 4. 695157 4. 363021 3. 433856 4. 108846 4. 108846 3. 359531 4. 392967  
100422993 1. 138516 1. 918172 2. 305366 1. 584244 1. 794497 1. 475442 2. 696662 1. 60656  
100422994 1. 65282 1. 657325 2. 746721 1. 930224 2. 739165 2. 655041 2. 140111 2. 446083



100422995 2. 531336 2. 505906 4. 266295 1. 710079 3. 054458 2. 131083 0. 832377 2. 19817  
100422996 2. 207346 2. 796585 1. 826652 2. 787934 2. 726964 1. 461507 2. 115039 2. 798663  
100422998 1. 32029 1. 10038 1. 35239 0. 810759 1. 007438 0. 653764 1. 347615 0. 94952  
100422999 1. 136959 1. 080568 1. 040983 1. 238833 1. 561126 1. 575333 1. 434602 1. 629126  
100423000 2. 393059 2. 653488 2. 871866 1. 564882 2. 079347 1. 347234 2. 008604 3. 108219  
100423001 0. 740842 1. 293993 0. 678461 1. 070874 2. 51213 1. 297059 0. 927682 0. 752754  
100423002 1. 944312 2. 134927 2. 190473 2. 0077 2. 966628 1. 462469 2. 503515 2. 376616  
100423003 1. 90467 1. 881802 1. 311648 0. 967277 2. 213306 1. 308946 0. 963083 1. 631371  
100423005 1. 997696 1. 060793 0. 987577 0. 559912 1. 666428 1. 518733 0. 933769 1. 313633  
100423010 0. 739304 1. 396341 1. 877997 1. 236908 1. 606753 0. 940654 0. 871131 0. 704552  
100423011 1. 016069 1. 983546 1. 188276 1. 25966 1. 255194 1. 673706 2. 043638 1. 510179  
100423012 1. 301431 1. 545607 1. 285345 1. 703615 1. 522637 1. 355548 1. 155933 1. 584583  
100423013 0. 992756 1. 635748 1. 886862 1. 76466 2. 672127 1. 324168 2. 147199 1. 044808  
100423015 3. 7468 4. 184687 3. 694252 2. 554942 3. 621152 3. 221297 1. 648727 2. 598358  
100423016 3. 562027 2. 039111 4. 511428 3. 134097 2. 5232 4. 092034 1. 898347 4. 589574  
100423017 1. 411779 0. 968509 1. 177694 1. 191985 1. 433555 1. 008151 1. 06519 1. 137908  
100423020 1. 2647 1. 644655 1. 007204 3. 158906 1. 156366 1. 215257 3. 690647 1. 318204  
100423021 1. 960848 1. 52778 3. 015248 3. 353663 3. 354408 4. 186015 2. 553013 2. 774849  
100423025 3. 06068 3. 569368 3. 570054 4. 310331 3. 512145 2. 683375 2. 443969 3. 363809  
100423026 2. 100089 1. 600867 1. 686277 1. 92854 3. 025035 1. 996498 2. 107441 2. 984085  
100423027 1. 051252 1. 63193 2. 933912 0. 907782 2. 544765 0. 986561 2. 509543 1. 860313  
100423028 2. 139518 2. 353277 2. 551676 3. 761356 3. 190155 2. 600893 3. 19095 3. 452382  
100423029 1. 790761 3. 921817 2. 818837 3. 229001 3. 714531 2. 766148 2. 904972 2. 708422  
100423030 1. 548794 2. 064122 1. 068715 4. 253891 1. 791584 1. 723218 1. 310096 1. 909302  
100423032 1. 596278 1. 694423 1. 76991 0. 769871 1. 381426 1. 545044 1. 232939 1. 346777  
100423033 1. 427536 0. 817924 1. 069124 0. 787649 1. 916055 1. 096578 1. 218808 1. 359882  
100423034 1. 074006 1. 369017 1. 047946 1. 075066 0. 994625 0. 799179 0. 627756 1. 399019  
100423036 1. 622395 1. 584021 1. 211529 1. 382154 1. 592651 1. 144184 1. 632891 3. 145724  
100423039 2. 614035 2. 376878 2. 251643 2. 310383 3. 710404 1. 49861 3. 218856 2. 456189  
100423040 1. 397018 1. 630204 0. 98468 1. 080909 1. 405015 1. 314405 1. 965331 2. 569657  
100423041 4. 037149 3. 754786 4. 903882 3. 289076 1. 979547 2. 159568 1. 331546 2. 788771  
100423042 1. 710032 0. 886025 1. 882858 1. 029256 0. 686258 0. 955422 1. 277187 0. 89843  
100423043 1. 192758 1. 634579 1. 511989 2. 024794 1. 873965 1. 422872 0. 588491 2. 504121  
100423062 2. 050233 2. 071658 2. 051772 2. 123056 2. 683608 2. 045921 2. 82169 3. 067693  
10042\_at 5. 977726 6. 038113 6. 174082 5. 406825 6. 063643 5. 86028 6. 611186 5. 883483  
100431172 0. 873337 0. 709022 1. 345558 0. 921861 0. 946524 0. 994656 1. 232672 0. 956703  
10043\_at 5. 769157 5. 789976 5. 827498 5. 910293 5. 269464 6. 376939 5. 320231 5. 31215  
10044\_at 5. 153232 4. 256758 4. 101461 5. 564747 3. 648567 5. 2231 4. 623675 4. 630669  
10045\_at 3. 294989 3. 450319 2. 519429 3. 089134 3. 474678 3. 271213 3. 976971 2. 724404  
100462953 1. 649994 2. 55817 4. 189686 3. 987356 2. 030744 2. 236123 2. 550487 4. 189023  
100462977 1. 022026 1. 22025 1. 149275 0. 951698 0. 931534 2. 379445 1. 11476 1. 770026  
100462981 3. 1761 2. 89702 1. 710553 2. 294929 2. 556911 2. 799119 2. 616683 2. 655066  
100462983 2. 555387 2. 627252 2. 919789 1. 178947 1. 657247 1. 647907 1. 138459 2. 823724  
100463285 1. 258504 1. 91516 1. 866272 1. 129071 1. 821958 1. 904368 2. 517012 1. 439061  
100463289 1. 177406 1. 094179 1. 157588 1. 299652 0. 784232 0. 81719 0. 985758 1. 521796  
100463482 1. 61526 2. 220937 2. 522593 1. 887073 2. 077841 1. 636943 1. 793403 1. 90568  
100463486 3. 389576 2. 27488 2. 938502 3. 389576 1. 22508 3. 286666 2. 965919 4. 046324  
100463487 0. 971494 1. 856624 0. 983324 1. 063052 1. 398414 0. 719617 1. 782545 2. 118281  
100463488 1. 795773 1. 26188 1. 051216 1. 096842 0. 938458 0. 586647 0. 940711 1. 681062  
10046\_at 3. 03532 3. 123806 3. 237476 3. 356427 3. 095208 3. 840284 4. 466212 1. 941799  
10047\_at 1. 350176 1. 971373 1. 617314 1. 301989 2. 110775 1. 67929 2. 005828 2. 175562

|           |          |          |          |          |          |          |          |          |
|-----------|----------|----------|----------|----------|----------|----------|----------|----------|
| 10048_at  | 7.195159 | 7.179857 | 6.923908 | 7.026487 | 7.30245  | 7.107371 | 6.637109 | 7.374586 |
| 100498859 | 0.978    | 0.835846 | 1.014492 | 1.221244 | 1.137809 | 1.429056 | 2.225837 | 1.83725  |
| 100499171 | 2.956207 | 2.057237 | 1.182249 | 1.049026 | 1.950022 | 1.381936 | 1.728496 | 1.410113 |
| 100499177 | 3.639342 | 2.38268  | 3.733635 | 3.385757 | 3.22813  | 2.881273 | 2.83293  | 4.679422 |
| 100499183 | 1.61626  | 2.155987 | 1.934665 | 2.230864 | 1.855664 | 2.785787 | 2.302979 | 1.15373  |
| 100499194 | 1.643933 | 2.217097 | 2.148591 | 2.161195 | 1.621703 | 1.594823 | 1.161604 | 1.62739  |
| 100499227 | 3.639606 | 1.807226 | 3.369409 | 2.536685 | 4.768259 | 3.66694  | 3.09956  | 2.642743 |
| 100499405 | 4.15551  | 4.394809 | 3.036491 | 3.979944 | 3.839397 | 3.427742 | 3.318626 | 2.825554 |
| 100499466 | 6.017594 | 5.884534 | 5.217611 | 5.943319 | 6.169779 | 5.863728 | 5.374444 | 5.812654 |
| 100499467 | 2.914603 | 3.133233 | 2.276286 | 2.108968 | 2.96007  | 2.575246 | 1.816555 | 1.981253 |
| 100499484 | 4.661625 | 3.702912 | 2.368489 | 0.466091 | 2.562545 | 2.347085 | 2.124604 | 2.295878 |
| 100499489 | 3.981967 | 3.856193 | 3.772523 | 3.717539 | 3.915616 | 3.675241 | 3.916177 | 3.814487 |
| 10049_at  | 6.459228 | 6.232254 | 6.206634 | 6.13027  | 6.082394 | 6.801423 | 6.247413 | 6.363327 |
| 1004_at   | 6.210296 | 5.736837 | 5.735152 | 6.002925 | 6.177889 | 6.913274 | 3.872722 | 6.86098  |
| 100500773 | 1.478825 | 1.885646 | 1.611184 | 1.2301   | 1.825156 | 2.103276 | 2.057493 | 2.01602  |
| 100500801 | 2.067371 | 0.967496 | 1.517252 | 1.008262 | 1.0966   | 0.987138 | 1.236375 | 1.590679 |
| 100500802 | 1.875443 | 3.675926 | 3.604946 | 1.638014 | 5.102606 | 1.617    | 1.983421 | 2.369206 |
| 100500803 | 1.349188 | 1.365602 | 1.433211 | 1.294054 | 1.504633 | 1.14483  | 1.724221 | 4.02729  |
| 100500805 | 1.371248 | 3.292501 | 3.373527 | 1.192036 | 4.049041 | 2.083451 | 1.31421  | 3.163417 |
| 100500807 | 1.416515 | 0.886287 | 0.892194 | 0.687885 | 1.512158 | 0.851408 | 1.712556 | 1.369111 |
| 100500809 | 1.645498 | 1.072842 | 1.180944 | 1.255755 | 1.212098 | 0.983754 | 1.350043 | 1.84102  |
| 100500810 | 3.96647  | 4.17745  | 3.786527 | 4.109064 | 4.385123 | 4.608708 | 4.407627 | 4.052835 |
| 100500811 | 3.260884 | 3.057245 | 4.553849 | 2.991581 | 1.807825 | 2.161017 | 4.224412 | 3.549039 |
| 100500812 | 3.276523 | 1.89419  | 4.374457 | 1.458375 | 1.46833  | 1.50856  | 1.443108 | 2.209873 |
| 100500813 | 1.658577 | 1.555162 | 1.175968 | 1.811277 | 2.653118 | 1.737533 | 2.613165 | 1.660067 |
| 100500814 | 1.146246 | 1.318844 | 1.293102 | 0.844132 | 1.437623 | 0.799133 | 1.528398 | 1.234681 |
| 100500816 | 0.830661 | 1.010028 | 1.627356 | 1.035747 | 0.97734  | 1.142734 | 1.1294   | 2.631275 |
| 100500817 | 1.091966 | 1.168299 | 0.890117 | 1.277571 | 2.294057 | 1.501806 | 1.947902 | 1.195941 |
| 100500818 | 0.754134 | 0.943795 | 0.838486 | 0.675857 | 0.992062 | 1.007808 | 1.440795 | 0.64188  |
| 100500819 | 0.876224 | 1.065639 | 1.243831 | 0.805307 | 1.465996 | 1.230491 | 1.274302 | 0.970902 |
| 100500821 | 0.890264 | 1.049957 | 0.647154 | 1.761133 | 0.931425 | 1.16241  | 1.416042 | 0.975844 |
| 100500822 | 1.440594 | 1.523637 | 2.127937 | 1.54959  | 2.687837 | 2.337205 | 2.134415 | 1.66872  |
| 100500823 | 0.952774 | 0.865747 | 0.948912 | 0.820515 | 1.059728 | 0.866647 | 1.061703 | 0.876634 |
| 100500824 | 5.415061 | 5.070183 | 4.453636 | 4.409423 | 5.280072 | 3.639834 | 3.752005 | 2.785404 |
| 100500825 | 1.033871 | 0.875145 | 1.04612  | 0.724546 | 1.043567 | 1.057981 | 0.983469 | 1.554724 |
| 100500826 | 1.277903 | 0.936522 | 1.127701 | 1.105239 | 1.314851 | 1.498033 | 1.490599 | 0.973193 |
| 100500828 | 3.873116 | 4.661988 | 4.377017 | 4.164776 | 3.740978 | 4.443247 | 4.876741 | 4.782561 |
| 100500829 | 0.779457 | 0.837666 | 1.064047 | 0.665724 | 0.934121 | 0.821124 | 1.67598  | 1.222519 |
| 100500830 | 1.53394  | 1.156336 | 0.974499 | 1.605456 | 1.413937 | 2.466672 | 0.778625 | 0.887822 |
| 100500831 | 1.466035 | 0.932774 | 1.49408  | 0.970124 | 1.795119 | 1.022453 | 1.492048 | 1.164461 |
| 100500834 | 0.518391 | 1.51846  | 1.092122 | 0.927202 | 1.363289 | 0.538348 | 1.304422 | 1.255657 |
| 100500835 | 5.993852 | 5.531988 | 6.442683 | 6.170268 | 6.473541 | 5.525716 | 5.59393  | 5.828499 |
| 100500836 | 1.034719 | 1.70442  | 0.879178 | 0.736066 | 0.956039 | 0.841144 | 1.118366 | 2.020195 |
| 100500838 | 1.414809 | 2.080213 | 1.779918 | 1.55255  | 2.61885  | 1.65198  | 1.967446 | 1.735269 |
| 100500839 | 1.525941 | 1.118056 | 1.091211 | 1.006918 | 1.991683 | 1.093442 | 0.995718 | 1.198271 |
| 100500841 | 1.264734 | 1.715678 | 1.709384 | 1.31209  | 1.69689  | 1.325807 | 1.671597 | 2.375501 |
| 100500843 | 2.514367 | 2.332093 | 2.752614 | 2.254759 | 2.563507 | 1.34616  | 3.581384 | 2.090807 |
| 100500844 | 1.047456 | 1.608639 | 0.80867  | 1.109567 | 1.478988 | 1.561831 | 1.832817 | 1.001567 |
| 100500845 | 2.127517 | 1.553726 | 1.456513 | 2.078486 | 1.954089 | 1.868523 | 2.660449 | 1.41452  |
| 100500849 | 3.738206 | 5.744218 | 3.913479 | 6.587019 | 2.988088 | 2.956974 | 2.744333 | 6.344499 |
| 100500850 | 0.950867 | 0.769463 | 2.91715  | 0.852561 | 0.926088 | 1.262914 | 2.825253 | 1.524248 |

100500851 3. 968389 3. 663904 4. 043501 4. 426697 3. 935332 4. 006589 4. 250598 4. 271847  
100500853 1. 549089 2. 040376 1. 925115 1. 797785 0. 923046 2. 126179 2. 335746 2. 446343  
100500854 2. 310336 2. 153405 1. 059939 4. 384246 4. 465328 4. 84415 2. 085052 4. 303725  
100500856 0. 814548 0. 369497 1. 033147 1. 527082 0. 700066 0. 616133 0. 588279 1. 112817  
100500857 3. 126251 2. 272973 2. 017632 3. 506644 2. 771674 2. 969139 2. 459604 1. 633093  
100500858 3. 315535 4. 021208 2. 315597 2. 810706 2. 682479 3. 027593 4. 44434 2. 847371  
100500859 1. 062694 1. 041539 0. 828702 0. 702309 1. 056221 1. 107952 1. 138828 1. 252641  
100500861 2. 082153 3. 130853 2. 925982 3. 617112 3. 22648 2. 275727 2. 898374 2. 553058  
100500865 3. 431636 2. 713989 2. 33096 3. 479554 2. 289583 4. 049274 2. 689208 2. 749246  
100500866 1. 44335 1. 091657 2. 984729 1. 136932 1. 619659 1. 01735 1. 523573 4. 128401  
100500867 1. 042427 1. 144794 1. 035332 0. 972099 5. 047105 1. 254393 1. 049387 1. 295422  
100500868 0. 885488 1. 157397 1. 144142 1. 082559 1. 069631 1. 231171 1. 416434 1. 136504  
100500869 0. 808012 1. 007727 1. 146501 0. 9356 1. 27242 1. 108953 0. 867816 1. 734009  
100500870 1. 932758 1. 808078 1. 688225 1. 877496 1. 791503 1. 66795 2. 512571 2. 434187  
100500871 3. 355592 4. 324154 4. 803479 3. 962374 4. 038494 4. 21196 3. 269546 4. 847815  
100500872 3. 930825 3. 088891 3. 75823 1. 72811 1. 115856 1. 944124 1. 971848 1. 617271  
100500873 2. 116189 2. 061493 2. 400609 2. 106552 2. 022156 1. 376748 1. 516126 2. 346727  
100500875 2. 27211 1. 131229 0. 913521 1. 115512 1. 133506 1. 277587 2. 434219 1. 084251  
100500876 1. 489363 3. 890738 1. 484746 1. 180906 1. 139128 1. 130583 2. 141096 5. 417745  
100500877 0. 844185 0. 920094 1. 002807 0. 948815 0. 974104 0. 790396 0. 974739 1. 406219  
100500879 0. 646369 0. 862422 0. 754491 0. 579506 0. 861429 0. 724591 2. 771427 1. 083072  
100500880 2. 113775 1. 206214 1. 297069 0. 95546 5. 685288 1. 368978 1. 730375 1. 667834  
100500881 0. 994189 0. 659806 1. 02396 0. 819567 1. 244685 0. 626145 0. 814778 0. 897002  
100500882 3. 298863 3. 734737 2. 779097 3. 737355 3. 353626 3. 426116 3. 716534 3. 252901  
100500883 1. 522617 1. 441813 0. 827331 0. 615334 0. 900631 0. 655205 2. 77765 1. 527787  
100500884 1. 687674 1. 662335 0. 924134 1. 424823 1. 568129 2. 457554 1. 50368 1. 178905  
100500885 2. 194194 3. 81913 1. 920523 1. 054797 1. 814778 1. 722845 1. 90225 3. 386299  
100500886 1. 905858 1. 034212 1. 287491 1. 11679 1. 268312 1. 465904 1. 317256 1. 755825  
100500887 2. 104195 1. 224902 1. 151629 1. 237133 1. 751109 2. 102702 1. 42026 2. 242983  
100500888 3. 441282 3. 883225 4. 937804 4. 293426 3. 291069 4. 353455 4. 613152 3. 879636  
100500889 2. 387602 1. 86849 2. 222129 2. 074776 2. 747103 2. 090426 2. 061497 2. 79576  
100500891 4. 538269 4. 90826 5. 410963 4. 695736 5. 51548 5. 295903 4. 773538 5. 243473  
100500893 1. 893669 2. 561942 1. 302431 1. 330921 2. 224707 1. 969462 0. 911445 1. 807307  
100500896 1. 651683 2. 676718 2. 758445 1. 43057 2. 435524 2. 044282 1. 461695 2. 541779  
100500897 0. 904922 1. 146779 1. 309446 1. 113289 1. 106652 0. 704355 1. 618076 1. 507543  
100500898 1. 66687 1. 753924 1. 35016 1. 348265 0. 952486 1. 367816 2. 023968 2. 095183  
100500899 2. 410807 1. 621219 1. 217221 1. 179473 1. 803837 2. 50055 1. 674972 1. 322277  
100500900 2. 020422 3. 113831 2. 682303 2. 346303 3. 954485 2. 990892 2. 333197 2. 710257  
100500901 2. 690897 2. 038829 4. 275346 3. 387745 2. 333707 3. 515844 3. 257496 1. 955865  
100500902 1. 261569 0. 858858 1. 70017 0. 747404 1. 065709 0. 9046 1. 528032 0. 545429  
100500903 2. 193985 2. 198326 1. 517236 0. 917629 2. 57259 2. 219082 1. 19119 1. 254016  
100500904 1. 660667 1. 065061 1. 504523 0. 874336 1. 232624 1. 061462 1. 434534 1. 321734  
100500905 7. 703524 7. 873489 7. 424529 7. 470499 7. 505269 7. 107248 7. 55638 7. 661469  
100500909 2. 49947 0. 990711 0. 754942 0. 712256 1. 487986 0. 674606 0. 912796 0. 960994  
100500911 2. 907999 4. 013327 3. 209166 3. 657457 3. 921897 2. 218613 3. 897734 3. 311758  
100500912 1. 954283 0. 78358 1. 320114 1. 340486 2. 267818 1. 766159 0. 776594 2. 386198  
100500915 1. 501928 1. 25301 1. 006788 1. 39555 1. 884539 1. 275141 2. 08486 1. 163497  
100500919 2. 141402 1. 291835 2. 137832 0. 827611 1. 762797 2. 567497 0. 969129 1. 922572  
100500920 1. 04286 1. 229351 0. 997035 0. 907061 1. 428695 1. 160941 1. 42213 1. 374322  
100500938 1. 725508 1. 512321 2. 100275 1. 250139 1. 33162 2. 29977 1. 99114 1. 706281  
100505474 1. 060799 1. 140376 1. 518175 1. 24382 1. 527648 1. 286214 1. 24382 1. 464487

100505478 2. 649034 3. 12178 3. 221781 2. 833554 4. 176014 3. 865728 3. 889698 3. 612247  
100505483 1. 81582 1. 988554 1. 503567 1. 838475 1. 858051 1. 538873 2. 026489 1. 623969  
100505495 4. 683285 4. 813576 4. 513751 4. 438034 4. 706895 3. 631467 4. 181502 4. 524176  
100505498 3. 234899 3. 737427 2. 862642 4. 294262 3. 752575 2. 877292 3. 408882 3. 266649  
100505501 2. 149479 2. 300655 2. 606548 3. 094108 1. 753547 2. 259604 2. 742289 2. 351676  
100505502 0. 682922 0. 515246 2. 166213 2. 165181 1. 503125 0. 070562 0. 856848 1. 108721  
100505504 2. 344864 2. 369533 1. 465911 1. 542596 1. 801365 2. 131911 1. 702701 2. 275012  
100505515 1. 491009 1. 879382 3. 646984 1. 362135 2. 77934 1. 538012 2. 75911 0. 707818  
100505518 1. 716867 1. 084306 1. 535955 1. 262081 1. 63023 1. 287964 1. 491944 1. 48083  
100505530 1. 858673 2. 22472 1. 386982 1. 81514 1. 936332 1. 496458 1. 677249 1. 840432  
100505532 1. 100316 1. 55511 2. 452738 2. 472177 1. 546224 2. 903292 1. 773588 1. 377942  
100505534 1. 452382 1. 181226 1. 49911 1. 455999 2. 254868 1. 819434 1. 064191 1. 265216  
100505536 2. 418803 2. 191077 1. 592681 2. 332069 2. 003722 2. 136912 2. 416931 2. 327245  
100505538 2. 679099 2. 802308 2. 738396 1. 840556 2. 540715 2. 823855 1. 710876 2. 368089  
100505540 1. 546496 1. 637536 1. 675729 1. 8191 1. 470769 2. 300228 1. 485443 1. 968683  
100505545 1. 630584 1. 773361 1. 733911 1. 61581 1. 898434 1. 822837 2. 03084 2. 172219  
100505547 2. 117281 1. 253582 1. 300217 1. 601163 1. 809405 1. 742726 1. 601163 1. 895213  
100505549 2. 491722 2. 876197 2. 49419 2. 513038 3. 300893 1. 848708 2. 568513 3. 398187  
100505555 3. 581631 3. 940829 3. 326442 3. 245017 2. 383185 3. 45603 3. 567919 2. 991782  
100505561 1. 248837 1. 710679 1. 770273 1. 643618 2. 192085 2. 13295 1. 367789 2. 156555  
100505564 3. 45219 3. 949665 3. 37748 3. 330092 2. 991462 3. 354865 2. 998777 2. 563261  
100505566 0. 852123 1. 224509 1. 080319 0. 948943 1. 497588 1. 002585 1. 279993 1. 586899  
100505570 3. 419242 5. 596427 3. 119817 4. 518035 3. 283382 2. 742281 3. 660105 3. 674892  
100505573 7. 196438 7. 766983 6. 360478 7. 134144 7. 80217 6. 878834 6. 362176 7. 577046  
100505576 3. 389676 3. 825316 3. 8587 3. 354212 3. 158305 4. 76415 4. 235322 2. 469761  
100505583 1. 606589 1. 845823 1. 874064 1. 968013 2. 01714 2. 329607 1. 938319 2. 643168  
100505585 2. 856764 3. 050679 2. 203045 2. 670597 2. 51508 2. 992194 3. 288875 2. 687457  
100505588 1. 800413 2. 467113 2. 035007 1. 709079 2. 272703 2. 978897 1. 82705 2. 486453  
100505591 2. 309743 2. 782923 2. 709966 2. 670276 3. 478094 2. 883141 2. 993194 3. 710733  
100505592 0. 977978 1. 142418 1. 64692 0. 884251 2. 289019 0. 975106 1. 044177 1. 030921  
100505601 2. 195197 1. 554091 3. 258766 1. 377934 1. 864453 2. 571859 1. 327416 1. 331557  
100505609 0. 598814 1. 119668 1. 169031 0. 637458 0. 599418 1. 273864 0. 533872 0. 980222  
100505616 4. 465666 3. 600913 1. 650189 3. 515736 3. 825815 3. 341563 4. 27423 3. 637848  
100505619 1. 482805 1. 046004 1. 211373 0. 934865 1. 168713 1. 117156 0. 974963 1. 03364  
100505622 2. 354035 1. 715679 2. 410556 2. 151564 1. 672206 2. 563738 2. 533758 1. 823053  
100505624 5. 763786 4. 608813 5. 515644 5. 750069 4. 447428 4. 701613 4. 824555 5. 726444  
100505625 2. 840275 1. 629278 1. 935249 1. 979598 1. 645436 1. 475882 0. 742144 1. 031324  
100505633 0. 986966 1. 285292 2. 20785 1. 374483 1. 602072 1. 550305 2. 550301 1. 175983  
100505635 2. 477635 3. 40716 2. 37792 2. 889271 2. 560006 3. 193355 2. 179092 2. 943752  
100505636 2. 747476 3. 089506 3. 173761 2. 26475 2. 193491 3. 389269 2. 963734 1. 737048  
100505641 7. 636831 7. 675843 7. 639396 7. 873983 7. 823874 7. 434607 7. 500533 7. 882691  
100505648 2. 831387 3. 845616 3. 526761 2. 408557 3. 30111 3. 964563 4. 112684 2. 575329  
100505650 5. 25089 4. 15766 5. 816298 4. 606733 1. 159502 6. 741168 1. 213357 3. 04481  
100505658 1. 15902 1. 162817 0. 997813 1. 108951 1. 896072 1. 14507 1. 386007 1. 257464  
100505659 1. 322946 2. 36773 1. 329733 1. 103009 2. 606463 1. 970316 1. 443399 1. 572131  
100505663 0. 840298 1. 283618 1. 051633 0. 831454 0. 962416 0. 968464 0. 988511 1. 109624  
100505664 8. 092182 7. 835984 6. 660902 7. 101908 6. 070748 6. 404108 7. 304003 7. 170386  
100505666 1. 66905 2. 338864 1. 942267 2. 656573 1. 773058 2. 109103 1. 630178 2. 165432  
100505676 1. 428667 1. 272094 1. 158955 1. 664723 2. 286232 2. 435455 0. 679557 2. 120298  
100505678 3. 064006 2. 145734 2. 918443 3. 445985 4. 144831 3. 261372 2. 508152 3. 143725  
100505681 3. 779761 4. 164815 4. 687773 4. 288563 4. 960996 3. 667266 4. 417518 5. 055444

100505683 2. 351754 4. 124766 3. 008427 3. 429115 4. 612186 2. 820795 1. 737008 2. 025926  
100505685 1. 683233 2. 06151 1. 858468 1. 944281 1. 364706 1. 381971 1. 75943 2. 14803  
100505687 3. 874441 4. 247814 4. 028408 3. 956803 4. 278347 3. 913231 3. 469697 3. 56824  
100505692 2. 170616 2. 734504 1. 354117 1. 355558 1. 74225 1. 636665 1. 823901 1. 565525  
100505696 3. 446156 2. 63012 3. 05319 3. 540043 3. 33778 3. 451351 3. 178341 2. 410508  
100505702 1. 626853 1. 452124 1. 361338 1. 448996 1. 630293 1. 387385 1. 340182 1. 3935  
100505710 1. 445275 2. 588555 1. 958236 1. 054683 1. 58227 1. 107588 1. 91439 3. 180176  
100505711 1. 751859 1. 568031 1. 494797 2. 010992 2. 875517 2. 378356 1. 612581 1. 707497  
100505715 3. 103155 1. 052552 2. 206317 0. 978021 0. 784206 0. 894923 1. 404289 1. 56366  
100505716 2. 481836 1. 548738 2. 032973 2. 125422 2. 266113 2. 491162 2. 678154 2. 449882  
100505718 1. 152182 1. 101082 1. 708044 1. 517684 1. 958277 1. 766404 1. 838664 1. 613082  
100505727 1. 474289 1. 94231 1. 956701 1. 899692 1. 454663 1. 747607 1. 595494 2. 370967  
100505736 1. 608044 1. 464302 2. 58166 1. 413408 1. 778093 1. 590189 1. 245904 2. 405321  
100505738 4. 07454 5. 504192 4. 535489 4. 914678 4. 246342 4. 568772 4. 807605 5. 066858  
100505739 1. 463483 1. 610853 2. 299047 1. 332884 1. 661616 1. 948371 1. 782318 2. 018567  
100505741 2. 532098 1. 269801 1. 442088 1. 086136 1. 233961 1. 925001 1. 142443 1. 461838  
100505746 2. 910702 1. 810809 1. 970431 1. 751585 3. 124221 2. 679041 3. 257132 1. 711015  
100505753 2. 190928 2. 052282 1. 813934 2. 026778 2. 169855 1. 681979 2. 009994 2. 411982  
100505761 4. 623964 5. 602406 4. 072946 5. 731529 4. 661164 4. 360004 4. 193165 4. 927703  
100505767 1. 160463 2. 193593 2. 082864 5. 401023 1. 666694 3. 303014 2. 87147 1. 226205  
100505768 1. 287627 0. 980975 1. 219585 1. 197064 1. 269502 1. 127135 2. 024048 2. 193237  
100505771 4. 519982 5. 350671 4. 049878 4. 456859 2. 996726 4. 13054 3. 41139 3. 534082  
100505774 1. 81079 1. 636587 1. 735659 1. 327448 1. 213605 1. 169594 3. 149954 1. 297367  
100505776 1. 362374 1. 350905 1. 507222 1. 877152 1. 478686 2. 711992 1. 793989 1. 092795  
100505782 2. 733751 2. 38985 2. 561641 2. 848975 1. 934739 2. 470549 1. 982878 1. 556681  
100505783 3. 964515 5. 188934 4. 402985 3. 497159 3. 829871 3. 514928 4. 387874 4. 11915  
100505784 0. 511823 0. 89092 1. 423647 0. 72376 1. 960909 0. 611036 0. 995157 1. 808926  
100505795 1. 365615 1. 723194 1. 475399 1. 643411 2. 191969 1. 767511 2. 677493 2. 379773  
100505797 2. 823059 1. 281966 1. 075778 3. 179509 0. 80764 2. 082873 1. 770734 1. 891203  
100505798 1. 590258 3. 48466 3. 863529 2. 704165 3. 168594 3. 077896 4. 057835 2. 5159  
100505806 7. 099584 6. 66399 6. 100072 5. 869552 5. 629957 6. 992859 5. 092936 5. 299934  
100505811 1. 018621 0. 941573 1. 81174 0. 970844 1. 039061 1. 10602 1. 161837 1. 273484  
100505812 1. 602514 2. 165539 1. 99654 2. 320778 2. 778256 2. 272755 3. 373034 2. 952257  
100505817 1. 63857 2. 103076 1. 342545 1. 401552 1. 789412 1. 211014 1. 30556 1. 646994  
100505824 2. 879573 2. 657961 2. 192098 1. 694303 3. 104828 2. 848639 1. 855007 2. 247758  
100505826 1. 551883 1. 579379 1. 122233 0. 874458 2. 0804 1. 505064 1. 794009 1. 88164  
100505832 1. 474966 0. 796867 0. 916787 1. 793928 1. 012323 0. 89854 2. 09824 1. 061954  
100505835 1. 045285 1. 30664 1. 594082 1. 396076 1. 87582 1. 638328 1. 68007 1. 633139  
100505839 1. 832055 2. 520942 1. 724482 1. 971878 2. 044285 1. 466622 2. 269684 2. 063131  
100505841 1. 568329 1. 374993 1. 891133 1. 714133 1. 673169 2. 087226 1. 587935 2. 447061  
100505845 1. 435475 0. 95888 1. 730804 1. 289201 1. 360069 1. 593152 1. 317034 1. 664033  
100505851 1. 714896 1. 335112 1. 282576 1. 036949 0. 963398 1. 195385 1. 304501 1. 304501  
100505853 1. 087744 2. 069075 1. 528298 1. 545156 1. 69402 1. 485443 1. 603516 1. 642981  
100505854 5. 830912 5. 657321 5. 267151 4. 980934 5. 454093 5. 089455 5. 544753 5. 409355  
100505865 4. 234656 3. 134171 4. 874803 4. 517961 3. 66362 3. 964598 3. 091244 4. 851451  
100505869 1. 978505 2. 124872 2. 856246 2. 792468 1. 771492 3. 488127 1. 857991 1. 796222  
100505875 3. 348317 3. 340159 2. 683666 2. 830737 3. 24115 2. 716682 3. 100722 3. 291162  
100505876 7. 350263 7. 404388 6. 968965 7. 549128 7. 796876 7. 221522 7. 251255 7. 327284  
100505877 1. 66061 1. 630634 1. 508704 1. 291913 2. 232576 1. 426195 1. 712509 1. 182787  
100505878 1. 724278 1. 080801 0. 781735 1. 585016 1. 572964 1. 629674 1. 944535 1. 655926  
100505879 1. 505231 1. 197495 1. 578665 0. 78088 1. 254937 1. 345478 1. 495981 1. 09066

100505881 8. 762766 8. 638986 8. 625843 8. 294921 7. 795358 7. 970546 8. 058636 8. 696979  
100505887 1. 412027 1. 699355 1. 217819 1. 206025 1. 323696 1. 800685 1. 508034 1. 61521  
100505890 1. 629444 1. 771746 1. 610672 1. 761197 1. 995564 2. 240727 1. 983658 1. 806767  
100505893 1. 745322 2. 226517 1. 231031 1. 577269 1. 590651 1. 89522 1. 426854 2. 52947  
100505894 3. 126972 3. 342821 3. 790469 3. 300365 3. 901389 3. 810258 2. 996993 4. 057093  
100505902 1. 512024 1. 986027 1. 88935 1. 662721 1. 710389 1. 382881 1. 645397 2. 11027  
100505912 1. 393354 1. 327618 1. 528809 1. 540031 1. 969636 2. 504135 2. 218256 1. 403587  
100505918 2. 08435 1. 430985 1. 921535 1. 771972 1. 440584 1. 98246 1. 902532 1. 414132  
100505920 2. 239452 1. 630624 2. 278999 1. 987094 1. 129576 2. 752846 2. 145435 2. 317507  
100505921 3. 619493 3. 839658 3. 957323 3. 111233 2. 395969 4. 50711 4. 782604 3. 625419  
100505929 1. 250733 1. 206746 1. 338642 1. 220662 1. 349163 0. 759392 2. 069064 2. 101179  
100505933 3. 741311 3. 697953 3. 980874 3. 256455 3. 903272 3. 715198 3. 533183 2. 975986  
100505938 3. 012078 4. 026431 5. 18337 5. 925607 3. 107524 5. 534871 3. 20634 1. 347636  
100505940 4. 427341 1. 850856 3. 905199 1. 478245 2. 444959 1. 454764 1. 816033 2. 405721  
100505942 3. 171771 3. 220801 3. 589093 3. 484873 3. 777749 4. 22112 2. 931175 2. 936682  
100505964 1. 355567 0. 964203 1. 241874 0. 892264 0. 826461 1. 438051 2. 078147 0. 777008  
100505967 1. 795164 1. 127756 1. 084929 1. 310083 2. 124663 1. 385816 1. 198291 1. 968268  
100505975 1. 998506 1. 200214 1. 332242 1. 082736 1. 056825 2. 781095 1. 971772 1. 275555  
100505978 1. 558822 1. 633424 1. 530991 1. 97927 2. 542462 1. 852234 1. 510037 2. 040018  
100505985 5. 134639 2. 866747 2. 528481 1. 991974 4. 491494 1. 711129 2. 916038 4. 820287  
100505989 1. 373844 1. 462724 1. 54495 1. 324719 1. 406066 1. 773562 1. 528699 2. 285532  
100505993 1. 543837 1. 175822 3. 142305 0. 901935 2. 64996 2. 256829 1. 774825 1. 979746  
100505994 1. 233 0. 83664 0. 870309 2. 162904 1. 702504 1. 672112 1. 874969 1. 775461  
100505996 1. 547733 1. 209849 1. 600788 1. 541682 2. 459723 1. 629981 1. 782826 1. 14288  
100506007 3. 039009 3. 131636 4. 547017 2. 69145 2. 015581 1. 437845 2. 033358 1. 670401  
100506012 1. 280004 1. 64507 2. 76727 1. 876007 0. 757709 1. 580231 1. 048655 0. 998689  
100506013 1. 566723 1. 36414 1. 350333 1. 376404 1. 460886 1. 452172 1. 822874 1. 943609  
100506014 3. 789669 5. 226147 3. 701852 4. 838485 4. 256214 3. 505672 3. 39471 3. 997075  
100506016 1. 63043 1. 704928 1. 716137 1. 195625 1. 451437 1. 20931 1. 805808 1. 229832  
100506022 1. 531523 2. 426807 3. 193291 3. 544506 2. 872597 2. 460026 3. 089821 2. 208708  
100506023 1. 88579 3. 461171 1. 721433 2. 086871 2. 114705 3. 218238 1. 487884 1. 899146  
100506025 1. 101144 1. 576991 1. 365732 1. 079578 1. 599645 1. 671989 1. 486866 1. 798399  
100506033 4. 33595 5. 173095 4. 914497 5. 098492 5. 220994 5. 425665 4. 690226 4. 901752  
100506035 2. 091389 1. 114035 1. 433174 2. 281533 1. 111943 1. 896937 1. 707054 1. 8998  
100506036 1. 829683 1. 881164 2. 845078 1. 592722 3. 862117 1. 94369 1. 442866 1. 108329  
100506046 4. 338515 3. 390659 4. 072371 5. 757666 3. 683606 3. 741007 3. 645077 4. 634406  
100506047 2. 49098 3. 594616 3. 62593 2. 546241 3. 772387 3. 474894 2. 875413 3. 024331  
100506049 1. 18896 1. 260894 0. 857547 1. 236491 0. 96907 1. 154091 1. 362855 1. 064911  
100506050 2. 509374 2. 817376 2. 485897 2. 936068 3. 60362 3. 863539 2. 487193 2. 955209  
100506054 3. 33654 2. 105311 2. 380092 4. 090164 2. 899611 3. 000821 3. 22921 2. 845608  
100506060 1. 480943 1. 275824 1. 939015 0. 907274 1. 73669 1. 204308 1. 219379 1. 299655  
100506068 1. 769284 2. 003982 1. 950814 1. 874033 1. 435898 1. 448911 1. 559369 1. 749199  
100506070 1. 096357 1. 056586 1. 525715 0. 985716 1. 550258 1. 241233 1. 523526 1. 407952  
100506071 2. 660975 1. 742284 1. 990394 1. 705035 1. 473643 2. 48363 1. 658379 2. 376394  
100506082 1. 915874 1. 276605 0. 973189 1. 260716 1. 853899 1. 561959 2. 947224 1. 062293  
100506083 2. 713818 2. 932685 2. 613399 2. 412209 2. 557948 3. 109159 2. 570146 2. 729035  
100506085 1. 715744 1. 818928 2. 34405 2. 306218 2. 671608 1. 644958 2. 257711 2. 500428  
100506098 2. 117483 1. 698348 1. 913263 1. 616296 1. 952196 1. 800975 1. 864914 2. 117483  
100506100 4. 743602 5. 899506 3. 869009 3. 739402 2. 981957 5. 26828 2. 363583 5. 053312  
100506107 1. 630478 1. 078184 1. 079128 0. 857781 1. 993464 2. 144779 0. 949415 1. 40417  
100506108 2. 463834 2. 439276 1. 956757 2. 19141 1. 887438 2. 345404 2. 315723 2. 157313

100506113 1. 864104 2. 587494 2. 016024 1. 040102 1. 232977 1. 855336 1. 372922 2. 776606  
100506114 1. 834158 1. 867011 2. 235725 2. 118721 2. 477262 1. 879597 2. 211485 1. 657006  
100506115 4. 201468 5. 227168 4. 816406 5. 540888 4. 89967 4. 905801 5. 598988 4. 912933  
100506119 2. 51265 1. 899156 2. 445043 2. 504862 1. 908269 1. 916897 2. 24306 2. 096689  
100506122 1. 209613 1. 092972 1. 667587 1. 221057 0. 795405 0. 729764 1. 367502 1. 093777  
100506124 1. 801404 1. 452552 1. 376629 1. 333426 1. 608693 1. 255098 1. 556278 1. 367731  
100506125 1. 894624 1. 033349 1. 14144 1. 529872 2. 060681 2. 085712 1. 420558 1. 512558  
100506126 1. 559148 1. 627396 2. 001358 1. 39767 2. 520026 1. 503414 1. 252628 1. 484185  
100506127 4. 080542 3. 306206 4. 26176 3. 720473 3. 908482 4. 913782 3. 944816 3. 301349  
100506134 2. 742681 1. 704355 1. 324033 2. 450044 1. 462884 2. 844959 1. 844565 2. 278902  
100506136 1. 789865 1. 427297 1. 523685 1. 428949 2. 189017 1. 136334 2. 071305 2. 359748  
100506142 2. 658613 3. 316373 3. 401635 2. 088323 3. 085746 3. 085059 2. 480951 4. 096041  
100506144 7. 972271 7. 819759 7. 716174 7. 452447 7. 855551 7. 330177 7. 519817 7. 291134  
100506157 2. 349816 1. 459044 5. 486899 2. 504332 1. 517761 3. 276074 0. 985939 1. 066539  
100506159 1. 327982 1. 189755 1. 954633 1. 137739 2. 75684 0. 879796 1. 523185 1. 099174  
100506161 3. 303831 2. 889269 3. 939031 2. 71478 2. 429027 3. 314235 1. 84825 2. 570408  
100506172 1. 208078 1. 525387 1. 464694 1. 317182 1. 514843 0. 991942 1. 344227 1. 160645  
100506175 2. 194823 2. 162195 2. 486906 1. 667211 1. 919905 2. 225908 2. 10826 1. 374389  
100506178 1. 851777 1. 446721 0. 97412 2. 183049 2. 020567 2. 222284 1. 593582 1. 369085  
100506188 1. 877598 2. 142945 1. 607114 1. 426594 1. 234683 1. 173801 1. 453103 0. 993884  
100506190 5. 263196 4. 041889 4. 666581 5. 6229 4. 939306 4. 776883 4. 618808 3. 917641  
100506195 2. 764225 1. 2546 1. 470748 1. 842118 0. 928597 1. 364721 1. 449261 1. 289952  
100506207 2. 110216 2. 819759 2. 740662 2. 063849 2. 544943 2. 128027 2. 857047 1. 88578  
100506211 2. 151025 1. 936775 2. 690103 1. 955021 2. 961692 2. 421058 2. 15224 2. 013173  
100506215 1. 981358 2. 265745 2. 240139 1. 187226 1. 690319 2. 134689 1. 585297 3. 771955  
100506229 1. 978867 1. 915665 2. 001663 2. 586012 2. 312593 1. 963499 2. 58308 1. 975311  
100506233 5. 573716 6. 737513 7. 318388 6. 002328 6. 510059 6. 857084 5. 03522 7. 213116  
100506235 2. 555984 3. 439133 2. 513993 1. 947493 3. 847346 3. 010566 1. 708843 2. 304732  
100506236 1. 148019 0. 966776 0. 870193 1. 360688 1. 227997 1. 145449 1. 415246 1. 886496  
100506237 1. 321383 1. 244612 1. 332445 1. 259208 1. 010697 1. 188732 2. 046259 1. 620923  
100506241 2. 85317 1. 249919 1. 515379 1. 834352 1. 105611 1. 745338 1. 137305 1. 425093  
100506243 2. 265642 3. 821185 2. 571504 4. 0099 2. 026544 3. 064504 2. 29553 3. 632441  
100506253 2. 615547 1. 45177 2. 367757 1. 515048 1. 20728 1. 362147 1. 532431 2. 510443  
100506258 2. 209019 1. 605153 3. 005165 0. 981634 1. 655213 1. 801505 1. 127636 0. 602475  
100506271 2. 130498 1. 598532 1. 271622 1. 52142 2. 186413 2. 406803 1. 43736 2. 335684  
100506272 1. 346497 1. 441155 1. 465624 1. 408792 1. 633326 1. 651634 1. 533043 1. 337648  
100506274 1. 632084 1. 143527 1. 469891 1. 780826 1. 975345 1. 482428 1. 485416 1. 726252  
100506281 2. 749108 3. 043771 2. 946996 3. 67452 3. 630182 3. 586835 3. 33313 3. 376578  
100506282 3. 475588 3. 404828 2. 661991 5. 402492 4. 844383 3. 602451 2. 72015 3. 982317  
100506286 1. 629317 1. 674252 2. 232671 1. 942178 1. 706552 1. 843754 1. 395741 1. 492613  
100506289 1. 899003 1. 901876 1. 605136 2. 651439 1. 863519 1. 781168 1. 932293 1. 841542  
100506299 2. 903383 0. 753482 1. 787129 1. 905336 2. 609518 3. 315668 1. 254788 1. 354789  
100506302 4. 059166 5. 580846 4. 79394 4. 98622 5. 917896 3. 770198 3. 789346 5. 767389  
100506305 4. 30166 2. 612381 4. 235076 4. 068432 4. 72216 4. 344221 4. 274443 3. 635447  
100506311 3. 450333 3. 729267 3. 516312 3. 916859 3. 500273 3. 075573 3. 282585 4. 198462  
100506314 3. 115818 2. 610033 1. 576318 5. 103493 3. 73824 0. 857452 2. 41032 1. 944198  
100506317 1. 797414 2. 087808 2. 089915 1. 932476 2. 134478 1. 504753 3. 275725 2. 037058  
100506319 1. 386431 1. 904962 1. 34727 1. 841231 1. 465176 2. 017574 1. 425117 1. 493068  
100506321 2. 645627 1. 973484 1. 931167 3. 837574 2. 359377 3. 161643 2. 599498 2. 328529  
100506325 2. 243464 1. 562628 1. 776263 1. 964013 1. 609382 1. 732647 2. 028479 1. 912142  
100506328 2. 526499 2. 479252 1. 581018 2. 209637 2. 12466 1. 727274 2. 098463 2. 053317

100506331 1. 661895 1. 815927 2. 520877 1. 390869 2. 195697 1. 819965 1. 549269 1. 776201  
100506334 3. 810704 5. 237454 3. 608788 3. 012083 3. 343455 2. 775674 2. 973673 3. 956745  
100506343 3. 165002 3. 172006 3. 543418 3. 310868 3. 168886 3. 145605 3. 228421 3. 723348  
100506351 1. 801142 1. 292587 1. 304847 1. 21728 1. 230543 1. 266143 2. 29269 1. 413688  
100506358 2. 884393 3. 763242 3. 399834 4. 174778 3. 94907 3. 302173 3. 245785 3. 359666  
100506365 7. 552264 7. 65972 7. 403766 7. 954765 7. 171582 7. 481586 7. 565584 7. 783013  
100506368 3. 228105 3. 605393 3. 300248 1. 666443 3. 734723 2. 678141 3. 863596 2. 07502  
100506371 2. 309475 2. 643667 2. 132329 2. 317662 2. 650969 2. 907149 2. 082219 1. 825423  
100506374 3. 123732 1. 411496 2. 202557 2. 59348 1. 334719 2. 534723 3. 018363 1. 482508  
100506376 1. 274126 1. 785407 1. 76916 1. 921025 2. 428623 1. 829998 2. 458423 1. 380824  
100506379 1. 200706 2. 173601 1. 856854 2. 39504 2. 925278 2. 097207 1. 497432 2. 260466  
100506380 3. 925763 3. 916853 3. 957235 2. 989981 4. 026994 3. 234023 4. 01242 4. 231148  
100506384 2. 09137 1. 884424 2. 399993 2. 092206 2. 398323 1. 425408 1. 235307 2. 285308  
100506385 2. 884511 1. 91249 2. 643267 2. 203306 2. 921963 1. 837633 2. 412981 2. 944797  
100506388 6. 997709 4. 807651 6. 134041 4. 611452 4. 140905 4. 733701 5. 674283 4. 927746  
100506392 3. 315235 2. 773021 2. 024904 2. 332856 2. 092651 2. 498288 2. 864621 3. 514383  
100506393 2. 396864 2. 465586 1. 811545 1. 735368 1. 458574 1. 999271 2. 284317 2. 539893  
100506394 3. 763221 3. 480233 3. 716955 2. 41619 3. 711464 3. 293046 3. 56945 2. 759903  
100506403 1. 129863 1. 538878 1. 799936 1. 231871 1. 39646 2. 075885 1. 55232 1. 337062  
100506405 1. 416412 1. 641401 1. 55941 2. 311829 2. 828704 1. 985429 2. 537928 1. 322433  
100506406 0. 995985 0. 699704 1. 074275 0. 860083 2. 023736 1. 114087 0. 767448 1. 237597  
100506409 0. 904474 1. 112243 1. 560519 1. 72461 1. 11487 1. 29932 2. 161703 1. 913038  
100506411 2. 187321 1. 897154 3. 636628 2. 241002 2. 140412 2. 16059 1. 996109 2. 268025  
100506412 1. 248821 0. 926455 1. 350063 1. 054709 1. 554534 2. 116844 1. 397899 1. 774991  
100506413 2. 168563 2. 50272 1. 192053 1. 208611 1. 234442 2. 137308 2. 947538 2. 00888  
100506421 2. 79151 2. 479738 2. 555671 2. 579439 6. 192407 2. 418895 2. 788959 2. 732758  
100506422 1. 33444 2. 142559 1. 459383 1. 354403 1. 415401 2. 027606 1. 616332 1. 20467  
100506428 2. 829835 3. 234624 2. 851337 4. 103707 3. 803028 3. 601851 3. 350332 2. 86135  
100506433 1. 380036 0. 962056 1. 753192 1. 270559 1. 803692 1. 351625 1. 344843 1. 263607  
100506436 2. 696425 1. 943984 1. 472172 2. 287563 2. 714576 2. 497612 3. 139293 4. 084084  
100506443 2. 525171 2. 318004 2. 190019 2. 685586 2. 749496 2. 236206 2. 951378 2. 749167  
100506444 0. 87586 1. 844041 1. 790751 1. 537258 1. 621373 1. 869955 1. 753262 1. 242303  
100506446 1. 916797 1. 643578 1. 2382 1. 886548 1. 648528 0. 848007 1. 880678 1. 683177  
100506451 5. 801694 6. 04395 6. 946787 4. 961298 6. 45862 5. 997759 5. 686785 5. 511854  
100506454 4. 334543 5. 097332 5. 594832 4. 701254 3. 770026 4. 682606 5. 098006 5. 366569  
100506457 2. 263791 1. 827035 2. 87014 1. 72778 1. 723728 1. 497808 2. 163348 1. 277028  
100506462 2. 474881 1. 86232 1. 11845 1. 586533 2. 024453 1. 049845 1. 699968 1. 765542  
100506465 2. 551346 2. 336342 2. 518588 2. 318315 2. 743408 2. 632396 2. 449878 2. 502092  
100506469 3. 060174 2. 141511 3. 17936 3. 584168 3. 503838 2. 741157 2. 211308 2. 299678  
100506470 1. 326215 1. 196451 1. 940579 1. 588879 2. 256365 1. 338471 1. 484739 1. 20829  
100506472 2. 260229 1. 738113 1. 656177 1. 519684 2. 233007 1. 198764 1. 367806 2. 382456  
100506473 2. 391753 2. 142558 1. 468469 1. 440142 1. 008668 1. 610607 1. 596662 2. 753757  
100506474 3. 570129 4. 044968 3. 64771 3. 97888 2. 494879 2. 007564 2. 05634 3. 291939  
100506475 1. 316177 1. 069982 1. 159076 0. 973249 1. 424199 1. 428794 0. 967939 0. 933882  
100506476 3. 239105 4. 247085 2. 752911 3. 027124 2. 274499 4. 185802 2. 954779 1. 837918  
100506489 1. 679371 1. 239469 1. 417278 0. 989356 1. 520053 1. 48175 1. 339986 1. 36717  
100506492 2. 23592 1. 747282 1. 636071 1. 652799 1. 695063 1. 913572 1. 783534 1. 874561  
100506495 1. 524687 1. 360284 1. 885111 1. 749256 1. 332304 2. 362676 2. 636713 1. 759363  
100506497 1. 231063 1. 542028 1. 382371 1. 457571 0. 785964 1. 844473 1. 805651 1. 392932  
100506498 1. 84979 0. 856536 1. 083561 1. 122454 1. 524876 1. 429006 1. 365979 1. 685963  
100506499 1. 899986 1. 917002 2. 017407 1. 39995 2. 267352 2. 177527 3. 27069 2. 371753



100506504 3.493769 4.37017 2.935989 4.053524 3.739983 4.361969 3.095135 4.265242  
100506516 1.72083 1.396258 1.311793 1.118741 1.376399 1.015226 1.553822 2.246751  
100506518 5.809924 6.747971 5.308095 6.5749 4.838595 5.262609 5.562423 6.251055  
100506526 1.302996 1.221745 1.538689 1.970048 1.063594 2.821825 1.44478 1.139412  
100506527 2.204557 1.867195 2.151996 1.928323 1.809251 2.083501 1.494009 2.240603  
100506530 0.784083 1.75129 1.051801 0.994372 1.597264 0.753253 1.270925 1.301656  
100506532 1.625549 1.549292 1.539056 0.939617 1.280829 1.563164 0.959923 2.594779  
100506538 1.94298 1.197446 1.389307 2.057762 2.230161 1.872032 3.405339 1.356422  
100506540 2.764676 3.296202 2.40088 3.086526 2.355671 2.583277 2.484152 1.908185  
100506542 3.597743 2.400137 2.666723 2.896289 3.015834 2.707049 3.58347 3.314511  
100506548 6.274482 5.843947 5.349188 5.556544 5.204066 5.652199 6.192754 6.100793  
100506551 2.495034 1.256874 1.957591 1.696929 1.544996 1.921779 2.478271 2.258072  
100506555 0.974506 2.006512 1.402029 1.505661 1.322097 1.177423 1.412319 1.202057  
100506557 1.733968 2.248495 1.965694 2.836968 1.850185 1.863022 2.376524 1.891885  
100506558 1.649564 1.965157 1.997612 1.91676 2.325577 1.730701 1.702323 2.362139  
100506563 1.135849 0.982466 1.085486 0.533358 0.892944 0.602713 0.848665 1.417101  
100506564 2.034331 1.717263 1.904255 1.943998 2.1088 1.026824 3.201725 2.428688  
100506571 1.910221 2.257759 1.524483 1.762081 2.300999 2.291663 2.979569 2.540235  
100506581 3.906922 2.69005 2.921673 4.127155 3.286612 3.300319 3.055463 3.268546  
100506585 2.303746 2.062823 1.483291 1.646089 1.505556 1.457186 1.841721 1.728627  
100506599 1.617136 2.640913 2.477211 2.41731 2.0074 2.4643 2.560533 2.328021  
100506603 2.790706 3.433671 3.499954 2.781201 3.780166 3.545536 3.8936 3.322794  
100506606 1.128745 1.824635 1.065849 1.178096 1.460159 1.768938 1.377052 1.356369  
100506622 1.152766 0.887136 1.799548 1.611219 1.847672 0.866114 2.005065 0.954508  
100506627 2.135288 1.801103 2.126244 1.62241 1.987862 2.093155 2.267286 2.087761  
100506634 3.264851 3.372523 3.784472 3.442817 3.871482 3.178609 4.345278 3.671  
100506637 1.680845 3.023434 1.016508 1.148366 1.076047 2.21121 0.876845 1.69159  
100506639 3.699866 3.41467 3.819024 3.318969 3.546513 3.875008 2.895853 3.208924  
100506649 4.440944 4.658149 2.776391 3.98881 3.139942 3.314359 4.250818 3.480735  
100506650 1.469729 1.195057 1.311952 1.310045 1.993716 1.163113 0.879465 1.568251  
100506655 1.692863 1.601339 2.044702 2.124487 2.631616 2.257233 3.151518 2.021855  
100506658 2.871742 3.470763 2.517675 3.861525 3.737418 2.708639 2.684087 2.869799  
100506660 2.661049 3.036141 2.076293 2.372719 3.350575 2.758484 2.568736 2.955153  
100506664 1.860182 3.593195 2.565248 1.219892 3.03002 2.459514 0.82963 1.532881  
100506668 4.30764 4.447459 5.241521 5.262841 4.799604 5.251647 4.487675 4.5601  
100506674 4.770023 5.292719 3.964375 4.074879 4.050533 4.891355 4.04344 6.082183  
100506675 0.750104 0.98058 0.911304 1.027099 1.077892 1.215196 1.038754 1.238262  
100506677 1.197261 1.141105 1.591625 0.897309 1.655401 1.86185 1.124166 1.924123  
100506679 2.14938 2.350332 2.064099 2.58127 2.745316 2.315856 2.006738 2.919263  
100506680 2.402431 2.126003 2.402413 2.330898 2.028752 1.716658 2.647843 2.305971  
100506681 1.574668 2.068192 1.237411 2.510456 1.446702 1.66031 2.930846 1.715817  
100506682 1.491044 1.438281 1.398152 1.156406 1.460588 1.627803 1.515649 1.42312  
100506686 3.127033 2.878446 3.272171 3.583227 3.693373 2.831567 3.083713 3.132101  
100506688 5.107885 5.059297 6.029895 4.835185 2.456971 4.860913 4.812585 5.343428  
100506691 3.575845 5.055024 3.498567 5.112222 2.906174 3.831025 3.48116 4.09048  
100506696 4.384839 5.037822 4.606835 4.30116 3.932384 5.130434 4.907467 4.782464  
100506697 2.479641 1.572593 1.801132 1.66299 2.985187 0.984603 1.43654 1.75675  
100506700 1.155789 0.860469 1.055064 0.902303 1.22594 1.675444 1.274461 1.17588  
100506710 5.740585 6.067305 6.230766 5.683215 6.334818 5.262727 6.290482 6.529267  
100506713 3.101704 1.545899 4.951728 3.981682 2.111533 3.420175 3.952286 1.390905  
100506714 2.967154 2.687267 2.415041 2.899886 2.615353 2.909274 3.155346 2.604711

100506724 1. 272556 1. 095602 1. 267698 1. 541641 2. 530086 0. 956198 0. 845032 1. 080117  
100506725 2. 91994 4. 164318 2. 320422 1. 676756 1. 99508 3. 682946 1. 440948 2. 844555  
100506730 3. 763972 4. 648168 3. 955152 2. 62268 4. 34885 3. 605751 5. 110539 3. 28174  
100506731 1. 138674 1. 684419 1. 495824 1. 585978 1. 274989 1. 729371 1. 85332 2. 032845  
100506733 1. 662221 2. 479224 1. 504124 1. 260132 1. 770783 1. 948667 1. 2735 1. 676366  
100506736 2. 284728 1. 065239 2. 918336 2. 655302 1. 858377 1. 841207 2. 885435 3. 280482  
100506737 1. 864524 2. 050026 1. 334529 2. 825471 3. 110476 2. 113265 2. 492362 1. 340386  
100506742 1. 61729 1. 852731 2. 369378 1. 797201 2. 084366 1. 566165 1. 167757 1. 481826  
100506746 5. 267254 5. 023809 5. 895811 4. 9915 5. 10208 4. 757565 5. 249172 3. 696589  
100506747 1. 142907 1. 133354 1. 549876 1. 342419 1. 578869 1. 387816 1. 992609 1. 771107  
100506749 1. 034497 0. 851417 1. 02727 1. 114864 2. 051473 2. 138488 1. 755559 1. 001673  
100506753 3. 42484 4. 197039 3. 76923 4. 221197 2. 691459 3. 249405 2. 301742 4. 813701  
100506755 7. 287251 5. 613607 7. 035948 5. 521823 7. 06406 6. 697401 6. 864397 5. 873357  
100506757 1. 693921 1. 15564 1. 718635 1. 0534 1. 268058 1. 261259 1. 396429 1. 774535  
100506765 1. 592253 1. 23497 1. 048775 0. 968678 1. 723779 1. 472522 1. 100152 1. 026764  
100506769 0. 968255 2. 252791 1. 394929 1. 477583 1. 269999 2. 758305 2. 824785 1. 156881  
100506775 2. 339405 1. 46095 2. 076026 1. 680789 1. 396391 1. 845109 1. 899983 1. 544749  
100506776 2. 229328 1. 124462 2. 59662 2. 262445 2. 305241 1. 69825 2. 627154 2. 504088  
100506779 3. 376242 2. 307466 2. 904405 2. 715024 2. 227188 2. 509683 3. 221655 3. 414728  
100506783 4. 027539 4. 316608 4. 070589 4. 950397 2. 763102 4. 548602 4. 526034 3. 646767  
100506787 1. 345288 0. 973945 1. 052662 1. 294186 1. 410097 0. 817411 1. 947088 1. 327844  
100506790 0. 739389 0. 980975 0. 976188 0. 768232 0. 901709 1. 087354 1. 500426 0. 810717  
100506791 1. 178681 1. 36686 1. 523098 0. 967044 1. 756703 1. 865404 1. 792491 1. 973796  
100506795 1. 113115 1. 646963 1. 17233 1. 323704 1. 137242 1. 339246 1. 419217 1. 55582  
100506797 1. 483178 1. 938499 1. 486854 3. 925929 2. 41644 1. 845973 1. 460254 1. 721565  
100506801 2. 425232 2. 342596 2. 911049 3. 036389 2. 445329 2. 635319 2. 168925 2. 565384  
100506804 2. 004741 1. 995236 2. 202893 1. 735424 1. 638328 2. 193102 1. 616479 3. 012699  
100506810 1. 274461 1. 210336 1. 458098 0. 848089 1. 417433 1. 015439 1. 66946 1. 370235  
100506826 4. 408685 4. 697856 3. 46135 4. 11073 3. 974355 4. 616736 3. 807742 4. 702834  
100506827 2. 701467 2. 152306 1. 918817 1. 771442 1. 967498 1. 827686 1. 646203 1. 551594  
100506834 3. 485707 2. 465395 1. 483987 1. 78101 1. 933044 1. 847199 2. 069587 2. 018045  
100506835 1. 274055 1. 450345 1. 304494 2. 044884 1. 125057 1. 311607 2. 120614 1. 385879  
100506840 1. 475897 1. 576072 1. 644641 1. 821398 1. 691403 1. 439554 2. 576724 2. 332808  
100506844 6. 191073 6. 76018 7. 04053 5. 964063 5. 497344 6. 365085 4. 378129 7. 108193  
100506851 3. 314845 1. 526519 2. 576374 1. 438139 4. 149243 2. 35096 3. 371384 2. 278425  
100506858 1. 290024 1. 367669 1. 343854 1. 534392 2. 205058 1. 320537 1. 526848 1. 31883  
100506859 2. 128023 2. 751309 3. 479155 3. 938311 1. 32523 1. 944755 2. 617728 2. 848147  
100506860 3. 677269 3. 689504 3. 123863 3. 403088 2. 402708 3. 451227 3. 344313 2. 798382  
100506866 1. 872369 2. 689823 2. 005023 2. 747572 3. 036388 3. 144444 3. 232355 2. 117506  
100506869 1. 194209 1. 19361 1. 576183 1. 388879 1. 162054 1. 994022 1. 508328 1. 20952  
100506870 1. 360584 2. 537818 3. 284438 2. 977275 1. 670536 1. 70343 1. 475954 4. 460228  
100506874 1. 228247 2. 151936 2. 24201 1. 399865 1. 730046 2. 360506 2. 11014 1. 552976  
100506881 1. 899101 2. 385854 1. 968998 1. 612224 3. 096269 3. 20637 4. 043583 2. 303583  
100506882 1. 44633 2. 028412 2. 165666 1. 744368 1. 730171 1. 602185 2. 523356 2. 06446  
100506885 1. 680241 0. 705222 2. 583495 1. 199064 1. 898396 0. 835248 0. 924627 1. 080009  
100506888 1. 973645 1. 818149 1. 518066 1. 678369 1. 581408 4. 115155 4. 025205 2. 43513  
100506895 1. 457007 1. 256146 0. 918463 1. 516565 1. 489896 1. 858268 1. 37968 1. 690286  
100506898 4. 454068 4. 385686 3. 866079 4. 328014 4. 96507 3. 302768 3. 569664 4. 744877  
100506901 2. 10429 4. 382133 2. 548711 3. 499681 1. 942908 2. 143992 3. 203801 4. 275801  
100506907 1. 468149 1. 529048 1. 638825 1. 68148 1. 734074 1. 827213 2. 610903 1. 559102  
100506908 1. 951012 2. 859509 1. 751339 3. 039122 1. 562481 2. 455633 1. 722152 2. 661682

100506915 5. 280588 4. 816675 5. 676773 4. 283863 4. 948076 5. 077567 4. 4582 4. 624486  
100506922 2. 673739 3. 11811 4. 889808 5. 018218 1. 570598 4. 226077 2. 722145 5. 65978  
100506929 1. 222346 2. 407918 1. 385378 1. 183744 1. 32442 1. 142797 2. 183596 1. 931297  
100506930 3. 644844 3. 879253 4. 068003 3. 719335 3. 409693 4. 261959 4. 223045 4. 362149  
100506937 1. 088475 1. 040892 1. 184596 1. 290467 1. 315866 0. 923649 0. 844374 1. 367097  
100506939 1. 545252 1. 29788 1. 71283 2. 380976 0. 841569 1. 279541 1. 546246 1. 961772  
100506944 2. 048084 1. 404571 0. 709522 1. 041415 2. 308618 1. 476647 1. 529069 2. 390831  
100506963 4. 010051 3. 895355 4. 327061 4. 040475 4. 2386 4. 497452 4. 436668 4. 042944  
100506974 2. 071008 1. 811862 2. 505866 2. 163087 3. 577537 1. 902317 1. 610562 1. 471443  
100506985 2. 869206 2. 935712 3. 437213 3. 461013 3. 431476 3. 712191 3. 496171 3. 412534  
100506994 1. 518823 1. 460742 1. 510797 2. 338083 2. 89074 1. 603654 1. 851465 1. 875418  
100506999 2. 719326 3. 015236 2. 001979 2. 207691 3. 614521 1. 482398 2. 676517 3. 367433  
100507002 2. 437897 2. 932225 2. 498355 3. 116497 2. 185535 4. 240638 2. 893414 4. 273408  
100507003 1. 945956 1. 965428 1. 851714 1. 795823 1. 62259 1. 641678 1. 83468 2. 169961  
100507006 1. 867789 1. 707694 1. 46616 1. 224295 2. 458258 1. 582112 3. 028801 1. 637413  
100507008 3. 769871 1. 187312 2. 430491 1. 103549 1. 569152 1. 126745 0. 686691 1. 289434  
100507012 0. 96975 1. 077278 1. 211054 1. 441239 1. 21957 2. 253065 1. 357208 1. 278153  
100507027 3. 168808 2. 774443 2. 56486 2. 022509 5. 012099 4. 895418 2. 046662 1. 372112  
100507032 2. 625924 2. 832484 2. 461695 4. 287854 1. 872201 1. 826649 2. 457674 2. 874811  
100507033 2. 268035 2. 34327 1. 898871 1. 968964 1. 371856 1. 04809 1. 308889 1. 620421  
100507034 2. 624787 2. 743311 3. 142646 2. 86063 2. 863586 2. 12759 3. 394032 3. 233991  
100507043 1. 569485 2. 216686 2. 024178 1. 71069 2. 526854 2. 472352 2. 137533 1. 90802  
100507050 3. 628287 2. 886742 2. 952323 2. 971843 2. 677558 2. 985533 2. 35966 2. 899825  
100507053 1. 272455 1. 1279 2. 146816 1. 73354 2. 067527 2. 037246 1. 225158 1. 286043  
100507054 2. 854089 2. 833247 2. 802224 2. 136875 1. 788066 3. 127012 2. 540418 2. 50817  
100507055 2. 35841 2. 282593 2. 130674 1. 761473 2. 357243 1. 735243 3. 269703 2. 068672  
100507056 2. 46685 2. 133975 1. 4207 1. 899396 1. 84287 1. 498673 2. 955196 2. 471889  
100507057 3. 249102 2. 969859 3. 684247 3. 046478 2. 615941 3. 252781 3. 367984 3. 476451  
100507058 0. 787712 1. 992543 1. 06895 1. 322352 1. 13803 2. 213274 1. 292614 1. 827496  
100507059 2. 068305 0. 927809 1. 706965 1. 325648 1. 056965 1. 083956 0. 874266 1. 461036  
100507062 3. 95261 2. 635109 3. 216752 3. 464427 2. 280211 4. 209044 2. 867807 3. 585449  
100507064 1. 23861 1. 086176 1. 222238 1. 249281 1. 617429 1. 501384 1. 680541 1. 514982  
100507065 2. 249656 2. 914289 2. 689854 3. 609231 1. 63565 3. 734189 3. 024773 4. 196995  
100507066 1. 530214 1. 903201 3. 197232 1. 667994 2. 45471 3. 330383 1. 726201 1. 820118  
100507071 1. 522308 1. 850303 2. 25448 1. 367924 2. 456134 1. 937237 1. 543744 1. 616919  
100507073 1. 506442 1. 58749 1. 464513 1. 167634 1. 335793 2. 041698 1. 400557 1. 7098  
100507086 1. 952314 2. 381149 1. 677082 1. 99671 3. 120557 2. 460402 2. 145286 3. 440143  
100507091 2. 332603 1. 613043 1. 865247 1. 416078 2. 6319 2. 030687 2. 358697 1. 60542  
100507096 1. 426289 1. 546969 1. 906975 1. 940539 1. 725927 1. 593978 1. 723288 2. 11611  
100507098 6. 45288 5. 265981 6. 05719 6. 191989 5. 607547 5. 332334 5. 685834 5. 941133  
100507099 5. 114135 4. 08667 4. 351462 3. 969847 3. 630566 4. 772445 4. 705719 4. 154031  
100507103 0. 724761 0. 883853 1. 234717 2. 059569 1. 634874 1. 200223 1. 234053 3. 330628  
100507113 3. 741774 3. 265043 2. 219519 3. 992304 4. 102102 3. 892347 4. 164945 2. 876483  
100507114 1. 333876 1. 549131 1. 478935 1. 196494 1. 869584 1. 816402 1. 257556 1. 490011  
100507117 1. 652107 1. 431472 1. 500558 3. 488319 1. 812154 2. 678263 2. 395892 1. 610509  
100507118 1. 93644 2. 65336 1. 096879 1. 908226 1. 875703 2. 353072 2. 847501 3. 148379  
100507127 4. 158534 3. 5166 4. 270941 4. 655461 4. 294788 2. 266934 2. 846969 2. 432342  
100507131 3. 302725 3. 296074 2. 687 3. 021795 2. 019122 3. 575334 2. 73306 1. 980574  
100507135 2. 561123 1. 484769 2. 676371 3. 351411 1. 84357 1. 382893 2. 510106 1. 842913  
100507140 2. 07494 1. 616543 2. 080239 1. 792232 1. 577412 1. 68954 1. 328975 3. 05817  
100507143 1. 262043 0. 991082 1. 10824 1. 346227 1. 2441 1. 121551 1. 287153 1. 27024

100507144 3. 357701 3. 837093 3. 569555 2. 743523 3. 432108 4. 342109 3. 329306 3. 209714  
100507156 3. 15 2. 725555 2. 54641 3. 091596 3. 951739 3. 541659 3. 251845 2. 767845  
100507163 2. 438814 1. 43102 1. 553065 1. 059374 1. 363751 1. 064403 1. 064671 1. 355277  
100507165 1. 563164 1. 738384 2. 459488 1. 953165 3. 15853 2. 116413 3. 446119 4. 183183  
100507171 3. 71273 3. 961131 4. 121068 4. 683913 2. 279429 4. 309898 3. 612711 4. 363267  
100507173 1. 223691 1. 895262 1. 940346 2. 791685 1. 75971 1. 540724 1. 644705 2. 644161  
100507175 1. 543592 1. 394388 1. 342047 1. 871392 1. 534246 1. 518941 1. 857538 1. 157551  
100507178 1. 643598 1. 61676 2. 375262 2. 263241 1. 906143 2. 69973 2. 096997 1. 261381  
100507191 3. 255482 2. 008521 2. 303723 1. 559674 2. 362618 1. 635497 2. 117963 2. 589553  
100507194 0. 935214 1. 207697 1. 337048 1. 075746 1. 691374 0. 998644 2. 39028 1. 496519  
100507195 3. 004012 2. 485013 2. 527166 1. 9556 2. 728064 3. 802536 1. 701942 3. 980032  
100507201 1. 474034 1. 566126 1. 227519 1. 095907 2. 255117 1. 240813 1. 900549 1. 48968  
100507203 2. 072774 2. 680936 2. 121787 2. 043038 2. 905427 2. 45742 2. 799097 2. 202721  
100507205 2. 209722 1. 45675 1. 071733 1. 260981 0. 995672 0. 848532 2. 737269 1. 726688  
100507206 1. 548434 1. 296752 1. 258187 2. 03281 2. 579888 1. 15002 1. 398187 1. 854558  
100507210 1. 40151 1. 18863 1. 056151 1. 177411 1. 817816 1. 588434 2. 012549 1. 191996  
100507213 2. 165193 1. 724182 1. 332483 2. 379264 2. 048276 1. 738745 2. 308622 3. 209179  
100507217 6. 036717 6. 480034 5. 732947 6. 298822 6. 512085 5. 61152 4. 648638 6. 979865  
100507218 2. 272072 2. 456487 1. 947927 2. 015308 1. 934648 1. 907646 1. 526721 2. 299747  
100507221 0. 733173 1. 169505 1. 249217 0. 904075 1. 020298 1. 183795 1. 579791 1. 157421  
100507240 1. 283524 1. 768486 1. 122077 1. 177262 1. 212622 1. 283524 1. 148285 1. 377453  
100507242 1. 313946 3. 109232 1. 397266 1. 591382 2. 04696 1. 788933 1. 370829 1. 618323  
100507244 1. 546496 1. 733116 0. 842067 1. 468268 1. 651652 1. 158772 1. 914668 1. 304217  
100507246 7. 898337 7. 315719 7. 589783 7. 234842 7. 225087 7. 344128 6. 544311 8. 634277  
100507250 2. 367459 1. 791116 1. 554029 1. 693778 2. 206833 1. 957854 1. 486108 2. 143662  
100507254 1. 078909 1. 151847 0. 529143 1. 708428 2. 048116 0. 919359 1. 238214 1. 609988  
100507257 1. 549839 2. 097447 1. 502019 1. 620647 2. 12152 1. 905652 1. 711238 1. 700463  
100507258 2. 852657 1. 395471 2. 248276 2. 923631 2. 388336 1. 452369 4. 057422 4. 024625  
100507261 1. 573261 1. 650612 1. 364296 1. 528458 1. 41368 1. 499233 1. 875849 1. 22044  
100507266 3. 2794 3. 249849 2. 944288 5. 376784 4. 817837 3. 846992 3. 255536 4. 275049  
100507267 1. 757955 1. 832599 2. 052998 1. 35603 1. 398212 2. 502432 2. 183285 1. 981228  
100507274 0. 921431 1. 118221 1. 090548 0. 865012 1. 503108 0. 911442 2. 032931 1. 538781  
100507277 1. 759011 1. 291643 1. 313132 1. 35979 1. 472137 1. 468712 2. 455216 1. 268363  
100507283 3. 503233 4. 730939 4. 327605 3. 61387 4. 553863 4. 16087 3. 269525 4. 734032  
100507290 3. 216744 3. 302565 3. 052323 2. 629951 3. 600882 3. 093485 3. 002948 2. 875884  
100507291 5. 580909 6. 005183 5. 319581 5. 371967 4. 983331 6. 072468 5. 676577 5. 354699  
100507297 3. 749637 4. 63547 2. 594676 3. 645473 5. 127972 3. 985074 2. 078107 3. 694296  
100507299 4. 223115 5. 174278 3. 039403 3. 989868 5. 462832 3. 892429 3. 597577 3. 08941  
100507300 2. 094592 1. 236852 1. 350506 1. 422542 2. 056112 1. 368501 1. 110932 1. 529338  
100507303 7. 3767 8. 191575 7. 324305 8. 459564 8. 478389 8. 106636 7. 136443 8. 48422  
100507308 6. 520804 4. 697091 4. 523622 5. 540163 4. 607278 5. 332319 4. 473981 4. 441287  
100507316 4. 331845 4. 202532 3. 729096 4. 843074 3. 304574 4. 563994 3. 535455 4. 648322  
100507321 3. 680127 1. 391757 4. 152704 3. 069151 2. 001571 2. 010664 2. 134392 2. 248053  
100507331 5. 295998 5. 142509 5. 462703 5. 776677 5. 011232 5. 5604 5. 155889 5. 168019  
100507334 1. 71413 2. 598022 1. 399621 1. 828358 1. 672539 1. 144815 1. 475118 4. 578534  
100507336 2. 004474 2. 272294 1. 35976 1. 534231 2. 074655 1. 544763 1. 700006 1. 390272  
100507341 1. 593853 1. 504599 1. 634636 1. 296302 1. 618979 1. 534109 1. 672062 1. 450641  
100507346 3. 20204 3. 515876 3. 515876 3. 454427 4. 018809 3. 695995 4. 654604 3. 587978  
100507347 4. 252828 4. 069749 4. 249047 4. 127215 3. 136614 4. 145999 4. 531665 3. 912328  
100507351 2. 314569 3. 212735 2. 371567 5. 091521 2. 201256 3. 053658 3. 193665 1. 685798  
100507353 1. 374265 0. 938928 0. 953203 0. 893812 0. 874334 0. 97197 1. 379409 1. 432532

100507362 1. 631883 1. 28165 1. 682979 1. 749759 1. 837922 1. 370118 1. 201313 2. 003337  
100507367 3. 596886 4. 611346 3. 399218 4. 402469 4. 312445 4. 449945 3. 546491 2. 920355  
100507373 3. 396431 4. 288666 4. 010976 3. 430979 4. 130878 4. 08589 3. 753179 3. 774667  
100507377 1. 123762 1. 700647 1. 523596 1. 332767 2. 017647 1. 340117 1. 332767 1. 168838  
100507381 1. 085471 1. 95223 1. 244371 1. 349277 1. 406138 1. 331462 1. 417108 1. 583479  
100507384 1. 117047 0. 96623 1. 655264 1. 148775 2. 706774 1. 782077 1. 291355 2. 094474  
100507387 0. 479887 3. 486045 3. 931365 0. 6659 0. 875057 2. 552706 4. 74356 4. 765035  
100507388 1. 679068 2. 35353 1. 901207 1. 991678 2. 367839 1. 909247 1. 924877 1. 421299  
100507389 1. 853943 2. 375001 1. 616096 1. 852193 2. 259277 2. 388568 2. 269063 2. 388353  
100507391 0. 937011 1. 164214 1. 124845 1. 339681 1. 431614 1. 151824 1. 805451 1. 415523  
100507392 2. 232603 2. 029387 3. 166726 2. 945133 4. 192356 3. 046929 3. 19647 2. 748475  
100507398 3. 671273 3. 855992 2. 111813 1. 721525 1. 840023 3. 320948 3. 009524 2. 559319  
100507401 1. 732528 1. 79635 1. 355684 2. 08901 1. 794441 3. 342117 2. 726586 1. 99545  
100507403 1. 151903 1. 798341 3. 491672 2. 655085 1. 541803 3. 176234 1. 127886 1. 246388  
100507410 1. 844926 1. 940485 1. 373687 1. 721492 2. 330797 1. 234656 1. 219743 1. 527679  
100507419 2. 161519 3. 087515 2. 686915 2. 860995 2. 481998 2. 353942 2. 334533 2. 565603  
100507420 2. 348891 2. 063174 1. 823848 1. 84559 2. 107146 1. 946594 2. 460928 2. 62371  
100507421 2. 418477 2. 720855 3. 17302 2. 988302 2. 528258 3. 663838 2. 461618 2. 997356  
100507423 1. 794182 2. 177654 1. 633217 1. 402521 1. 10858 2. 008416 1. 372725 1. 473783  
100507424 2. 601774 3. 593424 2. 015477 2. 931465 2. 151113 4. 025588 2. 871288 2. 705758  
100507428 1. 119552 0. 752762 1. 307223 0. 670892 0. 831313 1. 348413 0. 912439 1. 134031  
100507431 2. 008321 2. 348558 2. 341282 2. 02241 2. 559383 2. 570428 2. 301417 2. 336696  
100507433 2. 86867 2. 397786 2. 051189 2. 349175 1. 7528 0. 87189 2. 174246 2. 747084  
100507435 1. 762172 1. 844852 1. 974603 1. 538992 2. 961933 1. 630401 1. 690879 2. 209485  
100507436 5. 10454 4. 629223 5. 572757 5. 414818 5. 642181 4. 872798 5. 824798 4. 656235  
100507437 3. 383967 3. 69703 3. 248444 3. 474334 4. 42572 3. 309642 2. 601414 3. 189463  
100507443 2. 492856 1. 840211 1. 955978 1. 562118 2. 429323 1. 825698 1. 602545 1. 895832  
100507458 3. 921312 3. 01275 3. 78909 2. 127703 3. 156146 3. 543624 4. 160333 3. 636267  
100507459 4. 775392 4. 668213 3. 749374 5. 72513 6. 420711 2. 882526 4. 025738 2. 846799  
100507460 1. 154648 3. 917678 1. 109856 1. 214967 3. 403292 2. 158603 0. 646704 1. 92834  
100507461 1. 081892 1. 380335 1. 122925 0. 913276 1. 03883 1. 510687 0. 889577 1. 048604  
100507462 3. 405786 3. 419752 4. 039785 1. 164015 1. 972896 1. 615019 3. 215016 4. 137164  
100507463 5. 460065 5. 358848 4. 964626 5. 28744 4. 395458 4. 79358 4. 850892 5. 448293  
100507464 1. 134211 1. 440358 1. 385261 1. 496016 1. 339716 1. 697789 1. 329999 1. 358772  
100507466 3. 45802 1. 66052 2. 007377 2. 078469 1. 573439 1. 255771 1. 663321 2. 119813  
100507468 3. 715837 2. 295825 1. 354664 1. 718196 3. 139169 1. 090482 2. 318694 2. 211925  
100507470 1. 565816 1. 595129 2. 306714 1. 590198 1. 684869 1. 662992 1. 91767 2. 468311  
100507472 1. 813905 1. 941689 2. 530282 1. 264399 1. 878466 1. 545599 2. 003697 2. 10311  
100507475 4. 245217 4. 721023 3. 807488 1. 806789 1. 940614 3. 463427 3. 231541 3. 299967  
100507477 0. 711953 0. 980891 1. 964191 0. 717128 2. 361757 0. 897939 1. 33968 0. 827163  
100507480 1. 31606 1. 658387 1. 327863 1. 165405 1. 893923 2. 433101 2. 058222 0. 746292  
100507487 1. 684126 2. 960699 1. 846523 1. 830749 1. 980518 1. 531115 2. 125359 1. 587686  
100507489 1. 464287 1. 579496 1. 532779 1. 679304 1. 465746 1. 401001 1. 449389 1. 746728  
100507495 2. 877206 2. 864292 2. 364628 3. 13194 3. 008218 3. 253373 3. 967025 3. 122571  
100507500 1. 136373 0. 957125 1. 984284 1. 22848 1. 862117 1. 982324 1. 420003 1. 302266  
100507501 1. 662375 2. 634809 1. 712282 1. 819711 1. 835935 2. 227451 2. 168299 2. 570748  
100507506 1. 450601 1. 616006 1. 270309 0. 900027 1. 238433 1. 682799 2. 194992 1. 349005  
100507507 3. 82686 3. 742389 3. 226009 3. 331275 3. 082699 3. 421368 2. 433771 3. 551965  
100507513 0. 78957 1. 317488 1. 774406 1. 897281 1. 205664 1. 317057 1. 3918 0. 95796  
100507520 2. 673721 2. 453766 2. 791739 2. 347894 4. 026042 3. 682262 3. 08786 2. 353264  
100507521 1. 349505 1. 860852 1. 71061 1. 736704 1. 996436 2. 803001 1. 815163 2. 665426

100507524 4. 539416 3. 788788 4. 080717 4. 569817 1. 99633 4. 156931 2. 735869 4. 144802  
100507527 1. 198638 1. 095212 1. 625902 0. 995339 1. 414434 1. 699066 1. 224505 1. 211522  
100507528 1. 368649 1. 496735 1. 405911 0. 857046 0. 895045 1. 255229 0. 858122 1. 008142  
100507530 2. 207921 3. 052421 2. 708258 1. 813021 2. 711646 1. 939437 2. 204388 2. 072908  
100507533 1. 966893 2. 24892 2. 0424 1. 6344 1. 863601 2. 452764 1. 584276 1. 773812  
100507534 2. 470281 1. 822734 1. 669211 1. 900884 1. 285652 2. 247688 1. 263342 1. 748136  
100507537 1. 97212 1. 827092 2. 267864 0. 693199 3. 348556 2. 139241 1. 206365 2. 864399  
100507540 3. 990044 1. 467113 3. 153006 2. 697546 3. 764101 3. 522123 1. 502338 2. 809675  
100507547 3. 606585 3. 679796 2. 981765 3. 48485 3. 176166 3. 473056 3. 86236 4. 496517  
100507548 3. 583796 2. 580857 1. 28955 1. 97952 2. 025008 2. 731625 2. 638637 2. 645069  
100507554 3. 580267 2. 040816 3. 564424 3. 09345 2. 057895 3. 173715 1. 264438 2. 91397  
100507557 2. 901544 3. 722014 3. 585831 3. 864699 3. 925679 3. 62097 4. 539875 3. 874258  
100507560 1. 629666 2. 260409 2. 046424 1. 369763 2. 220787 1. 448172 2. 113619 2. 613322  
100507562 1. 490988 1. 565164 1. 364433 0. 983789 1. 418427 1. 560285 2. 382892 1. 828162  
100507564 3. 847925 3. 358629 3. 518937 3. 402746 3. 094643 3. 705141 2. 828909 3. 250861  
100507567 5. 433947 5. 332985 5. 234762 5. 570782 4. 152129 4. 219013 5. 052911 5. 830522  
100507577 5. 463045 4. 818064 5. 023759 5. 129594 5. 578161 5. 655753 5. 070581 4. 665595  
100507582 1. 558249 0. 974657 2. 068478 1. 511213 2. 026491 1. 55732 4. 011403 1. 655259  
100507584 2. 972357 1. 542734 1. 719382 1. 760232 3. 480782 1. 831337 2. 085311 2. 395391  
100507588 3. 463638 3. 333344 3. 608113 2. 465834 1. 953316 3. 74976 3. 304354 2. 334881  
100507589 1. 530859 1. 196386 1. 216943 0. 87969 1. 771841 1. 247962 1. 806362 2. 020596  
100507599 3. 744862 2. 278236 3. 002845 3. 214568 2. 849068 3. 168186 2. 598972 3. 439002  
100507600 1. 532635 1. 734176 1. 37315 1. 024803 1. 517938 1. 508995 1. 492638 1. 22183  
100507602 5. 954334 5. 414874 7. 13247 5. 737201 4. 750607 5. 891379 5. 947083 4. 970293  
100507605 1. 510404 2. 029315 1. 920526 1. 595247 2. 341894 1. 312204 2. 00279 1. 894161  
100507616 2. 373689 3. 331389 3. 365781 2. 231201 3. 662193 2. 366509 2. 962115 2. 872155  
100507629 2. 132554 2. 338043 2. 152174 2. 066958 2. 171572 1. 934427 1. 784139 2. 240751  
100507632 1. 467472 1. 627652 2. 040944 1. 578108 1. 42165 0. 94971 1. 508249 4. 088015  
100507633 3. 75549 3. 998591 3. 484291 3. 799218 3. 635453 3. 49349 4. 019527 3. 316331  
100507634 2. 721691 2. 414263 3. 047022 3. 372063 3. 052708 2. 879742 3. 381396 2. 465602  
100507639 2. 238974 1. 201316 1. 731287 1. 560885 2. 253272 1. 665916 3. 281836 1. 756309  
100507642 1. 988965 1. 249195 1. 552339 2. 393223 1. 177966 2. 602469 0. 934085 1. 80674  
100507650 2. 906649 1. 940467 2. 952853 1. 703823 2. 486445 1. 780021 1. 930434 2. 5059  
100507651 2. 946294 1. 598813 1. 489055 1. 805468 2. 663014 2. 165028 1. 084793 2. 417267  
100507656 1. 710886 1. 554177 2. 049712 1. 422283 1. 950479 1. 666459 1. 979443 1. 615362  
100507657 0. 896092 1. 565252 1. 279069 2. 371308 1. 534327 1. 147768 2. 137847 1. 313591  
100507661 1. 015195 1. 120912 1. 290007 0. 942207 1. 595859 0. 924705 1. 2738 1. 948708  
100507670 4. 169074 4. 416066 4. 466934 3. 646913 3. 323207 3. 449019 3. 108415 3. 680566  
100507674 1. 780771 2. 231973 2. 162101 1. 019225 2. 983991 1. 212593 1. 585523 2. 164786  
100507679 2. 653742 2. 548377 2. 253706 2. 412498 2. 429121 2. 759572 2. 562479 2. 337579  
100507747 3. 646587 2. 946424 3. 017789 3. 584086 3. 281755 2. 653165 4. 224266 2. 951562  
100508046 1. 460597 1. 516687 1. 863293 2. 054364 2. 158892 1. 569037 1. 46368 1. 784716  
100508120 3. 182369 2. 670057 2. 202887 1. 780254 3. 779202 3. 571005 4. 422544 2. 976527  
100508631 1. 25415 1. 038971 1. 805002 1. 213668 1. 192379 1. 545812 1. 640238 1. 889839  
100509303 1. 393622 1. 432119 1. 33662 1. 145936 1. 024175 1. 233029 1. 643939 1. 748358  
100509894 2. 30734 1. 48056 1. 214063 1. 894414 1. 405564 0. 889479 1. 407228 2. 067979  
10050\_at 1. 620519 1. 241662 1. 951212 1. 324132 2. 488715 2. 477071 2. 67038 2. 559201  
10051\_at 6. 04788 6. 786024 6. 253637 6. 387862 6. 415914 6. 660787 6. 271665 7. 385516  
100526771 3. 275305 3. 342568 2. 927866 2. 79312 3. 599816 3. 365829 3. 198004 3. 318643  
100526820 4. 502847 3. 700125 3. 211 4. 401697 3. 247347 4. 841749 2. 746428 2. 601446  
100527950 2. 445692 3. 834145 2. 426705 1. 529459 1. 204941 2. 902597 2. 308469 4. 449635

|           |          |          |          |          |          |          |          |          |
|-----------|----------|----------|----------|----------|----------|----------|----------|----------|
| 100527964 | 1.52931  | 2.04212  | 2.253157 | 1.483972 | 2.2521   | 1.567772 | 2.780232 | 1.909616 |
| 100528032 | 1.790246 | 2.300996 | 2.551643 | 2.122382 | 2.477732 | 2.401522 | 3.206234 | 1.665705 |
| 10052_at  | 4.65681  | 4.418762 | 3.38907  | 3.793936 | 3.168745 | 3.618983 | 4.07001  | 3.612267 |
| 100533106 | 3.479338 | 2.130812 | 1.430497 | 2.76122  | 2.601118 | 2.168061 | 0.801849 | 0.885857 |
| 100533177 | 1.999015 | 2.178662 | 2.196707 | 2.361986 | 1.81872  | 2.195407 | 1.715014 | 2.710936 |
| 100533178 | 1.238878 | 1.049255 | 1.169765 | 1.473031 | 1.076576 | 0.971845 | 2.084812 | 1.303282 |
| 100533182 | 1.793649 | 3.64776  | 3.440583 | 3.564285 | 2.867251 | 2.502537 | 3.632616 | 3.5424   |
| 100533990 | 1.446536 | 1.825196 | 2.512861 | 1.082448 | 3.368302 | 2.196709 | 2.289169 | 3.246753 |
| 100534593 | 2.566811 | 1.831769 | 4.42124  | 2.798916 | 2.319899 | 3.338177 | 4.254107 | 3.695732 |
| 10053_at  | 3.469165 | 3.4045   | 2.935284 | 2.726837 | 3.68233  | 2.883886 | 3.182491 | 2.90842  |
| 10054_at  | 7.287766 | 7.190841 | 6.851221 | 7.561543 | 7.305304 | 7.357119 | 6.672814 | 7.464079 |
| 100551499 | 1.582595 | 1.415493 | 1.132696 | 1.081657 | 1.551603 | 0.964127 | 1.884004 | 2.952598 |
| 10055_at  | 2.770161 | 2.879148 | 3.283629 | 3.108792 | 3.149276 | 2.670868 | 3.574735 | 2.421844 |
| 10056_at  | 6.153085 | 6.534847 | 6.529064 | 6.169409 | 5.433405 | 5.982057 | 5.53204  | 6.996753 |
| 10057_at  | 2.363833 | 2.769672 | 3.023981 | 4.09388  | 3.396321 | 2.759512 | 3.4587   | 2.624712 |
| 10058_at  | 2.95474  | 3.564267 | 3.179058 | 4.098399 | 3.602783 | 3.297298 | 3.985261 | 2.94405  |
| 10059_at  | 6.782192 | 7.224554 | 6.631623 | 6.818763 | 6.238739 | 6.839557 | 6.59433  | 6.796348 |
| 1005_at   | 2.027446 | 1.440121 | 1.308079 | 1.960692 | 1.613051 | 2.381221 | 1.405098 | 1.43565  |
| 10060_at  | 2.131743 | 2.281856 | 1.810882 | 1.576871 | 3.403739 | 2.993984 | 2.517766 | 1.831899 |
| 100616109 | 1.485703 | 1.612451 | 0.902123 | 0.99787  | 1.095674 | 1.087071 | 0.903176 | 1.600014 |
| 100616110 | 1.969876 | 2.137467 | 2.050004 | 2.094607 | 1.863025 | 2.161444 | 2.181854 | 2.519581 |
| 100616112 | 2.063914 | 2.438235 | 2.550595 | 1.567403 | 2.081047 | 1.724338 | 2.645246 | 3.541768 |
| 100616114 | 0.917683 | 0.646193 | 1.682584 | 0.795124 | 1.674181 | 1.57863  | 1.479801 | 1.417247 |
| 100616115 | 1.726483 | 0.853941 | 1.289381 | 1.801666 | 2.065079 | 1.52459  | 1.279052 | 2.064063 |
| 100616117 | 1.2883   | 1.138407 | 1.073542 | 0.784636 | 1.948877 | 1.601579 | 1.318231 | 1.368138 |
| 100616118 | 0.764861 | 1.425343 | 1.528647 | 0.987698 | 2.273902 | 1.438962 | 1.54049  | 1.745793 |
| 100616120 | 1.501141 | 2.897247 | 2.521088 | 3.133865 | 2.356707 | 1.5038   | 1.777075 | 2.47042  |
| 100616125 | 1.942391 | 2.688771 | 2.805704 | 1.420087 | 1.934314 | 1.65075  | 0.818862 | 2.665181 |
| 100616126 | 2.976399 | 3.260865 | 3.027338 | 3.457587 | 3.002933 | 3.466073 | 3.230174 | 2.71842  |
| 100616129 | 0.652146 | 1.251597 | 0.74203  | 0.86252  | 0.580593 | 0.769562 | 2.139173 | 1.15482  |
| 100616130 | 3.27408  | 2.428745 | 2.459696 | 2.856872 | 2.949223 | 4.691091 | 3.789358 | 4.098571 |
| 100616132 | 4.326161 | 3.959644 | 4.459479 | 4.161329 | 4.430526 | 3.444119 | 4.578166 | 3.74644  |
| 100616133 | 0.814503 | 0.834181 | 1.062295 | 1.048743 | 1.164118 | 1.091447 | 0.731661 | 1.086534 |
| 100616134 | 1.028096 | 0.947817 | 1.189013 | 1.63457  | 1.607555 | 1.901839 | 1.245189 | 0.7847   |
| 100616137 | 4.606192 | 5.091085 | 4.606658 | 4.579577 | 5.082669 | 4.106007 | 4.417007 | 4.332352 |
| 100616140 | 0.71964  | 1.423645 | 1.263867 | 0.558604 | 1.273013 | 0.875813 | 1.390142 | 1.002061 |
| 100616144 | 1.073497 | 2.168266 | 2.203378 | 2.965361 | 1.767253 | 1.647856 | 1.610832 | 1.889753 |
| 100616146 | 2.709394 | 4.449954 | 3.722893 | 4.372091 | 3.091205 | 3.975853 | 2.099873 | 3.577248 |
| 100616148 | 0.818793 | 1.021011 | 1.14696  | 0.729497 | 1.049607 | 0.548536 | 0.534804 | 0.781815 |
| 100616150 | 0.81419  | 1.29545  | 0.74427  | 1.047084 | 0.839416 | 1.126213 | 0.938271 | 1.309718 |
| 100616151 | 1.197134 | 1.314884 | 1.081497 | 1.482076 | 0.738472 | 0.913034 | 0.783875 | 0.612028 |
| 100616152 | 1.922246 | 2.046124 | 1.527434 | 1.498374 | 1.950193 | 1.57792  | 2.228963 | 2.002195 |
| 100616155 | 0.888458 | 0.520182 | 0.776727 | 0.597151 | 0.733447 | 0.98843  | 1.1239   | 0.784422 |
| 100616156 | 2.530899 | 2.303507 | 2.124885 | 1.435533 | 2.10195  | 0.405191 | 1.806735 | 1.139285 |
| 100616157 | 2.233901 | 2.185207 | 1.998379 | 1.428607 | 1.668789 | 1.304863 | 1.104144 | 1.932969 |
| 100616158 | 1.702636 | 1.837545 | 2.086701 | 1.775521 | 2.887441 | 2.899561 | 1.873304 | 1.431441 |
| 100616159 | 1.437969 | 1.387426 | 1.466484 | 1.542573 | 1.725218 | 1.729844 | 1.735429 | 1.76743  |
| 100616160 | 1.386313 | 3.818869 | 3.396042 | 2.718743 | 2.696703 | 4.416342 | 2.756347 | 2.473667 |
| 100616162 | 1.967663 | 0.966881 | 1.243377 | 1.116598 | 1.367632 | 1.77536  | 2.15307  | 1.09661  |
| 100616163 | 2.672138 | 3.504153 | 2.560321 | 3.764813 | 2.158687 | 2.931965 | 3.374773 | 2.216188 |
| 100616164 | 1.213175 | 1.448004 | 1.163002 | 1.344629 | 0.896826 | 1.70302  | 0.90464  | 0.986327 |

|           |          |          |          |          |          |          |          |          |
|-----------|----------|----------|----------|----------|----------|----------|----------|----------|
| 100616166 | 1.342694 | 0.958473 | 0.939635 | 0.804688 | 0.870481 | 0.798123 | 1.143113 | 0.700496 |
| 100616168 | 4.301988 | 3.869083 | 5.475543 | 4.292613 | 4.969466 | 4.281892 | 3.423186 | 5.360519 |
| 100616169 | 1.381254 | 1.42469  | 2.426527 | 2.279759 | 2.267071 | 1.872158 | 3.123975 | 2.588451 |
| 100616170 | 2.50734  | 2.329669 | 0.850766 | 3.446389 | 1.703002 | 1.489951 | 3.479403 | 2.4384   |
| 100616171 | 0.743841 | 1.445867 | 0.376576 | 0.604315 | 3.924555 | 1.933124 | 2.049259 | 3.454721 |
| 100616172 | 1.258762 | 0.861673 | 1.149512 | 0.786048 | 1.288368 | 0.798983 | 0.994087 | 1.053401 |
| 100616173 | 1.028158 | 0.882401 | 0.872658 | 0.84009  | 1.222379 | 0.966396 | 1.76144  | 1.082441 |
| 100616174 | 0.587512 | 0.883837 | 0.982493 | 0.399633 | 1.573907 | 0.783638 | 1.528669 | 1.197953 |
| 100616175 | 3.481335 | 2.814733 | 2.033347 | 1.947187 | 2.14437  | 1.974078 | 1.912204 | 2.258645 |
| 100616176 | 1.627581 | 1.4598   | 2.452014 | 1.990604 | 2.194156 | 1.749734 | 1.903827 | 1.220004 |
| 100616178 | 5.511054 | 6.249592 | 6.555771 | 5.598568 | 5.770797 | 6.797038 | 6.087597 | 6.151745 |
| 100616179 | 1.120633 | 2.456926 | 1.968655 | 1.368464 | 2.026081 | 1.637184 | 2.164032 | 0.987231 |
| 100616180 | 0.830303 | 1.326826 | 0.699531 | 0.58483  | 0.877094 | 0.915262 | 1.120429 | 1.0312   |
| 100616181 | 1.404877 | 2.37343  | 2.714239 | 2.468837 | 1.373249 | 2.546529 | 1.954377 | 2.733975 |
| 100616182 | 0.831764 | 1.338508 | 1.036868 | 1.287392 | 1.753274 | 2.365841 | 1.236819 | 1.102227 |
| 100616183 | 1.285349 | 1.314623 | 1.563323 | 1.23381  | 1.309908 | 1.503699 | 1.627967 | 1.501874 |
| 100616185 | 1.850643 | 2.349817 | 1.670986 | 2.144485 | 3.164372 | 1.410398 | 1.849683 | 1.659715 |
| 100616186 | 1.607789 | 0.924022 | 1.498149 | 0.792002 | 1.108888 | 0.878125 | 1.335526 | 0.795996 |
| 100616187 | 1.770356 | 3.416592 | 2.714219 | 2.207644 | 1.450815 | 2.343243 | 0.916846 | 1.801445 |
| 100616188 | 2.422101 | 1.807288 | 2.763602 | 2.2724   | 1.845115 | 2.809013 | 2.269177 | 2.403477 |
| 100616189 | 1.163501 | 1.022692 | 0.966741 | 1.269004 | 0.594004 | 1.680422 | 0.76292  | 1.787767 |
| 100616190 | 0.931133 | 1.688386 | 0.907738 | 4.86312  | 2.029269 | 0.957312 | 1.350047 | 1.321614 |
| 100616191 | 1.333117 | 1.635103 | 1.381695 | 0.942875 | 0.527459 | 1.056938 | 2.556644 | 1.436324 |
| 100616192 | 1.094602 | 1.658233 | 0.758951 | 1.099698 | 1.086119 | 1.535845 | 2.243276 | 1.806109 |
| 100616195 | 1.458524 | 1.688598 | 1.840649 | 1.575993 | 1.506345 | 1.696246 | 1.729986 | 1.570664 |
| 100616196 | 6.025347 | 6.339059 | 5.805473 | 6.485532 | 5.743372 | 6.240208 | 5.706498 | 5.529287 |
| 100616201 | 1.554039 | 0.710111 | 1.558612 | 0.515002 | 1.134093 | 0.734366 | 1.571933 | 1.186449 |
| 100616204 | 2.073423 | 1.114277 | 1.527564 | 1.117663 | 1.548655 | 0.752989 | 1.57028  | 1.531839 |
| 100616205 | 1.841761 | 1.05233  | 0.815118 | 1.397903 | 1.780036 | 1.719107 | 1.872187 | 1.014657 |
| 100616207 | 0.789999 | 0.732162 | 0.864589 | 0.947917 | 1.800019 | 0.789983 | 0.76866  | 1.086085 |
| 100616208 | 1.538229 | 1.075433 | 1.699458 | 1.33021  | 0.977185 | 2.112906 | 2.63076  | 1.496056 |
| 100616209 | 8.708701 | 9.196628 | 8.720732 | 9.308871 | 9.420021 | 9.129553 | 8.775772 | 9.201664 |
| 100616212 | 2.437732 | 4.02267  | 3.967821 | 3.026717 | 3.422033 | 4.075061 | 3.107707 | 4.40503  |
| 100616213 | 2.274482 | 1.812398 | 2.087865 | 2.285212 | 2.921553 | 2.596979 | 3.969933 | 2.940263 |
| 100616214 | 1.782917 | 2.20482  | 2.61958  | 2.641646 | 3.887318 | 0.809156 | 1.19464  | 1.5803   |
| 100616215 | 2.57869  | 1.128442 | 1.501063 | 3.306975 | 1.929476 | 2.569957 | 1.255214 | 0.742544 |
| 100616216 | 2.63087  | 0.948312 | 0.96219  | 1.523164 | 1.050265 | 0.727409 | 1.469019 | 0.976571 |
| 100616218 | 1.57689  | 3.303922 | 3.368041 | 3.86874  | 3.811803 | 1.040272 | 2.405138 | 1.783399 |
| 100616219 | 0.866733 | 1.259177 | 1.407506 | 1.530157 | 1.524739 | 0.962749 | 1.005808 | 1.41314  |
| 100616221 | 0.6745   | 1.707546 | 0.707677 | 0.98391  | 0.619864 | 0.617475 | 1.104675 | 0.820647 |
| 100616224 | 1.082376 | 0.980451 | 1.192799 | 1.494402 | 1.409977 | 0.579565 | 1.00822  | 1.586162 |
| 100616225 | 3.613413 | 4.854183 | 4.973499 | 4.846858 | 5.158514 | 4.65504  | 3.648028 | 4.442108 |
| 100616226 | 1.923053 | 1.484111 | 4.097588 | 1.254245 | 3.048312 | 2.757929 | 1.063781 | 1.153884 |
| 100616227 | 1.839131 | 1.212731 | 1.605999 | 2.750451 | 2.365279 | 1.96775  | 2.763627 | 1.753708 |
| 100616229 | 1.230554 | 1.430594 | 1.351598 | 0.886804 | 2.507922 | 1.120125 | 1.227251 | 1.629449 |
| 100616230 | 1.574821 | 2.502528 | 2.921242 | 2.492634 | 1.697382 | 2.96871  | 3.515841 | 2.045955 |
| 100616231 | 6.098146 | 6.820101 | 7.236525 | 7.156177 | 6.753825 | 4.906878 | 6.245783 | 6.684114 |
| 100616235 | 1.282958 | 1.339117 | 1.178767 | 0.760302 | 0.983598 | 1.03412  | 1.257247 | 0.844104 |
| 100616237 | 2.50885  | 3.418524 | 1.965006 | 2.125735 | 3.230176 | 2.491342 | 1.796025 | 3.83323  |
| 100616238 | 1.633414 | 0.837145 | 1.997739 | 0.97934  | 2.186278 | 2.386998 | 1.017773 | 1.379155 |
| 100616239 | 0.844273 | 0.887486 | 1.304575 | 0.957844 | 0.887417 | 1.17045  | 0.836134 | 0.986833 |



|           |          |          |          |          |          |          |          |          |
|-----------|----------|----------|----------|----------|----------|----------|----------|----------|
| 100616240 | 0.74022  | 0.865749 | 0.658839 | 0.570982 | 0.72461  | 0.303126 | 1.102603 | 1.041961 |
| 100616241 | 2.316141 | 1.081352 | 2.638616 | 3.906128 | 0.772191 | 0.862955 | 3.350948 | 1.09565  |
| 100616242 | 3.457748 | 4.613657 | 4.579794 | 2.852911 | 5.267631 | 4.421442 | 3.293368 | 4.935738 |
| 100616243 | 0.745793 | 1.214423 | 1.637842 | 1.737334 | 1.473913 | 0.769808 | 1.217356 | 1.000824 |
| 100616244 | 1.116863 | 0.736235 | 0.870163 | 1.164328 | 1.480171 | 0.793813 | 1.733116 | 1.156625 |
| 100616245 | 0.959437 | 1.275001 | 1.907798 | 2.867258 | 2.088761 | 1.750031 | 0.892625 | 1.296499 |
| 100616246 | 1.77055  | 2.502632 | 1.168439 | 1.999018 | 1.739495 | 2.156578 | 1.967654 | 2.109512 |
| 100616247 | 4.003346 | 4.229407 | 3.365809 | 4.048112 | 3.31226  | 4.810847 | 4.393815 | 3.584566 |
| 100616249 | 1.293282 | 0.886696 | 1.22513  | 1.009688 | 1.983916 | 1.027576 | 0.850964 | 1.805588 |
| 100616251 | 3.236629 | 2.027337 | 1.965188 | 1.928143 | 3.007229 | 2.329887 | 1.477654 | 1.960032 |
| 100616253 | 1.173809 | 0.969736 | 0.890752 | 0.920531 | 1.972503 | 0.825758 | 1.420067 | 0.985975 |
| 100616255 | 0.784547 | 0.994388 | 0.940389 | 0.956441 | 1.301396 | 0.559255 | 0.504749 | 0.911064 |
| 100616257 | 1.118196 | 0.97885  | 1.036425 | 1.213937 | 0.735948 | 1.344394 | 1.120071 | 0.997673 |
| 100616259 | 2.489853 | 2.565479 | 3.365771 | 3.749565 | 3.64133  | 4.548368 | 2.575845 | 4.514284 |
| 100616260 | 1.648411 | 2.86292  | 3.42913  | 3.22706  | 3.944808 | 2.157741 | 1.983564 | 3.715702 |
| 100616261 | 1.818027 | 0.902291 | 0.822471 | 1.098639 | 1.072993 | 1.644026 | 1.08383  | 1.111188 |
| 100616264 | 1.390736 | 2.119325 | 1.446859 | 1.43441  | 1.358364 | 1.827699 | 1.308769 | 2.030067 |
| 100616265 | 0.989313 | 1.51294  | 1.052606 | 1.213242 | 1.438174 | 2.102897 | 1.938187 | 2.416569 |
| 100616266 | 1.902767 | 2.661145 | 2.063254 | 4.101182 | 1.723111 | 2.425112 | 2.394038 | 2.23886  |
| 100616267 | 1.285719 | 1.279039 | 1.324879 | 1.536336 | 2.377868 | 1.115799 | 1.606786 | 2.062994 |
| 100616268 | 1.287034 | 1.201194 | 1.56577  | 1.151448 | 1.365049 | 1.273894 | 2.632441 | 1.011634 |
| 100616271 | 0.893173 | 0.87124  | 1.766205 | 0.847541 | 1.391726 | 1.181389 | 0.840593 | 0.682157 |
| 100616272 | 3.547608 | 2.693746 | 2.930547 | 3.621468 | 2.772122 | 4.418483 | 3.81529  | 3.363777 |
| 100616273 | 1.967731 | 1.536299 | 1.031199 | 1.231737 | 1.567909 | 0.943554 | 1.82772  | 1.188604 |
| 100616274 | 0.762101 | 0.906819 | 1.091426 | 0.725075 | 1.002292 | 1.61989  | 0.876323 | 1.547178 |
| 100616277 | 3.508511 | 3.814735 | 3.664297 | 3.866868 | 3.747782 | 3.3045   | 1.608669 | 1.854989 |
| 100616278 | 1.345453 | 2.112784 | 1.42407  | 1.255057 | 0.769229 | 1.968335 | 1.07736  | 2.901211 |
| 100616279 | 1.304457 | 1.105556 | 2.077528 | 1.330312 | 1.661797 | 1.368391 | 2.552914 | 1.226708 |
| 100616280 | 1.022354 | 1.076566 | 1.316183 | 0.711306 | 1.388449 | 1.375695 | 1.053399 | 1.689983 |
| 100616281 | 1.451931 | 1.816068 | 2.434164 | 1.858106 | 2.238945 | 2.19798  | 2.222418 | 2.168224 |
| 100616282 | 2.525272 | 1.32543  | 0.558779 | 1.002164 | 0.949708 | 0.524951 | 0.773063 | 0.563992 |
| 100616283 | 0.877617 | 1.145079 | 1.369337 | 1.058839 | 2.479138 | 0.867007 | 1.462726 | 0.876864 |
| 100616284 | 4.270488 | 4.776228 | 4.162176 | 4.383768 | 3.817038 | 4.399628 | 3.384086 | 5.118803 |
| 100616285 | 0.984934 | 1.266986 | 1.509183 | 0.743339 | 2.353186 | 2.807943 | 1.026993 | 0.887933 |
| 100616286 | 1.479249 | 1.277794 | 0.776835 | 0.785001 | 1.057069 | 0.792279 | 1.21688  | 1.032273 |
| 100616287 | 0.700474 | 0.948202 | 0.727202 | 0.659013 | 0.836127 | 1.489625 | 0.540964 | 0.747362 |
| 100616289 | 0.896439 | 0.946017 | 1.188179 | 0.867041 | 1.079652 | 1.099852 | 1.985635 | 0.651269 |
| 100616290 | 0.872587 | 1.748985 | 0.750209 | 1.627757 | 2.909045 | 1.060211 | 1.05783  | 1.482306 |
| 100616291 | 1.635002 | 0.932457 | 0.971204 | 0.935922 | 1.634802 | 1.272125 | 2.065502 | 2.521807 |
| 100616293 | 1.374387 | 0.895321 | 1.069259 | 0.955981 | 1.216157 | 0.755087 | 1.086286 | 1.080202 |
| 100616294 | 2.138859 | 1.727643 | 1.069741 | 1.573048 | 2.313776 | 1.681799 | 2.6317   | 2.508095 |
| 100616295 | 1.805619 | 1.608665 | 1.376441 | 1.284292 | 1.816602 | 1.638958 | 1.326385 | 1.691252 |
| 100616296 | 0.994207 | 1.373275 | 1.494573 | 0.861375 | 1.618308 | 1.596368 | 1.656742 | 0.64664  |
| 100616299 | 3.727426 | 3.273506 | 3.344058 | 4.561561 | 4.558124 | 3.272996 | 3.080601 | 3.959255 |
| 100616300 | 3.303672 | 2.825572 | 3.876284 | 3.43714  | 3.86459  | 3.858496 | 3.74234  | 4.016647 |
| 100616302 | 0.979053 | 0.99913  | 0.836428 | 1.258113 | 1.362315 | 2.703041 | 1.277075 | 1.620572 |
| 100616303 | 1.006531 | 0.777591 | 0.856344 | 0.68158  | 0.848192 | 0.666905 | 1.747652 | 1.057702 |
| 100616304 | 1.166565 | 0.730472 | 1.093197 | 0.664796 | 0.995577 | 0.635169 | 1.29021  | 1.106479 |
| 100616306 | 2.584062 | 0.771209 | 1.772232 | 2.38371  | 3.335431 | 2.983955 | 3.535815 | 1.039059 |
| 100616307 | 1.134094 | 1.820308 | 2.211686 | 1.511617 | 1.73555  | 1.174667 | 1.266189 | 2.016746 |
| 100616308 | 1.487475 | 1.970712 | 1.786824 | 1.069747 | 1.214975 | 1.430153 | 2.615035 | 1.247037 |

|           |           |           |           |           |           |           |           |           |
|-----------|-----------|-----------|-----------|-----------|-----------|-----------|-----------|-----------|
| 100616311 | 1. 364802 | 1. 425646 | 1. 454007 | 1. 070348 | 1. 500415 | 1. 587237 | 2. 006432 | 1. 456538 |
| 100616312 | 2. 336663 | 1. 447329 | 1. 119632 | 1. 142046 | 2. 385806 | 2. 029171 | 1. 538598 | 1. 215698 |
| 100616313 | 1. 147096 | 1. 883218 | 1. 310293 | 1. 473058 | 1. 080059 | 1. 471975 | 1. 254353 | 1. 047127 |
| 100616315 | 1. 715699 | 1. 18817  | 1. 861442 | 1. 069299 | 2. 036063 | 1. 228629 | 1. 270939 | 1. 850973 |
| 100616316 | 1. 137258 | 0. 79769  | 0. 894451 | 0. 583448 | 1. 656007 | 0. 50049  | 1. 195995 | 0. 851177 |
| 100616317 | 0. 746302 | 0. 651508 | 1. 024229 | 0. 640862 | 1. 052603 | 1. 044697 | 1. 061057 | 1. 534181 |
| 100616319 | 1. 338788 | 1. 273015 | 1. 062477 | 2. 135702 | 1. 487523 | 2. 191132 | 2. 20544  | 1. 565654 |
| 100616320 | 0. 864399 | 1. 699551 | 0. 474198 | 1. 063372 | 1. 103841 | 1. 895706 | 1. 029552 | 1. 096574 |
| 100616322 | 2. 24444  | 2. 274424 | 2. 060259 | 3. 243888 | 2. 912663 | 2. 164921 | 1. 291043 | 2. 043468 |
| 100616323 | 2. 658049 | 2. 108528 | 1. 74598  | 1. 533476 | 3. 440875 | 3. 016559 | 1. 887845 | 2. 629197 |
| 100616324 | 0. 652619 | 1. 019981 | 1. 073191 | 0. 480127 | 1. 241379 | 1. 202006 | 1. 062368 | 0. 739637 |
| 100616325 | 1. 958776 | 0. 767101 | 1. 120776 | 1. 02906  | 1. 300846 | 1. 595056 | 0. 863819 | 1. 531147 |
| 100616326 | 1. 229481 | 0. 754913 | 2. 127981 | 0. 887451 | 1. 177503 | 0. 938595 | 1. 035136 | 1. 310561 |
| 100616328 | 0. 944286 | 0. 885737 | 1. 019374 | 1. 06678  | 1. 267306 | 1. 066785 | 0. 835902 | 1. 124778 |
| 100616330 | 1. 996526 | 0. 815462 | 1. 239639 | 0. 925616 | 0. 963157 | 1. 855303 | 2. 285745 | 1. 459708 |
| 100616334 | 1. 190698 | 0. 890025 | 0. 950301 | 0. 717922 | 1. 190512 | 0. 917513 | 0. 801084 | 1. 45801  |
| 100616335 | 0. 87745  | 0. 790273 | 1. 075523 | 1. 058333 | 1. 047558 | 1. 27976  | 0. 828241 | 1. 499483 |
| 100616336 | 3. 616875 | 2. 013153 | 2. 690997 | 2. 312667 | 2. 654819 | 2. 722318 | 3. 982102 | 3. 435698 |
| 100616337 | 1. 225674 | 1. 128489 | 1. 271573 | 2. 708948 | 1. 313609 | 1. 163335 | 2. 37048  | 1. 05447  |
| 100616338 | 1. 529151 | 0. 686532 | 0. 881628 | 0. 867707 | 1. 287708 | 0. 966086 | 0. 864931 | 0. 778556 |
| 100616342 | 3. 434525 | 4. 233196 | 3. 746386 | 4. 640145 | 3. 67166  | 4. 497106 | 3. 156894 | 3. 104691 |
| 100616343 | 3. 08011  | 1. 805737 | 1. 639957 | 1. 77587  | 3. 386734 | 1. 783306 | 5. 598412 | 3. 74191  |
| 100616344 | 1. 072677 | 1. 936478 | 1. 205471 | 1. 693659 | 2. 235231 | 1. 64863  | 1. 968268 | 1. 6941   |
| 100616346 | 2. 237987 | 1. 598651 | 2. 63312  | 3. 339328 | 2. 6044   | 2. 59963  | 3. 332305 | 3. 007952 |
| 100616348 | 0. 789532 | 1. 048619 | 4. 736897 | 0. 920329 | 1. 380919 | 1. 770712 | 0. 972783 | 1. 291823 |
| 100616349 | 1. 784822 | 2. 1881   | 1. 803689 | 3. 429896 | 1. 997384 | 1. 856876 | 1. 593913 | 2. 293434 |
| 100616350 | 2. 73606  | 2. 066446 | 2. 133583 | 2. 272842 | 3. 005312 | 3. 017046 | 1. 541392 | 1. 952325 |
| 100616351 | 1. 072173 | 1. 188008 | 1. 339643 | 1. 130051 | 1. 250025 | 2. 299614 | 2. 570651 | 1. 742803 |
| 100616352 | 4. 554719 | 5. 327396 | 4. 573756 | 4. 727963 | 4. 669504 | 4. 502228 | 4. 198263 | 5. 583207 |
| 100616353 | 1. 629722 | 0. 845278 | 2. 711004 | 1. 266191 | 0. 950881 | 3. 639447 | 0. 783853 | 4. 347588 |
| 100616354 | 2. 028985 | 1. 855132 | 2. 488853 | 1. 585607 | 2. 423912 | 1. 726902 | 1. 836859 | 2. 897267 |
| 100616356 | 2. 108874 | 1. 497822 | 1. 51045  | 1. 400829 | 1. 512706 | 0. 984549 | 1. 631235 | 1. 67901  |
| 100616357 | 1. 488884 | 1. 540676 | 1. 025671 | 1. 000835 | 1. 646248 | 0. 637615 | 0. 737104 | 1. 142789 |
| 100616359 | 2. 514958 | 2. 803584 | 2. 919833 | 2. 930968 | 3. 236053 | 2. 91289  | 2. 542274 | 3. 146327 |
| 100616360 | 4. 052933 | 3. 702714 | 4. 072367 | 3. 189566 | 3. 610252 | 3. 465646 | 4. 502705 | 3. 883906 |
| 100616362 | 3. 853856 | 3. 821381 | 4. 827039 | 4. 679425 | 5. 236269 | 4. 165309 | 4. 628119 | 4. 570904 |
| 100616363 | 1. 416142 | 0. 71785  | 0. 767968 | 1. 900888 | 1. 017295 | 0. 735357 | 1. 162402 | 0. 634808 |
| 100616365 | 1. 493611 | 1. 93961  | 1. 830924 | 1. 67526  | 2. 183255 | 1. 173391 | 1. 382575 | 1. 83573  |
| 100616367 | 3. 773184 | 4. 07515  | 4. 529217 | 3. 293304 | 3. 54033  | 3. 675278 | 2. 634035 | 4. 587423 |
| 100616368 | 4. 274373 | 5. 279467 | 4. 658608 | 4. 981539 | 5. 48098  | 4. 868897 | 5. 522529 | 5. 415755 |
| 100616369 | 1. 660242 | 1. 798673 | 1. 377778 | 1. 498279 | 1. 073094 | 1. 550988 | 1. 768958 | 1. 201078 |
| 100616371 | 2. 912695 | 1. 811573 | 2. 344832 | 3. 545975 | 2. 749139 | 2. 556082 | 3. 401353 | 3. 085484 |
| 100616372 | 0. 807717 | 1. 370495 | 6. 320599 | 0. 79817  | 0. 995664 | 1. 089939 | 0. 612906 | 0. 775855 |
| 100616373 | 0. 818179 | 1. 17246  | 0. 695791 | 0. 863982 | 1. 468516 | 1. 369206 | 2. 199784 | 0. 841651 |
| 100616375 | 0. 630924 | 1. 180108 | 1. 209719 | 0. 829197 | 1. 688569 | 1. 416544 | 0. 60793  | 2. 473313 |
| 100616376 | 3. 400717 | 2. 187662 | 3. 737678 | 1. 86114  | 3. 091297 | 4. 570607 | 4. 650696 | 3. 6074   |
| 100616377 | 2. 389106 | 1. 842942 | 1. 468639 | 1. 993334 | 1. 965936 | 2. 025592 | 3. 370206 | 2. 379184 |
| 100616378 | 4. 956594 | 3. 223633 | 4. 820793 | 4. 891434 | 5. 490958 | 5. 422378 | 4. 214788 | 4. 452967 |
| 100616379 | 1. 199644 | 1. 102252 | 0. 981484 | 0. 852118 | 2. 269752 | 1. 031353 | 0. 956031 | 1. 687243 |
| 100616380 | 1. 346189 | 1. 150896 | 0. 941769 | 0. 775058 | 2. 015113 | 1. 248429 | 1. 422863 | 1. 004271 |
| 100616383 | 2. 958022 | 3. 456012 | 2. 397177 | 2. 577344 | 3. 232103 | 2. 354106 | 2. 375255 | 1. 502666 |

|           |          |          |          |          |          |          |          |          |
|-----------|----------|----------|----------|----------|----------|----------|----------|----------|
| 100616385 | 6.867254 | 7.26647  | 6.973708 | 7.297812 | 7.067562 | 6.692711 | 7.021429 | 7.036726 |
| 100616388 | 2.025762 | 2.097384 | 2.765972 | 1.530487 | 2.702618 | 2.364066 | 1.609419 | 1.866871 |
| 100616389 | 1.055481 | 0.995511 | 1.25735  | 0.968871 | 1.462187 | 0.529827 | 0.784833 | 1.272804 |
| 100616390 | 0.756376 | 0.842202 | 1.140643 | 0.951649 | 1.388558 | 0.738423 | 0.73653  | 1.213995 |
| 100616391 | 1.342187 | 2.132764 | 1.53941  | 1.283133 | 2.90488  | 1.135583 | 0.929837 | 1.895925 |
| 100616392 | 1.616255 | 1.168019 | 0.853502 | 1.016935 | 1.827433 | 0.574369 | 2.669201 | 2.031956 |
| 100616395 | 1.686163 | 1.295833 | 3.376332 | 1.265447 | 1.06107  | 1.185917 | 1.307672 | 2.343898 |
| 100616396 | 0.497393 | 0.719716 | 1.003513 | 0.759876 | 0.683139 | 0.643622 | 0.753043 | 0.912769 |
| 100616398 | 1.251632 | 1.980989 | 1.94767  | 1.497958 | 1.856714 | 2.281823 | 2.083251 | 2.796087 |
| 100616399 | 0.823395 | 1.023291 | 0.955305 | 1.659835 | 3.035578 | 1.902757 | 1.592028 | 0.918163 |
| 100616401 | 1.431201 | 1.048862 | 1.130065 | 0.820035 | 1.87783  | 1.526032 | 2.132276 | 0.714536 |
| 100616402 | 0.802635 | 0.780531 | 0.897343 | 1.449143 | 1.944057 | 1.142017 | 0.887469 | 0.998954 |
| 100616403 | 2.612244 | 3.187085 | 2.242253 | 2.837311 | 2.572261 | 3.150593 | 3.219757 | 2.528302 |
| 100616404 | 4.49807  | 4.093315 | 3.96342  | 4.308413 | 3.522853 | 4.587465 | 3.377284 | 3.764975 |
| 100616405 | 1.15157  | 1.249299 | 1.168047 | 1.396713 | 1.244488 | 0.63521  | 1.246346 | 1.648553 |
| 100616406 | 4.740497 | 5.846123 | 5.97728  | 6.137606 | 3.844489 | 5.373061 | 6.602389 | 3.863277 |
| 100616409 | 0.922806 | 1.450261 | 1.972257 | 1.012015 | 1.32641  | 1.112318 | 1.257193 | 1.378483 |
| 100616410 | 1.939917 | 2.522881 | 1.949923 | 2.77734  | 2.907952 | 1.907953 | 1.998419 | 2.606168 |
| 100616413 | 1.288462 | 1.973146 | 2.215768 | 2.126764 | 2.363179 | 0.994768 | 2.282194 | 2.004296 |
| 100616414 | 1.520366 | 3.893891 | 1.29523  | 2.198825 | 1.189138 | 2.43367  | 2.087213 | 0.590108 |
| 100616415 | 1.083423 | 1.271666 | 1.314089 | 2.531982 | 1.499451 | 1.832984 | 1.335261 | 2.336777 |
| 100616416 | 1.427762 | 1.104692 | 1.261777 | 0.810751 | 1.432533 | 1.177581 | 1.743532 | 2.192096 |
| 100616417 | 4.004551 | 3.764593 | 3.627561 | 5.117886 | 3.319188 | 2.991205 | 2.817328 | 4.354839 |
| 100616418 | 1.577647 | 1.153906 | 1.245797 | 1.172013 | 0.974174 | 1.019845 | 1.530095 | 1.364103 |
| 100616420 | 1.5884   | 0.998743 | 1.027489 | 0.783803 | 1.044064 | 1.57724  | 1.221062 | 1.086144 |
| 100616421 | 3.599424 | 3.232898 | 3.591634 | 4.157115 | 2.62504  | 4.215357 | 3.555278 | 4.351683 |
| 100616423 | 1.459147 | 1.153138 | 1.047613 | 1.325682 | 1.030706 | 1.155854 | 1.357295 | 1.727488 |
| 100616425 | 4.23676  | 3.80855  | 4.497559 | 4.452593 | 3.906363 | 4.638948 | 4.972439 | 3.546523 |
| 100616426 | 1.825175 | 1.604887 | 0.929869 | 0.847224 | 2.534279 | 1.679386 | 1.029183 | 2.19881  |
| 100616428 | 0.776211 | 0.988303 | 2.366048 | 1.715006 | 1.04814  | 1.158147 | 0.947522 | 1.524616 |
| 100616429 | 1.057069 | 1.700558 | 1.070946 | 1.963845 | 1.24549  | 0.832018 | 1.66176  | 0.957587 |
| 100616430 | 1.381886 | 1.65032  | 1.344701 | 1.395435 | 0.988932 | 1.464986 | 2.51894  | 1.017592 |
| 100616431 | 1.471995 | 1.103265 | 0.730915 | 0.58166  | 1.002321 | 1.036571 | 0.964317 | 1.211089 |
| 100616432 | 1.760205 | 0.98325  | 0.76116  | 0.837604 | 0.829631 | 0.837762 | 0.873515 | 0.822514 |
| 100616433 | 1.234006 | 0.926415 | 1.749481 | 1.283658 | 1.480808 | 1.131387 | 1.878655 | 2.482779 |
| 100616434 | 0.911369 | 0.622084 | 1.051277 | 1.267577 | 1.036834 | 1.722662 | 0.928588 | 1.604441 |
| 100616439 | 1.967042 | 1.73256  | 1.658799 | 2.687819 | 2.140756 | 2.626331 | 2.3792   | 1.895318 |
| 100616440 | 1.484357 | 1.120679 | 1.401747 | 2.34781  | 1.931936 | 1.734421 | 1.431566 | 1.454283 |
| 100616441 | 2.529973 | 2.250574 | 2.267354 | 2.855753 | 2.466363 | 1.890074 | 2.903624 | 3.518212 |
| 100616447 | 2.650454 | 3.536665 | 3.502163 | 3.488264 | 2.866199 | 3.69329  | 4.166702 | 3.519204 |
| 100616449 | 1.973538 | 2.561525 | 2.312091 | 2.876651 | 2.255367 | 3.765982 | 2.387345 | 2.345445 |
| 100616451 | 1.241474 | 1.041043 | 1.291911 | 1.08493  | 1.550103 | 1.313468 | 2.163312 | 1.100763 |
| 100616452 | 1.227188 | 1.890634 | 1.314224 | 1.380289 | 1.22311  | 1.520598 | 1.744272 | 2.097    |
| 100616454 | 1.943505 | 3.192252 | 1.66227  | 2.370673 | 1.727776 | 2.218179 | 3.625882 | 1.823617 |
| 100616456 | 2.256724 | 2.627041 | 2.55074  | 2.75195  | 2.503103 | 2.460626 | 1.677726 | 2.796072 |
| 100616457 | 1.178031 | 1.081633 | 0.403529 | 1.091385 | 0.708255 | 0.825363 | 0.666723 | 0.922003 |
| 100616463 | 1.810665 | 1.234944 | 0.958615 | 1.340327 | 0.915559 | 0.75955  | 0.998013 | 0.87015  |
| 100616464 | 1.841195 | 3.035039 | 2.550136 | 1.983838 | 3.264597 | 3.770357 | 2.878897 | 3.559161 |
| 100616466 | 0.492583 | 1.040749 | 1.785348 | 0.71398  | 1.883536 | 0.590958 | 1.370941 | 1.50056  |
| 100616468 | 2.931345 | 3.210622 | 3.048252 | 3.529433 | 4.808375 | 2.826806 | 2.561239 | 3.677992 |
| 100616469 | 1.507473 | 1.192425 | 1.386429 | 1.98017  | 1.454072 | 1.596241 | 2.156326 | 2.828406 |

100616471 1. 401996 1. 255728 1. 011507 1. 262904 2. 547196 3. 232851 1. 201084 3. 434854  
100616472 2. 149065 1. 749735 2. 436335 1. 636179 2. 001141 2. 173254 2. 307438 3. 17848  
100616473 1. 646899 1. 35224 0. 99615 1. 167707 1. 662912 2. 137556 0. 986575 1. 241243  
100616474 1. 392003 1. 203186 1. 709899 1. 478389 2. 157179 1. 643594 1. 247742 2. 077891  
100616475 1. 339786 0. 595488 1. 713985 0. 984473 1. 027526 2. 290378 1. 734839 1. 627906  
100616476 1. 641723 2. 194963 1. 621011 1. 345111 3. 139904 2. 390252 2. 512441 1. 740706  
100616477 6. 495951 7. 214589 6. 917132 7. 288367 8. 061583 7. 378923 6. 482326 7. 103571  
100616478 2. 031834 1. 722586 2. 271976 2. 206273 1. 228268 1. 857263 2. 164222 2. 139847  
100616479 1. 925306 2. 294518 2. 607993 1. 768092 1. 961098 1. 991992 2. 4974 3. 248226  
100616481 1. 143202 1. 464478 1. 145552 0. 836027 1. 292369 1. 391413 1. 848003 1. 404316  
100616482 2. 604013 3. 04632 3. 35707 3. 435533 2. 826512 2. 548605 2. 513332 2. 790952  
100616484 1. 07318 1. 529587 2. 602114 2. 221999 0. 945286 1. 940867 1. 269129 1. 79557  
100616485 0. 691671 0. 890453 1. 061882 0. 684794 1. 410331 1. 538889 1. 26272 0. 982172  
100616486 3. 470172 2. 140591 3. 530091 2. 843898 3. 765887 2. 73019 3. 423692 2. 431847  
100616487 1. 00386 1. 084296 0. 739686 1. 117513 1. 623509 0. 881663 1. 34259 1. 150233  
100616488 1. 276094 0. 970003 1. 626277 0. 627459 0. 710181 1. 250098 1. 229139 1. 088053  
100616489 3. 11229 3. 10702 1. 968202 2. 72256 3. 070757 5. 332777 2. 620003 2. 363615  
100616490 1. 109992 1. 399688 0. 944172 1. 196759 1. 634269 1. 135786 0. 750915 1. 33126  
100616491 2. 227276 2. 567525 2. 279203 3. 10403 3. 687451 2. 518967 2. 861139 2. 064234  
100616492 1. 242473 1. 085123 1. 388421 1. 171897 2. 598105 1. 427983 1. 665494 2. 217298  
100616493 2. 727498 1. 554254 2. 264839 1. 264192 2. 452551 1. 758219 1. 84479 1. 494836  
100616495 4. 177954 3. 710995 3. 979241 3. 735029 4. 49369 3. 228745 3. 354639 2. 558949  
100616498 2. 444732 2. 188022 1. 812992 2. 000804 2. 101047 2. 574894 2. 776348 1. 788351  
100616530 1. 116305 1. 492219 1. 449665 0. 952034 1. 786789 1. 295586 2. 592492 2. 667168  
100616668 2. 692429 2. 212172 0. 848573 1. 378764 1. 817351 1. 091212 1. 105803 1. 14768  
10061\_at 5. 309813 5. 813157 5. 259668 5. 356298 4. 712742 5. 505786 5. 639769 4. 900006  
100628307 1. 352299 1. 550652 0. 861826 1. 306418 1. 515543 1. 527774 1. 163509 1. 966693  
100628315 3. 344613 4. 135074 4. 265712 3. 945512 3. 041776 4. 244644 4. 202918 4. 110013  
10062\_at 4. 720083 2. 624655 3. 149654 3. 560421 3. 038862 3. 237412 3. 307518 3. 774719  
100630918 3. 287304 3. 326197 3. 296197 2. 750011 3. 803045 3. 060967 3. 238683 3. 007566  
100631378 1. 033965 1. 236846 1. 149402 1. 470719 2. 114223 1. 182612 1. 912138 1. 212962  
10063\_at 9. 868707 10. 10766 9. 58995 9. 999631 9. 625032 9. 564304 10. 02109 9. 398771  
100652730 2. 341633 2. 111377 1. 537977 1. 932045 1. 880118 1. 948922 2. 128524 1. 850464  
100652736 1. 802263 2. 885977 1. 591978 2. 871076 2. 447689 3. 675588 2. 674838 1. 788788  
100652739 2. 041332 2. 091199 2. 78851 2. 305212 1. 885389 1. 56311 2. 304322 2. 490225  
100652740 3. 433136 2. 365723 2. 820621 2. 583076 2. 165514 2. 985653 2. 463784 1. 922334  
100652748 5. 22421 2. 004788 2. 531609 3. 833867 4. 246823 3. 710926 3. 27485 4. 796218  
100652749 1. 169881 1. 520763 1. 551969 1. 078538 1. 996314 1. 93802 2. 319735 1. 569074  
100652758 2. 16179 2. 68718 2. 872773 3. 292181 3. 433996 1. 940488 2. 017822 2. 536679  
100652759 3. 628916 3. 847588 4. 286419 3. 874141 4. 469487 3. 229414 3. 89945 4. 169157  
100652768 4. 333207 4. 533443 3. 509278 4. 155288 4. 305198 4. 144902 4. 587997 3. 809956  
100652770 2. 660282 2. 549956 2. 221582 2. 574102 2. 952488 2. 528145 2. 39734 2. 71258  
100652772 5. 930137 4. 931255 5. 697688 7. 105838 4. 545495 5. 365319 5. 918693 4. 105092  
100652781 2. 38056 1. 06662 2. 260207 0. 761612 0. 774418 1. 09718 0. 715226 0. 806128  
100652791 1. 386459 1. 192653 1. 283692 2. 137092 1. 723687 1. 224773 2. 374224 1. 488165  
100652807 1. 876213 2. 498533 1. 67293 1. 865227 1. 270119 3. 509254 2. 179574 1. 521996  
100652824 1. 853223 1. 56517 1. 936186 1. 573159 2. 292077 2. 227711 2. 286821 1. 996366  
100652846 1. 648562 2. 107144 2. 03267 2. 264773 1. 65645 2. 11401 2. 573334 2. 073757  
100652853 4. 641665 3. 937258 5. 260761 2. 838585 3. 821355 4. 458406 4. 345583 5. 421887  
100652856 1. 030949 3. 688773 2. 326274 0. 809686 1. 298619 1. 322108 1. 405485 1. 261018  
100652857 0. 697766 0. 955529 0. 915534 1. 31837 1. 982038 0. 537039 1. 814416 1. 706609

100652865 2. 603432 1. 828041 2. 031093 1. 794852 2. 002453 1. 899213 2. 167421 1. 669491  
100652883 4. 368912 4. 88386 3. 285112 2. 43219 3. 155718 4. 592164 2. 072671 4. 17306  
100652901 2. 890333 3. 101744 3. 017012 2. 42498 2. 199059 2. 861928 2. 526465 2. 556806  
100652909 2. 016227 1. 213017 1. 394523 1. 166978 1. 933314 1. 104332 1. 432739 0. 515103  
100652911 1. 781169 2. 301494 1. 995829 1. 602685 1. 819173 2. 331532 2. 764712 1. 753788  
100652929 1. 939801 2. 437261 1. 422273 2. 37042 0. 950008 1. 999783 2. 437997 2. 07906  
100652930 1. 874287 3. 69009 1. 857287 2. 292825 2. 494369 2. 857118 2. 226311 2. 867202  
100652931 2. 071481 1. 231915 1. 627769 1. 158178 1. 542802 2. 051852 1. 914257 1. 886917  
100652988 1. 007746 1. 510685 0. 749702 1. 296739 2. 131103 1. 810091 0. 334847 0. 045723  
100652997 1. 102215 1. 57535 1. 186822 1. 23183 1. 324759 1. 023089 4. 280738 1. 373942  
100652999 6. 224023 7. 294985 7. 077553 7. 015122 6. 733707 6. 110086 7. 444945 7. 062235  
100653005 3. 072723 2. 218249 0. 936723 2. 811354 3. 031564 2. 867217 3. 189938 3. 602536  
100653233 1. 990696 2. 745049 2. 545271 2. 368558 2. 376423 2. 184464 2. 851321 1. 941906  
100653515 2. 536887 1. 877228 2. 798281 3. 006081 2. 572616 2. 27623 3. 137955 2. 737503  
10066\_at 8. 157591 7. 868443 8. 488705 7. 995451 7. 322358 8. 143935 8. 337625 7. 721789  
10067\_at 6. 96482 6. 406882 6. 836381 6. 891334 6. 691809 7. 115921 7. 319139 6. 752634  
100689074 1. 056997 1. 579107 1. 482699 1. 268614 0. 810105 0. 773518 2. 171562 1. 761905  
10068\_at 4. 431313 4. 103059 4. 107501 4. 795018 3. 404394 4. 958989 4. 332618 3. 344758  
10069\_at 5. 422946 6. 217841 6. 013335 5. 808516 6. 479852 5. 131803 5. 472496 5. 964159  
1006\_at 2. 082999 2. 069716 2. 000496 1. 555882 2. 900729 1. 212552 2. 054437 1. 551457  
10071\_at 1. 39309 1. 884649 1. 824487 1. 220457 1. 378386 1. 053816 1. 464162 1. 393295  
10072\_at 3. 154824 3. 31928 3. 211442 3. 424169 2. 971877 2. 255309 3. 732189 3. 189329  
10073\_at 6. 330602 6. 250952 5. 233029 5. 744924 6. 424344 5. 492841 5. 537787 5. 447611  
100750225 0. 902639 2. 430864 2. 614334 2. 640951 3. 001464 2. 966685 1. 875698 2. 043258  
100750246 2. 154474 2. 082452 2. 864478 2. 34408 2. 893262 2. 246182 2. 872694 3. 004726  
100750247 6. 880664 6. 885878 6. 654634 6. 515119 7. 544837 6. 913612 6. 516845 6. 753853  
100750325 3. 056835 3. 319663 3. 441834 2. 012175 2. 700268 2. 175946 2. 258184 2. 063494  
100750326 2. 714751 2. 05978 2. 951131 2. 222554 2. 465039 2. 471706 2. 423847 2. 834492  
10075\_at 7. 284203 8. 000748 7. 943364 7. 825375 7. 906457 7. 756454 7. 935436 7. 52963  
10076\_at 2. 676954 3. 061997 2. 600878 2. 46897 2. 792265 3. 441485 2. 961262 3. 741002  
100775104 1. 289621 1. 43051 3. 627463 1. 36702 1. 974688 1. 699495 1. 634364 1. 815543  
100775107 5. 150851 4. 492154 4. 527833 5. 687041 4. 75289 4. 948067 4. 500965 6. 203791  
10077\_at 3. 361035 2. 663964 3. 168031 2. 715276 3. 755821 3. 448278 3. 375576 3. 267085  
10078\_at 4. 35643 4. 318353 3. 877234 3. 864643 3. 907858 4. 780547 3. 991858 3. 267542  
10079\_at 5. 836352 6. 204945 6. 537517 6. 457083 6. 182335 5. 904429 6. 968634 6. 232979  
1007\_at 3. 021743 2. 154402 1. 79692 1. 905056 2. 115684 2. 022556 2. 239701 2. 476289  
10081\_at 3. 890932 4. 076693 3. 440391 4. 106389 2. 67205 3. 695581 2. 533097 2. 953708  
100820709 0. 833413 1. 648588 1. 143111 1. 075561 1. 093283 1. 388096 1. 922063 1. 217124  
10082\_at 6. 066876 6. 163429 7. 824081 7. 186677 6. 672879 7. 022412 8. 030257 5. 927494  
10083\_at 4. 101318 2. 457219 3. 110364 3. 661976 4. 50839 3. 988926 2. 659199 4. 460453  
100846978 1. 609751 1. 25846 1. 570211 1. 123738 2. 022907 1. 3815 1. 705444 1. 158557  
10084\_at 7. 398752 6. 408663 6. 422558 6. 972702 6. 542184 6. 362949 6. 951706 7. 024972  
100852408 1. 706903 1. 025247 1. 240497 1. 248438 1. 157694 1. 973346 1. 243497 1. 451892  
100852409 1. 134673 1. 122956 1. 603035 1. 422369 1. 584007 1. 856217 1. 390684 1. 738559  
100852410 1. 816632 1. 697997 2. 211558 1. 306732 1. 332509 1. 293536 1. 976804 1. 399903  
100856811 1. 901247 1. 342794 1. 080932 0. 953223 1. 70311 2. 32036 2. 159776 1. 412901  
100859921 2. 130463 1. 982967 2. 000294 1. 848936 2. 287499 2. 230086 1. 720085 2. 681363  
100859930 7. 910507 7. 414567 7. 191585 6. 468641 6. 668173 7. 068596 6. 552058 6. 682497  
10085\_at 6. 338856 6. 373635 6. 850002 6. 38123 6. 235552 4. 847021 6. 876071 6. 140088  
100861402 7. 549963 7. 872547 7. 900897 7. 821878 7. 541907 7. 257464 7. 483923 8. 094852  
100861468 1. 005103 1. 528671 1. 158163 1. 182803 1. 381443 1. 474208 1. 542068 1. 07169

100861510 1. 778258 1. 806735 1. 657358 0. 761665 2. 849571 1. 689431 1. 534627 1. 320882  
100861514 2. 201106 2. 722647 1. 597796 2. 339223 1. 775961 2. 701878 3. 03192 2. 589594  
100861518 1. 883579 1. 68657 1. 71525 1. 894052 4. 703659 1. 447155 2. 348834 2. 191891  
100861519 1. 764624 1. 149455 1. 210412 1. 179181 1. 053874 1. 015079 1. 409998 1. 938953  
100861520 1. 953895 1. 710009 2. 541081 1. 454885 1. 864898 2. 805686 1. 71293 1. 555431  
100861522 1. 691276 2. 304165 1. 940472 1. 997289 1. 280878 1. 611032 1. 858065 1. 553137  
100861523 2. 127696 2. 73116 1. 799383 2. 560439 1. 870511 2. 579154 3. 017798 4. 057331  
100861548 5. 926413 5. 16051 6. 631679 6. 210052 5. 70174 7. 047738 5. 846774 4. 926518  
100861550 1. 797619 1. 51309 2. 109621 1. 340013 1. 645368 2. 138958 1. 224759 2. 147267  
100861555 2. 050963 2. 091744 2. 423656 2. 144643 2. 353088 2. 876493 2. 20311 1. 76395  
100861573 1. 47722 1. 551657 1. 170866 1. 383832 1. 658738 1. 291467 2. 32011 1. 647198  
100862662 2. 123255 2. 351333 1. 80066 2. 167556 2. 581972 1. 88359 2. 161589 2. 404388  
100862679 1. 447438 1. 319133 1. 01063 1. 643313 1. 541551 1. 326497 1. 035224 2. 184155  
100862680 1. 692732 1. 977067 1. 877247 1. 363085 2. 012208 1. 904012 1. 577641 1. 816518  
100862692 1. 451912 1. 067471 0. 899464 1. 052587 1. 343259 1. 98068 2. 138409 0. 845354  
100862704 1. 970649 3. 442803 2. 085936 1. 219183 1. 405775 1. 753206 1. 57114 1. 840403  
100862728 1. 355591 2. 062412 1. 458069 1. 419955 2. 602053 1. 393067 2. 164044 1. 75728  
10086\_at 1. 034399 1. 105591 1. 856071 1. 575012 1. 13379 1. 455955 1. 031182 1. 791264  
100873065 0. 762516 2. 191966 5. 059842 1. 04357 1. 646881 0. 962158 1. 225752 0. 699756  
100873761 0. 930121 0. 964257 1. 515524 0. 747499 0. 909098 0. 808509 0. 926244 1. 096563  
100873762 0. 960298 0. 980339 1. 506567 1. 897868 1. 71049 1. 137897 1. 391545 1. 756266  
100873764 2. 104579 1. 667036 1. 715781 1. 617929 2. 539327 1. 46604 1. 777143 1. 881697  
100873765 0. 529082 1. 36123 1. 140764 0. 580091 2. 600214 2. 06905 0. 795503 1. 350665  
100873766 1. 07884 1. 214744 1. 178541 1. 020065 1. 680636 1. 370522 0. 835473 1. 089842  
100873767 2. 491253 1. 174095 1. 60121 1. 284234 1. 267328 2. 529953 2. 154741 0. 674433  
100873768 1. 272986 1. 975782 1. 991489 1. 85313 2. 670137 1. 241917 2. 079278 2. 204151  
100873769 1. 645516 1. 48216 0. 983015 1. 216788 1. 630549 1. 483026 1. 023715 1. 788429  
100873770 0. 864187 3. 0004 0. 682786 0. 727368 1. 620242 1. 32515 0. 859744 1. 675536  
100873771 0. 767607 0. 927633 1. 297061 0. 840404 1. 472294 1. 194237 0. 796626 0. 499824  
100873772 0. 704832 0. 9965 1. 468866 0. 842841 0. 906496 2. 799944 1. 410081 1. 536752  
100873773 1. 012103 0. 795061 1. 161712 0. 723179 1. 277191 1. 044118 0. 949928 0. 838278  
100873774 0. 88738 1. 266794 2. 492244 1. 182114 2. 54898 1. 566604 1. 062089 2. 230586  
100873775 2. 622442 2. 26135 1. 515813 1. 856821 3. 241393 3. 225805 0. 789209 1. 539199  
100873776 0. 895706 0. 731985 0. 872439 0. 870847 1. 060024 1. 150502 0. 977031 0. 965742  
100873777 0. 977007 1. 051773 1. 31763 1. 730569 2. 706881 1. 143024 1. 174745 0. 981221  
100873778 1. 988073 1. 933288 1. 786881 1. 439146 1. 849048 1. 603514 1. 706006 1. 71624  
100873779 1. 622798 2. 370049 4. 434241 6. 070608 2. 456588 2. 570367 3. 739894 1. 948775  
100873780 1. 276916 0. 947316 1. 744551 1. 823017 1. 9442 1. 347472 1. 569192 1. 108363  
100873781 1. 106865 2. 215989 1. 74616 1. 560534 1. 271162 1. 115974 1. 33012 2. 275698  
100873782 1. 388733 2. 546009 3. 477876 1. 590194 2. 159912 2. 760449 2. 895599 2. 773458  
100873917 1. 50864 1. 333947 1. 837148 1. 283798 1. 912798 1. 074872 2. 064829 1. 645716  
100873920 1. 775877 1. 672281 0. 901574 2. 251088 4. 706246 2. 063454 1. 391748 1. 729058  
100873921 3. 318414 1. 808397 3. 321491 2. 275783 2. 831419 2. 117876 2. 907725 2. 047376  
100873922 1. 03549 2. 648367 1. 485034 0. 872483 1. 003201 1. 574097 1. 243319 0. 979298  
100873924 1. 638362 1. 365754 2. 459695 2. 23005 1. 171118 2. 963468 1. 269669 0. 865373  
100873930 2. 403008 2. 118021 2. 565759 2. 555965 2. 893766 3. 250276 2. 996698 2. 737824  
100873932 1. 699989 1. 491429 2. 247183 1. 808183 2. 475151 1. 559182 1. 806495 1. 468723  
100873933 1. 478639 1. 789481 1. 394064 1. 849779 2. 241163 1. 84012 1. 957581 2. 484254  
100873935 1. 516957 2. 087334 1. 108571 1. 187419 1. 116968 1. 044612 1. 519831 1. 096791  
100873939 2. 103026 1. 18943 1. 71595 1. 41263 2. 012217 1. 713428 1. 781686 1. 637817  
100873941 1. 146115 1. 197562 2. 024231 1. 641982 1. 477787 1. 194915 1. 35156 1. 662056

100873942 1. 31513 1. 982111 1. 713891 1. 866058 1. 869265 1. 669369 1. 744255 2. 202433  
100873945 3. 902517 3. 801055 4. 898734 3. 8716 4. 283244 4. 278854 5. 091424 3. 575929  
100873946 1. 233735 1. 603944 1. 096003 1. 030023 1. 200227 1. 22738 1. 084721 1. 579201  
100873948 1. 108325 1. 258773 1. 201096 1. 040775 2. 270558 1. 087557 1. 244428 1. 550006  
100873949 3. 471018 3. 839858 4. 062571 3. 621013 3. 130366 3. 958728 5. 577756 3. 457947  
100873954 7. 972128 7. 903715 7. 627673 7. 513164 8. 133097 7. 614814 6. 770599 7. 670717  
100873955 1. 886478 1. 655849 1. 792974 1. 692497 1. 653676 2. 06004 1. 519084 2. 490614  
100873962 4. 576653 1. 887054 3. 843069 3. 919359 1. 474421 6. 172399 2. 730494 4. 217651  
100873965 7. 057058 6. 5292 6. 151599 6. 382782 7. 350453 5. 947933 6. 798691 7. 618266  
100873969 0. 69767 1. 370061 1. 396366 1. 189067 1. 448194 1. 559889 1. 151296 1. 48092  
100873972 1. 126785 1. 057111 1. 090068 0. 762963 0. 955351 1. 024886 1. 200071 1. 154438  
100873973 1. 425106 1. 005633 1. 247558 1. 173635 1. 442178 1. 25601 1. 147418 1. 66005  
100873974 1. 854752 2. 726305 3. 030818 2. 003615 2. 596284 1. 587738 2. 651344 2. 387463  
100873976 1. 968586 1. 549226 1. 408581 2. 186738 1. 623953 2. 296791 1. 169601 1. 195409  
100873978 3. 335639 2. 548664 1. 96324 1. 966312 2. 138934 2. 080509 1. 682013 2. 416273  
100873979 4. 79117 3. 058835 4. 574203 3. 295376 2. 18467 4. 490919 4. 391624 2. 236143  
100873980 2. 307163 2. 782997 2. 505846 2. 904308 4. 275204 2. 609069 2. 22644 3. 099213  
100873982 1. 344404 1. 026794 1. 094359 1. 221486 1. 887304 1. 592322 1. 407717 1. 47614  
100873983 2. 249971 2. 0878 1. 959508 1. 578128 1. 853227 3. 611588 1. 887307 1. 877396  
100873984 2. 248973 1. 425009 1. 532091 1. 394045 1. 843842 1. 928901 1. 709068 1. 788158  
100873989 1. 104778 1. 016259 1. 455308 1. 325636 1. 575678 1. 666889 1. 623426 1. 252873  
100873997 1. 50161 0. 991421 1. 07465 1. 544331 1. 335363 1. 258772 1. 261195 0. 795518  
100873998 2. 583974 4. 179615 3. 152395 2. 945168 3. 067187 3. 419841 3. 76408 2. 175501  
100874002 2. 403626 2. 407077 2. 355743 2. 061146 3. 030895 2. 181593 2. 322056 1. 962695  
100874006 2. 162804 1. 534948 2. 350774 1. 744402 1. 963314 1. 924868 2. 541091 2. 114529  
100874011 2. 249214 1. 45331 1. 517038 2. 219742 1. 590856 1. 253387 0. 819759 1. 482416  
100874012 2. 472805 1. 462371 1. 553956 1. 367579 1. 824967 1. 902265 1. 071373 1. 359343  
100874016 2. 021768 1. 280282 1. 08654 1. 351095 2. 388616 1. 201618 0. 883764 1. 065938  
100874018 2. 275134 1. 308992 1. 580943 1. 837318 0. 913677 3. 079038 1. 930504 1. 493937  
100874021 3. 013333 1. 472725 1. 164188 1. 356984 2. 398586 1. 875722 1. 707569 2. 634743  
100874027 1. 30712 1. 758145 1. 436276 1. 479519 2. 087558 2. 349351 1. 260505 2. 977705  
100874028 2. 337464 2. 383041 1. 72856 1. 87298 3. 080158 2. 355482 3. 699434 2. 667292  
100874029 2. 67125 2. 80175 1. 954269 1. 974063 3. 017911 2. 277392 1. 947737 2. 309654  
100874031 1. 12716 1. 56086 1. 437701 1. 286117 1. 769311 1. 864858 1. 929132 1. 724361  
100874032 2. 531831 2. 707887 1. 784033 3. 792368 3. 120524 2. 807337 2. 633099 2. 429659  
100874034 1. 646488 1. 184579 1. 921541 2. 266963 1. 792396 1. 616253 1. 501008 2. 081999  
100874035 1. 530778 1. 582841 1. 831253 1. 871842 1. 659215 1. 75297 2. 46875 1. 921669  
100874037 1. 13169 0. 951323 1. 224465 0. 719322 0. 929929 1. 467072 1. 022582 1. 024219  
100874038 1. 22019 1. 981998 2. 526558 1. 037937 1. 217371 1. 571246 1. 470234 2. 527631  
100874039 1. 161386 1. 163694 1. 297496 1. 308001 2. 026498 1. 094945 1. 439841 1. 239366  
100874041 2. 289403 3. 92423 2. 379033 1. 449783 1. 702482 2. 261535 2. 664286 4. 520398  
100874042 2. 892397 0. 880423 3. 093088 2. 686348 2. 630952 3. 252867 3. 562986 2. 747783  
100874047 2. 213424 1. 495463 1. 460332 1. 342495 1. 706398 1. 358753 1. 257269 2. 359746  
100874048 2. 015133 1. 95405 1. 994465 1. 837116 1. 978061 2. 967896 2. 077674 1. 765048  
100874051 2. 434919 1. 449865 1. 271303 2. 800697 1. 972228 1. 31174 2. 04358 2. 484701  
100874052 1. 63777 1. 213992 1. 760935 2. 532613 1. 721474 1. 530863 1. 913592 2. 283124  
100874053 1. 711654 2. 12531 1. 466244 1. 157596 2. 020829 2. 793817 1. 561431 1. 638727  
100874054 2. 574217 2. 479269 1. 743605 2. 151824 3. 637772 2. 494999 3. 587527 2. 112082  
100874055 1. 456983 1. 135991 2. 144449 1. 288284 1. 465506 1. 456983 1. 215778 1. 546108  
100874056 2. 481585 3. 163963 2. 302372 2. 183023 3. 578091 2. 541625 1. 929893 1. 533909  
100874058 3. 048294 4. 677626 5. 260831 4. 800577 4. 987434 5. 094534 5. 304909 4. 61236

100874063 1. 354115 1. 267904 1. 391151 1. 325959 1. 252351 1. 316022 1. 511263 1. 650089  
100874064 1. 287754 1. 666632 1. 573894 1. 258769 1. 769652 1. 780131 1. 225847 1. 6566  
100874071 2. 153559 1. 563767 1. 854799 1. 592882 0. 955889 2. 034196 1. 345175 2. 378852  
100874074 1. 092855 1. 143529 1. 15325 0. 933897 1. 084698 1. 229577 0. 699777 1. 56401  
100874081 2. 6408 3. 27142 2. 735223 2. 958132 3. 395342 2. 064293 2. 500138 2. 929487  
100874082 1. 40704 1. 561128 1. 688064 1. 328225 2. 322983 1. 565164 1. 6232 2. 109063  
100874083 1. 548766 1. 430065 1. 470256 1. 597412 1. 461562 2. 642632 1. 865858 1. 206614  
100874084 1. 370777 1. 491264 1. 437304 1. 417729 1. 858974 1. 911061 1. 560831 1. 551729  
100874086 0. 861644 0. 801977 1. 253949 1. 065229 0. 905202 0. 952424 1. 815849 1. 667585  
100874087 0. 977912 0. 972322 1. 144036 1. 089053 0. 816531 1. 313103 1. 239302 1. 217349  
100874090 1. 0619 0. 983663 1. 244941 1. 16726 1. 59969 1. 607961 1. 611007 1. 072576  
100874091 1. 173504 1. 810967 1. 873292 1. 034466 1. 65207 1. 603387 1. 745185 2. 341571  
100874093 1. 296492 1. 694897 1. 186374 1. 149789 3. 33855 0. 778743 1. 317442 1. 294875  
100874095 1. 491818 1. 481974 1. 119785 1. 407338 1. 603412 1. 863677 1. 148233 1. 38868  
100874096 2. 369115 1. 123369 1. 223466 1. 821701 1. 266677 1. 148388 1. 761722 1. 01993  
100874100 1. 389458 1. 201355 1. 264441 1. 264441 1. 348004 1. 411656 1. 529466 1. 264441  
100874101 2. 754211 1. 870687 2. 26954 2. 014727 2. 544043 2. 037412 2. 432906 2. 010768  
100874102 1. 56973 1. 231408 1. 678757 1. 282291 1. 155871 1. 656181 1. 833634 1. 554953  
100874107 2. 365195 2. 031976 2. 289422 2. 274911 1. 883662 2. 178408 1. 796447 3. 02333  
100874114 1. 631501 1. 739705 1. 662732 1. 546298 1. 89065 1. 822927 1. 608617 1. 727047  
100874123 2. 439479 2. 121128 2. 019854 2. 422484 2. 023211 2. 01429 2. 180078 2. 193899  
100874126 1. 118006 1. 519067 0. 736987 1. 436213 0. 731117 1. 793141 0. 878461 1. 524224  
100874127 1. 354213 1. 532022 1. 142282 0. 967809 1. 390403 1. 470015 1. 653589 1. 409964  
100874128 1. 737179 1. 354825 0. 679674 1. 563956 1. 068942 1. 600125 1. 585487 1. 269643  
100874133 0. 733794 1. 595602 0. 357443 1. 4075 1. 339167 1. 268838 1. 435328 1. 915755  
100874137 1. 214515 1. 231041 1. 575362 1. 17173 1. 388689 1. 885102 1. 43664 1. 271674  
100874139 1. 032609 1. 304872 0. 965741 1. 269678 1. 423751 1. 015493 1. 108939 1. 641488  
100874143 1. 646454 2. 323412 1. 955857 1. 200651 1. 605655 2. 256494 2. 231551 1. 961894  
100874147 0. 90705 0. 951226 0. 864685 1. 356682 1. 6876 0. 459412 0. 985565 1. 198565  
100874150 1. 583157 1. 197568 0. 96377 2. 373012 1. 422721 1. 289117 1. 424684 1. 429275  
100874151 1. 508939 2. 110101 1. 52242 1. 557976 2. 31953 1. 175701 1. 541947 1. 727649  
100874157 1. 603981 0. 846717 1. 355796 0. 673696 1. 226337 0. 880201 2. 108187 0. 927901  
100874158 1. 849619 1. 810748 1. 936258 2. 248431 1. 93478 2. 104394 2. 792889 2. 868193  
100874167 1. 373536 1. 529063 1. 618647 1. 881455 1. 714558 1. 75001 2. 234318 1. 807086  
100874168 1. 174651 0. 866624 1. 878405 1. 18321 2. 127538 1. 097028 1. 837255 1. 270984  
100874173 1. 847116 2. 967979 3. 049875 2. 476517 3. 13014 2. 973048 3. 94844 2. 674869  
100874175 1. 653485 1. 479596 1. 323764 0. 900841 1. 209207 1. 502404 1. 588575 1. 160293  
100874178 1. 477942 3. 251619 1. 838878 1. 212182 2. 091812 2. 592225 1. 625065 1. 895544  
100874179 1. 293229 1. 757981 1. 598513 1. 371959 2. 012554 1. 665678 2. 500985 1. 512689  
100874182 2. 031178 1. 219764 2. 827771 2. 401719 1. 924026 3. 302763 0. 941211 2. 467396  
100874184 1. 40309 1. 313709 2. 308071 1. 808983 1. 613461 2. 077509 1. 351883 2. 077299  
100874185 1. 002265 1. 067801 1. 025764 0. 928044 1. 212114 1. 296498 1. 337725 1. 544377  
100874188 2. 087584 0. 751846 1. 284633 2. 14523 1. 194249 1. 097848 1. 446737 0. 800924  
100874190 0. 959016 1. 462304 0. 735016 0. 74432 1. 204853 0. 819613 1. 419553 1. 160818  
100874194 1. 670612 1. 111139 1. 603066 1. 103679 1. 553199 1. 528896 1. 310608 1. 22669  
100874195 2. 511521 2. 688423 2. 868534 2. 318375 2. 167671 2. 336203 3. 784017 2. 3381  
100874196 1. 59827 1. 739624 1. 336896 1. 482626 1. 700253 1. 683678 1. 410968 1. 773175  
100874197 1. 779685 1. 879447 2. 006167 1. 674901 2. 469189 1. 572404 1. 757394 2. 504884  
100874198 1. 913653 2. 144777 2. 349035 1. 804913 1. 882529 1. 897005 2. 352462 2. 02848  
100874200 1. 903189 1. 769543 1. 834289 1. 109694 1. 68538 2. 123433 1. 538079 2. 008541  
100874203 1. 619064 1. 300207 1. 109662 1. 43764 1. 706645 1. 19244 1. 353058 1. 5241



100874204 2. 674796 2. 51312 1. 850671 2. 711428 3. 109857 2. 225715 1. 484589 2. 985184  
100874205 1. 673693 1. 580781 2. 07268 2. 234889 2. 152865 1. 95614 1. 887472 2. 413889  
100874206 2. 625573 1. 262831 2. 291926 2. 376716 1. 868663 2. 447042 1. 920475 1. 341471  
100874207 2. 178678 1. 545102 2. 468669 1. 736131 1. 393673 2. 440214 1. 777774 2. 841191  
100874208 1. 931247 1. 102439 1. 571947 1. 493835 2. 005224 1. 309887 2. 097549 1. 21588  
100874212 2. 000223 1. 732237 2. 533861 1. 831291 2. 444907 2. 182623 2. 234767 2. 007315  
100874214 3. 369924 3. 003211 5. 352991 3. 367608 3. 577939 3. 868651 4. 311935 3. 316582  
100874222 1. 438681 1. 780948 1. 27405 2. 148231 1. 587002 1. 41116 1. 740486 1. 469467  
100874231 1. 312098 1. 311045 2. 428528 2. 366754 1. 501826 2. 426841 1. 77653 3. 921393  
100874234 1. 560017 1. 35638 1. 938438 1. 657099 2. 713244 1. 424647 1. 705092 1. 45616  
100874236 2. 156798 1. 997638 2. 229677 1. 84566 2. 35704 2. 414208 1. 611943 1. 581434  
100874237 2. 487598 2. 377395 2. 371579 2. 589773 1. 967532 3. 116671 2. 560571 2. 140285  
100874239 1. 519196 1. 812125 2. 333507 1. 883871 2. 274592 2. 413325 1. 915595 2. 711227  
100874241 2. 748536 1. 788755 1. 298708 2. 333453 2. 488101 2. 458568 3. 186873 2. 280398  
100874242 0. 97794 1. 554509 1. 301675 1. 176769 1. 448797 1. 498445 1. 236155 1. 478445  
100874243 2. 602844 1. 637702 2. 041974 1. 361014 1. 607654 1. 198028 1. 590196 2. 509825  
100874249 2. 320196 2. 108606 1. 349973 1. 753208 1. 727629 1. 224155 3. 429218 1. 446664  
100874251 1. 65682 2. 831392 1. 397557 1. 603358 1. 443386 2. 453142 1. 648552 1. 544006  
100874253 5. 728381 5. 038319 5. 079077 3. 60595 2. 653934 5. 144378 4. 789163 5. 347415  
100874255 1. 437353 1. 3388 1. 486709 1. 643116 1. 205128 1. 539205 1. 318182 2. 161196  
100874261 3. 908639 4. 189161 3. 421607 5. 27444 4. 016595 4. 022579 4. 307702 3. 032084  
100874264 1. 538832 1. 227428 1. 594054 1. 233752 1. 969957 1. 092909 1. 087761 1. 306861  
100874270 2. 725474 1. 293721 1. 193013 1. 374589 3. 052786 1. 584342 1. 290642 1. 154664  
100874273 1. 548746 1. 227105 2. 04464 1. 21713 1. 490012 1. 148191 1. 653866 1. 871695  
100874275 0. 839001 1. 18942 1. 30852 1. 11265 1. 186742 0. 998628 1. 45679 1. 773561  
100874278 1. 20428 1. 318836 1. 769353 1. 059791 1. 337442 1. 404685 1. 352615 1. 319906  
100874281 1. 794563 3. 120281 3. 277127 1. 899871 2. 625451 2. 597344 1. 139777 2. 023486  
100874282 1. 141303 1. 02023 1. 63387 1. 475897 1. 210109 0. 70453 2. 614994 1. 346068  
100874286 1. 450254 0. 968845 1. 468709 1. 061092 0. 855689 0. 847405 1. 573136 1. 529453  
100874291 2. 080163 2. 856407 2. 286263 1. 664104 2. 500145 2. 327371 2. 541204 3. 027997  
100874295 2. 383874 1. 935682 3. 394847 2. 084676 2. 738412 2. 160696 2. 39581 2. 273551  
100874296 1. 267511 1. 260604 1. 011466 1. 368528 1. 22801 0. 788678 1. 187636 1. 171745  
100874300 2. 0233 1. 759882 2. 521419 1. 801092 1. 904292 1. 904446 2. 828164 1. 899699  
100874309 1. 561779 2. 470247 2. 802216 2. 039945 1. 874925 2. 120156 1. 51798 1. 803225  
100874313 1. 262268 1. 442531 1. 265979 2. 026623 1. 900797 2. 33402 2. 423483 2. 078029  
100874323 5. 261301 5. 44504 5. 109227 5. 528208 4. 624215 5. 283213 5. 543345 5. 450975  
100874326 1. 339306 1. 04207 1. 632232 1. 618961 1. 393448 1. 618743 2. 080692 1. 956396  
100874330 4. 076885 3. 132484 2. 308371 2. 534495 3. 02041 3. 076803 3. 062516 2. 726332  
100874342 2. 300958 3. 218859 2. 062323 1. 581264 1. 874531 2. 268735 2. 313735 2. 607696  
100874343 1. 035698 1. 299974 1. 547666 1. 695124 1. 090359 1. 693395 1. 679893 1. 731527  
100874353 1. 895841 2. 042249 2. 205024 1. 578088 1. 728738 1. 881135 2. 583045 2. 033924  
100874361 1. 124336 1. 062762 1. 064089 1. 61855 1. 402286 0. 949057 1. 333487 1. 094305  
100874362 3. 655338 2. 401528 4. 313396 1. 426331 3. 745723 5. 38653 4. 468804 3. 198244  
100874363 4. 260806 4. 748805 3. 833806 4. 563272 2. 166542 4. 510818 3. 980935 5. 284307  
100874364 4. 047807 3. 687584 4. 690404 2. 871518 3. 159609 5. 394521 3. 112018 5. 451286  
100874365 3. 428828 1. 118015 1. 743402 1. 214146 1. 79458 1. 749788 3. 79538 2. 766877  
100874366 2. 420828 3. 098124 2. 89802 2. 704198 3. 460081 3. 008865 2. 692452 2. 75663  
100874370 2. 626338 2. 468859 1. 665701 1. 974211 1. 721577 3. 922128 1. 641721 1. 106325  
100874372 2. 603511 1. 618761 1. 693558 1. 368825 1. 815636 2. 177727 1. 800083 1. 68873  
100874374 1. 458224 1. 47693 1. 467829 1. 691416 1. 634238 1. 66848 2. 154683 2. 073306  
100874375 1. 409396 1. 293272 1. 995569 1. 479213 1. 547349 1. 538193 1. 603082 1. 819278

100874377 1. 962743 2. 419906 1. 541098 2. 063074 2. 062998 2. 578295 2. 469736 2. 088992  
100874528 1. 371149 1. 343062 1. 657035 1. 356305 1. 964799 1. 708373 1. 967457 1. 658154  
100874530 4. 514149 4. 326023 3. 5821 3. 659593 3. 88752 4. 231337 3. 824893 3. 40934  
100874531 1. 594958 1. 458517 1. 407826 1. 37117 1. 360879 1. 214808 1. 098743 1. 729951  
10087\_at 6. 042233 6. 381949 6. 56803 6. 091752 6. 153579 5. 948825 6. 333708 6. 345228  
100885775 1. 647813 1. 619202 1. 183245 1. 16873 1. 288445 4. 251587 2. 028489 0. 992594  
100885776 4. 409906 4. 181542 3. 329264 3. 323356 3. 951608 2. 782489 4. 196118 4. 009195  
100885777 2. 519965 2. 596241 2. 355982 2. 698403 2. 127716 2. 769077 3. 025014 2. 914737  
100885778 0. 944112 1. 796461 1. 842417 1. 504694 1. 608691 1. 488365 1. 978894 2. 070331  
100885779 1. 31796 1. 138349 1. 657662 1. 241674 1. 495614 1. 066784 1. 257452 1. 228305  
100885780 1. 649364 2. 124822 1. 652825 1. 89248 1. 465433 2. 261913 2. 189653 1. 42671  
100885781 1. 357934 0. 846747 1. 082697 1. 624252 1. 204457 1. 970669 0. 95234 1. 036453  
100885782 1. 205998 1. 75213 1. 147671 1. 003313 1. 333377 0. 836765 2. 115203 1. 788873  
100885789 0. 921071 1. 31428 1. 292449 0. 888245 1. 488877 1. 340896 1. 68651 1. 216863  
100885795 1. 670178 2. 62694 1. 882399 1. 956555 2. 096519 1. 934907 2. 099848 1. 677897  
100885796 1. 986966 1. 776743 1. 051166 1. 659755 1. 627842 1. 329512 1. 109676 1. 800778  
100885798 2. 027578 1. 808264 1. 236959 1. 226417 1. 963042 1. 602071 2. 154323 2. 204358  
100887750 2. 514923 2. 638766 2. 909425 2. 645065 3. 004763 2. 712107 2. 457946 2. 564554  
100887754 1. 542783 1. 483092 1. 509574 2. 230413 2. 709078 1. 362426 1. 144748 2. 123607  
100887755 1. 528599 1. 910502 1. 174715 1. 581813 1. 989211 1. 643761 1. 646624 2. 063159  
10089\_at 2. 915176 2. 974326 3. 131083 3. 57424 3. 134276 2. 947105 3. 508666 3. 675557  
1008\_at 2. 524029 3. 862227 2. 515443 3. 789511 1. 850943 2. 782529 1. 935856 3. 265173  
10090\_at 3. 013422 3. 142061 2. 798357 3. 42669 3. 50691 3. 608599 3. 223966 2. 793694  
10092\_at 8. 803208 9. 023278 9. 242389 9. 363839 8. 968524 8. 312025 9. 071659 9. 365564  
10093\_at 8. 53415 8. 940077 8. 692805 8. 761149 8. 789957 8. 418346 8. 735336 8. 745986  
10094\_at 9. 407024 9. 223738 9. 378709 9. 403919 9. 173868 9. 257494 9. 271219 9. 152848  
10095\_at 6. 789803 6. 52487 5. 974712 6. 603307 6. 099753 5. 9356 5. 360077 5. 772022  
10096\_at 8. 745735 9. 152512 8. 73287 9. 127223 8. 883984 8. 51753 9. 063501 9. 370924  
10097\_at 9. 256448 9. 552127 9. 487188 9. 380257 9. 473618 8. 78296 9. 373339 9. 919494  
10098\_at 6. 352488 5. 703743 5. 876471 5. 529185 5. 956371 6. 261169 5. 749373 5. 729722  
100996246 2. 688214 1. 918283 1. 979441 2. 036751 3. 109471 2. 71864 1. 551689 2. 080868  
100996249 1. 03568 1. 07006 1. 060071 0. 939882 0. 488982 1. 443723 1. 04866 1. 226364  
100996251 1. 987481 1. 919262 1. 753579 2. 564936 2. 835517 2. 044428 1. 960593 3. 439395  
100996259 5. 18418 5. 730702 4. 821816 4. 744384 5. 314361 4. 993967 5. 233232 5. 369574  
100996266 3. 805165 3. 20829 4. 556813 2. 5888 3. 463063 1. 137924 2. 023942 3. 202274  
100996273 3. 093727 2. 107235 2. 43364 2. 954311 2. 897287 1. 783312 2. 346144 1. 953833  
100996279 1. 156618 1. 169154 1. 68258 2. 115978 1. 683939 1. 796883 2. 226263 1. 734062  
100996280 1. 156966 1. 143593 1. 039819 0. 951979 1. 784928 1. 120904 1. 702685 1. 596859  
100996286 2. 494779 1. 333487 1. 823005 3. 298191 1. 976462 2. 227513 2. 572356 1. 67233  
100996288 1. 56585 1. 86194 1. 401765 1. 185911 1. 213006 1. 707935 1. 063066 1. 307715  
100996291 1. 704587 2. 05097 2. 652923 1. 788865 2. 353644 2. 403963 2. 437472 2. 626231  
100996295 2. 572604 2. 098132 1. 846911 1. 766985 2. 290162 1. 759664 2. 204492 2. 071355  
100996301 1. 97691 2. 050725 1. 565729 2. 653388 2. 182343 2. 762059 1. 953538 2. 480911  
100996307 3. 834765 4. 406764 3. 590969 4. 27651 3. 847609 3. 521374 3. 948995 4. 235896  
100996318 0. 542967 1. 321257 1. 646156 2. 560175 0. 954164 1. 291213 2. 534291 1. 038175  
100996324 2. 047324 2. 636215 2. 403021 2. 205898 2. 437139 2. 006031 2. 530387 1. 814606  
100996325 1. 378694 2. 378043 1. 87054 1. 901364 1. 699709 0. 990616 1. 533646 1. 655051  
100996338 1. 232928 1. 012203 1. 61846 1. 323969 1. 700027 1. 612064 1. 342045 1. 701908  
100996342 3. 106146 1. 759374 2. 403644 1. 859014 2. 861207 2. 455571 2. 142908 1. 491242  
100996345 2. 044318 1. 745983 1. 583896 1. 4376 1. 850171 2. 102588 1. 535718 2. 031368  
100996348 2. 685459 2. 897646 3. 430791 3. 368785 3. 687397 1. 894164 2. 564318 3. 977944

100996350 1. 656272 0. 4885 0. 731613 2. 19048 1. 042356 2. 059892 0. 812516 0. 711726  
100996369 3. 192335 3. 033542 3. 722741 3. 339351 3. 623949 3. 357746 3. 412101 3. 227634  
100996385 4. 478583 5. 336615 4. 61059 4. 135878 3. 857074 3. 58009 5. 224433 3. 621217  
100996404 0. 99848 2. 215141 2. 554942 2. 304087 1. 629897 2. 015201 3. 214908 1. 834495  
100996419 3. 695452 3. 35982 3. 119555 3. 202729 3. 972536 3. 846634 3. 601934 4. 257865  
100996425 1. 366476 1. 21245 1. 19689 2. 147095 1. 458151 2. 152848 2. 439847 2. 126943  
100996437 2. 585796 2. 569415 2. 871691 2. 259494 2. 748132 2. 433325 3. 442974 2. 592428  
100996447 1. 712077 1. 670185 1. 650233 1. 430906 2. 402858 1. 33275 1. 336712 2. 320566  
100996455 1. 695941 2. 583422 2. 126735 1. 646 2. 071995 1. 496275 1. 960805 2. 300695  
100996457 1. 961547 4. 163959 2. 998789 2. 495246 3. 010669 3. 844384 1. 83539 2. 770938  
100996465 1. 531299 1. 233346 1. 556563 1. 560974 1. 376732 2. 099639 1. 690638 1. 785749  
100996485 2. 075878 2. 930056 3. 794188 3. 288876 2. 832163 2. 641224 2. 626254 2. 761182  
100996490 1. 316971 1. 685328 1. 362761 1. 02966 1. 04315 0. 910784 1. 533602 1. 318457  
100996492 2. 377439 1. 97641 2. 182169 2. 316398 1. 814763 2. 510359 2. 138052 2. 140308  
100996511 1. 925334 3. 721876 1. 856856 1. 61393 2. 744666 2. 767174 3. 123475 2. 09715  
100996535 1. 62272 1. 340312 1. 054195 3. 90722 2. 108309 2. 150082 1. 349522 3. 0365  
100996539 1. 820587 1. 843927 2. 105563 1. 641942 2. 165464 2. 040534 1. 741423 2. 256102  
100996557 2. 453288 2. 666565 2. 773286 4. 491623 2. 990938 2. 565685 3. 910842 2. 857873  
100996567 1. 582764 1. 60567 1. 525842 1. 200908 1. 577366 1. 257359 1. 471356 1. 367873  
100996569 1. 430848 1. 500841 1. 467387 1. 508857 1. 87059 1. 651015 1. 384993 1. 562398  
100996570 2. 120598 0. 983962 1. 504776 0. 928269 1. 781151 0. 886301 2. 358736 1. 863313  
100996571 1. 724776 1. 219859 1. 63899 1. 635171 2. 26226 2. 261918 1. 294783 2. 57721  
100996579 2. 230091 1. 931943 1. 603337 2. 003255 3. 731265 1. 042826 1. 779623 2. 342321  
100996583 1. 843783 1. 597589 2. 131264 1. 485642 1. 440178 2. 496857 1. 558792 1. 771684  
100996590 1. 124167 1. 628536 1. 475296 1. 269249 1. 611452 1. 469929 2. 876352 1. 905824  
100996597 2. 507759 2. 20339 2. 416477 1. 874068 2. 595463 1. 636075 2. 226817 2. 044952  
100996602 1. 383062 1. 235297 2. 293788 1. 059986 1. 769239 1. 286862 1. 986169 2. 791909  
100996609 2. 087432 1. 406454 1. 414651 1. 702761 2. 037976 1. 488906 1. 810923 2. 764129  
100996624 1. 352521 1. 635383 1. 497661 1. 793677 1. 839195 1. 710618 2. 845432 2. 074804  
100996630 0. 972079 1. 457308 1. 230952 0. 761328 1. 663416 0. 932666 0. 874701 1. 245381  
100996634 2. 301616 2. 177785 0. 947708 1. 07194 2. 521022 1. 369447 1. 391922 1. 569693  
100996635 0. 741256 1. 2498 0. 931573 1. 123624 1. 43023 2. 232628 0. 960726 1. 374663  
100996637 1. 629774 0. 847437 1. 74136 1. 302879 1. 613034 1. 707988 1. 59062 2. 238432  
100996645 1. 568949 0. 903525 1. 155076 0. 952166 1. 626683 1. 491759 1. 418889 1. 38357  
100996654 1. 074991 2. 565165 1. 856226 1. 425073 1. 742827 1. 452145 1. 827613 2. 088016  
100996660 3. 608755 2. 958308 4. 662253 1. 474084 1. 38773 2. 853569 2. 241095 2. 360591  
100996662 3. 594378 4. 677579 3. 635452 5. 154219 2. 829351 4. 332173 2. 807837 3. 048888  
100996663 2. 007577 2. 463466 2. 293672 2. 191205 2. 436813 2. 39091 3. 053101 3. 015967  
100996664 2. 898109 2. 846076 2. 397093 3. 057031 2. 124115 1. 816907 2. 433138 2. 742402  
100996665 1. 551344 1. 62339 1. 797163 1. 541184 2. 030047 1. 354561 1. 595044 2. 436372  
100996669 1. 967997 1. 835577 1. 546251 1. 13788 2. 434452 1. 262371 1. 787346 1. 341217  
100996671 2. 120828 2. 399644 1. 890975 1. 471053 1. 913573 1. 646958 3. 595269 2. 186193  
100996679 1. 04418 1. 768063 2. 669811 1. 747845 2. 637275 1. 852667 2. 30892 1. 178952  
100996681 2. 526025 2. 566897 2. 271717 2. 432538 2. 465615 2. 840373 3. 865033 2. 122897  
100996693 1. 314904 1. 536671 2. 150641 1. 757658 1. 599363 1. 893336 2. 651219 2. 419854  
100996694 1. 062075 0. 836027 1. 073816 1. 133178 1. 523499 1. 278516 1. 327805 1. 562334  
100996702 2. 49478 2. 118791 2. 686176 2. 8884 2. 297897 2. 259933 2. 604394 2. 22111  
100996760 3. 772984 3. 876745 3. 635862 3. 196736 4. 375076 2. 853985 3. 608805 3. 789913  
100996770 2. 35129 1. 282342 0. 876181 1. 177326 1. 346348 1. 031105 1. 395785 0. 618905  
100996813 1. 722935 1. 161246 1. 666567 1. 530776 1. 236844 1. 553337 1. 843997 1. 624782  
100996876 1. 967346 2. 237531 1. 660944 1. 697571 3. 263842 2. 356492 2. 786567 1. 870052

|           |          |          |          |          |          |          |          |          |
|-----------|----------|----------|----------|----------|----------|----------|----------|----------|
| 100996902 | 2.454181 | 2.04231  | 2.468016 | 1.567545 | 2.108083 | 2.582576 | 2.32422  | 2.459367 |
| 100996909 | 5.791232 | 5.758257 | 4.32583  | 5.395237 | 6.402376 | 1.741992 | 4.84395  | 5.20752  |
| 100996941 | 1.219797 | 1.070381 | 1.046054 | 1.234531 | 1.487376 | 1.19408  | 2.129755 | 1.475398 |
| 10099_at  | 7.243427 | 7.710896 | 7.45895  | 7.084484 | 7.958563 | 7.308864 | 7.568351 | 7.156136 |
| 1009_at   | 4.576831 | 4.947123 | 5.17808  | 5.157147 | 5.156467 | 5.06403  | 4.708126 | 4.618169 |
| 100_at    | 3.840133 | 3.377741 | 4.428456 | 4.680486 | 4.595248 | 3.094018 | 4.899435 | 5.291798 |
| 10100_at  | 8.064216 | 8.920073 | 8.682651 | 7.925564 | 8.787346 | 7.344416 | 8.647084 | 8.792584 |
| 10101_at  | 3.671481 | 4.514485 | 4.822456 | 4.329337 | 4.296591 | 4.033957 | 3.92038  | 4.289608 |
| 10102_at  | 4.966936 | 5.111416 | 4.329664 | 5.014523 | 4.124089 | 5.140959 | 5.746892 | 4.448493 |
| 10103_at  | 7.559783 | 6.619791 | 7.455192 | 4.45967  | 8.190084 | 8.017633 | 4.685009 | 6.787535 |
| 101054525 | 3.024712 | 2.639637 | 4.12892  | 3.428987 | 2.773273 | 2.778034 | 3.243458 | 2.797776 |
| 101055625 | 1.672489 | 3.830069 | 2.359957 | 2.209612 | 2.143084 | 2.291207 | 2.853265 | 2.07686  |
| 101059918 | 3.476259 | 6.640487 | 5.782829 | 4.923123 | 4.016512 | 4.498707 | 4.765457 | 5.316005 |
| 101059948 | 1.807353 | 0.983886 | 0.925282 | 1.142087 | 0.826654 | 0.888933 | 0.742409 | 2.211861 |
| 101059954 | 2.506518 | 2.150286 | 1.486137 | 2.01915  | 0.584908 | 1.880093 | 1.110801 | 1.745097 |
| 101059976 | 2.172092 | 1.94635  | 1.627844 | 2.117672 | 2.069777 | 1.344669 | 1.524783 | 1.962301 |
| 10105_at  | 4.96352  | 3.278862 | 3.77097  | 4.473364 | 3.363913 | 5.120649 | 4.622137 | 4.358891 |
| 101060004 | 1.537263 | 1.204049 | 1.300131 | 1.259563 | 1.166624 | 1.982517 | 0.527003 | 2.592501 |
| 101060019 | 1.433326 | 1.34198  | 1.275188 | 0.839112 | 1.591524 | 1.254029 | 1.051491 | 1.394118 |
| 101060038 | 1.352066 | 1.195995 | 1.263771 | 0.979868 | 1.369331 | 0.993294 | 2.104119 | 1.794351 |
| 101060091 | 1.302544 | 1.078132 | 1.537636 | 2.637073 | 1.104148 | 0.873848 | 2.463672 | 3.142074 |
| 101060146 | 1.696471 | 1.212096 | 1.941635 | 1.444659 | 1.975681 | 1.865963 | 1.566718 | 1.984678 |
| 101060153 | 1.17131  | 1.338386 | 1.493484 | 1.802451 | 1.450134 | 1.597207 | 3.293254 | 2.44901  |
| 101060157 | 1.413662 | 1.556611 | 2.514993 | 1.999298 | 1.983283 | 1.973964 | 1.430729 | 3.006441 |
| 101060179 | 2.906486 | 3.609458 | 3.129821 | 2.942124 | 1.721232 | 4.068813 | 3.264453 | 2.695734 |
| 101060200 | 2.508002 | 2.52028  | 2.644433 | 2.463114 | 2.12861  | 3.637326 | 2.405523 | 2.402735 |
| 101060264 | 2.827469 | 2.680313 | 2.076243 | 1.985612 | 1.630062 | 4.73172  | 2.824736 | 1.660062 |
| 101060385 | 1.921167 | 2.342896 | 2.104583 | 2.349002 | 2.072299 | 2.186218 | 3.307382 | 1.844737 |
| 101060391 | 2.685939 | 2.390838 | 2.428964 | 2.335548 | 2.006791 | 2.467799 | 2.824871 | 4.352197 |
| 101060400 | 1.8199   | 1.89988  | 3.89432  | 2.304003 | 3.191958 | 2.708131 | 3.359993 | 0.661936 |
| 101060498 | 1.349676 | 1.430937 | 1.576886 | 1.582067 | 1.539824 | 1.451642 | 1.06295  | 1.67222  |
| 101060542 | 1.70428  | 2.360591 | 1.76502  | 2.240876 | 2.334624 | 1.884842 | 2.159603 | 1.621266 |
| 101060544 | 2.419125 | 2.081135 | 2.195926 | 1.715932 | 2.533841 | 1.945674 | 3.34923  | 2.727255 |
| 101060553 | 1.89094  | 1.091671 | 1.294145 | 1.336986 | 1.38143  | 0.981081 | 1.431368 | 1.6431   |
| 101060684 | 1.601532 | 3.873698 | 3.7317   | 5.453878 | 3.790981 | 5.824805 | 4.532512 | 5.267953 |
| 10106_at  | 7.119354 | 7.396453 | 6.957099 | 7.559594 | 7.237053 | 7.446338 | 7.113639 | 7.586296 |
| 10107_at  | 2.474647 | 1.923202 | 2.067553 | 2.275004 | 1.985718 | 2.455052 | 1.841676 | 2.033361 |
| 10109_at  | 9.986518 | 9.805948 | 9.828004 | 10.18329 | 9.888983 | 9.852651 | 9.803462 | 9.745696 |
| 1010_at   | 3.235996 | 2.350647 | 4.870078 | 3.895444 | 3.00979  | 2.561892 | 3.877    | 2.744998 |
| 101101772 | 1.004558 | 1.384909 | 1.513325 | 1.158914 | 1.663814 | 0.943041 | 1.555303 | 2.077771 |
| 101101773 | 1.275125 | 1.715766 | 1.776003 | 1.474408 | 2.265415 | 2.083432 | 1.689174 | 1.520988 |
| 10110_at  | 3.054125 | 2.728423 | 3.309326 | 2.184851 | 3.807617 | 3.997588 | 2.937385 | 3.850896 |
| 10111_at  | 7.394305 | 7.536962 | 7.409801 | 7.488855 | 7.45196  | 6.834643 | 7.153754 | 7.187754 |
| 10112_at  | 1.867152 | 2.339835 | 1.73902  | 2.168659 | 2.674651 | 2.081873 | 3.243679 | 2.184904 |
| 10113_at  | 6.335254 | 5.891209 | 5.229278 | 5.924708 | 5.860452 | 6.091469 | 5.939597 | 5.945015 |
| 10114_at  | 8.379254 | 8.672491 | 8.489583 | 8.427935 | 8.542594 | 8.608121 | 8.665059 | 8.990151 |
| 101154687 | 2.186386 | 1.765861 | 3.369009 | 4.483787 | 3.197034 | 2.115022 | 2.639978 | 1.842026 |
| 10116_at  | 6.022865 | 5.468257 | 5.570582 | 6.239466 | 5.908963 | 6.045389 | 6.371011 | 5.368298 |
| 10117_at  | 2.62907  | 2.444795 | 2.617745 | 1.998131 | 2.773408 | 2.368864 | 2.431505 | 2.139749 |
| 10120_at  | 5.52083  | 5.967875 | 5.329593 | 5.4608   | 5.002642 | 5.341229 | 5.240885 | 5.893886 |
| 10121_at  | 6.589154 | 7.070432 | 6.566572 | 6.870497 | 6.941364 | 7.0568   | 7.240103 | 7.190952 |

10123\_at 4.070964 4.832799 3.663871 3.449639 3.313378 4.600625 4.522922 5.178665  
101243545 1.780991 1.851577 1.764628 1.545404 2.099588 1.985543 1.649186 2.091727  
10124\_at 2.507218 3.350682 3.191162 2.474492 3.078568 2.441976 2.977383 1.988798  
10125\_at 3.880116 3.00905 3.102138 2.6486 3.820856 2.985725 2.509294 3.146674  
10126\_at 4.727126 3.481203 4.665055 3.775412 5.305746 4.304205 4.872177 4.696379  
10127\_at 2.788095 1.9412 3.286384 2.156738 3.459018 2.704103 2.65546 2.101958  
10128\_at 6.656263 6.891387 6.5809 6.691573 7.564146 6.186066 6.303795 7.379718  
10129\_at 8.036847 7.819496 8.24724 7.877903 8.091615 7.742712 8.428877 8.327577  
1012\_at 6.151928 6.236307 6.698984 6.783797 6.720332 6.284086 6.985779 5.780594  
10130\_at 5.387806 5.624934 5.621802 5.427506 5.379725 5.071208 5.713534 5.811808  
10131\_at 5.433046 5.608502 5.438523 5.345503 4.989656 5.004978 5.0301 6.020146  
10133\_at 8.520008 8.184529 7.88125 8.37367 7.600184 8.171954 7.988769 8.298429  
101340251 2.517919 1.52058 1.294546 1.009065 2.328385 3.240478 1.407621 1.538065  
10134\_at 5.83863 5.506564 6.180762 5.603147 5.919721 6.460322 5.310418 5.040593  
10135\_at 6.39187 6.207234 6.555914 7.005433 6.074238 6.978503 6.059828 4.79078  
10136\_at 1.238434 1.034731 1.147741 0.916704 3.043108 1.619868 0.71948 1.376558  
10137\_at 6.028372 6.73711 6.433215 6.177937 5.964699 6.064882 5.750049 7.203785  
10138\_at 3.604643 4.195294 3.796049 4.350712 3.839571 3.414287 3.99439 3.824492  
10139\_at 3.509339 3.36201 4.49047 4.803373 2.4391 3.871827 4.401576 3.456899  
1013\_at 2.058674 2.066129 1.879201 1.740541 2.094207 1.89681 1.666288 1.462312  
101409253 1.633623 1.106974 1.543973 1.877776 1.029259 1.757427 1.637729 1.577893  
101409254 1.570921 1.871195 1.936502 2.362227 2.36589 2.036201 1.93369 1.982274  
101409257 1.732581 1.827703 1.803801 1.580749 1.943989 1.900052 2.002374 1.760807  
101409258 3.883102 4.815223 3.306167 2.921824 4.710687 3.726274 4.020307 3.944974  
101409261 3.906509 3.69152 3.476166 3.333238 3.137796 3.114191 3.584112 3.398298  
10140\_at 5.981077 6.346902 6.554187 6.522647 6.446137 5.668336 6.114178 6.212387  
101410535 2.900768 2.801059 3.559918 1.992581 2.790927 2.358253 2.90133 1.617981  
101410537 2.570577 1.78939 1.506406 1.534334 2.201312 1.974836 1.521122 1.914691  
101410538 7.121801 7.26636 7.26455 7.558748 7.401369 7.736733 7.156532 7.008159  
101410540 2.555457 1.971495 2.848659 1.663863 2.036431 1.883541 1.532082 1.817951  
101410541 1.029108 1.26627 1.774806 1.017986 1.395631 2.532585 1.268831 1.112391  
101410542 1.136377 2.135093 1.205369 1.930902 1.753654 1.147056 1.900508 1.211478  
101410543 1.707606 1.411066 1.513629 1.162743 1.546532 1.301778 2.182033 1.469466  
101410544 2.005678 1.501163 1.390884 1.908575 1.310302 1.140265 1.485638 1.120752  
101410545 1.320015 0.876265 1.43471 1.098958 2.146109 1.669221 1.219621 1.710229  
10141\_at 3.037563 1.427187 2.691487 1.555328 1.808212 3.824021 1.283331 1.78302  
10142\_at 6.296349 6.554365 6.593715 6.219041 6.519549 6.117671 5.950669 7.102117  
10143\_at 1.61144 1.690116 1.692805 1.573642 1.58093 2.440494 2.699939 1.065968  
10144\_at 5.297977 5.645197 5.222307 5.1302 5.236592 5.350892 5.296443 5.03713  
10146\_at 6.656164 7.378791 7.362749 7.686395 7.438069 7.237493 6.703625 7.406167  
10147\_at 4.720015 4.694843 4.305407 4.831713 4.238312 4.91486 4.753033 4.698485  
10148\_at 3.314448 1.710378 2.726195 1.751755 1.754435 2.475093 3.235546 2.910324  
10149\_at 2.251065 1.396605 1.509503 2.007078 1.337995 2.345622 1.399913 1.650941  
1014\_at 5.445458 2.824496 3.117133 4.760394 6.285627 5.243869 2.471438 3.570119  
10150\_at 8.674691 8.665749 8.686122 8.478765 8.285917 8.605202 8.646994 8.361485  
101515984 2.056721 2.730927 2.654434 2.09105 2.866176 2.474126 3.011723 2.897158  
10151\_at 0.848971 1.46729 1.433523 1.406244 1.783805 0.921864 1.217079 2.450172  
10152\_at 7.596436 8.056773 7.969185 8.21184 7.789154 7.84468 7.40719 8.252783  
10153\_at 6.685692 7.112471 6.868118 6.506388 7.275964 6.870855 6.513459 7.643354  
10154\_at 4.792159 4.709337 6.13236 4.793008 4.340204 4.701805 5.917911 4.595345  
101559451 1.654346 1.394547 1.411883 1.344588 3.011141 2.234669 2.256634 2.305271

|           |          |          |          |          |          |          |          |          |
|-----------|----------|----------|----------|----------|----------|----------|----------|----------|
| 10155_at  | 6.122149 | 5.471642 | 5.9253   | 5.876973 | 5.937512 | 5.645606 | 5.926461 | 4.668153 |
| 10157_at  | 5.921069 | 5.57472  | 5.883063 | 6.193072 | 5.730692 | 5.711513 | 5.512401 | 6.610367 |
| 10158_at  | 9.439562 | 8.229938 | 9.168297 | 8.698232 | 8.512045 | 9.239689 | 8.694376 | 8.018277 |
| 10159_at  | 7.640851 | 7.894382 | 7.989954 | 7.576528 | 8.102548 | 7.571039 | 8.062871 | 7.411637 |
| 1015_at   | 2.331216 | 2.057584 | 1.777269 | 2.543637 | 1.437328 | 2.400595 | 1.82674  | 1.90466  |
| 10160_at  | 6.086552 | 6.186779 | 5.978869 | 6.070872 | 6.157892 | 6.432482 | 6.254041 | 6.092135 |
| 10161_at  | 6.909821 | 6.929353 | 6.078884 | 6.500223 | 7.305796 | 6.828714 | 7.344203 | 7.792011 |
| 10162_at  | 8.035959 | 7.480468 | 8.315197 | 8.251806 | 8.366224 | 8.292276 | 8.250937 | 7.424996 |
| 10163_at  | 9.341813 | 9.422259 | 9.723103 | 9.751666 | 9.329378 | 9.41292  | 9.427671 | 9.066575 |
| 10164_at  | 1.816748 | 2.19319  | 1.846999 | 1.49684  | 1.983647 | 2.387831 | 1.578893 | 2.128293 |
| 10165_at  | 5.585429 | 4.647057 | 5.588813 | 5.843758 | 5.969247 | 4.622756 | 4.400408 | 5.616634 |
| 101669762 | 0.705051 | 2.361081 | 0.931431 | 0.695111 | 1.214056 | 0.843452 | 0.699277 | 1.73985  |
| 101669766 | 3.653443 | 1.8648   | 3.35235  | 2.372941 | 2.093167 | 2.718608 | 2.408783 | 2.782093 |
| 101669767 | 1.207659 | 0.78701  | 4.316691 | 1.108741 | 2.242489 | 1.271859 | 1.133667 | 1.783471 |
| 10166_at  | 3.401659 | 3.897738 | 3.62471  | 4.238657 | 3.351199 | 2.54992  | 2.824514 | 4.91326  |
| 10168_at  | 4.916704 | 5.01655  | 4.944093 | 4.625586 | 5.188757 | 5.297055 | 4.876622 | 5.050037 |
| 10169_at  | 6.543859 | 5.930943 | 6.282986 | 6.258559 | 6.116082 | 6.01065  | 5.974369 | 5.676512 |
| 1016_at   | 1.550908 | 1.438005 | 1.53205  | 1.506763 | 1.438863 | 1.747901 | 1.681535 | 1.411277 |
| 10170_at  | 0.995178 | 1.399756 | 0.925806 | 1.186403 | 1.099334 | 0.788017 | 1.731784 | 1.131816 |
| 10171_at  | 5.436994 | 5.794462 | 5.237281 | 6.036142 | 5.278368 | 5.234077 | 6.011215 | 5.511989 |
| 10172_at  | 4.689271 | 5.000499 | 4.040114 | 4.929551 | 5.247402 | 3.841146 | 5.132695 | 4.816125 |
| 10174_at  | 5.311021 | 4.963354 | 5.071333 | 5.562497 | 4.147177 | 5.306112 | 5.502401 | 4.921742 |
| 101752399 | 5.299248 | 5.869392 | 4.920746 | 5.903678 | 5.0895   | 5.346819 | 4.909909 | 4.94727  |
| 10175_at  | 6.681457 | 7.247845 | 7.158092 | 7.295464 | 7.188586 | 6.715586 | 7.367872 | 6.705223 |
| 10178_at  | 2.096403 | 2.385461 | 1.72633  | 2.028907 | 2.450031 | 2.952582 | 2.667454 | 2.466564 |
| 10179_at  | 5.093123 | 5.882058 | 5.129514 | 5.648254 | 5.591116 | 4.811685 | 5.340145 | 6.863999 |
| 1017_at   | 7.538496 | 7.405711 | 7.090165 | 7.738127 | 6.466835 | 7.124635 | 7.569916 | 7.680473 |
| 101805491 | 1.33154  | 2.516303 | 0.985156 | 1.141146 | 2.761484 | 1.4241   | 3.30955  | 1.878257 |
| 101805492 | 0.985069 | 1.357575 | 2.332305 | 0.845313 | 1.057155 | 1.237656 | 0.753975 | 1.974892 |
| 10180_at  | 6.39654  | 6.573263 | 5.592318 | 6.538164 | 6.388982 | 5.624207 | 5.230313 | 5.991473 |
| 10181_at  | 6.510197 | 6.738915 | 5.640126 | 6.680216 | 6.527087 | 6.52904  | 6.437346 | 6.4492   |
| 10184_at  | 2.869415 | 3.58118  | 2.758677 | 2.956695 | 2.736627 | 3.055798 | 4.017922 | 4.157354 |
| 10186_at  | 5.760013 | 6.096058 | 6.364047 | 5.747317 | 6.316456 | 5.798699 | 6.758186 | 6.063767 |
| 10188_at  | 2.833762 | 2.702544 | 2.975116 | 4.084777 | 2.937675 | 3.35919  | 4.30914  | 2.988367 |
| 10189_at  | 4.797746 | 4.652711 | 5.148757 | 3.691982 | 4.6334   | 4.678128 | 5.148885 | 5.003253 |
| 10190_at  | 6.058534 | 5.660529 | 4.272367 | 5.140934 | 5.900217 | 5.235609 | 5.547927 | 6.296223 |
| 101926887 | 2.647032 | 2.307602 | 2.271517 | 2.142316 | 2.555609 | 3.848528 | 2.159453 | 2.738542 |
| 101926888 | 4.079028 | 3.687486 | 2.178886 | 2.315019 | 3.415042 | 4.32438  | 2.620899 | 2.039546 |
| 101926890 | 1.987029 | 2.185155 | 1.365478 | 0.814397 | 0.765577 | 1.370988 | 1.527194 | 2.30052  |
| 101926892 | 1.210423 | 1.411894 | 1.620355 | 1.364621 | 1.31142  | 1.822447 | 1.419668 | 1.335773 |
| 101926893 | 2.009351 | 2.274956 | 2.063633 | 2.600634 | 2.15759  | 2.559724 | 1.769912 | 1.623085 |
| 101926895 | 2.387871 | 2.593778 | 2.650481 | 3.05112  | 2.551996 | 2.468993 | 3.381214 | 2.741677 |
| 101926898 | 1.020817 | 1.349773 | 1.026585 | 1.140467 | 2.00702  | 0.884966 | 1.097129 | 1.560593 |
| 101926900 | 2.244051 | 3.02522  | 2.194121 | 2.235466 | 1.984153 | 2.43279  | 2.294912 | 2.313053 |
| 101926903 | 1.931939 | 1.855768 | 2.073041 | 2.225909 | 2.095169 | 1.239997 | 1.73781  | 1.841117 |
| 101926904 | 1.362407 | 1.76382  | 1.127075 | 1.203382 | 1.552622 | 1.288003 | 1.545423 | 1.288723 |
| 101926905 | 1.560338 | 0.83295  | 1.220116 | 1.29259  | 1.954292 | 0.98926  | 0.879789 | 1.467506 |
| 101926906 | 3.00332  | 3.028868 | 2.175407 | 1.149004 | 4.353922 | 4.536724 | 1.623089 | 2.216273 |
| 101926908 | 0.857805 | 1.360021 | 1.202017 | 0.946396 | 1.178233 | 1.253062 | 1.092668 | 1.357856 |
| 101926911 | 1.622999 | 1.482387 | 1.38339  | 2.522317 | 1.342127 | 1.232121 | 1.379312 | 1.732434 |
| 101926913 | 1.798269 | 0.964956 | 1.952658 | 0.863056 | 1.336988 | 1.266349 | 0.87186  | 1.381982 |

101926917 2. 853548 2. 485798 1. 982503 2. 484149 1. 826424 3. 51858 1. 670019 2. 962668  
101926924 0. 994482 1. 387908 1. 566242 1. 691577 1. 661158 1. 029002 1. 202912 1. 69125  
101926925 1. 915314 1. 537743 2. 687014 1. 927551 2. 154566 1. 420304 3. 973877 1. 576398  
101926928 1. 350859 2. 086425 1. 069241 0. 976007 2. 566373 1. 364528 0. 893347 2. 002126  
101926930 1. 803359 1. 353754 1. 810598 1. 508397 1. 299149 1. 801081 1. 445877 1. 401865  
101926931 2. 318287 2. 03581 2. 672402 1. 740153 5. 012175 2. 013673 2. 122524 2. 512502  
101926933 2. 895972 2. 410462 2. 823289 2. 430029 1. 462902 3. 743453 2. 233595 2. 468288  
101926934 1. 717997 1. 406649 1. 174267 1. 472759 2. 65265 2. 121392 1. 339018 1. 778462  
101926937 3. 674396 3. 644195 3. 568044 3. 415347 3. 691229 3. 501226 3. 898407 3. 32748  
101926940 2. 937376 2. 181637 2. 741284 2. 24572 1. 961202 2. 690134 2. 236279 2. 272978  
101926941 2. 325676 1. 800914 2. 89887 1. 76056 2. 159523 2. 241111 1. 703932 1. 948453  
101926942 1. 259584 1. 415163 1. 243651 1. 59637 1. 304955 1. 680896 2. 454999 1. 839837  
101926943 3. 441356 4. 199458 3. 593965 4. 252043 3. 298838 3. 257092 4. 125334 3. 951806  
101926944 1. 756621 1. 179571 1. 970434 1. 158963 1. 20251 2. 259663 1. 466126 1. 298452  
101926947 1. 329428 1. 969663 1. 527767 1. 452672 2. 209241 1. 757068 1. 285513 1. 362238  
101926948 2. 055908 2. 339467 1. 955924 1. 963153 2. 666778 2. 17169 1. 333627 2. 90605  
101926951 1. 250718 0. 891103 1. 432007 2. 368351 2. 598228 1. 444674 1. 040769 1. 708587  
101926953 2. 450594 1. 345024 1. 191452 1. 52724 1. 881688 1. 209361 1. 526555 1. 356461  
101926955 0. 662925 0. 959449 0. 982249 0. 709518 0. 694076 1. 033341 0. 703754 0. 752995  
101926956 2. 136915 2. 037713 1. 890877 2. 165707 1. 665943 3. 169011 2. 229535 2. 674515  
101926957 3. 235202 4. 049588 3. 211005 3. 255856 3. 940688 3. 580125 2. 525118 3. 142032  
101926959 1. 413368 1. 921929 2. 114637 1. 853477 2. 771071 2. 238991 1. 718862 1. 919964  
101926960 1. 676997 2. 037447 1. 208493 1. 369783 1. 699434 1. 192091 1. 272837 1. 901233  
101926961 1. 217178 1. 069136 3. 139042 1. 356206 0. 899037 0. 976389 1. 358584 2. 019027  
101926962 1. 885516 3. 007684 2. 038278 1. 555633 1. 771539 1. 695924 3. 364906 1. 750728  
101926963 3. 369422 3. 125658 2. 507283 2. 686288 2. 754896 2. 149599 2. 775374 2. 545825  
101926964 1. 001066 0. 829028 1. 816406 1. 440613 1. 857577 0. 737586 0. 989836 0. 896978  
101926966 1. 548481 2. 320822 2. 452878 1. 609869 3. 105489 2. 087583 1. 415616 2. 219687  
101926971 1. 479318 1. 411317 0. 750386 1. 022524 1. 23326 0. 676703 1. 120369 1. 129787  
101926975 1. 296751 1. 155377 1. 617022 1. 124204 1. 557633 1. 280576 1. 458539 1. 348008  
101926977 2. 366044 2. 326322 2. 19259 3. 92595 1. 532389 2. 211357 2. 470655 1. 456232  
101926978 1. 542212 1. 128165 1. 168468 0. 842847 1. 242049 2. 177498 1. 053066 1. 525868  
101926983 1. 243546 1. 094414 0. 92993 1. 467938 0. 933019 2. 019278 1. 400605 1. 406942  
101926987 2. 225763 2. 262782 1. 400064 0. 874164 2. 757886 1. 76422 1. 164168 0. 821963  
101926994 2. 221803 1. 677307 1. 675769 2. 320793 2. 626376 3. 381467 2. 12293 1. 594948  
101926996 1. 033015 3. 350938 2. 024398 4. 903415 0. 530537 2. 120371 3. 028208 3. 032147  
101927000 2. 403447 1. 856417 2. 36133 1. 911668 2. 567839 1. 923193 1. 386104 2. 210395  
101927002 2. 279038 2. 321637 4. 827577 2. 995311 3. 65208 1. 762233 2. 343548 2. 002005  
101927003 1. 131624 1. 394033 1. 345274 0. 682753 2. 031647 1. 721327 1. 259619 1. 282903  
101927007 1. 180084 1. 62983 1. 366085 2. 154522 1. 762815 1. 965343 1. 711652 2. 377181  
101927013 2. 751998 2. 504067 2. 373977 1. 462395 3. 160941 3. 383538 2. 167827 3. 339682  
101927015 1. 789776 1. 556449 2. 595502 1. 542465 1. 958532 1. 735791 2. 836792 6. 056992  
101927017 0. 710353 2. 32929 1. 775595 1. 417165 3. 392505 2. 510646 2. 539132 4. 028194  
101927020 1. 110011 1. 202533 1. 399369 2. 053475 0. 814663 1. 008883 1. 146139 0. 967602  
101927021 3. 84054 2. 626591 2. 898321 2. 827774 2. 347439 3. 029304 2. 557449 3. 45091  
101927023 1. 093199 1. 01223 1. 09934 1. 352011 0. 840438 2. 108356 2. 04634 1. 460318  
101927024 1. 564666 1. 040428 1. 41004 1. 424153 2. 05032 1. 575517 1. 682697 1. 752053  
101927025 2. 145672 1. 839086 2. 153034 1. 655975 2. 154044 2. 378953 1. 101096 1. 921003  
101927026 2. 819121 3. 509044 3. 690148 3. 640452 2. 253708 4. 040953 4. 140126 3. 285753  
101927027 5. 246249 5. 16148 5. 24113 4. 653303 5. 509974 5. 621925 4. 867193 4. 023395  
101927029 1. 126292 2. 306627 1. 8494 1. 450451 2. 109251 1. 304809 2. 11289 1. 660238

101927031 1. 142777 0. 747066 0. 50354 1. 047755 1. 185022 0. 710401 1. 558646 0. 755327  
101927034 1. 605545 1. 015209 1. 321144 2. 127559 1. 517508 1. 225645 1. 760871 1. 117909  
101927035 2. 177352 2. 977732 3. 251598 3. 002248 2. 985047 2. 018362 2. 436151 2. 110591  
101927038 1. 09459 1. 169053 0. 842007 2. 539793 0. 905808 0. 695024 1. 082008 0. 77051  
101927039 2. 873181 1. 541351 3. 154464 1. 09955 3. 852081 1. 643957 1. 405857 0. 900874  
101927040 2. 199058 2. 8375 2. 532384 2. 900509 1. 384815 1. 340701 2. 073362 2. 424994  
101927041 0. 787601 1. 026924 1. 350667 0. 886428 0. 892978 0. 879139 1. 235458 1. 454232  
101927042 0. 804961 0. 711638 1. 223571 1. 002883 1. 233694 0. 738841 2. 747471 1. 813707  
101927043 3. 394883 2. 952505 3. 070129 2. 761114 3. 778603 2. 470628 3. 882282 2. 937048  
101927045 5. 527871 3. 814499 5. 026821 3. 734716 4. 018736 4. 047155 2. 113376 2. 304295  
101927048 1. 328711 1. 847973 1. 925958 1. 681371 2. 506944 1. 496129 2. 380281 2. 033479  
101927049 2. 590197 2. 664432 2. 842513 1. 233932 1. 345413 3. 616621 3. 70255 2. 315493  
101927051 1. 808316 2. 001531 1. 992327 1. 964431 1. 513263 1. 825633 1. 668044 1. 989821  
101927053 1. 781007 2. 207552 2. 43153 2. 381636 2. 974698 1. 990528 2. 179646 2. 341344  
101927055 1. 257254 1. 137874 0. 842208 0. 880498 1. 028513 3. 613282 1. 333554 1. 134966  
101927056 2. 833929 2. 016481 2. 419658 2. 977158 2. 091865 2. 235096 2. 37201 2. 276607  
101927057 1. 297358 1. 309585 1. 618118 1. 413872 1. 407208 2. 097734 1. 568066 1. 576202  
101927058 1. 27643 1. 051755 1. 47518 1. 102239 1. 062418 1. 754289 1. 192714 2. 163938  
101927059 2. 11431 1. 239986 1. 559494 1. 344416 1. 270318 2. 339162 1. 777476 1. 868022  
101927060 4. 875076 5. 280113 5. 152119 5. 280337 1. 836816 3. 142883 3. 77331 3. 690124  
101927062 2. 934625 2. 22272 3. 102525 1. 121298 4. 854712 2. 61536 1. 775116 4. 271665  
101927063 2. 572848 2. 150271 1. 618784 1. 852466 2. 331727 1. 882101 1. 627811 1. 759363  
101927067 1. 142913 4. 856596 1. 209536 1. 079799 1. 965306 1. 904802 1. 445347 1. 076888  
101927070 3. 372013 1. 925128 1. 701521 2. 334531 1. 810872 1. 650805 1. 102068 1. 454847  
101927072 1. 407722 1. 172123 1. 508939 0. 97795 1. 018006 2. 264488 2. 061589 1. 070056  
101927074 2. 090003 0. 835545 1. 197132 1. 536907 1. 969816 1. 349014 1. 669867 1. 12651  
101927075 1. 451934 1. 122677 1. 468248 0. 874656 0. 807961 1. 03154 1. 108913 1. 063831  
101927078 0. 629144 0. 908032 0. 683645 0. 789058 2. 040857 0. 772775 0. 458169 1. 412155  
101927081 1. 312845 2. 088138 1. 200892 0. 873094 0. 946638 0. 95066 1. 746801 1. 355053  
101927082 1. 113488 0. 881861 1. 455242 0. 93681 0. 965715 0. 629338 0. 928691 1. 090622  
101927084 2. 188808 2. 184143 1. 933138 1. 424385 1. 756487 1. 229555 1. 874238 1. 555099  
101927085 1. 896815 1. 719172 2. 031133 1. 717732 1. 518826 1. 954162 2. 771341 1. 727335  
101927087 2. 248131 1. 653168 1. 966718 1. 851966 1. 942755 1. 628785 2. 12993 2. 332163  
101927091 1. 844641 1. 900117 2. 181852 2. 010983 2. 227705 1. 435933 2. 3555 1. 798336  
101927093 2. 196632 3. 35495 1. 833618 2. 233412 2. 005461 4. 398778 2. 204052 2. 176926  
101927095 1. 685438 1. 671574 2. 223433 1. 662115 2. 247342 2. 600489 1. 5623 1. 712229  
101927096 3. 27016 2. 337276 1. 643519 3. 051435 2. 180887 1. 961853 2. 29852 3. 121743  
101927098 1. 094143 1. 724314 1. 441747 1. 333855 1. 107451 0. 962437 1. 373086 1. 774109  
101927100 3. 706214 4. 269003 4. 122243 4. 301404 3. 446811 3. 844242 2. 436694 1. 799019  
101927104 3. 490932 1. 985961 4. 963779 3. 263941 2. 066105 2. 350655 4. 628943 2. 395791  
101927109 1. 093914 1. 597273 1. 048384 1. 051946 1. 559225 1. 359368 1. 08291 1. 555674  
101927110 3. 636722 2. 312181 2. 296439 2. 8957 1. 373025 3. 02845 3. 238188 3. 10794  
101927111 1. 949105 2. 294129 2. 512501 2. 082004 2. 905824 3. 005417 2. 303191 2. 339161  
101927112 1. 189939 1. 087619 0. 909982 1. 039603 1. 801989 1. 102767 1. 142896 1. 401169  
101927115 0. 933182 2. 245493 0. 610224 0. 885691 3. 5296 0. 937247 3. 601664 1. 255842  
101927116 2. 210477 2. 711541 1. 433805 0. 971774 1. 40986 2. 404246 0. 56415 3. 735978  
101927117 2. 900115 2. 307934 2. 231795 2. 682901 2. 629946 2. 891797 3. 477081 3. 348692  
101927120 1. 006744 0. 832851 0. 994591 0. 988087 1. 420552 2. 082893 0. 978074 1. 199893  
101927121 0. 648103 1. 810648 1. 02625 1. 040505 0. 699135 1. 80092 1. 459684 1. 502746  
101927122 1. 545288 2. 100351 1. 405041 1. 486455 1. 567961 1. 021534 1. 348784 1. 774065  
101927123 0. 735796 1. 664419 2. 751955 1. 408047 1. 445089 1. 071628 2. 101661 0. 789396



101927124 2. 552115 2. 789177 1. 51554 2. 242224 2. 47697 1. 731117 2. 346518 1. 925894  
101927125 2. 349183 3. 021621 3. 040223 3. 367339 1. 966525 3. 198097 2. 551205 3. 854356  
101927127 2. 393297 2. 788583 2. 800129 1. 410358 1. 720169 2. 410761 2. 193652 3. 580503  
101927129 1. 506021 1. 528162 1. 533053 1. 730204 1. 950091 2. 090657 1. 947299 2. 527937  
101927134 2. 058688 1. 935595 1. 731125 1. 366378 2. 608331 1. 825419 2. 513424 3. 443419  
101927135 1. 559797 2. 110803 1. 574955 0. 959307 1. 321591 0. 786139 1. 125816 2. 0774  
101927136 1. 999438 3. 981113 2. 493389 2. 345618 2. 377706 3. 391755 2. 264431 3. 87244  
101927138 1. 546377 1. 496429 1. 409565 1. 299879 1. 661864 1. 426158 1. 18864 1. 755312  
101927139 1. 235238 1. 343402 1. 744627 1. 925439 1. 351156 1. 365346 1. 671767 1. 51559  
101927141 0. 860771 1. 040612 1. 156608 1. 70465 1. 826403 0. 779991 0. 987103 1. 180975  
101927142 1. 841238 1. 299749 1. 647954 1. 855465 1. 409067 1. 603387 1. 941785 1. 412814  
101927143 1. 783382 0. 86334 1. 829058 1. 250266 1. 384154 1. 228388 0. 886398 1. 57068  
101927144 3. 856692 3. 488826 3. 398977 3. 014149 3. 317983 2. 306665 2. 646776 3. 043664  
101927145 2. 218652 0. 793164 1. 955779 0. 862129 1. 954296 2. 058668 0. 692244 0. 860353  
101927149 2. 889987 2. 38902 2. 529683 2. 479767 3. 916161 2. 632 2. 410596 2. 627268  
101927151 2. 439005 2. 97276 3. 201363 2. 439005 1. 631986 2. 310375 1. 933253 2. 623402  
101927152 1. 608493 2. 093877 1. 611598 2. 364517 2. 471085 1. 868205 1. 946255 1. 964323  
101927153 0. 970328 0. 445938 0. 854464 0. 539465 0. 908029 1. 709221 0. 761202 1. 69709  
101927156 1. 146707 1. 445932 0. 740941 1. 581539 1. 405908 0. 890877 1. 481304 0. 834829  
101927157 2. 366204 4. 517632 1. 48706 2. 404624 2. 674357 2. 114868 2. 55731 3. 04762  
101927159 1. 824477 2. 087347 1. 71623 1. 619519 2. 237074 1. 83271 1. 973277 2. 151865  
101927164 2. 451809 2. 129203 2. 134542 2. 223253 2. 546642 2. 626414 2. 804377 1. 83998  
101927165 1. 784105 1. 498334 1. 481241 1. 542288 1. 939351 1. 247635 1. 423539 2. 025101  
101927167 2. 777074 3. 496667 3. 09734 2. 62502 3. 167779 2. 918199 4. 367021 2. 532869  
101927168 4. 100914 4. 230233 5. 227718 3. 377102 3. 488757 3. 761867 4. 280674 2. 590594  
101927169 3. 378995 1. 455097 1. 938971 2. 058739 3. 221318 2. 142311 3. 43624 1. 362602  
101927170 1. 150089 1. 230534 2. 427267 1. 14123 1. 32945 1. 803405 1. 595002 2. 285701  
101927171 1. 456272 1. 882595 1. 493627 1. 244509 2. 748156 2. 325919 1. 642576 1. 652803  
101927172 1. 210937 1. 004449 1. 006367 1. 083807 0. 909163 1. 107447 1. 91723 1. 300557  
101927176 2. 536175 1. 206816 1. 438016 1. 071901 1. 56219 0. 892533 1. 035984 1. 465235  
101927178 5. 267775 5. 231954 4. 747158 3. 968263 5. 00631 3. 871125 4. 914535 4. 127876  
101927181 1. 909858 2. 03692 2. 497785 2. 519419 1. 934554 1. 444566 2. 004114 3. 675361  
101927183 1. 734396 1. 902817 2. 27637 1. 439329 1. 630041 1. 897979 3. 07753 1. 434747  
101927184 1. 427891 1. 562342 1. 877666 3. 687706 2. 131307 2. 337582 2. 158615 3. 490788  
101927186 1. 139741 1. 314854 0. 901492 0. 773323 1. 179443 2. 890497 1. 026242 1. 118619  
101927187 4. 695596 5. 259239 5. 535453 4. 673021 5. 16937 5. 341418 4. 790724 5. 567819  
101927190 2. 971615 2. 183624 3. 475197 2. 855406 3. 320474 1. 909985 2. 622824 1. 809104  
101927193 1. 735606 2. 420028 2. 051179 1. 933962 2. 504856 2. 088711 2. 585801 1. 817315  
101927195 1. 415804 1. 202845 1. 513989 1. 502758 1. 465571 1. 921899 1. 429596 2. 015914  
101927196 2. 568132 1. 455965 2. 212148 1. 408875 1. 64041 1. 751086 1. 163231 1. 541962  
101927199 1. 504051 2. 248759 1. 784959 1. 177734 1. 228563 0. 80165 1. 29452 1. 081365  
101927200 1. 623878 1. 497899 1. 182256 1. 797702 1. 753691 1. 803656 2. 470313 2. 261052  
101927202 0. 881441 2. 079061 2. 505968 1. 519798 2. 006269 2. 168709 1. 194383 2. 047474  
101927204 4. 470991 4. 374141 4. 24768 4. 739673 4. 357144 4. 41576 4. 456554 3. 671068  
101927206 1. 47649 3. 350289 2. 248261 2. 008957 5. 530054 4. 061778 4. 451061 0. 826087  
101927207 1. 191619 2. 076988 2. 023668 2. 221655 1. 691699 2. 148718 3. 008171 1. 558679  
101927210 1. 274776 1. 639698 2. 104656 2. 09441 2. 252147 2. 016944 2. 141364 1. 822331  
101927211 1. 280037 1. 266508 1. 88712 1. 408255 1. 805986 1. 384917 1. 428861 1. 095357  
101927215 0. 837912 0. 941675 1. 138283 1. 04543 0. 806785 1. 331507 1. 104424 0. 838594  
101927216 1. 443605 1. 647026 1. 182215 0. 807062 3. 675679 1. 410325 0. 852415 1. 770606  
101927217 1. 836387 3. 016395 2. 88254 1. 20818 1. 016721 1. 792543 1. 709094 1. 449043

101927219 2. 608757 1. 562826 2. 233126 1. 426691 2. 157589 1. 920971 1. 21163 1. 611135  
101927220 1. 431421 1. 492528 1. 326004 1. 476859 1. 698482 1. 834094 1. 08109 1. 383905  
101927224 1. 923325 1. 123408 1. 19476 1. 092357 1. 414018 1. 481965 0. 941091 1. 573527  
101927226 2. 675773 3. 927442 3. 834829 3. 294332 5. 571174 3. 273951 3. 514421 3. 244626  
101927229 2. 094057 2. 452279 2. 610913 1. 952562 3. 176675 2. 297533 1. 758505 2. 217043  
101927230 1. 89765 2. 675988 1. 924038 2. 26978 2. 282286 2. 646285 2. 291741 2. 046642  
101927233 3. 352477 3. 352477 3. 704576 1. 834052 2. 009767 2. 044708 3. 649403 1. 260005  
101927235 2. 217351 0. 953893 1. 354116 1. 180149 1. 576339 1. 800376 1. 719723 1. 73812  
101927237 1. 160391 1. 328535 1. 868849 1. 187803 1. 18831 1. 090666 1. 019105 1. 630289  
101927239 1. 182606 1. 448616 1. 116873 1. 438964 1. 484414 1. 987481 1. 32741 1. 226081  
101927242 1. 513936 0. 737937 1. 110552 1. 027932 1. 453787 2. 187318 1. 51098 2. 869297  
101927244 1. 03931 0. 782706 1. 563054 0. 99357 2. 403585 1. 421934 1. 870514 1. 71772  
101927248 1. 168173 0. 970867 0. 885455 1. 009 1. 604373 0. 956091 1. 387944 1. 407494  
101927249 2. 376389 2. 228838 2. 184358 2. 253515 2. 390765 2. 479577 2. 428568 2. 471871  
101927250 0. 838188 1. 046979 1. 593652 1. 064747 0. 939182 2. 182321 1. 875921 1. 036439  
101927252 1. 870663 3. 131437 3. 304203 1. 689809 2. 02589 2. 593071 3. 76867 2. 143499  
101927253 2. 094043 2. 670993 2. 384365 1. 83871 2. 47505 1. 708527 1. 906346 2. 022356  
101927255 1. 646016 1. 450715 1. 893373 1. 844148 1. 580081 1. 293292 1. 531129 1. 976704  
101927256 1. 704032 1. 467644 1. 42956 1. 347173 1. 574197 1. 980243 1. 902436 1. 017797  
101927257 1. 791875 2. 352332 2. 141695 3. 036891 1. 836643 3. 484679 1. 956766 2. 446669  
101927258 2. 376439 1. 382532 2. 341209 2. 146908 3. 899697 1. 17053 1. 676114 1. 792978  
101927260 1. 450352 2. 390269 2. 113885 1. 651641 2. 095368 1. 301035 1. 629249 1. 580879  
101927262 2. 304434 4. 486801 1. 526579 2. 514114 0. 766127 1. 598956 3. 085864 1. 973497  
101927267 1. 743818 1. 632137 1. 54138 1. 291901 2. 052526 1. 150146 1. 744123 2. 119675  
101927269 1. 789081 0. 99216 1. 111865 0. 805606 1. 132981 0. 758878 1. 224149 1. 465732  
101927274 2. 573425 2. 96848 1. 84138 2. 272026 2. 319847 2. 704269 2. 420475 2. 994011  
101927277 1. 379048 1. 6105 0. 997709 1. 133458 1. 701226 1. 41436 1. 294031 2. 372079  
101927278 0. 802129 1. 424367 1. 828512 1. 589393 2. 024112 1. 077029 1. 770735 2. 575083  
101927279 2. 304941 3. 022045 2. 891871 3. 304963 2. 09084 3. 982971 2. 066608 2. 749037  
101927280 1. 116626 0. 970647 1. 443445 0. 952719 1. 366918 1. 619044 1. 407418 1. 965315  
101927281 1. 663108 1. 19623 3. 240988 1. 621199 2. 153869 2. 498539 3. 004299 1. 866241  
101927282 1. 699536 1. 18041 2. 985747 0. 959199 3. 434056 1. 523587 1. 305809 1. 92985  
101927285 1. 240067 1. 440665 1. 24307 1. 147421 1. 619555 1. 761736 1. 125622 1. 164178  
101927286 1. 553673 1. 633375 1. 634299 1. 786217 1. 756978 1. 737737 1. 666771 1. 592321  
101927289 2. 249931 2. 59755 2. 340581 2. 224991 2. 807005 3. 123276 3. 422489 4. 166574  
101927291 1. 426411 1. 228772 1. 335331 1. 808422 1. 557102 2. 395239 1. 654689 1. 581774  
101927292 1. 072556 0. 919376 0. 881693 0. 893516 2. 13237 1. 334148 2. 372478 1. 646226  
101927295 1. 787565 1. 730444 1. 412124 1. 328011 1. 447469 1. 957737 1. 734138 1. 142067  
101927300 2. 358448 2. 650072 3. 04024 1. 98567 3. 502698 3. 890368 3. 245524 2. 295171  
101927304 1. 391021 1. 056526 0. 627741 1. 023394 1. 389691 1. 716397 0. 814734 1. 2773  
101927305 1. 037557 0. 767321 2. 444399 0. 540052 2. 220726 0. 832461 2. 758276 2. 198389  
101927310 1. 499978 1. 106712 0. 824996 1. 471743 1. 33283 1. 388489 1. 308072 1. 525872  
101927311 1. 538426 1. 074484 1. 269014 2. 043707 1. 044996 0. 7437 1. 306888 1. 34439  
101927314 0. 843573 1. 027582 1. 520661 1. 460321 1. 49625 1. 190795 1. 613718 1. 215026  
101927318 1. 809314 2. 671969 1. 505347 2. 38187 2. 57179 3. 645278 1. 591956 2. 703495  
101927320 0. 778374 1. 131019 1. 037124 1. 022709 1. 321258 1. 406949 1. 762091 1. 830626  
101927324 1. 374281 1. 657008 1. 806332 2. 048902 1. 913143 1. 464134 1. 759401 2. 13589  
101927326 1. 390565 1. 872096 3. 268429 3. 04073 1. 750609 2. 344856 1. 712948 1. 636225  
101927328 1. 535542 1. 229757 2. 05279 2. 806891 1. 495798 1. 449735 1. 062925 1. 462191  
101927331 0. 849064 0. 810954 1. 597504 1. 224968 1. 095973 1. 025574 1. 129158 0. 913965  
101927332 1. 248308 1. 157935 1. 486949 1. 196953 1. 25884 2. 491784 1. 164278 0. 867988

101927334 1. 287176 1. 345456 1. 500515 1. 544767 1. 320316 1. 038595 1. 267968 1. 105367  
101927340 4. 820523 4. 553806 5. 387306 2. 71725 4. 159576 4. 052737 4. 165567 4. 318809  
101927341 1. 061025 2. 363501 1. 276826 1. 715211 2. 567673 1. 724458 1. 382039 1. 537982  
101927342 1. 262988 0. 914195 1. 041185 0. 842162 0. 985408 1. 159667 0. 979643 0. 989307  
101927344 2. 994304 3. 421148 4. 202637 2. 211306 2. 204481 2. 708494 4. 17131 3. 45247  
101927345 7. 045254 4. 225553 4. 846076 7. 571874 4. 289525 5. 631617 5. 351225 4. 779056  
101927346 1. 768974 2. 097281 2. 433987 1. 759512 1. 909833 1. 791716 2. 51106 2. 102135  
101927347 1. 225375 0. 889967 0. 912121 0. 825242 1. 264509 0. 960262 1. 006287 1. 061168  
101927348 1. 811187 0. 658235 1. 31968 1. 060802 1. 505303 1. 038831 1. 000328 3. 209498  
101927350 1. 244454 1. 13176 2. 050115 1. 209945 1. 937349 1. 562354 0. 678485 1. 729623  
101927351 1. 93268 0. 833174 1. 283813 1. 266369 1. 582247 1. 070643 1. 254774 1. 19507  
101927352 1. 967083 2. 871602 1. 111067 1. 733118 2. 356994 1. 353023 2. 57212 1. 250543  
101927354 3. 376571 1. 731506 2. 241721 2. 001452 2. 976477 2. 661398 2. 227601 3. 02211  
101927355 1. 523586 1. 657552 1. 400617 1. 777813 1. 830563 1. 692421 1. 941755 1. 557486  
101927356 1. 47713 1. 515663 1. 332525 1. 453521 1. 330365 1. 495458 1. 982562 1. 546263  
101927358 1. 060862 1. 123352 1. 65605 1. 095355 1. 126918 1. 027214 1. 711254 1. 463636  
101927359 1. 697201 1. 651145 2. 667946 1. 401854 1. 761639 1. 19533 1. 166219 1. 085899  
101927360 1. 37787 1. 021589 0. 808632 1. 114069 1. 367062 1. 346357 0. 682953 0. 743025  
101927361 1. 350759 1. 448135 1. 232614 1. 034278 1. 519008 1. 263421 1. 339096 1. 527661  
101927362 1. 733241 1. 678817 1. 960083 1. 543962 1. 898082 1. 606896 2. 358448 1. 765842  
101927363 1. 004476 0. 928138 0. 857173 0. 717605 1. 217182 1. 223991 1. 093368 1. 258714  
101927364 1. 912838 1. 736296 2. 114745 1. 672279 2. 82028 1. 843729 2. 557344 2. 152537  
101927365 3. 862931 2. 482677 3. 405388 3. 42504 4. 197233 2. 43914 2. 81577 2. 954624  
101927367 1. 803046 2. 062045 1. 868039 1. 975362 2. 225117 1. 290289 4. 076234 1. 812552  
101927372 1. 316264 1. 790581 1. 153171 0. 907282 0. 887821 1. 686926 0. 716218 0. 802994  
101927377 1. 363282 1. 447865 1. 617259 1. 427573 1. 13303 2. 08193 1. 79328 2. 173247  
101927378 3. 765147 3. 427378 2. 557727 3. 772529 2. 028264 3. 63873 3. 239459 3. 785614  
101927379 1. 080944 1. 504305 1. 469799 0. 832908 1. 405035 1. 019546 0. 967442 1. 056639  
101927381 1. 352598 1. 32446 1. 44567 0. 939348 1. 942129 2. 119492 1. 339375 2. 717963  
101927383 1. 55811 1. 565641 1. 305528 1. 43037 1. 505842 1. 235215 1. 477725 1. 499418  
101927389 1. 676737 1. 998993 2. 063375 1. 632132 2. 516122 2. 389148 1. 993684 1. 96999  
101927391 2. 603931 0. 815807 1. 986834 3. 207113 1. 810892 2. 585642 2. 392078 2. 928913  
101927392 0. 943312 1. 468565 1. 445756 1. 161774 1. 274438 1. 212373 0. 754269 0. 962126  
101927394 1. 816175 1. 151931 1. 553827 1. 57428 1. 4633 1. 173094 1. 545977 1. 843097  
101927396 2. 129998 1. 874269 1. 401709 2. 190315 2. 01056 1. 543733 1. 564564 2. 056174  
101927397 0. 976453 0. 75162 0. 816154 1. 521668 2. 171965 0. 908722 1. 285621 1. 626899  
101927402 3. 371629 1. 157222 1. 907972 1. 183341 1. 09658 1. 915722 1. 950486 1. 230368  
101927404 2. 887468 1. 719262 1. 090249 2. 296019 1. 221271 1. 926245 1. 466175 1. 983662  
101927405 2. 338504 1. 689451 1. 577205 2. 376455 2. 773951 2. 255759 1. 927171 2. 155704  
101927406 0. 9529 1. 041824 1. 416828 0. 897912 1. 49482 0. 98316 1. 262429 1. 302931  
101927411 1. 005489 1. 76703 1. 326317 2. 003522 1. 086975 0. 857165 1. 209827 1. 689383  
101927412 2. 793392 1. 999758 2. 854673 2. 723954 4. 181483 2. 905563 1. 312918 3. 161105  
101927413 0. 848948 0. 943351 0. 522757 0. 165656 0. 898234 1. 732339 0. 964365 1. 660666  
101927414 2. 581093 1. 596133 1. 8221 1. 76958 3. 067129 1. 757155 2. 344264 1. 752236  
101927415 1. 44381 1. 994349 1. 955552 2. 716622 3. 356209 1. 909082 1. 580019 2. 980649  
101927416 1. 75327 1. 925095 2. 409745 2. 098698 1. 201684 2. 149835 1. 81677 1. 97351  
101927417 1. 312504 1. 304125 1. 169521 1. 036308 1. 208228 0. 856682 1. 583271 1. 479336  
101927418 1. 726264 1. 566402 1. 626192 2. 449291 1. 181006 1. 8837 2. 432696 1. 865956  
101927419 2. 141743 2. 200413 1. 797478 1. 83386 2. 273131 1. 870275 1. 521547 1. 499566  
101927420 3. 025548 6. 011056 2. 95076 2. 545168 2. 354708 1. 554308 2. 829212 3. 528629  
101927421 0. 965191 1. 247042 1. 459804 0. 785094 2. 357205 1. 604115 1. 455283 2. 235711

101927422 0.984853 1.864076 1.789023 1.455379 2.852461 1.290903 1.6376 2.074624  
101927431 1.679425 1.83694 2.261344 2.061152 1.279434 1.297803 1.885671 1.333664  
101927433 1.264713 1.118509 1.310225 1.635316 1.135384 1.84197 1.857244 1.611808  
101927435 1.259765 1.40187 2.353835 1.382649 1.349615 1.395342 1.162031 1.784915  
101927437 1.745216 1.280864 1.541321 1.454311 1.19786 1.877808 1.914584 1.981959  
101927438 1.607968 1.28528 1.346725 0.974308 1.443302 1.226202 1.633412 1.466286  
101927439 1.348135 1.735897 1.186006 1.220419 1.596365 1.247865 2.150153 1.653598  
101927441 2.54605 1.527839 2.001468 2.584984 2.575243 2.032278 2.127883 3.076641  
101927446 0.627927 1.336288 1.431215 1.198334 0.831687 1.316246 3.142485 1.994343  
101927447 1.169469 2.67087 1.144133 1.491834 2.694346 2.095156 1.943053 1.377291  
101927449 1.157379 1.812738 1.455099 1.325604 2.241018 1.778519 1.173207 2.259078  
101927450 0.937232 1.3007 1.266443 0.91923 1.056568 1.146026 1.761778 1.072545  
101927455 1.348519 1.188535 1.130252 1.307205 1.410078 1.376252 1.559106 1.892859  
101927457 3.511417 1.629022 1.912342 3.109445 2.932204 2.399484 2.698028 2.595593  
101927459 0.74928 1.290764 1.109947 1.219963 2.33885 1.12512 0.809447 2.328449  
101927461 1.201127 1.079837 1.012056 2.119685 1.313456 1.843814 2.119879 1.173688  
101927464 1.206497 1.63387 1.442833 1.809174 1.921963 1.366658 2.14402 1.887488  
101927465 0.772456 1.478612 1.114628 0.98149 1.119679 1.261249 1.457582 1.186277  
101927467 2.261964 1.007963 1.78574 1.641378 1.696654 1.713427 3.444031 1.694453  
101927471 2.399611 1.692201 1.954826 3.764443 1.824611 1.724165 1.829513 2.013047  
101927472 1.635532 2.306595 3.479241 2.550481 2.506679 2.855569 2.88163 2.589203  
101927473 1.537451 1.128321 1.047739 1.144496 1.447465 1.552832 0.947184 0.96119  
101927476 2.530209 2.972947 2.799809 2.539356 3.595583 2.970027 3.018541 2.478911  
101927477 4.470661 3.671645 4.372684 3.89549 3.700851 2.76227 2.870759 4.955019  
101927478 1.626777 0.973903 1.169566 2.003555 1.262889 1.800803 1.572133 0.934269  
101927479 2.205837 2.531013 2.272679 2.403194 3.310113 2.024035 3.321189 2.43121  
101927480 1.008582 1.177433 1.133019 1.491441 1.189074 1.175036 0.981573 2.187374  
101927481 2.339653 2.440576 2.224946 2.90241 2.230871 1.816539 3.159268 2.043132  
101927482 2.508447 1.916766 1.529982 1.420678 1.288868 1.645676 1.032594 2.726138  
101927483 1.656644 0.965386 0.955881 1.33 1.525817 1.63811 1.891838 1.045429  
101927487 1.728547 1.422194 2.276592 0.998432 1.81345 1.074114 1.849795 2.047298  
101927488 1.244221 1.86188 1.50184 1.531668 1.092745 1.240163 1.328989 1.553203  
101927490 1.723439 1.898779 1.229893 1.410407 1.445237 1.178958 0.953997 1.179228  
101927491 0.941746 1.174951 1.954636 1.844099 1.085786 1.648322 0.909424 1.884253  
101927492 2.746817 3.130033 2.691474 2.523674 2.894313 3.014268 2.941366 2.81813  
101927493 0.89381 1.120477 0.504769 0.968029 1.181874 0.815058 0.711691 1.853743  
101927494 1.135479 1.340725 0.960405 1.171525 1.304549 1.034943 1.28417 1.348388  
101927495 2.110623 2.018546 2.729539 2.357268 2.382968 2.216354 2.813866 1.754643  
101927497 2.894559 4.173421 3.561548 6.129258 3.089549 4.103709 4.089506 4.157795  
101927498 1.760072 0.931432 1.53457 1.383614 1.360908 1.465659 1.116993 1.243627  
101927499 1.244854 2.391401 2.085008 2.095739 0.836371 1.495291 1.719279 1.808883  
101927501 1.910303 1.556871 1.086527 1.047244 1.595388 1.518542 1.789733 1.041302  
101927502 2.364533 2.777366 2.503467 2.752087 2.95155 3.065332 2.975354 2.321435  
101927503 2.094982 2.547086 2.259261 2.527742 2.970575 1.706708 2.692764 2.742137  
101927504 2.545085 1.01412 1.289332 1.414077 2.281941 1.442027 1.089285 1.464473  
101927505 1.586034 2.329758 2.341178 2.458032 2.589922 2.132232 3.462412 1.927275  
101927512 1.629564 1.367531 0.952449 1.34341 1.533772 1.372692 1.507103 1.614188  
101927513 2.91023 1.913897 1.964099 1.475182 2.429506 2.330429 1.545581 2.002896  
101927518 0.725086 0.862946 1.71761 0.692937 1.120557 1.004153 1.009814 1.042773  
101927522 1.255477 2.349435 1.844273 1.580026 2.60341 1.95277 2.155236 2.568642  
101927523 1.632677 1.588016 1.36904 0.938029 1.38028 1.099838 0.780305 1.203126

101927524 1. 313035 0. 959539 1. 107526 0. 918514 1. 516769 1. 596763 0. 865537 1. 150186  
101927525 3. 633009 3. 461474 1. 082312 1. 61628 2. 082753 1. 009843 1. 053563 1. 656023  
101927526 1. 987809 1. 455433 1. 674813 1. 698415 1. 730038 1. 64043 1. 196393 2. 138001  
101927528 1. 584115 0. 97436 0. 900927 0. 981767 1. 199151 1. 363455 0. 94629 1. 342896  
101927531 1. 316959 1. 291362 1. 343202 0. 793402 1. 550039 0. 982337 1. 635034 2. 44395  
101927532 2. 306871 2. 5124 2. 66889 2. 288755 2. 32609 2. 888397 3. 045567 2. 881344  
101927533 0. 841612 0. 817112 1. 221471 0. 913438 1. 123272 0. 615759 1. 309246 0. 982267  
101927534 2. 104817 1. 685282 1. 531889 1. 831724 2. 187209 3. 073945 1. 659925 1. 515725  
101927541 2. 270947 2. 380419 2. 013756 1. 975887 2. 910297 2. 170012 1. 947492 2. 16019  
101927542 2. 57687 1. 072356 2. 194524 0. 736301 0. 990686 0. 384925 2. 194014 0. 987378  
101927543 1. 944596 2. 5626 3. 05052 2. 371754 1. 390696 3. 47232 2. 037589 2. 408591  
101927547 2. 114588 1. 730921 1. 596968 1. 757217 2. 194849 1. 691293 1. 622533 1. 743162  
101927549 1. 497693 1. 130216 0. 888589 0. 859505 1. 183301 1. 691257 0. 778187 1. 662453  
101927550 2. 617436 0. 73537 0. 892796 3. 045937 1. 81967 3. 042244 2. 100213 3. 136625  
101927551 2. 324751 2. 038571 2. 376251 1. 810306 2. 045838 1. 280439 2. 04294 1. 201759  
101927552 1. 900738 2. 54425 2. 004005 0. 982616 3. 431593 1. 609964 0. 522481 4. 596958  
101927554 1. 373133 1. 985697 2. 512189 1. 420728 1. 685506 2. 019983 1. 275977 1. 413571  
101927560 1. 125695 1. 29749 1. 761665 1. 95477 2. 797606 1. 374296 1. 907951 1. 938793  
101927565 1. 874163 1. 641747 2. 670435 1. 787568 1. 453472 1. 526274 2. 682735 1. 686532  
101927574 1. 376953 1. 859735 3. 213781 1. 056099 1. 439825 1. 828671 1. 360896 1. 286658  
101927575 1. 615714 2. 056853 1. 528827 1. 233596 1. 756063 1. 739828 1. 263169 1. 393586  
101927577 1. 74616 1. 791917 1. 307768 1. 370521 1. 290064 1. 280499 1. 906609 1. 492792  
101927579 2. 423088 1. 905606 1. 570491 0. 913563 3. 468378 2. 332662 2. 364503 2. 952531  
101927581 1. 272508 1. 352436 1. 140511 1. 174658 1. 044307 1. 140204 1. 179653 0. 926907  
101927582 1. 552708 1. 315179 1. 065217 0. 739436 1. 688281 1. 13705 1. 455806 2. 187666  
101927585 2. 053199 0. 728872 1. 312257 1. 233776 1. 121298 0. 774887 2. 529929 1. 484041  
101927586 1. 754668 2. 174379 1. 972441 2. 235813 1. 942013 2. 214202 1. 926744 1. 975854  
101927587 1. 962843 1. 39257 1. 639023 2. 502981 1. 519697 2. 132517 2. 087446 1. 548354  
101927588 2. 015294 1. 347984 1. 858839 1. 441229 2. 84781 2. 309213 1. 820634 1. 908608  
101927591 1. 352116 1. 258141 1. 688776 1. 393822 1. 158619 1. 501303 1. 271962 1. 068876  
101927592 0. 829109 1. 919131 1. 129281 1. 414375 1. 816374 1. 460012 1. 732034 0. 997636  
101927596 2. 629072 1. 051761 1. 82908 1. 218504 1. 598618 1. 6762 1. 708963 1. 578178  
101927597 3. 521079 3. 022972 3. 111457 3. 537431 2. 237561 2. 758907 2. 46762 3. 41211  
101927598 1. 117891 0. 99615 1. 478651 2. 087388 2. 017872 1. 216415 1. 10073 1. 089326  
101927599 3. 676982 3. 878542 5. 323039 3. 219523 3. 134459 4. 963758 4. 302307 3. 346933  
101927604 1. 938554 1. 863698 2. 122672 1. 651841 2. 177527 2. 150226 1. 514772 1. 710691  
101927605 1. 040305 1. 737653 2. 027575 0. 881745 1. 526763 1. 408581 1. 6918 0. 768731  
101927608 1. 332222 1. 3107 1. 371284 2. 200592 1. 533195 4. 444403 2. 201436 2. 502969  
101927609 1. 965541 4. 333399 0. 668561 2. 957701 2. 116919 3. 450071 3. 270521 1. 367255  
101927610 1. 600846 1. 974612 1. 742807 1. 268954 2. 36863 2. 450673 1. 237285 1. 678686  
101927612 2. 004242 2. 182614 1. 583075 2. 302261 1. 72402 3. 042525 2. 028921 1. 829494  
101927613 1. 213437 1. 574283 1. 36422 1. 215335 1. 140448 1. 282242 1. 231957 2. 365321  
101927616 1. 82983 1. 200032 1. 537688 1. 743672 1. 98581 1. 678255 2. 7221 1. 857221  
101927617 1. 494222 2. 109455 3. 998686 1. 878425 1. 645526 3. 665612 1. 470821 1. 83094  
101927619 1. 215657 1. 469578 1. 298077 1. 018568 1. 391746 1. 180946 1. 223724 1. 674827  
101927620 1. 230428 1. 058048 1. 114258 1. 125231 1. 339107 0. 919263 1. 357057 1. 318471  
101927621 1. 90941 3. 352299 2. 599939 2. 709124 3. 196843 2. 162176 2. 114976 3. 798156  
101927624 1. 478381 1. 190287 1. 632424 0. 774874 1. 312529 1. 151017 1. 256014 1. 331684  
101927629 2. 405034 1. 782424 1. 623913 0. 817453 1. 732881 3. 074977 1. 638326 1. 783419  
101927630 1. 38439 1. 588015 1. 527637 1. 162245 1. 750066 1. 163786 1. 327884 1. 48185  
101927631 3. 967577 4. 158334 4. 488964 4. 735419 6. 05377 3. 877266 4. 570889 5. 2758

101927632 1. 182431 1. 195942 2. 676468 3. 206089 1. 325314 1. 994845 1. 751809 2. 994157  
101927635 1. 432269 1. 31872 1. 561545 2. 212252 2. 240364 1. 343599 1. 837311 1. 415249  
101927636 0. 985121 1. 382558 2. 122017 0. 908158 4. 097088 0. 776876 1. 490219 0. 761272  
101927637 1. 079167 0. 93698 1. 952134 0. 99907 1. 836539 1. 648706 2. 078969 0. 617996  
101927640 0. 981365 1. 048792 1. 003888 1. 003891 2. 080303 1. 273183 1. 545301 1. 09498  
101927641 1. 520034 1. 596703 1. 88314 1. 537278 1. 897271 1. 495224 1. 62019 1. 784279  
101927646 2. 477669 1. 097506 1. 571735 1. 965435 2. 000675 1. 444398 1. 805688 2. 171119  
101927650 0. 959393 1. 922845 1. 4822 1. 121241 1. 482367 1. 038757 2. 097742 1. 809885  
101927651 2. 271316 2. 222491 2. 407132 2. 450037 2. 461176 2. 578205 3. 002265 2. 158446  
101927653 1. 356168 2. 782558 1. 945017 2. 036828 1. 101501 0. 88639 2. 231896 1. 853513  
101927656 1. 794806 1. 218695 1. 266713 1. 544089 1. 76496 1. 083025 1. 408571 1. 861043  
101927657 0. 783818 1. 389729 1. 245829 1. 092586 2. 081855 1. 625612 1. 293542 1. 622232  
101927659 1. 822892 2. 439271 1. 843233 2. 284809 2. 108636 1. 762859 1. 751195 2. 189232  
101927660 2. 313276 2. 225435 1. 969311 2. 030432 2. 431451 2. 994283 1. 88569 2. 221577  
101927661 1. 177292 1. 090352 1. 460659 1. 361157 3. 195636 0. 934698 1. 235274 1. 217075  
101927664 1. 188124 2. 381363 1. 587116 1. 489482 1. 564888 1. 596303 1. 322499 1. 743772  
101927667 3. 127615 2. 882066 3. 408411 1. 989273 2. 989558 2. 650306 2. 794207 2. 489827  
101927668 1. 584661 4. 059037 1. 37249 1. 245698 1. 450619 1. 62351 1. 533959 2. 877098  
101927671 1. 89245 2. 157833 2. 108038 2. 09761 1. 216741 2. 148561 3. 105627 1. 544688  
101927675 2. 300787 1. 08313 0. 759076 0. 834293 1. 046376 0. 926564 0. 662033 1. 136511  
101927676 0. 92957 1. 182508 1. 109593 2. 478586 3. 526323 1. 295958 1. 377421 2. 630695  
101927678 1. 764091 1. 646728 1. 339972 0. 892503 1. 05576 1. 180018 1. 781009 1. 626983  
101927682 1. 981968 1. 737963 2. 272988 1. 841673 2. 331415 2. 398612 1. 791014 2. 837245  
101927683 1. 786263 1. 831591 2. 322497 1. 313082 2. 033017 1. 798766 2. 365253 1. 567315  
101927685 4. 521917 1. 142176 4. 948106 1. 010031 0. 746056 3. 969236 4. 586053 2. 399257  
101927686 1. 511999 1. 62347 1. 304051 1. 640844 1. 182734 1. 440302 1. 646856 2. 080655  
101927687 2. 267523 1. 610546 1. 640136 1. 589763 1. 409305 1. 949904 2. 126363 1. 615108  
101927690 1. 669626 1. 511572 1. 970501 2. 257031 1. 610323 1. 48898 2. 172988 1. 456304  
101927692 2. 029349 1. 939954 2. 443327 2. 116825 1. 994142 1. 858124 2. 016802 2. 146325  
101927693 1. 515048 1. 757192 2. 183903 1. 803817 2. 139328 2. 714336 1. 840521 2. 204497  
101927694 2. 24513 1. 891078 1. 923637 2. 031442 2. 045706 1. 701125 2. 023321 1. 907921  
101927696 2. 806473 4. 43446 2. 108714 1. 788799 3. 211985 4. 737717 4. 292471 1. 787354  
101927700 1. 212636 1. 875511 0. 748421 2. 331715 1. 412943 2. 013113 0. 954386 1. 288532  
101927701 1. 188857 1. 170838 1. 299702 1. 066312 2. 038796 1. 050234 1. 527442 1. 285624  
101927702 2. 201471 1. 793332 1. 790373 1. 639189 1. 50709 1. 277865 1. 898883 1. 348664  
101927703 8. 460176 8. 451156 8. 129559 8. 565038 7. 280283 7. 358361 8. 050648 7. 528673  
101927704 1. 458514 2. 285993 1. 923342 2. 270313 1. 307625 1. 554568 1. 531034 1. 504322  
101927705 2. 916215 3. 152059 3. 186955 1. 946185 3. 28639 3. 788608 1. 992147 3. 292551  
101927709 1. 681457 1. 448193 1. 126061 1. 341825 1. 501052 1. 236748 2. 314758 1. 426618  
101927710 1. 957247 1. 308809 1. 606644 1. 73598 1. 958519 1. 423686 1. 816631 1. 867757  
101927711 1. 058441 1. 546849 1. 29927 1. 717845 1. 666138 1. 137821 1. 462779 1. 901286  
101927712 2. 270596 1. 85903 2. 422456 2. 249531 3. 184893 1. 989692 3. 062964 2. 3767  
101927715 1. 591669 1. 166869 1. 841039 1. 208125 1. 513294 1. 449282 1. 927897 1. 406915  
101927719 1. 174279 1. 185889 1. 020857 0. 757009 1. 532931 1. 450339 1. 00617 0. 919466  
101927720 3. 692601 3. 066679 3. 208346 2. 737331 3. 714813 5. 711792 3. 738641 2. 280679  
101927721 2. 286232 1. 999653 1. 044339 1. 001065 2. 297245 2. 395144 1. 367097 1. 007333  
101927722 3. 096557 3. 23048 2. 744621 3. 080295 3. 354289 3. 078696 3. 614318 3. 356773  
101927723 1. 138001 1. 692225 1. 482373 1. 00273 1. 43297 1. 948951 1. 577393 1. 420716  
101927728 1. 812018 1. 489615 1. 566549 1. 577133 1. 43946 1. 557945 1. 671886 2. 886979  
101927729 2. 200329 1. 780988 2. 244021 2. 580046 2. 167314 1. 907846 1. 57535 1. 964508  
101927734 1. 858486 1. 306274 1. 177841 1. 107691 0. 971631 1. 617395 2. 101666 1. 240113

101927735 2. 067832 2. 243435 2. 591086 2. 297029 2. 362829 1. 890326 2. 259763 2. 636363  
101927738 1. 18419 1. 441507 1. 260612 1. 336202 2. 088542 1. 223008 1. 310305 1. 658798  
101927740 1. 583241 2. 303585 2. 063569 1. 65624 1. 70917 1. 876042 2. 74278 2. 563361  
101927746 2. 15211 2. 061377 2. 090615 2. 094326 1. 992582 2. 550672 2. 204291 1. 501807  
101927750 2. 723609 2. 072173 0. 43697 1. 742971 2. 803777 2. 308317 1. 930123 3. 3845  
101927751 1. 921132 1. 406627 1. 238897 1. 18256 0. 911762 1. 484019 0. 933058 1. 53097  
101927752 8. 04613 7. 844628 7. 527346 6. 935296 6. 505801 7. 134796 6. 86229 7. 18143  
101927755 2. 408108 3. 498748 3. 712013 3. 18849 4. 548639 3. 392908 3. 811028 4. 431511  
101927757 2. 191577 1. 165976 1. 483258 0. 947174 1. 000285 1. 538065 1. 413349 1. 362749  
101927759 3. 633544 2. 687446 3. 389534 2. 659223 3. 778442 3. 347493 4. 466784 2. 527535  
101927760 3. 083748 3. 530471 2. 788779 3. 76838 3. 275322 2. 754885 3. 054446 2. 664083  
101927761 3. 205811 3. 769511 3. 602744 4. 190808 2. 721996 2. 996238 3. 680594 3. 274708  
101927762 2. 32523 1. 652261 1. 494108 1. 644898 1. 670536 1. 434545 1. 316794 1. 565943  
101927765 2. 688031 2. 863677 2. 0185 2. 747515 2. 437783 3. 341293 2. 085504 3. 845679  
101927766 1. 878698 1. 816218 1. 44623 1. 210583 1. 376788 2. 21907 2. 758044 2. 075938  
101927767 3. 095427 3. 28376 2. 331916 2. 447361 3. 262467 1. 223436 0. 789713 2. 032605  
101927768 3. 228605 0. 461136 4. 211676 2. 076882 1. 462738 1. 334106 2. 008297 1. 391439  
101927769 1. 890797 1. 478917 0. 982277 0. 783493 1. 145844 1. 587112 1. 550174 1. 641508  
101927770 2. 122295 2. 88577 3. 249185 2. 660575 2. 857763 2. 616398 3. 921639 4. 110538  
101927773 2. 48646 2. 210693 2. 26799 2. 357282 2. 520123 1. 834801 2. 523085 1. 759953  
101927774 0. 931295 1. 416993 1. 392897 0. 939011 1. 477114 0. 968514 1. 546302 1. 927949  
101927775 1. 289436 1. 963432 2. 140659 2. 997684 1. 717386 1. 722057 2. 212198 1. 764513  
101927777 1. 3714 1. 235945 0. 877823 0. 925655 0. 579593 2. 153536 1. 212218 1. 053738  
101927780 2. 499739 1. 827407 1. 474676 1. 808362 2. 735017 1. 650772 1. 811525 2. 32651  
101927783 1. 372254 1. 805172 2. 49934 1. 543182 1. 428048 2. 121985 1. 629824 1. 467825  
101927786 0. 808317 1. 330185 0. 780549 1. 974681 1. 624501 0. 994469 1. 176451 1. 177874  
101927787 2. 446663 2. 366801 2. 520885 2. 901762 2. 792057 3. 331115 2. 862399 2. 847258  
101927789 3. 099671 3. 341717 4. 38639 3. 712184 2. 236568 3. 390777 2. 797423 2. 675052  
101927792 2. 648061 1. 268184 1. 123131 1. 277546 1. 182519 1. 003982 1. 083524 1. 171235  
101927794 2. 853605 2. 005277 1. 710077 1. 272386 1. 798542 2. 879922 2. 580428 1. 924018  
101927795 1. 735732 1. 362244 1. 748004 1. 400685 1. 805424 1. 847093 1. 807782 1. 435861  
101927796 0. 999225 1. 02106 1. 355524 1. 592447 1. 273169 1. 265584 1. 653704 1. 711346  
101927797 2. 892525 1. 354131 1. 672118 1. 407798 1. 594162 1. 728121 1. 795238 3. 005301  
101927798 1. 531879 1. 338063 1. 389878 1. 695495 1. 025878 1. 259281 1. 889713 1. 239715  
101927799 1. 79474 1. 60203 1. 876089 2. 047755 1. 538743 1. 714826 1. 232781 1. 982258  
101927800 0. 790026 0. 756867 1. 756064 1. 150542 1. 227502 1. 325231 1. 012567 0. 947209  
101927801 1. 659896 1. 988866 1. 685755 1. 639086 2. 797443 1. 216794 1. 659896 2. 106325  
101927802 1. 456824 2. 000994 2. 103576 1. 517322 1. 890905 1. 553129 2. 152295 1. 795667  
101927803 1. 610446 2. 068855 1. 249346 1. 629186 2. 58152 1. 618788 1. 883247 1. 881438  
101927805 1. 24935 0. 953896 1. 429887 0. 621967 1. 097445 0. 523487 0. 781384 1. 763978  
101927808 1. 288656 1. 777512 1. 489416 1. 642562 2. 183479 1. 70476 1. 482015 2. 357951  
101927810 2. 058631 1. 969696 4. 020424 2. 823956 1. 373281 2. 424014 1. 442298 2. 181397  
101927811 4. 433461 4. 260537 4. 623074 4. 109482 4. 009609 3. 075615 4. 130927 3. 602715  
101927813 1. 007802 1. 158071 1. 134365 1. 054466 1. 092566 1. 466995 1. 49066 1. 109976  
101927814 1. 428292 1. 922317 1. 325387 1. 719446 2. 273 1. 830926 2. 243063 1. 31211  
101927815 1. 527961 1. 381883 1. 902631 2. 497926 1. 422595 1. 141842 1. 781398 1. 362487  
101927816 2. 415742 2. 50124 2. 601253 1. 976944 2. 915158 1. 455595 1. 28275 3. 695728  
101927820 3. 041899 3. 075318 3. 846929 3. 021864 3. 007159 3. 824551 3. 157458 2. 124534  
101927821 1. 201537 1. 32638 1. 58305 1. 119179 1. 771684 1. 329996 1. 736577 0. 891  
101927822 2. 509577 2. 542276 1. 460457 1. 587907 1. 887826 2. 442507 2. 347954 2. 022239  
101927823 1. 160387 1. 61797 2. 966652 1. 132512 1. 358448 1. 039331 1. 614059 1. 042333

101927824 3. 014426 1. 947719 2. 774498 1. 699025 3. 622204 3. 08628 2. 569564 1. 61567  
101927827 1. 906969 1. 08568 1. 173404 1. 873254 1. 404638 1. 341656 1. 599438 1. 316791  
101927828 1. 680985 1. 541572 2. 11828 1. 943897 2. 029644 1. 875673 2. 586125 1. 757804  
101927829 0. 825892 1. 904999 1. 241985 1. 145336 1. 152599 3. 020012 0. 887499 1. 12828  
101927831 1. 59257 2. 600364 1. 790672 1. 827747 1. 430675 1. 925333 1. 075324 3. 27899  
101927832 1. 251408 1. 132012 1. 228052 0. 591928 1. 074478 1. 339282 1. 251408 1. 092138  
101927835 1. 62497 2. 434531 1. 122145 1. 898643 2. 16247 3. 053816 2. 42058 1. 680949  
101927836 1. 367616 1. 507664 1. 924679 1. 870271 2. 882582 1. 472748 3. 043926 1. 71545  
101927837 1. 523333 1. 496364 0. 940735 1. 400998 1. 037512 1. 62286 1. 600243 2. 841482  
101927839 1. 665444 1. 837293 1. 912608 2. 075546 1. 790508 2. 747219 2. 655625 2. 13178  
101927841 1. 672614 1. 923605 2. 570011 1. 578554 2. 264092 0. 93847 1. 541162 0. 979356  
101927842 0. 983978 1. 546622 1. 606037 1. 371856 1. 631136 2. 161688 1. 223148 1. 636316  
101927843 1. 463103 1. 436971 1. 36185 1. 298126 1. 269836 1. 492488 1. 544094 1. 795295  
101927845 0. 842741 1. 145107 1. 395021 0. 987933 1. 95093 1. 228023 1. 522594 1. 394154  
101927847 2. 510753 2. 004481 1. 196193 1. 578539 1. 336488 2. 516055 1. 966274 1. 236668  
101927849 0. 87526 1. 213289 1. 596756 1. 348851 1. 515769 1. 618203 1. 386596 1. 785177  
101927853 1. 363014 1. 459534 1. 70344 1. 182283 1. 738807 1. 383944 1. 353508 1. 615391  
101927856 2. 135926 1. 976257 2. 304576 3. 376915 1. 066659 1. 439262 3. 510184 1. 94455  
101927857 3. 348257 1. 550664 2. 298106 1. 085437 1. 849867 2. 469943 1. 682206 1. 638512  
101927858 1. 947912 2. 192093 2. 532045 1. 471501 2. 879542 2. 083705 2. 664639 1. 778144  
101927861 2. 491018 1. 26614 2. 274477 2. 504599 3. 402095 1. 456756 1. 496927 1. 369879  
101927862 1. 598299 1. 598764 1. 946262 2. 087304 3. 132352 1. 794074 2. 232976 3. 145748  
101927865 1. 203581 0. 896566 1. 216447 0. 810927 1. 604751 1. 078723 1. 577384 2. 167944  
101927866 1. 39159 1. 147061 1. 077622 1. 287973 1. 158448 0. 984774 1. 748142 1. 154434  
101927867 1. 091375 0. 497768 1. 077884 0. 495639 0. 655386 2. 556372 0. 892096 2. 218373  
101927869 1. 540288 1. 42735 1. 218202 1. 090073 1. 719527 1. 025401 1. 205662 1. 18157  
101927870 1. 25829 1. 098708 1. 488578 1. 111648 1. 39923 1. 006391 1. 364256 1. 546184  
101927871 1. 044555 1. 330664 1. 460134 1. 023319 2. 11244 1. 204285 1. 739315 1. 540462  
101927872 1. 809521 1. 164668 1. 931236 1. 633023 1. 814152 3. 000369 2. 112744 1. 530586  
101927873 1. 125033 1. 816404 1. 37792 1. 476293 2. 996474 1. 383554 0. 740976 2. 05273  
101927874 0. 697782 1. 013333 1. 56531 1. 362617 0. 93641 0. 604104 0. 487774 1. 745175  
101927877 1. 98529 1. 520963 1. 741012 1. 987568 2. 318298 2. 201009 2. 725269 2. 153664  
101927880 1. 325786 1. 077366 1. 567083 0. 816172 1. 377022 0. 76725 0. 936978 2. 153196  
101927881 1. 403475 1. 822683 2. 325534 1. 808569 1. 476255 0. 868795 1. 547132 2. 031409  
101927882 0. 894037 1. 041169 0. 991999 0. 905892 1. 945098 0. 957513 1. 489995 1. 902621  
101927884 2. 658836 2. 290301 2. 604308 2. 343818 2. 327617 2. 264845 2. 509339 2. 147207  
101927885 2. 216464 1. 442083 0. 781406 0. 933681 2. 221714 1. 291679 1. 274303 1. 335174  
101927886 3. 959387 3. 069251 2. 597343 4. 458362 1. 976829 3. 952956 4. 406013 3. 325073  
101927888 2. 481642 2. 599491 3. 070673 2. 035688 2. 257601 2. 56374 2. 196148 1. 949331  
101927889 1. 54978 1. 409035 1. 732567 1. 260437 1. 415222 1. 259964 1. 872767 1. 435298  
101927891 1. 298964 1. 292675 1. 646637 1. 620449 1. 931255 1. 568144 1. 948211 1. 790209  
101927895 3. 520987 3. 283204 3. 977357 3. 688528 4. 046905 2. 865186 3. 278069 3. 520515  
101927896 1. 168212 1. 477899 3. 63738 3. 02963 2. 438377 2. 017501 2. 278845 2. 204619  
101927900 1. 370208 1. 221071 1. 545391 1. 353094 2. 41704 1. 429937 1. 897644 1. 892566  
101927901 1. 26861 1. 439657 1. 376884 1. 648868 1. 587935 1. 507869 1. 53028 1. 442857  
101927902 2. 91306 1. 5836 1. 437193 2. 399326 1. 895585 1. 57143 1. 894286 3. 078946  
101927903 3. 15391 2. 650593 2. 779679 3. 37699 2. 451057 2. 60683 3. 643931 3. 021348  
101927904 1. 629652 1. 286047 1. 337859 0. 928933 1. 103931 1. 334151 1. 758731 1. 168264  
101927905 1. 371865 1. 319903 1. 238045 0. 543438 1. 399636 0. 915654 2. 798504 2. 046031  
101927907 1. 387265 0. 957454 0. 90192 0. 747114 1. 263251 1. 225561 1. 361888 0. 965356  
101927908 1. 374585 1. 500457 1. 561697 1. 170993 1. 371584 1. 260272 1. 181869 1. 360623



101927910 4. 655712 2. 873031 3. 304602 1. 742859 1. 766724 5. 824893 5. 782659 3. 692162  
101927913 1. 981624 1. 457306 1. 12813 1. 468367 2. 104165 2. 11368 1. 421689 1. 433237  
101927914 1. 683859 1. 321409 1. 338875 1. 418048 1. 687707 1. 371604 1. 865854 1. 898218  
101927916 1. 868558 2. 497621 1. 641395 1. 746605 1. 667269 1. 505835 2. 290798 1. 910895  
101927917 1. 331022 1. 354778 1. 265653 1. 290124 1. 386318 1. 970098 1. 380977 1. 087129  
101927919 2. 001614 1. 814564 1. 396395 1. 516823 2. 063553 1. 519577 1. 794485 1. 839445  
101927921 1. 315542 1. 044945 1. 357153 2. 073073 1. 618633 1. 326292 1. 669545 1. 479514  
101927922 1. 387063 0. 681055 1. 555499 1. 409025 0. 73994 1. 145053 2. 499848 1. 006017  
101927924 1. 744521 1. 165196 2. 239433 2. 893521 2. 265005 2. 570933 2. 471825 2. 261966  
101927926 1. 531806 1. 885995 1. 174488 1. 105872 1. 14744 1. 47035 1. 666409 1. 325707  
101927929 2. 432411 2. 842099 3. 652668 2. 928756 4. 328581 2. 61193 2. 754665 3. 683915  
101927931 0. 547955 1. 188665 2. 134121 1. 537034 2. 919134 2. 330026 2. 598937 2. 039381  
101927932 1. 960527 1. 943709 3. 216621 2. 72915 1. 158456 1. 535022 1. 92079 1. 639333  
101927933 2. 321697 2. 066598 0. 946279 1. 138668 2. 20922 0. 626431 1. 211357 0. 820471  
101927934 1. 769799 1. 701932 2. 439429 1. 736389 1. 969947 2. 528026 2. 177986 1. 82455  
101927936 1. 131995 1. 089909 0. 89733 0. 664878 0. 851879 1. 029961 1. 940639 0. 548725  
101927942 1. 066148 1. 184704 2. 005967 1. 106702 1. 64183 1. 034355 1. 527162 1. 607566  
101927943 2. 370368 2. 87492 0. 827643 1. 821714 3. 51 2. 498036 1. 347047 1. 812958  
101927944 3. 989845 3. 376127 3. 529043 3. 824527 4. 167072 3. 626536 3. 423658 2. 578653  
101927946 1. 510513 0. 844194 2. 111588 1. 510513 1. 548516 1. 144382 2. 248668 1. 168181  
101927948 2. 565891 1. 615376 1. 46232 1. 810918 1. 982346 2. 768978 2. 108187 1. 887802  
101927949 3. 616931 1. 750732 1. 785424 4. 104297 2. 597514 3. 492558 2. 937266 2. 450285  
101927952 2. 090299 2. 003956 2. 311437 2. 516368 2. 116243 2. 196025 2. 2138 2. 196025  
101927953 2. 76531 2. 668945 2. 769362 2. 801701 2. 487215 3. 035239 3. 087807 2. 959882  
101927957 1. 767895 2. 00753 1. 548286 2. 112607 2. 144014 3. 280172 2. 719024 1. 882725  
101927958 2. 772468 1. 360242 2. 035171 2. 912335 3. 116615 3. 555887 3. 492826 3. 027515  
101927959 2. 8655 4. 426165 3. 02195 3. 589319 1. 324641 1. 920322 3. 049499 1. 311887  
101927960 5. 316652 4. 63403 6. 02156 3. 477485 6. 743522 6. 079325 2. 511436 3. 964624  
101927963 3. 872844 4. 721635 3. 265376 3. 744727 3. 881058 3. 492356 3. 825093 3. 634547  
101927964 1. 709483 1. 315542 1. 629142 1. 236519 1. 489481 1. 347916 2. 061242 1. 328755  
101927967 1. 48514 0. 939002 0. 917638 1. 017488 1. 107114 0. 949304 0. 890903 1. 024923  
101927969 1. 630195 1. 280475 1. 464383 1. 439506 1. 397688 2. 079778 1. 561205 1. 209346  
101927972 1. 624838 1. 703212 1. 380091 1. 547886 1. 800914 1. 347633 1. 546301 1. 822495  
101927973 2. 432906 1. 8256 1. 082862 2. 793571 2. 136611 0. 917419 0. 62401 2. 520261  
101927974 3. 276287 2. 431046 2. 761031 2. 30326 2. 343591 3. 76856 2. 066094 3. 106211  
101927975 2. 363574 2. 376651 2. 287814 2. 35835 3. 592212 2. 606457 3. 014957 2. 576019  
101927981 2. 4472 2. 659348 3. 741297 3. 017023 3. 18918 1. 497559 2. 10462 2. 648553  
101927983 1. 843679 1. 362345 1. 161476 1. 847574 2. 742623 1. 072089 1. 997915 1. 624609  
101927987 1. 070088 1. 231612 1. 205092 1. 158705 1. 586265 1. 075889 1. 554239 1. 445106  
101927988 1. 493683 1. 530776 1. 348369 1. 447227 1. 213201 1. 198698 1. 236909 1. 613447  
101927990 1. 834086 1. 168783 1. 242309 1. 736077 1. 496947 1. 346789 1. 375864 1. 49814  
101927991 2. 654299 0. 621551 2. 210392 2. 461097 4. 15359 2. 739004 1. 99359 4. 507197  
101927992 1. 657998 1. 38918 1. 392603 1. 264594 1. 477846 1. 765855 1. 319154 2. 509512  
101927993 2. 931336 2. 865169 2. 434424 3. 081828 2. 448461 3. 506783 2. 684333 1. 891933  
101927994 1. 495219 1. 858227 1. 170562 0. 706341 0. 854394 1. 373199 1. 063251 1. 745248  
101927995 4. 006649 3. 589385 4. 883041 4. 986068 4. 325677 4. 699052 2. 733393 3. 700957  
101927999 5. 307515 5. 218664 6. 068864 7. 447562 4. 998848 6. 610091 6. 191323 4. 365612  
101928000 4. 310284 3. 84286 5. 455089 2. 940866 2. 544107 2. 648291 2. 909587 2. 526097  
101928002 1. 973739 1. 078156 1. 447226 1. 078839 1. 467781 1. 330523 1. 97008 1. 300835  
101928004 4. 400801 4. 746631 4. 297543 2. 97956 4. 486342 1. 985124 2. 617058 3. 943376  
101928005 2. 826159 1. 497183 2. 834562 1. 231342 1. 331611 2. 68541 2. 318757 2. 648236

101928008 1. 174112 1. 874021 1. 185661 1. 067287 1. 091623 0. 829205 1. 107821 1. 102584  
101928009 1. 411567 1. 110434 2. 152943 1. 574903 2. 366404 1. 602288 2. 469678 1. 444301  
101928011 0. 850324 1. 704213 2. 514401 1. 593822 2. 770997 0. 998605 3. 079169 1. 352835  
101928012 1. 369001 1. 255805 1. 516694 1. 214346 1. 600471 1. 638168 1. 319605 1. 145664  
101928014 1. 678759 1. 522837 1. 510052 1. 89266 2. 507394 2. 029863 2. 736437 2. 266487  
101928015 2. 061728 1. 647538 2. 084283 1. 592506 2. 111851 1. 600027 1. 562317 1. 720572  
101928017 2. 928321 3. 125525 3. 248132 4. 348369 4. 325052 3. 167505 2. 833941 4. 451588  
101928020 3. 998269 2. 885498 2. 419447 2. 961792 3. 25319 3. 246017 2. 093405 2. 450607  
101928021 3. 05868 0. 899153 3. 69897 0. 909369 0. 909383 1. 556426 2. 312935 0. 723165  
101928022 1. 173352 1. 813776 1. 506132 1. 002897 1. 9196 1. 608851 1. 192374 2. 213286  
101928026 1. 545051 1. 549506 0. 741297 0. 848907 1. 100799 1. 406832 1. 656819 2. 089907  
101928027 4. 002141 5. 852699 2. 984985 5. 352173 2. 294622 6. 542587 5. 709296 4. 447467  
101928030 1. 461069 1. 662503 1. 340448 1. 19829 1. 414037 1. 402441 1. 544099 1. 00799  
101928031 1. 45174 1. 150294 0. 78187 1. 073897 1. 516768 2. 335056 1. 289146 1. 606331  
101928033 1. 184577 1. 602844 2. 16309 1. 689648 1. 595846 1. 196643 1. 033346 1. 454222  
101928035 3. 432098 3. 313818 2. 200703 3. 410689 2. 61377 2. 801223 3. 159294 3. 186045  
101928036 1. 257942 1. 344808 1. 040801 1. 088618 1. 380405 1. 371612 1. 083788 1. 139644  
101928037 4. 468255 4. 431238 2. 099915 2. 612078 3. 191024 1. 821176 2. 950314 3. 045668  
101928038 2. 312566 1. 631786 2. 457216 2. 483258 3. 131663 2. 059482 1. 86834 1. 578915  
101928040 1. 354493 1. 391862 1. 382969 1. 187027 1. 709321 1. 246562 0. 972113 1. 049484  
101928043 1. 333675 1. 958771 1. 37459 1. 372849 1. 591917 1. 582795 1. 55168 3. 078605  
101928045 3. 175321 2. 649493 2. 634544 3. 226512 2. 88981 2. 493856 2. 962595 2. 213265  
101928046 1. 008638 1. 982565 1. 4919 0. 907455 0. 739994 0. 850353 1. 068651 3. 584468  
101928047 2. 221118 1. 48708 0. 939414 1. 275944 1. 60741 1. 281935 1. 62033 1. 691743  
101928048 1. 206082 2. 018999 0. 538389 1. 827023 1. 374581 1. 547131 1. 354272 1. 669233  
101928049 2. 870523 5. 513575 3. 684953 0. 739461 0. 727639 4. 493437 1. 411198 1. 463458  
101928051 1. 034273 1. 875348 1. 365249 2. 428655 0. 978469 2. 505205 1. 265293 6. 174192  
101928052 1. 461744 1. 533003 2. 009979 1. 576699 2. 167828 1. 405535 1. 634066 2. 382629  
101928053 1. 734221 1. 666193 1. 924433 1. 722166 2. 672745 1. 665305 1. 366502 2. 243925  
101928054 2. 182219 2. 885386 2. 996792 3. 891827 3. 089063 2. 882418 2. 633632 3. 484034  
101928056 1. 552585 3. 537946 2. 356592 3. 295552 1. 062327 4. 491727 4. 27779 4. 047415  
101928058 2. 148526 2. 078869 2. 166002 1. 311835 1. 054695 1. 231993 1. 672978 1. 308237  
101928061 5. 482017 5. 13194 4. 005719 4. 340041 2. 390876 3. 896957 3. 832562 5. 637627  
101928062 1. 88707 1. 19398 2. 764211 2. 167133 1. 382324 1. 267099 1. 817222 2. 498149  
101928063 3. 962595 4. 406919 4. 832116 2. 772767 4. 066564 4. 566183 3. 02163 4. 818522  
101928067 1. 251509 1. 013292 1. 520164 2. 203964 1. 126246 1. 166103 1. 035392 1. 476858  
101928069 4. 500585 4. 770423 4. 863487 4. 585426 4. 25831 4. 126654 5. 310643 3. 68164  
101928075 1. 635878 0. 75172 1. 397943 1. 433364 1. 368341 0. 988981 1. 082085 1. 973793  
101928076 2. 743273 2. 010176 1. 97816 3. 597047 3. 196993 2. 481745 2. 780809 2. 548415  
101928077 0. 846115 2. 23855 0. 823403 1. 628034 1. 26447 1. 05708 0. 949228 1. 066395  
101928079 2. 156817 1. 90352 2. 004413 2. 868553 2. 358002 3. 128188 1. 846165 2. 046557  
101928080 1. 030945 1. 369362 1. 493134 1. 478571 1. 801251 1. 162299 1. 380219 1. 448856  
101928081 2. 00311 2. 832417 2. 797558 1. 577327 2. 193648 2. 687343 1. 815449 0. 804058  
101928085 4. 686462 3. 782048 2. 459275 2. 481677 1. 368196 3. 347592 3. 251264 0. 814537  
101928087 1. 329762 1. 351766 1. 927011 1. 232887 2. 359843 1. 272051 1. 294288 2. 021069  
101928089 1. 28615 2. 04945 2. 467992 1. 303554 1. 774586 2. 077872 1. 187006 1. 283679  
101928093 1. 576462 1. 364818 1. 211807 1. 194694 1. 492597 1. 099134 1. 379905 1. 548473  
101928096 2. 982063 1. 135801 2. 039711 0. 899923 0. 574358 1. 867504 0. 944836 2. 396171  
101928098 2. 085765 2. 029012 1. 253606 1. 645429 4. 08001 2. 351177 1. 10429 1. 880451  
101928099 2. 318991 2. 170054 2. 396312 2. 754559 2. 30036 2. 027606 1. 817124 1. 111659  
101928100 3. 044435 3. 156982 3. 598593 3. 005195 3. 507596 3. 000155 2. 14084 3. 228953

101928101 2. 431761 1. 635765 1. 972489 1. 690189 1. 876831 2. 372629 1. 929354 1. 314985  
101928102 3. 929883 5. 141566 5. 037524 2. 833968 4. 992578 3. 553822 4. 038609 5. 014217  
101928103 1. 481319 1. 078072 1. 295278 1. 509764 1. 240486 1. 381537 1. 482282 1. 271715  
101928104 0. 854904 1. 183125 0. 91591 0. 919373 1. 975385 2. 415058 1. 152799 1. 07743  
101928105 1. 902297 1. 471863 1. 644771 2. 456626 1. 41897 1. 117821 1. 479202 2. 204725  
101928106 1. 578009 1. 656094 1. 773259 1. 548848 2. 954415 1. 139645 1. 747535 1. 378427  
101928107 2. 525897 1. 849113 1. 880719 2. 714765 1. 788117 2. 662455 1. 98803 2. 41396  
101928108 1. 984301 2. 192154 2. 262754 2. 124769 2. 93669 1. 851231 3. 12748 2. 415469  
101928111 4. 781609 5. 579299 4. 911643 4. 359057 2. 83974 5. 149042 4. 427517 4. 771632  
101928113 2. 238531 2. 589111 2. 067006 1. 966871 2. 673075 3. 133711 2. 138448 3. 317878  
101928114 1. 645796 0. 988406 1. 457723 1. 017642 1. 832973 2. 400224 2. 213047 1. 187309  
101928115 1. 683731 2. 200288 1. 395482 1. 440313 1. 879475 2. 402945 1. 49947 2. 15637  
101928117 1. 073485 1. 480748 1. 429072 1. 207743 1. 183073 0. 700925 1. 590607 1. 541445  
101928118 1. 988189 2. 203002 2. 090823 2. 420946 2. 883861 2. 201851 1. 487576 2. 391379  
101928119 1. 815579 2. 355059 1. 973798 3. 15345 1. 598158 2. 933687 1. 761163 3. 397827  
101928122 1. 3003 1. 434589 1. 283897 0. 99611 0. 976596 1. 115137 0. 889092 1. 69326  
101928123 4. 271771 2. 635817 3. 146579 1. 851172 2. 714635 4. 154031 2. 980562 3. 978763  
101928124 1. 064216 1. 544122 1. 059158 1. 254323 1. 77085 1. 275589 1. 340073 1. 571841  
101928125 1. 305478 0. 833859 1. 048219 1. 281272 1. 387593 0. 955876 1. 048396 1. 43364  
101928126 3. 511582 2. 931297 4. 465478 2. 907671 3. 960962 0. 872896 1. 290649 1. 498619  
101928128 1. 04108 1. 228935 1. 200883 1. 746323 1. 414407 0. 856435 2. 087785 1. 549406  
101928129 1. 897611 0. 918458 1. 945369 1. 264809 1. 314489 2. 530099 1. 433345 3. 257621  
101928131 1. 149057 1. 79099 1. 140514 0. 875266 1. 486145 1. 566127 1. 802811 1. 55433  
101928132 1. 151642 1. 395733 1. 481129 1. 173184 1. 901009 1. 498981 0. 970596 1. 253868  
101928134 1. 226924 1. 432678 1. 167372 1. 171823 1. 418732 1. 092209 1. 289841 0. 856406  
101928136 0. 982769 2. 953662 0. 483173 3. 225215 1. 958908 2. 400673 1. 356561 2. 142469  
101928137 1. 850049 1. 457233 0. 777752 1. 733375 1. 053013 1. 040116 0. 942815 1. 219714  
101928138 2. 467047 1. 254378 1. 422282 1. 329128 1. 925341 1. 391714 1. 360235 1. 576176  
101928139 2. 178786 2. 470227 2. 363646 2. 234958 2. 263947 1. 555318 2. 478607 3. 057072  
101928140 2. 060114 2. 38361 2. 242323 2. 291384 2. 714364 1. 882606 2. 507419 2. 470447  
101928141 1. 448431 0. 938805 1. 161073 1. 067313 1. 905962 1. 468227 1. 767507 1. 496473  
101928142 1. 111976 1. 102236 1. 71955 1. 448115 1. 570152 1. 053038 0. 857209 1. 894171  
101928143 2. 624277 1. 532302 1. 159528 1. 676971 1. 817065 4. 057964 1. 611574 0. 827266  
101928151 1. 069654 0. 95853 1. 44104 0. 940963 0. 984011 1. 294857 1. 030637 1. 277124  
101928154 1. 912322 2. 318418 1. 746647 2. 805518 3. 508122 2. 318418 3. 664717 1. 917021  
101928157 1. 121882 0. 405753 1. 615009 0. 602988 1. 940791 0. 698241 0. 544688 0. 732493  
101928158 3. 926323 2. 637204 3. 3524 4. 346919 3. 166709 2. 436673 2. 730104 3. 197413  
101928160 1. 977272 3. 340453 2. 234443 3. 216862 3. 656715 0. 785466 2. 902219 2. 438425  
101928161 1. 406925 1. 785628 1. 809888 1. 734478 2. 065995 2. 301213 4. 076413 0. 900322  
101928162 1. 810165 2. 252741 1. 832 1. 399006 2. 367489 2. 465836 1. 67262 1. 588001  
101928165 1. 234822 0. 758103 1. 065372 1. 122728 0. 889015 0. 9804 1. 839403 1. 236195  
101928167 0. 950315 1. 156382 0. 738368 0. 971769 1. 62793 1. 524577 1. 401276 1. 220183  
101928169 1. 476065 1. 033156 1. 54513 1. 193909 1. 546011 1. 374402 0. 792145 1. 42159  
101928170 7. 250685 7. 518862 7. 865881 7. 296843 7. 213685 7. 118539 7. 411722 7. 343045  
101928173 4. 135941 2. 225979 3. 68677 1. 225628 1. 821315 2. 404373 2. 588011 1. 876761  
101928174 1. 499202 1. 32416 1. 108558 1. 011873 1. 468995 1. 642603 1. 631738 1. 981986  
101928176 3. 385739 2. 538186 2. 75963 2. 7023 2. 982757 2. 558559 2. 963148 3. 960663  
101928177 2. 426304 1. 24441 3. 728557 1. 523866 1. 778235 1. 258129 3. 861295 1. 272312  
101928180 4. 18568 1. 916835 1. 837822 3. 328089 1. 641142 1. 649027 1. 719148 2. 587085  
101928185 1. 451582 1. 484532 1. 401554 1. 813251 1. 492098 1. 101184 1. 79709 2. 105525  
101928188 1. 335144 2. 995319 2. 962711 2. 101026 2. 240189 1. 372372 2. 394933 1. 059515

101928190 1. 797437 0. 966865 0. 96593 1. 687018 1. 569781 2. 101853 1. 266857 1. 673123  
101928195 0. 411141 3. 414629 3. 092764 3. 957104 2. 269369 4. 628069 3. 625543 3. 179595  
101928196 0. 854566 0. 692667 0. 976498 1. 076317 1. 806587 0. 880235 0. 994573 1. 275045  
101928199 3. 104239 4. 592382 1. 861287 2. 82807 1. 873133 2. 110404 1. 648168 2. 472677  
101928200 2. 408344 2. 255268 2. 636828 1. 723051 2. 352417 2. 428565 2. 892092 2. 283744  
101928201 1. 155257 1. 295545 1. 168089 0. 85509 1. 264962 0. 723397 1. 101678 2. 171955  
101928202 1. 38185 1. 079416 1. 03445 2. 00898 3. 673841 1. 14953 1. 063545 1. 423654  
101928203 1. 575861 1. 603919 2. 222852 1. 829282 2. 255906 2. 009509 2. 259437 1. 763189  
101928205 1. 598981 1. 366609 1. 534531 0. 948898 1. 51921 1. 305048 1. 083863 1. 641188  
101928207 0. 835585 0. 640944 0. 893012 1. 002053 1. 050127 0. 882573 0. 745855 0. 98581  
101928208 3. 619991 2. 479345 0. 739834 3. 216157 1. 493508 1. 075013 4. 123142 1. 510028  
101928211 1. 721924 1. 350193 1. 313219 1. 418232 2. 324527 1. 258545 1. 849696 1. 467999  
101928219 1. 450224 1. 593629 1. 177448 3. 023466 1. 114286 2. 120754 1. 611643 1. 450565  
101928220 1. 942784 2. 418757 1. 914246 3. 577412 1. 965212 2. 180478 1. 806055 2. 815612  
101928221 3. 461918 0. 714443 2. 553392 4. 366683 1. 360501 1. 184428 2. 148678 1. 074551  
101928222 2. 482879 1. 662607 1. 424693 1. 879222 2. 771781 2. 185925 1. 703001 2. 586121  
101928223 0. 709211 1. 473565 1. 880151 1. 923102 0. 943969 0. 504473 2. 601835 1. 676106  
101928225 1. 902924 1. 633764 1. 617645 1. 659154 2. 15037 1. 70955 1. 735143 3. 124305  
101928226 2. 5316 1. 830733 2. 241255 1. 633324 1. 379447 1. 503535 1. 560997 2. 506818  
101928227 0. 629773 2. 272528 2. 304846 1. 655096 0. 593403 1. 580916 2. 26073 1. 131111  
101928228 1. 123799 2. 069228 1. 528465 1. 046664 1. 193071 0. 583877 1. 031097 1. 082598  
101928231 1. 250121 1. 135541 1. 708507 1. 739017 1. 184301 2. 030564 1. 219848 1. 510143  
101928232 2. 764802 2. 406569 2. 397662 1. 986432 2. 470772 2. 702443 2. 565794 3. 10977  
101928233 2. 178709 2. 640945 3. 323146 2. 80191 2. 6392 3. 068155 2. 929921 1. 975185  
101928236 1. 036464 2. 155751 1. 909361 2. 118625 1. 6392 3. 116618 1. 835146 1. 414892  
101928237 0. 796692 1. 918689 2. 638746 1. 643891 1. 991456 1. 228468 1. 207424 1. 447851  
101928238 4. 757986 4. 196819 4. 536363 4. 571599 4. 946267 4. 763554 3. 569519 6. 371162  
101928239 2. 554663 2. 952447 1. 453366 2. 212162 2. 52353 2. 016538 2. 443351 2. 405951  
101928241 2. 042934 1. 582044 1. 142132 1. 249285 1. 894704 1. 89798 1. 663294 1. 975429  
101928243 2. 660865 1. 935689 1. 907129 1. 852985 2. 250254 1. 759875 1. 984481 1. 877533  
101928244 1. 774739 2. 224484 2. 576054 2. 235153 2. 216686 2. 343299 2. 533743 1. 864109  
101928245 1. 345147 1. 012722 1. 37339 1. 058688 1. 15209 2. 028432 2. 134322 2. 204396  
101928246 2. 712204 2. 858297 2. 573304 2. 455703 3. 075747 2. 161547 2. 47034 2. 542772  
101928248 2. 403512 4. 509577 1. 971292 1. 777094 1. 684177 1. 610548 2. 920721 2. 068493  
101928249 3. 643143 4. 052331 3. 484521 4. 26364 2. 555618 2. 301172 1. 960454 3. 440551  
101928250 1. 087431 0. 888688 1. 247674 0. 858901 1. 094916 0. 640716 1. 498059 1. 253104  
101928253 1. 32652 0. 7691 1. 071131 1. 068525 1. 369777 1. 299535 1. 021988 1. 718057  
101928254 1. 753345 0. 990985 1. 383821 1. 383821 1. 176433 1. 383821 1. 158699 1. 383821  
101928255 2. 539356 1. 646492 1. 864395 2. 20716 1. 780495 1. 472827 2. 89674 2. 654271  
101928257 0. 67378 0. 538082 1. 552871 0. 953135 0. 904147 1. 54717 0. 625082 1. 581484  
101928258 1. 186967 2. 637278 1. 052549 1. 271802 1. 740878 0. 701216 2. 543773 1. 908023  
101928259 1. 206311 1. 4764 1. 550212 1. 327076 0. 922622 2. 329319 1. 195346 1. 081832  
101928262 0. 894148 1. 164282 2. 231992 1. 549112 1. 107918 1. 196058 2. 050532 1. 164282  
101928264 0. 830343 1. 136572 1. 544529 1. 802542 0. 710527 1. 395611 0. 955743 2. 053981  
101928269 0. 964444 0. 785844 0. 710921 0. 471094 1. 374335 1. 060922 1. 1885 0. 44592  
101928270 1. 110818 1. 087391 1. 558893 1. 405877 1. 555584 1. 32652 1. 558122 1. 226637  
101928271 1. 35828 0. 947544 1. 124678 1. 459784 0. 826728 1. 577047 1. 299403 1. 453895  
101928273 1. 966758 1. 277575 2. 121255 1. 960931 1. 739217 2. 132234 1. 860694 1. 677125  
101928275 2. 772081 3. 153046 2. 88327 2. 671868 2. 650062 2. 749548 3. 450694 2. 162046  
101928276 1. 187125 1. 257048 0. 696626 1. 130183 2. 122279 0. 466184 1. 726839 1. 168852  
101928277 1. 678006 1. 027778 1. 238187 0. 928124 0. 828036 1. 957981 1. 185112 1. 689614

101928279 1. 684493 2. 47696 1. 856534 1. 774792 2. 20164 1. 279841 2. 341055 1. 541707  
101928280 1. 171303 1. 456147 0. 892225 1. 423208 1. 299157 1. 377269 1. 195768 1. 280724  
101928283 1. 240262 1. 05879 1. 166416 0. 994584 1. 019318 0. 874893 1. 00226 1. 628891  
101928284 2. 162744 2. 468649 1. 464027 1. 604703 2. 120005 1. 630189 1. 760208 3. 917073  
101928287 1. 468852 2. 716566 2. 009417 1. 678343 2. 030365 2. 590108 2. 452147 3. 075992  
101928288 1. 38095 1. 459045 1. 273982 1. 211118 1. 45416 1. 324171 1. 640088 1. 831203  
101928290 4. 356334 3. 873577 3. 588201 3. 077884 3. 205463 3. 153298 3. 071511 4. 512167  
101928291 4. 960234 2. 839611 4. 13818 3. 927003 3. 057396 3. 059125 5. 015404 2. 865494  
101928292 1. 404403 2. 01358 1. 957757 1. 778637 1. 473499 1. 555049 1. 376264 2. 122139  
101928298 1. 080034 1. 093572 1. 460335 1. 095326 1. 491223 1. 131586 1. 144227 1. 565534  
101928300 2. 307892 2. 390274 2. 52505 2. 266558 2. 944441 1. 774834 3. 139663 3. 646251  
101928303 1. 700735 2. 591733 2. 466417 1. 66716 1. 706002 1. 745169 1. 959785 2. 078789  
101928304 3. 526644 5. 281518 4. 465702 3. 488729 2. 696555 3. 270115 4. 125817 5. 485496  
101928306 1. 077805 1. 415342 0. 780485 2. 248512 3. 33261 2. 130371 2. 188847 1. 037633  
101928307 1. 116555 1. 804733 1. 544394 1. 26037 1. 452044 1. 194536 1. 345824 1. 499812  
101928309 0. 896964 1. 128798 1. 32929 1. 01587 1. 700548 1. 067708 1. 967249 1. 451557  
101928316 1. 161744 1. 076582 1. 495622 1. 185074 1. 753835 1. 417854 2. 334277 0. 793973  
101928322 1. 831204 2. 761437 1. 255886 1. 699659 1. 265833 2. 884897 2. 346857 1. 919762  
101928323 2. 642857 3. 610911 2. 28115 4. 293392 3. 448621 3. 748157 3. 356958 3. 722711  
101928324 1. 997028 1. 830578 2. 954703 2. 810211 2. 722094 2. 90294 2. 024517 1. 903517  
101928325 1. 996133 1. 139647 1. 86088 1. 527967 1. 871074 1. 594563 2. 2224 1. 755624  
101928326 1. 33548 1. 681705 1. 62679 1. 300068 1. 493156 1. 243027 2. 102271 1. 77886  
101928327 1. 036101 1. 36186 1. 275105 1. 117488 2. 001892 1. 167543 1. 172177 1. 32257  
101928331 2. 754823 2. 221171 1. 677108 2. 666316 3. 126925 2. 256884 1. 62393 1. 617899  
101928333 1. 789199 1. 278603 1. 806776 1. 826714 1. 998945 1. 622203 2. 578316 2. 144273  
101928334 1. 55038 0. 700362 0. 947419 0. 870747 0. 921461 0. 834548 1. 84069 1. 823206  
101928335 1. 923696 2. 123331 2. 335014 1. 501552 2. 022456 2. 382571 1. 307845 1. 687832  
101928336 2. 438806 1. 462295 1. 364403 2. 118888 1. 998962 3. 89046 1. 712217 2. 901077  
101928337 1. 634113 1. 142028 2. 964407 1. 469383 1. 245466 1. 632557 1. 220565 1. 790937  
101928338 1. 03289 0. 997804 1. 682688 0. 984999 1. 634156 1. 17871 1. 119623 1. 233281  
101928340 1. 677607 1. 650422 4. 33387 1. 808287 1. 850282 2. 614841 2. 231609 3. 308036  
101928342 1. 250256 1. 898228 1. 917483 1. 863161 1. 467679 1. 721972 1. 575871 1. 511329  
101928343 1. 914429 1. 192821 1. 520551 3. 110724 2. 704043 1. 501249 2. 630117 2. 49608  
101928346 2. 569963 1. 97222 1. 972227 5. 117319 1. 374558 1. 903767 2. 292656 1. 482296  
101928347 0. 979404 0. 832861 1. 376751 0. 808222 0. 876425 1. 164095 1. 165189 1. 109101  
101928353 1. 817046 1. 898715 2. 215533 1. 771896 1. 805664 2. 153373 1. 80141 1. 921701  
101928354 1. 163144 1. 965802 1. 157223 1. 648129 1. 384832 1. 130613 0. 838582 0. 864878  
101928358 2. 316284 1. 331672 1. 723494 1. 611131 1. 569856 2. 035275 1. 520483 1. 856491  
101928359 3. 068937 3. 076476 2. 93978 3. 373986 2. 998782 2. 927809 3. 146103 3. 147543  
101928360 3. 434443 2. 418586 1. 039931 1. 783529 1. 192594 2. 96771 1. 258732 1. 220976  
101928361 1. 523032 1. 771066 2. 225256 1. 331185 1. 089795 1. 524463 1. 32603 1. 019803  
101928370 3. 272911 3. 216353 3. 872739 2. 713123 2. 05783 3. 957233 3. 072589 1. 871215  
101928371 1. 245265 1. 478546 1. 7167 1. 642219 2. 046752 1. 483392 1. 932238 1. 81857  
101928372 1. 793312 2. 192823 1. 604912 2. 094245 1. 815256 2. 429832 1. 845313 2. 089471  
101928376 0. 886935 1. 628842 2. 113545 1. 487131 1. 524189 1. 318258 2. 466459 1. 511148  
101928377 1. 527133 1. 871086 2. 328087 1. 575414 2. 02034 1. 035601 2. 302363 1. 624373  
101928384 0. 798138 1. 392367 1. 39136 1. 043869 1. 838257 1. 28259 2. 165703 0. 852631  
101928385 0. 784336 1. 90658 1. 553661 1. 041855 1. 334519 1. 241404 1. 995035 1. 378  
101928386 1. 823496 1. 706961 2. 399452 1. 936142 1. 492044 1. 626153 2. 137732 1. 78746  
101928387 3. 081108 2. 112234 1. 888892 4. 012072 1. 021283 2. 433561 2. 864914 2. 585165  
101928388 1. 144044 1. 350585 1. 47104 1. 300587 1. 3321 1. 885375 0. 873743 1. 655004

101928389 1. 382522 1. 19563 1. 414325 0. 982846 1. 649635 1. 926749 1. 215494 1. 22661  
101928391 1. 37381 1. 169278 2. 533264 1. 422265 1. 30656 0. 852743 1. 616075 1. 143809  
101928392 1. 002588 1. 062741 0. 568211 1. 226937 0. 949309 1. 0601 1. 026541 1. 396939  
101928398 1. 115799 1. 330767 1. 923679 1. 300604 1. 40144 1. 492917 1. 533051 1. 292139  
101928399 2. 18014 1. 605572 2. 454111 3. 906342 2. 836454 2. 390884 2. 3993 2. 067269  
101928401 0. 940455 1. 2983 0. 944013 1. 41352 0. 769319 2. 272978 0. 816773 1. 820346  
101928402 2. 633874 5. 319933 1. 578357 1. 979563 1. 334121 1. 622517 1. 601719 4. 284712  
101928403 4. 033474 3. 911575 2. 747021 3. 297266 4. 464979 3. 260139 2. 503618 3. 340192  
101928404 1. 224149 1. 281764 1. 549389 1. 474329 1. 778542 1. 223574 1. 621317 2. 033956  
101928405 0. 975975 0. 981737 1. 924023 1. 280394 2. 494105 0. 908663 1. 680341 1. 374457  
101928406 2. 446058 2. 404085 3. 444928 1. 970099 1. 764468 1. 772895 2. 212704 1. 80972  
101928408 1. 335499 1. 295738 2. 375627 1. 183926 3. 757302 1. 011535 0. 819231 1. 627478  
101928409 2. 137943 0. 916864 1. 175261 1. 135567 2. 048466 1. 135442 1. 279654 1. 09754  
101928414 1. 238764 1. 623537 1. 262695 1. 672126 1. 234934 2. 609825 3. 092119 1. 264497  
101928416 2. 057348 2. 639972 1. 88742 1. 911064 2. 305406 1. 478339 2. 674594 2. 157472  
101928418 1. 201126 1. 522125 1. 825383 1. 214569 1. 625324 2. 093285 1. 269939 2. 169776  
101928420 1. 870424 2. 086658 1. 820212 2. 023825 2. 291677 2. 454862 1. 756775 2. 656803  
101928421 0. 675196 0. 92076 1. 110849 0. 723155 1. 385465 1. 149924 1. 199976 1. 083831  
101928424 1. 882096 2. 244646 2. 016998 1. 48054 1. 35694 1. 85436 3. 160826 1. 931705  
101928426 1. 637545 1. 929733 1. 743589 2. 297229 2. 26088 1. 854445 2. 350992 2. 189468  
101928427 1. 476732 1. 678445 1. 897241 1. 646184 2. 774117 1. 559077 1. 016485 2. 324315  
101928430 0. 824139 1. 462759 1. 157107 1. 219616 3. 413582 0. 91236 0. 91236 2. 172726  
101928431 2. 238411 1. 213992 1. 203083 1. 412287 2. 067635 2. 215977 2. 136311 1. 670821  
101928433 1. 588563 1. 793301 1. 598708 2. 445071 3. 065013 2. 486885 2. 65505 1. 833432  
101928435 2. 314154 1. 375057 1. 058243 0. 869678 1. 927292 1. 32125 0. 993692 1. 488945  
101928436 1. 32277 1. 238915 1. 459446 1. 188442 1. 163624 1. 346073 1. 880376 1. 24282  
101928438 0. 772091 1. 091143 1. 117026 1. 100699 1. 453237 1. 175541 0. 751404 1. 797913  
101928439 1. 377778 1. 445815 1. 379486 1. 434017 1. 452192 1. 960117 1. 859176 1. 30732  
101928440 1. 464466 1. 266737 1. 232484 1. 28117 1. 569572 1. 465865 1. 649144 1. 551125  
101928441 1. 005406 1. 112485 1. 434428 1. 808756 1. 354552 1. 852203 1. 181384 1. 77246  
101928442 1. 510401 1. 029135 1. 316632 1. 321564 1. 388695 1. 21998 1. 200806 1. 721334  
101928443 1. 646769 1. 881031 1. 929622 1. 345889 1. 697306 2. 057375 2. 744771 2. 394772  
101928445 1. 568638 2. 789526 3. 128234 1. 754631 2. 6745 2. 224986 2. 292149 2. 817689  
101928447 1. 674141 1. 721267 2. 050259 2. 264655 1. 986807 1. 596604 1. 977312 1. 886632  
101928448 1. 205063 1. 331438 1. 805779 2. 241126 1. 716534 1. 366207 2. 288831 2. 139123  
101928449 1. 085402 1. 524422 2. 269464 1. 421257 1. 407631 1. 426217 1. 071471 1. 057048  
101928450 5. 308803 4. 224738 5. 462348 3. 526897 1. 946124 4. 759065 4. 976955 3. 35549  
101928451 6. 843872 5. 868277 6. 940659 7. 23733 5. 912517 7. 113341 6. 402656 7. 111461  
101928453 2. 12643 1. 597772 1. 722215 2. 03299 1. 41034 2. 37405 2. 181807 1. 978263  
101928455 1. 977931 1. 289207 1. 362733 0. 765743 1. 288345 1. 979956 1. 015813 1. 116846  
101928460 1. 197523 2. 121741 2. 00187 1. 820221 2. 105213 1. 54249 1. 870147 1. 569279  
101928461 2. 547596 2. 052169 1. 87541 2. 669565 1. 94626 2. 050482 2. 554702 1. 827614  
101928464 2. 515499 2. 853033 2. 023413 3. 943868 3. 685199 3. 243474 2. 115582 1. 733616  
101928469 1. 756974 0. 950598 1. 826054 1. 229553 2. 348303 1. 767191 0. 794218 0. 96978  
101928470 2. 721696 2. 991662 4. 501023 1. 455166 5. 647417 2. 683766 2. 412289 4. 495707  
101928471 1. 270624 1. 357763 1. 235704 1. 218155 1. 625291 2. 050653 1. 459952 2. 612863  
101928472 5. 873672 4. 34022 2. 737501 0. 989405 2. 33966 2. 791296 2. 44141 3. 419865  
101928475 0. 473423 1. 483144 1. 444792 1. 586048 1. 454241 1. 333764 0. 973264 1. 791699  
101928476 2. 237542 1. 128928 1. 25669 1. 729623 1. 712937 1. 420351 1. 078907 1. 751146  
101928477 1. 506266 1. 012091 1. 329369 1. 059758 1. 124444 1. 540965 1. 006651 1. 541911  
101928478 1. 261373 1. 716185 0. 931781 1. 098449 2. 126562 1. 440493 1. 309237 1. 986962

101928483 1. 761849 2. 09117 1. 938645 2. 100953 2. 821438 2. 1517 2. 280024 2. 553195  
101928484 1. 464934 1. 39304 0. 820886 1. 104829 2. 096432 2. 065359 1. 624268 1. 710085  
101928489 3. 237074 2. 566088 1. 9923 3. 486604 2. 756626 2. 395991 4. 256114 2. 320141  
101928491 1. 610941 1. 431148 1. 052092 1. 17816 1. 326458 2. 00698 1. 421517 1. 303353  
101928495 0. 820412 1. 070154 1. 231426 1. 401457 1. 135216 1. 121407 1. 196854 1. 079568  
101928496 1. 230816 1. 015211 1. 146907 0. 927678 1. 247353 1. 524222 1. 449991 1. 26755  
101928499 1. 570892 1. 513598 1. 277044 1. 352916 2. 587275 1. 318674 1. 917263 2. 376614  
101928502 3. 089498 2. 295049 2. 336935 2. 161071 2. 749277 2. 505416 2. 545518 1. 910887  
101928504 1. 486791 1. 133676 2. 037169 2. 02356 1. 728572 1. 20023 1. 265562 3. 342428  
101928505 1. 066843 1. 393719 1. 834754 1. 536836 1. 689537 1. 588351 1. 380485 1. 676532  
101928509 1. 191911 1. 160271 1. 212881 1. 112105 1. 50674 1. 228755 1. 404017 1. 453573  
101928513 4. 831672 3. 93371 3. 653063 2. 938414 3. 542028 3. 875049 3. 955162 3. 182407  
101928516 1. 517684 1. 400278 1. 551269 1. 255864 1. 524544 2. 373703 1. 33194 2. 1594  
101928519 1. 143704 1. 926396 1. 104426 1. 317355 1. 209794 0. 995634 1. 202303 1. 039985  
101928521 2. 265885 2. 30861 2. 802666 2. 28217 2. 85383 2. 253812 2. 259284 2. 561497  
101928523 2. 106733 2. 804041 2. 831321 1. 456686 2. 159193 0. 311629 0. 640619 2. 179163  
101928524 2. 215586 3. 595628 2. 3084 3. 837836 4. 734459 1. 408341 1. 803551 3. 896374  
101928525 7. 008606 6. 098443 6. 576679 6. 15087 6. 10906 6. 187603 6. 57113 5. 662108  
101928527 5. 019007 5. 903392 6. 620629 5. 495315 5. 676157 4. 197566 6. 008048 6. 192668  
101928530 1. 006458 0. 854126 1. 265379 1. 654347 1. 100187 1. 179216 1. 068131 0. 78559  
101928532 2. 272176 2. 554895 1. 891054 2. 429602 2. 414242 2. 130549 2. 510376 2. 108922  
101928535 1. 150319 2. 444667 0. 941944 1. 25172 1. 789069 0. 813149 1. 606114 1. 0124  
101928536 1. 376056 1. 210579 0. 99898 0. 978989 1. 246928 1. 594611 1. 030739 1. 649592  
101928537 1. 60407 1. 541273 1. 466115 1. 053576 2. 052594 1. 398044 2. 58356 2. 493038  
101928539 1. 266522 0. 857763 0. 974981 1. 288927 1. 242316 1. 773326 1. 03149 1. 198335  
101928540 2. 030179 1. 276443 1. 500344 0. 964959 1. 499275 1. 792132 1. 093338 1. 753635  
101928545 2. 484688 2. 387034 2. 16019 3. 615129 3. 967777 4. 507935 2. 036936 3. 23962  
101928548 2. 494949 2. 951912 2. 238458 0. 753465 1. 758888 1. 435555 2. 444847 0. 47431  
101928550 0. 946476 1. 621297 1. 185182 2. 064811 1. 99865 0. 739017 2. 671944 1. 263194  
101928551 1. 571518 1. 280169 2. 226511 1. 737621 1. 73724 1. 090814 2. 705233 2. 553357  
101928553 0. 815326 1. 00349 0. 756867 1. 043523 1. 064373 1. 372963 0. 713336 1. 300947  
101928555 1. 545834 1. 352306 1. 214366 1. 966208 1. 299738 1. 175163 1. 264956 1. 93982  
101928557 1. 849204 2. 078169 2. 37593 4. 069324 1. 813125 1. 89485 1. 664514 2. 043497  
101928558 1. 753378 3. 985958 2. 110684 1. 844802 2. 482925 1. 556271 4. 752259 2. 00974  
101928559 1. 65629 1. 347275 1. 894674 1. 067076 1. 431026 1. 500956 1. 606962 1. 180079  
101928561 1. 731387 2. 071452 1. 647105 1. 213884 2. 430816 2. 229981 2. 176762 2. 003197  
101928564 0. 897535 0. 932295 1. 40629 0. 811948 1. 503021 0. 82903 1. 000401 1. 466947  
101928565 3. 725906 3. 802783 3. 455184 4. 276512 3. 893349 2. 104253 2. 207666 2. 924739  
101928569 1. 441788 1. 055022 1. 408268 1. 004475 1. 30409 1. 429239 0. 834329 1. 230503  
101928571 2. 135883 2. 297214 2. 023944 2. 23095 2. 525104 3. 351279 2. 056045 3. 2689  
101928573 6. 000092 3. 790424 4. 366938 5. 151484 4. 910328 4. 797309 5. 52626 4. 163018  
101928578 4. 95424 5. 340754 3. 720598 5. 25047 5. 406843 3. 363239 5. 699512 4. 211979  
101928579 1. 884035 2. 860577 3. 20683 2. 391103 2. 292989 2. 781125 2. 966959 3. 416807  
101928580 1. 833333 1. 54094 1. 833808 1. 564762 2. 069109 2. 239443 2. 251715 1. 860706  
101928582 0. 956884 1. 567916 1. 348909 1. 215412 1. 265914 0. 958885 1. 334739 1. 242673  
101928583 1. 732843 1. 697113 2. 275826 1. 495756 2. 204245 1. 839098 2. 320564 2. 201621  
101928584 3. 547372 1. 817284 3. 734216 2. 058309 1. 263406 2. 997542 2. 028245 1. 204621  
101928590 0. 925066 1. 093267 1. 157036 0. 948409 0. 863036 1. 046805 1. 535545 1. 421677  
101928591 2. 187664 1. 318488 1. 15603 1. 352491 1. 253554 0. 543818 0. 914702 1. 271131  
101928595 3. 378592 2. 504491 2. 697294 2. 86652 2. 311319 1. 863074 3. 127892 3. 181934  
101928596 1. 123594 1. 726471 1. 324998 1. 114751 1. 97326 1. 232214 0. 963107 1. 396865

101928597 1. 240149 1. 283088 1. 79788 1. 553443 2. 160308 1. 662863 1. 471504 1. 049126  
101928599 1. 363208 1. 081798 0. 976839 3. 758521 1. 876378 0. 791303 2. 243545 0. 934673  
101928600 1. 145065 2. 170051 2. 074779 1. 313403 0. 909999 0. 965401 0. 853738 1. 848235  
101928601 2. 904473 1. 14818 1. 129518 1. 26148 5. 420087 1. 285144 1. 392139 3. 672954  
101928603 1. 406603 1. 212421 1. 05688 1. 024839 1. 511539 3. 101446 1. 495216 1. 3295  
101928607 2. 404921 2. 933022 2. 137137 2. 702319 2. 524401 3. 275035 1. 880153 2. 502897  
101928608 2. 441784 1. 665297 3. 232815 1. 282953 1. 88785 1. 703296 3. 456551 1. 352998  
101928611 1. 573788 1. 617291 2. 235602 1. 86143 1. 700203 2. 043123 1. 895525 2. 358409  
101928612 4. 963136 4. 494095 5. 038566 4. 661217 4. 6536 5. 688531 4. 538075 4. 259173  
101928614 0. 76118 0. 517905 1. 130894 1. 712416 0. 878224 1. 058037 0. 675348 1. 042811  
101928616 1. 715734 1. 480387 2. 420959 2. 177656 1. 435522 1. 91702 1. 807751 1. 845326  
101928617 5. 029388 4. 113849 6. 506722 5. 637542 4. 920444 1. 394756 4. 893208 5. 263011  
101928618 1. 046252 1. 384093 1. 322479 1. 077422 1. 648761 0. 843218 1. 316014 1. 37884  
101928620 1. 003125 0. 727187 1. 2826 1. 703479 1. 263619 1. 072608 1. 27934 1. 812626  
101928622 1. 127863 1. 391776 1. 05956 1. 346583 1. 384184 1. 063169 0. 812907 1. 801865  
101928626 0. 853468 1. 015825 1. 230062 0. 647566 0. 850017 0. 98059 0. 968847 2. 837934  
101928627 1. 70324 1. 090395 1. 690986 1. 119534 2. 167309 1. 7964 0. 756976 2. 288269  
101928628 1. 261455 1. 36623 1. 346173 1. 247993 2. 266585 1. 026874 1. 444227 3. 111493  
101928630 1. 935736 1. 02662 1. 486007 0. 600508 1. 601555 1. 508223 1. 210957 1. 288682  
101928633 3. 363734 1. 795073 3. 40086 3. 743709 4. 341096 0. 992223 1. 934884 4. 935616  
101928635 1. 903297 0. 765915 1. 329212 0. 677801 0. 572439 3. 772671 0. 452543 1. 261833  
101928638 2. 039528 2. 561089 3. 199528 2. 73124 2. 708536 3. 658108 2. 289372 3. 837886  
101928646 1. 304657 1. 078685 1. 146552 1. 273269 1. 087961 1. 074024 1. 068444 1. 088792  
101928649 5. 160215 3. 719956 4. 799101 3. 188907 2. 829293 3. 582002 3. 803333 4. 38728  
101928651 2. 506483 1. 316344 1. 416584 1. 225806 1. 807817 1. 583299 1. 518566 1. 82162  
101928652 1. 840875 1. 464945 1. 359635 1. 147981 1. 356158 1. 123373 1. 239957 3. 580431  
101928656 1. 542506 1. 479025 1. 385369 1. 545855 1. 176943 1. 681167 2. 202336 1. 195068  
101928658 8. 642611 8. 831292 8. 459122 7. 525011 7. 080007 8. 008815 8. 287069 8. 471019  
101928659 3. 97087 2. 798057 4. 080851 4. 315559 2. 720548 4. 124281 3. 153091 2. 420998  
101928661 0. 935635 1. 821954 1. 492976 2. 17598 1. 678724 1. 941963 1. 657121 2. 300229  
101928662 0. 780864 0. 992327 1. 130343 0. 780552 1. 511855 2. 086606 1. 581827 1. 158319  
101928663 1. 096196 0. 893925 1. 033224 0. 854951 1. 297639 1. 028175 1. 90366 1. 123936  
101928666 0. 963344 1. 6382 1. 096969 1. 674361 1. 709994 1. 144256 1. 218473 1. 530681  
101928667 1. 852521 0. 594968 1. 724292 1. 372505 2. 063651 0. 869015 3. 03684 3. 296597  
101928668 1. 943394 1. 409175 1. 621736 1. 021986 2. 006453 1. 830204 1. 801752 1. 866922  
101928673 2. 368902 2. 509028 2. 566135 1. 579171 2. 923756 2. 105661 2. 352265 2. 444271  
101928674 1. 766291 1. 293886 1. 514694 1. 595461 1. 11364 1. 096544 1. 480636 2. 699984  
101928677 1. 499526 1. 741226 1. 472524 0. 918208 1. 668957 1. 016607 2. 078368 2. 038722  
101928679 1. 418239 1. 847792 1. 721732 1. 12654 1. 245313 1. 582669 1. 389939 2. 190554  
101928682 1. 670505 1. 478311 1. 408544 1. 91579 2. 619962 1. 806352 2. 318714 1. 865573  
101928684 1. 879793 1. 573525 1. 346333 1. 532551 1. 326482 1. 644705 1. 477417 1. 975869  
101928687 1. 609209 1. 426964 1. 692661 1. 075436 1. 571131 1. 758171 1. 881555 2. 14787  
101928689 1. 972525 1. 108769 1. 591428 0. 662247 1. 138125 1. 661211 1. 376837 1. 287174  
101928694 1. 225723 1. 042042 1. 202988 1. 25901 1. 793589 1. 898528 1. 366929 3. 445229  
101928696 1. 809018 1. 270175 1. 942403 1. 501977 1. 210837 2. 028477 1. 344688 1. 635491  
101928697 1. 812765 1. 463794 0. 863694 1. 274455 1. 453603 1. 581392 1. 072097 1. 17563  
101928698 1. 34268 1. 503426 1. 893556 1. 169804 1. 305646 0. 964773 1. 734576 1. 497286  
101928700 1. 857313 1. 80063 1. 693174 1. 227223 1. 979819 2. 012689 2. 007096 2. 85547  
101928701 2. 821332 2. 328556 2. 597025 1. 949042 2. 62067 2. 00567 1. 719104 3. 22509  
101928702 0. 91859 1. 029725 2. 559584 1. 614685 3. 966907 1. 061543 1. 074621 1. 489872  
101928703 4. 104794 3. 341161 3. 604405 2. 854498 4. 317139 2. 780748 2. 13741 5. 376228



101928704 1. 608049 2. 137218 1. 114124 1. 936955 1. 191155 2. 424891 1. 777182 2. 823623  
101928708 2. 28736 2. 381706 1. 877863 2. 620906 1. 94543 2. 243925 2. 801149 2. 710421  
101928710 0. 824262 1. 829196 0. 830771 0. 416458 0. 70408 1. 883368 0. 773569 0. 60855  
101928711 0. 888478 1. 28859 0. 943522 0. 757161 1. 050351 1. 721356 1. 170875 1. 068043  
101928714 3. 610572 2. 351248 2. 365523 2. 033649 1. 836313 4. 049616 1. 955503 1. 898455  
101928716 1. 415123 1. 647256 1. 139002 1. 320823 2. 470035 2. 387047 1. 649235 3. 433787  
101928717 2. 728946 2. 032733 1. 486817 2. 363683 1. 762969 2. 118355 2. 062153 3. 089036  
101928718 1. 677867 1. 320196 3. 309559 1. 718075 2. 570725 2. 323101 2. 937084 2. 257783  
101928720 1. 820518 1. 959321 2. 701653 2. 050334 2. 04872 2. 480639 1. 987953 2. 52671  
101928721 1. 945318 0. 856166 1. 378082 1. 009253 1. 282517 0. 775036 1. 087094 1. 375201  
101928722 2. 125563 0. 686368 2. 791582 3. 118204 4. 040459 1. 636246 2. 824776 4. 331483  
101928725 2. 509375 2. 066406 2. 436571 2. 818741 2. 902839 2. 284779 1. 66147 1. 634302  
101928729 1. 719549 1. 474727 2. 232731 1. 627419 2. 172585 1. 364214 1. 784079 1. 614285  
101928730 1. 224256 1. 283813 1. 792199 1. 568704 2. 796453 1. 718569 1. 427164 1. 368566  
101928731 2. 429023 3. 230044 2. 000392 1. 788424 1. 784412 2. 159443 1. 267908 1. 748469  
101928733 1. 648128 2. 136874 1. 566595 1. 114483 1. 669389 2. 226857 2. 209903 1. 729738  
101928734 1. 531932 1. 28439 1. 599271 1. 640232 1. 477282 1. 313896 1. 276914 1. 039207  
101928735 2. 706402 3. 408829 2. 249834 2. 11339 2. 536932 0. 972333 2. 023127 2. 271905  
101928738 4. 443475 3. 349414 3. 000918 3. 035801 3. 388913 3. 792803 3. 188211 3. 401847  
101928739 1. 500621 0. 976209 2. 123193 0. 889842 1. 091056 1. 172079 3. 061924 1. 265393  
101928741 1. 336452 1. 266111 1. 289729 1. 164093 1. 49516 1. 102891 1. 511749 1. 907649  
101928742 2. 902661 1. 855271 2. 162516 2. 051323 3. 030585 3. 414083 2. 189978 1. 578024  
101928743 1. 155315 1. 247302 1. 352643 1. 59607 1. 442583 1. 39768 1. 220868 1. 384871  
101928744 1. 253602 1. 425026 1. 872687 1. 121033 1. 465744 1. 545286 2. 011782 2. 042993  
101928748 1. 169329 1. 216936 1. 56361 0. 837152 1. 678702 1. 044817 1. 337735 0. 99565  
101928751 1. 517668 1. 593825 1. 580239 1. 63925 2. 005753 1. 447449 1. 636079 1. 549677  
101928752 1. 533251 1. 416114 2. 18455 1. 390947 1. 60204 1. 620583 1. 152632 1. 779251  
101928761 2. 11537 1. 966132 2. 056636 1. 888299 1. 400512 1. 874554 1. 738512 1. 419122  
101928762 1. 164665 1. 6649 1. 789519 1. 112774 2. 405965 2. 531843 0. 733537 1. 038449  
101928765 0. 643487 1. 12838 1. 059072 1. 815648 1. 347275 1. 160933 0. 874491 2. 447194  
101928766 1. 640338 1. 897996 2. 038748 2. 64338 2. 243334 2. 057367 2. 619764 2. 784376  
101928767 4. 634157 3. 176468 1. 157115 3. 174281 2. 271163 1. 572953 4. 373636 1. 902208  
101928769 0. 93277 0. 998893 1. 536772 1. 139177 3. 22179 1. 692833 1. 298034 1. 330381  
101928770 1. 339422 1. 212541 1. 155486 1. 088043 0. 998749 1. 781249 1. 479274 1. 461728  
101928773 1. 186487 1. 166152 0. 809747 0. 93768 1. 077922 0. 92456 1. 302745 1. 038932  
101928774 1. 869809 1. 472649 1. 894349 1. 628791 2. 30724 1. 218974 1. 629032 2. 105153  
101928775 0. 565196 0. 745528 2. 495156 0. 768618 0. 745528 1. 107513 1. 12016 0. 739387  
101928776 1. 28807 0. 955018 1. 65146 1. 316461 1. 419011 1. 496943 1. 703421 1. 637834  
101928778 1. 925091 1. 287718 1. 637341 1. 898873 2. 504049 1. 32086 1. 99071 1. 680664  
101928779 0. 90827 0. 618339 0. 895053 0. 879167 0. 85006 1. 827871 1. 446904 1. 284818  
101928780 2. 313733 2. 931308 2. 558178 2. 532762 2. 721202 2. 482056 2. 63126 3. 299731  
101928781 2. 276877 1. 623489 1. 27063 1. 942594 2. 987394 1. 034691 2. 859916 1. 48351  
101928782 1. 127722 1. 979161 2. 231077 1. 46286 1. 15481 1. 779647 1. 406455 1. 6277  
101928783 2. 099322 1. 868037 1. 517529 1. 682309 1. 763131 1. 882138 1. 86549 2. 628045  
101928784 1. 917987 1. 744311 2. 524705 2. 054685 3. 329444 2. 494387 1. 978621 2. 554228  
101928785 1. 987641 2. 608239 2. 164816 2. 816807 2. 531186 2. 785829 3. 267153 2. 616901  
101928787 1. 823174 1. 466584 1. 935042 1. 624356 1. 133255 2. 463075 1. 451898 1. 886084  
101928789 1. 180394 1. 435951 1. 626491 2. 67057 1. 558563 1. 804064 3. 393863 2. 651927  
101928790 1. 643775 1. 189635 1. 205687 0. 932159 1. 179013 0. 906416 1. 421132 1. 062256  
101928791 0. 951422 1. 227618 1. 278339 1. 299742 1. 931281 0. 993987 1. 146071 2. 070475  
101928792 2. 289865 3. 918045 1. 379293 1. 585555 2. 502559 2. 257093 3. 716295 1. 549003

101928794 3. 180651 1. 421098 1. 665765 3. 264253 3. 402132 1. 043739 2. 142774 2. 605411  
101928795 1. 057381 1. 317684 1. 277147 1. 280104 1. 269698 1. 036137 1. 615709 1. 075114  
101928796 2. 937329 2. 746106 1. 774055 2. 518768 2. 133941 2. 260273 1. 745001 2. 657859  
101928797 1. 275247 1. 450189 1. 582442 1. 280694 1. 213835 1. 473174 1. 351525 1. 670596  
101928800 0. 782816 0. 83029 1. 062176 3. 325201 1. 440941 2. 672001 1. 456798 1. 02784  
101928803 3. 96182 4. 453538 4. 249766 3. 441891 4. 057054 3. 098912 4. 053181 3. 62102  
101928807 1. 025006 1. 926871 2. 352943 1. 78017 1. 936052 1. 866052 1. 740835 1. 914785  
101928809 1. 36276 1. 341375 1. 368835 1. 363138 1. 197596 1. 951538 1. 27976 1. 279454  
101928810 1. 716321 1. 772257 2. 06064 1. 391945 2. 169917 1. 970567 2. 001369 1. 942427  
101928812 2. 142483 3. 473896 2. 860505 2. 779595 2. 40035 2. 671636 2. 885272 3. 23819  
101928813 1. 755237 0. 974764 3. 022858 1. 209369 1. 926563 2. 204436 1. 158887 3. 197091  
101928817 2. 328351 2. 570545 2. 172812 2. 223126 2. 927172 2. 941767 2. 9171 2. 59994  
101928819 1. 789551 1. 722185 1. 864736 1. 716665 2. 318775 1. 826333 2. 306342 2. 434964  
101928820 3. 565974 1. 968392 1. 680935 1. 658424 3. 650805 2. 889522 1. 675362 2. 679035  
101928822 0. 978568 1. 287701 1. 368937 2. 019237 1. 954789 0. 581794 1. 869087 1. 857773  
101928823 2. 868922 1. 628399 1. 197023 1. 923421 1. 589305 1. 010132 1. 500233 1. 250633  
101928825 0. 65178 1. 477398 1. 757637 1. 464096 1. 845271 1. 991486 1. 791672 1. 589322  
101928828 1. 437233 1. 469852 1. 591909 1. 674119 1. 90972 1. 252618 1. 046396 1. 47325  
101928829 3. 947362 3. 517497 1. 463203 3. 055428 2. 578763 2. 614015 2. 908771 4. 355734  
101928830 1. 696916 3. 399005 1. 957146 1. 842178 4. 387258 1. 458915 0. 955685 1. 8845  
101928832 1. 293483 1. 894581 1. 729816 0. 987731 1. 27439 1. 66362 1. 205948 1. 536305  
101928833 1. 628798 1. 333313 1. 114926 1. 742108 1. 798804 2. 613681 2. 009078 1. 098648  
101928834 1. 183038 1. 366731 0. 898298 1. 837964 2. 622145 1. 361873 2. 464776 1. 690723  
101928836 1. 759066 1. 162511 1. 847736 1. 695602 2. 052429 1. 383993 1. 161852 1. 176461  
101928837 3. 062967 1. 896606 3. 148821 2. 256987 3. 421284 2. 209888 2. 34871 2. 831126  
101928838 2. 722683 3. 465217 3. 247158 2. 498168 3. 512397 1. 730139 3. 977691 2. 451529  
101928839 3. 659829 3. 351914 3. 523135 3. 452327 3. 438071 3. 776113 2. 538012 3. 69355  
101928841 1. 654019 1. 832522 1. 843209 1. 277387 1. 034452 1. 511016 1. 3938 2. 054798  
101928845 2. 63877 2. 806745 2. 683173 2. 19638 2. 743385 3. 440902 2. 710664 3. 007273  
101928846 2. 08508 1. 653122 2. 495663 1. 478059 1. 629955 2. 589545 1. 462283 1. 743423  
101928847 2. 058675 3. 376951 2. 797121 2. 270693 2. 15026 1. 979696 2. 006539 2. 338222  
101928850 2. 439415 2. 123229 0. 836494 1. 572688 1. 433722 2. 003363 1. 842364 1. 293992  
101928851 1. 50339 1. 851618 1. 633807 2. 645238 1. 658152 1. 170317 2. 133757 2. 133485  
101928852 3. 128086 1. 48143 1. 566868 2. 024255 0. 749725 2. 05618 3. 350304 0. 800692  
101928854 0. 983473 3. 732836 1. 956479 4. 529746 2. 702951 3. 811505 3. 045422 3. 542407  
101928856 1. 764476 1. 760615 1. 659958 0. 898673 1. 425093 0. 95198 1. 834917 1. 625994  
101928857 2. 17234 2. 554208 2. 607419 2. 646853 3. 343913 2. 799372 2. 591614 1. 998433  
101928858 1. 85461 1. 69927 1. 740658 1. 56927 2. 133785 1. 706869 2. 219267 2. 211441  
101928859 0. 892722 0. 416425 1. 505764 0. 988754 3. 731294 1. 20088 0. 366907 2. 074666  
101928862 3. 300621 3. 126984 3. 760073 2. 6452 2. 36838 3. 216141 3. 040465 3. 194103  
101928864 2. 252111 1. 932881 1. 344763 1. 707728 1. 401278 1. 647259 2. 754934 1. 37329  
101928865 1. 325761 0. 947982 1. 377745 1. 121317 0. 971457 0. 845578 2. 207626 1. 096903  
101928868 2. 666905 1. 328878 2. 211053 2. 490426 2. 303535 2. 057477 1. 733428 3. 00114  
101928869 1. 870737 1. 740973 1. 568825 1. 847865 1. 745961 1. 678148 1. 862572 2. 069983  
101928870 6. 200011 3. 988388 4. 722852 5. 428423 5. 233995 5. 69684 6. 285661 4. 943882  
101928876 1. 423881 1. 185911 0. 639235 0. 88806 1. 584131 1. 196918 2. 443315 1. 528914  
101928877 1. 292367 1. 348959 1. 398895 1. 203144 1. 235297 1. 116879 1. 491565 1. 02169  
101928880 1. 060218 1. 237342 1. 1808 1. 113992 3. 944932 0. 889335 1. 208399 1. 576449  
101928881 1. 991463 2. 342612 2. 589593 4. 237934 2. 602294 3. 801022 3. 734619 2. 722509  
101928882 1. 234544 1. 676422 1. 740946 1. 490751 1. 597267 2. 337974 1. 183945 2. 415957  
101928885 1. 10232 0. 819105 0. 916971 0. 977625 1. 623273 0. 982711 1. 039018 0. 960835

101928886 2. 007791 2. 326771 2. 513883 2. 474452 1. 981843 2. 657851 1. 887842 2. 718119  
101928887 0. 820796 1. 638168 1. 305709 0. 882971 2. 485934 0. 85934 2. 052521 1. 513341  
101928891 1. 018464 2. 595354 1. 610592 1. 682063 1. 791033 2. 157907 2. 74063 2. 100557  
101928894 2. 51999 3. 339136 2. 340016 1. 774335 2. 81409 2. 431584 1. 953697 2. 580534  
101928896 1. 349351 0. 791102 2. 716598 0. 957713 1. 34166 0. 832355 0. 863786 0. 792777  
101928905 1. 562314 0. 836523 1. 00353 1. 265344 1. 393184 1. 555807 1. 120033 1. 112355  
101928907 1. 915176 2. 946069 1. 431928 2. 820016 3. 630099 2. 306106 1. 575906 3. 014593  
101928909 3. 496985 1. 81336 1. 851409 1. 767655 1. 40603 2. 483931 1. 771039 1. 803926  
101928912 1. 239179 1. 136785 1. 155974 1. 136785 1. 498974 1. 209343 2. 865921 1. 880747  
101928913 2. 69548 1. 023113 5. 350693 0. 918673 3. 628768 2. 301958 2. 50217 2. 116477  
101928915 2. 713352 3. 683931 3. 650028 2. 602754 1. 782429 4. 651849 1. 688206 5. 729788  
101928916 1. 739431 1. 120112 0. 931546 4. 227404 0. 834593 2. 158917 1. 205726 1. 755678  
101928917 1. 964071 1. 815931 1. 724369 1. 917806 2. 716543 1. 595955 1. 855239 3. 812388  
101928918 0. 942395 1. 30518 1. 630306 0. 889716 1. 043441 0. 924976 0. 801778 1. 330291  
101928919 3. 621326 4. 269544 3. 719951 4. 495391 3. 425751 4. 425402 4. 855785 3. 723531  
101928921 1. 488453 1. 185246 1. 38117 1. 152584 1. 710075 2. 030226 0. 666512 1. 12681  
101928922 4. 291381 2. 79531 1. 659358 3. 517162 4. 044361 2. 720771 3. 250367 3. 216659  
101928923 0. 878503 1. 394411 2. 659137 1. 02687 1. 455948 1. 741633 3. 130638 0. 684933  
101928924 1. 212575 1. 144894 1. 286418 1. 382483 1. 474846 1. 07216 1. 569357 1. 150792  
101928931 6. 99971 7. 393789 7. 829151 6. 844361 6. 134864 6. 345112 6. 564132 7. 290509  
101928932 1. 170409 1. 074281 0. 874833 1. 965601 0. 799151 2. 253534 2. 970689 3. 381381  
101928933 1. 16939 1. 444296 0. 816705 1. 252356 1. 013371 1. 257656 0. 716718 1. 560695  
101928937 1. 025349 1. 082408 1. 259222 0. 998597 1. 024672 0. 994062 2. 02617 1. 349876  
101928938 0. 964157 0. 621548 1. 326404 0. 813643 1. 216628 1. 037425 1. 444348 1. 743236  
101928940 1. 121783 1. 42994 1. 01551 1. 5094 1. 5395 1. 386678 1. 004318 1. 116075  
101928941 2. 221275 2. 831601 2. 906638 2. 010843 2. 798542 2. 229114 2. 527595 2. 507442  
101928942 1. 513625 1. 269107 1. 445036 1. 328205 1. 385721 1. 81574 1. 251604 1. 23638  
101928944 1. 725522 1. 61576 0. 904873 1. 118383 1. 793588 0. 959035 1. 452092 1. 810849  
101928947 1. 859539 1. 014722 1. 590721 0. 986082 1. 627312 1. 07715 1. 444068 1. 547848  
101928948 4. 488091 2. 543988 2. 224446 1. 771016 1. 162323 3. 967238 3. 616013 2. 253094  
101928955 2. 133164 1. 519977 1. 8098 1. 005637 1. 817057 1. 686436 1. 467383 1. 50137  
101928965 2. 484023 3. 550009 3. 462485 3. 767589 3. 983005 3. 287537 2. 493682 2. 593667  
101928967 2. 225759 0. 386581 0. 631598 1. 201292 3. 396079 2. 013965 2. 807004 4. 157622  
101928969 2. 406968 2. 307845 3. 310413 1. 438666 1. 52741 2. 233844 1. 782361 1. 902425  
101928971 1. 766121 1. 144771 1. 185368 1. 576689 1. 222926 1. 718682 2. 167434 1. 221536  
101928973 2. 360436 2. 097833 2. 390075 2. 635399 3. 494116 2. 700613 2. 118535 2. 82663  
101928977 0. 614305 0. 979961 0. 694862 1. 120053 0. 968101 0. 810344 1. 978139 0. 896957  
101928978 1. 174774 1. 611362 1. 307534 1. 106646 1. 419258 1. 288786 1. 394047 2. 163454  
101928987 1. 868207 2. 427365 2. 460381 1. 911064 2. 390851 2. 170271 1. 680234 1. 865075  
101928988 2. 012856 2. 244152 1. 860005 1. 905191 2. 276464 1. 65809 1. 835697 1. 718444  
101928989 0. 956629 1. 037665 1. 005505 0. 943922 2. 41523 1. 210557 1. 028252 0. 975412  
101928992 1. 494865 1. 724388 1. 437875 1. 567308 2. 326165 0. 658239 1. 107258 1. 837253  
101928994 2. 610524 1. 699119 2. 602911 1. 497489 2. 019842 2. 187525 1. 452073 2. 255217  
101928999 1. 103935 1. 292065 2. 082155 1. 145092 2. 074068 1. 734322 1. 469581 1. 26575  
101929002 1. 780605 1. 899626 1. 515057 2. 450061 1. 719206 2. 034684 1. 917087 1. 792563  
101929006 1. 316115 1. 183163 2. 275151 0. 971618 2. 446109 0. 70081 1. 271125 1. 237566  
101929007 2. 005343 1. 781422 1. 447794 1. 497044 2. 662439 1. 555808 2. 179985 1. 499821  
101929010 1. 397732 1. 56013 1. 964393 1. 922086 2. 280092 1. 207436 2. 696707 2. 137789  
101929011 1. 291099 1. 759531 2. 397757 1. 827362 1. 810206 2. 344912 1. 910697 2. 445177  
101929014 1. 481102 1. 015199 1. 491596 1. 594019 1. 880195 2. 060638 1. 358422 0. 681144  
101929018 1. 730333 2. 143194 4. 062749 2. 97441 3. 380529 3. 399576 2. 654812 2. 953352

101929019 1.499479 1.87109 1.487324 1.909848 2.572459 1.870684 2.365232 1.388505  
101929021 2.834661 2.797884 2.408614 2.575281 1.993629 3.741545 2.183092 1.87712  
101929023 2.266297 1.947874 2.191765 2.506065 3.245777 2.014294 2.174556 2.065173  
101929025 1.235286 0.594117 1.048215 1.010621 1.26754 1.043042 1.389095 1.860385  
101929027 1.901751 1.1406 2.146096 0.891566 2.018994 1.428887 1.0265 2.034041  
101929031 3.87219 4.51711 3.941737 4.134125 3.772353 3.621348 3.548933 4.070809  
101929034 1.094012 1.150616 1.43897 1.525656 1.67882 1.187485 1.18002 1.135721  
101929044 1.229039 1.665021 2.010577 1.427499 2.410591 1.907963 2.414848 1.958912  
101929048 0.91881 1.560657 1.1954 1.40402 1.616422 1.542071 1.020762 2.320785  
101929052 1.334188 1.449568 1.231839 1.248278 1.753397 1.486644 1.52964 1.481578  
101929054 2.922873 2.723416 2.172997 2.134497 2.761784 3.085726 2.628987 2.168895  
101929056 2.000216 1.437936 1.924697 1.134363 1.98292 2.052558 1.613745 1.434097  
101929057 1.726083 2.012999 2.561949 2.644607 1.822012 2.413819 1.804347 2.888291  
101929058 1.502897 1.175157 0.899487 1.099737 0.921297 1.049193 0.755338 1.024766  
101929064 1.797418 1.553522 1.771053 1.810835 1.877194 1.728809 1.441015 2.708766  
101929071 2.636742 1.813633 1.668646 1.148572 2.272307 1.173428 1.3052 1.596883  
101929073 1.286531 0.929041 1.318685 0.889359 1.22105 0.714661 1.167911 1.113508  
101929074 4.230148 5.118931 5.312115 5.464653 5.147339 5.586163 4.865483 4.869261  
101929076 1.444594 1.787206 1.629036 1.105011 2.165834 1.270084 1.948156 1.515991  
101929080 1.295995 1.370583 0.866389 1.73151 0.645755 0.965091 1.561737 1.020364  
101929081 1.557237 1.62942 1.105528 1.490636 1.960661 1.458484 1.806652 1.526504  
101929082 1.099625 1.333516 1.18016 1.074662 1.812199 1.03888 1.585295 0.885399  
101929083 1.689225 1.085198 1.331692 0.973901 1.55715 1.721437 1.481557 1.634007  
101929084 1.636404 1.457605 1.844861 1.206342 2.539761 1.593793 1.542453 2.308058  
101929086 1.8597 2.922893 2.099564 3.350416 2.198651 1.823908 2.196326 2.206815  
101929089 3.305787 3.574285 3.593529 1.294553 2.478115 2.402907 2.298936 1.051253  
101929093 2.507293 1.709029 1.144967 1.475757 3.215982 0.871851 1.157285 1.919604  
101929094 2.259538 1.851436 1.291698 1.522903 1.514991 1.598833 1.811843 2.067449  
101929095 3.569854 2.3629 2.254032 1.959496 3.330354 4.046952 2.957532 4.685763  
101929099 1.869453 1.081205 1.851003 1.64991 1.539635 2.012782 1.737646 1.602977  
101929106 1.835567 1.941989 1.872203 2.025448 1.881792 1.666793 1.760323 2.909802  
101929107 2.396928 2.05293 1.727719 1.913033 2.381353 1.640273 2.801699 1.5274  
101929108 2.509251 2.946303 3.480814 2.807164 2.490571 2.713043 2.298513 1.527399  
101929109 2.041083 1.411663 2.247533 2.431941 2.595398 1.651269 1.541741 1.882636  
101929110 1.498551 1.749398 2.322684 1.712632 1.844052 2.238021 2.627131 1.678606  
101929111 2.02598 2.076557 2.058914 2.159603 2.371252 2.508593 1.476707 2.43682  
101929112 3.848171 3.140017 2.639285 1.622166 3.242337 1.571179 1.779417 1.993575  
101929115 1.372923 3.608159 2.610221 1.792803 3.923817 3.848563 0.377142 4.086804  
101929116 2.983986 2.978669 3.575328 2.896569 3.082669 3.131215 3.177179 3.810437  
101929117 0.833622 1.877075 2.423884 1.313027 1.530291 1.616711 1.172321 1.549097  
101929118 2.155915 1.53011 2.18372 1.356439 1.788934 1.555878 2.281565 2.528062  
101929120 1.659897 1.297463 1.285803 0.90144 1.583136 0.950578 1.667809 1.788615  
101929121 1.941011 1.958334 1.936449 2.079218 2.29488 1.622498 1.03153 1.64161  
101929123 1.563474 0.860932 1.088879 1.354486 1.483373 1.327834 1.592283 1.575526  
101929125 2.033596 2.825065 2.252647 1.901389 2.319483 2.23032 2.642607 2.943423  
101929127 1.456211 2.87983 4.26134 3.662921 4.802867 -0.03242 1.942639 4.736423  
101929128 2.864756 1.755194 1.71048 2.177613 2.707508 1.748438 2.211618 2.834375  
101929129 2.821335 2.658922 3.649174 2.915178 3.173009 3.78528 3.053337 2.782997  
101929130 2.00904 1.523528 1.988653 1.884469 1.54967 1.60411 1.482721 2.454763  
101929131 1.841228 1.858036 2.267417 1.506539 3.043324 2.098031 1.862654 1.629953  
101929132 2.637743 0.949793 3.602949 1.174481 1.247494 1.01788 1.035447 1.593783

101929133 1.66035 1.371768 1.71005 1.349361 1.11641 1.596412 1.979431 1.40044  
101929137 2.343397 1.20585 1.027551 0.987075 1.28445 2.296761 2.098131 1.532487  
101929140 2.689275 3.470972 3.260238 1.511809 1.579441 2.419461 1.936423 1.390343  
101929142 1.09737 1.347823 1.12239 1.009559 1.201238 1.421721 1.284891 1.513996  
101929144 1.705292 2.64767 0.963144 1.411953 1.460931 1.851969 2.967851 1.327861  
101929145 4.460217 4.322493 4.560812 4.752245 5.235816 3.488012 3.758308 3.674434  
101929147 3.403338 4.529535 3.769604 3.205081 3.316944 3.0784 3.829492 3.880244  
101929149 1.270896 0.966645 3.18629 1.303346 0.754398 1.7695 1.948529 2.012072  
101929151 1.677551 1.856876 1.890677 1.933881 2.145867 2.531923 2.809562 1.593413  
101929152 1.381863 1.818456 2.221014 1.737372 0.889628 2.197191 1.6335 1.782509  
101929153 1.159026 1.526449 1.217528 1.619762 2.338187 1.39583 1.374292 1.59531  
101929154 0.960265 1.282494 0.951327 1.38816 1.223766 1.362787 1.042362 1.384366  
101929159 1.644832 1.460239 1.972128 1.412982 2.12345 1.952124 1.901847 1.596522  
101929161 2.197367 1.587269 1.802882 2.076167 1.932466 2.558227 2.65165 2.159888  
101929162 3.552598 2.556009 2.409548 3.415879 2.413199 2.211019 2.560548 3.827509  
101929164 0.765418 0.880903 0.959187 1.128737 0.838877 1.335591 1.53965 1.0972  
101929167 0.57451 1.791387 1.476273 1.039637 2.90425 0.914626 1.34334 1.694128  
101929172 0.802243 1.596316 1.417839 1.353519 2.659141 1.381566 1.453952 1.187615  
101929174 1.43951 1.563714 2.393636 1.278204 1.540362 2.286005 1.328425 1.633734  
101929176 3.034477 2.150324 2.953671 2.202038 2.472636 1.69526 1.894963 2.403279  
101929181 1.600832 1.981721 2.097513 2.672358 1.992789 1.365568 1.814155 2.324721  
101929184 4.845701 5.656327 5.149931 6.178825 5.545103 4.045077 4.71146 6.379694  
101929187 0.670705 0.691676 0.742397 0.624107 0.961419 0.926791 0.929369 2.376646  
101929188 2.129344 2.737324 2.081902 1.945791 2.194042 2.770319 3.060823 1.884674  
101929191 1.514034 1.692799 1.742744 1.830592 1.665469 2.23891 1.59442 2.35203  
101929194 0.819488 1.18877 1.103281 1.270753 0.856083 1.601944 1.717127 1.028731  
101929195 1.844058 2.152622 1.891985 1.605464 2.131752 1.539018 2.344798 1.913099  
101929198 2.44872 2.854028 3.694681 4.130102 2.507285 1.768771 2.90819 1.357792  
101929199 1.314923 1.613307 1.252022 1.150403 1.666097 1.584128 1.451781 1.578227  
101929202 2.176772 1.062097 1.827664 1.08258 1.511793 1.059172 1.524411 1.384032  
101929206 6.646794 6.705273 6.50266 4.972996 6.452355 6.087583 6.880359 6.035503  
101929207 2.717337 2.417852 3.327686 2.515338 3.316453 3.52781 2.344993 2.241309  
101929210 1.10396 1.074505 1.312256 0.962421 1.288572 0.8941 1.032935 1.164791  
101929212 3.814705 2.598055 3.435327 3.827094 4.646822 3.282635 2.565467 2.820806  
101929214 1.894416 1.350344 3.878622 2.066285 1.486471 2.313587 3.041887 2.388996  
101929215 1.512252 1.454672 1.834899 1.272863 2.130615 1.563816 1.671935 2.0819  
101929216 0.77739 2.671724 1.407133 1.637317 1.322675 2.620464 3.72638 3.318723  
101929217 1.136044 1.304751 1.724443 0.820026 0.7721 1.075127 1.300775 3.001476  
101929218 1.216283 1.580026 1.542074 1.234485 4.882448 1.578444 2.365416 1.105996  
101929223 3.057519 1.837565 1.475623 1.711683 1.910118 1.636019 1.540115 1.73898  
101929224 2.870204 4.474916 1.938189 1.796032 1.563755 1.886022 1.548533 1.953737  
101929225 2.379061 2.283386 2.272754 2.666364 2.214199 1.886267 2.211365 2.334554  
101929227 1.754938 1.905787 1.082662 1.778725 1.992041 1.784583 1.601445 1.596628  
101929229 2.185096 1.799141 2.403317 1.668332 2.550517 2.111106 2.158657 1.601976  
101929230 1.456108 1.67824 2.69467 1.844109 1.880392 1.501558 1.545445 1.857989  
101929231 3.568565 3.889092 1.467611 1.240501 4.958157 2.452976 2.179251 2.975329  
101929236 1.191277 1.423292 2.040782 1.193641 1.439456 1.659813 1.60381 1.297711  
101929237 2.064839 2.452867 3.128311 1.831907 3.066372 3.687996 2.024152 2.63705  
101929238 2.426553 1.296866 1.21952 1.043053 1.912618 1.502441 1.660921 1.659967  
101929239 0.825324 1.422289 1.11072 0.928433 1.404929 1.752275 2.376061 1.069683  
101929241 1.990738 2.397417 2.404157 1.637221 2.66301 2.263949 2.136572 2.432115

101929243 7. 063318 5. 591799 6. 514523 7. 228203 4. 954774 5. 402093 5. 4278 2. 807029  
101929244 1. 496434 0. 744523 1. 343208 0. 811372 2. 243003 1. 812455 1. 085366 1. 979122  
101929247 0. 901422 1. 013329 1. 495086 1. 192068 1. 1412 1. 659054 1. 925888 1. 326829  
101929248 1. 129007 2. 788698 2. 841161 2. 486442 3. 033352 1. 973941 2. 300077 1. 073275  
101929251 4. 091869 3. 086241 1. 677926 2. 41503 2. 5552 1. 690616 4. 292931 1. 467154  
101929258 1. 499692 1. 548086 1. 619152 2. 07988 1. 516878 1. 592929 2. 100225 2. 396356  
101929260 0. 983707 0. 907495 1. 5598 0. 944257 1. 562636 1. 572381 1. 691761 1. 060307  
101929261 1. 873632 2. 104247 1. 782862 1. 456987 1. 597796 1. 258801 1. 530125 1. 972682  
101929263 1. 521759 2. 502098 1. 807323 1. 533449 2. 454124 1. 77141 2. 041967 1. 831408  
101929265 1. 317506 1. 156183 1. 47059 1. 728192 2. 346489 1. 452555 2. 048644 1. 514534  
101929268 2. 788012 1. 975848 3. 301692 1. 963979 2. 19523 2. 190858 1. 957405 2. 130703  
101929269 1. 464072 1. 592591 1. 213842 2. 526267 1. 33416 2. 27344 1. 157916 1. 134685  
101929270 4. 977253 3. 694024 6. 380413 3. 753942 3. 003095 2. 338472 3. 383827 4. 766205  
101929272 1. 941924 1. 750444 1. 669434 2. 537229 3. 320461 1. 47785 1. 646998 2. 295988  
101929282 1. 386446 1. 41248 0. 969316 0. 854717 1. 147375 2. 11047 1. 790358 1. 97602  
101929284 1. 172369 1. 478449 1. 459695 1. 457908 1. 932765 1. 47767 1. 75714 1. 248551  
101929289 2. 213091 3. 220425 3. 764798 2. 500756 1. 658921 1. 416886 1. 550081 1. 086618  
101929290 1. 981651 2. 554926 2. 088616 2. 532972 3. 0632 2. 048705 1. 908362 2. 464027  
101929294 2. 130437 1. 04016 0. 986081 1. 363452 0. 75814 0. 885858 2. 247325 1. 373693  
101929295 2. 538912 2. 053252 1. 985041 2. 574337 2. 181321 2. 5481 3. 533035 2. 726972  
101929302 2. 76722 1. 186923 1. 68939 1. 891776 2. 898599 4. 504461 1. 502715 1. 649768  
101929305 0. 87387 1. 722969 2. 438349 1. 841428 1. 519888 1. 29141 2. 25108 1. 158822  
101929307 1. 176003 2. 625917 2. 533268 1. 543959 2. 600875 1. 785747 3. 740645 2. 411211  
101929309 1. 596047 1. 215913 3. 190616 1. 442038 1. 220667 1. 734768 1. 750267 2. 6065  
101929310 1. 362319 1. 398111 1. 928433 1. 815002 1. 801599 1. 967659 1. 721181 2. 381214  
101929312 0. 968096 1. 159751 1. 509195 1. 254227 1. 346685 1. 757032 1. 24481 1. 510808  
101929315 0. 833025 1. 013243 1. 335014 1. 060466 1. 261081 0. 922423 0. 888579 1. 096382  
101929316 1. 874329 1. 100384 1. 322298 0. 967752 1. 625296 1. 775961 1. 497937 1. 730836  
101929320 1. 231845 1. 077967 2. 43099 0. 890482 1. 54011 1. 543875 1. 071987 1. 75418  
101929325 2. 11565 1. 653097 1. 78628 0. 646637 1. 376905 1. 199828 1. 509077 1. 227233  
101929327 2. 350599 1. 612477 1. 042332 1. 149197 3. 156046 1. 542322 2. 393249 1. 719908  
101929328 1. 336145 1. 198852 1. 569787 1. 280462 1. 439454 1. 576318 1. 901231 1. 394884  
101929329 2. 219418 2. 860767 2. 647652 2. 397296 1. 902133 2. 431561 2. 112428 3. 142984  
101929330 1. 832996 2. 378472 1. 745544 1. 984062 1. 272971 2. 163655 2. 140156 2. 149724  
101929331 3. 798013 4. 059915 4. 364385 4. 825797 4. 915407 2. 809704 3. 686307 3. 253301  
101929335 8. 344478 8. 153479 8. 065007 7. 659651 8. 238221 6. 953145 7. 303018 8. 384757  
101929337 1. 291077 1. 270028 1. 810448 2. 166915 2. 206316 1. 47609 2. 600252 1. 810593  
101929338 2. 938572 2. 529453 1. 635813 2. 645535 1. 844131 1. 563022 1. 566006 1. 386242  
101929340 2. 903682 2. 624825 2. 406052 3. 325111 3. 659476 2. 206806 1. 656598 1. 988853  
101929341 1. 88801 2. 67732 1. 560773 1. 402976 1. 6004 1. 678185 1. 927876 1. 482927  
101929344 1. 498391 1. 501665 1. 148421 0. 923801 1. 790682 0. 526561 1. 711401 1. 439826  
101929350 1. 116489 0. 566157 0. 693409 1. 347685 2. 200224 0. 361765 1. 337338 0. 57144  
101929353 0. 71238 1. 041681 0. 869232 0. 778758 1. 435523 0. 850759 1. 198246 1. 434241  
101929355 1. 465008 2. 110573 1. 852576 1. 646741 1. 478933 1. 414183 1. 603497 1. 722989  
101929356 3. 089959 1. 09653 1. 023776 1. 248772 3. 876209 2. 550062 1. 113724 0. 910561  
101929363 1. 074171 1. 495726 0. 830213 0. 869978 1. 966688 0. 790936 0. 976539 0. 958997  
101929369 1. 549298 1. 6257 1. 526882 2. 076226 2. 213127 1. 847782 1. 975541 2. 009562  
101929372 1. 675938 1. 216587 1. 83357 1. 087759 1. 492732 1. 686634 1. 430095 1. 287706  
101929374 1. 618757 2. 8597 2. 507844 2. 122737 2. 237107 2. 085414 2. 108994 1. 968733  
101929378 0. 960037 0. 899666 1. 472767 0. 986996 1. 229647 1. 38811 1. 256669 1. 713977  
101929380 1. 107576 2. 274499 2. 775667 1. 237508 1. 494443 1. 015439 2. 816462 1. 366265

101929381 5. 169498 5. 034658 2. 157983 3. 3085 4. 71595 5. 57844 4. 201978 2. 840897  
101929384 1. 480942 1. 956223 2. 364918 2. 039114 2. 408472 1. 3936 1. 571232 1. 542428  
101929385 3. 300846 3. 078935 3. 008878 3. 741263 4. 048631 3. 955644 2. 760906 2. 78082  
101929390 1. 36883 1. 466565 1. 590985 0. 944723 1. 087617 1. 821342 1. 107254 1. 539399  
101929393 0. 934815 1. 75102 0. 828933 1. 296809 2. 158866 1. 284307 1. 888597 3. 004724  
101929395 3. 261554 1. 513421 1. 240541 1. 075115 1. 353648 1. 628414 1. 612892 1. 133564  
101929397 2. 150689 1. 905614 1. 869472 2. 000687 2. 565427 2. 328357 2. 482153 3. 013975  
101929398 2. 486204 2. 173932 1. 027191 1. 059475 1. 265817 2. 398704 2. 270745 1. 804895  
101929402 3. 128967 1. 614301 2. 278584 1. 795952 1. 855032 1. 988332 2. 400835 2. 394954  
101929406 1. 854317 1. 707879 1. 479092 1. 353483 0. 922985 1. 13263 1. 0342 2. 298485  
101929407 4. 124561 3. 962316 5. 382816 2. 699687 3. 573182 3. 837163 3. 114126 5. 573576  
101929410 1. 929958 0. 621399 2. 234674 0. 775045 1. 057946 1. 386691 1. 305658 1. 292334  
101929412 1. 246638 1. 326162 1. 259939 1. 487739 2. 100503 1. 373608 2. 106439 2. 192034  
101929413 1. 122831 1. 495354 1. 42557 1. 158385 0. 988857 1. 219998 1. 316026 1. 632062  
101929415 1. 14789 1. 08141 1. 355497 1. 242726 1. 873462 1. 57038 1. 423113 1. 742478  
101929419 1. 057503 0. 621639 0. 768238 0. 792111 2. 254341 1. 609238 0. 769575 1. 701156  
101929420 1. 58596 1. 998901 2. 415197 1. 876464 2. 469595 2. 406085 1. 90793 2. 12287  
101929422 1. 733052 2. 524254 1. 697462 2. 191014 2. 49039 2. 133785 2. 551821 1. 802903  
101929423 1. 569814 2. 461972 2. 341539 2. 389237 2. 095585 3. 078 2. 231228 2. 575999  
101929425 3. 115307 1. 835127 2. 78444 3. 156516 1. 91627 2. 475373 1. 753207 2. 354955  
101929427 0. 891038 1. 142488 1. 397977 0. 951951 0. 930336 1. 580531 0. 74075 1. 709726  
101929428 1. 487629 1. 068264 1. 20179 0. 940461 1. 147403 1. 393941 2. 482915 1. 39195  
101929431 1. 170071 2. 690184 1. 406765 1. 927706 1. 943665 1. 96801 1. 919217 1. 672276  
101929432 1. 92147 2. 115944 3. 099058 1. 856001 2. 510914 3. 098747 2. 079063 2. 806564  
101929435 3. 159315 1. 734108 1. 3485 1. 464162 0. 931528 0. 750892 1. 245998 1. 124077  
101929436 1. 548552 1. 289433 1. 027843 1. 396985 1. 717421 1. 171385 1. 534436 1. 284044  
101929437 1. 845296 2. 187739 1. 269574 1. 817522 1. 877021 2. 976851 2. 017074 2. 641236  
101929438 5. 997177 5. 442441 5. 53528 6. 207024 5. 848375 5. 116188 5. 665072 5. 152746  
101929439 1. 337592 1. 141844 1. 399877 2. 779579 1. 672645 1. 171583 1. 510349 1. 452284  
101929441 1. 856026 1. 760708 2. 802865 1. 730384 2. 078065 1. 648028 2. 4876 3. 43348  
101929443 1. 65318 1. 775358 2. 520194 1. 337812 1. 554966 1. 605087 2. 287922 1. 245498  
101929445 2. 814445 1. 635438 1. 72855 1. 307427 2. 195267 1. 950663 2. 291605 2. 026492  
101929446 1. 513394 1. 918146 1. 536192 1. 322744 2. 356811 1. 629502 2. 057286 1. 099007  
101929447 0. 933619 0. 934729 0. 848303 0. 969532 2. 739268 1. 068177 0. 956857 1. 626077  
101929448 0. 903944 1. 561297 1. 044669 0. 897242 1. 014323 0. 669798 1. 084012 1. 392424  
101929450 0. 713091 0. 735612 1. 977035 1. 333248 1. 143011 2. 909805 0. 852412 0. 556562  
101929452 1. 923199 1. 716764 1. 517061 1. 941049 2. 258874 2. 054788 1. 448174 2. 664543  
101929453 1. 580253 1. 433638 1. 871636 1. 069111 1. 78701 1. 531251 0. 343395 2. 021415  
101929454 5. 311236 4. 816309 3. 061849 3. 905259 4. 172409 4. 420692 4. 352508 5. 010384  
101929457 1. 403648 1. 965623 2. 000925 1. 485986 1. 547708 0. 994726 1. 542805 1. 407692  
101929459 1. 576925 1. 125484 1. 180481 1. 091728 1. 697863 1. 70906 1. 078117 1. 920515  
101929460 2. 17008 2. 059163 1. 406128 1. 628195 2. 431359 1. 726037 1. 378315 2. 52452  
101929462 2. 319356 1. 432601 1. 610729 2. 197636 1. 028203 1. 84817 1. 510555 1. 346143  
101929463 1. 416215 0. 348639 3. 283218 0. 684356 1. 000499 1. 008193 1. 791218 0. 845301  
101929465 1. 433818 0. 994333 1. 631858 1. 140634 1. 575138 1. 477348 0. 87727 1. 932234  
101929467 1. 233426 0. 912998 0. 851227 0. 961257 1. 63542 0. 742535 0. 852565 1. 412181  
101929468 1. 097946 0. 782645 1. 144404 1. 561675 1. 428322 1. 491303 1. 118025 1. 80036  
101929469 2. 797832 2. 33647 2. 071466 2. 086593 2. 125278 2. 479228 2. 893182 3. 133538  
101929470 1. 446866 1. 532757 1. 724491 1. 366059 1. 420037 1. 776767 1. 0066 1. 628788  
101929472 1. 149611 0. 971861 1. 264266 0. 989033 1. 881441 1. 560949 1. 209232 1. 918727  
101929475 1. 080101 1. 278592 1. 305551 0. 988904 1. 934131 1. 090498 1. 301776 1. 308719

101929476 2. 347073 2. 302828 2. 281471 1. 297469 1. 732349 3. 017554 2. 276473 2. 168252  
101929477 1. 203979 1. 190992 3. 856995 1. 152109 1. 774472 1. 15421 1. 381027 1. 518006  
101929478 1. 334171 1. 31566 1. 373386 1. 89589 1. 164441 1. 006362 1. 871045 1. 421852  
101929484 0. 900499 0. 721968 3. 870652 1. 083561 0. 877132 1. 316024 1. 168378 0. 622193  
101929485 1. 362143 1. 001949 1. 512927 1. 813764 1. 196201 1. 759407 1. 139051 3. 112732  
101929486 1. 681583 1. 402207 1. 843351 2. 324312 1. 780775 1. 092643 1. 350515 1. 775259  
101929488 2. 071339 1. 801023 1. 699074 1. 605005 1. 55407 1. 848923 1. 821473 1. 651467  
101929491 0. 914008 1. 423967 1. 804947 1. 168977 1. 642864 1. 151298 1. 983576 0. 988882  
101929492 1. 141875 1. 325391 1. 024245 0. 878718 1. 697114 1. 430673 1. 1102 1. 674016  
101929494 6. 733611 6. 790129 7. 035842 6. 650983 4. 73202 6. 633948 7. 395567 6. 58202  
101929495 2. 401717 1. 156228 1. 194832 1. 015281 1. 281333 1. 626077 1. 07471 1. 163189  
101929497 0. 70997 1. 428243 1. 423584 2. 860502 1. 021687 0. 897086 2. 197723 0. 963559  
101929500 4. 251907 4. 780902 6. 74792 5. 427022 5. 357015 3. 086012 3. 571447 2. 918251  
101929504 1. 669254 1. 865891 1. 900919 2. 09114 2. 077113 1. 926076 2. 086101 1. 876944  
101929505 1. 728618 1. 84823 1. 264899 1. 252852 1. 734614 1. 3327 1. 658879 1. 70605  
101929511 1. 385236 1. 646768 1. 500066 1. 376885 1. 737527 1. 59437 1. 208361 2. 243332  
101929512 0. 893126 0. 968388 1. 030536 1. 499116 1. 269527 0. 529743 1. 387004 1. 166144  
101929514 2. 742164 0. 994657 0. 73188 0. 532918 1. 174213 2. 979782 1. 931641 2. 373741  
101929515 1. 635926 1. 298366 2. 010425 1. 752478 1. 654196 1. 777691 1. 708193 2. 146498  
101929517 1. 076475 1. 759581 1. 570173 1. 441216 1. 443235 1. 647898 2. 048384 2. 669352  
101929520 1. 389346 1. 403973 1. 757989 1. 074625 2. 066269 1. 163671 2. 375127 0. 888673  
101929523 4. 248149 1. 935376 1. 956858 2. 954617 2. 652602 2. 958684 1. 642849 2. 001636  
101929524 2. 161178 3. 22898 2. 625071 3. 380032 2. 351627 2. 597852 2. 660796 3. 02027  
101929526 2. 18819 1. 689076 1. 744501 1. 865381 2. 085947 1. 849753 1. 342066 1. 805686  
101929528 0. 908289 1. 451371 2. 023206 1. 691585 2. 060094 1. 475044 1. 299776 1. 311167  
101929529 2. 396728 1. 238204 2. 404084 1. 640908 3. 664966 0. 891608 1. 427128 3. 746602  
101929530 0. 903317 1. 011887 1. 362034 1. 257343 1. 544262 1. 303435 1. 505703 1. 359621  
101929531 5. 140131 2. 469685 5. 081028 3. 961252 3. 754011 3. 410984 3. 366191 3. 058695  
101929532 1. 132645 0. 998918 1. 4339 1. 357698 1. 639791 1. 165655 1. 895746 1. 77326  
101929535 2. 023115 2. 174257 2. 177472 2. 175721 2. 331595 2. 468062 2. 151977 2. 349584  
101929536 1. 339452 1. 509368 1. 598348 1. 267012 1. 588477 1. 064104 2. 172749 0. 769595  
101929538 2. 393757 1. 946749 2. 412271 2. 243721 2. 24541 3. 037503 2. 231006 1. 950266  
101929539 1. 967981 2. 890776 2. 039564 1. 758216 1. 955168 3. 230094 2. 830407 2. 830718  
101929540 6. 869397 6. 054731 7. 296956 7. 42887 6. 415716 6. 792096 6. 648506 6. 800095  
101929541 1. 212509 1. 802539 1. 908979 1. 573161 1. 656829 1. 39294 1. 715108 1. 654486  
101929542 1. 679464 1. 370127 1. 307179 1. 575568 1. 5741 1. 22422 1. 814755 1. 939427  
101929544 1. 306748 2. 328564 1. 224723 1. 442639 1. 544305 1. 577377 0. 933339 1. 093702  
101929547 0. 633655 2. 231976 1. 23276 1. 093353 1. 354235 2. 030351 2. 089117 2. 173217  
101929548 2. 54482 2. 612683 2. 136615 2. 025031 2. 486613 3. 014986 2. 651381 2. 245937  
101929549 2. 840768 2. 885206 2. 450018 2. 203679 3. 474105 2. 271731 2. 526559 3. 056333  
101929551 1. 21109 1. 505765 1. 008084 1. 431859 1. 112888 1. 142963 1. 295243 0. 964532  
101929552 1. 161885 1. 272718 2. 144202 2. 174365 1. 24675 0. 793717 2. 063045 1. 711432  
101929555 0. 978703 0. 909304 0. 881503 1. 415793 1. 034275 1. 063153 1. 65415 2. 241226  
101929557 1. 666034 1. 044856 1. 453705 1. 96929 1. 569782 1. 816253 2. 527007 1. 586783  
101929558 7. 064501 4. 551132 6. 658371 5. 96023 6. 443221 5. 045679 6. 602248 6. 045707  
101929559 1. 195559 1. 269833 1. 239961 2. 32348 1. 590347 1. 012305 1. 997045 1. 335032  
101929560 1. 427192 3. 530828 1. 802383 1. 249355 1. 308641 2. 003503 2. 516111 1. 892388  
101929563 1. 230785 1. 10338 0. 917218 0. 908083 1. 200576 1. 436941 1. 053826 1. 151316  
101929565 1. 056404 1. 606989 1. 018058 0. 870314 2. 307909 0. 995825 1. 511592 1. 751056  
101929566 1. 426764 1. 709058 2. 645631 1. 709207 2. 032624 1. 684692 2. 671575 1. 75135  
101929567 2. 015284 2. 08346 2. 324705 2. 178078 2. 831306 2. 633854 2. 066984 2. 007291



10192957C 1. 593225 1. 523162 1. 833656 1. 448504 1. 963326 1. 934129 1. 524811 1. 770271  
101929574 2. 124224 2. 547133 2. 129569 2. 225716 2. 245253 2. 019123 1. 59777 2. 088652  
101929577 1. 300678 1. 070772 1. 408132 1. 155379 1. 308373 1. 834901 1. 104073 2. 2414  
10192958C 1. 303196 1. 204253 1. 249355 0. 900631 1. 121104 1. 861352 2. 822936 1. 154812  
101929582 1. 782946 1. 775933 1. 126653 0. 920875 1. 339366 1. 016659 1. 232165 1. 014945  
101929584 2. 003509 1. 97959 2. 555598 2. 297486 2. 670016 2. 66066 2. 647848 2. 619984  
101929585 2. 221596 1. 966184 2. 228285 1. 942774 2. 407994 2. 35722 2. 037752 2. 94601  
101929586 1. 548154 1. 244778 1. 278198 1. 574264 1. 10732 1. 188774 1. 942538 1. 63178  
101929587 1. 962072 2. 459006 2. 921855 2. 634457 2. 668491 2. 683662 2. 43804 2. 33848  
10192959C 1. 868118 1. 690151 1. 566422 2. 135912 1. 101589 1. 667607 1. 527376 1. 155543  
101929591 1. 521098 1. 476647 1. 66909 1. 637502 2. 704525 1. 371294 1. 265531 1. 554877  
101929592 1. 500543 1. 293518 1. 422558 1. 367112 1. 354061 1. 084959 1. 295782 1. 970749  
101929593 1. 333926 0. 701657 0. 509 0. 546716 1. 134786 0. 404694 1. 03458 1. 318122  
101929596 2. 743047 2. 729395 1. 822825 2. 640705 3. 012238 1. 895595 1. 567856 1. 912891  
101929602 1. 888214 1. 772379 2. 025417 1. 859897 2. 021074 2. 27408 2. 498264 1. 60705  
101929604 3. 638134 3. 384906 2. 295497 2. 248661 4. 78335 2. 012034 3. 65421 2. 789477  
101929607 3. 215219 1. 520578 1. 197499 2. 047423 2. 309684 1. 719406 1. 512665 3. 319056  
101929608 1. 208527 1. 894986 1. 530784 0. 937738 1. 970867 1. 950375 1. 753624 1. 88735  
101929609 0. 695423 1. 539029 2. 000513 2. 508247 1. 921209 1. 705496 1. 710266 1. 822144  
10192961C 1. 024756 1. 676791 1. 10377 1. 531681 1. 10572 1. 316887 1. 095385 1. 703496  
101929614 3. 039103 2. 350692 1. 85551 2. 625229 2. 649949 3. 385977 3. 071778 5. 35965  
101929622 1. 591812 1. 333901 1. 53819 1. 878112 2. 121839 1. 833763 1. 237176 1. 723686  
101929623 1. 603387 1. 649488 1. 581717 1. 208422 2. 526257 1. 118007 1. 48136 1. 967838  
101929624 1. 251994 1. 778388 1. 831804 1. 693158 1. 292545 1. 976982 1. 632659 1. 136844  
101929625 1. 348002 1. 614376 1. 594539 1. 119478 1. 212412 1. 218493 1. 160949 1. 691956  
101929626 2. 038823 1. 182965 1. 96468 1. 046193 4. 952909 1. 214064 0. 981342 1. 293109  
101929628 2. 471625 0. 929267 0. 316113 1. 597883 1. 800779 1. 104467 1. 538765 2. 578484  
101929631 1. 087327 0. 914338 1. 143425 1. 262098 2. 082673 1. 207527 0. 892237 1. 290149  
101929633 3. 70243 3. 093873 2. 801279 4. 066638 4. 552166 4. 87891 2. 952254 4. 01059  
101929634 3. 105115 2. 190663 3. 612973 2. 921173 2. 106117 3. 553773 2. 390506 4. 871959  
101929636 3. 047161 3. 228682 3. 221237 3. 170496 4. 098125 3. 464209 3. 745019 2. 5616  
101929637 1. 45528 0. 995371 1. 411312 2. 278475 3. 460812 1. 758387 0. 952526 1. 250044  
101929639 3. 769082 2. 415937 3. 254827 2. 331992 2. 571671 3. 088478 2. 714687 2. 296251  
101929641 1. 06172 2. 456187 1. 731087 4. 368617 1. 474557 1. 299362 1. 046957 2. 806961  
101929643 1. 470491 2. 021765 1. 763318 1. 034727 1. 376347 1. 977714 2. 110888 1. 313363  
101929646 1. 286906 1. 399737 1. 568656 1. 053278 1. 702485 2. 301758 1. 534086 1. 772823  
101929648 2. 647185 1. 617088 2. 228819 1. 401646 1. 824524 2. 537846 1. 381328 2. 092654  
101929651 1. 237594 1. 296625 1. 859554 1. 305874 1. 634919 0. 976347 1. 467711 1. 762506  
101929653 1. 389825 1. 713261 1. 713261 1. 119483 1. 609098 1. 100503 1. 5993 1. 004043  
101929654 1. 606167 1. 30169 1. 13168 1. 076437 1. 673213 1. 639225 2. 1621 1. 521706  
101929655 1. 929711 1. 987988 1. 48215 2. 014018 1. 597888 1. 155813 1. 319391 1. 431564  
101929657 1. 268946 1. 600441 1. 504163 1. 459009 1. 987222 1. 554586 1. 709535 1. 717911  
10192966C 1. 482334 1. 122469 1. 160968 2. 623531 1. 849374 1. 990643 0. 814865 1. 021432  
101929663 0. 731266 1. 739069 0. 730956 0. 995086 1. 745278 1. 841461 1. 278796 0. 967858  
101929664 1. 372388 1. 531436 1. 676448 1. 696703 2. 549552 3. 240639 3. 010691 1. 802682  
101929665 3. 804558 1. 430307 2. 318509 3. 781192 4. 232639 2. 517018 2. 724649 1. 639019  
101929666 4. 609697 2. 590262 4. 48515 4. 593583 5. 464375 3. 970853 4. 977146 6. 494389  
101929668 3. 618274 2. 86538 1. 414917 1. 554403 3. 459272 2. 947873 4. 202755 1. 536999  
101929675 1. 500544 1. 035838 1. 911313 0. 925037 2. 56663 1. 122965 1. 444477 1. 163527  
101929679 1. 6288 2. 502621 1. 335866 1. 179189 2. 544412 1. 686184 1. 453409 1. 705611  
10192968C 2. 232762 2. 299091 2. 145794 2. 480009 2. 139914 2. 094804 2. 159109 2. 541475

101929681 1. 504634 1. 260706 2. 301897 1. 507059 1. 64023 3. 04492 1. 434344 2. 700603  
101929683 1. 278986 1. 738612 1. 389938 1. 324106 1. 847248 1. 245942 1. 556702 2. 023528  
101929685 1. 24644 2. 269532 1. 992892 1. 365522 1. 485004 2. 710919 2. 02778 1. 204666  
101929688 0. 936359 1. 716995 1. 305831 1. 279096 1. 465455 1. 446766 1. 440417 1. 328996  
101929689 1. 625353 1. 225684 2. 840111 0. 861433 2. 768117 2. 257839 1. 398389 3. 931297  
101929690 1. 388231 1. 908978 1. 626174 1. 245054 1. 988415 1. 591642 1. 9255 2. 662872  
101929694 0. 55106 0. 852657 0. 918449 0. 840637 1. 339286 1. 392516 0. 944934 0. 853394  
101929696 1. 051921 1. 385677 1. 53491 0. 94818 1. 349228 1. 52913 2. 574986 1. 658239  
101929697 1. 402429 1. 622845 1. 314554 3. 162807 1. 505621 1. 577455 0. 769526 2. 019715  
101929700 1. 857447 1. 210665 0. 879266 0. 730386 1. 685514 1. 302154 1. 41439 1. 536434  
101929701 2. 001968 1. 154651 1. 149733 1. 756576 1. 653062 2. 208511 1. 934045 1. 181714  
101929705 3. 332805 5. 393581 3. 975894 6. 394666 3. 322708 4. 233647 2. 485137 2. 879236  
101929707 1. 473063 1. 535159 1. 1591 1. 841934 1. 53878 1. 939633 1. 738602 1. 583753  
101929709 3. 12778 3. 408782 2. 656038 3. 3481 1. 743731 2. 875291 2. 440731 4. 180013  
101929710 2. 959494 1. 30912 2. 583171 2. 282943 0. 420397 0. 893552 2. 451338 0. 501929  
101929713 1. 159764 1. 326043 1. 032764 0. 878011 2. 796451 1. 732638 0. 961067 2. 225736  
101929715 1. 829907 1. 719884 1. 28979 1. 605721 3. 65312 1. 697868 3. 294595 4. 505492  
101929716 0. 741169 2. 009153 1. 07212 1. 303257 0. 98346 1. 575024 1. 429399 1. 420913  
101929717 2. 489966 1. 700688 1. 549476 1. 48069 2. 231335 1. 329077 1. 660555 1. 866858  
101929718 4. 290836 4. 290836 4. 380797 4. 233082 5. 199139 4. 553851 4. 006775 5. 087933  
101929719 2. 673723 2. 753692 1. 720938 2. 750071 2. 428165 2. 178462 1. 344095 1. 285539  
101929723 0. 97562 3. 113124 1. 05663 0. 949212 1. 800055 1. 360439 1. 19881 1. 564893  
101929726 1. 738543 1. 922224 2. 578332 1. 791502 2. 194366 1. 450784 2. 629034 2. 171021  
101929728 2. 128554 0. 556505 0. 292293 0. 526647 0. 655659 0. 621587 4. 142448 2. 175881  
101929730 1. 909722 2. 282881 2. 329472 2. 334848 2. 241107 1. 77569 2. 318691 3. 782398  
101929741 0. 792545 1. 159421 1. 723754 1. 173932 2. 910461 0. 684211 1. 243396 1. 752027  
101929743 1. 478501 1. 82936 2. 830728 1. 821797 2. 391523 1. 726754 2. 458368 1. 304702  
101929745 1. 393597 1. 37725 1. 852573 1. 406503 1. 721007 1. 225495 1. 698161 1. 578212  
101929746 1. 769947 1. 900162 2. 546838 1. 673068 1. 356764 2. 800706 1. 67419 2. 242013  
101929752 1. 438281 1. 714572 1. 11278 1. 382583 1. 442744 1. 551499 1. 627244 1. 861218  
101929753 1. 043035 0. 950156 1. 157813 1. 136893 2. 239133 1. 315646 1. 404695 1. 559295  
101929754 1. 452616 1. 68057 1. 55656 1. 173657 1. 185407 0. 972851 1. 435296 1. 23444  
101929757 1. 044775 1. 432532 1. 229343 1. 764892 1. 479165 1. 268637 1. 250122 2. 051594  
101929758 3. 235677 5. 613559 4. 492322 4. 83897 4. 544278 2. 843621 5. 774605 3. 64534  
101929759 3. 388468 2. 064418 2. 390668 1. 882647 2. 578142 3. 056676 2. 413454 3. 023191  
101929760 2. 676063 3. 639155 3. 795695 1. 958074 5. 188984 1. 888636 2. 032752 2. 654182  
101929761 4. 144409 5. 424506 4. 743994 5. 718811 2. 393619 4. 931058 5. 187856 4. 116263  
101929762 3. 265849 2. 68567 3. 647627 3. 399615 3. 941389 3. 200905 3. 186065 2. 44178  
101929763 1. 263844 1. 404575 1. 046646 0. 78974 1. 205106 1. 222058 0. 935131 1. 464385  
101929765 1. 6823 2. 044495 2. 167885 1. 8714 3. 027011 1. 955596 1. 834302 2. 121078  
101929767 3. 556347 3. 832097 3. 854962 1. 982856 1. 675189 2. 180892 2. 833697 4. 370357  
101929768 0. 795698 0. 706714 0. 857305 3. 229596 1. 899245 2. 799899 0. 801266 0. 795653  
101929769 2. 954748 1. 842175 2. 029557 2. 543845 2. 608896 3. 935112 2. 892106 3. 20391  
101929770 1. 494958 1. 686903 1. 71087 1. 68179 2. 260545 1. 790495 2. 074659 2. 777417  
101929771 1. 666159 1. 454268 1. 938801 1. 742452 2. 651678 1. 47913 1. 896523 2. 3862  
101929777 1. 727995 2. 035538 1. 757694 1. 792009 1. 818189 1. 432558 1. 479056 1. 859994  
101929800 2. 657619 1. 512931 3. 689738 2. 379349 0. 661409 3. 285777 2. 931579 1. 919629  
101929863 1. 277249 1. 922509 1. 300506 2. 601877 1. 167181 1. 582164 1. 919195 1. 593245  
101929866 1. 043251 2. 406026 1. 387302 2. 057102 1. 886823 0. 655886 1. 284337 1. 263987  
101929897 2. 120765 2. 14012 2. 468924 2. 890329 2. 148373 2. 227184 2. 074884 1. 904746  
101929901 2. 218109 1. 404793 1. 604149 3. 750707 2. 314501 2. 125506 2. 614176 1. 018333

101929937 4. 393485 4. 018699 4. 568164 2. 811916 3. 536225 2. 807762 3. 746692 3. 792255  
101929946 2. 205081 3. 438585 3. 303501 1. 159557 2. 856539 2. 252517 2. 214114 1. 485753  
101929949 2. 348982 1. 689207 3. 310202 1. 454576 2. 400677 2. 312128 1. 567855 2. 159898  
101929953 3. 334854 2. 259744 1. 502709 1. 947342 2. 512511 0. 984512 2. 033438 0. 863642  
101929964 2. 370851 2. 061578 2. 4478 2. 023105 2. 208018 3. 486095 1. 787129 1. 827675  
101929976 3. 085115 1. 546268 0. 707682 1. 603855 1. 086545 0. 608049 2. 825429 1. 516585  
101929989 1. 822526 1. 76305 1. 923014 1. 278545 1. 933702 1. 233021 1. 265476 1. 953793  
101930010 1. 252827 2. 216155 1. 387385 2. 359158 1. 905072 1. 395007 1. 567906 1. 296202  
101930026 3. 280423 3. 251 3. 004849 4. 886099 3. 816091 2. 644634 3. 096774 3. 536552  
101930033 1. 661491 1. 331357 1. 352516 1. 489542 1. 330486 1. 318885 4. 362505 1. 833177  
101930048 1. 237295 1. 615694 1. 243501 1. 384948 1. 55148 0. 856619 1. 519075 1. 45721  
101930053 1. 231975 1. 231619 1. 159033 1. 590017 2. 538831 1. 375861 2. 157901 1. 526154  
101930114 5. 082113 6. 114528 5. 4244 4. 683529 6. 207943 3. 429971 4. 582926 6. 042981  
101930164 0. 964657 1. 695583 1. 563404 2. 199367 1. 337295 1. 759037 2. 202597 2. 604587  
101930275 0. 819895 1. 367198 2. 522326 0. 903541 1. 445804 0. 534549 1. 361461 0. 829555  
101930276 1. 233623 1. 410899 1. 347991 0. 863364 1. 276574 1. 563971 0. 975557 1. 329446  
101930294 3. 992031 3. 317021 3. 972056 4. 13987 3. 283449 3. 776169 2. 213343 3. 325826  
101930305 3. 607339 3. 788326 3. 869048 3. 549722 3. 998436 4. 289649 3. 296387 4. 034733  
101930332 4. 960399 4. 285755 4. 091125 3. 34599 4. 007108 3. 056056 4. 509177 4. 512169  
101930370 2. 681477 4. 462777 3. 047117 3. 47956 1. 626346 2. 04692 2. 051864 5. 189319  
101930375 1. 444908 1. 592849 4. 730142 3. 263733 1. 324057 1. 620224 1. 332536 2. 571302  
101930384 1. 114363 2. 346384 1. 992443 1. 939692 4. 494002 0. 785972 0. 87285 1. 939692  
101930421 2. 942742 2. 073347 1. 91613 2. 231462 2. 173477 1. 711343 2. 40558 2. 849703  
101930434 1. 347191 1. 608753 1. 52184 1. 284442 1. 328985 2. 419157 1. 597127 2. 12708  
101930476 1. 736175 2. 095026 1. 762105 1. 633454 1. 42988 1. 541534 1. 930514 1. 83656  
101930531 1. 463914 1. 32378 1. 653882 1. 177866 1. 291161 1. 159345 2. 868547 2. 121315  
101930567 1. 894837 2. 561984 1. 984861 3. 300764 2. 253697 3. 155738 5. 652859 2. 113869  
101930644 0. 699974 0. 693788 1. 959447 0. 440684 0. 649541 2. 202818 0. 770181 0. 910696  
101930746 1. 734893 1. 350342 1. 266754 0. 928062 1. 457889 1. 222375 2. 114221 1. 684864  
101930747 1. 367556 1. 289293 1. 774933 0. 833633 0. 897857 1. 348411 1. 31574 0. 993541  
101930748 1. 331026 2. 677457 1. 952887 2. 205956 2. 455623 1. 85422 2. 062986 1. 75981  
101937451 1. 974351 2. 16277 1. 836904 1. 676574 2. 391425 1. 378087 1. 414321 1. 58051  
10193\_at 5. 452887 5. 383165 5. 461499 4. 707527 5. 00588 5. 03937 6. 000112 4. 817695  
10194\_at 6. 863172 7. 094026 7. 333274 6. 605387 6. 432012 6. 880132 7. 397669 7. 03391  
101954204 1. 494047 1. 565226 1. 857628 0. 804659 1. 322501 0. 955548 1. 300518 1. 403951  
101954264 1. 615536 1. 261944 2. 626909 1. 104719 1. 088101 1. 086387 1. 143792 1. 076159  
101954266 2. 874793 1. 447819 1. 537688 1. 47421 1. 844093 1. 304955 3. 003121 1. 648181  
101954267 1. 47346 1. 154253 1. 044234 1. 325787 1. 656398 1. 119025 1. 460977 1. 454426  
101954269 0. 837717 0. 804172 2. 091128 0. 864027 1. 144263 0. 757757 1. 229689 2. 261332  
101954272 1. 94615 1. 050928 5. 025436 1. 178153 1. 360759 1. 271934 1. 447853 0. 939043  
101954276 1. 522537 2. 497775 1. 009027 0. 809745 1. 443907 1. 84048 0. 823028 1. 43468  
101954277 1. 156894 2. 286191 0. 995006 0. 975657 1. 631458 1. 115134 1. 171674 0. 926137  
10195\_at 4. 959205 5. 46099 5. 431006 4. 857029 4. 674979 5. 412128 5. 726631 5. 095386  
10196\_at 4. 515432 4. 707341 4. 226653 4. 078796 4. 940343 4. 622223 5. 044052 5. 248863  
101978719 1. 696531 1. 993403 2. 062923 2. 276138 2. 178158 2. 000661 1. 92042 2. 197089  
101978785 2. 33052 1. 176814 2. 332613 1. 451647 1. 014156 1. 16521 0. 683924 2. 663366  
10197\_at 6. 106849 6. 842987 6. 37278 7. 116146 6. 85663 6. 538565 5. 67663 6. 68216  
10198\_at 3. 855199 4. 206117 3. 921144 4. 377874 3. 320961 3. 647039 4. 877138 4. 924978  
10199\_at 6. 396191 5. 821346 5. 577679 5. 973927 5. 984249 6. 731356 6. 23269 6. 555568  
1019\_at 7. 045801 7. 133686 6. 951816 6. 633991 7. 053089 6. 819254 6. 291679 6. 568521  
101\_at 2. 493198 2. 073207 2. 841239 1. 983152 2. 633266 3. 662892 2. 485802 2. 751384

|           |          |          |          |          |          |          |          |          |
|-----------|----------|----------|----------|----------|----------|----------|----------|----------|
| 10200_at  | 5.259087 | 6.790576 | 5.199549 | 5.53925  | 6.561553 | 6.504383 | 5.804492 | 5.880519 |
| 10201_at  | 3.365135 | 2.694435 | 2.702823 | 2.516113 | 2.398349 | 3.760947 | 3.349532 | 4.524461 |
| 10202_at  | 3.490463 | 2.472687 | 4.007729 | 4.314296 | 2.940042 | 2.736574 | 2.770238 | 3.688244 |
| 102031319 | 2.304701 | 2.379143 | 2.4202   | 2.911348 | 2.668541 | 2.198039 | 3.090982 | 1.882484 |
| 10203_at  | 7.317632 | 7.452645 | 7.234383 | 7.22036  | 7.273027 | 7.28871  | 7.753141 | 7.520625 |
| 10204_at  | 5.604477 | 5.13345  | 6.069318 | 5.814195 | 5.447129 | 4.767516 | 4.915513 | 4.591758 |
| 10205_at  | 3.333487 | 5.55125  | 5.230131 | 5.331438 | 5.520634 | 4.925372 | 5.134905 | 5.460729 |
| 102060414 | 2.226541 | 2.139532 | 1.905187 | 2.043082 | 2.247068 | 1.994769 | 2.307681 | 1.599292 |
| 10206_at  | 5.238795 | 5.705725 | 4.56921  | 5.106022 | 4.912828 | 5.122672 | 4.856948 | 5.635036 |
| 10207_at  | 5.610446 | 6.24855  | 5.717091 | 5.804816 | 6.446163 | 5.969031 | 5.685742 | 6.867144 |
| 10208_at  | 5.366941 | 5.138361 | 4.397148 | 4.670049 | 5.127765 | 4.25524  | 4.995999 | 4.267841 |
| 10209_at  | 10.55908 | 10.26543 | 10.0835  | 10.26175 | 10.04072 | 10.47399 | 10.18708 | 10.34814 |
| 1020_at   | 5.981359 | 6.378079 | 4.739457 | 4.650273 | 6.149519 | 5.822846 | 5.847809 | 5.637313 |
| 10210_at  | 6.009226 | 6.138501 | 5.957786 | 5.636703 | 6.68926  | 6.082214 | 5.72186  | 6.028186 |
| 10211_at  | 7.687908 | 7.414079 | 7.437434 | 7.172436 | 7.302641 | 7.441602 | 7.346671 | 7.138989 |
| 10212_at  | 6.126909 | 5.68575  | 5.689962 | 5.55497  | 5.793151 | 5.581574 | 4.79751  | 6.218759 |
| 10213_at  | 8.039731 | 7.989494 | 7.691242 | 7.48467  | 7.985694 | 6.962946 | 7.943935 | 8.496714 |
| 10214_at  | 0.712208 | 0.973182 | 0.413691 | 0.693028 | 2.175717 | 1.051916 | 0.892313 | 0.693526 |
| 10215740C | 1.818715 | 1.422107 | 2.024586 | 2.464818 | 2.017238 | 1.331998 | 1.367369 | 1.854661 |
| 102157402 | 8.130421 | 8.884939 | 8.104777 | 7.69739  | 8.55382  | 7.320024 | 7.374612 | 8.865596 |
| 10215_at  | 1.768429 | 1.664133 | 1.886533 | 2.68494  | 2.065946 | 1.550409 | 2.218539 | 1.890002 |
| 10216_at  | 2.410515 | 4.313379 | 2.041719 | 2.562279 | 2.429143 | 2.133049 | 2.181134 | 4.469051 |
| 10217_at  | 8.651191 | 8.868034 | 8.966346 | 8.698377 | 8.749357 | 8.433315 | 8.95014  | 8.401258 |
| 10218_at  | 1.55067  | 2.053058 | 1.752947 | 1.560385 | 1.929785 | 1.981221 | 1.643031 | 1.445389 |
| 10219_at  | 3.083317 | 2.037546 | 1.680484 | 1.553081 | 1.759879 | 1.916849 | 1.60757  | 1.915581 |
| 1021_at   | 5.701221 | 6.873119 | 6.61972  | 7.052584 | 6.482753 | 6.291899 | 6.926229 | 6.650646 |
| 10220_at  | 4.788046 | 4.891826 | 5.467704 | 4.453652 | 4.112006 | 4.85182  | 4.501095 | 4.260671 |
| 102216268 | 1.658563 | 1.665899 | 1.927583 | 2.906949 | 0.476276 | 1.572226 | 1.934045 | 2.946123 |
| 102216342 | 1.82582  | 1.558204 | 1.823475 | 1.177689 | 0.768562 | 1.042227 | 1.879123 | 1.508458 |
| 10221_at  | 3.38597  | 3.089561 | 2.908764 | 2.818763 | 3.95658  | 3.253823 | 3.053609 | 2.682967 |
| 102238594 | 1.212008 | 2.014539 | 1.907582 | 2.065402 | 1.702256 | 1.990467 | 1.253386 | 1.793722 |
| 10223_at  | 1.576658 | 2.427916 | 1.512234 | 2.260293 | 1.557083 | 1.540538 | 1.603387 | 2.387584 |
| 10224_at  | 2.408574 | 1.956135 | 2.98028  | 3.016203 | 0.837666 | 2.538536 | 2.561611 | 3.452151 |
| 10225_at  | 1.621585 | 2.236023 | 2.33249  | 2.885502 | 2.105345 | 3.02539  | 2.586651 | 2.710244 |
| 10226_at  | 3.228481 | 4.336087 | 4.113846 | 4.876741 | 4.23708  | 4.969628 | 4.1929   | 3.744723 |
| 10227_at  | 5.547673 | 4.792432 | 5.459569 | 5.112709 | 3.643441 | 5.226105 | 5.080372 | 3.943534 |
| 10228_at  | 5.461045 | 4.982339 | 4.949484 | 5.053187 | 5.211272 | 4.272747 | 5.530037 | 5.231712 |
| 10229_at  | 5.924249 | 7.036853 | 6.708983 | 6.042895 | 5.74134  | 5.124472 | 5.649915 | 6.285161 |
| 1022_at   | 6.088869 | 6.972435 | 6.550541 | 6.567131 | 6.229295 | 5.906051 | 5.961333 | 6.402468 |
| 10230_at  | 4.768721 | 4.649686 | 4.55825  | 5.277048 | 3.302414 | 5.37633  | 1.375464 | 2.526271 |
| 10231_at  | 6.16624  | 6.887041 | 6.311072 | 6.624646 | 6.198756 | 5.876955 | 6.237726 | 6.32703  |
| 10232_at  | 4.420585 | 5.063347 | 4.251494 | 3.328437 | 4.233994 | 4.324197 | 2.953131 | 3.325306 |
| 10233_at  | 3.825929 | 4.763379 | 4.505971 | 4.471827 | 3.434843 | 4.078663 | 2.815354 | 4.144188 |
| 10234_at  | 1.668292 | 1.566936 | 1.423469 | 1.035571 | 2.731712 | 1.791174 | 2.401578 | 2.0799   |
| 10235_at  | 2.620831 | 3.54101  | 3.182003 | 3.461202 | 2.251333 | 3.030452 | 2.654585 | 3.615144 |
| 10236_at  | 7.086606 | 7.149037 | 7.062084 | 7.387514 | 7.80647  | 7.141881 | 7.059472 | 7.269588 |
| 10237_at  | 7.650266 | 7.928431 | 7.935988 | 7.680764 | 7.256378 | 7.671007 | 7.36615  | 7.602801 |
| 10238_at  | 5.758924 | 6.82261  | 7.496355 | 6.906623 | 6.552022 | 6.738464 | 7.468892 | 6.493947 |
| 10240_at  | 7.174374 | 6.777267 | 6.777296 | 6.357323 | 7.420433 | 5.709516 | 6.301559 | 7.185122 |
| 10241_at  | 8.059824 | 8.269664 | 7.970766 | 7.959096 | 7.998254 | 8.450619 | 7.957416 | 7.639105 |
| 10242_at  | 4.98685  | 3.297697 | 4.040703 | 3.274825 | 4.293615 | 4.984212 | 3.981033 | 4.025143 |

10243\_at 7.312881 6.4739 7.488294 7.101534 7.295114 7.095257 7.49306 7.252025  
10244\_at 4.07697 4.500915 3.83944 3.242679 3.962982 3.968382 4.029024 2.767069  
10245\_at 5.169186 3.876683 4.464812 4.433627 4.629666 4.247639 4.535466 3.257674  
102465501 1.044059 1.920386 2.548901 1.10428 2.493343 3.951656 1.979319 3.494292  
102466721 1.505817 0.861005 2.880511 1.945236 1.520706 1.513879 1.909028 1.038067  
102467073 2.320782 1.41994 1.270621 1.315141 1.592814 3.843596 1.471319 2.379577  
102467074 1.283441 2.016153 1.539304 1.564237 1.085968 1.883298 3.193506 1.178251  
102467075 2.220771 2.191801 1.922428 2.450498 2.147139 3.088888 2.349572 2.079492  
102467077 2.015553 2.800493 1.296017 1.067438 1.309908 1.282178 1.568647 1.382565  
102467079 0.759847 1.5674 0.942264 0.573035 0.960305 1.54522 1.082134 1.222098  
102467080 1.267677 1.849811 2.207733 1.052862 1.584596 0.93102 1.197101 1.306969  
102467081 1.154508 1.346777 2.173314 0.998543 1.356878 1.132403 1.724086 1.379891  
102467146 3.138471 1.317797 2.184034 1.470422 2.451025 1.709911 1.941381 1.685088  
102467147 1.310614 2.450921 1.278114 1.236398 1.377635 2.367462 1.808874 2.905813  
102467212 2.313032 1.940463 2.319892 2.466872 2.048177 3.646992 1.616998 2.584482  
102467213 1.633424 1.330015 0.9556 1.197628 2.178959 1.097955 2.072629 1.184463  
102467214 1.057528 0.919714 1.397304 1.703873 1.315263 1.566086 2.172242 1.320841  
102467216 1.989525 2.947675 2.775348 3.529986 3.240193 1.984149 3.240281 3.759785  
102467217 1.345956 1.55577 1.514973 1.154836 2.656302 0.94223 2.903907 1.130357  
102467223 1.816091 1.383889 2.068602 1.312213 2.088189 1.836542 1.906355 2.37116  
102467224 1.73333 2.400447 1.000272 0.955875 0.993668 0.611998 1.933819 1.445108  
102467225 0.87169 0.827805 1.16085 1.261514 1.264817 1.4078 1.078514 1.10398  
102467226 0.943325 0.895886 1.082084 0.701877 1.712957 0.866757 0.95551 1.132873  
102467655 0.873082 1.023399 1.659213 2.035822 1.003122 0.611786 0.770323 1.907624  
10246\_at 1.826194 2.178007 1.630098 1.950781 2.400463 1.976959 1.929672 2.809854  
102477328 2.596264 1.59149 2.289483 2.125791 1.633657 1.872256 2.455639 2.316295  
10247\_at 6.481636 5.740856 4.509337 4.636895 6.804437 5.704317 4.212945 5.821896  
10248\_at 6.024032 6.443558 5.941625 6.157857 5.502628 6.055887 5.891858 6.078566  
10249\_at 7.456284 6.841245 6.870526 3.340391 7.881492 7.399648 5.065518 7.114765  
1024\_at 5.396034 4.538511 5.805981 6.255111 5.80693 5.407571 5.49713 5.304884  
102503427 2.071694 0.99992 1.094974 0.698345 1.044807 1.27796 0.759457 0.909908  
102503429 1.144839 1.219516 1.236295 1.144408 1.229298 1.241147 1.506898 2.011332  
10250\_at 8.946871 8.980679 9.231418 9.094235 8.872128 9.291116 8.871872 8.466458  
10251\_at 4.083472 3.383585 4.461546 5.14268 4.399132 3.630875 4.667115 3.99496  
102524628 1.244733 0.730792 0.872123 1.478958 1.182735 1.236828 1.217151 1.048278  
10252\_at 6.989197 7.113161 6.845474 7.36625 6.309797 7.010741 6.426498 6.604216  
10253\_at 6.082828 6.699564 5.616096 5.813003 6.246335 5.385888 6.411286 5.1216  
102546175 2.031214 1.250692 0.971021 0.919663 2.288055 1.772507 0.962841 1.141337  
102546226 1.231087 1.141024 1.311485 1.094153 1.019731 1.470699 1.303966 0.871131  
102546227 1.33538 1.266744 1.063624 1.151368 0.932169 1.196274 2.296787 1.191973  
102546228 1.644765 1.331252 0.929641 1.650009 2.326672 0.993906 1.644777 1.663195  
102546229 0.755753 1.417985 1.155845 1.095032 1.306703 0.938288 2.141277 1.602182  
102546294 1.505018 1.060329 1.200763 2.194964 1.449563 1.843389 1.670723 1.688904  
102546298 1.657088 1.551255 1.512213 1.441778 2.297377 1.361649 1.956503 1.858931  
10254\_at 7.906367 7.397393 7.426728 7.535944 7.891508 7.863332 7.788859 8.007784  
102557615 2.553207 0.932869 1.069043 0.597508 0.631592 0.953473 2.457645 1.009006  
10255\_at 2.212393 3.461046 2.891432 3.198196 4.302067 2.419352 2.834253 2.541509  
10256\_at 1.095235 2.003457 1.657501 2.671627 3.684704 2.03629 1.440868 1.412769  
102577424 2.84132 2.464607 2.559083 2.163224 2.475826 2.463717 2.647668 2.044611  
102577426 1.484808 1.638725 1.831331 1.70037 1.945699 1.812766 2.177952 1.499323  
10257\_at 4.950036 4.015485 5.117939 4.224018 5.275379 5.180689 4.413745 5.678077

|           |          |          |          |          |          |          |          |          |
|-----------|----------|----------|----------|----------|----------|----------|----------|----------|
| 1025_at   | 6.285891 | 6.743521 | 6.139809 | 6.766636 | 6.182575 | 6.586081 | 6.502753 | 6.112224 |
| 102606463 | 0.759601 | 0.852448 | 0.928494 | 1.14963  | 1.393861 | 1.852516 | 2.106651 | 1.472938 |
| 102606465 | 2.507944 | 4.173728 | 1.586168 | 2.5921   | 3.817884 | 2.248897 | 2.305534 | 4.012329 |
| 102606466 | 0.638863 | 1.856662 | 1.542955 | 1.164708 | 2.736803 | 0.816645 | 1.353901 | 2.272251 |
| 10260_at  | 6.032526 | 6.575937 | 6.272898 | 6.117656 | 6.356337 | 5.609256 | 6.1965   | 6.233862 |
| 10261_at  | 4.437457 | 4.111153 | 4.659485 | 5.207187 | 3.418257 | 4.006852 | 3.690663 | 4.208511 |
| 10262_at  | 7.188088 | 7.423608 | 7.809154 | 7.502894 | 7.099292 | 7.450882 | 7.034436 | 7.228177 |
| 10263_at  | 4.157277 | 4.37276  | 3.337843 | 2.623103 | 2.740693 | 4.263643 | 3.552605 | 3.089649 |
| 102659288 | 1.57901  | 0.855702 | 1.570241 | 1.120827 | 1.59429  | 1.431715 | 1.456416 | 1.704144 |
| 10265_at  | 1.406098 | 1.370024 | 2.241852 | 1.927919 | 3.250505 | 2.345483 | 1.769568 | 1.505824 |
| 10266_at  | 10.15362 | 10.07204 | 10.23773 | 10.42078 | 10.15748 | 9.844931 | 10.3119  | 9.875836 |
| 10267_at  | 3.651798 | 4.185712 | 5.028617 | 2.791729 | 2.56523  | 3.408315 | 3.850887 | 3.766809 |
| 10268_at  | 6.785012 | 6.025675 | 7.609552 | 6.348815 | 6.165213 | 7.292591 | 8.450472 | 6.027477 |
| 10269_at  | 7.030478 | 7.176764 | 7.096869 | 7.622372 | 7.767967 | 6.982777 | 7.420725 | 7.84178  |
| 1026_at   | 4.207543 | 4.861107 | 5.329101 | 5.497963 | 4.160289 | 4.719419 | 4.501289 | 3.533684 |
| 10270_at  | 5.470028 | 5.490375 | 5.359303 | 5.148743 | 4.972322 | 5.429292 | 5.603251 | 4.907877 |
| 102723313 | 3.505284 | 2.51902  | 0.98039  | 4.36335  | 6.197583 | 2.889056 | 4.529014 | 1.244691 |
| 102723315 | 2.973265 | 1.055591 | 2.862077 | 2.317237 | 1.71783  | 2.525571 | 3.289163 | 3.344765 |
| 102723318 | 2.041189 | 1.333639 | 1.987317 | 1.33979  | 1.728116 | 2.68553  | 1.382824 | 2.687323 |
| 102723320 | 0.901643 | 0.879257 | 0.795171 | 2.05023  | 1.469641 | 0.991159 | 1.599408 | 1.071489 |
| 102723321 | 2.935321 | 0.915057 | 1.092025 | 0.849797 | 1.939429 | 1.377212 | 1.64294  | 3.568828 |
| 102723323 | 1.809009 | 1.363001 | 1.682032 | 1.885827 | 3.748641 | 1.617747 | 3.187947 | 2.787984 |
| 102723324 | 1.597254 | 1.46455  | 1.638815 | 1.574151 | 1.473605 | 2.397236 | 2.785429 | 1.255045 |
| 102723325 | 1.633886 | 1.676065 | 1.773394 | 1.791166 | 1.879286 | 1.74971  | 1.56081  | 2.319142 |
| 102723329 | 1.363923 | 1.966091 | 1.7766   | 1.599459 | 1.824736 | 2.116195 | 1.371884 | 1.540779 |
| 102723330 | 1.878853 | 1.689709 | 2.168227 | 1.854141 | 2.02001  | 1.974689 | 1.874912 | 2.117655 |
| 102723331 | 3.141466 | 3.651821 | 1.740331 | 2.639217 | 2.09017  | 3.331789 | 2.745423 | 4.809646 |
| 102723332 | 1.611471 | 0.926981 | 1.572158 | 0.990151 | 1.555713 | 2.234275 | 0.90147  | 1.537288 |
| 102723335 | 2.005268 | 2.126912 | 1.945344 | 1.925793 | 3.270297 | 1.943234 | 2.08972  | 2.21768  |
| 102723337 | 3.347025 | 3.375863 | 3.585476 | 3.679084 | 3.242661 | 3.936352 | 3.479898 | 3.362456 |
| 102723340 | 0.953705 | 3.994515 | 0.698111 | 1.216931 | 2.424055 | 0.655779 | 0.989988 | 0.955817 |
| 102723341 | 0.852002 | 0.554325 | 0.998133 | 0.500484 | 0.816182 | 0.813497 | 0.908324 | 1.094397 |
| 102723344 | 1.469226 | 1.20707  | 2.406002 | 2.183631 | 1.56278  | 1.426445 | 0.739125 | 1.096553 |
| 102723346 | 1.505502 | 1.31353  | 1.404026 | 1.194574 | 1.967685 | 1.239944 | 1.641513 | 2.355894 |
| 102723350 | 1.823794 | 2.569228 | 2.415505 | 2.34611  | 3.114351 | 3.050209 | 2.075538 | 3.235139 |
| 102723354 | 2.096591 | 2.335252 | 2.713549 | 2.852744 | 2.145358 | 2.441433 | 2.072704 | 2.463404 |
| 102723355 | 1.529392 | 2.321663 | 2.420198 | 1.646389 | 5.252532 | 2.629773 | 2.863265 | 0.633613 |
| 102723356 | 2.316703 | 4.696902 | 4.996497 | 4.770306 | 3.717869 | 4.533303 | 2.210012 | 2.96871  |
| 102723361 | 1.048144 | 2.820347 | 0.77599  | 1.496755 | 1.235781 | 3.724051 | 1.213341 | 1.776424 |
| 102723362 | 0.688711 | 0.841147 | 0.639584 | 0.898614 | 0.721985 | 0.822191 | 0.753538 | 0.861549 |
| 102723365 | 1.636987 | 1.733704 | 1.955365 | 3.277001 | 2.657754 | 1.746277 | 1.441332 | 1.951302 |
| 102723366 | 1.592561 | 1.842438 | 1.102848 | 2.339932 | 1.355733 | 1.173288 | 1.268844 | 1.385289 |
| 102723370 | 1.359938 | 1.397352 | 1.643134 | 1.050666 | 1.696934 | 1.52407  | 1.175472 | 1.175472 |
| 102723373 | 1.279353 | 1.789265 | 1.416226 | 1.281161 | 2.578077 | 0.720679 | 1.165067 | 4.807712 |
| 102723375 | 5.04988  | 3.826942 | 3.654991 | 3.672625 | 4.691749 | 5.869118 | 4.704166 | 4.131997 |
| 102723377 | 1.573327 | 1.612161 | 1.725187 | 1.584357 | 1.739761 | 2.422238 | 2.820798 | 2.468163 |
| 102723378 | 1.963264 | 1.447102 | 2.114723 | 1.797445 | 2.47227  | 1.873261 | 1.851736 | 2.529231 |
| 102723379 | 2.682321 | 1.940171 | 1.4033   | 1.251572 | 1.440556 | 1.520109 | 0.877103 | 1.183875 |
| 102723389 | 1.42877  | 1.263723 | 1.640789 | 2.049966 | 2.267925 | 1.578062 | 1.777136 | 1.044812 |
| 102723391 | 1.265008 | 1.340725 | 1.535924 | 1.030934 | 1.196306 | 1.597952 | 2.631378 | 2.706354 |
| 102723392 | 1.111735 | 1.739377 | 0.981041 | 1.141456 | 1.315047 | 0.805324 | 1.599215 | 1.490899 |

102723403 1.76651 2.084286 1.176068 1.31651 1.493152 3.385615 2.062431 1.190153  
102723405 2.622124 1.600627 3.353312 2.49376 3.006582 2.284826 3.731904 2.240824  
102723409 2.208114 0.449937 1.649427 2.521291 2.644555 2.38031 0.75648 3.408226  
102723411 2.262272 1.084603 1.879531 2.147903 1.545141 1.327676 4.301848 1.454495  
102723413 1.284218 0.664039 1.621455 1.041887 1.250788 2.292062 0.777189 0.962754  
102723415 1.302429 1.377555 1.24441 2.034215 1.515398 1.342104 1.30325 1.323952  
102723418 1.295228 1.481121 1.270092 2.396528 2.185753 1.544717 1.451349 1.518775  
102723426 1.548193 2.242305 1.806707 2.601373 2.376217 2.676125 2.196266 2.148538  
102723427 0.922792 1.220014 2.480872 1.004229 1.0686 1.09686 1.699408 2.277448  
102723429 2.346189 2.325462 3.605207 3.403053 3.775166 3.024158 3.845243 3.417524  
102723430 2.097635 1.24553 2.54782 0.592543 3.073337 1.137156 0.777697 1.754443  
102723441 1.096254 1.489757 0.954287 1.482691 1.014121 1.359375 0.992867 0.988647  
102723442 0.863023 1.673308 1.336993 3.039195 2.922959 2.61161 2.089047 1.460195  
102723446 3.030515 1.107468 1.384629 1.471821 1.366915 1.221306 1.19704 1.194064  
102723448 1.749233 2.311576 1.379696 2.394652 1.833198 2.534469 2.76455 3.152925  
102723452 3.159484 4.352881 4.52766 3.480967 2.901678 5.051565 3.894356 3.210788  
102723456 1.040328 1.078393 1.282509 1.482074 0.64063 2.128161 0.595685 1.656014  
102723457 1.388132 1.942231 2.120407 1.843949 2.76671 1.955722 3.03511 2.046612  
102723465 3.341311 3.697822 4.927085 3.443403 2.231141 4.014072 2.97144 3.022775  
102723466 2.363108 1.663825 2.085194 1.803003 3.22369 2.03023 1.735337 2.5435  
102723471 2.918292 3.055461 2.50092 2.227713 2.174613 2.569585 3.098856 2.841698  
102723481 1.320188 0.865626 0.994922 1.139356 0.932768 0.751212 0.97402 2.376335  
102723483 1.457826 1.581947 1.73854 2.141503 2.22812 1.52509 1.192951 3.057022  
102723487 1.471131 0.905729 1.215077 2.008412 0.890785 1.051815 1.794036 1.102333  
102723489 2.320065 2.744959 3.82084 3.085299 2.165956 2.422802 4.028045 1.823426  
102723493 4.427736 2.742468 3.359781 3.891412 4.4188 4.083924 2.346626 2.606557  
102723496 2.337004 1.951682 3.210291 2.182886 1.951723 4.553732 2.54724 1.999757  
102723499 1.020281 1.863137 0.864376 0.718542 1.450886 0.6496 2.347347 1.87325  
102723501 2.604104 1.658096 1.939219 2.147038 2.056739 1.673785 1.906862 2.057498  
102723503 0.966259 0.845256 2.416433 1.263921 1.677694 1.166969 1.333315 1.335255  
102723505 1.008147 1.314285 1.728163 1.101132 1.411093 1.468982 2.233537 1.342393  
102723508 2.184842 2.039774 3.468524 3.290907 3.392453 2.48241 3.036295 2.374519  
102723516 1.21019 1.079477 0.549927 0.812063 2.02086 1.056241 2.145948 2.086458  
102723517 1.08829 1.091714 1.382453 1.221692 2.047156 1.474614 2.395198 1.639396  
102723521 7.247991 7.627103 7.577565 7.633873 7.835055 7.657487 7.404272 7.65926  
102723523 1.870157 1.461833 1.091091 0.528054 1.03002 0.897294 0.802214 1.192961  
102723525 1.409667 1.486875 1.430428 2.361274 1.976794 1.617743 2.09443 1.945264  
102723526 1.432968 1.208332 1.29745 0.854132 1.265537 1.861779 1.335699 2.181158  
102723529 2.765489 2.963631 1.456535 1.074953 2.661027 0.865911 2.158376 2.789949  
102723530 3.068305 2.905117 2.446627 3.389254 2.934072 4.002242 2.606679 2.124598  
102723536 1.442813 1.109398 1.704288 1.367774 0.728254 0.792957 0.760271 0.553406  
102723539 3.279101 2.718051 2.595214 1.221177 3.473171 1.241689 2.911474 3.221395  
102723540 4.208089 3.924752 3.64375 2.46565 1.965925 3.102549 3.201676 2.627066  
102723542 1.670405 3.700682 1.728926 2.904743 4.844762 2.080465 2.100903 2.077389  
102723544 1.888689 1.623116 1.970568 2.920756 1.453532 2.033516 2.284883 2.346999  
102723548 2.679756 2.256623 1.075417 1.296644 3.000958 1.980169 2.388789 5.052428  
102723549 4.444455 3.686007 2.20367 5.23295 1.46809 1.47952 1.547814 3.819074  
102723554 1.351273 1.507481 1.401781 1.010465 2.256919 1.45342 1.555846 1.217967  
102723557 2.79898 2.793233 2.512337 2.875285 3.584236 3.812246 2.564609 2.694275  
102723561 2.742835 1.563136 2.22458 1.567035 2.084342 1.824417 1.283517 2.315233  
102723566 2.855454 2.258889 1.971563 3.381878 2.881727 2.950064 1.743436 2.814

102723567 0.589865 1.123459 1.079713 0.997316 1.266137 1.087346 1.126078 1.648709  
102723577 1.690956 1.414795 1.437033 1.760364 1.425847 2.276942 1.748044 2.038949  
102723578 1.297592 1.279953 0.612342 0.639114 1.025338 1.218082 1.02592 1.09538  
102723579 4.44555 3.005689 3.762314 1.150501 5.559624 4.535311 2.655243 5.792797  
102723581 2.202297 1.048327 1.165994 1.432641 2.324418 1.51535 1.289017 1.473443  
102723583 1.485042 2.0608 0.975203 1.364235 1.109786 0.941735 2.803423 1.91638  
102723589 1.580126 2.008341 2.252471 1.803215 1.962365 1.880607 1.582695 2.368433  
102723590 1.909365 2.271111 1.757978 1.330412 3.531823 2.347603 1.48049 1.745354  
102723594 1.405457 1.562843 1.541158 1.953316 2.44631 1.380902 2.285979 0.964077  
102723596 1.721089 1.113166 1.92324 0.873594 1.549189 2.648725 2.40967 0.776598  
102723597 1.276737 1.511679 1.8708 2.839137 1.823585 0.962757 1.996365 2.32902  
102723602 2.003518 3.28734 1.383793 2.47395 0.638693 1.414584 3.681812 1.762533  
102723604 1.464512 1.231826 1.473485 1.433183 1.602405 0.962386 1.1388 1.10308  
102723605 1.225317 1.304463 2.380451 2.400382 1.830563 2.013927 1.375827 3.047409  
102723607 2.32437 2.656209 2.287003 2.497477 3.029796 2.824119 3.240456 2.127598  
102723615 1.513673 1.267618 1.462036 0.752002 1.817806 2.162116 1.767248 1.44909  
102723616 4.388277 4.408446 2.171072 3.068003 4.37223 2.384818 2.726604 4.67072  
102723617 1.716186 1.515357 2.36502 1.663026 1.81341 1.69207 2.077084 1.637645  
102723619 3.011467 2.131793 2.244822 2.69879 3.540829 1.87044 2.880157 2.442244  
102723627 1.293743 1.242869 0.740872 4.315246 0.938529 1.833224 1.552489 1.34007  
102723629 3.494634 2.572665 2.897725 2.675876 3.237763 3.768932 3.538016 2.109606  
102723631 1.692753 2.547258 1.36616 2.97733 1.804843 1.76899 4.64777 2.171422  
102723633 2.078064 2.222619 1.414487 1.683802 1.682754 2.31915 2.39558 3.243601  
102723639 4.927181 4.734575 5.519768 4.693044 5.134785 7.164983 4.553111 2.412246  
102723641 2.085396 2.303581 2.479848 1.977275 2.466637 2.500242 2.375311 2.047972  
102723642 1.257415 1.098093 2.054873 1.415391 1.388757 2.64503 1.409813 1.631414  
102723644 2.384531 0.882517 0.702263 2.190427 2.807717 0.707955 1.144449 1.215246  
102723648 1.138654 1.391938 1.415357 1.343218 2.290448 1.78278 1.388903 1.36813  
102723649 1.478809 1.019579 2.387806 1.411358 2.580708 2.527096 2.732957 2.671365  
102723658 1.157917 1.011803 1.197312 1.744282 1.198306 1.846049 0.87328 1.489719  
102723661 1.733488 0.773886 1.508749 0.901398 1.514777 1.13591 2.69703 1.374388  
102723671 4.058306 4.306659 4.081005 5.636722 3.687626 2.102129 3.158019 4.520771  
102723672 2.464375 2.566952 1.575029 2.437362 3.558251 3.650312 2.256815 2.80767  
102723676 1.622842 3.352301 2.309326 3.040254 2.868296 2.003337 1.84326 2.448264  
102723677 3.297512 0.583193 0.76451 0.552098 3.908053 0.840631 0.960898 1.033953  
102723690 1.724193 1.829395 2.006418 1.633273 1.792224 2.780417 1.744752 1.522282  
102723699 1.28659 1.115257 2.444596 1.382419 0.882694 1.178335 1.340999 3.971351  
102723701 2.440258 3.197851 2.949434 2.555348 3.098165 2.322554 2.629692 2.794175  
102723703 2.521423 1.28475 1.979315 3.112086 3.06579 1.063535 1.292422 3.313643  
102723704 1.226888 0.941659 1.011645 1.200266 1.2093 1.278512 1.638446 1.462724  
102723712 0.855087 0.929211 1.415155 1.458736 1.221654 1.386619 0.882588 1.384455  
102723716 1.225536 1.297779 1.201442 0.989103 1.122517 1.382904 1.508879 1.464821  
102723721 2.820438 3.783271 2.635412 3.726888 4.312773 2.927426 3.262386 3.029885  
102723723 1.27691 0.964798 0.932333 1.10244 1.65902 1.011443 1.593958 1.865509  
102723724 1.346054 1.84173 1.839902 1.304725 2.176061 1.217436 1.476142 1.398445  
102723727 0.806996 1.306663 0.779505 0.565082 0.618063 0.66489 1.236591 0.682599  
102723729 3.439951 4.429115 3.73614 3.141966 2.706313 3.567447 1.843319 1.901403  
102723736 1.240263 1.976469 2.120885 2.336734 1.981176 1.393115 2.309838 3.599321  
102723740 1.342445 0.685821 1.805727 1.292882 1.128505 1.543067 0.909833 1.349326  
102723741 1.192707 1.638125 2.216969 2.210957 2.447122 0.870202 1.425272 1.733438  
102723742 3.391344 3.984733 2.51388 5.656433 4.040238 2.805138 2.443805 3.601394



102723744 2.05607 1.092577 0.953158 0.841637 1.563363 2.642565 0.609422 0.778233  
102723757 1.416214 1.780669 1.488113 1.366484 1.915335 1.788441 2.043592 1.992521  
102723759 1.458947 1.350509 1.320446 2.223547 1.879263 1.079474 1.503243 3.107143  
102723761 1.95874 2.640244 1.391812 2.132001 2.593236 1.993778 3.176135 2.530153  
102723763 3.885385 2.044641 1.885707 2.960668 2.869314 1.977836 3.174807 2.137067  
102723764 0.842458 0.642312 1.729202 1.030293 0.920789 1.028568 1.178243 1.762481  
102723765 1.67152 1.321615 2.532151 1.802 2.042099 1.343695 1.838057 1.585122  
102723766 0.51254 2.867935 2.150861 0.822419 0.498638 0.838915 1.456595 1.808547  
102723768 2.872738 1.418262 1.163777 1.698946 1.866894 1.521585 1.859057 1.348121  
102723773 1.195735 1.619141 1.363845 1.642592 2.023492 0.968814 1.963263 1.891691  
102723775 2.493761 2.499786 3.658615 2.398047 2.811238 2.713232 2.729429 2.911267  
102723778 2.233694 1.20078 1.804535 1.086972 1.502062 1.269637 2.129282 1.636769  
102723779 4.545732 4.781237 3.936863 3.026306 4.741591 3.677883 1.931724 5.541386  
102723781 1.200299 2.056781 1.391293 1.003481 2.514785 2.790327 0.912534 2.073345  
102723788 2.936283 2.776649 3.023244 3.336051 2.5162 3.624527 2.228127 3.144859  
102723789 1.558061 1.675233 2.002886 1.534201 1.316892 2.089316 1.30399 2.271934  
102723793 0.817781 1.362936 1.559338 0.777217 1.354565 1.240467 2.714131 2.299021  
102723795 1.655544 1.123026 0.98884 1.943403 1.389092 2.024244 0.537909 2.008781  
102723796 2.064621 2.142709 1.439475 0.687432 4.237428 0.93269 2.352098 1.754842  
102723801 0.774549 1.048838 1.084627 3.516315 1.918674 0.969071 0.694845 3.642188  
102723803 4.016631 2.140524 2.134623 1.662087 1.933742 2.407496 2.029768 2.500624  
102723804 4.074311 4.089865 3.365266 4.282133 4.821261 3.075414 3.658805 4.229124  
102723808 1.772413 3.441448 1.730868 3.56706 4.502928 2.287112 3.490641 2.569835  
102723809 3.717452 2.096289 5.367287 3.82789 1.255204 2.641032 3.019422 4.181593  
102723811 2.989631 4.005665 3.66465 3.168091 3.854813 3.464317 3.223119 3.702096  
102723817 1.236112 1.251373 0.970671 1.777679 1.6188 1.031832 1.544413 1.636332  
102723818 3.634392 2.296626 2.422985 2.128641 3.043232 2.792972 2.664778 2.482527  
102723820 3.409342 2.616402 3.073218 1.824234 1.261155 1.56233 2.664842 1.421252  
102723821 1.042971 1.419959 1.152268 1.539416 1.072498 1.131277 1.326438 0.812288  
102723824 1.802687 1.81004 1.754834 1.497729 1.965582 1.910857 1.375636 1.508564  
102723825 2.618995 1.64323 1.424659 1.558674 2.53744 1.190771 1.631408 1.757499  
102723827 1.227174 1.17004 3.81217 0.832062 4.822696 2.617537 0.977568 1.088407  
102723828 2.32273 1.840009 3.078519 5.562976 2.434854 2.004606 2.1003 2.058801  
102723831 2.902393 2.451058 2.69137 2.381947 2.739652 2.538181 2.994228 2.877592  
102723833 1.248049 0.835486 0.808703 0.964423 1.320906 0.776586 1.194187 1.270705  
102723834 0.833694 1.914956 1.197861 0.524436 3.656357 2.037684 1.351419 4.01875  
102723838 1.137418 1.346658 2.085036 1.065635 1.663775 1.735687 1.749017 1.151557  
102723839 0.953852 0.881428 1.108331 1.437773 0.923881 0.900317 1.476868 1.024248  
102723843 1.584256 1.825229 2.025222 2.342227 1.721638 1.422506 1.670025 1.643658  
102723846 1.73027 1.201297 0.964551 0.940271 0.869728 1.909387 1.001875 0.910067  
102723854 3.82843 3.544119 3.759171 3.808705 3.618254 4.086819 3.16087 3.338391  
102723862 1.64915 1.00189 1.087482 0.73963 1.946506 1.127677 1.076917 1.673263  
102723866 1.956583 1.294867 1.364721 1.343674 1.168816 1.142714 1.162646 1.526333  
102723875 1.357656 1.722978 1.134216 1.233148 0.809875 2.12831 1.845213 1.979511  
102723876 2.452897 0.923962 2.378644 0.97758 1.571908 1.485668 1.127486 1.357271  
102723877 3.612283 4.690904 3.595265 1.565392 4.243831 3.760697 4.166144 2.360457  
102723879 1.300601 1.343901 1.640907 0.905009 1.423201 1.176653 0.860902 1.610791  
102723883 0.951508 1.390558 1.793334 0.983952 2.350851 1.210088 1.527333 1.29034  
102723885 2.015717 1.818294 1.735222 1.583799 1.617913 1.666885 1.518508 2.090549  
102723886 1.868705 3.477902 3.258193 1.162013 1.469698 1.780679 1.540972 4.52149  
102723888 1.623942 1.373408 1.81101 1.709114 2.390234 1.628472 2.913399 2.851944

102723889 2. 726676 3. 29924 2. 956826 4. 215104 2. 356354 5. 029727 2. 749139 3. 469246  
102723894 2. 110524 1. 748473 3. 325683 2. 183659 2. 333245 1. 760516 1. 98728 2. 010841  
102723895 1. 055179 1. 676398 1. 13241 1. 142978 1. 12905 1. 007386 0. 83976 2. 125465  
102723896 1. 740813 1. 253092 1. 842269 1. 590991 1. 677434 1. 151576 1. 456182 1. 786726  
102723899 1. 901015 1. 026123 2. 821901 4. 636847 1. 470214 0. 799756 5. 118401 2. 072832  
102723903 2. 125234 3. 00073 2. 81771 1. 564353 4. 287741 2. 153876 1. 378043 1. 636321  
102723906 2. 001928 1. 941221 1. 592732 2. 030768 1. 983332 2. 011523 2. 019109 1. 998748  
102723911 4. 38337 4. 651467 5. 554455 1. 64457 3. 082712 4. 86721 5. 253979 2. 459253  
102723915 1. 590199 2. 43973 1. 147246 1. 659892 1. 514606 2. 371312 2. 043399 1. 82893  
102723916 1. 002343 4. 323553 4. 03601 0. 809418 1. 339554 4. 895437 3. 49962 3. 893141  
102723918 1. 306443 1. 741255 2. 048394 1. 053867 1. 199392 1. 285754 1. 674387 1. 53621  
102723919 5. 186465 6. 731188 6. 50187 6. 44865 6. 704948 6. 482795 5. 71258 7. 146948  
102723920 1. 854562 1. 10986 1. 061338 0. 810709 0. 877142 1. 074381 1. 257166 0. 954523  
102723921 0. 962041 0. 852274 1. 633785 1. 145712 1. 695965 2. 421635 1. 319695 0. 946101  
102723922 1. 13362 1. 185149 1. 126147 1. 695928 1. 17109 0. 987225 1. 53478 1. 868561  
102723924 1. 187247 1. 493821 3. 142338 1. 200831 0. 808782 2. 596193 1. 572254 1. 604684  
102723926 4. 950097 4. 894579 6. 434038 3. 762704 5. 899768 5. 693075 4. 407485 5. 882841  
102723927 1. 895682 1. 684827 2. 093566 1. 880904 2. 509256 2. 813535 2. 443196 1. 645535  
102723929 2. 158184 5. 100465 5. 845469 2. 256612 4. 9112 4. 571601 6. 96359 1. 326065  
102723932 1. 475844 2. 945362 3. 259242 1. 335819 2. 491574 1. 525246 2. 324871 1. 786992  
102723944 1. 522555 1. 469604 2. 542566 1. 142018 1. 588999 1. 63779 1. 536875 1. 607369  
102723946 1. 41473 1. 482528 2. 200064 2. 622806 2. 355537 2. 156728 2. 287758 1. 435646  
102723947 1. 64367 1. 234802 2. 331969 2. 022617 2. 813238 1. 60289 0. 912153 2. 318254  
102723948 1. 858273 1. 316471 1. 682941 1. 257183 1. 588511 1. 448408 2. 365358 2. 309044  
102723949 1. 690634 3. 235811 2. 400393 1. 697281 1. 739074 1. 043889 3. 859032 4. 235074  
102723953 1. 630617 2. 043171 1. 778053 1. 888706 2. 41246 1. 345703 2. 125946 2. 245784  
102723954 2. 36896 3. 068694 3. 586024 3. 327186 3. 275469 2. 968892 2. 227387 3. 491979  
102723958 2. 164832 2. 019276 1. 836426 2. 02101 2. 517093 2. 00163 2. 058174 2. 369507  
102723961 1. 120472 1. 854583 1. 650691 2. 027528 1. 860545 1. 882611 2. 692272 2. 568983  
102723968 1. 47627 1. 701398 1. 315841 0. 905248 1. 644331 2. 762264 1. 851526 1. 076191  
102723970 0. 672203 2. 162577 3. 325612 1. 808961 2. 748453 1. 376999 1. 42073 4. 159674  
102723973 1. 110466 1. 234111 1. 245572 1. 208608 1. 20235 1. 37416 1. 389312 1. 476556  
102723986 1. 646874 2. 592828 2. 443872 3. 843937 2. 67391 3. 504938 1. 874589 2. 992911  
102723989 4. 931574 4. 203046 4. 137898 4. 728099 2. 638578 4. 683465 4. 279406 2. 507744  
102723990 6. 868496 7. 308124 6. 53985 6. 597039 6. 649835 5. 800981 6. 881879 4. 3374  
102723993 2. 49493 2. 095854 1. 832391 1. 824478 3. 106637 1. 733322 2. 620221 1. 193693  
102723994 1. 426206 2. 272016 1. 71755 1. 030208 1. 777638 1. 760744 1. 553291 1. 512984  
102724002 4. 221465 4. 59836 4. 749932 5. 07858 5. 69734 4. 312264 4. 574645 4. 350696  
102724005 4. 277394 6. 513372 0. 573318 5. 265281 4. 565556 0. 199575 2. 309338 3. 175586  
102724009 2. 140419 2. 56019 1. 980363 2. 603005 2. 236911 2. 518249 1. 819695 2. 012381  
102724015 0. 48983 0. 788238 1. 201358 1. 370007 0. 763579 0. 624616 0. 822917 0. 781024  
102724017 4. 096216 3. 984793 3. 462839 3. 945883 4. 3799 3. 590262 2. 379182 5. 177149  
102724020 0. 817299 1. 188089 2. 025785 2. 267373 1. 278332 0. 814376 1. 678542 2. 131495  
102724021 2. 235317 2. 199728 2. 546708 2. 188492 2. 757633 3. 426552 3. 061674 2. 070215  
102724024 4. 188138 4. 030138 3. 131417 5. 146696 3. 623684 5. 074284 3. 624158 2. 961142  
102724027 2. 942368 0. 980585 2. 229155 1. 397419 2. 279599 1. 151598 1. 825886 0. 913015  
102724028 2. 452373 2. 641636 2. 294693 1. 734527 2. 405235 1. 606065 1. 199666 3. 740182  
102724030 1. 223277 1. 967609 2. 62243 2. 022385 1. 657833 3. 341118 2. 997448 1. 652251  
102724036 1. 754349 1. 328559 1. 886272 2. 584134 1. 637658 2. 33612 2. 528237 1. 424144  
102724037 1. 934002 1. 960698 1. 93948 3. 099346 3. 113961 1. 101013 1. 969426 1. 540185  
102724039 1. 804967 1. 620573 1. 827632 2. 244665 1. 645257 2. 663008 3. 382471 1. 142192

102724043 1. 803374 1. 596485 1. 558109 1. 583222 1. 876881 4. 272977 1. 903243 2. 944931  
102724046 0. 922019 2. 55443 0. 986726 0. 756902 1. 286023 1. 282863 1. 0421 1. 098075  
102724050 1. 364115 1. 747295 1. 091674 3. 844124 2. 220324 2. 375953 2. 501311 1. 031362  
102724053 1. 276457 1. 469921 1. 974988 1. 410687 2. 047575 1. 706832 1. 147353 2. 165821  
102724057 0. 804169 0. 952877 0. 529728 1. 533586 2. 265554 0. 790164 0. 679225 2. 480336  
102724059 1. 458836 1. 319168 1. 415236 1. 278847 1. 568936 1. 497035 1. 693931 1. 863486  
102724061 3. 811459 3. 99553 4. 244629 4. 191722 3. 653178 3. 387356 4. 040063 4. 886241  
102724063 1. 019124 1. 519956 1. 131224 1. 00948 0. 713152 0. 667591 0. 714305 1. 574471  
102724064 4. 63718 4. 370335 3. 40432 3. 72933 5. 292861 3. 766405 0. 776792 0. 729591  
102724065 1. 461476 1. 695352 2. 188514 0. 957333 1. 165489 2. 15137 0. 695478 1. 745173  
102724067 0. 852573 0. 659586 0. 590038 2. 506815 0. 267386 0. 720485 1. 013986 0. 494268  
102724072 0. 812246 0. 809447 1. 168214 0. 917164 0. 891984 0. 902061 1. 419353 1. 509925  
102724074 1. 566696 1. 390907 0. 765669 0. 660159 0. 652389 1. 113833 0. 706147 1. 364883  
102724075 3. 985497 3. 926093 3. 771818 4. 323677 3. 251008 4. 034354 3. 299221 5. 607866  
102724076 1. 971366 1. 460355 1. 092783 1. 267122 1. 295872 1. 579288 2. 293618 1. 522737  
102724077 4. 90147 4. 352571 2. 85294 2. 517138 1. 18977 3. 988709 3. 779226 3. 495907  
102724080 0. 977435 1. 407068 1. 130929 0. 949776 1. 550982 0. 944305 1. 852361 2. 403259  
102724081 2. 1471 2. 500776 3. 56957 1. 392727 3. 799737 3. 017847 2. 652602 2. 427242  
102724084 0. 893593 1. 424757 1. 314446 1. 679398 1. 403226 1. 804483 1. 24572 1. 257907  
102724087 1. 18797 1. 443503 1. 270241 1. 041084 0. 975096 1. 633975 1. 298598 1. 639609  
102724092 1. 808393 1. 361281 1. 381201 1. 356219 1. 98435 1. 980042 1. 681492 1. 615907  
102724094 2. 705582 4. 902603 4. 814104 4. 022215 1. 321925 3. 165073 3. 063691 4. 559099  
102724096 1. 898747 1. 645283 2. 001914 2. 228387 1. 562938 1. 465367 1. 516886 1. 530998  
102724097 1. 49779 2. 664293 2. 064383 2. 590996 2. 864812 2. 900917 1. 511506 2. 67813  
102724100 1. 407435 0. 99215 1. 095517 1. 170448 1. 597638 2. 223722 1. 509019 2. 222341  
102724104 3. 325067 0. 831328 3. 567852 1. 641601 1. 418088 1. 82684 0. 790124 0. 764448  
102724105 5. 855916 2. 500808 4. 595786 4. 349939 3. 110569 2. 187943 3. 48155 3. 67424  
102724106 1. 563071 1. 625241 1. 034474 1. 931246 1. 47349 2. 502059 1. 139754 1. 189527  
102724108 0. 517155 2. 367931 2. 41075 1. 333695 3. 356623 2. 379795 2. 935775 0. 559787  
102724111 1. 634797 2. 311497 2. 206864 1. 684429 1. 354883 2. 224835 2. 141315 2. 417575  
102724112 5. 495532 5. 591625 5. 642447 3. 304634 3. 514837 2. 038915 5. 294218 4. 747166  
102724113 2. 397586 2. 804775 1. 72217 2. 684678 2. 145845 2. 034605 2. 788462 2. 390359  
102724115 2. 06712 2. 927692 3. 329921 2. 486441 2. 644197 2. 622494 2. 566534 2. 888496  
102724122 2. 726676 2. 060589 1. 172171 0. 737037 1. 539017 0. 797274 1. 320899 2. 277549  
102724124 3. 120209 1. 699144 2. 832376 1. 092871 1. 425489 2. 202537 2. 047583 1. 606947  
102724125 2. 157374 1. 506562 1. 862268 2. 11691 2. 531732 1. 653727 2. 332187 1. 816243  
102724129 10. 00816 9. 985727 9. 80599 10. 21693 10. 19426 10. 22986 9. 761521 9. 970711  
102724131 2. 581389 3. 275851 4. 132194 4. 305279 3. 536514 3. 778589 5. 442812 3. 133546  
102724133 7. 514006 7. 728464 7. 1352 6. 867418 7. 174853 6. 757944 7. 451449 6. 949463  
102724141 2. 438554 3. 888714 2. 220085 4. 569797 4. 972129 3. 69121 1. 569674 1. 968003  
102724152 2. 492481 1. 701363 2. 246483 1. 507928 1. 511514 1. 543994 1. 971829 2. 807281  
102724153 1. 011994 1. 168111 1. 528266 1. 193142 1. 17443 1. 150119 1. 593721 1. 186864  
102724155 2. 512007 2. 544716 2. 591719 1. 974675 2. 829631 2. 700345 2. 993078 3. 003741  
102724156 3. 852879 3. 623972 3. 838688 3. 32761 4. 027503 3. 943539 3. 778513 3. 059709  
102724165 1. 606457 0. 899892 1. 355332 0. 988683 1. 365475 2. 252274 1. 175818 1. 319053  
102724167 1. 08124 0. 987657 0. 991232 2. 897063 1. 126515 1. 115979 1. 608954 0. 972321  
102724168 1. 554895 1. 388499 2. 162651 2. 01369 2. 030745 1. 20986 1. 268839 1. 09811  
102724176 2. 135551 3. 233259 2. 152149 1. 507427 2. 510136 2. 389087 2. 437682 3. 037215  
102724183 2. 564141 2. 768821 2. 799989 2. 810962 2. 96227 3. 187791 2. 861067 3. 00921  
102724190 2. 063987 1. 832316 2. 086083 1. 880007 1. 2289 1. 756535 1. 529057 1. 164965  
102724193 5. 735882 5. 913237 5. 215286 5. 385582 5. 427073 6. 282938 4. 982045 4. 888521

102724194 1. 040005 1. 19655 1. 309812 0. 94314 1. 150044 2. 335675 2. 795116 1. 693509  
102724195 1. 244319 0. 954098 1. 031616 0. 874181 1. 46557 1. 295675 2. 611457 1. 080197  
102724196 1. 19946 1. 480109 1. 48787 1. 379435 1. 832695 1. 849728 1. 678817 1. 75565  
102724201 1. 247638 0. 714817 0. 895278 1. 43003 1. 320411 1. 061531 0. 819048 1. 171515  
102724205 1. 482954 1. 324039 1. 324514 1. 127349 1. 319654 1. 06088 1. 135276 1. 137119  
102724209 0. 679435 1. 517712 0. 852987 1. 749368 1. 993276 0. 75627 2. 167384 0. 843078  
102724210 0. 758791 0. 742651 3. 38479 1. 147058 1. 152762 0. 973656 1. 013296 0. 784044  
102724212 0. 768416 2. 594912 2. 915149 1. 569635 1. 644564 1. 598718 1. 462586 1. 668402  
102724214 1. 118592 1. 380483 1. 816458 0. 918489 1. 801656 2. 036066 1. 67897 1. 71587  
102724216 1. 053265 2. 312884 1. 392066 2. 079227 2. 472463 1. 225125 1. 279289 2. 201893  
102724222 2. 164065 1. 256399 1. 041981 1. 02034 2. 490186 1. 268005 1. 682228 2. 267072  
102724224 1. 383576 1. 644594 0. 884867 1. 010166 1. 281897 1. 886506 1. 644756 1. 327238  
102724227 1. 848305 1. 895882 1. 07498 0. 624678 0. 97251 0. 946403 0. 94286 1. 16675  
102724230 1. 70717 1. 713821 2. 305559 1. 52058 2. 067498 1. 80055 1. 794765 1. 874236  
102724231 4. 089585 2. 542797 1. 735291 4. 504941 2. 199887 4. 712765 1. 112497 2. 12651  
102724233 0. 840158 0. 798882 2. 752973 0. 773899 1. 34867 0. 743903 1. 704505 1. 122754  
102724234 1. 486613 1. 023658 0. 927074 1. 39751 2. 15739 1. 172295 1. 275666 0. 779993  
102724244 2. 256686 1. 743711 0. 794459 2. 245504 1. 826687 2. 855215 2. 130915 1. 926073  
102724245 1. 584933 0. 413631 0. 766698 1. 333687 0. 809054 0. 963435 0. 961688 2. 797134  
102724247 4. 809328 4. 769187 4. 194878 4. 645125 4. 853359 4. 541024 4. 519634 5. 926925  
102724248 3. 411751 3. 175621 2. 946856 2. 762408 2. 956138 3. 28831 3. 095746 3. 174525  
102724252 2. 493226 1. 551211 3. 22626 3. 69568 0. 751892 4. 439694 3. 429173 2. 652323  
102724253 1. 401883 1. 436954 0. 881092 1. 748287 1. 849647 2. 105377 2. 48992 2. 155482  
102724261 1. 390749 0. 861694 0. 946192 0. 444018 4. 950558 1. 088419 2. 957131 3. 420992  
102724264 0. 984826 1. 149702 1. 178764 1. 176988 1. 388041 1. 529054 1. 551055 1. 820932  
102724265 1. 851634 1. 017226 1. 647219 1. 087752 1. 875858 1. 579463 0. 943403 0. 85481  
102724271 3. 255555 3. 280115 2. 20949 0. 951397 2. 640244 3. 686834 2. 359369 1. 551377  
102724280 3. 307212 1. 495593 2. 623486 3. 710542 0. 845017 1. 310667 2. 172861 1. 003421  
102724283 1. 983875 1. 360022 1. 124168 1. 284455 0. 982192 1. 647887 1. 28191 1. 003446  
102724286 2. 688048 3. 095988 3. 175466 2. 869388 3. 326611 3. 286043 3. 831758 2. 532823  
102724289 2. 04062 1. 679568 2. 499809 1. 24521 1. 634614 2. 589902 2. 830849 2. 931321  
102724290 1. 226658 0. 93109 1. 707652 1. 052831 2. 241291 1. 644726 1. 067959 1. 66964  
102724293 0. 643573 0. 83268 0. 870211 1. 834107 1. 136182 1. 299439 0. 875684 2. 348467  
102724294 1. 969596 0. 726089 1. 394631 1. 340472 0. 778669 1. 051039 1. 624748 2. 107216  
102724297 1. 526997 1. 324732 0. 72438 1. 186618 1. 116595 1. 30615 2. 269197 1. 146521  
102724298 0. 958205 0. 816933 2. 184342 2. 129515 1. 331501 1. 533251 2. 480811 1. 964036  
102724299 1. 306797 1. 311283 1. 336366 1. 969798 1. 329653 1. 447311 1. 221793 1. 832218  
102724301 2. 741317 1. 479603 1. 43529 1. 484854 1. 15778 1. 989198 1. 244965 1. 384115  
102724306 1. 658575 1. 946272 1. 354883 1. 443465 1. 505971 2. 272091 2. 503922 1. 533123  
102724307 3. 313008 2. 453079 3. 627869 3. 201494 2. 891562 3. 623429 3. 61634 2. 830572  
102724309 1. 288521 1. 086156 1. 240567 1. 156809 1. 044734 1. 51893 1. 914708 1. 242016  
102724311 3. 635848 4. 213698 2. 90111 4. 148025 3. 838111 4. 244242 3. 652613 5. 132359  
102724312 6. 471132 5. 901456 6. 65539 6. 642125 6. 638154 6. 11479 6. 515466 6. 22681  
102724321 0. 779943 1. 21786 1. 33409 1. 283044 0. 978479 1. 022821 1. 465001 1. 270528  
102724323 1. 766216 1. 088049 2. 002035 1. 239536 1. 20184 1. 411064 1. 204713 1. 437016  
102724329 2. 844246 1. 069251 1. 143177 0. 7751 1. 39813 0. 74609 0. 889612 1. 604063  
102724330 3. 463174 3. 754929 3. 925606 2. 410205 4. 455491 3. 118596 3. 121838 5. 142949  
102724333 1. 925827 1. 669688 1. 829505 1. 514835 1. 542786 1. 658925 2. 081647 2. 175982  
102724338 2. 208586 1. 544977 2. 143237 1. 5944 1. 685852 1. 547146 1. 947578 2. 52701  
102724341 2. 032735 2. 91051 2. 389865 2. 445956 3. 229726 2. 413552 2. 14951 2. 423343  
102724344 4. 28916 3. 867146 1. 950292 2. 098047 3. 127306 2. 71365 2. 377954 3. 214606

102724349 3. 439267 1. 860681 3. 66996 1. 611283 2. 791449 0. 300111 2. 039879 2. 116616  
102724351 1. 389215 1. 657142 0. 725907 1. 675639 0. 857942 0. 692878 1. 679258 0. 82881  
102724356 1. 859122 2. 478289 0. 995578 2. 229796 1. 666438 1. 710407 5. 064045 2. 838496  
102724357 1. 311896 1. 416773 1. 430079 1. 172712 1. 398039 1. 882821 1. 68461 1. 213857  
102724358 1. 161098 0. 80665 1. 245149 0. 937087 1. 08404 1. 019978 3. 175565 1. 118538  
102724368 3. 39499 4. 808699 4. 451817 4. 641477 5. 025566 3. 958719 4. 350127 3. 040189  
102724379 2. 033143 2. 752593 1. 690372 1. 920071 2. 999852 1. 948333 2. 337678 2. 361875  
102724380 0. 799323 1. 117957 1. 907084 1. 309355 1. 906976 0. 941302 1. 247953 3. 475695  
102724382 1. 24798 1. 685686 0. 966641 2. 011607 2. 517124 0. 901013 0. 901013 0. 633482  
102724384 1. 539837 1. 543864 1. 326968 1. 319109 1. 276239 1. 66012 1. 231734 1. 240816  
102724386 1. 239442 3. 274412 2. 942011 4. 286362 1. 499411 1. 870677 2. 075313 1. 836854  
102724397 2. 943461 1. 682491 2. 224852 2. 015903 1. 625266 2. 308229 3. 718047 1. 842215  
102724399 4. 64053 1. 182722 2. 924091 1. 219461 0. 665489 0. 663965 2. 683574 3. 624055  
102724406 2. 862575 2. 832393 2. 824177 2. 288344 1. 461689 3. 628137 2. 459066 6. 220642  
102724407 2. 797718 1. 950586 0. 590051 0. 888506 1. 542142 0. 832819 0. 9031 1. 122399  
102724414 1. 782565 1. 220986 3. 054941 1. 051196 0. 953452 4. 000109 2. 078465 1. 264624  
102724416 1. 850581 1. 57407 1. 501984 3. 17871 2. 246543 3. 123191 1. 559965 1. 457865  
102724418 4. 739405 5. 514296 5. 516173 5. 270358 8. 03862 6. 545233 4. 885363 6. 266961  
102724420 1. 461105 2. 995931 1. 99844 1. 940938 1. 3104 1. 654958 1. 674622 2. 286061  
102724421 1. 342039 1. 922952 1. 929442 1. 18289 1. 804152 1. 860919 1. 069672 1. 180003  
102724422 2. 469197 2. 249142 3. 265396 2. 313269 2. 367086 2. 294118 0. 369897 1. 66481  
102724424 1. 382826 1. 756572 0. 75398 0. 783764 0. 905349 0. 852094 1. 808557 0. 667224  
102724425 2. 608889 2. 514231 1. 541694 1. 512133 1. 781134 2. 414598 1. 426844 2. 770714  
102724429 2. 231209 1. 432287 3. 323563 2. 628454 3. 355938 2. 155996 2. 997216 2. 428097  
102724433 1. 664177 1. 821556 1. 648957 1. 820019 1. 808731 1. 938559 2. 350696 2. 121638  
102724434 2. 13844 1. 267669 2. 160638 1. 094326 2. 55536 0. 88618 1. 614259 1. 628044  
102724438 3. 70919 3. 188093 2. 491338 3. 029312 4. 255786 2. 304843 2. 266415 1. 911995  
102724439 1. 774972 0. 991043 0. 908898 0. 788159 1. 443027 1. 135998 1. 568437 2. 004122  
102724440 1. 847688 1. 266204 2. 106712 1. 52192 1. 893535 2. 600013 1. 503877 1. 491519  
102724443 1. 802616 1. 27266 1. 110882 1. 635309 2. 559145 1. 174314 1. 674215 0. 928674  
102724445 3. 818752 3. 701914 4. 130365 4. 469539 5. 46233 4. 133754 4. 716856 4. 488827  
102724446 2. 890797 1. 726956 1. 653552 2. 121448 3. 315094 2. 531526 2. 509459 2. 40835  
102724448 1. 037286 1. 905536 1. 202572 2. 445261 1. 328202 1. 926033 1. 21239 2. 187766  
102724449 1. 138526 1. 331436 1. 238691 1. 507103 1. 017776 0. 944861 1. 534149 1. 57615  
102724450 3. 960779 6. 098513 4. 241548 5. 072066 4. 781014 4. 35096 5. 520447 4. 122825  
102724452 1. 274907 1. 731419 1. 305301 0. 912015 1. 075176 0. 940618 1. 02798 2. 235249  
102724458 2. 097962 2. 552496 1. 648669 1. 464273 1. 296623 1. 681285 2. 464869 2. 073996  
102724463 2. 332847 4. 124764 1. 772322 2. 146011 1. 860848 1. 810012 2. 990992 1. 75519  
102724465 1. 638573 1. 164189 1. 086241 0. 958123 1. 507893 1. 342324 2. 060084 0. 843629  
102724467 2. 421762 3. 061679 2. 391618 2. 375287 2. 234577 3. 217059 1. 739951 2. 590091  
102724472 1. 492719 0. 924027 0. 625324 2. 029036 1. 272825 1. 953112 1. 125582 0. 863453  
102724474 1. 940274 1. 809698 2. 807761 2. 252493 1. 877135 1. 867038 2. 488741 1. 374113  
102724475 2. 090033 2. 618678 1. 683546 1. 955425 2. 525911 1. 683839 1. 929335 1. 378031  
102724476 1. 683757 1. 478683 1. 656977 2. 146948 1. 84705 2. 36301 1. 850091 1. 688557  
102724478 2. 504544 1. 768868 1. 623816 1. 424562 2. 176944 2. 083933 2. 652948 2. 535259  
102724479 1. 618802 1. 960203 1. 825747 1. 811771 2. 003761 1. 238271 1. 677536 1. 953772  
102724481 3. 292944 0. 845708 1. 851532 2. 372631 1. 895136 1. 273761 1. 933736 0. 890256  
102724482 2. 825275 3. 032069 2. 546796 2. 361354 2. 452512 3. 022416 2. 427071 2. 677091  
102724483 3. 292999 2. 998609 4. 440407 0. 682997 1. 341414 1. 843702 1. 806201 4. 988323  
102724484 1. 463896 2. 211554 2. 190581 1. 474519 1. 67143 1. 433278 1. 46856 1. 449329  
102724491 1. 89702 4. 338229 1. 317563 0. 7015 3. 256512 2. 156113 1. 137032 0. 820805

102724493 2. 420445 0. 229761 0. 763793 2. 256173 1. 748266 2. 367865 1. 699383 4. 437536  
102724496 1. 284887 1. 634971 2. 986786 0. 900539 1. 962455 1. 295996 1. 825891 0. 873065  
102724501 3. 780743 3. 704389 3. 639407 3. 544403 4. 572766 2. 678031 4. 608913 3. 40303  
102724502 1. 479133 0. 853828 1. 440384 1. 190194 0. 881451 0. 903642 1. 194281 1. 062368  
102724508 1. 977177 1. 335687 2. 073915 1. 222909 1. 578322 1. 921448 1. 828159 2. 054816  
102724509 1. 269677 1. 089097 1. 537045 1. 951269 2. 299091 0. 988656 1. 226635 1. 553517  
102724511 1. 199353 1. 189742 1. 548743 1. 588283 1. 246867 1. 58677 1. 971544 1. 49749  
102724515 4. 371292 0. 938722 0. 929845 4. 106426 2. 339716 1. 477783 5. 664727 1. 178817  
102724520 1. 385582 1. 212632 2. 333415 1. 376385 2. 258386 1. 86538 2. 128493 2. 155269  
102724528 6. 876572 6. 496302 6. 337839 6. 101783 5. 037937 5. 311569 5. 904948 7. 405568  
102724529 1. 275521 2. 272979 1. 751336 1. 088175 1. 751107 2. 895844 1. 780436 1. 440407  
102724530 1. 468721 2. 518011 2. 643139 2. 284556 1. 644961 2. 034558 2. 309512 2. 460892  
102724532 4. 686768 4. 90771 5. 620543 4. 933351 5. 26003 3. 779183 4. 748215 6. 695507  
102724536 2. 056192 1. 471306 1. 961544 1. 960087 2. 08605 1. 950368 0. 995082 2. 549667  
102724539 3. 43964 2. 380924 1. 91661 2. 585969 3. 445343 3. 009837 3. 487922 3. 127461  
102724543 1. 829789 1. 479112 1. 741888 1. 570274 1. 829536 1. 883486 1. 651621 1. 969591  
102724548 0. 827332 1. 227647 0. 811439 1. 032673 1. 463562 1. 464822 1. 802905 1. 404782  
102724550 1. 245924 1. 271021 1. 400023 1. 373262 2. 491842 1. 771604 1. 33654 1. 221395  
102724551 1. 142064 1. 151772 1. 200094 0. 915678 1. 100402 1. 092417 1. 6034 2. 263727  
102724552 2. 159324 3. 388456 1. 664551 1. 611617 2. 081086 2. 439714 2. 585369 2. 833518  
102724553 2. 74241 1. 637167 2. 842858 1. 823781 2. 475081 2. 315912 3. 716984 2. 181829  
102724554 1. 497065 2. 701084 2. 588342 2. 289501 2. 497691 2. 166422 2. 491077 2. 639422  
102724555 2. 584409 2. 818124 1. 711192 2. 507996 3. 365872 2. 757153 1. 553019 3. 617149  
102724566 2. 094975 2. 277724 1. 790972 2. 333727 3. 451639 1. 830264 2. 38634 2. 598244  
102724567 3. 368908 1. 675941 1. 439562 1. 732359 1. 386211 1. 510292 1. 902162 1. 252074  
102724571 0. 873368 1. 06931 1. 115049 0. 977175 2. 576334 1. 519855 2. 107221 1. 855748  
102724572 0. 248547 0. 349627 1. 369716 1. 958688 1. 242155 0. 398889 0. 926343 0. 294412  
102724577 1. 159277 1. 813247 1. 070296 1. 043354 1. 176942 1. 209161 1. 831908 2. 057193  
102724578 1. 569784 1. 191103 1. 084491 1. 271479 1. 902889 1. 293296 1. 685507 1. 533653  
102724585 0. 762338 0. 842112 0. 77333 2. 420349 1. 920735 0. 551044 0. 715243 1. 411173  
102724587 1. 722131 1. 849211 0. 872853 1. 44631 1. 287755 1. 651584 0. 975682 1. 496915  
102724589 2. 245365 1. 409639 1. 197545 2. 017437 1. 592927 1. 687465 2. 159719 1. 536375  
102724596 1. 988488 1. 381123 1. 281123 1. 679215 1. 191643 2. 37914 2. 641828 1. 49491  
102724598 1. 351663 1. 059208 1. 059584 0. 874929 1. 862798 1. 005016 2. 294046 1. 031949  
102724601 0. 981461 1. 539202 1. 522733 2. 482598 2. 712412 2. 904247 2. 350424 3. 074982  
102724604 1. 331735 2. 524205 2. 926802 2. 795135 2. 386246 2. 884809 3. 465706 1. 486045  
102724607 2. 325637 4. 028511 2. 818433 1. 63999 2. 657988 3. 954008 1. 875527 4. 355374  
102724609 2. 860746 4. 218419 3. 900072 5. 063211 3. 802773 2. 561626 3. 91746 1. 913677  
102724612 1. 662599 2. 278232 1. 079744 1. 431211 2. 392285 0. 873738 1. 746507 0. 786454  
102724617 0. 789169 1. 314747 0. 874047 0. 872382 2. 210713 0. 647079 0. 632409 1. 177033  
102724622 1. 321593 1. 711365 1. 632984 1. 660629 2. 137158 2. 78122 1. 343081 1. 497518  
102724623 2. 361364 2. 801261 2. 781536 2. 242304 3. 099556 2. 825805 4. 20703 2. 476243  
102724624 4. 257191 3. 899585 3. 463398 4. 939996 6. 148528 4. 971304 4. 897242 3. 90335  
102724626 3. 715701 2. 859736 1. 575527 1. 954063 3. 272361 2. 008897 3. 245996 1. 886424  
102724627 1. 539297 2. 270809 1. 944229 1. 291764 0. 934492 2. 370093 1. 182107 1. 433314  
102724629 2. 117579 2. 77072 1. 610425 1. 129015 1. 522581 3. 126415 1. 262057 1. 851468  
102724630 1. 709812 1. 323328 1. 559127 1. 257236 1. 921833 1. 262102 1. 261352 1. 703758  
102724637 1. 136419 1. 440808 1. 210387 0. 802281 1. 649767 0. 993212 3. 029046 1. 422984  
102724640 2. 413381 2. 052538 1. 619913 1. 10696 1. 651073 2. 159485 0. 922979 1. 868003  
102724643 1. 668589 2. 581493 1. 872073 1. 032945 3. 233958 2. 320551 1. 272122 1. 06714  
102724646 1. 110258 1. 153425 0. 656426 1. 308057 1. 056635 1. 123893 1. 019299 0. 881133

102724651 0.516548 3.557975 1.623111 0.782689 1.393847 0.479722 0.469847 1.584193  
102724657 2.457877 1.314618 1.144327 1.946897 1.247046 2.537839 2.070728 2.183366  
102724659 1.929498 2.08131 2.228448 1.51977 2.717333 2.571861 1.554379 2.42742  
102724661 2.278162 2.563821 2.40878 2.043091 2.904459 2.644449 3.381546 2.82835  
102724663 1.055863 0.987819 1.425014 1.02873 1.681588 0.815501 1.096816 3.153555  
102724667 1.750749 1.476179 2.007952 2.270531 2.436198 1.632156 2.607019 2.253426  
102724671 3.351532 3.521351 3.811404 2.29484 4.468959 4.737721 3.416235 3.864147  
102724675 0.99561 2.113883 0.982418 1.958282 1.339819 1.162986 1.671936 2.152202  
102724678 2.321692 0.843789 3.30903 0.58789 0.97077 0.96212 2.740175 0.691072  
102724679 1.192689 4.203917 1.608172 2.970531 0.932325 1.017645 1.476082 2.940819  
102724680 1.405875 0.825588 2.842326 0.973313 2.835075 1.258255 1.379444 0.90533  
102724684 1.957466 1.390424 1.478745 1.037137 0.702153 1.020146 2.266932 1.995389  
102724686 4.315333 1.481726 1.561144 1.615147 1.427653 1.547205 1.345236 2.54309  
102724687 1.189166 0.808551 1.062149 0.911772 1.39002 1.970837 1.075386 1.170455  
102724691 2.943119 3.752795 1.812803 2.213013 1.84811 3.377671 2.393246 2.855551  
102724695 1.69145 1.777827 4.435704 4.58272 4.716684 0.892915 3.116375 3.668218  
102724699 2.211858 1.804849 2.146581 2.321932 2.614323 2.667058 1.867401 2.427775  
102724700 3.716991 4.126274 3.341543 3.478808 3.931935 4.282361 3.717055 3.833271  
102724708 1.009368 1.430942 2.06278 0.712666 2.046352 1.394047 1.848179 0.786934  
102724710 1.295655 1.219789 1.223001 1.268248 1.139208 1.397528 1.458336 1.600694  
102724711 1.305969 1.362089 1.096872 1.61754 1.696752 1.24714 1.521856 1.209326  
102724712 0.73347 1.40088 0.678595 1.078319 0.925733 1.103932 0.77556 0.68752  
102724715 2.629931 2.430679 2.483953 2.532008 2.558807 2.177895 2.709284 3.133807  
102724719 1.091552 1.097585 1.26569 2.022035 1.145555 1.689319 0.678828 0.982898  
102724720 1.427396 0.7355 0.869884 1.427594 1.74074 1.028146 1.102915 1.26582  
102724724 2.898898 2.808269 2.716464 2.320772 2.503581 2.471563 2.376338 2.672931  
102724731 1.408717 1.36138 1.521599 2.06226 1.351402 1.229671 1.549306 0.661111  
102724732 1.658509 1.340239 1.086913 1.115091 1.627292 1.121122 1.618301 1.667072  
102724734 3.246759 3.892342 3.357247 3.898045 4.105076 3.207414 4.47694 4.01806  
102724736 1.291069 1.120344 1.798815 1.098039 3.012355 1.817857 1.410096 1.284287  
102724740 1.548408 2.004532 2.080466 2.379105 2.352059 1.684842 1.237 1.638082  
102724744 1.155586 1.601739 0.835476 1.550986 0.829688 1.171582 1.87206 1.408345  
102724745 1.053529 0.582481 0.907446 0.657966 1.042774 0.690784 1.120104 1.407173  
102724748 2.40759 2.405963 3.219701 3.181403 3.139633 2.693602 3.815958 3.875592  
102724749 1.0366 2.637001 1.616844 1.235627 0.783183 0.966047 1.948405 1.660982  
102724757 1.251685 3.5926 0.790199 0.946242 1.92613 1.814676 2.443368 0.892258  
102724758 2.493692 1.288485 2.251044 0.788017 1.589333 2.321651 1.027891 1.651916  
102724763 2.430725 1.964025 1.950415 1.60406 2.237735 2.39957 1.519386 1.948756  
102724764 1.644193 0.865955 1.502368 2.343448 2.107283 1.471005 1.822525 1.455856  
102724767 1.237045 1.16475 1.412933 1.052769 1.550951 1.602647 1.722068 1.49071  
102724768 1.089953 2.737448 0.843397 1.508555 1.218195 1.743271 2.871646 2.816828  
102724772 1.222915 0.954214 0.949467 0.48378 0.741512 1.385582 1.157321 0.958918  
102724774 2.858103 3.10051 2.688978 2.572001 2.949338 2.97357 3.933853 4.485042  
102724775 1.124412 1.096444 1.247363 1.44947 4.713981 1.030054 1.536339 2.026579  
102724776 1.590247 1.400001 1.038645 1.312113 1.78325 1.566093 1.360611 1.922933  
102724783 1.01038 1.205094 1.456029 1.508709 2.113126 1.143469 1.101029 2.035113  
102724784 1.300306 1.155904 2.949713 1.866775 2.273236 1.76133 1.787879 2.110759  
102724785 2.058526 0.905556 1.631124 0.921283 1.044511 1.223012 1.282833 2.093869  
102724786 2.315315 1.559195 1.19518 2.725285 1.473437 1.526032 1.65429 1.881058  
102724790 1.278986 2.172878 1.928122 0.895719 1.777492 0.714737 1.528085 1.603878  
102724791 2.84689 2.773937 2.56 2.583368 2.91896 2.234519 2.592995 2.674632

102724792 1. 870717 1. 97911 2. 260808 1. 525941 2. 236263 2. 196253 2. 159382 1. 436404  
102724795 2. 144196 4. 14378 1. 593758 2. 290048 2. 585294 2. 576073 2. 837376 5. 080803  
102724799 0. 877525 1. 676202 2. 085097 0. 59956 1. 28183 0. 733281 0. 691399 0. 503733  
102724800 2. 329893 1. 097492 1. 370258 1. 068328 3. 769289 1. 755276 1. 629123 2. 443839  
102724804 1. 361508 0. 912999 1. 486342 1. 040996 0. 782989 1. 028885 1. 242845 0. 738329  
102724805 1. 591422 1. 586859 1. 342097 1. 410743 2. 956875 1. 829514 1. 83743 1. 089864  
102724809 1. 5987 2. 767243 1. 408611 1. 17467 2. 022921 1. 484677 0. 991811 2. 320254  
102724810 0. 921803 1. 119854 0. 98364 0. 814676 1. 256524 2. 873099 1. 405651 1. 073499  
102724811 1. 668611 1. 475066 1. 868565 1. 282858 1. 371005 1. 714609 1. 399062 1. 303946  
102724814 2. 865275 3. 682541 3. 211755 2. 656761 3. 116066 3. 079239 3. 241977 3. 072398  
102724815 3. 217819 3. 066749 2. 362106 3. 826388 2. 154185 4. 540312 1. 529568 1. 606963  
102724820 0. 829939 1. 08569 0. 578992 2. 920896 0. 912677 1. 062058 1. 831746 0. 932388  
102724824 1. 145625 1. 201395 0. 911321 1. 527598 1. 906689 1. 155841 1. 34458 1. 633171  
102724826 1. 284841 1. 020537 2. 92277 3. 692145 0. 965429 1. 829371 1. 202228 4. 877783  
102724831 2. 12944 2. 660778 2. 049922 2. 014549 2. 319619 2. 244583 1. 040856 2. 413143  
102724833 2. 902919 1. 645137 3. 767935 3. 573263 1. 192278 2. 446974 3. 187986 3. 221936  
102724834 1. 143028 0. 596271 0. 797411 1. 316026 1. 191469 0. 955313 0. 942991 0. 821602  
102724836 1. 932354 1. 518533 1. 610953 1. 124458 1. 176875 0. 746543 2. 437101 2. 01572  
102724842 2. 531903 2. 75817 1. 931236 3. 871979 2. 83334 1. 407703 1. 48774 3. 045494  
102724845 0. 752059 0. 684631 0. 524587 0. 715288 0. 906837 0. 62542 0. 735009 1. 005256  
102724847 1. 673662 0. 79179 0. 668459 1. 470796 0. 717888 0. 498005 0. 929642 1. 84649  
102724849 0. 879394 1. 282958 1. 434974 1. 149142 1. 377551 1. 278445 1. 232792 1. 491469  
102724850 0. 974098 1. 118106 0. 986616 0. 628805 1. 327778 1. 249222 1. 349826 1. 356632  
102724855 1. 875375 2. 184854 2. 046091 2. 537968 2. 850669 2. 8112 1. 718383 3. 012177  
102724861 2. 213515 3. 744746 2. 118806 1. 327098 1. 690472 2. 49497 1. 809672 2. 205686  
102724872 2. 68651 2. 540022 2. 757355 2. 318308 2. 822782 3. 11961 3. 437378 2. 269534  
102724873 6. 210802 6. 099605 5. 307456 2. 453659 5. 674599 4. 772063 5. 212545 3. 80802  
102724874 1. 490228 2. 039926 0. 990223 1. 308044 2. 76383 1. 256039 1. 735945 1. 453516  
102724877 1. 116264 2. 813657 1. 299034 0. 699656 3. 068754 2. 442496 2. 210707 2. 792365  
102724880 2. 631009 2. 070755 2. 107575 2. 10493 1. 613267 2. 629681 2. 160894 2. 33627  
102724883 3. 571365 3. 854001 2. 004867 1. 951685 3. 345619 3. 94604 2. 09752 4. 299727  
102724885 1. 61836 1. 01923 2. 188479 1. 729028 2. 026983 1. 781542 1. 593948 1. 468829  
102724889 5. 90239 5. 23745 5. 140135 7. 01459 6. 486519 6. 708039 4. 943147 6. 828218  
102724890 0. 936099 0. 822781 0. 88297 0. 745514 2. 200695 0. 950209 1. 439396 0. 908671  
102724894 2. 607753 1. 515714 1. 509374 1. 713069 2. 338707 2. 264953 1. 543198 3. 027148  
102724895 0. 71805 0. 959302 1. 774968 0. 980746 1. 570891 1. 541684 1. 584365 1. 428404  
102724897 2. 66982 1. 157142 1. 092793 1. 035218 1. 024 1. 10615 1. 326884 2. 397935  
102724899 2. 635694 2. 017433 3. 387377 1. 551411 1. 572796 2. 369665 2. 941121 2. 524182  
102724911 2. 343637 3. 063285 1. 128103 1. 239482 2. 648403 2. 749915 1. 8898 0. 74262  
102724913 1. 237895 1. 833118 1. 411674 1. 434437 1. 100196 0. 931428 2. 078771 1. 581892  
102724919 0. 627861 0. 822325 2. 273402 1. 334621 1. 294504 1. 534138 2. 051521 2. 114118  
102724921 1. 559119 1. 513049 1. 036814 1. 754667 1. 173109 1. 388068 1. 409808 1. 620429  
102724927 2. 358866 1. 294095 1. 391079 1. 441031 1. 831763 1. 139727 1. 356274 1. 845318  
102724929 1. 247661 2. 138925 2. 192892 2. 255137 2. 012006 1. 78587 1. 451947 1. 238799  
102724933 2. 302002 1. 689275 1. 490112 2. 359899 2. 119929 2. 530896 1. 602217 1. 505327  
102724934 1. 982763 1. 026449 2. 504759 0. 717811 1. 284111 0. 879065 0. 135831 0. 863115  
102724942 2. 37743 1. 989413 2. 720028 2. 152593 1. 885133 2. 758538 2. 076521 2. 189625  
102724943 1. 364576 1. 684739 0. 876026 1. 5362 1. 324123 1. 051536 1. 238175 1. 491477  
102724944 2. 738252 1. 817002 3. 890823 2. 38615 2. 00927 3. 774898 2. 518021 2. 860728  
102724948 1. 37537 0. 917848 1. 886421 0. 809848 1. 708508 1. 643342 1. 625072 1. 191736  
102724950 1. 122743 1. 90429 1. 886567 1. 646663 2. 007191 1. 91671 1. 349822 1. 102563



102724952 1. 375256 1. 40181 1. 664616 1. 145248 1. 949468 1. 528252 1. 147916 1. 856488  
102724954 1. 777955 1. 191419 0. 70938 2. 570102 2. 935177 2. 829493 1. 451659 2. 61394  
102724955 1. 682575 2. 136284 2. 273515 1. 594926 2. 923457 3. 174077 2. 834623 3. 201664  
102724957 3. 096509 1. 662755 1. 226994 0. 752939 2. 125329 1. 259596 1. 431689 0. 983022  
102724958 2. 158264 1. 364606 1. 838816 4. 757492 1. 663035 1. 657822 2. 009964 1. 764217  
102724959 0. 894734 1. 258465 2. 1012 0. 998019 3. 254115 2. 471121 -0. 03213 0. 687474  
102724965 2. 694444 1. 995389 2. 013074 1. 487286 2. 553096 1. 25865 3. 238612 2. 248992  
102724966 2. 031017 2. 410738 1. 821064 2. 040308 2. 577505 1. 410785 1. 091207 2. 26733  
102724967 4. 361109 5. 154711 3. 815621 4. 364679 4. 099864 4. 167704 4. 727475 5. 447066  
102724970 3. 148787 1. 823797 2. 234926 3. 360279 3. 062771 1. 853857 2. 4338 1. 951984  
102724973 1. 550797 1. 770168 1. 69304 1. 443067 1. 914981 1. 837441 1. 416156 2. 249224  
102724975 1. 281684 2. 951956 1. 870223 1. 231091 1. 993042 1. 338635 2. 330826 1. 865608  
10272\_at 4. 204119 4. 427007 4. 237808 4. 789579 3. 752939 4. 477959 3. 615696 3. 255469  
10273\_at 7. 562927 6. 784795 7. 120386 6. 789342 6. 656479 7. 079569 6. 921927 6. 285774  
10274\_at 4. 814561 5. 435396 5. 483943 5. 901666 6. 0538 5. 096151 5. 066909 6. 070238  
10276\_at 7. 144373 7. 286229 7. 082321 7. 228256 7. 840126 6. 702003 7. 462837 7. 592963  
10277\_at 7. 132408 7. 19976 6. 861296 6. 542211 6. 73548 6. 946098 7. 061087 6. 84513  
10278\_at 3. 340372 3. 518569 2. 900599 3. 272354 2. 890298 3. 843853 3. 145365 2. 84986  
10279\_at 1. 820884 1. 665864 1. 595651 2. 179722 1. 265878 2. 69674 1. 895625 1. 389421  
1027\_at 9. 140694 8. 959114 9. 27534 9. 142089 9. 365231 8. 643558 8. 92684 9. 380223  
10280\_at 6. 387407 6. 343973 5. 714035 5. 401907 5. 692691 6. 19586 5. 738536 5. 856453  
10281\_at 2. 512412 3. 290499 4. 148107 1. 841782 1. 910578 2. 193908 2. 100284 2. 658408  
10282\_at 2. 731975 2. 570034 2. 673959 1. 794234 2. 678223 2. 02542 1. 24405 2. 544053  
10283\_at 6. 483547 6. 516331 6. 563591 6. 583258 5. 729854 6. 253788 6. 173931 7. 256413  
10284\_at 9. 298273 9. 275208 9. 627653 9. 349721 8. 874279 9. 310039 9. 303703 9. 631828  
10285\_at 6. 150459 6. 679756 6. 177842 6. 638982 6. 0722 6. 950498 7. 083378 6. 198918  
10286\_at 7. 673182 7. 058585 7. 092869 6. 970578 7. 189265 7. 229739 7. 508763 7. 572068  
10287\_at 3. 178423 3. 529217 3. 055549 3. 273022 3. 930272 3. 727541 3. 483922 2. 877417  
10288\_at 3. 56878 3. 514194 4. 889127 4. 875056 1. 700946 4. 733397 3. 857066 3. 977661  
10289\_at 8. 275396 7. 666549 7. 390739 7. 462529 7. 824433 8. 029155 7. 06345 7. 868373  
1028\_at 8. 161159 7. 861354 8. 307563 8. 093644 6. 687484 8. 308582 8. 89264 7. 347385  
10290\_at 2. 030918 1. 428782 1. 716262 1. 535403 1. 571351 1. 789244 2. 271684 1. 716336  
10291\_at 6. 811028 7. 128505 6. 983247 7. 334083 7. 132308 6. 964449 7. 080362 6. 755396  
10293\_at 1. 453867 2. 506658 2. 625036 2. 419651 2. 718012 2. 119532 1. 988297 2. 039214  
10294\_at 7. 613547 7. 640073 7. 53422 7. 604576 7. 653236 7. 690335 7. 155223 7. 440492  
10295\_at 6. 082189 4. 683404 6. 095954 5. 568397 5. 124762 5. 824548 5. 791097 5. 278193  
10296\_at 5. 616546 6. 133297 6. 075975 6. 24813 4. 948575 5. 732136 5. 640757 4. 661384  
10297\_at 2. 599717 2. 520197 2. 32293 2. 638437 1. 999595 2. 774449 1. 783681 2. 392828  
10298\_at 3. 73232 2. 790638 2. 623323 3. 083936 2. 618708 2. 271575 2. 650696 3. 259254  
10299\_at 7. 446816 7. 832706 8. 15488 7. 94461 8. 32207 8. 043645 8. 252336 8. 403044  
1029\_at 1. 877722 1. 258885 1. 525906 1. 476085 1. 478131 1. 565896 1. 718362 1. 147376  
102\_at 7. 145002 8. 037838 7. 655395 8. 147477 7. 540337 7. 348434 7. 780312 7. 911644  
10300\_at 4. 692849 4. 175463 4. 687175 4. 101906 4. 095208 5. 279507 4. 573834 4. 349005  
10301\_at 2. 094962 1. 773877 1. 924547 2. 426592 1. 650431 2. 22696 1. 547699 2. 35471  
10302\_at 5. 707296 5. 255451 4. 421093 4. 566535 4. 153304 5. 6328 5. 126556 5. 150846  
10307\_at 2. 310798 2. 653237 2. 603212 2. 024647 2. 124474 2. 478974 2. 626811 2. 92422  
10308\_at 4. 087605 5. 642158 4. 341882 4. 913617 3. 45103 5. 723301 4. 814307 4. 906945  
10309\_at 1. 944088 2. 014912 1. 575897 2. 219754 2. 02922 2. 019854 1. 269894 1. 454828  
1030\_at 1. 785175 2. 577341 1. 939876 1. 841474 2. 451081 2. 087521 1. 909525 1. 639828  
10311\_at 7. 421267 7. 288495 6. 862551 7. 333997 6. 270449 7. 070014 7. 103907 6. 942676  
10312\_at 5. 245667 4. 907121 5. 061365 5. 298436 4. 713601 5. 707536 5. 869294 5. 339018

|          |          |          |          |          |          |          |          |          |
|----------|----------|----------|----------|----------|----------|----------|----------|----------|
| 10313_at | 6.725753 | 6.968824 | 7.18858  | 6.947206 | 7.063347 | 6.824668 | 7.23518  | 7.209764 |
| 10314_at | 6.48743  | 5.895737 | 6.768861 | 6.117313 | 6.400948 | 6.411138 | 6.327177 | 6.158749 |
| 10316_at | 3.513029 | 2.891341 | 3.234102 | 3.596032 | 3.515952 | 3.501446 | 4.30316  | 3.428832 |
| 10317_at | 1.858437 | 1.843995 | 1.508452 | 1.829111 | 2.144396 | 2.169931 | 1.715734 | 1.873859 |
| 10318_at | 6.856094 | 6.512682 | 6.381637 | 6.328735 | 5.878774 | 6.403341 | 6.877562 | 6.352166 |
| 10319_at | 2.203458 | 2.152206 | 2.517045 | 1.884702 | 2.653336 | 2.331598 | 2.059028 | 1.619706 |
| 1031_at  | 4.459156 | 4.518329 | 3.753774 | 3.574499 | 4.433083 | 4.065349 | 4.823799 | 4.336683 |
| 10320_at | 2.95009  | 3.670286 | 2.281455 | 4.757887 | 4.050385 | 2.864405 | 4.080188 | 3.288222 |
| 10321_at | 1.927793 | 1.542755 | 2.230024 | 1.343744 | 1.235207 | 1.497619 | 1.39881  | 1.808139 |
| 10322_at | 3.798653 | 3.050032 | 3.112693 | 3.383513 | 2.838659 | 3.409252 | 2.968418 | 2.141623 |
| 10324_at | 1.19319  | 1.830948 | 2.150518 | 1.107077 | 1.874958 | 2.69687  | 1.544022 | 1.529775 |
| 10325_at | 5.484238 | 5.617865 | 5.5675   | 5.12781  | 6.183056 | 5.099871 | 5.789875 | 5.656701 |
| 10326_at | 2.044066 | 2.722475 | 2.077715 | 4.141879 | 2.087914 | 2.826919 | 2.558696 | 2.599678 |
| 10327_at | 7.451656 | 7.287338 | 6.660415 | 6.467846 | 7.260357 | 7.288374 | 5.9109   | 7.138539 |
| 10328_at | 6.275236 | 5.968523 | 5.900297 | 5.448735 | 4.993836 | 6.061939 | 5.451972 | 6.030636 |
| 10329_at | 5.224991 | 5.176434 | 4.904106 | 5.20641  | 5.011489 | 5.166967 | 4.911442 | 5.221272 |
| 1032_at  | 3.750367 | 4.501293 | 4.324288 | 4.026897 | 3.809543 | 3.639564 | 3.149507 | 4.039966 |
| 10330_at | 9.596107 | 9.150588 | 9.363936 | 8.980745 | 8.163723 | 9.249033 | 8.277646 | 9.064017 |
| 10331_at | 2.2777   | 1.296446 | 1.60018  | 1.419448 | 1.449365 | 2.382158 | 1.548894 | 2.510877 |
| 10332_at | 1.874849 | 1.449479 | 1.827943 | 1.815398 | 1.501852 | 1.954096 | 1.521617 | 1.517687 |
| 10333_at | 1.209761 | 1.481043 | 1.827695 | 1.608087 | 1.367082 | 1.717489 | 3.418691 | 2.027823 |
| 10335_at | 6.04417  | 6.388366 | 6.4908   | 6.377746 | 5.793809 | 5.470564 | 6.149732 | 5.634224 |
| 10336_at | 4.714623 | 4.138121 | 4.28514  | 4.475338 | 3.492124 | 4.255274 | 4.520911 | 3.688333 |
| 1033_at  | 1.938531 | 2.858588 | 2.701427 | 3.053303 | 2.476403 | 1.932632 | 4.60545  | 3.707105 |
| 10342_at | 8.197173 | 7.92919  | 7.871831 | 7.742169 | 7.394674 | 7.626323 | 7.665797 | 7.755007 |
| 10343_at | 1.626221 | 2.293987 | 1.882792 | 1.571755 | 2.076827 | 1.967311 | 2.316181 | 1.415931 |
| 10344_at | 2.235937 | 2.2196   | 2.355428 | 2.218227 | 2.386224 | 2.472053 | 3.198344 | 3.006279 |
| 10345_at | 1.490478 | 2.048666 | 1.207502 | 1.248092 | 1.576466 | 1.7955   | 1.358591 | 1.493732 |
| 10346_at | 5.765917 | 5.980968 | 5.353985 | 5.868039 | 5.48126  | 5.818317 | 5.475222 | 5.562463 |
| 10347_at | 2.77655  | 2.719752 | 2.748074 | 3.163158 | 2.905778 | 2.881937 | 3.518195 | 3.792377 |
| 10349_at | 1.483173 | 1.101668 | 1.149712 | 1.36909  | 1.132166 | 1.059926 | 1.178908 | 1.574846 |
| 10350_at | 1.68368  | 1.419711 | 1.373323 | 1.589359 | 1.283993 | 1.548218 | 1.109117 | 1.797919 |
| 10351_at | 1.715145 | 1.302054 | 1.366026 | 1.335242 | 1.637834 | 1.586141 | 1.477531 | 1.727916 |
| 10352_at | 5.06454  | 5.963561 | 4.889346 | 4.904692 | 4.410195 | 4.600674 | 4.818838 | 5.045037 |
| 10360_at | 2.709246 | 2.554224 | 2.877914 | 3.446671 | 2.569073 | 1.927574 | 1.786769 | 2.688957 |
| 10361_at | 2.235725 | 2.285825 | 2.372611 | 2.013797 | 3.102021 | 2.200594 | 3.134918 | 2.643576 |
| 10362_at | 5.006348 | 4.881632 | 4.378456 | 5.039386 | 4.564132 | 5.673171 | 4.892191 | 4.708212 |
| 10363_at | 6.161009 | 6.593288 | 5.903928 | 6.468972 | 5.408591 | 6.101554 | 6.182616 | 6.201074 |
| 10365_at | 6.851953 | 6.846826 | 6.911732 | 6.969095 | 5.925172 | 7.726642 | 7.370089 | 5.919037 |
| 10367_at | 6.280072 | 6.057691 | 6.161142 | 6.005548 | 5.681765 | 5.975996 | 5.608556 | 6.797424 |
| 10368_at | 2.375078 | 2.738993 | 2.588509 | 2.215635 | 2.209524 | 2.002208 | 2.153406 | 2.467237 |
| 10369_at | 1.068741 | 1.151935 | 1.181336 | 1.321647 | 1.31066  | 1.93764  | 2.033116 | 1.382371 |
| 1036_at  | 3.522704 | 3.335743 | 3.59415  | 4.102488 | 4.185316 | 2.919545 | 3.287981 | 3.862827 |
| 10370_at | 8.931835 | 8.703932 | 8.563849 | 8.331379 | 7.777499 | 8.706398 | 8.703555 | 7.796328 |
| 10371_at | 2.986577 | 2.433878 | 2.199846 | 3.072986 | 3.952089 | 3.198982 | 3.422153 | 3.062913 |
| 10376_at | 6.380489 | 8.639669 | 8.631762 | 8.658218 | 7.642206 | 8.239609 | 8.839274 | 7.51133  |
| 10379_at | 7.680355 | 7.224518 | 7.076554 | 7.535323 | 6.027546 | 7.412918 | 7.29109  | 6.510349 |
| 10380_at | 5.296735 | 5.916528 | 5.878648 | 6.074626 | 4.938013 | 5.308615 | 5.439059 | 5.278388 |
| 10382_at | 4.040465 | 4.128802 | 4.32751  | 4.25032  | 5.497056 | 4.371392 | 4.18506  | 5.13191  |
| 10383_at | 11.04013 | 11.27619 | 11.13137 | 10.95355 | 11.4088  | 11.10178 | 10.53738 | 11.44476 |
| 10385_at | 3.815935 | 5.312473 | 5.531609 | 6.076606 | 4.065043 | 5.016384 | 4.231197 | 5.557838 |

|           |          |          |          |          |          |          |          |          |
|-----------|----------|----------|----------|----------|----------|----------|----------|----------|
| 10388_at  | 2.589561 | 3.08502  | 1.957716 | 2.478173 | 1.597372 | 2.632161 | 2.683527 | 2.927593 |
| 10389_at  | 2.228212 | 2.439817 | 1.83703  | 1.808267 | 2.276676 | 2.183602 | 1.671948 | 1.420743 |
| 1038_at   | 6.894979 | 7.545737 | 7.368382 | 7.476118 | 6.756514 | 6.656285 | 6.629585 | 6.375054 |
| 10390_at  | 5.907102 | 6.492502 | 5.757262 | 5.687479 | 4.974742 | 5.543932 | 5.816342 | 6.619083 |
| 103910_at | 3.283206 | 2.857704 | 3.483106 | 3.727135 | 2.995091 | 2.967637 | 2.858213 | 4.008192 |
| 10391_at  | 6.994521 | 6.642945 | 7.146966 | 6.524703 | 5.811086 | 5.711664 | 6.877948 | 6.052256 |
| 10392_at  | 4.882814 | 4.176077 | 3.831171 | 4.863813 | 3.566939 | 4.161711 | 4.693334 | 3.987706 |
| 10393_at  | 3.201689 | 3.951681 | 3.212231 | 2.487948 | 3.213031 | 2.889018 | 2.881826 | 3.208857 |
| 10394_at  | 1.93496  | 1.772447 | 1.811035 | 1.528891 | 1.872363 | 1.980184 | 1.538793 | 2.181604 |
| 10395_at  | 4.755668 | 5.073087 | 4.983466 | 5.02682  | 4.422073 | 4.670524 | 4.988307 | 4.787854 |
| 10396_at  | 2.817023 | 4.015985 | 3.806876 | 3.621432 | 4.184791 | 3.987418 | 3.540925 | 3.845688 |
| 10397_at  | 9.651323 | 9.808982 | 9.567936 | 9.55875  | 9.625853 | 9.484466 | 9.748682 | 9.741353 |
| 10398_at  | 10.73491 | 10.53116 | 10.95941 | 10.91073 | 10.44751 | 10.51148 | 10.82031 | 10.39875 |
| 10399_at  | 10.79958 | 10.18835 | 10.1146  | 10.36235 | 10.44412 | 10.49135 | 10.05635 | 10.34121 |
| 1039_at   | 7.203251 | 7.425838 | 7.085028 | 7.051185 | 6.761039 | 6.68987  | 7.046618 | 6.726552 |
| 103_at    | 6.442555 | 6.757924 | 6.882258 | 6.910632 | 6.283726 | 7.095024 | 7.024627 | 6.140256 |
| 10400_at  | 5.284603 | 4.832637 | 4.754557 | 5.388887 | 5.356021 | 4.887065 | 4.83591  | 4.344635 |
| 10401_at  | 6.073502 | 6.075617 | 6.272513 | 6.17234  | 5.147418 | 6.302009 | 7.124583 | 5.688356 |
| 10402_at  | 6.190024 | 6.126748 | 5.572122 | 5.203144 | 5.869641 | 4.678743 | 5.951594 | 6.058733 |
| 10403_at  | 2.334505 | 2.773211 | 2.136526 | 3.394399 | 2.34342  | 2.419446 | 1.662364 | 3.940917 |
| 10404_at  | 7.659092 | 7.058325 | 7.529306 | 7.459092 | 7.505248 | 7.26189  | 7.340173 | 7.346768 |
| 10406_at  | 8.290512 | 4.711566 | 7.662969 | 7.632475 | 8.563254 | 9.713608 | 3.843257 | 5.819834 |
| 10407_at  | 1.749453 | 1.332617 | 0.974788 | 1.312804 | 2.196554 | 1.332617 | 0.905949 | 0.87816  |
| 10408_at  | 1.424936 | 2.378455 | 1.084943 | 1.21806  | 1.663789 | 1.77762  | 1.959329 | 0.937954 |
| 10409_at  | 5.077292 | 6.617645 | 5.441038 | 6.850141 | 4.273161 | 5.83013  | 5.375892 | 4.545408 |
| 1040_at   | 5.893798 | 6.004242 | 5.559612 | 4.769954 | 5.439641 | 6.040039 | 4.471637 | 6.56404  |
| 10410_at  | 11.63216 | 11.72951 | 11.82825 | 11.89235 | 11.84667 | 11.16826 | 11.62598 | 11.79193 |
| 10411_at  | 5.505933 | 4.877597 | 4.930391 | 4.799334 | 3.895897 | 5.639224 | 5.141148 | 4.663053 |
| 10412_at  | 7.345429 | 7.948747 | 7.683286 | 7.874793 | 7.379279 | 8.057022 | 6.665215 | 7.397788 |
| 10413_at  | 7.442108 | 7.406107 | 8.006418 | 8.126026 | 7.160485 | 8.075215 | 7.858215 | 7.498606 |
| 10417_at  | 4.299131 | 4.301124 | 4.256643 | 4.30848  | 3.40435  | 3.864061 | 3.96368  | 3.859006 |
| 10418_at  | 1.647604 | 2.075845 | 2.786864 | 1.722757 | 2.18915  | 1.993414 | 1.921991 | 2.220211 |
| 10419_at  | 6.0045   | 5.386515 | 4.638838 | 5.121573 | 5.059653 | 5.015392 | 5.444823 | 5.738362 |
| 1041_at   | 2.515646 | 2.120077 | 2.153515 | 2.306819 | 2.422422 | 2.259133 | 2.424912 | 1.874862 |
| 10420_at  | 2.938612 | 2.32508  | 4.214482 | 3.772234 | 3.531869 | 1.860937 | 3.288834 | 2.997582 |
| 10421_at  | 6.032256 | 5.962355 | 5.418784 | 5.455505 | 6.096351 | 5.817688 | 5.76333  | 5.866686 |
| 10422_at  | 5.744011 | 5.74293  | 5.097063 | 5.938971 | 5.833348 | 5.851666 | 5.444642 | 4.307742 |
| 10423_at  | 7.848883 | 7.151741 | 7.963924 | 8.033892 | 6.355206 | 7.389593 | 7.365574 | 6.336376 |
| 10424_at  | 6.434095 | 6.669332 | 7.039929 | 6.549353 | 6.214786 | 6.330826 | 6.376754 | 6.819375 |
| 10425_at  | 6.330505 | 6.125633 | 5.840357 | 5.701883 | 5.493953 | 6.512568 | 6.332227 | 6.382708 |
| 10426_at  | 4.858451 | 5.233316 | 4.911634 | 4.975795 | 4.672254 | 4.908575 | 4.729959 | 5.217486 |
| 10427_at  | 7.907546 | 8.247605 | 8.234466 | 8.504311 | 7.954966 | 7.645675 | 7.875594 | 7.697042 |
| 10428_at  | 6.852255 | 6.914668 | 6.481538 | 6.900996 | 7.279457 | 6.965791 | 6.953765 | 7.597727 |
| 10430_at  | 7.761994 | 7.846949 | 7.347827 | 7.485158 | 7.193875 | 7.868596 | 7.461966 | 7.328262 |
| 10432_at  | 4.544755 | 3.780133 | 4.878011 | 4.472743 | 4.905314 | 4.571193 | 4.215531 | 4.598498 |
| 10434_at  | 6.852351 | 6.933061 | 6.286267 | 5.746686 | 7.067712 | 6.048125 | 6.937764 | 6.693382 |
| 10435_at  | 6.78195  | 6.794213 | 7.018507 | 6.741997 | 5.175579 | 6.877409 | 7.231871 | 6.080489 |
| 10436_at  | 5.158292 | 5.236075 | 5.498959 | 5.283598 | 5.502702 | 5.797043 | 5.691418 | 5.726045 |
| 10437_at  | 8.008439 | 7.619701 | 7.006809 | 7.787897 | 6.947897 | 7.696343 | 7.278964 | 7.532883 |
| 10439_at  | 3.071769 | 3.028839 | 4.459665 | 3.374707 | 2.600172 | 3.076483 | 3.149015 | 2.8925   |
| 1043_at   | 8.315659 | 7.580379 | 7.771153 | 8.957644 | 6.72419  | 8.19748  | 8.807489 | 7.324155 |

|          |          |          |          |          |          |          |          |          |
|----------|----------|----------|----------|----------|----------|----------|----------|----------|
| 10440_at | 7.111282 | 6.650445 | 6.700175 | 7.386211 | 6.631401 | 6.141964 | 6.925408 | 7.832196 |
| 10443_at | 6.515929 | 6.18646  | 6.199124 | 6.515013 | 6.776945 | 6.528841 | 6.476063 | 6.550242 |
| 10444_at | 5.771188 | 5.249925 | 6.009914 | 5.799421 | 5.265373 | 4.804492 | 5.320198 | 5.184946 |
| 10445_at | 5.725118 | 4.734219 | 5.431208 | 4.860286 | 4.646404 | 5.25442  | 5.103823 | 5.085015 |
| 10446_at | 5.11967  | 5.643922 | 5.291139 | 4.746884 | 4.764452 | 4.077261 | 3.45645  | 4.147842 |
| 10447_at | 9.29204  | 9.829755 | 9.277781 | 9.592306 | 9.928192 | 9.184309 | 9.473996 | 9.711811 |
| 10449_at | 7.121056 | 7.261651 | 7.190814 | 6.429198 | 8.162095 | 6.803152 | 6.468175 | 7.519616 |
| 1044_at  | 3.143245 | 2.745601 | 2.573821 | 3.012449 | 3.79844  | 3.687863 | 2.919933 | 2.336727 |
| 10450_at | 5.577789 | 6.36229  | 5.921554 | 6.494391 | 5.951239 | 6.086118 | 6.340726 | 6.410333 |
| 10451_at | 4.898261 | 4.593778 | 4.862265 | 3.916273 | 4.815206 | 5.313417 | 4.914296 | 4.847436 |
| 10452_at | 4.57401  | 5.363878 | 4.431278 | 3.938247 | 4.546164 | 4.771809 | 5.442536 | 4.587976 |
| 10454_at | 4.310777 | 4.012251 | 4.988133 | 3.693491 | 4.577775 | 5.068681 | 4.449153 | 4.0341   |
| 10455_at | 8.041423 | 7.976464 | 7.405998 | 7.352951 | 8.331422 | 8.064387 | 7.238706 | 8.326481 |
| 10456_at | 7.594    | 6.736074 | 7.465299 | 7.12173  | 7.336993 | 7.166143 | 6.677036 | 6.940171 |
| 10457_at | 7.955623 | 7.531344 | 7.199664 | 8.422918 | 7.971481 | 7.793907 | 8.066752 | 7.417295 |
| 10458_at | 6.137372 | 5.933998 | 5.423566 | 5.277187 | 4.882714 | 6.257025 | 5.899974 | 5.382293 |
| 10459_at | 5.455857 | 4.015945 | 5.011869 | 4.729724 | 3.497152 | 4.770252 | 5.1758   | 5.042265 |
| 1045_at  | 2.694332 | 2.452345 | 2.471375 | 1.636224 | 1.856764 | 2.030132 | 2.349912 | 2.443886 |
| 10460_at | 4.670021 | 3.617391 | 2.73134  | 3.394823 | 2.546206 | 2.934596 | 4.605794 | 2.927167 |
| 10461_at | 4.851331 | 5.1951   | 4.788475 | 4.986195 | 4.688778 | 4.343138 | 4.39438  | 4.224577 |
| 10462_at | 2.166059 | 1.774717 | 2.031359 | 1.966549 | 1.914256 | 1.995152 | 2.143174 | 1.606311 |
| 10463_at | 7.041962 | 7.396039 | 6.788496 | 7.12565  | 7.454776 | 6.420017 | 6.987629 | 7.642371 |
| 10464_at | 6.368965 | 5.829526 | 5.433655 | 5.599891 | 5.69599  | 5.299162 | 5.421321 | 5.810241 |
| 10465_at | 5.300016 | 5.979942 | 5.721344 | 5.968302 | 5.296416 | 5.832593 | 5.670766 | 5.364856 |
| 10466_at | 6.023463 | 6.21109  | 6.170411 | 6.350853 | 6.142586 | 5.950304 | 6.154383 | 6.332274 |
| 10467_at | 6.920026 | 6.332081 | 6.819946 | 6.384244 | 6.125496 | 6.635461 | 6.196933 | 5.667724 |
| 10468_at | 2.061035 | 2.887459 | 2.225979 | 1.619835 | 3.046097 | 2.551567 | 1.735716 | 1.987779 |
| 10469_at | 3.839218 | 4.788043 | 3.884021 | 3.714178 | 3.298288 | 3.864491 | 4.179603 | 4.151271 |
| 1046_at  | 1.750707 | 0.977642 | 1.134586 | 1.592844 | 1.37936  | 1.565801 | 2.725045 | 1.395051 |
| 10471_at | 6.191878 | 7.114799 | 6.237168 | 6.445093 | 6.168209 | 6.508474 | 5.966273 | 6.013052 |
| 10472_at | 3.991608 | 4.545698 | 3.865552 | 3.944278 | 4.508594 | 4.424501 | 4.139245 | 5.486128 |
| 10473_at | 6.663328 | 6.347252 | 5.782786 | 6.584359 | 6.514475 | 6.488278 | 5.622955 | 6.454829 |
| 10474_at | 5.747128 | 5.053546 | 4.700539 | 4.56575  | 4.785602 | 4.88391  | 5.885578 | 5.469313 |
| 10475_at | 6.013379 | 6.492655 | 5.417228 | 5.943439 | 5.856543 | 6.083199 | 5.816719 | 5.893115 |
| 10476_at | 6.851635 | 6.799343 | 7.256403 | 7.067119 | 6.269928 | 7.2383   | 6.224345 | 6.956964 |
| 10477_at | 4.314562 | 3.962881 | 3.546155 | 3.446075 | 4.476483 | 3.348762 | 3.890659 | 4.88953  |
| 10478_at | 5.527106 | 4.63847  | 4.948434 | 5.30705  | 6.314422 | 5.248194 | 5.359354 | 5.312255 |
| 10479_at | 5.13184  | 5.014098 | 5.424714 | 5.384606 | 5.044329 | 5.221696 | 5.840639 | 5.819673 |
| 1047_at  | 2.395617 | 2.90622  | 1.690631 | 3.049294 | 1.868851 | 2.145428 | 3.700571 | 2.004417 |
| 10480_at | 9.077278 | 9.467528 | 9.35255  | 9.126142 | 9.0625   | 8.778973 | 9.027203 | 9.445605 |
| 10481_at | 1.440565 | 1.505857 | 2.199239 | 1.129096 | 1.491108 | 1.842785 | 1.854326 | 2.229705 |
| 10482_at | 6.015724 | 6.365398 | 5.571245 | 5.957268 | 5.76873  | 6.287187 | 6.225744 | 6.225339 |
| 10483_at | 6.767885 | 6.701752 | 6.06474  | 6.102303 | 6.324607 | 6.142389 | 6.309958 | 6.621813 |
| 10484_at | 5.804421 | 6.602432 | 6.232411 | 6.166264 | 5.996057 | 6.114089 | 6.052593 | 6.499223 |
| 10485_at | 1.322753 | 1.483889 | 1.494463 | 1.71984  | 2.462856 | 1.98936  | 1.158479 | 1.366314 |
| 10486_at | 6.541894 | 6.955826 | 6.783285 | 6.194729 | 6.867327 | 6.349706 | 5.882407 | 6.14768  |
| 10487_at | 8.950562 | 8.841995 | 8.909636 | 8.993083 | 8.995641 | 8.571664 | 8.739182 | 8.726441 |
| 10488_at | 6.684085 | 6.702672 | 6.601534 | 6.142029 | 6.305343 | 7.025519 | 6.164549 | 5.975202 |
| 10489_at | 7.338334 | 6.65622  | 7.131506 | 6.75465  | 6.86142  | 6.997038 | 6.634971 | 6.892263 |
| 1048_at  | 1.458998 | 1.81796  | 1.606617 | 1.574952 | 2.028753 | 2.027684 | 2.264354 | 1.976852 |
| 10490_at | 8.076739 | 8.238936 | 8.151388 | 8.005137 | 7.658744 | 8.501764 | 7.900681 | 7.762174 |

|          |          |          |          |          |          |          |          |          |
|----------|----------|----------|----------|----------|----------|----------|----------|----------|
| 10491_at | 7.419513 | 7.31101  | 6.909032 | 7.564893 | 7.265722 | 7.373235 | 7.749853 | 6.651031 |
| 10492_at | 7.610607 | 8.134662 | 8.102358 | 8.186702 | 8.498819 | 7.942333 | 8.006572 | 8.489848 |
| 10493_at | 5.279018 | 5.451325 | 5.373719 | 5.108894 | 5.409233 | 5.154984 | 5.604653 | 4.515201 |
| 10494_at | 6.561153 | 5.759532 | 6.312735 | 6.625491 | 5.056847 | 6.581549 | 7.130684 | 5.274969 |
| 10495_at | 4.699731 | 5.17132  | 5.907074 | 5.095177 | 5.390443 | 4.692517 | 4.37106  | 4.819663 |
| 10497_at | 5.995517 | 6.640214 | 6.148663 | 5.918924 | 5.677476 | 5.850029 | 6.15251  | 6.414863 |
| 10498_at | 5.587171 | 5.789181 | 5.292633 | 5.686707 | 4.915628 | 5.7345   | 5.898101 | 4.618996 |
| 10499_at | 6.408105 | 6.904876 | 6.737739 | 6.87187  | 7.309579 | 6.836753 | 7.002025 | 6.650498 |
| 104_at   | 4.641745 | 5.756199 | 4.659558 | 5.324851 | 4.891603 | 4.706959 | 4.38526  | 4.233205 |
| 10500_at | 2.297167 | 1.79197  | 2.522787 | 3.039535 | 2.570487 | 3.858619 | 2.786261 | 2.528501 |
| 10501_at | 3.116663 | 2.44359  | 2.960419 | 3.250755 | 3.428176 | 2.795326 | 3.119099 | 2.234678 |
| 10505_at | 2.370145 | 3.055759 | 3.444336 | 3.180649 | 2.648493 | 2.442132 | 3.181205 | 3.112061 |
| 10507_at | 3.215335 | 3.64329  | 3.352062 | 3.91737  | 2.919216 | 3.766931 | 3.521351 | 3.695528 |
| 10509_at | 3.8483   | 3.155013 | 4.033458 | 4.261023 | 3.121068 | 4.181267 | 3.123738 | 2.721558 |
| 1050_at  | 2.640609 | 2.628451 | 3.461466 | 3.069607 | 2.625407 | 2.973682 | 2.837321 | 2.050172 |
| 10512_at | 4.979661 | 5.452867 | 5.50247  | 4.881603 | 4.713266 | 6.125664 | 5.573243 | 5.008936 |
| 10513_at | 7.171211 | 7.033765 | 7.240193 | 6.746029 | 6.929285 | 6.393546 | 7.214367 | 7.61911  |
| 10514_at | 4.438901 | 4.222634 | 4.178346 | 4.81132  | 3.88385  | 5.101307 | 5.170067 | 3.429602 |
| 10516_at | 5.434096 | 4.760835 | 3.915164 | 5.393589 | 6.772957 | 5.799717 | 4.851814 | 5.055713 |
| 10517_at | 1.279169 | 1.460034 | 1.425485 | 1.14094  | 2.156806 | 1.173048 | 2.61006  | 1.939709 |
| 10518_at | 3.483196 | 3.962507 | 3.042789 | 3.252734 | 3.013789 | 4.13896  | 3.024012 | 4.393167 |
| 10519_at | 6.807967 | 6.224944 | 6.63722  | 6.560001 | 6.520905 | 6.589519 | 6.670136 | 6.067547 |
| 1051_at  | 3.821684 | 4.212663 | 3.776836 | 3.960116 | 3.625381 | 4.291082 | 3.813695 | 3.463849 |
| 10520_at | 4.522557 | 4.536635 | 4.219354 | 4.444543 | 3.396302 | 2.179528 | 3.282901 | 3.502082 |
| 10521_at | 8.528309 | 8.834746 | 8.541452 | 8.929642 | 8.771819 | 8.633108 | 7.992676 | 8.953767 |
| 10522_at | 4.920791 | 5.59809  | 4.358801 | 5.490564 | 3.575358 | 5.046038 | 4.888416 | 4.727858 |
| 10523_at | 5.791563 | 5.914334 | 6.351268 | 5.692843 | 5.748513 | 5.830192 | 5.714866 | 5.316391 |
| 10524_at | 7.148505 | 6.123688 | 5.832865 | 6.435524 | 6.937401 | 7.045001 | 6.858549 | 6.912368 |
| 10525_at | 6.411105 | 7.087394 | 7.135682 | 6.898486 | 7.098481 | 7.281598 | 7.412807 | 6.79218  |
| 10526_at | 6.629998 | 6.617029 | 6.64658  | 6.233978 | 6.359883 | 6.302001 | 6.576799 | 6.757725 |
| 10527_at | 7.190494 | 7.405735 | 7.297471 | 7.5519   | 7.79501  | 7.23201  | 7.409099 | 7.962698 |
| 10528_at | 6.410949 | 6.45877  | 6.503203 | 5.910856 | 6.830527 | 7.545295 | 6.762819 | 5.579681 |
| 10529_at | 5.35243  | 5.129551 | 5.586119 | 5.150495 | 5.43178  | 5.111797 | 4.70536  | 5.276427 |
| 1052_at  | 6.364635 | 5.933724 | 5.41547  | 5.699153 | 5.587007 | 6.566026 | 5.237767 | 5.275154 |
| 10531_at | 6.723366 | 6.408188 | 6.526862 | 6.153529 | 6.384957 | 6.303629 | 6.887619 | 6.377951 |
| 10533_at | 4.41602  | 4.69421  | 5.403929 | 4.61106  | 5.670604 | 4.747504 | 4.989234 | 4.841198 |
| 10534_at | 6.02019  | 6.028549 | 5.718222 | 6.32246  | 4.82848  | 5.650745 | 5.574284 | 4.153951 |
| 10535_at | 4.991095 | 4.264792 | 4.590069 | 4.988887 | 4.929176 | 4.477353 | 5.19009  | 4.899079 |
| 10536_at | 2.395035 | 3.217735 | 2.746707 | 2.379639 | 2.132631 | 2.727425 | 3.236262 | 2.871204 |
| 10537_at | 4.720007 | 5.046311 | 4.941533 | 5.789142 | 4.598888 | 5.133115 | 4.674463 | 6.229153 |
| 10538_at | 2.472904 | 3.269687 | 3.0941   | 2.37865  | 3.575986 | 3.006367 | 2.842799 | 2.796927 |
| 10539_at | 6.561413 | 5.9714   | 5.803466 | 6.162072 | 6.342881 | 6.106749 | 5.776637 | 5.800601 |
| 1053_at  | 1.735254 | 1.628138 | 2.165375 | 1.488651 | 1.327497 | 1.341156 | 1.632452 | 2.166097 |
| 10540_at | 7.960689 | 7.89491  | 7.252072 | 8.129529 | 7.869046 | 7.768559 | 8.150078 | 8.035084 |
| 10541_at | 6.439767 | 6.524945 | 6.520567 | 6.357218 | 6.098959 | 6.324722 | 6.546892 | 6.485374 |
| 10542_at | 9.422396 | 8.990283 | 8.932789 | 8.810442 | 9.274913 | 8.830925 | 8.892485 | 8.674787 |
| 10544_at | 4.625911 | 4.2467   | 5.138035 | 5.553235 | 5.392295 | 5.222227 | 5.40171  | 4.815148 |
| 10548_at | 6.917011 | 6.410985 | 7.058327 | 6.734971 | 6.314119 | 6.738613 | 7.08066  | 6.936736 |
| 10549_at | 7.236091 | 6.629793 | 6.014426 | 6.374508 | 6.61966  | 6.578302 | 6.579065 | 6.873543 |
| 1054_at  | 4.562978 | 4.870942 | 5.163011 | 6.176777 | 4.376605 | 5.277634 | 4.621026 | 5.327337 |
| 10550_at | 9.163694 | 8.791853 | 8.691956 | 8.618961 | 8.634161 | 9.032522 | 9.467915 | 8.426684 |

|          |          |          |          |          |          |          |          |          |
|----------|----------|----------|----------|----------|----------|----------|----------|----------|
| 10551_at | 2.731518 | 3.752853 | 3.424082 | 2.238215 | 4.015262 | 6.450443 | 3.466314 | 2.457334 |
| 10552_at | 8.848788 | 8.693665 | 8.422317 | 8.107251 | 8.104282 | 8.119888 | 8.346776 | 8.25725  |
| 10553_at | 5.473804 | 5.695639 | 4.777034 | 4.774577 | 5.567107 | 4.989461 | 5.621317 | 5.700665 |
| 10554_at | 6.627027 | 6.449213 | 6.885605 | 6.46192  | 6.410891 | 6.235489 | 6.790026 | 6.073851 |
| 10555_at | 4.261814 | 3.757743 | 4.241912 | 4.100517 | 4.245558 | 4.519087 | 3.946029 | 3.412724 |
| 10556_at | 6.261115 | 6.497983 | 5.840154 | 5.91712  | 5.74249  | 6.260458 | 6.026147 | 6.812086 |
| 10557_at | 5.466623 | 4.779233 | 4.393908 | 4.936021 | 4.621473 | 5.156163 | 5.067993 | 4.785867 |
| 10558_at | 6.549682 | 6.983709 | 6.598219 | 6.940447 | 7.059546 | 6.867312 | 6.814269 | 7.271579 |
| 10559_at | 5.470076 | 4.609559 | 4.591466 | 4.678287 | 4.367656 | 4.766711 | 5.285278 | 4.798139 |
| 10560_at | 4.246795 | 3.660959 | 3.726451 | 3.170943 | 5.423553 | 2.734166 | 3.602038 | 4.646937 |
| 10561_at | 6.059964 | 5.743181 | 5.48299  | 6.517416 | 6.805291 | 5.703518 | 6.43409  | 5.984593 |
| 10562_at | 1.229018 | 1.182215 | 1.494845 | 2.79957  | 1.993135 | 1.866954 | 2.054786 | 2.016903 |
| 10563_at | 1.411531 | 1.230442 | 1.300743 | 1.232943 | 3.049327 | 1.76631  | 1.628845 | 1.843417 |
| 10564_at | 6.468489 | 6.170893 | 6.278882 | 6.223337 | 6.818427 | 6.488573 | 6.155622 | 5.736043 |
| 10565_at | 6.366148 | 6.472541 | 6.41972  | 6.307022 | 6.367591 | 6.458238 | 6.551646 | 7.010658 |
| 10566_at | 2.415586 | 3.077338 | 1.492611 | 1.681843 | 1.526336 | 1.516872 | 1.710048 | 1.695998 |
| 10567_at | 9.468929 | 8.767117 | 8.885539 | 8.972306 | 9.035007 | 9.551682 | 9.068711 | 8.086131 |
| 10568_at | 3.069893 | 2.684055 | 1.622142 | 2.700465 | 2.540174 | 4.221137 | 1.676467 | 2.02365  |
| 10569_at | 6.689894 | 6.790835 | 6.548669 | 6.620133 | 6.145167 | 6.132294 | 6.412797 | 6.68969  |
| 1056_at  | 2.586127 | 1.780626 | 1.575467 | 2.674966 | 3.873312 | 1.89636  | 2.375342 | 2.597853 |
| 10570_at | 1.994675 | 2.42391  | 1.782124 | 2.470371 | 2.007645 | 2.25838  | 3.183693 | 2.515287 |
| 10572_at | 7.968272 | 7.613867 | 6.853488 | 7.123709 | 7.558303 | 7.931132 | 6.547655 | 6.524239 |
| 10573_at | 6.172325 | 5.106748 | 5.526333 | 5.845452 | 5.403022 | 5.978915 | 5.916948 | 5.332107 |
| 10574_at | 7.677891 | 7.509771 | 7.711152 | 7.274012 | 7.100016 | 7.055835 | 7.622091 | 7.558486 |
| 10575_at | 6.393297 | 6.365689 | 5.818203 | 6.545936 | 6.038866 | 6.122188 | 6.002547 | 6.608782 |
| 10576_at | 8.342527 | 8.104743 | 8.002638 | 7.856962 | 8.296443 | 7.986603 | 8.220903 | 7.976481 |
| 10577_at | 9.839677 | 9.626523 | 9.959599 | 10.05384 | 10.07075 | 9.760848 | 10.04907 | 9.633643 |
| 10578_at | 4.554089 | 3.856394 | 5.449218 | 6.199096 | 4.951032 | 6.429912 | 5.855398 | 5.031433 |
| 10579_at | 7.579692 | 7.39591  | 7.062134 | 6.697058 | 6.488495 | 7.037401 | 7.033499 | 6.787537 |
| 1057_at  | 1.068454 | 1.521419 | 2.140559 | 1.032929 | 1.626237 | 1.139073 | 0.888094 | 1.782007 |
| 10580_at | 5.447006 | 5.665951 | 5.819147 | 5.512008 | 5.665385 | 6.209216 | 5.516072 | 5.111362 |
| 10581_at | 9.975536 | 9.663947 | 10.03682 | 9.802862 | 9.641414 | 9.836088 | 10.01558 | 8.917498 |
| 10584_at | 1.199606 | 1.696092 | 2.389284 | 1.510017 | 1.889252 | 1.727536 | 1.290294 | 1.240958 |
| 10585_at | 4.433078 | 4.757091 | 4.553733 | 4.263658 | 4.221073 | 4.098956 | 4.888725 | 4.048769 |
| 10586_at | 1.780243 | 1.201236 | 1.767453 | 1.148077 | 1.873921 | 2.245377 | 1.329214 | 1.852703 |
| 10587_at | 3.582008 | 3.146212 | 3.753742 | 3.637006 | 3.066561 | 2.845036 | 4.31573  | 3.207855 |
| 10588_at | 5.367359 | 5.241619 | 4.734164 | 5.384886 | 4.675255 | 5.530595 | 4.817503 | 4.606429 |
| 10589_at | 5.993147 | 5.336648 | 5.995667 | 5.218189 | 6.014492 | 5.914927 | 5.090666 | 5.738418 |
| 1058_at  | 2.917569 | 2.911987 | 3.473338 | 3.454013 | 4.507114 | 3.200345 | 2.932794 | 3.277087 |
| 10590_at | 1.48946  | 1.593972 | 1.632141 | 1.39354  | 1.642236 | 2.065532 | 1.716415 | 2.162063 |
| 10591_at | 5.962353 | 5.824577 | 5.500161 | 4.483495 | 5.745742 | 5.292966 | 5.604892 | 5.642244 |
| 10592_at | 5.417778 | 5.224819 | 6.000529 | 5.431277 | 6.126375 | 5.061174 | 6.049668 | 6.676773 |
| 10594_at | 7.850571 | 8.044305 | 8.10099  | 8.074363 | 7.972952 | 7.877583 | 8.298397 | 7.93546  |
| 10595_at | 2.733012 | 2.547226 | 2.567496 | 2.256326 | 2.835016 | 3.007127 | 2.96075  | 3.53621  |
| 10597_at | 8.585778 | 8.759118 | 7.848516 | 9.038762 | 8.446028 | 8.757742 | 7.382033 | 8.538801 |
| 10598_at | 7.569144 | 7.806795 | 7.244693 | 7.087615 | 7.288892 | 7.691541 | 7.656393 | 7.8164   |
| 10599_at | 1.304613 | 1.030956 | 1.084773 | 1.205872 | 2.186221 | 1.080736 | 1.803039 | 2.167088 |
| 1059_at  | 6.115877 | 6.130554 | 6.013704 | 5.864297 | 5.776409 | 5.873163 | 5.828431 | 5.23071  |
| 105_at   | 2.11343  | 1.642942 | 1.656556 | 1.924394 | 2.195376 | 1.992935 | 2.222134 | 2.496015 |
| 10600_at | 6.824572 | 6.681409 | 6.741359 | 6.406889 | 6.71552  | 6.601678 | 6.353454 | 7.182564 |
| 10602_at | 8.234378 | 8.421113 | 8.160476 | 7.95103  | 7.36323  | 7.635605 | 8.106186 | 7.9435   |

|          |          |          |          |          |          |          |          |          |
|----------|----------|----------|----------|----------|----------|----------|----------|----------|
| 10603_at | 2.50105  | 3.46049  | 3.833164 | 2.852967 | 3.670862 | 3.185438 | 3.317408 | 3.018797 |
| 10605_at | 4.696843 | 4.537968 | 4.041124 | 4.925228 | 4.170646 | 5.053341 | 4.24995  | 4.760283 |
| 10606_at | 2.819345 | 2.32652  | 2.353121 | 2.291991 | 2.479488 | 3.114032 | 2.84202  | 2.844071 |
| 10607_at | 4.352036 | 4.054692 | 4.445028 | 4.314934 | 3.969898 | 4.481645 | 3.980059 | 3.225731 |
| 10608_at | 7.472881 | 6.854716 | 6.7323   | 7.518975 | 5.976632 | 7.732276 | 7.165903 | 5.203713 |
| 10609_at | 3.851208 | 4.055399 | 4.058594 | 4.494335 | 3.812186 | 4.319512 | 4.249832 | 3.780092 |
| 1060_at  | 5.859959 | 6.153235 | 6.421815 | 6.351365 | 5.757631 | 6.335568 | 6.18367  | 6.795951 |
| 10610_at | 5.368685 | 4.810862 | 5.379989 | 5.587796 | 5.477108 | 5.962961 | 4.588178 | 4.454645 |
| 10611_at | 7.822117 | 7.846738 | 8.026454 | 7.712417 | 7.21507  | 7.023558 | 7.887794 | 8.179161 |
| 10612_at | 2.064332 | 2.588153 | 3.670559 | 2.832977 | 2.26967  | 3.173419 | 3.373599 | 2.770117 |
| 10613_at | 7.09959  | 7.228959 | 6.723204 | 7.358576 | 7.815637 | 6.659369 | 6.801217 | 6.877079 |
| 10614_at | 7.572872 | 7.197597 | 7.551996 | 7.387067 | 7.358915 | 7.101239 | 7.442497 | 7.937494 |
| 10615_at | 2.988711 | 2.40714  | 2.657774 | 2.174749 | 3.319491 | 2.354683 | 2.715196 | 3.92405  |
| 10616_at | 5.585695 | 5.222965 | 5.311533 | 5.861735 | 4.089255 | 4.677921 | 5.399413 | 5.183888 |
| 10617_at | 5.362308 | 5.36727  | 5.664206 | 5.27157  | 5.102637 | 5.148736 | 4.727318 | 5.156628 |
| 10618_at | 7.746332 | 7.926319 | 8.256759 | 8.418022 | 8.259676 | 8.28588  | 8.524469 | 7.789155 |
| 10620_at | 2.145701 | 4.793349 | 3.476183 | 2.998828 | 4.187818 | 4.050908 | 3.525363 | 2.687927 |
| 10621_at | 5.023556 | 4.449325 | 4.984755 | 5.165038 | 5.906874 | 5.316408 | 4.782054 | 4.849281 |
| 10622_at | 3.592519 | 3.804641 | 2.617407 | 2.59191  | 4.384996 | 3.520544 | 2.034647 | 5.885307 |
| 10623_at | 6.32714  | 6.051244 | 5.223925 | 5.688615 | 6.131643 | 6.058828 | 5.710108 | 6.351865 |
| 10625_at | 6.689971 | 6.236214 | 6.635296 | 6.884611 | 7.848445 | 6.86284  | 6.270031 | 7.101409 |
| 10627_at | 4.656077 | 4.959378 | 4.972037 | 4.841113 | 5.279768 | 4.852134 | 4.583141 | 4.728042 |
| 10628_at | 10.05362 | 10.32885 | 10.33673 | 10.35652 | 10.47848 | 10.27677 | 10.08145 | 10.22244 |
| 10629_at | 3.85388  | 4.178749 | 3.473734 | 3.144762 | 3.456753 | 4.274218 | 4.264069 | 2.825389 |
| 1062_at  | 2.283049 | 3.122216 | 2.4783   | 2.62007  | 1.759327 | 2.268306 | 2.797341 | 2.96873  |
| 10630_at | 6.20799  | 6.20767  | 5.685388 | 6.751743 | 5.555025 | 5.035663 | 6.179602 | 5.045382 |
| 10631_at | 8.804484 | 8.799539 | 7.860321 | 9.015843 | 9.049597 | 8.758005 | 9.238082 | 9.188037 |
| 10632_at | 3.915199 | 4.889804 | 4.450704 | 4.875652 | 4.798908 | 3.291369 | 4.074426 | 4.559345 |
| 10633_at | 2.171255 | 3.397182 | 3.804051 | 2.652943 | 1.872502 | 2.151592 | 2.536525 | 1.776852 |
| 10634_at | 4.44375  | 4.185773 | 4.040863 | 4.876658 | 3.904824 | 3.674159 | 4.656507 | 1.985749 |
| 10635_at | 2.519501 | 2.149469 | 2.773493 | 3.29737  | 3.578256 | 2.230699 | 1.563118 | 2.561048 |
| 10636_at | 2.368323 | 2.298742 | 3.157918 | 2.915418 | 2.622459 | 3.133126 | 3.468868 | 2.547986 |
| 10637_at | 2.820857 | 4.007788 | 3.030013 | 3.423914 | 2.249716 | 2.423153 | 3.404336 | 3.676238 |
| 1063_at  | 2.044634 | 4.028274 | 1.988719 | 2.633953 | 2.556422 | 1.835506 | 2.221321 | 3.092657 |
| 10640_at | 7.71782  | 7.495376 | 7.567163 | 8.144561 | 7.557317 | 7.370242 | 7.843524 | 8.309279 |
| 10641_at | 5.636469 | 4.817417 | 5.192904 | 4.118214 | 5.148448 | 5.318755 | 4.955062 | 5.25026  |
| 10642_at | 3.333123 | 2.601236 | 2.041959 | 1.800888 | 2.884977 | 2.310703 | 2.642023 | 2.859134 |
| 10643_at | 2.930816 | 2.78606  | 4.029669 | 3.217429 | 3.609634 | 2.966783 | 3.132975 | 3.259663 |
| 10644_at | 4.500159 | 4.126311 | 4.346192 | 4.547625 | 4.671996 | 4.162335 | 4.104845 | 5.057095 |
| 10645_at | 6.509814 | 6.083446 | 6.160628 | 6.4324   | 5.907175 | 6.298131 | 6.208069 | 5.590732 |
| 10647_at | 4.210983 | 1.8929   | 2.581887 | 1.916565 | 3.947657 | 1.756381 | 2.872696 | 1.900836 |
| 10648_at | 1.096392 | 1.823539 | 1.0333   | 0.875047 | 0.912464 | 1.200183 | 1.005908 | 1.294429 |
| 10650_at | 2.797474 | 4.601834 | 2.584742 | 2.530798 | 1.810044 | 2.873416 | 2.906055 | 1.778563 |
| 10651_at | 5.843894 | 6.050608 | 6.192581 | 5.737236 | 5.726273 | 5.626993 | 5.859227 | 6.344212 |
| 10652_at | 6.013578 | 6.019413 | 6.432316 | 6.160034 | 6.096665 | 5.7509   | 6.166965 | 5.883382 |
| 10653_at | 7.990927 | 8.010538 | 8.1916   | 7.497247 | 7.474676 | 8.285853 | 8.465312 | 7.934052 |
| 10654_at | 4.909171 | 4.552876 | 4.572607 | 4.969195 | 3.772618 | 4.333477 | 4.728824 | 4.381634 |
| 10655_at | 1.462538 | 1.824282 | 1.821317 | 2.21769  | 3.067956 | 1.506745 | 1.688838 | 2.411325 |
| 10656_at | 6.558123 | 5.808454 | 4.797267 | 5.096211 | 5.761063 | 5.629272 | 4.873092 | 6.487362 |
| 10657_at | 7.155252 | 7.073466 | 6.960867 | 7.086623 | 7.354777 | 7.399905 | 6.989277 | 7.242962 |
| 10658_at | 4.882209 | 5.296562 | 5.783296 | 5.52717  | 4.79021  | 5.696062 | 5.190379 | 5.253557 |

|          |          |          |          |          |          |          |          |          |
|----------|----------|----------|----------|----------|----------|----------|----------|----------|
| 10659_at | 3.845105 | 3.80819  | 3.716058 | 4.653093 | 3.571974 | 3.910561 | 2.999225 | 3.782531 |
| 10660_at | 1.459547 | 0.84761  | 1.476956 | 1.274575 | 1.240285 | 1.152172 | 1.469718 | 1.566593 |
| 10661_at | 1.72445  | 1.982046 | 1.826129 | 2.424902 | 1.905527 | 2.836923 | 2.399294 | 1.897341 |
| 10663_at | 2.129819 | 2.367445 | 2.541269 | 3.404566 | 2.932606 | 1.943065 | 2.455635 | 2.604418 |
| 10664_at | 6.804938 | 7.015994 | 6.646137 | 6.650927 | 6.853684 | 7.178091 | 6.721109 | 7.415701 |
| 10665_at | 1.490591 | 1.107702 | 1.240152 | 1.238488 | 1.391747 | 1.586853 | 1.415501 | 1.355377 |
| 10666_at | 3.522655 | 3.858174 | 2.892127 | 3.804726 | 1.878093 | 2.043346 | 2.735806 | 4.188438 |
| 10667_at | 5.244544 | 4.849017 | 4.06144  | 4.096419 | 5.281124 | 4.277437 | 4.302626 | 4.263167 |
| 10668_at | 6.002641 | 5.814918 | 7.249865 | 5.586014 | 5.448534 | 4.645668 | 5.097519 | 6.30214  |
| 10669_at | 2.492172 | 2.392535 | 2.382547 | 2.266658 | 1.888764 | 2.590782 | 2.23658  | 2.522794 |
| 1066_at  | 2.64743  | 4.443811 | 3.60138  | 4.096472 | 4.755584 | 2.855492 | 4.484193 | 3.987669 |
| 10670_at | 8.096324 | 8.253523 | 8.066226 | 8.20906  | 8.322924 | 7.71898  | 7.914115 | 8.065218 |
| 10671_at | 8.64698  | 8.498187 | 8.614938 | 8.504587 | 8.260417 | 8.191632 | 8.770506 | 7.731141 |
| 10672_at | 6.216181 | 6.339979 | 6.421696 | 6.749229 | 6.625478 | 6.988111 | 6.787202 | 6.089146 |
| 10673_at | 4.028837 | 3.313189 | 4.646479 | 4.139172 | 2.441755 | 3.817746 | 3.673216 | 4.134474 |
| 10675_at | 2.008739 | 2.029766 | 2.520448 | 2.686223 | 1.953745 | 1.997623 | 2.787597 | 3.126135 |
| 10677_at | 2.977087 | 3.176833 | 3.220116 | 3.302179 | 2.376801 | 3.353301 | 2.179745 | 2.605506 |
| 10678_at | 6.53664  | 7.007167 | 5.6196   | 6.430915 | 6.813537 | 5.819476 | 6.212901 | 7.253696 |
| 10681_at | 5.116298 | 5.82297  | 4.976985 | 4.047715 | 5.436939 | 5.091885 | 5.832357 | 5.371697 |
| 10682_at | 7.705852 | 7.779425 | 7.924646 | 7.071912 | 7.537266 | 7.415209 | 7.823554 | 7.520934 |
| 10683_at | 1.709581 | 1.488394 | 1.726323 | 1.777229 | 1.766576 | 2.219974 | 1.400493 | 2.647    |
| 10686_at | 4.454555 | 4.939683 | 2.19762  | 3.837553 | 6.878714 | 4.232803 | 2.16989  | 4.179878 |
| 10687_at | 6.253294 | 5.351091 | 6.686462 | 6.131976 | 6.423745 | 6.312465 | 7.535693 | 6.120655 |
| 1068_at  | 1.892019 | 2.215854 | 2.143672 | 1.840286 | 2.621182 | 2.23442  | 2.036367 | 2.627463 |
| 10690_at | 1.682058 | 2.523695 | 1.888263 | 2.261497 | 1.323335 | 1.350941 | 1.553659 | 1.829775 |
| 10691_at | 5.765685 | 5.734156 | 6.07146  | 6.113738 | 4.964345 | 5.780958 | 5.392293 | 5.918132 |
| 10692_at | 1.631294 | 1.558446 | 2.620709 | 1.90136  | 1.333713 | 1.487128 | 1.487984 | 1.050876 |
| 10693_at | 2.23616  | 1.57421  | 2.503815 | 1.662168 | 2.200796 | 1.322332 | 1.309184 | 2.114415 |
| 10694_at | 7.321805 | 7.375484 | 6.479066 | 7.073827 | 7.398758 | 7.161232 | 7.685491 | 7.079469 |
| 10695_at | 5.923827 | 6.162087 | 5.307495 | 6.156872 | 5.874667 | 6.285108 | 6.20875  | 5.635796 |
| 10699_at | 1.763697 | 2.360974 | 2.452219 | 2.136446 | 1.512539 | 2.131743 | 2.702338 | 1.940781 |
| 1069_at  | 7.959838 | 7.966466 | 7.953868 | 7.725016 | 7.961434 | 7.488579 | 7.602636 | 8.090436 |
| 1070_at  | 5.717661 | 6.63681  | 6.219767 | 5.795228 | 5.597759 | 4.854103 | 5.429745 | 6.40219  |
| 10712_at | 5.897761 | 5.619783 | 5.831394 | 6.018092 | 4.602136 | 6.383972 | 5.466396 | 4.677302 |
| 10713_at | 5.304032 | 5.579776 | 5.180724 | 5.136982 | 4.574041 | 4.732037 | 5.398984 | 5.177661 |
| 10714_at | 6.969248 | 6.954712 | 7.041867 | 5.788094 | 6.979082 | 6.434623 | 6.855759 | 7.445057 |
| 10716_at | 1.758037 | 1.342572 | 1.239413 | 1.282729 | 1.214747 | 1.527767 | 1.734893 | 1.417957 |
| 10717_at | 3.606979 | 4.752937 | 3.948051 | 3.050794 | 4.003491 | 4.133805 | 4.607571 | 3.702125 |
| 10718_at | 3.84097  | 3.845827 | 4.005669 | 4.116151 | 3.784584 | 3.49532  | 3.357403 | 2.508597 |
| 1071_at  | 6.460233 | 4.921736 | 4.995569 | 5.73037  | 5.043988 | 5.284859 | 5.065111 | 5.338732 |
| 10721_at | 1.702759 | 1.214366 | 2.215518 | 1.45924  | 2.554299 | 1.651534 | 1.789844 | 2.139363 |
| 10723_at | 2.555986 | 2.55123  | 3.600655 | 3.292898 | 3.742362 | 4.364406 | 4.151233 | 3.190043 |
| 10724_at | 6.752914 | 6.714115 | 6.643554 | 6.77164  | 7.279533 | 7.216956 | 6.863213 | 7.106645 |
| 10725_at | 6.444129 | 6.57933  | 6.703787 | 7.040273 | 7.041291 | 6.073806 | 6.782027 | 6.707645 |
| 10726_at | 7.19017  | 7.471503 | 7.252856 | 6.602611 | 7.004785 | 7.111744 | 6.747722 | 6.821261 |
| 10728_at | 7.521319 | 7.735134 | 7.429577 | 7.004704 | 7.703004 | 7.075961 | 7.894409 | 7.656133 |
| 1072_at  | 8.976046 | 8.604882 | 8.580756 | 8.705624 | 8.607458 | 7.429706 | 8.706402 | 8.115267 |
| 10730_at | 8.410349 | 8.929239 | 8.575111 | 8.638844 | 8.698691 | 8.569995 | 8.577348 | 8.780078 |
| 10732_at | 4.188513 | 4.480698 | 4.084414 | 4.785289 | 3.181678 | 4.460233 | 4.137335 | 3.60436  |
| 10733_at | 2.762804 | 2.084425 | 2.02843  | 1.535408 | 2.785956 | 1.640889 | 1.769632 | 3.589904 |
| 10734_at | 2.06184  | 2.689998 | 2.310558 | 1.848551 | 3.062441 | 2.057368 | 3.097877 | 1.886899 |



|          |          |          |          |          |          |          |          |          |
|----------|----------|----------|----------|----------|----------|----------|----------|----------|
| 10735_at | 5.491333 | 5.861327 | 5.591209 | 5.770143 | 5.6036   | 5.062622 | 5.268075 | 6.265498 |
| 10736_at | 4.415216 | 4.174945 | 4.132488 | 3.802759 | 2.980656 | 5.221784 | 3.238558 | 3.944328 |
| 10737_at | 1.760379 | 1.544184 | 1.448052 | 1.891078 | 2.140124 | 1.657891 | 1.997952 | 1.425767 |
| 10738_at | 0.709715 | 1.037116 | 1.330516 | 0.889918 | 1.424803 | 1.218902 | 1.213678 | 1.032029 |
| 10739_at | 1.520474 | 1.6359   | 2.958875 | 2.366645 | 3.563908 | 3.019882 | 2.962289 | 3.03436  |
| 1073_at  | 7.101751 | 7.596132 | 6.899168 | 6.625664 | 7.31596  | 7.029348 | 7.04027  | 7.035762 |
| 10740_at | 0.803689 | 1.404279 | 1.365336 | 1.292198 | 1.308454 | 1.661223 | 1.607151 | 0.978149 |
| 10741_at | 5.569195 | 5.634517 | 5.8368   | 5.781761 | 5.13583  | 4.954458 | 5.89912  | 4.787092 |
| 10742_at | 5.7816   | 5.163216 | 6.102261 | 5.472648 | 5.573365 | 5.644276 | 5.726132 | 5.478119 |
| 10743_at | 4.886025 | 5.764961 | 5.841659 | 4.974463 | 3.720211 | 5.235921 | 5.114585 | 4.51718  |
| 10744_at | 2.038032 | 2.129782 | 1.264015 | 3.880653 | 1.137385 | 1.377365 | 1.90916  | 1.630308 |
| 10745_at | 5.637704 | 6.501671 | 5.950633 | 6.179452 | 6.747539 | 5.168038 | 5.260001 | 6.195334 |
| 10746_at | 5.653756 | 5.247979 | 5.679892 | 5.922425 | 5.673903 | 4.964312 | 5.280114 | 6.280827 |
| 10747_at | 2.139497 | 2.101317 | 1.87285  | 2.291244 | 2.540845 | 1.739602 | 2.156475 | 1.614895 |
| 10748_at | 2.857268 | 1.764696 | 2.00497  | 2.275989 | 2.620219 | 1.878957 | 1.871345 | 2.393007 |
| 10749_at | 6.120788 | 6.580484 | 6.620919 | 6.473187 | 6.691586 | 6.615253 | 6.487356 | 6.166303 |
| 10750_at | 3.85229  | 3.720569 | 3.87108  | 3.744292 | 3.540838 | 3.587747 | 3.640757 | 3.67494  |
| 10752_at | 2.447126 | 2.979197 | 2.731419 | 2.487434 | 4.270731 | 2.753753 | 1.840166 | 2.71294  |
| 10753_at | 3.166423 | 2.082191 | 1.791235 | 1.694284 | 3.148241 | 2.326364 | 1.489152 | 1.960609 |
| 10755_at | 3.352025 | 4.063871 | 3.434039 | 3.958334 | 4.093391 | 3.991412 | 3.870146 | 3.199905 |
| 10758_at | 4.832221 | 5.194249 | 4.599346 | 4.784228 | 4.725339 | 4.387563 | 4.998477 | 4.04546  |
| 1075_at  | 7.23174  | 6.023008 | 6.230069 | 6.447496 | 6.716359 | 7.117424 | 5.627166 | 6.942584 |
| 10761_at | 1.774633 | 1.532068 | 1.748922 | 2.612141 | 1.892694 | 2.087157 | 2.351123 | 1.839525 |
| 10762_at | 5.417401 | 6.011488 | 5.661155 | 5.816181 | 6.68153  | 6.443189 | 5.812167 | 6.468266 |
| 10763_at | 9.344156 | 9.324283 | 9.572176 | 9.488315 | 9.002936 | 9.174218 | 9.507207 | 8.838724 |
| 10765_at | 6.476619 | 6.812943 | 6.609321 | 6.525871 | 6.432593 | 6.785033 | 6.550672 | 6.377349 |
| 10766_at | 4.847684 | 5.417779 | 5.401065 | 5.125091 | 5.295192 | 5.357941 | 5.780836 | 4.328136 |
| 10767_at | 6.903507 | 6.487782 | 6.299181 | 6.385172 | 7.175907 | 6.227945 | 6.274682 | 6.404042 |
| 10768_at | 7.37385  | 7.432518 | 7.528965 | 7.271356 | 7.923389 | 7.312923 | 7.562882 | 8.062794 |
| 10769_at | 7.216728 | 6.864372 | 7.140151 | 7.512843 | 6.808927 | 7.168489 | 6.694017 | 7.014383 |
| 10771_at | 7.225277 | 7.397936 | 7.745605 | 7.362615 | 7.690776 | 7.225839 | 6.950628 | 7.06572  |
| 10772_at | 5.482834 | 6.076702 | 5.950777 | 6.285791 | 6.107831 | 6.239466 | 5.808923 | 5.91535  |
| 10773_at | 5.589618 | 6.016368 | 5.941388 | 5.501282 | 6.052932 | 5.277533 | 5.689995 | 5.714137 |
| 10775_at | 6.518864 | 5.836158 | 5.551434 | 6.000252 | 5.637429 | 6.093034 | 6.117174 | 6.67046  |
| 10776_at | 7.76548  | 7.925875 | 8.401486 | 7.921648 | 8.392981 | 8.198162 | 8.017672 | 7.967939 |
| 10777_at | 1.886522 | 1.680035 | 1.785545 | 1.843418 | 2.312067 | 1.636115 | 1.524602 | 2.23649  |
| 10778_at | 5.365284 | 5.381929 | 5.594481 | 4.994236 | 5.538437 | 4.638893 | 4.76932  | 5.158113 |
| 10780_at | 4.917654 | 5.653393 | 5.146055 | 4.128398 | 5.543565 | 4.28687  | 4.267128 | 4.767681 |
| 10781_at | 4.458266 | 3.333427 | 3.848288 | 3.474097 | 5.136261 | 4.213465 | 3.296184 | 4.0565   |
| 10782_at | 4.198285 | 3.621235 | 3.154138 | 3.301169 | 2.674274 | 4.122537 | 3.727406 | 2.706458 |
| 10783_at | 3.360051 | 3.442076 | 2.879102 | 3.475028 | 3.282411 | 3.748883 | 3.686478 | 3.4619   |
| 10785_at | 2.095782 | 2.134031 | 2.130816 | 2.11276  | 2.737994 | 1.897601 | 2.303936 | 1.957567 |
| 10786_at | 5.608056 | 4.993799 | 4.979693 | 2.601764 | 6.337758 | 6.643999 | 1.952238 | 6.726976 |
| 10787_at | 9.011558 | 8.735227 | 8.770262 | 8.740279 | 8.737919 | 8.547904 | 8.680776 | 9.069089 |
| 10788_at | 8.664457 | 8.830378 | 9.085007 | 8.680497 | 8.765127 | 8.62929  | 8.916996 | 9.026317 |
| 10791_at | 9.985923 | 9.411655 | 9.631579 | 9.418988 | 9.053588 | 9.691881 | 9.313733 | 9.079646 |
| 10793_at | 1.50489  | 2.01072  | 2.319157 | 2.491996 | 1.823933 | 1.813929 | 2.100516 | 2.210926 |
| 10794_at | 5.274632 | 5.346407 | 5.673319 | 6.217916 | 5.724822 | 5.24996  | 5.83485  | 5.465464 |
| 10795_at | 3.886585 | 3.905759 | 3.959778 | 4.54981  | 4.126912 | 4.073933 | 3.273422 | 4.454969 |
| 10797_at | 5.522847 | 7.153338 | 5.799463 | 6.789995 | 5.929324 | 6.230446 | 6.379093 | 6.269842 |
| 10798_at | 1.215038 | 1.016523 | 1.189115 | 1.124189 | 1.86256  | 2.72496  | 2.571655 | 1.172927 |

|          |          |          |          |          |          |          |          |          |
|----------|----------|----------|----------|----------|----------|----------|----------|----------|
| 10799_at | 3.166562 | 2.036856 | 1.718747 | 1.976394 | 2.31962  | 2.160033 | 2.582128 | 2.428677 |
| 107_at   | 4.46756  | 5.918159 | 4.319987 | 5.281078 | 3.859921 | 4.000959 | 3.175391 | 3.813024 |
| 10800_at | 3.769491 | 4.334206 | 2.511003 | 4.517524 | 4.502489 | 3.519092 | 4.320203 | 4.110353 |
| 10801_at | 6.743873 | 6.804162 | 6.863073 | 6.760867 | 5.812807 | 6.984523 | 7.024571 | 6.213465 |
| 10802_at | 6.400786 | 6.460506 | 6.389452 | 5.739359 | 6.512119 | 6.61223  | 6.122979 | 6.444403 |
| 10803_at | 1.80836  | 1.75374  | 1.402847 | 2.00036  | 2.304268 | 2.144563 | 2.258752 | 2.227136 |
| 10804_at | 2.012912 | 1.987381 | 2.162605 | 2.954553 | 2.40921  | 2.531514 | 2.270342 | 1.884618 |
| 10806_at | 6.116116 | 5.919847 | 5.901365 | 5.781689 | 5.597294 | 6.222271 | 5.863967 | 5.936241 |
| 10807_at | 5.304869 | 4.756391 | 4.242414 | 4.321197 | 2.23179  | 4.206767 | 3.902652 | 3.463305 |
| 10808_at | 6.838106 | 7.5847   | 6.650848 | 6.944078 | 6.817822 | 6.990363 | 6.583373 | 7.413069 |
| 10809_at | 4.873285 | 5.349378 | 3.902233 | 4.743038 | 5.031773 | 5.144922 | 3.954779 | 3.410478 |
| 1080_at  | 1.009708 | 0.917012 | 1.534637 | 1.102454 | 1.997517 | 1.07947  | 0.933208 | 1.499544 |
| 10810_at | 6.471319 | 6.366266 | 5.646793 | 6.589917 | 6.281132 | 5.809366 | 6.096276 | 5.553016 |
| 10811_at | 3.657163 | 3.734849 | 3.666593 | 3.043346 | 4.057059 | 3.446301 | 2.953778 | 3.47543  |
| 10813_at | 2.200902 | 5.173947 | 3.796797 | 4.285659 | 3.281602 | 4.649689 | 3.555557 | 3.876417 |
| 10814_at | 2.717086 | 2.519054 | 3.411072 | 2.978538 | 3.847987 | 3.202959 | 2.759332 | 2.438046 |
| 10815_at | 3.717284 | 3.150111 | 2.813977 | 3.534635 | 2.144321 | 2.956948 | 3.699893 | 2.933917 |
| 10816_at | 1.378463 | 1.068677 | 1.042714 | 1.103043 | 1.310632 | 1.003851 | 1.728112 | 1.744996 |
| 10817_at | 4.579596 | 3.287317 | 3.148213 | 4.7532   | 3.109408 | 3.927743 | 2.913051 | 4.177792 |
| 10818_at | 6.84786  | 6.78438  | 6.39758  | 6.772708 | 5.984329 | 6.475435 | 6.327319 | 7.422897 |
| 10819_at | 2.749378 | 2.361304 | 2.409412 | 3.299346 | 2.478449 | 3.083736 | 2.342627 | 1.916412 |
| 1081_at  | 1.896338 | 2.006665 | 2.516446 | 0.980385 | 2.987279 | 7.751519 | 1.859552 | 1.638516 |
| 10821_at | 1.292358 | 2.706304 | 1.912992 | 2.423114 | 2.106035 | 1.665956 | 2.888312 | 2.278316 |
| 10825_at | 2.141084 | 1.33102  | 2.616986 | 3.304996 | 3.278709 | 2.573602 | 2.896385 | 2.659315 |
| 10826_at | 7.472923 | 7.941388 | 7.975156 | 7.771048 | 7.797447 | 7.787407 | 7.864653 | 7.794781 |
| 10827_at | 5.254275 | 5.270255 | 5.205555 | 4.42936  | 4.432711 | 5.138888 | 4.913119 | 5.798119 |
| 1082_at  | 2.035346 | 3.060512 | 2.583815 | 1.813959 | 1.899657 | 2.335761 | 2.141679 | 1.87272  |
| 10838_at | 4.579055 | 4.752951 | 5.081974 | 5.768366 | 5.16903  | 5.269108 | 3.799586 | 3.799098 |
| 10840_at | 3.013197 | 3.514346 | 3.638719 | 3.103987 | 4.620915 | 4.27535  | 2.513085 | 3.6745   |
| 10841_at | 4.82331  | 4.00791  | 4.246747 | 2.513382 | 4.029775 | 4.961137 | 2.941098 | 4.33496  |
| 10842_at | 2.152718 | 1.94544  | 1.430209 | 1.985717 | 2.182873 | 1.776814 | 2.995461 | 1.800541 |
| 10844_at | 7.367148 | 6.856256 | 6.92474  | 6.653133 | 6.091557 | 6.841797 | 6.391368 | 5.723481 |
| 10845_at | 6.648536 | 7.20708  | 6.40158  | 7.066931 | 6.670051 | 6.250875 | 6.333117 | 7.204348 |
| 10846_at | 4.566601 | 4.423924 | 4.47345  | 5.74928  | 5.742751 | 5.730588 | 5.320619 | 4.878403 |
| 10847_at | 5.651805 | 6.111116 | 6.072723 | 6.1228   | 6.172695 | 6.169743 | 6.20491  | 5.445812 |
| 10848_at | 3.739297 | 3.17556  | 2.376484 | 2.920458 | 2.681803 | 3.403437 | 4.654637 | 1.989835 |
| 10849_at | 3.762037 | 3.979388 | 3.694177 | 3.533564 | 3.371411 | 3.674429 | 3.541867 | 2.989117 |
| 1084_at  | 2.044469 | 2.244195 | 1.804403 | 2.439182 | 1.559907 | 1.7984   | 2.182374 | 1.409475 |
| 10850_at | 1.63311  | 1.963435 | 3.953849 | 2.636237 | 4.091057 | 2.506733 | 3.637902 | 3.17912  |
| 10855_at | 1.68295  | 1.428168 | 2.096358 | 2.29257  | 1.714318 | 1.908168 | 1.306791 | 2.087623 |
| 10856_at | 7.001609 | 6.235973 | 6.432576 | 5.952978 | 6.621166 | 6.239766 | 5.990788 | 6.508878 |
| 10857_at | 6.341709 | 6.612565 | 6.566253 | 6.36358  | 6.754185 | 6.917223 | 6.025882 | 6.016368 |
| 10858_at | 2.625571 | 2.742887 | 3.167508 | 3.798996 | 2.623642 | 2.910462 | 2.632699 | 2.602428 |
| 10859_at | 3.739526 | 2.804788 | 1.898073 | 1.961511 | 2.206481 | 1.256655 | 4.037901 | 0.319193 |
| 10861_at | 1.719154 | 1.705653 | 1.503802 | 1.874813 | 1.37973  | 1.458398 | 1.431613 | 1.709848 |
| 10863_at | 4.612692 | 2.934389 | 4.171638 | 4.115422 | 1.962248 | 4.909388 | 2.293407 | 2.855129 |
| 10864_at | 2.008568 | 2.313139 | 2.195872 | 1.399846 | 2.314544 | 3.688644 | 0.812539 | 2.723593 |
| 10865_at | 3.40809  | 2.976424 | 3.097366 | 3.550858 | 2.511551 | 3.822303 | 2.99091  | 2.362777 |
| 10866_at | 5.512184 | 5.520714 | 4.961906 | 5.604418 | 5.799905 | 5.320432 | 5.304009 | 6.095711 |
| 10867_at | 5.332122 | 5.631708 | 5.303488 | 5.798971 | 4.515553 | 4.98045  | 6.288695 | 4.103736 |
| 10868_at | 3.775086 | 3.935689 | 3.463739 | 3.516661 | 3.47879  | 3.919826 | 3.805863 | 3.174947 |

|          |          |          |          |          |          |          |          |          |
|----------|----------|----------|----------|----------|----------|----------|----------|----------|
| 10869_at | 4.475352 | 4.527536 | 3.985249 | 4.300882 | 4.316486 | 4.496637 | 4.322352 | 3.698825 |
| 10870_at | 6.033377 | 4.876579 | 5.995327 | 6.528801 | 4.244524 | 6.654447 | 6.584931 | 4.182314 |
| 10871_at | 4.35011  | 3.591717 | 2.992015 | 3.706146 | 3.401849 | 3.530592 | 3.303032 | 3.816017 |
| 10873_at | 4.239499 | 4.089748 | 3.085785 | 3.277091 | 3.513656 | 3.445992 | 2.977792 | 3.260632 |
| 10874_at | 2.986667 | 3.766362 | 2.412958 | 5.48766  | 2.509088 | 2.141321 | 2.803325 | 3.317412 |
| 10875_at | 7.908995 | 7.816507 | 8.309978 | 8.045176 | 8.25495  | 8.344909 | 8.493619 | 8.128241 |
| 10876_at | 1.162766 | 1.05704  | 0.693274 | 0.784184 | 0.758252 | 1.930611 | 1.292496 | 0.977968 |
| 10877_at | 1.197748 | 0.819136 | 1.780481 | 1.686892 | 1.41612  | 1.855781 | 1.601635 | 0.788778 |
| 10878_at | 1.133555 | 1.713826 | 2.039664 | 1.170467 | 1.678576 | 1.71737  | 0.677083 | 1.699358 |
| 10879_at | 1.360915 | 1.814184 | 1.43051  | 0.671314 | 0.989721 | 0.776213 | 2.386994 | 1.534964 |
| 1087_at  | 1.760811 | 1.280365 | 1.215236 | 1.124198 | 2.21623  | 2.004175 | 2.398256 | 1.488337 |
| 10880_at | 2.241631 | 1.635146 | 1.644128 | 2.360301 | 2.452558 | 1.359527 | 1.266373 | 2.839712 |
| 10881_at | 1.366472 | 1.445696 | 1.670424 | 1.37244  | 1.526301 | 1.44123  | 2.159408 | 1.443559 |
| 10882_at | 5.744615 | 3.982782 | 6.361793 | 4.360455 | 3.691275 | 4.892701 | 5.233523 | 4.336593 |
| 10884_at | 6.845775 | 7.470275 | 7.574818 | 7.75971  | 7.685403 | 7.470475 | 7.223113 | 7.953618 |
| 10885_at | 4.531991 | 4.776562 | 3.524906 | 4.419537 | 4.641348 | 4.748633 | 3.171304 | 5.044367 |
| 10886_at | 1.291241 | 0.740237 | 1.023834 | 1.095477 | 1.584947 | 1.681201 | 1.139298 | 1.499431 |
| 10887_at | 3.398324 | 2.361129 | 2.420586 | 3.404037 | 4.152923 | 2.553005 | 2.84019  | 3.50784  |
| 10888_at | 1.449101 | 1.683969 | 1.579961 | 1.687387 | 2.030001 | 1.74789  | 1.60939  | 1.664752 |
| 1088_at  | 1.396291 | 0.979405 | 1.557124 | 1.209463 | 1.373535 | 1.500426 | 1.078386 | 2.554637 |
| 10890_at | 8.233237 | 8.11502  | 8.438974 | 8.513244 | 8.280495 | 8.12592  | 7.978328 | 8.479868 |
| 10891_at | 5.143536 | 5.086542 | 4.524895 | 5.524945 | 6.085602 | 5.986222 | 3.473941 | 6.051818 |
| 10892_at | 4.701598 | 5.054411 | 4.668917 | 4.41315  | 5.310447 | 5.050021 | 4.930894 | 5.516505 |
| 10893_at | 3.254618 | 3.283616 | 3.510805 | 3.649214 | 3.878953 | 2.690292 | 3.290296 | 2.529466 |
| 10894_at | 4.941301 | 4.137097 | 5.902934 | 6.00334  | 3.360481 | 4.689344 | 6.364206 | 4.521178 |
| 10895_at | 2.082172 | 1.451442 | 1.182568 | 1.437074 | 1.603907 | 1.408376 | 1.458854 | 1.769424 |
| 10896_at | 1.084506 | 3.417511 | 1.00245  | 4.050863 | 4.327935 | 1.182417 | 0.753565 | 2.596081 |
| 10897_at | 7.474234 | 6.676902 | 6.62948  | 6.878013 | 6.625009 | 6.905102 | 6.350622 | 6.490338 |
| 10898_at | 3.761901 | 3.598259 | 4.703568 | 3.710565 | 3.378536 | 3.880007 | 4.110068 | 2.21355  |
| 10899_at | 6.632856 | 6.501095 | 6.023521 | 5.684194 | 5.864465 | 5.954669 | 5.475619 | 6.239327 |
| 1089_at  | 1.447422 | 2.180654 | 1.251006 | 1.593709 | 2.456683 | 2.013205 | 1.826068 | 1.379812 |
| 108_at   | 1.406653 | 2.054263 | 1.253274 | 2.055167 | 1.599495 | 2.693797 | 1.580961 | 2.333385 |
| 10900_at | 2.76027  | 1.62646  | 2.339041 | 2.78038  | 2.693453 | 2.133512 | 2.123354 | 2.035249 |
| 10901_at | 4.836175 | 3.884037 | 5.242694 | 4.529157 | 4.461054 | 4.550823 | 4.564131 | 5.924585 |
| 10902_at | 4.996728 | 5.059742 | 4.933707 | 4.481923 | 4.454682 | 5.068271 | 5.224131 | 4.980772 |
| 10903_at | 4.406799 | 4.900388 | 4.885751 | 3.96216  | 4.057453 | 4.888279 | 3.395108 | 4.543779 |
| 10904_at | 3.466037 | 2.99513  | 3.4078   | 3.461173 | 2.801849 | 2.658891 | 2.350418 | 3.166643 |
| 10905_at | 7.683695 | 8.084626 | 7.970105 | 8.034843 | 7.910312 | 7.886434 | 7.862634 | 8.317492 |
| 10906_at | 5.445706 | 5.875604 | 6.183454 | 6.156153 | 5.86597  | 5.829388 | 5.786539 | 6.349983 |
| 10907_at | 7.874633 | 7.409849 | 7.557488 | 7.327715 | 6.909066 | 7.86679  | 7.281256 | 7.259781 |
| 10908_at | 5.449764 | 4.841776 | 4.562057 | 4.820269 | 4.156277 | 5.34212  | 5.089314 | 4.183623 |
| 10910_at | 7.667684 | 7.402353 | 7.051991 | 7.125999 | 7.352919 | 7.435428 | 6.750942 | 7.060467 |
| 10911_at | 1.189386 | 1.194401 | 0.969971 | 1.117972 | 0.72429  | 1.76354  | 0.964127 | 1.433367 |
| 10912_at | 2.111531 | 2.774043 | 3.057119 | 2.860171 | 2.825726 | 2.996837 | 2.800123 | 3.410661 |
| 10913_at | 1.582817 | 2.081902 | 2.061833 | 2.00362  | 2.197827 | 2.103512 | 2.289028 | 1.586711 |
| 10914_at | 6.645637 | 7.236392 | 7.034578 | 7.10589  | 7.055035 | 6.282334 | 6.726335 | 7.208091 |
| 10915_at | 6.545189 | 5.876109 | 6.050296 | 5.619495 | 6.154428 | 5.75859  | 6.772519 | 6.335551 |
| 10916_at | 7.367364 | 7.406456 | 7.515527 | 7.781781 | 7.679737 | 7.878818 | 7.596347 | 7.267802 |
| 10917_at | 1.684444 | 1.355764 | 1.973269 | 1.404754 | 2.021078 | 1.383554 | 2.957232 | 1.942055 |
| 10919_at | 4.536529 | 4.285535 | 4.716901 | 4.338103 | 4.52271  | 4.604786 | 4.581156 | 4.499801 |
| 10920_at | 7.421117 | 6.875703 | 7.546105 | 6.884856 | 7.317227 | 6.718649 | 6.17464  | 7.342627 |

|          |          |          |          |          |          |          |          |          |
|----------|----------|----------|----------|----------|----------|----------|----------|----------|
| 10921_at | 7.61981  | 6.848962 | 7.242797 | 7.006093 | 6.844197 | 7.647415 | 7.291429 | 7.03209  |
| 10922_at | 5.339935 | 4.824313 | 4.624509 | 5.010222 | 4.427583 | 5.27648  | 4.478134 | 4.450581 |
| 10923_at | 9.207539 | 9.044069 | 9.180673 | 9.418953 | 8.954612 | 8.854829 | 8.904721 | 8.949401 |
| 10924_at | 5.481479 | 5.798371 | 5.479716 | 5.331878 | 6.810176 | 4.799652 | 5.028819 | 4.635047 |
| 10926_at | 1.98486  | 1.087263 | 1.85008  | 1.820597 | 1.474831 | 1.030388 | 2.659546 | 2.412152 |
| 10927_at | 7.053136 | 7.803208 | 7.283624 | 7.061054 | 6.611785 | 6.884613 | 7.386617 | 7.092355 |
| 10928_at | 7.1126   | 7.041986 | 7.208891 | 6.95723  | 7.554311 | 6.906009 | 6.70107  | 6.741262 |
| 10929_at | 6.873684 | 6.882847 | 6.774969 | 7.07106  | 7.225324 | 7.135009 | 6.987814 | 6.108089 |
| 10930_at | 1.626417 | 1.62599  | 2.31544  | 1.821743 | 2.13037  | 1.946299 | 2.109051 | 2.140405 |
| 10933_at | 4.41558  | 4.756184 | 4.404509 | 4.812992 | 5.235178 | 4.203072 | 4.788725 | 4.888733 |
| 10935_at | 8.669188 | 8.185243 | 8.53719  | 8.361515 | 8.820105 | 8.399817 | 8.709972 | 8.700952 |
| 10936_at | 1.47293  | 2.691725 | 3.093842 | 4.206453 | 1.773069 | 1.656198 | 3.608388 | 2.26114  |
| 10938_at | 2.799759 | 2.133358 | 3.946087 | 2.89266  | 3.245641 | 2.656741 | 3.503039 | 2.79139  |
| 10939_at | 6.23697  | 5.714023 | 5.983119 | 6.011547 | 6.393112 | 5.818902 | 5.485895 | 6.20313  |
| 10940_at | 2.62176  | 2.124686 | 2.49411  | 2.846573 | 2.760925 | 3.345852 | 2.431651 | 1.577643 |
| 10941_at | 2.00775  | 0.56278  | 2.16972  | 0.874102 | 2.615589 | 3.030454 | 2.663308 | 1.484406 |
| 10942_at | 2.419943 | 2.77293  | 1.995057 | 1.832056 | 1.788984 | 1.544634 | 1.683874 | 1.799259 |
| 10943_at | 1.976964 | 4.737072 | 3.538783 | 3.714903 | 4.050366 | 4.171863 | 2.692713 | 3.675949 |
| 10944_at | 8.014956 | 7.885891 | 7.817054 | 7.514256 | 7.963868 | 7.493555 | 7.544872 | 8.424121 |
| 10945_at | 8.417932 | 8.356918 | 8.166634 | 8.462479 | 8.080657 | 8.387378 | 8.435646 | 7.777625 |
| 10946_at | 6.625624 | 7.463036 | 7.244681 | 7.509637 | 7.198909 | 6.803892 | 6.056977 | 7.330516 |
| 10947_at | 5.414894 | 5.301503 | 5.537454 | 5.142183 | 5.928834 | 5.38022  | 5.696053 | 6.075763 |
| 10948_at | 5.196062 | 5.301822 | 5.268476 | 6.102967 | 5.538555 | 4.92287  | 4.645975 | 4.325256 |
| 10949_at | 5.363658 | 6.144076 | 6.093861 | 6.207194 | 6.139538 | 5.953349 | 6.397753 | 6.378753 |
| 10950_at | 7.557816 | 7.355587 | 6.580257 | 6.257411 | 6.302995 | 6.903076 | 6.761077 | 7.64426  |
| 10951_at | 6.119127 | 6.021877 | 6.897803 | 6.721571 | 6.571285 | 6.689575 | 6.02155  | 6.81819  |
| 10952_at | 8.86024  | 8.658822 | 8.903677 | 8.959833 | 8.314094 | 8.904966 | 8.53444  | 8.261463 |
| 10953_at | 6.032421 | 5.524597 | 5.144359 | 6.057021 | 5.311262 | 6.092487 | 5.819168 | 5.11931  |
| 10954_at | 6.852696 | 5.973515 | 6.959649 | 6.836859 | 7.052484 | 6.503046 | 6.491492 | 6.651318 |
| 10955_at | 9.855576 | 9.77531  | 10.06846 | 10.15465 | 9.725427 | 9.774372 | 10.08799 | 9.81818  |
| 10956_at | 7.767274 | 8.324588 | 8.644487 | 8.67097  | 8.065001 | 8.413449 | 8.362991 | 7.906368 |
| 10957_at | 9.193549 | 8.745983 | 8.906517 | 9.153784 | 8.137242 | 8.741356 | 9.065931 | 8.533754 |
| 10959_at | 9.679927 | 9.899955 | 9.782763 | 9.678819 | 9.689071 | 9.45133  | 9.414254 | 9.697978 |
| 10960_at | 8.215048 | 7.653943 | 8.168259 | 8.23273  | 7.991585 | 8.188297 | 8.625046 | 7.756366 |
| 10961_at | 6.838982 | 7.596824 | 7.849924 | 7.915658 | 6.96871  | 8.002716 | 7.229314 | 7.261026 |
| 10962_at | 4.46389  | 4.59402  | 4.086005 | 5.437123 | 4.628579 | 5.611194 | 4.751223 | 4.299589 |
| 10963_at | 6.625288 | 7.324124 | 6.719965 | 6.905909 | 6.511003 | 7.380388 | 7.002883 | 6.850654 |
| 10964_at | 5.488193 | 5.52599  | 4.429359 | 6.090116 | 6.23415  | 5.752824 | 6.287332 | 4.72376  |
| 10965_at | 4.192698 | 4.210521 | 4.544868 | 5.455333 | 5.071505 | 6.234069 | 6.611467 | 4.839371 |
| 10966_at | 4.26696  | 2.760492 | 3.496226 | 4.130947 | 4.376572 | 4.913934 | 3.90552  | 3.86321  |
| 10969_at | 6.431113 | 6.464672 | 6.437749 | 5.559959 | 6.116326 | 6.666718 | 5.520149 | 6.568348 |
| 10970_at | 5.3759   | 5.252388 | 5.735453 | 5.685078 | 5.774157 | 5.533516 | 5.276283 | 6.286278 |
| 10971_at | 9.406182 | 9.455729 | 9.06683  | 9.217105 | 8.907863 | 8.558217 | 8.973532 | 9.475118 |
| 10972_at | 8.458169 | 8.848882 | 9.264115 | 8.542611 | 8.117967 | 8.51281  | 8.778781 | 7.611333 |
| 10973_at | 5.803009 | 5.580956 | 5.835569 | 6.207664 | 6.172351 | 5.497913 | 6.507349 | 5.908953 |
| 10974_at | 9.165327 | 8.557917 | 8.779674 | 8.38049  | 7.611772 | 9.491581 | 8.633576 | 6.682436 |
| 10975_at | 9.051553 | 8.695901 | 9.044065 | 8.770061 | 8.719342 | 9.313661 | 9.047735 | 8.368117 |
| 10978_at | 5.280274 | 4.720352 | 5.475815 | 5.333168 | 3.32337  | 4.439407 | 4.21114  | 4.565376 |
| 10979_at | 9.166675 | 9.282237 | 8.930917 | 8.582088 | 8.609858 | 8.736349 | 9.387493 | 9.281767 |
| 10980_at | 7.842551 | 7.658635 | 7.393448 | 7.759643 | 7.771854 | 7.985651 | 7.323008 | 7.960545 |
| 10981_at | 6.122558 | 4.823178 | 5.104024 | 5.40713  | 6.181801 | 5.081496 | 4.386392 | 5.162176 |

|          |          |          |          |          |          |          |          |          |
|----------|----------|----------|----------|----------|----------|----------|----------|----------|
| 10982_at | 7.262724 | 7.439619 | 7.740709 | 7.174445 | 6.988052 | 7.117662 | 7.281809 | 7.297468 |
| 10983_at | 9.95466  | 9.967201 | 9.480069 | 9.718821 | 9.443721 | 9.617911 | 9.527142 | 9.788558 |
| 10984_at | 4.243331 | 2.858125 | 3.563938 | 4.50171  | 4.149546 | 3.872089 | 3.29306  | 3.438443 |
| 10985_at | 4.715709 | 6.090543 | 4.890523 | 5.943909 | 5.576394 | 5.042995 | 5.908349 | 4.983867 |
| 10987_at | 6.272485 | 6.299435 | 5.831024 | 5.255553 | 6.820477 | 5.739453 | 5.779676 | 6.67079  |
| 10988_at | 7.541591 | 7.959632 | 7.826622 | 8.150209 | 7.691008 | 7.834662 | 7.457534 | 8.353716 |
| 10989_at | 7.28636  | 7.306958 | 7.013112 | 7.718117 | 7.526306 | 7.825806 | 7.112957 | 7.651471 |
| 10990_at | 1.654691 | 1.515218 | 1.931424 | 2.4666   | 1.825705 | 2.966902 | 2.386903 | 3.443713 |
| 10991_at | 2.707195 | 3.04153  | 2.515484 | 2.768    | 2.894627 | 2.705012 | 2.583637 | 2.536463 |
| 10992_at | 7.884746 | 7.493432 | 8.101462 | 7.902207 | 7.983861 | 8.169908 | 7.928121 | 7.955705 |
| 10993_at | 1.486302 | 2.458162 | 1.333771 | 2.498887 | 1.650774 | 1.341367 | 1.542786 | 1.958434 |
| 10994_at | 6.367205 | 5.171885 | 5.521957 | 5.248775 | 5.187052 | 5.471764 | 5.098319 | 5.583675 |
| 10998_at | 3.545118 | 2.3265   | 3.610365 | 3.048692 | 3.247559 | 3.8847   | 3.684532 | 3.394136 |
| 10999_at | 3.480873 | 4.354124 | 4.08937  | 3.755279 | 3.021345 | 3.676358 | 3.656191 | 3.765364 |
| 109_at   | 4.728398 | 4.728944 | 4.464539 | 4.755145 | 3.984512 | 4.257322 | 4.592723 | 3.969473 |
| 10_at    | 2.075752 | 1.739622 | 1.707137 | 1.678837 | 1.358756 | 0.894945 | 1.522303 | 1.36917  |
| 11000_at | 4.665722 | 5.441701 | 4.171477 | 4.600445 | 4.514296 | 5.0229   | 4.174824 | 4.400827 |
| 11001_at | 6.356808 | 5.107569 | 5.286828 | 5.676948 | 7.175587 | 6.066964 | 2.178143 | 7.190919 |
| 11004_at | 1.321155 | 1.547618 | 1.698291 | 1.485021 | 1.444666 | 1.197175 | 1.69702  | 1.193018 |
| 11005_at | 1.75673  | 2.297529 | 1.755641 | 1.500017 | 1.82092  | 1.422286 | 1.615807 | 1.923377 |
| 11006_at | 2.369902 | 3.537014 | 3.014404 | 1.959539 | 3.410004 | 3.183639 | 4.122968 | 4.372799 |
| 11007_at | 4.097998 | 3.974341 | 3.418714 | 3.655627 | 2.846545 | 4.446788 | 3.635843 | 2.65887  |
| 11009_at | 2.123364 | 1.792995 | 2.65033  | 1.016533 | 1.541338 | 1.33791  | 1.661237 | 1.037732 |
| 11010_at | 5.863794 | 5.723543 | 4.671109 | 6.956969 | 5.690964 | 4.595727 | 4.799054 | 5.637158 |
| 11011_at | 6.157803 | 5.760197 | 6.292079 | 6.143238 | 6.986235 | 5.930906 | 6.283282 | 5.851075 |
| 11012_at | 2.382337 | 3.075449 | 2.279066 | 3.105059 | 3.086493 | 2.448484 | 2.987667 | 3.176924 |
| 11013_at | 7.647839 | 7.944501 | 5.815785 | 7.107471 | 7.222209 | 4.662004 | 6.15764  | 6.840304 |
| 11014_at | 9.255095 | 8.906532 | 9.584209 | 9.454729 | 8.855256 | 9.185067 | 9.389102 | 8.964496 |
| 11015_at | 6.732725 | 6.101901 | 5.979665 | 5.563417 | 6.096751 | 5.892746 | 6.856842 | 6.964445 |
| 11016_at | 6.100407 | 5.276191 | 6.077019 | 6.609795 | 5.604801 | 6.218773 | 6.017396 | 4.863623 |
| 11017_at | 6.802189 | 7.014514 | 6.357811 | 6.948524 | 6.361191 | 6.871737 | 6.067798 | 7.039713 |
| 11018_at | 4.064733 | 3.760033 | 3.566056 | 3.692237 | 4.095286 | 4.190609 | 3.317704 | 2.962231 |
| 11019_at | 4.814578 | 4.59941  | 4.146422 | 4.1669   | 6.336513 | 5.078397 | 4.41518  | 5.465578 |
| 1101_at  | 1.523241 | 1.881477 | 2.129445 | 1.217476 | 2.202609 | 2.934604 | 1.92224  | 2.065144 |
| 11020_at | 4.639532 | 4.277895 | 4.110557 | 4.327966 | 4.369029 | 4.491328 | 4.456386 | 4.443145 |
| 11021_at | 5.682715 | 6.067305 | 5.56685  | 6.568506 | 5.506096 | 6.600796 | 6.054872 | 6.332621 |
| 11022_at | 2.53706  | 4.74492  | 4.655826 | 3.689208 | 2.006882 | 3.294535 | 4.52129  | 4.561583 |
| 11023_at | 1.347096 | 1.576197 | 1.267604 | 1.739775 | 1.62801  | 2.243502 | 1.873365 | 1.520594 |
| 11024_at | 2.634021 | 2.223279 | 2.513438 | 3.063984 | 2.734364 | 3.142105 | 2.944155 | 2.555849 |
| 11025_at | 2.151492 | 2.441378 | 2.411016 | 3.590009 | 2.492714 | 3.22214  | 1.761014 | 2.997842 |
| 11027_at | 2.47765  | 2.779278 | 1.18571  | 2.829119 | 1.422353 | 1.971637 | 2.770488 | 2.456098 |
| 1102_at  | 5.043557 | 5.976141 | 4.871659 | 4.81134  | 5.311198 | 5.135047 | 5.043557 | 5.407232 |
| 11030_at | 8.689199 | 8.724798 | 8.906503 | 8.493785 | 8.693627 | 8.725144 | 8.307292 | 8.378961 |
| 11031_at | 7.292726 | 7.181315 | 7.029049 | 7.733735 | 7.276188 | 7.513159 | 7.201384 | 7.238125 |
| 11033_at | 2.817872 | 1.354047 | 1.672344 | 2.768448 | 1.268988 | 1.816536 | 3.361162 | 1.4631   |
| 11034_at | 7.051912 | 7.201229 | 7.063323 | 6.937403 | 6.883564 | 6.74555  | 7.405898 | 6.770171 |
| 11035_at | 1.522681 | 2.266676 | 1.992746 | 1.268146 | 1.311234 | 1.710468 | 1.592504 | 1.475129 |
| 11037_at | 6.847054 | 7.947772 | 7.337934 | 7.167103 | 6.989857 | 6.586529 | 7.050478 | 8.335244 |
| 1103_at  | 2.321064 | 2.456618 | 1.184718 | 2.311151 | 1.608946 | 2.031643 | 2.115611 | 1.367925 |
| 11040_at | 3.956598 | 4.133166 | 2.816824 | 3.067564 | 1.945086 | 2.673861 | 4.263457 | 3.26653  |
| 11041_at | 5.947092 | 5.585447 | 6.02819  | 5.197477 | 5.204609 | 5.250686 | 6.110431 | 5.15813  |

|          |          |          |          |          |          |          |          |          |
|----------|----------|----------|----------|----------|----------|----------|----------|----------|
| 11043_at | 6.048398 | 6.185443 | 6.581627 | 6.11232  | 5.44458  | 5.708013 | 5.881859 | 6.585409 |
| 11044_at | 5.235238 | 5.159365 | 4.678473 | 5.002599 | 5.302563 | 4.840723 | 5.256164 | 5.030259 |
| 11045_at | 2.958362 | 2.015436 | 3.342086 | 3.394534 | 2.283864 | 1.755065 | 2.77499  | 4.095447 |
| 11046_at | 6.205663 | 6.439665 | 6.276821 | 5.401182 | 5.391641 | 5.64695  | 5.84621  | 6.318141 |
| 11047_at | 7.200446 | 6.772436 | 6.86999  | 6.871513 | 6.492806 | 6.525417 | 6.84232  | 6.369576 |
| 1104_at  | 1.484849 | 3.502062 | 2.464788 | 1.352644 | 3.984478 | 2.655777 | 2.919111 | 0.774623 |
| 11051_at | 8.315847 | 7.976696 | 8.150135 | 8.691575 | 8.425079 | 8.181319 | 8.578281 | 8.049044 |
| 11052_at | 6.518002 | 6.213836 | 5.889187 | 6.367012 | 6.099727 | 6.55091  | 6.284072 | 7.090473 |
| 11054_at | 4.764114 | 5.556263 | 4.548749 | 5.733132 | 2.29309  | 4.61113  | 5.019643 | 3.592277 |
| 11055_at | 1.815623 | 2.057076 | 1.838213 | 1.92467  | 1.7395   | 2.23927  | 1.897345 | 3.748474 |
| 11056_at | 6.271361 | 6.432322 | 6.42096  | 6.210543 | 6.862947 | 6.000869 | 6.483264 | 7.099297 |
| 11057_at | 5.179208 | 4.787728 | 5.913814 | 5.82163  | 5.696163 | 5.606994 | 5.495351 | 5.039163 |
| 11059_at | 7.541794 | 7.617926 | 8.229739 | 7.54701  | 7.377301 | 8.265698 | 7.859244 | 7.911371 |
| 1105_at  | 6.373    | 6.586607 | 6.556019 | 5.796024 | 6.149453 | 5.721075 | 5.985915 | 6.59135  |
| 11060_at | 6.226732 | 6.500519 | 6.182906 | 5.897533 | 5.414825 | 6.079115 | 6.120571 | 5.722718 |
| 11061_at | 1.352742 | 1.544444 | 1.619653 | 1.390463 | 1.33422  | 1.657138 | 1.324636 | 2.419773 |
| 11062_at | 4.033384 | 4.980896 | 3.412035 | 2.555319 | 3.465194 | 3.727809 | 3.521992 | 2.943387 |
| 11063_at | 1.992954 | 1.872599 | 2.204976 | 1.800297 | 1.756889 | 2.878774 | 1.815066 | 1.869327 |
| 11064_at | 4.844233 | 4.03654  | 4.977871 | 5.391741 | 4.937299 | 4.495129 | 4.759472 | 4.161931 |
| 11065_at | 2.261315 | 4.723885 | 3.131487 | 4.173124 | 3.831536 | 2.234975 | 4.538764 | 4.835702 |
| 11066_at | 5.314394 | 5.454503 | 5.188285 | 4.884104 | 5.01523  | 5.121435 | 4.918353 | 4.888236 |
| 11067_at | 5.164854 | 4.971795 | 5.30414  | 6.442756 | 4.116763 | 5.815389 | 6.060394 | 4.657323 |
| 11068_at | 3.746341 | 4.423923 | 4.315557 | 5.164643 | 2.825901 | 3.399569 | 3.48127  | 3.797014 |
| 11069_at | 6.226414 | 6.366977 | 6.31299  | 6.496761 | 6.6907   | 5.857078 | 6.438395 | 6.53508  |
| 1106_at  | 7.220133 | 7.343511 | 6.456597 | 7.221193 | 7.341682 | 7.193544 | 6.91987  | 7.158151 |
| 11070_at | 5.628568 | 5.482231 | 4.893568 | 5.49308  | 4.592815 | 5.646857 | 4.283136 | 5.281381 |
| 11072_at | 5.373064 | 5.378213 | 5.921487 | 6.182325 | 4.270971 | 5.894558 | 6.144659 | 6.30475  |
| 11073_at | 5.951563 | 6.300938 | 5.34137  | 5.857883 | 5.974745 | 5.814765 | 6.194238 | 6.387582 |
| 11074_at | 1.47891  | 1.726407 | 1.447553 | 1.656747 | 1.636106 | 1.229283 | 1.560135 | 1.450132 |
| 11075_at | 2.095067 | 2.553124 | 2.562329 | 1.798603 | 2.273518 | 2.326031 | 3.068359 | 2.296189 |
| 11076_at | 2.928423 | 4.04985  | 3.839137 | 3.35431  | 3.741412 | 2.908768 | 2.604286 | 2.504011 |
| 11077_at | 1.863191 | 1.588873 | 1.578861 | 1.753545 | 1.297727 | 1.541077 | 1.180906 | 1.434936 |
| 11078_at | 4.452552 | 4.306282 | 4.169283 | 4.277881 | 4.148543 | 4.79205  | 4.135566 | 3.690459 |
| 11079_at | 8.136014 | 7.723124 | 7.646431 | 7.883629 | 7.722184 | 7.412331 | 7.557596 | 7.997057 |
| 1107_at  | 7.546532 | 7.760381 | 8.179767 | 7.930781 | 8.114412 | 7.784667 | 8.043835 | 7.763675 |
| 11080_at | 5.359437 | 5.719655 | 5.486457 | 5.023672 | 5.854141 | 5.332183 | 5.224731 | 6.219398 |
| 11081_at | 1.249143 | 1.04132  | 1.011307 | 2.32187  | 1.299021 | 1.346899 | 1.26176  | 1.454519 |
| 11082_at | 5.826224 | 6.405705 | 7.054144 | 7.065562 | 6.737705 | 7.49616  | 5.740039 | 5.748688 |
| 11083_at | 6.140589 | 6.481394 | 6.187269 | 6.226673 | 5.826625 | 6.012962 | 6.137931 | 6.185743 |
| 11085_at | 2.249072 | 1.652777 | 0.747001 | 1.614442 | 2.114163 | 1.482903 | 1.809259 | 1.47446  |
| 11086_at | 1.780378 | 1.284948 | 1.041242 | 1.278743 | 1.385286 | 1.222697 | 1.652161 | 1.383342 |
| 1108_at  | 7.426761 | 7.570612 | 7.594421 | 7.813635 | 7.491991 | 7.353951 | 7.498821 | 7.833085 |
| 11091_at | 4.650275 | 4.360653 | 5.16985  | 5.03814  | 3.411508 | 5.139796 | 3.653274 | 3.292136 |
| 11092_at | 6.666159 | 6.078369 | 6.556899 | 6.546205 | 5.050071 | 7.000598 | 6.662886 | 5.306015 |
| 11093_at | 2.470516 | 2.955397 | 2.760828 | 2.715831 | 2.995455 | 2.955725 | 3.465155 | 2.754362 |
| 11094_at | 2.713417 | 1.769002 | 3.31007  | 2.980868 | 2.291911 | 2.36572  | 2.921356 | 2.313293 |
| 11095_at | 3.321325 | 2.205941 | 2.263707 | 2.808792 | 2.600265 | 2.871706 | 2.325305 | 3.022044 |
| 11096_at | 4.538797 | 5.635967 | 5.486309 | 5.288034 | 5.791306 | 6.94918  | 5.275645 | 5.652829 |
| 11097_at | 4.737733 | 5.512937 | 5.135692 | 4.939283 | 5.630601 | 4.556611 | 5.227805 | 5.184327 |
| 11098_at | 7.259964 | 6.891229 | 6.882223 | 6.803092 | 6.523638 | 6.763069 | 6.111954 | 6.769107 |
| 11099_at | 6.634277 | 7.250652 | 7.02424  | 6.857954 | 6.877281 | 6.615801 | 6.253459 | 6.814345 |

|          |          |          |          |          |          |          |          |          |
|----------|----------|----------|----------|----------|----------|----------|----------|----------|
| 1109_at  | 1.390848 | 0.880777 | 1.272998 | 1.361603 | 1.165335 | 1.306368 | 2.433056 | 1.2047   |
| 11100_at | 7.727836 | 7.78817  | 7.638278 | 7.781576 | 7.781145 | 7.647025 | 7.640241 | 7.864202 |
| 11101_at | 4.675387 | 4.79192  | 5.194893 | 5.198372 | 4.667058 | 4.921141 | 5.228647 | 4.920583 |
| 11102_at | 4.557787 | 4.913447 | 4.926496 | 4.563315 | 5.423948 | 4.389048 | 4.7532   | 4.90522  |
| 11103_at | 6.308502 | 6.782284 | 6.403857 | 6.471923 | 6.297927 | 6.4465   | 6.39667  | 7.020387 |
| 11104_at | 5.693085 | 5.596515 | 6.05031  | 6.096634 | 5.584188 | 5.579666 | 5.913513 | 6.217536 |
| 11105_at | 1.418761 | 2.893335 | 1.023733 | 1.802329 | 1.766478 | 1.997534 | 1.400827 | 0.997072 |
| 11107_at | 6.23365  | 6.123598 | 6.321861 | 5.523631 | 5.160438 | 5.454316 | 5.738773 | 6.182622 |
| 11108_at | 6.952851 | 6.889517 | 6.56831  | 7.487585 | 5.890728 | 6.92579  | 7.112103 | 7.148548 |
| 11112_at | 6.741987 | 6.931607 | 6.493132 | 6.633898 | 6.762087 | 6.775434 | 6.1981   | 6.963594 |
| 11113_at | 2.211106 | 1.952318 | 2.074493 | 2.134282 | 2.8273   | 2.384301 | 2.274505 | 1.813868 |
| 11116_at | 4.313303 | 4.29549  | 4.608268 | 5.055744 | 4.732169 | 3.841227 | 3.986081 | 5.174208 |
| 11117_at | 3.290993 | 3.372182 | 2.971449 | 3.383263 | 2.781311 | 3.618822 | 3.139342 | 2.960591 |
| 11118_at | 5.088308 | 5.307688 | 3.686479 | 4.457422 | 4.224374 | 5.274471 | 5.889064 | 5.67152  |
| 11119_at | 5.189027 | 5.145763 | 5.648986 | 6.380644 | 6.138916 | 6.044184 | 4.710971 | 5.955008 |
| 1111_at  | 2.468371 | 1.712795 | 3.524484 | 3.088847 | 2.339447 | 2.269918 | 2.923543 | 3.201718 |
| 11120_at | 5.511708 | 5.423433 | 5.026929 | 4.626478 | 5.101665 | 5.260142 | 5.200556 | 5.511679 |
| 11122_at | 2.836434 | 1.893382 | 1.333853 | 1.664748 | 2.213187 | 1.457063 | 2.03446  | 2.097681 |
| 11123_at | 5.234222 | 5.718703 | 5.758698 | 6.046309 | 6.053319 | 5.723117 | 5.891572 | 5.843918 |
| 11124_at | 6.339354 | 5.248413 | 6.448725 | 6.212869 | 5.634614 | 5.519005 | 5.663419 | 5.711889 |
| 11126_at | 1.585617 | 2.128378 | 2.207311 | 2.628759 | 1.979699 | 3.59422  | 1.443876 | 2.107092 |
| 11127_at | 5.598727 | 5.784014 | 5.163988 | 5.236093 | 5.568315 | 5.345705 | 4.687396 | 5.683297 |
| 11128_at | 4.357127 | 5.215738 | 4.110139 | 4.847654 | 4.150835 | 4.826076 | 4.538329 | 4.134505 |
| 11129_at | 4.297338 | 4.063314 | 3.648755 | 3.408031 | 3.30903  | 4.728743 | 3.902992 | 3.965616 |
| 1112_at  | 6.220766 | 6.28559  | 6.090508 | 6.918967 | 6.913118 | 6.835452 | 6.465436 | 5.928033 |
| 11130_at | 1.676983 | 2.65123  | 2.775628 | 2.797729 | 1.456929 | 1.657381 | 1.766048 | 1.191345 |
| 11131_at | 1.344002 | 1.545233 | 1.28001  | 1.495677 | 2.184898 | 1.544931 | 2.026468 | 2.128763 |
| 11132_at | 1.671078 | 2.386474 | 2.570905 | 2.339382 | 2.444743 | 2.312008 | 1.74615  | 2.01815  |
| 11133_at | 2.735948 | 3.338655 | 1.930832 | 2.65096  | 2.663886 | 2.424793 | 2.735948 | 2.872407 |
| 11135_at | 5.680692 | 5.419261 | 5.217983 | 6.055801 | 5.193017 | 5.470467 | 5.56306  | 4.734258 |
| 11136_at | 5.834227 | 5.060382 | 4.989908 | 2.005168 | 5.802046 | 5.106438 | 2.387764 | 5.286978 |
| 11137_at | 7.727889 | 7.1964   | 7.086792 | 7.303179 | 7.268154 | 7.002    | 7.338667 | 7.882515 |
| 11138_at | 5.297729 | 5.864264 | 5.679086 | 5.867893 | 3.824616 | 5.811747 | 5.686914 | 4.461579 |
| 1113_at  | 1.648824 | 2.007919 | 5.328495 | 4.013122 | 3.24138  | 2.652919 | 4.56675  | 1.069905 |
| 11140_at | 8.456399 | 8.442593 | 8.466657 | 8.304577 | 7.90185  | 8.864247 | 8.735002 | 8.114997 |
| 11141_at | 1.190499 | 1.360084 | 1.050031 | 0.871075 | 1.224883 | 1.301639 | 1.062462 | 1.168031 |
| 11142_at | 6.32442  | 6.62584  | 6.259065 | 5.907065 | 5.76036  | 6.155218 | 6.381071 | 6.870438 |
| 11143_at | 6.594089 | 6.084284 | 5.98473  | 5.923797 | 5.741411 | 6.439321 | 5.973671 | 6.419919 |
| 11144_at | 1.881109 | 2.403789 | 1.318285 | 1.499578 | 2.006768 | 2.028955 | 1.953357 | 2.6956   |
| 11145_at | 7.026345 | 6.932431 | 7.285921 | 7.255343 | 7.347485 | 7.617139 | 6.432704 | 6.375369 |
| 11146_at | 3.440456 | 3.934104 | 4.288415 | 3.243789 | 3.332497 | 4.048891 | 2.429576 | 4.35387  |
| 11147_at | 5.227865 | 3.830212 | 3.750348 | 5.859218 | 4.527483 | 4.268369 | 4.714574 | 5.4138   |
| 11148_at | 3.032804 | 0.947369 | 1.497176 | 1.512385 | 1.753074 | 3.039858 | 1.435001 | 1.460557 |
| 11149_at | 1.718355 | 2.298976 | 1.975078 | 1.267508 | 2.660286 | 2.254336 | 2.062415 | 1.818374 |
| 1114_at  | 1.822791 | 2.304245 | 2.229588 | 1.564255 | 2.260396 | 3.843767 | 1.302431 | 2.199862 |
| 11151_at | 3.951076 | 4.465752 | 4.365744 | 4.018776 | 4.517631 | 3.424019 | 5.011193 | 4.275167 |
| 11152_at | 5.459758 | 5.316127 | 5.084133 | 5.511044 | 5.831224 | 5.239389 | 5.681117 | 4.268474 |
| 11153_at | 3.113465 | 5.455783 | 4.390581 | 4.741053 | 4.157611 | 5.439145 | 5.717073 | 3.206007 |
| 11154_at | 2.971332 | 2.992418 | 3.432802 | 3.332724 | 2.674403 | 2.825883 | 3.70578  | 3.647336 |
| 11155_at | 1.615766 | 1.579004 | 1.908275 | 2.161587 | 1.410519 | 1.622736 | 2.776995 | 2.195432 |
| 11156_at | 6.611539 | 6.55322  | 6.221789 | 5.876425 | 6.249335 | 5.823984 | 6.103576 | 6.89015  |

|          |          |          |          |          |          |          |          |          |
|----------|----------|----------|----------|----------|----------|----------|----------|----------|
| 11157_at | 6.900095 | 6.78813  | 6.773919 | 6.848995 | 7.082767 | 6.728071 | 6.860446 | 7.164669 |
| 11158_at | 4.615901 | 3.748075 | 2.678587 | 5.846374 | 2.324049 | 6.169576 | 2.918048 | 5.226734 |
| 11159_at | 5.961582 | 5.482408 | 5.091521 | 5.868956 | 5.849914 | 5.710621 | 4.993168 | 4.077006 |
| 11160_at | 5.638347 | 6.197786 | 5.649257 | 6.197152 | 5.017989 | 5.335528 | 5.398728 | 5.923918 |
| 11161_at | 8.235299 | 8.408924 | 8.788335 | 8.699273 | 8.503801 | 8.311416 | 8.985001 | 9.097846 |
| 11162_at | 4.550409 | 4.983302 | 4.573468 | 4.168998 | 4.716662 | 4.636036 | 4.804625 | 4.837265 |
| 11163_at | 1.6095   | 2.670756 | 3.275847 | 3.148635 | 1.558216 | 1.113854 | 3.223076 | 1.572968 |
| 11164_at | 7.073852 | 6.303926 | 6.059403 | 6.739403 | 6.98348  | 7.05494  | 6.908506 | 7.044734 |
| 11166_at | 2.326226 | 2.241144 | 2.290809 | 2.699947 | 2.959149 | 2.451123 | 3.816785 | 1.51539  |
| 11167_at | 8.348797 | 8.505945 | 9.188376 | 8.807845 | 8.51109  | 8.616206 | 9.397349 | 7.672352 |
| 11168_at | 7.406372 | 7.570475 | 7.361703 | 7.565725 | 7.603545 | 7.452917 | 7.250067 | 7.715127 |
| 11169_at | 3.2849   | 2.560001 | 2.810737 | 3.712269 | 3.663426 | 3.830666 | 4.140721 | 4.978486 |
| 1116_at  | 8.232763 | 8.061343 | 7.389998 | 6.891354 | 6.563904 | 8.55434  | 7.943656 | 7.547286 |
| 11170_at | 3.382453 | 3.75058  | 3.744164 | 3.628281 | 2.941382 | 3.937206 | 3.177571 | 2.888555 |
| 11171_at | 7.540706 | 7.46539  | 7.503525 | 7.578074 | 7.274754 | 6.786367 | 6.825023 | 7.577597 |
| 11172_at | 1.243109 | 1.573009 | 1.354488 | 2.544283 | 1.533335 | 1.817626 | 0.962245 | 1.014838 |
| 11173_at | 3.600899 | 2.233607 | 2.846539 | 3.800089 | 2.46014  | 2.755289 | 2.875856 | 1.403265 |
| 11174_at | 3.391943 | 3.375488 | 3.223153 | 3.106687 | 3.762629 | 3.431486 | 3.328009 | 3.604    |
| 11176_at | 5.765803 | 5.219099 | 5.829239 | 5.96553  | 6.066767 | 5.862821 | 6.172007 | 6.153747 |
| 11177_at | 4.508317 | 5.334743 | 4.841801 | 5.270502 | 4.939853 | 5.466964 | 5.271097 | 5.537599 |
| 11178_at | 4.214458 | 2.998738 | 4.045615 | 3.873498 | 4.10471  | 4.113225 | 3.575959 | 2.805042 |
| 11179_at | 6.416473 | 6.907384 | 6.120958 | 6.0795   | 6.371408 | 6.160958 | 6.167452 | 6.954905 |
| 1117_at  | 2.3369   | 3.174666 | 2.268381 | 1.968947 | 2.360094 | 0.993165 | 1.983433 | 1.874464 |
| 11180_at | 4.225314 | 4.236111 | 4.544851 | 4.977665 | 4.421162 | 4.532221 | 4.571378 | 4.175224 |
| 11181_at | 3.184341 | 2.262756 | 2.045201 | 2.216088 | 2.491038 | 2.341176 | 1.89596  | 4.134523 |
| 11182_at | 3.682288 | 3.143655 | 3.164675 | 3.568911 | 2.994139 | 2.797746 | 3.801398 | 3.436543 |
| 11183_at | 7.118539 | 7.19536  | 7.009788 | 7.392501 | 7.239752 | 7.342761 | 7.12306  | 7.05597  |
| 11184_at | 1.836145 | 2.095877 | 1.64649  | 1.875891 | 1.538973 | 1.352536 | 1.320949 | 1.973829 |
| 11185_at | 7.059265 | 7.110827 | 6.405994 | 6.93137  | 6.92433  | 7.019774 | 6.758732 | 6.250504 |
| 11186_at | 3.556574 | 3.641233 | 3.374819 | 3.109351 | 3.218674 | 4.246185 | 3.929753 | 4.417892 |
| 11187_at | 2.082311 | 2.138907 | 2.776053 | 2.281269 | 1.364791 | 2.165688 | 1.675833 | 2.008908 |
| 11188_at | 5.848877 | 5.608399 | 6.062818 | 5.207928 | 5.449818 | 6.337929 | 6.062818 | 5.062178 |
| 11189_at | 1.660531 | 1.886575 | 1.747021 | 1.772095 | 1.700421 | 2.173182 | 1.363894 | 1.632781 |
| 1118_at  | 1.410577 | 0.945144 | 0.975419 | 1.542082 | 2.769679 | 1.010221 | 1.346268 | 2.246878 |
| 11190_at | 2.142326 | 2.913774 | 2.701135 | 2.223563 | 4.138659 | 2.830656 | 2.442645 | 2.406734 |
| 11191_at | 1.934016 | 1.876912 | 1.240002 | 1.428492 | 1.393973 | 1.805628 | 1.366127 | 1.690741 |
| 11193_at | 5.649474 | 5.462025 | 5.128338 | 5.553452 | 5.243713 | 5.508603 | 5.551567 | 5.956139 |
| 11194_at | 2.254791 | 2.562352 | 2.591868 | 2.431102 | 2.513888 | 1.519066 | 2.623748 | 2.100486 |
| 11196_at | 5.567628 | 5.535624 | 5.659281 | 5.684483 | 5.229543 | 5.189389 | 5.893467 | 6.452737 |
| 11197_at | 1.931859 | 1.486909 | 1.299181 | 1.725267 | 1.901552 | 1.166199 | 2.27241  | 1.462253 |
| 11198_at | 6.825237 | 7.584639 | 7.366983 | 7.313156 | 7.394101 | 6.99592  | 7.077731 | 7.494391 |
| 11199_at | 1.404752 | 1.440217 | 1.592649 | 1.666117 | 1.316276 | 1.442883 | 2.370882 | 1.798625 |
| 1119_at  | 3.744111 | 4.10993  | 3.318743 | 4.209972 | 3.797261 | 2.951232 | 2.940047 | 3.277086 |
| 111_at   | 3.238757 | 2.213149 | 3.248496 | 3.099609 | 3.152042 | 3.288033 | 3.005762 | 2.744921 |
| 11200_at | 3.063855 | 4.228163 | 2.195575 | 1.934958 | 2.689518 | 2.637259 | 1.481104 | 4.544034 |
| 11201_at | 6.920311 | 7.00502  | 7.038409 | 6.983853 | 6.314386 | 6.28666  | 6.687562 | 7.203017 |
| 11202_at | 4.127332 | 3.219585 | 3.987041 | 3.684636 | 4.357921 | 3.83424  | 4.843056 | 2.432871 |
| 11209_at | 3.192864 | 3.319589 | 3.058309 | 3.778273 | 3.210677 | 4.191746 | 3.560857 | 3.899251 |
| 11211_at | 1.879126 | 2.14998  | 2.948653 | 3.197835 | 2.028091 | 3.436856 | 3.134137 | 2.73191  |
| 11212_at | 6.606855 | 6.462382 | 6.475985 | 6.797358 | 7.030721 | 6.651368 | 6.314081 | 6.131111 |
| 11213_at | 5.668646 | 6.261047 | 5.369294 | 5.867429 | 5.7392   | 5.588345 | 6.058207 | 5.245699 |



|           |          |          |          |          |          |          |          |          |
|-----------|----------|----------|----------|----------|----------|----------|----------|----------|
| 11214_at  | 6.06211  | 6.734798 | 6.235703 | 6.335843 | 6.470335 | 6.109703 | 5.845802 | 6.410342 |
| 11215_at  | 5.084855 | 5.865369 | 6.138061 | 6.09277  | 6.383338 | 5.641843 | 6.271836 | 6.6907   |
| 11216_at  | 5.61147  | 5.57035  | 6.422569 | 5.897949 | 5.324147 | 5.315724 | 5.811316 | 5.636152 |
| 11218_at  | 3.781889 | 2.989432 | 1.977595 | 3.012855 | 2.665185 | 3.108041 | 3.755777 | 3.992518 |
| 11219_at  | 1.14941  | 1.926928 | 1.041729 | 1.861713 | 2.694361 | 0.985042 | 2.723057 | 3.690084 |
| 1121_at   | 5.28125  | 4.944714 | 5.200868 | 5.239558 | 5.781849 | 5.213424 | 5.805034 | 5.77231  |
| 11221_at  | 5.231724 | 6.719132 | 5.493747 | 4.224781 | 3.84353  | 4.64493  | 4.464289 | 6.420394 |
| 11222_at  | 7.190439 | 6.572921 | 6.117785 | 6.38446  | 7.125858 | 6.593404 | 6.338574 | 7.562296 |
| 11223_at  | 3.139024 | 3.416244 | 4.170804 | 3.536208 | 4.70125  | 3.506484 | 2.052969 | 4.149529 |
| 11224_at  | 11.52109 | 11.24693 | 11.26694 | 11.37379 | 11.34313 | 11.1915  | 11.21482 | 11.24305 |
| 11226_at  | 2.683288 | 2.90808  | 3.696738 | 2.898151 | 3.705367 | 3.724722 | 3.229153 | 3.454181 |
| 11227_at  | 1.935412 | 1.705702 | 2.038168 | 1.844807 | 2.176591 | 2.113557 | 2.501337 | 1.287969 |
| 11228_at  | 7.482328 | 7.721511 | 7.813034 | 7.425455 | 7.386049 | 7.581176 | 7.147881 | 8.098157 |
| 1122_at   | 4.282125 | 5.052882 | 3.987805 | 3.998136 | 3.869964 | 4.730117 | 5.002651 | 4.958758 |
| 11230_at  | 6.484253 | 6.500118 | 7.426741 | 6.447147 | 6.444426 | 6.705423 | 6.77016  | 5.57956  |
| 11231_at  | 7.99802  | 8.299327 | 7.856559 | 8.023306 | 8.038788 | 8.312407 | 8.025743 | 8.091398 |
| 11232_at  | 2.607372 | 2.695195 | 2.310348 | 2.530736 | 2.841317 | 3.199247 | 1.009684 | 3.550322 |
| 11234_at  | 6.22083  | 6.668309 | 6.892463 | 5.893922 | 6.672251 | 6.705353 | 7.180931 | 6.308002 |
| 11235_at  | 5.925899 | 5.951595 | 5.962798 | 5.763544 | 6.454086 | 5.822097 | 5.429922 | 6.703835 |
| 11236_at  | 5.380661 | 6.393079 | 6.286975 | 6.503567 | 6.57019  | 6.562084 | 6.667944 | 6.551919 |
| 11237_at  | 5.391361 | 5.244902 | 4.968034 | 5.420513 | 5.489239 | 5.359745 | 5.513648 | 4.52731  |
| 11238_at  | 5.182206 | 5.333273 | 6.104392 | 5.531792 | 5.201303 | 5.335189 | 4.856903 | 4.281931 |
| 112399_at | 3.355256 | 1.889558 | 1.132829 | 2.370348 | 1.811107 | 2.30512  | 2.20853  | 2.019277 |
| 1123_at   | 3.608501 | 4.670623 | 4.483141 | 5.359867 | 4.183031 | 4.344431 | 5.531989 | 4.322136 |
| 112401_at | 1.592561 | 2.202866 | 2.145428 | 2.192111 | 2.057859 | 2.404272 | 1.40962  | 2.595946 |
| 11240_at  | 3.07664  | 2.351966 | 2.770403 | 2.198916 | 3.246561 | 2.542187 | 1.973628 | 1.855751 |
| 11244_at  | 6.387221 | 6.768669 | 5.916002 | 5.99367  | 5.913496 | 5.267362 | 5.922243 | 6.680066 |
| 11245_at  | 2.983686 | 2.883961 | 3.57582  | 3.055268 | 2.951854 | 4.014923 | 2.7044   | 2.79178  |
| 112464_at | 5.600392 | 4.966262 | 4.93099  | 4.514664 | 5.14581  | 4.653931 | 3.522034 | 4.176185 |
| 112476_at | 2.24504  | 1.826767 | 1.999634 | 1.999571 | 1.47715  | 2.48755  | 1.773648 | 1.513372 |
| 112479_at | 3.699969 | 4.320799 | 4.25289  | 3.558399 | 5.115774 | 2.814781 | 2.801423 | 4.680584 |
| 11247_at  | 1.110265 | 2.102077 | 2.045989 | 2.115681 | 2.73754  | 2.740014 | 2.217122 | 1.374126 |
| 112483_at | 6.574569 | 5.738174 | 5.977975 | 5.767338 | 7.124045 | 7.03171  | 5.67782  | 6.549265 |
| 112487_at | 6.178362 | 6.123754 | 5.383445 | 4.230481 | 4.736871 | 4.687623 | 5.908323 | 6.566832 |
| 11248_at  | 2.223165 | 3.988571 | 3.466921 | 3.07653  | 3.875625 | 2.790617 | 3.320993 | 3.755523 |
| 112495_at | 6.040106 | 6.436493 | 5.934234 | 6.132671 | 6.303112 | 5.049787 | 5.801015 | 6.502993 |
| 11249_at  | 3.158448 | 3.590054 | 2.980807 | 3.437959 | 3.473829 | 3.653229 | 3.17119  | 5.390177 |
| 1124_at   | 3.589067 | 3.478977 | 4.350781 | 3.790891 | 3.846047 | 3.965419 | 3.617703 | 3.990985 |
| 11250_at  | 1.061431 | 1.77236  | 1.61332  | 1.415378 | 2.472597 | 1.95431  | 1.316545 | 1.89806  |
| 11251_at  | 4.360686 | 4.219851 | 4.515728 | 3.647933 | 3.22276  | 3.506278 | 4.285517 | 4.322173 |
| 11252_at  | 5.832398 | 6.005698 | 5.731687 | 6.029471 | 5.805287 | 5.977843 | 5.964512 | 5.638775 |
| 11253_at  | 5.353876 | 5.191775 | 5.428166 | 5.191775 | 4.741688 | 5.080906 | 5.73729  | 4.555216 |
| 11254_at  | 1.726074 | 1.548145 | 2.103135 | 2.381282 | 1.926603 | 2.326609 | 2.042543 | 2.204287 |
| 11255_at  | 3.016009 | 2.323489 | 2.765714 | 3.519408 | 2.570058 | 2.635511 | 2.553013 | 2.022857 |
| 112574_at | 3.603688 | 4.26369  | 4.568601 | 3.863874 | 4.621812 | 4.629739 | 4.381497 | 3.649191 |
| 11257_at  | 6.509486 | 6.265129 | 6.378207 | 6.398322 | 4.82148  | 6.00133  | 5.594018 | 5.138437 |
| 11258_at  | 7.24166  | 6.243443 | 6.661702 | 6.390655 | 6.489261 | 6.669517 | 6.383043 | 6.739513 |
| 11259_at  | 4.034612 | 4.054477 | 3.913481 | 4.580686 | 3.651637 | 4.240011 | 3.772429 | 3.795979 |
| 112609_at | 2.276904 | 2.005656 | 2.199299 | 2.506744 | 1.889933 | 2.426495 | 2.366936 | 2.145644 |
| 11260_at  | 6.422831 | 6.807711 | 6.253977 | 7.057036 | 7.474041 | 6.926412 | 6.84788  | 7.107771 |
| 112611_at | 4.086474 | 2.907597 | 3.881836 | 2.968504 | 3.1788   | 4.303706 | 2.732226 | 5.159801 |

112616\_at 6.245362 5.946945 5.420228 6.040589 4.966532 5.759977 5.887988 4.992144  
11261\_at 8.130345 7.618979 8.221492 8.171409 8.580849 8.30502 8.469302 8.281815  
11262\_at 1.342778 1.510245 1.609123 1.388241 1.253687 1.954581 1.640051 1.286485  
11264\_at 5.156333 5.502457 5.938863 5.570613 4.438554 5.099202 6.007864 4.081573  
11266\_at 5.520867 5.452161 5.71113 5.598457 5.815867 5.085467 5.543641 5.732356  
11267\_at 8.282395 8.388689 7.204566 8.590245 7.93198 8.151277 8.190085 8.111254  
11269\_at 5.757636 5.688582 5.888597 5.859851 5.757212 6.655881 6.831745 6.191169  
112703\_at 3.17146 2.445362 2.57086 2.780174 2.894026 3.810224 3.846571 2.228133  
11270\_at 4.96722 4.61107 4.752921 5.00069 4.672002 5.271895 4.022412 4.585359  
112714\_at 2.285091 2.223036 1.645686 2.076742 1.857345 1.533525 1.207068 2.344576  
112724\_at 2.499185 2.230553 3.653735 3.216342 2.873494 1.541008 3.241815 1.607972  
11272\_at 0.789917 2.249175 3.760484 5.440604 1.614982 3.481007 3.717309 1.126594  
11273\_at 7.058122 7.130177 7.335126 6.958032 7.145832 7.052028 6.66154 6.435324  
112744\_at 2.092728 1.903823 2.280681 2.191092 2.287198 2.437932 3.047564 2.18679  
11274\_at 2.786395 3.479589 3.755318 4.611187 4.054186 4.694825 4.309502 3.808764  
112752\_at 5.585481 5.01515 5.409411 5.563588 4.878628 5.50028 4.850658 4.848656  
112755\_at 2.331473 2.346675 1.711311 2.001959 2.321372 2.838239 2.495531 2.399077  
11275\_at 6.107874 6.213532 6.114872 5.13787 6.153453 5.744132 5.4546 5.452926  
11276\_at 6.496374 6.622196 6.514002 6.472775 5.376292 5.954537 6.113909 6.353104  
112770\_at 6.732058 6.626094 7.236539 7.106958 6.829625 6.752141 7.101404 6.585529  
11277\_at 4.065344 3.235084 3.098513 3.755165 3.498439 3.99402 3.493312 3.508504  
11278\_at 5.218742 5.346627 4.743822 5.619756 5.046923 4.821261 5.430271 5.726292  
11279\_at 4.177303 3.962968 2.959076 3.357065 3.724439 3.928453 3.155478 3.907344  
112802\_at 1.23098 2.131844 1.975378 1.539256 1.844085 1.579443 1.347743 1.65753  
11280\_at 1.877903 1.96918 1.932184 1.645085 1.96423 2.029647 1.88229 2.138959  
112812\_at 6.919154 6.105746 5.974387 6.554483 6.199646 6.526608 6.654324 5.71085  
112817\_at 4.840305 4.286343 4.91234 4.110418 4.381244 3.871112 5.876065 4.119048  
11281\_at 3.105223 2.954641 3.033576 4.176506 2.563538 3.259643 3.534789 2.027875  
11282\_at 7.563438 7.067803 7.590827 7.433119 7.189072 7.814177 7.472845 6.96539  
11283\_at 2.474283 1.793837 1.827497 1.78879 1.863816 2.515417 2.620886 2.473644  
112840\_at 3.743417 3.999548 3.500339 3.720107 3.914822 4.629582 4.020787 4.824029  
112849\_at 3.934694 3.560456 2.805427 3.757787 3.784863 4.05155 3.483989 4.105469  
11284\_at 5.181077 4.554758 3.975068 4.463632 3.875814 4.789463 3.826565 4.483364  
112858\_at 4.30616 4.151002 3.335876 3.485017 4.020046 3.839268 3.711366 4.281169  
11285\_at 4.933498 4.221743 4.941689 5.054689 3.334799 4.742685 4.736383 4.193656  
112869\_at 3.89491 4.273824 4.518522 4.250579 3.918657 5.341758 3.876456 3.298155  
112885\_at 3.70831 3.657482 3.206151 2.798817 3.2365 3.099247 3.08381 2.855406  
1128\_at 3.222557 4.475621 4.991526 3.570414 3.869164 4.063114 3.089292 4.429703  
112936\_at 6.241417 6.448344 5.85798 6.037823 3.846882 5.491752 5.38728 5.655464  
112937\_at 1.197242 1.42011 1.437156 1.291074 1.93433 1.760857 1.928546 1.59803  
112939\_at 5.127687 4.77411 5.741052 5.711297 4.776271 5.706928 4.87944 4.467751  
112942\_at 7.131167 6.875717 6.806975 6.527353 7.027894 6.8296 6.445927 6.705086  
112950\_at 4.897303 4.73343 4.413071 4.239945 3.431516 5.117038 5.132868 4.365374  
1129\_at 1.653976 1.350971 1.552884 2.100221 1.390424 1.487949 1.895091 1.536936  
112\_at 4.740907 4.767157 4.488433 4.504383 4.266208 3.53108 4.172474 3.949624  
113000\_at 2.27602 2.011124 2.294985 3.340099 2.229479 2.59197 3.07923 2.202493  
113026\_at 6.605459 5.863797 6.817128 6.40783 5.581183 6.350438 7.123766 5.503743  
113091\_at 2.108178 2.79768 3.33284 2.651609 3.502028 2.885189 2.448958 2.383774  
11309\_at 3.053004 2.908144 2.906037 3.630814 2.784532 3.660896 2.925378 1.890051  
1130\_at 4.655249 4.918577 4.193463 4.180388 4.033061 4.053622 4.533001 4.782321  
113115\_at 2.332109 1.522934 1.65783 1.775166 1.211503 1.357079 1.248851 1.187989

11311\_at 6.683225 6.435865 6.235914 6.468893 6.693062 6.355784 6.450541 6.607618  
113130\_at 2.523619 3.503441 2.328787 3.772736 3.353804 3.142875 3.209291 3.173012  
113146\_at 2.091623 3.165504 2.647412 2.392909 1.165626 2.744734 2.317956 1.928575  
11314\_at 3.649674 3.150285 2.254912 3.535866 2.996651 3.313578 2.970816 2.909254  
113157\_at 2.578778 1.849413 1.723577 1.490107 2.996264 1.662413 1.509358 2.17511  
11315\_at 9.834375 9.828482 9.694379 9.428761 9.832512 9.449028 9.469985 10.11393  
11316\_at 5.960189 4.768438 4.629313 5.283449 4.311291 5.433521 5.434423 4.768211  
113174\_at 3.560044 3.42175 3.342946 4.351533 4.023068 3.272499 4.10364 5.434232  
113177\_at 2.18973 3.003008 2.564461 2.569096 2.841777 1.848266 3.177426 2.167069  
113178\_at 4.346517 4.075456 3.92529 4.921466 3.056646 4.958077 4.032038 4.530362  
11317\_at 2.520218 2.425285 1.936745 2.318841 1.925822 3.006525 2.12529 2.36823  
113189\_at 4.207083 4.588937 3.81305 4.541798 3.684286 4.483542 4.415317 3.949819  
11318\_at 2.729701 2.520147 2.759523 2.655737 2.672673 3.881097 2.126265 1.38386  
11319\_at 6.525803 6.409584 6.562299 6.414169 6.962587 6.405652 6.720275 6.687106  
1131\_at 4.017558 4.617247 3.958694 3.760558 4.528846 4.220825 4.994093 4.220617  
113201\_at 8.439974 8.447156 8.517848 8.381779 8.098399 8.171081 8.480582 8.445228  
11320\_at 6.178683 6.097023 6.074542 6.007039 5.421497 6.024147 6.197555 7.171019  
11321\_at 6.701497 6.590508 6.0249 5.767626 6.427478 6.210849 6.507224 6.418087  
113220\_at 3.937043 3.76457 2.770217 4.188355 2.843627 4.875907 3.856094 2.317399  
11322\_at 2.462863 2.852176 2.694424 3.234055 2.768508 3.347781 2.304157 2.570434  
113230\_at 2.990353 2.28221 2.122233 3.084053 2.986053 3.042439 1.848941 2.406203  
113235\_at 3.68133 3.677397 4.103837 3.798808 4.597775 4.124845 4.738851 3.824161  
113246\_at 9.544476 9.19818 9.571886 9.392619 9.466862 9.557214 9.323631 9.026764  
113251\_at 6.434174 6.912373 5.967465 6.158018 6.260247 6.014064 6.945009 6.49885  
11325\_at 6.720336 7.146095 7.005781 6.899706 6.968959 7.275457 7.084027 7.309042  
113263\_at 4.901279 5.299827 5.229653 5.779123 4.316684 5.174763 5.74878 3.933255  
11326\_at 3.686672 2.666187 3.289907 4.35004 2.394997 3.003622 2.997882 2.401875  
113277\_at 6.406462 6.740771 5.714517 6.211305 6.728741 6.603647 5.798426 6.176787  
113278\_at 3.547297 2.93328 2.971415 2.711514 3.136144 3.113868 3.017847 3.077017  
11328\_at 6.731016 7.291496 7.298381 7.493455 7.169476 7.27029 6.89316 6.133872  
11329\_at 6.493586 6.467057 6.991121 6.874741 6.045022 6.409413 6.37054 6.726088  
1132\_at 1.805573 1.818085 1.916787 2.859748 2.713891 1.818701 1.564258 2.055236  
11330\_at 1.761923 2.542903 2.367703 2.15759 2.679446 1.701482 3.240758 1.46996  
11331\_at 7.743782 7.531659 7.083476 7.361952 7.711282 7.615609 7.329176 7.371599  
11332\_at 3.621217 3.753919 3.697213 4.464857 3.874747 3.344476 3.503044 3.524951  
11333\_at 5.002423 4.640831 4.555009 4.803662 3.87871 5.000883 4.862708 4.365539  
11334\_at 5.473804 4.429804 5.013386 5.069688 3.745395 5.627838 4.031392 5.285133  
11335\_at 6.565175 7.072227 7.021855 7.273043 6.683793 6.719313 7.211392 7.541935  
11336\_at 6.370331 5.703442 5.976752 4.998185 6.219471 6.319145 6.16818 7.081507  
11337\_at 10.5753 10.2107 10.24958 10.35963 10.20151 10.28132 10.52771 10.43455  
11338\_at 5.260498 5.062144 5.961511 4.976328 5.050233 5.961234 5.471072 4.992818  
11339\_at 2.336346 1.741659 1.881774 1.151711 2.468781 1.599003 1.792347 1.980332  
1133\_at 1.484513 1.443461 1.247945 1.589948 1.856391 1.063951 2.15185 1.325223  
113402\_at 7.24483 7.010331 6.697501 6.058926 6.56549 6.613559 5.939607 7.627004  
11340\_at 5.643635 5.498448 5.163148 4.250499 4.33634 5.970718 5.633659 5.666821  
113419\_at 6.497733 7.320003 7.088372 7.109869 6.650635 7.037879 7.135109 7.388583  
11341\_at 1.98947 1.532798 1.746999 1.589161 2.063438 1.692916 1.600634 1.704532  
11342\_at 8.079918 7.719851 7.968043 7.516583 7.643083 7.477927 7.522502 7.997839  
11343\_at 6.773357 6.910492 6.852859 6.831779 6.949019 6.792594 6.700561 5.687819  
113444\_at 3.999767 3.919306 3.908686 3.657007 3.567746 3.402025 3.386643 3.48641  
11344\_at 5.104141 4.869259 5.66873 5.191911 4.518947 6.229718 4.91175 4.76625

113451\_at 3.127004 2.914009 3.224027 3.069977 2.790094 2.285281 3.555628 2.516087  
113452\_at 5.117103 4.502349 6.679273 5.371902 3.943215 6.104607 7.265782 4.920339  
113457\_at 1.414438 2.372583 2.764658 3.210382 3.683841 3.379132 4.018572 2.702741  
11345\_at 8.851721 8.520032 8.244976 8.452631 8.142387 8.278841 8.67854 8.57318  
11346\_at 7.257143 7.253148 7.787481 7.597342 7.069629 7.648335 8.26219 7.021737  
1134\_at 1.623274 2.658723 1.356859 2.085882 2.307833 2.023366 2.077157 1.695884  
113510\_at 4.434762 4.284658 4.38191 4.006549 4.276551 4.398507 3.952119 4.531294  
113540\_at 4.113429 4.073009 2.508447 3.56989 2.769127 3.398294 5.164777 2.056763  
1135\_at 1.819738 1.848064 2.108989 2.153296 1.883089 1.72955 2.934049 1.687667  
113612\_at 5.934677 5.492538 6.033755 6.129656 6.243996 5.177027 6.640335 5.833055  
113622\_at 3.338586 2.830857 3.008167 3.008167 2.754852 2.786311 3.006674 2.167382  
113655\_at 4.892523 4.42766 4.519903 4.566285 3.258996 4.472087 4.021049 3.758135  
113675\_at 3.348933 3.005796 4.020677 3.002554 3.740491 3.567921 2.897406 3.60465  
113691\_at 2.164436 1.822293 2.29987 2.610594 1.884408 3.568076 3.507987 2.90571  
1136\_at 1.651104 1.291126 1.73494 2.238651 1.911011 1.467224 1.686517 1.252618  
113730\_at 1.474433 1.536554 2.863301 1.694539 1.680007 2.913579 1.649514 1.882516  
113746\_at 1.643771 2.182438 2.217891 2.139619 2.341362 2.562359 2.548439 2.023845  
113763\_at 2.669795 3.518743 3.064975 2.780531 2.535004 2.401183 2.777547 2.297949  
113791\_at 4.639284 4.244415 5.253492 4.756981 4.887656 4.61022 4.829151 4.485554  
1137\_at 2.991335 2.983494 1.213992 0.88391 2.91286 1.284009 1.478048 1.26669  
113802\_at 1.653431 2.395882 1.468488 2.068435 2.424278 1.541292 1.545776 3.219147  
113828\_at 2.006217 2.427325 1.233671 3.120937 2.971542 1.186947 1.981835 2.15203  
113829\_at 7.481653 6.97598 7.463037 7.515022 6.3764 7.535866 7.139836 6.652382  
113835\_at 4.533249 4.244108 3.372607 1.303407 2.383986 2.15827 2.717163 1.818015  
113878\_at 5.314099 3.505268 4.794663 4.674614 3.370824 3.795023 1.909924 4.35865  
1138\_at 1.67729 2.286702 1.715032 1.798594 1.58643 0.953402 2.567917 1.481965  
1139\_at 1.606374 2.142992 2.168933 2.279672 4.167849 1.537294 1.095851 1.129098  
113\_at 2.313365 3.430507 4.381957 3.311218 2.965396 2.824872 2.543004 3.381316  
114026\_at 1.071475 0.951018 0.991745 1.435683 2.103104 0.781813 1.117637 1.200843  
114034\_at 3.09263 3.04345 3.958105 3.514638 3.18633 3.496115 3.886127 3.332913  
114036\_at 1.870651 1.929577 1.690061 2.03652 1.30065 1.482332 1.061696 1.329636  
114041\_at 1.553574 1.294233 1.391999 1.629199 1.505704 1.464039 1.381795 1.761213  
114043\_at 2.136959 2.261264 1.762947 1.603006 1.070607 1.740155 1.125491 1.851427  
114044\_at 5.00701 5.367631 6.640046 5.192849 5.144732 6.903627 6.089304 4.886988  
114049\_at 5.45404 5.643384 5.402373 5.742373 5.319935 6.038837 5.261844 5.557794  
114088\_at 1.780981 2.001731 1.621316 1.603307 2.453013 1.950358 2.239303 1.6802  
1140\_at 4.626857 5.390678 4.315044 5.002642 4.725612 3.896024 4.978706 4.829821  
114112\_at 3.186109 3.530494 4.205283 4.039298 3.131521 4.569671 4.359674 4.742694  
114131\_at 1.928684 1.830859 2.676842 1.804257 2.662993 2.837066 2.512425 2.087449  
114132\_at 2.627232 1.699818 1.613025 1.586925 1.682922 2.024531 2.100329 1.922632  
114134\_at 6.250487 5.824734 6.872175 6.479285 5.474822 5.777221 6.586725 6.131502  
1141\_at 3.119761 1.984465 1.903335 1.52665 2.344689 2.052886 1.626469 2.0041  
114294\_at 5.267775 5.407686 5.646691 5.948174 5.539895 5.387163 5.379926 6.187008  
114299\_at 2.984748 1.839572 2.964837 1.311922 4.851092 2.858485 2.811399 4.071347  
1142\_at 1.30489 1.896234 1.464216 1.826704 2.391606 1.868563 1.727169 2.122747  
114327\_at 3.938805 4.409694 4.092223 4.254705 3.381095 3.570979 3.969967 5.512975  
114335\_at 0.998114 3.021548 1.95969 2.511744 1.344412 2.948775 2.765699 4.082105  
114336\_at 1.099189 1.656046 1.155096 1.167659 1.481216 0.544031 1.276571 2.758068  
1143\_at 3.316339 3.834994 3.887973 3.530902 3.229351 3.181686 4.610528 3.945306  
1144\_at 1.884921 1.968008 2.205979 2.578236 2.00025 2.848107 1.960542 1.983182  
114548\_at 1.831326 3.588495 2.27487 2.321443 3.116773 2.170686 2.159439 2.77427

114569\_at 9.58125 10.16292 10.10167 9.253521 9.823188 9.182631 9.907253 9.786106  
114571\_at 2.460561 2.513607 2.157083 2.546407 2.641735 2.548994 2.714426 2.396915  
114599\_at 2.338717 3.333137 2.872908 2.017771 2.666309 2.366713 3.29866 4.10944  
1145\_at 4.053672 2.352186 3.34349 3.023555 3.218855 2.967928 3.248329 2.575055  
114609\_at 4.207563 3.872127 4.566157 5.52121 4.298253 4.844267 3.698749 3.286938  
114614\_at 2.016218 2.772374 1.943693 2.076704 3.001791 3.042486 2.327179 3.069766  
114625\_at 4.061364 4.066049 3.751893 4.195844 4.798872 3.357483 3.766327 3.912134  
114659\_at 3.397677 2.949924 4.478977 2.879958 4.133316 3.91967 4.607966 2.670334  
1146\_at 1.922835 1.33961 1.563567 1.872281 2.425144 1.831385 1.804893 1.807501  
114757\_at 3.921151 3.9065 3.678516 4.479558 3.9668 3.520245 3.304688 4.342448  
114769\_at 3.766548 4.087289 4.3155 4.403804 4.71368 3.900285 3.78885 4.964525  
114770\_at 1.561199 1.818631 1.479809 1.480404 1.307012 1.746741 2.262642 1.356663  
114771\_at 1.612682 1.716914 1.53715 1.692976 2.005649 2.037594 2.658871 1.790505  
114780\_at 2.046513 2.169492 2.113524 1.5715 1.981368 1.84097 1.954381 1.522909  
114781\_at 4.953401 4.993435 4.626526 4.743312 3.451802 4.74839 5.120914 4.182459  
114783\_at 2.127284 3.38364 2.357307 2.589326 2.628079 2.306504 2.32305 2.331356  
114784\_at 1.664513 2.016576 1.97919 2.070211 1.968229 2.23941 1.908469 2.215454  
114785\_at 4.83772 5.162409 4.99403 5.490271 5.930063 5.025476 4.08889 4.163535  
114786\_at 3.740956 3.940786 3.989923 3.129254 2.960434 3.551536 3.227053 3.013066  
114787\_at 2.046602 2.161081 1.552363 1.784889 1.672444 1.795307 2.067576 1.614366  
114788\_at 1.120314 1.357247 1.477233 1.840428 1.458732 1.511628 1.322168 1.866042  
114789\_at 1.89639 2.502919 2.06915 2.858821 2.462199 2.804299 2.733746 1.849074  
114790\_at 1.790047 3.288465 3.513818 2.507515 3.101847 3.358539 2.849163 2.421119  
114791\_at 4.355997 5.09324 5.064024 4.565687 4.706231 4.527884 4.952976 5.012216  
114792\_at 1.752156 3.11428 1.492066 1.374965 1.883382 2.335186 1.677642 2.179849  
114793\_at 6.714362 7.476645 7.260536 6.768931 6.825514 6.821851 7.317215 7.215682  
114794\_at 2.755357 2.45779 2.726629 2.856908 2.545953 2.953334 3.644889 2.885668  
114795\_at 1.728758 2.896796 1.588945 1.934587 3.062407 1.901953 2.954699 2.0761  
114796\_at 3.223769 3.092783 2.91595 2.735993 3.580214 3.214268 3.009619 4.694508  
114798\_at 1.574843 1.608976 1.510116 1.702876 2.374677 2.351317 1.26244 2.044999  
114799\_at 5.577752 5.83273 5.887101 5.800947 5.706896 5.115428 5.725666 6.943542  
1147\_at 5.231486 5.290317 5.521769 5.150814 5.460143 5.172982 4.881574 5.685879  
114800\_at 2.507853 1.966196 2.935618 2.872607 2.226933 2.622192 3.009936 2.391933  
114801\_at 3.877622 5.07025 4.239752 4.491361 4.604159 3.927237 3.691822 4.606238  
114803\_at 5.320628 5.794501 5.477807 5.199344 5.361582 5.667668 5.054736 5.570006  
114804\_at 4.11326 4.259656 4.545081 3.300557 2.550867 3.509586 3.050459 4.697503  
114805\_at 1.496231 1.057447 0.896614 1.014694 1.701068 3.560363 1.95521 1.866966  
114814\_at 4.620451 4.114079 5.393471 4.766975 4.283169 4.265098 4.510309 4.057915  
114815\_at 1.45752 1.78408 1.585209 1.484906 2.521073 1.847034 1.538248 1.975532  
114818\_at 5.562077 4.980234 5.433159 4.788002 4.693438 5.064046 5.68454 4.453995  
114819\_at 2.543447 2.189264 2.018625 1.537994 1.731586 2.057494 1.772036 2.147086  
114821\_at 1.903168 3.610039 1.908461 2.819703 1.984975 3.625587 2.624885 2.717819  
114822\_at 2.434778 2.284634 2.693366 2.576542 2.143272 1.999896 2.089455 3.038627  
114823\_at 7.159894 6.605066 6.828937 7.162945 5.946254 6.873659 6.062231 6.017337  
114824\_at 2.65126 2.581646 2.883032 2.197699 2.493339 2.419086 2.684325 3.057547  
114825\_at 5.040024 4.871667 4.576028 4.660105 4.646992 4.983736 4.749122 5.547679  
114826\_at 3.571776 3.794818 3.952302 3.747361 2.535253 2.955815 4.638701 3.053266  
114827\_at 2.106644 2.893122 2.362455 2.353107 2.303786 1.899112 2.141671 2.143319  
114836\_at 2.242616 2.169801 2.166731 3.164314 2.620701 3.431301 3.108207 1.883173  
114876\_at 5.737843 5.131937 4.7821 4.738597 4.875935 5.762396 4.754712 4.518747  
114879\_at 3.670837 3.380966 3.846428 3.990607 2.818869 4.104853 3.145318 3.639898

114880\_at 2.510049 2.497966 2.840397 2.146497 2.220113 2.903682 2.507626 1.837288  
114881\_at 3.022874 2.101598 2.377613 2.82487 1.889788 1.861219 2.76037 2.133639  
114882\_at 7.41418 7.739453 7.18517 7.51649 7.574678 7.375449 7.23087 7.627204  
114883\_at 7.052371 6.939931 6.939931 6.897876 6.74921 7.066643 6.447851 7.214232  
114884\_at 5.309437 5.09682 3.670043 5.958852 4.489846 5.762212 4.922417 5.235597  
114885\_at 5.240736 5.056671 4.369131 4.379654 5.390245 5.190293 5.11893 5.039364  
114897\_at 3.50364 4.329465 4.684985 3.495678 2.874414 4.86038 4.040221 3.166621  
114898\_at 1.568506 2.880858 2.160511 2.103653 2.221954 3.077103 1.961346 2.251049  
114899\_at 4.587523 4.402538 2.21579 3.303732 4.83684 2.151681 2.38906 3.825491  
114900\_at 2.068156 2.946717 2.525765 1.903878 2.697589 1.85729 3.556834 1.98845  
114904\_at 4.133759 3.474 3.760064 4.500308 4.559421 3.472995 3.862413 2.863252  
114905\_at 2.967482 2.303883 1.955611 2.624834 4.199369 2.529991 1.222604 2.412055  
114907\_at 4.347392 4.301961 5.424928 5.20778 3.571203 4.872457 1.61865 5.177491  
114908\_at 8.345262 8.402117 8.63907 8.796945 8.249515 7.925811 8.177147 7.991695  
114915\_at 6.539764 6.755307 6.880576 6.730184 6.539402 6.806723 6.368191 6.314738  
114926\_at 6.894056 6.937802 6.978649 6.067175 6.54397 6.691062 6.33567 6.843601  
114932\_at 5.987535 6.695396 6.388675 6.276824 6.769829 6.227219 6.474694 7.228794  
114960\_at 1.350277 1.49501 2.195442 1.500189 1.089612 1.235664 1.140273 2.229929  
114971\_at 6.970268 6.62879 6.039826 6.273276 6.452519 6.559155 6.326084 5.983605  
114984\_at 6.486126 6.085734 6.462104 5.655819 6.396241 6.142777 6.31072 5.946953  
114987\_at 3.360455 4.042872 4.925823 3.600836 3.60375 3.48005 5.076864 4.043945  
114990\_at 7.089324 7.133018 7.167798 6.856637 6.358025 7.260248 7.672632 5.762828  
114991\_at 4.178329 4.125947 4.446634 4.816825 4.309602 3.919147 4.110557 4.372161  
1149\_at 1.369526 1.536736 1.645853 1.655712 1.76487 1.435213 1.657717 1.598316  
114\_at 2.059134 1.573158 1.499094 1.301409 1.420792 1.222629 1.329814 1.64593  
115004\_at 3.955649 2.739009 2.923041 3.518493 4.174483 3.575765 3.416716 5.022592  
115019\_at 1.330443 1.185602 1.36763 2.265448 2.065698 1.64308 1.413414 1.744451  
115024\_at 6.730226 6.467701 7.001405 6.754601 6.700135 6.487264 5.039241 6.635098  
115098\_at 5.660797 5.49931 5.365315 5.46364 3.423904 5.57709 5.159503 5.335659  
115106\_at 6.160875 5.694931 5.608351 5.259945 5.112639 5.162253 5.739999 6.311804  
115111\_at 0.898087 0.848217 1.257296 0.7426 1.801113 1.137578 1.767907 1.328111  
115123\_at 3.673032 2.27318 3.387773 3.278796 3.117982 3.363452 1.8484 2.635485  
115196\_at 3.357146 2.356442 3.19453 3.398817 2.680893 2.505644 2.505794 4.659589  
115201\_at 4.977611 5.281346 5.202151 4.690241 5.174804 4.641957 5.017412 4.772885  
115207\_at 6.671146 6.737974 7.797125 7.825719 6.699291 7.053892 7.424518 6.096875  
115209\_at 4.806356 4.059215 4.27348 4.640976 5.375769 4.346298 4.316536 3.612343  
115265\_at 5.775953 5.607077 5.042622 4.78218 3.23037 5.113906 4.722684 4.758074  
115273\_at 0.931118 1.162755 1.024635 1.022772 1.596464 1.234454 1.862538 1.630541  
115286\_at 6.226785 5.611585 6.608752 5.921296 6.415749 5.728994 5.927037 6.331324  
115290\_at 6.292763 5.945694 6.313004 5.365527 4.913634 6.561496 6.408 5.794575  
115294\_at 6.889195 7.271826 7.431748 7.417703 7.54099 6.718903 7.16205 7.629687  
1152\_at 6.213722 6.05305 5.265809 5.570356 4.966686 5.376671 4.689189 5.569015  
115330\_at 3.815616 3.60343 3.068922 3.570035 3.573485 3.577588 2.643716 2.672418  
115350\_at 1.179183 1.376558 1.010217 1.294683 1.760843 1.879906 1.899387 1.549895  
115352\_at 1.828041 2.078446 2.255724 2.184126 2.184957 2.255798 3.285949 2.429564  
115353\_at 6.139549 6.216072 6.701433 4.842983 5.577958 5.908299 5.967846 6.104844  
115361\_at 6.69942 6.853123 7.263664 8.032647 7.769108 7.394984 7.583887 7.484286  
115362\_at 2.748624 2.141824 3.093918 2.802892 3.87257 2.198264 2.795119 4.982379  
115399\_at 2.008786 2.903844 2.857674 2.802389 3.641394 2.52013 3.020274 2.982014  
1153\_at 8.145184 8.355773 8.90986 8.690625 8.436086 8.226152 8.53663 8.100584  
115416\_at 8.409868 8.499822 8.476484 8.298211 8.700717 8.46951 8.377472 8.399415

115426\_at 3.695847 4.382282 4.507827 4.868562 4.070146 4.277788 4.401419 4.818311  
1154\_at 3.405652 4.241503 3.143233 4.100997 4.119326 3.220965 3.506355 2.703262  
115509\_at 3.302399 2.440759 2.048175 1.993875 2.471812 3.018222 2.541779 1.959412  
115548\_at 5.827954 5.785342 5.618522 5.9939 5.622581 5.287376 5.443701 5.873789  
115557\_at 4.959099 4.747468 5.109857 4.090138 4.35466 3.520174 3.835016 3.681514  
115560\_at 3.032948 3.159611 3.442158 2.159161 3.026622 3.648589 2.607234 2.265722  
115572\_at 2.709496 3.287773 3.521579 3.088106 3.258582 2.816769 2.91678 3.18665  
115584\_at 2.378474 2.38981 2.860481 1.337045 1.656605 1.403595 1.481633 2.046927  
1155\_at 8.314296 8.194352 7.891602 7.680308 7.526069 8.235426 7.782786 7.728888  
115650\_at 2.111347 2.794107 2.040439 3.159083 2.156232 2.509963 2.241154 2.216987  
115653\_at 3.560531 3.515302 3.108371 3.504038 3.498219 2.917571 4.028207 2.23206  
115677\_at 8.63975 7.747424 8.007249 8.08303 8.279008 8.632129 8.292706 7.489628  
115701\_at 2.747657 2.814036 2.568946 2.959646 2.971714 3.181431 2.089713 3.731138  
115703\_at 3.008969 2.090784 1.776905 1.359821 1.968052 1.987078 1.774622 2.247188  
115704\_at 3.929061 3.201647 3.476645 3.21816 3.377496 3.931264 3.158428 3.295505  
115708\_at 1.987061 2.147793 1.638942 1.842726 1.585555 2.101331 1.456216 1.531946  
115727\_at 2.780762 2.037353 2.585775 2.1932 2.344216 2.526923 3.130598 2.119812  
115749\_at 3.574878 3.180587 3.260036 2.595321 3.312643 2.265196 2.365045 2.875647  
115752\_at 4.474626 4.100997 3.369591 4.551984 4.381803 4.179161 4.063595 4.231647  
115761\_at 2.498261 1.417639 2.946588 1.593104 1.922494 1.579932 1.689671 1.34061  
115795\_at 1.585263 2.038974 1.617689 2.321386 2.024827 2.523063 1.511567 1.139551  
115811\_at 2.873799 2.262156 3.553837 2.139683 2.385314 3.867835 1.807576 2.931389  
115817\_at 5.586328 4.237823 5.716475 4.598701 5.199163 5.153181 5.378777 4.799522  
115825\_at 4.693851 3.716067 3.63284 4.438501 3.812875 4.229113 3.377682 2.791271  
115827\_at 1.667894 1.461536 1.622264 1.537804 2.079118 1.876463 1.665958 1.66615  
115861\_at 2.24872 2.148824 2.60639 3.176603 1.86373 2.862202 2.200229 2.63719  
1158\_at 1.610604 2.298233 1.88189 2.338762 1.293419 1.914978 2.423295 2.753262  
115908\_at 2.931064 2.648044 3.528545 2.989965 3.114529 3.945414 2.396867 3.188963  
115939\_at 6.001291 6.210487 5.564836 5.623743 5.611397 6.081847 5.660377 5.492224  
115948\_at 2.382924 1.881997 1.421686 2.528472 1.890933 1.803246 3.085296 2.078659  
115950\_at 2.769768 3.082071 2.264068 3.619576 2.523762 3.311239 3.943705 3.387546  
115992\_at 5.564759 5.009124 5.18365 5.251147 4.812958 5.444176 5.147708 4.436831  
115\_at 4.716297 4.479374 5.279835 4.56737 5.018732 5.299178 5.463416 4.828351  
116028\_at 2.58238 4.207978 3.04753 4.732196 4.379024 3.468026 3.673906 2.223463  
116039\_at 2.033313 1.675009 1.726536 2.229868 1.84014 1.558497 1.220052 2.098019  
116064\_at 5.941856 6.386266 5.949848 6.193156 6.030808 6.059269 5.106112 6.328543  
116068\_at 6.247989 6.132228 6.205124 5.335584 6.132967 5.853793 5.946748 6.940763  
116071\_at 5.994117 5.019301 4.554784 5.691427 4.242423 5.28987 4.991575 5.275418  
116085\_at 4.525693 2.541772 3.88421 2.96422 5.283126 3.089708 3.518222 3.625973  
116092\_at 6.473087 5.983662 5.128911 5.605242 5.289706 6.297151 4.549363 5.877125  
116093\_at 1.075667 1.186257 1.209868 0.947233 1.312719 1.328543 0.875031 1.491406  
1160\_at 3.269025 2.685569 3.28683 2.391605 4.13996 3.582631 2.99925 2.586973  
116113\_at 5.367686 4.653041 4.940422 5.231685 4.003622 4.910561 5.240786 3.513285  
116115\_at 4.270507 4.272735 4.321037 4.873148 4.979797 4.940455 3.586925 4.52182  
116123\_at 1.452302 0.830395 1.177942 1.213121 1.306203 1.205452 1.151065 1.486535  
116135\_at 1.514273 1.602203 1.631354 1.85128 2.396216 1.375518 1.922153 2.9869  
116138\_at 6.036266 5.470208 5.480753 5.221244 5.991481 5.39361 5.703872 4.968178  
116143\_at 4.456328 4.662317 4.739129 4.983263 5.034022 4.053721 4.770674 4.551481  
116150\_at 6.882028 6.774271 5.99945 6.22467 6.645146 5.595508 6.688517 7.673505  
116151\_at 6.818051 6.452316 6.721106 7.287623 7.560462 6.701772 6.580675 7.352744  
116154\_at 2.924543 3.376344 3.727817 2.770591 3.281764 3.136306 2.369961 4.336974

116159\_at 7.208423 6.082742 7.857137 8.120774 6.712555 7.760711 7.727624 5.948772  
116173\_at 2.4341 2.243256 2.170079 3.122214 3.053574 1.551479 1.91281 2.585832  
116179\_at 2.390859 1.824638 1.641295 1.474359 1.912227 1.343765 1.621496 2.042314  
1161\_at 4.247322 4.519154 4.383246 4.785502 4.823093 4.285396 4.131157 5.350411  
116224\_at 5.034684 5.975598 4.946524 5.527453 4.983394 5.738601 5.290042 5.285267  
116225\_at 4.859813 4.526255 4.942071 4.480466 5.011979 4.710331 5.030499 4.955773  
116228\_at 7.740481 8.078315 7.979595 8.221961 8.39402 7.766566 7.704162 8.144318  
116236\_at 4.51513 4.237653 4.238823 4.75661 3.884231 3.808546 4.641025 4.444395  
116238\_at 4.118875 4.372863 2.693885 3.186588 3.530597 3.616472 2.754895 2.867185  
116254\_at 8.595638 8.683741 8.846146 8.683414 8.146525 8.460784 8.959087 8.84245  
116255\_at 1.65772 1.456045 1.882002 1.339295 1.776732 1.271108 1.390408 1.556963  
116285\_at 1.923667 1.514613 1.43147 1.582959 2.231682 1.709002 1.955781 1.761807  
116328\_at 1.663727 1.442451 2.491854 2.481166 1.306413 1.433366 2.053212 1.307868  
116337\_at 1.99855 1.563297 1.626825 2.438773 2.602346 2.091221 2.293981 1.454923  
116349\_at 3.037364 2.208613 3.194781 3.241464 2.508628 3.361965 2.376559 2.571393  
116362\_at 7.398158 7.763822 7.519678 7.046774 6.949169 8.409246 7.974083 7.185831  
116369\_at 1.618972 0.969776 1.595774 1.710997 1.073307 1.084377 1.134294 1.312628  
116372\_at 3.558015 2.487572 2.779904 3.937367 2.640882 4.51727 4.510421 3.750951  
116379\_at 1.253784 1.3533 1.244672 1.36323 1.62587 1.679275 2.157075 1.063352  
1163\_at 3.851617 1.265456 0.760269 2.43954 1.066902 3.057447 4.396016 5.337594  
116412\_at 2.218909 2.766514 2.013125 2.594338 2.341138 2.889194 3.199728 1.810075  
116437\_at 2.154336 0.622049 1.258793 1.070868 0.708332 1.059976 3.913716 0.860353  
116441\_at 6.888791 6.71996 6.933839 7.226529 6.793286 7.341558 7.651269 6.575353  
116442\_at 3.726338 2.231291 3.21144 3.115686 2.942952 2.714804 3.827859 2.911224  
116443\_at 0.954067 2.310896 1.877881 2.868768 3.60358 2.420713 2.242324 2.7691  
116444\_at 2.504239 2.291544 3.12722 2.884221 3.263701 2.668149 2.178632 3.124515  
116447\_at 2.995527 3.359841 1.578658 2.85861 2.44432 3.092594 2.734914 3.462804  
116448\_at 3.898916 2.453783 2.202039 2.417176 2.70772 1.67393 3.094357 3.361066  
116449\_at 2.060318 1.790072 1.967352 1.933945 2.58282 2.297526 2.638457 1.807036  
116461\_at 5.965968 5.324542 6.248652 4.892538 6.106878 5.972224 5.831601 5.302216  
116496\_at 4.6834 5.003243 5.092711 5.135091 4.880913 5.088685 4.1511 4.821446  
1164\_at 5.438068 5.435726 4.961311 3.448368 5.467789 5.241319 4.759759 5.944732  
116511\_at 1.089551 1.063607 0.911924 3.426583 3.199988 1.124413 1.530808 1.071059  
116512\_at 2.966561 3.15936 2.850529 3.267603 2.516541 2.55489 2.290553 3.033394  
116519\_at 2.846273 3.304139 3.200598 3.032809 3.378974 3.412081 3.333434 3.393045  
116534\_at 2.0101 3.346269 3.645541 3.199262 3.422947 3.767789 2.727942 2.854816  
116535\_at 7.253135 7.189427 7.631353 6.780478 6.949033 7.160534 7.516584 6.425654  
116540\_at 7.864957 7.56751 7.236022 6.900174 7.035734 7.645641 6.937909 7.080212  
116541\_at 7.716904 7.187643 7.238404 6.727576 5.925248 7.354113 6.319032 6.592054  
116729\_at 1.96788 2.510152 1.634707 2.163717 2.195107 1.888263 1.874894 1.718033  
116828\_at 4.503054 3.22365 2.602503 2.355488 4.221803 3.552179 2.470109 5.146052  
116832\_at 6.081002 3.076786 5.862804 6.027127 5.627793 5.459107 4.324839 5.740015  
116835\_at 4.306999 4.218772 3.964603 4.951738 2.904271 3.949911 3.728691 3.746406  
116840\_at 5.337818 5.12658 5.029651 5.195886 5.940023 5.617106 4.803905 4.801339  
116841\_at 4.649676 4.529427 4.734956 4.734245 3.970607 4.524731 3.779885 4.265396  
116842\_at 5.708771 3.945054 2.512253 2.901446 2.756644 3.943518 1.791684 3.365009  
116843\_at 4.586942 4.619627 5.466721 5.228224 5.851791 4.336359 4.722272 5.159976  
116844\_at 3.324297 3.487332 3.388293 3.439406 3.497845 4.18554 3.397343 3.308597  
116931\_at 1.761734 1.260902 1.808989 1.41228 2.606268 1.812979 1.772159 1.957461  
116933\_at 1.689665 1.705333 1.247717 1.589606 1.963581 1.700773 1.592397 2.437181  
116937\_at 1.488555 1.100376 1.118255 1.07431 1.739786 1.379305 1.438656 1.330626



116938\_at 3.05416 4.672365 4.531185 6.018481 6.383319 3.637089 4.624793 2.365085  
116966\_at 3.011055 2.795773 2.794384 2.43198 2.78573 2.860448 2.361357 3.028314  
116969\_at 2.093347 2.257262 1.956501 1.686731 2.105245 1.799626 2.25142 2.261378  
116983\_at 2.249149 1.940611 2.285976 2.559866 2.269507 3.080601 1.905448 2.51874  
116984\_at 4.469369 5.026151 4.130679 4.665219 4.286512 4.585241 4.626532 5.858146  
116985\_at 3.503983 4.150912 4.239312 4.219389 3.980648 4.0928 3.642393 3.653245  
116986\_at 2.227136 2.604469 2.333551 2.346348 2.715565 3.146004 2.565715 3.638284  
116987\_at 2.988321 3.500708 3.263617 2.726929 2.83911 2.955742 3.235812 3.498486  
116988\_at 4.20036 4.73391 4.075586 4.183648 4.121381 4.218034 4.426598 3.452752  
116\_at 2.101396 2.653559 2.428727 2.542085 2.992299 2.718011 2.624017 2.271107  
117143\_at 4.342438 5.392906 4.962117 4.160021 5.089336 4.02747 4.596564 5.802338  
117144\_at 1.419823 1.563233 1.95711 1.596089 2.470294 2.947422 1.873631 2.139519  
117145\_at 2.593507 2.15998 2.885804 2.109331 3.674834 1.297792 2.096774 2.899899  
117153\_at 3.180334 2.670167 2.413665 3.194735 3.645768 4.124491 2.761072 4.2932  
117154\_at 4.193128 4.060856 3.807292 3.605303 3.645203 3.125886 2.938332 4.159197  
117155\_at 1.791681 2.499018 2.94646 3.213601 1.658926 1.347545 3.478822 2.424624  
117156\_at 1.614548 1.864844 1.796815 1.607191 2.165638 0.830177 1.105625 2.469416  
117157\_at 3.033319 1.428283 1.760123 3.792366 1.108433 2.025576 2.034375 2.441905  
117159\_at 0.785446 1.028803 1.424763 1.135766 1.244174 2.01712 1.221604 1.191509  
117166\_at 3.925391 3.481545 3.302297 4.42221 3.580928 4.375372 3.153333 4.569763  
117177\_at 5.645582 5.348085 6.64303 4.741676 6.038739 5.962168 5.899977 6.391449  
117178\_at 3.805762 4.201521 4.217846 2.81937 3.966329 3.575913 3.866193 4.207877  
117194\_at 1.99463 1.999871 1.891992 2.685881 1.97421 1.601404 2.397499 3.14582  
117195\_at 1.124034 2.468089 0.967395 1.164812 2.407382 0.790621 1.0358 1.774449  
117196\_at 1.791446 1.988499 1.276556 2.071052 2.675386 1.467969 1.951319 2.225204  
117245\_at 1.955815 2.069287 1.361663 3.125274 2.07821 1.71813 1.4285 1.714454  
117246\_at 5.284155 5.843408 5.446565 5.412385 5.497325 4.65024 4.975495 4.886999  
117247\_at 5.980416 6.449374 6.661736 6.208602 6.180421 5.67568 6.285336 6.496361  
117248\_at 2.249221 4.124605 3.515586 4.022426 2.641653 5.480161 4.096963 3.349041  
117283\_at 3.142092 2.659486 5.216373 4.301297 2.01118 3.738915 3.020001 2.967313  
117285\_at 1.59784 1.378971 1.545613 1.22504 2.074866 1.72639 1.350726 1.656828  
117286\_at 1.995104 1.815952 1.88581 1.623142 1.754225 1.888118 1.668488 1.781199  
117289\_at 2.858553 3.13425 3.050682 1.944155 3.123503 3.232854 2.901689 2.026294  
1173\_at 7.80566 7.964223 7.64381 8.008213 7.942215 8.419657 7.740361 8.001279  
1174\_at 4.872263 5.047967 6.02422 5.974937 3.559823 4.974568 5.073364 4.436788  
117531\_at 2.746326 2.341402 2.83254 1.686128 2.818225 2.090761 3.500486 2.456532  
117532\_at 2.004982 1.964255 2.410094 1.918892 2.075756 2.182023 2.704589 2.305055  
117579\_at 3.205981 2.656076 1.420046 2.410007 2.153923 3.184051 3.216862 2.643167  
117581\_at 1.31905 2.324227 1.192526 2.150108 2.30316 2.055585 1.310573 1.805959  
117583\_at 6.858139 6.697577 7.208059 6.985624 6.692825 6.850615 7.399253 7.092427  
117584\_at 5.118734 3.564719 1.60272 3.339196 2.924157 3.327315 5.86576 3.528461  
1175\_at 8.266761 8.121066 7.354526 8.145134 7.359461 7.777141 7.366395 7.224844  
117608\_at 1.816311 2.976339 3.26693 1.879026 1.8189 1.529589 1.909563 1.433775  
1176\_at 4.629561 4.674854 4.5002 3.867072 4.115425 3.809598 3.787922 4.575204  
117854\_at 4.93607 5.667031 5.167095 2.850061 5.847258 3.844004 4.120279 4.841297  
1178\_at 4.109681 2.155284 1.627344 2.502357 2.53161 1.8659 1.529094 1.580918  
1179\_at 1.033232 1.091524 1.574759 1.61384 1.352947 1.128874 1.647087 1.101086  
117\_at 1.75879 2.068433 2.196129 2.073261 2.223338 1.953317 2.580721 2.497509  
1180\_at 1.029439 1.38937 1.443982 1.624122 1.457092 1.75577 0.926674 1.616913  
1181\_at 2.524291 2.659472 2.200319 2.777087 1.919403 2.746296 3.235712 2.052074  
1182\_at 5.630175 6.029864 6.611037 6.089325 6.895528 5.452788 6.648637 6.830914

1183\_at 2.842383 4.071785 3.267699 3.957778 3.893259 3.387871 3.463821 4.549492  
118421\_at 1.047846 1.052512 1.409172 0.794765 1.344933 1.349576 0.801752 0.940024  
118424\_at 4.138424 3.965953 4.699512 5.047007 4.375332 4.696059 4.126435 5.251983  
118425\_at 2.197446 1.206627 1.560315 1.132485 1.117918 1.485817 1.744254 1.246453  
118426\_at 4.14261 4.07085 5.123862 5.376251 3.055776 4.057632 4.386863 4.811563  
118427\_at 2.237763 2.326964 2.40643 2.312263 2.139642 1.914902 2.105771 2.050714  
118429\_at 7.260833 7.218124 7.060823 7.488081 7.932569 6.685084 7.395868 8.155962  
118430\_at 1.514705 2.1173 1.488619 1.337233 1.486135 2.112712 1.428592 1.521925  
118432\_at 5.733558 4.848792 5.522044 5.948136 3.900235 5.757266 4.83676 5.588583  
118433\_at 0.80259 1.606545 1.979089 3.059986 1.227926 2.470577 3.482528 0.650311  
118442\_at 2.048398 2.600883 2.28724 1.669206 2.759941 2.357434 1.937993 2.185912  
118460\_at 4.401522 3.981664 4.081539 4.103932 4.029003 3.465829 4.659985 4.261921  
118461\_at 1.845367 2.282969 1.97447 2.268531 1.967471 1.742572 2.497384 2.258547  
118471\_at 7.227867 5.71808 6.230129 4.837065 6.681531 6.869404 4.455904 5.445574  
118472\_at 5.450821 5.478777 4.637176 5.32681 5.615285 5.058118 4.768546 3.677933  
118487\_at 5.989553 6.099958 5.946959 5.406935 5.303526 5.477981 4.998013 5.802898  
118490\_at 2.357366 2.165802 2.222205 2.810871 2.999716 2.611787 2.251384 1.993863  
118491\_at 2.537636 1.638942 1.276801 1.67719 2.138353 1.499663 2.343724 2.575644  
1184\_at 4.459361 4.23446 3.513608 3.122243 5.919187 3.549588 3.269245 4.996615  
1185\_at 4.405551 4.580995 4.850765 4.927371 3.318765 5.181546 3.499039 3.942035  
118611\_at 1.112812 1.377638 1.521914 1.482048 1.553752 1.578898 1.564106 1.259411  
118663\_at 1.678175 1.789738 1.409109 1.911512 1.936613 1.733894 2.079084 1.493852  
118670\_at 2.325602 1.765954 2.247998 1.419757 1.775631 1.901502 0.96547 3.124776  
118672\_at 3.957904 3.682022 3.461422 3.357869 4.239648 3.633411 4.336254 4.928254  
1186\_at 5.549004 4.500229 3.865442 5.224864 4.989592 4.923166 5.023936 4.100016  
118738\_at 1.642874 1.339944 2.137395 0.952591 3.057077 2.428946 3.651631 1.941851  
118788\_at 5.298068 4.220183 4.861421 5.522342 4.769489 5.001875 5.024946 4.222141  
1187\_at 4.161702 3.517059 2.124532 1.940704 5.850678 3.785222 1.512255 0.648373  
118812\_at 4.086005 5.112702 2.962104 2.574756 4.373047 3.591959 3.032909 2.458172  
118813\_at 3.654637 4.328464 4.184886 3.950755 3.728701 4.30751 3.855109 3.830356  
118856\_at 1.469101 1.954458 1.718585 2.090696 1.505451 1.560786 2.042171 1.604167  
118881\_at 5.434171 5.467564 5.03542 5.1699 4.449937 5.768621 5.241799 4.715223  
1188\_at 4.090917 3.591952 2.698218 3.503352 6.527678 5.067322 1.709894 2.615772  
118924\_at 6.632925 7.28782 6.462812 6.250173 6.29497 6.96408 6.106458 7.129779  
118932\_at 1.12895 0.942023 1.490609 0.975993 1.871818 1.408012 1.409142 1.646861  
118980\_at 5.466148 4.090564 4.933932 3.23391 5.547622 4.669958 3.774874 5.154134  
118987\_at 5.964759 5.86518 5.682919 5.290513 5.374504 6.280824 5.810378 5.560578  
118\_at 7.150988 7.290789 7.188369 7.256925 6.715577 7.035804 7.100511 6.640525  
119032\_at 7.91388 7.947295 7.741267 7.32911 7.810011 5.867458 7.523645 8.056788  
1191\_at 6.977509 6.425619 6.837334 6.921243 7.36745 7.241642 5.611152 6.060244  
1192\_at 8.505467 8.279119 8.336495 8.693891 8.075197 8.338931 8.338365 8.167945  
119369\_at 2.658886 2.056245 1.403369 1.730438 1.378419 1.24455 2.323164 2.279706  
119385\_at 2.944535 1.894612 2.304623 2.404918 1.904617 1.248665 1.602618 1.923426  
119391\_at 4.051185 4.219421 4.759491 4.234094 4.299757 3.813371 4.02572 4.756509  
119392\_at 4.447806 4.833291 3.620277 5.06408 4.504417 3.526449 3.562215 3.692319  
119395\_at 1.496906 1.753509 1.467477 1.279596 2.15491 1.318847 1.733206 2.867404  
1193\_at 5.953369 6.40029 6.206915 6.553991 6.391022 6.595694 5.818958 6.864138  
119437\_at 1.304888 1.445784 1.287256 1.1548 1.060996 1.030661 1.490887 1.445857  
119467\_at 5.997364 4.990056 3.368672 2.861286 4.953505 4.170253 2.942889 4.990938  
119504\_at 8.130434 7.632623 7.705484 7.633147 7.718914 8.191562 7.688505 7.890034  
119548\_at 1.244716 1.181139 1.735304 0.71658 1.065125 1.281629 1.488973 1.524474

119559\_at 3.501609 3.574768 3.613196 4.044647 4.008407 3.882571 3.011115 3.014502  
119587\_at 2.686287 2.28756 3.173998 3.238804 3.86745 1.468384 2.68393 3.646109  
1195\_at 6.723836 6.380979 6.366865 6.487377 6.263678 6.717462 6.111847 6.887242  
119678\_at 2.246019 1.543774 1.307585 1.378791 2.020338 1.238594 1.680765 1.491673  
119679\_at 1.387534 1.909281 1.712983 1.112275 3.193806 1.549678 1.432852 1.967185  
119682\_at 1.82685 0.913328 1.432527 1.401279 1.011619 1.138094 0.890111 1.34226  
119687\_at 1.845337 1.510433 1.453171 1.135481 1.083747 1.696647 1.127092 1.133593  
119692\_at 2.385334 2.416411 2.125774 3.375878 3.199896 3.280573 1.281769 1.461291  
119694\_at 2.224189 2.96301 3.77243 2.810674 3.445608 3.170291 3.055958 3.484128  
119695\_at 2.335694 2.76502 2.343278 3.060336 1.945104 2.291298 3.64864 2.546443  
1196\_at 4.71774 5.347774 3.984804 5.225113 3.537048 4.270989 3.630231 5.340006  
119710\_at 5.002657 4.372691 4.569856 4.409452 4.340036 4.182688 3.364686 5.242575  
119749\_at 1.591717 0.885625 1.290608 1.886995 1.385986 2.394813 1.896277 2.045718  
119764\_at 2.803402 1.872897 1.829214 2.542273 3.320016 2.531278 2.204005 2.457131  
119765\_at 1.546605 1.194349 1.062869 0.932203 1.519466 1.209076 1.405331 1.168291  
119772\_at 2.438583 1.575749 2.169704 1.554537 1.700397 1.812276 1.8102 1.640101  
119774\_at 1.590315 0.856758 0.773188 0.988372 1.336175 1.64548 2.253625 1.144205  
1197\_at 3.421209 3.217285 3.641489 3.310484 3.271598 3.669884 3.038749 1.881732  
1198\_at 5.67314 5.703322 4.854615 4.819275 4.436236 5.371576 5.427944 4.385795  
119\_at 1.992544 1.046102 2.003012 1.789124 1.603424 1.329397 2.679189 0.944648  
120065\_at 0.987613 1.675043 1.402212 1.645195 2.563621 3.786629 3.329214 1.673967  
120066\_at 1.12889 1.571599 1.356708 1.294763 1.266805 1.122174 1.145157 1.45838  
120071\_at 3.715165 3.729049 3.37144 3.91988 4.599815 3.722288 2.869797 2.656535  
1200\_at 7.743156 8.215846 8.059673 8.220949 7.086808 8.311944 8.266692 6.808165  
120103\_at 3.519133 4.309677 3.152461 3.235484 4.052198 3.342341 3.140022 4.08722  
120114\_at 1.19133 1.617243 2.214078 1.527235 1.4875 1.750163 1.751772 1.761807  
120146\_at 1.451427 1.11178 1.018943 1.668487 0.895052 1.583384 2.699147 0.676549  
1201\_at 6.871026 5.997644 6.686285 6.131662 5.184707 6.260005 6.165418 4.990813  
120224\_at 3.390898 3.369038 3.881829 4.265408 4.843087 2.491337 3.402126 4.338268  
120227\_at 4.020723 2.186967 2.718941 2.722354 4.003084 2.262766 2.529734 2.706784  
120237\_at 1.263476 2.15896 2.082459 2.256231 1.405936 1.552308 3.201011 1.478965  
120376\_at 2.760299 3.243753 2.840541 2.558379 2.922603 2.876752 1.83295 2.575754  
120379\_at 3.564303 3.530156 3.554102 2.004422 4.534791 3.43147 2.144642 4.171283  
1203\_at 7.104964 7.246906 7.390176 6.875411 6.630277 6.991517 7.009216 6.999092  
120400\_at 2.238885 1.50061 1.270443 1.603506 2.408987 1.522044 1.018532 1.319779  
120406\_at 1.129442 1.174207 1.494108 1.669931 2.551259 1.090066 1.161962 0.975078  
120425\_at 2.697336 3.371217 1.786604 3.153378 1.982729 3.345032 3.395321 2.724742  
120526\_at 6.415896 5.880696 5.964692 6.344204 5.129513 5.213077 5.399193 6.067549  
120534\_at 7.031551 7.13549 7.037392 7.280476 6.517258 6.683764 7.103122 7.307285  
120586\_at 0.916444 1.221955 1.397805 1.555706 1.620267 1.393526 1.635703 1.21435  
120775\_at 1.258729 2.104138 0.996743 0.756272 1.404302 1.479087 2.080771 1.308728  
120776\_at 2.190996 1.559767 1.074384 1.987747 1.576777 1.890181 0.791295 1.532909  
120787\_at 1.731956 2.116202 1.639955 2.677903 2.163433 2.085178 2.139788 1.881771  
120793\_at 1.914349 2.192588 2.04502 1.984064 1.828411 1.426466 2.372041 3.446202  
120796\_at 2.592869 1.52046 1.751728 1.166145 1.56442 1.360361 1.663491 2.097993  
1207\_at 5.964898 6.363471 6.587738 6.506606 6.089494 6.727504 5.917177 6.697368  
120863\_at 1.631862 1.194482 1.076923 1.388199 1.781679 0.648819 1.228529 1.427219  
120892\_at 4.513411 4.558028 4.13696 4.999535 5.505766 4.334293 4.395167 5.444443  
1208\_at 1.674833 2.159158 2.711254 1.845133 1.925332 1.413005 1.90479 2.298748  
120935\_at 1.339742 1.414257 1.235897 1.148803 1.143453 1.492592 1.370484 1.802222  
120939\_at 6.577328 5.507126 2.928455 5.470654 8.477421 3.326776 2.597137 3.519092

|           |          |          |          |          |          |          |          |          |
|-----------|----------|----------|----------|----------|----------|----------|----------|----------|
| 1209_at   | 8.566347 | 8.309364 | 8.79045  | 8.803992 | 7.97527  | 8.292564 | 8.757931 | 8.157872 |
| 120_at    | 7.669364 | 7.83169  | 8.075982 | 7.644893 | 7.610461 | 7.334699 | 7.561492 | 7.705608 |
| 121006_at | 1.278072 | 0.965158 | 1.165082 | 1.246918 | 1.111167 | 1.943234 | 1.058456 | 0.89645  |
| 121053_at | 6.100962 | 5.860824 | 5.359088 | 4.940686 | 3.068782 | 5.941902 | 4.484558 | 5.066745 |
| 121129_at | 0.879919 | 2.324903 | 0.791166 | 1.181448 | 1.582    | 1.111989 | 0.989062 | 1.452165 |
| 121130_at | 1.577446 | 2.521111 | 1.993406 | 1.591319 | 2.611509 | 1.695926 | 2.916301 | 2.143719 |
| 1211_at   | 7.7552   | 7.321529 | 7.522417 | 7.931452 | 7.497611 | 7.557361 | 7.167493 | 7.859027 |
| 121214_at | 2.275724 | 1.88737  | 2.364835 | 2.073791 | 2.65022  | 2.190096 | 2.891557 | 1.660025 |
| 121227_at | 4.500407 | 5.025108 | 4.495971 | 4.39383  | 4.500009 | 4.63882  | 4.683844 | 4.452184 |
| 121256_at | 1.442336 | 1.697749 | 1.734117 | 1.153271 | 1.527117 | 1.695566 | 1.813661 | 1.545576 |
| 121260_at | 6.784956 | 6.763692 | 6.235844 | 6.614686 | 6.940482 | 5.256191 | 6.972097 | 6.697446 |
| 121268_at | 1.880513 | 1.70961  | 1.645559 | 2.382459 | 1.757728 | 1.08676  | 1.584084 | 1.632293 |
| 121273_at | 1.768605 | 1.563735 | 1.254212 | 1.151299 | 1.73165  | 2.834533 | 2.227493 | 1.566426 |
| 121274_at | 3.487746 | 3.379283 | 4.192563 | 4.942618 | 3.511017 | 2.273758 | 2.742848 | 3.699233 |
| 121275_at | 2.631485 | 1.773805 | 1.456723 | 1.772987 | 2.339358 | 1.731704 | 2.352962 | 2.415425 |
| 121278_at | 3.112997 | 1.121215 | 2.366757 | 1.936487 | 1.76324  | 1.765297 | 2.536566 | 2.84118  |
| 1212_at   | 7.31259  | 6.926205 | 6.780649 | 6.632453 | 6.661334 | 6.864975 | 6.623028 | 6.314087 |
| 121340_at | 2.195903 | 2.094303 | 1.939463 | 1.773208 | 1.537394 | 1.420971 | 1.987972 | 2.625756 |
| 121355_at | 2.68454  | 1.219392 | 1.909046 | 1.378316 | 2.688797 | 2.217329 | 1.935361 | 2.759942 |
| 121364_at | 1.940627 | 1.199784 | 1.301099 | 1.38522  | 2.088562 | 1.347973 | 1.6113   | 1.667206 |
| 121391_at | 1.040331 | 1.552944 | 1.68421  | 1.783546 | 1.396315 | 1.616908 | 2.038131 | 0.947789 |
| 1213_at   | 8.551772 | 8.958377 | 9.093198 | 8.919294 | 9.098441 | 8.644454 | 9.025046 | 9.242728 |
| 121441_at | 5.545979 | 5.488209 | 5.370574 | 5.881468 | 5.005306 | 5.317906 | 4.61805  | 6.184159 |
| 121456_at | 5.369474 | 5.036114 | 5.202401 | 5.790845 | 4.988366 | 3.892411 | 5.224162 | 5.906277 |
| 121457_at | 6.476132 | 5.513468 | 5.462963 | 5.879061 | 5.524131 | 5.639796 | 5.724985 | 5.077259 |
| 121504_at | 7.309391 | 6.904265 | 7.949499 | 6.237899 | 6.802403 | 7.222297 | 6.287824 | 7.598001 |
| 121506_at | 6.95302  | 5.731548 | 4.850294 | 5.901655 | 5.377647 | 6.997814 | 5.674247 | 6.423919 |
| 121512_at | 5.119448 | 5.369085 | 5.790061 | 5.657234 | 5.254869 | 5.298253 | 4.622775 | 5.29072  |
| 121536_at | 6.200936 | 7.079898 | 6.531319 | 6.332798 | 6.430095 | 6.296075 | 6.743364 | 6.529246 |
| 121549_at | 1.507292 | 2.039535 | 1.520855 | 1.566721 | 1.737152 | 1.641439 | 1.363557 | 1.339999 |
| 121551_at | 2.266861 | 1.764526 | 1.722771 | 1.5708   | 2.382886 | 1.537861 | 1.809149 | 1.615121 |
| 121599_at | 1.38977  | 0.776088 | 1.271942 | 0.935163 | 1.139256 | 1.024733 | 0.938956 | 1.425459 |
| 1215_at   | 2.052464 | 1.678142 | 1.894746 | 2.518057 | 2.848568 | 2.029749 | 2.485254 | 1.862057 |
| 121601_at | 1.282167 | 1.699599 | 1.421392 | 2.132443 | 1.92677  | 1.015616 | 1.575313 | 1.465786 |
| 121642_at | 4.504176 | 4.347992 | 3.690996 | 2.427156 | 4.824599 | 5.059207 | 3.12718  | 2.497752 |
| 121643_at | 2.745103 | 2.407769 | 3.676428 | 2.891584 | 3.358416 | 2.732924 | 2.488743 | 2.493165 |
| 121665_at | 7.221564 | 7.239393 | 7.586744 | 7.104155 | 6.743425 | 6.976441 | 7.509241 | 6.96466  |
| 121793_at | 3.237446 | 2.325277 | 1.769474 | 1.322045 | 2.098905 | 2.663802 | 2.336977 | 2.009887 |
| 121838_at | 1.84181  | 1.153265 | 1.414794 | 1.67788  | 2.309566 | 1.762653 | 2.654005 | 1.395301 |
| 121952_at | 1.504019 | 1.438462 | 1.592428 | 0.599376 | 1.537995 | 1.215093 | 0.71186  | 3.220822 |
| 122011_at | 3.22598  | 3.129886 | 2.997156 | 3.316744 | 3.200292 | 3.476582 | 3.275113 | 3.258266 |
| 122042_at | 1.580442 | 0.874567 | 1.039249 | 1.191771 | 1.29581  | 1.10516  | 2.246068 | 1.278034 |
| 122046_at | 1.315882 | 1.242649 | 1.014901 | 1.442646 | 1.522165 | 1.051091 | 1.460069 | 1.244454 |
| 122060_at | 3.355404 | 3.140624 | 3.202493 | 2.979796 | 3.048912 | 2.586877 | 3.137652 | 3.287936 |
| 122258_at | 1.701316 | 1.663732 | 1.711584 | 1.802138 | 1.492759 | 1.333935 | 2.391925 | 1.574347 |
| 122402_at | 2.37345  | 2.632021 | 2.618775 | 1.929087 | 2.404082 | 2.222792 | 3.491233 | 2.544555 |
| 122416_at | 3.008256 | 2.508796 | 2.369475 | 2.220515 | 2.025181 | 2.642373 | 2.862391 | 1.913266 |
| 122481_at | 2.083042 | 2.201632 | 3.237806 | 2.428474 | 2.138074 | 2.198852 | 2.274271 | 2.278318 |
| 122509_at | 6.45007  | 5.412894 | 5.014088 | 5.353176 | 5.860515 | 6.846168 | 5.826486 | 4.981166 |
| 122525_at | 3.558895 | 2.923848 | 2.144981 | 2.173081 | 3.573147 | 2.363467 | 3.243178 | 3.578849 |
| 122553_at | 6.547288 | 6.817363 | 6.642961 | 7.086288 | 7.460782 | 7.020228 | 6.694283 | 6.916761 |

122616\_at 1.611318 4.077937 2.138259 2.250934 1.823373 3.516476 2.530364 2.492157  
122618\_at 1.636342 1.912767 1.567903 3.27928 1.719879 1.902776 1.848853 2.025952  
122622\_at 4.55956 4.08154 4.340952 3.661849 3.66056 3.990636 3.376548 3.605199  
122651\_at 1.285961 2.150658 1.409179 1.578907 2.400693 1.638361 2.047858 1.608241  
122664\_at 3.796765 3.669045 2.458742 2.758112 3.082839 3.815285 3.226614 4.427351  
122665\_at 1.795167 1.5239 1.271521 0.774803 1.447828 0.97587 1.447736 1.723628  
122704\_at 6.087594 6.665326 5.953808 5.53531 5.281505 5.702108 5.987837 4.394297  
122706\_at 1.460572 1.551031 1.612421 1.431849 2.15186 1.296571 2.063458 1.522161  
122740\_at 1.219099 1.604243 1.648016 1.582117 0.986724 1.340191 1.091677 1.75686  
122742\_at 2.489574 0.888848 1.231316 2.067062 1.231996 1.074579 1.540628 1.051368  
122748\_at 3.816678 1.103083 2.555128 1.681029 0.945601 3.20023 2.212948 1.456857  
122769\_at 4.346322 4.446793 3.021719 3.595058 4.551455 3.089459 3.509038 3.69533  
122773\_at 5.468443 5.339232 5.692974 4.415706 5.135974 5.570322 5.542105 5.700834  
122786\_at 4.079163 5.440373 4.784734 5.235874 4.054387 4.499485 4.819347 5.131945  
122809\_at 6.754431 7.082124 7.349209 6.530659 6.559461 6.442674 7.097527 7.03554  
122830\_at 5.778529 6.0648 6.107945 5.919503 5.946658 5.943317 6.054601 5.670433  
122876\_at 1.212426 1.103443 0.810278 0.777658 1.022617 1.113542 0.727877 1.014026  
122945\_at 2.806906 1.843247 2.433669 1.755636 1.503943 2.092481 1.671425 1.663567  
122953\_at 3.83873 3.789648 3.508762 3.387563 2.989058 4.180483 3.123262 2.939197  
122961\_at 6.144467 5.341401 6.018215 5.97166 5.846806 5.507562 5.910524 5.472524  
122970\_at 0.884816 0.707717 2.027021 1.214097 0.945279 2.426653 1.015188 1.216884  
123016\_at 3.30573 3.577528 3.651752 3.177246 4.057812 3.374874 3.076809 3.208522  
123036\_at 3.431732 3.645731 2.469396 3.853374 4.084411 3.444071 3.253234 4.249703  
123041\_at 2.155652 2.764601 1.689414 1.966212 1.751903 2.420031 1.980113 3.036022  
123096\_at 4.014933 3.561532 3.954548 3.779846 3.554302 3.513579 4.165914 4.245358  
123099\_at 3.05165 2.997063 3.215603 4.799057 3.977174 4.496187 3.173305 2.762506  
1230\_at 3.334456 2.09845 1.96675 2.719027 2.682564 3.340994 3.859304 3.405983  
123103\_at 1.881217 2.002645 3.053904 1.998841 3.109786 2.308382 2.389053 2.606784  
123169\_at 6.49228 6.657588 6.146826 6.565065 6.740167 6.660366 6.693356 6.332815  
123207\_at 5.688613 5.053366 5.680095 4.5119 4.945773 5.643297 4.84093 5.09345  
123228\_at 3.489818 2.898677 2.696847 2.810704 3.332258 2.8515 3.630986 2.623173  
123263\_at 5.813043 5.0927 5.110066 4.964599 5.93993 5.298594 4.715459 5.928286  
123264\_at 3.806463 2.839083 2.508138 2.328175 2.962081 3.581437 1.92166 3.431156  
123283\_at 5.295734 4.336794 3.440703 4.077275 4.226666 5.506903 5.023012 5.000553  
1232\_at 1.359786 1.176749 1.231291 1.186308 0.894984 0.941938 0.907465 1.104912  
123346\_at 1.600206 1.302264 1.064025 1.698034 1.321227 1.311415 1.379467 1.991068  
123355\_at 4.50398 4.81933 4.883565 3.432384 4.892969 4.272851 4.301294 3.759307  
1233\_at 2.171096 1.548125 1.528447 1.417722 3.313476 1.006117 3.26488 2.098967  
1234\_at 1.739117 1.735539 1.627857 1.947738 2.232364 1.887787 1.894262 1.507202  
123591\_at 4.62021 5.363899 5.724537 5.09241 3.533921 5.138056 4.589449 4.545032  
1235\_at 1.511135 2.094512 2.564705 2.075621 2.570109 1.638121 2.516494 2.289901  
123606\_at 4.640944 4.511144 5.201553 5.154502 5.252222 4.281715 5.129104 4.015425  
123624\_at 2.120996 1.642148 1.855005 1.663005 2.035172 2.287003 1.461501 1.798717  
123688\_at 4.777599 3.633692 3.397045 3.378487 3.587052 4.341501 4.191816 2.764016  
1236\_at 3.181584 3.399269 3.62369 3.403306 3.22862 3.858542 4.123705 3.136745  
123720\_at 4.526469 4.671183 4.484103 3.809215 4.194483 3.914794 4.311335 3.352946  
123722\_at 2.000544 2.235043 2.532691 2.255599 2.01581 1.698989 1.726004 2.198492  
123745\_at 1.544428 1.889398 1.252739 1.419591 2.09161 1.727543 1.679527 1.783043  
123775\_at 2.027743 2.056817 2.156386 2.027476 2.25225 2.249443 1.826122 2.336504  
1237\_at 1.670982 1.193533 2.115754 1.8515 1.735735 1.509255 2.056436 1.504427  
123803\_at 7.616584 7.14687 6.319025 6.248126 6.292779 7.102869 6.835001 7.429128

123811\_at 7.392718 6.850224 7.610119 7.340446 6.62342 7.341935 7.59816 7.663244  
123872\_at 1.722722 1.539107 1.716355 1.752533 1.641662 1.764573 2.24015 1.72502  
123876\_at 6.728251 5.560982 5.137941 4.437269 6.3746 6.814042 0.614384 6.552839  
123879\_at 3.984454 3.796779 4.494584 4.343398 4.749798 4.615996 4.884328 3.438305  
1238\_at 1.655466 1.574749 1.974299 1.903878 2.65589 2.307974 3.181059 2.693549  
123904\_at 3.111858 2.396997 2.498157 2.816223 2.907857 2.128259 1.734764 2.099543  
123920\_at 5.822913 5.602703 5.958597 5.964674 5.106768 5.272919 5.090285 5.537875  
123970\_at 1.376839 1.861846 2.377083 1.54421 1.689004 2.229081 1.716257 1.992558  
123\_at 7.306394 7.726915 7.312545 7.542388 8.340349 7.48886 7.478515 7.726414  
124044\_at 3.29793 3.299748 3.636618 4.486196 4.24608 3.279685 3.828324 3.427107  
124045\_at 2.683434 2.297134 3.786673 2.551426 3.253061 4.753528 3.11435 1.866631  
124056\_at 1.824088 2.211769 2.30137 2.528948 1.628715 2.200861 3.084163 2.369764  
124093\_at 2.508949 2.231955 2.726156 2.108934 2.7951 2.68694 2.126195 1.705454  
1240\_at 3.766952 4.998257 4.580253 5.151987 5.202942 4.767915 5.463922 4.168082  
124149\_at 1.072768 1.114515 1.06928 0.853047 1.003681 1.586708 1.34792 2.110199  
124152\_at 5.546567 4.375244 4.584829 5.255646 5.847315 4.319203 4.871195 4.655558  
1241\_at 1.765178 1.694135 2.118111 3.373224 2.088865 2.069655 2.859078 2.104801  
124220\_at 4.644148 5.098778 3.926548 4.624865 4.172672 4.757511 4.62336 5.851325  
124221\_at 3.127933 1.901361 2.149587 2.330082 1.778792 3.43582 3.31709 2.022435  
124222\_at 3.586472 3.879321 3.273998 3.722283 3.203641 3.550307 4.084064 3.363532  
124245\_at 5.614108 5.23295 5.473242 5.625735 4.867194 5.435574 5.384424 4.91194  
124274\_at 1.82128 1.460446 2.30646 2.537597 1.879451 2.571951 2.402952 2.103524  
124359\_at 2.814336 2.480885 2.80543 3.94874 3.588284 3.315957 4.340667 2.126444  
124401\_at 2.972739 3.922628 4.240686 3.566396 3.510878 3.951724 3.909411 2.606398  
124402\_at 6.157797 5.810934 6.00124 6.100195 5.238876 6.23117 4.961397 4.54489  
124404\_at 2.537922 2.943089 2.562844 1.807417 2.321937 1.830493 2.367601 2.456528  
124446\_at 9.71369 9.845829 9.501178 9.393665 9.517768 9.962366 9.335424 9.517841  
124454\_at 3.960684 3.784559 3.675553 4.01323 3.224277 3.393324 2.697635 3.623081  
124460\_at 1.571782 1.881165 1.835226 1.993702 1.732619 1.519117 1.268083 1.774618  
124491\_at 5.936139 6.003943 5.967551 6.336316 5.951019 5.841101 6.162124 5.773211  
1244\_at 3.408594 2.220485 3.397492 1.424993 4.061321 3.089552 2.756844 4.147827  
124512\_at 5.396931 5.264552 4.653883 4.216569 4.916631 4.607039 4.452825 4.86779  
124535\_at 1.277986 2.016287 1.345173 1.973156 1.425801 1.643946 1.982737 1.663132  
124538\_at 0.582695 1.123351 1.383442 1.100887 2.042722 2.005161 1.06134 2.989763  
124540\_at 7.565458 7.361354 8.13169 7.49554 7.486038 7.141111 7.948797 7.700502  
124565\_at 4.628381 5.328385 5.392477 5.509836 5.503881 5.984597 5.994571 5.026785  
124583\_at 5.375552 4.218008 4.78287 5.055985 4.153522 4.9084 4.103992 4.05115  
124590\_at 3.319709 2.721553 2.709206 2.989202 2.561813 2.636805 2.774418 2.193851  
124599\_at 1.715053 1.593009 1.829836 1.6321 1.92211 1.468721 1.597312 1.504297  
124602\_at 2.605012 3.03754 1.886996 2.801192 2.707721 2.712015 2.714474 2.818838  
124626\_at 1.145285 1.350801 1.271524 1.107969 1.217341 1.36458 1.753396 1.273809  
124637\_at 4.73362 4.751654 5.023533 4.782362 4.558721 4.742879 4.674206 5.154382  
124641\_at 3.308169 1.663189 3.159354 1.221665 1.711921 2.774804 0.802631 1.169109  
124739\_at 1.673344 2.499663 1.602073 1.678353 1.509746 1.539051 2.048871 2.455978  
124751\_at 4.111176 4.174982 3.81873 4.637043 3.831201 3.596897 4.551881 4.661317  
124773\_at 1.993618 2.337882 2.281601 2.072094 2.220686 2.329883 2.476999 2.925298  
124783\_at 2.43521 2.248674 2.487772 1.216023 2.029088 1.65853 1.410509 1.950413  
124790\_at 4.129859 3.79572 3.861941 3.260859 4.149762 4.523985 3.089069 3.987446  
124801\_at 2.693439 2.095695 3.31732 1.859301 2.414875 1.91347 3.198302 2.717779  
124808\_at 5.397795 6.826501 6.380768 6.597177 6.295056 5.877996 6.458445 6.845047  
124817\_at 1.514174 1.299322 2.081737 2.14216 1.631473 1.917011 1.587334 1.637093

124842\_at 2.089409 2.63055 3.055274 1.958 2.677471 2.112565 2.251661 3.125894  
124857\_at 2.104342 2.507589 1.961094 1.885298 1.993849 1.42379 1.414886 2.04507  
124871\_at 1.894092 2.614564 2.047741 1.352668 2.220166 1.483628 1.61665 1.33532  
124872\_at 1.530991 1.888206 1.792384 1.252326 3.009568 2.766215 2.43436 1.944922  
124912\_at 1.84711 1.81599 2.120031 2.407054 2.804483 2.856168 2.281251 2.397772  
124923\_at 1.457936 2.046313 1.455774 1.337656 2.550955 1.888335 1.823402 1.591445  
124925\_at 1.976696 1.548093 1.941875 2.375921 1.245884 1.657288 2.276047 1.632765  
124930\_at 2.806449 3.063141 2.299522 2.858205 3.103313 2.123322 1.785276 3.185342  
124935\_at 5.39606 4.806936 5.049338 5.952721 6.121986 5.071164 5.547425 3.101083  
124936\_at 5.496119 5.402138 5.876691 5.642207 5.661588 5.739197 5.645899 4.909561  
124961\_at 5.617119 5.122619 5.901825 5.634707 4.881327 4.424152 4.35701 3.657707  
124975\_at 4.711471 3.773313 3.563756 3.404143 4.704389 4.559979 3.484613 4.141379  
124976\_at 4.732847 3.832583 4.151545 4.137852 3.89351 4.792094 4.392188 4.172562  
124989\_at 6.787894 5.749029 6.209552 5.701662 6.019397 5.819168 5.989106 6.981737  
124995\_at 4.670963 5.366064 4.770069 4.788567 4.837702 4.545422 5.022373 4.296166  
124997\_at 2.769533 3.561608 3.405361 2.86602 2.661073 2.413627 2.718323 3.41484  
124\_at 0.94415 0.948584 1.420876 0.718416 1.584918 2.139707 1.577529 1.172298  
125058\_at 3.238142 3.54736 3.434768 3.09155 2.610773 3.764579 3.475949 3.339959  
125061\_at 3.910899 3.992651 4.112624 3.762628 3.994092 3.545172 4.365657 4.961179  
125111\_at 4.659128 4.726176 5.256074 5.381295 3.879927 4.491864 4.49534 4.169863  
125113\_at 1.587469 3.112158 2.15787 1.506473 1.850419 1.565691 1.812856 1.505827  
125115\_at 1.224592 2.065415 1.249365 1.392199 1.262631 1.419418 1.307622 1.473955  
125144\_at 5.254714 5.040115 5.202487 4.941248 5.241811 4.753867 4.85155 5.184684  
125150\_at 7.543921 5.719383 5.692477 5.596819 7.384395 6.474584 6.174321 7.409669  
125170\_at 2.993281 3.094633 3.200496 2.571237 2.809105 2.593067 3.304618 2.440249  
125206\_at 4.75658 4.411908 3.964171 3.685202 4.060469 3.59102 2.916402 5.405542  
125228\_at 4.705463 4.430918 4.812302 4.387504 5.221753 4.244619 4.733462 4.123675  
125336\_at 1.451085 1.336528 1.507131 1.351905 1.377476 1.840335 2.137308 1.531712  
125476\_at 4.546152 5.380904 5.579661 5.233404 4.193612 5.532833 5.195744 5.26625  
125488\_at 2.940577 2.725386 2.144815 2.933998 2.760525 2.98992 2.337931 3.099018  
125704\_at 2.615099 2.10707 2.882926 2.171962 1.839546 1.643654 2.372444 1.627269  
125875\_at 4.945081 5.805068 5.694256 4.372135 2.947714 5.57706 4.883573 4.595706  
125893\_at 3.0961 3.629618 4.045276 4.290218 3.194138 4.682274 2.581256 3.032567  
1258\_at 1.801515 2.112911 2.077194 1.887593 2.042447 2.028089 2.246588 1.869714  
125919\_at 4.917345 4.595574 4.570212 4.538269 3.968946 4.578658 4.987189 3.360311  
125931\_at 3.020138 1.899339 2.547413 1.818991 2.074885 1.818991 1.557665 1.823266  
125950\_at 4.106807 4.864965 4.962667 5.287971 4.132155 5.028195 4.487321 4.278651  
125958\_at 1.655552 3.536885 1.191936 1.436188 3.026835 1.555207 1.171288 1.967104  
125962\_at 2.202237 1.294343 1.189944 1.868828 3.091083 2.28757 1.35486 1.284146  
125963\_at 1.546181 2.209953 1.509611 1.775251 2.125567 2.09999 2.331208 2.477416  
125965\_at 2.040101 2.184067 1.764126 1.778104 2.35013 2.367569 2.553834 1.781414  
125972\_at 1.89298 1.472485 1.427544 1.401414 1.697981 1.785922 2.084795 1.554595  
125981\_at 2.603138 1.971548 1.981497 1.333219 1.994675 1.905641 2.232137 2.01015  
125988\_at 7.877958 7.148512 7.303469 7.647448 6.939407 7.854272 7.007632 6.326413  
125997\_at 0.961783 3.758375 1.239823 1.94751 2.894298 2.454947 5.256968 3.898838  
1259\_at 4.56899 2.519967 2.817078 3.303238 4.310075 3.100543 3.017859 3.146936  
125\_at 1.304266 1.198171 1.848682 1.250215 0.763715 1.103138 0.733185 1.659983  
126003\_at 8.183568 7.873783 7.684521 7.719776 7.279879 8.208267 7.832305 7.098211  
126006\_at 2.154235 1.977612 2.501241 2.673676 1.660087 2.903207 1.917893 1.676148  
126014\_at 2.978469 2.304177 2.305766 2.231367 2.568907 3.090569 2.275455 2.452158  
126068\_at 4.200359 4.353632 4.174667 3.441331 4.141985 3.024258 4.259614 3.328922

126069\_at 1.583203 2.270415 1.741509 2.615608 1.798837 1.180619 1.761275 3.215091  
126070\_at 4.362418 1.76871 4.625068 4.291445 4.905882 4.744031 3.287685 4.31529  
126074\_at 4.261522 4.331647 4.769763 4.948146 5.181419 4.137513 3.749952 3.455235  
126075\_at 4.570166 4.296024 3.302485 3.744422 3.849711 2.744397 1.855281 3.558639  
1260\_at 1.594334 1.697963 1.762123 1.612927 1.865218 1.550082 1.72324 1.896959  
126119\_at 5.172406 4.256229 5.337048 4.196989 3.221743 5.018863 4.252661 4.552116  
126123\_at 1.536628 0.985948 1.271898 1.405559 1.291861 1.915411 1.750494 1.202216  
126129\_at 3.671994 3.716926 2.33676 3.550745 3.398344 2.887316 3.291696 2.729544  
126133\_at 2.331454 2.50266 2.032212 2.181357 1.980311 2.539886 3.48809 2.725719  
126147\_at 1.418296 1.563454 1.639553 1.820428 2.171711 1.6126 1.363936 1.760478  
1261\_at 2.52184 3.012872 1.751429 1.495324 1.71512 1.261041 2.115787 3.350972  
126204\_at 1.740681 1.825308 1.426022 2.389271 1.554734 2.385771 1.348989 1.599023  
126205\_at 1.569976 1.608775 1.810834 1.57534 1.456545 2.249907 1.917433 1.895936  
126206\_at 1.490092 1.602173 1.907398 1.950006 1.470049 2.030869 2.42188 1.378929  
126208\_at 4.739392 5.275069 3.970142 5.085121 5.270353 5.211764 4.876952 4.723444  
126231\_at 2.610438 3.78066 3.942521 2.728034 2.901206 3.213744 2.477833 3.138274  
126248\_at 1.497064 2.117635 1.812859 1.432586 1.647143 1.761665 2.021975 1.598364  
126259\_at 2.047234 1.881982 3.206692 1.888 3.565304 2.255885 2.332631 2.735714  
126272\_at 2.329922 1.943448 1.459791 1.669683 1.792219 1.352944 2.680362 1.824412  
126282\_at 3.518769 3.476313 3.644033 3.477237 2.924485 3.407182 3.321153 2.627189  
126295\_at 4.30194 3.865955 4.511687 3.866975 4.919382 4.709855 4.199966 4.270725  
126298\_at 2.495155 2.172565 3.131083 3.502985 3.116609 2.479694 2.703254 3.317925  
126299\_at 4.341908 4.732278 4.418959 4.52464 4.738986 4.324418 4.458721 4.775778  
1262\_at 1.944618 1.368464 1.550376 1.877524 1.981153 1.146723 2.234105 1.996788  
126306\_at 3.316799 4.18652 3.676386 3.85272 4.092667 3.479117 3.59707 3.38367  
126308\_at 6.55332 5.885764 6.472684 6.409415 6.06951 6.34523 6.988925 5.565926  
126321\_at 4.906632 3.996302 4.545619 5.062869 4.513053 4.597875 4.645281 4.506594  
126326\_at 4.440691 3.228316 4.758292 4.457502 3.265556 3.10174 4.302411 2.101906  
126328\_at 8.560885 8.141164 8.303057 8.399587 8.141009 8.572483 8.352125 7.86136  
126353\_at 3.70685 2.496255 3.344546 3.169826 3.986637 2.624184 2.903324 2.798697  
126364\_at 3.393329 2.609997 1.432822 2.387008 1.911654 2.413519 3.372494 2.04164  
126370\_at 1.751525 1.781578 1.688909 1.348416 3.113985 1.202858 1.630341 2.090132  
126374\_at 5.221703 5.209361 5.468625 5.175474 3.811045 4.656724 6.466357 4.216408  
126375\_at 3.689213 3.494587 4.390626 4.917771 3.792068 4.77692 4.219588 3.829026  
126382\_at 5.851961 4.420795 4.653553 4.738559 4.046625 4.719935 5.172819 4.330233  
126393\_at 4.545357 4.722653 4.124977 4.949246 4.891064 4.723263 5.392492 3.336513  
1263\_at 3.69351 3.620438 4.234427 3.900151 2.574875 3.71452 3.649976 3.024412  
126402\_at 1.07267 1.354636 1.376703 1.861131 1.457295 2.240664 1.583817 1.138865  
126410\_at 1.653739 1.612319 1.292181 1.632987 1.916468 2.354418 1.906108 2.095053  
126432\_at 2.389393 2.753606 2.699469 2.281178 3.038976 2.518667 3.266028 2.299068  
126433\_at 5.205272 4.827997 5.177372 4.266561 4.387864 5.279638 4.803662 3.730776  
1264\_at 2.655705 2.600663 3.689502 2.634625 2.723202 3.224871 2.206102 3.062926  
126520\_at 1.290977 2.066375 1.790232 1.284287 1.968487 1.175453 1.249259 1.491788  
126526\_at 3.428648 3.588967 4.319902 3.672299 2.926688 3.474704 3.456265 3.304556  
126536\_at 1.630059 2.340453 2.657105 1.453784 2.454288 1.58405 1.766106 1.553206  
126541\_at 1.842959 2.321862 2.659834 2.340331 3.222384 1.709317 3.661353 1.726549  
126549\_at 2.865755 3.41632 3.370049 3.180993 2.679574 3.219398 3.002813 3.175837  
126567\_at 1.899882 2.810996 2.531568 2.345026 2.213768 2.994222 2.696361 2.69773  
1265\_at 8.549583 7.824793 8.089774 8.686299 7.842419 8.163542 8.604957 7.747631  
126626\_at 5.985459 6.241441 6.413992 5.75621 5.979552 6.14776 6.775926 6.088877  
126637\_at 1.684629 2.023638 1.471739 1.4495 2.377044 1.846406 1.986006 2.32843



126638\_at 1.111836 1.647612 1.88891 1.671955 1.598153 1.514757 1.438423 1.508251  
126661\_at 3.351522 2.516062 1.797009 1.790179 1.996251 2.176471 2.124692 3.081395  
126668\_at 2.103187 2.273557 1.738966 2.283157 1.609089 2.0771 1.955323 2.072751  
126669\_at 5.252887 5.452344 5.317574 5.415836 5.105526 5.320701 5.737995 4.854969  
126695\_at 3.131264 2.595609 2.466163 2.796126 2.981677 2.769287 2.405885 3.052531  
1266\_at 8.138901 8.086782 8.300344 8.408227 7.688265 8.49507 8.234966 8.157619  
126731\_at 3.728775 5.415871 4.321549 5.666358 4.70069 4.501566 5.074466 5.534984  
126755\_at 2.721426 2.265502 1.418611 1.971247 1.559445 3.844457 1.441773 3.160714  
126767\_at 1.531541 1.289205 1.404777 1.177773 2.115185 3.214489 1.667586 1.423665  
126789\_at 4.462483 4.232119 4.800582 4.197898 4.077784 4.258305 3.436536 4.525158  
126792\_at 5.439146 5.379416 5.308703 5.36896 5.165558 5.308703 4.906103 4.756105  
1267\_at 4.627048 4.687001 4.151982 5.189818 4.408442 4.132125 4.795831 4.27009  
126820\_at 2.139387 2.280835 1.923138 1.172664 2.465341 1.758579 2.035524 1.145857  
126823\_at 3.917318 3.713788 3.219413 2.87192 3.836604 3.863578 2.799376 3.57281  
126859\_at 2.168924 1.727982 1.840038 1.58621 1.93935 1.465234 2.507174 1.692314  
126868\_at 1.009062 1.465289 1.358535 1.529788 1.62326 1.968799 1.73481 1.562974  
1268\_at 1.192584 1.215003 1.393716 1.434495 1.539052 1.389013 1.302548 1.619593  
126917\_at 5.233659 6.042636 5.105216 4.420452 4.326554 4.928459 4.110089 4.783868  
126969\_at 5.181174 4.705304 4.383945 4.260988 5.825184 5.200561 4.921716 4.550222  
1269\_at 1.394982 1.071095 1.410981 1.436706 1.537302 1.925819 1.297166 1.867477  
126\_at 2.476847 2.540829 2.441228 1.435702 3.110738 1.691501 3.631512 1.39685  
127002\_at 3.052387 3.123734 3.36883 2.734317 4.513343 2.808287 3.334974 3.435094  
127003\_at 2.610165 2.673254 2.162285 2.22644 2.073589 3.222347 2.054461 2.374485  
127018\_at 5.656194 4.894961 5.066124 4.792927 5.729255 5.572259 5.564753 5.822021  
127059\_at 2.409349 1.76058 1.491742 1.111894 1.807291 0.946246 1.194439 1.827363  
127064\_at 2.930858 3.153498 3.745804 4.031152 4.360738 3.457111 2.29041 3.754646  
127066\_at 1.510676 1.781135 1.724637 2.068972 1.631619 2.030723 2.102204 2.30195  
127069\_at 6.013898 3.181864 4.235161 3.37715 5.094173 3.47736 3.562488 5.302694  
127074\_at 1.5346 0.986505 2.323007 1.293521 0.874421 2.37295 1.024168 1.484816  
127077\_at 2.262746 1.958816 3.426738 2.210446 2.139948 2.164595 2.944216 2.380901  
127124\_at 1.81323 1.689408 1.863261 2.334221 4.818697 2.169992 2.083 2.136691  
1271\_at 3.489333 3.685599 2.91323 4.441351 3.098426 3.793141 2.608361 2.902271  
127247\_at 1.201438 1.223407 1.266644 1.04844 1.154434 0.836092 1.152369 1.173987  
127253\_at 7.335125 7.260289 7.076963 6.437283 7.381728 6.725787 6.679608 7.318413  
127254\_at 0.653172 1.346789 1.18214 1.426473 1.160454 1.034564 1.541456 1.136407  
127255\_at 1.623445 1.407077 1.333338 1.339235 1.528963 1.520066 1.365314 2.999216  
127262\_at 7.314001 6.766197 7.068064 7.194362 6.492188 6.720402 6.86193 5.572158  
127281\_at 2.399589 2.960477 4.847119 3.949943 4.211817 3.32028 3.220742 3.571216  
127294\_at 4.187434 2.865115 3.348222 3.312422 2.420648 3.604235 2.350881 4.010854  
1272\_at 5.304071 5.945253 6.205055 6.231018 4.806828 6.026995 5.960962 5.581642  
127343\_at 2.378522 1.807864 2.062766 2.006413 2.506917 2.384663 2.629781 2.438258  
127385\_at 0.69973 0.959048 1.115854 0.566926 2.63155 1.935035 3.264925 1.13806  
127391\_at 2.269538 1.208422 1.37541 1.724839 1.761546 1.461301 1.033587 1.102305  
127396\_at 5.121506 4.636965 5.050291 4.740949 5.229066 4.295465 4.885111 4.983024  
127428\_at 4.288494 4.095436 5.145798 5.463867 4.611433 4.079129 4.585046 5.578679  
127435\_at 2.374869 2.140805 2.06634 2.872289 2.404827 1.790713 1.841822 2.84712  
127495\_at 1.882129 1.635052 1.388799 1.80053 2.516023 1.872307 1.642432 1.377775  
127534\_at 1.454071 1.260485 1.521294 1.570647 1.835446 1.568723 1.968283 1.82362  
127540\_at 1.736308 2.297555 1.842883 2.141088 1.989783 1.954583 1.9214 1.807455  
127544\_at 5.765316 6.062441 6.408101 6.429047 5.499189 5.75622 5.671892 6.671385  
127579\_at 2.158645 2.796206 2.367147 2.206586 2.4337 2.058868 2.28954 1.845641

127602\_at 2.157604 1.905005 1.707088 1.677446 2.08413 1.777122 1.703688 1.924323  
127623\_at 1.610553 1.519295 2.228093 1.425517 2.627056 1.355735 2.345736 3.176077  
127665\_at 1.62543 1.979828 2.29878 1.681403 1.773941 1.531584 2.119665 2.00219  
127670\_at 1.412517 1.87434 1.497428 1.02752 1.616546 1.989318 1.683643 1.559066  
127687\_at 6.078067 5.334104 5.868853 4.99233 4.466296 6.060567 5.599825 4.892287  
127700\_at 4.81192 4.517331 3.607719 4.462644 3.574909 3.406687 4.308158 4.787975  
127703\_at 1.978155 2.807816 3.678149 4.666069 2.415841 3.146391 2.520398 3.015212  
127707\_at 4.189071 2.41125 2.864086 2.917388 3.220013 3.888036 2.545845 2.930906  
127731\_at 2.580821 2.07814 1.506654 2.11604 1.72582 2.022002 2.359803 2.520653  
127733\_at 2.231961 2.676847 3.195328 2.991274 2.780871 2.918977 2.491367 2.082184  
127795\_at 1.918039 1.816161 1.858976 1.496155 1.960828 2.386876 2.245577 1.761597  
1277\_at 3.410255 4.473799 3.05559 4.676984 4.045584 3.933 3.642587 3.722957  
127829\_at 7.649738 8.016678 7.420298 7.128749 7.206324 7.52465 6.864967 7.397794  
127833\_at 2.04879 2.301261 2.872749 2.114043 3.005177 4.007336 2.869424 1.427625  
127841\_at 1.561069 1.586091 1.452745 1.381696 1.794167 1.620308 2.193482 1.767952  
127845\_at 2.944662 2.543306 3.314734 2.638408 2.218417 3.573866 2.539159 3.984768  
1278\_at 3.822228 4.30652 4.228938 4.522365 4.74977 4.035171 3.946186 4.426103  
127933\_at 7.342092 7.779912 7.785604 7.619573 8.039565 7.105137 8.100494 7.460509  
127943\_at 2.305239 2.933634 2.3765 2.817066 2.912788 2.116355 2.898132 2.570042  
127\_at 2.377924 1.654229 1.661619 1.831623 1.943576 1.588716 1.708067 1.687804  
128025\_at 1.459956 1.15616 1.415952 1.305548 1.997969 1.57655 1.506383 1.665364  
128061\_at 5.374481 5.463832 5.856748 5.865531 5.855161 4.576353 4.419664 4.581099  
128077\_at 5.136534 4.652585 4.977206 5.596739 4.226773 5.070028 5.34674 5.435998  
1280\_at 2.146469 1.59915 2.307891 2.180552 2.222122 2.418575 1.99658 2.760862  
128102\_at 3.136274 2.499895 2.170336 1.988994 2.764275 2.354892 3.119554 1.980184  
128153\_at 3.35554 2.592923 3.174098 2.145919 2.93907 2.759867 2.620763 3.771285  
128178\_at 1.614204 2.69192 1.900382 2.369806 2.543264 3.128484 2.181463 2.398625  
1281\_at 4.500222 5.634463 4.396334 5.050258 4.170563 4.231466 4.523971 4.612223  
128209\_at 2.251637 1.752005 1.817055 1.692107 2.208761 1.565995 1.840729 1.764997  
128218\_at 3.937338 4.063908 3.323114 3.646776 4.24015 3.736888 3.400775 3.954689  
128229\_at 1.736454 1.27333 1.492723 1.498902 1.915149 1.439887 0.763891 1.70645  
128239\_at 2.057916 2.167978 1.872697 1.990417 1.924655 2.243044 2.363332 2.41509  
128240\_at 8.503149 8.291304 8.216966 7.288562 7.541444 8.479275 7.816753 7.53014  
128272\_at 2.497643 2.346346 2.614154 3.03049 2.324255 1.868613 2.482465 2.880074  
1282\_at 5.513112 6.42295 6.109929 7.000267 6.484195 5.953173 6.074199 6.025759  
128308\_at 5.802704 4.99217 5.219742 4.882882 3.963316 5.344495 5.307504 4.223473  
128312\_at 3.547049 3.392526 3.718848 2.58747 3.09575 3.540063 4.085213 3.299301  
128338\_at 6.472491 6.763506 6.133402 6.064584 6.130383 6.051449 6.111965 6.100851  
128344\_at 3.71738 5.280579 3.50649 3.703579 4.615083 4.095058 2.416415 4.541955  
128346\_at 5.013587 5.498302 4.484741 5.525432 3.944527 5.459043 5.799667 5.201541  
128360\_at 1.297545 0.966389 1.405558 1.254518 1.608095 2.242667 1.037382 1.540263  
128366\_at 1.376041 1.161242 1.455134 1.579768 1.502886 1.817219 2.105636 2.732412  
128367\_at 1.12056 2.837962 2.244915 1.225619 1.353252 1.337132 1.581086 1.522559  
128368\_at 1.370142 1.3912 1.323232 1.1709 1.323915 1.40829 1.260154 2.337327  
128371\_at 0.755928 0.961499 0.723844 1.828379 1.333367 0.618524 2.260901 1.389067  
128372\_at 2.299817 1.595665 0.846263 1.292399 1.389662 1.995425 1.171138 1.775404  
128387\_at 5.609265 4.794662 3.846185 4.904165 4.863463 4.047466 4.803258 5.121839  
128408\_at 2.333382 1.790311 2.522448 1.573922 1.353407 1.501673 2.482876 1.729572  
128414\_at 3.730735 2.76894 2.092765 2.717551 2.297474 2.994293 1.805518 2.200754  
128434\_at 2.355261 3.113573 3.687763 2.920337 3.02223 2.895704 3.631823 2.326747  
128439\_at 4.346433 4.58316 4.479159 4.031767 4.635801 4.483144 4.174901 4.682561

128486\_at 6.74163 6.505275 6.625895 6.755294 5.270497 6.257204 6.320219 6.805822  
128488\_at 2.585026 2.171545 2.179295 3.193123 3.488843 2.375501 3.199005 2.116523  
128497\_at 3.582416 3.078343 2.481919 3.231774 5.544013 3.8904 2.888238 5.894954  
1284\_at 5.273056 6.151001 5.89267 6.701528 5.781264 6.25688 6.577677 5.030494  
128506\_at 1.35633 2.118534 2.006034 1.819533 2.202455 1.529677 1.739328 2.206029  
128553\_at 3.565659 4.752889 3.101114 3.564989 2.756757 3.943721 3.739435 3.395369  
1285\_at 7.076402 7.055699 7.158748 6.635551 6.77489 6.53102 7.35773 7.095511  
128602\_at 1.265294 1.95697 1.686386 2.550154 2.629225 2.00125 1.409963 1.966939  
128611\_at 2.395789 1.775383 2.382641 2.028346 2.061649 2.14893 2.325643 2.113427  
128637\_at 6.395256 6.548112 6.952449 6.826686 6.390981 6.79742 6.759565 6.281673  
128646\_at 2.560124 1.946786 2.058316 1.904742 2.115908 1.777905 2.205901 2.442094  
128653\_at 3.763912 3.412371 3.189604 3.161071 2.84018 3.425123 3.465683 3.445076  
128674\_at 1.851848 1.930251 1.9018 1.882661 2.20703 1.842766 2.825323 2.074818  
1286\_at 3.97964 4.378024 4.831808 4.881491 4.051222 3.940317 5.088323 4.537668  
128710\_at 3.468247 4.605081 4.040625 4.652886 2.159177 3.614979 4.783537 4.194144  
1287\_at 3.646485 4.220515 4.366749 3.922205 3.874325 3.862001 4.291812 4.119657  
128817\_at 1.282525 1.659313 1.943647 1.701642 1.465159 1.318286 1.590772 1.860636  
128821\_at 2.106814 3.044365 1.561342 1.770511 2.337303 2.009888 2.219978 2.582317  
128822\_at 1.553616 1.917251 1.165406 1.031311 1.265441 1.82178 1.41959 2.16473  
128826\_at 4.115636 2.690671 3.114953 2.836868 2.927665 3.150932 3.070714 2.974453  
128853\_at 4.362122 4.053367 4.271392 4.968834 3.931723 5.759586 4.807453 4.12821  
128854\_at 3.774764 3.413032 2.588609 4.24719 2.243573 3.05993 3.095677 3.685657  
128859\_at 1.786594 1.943779 2.988682 1.572715 2.241611 1.938084 2.03058 1.828547  
128861\_at 1.586339 2.759602 1.616194 1.443269 1.978989 2.076417 2.5249 1.948591  
128864\_at 2.289642 2.499424 3.469188 2.161145 2.155482 2.821076 2.293692 3.983653  
128866\_at 8.871592 8.888092 8.926943 8.692441 8.718848 8.881674 8.628016 8.985026  
128869\_at 6.30885 6.486626 6.942829 6.832875 5.738775 7.13586 5.891785 5.232033  
128872\_at 2.440464 1.282047 2.364393 1.648857 1.888939 1.111071 1.695484 0.921662  
128876\_at 2.112732 2.647395 2.609232 1.964203 1.795683 1.809586 2.066627 2.24736  
1288\_at 2.210997 2.472838 2.178157 2.092296 1.947449 2.868936 2.682875 2.029992  
128954\_at 1.810363 2.052005 2.341638 1.757781 2.334494 2.25059 2.147632 2.286243  
128977\_at 4.959283 5.369674 4.823037 4.52484 4.100955 4.669354 4.769713 4.404061  
128989\_at 4.119454 3.618528 4.61783 3.477437 2.755901 3.544288 4.39083 2.601801  
1289\_at 2.329246 2.3665 2.352111 2.227079 2.621698 2.606235 1.671304 2.965954  
128\_at 8.174254 9.162514 8.587872 8.152249 8.258675 8.140758 8.315424 8.27487  
129025\_at 1.503723 1.047968 2.208349 1.708997 2.218226 1.389248 1.103942 1.806386  
129049\_at 1.783057 2.535919 2.8656 2.63928 3.004341 2.499267 1.604222 2.090293  
129080\_at 4.515384 3.728603 4.22384 4.428348 4.353156 4.16691 3.739962 3.014593  
1290\_at 2.69267 2.948078 1.932548 3.048523 2.476865 1.968979 2.629694 2.367607  
129138\_at 4.251406 4.80704 2.878344 3.740626 2.703288 2.985106 3.603479 3.45866  
1291\_at 6.03887 6.104395 5.185411 5.940692 5.696904 5.906958 5.057784 5.280001  
129285\_at 6.517171 6.048406 6.658055 6.089982 5.590258 6.136917 5.82634 6.538694  
129293\_at 3.204786 2.616077 2.831808 4.206838 3.352221 2.253954 2.767434 2.122691  
1292\_at 5.676081 5.327114 4.948621 5.600543 4.453389 6.176024 4.985813 4.328251  
129303\_at 5.376697 5.132788 5.842549 5.097318 5.384533 5.675255 5.156661 5.609534  
1293\_at 2.73691 3.136402 3.380838 3.432938 3.427505 2.892749 2.519543 3.07176  
129401\_at 4.627493 4.276598 4.190596 3.64307 4.07706 5.050508 4.977396 5.561995  
129446\_at 1.623461 1.510117 1.897686 1.834766 1.79777 1.673937 1.344186 1.556998  
129450\_at 4.431572 4.889248 4.946239 4.114155 4.809931 4.62451 3.590588 4.901675  
1294\_at 1.807721 2.459727 2.419466 2.34093 2.28972 1.593156 1.807703 1.867914  
129521\_at 1.653006 1.140033 2.043892 1.830786 2.074854 1.851717 1.316117 2.440063

129530\_at 3.408108 3.491114 3.845295 2.957139 3.590963 3.315761 1.373595 2.659762  
129531\_at 6.656013 6.338754 5.634169 6.722135 5.72013 6.562475 5.762811 6.536762  
129563\_at 4.90438 4.538106 5.318189 4.361822 4.384335 4.928036 3.863804 4.501165  
1295\_at 4.786655 2.853896 4.476309 6.052088 2.762879 4.671617 3.443666 4.28832  
129607\_at 5.355109 4.219456 4.905745 4.908702 5.068975 4.309605 4.941916 4.313143  
129642\_at 6.882031 7.468045 7.126029 6.872067 7.2241 6.604231 7.243044 6.407301  
129684\_at 1.272026 1.284442 1.416356 1.509981 1.604216 1.419211 1.033059 1.578611  
129685\_at 5.638784 5.777142 6.275237 6.006523 4.670778 5.622224 6.344849 5.175198  
1296\_at 2.442871 2.087631 2.318218 2.408468 1.584342 1.596006 1.600651 1.99748  
129787\_at 6.217658 6.037689 7.149161 6.859427 7.512434 7.296726 7.371517 6.383441  
129790\_at 2.303389 2.346009 3.824454 2.808892 2.162518 3.533164 1.411128 2.191891  
1297\_at 1.758878 2.521438 1.968772 1.959953 1.947506 2.055999 2.253603 2.429367  
129804\_at 1.513778 1.85435 2.251694 3.019547 2.235293 2.090025 1.961253 1.578291  
129807\_at 1.759785 3.023029 1.51923 2.767778 2.794379 2.971431 2.02251 2.105228  
129831\_at 4.396553 3.965303 3.90721 1.850014 4.254867 2.913061 2.166123 3.305042  
129852\_at 1.539307 2.93953 1.383479 0.966929 1.443379 1.664029 2.128632 1.243434  
129868\_at 0.775074 0.989304 0.459646 1.409469 1.081224 1.453486 2.961878 1.470215  
129880\_at 4.41236 4.630199 4.997863 5.099891 5.264448 4.626262 4.971584 4.976083  
129881\_at 2.618374 1.640578 1.652834 1.646822 1.801675 1.672279 1.227408 1.560445  
1298\_at 2.41431 2.72871 2.854996 2.775705 3.22721 2.530516 2.626923 2.530292  
1299\_at 3.20363 3.011429 1.672682 2.882443 2.133642 3.188851 2.175506 2.373299  
12\_at 4.939438 2.327871 2.368083 3.386041 3.130626 2.008845 2.122474 1.578538  
130013\_at 5.485244 4.571717 4.615744 3.76409 6.409393 5.142195 3.182652 6.051294  
130026\_at 3.21293 3.598863 3.877208 3.922103 3.858998 3.549919 2.917549 4.484275  
130074\_at 7.59961 7.501055 8.029339 7.985992 7.366454 7.278147 8.131739 7.138553  
130075\_at 2.253193 0.568898 3.217632 0.937674 1.418372 0.767109 1.880259 1.704369  
1300\_at 1.559722 2.047354 1.993658 3.281148 2.362395 2.768796 1.859559 2.526812  
130106\_at 2.51995 1.043482 0.652513 1.363179 2.387138 0.865718 2.530695 2.33682  
130120\_at 3.207915 2.214959 2.057396 2.199715 1.738929 2.345613 1.442761 1.570232  
130132\_at 5.599125 5.984757 5.550895 5.304127 6.06269 4.902083 5.456419 5.363924  
130162\_at 1.602121 1.601708 1.602821 1.938782 1.701801 1.959915 1.795485 1.579443  
1301\_at 2.206195 1.922761 1.854664 2.009716 2.135375 1.847489 2.44782 2.177889  
130271\_at 5.408964 5.543427 5.201344 5.686079 4.830408 5.874674 4.606776 5.486098  
1302\_at 2.73331 3.196099 3.442303 3.070573 3.570933 3.059998 2.80654 3.53703  
130340\_at 4.132109 5.464173 3.767742 2.576647 5.032663 4.265144 3.594804 3.636258  
130355\_at 4.920181 4.989373 5.07274 5.016919 5.153471 4.627371 4.681059 5.851139  
130367\_at 3.668822 2.638306 3.981704 3.606766 4.486344 4.547264 2.659682 5.177657  
130399\_at 2.065297 1.518041 1.984567 1.724852 1.457284 1.973071 2.205039 1.111478  
1303\_at 5.395904 6.607153 6.25701 6.577481 6.054862 6.422211 6.458846 6.308203  
130497\_at 4.345455 3.318883 4.269456 3.367835 3.860246 3.903733 3.193112 3.126043  
130502\_at 2.688463 2.932647 3.671444 3.213698 2.715226 2.395689 2.465617 3.372708  
130507\_at 6.504649 6.169212 6.292566 6.547676 6.70261 6.45272 6.408042 6.794295  
130535\_at 4.442524 4.88816 4.850087 5.139057 4.858194 4.882738 3.314144 5.052137  
130540\_at 2.510333 2.740408 2.144506 3.704354 1.384153 2.781561 2.50662 2.3599  
130557\_at 2.9748 3.348342 3.591169 3.489939 4.398265 3.812457 3.548588 4.023698  
130560\_at 1.482411 1.467608 1.136151 1.423006 1.547452 1.954591 2.033757 1.576962  
130574\_at 1.81272 1.735987 1.87964 1.862243 2.108924 1.979833 2.501147 1.389117  
130576\_at 2.002289 2.828449 2.538613 3.162916 2.325703 2.976138 2.290125 1.925645  
130589\_at 5.369761 3.876425 3.713948 2.924139 5.405616 3.447151 3.722195 3.867603  
1305\_at 2.283985 1.571078 1.96885 2.805691 2.536132 2.474582 2.910676 1.814347  
130612\_at 2.138336 2.359659 2.880892 2.335594 2.331911 1.924919 2.461002 2.393485

130617\_at 6.811541 6.071308 6.118412 6.253412 5.739742 5.745873 6.48369 6.129168  
1306\_at 3.25787 4.121802 3.589615 3.988881 3.597957 2.447555 4.370113 3.893436  
130733\_at 6.836388 6.543681 7.320605 6.018888 5.406998 6.913233 7.538214 5.968301  
130749\_at 1.320884 1.695415 2.102228 1.419024 1.628899 1.223513 1.600125 1.711501  
130752\_at 1.477795 1.930814 2.389142 1.551514 1.037151 1.517062 1.413186 1.710888  
1307\_at 1.945176 2.844085 2.720039 3.022885 2.799998 3.135734 3.147287 2.438947  
130813\_at 1.787954 1.871727 1.774142 1.981061 2.836596 2.772712 2.393142 2.392238  
130814\_at 6.087028 6.23215 6.440768 6.7839 6.299995 5.91223 6.751882 6.350884  
130827\_at 2.039661 3.1968 1.647634 2.24233 2.21673 2.329986 3.261012 2.170443  
130872\_at 4.495198 4.30717 3.422488 4.493604 5.168517 4.18293 3.074434 5.115487  
130888\_at 4.83387 5.58255 4.431907 4.561174 3.82225 3.563118 5.470158 5.59553  
1308\_at 1.834634 1.936285 2.342972 2.119186 2.299499 2.257679 2.401515 2.503805  
130916\_at 4.527872 4.357433 3.999725 4.22292 4.496688 4.631216 3.750011 4.345532  
130940\_at 4.585909 4.939217 4.882822 4.02886 4.482169 5.143563 4.922063 4.820211  
130951\_at 1.536461 1.81534 0.925144 2.048627 2.209769 1.792949 1.759741 2.517038  
130\_at 3.498244 2.927601 2.205331 1.685303 4.176248 2.79815 1.583541 1.652372  
131034\_at 4.556409 4.14082 5.917646 3.922323 1.344762 4.637436 5.090043 3.354274  
131076\_at 7.220283 6.884703 7.663219 7.56959 7.553954 7.213117 6.226168 7.762293  
131096\_at 1.367128 1.254106 1.163885 1.13905 1.102893 2.092856 1.522557 1.300748  
1310\_at 1.978869 2.213465 1.884861 1.633097 1.821699 2.97387 2.458229 2.539813  
131118\_at 7.700538 7.623008 8.001563 7.508409 8.16467 7.402013 7.583177 7.866758  
131149\_at 2.193625 1.471172 2.119375 1.1861 1.682338 1.651163 1.063268 2.795618  
131177\_at 2.240136 2.596871 2.552947 1.978722 2.665912 2.52306 2.549519 2.813568  
1311\_at 2.211707 2.411051 1.960538 3.226041 3.002195 3.586553 2.651471 2.119668  
1312\_at 5.476424 5.320168 5.280828 5.617327 5.388153 5.668202 5.903793 4.834659  
131368\_at 1.373138 1.232441 1.698617 1.074182 1.434162 1.579709 1.307151 1.976639  
131375\_at 1.32699 1.536543 1.301598 1.001398 2.214912 2.125685 0.947699 1.008892  
131377\_at 2.003538 2.121583 1.448617 2.28373 2.085071 2.351068 2.463783 2.41326  
131405\_at 1.972222 2.066193 2.085703 1.671696 2.56603 2.302205 1.99567 1.821559  
131408\_at 4.223037 3.476067 3.193776 2.934748 3.08862 3.635526 2.994503 3.495219  
131450\_at 1.063193 2.815976 1.521811 1.441771 1.333426 1.649252 1.843122 1.776718  
131474\_at 3.685456 3.275304 2.703886 2.694787 2.835882 2.744354 2.154255 2.644409  
1314\_at 6.559785 7.467309 7.071407 7.306137 6.832513 6.932005 7.1828 7.553682  
131540\_at 3.477031 3.720167 3.15986 3.489826 4.557104 2.546317 3.033966 3.612407  
131544\_at 4.653359 5.22352 4.764959 5.100331 5.238452 4.459677 4.950989 4.29836  
131566\_at 7.813393 7.910884 8.134574 7.773847 6.994056 7.55019 7.430737 8.145928  
131578\_at 1.542313 1.711861 1.937857 2.291003 2.60259 1.451077 2.932291 2.380834  
131583\_at 6.46427 6.699345 6.323817 5.840185 5.876247 5.945552 5.838273 6.608658  
1315\_at 7.998833 7.92045 7.832293 7.911727 7.998833 7.966899 7.779627 8.335305  
131601\_at 4.924156 5.041713 4.573716 4.614689 4.16613 4.326856 4.553 3.510593  
131616\_at 4.94465 5.930549 5.443447 5.572111 4.830331 4.949844 5.919721 4.600724  
131669\_at 1.475183 2.122786 1.521027 1.713881 2.18082 1.97023 1.635928 2.342761  
1316\_at 6.014389 6.689647 6.082546 6.18042 6.130663 6.172304 6.490781 6.322976  
1317\_at 6.320054 6.863187 5.060299 6.86954 6.855428 5.652113 7.643992 6.437614  
131831\_at 1.571765 1.337862 1.037057 1.409827 1.524232 1.247805 1.877718 1.192611  
131870\_at 4.795122 5.165787 5.281379 4.629714 3.447868 4.475504 4.736535 4.800923  
131873\_at 1.858614 2.108665 1.929023 1.842615 2.129161 2.086938 2.192134 2.576112  
131890\_at 1.537528 2.975472 2.081891 1.817143 2.370004 2.29491 2.969242 2.557462  
1318\_at 5.950784 6.932867 5.99469 5.582989 6.079906 5.155285 6.699452 5.949061  
131909\_at 1.053784 1.133502 0.967958 1.780257 2.028088 2.287823 1.823668 1.453484  
131920\_at 2.247094 1.506407 1.749613 2.087015 2.683625 2.036802 1.76963 1.696174

131965\_at 4.214767 5.043614 5.124981 4.098728 3.683395 4.732714 3.445743 5.28547  
131\_at 2.425778 1.259044 1.278304 1.084446 0.955152 1.454579 1.473376 2.026172  
132001\_at 4.326336 4.782877 4.856111 5.031407 5.556158 2.934391 5.05622 5.229849  
132014\_at 4.475205 4.454985 5.363802 5.784525 5.28193 4.98082 4.705051 4.013033  
132112\_at 1.915829 1.200481 1.059388 1.286424 1.520568 1.039603 1.440801 1.427392  
132141\_at 1.48024 1.245545 1.342836 1.11045 1.393422 0.71035 1.422506 1.410288  
132158\_at 3.760537 2.808652 2.600644 2.204537 2.798999 1.816973 2.277894 2.573229  
132160\_at 4.896616 4.766363 5.272091 4.485743 3.660556 4.68995 5.695062 4.120217  
132200\_at 2.460868 2.888747 2.416478 2.171996 2.721733 2.845393 2.791698 2.095567  
132203\_at 1.989535 1.350099 1.438669 1.484909 1.789442 1.63895 1.338024 2.097738  
132204\_at 1.365974 1.64562 1.119989 1.082087 1.649378 1.195776 1.579584 0.98557  
132228\_at 2.448289 1.926825 2.19954 2.269417 2.045752 2.750271 2.509555 2.4682  
132241\_at 3.728117 2.871898 3.138523 2.498927 3.021705 3.448625 2.282706 2.948139  
132243\_at 2.394113 2.750434 2.109076 2.593601 2.916488 2.543177 2.604055 3.083126  
132299\_at 8.221836 7.546691 6.593534 6.971705 8.532988 7.94558 5.631996 8.289525  
132320\_at 5.294205 5.722442 4.492393 5.038423 4.794767 5.184553 5.409604 5.619124  
132321\_at 4.025198 3.774107 4.514459 4.814863 4.83675 4.183859 3.740068 4.574423  
132332\_at 0.905278 1.174313 1.275779 1.398271 1.99869 1.024139 1.296413 1.093248  
132430\_at 1.049233 3.142615 1.119394 1.435667 3.485914 1.03776 1.685519 1.42352  
1325\_at 3.941468 2.335849 1.817972 1.453173 2.034682 0.176455 0.903604 0.615028  
132612\_at 1.263647 1.779453 1.921911 1.342551 1.693228 1.185601 1.5568 1.534771  
132625\_at 1.34558 1.241622 1.351838 1.598127 1.795346 1.35993 1.408143 2.529572  
132660\_at 5.47277 6.147612 5.060496 4.719521 5.344308 5.247394 5.687686 5.751772  
132671\_at 6.565769 5.128649 6.971842 6.4994 5.32237 6.035841 6.75805 3.603269  
1326\_at 4.322778 3.463801 4.432147 4.523145 4.361146 4.103923 4.816219 2.577806  
132720\_at 7.405566 7.172291 6.898214 7.00406 7.335231 6.404384 7.140085 6.899463  
132724\_at 1.826016 0.999902 1.630042 1.025223 1.883406 1.058451 1.51342 1.544484  
132789\_at 4.863658 4.62987 4.796066 5.161484 4.941312 3.862546 4.674512 5.054436  
1327\_at 10.12493 9.998553 9.745863 9.666832 10.1752 9.814092 9.602758 9.872443  
132851\_at 3.547143 1.88016 0.973621 1.485752 1.075636 1.654583 1.453919 1.584368  
132864\_at 5.509857 5.746639 5.600322 5.269882 5.971209 5.192844 5.27941 6.411014  
132884\_at 2.613086 2.383282 2.428468 1.472461 2.097578 3.302195 1.788681 2.023412  
132946\_at 2.526328 1.573599 1.328889 0.754804 1.441357 0.994174 1.787733 0.72575  
132949\_at 5.344211 5.783932 5.796625 5.54953 5.345709 4.995961 4.930611 5.860152  
132954\_at 0.625935 0.893157 0.678692 1.277712 1.310212 1.280001 1.191997 1.672042  
132989\_at 1.835373 1.145797 2.492639 1.26983 2.244072 1.351911 2.195947 3.024679  
1329\_at 9.216971 9.142919 9.405534 9.082591 9.650678 9.270658 8.911031 8.682569  
132\_at 6.535877 6.287055 6.143882 5.571432 5.073658 5.808743 5.667373 5.877866  
133015\_at 3.975354 4.044969 3.301342 3.691241 3.133561 4.292737 2.724383 4.945471  
133022\_at 4.041403 5.614647 3.673267 5.296639 5.701143 3.845704 5.49785 5.747545  
133060\_at 1.768035 2.291398 1.737684 2.055423 2.075364 1.459308 1.854376 2.155994  
133121\_at 3.380285 3.22056 3.065233 1.221055 3.158998 2.717545 3.128847 3.146581  
133308\_at 5.12712 4.360539 5.019801 5.641701 3.846329 4.3248 4.995945 3.58366  
133383\_at 3.936212 3.823037 3.558948 2.587107 3.828561 3.185454 2.270171 4.577902  
133396\_at 2.3235 1.763585 2.185017 1.669206 2.46149 1.731418 1.74542 1.821635  
133418\_at 5.321368 6.03372 5.165971 4.934894 6.235746 5.729437 4.562849 3.159795  
133482\_at 0.917329 0.904377 0.838788 0.940768 1.399247 0.808626 1.229741 1.333344  
133491\_at 0.941741 2.216008 1.838866 1.640344 1.360661 1.490024 1.552609 1.411403  
133522\_at 3.427944 2.994028 4.519515 3.847603 4.145726 4.184848 3.834224 3.769356  
133558\_at 1.725383 1.167986 1.347307 1.286025 1.279071 1.292517 2.094798 2.217476  
133584\_at 1.849579 1.831252 2.401471 1.985758 2.697129 2.092431 2.876304 2.068548

133619\_at 6.907307 7.271532 7.46177 7.219542 7.418264 7.432259 7.438253 6.953448  
133686\_at 6.157071 7.008143 6.954694 6.935288 7.432662 5.487403 6.215324 6.78354  
133688\_at 2.317299 1.770417 2.484159 1.736265 4.154751 2.995629 2.662291 2.733675  
133690\_at 1.774014 1.103325 1.533412 1.462515 1.742309 1.288411 1.202318 1.609718  
133746\_at 6.531681 6.769553 6.644444 7.004237 6.659885 6.4719 6.938438 6.823391  
133874\_at 0.793399 1.3389 0.793228 1.150368 1.036443 1.404462 0.477282 1.463519  
133923\_at 1.671088 2.119043 1.757049 1.173076 1.546559 1.384798 1.818406 3.168836  
133957\_at 6.82711 6.762936 6.640616 5.645908 5.64695 6.555208 5.955233 6.664345  
1339\_at 3.808326 3.629947 3.237314 2.194702 2.003361 3.064467 1.548486 3.26511  
133\_at 6.440033 5.019608 6.263766 6.078002 5.793046 4.99932 5.457077 5.164125  
134083\_at 2.490491 0.972191 1.41748 0.637756 1.69461 1.675264 0.811074 2.711041  
1340\_at 9.655299 9.505917 9.592057 9.67055 9.563948 9.881389 9.063905 9.539878  
134111\_at 1.756511 2.162829 2.081196 1.658468 1.539629 2.15669 2.007733 2.471888  
134121\_at 3.130114 3.362877 2.257063 2.353336 2.029726 3.205089 3.673824 3.519378  
134145\_at 4.72431 4.917779 4.932227 4.83599 4.214768 3.913182 4.454803 5.726967  
134147\_at 7.047534 5.967804 6.358538 6.235629 6.750678 6.841026 5.065729 6.660366  
134187\_at 2.28868 1.740458 1.655509 1.865892 1.561963 2.322537 1.659369 1.185362  
134218\_at 7.071339 7.434466 7.418004 7.420488 7.627138 7.160015 7.729775 7.553959  
134265\_at 4.454801 4.240081 3.505946 4.682554 3.447401 4.778454 4.707433 3.239485  
134266\_at 4.598659 5.489503 5.196937 5.346555 4.643163 5.606086 5.024358 5.334037  
134285\_at 4.297118 3.192712 3.394437 2.039072 4.78291 5.399152 2.663227 5.222204  
134288\_at 6.496204 5.630772 6.067337 3.921267 7.013997 5.770871 3.106135 5.846603  
134353\_at 3.380532 1.498669 3.128922 1.709429 2.674862 2.122055 2.199598 2.976113  
134359\_at 4.346998 4.011109 4.574909 3.942833 3.137971 4.262724 4.116853 4.650537  
134391\_at 2.048982 1.173578 1.129622 1.534631 1.149099 2.95836 1.50021 0.826146  
134429\_at 4.315562 4.548189 5.229619 5.306551 5.88438 4.601462 5.975688 5.633759  
134430\_at 5.822366 6.201185 5.951819 5.711142 6.974806 5.410981 5.706053 6.412718  
134466\_at 1.866207 2.329375 1.407619 1.63289 2.824338 4.074665 0.807828 3.287833  
134492\_at 6.697574 6.426218 5.600181 6.197928 6.382396 6.34131 5.555782 6.303453  
134510\_at 7.448617 7.476761 6.817042 7.051354 7.07651 6.62026 7.339059 7.112423  
134526\_at 1.533564 1.109107 1.445227 1.320738 2.04229 1.679175 1.45508 1.096287  
134548\_at 1.598376 1.788152 1.70133 2.854211 1.998261 2.352905 1.373397 2.463072  
134549\_at 4.255943 2.892646 3.618569 4.017902 3.992214 5.123864 4.391284 4.007827  
134553\_at 4.930661 5.311409 5.532365 5.312217 5.29364 5.427587 5.366651 5.414628  
1345\_at 7.220442 7.831404 7.717012 7.522103 7.70925 7.343672 6.531303 7.638628  
134637\_at 3.011243 3.412111 2.670009 4.110801 3.599478 2.398438 3.028242 2.63559  
1346\_at 9.899699 9.694418 9.912555 9.946646 9.746484 9.965146 9.79835 9.523541  
134701\_at 2.062917 2.748688 2.398126 2.231956 1.91511 2.398126 2.21518 2.321865  
134728\_at 5.147425 4.554088 5.40589 5.030786 4.46331 3.548891 4.897987 4.151231  
1347\_at 7.400639 7.238575 7.083852 7.002318 7.323521 6.986281 6.739405 7.660897  
134829\_at 1.674853 1.173937 1.101853 1.070088 1.430907 1.065392 1.291478 1.258516  
134860\_at 1.519101 2.03263 0.958343 2.172003 1.375323 1.305264 1.333163 2.724651  
134864\_at 1.635342 1.441571 1.319502 1.166181 1.121918 1.266641 1.298496 1.564905  
134957\_at 4.04361 4.354458 3.880658 4.868225 4.139281 4.370225 4.656893 4.343195  
1349\_at 10.69826 10.69106 10.54231 10.48032 10.38522 10.64176 10.20825 10.38167  
134\_at 6.027141 4.855404 6.475486 5.656659 6.05938 5.034079 5.598604 5.851871  
1350\_at 10.56172 10.35268 10.24951 10.24228 10.41223 10.35039 10.00119 10.06737  
135112\_at 6.163548 5.954046 5.989796 6.283938 6.269529 6.345778 6.019579 6.271003  
135114\_at 5.112767 5.303689 5.259129 6.021053 3.737371 5.204574 4.913167 5.831312  
135138\_at 4.211111 4.156874 3.637423 3.965304 3.144682 4.8896 3.409156 5.068797  
135152\_at 3.217884 3.014992 3.698653 3.237065 3.698996 3.181304 3.576214 3.22601

135154\_at 5.502665 5.125069 5.98545 5.630311 6.235925 4.890713 5.933428 6.45052  
1351\_at 9.937114 9.378229 9.841167 9.507123 9.803319 9.980984 9.688964 9.484134  
135228\_at 4.620403 5.725427 5.502057 5.705441 6.028591 5.216166 5.829602 5.993345  
135250\_at 6.07998 7.44404 6.381557 4.191613 5.136045 5.710061 7.270321 6.291778  
135293\_at 4.728042 5.017233 4.07306 4.351873 4.185976 4.393619 4.54937 4.5829  
135295\_at 2.066327 2.211103 1.719313 1.719949 2.011014 2.960697 2.289651 1.966819  
1352\_at 5.076876 4.729317 5.376412 4.837959 4.611679 4.807157 5.278967 4.181444  
135398\_at 1.585091 1.105507 1.541419 1.267472 1.667909 1.147186 1.452498 1.590953  
1353\_at 5.757984 5.853639 5.626175 5.820338 5.708784 5.790767 4.852273 5.703454  
135458\_at 0.932533 1.538664 1.770839 1.029169 1.604416 0.942964 1.3195 1.006691  
1355\_at 6.291369 5.770104 5.910937 5.899849 5.922893 5.892501 5.616491 6.093697  
135644\_at 2.577842 2.751777 2.748763 2.77807 2.480352 2.166339 2.40493 2.497644  
135656\_at 2.240203 2.621764 2.463363 2.710339 2.5714 2.435221 2.518526 2.686094  
1356\_at 2.76827 2.660631 2.211393 3.414011 2.983234 2.322195 6.258498 2.512714  
1357\_at 1.886639 1.714762 2.102055 1.71057 2.79845 2.264396 2.053481 2.333765  
135886\_at 1.203397 2.351012 1.408527 1.708538 1.418476 1.383954 1.558864 1.969767  
135892\_at 2.206961 2.635471 2.686275 1.89506 1.353631 1.317012 1.171338 2.637139  
1358\_at 1.370126 1.450095 2.073446 1.704664 1.655309 1.436762 1.628551 1.150695  
135924\_at 2.866731 1.707688 1.765808 3.245527 1.881847 2.742978 1.49611 2.512164  
135927\_at 1.376491 3.057489 2.078801 2.640306 2.658566 2.010917 2.223416 3.601581  
135932\_at 5.055747 4.642587 4.665091 4.722129 3.925704 5.023452 4.242271 5.567518  
135935\_at 1.485803 1.173294 1.562294 2.192859 1.69402 1.743511 1.845665 2.360733  
135941\_at 1.351667 1.431861 0.440665 1.186692 0.95219 1.274917 1.255039 1.221438  
135946\_at 1.393921 1.465953 1.422994 1.489918 1.868599 1.167239 2.487882 1.334021  
135948\_at 2.49276 2.079754 3.597829 2.675287 2.310345 1.459958 1.634713 2.783291  
1359\_at 0.932726 1.404145 1.077158 2.747633 2.795861 1.644639 1.719123 1.036023  
135\_at 3.437991 2.53482 2.183193 1.020416 2.846347 2.687084 4.158075 1.401084  
136051\_at 2.398462 2.14939 1.27553 1.999504 3.401419 1.328048 2.057774 2.509618  
1360\_at 1.529679 1.686471 1.292588 1.259203 2.134243 1.343497 1.537787 1.661915  
1361\_at 1.412407 1.335952 2.028725 1.126027 1.71327 1.354317 1.330043 2.433068  
136227\_at 3.054932 3.269669 3.049841 4.296048 3.011536 4.495362 4.208353 3.064275  
136242\_at 1.461672 1.821182 1.705279 1.470992 1.674015 1.614243 1.812473 1.540727  
136259\_at 1.030884 1.863765 2.329028 2.737285 1.657104 1.413759 1.583732 2.02787  
136263\_at 0.981935 1.170102 1.506899 1.19607 1.393533 1.357225 1.157753 1.066047  
136288\_at 1.55171 1.849056 1.970697 1.418459 1.872194 1.606726 1.668814 2.073135  
1362\_at 6.956619 7.359668 7.231296 7.011534 7.125139 6.920781 7.770215 7.098175  
136306\_at 1.563986 1.519447 1.533436 1.443855 1.949114 1.497424 1.4048 1.791785  
136332\_at 2.523305 2.483815 1.839147 1.976892 2.603995 2.302679 1.778816 2.160619  
136371\_at 2.641716 2.190899 2.209318 2.347246 1.926558 2.605027 1.967875 2.399858  
1363\_at 5.533241 4.432413 4.588619 4.713237 5.544232 5.311482 4.823012 2.900789  
1364\_at 3.988108 4.385341 2.36863 3.274103 2.878108 4.994424 2.321557 4.546433  
136541\_at 1.509185 1.184255 1.13424 1.117731 1.485936 1.005721 1.600501 1.605804  
1365\_at 6.30321 5.867384 5.940612 5.884863 5.761118 6.783396 5.559007 5.718294  
136647\_at 6.917946 6.36571 5.778213 6.717018 6.432154 5.692982 5.968194 6.459367  
1366\_at 4.588304 4.038594 5.015503 3.901083 5.770009 5.198785 4.467192 4.337148  
136853\_at 1.87637 2.42738 1.893003 1.982958 2.062326 1.991815 1.728097 2.066027  
136895\_at 4.34704 4.841533 3.948048 5.075056 2.945317 4.071305 4.482873 3.116254  
1368\_at 6.941212 6.537012 6.600499 7.413604 5.866534 7.593111 6.462325 6.478796  
136991\_at 1.402969 1.122815 1.582666 0.72753 1.313186 1.135174 1.527631 1.250599  
1369\_at 1.400345 1.627395 1.386142 1.544627 2.109097 2.070108 1.711905 1.45066  
136\_at 3.861222 3.558316 3.054813 3.472783 3.087885 3.667057 2.932394 4.052616



137075\_at 3.845529 3.008089 1.948134 2.724594 1.784046 3.006778 2.289541 3.170646  
1370\_at 3.452026 3.324071 4.476461 3.293158 4.392306 3.694832 3.636733 3.358854  
1371\_at 2.838641 4.367863 4.328133 3.519394 3.671021 4.766573 3.772208 5.141299  
137209\_at 3.889987 1.674252 1.388879 1.356243 1.794165 2.25683 2.187876 1.912778  
137362\_at 1.34238 1.510403 1.71544 1.331091 1.751031 1.082078 0.899449 1.761163  
1373\_at 3.723426 3.230167 2.644049 2.116568 3.580963 3.342104 3.080443 2.741473  
137492\_at 7.644655 6.948936 7.007483 7.189403 6.388756 6.987492 6.427066 7.005923  
1374\_at 6.254317 6.801396 5.860813 6.097006 6.334195 6.731201 6.423187 5.864444  
137682\_at 3.846836 3.282858 3.734999 4.411622 3.636711 3.927926 3.781613 4.111723  
137695\_at 4.962327 5.768549 4.808982 4.311521 3.82592 4.239285 4.110823 4.639502  
1376\_at 5.1851 4.563478 5.273806 4.657318 5.13204 5.223497 4.502953 4.10215  
137735\_at 1.539781 1.499708 1.278945 1.430264 2.168669 2.46013 1.966558 2.396018  
137797\_at 2.77027 3.492788 2.311142 2.09536 2.980895 2.132031 3.125881 2.681327  
137814\_at 2.710785 2.213393 2.01106 1.908657 2.354132 1.445604 1.643971 1.82403  
137835\_at 2.333527 1.670291 2.479006 1.42541 1.229643 1.407087 1.63937 2.062357  
137868\_at 1.642334 1.551282 1.197298 1.111485 1.412513 1.088508 2.064524 1.49369  
137872\_at 5.447747 4.534495 5.42314 3.623535 3.103294 4.879644 4.006079 4.915057  
137886\_at 4.102636 4.644917 5.24143 4.346954 2.846102 4.147559 3.27242 4.408615  
1378\_at 7.008136 6.959364 7.121871 7.329324 6.661795 6.209009 6.683985 7.741018  
137902\_at 2.16133 2.131277 1.906074 1.5827 1.749832 2.98275 2.541264 2.143725  
137964\_at 5.535929 5.832104 5.921024 6.221346 6.026043 6.215024 5.964484 5.930953  
137970\_at 3.774019 4.567904 2.418037 3.628097 2.908506 3.18153 3.179308 2.007218  
137994\_at 2.751677 2.700026 3.187361 2.845658 3.210876 2.29403 3.205319 2.748177  
1379\_at 1.416013 2.848309 1.416243 1.566874 2.870899 3.222125 4.047586 1.648098  
138009\_at 1.795274 1.975209 2.400487 1.401717 1.46905 1.575254 2.588745 1.735013  
138046\_at 1.99001 2.401029 1.721708 1.575128 3.316463 2.192734 1.961066 2.770556  
138050\_at 6.306717 6.769937 6.319719 6.553749 6.866398 6.392487 6.130998 6.434997  
138065\_at 3.879413 5.333817 4.32732 2.719949 5.729662 2.996737 3.224565 4.702337  
1380\_at 1.828778 3.23943 2.141309 2.160309 2.617972 2.652925 2.405425 2.532533  
138151\_at 4.970792 5.519587 5.278847 4.849161 4.336614 4.018151 5.537328 4.687969  
138162\_at 4.288918 3.120415 4.598581 2.750429 3.129092 4.54214 2.901617 3.611291  
138199\_at 5.715579 6.079722 3.762243 5.129092 5.213458 4.642045 2.478342 5.122809  
1381\_at 3.81145 2.250866 3.59242 2.049992 3.064038 2.429049 2.319072 1.847642  
138240\_at 1.207945 1.395422 0.927982 0.944592 1.03847 1.388327 1.414034 2.239947  
138241\_at 6.113897 5.769101 5.345096 5.829124 5.526008 5.996013 6.19846 5.519684  
138255\_at 1.824334 1.845219 2.143601 1.59714 1.412092 1.403244 1.230386 1.829091  
1382\_at 1.602432 1.628767 1.741727 1.586057 1.883121 1.692141 2.566643 1.265405  
138307\_at 1.689537 1.755043 1.594657 2.267971 1.621221 2.543558 1.853721 1.813163  
138311\_at 3.014485 1.836767 1.997614 3.668483 2.088723 3.603291 3.120223 2.361703  
138428\_at 6.172596 6.380662 5.425511 5.229636 5.667616 6.460392 5.837512 5.207086  
138429\_at 1.66146 1.923738 1.918421 1.658366 1.524089 2.788407 2.059812 1.71208  
138474\_at 1.970599 2.595051 2.180561 1.840112 1.965441 1.445043 2.503068 2.255671  
1384\_at 5.508802 5.274438 5.574083 5.188232 4.749443 4.862249 4.248066 4.54603  
1385\_at 8.301671 8.42123 8.109945 8.281916 8.025336 7.736449 8.089898 7.949435  
138639\_at 3.661113 5.121611 4.961868 4.255059 3.474698 4.085176 3.495924 4.797378  
138649\_at 5.459477 6.416913 5.378672 5.417909 5.291057 5.478715 5.533195 5.602093  
1386\_at 7.62357 7.42054 7.409828 7.485746 7.535306 7.614967 7.878522 7.781905  
138715\_at 1.415507 1.251612 1.721727 1.259834 2.525341 1.508114 2.002559 1.512716  
138716\_at 5.343652 4.057136 4.593324 4.472368 5.19931 5.505499 4.658503 4.755637  
138724\_at 2.443507 1.877648 2.32215 2.039423 0.826124 1.655886 1.963911 1.414608  
1387\_at 7.641197 7.90642 7.929917 7.987753 7.681711 8.109814 7.905858 7.222594

138802\_at 1.018561 1.243367 1.550483 1.968312 1.260076 0.884784 1.211524 0.994695  
138803\_at 2.510116 1.492937 2.109333 1.609603 1.342646 1.600151 1.918121 1.320495  
138804\_at 0.814793 1.525512 0.782483 0.989197 1.534712 1.242312 1.268975 1.411599  
138805\_at 1.365129 0.605718 1.170242 1.297485 1.301057 0.799562 1.149032 2.115534  
138881\_at 0.877261 2.162321 1.779213 0.837273 2.140115 1.384834 2.370685 0.841277  
138882\_at 1.358328 1.143264 1.222865 1.647414 2.41301 1.436696 3.858637 1.052687  
138883\_at 2.610602 1.566288 1.716324 2.260508 2.145932 1.866282 2.623676 2.317532  
1388\_at 7.347743 7.180583 7.069784 7.516279 6.682212 6.969917 6.81913 6.419958  
138948\_at 1.681785 1.846859 1.477698 1.421889 1.93946 1.074465 1.591397 1.380321  
1389\_at 7.498302 6.977615 7.14019 6.984155 6.738368 7.824543 6.907373 7.573183  
139065\_at 2.034888 2.151646 1.769129 2.28431 1.689068 3.223787 1.906734 3.155408  
139067\_at 1.41981 1.46599 1.26336 1.032484 1.119401 1.041455 2.476948 1.681775  
139081\_at 2.377052 1.071313 2.16128 1.54186 2.44696 1.633962 1.776671 2.030259  
1390\_at 4.826235 4.755908 3.775803 3.819446 4.773617 3.951953 4.440967 4.645261  
139105\_at 1.602243 1.313739 1.561402 2.808664 2.872339 1.449931 2.435276 1.968712  
139135\_at 1.241722 0.919202 1.265213 1.006636 1.223857 1.832892 1.868906 1.227237  
139170\_at 2.491515 2.987657 2.038785 1.349524 2.221999 2.642781 2.194798 2.598131  
139189\_at 3.188391 2.854484 2.871066 2.280292 2.09544 2.522782 2.921156 2.362474  
139201\_at 1.233393 1.294229 2.079667 1.427479 1.974249 2.06314 1.184151 1.124492  
139212\_at 1.315302 1.793262 1.514606 1.634056 1.581736 1.355192 1.967901 1.324971  
139221\_at 1.996094 2.092813 1.269195 1.365691 1.605107 2.702765 1.584946 1.637752  
139231\_at 6.016183 6.543911 6.577604 6.191457 6.072922 5.681507 5.859665 6.948481  
139285\_at 2.772919 2.471367 3.327132 3.278992 3.114832 3.339457 2.896596 2.017634  
1392\_at 0.861545 0.945099 1.244436 1.510255 1.554413 0.917622 1.628807 1.223068  
139322\_at 7.887374 7.981673 7.919125 8.186488 8.292421 8.03182 8.331757 7.912057  
139324\_at 2.970505 2.916135 2.68213 3.015277 2.218116 3.117923 3.793518 3.316763  
139341\_at 6.407669 6.234315 6.126981 4.876844 5.801056 5.82801 5.532809 5.526451  
139378\_at 1.396127 1.421352 1.671842 1.189418 2.02222 1.117569 1.529425 2.263671  
1393\_at 9.696846 10.0387 9.64377 9.798136 10.172 9.181244 10.06676 9.911424  
139411\_at 1.655323 3.472843 1.463236 1.913724 4.014315 1.951012 1.894323 2.024355  
139420\_at 2.264898 1.487516 1.554941 1.738043 1.44815 1.731206 1.965549 1.352463  
139422\_at 1.19243 0.966467 1.371016 1.133622 1.520575 1.078984 1.26401 1.921475  
139425\_at 1.419032 1.090671 1.561797 0.881396 1.616903 1.799001 0.989523 1.955555  
1394\_at 2.073748 1.658587 1.949944 1.905511 2.101779 1.938202 1.809973 2.795244  
139538\_at 0.84664 0.898652 0.808012 0.820438 0.946405 1.326999 1.089965 1.118578  
139562\_at 2.525129 1.887557 2.127677 2.031902 1.076367 2.108179 2.386824 2.14191  
139596\_at 4.737163 5.894721 5.436093 5.034252 5.331739 5.395219 5.151396 5.367193  
139599\_at 1.322259 1.76851 1.645071 1.806885 1.466576 1.730077 2.61419 1.66443  
1395\_at 1.991845 2.11045 2.059057 2.625977 2.171047 2.845135 1.542589 2.974553  
139604\_at 1.679245 1.985268 2.438387 2.374528 2.179358 2.000358 2.259608 2.083652  
139628\_at 2.020797 1.428966 1.38378 2.090166 1.760063 1.933382 1.975938 1.768579  
139629\_at 1.587804 1.865653 1.563967 1.029461 1.975258 2.54699 1.711435 2.409699  
1396\_at 9.45381 8.781686 9.434458 9.196263 8.659598 9.37087 9.015563 8.748135  
139716\_at 3.043218 3.610933 3.973359 3.515032 1.97787 3.674016 2.668879 2.7367  
139728\_at 2.50206 2.110618 2.078064 1.672713 1.000944 1.406475 2.473229 1.706863  
139735\_at 1.326907 1.486473 1.586842 0.965601 1.496097 1.411926 1.473783 2.206138  
139741\_at 1.058197 1.837459 1.201517 1.933264 1.192549 1.025548 1.82553 1.526007  
139760\_at 1.177268 1.767057 1.7011 1.449132 0.982238 1.205691 1.530053 1.22311  
139793\_at 1.973236 1.133789 2.007356 1.211395 1.536184 1.158021 2.098118 1.865907  
1397\_at 6.093011 5.128672 5.706648 5.911361 4.730462 6.128945 5.764963 4.864303  
139804\_at 2.154644 2.906201 2.538657 2.243769 3.252522 2.444637 2.501568 2.391201

139818\_at 5.467206 4.406836 4.781248 5.286227 4.644307 5.278665 4.313103 5.175002  
139886\_at 3.30504 3.955656 4.328514 4.012585 4.829409 3.08137 3.639241 4.496442  
1398\_at 6.386364 6.629443 6.845862 6.149018 6.734159 6.7951 6.501443 6.879875  
1399\_at 6.529698 7.031408 7.171874 6.868339 6.514535 6.699883 6.813437 6.540027  
13\_at 1.114707 1.017162 0.924665 1.194096 1.318205 0.937906 1.008074 0.903138  
140032\_at 2.976847 2.035628 1.986848 0.980923 1.418577 0.54345 2.572214 1.012607  
1400\_at 1.561202 1.726499 1.888879 1.822367 2.046276 1.957807 1.667638 1.367874  
1401\_at 1.952262 1.79866 2.551673 1.81925 2.182647 2.346513 2.336903 1.932159  
140258\_at 1.74659 1.375679 1.314554 1.844618 1.644201 1.699184 1.740599 1.67501  
140290\_at 1.567476 2.579025 1.641014 2.226623 2.672219 3.602758 2.419156 2.308753  
140432\_at 2.287568 2.632665 2.236258 2.561844 3.603729 3.017567 1.766154 3.253479  
140453\_at 1.732452 1.339187 1.822028 1.318238 1.661109 1.591611 1.781771 2.28685  
140456\_at 1.551037 1.995145 1.914325 1.841443 2.06904 1.73426 1.702125 1.953496  
140458\_at 1.734355 1.80867 1.417887 1.383719 1.935492 1.029586 1.951233 1.474614  
140459\_at 4.703382 3.789817 4.187941 4.754484 4.435158 4.179143 4.121255 2.717672  
140460\_at 5.281802 4.797826 5.028054 6.212796 5.166838 4.144283 4.659823 4.985193  
140461\_at 6.732856 6.125733 6.587398 7.012125 6.286133 6.132914 6.918824 6.499052  
140462\_at 2.962296 3.389508 3.315846 3.389508 4.530978 2.983968 2.411848 3.076406  
140464\_at 1.402396 1.251295 1.35181 1.20326 1.532101 1.824353 2.52719 1.618405  
140465\_at 6.464315 5.872659 5.388898 5.656159 6.277481 6.486646 5.278674 6.808841  
140467\_at 7.503457 7.617424 7.425738 6.969458 6.793234 7.536228 7.372066 6.564219  
140469\_at 2.418279 2.232624 1.60177 1.483283 2.477313 1.582335 2.488413 2.189054  
1404\_at 0.789431 1.180798 0.911605 1.378904 1.512113 1.649881 1.111765 1.434016  
140545\_at 2.687067 3.080781 2.589469 2.956513 2.876268 2.390586 3.838231 2.993944  
140564\_at 3.98785 4.392943 4.963566 3.927997 3.252585 4.881148 3.148434 4.751972  
140576\_at 7.045289 6.509284 6.495047 7.007156 6.316981 7.222905 6.741565 6.669999  
140578\_at 2.55857 4.39207 3.779867 3.747638 6.497966 2.571602 3.311721 4.411136  
140597\_at 9.282072 9.125787 8.923134 8.149584 8.816417 8.435215 8.376021 9.677973  
140606\_at 7.806149 6.81756 6.918035 6.870404 5.823781 7.666549 7.481421 5.306001  
140609\_at 7.574715 7.864188 7.729842 7.216867 7.326793 6.996792 7.849779 7.97074  
140612\_at 3.974715 5.038508 3.806768 4.342792 3.760364 4.481174 5.403004 6.060224  
140625\_at 1.756413 1.53712 1.458726 1.439967 2.240264 2.001043 1.234393 2.066406  
140628\_at 6.165696 5.199333 4.656512 5.40755 5.118256 5.142465 5.311849 3.980078  
140678\_at 1.87419 3.026683 1.219017 2.557628 1.623883 1.364126 1.475334 1.896388  
140679\_at 2.525377 2.288503 2.230655 2.300627 2.472472 2.401882 2.253132 3.109657  
140680\_at 3.259342 2.578014 3.573726 2.722675 3.217307 2.907868 2.381695 1.511506  
140683\_at 2.529461 1.726842 1.87031 1.57764 2.83015 1.658525 1.916303 2.051327  
140685\_at 4.71322 4.913725 4.583061 4.381202 4.324291 4.259991 4.314895 4.62537  
140686\_at 2.413364 2.659274 2.275281 1.9543 1.898228 1.805578 2.894544 2.709858  
140687\_at 2.252914 0.955804 1.696483 1.852375 1.976442 1.336667 1.590667 1.828881  
140688\_at 3.731606 3.256778 3.983505 4.304923 3.624146 4.252859 4.1052 3.293882  
140689\_at 1.576528 1.200657 1.983503 1.315575 1.455888 1.298791 1.597624 1.455905  
140690\_at 1.593234 1.757528 1.971489 1.960618 3.231458 1.54006 1.758613 2.305352  
140691\_at 3.201627 2.226483 1.904025 2.372673 2.352141 2.505238 2.129249 2.736043  
140699\_at 3.504755 3.019161 2.22203 2.877306 2.540455 2.668214 2.759594 2.38883  
1406\_at 1.718608 2.305841 1.159432 2.36141 2.131176 2.345061 1.305331 1.424009  
140700\_at 3.011126 2.773133 2.755575 4.079135 3.362346 3.076434 1.911879 3.08684  
140701\_at 3.487899 3.275234 3.071769 2.896937 2.157336 2.242265 3.896667 2.542216  
140706\_at 3.947006 3.836391 3.88054 4.099222 3.220082 3.049378 4.567387 3.235657  
140707\_at 3.904275 4.703045 4.117064 4.72479 5.116192 4.774144 5.031753 5.396445  
140710\_at 3.497378 2.833748 4.623125 4.357274 4.517937 4.527693 3.58681 3.579596

140711\_at 1.713228 2.165212 2.046478 1.865094 2.183308 2.260617 2.02883 1.927574  
140730\_at 2.030102 2.332153 2.201624 2.268688 2.961827 2.108464 2.267427 3.081123  
140731\_at 1.79007 0.837738 0.917716 1.40022 1.44354 1.420955 1.501788 1.811897  
140732\_at 1.346049 2.065229 1.334312 1.577413 1.295105 1.789191 1.727036 1.323474  
140733\_at 3.774415 3.057437 6.487101 3.518788 3.257967 4.099388 5.95227 4.47439  
140735\_at 7.471561 7.649194 8.071331 7.761903 6.830745 8.023599 7.576204 7.307477  
140738\_at 5.857922 5.394917 5.267653 5.241742 5.907451 6.292744 5.061245 4.996065  
140739\_at 1.666397 0.907364 0.525897 1.470249 0.8627 1.440174 0.830845 3.036637  
140766\_at 2.435578 2.737745 2.161054 2.219421 2.310144 2.078518 2.319274 2.180943  
140767\_at 1.869946 3.132353 2.248695 1.673736 1.748199 1.892138 3.845155 4.361658  
140771\_at 1.509637 1.74804 1.299052 2.525362 1.975688 2.288182 2.397166 1.623748  
140775\_at 5.225606 5.043084 5.889706 5.506248 4.7214 5.008905 4.598718 5.178697  
140776\_at 1.864853 2.862547 3.020356 2.826007 3.079134 3.069437 3.874135 3.569238  
1407\_at 6.054903 5.78415 5.224302 4.799268 5.123409 5.569988 5.539432 5.716173  
140801\_at 1.276139 1.248808 1.646363 1.448767 1.576097 1.348723 1.332642 1.288087  
140803\_at 2.35358 1.684502 1.548831 1.905318 2.513489 1.827427 1.95842 1.70908  
140807\_at 0.762007 1.530603 0.879148 1.240784 1.275153 2.061474 1.921597 1.86977  
140809\_at 5.120512 5.315725 4.829348 4.466412 4.003581 5.02537 5.220171 5.121847  
140823\_at 9.51697 9.557945 9.474836 9.589245 9.561055 9.320862 9.150803 9.617097  
140825\_at 3.434485 2.978985 2.128827 2.308727 3.532527 4.071395 3.058599 4.455126  
140828\_at 1.222055 1.767749 2.266323 0.988842 2.877069 1.324719 1.442226 1.778296  
140831\_at 2.463309 2.793885 1.980246 3.690114 2.787665 2.509176 1.840124 3.433981  
140832\_at 2.024807 1.554957 1.715013 2.274542 1.276946 1.934538 2.216792 1.912242  
140834\_at 2.235964 1.284652 0.952693 1.371736 1.549121 1.508097 1.255763 1.445163  
140836\_at 1.609323 1.356539 1.394809 1.301986 1.489411 1.702915 1.242998 1.399475  
140838\_at 3.739062 3.901546 4.131551 3.211763 5.203381 4.237609 3.417101 3.157891  
140846\_at 1.561506 2.014598 2.635965 1.88429 1.616959 2.011181 2.810905 1.98443  
140848\_at 1.511922 1.415106 1.201371 1.030279 1.379762 1.784055 2.023304 1.092386  
140850\_at 0.719611 1.196492 0.823584 1.401807 1.720593 1.272719 1.027956 1.246399  
140856\_at 1.407266 0.932862 1.370401 0.765493 1.418599 1.268192 1.874352 0.944505  
140862\_at 4.146559 3.150519 1.338407 3.52729 2.535234 4.347477 3.556627 2.797583  
140870\_at 0.5214 0.9886 1.089134 1.117963 1.756132 1.741347 1.790074 1.082977  
140873\_at 1.720509 1.726312 1.975397 1.711311 2.530663 2.220624 1.749466 1.766825  
140875\_at 1.425293 2.049096 2.039501 1.793172 1.985604 1.771079 2.066024 1.791205  
140876\_at 1.991501 1.955771 2.178259 1.946298 2.873185 2.263304 1.424014 1.909533  
140880\_at 1.317086 0.804829 1.454539 1.256972 3.797174 1.257887 1.869122 1.754927  
140881\_at 1.46814 0.846329 0.763125 0.766954 1.327844 1.150455 0.835046 1.101925  
140883\_at 2.072535 3.037474 2.721968 3.756397 2.780098 2.700707 1.939109 2.824255  
140885\_at 7.980809 7.94168 8.73998 7.424561 7.910475 8.157947 8.489069 7.448919  
140886\_at 2.710116 3.844482 1.845102 2.861086 3.056031 2.911569 2.254813 4.050231  
140890\_at 6.001464 6.019336 6.31725 5.964868 5.744538 6.231915 5.699844 6.524106  
140893\_at 2.75827 2.03929 2.081513 2.82312 2.062575 2.405724 2.169173 2.705919  
140894\_at 1.25469 1.776498 1.278781 1.417195 1.784437 1.501922 2.280689 1.303889  
1408\_at 4.329547 4.39797 5.142189 4.945527 3.927734 5.051304 4.616667 4.06619  
140901\_at 4.879025 3.965242 4.976092 3.890626 3.662245 4.176389 4.029837 5.03384  
140902\_at 1.612835 1.165019 1.543477 1.527909 2.622335 1.498607 1.358435 1.901466  
140947\_at 1.719613 2.100658 2.04684 2.399792 2.09778 2.485049 2.312756 1.944937  
140\_at 1.988074 2.141188 1.784838 1.998021 3.218137 2.269117 1.975224 2.992372  
1410\_at 10.18293 10.1801 10.1006 9.764696 9.824708 10.13531 9.588834 10.10039  
1411\_at 2.86659 1.276797 2.104837 1.718462 1.821774 1.78276 0.74268 2.255846  
1412\_at 1.811312 1.907244 1.815712 2.143575 2.91362 1.30271 1.665817 2.068805

|           |          |          |          |          |          |          |          |          |
|-----------|----------|----------|----------|----------|----------|----------|----------|----------|
| 1413_at   | 2.446427 | 2.160663 | 2.497544 | 2.200581 | 2.037104 | 1.821743 | 1.999744 | 2.366509 |
| 1414_at   | 1.586752 | 1.656459 | 1.867813 | 2.046199 | 2.329596 | 2.028161 | 2.120794 | 1.611044 |
| 1415_at   | 2.854556 | 3.079647 | 2.991461 | 3.297138 | 3.488208 | 4.125944 | 4.029621 | 3.338672 |
| 1416_at   | 3.641007 | 4.700911 | 6.170941 | 4.550225 | 2.13302  | 3.528561 | 5.274952 | 4.099887 |
| 1417_at   | 2.557099 | 2.662449 | 3.981421 | 3.639656 | 2.817028 | 3.499527 | 3.079889 | 4.219763 |
| 1418_at   | 2.009981 | 2.498214 | 2.534464 | 2.908256 | 2.22381  | 2.634228 | 2.808229 | 2.359112 |
| 1419_at   | 2.307074 | 1.482483 | 1.228888 | 1.534995 | 2.036314 | 1.350954 | 1.361049 | 1.693327 |
| 141_at    | 4.945391 | 5.088179 | 4.878813 | 5.268937 | 4.682873 | 5.684543 | 5.224054 | 4.274914 |
| 1420_at   | 1.571995 | 2.288954 | 1.914879 | 1.948772 | 2.369667 | 2.55469  | 1.606934 | 2.930254 |
| 1421_at   | 2.918341 | 2.516294 | 2.289347 | 2.924265 | 1.894739 | 2.871198 | 2.918095 | 2.378684 |
| 142678_at | 3.827566 | 3.763583 | 2.595403 | 3.600865 | 3.71698  | 3.690535 | 2.752531 | 2.768637 |
| 142679_at | 4.00621  | 4.671765 | 3.8477   | 4.742479 | 3.648133 | 4.230849 | 3.660275 | 3.75578  |
| 142680_at | 3.240303 | 2.081122 | 1.853244 | 2.157149 | 3.294795 | 2.134719 | 2.139808 | 1.545472 |
| 142683_at | 1.881618 | 1.168564 | 1.100554 | 2.271397 | 1.583268 | 1.372898 | 1.282344 | 1.131763 |
| 142684_at | 1.272025 | 1.9754   | 1.63849  | 1.137569 | 0.981529 | 2.160013 | 1.100147 | 1.294003 |
| 142685_at | 3.041171 | 1.801775 | 1.516784 | 1.222038 | 1.876338 | 2.356846 | 1.549122 | 2.727581 |
| 142686_at | 1.711455 | 1.430559 | 1.540655 | 1.587249 | 2.097943 | 2.014958 | 1.445736 | 1.439007 |
| 142689_at | 2.318426 | 2.422792 | 2.301653 | 1.90187  | 2.503882 | 2.482267 | 2.042393 | 2.696698 |
| 1427_at   | 3.401895 | 2.686168 | 2.740457 | 2.919649 | 4.084602 | 2.700098 | 3.009285 | 1.966657 |
| 142827_at | 1.186916 | 1.022475 | 1.978381 | 1.802326 | 2.603491 | 0.97602  | 1.131026 | 1.038658 |
| 142891_at | 6.329178 | 6.001944 | 6.390958 | 5.994069 | 5.832849 | 5.238519 | 6.118387 | 6.376766 |
| 1428_at   | 2.915878 | 2.70767  | 3.769772 | 2.690388 | 4.970316 | 3.198192 | 2.514761 | 4.532229 |
| 142910_at | 0.969792 | 1.550744 | 1.231438 | 0.751276 | 1.072008 | 1.404179 | 1.240546 | 1.043    |
| 142913_at | 2.674746 | 3.852221 | 2.973916 | 1.907643 | 1.693852 | 1.840454 | 2.860114 | 3.629933 |
| 142940_at | 5.015206 | 4.409251 | 5.168783 | 4.617475 | 2.631109 | 5.115281 | 5.391914 | 3.825485 |
| 1429_at   | 7.774923 | 7.038472 | 6.468477 | 6.768694 | 6.955546 | 6.967437 | 4.277679 | 7.397568 |
| 142_at    | 6.50613  | 6.309168 | 6.1862   | 6.189552 | 5.950006 | 6.504348 | 6.274673 | 6.970394 |
| 143098_at | 2.739405 | 2.842731 | 3.934511 | 2.204854 | 4.166231 | 4.028481 | 2.599195 | 3.625775 |
| 143162_at | 1.957718 | 2.373256 | 1.396105 | 1.378544 | 1.788976 | 1.562508 | 1.828282 | 1.598168 |
| 143187_at | 6.621114 | 6.479155 | 6.857343 | 6.724609 | 6.577401 | 6.157976 | 6.926536 | 6.785985 |
| 1431_at   | 7.347595 | 7.787721 | 6.409642 | 7.575301 | 7.228185 | 7.150922 | 6.961563 | 6.733137 |
| 143241_at | 1.438777 | 1.232818 | 1.459327 | 1.531067 | 1.301146 | 2.354517 | 1.766521 | 1.591697 |
| 143244_at | 2.828688 | 1.955569 | 1.838299 | 1.147265 | 1.905421 | 1.87312  | 1.520321 | 2.605938 |
| 143279_at | 4.734283 | 3.953417 | 4.691517 | 4.640873 | 3.964843 | 4.368792 | 4.119794 | 4.779067 |
| 143282_at | 2.235328 | 2.692291 | 2.051312 | 1.885618 | 1.956509 | 2.517164 | 3.749711 | 2.411557 |
| 1432_at   | 5.711916 | 6.136263 | 6.149963 | 5.951976 | 5.615946 | 6.001279 | 5.95077  | 5.732098 |
| 143379_at | 4.511594 | 5.942829 | 5.761674 | 3.585369 | 4.200338 | 4.342642 | 6.169865 | 4.586541 |
| 143384_at | 6.824576 | 5.700344 | 6.156656 | 6.885234 | 6.922588 | 6.408349 | 6.228502 | 6.601395 |
| 143425_at | 4.044527 | 4.931483 | 4.208675 | 3.102765 | 3.024617 | 3.89181  | 3.149024 | 3.062186 |
| 143458_at | 3.548729 | 2.789705 | 3.520909 | 3.301676 | 2.240701 | 2.686217 | 2.809545 | 2.798768 |
| 143471_at | 1.307246 | 1.462207 | 1.320272 | 1.145743 | 1.683212 | 0.991003 | 1.66221  | 2.002022 |
| 143496_at | 1.118685 | 0.89702  | 1.091785 | 1.100122 | 1.912886 | 1.210387 | 0.94568  | 1.749029 |
| 1434_at   | 7.792747 | 7.915104 | 7.843502 | 8.002298 | 7.830348 | 7.692922 | 8.16129  | 8.287749 |
| 143501_at | 1.952545 | 2.505616 | 2.0056   | 1.974864 | 2.716927 | 2.56309  | 2.70486  | 2.332578 |
| 143502_at | 1.699331 | 1.145537 | 0.849811 | 1.153795 | 1.951024 | 0.922051 | 1.457628 | 1.674242 |
| 143503_at | 1.938309 | 2.637837 | 7.154506 | 3.685054 | 8.551177 | 2.091835 | 9.235862 | 1.911626 |
| 143570_at | 3.342242 | 3.410796 | 3.696193 | 4.093222 | 5.024319 | 2.778027 | 1.527566 | 2.756332 |
| 1435_at   | 5.253077 | 4.581909 | 5.308725 | 4.830319 | 5.211177 | 4.373321 | 4.677381 | 4.670011 |
| 143630_at | 1.294849 | 1.25899  | 2.171068 | 1.760079 | 2.646417 | 1.380429 | 1.523524 | 1.735902 |
| 143662_at | 3.184624 | 2.356895 | 1.668783 | 3.283345 | 1.948175 | 2.14744  | 1.599036 | 2.34693  |
| 143666_at | 2.620222 | 3.2793   | 3.130839 | 2.21789  | 2.934243 | 3.037864 | 3.179841 | 3.604536 |

143678\_at 1. 849832 2. 140596 2. 146431 2. 061447 2. 667841 2. 837654 2. 393463 2. 217891  
143684\_at 3. 846344 3. 887037 3. 619587 3. 910617 2. 447169 3. 980015 2. 512488 2. 004644  
143686\_at 5. 253674 5. 249094 4. 932796 4. 740155 4. 751513 5. 184928 4. 794202 5. 182748  
143689\_at 1. 711323 2. 830969 1. 71223 1. 227094 1. 83846 2. 012068 0. 938688 1. 382389  
1436\_at 5. 24966 5. 459708 4. 477622 5. 553993 4. 424487 4. 947622 5. 563855 3. 793944  
1437\_at 1. 028957 1. 110367 1. 303157 1. 171402 1. 022851 1. 178791 1. 658288 1. 064156  
143872\_at 4. 143831 5. 056756 4. 973218 5. 027589 4. 438904 4. 638592 4. 101126 4. 443579  
143879\_at 4. 331804 4. 931737 4. 610421 4. 377321 4. 804644 4. 599883 4. 619036 4. 745488  
143884\_at 5. 837085 6. 113393 6. 05566 5. 5103 6. 804453 5. 643462 5. 596908 6. 251665  
143888\_at 7. 012838 6. 702169 6. 351921 6. 889331 7. 189847 6. 290024 7. 425526 6. 798637  
1438\_at 2. 13888 2. 535619 1. 717594 2. 331751 2. 559229 3. 553558 2. 275317 2. 360815  
143903\_at 3. 780466 3. 483314 3. 863298 4. 037599 3. 448089 4. 002324 4. 330654 2. 490132  
143941\_at 1. 801559 2. 584165 2. 620365 1. 79419 4. 169706 3. 073817 1. 513684 1. 909805  
1439\_at 3. 830723 3. 831035 6. 589065 4. 620584 4. 404423 5. 269384 6. 831177 3. 590488  
143\_at 7. 101989 7. 260395 7. 27137 7. 198998 7. 482736 7. 2481 7. 256108 7. 349031  
144097\_at 3. 442733 2. 64223 2. 528276 3. 394811 2. 508957 4. 159274 3. 325498 2. 788022  
1440\_at 1. 935597 1. 659325 1. 86444 2. 037864 1. 616309 2. 531171 1. 423249 2. 142364  
144100\_at 2. 991166 3. 610863 3. 975679 3. 588472 3. 132836 4. 07359 4. 360669 4. 067021  
144108\_at 5. 619602 5. 99233 5. 514135 5. 931391 5. 946343 4. 658788 6. 08713 5. 448238  
144110\_at 5. 145157 5. 376792 5. 546212 2. 921987 3. 08938 5. 252489 4. 175987 5. 191287  
144124\_at 1. 167455 1. 748548 1. 510179 2. 444165 1. 663201 2. 475544 1. 956801 2. 202598  
144125\_at 1. 587243 1. 148231 1. 726258 1. 099131 1. 176788 1. 48674 1. 693693 1. 041718  
144132\_at 2. 567162 2. 434004 2. 294613 2. 031025 2. 831414 2. 172936 2. 27825 2. 465192  
144165\_at 6. 323519 6. 875052 7. 398585 6. 640763 6. 838606 6. 489542 6. 85107 7. 506143  
144193\_at 3. 300706 1. 894075 1. 918164 1. 620229 2. 233285 2. 14106 1. 421825 2. 557013  
144195\_at 1. 306362 2. 463258 1. 407144 0. 844566 1. 54672 1. 269502 2. 273634 2. 634676  
1441\_at 2. 429238 3. 258747 2. 785191 3. 259938 2. 692193 3. 270675 2. 114116 2. 040608  
144233\_at 3. 612458 2. 078534 3. 209393 3. 191864 2. 280486 2. 406081 3. 424032 3. 199025  
144245\_at 4. 578082 4. 106492 3. 652333 4. 849745 5. 264958 0. 915908 0. 03842 5. 594251  
144321\_at 3. 309115 3. 440274 3. 571796 2. 993865 4. 043757 3. 873041 3. 153263 1. 749567  
144360\_at 0. 549314 1. 148499 1. 106349 1. 226502 0. 979165 0. 907245 1. 304053 1. 138182  
144363\_at 4. 410936 4. 152479 3. 530591 3. 480047 3. 688446 3. 137299 3. 814926 3. 753539  
1443\_at 1. 026621 1. 623911 2. 025096 2. 134503 1. 992754 3. 354976 2. 495171 2. 70558  
144402\_at 7. 78945 7. 592364 7. 848735 7. 655837 7. 840246 7. 53166 7. 898343 7. 994561  
144404\_at 3. 491193 3. 292984 1. 805164 3. 203505 3. 539703 2. 596309 4. 193267 3. 846666  
144406\_at 4. 407097 4. 601709 4. 11083 3. 716712 3. 310222 4. 403674 3. 72548 3. 785271  
144423\_at 1. 512645 1. 309011 1. 755295 1. 506706 2. 451508 2. 233524 1. 560183 1. 883375  
144448\_at 1. 078363 2. 411102 1. 24964 1. 269292 1. 586694 1. 248316 1. 110724 1. 813241  
144453\_at 1. 590004 2. 064894 1. 443264 1. 827659 2. 028501 1. 363178 1. 550873 2. 098263  
144455\_at 1. 924586 1. 849248 1. 807403 1. 934193 1. 70345 2. 457431 1. 551673 1. 921294  
144481\_at 1. 665935 1. 403155 2. 667743 2. 970503 2. 36253 1. 545929 2. 307048 2. 309008  
144486\_at 1. 094716 1. 046288 1. 725625 1. 600153 1. 311855 1. 133702 1. 218622 2. 030151  
1444\_at 0. 66026 1. 479371 2. 21774 1. 487585 1. 543056 2. 538824 2. 404192 1. 56479  
144501\_at 1. 76374 1. 821533 1. 785483 1. 830876 1. 437175 1. 490942 1. 276319 2. 183388  
144535\_at 1. 588368 1. 56445 1. 422578 1. 127728 1. 095069 1. 585293 2. 071271 2. 482691  
144568\_at 1. 364181 1. 617566 1. 48682 1. 647668 2. 851063 2. 283899 1. 703938 1. 175555  
144571\_at 4. 535312 4. 784916 4. 412785 4. 93031 3. 686681 4. 04906 3. 93019 4. 80545  
144577\_at 1. 980541 3. 250824 2. 546833 2. 591355 2. 546275 2. 894833 2. 480062 3. 599793  
1445\_at 4. 457258 3. 868765 3. 789832 4. 514998 3. 895366 4. 54628 3. 893082 3. 779248  
144608\_at 3. 174358 2. 808525 3. 731072 3. 674953 3. 750167 3. 884021 3. 34145 2. 738738  
144699\_at 5. 386139 5. 14236 3. 759296 5. 407023 3. 227075 4. 919805 4. 27577 3. 543531

|           |          |          |          |          |          |          |          |          |
|-----------|----------|----------|----------|----------|----------|----------|----------|----------|
| 1446_at   | 1.194282 | 1.573163 | 1.261553 | 1.147703 | 1.543673 | 1.629836 | 1.629841 | 1.660257 |
| 144715_at | 1.349797 | 1.411052 | 1.646591 | 1.414533 | 2.139591 | 1.168195 | 2.00325  | 1.680271 |
| 144717_at | 3.153778 | 3.524464 | 2.844676 | 3.088359 | 2.941135 | 3.20536  | 3.149446 | 3.379973 |
| 144742_at | 1.405426 | 0.972784 | 0.971061 | 0.594855 | 1.185171 | 1.053295 | 0.931342 | 1.217166 |
| 144776_at | 1.231081 | 1.817117 | 1.390946 | 0.981453 | 1.299282 | 0.988657 | 1.888575 | 1.017267 |
| 1447_at   | 1.575519 | 1.438563 | 1.184984 | 1.003958 | 1.319245 | 0.591301 | 2.102893 | 1.405243 |
| 144809_at | 1.852866 | 1.670879 | 1.01106  | 1.631688 | 1.24212  | 1.595457 | 1.88052  | 1.975855 |
| 144811_at | 3.794884 | 3.396338 | 3.962339 | 2.933496 | 3.077406 | 2.678267 | 2.614258 | 3.573139 |
| 144817_at | 1.085576 | 1.700685 | 1.765136 | 1.143111 | 1.228046 | 1.516975 | 2.335523 | 1.64371  |
| 1448_at   | 1.46346  | 1.684769 | 2.0948   | 2.103923 | 2.47246  | 2.399545 | 1.978007 | 1.754906 |
| 144920_at | 0.919379 | 0.716088 | 1.007716 | 0.820331 | 1.58432  | 1.392669 | 1.388957 | 1.066929 |
| 144983_at | 1.466457 | 1.739613 | 4.481952 | 2.661534 | 2.554868 | 1.124144 | 2.435022 | 3.571847 |
| 145165_at | 1.546853 | 0.957736 | 1.577494 | 1.743247 | 2.333973 | 1.556518 | 1.280665 | 2.636195 |
| 145173_at | 3.269938 | 3.310639 | 3.71107  | 3.718846 | 2.953552 | 3.165639 | 4.039066 | 3.918846 |
| 145200_at | 1.447749 | 1.485247 | 1.358911 | 3.58985  | 2.954122 | 1.804831 | 1.538232 | 2.333614 |
| 145216_at | 2.528736 | 2.700952 | 2.872519 | 2.332221 | 2.578242 | 2.294214 | 2.789034 | 2.806695 |
| 145226_at | 2.715977 | 2.631789 | 1.485031 | 1.358693 | 4.224712 | 2.510536 | 1.420427 | 3.571393 |
| 145241_at | 1.095295 | 1.104444 | 2.082355 | 2.20449  | 1.315981 | 1.167347 | 2.088623 | 1.023039 |
| 145258_at | 1.957797 | 2.461791 | 2.479639 | 2.057585 | 2.334472 | 2.639837 | 2.433111 | 2.168712 |
| 145264_at | 1.091502 | 1.655292 | 2.758335 | 2.046502 | 1.787246 | 1.626801 | 2.095913 | 1.402996 |
| 145270_at | 1.787782 | 1.651273 | 1.978545 | 1.793141 | 1.936895 | 1.958923 | 1.832563 | 1.54562  |
| 145282_at | 4.932299 | 4.381682 | 4.543417 | 3.644279 | 3.523622 | 3.601464 | 4.306597 | 4.54588  |
| 1452_at   | 6.65321  | 5.781934 | 6.564393 | 6.442268 | 6.291154 | 6.309477 | 6.751387 | 5.775575 |
| 145376_at | 1.966226 | 1.422355 | 1.084709 | 1.279772 | 1.401699 | 1.454056 | 1.125182 | 1.134763 |
| 145389_at | 5.324072 | 5.353887 | 3.758833 | 5.645478 | 4.627832 | 4.872466 | 4.629672 | 6.251476 |
| 1453_at   | 7.444378 | 7.2921   | 7.344651 | 7.311662 | 7.201067 | 7.834651 | 7.344894 | 6.820207 |
| 145407_at | 9.355565 | 9.792214 | 9.957602 | 9.446769 | 9.522697 | 9.356526 | 9.946242 | 9.546736 |
| 145438_at | 2.095981 | 2.633892 | 2.630954 | 2.543465 | 2.384366 | 3.202062 | 1.954977 | 1.976365 |
| 145447_at | 4.877684 | 4.680284 | 4.139195 | 5.297413 | 3.781819 | 4.732258 | 3.653139 | 3.757371 |
| 145474_at | 1.486016 | 1.185363 | 1.994888 | 1.322004 | 1.528392 | 1.881537 | 1.443636 | 1.210295 |
| 145482_at | 4.67999  | 5.279706 | 6.659195 | 5.454596 | 6.696143 | 4.702606 | 4.88993  | 6.049308 |
| 145483_at | 4.715562 | 4.368    | 3.962381 | 3.637426 | 3.385744 | 3.58364  | 3.269882 | 3.465464 |
| 145497_at | 1.811368 | 1.406703 | 1.798429 | 1.966817 | 2.120482 | 1.39936  | 1.873563 | 2.074882 |
| 1454_at   | 7.165697 | 6.861334 | 6.52361  | 6.664727 | 6.900849 | 6.954119 | 7.07332  | 6.791272 |
| 145501_at | 2.593252 | 3.445172 | 3.774001 | 2.4783   | 2.965137 | 2.811572 | 2.245247 | 3.324334 |
| 145508_at | 3.596544 | 3.86351  | 2.586608 | 3.802096 | 3.931944 | 4.509587 | 3.126531 | 4.028908 |
| 145553_at | 2.872312 | 3.724111 | 3.796248 | 2.962699 | 1.627888 | 3.272796 | 1.873615 | 3.158356 |
| 145567_at | 4.8006   | 5.469881 | 5.423293 | 4.584354 | 4.531386 | 5.436157 | 5.157557 | 5.303869 |
| 145581_at | 3.66635  | 2.903674 | 1.805892 | 3.737439 | 2.814349 | 2.848238 | 3.507288 | 4.205909 |
| 1455_at   | 5.336504 | 5.18684  | 5.765791 | 5.172    | 3.550049 | 5.497071 | 5.598683 | 4.378577 |
| 145624_at | 1.762242 | 1.01699  | 1.370119 | 1.418326 | 1.966836 | 1.560236 | 1.155062 | 1.510772 |
| 145645_at | 1.523633 | 1.622557 | 1.706275 | 1.042377 | 2.144107 | 1.849884 | 1.263475 | 1.506752 |
| 145663_at | 2.199576 | 1.359199 | 1.552024 | 1.401261 | 1.563281 | 1.554972 | 1.557763 | 1.203774 |
| 1456_at   | 6.507738 | 7.153321 | 7.064883 | 6.996261 | 6.281632 | 6.470877 | 6.835271 | 7.130493 |
| 145741_at | 2.441527 | 2.913932 | 2.955157 | 2.879025 | 2.54634  | 3.383178 | 2.470313 | 2.226965 |
| 145748_at | 2.587684 | 1.948081 | 1.965383 | 3.324093 | 2.181815 | 2.174361 | 2.696346 | 2.049584 |
| 145757_at | 2.571257 | 1.984184 | 2.401494 | 1.941682 | 1.744242 | 1.93522  | 1.773608 | 2.078138 |
| 145773_at | 6.498515 | 5.974222 | 5.42042  | 4.791462 | 5.336254 | 5.12856  | 6.330805 | 5.588839 |
| 145781_at | 0.924271 | 0.492878 | 1.291029 | 0.995734 | 1.57254  | 1.402516 | 1.132668 | 1.104898 |
| 145783_at | 4.662973 | 3.798374 | 5.168223 | 4.680572 | 4.206013 | 4.713533 | 3.03543  | 4.0037   |
| 145788_at | 6.12726  | 5.160862 | 5.47849  | 4.993213 | 5.572809 | 5.87016  | 4.743288 | 3.31001  |

1457\_at 4.834477 5.00337 5.267803 4.850832 4.222927 4.324119 4.609752 5.031488  
145814\_at 1.776072 1.896224 1.204294 1.858072 1.759338 1.89477 1.410245 1.513195  
145820\_at 4.010739 2.211236 1.911194 2.705169 2.174209 2.184111 2.917883 3.607752  
145837\_at 1.960806 1.532574 2.038925 1.44957 4.331625 1.876485 2.416613 4.345825  
145845\_at 1.194588 1.649373 1.293346 1.257203 2.726538 1.272789 1.233402 1.51196  
145853\_at 6.606721 6.704106 6.33261 5.504441 5.335357 5.599288 4.418631 5.657216  
145858\_at 2.289321 1.186576 2.041862 1.56032 2.001207 1.511615 2.119779 1.396983  
145864\_at 2.180964 2.623081 2.038629 3.124639 1.860199 1.556948 2.030785 1.747552  
145873\_at 2.502032 2.65749 2.14739 3.463639 3.364569 2.070942 2.467283 2.278744  
145942\_at 1.838902 1.55785 1.598491 1.176215 2.310708 1.681655 1.163507 2.061099  
145946\_at 1.712912 1.241086 1.610713 1.223514 1.412146 1.560776 1.725203 1.712912  
145957\_at 4.119029 3.741074 3.356817 4.743748 3.040715 3.742598 2.858661 2.977113  
145978\_at 5.028578 3.752011 2.084917 3.174716 3.106236 5.035651 5.291415 3.058087  
1459\_at 7.270601 7.632387 7.955812 7.505807 8.42133 7.291993 7.567286 7.553065  
146050\_at 4.266084 4.909604 4.501882 4.884797 5.318665 3.855522 5.941548 4.197388  
146057\_at 4.684121 5.182764 4.256557 5.619477 4.787039 5.586026 5.338662 4.857125  
146059\_at 3.029272 3.067188 2.448783 2.979675 2.79856 3.517286 3.670382 3.631475  
1460\_at 9.561775 9.124004 9.174074 8.985478 9.208852 9.046014 8.871779 8.884113  
146167\_at 2.909252 2.150024 2.213134 2.751284 1.778672 1.613107 2.473158 2.141904  
146177\_at 2.426488 1.325344 2.116543 2.006711 1.728699 2.136823 1.962749 1.277157  
146183\_at 1.136674 1.902819 1.392213 0.836635 1.340704 0.743818 1.315972 1.316547  
146198\_at 4.952748 4.361708 5.372374 4.922634 4.89824 4.511454 4.4498 4.267589  
146206\_at 2.26925 2.0968 2.269188 2.159161 1.632621 2.181609 2.22335 2.194325  
146212\_at 2.212465 2.371148 2.064933 1.826474 1.827689 1.710814 1.903133 1.868566  
146223\_at 5.247913 6.023184 5.560005 5.304428 7.100783 5.503173 5.991752 5.909018  
146225\_at 3.093885 2.249452 2.400699 2.07231 2.623932 2.49004 2.035788 2.057835  
146227\_at 3.761133 2.455812 2.860311 3.080204 3.073397 3.382539 3.057277 3.715637  
146279\_at 1.189622 1.572037 1.687268 1.413996 1.508342 1.067683 1.498084 1.417849  
1462\_at 4.88805 4.393255 4.607145 5.660662 2.934552 5.786763 4.095773 5.590089  
146310\_at 2.545752 2.522868 1.945644 2.036416 2.526501 2.591337 2.484042 2.10646  
146325\_at 2.477843 3.307283 1.99764 2.903143 3.063438 3.264401 3.088951 3.058191  
146330\_at 1.749701 2.026977 1.867393 1.737399 2.243625 2.45311 1.66977 2.046572  
146336\_at 1.571237 1.902975 1.900887 1.339017 2.155025 1.745571 1.981178 1.80299  
146378\_at 1.247383 1.673344 2.824308 1.385077 1.972815 1.466973 2.440076 2.417815  
146395\_at 2.113664 1.91707 2.134669 2.587141 2.31627 1.848788 2.1898 2.778819  
1463\_at 1.585904 2.049795 2.047718 2.029552 2.498583 2.091122 2.144905 2.068493  
146429\_at 2.063803 1.986759 2.221029 2.328684 2.949211 1.926469 2.948894 2.199394  
146433\_at 2.720048 3.157071 3.804588 3.569185 2.795812 3.501007 4.477199 3.50769  
146434\_at 5.392383 5.589416 5.014825 4.004027 4.609729 5.167804 5.646517 4.104205  
146439\_at 2.208861 2.574433 2.545302 2.776689 2.748891 3.494272 2.586294 2.457301  
146456\_at 4.482103 3.077397 3.122538 2.248842 3.434262 2.890098 1.928268 2.896198  
146481\_at 2.54827 1.154443 1.128904 1.286959 1.546062 0.783011 1.035344 1.092453  
1464\_at 3.247236 3.472462 3.659606 3.51891 3.389127 3.495319 3.09854 3.13231  
146512\_at 2.254241 2.459334 2.856746 2.141709 2.864797 3.305062 2.543605 2.608852  
146513\_at 2.294931 2.150563 1.729503 2.306246 2.114564 2.315666 2.728209 2.7427  
146540\_at 3.342827 4.124568 3.622168 4.001442 3.928109 3.848142 3.459668 3.528861  
146542\_at 4.597598 4.247276 4.310851 4.34064 4.189888 5.186416 4.364409 4.6154  
146547\_at 1.675993 2.191628 2.028843 2.114836 2.446506 1.976207 2.59387 1.822806  
146556\_at 3.069092 2.301217 2.482657 2.396249 3.981699 2.921025 2.788709 3.177482  
146562\_at 2.463698 2.753259 2.766192 2.091858 2.580771 2.015217 2.246257 2.217  
1465\_at 7.918762 8.446597 8.014259 8.013888 8.247707 7.685633 8.521773 7.72048



146664\_at 1.97155 1.890575 2.516705 2.467562 2.124131 1.775205 1.868707 1.990575  
146691\_at 7.172327 7.790633 8.492711 7.169258 6.511918 7.119131 7.423358 7.330395  
1466\_at 4.393322 4.491839 3.588241 2.749348 3.85583 4.877578 3.943842 2.203786  
146705\_at 3.006014 3.262677 3.484247 3.478622 3.884627 3.393686 3.578529 2.554914  
146712\_at 3.433819 2.539059 2.599916 3.040716 2.738495 2.858564 2.714533 2.393191  
146713\_at 1.976064 2.450545 2.443087 2.536778 2.617232 3.565953 2.680656 1.892224  
146722\_at 2.953394 2.847753 3.831848 3.480104 2.791736 2.257355 1.742463 1.618474  
146723\_at 2.176714 1.785441 2.150481 1.52908 1.449873 1.611479 2.643572 2.445614  
146754\_at 1.575014 1.933715 1.711511 1.760821 1.964708 2.50667 1.772762 1.946197  
146760\_at 2.990025 3.70878 3.461302 3.134814 2.554808 2.818372 3.914956 2.151001  
146771\_at 1.397629 1.358466 1.284675 1.537121 1.164518 1.865229 1.760042 1.528717  
146779\_at 1.418285 1.000447 1.646802 1.060951 1.299931 1.632176 1.27416 0.699331  
146802\_at 4.880861 3.813826 4.510115 4.697395 5.304258 5.204889 4.426982 4.002895  
146845\_at 1.734218 1.540785 1.681892 2.184729 1.53387 1.544223 1.593309 1.960098  
146849\_at 1.771118 1.541621 1.837306 1.899988 1.562522 2.361283 1.560011 2.097669  
146850\_at 1.9908 2.570173 1.926289 2.308806 1.84838 1.591088 2.415952 2.044031  
146852\_at 1.269674 1.682944 1.239931 1.462832 1.364124 0.97792 1.085707 2.319728  
146853\_at 3.016025 3.046649 3.21312 2.975678 3.160248 3.719377 3.980556 3.219548  
146857\_at 1.414888 1.835933 1.889727 2.388639 2.298047 2.513366 2.359991 2.619242  
146861\_at 0.976842 1.431642 1.142967 0.975196 0.609607 1.927929 0.8847 1.416905  
146862\_at 1.203657 1.880695 1.366655 1.244848 2.196413 1.028187 1.735207 1.278196  
146880\_at 2.635016 2.921889 2.117534 1.699416 2.866464 2.455331 2.868797 1.703579  
146894\_at 2.881821 2.728876 3.260497 2.312531 2.434233 2.579065 3.162572 2.648639  
1468\_at 4.270665 3.874004 4.473244 4.461303 4.438211 4.409265 2.982181 3.018599  
146909\_at 3.075603 3.000303 2.210199 2.68278 2.849156 2.645417 2.922115 2.687629  
146923\_at 4.256613 4.381807 4.588222 4.658029 4.277974 4.079819 5.546684 5.68365  
146956\_at 2.590801 3.085079 2.825826 2.240691 2.504739 3.598485 3.232891 2.733739  
1469\_at 2.550687 2.349814 1.835007 1.725804 3.910374 3.640689 1.971452 3.93935  
146\_at 3.009799 3.80403 2.513585 3.249495 3.653442 2.613773 2.843058 2.838439  
147007\_at 6.382456 5.849271 5.935798 6.542171 6.093657 6.419423 6.681972 4.935187  
147011\_at 1.781236 1.547784 1.660933 2.19007 2.031997 2.266277 1.825564 2.048627  
147015\_at 2.599172 2.835086 2.387886 2.711661 2.685022 2.215441 2.868903 3.013889  
147040\_at 4.667427 4.596921 4.320314 3.847669 4.738332 4.17664 4.660877 4.662963  
147081\_at 2.880008 4.027751 3.596669 3.056139 2.809613 2.751472 2.437375 2.772006  
147093\_at 1.194525 1.960883 1.232981 1.894152 2.796371 2.114989 1.731082 2.248333  
1470\_at 2.127114 2.968954 3.237939 3.84901 3.35354 1.889708 3.461518 2.167664  
147111\_at 1.961582 1.56713 1.998679 2.214457 2.224083 1.334119 2.87826 1.607043  
147138\_at 2.228102 2.229427 2.656301 2.103829 1.96341 1.930946 2.090022 1.809962  
147166\_at 1.745398 1.576938 3.387698 2.512954 2.771668 1.677156 3.479663 2.112044  
147172\_at 4.840192 4.23277 4.271755 3.892908 5.413161 4.603446 5.795599 4.252664  
147179\_at 5.737922 5.371927 6.118168 5.359285 4.886093 6.140274 5.712435 4.519919  
147183\_at 1.26322 1.159279 0.843498 1.329282 1.929031 1.226457 1.487492 1.975945  
147184\_at 3.577635 4.333934 3.88677 4.031145 3.578955 3.236994 3.94453 4.946852  
1471\_at 8.011885 7.708363 7.998333 7.841402 7.550846 7.863629 8.545455 7.041712  
1472\_at 2.817944 3.63082 3.182169 2.904391 2.835936 3.054218 2.204262 3.332955  
147323\_at 0.96826 1.36855 0.912234 1.131824 1.260711 1.131933 1.412296 1.166021  
147339\_at 4.618615 4.988594 5.085427 5.250928 4.474933 4.449751 4.498886 4.860411  
147372\_at 6.189935 5.934202 6.403948 4.881351 5.798384 6.52924 6.162273 6.328155  
147381\_at 2.596816 2.527802 3.109608 3.066054 2.954379 2.501582 3.062384 3.149826  
1473\_at 1.584638 2.358136 1.795483 1.658644 1.855799 1.231073 1.653275 1.605018  
147407\_at 1.272721 1.407828 2.00552 1.239145 1.465327 2.339407 2.832016 1.931972

147409\_at 1.369172 1.503371 1.267795 1.469935 1.801966 1.904736 1.935598 1.437985  
147429\_at 0.891816 0.997642 1.092278 1.090442 0.672969 0.980421 1.026879 1.450423  
147463\_at 1.575814 2.227059 2.264968 2.809976 1.995418 3.601858 2.053866 2.508532  
147495\_at 4.433839 2.478388 2.761566 2.600246 2.272937 4.15224 2.552551 2.663882  
1474\_at 4.200684 4.33132 4.888768 3.757469 2.064247 4.926047 2.700553 4.677241  
147525\_at 2.109427 2.577401 3.280755 1.84489 2.511034 2.450829 2.409617 2.290258  
1475\_at 4.935692 5.875753 4.401439 5.541387 4.352852 5.925786 4.747427 5.160747  
147645\_at 2.653739 2.694406 2.513794 2.846508 2.694694 2.120128 3.12747 3.215558  
147646\_at 0.939425 1.514879 1.401193 1.164624 1.548905 1.544854 1.470868 1.861583  
147650\_at 4.819388 5.045736 4.344718 4.802223 3.513146 4.988393 4.396917 3.701683  
147657\_at 6.132693 4.820535 5.566905 5.131919 5.260973 5.776725 5.062034 5.267142  
147658\_at 3.220208 4.05079 3.143011 4.593462 2.985207 4.217516 3.898303 3.303093  
147660\_at 2.461673 5.260713 4.058237 4.649095 1.144165 3.459956 4.599096 4.473753  
147664\_at 1.059767 1.273375 1.678747 1.431131 1.990957 1.108982 1.848348 1.460018  
147670\_at 1.850815 2.118954 2.174857 2.007286 2.242331 2.232892 2.570765 2.44179  
147685\_at 2.83198 2.810397 3.6738 3.085741 2.393707 2.641489 2.607802 3.641734  
147686\_at 2.367664 2.307819 3.172271 3.533152 4.303483 2.663728 2.02365 3.349752  
147687\_at 5.504098 5.283064 6.244754 6.070235 2.573889 6.406841 7.213246 6.362041  
147694\_at 4.801693 6.121574 5.506599 5.267591 5.585782 5.619273 5.267211 3.979635  
147699\_at 2.878136 1.622511 2.416372 2.074995 1.81997 2.214619 3.640991 2.046048  
1476\_at 10.19913 9.828474 9.918141 10.3257 9.542398 10.42312 10.21984 9.822842  
147700\_at 3.600034 3.002333 2.709149 3.470436 3.524006 3.81392 2.493706 2.26182  
147710\_at 2.030062 2.564258 2.192769 2.039243 3.027159 2.623999 2.123774 2.317219  
147719\_at 1.343314 2.239461 1.76567 2.308177 1.16525 1.546535 2.166979 1.62054  
147727\_at 4.472911 3.739957 3.714846 4.034534 2.589166 3.679783 4.377497 2.785531  
147741\_at 1.402364 2.089965 1.942979 1.318797 1.747925 1.359042 1.072006 1.420233  
147744\_at 1.693584 1.976332 2.191538 1.888251 1.775201 1.693227 1.973222 2.16116  
147746\_at 2.394405 2.028067 2.684166 1.645448 1.731951 1.6507 1.561306 2.079464  
147798\_at 2.756334 2.665902 3.06169 3.377626 3.576435 2.729715 2.531032 3.286619  
1477\_at 5.417626 4.677795 5.247887 5.066842 4.325728 5.071404 5.235173 4.996149  
147807\_at 5.704712 5.340877 4.743741 5.024117 5.103624 5.83027 4.861352 5.391324  
147808\_at 4.076971 4.274957 3.657173 3.737193 3.830572 5.071056 3.915502 5.020066  
147837\_at 1.486291 2.404265 2.400893 2.107393 1.496063 2.373252 3.358311 1.144428  
147841\_at 1.980342 2.099361 1.803208 1.731254 2.408443 1.928711 1.933083 2.916038  
147872\_at 2.440711 2.368275 1.533085 2.368073 2.733898 2.995727 2.211082 2.762695  
1478\_at 3.092721 4.37988 4.371727 4.571477 2.618373 3.166967 3.996041 5.023605  
147906\_at 3.1427 3.52612 3.430305 3.347594 2.964537 4.008296 3.914887 3.077883  
147912\_at 3.463838 3.028751 3.127172 2.809392 2.677968 2.426828 1.936448 2.360712  
147920\_at 1.74605 2.207199 1.8209 1.439069 2.062432 1.308551 1.294442 2.225196  
147923\_at 4.741407 5.540689 5.296247 4.848673 5.29964 5.64297 5.382518 4.938572  
147929\_at 2.794534 1.898612 2.969165 2.586342 2.634177 1.710279 2.574735 2.99263  
147945\_at 1.436212 1.451332 1.497317 1.131341 1.290348 1.672567 1.614116 1.265877  
147947\_at 3.01436 2.783253 2.7104 2.586534 1.967358 3.006924 2.809923 2.785716  
147948\_at 2.428807 3.136712 2.47886 2.651322 3.357319 2.762429 2.99571 1.54794  
147949\_at 5.543289 5.882982 5.212101 5.357579 4.545602 5.709614 5.282231 5.891005  
147965\_at 5.04104 4.603699 4.975333 4.818193 3.795169 4.205074 4.216666 3.995893  
147968\_at 2.019502 2.451791 2.045417 2.315754 1.812321 2.42007 2.819862 2.366726  
147991\_at 5.602207 5.832188 5.228961 5.387158 4.485767 4.703042 5.746271 5.799597  
1479\_at 5.6221 6.146525 5.966466 5.523221 6.309715 5.434337 6.213777 6.174405  
147\_at 4.028364 3.249648 2.618854 3.488767 3.174938 3.383964 3.276609 2.222768  
148003\_at 1.808037 1.574096 2.048518 1.423353 1.063461 1.302866 1.308825 1.678767

148014\_at 1.561242 1.373298 1.185941 1.220003 0.961171 1.135313 1.202389 1.15757  
148022\_at 4.281116 3.795934 4.204672 4.393929 4.181486 4.464831 3.893828 3.964421  
148046\_at 2.198733 1.550492 1.736244 1.91686 1.901834 2.610645 1.502578 1.573953  
148066\_at 2.532651 2.858265 2.0703 3.574274 1.951638 2.424658 2.75631 2.473619  
148103\_at 1.405224 2.633071 1.910642 2.632555 1.750719 1.852392 2.146026 1.060336  
148109\_at 2.034355 2.289604 2.383155 2.341822 2.534206 1.792678 2.014441 1.670554  
148113\_at 2.328285 3.193338 2.321074 2.330707 2.153465 2.192799 2.829013 2.207034  
148137\_at 4.72106 3.817663 4.913132 5.609704 4.688244 4.979071 5.24688 4.10369  
148145\_at 2.131467 1.447387 1.031031 0.629925 1.287213 1.138669 0.622976 1.132547  
148156\_at 3.337971 3.214654 2.483755 2.617807 2.368164 3.357052 3.620926 3.727286  
148170\_at 5.333163 4.258025 4.708642 4.692898 4.202779 6.16 5.954764 4.059031  
148189\_at 2.448928 5.051411 3.286337 4.270961 4.754185 1.570237 3.841086 4.756119  
148198\_at 2.160447 2.794495 4.21491 4.771694 2.596165 3.870706 3.594942 3.543772  
148203\_at 3.475368 2.385973 3.617229 3.099188 4.188401 4.266339 2.888288 3.814125  
148206\_at 2.185685 1.127123 1.043877 1.334572 1.587265 0.812995 1.677778 3.385261  
148213\_at 2.262397 2.187289 3.336085 1.887065 3.263965 3.912517 2.84744 1.783427  
148223\_at 3.035353 3.340987 3.278274 3.62192 3.772256 3.328484 4.088272 3.875029  
148229\_at 1.930333 2.747075 2.315186 1.620728 1.960159 2.401618 1.917631 2.270854  
148231\_at 1.798918 2.007141 1.811504 2.027999 1.686802 2.245286 2.171495 2.088829  
148252\_at 3.513685 2.543084 3.345408 2.522098 2.688494 2.387754 2.196203 5.484229  
148254\_at 4.23935 3.632771 3.905107 4.105866 3.893127 4.914817 4.267681 4.711512  
148266\_at 3.039162 3.814597 2.513082 2.720511 1.860663 3.484231 2.574852 3.615653  
148268\_at 4.329974 4.457919 4.787389 4.310366 4.515216 3.509882 4.558409 3.835755  
148281\_at 2.011307 1.31542 1.827871 1.159475 2.661263 1.321562 1.584673 1.65666  
1482\_at 1.946415 2.026878 2.026878 2.389565 2.032265 1.971596 1.839603 2.161134  
148304\_at 2.39154 2.477746 1.753543 1.990866 1.620378 1.501545 2.093599 1.480068  
148327\_at 2.997646 2.712052 2.635972 2.634114 3.420301 3.210366 3.156642 2.862737  
148345\_at 1.54351 1.315943 1.686676 1.122783 1.814468 2.188421 1.559654 1.698458  
148362\_at 7.583305 7.647245 7.464855 7.399329 7.615851 7.449052 7.301386 7.861378  
148398\_at 3.2307 3.012609 2.429355 2.347533 2.011175 3.40916 2.488225 3.018139  
148413\_at 3.257361 3.657506 2.822899 2.309282 3.459079 3.422498 2.500662 2.649197  
148418\_at 1.701141 1.478365 2.685192 2.387336 2.420672 2.461742 1.135443 1.885195  
148423\_at 5.898236 6.439351 5.643521 6.864749 5.851422 6.286022 5.529557 5.925626  
148479\_at 4.566376 3.589081 3.527602 3.451198 4.033095 4.28477 3.31005 3.693869  
148523\_at 3.24367 4.165712 4.598227 4.979162 3.876359 3.319969 3.485583 2.48281  
148534\_at 5.595368 4.894066 5.203908 5.728298 3.530029 4.702572 4.42435 5.550075  
148545\_at 1.785105 2.030587 2.175485 1.585635 2.115288 1.510929 2.182796 2.349443  
148581\_at 1.436679 1.130819 1.217242 1.054253 1.487031 1.473171 0.791957 1.07106  
148641\_at 2.451552 2.830066 2.17827 2.857506 3.117585 2.658394 3.058486 2.25811  
148645\_at 1.863624 2.106277 1.639467 1.626101 2.280119 1.530748 1.764016 1.80935  
148696\_at 2.294779 1.4632 2.152526 2.691354 2.222967 2.050817 2.890158 2.065874  
1486\_at 7.231955 7.418853 6.867459 6.868026 7.194465 6.486132 6.823919 6.692504  
148709\_at 2.69671 1.033219 1.720552 1.519335 2.270224 1.148777 2.198879 1.856623  
148713\_at 2.008323 2.544497 2.066394 1.6533 2.075639 2.971143 2.096644 2.560458  
148738\_at 2.648253 3.098098 1.939849 1.630797 1.74035 2.532709 1.786532 2.410647  
148741\_at 2.554198 1.703474 1.603115 2.393691 1.721435 1.556182 1.756194 1.821656  
148753\_at 1.642312 1.772975 1.607856 1.390595 2.061525 1.428558 2.114591 1.758663  
148789\_at 6.2854 5.048795 5.007211 5.197559 5.449997 6.061974 4.632549 5.258968  
1487\_at 6.245926 5.754986 5.498387 5.9972 4.889965 5.959473 6.204368 5.00823  
148808\_at 3.568331 3.958214 2.70238 2.552025 5.768893 2.824825 2.516442 2.204342  
148811\_at 1.324255 2.428736 1.909254 2.358172 1.867905 2.485851 1.264447 2.122242

148823\_at 1.084607 1.239823 1.645677 1.052031 1.475208 1.474764 1.234932 1.564788  
148824\_at 2.8242 2.912917 3.25683 2.417564 4.266786 2.119825 2.607366 3.796216  
148867\_at 5.127642 5.148784 5.170736 5.511335 5.718174 5.329016 4.954616 5.35408  
148870\_at 1.39526 1.686614 2.176413 2.200385 1.832627 1.974098 2.195248 2.513292  
148898\_at 3.399035 2.960379 3.611825 2.897238 3.269595 3.433537 2.881714 2.477966  
1488\_at 2.425533 3.048599 3.571207 2.753809 4.525285 4.388157 4.460407 3.175127  
148930\_at 1.743161 2.459061 1.86117 2.196321 2.756597 2.999236 2.619879 1.916669  
148932\_at 3.417752 2.88265 2.621529 2.025417 2.348141 2.827356 3.829744 1.805589  
148979\_at 2.482783 3.087984 3.446902 2.265894 3.328019 2.85759 3.653939 2.753467  
1489\_at 5.656087 4.908956 5.537924 4.763324 6.289093 5.76335 5.510383 4.756193  
148\_at 1.29383 1.659713 1.323164 1.220808 1.530936 1.423926 1.233772 0.961198  
149013\_at 5.907195 4.724936 4.71951 4.952687 5.295186 4.338498 4.081246 5.497683  
149018\_at 2.01284 2.205051 1.545113 1.666095 2.159277 1.971541 1.920225 2.753024  
149041\_at 6.686309 5.995611 7.207905 6.729534 6.264648 6.740074 6.671251 6.582339  
149047\_at 1.052012 1.076571 1.463764 1.390256 1.681917 1.576232 2.065653 2.144944  
149069\_at 2.826422 2.016762 1.959692 2.209164 2.217903 1.928946 2.017745 1.96385  
149076\_at 6.807001 6.333457 6.511832 6.532133 6.655106 6.66305 7.009526 6.04948  
149086\_at 2.000406 2.644863 2.690309 2.122798 3.224152 1.942211 2.179533 2.258411  
149095\_at 2.100901 2.350191 2.673848 1.878156 2.928715 2.369059 2.449987 2.536453  
1490\_at 10.59692 10.65811 10.68426 10.65355 10.37786 10.82139 11.04498 9.894336  
149111\_at 2.202951 2.526491 1.732506 2.407473 2.387887 2.352626 2.184916 3.162927  
149134\_at 0.722404 1.068307 1.047683 1.103559 1.618824 2.668591 2.277593 1.484723  
149175\_at 3.986959 2.98387 5.134428 4.695223 2.801606 3.392296 3.21631 3.400293  
1491\_at 2.526921 2.385156 2.276806 3.403958 2.908892 3.075561 2.200728 2.465438  
149233\_at 0.883878 1.033504 1.10575 1.363114 1.111919 1.041858 1.100761 1.1655  
149281\_at 1.280123 1.036084 2.220347 1.41491 1.292336 1.955101 2.046792 1.556853  
149297\_at 2.529133 1.747746 1.810904 1.433177 2.822804 3.156414 3.19103 3.427943  
149345\_at 5.5792 4.051448 5.063524 5.480943 3.621483 4.882462 6.120568 4.104115  
149351\_at 2.298985 1.677721 2.723026 1.866231 2.950271 1.908511 1.498594 1.210451  
149371\_at 5.54424 6.021808 5.496503 6.077246 6.282594 5.019777 5.744405 6.39898  
149373\_at 2.323894 2.250361 2.230172 1.401293 2.556922 1.480154 2.292595 2.117792  
1493\_at 1.368289 2.418429 2.247019 1.873276 1.530757 1.555522 2.259795 1.235357  
149420\_at 4.327612 2.99945 4.03759 4.313674 4.703359 2.614305 4.144775 3.975511  
149428\_at 2.167319 2.187128 2.399032 2.256469 2.440806 2.473468 2.108428 2.910837  
149461\_at 3.545186 3.396865 3.437367 3.102596 3.886592 3.832417 3.271625 4.201747  
149465\_at 2.371397 2.158883 1.508661 1.570427 1.9637 2.443049 1.560005 2.299302  
149466\_at 1.537649 1.438499 1.949087 1.299119 2.36355 1.703816 2.095964 1.696547  
149473\_at 2.716249 2.529706 3.651893 2.232763 2.438939 2.211151 2.726769 2.800823  
149478\_at 3.308222 3.289885 3.636973 3.343097 2.40773 3.490711 4.250932 3.47094  
149483\_at 3.331371 1.565816 1.573499 2.517219 1.1518 1.724608 2.644461 2.619791  
149499\_at 2.04954 1.72474 2.232619 2.183446 2.149526 2.578254 2.854549 1.756441  
149563\_at 1.457362 1.662088 1.408614 2.36986 2.769518 2.231014 1.981587 2.187414  
1495\_at 8.44864 8.74303 8.689959 8.764405 8.676496 8.578604 8.827443 8.425965  
149603\_at 6.201631 6.607396 6.256558 5.815965 5.994461 6.712057 6.058047 6.565065  
149620\_at 1.359398 1.079599 1.513019 1.271837 1.8318 1.31851 1.513078 1.684862  
149628\_at 1.729935 1.814843 1.684013 2.040149 2.828319 1.939269 4.133858 1.981439  
149643\_at 0.933705 1.97966 1.195395 1.348886 1.619256 0.885835 1.446878 1.84844  
149647\_at 1.62873 2.704285 2.309515 1.929352 1.398741 2.418324 1.62769 1.889559  
149685\_at 2.659039 2.874471 1.833445 2.215572 2.480289 3.178223 2.665002 2.800902  
149699\_at 1.456815 1.594382 2.365342 1.53845 1.818233 2.198142 2.103545 1.754102  
1496\_at 1.596196 1.482727 1.832451 1.400449 1.574975 1.40737 2.300262 1.982789

149708\_at 1.780797 1.622501 2.086109 2.324891 2.19041 1.418395 2.060416 2.388989  
149773\_at 1.790918 1.598177 1.75617 1.726467 1.704007 1.403574 1.011596 2.102936  
149775\_at 1.964431 2.010125 1.837467 1.597314 2.00649 2.152855 2.367168 1.811455  
1497\_at 4.097593 4.61491 3.268867 4.097593 3.433936 3.767657 3.977599 3.601577  
149830\_at 1.84747 1.758705 1.541293 1.752906 1.214743 1.341879 1.253535 1.402016  
149837\_at 3.352279 3.335325 2.647397 3.767261 4.351343 2.532115 3.401714 3.171941  
149840\_at 4.589768 4.38561 4.351745 4.572443 4.151386 5.294462 4.4724 4.339793  
149934\_at 0.84324 0.675296 1.10673 0.72112 1.081556 0.910868 0.572192 0.467427  
149950\_at 1.458696 1.644025 2.520631 1.679622 2.130858 1.392374 2.047813 2.245523  
149951\_at 8.064407 7.892314 7.616507 7.679209 7.53715 7.701235 7.760995 7.832494  
149954\_at 2.173573 1.602609 1.726411 1.706376 1.878164 1.936038 1.670725 2.195984  
149986\_at 5.234691 5.262813 4.692604 4.580237 3.201374 5.038899 4.288599 4.733239  
149998\_at 0.925109 0.824732 1.738318 1.262433 1.356123 1.844415 1.552821 1.407365  
1499\_at 8.403884 8.646651 8.449689 8.494708 8.541114 8.420337 8.963431 8.72786  
14\_at 5.132646 4.860379 4.736448 4.755091 4.168976 4.555625 5.733979 4.597752  
150000\_at 1.259498 1.645764 2.201755 1.716586 1.277551 2.204697 2.105918 2.793927  
150051\_at 1.35188 2.072671 1.633165 1.766837 1.484284 2.195387 1.500793 1.706424  
150082\_at 1.785681 2.30549 2.465825 1.636271 2.158555 2.381992 2.187769 2.121571  
150084\_at 1.385598 1.26121 1.500971 1.51825 1.317406 1.310151 1.362756 1.167959  
1500\_at 5.444387 5.312338 5.881127 6.654754 5.054889 5.886043 6.240301 5.875266  
150135\_at 1.547972 1.898641 2.154884 1.323751 1.758338 1.554491 2.524111 1.67666  
150142\_at 1.968737 1.75484 1.298254 1.192368 1.875813 1.391022 1.567154 1.064079  
150147\_at 2.049915 2.580954 2.701356 3.217603 2.233597 2.955206 2.446115 2.633387  
150159\_at 1.659483 1.464213 0.844499 1.584256 0.84161 0.936865 1.196541 2.209861  
150160\_at 1.276287 1.210624 1.721494 1.116923 1.47538 1.273854 1.699102 1.620133  
150165\_at 1.335692 2.164421 1.563566 1.377502 2.511698 1.585577 1.708053 1.542615  
150185\_at 1.810885 2.402511 2.397447 1.917957 2.402511 1.918489 2.329269 2.282224  
150197\_at 1.944542 1.999211 1.588579 2.306575 2.305152 1.974908 1.31592 3.320703  
1501\_at 1.659401 2.298201 2.227674 2.222025 2.349211 2.348696 2.262803 2.158943  
150209\_at 1.379235 1.632084 2.33575 1.815094 1.665906 2.132147 0.970829 1.986181  
150223\_at 4.296086 3.742714 4.13739 4.151931 2.877789 4.071937 3.451921 4.075817  
150244\_at 1.619926 1.971343 1.862911 2.267086 2.231278 2.281811 2.172011 2.396208  
150248\_at 3.607188 2.042333 2.176669 2.159146 3.075157 1.765018 2.01942 1.585253  
150274\_at 5.212102 4.540673 3.813631 4.684527 3.491289 4.840089 3.627419 5.370163  
150275\_at 6.19491 7.694551 6.591613 6.690104 6.405732 6.125837 7.026675 7.05089  
150280\_at 1.002599 1.035888 1.2571 1.266992 2.110965 1.071966 1.079136 1.480662  
150290\_at 4.74755 4.002629 5.356519 3.690875 3.49433 3.787857 4.515341 4.914654  
150291\_at 3.236024 3.295305 4.151064 4.132658 4.222098 3.262029 3.254828 4.093018  
150297\_at 1.538982 2.491946 2.541864 2.129631 2.753094 2.081485 2.020527 2.28882  
150350\_at 0.977936 1.155586 0.952332 1.171618 0.973405 1.149581 1.554023 1.691852  
150353\_at 3.049605 2.952311 1.881164 1.841819 1.500116 1.575934 1.389956 1.799781  
150356\_at 3.376326 3.913478 3.835268 3.320972 2.691858 3.016711 3.406678 3.975317  
150365\_at 2.469069 1.706261 1.378618 1.366911 1.884811 2.046705 1.998303 2.246243  
150368\_at 2.517567 2.906654 3.643494 2.753632 3.083124 3.702725 2.730921 2.567281  
150372\_at 3.302422 3.970845 2.719279 3.515009 3.62757 4.092934 2.866612 3.317376  
150379\_at 1.341795 1.77305 1.50153 1.834673 2.077123 1.35955 1.765069 1.581536  
150381\_at 2.769793 3.470684 3.297941 3.443107 2.628838 2.505377 3.584789 4.052448  
150383\_at 2.281179 3.151023 4.159011 4.012327 2.469821 4.904234 4.574958 1.592587  
150384\_at 1.962937 2.40798 2.369421 1.881156 1.80502 1.87331 2.318787 1.651704  
1503\_at 3.950773 4.704584 3.046327 3.956759 4.117449 4.454981 4.971117 3.836146  
150465\_at 4.806671 4.153531 5.412739 5.106515 4.664029 5.156433 5.117751 5.943484

150468\_at 2.194148 2.582594 2.226713 3.229498 1.563563 2.070323 2.837057 2.635068  
150483\_at 1.778162 2.216618 2.324582 2.915082 2.176133 2.436473 2.051836 1.734539  
1504\_at 2.200928 1.314309 1.489119 3.236857 2.212112 1.737668 2.254408 1.637496  
150538\_at 1.445072 0.995816 0.943928 1.258282 1.501921 1.377758 0.707183 0.977774  
150568\_at 1.408537 1.736405 1.117081 2.174205 1.337942 1.805715 1.222178 1.191663  
150572\_at 1.774835 1.501172 1.193535 1.87615 2.022293 1.376488 2.616628 1.779546  
150577\_at 1.650269 1.875807 1.645573 1.802927 2.12775 2.585443 2.035402 2.067033  
150590\_at 4.011383 2.931398 1.612127 2.296279 4.363955 3.514011 2.161332 2.669014  
150622\_at 1.42772 1.292618 1.308828 1.479591 2.556465 1.423578 1.478298 1.585034  
150677\_at 1.6104 2.394381 2.8373 1.961508 2.255521 2.008626 2.652556 1.135304  
150678\_at 6.619585 6.979407 6.388672 6.785352 6.753909 6.65879 6.378693 6.456383  
150681\_at 1.355113 1.47691 1.481286 1.376346 1.554074 1.401187 1.434216 1.362744  
150684\_at 8.815366 8.960485 8.433172 8.641585 8.290408 9.074135 8.214565 8.83338  
150696\_at 2.545649 2.252823 2.64046 2.585949 3.850181 2.214767 2.900074 3.133194  
1506\_at 2.966291 2.372313 2.930303 2.621744 1.933012 2.733342 2.187208 2.479645  
150709\_at 2.361282 3.313498 3.752474 2.296382 2.246234 3.095976 3.435963 3.239008  
150726\_at 2.413757 2.200354 2.806731 2.199499 2.371199 2.521852 3.024878 2.495102  
150737\_at 4.944368 4.259368 3.957347 3.619935 4.249071 3.572297 2.578977 4.145264  
150763\_at 3.485986 3.182875 3.818405 3.92432 3.972392 1.436286 1.764255 3.517141  
150771\_at 1.78377 1.778163 2.504383 2.926945 1.841694 2.145313 1.825817 1.888122  
150776\_at 5.479179 3.560835 3.699664 4.525556 3.833144 3.548938 3.742951 4.702351  
150786\_at 1.285265 1.135998 1.918324 0.544877 2.496182 0.749027 1.01954 1.192248  
150864\_at 6.385462 5.73043 5.435173 6.314645 6.393233 6.368295 5.964793 4.678918  
1508\_at 8.777397 8.520216 8.260322 8.886882 8.658112 9.204143 7.766494 8.744298  
150921\_at 2.573403 2.236337 1.517615 2.188562 2.501765 2.210753 2.538996 3.022474  
150935\_at 0.750313 2.246547 1.650936 1.162879 2.734425 1.023478 1.260236 1.421438  
150946\_at 2.343475 2.006276 3.023166 2.575938 2.677095 1.777906 2.302185 2.009993  
150962\_at 2.62701 3.123991 3.564614 3.504071 4.261699 3.683776 1.893656 3.533741  
150967\_at 3.858312 5.861372 5.346126 6.229061 6.915814 5.646345 4.681364 5.161753  
150992\_at 1.20951 1.156909 2.253181 1.512252 1.734207 1.684851 2.142544 1.442317  
1509\_at 9.008759 8.685902 9.348527 9.376633 8.468886 9.29128 9.496263 7.871532  
150\_at 1.75368 1.831408 1.959996 2.401884 1.693702 1.555219 1.903241 1.792784  
151011\_at 6.983628 7.76167 7.187414 7.152167 7.086969 6.622646 7.122265 6.736577  
151050\_at 6.083704 5.535978 5.916046 5.581998 5.749256 5.655354 5.489914 5.810816  
151056\_at 2.526689 2.114264 2.056169 2.312202 2.609992 2.579427 2.564841 2.096466  
1510\_at 2.026287 1.512302 1.801725 2.021101 2.207026 1.905816 3.58062 2.286078  
151112\_at 1.036929 1.107438 1.12476 1.045606 0.930064 1.174248 1.490032 1.32466  
151121\_at 1.697652 1.711003 2.13068 1.581164 1.946459 1.546706 1.52058 2.520431  
151126\_at 3.349234 2.787916 2.674748 3.002017 4.492375 4.074479 3.042156 4.268766  
151171\_at 2.557986 2.42228 2.340114 2.732825 2.611032 1.61802 2.010599 2.836214  
151174\_at 4.130298 2.467008 1.818879 1.543009 2.150538 3.487064 2.987524 3.467273  
151176\_at 2.340546 2.368529 2.585488 2.857162 1.891552 3.153318 2.524515 2.190676  
151188\_at 3.431093 3.478716 3.627515 4.441813 4.513109 3.462301 3.3587 4.059124  
151194\_at 3.35121 3.320146 3.78445 3.566787 3.493371 3.56332 3.578061 2.877214  
151195\_at 6.542281 7.304491 7.052356 6.946025 7.904019 6.284518 7.514871 7.066148  
1511\_at 2.000441 1.830514 1.54903 1.838454 2.552763 1.888174 1.724721 2.591074  
151234\_at 0.797296 1.649205 1.183551 0.952897 1.399118 1.018374 1.478748 2.004355  
151242\_at 1.958826 1.920893 2.553753 3.166523 2.523203 2.833375 2.077496 1.753927  
151246\_at 2.913524 3.35021 3.932709 3.056102 2.578873 3.997169 4.288929 2.469329  
151254\_at 1.63895 1.608762 2.625398 2.320225 1.300432 2.62817 2.391312 1.749428  
151258\_at 1.416102 1.082474 1.646692 2.232529 1.909074 1.333438 1.122038 1.326586

151278\_at 2.014962 1.800834 1.534976 1.906084 1.616613 0.9958 2.392046 1.757696  
151295\_at 3.632006 3.077618 2.38692 2.512916 2.766206 2.753154 2.016481 4.867949  
1512\_at 6.342079 5.331812 4.932661 4.00698 5.612085 6.106903 4.064411 6.374878  
151300\_at 1.574653 1.348614 1.114395 1.198585 1.027687 1.757441 1.636687 1.347076  
151306\_at 3.469788 3.617975 3.659729 4.033505 2.900985 4.348169 4.285688 4.283997  
151325\_at 1.561893 2.026189 1.923785 2.592875 1.914441 1.424613 3.255282 2.28581  
151354\_at 2.362864 2.631301 2.794593 3.14175 2.50816 3.101788 3.000444 3.214832  
151393\_at 4.153327 4.072161 4.006425 4.280149 4.684506 4.150977 3.986525 4.318188  
1513\_at 3.351958 2.9597 2.810925 5.057562 3.536504 4.563301 4.07094 4.859385  
151449\_at 1.757584 3.644618 2.742341 3.169078 2.762275 3.129569 2.503115 2.563643  
151473\_at 2.510399 2.154704 1.485853 2.612786 2.037941 1.550311 2.025514 2.095511  
151475\_at 1.025868 2.08278 1.182102 1.508937 2.228695 0.96824 1.747187 1.446718  
151477\_at 1.952817 2.930006 1.77915 1.721988 1.855487 3.359929 2.532259 1.582551  
151484\_at 1.648166 2.357891 2.244039 2.11633 2.369459 2.193808 2.632384 1.861373  
1514\_at 7.78632 7.908113 7.898045 8.048272 8.156463 8.187824 8.430751 7.756798  
151507\_at 1.986787 2.480487 2.153177 2.169924 2.05742 2.483282 1.500163 2.838032  
151516\_at 1.465376 4.686376 1.82928 2.258684 2.793366 2.234361 1.752099 2.223212  
151525\_at 4.965094 4.271881 4.527083 5.133656 5.054924 4.744912 5.089107 5.184719  
151531\_at 3.830939 3.487881 3.857457 2.710297 3.376506 2.666922 2.216486 4.557175  
151534\_at 2.724479 2.067019 2.307252 2.082232 2.197694 1.732098 2.010398 2.761242  
151556\_at 4.374067 3.370797 5.095374 4.685443 4.563968 4.632171 4.952553 5.832339  
1515\_at 5.112055 7.078865 4.784848 3.553097 4.666369 5.461549 3.823112 5.586088  
151613\_at 7.025982 5.74101 6.025593 5.584838 6.345099 5.713747 5.380291 6.723541  
151636\_at 7.254458 7.379355 7.450446 7.692686 7.088742 7.480237 7.380646 6.330005  
151647\_at 2.730784 1.904516 1.639086 1.784685 1.265229 1.061584 1.561252 1.743163  
151648\_at 2.301688 1.980565 1.564156 1.393537 1.814263 1.479696 1.590712 3.226636  
151649\_at 1.18471 2.356247 1.324249 0.819415 2.338419 1.361679 1.378649 1.763606  
151651\_at 1.777401 1.569577 1.862454 1.561572 1.779934 1.544157 2.076328 1.161511  
151658\_at 1.279267 1.540943 1.159058 1.677845 1.641 1.244399 2.117336 1.726013  
151742\_at 3.656608 4.347466 3.340273 2.649406 3.501019 3.40135 2.905443 3.715321  
151760\_at 2.167575 2.21485 1.815594 2.268879 2.307203 2.703028 1.843701 1.904697  
151790\_at 5.088239 5.67014 5.144117 5.305979 4.488242 4.903946 4.736732 4.468213  
1517\_at 4.487891 4.036321 3.419945 4.539097 4.120069 4.198837 4.526627 5.9521  
151827\_at 4.387574 4.326566 4.233582 4.342292 2.958267 2.786716 3.339814 4.536207  
151835\_at 1.417702 2.443896 1.23745 1.579789 2.146243 2.239777 1.987557 1.882507  
151871\_at 1.812813 2.426617 1.42087 1.501649 2.512564 2.028581 2.04019 2.768431  
151877\_at 1.020228 1.989717 1.618084 2.173143 1.441775 2.515127 1.619631 2.74396  
151887\_at 6.113439 7.673712 6.639494 7.662271 7.371652 7.65815 6.696232 7.203768  
151888\_at 1.426094 1.733455 1.88476 1.209266 1.902257 1.270718 1.597985 1.885388  
1518\_at 3.533138 1.617562 1.519512 1.250947 0.759415 0.653069 1.807426 1.416246  
151903\_at 6.424509 6.132893 6.13176 6.490739 6.047678 6.438013 5.815983 6.192989  
151963\_at 4.02175 4.687447 4.224496 4.34711 4.808379 3.965061 4.715692 5.819147  
151987\_at 5.235075 6.25754 3.900165 5.390229 6.036697 5.318316 5.095999 5.471714  
1519\_at 6.463217 6.869215 6.121997 6.323884 7.261621 5.986 6.498113 7.014546  
151\_at 5.467069 5.198758 6.05654 5.810653 4.36276 5.960663 6.025467 4.758214  
152002\_at 2.531552 2.426093 2.750306 3.316468 2.504152 3.00449 2.707336 1.73288  
152006\_at 7.968046 8.098493 8.360177 8.054638 8.132641 8.022594 8.145544 7.688977  
152007\_at 4.919046 5.735868 4.549562 5.528573 3.79948 5.689058 4.795808 5.52666  
152015\_at 0.992427 1.633558 1.275575 1.144209 1.239563 2.631601 1.904073 1.065823  
152024\_at 2.304724 2.466079 1.793602 2.021565 2.696361 1.6268 1.9963 1.79291  
152065\_at 1.725205 2.713527 1.95324 1.764683 2.555017 2.336101 1.8081 2.136567

152078\_at 1. 713239 1. 519379 1. 131704 1. 503559 1. 296465 1. 469551 2. 046979 1. 888212  
152098\_at 2. 696914 3. 518249 4. 308215 3. 102362 2. 813535 3. 446273 4. 161748 3. 649127  
1520\_at 7. 002905 7. 101764 6. 141094 7. 396287 6. 688462 6. 440947 7. 331574 7. 069581  
152100\_at 4. 131763 4. 427052 5. 196616 5. 053722 5. 236956 4. 635286 4. 054332 4. 422693  
152110\_at 1. 319656 1. 624681 1. 646266 1. 269431 1. 313534 1. 61664 1. 333097 1. 961176  
152118\_at 2. 177672 1. 568308 2. 616732 1. 824179 1. 936221 3. 589347 1. 882583 1. 843429  
152137\_at 7. 23473 6. 676417 7. 156284 7. 286312 7. 188237 7. 453464 7. 335246 7. 909348  
152138\_at 2. 152715 1. 778662 1. 748675 1. 317904 2. 228854 2. 973737 1. 941979 1. 76027  
152185\_at 5. 339296 4. 233884 4. 656076 4. 664949 4. 979422 3. 829491 4. 975146 4. 879435  
152189\_at 6. 996476 6. 628929 6. 613618 7. 001913 7. 243624 7. 588295 6. 709669 6. 072326  
152195\_at 4. 369815 2. 996756 4. 430469 4. 984559 2. 805731 3. 622823 3. 63308 3. 77216  
1521\_at 5. 074569 3. 191503 4. 725233 4. 540827 3. 512348 3. 836981 4. 234853 2. 744133  
152206\_at 2. 198313 2. 700392 2. 977571 2. 291685 1. 870994 3. 058581 1. 868582 2. 397745  
152217\_at 5. 613759 5. 134687 4. 617829 5. 283298 4. 104811 4. 597961 3. 721581 4. 398136  
152225\_at 0. 853789 0. 939837 1. 084177 0. 908705 0. 966726 1. 031456 0. 969373 1. 245301  
152273\_at 5. 578732 6. 105801 5. 861542 6. 207921 5. 7574 6. 061953 6. 003414 5. 23258  
1522\_at 6. 378098 5. 637029 6. 701813 6. 620958 6. 124548 7. 083537 6. 588726 5. 324412  
152302\_at 5. 986786 5. 256808 6. 041724 4. 950129 4. 084803 5. 428407 5. 570625 4. 785786  
152330\_at 2. 920203 4. 776188 1. 478893 4. 717144 6. 15248 5. 236319 5. 295465 3. 111768  
1523\_at 6. 510345 6. 645924 6. 909563 6. 631555 6. 2016 6. 434624 6. 655495 6. 139758  
152404\_at 3. 476704 3. 648935 2. 633273 2. 767688 3. 505544 4. 251786 2. 434993 2. 592723  
152405\_at 2. 488297 1. 525114 2. 036003 1. 320521 1. 945173 1. 480666 1. 903871 1. 925464  
152485\_at 5. 073216 5. 035684 5. 509657 5. 215828 4. 112729 5. 688038 4. 629277 4. 861219  
1524\_at 2. 805893 3. 112193 3. 709109 4. 046609 3. 682568 4. 104611 4. 204319 2. 913911  
152503\_at 6. 103843 6. 111114 5. 986651 6. 064759 5. 909604 5. 820624 6. 258376 5. 161899  
152518\_at 4. 422338 4. 178405 4. 503407 4. 121447 3. 974492 4. 35079 4. 40691 4. 389368  
152519\_at 2. 645831 1. 027928 0. 966147 1. 630666 2. 462881 2. 613021 2. 302534 0. 829348  
152559\_at 4. 298775 4. 168509 4. 207298 4. 698439 4. 235046 3. 569476 5. 008162 4. 377301  
152573\_at 5. 949697 5. 907601 6. 069958 5. 770407 5. 147645 5. 852911 6. 12855 5. 185554  
152578\_at 0. 836123 1. 064568 0. 763142 1. 098267 1. 007484 1. 373959 1. 238294 1. 461817  
152579\_at 5. 234791 4. 578617 5. 681264 4. 987348 5. 352415 4. 571515 4. 428418 5. 314171  
152586\_at 1. 127823 1. 304704 1. 234932 0. 984562 0. 957535 1. 385751 1. 550716 1. 235589  
1525\_at 2. 74335 2. 548916 2. 292088 4. 545362 2. 129503 2. 391991 3. 199007 5. 193337  
152641\_at 1. 91563 1. 584099 2. 140127 1. 70559 2. 313887 2. 244695 2. 00998 1. 615182  
152687\_at 3. 606526 5. 862022 6. 171056 5. 059669 5. 011131 5. 218549 4. 974079 4. 584111  
152742\_at 1. 444948 0. 897405 1. 704795 0. 987339 3. 572146 1. 607814 1. 225996 1. 497606  
152756\_at 2. 281416 3. 416358 2. 764906 2. 801403 2. 22851 2. 612003 2. 36608 2. 603169  
152789\_at 1. 955852 1. 591209 2. 281461 1. 793394 2. 126148 2. 455932 1. 598217 1. 804539  
1527\_at 4. 982242 4. 625123 4. 39681 4. 149512 5. 843942 4. 804074 4. 306813 4. 842506  
152815\_at 5. 359737 5. 098231 5. 891277 4. 498615 6. 204331 4. 937826 4. 607607 5. 308593  
152816\_at 1. 813517 1. 113733 1. 470472 1. 468702 2. 112398 1. 874293 1. 657001 1. 21011  
152831\_at 1. 477513 1. 451767 1. 212189 1. 478982 1. 497413 1. 489383 2. 317 1. 758917  
152877\_at 2. 362247 2. 071639 1. 992767 1. 854232 3. 017908 2. 210979 1. 672824 1. 829953  
1528\_at 10. 13848 9. 91429 9. 843149 9. 206405 9. 800614 9. 795764 9. 585868 9. 707664  
152926\_at 4. 272763 4. 533043 4. 351715 4. 027158 4. 385088 4. 819723 4. 541796 5. 229649  
152940\_at 1. 601531 1. 031578 1. 138528 1. 06854 1. 155125 1. 925101 1. 710741 1. 18016  
152992\_at 4. 101173 3. 631781 3. 306563 3. 86752 3. 278901 3. 629818 4. 093511 3. 483943  
152\_at 2. 553307 2. 557379 2. 15822 2. 632119 2. 551779 3. 303864 2. 699992 2. 318713  
153020\_at 7. 245591 7. 434743 6. 699211 7. 843074 7. 657756 7. 16354 7. 784007 7. 283195  
153090\_at 5. 48781 5. 505695 6. 432252 6. 354637 5. 354285 5. 187215 6. 456054 4. 875455  
153129\_at 3. 657326 3. 929002 4. 78844 4. 679558 3. 603198 4. 416317 3. 335116 4. 351738



153163\_at 0.987765 1.000294 1.070597 1.129134 0.924364 0.703187 1.578709 1.321967  
153201\_at 5.578036 4.832295 5.900564 1.989345 6.82467 6.180477 3.474134 7.128055  
153218\_at 1.15024 1.452354 0.960993 1.13001 1.425569 1.381297 1.187224 3.226018  
153222\_at 5.328457 5.553788 6.135304 5.751077 6.12889 5.321442 5.890613 5.414172  
153241\_at 6.011387 6.196191 6.199295 5.999363 6.546437 6.06678 5.917518 6.721621  
153328\_at 1.8849 1.943939 1.75265 2.213031 2.464844 1.627058 1.918547 2.094034  
153339\_at 5.333071 5.467059 5.288758 6.348936 4.891365 6.352395 6.005476 5.86891  
153364\_at 3.641039 3.998287 4.433632 3.860132 3.902128 4.313555 4.818119 4.317374  
153396\_at 4.111395 4.652991 4.114365 5.396908 5.216286 4.504775 4.773379 4.504097  
153443\_at 5.729038 5.697805 6.834716 6.353853 4.534269 6.217272 5.850022 6.531217  
153469\_at 4.048451 2.506826 2.854819 1.984419 2.667456 2.91027 2.645083 2.645083  
153478\_at 2.402718 2.196741 2.275816 2.189141 2.175621 2.780157 2.14075 2.532047  
1534\_at 3.701018 3.88955 3.150776 3.442353 4.142196 4.254178 3.199573 3.13812  
153527\_at 6.973356 7.510242 7.133931 7.144006 7.133098 7.588595 6.906468 7.493938  
153562\_at 4.017883 4.665199 4.491465 4.583852 5.935634 4.508879 3.728861 5.64799  
153571\_at 2.020382 2.201826 1.952735 1.746019 1.699325 1.924273 2.030821 1.906439  
153572\_at 2.012535 2.040099 2.876987 2.301426 2.786093 3.925915 2.868786 3.008804  
153579\_at 4.552764 4.552842 4.470614 3.904021 3.700541 4.324802 3.373851 2.728567  
1535\_at 6.685914 5.463039 5.895118 6.768736 5.147757 6.843417 6.1957 4.906049  
153642\_at 4.285875 5.320515 5.667292 4.488305 4.603518 4.53646 4.903478 5.910425  
153643\_at 2.510419 1.998002 2.092819 2.53711 2.385913 3.600439 2.066848 2.252054  
153657\_at 1.709533 1.744438 1.380742 1.138824 1.738326 1.283234 2.820683 1.526127  
153684\_at 1.183349 1.275582 1.477294 1.030436 1.861271 0.701487 1.408654 1.880042  
1536\_at 5.490452 6.641734 5.792353 6.736712 4.99048 6.051173 6.64999 6.504686  
153733\_at 3.801952 5.168106 3.821995 3.845738 3.592749 3.675579 3.286356 5.027069  
153743\_at 1.066828 1.281773 1.804817 1.075064 0.993033 1.562275 2.029502 1.319273  
153745\_at 1.419645 1.830403 2.723466 2.072192 1.602832 1.348076 1.579708 2.503765  
153768\_at 3.074916 2.864241 2.596371 3.343571 4.664986 3.242974 1.505014 3.415536  
153769\_at 3.742692 3.014041 3.050882 2.513357 3.432312 3.253836 3.473359 3.33854  
153770\_at 1.638202 1.363259 1.32646 1.371733 1.576677 1.881551 1.793218 1.279728  
1537\_at 8.401787 7.494847 7.696818 7.421042 7.532495 8.136942 7.207266 6.533574  
153830\_at 5.79163 6.119878 6.017981 5.067503 6.455267 5.430537 5.677803 6.47645  
1538\_at 1.284917 1.129435 1.455825 1.100483 1.189917 1.49908 1.051875 1.528952  
153910\_at 1.632329 2.035043 2.093601 2.676083 2.351892 2.086837 3.192626 2.923799  
153918\_at 2.510657 1.754629 1.777168 1.405071 1.363002 1.606131 1.668324 3.897311  
1539\_at 1.455359 1.120675 1.132024 1.296188 1.29893 1.676858 1.43174 1.46596  
153\_at 3.061939 2.914163 3.846005 3.457326 3.986717 3.066653 3.191886 2.802741  
154007\_at 4.834001 4.693741 4.70228 5.588147 4.641069 4.305381 4.293807 4.794222  
154043\_at 6.008211 6.105868 6.632152 6.186511 6.494123 6.309999 6.872703 5.150036  
154064\_at 1.652307 0.985398 0.923148 1.111234 3.805996 3.542213 1.113112 1.569451  
154075\_at 2.820287 2.045468 1.944998 4.276052 2.521724 2.246625 2.440414 2.877823  
154089\_at 3.651468 2.229483 2.958347 2.697914 2.332256 2.78674 2.338332 3.231506  
154091\_at 6.880168 6.34608 7.390273 5.730123 6.291414 6.305347 7.538024 4.848186  
154092\_at 2.002607 2.598245 1.768758 2.019481 1.934867 2.035673 2.180814 2.718642  
1540\_at 6.329722 7.057758 6.84203 6.738557 6.737244 6.544464 7.020309 6.876572  
154141\_at 6.472427 6.183551 5.855075 5.769641 6.155214 6.025884 5.273585 5.360131  
154150\_at 1.703379 2.484976 1.899086 2.080346 1.557796 2.100886 2.704963 2.061801  
154197\_at 1.815321 1.427401 1.444269 1.269602 1.511499 1.205694 1.374834 1.879217  
154214\_at 3.158528 3.686158 3.912204 2.532648 3.348604 3.267522 3.563943 3.775814  
154215\_at 1.355127 1.022927 0.841506 1.686375 2.071587 1.152505 1.569264 1.553214  
154288\_at 1.847582 2.065189 1.813121 2.207672 2.408032 2.234179 2.204644 2.721681

154313\_at 2.538603 1.611423 2.137622 2.368017 1.939197 1.232632 1.759496 2.978591  
154386\_at 1.626188 2.213174 2.967445 2.314234 2.281126 1.91813 1.700511 2.159182  
1543\_at 1.519924 1.434373 1.539587 1.161197 1.108996 2.147944 1.335312 1.572347  
154442\_at 1.753718 1.115278 1.40734 1.496379 1.813478 1.420579 1.291431 1.951122  
154449\_at 2.594947 1.947237 1.948547 2.67924 2.143006 2.786612 2.468465 1.953097  
154467\_at 5.612046 5.764093 5.125565 5.871939 5.583643 6.064835 5.625482 5.679232  
1544\_at 1.394845 2.089445 2.560478 1.976627 1.950883 1.809828 2.649551 1.344292  
1545\_at 6.710864 6.892483 6.030551 6.635711 5.967731 6.531829 7.082567 5.916719  
154661\_at 1.713721 1.85442 2.619452 1.583124 2.664379 1.354518 2.693956 1.840379  
154664\_at 1.406399 1.582918 1.174981 1.393979 1.68394 1.545478 1.483315 1.491327  
154743\_at 5.782998 5.474276 5.638015 6.408081 4.899066 5.736128 5.778001 6.287301  
154761\_at 0.9956 3.879498 5.051629 6.084412 5.108217 4.739541 0.145953 0.627946  
154790\_at 1.690989 1.851355 2.158724 1.546498 2.108026 1.55974 2.073208 2.136537  
154791\_at 7.409483 7.284491 7.122127 6.499756 7.240332 6.704204 6.585067 6.950314  
154796\_at 6.871951 7.218328 5.847774 7.366237 5.693647 7.000434 7.847642 6.622689  
154807\_at 7.296486 7.592155 7.46689 7.637684 8.068154 7.375083 7.46271 8.004622  
154810\_at 6.854141 6.33169 7.278194 7.174525 6.602823 6.635903 6.937871 6.82874  
154822\_at 1.127854 1.510185 1.389732 1.408827 1.742343 1.542552 2.524187 1.551491  
154860\_at 1.177396 1.894162 1.496895 1.421164 1.681165 1.245015 1.480044 1.908025  
154865\_at 3.121384 2.520229 2.383387 2.228939 2.664828 2.409957 2.436756 3.374314  
154872\_at 0.908614 0.897111 1.596866 1.25295 0.757413 1.818856 1.643746 1.147084  
154881\_at 4.658383 3.866145 5.407374 4.45753 4.003713 4.002221 5.306707 4.40009  
1548\_at 2.080614 2.39993 3.185289 2.194833 1.752204 1.862606 1.610435 1.501315  
154907\_at 1.095085 0.987972 1.32973 1.450734 1.14161 1.154291 1.87545 1.632323  
1549\_at 3.436033 3.862953 2.697999 3.241826 2.999141 3.656875 4.180689 3.873542  
154\_at 1.73693 2.666053 3.553502 2.984083 2.613577 2.350901 2.424605 2.324074  
155006\_at 3.233482 3.228999 2.83361 2.602765 5.886696 3.669367 2.739461 2.843518  
155038\_at 7.013524 6.803236 7.468368 7.395461 7.587755 7.601937 7.642094 6.903079  
155051\_at 2.129598 2.35958 2.556813 2.506001 2.360662 2.230523 2.714849 2.598275  
155054\_at 3.847786 4.299179 5.284807 5.10486 3.504044 4.124977 4.75185 5.97248  
155060\_at 1.827573 2.753812 2.039535 2.253572 2.309956 2.339854 2.253572 2.328903  
155061\_at 4.514709 4.830204 4.049663 5.288625 5.753194 5.502337 6.549143 4.335278  
155066\_at 4.585798 4.252123 5.300845 4.965389 4.721227 5.134745 5.213375 4.53075  
155184\_at 2.322297 2.279355 2.288874 1.595057 2.301524 2.449653 3.106294 2.147167  
155185\_at 1.964382 2.599386 2.784743 2.190807 2.173933 2.075924 3.399983 2.646622  
155368\_at 4.947249 3.648363 4.323155 3.778962 5.987518 2.997636 3.362929 3.262195  
155370\_at 2.800733 3.733879 3.574998 3.469082 3.681108 3.092698 3.026299 3.499099  
155382\_at 2.813323 2.159201 2.234929 2.745675 3.460646 2.481676 2.578686 3.659259  
1553\_at 1.277024 1.353746 2.281948 1.698718 1.901805 1.775151 1.372271 2.029514  
155400\_at 3.579218 3.303434 2.70393 2.556572 2.799355 3.641957 2.773937 2.453363  
155435\_at 5.42421 4.650367 3.941924 5.758859 4.7469 5.07748 6.128197 5.098507  
155465\_at 1.039035 1.06295 1.040542 0.92221 0.832558 1.354542 1.642109 0.955831  
1555\_at 4.028034 1.267689 4.180138 2.771308 3.214498 1.116114 3.364258 0.908088  
1556\_at 1.961304 2.22486 1.094538 1.842856 2.246489 1.891588 2.614446 2.604825  
1557\_at 0.889626 1.227145 1.056961 1.060184 1.414508 1.055025 1.238695 0.763916  
1558\_at 0.943138 0.523278 1.195844 1.298927 1.431958 1.871738 2.873793 1.495064  
155\_at 1.879896 2.694131 1.832065 2.514942 2.478011 1.039226 2.456867 1.936893  
1562\_at 1.141844 1.243155 1.549717 1.029939 1.239827 1.062229 1.232606 1.934558  
1564\_at 3.557974 2.08462 3.23836 2.030166 2.045497 3.011342 2.987787 1.978177  
1565\_at 3.989517 2.406125 3.043195 4.024825 2.688314 2.639489 4.111087 4.805515  
156\_at 5.27858 4.137337 4.327197 5.294199 4.471264 5.074175 5.868384 4.528013

1571\_at 1.725142 1.689431 1.646991 1.479151 2.710049 1.748644 2.558535 1.415062  
157247\_at 5.272228 4.979223 5.272584 5.595676 5.369853 4.836875 5.737617 4.804028  
157273\_at 1.954435 2.270335 1.965548 1.306981 2.268497 2.133577 2.170826 2.099069  
157285\_at 3.682104 3.918578 4.006826 3.619773 3.530288 3.5618 4.356077 3.847748  
1572\_at 2.580562 2.804739 2.509037 2.032954 1.531168 2.131539 2.482577 3.566982  
157310\_at 5.629247 4.921663 4.804015 4.015764 3.137897 5.25529 5.551985 3.311038  
157313\_at 1.289097 2.568472 1.142844 1.851496 1.393866 1.018963 2.24602 1.563624  
157376\_at 1.182 1.297908 1.210353 1.44365 0.65444 1.133313 1.92064 1.150255  
157378\_at 5.188919 6.732837 5.038729 5.328223 5.257546 5.787079 5.548264 4.959457  
157381\_at 1.78119 1.612698 1.237443 1.852461 1.407672 1.100553 1.473761 1.66975  
1573\_at 1.549298 2.086894 1.321803 1.224426 3.040881 1.681461 1.118157 2.679875  
157506\_at 5.273611 4.761921 5.555269 5.023984 4.058149 3.924362 4.841918 5.832501  
157556\_at 1.230681 1.585506 1.230388 1.552587 2.555105 1.877254 1.89613 1.187041  
157567\_at 4.893163 4.443176 4.71361 4.014936 4.652711 3.819969 4.172011 4.166986  
157570\_at 1.325858 1.757434 1.402086 1.324659 4.205116 1.046547 1.43344 1.553449  
157574\_at 4.254454 4.824124 3.528459 3.808883 4.703431 3.572878 5.414315 4.575151  
157627\_at 2.366144 1.307015 1.168257 1.173133 1.753811 1.511632 1.373629 1.12393  
157638\_at 4.013265 3.93495 3.388181 3.372651 3.411992 3.525656 3.848285 3.554314  
157657\_at 2.013917 1.33592 1.902769 2.743602 2.71508 2.224936 2.58072 2.218062  
157680\_at 4.995929 5.626275 5.913497 5.76736 5.513448 5.524397 6.373471 5.776852  
157693\_at 1.402506 1.609867 1.371204 1.196484 1.701266 1.597899 1.83246 1.485185  
157695\_at 4.486534 4.90057 3.589874 4.803862 5.211955 4.123266 4.985901 4.829469  
157697\_at 6.164701 6.241012 6.17175 5.802088 6.119232 5.82322 5.647068 6.315964  
1576\_at 2.431892 2.034889 1.443843 0.476488 1.321195 1.61386 1.302789 2.766353  
157724\_at 3.320807 2.629446 3.936191 1.222786 1.862377 1.510948 1.384204 3.417288  
157739\_at 1.261509 1.852168 2.101908 0.887045 1.105913 1.281867 0.922769 1.528415  
157753\_at 1.396523 2.178021 2.32086 2.519843 1.040155 1.342451 2.192123 0.899817  
157769\_at 6.388751 6.766667 6.147019 6.030404 7.109761 5.716083 6.290315 7.162873  
157773\_at 3.232936 4.661223 3.984103 2.103397 3.420083 2.452387 2.107311 3.206732  
157777\_at 1.596193 1.072523 1.412132 1.506745 2.016486 1.492195 1.637054 1.286405  
1577\_at 3.451845 2.269717 3.39706 2.949958 3.341763 4.261281 2.537393 2.965932  
157807\_at 1.965476 2.388048 2.517257 1.787265 2.824101 1.712517 2.006838 2.262543  
157848\_at 2.012448 1.957921 2.83808 1.38169 3.096034 1.399586 2.517256 1.744267  
157855\_at 1.306141 1.319126 1.314011 2.059531 1.481912 1.536587 1.591687 1.248959  
157869\_at 8.393718 8.041479 8.964208 7.811018 4.909207 7.093031 7.978732 8.020344  
157922\_at 5.19844 5.512276 4.824673 5.228273 4.722193 5.278684 5.57417 5.327292  
157927\_at 1.394638 2.421909 1.992835 3.009637 1.899315 2.670785 2.042896 1.897173  
157983\_at 5.23657 2.732565 5.325702 2.525613 4.600515 4.040006 3.977966 4.593436  
1579\_at 6.841481 5.874897 6.904112 5.430413 7.667138 8.293993 2.570423 6.297145  
157\_at 6.270614 6.294034 6.539389 5.849127 6.16985 6.413833 6.723124 6.604658  
158035\_at 1.445788 2.130615 1.16993 1.831322 2.238419 1.726477 1.540955 2.167059  
158038\_at 2.213003 2.587633 1.668689 1.527147 1.964299 1.176537 1.854173 3.450116  
158046\_at 2.69542 1.551776 1.914003 1.453827 2.052117 1.944622 1.821398 1.650831  
158055\_at 1.542614 2.893514 2.608547 2.586331 2.877885 3.058578 2.709782 2.236275  
158056\_at 2.518825 2.010954 2.135949 2.344492 2.990537 2.214577 3.705319 2.154312  
158062\_at 2.339862 3.315425 2.474143 2.566987 2.956899 4.088064 2.810813 3.822707  
158067\_at 4.054054 3.446027 3.056973 2.849118 2.804097 2.473359 3.823974 3.665434  
1580\_at 3.472265 3.946428 4.64243 3.52054 4.016852 3.683151 2.384993 2.814431  
158131\_at 0.942965 0.889942 0.629573 1.421811 0.864846 0.94382 2.331112 0.920138  
158135\_at 3.219588 3.384977 3.518655 4.253439 2.754678 3.361318 3.204252 3.604045  
158158\_at 2.964988 3.362721 3.127828 2.553539 2.918186 3.66944 2.080353 2.887619

158160\_at 1.898747 3.391546 2.185616 3.121315 2.135994 2.984053 3.093152 3.128009  
1581\_at 1.830234 1.220002 1.727549 1.057058 1.546173 1.235009 1.491872 1.623177  
158219\_at 4.380091 5.079556 5.36309 3.821109 4.780988 4.784174 5.311887 5.567708  
158228\_at 3.864321 3.826722 3.403019 4.411187 3.681872 4.220552 4.641637 4.150068  
158234\_at 4.460006 5.461667 4.750966 4.115551 5.71014 4.430792 3.994653 4.615864  
158248\_at 2.621628 3.078944 2.198342 2.182761 2.91125 2.582768 2.388574 2.835009  
158257\_at 3.843203 3.070878 3.049278 2.8838 2.288408 2.846796 2.831066 3.609851  
158293\_at 6.764969 6.198323 6.172985 6.224052 6.348765 6.446129 6.906529 6.031979  
158297\_at 1.670591 2.047479 1.46485 1.875492 2.039429 1.792874 1.902712 1.456923  
1582\_at 2.274324 3.218805 3.223324 0.855223 2.271102 2.622985 2.579432 2.05466  
158314\_at 3.411056 0.449837 0.617672 2.272148 2.829415 1.663014 1.269017 1.805464  
158326\_at 3.526108 2.628013 2.695746 2.977443 2.872953 2.835414 2.514041 2.931861  
158358\_at 6.351527 6.62009 6.205052 6.295376 6.902814 6.599869 6.755779 6.072535  
158376\_at 6.865733 6.096477 6.357833 7.001249 4.902409 6.630415 5.633066 5.970331  
158381\_at 1.624667 2.085373 1.548294 1.593245 2.130459 1.959124 2.004696 1.912205  
158399\_at 4.433869 5.024914 4.501141 4.347686 4.773552 4.974454 5.011015 4.510825  
1583\_at 1.397848 1.555784 1.825651 1.39478 1.652113 1.510673 1.753492 1.594548  
158401\_at 1.413415 1.494621 1.45404 1.770301 2.842499 1.711611 1.837905 1.836883  
158405\_at 3.176977 3.621198 3.211246 4.483077 2.009637 3.414168 3.348299 2.539183  
158427\_at 4.936157 4.444171 4.750187 5.00976 4.386314 4.357018 4.947374 4.835112  
158431\_at 2.668196 2.498012 2.383854 3.01979 3.177234 3.070203 2.07449 2.420858  
158435\_at 1.758555 1.849558 2.026519 2.03682 2.374973 2.423047 2.70472 2.203313  
158471\_at 4.144964 4.571143 4.139391 4.575179 3.008103 4.471234 3.328687 4.962963  
1584\_at 3.130754 3.100678 2.732875 3.172844 3.071531 2.427539 3.49103 3.630362  
158506\_at 1.008543 1.146387 1.899573 1.280204 0.978338 0.782608 1.037409 1.661672  
158511\_at 2.493982 3.949419 2.716208 2.56644 2.092453 3.859663 2.205824 2.830628  
158521\_at 1.496881 2.032569 1.631045 1.852911 1.540936 1.833463 1.641022 2.45816  
158572\_at 1.647755 2.084484 1.413534 1.165215 1.408818 2.311644 1.529438 1.212534  
158584\_at 2.668245 2.23366 1.874952 2.259544 3.117556 2.156992 3.353592 2.14835  
158586\_at 6.054479 6.201658 5.725075 6.407716 6.039638 6.367729 6.189382 6.16181  
1585\_at 2.366893 1.986582 2.832978 1.497103 2.489529 1.532464 1.150129 1.722577  
158696\_at 1.065382 1.545277 1.391273 0.873375 1.60625 1.069345 1.150834 3.060053  
1586\_at 5.476674 3.908899 4.983804 3.126964 5.700694 3.362654 2.3562 5.434189  
158724\_at 2.451462 1.827108 2.014083 2.291578 1.979407 2.610928 2.734752 1.304867  
158747\_at 5.307374 5.509845 5.354645 5.169899 5.450849 4.59439 5.396065 5.688878  
158763\_at 1.879785 1.66318 2.071777 1.831415 1.825625 2.397213 2.04101 2.375721  
158787\_at 1.950356 2.452431 1.630466 2.436238 1.574753 2.181472 2.135187 2.110404  
158798\_at 0.702757 1.3424 1.156143 1.155277 1.040541 1.340239 1.095805 0.801828  
1587\_at 1.226355 1.15815 1.51131 1.09054 1.294588 1.938178 1.650845 1.233933  
158800\_at 1.189213 1.67982 1.195363 2.549815 1.554272 2.182258 1.434986 0.933884  
158801\_at 1.359438 0.958501 2.315654 1.779581 2.107239 2.67004 1.201636 0.709682  
158809\_at 1.3851 1.925783 2.008691 2.361008 2.318143 1.55267 1.78794 2.067335  
158830\_at 1.121971 2.415338 1.05951 1.413024 1.738061 1.450695 1.217775 2.087076  
158833\_at 1.776583 1.598079 1.949821 0.923667 1.944792 1.202114 2.372422 1.996543  
158835\_at 1.442802 2.230945 1.440032 1.988214 2.311952 2.199274 1.953409 2.515911  
158866\_at 3.476415 4.217008 3.789229 2.326471 3.24134 3.929577 4.076138 3.911002  
158880\_at 4.276584 2.599659 4.005637 3.962024 4.286855 4.099592 2.654426 4.837169  
1588\_at 2.456476 1.537884 1.803448 2.338654 1.818045 2.035996 1.025991 2.103824  
158931\_at 2.840983 5.484424 3.600942 2.200118 3.417591 2.081078 1.747366 5.385495  
158983\_at 1.787781 1.434408 2.774669 1.621334 2.24335 2.115236 1.420407 1.868926  
1589\_at 2.901733 1.671757 1.779998 3.666385 6.643067 2.825069 4.003151 1.928157

|           |          |          |          |          |          |          |          |          |
|-----------|----------|----------|----------|----------|----------|----------|----------|----------|
| 158_at    | 5.815941 | 5.262277 | 5.198318 | 5.794392 | 6.070362 | 5.903456 | 5.370377 | 6.204624 |
| 159013_at | 3.38198  | 3.811852 | 4.47683  | 3.90381  | 4.11879  | 4.878119 | 3.973238 | 4.071124 |
| 159090_at | 5.83495  | 5.344311 | 5.539159 | 5.388167 | 5.964011 | 5.328298 | 5.151523 | 6.256798 |
| 159091_at | 2.319764 | 2.880032 | 3.19652  | 3.088865 | 3.27143  | 2.330213 | 3.44208  | 2.686095 |
| 1590_at   | 2.868571 | 2.559663 | 2.261473 | 3.15674  | 3.223294 | 3.368714 | 2.337722 | 3.749583 |
| 159125_at | 1.675517 | 1.456512 | 2.049347 | 1.267989 | 3.187303 | 1.680163 | 1.513733 | 2.158038 |
| 159162_at | 1.366762 | 1.113485 | 1.18467  | 2.127553 | 0.820494 | 0.957767 | 1.009551 | 3.044093 |
| 159195_at | 4.165577 | 4.867648 | 4.507437 | 3.887143 | 3.139224 | 4.800779 | 3.878481 | 3.893218 |
| 1591_at   | 4.742965 | 2.109786 | 3.239455 | 2.075599 | 1.941012 | 4.633984 | 2.313452 | 5.668495 |
| 159296_at | 1.027543 | 1.616228 | 1.548068 | 1.402726 | 1.451453 | 1.419367 | 1.478852 | 1.74288  |
| 1592_at   | 1.514654 | 1.705504 | 2.057278 | 1.351089 | 1.483218 | 1.207542 | 2.35536  | 2.154396 |
| 159371_at | 2.14888  | 2.530443 | 1.762281 | 3.13277  | 2.74212  | 2.616563 | 1.985295 | 1.428374 |
| 1593_at   | 5.411723 | 5.016274 | 4.062845 | 4.861902 | 4.444325 | 4.855543 | 4.732089 | 5.559926 |
| 1594_at   | 2.522326 | 2.207445 | 2.138134 | 1.523011 | 2.089354 | 2.531662 | 1.46633  | 2.038135 |
| 1595_at   | 5.820424 | 6.129825 | 6.181698 | 6.695492 | 5.874205 | 5.312413 | 6.791649 | 6.008126 |
| 159686_at | 2.128748 | 2.180098 | 2.067104 | 1.778759 | 2.335236 | 1.159663 | 1.421255 | 1.913663 |
| 159963_at | 7.043526 | 6.364299 | 6.852498 | 4.556275 | 7.920939 | 7.1954   | 3.723712 | 7.593154 |
| 159989_at | 1.657745 | 0.987143 | 1.638073 | 1.182155 | 1.763333 | 1.352863 | 1.057823 | 1.632447 |
| 159_at    | 5.819501 | 6.464468 | 5.928039 | 6.232984 | 6.993334 | 5.865062 | 6.505665 | 6.64721  |
| 15_at     | 1.607584 | 1.454778 | 1.842306 | 1.848977 | 1.699362 | 1.579949 | 1.518717 | 2.0748   |
| 160065_at | 2.068788 | 2.028351 | 1.840986 | 1.894075 | 1.811143 | 1.880986 | 1.376132 | 1.202671 |
| 1600_at   | 1.460915 | 3.182644 | 1.591779 | 1.640962 | 1.959599 | 1.641392 | 3.226964 | 2.420572 |
| 160140_at | 1.277519 | 1.433809 | 1.888826 | 1.025506 | 1.291062 | 1.447755 | 1.632456 | 1.54503  |
| 1601_at   | 8.562964 | 8.880793 | 8.519912 | 8.695069 | 8.438364 | 8.574249 | 8.51488  | 8.987072 |
| 160287_at | 2.294577 | 2.412938 | 1.929531 | 2.684432 | 2.845207 | 1.797244 | 1.956206 | 2.343886 |
| 160298_at | 1.476201 | 1.561961 | 2.197677 | 1.664195 | 1.913475 | 1.324275 | 1.349274 | 2.407511 |
| 1602_at   | 8.238147 | 8.609047 | 8.456611 | 8.139903 | 8.041771 | 7.660478 | 8.399158 | 8.677955 |
| 160313_at | 2.685312 | 2.152915 | 3.209321 | 1.402636 | 2.622067 | 1.789548 | 2.417536 | 3.010508 |
| 160335_at | 3.750663 | 3.309449 | 3.024657 | 2.363575 | 3.811205 | 3.430255 | 2.544777 | 3.666686 |
| 160364_at | 2.135996 | 1.210343 | 1.013335 | 1.495468 | 1.488342 | 1.761598 | 2.646676 | 2.46864  |
| 160365_at | 1.589348 | 1.663753 | 0.977871 | 1.212946 | 1.309117 | 1.245304 | 1.48772  | 1.245255 |
| 1603_at   | 10.23841 | 10.29623 | 10.38954 | 10.29302 | 10.11933 | 10.30385 | 9.862226 | 10.03331 |
| 160418_at | 6.826538 | 6.803105 | 7.261898 | 6.69888  | 7.253884 | 6.515181 | 6.810154 | 7.104931 |
| 160419_at | 1.03756  | 1.071572 | 1.439326 | 0.995006 | 0.956203 | 1.334434 | 1.605502 | 1.112074 |
| 160428_at | 1.30092  | 1.631533 | 1.661984 | 1.825257 | 1.511882 | 1.818814 | 1.90507  | 1.479901 |
| 160492_at | 1.11768  | 1.370586 | 1.082147 | 1.379398 | 1.215124 | 1.186154 | 1.078571 | 1.547033 |
| 1604_at   | 9.114852 | 8.695543 | 9.068192 | 8.84038  | 9.208145 | 8.522414 | 9.003022 | 9.240625 |
| 160518_at | 5.378766 | 5.837995 | 5.992921 | 5.641829 | 4.396778 | 5.173244 | 5.525643 | 5.992492 |
| 1605_at   | 5.792137 | 5.946275 | 5.980876 | 6.202669 | 5.737422 | 5.215616 | 6.594291 | 5.490687 |
| 160622_at | 3.234719 | 3.076007 | 3.241901 | 3.230756 | 1.490005 | 2.31929  | 3.004443 | 2.152901 |
| 1606_at   | 3.372806 | 2.920388 | 3.154854 | 3.376972 | 2.41819  | 3.132449 | 2.986335 | 3.14584  |
| 160728_at | 2.837435 | 0.992872 | 1.470664 | 1.792099 | 1.406142 | 1.027836 | 1.102263 | 2.991505 |
| 160760_at | 4.987626 | 4.887092 | 5.330562 | 4.082694 | 5.449739 | 4.875559 | 5.919279 | 5.940723 |
| 160762_at | 1.395047 | 2.445243 | 1.641969 | 2.148605 | 1.579732 | 1.730865 | 1.503439 | 1.428369 |
| 160777_at | 1.808696 | 2.08803  | 1.835112 | 1.876215 | 1.850458 | 2.021806 | 2.90652  | 2.114755 |
| 1607_at   | 1.02519  | 1.227098 | 1.082587 | 1.49056  | 2.438924 | 1.175598 | 1.897845 | 1.466429 |
| 160851_at | 3.955275 | 4.78934  | 4.546837 | 4.600609 | 4.542919 | 3.816645 | 3.745298 | 3.629675 |
| 160857_at | 5.118631 | 4.439805 | 4.077181 | 4.197431 | 4.684162 | 3.858258 | 3.464638 | 5.255128 |
| 160897_at | 2.929193 | 3.77552  | 3.469017 | 2.958641 | 3.78407  | 3.130314 | 2.741809 | 3.217125 |
| 1608_at   | 2.681298 | 2.793358 | 2.390185 | 3.079871 | 1.927765 | 4.013358 | 3.609052 | 3.280105 |
| 1609_at   | 2.527722 | 3.307821 | 2.979863 | 2.874381 | 2.384313 | 2.901654 | 2.598699 | 2.280295 |

160\_at 5.729819 5.978656 5.831832 6.331983 6.291511 6.448967 6.001582 5.724615  
161003\_at 1.296407 1.10749 1.559858 1.805825 2.171816 1.540131 2.155313 2.054305  
1610\_at 5.740749 3.292704 5.430989 2.303809 6.789723 5.811354 3.044548 5.132007  
161142\_at 1.843785 1.932051 1.948199 1.661028 2.052101 1.454318 1.720349 2.043701  
161145\_at 2.082116 2.787221 2.987321 2.058767 1.74908 1.723908 1.785368 2.38013  
161159\_at 1.170754 1.08661 1.225699 1.802398 2.710919 2.423643 1.860641 1.010762  
161176\_at 2.669227 3.106589 3.482069 3.397861 3.507443 1.965657 2.446375 3.382334  
161198\_at 5.736326 5.418561 5.150986 5.320342 5.823713 5.479995 5.598419 4.840837  
1611\_at 7.860881 7.171356 8.060337 8.47582 6.951729 7.514737 7.995054 6.342183  
161247\_at 2.511779 1.970273 2.186326 2.145537 2.976114 2.088481 1.50944 2.426676  
161253\_at 1.596288 2.446287 2.299152 2.378769 1.725842 1.546857 2.42596 3.507831  
161291\_at 2.271176 2.043465 1.864093 2.40572 2.265817 1.991966 1.971475 2.375981  
1612\_at 6.947363 6.810928 7.512568 7.187888 7.318416 7.220068 7.587554 7.321993  
161357\_at 1.021093 1.419253 1.478705 1.658871 2.738113 1.944458 1.374238 2.569763  
161394\_at 1.617082 2.676429 1.771027 1.759362 1.279262 1.911586 2.733992 1.942145  
1613\_at 4.001793 3.861567 3.686725 3.667764 3.238781 3.465756 3.070192 2.184261  
161424\_at 3.811231 3.303169 3.816789 4.093638 3.372378 4.244538 4.101007 3.368816  
161436\_at 1.468242 2.121975 1.740905 1.520674 1.547657 1.999755 1.904763 2.456797  
161497\_at 2.095609 1.316944 2.383857 2.53559 2.767206 2.54606 2.219656 2.853061  
161502\_at 1.794777 2.03339 1.569282 1.7341 1.817389 1.86815 1.682527 1.61384  
161514\_at 2.14056 1.366386 1.458192 1.589983 1.451374 1.205198 1.363148 2.006414  
161582\_at 4.825806 5.109408 5.673963 3.894447 6.025312 5.185766 3.950521 5.279727  
1615\_at 7.243425 7.276315 7.231067 7.330282 7.901096 7.3332 6.809787 7.888534  
161635\_at 2.11273 1.47804 2.059948 3.334762 2.575301 1.759589 1.387253 3.165312  
1616\_at 5.998485 5.476706 5.404098 5.257343 5.497116 5.525858 4.907673 4.713714  
161725\_at 1.622976 1.681872 1.897164 2.040393 1.804508 2.287569 1.715986 1.999904  
161742\_at 7.634658 6.888984 7.155584 7.553936 7.87866 7.43235 7.382189 7.557638  
161753\_at 2.754895 2.388669 2.432065 2.146357 1.970488 2.523604 2.459404 2.302567  
161779\_at 2.932958 2.965864 2.462839 2.392264 2.859285 2.836488 3.128892 2.9541  
161823\_at 4.610172 4.127625 4.266796 3.765003 4.281103 3.916718 4.739947 4.474768  
161829\_at 1.643098 1.821922 1.638818 2.140641 1.815679 1.524263 2.040123 1.697537  
161835\_at 2.892473 2.585808 2.38186 2.309147 1.942104 1.768705 2.450964 2.268932  
161882\_at 3.641879 3.771558 3.993171 4.040019 3.090349 4.548727 3.255389 2.84743  
1618\_at 1.82664 1.7771 1.582622 1.200607 1.654028 1.812969 2.364444 1.865318  
161931\_at 1.999611 2.548466 3.033549 3.048169 2.380654 3.089291 3.08851 2.315555  
161\_at 6.892197 6.248773 6.116156 7.050649 6.457685 6.643982 6.373292 6.288645  
162073\_at 4.414183 5.159831 5.064744 5.153318 4.277561 4.99157 5.351606 4.856091  
162083\_at 2.248357 1.451002 1.693941 1.566757 1.775248 1.718642 1.823624 1.918286  
1620\_at 1.758237 3.748623 1.641042 1.211399 2.02608 2.002104 1.768041 1.667533  
1621\_at 2.189666 2.197225 1.948768 2.091136 2.348406 2.690087 1.784592 2.393603  
162239\_at 5.013695 5.202568 3.361094 4.734044 5.134951 3.681143 3.838424 5.22693  
162282\_at 1.349584 1.55723 1.021775 1.278265 1.744451 1.089478 1.241918 1.248606  
1622\_at 6.999567 6.508329 7.011015 7.092887 6.957175 7.530524 6.780716 6.47706  
162333\_at 1.785763 2.392387 1.632636 1.849424 2.012423 1.851223 1.585261 1.707359  
162387\_at 2.679524 4.683652 4.490057 1.903522 2.183207 1.833061 3.288257 3.672701  
162394\_at 6.613925 6.998812 6.942447 7.671783 7.591543 7.727391 7.417866 7.085268  
162417\_at 3.696868 3.52825 4.061292 3.235125 3.878879 3.297077 2.657321 3.899924  
162427\_at 5.715901 5.866742 5.952788 6.000751 5.127756 5.80119 5.819426 5.848604  
162461\_at 2.012146 2.205387 2.739256 2.606358 2.591361 2.608593 3.322538 2.683423  
162466\_at 2.707382 2.981523 3.423961 2.660891 3.215467 2.875067 3.880409 3.189664  
162494\_at 2.241357 2.417762 1.554373 2.218268 1.836201 2.035216 2.133687 3.052643

162514\_at 2.087894 1.723156 1.895514 2.072946 2.687462 2.199401 2.072946 2.325019  
162515\_at 2.418188 1.956031 2.091696 2.83615 2.824588 2.167285 2.38446 2.144808  
162517\_at 1.839567 2.478564 2.343444 1.993663 2.477211 3.636664 1.896707 2.492621  
162540\_at 1.971272 2.311683 2.261492 2.314532 2.549169 2.326383 2.114756 2.014013  
162605\_at 1.522847 1.633573 1.833078 1.430946 1.519447 2.160536 1.593919 1.702933  
162655\_at 1.981917 1.40743 2.714238 1.648734 1.538264 1.653016 3.235667 1.470951  
162681\_at 4.613026 5.237294 4.128921 3.520206 5.349079 3.489765 3.781464 5.277821  
1627\_at 5.902721 5.7916 6.173249 5.57709 5.220184 5.626849 6.277335 5.746862  
1628\_at 4.963261 5.03391 4.588424 5.613801 5.12502 4.259683 4.746621 4.743287  
162962\_at 2.628765 2.892922 4.15771 4.035144 1.386516 4.868581 4.150504 3.691126  
162963\_at 3.836252 3.871647 2.743476 4.055826 3.315887 3.436647 4.234653 3.949053  
162966\_at 2.39553 4.4909 3.744318 2.885855 4.726253 2.813767 1.880815 1.41283  
162967\_at 4.235058 4.59763 4.229973 4.504046 3.919485 4.702407 3.370369 5.231404  
162968\_at 2.052815 3.150868 2.868173 3.829622 3.166872 3.187098 2.244611 3.035282  
162972\_at 2.849463 2.64997 3.066063 3.725081 2.85006 3.036087 2.943854 3.012641  
162979\_at 2.851748 3.826933 4.233129 3.014267 3.417015 4.396194 3.276345 2.708167  
162989\_at 3.68835 3.265278 2.915823 3.851364 3.058517 4.733762 2.985422 3.326809  
162993\_at 3.718832 3.139562 3.711559 2.901011 2.903997 3.301869 3.143632 3.775983  
162998\_at 2.089331 2.596101 1.866312 1.389087 2.741561 0.92469 1.980467 1.087394  
1629\_at 5.445416 5.777851 5.933813 5.705045 6.126438 5.454891 5.542576 6.074801  
162\_at 6.493734 6.511788 6.915574 6.451223 6.687531 6.940566 6.960992 6.691271  
163033\_at 4.079949 4.850008 3.741499 4.486226 3.276431 5.113742 3.514006 4.246367  
163049\_at 5.475853 5.509365 6.141371 5.639031 5.613881 5.516592 5.969112 6.267446  
163050\_at 4.97367 4.964344 5.682418 5.362773 5.623387 5.631011 5.739297 5.583841  
163051\_at 3.804561 2.946035 3.874918 4.220972 3.911344 5.1255 3.931101 4.479325  
163059\_at 2.960276 2.910504 2.94597 2.804807 3.517894 3.470389 2.373861 3.65413  
163071\_at 2.299759 3.201141 3.208577 2.949136 3.308782 3.100588 3.142784 3.482635  
163081\_at 4.0462 3.288077 3.841073 3.944488 4.22794 3.190359 3.801762 4.140113  
163087\_at 4.904664 2.954237 4.298773 4.348544 5.435402 4.548125 3.383013 3.826303  
1630\_at 1.676343 2.919302 2.088153 2.867248 2.155453 1.958819 2.675999 3.004651  
163115\_at 2.630403 1.60655 1.293575 2.58522 2.497259 1.980956 1.539486 2.529344  
163126\_at 5.040558 4.10344 4.053923 4.209762 4.208866 4.306346 4.073474 4.142073  
163131\_at 5.712906 4.802555 5.278246 6.253891 4.411294 5.155772 5.507988 5.881189  
163154\_at 2.177033 2.073261 2.376218 1.550267 2.884952 2.599965 1.355203 3.314553  
163175\_at 3.247832 3.736327 3.640147 3.130866 2.608741 3.607157 3.508334 3.296825  
163183\_at 3.36509 2.63374 2.413751 2.413751 1.95601 3.315523 2.045134 2.380539  
163223\_at 1.570434 2.47041 2.613312 1.750512 1.62261 1.359592 3.366057 2.190871  
163227\_at 3.408778 3.96759 5.105456 4.371059 3.847803 2.940401 2.625001 6.001466  
163255\_at 2.022356 3.760894 5.231904 5.349721 1.268251 3.081579 4.327323 2.740438  
163259\_at 3.226584 3.437536 2.972575 4.255076 1.987769 3.146831 3.936459 4.217786  
1632\_at 6.742777 5.691184 5.371339 5.451312 5.089809 6.222214 5.060818 5.13243  
163351\_at 1.524489 1.261905 2.010625 1.216335 1.210921 1.184281 2.111642 2.340335  
1633\_at 6.561188 6.235373 5.587222 5.972779 6.369961 5.840135 6.824117 6.895185  
163404\_at 1.046887 1.198143 1.513218 1.278418 1.497536 1.771144 1.392138 1.470538  
163479\_at 1.107219 2.102281 1.268862 1.060418 1.195617 1.457107 1.378896 1.512132  
163486\_at 3.921896 3.784624 3.82342 3.796716 3.884685 3.751239 3.750703 4.100411  
1634\_at 10.51926 10.59396 10.31005 10.43313 10.05041 10.22986 9.640489 10.62144  
163589\_at 3.739398 3.863901 3.464583 2.916556 2.549832 3.047702 3.384502 2.646108  
163590\_at 6.761659 6.314129 6.979117 6.907652 6.867436 6.712881 7.11436 6.048329  
1635\_at 6.293923 6.672097 6.496482 6.386293 6.335672 6.165428 6.25108 6.831816  
163688\_at 2.802393 2.125909 2.762155 2.064361 2.652931 2.22157 3.01169 3.094563

1636\_at 2.690245 2.729694 2.095805 2.397866 3.168124 2.447245 1.884563 2.499621  
163702\_at 2.894437 2.691585 1.970041 2.464557 2.559915 2.784443 3.063382 3.447666  
163732\_at 3.597977 3.291688 3.065089 3.35357 3.407892 3.665606 3.239472 3.516741  
163742\_at 2.0668 1.538467 1.273469 1.274067 1.550041 1.794684 1.80185 1.375256  
163747\_at 1.838426 1.620484 1.209073 1.501222 1.294495 1.392251 1.960573 1.723031  
163778\_at 3.386642 3.611659 2.012126 2.58548 3.044857 2.883177 4.181566 3.44415  
163782\_at 1.72804 1.943307 2.950483 2.375904 1.999187 1.361667 1.74344 2.229564  
163786\_at 4.990455 4.918366 4.296008 3.75823 2.968503 4.068983 3.258495 5.131951  
163859\_at 5.920782 6.43701 6.011069 5.881733 6.418616 6.282274 6.682744 7.148585  
163882\_at 4.698021 5.065152 4.792951 4.768676 5.553384 5.14071 4.966169 5.456034  
1638\_at 2.318331 1.963396 1.989011 1.748797 1.842161 1.668893 1.791183 2.19151  
163933\_at 1.789677 2.132873 1.941085 2.045693 1.497693 1.87002 2.633175 1.674002  
1639\_at 6.700797 6.995781 6.780002 7.156349 6.143306 7.09887 6.605571 6.415789  
163\_at 8.032193 8.434168 8.552749 8.402246 8.211612 8.597673 8.737462 8.091982  
164045\_at 2.995878 1.721668 2.858353 3.572507 2.999341 3.474393 3.343167 2.89195  
164091\_at 7.918157 7.826759 8.410897 7.651754 7.289359 7.456299 8.320504 7.332991  
164118\_at 1.539289 1.938956 1.8118 2.138979 2.403748 2.763755 2.939315 2.545009  
164127\_at 1.055133 1.406113 1.50025 1.277156 1.959094 1.540786 1.620393 1.869971  
164153\_at 2.926762 2.821437 3.11988 3.063237 3.336946 3.142143 2.783689 3.392158  
1641\_at 1.605277 2.060703 2.3848 2.117779 1.806928 1.845976 1.685311 1.895736  
164237\_at 2.414453 2.910514 2.84867 2.737891 3.291254 3.164557 2.458648 2.774216  
164284\_at 2.194372 2.494985 2.746152 2.72169 3.509141 3.182336 3.361192 3.138196  
1642\_at 6.577272 6.783237 7.116061 7.142262 6.578711 6.546642 6.797666 6.904954  
164312\_at 3.758434 3.785498 4.145701 3.412427 1.83527 5.15524 3.680283 3.8618  
164380\_at 2.122849 1.671211 2.227564 1.363951 1.761887 1.662322 2.038573 1.776499  
164395\_at 1.492532 1.183649 2.62065 1.718585 1.633228 2.288356 1.360692 1.61546  
1643\_at 5.752033 4.232184 5.624032 5.839959 4.232237 6.151633 5.973605 4.700724  
1644\_at 6.05431 5.467873 5.386296 4.516948 6.757498 6.140887 3.186591 5.655803  
164592\_at 1.482012 2.214491 1.604374 2.448731 1.946723 1.973232 1.885209 2.883157  
164633\_at 2.166103 1.621855 1.81345 2.162801 3.077137 1.35312 1.895106 2.209099  
164656\_at 1.787399 1.6928 2.129427 2.073727 1.553367 1.721029 1.861368 1.669626  
164668\_at 1.907219 1.896294 1.911664 2.645782 2.065935 2.312741 2.957646 1.962074  
164684\_at 1.323926 2.226636 2.158821 2.446025 2.348436 1.771091 1.881677 1.597677  
1646\_at 1.611216 1.376138 1.282042 1.783369 1.246627 1.523591 1.322763 1.399315  
164714\_at 2.204612 2.312305 2.42425 2.340671 2.906573 2.586163 2.991851 3.044463  
164781\_at 1.46701 2.066111 1.54158 1.576617 1.743109 1.389832 2.416571 1.87899  
1647\_at 9.376557 8.976635 8.789728 8.613809 8.87606 7.938176 8.353019 9.599144  
164832\_at 2.452907 3.339347 3.478421 2.902335 2.827996 3.105855 3.363385 3.238265  
1649\_at 3.718051 3.655702 2.401518 2.472177 2.995607 2.605924 2.449944 3.454152  
164\_at 8.134525 7.87634 8.163493 7.784243 8.130161 7.935166 7.778307 7.803506  
165055\_at 1.783066 1.499676 1.673612 1.206524 1.462496 1.884333 1.770257 2.631821  
165082\_at 1.89631 1.661054 2.321097 2.244447 2.319239 1.955795 1.824197 2.194174  
1650\_at 7.874288 7.840533 8.37063 8.143895 7.743262 7.783126 8.473244 8.023121  
165100\_at 1.221702 1.336786 1.48741 1.015067 1.873598 1.473679 2.017711 2.538336  
165140\_at 3.702344 3.322806 3.951513 5.070759 5.647491 3.523933 4.454866 3.414384  
165186\_at 3.105467 3.001327 2.715438 2.793913 2.053726 2.568836 2.847142 3.096018  
165215\_at 6.19734 5.063497 4.712615 5.354471 5.776326 5.130277 5.524876 6.644222  
165257\_at 2.084478 1.250578 1.40804 1.256971 2.422412 2.287575 1.520552 1.664347  
1652\_at 9.8957 9.590559 9.779132 9.637853 9.4414 9.87152 9.521397 9.161898  
165324\_at 5.09606 6.136169 4.938067 5.707418 5.887718 5.351783 6.224069 5.414184  
1653\_at 7.860259 7.893602 7.472381 7.750737 8.186274 7.793344 7.6141 8.17417



|           |          |          |          |          |          |          |          |          |
|-----------|----------|----------|----------|----------|----------|----------|----------|----------|
| 1654_at   | 7.069013 | 7.914387 | 7.786226 | 7.807914 | 8.279491 | 7.656728 | 8.508084 | 8.140252 |
| 165530_at | 1.896253 | 1.969792 | 1.672989 | 1.70564  | 1.65255  | 1.841373 | 2.103747 | 1.552813 |
| 165545_at | 1.466149 | 1.765713 | 2.039867 | 1.983429 | 2.346054 | 1.247173 | 2.376925 | 1.968418 |
| 1655_at   | 7.573757 | 7.328298 | 7.451324 | 7.461643 | 7.449571 | 7.522207 | 7.184697 | 8.093297 |
| 165631_at | 1.20769  | 1.68408  | 1.281614 | 1.049911 | 2.286657 | 1.447175 | 1.456362 | 1.154637 |
| 165679_at | 0.961223 | 2.059469 | 4.577338 | 1.262882 | 0.942725 | 1.813257 | 5.502399 | 1.34691  |
| 1656_at   | 7.756399 | 7.879657 | 7.929213 | 8.040515 | 8.101325 | 7.719003 | 8.069099 | 8.386684 |
| 165721_at | 2.282355 | 2.070575 | 1.801338 | 2.481284 | 2.367298 | 2.320066 | 2.481211 | 2.351299 |
| 1657_at   | 6.11918  | 6.738212 | 6.440279 | 6.093018 | 7.115059 | 5.932267 | 6.04593  | 6.970477 |
| 165829_at | 1.470181 | 1.469448 | 1.420021 | 1.652625 | 1.338579 | 1.28165  | 1.933329 | 1.142069 |
| 165904_at | 2.617185 | 1.773561 | 1.701964 | 2.159811 | 2.840852 | 3.096538 | 2.348008 | 2.178234 |
| 165918_at | 6.933228 | 6.61641  | 7.414284 | 6.780496 | 6.440037 | 6.414462 | 6.191732 | 6.978792 |
| 1659_at   | 5.82332  | 5.912127 | 5.871019 | 5.580976 | 5.660604 | 5.358496 | 5.387377 | 5.678827 |
| 165_at    | 4.816221 | 5.682399 | 5.73389  | 7.057319 | 4.853457 | 6.304366 | 5.452423 | 4.969347 |
| 166012_at | 2.21575  | 1.637243 | 2.230123 | 2.723812 | 2.04863  | 2.011587 | 2.756306 | 2.71291  |
| 1660_at   | 6.15931  | 7.012446 | 7.162352 | 7.239019 | 7.434307 | 7.029512 | 6.729177 | 6.56398  |
| 1662_at   | 5.222387 | 4.374001 | 4.799887 | 4.630455 | 5.384733 | 4.235518 | 3.612784 | 5.111435 |
| 166336_at | 3.956497 | 4.231588 | 4.097727 | 4.039024 | 4.625383 | 3.662296 | 4.692566 | 4.87735  |
| 166348_at | 1.4624   | 1.024714 | 1.276483 | 1.387154 | 1.980673 | 0.952549 | 1.179768 | 1.05286  |
| 166378_at | 4.078861 | 4.435119 | 4.699877 | 4.94469  | 4.568798 | 4.920239 | 4.887478 | 4.977441 |
| 166379_at | 3.132266 | 3.313526 | 3.928179 | 2.685191 | 4.458413 | 3.569147 | 2.644364 | 4.046343 |
| 1663_at   | 3.424858 | 4.276149 | 5.03449  | 1.257302 | 1.807731 | 4.599047 | 1.743106 | 1.229609 |
| 1665_at   | 7.234048 | 7.569745 | 7.147655 | 7.256374 | 7.46066  | 6.918276 | 6.914523 | 7.959007 |
| 166614_at | 4.682185 | 3.850311 | 4.40161  | 5.046248 | 3.859031 | 3.782148 | 3.184562 | 4.23713  |
| 166647_at | 5.470499 | 5.924518 | 5.492819 | 4.881393 | 5.48623  | 5.084684 | 5.760289 | 5.592018 |
| 166655_at | 1.15318  | 1.254462 | 1.215656 | 1.094677 | 1.447708 | 1.759715 | 1.591282 | 1.123796 |
| 1666_at   | 7.981873 | 8.269947 | 7.856977 | 7.681606 | 7.968682 | 8.230933 | 7.9006   | 7.928525 |
| 166752_at | 1.448169 | 1.874466 | 1.508522 | 1.699596 | 1.174354 | 2.325631 | 1.227826 | 1.391851 |
| 166785_at | 5.073738 | 5.21724  | 4.914025 | 5.248339 | 5.239591 | 5.367681 | 4.624538 | 5.618473 |
| 166793_at | 2.8534   | 2.550484 | 2.37977  | 2.197852 | 2.886187 | 3.288367 | 3.20469  | 2.878728 |
| 166815_at | 4.053692 | 3.113987 | 2.746585 | 2.158317 | 3.412306 | 2.08509  | 2.043273 | 3.706611 |
| 166824_at | 1.553397 | 0.94204  | 1.949325 | 1.266159 | 1.248766 | 1.073513 | 1.073685 | 1.420963 |
| 166863_at | 0.875764 | 1.679782 | 1.055714 | 1.4506   | 2.032423 | 1.831153 | 1.58722  | 1.460606 |
| 1668_at   | 3.391835 | 0.714743 | 7.532087 | 2.439943 | 0.844946 | 1.348689 | 1.582483 | 1.484025 |
| 166929_at | 5.183808 | 4.903444 | 4.452165 | 4.716842 | 5.639605 | 3.928876 | 4.124372 | 5.033478 |
| 166968_at | 4.071046 | 4.679304 | 6.072806 | 5.619562 | 5.085438 | 4.904426 | 5.04877  | 5.613641 |
| 166979_at | 1.565614 | 1.419237 | 2.064059 | 2.52381  | 1.87084  | 2.415823 | 1.900412 | 1.66322  |
| 1669_at   | 1.252201 | 1.994633 | 3.729886 | 1.895005 | 2.074675 | 2.134363 | 1.800505 | 1.797699 |
| 166_at    | 7.93364  | 7.171753 | 7.945365 | 7.463375 | 7.084981 | 8.35122  | 7.805173 | 6.677689 |
| 1670_at   | 0.91287  | 0.615848 | 1.822003 | 1.562173 | 1.246506 | 1.200044 | 1.507751 | 1.580819 |
| 167127_at | 3.139171 | 1.672601 | 1.577027 | 1.562596 | 1.959278 | 1.325481 | 1.430962 | 2.211337 |
| 167153_at | 7.301209 | 7.088387 | 6.820422 | 6.643746 | 7.687748 | 6.535363 | 6.207788 | 7.61014  |
| 1671_at   | 1.853379 | 1.042472 | 1.099305 | 1.294172 | 1.637068 | 0.74391  | 1.294786 | 1.888978 |
| 167227_at | 6.174027 | 6.343906 | 6.887294 | 6.361711 | 6.240338 | 5.985793 | 6.998306 | 6.088707 |
| 1672_at   | 9.305781 | 8.499006 | 7.872349 | 9.310287 | 10.61716 | 8.20356  | 5.007451 | 7.8185   |
| 167359_at | 1.756621 | 1.904109 | 1.688418 | 1.76793  | 2.532372 | 1.614391 | 1.631769 | 2.237942 |
| 1673_at   | 0.779881 | 3.631541 | 1.897483 | 1.234811 | 1.123248 | 1.314816 | 1.187453 | 2.163133 |
| 167410_at | 4.860983 | 3.394353 | 2.316026 | 4.552906 | 4.423815 | 5.336704 | 2.971298 | 3.503046 |
| 167465_at | 5.467959 | 5.594124 | 6.528369 | 7.116487 | 4.33948  | 6.689644 | 6.193366 | 4.655101 |
| 1674_at   | 1.968257 | 2.964036 | 2.256892 | 1.709712 | 2.204382 | 2.778715 | 2.049488 | 3.041318 |
| 167555_at | 4.146666 | 3.72177  | 4.337216 | 3.667809 | 2.743598 | 3.469933 | 2.748325 | 2.844416 |

1675\_at 3.755189 4.489433 3.690548 4.350108 3.697881 4.981895 4.089073 4.15645  
167681\_at 1.426867 1.004971 1.798319 1.615763 2.364508 0.81373 1.602942 1.019154  
167691\_at 6.547616 5.603091 5.589035 5.167236 4.745694 5.569971 5.49937 6.118231  
1676\_at 5.003634 5.017364 4.862512 5.72789 4.631401 4.605876 4.34923 5.240696  
1677\_at 3.530823 2.961744 4.041027 4.017329 2.510476 2.785888 3.734172 3.304824  
167826\_at 1.230251 1.556932 1.559576 1.534081 1.490476 1.19353 1.997894 2.344816  
167838\_at 2.172393 2.081698 1.935047 2.836428 2.314124 2.00644 2.521548 1.882481  
1678\_at 4.784088 4.192404 4.537102 5.114924 5.195599 4.034415 4.760823 3.74428  
167\_at 1.137109 0.713416 1.557373 0.942219 1.307944 1.321577 1.106479 1.724694  
168002\_at 2.140007 2.660095 1.813449 2.881684 2.577628 2.652463 1.894898 2.22762  
168090\_at 1.437851 1.250307 1.303176 1.104019 1.691079 1.060811 1.204235 2.257905  
168374\_at 4.461978 4.461978 4.539565 6.030741 4.885684 3.145111 4.793695 4.472518  
168391\_at 1.432389 1.059434 1.402907 1.296388 2.121903 1.324661 1.244816 1.495681  
168400\_at 1.423995 1.039346 1.539774 1.214481 1.287714 1.265191 1.53227 1.370347  
168417\_at 1.725227 1.455725 1.215575 1.107025 2.081778 1.862779 1.752059 2.114715  
168433\_at 1.374246 0.98963 1.134245 1.089585 1.252828 1.184901 1.721555 1.32369  
168448\_at 1.468078 1.73847 1.429664 1.77348 1.594229 1.508922 1.051371 1.62396  
168451\_at 6.808765 6.534176 7.156738 6.749384 6.068465 6.449775 6.42597 5.656053  
168455\_at 4.116084 4.708868 4.919574 5.089548 4.565618 4.273475 5.114694 4.737382  
168507\_at 1.645817 1.35212 1.612646 1.306009 1.600397 1.551488 1.794972 1.682698  
168537\_at 7.492823 7.734219 7.179266 7.46454 6.683816 8.062095 8.066282 6.492622  
168544\_at 4.556969 4.05911 4.421027 4.222221 4.024277 4.701177 4.350592 3.465799  
168620\_at 1.80797 2.634315 2.214069 3.16364 3.181131 2.979563 2.579364 2.339343  
168667\_at 2.630665 2.7517 3.090392 2.858451 3.004202 2.779625 2.646884 2.766765  
168741\_at 1.365713 1.324006 1.133467 1.168946 1.712216 1.367934 1.384193 1.096698  
1687\_at 1.957537 2.244274 2.692869 2.713938 2.927289 2.997035 2.257617 2.791931  
168850\_at 5.954126 5.471868 5.681276 5.430631 5.393258 5.763577 5.943148 5.244481  
168975\_at 1.308395 1.279961 1.653225 1.059971 1.267694 1.747343 2.383769 1.501105  
169026\_at 1.033489 1.453336 1.315526 1.230634 1.346033 1.037328 1.382887 1.733027  
169044\_at 1.811634 2.089905 1.971854 1.909075 1.894841 1.883179 3.099903 1.677613  
1690\_at 2.792277 2.676401 2.132873 2.281178 2.145177 2.051436 2.19813 2.609066  
169166\_at 1.330612 1.152492 1.262154 1.059051 0.479363 1.018314 1.433066 1.415717  
169200\_at 7.483198 7.615753 7.191424 6.877483 8.261999 6.828353 6.850219 8.050198  
169270\_at 5.028283 5.350076 4.488127 4.125816 4.701699 4.066207 5.198246 3.952392  
169355\_at 1.698475 1.690255 0.850741 1.093686 1.68463 1.078228 1.122782 1.396688  
169436\_at 2.760411 2.064988 2.566673 2.849606 2.001498 2.064988 1.689577 2.552492  
169522\_at 2.900903 2.085166 1.660605 2.299018 1.855825 2.947255 2.611769 2.132837  
169611\_at 5.830168 6.023558 6.46359 5.814286 4.56901 6.360327 6.270675 6.803586  
169693\_at 2.345949 3.384905 2.511801 2.5912 2.86695 3.602286 2.372992 2.999785  
169714\_at 4.220969 4.662306 2.979671 4.596747 4.187154 3.506278 2.82295 3.487439  
169792\_at 4.787395 3.682227 4.821207 4.96971 4.061339 5.971619 3.671864 5.508571  
169834\_at 3.693324 4.161692 2.870452 2.841912 4.651119 2.860635 2.695483 4.465443  
169841\_at 2.59714 1.542774 1.66743 2.074669 2.364024 1.45874 3.407517 2.809551  
169966\_at 1.101544 1.142672 1.289968 0.774347 0.805059 1.162995 1.344841 1.066378  
169981\_at 2.617619 3.218956 2.613376 2.795579 2.953289 2.842955 2.705495 3.05304  
16\_at 6.329211 6.971107 7.226432 6.78951 6.623541 7.006244 7.33452 7.241059  
170062\_at 0.819682 1.134578 0.826673 0.198996 1.953674 1.84191 1.514819 1.712489  
170063\_at 1.44278 1.395221 1.693091 1.337587 1.332404 1.254577 1.205959 2.014267  
170067\_at 2.279393 1.615942 1.078739 1.516801 1.171235 2.058817 1.791634 1.516153  
170082\_at 3.00704 3.429303 3.580146 2.561795 3.302169 3.162984 3.402718 3.745842  
170261\_at 1.341969 1.54202 0.971424 1.162202 1.222238 2.05766 2.042268 2.174407

170302\_at 2.694914 2.588884 2.599202 2.996516 2.62495 2.870942 2.754751 2.61957  
170370\_at 1.739454 1.809176 1.790653 2.711095 2.409274 2.188229 2.316633 1.942413  
170371\_at 2.433395 3.150248 2.645028 2.424103 2.229869 2.694264 2.85042 2.991163  
170384\_at 4.771708 5.208797 4.315322 5.129413 4.80562 4.625064 5.659227 5.031353  
170392\_at 1.835349 1.755931 1.61064 1.584888 2.272115 1.646255 2.544977 2.000943  
170393\_at 1.128232 0.800793 1.565009 1.101841 1.620592 2.542023 0.705247 1.016462  
170394\_at 3.811774 2.590204 2.584544 2.674011 2.663065 3.364641 2.444016 2.573474  
170425\_at 1.3733 1.282213 1.410297 1.511737 1.214931 1.644308 1.295634 1.268004  
170463\_at 4.938652 3.616107 3.899056 4.152238 4.226664 4.418037 4.94313 2.944387  
170482\_at 1.43898 1.302877 1.226884 1.557022 1.438686 2.190602 2.016934 1.247622  
170487\_at 2.124146 2.083615 1.568475 1.566789 1.687927 2.346581 2.155269 2.352181  
170506\_at 6.495176 7.268398 7.384135 7.215897 7.25067 6.988347 7.226753 7.542412  
170572\_at 1.015056 1.873918 1.526459 1.652131 1.375973 1.70119 1.563968 2.555201  
170575\_at 5.837673 6.079071 6.392349 6.315046 6.679657 7.294997 4.473175 5.001402  
170589\_at 2.792635 2.072535 2.354452 2.858919 2.407159 2.403897 2.621434 2.932069  
170591\_at 2.280636 3.382309 3.217799 2.732518 3.272962 2.514669 3.005462 2.946364  
170622\_at 6.030578 5.627753 5.380783 5.33549 5.472037 5.565663 5.684537 4.978962  
170626\_at 1.215091 1.363723 2.869285 1.549699 2.698344 1.936732 1.937155 1.834871  
170627\_at 1.211651 0.921817 0.90788 1.149492 1.331064 1.720144 3.178896 1.094586  
170679\_at 2.462838 2.571073 2.636247 2.080631 2.92243 2.654229 2.956428 2.390208  
170680\_at 1.87376 2.404679 2.505523 2.482791 2.799121 2.448846 1.897924 2.232829  
170685\_at 4.683171 5.665624 3.991025 4.019625 5.022381 4.654086 3.68397 5.189157  
170689\_at 3.409705 2.382875 1.972641 2.858655 2.820188 2.900304 2.710634 3.481204  
170690\_at 3.164512 2.608488 1.703977 4.207799 2.879053 4.84169 3.124606 3.31996  
170691\_at 1.593754 1.722499 1.548163 2.219224 1.672806 1.685196 1.943928 1.935161  
170692\_at 1.436949 2.318632 1.137412 1.264148 2.234381 3.126328 1.783705 1.520577  
170712\_at 1.959181 1.70592 1.204332 0.963958 1.166534 1.268949 1.353686 1.304456  
170825\_at 2.894489 3.115745 3.478764 2.193628 3.383758 2.849699 3.837797 3.13385  
170850\_at 1.973903 1.825316 1.783038 1.872096 2.026397 1.639255 2.084018 2.18695  
170954\_at 6.491222 6.19603 6.128981 6.419457 6.180961 6.00986 5.82256 5.836742  
170958\_at 4.06368 1.403074 2.903463 3.709066 4.612382 1.393545 1.63458 5.110553  
170959\_at 4.01877 3.956022 4.556698 4.364181 4.414501 3.679862 3.402656 3.731345  
170960\_at 4.941878 5.426904 3.730075 5.517578 2.650339 3.629032 4.456665 3.811136  
170961\_at 1.180437 1.924686 1.341227 1.608245 1.82018 1.395061 1.538267 1.963334  
171017\_at 6.916588 7.055295 7.000658 6.377354 6.561086 6.977535 6.575092 6.589582  
171019\_at 4.584202 5.266448 5.858262 5.025457 4.491739 5.336186 5.666565 5.866235  
171022\_at 2.838896 2.892669 2.982176 2.100736 1.94767 2.947322 1.97757 2.638539  
171023\_at 4.161231 4.124602 4.86397 4.171016 3.944834 4.693594 4.09947 3.431928  
171024\_at 4.085728 4.648247 4.074954 4.893909 4.681276 3.394726 3.806641 4.639534  
171169\_at 1.663796 1.843925 1.507155 1.736598 1.382814 2.055794 2.037511 1.637538  
171177\_at 2.029926 1.535118 1.800377 2.153246 2.225611 1.571889 1.298346 2.953838  
171220\_at 3.664931 5.407225 3.982288 4.763898 2.703393 5.243636 4.381979 4.074631  
171389\_at 1.929063 1.66347 1.891806 2.232752 1.387912 1.19152 1.305349 1.8674  
171391\_at 3.567001 2.347459 2.992672 3.841629 2.978884 2.680891 4.319428 3.56565  
171392\_at 3.037052 4.187826 3.938685 2.111737 1.152904 2.763263 2.478474 3.42213  
171423\_at 4.359665 6.090849 2.16923 6.028329 7.286974 5.794378 6.255997 4.328426  
171425\_at 3.717945 4.214609 4.365514 4.053209 3.795563 4.277273 3.892528 3.982461  
171482\_at 1.489657 1.437136 1.066311 1.270961 0.980806 1.38722 1.151457 2.060629  
171483\_at 1.854851 1.288918 1.06582 1.46159 0.895072 0.793204 2.370964 1.136943  
171484\_at 3.21795 3.355887 3.959626 3.212139 2.290421 4.033544 3.562864 2.848788  
171546\_at 6.507522 6.231431 6.38862 6.11127 6.497032 6.311643 6.521126 6.884228

|           |          |          |          |          |          |          |          |          |
|-----------|----------|----------|----------|----------|----------|----------|----------|----------|
| 171558_at | 3.352743 | 3.916036 | 3.499334 | 3.129924 | 2.939366 | 3.757553 | 3.60034  | 4.29518  |
| 171568_at | 4.83072  | 3.466379 | 3.875838 | 4.666666 | 4.957631 | 4.8698   | 4.283532 | 4.714038 |
| 171586_at | 5.611918 | 4.919985 | 4.609921 | 5.082964 | 4.713652 | 4.160857 | 4.681177 | 4.863928 |
| 1716_at   | 6.546163 | 6.812575 | 6.682602 | 6.261814 | 6.559555 | 6.3502   | 6.438255 | 6.673359 |
| 1717_at   | 6.104461 | 5.949329 | 5.789394 | 5.01882  | 5.045443 | 5.483722 | 6.388835 | 6.089825 |
| 1718_at   | 5.814128 | 5.467982 | 6.341238 | 6.815888 | 6.235896 | 5.07174  | 7.142883 | 6.227872 |
| 1719_at   | 3.584363 | 3.411298 | 3.972687 | 2.738283 | 3.224865 | 2.654991 | 2.518981 | 3.416965 |
| 1720_at   | 1.875652 | 1.389337 | 1.183506 | 1.528009 | 1.30449  | 1.703776 | 1.178989 | 1.848811 |
| 1723_at   | 4.419184 | 3.096249 | 4.298457 | 3.205437 | 3.67225  | 3.535698 | 3.106886 | 3.429078 |
| 1725_at   | 6.569683 | 6.41707  | 6.140741 | 5.875411 | 6.742742 | 6.793381 | 6.160091 | 6.334876 |
| 1727_at   | 8.964678 | 8.707461 | 9.078618 | 9.021974 | 8.769211 | 8.777167 | 9.377071 | 7.705019 |
| 1728_at   | 7.993521 | 7.728369 | 8.225546 | 8.319309 | 7.644696 | 7.619526 | 7.996058 | 8.082401 |
| 1729_at   | 6.647464 | 6.525347 | 6.351317 | 7.409013 | 6.815888 | 6.792427 | 6.210126 | 7.076396 |
| 172_at    | 3.162549 | 3.781771 | 3.737402 | 3.437827 | 3.83243  | 3.613243 | 3.589082 | 2.824767 |
| 1730_at   | 5.596711 | 6.272327 | 5.58566  | 5.835246 | 5.91102  | 5.761807 | 5.647206 | 5.532753 |
| 1731_at   | 3.742876 | 3.466577 | 3.693488 | 4.840766 | 2.123492 | 3.723614 | 3.137209 | 3.675021 |
| 1733_at   | 5.911116 | 3.496176 | 4.249385 | 3.012749 | 5.919313 | 5.152826 | 2.990971 | 6.023224 |
| 1734_at   | 1.361907 | 1.268247 | 1.401686 | 1.228357 | 1.6444   | 1.521523 | 1.696592 | 1.387823 |
| 1735_at   | 1.661011 | 2.677988 | 1.842246 | 2.206345 | 1.858387 | 2.460765 | 2.352357 | 2.178738 |
| 1736_at   | 4.970735 | 5.537764 | 5.090189 | 4.926884 | 5.41041  | 4.80223  | 5.295647 | 5.091769 |
| 1737_at   | 6.84542  | 7.00347  | 6.570504 | 6.603668 | 6.943016 | 6.540753 | 6.045638 | 6.823924 |
| 1738_at   | 7.652912 | 7.078435 | 6.816143 | 7.458578 | 7.760482 | 7.279984 | 7.215621 | 7.864528 |
| 1739_at   | 6.3564   | 6.562497 | 5.958219 | 6.031768 | 6.231056 | 6.079262 | 5.902204 | 6.091661 |
| 173_at    | 5.734204 | 4.719487 | 4.824028 | 2.196343 | 6.130482 | 5.368304 | 2.614202 | 6.235896 |
| 1740_at   | 4.830683 | 5.065173 | 4.908332 | 4.416924 | 4.807452 | 4.784325 | 4.795076 | 5.129566 |
| 1741_at   | 3.64236  | 3.792537 | 4.029146 | 4.232235 | 4.022559 | 3.290645 | 3.260854 | 4.315824 |
| 1742_at   | 3.93802  | 4.163899 | 3.737581 | 4.248761 | 4.651431 | 3.079625 | 4.259274 | 3.143889 |
| 1743_at   | 5.763345 | 5.943683 | 5.876826 | 6.076149 | 6.388651 | 5.570585 | 5.30034  | 5.29733  |
| 1745_at   | 2.520782 | 2.981236 | 2.872739 | 2.643366 | 3.023569 | 3.643218 | 3.149988 | 2.91979  |
| 1746_at   | 1.882917 | 2.350085 | 2.480951 | 2.580672 | 2.295091 | 2.313361 | 2.814227 | 2.142936 |
| 1747_at   | 1.963883 | 1.905217 | 2.232161 | 1.895545 | 1.452268 | 2.158121 | 1.594377 | 1.49118  |
| 1748_at   | 2.282651 | 2.758389 | 2.156925 | 2.736071 | 2.758748 | 2.307604 | 2.683377 | 2.084675 |
| 1749_at   | 1.062943 | 1.83647  | 2.058858 | 3.252826 | 1.897255 | 2.536478 | 1.963541 | 3.276914 |
| 174_at    | 1.800783 | 2.427811 | 2.154398 | 2.100579 | 1.548787 | 2.011851 | 1.80733  | 2.62609  |
| 1750_at   | 2.111184 | 2.831611 | 3.363221 | 2.959518 | 2.268068 | 2.433209 | 2.620675 | 2.623705 |
| 1755_at   | 1.692317 | 1.444094 | 1.726419 | 2.009354 | 2.07352  | 1.614163 | 1.091069 | 1.423101 |
| 1756_at   | 2.206642 | 2.275955 | 3.162329 | 2.297054 | 2.297637 | 2.612903 | 3.318695 | 2.184133 |
| 1757_at   | 3.57459  | 2.254859 | 2.934808 | 2.338542 | 3.353537 | 2.561312 | 2.373514 | 3.521024 |
| 1758_at   | 1.249387 | 0.887681 | 1.223967 | 1.247743 | 1.125713 | 0.837049 | 0.886471 | 0.679741 |
| 1759_at   | 4.33774  | 3.69149  | 4.205458 | 3.555376 | 3.657895 | 4.387695 | 4.37633  | 2.571924 |
| 175_at    | 5.153279 | 5.623239 | 5.398989 | 4.84384  | 5.824158 | 5.89253  | 6.186585 | 5.894712 |
| 1760_at   | 3.218665 | 2.341746 | 2.526396 | 3.410506 | 2.61663  | 3.580098 | 4.017146 | 2.436056 |
| 1761_at   | 2.110994 | 1.994317 | 2.166663 | 1.886744 | 2.375369 | 1.788531 | 3.112353 | 2.496545 |
| 1762_at   | 5.559078 | 5.475479 | 5.260042 | 6.233018 | 4.812411 | 5.772605 | 5.54461  | 4.688618 |
| 1763_at   | 1.71792  | 3.151319 | 2.135215 | 2.288768 | 1.646061 | 1.803658 | 1.055401 | 2.203633 |
| 1767_at   | 2.076573 | 1.836914 | 1.951642 | 1.850087 | 1.993967 | 1.779939 | 1.6762   | 2.385334 |
| 1768_at   | 2.061188 | 1.631743 | 1.616085 | 1.273708 | 1.835766 | 1.745342 | 1.72699  | 1.683711 |
| 1769_at   | 1.514841 | 1.51002  | 1.687109 | 1.233919 | 1.50337  | 1.415241 | 1.547414 | 1.578674 |
| 176_at    | 3.026194 | 1.89671  | 1.654642 | 1.530173 | 1.896761 | 1.958522 | 1.252979 | 1.050329 |
| 1770_at   | 2.607963 | 2.377682 | 2.261271 | 2.206705 | 2.297426 | 2.072865 | 2.691883 | 2.588066 |
| 1773_at   | 2.862832 | 3.59121  | 3.239387 | 3.460049 | 4.587558 | 2.922966 | 3.283868 | 2.551388 |

|         |          |          |          |          |          |          |          |          |
|---------|----------|----------|----------|----------|----------|----------|----------|----------|
| 1774_at | 4.61291  | 4.479965 | 4.399222 | 4.836305 | 4.391705 | 4.980985 | 5.383347 | 4.260698 |
| 1775_at | 3.235012 | 3.17148  | 2.914311 | 3.64484  | 3.02367  | 3.218848 | 2.432169 | 2.580975 |
| 1776_at | 4.276115 | 4.707163 | 4.551868 | 3.853822 | 3.231144 | 5.959438 | 6.067764 | 3.881705 |
| 1777_at | 5.685054 | 5.692497 | 5.586645 | 5.405799 | 4.383387 | 6.420551 | 5.822505 | 4.358766 |
| 1778_at | 6.470348 | 7.442065 | 7.592311 | 7.594833 | 7.602375 | 7.438762 | 7.55383  | 7.685267 |
| 177_at  | 3.627262 | 3.392872 | 2.853281 | 3.252022 | 2.764125 | 2.844163 | 2.192877 | 2.417503 |
| 1780_at | 4.960436 | 3.686124 | 5.641369 | 5.180439 | 3.654122 | 4.705344 | 4.508109 | 3.916572 |
| 1781_at | 6.353924 | 6.503713 | 6.3832   | 6.157196 | 6.423564 | 6.071347 | 6.55045  | 6.170102 |
| 1783_at | 7.299451 | 7.982784 | 7.858585 | 7.973491 | 7.495952 | 7.839491 | 8.02821  | 7.357541 |
| 1785_at | 6.663971 | 6.092599 | 6.832907 | 6.435196 | 6.27907  | 6.687471 | 6.967426 | 6.132218 |
| 1786_at | 5.17593  | 4.84942  | 4.944726 | 5.197031 | 5.585549 | 5.694066 | 5.242912 | 5.207957 |
| 1787_at | 3.732101 | 3.630183 | 3.769249 | 3.863887 | 3.211608 | 3.817743 | 3.547093 | 3.8906   |
| 1788_at | 3.611464 | 3.475555 | 4.622179 | 3.323183 | 3.591858 | 3.469875 | 3.413372 | 3.75093  |
| 1789_at | 3.106014 | 2.500944 | 2.377793 | 2.811998 | 2.340153 | 2.660298 | 2.371871 | 2.744475 |
| 178_at  | 4.938461 | 5.036078 | 4.759275 | 5.187318 | 5.496532 | 4.69067  | 4.295737 | 5.789929 |
| 1791_at | 2.436603 | 1.873649 | 2.071999 | 1.7295   | 1.878422 | 1.9834   | 1.912555 | 1.718674 |
| 1793_at | 6.815003 | 7.179547 | 7.340064 | 7.34584  | 7.030718 | 7.199147 | 7.326885 | 7.556737 |
| 1794_at | 2.719718 | 2.681477 | 2.281512 | 3.221938 | 2.759419 | 2.945781 | 4.135931 | 2.52606  |
| 1795_at | 2.751477 | 2.240065 | 2.906843 | 2.411865 | 2.739347 | 3.547137 | 3.119438 | 2.180041 |
| 1796_at | 3.382309 | 4.619186 | 3.321788 | 2.992499 | 4.111745 | 2.579872 | 2.997848 | 2.390256 |
| 1797_at | 4.148177 | 4.525909 | 4.108191 | 4.37933  | 3.439095 | 3.514407 | 3.853447 | 3.905577 |
| 1798_at | 6.659558 | 6.710207 | 6.959464 | 7.274752 | 6.603358 | 6.844505 | 6.945329 | 7.098784 |
| 1800_at | 5.153351 | 4.796961 | 4.28204  | 3.592312 | 4.847361 | 4.952695 | 3.657873 | 2.874506 |
| 1801_at | 4.859447 | 5.12951  | 5.410556 | 4.718971 | 5.337777 | 4.615028 | 4.347557 | 4.630613 |
| 1802_at | 2.061217 | 2.890071 | 3.109188 | 2.662405 | 2.634823 | 2.711385 | 2.350891 | 2.656851 |
| 1803_at | 6.878527 | 6.10259  | 6.105065 | 7.920377 | 8.692731 | 6.873492 | 6.624125 | 6.191921 |
| 1804_at | 7.500148 | 7.587336 | 8.10467  | 7.306382 | 6.660552 | 7.902478 | 8.080237 | 7.449392 |
| 1805_at | 1.329265 | 1.074876 | 1.13822  | 1.788969 | 2.051848 | 2.844001 | 1.377419 | 2.000479 |
| 1806_at | 6.101198 | 6.44005  | 5.759177 | 6.68489  | 6.280578 | 5.814082 | 6.596795 | 6.538418 |
| 1807_at | 6.600433 | 5.555652 | 5.740149 | 3.094243 | 7.761463 | 5.753434 | 3.842476 | 6.289569 |
| 1808_at | 7.792866 | 7.999003 | 7.911129 | 8.211132 | 8.538604 | 8.102651 | 8.473335 | 7.841222 |
| 1809_at | 5.657511 | 6.363305 | 5.970651 | 5.810987 | 6.083057 | 5.696567 | 6.162127 | 6.536087 |
| 1810_at | 7.263993 | 7.205126 | 8.002531 | 7.76161  | 6.932642 | 7.786954 | 7.282907 | 7.744133 |
| 1811_at | 1.365238 | 1.145708 | 1.867928 | 0.633211 | 1.216562 | 0.945697 | 1.080523 | 1.24612  |
| 1812_at | 1.340177 | 1.149915 | 1.368571 | 1.364604 | 1.366165 | 1.743729 | 2.191204 | 1.593248 |
| 1813_at | 2.862834 | 2.485113 | 2.003563 | 2.908476 | 3.046451 | 2.14347  | 2.54731  | 2.153571 |
| 1814_at | 1.41339  | 2.302897 | 2.126242 | 2.267807 | 2.461641 | 1.99323  | 2.734497 | 2.011587 |
| 1815_at | 4.483201 | 4.117061 | 4.074088 | 3.466017 | 1.922494 | 3.906433 | 1.326411 | 4.742572 |
| 1816_at | 2.575092 | 2.722912 | 3.466474 | 2.539434 | 2.693674 | 3.272837 | 3.184164 | 3.188026 |
| 1819_at | 5.858686 | 5.02804  | 4.894584 | 5.866805 | 5.254561 | 6.245541 | 6.037499 | 5.112667 |
| 181_at  | 1.516516 | 2.035387 | 1.542186 | 1.769538 | 1.507378 | 1.88335  | 1.662799 | 1.673446 |
| 1820_at | 4.053739 | 4.119014 | 4.107956 | 4.18316  | 3.17943  | 3.228683 | 3.462876 | 3.49585  |
| 1821_at | 1.795689 | 2.105991 | 1.750345 | 2.462526 | 1.80627  | 1.357071 | 2.266795 | 1.2155   |
| 1822_at | 6.463074 | 6.51651  | 7.138661 | 7.169279 | 6.352416 | 6.880654 | 6.495373 | 5.928168 |
| 1823_at | 2.389833 | 1.763713 | 1.634921 | 2.037064 | 1.644181 | 1.908498 | 2.035683 | 2.0624   |
| 1824_at | 6.783912 | 6.899445 | 7.508507 | 6.903977 | 6.905652 | 6.722911 | 7.029848 | 7.246224 |
| 1825_at | 1.417386 | 1.056335 | 1.391451 | 1.43972  | 1.140173 | 1.889328 | 2.022849 | 1.453333 |
| 1826_at | 2.339162 | 1.877766 | 1.59077  | 1.791443 | 1.467934 | 1.523428 | 2.171508 | 1.857733 |
| 1827_at | 4.34849  | 4.817265 | 4.408824 | 4.006219 | 3.703573 | 3.714263 | 4.521591 | 3.778993 |
| 1828_at | 1.567053 | 1.076706 | 0.974653 | 0.994359 | 1.278734 | 1.459487 | 1.255146 | 1.230228 |
| 1829_at | 6.457453 | 6.586837 | 6.449702 | 6.608345 | 6.732285 | 6.489581 | 6.731045 | 7.24843  |

|         |          |          |          |          |          |          |          |          |
|---------|----------|----------|----------|----------|----------|----------|----------|----------|
| 182_at  | 4.942262 | 5.341383 | 4.915121 | 4.68181  | 5.795619 | 5.527261 | 5.925987 | 5.086069 |
| 1830_at | 1.252493 | 1.678993 | 1.205843 | 0.950895 | 1.21911  | 1.213244 | 1.619336 | 1.393525 |
| 1831_at | 6.0987   | 6.423258 | 5.866781 | 6.235307 | 5.593114 | 5.935508 | 6.052611 | 5.595156 |
| 1832_at | 5.478522 | 5.684176 | 5.00269  | 5.484184 | 5.789363 | 6.516355 | 4.071041 | 5.856587 |
| 1833_at | 1.269617 | 1.553329 | 1.189875 | 1.346938 | 1.78668  | 1.646097 | 1.406327 | 1.618378 |
| 1834_at | 1.659584 | 1.496805 | 1.416881 | 1.653767 | 1.852693 | 1.441948 | 1.333075 | 2.707123 |
| 1836_at | 5.357377 | 4.857244 | 5.673989 | 5.580045 | 5.475431 | 5.780212 | 6.030609 | 5.337225 |
| 1837_at | 4.689928 | 4.458813 | 4.692711 | 4.534778 | 3.919605 | 3.842861 | 4.785467 | 5.944323 |
| 1838_at | 5.014441 | 4.422748 | 4.300082 | 5.431176 | 4.685917 | 4.828381 | 4.921871 | 4.179907 |
| 1839_at | 4.856022 | 5.981594 | 6.000907 | 5.946167 | 5.669757 | 5.691076 | 6.638973 | 5.610597 |
| 183_at  | 4.978206 | 4.438267 | 3.240404 | 4.125828 | 5.820208 | 3.961927 | 2.912899 | 4.752761 |
| 1840_at | 3.719169 | 4.290494 | 3.337925 | 3.772879 | 2.774742 | 4.024355 | 3.070778 | 3.171197 |
| 1841_at | 5.64647  | 5.327952 | 6.27203  | 4.803546 | 4.804372 | 4.188112 | 5.28645  | 4.447824 |
| 1842_at | 6.034297 | 6.496501 | 6.565828 | 6.829041 | 6.281593 | 6.28422  | 6.925373 | 6.306145 |
| 1843_at | 5.681529 | 6.37657  | 5.442031 | 5.933101 | 6.243297 | 5.989221 | 6.152085 | 5.856414 |
| 1844_at | 4.189727 | 4.218592 | 4.106157 | 4.248858 | 3.858032 | 4.10672  | 3.693083 | 4.208532 |
| 1845_at | 7.844963 | 7.73677  | 8.374467 | 8.482088 | 6.886906 | 8.090578 | 8.629065 | 7.31009  |
| 1846_at | 2.187059 | 1.574366 | 2.325237 | 2.13932  | 2.913489 | 2.160252 | 2.723777 | 2.917914 |
| 1847_at | 3.463604 | 2.685129 | 2.863722 | 3.680985 | 2.538214 | 2.563218 | 3.931713 | 3.494907 |
| 1848_at | 5.861958 | 5.328679 | 6.01644  | 5.585795 | 5.814488 | 5.593071 | 6.060159 | 4.192419 |
| 1849_at | 8.031985 | 8.171327 | 8.618075 | 8.56052  | 7.807815 | 8.15425  | 8.548305 | 7.542749 |
| 1850_at | 4.22036  | 3.448037 | 2.652698 | 2.860719 | 3.47298  | 3.385367 | 2.735892 | 3.780104 |
| 1852_at | 3.965666 | 3.385255 | 3.90078  | 2.917439 | 5.476592 | 2.544538 | 3.371783 | 4.518649 |
| 1854_at | 2.300789 | 4.145002 | 2.257967 | 2.76425  | 1.977026 | 1.334116 | 3.77925  | 3.301863 |
| 1855_at | 3.829064 | 4.018362 | 3.979944 | 4.214281 | 4.612639 | 4.801733 | 4.251346 | 4.055721 |
| 1856_at | 3.704627 | 3.296797 | 4.382533 | 3.48599  | 4.547673 | 4.277681 | 3.117823 | 3.146973 |
| 1857_at | 7.024512 | 6.630806 | 6.369403 | 6.270357 | 6.133169 | 6.767136 | 6.365079 | 6.014327 |
| 1859_at | 6.498302 | 6.299236 | 6.658653 | 6.258194 | 6.050824 | 5.937039 | 6.216343 | 6.487689 |
| 185_at  | 7.437477 | 8.105855 | 7.391366 | 7.774176 | 8.067521 | 7.715986 | 6.998309 | 7.566536 |
| 1861_at | 7.598006 | 7.280559 | 7.914041 | 6.895774 | 7.654372 | 6.885605 | 7.41939  | 7.313837 |
| 1869_at | 1.91082  | 1.837863 | 2.37743  | 3.003245 | 1.751997 | 1.384485 | 1.39654  | 1.579618 |
| 186_at  | 1.069688 | 1.079342 | 1.406059 | 1.879399 | 1.304323 | 1.39576  | 1.07291  | 1.307642 |
| 1870_at | 2.470368 | 2.627892 | 2.474123 | 3.192744 | 2.177832 | 2.747391 | 2.806051 | 1.995868 |
| 1871_at | 3.578536 | 3.177695 | 4.219478 | 3.546529 | 3.28393  | 3.808955 | 3.654572 | 3.0608   |
| 1874_at | 6.187692 | 5.496146 | 5.23923  | 4.943799 | 4.48925  | 5.340434 | 5.572517 | 4.338362 |
| 1875_at | 4.646888 | 4.650614 | 4.233437 | 3.848487 | 3.440278 | 4.087798 | 3.448348 | 4.961109 |
| 1876_at | 4.426225 | 3.06819  | 4.569483 | 4.305228 | 3.407466 | 2.350475 | 4.451133 | 3.034646 |
| 1877_at | 3.582143 | 3.529543 | 2.684316 | 2.600438 | 2.493286 | 3.124644 | 3.544042 | 2.842778 |
| 1879_at | 7.020039 | 6.318486 | 7.163998 | 7.282316 | 7.771922 | 6.626251 | 6.936898 | 6.742556 |
| 187_at  | 8.148231 | 7.824373 | 8.038318 | 8.976075 | 8.333457 | 8.264484 | 8.380015 | 7.342962 |
| 1880_at | 2.541046 | 1.930041 | 2.213651 | 3.72555  | 1.773256 | 2.905885 | 2.444252 | 2.267976 |
| 1889_at | 7.172941 | 7.00249  | 7.174852 | 7.53884  | 7.466264 | 7.971731 | 7.307224 | 5.858707 |
| 1890_at | 5.43694  | 4.667277 | 4.784148 | 4.422557 | 4.080817 | 4.69693  | 4.592144 | 3.939647 |
| 1891_at | 7.601429 | 7.297603 | 7.785186 | 7.589259 | 7.94072  | 8.109489 | 7.698982 | 7.120702 |
| 1892_at | 7.475944 | 6.699244 | 7.051894 | 6.541538 | 7.198391 | 7.931432 | 5.814894 | 6.393459 |
| 1893_at | 10.01962 | 9.339401 | 10.94073 | 10.43773 | 10.08827 | 9.808741 | 10.45984 | 9.329399 |
| 1894_at | 2.867222 | 4.204579 | 3.746067 | 4.262797 | 3.525198 | 3.461823 | 3.423853 | 4.189059 |
| 1896_at | 2.944586 | 2.578023 | 2.793605 | 2.178486 | 2.517886 | 2.816776 | 2.279342 | 2.646185 |
| 189_at  | 2.02835  | 2.580949 | 2.575829 | 2.811984 | 2.058383 | 2.766639 | 2.026703 | 3.062264 |
| 18_at   | 5.943916 | 5.073614 | 5.487385 | 4.345699 | 6.271476 | 5.191831 | 4.050548 | 4.858039 |
| 1901_at | 7.283124 | 7.031478 | 7.139915 | 7.683895 | 7.052382 | 7.476332 | 7.330264 | 5.391576 |

|           |          |          |          |          |          |          |          |          |
|-----------|----------|----------|----------|----------|----------|----------|----------|----------|
| 1902_at   | 2.652767 | 2.435668 | 2.691799 | 4.951478 | 4.38922  | 4.077901 | 2.726826 | 2.601131 |
| 1903_at   | 6.761531 | 5.270085 | 6.632447 | 6.01703  | 6.647766 | 7.012359 | 6.215526 | 4.848746 |
| 1906_at   | 3.673478 | 2.727731 | 2.458199 | 3.092453 | 3.755712 | 4.160885 | 4.253395 | 2.812655 |
| 1907_at   | 2.003084 | 2.436757 | 2.290446 | 2.078222 | 2.680062 | 1.723177 | 2.115449 | 2.607169 |
| 1908_at   | 3.145433 | 3.530317 | 3.244157 | 3.484746 | 3.255975 | 3.396488 | 3.572067 | 3.126673 |
| 1909_at   | 4.747476 | 5.091711 | 4.168644 | 5.135331 | 5.401479 | 4.738359 | 4.58014  | 4.671835 |
| 190_at    | 1.945124 | 2.568945 | 2.020004 | 1.897546 | 2.375261 | 1.8611   | 1.728783 | 2.660557 |
| 1910_at   | 6.062427 | 7.506241 | 7.588044 | 6.386073 | 6.51995  | 7.342113 | 7.079569 | 6.158343 |
| 1911_at   | 7.74191  | 7.683542 | 6.682366 | 7.443227 | 6.978842 | 7.322944 | 6.584999 | 5.068763 |
| 1912_at   | 3.666048 | 3.148091 | 3.630659 | 3.094514 | 2.980496 | 3.82601  | 3.477336 | 2.686966 |
| 191585_at | 2.21108  | 1.460184 | 1.010167 | 1.08894  | 1.119537 | 1.612548 | 1.194413 | 1.534174 |
| 1917_at   | 3.148101 | 3.576566 | 3.224128 | 2.787383 | 3.576444 | 3.465672 | 3.233308 | 3.651608 |
| 191_at    | 5.913421 | 6.066693 | 5.553003 | 5.188631 | 5.151553 | 5.272728 | 4.780281 | 5.300021 |
| 192111_at | 4.029489 | 4.028627 | 3.70275  | 4.200683 | 5.055272 | 4.7979   | 3.858773 | 2.794948 |
| 192134_at | 2.307548 | 2.244026 | 2.498012 | 2.213427 | 2.19146  | 2.679574 | 2.591034 | 3.071942 |
| 192286_at | 9.140762 | 8.375739 | 8.7317   | 8.858801 | 8.701785 | 8.729597 | 8.76378  | 7.551524 |
| 192666_at | 1.246317 | 1.597426 | 0.794085 | 1.490566 | 1.419721 | 1.155543 | 0.67693  | 1.160585 |
| 192668_at | 5.909816 | 4.777074 | 3.958634 | 5.117498 | 4.672958 | 5.336357 | 3.787922 | 3.757706 |
| 192669_at | 4.994323 | 5.468663 | 4.424064 | 4.583517 | 3.689193 | 4.940652 | 5.494424 | 5.442245 |
| 192670_at | 4.436328 | 4.87062  | 4.551881 | 4.722132 | 5.083169 | 5.306242 | 4.859539 | 4.974356 |
| 192683_at | 4.543529 | 3.850597 | 3.101651 | 2.914349 | 4.970904 | 4.771073 | 3.779981 | 4.07009  |
| 1933_at   | 5.826921 | 5.831259 | 6.838903 | 5.648607 | 6.25345  | 6.702055 | 5.579825 | 6.712917 |
| 193629_at | 1.452296 | 1.661971 | 2.188395 | 1.753081 | 2.203382 | 0.975048 | 1.813656 | 1.104479 |
| 1936_at   | 3.219596 | 2.535343 | 2.415082 | 2.220569 | 2.087478 | 1.956903 | 2.156188 | 2.51741  |
| 1937_at   | 10.41479 | 9.732947 | 9.223454 | 10.30874 | 10.01028 | 10.25645 | 9.533403 | 9.760731 |
| 1938_at   | 9.435592 | 9.134757 | 9.215929 | 9.148156 | 8.938204 | 9.146867 | 8.800172 | 8.673898 |
| 1939_at   | 6.45656  | 5.96547  | 5.940992 | 5.321697 | 5.952098 | 6.279098 | 6.071233 | 6.555789 |
| 1942_at   | 6.388766 | 5.578665 | 6.112005 | 6.440496 | 4.935711 | 5.978044 | 5.888296 | 6.168796 |
| 1943_at   | 2.761432 | 2.180802 | 2.141368 | 1.9971   | 2.20889  | 2.434534 | 3.158134 | 2.208844 |
| 1944_at   | 1.972567 | 1.746699 | 1.702555 | 1.801343 | 1.533694 | 1.664147 | 2.386202 | 1.227357 |
| 1945_at   | 2.366232 | 4.230714 | 3.195751 | 2.765891 | 3.650386 | 2.17517  | 3.417537 | 2.781502 |
| 1946_at   | 4.690125 | 3.702989 | 4.459119 | 5.514221 | 5.532817 | 6.089696 | 4.516505 | 5.707077 |
| 1947_at   | 7.915868 | 7.901594 | 8.033417 | 7.768887 | 7.243005 | 7.320582 | 8.05253  | 7.125828 |
| 1948_at   | 7.858996 | 8.001843 | 7.600261 | 7.903895 | 7.452598 | 7.967703 | 7.737778 | 7.259131 |
| 1949_at   | 3.226603 | 3.385563 | 3.626912 | 3.982173 | 3.270346 | 4.439889 | 4.117403 | 3.264012 |
| 1950_at   | 3.85921  | 3.464135 | 2.110579 | 2.248327 | 6.494826 | 2.367689 | 3.668218 | 4.491263 |
| 1951_at   | 1.900548 | 1.858805 | 2.587728 | 2.281259 | 2.337051 | 1.882271 | 2.441094 | 2.658743 |
| 1952_at   | 5.069971 | 5.141723 | 5.941132 | 5.251239 | 4.561759 | 5.720032 | 5.871315 | 4.691291 |
| 1953_at   | 2.538642 | 2.676203 | 2.248471 | 2.492467 | 2.011219 | 1.834497 | 1.883253 | 2.27503  |
| 1954_at   | 3.84064  | 3.772737 | 3.751207 | 3.443112 | 3.676419 | 3.735401 | 3.89683  | 3.252053 |
| 1955_at   | 7.908085 | 7.381764 | 8.441032 | 7.844552 | 7.467248 | 7.997982 | 8.732513 | 7.628567 |
| 1956_at   | 5.727387 | 5.619843 | 6.158746 | 5.918698 | 6.458158 | 6.139813 | 6.515311 | 6.019053 |
| 195814_at | 1.948068 | 1.809667 | 1.268541 | 1.819073 | 1.829124 | 1.706715 | 2.408458 | 1.890911 |
| 195827_at | 4.588717 | 5.706834 | 4.349482 | 4.880162 | 5.067782 | 3.338175 | 4.98223  | 5.350494 |
| 195828_at | 2.865735 | 2.339274 | 2.576671 | 3.594381 | 2.54278  | 2.882685 | 2.230754 | 3.921535 |
| 1958_at   | 5.838837 | 7.740969 | 6.166566 | 6.94191  | 7.722723 | 7.611474 | 7.643094 | 6.395465 |
| 195977_at | 1.809549 | 1.843946 | 2.123796 | 1.943849 | 1.862083 | 2.290733 | 1.680747 | 3.164108 |
| 1959_at   | 3.431395 | 3.419449 | 3.938761 | 2.684953 | 1.712915 | 3.225493 | 4.025234 | 4.698788 |
| 196047_at | 5.20885  | 4.437621 | 4.411452 | 3.670676 | 5.213421 | 5.724582 | 3.446345 | 4.272712 |
| 196051_at | 3.958285 | 3.259819 | 3.292337 | 3.065712 | 2.846721 | 3.803763 | 2.703711 | 2.89629  |
| 196074_at | 2.876261 | 3.420839 | 3.397378 | 3.599298 | 2.784162 | 4.295668 | 4.65808  | 3.888887 |

|           |          |          |          |          |          |          |          |          |
|-----------|----------|----------|----------|----------|----------|----------|----------|----------|
| 1960_at   | 3.000006 | 4.571603 | 3.236575 | 3.422936 | 3.756732 | 3.103851 | 4.173492 | 4.261296 |
| 1961_at   | 2.077181 | 2.253877 | 2.155275 | 2.203799 | 1.929558 | 2.050696 | 2.293601 | 2.188706 |
| 196264_at | 2.775769 | 3.068381 | 3.413255 | 2.410948 | 2.666516 | 2.268875 | 2.645954 | 3.227943 |
| 196294_at | 2.509927 | 2.238085 | 3.192376 | 2.337658 | 1.073085 | 1.802114 | 2.977063 | 1.307285 |
| 1962_at   | 5.384384 | 5.003781 | 5.713425 | 4.748595 | 7.080761 | 5.075656 | 4.982153 | 5.190208 |
| 196335_at | 0.777488 | 2.065662 | 2.004028 | 2.616999 | 1.63002  | 2.018788 | 1.201935 | 1.377704 |
| 196374_at | 2.061468 | 2.758377 | 1.981245 | 2.004769 | 1.64391  | 1.955083 | 2.137074 | 2.189589 |
| 196383_at | 7.025138 | 7.313556 | 6.87803  | 6.49238  | 7.154441 | 6.703208 | 6.852179 | 6.385018 |
| 196385_at | 1.8818   | 2.202897 | 1.777121 | 2.073707 | 1.71444  | 1.788939 | 2.269988 | 2.593212 |
| 196394_at | 5.722102 | 5.632914 | 5.319553 | 5.84839  | 5.640975 | 5.830315 | 5.389772 | 6.187371 |
| 196403_at | 4.77005  | 4.838344 | 4.806435 | 5.047832 | 4.646396 | 5.250353 | 3.813679 | 4.713203 |
| 196410_at | 5.374026 | 5.725186 | 5.951048 | 5.080194 | 5.962826 | 6.201363 | 3.767023 | 5.679845 |
| 196415_at | 2.723651 | 1.696559 | 1.701076 | 1.877801 | 1.807608 | 1.810791 | 2.174246 | 1.594869 |
| 196441_at | 5.974952 | 5.721326 | 5.729081 | 6.036247 | 5.843458 | 5.573607 | 5.866232 | 5.80327  |
| 196446_at | 1.214965 | 1.560869 | 1.568295 | 1.158752 | 2.291612 | 1.253226 | 1.073234 | 1.46165  |
| 196463_at | 5.496962 | 5.76161  | 6.620101 | 6.44798  | 6.346057 | 6.492123 | 7.087719 | 5.286031 |
| 196472_at | 0.702741 | 1.435732 | 1.447099 | 1.429146 | 1.751335 | 1.593815 | 0.729954 | 1.202387 |
| 196475_at | 4.509986 | 4.185761 | 4.497003 | 3.67934  | 4.682223 | 4.247756 | 3.718066 | 5.314783 |
| 196477_at | 1.196614 | 1.192074 | 1.14662  | 1.525171 | 1.788405 | 1.369903 | 1.861258 | 1.255424 |
| 196483_at | 5.450293 | 4.535326 | 5.178709 | 4.564241 | 5.362038 | 5.572138 | 5.31     | 4.94598  |
| 1964_at   | 7.426537 | 7.885282 | 7.99685  | 7.755568 | 8.283171 | 7.617391 | 7.261083 | 8.56841  |
| 196500_at | 1.859512 | 1.760637 | 2.417133 | 1.953    | 2.881913 | 2.643929 | 1.760751 | 2.154238 |
| 196513_at | 6.181381 | 6.235431 | 5.815502 | 5.899083 | 5.991601 | 5.939274 | 5.729967 | 4.651653 |
| 196527_at | 7.508799 | 7.93531  | 8.03101  | 8.366982 | 7.961459 | 7.918484 | 8.072959 | 7.920334 |
| 196528_at | 6.248147 | 6.588005 | 5.882205 | 6.264664 | 6.885116 | 5.811075 | 6.074628 | 6.802256 |
| 196541_at | 0.969456 | 1.050992 | 1.268436 | 1.058289 | 1.459048 | 1.034304 | 1.589151 | 1.227187 |
| 196549_at | 5.993284 | 5.482171 | 5.913928 | 6.403049 | 4.729519 | 5.981803 | 5.946757 | 4.8922   |
| 1965_at   | 7.075109 | 7.63658  | 7.099477 | 7.365253 | 7.820571 | 7.052544 | 6.925082 | 7.686248 |
| 196740_at | 5.541553 | 4.588081 | 4.58779  | 4.378338 | 5.053387 | 5.021033 | 5.773013 | 4.987543 |
| 196743_at | 3.065815 | 3.058802 | 2.68213  | 3.172938 | 3.396049 | 3.173585 | 3.258957 | 2.642021 |
| 196792_at | 4.493648 | 4.216558 | 2.652625 | 5.193771 | 5.513095 | 2.805212 | 5.319571 | 1.563366 |
| 1967_at   | 5.961625 | 5.956856 | 5.976617 | 6.529794 | 5.96928  | 6.016321 | 6.829978 | 6.625449 |
| 196872_at | 2.938312 | 1.914556 | 1.710709 | 1.946855 | 2.306391 | 2.15729  | 2.368329 | 2.353392 |
| 196883_at | 4.244338 | 4.273419 | 4.091055 | 3.486261 | 4.500715 | 4.231469 | 4.411453 | 3.950075 |
| 1968_at   | 9.221744 | 9.632566 | 8.974959 | 8.985711 | 10.04819 | 8.488049 | 9.024965 | 9.884452 |
| 196913_at | 2.170084 | 3.087483 | 2.956652 | 2.979549 | 2.497019 | 1.505563 | 2.335263 | 3.150474 |
| 196951_at | 3.025302 | 2.84612  | 2.892171 | 2.776812 | 3.080316 | 2.761472 | 2.671308 | 4.061042 |
| 196968_at | 2.99339  | 2.626425 | 1.873154 | 1.988824 | 1.624035 | 1.93588  | 1.394474 | 1.215838 |
| 196993_at | 1.889632 | 2.392487 | 2.118666 | 1.740999 | 2.813343 | 2.610639 | 1.985243 | 2.876955 |
| 196996_at | 2.240225 | 2.144716 | 3.106934 | 2.891848 | 2.716711 | 2.735214 | 2.39654  | 2.505145 |
| 1969_at   | 3.911197 | 2.693011 | 3.029021 | 3.386888 | 2.419239 | 4.075089 | 3.894536 | 3.058175 |
| 196_at    | 7.892783 | 7.872565 | 7.882795 | 7.872189 | 7.012797 | 7.99585  | 7.942954 | 7.726842 |
| 197003_at | 2.192245 | 1.257952 | 1.746362 | 1.538637 | 2.059261 | 2.076711 | 1.8717   | 1.71614  |
| 197021_at | 1.226821 | 1.338346 | 1.300675 | 1.490641 | 2.692422 | 2.052235 | 2.151184 | 2.168787 |
| 197131_at | 5.943031 | 6.051562 | 6.08788  | 5.863433 | 6.198021 | 5.553298 | 6.179409 | 6.015471 |
| 197135_at | 2.121675 | 2.136675 | 1.77676  | 2.08062  | 1.340659 | 1.573423 | 1.018293 | 2.335846 |
| 197187_at | 3.09068  | 2.965501 | 2.254536 | 3.081088 | 3.818657 | 3.089247 | 3.445123 | 2.937048 |
| 197196_at | 1.160182 | 1.102325 | 1.238314 | 1.15973  | 1.767798 | 0.816567 | 1.238314 | 1.238007 |
| 197257_at | 3.196928 | 2.469392 | 2.362342 | 2.508277 | 4.116761 | 4.143635 | 3.352468 | 3.826685 |
| 197258_at | 2.651902 | 3.674223 | 2.820867 | 2.845213 | 2.622348 | 3.144716 | 2.87273  | 2.432766 |
| 197259_at | 4.267958 | 5.057407 | 3.381402 | 5.300732 | 3.55986  | 3.71717  | 4.660025 | 2.766616 |



197320\_at 2.367384 2.520358 2.20739 2.697541 2.017985 2.292947 3.603111 2.830306  
197322\_at 3.532931 4.376147 4.012206 3.510099 4.329905 3.893385 3.136147 3.840701  
197335\_at 3.162304 3.430769 3.469851 2.923139 2.790011 3.490476 3.306589 3.070062  
197342\_at 3.187108 3.157926 3.539917 3.823265 3.03766 3.515079 3.460631 3.776238  
197350\_at 2.535989 2.461986 2.551705 2.898645 2.952315 2.078406 2.737578 2.781124  
197358\_at 1.411551 1.672199 2.580346 2.493596 1.430405 2.659133 2.139708 1.833514  
197370\_at 7.767457 7.778372 7.550527 7.390896 7.395237 7.641657 6.907702 7.396057  
197407\_at 2.77308 2.356902 2.318766 3.489035 3.538513 3.082379 2.27812 2.769389  
1974\_at 9.188073 9.439164 9.110294 9.421969 9.397205 9.355372 9.356942 9.788469  
1975\_at 6.932472 7.515047 7.071943 7.515772 7.061155 7.558659 7.115822 8.018338  
1977\_at 3.219062 3.535163 4.053587 3.515822 4.196733 4.416905 4.418037 3.675434  
1978\_at 6.124142 4.766188 5.300943 5.608307 3.86533 5.358968 3.66954 4.586887  
1979\_at 9.286659 9.237211 9.487383 9.429578 8.956955 9.568021 9.580094 8.633072  
197\_at 2.324316 2.632199 2.625107 2.165899 2.335282 1.932372 2.325259 2.856598  
1981\_at 6.690009 6.695418 6.561355 7.063923 7.011639 6.841509 6.708011 5.837661  
1982\_at 9.295131 9.508516 9.421306 9.518665 9.524489 9.157341 9.241462 9.54792  
1983\_at 7.965712 7.801722 7.966998 8.061257 8.135578 8.258309 7.820404 7.950661  
198437\_at 1.567168 1.971249 2.248992 2.173512 2.787471 1.611201 1.40829 1.914554  
1984\_at 2.832261 3.939608 3.363673 3.06913 2.922864 3.951757 4.518074 3.688389  
1990\_at 1.26255 1.864403 2.344019 1.736666 2.459949 1.914157 1.864397 2.39526  
1991\_at 2.646592 2.791762 2.890818 2.778076 2.980945 2.294202 2.32145 3.178937  
199221\_at 3.109068 2.84413 2.942709 3.279877 2.21022 2.62708 2.159396 2.818998  
199223\_at 2.038087 1.608293 2.007645 2.268522 2.676994 2.58483 2.538764 1.831958  
1992\_at 7.030313 6.725503 6.782031 6.762476 7.0783 7.114956 6.515039 7.376501  
1993\_at 0.928496 1.204955 1.151426 1.886234 2.096281 1.229183 1.358761 0.917577  
1994\_at 6.194012 6.428222 6.177007 5.785482 6.602235 6.123836 6.060414 6.58741  
1995\_at 1.480901 2.056563 1.776093 2.479455 1.762809 1.576581 1.236406 1.895432  
199675\_at 1.250866 1.50714 1.685437 1.091347 1.369856 1.958766 1.275712 1.590007  
199692\_at 4.214807 4.819932 4.283471 3.521567 3.402612 3.680569 3.526443 3.901061  
199699\_at 1.532085 1.905456 2.152944 2.396694 1.354492 2.376819 1.716514 2.788535  
1996\_at 1.901187 1.294417 1.468565 1.116945 2.41132 1.442322 2.19986 2.160016  
199704\_at 5.373807 4.586119 5.601283 5.573927 4.628633 4.45455 5.019982 5.375606  
199713\_at 1.491326 1.788504 1.297343 2.010804 2.28583 1.318056 1.890292 1.429346  
199720\_at 2.169658 2.198931 2.739843 2.134338 1.856452 1.669413 2.415707 2.0396  
199731\_at 4.737757 3.677653 4.460355 4.70942 4.144371 4.659658 5.62428 4.737757  
199745\_at 4.02208 4.763762 3.986032 3.90285 3.526566 3.941779 4.235148 3.336743  
199746\_at 4.667391 4.829432 3.711416 3.613088 3.524 4.452005 4.055087 4.969039  
199777\_at 5.043084 4.690515 5.742285 4.861238 4.596471 4.01576 5.251804 5.11491  
199786\_at 1.364852 2.433782 2.003451 2.490846 2.109275 2.127169 2.084687 3.144463  
1997\_at 7.987278 7.696507 7.658373 8.16989 7.918447 7.631106 7.593502 8.078455  
199800\_at 2.881352 2.899096 3.351485 2.773157 2.861268 2.752414 3.024547 3.162726  
199834\_at 4.666578 4.333273 3.935993 4.244585 2.981114 4.22547 3.631325 3.486592  
199857\_at 6.870874 7.084225 6.414965 6.540769 5.907908 6.982021 6.770834 6.627429  
199870\_at 3.681645 2.994462 3.490308 4.134443 3.04206 3.068482 3.497047 2.877398  
199899\_at 1.331798 1.247457 1.523109 1.240812 2.050071 2.579086 2.482172 2.031441  
1998\_at 6.157824 6.136349 6.146496 6.436219 6.086709 5.854994 5.874612 5.982638  
199920\_at 2.265607 1.910264 1.359876 1.458932 2.189107 1.839829 1.810528 1.673726  
199953\_at 2.576277 1.674853 3.166142 1.956624 2.321786 3.233576 2.906964 2.181389  
199964\_at 3.135348 3.028984 3.289338 2.753998 3.441676 2.611047 2.616593 2.853534  
199974\_at 2.220942 1.978194 1.137509 1.324553 1.251423 4.118578 1.089115 1.278195  
199990\_at 5.430125 4.858927 4.905342 5.354245 4.766406 5.595006 4.719435 4.744675

|           |          |          |          |          |          |          |          |          |
|-----------|----------|----------|----------|----------|----------|----------|----------|----------|
| 1999_at   | 2.440596 | 1.810429 | 1.942962 | 2.627956 | 3.133372 | 3.261163 | 3.382659 | 2.912956 |
| 199_at    | 9.244959 | 9.435878 | 9.150545 | 9.050939 | 8.629217 | 8.958643 | 8.599397 | 9.393528 |
| 19_at     | 3.865038 | 3.505676 | 4.089193 | 4.541951 | 4.784919 | 5.059814 | 4.399948 | 4.549828 |
| 1_at      | 2.837601 | 3.042434 | 3.450617 | 2.167395 | 3.514078 | 3.814695 | 3.755808 | 3.604596 |
| 200008_at | 1.03566  | 1.455376 | 2.148923 | 1.629669 | 2.664039 | 1.749269 | 2.224166 | 2.080375 |
| 200010_at | 2.94098  | 3.173355 | 3.240334 | 2.089179 | 1.959653 | 1.813433 | 2.081423 | 2.719617 |
| 200014_at | 4.903852 | 5.028897 | 3.962319 | 4.666237 | 3.84941  | 4.796315 | 4.82138  | 4.959743 |
| 200035_at | 3.628002 | 2.159089 | 2.902915 | 2.324359 | 3.452571 | 2.752669 | 4.008734 | 2.838481 |
| 200058_at | 3.116235 | 2.644396 | 2.660958 | 3.866326 | 3.22154  | 4.018152 | 4.162995 | 2.549053 |
| 200081_at | 6.295208 | 7.111594 | 7.132164 | 6.94711  | 6.274422 | 6.17206  | 7.118632 | 6.182286 |
| 2000_at   | 4.877101 | 4.587788 | 5.416657 | 4.380552 | 4.357296 | 5.168959 | 4.787395 | 5.069643 |
| 200132_at | 1.055774 | 2.124368 | 1.008397 | 1.116336 | 1.441513 | 1.511535 | 1.00241  | 1.267788 |
| 200150_at | 1.668067 | 1.705945 | 1.795487 | 2.196288 | 2.377409 | 1.72008  | 1.713239 | 2.661826 |
| 200159_at | 1.491499 | 2.104889 | 2.014161 | 1.40188  | 1.346241 | 1.8932   | 1.017496 | 1.976399 |
| 200162_at | 2.104421 | 2.396464 | 1.625182 | 1.815106 | 1.997389 | 1.572785 | 1.895528 | 2.283525 |
| 200172_at | 1.828217 | 2.123884 | 1.931956 | 2.238564 | 2.423596 | 2.40106  | 2.421472 | 2.044679 |
| 200185_at | 9.659938 | 9.540969 | 9.626408 | 9.582962 | 9.475814 | 9.949601 | 9.551488 | 9.312406 |
| 200186_at | 6.749911 | 6.046566 | 6.758306 | 7.319454 | 6.116756 | 7.230603 | 6.89361  | 5.923334 |
| 200197_at | 1.390998 | 2.516596 | 1.494512 | 1.87032  | 2.702882 | 1.644411 | 2.108629 | 1.762413 |
| 2001_at   | 1.173082 | 1.548921 | 1.256336 | 1.331647 | 1.686784 | 1.440439 | 1.50886  | 1.554939 |
| 200205_at | 2.602464 | 2.992481 | 3.461745 | 2.791953 | 2.49444  | 3.169195 | 3.941752 | 1.759687 |
| 200232_at | 2.065847 | 2.657395 | 0.60891  | 0.74365  | 2.76944  | 0.967944 | 1.499044 | 1.191093 |
| 200261_at | 1.833573 | 1.550968 | 1.360033 | 1.661983 | 1.748544 | 1.897296 | 1.693325 | 1.348287 |
| 200298_at | 1.79554  | 2.94419  | 2.37471  | 2.010948 | 2.561161 | 2.673688 | 1.818254 | 2.096827 |
| 2002_at   | 4.508298 | 4.819853 | 5.859948 | 3.958118 | 2.984352 | 4.937359 | 4.957799 | 4.787977 |
| 200312_at | 3.185958 | 1.820617 | 3.257876 | 3.190449 | 2.000379 | 2.858426 | 2.698188 | 2.44464  |
| 200315_at | 1.8217   | 2.911159 | 2.582775 | 2.475261 | 1.834228 | 2.889479 | 3.716288 | 2.115116 |
| 200316_at | 4.835831 | 5.149104 | 4.24812  | 5.956946 | 3.292937 | 4.91763  | 6.138821 | 5.578784 |
| 200350_at | 2.095291 | 2.833156 | 1.959891 | 2.028205 | 2.421012 | 1.719808 | 2.366896 | 2.777864 |
| 200373_at | 3.473936 | 3.171183 | 3.057556 | 3.710454 | 3.550419 | 3.434915 | 2.800948 | 3.154228 |
| 200403_at | 1.685035 | 1.362168 | 1.454773 | 1.291557 | 1.713239 | 1.33229  | 1.641293 | 1.691562 |
| 200407_at | 1.35334  | 2.432817 | 2.250232 | 1.597726 | 1.904773 | 2.392092 | 1.729503 | 2.122787 |
| 200420_at | 3.172835 | 2.103047 | 2.767364 | 2.367563 | 2.492285 | 2.776219 | 2.257087 | 2.632062 |
| 200424_at | 2.011313 | 2.753816 | 2.419026 | 2.761434 | 2.210545 | 2.493479 | 2.464128 | 3.141607 |
| 2004_at   | 7.195314 | 7.071291 | 7.707542 | 7.59573  | 7.068203 | 7.50754  | 7.766533 | 6.430585 |
| 200504_at | 0.978093 | 1.083332 | 1.347124 | 1.065832 | 1.022943 | 1.24593  | 0.944383 | 1.430387 |
| 200523_at | 1.823381 | 1.606084 | 1.819287 | 1.987395 | 1.499245 | 1.813254 | 1.326039 | 1.225532 |
| 200539_at | 2.841504 | 2.463866 | 2.877989 | 3.764332 | 2.900551 | 2.931927 | 2.538046 | 2.530951 |
| 200558_at | 4.779713 | 5.725533 | 5.06404  | 5.408141 | 3.816135 | 5.501421 | 5.077808 | 5.360294 |
| 200576_at | 5.809147 | 6.601327 | 6.266933 | 6.326969 | 6.373399 | 5.790742 | 6.258504 | 6.849622 |
| 2005_at   | 4.604789 | 4.631336 | 4.659248 | 4.913117 | 4.723932 | 4.737745 | 5.072886 | 4.283008 |
| 200634_at | 2.950452 | 4.362441 | 3.107157 | 3.604421 | 3.441014 | 2.820842 | 2.742224 | 4.164552 |
| 2006_at   | 1.93432  | 2.332239 | 2.846105 | 2.547077 | 2.766994 | 2.591961 | 3.193986 | 2.043112 |
| 200726_at | 1.565526 | 0.986193 | 1.015745 | 1.563149 | 1.763704 | 1.392687 | 1.093592 | 1.366364 |
| 200728_at | 4.74053  | 4.489017 | 4.915793 | 3.10996  | 3.472339 | 3.912405 | 3.821763 | 5.84568  |
| 200734_at | 7.505591 | 7.468851 | 7.778748 | 7.684529 | 6.61607  | 7.805852 | 7.419282 | 7.302761 |
| 200765_at | 3.296038 | 3.559865 | 2.380409 | 2.040238 | 3.230006 | 3.36977  | 3.601547 | 3.765171 |
| 200772_at | 1.981803 | 1.30203  | 1.820488 | 1.89641  | 1.708067 | 2.476137 | 1.919192 | 1.74045  |
| 200810_at | 2.284756 | 1.808675 | 1.18216  | 2.207319 | 2.455194 | 2.271037 | 1.892521 | 1.522186 |
| 200844_at | 2.626412 | 1.977226 | 2.835685 | 2.013409 | 1.530874 | 2.025561 | 2.756296 | 1.408222 |
| 200845_at | 2.460034 | 2.360585 | 2.424455 | 2.048395 | 2.064803 | 1.931109 | 1.524264 | 3.088735 |

200879\_at 2.388184 2.306857 2.001279 1.701357 3.380319 1.936808 3.98856 3.12961  
200894\_at 6.631897 6.04399 6.377593 6.813963 6.37101 6.172265 6.361874 6.825249  
200895\_at 4.333177 5.632226 4.760894 3.381017 4.977581 3.962823 4.564848 5.075131  
200909\_at 1.685657 1.15349 1.768557 1.522253 2.162229 1.983363 1.408673 0.878773  
200916\_at 4.839707 5.272643 5.640378 4.579401 4.379097 4.873116 4.958347 5.475805  
200931\_at 3.931435 2.165795 2.038838 2.383198 2.535237 3.973142 3.229753 2.775285  
200933\_at 2.21302 2.538091 2.38019 3.636401 2.41307 2.782632 3.489161 2.886301  
200942\_at 3.694339 4.41474 3.564514 4.461749 3.702333 3.831221 4.496691 2.879699  
200958\_at 4.716944 5.370719 4.300137 4.218497 5.637985 4.961909 3.530869 4.929927  
200959\_at 0.831224 1.435437 1.177763 1.369972 2.845082 1.328522 2.026263 1.168539  
2009\_at 6.756661 6.972615 7.112884 6.314823 6.849506 6.766854 6.795488 7.243999  
2010\_at 6.93701 7.121113 6.101236 6.021023 6.187654 6.470762 7.071794 5.205875  
201134\_at 5.127035 5.693269 5.078386 4.710515 5.395097 5.876701 5.483612 5.75773  
201140\_at 2.247289 1.810491 2.075584 1.69072 1.509676 1.971982 1.618417 2.18887  
201158\_at 1.510107 4.009083 1.788449 4.636188 3.999924 1.587293 1.59343 1.742879  
201161\_at 4.938561 4.828038 3.850432 3.933803 4.767332 5.466273 3.885457 5.110963  
201163\_at 3.469084 4.103852 4.264818 4.623274 4.264818 3.265754 4.100224 3.203953  
201164\_at 3.059836 2.407092 4.416419 2.475996 2.423223 2.12545 1.716118 4.330077  
201176\_at 3.888789 3.595094 3.374161 2.896968 3.36833 2.878645 3.224813 3.420099  
201181\_at 2.583201 2.746178 3.016025 2.759773 2.966629 2.947405 3.033786 2.839106  
201191\_at 3.885896 4.546651 3.376945 3.972147 3.864561 4.412557 4.326925 3.168876  
2011\_at 4.241745 4.474831 4.613108 4.533058 4.14624 4.558984 4.419057 4.291421  
201229\_at 2.550516 2.961316 2.173701 2.274194 2.563328 2.711962 2.574866 2.602048  
201232\_at 4.700213 3.530527 3.672123 3.706625 5.524975 3.993715 3.779623 3.73978  
201243\_at 1.292807 2.500217 1.886654 1.475387 1.629424 1.491842 1.851242 1.651626  
201254\_at 5.35783 5.613537 5.571869 6.107556 3.909809 5.84163 4.205717 4.425892  
201255\_at 3.882492 2.853831 3.60589 3.222006 3.025827 4.011055 3.347003 2.588338  
201266\_at 3.358028 3.869787 5.277353 4.382312 5.178528 3.987166 3.393312 4.55331  
201283\_at 3.053515 1.024022 1.326851 3.291535 1.496653 0.649889 1.644857 0.958046  
201292\_at 3.725502 3.959196 3.455317 4.529039 3.455933 3.273828 3.980926 3.780011  
201294\_at 2.699838 3.815432 2.300299 3.398956 3.840555 3.674859 3.463081 3.126741  
201299\_at 1.417239 1.47839 1.960446 1.835993 1.741163 1.808414 1.338324 1.626031  
2012\_at 6.731575 7.396038 8.195623 7.707044 7.806643 5.912111 7.349025 5.767374  
201305\_at 2.185474 2.46183 2.278682 2.57616 2.603542 2.401507 2.922678 2.761607  
2013\_at 8.566773 8.67606 8.52158 8.832939 8.047095 9.219217 9.013035 8.218819  
201456\_at 2.081547 1.557872 1.565203 1.932092 1.026053 2.049447 2.531379 1.241106  
201475\_at 7.515557 7.620549 7.062617 7.47378 7.133316 7.463473 7.426313 7.601045  
201477\_at 1.374622 1.047207 2.1307 1.801791 1.781122 1.822796 2.121908 1.934543  
2014\_at 9.319041 8.650653 9.103132 9.242919 8.532674 8.986713 9.279329 8.542081  
201501\_at 3.627036 4.002453 3.787823 2.995919 3.455963 3.915197 3.273182 3.114224  
201514\_at 3.370552 3.473332 3.293347 3.056899 4.29556 3.130238 2.51915 4.180382  
201516\_at 1.920886 1.478144 1.66482 1.226428 1.105804 0.892013 1.582139 1.503047  
201562\_at 6.770965 7.20554 7.622099 7.551822 6.83521 6.714578 7.528195 7.516394  
201595\_at 6.649026 7.42414 7.482158 7.005962 7.576917 6.896166 6.917372 7.811259  
2015\_at 1.856398 2.333706 1.975026 3.147658 2.367823 1.931189 2.560167 2.626094  
201617\_at 1.584885 1.417048 1.289127 2.06572 1.65449 1.463442 1.47941 1.653775  
201625\_at 1.351955 1.257024 1.203123 1.099214 1.238753 1.05386 1.39115 1.446177  
201626\_at 5.006376 5.644379 4.731152 4.891412 4.322401 4.106783 4.611781 4.95303  
201627\_at 6.478362 6.337523 6.215513 6.667519 6.992373 6.771191 6.58807 6.750387  
201633\_at 1.118982 2.184125 1.441157 1.921493 1.53928 1.04529 1.104032 2.036032  
201651\_at 1.144217 1.474221 1.083709 1.204169 1.835081 1.261412 1.485909 1.21051

|           |          |          |          |          |          |          |          |          |
|-----------|----------|----------|----------|----------|----------|----------|----------|----------|
| 2016_at   | 2.495668 | 2.698681 | 3.206184 | 2.991707 | 3.485224 | 3.425177 | 3.437854 | 2.713105 |
| 201725_at | 4.489385 | 4.540215 | 4.325308 | 3.639644 | 3.588514 | 3.703661 | 3.635863 | 4.108221 |
| 201780_at | 1.691436 | 1.490586 | 1.512831 | 2.326327 | 1.204418 | 1.061133 | 1.427465 | 1.484078 |
| 201798_at | 1.750182 | 1.99258  | 1.581817 | 0.819652 | 2.38846  | 1.32393  | 1.901813 | 1.251646 |
| 201799_at | 3.754408 | 3.272359 | 3.643734 | 3.296839 | 3.914608 | 3.215023 | 3.925394 | 3.86439  |
| 2017_at   | 8.485929 | 8.549778 | 8.774462 | 8.762522 | 8.920903 | 8.343633 | 8.788923 | 9.000222 |
| 201895_at | 7.333754 | 7.732891 | 7.567069 | 7.233927 | 7.54919  | 7.125274 | 7.850892 | 8.28243  |
| 2018_at   | 5.285529 | 4.300611 | 4.303521 | 3.355628 | 5.653805 | 5.538498 | 3.518839 | 3.765205 |
| 201931_at | 6.243469 | 5.466516 | 5.474346 | 6.101739 | 6.064676 | 6.102416 | 6.053131 | 5.641706 |
| 201965_at | 2.412763 | 3.507861 | 3.025167 | 3.549329 | 3.615919 | 3.330694 | 3.606825 | 3.877438 |
| 201973_at | 4.912629 | 5.38657  | 4.383798 | 4.958617 | 2.948502 | 4.391374 | 3.478339 | 4.996218 |
| 2019_at   | 1.757609 | 1.672408 | 2.142097 | 2.108089 | 1.8786   | 1.626519 | 1.284259 | 1.246695 |
| 202018_at | 5.909659 | 5.63544  | 5.393703 | 5.431086 | 5.50786  | 5.80268  | 4.956237 | 6.332313 |
| 202020_at | 4.549311 | 4.962947 | 4.759866 | 4.733221 | 4.321469 | 4.012963 | 3.960743 | 4.094754 |
| 202051_at | 2.195875 | 3.93082  | 1.528972 | 3.35751  | 2.301868 | 4.608881 | 2.854831 | 2.44398  |
| 202052_at | 3.774548 | 4.374195 | 4.641585 | 3.963508 | 4.10785  | 3.477331 | 3.561008 | 3.772601 |
| 2020_at   | 1.899441 | 1.897618 | 1.39046  | 1.836697 | 2.504077 | 1.948411 | 1.525624 | 1.695099 |
| 202151_at | 3.568656 | 4.02157  | 4.513629 | 3.975095 | 4.009383 | 3.661658 | 3.04904  | 3.573423 |
| 202181_at | 4.276249 | 4.193165 | 4.617698 | 3.744081 | 2.02912  | 3.977584 | 3.7979   | 3.44715  |
| 2021_at   | 6.410852 | 6.35519  | 5.871461 | 5.531422 | 5.532508 | 5.946887 | 5.753849 | 5.863202 |
| 202243_at | 4.624689 | 5.49995  | 4.802186 | 5.401886 | 5.289403 | 4.786635 | 5.549266 | 4.742436 |
| 202299_at | 1.414315 | 1.571208 | 2.256346 | 1.346557 | 1.279569 | 1.459137 | 1.671192 | 1.452356 |
| 2022_at   | 8.989471 | 8.992665 | 9.017373 | 9.342065 | 9.228892 | 9.396002 | 9.556263 | 8.4053   |
| 202309_at | 1.522814 | 2.745101 | 2.276907 | 1.263343 | 1.531498 | 1.740921 | 2.966001 | 2.318809 |
| 202333_at | 5.999918 | 5.940357 | 5.79029  | 4.442507 | 4.128198 | 5.135827 | 4.541945 | 5.847427 |
| 202374_at | 3.187172 | 2.171763 | 1.982859 | 1.589276 | 2.670844 | 2.653454 | 2.58831  | 3.010401 |
| 2023_at   | 6.293301 | 5.231629 | 6.26917  | 5.715103 | 6.279594 | 6.675245 | 5.552977 | 6.306507 |
| 202459_at | 1.428479 | 1.839651 | 1.107787 | 2.540592 | 1.962168 | 1.118035 | 1.093136 | 1.19696  |
| 202500_at | 1.921806 | 1.062998 | 1.195265 | 1.777491 | 1.995144 | 1.89889  | 2.282061 | 1.150301 |
| 202559_at | 2.047321 | 1.575608 | 1.5653   | 1.921531 | 1.918878 | 1.802101 | 2.048136 | 2.146645 |
| 2026_at   | 3.836584 | 3.07251  | 2.689147 | 4.003936 | 2.103167 | 3.055289 | 3.549648 | 3.477221 |
| 202781_at | 3.124759 | 4.221081 | 3.81155  | 4.421713 | 2.487855 | 3.292738 | 3.027427 | 3.062464 |
| 2027_at   | 4.474748 | 2.801117 | 3.289908 | 2.243221 | 4.355516 | 2.678059 | 3.404727 | 3.135062 |
| 202865_at | 1.087006 | 1.586711 | 1.403654 | 1.783603 | 2.399811 | 1.257646 | 1.982446 | 2.419971 |
| 2028_at   | 9.504271 | 9.668391 | 8.895611 | 9.174106 | 9.2417   | 9.094865 | 8.798817 | 9.888646 |
| 202915_at | 2.277659 | 3.459397 | 3.545602 | 2.998826 | 2.622939 | 2.869008 | 3.695536 | 2.845236 |
| 2029_at   | 6.72709  | 6.903108 | 6.660132 | 6.757482 | 6.645743 | 6.650361 | 6.438573 | 6.62808  |
| 202_at    | 4.903832 | 4.266238 | 4.1015   | 3.146382 | 6.085703 | 4.485231 | 4.051952 | 3.833933 |
| 203054_at | 2.903318 | 3.337567 | 2.861694 | 2.82226  | 2.243839 | 2.143301 | 2.271009 | 2.621166 |
| 203062_at | 2.839655 | 2.350431 | 2.340191 | 1.984948 | 2.650915 | 2.934071 | 2.197678 | 3.016969 |
| 203068_at | 8.923244 | 9.014739 | 9.450734 | 9.183007 | 8.752222 | 8.855832 | 9.406543 | 8.578345 |
| 203069_at | 5.854684 | 5.780294 | 4.354928 | 5.504146 | 4.491055 | 5.760016 | 5.962688 | 5.408015 |
| 203074_at | 1.829952 | 2.68907  | 2.227423 | 1.744573 | 1.471577 | 1.892115 | 2.835093 | 2.568671 |
| 203076_at | 3.44955  | 3.107149 | 3.089246 | 5.216743 | 2.923317 | 4.859569 | 2.977707 | 4.431881 |
| 2030_at   | 6.15996  | 5.815205 | 7.003613 | 6.370493 | 6.17324  | 5.789092 | 6.591202 | 5.808949 |
| 203100_at | 1.86395  | 2.312612 | 2.329094 | 1.817426 | 1.894023 | 2.179671 | 2.381936 | 1.885065 |
| 203102_at | 2.738407 | 2.274982 | 3.613132 | 3.65955  | 2.465701 | 3.104479 | 2.290638 | 3.388861 |
| 203111_at | 3.400557 | 3.2162   | 4.196293 | 3.368903 | 3.464716 | 3.439346 | 4.008954 | 3.368903 |
| 203190_at | 1.863702 | 2.936004 | 2.525117 | 2.480462 | 2.556677 | 3.466844 | 2.826097 | 2.510086 |
| 203197_at | 4.315441 | 3.007611 | 3.178001 | 2.97839  | 4.447818 | 3.973198 | 3.062394 | 3.836343 |
| 203228_at | 5.095312 | 4.660914 | 4.423799 | 4.024099 | 4.084212 | 4.050603 | 3.929634 | 5.144059 |

203238\_at 3.604561 1.959522 3.696175 2.118574 2.647907 3.232377 2.682332 2.104203  
203245\_at 4.103579 4.092548 3.678454 3.381657 3.57397 4.356121 3.146901 3.295196  
203259\_at 6.106606 7.2976 7.00566 7.336134 6.544954 6.823507 6.363273 6.568232  
203260\_at 5.881436 6.034918 4.999726 5.920897 3.843686 5.865049 6.025119 6.051683  
203286\_at 4.242265 3.554597 3.232625 3.9471 3.183088 4.419712 4.51782 3.868132  
203328\_at 4.643298 3.563446 2.702839 3.779879 3.202229 3.543604 3.313406 3.225438  
2033\_at 7.402147 7.826046 7.936629 7.698085 8.175286 7.629447 7.669806 7.745293  
203413\_at 2.260442 1.885485 2.619954 2.455421 1.904999 2.851827 3.036224 2.967654  
203427\_at 4.033283 4.357168 4.145238 5.576526 4.022382 4.685923 4.219226 5.137544  
203430\_at 2.256197 2.163495 2.413825 2.009096 2.269657 2.949032 2.411999 2.177934  
203447\_at 2.713386 2.731961 1.659121 2.523224 4.016167 1.902437 1.930586 2.21647  
2034\_at 10.37691 10.49653 10.55871 10.55765 10.30169 10.60106 10.68177 9.48414  
203522\_at 2.545916 2.418516 2.289994 2.967555 3.507624 2.578712 2.155098 2.961124  
203523\_at 5.202376 4.717718 5.619785 4.655341 4.952168 4.454964 4.157725 4.579726  
203547\_at 3.995806 3.954739 4.47391 4.695925 4.050947 3.723765 3.537652 4.415104  
203562\_at 1.96718 2.394534 1.928607 1.991165 3.155128 4.109984 2.646369 2.707327  
203569\_at 3.029261 1.351606 0.98309 0.763994 0.874305 1.796694 1.791428 2.220428  
2035\_at 5.702003 5.532227 5.972703 5.63249 6.087541 5.065547 6.074068 5.829478  
203611\_at 3.055107 2.658063 2.323978 2.647386 3.472145 4.09298 3.8041 1.578341  
2036\_at 5.746933 5.593939 5.829367 5.827503 5.778314 5.617981 5.611684 4.987346  
2037\_at 7.160682 7.130488 6.638779 7.308572 6.986483 7.029132 7.043289 6.652036  
203859\_at 3.50322 3.878363 4.829444 4.204834 4.97118 3.456108 4.764064 4.834919  
2038\_at 2.634397 2.669709 2.141762 2.495577 2.455725 2.110941 2.85335 3.557598  
2039\_at 5.490555 4.869583 4.398791 4.411324 4.496083 4.804728 5.155253 3.53491  
203\_at 6.725977 6.482738 6.825715 6.816821 6.239168 6.357678 6.376411 6.211838  
204010\_at 2.820984 1.926853 2.711969 2.045782 1.691487 3.958529 3.233047 2.784893  
2040\_at 7.353395 7.653971 7.313044 7.832641 7.976374 7.549811 7.795942 7.923069  
2041\_at 2.20595 1.964842 2.533183 2.776123 3.018978 2.560462 2.243806 2.793616  
204219\_at 1.203449 1.82869 1.762312 1.416109 1.807436 1.489471 1.923951 1.514626  
2042\_at 2.274632 2.478473 3.112116 2.758779 2.559892 2.35671 3.240124 3.97634  
2043\_at 4.133873 5.505486 6.220741 5.275769 5.702703 5.578536 6.146984 5.323255  
204474\_at 1.868666 1.492887 1.758044 1.630502 1.740667 2.362416 1.154773 1.998559  
2044\_at 1.456001 1.495615 1.356635 1.798785 1.345373 1.698472 2.018635 1.567067  
2045\_at 4.125175 2.636623 4.402578 3.920959 3.427898 4.647041 4.648716 4.243243  
2046\_at 2.185117 1.636584 2.746029 1.42897 2.306652 1.499838 1.694457 1.650657  
2047\_at 1.208638 1.510548 2.549421 1.690821 1.789525 1.525382 1.470708 2.078704  
204801\_at 2.124094 1.691883 2.186225 1.747978 1.754649 1.00282 1.7032 1.266351  
204851\_at 7.50756 7.242054 7.830183 7.758531 7.661817 7.260227 7.574791 7.288205  
2048\_at 2.646758 2.523829 2.897958 2.172714 2.306216 4.217315 3.566234 1.816151  
204962\_at 2.421831 1.501762 1.929671 2.374926 2.898075 2.010724 1.698391 1.996044  
2049\_at 1.822944 2.161074 2.237147 2.547994 2.810306 2.224731 2.90163 2.086126  
204\_at 6.490833 6.417182 6.347466 6.207612 6.425757 5.956987 6.31944 6.317861  
2050\_at 5.711983 5.691724 5.563981 5.670905 5.272597 5.29526 5.628333 5.100613  
205147\_at 2.772608 2.2324 1.546796 1.331319 1.680307 2.497511 1.249099 1.514911  
2051\_at 2.730548 3.374121 3.362462 4.259017 4.052043 2.994812 2.947881 3.893099  
205251\_at 1.400145 1.606677 1.644954 1.349838 1.863121 1.723384 1.617028 1.32838  
2052\_at 7.576282 7.035427 7.806465 7.493472 7.399947 7.530136 7.911569 7.11539  
205327\_at 3.579685 3.525184 3.000755 3.393744 3.180012 3.473466 2.921904 4.113812  
2053\_at 5.3442 5.344187 5.002337 3.551671 5.411592 4.655175 3.894428 5.163923  
205428\_at 6.358568 5.922432 5.499312 5.268568 5.413216 5.559484 5.607604 5.889378  
2054\_at 6.231852 6.346464 6.264539 6.528195 6.769727 6.325883 6.658212 6.385444

|           |          |          |          |          |          |          |          |          |
|-----------|----------|----------|----------|----------|----------|----------|----------|----------|
| 205564_at | 5.802154 | 5.970583 | 5.899188 | 5.57483  | 6.046699 | 6.090842 | 6.228052 | 5.914346 |
| 2055_at   | 4.743163 | 4.440855 | 4.001465 | 4.259155 | 3.460391 | 4.808931 | 4.605154 | 4.176387 |
| 2056_at   | 2.58006  | 2.484757 | 1.868746 | 2.236074 | 1.942998 | 2.113911 | 2.801637 | 2.951562 |
| 205717_at | 5.138972 | 5.779583 | 5.614204 | 5.675242 | 5.958026 | 6.023814 | 5.624145 | 5.233073 |
| 2057_at   | 2.394069 | 3.200013 | 3.973685 | 3.05188  | 3.37148  | 3.388923 | 3.908426 | 3.412997 |
| 205860_at | 1.648304 | 1.647725 | 1.739083 | 1.888473 | 1.8747   | 1.508303 | 1.522405 | 1.261    |
| 2058_at   | 7.211622 | 6.973376 | 7.19007  | 7.117042 | 7.208004 | 6.404771 | 7.035354 | 7.460333 |
| 2059_at   | 7.020007 | 6.050261 | 6.599217 | 5.8765   | 6.541279 | 6.867838 | 6.223824 | 5.594148 |
| 205_at    | 4.468907 | 5.095153 | 4.537471 | 4.354496 | 5.012175 | 5.468922 | 4.204425 | 4.784151 |
| 2060_at   | 7.275834 | 7.035388 | 7.298399 | 7.172644 | 6.760705 | 6.826734 | 6.992279 | 7.271365 |
| 206338_at | 1.247978 | 2.039869 | 2.820963 | 1.366436 | 1.875077 | 1.568017 | 1.836712 | 1.436987 |
| 206358_at | 4.822501 | 5.517569 | 4.570404 | 5.329481 | 5.523107 | 5.045967 | 4.334292 | 4.450843 |
| 2063_at   | 4.982439 | 4.938562 | 4.817361 | 3.806341 | 4.151036 | 4.293363 | 4.066396 | 3.605841 |
| 206412_at | 1.794469 | 1.155298 | 1.530257 | 1.283384 | 1.10001  | 1.372427 | 1.258805 | 1.538761 |
| 206426_at | 2.275497 | 1.870493 | 1.922193 | 1.175251 | 1.872553 | 1.117333 | 3.547754 | 2.398602 |
| 2064_at   | 5.781526 | 4.755094 | 5.390307 | 5.137506 | 5.238179 | 5.779457 | 5.505757 | 4.978534 |
| 2065_at   | 5.679088 | 5.357022 | 5.653421 | 4.903447 | 6.093782 | 5.346046 | 4.394239 | 5.65152  |
| 2066_at   | 5.994014 | 5.641726 | 5.570725 | 5.263788 | 6.442844 | 5.256082 | 5.424626 | 6.36962  |
| 2067_at   | 6.621843 | 6.278193 | 6.223482 | 6.657394 | 5.985234 | 6.869307 | 6.343626 | 5.698851 |
| 2068_at   | 5.664801 | 4.604546 | 5.283917 | 5.39953  | 4.095616 | 4.852197 | 4.953333 | 3.228604 |
| 2069_at   | 1.316866 | 1.36402  | 2.083152 | 1.984989 | 1.570478 | 1.48634  | 2.741584 | 1.526015 |
| 207063_at | 6.080269 | 6.936377 | 5.785228 | 5.717285 | 4.898457 | 6.655441 | 7.327306 | 4.360379 |
| 2070_at   | 3.478014 | 2.262283 | 3.458014 | 3.61552  | 4.353889 | 3.313443 | 2.627646 | 3.131771 |
| 207107_at | 1.400621 | 0.89576  | 1.082148 | 1.208529 | 0.825562 | 2.255391 | 0.993016 | 1.143403 |
| 207147_at | 1.21187  | 1.468136 | 1.399408 | 1.018614 | 1.63229  | 1.178885 | 1.399408 | 1.685474 |
| 2071_at   | 6.265019 | 6.104743 | 5.886502 | 6.502164 | 5.738692 | 6.09375  | 5.687876 | 6.326608 |
| 2072_at   | 3.73806  | 4.058687 | 4.027448 | 3.865981 | 4.603301 | 4.328027 | 2.95816  | 4.409192 |
| 2074_at   | 5.49973  | 4.348248 | 5.112908 | 4.180152 | 4.988533 | 5.159654 | 4.833102 | 5.564386 |
| 2077_at   | 6.690162 | 7.168603 | 6.662384 | 6.850654 | 6.340802 | 7.313152 | 7.260504 | 5.5649   |
| 2078_at   | 6.687213 | 6.098813 | 6.826388 | 7.439089 | 6.286143 | 6.955307 | 6.967337 | 6.496599 |
| 2079_at   | 8.371717 | 8.865178 | 8.871429 | 8.55516  | 8.743502 | 8.574675 | 8.317172 | 8.636113 |
| 207_at    | 5.581402 | 4.43468  | 5.741152 | 5.157668 | 4.947156 | 5.982517 | 5.411364 | 5.27039  |
| 2081_at   | 3.546352 | 4.072785 | 3.762301 | 4.233932 | 2.557683 | 4.210461 | 3.653793 | 3.032369 |
| 2086_at   | 5.569737 | 5.060331 | 4.359879 | 4.745113 | 4.799708 | 4.169042 | 5.013054 | 3.082739 |
| 208_at    | 6.33142  | 5.589304 | 6.037851 | 6.07691  | 6.032167 | 5.9675   | 6.95812  | 6.404209 |
| 2091_at   | 8.214584 | 7.975016 | 7.510339 | 7.817561 | 7.649121 | 8.109508 | 7.295257 | 7.829529 |
| 2098_at   | 9.029044 | 8.67255  | 8.979794 | 8.905679 | 8.659445 | 8.884975 | 9.119122 | 9.06226  |
| 2099_at   | 1.379447 | 0.907131 | 1.611209 | 0.894176 | 1.195678 | 0.945525 | 2.847137 | 2.391211 |
| 20_at     | 4.378069 | 4.196164 | 4.108173 | 4.2978   | 3.495456 | 4.481079 | 4.759181 | 3.321676 |
| 2100_at   | 1.626201 | 2.213952 | 1.958396 | 2.05237  | 3.097208 | 2.263234 | 1.678129 | 2.606932 |
| 2101_at   | 2.114156 | 1.862249 | 2.064756 | 1.620074 | 1.835301 | 2.100718 | 2.180513 | 1.742552 |
| 2103_at   | 2.214981 | 3.119578 | 2.903068 | 2.441657 | 2.592864 | 3.033292 | 2.996448 | 2.753982 |
| 2104_at   | 2.986613 | 2.639909 | 3.554605 | 2.983615 | 3.474881 | 2.822061 | 2.059967 | 3.583553 |
| 2107_at   | 6.941033 | 6.738234 | 6.88936  | 7.064185 | 6.677039 | 7.02396  | 6.84066  | 6.744426 |
| 2108_at   | 8.018922 | 7.662897 | 7.817424 | 7.834117 | 8.619733 | 7.647738 | 7.667404 | 8.431596 |
| 2109_at   | 6.995675 | 6.534433 | 6.599262 | 6.747722 | 6.74068  | 7.278095 | 6.770529 | 6.035298 |
| 210_at    | 5.218152 | 5.01018  | 5.894641 | 4.681026 | 6.071632 | 6.26276  | 4.62341  | 4.930884 |
| 2110_at   | 5.596675 | 6.657585 | 6.505011 | 5.450303 | 6.779876 | 5.405456 | 5.740674 | 6.797036 |
| 2113_at   | 7.724294 | 8.10724  | 8.142034 | 8.300788 | 8.160047 | 8.116716 | 8.252839 | 7.632337 |
| 2114_at   | 8.707069 | 8.899681 | 8.782921 | 9.226592 | 8.730182 | 9.232101 | 9.496883 | 8.554358 |
| 2115_at   | 2.163033 | 4.623668 | 3.282119 | 2.95545  | 2.365535 | 4.159139 | 3.211742 | 3.521386 |

|         |           |           |           |           |           |           |           |           |
|---------|-----------|-----------|-----------|-----------|-----------|-----------|-----------|-----------|
| 2116_at | 2. 22275  | 1. 846001 | 2. 694549 | 2. 220356 | 2. 976088 | 2. 232677 | 2. 139765 | 2. 673413 |
| 2117_at | 6. 526898 | 5. 361561 | 6. 504279 | 6. 370486 | 6. 682017 | 6. 173773 | 6. 567554 | 6. 533199 |
| 2118_at | 2. 476123 | 2. 27854  | 2. 075146 | 2. 634251 | 1. 918251 | 2. 300675 | 2. 943957 | 2. 165874 |
| 2119_at | 5. 137283 | 5. 016786 | 6. 532257 | 5. 477473 | 5. 880948 | 4. 690483 | 5. 978806 | 4. 640323 |
| 211_at  | 6. 583653 | 6. 399225 | 6. 635314 | 6. 666829 | 6. 636199 | 6. 515973 | 5. 826823 | 5. 673378 |
| 2120_at | 5. 729823 | 6. 071478 | 5. 966235 | 4. 943636 | 6. 437832 | 5. 759816 | 5. 598925 | 5. 548979 |
| 2121_at | 4. 852738 | 4. 685419 | 4. 359388 | 4. 080188 | 3. 529226 | 4. 801063 | 5. 269091 | 3. 79231  |
| 2122_at | 5. 784698 | 5. 320538 | 5. 316078 | 6. 471066 | 6. 924665 | 5. 383124 | 5. 179054 | 5. 654118 |
| 2123_at | 2. 036805 | 2. 090942 | 3. 082145 | 3. 104097 | 3. 565637 | 2. 961252 | 3. 093997 | 2. 253571 |
| 2124_at | 4. 832437 | 4. 054004 | 3. 794328 | 4. 82479  | 3. 487967 | 4. 252271 | 4. 024654 | 3. 713445 |
| 2125_at | 3. 109648 | 3. 311018 | 3. 923602 | 3. 617972 | 3. 241099 | 3. 40071  | 3. 673168 | 3. 478536 |
| 2128_at | 2. 40825  | 2. 64356  | 1. 96033  | 1. 665142 | 2. 720542 | 2. 290843 | 2. 182167 | 2. 428604 |
| 212_at  | 1. 849104 | 2. 023383 | 2. 735355 | 2. 193933 | 2. 409184 | 2. 23016  | 2. 615821 | 1. 489094 |
| 2130_at | 7. 907337 | 7. 608402 | 8. 303999 | 8. 178724 | 8. 124273 | 7. 769787 | 7. 834151 | 8. 391224 |
| 2131_at | 6. 52025  | 6. 679521 | 6. 666923 | 6. 812823 | 7. 004583 | 6. 288187 | 6. 449897 | 6. 816731 |
| 2132_at | 6. 899709 | 7. 761421 | 7. 273943 | 7. 654905 | 7. 453296 | 7. 080197 | 7. 426703 | 6. 732679 |
| 2134_at | 2. 356624 | 1. 630227 | 2. 414045 | 2. 207402 | 2. 667853 | 2. 164776 | 2. 931095 | 3. 156783 |
| 2135_at | 4. 645233 | 4. 783833 | 4. 464151 | 5. 230098 | 4. 858321 | 4. 203569 | 5. 003795 | 5. 560907 |
| 2137_at | 4. 627075 | 4. 730027 | 4. 360971 | 4. 952387 | 5. 424376 | 5. 029061 | 5. 313203 | 5. 85722  |
| 2138_at | 1. 848047 | 1. 929761 | 1. 551229 | 1. 618356 | 2. 050652 | 1. 502004 | 1. 707997 | 2. 975013 |
| 2139_at | 4. 814147 | 4. 526562 | 4. 4284   | 5. 499943 | 3. 338971 | 5. 110381 | 3. 04462  | 4. 411435 |
| 213_at  | 6. 60961  | 6. 358851 | 6. 820626 | 4. 597006 | 7. 002525 | 5. 727372 | 3. 348793 | 5. 201141 |
| 2140_at | 6. 46652  | 5. 925625 | 5. 60875  | 6. 516872 | 7. 058863 | 6. 264229 | 6. 834237 | 6. 875851 |
| 2145_at | 6. 937501 | 6. 731525 | 7. 328223 | 7. 099759 | 5. 760351 | 7. 452184 | 7. 172579 | 6. 089516 |
| 2146_at | 3. 367342 | 2. 231337 | 2. 644607 | 3. 328959 | 1. 840922 | 3. 010412 | 2. 656513 | 2. 444924 |
| 2147_at | 2. 037664 | 1. 917069 | 2. 57199  | 1. 883378 | 2. 269318 | 2. 027189 | 1. 981829 | 2. 338618 |
| 2149_at | 9. 101671 | 9. 24636  | 9. 715432 | 9. 466587 | 8. 520353 | 9. 387065 | 10. 18035 | 8. 47192  |
| 214_at  | 5. 505272 | 6. 238675 | 5. 597875 | 5. 208069 | 5. 31258  | 5. 475509 | 5. 14904  | 5. 874572 |
| 2150_at | 3. 280862 | 2. 384814 | 2. 923106 | 3. 572269 | 4. 036216 | 2. 45536  | 2. 004238 | 2. 934232 |
| 2151_at | 6. 270018 | 5. 319341 | 4. 233483 | 4. 739087 | 6. 675367 | 3. 818007 | 2. 734251 | 2. 347173 |
| 2152_at | 8. 393573 | 8. 42748  | 8. 024822 | 7. 608097 | 7. 058442 | 7. 629052 | 8. 11551  | 8. 224324 |
| 2153_at | 6. 38149  | 6. 78687  | 6. 984751 | 6. 727905 | 6. 633285 | 8. 147634 | 7. 162571 | 7. 78944  |
| 2155_at | 2. 382658 | 1. 668666 | 2. 47117  | 2. 601992 | 2. 326177 | 1. 664451 | 1. 416141 | 2. 126399 |
| 2157_at | 6. 407739 | 7. 334123 | 7. 371952 | 7. 25264  | 7. 165852 | 7. 305284 | 7. 946798 | 6. 573434 |
| 2158_at | 1. 481635 | 1. 31524  | 1. 071109 | 1. 074559 | 1. 281116 | 2. 081803 | 0. 957414 | 1. 792238 |
| 2159_at | 2. 587342 | 1. 746538 | 2. 287265 | 2. 076196 | 2. 014616 | 1. 414328 | 1. 555794 | 2. 083901 |
| 215_at  | 2. 566791 | 3. 19038  | 3. 588536 | 1. 918038 | 2. 048824 | 1. 972159 | 2. 274816 | 2. 592396 |
| 2160_at | 3. 118375 | 2. 501688 | 2. 331794 | 1. 63228  | 4. 27848  | 2. 092772 | 1. 928861 | 2. 511417 |
| 2161_at | 2. 502273 | 1. 776348 | 1. 432248 | 2. 153194 | 1. 666281 | 2. 068213 | 2. 240344 | 2. 585292 |
| 2162_at | 1. 89281  | 4. 292068 | 2. 618148 | 3. 962797 | 3. 782673 | 2. 824175 | 2. 517543 | 5. 801997 |
| 2165_at | 1. 028247 | 0. 754156 | 0. 93146  | 0. 959724 | 1. 258575 | 0. 964252 | 1. 523642 | 1. 408983 |
| 2166_at | 3. 646435 | 4. 165457 | 3. 673871 | 3. 720437 | 3. 113611 | 4. 328669 | 3. 648247 | 3. 924389 |
| 2167_at | 6. 796768 | 7. 213884 | 6. 837253 | 6. 612629 | 6. 875566 | 6. 57231  | 6. 495905 | 6. 252365 |
| 2168_at | 8. 940928 | 7. 708122 | 7. 502689 | 3. 491381 | 9. 419996 | 8. 638912 | 5. 436327 | 8. 882085 |
| 2169_at | 1. 120858 | 1. 109841 | 0. 910566 | 0. 797395 | 1. 410602 | 0. 910651 | 2. 568649 | 0. 979019 |
| 216_at  | 6. 96731  | 7. 518211 | 6. 152202 | 7. 396303 | 7. 08526  | 6. 843046 | 5. 867514 | 7. 179477 |
| 2170_at | 7. 747715 | 7. 099642 | 6. 163877 | 3. 890343 | 7. 421306 | 5. 559209 | 4. 478274 | 6. 776428 |
| 2172_at | 1. 478153 | 2. 479117 | 1. 430111 | 2. 34344  | 2. 593694 | 2. 912866 | 1. 70006  | 1. 820637 |
| 2173_at | 1. 3361   | 1. 227744 | 1. 425486 | 1. 193145 | 1. 519261 | 1. 422067 | 1. 059289 | 0. 922975 |
| 2175_at | 2. 842767 | 2. 38965  | 3. 0233   | 2. 868581 | 1. 888027 | 2. 804789 | 2. 353298 | 2. 363871 |
| 2176_at | 4. 061163 | 4. 482352 | 3. 204333 | 4. 042159 | 2. 327748 | 4. 165498 | 3. 846874 | 3. 876964 |

|           |          |          |          |          |          |          |          |          |
|-----------|----------|----------|----------|----------|----------|----------|----------|----------|
| 2177_at   | 3.035466 | 2.166234 | 1.880634 | 2.318549 | 3.092952 | 2.662808 | 1.951909 | 2.513884 |
| 2178_at   | 1.538991 | 2.013612 | 3.404925 | 1.756726 | 2.021418 | 1.973887 | 1.732823 | 1.57757  |
| 217_at    | 6.749493 | 6.317445 | 6.087309 | 5.851557 | 6.779472 | 6.993887 | 5.954065 | 6.308209 |
| 2180_at   | 4.964858 | 5.313828 | 5.576902 | 5.114112 | 6.674236 | 5.968948 | 4.66237  | 6.272536 |
| 2181_at   | 7.043953 | 7.701242 | 7.450653 | 7.373811 | 7.329248 | 7.050785 | 7.484708 | 7.163204 |
| 2182_at   | 6.791916 | 7.221299 | 7.097325 | 6.874361 | 7.808332 | 7.19532  | 6.88996  | 7.299989 |
| 2184_at   | 6.651643 | 5.745876 | 6.068154 | 5.689093 | 4.591551 | 6.559321 | 4.878688 | 5.709376 |
| 2185_at   | 4.638452 | 4.8227   | 4.55072  | 5.418437 | 5.138714 | 5.258362 | 4.446624 | 4.919342 |
| 2186_at   | 7.582654 | 7.93576  | 8.06272  | 7.795849 | 7.763929 | 7.906546 | 7.41928  | 7.24524  |
| 2187_at   | 2.00821  | 1.69174  | 1.433971 | 2.271811 | 2.392119 | 1.551523 | 1.83465  | 2.013011 |
| 2188_at   | 4.864334 | 4.535074 | 4.422145 | 4.160589 | 4.225768 | 4.207267 | 3.26249  | 5.195938 |
| 2189_at   | 3.295312 | 2.926374 | 3.765428 | 3.166362 | 3.07713  | 3.015546 | 3.669557 | 3.104805 |
| 218_at    | 2.07017  | 1.898847 | 1.822692 | 1.637224 | 1.794414 | 1.850966 | 2.207388 | 2.202634 |
| 2191_at   | 2.692155 | 1.615371 | 1.613579 | 1.997461 | 1.868075 | 1.844384 | 1.4499   | 1.569405 |
| 219285_at | 5.545576 | 5.83863  | 5.554612 | 5.786211 | 5.240291 | 5.804813 | 5.905811 | 5.440343 |
| 219287_at | 1.526543 | 2.357572 | 2.300505 | 1.9979   | 1.803803 | 1.938983 | 1.945385 | 2.13558  |
| 219293_at | 1.822713 | 1.765711 | 1.995035 | 1.782814 | 2.29409  | 2.22872  | 1.238892 | 2.440151 |
| 2192_at   | 3.284603 | 3.432017 | 3.068376 | 3.911955 | 3.918274 | 3.333009 | 3.597766 | 2.614948 |
| 219333_at | 6.086621 | 6.181432 | 6.483885 | 6.407249 | 6.571286 | 6.084841 | 5.933613 | 6.655794 |
| 219347_at | 1.22926  | 1.436521 | 1.557513 | 1.365943 | 1.374647 | 1.37833  | 2.364923 | 1.750195 |
| 219348_at | 7.443473 | 6.729183 | 6.824588 | 6.729312 | 5.86463  | 6.985855 | 6.782086 | 5.091555 |
| 2193_at   | 6.678414 | 6.191176 | 6.596496 | 6.445586 | 6.365464 | 6.677768 | 6.190683 | 6.359344 |
| 219402_at | 6.338942 | 5.855092 | 5.355236 | 5.452947 | 5.512769 | 5.772135 | 5.285953 | 5.654311 |
| 219409_at | 2.363273 | 1.770631 | 3.292295 | 2.469072 | 2.344248 | 2.852717 | 2.974324 | 2.463826 |
| 219417_at | 1.293574 | 1.13213  | 1.052064 | 1.478794 | 1.24336  | 1.110653 | 2.543358 | 1.421018 |
| 219428_at | 1.334759 | 0.794135 | 1.206489 | 1.189828 | 0.9521   | 1.868549 | 1.295352 | 1.449097 |
| 219429_at | 1.507316 | 1.175993 | 1.055663 | 0.695201 | 0.68854  | 1.256219 | 2.020459 | 1.18168  |
| 219431_at | 1.20162  | 0.904628 | 1.585597 | 0.995695 | 1.734919 | 2.567855 | 1.302985 | 1.12745  |
| 219432_at | 1.871258 | 1.374043 | 1.190367 | 2.229794 | 1.328097 | 2.422195 | 1.943534 | 1.37474  |
| 219436_at | 1.328962 | 1.051297 | 0.881573 | 0.97698  | 1.1201   | 0.95202  | 1.181904 | 1.355261 |
| 219438_at | 0.91771  | 1.305435 | 1.182275 | 1.139144 | 1.719492 | 1.039815 | 1.200392 | 1.165898 |
| 219445_at | 2.424574 | 3.90237  | 4.050853 | 2.844891 | 2.200109 | 4.225522 | 3.342077 | 3.853863 |
| 219447_at | 2.375148 | 1.252525 | 1.346084 | 1.216462 | 1.62406  | 1.254616 | 1.412892 | 1.668484 |
| 219453_at | 1.541296 | 1.038232 | 1.334166 | 1.660734 | 1.898141 | 0.971186 | 2.05728  | 1.460697 |
| 219464_at | 1.866929 | 0.344517 | 1.201509 | 0.77085  | 3.01774  | 1.210747 | 1.198289 | 0.934343 |
| 219469_at | 1.994021 | 2.072877 | 2.934806 | 1.506078 | 2.854437 | 2.109965 | 2.259274 | 2.459515 |
| 219473_at | 1.340196 | 1.420349 | 1.951579 | 1.145476 | 0.975213 | 2.536522 | 2.023454 | 2.163663 |
| 219477_at | 1.297276 | 1.21369  | 1.421235 | 0.797453 | 2.399853 | 0.763006 | 1.231206 | 1.203429 |
| 219479_at | 1.699881 | 1.389205 | 1.285508 | 1.155415 | 1.273134 | 1.531153 | 2.159847 | 2.126574 |
| 219482_at | 0.712772 | 0.926772 | 1.406995 | 0.702894 | 2.161583 | 0.759144 | 0.677822 | 1.003682 |
| 219484_at | 4.380797 | 3.598981 | 1.526051 | 3.362111 | 1.432561 | 2.297753 | 2.716825 | 2.809372 |
| 219487_at | 1.585789 | 2.174083 | 2.232641 | 1.858543 | 1.524618 | 1.794021 | 2.561159 | 1.876103 |
| 219493_at | 2.078667 | 2.023088 | 2.180107 | 1.824095 | 1.366348 | 1.951462 | 1.490621 | 2.528818 |
| 2194_at   | 3.02511  | 3.229632 | 3.653204 | 4.322941 | 3.269019 | 4.30023  | 3.69106  | 3.379635 |
| 219525_at | 2.528639 | 2.233779 | 2.336908 | 1.41232  | 2.510046 | 2.331517 | 1.380082 | 2.212688 |
| 219527_at | 4.953507 | 5.925689 | 3.992481 | 4.119974 | 4.452917 | 4.154879 | 4.997824 | 6.017954 |
| 219537_at | 2.161044 | 2.58904  | 1.950861 | 2.73548  | 2.350804 | 2.619592 | 1.770539 | 1.905723 |
| 219539_at | 1.792089 | 1.913888 | 2.941707 | 2.293316 | 2.451877 | 3.343992 | 3.027931 | 2.024739 |
| 219541_at | 5.755985 | 4.825093 | 5.333134 | 4.645506 | 4.342316 | 4.755793 | 5.343997 | 5.087073 |
| 219557_at | 1.293911 | 1.098764 | 1.40505  | 1.015419 | 2.333932 | 1.419901 | 1.221678 | 1.291652 |
| 219578_at | 2.614591 | 2.006186 | 2.609007 | 2.380544 | 1.496741 | 2.490899 | 2.359839 | 2.0167   |



|           |          |          |          |          |          |          |          |          |
|-----------|----------|----------|----------|----------|----------|----------|----------|----------|
| 219595_at | 2.9997   | 2.819659 | 1.530955 | 1.182156 | 3.190498 | 2.700654 | 1.155568 | 0.80396  |
| 2195_at   | 8.587804 | 8.5545   | 9.256711 | 8.677352 | 9.177427 | 9.071766 | 9.150912 | 9.201822 |
| 219621_at | 4.38707  | 3.313588 | 4.455581 | 3.126924 | 1.582249 | 4.715918 | 4.330992 | 5.49032  |
| 219623_at | 4.665845 | 4.789617 | 4.58     | 4.113567 | 5.495841 | 4.455788 | 5.158536 | 5.133953 |
| 219654_at | 4.24369  | 4.412958 | 4.534167 | 4.393407 | 3.784558 | 4.47545  | 4.627718 | 2.825903 |
| 219670_at | 1.030338 | 1.405883 | 0.928333 | 1.12482  | 2.287375 | 1.333438 | 1.04855  | 1.815142 |
| 219681_at | 2.057937 | 1.78754  | 1.025635 | 1.200038 | 1.519686 | 1.526608 | 1.823851 | 1.552707 |
| 219699_at | 6.360749 | 6.261033 | 6.29286  | 6.944884 | 6.242085 | 6.500907 | 6.52467  | 5.217256 |
| 2196_at   | 1.983592 | 2.584368 | 1.705358 | 2.17374  | 2.672221 | 1.572799 | 2.584176 | 1.72789  |
| 219731_at | 2.463222 | 1.791322 | 1.764525 | 1.585468 | 1.83641  | 1.471457 | 1.52341  | 0.986502 |
| 219736_at | 1.395388 | 1.049727 | 3.482117 | 1.12658  | 2.380691 | 0.891189 | 1.616583 | 1.373966 |
| 219738_at | 2.713384 | 3.340201 | 3.302823 | 2.776046 | 2.68468  | 2.574682 | 3.110821 | 3.857094 |
| 219743_at | 4.564944 | 4.191516 | 4.102121 | 3.938345 | 3.419598 | 3.669499 | 5.349341 | 2.792226 |
| 219749_at | 6.784414 | 7.000817 | 6.872825 | 5.900916 | 6.759738 | 6.662892 | 7.304856 | 6.667038 |
| 219770_at | 1.605257 | 1.681172 | 1.978015 | 1.478558 | 2.266639 | 2.022488 | 1.709283 | 1.650994 |
| 219771_at | 6.679422 | 6.302976 | 6.346296 | 6.734144 | 6.158453 | 6.643709 | 6.848939 | 6.392646 |
| 219790_at | 1.438358 | 1.50551  | 1.685218 | 1.501134 | 1.49382  | 1.112381 | 1.786809 | 1.119811 |
| 219793_at | 1.852345 | 1.549882 | 1.639634 | 1.703157 | 2.511741 | 2.033291 | 2.4779   | 1.550944 |
| 219833_at | 1.671232 | 2.582419 | 2.095322 | 2.431477 | 2.332621 | 2.424015 | 2.375762 | 1.994468 |
| 219844_at | 4.350084 | 4.079519 | 4.279408 | 3.993126 | 4.498598 | 4.631315 | 4.473772 | 4.842441 |
| 219854_at | 3.976697 | 4.46967  | 4.932984 | 3.413848 | 4.565515 | 4.077773 | 4.277829 | 4.493811 |
| 219855_at | 2.559253 | 2.24326  | 1.980966 | 1.753545 | 2.652686 | 2.142305 | 2.840286 | 1.97416  |
| 219858_at | 1.472726 | 2.352608 | 1.959221 | 2.727299 | 2.681317 | 1.685235 | 1.741114 | 2.975454 |
| 219865_at | 1.44183  | 1.738247 | 1.035777 | 0.821794 | 1.437204 | 1.862143 | 1.101223 | 1.512898 |
| 219869_at | 2.175473 | 1.179897 | 2.22343  | 1.102612 | 1.905631 | 2.923842 | 2.06192  | 1.541072 |
| 219870_at | 2.170335 | 2.191341 | 1.624041 | 2.694875 | 2.502221 | 2.585015 | 1.640105 | 1.718369 |
| 219873_at | 1.554631 | 1.587439 | 2.27469  | 1.503262 | 2.872843 | 3.276624 | 3.007936 | 3.953533 |
| 219874_at | 1.670288 | 1.285892 | 2.217267 | 2.902279 | 2.314815 | 1.742239 | 3.04862  | 2.332533 |
| 219875_at | 1.492435 | 2.196288 | 2.916489 | 2.389098 | 3.453735 | 1.413104 | 3.231204 | 4.41924  |
| 219899_at | 6.504832 | 6.386907 | 6.325756 | 6.216162 | 6.137411 | 6.209731 | 6.421696 | 6.50725  |
| 219902_at | 4.573573 | 4.63151  | 3.529454 | 4.497788 | 2.965846 | 3.800736 | 4.460402 | 4.339189 |
| 219927_at | 7.416276 | 7.504194 | 7.101686 | 7.596804 | 6.999374 | 7.392477 | 6.531361 | 7.080016 |
| 219931_at | 3.165999 | 3.532473 | 3.631637 | 3.601251 | 3.207192 | 3.031687 | 3.200007 | 3.874493 |
| 219938_at | 1.703126 | 1.752939 | 2.295843 | 1.58477  | 1.559876 | 2.112803 | 2.073275 | 1.818541 |
| 219952_at | 1.861113 | 1.982891 | 1.854544 | 2.239699 | 1.805315 | 2.748964 | 2.15983  | 2.24962  |
| 219954_at | 2.273307 | 2.720479 | 2.225684 | 2.109892 | 2.796349 | 2.395694 | 3.222891 | 2.499965 |
| 219956_at | 1.964026 | 1.104821 | 2.206944 | 1.364253 | 1.468937 | 1.42453  | 2.145663 | 1.378457 |
| 219957_at | 0.968237 | 1.628767 | 1.849863 | 0.913236 | 1.292104 | 1.247523 | 1.237766 | 1.377655 |
| 219958_at | 2.679568 | 2.349319 | 1.960338 | 1.907376 | 3.149428 | 2.498991 | 3.023529 | 2.588795 |
| 219959_at | 1.166747 | 1.145929 | 1.368437 | 1.354355 | 1.077191 | 1.258375 | 1.400864 | 0.953384 |
| 219960_at | 1.909062 | 1.752811 | 1.394072 | 1.214676 | 1.584703 | 1.425503 | 2.291519 | 1.598999 |
| 219965_at | 0.841137 | 1.602527 | 1.149708 | 1.002197 | 1.270449 | 1.533208 | 1.321884 | 1.897848 |
| 219968_at | 0.908361 | 2.357282 | 2.071785 | 1.032945 | 1.687686 | 0.688682 | 2.774588 | 2.428416 |
| 219970_at | 1.086289 | 1.604902 | 1.048339 | 0.846561 | 2.6522   | 1.512895 | 1.500163 | 1.841886 |
| 219972_at | 4.412011 | 4.207694 | 4.033157 | 4.526242 | 4.510553 | 4.551182 | 4.818097 | 4.461261 |
| 219981_at | 1.720216 | 2.164948 | 1.457633 | 1.547849 | 3.293877 | 2.358961 | 1.935253 | 2.231928 |
| 219982_at | 1.457995 | 2.730352 | 2.478239 | 2.01231  | 1.908883 | 3.142971 | 3.566656 | 1.797528 |
| 219983_at | 3.647225 | 2.681013 | 3.929763 | 2.036889 | 2.881269 | 2.374424 | 2.487166 | 2.674099 |
| 219986_at | 0.843429 | 1.238196 | 1.25669  | 1.354802 | 1.25313  | 2.753565 | 1.157269 | 0.848707 |
| 219988_at | 6.827907 | 7.054203 | 7.311634 | 7.526395 | 7.420451 | 7.021503 | 7.376891 | 7.682151 |
| 219990_at | 1.606025 | 1.033473 | 0.952809 | 1.685738 | 1.965805 | 1.159261 | 1.338756 | 1.271081 |

219995\_at 1.907269 2.119144 2.164206 2.19208 1.964748 1.826705 2.280861 2.716646  
2199\_at 2.89155 1.677236 1.404469 2.099943 2.042609 1.289121 1.923102 2.017132  
219\_at 4.917391 5.669557 4.283013 4.903399 4.619963 4.962195 4.313416 4.532621  
21\_at 4.718194 3.998513 5.560874 5.542689 4.93959 5.085611 6.230455 4.983236  
220001\_at 2.464941 3.16552 2.554878 3.039371 1.857975 2.647887 3.651107 2.18509  
220002\_at 3.789844 4.344526 3.877579 3.885637 3.645068 3.841235 4.242342 4.048948  
220004\_at 3.178935 3.033015 2.924492 3.498477 2.630956 3.73006 2.206864 3.684201  
220032\_at 1.67554 1.503837 1.664461 1.141163 1.462198 1.467059 1.266669 1.337762  
220042\_at 1.287553 2.019011 2.249596 2.730549 2.140977 1.146859 1.772742 1.842618  
220047\_at 2.145654 1.502405 0.88069 1.298042 1.507788 1.351037 1.147079 1.440301  
220064\_at 5.096037 5.136929 4.338908 5.598343 5.14992 4.640904 4.593215 4.289686  
220070\_at 1.991845 2.515113 1.963671 1.987953 2.646427 2.433492 2.149852 3.289176  
220074\_at 2.976291 3.022244 3.112531 3.014659 3.922032 2.73831 4.219748 3.266218  
220081\_at 0.979783 1.039851 1.361139 1.184656 1.537441 1.338839 1.205319 1.456128  
220082\_at 1.200287 1.329326 1.622982 1.238113 1.177641 0.936045 1.709301 1.43896  
2200\_at 3.75444 4.952702 4.445107 5.680552 5.247082 4.234054 4.873403 5.250639  
220107\_at 1.289087 1.788897 2.152987 1.840106 3.058633 0.790923 1.572833 1.393567  
220108\_at 2.570321 3.097174 2.298705 2.11113 2.00778 2.74427 2.062374 2.739342  
220115\_at 0.908002 0.906257 1.018301 0.769352 1.373941 2.541618 1.32302 0.781485  
220134\_at 1.640857 1.467936 1.567183 1.089191 1.954636 1.637325 2.173984 2.689222  
220136\_at 2.965952 3.912957 3.63785 2.530547 3.224943 1.944007 3.365556 3.280642  
220158\_at 1.637801 1.163278 1.663197 1.812358 1.272286 0.69335 1.143802 1.268579  
220164\_at 2.830541 2.115853 3.432058 3.101601 4.697075 1.939263 1.989488 1.281205  
2201\_at 1.849504 1.433309 1.617582 1.899651 2.31162 1.664485 1.596794 2.409609  
220202\_at 1.413137 0.964105 1.184179 1.225784 1.701772 1.674529 1.128226 1.379663  
220213\_at 4.129214 4.675349 4.503681 4.114909 4.75165 4.823961 4.533091 5.17094  
220296\_at 2.48531 1.932788 1.664258 2.147582 1.839692 1.060066 1.96394 1.421261  
2202\_at 9.057643 9.682365 9.167235 9.134505 9.228904 9.234807 9.812243 8.660655  
220323\_at 4.767454 4.524148 4.774773 4.755731 4.179392 4.339665 4.060334 4.291594  
220359\_at 1.834498 2.183083 1.94885 2.342741 2.276122 1.668734 2.072005 1.689507  
220382\_at 2.407079 2.091758 1.911863 1.643717 2.780465 2.712844 2.040098 1.620102  
220388\_at 3.135003 4.324092 2.370829 2.521553 3.101461 2.449423 4.984082 5.082476  
2203\_at 7.430465 5.622257 6.111259 4.392665 7.16325 6.638819 5.923729 6.088778  
220416\_at 1.69734 1.497336 1.407528 1.500211 1.411096 1.448792 2.086985 2.023413  
220429\_at 0.803164 0.604485 0.88003 1.267469 1.265713 1.029789 1.262774 0.688868  
220441\_at 4.761736 4.877858 5.003703 3.794161 5.803138 5.180907 2.534767 5.017461  
2204\_at 2.190334 1.446739 1.405097 2.040095 1.59723 2.361035 1.911958 1.986976  
220594\_at 2.030444 2.057548 1.779675 2.707447 1.366152 2.506268 1.995562 2.073081  
2205\_at 2.654355 1.782515 3.434779 2.362888 2.185471 4.878976 2.350623 2.109419  
2206\_at 2.197572 1.170255 0.906607 0.920103 0.990362 1.419352 1.559622 0.786623  
220729\_at 4.911143 5.611029 4.052711 3.57679 3.177481 3.275038 4.159034 6.060412  
2207\_at 7.877521 7.910456 6.843813 7.901015 6.823113 7.917403 7.972379 7.229579  
220832\_at 1.795077 1.56761 1.887878 1.687848 1.451429 2.564604 1.038372 1.898777  
2208\_at 1.477273 1.814941 1.701565 1.51116 1.685804 2.021121 1.511974 1.915696  
220906\_at 4.415088 4.509714 4.454614 4.073321 3.580673 4.054931 3.998749 4.267543  
220929\_at 4.496749 4.334586 5.566573 5.069296 5.13796 4.851132 5.060843 5.180871  
220930\_at 4.764421 4.024114 5.304045 6.374832 4.868545 5.700672 5.363399 3.481609  
220963\_at 7.06094 5.539314 6.175477 4.816972 7.389041 7.077447 5.288677 7.32072  
220965\_at 2.579486 1.980522 3.291891 2.075648 2.735146 1.97121 1.791042 2.523129  
220972\_at 5.215807 5.447863 4.931267 5.078011 4.502926 5.363822 5.828948 4.517401  
220979\_at 5.796825 4.111517 4.51445 4.371081 6.193241 4.512094 5.463675 5.143341

220980\_at 2.910382 1.652811 2.419282 1.218814 2.510502 1.95791 1.45184 1.648722  
220988\_at 7.627681 7.508624 8.21559 6.947138 7.422109 6.315099 7.732135 7.63834  
220992\_at 3.078383 1.899941 1.407169 2.028345 1.904352 1.339678 2.846809 1.379239  
220\_at 2.35324 2.160989 1.559178 1.693245 2.015331 1.489424 1.731367 1.575274  
221002\_at 3.760801 2.888888 2.869772 2.731859 3.434566 2.932064 3.480752 2.046081  
221035\_at 7.523822 7.39585 7.887925 8.159746 8.433064 7.90098 8.230545 7.982307  
221037\_at 6.158229 6.104031 6.126087 6.228672 6.286466 6.141946 5.915943 6.623036  
221044\_at 1.500164 2.313114 1.765767 1.733358 2.26218 1.225966 1.228486 1.755528  
221060\_at 1.260171 1.437565 1.766309 1.070879 1.484061 1.148583 2.178569 1.780391  
221061\_at 4.037934 3.110105 3.926791 3.481503 5.516754 2.910936 2.835739 3.47201  
221074\_at 1.373423 1.712713 1.721355 1.761273 1.656661 1.879365 1.489628 1.555429  
221078\_at 3.94458 4.441049 4.649769 4.088093 4.61054 3.497365 3.695423 3.436029  
221079\_at 5.355794 5.884585 5.854804 5.312651 5.001434 5.71037 5.909056 5.490292  
221091\_at 2.591431 2.456053 3.064689 2.514524 3.514142 2.858082 3.144353 2.95316  
2210\_at 0.299869 0.576742 0.65402 2.160974 0.533507 3.217697 1.315081 2.760032  
221120\_at 5.147986 4.906938 4.314454 4.864454 5.468086 4.792396 4.325413 5.430398  
221122\_at 1.383699 2.493822 2.638099 2.576053 2.107697 1.337633 1.766965 2.745127  
221143\_at 6.091489 5.657468 6.376799 5.342299 5.804279 5.826062 5.554086 5.816083  
221150\_at 2.130429 1.831778 2.616311 2.250195 2.2049 2.132473 3.983853 2.177513  
221154\_at 5.279728 5.525137 5.662819 5.325556 5.033041 5.155223 3.01221 5.779192  
221178\_at 6.209636 5.593127 6.000091 5.630079 5.2607 5.120702 5.9005 5.125648  
221184\_at 7.055456 7.62025 7.001736 7.99905 6.862848 7.068032 7.591047 6.616026  
221188\_at 2.174256 2.535447 2.175447 2.731068 2.607894 2.717879 2.532314 3.101639  
221191\_at 1.912797 1.568846 1.995626 1.818047 2.512523 1.769965 2.091208 2.133768  
221223\_at 1.072014 1.234165 1.327128 1.778915 1.017927 1.355074 1.554687 1.486725  
221241\_at 1.019955 1.142724 1.333866 0.888612 1.595564 1.904567 1.400962 1.494476  
221262\_at 1.441282 1.654492 1.70211 1.146324 1.656207 1.345008 1.213553 1.691891  
221264\_at 3.041952 3.092555 3.116652 3.215363 2.590814 3.167669 3.028554 3.07028  
221294\_at 6.489519 5.954052 5.731843 6.101003 5.547526 5.746439 5.311859 6.157619  
2212\_at 3.340007 3.292854 2.38395 2.980639 2.394998 3.61615 3.186545 2.793136  
221301\_at 4.067803 3.18624 4.149316 5.880567 5.029852 2.683931 5.755953 4.302221  
221302\_at 3.988819 5.219967 3.133366 3.402795 4.666894 2.922617 3.086548 5.58643  
221303\_at 5.684552 5.281819 5.195553 5.029575 6.002555 5.632116 4.837403 4.837035  
221322\_at 2.162432 2.134572 2.361393 2.757528 1.670107 2.499921 2.839367 3.501842  
221336\_at 3.317071 4.170165 3.187256 2.890983 2.194832 3.199242 2.366286 3.287885  
221357\_at 4.376213 3.289298 3.744307 4.142119 4.85655 5.176065 4.337147 5.106929  
221391\_at 1.571957 1.808802 1.496805 1.684643 2.125055 2.204168 2.171932 1.573184  
221393\_at 1.4554 1.508224 1.259236 1.10307 1.703778 1.962388 1.672341 1.388296  
221395\_at 8.649922 8.977877 8.913081 9.299861 9.139625 9.208638 8.997863 8.603668  
2213\_at 2.6658 3.091978 1.899047 2.337134 3.493325 1.56814 0.500052 4.306046  
221400\_at 1.839238 1.82243 1.979611 1.709813 1.710181 2.44104 1.707934 1.523008  
221409\_at 1.7755 2.911047 2.256213 1.728913 1.481518 1.612915 2.299974 1.656994  
221416\_at 1.647084 1.996165 2.428667 3.240767 2.411791 2.196811 2.07137 2.487787  
221421\_at 3.339928 3.357994 3.770554 2.599046 3.327633 2.764138 2.967996 3.554041  
221424\_at 3.855169 4.033929 3.733225 2.548874 2.994047 2.534895 3.857519 4.141684  
221438\_at 2.423493 2.566964 2.253325 1.921998 4.114845 2.544064 2.682607 3.546684  
221442\_at 1.742358 2.07951 1.901958 1.866944 2.41608 1.890964 2.191737 1.98224  
221443\_at 7.20872 7.253891 7.253145 7.218484 7.953336 6.662167 7.544017 6.407268  
221458\_at 0.936631 3.371394 2.247816 1.600287 1.525686 1.109731 2.257168 1.618371  
221468\_at 2.888985 2.19454 1.572201 1.811628 1.327374 1.444329 1.964588 1.72285  
221472\_at 2.335269 2.743589 3.33544 1.974046 2.54669 2.708417 2.524469 2.861277

221476\_at 4.562061 2.804908 4.939285 3.709544 4.231791 3.214689 2.667486 5.079214  
221477\_at 5.661892 6.205766 6.082661 5.983802 6.258952 6.451414 6.309154 5.91764  
221481\_at 2.049254 2.131688 1.72109 1.970416 1.331374 1.414683 1.82641 2.466363  
221491\_at 3.949644 4.513337 4.473198 4.35566 4.144581 4.286945 4.17117 3.630671  
221496\_at 4.025632 4.784026 4.445518 4.781819 4.147369 4.057863 5.195883 4.259336  
2214\_at 1.484577 2.643391 2.122161 2.371371 2.446615 1.354127 1.590297 2.132683  
221504\_at 3.361372 2.834544 2.834544 2.83252 3.201614 3.444809 3.680847 4.175951  
221527\_at 1.952162 1.274851 1.197725 3.67414 2.392539 2.184791 1.907137 2.205704  
221545\_at 5.388041 5.734615 5.822278 5.010762 6.012051 6.000782 5.068738 4.727229  
221584\_at 3.284879 3.57566 3.485633 3.873389 3.312009 2.586733 2.932306 2.594497  
2215\_at 2.055612 3.696457 1.769009 1.674542 2.153709 1.497441 1.161641 2.388369  
221613\_at 2.607695 1.204385 3.13433 1.691222 1.815456 1.153865 2.01228 2.34751  
221656\_at 3.910719 4.600298 3.534131 4.035845 3.348408 3.840868 4.170733 3.419338  
221662\_at 1.378287 2.166393 1.403935 1.469761 1.517082 1.143996 2.061799 1.522497  
221687\_at 1.935144 1.914909 2.311448 1.636861 2.353155 1.85559 1.192663 1.646843  
221692\_at 2.23985 2.112648 2.4388 2.340793 2.828766 2.66988 1.496062 2.499861  
221710\_at 5.049083 5.049283 5.32461 5.344387 5.227944 4.018904 5.961936 5.049283  
221711\_at 3.155116 1.886115 2.82744 2.740001 2.500888 2.348646 2.61237 1.944079  
221718\_at 2.048881 2.438683 1.176311 1.540347 2.16477 2.023988 2.140087 1.713161  
221749\_at 6.915082 6.785293 6.5538 6.468217 6.739606 6.719093 7.136682 6.133647  
221756\_at 1.583474 1.897083 1.625304 2.085383 2.945391 3.455645 3.657887 2.545377  
221785\_at 4.305211 4.178726 2.914239 4.683011 3.375468 3.134878 2.956807 3.277281  
221786\_at 4.164395 4.048889 4.111888 3.591609 3.447834 4.612404 2.690392 3.196897  
2217\_at 6.132036 5.699698 5.360103 5.479316 5.725554 6.343284 5.370581 5.657525  
221806\_at 1.726121 1.611526 1.682966 1.646071 1.518548 2.045789 1.845727 2.209094  
221823\_at 1.399205 0.958853 2.164973 1.257502 2.210351 1.220779 1.834315 1.893418  
221830\_at 6.047383 6.054026 5.415098 6.098009 5.484343 5.538656 5.567957 5.31014  
221833\_at 1.492096 1.071311 1.108683 1.513732 1.621835 1.864433 1.281832 1.282153  
221883\_at 4.050554 3.744186 2.718331 2.580734 2.549594 3.804127 3.718787 2.643497  
221895\_at 6.7259 5.717033 6.993663 6.481851 5.569901 6.743838 6.354272 5.282042  
2218\_at 4.65881 5.161442 5.209964 5.229432 5.131346 4.527124 5.048296 4.563146  
221908\_at 6.848818 6.089652 5.74767 5.765404 5.16585 5.717495 5.651897 5.397126  
221914\_at 2.022106 2.541018 2.382671 2.722912 2.646694 1.634795 1.768739 1.878026  
221927\_at 3.20789 3.990804 3.659823 3.215561 3.720159 3.404096 3.09699 3.706756  
221935\_at 2.397437 2.090253 2.477719 2.799012 2.22284 3.113118 2.47783 2.881746  
221937\_at 5.981121 6.007273 6.111174 6.35479 5.33044 6.151629 6.530293 5.186307  
221938\_at 1.793299 1.870313 1.621544 1.607584 1.748286 1.187954 2.319995 1.514699  
221955\_at 3.719789 4.4526 5.271361 2.69794 3.5918 3.330074 4.001433 1.485468  
221981\_at 7.674166 8.060071 8.125907 7.256725 8.014962 6.957979 8.163448 8.269096  
2219\_at 4.473131 4.255597 4.529016 5.224929 2.826303 5.253123 4.790777 4.274949  
221\_at 4.696068 5.281209 4.906099 5.183402 5.569559 5.19006 6.082195 3.926466  
222008\_at 1.727736 1.412543 2.262129 0.925436 2.054866 1.881059 1.885377 1.781031  
222029\_at 2.600825 2.116459 2.126044 1.908873 2.787216 2.114782 2.360319 2.168928  
222068\_at 8.160537 8.401645 8.177894 7.988755 7.86405 7.346274 8.336101 7.819394  
2220\_at 1.316317 1.641347 2.258275 2.288031 3.34997 2.320298 2.524019 0.730594  
222161\_at 4.994061 6.284963 5.688246 5.258919 6.835104 5.461873 5.577312 6.319736  
222166\_at 5.990171 5.88472 5.664674 6.705537 6.361453 5.938672 6.048131 5.39472  
222171\_at 2.575921 2.746498 2.518288 2.121303 3.033264 3.18318 2.876321 2.422645  
222183\_at 2.761553 2.712469 2.894834 2.46781 2.933278 2.215117 2.685448 2.602024  
222194\_at 6.623418 6.81737 6.316851 6.00273 6.38938 6.51477 6.108205 6.804287  
222223\_at 4.80551 5.676206 5.001935 4.455669 5.223771 4.615684 3.991564 5.472795

222229\_at 3.997948 4.281649 3.781831 3.905106 3.332058 4.026866 3.586911 3.092487  
222234\_at 4.64866 3.606909 4.127725 3.759546 2.878343 4.752561 3.96481 3.727769  
222235\_at 1.526659 1.570858 2.405536 1.417416 2.416407 2.696584 1.600622 2.14199  
222236\_at 6.654792 7.111645 6.45578 6.53133 6.71975 6.47055 6.255488 6.847315  
222255\_at 4.402728 4.440283 3.583444 4.234161 4.409954 4.064727 3.640776 4.349342  
222256\_at 1.550873 2.399008 1.589308 2.53868 1.582807 1.459611 2.634534 1.947127  
2222\_at 5.709573 5.319329 5.731646 4.66459 5.557413 5.032793 5.673642 5.042063  
222389\_at 4.140218 5.758109 3.933838 4.100329 5.108552 5.489211 5.458685 3.564598  
222484\_at 5.900104 6.834825 6.104294 5.677227 5.831659 5.358734 6.33518 5.853102  
222487\_at 2.175214 2.237539 2.338238 2.542127 2.774469 2.150639 2.216671 2.465496  
2224\_at 4.858211 4.766565 4.641229 4.568732 3.956043 4.142294 4.800208 4.31401  
222537\_at 1.6778 1.075381 1.352598 1.604143 0.968177 1.57137 1.871299 1.274296  
222545\_at 1.622218 1.318675 1.355815 0.973254 1.216408 1.55768 1.426654 1.900238  
222546\_at 1.381647 1.005686 1.360442 1.562215 1.469987 1.328186 1.885441 1.854562  
222553\_at 1.934368 2.209721 2.286707 2.036898 2.60692 2.13465 2.75458 2.10565  
222584\_at 2.514662 2.526997 2.824482 1.093997 2.120369 2.529536 2.20227 2.309274  
222611\_at 1.632062 1.954681 1.834526 1.916597 2.204145 1.652694 1.853892 1.409001  
222642\_at 1.486584 1.77821 2.474097 1.921689 2.165361 1.889941 1.773761 2.144014  
222643\_at 2.629243 2.564567 3.033652 3.049182 3.565496 4.119206 2.841255 2.664914  
222658\_at 5.120608 5.616258 5.369046 5.77271 5.172441 4.947708 5.689233 5.385464  
222659\_at 1.320783 1.084445 1.885988 2.04412 1.572991 1.157622 1.546382 1.161768  
222662\_at 1.917502 2.661131 1.737846 1.578012 0.765226 1.796054 1.803977 1.776639  
222663\_at 2.381452 2.656728 3.366111 2.813005 4.084 2.975472 2.618644 2.984128  
222696\_at 2.080511 2.853596 2.094587 2.289033 2.255099 3.407479 2.154959 2.380015  
222698\_at 2.594526 2.742479 3.136104 2.581427 2.555134 3.562879 2.939394 3.956996  
222699\_at 4.771562 3.845383 4.308898 4.536091 2.948859 4.564928 4.581667 6.085331  
222826\_at 0.930514 1.326209 1.247419 1.058481 1.630463 1.445087 1.38334 1.184701  
222865\_at 5.912963 4.618462 5.796123 6.904959 4.953459 6.644655 6.910534 4.199948  
222894\_at 1.81946 2.474928 2.4233 2.448295 2.180987 2.514406 2.37454 2.048622  
222901\_at 1.67755 1.378911 1.746147 1.265823 2.106135 1.665032 1.824865 2.440436  
222950\_at 2.657419 2.297328 2.115409 2.453379 2.869001 3.238626 3.100689 2.028721  
222962\_at 2.134756 2.564962 3.368146 2.286563 2.734233 2.712937 2.336944 2.453605  
222967\_at 0.931269 1.223116 1.502414 4.3976 1.121662 0.560684 2.693151 1.531437  
222\_at 2.164624 2.37714 2.423574 2.512706 2.555869 2.803252 2.755884 3.347443  
223075\_at 2.054586 2.06921 1.796033 1.805535 2.78909 1.997119 2.266577 1.732339  
223082\_at 5.590299 5.265104 5.422259 5.512871 5.714858 5.027919 4.758159 5.910704  
2230\_at 6.142629 6.301154 5.741783 6.287529 6.952111 5.884774 5.576286 5.948779  
223117\_at 2.129102 1.250486 1.658021 1.384842 2.674343 1.857653 1.545326 1.849107  
2232\_at 2.784577 3.009209 3.222227 2.879014 2.752602 3.139021 2.814 2.902342  
2235\_at 4.607754 4.8013 5.000147 4.530317 5.79219 4.658283 3.839636 4.85276  
2237\_at 3.974379 3.502709 4.301074 4.748611 3.479134 3.98604 3.084396 4.214601  
2239\_at 6.739229 6.905849 6.890552 6.494366 5.831587 7.207049 6.138711 6.610063  
223\_at 6.994549 6.909015 7.389161 6.810389 7.247721 7.239479 7.297847 7.113359  
2241\_at 6.332453 6.515657 6.540592 7.26338 6.288291 5.867385 7.066127 6.676967  
2242\_at 4.328762 2.938145 3.84587 3.232751 3.555272 3.818546 3.828155 4.383437  
2243\_at 2.469802 1.923333 2.036055 3.082741 2.520115 8.585375 2.793 2.517308  
2244\_at 2.80309 2.035022 2.229859 3.153903 2.246165 7.114715 4.16803 3.561278  
2245\_at 4.057288 3.415059 4.618812 4.095624 3.408475 3.278686 3.783141 4.065794  
2246\_at 7.285957 7.896755 8.28086 7.984412 7.612769 7.70474 8.187627 7.657373  
2247\_at 5.57433 5.701359 4.546302 5.622152 5.562154 5.758607 5.432547 5.564107  
2248\_at 1.829527 2.121501 1.738597 1.961107 1.922435 1.317049 1.823233 2.182695

|           |          |          |          |          |          |          |          |          |
|-----------|----------|----------|----------|----------|----------|----------|----------|----------|
| 2249_at   | 1.600313 | 1.683841 | 1.80474  | 1.798783 | 1.868748 | 1.629985 | 2.406173 | 1.63627  |
| 224_at    | 6.083091 | 5.822851 | 5.909404 | 6.057088 | 6.883903 | 6.400654 | 4.988184 | 6.460073 |
| 2250_at   | 1.980395 | 1.74258  | 2.130975 | 1.673591 | 1.603465 | 1.761268 | 2.274392 | 1.701057 |
| 2251_at   | 0.920612 | 1.2199   | 1.380284 | 1.0774   | 1.704488 | 2.133363 | 1.217452 | 1.33593  |
| 2252_at   | 2.35025  | 0.974655 | 1.214393 | 1.339945 | 1.855336 | 2.573019 | 2.526699 | 1.273831 |
| 2253_at   | 1.58695  | 1.651919 | 2.813183 | 1.671885 | 1.529823 | 1.664294 | 1.402244 | 1.797388 |
| 2254_at   | 4.316592 | 5.282188 | 5.021254 | 5.050731 | 6.068582 | 3.700931 | 4.344589 | 5.117122 |
| 2255_at   | 0.880108 | 1.243611 | 1.607777 | 1.209815 | 1.671531 | 1.229747 | 2.216792 | 1.335566 |
| 225689_at | 3.057033 | 2.804731 | 2.992462 | 3.018102 | 2.050474 | 3.361936 | 3.278807 | 2.615547 |
| 2256_at   | 1.997356 | 2.331663 | 1.659163 | 2.005429 | 2.497971 | 2.78111  | 2.236815 | 2.015485 |
| 2257_at   | 2.75575  | 2.619683 | 2.391727 | 2.854663 | 3.057897 | 2.790955 | 2.582453 | 2.133999 |
| 2258_at   | 4.389847 | 4.189703 | 3.926147 | 3.795029 | 4.361921 | 3.921133 | 4.313073 | 4.439277 |
| 2259_at   | 1.32522  | 1.782339 | 2.025565 | 1.452279 | 1.683686 | 1.196305 | 1.517993 | 1.614278 |
| 225_at    | 0.821918 | 1.191044 | 0.887303 | 0.885315 | 1.929967 | 1.431685 | 1.137071 | 1.08028  |
| 2260_at   | 6.642493 | 6.318179 | 6.771714 | 6.580747 | 5.95606  | 6.358448 | 6.630589 | 5.942848 |
| 2261_at   | 3.856505 | 3.016531 | 2.242346 | 2.926115 | 3.649242 | 3.267166 | 3.493913 | 2.72199  |
| 2262_at   | 1.811478 | 1.623276 | 1.955601 | 1.90919  | 2.425204 | 1.721328 | 2.59357  | 1.755135 |
| 2263_at   | 4.955022 | 4.958411 | 4.763445 | 4.543243 | 4.788957 | 5.364856 | 4.661717 | 5.674394 |
| 2264_at   | 5.706776 | 5.580267 | 5.691976 | 4.473606 | 4.789397 | 4.968118 | 4.854541 | 4.92141  |
| 2266_at   | 1.213338 | 1.572156 | 1.395844 | 1.439745 | 1.85634  | 2.776416 | 1.586947 | 2.003418 |
| 2267_at   | 1.096212 | 1.178125 | 1.062117 | 1.30252  | 1.297713 | 1.667772 | 1.079321 | 1.416144 |
| 2268_at   | 3.569524 | 4.334335 | 3.898566 | 4.395955 | 3.332661 | 3.416302 | 3.801353 | 3.064584 |
| 226_at    | 8.246103 | 7.773885 | 8.240463 | 8.153395 | 7.549069 | 8.268764 | 8.429703 | 7.411636 |
| 2271_at   | 6.436509 | 6.34462  | 6.746924 | 5.945091 | 6.670984 | 5.788497 | 6.2478   | 6.359496 |
| 2272_at   | 4.604531 | 3.816559 | 4.28721  | 2.992501 | 3.765723 | 3.812118 | 2.682553 | 4.381697 |
| 2273_at   | 1.885212 | 2.014618 | 2.317434 | 2.207031 | 1.643932 | 2.168007 | 2.581365 | 2.441393 |
| 2274_at   | 5.918923 | 5.381526 | 5.395706 | 5.572096 | 5.445886 | 6.024923 | 5.938114 | 5.879561 |
| 2275_at   | 6.128857 | 5.097407 | 5.102053 | 5.246741 | 5.18779  | 5.88473  | 6.087944 | 4.197084 |
| 22794_at  | 7.88995  | 7.913933 | 8.008614 | 7.919848 | 7.631017 | 7.581129 | 8.002306 | 7.782056 |
| 22795_at  | 5.615599 | 5.848203 | 5.068036 | 6.398122 | 5.088687 | 6.0087   | 4.883983 | 5.126656 |
| 22796_at  | 5.878294 | 5.673366 | 4.919676 | 5.737276 | 6.281116 | 6.012962 | 5.253569 | 6.261777 |
| 22797_at  | 3.46269  | 2.477707 | 3.741921 | 2.097811 | 3.673456 | 2.990653 | 1.122642 | 3.576924 |
| 22798_at  | 2.365369 | 1.556259 | 1.630378 | 2.148632 | 1.933252 | 1.979087 | 1.700783 | 1.700804 |
| 22800_at  | 2.013776 | 1.822664 | 1.907556 | 2.270458 | 2.961602 | 2.642913 | 3.472642 | 2.124073 |
| 22801_at  | 4.535399 | 5.323152 | 5.691503 | 6.379976 | 4.675329 | 5.432463 | 4.911423 | 4.291491 |
| 22802_at  | 1.127158 | 1.247159 | 0.913236 | 1.023911 | 1.071423 | 1.200478 | 1.457789 | 1.447464 |
| 22803_at  | 6.433563 | 6.208587 | 6.757014 | 6.548975 | 7.013741 | 6.192987 | 6.256033 | 7.016396 |
| 22806_at  | 2.26525  | 2.403738 | 2.855993 | 3.374346 | 2.996043 | 2.584858 | 3.880256 | 2.856753 |
| 22807_at  | 4.356995 | 3.373801 | 5.321746 | 3.841365 | 3.980343 | 3.690063 | 3.832776 | 4.736955 |
| 22808_at  | 3.087935 | 3.210586 | 3.402631 | 3.38097  | 3.401217 | 3.215287 | 2.746408 | 2.49853  |
| 22809_at  | 5.027797 | 4.875556 | 5.500626 | 5.656221 | 4.683031 | 5.584045 | 5.58446  | 5.042371 |
| 22818_at  | 7.766044 | 7.518117 | 7.697164 | 7.5296   | 7.117346 | 7.270441 | 7.807144 | 7.067076 |
| 2281_at   | 5.907021 | 5.389446 | 4.951557 | 4.651454 | 4.783748 | 5.256165 | 5.098767 | 4.916742 |
| 22820_at  | 7.892785 | 7.766699 | 7.564844 | 7.639108 | 7.68474  | 7.328252 | 7.833455 | 7.274437 |
| 22821_at  | 4.642218 | 4.379609 | 4.516106 | 5.304926 | 4.489189 | 4.677285 | 5.412521 | 4.514082 |
| 22822_at  | 6.157282 | 6.307897 | 5.786742 | 5.285165 | 6.260797 | 5.42532  | 6.863259 | 6.391495 |
| 22823_at  | 5.134436 | 4.640007 | 4.888685 | 5.652416 | 6.821981 | 5.316426 | 5.642091 | 6.255495 |
| 22824_at  | 4.414807 | 4.716758 | 4.772859 | 4.690043 | 5.15115  | 4.712922 | 3.755035 | 5.634967 |
| 22826_at  | 6.41707  | 6.46581  | 6.25738  | 6.383191 | 5.916171 | 6.272055 | 5.415013 | 6.909988 |
| 22827_at  | 7.207049 | 6.308367 | 6.001213 | 6.08524  | 5.942263 | 7.214322 | 6.014438 | 7.255519 |
| 22828_at  | 7.217992 | 7.458052 | 7.250005 | 7.449477 | 7.542492 | 7.500065 | 7.175894 | 6.955907 |

|          |          |          |          |          |          |          |          |          |
|----------|----------|----------|----------|----------|----------|----------|----------|----------|
| 22829_at | 2.596236 | 2.672451 | 3.463604 | 2.4827   | 3.615933 | 2.30047  | 3.740161 | 2.329827 |
| 2282_at  | 2.110358 | 1.631385 | 2.92943  | 3.348951 | 3.862563 | 2.833235 | 3.785986 | 3.251618 |
| 22832_at | 3.25292  | 4.411701 | 3.404721 | 3.763099 | 3.931842 | 4.058427 | 3.842769 | 4.134739 |
| 22834_at | 6.411064 | 6.674577 | 6.844709 | 6.310684 | 7.315185 | 5.999196 | 6.357679 | 6.362392 |
| 22835_at | 4.270605 | 5.018199 | 5.059765 | 4.133276 | 5.149468 | 5.406916 | 4.316325 | 5.887765 |
| 22836_at | 5.959259 | 5.62456  | 7.040888 | 6.769391 | 6.156982 | 6.406277 | 7.120599 | 5.922558 |
| 22837_at | 5.71308  | 5.929398 | 6.290419 | 6.858558 | 7.201271 | 6.531532 | 6.407858 | 5.874367 |
| 22838_at | 5.427624 | 5.555801 | 5.831135 | 5.701488 | 5.602518 | 5.423143 | 6.592338 | 3.846782 |
| 22839_at | 7.278596 | 7.558485 | 7.361378 | 7.227905 | 6.631266 | 7.405475 | 7.109423 | 6.424168 |
| 22841_at | 7.25717  | 7.2284   | 7.440667 | 6.611926 | 6.641289 | 7.084797 | 6.784798 | 6.950352 |
| 22843_at | 1.757614 | 1.19809  | 1.198543 | 1.178482 | 2.026367 | 1.261252 | 1.580246 | 1.584345 |
| 22844_at | 1.560006 | 1.607645 | 2.000062 | 1.288415 | 1.841257 | 1.656385 | 1.620795 | 1.510512 |
| 22845_at | 5.202253 | 5.363181 | 4.695297 | 5.471104 | 5.144114 | 5.261474 | 4.833615 | 4.916002 |
| 22846_at | 3.942552 | 3.581012 | 4.330823 | 3.95357  | 4.443588 | 3.687786 | 4.535336 | 2.878118 |
| 22847_at | 5.889954 | 6.297167 | 5.876892 | 5.571972 | 6.065018 | 5.056769 | 5.42903  | 5.937842 |
| 22848_at | 5.321318 | 5.659379 | 5.730708 | 5.546611 | 5.517083 | 6.127233 | 6.068097 | 5.762928 |
| 22849_at | 2.935665 | 3.866119 | 3.23313  | 3.69162  | 3.408379 | 2.940609 | 2.477553 | 3.673903 |
| 22850_at | 4.318191 | 4.716862 | 4.716095 | 3.30536  | 5.471605 | 4.955732 | 5.215801 | 4.257855 |
| 22852_at | 5.163471 | 5.165571 | 4.589208 | 5.316499 | 3.905031 | 4.784088 | 4.916612 | 5.013402 |
| 22853_at | 4.88807  | 5.386739 | 5.405863 | 4.345423 | 4.406862 | 5.01053  | 5.404213 | 4.745525 |
| 22854_at | 8.807567 | 8.61983  | 9.180399 | 9.050658 | 8.116481 | 8.369374 | 8.915547 | 9.084606 |
| 22856_at | 6.362943 | 6.75139  | 5.614976 | 6.174554 | 6.006007 | 5.904935 | 6.227036 | 6.785926 |
| 22858_at | 5.383869 | 5.587086 | 5.336038 | 5.977142 | 4.113949 | 5.300067 | 4.957208 | 5.505069 |
| 22859_at | 5.525774 | 4.893083 | 5.781455 | 5.412992 | 5.623001 | 5.330332 | 5.762498 | 4.956449 |
| 22861_at | 3.96464  | 3.640771 | 2.828245 | 4.513484 | 3.645416 | 3.196911 | 3.692695 | 2.57857  |
| 22862_at | 7.726037 | 7.7529   | 7.518302 | 8.2234   | 7.842325 | 7.671724 | 7.928554 | 7.679767 |
| 22863_at | 5.091151 | 5.562198 | 4.886864 | 5.501111 | 5.338465 | 5.40793  | 5.532601 | 5.503763 |
| 22864_at | 7.348691 | 7.341043 | 6.981513 | 7.647348 | 6.547904 | 7.517755 | 7.278811 | 6.865162 |
| 22865_at | 2.734491 | 1.716357 | 1.641715 | 1.802336 | 1.69739  | 2.22993  | 2.372562 | 2.507896 |
| 22866_at | 2.647558 | 2.140012 | 2.176526 | 1.651035 | 2.439822 | 1.33704  | 2.220526 | 3.299751 |
| 22868_at | 5.306187 | 5.060347 | 4.818963 | 4.881226 | 5.161305 | 4.766543 | 4.852923 | 5.344673 |
| 22869_at | 6.352168 | 5.173427 | 6.034836 | 5.567668 | 5.46407  | 4.706419 | 5.239065 | 5.606525 |
| 2286_at  | 10.03598 | 10.03486 | 9.975694 | 9.946535 | 10.02422 | 9.707278 | 9.6842   | 9.629179 |
| 22870_at | 5.67952  | 5.494999 | 6.008418 | 5.953946 | 6.095362 | 5.897352 | 6.164944 | 5.601644 |
| 22871_at | 1.801252 | 1.445289 | 2.054965 | 2.678993 | 2.630269 | 1.654462 | 2.284554 | 2.518059 |
| 22872_at | 8.569245 | 8.542894 | 8.522363 | 8.59062  | 8.694408 | 8.471158 | 8.590286 | 8.777402 |
| 22873_at | 5.141482 | 5.993785 | 5.514808 | 5.615994 | 5.480622 | 5.484626 | 4.813919 | 4.693704 |
| 22874_at | 3.683002 | 4.237724 | 4.403599 | 4.476482 | 4.162467 | 4.607549 | 4.066883 | 3.648232 |
| 22875_at | 6.555108 | 5.580643 | 6.854072 | 6.627806 | 6.584756 | 6.591453 | 7.05312  | 6.185626 |
| 22876_at | 5.859826 | 5.848007 | 5.577846 | 5.947637 | 6.119608 | 6.060868 | 6.001792 | 6.578297 |
| 22877_at | 7.527055 | 7.123719 | 7.285657 | 7.30654  | 6.766305 | 7.03355  | 7.197283 | 6.480886 |
| 22878_at | 6.276101 | 6.098708 | 5.623478 | 5.619752 | 5.913794 | 5.221107 | 6.015844 | 6.231781 |
| 22879_at | 3.82221  | 4.067956 | 3.652403 | 3.507239 | 4.179211 | 3.360052 | 3.739774 | 3.156085 |
| 2287_at  | 7.137028 | 7.524694 | 7.370894 | 7.032952 | 7.112767 | 7.111432 | 6.983461 | 7.781931 |
| 22880_at | 5.094861 | 5.841581 | 5.771454 | 5.856035 | 5.442021 | 5.81523  | 6.016408 | 5.288758 |
| 22881_at | 4.438087 | 2.252436 | 4.490887 | 2.216596 | 3.431695 | 4.91536  | 4.143657 | 3.937956 |
| 22882_at | 4.619472 | 4.49969  | 4.746174 | 4.940424 | 5.321319 | 4.255448 | 4.203824 | 4.706763 |
| 22883_at | 7.234061 | 7.120141 | 7.646394 | 7.354285 | 7.199578 | 7.71853  | 7.465343 | 7.069024 |
| 22884_at | 4.510252 | 5.116138 | 5.039115 | 5.450416 | 3.567876 | 4.953064 | 5.006111 | 5.018012 |
| 22885_at | 4.248751 | 4.697626 | 5.098676 | 5.227223 | 4.019303 | 5.422026 | 4.616544 | 3.792942 |
| 22887_at | 7.20337  | 6.695744 | 7.008829 | 7.069077 | 6.931071 | 6.764635 | 7.632144 | 6.621351 |

22888\_at 3.774649 4.138146 4.554258 4.16483 3.771386 4.035865 2.375656 4.067442  
22889\_at 6.021348 5.880824 5.785124 5.948304 5.705688 5.581606 5.89526 5.888082  
2288\_at 6.674731 7.004823 6.741605 7.012982 6.7531 7.139682 6.46057 6.620475  
22890\_at 4.924539 5.324824 5.550683 5.110055 4.529984 4.8352 4.669809 5.269331  
22891\_at 1.441439 1.919425 1.300642 1.333802 1.443579 1.598811 2.181155 2.215835  
22893\_at 4.091544 5.282059 4.540613 4.978123 3.945827 4.814187 5.948763 3.928306  
22894\_at 6.93957 7.078053 6.899433 6.782913 7.622571 6.86063 6.746086 7.517563  
22895\_at 2.196837 2.951775 1.965958 1.901346 1.579403 2.049723 3.424037 2.279037  
22897\_at 3.651452 5.119192 4.734796 4.657021 4.517401 4.274717 4.013578 4.250494  
22898\_at 4.367992 4.947503 4.788509 4.282939 4.577872 4.211825 5.015308 3.730325  
22899\_at 6.268428 6.622901 6.76658 6.881008 6.340272 6.541227 6.87271 5.055764  
2289\_at 7.296912 8.454845 7.995142 8.488802 6.1541 8.322484 7.639886 7.853649  
22900\_at 4.682111 4.339281 4.458712 5.360176 4.457609 4.838655 4.509384 4.56545  
22901\_at 3.365481 2.859473 2.497178 3.694329 2.497056 2.992586 3.08757 2.929076  
22902\_at 5.632828 5.254729 5.293759 5.512953 6.232407 4.892136 5.550036 5.588294  
22903\_at 6.477167 6.979239 7.194423 6.797199 6.745292 6.71371 6.923455 6.322808  
22904\_at 2.235668 3.010945 2.290503 3.55257 2.769147 2.810986 3.601604 1.810307  
22905\_at 6.098918 6.254195 6.218902 6.385435 5.807554 6.370352 6.65576 5.563158  
22906\_at 5.390842 5.646106 4.756064 4.887733 5.450527 5.490979 5.190605 4.564591  
22907\_at 4.71657 5.30568 4.911153 5.181967 4.639315 5.131749 4.765976 4.446149  
22908\_at 6.294702 6.651086 6.514961 6.872283 7.36884 6.528749 6.593247 7.047662  
22909\_at 3.211992 4.00138 3.633089 4.002782 4.162236 3.386974 3.392145 3.854573  
2290\_at 3.064017 2.062158 2.595207 2.175872 2.759922 2.480693 1.909725 2.667852  
22911\_at 4.648692 4.780768 4.276984 5.108823 5.267756 4.792683 5.390449 4.867553  
22913\_at 7.139756 6.791598 6.637259 7.080536 6.256681 6.718313 7.278328 6.228399  
22915\_at 1.850426 1.359567 1.534818 1.600158 1.577869 1.069343 1.653279 2.37933  
22916\_at 4.965554 5.96792 5.790687 5.721173 3.518849 6.248649 6.184806 5.644484  
22917\_at 2.265181 1.365285 1.466399 1.464433 2.494996 1.479095 2.223938 2.531248  
22918\_at 5.51293 5.241468 5.019076 5.317445 4.737483 4.891534 5.504026 5.087078  
22919\_at 7.587551 8.29364 7.995091 8.348036 7.899381 8.125454 8.054958 8.072354  
22920\_at 6.948218 7.086033 6.54931 6.648259 6.840496 6.982578 6.71154 7.104385  
22921\_at 7.619602 7.493704 6.765269 6.588444 6.38076 6.997583 5.949083 6.067345  
22924\_at 6.201659 5.54345 5.607438 5.861392 6.216556 5.689452 5.393269 3.7446  
22925\_at 9.333789 9.377997 9.411593 9.211552 9.637926 8.815805 9.256784 9.525466  
22926\_at 7.5835 7.470627 7.931557 7.984287 7.747131 7.675273 8.075446 7.694813  
22927\_at 7.12934 7.928154 6.831105 6.98184 7.331929 7.091491 6.982875 7.582686  
22928\_at 6.038467 5.639247 5.005063 4.703729 6.149085 5.464125 5.167325 6.407034  
22929\_at 6.741071 7.499775 7.179777 7.005295 7.226485 7.392619 7.650925 6.968973  
22930\_at 7.014751 7.342343 7.356133 6.941046 7.359653 6.970232 7.152761 7.166952  
22931\_at 7.787424 7.819644 7.384605 7.519637 7.606588 6.95541 7.453977 7.758358  
22932\_at 4.833771 5.906522 6.028649 6.478242 4.861099 4.760143 5.361693 5.590714  
22933\_at 5.738869 5.069339 5.278029 6.489304 4.199311 6.364454 6.055255 5.516071  
22934\_at 3.6667 3.368365 3.326484 4.394072 4.269619 2.932935 3.879191 3.999262  
22936\_at 7.968789 8.003573 8.577026 8.237349 7.158685 8.41664 8.100469 7.940409  
22937\_at 6.217777 6.086991 6.131553 6.153605 5.766659 6.002475 6.244683 4.960441  
22938\_at 6.076952 6.446054 6.035741 5.925386 5.714656 6.018549 5.577738 6.132694  
22941\_at 2.976505 2.674694 3.609279 3.332199 2.056199 4.582909 2.059743 4.045371  
22943\_at 2.740768 1.583101 1.964971 2.039864 2.066605 1.969704 2.053595 1.698099  
22944\_at 4.889027 5.242241 4.628148 4.179255 3.494981 4.952152 4.200076 5.51845  
22948\_at 7.938302 7.922973 7.699643 6.515515 7.647518 6.884077 7.242984 7.936909  
22949\_at 7.308427 7.134076 7.613924 7.348645 7.526799 8.108099 7.048573 7.939635



|          |          |          |          |          |          |          |          |          |
|----------|----------|----------|----------|----------|----------|----------|----------|----------|
| 2294_at  | 3.840421 | 3.925803 | 4.133056 | 3.992607 | 4.407467 | 3.439114 | 4.146514 | 2.993867 |
| 22950_at | 5.993231 | 5.696535 | 5.698627 | 5.412422 | 5.895294 | 5.619914 | 4.525727 | 6.014387 |
| 22952_at | 2.185258 | 3.210254 | 1.87854  | 1.684364 | 1.936906 | 2.370165 | 2.741096 | 2.165379 |
| 22953_at | 2.553941 | 2.612285 | 1.918083 | 2.309954 | 2.068408 | 2.923524 | 2.382442 | 2.657854 |
| 22954_at | 3.98794  | 4.556827 | 4.465072 | 5.108783 | 4.282229 | 4.364416 | 4.881086 | 4.75237  |
| 22955_at | 6.677867 | 6.301076 | 6.235168 | 6.179953 | 5.726642 | 6.64713  | 6.31346  | 5.576985 |
| 2295_at  | 1.753108 | 1.43277  | 1.830528 | 1.260895 | 1.503916 | 1.883316 | 1.697222 | 1.892081 |
| 2296_at  | 9.616599 | 9.560884 | 9.483881 | 9.137552 | 8.642438 | 9.531312 | 9.286553 | 9.254087 |
| 22973_at | 1.320848 | 2.103825 | 3.961688 | 1.820594 | 2.823785 | 2.313497 | 2.883105 | 1.409318 |
| 22974_at | 1.918138 | 2.638048 | 1.741253 | 2.800511 | 2.110953 | 1.536578 | 3.624985 | 3.266582 |
| 22976_at | 4.861689 | 5.022521 | 5.251376 | 5.424389 | 4.231257 | 5.15416  | 4.6134   | 5.036848 |
| 22977_at | 6.595843 | 5.353561 | 4.928582 | 3.218589 | 6.241802 | 5.260341 | 2.909718 | 5.841248 |
| 22978_at | 5.813618 | 5.712685 | 6.668492 | 5.972546 | 6.439735 | 6.558042 | 6.498369 | 6.608249 |
| 22979_at | 2.151162 | 2.624031 | 2.369179 | 3.154711 | 3.477117 | 2.960411 | 2.623074 | 2.793332 |
| 2297_at  | 4.970066 | 5.353028 | 5.314372 | 2.941447 | 4.010141 | 4.969473 | 4.723484 | 6.105867 |
| 22980_at | 6.920409 | 6.635493 | 6.676335 | 6.800042 | 6.853726 | 7.102423 | 7.042946 | 6.538977 |
| 22981_at | 3.784049 | 3.041963 | 2.874941 | 3.115534 | 4.302684 | 3.441134 | 2.375021 | 3.258523 |
| 22982_at | 4.765245 | 4.866234 | 5.005745 | 5.513847 | 4.681892 | 5.005089 | 5.230642 | 4.44619  |
| 22983_at | 1.418611 | 1.515754 | 2.010161 | 1.378987 | 2.112195 | 1.763271 | 2.522959 | 2.41863  |
| 22984_at | 3.753456 | 5.347334 | 5.022864 | 3.504037 | 4.845046 | 4.176572 | 4.720705 | 3.892957 |
| 22985_at | 5.224456 | 5.128226 | 5.449278 | 5.834127 | 4.76055  | 5.537783 | 5.588514 | 5.218499 |
| 22986_at | 1.200031 | 1.507964 | 2.098374 | 1.392299 | 1.503995 | 1.544501 | 2.285588 | 1.300107 |
| 22987_at | 1.814233 | 1.192754 | 1.212411 | 1.418808 | 1.177175 | 1.655818 | 1.6428   | 1.112454 |
| 22989_at | 1.527085 | 1.269253 | 1.664742 | 1.183292 | 2.172285 | 1.260317 | 1.473547 | 1.449639 |
| 2298_at  | 3.536227 | 4.399364 | 3.699946 | 3.973059 | 2.672357 | 3.158511 | 3.684329 | 4.779633 |
| 22990_at | 6.087502 | 6.416593 | 6.770457 | 6.539144 | 6.627175 | 6.01771  | 6.562212 | 7.04587  |
| 22992_at | 6.169879 | 6.77587  | 6.606911 | 6.775775 | 6.877007 | 6.718228 | 6.663223 | 6.203475 |
| 22993_at | 4.233471 | 4.278481 | 3.833886 | 4.665018 | 3.867759 | 4.590484 | 3.772295 | 4.212486 |
| 22994_at | 3.672306 | 4.042332 | 3.990718 | 3.843282 | 4.225737 | 3.922468 | 3.392995 | 3.901233 |
| 22995_at | 3.592175 | 1.972573 | 2.61086  | 1.828082 | 3.000166 | 2.772731 | 1.7277   | 2.633664 |
| 22996_at | 2.894058 | 2.753056 | 4.024644 | 3.090045 | 2.266666 | 2.94463  | 3.724092 | 2.924782 |
| 22997_at | 2.518957 | 2.177385 | 3.004383 | 3.255165 | 2.763039 | 3.582119 | 2.454526 | 2.683833 |
| 22998_at | 6.303076 | 6.864513 | 6.694575 | 7.316448 | 7.40159  | 7.324942 | 7.06342  | 6.740012 |
| 22999_at | 1.823764 | 1.981457 | 1.75162  | 1.465492 | 1.616857 | 1.439127 | 1.700238 | 1.699296 |
| 2299_at  | 2.203692 | 2.589762 | 2.816195 | 2.431835 | 3.062294 | 2.226967 | 1.91269  | 2.22524  |
| 229_at   | 9.950916 | 8.971587 | 9.150539 | 7.191342 | 10.10574 | 9.592865 | 7.647897 | 9.409025 |
| 22_at    | 5.780463 | 5.530835 | 4.582345 | 4.987762 | 4.865113 | 4.630039 | 4.982555 | 5.981961 |
| 23001_at | 6.216436 | 6.23493  | 6.327874 | 6.18329  | 6.258697 | 6.261564 | 6.374177 | 6.411883 |
| 23002_at | 5.040149 | 5.328496 | 5.012028 | 5.792113 | 5.700799 | 5.061413 | 5.356344 | 6.091853 |
| 23005_at | 3.558189 | 3.161337 | 3.669419 | 3.146891 | 3.524673 | 3.794777 | 2.94271  | 3.342715 |
| 23007_at | 2.806141 | 1.393787 | 1.685697 | 1.741846 | 1.694428 | 2.01696  | 1.875961 | 1.940426 |
| 23008_at | 7.500165 | 7.52964  | 7.155732 | 7.757416 | 7.142157 | 7.293039 | 7.402122 | 7.558644 |
| 2300_at  | 2.316986 | 4.358068 | 3.15102  | 3.126094 | 2.180183 | 2.591843 | 2.908117 | 3.730044 |
| 23011_at | 7.353784 | 7.872742 | 7.419204 | 7.510616 | 7.645388 | 7.632208 | 7.570696 | 7.364441 |
| 23012_at | 6.171007 | 6.031894 | 5.579277 | 5.991409 | 6.321187 | 6.053276 | 5.205904 | 6.496368 |
| 23013_at | 5.647097 | 6.548195 | 6.220835 | 6.445346 | 6.63566  | 6.849528 | 6.364248 | 5.933982 |
| 23014_at | 6.755557 | 7.173925 | 7.897486 | 7.008916 | 6.5683   | 7.648568 | 7.377932 | 6.798682 |
| 23015_at | 5.496355 | 3.187248 | 3.187248 | 5.494551 | 5.293675 | 5.607114 | 4.418813 | 5.765452 |
| 23016_at | 5.966242 | 6.486427 | 6.344959 | 5.528036 | 6.835277 | 5.983644 | 5.788996 | 6.409649 |
| 23017_at | 2.026501 | 1.869775 | 2.184319 | 2.219422 | 3.063618 | 2.08656  | 1.981334 | 2.100106 |
| 23019_at | 7.716496 | 7.771021 | 7.881248 | 7.897995 | 8.076455 | 7.911719 | 7.575382 | 7.997167 |

|          |          |          |          |          |          |          |          |          |
|----------|----------|----------|----------|----------|----------|----------|----------|----------|
| 2301_at  | 4.641195 | 2.554421 | 3.131547 | 2.587598 | 2.64635  | 3.63705  | 2.367627 | 4.095487 |
| 23020_at | 6.925663 | 7.46728  | 7.104566 | 7.429133 | 7.299204 | 7.103264 | 7.234433 | 7.174773 |
| 23022_at | 7.312842 | 7.197032 | 7.148981 | 6.863631 | 7.220954 | 7.292307 | 7.367869 | 6.8044   |
| 23023_at | 5.00332  | 4.697285 | 4.624931 | 4.809506 | 5.163826 | 5.122844 | 5.537409 | 5.091797 |
| 23024_at | 2.983906 | 2.908842 | 2.6159   | 2.668358 | 2.32667  | 2.371854 | 2.615717 | 2.731886 |
| 23025_at | 2.430726 | 2.697727 | 2.558874 | 2.737105 | 2.824638 | 2.889827 | 1.846649 | 2.537718 |
| 23026_at | 2.079501 | 1.435609 | 1.246834 | 1.531554 | 1.918659 | 1.36223  | 1.692999 | 1.969805 |
| 23028_at | 6.955076 | 7.022245 | 6.464133 | 6.93556  | 6.648238 | 6.866499 | 6.556036 | 7.070971 |
| 23029_at | 7.93882  | 7.915204 | 7.739553 | 8.025642 | 7.624979 | 7.60706  | 7.362743 | 7.872226 |
| 2302_at  | 2.381622 | 2.617979 | 2.509775 | 2.376399 | 2.505698 | 2.439735 | 2.818248 | 1.888407 |
| 23030_at | 4.691519 | 4.900939 | 4.216009 | 4.126521 | 3.642615 | 5.228994 | 4.107483 | 3.964163 |
| 23031_at | 4.369795 | 4.228649 | 5.157123 | 5.014438 | 4.202633 | 4.386275 | 4.884235 | 4.40229  |
| 23032_at | 6.587145 | 6.698601 | 6.658079 | 6.807695 | 6.784568 | 6.305508 | 6.336931 | 6.423921 |
| 23033_at | 4.650193 | 4.845351 | 4.317405 | 4.793316 | 4.244529 | 4.015002 | 4.045925 | 4.652581 |
| 23034_at | 3.828584 | 5.305869 | 5.772426 | 5.529219 | 5.153605 | 5.320745 | 6.236926 | 5.197689 |
| 23035_at | 4.41532  | 5.081932 | 4.924138 | 3.536465 | 3.926415 | 3.579818 | 3.49199  | 4.635242 |
| 23036_at | 5.521408 | 6.442524 | 6.12471  | 5.330835 | 6.102646 | 6.018877 | 5.869598 | 6.683797 |
| 23037_at | 4.322584 | 4.55168  | 4.961313 | 4.202099 | 4.379461 | 4.180905 | 4.681208 | 4.236235 |
| 23038_at | 5.095304 | 5.268216 | 5.263157 | 5.74243  | 5.030011 | 5.601289 | 6.161985 | 4.39506  |
| 23039_at | 6.722533 | 7.120643 | 7.159804 | 6.919773 | 6.81342  | 6.399637 | 7.183049 | 7.390192 |
| 2303_at  | 5.499508 | 4.810725 | 5.405445 | 4.328283 | 3.467765 | 4.788371 | 5.228866 | 4.640096 |
| 23040_at | 2.104536 | 2.75413  | 2.9444   | 1.701125 | 3.037404 | 2.343861 | 1.514725 | 2.572911 |
| 23041_at | 5.742241 | 5.93601  | 5.943374 | 5.602976 | 5.808998 | 5.562331 | 5.87474  | 6.142723 |
| 23042_at | 6.040428 | 5.536465 | 5.536627 | 6.05711  | 5.84962  | 5.737097 | 5.511483 | 5.14222  |
| 23043_at | 4.327906 | 5.647588 | 4.543931 | 4.101256 | 3.87244  | 4.777546 | 3.398575 | 5.057612 |
| 23046_at | 1.941455 | 1.877301 | 1.610076 | 2.513944 | 2.830026 | 2.247249 | 2.794211 | 2.073584 |
| 23047_at | 7.039471 | 7.048883 | 6.588455 | 6.929884 | 6.933147 | 6.926185 | 7.288927 | 7.186028 |
| 23048_at | 8.23468  | 8.539167 | 8.43453  | 8.55753  | 8.600285 | 8.37242  | 8.610506 | 8.281549 |
| 23049_at | 5.357832 | 5.38562  | 5.662369 | 5.419817 | 5.937957 | 5.423956 | 5.7176   | 5.916411 |
| 2304_at  | 2.572853 | 2.336931 | 2.71778  | 2.722227 | 2.222576 | 2.709975 | 3.653186 | 2.80269  |
| 23051_at | 4.799716 | 4.906986 | 4.713223 | 4.244764 | 5.04732  | 4.805714 | 4.154951 | 5.081715 |
| 23052_at | 6.139112 | 5.76054  | 5.905835 | 6.060453 | 5.79697  | 5.832849 | 6.537326 | 5.912428 |
| 23053_at | 5.769722 | 5.222716 | 5.916955 | 6.138804 | 5.279009 | 5.73919  | 6.130927 | 5.581038 |
| 23054_at | 5.280718 | 5.387453 | 5.455612 | 5.609858 | 5.134774 | 5.151414 | 5.207213 | 5.598015 |
| 23057_at | 1.960508 | 2.252775 | 2.978988 | 1.703097 | 1.801969 | 1.969783 | 1.488256 | 2.353625 |
| 23059_at | 7.136733 | 7.204402 | 7.216285 | 7.123933 | 5.861955 | 6.151896 | 6.561554 | 6.93042  |
| 2305_at  | 2.057928 | 2.912851 | 2.007873 | 2.4562   | 2.165321 | 2.377866 | 2.014761 | 3.163677 |
| 23060_at | 6.579059 | 6.98328  | 7.350467 | 6.979251 | 6.47852  | 6.967933 | 7.288427 | 6.526453 |
| 23061_at | 5.910443 | 6.030946 | 5.501109 | 5.164111 | 5.239979 | 6.056304 | 5.875563 | 4.935516 |
| 23062_at | 5.874308 | 5.516515 | 5.476027 | 5.46415  | 5.235136 | 5.246435 | 5.581567 | 5.06895  |
| 23063_at | 7.553612 | 7.09902  | 7.263279 | 7.55681  | 7.138457 | 7.188867 | 7.035426 | 7.602298 |
| 23064_at | 6.767748 | 7.417446 | 7.5648   | 7.25451  | 7.501062 | 7.01264  | 7.355929 | 7.384643 |
| 23065_at | 4.978667 | 5.798295 | 5.69886  | 5.803284 | 5.782649 | 5.729821 | 6.470994 | 5.431894 |
| 23066_at | 5.057732 | 4.857986 | 5.315555 | 4.862793 | 4.481879 | 4.88512  | 4.530305 | 4.770537 |
| 23067_at | 4.792526 | 5.678058 | 5.14873  | 6.176536 | 5.017422 | 5.45122  | 5.612464 | 4.538138 |
| 2306_at  | 5.028247 | 4.692796 | 4.74415  | 4.785665 | 4.207252 | 5.100574 | 5.131442 | 4.801152 |
| 23070_at | 4.884969 | 4.840453 | 4.907301 | 5.406464 | 5.438951 | 5.005845 | 4.698418 | 4.791784 |
| 23071_at | 7.456655 | 7.730202 | 7.974724 | 7.92564  | 7.789352 | 7.696523 | 8.041044 | 8.160661 |
| 23072_at | 2.968558 | 2.326806 | 3.910935 | 2.484288 | 3.347257 | 3.818196 | 2.274467 | 2.444811 |
| 23074_at | 5.719391 | 5.936647 | 5.748377 | 5.268408 | 5.303305 | 5.764054 | 5.783921 | 5.995795 |
| 23075_at | 7.838559 | 7.999116 | 7.877306 | 7.576523 | 7.124933 | 7.667441 | 7.621202 | 7.779164 |

|          |          |          |          |          |          |          |          |          |
|----------|----------|----------|----------|----------|----------|----------|----------|----------|
| 23076_at | 4.841118 | 4.985552 | 3.74358  | 3.869314 | 4.679154 | 4.805544 | 4.266643 | 5.056127 |
| 23077_at | 5.881951 | 6.496336 | 6.563772 | 6.871287 | 6.863197 | 6.276742 | 6.567427 | 6.939503 |
| 23078_at | 5.522249 | 5.228666 | 5.401123 | 5.321418 | 5.000514 | 5.267372 | 5.20775  | 4.35225  |
| 2307_at  | 5.796846 | 5.272386 | 5.272428 | 5.641479 | 3.357037 | 5.328807 | 5.503927 | 4.373867 |
| 23080_at | 4.866638 | 4.562985 | 5.214646 | 4.858136 | 5.010472 | 4.582874 | 4.686874 | 5.253042 |
| 23081_at | 4.305636 | 5.109763 | 5.167855 | 4.504589 | 5.435208 | 5.152189 | 4.423675 | 4.448704 |
| 23082_at | 5.506185 | 4.02769  | 4.942926 | 4.946413 | 4.142914 | 5.753057 | 5.817226 | 4.312659 |
| 23085_at | 7.314854 | 7.763208 | 8.070015 | 7.640669 | 7.850319 | 7.511195 | 8.202585 | 7.892863 |
| 23086_at | 6.815433 | 6.955848 | 7.177875 | 6.91011  | 5.980082 | 6.747889 | 7.008855 | 6.995147 |
| 23087_at | 3.933356 | 4.094201 | 4.577249 | 3.736048 | 3.693339 | 3.239921 | 4.731384 | 3.675313 |
| 23089_at | 5.325653 | 4.787275 | 5.21355  | 6.175839 | 5.156817 | 5.501502 | 5.803699 | 5.106054 |
| 2308_at  | 5.068248 | 5.877159 | 5.68094  | 5.146877 | 5.338441 | 5.568668 | 5.206124 | 5.74389  |
| 23090_at | 3.545021 | 4.879462 | 4.702705 | 4.197247 | 4.122458 | 4.56101  | 4.249498 | 4.233189 |
| 23091_at | 7.1066   | 7.141108 | 7.509803 | 7.255484 | 7.215147 | 7.214478 | 7.471511 | 6.897142 |
| 23092_at | 4.322726 | 5.655111 | 4.966965 | 5.146556 | 5.543981 | 5.101825 | 5.91902  | 3.660807 |
| 23093_at | 5.460977 | 6.039351 | 6.134593 | 6.229186 | 6.065139 | 6.197757 | 6.144502 | 5.434007 |
| 23094_at | 5.272029 | 5.579266 | 5.134808 | 5.512626 | 4.669482 | 5.538932 | 4.997681 | 4.245312 |
| 23095_at | 6.560316 | 6.953862 | 6.803102 | 6.861379 | 6.51566  | 6.788362 | 6.91628  | 6.922943 |
| 23096_at | 4.765943 | 4.49754  | 4.182736 | 5.033616 | 3.685098 | 4.776376 | 4.368669 | 3.642764 |
| 23097_at | 5.700394 | 5.826882 | 6.520117 | 5.630146 | 5.859064 | 6.115537 | 5.847846 | 5.098735 |
| 23098_at | 2.705883 | 2.376009 | 2.358994 | 1.881834 | 2.240578 | 2.071655 | 2.342999 | 1.848851 |
| 23099_at | 3.689491 | 3.308854 | 3.205405 | 3.689491 | 4.942433 | 4.211166 | 3.932175 | 3.557717 |
| 2309_at  | 2.42495  | 2.73034  | 2.410989 | 2.682539 | 2.045587 | 3.158425 | 1.623564 | 2.090282 |
| 230_at   | 4.991751 | 4.831971 | 5.320377 | 4.669874 | 5.19025  | 5.034206 | 5.411579 | 3.968228 |
| 23101_at | 2.063581 | 2.439676 | 2.152109 | 2.347853 | 1.600839 | 1.798524 | 2.919434 | 1.673361 |
| 23102_at | 6.121213 | 6.118693 | 5.266972 | 6.209546 | 5.695692 | 6.187334 | 5.793297 | 6.026982 |
| 23105_at | 1.462056 | 2.477627 | 2.370466 | 1.923537 | 2.509996 | 1.719279 | 3.489161 | 1.383642 |
| 23107_at | 5.66735  | 6.323878 | 5.815811 | 5.910563 | 6.512625 | 6.394602 | 6.547806 | 6.132012 |
| 23108_at | 2.067034 | 2.051631 | 2.238242 | 2.652532 | 2.780603 | 1.707191 | 2.290525 | 1.914914 |
| 23109_at | 6.198331 | 5.970333 | 5.721189 | 6.554222 | 5.83585  | 5.183484 | 5.074608 | 5.92937  |
| 23111_at | 5.453908 | 5.599432 | 5.59096  | 5.449548 | 6.342988 | 5.809428 | 6.16926  | 6.451351 |
| 23112_at | 5.019681 | 5.890574 | 6.273328 | 5.964655 | 6.360463 | 5.86462  | 5.066469 | 5.545548 |
| 23113_at | 3.473873 | 3.859296 | 3.842217 | 3.921562 | 2.782695 | 3.480479 | 2.744867 | 3.198167 |
| 23114_at | 7.618543 | 7.767465 | 9.059218 | 8.49681  | 8.187164 | 8.486405 | 8.853698 | 7.31496  |
| 23116_at | 5.252998 | 5.214472 | 4.105437 | 4.644689 | 6.038095 | 4.708783 | 4.883054 | 5.961294 |
| 23118_at | 7.591627 | 7.099679 | 7.220872 | 7.536801 | 6.712406 | 7.669352 | 7.621837 | 7.314557 |
| 23119_at | 3.579167 | 2.451706 | 3.828367 | 3.216186 | 3.681907 | 3.55565  | 2.295638 | 2.342195 |
| 23120_at | 1.460456 | 1.377885 | 1.634728 | 1.350461 | 2.188244 | 2.293454 | 1.561823 | 2.349193 |
| 23122_at | 5.615396 | 5.877457 | 6.020191 | 6.160042 | 6.052206 | 5.86916  | 6.383615 | 6.252799 |
| 23125_at | 5.805076 | 5.714913 | 6.311354 | 5.784306 | 5.382206 | 6.258455 | 6.988514 | 5.275063 |
| 23126_at | 6.511368 | 6.508362 | 6.778126 | 6.279404 | 6.28821  | 7.081536 | 6.012448 | 6.591669 |
| 23127_at | 5.121847 | 5.055192 | 5.39751  | 5.082451 | 4.759819 | 4.767259 | 5.977578 | 3.458157 |
| 23129_at | 6.512295 | 6.650184 | 7.155435 | 7.283018 | 6.337504 | 6.699499 | 7.280208 | 5.70266  |
| 2312_at  | 1.481555 | 2.224918 | 2.764872 | 1.732572 | 1.321207 | 2.81101  | 1.944027 | 2.36945  |
| 23130_at | 3.705417 | 3.772789 | 4.197389 | 3.675441 | 3.153059 | 4.654223 | 4.098378 | 3.587354 |
| 23131_at | 6.292164 | 5.933008 | 5.732354 | 6.670202 | 7.128951 | 6.274021 | 6.088315 | 6.614531 |
| 23132_at | 5.26431  | 5.407788 | 6.20888  | 6.583206 | 5.346622 | 5.809962 | 5.980139 | 6.367238 |
| 23133_at | 4.875807 | 5.515482 | 4.772321 | 4.89123  | 4.491706 | 5.436508 | 5.587644 | 4.574026 |
| 23135_at | 4.550282 | 4.671525 | 4.565609 | 4.932867 | 4.340992 | 4.260316 | 5.124351 | 4.276823 |
| 23136_at | 5.155613 | 3.89949  | 4.029669 | 4.904607 | 5.141515 | 4.980693 | 3.747814 | 4.656895 |
| 23137_at | 6.858086 | 6.656666 | 5.95283  | 6.058361 | 5.563902 | 6.243335 | 6.565136 | 6.843312 |

|          |           |           |           |           |           |           |           |           |
|----------|-----------|-----------|-----------|-----------|-----------|-----------|-----------|-----------|
| 23138_at | 1. 583665 | 2. 389346 | 2. 946384 | 1. 913144 | 1. 331222 | 2. 523227 | 2. 154549 | 1. 657916 |
| 23139_at | 3. 905827 | 4. 654566 | 4. 50432  | 4. 690616 | 4. 579452 | 4. 829084 | 4. 974875 | 4. 371914 |
| 2313_at  | 6. 131992 | 5. 345936 | 6. 076718 | 6. 173503 | 5. 296269 | 5. 727742 | 5. 450516 | 5. 390421 |
| 23140_at | 5. 070098 | 6. 006184 | 5. 907799 | 5. 655704 | 5. 503494 | 5. 81929  | 5. 143263 | 5. 35281  |
| 23141_at | 5. 792996 | 6. 626431 | 5. 856602 | 5. 406914 | 5. 792344 | 6. 044958 | 5. 461494 | 6. 38538  |
| 23142_at | 5. 840077 | 6. 340368 | 6. 678455 | 5. 336411 | 5. 642412 | 5. 88023  | 5. 960386 | 6. 233087 |
| 23143_at | 6. 61693  | 6. 971962 | 6. 662282 | 6. 289426 | 6. 800381 | 6. 895897 | 6. 684349 | 6. 581856 |
| 23144_at | 4. 103893 | 4. 269765 | 4. 247042 | 4. 6961   | 4. 221915 | 4. 007718 | 5. 147578 | 4. 4945   |
| 23145_at | 1. 500808 | 2. 484075 | 2. 528274 | 2. 56014  | 2. 599964 | 2. 054512 | 1. 980439 | 2. 544197 |
| 23148_at | 4. 545991 | 4. 607047 | 4. 367771 | 4. 234402 | 3. 916133 | 5. 010238 | 3. 617645 | 4. 649859 |
| 23149_at | 2. 690139 | 2. 525399 | 3. 013    | 2. 461501 | 2. 942819 | 2. 920269 | 3. 075278 | 2. 494123 |
| 2314_at  | 7. 220623 | 7. 164332 | 7. 270107 | 6. 954487 | 6. 343411 | 7. 079264 | 7. 340627 | 6. 565329 |
| 23150_at | 4. 434424 | 3. 984996 | 4. 310694 | 4. 747253 | 3. 917179 | 4. 571796 | 4. 071804 | 3. 661295 |
| 23151_at | 2. 67331  | 2. 741404 | 2. 655347 | 3. 090393 | 2. 712217 | 3. 040521 | 2. 318768 | 2. 364528 |
| 23152_at | 3. 369645 | 3. 960558 | 3. 846148 | 4. 072205 | 4. 35047  | 4. 135043 | 4. 040983 | 4. 178615 |
| 23154_at | 5. 121989 | 4. 810705 | 5. 779601 | 5. 136125 | 3. 459011 | 5. 315658 | 5. 076722 | 5. 02141  |
| 23155_at | 5. 391386 | 5. 843255 | 6. 200999 | 6. 1427   | 6. 234431 | 5. 686123 | 6. 092132 | 6. 65806  |
| 23157_at | 3. 858391 | 4. 524859 | 3. 959095 | 4. 336166 | 3. 615687 | 3. 371878 | 3. 173046 | 3. 716826 |
| 23158_at | 6. 166256 | 6. 44707  | 6. 783332 | 6. 482564 | 6. 638277 | 6. 018943 | 6. 372319 | 6. 106381 |
| 2315_at  | 2. 648716 | 4. 407075 | 2. 660297 | 2. 625061 | 1. 929107 | 2. 22072  | 1. 805717 | 2. 889715 |
| 23160_at | 5. 890565 | 5. 624368 | 6. 01552  | 6. 814473 | 6. 441982 | 6. 107643 | 5. 172408 | 6. 661168 |
| 23161_at | 6. 586863 | 6. 650981 | 6. 550253 | 6. 592291 | 6. 364554 | 6. 311234 | 6. 357509 | 7. 134045 |
| 23162_at | 3. 266723 | 2. 604918 | 2. 672203 | 3. 415689 | 2. 946876 | 3. 580508 | 3. 321576 | 2. 225441 |
| 23163_at | 4. 381748 | 4. 53272  | 4. 529203 | 4. 417385 | 4. 727084 | 4. 854503 | 4. 957234 | 2. 767482 |
| 23164_at | 7. 049528 | 6. 715375 | 6. 671217 | 6. 903086 | 6. 636091 | 6. 760708 | 6. 960034 | 6. 157584 |
| 23165_at | 4. 891068 | 5. 714047 | 4. 792707 | 5. 897854 | 5. 195238 | 5. 012903 | 5. 501343 | 5. 677029 |
| 23166_at | 2. 567268 | 3. 5274   | 3. 434872 | 3. 787662 | 3. 633578 | 3. 333878 | 3. 984557 | 2. 836297 |
| 23167_at | 7. 425991 | 7. 512125 | 7. 75833  | 7. 435194 | 7. 575364 | 7. 441186 | 7. 278539 | 7. 542537 |
| 23168_at | 6. 674763 | 7. 09998  | 7. 294682 | 6. 857953 | 6. 49373  | 6. 814964 | 7. 158538 | 6. 585778 |
| 23169_at | 4. 622421 | 3. 804895 | 4. 714634 | 3. 193138 | 4. 959792 | 3. 793774 | 4. 477261 | 4. 825939 |
| 2316_at  | 7. 140157 | 7. 114868 | 7. 193692 | 7. 221059 | 6. 534695 | 7. 558072 | 7. 936595 | 6. 636421 |
| 23170_at | 5. 080517 | 4. 844407 | 4. 882022 | 5. 546985 | 4. 679088 | 4. 88215  | 4. 913336 | 5. 496693 |
| 23171_at | 6. 15212  | 6. 15055  | 6. 611257 | 6. 796451 | 5. 958371 | 6. 187246 | 6. 389716 | 5. 067565 |
| 23172_at | 6. 095909 | 5. 823212 | 6. 556403 | 6. 869427 | 6. 041654 | 6. 476654 | 7. 12072  | 6. 353873 |
| 23173_at | 6. 739832 | 6. 939157 | 7. 415366 | 7. 026182 | 6. 907932 | 6. 976647 | 7. 069025 | 7. 139575 |
| 23174_at | 5. 983438 | 5. 745075 | 5. 775257 | 5. 737811 | 6. 514117 | 6. 165753 | 5. 974219 | 5. 273026 |
| 23175_at | 4. 069258 | 4. 695981 | 4. 459289 | 3. 987568 | 4. 270104 | 4. 548413 | 4. 867718 | 4. 344595 |
| 23176_at | 5. 793514 | 5. 842159 | 6. 139973 | 6. 182056 | 5. 436123 | 5. 719615 | 5. 751229 | 6. 018597 |
| 23177_at | 4. 155163 | 4. 829465 | 4. 851233 | 3. 742269 | 4. 073945 | 4. 044202 | 4. 27765  | 4. 407679 |
| 23178_at | 1. 719175 | 2. 066468 | 2. 452635 | 1. 129575 | 1. 735573 | 2. 397142 | 2. 216776 | 2. 279165 |
| 23179_at | 7. 010621 | 7. 146866 | 8. 137661 | 7. 849393 | 7. 293925 | 7. 324307 | 8. 136908 | 7. 115423 |
| 2317_at  | 5. 14405  | 5. 374476 | 5. 189998 | 5. 837901 | 5. 993667 | 5. 660033 | 4. 635219 | 4. 358353 |
| 23180_at | 5. 768523 | 6. 190062 | 6. 544652 | 6. 19818  | 5. 442486 | 6. 316718 | 6. 420155 | 4. 993506 |
| 23181_at | 4. 109637 | 4. 005482 | 4. 752407 | 4. 174036 | 4. 349331 | 4. 72218  | 4. 625592 | 4. 044424 |
| 23184_at | 7. 693288 | 7. 575321 | 7. 601225 | 7. 545675 | 7. 507657 | 7. 726219 | 7. 73234  | 7. 574731 |
| 23185_at | 5. 524603 | 5. 184453 | 5. 453131 | 5. 859057 | 5. 559875 | 5. 364719 | 5. 30178  | 5. 371501 |
| 23186_at | 4. 911071 | 6. 017106 | 5. 521638 | 6. 079094 | 4. 796415 | 5. 100161 | 5. 2439   | 5. 569551 |
| 23187_at | 3. 805283 | 3. 919323 | 3. 14107  | 3. 90985  | 3. 547846 | 4. 225547 | 3. 869552 | 3. 7422   |
| 23189_at | 7. 060114 | 7. 185905 | 7. 169933 | 6. 853224 | 6. 853586 | 6. 648783 | 6. 688893 | 6. 790431 |
| 2318_at  | 4. 500711 | 4. 802582 | 4. 052109 | 4. 416365 | 4. 442383 | 3. 938205 | 4. 466114 | 4. 838333 |
| 23190_at | 7. 665763 | 7. 849113 | 7. 529067 | 7. 291939 | 7. 753297 | 7. 26318  | 7. 290951 | 7. 89727  |

|          |          |          |          |          |          |          |          |          |
|----------|----------|----------|----------|----------|----------|----------|----------|----------|
| 23191_at | 6.270063 | 6.559156 | 6.704722 | 6.761763 | 6.175555 | 6.564621 | 7.060095 | 5.809225 |
| 23192_at | 4.054946 | 3.753987 | 3.966337 | 4.041856 | 4.662788 | 3.256851 | 4.259883 | 2.584334 |
| 23193_at | 6.221874 | 7.287564 | 7.361763 | 7.571082 | 7.333696 | 7.190051 | 7.322075 | 6.930558 |
| 23194_at | 5.106796 | 4.414145 | 5.187699 | 4.953947 | 4.325134 | 5.763878 | 5.36763  | 4.259383 |
| 23195_at | 3.95707  | 3.628716 | 3.975824 | 4.074408 | 4.551979 | 4.019512 | 4.154942 | 4.22779  |
| 23196_at | 6.44918  | 6.856535 | 6.701893 | 6.408534 | 6.499523 | 6.824809 | 6.832415 | 6.281931 |
| 23197_at | 6.197769 | 6.547568 | 5.539488 | 7.229106 | 6.504323 | 6.218873 | 6.755684 | 6.703468 |
| 23198_at | 4.960005 | 5.445786 | 5.473429 | 5.318932 | 5.848073 | 4.710331 | 4.191194 | 5.736973 |
| 23199_at | 3.275743 | 3.289586 | 3.119232 | 3.187175 | 3.174179 | 3.360722 | 3.427632 | 2.926834 |
| 2319_at  | 5.733161 | 5.309911 | 5.754276 | 5.818492 | 5.847499 | 5.589831 | 5.836636 | 5.225463 |
| 231_at   | 6.843943 | 5.804714 | 6.06331  | 5.976478 | 6.562077 | 6.23893  | 6.569493 | 6.586846 |
| 23200_at | 6.588316 | 7.402235 | 6.894388 | 6.78883  | 7.446746 | 6.51998  | 7.228497 | 7.676056 |
| 23201_at | 6.937188 | 7.249841 | 7.935756 | 7.603383 | 6.415556 | 7.16688  | 7.636388 | 6.720323 |
| 23203_at | 3.732602 | 4.499786 | 4.34056  | 3.91684  | 4.651256 | 4.46754  | 4.064129 | 4.600782 |
| 23204_at | 8.703793 | 8.821458 | 8.506721 | 8.902139 | 8.811512 | 8.576738 | 8.540689 | 9.016551 |
| 23205_at | 1.337272 | 1.864392 | 1.01348  | 1.238251 | 1.122536 | 1.512924 | 1.0868   | 1.564861 |
| 23207_at | 5.781768 | 5.848287 | 5.507542 | 5.341749 | 5.403603 | 5.945934 | 6.197054 | 5.296659 |
| 23208_at | 5.424304 | 5.607863 | 6.414172 | 6.868515 | 6.258472 | 6.942462 | 5.60622  | 5.795036 |
| 23209_at | 1.993882 | 2.833904 | 2.442975 | 2.626221 | 2.257915 | 2.334767 | 2.823361 | 2.38636  |
| 23210_at | 4.85359  | 4.676481 | 3.659703 | 4.132596 | 4.341984 | 4.773552 | 3.910042 | 4.302051 |
| 23211_at | 4.963471 | 5.695427 | 5.304827 | 5.552532 | 5.194009 | 5.51165  | 5.021535 | 5.125945 |
| 23212_at | 3.486027 | 2.656797 | 2.879598 | 2.952142 | 1.680956 | 3.244131 | 2.057219 | 3.022042 |
| 23213_at | 8.505258 | 8.674775 | 9.209989 | 8.75104  | 9.382144 | 9.030115 | 9.466672 | 8.790086 |
| 23214_at | 7.450942 | 6.596379 | 6.986787 | 7.248857 | 7.127351 | 6.988677 | 6.937018 | 7.043627 |
| 23215_at | 7.978641 | 8.480338 | 8.688168 | 8.75031  | 8.2611   | 8.356645 | 8.535205 | 7.878478 |
| 23216_at | 7.095687 | 7.388802 | 7.12006  | 7.433524 | 7.493354 | 7.413417 | 7.12006  | 7.503412 |
| 23217_at | 1.837953 | 1.795916 | 1.718991 | 1.991427 | 1.697422 | 1.924306 | 1.924306 | 1.785181 |
| 23218_at | 2.519575 | 3.081753 | 3.879683 | 3.809384 | 2.946474 | 3.660086 | 3.759623 | 3.489946 |
| 23219_at | 6.925474 | 6.732613 | 6.172187 | 6.338977 | 6.83878  | 6.339896 | 6.612914 | 7.429107 |
| 2321_at  | 7.310031 | 7.855886 | 8.344477 | 8.243923 | 8.48805  | 7.835972 | 8.385241 | 7.459372 |
| 23220_at | 6.615264 | 6.353848 | 5.633408 | 6.280126 | 5.437444 | 6.14612  | 5.987203 | 5.342585 |
| 23221_at | 6.594204 | 6.00514  | 6.053097 | 5.963695 | 5.932516 | 6.148535 | 6.729764 | 6.621559 |
| 23223_at | 2.854927 | 3.126132 | 4.195869 | 3.636554 | 2.334556 | 3.338826 | 3.235458 | 3.258118 |
| 23224_at | 6.916545 | 7.775398 | 7.656819 | 7.926355 | 7.587175 | 7.762605 | 7.857465 | 7.822924 |
| 23225_at | 3.776434 | 3.553921 | 3.948685 | 4.630251 | 3.988103 | 3.526527 | 3.616629 | 4.149466 |
| 23228_at | 4.972496 | 5.046537 | 4.109348 | 4.894569 | 4.760759 | 4.426929 | 4.715099 | 4.516781 |
| 23229_at | 5.435484 | 5.254679 | 5.071336 | 5.902174 | 6.532142 | 5.399062 | 6.102391 | 5.214947 |
| 2322_at  | 1.766687 | 2.310646 | 2.359589 | 1.704153 | 2.677323 | 1.727184 | 1.335669 | 2.187039 |
| 23230_at | 5.669897 | 5.886874 | 5.763448 | 5.872624 | 6.415344 | 5.584283 | 5.556572 | 6.434911 |
| 23231_at | 3.029335 | 3.257292 | 3.490774 | 3.895139 | 2.060381 | 3.679376 | 2.138455 | 3.327961 |
| 23232_at | 4.226152 | 4.64613  | 3.874331 | 4.707681 | 3.43676  | 3.685288 | 3.9424   | 4.232461 |
| 23233_at | 5.400728 | 5.264086 | 6.006645 | 5.043904 | 5.795838 | 5.042363 | 4.980245 | 5.885239 |
| 23234_at | 1.936853 | 2.467117 | 3.479835 | 2.616583 | 2.412343 | 2.459327 | 2.527128 | 4.751305 |
| 23235_at | 6.099826 | 5.933744 | 6.942181 | 5.967443 | 6.307101 | 6.632875 | 5.823604 | 6.178762 |
| 23236_at | 4.198803 | 4.78501  | 4.299784 | 4.900149 | 5.515453 | 4.193435 | 4.419563 | 4.725493 |
| 23237_at | 2.169567 | 3.141857 | 2.384879 | 2.926087 | 3.088805 | 1.981701 | 3.393643 | 2.387035 |
| 23239_at | 5.966023 | 6.358965 | 6.108674 | 6.458605 | 6.789344 | 5.753843 | 5.829765 | 5.919804 |
| 2323_at  | 5.492031 | 4.659085 | 5.206868 | 5.438078 | 3.546122 | 5.111532 | 4.376935 | 4.85382  |
| 23240_at | 4.283016 | 5.225925 | 4.614405 | 5.375366 | 4.017893 | 3.969552 | 3.630832 | 5.015587 |
| 23241_at | 5.245433 | 4.121446 | 3.941269 | 6.083863 | 4.403817 | 6.395586 | 5.321909 | 3.284497 |
| 23242_at | 4.425439 | 4.460913 | 5.04582  | 3.464684 | 4.438988 | 5.301878 | 3.871289 | 4.484223 |

|          |          |          |          |          |          |          |          |          |
|----------|----------|----------|----------|----------|----------|----------|----------|----------|
| 23243_at | 5.525106 | 5.319828 | 5.376977 | 4.770021 | 5.610297 | 5.463315 | 5.776032 | 6.245658 |
| 23244_at | 6.007487 | 6.499647 | 6.416959 | 6.057101 | 6.709802 | 6.054352 | 6.494333 | 6.645206 |
| 23245_at | 2.364639 | 2.796148 | 3.082015 | 2.689277 | 2.485987 | 3.425371 | 2.498274 | 2.860871 |
| 23246_at | 3.723284 | 3.836139 | 3.579753 | 3.73766  | 4.682261 | 3.965068 | 4.03606  | 3.460607 |
| 23247_at | 4.917473 | 4.626248 | 4.865594 | 4.594967 | 3.739265 | 4.857114 | 4.765853 | 3.996492 |
| 23248_at | 7.240822 | 7.268354 | 7.254773 | 7.148847 | 6.645664 | 7.644472 | 7.370588 | 7.223547 |
| 2324_at  | 5.399082 | 5.81823  | 5.885242 | 6.269651 | 5.391422 | 5.864406 | 5.839419 | 4.031434 |
| 23250_at | 5.487466 | 5.889775 | 5.85832  | 6.290254 | 5.445106 | 6.719702 | 6.005818 | 6.456268 |
| 23251_at | 2.53823  | 2.767683 | 2.42832  | 1.312692 | 2.450903 | 1.457855 | 4.147082 | 1.830475 |
| 23252_at | 4.007729 | 4.255364 | 3.563198 | 3.875477 | 3.932496 | 4.035527 | 3.642169 | 3.906898 |
| 23253_at | 7.266106 | 7.221365 | 7.187866 | 7.35145  | 7.060819 | 7.276952 | 7.635044 | 7.504546 |
| 23254_at | 2.172901 | 2.556507 | 2.467067 | 2.005305 | 2.197067 | 2.545775 | 2.152071 | 2.411849 |
| 23255_at | 2.815562 | 3.171829 | 2.593134 | 2.376026 | 2.392789 | 3.122217 | 2.262191 | 2.996423 |
| 23256_at | 7.431379 | 7.054423 | 7.520809 | 6.386734 | 7.034046 | 6.767668 | 6.274612 | 7.386771 |
| 23258_at | 6.543611 | 6.22816  | 6.527508 | 6.804579 | 6.690932 | 6.565062 | 6.616176 | 6.386743 |
| 23259_at | 5.846515 | 5.785242 | 5.870804 | 5.549023 | 5.786188 | 5.603703 | 5.954601 | 6.048108 |
| 23261_at | 5.465713 | 5.356146 | 5.562454 | 5.696223 | 5.330752 | 5.231604 | 5.104616 | 5.361238 |
| 23262_at | 6.277083 | 6.310997 | 5.94238  | 5.63266  | 6.072881 | 5.844978 | 5.606699 | 6.211286 |
| 23263_at | 3.508372 | 4.069679 | 3.287842 | 3.486311 | 3.299742 | 3.730816 | 3.977572 | 2.880836 |
| 23264_at | 6.941825 | 6.503085 | 7.365837 | 6.465736 | 5.831325 | 7.373277 | 6.940069 | 6.149071 |
| 23265_at | 7.091971 | 6.991318 | 6.991099 | 6.806691 | 6.465514 | 7.170727 | 7.183524 | 6.26176  |
| 23266_at | 6.487854 | 6.937076 | 6.731564 | 7.153954 | 7.258186 | 6.636823 | 6.645951 | 6.984211 |
| 23268_at | 4.868555 | 4.747662 | 4.872639 | 5.552906 | 4.934639 | 4.090456 | 5.063235 | 5.522634 |
| 23269_at | 6.908728 | 7.017066 | 6.631108 | 7.033047 | 6.59106  | 7.085462 | 6.914663 | 6.238714 |
| 2326_at  | 6.525671 | 5.706216 | 5.68585  | 3.993482 | 7.425129 | 6.413511 | 3.75367  | 6.142268 |
| 23270_at | 4.405004 | 5.311287 | 3.808232 | 5.29308  | 4.747357 | 5.086241 | 5.210107 | 4.310946 |
| 23271_at | 7.553013 | 8.357831 | 7.88873  | 7.941082 | 7.830165 | 7.379538 | 7.939731 | 7.945293 |
| 23272_at | 6.204212 | 6.512656 | 6.482536 | 6.38954  | 6.434098 | 6.010775 | 6.281753 | 6.462244 |
| 23274_at | 5.900996 | 6.232102 | 6.13869  | 5.852178 | 5.56103  | 5.966487 | 5.773292 | 6.179096 |
| 23275_at | 3.063884 | 3.512374 | 3.143931 | 3.8019   | 4.434968 | 4.134627 | 4.90062  | 2.920437 |
| 23276_at | 2.305093 | 4.592275 | 3.669452 | 3.986909 | 4.568561 | 2.874857 | 3.538865 | 4.017788 |
| 23277_at | 4.913525 | 4.034706 | 4.714404 | 4.779251 | 4.597773 | 5.860795 | 4.980667 | 3.675173 |
| 23279_at | 5.859032 | 5.684137 | 5.38217  | 5.548156 | 5.289077 | 5.421633 | 5.361774 | 5.592197 |
| 2327_at  | 2.44116  | 2.843775 | 6.045787 | 2.389328 | 5.12719  | 2.082915 | 2.355509 | 4.332424 |
| 23281_at | 1.342359 | 1.8737   | 1.444675 | 2.138987 | 1.907433 | 1.609117 | 1.867955 | 2.31703  |
| 23283_at | 4.110206 | 4.901849 | 4.924603 | 4.655007 | 5.24905  | 4.598978 | 4.308861 | 4.673003 |
| 23284_at | 1.675384 | 1.582773 | 1.326373 | 2.130277 | 1.94885  | 1.732199 | 1.303058 | 2.794561 |
| 23285_at | 3.639239 | 3.813252 | 3.996177 | 2.765158 | 2.244028 | 2.248021 | 3.47152  | 4.580601 |
| 23286_at | 4.272304 | 4.105934 | 3.196645 | 3.826273 | 3.27831  | 5.47426  | 3.402778 | 4.226867 |
| 23287_at | 5.521529 | 5.806106 | 5.428394 | 6.055069 | 6.337711 | 5.271236 | 5.557152 | 6.034063 |
| 23288_at | 4.820251 | 4.276606 | 5.332701 | 4.60276  | 4.776567 | 4.868332 | 4.163311 | 4.448422 |
| 2328_at  | 1.175009 | 1.8063   | 1.393428 | 1.56813  | 3.467026 | 1.348227 | 2.128206 | 4.443563 |
| 23291_at | 5.874793 | 6.042202 | 5.705207 | 6.484221 | 5.85976  | 5.9358   | 6.528747 | 6.27783  |
| 23293_at | 4.613543 | 4.823945 | 5.102013 | 5.267021 | 5.253947 | 4.940096 | 5.393896 | 5.031561 |
| 23294_at | 6.144608 | 6.880213 | 7.030979 | 7.218589 | 5.788738 | 7.400825 | 6.128172 | 5.255442 |
| 23295_at | 6.102521 | 6.672445 | 5.985368 | 6.09463  | 5.781854 | 5.76085  | 6.44204  | 4.876505 |
| 23299_at | 4.517424 | 4.442163 | 4.418263 | 4.514137 | 5.088788 | 4.454493 | 4.772457 | 5.288033 |
| 2329_at  | 5.641797 | 5.355577 | 5.415181 | 5.267733 | 6.457375 | 4.896988 | 4.668589 | 5.849091 |
| 23300_at | 6.172008 | 6.475505 | 5.718292 | 5.511666 | 5.819342 | 5.818903 | 5.820281 | 5.705672 |
| 23301_at | 6.387242 | 6.268462 | 6.047217 | 5.727306 | 6.075686 | 6.457884 | 6.088267 | 6.279245 |
| 23302_at | 2.035554 | 2.179169 | 2.651531 | 2.772266 | 3.091171 | 2.74424  | 2.301659 | 2.802448 |

|          |          |          |          |          |          |          |          |          |
|----------|----------|----------|----------|----------|----------|----------|----------|----------|
| 23303_at | 5.163577 | 5.777285 | 5.807093 | 5.594774 | 6.751972 | 5.70201  | 5.010998 | 5.571891 |
| 23304_at | 6.398903 | 6.858046 | 6.754937 | 6.547262 | 6.800003 | 6.938047 | 6.72291  | 7.254986 |
| 23305_at | 2.03633  | 1.537609 | 2.205641 | 2.217752 | 1.648507 | 1.784899 | 2.542329 | 1.788247 |
| 23306_at | 4.384919 | 4.94637  | 4.12027  | 4.75649  | 5.277143 | 5.325965 | 5.69981  | 4.743871 |
| 23307_at | 6.89147  | 6.103065 | 6.441638 | 6.723024 | 6.4964   | 6.979093 | 6.653949 | 7.035709 |
| 23309_at | 4.377774 | 4.27116  | 4.387252 | 4.185591 | 3.735736 | 4.730356 | 4.148517 | 3.65833  |
| 2330_at  | 4.083282 | 3.023451 | 3.685927 | 4.168199 | 4.454859 | 3.907713 | 3.404931 | 4.797899 |
| 23310_at | 3.700584 | 5.152281 | 4.611148 | 4.388841 | 4.721791 | 4.712074 | 5.564732 | 4.942137 |
| 23312_at | 5.241332 | 5.313909 | 5.75219  | 5.517182 | 5.628092 | 5.731013 | 5.957456 | 6.223124 |
| 23313_at | 5.099683 | 4.095498 | 5.124573 | 4.625472 | 3.113957 | 5.934522 | 5.428992 | 5.104992 |
| 23314_at | 3.843647 | 3.775061 | 3.88572  | 3.358008 | 2.665956 | 3.669367 | 3.075298 | 2.76496  |
| 23315_at | 5.569922 | 5.475175 | 5.491097 | 5.913292 | 5.841719 | 5.281648 | 6.135955 | 5.695041 |
| 23316_at | 1.519485 | 2.102726 | 1.74301  | 2.079033 | 1.833429 | 1.546192 | 2.438071 | 2.316874 |
| 23317_at | 5.865819 | 6.159814 | 6.377801 | 6.253266 | 7.100194 | 5.819041 | 5.976472 | 6.250154 |
| 23318_at | 5.891632 | 6.328545 | 5.934304 | 6.207041 | 6.07775  | 5.99725  | 6.204097 | 6.556799 |
| 2331_at  | 3.100832 | 2.572176 | 4.162125 | 2.763141 | 3.337377 | 2.660286 | 3.914233 | 2.883833 |
| 23321_at | 5.068754 | 4.528281 | 4.587239 | 5.374888 | 6.289697 | 4.704116 | 4.60657  | 5.584036 |
| 23322_at | 3.762255 | 4.025928 | 2.916341 | 3.474198 | 3.369973 | 4.239305 | 3.007262 | 3.964411 |
| 23324_at | 6.454847 | 6.309329 | 6.542499 | 5.943504 | 5.584013 | 5.509185 | 6.344184 | 5.694714 |
| 23325_at | 7.124875 | 6.623758 | 7.250059 | 6.988149 | 6.788689 | 6.608255 | 7.02023  | 7.457702 |
| 23326_at | 8.103804 | 7.543513 | 8.061517 | 8.126954 | 7.349441 | 8.243177 | 8.312522 | 7.330574 |
| 23327_at | 5.778115 | 5.733613 | 5.778482 | 5.980986 | 5.995471 | 5.770286 | 5.75118  | 6.454359 |
| 23328_at | 7.78177  | 7.388402 | 7.935526 | 8.008098 | 6.863872 | 7.76454  | 7.80054  | 7.027048 |
| 23329_at | 2.883432 | 2.59722  | 2.876304 | 2.509279 | 3.909589 | 2.574544 | 3.204603 | 2.612701 |
| 2332_at  | 6.627581 | 6.300617 | 6.42693  | 6.749439 | 6.584435 | 5.8777   | 5.732036 | 7.162195 |
| 23331_at | 4.923182 | 5.489361 | 4.926163 | 5.32182  | 5.885106 | 5.927629 | 5.731698 | 4.542576 |
| 23332_at | 6.198995 | 6.145695 | 6.816717 | 6.735814 | 6.641464 | 6.417004 | 6.547077 | 5.860131 |
| 23333_at | 2.040094 | 3.293047 | 3.39118  | 3.06573  | 1.719634 | 1.532165 | 1.8823   | 2.23072  |
| 23334_at | 3.599837 | 3.775749 | 3.330207 | 3.769355 | 3.695074 | 3.95856  | 3.067035 | 3.241066 |
| 23335_at | 5.821474 | 6.658361 | 6.534551 | 6.231657 | 6.788772 | 6.707224 | 6.635902 | 5.752224 |
| 23336_at | 4.209905 | 4.488116 | 5.130058 | 5.02957  | 4.522781 | 4.741579 | 4.171377 | 3.703571 |
| 23338_at | 4.026172 | 3.671172 | 4.697614 | 3.339579 | 4.169324 | 3.268809 | 4.327948 | 4.157029 |
| 23339_at | 6.855554 | 6.720056 | 6.857145 | 7.069881 | 7.169745 | 7.118623 | 6.703286 | 7.333999 |
| 23341_at | 5.076169 | 5.303216 | 5.056714 | 5.926197 | 5.63488  | 5.176251 | 5.520462 | 6.14081  |
| 23344_at | 7.026491 | 6.85393  | 7.050231 | 7.155886 | 7.151779 | 6.617349 | 7.52135  | 7.026655 |
| 23345_at | 7.056073 | 7.991232 | 7.586504 | 7.974234 | 7.957169 | 7.932666 | 8.101766 | 7.527577 |
| 23347_at | 6.451014 | 6.975229 | 6.56546  | 6.855913 | 6.576549 | 6.477019 | 6.341326 | 6.801714 |
| 23348_at | 6.323484 | 6.489769 | 6.475917 | 6.584869 | 5.811625 | 6.941061 | 6.572475 | 6.249328 |
| 23349_at | 2.086516 | 2.124664 | 2.279721 | 1.969993 | 2.446646 | 2.332788 | 2.374967 | 2.279878 |
| 2334_at  | 2.125543 | 1.96653  | 2.727758 | 2.172716 | 2.323069 | 2.754269 | 2.591755 | 1.962902 |
| 23350_at | 7.18737  | 6.946024 | 7.172005 | 6.954818 | 6.982865 | 6.766362 | 6.995609 | 7.7073   |
| 23351_at | 3.32205  | 3.756991 | 4.237869 | 3.971161 | 4.024152 | 4.277875 | 4.213559 | 4.459123 |
| 23352_at | 6.15117  | 6.556185 | 6.749973 | 6.767412 | 6.714411 | 6.590691 | 6.610294 | 6.064425 |
| 23353_at | 6.600318 | 7.015861 | 7.327063 | 6.949527 | 7.001137 | 6.594043 | 7.35852  | 6.980105 |
| 23354_at | 2.871033 | 2.294144 | 2.600223 | 2.593447 | 2.006041 | 2.314772 | 2.379336 | 2.980173 |
| 23355_at | 4.145175 | 4.849739 | 4.7248   | 4.50176  | 4.604536 | 4.716884 | 4.157798 | 5.415021 |
| 23357_at | 4.166658 | 2.889811 | 2.549598 | 3.249893 | 3.193137 | 3.507925 | 3.670025 | 2.671758 |
| 23358_at | 5.712052 | 5.384388 | 5.867946 | 6.24514  | 6.188806 | 5.668275 | 5.660189 | 6.008198 |
| 23359_at | 2.455877 | 2.632774 | 2.263652 | 2.54037  | 2.60732  | 3.646939 | 3.420602 | 2.443192 |
| 2335_at  | 7.227022 | 7.108551 | 6.608838 | 9.066117 | 7.165135 | 8.184481 | 7.983465 | 7.667189 |
| 23360_at | 6.238605 | 5.084063 | 5.798163 | 5.446935 | 5.318202 | 5.822291 | 4.923101 | 6.507292 |

|          |          |          |          |          |          |          |          |          |
|----------|----------|----------|----------|----------|----------|----------|----------|----------|
| 23361_at | 5.354651 | 3.994141 | 4.896763 | 5.005748 | 3.795472 | 5.420873 | 5.314461 | 4.272692 |
| 23362_at | 5.832727 | 5.866203 | 6.268105 | 5.960143 | 5.024303 | 5.651015 | 5.448198 | 6.424445 |
| 23363_at | 3.410758 | 2.769352 | 2.931147 | 2.772454 | 2.373897 | 2.741747 | 2.649542 | 2.977731 |
| 23365_at | 9.914815 | 10.0825  | 10.21386 | 10.00007 | 9.910131 | 9.849628 | 10.08928 | 10.34624 |
| 23366_at | 4.3865   | 4.106293 | 3.115038 | 4.122018 | 4.580834 | 4.250596 | 3.067821 | 3.10205  |
| 23367_at | 8.049341 | 7.703875 | 8.157901 | 8.067798 | 8.023362 | 7.629661 | 8.26852  | 7.697222 |
| 23368_at | 5.850939 | 5.579354 | 5.761356 | 6.081453 | 6.487331 | 5.282717 | 5.778045 | 5.522485 |
| 23369_at | 6.613637 | 6.920437 | 7.030312 | 6.622353 | 6.446665 | 6.546968 | 6.424146 | 7.398914 |
| 23370_at | 3.028111 | 2.856977 | 3.204747 | 3.18233  | 2.963398 | 3.073842 | 3.428201 | 2.980052 |
| 23371_at | 9.078338 | 8.823354 | 9.027021 | 8.601666 | 7.466641 | 8.804011 | 9.349278 | 8.026859 |
| 23373_at | 4.086991 | 4.784502 | 4.992922 | 4.569991 | 3.859802 | 4.583533 | 5.058755 | 3.89375  |
| 23376_at | 6.19217  | 6.335573 | 6.529543 | 6.253608 | 6.157772 | 6.313412 | 6.333656 | 6.510261 |
| 23378_at | 4.556805 | 5.754402 | 5.186732 | 4.580603 | 4.165772 | 4.581122 | 3.711184 | 4.382799 |
| 23379_at | 5.767854 | 5.730395 | 5.788925 | 5.231015 | 5.969904 | 5.315635 | 5.617328 | 6.133878 |
| 23380_at | 8.506316 | 8.314829 | 8.291945 | 8.096155 | 6.949764 | 7.63637  | 8.250696 | 7.659001 |
| 23381_at | 5.717406 | 5.401539 | 5.133579 | 5.7071   | 5.383056 | 5.236468 | 5.126536 | 5.567911 |
| 23382_at | 5.303037 | 5.575544 | 5.422504 | 6.04096  | 5.854882 | 5.885102 | 5.977005 | 5.977777 |
| 23383_at | 5.506481 | 5.63801  | 6.426497 | 5.766685 | 4.750975 | 5.426555 | 5.537306 | 5.068199 |
| 23384_at | 2.245619 | 2.844899 | 3.330443 | 2.223206 | 3.192021 | 3.331926 | 3.955419 | 2.570584 |
| 23385_at | 8.411816 | 8.294036 | 8.968162 | 8.245646 | 8.185124 | 8.827001 | 8.984533 | 8.247393 |
| 23386_at | 4.947521 | 4.962117 | 4.794706 | 4.50393  | 3.643869 | 4.863524 | 4.021588 | 4.468713 |
| 23387_at | 6.396798 | 6.770997 | 6.553381 | 6.376553 | 6.286537 | 6.098885 | 6.598317 | 6.507002 |
| 23389_at | 6.673292 | 6.587873 | 6.636194 | 6.590342 | 6.429954 | 6.545319 | 6.738824 | 6.365639 |
| 23390_at | 6.095937 | 5.887343 | 6.652421 | 6.290932 | 6.382216 | 5.916816 | 4.733298 | 7.073655 |
| 23392_at | 6.210925 | 6.359578 | 6.269033 | 5.953929 | 6.383984 | 6.014607 | 5.526996 | 6.325386 |
| 23394_at | 7.363347 | 7.450835 | 7.365435 | 6.890528 | 6.553925 | 7.599741 | 7.290802 | 6.843524 |
| 23395_at | 4.083732 | 4.4611   | 4.166109 | 3.718065 | 4.372315 | 3.360157 | 2.966131 | 4.304538 |
| 23396_at | 4.213155 | 4.660742 | 4.732192 | 3.857695 | 2.951237 | 4.054477 | 4.702596 | 3.67778  |
| 23397_at | 1.531301 | 1.823851 | 2.210858 | 1.750057 | 2.166121 | 2.051457 | 2.014011 | 1.936165 |
| 23398_at | 6.44813  | 6.21773  | 6.513342 | 7.658723 | 6.823504 | 6.052537 | 5.882188 | 7.660158 |
| 23399_at | 7.005031 | 6.828212 | 6.62578  | 6.121278 | 6.802833 | 7.011901 | 6.683003 | 6.895311 |
| 2339_at  | 7.112081 | 7.532308 | 6.939746 | 7.039256 | 7.5492   | 6.808406 | 6.654755 | 7.361735 |
| 23400_at | 5.443293 | 5.821012 | 6.00707  | 5.541082 | 4.651969 | 5.880634 | 5.819183 | 5.2234   |
| 23401_at | 3.440384 | 4.682862 | 4.48431  | 4.502262 | 3.834688 | 3.787411 | 4.037065 | 4.13261  |
| 23403_at | 5.209743 | 5.015143 | 4.984071 | 4.684932 | 4.492529 | 4.320275 | 4.929422 | 4.349172 |
| 23404_at | 5.141607 | 5.840452 | 4.267318 | 6.163037 | 4.444377 | 4.845929 | 5.591148 | 5.465932 |
| 23405_at | 7.240311 | 7.64975  | 7.676009 | 7.979491 | 7.987742 | 7.617408 | 7.648031 | 7.826268 |
| 23406_at | 6.990267 | 6.564411 | 6.799148 | 7.133601 | 6.843659 | 7.316471 | 6.546254 | 6.008108 |
| 23408_at | 5.35164  | 5.542169 | 5.445541 | 4.797532 | 5.020415 | 5.437185 | 5.285973 | 5.216874 |
| 23409_at | 2.379657 | 2.746156 | 1.966379 | 1.843109 | 1.687711 | 3.01595  | 2.089946 | 2.295103 |
| 23410_at | 4.229102 | 3.082247 | 3.147143 | 2.714422 | 3.043618 | 3.476178 | 3.933274 | 3.612448 |
| 23411_at | 6.074863 | 5.840489 | 5.820883 | 5.738383 | 6.005018 | 5.984517 | 5.388876 | 5.861523 |
| 23412_at | 8.219405 | 8.058458 | 7.971381 | 7.444324 | 7.552601 | 8.398977 | 6.535084 | 7.450249 |
| 23413_at | 2.880142 | 3.956006 | 4.553883 | 4.292936 | 4.433278 | 4.156272 | 4.709167 | 3.484081 |
| 23414_at | 2.571556 | 6.412259 | 4.978262 | 3.568646 | 2.967454 | 3.44401  | 3.799874 | 5.177474 |
| 23415_at | 2.045522 | 1.873026 | 1.909015 | 2.212054 | 1.661628 | 1.932897 | 1.945652 | 2.377719 |
| 23416_at | 2.991698 | 2.379519 | 2.741856 | 2.279378 | 1.939051 | 2.415482 | 2.692951 | 2.332408 |
| 23417_at | 4.388525 | 4.88437  | 3.560998 | 4.758047 | 3.339496 | 4.324141 | 3.281199 | 4.740733 |
| 23418_at | 1.699209 | 1.474556 | 1.650224 | 0.974418 | 1.33339  | 1.506845 | 1.629114 | 1.558576 |
| 23420_at | 7.714026 | 7.61704  | 7.982756 | 7.894517 | 7.422286 | 7.280186 | 7.56417  | 7.820228 |
| 23421_at | 5.128697 | 5.753745 | 5.138015 | 4.656283 | 4.463739 | 5.827203 | 5.237247 | 6.253163 |



|          |          |          |          |          |          |          |          |          |
|----------|----------|----------|----------|----------|----------|----------|----------|----------|
| 23423_at | 5.614856 | 5.337247 | 5.442137 | 5.598034 | 5.837445 | 5.944889 | 6.581195 | 5.132858 |
| 23424_at | 6.72432  | 6.495375 | 6.580461 | 6.149844 | 6.19838  | 6.549539 | 6.468468 | 5.689924 |
| 23426_at | 2.493967 | 2.387798 | 2.768687 | 1.988108 | 2.289172 | 2.448726 | 2.550057 | 2.349046 |
| 23428_at | 7.68786  | 7.964452 | 7.857654 | 6.992393 | 8.391945 | 7.888311 | 6.39933  | 7.241282 |
| 23429_at | 7.900665 | 7.043034 | 7.645395 | 8.24102  | 7.241378 | 7.225377 | 8.273911 | 7.123381 |
| 23430_at | 1.635916 | 1.597477 | 1.359527 | 2.240686 | 1.925628 | 2.616089 | 2.091718 | 2.982254 |
| 23431_at | 4.178471 | 4.797311 | 4.628051 | 5.566664 | 5.737124 | 4.345427 | 5.440769 | 5.989451 |
| 23432_at | 2.595204 | 2.588686 | 2.583593 | 3.314169 | 3.408771 | 3.144366 | 2.449105 | 3.175122 |
| 23434_at | 1.849222 | 1.960747 | 1.574504 | 2.380305 | 1.713429 | 2.15483  | 2.275394 | 2.250133 |
| 23435_at | 6.310762 | 6.963468 | 6.942567 | 6.965604 | 7.124188 | 6.72722  | 6.054358 | 7.208378 |
| 23438_at | 5.009278 | 5.233505 | 5.117346 | 5.064848 | 5.10001  | 5.25501  | 5.168574 | 3.874888 |
| 23439_at | 1.467298 | 2.109932 | 1.654513 | 2.182675 | 1.519875 | 2.333668 | 2.004103 | 1.85832  |
| 23440_at | 3.164845 | 3.287634 | 3.76174  | 4.048518 | 3.141656 | 3.445559 | 3.439952 | 3.028722 |
| 23443_at | 3.61656  | 4.006074 | 4.506004 | 4.568799 | 4.566399 | 3.973321 | 4.469194 | 3.976832 |
| 23446_at | 7.605621 | 7.542214 | 7.527358 | 7.813902 | 7.79153  | 7.317993 | 7.526786 | 7.951221 |
| 23450_at | 6.462379 | 7.040066 | 6.769545 | 7.112822 | 7.067125 | 7.027357 | 7.114944 | 7.092439 |
| 23451_at | 8.432883 | 8.518795 | 8.07765  | 8.47574  | 8.644282 | 8.066755 | 7.962514 | 8.899075 |
| 23452_at | 4.445581 | 4.301633 | 4.619047 | 4.764515 | 5.181897 | 4.434096 | 4.56429  | 4.455218 |
| 23456_at | 4.397425 | 4.290467 | 4.412405 | 5.052121 | 3.776092 | 3.853459 | 5.441935 | 5.940352 |
| 23457_at | 2.212713 | 2.149836 | 3.454107 | 2.871504 | 2.572656 | 2.296567 | 3.132284 | 2.315352 |
| 23460_at | 0.938024 | 1.001031 | 1.171845 | 1.060634 | 2.496626 | 1.018546 | 1.407495 | 2.701447 |
| 23461_at | 3.781098 | 4.655478 | 3.65077  | 3.970802 | 4.465781 | 3.630477 | 3.71539  | 4.186511 |
| 23462_at | 4.598468 | 4.576038 | 4.504444 | 5.457211 | 4.956985 | 3.540339 | 5.398454 | 4.30772  |
| 23463_at | 5.820293 | 6.499628 | 6.322973 | 6.390914 | 6.281177 | 5.751909 | 6.694398 | 6.32317  |
| 23464_at | 3.964494 | 3.25014  | 3.358467 | 3.406294 | 3.098564 | 2.629906 | 2.71209  | 3.426531 |
| 23466_at | 5.778084 | 5.230134 | 6.233807 | 6.173088 | 4.587823 | 5.581505 | 5.293566 | 4.378464 |
| 23467_at | 1.953217 | 2.005184 | 2.68275  | 2.110389 | 2.072702 | 1.618526 | 3.03874  | 2.795204 |
| 23468_at | 6.55805  | 7.639265 | 7.580953 | 7.436297 | 7.494882 | 7.203483 | 7.465576 | 7.671105 |
| 23469_at | 7.489027 | 7.267613 | 7.45854  | 7.79016  | 7.632763 | 7.446254 | 7.330699 | 7.656953 |
| 2346_at  | 5.37377  | 4.472857 | 5.535973 | 1.059249 | 5.974777 | 6.217037 | 4.09836  | 2.859792 |
| 23471_at | 9.04996  | 8.98376  | 8.872154 | 8.648703 | 9.264231 | 8.762377 | 8.365837 | 9.223748 |
| 23473_at | 6.16301  | 6.178807 | 5.939411 | 6.21374  | 6.075632 | 5.703532 | 5.59139  | 6.114319 |
| 23474_at | 8.198221 | 8.073594 | 8.130263 | 7.758479 | 7.114978 | 7.868132 | 8.34883  | 7.327633 |
| 23475_at | 7.654792 | 6.413132 | 7.312084 | 6.425597 | 6.839622 | 7.313864 | 7.327045 | 6.572391 |
| 23476_at | 5.656382 | 6.220713 | 6.406555 | 6.486673 | 6.042941 | 6.341996 | 6.26491  | 5.392243 |
| 23478_at | 6.863113 | 7.008541 | 7.049472 | 6.863113 | 7.184825 | 6.426919 | 6.524902 | 7.378027 |
| 23479_at | 3.735607 | 3.274659 | 3.703534 | 3.659038 | 3.946143 | 3.34197  | 3.528803 | 3.566992 |
| 23480_at | 9.286007 | 9.973966 | 9.448662 | 9.769944 | 9.555424 | 9.145159 | 9.181425 | 9.980983 |
| 23481_at | 4.756406 | 4.906385 | 5.104408 | 4.766302 | 5.22844  | 5.233361 | 4.847966 | 4.984635 |
| 23483_at | 4.489712 | 4.788489 | 4.85228  | 5.48214  | 3.856236 | 4.382894 | 4.862234 | 4.946648 |
| 23484_at | 6.493194 | 7.074698 | 6.749317 | 7.557475 | 6.862565 | 7.210558 | 6.594602 | 5.707942 |
| 2348_at  | 7.239462 | 6.10862  | 7.19274  | 7.020093 | 7.100545 | 7.285191 | 7.244264 | 6.565046 |
| 23491_at | 2.75174  | 2.466254 | 3.424174 | 2.321915 | 3.470944 | 3.488971 | 2.517884 | 2.398674 |
| 23492_at | 5.331348 | 4.754084 | 5.268736 | 5.234249 | 4.430975 | 4.967181 | 4.73971  | 3.076768 |
| 23493_at | 3.941981 | 2.444095 | 3.097895 | 2.616027 | 2.733703 | 3.685964 | 3.168525 | 2.435384 |
| 23495_at | 2.769002 | 3.459825 | 2.999004 | 4.009556 | 3.733871 | 4.129669 | 3.612371 | 3.458474 |
| 23498_at | 5.072482 | 4.41327  | 3.834528 | 4.479616 | 5.52024  | 5.538305 | 4.415568 | 5.361677 |
| 23499_at | 6.42441  | 6.876829 | 7.434072 | 7.434307 | 7.376616 | 7.05371  | 7.538571 | 7.23665  |
| 23500_at | 6.533114 | 6.80349  | 6.790609 | 6.630426 | 6.142687 | 6.280947 | 6.236129 | 6.067392 |
| 23503_at | 4.368806 | 4.146729 | 4.586648 | 4.32318  | 5.072956 | 4.628374 | 4.673226 | 3.655312 |
| 23504_at | 2.934565 | 2.200672 | 1.852548 | 2.549493 | 1.567239 | 2.722325 | 2.188924 | 2.471018 |

|          |          |          |          |          |          |          |          |          |
|----------|----------|----------|----------|----------|----------|----------|----------|----------|
| 23505_at | 7.169957 | 7.203925 | 7.576968 | 7.369846 | 7.166427 | 7.485422 | 7.648196 | 7.39178  |
| 23506_at | 5.505149 | 5.152088 | 4.86922  | 5.545328 | 4.525861 | 5.421487 | 5.283589 | 4.896803 |
| 23507_at | 4.211884 | 3.978403 | 4.16154  | 4.849726 | 4.035805 | 4.199907 | 3.543158 | 4.603969 |
| 23508_at | 2.45464  | 3.597269 | 2.084191 | 3.196033 | 2.051246 | 2.555543 | 3.141584 | 2.170679 |
| 23509_at | 5.352527 | 5.797487 | 5.785282 | 5.208856 | 4.034683 | 5.09078  | 5.46298  | 4.283465 |
| 2350_at  | 2.455946 | 2.015276 | 1.689884 | 2.677416 | 1.579805 | 1.876261 | 2.524855 | 2.970947 |
| 23510_at | 5.555839 | 6.242398 | 4.89521  | 5.3859   | 5.495991 | 5.926929 | 6.179691 | 5.559433 |
| 23511_at | 5.042142 | 5.700721 | 4.955914 | 5.329593 | 5.030721 | 5.954815 | 5.942988 | 4.988556 |
| 23512_at | 6.617827 | 6.668287 | 6.503238 | 6.248619 | 6.508528 | 6.733399 | 6.502961 | 7.530627 |
| 23513_at | 3.955748 | 3.740771 | 3.434901 | 3.379978 | 3.694957 | 3.513606 | 3.873777 | 3.142485 |
| 23514_at | 5.356735 | 5.051698 | 5.346032 | 5.646711 | 3.835992 | 5.278416 | 5.134019 | 4.239944 |
| 23515_at | 5.603279 | 5.477825 | 5.085527 | 5.324367 | 4.831986 | 5.163868 | 5.198146 | 5.446287 |
| 23516_at | 4.321812 | 4.256774 | 5.02224  | 4.950498 | 4.795315 | 5.076305 | 5.022617 | 4.210322 |
| 23517_at | 5.875281 | 6.450455 | 6.514512 | 6.090108 | 6.254427 | 6.387349 | 6.809502 | 7.177908 |
| 23518_at | 6.319425 | 6.183409 | 5.886158 | 6.44312  | 6.616633 | 6.75177  | 5.943747 | 5.993329 |
| 23519_at | 0.92526  | 0.933292 | 1.027017 | 1.25749  | 2.009127 | 1.248696 | 1.417377 | 1.282748 |
| 23520_at | 0.996712 | 1.170518 | 1.058318 | 0.924792 | 1.146014 | 1.329438 | 2.135289 | 0.976421 |
| 23521_at | 3.177459 | 2.725611 | 3.319545 | 2.653829 | 2.982139 | 2.414321 | 2.856422 | 2.90828  |
| 23522_at | 5.717577 | 6.441283 | 6.505284 | 6.292054 | 5.819362 | 6.217946 | 6.241506 | 6.047925 |
| 23523_at | 4.798073 | 4.990799 | 4.635601 | 4.829972 | 4.034098 | 5.404607 | 4.935754 | 4.488844 |
| 23524_at | 8.259905 | 8.121957 | 8.258557 | 8.597412 | 7.875702 | 8.357656 | 8.051073 | 7.750435 |
| 23526_at | 3.936143 | 3.402908 | 3.465862 | 3.888318 | 3.397722 | 3.362724 | 3.482416 | 2.952329 |
| 23527_at | 6.278154 | 6.809802 | 6.061236 | 6.693291 | 6.528373 | 6.345505 | 6.8202   | 6.543478 |
| 23528_at | 3.859861 | 4.814491 | 4.352508 | 4.618365 | 3.871561 | 4.80605  | 4.613741 | 4.475966 |
| 23529_at | 4.05857  | 4.16689  | 4.795013 | 4.509245 | 4.124579 | 4.917443 | 3.773623 | 3.865074 |
| 2352_at  | 3.078085 | 2.437915 | 1.998173 | 1.727588 | 3.137793 | 3.068794 | 2.558518 | 2.144453 |
| 23530_at | 6.366125 | 6.322558 | 6.888666 | 6.64845  | 6.735475 | 5.858787 | 6.509711 | 6.646035 |
| 23531_at | 3.982688 | 3.47454  | 3.927771 | 2.470888 | 3.024753 | 2.820863 | 3.353766 | 4.434791 |
| 23532_at | 2.353483 | 1.845553 | 1.423828 | 1.612356 | 1.45226  | 2.99094  | 1.685156 | 1.739411 |
| 23533_at | 2.520526 | 2.688942 | 3.469132 | 2.177757 | 2.455833 | 2.610843 | 3.420067 | 2.349908 |
| 23534_at | 6.869126 | 6.768549 | 6.933107 | 7.347218 | 6.414791 | 6.904774 | 6.94768  | 7.215341 |
| 23536_at | 4.710301 | 4.395566 | 4.568632 | 3.859561 | 5.236574 | 5.161573 | 3.437143 | 2.089178 |
| 23538_at | 1.592945 | 1.967887 | 2.135342 | 2.33283  | 1.917007 | 0.895543 | 2.210203 | 1.901361 |
| 23539_at | 3.245672 | 3.004178 | 1.970609 | 2.093536 | 1.981489 | 4.234658 | 2.831358 | 1.7808   |
| 2353_at  | 4.034753 | 7.124838 | 5.680433 | 5.160429 | 4.829537 | 4.893691 | 6.718018 | 4.429713 |
| 23541_at | 2.272585 | 1.50369  | 1.987237 | 2.375065 | 2.691685 | 2.276289 | 1.498105 | 1.636966 |
| 23542_at | 1.499708 | 1.664152 | 2.029704 | 2.078158 | 2.728687 | 1.636238 | 2.028009 | 1.999857 |
| 23543_at | 6.069216 | 6.210712 | 6.13257  | 7.034784 | 6.286634 | 6.093546 | 5.893735 | 6.934247 |
| 23544_at | 1.746016 | 1.562622 | 1.710635 | 1.576162 | 2.656592 | 1.800217 | 1.853585 | 1.795957 |
| 23545_at | 4.601544 | 4.555479 | 3.164005 | 5.000032 | 4.111774 | 4.435669 | 5.434032 | 4.49924  |
| 23546_at | 2.379568 | 3.037664 | 2.43603  | 2.45771  | 2.214975 | 2.249998 | 2.886128 | 2.663167 |
| 23547_at | 1.409996 | 1.70586  | 2.006173 | 1.315097 | 1.611426 | 2.010517 | 2.545877 | 0.715985 |
| 23548_at | 4.783499 | 5.20282  | 4.984015 | 5.680783 | 4.729962 | 5.141505 | 4.841752 | 6.042994 |
| 23549_at | 6.154807 | 4.923404 | 5.584504 | 5.310538 | 4.656739 | 6.063579 | 5.523708 | 5.698489 |
| 2354_at  | 2.895291 | 3.5059   | 3.138092 | 3.227783 | 3.170421 | 3.210652 | 3.06888  | 2.716898 |
| 23550_at | 3.269471 | 2.816789 | 4.21515  | 3.133251 | 2.676476 | 3.750814 | 3.658229 | 1.896304 |
| 23551_at | 1.907682 | 2.360139 | 3.326222 | 3.958058 | 2.387267 | 2.418568 | 2.221313 | 1.661664 |
| 23552_at | 3.903864 | 2.711011 | 3.628173 | 4.144138 | 3.687952 | 3.675396 | 3.244709 | 3.093516 |
| 23553_at | 1.34464  | 1.370557 | 1.235756 | 1.210441 | 1.112534 | 1.377426 | 1.197456 | 0.945005 |
| 23554_at | 6.783725 | 6.571717 | 6.296212 | 5.967514 | 7.247762 | 7.157495 | 6.112849 | 7.139912 |
| 23555_at | 5.69577  | 5.839117 | 7.082042 | 6.861309 | 5.797031 | 6.658398 | 6.696799 | 5.997626 |

|          |          |          |          |          |          |          |          |          |
|----------|----------|----------|----------|----------|----------|----------|----------|----------|
| 23556_at | 5.097708 | 5.617798 | 5.132021 | 4.829274 | 5.178818 | 4.021021 | 4.979167 | 6.060233 |
| 23557_at | 7.333014 | 6.860378 | 7.190392 | 7.575249 | 6.584298 | 7.239211 | 7.356643 | 7.162343 |
| 23558_at | 7.776954 | 7.641917 | 7.405565 | 7.443978 | 7.407801 | 7.343051 | 8.236136 | 6.997305 |
| 2355_at  | 4.67624  | 4.777357 | 4.833098 | 5.653066 | 4.024779 | 5.487886 | 5.136146 | 4.253173 |
| 23560_at | 5.995234 | 6.609894 | 6.113098 | 5.625293 | 6.376309 | 6.205939 | 5.051355 | 6.250475 |
| 23562_at | 2.377744 | 2.792329 | 2.078243 | 2.520367 | 2.459003 | 2.59658  | 2.070906 | 2.339063 |
| 23563_at | 1.390493 | 2.078014 | 2.14397  | 1.768695 | 1.275356 | 2.665087 | 1.782003 | 1.394636 |
| 23564_at | 7.14998  | 6.634184 | 6.64564  | 6.221334 | 5.958011 | 6.886579 | 6.007145 | 6.066502 |
| 23566_at | 1.63681  | 2.357726 | 2.102445 | 3.103366 | 2.876038 | 1.978013 | 2.054757 | 2.199387 |
| 23567_at | 5.023823 | 4.808885 | 4.727278 | 3.900028 | 2.934871 | 4.067393 | 5.103294 | 4.61048  |
| 23568_at | 6.792019 | 6.774717 | 7.022495 | 7.182842 | 6.174035 | 6.489108 | 7.023421 | 6.970491 |
| 23569_at | 1.981963 | 2.069076 | 1.985846 | 1.863473 | 1.430389 | 2.059634 | 2.049569 | 1.99571  |
| 2356_at  | 3.204753 | 4.401828 | 3.982623 | 3.578175 | 4.782293 | 3.60569  | 4.333482 | 3.017964 |
| 23574_at | 1.36864  | 1.462654 | 1.578497 | 1.087904 | 2.02666  | 1.949342 | 1.277965 | 1.448568 |
| 23576_at | 6.981489 | 6.526229 | 5.938455 | 5.871888 | 7.740986 | 7.239508 | 4.717731 | 7.038522 |
| 2357_at  | 5.127513 | 4.906482 | 4.706601 | 5.082382 | 4.461366 | 4.389672 | 4.901455 | 5.573364 |
| 23580_at | 5.29807  | 5.045533 | 5.440227 | 5.940309 | 4.269137 | 5.703115 | 5.311637 | 5.283169 |
| 23581_at | 1.691699 | 1.759245 | 1.617283 | 1.732104 | 1.606266 | 1.401433 | 1.908709 | 1.132746 |
| 23582_at | 7.482305 | 7.09472  | 7.248428 | 7.007203 | 6.742968 | 6.720128 | 6.960674 | 6.627358 |
| 23583_at | 3.743537 | 4.603471 | 4.036221 | 4.577137 | 3.750306 | 4.055748 | 3.888913 | 3.216229 |
| 23584_at | 4.209867 | 4.05532  | 4.068792 | 4.110593 | 4.26455  | 3.404639 | 2.995821 | 3.382294 |
| 23585_at | 8.079581 | 8.729507 | 8.602602 | 8.569654 | 8.848906 | 8.49039  | 8.58846  | 8.630483 |
| 23586_at | 6.977905 | 6.831826 | 6.004427 | 6.725961 | 7.034471 | 6.501906 | 6.911668 | 6.82435  |
| 23587_at | 5.332842 | 5.784804 | 5.471817 | 5.078682 | 4.680979 | 5.592709 | 4.875786 | 5.639247 |
| 23588_at | 7.946669 | 7.303036 | 7.147823 | 7.29422  | 8.029603 | 7.098159 | 6.932442 | 7.859431 |
| 23589_at | 6.545371 | 5.650313 | 5.826285 | 6.545996 | 5.896095 | 6.041944 | 6.051736 | 6.057159 |
| 2358_at  | 2.10976  | 1.530641 | 1.426458 | 1.891348 | 1.696534 | 1.174877 | 2.455534 | 2.162549 |
| 23590_at | 3.322705 | 2.558919 | 2.172151 | 2.169625 | 4.780839 | 2.327456 | 2.808712 | 2.948797 |
| 23591_at | 2.109397 | 1.94058  | 3.473818 | 1.52262  | 2.764193 | 3.368354 | 3.037106 | 2.29796  |
| 23592_at | 5.772558 | 6.740839 | 6.455711 | 6.621839 | 6.590321 | 6.386211 | 6.815737 | 7.157463 |
| 23593_at | 7.654592 | 6.842713 | 6.939837 | 6.151701 | 7.340462 | 6.548367 | 6.380014 | 7.464793 |
| 23594_at | 5.629677 | 4.155937 | 4.149811 | 4.810287 | 4.403005 | 4.570515 | 4.759564 | 4.975128 |
| 23595_at | 6.752119 | 6.345851 | 5.975369 | 6.020974 | 6.341422 | 5.786167 | 5.854242 | 6.478348 |
| 23596_at | 5.45018  | 5.569644 | 5.260938 | 5.093934 | 4.724323 | 5.413387 | 5.877701 | 5.388923 |
| 23597_at | 5.478269 | 5.83623  | 5.541637 | 5.426371 | 5.397007 | 5.522807 | 4.751454 | 5.025902 |
| 23598_at | 4.678783 | 5.390001 | 4.277924 | 4.735256 | 4.839887 | 4.760943 | 4.166153 | 4.701978 |
| 2359_at  | 2.732526 | 2.343914 | 1.564318 | 3.599146 | 2.654967 | 2.980363 | 2.435653 | 3.177251 |
| 23601_at | 2.183319 | 1.829629 | 1.586689 | 1.962949 | 1.76768  | 1.354543 | 1.823081 | 1.076355 |
| 23603_at | 6.683416 | 6.677618 | 6.495248 | 6.359727 | 6.667795 | 5.736227 | 6.951925 | 6.604313 |
| 23604_at | 3.282129 | 3.738064 | 2.871377 | 4.638553 | 3.510686 | 2.999608 | 4.256951 | 3.71344  |
| 23607_at | 9.12636  | 8.976031 | 8.820174 | 8.987119 | 9.02279  | 8.401366 | 8.809518 | 9.182958 |
| 23608_at | 4.949844 | 5.53429  | 5.369462 | 5.088981 | 5.606023 | 4.857071 | 5.286963 | 6.057008 |
| 23609_at | 6.060332 | 5.542652 | 5.375549 | 5.72153  | 4.806297 | 5.928723 | 6.220999 | 6.090535 |
| 23612_at | 4.047395 | 3.620501 | 3.928639 | 4.255757 | 3.668355 | 4.059075 | 3.202293 | 3.230309 |
| 23613_at | 5.964295 | 5.643614 | 5.779857 | 5.948554 | 4.791797 | 5.567388 | 5.624735 | 5.402585 |
| 23614_at | 1.728031 | 1.554567 | 1.150395 | 1.914211 | 1.357256 | 1.506392 | 1.275686 | 2.224527 |
| 23615_at | 2.473608 | 3.38032  | 2.796416 | 3.158864 | 2.801468 | 2.910827 | 3.26514  | 2.357063 |
| 23616_at | 2.885513 | 3.207542 | 2.805631 | 4.19475  | 3.220019 | 4.011729 | 3.297229 | 2.846767 |
| 23617_at | 2.557485 | 1.60241  | 1.129293 | 1.620033 | 1.928965 | 2.862019 | 1.458285 | 2.10987  |
| 23619_at | 1.8276   | 2.022632 | 3.026321 | 1.570119 | 2.082457 | 1.781729 | 3.486934 | 3.66355  |
| 23620_at | 1.592165 | 1.590122 | 1.133019 | 1.523605 | 2.393557 | 2.409928 | 2.985278 | 1.574577 |

|          |          |          |          |          |          |          |          |          |
|----------|----------|----------|----------|----------|----------|----------|----------|----------|
| 23621_at | 7.465583 | 7.468081 | 7.881129 | 7.769573 | 7.046145 | 7.636868 | 7.627931 | 7.371474 |
| 23623_at | 4.247946 | 3.667497 | 3.837856 | 3.999595 | 3.778974 | 4.450735 | 4.015441 | 3.341894 |
| 23624_at | 2.546301 | 1.697295 | 1.860255 | 1.343689 | 1.129542 | 1.574897 | 2.794593 | 1.294    |
| 23625_at | 7.500115 | 5.925045 | 6.344273 | 7.178922 | 5.221829 | 6.416842 | 6.936682 | 5.454439 |
| 23626_at | 1.354674 | 1.225915 | 1.212084 | 0.999861 | 1.612413 | 1.168099 | 1.585025 | 1.244879 |
| 23627_at | 2.707261 | 2.571367 | 2.127123 | 1.443686 | 2.014539 | 1.72971  | 1.674941 | 1.735291 |
| 23629_at | 0.954188 | 1.045739 | 1.411491 | 1.773932 | 1.488009 | 1.613423 | 1.446615 | 0.709863 |
| 23630_at | 1.663233 | 2.054428 | 3.713977 | 2.90943  | 2.721868 | 2.740889 | 2.444982 | 2.16948  |
| 23632_at | 2.508663 | 2.065216 | 1.805613 | 1.736058 | 3.405317 | 2.194065 | 1.517955 | 2.497072 |
| 23633_at | 6.441619 | 6.80978  | 6.497777 | 6.935935 | 6.500579 | 6.262016 | 6.653548 | 6.519676 |
| 23635_at | 6.78648  | 7.216819 | 6.589066 | 6.092566 | 6.415663 | 5.534752 | 6.730002 | 6.188963 |
| 23636_at | 5.978937 | 5.165369 | 5.2617   | 5.788101 | 5.800825 | 5.110007 | 6.411219 | 4.572202 |
| 23637_at | 6.891032 | 7.121067 | 7.127783 | 7.2036   | 7.093853 | 7.000999 | 6.683645 | 7.617111 |
| 23639_at | 6.377122 | 6.385027 | 5.938887 | 5.12369  | 5.043755 | 5.831022 | 5.449807 | 6.692107 |
| 23640_at | 4.208718 | 4.749485 | 4.165905 | 4.63465  | 4.785828 | 4.534595 | 4.093628 | 3.62893  |
| 23641_at | 5.354531 | 5.097864 | 5.823393 | 6.453482 | 4.83484  | 5.960904 | 6.660281 | 4.997947 |
| 23643_at | 4.527182 | 4.868131 | 3.584315 | 4.711242 | 4.750318 | 4.757658 | 4.025509 | 4.559582 |
| 23644_at | 4.481442 | 3.950336 | 4.683212 | 4.437425 | 4.020052 | 4.875431 | 4.64534  | 3.743735 |
| 23645_at | 5.724143 | 6.317493 | 6.853137 | 6.099887 | 5.313061 | 5.78468  | 5.994596 | 5.770012 |
| 23646_at | 8.421719 | 7.755003 | 8.761741 | 8.397641 | 7.767466 | 8.132347 | 9.014451 | 7.060026 |
| 23647_at | 5.113369 | 5.122443 | 4.673447 | 5.117424 | 4.893114 | 5.010747 | 3.601545 | 5.253331 |
| 23648_at | 7.154992 | 7.644326 | 6.769982 | 6.592624 | 6.978472 | 7.16443  | 7.336602 | 7.27979  |
| 23649_at | 4.581125 | 5.307267 | 4.587551 | 4.42225  | 4.547199 | 5.064107 | 4.829044 | 5.022627 |
| 23650_at | 2.442538 | 1.744415 | 1.802316 | 1.565231 | 1.811468 | 3.205475 | 3.284239 | 1.498629 |
| 23654_at | 7.087352 | 6.9843   | 7.465322 | 7.215274 | 6.463826 | 6.871189 | 7.429746 | 6.182948 |
| 23657_at | 1.726024 | 1.407605 | 2.039781 | 2.046537 | 1.754451 | 2.562363 | 2.28893  | 1.774114 |
| 23658_at | 4.390718 | 3.568904 | 3.886439 | 3.383087 | 4.183292 | 3.871861 | 4.217737 | 3.550313 |
| 23659_at | 5.741743 | 6.066363 | 6.49657  | 5.828892 | 5.122416 | 5.676582 | 6.859513 | 4.549897 |
| 23660_at | 3.472506 | 4.206468 | 4.601812 | 3.511186 | 5.115223 | 3.482161 | 3.677547 | 4.580409 |
| 23670_at | 6.337169 | 6.885627 | 6.708554 | 5.971417 | 5.839265 | 6.646666 | 6.527709 | 6.431176 |
| 23671_at | 2.336993 | 1.412768 | 1.313743 | 2.023512 | 1.483305 | 2.27153  | 2.434179 | 2.057342 |
| 23673_at | 7.926425 | 7.349152 | 7.896024 | 7.457041 | 8.009243 | 7.979026 | 7.899324 | 7.494944 |
| 23676_at | 1.711744 | 1.146324 | 1.200632 | 1.728346 | 1.458478 | 1.159635 | 1.423874 | 1.467339 |
| 23677_at | 5.004121 | 4.470282 | 4.857657 | 5.051706 | 5.083364 | 5.104296 | 4.146406 | 4.939234 |
| 23682_at | 3.316858 | 2.181608 | 2.435049 | 3.820048 | 3.08282  | 2.137402 | 2.17982  | 3.31835  |
| 23683_at | 6.325381 | 6.523359 | 5.776868 | 6.048171 | 6.027046 | 5.890632 | 5.604209 | 6.657576 |
| 23704_at | 3.578529 | 3.831754 | 4.266699 | 3.458475 | 3.737937 | 3.692556 | 4.351676 | 4.231911 |
| 23705_at | 5.941577 | 6.201652 | 5.815247 | 5.494099 | 6.287155 | 6.670082 | 6.785529 | 6.455415 |
| 23708_at | 4.594986 | 5.290363 | 4.350981 | 4.17544  | 2.875346 | 4.397146 | 4.955033 | 4.986499 |
| 23710_at | 3.109375 | 1.283483 | 1.604373 | 2.045912 | 2.792929 | 2.083451 | 2.870414 | 1.563911 |
| 23729_at | 3.745986 | 5.251915 | 3.937484 | 3.005232 | 3.446569 | 4.351773 | 3.658867 | 3.605244 |
| 23731_at | 7.926703 | 8.554685 | 8.340606 | 7.954819 | 8.17067  | 8.013063 | 8.607413 | 8.173421 |
| 23732_at | 1.85016  | 1.887597 | 2.757739 | 1.687318 | 1.431391 | 2.613419 | 2.883729 | 1.82476  |
| 23741_at | 8.430963 | 8.538462 | 8.84657  | 8.6757   | 8.514731 | 8.442781 | 8.652102 | 9.022634 |
| 23742_at | 2.486584 | 1.84426  | 1.939034 | 1.586059 | 1.626958 | 1.940011 | 1.46746  | 2.366335 |
| 23743_at | 7.780839 | 6.945906 | 7.090907 | 5.496109 | 8.594095 | 7.329943 | 4.441312 | 7.701622 |
| 23746_at | 2.053681 | 2.197203 | 2.026417 | 2.500768 | 1.813791 | 2.133502 | 2.148302 | 2.524642 |
| 23753_at | 5.737573 | 6.112058 | 5.234996 | 5.528234 | 5.348871 | 5.728723 | 5.098467 | 5.739716 |
| 23759_at | 5.823467 | 5.088474 | 5.368677 | 5.721321 | 5.191689 | 5.812887 | 6.103726 | 5.213126 |
| 23760_at | 8.269827 | 8.735856 | 8.254232 | 8.529384 | 8.748451 | 8.212164 | 8.052382 | 8.597174 |
| 23761_at | 4.074135 | 3.729558 | 3.252544 | 2.560244 | 3.321997 | 4.334805 | 3.142535 | 3.830483 |

|           |          |          |          |          |          |          |          |          |
|-----------|----------|----------|----------|----------|----------|----------|----------|----------|
| 23762_at  | 2.05134  | 2.675415 | 3.08219  | 2.602771 | 3.054742 | 2.91984  | 3.01078  | 3.058644 |
| 23764_at  | 3.290197 | 2.566464 | 3.098404 | 2.478824 | 2.602187 | 2.425783 | 4.434087 | 2.374636 |
| 23765_at  | 6.151665 | 6.285374 | 7.095122 | 7.181556 | 5.710904 | 6.791566 | 6.790907 | 5.607783 |
| 23766_at  | 1.370575 | 1.621845 | 1.63993  | 2.173285 | 1.728054 | 1.549891 | 1.836919 | 1.738359 |
| 23767_at  | 7.946438 | 8.400082 | 8.177891 | 7.72636  | 6.975577 | 8.251008 | 8.11755  | 8.171383 |
| 23768_at  | 5.004561 | 4.580133 | 4.713446 | 4.989366 | 5.350798 | 5.249018 | 5.283    | 4.936482 |
| 23769_at  | 3.10752  | 2.366066 | 2.496232 | 2.133584 | 2.739348 | 2.661143 | 2.721639 | 3.860786 |
| 23770_at  | 6.390771 | 5.440198 | 6.154473 | 5.884518 | 4.41876  | 5.702842 | 5.818205 | 4.895352 |
| 23774_at  | 4.120525 | 4.861732 | 4.459985 | 4.93967  | 3.786572 | 4.108208 | 4.453595 | 3.442684 |
| 23780_at  | 3.757826 | 2.658373 | 2.652229 | 4.006387 | 4.143489 | 2.271825 | 3.250117 | 3.030631 |
| 23782_at  | 2.892581 | 3.682945 | 4.058907 | 3.779895 | 4.869596 | 4.281026 | 3.899114 | 3.480127 |
| 23783_at  | 1.650189 | 1.452216 | 1.039001 | 1.237948 | 0.907479 | 0.674873 | 3.106997 | 1.356228 |
| 23784_at  | 2.498141 | 1.739791 | 3.167186 | 2.242079 | 3.198682 | 2.578201 | 3.037739 | 1.505031 |
| 23786_at  | 4.816896 | 5.690219 | 5.630522 | 5.193653 | 4.707802 | 5.140348 | 5.534275 | 5.519413 |
| 23787_at  | 7.26534  | 7.137275 | 7.472995 | 7.346017 | 7.335614 | 7.34951  | 7.36819  | 6.910306 |
| 23788_at  | 8.470329 | 8.697024 | 8.112834 | 7.715425 | 8.781355 | 8.124636 | 7.93853  | 8.753176 |
| 238_at    | 3.330747 | 2.037862 | 2.446007 | 2.340455 | 2.151933 | 2.687852 | 2.555436 | 2.941856 |
| 2395_at   | 3.621514 | 4.953487 | 5.030361 | 4.820985 | 3.934956 | 4.251778 | 3.983166 | 2.943622 |
| 239_at    | 2.238333 | 1.658458 | 2.057559 | 2.506133 | 1.96029  | 2.082743 | 2.01251  | 2.328442 |
| 23_at     | 6.100244 | 7.002183 | 7.0446   | 6.464146 | 6.722807 | 6.70694  | 7.103631 | 6.4382   |
| 240_at    | 3.722368 | 2.804027 | 3.542044 | 4.074001 | 1.735554 | 2.924642 | 3.051198 | 3.184185 |
| 24137_at  | 1.33704  | 2.924807 | 2.925221 | 2.730689 | 2.793819 | 2.779805 | 2.854571 | 1.691176 |
| 24138_at  | 6.084334 | 5.88423  | 5.486793 | 5.874555 | 5.746733 | 5.855574 | 5.992166 | 5.950661 |
| 24139_at  | 3.284898 | 3.778482 | 3.995279 | 4.320601 | 3.630657 | 4.688486 | 3.787543 | 3.984208 |
| 24140_at  | 5.389742 | 5.395948 | 5.010679 | 5.449681 | 4.548966 | 5.240078 | 4.363016 | 4.646539 |
| 24141_at  | 4.735911 | 1.829717 | 2.455572 | 4.738725 | 3.06016  | 3.909688 | 3.259804 | 2.31364  |
| 24142_at  | 3.603429 | 4.426286 | 4.790624 | 5.161639 | 3.742946 | 4.161767 | 4.282889 | 3.657628 |
| 24144_at  | 4.991469 | 5.915776 | 5.795144 | 5.138083 | 4.731262 | 5.411847 | 6.139693 | 5.75297  |
| 24145_at  | 5.168676 | 5.085842 | 5.459002 | 4.861426 | 4.471607 | 5.153207 | 5.091165 | 5.419456 |
| 24146_at  | 3.817016 | 2.023397 | 4.150788 | 3.874019 | 3.355872 | 3.898796 | 2.81253  | 2.572732 |
| 24147_at  | 3.487543 | 3.168792 | 3.398158 | 2.376138 | 3.470256 | 2.695967 | 4.152898 | 3.717423 |
| 24148_at  | 5.846009 | 6.106284 | 5.970987 | 6.102287 | 5.3278   | 5.91906  | 5.99299  | 6.098984 |
| 24149_at  | 4.860525 | 5.67864  | 5.949919 | 5.462663 | 5.648759 | 5.207828 | 5.877696 | 5.784075 |
| 241_at    | 4.931449 | 2.2195   | 4.035905 | 6.28444  | 4.375516 | 6.108962 | 5.240205 | 3.580902 |
| 242_at    | 1.20163  | 1.934375 | 1.38313  | 1.405595 | 1.531101 | 1.517543 | 1.580694 | 1.668737 |
| 2444_at   | 5.123167 | 4.512923 | 4.55918  | 5.276902 | 7.045201 | 5.255447 | 4.311064 | 6.013452 |
| 245711_at | 1.933202 | 2.004198 | 1.671631 | 1.830236 | 1.626043 | 1.893132 | 1.958791 | 1.729463 |
| 245802_at | 1.498975 | 1.347074 | 1.280078 | 1.060573 | 1.071928 | 1.229355 | 1.724301 | 0.918525 |
| 245806_at | 2.915758 | 3.205487 | 2.641764 | 2.735863 | 3.03358  | 3.449007 | 3.147498 | 3.5047   |
| 245812_at | 4.976866 | 5.423016 | 5.086133 | 5.104146 | 5.835318 | 5.735494 | 5.332355 | 5.467633 |
| 245911_at | 5.105985 | 5.015651 | 3.88612  | 4.199156 | 4.315492 | 5.501574 | 5.355132 | 5.800051 |
| 245913_at | 1.107798 | 1.528409 | 1.803417 | 1.080295 | 1.571915 | 1.013552 | 1.797527 | 1.601842 |
| 245915_at | 1.309614 | 1.232519 | 0.936605 | 1.324665 | 1.730744 | 0.812507 | 1.084469 | 1.487892 |
| 245927_at | 1.373435 | 2.371814 | 1.870674 | 1.957303 | 2.518312 | 1.949611 | 2.450024 | 2.967686 |
| 245928_at | 1.140828 | 0.663419 | 0.843283 | 1.061695 | 1.289084 | 1.440356 | 0.780755 | 0.943037 |
| 245929_at | 1.917735 | 2.836691 | 1.945775 | 1.729003 | 2.09533  | 2.044366 | 1.79712  | 2.721782 |
| 245930_at | 1.771629 | 1.85019  | 1.66671  | 2.165313 | 1.336021 | 1.292555 | 2.061342 | 1.775763 |
| 245932_at | 1.25654  | 1.372081 | 1.487341 | 1.513652 | 1.497288 | 1.123869 | 1.28143  | 2.01526  |
| 245934_at | 1.718006 | 1.283055 | 1.383786 | 1.524352 | 2.037779 | 1.788576 | 1.636977 | 2.538292 |
| 245935_at | 1.160376 | 1.638831 | 1.339041 | 1.084048 | 2.069076 | 1.067918 | 1.589715 | 1.401016 |
| 245936_at | 2.85502  | 2.0926   | 2.713271 | 2.078453 | 1.75453  | 1.649358 | 1.835069 | 2.325916 |

245937\_at 3.536836 2.638084 2.997581 3.643242 2.261552 2.749119 3.349377 3.21681  
245938\_at 1.032689 1.183485 2.043289 1.153851 1.565533 1.324683 1.204709 1.426914  
245939\_at 0.689755 1.198167 1.17845 0.903386 1.076285 1.058345 0.773288 2.211384  
245972\_at 4.326514 3.856045 3.174938 5.222091 7.686738 3.39415 1.935624 5.793374  
245973\_at 2.387318 2.093346 2.694746 2.313227 2.326047 2.043407 2.094839 1.972684  
245\_at 1.7125 1.464984 1.61524 1.597444 1.547301 1.354681 2.285101 1.548273  
246119\_at 2.463066 3.188235 2.169224 1.657113 3.871427 3.900414 2.357832 2.798068  
246126\_at 5.312498 4.522859 4.098166 4.967453 5.098465 4.683401 4.509878 4.370185  
246175\_at 6.549974 6.15226 6.620546 6.979772 6.498428 6.569543 6.375737 7.120165  
246176\_at 1.838221 1.739419 2.235345 1.645922 1.720513 3.056183 2.003957 2.338802  
246181\_at 2.946453 3.076765 2.15032 2.990384 2.626372 1.799811 1.890519 2.423883  
246182\_at 2.696001 1.991901 2.299424 3.07767 2.397622 2.60324 2.058381 1.776468  
246184\_at 5.588477 5.192988 4.566946 4.884159 5.572248 5.789823 5.655449 4.964479  
246213\_at 1.774959 1.607142 1.727494 1.762824 1.492165 1.680133 2.066375 1.866156  
246243\_at 5.768709 6.093202 6.119514 5.855643 5.756016 6.034489 5.843788 5.933833  
246269\_at 3.148843 3.736489 4.589251 2.847533 3.401799 2.836611 3.531431 3.798154  
246312\_at 1.427424 0.864768 1.082413 0.972024 1.770615 0.844741 1.526449 0.734656  
246329\_at 1.939749 2.063929 1.577504 1.540108 1.822514 1.795567 2.615664 1.727531  
246330\_at 2.548239 3.027343 2.407298 3.109048 3.438334 3.203291 3.33045 3.524237  
246705\_at 0.659946 1.406544 1.066725 2.863112 1.547398 1.780971 1.769156 0.972344  
246744\_at 1.779096 1.678017 3.019307 1.981 2.349996 2.208057 1.651135 2.212589  
246754\_at 1.656384 1.888604 2.41709 2.056852 2.644138 1.353593 2.00032 2.087882  
246777\_at 4.896765 5.445921 5.376305 3.464056 4.349858 3.690198 3.342827 5.126481  
246778\_at 2.63925 2.325177 2.653519 3.105092 2.036887 2.182859 2.835352 2.22978  
246\_at 1.41587 2.10662 2.606825 1.58208 1.645488 2.01969 2.637714 2.046623  
2475\_at 5.745643 6.47489 6.47489 6.432924 5.839688 5.964555 6.573808 5.707499  
247\_at 1.572009 1.41478 1.447511 2.023315 2.216161 1.430299 0.904568 1.180565  
2483\_at 8.4749 8.785979 7.914856 8.851821 6.634284 8.735265 8.703966 7.669655  
2487\_at 7.906043 8.094153 7.870693 8.542661 8.338365 8.116019 7.132748 7.914434  
2488\_at 2.088309 2.240133 2.186354 1.960291 2.723015 2.205072 2.753674 1.835584  
248\_at 1.445458 2.2893 2.3691 1.470968 2.089216 3.095759 2.540186 2.182347  
2491\_at 2.023669 2.803418 2.086842 1.684719 1.66989 1.177778 2.316106 1.336989  
2492\_at 1.844056 1.526099 1.623384 1.415767 2.552207 1.622682 2.055822 1.891753  
2494\_at 2.506055 1.826354 3.37535 3.886223 3.152259 3.017511 2.837616 2.741194  
2495\_at 5.689748 5.588293 5.905295 5.584067 5.933305 4.383443 6.211527 5.137501  
2498\_at 4.204561 4.189031 3.753087 3.761583 5.196536 3.865899 3.29795 4.850804  
249\_at 4.954382 4.415959 4.213692 2.30109 5.783865 4.486849 3.202707 4.784705  
24\_at 1.440182 2.324831 1.809256 1.80228 1.665409 1.396308 1.828603 1.862116  
250\_at 1.5652 3.024307 2.646695 1.676983 2.17928 2.233362 1.281665 3.917375  
2512\_at 11.46809 10.93993 11.15419 11.05114 11.21406 11.26228 10.57828 10.91896  
2515\_at 0.929184 1.228384 1.88139 1.354163 1.127844 1.195152 1.316813 1.427568  
2516\_at 2.496507 2.142746 1.637226 1.281027 2.030059 2.755294 1.698449 2.325245  
2517\_at 6.955038 6.501612 6.443255 6.208904 7.349302 6.652242 6.584786 7.220154  
2519\_at 6.844691 6.741751 7.133947 7.178203 6.502043 6.606352 7.09798 7.022414  
251\_at 2.786692 2.008299 1.120146 1.733002 3.585325 3.41484 1.678859 2.209029  
2520\_at 2.001889 2.807284 2.061696 2.844503 1.266915 3.17153 2.172988 2.850992  
2521\_at 7.015142 7.419094 7.274385 7.897706 7.407961 7.17477 7.552778 7.284623  
2523\_at 2.195584 3.071993 2.412766 2.880113 2.479643 2.956137 3.285565 3.350979  
2524\_at 2.591979 1.897137 1.7553 2.883207 2.018194 2.475458 1.676879 1.832841  
2525\_at 1.534241 1.271723 1.680896 1.941068 2.360877 2.1832 1.958767 1.79679  
2526\_at 2.837247 2.336035 3.039495 2.688752 3.511442 2.402596 3.636433 4.207457

2527\_at 1.356283 3.5592 1.809019 2.197576 1.895686 1.707855 1.825384 2.356529  
252839\_at 4.114579 4.033957 4.658057 4.402389 4.351102 4.578335 4.718745 4.268125  
252884\_at 2.041346 2.16295 2.360245 2.70476 2.054058 2.389639 1.738816 3.178596  
2528\_at 5.086901 4.725522 3.590797 2.949338 6.138052 5.06233 2.201817 3.120404  
252948\_at 1.406921 1.93341 1.50486 1.66674 1.873787 1.79416 1.460092 1.931474  
252950\_at 1.583021 1.437874 1.089458 1.394023 1.932642 3.012321 2.299908 1.363958  
252951\_at 1.815767 2.891208 2.521206 2.63306 1.509425 2.979466 2.683151 2.29061  
252952\_at 1.45984 1.409092 1.166659 1.252963 1.134783 1.35396 1.25047 1.397205  
252954\_at 2.726227 2.075489 2.384662 2.937056 1.533784 2.091082 3.178166 1.212104  
252969\_at 2.511567 2.969724 2.379371 3.066435 2.840049 3.306372 3.053488 3.2349  
252983\_at 4.016789 4.513625 4.246234 4.177868 4.3984 4.82096 4.250493 4.543453  
252995\_at 2.699946 2.665039 1.938465 3.234354 3.025561 2.018343 2.829989 3.489521  
2529\_at 2.572766 1.608338 1.684698 1.992864 1.816821 1.669769 2.720323 1.681969  
253012\_at 1.284927 1.458383 1.44772 1.950175 2.018104 1.386149 1.252626 2.349569  
253017\_at 1.271331 0.801782 1.178022 1.220137 1.056725 2.822181 1.300962 1.024592  
253018\_at 2.389793 2.773173 1.682287 1.935285 2.551147 3.390892 2.078023 2.037739  
253039\_at 4.58779 3.363659 5.185355 3.012384 2.610653 4.126984 1.298328 4.856253  
253044\_at 1.716047 0.894485 1.362991 1.394248 1.45623 2.173267 1.663854 1.415814  
2530\_at 6.660433 6.564099 6.044755 6.800812 6.654634 5.696937 6.100091 6.521489  
253128\_at 1.090669 1.582106 1.478595 1.055857 0.872094 2.193663 1.460517 0.90036  
253143\_at 4.956793 4.889926 4.890983 5.080032 5.256218 5.581246 4.154958 4.916241  
253152\_at 1.999214 1.334439 1.140969 1.296323 1.284506 2.11495 1.734125 1.349892  
253190\_at 3.155299 1.17471 1.323227 0.631716 1.077385 0.786753 1.288166 2.499891  
2531\_at 5.947711 6.376736 5.851704 6.260528 5.893495 5.846653 6.399847 6.343645  
253260\_at 5.32728 5.476612 5.3047 5.30164 6.255954 5.245178 5.299508 6.258525  
253264\_at 5.203398 4.772148 4.976519 4.38571 4.913092 4.10081 4.612546 4.776984  
2532\_at 3.567837 3.662926 2.933528 2.498379 2.092843 2.427057 2.666255 2.672686  
253314\_at 3.30285 2.686445 2.461886 3.142273 3.325727 2.857934 2.544582 3.142037  
2533\_at 3.939796 5.245159 4.694054 4.877754 4.767076 4.133433 4.864512 5.12847  
253430\_at 5.34039 5.562723 5.198634 5.669108 6.409007 5.235006 5.272968 5.21886  
253461\_at 5.749269 5.440052 5.388448 4.831261 5.390992 4.381206 5.641263 5.113936  
2534\_at 7.558103 7.286378 7.503078 7.360769 7.232552 7.015132 6.880045 7.944539  
253512\_at 6.740425 6.874215 7.179132 7.277237 8.153712 7.108171 7.046816 7.002769  
253558\_at 4.659404 5.198121 5.086885 4.013466 5.804711 5.455375 6.235482 6.011588  
253559\_at 1.399611 1.500697 1.804414 1.458793 1.369193 1.56593 1.721758 1.445424  
253573\_at 1.884735 1.745527 1.586994 1.610229 1.156893 1.31242 2.252862 1.984792  
253582\_at 2.250371 4.714375 5.178368 1.621737 2.808947 0.939381 3.244282 4.738602  
2535\_at 4.570822 5.285192 5.615095 4.931422 4.083858 4.87948 4.389119 4.627672  
253635\_at 5.267852 5.586822 5.742055 6.077763 5.251681 5.419803 5.432299 5.707037  
253639\_at 3.369834 4.516713 4.197957 3.369099 3.582855 2.754693 3.547543 2.28476  
253650\_at 2.594047 2.879624 1.995395 2.640761 2.962771 2.913584 3.405521 2.175547  
253714\_at 1.905594 2.372937 3.356912 2.505957 3.438494 2.794813 3.326015 3.598122  
253724\_at 1.466598 1.902781 1.798185 2.176663 1.53315 1.158627 1.418023 2.006181  
253725\_at 6.488474 7.211359 6.762076 6.474929 6.993021 7.454103 6.632836 7.008435  
253738\_at 0.889924 1.222072 1.769294 1.449183 1.469857 1.571294 1.392321 1.575018  
253769\_at 2.689367 1.994411 2.517668 2.849534 2.711278 2.206714 2.84757 3.069779  
253782\_at 8.936448 8.993092 9.165584 8.654962 8.568317 8.826642 9.143029 8.834767  
2537\_at 7.005311 7.060137 6.904623 7.191109 7.055859 7.547659 7.545385 6.852786  
253827\_at 6.822894 6.949477 7.081652 6.544069 6.037537 6.847748 6.820815 6.632175  
253832\_at 6.236203 5.558842 5.707792 6.284642 6.080136 5.783549 5.338174 5.721807  
253868\_at 2.719604 2.893506 3.197564 3.193149 3.060975 3.633337 3.041404 2.65494

2538\_at 6.505373 5.199145 4.121616 3.526065 6.152419 7.73673 3.424646 4.025535  
253935\_at 1.373806 1.063387 1.104036 0.922585 1.29036 1.113959 1.032205 1.776348  
253943\_at 6.312315 6.205049 5.810531 6.213954 6.169849 5.721219 6.033061 6.821953  
253959\_at 6.084597 6.025177 5.835167 5.525616 5.355691 6.031661 5.65312 6.359435  
253962\_at 2.616769 3.549672 3.224044 3.407812 3.871346 3.269233 4.003787 3.185891  
253970\_at 0.920954 1.262876 0.748402 1.437649 0.765397 1.207907 1.382867 0.905772  
253980\_at 5.970311 5.850187 6.732123 5.633036 6.560687 5.019711 5.383891 4.164639  
253982\_at 4.198591 3.970173 4.948776 4.430742 4.770724 3.572284 4.472799 3.452368  
2539\_at 4.394988 3.583202 5.457776 5.087033 3.35152 5.664928 4.82025 5.260161  
254013\_at 3.055005 2.498067 2.014995 3.671754 2.375696 2.830054 3.356295 3.793953  
254028\_at 0.933309 1.428132 0.806195 0.755961 1.578476 1.342704 2.175999 1.678885  
254042\_at 2.177785 2.60642 3.130262 2.194087 1.413695 1.667317 2.446739 1.260373  
254048\_at 5.558907 5.508006 5.633323 5.329271 5.990685 5.139308 4.679574 5.662734  
254050\_at 2.820058 2.051045 2.213128 2.182056 2.133495 2.756492 1.45959 2.947236  
254065\_at 4.328951 4.910014 5.169894 4.771973 4.249933 4.744591 4.384905 4.804272  
254099\_at 3.066664 2.239682 1.91498 2.778209 2.30311 1.965345 2.735092 2.843808  
254100\_at 1.592153 3.312665 1.99594 2.902135 3.427924 2.431235 2.632018 3.226457  
254102\_at 2.837387 2.12861 2.342076 3.274983 2.111457 2.450029 2.600757 1.240051  
254122\_at 2.89336 1.983749 1.793848 1.966201 1.647394 1.501083 1.891173 2.43258  
254128\_at 4.467038 4.310454 4.581823 4.321662 4.345817 4.573791 3.860168 4.646281  
254158\_at 1.117114 1.379792 1.456458 1.576618 1.521025 1.694225 1.633141 1.633686  
254170\_at 5.597814 5.168438 5.42958 4.98116 5.569837 5.013581 5.525406 5.28581  
254173\_at 2.058388 2.742144 2.547776 2.725897 2.435303 2.44441 2.302933 2.301253  
254187\_at 2.848485 4.056497 2.976795 2.93266 2.323061 2.566442 2.598679 3.1837  
254225\_at 4.990913 5.846389 5.842849 5.917709 5.071868 5.578374 5.420045 6.091152  
254228\_at 7.848486 8.632174 8.281388 8.704586 8.991003 8.592783 8.700771 7.862663  
254240\_at 1.646726 1.527708 1.527596 1.35185 1.917232 1.781094 1.586927 1.976781  
254251\_at 4.234592 4.098872 4.550951 4.114376 3.94967 3.112901 3.949387 4.285379  
254263\_at 1.703087 2.026314 1.433362 2.177833 2.456915 1.780166 1.407405 2.078658  
254268\_at 1.261508 1.10369 1.059736 1.955265 1.385514 1.189354 2.082825 1.953466  
254295\_at 4.326241 4.786244 3.684131 3.581453 3.400547 4.6106 2.667841 3.069283  
2542\_at 5.093426 4.73121 4.856094 4.219962 5.117508 4.622408 4.937033 3.609054  
254312\_at 1.697065 1.080716 1.381319 1.345373 1.660125 1.663618 1.437549 1.944098  
254359\_at 4.076867 3.801931 3.8922 3.801989 3.025598 4.770275 4.318868 3.87246  
254394\_at 4.270451 3.52912 3.660511 4.88075 3.08381 4.361303 3.596125 4.186586  
2543\_at 2.858893 1.571171 1.000873 2.163608 1.581334 1.432093 1.164348 2.163608  
254427\_at 3.361041 3.681162 3.887575 3.596483 4.61755 3.658303 3.472143 3.318334  
254428\_at 5.702971 4.552585 5.188369 5.222315 5.771415 5.396075 6.379134 4.837304  
254439\_at 1.905605 2.166599 1.802641 2.070443 2.088626 1.212653 2.326057 1.418942  
254528\_at 2.28592 1.182892 1.454924 1.398226 3.12528 1.652892 1.330355 2.343983  
254531\_at 5.073593 4.626099 4.943892 5.575618 4.790338 4.607377 3.67218 4.643083  
254552\_at 5.067329 4.543699 4.321518 4.23418 4.341679 4.278758 3.923538 3.974871  
254559\_at 2.493931 3.294324 2.834339 1.762945 1.633266 2.221758 2.919452 1.826441  
254773\_at 2.411311 1.81225 1.857273 1.847473 1.823891 2.798258 2.075491 1.693834  
254778\_at 2.849784 2.019423 1.377582 2.029827 2.755846 2.029871 1.522824 1.290214  
254783\_at 1.438157 2.519985 1.425058 1.760789 2.293266 1.479584 0.949496 1.120898  
254786\_at 1.682203 1.363487 1.805649 1.517263 2.482692 1.914001 1.399121 2.172393  
2547\_at 5.476045 6.263752 5.509676 5.805139 5.037886 6.122675 6.120432 5.477646  
254827\_at 4.367244 3.924495 4.890267 2.878879 4.366657 4.187071 4.590989 5.052454  
254879\_at 2.336537 2.753642 3.597304 2.284911 3.284305 2.626459 1.947091 3.948346  
254887\_at 2.945122 2.494449 3.413125 2.942241 1.876926 1.254527 2.57012 1.822524



254896\_at 2.535851 2.652596 1.645895 2.864013 2.280095 3.593074 2.914261 2.864013  
2548\_at 5.0418 4.750638 4.639741 5.396702 4.558127 5.227414 5.206956 4.234504  
254910\_at 0.94102 1.201562 1.82722 1.241369 1.400882 1.395555 1.566362 1.867454  
254950\_at 1.190807 1.721004 1.721004 2.119955 1.646622 1.87738 1.153109 1.890087  
254956\_at 1.676062 1.19249 1.923555 1.483575 1.105583 1.020643 2.373037 1.70825  
254958\_at 1.387735 1.755853 1.385243 1.250993 1.95919 2.380664 1.794276 1.563504  
254973\_at 0.993754 0.963561 1.265795 0.874183 1.155824 0.9856 1.513678 0.930767  
2549\_at 6.043201 6.130319 5.849133 6.072311 6.043378 6.063709 6.028523 5.75097  
255022\_at 1.393806 2.29299 2.409365 2.250422 1.924556 2.081715 2.163782 2.230142  
255025\_at 0.852776 1.134075 0.793042 0.903001 1.135223 1.119293 0.708833 1.147279  
255027\_at 4.187529 3.635729 4.79824 3.203462 4.03 4.349636 3.666188 3.382523  
255031\_at 2.941628 3.8058 2.532753 2.924856 2.828625 3.011837 3.521255 3.9175  
255043\_at 3.396035 3.038531 3.674359 2.565127 3.007674 2.658119 3.042653 3.285772  
255057\_at 2.674768 2.439791 2.465911 2.661707 2.873052 2.455146 2.811543 2.265338  
255061\_at 2.484235 3.025108 3.458482 3.224485 3.362427 1.988402 2.788875 2.70898  
255082\_at 2.00252 2.615402 4.676706 4.311117 2.41427 1.933214 3.75467 2.824826  
2550\_at 3.622757 3.48133 3.126306 3.610047 3.785604 4.708646 3.21608 3.081644  
255101\_at 1.867436 2.173997 2.340669 2.452646 2.225899 2.134975 2.62282 2.078314  
255104\_at 3.467703 2.725551 2.988239 2.421659 1.760858 3.080507 2.09192 2.405072  
255119\_at 1.793884 1.21701 1.150912 1.307602 1.034363 1.445426 2.197589 1.067998  
255130\_at 1.978279 2.140602 3.005806 2.359183 1.76882 2.102825 2.123991 2.182947  
255167\_at 1.709687 1.990815 2.442378 1.95064 1.983188 1.497517 2.756448 2.261603  
255177\_at 1.398446 1.06858 1.087529 0.875653 1.095079 0.832705 1.000579 1.376599  
255180\_at 2.27492 1.971074 2.485881 1.895272 1.544309 2.142872 2.205095 1.632798  
255187\_at 1.754328 1.456918 1.29716 1.324132 1.371866 1.471483 2.019248 1.968933  
255189\_at 2.524426 1.500036 1.776065 2.202482 2.493625 1.632828 2.107717 2.807898  
255193\_at 2.058226 1.996114 2.137645 2.271911 3.163435 3.291856 2.375514 2.420792  
2551\_at 5.601337 5.894171 5.865722 5.586385 6.405328 6.601593 6.362491 6.279494  
255220\_at 1.645089 1.459578 2.753997 1.720823 1.241188 1.54673 1.109281 2.767658  
255231\_at 2.224285 1.742 1.721656 1.823695 1.897816 1.560997 1.460279 1.810406  
255239\_at 2.723545 2.809667 2.197003 2.11329 1.811647 2.747021 2.652699 3.286447  
255252\_at 5.804481 6.615724 6.290093 6.053637 5.842126 5.565134 6.067316 4.939491  
255275\_at 2.451149 3.086543 1.891235 2.465169 2.304832 2.613821 2.838024 2.854894  
255324\_at 2.395557 2.000281 1.559505 1.396775 1.975142 1.795329 1.898593 1.671643  
255330\_at 1.544626 0.907409 1.37857 0.96766 1.406907 1.18699 1.178062 0.968049  
255349\_at 2.26344 2.14164 1.88387 1.621905 3.20889 3.478536 1.308946 1.752157  
255374\_at 2.359106 2.30992 1.583761 2.011945 2.250371 2.362433 2.227459 2.692682  
255394\_at 5.488067 5.148347 6.093822 5.474507 6.913988 5.232511 4.739954 5.633891  
2553\_at 5.036064 4.587979 4.986693 5.46327 4.509806 4.894046 5.258792 5.37169  
255403\_at 4.290237 4.858607 4.992821 5.29061 2.614488 3.780882 5.201917 5.847559  
255411\_at 1.883308 1.233059 1.040694 1.067121 1.455457 1.040404 1.056882 1.069136  
255426\_at 1.714574 2.458646 2.868177 2.125254 1.584328 2.310782 2.737904 2.043631  
255480\_at 1.62461 1.087434 1.560107 1.560501 1.72111 2.164128 0.919655 1.081507  
255488\_at 6.002918 5.736355 5.754995 6.583507 5.54051 6.920469 6.584773 5.410728  
2554\_at 0.936758 1.357182 1.944934 1.115453 1.719762 1.095688 1.335772 1.596114  
255512\_at 4.701463 4.422219 4.122908 3.942302 4.152832 4.050457 3.367756 4.401237  
255520\_at 5.103857 5.416298 5.109417 5.296574 5.740055 5.473872 5.573432 6.117242  
2555\_at 2.6644 2.59495 5.356238 5.380859 5.033314 2.904683 5.20138 4.108084  
255626\_at 1.255428 0.927657 1.29111 0.839401 1.495887 2.186973 2.712941 1.763935  
255631\_at 1.739211 1.89281 1.777219 1.737786 1.868672 2.350218 2.311105 2.215893  
255649\_at 1.364398 1.438494 1.312235 1.19495 1.980811 2.006489 1.584693 1.343605

255654\_at 1.946503 2.440031 2.1298 2.124151 2.099227 2.44513 2.260362 2.137789  
2556\_at 2.079228 1.50626 1.284403 1.619805 1.909614 1.987171 1.390289 3.002453  
255725\_at 2.099479 1.719236 2.675277 2.643147 2.079915 1.934194 2.524015 1.235547  
255738\_at 1.44008 1.784125 1.95069 2.450516 2.047734 1.823812 2.161302 2.390271  
255743\_at 9.437882 9.508141 9.739883 9.704424 9.383451 9.269283 9.696438 9.694838  
255758\_at 7.075076 6.691861 6.050339 5.987942 6.447064 6.637235 6.309629 5.198889  
255762\_at 1.832638 2.004181 1.814152 1.507339 2.726096 2.254766 2.137298 2.407169  
255783\_at 3.096478 2.814494 2.486575 3.048381 2.668538 4.0102 2.42227 2.223011  
255798\_at 1.735737 1.850658 1.534086 1.60765 1.486259 2.006244 1.665603 1.808889  
2557\_at 1.177406 2.017815 2.010693 1.12943 2.03594 1.203232 1.758892 1.689072  
255809\_at 2.734086 3.026043 2.430457 3.277472 2.300504 3.011481 2.662603 2.351389  
255877\_at 6.01876 5.699644 6.655029 7.61767 5.827116 6.178977 6.458517 5.1455  
2558\_at 2.025886 2.287902 2.512367 2.387459 1.887704 2.446226 2.196129 3.358214  
255919\_at 5.568932 5.177481 5.164475 5.69851 5.314343 5.072321 5.759024 5.053864  
255926\_at 1.150871 1.169134 1.256555 1.339478 1.084607 1.439047 1.417844 1.423948  
255928\_at 1.307428 2.072567 1.395782 2.498694 1.48323 0.829971 1.278133 1.021463  
255967\_at 5.828032 6.146185 6.061809 6.596039 6.00152 5.897357 5.659104 6.110512  
2559\_at 1.496313 1.120493 0.984545 1.03065 1.465408 0.871872 1.447609 0.825451  
256006\_at 1.217412 1.252311 1.279683 1.329881 1.041843 1.325163 1.304225 1.060564  
256021\_at 2.082751 1.88025 1.411756 1.52559 1.396705 2.318458 0.882661 1.054189  
256051\_at 3.54895 2.631001 2.399906 2.102132 4.535207 3.585808 4.372162 4.506754  
256076\_at 1.942609 1.119973 1.353254 1.084079 1.330481 1.32421 1.418936 1.587747  
2560\_at 1.223971 1.265357 1.316193 1.350812 1.852253 1.525026 1.34614 1.634339  
256126\_at 1.713137 2.007362 2.893693 2.065216 1.548888 1.820339 1.975854 1.928707  
256130\_at 1.785786 1.738193 1.923187 2.15902 1.747285 1.630699 2.506757 2.253739  
256144\_at 0.883952 1.81867 2.321856 0.854634 0.028284 2.512509 0.554822 2.229328  
256148\_at 0.696525 1.60451 1.125284 1.317365 1.457758 2.783409 1.601878 1.532815  
256158\_at 1.905456 2.373738 1.956792 2.192732 2.063728 1.994474 2.572555 2.320107  
2561\_at 1.67889 2.319235 2.372228 1.383096 2.186986 1.002374 1.771958 2.024479  
256223\_at 1.00698 0.737131 1.831726 0.915104 0.903092 0.5493 0.735399 1.295608  
256227\_at 1.831112 2.929151 3.201065 2.25581 4.058414 2.634294 3.271871 2.512246  
256236\_at 3.034662 4.60599 2.74349 4.407874 4.951385 5.084068 4.078771 3.75188  
256281\_at 3.376597 3.325024 2.697738 3.394388 2.092133 3.044705 3.266809 2.845797  
256297\_at 1.950715 1.410374 1.112678 1.285534 1.24704 1.982001 1.724398 2.002233  
2562\_at 1.642627 2.090556 1.775591 1.715398 1.658864 1.109666 1.813574 1.262372  
256302\_at 4.567718 4.091985 4.787304 4.513383 4.231615 4.917205 4.938061 4.516952  
256309\_at 2.964176 1.685876 2.004744 2.880943 2.316316 2.311375 2.547746 1.902996  
256329\_at 2.63143 2.844633 2.449952 2.675166 2.970624 3.285853 3.094724 3.191847  
256355\_at 4.264518 4.781768 3.40437 2.729242 2.897486 3.956363 2.681282 4.319693  
256356\_at 3.28189 3.32353 3.812429 4.186147 3.973828 4.523231 3.321787 3.352789  
256364\_at 4.450193 4.383942 5.204098 4.515908 4.257761 4.971378 4.78295 4.158916  
256369\_at 1.775866 1.431683 2.090504 1.823508 1.948849 1.790953 1.730101 1.499294  
256380\_at 1.63143 2.156419 1.96533 1.463414 1.742439 1.956581 2.435008 1.761148  
256394\_at 1.573181 1.810538 1.657419 2.663242 1.962073 2.095562 1.435365 1.884086  
2563\_at 2.12835 2.355794 2.655021 2.865838 3.439227 2.093833 2.703566 2.615953  
256435\_at 7.753489 7.58585 7.962226 7.811558 7.747468 7.049534 8.280237 8.241125  
256471\_at 4.034466 4.079944 4.02804 3.493243 4.351337 4.041946 4.117111 4.766687  
256472\_at 2.372692 2.382448 2.412749 1.476959 2.174366 1.949787 2.449626 1.854288  
2564\_at 2.79946 2.127833 2.656716 1.955669 1.359515 1.31592 2.344245 2.500288  
256536\_at 1.120444 1.085652 2.770132 1.338883 2.121153 2.226298 1.200819 1.728589  
256586\_at 4.659628 4.168239 3.396372 3.595192 5.154478 3.934761 4.467606 3.887236

|           |          |          |          |          |          |          |          |          |
|-----------|----------|----------|----------|----------|----------|----------|----------|----------|
| 2565_at   | 1.198692 | 1.315059 | 0.961101 | 1.700684 | 1.05984  | 1.534665 | 0.962125 | 2.05794  |
| 256643_at | 5.188269 | 5.118635 | 5.466318 | 5.113906 | 5.603439 | 4.40965  | 5.468308 | 4.670743 |
| 256646_at | 1.811291 | 1.195771 | 1.230983 | 1.387814 | 1.743349 | 1.489208 | 1.50532  | 2.791032 |
| 256691_at | 2.941527 | 3.983211 | 2.361845 | 2.415094 | 3.157686 | 2.906939 | 1.796905 | 2.025415 |
| 2566_at   | 1.422979 | 1.881852 | 1.579564 | 0.982406 | 1.026378 | 1.650546 | 1.777461 | 1.217619 |
| 256710_at | 2.241797 | 2.129297 | 2.444116 | 2.872226 | 2.976252 | 2.317858 | 2.144073 | 2.466379 |
| 256714_at | 2.399148 | 2.306298 | 1.7963   | 1.89715  | 2.303884 | 2.530926 | 2.119721 | 2.249768 |
| 256764_at | 5.909223 | 5.275993 | 5.690237 | 4.274869 | 7.193466 | 5.871352 | 3.455264 | 6.632459 |
| 2567_at   | 1.002271 | 1.151098 | 0.854398 | 1.122573 | 2.098426 | 1.513934 | 1.268879 | 1.309913 |
| 256815_at | 1.101832 | 1.967268 | 2.474122 | 1.897687 | 2.073746 | 1.160396 | 1.522602 | 1.557271 |
| 256880_at | 2.272724 | 1.089103 | 1.140406 | 2.217338 | 1.974889 | 1.627822 | 1.513186 | 1.044833 |
| 256892_at | 1.052499 | 1.349951 | 1.514948 | 1.27495  | 2.563698 | 1.30536  | 1.474725 | 1.577264 |
| 2568_at   | 1.843706 | 2.447177 | 2.119953 | 1.85933  | 2.127126 | 1.862287 | 1.654419 | 1.549995 |
| 256933_at | 2.861311 | 2.449588 | 3.692131 | 2.444242 | 2.280944 | 2.674823 | 1.890398 | 1.964036 |
| 256949_at | 6.632128 | 6.242165 | 5.879224 | 5.290088 | 6.099468 | 6.361196 | 5.935249 | 5.392781 |
| 256957_at | 1.769771 | 1.209135 | 1.285818 | 1.431069 | 1.564465 | 1.794502 | 1.579092 | 1.262434 |
| 256979_at | 1.66551  | 1.463051 | 1.482742 | 1.149876 | 1.250106 | 1.222295 | 1.179482 | 1.064805 |
| 256987_at | 6.846903 | 7.085806 | 7.843559 | 7.651119 | 6.968692 | 6.51886  | 7.707578 | 7.313673 |
| 2569_at   | 2.846907 | 2.101421 | 2.06512  | 1.325377 | 1.839979 | 2.602826 | 2.990709 | 2.98073  |
| 257000_at | 1.177192 | 1.497374 | 1.49535  | 1.624238 | 3.122625 | 2.049781 | 1.453875 | 2.5734   |
| 257019_at | 6.621525 | 6.954585 | 7.273614 | 6.913479 | 6.489489 | 7.006905 | 7.219736 | 6.910246 |
| 257044_at | 2.399481 | 1.951094 | 2.022478 | 2.080487 | 2.400037 | 2.054345 | 1.591674 | 1.877916 |
| 257062_at | 1.589422 | 1.486022 | 1.507772 | 1.918514 | 1.481273 | 1.791177 | 1.286056 | 2.176308 |
| 257068_at | 3.023141 | 2.295896 | 1.520708 | 1.852987 | 4.128025 | 2.826584 | 2.001294 | 1.811657 |
| 2570_at   | 3.829662 | 3.126831 | 3.383501 | 3.491973 | 3.377929 | 2.993857 | 3.405166 | 3.311419 |
| 257101_at | 2.390416 | 1.741578 | 1.922477 | 1.958076 | 1.854088 | 2.097106 | 1.928629 | 2.397321 |
| 257106_at | 2.377247 | 3.129668 | 2.304552 | 3.953675 | 1.878834 | 2.277705 | 2.518407 | 3.202182 |
| 257144_at | 3.116724 | 3.219376 | 2.65939  | 2.486893 | 2.704533 | 2.455353 | 3.316988 | 2.070606 |
| 257160_at | 5.979324 | 6.15909  | 6.492915 | 6.707662 | 5.915069 | 5.521796 | 6.180394 | 6.555412 |
| 257169_at | 1.834062 | 1.976969 | 1.365275 | 1.959388 | 1.661579 | 2.48422  | 1.432176 | 2.864841 |
| 257177_at | 5.69369  | 6.040587 | 5.687554 | 5.847459 | 6.374115 | 6.073783 | 5.400848 | 5.007882 |
| 257194_at | 1.862933 | 1.91171  | 2.364988 | 2.541663 | 3.153259 | 1.941553 | 2.081226 | 1.744596 |
| 2571_at   | 2.442787 | 2.123954 | 2.002509 | 1.56507  | 1.959692 | 1.697932 | 1.2059   | 1.845703 |
| 257202_at | 1.832435 | 2.203375 | 2.226409 | 2.224774 | 2.641185 | 2.432516 | 3.108375 | 3.308063 |
| 257203_at | 1.73702  | 1.761294 | 2.170004 | 2.890701 | 1.500641 | 1.007699 | 1.46339  | 1.980358 |
| 257218_at | 5.308872 | 5.140193 | 5.638106 | 5.714342 | 6.438289 | 4.901647 | 4.944795 | 5.900263 |
| 257236_at | 1.927098 | 3.034722 | 1.758815 | 2.627648 | 2.124193 | 2.031497 | 1.830921 | 1.616943 |
| 257240_at | 2.04531  | 1.720185 | 2.404635 | 1.962762 | 2.557626 | 1.339896 | 1.271583 | 1.745086 |
| 2572_at   | 1.410386 | 1.933932 | 1.647334 | 1.435494 | 2.152756 | 1.934722 | 1.890529 | 2.358181 |
| 257313_at | 1.173995 | 1.696915 | 1.39766  | 1.340732 | 1.716286 | 2.440943 | 1.303208 | 2.475564 |
| 257357_at | 2.628756 | 1.848927 | 3.093045 | 4.896999 | 2.644065 | 2.485657 | 3.019947 | 2.481935 |
| 257358_at | 0.867459 | 1.016984 | 1.364691 | 0.913606 | 1.502412 | 1.167194 | 0.983344 | 1.303129 |
| 257364_at | 5.244978 | 4.992367 | 5.334048 | 4.780969 | 4.185364 | 4.551241 | 4.770245 | 4.320693 |
| 257396_at | 2.802412 | 4.451558 | 3.458999 | 3.312227 | 3.767495 | 3.252789 | 2.877    | 4.055204 |
| 257397_at | 5.565509 | 5.497749 | 5.156023 | 5.810842 | 5.599759 | 5.634686 | 5.325048 | 5.387066 |
| 257407_at | 2.540799 | 2.928359 | 3.27766  | 2.893471 | 3.67367  | 2.440063 | 2.370715 | 3.84848  |
| 257415_at | 4.067763 | 4.122948 | 3.799399 | 2.639349 | 4.207453 | 4.548539 | 3.761192 | 2.919768 |
| 25758_at  | 2.287873 | 1.657692 | 1.58568  | 2.075813 | 2.524984 | 1.504698 | 2.036567 | 2.078664 |
| 25759_at  | 4.397104 | 4.205187 | 4.091903 | 3.44749  | 3.9484   | 3.611769 | 4.059873 | 3.131759 |
| 257629_at | 2.97133  | 1.855011 | 2.105412 | 1.71692  | 2.072823 | 3.035024 | 1.841007 | 3.163284 |
| 25763_at  | 1.431082 | 1.688442 | 1.706628 | 1.695787 | 2.095011 | 1.777007 | 2.094265 | 1.920886 |

|           |          |          |          |          |          |          |          |          |
|-----------|----------|----------|----------|----------|----------|----------|----------|----------|
| 25766_at  | 4.531549 | 4.863733 | 4.745502 | 4.932358 | 4.612936 | 5.201917 | 5.085141 | 3.828282 |
| 25769_at  | 1.27016  | 1.513991 | 1.07105  | 2.125816 | 1.491227 | 1.005732 | 1.341421 | 1.639867 |
| 25770_at  | 1.575119 | 1.927338 | 1.416087 | 1.501071 | 1.829529 | 1.882329 | 1.546502 | 1.813611 |
| 25771_at  | 6.527553 | 6.072344 | 6.698088 | 6.104746 | 6.183294 | 6.275375 | 6.240869 | 6.100745 |
| 25775_at  | 1.936346 | 2.568633 | 2.844557 | 1.975703 | 2.637182 | 2.530471 | 2.4258   | 2.649928 |
| 25776_at  | 6.369596 | 6.196822 | 6.237436 | 6.935822 | 7.084189 | 6.365598 | 6.518328 | 6.368336 |
| 25777_at  | 5.474774 | 5.453075 | 5.776768 | 5.289702 | 5.227585 | 6.272555 | 5.285155 | 4.737795 |
| 25778_at  | 4.750005 | 5.535357 | 5.554416 | 5.157506 | 5.397711 | 5.491231 | 5.554447 | 5.483697 |
| 25780_at  | 7.316779 | 6.857323 | 7.322532 | 7.113853 | 7.469526 | 7.039094 | 7.503337 | 7.29462  |
| 25782_at  | 6.399926 | 6.319519 | 6.663503 | 6.440358 | 6.895764 | 5.791162 | 7.025305 | 7.040072 |
| 25786_at  | 3.627549 | 4.48662  | 3.416221 | 3.54918  | 3.70571  | 3.078789 | 3.427277 | 4.119444 |
| 25787_at  | 1.769403 | 1.44278  | 1.548476 | 1.57403  | 2.098945 | 1.492478 | 2.041403 | 2.05872  |
| 25788_at  | 2.562051 | 2.524469 | 2.924488 | 3.218245 | 3.070914 | 1.903433 | 3.296568 | 2.838226 |
| 25789_at  | 2.458472 | 2.421812 | 2.499513 | 2.431678 | 2.46167  | 2.364944 | 2.87347  | 3.349635 |
| 25790_at  | 3.105504 | 3.502109 | 3.354035 | 2.822886 | 2.823587 | 2.598814 | 2.670473 | 3.12963  |
| 25791_at  | 3.348391 | 2.713131 | 2.833877 | 3.087943 | 3.800412 | 3.55066  | 2.157678 | 3.061195 |
| 25792_at  | 7.353043 | 7.09464  | 7.249609 | 7.017749 | 5.980812 | 7.877304 | 7.319795 | 6.40452  |
| 25793_at  | 8.250035 | 8.176925 | 8.180261 | 8.035423 | 8.050202 | 8.054512 | 8.032062 | 8.111997 |
| 25794_at  | 2.321838 | 2.533504 | 2.181877 | 2.684556 | 3.179731 | 3.293907 | 3.623995 | 2.058504 |
| 25796_at  | 7.74849  | 6.531451 | 6.975164 | 7.156607 | 5.934321 | 7.120281 | 7.075865 | 5.916033 |
| 25797_at  | 6.271324 | 6.727038 | 5.431529 | 5.827676 | 6.114559 | 5.538099 | 5.442104 | 6.991266 |
| 25798_at  | 4.891251 | 4.366314 | 4.621214 | 4.646519 | 4.666077 | 4.860252 | 4.593272 | 4.105273 |
| 25799_at  | 1.831759 | 2.271259 | 2.2907   | 2.248181 | 2.691353 | 2.408166 | 1.680889 | 2.786836 |
| 257_at    | 1.879141 | 2.048502 | 2.829188 | 2.396623 | 1.96362  | 2.97544  | 1.65212  | 2.775211 |
| 25800_at  | 7.735058 | 7.873936 | 8.103497 | 7.769411 | 7.731215 | 8.270481 | 8.434321 | 8.080459 |
| 258010_at | 6.305965 | 7.218414 | 6.343246 | 6.715761 | 6.331989 | 6.000583 | 6.794688 | 6.560178 |
| 25801_at  | 4.861104 | 4.50468  | 4.178268 | 4.191803 | 4.823444 | 3.670408 | 4.391039 | 4.641318 |
| 25802_at  | 4.870763 | 5.165451 | 5.117061 | 3.8503   | 4.599085 | 5.282106 | 4.27251  | 4.20797  |
| 25803_at  | 2.250175 | 2.867987 | 2.896842 | 2.480176 | 2.378335 | 2.705322 | 2.499514 | 2.49762  |
| 25804_at  | 6.063426 | 5.927243 | 6.28453  | 5.380918 | 4.693633 | 5.72427  | 5.582329 | 4.494814 |
| 25805_at  | 8.462729 | 8.358227 | 8.087205 | 7.390203 | 7.796807 | 7.725287 | 8.677566 | 7.140261 |
| 25806_at  | 3.495645 | 3.444551 | 3.611563 | 3.389209 | 2.881723 | 2.818078 | 4.108411 | 3.191016 |
| 25807_at  | 4.684468 | 4.067123 | 4.280858 | 4.02619  | 2.901978 | 3.681823 | 3.458959 | 2.830096 |
| 25809_at  | 3.840088 | 4.712793 | 4.886539 | 3.588795 | 4.058154 | 4.706679 | 5.002866 | 4.335495 |
| 2580_at   | 5.252564 | 5.161004 | 5.284845 | 5.294339 | 4.312486 | 5.551021 | 5.189368 | 5.256275 |
| 25812_at  | 2.062318 | 3.464591 | 2.103777 | 2.598105 | 2.781333 | 2.690884 | 2.541345 | 2.296383 |
| 25813_at  | 5.894358 | 6.167033 | 5.562527 | 6.178414 | 5.514984 | 6.01668  | 5.79941  | 5.960535 |
| 25814_at  | 8.336961 | 8.67073  | 8.302904 | 8.141471 | 8.108692 | 8.065687 | 7.705716 | 8.746726 |
| 25816_at  | 2.648546 | 2.081448 | 1.823426 | 2.969395 | 1.881003 | 1.884671 | 1.816735 | 3.342186 |
| 25817_at  | 2.180162 | 2.243653 | 1.821161 | 2.254359 | 2.234059 | 1.992413 | 1.809012 | 1.928751 |
| 25818_at  | 4.14353  | 3.788791 | 3.904074 | 4.467186 | 3.63178  | 6.480024 | 3.993654 | 4.23899  |
| 25819_at  | 4.50338  | 3.84086  | 2.843582 | 3.526482 | 4.01117  | 2.916533 | 3.92053  | 3.477624 |
| 2581_at   | 6.719346 | 6.967596 | 7.088083 | 6.925636 | 6.697078 | 6.907159 | 7.664692 | 7.128751 |
| 25820_at  | 6.848389 | 7.317106 | 6.999705 | 7.267696 | 6.554939 | 6.919054 | 7.066266 | 6.818021 |
| 25821_at  | 5.148517 | 5.699021 | 5.430843 | 5.684193 | 5.826465 | 5.387102 | 5.230221 | 6.13106  |
| 25822_at  | 4.670487 | 3.828058 | 4.179137 | 4.310668 | 3.591097 | 3.622919 | 3.878079 | 4.067242 |
| 25823_at  | 2.62744  | 3.097809 | 2.268226 | 2.6733   | 2.467001 | 3.251452 | 2.736654 | 2.834989 |
| 25824_at  | 9.379627 | 9.586129 | 9.467054 | 9.40361  | 9.611417 | 9.028642 | 9.422755 | 9.28706  |
| 25825_at  | 4.8374   | 4.523985 | 4.794543 | 4.986255 | 5.807178 | 4.833627 | 5.749449 | 4.744226 |
| 25826_at  | 1.325444 | 2.336007 | 4.05867  | 1.254269 | 4.239555 | 1.091898 | 1.451088 | 1.193787 |
| 25827_at  | 6.13285  | 6.247528 | 6.061568 | 6.468905 | 5.636435 | 5.756738 | 6.231777 | 6.560298 |

|          |          |          |          |          |          |          |          |          |
|----------|----------|----------|----------|----------|----------|----------|----------|----------|
| 25828_at | 5.959023 | 5.781174 | 5.386984 | 5.888731 | 5.3356   | 5.259126 | 5.908324 | 4.601127 |
| 25829_at | 8.21437  | 7.929785 | 8.095328 | 8.333546 | 7.689604 | 8.107203 | 8.308977 | 7.638849 |
| 2582_at  | 1.94351  | 0.749227 | 2.100798 | 1.690112 | 2.302225 | 2.139953 | 2.123152 | 2.238686 |
| 25830_at | 1.649756 | 1.689843 | 1.420492 | 1.795292 | 2.289615 | 1.872647 | 1.160286 | 2.290141 |
| 25831_at | 6.974065 | 7.315479 | 7.424322 | 7.421045 | 7.04618  | 7.158861 | 7.335831 | 7.917739 |
| 25833_at | 1.779991 | 1.610583 | 1.741364 | 2.209513 | 2.779105 | 1.858079 | 1.948004 | 2.69857  |
| 25834_at | 1.297407 | 1.409408 | 1.619246 | 1.543302 | 1.251872 | 1.305885 | 1.341038 | 1.510837 |
| 25836_at | 7.221359 | 7.471642 | 7.34434  | 7.425951 | 7.196828 | 7.182263 | 6.87126  | 7.682492 |
| 25837_at | 2.512998 | 2.958599 | 3.056595 | 2.866833 | 2.805069 | 3.005087 | 1.96179  | 3.732378 |
| 25839_at | 5.436766 | 5.947536 | 5.525931 | 5.876938 | 5.515806 | 5.45758  | 6.225244 | 5.823147 |
| 2583_at  | 2.369422 | 2.536885 | 2.80618  | 2.384041 | 3.137698 | 2.817219 | 2.737974 | 1.813451 |
| 25840_at | 5.022349 | 6.556395 | 5.795885 | 5.921884 | 6.408779 | 6.360225 | 5.005248 | 5.925715 |
| 25841_at | 2.835292 | 1.861176 | 2.715566 | 2.558226 | 3.925719 | 3.303066 | 3.063579 | 1.914822 |
| 25842_at | 7.295669 | 7.45571  | 7.100262 | 7.289918 | 7.953513 | 7.164499 | 7.255107 | 7.890163 |
| 25844_at | 7.032923 | 6.965698 | 6.903451 | 6.960437 | 7.164808 | 6.775009 | 7.492426 | 6.815851 |
| 25845_at | 8.135917 | 7.088495 | 7.412222 | 7.185594 | 8.141756 | 8.048464 | 7.359103 | 8.349346 |
| 25847_at | 7.244966 | 6.936339 | 7.143559 | 7.78977  | 7.945803 | 6.990603 | 7.07679  | 7.902627 |
| 25849_at | 6.78361  | 7.541795 | 7.794033 | 7.502899 | 6.092763 | 7.321958 | 7.587729 | 5.902294 |
| 2584_at  | 6.205077 | 5.389737 | 4.801713 | 5.296721 | 4.181592 | 5.55461  | 4.819759 | 4.557217 |
| 25850_at | 2.851322 | 2.770928 | 2.867934 | 3.2694   | 2.369276 | 2.269475 | 1.881193 | 2.285482 |
| 25851_at | 2.633869 | 2.819452 | 3.307209 | 3.216924 | 3.147354 | 3.188357 | 3.347289 | 3.143357 |
| 25852_at | 6.046839 | 5.628856 | 5.649617 | 5.959144 | 5.962061 | 5.452625 | 5.634013 | 6.264343 |
| 25853_at | 5.930462 | 6.085838 | 5.718497 | 5.356885 | 5.506382 | 5.561481 | 5.392137 | 5.034363 |
| 25854_at | 4.582742 | 4.399351 | 4.801935 | 4.901761 | 4.244828 | 4.759567 | 3.352876 | 5.08414  |
| 25855_at | 4.685174 | 4.690064 | 4.860748 | 4.3815   | 5.096467 | 4.148517 | 3.150596 | 4.767549 |
| 25858_at | 2.37554  | 2.037323 | 1.546112 | 2.159906 | 1.858464 | 2.038138 | 2.372861 | 1.644369 |
| 25859_at | 1.603191 | 2.543573 | 2.288685 | 2.101974 | 1.966321 | 3.089081 | 2.145605 | 1.434147 |
| 2585_at  | 5.008632 | 5.167555 | 4.791958 | 5.159529 | 4.713729 | 4.439841 | 4.506691 | 5.07777  |
| 25861_at | 2.900248 | 2.401738 | 2.240925 | 2.467079 | 2.209547 | 2.932836 | 2.513481 | 2.801941 |
| 25862_at | 1.869288 | 1.81873  | 2.237561 | 1.831371 | 1.674205 | 1.798604 | 1.555506 | 2.55235  |
| 25864_at | 7.768157 | 5.332806 | 5.144681 | 6.345617 | 6.317979 | 6.702577 | 7.184479 | 6.389183 |
| 25865_at | 6.516616 | 5.960462 | 6.01794  | 6.840156 | 6.654301 | 6.033673 | 6.691696 | 4.87194  |
| 25870_at | 6.800211 | 6.646722 | 6.805863 | 6.828797 | 6.439468 | 7.070017 | 7.47165  | 5.859723 |
| 25871_at | 7.10919  | 6.943632 | 6.782698 | 7.139609 | 6.399523 | 6.792228 | 7.252607 | 6.986832 |
| 25873_at | 5.331135 | 6.485179 | 5.51858  | 5.409698 | 5.179041 | 5.657333 | 4.503609 | 4.456843 |
| 25874_at | 8.059025 | 7.583585 | 7.354887 | 7.297625 | 7.149089 | 7.113829 | 7.204384 | 7.277055 |
| 25875_at | 5.78479  | 5.238494 | 5.69119  | 4.624304 | 4.303283 | 4.196306 | 5.691241 | 5.281767 |
| 25876_at | 1.207892 | 1.829262 | 1.819921 | 1.837556 | 1.533476 | 1.392283 | 1.365349 | 1.663186 |
| 25878_at | 2.520377 | 3.880727 | 3.401046 | 5.220168 | 5.033336 | 4.13762  | 2.849138 | 3.181265 |
| 25879_at | 4.386337 | 4.343259 | 3.042701 | 3.759923 | 3.356456 | 4.758602 | 2.979902 | 5.311761 |
| 2587_at  | 1.292355 | 1.510635 | 1.19416  | 1.019861 | 1.004495 | 1.447494 | 1.643909 | 1.59836  |
| 25880_at | 3.56213  | 4.312409 | 4.571476 | 3.828714 | 4.656235 | 4.007634 | 3.246243 | 3.177905 |
| 25884_at | 2.503213 | 3.388434 | 2.902776 | 2.777791 | 2.934052 | 2.784273 | 2.673106 | 2.532148 |
| 25885_at | 4.443745 | 4.524217 | 5.150426 | 3.998072 | 4.262935 | 4.808733 | 4.158433 | 4.240095 |
| 25886_at | 2.774391 | 2.936406 | 2.766158 | 2.912655 | 2.981882 | 2.640888 | 2.602847 | 3.957199 |
| 25888_at | 2.891379 | 3.134064 | 2.85959  | 3.859694 | 2.83718  | 3.149207 | 2.761761 | 2.592846 |
| 2588_at  | 4.435223 | 4.945714 | 4.997161 | 5.04731  | 4.654651 | 4.898641 | 5.435412 | 4.070647 |
| 25890_at | 5.291338 | 4.265102 | 4.358412 | 5.052853 | 4.896058 | 5.972186 | 3.728899 | 4.7238   |
| 25891_at | 3.312131 | 4.721946 | 5.063077 | 2.612944 | 1.344608 | 1.927124 | 2.002379 | 4.737669 |
| 25893_at | 3.320716 | 2.749155 | 3.411864 | 4.310248 | 2.321649 | 2.925593 | 4.134116 | 3.687522 |
| 25894_at | 1.574438 | 1.916399 | 1.749674 | 1.448893 | 2.380871 | 1.767937 | 2.2128   | 1.712831 |

25895\_at 4.052164 4.213097 3.578073 3.676704 4.663413 3.381802 3.821353 4.156407  
25896\_at 4.441184 4.509271 4.206869 3.448781 4.073099 4.246745 3.283415 5.176014  
25897\_at 6.67544 6.829294 6.567418 6.716689 6.57844 6.889182 7.369998 7.380056  
25898\_at 5.020743 5.4128 5.238786 5.196291 5.629364 4.370574 4.852123 5.901693  
2589\_at 6.080441 6.03644 6.220408 5.995142 6.649368 5.865618 5.974307 7.216397  
258\_at 1.404314 1.282944 1.352675 0.995923 1.657582 1.942957 1.197566 2.704428  
25900\_at 2.416819 2.491417 3.694723 3.086049 3.082688 3.690024 3.153599 2.783686  
25901\_at 5.511475 5.888201 5.940562 5.810234 6.220663 6.207735 5.391145 6.557583  
25902\_at 2.997678 3.285337 3.982563 3.73768 3.247558 4.438574 2.787739 4.544625  
25903\_at 4.164295 3.895151 4.388321 4.988857 2.107105 4.338573 3.05031 3.385961  
25904\_at 4.908794 5.473271 5.53286 5.611585 5.482047 4.317099 4.695884 5.413946  
25906\_at 5.563813 5.142164 4.614793 5.247036 5.221401 4.858561 5.17827 5.063663  
25907\_at 3.609074 3.202505 2.079125 2.02901 3.027009 2.876655 2.438116 3.431466  
25909\_at 5.592101 5.808486 5.843484 5.349509 5.205958 5.579703 5.486606 5.909887  
2590\_at 4.671766 5.647218 5.889563 6.262252 5.55895 5.935026 5.556602 5.253413  
25911\_at 6.983211 5.754485 5.934523 5.46642 6.161587 7.06029 6.245697 6.354423  
25912\_at 9.516327 9.53218 9.210139 9.294812 9.567618 9.615604 9.544372 9.619809  
25913\_at 5.681151 6.025344 5.016728 6.126209 5.226292 5.506524 5.249003 6.142647  
25914\_at 4.335935 4.274266 4.554982 3.679594 3.770334 4.250415 3.959044 4.506252  
25915\_at 7.167274 6.57856 6.500583 6.775386 6.578103 7.155975 7.12037 5.864853  
259173\_at 5.804041 5.342424 5.324508 5.416732 4.566671 5.608759 5.461415 4.472425  
25917\_at 6.547584 6.602595 6.809012 6.420627 6.742931 6.29159 6.227262 6.601507  
259197\_at 2.303763 2.495879 2.0283 3.169792 1.963269 2.496194 3.114093 2.828907  
2591\_at 1.799582 1.131443 1.469819 1.689573 1.570816 2.085115 1.845184 1.919146  
25920\_at 5.31452 5.431919 4.521399 4.882217 4.197485 5.305591 4.878578 4.346377  
259215\_at 2.366468 3.047714 2.615615 2.935999 3.174691 2.586481 2.977664 2.764014  
259217\_at 5.811396 6.266692 6.898414 5.864632 5.786494 6.253112 6.302609 5.013784  
25921\_at 7.003789 7.015065 6.777628 6.850981 7.221572 7.221283 7.037387 6.924975  
259230\_at 7.250184 6.76103 6.830868 7.35363 6.483023 6.713353 7.133997 6.764679  
259232\_at 3.249245 4.523227 4.52745 4.571697 4.145393 3.237093 4.72444 3.724194  
259234\_at 1.506347 1.518005 1.677013 1.603941 1.620921 1.330349 1.463381 1.472535  
259236\_at 4.836324 5.786576 4.387404 2.823727 4.164279 3.663129 3.758558 5.504565  
259239\_at 1.53586 2.014909 1.114447 1.342164 2.03313 1.150151 1.401112 1.477739  
25923\_at 6.664334 6.746127 7.196192 6.595086 6.564891 6.872919 7.184669 6.787003  
259240\_at 1.470974 1.722571 0.975731 1.474968 0.963319 1.302999 1.085866 1.388141  
259249\_at 3.416112 2.663367 2.683874 3.273112 2.544655 3.472489 3.238376 3.474212  
25924\_at 2.500702 2.121757 2.192023 2.514536 2.106432 1.14543 2.408132 2.979037  
25925\_at 4.118161 4.064081 4.187229 4.569381 4.735228 3.943034 3.952528 4.408712  
259266\_at 2.15545 2.31383 2.122098 1.928204 2.190583 1.763947 3.643543 3.610381  
25926\_at 6.279097 5.763916 5.130425 5.869529 4.883357 5.037496 5.203388 5.919379  
25927\_at 5.278838 4.741094 5.008953 5.17022 3.789799 4.704112 5.426218 4.387939  
259282\_at 6.386893 6.589009 6.235711 6.804966 6.334475 6.675351 6.845115 6.616376  
259283\_at 2.285916 2.322466 3.077757 1.892313 3.112552 2.989819 2.270064 3.61448  
259285\_at 1.212789 1.309755 1.811743 1.329769 1.088042 1.095458 1.435662 1.496392  
259286\_at 1.502152 2.281386 2.016102 1.285983 1.471595 1.611086 1.207762 2.470788  
259287\_at 1.254465 1.388837 1.88724 1.92802 1.800518 1.420627 1.751641 1.877405  
259289\_at 1.095158 0.965731 1.040907 0.924008 1.33935 0.770776 0.907868 0.477037  
25928\_at 4.981757 6.660998 5.925449 6.422176 5.885536 6.488145 2.832616 5.089066  
259290\_at 1.950752 3.330609 1.543537 1.207237 2.069884 1.567234 0.964177 1.119611  
259292\_at 1.683493 0.931844 1.8266 1.34187 2.050598 2.137764 1.815555 1.375633  
259294\_at 0.915193 2.63055 1.561914 1.098611 2.800353 0.066264 1.151578 3.222117

|           |          |          |          |          |          |          |          |          |
|-----------|----------|----------|----------|----------|----------|----------|----------|----------|
| 259295_at | 1.066262 | 1.069201 | 1.080717 | 0.897888 | 0.927159 | 1.809437 | 0.981465 | 1.452669 |
| 259296_at | 2.11641  | 0.76398  | 1.326146 | 0.927277 | 1.689474 | 0.964621 | 1.207345 | 1.283104 |
| 25929_at  | 5.083383 | 4.748648 | 4.619827 | 5.216765 | 5.144532 | 4.430629 | 4.57942  | 3.634867 |
| 2592_at   | 6.677425 | 6.384977 | 6.564838 | 6.636869 | 6.078385 | 6.662389 | 7.081044 | 5.488644 |
| 259307_at | 1.86216  | 2.738945 | 2.419461 | 2.715795 | 2.946734 | 2.237065 | 1.920876 | 2.769054 |
| 259308_at | 3.435717 | 2.033266 | 1.900052 | 2.333974 | 1.911102 | 2.200852 | 3.418707 | 2.320487 |
| 25930_at  | 4.986946 | 5.579479 | 6.001336 | 5.430223 | 4.806598 | 5.558713 | 5.749934 | 4.465214 |
| 25932_at  | 8.728209 | 8.559201 | 8.851002 | 9.009235 | 8.85531  | 8.903092 | 8.974495 | 8.749544 |
| 25934_at  | 6.219315 | 6.46433  | 6.657144 | 6.34671  | 6.305384 | 5.991714 | 6.591891 | 6.574973 |
| 25936_at  | 6.575057 | 5.676041 | 5.726373 | 6.442289 | 5.991175 | 5.940722 | 6.946635 | 6.353274 |
| 25937_at  | 8.158585 | 8.053823 | 8.477965 | 8.50679  | 7.901366 | 8.788905 | 8.546857 | 8.111414 |
| 25938_at  | 4.316968 | 5.711943 | 5.253159 | 4.760598 | 5.12664  | 4.962818 | 5.420299 | 5.329056 |
| 25939_at  | 7.314755 | 7.744634 | 6.941286 | 7.356253 | 7.531763 | 7.989672 | 7.562008 | 7.520625 |
| 2593_at   | 5.692119 | 5.462427 | 4.810402 | 4.990399 | 5.263083 | 4.881468 | 5.33799  | 4.792056 |
| 25940_at  | 6.898219 | 7.006021 | 7.206224 | 6.929637 | 6.84531  | 6.926293 | 7.363654 | 7.849697 |
| 25941_at  | 8.06755  | 8.085975 | 8.305198 | 8.092322 | 7.423217 | 7.866433 | 8.109356 | 7.397233 |
| 25942_at  | 6.307167 | 6.530897 | 6.58293  | 6.355864 | 6.474955 | 6.45908  | 6.508299 | 6.130053 |
| 25943_at  | 5.979522 | 6.458691 | 7.158614 | 7.094023 | 6.364481 | 6.242381 | 7.524732 | 6.746778 |
| 25945_at  | 6.535597 | 6.842776 | 6.843738 | 6.79173  | 6.442858 | 5.553699 | 6.269163 | 6.947103 |
| 25946_at  | 4.296988 | 3.10583  | 3.596684 | 5.354451 | 3.933074 | 4.147051 | 4.609255 | 2.647219 |
| 25948_at  | 6.041592 | 6.088914 | 5.238921 | 5.651743 | 6.063237 | 5.439458 | 6.173092 | 6.270381 |
| 25949_at  | 8.628296 | 8.497725 | 8.796918 | 8.678335 | 8.923488 | 8.570618 | 8.088406 | 8.57915  |
| 25950_at  | 4.600912 | 5.143125 | 5.098059 | 4.974181 | 4.666234 | 4.093251 | 3.863452 | 4.838961 |
| 25953_at  | 5.406573 | 5.024251 | 5.280968 | 5.285587 | 4.47901  | 5.232779 | 4.687879 | 4.250549 |
| 25956_at  | 3.181559 | 2.630826 | 3.297961 | 3.743771 | 3.240488 | 3.52307  | 2.740014 | 2.63917  |
| 25957_at  | 8.25423  | 7.754073 | 7.825576 | 7.774551 | 8.206429 | 7.891095 | 7.617338 | 8.06565  |
| 25959_at  | 6.583124 | 6.205224 | 6.373844 | 6.744999 | 5.505931 | 6.624052 | 6.513683 | 5.917871 |
| 2595_at   | 4.548114 | 3.681628 | 3.766849 | 4.423397 | 4.416255 | 4.437951 | 4.37803  | 5.913236 |
| 25960_at  | 5.355855 | 5.290507 | 4.965473 | 5.142463 | 4.820028 | 5.339382 | 4.751043 | 4.460108 |
| 25961_at  | 3.687467 | 3.554384 | 2.63594  | 4.854036 | 3.38153  | 3.669885 | 2.718439 | 3.415886 |
| 25962_at  | 5.526313 | 5.872837 | 6.034271 | 5.943458 | 6.342598 | 5.503903 | 5.359226 | 6.393094 |
| 25963_at  | 7.058041 | 7.11865  | 6.978409 | 7.162086 | 7.289094 | 7.106403 | 7.38982  | 7.214168 |
| 25966_at  | 5.648041 | 5.063111 | 5.039909 | 5.341546 | 5.185144 | 4.547308 | 5.216787 | 4.596586 |
| 2596_at   | 2.351102 | 1.860441 | 1.75521  | 1.965309 | 2.388614 | 2.156072 | 1.871971 | 1.936432 |
| 25970_at  | 3.461801 | 4.163862 | 3.169319 | 3.266695 | 3.583298 | 3.029977 | 4.322048 | 3.846639 |
| 25972_at  | 7.99637  | 8.626395 | 8.079557 | 8.21673  | 8.39362  | 7.846146 | 8.111875 | 8.503328 |
| 25973_at  | 2.901622 | 4.15452  | 2.213489 | 3.390155 | 3.646166 | 3.290707 | 3.831011 | 2.954883 |
| 25974_at  | 2.47673  | 1.636209 | 3.040304 | 2.972104 | 1.864865 | 2.164867 | 2.096845 | 2.052845 |
| 25975_at  | 2.161155 | 1.660792 | 1.816358 | 2.003428 | 1.801066 | 1.681465 | 1.333957 | 1.577146 |
| 25976_at  | 6.031911 | 7.505019 | 7.385344 | 6.987964 | 6.265256 | 6.351176 | 6.636467 | 7.879987 |
| 25977_at  | 6.906802 | 6.846017 | 6.908531 | 7.057781 | 7.035281 | 7.25055  | 6.210673 | 6.592044 |
| 25978_at  | 6.3684   | 5.964076 | 5.86223  | 5.966556 | 5.765929 | 6.024787 | 5.415924 | 6.365576 |
| 25979_at  | 5.581964 | 5.200145 | 4.492095 | 4.820467 | 4.416795 | 5.446476 | 5.515495 | 5.460504 |
| 2597_at   | 9.715832 | 9.891273 | 10.5772  | 9.62813  | 10.16211 | 9.680832 | 9.917974 | 10.06719 |
| 25980_at  | 6.282374 | 6.266696 | 5.754566 | 6.091024 | 5.757783 | 6.488994 | 6.277896 | 5.286874 |
| 25981_at  | 2.030105 | 2.140694 | 2.237786 | 2.141345 | 2.053958 | 2.09452  | 2.682147 | 2.440864 |
| 25983_at  | 6.191803 | 6.019877 | 5.304777 | 5.756022 | 5.311107 | 5.422576 | 4.972262 | 6.319104 |
| 25984_at  | 3.439255 | 3.08192  | 2.975597 | 5.278126 | 1.62975  | 2.610266 | 2.786283 | 4.259764 |
| 25987_at  | 6.026947 | 4.268948 | 5.529503 | 5.714675 | 4.955153 | 6.149218 | 5.655324 | 4.749604 |
| 25988_at  | 5.581846 | 5.046272 | 4.54096  | 4.396227 | 4.179248 | 3.939818 | 6.530748 | 5.861622 |
| 25989_at  | 3.021548 | 1.986829 | 2.358433 | 3.461842 | 2.592445 | 2.320881 | 3.426936 | 1.879602 |

|           |          |          |          |          |          |          |          |          |
|-----------|----------|----------|----------|----------|----------|----------|----------|----------|
| 25992_at  | 4.167049 | 4.277768 | 5.51614  | 4.982262 | 4.654198 | 5.607638 | 5.444614 | 4.446369 |
| 25994_at  | 8.123338 | 8.576712 | 8.809103 | 8.443356 | 8.998539 | 7.651249 | 8.136848 | 8.933703 |
| 25996_at  | 7.314579 | 6.831916 | 6.836215 | 6.862619 | 7.129902 | 7.276796 | 6.951007 | 7.067465 |
| 25998_at  | 6.316479 | 6.440412 | 6.37875  | 6.498069 | 6.897208 | 5.97281  | 6.24053  | 6.920525 |
| 25999_at  | 6.394187 | 6.821123 | 7.371088 | 6.750754 | 5.371614 | 6.880914 | 6.706248 | 6.555635 |
| 259_at    | 2.250574 | 1.963042 | 1.650223 | 1.633467 | 1.688006 | 1.896652 | 1.931595 | 2.225918 |
| 25_at     | 5.445123 | 5.692326 | 5.495919 | 4.801893 | 5.360073 | 6.039869 | 5.260363 | 5.449539 |
| 26000_at  | 3.163891 | 3.162442 | 2.708091 | 3.030245 | 3.490867 | 3.068942 | 3.264249 | 3.676545 |
| 26001_at  | 7.112007 | 6.656529 | 6.977352 | 6.716639 | 6.278024 | 6.586607 | 6.622716 | 6.469316 |
| 26002_at  | 3.310476 | 3.380911 | 3.832581 | 3.659092 | 4.917943 | 3.110713 | 3.570684 | 2.57857  |
| 26003_at  | 7.363032 | 7.171708 | 6.937677 | 7.007419 | 7.576242 | 7.388772 | 7.687086 | 7.036087 |
| 26005_at  | 4.950316 | 5.261758 | 4.78081  | 5.474649 | 3.989368 | 5.222717 | 5.621729 | 4.945674 |
| 26007_at  | 4.192614 | 4.393683 | 4.288914 | 4.974019 | 3.952219 | 3.334594 | 2.70457  | 4.143796 |
| 26009_at  | 6.961919 | 6.443764 | 6.652348 | 6.64483  | 5.359885 | 6.597291 | 6.369063 | 6.278619 |
| 26010_at  | 5.736823 | 5.753202 | 6.017473 | 5.831438 | 5.18404  | 5.96601  | 5.358577 | 5.186843 |
| 26011_at  | 1.787982 | 1.538886 | 1.938039 | 1.349    | 2.767644 | 2.563927 | 2.161414 | 2.536896 |
| 26012_at  | 5.807854 | 4.111156 | 4.646831 | 4.56664  | 3.351717 | 5.093184 | 4.461414 | 3.658864 |
| 26013_at  | 3.944088 | 3.260413 | 2.645535 | 3.381139 | 2.634674 | 3.90683  | 2.759402 | 2.543516 |
| 26015_at  | 5.312682 | 4.953442 | 4.814493 | 5.039722 | 4.99565  | 4.84174  | 5.581244 | 4.145211 |
| 26017_at  | 7.971039 | 7.342416 | 7.507921 | 7.704002 | 7.636899 | 8.094229 | 7.736926 | 7.494457 |
| 26018_at  | 5.008162 | 5.336867 | 5.828202 | 5.860398 | 4.380565 | 4.840646 | 5.505375 | 4.808904 |
| 26019_at  | 4.881517 | 5.906469 | 5.586905 | 5.823712 | 5.742128 | 5.638746 | 4.998519 | 6.308332 |
| 26020_at  | 7.900861 | 7.533369 | 8.028454 | 8.106183 | 7.701133 | 8.046314 | 8.29998  | 6.229153 |
| 26022_at  | 5.984302 | 5.442359 | 6.706619 | 5.847493 | 5.226028 | 5.696711 | 5.071684 | 5.63993  |
| 26025_at  | 3.251986 | 2.314416 | 5.29576  | 4.040847 | 2.268318 | 4.159402 | 4.635572 | 2.603612 |
| 26027_at  | 3.930289 | 2.93781  | 3.496208 | 2.710025 | 3.335344 | 3.928474 | 1.992038 | 2.557852 |
| 260293_at | 3.193701 | 4.184177 | 4.219313 | 3.802255 | 2.693764 | 3.59402  | 2.506353 | 3.349723 |
| 260294_at | 2.473055 | 1.950679 | 3.026451 | 2.212839 | 1.839719 | 1.829864 | 2.664874 | 1.558831 |
| 26030_at  | 4.197703 | 4.743947 | 4.713797 | 4.814356 | 4.136563 | 4.845095 | 4.483809 | 4.723798 |
| 26031_at  | 4.002782 | 4.46459  | 3.485229 | 4.055069 | 4.246174 | 4.348    | 5.6884   | 4.137904 |
| 26032_at  | 1.896095 | 2.234696 | 1.970298 | 1.843943 | 2.351634 | 1.982576 | 1.754123 | 1.607148 |
| 26033_at  | 3.352465 | 4.663177 | 4.823634 | 4.482249 | 4.860465 | 4.222787 | 5.260514 | 4.784104 |
| 260341_at | 1.449581 | 1.751177 | 1.814842 | 1.436152 | 1.432238 | 1.349827 | 1.768333 | 1.59002  |
| 26034_at  | 2.47982  | 2.243346 | 2.117645 | 2.332255 | 2.307371 | 1.746062 | 2.280548 | 2.544557 |
| 26035_at  | 4.297491 | 4.884469 | 5.155422 | 5.278797 | 5.5602   | 5.173099 | 5.363154 | 5.572344 |
| 26036_at  | 5.338758 | 5.2261   | 5.126032 | 5.357084 | 5.823292 | 5.142335 | 5.664324 | 5.366594 |
| 26037_at  | 5.544329 | 6.159719 | 5.607746 | 5.581418 | 4.905904 | 5.449602 | 5.7581   | 5.044451 |
| 26038_at  | 1.36299  | 2.216756 | 1.599921 | 1.613109 | 1.752165 | 2.448511 | 1.430315 | 1.674254 |
| 26039_at  | 3.291528 | 3.152348 | 3.689497 | 3.564251 | 3.152038 | 3.932579 | 4.256347 | 3.498628 |
| 26040_at  | 3.87854  | 3.151389 | 3.110778 | 3.762063 | 3.555497 | 4.388201 | 4.041281 | 3.157532 |
| 260425_at | 3.790536 | 4.853882 | 4.882298 | 4.483214 | 3.819098 | 4.198282 | 3.949558 | 3.759948 |
| 260429_at | 2.511445 | 2.315231 | 2.274523 | 2.488382 | 2.786584 | 2.717882 | 2.658373 | 1.695412 |
| 260434_at | 1.943092 | 2.08226  | 2.282773 | 1.773784 | 2.753416 | 2.350053 | 2.037136 | 2.02104  |
| 260436_at | 0.677706 | 1.284396 | 0.85895  | 0.914129 | 2.159763 | 1.862951 | 1.438397 | 1.241861 |
| 26043_at  | 5.283275 | 5.561488 | 6.112417 | 6.048882 | 5.753335 | 6.226082 | 6.268453 | 6.225097 |
| 26045_at  | 2.173624 | 1.928078 | 2.492722 | 1.367224 | 1.729752 | 1.210448 | 2.300943 | 1.111063 |
| 26046_at  | 5.639878 | 6.327431 | 5.446657 | 5.616269 | 6.352565 | 5.550305 | 5.699715 | 5.893367 |
| 26047_at  | 1.535138 | 2.295377 | 2.256005 | 2.320255 | 2.050512 | 1.257466 | 2.478564 | 2.164851 |
| 26048_at  | 2.342599 | 2.598525 | 2.780984 | 3.116656 | 2.887513 | 3.473174 | 2.358282 | 3.058206 |
| 26049_at  | 3.991431 | 3.72799  | 3.561836 | 2.798437 | 4.849853 | 3.082666 | 3.527815 | 3.441767 |
| 26050_at  | 1.554091 | 1.724758 | 1.865094 | 2.393462 | 1.982303 | 2.10736  | 2.350578 | 1.864643 |



|          |          |          |          |          |          |          |          |          |
|----------|----------|----------|----------|----------|----------|----------|----------|----------|
| 26051_at | 2.287925 | 4.557057 | 3.669967 | 2.736901 | 3.74597  | 3.852026 | 3.636683 | 3.54388  |
| 26052_at | 4.013399 | 3.89953  | 4.289333 | 4.142862 | 4.804393 | 4.157535 | 5.074091 | 3.908378 |
| 26053_at | 3.399674 | 3.101934 | 3.730846 | 3.92214  | 2.824429 | 3.38978  | 2.635671 | 2.893989 |
| 26054_at | 7.242547 | 6.852926 | 6.858267 | 7.202743 | 6.669563 | 6.877884 | 7.180236 | 7.169598 |
| 26056_at | 4.874735 | 3.958379 | 3.524521 | 3.958518 | 3.971367 | 4.929965 | 4.419615 | 4.040745 |
| 26057_at | 7.084986 | 7.322712 | 7.462606 | 7.273524 | 7.233099 | 7.400929 | 7.051549 | 7.342249 |
| 26058_at | 6.134012 | 7.02404  | 6.518584 | 6.639762 | 6.212897 | 6.5325   | 6.395187 | 6.79552  |
| 26059_at | 2.624788 | 4.760294 | 3.038637 | 2.767763 | 3.320129 | 3.07501  | 2.179772 | 4.243941 |
| 26060_at | 7.431023 | 7.364032 | 7.27367  | 7.537478 | 7.342308 | 7.295342 | 7.79434  | 7.070186 |
| 26061_at | 4.779061 | 4.843631 | 3.633701 | 4.820544 | 4.565683 | 4.298316 | 5.088185 | 4.943099 |
| 26062_at | 0.808415 | 1.487134 | 1.68835  | 0.896884 | 1.084885 | 1.121589 | 1.959764 | 1.374152 |
| 26063_at | 4.910884 | 5.278945 | 5.393074 | 4.40332  | 5.592386 | 5.40593  | 4.707213 | 4.600042 |
| 26064_at | 6.830488 | 6.82775  | 7.205221 | 7.346015 | 6.807068 | 7.024788 | 7.093306 | 6.708935 |
| 26065_at | 8.388378 | 8.553055 | 8.715686 | 8.717902 | 8.328082 | 8.716916 | 8.229266 | 8.583836 |
| 26070_at | 1.429555 | 1.356628 | 1.57712  | 2.513945 | 1.472859 | 1.645145 | 3.207763 | 1.583418 |
| 26071_at | 5.753328 | 4.645445 | 4.908431 | 5.28657  | 4.745297 | 5.96224  | 5.379316 | 4.080867 |
| 26073_at | 7.313399 | 7.225145 | 7.27598  | 7.003113 | 7.469225 | 6.751412 | 7.480465 | 7.691646 |
| 26074_at | 1.674042 | 2.363994 | 1.656579 | 1.873184 | 1.552213 | 1.559181 | 1.971939 | 2.36313  |
| 26077_at | 1.575763 | 1.957898 | 1.66654  | 1.47275  | 1.96766  | 1.65849  | 2.091934 | 1.944097 |
| 26080_at | 0.812494 | 0.948413 | 0.859455 | 0.567182 | 0.68956  | 1.155879 | 0.836403 | 1.22185  |
| 26082_at | 0.940759 | 1.061942 | 1.26573  | 1.724659 | 1.664339 | 0.935263 | 1.733513 | 1.177624 |
| 26083_at | 1.685477 | 1.79562  | 1.456304 | 2.050719 | 2.741636 | 3.741374 | 1.399549 | 3.330701 |
| 26084_at | 6.315312 | 6.488167 | 6.945586 | 6.433348 | 5.583582 | 6.761668 | 6.797449 | 6.480503 |
| 26085_at | 1.991698 | 1.364072 | 1.45779  | 1.281338 | 1.350218 | 1.99333  | 1.6583   | 2.00455  |
| 26086_at | 4.269204 | 4.535369 | 4.054044 | 3.893866 | 2.69129  | 4.348522 | 3.783818 | 3.204481 |
| 26088_at | 3.191456 | 3.220472 | 3.662099 | 3.611151 | 3.324504 | 3.192101 | 3.124841 | 3.698351 |
| 26090_at | 5.881607 | 5.895701 | 6.086978 | 5.600297 | 5.896322 | 5.830087 | 5.529904 | 5.377098 |
| 26091_at | 5.127958 | 5.643851 | 5.358658 | 5.752412 | 5.717429 | 5.401981 | 5.107405 | 6.131169 |
| 26092_at | 8.160993 | 7.947636 | 8.08129  | 8.031789 | 7.841779 | 8.018897 | 7.631152 | 7.592104 |
| 26093_at | 2.852255 | 3.708532 | 3.408169 | 4.344518 | 3.132339 | 3.848625 | 2.294077 | 3.534103 |
| 26094_at | 3.035578 | 3.179124 | 2.010574 | 1.821786 | 2.345458 | 2.32962  | 3.01206  | 1.744195 |
| 26097_at | 5.752986 | 5.741289 | 5.945519 | 5.531518 | 4.813787 | 5.566816 | 5.968313 | 5.620971 |
| 26098_at | 4.637566 | 4.395487 | 3.86873  | 4.296644 | 4.010691 | 3.810725 | 3.30351  | 5.756885 |
| 26099_at | 7.076482 | 6.50248  | 6.893024 | 7.26272  | 6.425973 | 7.54457  | 7.236348 | 6.561988 |
| 26100_at | 6.483654 | 7.338177 | 6.069413 | 6.454875 | 7.156463 | 6.644391 | 6.650955 | 7.044178 |
| 26102_at | 1.98286  | 1.70774  | 1.83231  | 1.847154 | 1.933631 | 1.580784 | 1.518407 | 2.305742 |
| 26103_at | 1.797896 | 1.552983 | 2.370102 | 1.745202 | 1.443568 | 2.091147 | 1.849356 | 2.047263 |
| 26108_at | 3.336498 | 3.217181 | 3.467476 | 2.804647 | 2.316282 | 3.475584 | 2.8646   | 4.080477 |
| 26112_at | 4.682692 | 5.023517 | 4.536892 | 5.108146 | 5.082238 | 5.141132 | 6.56851  | 4.80949  |
| 26115_at | 4.091241 | 5.225824 | 4.111984 | 4.621306 | 4.898691 | 4.944919 | 4.368345 | 3.364178 |
| 26118_at | 6.992193 | 7.150503 | 6.914358 | 7.494453 | 7.835836 | 6.162845 | 6.548142 | 7.582352 |
| 26119_at | 4.742758 | 3.840363 | 3.901141 | 4.584834 | 4.371552 | 4.526043 | 4.626716 | 4.325096 |
| 26121_at | 5.349723 | 4.891824 | 4.403261 | 5.533365 | 4.708093 | 4.164749 | 5.237789 | 4.449517 |
| 26122_at | 7.110012 | 7.243385 | 7.022307 | 6.704657 | 7.097389 | 7.212206 | 6.379532 | 7.005011 |
| 26123_at | 7.414153 | 7.173792 | 7.452395 | 7.523925 | 7.343218 | 7.342253 | 7.826374 | 7.365229 |
| 26127_at | 5.605132 | 5.722441 | 5.34192  | 5.757545 | 6.148225 | 6.421938 | 4.831081 | 6.555861 |
| 26128_at | 6.565721 | 6.434764 | 5.950568 | 5.818228 | 6.26349  | 5.819227 | 6.3366   | 6.425564 |
| 26130_at | 5.898234 | 5.549708 | 6.194409 | 5.710611 | 5.945229 | 5.189637 | 5.786036 | 6.164214 |
| 26133_at | 5.791241 | 5.697294 | 6.419586 | 6.442876 | 4.981086 | 6.24872  | 6.423744 | 6.750593 |
| 26135_at | 8.142071 | 8.495179 | 8.830467 | 8.446217 | 8.534918 | 8.040867 | 8.625488 | 8.370774 |
| 26136_at | 5.520159 | 5.900357 | 6.339047 | 5.259664 | 5.70517  | 5.493577 | 5.731102 | 5.839983 |

|           |          |          |          |          |          |          |          |          |
|-----------|----------|----------|----------|----------|----------|----------|----------|----------|
| 26137_at  | 5.992465 | 6.746474 | 7.117925 | 7.054001 | 6.518264 | 6.881397 | 6.622067 | 6.628803 |
| 26138_at  | 1.350745 | 0.776614 | 0.556363 | 0.970937 | 1.059445 | 1.871528 | 1.398479 | 1.838145 |
| 26140_at  | 4.363937 | 3.469056 | 3.970448 | 4.020361 | 3.407858 | 4.153067 | 4.522347 | 3.879798 |
| 26145_at  | 4.579539 | 4.717361 | 4.761771 | 4.467722 | 4.210753 | 5.449439 | 5.082395 | 4.249164 |
| 26146_at  | 6.115603 | 6.320889 | 6.183326 | 6.14483  | 5.64457  | 6.261657 | 6.107452 | 5.88983  |
| 26147_at  | 3.540871 | 3.114963 | 2.951477 | 4.134125 | 2.890027 | 4.716002 | 4.479907 | 3.522909 |
| 26148_at  | 4.226019 | 4.614365 | 4.018633 | 3.493797 | 3.605905 | 3.075899 | 4.53142  | 3.1181   |
| 26150_at  | 1.651046 | 1.295809 | 1.292198 | 1.216477 | 1.799172 | 1.24703  | 1.705302 | 1.874959 |
| 26151_at  | 2.939021 | 3.637206 | 2.928846 | 3.367888 | 2.597193 | 3.897361 | 2.824504 | 2.266997 |
| 26152_at  | 5.321698 | 4.708195 | 4.877721 | 3.809376 | 3.631046 | 4.627125 | 4.437364 | 4.416542 |
| 26153_at  | 1.781705 | 2.409242 | 3.148733 | 2.862371 | 3.31119  | 2.275809 | 2.830052 | 3.427073 |
| 26154_at  | 1.467906 | 1.410214 | 2.117579 | 1.2475   | 1.878464 | 2.198494 | 1.451718 | 1.804143 |
| 26155_at  | 1.511153 | 1.777598 | 2.619116 | 2.391188 | 0.673513 | 1.34303  | 1.544583 | 2.491115 |
| 26156_at  | 7.805473 | 7.548612 | 7.144255 | 7.274256 | 6.732967 | 7.170697 | 7.275612 | 7.18901  |
| 26157_at  | 6.835651 | 5.800454 | 6.011035 | 6.236532 | 5.796572 | 6.250508 | 5.94802  | 7.108177 |
| 2615_at   | 7.731162 | 7.861683 | 7.097797 | 7.791885 | 7.425409 | 7.528608 | 8.113292 | 6.480839 |
| 26160_at  | 3.832604 | 4.037468 | 4.053857 | 3.873249 | 2.775878 | 4.058387 | 3.627066 | 4.027784 |
| 26164_at  | 3.830006 | 3.58435  | 4.057241 | 4.41718  | 3.617385 | 4.710752 | 3.661338 | 3.262401 |
| 26166_at  | 2.014763 | 1.538138 | 2.53502  | 0.941598 | 1.657235 | 1.462254 | 1.290083 | 2.678438 |
| 26167_at  | 4.534841 | 5.961446 | 5.188859 | 4.942374 | 5.42899  | 4.776411 | 5.060566 | 4.514526 |
| 261726_at | 6.763848 | 6.656636 | 6.947742 | 7.139877 | 7.336708 | 7.03881  | 6.846296 | 6.993961 |
| 261729_at | 2.479895 | 2.549218 | 2.022693 | 2.898101 | 4.390721 | 2.618158 | 2.897542 | 2.963078 |
| 261734_at | 3.235734 | 2.800609 | 3.720716 | 3.457193 | 3.058377 | 3.073915 | 3.66543  | 3.020611 |
| 26173_at  | 5.153119 | 5.500947 | 5.048404 | 4.717178 | 4.275812 | 5.345207 | 4.68326  | 4.450212 |
| 26175_at  | 5.368091 | 4.944006 | 4.472434 | 4.70175  | 5.171456 | 4.632243 | 4.280471 | 4.85195  |
| 2617_at   | 6.345111 | 6.651546 | 6.002805 | 5.843047 | 6.491789 | 6.232094 | 6.264043 | 6.249956 |
| 26184_at  | 1.336745 | 1.756492 | 1.234113 | 1.058866 | 0.51158  | 1.811384 | 1.209907 | 1.926018 |
| 26188_at  | 1.48723  | 1.595684 | 1.058887 | 1.976738 | 3.239716 | 1.698882 | 2.221777 | 1.282712 |
| 26189_at  | 1.909816 | 2.270593 | 1.825462 | 2.171862 | 2.423084 | 2.25394  | 1.987766 | 3.569016 |
| 2618_at   | 5.355382 | 5.733533 | 5.820853 | 5.806013 | 6.527884 | 5.453563 | 4.896309 | 5.52022  |
| 26190_at  | 5.387323 | 5.986823 | 5.605727 | 5.752289 | 5.869611 | 5.527344 | 5.153729 | 5.772362 |
| 26191_at  | 2.272991 | 1.345083 | 1.599494 | 4.004365 | 1.995787 | 1.307496 | 3.127782 | 1.921638 |
| 2619_at   | 4.730629 | 5.04375  | 4.976135 | 4.231519 | 4.433202 | 4.58201  | 4.469766 | 4.613513 |
| 26205_at  | 4.580517 | 4.416599 | 3.65521  | 5.578939 | 4.504686 | 3.677676 | 4.822892 | 3.478719 |
| 26206_at  | 2.570155 | 2.662581 | 2.917812 | 2.05386  | 2.348533 | 2.204689 | 1.730737 | 2.997088 |
| 26207_at  | 6.507041 | 7.299806 | 6.073497 | 7.177494 | 6.539471 | 6.878696 | 6.328377 | 6.635803 |
| 2620_at   | 6.153025 | 6.440758 | 4.99917  | 5.952724 | 5.949045 | 4.825166 | 4.614638 | 5.932594 |
| 26211_at  | 0.939322 | 1.365096 | 1.534452 | 0.813139 | 1.457073 | 0.837944 | 1.27511  | 1.340993 |
| 26212_at  | 0.93939  | 0.964691 | 2.037026 | 1.19897  | 1.498613 | 0.602    | 1.08233  | 1.456902 |
| 26219_at  | 1.142617 | 0.611055 | 1.695119 | 0.865595 | 1.406429 | 1.044523 | 0.921869 | 1.206629 |
| 2621_at   | 5.475876 | 5.174806 | 5.614703 | 5.208261 | 5.407918 | 5.92854  | 5.555996 | 4.346994 |
| 26220_at  | 1.969326 | 2.035597 | 1.998142 | 2.00881  | 1.97337  | 1.872261 | 2.251248 | 1.899815 |
| 26222_at  | 1.562646 | 0.940723 | 1.383708 | 1.443462 | 1.356966 | 1.10926  | 2.021384 | 1.498222 |
| 26223_at  | 1.362116 | 2.092565 | 1.345048 | 1.084891 | 1.757568 | 1.178202 | 1.646881 | 1.581356 |
| 26224_at  | 7.721081 | 7.692192 | 7.56244  | 6.723627 | 7.094108 | 7.75243  | 7.185796 | 8.394236 |
| 26225_at  | 4.582782 | 4.448676 | 5.029283 | 4.79766  | 4.6147   | 4.46002  | 5.897494 | 3.391577 |
| 26226_at  | 1.594407 | 2.052104 | 1.912746 | 2.946667 | 2.086263 | 2.006475 | 1.949442 | 1.884623 |
| 26227_at  | 4.45054  | 4.395972 | 3.604591 | 3.221479 | 4.909518 | 4.860624 | 2.429649 | 2.996165 |
| 26228_at  | 1.650742 | 1.003679 | 1.093657 | 1.904265 | 2.078416 | 1.520002 | 1.152164 | 1.940994 |
| 26229_at  | 4.246871 | 3.351065 | 2.920216 | 3.567055 | 2.75084  | 3.488332 | 3.055849 | 2.987494 |
| 2622_at   | 4.371889 | 4.251163 | 3.877159 | 3.747242 | 3.22808  | 3.79428  | 4.297335 | 4.176211 |

|          |          |          |          |          |          |          |          |          |
|----------|----------|----------|----------|----------|----------|----------|----------|----------|
| 26230_at | 2.807402 | 2.662274 | 1.550096 | 1.695816 | 2.481578 | 2.195565 | 3.018566 | 2.948844 |
| 26231_at | 4.243694 | 4.084346 | 4.105564 | 3.208892 | 3.373087 | 2.392944 | 4.18713  | 3.718072 |
| 26232_at | 6.421796 | 4.826521 | 4.527144 | 6.011779 | 5.245075 | 5.943248 | 6.442131 | 5.229897 |
| 26233_at | 4.120861 | 3.194474 | 2.862399 | 2.88477  | 2.417091 | 2.893864 | 2.711074 | 3.472197 |
| 26234_at | 7.320736 | 7.9461   | 7.49388  | 7.261702 | 7.636229 | 6.932574 | 7.175566 | 7.689535 |
| 26235_at | 5.936316 | 5.970984 | 5.961901 | 5.722018 | 6.068522 | 5.516256 | 6.189187 | 5.351845 |
| 26238_at | 1.992669 | 2.024081 | 4.035212 | 2.537116 | 2.299398 | 3.496814 | 2.246235 | 2.220681 |
| 26239_at | 1.043803 | 1.189351 | 0.957127 | 1.399761 | 1.916229 | 0.847707 | 1.188596 | 1.544442 |
| 2623_at  | 2.867443 | 2.907986 | 4.07333  | 3.248018 | 3.679817 | 3.791832 | 3.871983 | 3.443323 |
| 26240_at | 4.506816 | 4.039523 | 4.53091  | 4.241155 | 4.374774 | 3.317905 | 2.624722 | 4.563717 |
| 26245_at | 1.780105 | 1.431751 | 2.461234 | 1.355976 | 2.439398 | 1.212333 | 2.380074 | 1.457213 |
| 26246_at | 1.626991 | 2.352746 | 2.648256 | 1.351802 | 1.244964 | 1.438058 | 1.28205  | 1.838911 |
| 26247_at | 4.174886 | 4.777567 | 5.146508 | 4.999388 | 5.176539 | 4.679401 | 5.752931 | 5.17517  |
| 26248_at | 2.584791 | 1.698692 | 1.761832 | 2.369079 | 2.586028 | 1.495558 | 2.466004 | 3.421012 |
| 26249_at | 2.619394 | 3.167308 | 4.312803 | 3.711597 | 4.422225 | 2.146859 | 3.276084 | 2.206479 |
| 2624_at  | 4.197917 | 3.819517 | 5.167436 | 4.910335 | 4.262738 | 4.058841 | 4.569152 | 3.769333 |
| 26251_at | 1.824023 | 1.921969 | 3.376134 | 2.790077 | 2.373764 | 2.234383 | 3.127266 | 2.349105 |
| 26253_at | 2.021416 | 3.347386 | 2.406387 | 1.941086 | 1.117106 | 3.599323 | 2.376768 | 2.622819 |
| 26254_at | 1.967937 | 3.146137 | 2.735096 | 2.490681 | 2.553865 | 2.338307 | 2.718255 | 2.558013 |
| 26255_at | 3.190711 | 1.957927 | 1.600235 | 2.517349 | 1.942072 | 1.939085 | 4.425794 | 1.625821 |
| 26256_at | 3.76853  | 3.305136 | 3.819986 | 3.080444 | 3.536734 | 3.033439 | 3.51635  | 3.350409 |
| 26257_at | 2.008009 | 1.614567 | 1.87518  | 1.975223 | 1.534063 | 1.954874 | 2.034977 | 1.644055 |
| 26258_at | 6.468805 | 6.657742 | 6.780095 | 6.654595 | 6.831249 | 6.258914 | 6.436846 | 6.764975 |
| 26259_at | 4.691157 | 4.819351 | 4.480801 | 5.23001  | 5.034673 | 5.394556 | 4.230196 | 4.806885 |
| 2625_at  | 7.726608 | 7.637789 | 7.604856 | 8.063341 | 7.012099 | 7.864232 | 7.241804 | 6.682071 |
| 26260_at | 6.871849 | 6.403082 | 6.346103 | 6.140035 | 6.484036 | 6.354603 | 6.692808 | 6.588856 |
| 26261_at | 2.456367 | 2.202696 | 1.805376 | 1.894916 | 2.576415 | 1.553958 | 1.727183 | 2.146318 |
| 26262_at | 5.341579 | 5.661125 | 4.863588 | 5.34732  | 4.277279 | 4.295711 | 5.41701  | 4.831494 |
| 26263_at | 4.978989 | 5.182299 | 5.273445 | 3.851386 | 5.143378 | 4.648947 | 4.236676 | 5.469905 |
| 26266_at | 1.84905  | 2.764052 | 2.88414  | 3.395323 | 3.351246 | 2.43184  | 2.380918 | 2.610013 |
| 26267_at | 4.463392 | 4.501382 | 3.425035 | 4.779845 | 5.214157 | 3.867971 | 4.762968 | 3.328042 |
| 26268_at | 7.603636 | 8.090006 | 7.566537 | 7.396474 | 7.234791 | 7.888272 | 7.130785 | 8.056245 |
| 26269_at | 7.108239 | 6.721406 | 6.786108 | 7.298241 | 6.730488 | 6.436022 | 6.219251 | 7.758315 |
| 2626_at  | 2.366287 | 1.989622 | 1.601625 | 1.726447 | 1.620805 | 2.857703 | 3.312367 | 2.5332   |
| 26270_at | 2.824395 | 2.265413 | 2.848675 | 3.102729 | 2.542019 | 3.242398 | 3.439795 | 2.805599 |
| 26271_at | 5.287929 | 4.682282 | 4.555533 | 3.95911  | 3.514943 | 4.993833 | 3.874084 | 4.504811 |
| 26272_at | 4.381212 | 4.701008 | 4.281052 | 4.844093 | 4.339796 | 3.360436 | 3.784435 | 4.355667 |
| 26273_at | 6.182606 | 6.249592 | 6.439858 | 6.113279 | 6.301982 | 6.500548 | 5.925096 | 6.693062 |
| 26275_at | 7.224011 | 7.076699 | 6.601245 | 7.14208  | 6.047194 | 7.197691 | 4.534092 | 7.412018 |
| 26276_at | 5.369113 | 4.85332  | 4.553683 | 4.267735 | 5.923972 | 3.820541 | 3.697458 | 4.299685 |
| 26277_at | 7.213888 | 7.203023 | 7.128057 | 7.145922 | 6.37305  | 7.081925 | 6.631244 | 6.923169 |
| 26278_at | 2.423453 | 4.41604  | 3.290626 | 3.836956 | 3.387486 | 2.431712 | 1.43943  | 4.542218 |
| 26279_at | 1.370781 | 2.001597 | 1.287914 | 1.220472 | 1.519508 | 2.235765 | 1.368454 | 1.793655 |
| 2627_at  | 3.271936 | 2.562204 | 2.991532 | 2.363429 | 4.186174 | 3.080471 | 2.901071 | 3.018776 |
| 26280_at | 0.721104 | 0.988606 | 1.582981 | 1.431158 | 1.556296 | 0.874006 | 2.50583  | 1.46576  |
| 26281_at | 1.074201 | 1.335438 | 1.6187   | 1.693916 | 1.500519 | 3.104147 | 1.123859 | 2.052332 |
| 26284_at | 5.891771 | 5.577079 | 4.49812  | 5.915916 | 4.054296 | 5.913464 | 4.940774 | 4.923905 |
| 26285_at | 0.945876 | 1.470549 | 1.686162 | 1.398004 | 1.58397  | 1.487096 | 1.816018 | 1.288285 |
| 26286_at | 6.395701 | 6.363841 | 5.936725 | 5.883143 | 6.090427 | 6.55839  | 6.263772 | 6.60574  |
| 26287_at | 2.052163 | 2.294821 | 4.015668 | 3.383644 | 2.772503 | 3.2158   | 2.416962 | 2.293437 |
| 26289_at | 4.649286 | 4.149358 | 5.142589 | 4.641366 | 3.683002 | 3.51206  | 3.430621 | 2.950368 |

|          |          |          |          |          |          |          |          |          |
|----------|----------|----------|----------|----------|----------|----------|----------|----------|
| 2628_at  | 8.671932 | 7.881185 | 8.032101 | 5.125724 | 8.785208 | 8.171772 | 5.462132 | 8.466144 |
| 26290_at | 2.490277 | 2.373121 | 3.081426 | 2.208358 | 2.651803 | 2.145999 | 2.068031 | 1.951494 |
| 26291_at | 2.087738 | 1.947133 | 2.272574 | 1.738374 | 1.470063 | 2.413447 | 1.949636 | 2.1766   |
| 26297_at | 5.237352 | 5.315633 | 4.577471 | 4.786686 | 5.598026 | 5.501676 | 5.365563 | 5.559913 |
| 26298_at | 3.262977 | 2.709057 | 2.543061 | 2.840895 | 3.043046 | 3.48496  | 2.781288 | 3.862392 |
| 2629_at  | 7.161658 | 7.433571 | 7.149291 | 7.228884 | 6.979616 | 7.322092 | 7.91968  | 6.97461  |
| 262_at   | 5.504554 | 6.368646 | 5.449201 | 5.907565 | 5.972424 | 6.656541 | 6.298619 | 5.836393 |
| 26301_at | 3.180547 | 3.151497 | 3.461754 | 2.770677 | 2.497479 | 2.816446 | 3.195858 | 4.249149 |
| 2630_at  | 4.271263 | 2.219955 | 2.453024 | 2.264091 | 4.211541 | 4.731748 | 2.086634 | 1.65951  |
| 2631_at  | 7.103808 | 6.658269 | 6.437904 | 5.975337 | 6.578927 | 6.489092 | 5.658279 | 6.664041 |
| 2632_at  | 6.857035 | 7.045498 | 6.812393 | 6.209819 | 6.970629 | 5.752825 | 6.700261 | 7.412434 |
| 26330_at | 3.220007 | 2.561611 | 2.01214  | 2.724701 | 2.756834 | 2.990028 | 2.641368 | 1.636869 |
| 26333_at | 2.164629 | 1.089157 | 1.03681  | 0.737855 | 4.717288 | 1.707848 | 3.159109 | 1.420049 |
| 26338_at | 0.681276 | 2.261035 | 3.549927 | 1.568982 | 2.294597 | 1.146688 | 2.163026 | 0.714656 |
| 2633_at  | 6.117698 | 7.220554 | 5.084509 | 7.396456 | 4.031597 | 6.569241 | 6.401352 | 7.331383 |
| 26341_at | 1.126124 | 1.005872 | 1.347202 | 0.803854 | 1.033907 | 1.448232 | 2.30207  | 1.032345 |
| 26343_at | 1.454268 | 1.728328 | 1.54066  | 1.43753  | 1.807587 | 1.721393 | 1.593999 | 2.184285 |
| 2634_at  | 5.315508 | 6.137606 | 5.022966 | 6.48192  | 5.208296 | 6.058826 | 4.600226 | 5.535059 |
| 26353_at | 6.685741 | 5.931837 | 6.837443 | 6.480498 | 6.278383 | 6.527121 | 6.564167 | 6.007499 |
| 26354_at | 6.634001 | 6.468868 | 6.589813 | 6.11523  | 6.478192 | 5.503592 | 5.239478 | 7.128562 |
| 26355_at | 7.557013 | 7.399947 | 7.665557 | 7.01957  | 7.016351 | 7.548021 | 7.910825 | 6.864684 |
| 2635_at  | 6.579118 | 5.822226 | 4.82035  | 3.913912 | 6.20862  | 6.084447 | 5.627746 | 6.024179 |
| 2636_at  | 1.943109 | 1.576391 | 1.979395 | 1.424111 | 0.834336 | 1.783855 | 0.722386 | 1.455338 |
| 2637_at  | 1.819097 | 2.074158 | 2.72274  | 2.833251 | 2.743838 | 3.040986 | 3.022607 | 2.548309 |
| 2638_at  | 1.545632 | 2.822122 | 3.735235 | 1.401906 | 1.825749 | 1.777424 | 1.334689 | 2.385852 |
| 2639_at  | 3.752769 | 4.226474 | 2.50884  | 2.567208 | 2.87853  | 3.04085  | 2.692725 | 3.176172 |
| 2641_at  | 1.716101 | 1.192021 | 0.853781 | 1.191581 | 2.10171  | 1.381796 | 1.791985 | 1.359265 |
| 2642_at  | 3.177064 | 3.066722 | 3.170716 | 2.437826 | 3.345026 | 2.817848 | 2.995361 | 3.239932 |
| 2643_at  | 4.513968 | 4.601987 | 4.646731 | 4.547395 | 4.811929 | 4.835573 | 5.235813 | 5.622078 |
| 2644_at  | 6.843065 | 5.469098 | 5.72231  | 4.097155 | 4.176896 | 6.855513 | 6.395782 | 4.35169  |
| 2645_at  | 1.542787 | 2.17664  | 2.008289 | 1.593546 | 2.43379  | 3.142871 | 2.005909 | 2.164057 |
| 26468_at | 2.260646 | 2.323138 | 2.738749 | 2.098929 | 2.333342 | 2.879772 | 2.177052 | 1.898753 |
| 26469_at | 5.035259 | 4.873678 | 5.232754 | 4.861166 | 4.110506 | 4.055478 | 4.88362  | 4.352985 |
| 2646_at  | 1.565009 | 1.901476 | 1.759573 | 1.386718 | 1.938268 | 1.938438 | 2.267938 | 1.827563 |
| 26470_at | 4.718613 | 5.297012 | 5.312549 | 5.279777 | 4.222539 | 5.121654 | 5.278073 | 4.808303 |
| 26471_at | 7.286985 | 7.072543 | 7.542944 | 7.230989 | 6.519849 | 8.17533  | 7.665184 | 6.303943 |
| 26476_at | 1.848001 | 1.377595 | 1.483422 | 1.467459 | 2.009728 | 2.205178 | 1.256377 | 1.896098 |
| 2647_at  | 5.439094 | 5.055042 | 4.844185 | 4.814247 | 4.05582  | 4.429775 | 4.637676 | 4.321694 |
| 2648_at  | 4.793259 | 3.819229 | 3.131394 | 3.900097 | 2.530317 | 4.535395 | 2.754097 | 4.269073 |
| 26492_at | 1.646219 | 1.450658 | 1.784573 | 1.174042 | 2.101603 | 1.484454 | 1.33297  | 1.522915 |
| 26493_at | 1.97446  | 2.226813 | 1.644962 | 1.668214 | 1.154119 | 1.653424 | 3.149741 | 1.441506 |
| 26494_at | 1.510607 | 1.756181 | 1.041511 | 1.91593  | 3.254676 | 1.29792  | 1.612749 | 1.456442 |
| 26496_at | 2.948498 | 3.15559  | 2.934361 | 2.207662 | 2.160667 | 3.064063 | 3.303038 | 2.364656 |
| 26499_at | 2.905079 | 2.545778 | 3.432435 | 1.91732  | 1.2158   | 3.102309 | 3.531546 | 2.279059 |
| 2649_at  | 2.304334 | 1.590779 | 2.310718 | 2.736668 | 1.286471 | 2.431753 | 1.453868 | 1.484834 |
| 26502_at | 5.826927 | 5.891041 | 6.032068 | 5.568503 | 5.281347 | 5.253429 | 5.773092 | 6.161887 |
| 26503_at | 7.32811  | 7.885837 | 7.652714 | 7.684174 | 8.11892  | 7.520421 | 8.502327 | 8.08641  |
| 26504_at | 3.150003 | 5.090696 | 4.116213 | 4.166541 | 4.268882 | 3.467678 | 3.874829 | 3.413165 |
| 26505_at | 5.031762 | 5.109021 | 5.82969  | 5.634913 | 5.407328 | 5.116765 | 5.35985  | 6.133692 |
| 26507_at | 1.64144  | 2.002433 | 2.01013  | 1.97007  | 2.573571 | 2.137879 | 2.344773 | 1.956571 |
| 26508_at | 5.087637 | 4.198269 | 5.653088 | 4.180811 | 3.952663 | 4.573554 | 5.56098  | 4.158395 |

|           |          |          |          |          |          |          |          |          |
|-----------|----------|----------|----------|----------|----------|----------|----------|----------|
| 26509_at  | 6.515968 | 7.797115 | 7.455152 | 7.476176 | 7.476673 | 6.946671 | 7.547445 | 7.012647 |
| 2650_at   | 4.383296 | 2.873877 | 2.745152 | 3.37397  | 2.991676 | 3.649097 | 3.361653 | 4.331533 |
| 26511_at  | 6.709563 | 6.901156 | 6.179485 | 6.34438  | 6.888346 | 7.112566 | 6.683047 | 6.684773 |
| 26512_at  | 4.101981 | 4.83726  | 4.370355 | 5.055953 | 4.539135 | 4.672212 | 3.461382 | 4.954531 |
| 26515_at  | 6.448132 | 6.012684 | 6.53621  | 7.032988 | 5.215693 | 6.387739 | 6.831507 | 5.722411 |
| 26517_at  | 8.384146 | 7.601549 | 7.523278 | 7.605435 | 6.387371 | 7.957752 | 7.678278 | 7.255307 |
| 26519_at  | 6.782442 | 6.407288 | 7.833489 | 7.15637  | 8.068221 | 6.746441 | 6.148935 | 6.334005 |
| 2651_at   | 2.407856 | 2.440715 | 2.911619 | 2.607295 | 3.281235 | 3.565139 | 2.678021 | 3.321617 |
| 26520_at  | 7.363563 | 6.247766 | 6.795749 | 6.771237 | 6.486674 | 5.639634 | 6.24398  | 6.403176 |
| 26521_at  | 6.521136 | 6.527066 | 5.871353 | 6.09653  | 6.592494 | 6.291668 | 6.285422 | 6.188839 |
| 26523_at  | 4.356143 | 4.804445 | 4.767161 | 4.52752  | 4.109877 | 4.611491 | 4.226375 | 4.322208 |
| 26524_at  | 5.980158 | 6.093134 | 6.220754 | 6.246744 | 6.237253 | 5.747089 | 6.687949 | 6.251817 |
| 26525_at  | 1.351106 | 2.075096 | 3.176512 | 1.763779 | 1.801643 | 1.622743 | 1.531619 | 1.33614  |
| 26526_at  | 1.150046 | 1.303967 | 1.465693 | 1.272412 | 2.754335 | 1.365614 | 1.587423 | 1.801041 |
| 26528_at  | 4.818189 | 4.763658 | 4.149998 | 5.177441 | 4.874644 | 4.779126 | 4.711825 | 5.37065  |
| 26529_at  | 1.368185 | 1.073126 | 1.19762  | 1.05216  | 1.372399 | 1.330899 | 1.488737 | 1.568323 |
| 26531_at  | 1.132315 | 1.242521 | 1.243052 | 0.906304 | 1.497729 | 1.018357 | 1.784979 | 1.894838 |
| 26532_at  | 1.594976 | 1.676648 | 1.918318 | 2.543486 | 0.986845 | 2.812982 | 2.106754 | 1.822934 |
| 26533_at  | 1.405176 | 1.189985 | 1.039094 | 1.254832 | 1.574028 | 1.594855 | 2.970882 | 1.768646 |
| 26534_at  | 3.88131  | 4.735861 | 3.419372 | 4.072325 | 3.027666 | 3.763442 | 2.715547 | 4.529734 |
| 26538_at  | 1.500289 | 1.60553  | 1.536659 | 1.210828 | 1.232518 | 1.244329 | 1.073011 | 1.66922  |
| 26539_at  | 1.723453 | 1.52055  | 1.525136 | 1.718281 | 1.571719 | 1.50054  | 1.372914 | 1.70601  |
| 2653_at   | 1.780263 | 2.607456 | 2.428321 | 3.193455 | 4.556528 | 1.793188 | 1.318726 | 4.519269 |
| 26548_at  | 2.089858 | 2.520812 | 2.40823  | 2.009339 | 2.380846 | 2.080658 | 2.073324 | 2.313517 |
| 26574_at  | 6.732493 | 6.555794 | 6.415287 | 6.659855 | 6.600067 | 7.004605 | 6.487684 | 6.628417 |
| 26575_at  | 2.367438 | 2.395108 | 2.182326 | 2.14335  | 2.761268 | 2.911552 | 2.818374 | 2.989015 |
| 26576_at  | 1.807775 | 1.574746 | 2.188471 | 2.901038 | 1.920515 | 1.69103  | 1.954115 | 2.554614 |
| 26577_at  | 9.864371 | 9.840331 | 10.20039 | 9.493673 | 9.837475 | 9.693737 | 9.77462  | 10.31101 |
| 26578_at  | 7.331704 | 7.564547 | 7.501487 | 7.324362 | 7.603044 | 7.491572 | 7.142843 | 7.728994 |
| 26579_at  | 1.047991 | 1.557907 | 1.000057 | 1.764029 | 3.026568 | 0.920081 | 0.708886 | 1.613575 |
| 26580_at  | 2.028156 | 1.723483 | 1.022416 | 1.434177 | 1.957564 | 2.217773 | 2.117546 | 4.176181 |
| 26585_at  | 2.090153 | 2.556027 | 1.742425 | 2.13111  | 1.682495 | 3.153034 | 2.622454 | 1.748084 |
| 26586_at  | 4.912792 | 4.72562  | 5.260665 | 5.599306 | 4.273059 | 5.02557  | 5.228468 | 6.138096 |
| 26589_at  | 6.310297 | 6.350929 | 5.644143 | 6.068723 | 6.24112  | 6.318405 | 5.369775 | 6.348714 |
| 2658_at   | 1.963145 | 1.809758 | 2.294562 | 2.62214  | 2.578892 | 2.734562 | 1.887323 | 1.576722 |
| 26595_at  | 1.105817 | 0.783108 | 0.982925 | 0.914145 | 1.675952 | 2.232036 | 0.610796 | 1.038071 |
| 265_at    | 1.211106 | 1.469113 | 1.881091 | 1.013917 | 2.088516 | 1.934601 | 2.807145 | 2.552335 |
| 26608_at  | 3.406687 | 4.245888 | 3.477072 | 3.375872 | 2.249084 | 3.439173 | 4.31141  | 2.948271 |
| 26609_at  | 0.62568  | 1.517763 | 0.641514 | 0.993023 | 1.010432 | 0.771187 | 1.513376 | 1.504631 |
| 2660_at   | 2.114463 | 3.020784 | 2.890687 | 1.575927 | 1.899941 | 1.813768 | 1.945648 | 2.614035 |
| 26610_at  | 6.010027 | 6.011834 | 6.26478  | 5.455586 | 5.80394  | 5.953305 | 5.722911 | 5.908466 |
| 2661_at   | 0.939184 | 1.037673 | 0.996558 | 1.126831 | 0.874277 | 1.038032 | 1.640255 | 1.310108 |
| 2662_at   | 2.157359 | 2.197794 | 2.686446 | 2.249793 | 2.877662 | 2.4883   | 2.928057 | 2.630456 |
| 2664_at   | 8.008961 | 7.572013 | 7.552877 | 8.085724 | 7.604764 | 7.264725 | 7.461149 | 7.511353 |
| 266553_at | 0.646085 | 0.867726 | 1.211447 | 0.823206 | 1.017739 | 0.873026 | 3.428456 | 1.332904 |
| 26658_at  | 1.781149 | 2.441433 | 2.279761 | 1.738731 | 2.211222 | 1.98618  | 1.45816  | 1.882701 |
| 26659_at  | 1.313917 | 0.996814 | 1.202838 | 0.940579 | 1.596036 | 1.310158 | 1.262144 | 2.181888 |
| 2665_at   | 8.302525 | 7.964161 | 8.290704 | 8.4859   | 8.718756 | 8.100046 | 8.062769 | 8.733101 |
| 266629_at | 2.263961 | 2.02137  | 1.431934 | 1.814312 | 1.749634 | 1.740529 | 2.326458 | 1.221899 |
| 26664_at  | 0.819521 | 0.822136 | 1.202198 | 0.907158 | 2.210273 | 1.409968 | 3.033933 | 2.533049 |
| 266655_at | 5.1688   | 4.912336 | 4.491736 | 5.295202 | 4.63281  | 4.913862 | 4.979583 | 5.505649 |

|           |          |          |          |          |          |          |          |          |
|-----------|----------|----------|----------|----------|----------|----------|----------|----------|
| 266675_at | 1.407122 | 1.818867 | 1.484249 | 1.646903 | 1.491026 | 1.066683 | 2.375803 | 2.694693 |
| 266697_at | 2.186257 | 1.430351 | 1.355834 | 1.351926 | 1.977922 | 0.829678 | 1.830825 | 1.983955 |
| 266722_at | 2.555226 | 1.392925 | 1.531921 | 1.117363 | 1.90804  | 2.55067  | 1.570877 | 1.258065 |
| 266727_at | 1.908565 | 2.239348 | 2.725628 | 2.426022 | 1.433487 | 2.038339 | 1.45593  | 1.650842 |
| 266743_at | 1.20913  | 1.447901 | 1.389957 | 1.00481  | 1.814379 | 1.428767 | 2.734077 | 1.406029 |
| 266747_at | 1.462671 | 2.182069 | 2.129975 | 1.649513 | 3.593131 | 1.611671 | 3.561757 | 2.102259 |
| 266812_at | 7.082631 | 6.576498 | 6.362562 | 5.520203 | 5.381225 | 5.736562 | 6.574197 | 6.669641 |
| 26686_at  | 1.533839 | 3.257011 | 1.867356 | 1.823239 | 2.260028 | 1.574466 | 1.748926 | 2.036775 |
| 26689_at  | 1.046321 | 1.249938 | 1.065149 | 0.830521 | 2.526074 | 2.44883  | 1.966673 | 3.188192 |
| 2668_at   | 1.983362 | 2.147539 | 2.053319 | 1.753081 | 2.625754 | 1.888675 | 2.835062 | 2.711606 |
| 266917_at | 1.27763  | 1.506113 | 1.767839 | 1.252077 | 1.04367  | 1.550859 | 1.407003 | 1.607132 |
| 266919_at | 0.932924 | 1.217115 | 1.165055 | 1.313269 | 1.023959 | 1.326696 | 1.090116 | 1.116134 |
| 26692_at  | 1.433268 | 1.167945 | 1.991773 | 1.440347 | 1.267297 | 1.538038 | 2.617257 | 1.628035 |
| 26693_at  | 0.828192 | 1.994884 | 1.288042 | 1.470299 | 1.732372 | 1.566435 | 1.18327  | 0.978378 |
| 26696_at  | 1.518157 | 1.208269 | 1.601389 | 1.351484 | 1.610766 | 0.984375 | 1.022137 | 1.602902 |
| 266971_at | 1.984914 | 0.82276  | 1.632946 | 1.763476 | 1.928475 | 1.138188 | 0.880933 | 0.909547 |
| 266977_at | 2.421975 | 2.037531 | 2.24082  | 2.744747 | 4.000467 | 3.419645 | 2.581373 | 2.553936 |
| 2669_at   | 5.854735 | 5.592577 | 5.077262 | 6.21629  | 5.875909 | 4.132559 | 5.206948 | 4.267988 |
| 266_at    | 1.152057 | 2.345768 | 2.233491 | 1.747672 | 1.885075 | 1.71365  | 2.002826 | 1.93845  |
| 267002_at | 2.84206  | 2.523319 | 3.78957  | 3.419523 | 3.249183 | 2.834989 | 2.828515 | 2.887516 |
| 267010_at | 4.858909 | 4.959147 | 4.752742 | 5.175453 | 3.825746 | 3.359436 | 4.224388 | 3.35826  |
| 267012_at | 0.755994 | 1.048122 | 0.857203 | 1.77187  | 1.628252 | 2.281666 | 1.886866 | 1.65581  |
| 267020_at | 1.800768 | 1.965282 | 1.764861 | 2.960458 | 2.201638 | 2.38576  | 2.360915 | 1.721058 |
| 26707_at  | 1.353753 | 0.920878 | 1.194942 | 0.865453 | 1.259365 | 0.995291 | 1.099356 | 0.986097 |
| 2670_at   | 2.28349  | 2.072569 | 2.641239 | 2.362113 | 1.433854 | 2.22407  | 1.557596 | 2.870836 |
| 26716_at  | 1.926896 | 2.46031  | 1.579929 | 1.856907 | 1.99009  | 1.861043 | 1.338277 | 1.815106 |
| 2671_at   | 4.88623  | 3.970617 | 3.87207  | 5.307923 | 3.547596 | 5.162539 | 4.529051 | 3.481335 |
| 2672_at   | 1.710196 | 1.829421 | 1.433725 | 2.256804 | 2.388408 | 1.547552 | 1.476351 | 1.954574 |
| 26735_at  | 2.719231 | 1.135043 | 1.757779 | 1.073014 | 0.752666 | 1.148421 | 0.977453 | 1.042536 |
| 26737_at  | 1.218234 | 1.778989 | 1.310406 | 1.058065 | 3.11174  | 1.97531  | 1.974794 | 2.152527 |
| 2673_at   | 6.964513 | 6.647141 | 6.891468 | 7.185446 | 7.534936 | 6.955446 | 7.40462  | 7.597895 |
| 26740_at  | 1.335456 | 1.361877 | 1.336299 | 1.492959 | 1.768978 | 0.977596 | 1.413009 | 1.568108 |
| 26747_at  | 3.403904 | 4.918977 | 3.985991 | 5.269558 | 4.224936 | 4.644042 | 4.35657  | 4.687396 |
| 2674_at   | 3.176134 | 3.513956 | 3.06002  | 4.189811 | 4.092706 | 3.541274 | 2.632161 | 3.011612 |
| 26750_at  | 5.010103 | 5.202302 | 5.281819 | 4.738686 | 5.577925 | 5.159023 | 5.15271  | 5.76323  |
| 26751_at  | 4.027979 | 4.125755 | 3.360971 | 4.180419 | 4.025158 | 4.21332  | 3.817672 | 4.242177 |
| 2675_at   | 1.310473 | 2.912222 | 1.599813 | 1.524863 | 1.780016 | 2.288353 | 2.787991 | 2.255926 |
| 26762_at  | 2.048214 | 2.573133 | 2.944836 | 2.057468 | 1.854748 | 2.452442 | 2.130267 | 2.822843 |
| 26765_at  | 3.00094  | 2.528216 | 0.624667 | 1.236302 | 0.684951 | 1.652412 | 0.941447 | 1.059415 |
| 26766_at  | 2.216884 | 2.261291 | 1.197109 | 1.529483 | 2.013393 | 1.695104 | 2.170271 | 1.450622 |
| 26767_at  | 3.366532 | 2.763517 | 1.856516 | 3.28264  | 3.095981 | 3.254488 | 2.598689 | 3.143369 |
| 26769_at  | 7.083112 | 6.038008 | 6.942925 | 4.088861 | 6.520351 | 6.224291 | 6.103593 | 6.260681 |
| 2676_at   | 1.859884 | 1.644178 | 1.468021 | 1.817104 | 1.612953 | 2.193073 | 1.698904 | 2.508262 |
| 26770_at  | 3.873983 | 1.335152 | 2.26538  | 0.952298 | 1.509378 | 2.661659 | 0.886452 | 1.90284  |
| 26771_at  | 5.5769   | 3.685138 | 4.268401 | 4.01146  | 3.747547 | 5.749234 | 2.095836 | 6.302984 |
| 26772_at  | 3.417274 | 1.3364   | 3.153747 | 1.417734 | 5.768429 | 1.663893 | 2.260765 | 1.774449 |
| 26773_at  | 4.141755 | 1.420068 | 1.425423 | 3.440227 | 1.549788 | 3.015067 | 1.484003 | 1.12773  |
| 26774_at  | 4.610749 | 4.597848 | 4.501909 | 3.884588 | 3.444517 | 3.955754 | 3.699284 | 4.278065 |
| 26775_at  | 2.621342 | 1.088418 | 0.800069 | 1.235214 | 1.386344 | 1.250903 | 2.717315 | 2.184145 |
| 26776_at  | 2.532982 | 1.098302 | 0.88881  | 3.268836 | 1.453959 | 1.377788 | 0.58798  | 2.210509 |
| 26777_at  | 5.029336 | 4.390983 | 2.621936 | 4.88648  | 3.898915 | 3.564429 | 5.326566 | 3.291685 |

|          |          |          |          |          |          |          |          |          |
|----------|----------|----------|----------|----------|----------|----------|----------|----------|
| 26778_at | 2.53941  | 2.594228 | 2.544585 | 4.040425 | 1.439759 | 3.566945 | 1.294422 | 4.409282 |
| 26779_at | 1.287127 | 1.275058 | 3.153391 | 0.774595 | 1.083794 | 1.060482 | 1.052146 | 1.2257   |
| 2677_at  | 6.352316 | 6.924471 | 7.060019 | 6.364033 | 6.929602 | 6.621705 | 6.925328 | 6.304024 |
| 26780_at | 4.947756 | 4.315087 | 2.535289 | 4.647712 | 1.286017 | 4.644712 | 3.87183  | 2.87679  |
| 26781_at | 2.165191 | 4.022467 | 1.627513 | 1.473187 | 4.298214 | 1.348629 | 2.009173 | 2.207347 |
| 26782_at | 2.03875  | 2.45036  | 2.025967 | 1.144387 | 4.901062 | 1.523315 | 1.410657 | 3.178115 |
| 26783_at | 3.174139 | 4.875782 | 3.918973 | 3.504814 | 1.831723 | 4.52289  | 4.388817 | 5.430147 |
| 26784_at | 2.662769 | 3.55701  | 3.450471 | 1.799117 | 1.99967  | 4.376251 | 3.494241 | 1.601357 |
| 26785_at | 5.099245 | 2.44564  | 4.071027 | 5.372258 | 1.997947 | 2.494581 | 0.948542 | 5.335282 |
| 26787_at | 1.622716 | 2.114708 | 1.574394 | 2.816796 | 0.910221 | 1.202244 | 3.610556 | 3.926847 |
| 26788_at | 1.136525 | 1.187224 | 1.199735 | 0.888927 | 1.408734 | 1.060197 | 0.915045 | 1.257032 |
| 26789_at | 1.459349 | 0.956919 | 1.225099 | 1.871137 | 1.412373 | 1.523366 | 1.682377 | 1.104388 |
| 26791_at | 1.786009 | 5.247857 | 2.154894 | 0.690047 | 1.304869 | 1.568363 | 1.355802 | 0.867903 |
| 26792_at | 4.590967 | 2.148759 | 4.546616 | 4.358109 | 3.450435 | 2.279223 | 2.759102 | 4.064085 |
| 26793_at | 1.682153 | 1.035496 | 1.052021 | 1.493221 | 2.054373 | 1.140992 | 1.489619 | 1.579784 |
| 26795_at | 1.076659 | 1.003111 | 1.074835 | 1.134378 | 1.573609 | 4.041047 | 1.007842 | 1.334316 |
| 26796_at | 3.940496 | 4.216939 | 5.168459 | 4.622129 | 4.563008 | 4.994732 | 4.12434  | 4.24685  |
| 26797_at | 4.119857 | 3.762672 | 4.546466 | 3.866717 | 4.130752 | 2.049029 | 2.139565 | 1.494851 |
| 26798_at | 3.008876 | 2.097269 | 2.728308 | 2.4032   | 2.512449 | 2.108029 | 2.181328 | 1.556687 |
| 26799_at | 5.348032 | 6.982091 | 5.568907 | 5.376602 | 3.028029 | 5.188423 | 5.057999 | 7.008996 |
| 267_at   | 7.495314 | 7.220358 | 7.774851 | 7.601096 | 7.47954  | 7.455135 | 8.088654 | 7.471638 |
| 26800_at | 2.593757 | 1.327156 | 2.59439  | 1.353057 | 3.190903 | 2.396882 | 1.408359 | 1.628066 |
| 26801_at | 8.05157  | 7.780347 | 7.813527 | 8.123309 | 8.218017 | 7.905298 | 6.705665 | 8.905526 |
| 26802_at | 4.193483 | 4.960942 | 5.814055 | 5.54635  | 6.669346 | 3.89208  | 2.549696 | 4.725026 |
| 26804_at | 3.282199 | 1.294742 | 1.153915 | 3.513401 | 1.965967 | 1.106656 | 1.760292 | 1.316885 |
| 26805_at | 1.071633 | 0.877108 | 1.878353 | 3.262519 | 0.936942 | 0.586475 | 1.09373  | 6.610616 |
| 26806_at | 1.796906 | 1.332966 | 1.756499 | 1.411045 | 1.585591 | 1.17842  | 1.067265 | 1.717731 |
| 26807_at | 3.350482 | 2.258061 | 3.677885 | 4.101044 | 2.593224 | 3.756083 | 2.57618  | 2.665032 |
| 26808_at | 3.046174 | 1.780787 | 1.286836 | 1.012408 | 1.117016 | 0.975443 | 1.556809 | 1.496228 |
| 26809_at | 1.848579 | 1.681393 | 1.340752 | 1.321284 | 1.411665 | 3.504059 | 3.196844 | 1.897965 |
| 26810_at | 4.051532 | 0.796984 | 0.777762 | 3.320259 | 1.39532  | 0.824223 | 1.268208 | 1.451264 |
| 26811_at | 1.94394  | 1.291092 | 2.430077 | 1.571368 | 2.026408 | 1.76497  | 1.752692 | 2.13029  |
| 26812_at | 2.139925 | 1.718251 | 2.667949 | 1.22041  | 1.716158 | 2.479519 | 2.522566 | 2.957571 |
| 26813_at | 2.666174 | 1.147084 | 1.357729 | 1.091205 | 1.908644 | 2.016312 | 0.910832 | 3.08592  |
| 26814_at | 1.358651 | 0.994414 | 2.408667 | 1.935488 | 1.413814 | 1.052454 | 0.598523 | 1.068142 |
| 26815_at | 1.694403 | 1.157604 | 1.229593 | 3.564663 | 5.663618 | 0.865878 | 0.799998 | 1.135584 |
| 26816_at | 1.896491 | 2.368045 | 2.276491 | 1.465551 | 0.922913 | 2.103417 | 1.829257 | 1.345827 |
| 26817_at | 3.065042 | 0.820093 | 1.665766 | 1.38257  | 1.710427 | 1.809134 | 1.656147 | 1.221094 |
| 26818_at | 4.383221 | 4.777352 | 4.374042 | 5.477427 | 3.599243 | 4.519579 | 3.044978 | 4.518802 |
| 26819_at | 4.557254 | 2.277932 | 0.804188 | 6.362526 | 1.304959 | 4.506348 | 5.08507  | 2.348076 |
| 2681_at  | 1.234289 | 0.711092 | 0.74044  | 1.562857 | 2.354146 | 1.629493 | 1.262181 | 1.995711 |
| 26820_at | 1.890418 | 1.915395 | 2.493926 | 2.396193 | 2.333965 | 2.574881 | 2.01612  | 3.299171 |
| 26821_at | 1.350787 | 1.206304 | 2.344406 | 1.303108 | 2.182137 | 1.357984 | 1.377165 | 1.82753  |
| 26822_at | 1.350277 | 1.592068 | 3.054873 | 2.659756 | 3.475016 | 2.368022 | 2.643067 | 2.158208 |
| 26824_at | 5.303248 | 5.239915 | 5.398491 | 4.965485 | 4.390835 | 3.898583 | 5.728611 | 5.144191 |
| 26828_at | 0.764098 | 1.895746 | 1.236133 | 1.446702 | 1.757077 | 2.893989 | 2.57862  | 1.751727 |
| 26829_at | 3.480076 | 4.332502 | 3.431392 | 4.140653 | 2.961097 | 3.301006 | 4.318899 | 3.289922 |
| 26832_at | 3.742749 | 3.456255 | 2.94954  | 4.07675  | 3.312266 | 4.243014 | 4.600935 | 3.341318 |
| 2683_at  | 7.248721 | 7.52462  | 7.33023  | 7.86669  | 7.833035 | 7.48569  | 7.832484 | 7.677711 |
| 2686_at  | 2.824702 | 3.74528  | 3.709681 | 3.922578 | 3.442754 | 4.561546 | 3.650082 | 3.001377 |
| 26872_at | 4.55558  | 1.409488 | 0.772055 | 1.936751 | 5.655202 | 3.350348 | 2.274337 | 2.814936 |

|          |          |          |          |          |          |          |          |          |
|----------|----------|----------|----------|----------|----------|----------|----------|----------|
| 26873_at | 1.660234 | 2.867395 | 1.934385 | 2.403174 | 2.306456 | 2.718059 | 1.850937 | 2.196193 |
| 2687_at  | 3.181918 | 3.054406 | 3.218289 | 3.831059 | 4.092419 | 3.876406 | 3.433398 | 3.648591 |
| 2688_at  | 3.271063 | 1.766085 | 2.434198 | 1.834821 | 2.12368  | 1.793953 | 2.904904 | 2.617514 |
| 2689_at  | 2.334883 | 1.919253 | 2.134971 | 2.150608 | 1.214319 | 1.66453  | 1.942231 | 1.191244 |
| 268_at   | 2.520119 | 2.700322 | 2.674284 | 3.574603 | 3.452443 | 3.240748 | 2.885643 | 2.742928 |
| 2690_at  | 3.89367  | 4.071839 | 3.922948 | 3.115375 | 3.742317 | 3.647696 | 2.739456 | 3.250206 |
| 2691_at  | 2.282365 | 1.976993 | 1.769836 | 2.023855 | 2.670883 | 1.663918 | 1.993013 | 2.766638 |
| 2692_at  | 2.114688 | 2.225199 | 2.34837  | 2.856581 | 3.099393 | 3.820932 | 2.949798 | 2.756792 |
| 2693_at  | 1.860355 | 1.907373 | 1.450552 | 1.536598 | 2.063054 | 1.270435 | 2.594205 | 1.567747 |
| 2694_at  | 2.074879 | 1.520301 | 1.072629 | 1.167548 | 1.031937 | 0.873649 | 1.877917 | 1.21948  |
| 26952_at | 2.032022 | 1.132361 | 2.769342 | 1.608274 | 1.28979  | 1.988295 | 1.965985 | 2.184404 |
| 26953_at | 5.221526 | 5.559881 | 5.648001 | 6.317103 | 6.088119 | 5.814188 | 5.188558 | 5.008013 |
| 26958_at | 5.431746 | 5.094528 | 5.093204 | 5.562106 | 4.491863 | 4.938485 | 5.809932 | 4.829236 |
| 26959_at | 4.825794 | 5.170818 | 5.303851 | 5.520095 | 5.604629 | 4.931228 | 5.007724 | 4.938887 |
| 2695_at  | 1.806803 | 2.032909 | 1.465703 | 1.943813 | 3.117546 | 2.809155 | 1.65479  | 2.682479 |
| 26960_at | 4.273634 | 5.06007  | 5.15538  | 5.555673 | 5.50102  | 4.817102 | 5.574752 | 4.940604 |
| 2696_at  | 1.888001 | 1.826785 | 2.19591  | 2.203395 | 2.394338 | 2.259513 | 2.309638 | 1.975378 |
| 26973_at | 4.814318 | 4.471075 | 2.578155 | 4.259208 | 3.70742  | 5.593181 | 5.769909 | 3.555783 |
| 26974_at | 1.797118 | 4.2059   | 3.014123 | 3.33613  | 4.184894 | 1.254355 | 2.853215 | 2.864167 |
| 2697_at  | 7.764195 | 7.99995  | 8.740793 | 8.144769 | 8.275261 | 8.080024 | 8.479629 | 7.8684   |
| 26984_at | 4.827607 | 4.644989 | 4.238804 | 5.107927 | 5.574846 | 4.887725 | 4.601742 | 5.072334 |
| 26985_at | 7.53625  | 7.613176 | 7.557734 | 7.637539 | 7.669949 | 7.137131 | 7.896864 | 7.450407 |
| 26993_at | 6.36138  | 5.959429 | 6.623864 | 6.177011 | 6.73669  | 5.866234 | 6.687265 | 6.543506 |
| 26994_at | 8.696211 | 8.067592 | 8.89728  | 8.297685 | 7.863496 | 8.446325 | 8.358651 | 8.113918 |
| 26995_at | 5.788093 | 3.599195 | 4.664942 | 5.679942 | 5.480762 | 4.562847 | 4.755508 | 3.713773 |
| 26996_at | 4.879284 | 4.22362  | 4.359007 | 4.654249 | 5.197149 | 3.886619 | 4.18645  | 4.13094  |
| 26998_at | 1.540571 | 1.48239  | 1.166958 | 1.522919 | 1.469179 | 1.807693 | 1.625375 | 0.789164 |
| 26999_at | 6.629306 | 6.762253 | 6.204512 | 5.000265 | 6.996371 | 5.96116  | 5.76673  | 6.565661 |
| 269_at   | 1.897248 | 2.093939 | 1.567491 | 1.717018 | 1.483587 | 1.887643 | 2.398778 | 1.998762 |
| 26_at    | 4.861795 | 4.478373 | 5.007522 | 3.75386  | 5.097437 | 4.50702  | 2.60469  | 4.73231  |
| 27000_at | 6.481788 | 6.316289 | 5.87924  | 5.9712   | 5.581054 | 6.736411 | 5.833429 | 5.830969 |
| 27004_at | 2.884632 | 2.679499 | 2.582435 | 1.638332 | 2.201453 | 2.428519 | 2.398391 | 2.786597 |
| 27005_at | 5.135181 | 4.551862 | 4.671099 | 3.938676 | 4.868287 | 5.131665 | 4.15969  | 5.275578 |
| 27006_at | 0.904656 | 1.690371 | 1.403731 | 1.936084 | 1.193828 | 2.346311 | 2.177759 | 2.129006 |
| 2700_at  | 4.159601 | 5.753488 | 5.0131   | 4.868982 | 4.57338  | 4.351542 | 5.592633 | 4.612589 |
| 27010_at | 5.450287 | 5.822337 | 5.074948 | 4.050372 | 4.42834  | 4.306778 | 4.383777 | 3.793273 |
| 27012_at | 1.607919 | 2.087477 | 1.846011 | 1.696737 | 2.113315 | 1.816557 | 1.664398 | 1.49335  |
| 27013_at | 4.641407 | 4.592317 | 5.075184 | 4.993921 | 3.667052 | 4.362812 | 5.607206 | 3.796951 |
| 27018_at | 4.253299 | 4.392606 | 4.157353 | 4.439775 | 4.205809 | 4.21203  | 4.851087 | 4.341624 |
| 27019_at | 1.517064 | 1.472799 | 1.925381 | 1.819197 | 2.337072 | 1.642673 | 2.294691 | 2.080699 |
| 2701_at  | 6.007633 | 4.865607 | 4.531692 | 4.914351 | 4.359874 | 3.822364 | 6.139403 | 4.551028 |
| 27020_at | 8.331    | 8.409542 | 8.523263 | 8.291533 | 8.461464 | 8.261422 | 8.506284 | 7.950505 |
| 27022_at | 1.764233 | 1.37464  | 1.577335 | 1.991361 | 2.995879 | 2.363514 | 1.93595  | 1.937479 |
| 27023_at | 0.681701 | 1.439018 | 1.553215 | 1.013061 | 1.620385 | 1.703415 | 1.878343 | 2.044115 |
| 2702_at  | 7.415654 | 7.182927 | 7.727241 | 7.863561 | 8.020053 | 7.531445 | 7.741518 | 6.988267 |
| 27030_at | 3.303716 | 3.61034  | 4.054875 | 3.825004 | 3.356541 | 3.501667 | 3.422402 | 4.645243 |
| 27032_at | 6.381675 | 6.724417 | 6.227365 | 6.166077 | 6.542342 | 6.118999 | 6.2857   | 6.897854 |
| 27033_at | 0.912757 | 1.719294 | 1.894331 | 0.858841 | 2.129239 | 2.252075 | 1.673901 | 1.731866 |
| 27034_at | 3.33323  | 3.106061 | 3.260166 | 3.275087 | 3.535882 | 2.849509 | 2.863295 | 3.673002 |
| 27035_at | 1.582217 | 1.589704 | 1.454653 | 1.468458 | 1.85854  | 1.341737 | 1.530328 | 2.645636 |
| 27036_at | 2.497826 | 1.86703  | 1.758975 | 2.764768 | 1.665312 | 3.433187 | 1.976253 | 2.153962 |



|          |          |          |          |          |          |          |          |          |
|----------|----------|----------|----------|----------|----------|----------|----------|----------|
| 27037_at | 3.866441 | 2.735549 | 2.929142 | 2.332926 | 2.213562 | 3.137577 | 3.347829 | 3.241156 |
| 27039_at | 1.529013 | 1.349161 | 1.512978 | 1.363205 | 1.663411 | 1.290555 | 1.732476 | 1.682482 |
| 2703_at  | 1.076553 | 1.376958 | 1.498485 | 0.904736 | 2.563592 | 1.48352  | 1.209287 | 0.967333 |
| 27040_at | 4.666947 | 3.50382  | 4.394197 | 4.290053 | 4.407103 | 4.377019 | 4.944528 | 4.827363 |
| 27042_at | 4.66393  | 4.355512 | 3.917999 | 5.102472 | 5.536437 | 4.44465  | 3.359166 | 4.535669 |
| 27043_at | 4.487763 | 4.296357 | 3.611489 | 4.437392 | 3.941472 | 4.510752 | 3.654026 | 2.795631 |
| 27044_at | 6.615016 | 7.068383 | 6.883013 | 7.006113 | 7.05983  | 6.988205 | 6.923495 | 7.167219 |
| 2705_at  | 4.725969 | 3.621726 | 4.120886 | 3.36267  | 4.384588 | 4.809943 | 1.777765 | 4.379977 |
| 27063_at | 2.395938 | 3.951785 | 1.441948 | 2.060833 | 2.403948 | 2.889427 | 1.431575 | 4.525353 |
| 27065_at | 4.246539 | 4.081579 | 3.311671 | 3.952443 | 3.926547 | 3.562311 | 5.065881 | 2.848685 |
| 27067_at | 6.003624 | 5.626209 | 6.589967 | 6.139909 | 5.935542 | 6.200201 | 6.228384 | 6.18709  |
| 27068_at | 6.87338  | 6.525533 | 5.72462  | 5.984199 | 6.147282 | 6.187313 | 5.82242  | 6.778299 |
| 27069_at | 7.879417 | 8.086288 | 7.809166 | 8.302075 | 8.723207 | 7.956244 | 8.129665 | 8.481194 |
| 2706_at  | 5.705827 | 4.317227 | 4.843814 | 4.60196  | 4.236824 | 5.570775 | 1.601341 | 5.537761 |
| 27071_at | 3.624911 | 1.725568 | 2.964688 | 1.716808 | 2.296146 | 1.669401 | 2.107482 | 3.270943 |
| 27072_at | 6.562414 | 7.025202 | 7.170522 | 7.375923 | 7.314736 | 7.340908 | 7.56427  | 7.210503 |
| 27074_at | 2.553198 | 2.206372 | 1.973761 | 2.646823 | 2.245758 | 1.842015 | 2.094947 | 3.522255 |
| 27075_at | 4.673612 | 6.828161 | 4.323173 | 5.771107 | 5.226024 | 4.595653 | 4.297669 | 3.27747  |
| 27076_at | 3.859731 | 3.938517 | 3.885017 | 3.495888 | 3.493331 | 3.615615 | 2.711932 | 2.725045 |
| 27077_at | 5.908114 | 5.431393 | 5.74256  | 5.098371 | 4.650247 | 5.803605 | 5.826944 | 5.271332 |
| 27079_at | 3.748955 | 4.369355 | 3.959832 | 4.820956 | 3.86398  | 4.199718 | 4.634906 | 3.723337 |
| 2707_at  | 1.798731 | 2.156047 | 1.633667 | 1.680472 | 2.274223 | 1.788871 | 2.396084 | 2.04112  |
| 27085_at | 2.600918 | 2.935056 | 2.675292 | 2.896186 | 2.507263 | 2.305491 | 2.572841 | 2.993996 |
| 27086_at | 4.25387  | 5.074951 | 4.370426 | 4.288596 | 4.346766 | 3.981327 | 4.295509 | 4.432217 |
| 27087_at | 1.923895 | 2.629443 | 2.62368  | 2.422757 | 2.507048 | 2.674113 | 2.840085 | 2.006094 |
| 27089_at | 8.597873 | 8.367336 | 8.114949 | 8.167063 | 8.435519 | 8.476821 | 7.828197 | 7.767214 |
| 27090_at | 5.501966 | 4.824126 | 5.416113 | 5.313123 | 4.855627 | 5.434161 | 6.053663 | 6.093082 |
| 27091_at | 2.385564 | 1.707222 | 2.137261 | 1.433964 | 2.055328 | 2.628336 | 1.596533 | 1.995726 |
| 27092_at | 1.529088 | 1.819444 | 2.676419 | 3.98478  | 1.973817 | 3.052684 | 2.623606 | 2.384941 |
| 27094_at | 2.263951 | 2.416783 | 2.874845 | 2.080256 | 2.430078 | 3.407342 | 3.603584 | 2.483162 |
| 27095_at | 7.354906 | 7.970857 | 7.580969 | 8.367824 | 7.416952 | 7.792557 | 7.343984 | 8.157613 |
| 27097_at | 4.585732 | 4.955323 | 4.758848 | 5.384712 | 4.934129 | 3.983306 | 4.414699 | 3.409813 |
| 27098_at | 2.416489 | 2.65613  | 1.818482 | 2.863116 | 2.931933 | 3.328241 | 2.511674 | 2.195422 |
| 27099_at | 2.165538 | 2.403817 | 1.264892 | 1.314702 | 1.707924 | 1.688676 | 2.806129 | 1.782328 |
| 2709_at  | 1.819731 | 2.260495 | 2.075426 | 2.094578 | 2.442422 | 2.364896 | 2.387336 | 2.018595 |
| 270_at   | 1.387364 | 1.689604 | 1.643758 | 1.60847  | 1.657785 | 1.163195 | 1.891354 | 1.747743 |
| 27101_at | 6.784979 | 7.224517 | 6.386504 | 6.702296 | 6.893109 | 7.114881 | 5.9313   | 6.231129 |
| 27102_at | 6.962253 | 6.898094 | 6.427186 | 6.634633 | 7.032659 | 6.57733  | 6.672943 | 7.141613 |
| 27106_at | 3.430344 | 4.139201 | 4.545051 | 4.597133 | 2.643763 | 4.14907  | 4.197341 | 3.379211 |
| 27107_at | 5.563241 | 5.187286 | 5.537173 | 5.498144 | 5.555681 | 4.921031 | 5.664613 | 5.454852 |
| 27109_at | 3.831717 | 3.195239 | 3.783131 | 4.080227 | 4.290842 | 4.011443 | 3.214203 | 4.742149 |
| 27112_at | 1.94218  | 2.26816  | 2.039353 | 2.396141 | 1.929344 | 2.694834 | 3.174743 | 2.671118 |
| 27113_at | 1.879036 | 3.216589 | 2.31122  | 1.806235 | 2.741525 | 2.147128 | 2.789489 | 1.878957 |
| 27115_at | 8.423175 | 7.548473 | 8.473528 | 8.528564 | 7.946807 | 8.543135 | 8.708308 | 7.960611 |
| 27120_at | 2.286571 | 2.402874 | 2.539101 | 2.56823  | 2.185675 | 1.855746 | 2.027559 | 2.450158 |
| 27121_at | 1.336743 | 1.085199 | 1.648562 | 1.953158 | 1.657928 | 1.427213 | 1.183815 | 2.353113 |
| 27122_at | 3.724202 | 3.612777 | 4.340709 | 5.056967 | 3.589851 | 5.148161 | 4.389446 | 4.12912  |
| 27123_at | 4.075565 | 2.405908 | 2.688429 | 1.821821 | 2.147463 | 2.681144 | 1.701356 | 2.454661 |
| 27124_at | 2.812828 | 2.074713 | 1.597533 | 2.499387 | 3.404159 | 2.986091 | 2.79003  | 1.436246 |
| 27125_at | 8.033584 | 8.034065 | 7.948029 | 7.745412 | 8.236471 | 8.217796 | 8.464193 | 7.690298 |
| 27127_at | 1.267152 | 0.864546 | 1.375995 | 0.895134 | 1.627289 | 1.895031 | 1.206139 | 1.553288 |

|          |          |          |          |          |          |          |          |          |
|----------|----------|----------|----------|----------|----------|----------|----------|----------|
| 27128_at | 2.486906 | 2.35828  | 3.62343  | 2.602897 | 3.077647 | 3.400762 | 3.146474 | 2.855498 |
| 27129_at | 3.166413 | 2.829244 | 4.013466 | 4.398232 | 3.923132 | 3.474153 | 4.504419 | 2.309987 |
| 2712_at  | 1.565923 | 1.309056 | 1.481342 | 1.409837 | 1.819083 | 1.015162 | 1.845042 | 2.01361  |
| 27130_at | 4.144171 | 4.726934 | 3.564946 | 4.432853 | 3.01837  | 5.161026 | 4.103715 | 4.374995 |
| 27131_at | 7.274375 | 7.099375 | 6.737337 | 7.374077 | 7.000548 | 7.132216 | 6.87212  | 7.183533 |
| 27132_at | 1.622827 | 1.927506 | 2.22473  | 2.235628 | 2.269009 | 1.898221 | 2.346449 | 2.082478 |
| 27133_at | 1.919927 | 1.262588 | 1.197242 | 1.237218 | 1.768155 | 1.415117 | 0.789654 | 1.600784 |
| 27134_at | 3.287312 | 3.776897 | 4.081998 | 3.026419 | 3.730729 | 2.808605 | 2.602387 | 2.872525 |
| 27136_at | 1.227707 | 1.430695 | 1.934055 | 1.401354 | 1.508242 | 1.185861 | 1.469292 | 1.707442 |
| 2713_at  | 1.777701 | 0.95647  | 3.417533 | 0.980974 | 2.372784 | 1.577847 | 1.404992 | 1.20885  |
| 27141_at | 5.406329 | 6.403583 | 5.735172 | 6.022874 | 6.01616  | 6.18344  | 5.903    | 5.832766 |
| 27143_at | 2.445572 | 3.226517 | 2.9645   | 2.729438 | 1.82432  | 2.942021 | 2.617101 | 2.595326 |
| 27145_at | 5.141007 | 4.679174 | 4.97389  | 4.937257 | 5.14385  | 5.431841 | 5.138404 | 5.71517  |
| 27146_at | 4.336613 | 4.96209  | 4.139905 | 4.924547 | 4.257647 | 4.704816 | 4.400117 | 3.944677 |
| 27147_at | 1.648385 | 1.79539  | 2.246959 | 1.393383 | 1.899877 | 2.061545 | 2.824174 | 2.074426 |
| 27148_at | 3.663997 | 4.084309 | 3.833719 | 3.508903 | 3.889034 | 4.205439 | 3.935614 | 3.288283 |
| 27151_at | 3.174827 | 3.389861 | 2.721019 | 2.840206 | 2.941888 | 3.944784 | 3.87537  | 3.492871 |
| 27152_at | 3.471976 | 4.118211 | 4.39901  | 2.93364  | 2.95984  | 3.785762 | 3.737374 | 2.679063 |
| 27153_at | 3.644419 | 3.117081 | 3.170784 | 4.088564 | 2.759226 | 3.579603 | 4.441303 | 4.143788 |
| 27154_at | 5.159632 | 5.07898  | 4.254976 | 5.244896 | 5.371312 | 4.919702 | 5.230804 | 4.648778 |
| 27156_at | 3.433698 | 1.892664 | 1.941543 | 1.895631 | 2.579045 | 3.012865 | 2.462558 | 2.062832 |
| 27158_at | 4.071541 | 3.709631 | 4.108613 | 4.053453 | 3.714044 | 3.667377 | 3.669057 | 4.244742 |
| 27159_at | 1.90796  | 0.909725 | 1.354126 | 1.136789 | 1.233712 | 2.30917  | 1.149558 | 1.307238 |
| 27160_at | 3.864151 | 2.02944  | 1.99692  | 2.29194  | 1.765743 | 2.939166 | 3.046319 | 2.255161 |
| 27161_at | 6.494129 | 7.115191 | 6.113816 | 6.458656 | 5.499568 | 5.6015   | 6.437108 | 6.230342 |
| 27163_at | 5.853696 | 5.363692 | 5.756191 | 6.045643 | 5.124109 | 5.898633 | 6.994427 | 5.728707 |
| 27164_at | 1.024897 | 1.286291 | 1.25158  | 1.563537 | 2.11202  | 1.573732 | 1.684908 | 1.374024 |
| 27165_at | 1.758723 | 2.630186 | 2.583208 | 3.200226 | 2.422488 | 1.898005 | 2.64679  | 2.444294 |
| 27166_at | 9.309133 | 8.740847 | 8.610125 | 9.125941 | 7.822545 | 8.645508 | 8.586392 | 8.059898 |
| 27173_at | 2.70246  | 2.984292 | 2.43221  | 3.09577  | 2.677633 | 2.599776 | 3.410329 | 2.440198 |
| 27175_at | 7.091109 | 7.130736 | 7.215143 | 6.874187 | 6.425065 | 7.277522 | 7.301723 | 6.168734 |
| 27177_at | 0.92277  | 1.580004 | 1.203477 | 1.44898  | 1.522645 | 1.917594 | 1.738706 | 1.722912 |
| 27178_at | 1.378481 | 0.88908  | 1.366823 | 1.136509 | 2.069849 | 1.531839 | 1.302385 | 1.080103 |
| 27179_at | 1.425839 | 2.472074 | 1.950961 | 1.511627 | 2.546556 | 1.982896 | 1.918545 | 2.060377 |
| 2717_at  | 4.80864  | 5.464603 | 5.70421  | 4.395506 | 5.292478 | 4.646159 | 5.277298 | 5.205414 |
| 27180_at | 4.147572 | 4.033682 | 3.060047 | 2.273338 | 2.532134 | 2.184012 | 1.769956 | 3.733166 |
| 27181_at | 1.768064 | 1.79659  | 1.680788 | 2.336991 | 1.703166 | 2.024073 | 3.201697 | 1.68712  |
| 27183_at | 6.039296 | 6.469435 | 6.415594 | 6.175669 | 5.172827 | 6.13172  | 5.715551 | 5.526554 |
| 27184_at | 2.151548 | 1.565455 | 2.412482 | 1.69701  | 2.265043 | 2.410211 | 2.329589 | 2.070655 |
| 27185_at | 2.199019 | 2.084749 | 2.018721 | 1.702201 | 1.255736 | 1.283425 | 1.530672 | 1.839449 |
| 27189_at | 1.378291 | 2.504301 | 2.502623 | 1.956586 | 1.594019 | 2.506545 | 1.989368 | 1.83856  |
| 27190_at | 3.642556 | 2.351805 | 2.542156 | 2.251242 | 1.852483 | 2.853999 | 0.904329 | 1.537534 |
| 27197_at | 2.853894 | 1.76588  | 1.128421 | 2.987991 | 1.322341 | 2.409933 | 1.210899 | 2.234657 |
| 27198_at | 1.929034 | 2.582924 | 2.584844 | 3.583353 | 2.58451  | 3.363692 | 2.726874 | 2.112455 |
| 27199_at | 1.982059 | 2.059643 | 1.513216 | 1.744631 | 2.66503  | 1.614744 | 1.856051 | 2.631088 |
| 2719_at  | 4.621773 | 3.600417 | 5.577123 | 5.422026 | 4.28711  | 6.564617 | 5.587238 | 5.217583 |
| 271_at   | 4.309684 | 3.842884 | 3.492068 | 3.958252 | 2.656636 | 3.912686 | 3.204667 | 4.07931  |
| 27201_at | 3.417358 | 2.968139 | 2.387673 | 2.35396  | 2.52237  | 2.776209 | 1.942225 | 3.260315 |
| 27202_at | 2.58715  | 2.409229 | 2.361184 | 2.07739  | 2.286123 | 2.13365  | 2.803807 | 2.286123 |
| 2720_at  | 6.222365 | 6.072485 | 6.492516 | 6.574205 | 6.467254 | 6.437979 | 6.976565 | 5.988891 |
| 27229_at | 4.107763 | 4.757304 | 4.377952 | 5.429871 | 5.012384 | 4.323666 | 4.540838 | 5.561021 |

|          |          |          |          |          |          |          |          |          |
|----------|----------|----------|----------|----------|----------|----------|----------|----------|
| 27230_at | 8.55923  | 8.249029 | 8.024028 | 8.066465 | 8.18581  | 7.636739 | 7.423478 | 8.412147 |
| 27231_at | 2.293908 | 1.89623  | 2.953425 | 2.099774 | 1.976595 | 2.216032 | 3.258548 | 1.607611 |
| 27232_at | 1.513787 | 1.247389 | 1.313447 | 1.114049 | 2.169636 | 1.559914 | 1.712259 | 2.638792 |
| 27233_at | 4.713985 | 5.287175 | 3.876224 | 5.760814 | 5.527125 | 5.555469 | 4.251685 | 5.935455 |
| 27235_at | 2.793444 | 3.96056  | 4.506585 | 3.850705 | 3.517647 | 3.07484  | 2.554466 | 3.298968 |
| 27236_at | 6.749129 | 5.823575 | 6.52087  | 6.901833 | 6.515384 | 6.272875 | 7.411839 | 6.998578 |
| 27237_at | 3.607814 | 3.152267 | 2.85652  | 2.257568 | 2.336211 | 3.324268 | 3.062005 | 3.3272   |
| 27238_at | 6.137216 | 5.869044 | 5.052629 | 6.529695 | 5.159099 | 5.643477 | 5.668428 | 4.985056 |
| 27239_at | 2.372453 | 2.227    | 2.010317 | 2.079843 | 2.823515 | 2.435933 | 2.350163 | 2.331136 |
| 27240_at | 2.069118 | 2.178436 | 1.987806 | 1.656987 | 1.970694 | 2.799443 | 2.760332 | 2.632791 |
| 27241_at | 5.575619 | 5.60576  | 5.890388 | 5.087466 | 5.399223 | 5.747928 | 5.73778  | 5.981794 |
| 27242_at | 7.450427 | 7.347621 | 7.277359 | 8.157775 | 8.281697 | 7.530584 | 8.111502 | 6.878706 |
| 27243_at | 8.001157 | 7.739184 | 7.650101 | 7.751548 | 7.852546 | 7.780959 | 7.553334 | 7.279269 |
| 27244_at | 5.488518 | 5.739157 | 6.111117 | 5.856822 | 5.964662 | 4.810528 | 5.120765 | 5.290339 |
| 27245_at | 4.802014 | 5.381293 | 4.683125 | 5.32727  | 4.562946 | 5.065574 | 4.353728 | 4.081572 |
| 27246_at | 7.053044 | 6.855325 | 6.589587 | 6.524498 | 6.114281 | 6.309637 | 6.61294  | 6.47434  |
| 27247_at | 6.736987 | 5.690807 | 6.189972 | 5.805856 | 5.886667 | 6.480934 | 5.675806 | 6.153932 |
| 27248_at | 7.509604 | 7.542681 | 7.792377 | 7.471289 | 7.320189 | 7.138469 | 7.993858 | 7.663335 |
| 27249_at | 7.538308 | 7.19908  | 6.666452 | 7.047395 | 6.685342 | 6.488269 | 6.43872  | 7.372942 |
| 27250_at | 6.686483 | 7.426567 | 7.468451 | 7.283984 | 8.015073 | 6.904077 | 7.196209 | 7.766094 |
| 27252_at | 5.332755 | 4.611582 | 5.406077 | 5.2706   | 4.930089 | 4.690704 | 4.82641  | 5.722101 |
| 27253_at | 5.28695  | 4.867776 | 4.769789 | 5.792509 | 5.875738 | 3.590876 | 5.723674 | 4.446305 |
| 27254_at | 6.319548 | 7.377872 | 5.877315 | 6.269829 | 6.07855  | 5.780044 | 6.525339 | 6.964921 |
| 27255_at | 1.418558 | 1.383219 | 1.391668 | 1.709309 | 1.417104 | 1.994602 | 1.574248 | 2.002089 |
| 27257_at | 5.913519 | 5.773372 | 5.887374 | 5.590736 | 5.993493 | 5.629822 | 5.664561 | 5.784336 |
| 27258_at | 5.043923 | 6.067367 | 4.781662 | 4.703788 | 4.060968 | 5.501254 | 5.086815 | 5.179382 |
| 27283_at | 5.668711 | 4.362586 | 4.623633 | 2.409712 | 6.184265 | 3.879962 | 3.475197 | 5.167228 |
| 27284_at | 1.001761 | 1.173184 | 1.257741 | 1.016022 | 1.036921 | 2.097745 | 1.472449 | 1.986578 |
| 27285_at | 1.962311 | 2.416023 | 1.700068 | 1.538045 | 1.586427 | 2.398431 | 1.954922 | 1.536481 |
| 27286_at | 4.308593 | 3.223945 | 4.624169 | 3.307638 | 3.100983 | 3.95608  | 2.926012 | 3.077012 |
| 27287_at | 1.132039 | 1.434561 | 1.690608 | 1.648551 | 1.524804 | 2.128723 | 1.520949 | 1.449558 |
| 27288_at | 1.383135 | 1.249552 | 0.906731 | 1.915306 | 0.798391 | 1.729709 | 1.62681  | 1.525024 |
| 27289_at | 3.019239 | 3.77981  | 1.927792 | 3.184459 | 1.806176 | 1.821124 | 1.816607 | 2.85229  |
| 27290_at | 3.288804 | 3.06114  | 3.782614 | 3.176037 | 4.097179 | 2.142876 | 3.958277 | 3.030888 |
| 27291_at | 4.421685 | 4.953241 | 4.299557 | 3.883885 | 4.767856 | 3.420307 | 4.135423 | 3.663871 |
| 27292_at | 5.548883 | 5.579892 | 4.801001 | 4.344    | 5.424499 | 5.235064 | 4.537006 | 6.244729 |
| 27293_at | 2.228855 | 2.046976 | 1.856072 | 2.063279 | 1.716468 | 1.69021  | 1.551272 | 1.572809 |
| 27294_at | 3.405359 | 2.366414 | 3.145546 | 2.335602 | 4.422844 | 3.296959 | 3.556772 | 2.813067 |
| 27295_at | 5.164308 | 3.535971 | 4.406854 | 4.079398 | 5.118559 | 4.998629 | 4.241138 | 4.087592 |
| 27296_at | 1.2219   | 2.246405 | 1.465006 | 2.057056 | 1.319076 | 1.530151 | 1.36253  | 2.299612 |
| 27297_at | 6.020548 | 6.452066 | 6.902054 | 6.196431 | 6.407958 | 5.865072 | 6.538837 | 6.795267 |
| 27299_at | 1.50818  | 1.538212 | 1.369704 | 1.502961 | 1.537474 | 1.575975 | 1.570201 | 1.557576 |
| 2729_at  | 5.269092 | 5.109836 | 4.898486 | 4.905888 | 5.228094 | 4.618929 | 4.918661 | 5.496551 |
| 272_at   | 3.563477 | 2.694679 | 3.253943 | 3.530758 | 2.602268 | 3.092409 | 3.452261 | 2.743374 |
| 27300_at | 5.023827 | 4.658189 | 4.740287 | 4.319276 | 4.781009 | 4.665018 | 3.852817 | 4.557672 |
| 27301_at | 3.38489  | 3.196403 | 3.393411 | 2.718069 | 3.320305 | 2.91348  | 2.867844 | 1.936419 |
| 27302_at | 1.345308 | 1.671557 | 1.861941 | 1.663006 | 2.036474 | 1.483319 | 1.137074 | 1.509426 |
| 27303_at | 6.993202 | 7.217706 | 7.152471 | 7.314344 | 7.127293 | 6.87106  | 7.046634 | 6.835191 |
| 27304_at | 4.027832 | 4.01243  | 3.554131 | 3.976209 | 4.405534 | 3.753244 | 3.235513 | 4.025388 |
| 27306_at | 1.900566 | 2.053496 | 1.355306 | 1.478912 | 5.326711 | 1.687819 | 1.575615 | 2.306569 |
| 27309_at | 5.633934 | 6.304826 | 6.110257 | 5.436018 | 6.752011 | 6.426528 | 6.049312 | 6.024099 |

|          |          |          |          |          |          |          |          |          |
|----------|----------|----------|----------|----------|----------|----------|----------|----------|
| 2730_at  | 4.893308 | 5.393341 | 5.521999 | 4.614981 | 4.48652  | 4.442025 | 5.321615 | 4.008209 |
| 27314_at | 5.20891  | 4.227603 | 4.931518 | 5.147517 | 6.550677 | 3.712597 | 4.57463  | 5.320493 |
| 27315_at | 4.268717 | 4.106066 | 4.711442 | 4.719325 | 4.719363 | 4.479619 | 4.818856 | 3.511044 |
| 27316_at | 4.93972  | 5.437644 | 5.37559  | 5.340972 | 5.502948 | 4.044236 | 5.131639 | 4.200848 |
| 27319_at | 1.604006 | 0.92877  | 1.328948 | 1.275195 | 2.146012 | 1.734911 | 1.544331 | 1.714167 |
| 2731_at  | 3.509417 | 2.498083 | 3.824964 | 2.868712 | 4.234258 | 2.581645 | 2.721432 | 2.522267 |
| 27324_at | 2.787441 | 2.692216 | 3.051554 | 3.229963 | 3.900386 | 2.422174 | 3.137084 | 3.494561 |
| 27327_at | 5.91558  | 6.170991 | 6.687682 | 6.688625 | 6.057813 | 6.503311 | 5.818537 | 6.186534 |
| 27328_at | 1.38902  | 0.99122  | 1.019124 | 1.249368 | 1.560127 | 1.461503 | 3.052258 | 2.092743 |
| 27329_at | 5.626951 | 2.877556 | 3.087606 | 1.180795 | 5.62496  | 4.403918 | 2.829479 | 5.679545 |
| 27330_at | 4.526791 | 5.761215 | 3.985082 | 4.410631 | 5.848754 | 5.336239 | 3.783333 | 6.899053 |
| 27332_at | 7.685258 | 7.571062 | 7.268031 | 7.658683 | 7.749866 | 7.119938 | 6.826539 | 7.794988 |
| 27333_at | 9.303447 | 9.346209 | 9.387318 | 8.905815 | 9.090468 | 9.107318 | 9.371329 | 8.962968 |
| 27334_at | 1.462561 | 1.543235 | 1.432764 | 1.214768 | 2.19986  | 1.279554 | 0.986678 | 1.547035 |
| 27335_at | 9.696235 | 9.117922 | 9.443435 | 9.539168 | 9.144183 | 9.348186 | 8.965395 | 8.769406 |
| 27336_at | 6.819353 | 7.328928 | 7.453439 | 7.576693 | 7.161664 | 7.025033 | 7.048417 | 7.473583 |
| 27338_at | 2.230368 | 1.41965  | 2.00745  | 1.345661 | 2.017087 | 3.309183 | 1.368296 | 1.492537 |
| 27339_at | 5.867076 | 6.858532 | 6.066151 | 6.171469 | 5.894716 | 6.472251 | 6.288684 | 6.425827 |
| 2733_at  | 5.010242 | 4.472111 | 5.160845 | 5.7959   | 4.629209 | 4.301045 | 4.38669  | 4.73769  |
| 27340_at | 4.466439 | 5.094528 | 4.864272 | 5.092256 | 5.322031 | 4.303974 | 5.208816 | 4.83699  |
| 27341_at | 4.753983 | 3.817593 | 4.550832 | 4.162493 | 5.018666 | 3.908802 | 5.866807 | 4.825361 |
| 27342_at | 5.262123 | 5.260672 | 4.852375 | 5.065473 | 4.812023 | 5.624177 | 4.398987 | 5.221257 |
| 27343_at | 3.34681  | 3.147371 | 2.327187 | 3.118904 | 3.196126 | 2.814391 | 3.162482 | 3.051627 |
| 27344_at | 7.876989 | 5.498234 | 6.530606 | 5.201668 | 8.047954 | 8.037082 | 5.645758 | 6.01195  |
| 27345_at | 4.420411 | 4.768398 | 3.691275 | 4.084822 | 4.928365 | 4.927108 | 4.509996 | 3.905101 |
| 27346_at | 5.087894 | 4.016137 | 5.076151 | 5.349049 | 5.871543 | 4.189298 | 5.996689 | 4.834856 |
| 27347_at | 5.724523 | 5.628958 | 4.955683 | 5.851612 | 5.892644 | 4.962689 | 4.89942  | 6.457455 |
| 27348_at | 5.870435 | 5.67293  | 5.974598 | 6.075649 | 5.154621 | 6.378892 | 6.34887  | 5.543029 |
| 27349_at | 5.40479  | 4.904513 | 4.46001  | 4.513239 | 4.706981 | 4.36945  | 4.498054 | 5.919843 |
| 2734_at  | 7.278383 | 7.719548 | 7.791886 | 7.961374 | 7.663723 | 7.894511 | 7.554155 | 7.824937 |
| 27350_at | 6.370032 | 5.935153 | 7.377823 | 7.065406 | 5.459486 | 6.582371 | 6.010953 | 5.604831 |
| 27351_at | 5.3642   | 5.360799 | 5.486025 | 5.352898 | 5.84278  | 5.192769 | 6.074837 | 5.39428  |
| 27352_at | 3.165458 | 3.380434 | 3.745938 | 2.380435 | 4.058735 | 3.79551  | 2.582794 | 3.630534 |
| 2735_at  | 2.216111 | 1.779597 | 1.846865 | 2.25875  | 1.772519 | 1.89563  | 1.588718 | 2.362826 |
| 2736_at  | 3.147098 | 3.304904 | 2.934463 | 3.31501  | 2.800965 | 3.348443 | 3.629636 | 3.200109 |
| 2737_at  | 4.580409 | 5.259119 | 5.164775 | 4.810382 | 3.992511 | 4.540825 | 4.239378 | 3.428937 |
| 2738_at  | 4.627061 | 3.670953 | 3.548119 | 4.03935  | 3.126086 | 2.951646 | 1.829931 | 2.597336 |
| 2739_at  | 7.817606 | 7.817813 | 8.055254 | 7.621123 | 7.653185 | 7.540725 | 8.003923 | 7.416492 |
| 273_at   | 2.605282 | 3.257382 | 3.789189 | 2.871572 | 2.707901 | 2.261257 | 2.385433 | 4.931465 |
| 2740_at  | 1.674769 | 1.461057 | 1.429085 | 2.051881 | 2.190888 | 1.234206 | 2.124501 | 1.487734 |
| 2741_at  | 1.455206 | 1.942985 | 1.439443 | 1.251775 | 1.445607 | 0.952286 | 1.56584  | 1.969508 |
| 27429_at | 7.053367 | 5.707352 | 5.442392 | 5.375029 | 5.239421 | 6.183988 | 4.674076 | 5.896952 |
| 2742_at  | 1.37748  | 1.475512 | 1.567215 | 1.362537 | 1.828864 | 1.861932 | 1.956451 | 1.251926 |
| 27430_at | 7.582016 | 7.682504 | 7.617666 | 7.68182  | 7.689686 | 7.215125 | 7.252536 | 7.951115 |
| 27433_at | 3.943668 | 3.87699  | 3.726525 | 4.035564 | 2.514095 | 3.416263 | 4.081411 | 3.195207 |
| 27434_at | 2.14756  | 2.53039  | 2.788315 | 3.557824 | 2.487838 | 2.86457  | 3.47997  | 3.052127 |
| 27436_at | 6.466408 | 6.808037 | 6.708964 | 7.165616 | 6.879414 | 6.507844 | 6.911047 | 7.398353 |
| 27437_at | 0.965603 | 0.997831 | 1.232543 | 2.919929 | 1.884356 | 1.219468 | 1.203557 | 1.833972 |
| 27439_at | 2.107408 | 2.975914 | 3.642015 | 3.415628 | 3.210313 | 3.46213  | 2.897554 | 3.557528 |
| 2743_at  | 1.686918 | 1.697944 | 2.64184  | 3.014656 | 3.02251  | 1.97043  | 1.569069 | 1.546664 |
| 27440_at | 2.882005 | 2.62141  | 2.732864 | 2.83949  | 3.045937 | 3.733741 | 2.359131 | 4.459921 |

|           |          |          |          |          |          |          |          |          |
|-----------|----------|----------|----------|----------|----------|----------|----------|----------|
| 27442_at  | 0.912123 | 1.181861 | 1.156671 | 1.602227 | 1.131781 | 1.796696 | 1.157977 | 0.877222 |
| 27443_at  | 2.776324 | 3.294685 | 3.69945  | 3.374544 | 3.03485  | 2.597256 | 2.780679 | 3.199156 |
| 27445_at  | 2.331483 | 2.258671 | 2.239579 | 2.318139 | 2.617589 | 1.711994 | 2.15413  | 2.584826 |
| 2744_at   | 7.786319 | 7.329614 | 7.538889 | 7.462448 | 7.711626 | 6.920979 | 6.887119 | 8.069925 |
| 2745_at   | 4.003385 | 2.697549 | 2.785982 | 3.166158 | 2.365555 | 4.095038 | 2.5007   | 2.386179 |
| 2747_at   | 1.391136 | 1.783655 | 1.81704  | 1.773151 | 3.039344 | 1.574904 | 2.618314 | 2.005993 |
| 274_at    | 5.314004 | 5.352005 | 5.692511 | 5.890634 | 5.16573  | 6.062406 | 5.567541 | 5.2692   |
| 2752_at   | 4.668482 | 5.601106 | 4.806113 | 5.243735 | 5.173872 | 5.400988 | 5.047658 | 5.759676 |
| 275_at    | 4.679841 | 4.552529 | 4.17495  | 3.959586 | 4.901099 | 4.803444 | 3.438238 | 4.888956 |
| 2760_at   | 6.950682 | 6.664441 | 7.348355 | 7.664309 | 5.401264 | 7.298325 | 7.407732 | 7.229238 |
| 2762_at   | 6.319473 | 6.120182 | 5.909266 | 5.833837 | 5.741322 | 6.171491 | 6.402958 | 6.13445  |
| 2764_at   | 8.263542 | 9.073299 | 8.721469 | 8.988088 | 9.058689 | 7.94026  | 8.944459 | 9.120505 |
| 2765_at   | 1.287221 | 1.181878 | 1.180111 | 1.008736 | 1.457092 | 1.034266 | 0.980021 | 0.945419 |
| 2766_at   | 3.37393  | 3.619648 | 2.959761 | 4.812733 | 3.104089 | 3.253595 | 3.948771 | 3.605797 |
| 2767_at   | 6.988061 | 6.80359  | 6.938522 | 6.843594 | 6.163229 | 6.73352  | 7.299258 | 5.974167 |
| 2768_at   | 2.415156 | 2.674906 | 3.40489  | 3.895334 | 2.456747 | 3.352868 | 3.746928 | 3.344213 |
| 2769_at   | 3.000901 | 2.103799 | 2.220807 | 1.756106 | 1.386279 | 1.691049 | 1.626108 | 1.520181 |
| 2770_at   | 5.930047 | 6.224776 | 5.908753 | 6.090044 | 6.81947  | 6.187718 | 6.080733 | 6.096489 |
| 2771_at   | 7.980261 | 7.282306 | 7.669966 | 7.880545 | 7.657867 | 7.840176 | 7.358024 | 6.965317 |
| 2773_at   | 7.015528 | 7.692286 | 7.326894 | 6.804009 | 7.288297 | 6.826653 | 7.414861 | 7.277833 |
| 2774_at   | 2.583369 | 3.961501 | 4.047545 | 2.269893 | 1.823479 | 3.387333 | 2.703121 | 2.01782  |
| 2775_at   | 5.928408 | 5.401142 | 5.913544 | 5.510332 | 5.427355 | 5.224057 | 5.403404 | 5.050491 |
| 2776_at   | 7.804612 | 8.112797 | 7.581474 | 8.569879 | 8.311085 | 7.456602 | 8.378091 | 8.374106 |
| 2778_at   | 8.967498 | 8.761122 | 8.583934 | 8.829326 | 9.140439 | 8.957192 | 8.846987 | 8.987204 |
| 2779_at   | 1.699442 | 2.926114 | 1.688839 | 1.619061 | 2.278868 | 2.861879 | 2.263726 | 1.946796 |
| 2780_at   | 2.318334 | 2.618089 | 2.361172 | 3.020629 | 3.244198 | 2.778961 | 2.851366 | 2.382127 |
| 2781_at   | 4.666862 | 4.482832 | 4.953012 | 4.170469 | 4.077158 | 3.943505 | 4.438478 | 4.48729  |
| 2782_at   | 10.37207 | 10.57729 | 10.68671 | 10.88271 | 10.59546 | 10.77529 | 10.45892 | 10.17189 |
| 2783_at   | 7.063918 | 5.822768 | 6.531791 | 6.352674 | 5.770991 | 6.876557 | 6.558589 | 5.699504 |
| 2784_at   | 1.898103 | 2.102769 | 1.626    | 1.913914 | 2.747487 | 2.066343 | 2.742252 | 2.411717 |
| 2785_at   | 2.882397 | 3.025512 | 2.415093 | 3.0654   | 2.475822 | 1.860051 | 2.63477  | 3.054972 |
| 2786_at   | 2.993077 | 3.028805 | 3.208199 | 2.885239 | 4.139749 | 3.044201 | 2.56913  | 2.547673 |
| 2787_at   | 4.443669 | 2.663541 | 4.538991 | 4.9216   | 4.408535 | 2.325318 | 3.650935 | 3.903119 |
| 2788_at   | 6.924998 | 7.281538 | 7.235548 | 6.632793 | 6.396193 | 6.809035 | 7.173979 | 6.651205 |
| 2791_at   | 9.268546 | 8.911085 | 8.417562 | 9.226052 | 8.733754 | 8.9873   | 8.822413 | 8.660249 |
| 2792_at   | 2.227335 | 1.01749  | 0.901066 | 0.689339 | 2.062757 | 1.386917 | 2.048784 | 1.794601 |
| 2793_at   | 3.526414 | 2.173483 | 1.843069 | 3.14761  | 2.917803 | 2.390042 | 2.496804 | 2.543529 |
| 2794_at   | 4.604646 | 4.757392 | 4.614723 | 4.460748 | 4.69887  | 4.556171 | 4.416824 | 4.630207 |
| 2796_at   | 2.539351 | 1.580488 | 2.871753 | 2.136795 | 2.0088   | 3.403877 | 1.850893 | 2.576409 |
| 2797_at   | 2.782044 | 2.989496 | 3.503035 | 3.265272 | 2.630211 | 3.181223 | 3.611776 | 3.048542 |
| 2798_at   | 3.055107 | 1.314381 | 1.047434 | 1.641819 | 1.931674 | 2.908957 | 1.661762 | 2.573287 |
| 2799_at   | 8.126255 | 7.907687 | 8.219969 | 8.282722 | 8.248167 | 7.903832 | 8.678353 | 7.882372 |
| 279_at    | 0.547352 | 1.506632 | 1.715778 | 1.876463 | 1.207782 | 1.756402 | 2.868282 | 1.495927 |
| 27_at     | 3.274144 | 4.57153  | 3.650783 | 3.869779 | 2.719651 | 3.988833 | 3.513666 | 2.791863 |
| 2800_at   | 5.175357 | 4.792229 | 4.008989 | 3.969859 | 4.707512 | 5.34012  | 5.212801 | 4.383264 |
| 2801_at   | 7.159357 | 6.446029 | 6.90695  | 7.216627 | 6.093821 | 6.805016 | 7.266704 | 6.54856  |
| 2802_at   | 5.488841 | 5.336496 | 5.334766 | 5.33165  | 5.153244 | 5.78334  | 5.315176 | 5.032661 |
| 2803_at   | 6.751363 | 6.958294 | 6.645282 | 6.489794 | 6.236979 | 6.335519 | 6.184928 | 7.235208 |
| 2804_at   | 7.048155 | 7.157265 | 7.914785 | 7.572528 | 7.860273 | 7.227434 | 7.361829 | 7.690601 |
| 2805_at   | 6.174648 | 6.544238 | 5.563174 | 5.451112 | 6.690937 | 6.313989 | 6.188317 | 6.593409 |
| 280636_at | 7.019577 | 6.796228 | 6.53912  | 6.403223 | 6.308571 | 7.121688 | 6.337086 | 6.14251  |

|           |          |          |          |          |          |          |          |          |
|-----------|----------|----------|----------|----------|----------|----------|----------|----------|
| 280655_at | 0.606289 | 2.323042 | 1.317496 | 1.978246 | 1.474475 | 1.386508 | 1.558051 | 1.096169 |
| 280658_at | 3.441427 | 1.361292 | 0.833476 | 1.916718 | 0.285542 | 2.71039  | 1.234533 | 2.541728 |
| 280659_at | 3.920677 | 2.866165 | 3.420396 | 3.160019 | 2.385989 | 3.585752 | 3.684603 | 3.116015 |
| 280660_at | 1.356981 | 1.092268 | 0.70733  | 0.728553 | 0.826282 | 0.794153 | 0.976441 | 1.233418 |
| 280664_at | 1.471342 | 1.536573 | 2.15544  | 1.47554  | 2.17365  | 1.631993 | 2.825767 | 2.78337  |
| 2806_at   | 6.092709 | 5.831555 | 6.778081 | 5.963167 | 5.847192 | 6.23943  | 6.247637 | 5.644846 |
| 2810_at   | 2.812034 | 2.772074 | 1.78184  | 2.654143 | 1.784452 | 2.931369 | 1.992552 | 3.063072 |
| 2811_at   | 1.743662 | 2.467007 | 3.474551 | 3.47924  | 2.624183 | 2.316425 | 3.486382 | 4.567797 |
| 2813_at   | 2.313579 | 2.490537 | 2.329337 | 2.406431 | 2.57642  | 2.003781 | 2.043754 | 2.984663 |
| 2814_at   | 2.337753 | 1.172528 | 1.970171 | 2.669638 | 2.351981 | 1.684843 | 1.964684 | 1.808067 |
| 2815_at   | 1.963422 | 1.694675 | 2.841765 | 2.403567 | 2.712185 | 1.662978 | 2.002734 | 2.700722 |
| 2817_at   | 4.45072  | 3.038908 | 5.1466   | 4.187347 | 4.342869 | 4.563816 | 4.211524 | 3.882817 |
| 2819_at   | 4.23067  | 3.686453 | 4.424493 | 4.16114  | 3.910973 | 3.385299 | 1.70832  | 5.335029 |
| 2820_at   | 5.223598 | 4.638111 | 4.561456 | 5.420762 | 4.516408 | 4.77086  | 4.955889 | 4.654131 |
| 2821_at   | 7.340264 | 7.270621 | 7.260315 | 7.446603 | 7.229491 | 7.416796 | 7.062744 | 6.821289 |
| 28227_at  | 2.647409 | 3.314438 | 2.725628 | 2.74672  | 3.121314 | 2.892743 | 3.011362 | 2.661515 |
| 2822_at   | 2.28578  | 2.713337 | 2.452738 | 3.248629 | 2.251735 | 2.29164  | 2.695431 | 2.739976 |
| 28231_at  | 3.106727 | 3.118674 | 2.20238  | 3.750572 | 3.382173 | 3.808321 | 2.660943 | 3.703557 |
| 28232_at  | 6.091262 | 5.888838 | 6.313071 | 6.278416 | 6.062752 | 6.120916 | 6.097613 | 4.904638 |
| 28234_at  | 1.225494 | 1.121523 | 1.305582 | 0.731137 | 0.605609 | 1.279643 | 1.779182 | 1.05015  |
| 2823_at   | 2.152406 | 2.764184 | 2.128054 | 2.088772 | 1.387348 | 1.329153 | 2.361455 | 2.304118 |
| 2824_at   | 4.753199 | 4.740156 | 4.829991 | 4.364802 | 5.322549 | 4.999369 | 5.209426 | 4.215196 |
| 282566_at | 2.718484 | 3.681599 | 1.411394 | 2.375841 | 3.278238 | 1.61934  | 2.565842 | 2.874459 |
| 2825_at   | 1.713555 | 1.641406 | 1.556698 | 2.155016 | 2.94054  | 2.368015 | 1.647172 | 1.8157   |
| 282616_at | 4.849214 | 4.164458 | 4.086747 | 4.170515 | 4.156582 | 4.482203 | 4.18248  | 4.158661 |
| 282617_at | 3.204054 | 3.343214 | 4.238121 | 3.375548 | 3.183646 | 3.50924  | 3.625938 | 2.88462  |
| 282618_at | 2.201473 | 1.324679 | 2.054512 | 1.474088 | 3.175065 | 1.654848 | 1.709096 | 1.138792 |
| 282679_at | 4.128474 | 2.915408 | 3.814503 | 2.877461 | 5.190116 | 3.697008 | 3.71921  | 3.763028 |
| 2826_at   | 2.271456 | 1.399993 | 2.746095 | 1.222037 | 1.59469  | 2.965059 | 2.238842 | 2.596186 |
| 282706_at | 2.110594 | 1.353994 | 1.295945 | 1.551529 | 1.069016 | 1.21997  | 2.087051 | 1.970141 |
| 282763_at | 1.928133 | 1.430684 | 1.334491 | 1.228731 | 0.841638 | 1.086904 | 0.922952 | 1.311758 |
| 282770_at | 1.098078 | 1.525923 | 1.489933 | 0.549877 | 1.401436 | 2.420335 | 1.210433 | 0.631387 |
| 282775_at | 0.601288 | 1.18281  | 0.872532 | 1.131386 | 1.58076  | 1.583916 | 1.004456 | 1.62884  |
| 2827_at   | 4.518088 | 2.549474 | 3.68124  | 5.370751 | 2.357627 | 2.944683 | 2.626605 | 2.140029 |
| 282808_at | 0.805158 | 1.665818 | 0.927516 | 0.854684 | 0.869688 | 1.513436 | 1.059866 | 1.363494 |
| 282809_at | 4.668518 | 3.534847 | 4.36068  | 4.265741 | 3.696724 | 3.592565 | 3.013563 | 4.566685 |
| 282890_at | 2.770804 | 2.327462 | 2.216497 | 3.378038 | 3.367318 | 2.709746 | 3.025644 | 3.364841 |
| 2828_at   | 6.052862 | 6.306344 | 6.316815 | 6.541921 | 5.493607 | 6.635571 | 6.741617 | 5.28469  |
| 282966_at | 1.981343 | 1.704789 | 1.898359 | 1.037398 | 1.874889 | 1.330279 | 3.025738 | 2.256546 |
| 282969_at | 7.067605 | 6.724469 | 6.14978  | 6.874465 | 6.591034 | 7.537988 | 7.086031 | 7.439592 |
| 282973_at | 1.258782 | 1.430085 | 1.512225 | 1.694315 | 1.465817 | 2.19534  | 1.602323 | 1.37715  |
| 282974_at | 4.276446 | 3.948497 | 3.37975  | 4.144067 | 2.868839 | 3.326314 | 2.760706 | 3.383909 |
| 282980_at | 2.773568 | 2.899656 | 2.987935 | 2.698399 | 2.509258 | 2.548318 | 2.644817 | 2.151692 |
| 282991_at | 5.936511 | 5.374914 | 5.72804  | 6.04835  | 5.579828 | 5.643975 | 6.557867 | 5.951698 |
| 282996_at | 1.78107  | 1.667257 | 1.459667 | 2.206831 | 1.878818 | 1.926459 | 1.908378 | 1.53135  |
| 282997_at | 1.673172 | 2.82463  | 1.820048 | 2.341152 | 3.654239 | 1.602041 | 1.463052 | 1.830034 |
| 28299_at  | 1.20626  | 0.752646 | 1.902228 | 1.034677 | 1.298769 | 0.961663 | 2.134366 | 2.219789 |
| 2829_at   | 2.326025 | 3.026786 | 3.765332 | 1.089484 | 2.926952 | 3.352055 | 3.924373 | 3.922777 |
| 283011_at | 3.175503 | 2.848254 | 3.610773 | 1.602391 | 2.203958 | 2.04389  | 1.982382 | 1.821844 |
| 283025_at | 0.932295 | 1.847829 | 2.468229 | 1.009139 | 1.262266 | 1.164913 | 2.555843 | 1.638741 |
| 283033_at | 1.902862 | 2.009559 | 1.882781 | 1.599584 | 3.181616 | 1.575211 | 2.09875  | 2.041436 |

283038\_at 2.493027 1.494395 2.21169 2.299183 1.701077 1.582863 2.104969 1.250141  
283045\_at 1.368394 1.429175 1.918018 1.683168 1.4017 1.854338 0.95757 1.068852  
283050\_at 2.516251 2.942011 2.181055 2.558156 2.290397 3.110661 2.190377 2.587486  
283078\_at 1.515186 1.508731 1.633491 1.310624 1.586867 1.525449 1.328191 1.224253  
283080\_at 1.018587 1.256727 1.647344 1.299351 1.714114 1.131336 1.825372 1.815158  
283089\_at 1.115235 1.243132 0.965196 1.126274 0.993723 1.164481 1.201744 3.537541  
283092\_at 2.192973 1.258591 0.930187 0.607685 0.878183 1.530471 2.553118 0.93132  
283093\_at 1.827223 1.219053 1.928875 1.193541 1.547048 2.099289 4.513593 0.971123  
2830\_at 3.10002 2.747065 2.549007 2.646231 3.440209 2.55106 2.948003 2.763124  
283102\_at 2.005629 1.830359 1.801664 1.553702 2.078228 1.392153 2.256555 2.016591  
283104\_at 4.557795 4.75019 3.469322 4.07955 4.111075 4.560705 4.286284 5.401446  
283106\_at 3.028005 4.162266 2.906294 4.422127 4.445327 2.95968 1.77488 3.625567  
283111\_at 1.086515 1.948855 1.157246 1.344667 1.783612 1.522517 1.791814 1.187271  
283116\_at 0.455763 1.344783 1.001314 1.879374 1.050834 0.889127 0.995586 1.412131  
283120\_at 8.103931 7.973804 7.665606 9.41053 8.904825 8.879042 8.44063 6.824406  
283129\_at 1.971742 1.564576 2.089273 1.718051 2.447338 1.863435 2.021321 1.759327  
283130\_at 3.248591 2.670745 3.546098 3.717932 3.512111 2.694175 2.871757 2.592357  
283131\_at 8.819523 9.285267 8.897551 9.598161 9.500174 8.587851 8.629867 9.189798  
283143\_at 2.862227 1.83537 2.208559 2.704183 1.986816 2.091987 2.53582 3.342072  
283149\_at 5.716023 6.114143 6.150477 6.083378 4.714789 5.722344 5.836896 4.440574  
283150\_at 2.00507 1.951566 1.526904 2.405354 2.581519 2.476665 2.891513 2.00507  
283152\_at 2.996903 3.584153 3.949453 3.133332 3.957191 3.429621 3.809175 4.157154  
283159\_at 1.768257 2.800158 2.529959 2.692476 2.221758 1.811474 3.275318 2.674618  
283160\_at 2.136744 2.097502 2.009425 1.495324 2.726988 1.600645 2.27534 2.002189  
283162\_at 0.811503 1.273142 1.327295 1.545382 1.922784 1.603322 2.654071 1.144671  
283165\_at 1.804097 2.675182 2.058865 2.758603 2.14236 2.693904 2.874333 2.718474  
28316\_at 2.203648 1.362556 1.708253 1.80596 2.123311 1.779199 1.971664 1.712776  
283171\_at 1.123912 1.496514 1.683587 1.276986 1.484725 1.030873 2.053678 1.474882  
283174\_at 1.529143 2.312707 2.338368 2.257434 1.363285 2.268638 1.419084 2.5217  
283177\_at 1.998072 3.13127 1.868942 1.570089 2.228606 1.600481 1.517667 2.803548  
283189\_at 1.763814 1.411447 1.572167 1.342897 1.741204 1.141226 1.649464 2.076491  
283194\_at 1.179711 1.476145 1.204633 1.15387 1.140913 0.942511 1.381454 1.577642  
283197\_at 1.709021 1.187926 1.185628 0.944838 1.23053 1.368266 1.401386 1.575198  
2831\_at 2.315292 1.505197 3.390769 2.358486 1.466522 1.55457 2.829066 1.706373  
283208\_at 1.662077 1.17964 1.841493 1.174142 1.920472 1.237245 1.056588 1.344036  
283209\_at 5.073383 4.723432 4.476612 4.645536 5.160585 4.244475 4.886067 4.649292  
283212\_at 2.79655 1.828796 1.949486 2.565739 2.048709 3.407154 2.475033 1.827319  
283214\_at 2.143057 1.221112 1.476474 1.662563 1.558052 1.933091 1.724401 1.589507  
283219\_at 4.87178 4.35854 4.475511 4.21837 4.42242 4.826685 4.154294 4.112583  
283229\_at 3.099918 2.147637 2.977382 2.122221 2.691389 2.182587 1.922077 2.340464  
283232\_at 4.75672 4.295505 4.939945 5.269365 4.810657 4.961181 3.535391 4.800439  
283234\_at 2.433381 2.105071 1.469239 2.266318 2.899949 2.520334 2.937497 1.311495  
283237\_at 6.280842 5.941241 6.170789 6.284072 5.681607 5.42499 6.161313 5.97328  
283238\_at 1.850118 1.919801 1.794437 2.14145 3.281117 2.041116 1.555883 1.200309  
283248\_at 3.040251 3.724614 3.570649 3.612165 3.051902 3.424128 4.002249 3.151683  
283254\_at 3.137802 4.636536 2.808549 2.879388 4.338843 3.139331 2.615871 3.312861  
283267\_at 5.225907 6.75957 6.852115 5.260199 5.845752 5.371203 6.893414 5.332523  
283284\_at 1.697163 1.375161 1.868136 1.851732 1.631662 1.995342 1.872655 2.160709  
283297\_at 1.700117 1.545823 2.067442 1.531164 1.529088 1.744574 1.602356 1.377043  
283298\_at 4.863878 5.988268 4.822586 4.802484 4.292415 5.692781 5.383839 5.344128  
283299\_at 1.781604 1.863532 2.753721 0.904612 1.121803 1.44942 1.690028 1.730426

2832\_at 1.67024 1.709317 1.986096 1.790638 2.551542 2.719302 2.411087 2.227546  
283303\_at 1.915888 1.996403 1.885477 1.910442 2.307949 2.412769 2.7564 2.046586  
283310\_at 2.618464 1.912793 1.369166 1.23066 3.382369 1.340201 1.445684 2.148279  
283314\_at 2.07733 1.554442 2.068988 2.146545 2.751987 2.266658 2.030325 2.165088  
283316\_at 1.661456 1.817584 1.71622 1.93179 2.432462 1.068855 1.556509 2.320078  
283332\_at 1.642439 1.340249 1.172821 1.807544 1.438761 1.373585 2.311958 1.785016  
283335\_at 6.197674 6.084527 5.752908 6.848391 4.969685 5.167337 5.640584 5.654328  
283337\_at 5.170631 5.546077 4.55674 5.360061 3.55681 5.719905 4.813179 6.323081  
283345\_at 4.994435 5.37048 4.446646 4.140731 4.118359 5.293195 4.519475 3.238533  
283349\_at 5.4375 5.408393 5.892521 6.343689 5.651052 5.935753 5.972364 5.960541  
283352\_at 2.02861 1.07827 0.999161 0.712387 1.360503 0.759877 0.992797 1.440791  
283358\_at 1.957658 2.533989 2.125726 2.392295 2.902365 2.529702 1.919923 2.491188  
283365\_at 1.158408 1.117609 0.935434 1.183747 1.410371 1.60096 1.839695 1.128146  
283373\_at 5.257805 5.130035 5.447849 5.634899 4.860407 5.301732 5.934086 3.83015  
283375\_at 5.209711 4.077554 3.632062 2.472453 4.975156 4.018181 2.455454 3.790499  
283377\_at 4.566508 4.181481 4.531494 4.529043 4.52937 4.038321 4.522049 4.701535  
283383\_at 4.121983 5.072554 5.652082 4.384672 4.380208 3.222192 4.582396 3.775077  
283385\_at 2.111087 2.27208 2.180428 2.073099 2.307471 2.045383 2.115408 1.793474  
283387\_at 1.464242 2.231348 1.325486 1.297457 2.397909 1.31721 1.355868 2.036708  
283392\_at 3.706289 2.711405 2.309168 2.199487 3.961231 3.178111 2.63857 3.764572  
2833\_at 2.205852 2.232793 1.102224 1.273985 2.300949 3.152935 2.000919 2.20868  
283403\_at 1.744103 2.559013 2.386398 2.043786 1.39927 2.632282 1.702138 2.917368  
283404\_at 1.421764 1.228707 1.951138 2.093806 2.047241 1.888707 1.755885 1.874539  
283416\_at 2.592431 1.529965 2.280224 1.981259 1.91255 2.05302 2.114278 1.839399  
283417\_at 3.392331 3.916417 2.124698 3.698783 2.962043 2.825294 3.642741 1.153313  
283420\_at 1.222237 1.141279 2.014602 1.263419 1.296483 2.307564 1.602825 2.243725  
283422\_at 3.880304 3.707986 3.096081 3.501759 3.701461 3.172309 2.289819 3.255001  
283431\_at 1.396123 2.574674 2.348562 3.208834 2.820569 2.157914 2.310655 3.794856  
283432\_at 1.910066 2.361423 2.323488 2.320691 2.830135 1.641441 2.278909 1.784856  
283440\_at 2.026708 2.594109 1.682506 1.215571 1.574946 1.255312 1.609165 1.14866  
283446\_at 1.317483 1.219908 1.012086 1.241972 1.385279 1.424718 1.473976 2.458753  
283450\_at 5.110104 5.477183 5.495509 5.525925 5.413164 5.829806 5.71092 5.002364  
283455\_at 1.755831 1.63778 1.943488 1.511993 1.223238 1.448295 1.755831 2.088329  
283459\_at 6.074451 6.85314 6.260305 5.653904 6.473489 5.743197 5.605834 4.738959  
283460\_at 3.311006 2.671667 3.014791 2.36688 3.426074 3.170329 2.254203 2.61065  
283461\_at 1.194296 1.172346 1.097133 1.19203 0.974078 1.798874 1.474145 1.345496  
283463\_at 1.689905 1.456118 1.37716 1.373919 1.5387 1.581009 1.554519 1.565425  
283464\_at 4.946443 5.54871 5.905671 5.799394 5.457658 4.989455 6.405279 6.08997  
283471\_at 0.878287 1.390843 1.50385 1.151221 1.077933 1.965449 1.067207 1.129701  
283480\_at 2.117884 1.729591 1.86535 2.073432 2.164363 1.779906 1.71233 2.042218  
283481\_at 5.808024 5.593906 4.911711 5.302673 4.576038 4.160339 3.987898 5.700979  
283483\_at 2.375068 2.086715 2.586469 2.072174 1.585278 2.574717 3.134065 1.067795  
283487\_at 1.282841 2.024917 1.851683 2.423316 2.200635 1.516913 1.823736 2.182792  
283489\_at 4.132898 4.605526 4.66743 4.424112 4.23522 4.662021 4.183808 4.804761  
283491\_at 1.255644 1.014507 0.996065 1.907821 2.000611 1.144569 2.093124 1.319944  
2834\_at 1.374926 2.245347 1.98042 2.180704 1.773936 1.654057 2.210747 2.05612  
283507\_at 1.910941 1.848575 0.732084 2.253401 0.111382 1.461072 1.216267 1.116145  
283514\_at 2.563317 2.175046 1.454188 1.530612 2.217914 1.599986 1.945839 1.747545  
283518\_at 2.93738 1.540667 1.799217 0.65924 4.223537 1.730869 1.655713 3.000415  
283521\_at 1.574915 2.452344 2.078985 2.246226 2.259914 2.372783 1.951479 2.702485  
283537\_at 6.406717 7.21091 6.617836 6.50815 6.975214 5.702176 6.562954 6.992042



283547\_at 1.667835 1.755832 1.858981 1.650525 2.071212 1.911309 1.915732 1.761195  
283551\_at 2.239026 2.682777 1.658296 1.965635 3.375199 2.022239 1.869863 2.868629  
283553\_at 1.536762 2.799497 1.655719 1.372333 1.721723 1.384729 2.328918 1.407873  
283554\_at 2.139502 2.047909 1.481961 1.34484 1.21375 1.808364 1.706725 2.381877  
283571\_at 2.556004 1.717753 2.474792 2.221645 1.738464 1.721189 3.07988 2.300574  
283575\_at 1.281827 1.991256 2.153904 3.226344 2.059812 2.305759 2.575955 1.833719  
283576\_at 1.213006 2.059043 1.719637 1.764983 2.02457 1.7262 2.061571 1.496038  
283578\_at 3.703402 3.943476 2.437036 4.884596 3.062567 3.569037 3.434304 3.851986  
283579\_at 1.524971 2.469698 2.193048 0.712777 1.166863 2.142128 1.381281 0.970311  
283585\_at 0.974292 1.092525 1.393125 1.103998 1.504886 1.032845 1.589392 1.379579  
283592\_at 1.793969 2.388038 1.943302 2.426015 2.158682 2.149449 1.500288 1.543405  
283596\_at 3.178783 3.767381 3.507562 3.182103 4.117731 3.37294 2.436037 3.211327  
283598\_at 1.320901 1.44872 2.007927 1.273288 1.369589 2.039631 2.25838 1.504097  
2835\_at 2.37389 1.860376 2.357775 1.878951 2.083876 1.692803 2.382887 2.116324  
283600\_at 3.016958 2.61953 3.340616 2.463353 2.719201 3.035993 2.721038 3.072504  
283601\_at 2.40626 1.210733 1.826534 0.951148 1.730427 1.67787 2.850243 1.867204  
283624\_at 4.13669 6.108427 4.099471 4.568579 2.711831 4.3849 5.04751 4.187909  
283629\_at 2.902681 2.918746 3.167689 2.656966 2.393358 3.084766 2.951806 2.682715  
283635\_at 6.461341 6.125158 6.294947 5.657862 5.387714 6.021819 6.194778 6.501446  
283638\_at 4.889686 4.831584 4.47237 5.032987 4.044609 5.240257 4.558191 4.30316  
283643\_at 2.345546 2.763852 2.329767 2.310167 2.349987 2.703451 3.256866 3.006986  
283651\_at 2.987344 1.688315 2.549959 2.973857 2.110889 1.753904 2.623364 2.538724  
283652\_at 3.696521 3.906937 3.7445 2.840767 3.269483 3.596339 3.72193 3.262059  
283659\_at 2.048754 2.942248 3.469138 2.212655 3.621885 2.863127 2.692353 2.567618  
283663\_at 1.308296 1.828549 1.992646 1.690078 1.904101 1.908425 2.154853 4.128601  
283673\_at 1.252736 1.668787 2.087838 1.585706 1.812197 1.694802 1.630151 1.835988  
283677\_at 1.153545 1.117944 1.55186 1.317952 1.651413 1.334925 1.887397 1.151391  
283682\_at 1.486189 0.958099 1.423489 1.464265 0.566784 1.708098 2.614443 1.635526  
283683\_at 4.685625 4.395897 4.181413 4.34092 5.424596 4.800719 1.761891 3.685712  
283685\_at 2.158976 2.258645 3.789229 2.408964 1.869467 1.879787 1.637335 1.519797  
283687\_at 3.223815 3.640436 2.269588 3.516611 3.367349 3.150506 3.497279 3.909521  
283688\_at 1.915153 1.617934 2.025006 1.878989 1.178404 1.640981 1.948331 1.629018  
283692\_at 1.004033 1.375151 1.174465 1.524336 1.323845 1.627976 1.660941 2.399113  
283693\_at 1.770624 2.512248 2.68682 1.870042 1.975741 1.887962 2.318512 3.624808  
283710\_at 1.659607 1.464504 1.645802 2.061454 0.93947 2.382563 1.074507 2.712933  
283726\_at 2.23078 0.933478 1.299853 1.262868 1.569119 1.589956 2.137112 2.658556  
283731\_at 1.745371 1.959764 1.75412 2.164852 1.889817 2.303461 2.366514 2.299387  
283738\_at 1.549028 1.4903 1.37177 1.316174 2.058427 1.538872 2.211914 2.347142  
283742\_at 6.07098 5.566176 5.581333 5.504434 4.835855 5.345154 4.779026 6.470031  
283748\_at 1.865 2.077328 1.702127 2.174468 1.84847 2.520799 2.130452 2.360563  
283755\_at 5.512178 6.397659 4.87219 6.042694 5.15268 4.860096 4.911923 6.477352  
283761\_at 2.216428 2.286352 2.929135 1.64551 2.458439 2.27828 2.93265 1.814044  
283777\_at 1.633259 1.125934 2.227595 1.365172 2.01792 1.951312 1.37921 1.527353  
28378\_at 2.117309 2.066775 1.101777 1.931387 1.691391 2.068002 1.955745 2.503229  
2837\_at 1.980315 2.25877 2.349226 2.290362 2.510073 0.580051 2.033774 2.686302  
283807\_at 1.717756 2.592105 1.706331 1.514063 2.951042 2.547016 1.715664 1.828062  
283847\_at 1.347077 1.122086 1.346831 1.175062 1.90036 0.882881 1.62019 1.780964  
283848\_at 2.500278 1.429048 1.303115 2.055662 1.674182 1.433502 1.878497 1.698619  
283849\_at 4.481722 3.371402 4.407007 4.426946 4.558483 3.349263 4.228412 4.12766  
283854\_at 1.453659 1.10892 0.885793 1.013667 1.368899 1.464113 0.929011 1.097539  
283856\_at 2.376528 2.380239 2.668666 1.605416 2.947273 1.528641 2.226826 1.845283

28385\_at 2.493475 1.512128 1.057934 1.978034 1.529527 0.909002 2.031249 1.456303  
283860\_at 2.474624 2.005424 2.340445 2.08625 2.243939 2.221107 2.302824 1.635097  
283867\_at 1.238751 1.331674 0.947006 1.080032 1.960066 1.097163 0.956373 1.562385  
283869\_at 4.547516 4.618836 4.385137 4.513737 3.746464 4.295041 4.481995 3.700873  
283870\_at 4.725048 4.287238 4.456811 4.598314 3.457342 4.211912 4.037604 4.016023  
283871\_at 6.415743 5.824455 6.027649 5.870526 4.003419 5.185048 5.927818 5.019681  
283875\_at 2.668944 2.11112 2.297121 1.923129 2.50088 1.771204 1.940123 2.153651  
283876\_at 3.763298 2.885121 3.592297 2.72382 2.518078 2.888432 3.835585 2.72382  
283887\_at 2.731656 2.077639 1.695794 2.232979 2.211571 1.945816 2.077612 2.203174  
283888\_at 2.560293 1.964621 2.432103 2.21663 2.416971 2.558531 2.345105 2.356521  
28388\_at 1.378139 1.198819 2.691037 2.791903 0.608708 0.696662 1.315491 3.893975  
283897\_at 3.529388 3.371651 3.222317 3.073792 3.341811 2.603603 2.852224 3.401409  
283899\_at 4.366013 4.690403 4.539222 4.843219 4.317605 5.175169 3.805958 3.760875  
2838\_at 1.262121 1.32989 1.25177 1.202455 1.600871 0.875584 1.306934 1.211368  
283902\_at 2.111118 2.985143 2.540738 1.925241 1.984773 3.010124 2.364344 2.367789  
283914\_at 1.683596 1.551111 1.161226 1.785824 1.836539 1.485732 1.35733 1.854122  
28391\_at 2.900819 1.340349 1.692674 2.223891 2.468341 1.405463 3.288603 1.933853  
283927\_at 4.359346 3.806677 3.218616 2.374517 4.81866 3.411867 3.390528 3.711799  
283932\_at 3.642031 3.703399 3.346539 3.702178 4.085446 3.245007 4.559593 4.841423  
283933\_at 1.254231 1.851667 1.913157 1.815512 1.12733 2.827188 1.379341 2.079512  
283948\_at 1.804392 2.717337 2.058671 2.382433 3.066624 2.811775 2.395665 2.094966  
28394\_at 4.79767 4.586434 4.823635 4.591596 5.211081 5.243919 6.412343 4.415918  
283951\_at 6.603271 5.879501 5.492615 6.055756 6.824063 5.597354 5.801478 5.82574  
283953\_at 1.467075 1.429538 1.9345 1.792591 1.740786 1.783796 2.812337 1.671964  
28395\_at 2.79338 2.262736 1.993228 7.011367 2.723329 2.872655 2.797352 2.859521  
283970\_at 3.204492 1.864296 1.877838 1.530256 2.805153 1.772173 1.724267 1.457631  
283971\_at 3.445525 2.186502 1.774149 1.526295 1.934419 2.050527 2.186502 2.414387  
283981\_at 1.613709 1.807943 1.266347 1.119986 2.957066 2.207972 1.09585 1.428889  
283982\_at 2.368098 1.10367 1.26999 0.973663 1.055152 1.067269 1.968012 1.281565  
283985\_at 1.66376 1.97421 3.012666 2.181701 2.625428 1.570772 3.493324 1.597651  
283987\_at 6.297616 6.346876 6.332106 6.673252 5.518413 6.57583 6.877759 5.437701  
283989\_at 4.087488 2.929602 2.948544 4.147759 2.536466 3.36389 4.051965 3.781621  
283991\_at 7.216663 7.476464 6.635617 7.263664 6.481133 7.350224 7.898719 6.55136  
283999\_at 2.16826 2.963277 2.222167 2.726393 2.853585 2.332893 2.415392 2.775598  
283\_at 7.421479 6.376477 6.895968 6.633306 4.195628 6.413118 3.380343 5.798486  
284001\_at 3.00264 2.721812 2.500494 4.18078 2.241774 2.644208 2.283423 2.75343  
284004\_at 3.208846 3.432263 3.419355 2.976813 3.310624 3.572903 2.997876 3.281943  
284009\_at 1.604684 1.457855 2.030929 2.107939 2.127951 1.452739 2.331603 1.783304  
28400\_at 1.608316 1.988635 1.592343 0.963586 1.656319 0.784673 1.612753 3.84878  
284013\_at 4.334258 3.579859 4.258188 2.999509 3.45046 4.838655 2.602681 2.756053  
284018\_at 2.853906 2.672992 2.271521 2.606224 2.531859 2.886761 2.360136 3.611461  
284021\_at 3.989796 2.07063 1.301164 2.551011 2.824907 4.593075 1.692351 2.150825  
284023\_at 2.989889 2.913779 3.785389 3.550799 3.807004 2.856553 3.283886 4.06148  
284029\_at 3.423662 2.446756 2.937955 2.779745 2.950433 2.941154 2.496446 2.476457  
284034\_at 1.768861 1.539468 2.013571 1.600705 1.694742 2.724968 2.396411 2.668264  
284047\_at 2.416618 2.638369 1.750391 1.973825 2.680287 3.439096 2.935233 2.644953  
284058\_at 6.014472 5.618105 6.318484 5.693943 5.76309 5.24681 5.903911 5.117402  
284067\_at 1.33556 1.5553 2.28754 1.305408 1.926572 2.546011 1.153135 1.735176  
284069\_at 2.266361 2.304433 1.688179 2.134777 2.222741 1.79728 1.829194 1.64916  
284071\_at 1.577374 1.858842 1.925635 1.583017 1.943497 1.575079 2.332117 1.39911  
284076\_at 2.318956 2.277052 2.100851 2.462859 1.899747 2.604102 1.714248 1.811438

284080\_at 4.387366 3.697131 4.13375 3.754467 3.451405 4.409766 4.840422 5.164081  
284083\_at 1.289364 0.992059 1.065482 1.390262 0.926744 0.992645 2.203051 1.17904  
284085\_at 2.018403 2.445591 2.733912 3.014904 2.789675 2.183679 2.641987 2.52228  
284086\_at 3.531631 2.80759 3.221124 2.880342 2.764457 3.23933 3.3475 3.652883  
284098\_at 2.730899 3.072056 3.765404 3.001513 3.887129 2.491952 3.622114 2.739549  
284099\_at 1.636778 1.229249 1.917448 1.040605 1.501835 1.441862 2.409566 1.436379  
28409\_at 0.954763 0.96151 2.187731 1.312042 1.077437 2.920856 3.286307 2.690655  
2840\_at 1.950072 2.487663 1.880455 1.773787 2.679253 2.047321 2.720465 1.711922  
284100\_at 1.267556 1.272493 0.697267 1.22658 0.872487 1.109221 0.809191 1.7414  
284106\_at 7.124969 6.578534 6.804224 6.862428 6.545269 6.299226 5.978532 5.781902  
28410\_at 1.60637 1.422758 1.805233 1.596023 1.848089 1.004536 5.483639 2.442544  
284110\_at 4.312772 3.443673 2.542116 3.165467 3.271502 3.622752 3.63702 3.442117  
284111\_at 2.713647 2.696332 2.169327 1.775003 2.068327 2.80544 2.516256 3.272807  
284114\_at 1.843311 1.464685 2.402804 1.753207 1.759495 2.338075 2.527676 1.600779  
284116\_at 2.564347 2.171629 2.16731 2.120715 2.106283 1.587012 1.961568 1.680944  
284119\_at 6.166103 6.29643 6.369 6.935511 6.421389 6.489641 7.249765 5.372156  
284123\_at 2.308049 2.181596 3.028283 2.528764 2.944934 2.467851 2.189273 3.191317  
284124\_at 1.5557 1.634312 1.56371 1.036822 1.497598 0.992612 1.409914 1.595703  
284129\_at 3.622468 3.514056 4.845852 4.049866 4.450133 4.738537 4.533476 3.013561  
284131\_at 2.536981 2.39803 3.173108 2.160758 2.414583 2.480929 1.673659 2.161914  
284161\_at 2.492215 2.338396 1.572679 1.426374 1.532623 1.850228 3.200078 3.131718  
284184\_at 8.547573 8.570258 8.506841 8.251084 8.61943 7.947169 8.254665 8.577972  
284185\_at 2.974009 3.001209 3.186645 2.560014 3.21481 1.908833 2.518248 3.192888  
284186\_at 2.36811 2.739133 2.985042 2.731167 2.813738 3.079615 2.166919 2.669482  
284191\_at 3.513686 3.52942 2.98881 4.023112 3.182398 3.398245 2.949337 3.583842  
2841\_at 3.251347 3.932553 2.352733 3.121358 2.81576 3.163868 3.240853 3.625851  
284207\_at 5.183146 5.115211 4.554627 4.715058 4.619213 4.862677 3.94123 3.002625  
284215\_at 1.740608 2.058877 1.823746 1.354238 1.724588 1.582934 1.884325 1.164656  
284217\_at 2.275884 2.698156 2.109407 2.049463 2.430397 1.94232 2.025932 2.18303  
284232\_at 1.487859 1.347491 1.038892 1.080739 1.475019 0.99939 1.779632 1.165922  
284233\_at 2.32729 0.67507 1.625099 1.077318 1.46262 1.631833 0.875356 1.466794  
28423\_at 1.913505 0.611062 1.572064 0.802718 0.848157 1.431687 0.940185 0.720254  
284240\_at 2.504765 1.448576 1.884242 2.542932 1.222794 2.341815 1.606424 1.716743  
284241\_at 2.445969 2.209582 2.061007 1.8714 2.118199 2.547265 2.146947 2.018839  
284252\_at 3.325614 2.778989 3.204419 2.441138 3.841996 3.212307 3.350513 2.445536  
284254\_at 1.205223 1.000685 1.228505 0.572151 2.067489 1.125667 0.798589 1.050946  
284257\_at 1.475417 1.427042 1.364763 2.051712 3.103689 1.479906 1.470903 2.234719  
284266\_at 2.509073 2.652789 1.932567 2.272345 2.438748 2.091065 2.557946 1.895932  
28426\_at 0.503551 0.913149 1.44155 0.666472 2.511129 1.369795 2.009898 0.738036  
284273\_at 6.111829 6.228774 6.157429 5.899784 5.547439 5.6726 6.2759 6.051437  
284274\_at 1.785029 1.190073 1.674204 1.316362 1.211944 1.492936 2.399381 1.666305  
284276\_at 1.846646 2.057276 2.300203 2.018221 1.792711 2.460352 2.509824 2.230393  
284293\_at 1.034587 1.554477 1.563888 1.238286 0.987025 0.957207 1.117593 1.626063  
284294\_at 0.753306 1.450336 1.83707 0.903933 0.964578 1.219631 1.144788 1.040772  
284297\_at 4.533099 3.829328 5.375095 4.729771 4.115914 5.166112 4.490293 3.940779  
28429\_at 1.527867 1.095606 1.158335 1.841555 2.530049 1.434476 1.718403 1.326369  
2842\_at 1.765356 1.963608 1.74012 1.332245 2.283938 2.298736 1.88419 2.743271  
284306\_at 3.314115 4.134201 2.653046 4.245034 2.544513 1.224994 2.852394 3.508796  
284307\_at 3.311546 3.635426 3.940428 3.929154 4.234299 3.910973 3.600924 4.406744  
284309\_at 5.400337 4.462335 4.497441 4.703576 5.82726 4.653405 4.800033 4.356711  
284312\_at 3.118821 2.493917 3.776609 3.125453 1.894358 3.125319 3.844734 3.066319

284323\_at 3.725079 4.732156 4.423046 4.854012 3.931007 4.228421 5.036363 4.786494  
284325\_at 3.214937 2.71357 2.176708 3.277963 2.959426 2.850633 3.272132 3.508529  
28432\_at 0.832346 1.20152 1.985278 1.002431 1.191432 0.78463 1.112204 0.87582  
284338\_at 1.931309 1.948646 2.39931 2.275461 2.028162 2.277008 2.286521 2.179569  
284339\_at 2.338715 2.344324 2.789509 3.218102 3.0695 2.551664 1.699939 2.264104  
284340\_at 1.941758 2.249486 2.122663 2.499852 1.879983 2.656024 1.766918 2.429811  
284344\_at 2.661895 2.979687 1.927673 1.761429 1.966907 2.041397 1.994697 2.203727  
284346\_at 2.492392 3.374535 3.375217 3.929101 3.470519 3.311982 2.892243 3.199119  
284348\_at 3.516625 3.51606 3.335821 3.242665 3.213506 3.308939 4.132311 3.668776  
284349\_at 4.058208 3.075932 3.970932 4.550802 2.15226 3.811646 4.760444 3.456293  
28434\_at 4.588384 1.933406 3.442981 3.88195 3.305292 2.584443 4.406406 1.147293  
284352\_at 4.553104 4.076941 4.824503 4.14158 3.614298 4.530188 4.939296 3.53163  
284353\_at 2.006774 2.495122 1.980466 2.153032 2.379667 1.694479 2.658428 3.211976  
284355\_at 1.739022 2.306524 2.693276 3.047874 2.93328 2.664102 2.347763 1.880399  
284358\_at 2.874751 2.394105 3.025378 2.394105 3.042797 2.818129 3.401423 2.171151  
284359\_at 2.457769 1.233664 1.84064 1.642159 2.333836 1.360805 1.632375 1.243139  
284361\_at 5.490196 5.406137 5.510059 5.896439 5.564501 5.305807 5.754089 4.641487  
284365\_at 4.365657 4.0827 3.809019 3.265605 3.591942 3.35875 3.141894 3.534341  
284366\_at 2.50719 1.88269 2.541811 1.765305 3.072694 1.47866 1.833186 3.373634  
284367\_at 1.13006 1.137819 3.365877 1.581465 1.125119 2.272796 1.825137 1.425318  
284369\_at 1.590676 1.76754 1.597533 1.738512 1.819065 1.249452 1.332038 1.704924  
284370\_at 2.865685 3.01111 4.725709 2.569789 4.832228 3.615913 3.480509 4.310981  
284371\_at 5.216652 5.622994 5.521885 6.365593 5.201123 5.299197 3.064418 3.461504  
284379\_at 1.333982 1.518839 1.843691 1.773876 2.178912 1.482603 1.758043 1.355814  
284382\_at 1.522816 2.200275 1.833461 1.991333 1.582683 1.373899 2.812012 2.08019  
284383\_at 1.728973 1.717424 1.50129 1.936627 2.244438 1.706184 1.563698 1.912438  
284385\_at 3.48942 3.818093 2.593137 4.40043 2.445673 5.152953 3.709487 3.52468  
284390\_at 1.748251 2.762923 1.797147 4.117166 3.511377 2.041062 3.079088 1.006605  
284391\_at 5.033599 4.902526 4.663253 4.735654 4.79335 4.278886 3.628889 5.23357  
284395\_at 1.429755 1.481664 1.608229 1.480207 1.994797 1.386892 1.673269 1.953615  
28439\_at 1.553203 1.162698 0.293363 1.756699 1.985515 1.294781 1.134295 1.532184  
2843\_at 2.25614 3.388013 2.420417 2.485027 2.928016 3.123647 3.906785 3.023669  
284402\_at 1.523448 1.74132 1.734358 1.797465 3.060699 2.147307 2.206752 1.95762  
284403\_at 2.470015 3.326016 3.020273 3.872346 3.363964 3.799809 3.561 2.996506  
284406\_at 3.034955 4.735754 3.932097 3.070802 3.644098 4.596227 3.704574 4.735926  
284408\_at 4.20459 3.686598 3.088325 4.290481 4.529917 3.223351 3.228461 3.985412  
284412\_at 2.193749 1.054996 1.5979 2.415758 1.861655 2.090377 0.661241 1.172539  
284415\_at 3.165568 2.501022 1.800136 3.277849 1.904398 1.51891 2.261294 1.727764  
284417\_at 2.05347 2.149851 1.724988 1.807504 2.316172 1.362721 1.461897 2.490663  
284418\_at 2.247608 2.997196 2.079354 2.536638 2.360343 2.359686 1.841394 2.083876  
284422\_at 8.13803 7.320416 7.936219 6.962117 8.857132 8.266668 5.897962 7.466578  
284424\_at 1.796429 1.99521 2.095034 1.549437 1.675147 1.740889 1.749379 2.150317  
284427\_at 2.02471 2.078338 1.44029 1.19358 1.782116 2.2205 2.080252 1.818387  
28442\_at 1.265811 1.173394 2.250578 2.454973 3.495029 1.363708 1.211435 1.7126  
284433\_at 1.317256 1.095708 2.351063 1.836606 1.888825 3.799783 3.774856 1.871346  
284434\_at 1.296909 1.836948 1.515705 1.792107 1.398802 1.918353 1.69163 1.698277  
284439\_at 4.308554 4.167886 4.493994 5.095637 4.071134 4.428693 4.543405 3.327453  
284440\_at 2.535801 3.624574 2.761355 3.259325 1.649131 3.124322 2.543191 2.738214  
284443\_at 4.332573 2.009279 3.372195 4.429421 4.39039 2.156654 2.759095 2.256855  
284451\_at 2.989708 3.078787 3.628251 2.303124 1.782591 2.862683 3.505685 1.8033  
284454\_at 2.629319 4.068785 2.173437 4.154457 2.461491 3.202531 3.386657 3.941107

|           |          |          |          |          |          |          |          |          |
|-----------|----------|----------|----------|----------|----------|----------|----------|----------|
| 284459_at | 4.03537  | 3.962346 | 3.267298 | 4.285319 | 4.873708 | 3.09393  | 3.533966 | 2.983064 |
| 28445_at  | 1.22146  | 1.18037  | 1.260009 | 0.704702 | 2.478781 | 1.341575 | 0.680571 | 0.903854 |
| 284467_at | 2.06407  | 1.823696 | 1.376236 | 1.224624 | 1.569274 | 0.826071 | 1.275911 | 1.070924 |
| 28447_at  | 3.471237 | 3.523808 | 4.789321 | 4.065157 | 3.980295 | 5.139182 | 3.452948 | 4.110736 |
| 284485_at | 4.811441 | 4.917417 | 3.652302 | 1.134884 | 2.327817 | 4.939743 | 4.154855 | 5.374243 |
| 284486_at | 2.868349 | 2.226143 | 1.818106 | 2.094181 | 1.60613  | 1.686366 | 2.236191 | 2.962344 |
| 28448_at  | 1.675606 | 3.016483 | 2.255837 | 3.454676 | 1.254178 | 3.095434 | 2.982563 | 2.694494 |
| 284498_at | 2.091032 | 2.209273 | 3.002585 | 2.18541  | 1.636826 | 2.744156 | 2.322704 | 1.981268 |
| 28449_at  | 2.18283  | 1.565189 | 2.126556 | 1.548064 | 2.609202 | 1.808681 | 1.708541 | 1.742401 |
| 2844_at   | 4.155229 | 3.373346 | 2.525105 | 3.658808 | 3.188737 | 3.513324 | 2.376138 | 1.863794 |
| 284521_at | 2.171425 | 1.567798 | 2.28084  | 1.565531 | 1.762509 | 1.620868 | 1.702072 | 1.898282 |
| 284525_at | 1.708035 | 1.567541 | 1.065723 | 1.230543 | 1.532968 | 1.027811 | 0.989002 | 1.238904 |
| 28452_at  | 1.33696  | 0.758529 | 0.73159  | 0.72941  | 2.759742 | 0.496285 | 0.689934 | 0.765279 |
| 284532_at | 1.291238 | 1.436895 | 1.457169 | 1.18211  | 1.653844 | 1.087093 | 1.173987 | 1.407112 |
| 284541_at | 1.522204 | 1.568378 | 4.608289 | 1.965571 | 2.263677 | 1.727674 | 1.822938 | 1.965571 |
| 284546_at | 1.535196 | 1.69755  | 1.518198 | 1.660506 | 1.265862 | 1.45156  | 1.935527 | 1.598211 |
| 284551_at | 1.78338  | 2.531283 | 1.865748 | 2.050717 | 1.887497 | 1.42095  | 1.728341 | 1.798317 |
| 28455_at  | 1.321319 | 0.732672 | 1.141819 | 0.841987 | 1.256985 | 0.936063 | 1.197599 | 1.278695 |
| 284561_at | 1.784291 | 1.714527 | 1.589739 | 1.420214 | 2.050506 | 1.276175 | 1.426223 | 1.630825 |
| 284565_at | 4.418224 | 5.747147 | 5.524203 | 6.411185 | 5.415651 | 5.570582 | 4.79281  | 5.614491 |
| 284573_at | 1.485519 | 1.648165 | 2.269399 | 1.77766  | 1.982183 | 1.910382 | 1.955422 | 1.370308 |
| 284576_at | 1.192887 | 1.357816 | 1.757544 | 1.672422 | 1.904734 | 1.375616 | 1.486124 | 1.334576 |
| 284577_at | 1.643907 | 1.665103 | 1.710391 | 1.635362 | 1.728841 | 1.557131 | 2.087052 | 1.496589 |
| 284578_at | 3.729718 | 2.625799 | 2.142942 | 1.64618  | 5.292447 | 2.069992 | 1.112103 | 2.521634 |
| 284581_at | 0.958398 | 1.002282 | 2.268641 | 1.873913 | 1.560117 | 1.186787 | 0.951173 | 2.93359  |
| 2845_at   | 2.288153 | 1.741141 | 1.73148  | 1.583705 | 1.850115 | 2.239763 | 1.722005 | 1.446292 |
| 284600_at | 2.622923 | 1.777926 | 2.891889 | 2.425678 | 2.158022 | 2.429934 | 1.478577 | 1.851543 |
| 284611_at | 3.91778  | 4.150856 | 3.613433 | 4.387243 | 5.657935 | 4.213011 | 2.082313 | 3.50854  |
| 284612_at | 3.107703 | 3.097054 | 4.341363 | 3.118708 | 3.324379 | 3.821765 | 3.695787 | 4.181731 |
| 284613_at | 3.52726  | 4.367399 | 4.752087 | 3.886676 | 2.65649  | 4.094594 | 5.035637 | 3.952057 |
| 284615_at | 2.70249  | 2.12018  | 2.510054 | 2.631501 | 2.723187 | 2.57617  | 2.291831 | 3.134999 |
| 284618_at | 3.599781 | 3.068335 | 2.573442 | 2.916873 | 3.063805 | 2.738288 | 3.040175 | 3.29991  |
| 284632_at | 1.047279 | 2.111782 | 2.078459 | 2.156025 | 2.426459 | 2.685906 | 2.08994  | 1.847075 |
| 284648_at | 1.458543 | 1.388263 | 2.100703 | 2.042122 | 2.314764 | 1.66252  | 1.310319 | 2.616865 |
| 284649_at | 1.306588 | 1.219158 | 1.747206 | 1.354862 | 2.035334 | 1.414926 | 1.670137 | 1.570355 |
| 28464_at  | 1.241873 | 2.008534 | 2.437873 | 0.707541 | 2.780383 | 1.633685 | 2.16564  | 1.793883 |
| 284654_at | 2.209875 | 2.708652 | 2.807546 | 2.268399 | 2.110821 | 3.017755 | 1.766303 | 3.206594 |
| 284656_at | 1.202363 | 1.436193 | 1.490355 | 1.390593 | 1.965496 | 1.212328 | 1.983427 | 1.643092 |
| 28465_at  | 2.063574 | 2.361541 | 2.280277 | 2.551499 | 2.912251 | 2.012053 | 2.193237 | 3.231801 |
| 284661_at | 1.156506 | 1.281609 | 1.00618  | 1.367618 | 1.386951 | 0.860391 | 1.637038 | 1.614666 |
| 28466_at  | 0.936295 | 1.157721 | 1.032104 | 1.023174 | 0.984829 | 1.532798 | 1.622389 | 2.25654  |
| 284677_at | 5.164314 | 4.47486  | 4.991491 | 5.354073 | 3.862686 | 5.115741 | 5.657175 | 6.658332 |
| 28467_at  | 2.796309 | 3.658183 | 2.890126 | 1.840471 | 4.155937 | 2.638234 | 2.404111 | 3.461828 |
| 284680_at | 2.979464 | 3.294501 | 2.813428 | 1.924379 | 2.909075 | 4.01853  | 3.075302 | 2.728752 |
| 284688_at | 1.255796 | 1.656242 | 1.400084 | 1.52503  | 1.865759 | 1.168151 | 1.218362 | 1.34196  |
| 28468_at  | 0.856845 | 1.228411 | 1.653566 | 1.288976 | 2.109278 | 0.79894  | 3.30893  | 2.209467 |
| 284695_at | 5.710299 | 5.634564 | 5.525202 | 6.169181 | 5.32016  | 5.475944 | 5.554125 | 6.247451 |
| 284697_at | 2.151865 | 1.387555 | 2.154513 | 3.690835 | 1.00721  | 1.711824 | 2.157953 | 1.793033 |
| 2846_at   | 1.416861 | 1.403682 | 1.384554 | 1.478038 | 1.805327 | 1.457467 | 1.161631 | 1.973349 |
| 284702_at | 4.106273 | 3.273195 | 4.529487 | 3.658467 | 4.891104 | 3.568759 | 4.025839 | 3.971133 |
| 284716_at | 1.603751 | 1.241095 | 1.59112  | 1.344261 | 1.416889 | 1.682159 | 1.208459 | 1.927796 |

284723\_at 2.194582 2.230662 1.838079 1.841956 2.565262 2.565131 2.483027 2.760128  
284729\_at 3.448672 2.220594 4.004333 2.647365 2.247767 4.556465 4.041574 3.222633  
284739\_at 1.932694 2.541279 2.56271 3.154704 1.821268 2.145475 2.318787 2.522851  
28473\_at 1.313424 1.362287 1.980663 1.074794 1.175095 2.941048 2.862671 0.930316  
284749\_at 3.320489 1.57133 1.666177 0.880495 0.85293 1.512619 1.946846 1.064185  
28474\_at 2.464403 3.430102 1.490436 4.455663 2.837351 3.205495 4.08724 2.816821  
284751\_at 2.543605 2.54772 2.201598 1.911285 2.964848 2.818991 3.799824 2.893008  
284756\_at 2.98853 2.971162 3.792752 3.60914 3.126215 3.340364 3.14572 3.126368  
284757\_at 2.449027 1.307737 1.014646 1.352763 1.605028 1.336532 1.039727 1.50102  
284759\_at 1.720882 1.965833 1.916699 2.046651 2.849764 2.489013 2.978196 1.453185  
28475\_at 1.272404 2.047851 2.107155 0.828393 3.03576 1.661822 2.59434 2.643952  
284788\_at 0.832637 0.845633 0.806045 0.869809 1.089278 0.991443 0.932418 1.383274  
284798\_at 1.150623 1.452275 1.685997 1.422641 2.09077 1.569228 1.80253 2.056423  
28479\_at 2.552984 3.283338 1.318675 2.456497 2.128695 2.283017 2.590229 2.014971  
2847\_at 2.688475 2.404109 2.9868 1.974968 2.874786 2.42548 2.091527 3.058568  
284800\_at 1.039942 1.722468 4.171146 2.658034 2.31304 2.998962 3.455795 4.013012  
284801\_at 1.340059 1.445442 1.629558 1.015968 1.686417 2.003605 2.258196 2.161537  
284805\_at 1.045652 1.26197 1.819351 1.384277 1.832114 1.691632 2.21253 1.177566  
28481\_at 2.533614 4.530092 2.707291 3.233561 3.135027 1.664519 2.956138 1.79251  
284825\_at 6.152708 4.154592 4.395956 4.794721 6.376036 4.100398 4.26815 5.213336  
284827\_at 0.983764 1.020825 1.501686 0.951515 0.818636 0.851699 1.105322 1.840809  
284835\_at 0.844903 0.536642 1.150608 1.148615 1.669757 1.653118 1.187983 0.626518  
284837\_at 1.930141 2.015243 1.982648 1.794853 2.763589 1.946508 1.979515 2.626628  
28483\_at 4.666721 4.763823 5.09298 4.46328 4.422447 3.914002 4.641436 4.452986  
284865\_at 2.406021 1.775894 2.521526 1.619382 2.37861 2.168668 1.981481 3.013644  
284889\_at 2.86936 2.091084 2.435954 3.439143 2.104614 2.739275 2.711102 1.944179  
284898\_at 2.043283 1.488648 1.430188 1.381679 2.207502 1.422142 1.915806 1.465687  
2848\_at 1.569526 2.10633 1.767651 2.679081 2.379257 2.160786 1.364919 1.393038  
284900\_at 3.284202 3.928252 3.75272 2.806573 3.040391 2.850822 3.417098 4.171553  
284904\_at 2.316624 2.340481 2.635975 2.316624 1.842793 3.171924 2.316624 2.533145  
284930\_at 1.590203 1.691396 1.77867 1.741044 1.436286 1.665806 1.417292 1.620613  
284933\_at 2.249589 3.270654 3.224471 2.137798 2.577951 2.746339 2.849817 2.48265  
284942\_at 5.497443 4.989792 5.013329 4.875359 4.912632 5.323341 5.495091 4.952573  
284948\_at 2.558772 2.512321 3.351924 2.360217 2.95814 2.014648 2.617157 2.215545  
284950\_at 1.364521 2.103467 1.559818 1.925615 1.955936 1.450698 2.262967 1.838806  
284992\_at 1.74301 1.389976 1.649542 1.470388 1.828545 1.739302 1.306759 1.791249  
284996\_at 3.954024 4.558541 3.35014 4.340395 3.94344 4.461369 2.77774 4.372253  
284998\_at 0.833859 0.945679 0.935471 0.839582 1.216678 1.700199 1.445393 0.886707  
2849\_at 1.674268 2.250195 1.361365 1.650187 1.568054 2.581294 2.434382 1.987553  
284\_at 5.322689 5.223031 5.021569 5.159107 5.833132 3.88355 5.61138 4.5138  
285000\_at 1.016068 1.189759 1.614504 1.349914 1.975693 1.222015 1.292333 2.078957  
28500\_at 1.964069 1.000418 1.04443 0.529785 1.685259 0.941589 2.487971 1.09108  
285016\_at 3.05208 4.922276 3.440989 3.938049 3.526842 4.739971 3.211684 3.991764  
285025\_at 2.516083 1.444404 1.658023 1.817568 1.722233 1.909191 1.932881 1.535122  
28502\_at 3.761798 4.55267 5.120059 5.6499 4.741396 3.9411 5.355408 2.473287  
285033\_at 2.772451 4.851041 3.168079 3.26955 2.534525 4.263279 3.178957 3.587502  
28503\_at 3.018109 3.944975 4.66436 3.722564 2.92012 2.606835 2.728679 4.494412  
285043\_at 1.921175 2.171435 2.510237 1.879588 3.676098 2.490884 2.118769 1.664491  
285045\_at 1.085384 1.222534 1.083933 1.127762 1.12076 0.818278 0.686447 0.970723  
28504\_at 0.711494 1.072896 0.882611 1.001517 0.880695 1.538225 0.93889 1.364135  
285051\_at 2.163732 2.506251 2.662943 2.643852 2.509821 1.880917 2.092926 1.696397

285074\_at 3.522087 4.47622 3.747846 3.562492 5.484608 3.089397 3.35544 4.413369  
285084\_at 1.627813 1.604893 1.397669 1.570405 1.743685 1.300806 1.131519 1.607177  
285093\_at 3.590108 5.260667 4.507731 4.315465 3.643551 4.923339 4.541521 5.593037  
285095\_at 1.691897 1.35285 3.314134 1.428702 1.570625 2.026203 1.623928 1.033781  
285097\_at 0.99412 1.280007 1.141554 1.905883 1.198944 1.438998 1.230456 1.007651  
2850\_at 4.342307 4.565879 5.271543 3.35022 4.112823 4.429286 5.516457 4.505867  
285103\_at 2.609895 4.230079 2.569089 3.934366 3.243684 2.014863 2.076975 2.035795  
28511\_at 4.95376 3.559102 4.40281 3.603671 3.909349 4.024666 3.568387 2.820705  
285126\_at 1.145239 1.244544 1.282482 1.315886 1.352813 1.726878 1.338457 1.696695  
28512\_at 3.529962 4.648305 4.89948 4.411736 2.527221 4.141193 5.087569 5.5604  
28513\_at 1.684641 0.782267 1.052386 1.124002 2.106872 0.723594 2.025599 1.412442  
285141\_at 1.639082 1.619972 3.249124 1.686745 1.533841 1.480982 2.077823 1.903669  
285148\_at 5.374766 4.748872 4.734736 4.946474 5.080036 5.379392 4.882849 4.541185  
28514\_at 3.458838 3.236002 2.653323 3.291526 2.636415 2.281477 3.569202 2.565419  
285150\_at 1.274531 2.09236 1.700125 0.998046 1.806059 1.537846 1.415985 1.771622  
285154\_at 0.975292 1.09039 1.381889 0.876381 1.152834 1.328335 0.5975 1.61881  
28516\_at 1.615089 0.480362 1.071301 0.93464 0.88147 0.908799 1.152756 0.818512  
285172\_at 4.882579 5.368725 5.522828 5.864998 5.90038 5.932389 5.510726 6.049865  
285175\_at 1.777551 1.42405 1.796074 1.856321 1.509914 1.992991 2.560291 1.773965  
28517\_at 2.238644 1.725718 1.595652 2.306478 1.985542 1.568181 2.590289 1.98109  
285180\_at 3.509236 1.518845 1.201356 1.581797 1.416869 1.536139 1.084507 1.456622  
285189\_at 3.269363 3.215208 4.029194 2.43719 4.603301 4.401259 2.760726 2.878894  
28518\_at 2.515817 1.404224 1.319075 1.06045 1.75819 2.725584 1.592279 1.646739  
285190\_at 1.976446 2.097014 2.835815 1.837941 1.847609 1.650742 1.246802 2.437519  
285191\_at 1.759246 2.146391 1.351782 1.298471 1.006376 1.790294 1.950826 2.457312  
285193\_at 4.173498 3.923822 4.089774 4.002571 3.091605 3.784289 3.889482 4.06608  
285194\_at 1.107376 1.389691 1.241321 1.078512 1.188674 1.514512 2.523702 1.583435  
285195\_at 4.605626 5.538632 5.079963 5.312038 5.434911 5.042973 4.880503 5.529575  
28519\_at 2.645402 0.551712 0.920933 0.591688 1.014821 1.087273 0.746745 1.573378  
285203\_at 5.742276 5.855255 6.02567 5.215823 5.871511 5.764277 6.30238 5.483283  
285205\_at 2.187802 2.332972 2.478396 1.731771 2.447108 1.392444 2.166853 1.892276  
28520\_at 2.202172 1.603194 1.655794 4.400071 2.744672 2.070546 2.278816 2.351273  
28521\_at 5.319617 1.270768 5.466224 1.432157 0.748249 3.860346 2.419369 1.567699  
285220\_at 1.665208 2.193467 1.963146 1.854582 1.976363 1.912308 2.101842 2.118309  
285224\_at 2.754946 2.357352 2.274997 1.70073 2.141225 1.845782 2.132174 2.397387  
28522\_at 4.264113 2.529452 2.701071 4.814578 3.752843 5.257563 3.248983 2.681366  
285231\_at 2.070088 1.324496 1.741961 1.335907 1.736505 1.55669 1.381275 1.876879  
285237\_at 6.406036 6.19753 7.126942 6.118993 6.20007 6.166483 6.191215 6.571461  
285242\_at 1.448558 0.856855 0.904517 1.748919 1.174526 1.152234 1.223291 1.192968  
285266\_at 3.363863 2.281958 4.435586 2.62348 3.35427 2.729332 4.02272 2.557228  
285267\_at 2.595764 2.822308 3.505466 3.133555 3.544536 3.315369 3.660869 3.640033  
285268\_at 5.48394 5.609925 5.495385 6.027798 4.94264 4.358407 5.362516 5.126129  
28526\_at 3.97122 2.948572 3.560571 2.747704 3.177237 4.655287 3.799697 4.410506  
285282\_at 6.545678 6.106515 6.75557 6.744145 6.211156 6.131995 6.675095 6.853409  
285286\_at 1.252237 1.438101 1.376241 1.300563 1.54812 1.479438 1.570282 1.348516  
2852\_at 5.910264 5.545651 5.349609 5.164326 4.649082 5.841038 5.852299 4.56259  
285311\_at 1.544829 1.35005 1.656062 1.617249 2.990968 1.510502 2.27948 1.7768  
285313\_at 3.052676 2.069783 2.456988 2.139279 3.402942 2.350858 2.393478 2.465933  
285315\_at 3.368981 3.069169 3.635656 3.164999 3.562781 3.395852 3.522979 2.368579  
285326\_at 1.000646 1.186075 1.367759 1.298577 1.710876 0.571101 0.956222 1.085423  
285331\_at 4.494236 4.07299 4.340767 4.316298 4.471777 4.316298 4.212635 4.311532

285335\_at 1.583684 0.788351 1.295156 1.167206 1.816334 1.110922 1.317812 0.9406  
285343\_at 6.249566 6.093065 6.360087 5.71737 5.132966 6.266904 6.332718 6.271835  
285346\_at 3.031739 3.847195 2.120777 4.13684 4.087004 3.509639 3.276353 4.980194  
285349\_at 4.320142 4.962042 4.459564 4.978552 5.720346 4.122905 4.820072 5.266584  
285352\_at 1.584117 2.1671 1.917036 1.637301 1.95545 2.050571 1.274012 1.923657  
285362\_at 6.151316 5.839542 6.373552 5.598271 6.033176 6.1816 6.507252 5.777159  
285367\_at 5.5813 4.53722 4.857599 4.420345 4.511684 5.032819 3.953913 4.426403  
285368\_at 5.136547 3.75762 4.732986 4.928706 3.566724 3.74279 3.608876 3.964438  
285370\_at 2.053437 2.19066 1.791503 2.129506 1.73839 2.291039 2.072037 2.516147  
285375\_at 1.466499 2.173044 2.242882 2.212366 3.190936 1.550791 2.08892 2.026999  
285381\_at 7.397038 7.019811 7.276495 7.332431 7.196798 7.035993 7.53788 6.70914  
285382\_at 6.278124 6.207262 6.424246 7.01448 6.975012 6.327895 6.868654 5.764148  
285386\_at 1.787603 1.819718 2.507356 1.859766 1.998161 2.024198 2.207662 1.923887  
285389\_at 1.762479 1.875848 1.396455 1.74959 1.678183 1.502848 1.502848 1.825194  
2853\_at 3.576431 2.492698 1.930898 2.745544 2.259679 2.951358 1.573864 1.596486  
285401\_at 0.791592 2.662571 2.091957 0.621925 1.349169 0.714217 1.803081 0.906388  
285407\_at 3.276326 3.045414 4.194737 3.831741 4.424658 4.307221 4.380273 2.842778  
285419\_at 0.779938 0.695704 1.342441 1.072924 2.966128 1.485607 0.769863 2.035213  
285423\_at 1.147412 1.231675 1.154743 1.155466 1.123991 1.253232 2.342036 1.405204  
285429\_at 1.215247 0.889706 1.31765 1.067851 1.943447 2.423171 1.26812 1.16641  
285440\_at 6.074859 6.837289 6.561495 6.609121 7.314785 6.680624 6.912033 7.342509  
285441\_at 3.23134 1.486544 3.119263 2.121638 1.95563 1.478282 2.592284 1.864994  
285456\_at 2.078907 1.336673 1.793928 1.645041 2.002831 1.349216 1.462611 1.717934  
285463\_at 3.063472 3.849729 3.144489 3.448342 3.537755 3.087971 3.914328 3.257589  
285464\_at 5.648482 6.940857 6.251135 6.257924 6.680945 5.650422 5.441617 4.608433  
285484\_at 1.930043 1.677432 1.613589 1.753383 1.642465 1.590557 1.937225 2.241792  
285489\_at 3.169076 3.116474 3.217632 2.954518 2.384089 2.597585 3.010245 2.792072  
285492\_at 1.17895 1.409215 1.577724 1.380317 1.515035 1.479933 2.029755 2.217682  
285498\_at 2.548252 2.357732 2.728195 3.533241 3.195451 2.424527 2.548252 2.608158  
2854\_at 2.000411 1.657173 2.338466 1.708994 2.555754 1.220622 1.852723 2.76837  
285501\_at 1.061505 1.139302 0.715622 0.789898 1.031856 1.120197 1.747561 0.961571  
285512\_at 2.337502 3.106366 2.9326 2.319263 2.924428 3.158476 2.713742 3.641707  
285513\_at 3.272667 3.031584 2.338376 3.721851 3.848128 3.860004 3.584496 3.276626  
285521\_at 4.249358 4.114035 5.600714 5.233094 4.349467 4.202225 4.349467 4.849175  
285525\_at 1.755436 1.965247 1.744311 2.065563 2.287033 1.623392 1.760465 2.189131  
285527\_at 5.767462 6.128514 6.231681 6.180083 5.997671 6.045583 6.133321 6.438368  
285533\_at 1.94173 1.724018 1.38802 1.645295 2.005816 1.129793 2.045163 1.989835  
285540\_at 3.904991 4.056148 3.142293 3.257048 3.650207 2.581926 4.331448 3.361847  
285547\_at 1.907373 2.212918 2.217191 1.989994 1.754519 2.460109 2.203605 2.434665  
285548\_at 2.609815 1.722562 1.771907 1.510565 2.038003 1.6289 1.343299 1.591373  
285550\_at 6.353258 6.117557 6.327926 5.970132 6.36476 5.963536 5.720583 5.751323  
285555\_at 2.434868 1.504057 1.923466 1.814236 2.118519 2.068832 2.169124 2.417356  
285556\_at 1.094706 1.851295 2.321259 1.954357 1.615588 1.064369 1.366765 1.881918  
285577\_at 1.838127 2.102523 1.753001 1.982221 1.962681 3.184119 2.288601 2.383259  
28557\_at 1.267115 1.375367 1.161168 1.382895 2.169653 1.190358 0.974148 1.510042  
285588\_at 1.917467 1.07851 1.246058 1.135731 1.033367 0.906607 0.682189 0.952515  
28558\_at 2.180697 1.372038 2.082476 2.288029 2.387235 4.246228 1.401569 1.473222  
285590\_at 3.190639 3.575832 3.461139 2.722502 3.110047 2.950028 2.701753 2.882577  
285593\_at 1.132342 1.196144 1.424468 1.5413 2.027426 1.062208 2.158894 1.428482  
285598\_at 2.335483 1.907431 2.634931 2.308805 1.286268 1.299009 1.825003 1.445907  
28559\_at 1.184314 1.104003 0.923118 2.080848 1.402281 1.112967 2.133134 1.05942



285600\_at 4.499768 3.666218 3.632111 3.548555 4.086726 3.452043 3.758339 4.447402  
285601\_at 3.389664 2.668429 1.048516 2.070117 1.965551 0.752854 1.513895 4.231361  
285605\_at 5.622046 4.201808 4.514846 4.926995 5.173634 4.062398 3.872196 4.564173  
28560\_at 1.705988 2.539491 1.663616 1.789554 1.77542 2.340484 1.581932 1.824669  
285613\_at 2.926938 2.828189 2.628066 2.956476 2.585701 3.203638 2.631739 2.70145  
285622\_at 1.230866 0.765067 1.247639 1.17369 1.643826 0.63312 0.946754 1.315692  
285626\_at 1.666663 1.399509 1.886348 1.406648 1.701656 1.359608 1.961462 1.468359  
285627\_at 1.321383 1.065641 1.360883 1.208951 1.482051 1.432065 1.214806 1.370039  
285629\_at 1.313297 2.156387 1.851671 1.365444 2.479833 1.377049 2.211701 1.761061  
28562\_at 1.015233 1.183974 1.012509 0.923011 1.081406 1.639523 0.962461 1.493459  
285636\_at 5.570546 6.3169 5.608714 5.457159 5.315475 6.153652 5.470819 5.809604  
285638\_at 1.634716 1.980902 1.75774 2.314447 2.475535 1.647275 2.099781 2.244607  
28563\_at 1.937293 1.181705 1.650869 1.726765 3.148107 1.869144 1.46019 1.606957  
285641\_at 1.509602 1.100352 1.674024 1.485225 1.112366 1.336315 1.179356 1.612896  
285643\_at 2.509504 4.589559 4.32851 4.110205 4.588177 4.369794 4.009832 3.522887  
285659\_at 1.20759 1.748112 1.764671 1.239839 1.358365 1.686782 1.475503 1.117899  
285668\_at 1.211515 1.118938 1.045608 1.681153 1.122843 1.135143 1.234339 1.191997  
285671\_at 4.687341 5.082079 5.169937 4.837285 4.538866 4.383877 4.553458 4.987339  
285672\_at 5.592129 5.828752 5.735262 6.193354 5.28246 6.275159 5.467426 5.167131  
285676\_at 2.234871 1.79461 3.016142 1.962327 1.976194 2.886553 2.04501 1.971295  
285679\_at 1.340963 1.189448 1.670769 1.244459 1.365153 0.893425 0.981876 1.770902  
28567\_at 1.978621 2.149098 3.195068 2.702908 3.088147 1.455442 3.464457 2.174962  
28568\_at 2.16076 2.090003 3.324512 2.342924 1.768905 1.142797 1.699779 3.197495  
285692\_at 1.765562 1.305874 1.165606 0.854041 1.713516 2.293681 2.398393 1.869524  
285696\_at 1.509555 1.341631 1.409322 1.856167 2.081058 1.738865 2.035145 1.775546  
2856\_at 2.302148 0.97855 1.128521 1.145419 1.436071 1.4362 2.006964 1.603584  
285704\_at 3.524312 3.862806 4.244806 3.936575 4.150825 4.035998 3.695021 4.320792  
285708\_at 1.475071 1.157718 0.808791 1.044356 1.163486 1.164843 1.056478 1.153721  
285735\_at 0.966744 1.238867 1.345754 1.036603 1.251976 1.365373 1.454506 1.300482  
285740\_at 1.685637 1.015919 1.524364 1.178848 1.664302 1.166358 1.449267 2.045417  
285753\_at 4.700901 4.653948 4.172999 4.566052 4.368311 3.382541 4.107826 5.188972  
285755\_at 3.580811 3.015179 2.907439 3.539074 2.860275 3.372485 2.397701 3.243074  
285758\_at 1.474031 1.430949 1.936565 0.875894 1.685072 0.881368 2.189842 0.937525  
285759\_at 1.515907 1.244816 1.008085 1.111034 2.153594 1.175668 1.729522 2.492935  
285761\_at 4.996899 3.163322 3.719823 4.356553 5.074602 4.244544 3.318253 4.814033  
285762\_at 1.016133 1.058803 0.992451 1.415401 2.441468 1.09872 0.815602 0.747482  
285768\_at 1.65922 0.792193 1.557756 1.48255 2.735713 1.780695 0.737632 1.354905  
285780\_at 1.674789 1.494055 1.765324 1.935632 2.751105 1.457724 2.457525 2.376721  
285782\_at 1.110688 0.878188 1.292618 0.99411 1.583404 2.284274 1.216471 1.785718  
285796\_at 2.075977 1.29019 1.702455 1.391485 2.373043 1.57793 1.615925 2.381183  
2857\_at 2.800253 2.531094 2.873171 4.192048 1.972241 1.782726 2.249527 1.811738  
285800\_at 2.641193 1.924586 2.070639 2.221784 2.342991 2.419607 3.44129 2.160665  
285819\_at 2.174242 2.14302 1.635706 1.983987 1.488453 1.213757 1.362771 2.28893  
28581\_at 1.393972 1.651087 3.365458 2.218415 0.824617 1.605876 1.599819 1.754464  
28582\_at 3.332338 3.980057 3.457704 4.50261 4.419996 3.910919 3.883719 5.082961  
285830\_at 4.571062 3.902851 3.907366 4.224135 3.666266 4.587501 3.750496 5.303368  
285834\_at 2.266566 2.542751 2.451997 1.729799 2.806235 2.434502 1.783371 2.484316  
285847\_at 2.436273 2.535916 1.684035 2.256473 1.646243 2.605094 2.506967 2.537169  
285848\_at 3.417795 2.266784 1.924667 1.977817 3.311296 2.003694 3.679579 2.098856  
28584\_at 1.251909 3.175622 2.348888 1.508904 2.393851 1.139655 2.090597 4.225002  
285852\_at 1.997574 1.116915 2.411786 1.913313 2.492232 1.708603 1.682061 3.31867

|           |          |          |          |          |          |          |          |          |
|-----------|----------|----------|----------|----------|----------|----------|----------|----------|
| 285855_at | 5.929236 | 5.711219 | 5.846977 | 6.003703 | 5.749315 | 5.254358 | 5.617545 | 5.220337 |
| 28585_at  | 1.217438 | 1.457511 | 1.24238  | 0.79284  | 2.032773 | 2.557589 | 0.546917 | 1.394223 |
| 28586_at  | 1.144901 | 1.218271 | 1.426231 | 1.164523 | 0.831582 | 2.866314 | 1.053691 | 1.867533 |
| 285877_at | 1.797519 | 1.913182 | 1.785121 | 2.316503 | 1.955412 | 2.419613 | 1.804266 | 2.23726  |
| 285878_at | 1.670931 | 2.035462 | 1.294075 | 1.108303 | 2.637573 | 1.462509 | 1.295403 | 1.336037 |
| 285888_at | 1.581313 | 1.541753 | 1.54179  | 1.624421 | 2.29919  | 1.717391 | 1.727947 | 1.38616  |
| 285889_at | 2.699252 | 1.892124 | 2.704637 | 2.049941 | 3.923001 | 1.885823 | 2.152216 | 2.612714 |
| 28589_at  | 2.055962 | 1.43891  | 0.736141 | 2.48616  | 2.684281 | 1.516317 | 3.44723  | 3.96023  |
| 285905_at | 1.960106 | 1.411277 | 0.730654 | 1.124007 | 1.148869 | 1.61899  | 2.764186 | 1.510809 |
| 285908_at | 1.240383 | 2.785896 | 4.069731 | 1.434133 | 4.312598 | 2.965046 | 1.419798 | 1.945736 |
| 28591_at  | 2.254778 | 1.01371  | 1.877012 | 1.096675 | 1.720524 | 1.408006 | 0.584959 | 0.872956 |
| 28592_at  | 0.85453  | 2.304211 | 1.246402 | 0.705806 | 1.214947 | 0.583851 | 2.018855 | 1.009883 |
| 285941_at | 1.806488 | 1.631107 | 1.802325 | 1.975756 | 1.815555 | 1.615292 | 2.445963 | 1.796472 |
| 285943_at | 4.126752 | 4.40431  | 3.392943 | 4.073782 | 4.906543 | 3.974946 | 2.958413 | 4.536424 |
| 28594_at  | 1.319293 | 1.633838 | 1.588787 | 1.152616 | 2.04105  | 0.841222 | 2.172106 | 2.178176 |
| 285954_at | 2.24188  | 1.370299 | 1.407251 | 1.791163 | 1.538574 | 1.474439 | 2.234275 | 2.282145 |
| 285955_at | 3.705258 | 4.178224 | 4.307087 | 3.444125 | 3.599141 | 3.15156  | 4.626356 | 4.177155 |
| 285958_at | 4.861802 | 6.086541 | 5.046533 | 3.903228 | 5.177901 | 5.466767 | 5.515276 | 4.406558 |
| 28595_at  | 1.533757 | 1.820624 | 2.07083  | 1.739025 | 1.662182 | 1.474647 | 1.061748 | 1.789775 |
| 285962_at | 3.114155 | 1.232293 | 2.335415 | 1.119961 | 2.48053  | 1.497771 | 2.419964 | 2.235475 |
| 285965_at | 1.496548 | 1.233808 | 1.356328 | 1.299695 | 1.868418 | 2.028454 | 1.44969  | 1.882124 |
| 285966_at | 2.709173 | 3.767428 | 2.371515 | 2.990966 | 3.245992 | 4.417804 | 3.988954 | 2.637959 |
| 285971_at | 4.412255 | 3.607537 | 3.482486 | 3.178887 | 3.753967 | 3.90512  | 3.677133 | 3.623207 |
| 285972_at | 2.470836 | 1.554374 | 2.07184  | 2.281829 | 2.268498 | 1.778856 | 1.947409 | 2.619926 |
| 285973_at | 2.338804 | 1.361942 | 2.452049 | 3.086089 | 2.004973 | 1.890781 | 2.337458 | 1.922784 |
| 285987_at | 0.895471 | 0.918266 | 1.447261 | 0.908511 | 2.166668 | 1.255987 | 0.979412 | 1.747748 |
| 285989_at | 3.387214 | 2.322737 | 2.24228  | 3.704201 | 2.846247 | 3.583427 | 2.486815 | 2.630202 |
| 28599_at  | 1.155762 | 0.783155 | 2.320506 | 1.600473 | 0.63774  | 1.243506 | 1.47899  | 1.557305 |
| 2859_at   | 2.500916 | 2.322172 | 2.502435 | 2.549291 | 2.843587 | 3.023413 | 2.275588 | 2.558781 |
| 285_at    | 3.391424 | 2.400114 | 4.468761 | 4.508164 | 2.571351 | 4.188698 | 4.313303 | 4.140829 |
| 286002_at | 1.317641 | 2.246462 | 1.417964 | 2.182422 | 1.308452 | 1.305702 | 1.805104 | 1.734115 |
| 286006_at | 3.045527 | 1.809656 | 2.431782 | 2.329995 | 3.669482 | 3.447769 | 2.820246 | 2.443495 |
| 286016_at | 2.969931 | 3.067379 | 2.116207 | 3.646092 | 2.67292  | 2.144392 | 2.939429 | 3.417329 |
| 28601_at  | 1.869799 | 1.480247 | 1.486936 | 1.538249 | 3.005072 | 1.984215 | 2.27179  | 1.838891 |
| 286023_at | 1.082956 | 2.038026 | 1.862767 | 1.519965 | 2.107037 | 2.27686  | 1.894759 | 1.264029 |
| 28602_at  | 3.836985 | 5.117453 | 4.43744  | 5.544254 | 3.927054 | 3.642099 | 5.166896 | 4.935647 |
| 28603_at  | 1.519614 | 1.30731  | 1.175436 | 1.335497 | 1.365115 | 1.291982 | 1.634289 | 1.744647 |
| 286042_at | 3.37355  | 4.059292 | 3.556602 | 3.640259 | 3.873553 | 3.125165 | 3.191203 | 3.898168 |
| 286046_at | 1.819658 | 2.356655 | 3.163835 | 2.572699 | 2.505312 | 3.304819 | 3.483241 | 2.750228 |
| 286053_at | 6.627292 | 6.839719 | 6.74314  | 6.272055 | 6.03499  | 6.215797 | 5.590341 | 6.891055 |
| 286059_at | 2.239062 | 1.946281 | 2.120608 | 2.488609 | 2.143265 | 1.670161 | 2.994472 | 2.097175 |
| 28606_at  | 2.17605  | 1.216186 | 1.509386 | 2.453111 | 1.446334 | 0.755594 | 1.760183 | 2.845789 |
| 286075_at | 1.062245 | 1.399603 | 1.502524 | 1.254737 | 1.230276 | 2.042682 | 1.58683  | 1.482893 |
| 286076_at | 2.294716 | 2.893139 | 2.197089 | 2.312451 | 1.755255 | 1.64946  | 2.058429 | 2.137249 |
| 286077_at | 3.330073 | 3.671851 | 4.170463 | 3.283576 | 3.908955 | 4.668807 | 2.799106 | 3.897744 |
| 286083_at | 1.975577 | 2.455375 | 1.821379 | 1.654438 | 1.909642 | 1.480984 | 1.507918 | 1.733622 |
| 28608_at  | 1.194203 | 1.417253 | 1.34781  | 1.350577 | 1.100915 | 2.024603 | 2.092649 | 1.554112 |
| 286094_at | 0.924566 | 0.972295 | 1.077837 | 0.846924 | 1.405865 | 1.276665 | 1.461078 | 1.244882 |
| 286097_at | 3.890159 | 3.700304 | 2.497387 | 3.716418 | 3.800459 | 3.064756 | 3.850125 | 3.15728  |
| 28609_at  | 2.393238 | 2.283891 | 1.241858 | 1.799559 | 1.762944 | 1.736199 | 2.105012 | 1.799559 |
| 286101_at | 5.224279 | 5.270195 | 5.972246 | 5.709172 | 6.515116 | 5.035007 | 5.046641 | 5.902017 |

286102\_at 2.997368 2.232445 3.301846 2.361579 3.896493 1.817311 2.80194 3.526418  
286103\_at 2.252162 1.959004 2.891339 2.340444 2.617604 2.092881 1.906477 1.963209  
28610\_at 3.117189 3.342707 3.203728 2.937589 2.228654 2.575445 3.401035 2.622535  
286114\_at 1.724093 1.615909 1.502833 1.57376 2.155632 1.805192 2.36169 1.553678  
286122\_at 2.513064 2.731316 2.750947 1.678835 2.327934 2.621579 2.242124 3.003261  
286128\_at 3.146146 3.075827 2.40427 3.466525 3.183059 2.626192 2.58861 2.938243  
286133\_at 2.587057 1.530865 2.082962 2.560173 1.570719 2.291201 2.099765 1.28021  
286135\_at 1.848862 2.196537 2.324388 1.707456 2.527039 2.697684 2.321532 2.2527  
286140\_at 2.643135 3.479609 2.731155 2.886467 3.890096 3.44919 2.505038 3.102109  
286144\_at 6.26383 6.245804 6.10083 6.343429 5.917989 6.817687 6.699753 5.938779  
286148\_at 5.947056 6.67504 6.275309 5.779698 6.387723 5.921382 5.356835 6.6843  
286151\_at 1.207703 1.078536 1.006956 1.399718 2.191974 1.456257 2.190836 1.63655  
28616\_at 1.337045 2.387041 2.505911 1.705927 1.915814 3.032476 1.481668 1.549636  
286177\_at 1.098954 2.061967 1.352204 1.876145 1.167979 1.534728 1.220996 1.459061  
286178\_at 2.26448 1.91348 2.00224 1.915081 2.70347 1.567865 2.305357 2.893834  
28617\_at 1.379704 1.927542 1.152537 1.576107 1.523976 2.066435 1.216985 1.210359  
286183\_at 2.54022 2.255826 2.204956 2.10526 2.461019 2.777683 2.14467 2.203487  
286184\_at 1.100479 1.986112 1.30972 1.070199 1.3929 2.23706 2.260294 1.378665  
286186\_at 1.724083 2.055206 2.347035 2.187023 2.188266 2.352822 2.261801 2.3429  
286187\_at 1.512987 1.390744 2.151025 0.857758 1.003747 1.277439 0.976718 1.968882  
286189\_at 1.654605 1.040486 1.980739 1.147228 1.57541 2.460192 1.298659 1.785891  
286190\_at 1.820963 1.686483 1.32804 0.985763 1.7064 1.799097 1.992814 1.992272  
28619\_at 1.899891 3.617449 1.477783 1.02777 3.13171 2.313633 1.425391 1.548513  
2861\_at 2.408012 2.376884 1.186642 1.862556 1.829557 1.773241 1.680081 2.32997  
286204\_at 5.597859 5.525332 5.946681 5.56515 5.325722 5.602153 6.221128 5.066926  
286205\_at 3.741108 2.914846 3.735343 4.540132 3.594907 4.489768 3.127524 3.726617  
286207\_at 1.469589 2.285073 2.418159 1.771972 2.307721 1.387336 1.975789 1.357651  
28620\_at 1.488531 1.208388 1.222878 1.310699 3.259713 0.932741 1.18376 1.208275  
286223\_at 2.151153 2.729618 2.045271 2.221618 1.846817 2.515162 2.781209 2.269715  
28622\_at 3.742392 2.780166 1.99749 2.261375 6.966914 7.896519 1.930934 2.234726  
286234\_at 1.437911 2.453341 3.069353 2.13522 3.086252 2.266742 1.537108 2.246766  
286238\_at 1.571947 2.190493 2.138363 1.490841 3.528962 2.716667 1.412933 2.590047  
28623\_at 3.166741 2.005502 1.263902 3.155302 4.325764 3.37219 3.902494 4.115549  
28624\_at 2.543644 2.254166 2.094415 2.887245 1.810275 3.125622 2.601988 1.721096  
286256\_at 2.952309 3.152279 2.740766 2.681958 3.744908 3.676228 2.707552 2.74584  
286257\_at 8.004168 7.363023 7.718323 7.735983 6.778359 8.089585 7.353904 6.777299  
28625\_at 2.324883 0.995705 0.660237 1.174971 1.388921 1.433225 1.386729 0.918065  
286262\_at 3.035755 3.333444 1.632282 2.248327 2.786865 3.250585 2.98489 2.009789  
28626\_at 4.877302 4.98744 5.817485 5.974351 4.857126 4.997786 5.270186 4.930414  
28628\_at 3.392602 2.124119 1.609223 2.192101 2.768338 1.871009 2.411677 1.396124  
28629\_at 3.5672 4.372568 3.697833 4.977282 3.663997 4.493716 3.400136 3.434917  
2862\_at 1.921882 1.822802 2.333061 1.966601 3.127111 2.674545 2.485776 1.840854  
286319\_at 4.572795 4.564412 3.958056 4.09511 3.188805 3.800988 3.382973 4.453345  
286333\_at 1.946873 1.744533 3.802702 3.01731 2.162553 2.436673 1.970637 1.752562  
286336\_at 3.988709 3.248334 2.868348 4.528035 4.316768 4.102271 3.950262 3.77959  
286343\_at 3.043327 2.626623 1.69587 2.753451 3.442651 2.485512 2.039587 2.187145  
286359\_at 1.395656 1.341766 1.398426 1.672159 1.989938 1.573572 1.527808 1.879686  
286362\_at 1.485906 1.131299 1.264412 1.091836 1.554139 0.88592 1.369484 1.196077  
286365\_at 0.629446 1.411647 1.056089 1.344154 1.282049 1.09423 0.992858 1.510991  
286370\_at 1.550757 1.623663 1.419623 1.802557 1.628591 2.139755 1.496468 2.288748  
286380\_at 5.662556 5.813029 6.584532 6.239951 5.741964 6.073879 5.983724 5.370782

|           |          |          |          |          |          |          |          |          |
|-----------|----------|----------|----------|----------|----------|----------|----------|----------|
| 28638_at  | 8.136911 | 6.444001 | 6.948892 | 8.809498 | 1.528824 | 7.78761  | 5.567813 | 6.941989 |
| 2863_at   | 3.005175 | 2.274077 | 1.939087 | 2.803434 | 3.211348 | 2.995375 | 2.395859 | 2.445858 |
| 28640_at  | 1.524519 | 1.399986 | 1.393632 | 1.7612   | 1.616945 | 1.225786 | 1.442382 | 1.995421 |
| 286410_at | 6.612268 | 6.755878 | 7.001058 | 6.964518 | 6.797981 | 6.510276 | 6.870652 | 6.575996 |
| 286411_at | 1.551425 | 1.299789 | 1.342463 | 1.0184   | 1.589099 | 1.099314 | 1.769056 | 1.215886 |
| 28641_at  | 1.47474  | 1.702024 | 1.291396 | 1.221225 | 1.763015 | 1.597848 | 0.966062 | 0.670039 |
| 28642_at  | 5.727416 | 3.235409 | 4.75668  | 5.212414 | 2.376952 | 4.154829 | 5.693308 | 2.395503 |
| 286436_at | 1.398932 | 1.110728 | 1.398932 | 1.03627  | 1.766441 | 1.238165 | 1.039995 | 1.487268 |
| 286437_at | 5.0563   | 5.186736 | 5.530662 | 5.393944 | 4.577255 | 5.0342   | 5.062632 | 5.364532 |
| 28643_at  | 4.126377 | 5.344073 | 4.885014 | 4.530226 | 3.477739 | 2.417748 | 3.421458 | 4.547217 |
| 286442_at | 1.412029 | 1.116377 | 2.092105 | 1.799846 | 1.536139 | 2.033709 | 1.32283  | 1.598079 |
| 28644_at  | 2.295563 | 3.935806 | 3.046432 | 3.232797 | 2.850786 | 2.350133 | 3.743307 | 3.152615 |
| 286451_at | 7.240096 | 7.57115  | 7.613256 | 7.035815 | 7.718021 | 6.375916 | 7.633666 | 7.600997 |
| 286464_at | 1.057213 | 1.687304 | 2.563405 | 0.948456 | 1.881442 | 1.799479 | 1.205295 | 1.751568 |
| 286467_at | 2.42658  | 1.489629 | 1.736406 | 1.4003   | 1.775614 | 1.630241 | 2.297039 | 2.749447 |
| 28646_at  | 1.116062 | 1.062188 | 1.687998 | 0.991989 | 1.418822 | 0.805429 | 1.207274 | 1.282358 |
| 28647_at  | 1.53315  | 1.528727 | 1.25526  | 1.17953  | 2.277195 | 1.341315 | 1.145788 | 1.014768 |
| 28648_at  | 0.795751 | 0.935081 | 1.253561 | 1.006742 | 1.520418 | 0.965065 | 1.251012 | 1.324747 |
| 286495_at | 3.524126 | 3.702479 | 3.750485 | 2.933821 | 3.590693 | 3.596786 | 4.22135  | 3.895603 |
| 286499_at | 1.842013 | 1.588463 | 1.413949 | 1.335314 | 1.995705 | 1.805248 | 2.015593 | 1.939194 |
| 2864_at   | 2.488426 | 2.501295 | 2.397999 | 2.194622 | 2.77105  | 1.966459 | 2.561281 | 2.639226 |
| 286514_at | 1.244112 | 1.043181 | 1.179149 | 1.285657 | 1.281337 | 1.731419 | 1.244879 | 1.441375 |
| 28652_at  | 2.507678 | 2.654155 | 2.486602 | 1.60219  | 2.036208 | 1.972605 | 1.611355 | 2.799624 |
| 286530_at | 2.737722 | 2.753371 | 4.025056 | 2.078893 | 1.445968 | 3.014808 | 3.060226 | 2.148151 |
| 28653_at  | 1.0453   | 1.229747 | 0.994921 | 1.57263  | 1.811512 | 1.164357 | 0.81682  | 1.149513 |
| 286554_at | 2.146388 | 1.881758 | 1.537603 | 1.531419 | 1.790973 | 1.577122 | 1.919628 | 1.396326 |
| 286557_at | 1.293236 | 1.205989 | 1.127346 | 0.929148 | 1.547869 | 1.281015 | 0.896403 | 1.517479 |
| 28655_at  | 2.502219 | 1.323045 | 1.647247 | 1.197619 | 1.746735 | 1.019467 | 2.565978 | 1.494829 |
| 28656_at  | 0.955156 | 0.776953 | 0.928941 | 1.369612 | 1.004428 | 0.908743 | 1.683857 | 1.998541 |
| 28657_at  | 1.058067 | 1.057985 | 2.076105 | 1.621939 | 1.601472 | 1.292273 | 2.449501 | 1.223844 |
| 28658_at  | 1.45225  | 1.201719 | 1.629592 | 1.076856 | 1.998685 | 1.242707 | 1.263186 | 1.469419 |
| 28659_at  | 1.318167 | 1.506531 | 1.197251 | 1.01969  | 1.587155 | 1.542623 | 1.009981 | 1.220964 |
| 2865_at   | 2.657051 | 1.609232 | 3.20918  | 2.10061  | 3.425006 | 1.848685 | 3.207129 | 2.769126 |
| 28660_at  | 1.058801 | 0.733378 | 1.278653 | 0.693768 | 0.747607 | 0.51367  | 0.952527 | 1.257319 |
| 28661_at  | 1.965941 | 1.469358 | 1.445168 | 1.805155 | 1.714064 | 1.387668 | 1.263843 | 1.833672 |
| 28662_at  | 1.683488 | 1.539553 | 2.10333  | 4.400974 | 2.094671 | 1.931838 | 1.378001 | 1.863268 |
| 28663_at  | 1.024926 | 1.313674 | 1.070824 | 0.927619 | 1.67445  | 1.061545 | 0.886579 | 1.144849 |
| 28664_at  | 2.017706 | 1.583183 | 1.803251 | 1.759642 | 2.858771 | 2.484146 | 2.089201 | 1.596337 |
| 28665_at  | 0.661688 | 1.623788 | 2.037528 | 1.95046  | 1.526874 | 2.510921 | 1.627999 | 1.274748 |
| 28666_at  | 1.564177 | 2.530529 | 3.260546 | 1.60724  | 1.865615 | 1.389947 | 2.534208 | 2.101065 |
| 286676_at | 3.460468 | 2.766445 | 2.660109 | 2.489537 | 3.257069 | 1.518482 | 2.074646 | 2.817549 |
| 28667_at  | 1.156733 | 0.996821 | 1.259795 | 1.135657 | 2.067006 | 1.941047 | 2.095106 | 1.444429 |
| 28669_at  | 2.16268  | 2.088036 | 1.919491 | 1.62655  | 1.43907  | 2.091662 | 1.518503 | 1.407815 |
| 28670_at  | 2.365514 | 1.812805 | 1.628502 | 1.330066 | 2.091572 | 1.476759 | 1.35918  | 2.140191 |
| 28671_at  | 2.439478 | 1.869902 | 2.310772 | 2.25696  | 2.063039 | 1.258465 | 2.143063 | 2.482663 |
| 28672_at  | 1.617318 | 2.491631 | 1.432708 | 1.661241 | 1.383403 | 2.136791 | 1.409507 | 1.584169 |
| 28673_at  | 1.217695 | 2.001044 | 2.378257 | 1.621624 | 1.547219 | 2.020138 | 3.904294 | 1.655097 |
| 286749_at | 0.980927 | 2.185778 | 1.363793 | 2.785793 | 3.150933 | 1.458097 | 1.844243 | 1.374409 |
| 28674_at  | 2.097113 | 1.904589 | 1.835764 | 2.532014 | 2.473904 | 1.620204 | 1.775888 | 2.767386 |
| 286753_at | 2.029218 | 2.181459 | 2.224518 | 2.511972 | 2.949146 | 2.408396 | 2.392777 | 2.628274 |
| 28676_at  | 1.734011 | 1.512055 | 1.347521 | 2.164815 | 1.297588 | 1.288853 | 1.487756 | 1.643966 |

|           |          |          |          |          |          |          |          |          |
|-----------|----------|----------|----------|----------|----------|----------|----------|----------|
| 28677_at  | 1.208588 | 0.95234  | 0.818574 | 0.981372 | 1.287022 | 0.843996 | 1.123039 | 1.146767 |
| 28678_at  | 0.987429 | 1.574227 | 1.50014  | 1.049568 | 1.470747 | 1.113888 | 1.44613  | 1.713102 |
| 28679_at  | 2.066553 | 3.291612 | 3.163371 | 3.254041 | 1.999767 | 2.132795 | 2.954167 | 3.50117  |
| 2867_at   | 1.69548  | 1.725405 | 1.60739  | 1.872094 | 1.497628 | 1.419703 | 2.220995 | 2.099549 |
| 28680_at  | 2.295015 | 1.908694 | 1.214612 | 3.292994 | 2.468707 | 2.524389 | 3.907363 | 1.755964 |
| 286826_at | 3.840033 | 3.479068 | 3.555493 | 3.038725 | 3.103066 | 3.970289 | 3.421062 | 3.251354 |
| 286827_at | 3.456415 | 3.153152 | 3.244758 | 2.933606 | 2.537608 | 3.562523 | 2.726641 | 3.840641 |
| 286828_at | 1.122248 | 1.27941  | 1.058503 | 0.712482 | 1.623023 | 0.943412 | 1.282523 | 1.784935 |
| 28682_at  | 3.267582 | 0.992417 | 2.483364 | 1.57074  | 2.966448 | 2.861384 | 2.620714 | 5.191023 |
| 28683_at  | 2.686285 | 3.415561 | 3.836492 | 1.190008 | 1.661953 | 2.172985 | 2.692445 | 1.75425  |
| 28685_at  | 1.322266 | 1.95744  | 0.65329  | 1.441773 | 2.325845 | 1.763995 | 3.579278 | 1.336984 |
| 28686_at  | 0.967886 | 0.982622 | 1.213481 | 0.694908 | 0.834571 | 0.740417 | 2.231931 | 1.102154 |
| 286887_at | 2.032459 | 1.170614 | 1.661535 | 0.259049 | 0.643402 | 1.021596 | 2.617289 | 1.017062 |
| 28688_at  | 1.49337  | 1.237572 | 2.166162 | 1.763189 | 1.487882 | 0.964088 | 1.008633 | 1.614598 |
| 28689_at  | 2.208773 | 2.263228 | 2.819456 | 3.382824 | 3.365882 | 2.509013 | 2.62214  | 3.097121 |
| 2868_at   | 2.654878 | 2.033652 | 2.180022 | 2.292485 | 2.500313 | 2.043243 | 2.586144 | 1.776687 |
| 28690_at  | 1.636775 | 1.884322 | 1.881715 | 1.488526 | 2.627552 | 1.244102 | 1.73485  | 1.821823 |
| 28691_at  | 1.468312 | 2.513367 | 2.230715 | 2.46309  | 3.013792 | 1.82692  | 2.48436  | 2.702301 |
| 28692_at  | 1.917643 | 2.652682 | 1.513652 | 2.92934  | 1.678768 | 2.261114 | 2.04534  | 1.369234 |
| 28693_at  | 1.993978 | 3.032691 | 2.711677 | 2.622209 | 2.83361  | 2.331835 | 1.742779 | 3.17955  |
| 28694_at  | 1.685746 | 2.145833 | 0.951171 | 0.727912 | 1.308968 | 1.237769 | 0.495178 | 1.559977 |
| 28696_at  | 1.422213 | 1.217262 | 0.985037 | 0.880075 | 1.262724 | 2.485603 | 0.837043 | 1.227217 |
| 28697_at  | 1.480085 | 1.168714 | 3.177858 | 1.493362 | 1.967775 | 1.043143 | 1.127706 | 2.369944 |
| 28698_at  | 1.12407  | 1.135133 | 0.941161 | 1.283499 | 1.476875 | 1.203822 | 0.86732  | 1.298636 |
| 28699_at  | 0.873045 | 0.958485 | 0.883201 | 0.544761 | 1.011645 | 0.885356 | 1.054333 | 1.750932 |
| 2869_at   | 6.608201 | 5.86751  | 6.434295 | 5.321097 | 4.752922 | 6.403729 | 5.206383 | 5.946221 |
| 286_at    | 3.983884 | 3.120005 | 3.842407 | 3.129713 | 4.131765 | 3.554886 | 3.838146 | 3.23789  |
| 287015_at | 1.314676 | 2.279941 | 1.338096 | 1.479417 | 1.185755 | 1.324478 | 1.855536 | 1.002056 |
| 28701_at  | 2.307258 | 3.551467 | 3.031139 | 2.484925 | 1.75766  | 3.50024  | 3.376533 | 3.555382 |
| 28702_at  | 1.23428  | 4.659116 | 1.253023 | 1.39666  | 1.508019 | 1.963974 | 0.978193 | 1.037343 |
| 28703_at  | 1.052732 | 1.072155 | 0.841516 | 4.262323 | 1.130234 | 0.617155 | 0.773674 | 0.807334 |
| 28705_at  | 2.095766 | 0.79739  | 1.50507  | 1.62023  | 1.326491 | 1.012633 | 1.919223 | 1.209961 |
| 28706_at  | 2.844561 | 0.942251 | 1.756765 | 1.105842 | 1.579156 | 1.660199 | 1.663468 | 1.3594   |
| 28707_at  | 2.816846 | 2.413962 | 2.340167 | 3.110166 | 2.297746 | 3.273293 | 4.418059 | 2.621342 |
| 28708_at  | 1.620784 | 1.292525 | 3.266599 | 0.892997 | 1.667669 | 1.508222 | 1.475487 | 1.843207 |
| 28709_at  | 2.506256 | 1.563022 | 2.126798 | 1.665859 | 1.743086 | 3.015306 | 1.110948 | 1.611553 |
| 2870_at   | 3.77237  | 3.342886 | 2.318421 | 2.014159 | 2.938321 | 3.469817 | 3.762438 | 2.745669 |
| 28710_at  | 1.400921 | 1.048863 | 1.618989 | 2.019914 | 2.038372 | 1.255702 | 1.222017 | 1.788693 |
| 28711_at  | 1.480064 | 1.067801 | 1.938634 | 1.197069 | 2.358627 | 1.443217 | 1.326154 | 1.48129  |
| 28712_at  | 2.067322 | 1.667336 | 4.343736 | 1.904834 | 1.892635 | 1.344168 | 1.637683 | 1.68563  |
| 28713_at  | 2.879125 | 1.252072 | 1.58853  | 1.734157 | 1.374712 | 1.197266 | 2.094866 | 1.240822 |
| 28714_at  | 1.872196 | 2.568595 | 1.956384 | 2.621416 | 2.026431 | 2.498895 | 2.714404 | 3.855861 |
| 28715_at  | 1.061346 | 0.86755  | 1.61763  | 1.428219 | 1.212959 | 0.473438 | 2.088241 | 0.927941 |
| 28716_at  | 1.803541 | 1.994498 | 3.385668 | 1.992243 | 3.457166 | 2.239536 | 2.600165 | 3.860295 |
| 28717_at  | 0.976474 | 1.34026  | 2.574365 | 1.659901 | 1.844999 | 1.057403 | 3.917152 | 1.789564 |
| 28718_at  | 2.244504 | 1.901883 | 2.933403 | 1.792902 | 1.990969 | 3.092808 | 2.183982 | 2.303155 |
| 28719_at  | 2.958643 | 1.853238 | 2.528413 | 1.91327  | 2.919869 | 4.194148 | 3.354227 | 2.374952 |
| 28720_at  | 7.415664 | 7.380502 | 6.231565 | 4.751724 | 7.461264 | 4.722418 | 5.954925 | 5.49604  |
| 28721_at  | 3.318015 | 0.665707 | 2.860964 | 0.830117 | 0.830059 | 0.758512 | 0.875016 | 1.244878 |
| 28722_at  | 4.460771 | 0.783862 | 0.884276 | 0.567604 | 3.983371 | 3.780881 | 0.669213 | 1.018467 |
| 28723_at  | 4.809653 | 3.547692 | 2.502197 | 2.513838 | 4.74721  | 3.085729 | 2.761524 | 1.70619  |

|          |          |          |          |          |          |          |          |          |
|----------|----------|----------|----------|----------|----------|----------|----------|----------|
| 28724_at | 1.732691 | 6.433822 | 1.45153  | 2.139719 | 1.96536  | 0.910796 | 1.297313 | 6.696284 |
| 28725_at | 2.337651 | 1.280611 | 1.867784 | 0.913699 | 1.334515 | 2.22919  | 1.393298 | 0.641735 |
| 28726_at | 3.692191 | 0.777932 | 1.058035 | 0.754244 | 1.234066 | 0.858665 | 0.761007 | 0.906027 |
| 28727_at | 2.513944 | 1.961155 | 2.964439 | 2.197357 | 1.93591  | 1.941722 | 1.581283 | 3.005051 |
| 28728_at | 1.332441 | 1.555104 | 1.860126 | 2.32252  | 2.654973 | 1.90196  | 3.382848 | 4.659928 |
| 28729_at | 1.500301 | 1.542365 | 1.905662 | 1.482109 | 1.368657 | 2.262486 | 1.759658 | 1.54296  |
| 2872_at  | 6.741434 | 6.271439 | 6.437985 | 6.520416 | 5.891713 | 6.586287 | 5.905151 | 6.003934 |
| 28730_at | 1.398353 | 1.405328 | 0.919062 | 1.485293 | 2.163678 | 2.224553 | 1.049424 | 0.956534 |
| 28731_at | 4.150157 | 2.790375 | 3.467952 | 2.756118 | 3.947762 | 3.549146 | 4.44257  | 3.476684 |
| 28732_at | 3.095729 | 1.131706 | 0.972724 | 1.801096 | 1.068853 | 1.264162 | 2.240242 | 2.97593  |
| 28733_at | 2.660426 | 0.773354 | 1.020688 | 4.006758 | 4.188127 | 1.053085 | 1.307733 | 1.689113 |
| 28734_at | 2.842292 | 1.242527 | 1.392119 | 2.36771  | 2.599241 | 3.257285 | 1.350701 | 2.518021 |
| 28735_at | 1.775916 | 1.99453  | 1.621556 | 1.910676 | 1.649661 | 1.884212 | 1.554713 | 4.854676 |
| 28736_at | 1.721423 | 1.352382 | 1.034966 | 2.39593  | 0.825128 | 1.080217 | 2.314283 | 1.302391 |
| 28737_at | 1.380554 | 1.397191 | 1.301743 | 1.785774 | 1.266394 | 1.332856 | 1.373858 | 1.529108 |
| 28738_at | 1.538049 | 1.128485 | 0.883499 | 2.199134 | 1.012987 | 2.754763 | 1.003214 | 1.299521 |
| 28739_at | 3.958334 | 1.242092 | 2.156846 | 3.887508 | 1.780543 | 1.54455  | 2.479408 | 1.132709 |
| 2873_at  | 7.403831 | 6.312721 | 6.844457 | 6.918468 | 6.087548 | 6.75619  | 6.469479 | 6.110102 |
| 28741_at | 0.677592 | 1.418192 | 1.287275 | 1.152058 | 1.103844 | 1.528633 | 0.734115 | 0.949815 |
| 28742_at | 2.969629 | 1.185095 | 1.850075 | 2.47617  | 1.752479 | 3.00397  | 1.031188 | 1.207189 |
| 28743_at | 1.320721 | 0.749303 | 0.868178 | 0.963783 | 1.175439 | 1.253491 | 0.93876  | 1.22964  |
| 28744_at | 3.191467 | 2.718189 | 2.942372 | 3.304533 | 3.527221 | 3.523929 | 3.464895 | 3.801284 |
| 28745_at | 1.396701 | 1.769557 | 1.722124 | 1.218617 | 2.418034 | 3.744699 | 1.833767 | 1.894284 |
| 28746_at | 1.359805 | 4.052697 | 1.600419 | 1.364195 | 1.442771 | 1.521659 | 1.898683 | 1.649241 |
| 28747_at | 4.754268 | 4.963143 | 5.557162 | 4.944503 | 5.645114 | 5.819518 | 5.35242  | 4.47058  |
| 28748_at | 2.093138 | 1.300857 | 1.919095 | 0.971467 | 1.427175 | 0.976386 | 1.323022 | 1.417977 |
| 28749_at | 1.225545 | 1.247126 | 1.473306 | 0.983754 | 0.941934 | 1.096058 | 3.494489 | 1.069208 |
| 2874_at  | 8.308227 | 7.917335 | 7.885546 | 7.601828 | 7.472029 | 7.543573 | 7.265098 | 7.051487 |
| 28750_at | 4.552272 | 0.415988 | 1.953928 | 2.20929  | 1.563207 | 3.10496  | 2.122568 | 1.439052 |
| 28751_at | 1.635525 | 1.97498  | 4.410208 | 1.955645 | 1.415672 | 1.275715 | 1.688864 | 1.906222 |
| 28752_at | 1.067314 | 1.107024 | 0.921802 | 1.81609  | 1.152002 | 1.178102 | 1.740352 | 1.11966  |
| 28753_at | 1.101213 | 0.670631 | 0.828814 | 0.927005 | 1.40994  | 0.721689 | 1.536094 | 1.035859 |
| 28754_at | 1.689537 | 0.994867 | 1.57339  | 1.26301  | 1.560835 | 1.501781 | 2.109999 | 1.668399 |
| 28755_at | 9.049117 | 8.414346 | 7.47133  | 7.442037 | 8.875726 | 7.271771 | 7.251896 | 7.547542 |
| 2875_at  | 3.049351 | 3.245977 | 2.4858   | 3.190314 | 3.307208 | 2.197107 | 1.874113 | 2.854821 |
| 2876_at  | 5.186273 | 4.887275 | 4.597208 | 5.277746 | 4.595671 | 5.021843 | 4.453622 | 4.917823 |
| 28770_at | 1.62284  | 1.041856 | 1.200182 | 1.413503 | 0.998883 | 1.595625 | 1.244222 | 1.111913 |
| 28772_at | 3.020603 | 3.523675 | 4.051151 | 3.751361 | 2.945583 | 3.899548 | 4.052532 | 3.087634 |
| 28773_at | 0.95023  | 1.865372 | 1.88475  | 0.970018 | 3.021626 | 2.506279 | 1.394334 | 1.444958 |
| 28774_at | 1.492377 | 0.737715 | 1.223405 | 2.155269 | 1.458666 | 1.34737  | 0.629163 | 1.406828 |
| 28775_at | 1.049047 | 1.415263 | 1.840363 | 1.522611 | 1.222764 | 2.154022 | 1.465912 | 2.911019 |
| 28776_at | 1.377607 | 2.948481 | 1.351852 | 1.518684 | 2.117058 | 1.983521 | 2.131377 | 3.166384 |
| 28778_at | 1.198088 | 0.894319 | 1.880368 | 1.777674 | 1.178265 | 0.987258 | 2.280042 | 1.851712 |
| 2877_at  | 2.36461  | 2.041417 | 2.357161 | 2.459844 | 1.905714 | 2.07824  | 2.035228 | 3.000543 |
| 28781_at | 1.015123 | 1.134683 | 0.67594  | 1.024827 | 1.543244 | 0.819663 | 1.48522  | 0.659369 |
| 28783_at | 0.979917 | 1.263301 | 1.143577 | 1.076326 | 1.378581 | 1.185979 | 1.516602 | 1.383262 |
| 28784_at | 0.853318 | 3.693821 | 2.640362 | 4.013886 | 2.968145 | 0.661474 | 2.176673 | 3.270529 |
| 28785_at | 1.39823  | 2.577697 | 1.711264 | 2.398803 | 2.671701 | 1.470028 | 1.813348 | 2.717021 |
| 28786_at | 1.788973 | 2.439848 | 2.401292 | 1.848565 | 3.135703 | 2.014231 | 2.151549 | 1.963495 |
| 28787_at | 1.825655 | 1.804586 | 1.463763 | 1.485945 | 1.493231 | 1.84276  | 1.380842 | 1.203976 |
| 2878_at  | 10.7146  | 10.23095 | 10.59684 | 10.10024 | 10.90105 | 10.59127 | 10.19837 | 9.998425 |

|          |          |          |          |          |          |          |          |          |
|----------|----------|----------|----------|----------|----------|----------|----------|----------|
| 28791_at | 1.763314 | 2.00994  | 2.839415 | 2.192982 | 2.233281 | 1.940577 | 1.491604 | 2.902464 |
| 28793_at | 3.102959 | 1.770651 | 2.796142 | 2.688458 | 2.673779 | 3.162007 | 2.888375 | 2.260158 |
| 28795_at | 2.916546 | 2.398304 | 1.408643 | 1.628419 | 2.377071 | 2.370348 | 2.654469 | 3.76834  |
| 28796_at | 2.245339 | 4.147573 | 2.734914 | 2.468561 | 3.3492   | 2.59732  | 3.120924 | 3.495686 |
| 28797_at | 2.309498 | 1.529426 | 1.706522 | 1.678249 | 1.543389 | 1.7523   | 1.432141 | 1.509543 |
| 28799_at | 1.458401 | 2.280346 | 1.749065 | 1.845743 | 2.288545 | 2.480529 | 2.99352  | 4.000966 |
| 2879_at  | 7.753555 | 7.094253 | 7.050107 | 7.356944 | 6.805912 | 7.460841 | 6.786058 | 6.414918 |
| 287_at   | 4.59428  | 4.433435 | 5.028887 | 3.783776 | 5.229418 | 4.700015 | 4.465408 | 5.130161 |
| 28802_at | 1.372243 | 1.809666 | 2.263897 | 1.363015 | 2.282643 | 1.461902 | 2.72067  | 2.128501 |
| 28803_at | 2.833402 | 2.669432 | 3.241889 | 2.835018 | 4.132044 | 3.763653 | 3.035207 | 3.484431 |
| 28804_at | 3.289988 | 3.919431 | 3.246456 | 3.824463 | 3.016995 | 3.204372 | 3.073318 | 3.246151 |
| 28809_at | 2.414863 | 4.488731 | 3.605819 | 3.15529  | 2.766602 | 2.973454 | 4.004458 | 3.574998 |
| 2880_at  | 1.891929 | 2.055901 | 1.804222 | 2.302556 | 2.469715 | 2.34119  | 2.225176 | 2.435165 |
| 28811_at | 0.727023 | 1.145169 | 1.426831 | 1.304096 | 1.419755 | 1.049734 | 2.242557 | 1.518535 |
| 28814_at | 1.457174 | 2.377527 | 1.169815 | 3.484537 | 3.625859 | 2.448533 | 2.285125 | 1.183704 |
| 28815_at | 9.043315 | 9.129355 | 9.558195 | 8.240504 | 8.870878 | 9.614372 | 9.250695 | 8.99742  |
| 28821_at | 1.520181 | 1.269284 | 1.448552 | 1.061924 | 1.589227 | 1.652028 | 1.08399  | 1.443628 |
| 28822_at | 1.260175 | 0.330465 | 1.539981 | 1.292444 | 1.551929 | 0.967117 | 1.852476 | 1.574389 |
| 28823_at | 0.535896 | 0.976256 | 1.434432 | 0.084269 | 0.720348 | 1.645485 | 0.249717 | 0.75313  |
| 28825_at | 3.851723 | 3.531574 | 4.785686 | 4.104129 | 3.774667 | 4.185378 | 3.921796 | 3.80986  |
| 28826_at | 5.167214 | 4.957342 | 4.796883 | 4.462581 | 4.723505 | 3.805573 | 4.609627 | 4.400702 |
| 28827_at | 5.541539 | 5.728293 | 4.96753  | 5.34965  | 5.953786 | 5.009145 | 6.243197 | 4.634999 |
| 2882_at  | 6.201023 | 5.582449 | 5.713848 | 4.754895 | 4.062333 | 5.90303  | 5.102642 | 5.773923 |
| 28830_at | 2.482319 | 2.04306  | 1.986546 | 3.237622 | 2.416519 | 4.348492 | 3.283416 | 2.808975 |
| 28834_at | 2.50037  | 2.183487 | 1.479029 | 1.6745   | 3.430908 | 2.595357 | 1.345969 | 1.796482 |
| 2885_at  | 7.154931 | 7.271276 | 7.982787 | 7.421009 | 7.36872  | 7.352001 | 7.414972 | 6.981961 |
| 28869_at | 1.79244  | 1.637841 | 1.866122 | 1.497675 | 2.822078 | 0.832521 | 1.040691 | 1.30123  |
| 2886_at  | 3.993988 | 2.783457 | 3.185007 | 3.028061 | 3.502553 | 3.56187  | 2.279968 | 3.303039 |
| 2887_at  | 5.519855 | 5.473455 | 5.456679 | 5.470217 | 5.567866 | 5.229155 | 5.414703 | 4.28077  |
| 28882_at | 1.076764 | 1.177016 | 1.896361 | 0.743446 | 0.965638 | 1.294686 | 1.853977 | 1.284063 |
| 28884_at | 2.69619  | 2.298485 | 1.955615 | 2.196813 | 2.045314 | 2.294016 | 2.374592 | 2.170804 |
| 28885_at | 1.211991 | 3.144404 | 1.211407 | 1.508565 | 3.739569 | 2.982501 | 4.082597 | 0.557309 |
| 2888_at  | 4.749548 | 3.138823 | 3.191337 | 3.155559 | 5.154931 | 4.3167   | 2.208275 | 4.267619 |
| 28891_at | 0.806947 | 0.980011 | 0.905193 | 0.903365 | 0.982959 | 0.97339  | 1.097755 | 1.448924 |
| 28892_at | 0.831683 | 0.99039  | 0.918036 | 1.031696 | 0.881607 | 1.224592 | 1.552224 | 2.424243 |
| 2889_at  | 5.82835  | 6.268313 | 6.654166 | 6.346006 | 5.706526 | 6.508015 | 6.692136 | 5.139524 |
| 288_at   | 5.647778 | 5.212778 | 5.400682 | 5.539714 | 5.964903 | 6.231184 | 5.522855 | 5.926747 |
| 28901_at | 0.583077 | 3.874589 | 5.384125 | 6.472507 | 4.402465 | 3.895059 | 4.057802 | 4.90321  |
| 28902_at | 1.260866 | 1.550372 | 1.175231 | 2.077726 | 2.656828 | 0.448203 | 1.137266 | 0.48657  |
| 28904_at | 1.289473 | 1.539472 | 1.658105 | 1.619595 | 2.098083 | 1.024364 | 1.529963 | 3.233573 |
| 28906_at | 2.653722 | 1.511902 | 1.056985 | 2.280752 | 1.204444 | 1.784565 | 2.490634 | 2.549476 |
| 28907_at | 1.919672 | 1.51846  | 4.599151 | 3.218477 | 4.537603 | 3.064951 | 3.979633 | 3.125031 |
| 28908_at | 2.638079 | 0.880176 | 1.513105 | 0.832502 | 2.11377  | 1.483492 | 4.169578 | 2.791563 |
| 2890_at  | 1.056402 | 1.709459 | 1.565067 | 1.966968 | 1.231907 | 1.327117 | 2.803403 | 1.886912 |
| 28912_at | 2.581915 | 4.976731 | 4.359976 | 4.881101 | 5.247634 | 5.244524 | 4.129113 | 5.039319 |
| 28913_at | 3.060066 | 2.221696 | 3.243778 | 2.704286 | 2.977103 | 2.836242 | 1.585222 | 3.268257 |
| 28914_at | 4.217323 | 0.819119 | 4.5705   | 2.255268 | 3.472935 | 3.875933 | 1.691331 | 0.918286 |
| 28915_at | 5.158826 | 4.205512 | 3.29662  | 4.324248 | 4.877299 | 4.877198 | 4.403736 | 5.008394 |
| 2891_at  | 1.467901 | 1.22283  | 1.172836 | 1.233917 | 1.665883 | 1.127732 | 1.577317 | 1.334226 |
| 28920_at | 2.17214  | 1.62568  | 1.988028 | 2.907272 | 2.090218 | 1.505991 | 2.686337 | 3.027584 |
| 2892_at  | 1.702979 | 1.210802 | 1.061966 | 1.569547 | 1.957902 | 1.122411 | 1.337761 | 2.074268 |

|          |          |          |          |          |          |          |          |          |
|----------|----------|----------|----------|----------|----------|----------|----------|----------|
| 28935_at | 1.825402 | 3.331924 | 1.915792 | 2.58356  | 4.287498 | 1.07849  | 3.561572 | 2.438058 |
| 28937_at | 1.100107 | 2.361971 | 2.644887 | 5.713846 | 1.347777 | 2.923781 | 1.64104  | 2.866123 |
| 28938_at | 2.771054 | 1.783699 | 2.861129 | 5.721117 | 3.576813 | 3.086955 | 2.539732 | 3.237409 |
| 2893_at  | 1.772246 | 1.656229 | 1.803069 | 1.510201 | 1.537235 | 2.359075 | 1.639044 | 2.885482 |
| 28942_at | 0.862269 | 0.918718 | 1.759723 | 1.174297 | 2.096212 | 3.413518 | 0.77708  | 1.348192 |
| 28943_at | 1.695758 | 1.793767 | 2.527935 | 1.224951 | 1.345125 | 1.057705 | 1.926484 | 2.158134 |
| 28946_at | 12.01066 | 1.961336 | 6.846027 | 2.359051 | 1.798921 | 3.00706  | 4.565068 | 1.508413 |
| 28948_at | 3.150465 | 1.085932 | 1.852193 | 1.286175 | 9.82702  | 1.445654 | 1.898413 | 1.621545 |
| 2894_at  | 1.714614 | 1.619963 | 1.437357 | 2.407035 | 1.89383  | 1.830604 | 1.630334 | 1.774619 |
| 28951_at | 8.525128 | 8.744892 | 8.642004 | 8.873114 | 8.385442 | 8.350779 | 8.553073 | 8.92     |
| 28952_at | 5.130313 | 5.152309 | 4.99045  | 4.849201 | 4.145577 | 4.824984 | 5.081045 | 4.562897 |
| 28954_at | 2.650157 | 1.884823 | 2.814338 | 3.393209 | 2.601175 | 2.610566 | 2.185567 | 3.075637 |
| 28955_at | 6.840573 | 6.017353 | 7.295451 | 7.089855 | 6.501289 | 7.246712 | 6.629419 | 6.566317 |
| 28956_at | 7.706544 | 7.20279  | 7.195078 | 7.273098 | 6.731463 | 7.658376 | 7.240739 | 6.010777 |
| 28957_at | 7.190813 | 7.398319 | 7.237676 | 7.159091 | 7.136882 | 6.697671 | 6.930847 | 7.215951 |
| 28958_at | 8.339145 | 8.276905 | 8.075006 | 7.567782 | 8.235731 | 8.094935 | 7.677896 | 7.387515 |
| 28959_at | 4.922468 | 5.189966 | 6.267673 | 4.69103  | 7.344105 | 6.857792 | 4.849923 | 5.838265 |
| 2895_at  | 2.18855  | 1.383391 | 1.67241  | 0.991132 | 0.91997  | 1.421432 | 1.809372 | 1.643356 |
| 28960_at | 5.463312 | 5.570463 | 6.048379 | 5.794422 | 5.100075 | 5.913089 | 4.996771 | 5.38808  |
| 28962_at | 7.656258 | 7.702796 | 7.343656 | 7.57544  | 7.180693 | 7.201634 | 7.370244 | 7.753031 |
| 28964_at | 5.776168 | 5.537613 | 5.588027 | 6.203553 | 5.757056 | 5.679444 | 5.554348 | 5.196467 |
| 28965_at | 1.179823 | 1.084269 | 1.256099 | 0.902068 | 1.166059 | 1.213326 | 1.192022 | 1.540671 |
| 28966_at | 4.11087  | 5.873026 | 5.111541 | 5.031529 | 5.591594 | 5.164007 | 5.317707 | 4.54038  |
| 28968_at | 4.19265  | 4.468327 | 4.025456 | 3.542962 | 2.648564 | 4.280893 | 4.394413 | 3.712449 |
| 28969_at | 4.208707 | 5.022496 | 4.371479 | 4.340693 | 3.468838 | 3.923161 | 4.013442 | 5.497394 |
| 2896_at  | 8.071646 | 7.910046 | 8.469688 | 8.440033 | 8.019014 | 8.370049 | 8.829449 | 7.082468 |
| 28970_at | 7.84981  | 7.866863 | 7.548575 | 7.26114  | 8.241095 | 8.146038 | 6.964717 | 8.24981  |
| 28971_at | 6.922179 | 6.72862  | 6.294572 | 7.33176  | 6.582356 | 7.133842 | 7.155014 | 6.208347 |
| 28972_at | 10.04646 | 9.774074 | 9.844347 | 10.06427 | 10.00335 | 9.965822 | 9.900267 | 9.820287 |
| 28973_at | 7.850612 | 8.107555 | 8.26777  | 8.261339 | 8.170955 | 7.637635 | 8.03411  | 8.03439  |
| 28974_at | 9.515833 | 9.038752 | 9.135332 | 9.491584 | 8.974813 | 9.517045 | 9.531538 | 8.867105 |
| 28976_at | 5.576149 | 5.082735 | 5.653314 | 4.929726 | 5.541234 | 5.016403 | 4.78117  | 5.411732 |
| 28977_at | 6.668359 | 6.43372  | 6.303018 | 6.845408 | 6.714507 | 6.223525 | 6.33462  | 6.795931 |
| 28978_at | 7.547232 | 7.762921 | 7.746972 | 7.026414 | 7.581062 | 7.15556  | 7.57184  | 8.345878 |
| 2897_at  | 2.746211 | 1.86995  | 2.280711 | 2.175267 | 1.723618 | 1.657038 | 1.449352 | 1.993571 |
| 28981_at | 5.535535 | 5.158137 | 5.614739 | 5.254829 | 4.656697 | 4.039957 | 3.90614  | 6.150037 |
| 28982_at | 4.610849 | 2.742419 | 4.775154 | 3.490697 | 5.07422  | 3.488738 | 3.966743 | 5.542702 |
| 28983_at | 1.33847  | 1.299179 | 1.007181 | 1.0756   | 2.254992 | 1.158761 | 1.327273 | 1.490517 |
| 28984_at | 4.801379 | 4.073737 | 5.107994 | 4.824436 | 3.878611 | 3.716189 | 3.732548 | 3.014529 |
| 28985_at | 4.162944 | 4.924375 | 5.040856 | 4.445797 | 4.920097 | 3.692725 | 3.744121 | 3.556118 |
| 28986_at | 6.88157  | 7.683445 | 6.822596 | 6.495354 | 6.695525 | 6.752071 | 6.563451 | 6.829862 |
| 28987_at | 7.157704 | 6.645627 | 7.189232 | 6.468905 | 5.849994 | 6.901259 | 6.635003 | 6.788686 |
| 28988_at | 5.492914 | 4.662709 | 4.818787 | 5.011066 | 4.880435 | 5.509032 | 5.022416 | 4.166988 |
| 28989_at | 5.098029 | 5.083579 | 4.583361 | 4.284166 | 4.99772  | 5.000716 | 4.466444 | 5.435069 |
| 2898_at  | 5.711443 | 5.670237 | 5.819908 | 5.981175 | 5.144174 | 4.185254 | 6.426682 | 5.058249 |
| 28990_at | 4.421047 | 3.091371 | 4.052857 | 3.505752 | 3.074621 | 3.583336 | 3.203889 | 4.106602 |
| 28991_at | 3.07662  | 3.445911 | 3.395153 | 3.265081 | 3.782962 | 3.593722 | 3.377479 | 3.300843 |
| 28992_at | 4.313555 | 3.907824 | 3.433791 | 3.355973 | 5.379284 | 4.164419 | 3.025645 | 4.574277 |
| 28996_at | 9.643192 | 10.00519 | 10.42709 | 10.30722 | 9.873205 | 10.22637 | 10.44993 | 9.062517 |
| 28998_at | 7.373356 | 7.018136 | 6.931723 | 6.9974   | 7.375527 | 7.170124 | 6.85039  | 7.039773 |
| 28999_at | 2.472092 | 1.864215 | 1.815003 | 2.40323  | 1.891042 | 1.924117 | 1.92951  | 1.815917 |



|          |          |          |          |          |          |          |          |          |
|----------|----------|----------|----------|----------|----------|----------|----------|----------|
| 2899_at  | 1.303419 | 2.046142 | 1.976911 | 1.451091 | 2.201445 | 1.619001 | 2.157325 | 1.495747 |
| 28_at    | 1.286507 | 2.364155 | 2.098127 | 3.253807 | 2.543451 | 2.305367 | 3.145547 | 1.932309 |
| 2900_at  | 2.157386 | 3.721915 | 2.175332 | 3.430605 | 1.928067 | 3.102618 | 3.380451 | 2.630042 |
| 29015_at | 5.698697 | 6.641162 | 6.011399 | 5.733508 | 5.900788 | 5.597223 | 6.193115 | 4.674007 |
| 29018_at | 1.664813 | 1.746903 | 1.845975 | 2.264471 | 2.801794 | 2.597421 | 2.484912 | 1.433558 |
| 2901_at  | 4.911762 | 4.167076 | 4.860772 | 3.384428 | 4.150078 | 4.478045 | 3.35305  | 4.297576 |
| 29028_at | 2.314843 | 4.454073 | 3.625896 | 4.854727 | 3.098781 | 2.938876 | 4.886828 | 4.061056 |
| 2902_at  | 1.84433  | 1.592314 | 1.871114 | 1.955718 | 1.96423  | 1.920314 | 1.748031 | 1.665296 |
| 29034_at | 1.091926 | 1.177093 | 1.109131 | 1.019482 | 1.702323 | 1.863935 | 1.494946 | 1.229583 |
| 29035_at | 7.967458 | 7.599767 | 7.69853  | 7.897091 | 7.957947 | 7.03416  | 7.869996 | 7.42579  |
| 2903_at  | 2.028576 | 2.914781 | 1.919594 | 1.957952 | 2.70129  | 1.818603 | 2.242719 | 2.182772 |
| 2904_at  | 1.79563  | 1.517451 | 2.008405 | 1.81148  | 2.719417 | 2.031457 | 1.572034 | 2.456131 |
| 29057_at | 1.354474 | 1.665013 | 1.840609 | 2.268171 | 1.963258 | 2.379603 | 2.894213 | 3.507774 |
| 29058_at | 6.850653 | 5.693705 | 6.200251 | 6.787455 | 6.791188 | 6.121433 | 6.318215 | 5.713056 |
| 2905_at  | 1.637677 | 2.04735  | 2.231354 | 2.013778 | 2.679077 | 1.814042 | 2.416892 | 1.884974 |
| 29062_at | 5.072555 | 4.650371 | 5.39339  | 5.052931 | 5.078533 | 5.000841 | 4.037861 | 3.645648 |
| 29063_at | 2.779343 | 2.559205 | 2.678852 | 3.429963 | 3.508407 | 3.50646  | 3.893734 | 3.549915 |
| 29065_at | 1.575698 | 2.192433 | 1.839107 | 1.54014  | 1.93897  | 1.702423 | 1.729953 | 1.995563 |
| 29066_at | 6.683019 | 6.656366 | 6.870683 | 6.522943 | 6.834243 | 7.064423 | 6.648525 | 6.065734 |
| 29068_at | 7.125385 | 7.471382 | 7.069472 | 7.324335 | 7.388221 | 6.671779 | 6.740597 | 7.448502 |
| 2906_at  | 2.396477 | 3.514558 | 3.547118 | 2.417115 | 2.892397 | 2.477695 | 2.458742 | 2.323634 |
| 29070_at | 4.317266 | 3.251594 | 3.751128 | 3.825714 | 4.427455 | 3.092875 | 3.234774 | 3.993063 |
| 29071_at | 5.846605 | 5.934046 | 5.997177 | 5.170141 | 5.797383 | 5.445011 | 5.458701 | 5.770618 |
| 29072_at | 7.445622 | 7.623561 | 7.609533 | 7.772728 | 7.7133   | 7.584538 | 7.515876 | 7.39879  |
| 29074_at | 6.937306 | 7.362019 | 6.544046 | 6.844637 | 6.886709 | 6.698249 | 6.249764 | 7.120019 |
| 29075_at | 3.195613 | 1.532824 | 1.532395 | 1.399518 | 2.274373 | 1.729086 | 2.152567 | 2.284483 |
| 29078_at | 5.458751 | 5.936705 | 4.357523 | 4.828252 | 3.098273 | 5.216488 | 4.256344 | 4.507303 |
| 29079_at | 7.26996  | 7.314092 | 7.147934 | 6.918389 | 7.202443 | 6.701619 | 6.671246 | 7.728506 |
| 2907_at  | 6.02167  | 6.451025 | 6.441123 | 6.604193 | 5.818766 | 6.469898 | 7.117865 | 5.890178 |
| 29080_at | 7.504549 | 7.208564 | 7.021855 | 7.143644 | 6.937038 | 7.552606 | 6.932005 | 6.996074 |
| 29081_at | 7.159633 | 7.240208 | 7.13832  | 6.728842 | 6.442154 | 7.431014 | 6.699102 | 6.928672 |
| 29082_at | 6.900376 | 6.514584 | 6.286404 | 6.766218 | 6.701071 | 6.647674 | 6.793263 | 6.285766 |
| 29083_at | 6.531893 | 5.567924 | 5.021511 | 4.462139 | 5.604115 | 5.659258 | 5.677469 | 5.690774 |
| 29085_at | 5.658799 | 5.250752 | 5.660892 | 5.69822  | 5.082887 | 6.140451 | 5.064504 | 4.987375 |
| 29086_at | 6.931681 | 6.247268 | 6.401974 | 5.505729 | 6.465624 | 6.275747 | 5.605156 | 6.163874 |
| 29087_at | 5.998828 | 5.451769 | 5.58707  | 5.884951 | 6.013908 | 5.98919  | 5.74455  | 5.689411 |
| 29088_at | 5.59929  | 5.282528 | 6.027813 | 6.441706 | 6.046665 | 6.421796 | 5.586591 | 6.01743  |
| 29089_at | 4.412339 | 4.687562 | 4.621095 | 3.190013 | 4.336747 | 4.082435 | 2.692806 | 4.450502 |
| 2908_at  | 7.220545 | 7.324328 | 7.103295 | 7.28995  | 7.04994  | 6.991147 | 7.406509 | 7.541535 |
| 29090_at | 6.5389   | 6.71346  | 6.850815 | 6.217692 | 6.682345 | 6.110708 | 5.874016 | 6.394619 |
| 29091_at | 2.04685  | 2.650319 | 2.61814  | 2.632772 | 2.375524 | 2.184268 | 1.774507 | 2.413901 |
| 29092_at | 3.514035 | 2.81722  | 4.041133 | 4.371397 | 2.822787 | 4.161796 | 3.968641 | 2.697034 |
| 29093_at | 6.516529 | 6.183591 | 5.67842  | 6.549946 | 6.516645 | 5.907951 | 5.27167  | 6.29245  |
| 29094_at | 6.993181 | 7.156989 | 7.234444 | 6.1713   | 6.497813 | 7.344699 | 6.335437 | 7.059994 |
| 29095_at | 8.132823 | 7.979396 | 8.294433 | 8.145906 | 8.016841 | 8.201443 | 8.065497 | 8.246813 |
| 29097_at | 7.013559 | 6.985996 | 7.22787  | 7.189182 | 7.51598  | 7.090676 | 7.109377 | 7.476507 |
| 29098_at | 5.021143 | 5.373965 | 5.581998 | 5.231469 | 4.850391 | 5.055938 | 5.238438 | 5.053616 |
| 29099_at | 6.813073 | 6.326975 | 6.159084 | 5.394463 | 6.038535 | 6.009325 | 6.119504 | 6.210149 |
| 2909_at  | 7.471461 | 7.790651 | 7.591296 | 8.195702 | 7.890096 | 7.519476 | 7.686916 | 7.563471 |
| 290_at   | 8.959398 | 7.610676 | 8.249567 | 6.272517 | 9.00486  | 8.443895 | 6.337741 | 8.242822 |
| 29100_at | 7.133803 | 6.987604 | 6.755105 | 6.811286 | 5.853006 | 6.884003 | 6.093336 | 6.538654 |

|          |          |          |          |          |          |          |          |          |
|----------|----------|----------|----------|----------|----------|----------|----------|----------|
| 29101_at | 7.19368  | 7.213402 | 6.952951 | 6.499259 | 7.019236 | 7.10655  | 6.905382 | 6.828267 |
| 29102_at | 5.761431 | 6.36674  | 5.940668 | 5.731904 | 6.306147 | 5.793448 | 6.208684 | 6.483116 |
| 29103_at | 9.514016 | 9.469058 | 9.440603 | 9.5556   | 9.399265 | 9.146286 | 9.722467 | 8.75091  |
| 29104_at | 2.962683 | 4.634199 | 4.651733 | 4.986434 | 4.389301 | 4.223514 | 5.054876 | 5.075499 |
| 29105_at | 7.698789 | 7.171467 | 7.051098 | 6.612518 | 7.349535 | 7.080495 | 6.310996 | 7.023635 |
| 29106_at | 1.600976 | 1.451335 | 2.023723 | 1.178175 | 2.547328 | 2.86462  | 3.154817 | 1.397374 |
| 29107_at | 4.830765 | 4.368418 | 3.817787 | 4.231934 | 4.035517 | 3.81117  | 3.211371 | 4.244806 |
| 29108_at | 7.504542 | 7.074371 | 6.33543  | 7.238344 | 5.499744 | 6.986526 | 5.705177 | 6.836855 |
| 29109_at | 3.577689 | 3.843075 | 3.94136  | 3.902955 | 3.490495 | 3.915685 | 3.299755 | 2.85796  |
| 29110_at | 5.929701 | 5.97629  | 6.065884 | 6.258703 | 6.072858 | 5.807833 | 5.776346 | 5.92678  |
| 29113_at | 3.461129 | 3.537088 | 3.022274 | 3.359973 | 3.651031 | 2.833179 | 3.489427 | 3.718273 |
| 29114_at | 3.038663 | 3.80972  | 3.132283 | 3.150211 | 3.188671 | 2.503903 | 2.342571 | 2.495363 |
| 29115_at | 6.236328 | 6.545877 | 6.175309 | 6.448946 | 6.516567 | 6.490103 | 5.689203 | 6.314411 |
| 29116_at | 7.790634 | 8.403868 | 8.352923 | 8.287583 | 7.887821 | 8.084119 | 8.74365  | 7.68612  |
| 29117_at | 7.391653 | 7.518265 | 7.532938 | 7.317723 | 7.657562 | 6.562801 | 6.974337 | 8.216589 |
| 29118_at | 1.061646 | 1.201557 | 2.11055  | 1.562772 | 1.912606 | 2.053244 | 1.620473 | 1.565433 |
| 29119_at | 3.178186 | 2.986285 | 1.998334 | 0.937284 | 2.394954 | 2.11369  | 2.459183 | 1.376092 |
| 2911_at  | 1.576062 | 2.130274 | 1.805022 | 2.150948 | 2.601445 | 1.739765 | 1.643108 | 3.00177  |
| 29121_at | 2.378211 | 2.420162 | 3.56849  | 1.183599 | 2.504192 | 2.688061 | 2.043959 | 1.717711 |
| 29122_at | 4.341715 | 3.773426 | 4.050386 | 4.019842 | 2.517532 | 3.638404 | 4.33194  | 3.587601 |
| 29123_at | 6.17121  | 6.413526 | 6.454273 | 6.585764 | 6.333074 | 6.401562 | 6.846953 | 6.064395 |
| 29124_at | 0.909737 | 1.098122 | 1.407336 | 0.869158 | 2.353018 | 1.339437 | 1.736379 | 1.304682 |
| 29125_at | 1.94527  | 1.797373 | 2.076952 | 2.014713 | 2.551393 | 2.68138  | 2.873321 | 1.827919 |
| 29126_at | 4.712249 | 7.34223  | 5.409565 | 5.470545 | 4.448779 | 4.37443  | 4.811523 | 5.416976 |
| 29127_at | 2.398528 | 2.251115 | 2.429511 | 1.625798 | 2.415125 | 2.250254 | 2.992968 | 3.43949  |
| 29128_at | 1.840066 | 2.757694 | 1.840749 | 1.936096 | 2.085459 | 1.981597 | 3.389411 | 2.688636 |
| 2912_at  | 1.784171 | 1.557969 | 2.586034 | 1.548484 | 3.232426 | 2.117859 | 1.717502 | 1.797253 |
| 2913_at  | 1.774214 | 1.661831 | 2.221902 | 1.647809 | 1.595405 | 1.570976 | 1.639846 | 1.016886 |
| 2914_at  | 2.396666 | 3.203159 | 2.942427 | 2.485314 | 2.865575 | 3.071957 | 3.383921 | 2.77903  |
| 2915_at  | 1.467611 | 1.759586 | 2.046788 | 2.379099 | 2.481693 | 1.724327 | 2.008055 | 2.121098 |
| 2916_at  | 2.262474 | 2.844086 | 2.091262 | 2.753314 | 1.330093 | 3.400454 | 2.464117 | 1.595767 |
| 2917_at  | 1.210095 | 1.518227 | 2.031699 | 1.424603 | 1.534525 | 2.88264  | 1.721061 | 1.374077 |
| 2918_at  | 1.85167  | 1.320379 | 1.363397 | 1.52504  | 1.545309 | 1.788667 | 1.162198 | 1.739044 |
| 2919_at  | 4.958062 | 5.153942 | 2.931408 | 4.680225 | 4.806271 | 4.726256 | 3.096187 | 4.170683 |
| 291_at   | 6.570235 | 6.293625 | 6.59485  | 6.231503 | 6.409861 | 5.927927 | 6.42311  | 6.522518 |
| 2920_at  | 2.374662 | 1.582534 | 2.15593  | 2.894165 | 2.352088 | 1.222942 | 3.488234 | 1.955709 |
| 2921_at  | 2.899104 | 2.935604 | 2.018484 | 2.411988 | 2.337826 | 2.652816 | 4.194693 | 3.658678 |
| 2922_at  | 2.399071 | 2.46957  | 2.400253 | 2.572442 | 2.716356 | 2.859957 | 2.1294   | 2.73104  |
| 2925_at  | 1.932493 | 2.509029 | 1.9979   | 2.369477 | 1.832787 | 2.455563 | 1.721586 | 2.107749 |
| 2926_at  | 6.913159 | 6.978429 | 7.037792 | 7.185619 | 6.897276 | 7.038337 | 6.804513 | 7.228758 |
| 2928_at  | 1.378598 | 1.291331 | 1.743997 | 1.908601 | 2.637796 | 1.309201 | 1.47787  | 1.415901 |
| 292_at   | 7.466667 | 6.710932 | 6.84104  | 6.32464  | 7.465666 | 5.882292 | 6.463135 | 7.213713 |
| 2931_at  | 7.189035 | 6.809087 | 6.887828 | 6.873227 | 6.830682 | 7.050837 | 6.749538 | 6.361555 |
| 2932_at  | 7.388443 | 7.626807 | 7.755407 | 7.961426 | 7.904245 | 7.875277 | 7.353541 | 7.16394  |
| 2934_at  | 6.468049 | 6.50087  | 6.749639 | 6.464905 | 6.161378 | 6.566436 | 6.416311 | 5.973623 |
| 2935_at  | 5.205839 | 5.716056 | 4.822803 | 5.657697 | 5.699998 | 5.670955 | 5.446696 | 5.483842 |
| 2936_at  | 7.059467 | 6.890209 | 7.183317 | 6.555624 | 6.58624  | 7.268346 | 6.951551 | 7.225841 |
| 2937_at  | 6.264359 | 5.986606 | 6.078875 | 5.839329 | 6.701474 | 6.409884 | 6.066323 | 5.757661 |
| 2938_at  | 8.494359 | 7.699862 | 8.220878 | 5.456459 | 9.025416 | 8.369169 | 6.71929  | 8.810054 |
| 2939_at  | 6.883313 | 6.515807 | 6.399038 | 2.62192  | 6.375456 | 6.839119 | 4.71918  | 6.758771 |
| 293_at   | 10.13892 | 9.585638 | 9.588554 | 9.82451  | 9.43808  | 10.08001 | 9.540147 | 8.295714 |

|          |          |          |          |          |          |          |          |          |
|----------|----------|----------|----------|----------|----------|----------|----------|----------|
| 2940_at  | 1.480157 | 1.7615   | 1.625067 | 1.58103  | 1.509364 | 1.306299 | 3.192398 | 2.498421 |
| 2941_at  | 6.79943  | 7.378096 | 6.583692 | 6.102806 | 5.673346 | 6.330645 | 6.045514 | 6.467421 |
| 2946_at  | 5.680238 | 4.201869 | 2.626824 | 2.298017 | 1.250734 | 3.247183 | 3.789387 | 4.890399 |
| 2947_at  | 6.918694 | 7.025323 | 6.214381 | 6.256404 | 7.206807 | 6.993509 | 7.178917 | 6.592595 |
| 2948_at  | 5.673162 | 6.225199 | 6.353201 | 5.358659 | 6.792618 | 6.223686 | 5.883518 | 5.626574 |
| 2949_at  | 2.974421 | 5.86426  | 5.061193 | 2.427751 | 5.943982 | 2.0665   | 2.443557 | 5.005226 |
| 2950_at  | 9.455246 | 9.109205 | 9.463291 | 9.239211 | 8.86762  | 9.439877 | 9.611566 | 9.136461 |
| 2954_at  | 3.493776 | 3.832018 | 2.958363 | 3.57372  | 3.209918 | 3.087249 | 3.189709 | 3.070179 |
| 2956_at  | 6.299491 | 6.889983 | 7.051412 | 6.483225 | 6.79118  | 7.168133 | 6.571152 | 7.216653 |
| 2957_at  | 8.088602 | 8.149169 | 8.494882 | 8.418667 | 8.501231 | 8.020369 | 8.27966  | 8.647054 |
| 2958_at  | 5.382506 | 5.693088 | 5.389376 | 5.36283  | 5.251555 | 5.34798  | 5.273314 | 5.251022 |
| 2959_at  | 7.198613 | 7.07058  | 7.429962 | 6.786797 | 7.057609 | 6.840624 | 7.021705 | 7.59907  |
| 2960_at  | 5.19594  | 4.597053 | 5.073654 | 5.07096  | 5.547602 | 3.541344 | 5.208766 | 5.160475 |
| 2961_at  | 6.204774 | 6.306464 | 5.768722 | 5.938391 | 5.925436 | 5.883359 | 5.227981 | 6.145217 |
| 2962_at  | 6.996687 | 6.322943 | 6.930984 | 6.569728 | 6.384976 | 7.101155 | 6.891374 | 6.160353 |
| 2963_at  | 6.959139 | 6.366778 | 5.027171 | 6.530985 | 5.623451 | 6.747375 | 6.448823 | 7.150205 |
| 2965_at  | 6.449936 | 5.779743 | 5.984219 | 5.724564 | 6.179347 | 5.764901 | 5.688357 | 6.240048 |
| 2967_at  | 4.689689 | 4.995853 | 5.209276 | 5.768147 | 4.652193 | 4.188722 | 4.942724 | 4.836239 |
| 2968_at  | 4.314994 | 4.280406 | 4.598783 | 3.352725 | 3.31341  | 3.376007 | 3.477675 | 3.761113 |
| 2969_at  | 7.281171 | 6.909848 | 6.835443 | 7.808515 | 6.851423 | 7.143533 | 6.824113 | 6.854175 |
| 2971_at  | 7.961932 | 7.500974 | 7.013663 | 6.87305  | 6.942713 | 7.548776 | 7.062308 | 7.661161 |
| 2972_at  | 3.981887 | 4.122623 | 4.641515 | 4.376198 | 3.734685 | 3.791456 | 4.016065 | 4.326379 |
| 2974_at  | 1.602972 | 1.682981 | 1.713278 | 2.77588  | 2.128461 | 2.023274 | 1.583592 | 1.883516 |
| 2975_at  | 5.717701 | 6.148667 | 5.748058 | 5.66709  | 4.939864 | 5.991432 | 6.004844 | 5.275863 |
| 29760_at | 2.969927 | 2.33513  | 2.339863 | 3.182343 | 3.927167 | 3.558732 | 3.315007 | 3.090573 |
| 29761_at | 6.717712 | 6.518868 | 6.46159  | 6.530273 | 6.608233 | 6.659559 | 6.649737 | 7.340107 |
| 29763_at | 3.38497  | 3.367706 | 3.258932 | 3.009948 | 3.457552 | 3.781186 | 3.240669 | 2.937486 |
| 29765_at | 1.611762 | 2.411195 | 1.851251 | 1.964629 | 2.179189 | 1.691489 | 2.54417  | 1.969332 |
| 29766_at | 8.76357  | 9.127841 | 8.787305 | 9.01987  | 8.969406 | 8.894252 | 9.387166 | 9.22475  |
| 29767_at | 5.811106 | 5.270031 | 6.595765 | 5.838882 | 4.966282 | 5.704321 | 7.17472  | 5.772463 |
| 2976_at  | 6.209296 | 5.628067 | 5.442589 | 5.771265 | 5.323874 | 6.066808 | 6.111147 | 5.338884 |
| 29774_at | 2.777259 | 1.138193 | 2.617384 | 1.252384 | 1.318093 | 1.341359 | 1.307339 | 1.863297 |
| 29775_at | 4.520563 | 4.420844 | 4.343094 | 4.431465 | 3.409919 | 3.541385 | 4.351745 | 4.367107 |
| 29777_at | 4.134031 | 4.129874 | 4.76755  | 4.195449 | 3.793288 | 4.178751 | 5.053297 | 4.240119 |
| 2977_at  | 2.891123 | 4.233153 | 2.772275 | 3.008832 | 3.708742 | 2.800187 | 2.540852 | 2.81859  |
| 29780_at | 4.247978 | 3.292817 | 5.103271 | 4.078543 | 3.458273 | 4.764078 | 3.252443 | 3.041954 |
| 29781_at | 3.273967 | 2.642109 | 3.155985 | 3.09977  | 3.416799 | 2.536953 | 3.357915 | 3.35352  |
| 29785_at | 2.819368 | 2.913483 | 3.022816 | 2.960036 | 2.572357 | 2.662556 | 3.322896 | 3.30329  |
| 29789_at | 5.847522 | 5.788539 | 5.831842 | 5.622306 | 4.9598   | 5.655547 | 5.865741 | 6.365285 |
| 2978_at  | 1.650402 | 1.850044 | 2.786071 | 2.424707 | 1.987579 | 2.356407 | 2.091515 | 2.089093 |
| 29796_at | 10.2515  | 9.941481 | 10.16867 | 9.881263 | 9.495557 | 9.855417 | 9.933751 | 9.381728 |
| 29797_at | 5.532736 | 5.96831  | 5.456209 | 5.286611 | 6.118927 | 5.204962 | 5.456226 | 5.160401 |
| 29799_at | 3.602003 | 2.939523 | 2.980581 | 3.030558 | 2.534837 | 2.383841 | 3.351824 | 2.321575 |
| 2979_at  | 2.290036 | 1.626258 | 2.812439 | 1.323317 | 2.290807 | 1.461305 | 2.224808 | 2.256814 |
| 29800_at | 5.559146 | 5.427054 | 4.886353 | 4.822856 | 4.421721 | 5.414151 | 5.413961 | 4.751991 |
| 29801_at | 4.589534 | 4.66824  | 4.529274 | 4.95047  | 4.97202  | 4.400891 | 5.073484 | 4.231694 |
| 29802_at | 1.793817 | 1.483751 | 2.834135 | 1.31701  | 1.835515 | 2.452302 | 1.839669 | 1.862466 |
| 29803_at | 4.59242  | 4.435687 | 5.623996 | 5.265962 | 6.032269 | 4.426156 | 4.699948 | 5.286682 |
| 2980_at  | 2.978761 | 2.804436 | 3.287401 | 3.399488 | 3.116141 | 3.206192 | 3.602869 | 3.103574 |
| 2981_at  | 1.818229 | 1.411658 | 1.993481 | 2.158349 | 2.442319 | 1.4484   | 2.149635 | 1.831849 |
| 2982_at  | 6.104529 | 6.456536 | 5.216473 | 6.028854 | 5.466508 | 5.876915 | 5.639868 | 6.147461 |

|          |          |          |          |          |          |          |          |          |
|----------|----------|----------|----------|----------|----------|----------|----------|----------|
| 2983_at  | 7.264917 | 7.047699 | 7.116376 | 6.836587 | 6.524353 | 6.741419 | 7.471505 | 7.138976 |
| 29841_at | 3.398965 | 2.66951  | 2.076115 | 2.046809 | 3.405017 | 2.143955 | 2.596109 | 3.01346  |
| 29842_at | 3.18963  | 3.955704 | 4.07855  | 5.430725 | 4.873756 | 4.867738 | 3.057947 | 2.938108 |
| 29843_at | 6.313735 | 5.657987 | 6.158934 | 5.781499 | 5.454935 | 5.142711 | 5.837518 | 6.09589  |
| 29844_at | 5.585079 | 5.960396 | 5.36443  | 5.953264 | 4.267396 | 5.479567 | 3.729922 | 4.60417  |
| 2984_at  | 1.592606 | 1.699546 | 1.468733 | 1.753337 | 1.938298 | 1.462861 | 1.554299 | 1.992591 |
| 29850_at | 1.825029 | 2.876302 | 2.464768 | 2.863916 | 2.468684 | 1.87494  | 2.290867 | 2.45575  |
| 29851_at | 2.47468  | 1.080096 | 1.249183 | 0.810795 | 1.260216 | 1.277418 | 0.95891  | 1.412797 |
| 29855_at | 3.89728  | 3.998885 | 3.966981 | 4.527204 | 4.037816 | 4.48589  | 4.867882 | 4.850732 |
| 2986_at  | 1.748586 | 1.430584 | 1.185076 | 1.309257 | 2.485118 | 1.469367 | 1.726357 | 1.1931   |
| 2987_at  | 8.524275 | 7.955138 | 7.748912 | 7.499984 | 7.910731 | 8.161241 | 7.965735 | 7.544761 |
| 29880_at | 6.590141 | 6.714414 | 6.734651 | 6.355816 | 6.908147 | 5.868635 | 6.163431 | 7.46059  |
| 29881_at | 1.325117 | 1.570794 | 2.327368 | 1.803613 | 2.073959 | 1.653823 | 1.880355 | 2.046433 |
| 29882_at | 3.551846 | 3.287263 | 3.5581   | 3.604511 | 3.138754 | 3.407319 | 3.199268 | 3.456033 |
| 29883_at | 5.22298  | 5.330368 | 5.008848 | 5.43161  | 5.344609 | 4.633624 | 4.770878 | 6.171306 |
| 29886_at | 4.785313 | 4.545599 | 4.299104 | 3.982368 | 3.505199 | 3.784288 | 4.313591 | 3.90173  |
| 29887_at | 4.555009 | 4.299817 | 4.663723 | 5.208249 | 4.889014 | 3.861118 | 4.964456 | 5.646622 |
| 29888_at | 4.58481  | 4.802131 | 5.285656 | 5.175548 | 3.652614 | 4.195871 | 4.738397 | 4.410828 |
| 29889_at | 5.840505 | 5.700705 | 5.967295 | 5.715426 | 6.08776  | 5.771758 | 6.115755 | 6.215988 |
| 29890_at | 4.588356 | 4.019559 | 4.390571 | 3.614184 | 4.317364 | 4.53626  | 4.326768 | 4.311352 |
| 29893_at | 4.462243 | 4.859512 | 4.444211 | 4.593841 | 3.466711 | 4.508829 | 4.261121 | 4.342006 |
| 29894_at | 4.738348 | 4.691326 | 4.787819 | 4.561123 | 3.303025 | 4.785261 | 4.394474 | 4.518955 |
| 29895_at | 4.057543 | 3.86272  | 3.706388 | 3.791924 | 3.308746 | 3.776567 | 2.880717 | 2.350973 |
| 29896_at | 7.393421 | 8.148779 | 7.468351 | 7.33544  | 6.828773 | 7.528802 | 7.449263 | 7.52501  |
| 29899_at | 2.946093 | 1.710291 | 1.659406 | 1.480648 | 1.935968 | 1.940574 | 2.791851 | 1.748326 |
| 29901_at | 1.596449 | 2.398933 | 2.578229 | 2.467859 | 2.599332 | 2.709683 | 2.343441 | 2.748094 |
| 29902_at | 4.245591 | 4.595208 | 4.175247 | 4.088432 | 5.228427 | 4.095101 | 3.76969  | 5.024796 |
| 29903_at | 3.283177 | 2.515578 | 3.400186 | 2.275282 | 2.510521 | 2.865765 | 2.691339 | 2.203168 |
| 29904_at | 4.137211 | 4.279137 | 4.271814 | 4.016773 | 3.225082 | 3.976079 | 3.721047 | 3.333697 |
| 29906_at | 2.256767 | 1.882141 | 2.285744 | 1.755094 | 1.919348 | 1.93972  | 2.182798 | 2.212753 |
| 29909_at | 2.068393 | 2.972973 | 2.439032 | 1.307744 | 2.557582 | 1.60147  | 2.790074 | 1.754368 |
| 2990_at  | 6.401772 | 5.978657 | 5.73144  | 6.003212 | 6.146485 | 5.726956 | 5.989726 | 5.921136 |
| 29911_at | 3.526104 | 2.830155 | 2.661679 | 2.770244 | 2.644959 | 3.56655  | 3.192985 | 2.296318 |
| 29914_at | 4.711859 | 4.688103 | 4.764777 | 4.793443 | 5.543957 | 4.262661 | 4.733818 | 4.149234 |
| 29915_at | 5.85956  | 6.61596  | 5.410351 | 6.477961 | 5.774735 | 6.036159 | 6.376698 | 6.38487  |
| 29916_at | 4.706049 | 4.78859  | 4.618535 | 4.329957 | 4.26804  | 4.297261 | 5.516643 | 5.313629 |
| 29919_at | 5.982888 | 5.588774 | 5.707948 | 5.245516 | 5.508408 | 5.47979  | 5.356541 | 5.534494 |
| 29920_at | 4.924055 | 5.334976 | 5.262104 | 4.757153 | 4.098346 | 5.359759 | 5.489163 | 4.362666 |
| 29922_at | 6.127168 | 6.498169 | 6.029592 | 5.948221 | 6.051583 | 5.763587 | 5.912645 | 6.258152 |
| 29923_at | 4.312403 | 4.586024 | 4.996616 | 5.0549   | 3.091571 | 4.241711 | 3.260862 | 3.591297 |
| 29924_at | 5.019023 | 5.014822 | 5.465392 | 5.305604 | 5.00881  | 5.58983  | 5.470585 | 3.974132 |
| 29925_at | 4.022268 | 3.34047  | 3.11957  | 3.533749 | 3.354271 | 3.623913 | 4.134722 | 3.158171 |
| 29926_at | 5.873091 | 5.623396 | 5.963035 | 4.976893 | 4.590575 | 5.140917 | 5.879331 | 5.564086 |
| 29927_at | 8.627977 | 8.638204 | 8.723795 | 8.980549 | 8.539366 | 8.358604 | 8.678417 | 8.626959 |
| 29928_at | 5.312336 | 6.383665 | 6.04156  | 6.301884 | 6.154593 | 5.256998 | 5.311219 | 5.115527 |
| 29929_at | 4.74037  | 5.536436 | 4.453508 | 4.716555 | 4.459247 | 4.692719 | 4.572641 | 5.627875 |
| 2992_at  | 5.909705 | 6.364149 | 5.123071 | 5.446532 | 5.348429 | 5.331643 | 5.515629 | 5.863584 |
| 29930_at | 1.185913 | 1.078474 | 0.997955 | 1.174778 | 1.032762 | 1.219355 | 1.36441  | 1.208273 |
| 29931_at | 1.948823 | 2.4314   | 2.076546 | 1.431984 | 3.16949  | 1.474147 | 2.39911  | 1.113116 |
| 29933_at | 1.80483  | 1.506085 | 1.370007 | 0.905026 | 1.648611 | 0.884433 | 1.462423 | 1.148842 |
| 29934_at | 6.571254 | 6.807571 | 7.477239 | 7.292801 | 7.31967  | 7.019333 | 7.390594 | 7.138117 |

|          |          |          |          |          |          |          |          |          |
|----------|----------|----------|----------|----------|----------|----------|----------|----------|
| 29935_at | 1.703908 | 1.453538 | 1.474617 | 1.573967 | 1.372389 | 1.34123  | 2.000825 | 2.149163 |
| 29937_at | 9.182269 | 8.620962 | 8.718942 | 8.390518 | 8.645175 | 8.876659 | 7.865428 | 8.903349 |
| 2993_at  | 1.849183 | 3.156408 | 1.202746 | 0.980879 | 1.986848 | 1.136705 | 1.26933  | 1.03561  |
| 29940_at | 6.358214 | 6.119082 | 6.225513 | 6.119693 | 5.340636 | 6.125262 | 6.026364 | 6.4557   |
| 29941_at | 3.31751  | 3.144127 | 2.451841 | 3.703141 | 2.819437 | 3.591988 | 3.051948 | 4.123432 |
| 29942_at | 2.214153 | 2.243067 | 2.34139  | 2.396124 | 3.571477 | 3.010096 | 2.151606 | 2.350714 |
| 29943_at | 1.771223 | 2.106156 | 1.728946 | 2.488501 | 2.501343 | 1.48739  | 1.74343  | 2.062108 |
| 29944_at | 3.334076 | 3.180594 | 3.228378 | 2.660665 | 2.701234 | 2.870503 | 2.737106 | 3.417588 |
| 29945_at | 4.135051 | 4.14855  | 3.392642 | 4.312333 | 4.057592 | 3.922166 | 3.814484 | 4.798754 |
| 29946_at | 4.325496 | 5.026838 | 4.093779 | 4.541996 | 4.544447 | 3.227017 | 4.737981 | 4.742381 |
| 29947_at | 1.721016 | 1.218085 | 1.291755 | 1.422441 | 2.48706  | 1.633196 | 1.122737 | 1.470468 |
| 29948_at | 3.332257 | 3.976168 | 5.65876  | 3.881772 | 2.958608 | 5.355905 | 4.746237 | 3.264919 |
| 29949_at | 1.582793 | 2.248785 | 1.723427 | 1.684601 | 1.984748 | 1.672577 | 1.563396 | 2.07671  |
| 2994_at  | 1.466534 | 2.708581 | 1.399714 | 2.638785 | 2.290829 | 1.418867 | 3.76457  | 3.480346 |
| 29950_at | 4.696016 | 4.672545 | 4.55898  | 5.059835 | 4.381288 | 4.825782 | 4.503503 | 4.182389 |
| 29951_at | 1.062368 | 0.957458 | 0.840701 | 1.270977 | 1.647775 | 2.03493  | 1.171475 | 0.803695 |
| 29952_at | 6.28707  | 5.867519 | 5.440624 | 5.508636 | 5.233411 | 6.55634  | 5.746451 | 4.768302 |
| 29953_at | 3.819301 | 3.808897 | 3.59877  | 2.188681 | 4.497947 | 2.432497 | 1.523734 | 3.752449 |
| 29954_at | 4.661808 | 5.349678 | 5.483318 | 5.169003 | 5.052276 | 5.429112 | 6.422632 | 5.521414 |
| 29956_at | 8.161177 | 8.301846 | 8.125276 | 7.895151 | 8.05987  | 8.03671  | 8.320433 | 7.596678 |
| 29957_at | 5.989056 | 5.643325 | 5.635819 | 5.402663 | 5.90692  | 5.713973 | 6.131979 | 5.708469 |
| 29958_at | 4.79659  | 3.491123 | 4.600617 | 2.563924 | 5.469615 | 3.966753 | 2.203449 | 4.818161 |
| 29959_at | 7.759922 | 7.830859 | 7.645857 | 8.267797 | 7.387261 | 7.713811 | 7.853951 | 7.438402 |
| 2995_at  | 6.16491  | 6.253543 | 6.131906 | 6.662866 | 5.469055 | 6.513909 | 5.801396 | 5.996707 |
| 29960_at | 5.96861  | 5.762795 | 5.0546   | 4.710162 | 5.815175 | 5.430624 | 5.133694 | 5.704504 |
| 29964_at | 2.646964 | 2.613094 | 1.792062 | 2.134684 | 1.746898 | 3.017308 | 2.626303 | 2.716603 |
| 29965_at | 4.175751 | 4.946974 | 4.804936 | 3.763032 | 4.293589 | 4.278358 | 5.124445 | 3.683885 |
| 29966_at | 6.975776 | 7.22745  | 6.838543 | 7.186109 | 7.219378 | 6.247451 | 7.252386 | 7.20643  |
| 29967_at | 4.747889 | 5.563584 | 5.349313 | 5.450829 | 4.544659 | 4.913066 | 5.187373 | 5.396006 |
| 29968_at | 6.077901 | 5.420897 | 6.216528 | 3.657806 | 7.949615 | 6.51919  | 4.31071  | 6.341848 |
| 29969_at | 4.807258 | 4.648779 | 4.931602 | 4.671118 | 4.042394 | 4.733242 | 4.360564 | 4.258996 |
| 2996_at  | 2.847196 | 2.453777 | 2.243027 | 2.870548 | 1.560654 | 2.21551  | 1.569133 | 2.809181 |
| 29970_at | 2.419074 | 2.422485 | 2.314757 | 4.179772 | 1.345095 | 1.898363 | 3.534826 | 3.605898 |
| 29974_at | 4.02178  | 4.018929 | 4.313143 | 3.16277  | 5.792963 | 3.929657 | 2.787078 | 4.106716 |
| 29978_at | 6.255616 | 5.947279 | 6.51454  | 6.472987 | 5.317427 | 6.269119 | 6.588288 | 5.72289  |
| 29979_at | 8.608667 | 8.510031 | 8.6112   | 8.561369 | 8.253201 | 8.519592 | 8.577436 | 8.056814 |
| 2997_at  | 3.854733 | 3.161325 | 3.572385 | 3.651166 | 4.521295 | 3.747018 | 4.152672 | 2.842714 |
| 29980_at | 4.283368 | 3.168876 | 2.910526 | 2.590249 | 2.611041 | 1.962013 | 2.867857 | 2.916684 |
| 29982_at | 5.871226 | 5.898798 | 5.868232 | 4.822298 | 4.89589  | 5.064738 | 5.162914 | 5.284495 |
| 29984_at | 4.342246 | 4.888159 | 3.331156 | 4.379591 | 3.36056  | 4.855541 | 4.340769 | 4.127352 |
| 29985_at | 4.461844 | 3.639492 | 3.008904 | 4.144782 | 2.480644 | 3.192537 | 4.901611 | 2.609193 |
| 29986_at | 2.036008 | 2.211515 | 1.593481 | 2.290356 | 2.056228 | 3.450935 | 2.621912 | 1.661246 |
| 29988_at | 4.214444 | 4.423575 | 4.647877 | 4.734363 | 4.102403 | 4.454761 | 4.383341 | 4.822364 |
| 29989_at | 2.567288 | 1.545523 | 3.009731 | 1.534077 | 0.752432 | 1.067861 | 1.466143 | 1.947666 |
| 2998_at  | 2.094333 | 1.462804 | 2.160287 | 1.812937 | 2.021163 | 1.927042 | 1.508291 | 1.798924 |
| 29991_at | 2.158776 | 2.830712 | 2.174952 | 4.42776  | 2.307232 | 2.457873 | 3.361897 | 3.809259 |
| 29992_at | 5.43679  | 4.824822 | 4.791054 | 3.851561 | 2.606841 | 4.727974 | 5.119882 | 4.684227 |
| 29993_at | 2.513964 | 2.554754 | 2.231167 | 2.852163 | 2.963037 | 2.384584 | 2.369674 | 3.854222 |
| 29994_at | 6.34502  | 6.17613  | 6.828793 | 6.545617 | 6.579037 | 6.315589 | 5.918827 | 6.39447  |
| 29995_at | 5.407625 | 5.695697 | 6.477705 | 5.440691 | 5.031499 | 6.428268 | 5.809281 | 5.687162 |
| 29997_at | 8.995527 | 8.624192 | 8.102538 | 8.343434 | 7.964612 | 8.767848 | 8.318294 | 8.158004 |

|          |          |          |          |          |          |          |          |          |
|----------|----------|----------|----------|----------|----------|----------|----------|----------|
| 29998_at | 3.963326 | 3.079127 | 3.837384 | 4.127486 | 2.929439 | 3.996204 | 3.206398 | 3.117342 |
| 29999_at | 3.139798 | 1.338347 | 2.10001  | 1.756907 | 2.087243 | 2.389213 | 2.078716 | 1.966181 |
| 2999_at  | 5.594503 | 2.726084 | 5.835004 | 4.167908 | 4.009301 | 5.951803 | 3.631872 | 3.698334 |
| 29_at    | 5.877223 | 5.46386  | 5.658222 | 5.92884  | 5.717085 | 5.772088 | 6.213456 | 5.170797 |
| 2_at     | 9.888761 | 10.51424 | 10.10693 | 10.73089 | 10.44362 | 10.27798 | 10.23054 | 10.24088 |
| 30000_at | 6.870551 | 6.611338 | 7.210464 | 6.901984 | 6.973906 | 6.45024  | 6.83113  | 6.1096   |
| 30001_at | 7.1179   | 7.018726 | 6.907262 | 7.116434 | 7.667974 | 7.452351 | 7.534515 | 7.057698 |
| 30008_at | 7.869482 | 7.269863 | 7.211478 | 7.503215 | 7.586066 | 7.600636 | 7.925712 | 6.641952 |
| 30009_at | 2.258109 | 3.066332 | 3.958821 | 3.640785 | 2.781318 | 3.13577  | 3.581731 | 3.013394 |
| 3000_at  | 2.080716 | 2.075547 | 2.625695 | 2.026718 | 1.828538 | 2.357194 | 2.111693 | 1.993153 |
| 30010_at | 2.079086 | 2.313841 | 2.273848 | 2.348262 | 2.363857 | 2.136274 | 1.891536 | 2.59807  |
| 30011_at | 7.294143 | 6.856086 | 7.243378 | 7.667103 | 7.151504 | 7.679356 | 7.27463  | 6.904805 |
| 30012_at | 2.49903  | 2.316305 | 2.346229 | 2.207006 | 2.521059 | 3.146287 | 2.34231  | 2.023091 |
| 3001_at  | 5.167055 | 3.729633 | 5.704687 | 6.787515 | 6.155589 | 5.987836 | 4.66475  | 5.220586 |
| 3002_at  | 5.858571 | 4.344381 | 5.203193 | 6.891596 | 2.180506 | 5.598201 | 4.833837 | 5.768422 |
| 3003_at  | 3.023971 | 2.837435 | 1.53847  | 3.425544 | 3.504588 | 1.769641 | 2.593246 | 3.335779 |
| 3004_at  | 3.856897 | 4.01553  | 3.907821 | 4.740365 | 4.389396 | 3.635091 | 4.305061 | 3.81614  |
| 3005_at  | 8.912241 | 8.879493 | 8.674283 | 8.803705 | 8.513777 | 8.529078 | 8.796075 | 8.813988 |
| 30061_at | 7.101097 | 7.267752 | 6.611076 | 6.974695 | 7.588448 | 7.200832 | 7.157956 | 7.194019 |
| 30062_at | 1.841405 | 1.660446 | 2.317028 | 1.783557 | 1.744866 | 2.320853 | 1.726417 | 1.561282 |
| 3006_at  | 8.119278 | 8.251787 | 7.855536 | 8.490812 | 8.102809 | 8.260398 | 8.388725 | 7.647042 |
| 3007_at  | 4.623371 | 5.333497 | 5.0525   | 5.822662 | 2.912666 | 4.25963  | 4.703948 | 4.668104 |
| 3008_at  | 8.921054 | 8.07577  | 8.921508 | 9.073654 | 8.493778 | 8.773399 | 9.477736 | 7.390162 |
| 3009_at  | 1.284836 | 0.85116  | 1.03402  | 2.904615 | 1.25546  | 0.97647  | 2.53078  | 2.775125 |
| 3010_at  | 1.427862 | 1.201104 | 1.357937 | 0.836758 | 0.946553 | 0.871597 | 0.927262 | 1.236988 |
| 3012_at  | 4.399798 | 5.193921 | 5.656425 | 5.321408 | 5.767047 | 4.870654 | 5.553038 | 6.262607 |
| 3013_at  | 0.976484 | 0.718578 | 1.209794 | 1.12807  | 1.0395   | 3.55452  | 1.202321 | 1.443613 |
| 3014_at  | 4.776555 | 5.161518 | 4.70605  | 5.20509  | 4.764566 | 4.872    | 4.794819 | 4.505925 |
| 3015_at  | 8.492219 | 8.391483 | 8.426993 | 8.176576 | 8.66112  | 8.512615 | 8.043383 | 8.714986 |
| 3017_at  | 8.25699  | 7.98934  | 8.041549 | 8.297281 | 8.833232 | 7.780459 | 7.526912 | 9.023083 |
| 3018_at  | 3.45507  | 3.252049 | 3.775423 | 2.616543 | 3.009287 | 3.892774 | 4.396355 | 3.226954 |
| 301_at   | 9.269867 | 8.885498 | 9.039551 | 9.228425 | 9.205498 | 8.638349 | 8.724221 | 8.692617 |
| 3021_at  | 9.086971 | 9.351606 | 9.305828 | 9.467594 | 8.959651 | 9.213899 | 9.371058 | 8.80403  |
| 3024_at  | 3.851882 | 2.110594 | 2.297245 | 2.601982 | 3.66329  | 1.518427 | 3.124293 | 1.803934 |
| 3026_at  | 2.136549 | 2.875467 | 3.104604 | 2.392399 | 3.427476 | 3.099972 | 2.918297 | 4.194656 |
| 3028_at  | 6.830038 | 6.289361 | 6.4507   | 6.41871  | 6.53525  | 6.846381 | 5.767546 | 6.482976 |
| 3029_at  | 7.92946  | 7.812714 | 7.274224 | 6.798906 | 7.501394 | 7.538646 | 6.92065  | 7.162497 |
| 302_at   | 6.384637 | 6.728187 | 6.836281 | 6.965234 | 5.766814 | 5.103515 | 6.835465 | 6.607936 |
| 3030_at  | 8.824685 | 8.924432 | 8.838827 | 8.582141 | 9.315944 | 8.742612 | 8.866067 | 8.797182 |
| 3032_at  | 7.761186 | 8.11399  | 8.182212 | 7.892091 | 8.193071 | 7.97064  | 7.719498 | 7.668687 |
| 3033_at  | 6.468308 | 6.479996 | 6.438705 | 5.1945   | 7.031355 | 5.888861 | 6.286652 | 5.930825 |
| 3034_at  | 1.188833 | 1.622525 | 1.229758 | 1.551719 | 1.935095 | 1.773545 | 0.942577 | 1.336417 |
| 3035_at  | 4.045998 | 5.276237 | 4.700762 | 5.324694 | 4.701947 | 4.704135 | 4.427166 | 5.14134  |
| 3036_at  | 1.412766 | 2.240746 | 2.222006 | 1.415351 | 2.632446 | 2.821998 | 1.466374 | 1.026289 |
| 3037_at  | 1.611093 | 2.10157  | 2.349619 | 1.866829 | 2.728454 | 1.742911 | 1.971666 | 2.551666 |
| 3038_at  | 3.295773 | 3.08624  | 2.805341 | 2.523438 | 2.709221 | 2.858205 | 2.679863 | 2.254011 |
| 3039_at  | 10.11402 | 11.07541 | 10.3679  | 10.8918  | 9.991275 | 10.12303 | 11.0753  | 9.662393 |
| 303_at   | 2.337906 | 2.759134 | 3.433728 | 1.915334 | 2.373525 | 2.289555 | 2.055205 | 2.974172 |
| 3040_at  | 11.38755 | 11.75152 | 11.4906  | 11.63767 | 11.11426 | 11.54319 | 11.66856 | 11.10886 |
| 3042_at  | 3.231563 | 3.75595  | 2.781012 | 4.396499 | 3.22156  | 3.103097 | 4.032312 | 2.295789 |
| 3043_at  | 9.898262 | 10.62182 | 9.905932 | 10.28059 | 9.61364  | 10.04223 | 10.42852 | 9.833873 |

|          |          |          |          |          |          |          |          |          |
|----------|----------|----------|----------|----------|----------|----------|----------|----------|
| 3044_at  | 1.195979 | 1.345664 | 1.146792 | 1.720929 | 1.090276 | 1.604193 | 2.039194 | 1.418365 |
| 3045_at  | 1.061316 | 0.990034 | 1.318717 | 1.453667 | 1.684695 | 1.863638 | 1.47344  | 1.275206 |
| 3046_at  | 2.580635 | 3.432954 | 3.049741 | 3.100736 | 2.34099  | 3.170167 | 2.3754   | 3.605761 |
| 3049_at  | 2.60147  | 2.598748 | 2.85166  | 1.988348 | 2.320365 | 3.37063  | 3.826267 | 2.402525 |
| 304_at   | 8.591556 | 8.577162 | 8.748756 | 8.586018 | 8.743757 | 8.568348 | 8.43484  | 8.772282 |
| 3050_at  | 2.687086 | 2.138688 | 1.615228 | 2.777864 | 2.063113 | 2.628003 | 1.964746 | 2.098587 |
| 3052_at  | 6.54043  | 5.900873 | 6.303323 | 5.020007 | 5.979667 | 5.275161 | 5.907349 | 6.189919 |
| 3053_at  | 4.058609 | 4.536516 | 4.039259 | 3.808475 | 3.324741 | 3.776232 | 3.730315 | 4.308695 |
| 3054_at  | 6.263271 | 6.320475 | 6.686115 | 6.666291 | 6.30955  | 6.420396 | 6.822439 | 6.151292 |
| 3055_at  | 3.574334 | 3.680277 | 2.778872 | 4.775902 | 2.52594  | 4.041665 | 4.26667  | 3.122646 |
| 3059_at  | 6.053885 | 5.785186 | 6.197286 | 6.558623 | 5.296749 | 6.37345  | 6.249573 | 6.091571 |
| 305_at   | 3.551246 | 2.880559 | 2.417861 | 2.572396 | 2.33575  | 2.750386 | 1.227822 | 2.045303 |
| 3060_at  | 2.701627 | 3.033117 | 2.984233 | 2.999561 | 3.517762 | 2.675544 | 3.040608 | 2.907603 |
| 3061_at  | 1.332822 | 1.601822 | 2.2105   | 1.693731 | 1.891766 | 1.847885 | 2.550694 | 1.935925 |
| 3062_at  | 2.615042 | 1.932198 | 2.12516  | 2.266787 | 1.904594 | 1.772367 | 1.809489 | 1.695027 |
| 3064_at  | 5.817647 | 6.005036 | 6.135049 | 6.219805 | 6.306438 | 6.091081 | 6.280798 | 6.045669 |
| 3065_at  | 6.978555 | 7.310432 | 6.363421 | 6.762788 | 6.954289 | 6.843944 | 7.246526 | 7.141792 |
| 3066_at  | 7.259494 | 7.67012  | 7.561989 | 7.26508  | 8.146992 | 6.717049 | 7.835683 | 8.403347 |
| 3067_at  | 2.314932 | 1.94636  | 1.616704 | 1.444573 | 1.231781 | 1.553474 | 2.385199 | 1.663045 |
| 3068_at  | 5.354248 | 5.346769 | 5.223952 | 5.155049 | 5.494638 | 5.997852 | 5.219317 | 5.253725 |
| 3069_at  | 8.324613 | 8.306414 | 8.217359 | 8.243813 | 8.051657 | 8.152494 | 8.337206 | 8.378256 |
| 306_at   | 3.870159 | 3.455252 | 3.80454  | 4.308667 | 3.665891 | 5.265416 | 3.482042 | 3.680016 |
| 3070_at  | 1.846257 | 1.98629  | 1.534474 | 3.884991 | 2.009115 | 2.027314 | 1.776191 | 2.526105 |
| 3071_at  | 4.177637 | 4.214676 | 4.152975 | 4.738388 | 4.115737 | 3.939215 | 5.069986 | 4.957872 |
| 3073_at  | 8.136112 | 8.057125 | 8.678641 | 8.456808 | 8.212473 | 7.639445 | 8.539119 | 8.10807  |
| 3074_at  | 8.032471 | 8.270128 | 8.039308 | 8.200755 | 8.551096 | 7.986157 | 8.098912 | 8.241765 |
| 3075_at  | 7.247787 | 6.475885 | 6.751722 | 7.859912 | 6.203777 | 6.902067 | 6.667593 | 7.259989 |
| 3077_at  | 4.315282 | 3.138631 | 3.24303  | 4.028527 | 2.519468 | 4.072629 | 4.553403 | 2.485814 |
| 307_at   | 7.268021 | 6.720615 | 7.321203 | 6.56869  | 7.113424 | 7.305687 | 6.391596 | 7.166172 |
| 3080_at  | 1.405932 | 0.808319 | 0.83367  | 0.588502 | 1.635729 | 0.960129 | 0.551187 | 1.040932 |
| 30811_at | 2.039455 | 2.066251 | 1.810107 | 4.398786 | 3.055184 | 4.127646 | 1.700762 | 2.290726 |
| 30812_at | 2.138072 | 2.540713 | 2.381436 | 2.282427 | 3.021503 | 2.399963 | 2.303246 | 2.44951  |
| 30813_at | 2.37246  | 2.025169 | 2.138183 | 0.938076 | 1.271978 | 1.483453 | 1.340641 | 1.795158 |
| 30814_at | 2.319608 | 2.090467 | 1.756248 | 1.602903 | 2.629882 | 2.291093 | 2.040023 | 3.113013 |
| 30815_at | 6.840878 | 5.778778 | 6.663816 | 6.130039 | 5.053086 | 6.41744  | 6.552595 | 5.73839  |
| 30816_at | 1.735691 | 1.545227 | 2.034999 | 2.804271 | 2.37324  | 1.440163 | 2.238692 | 1.242306 |
| 30817_at | 3.063404 | 1.626096 | 1.156943 | 3.865475 | 5.56247  | 4.147306 | 3.738578 | 2.722948 |
| 30818_at | 3.474928 | 3.756651 | 3.701878 | 3.7983   | 3.564258 | 3.189178 | 3.224001 | 2.689758 |
| 30819_at | 2.023681 | 2.72127  | 2.197502 | 2.196463 | 2.936601 | 1.968924 | 3.117949 | 2.2136   |
| 3081_at  | 6.274736 | 5.274984 | 5.03732  | 4.140648 | 6.594037 | 6.219961 | 4.803522 | 6.145625 |
| 30820_at | 2.62674  | 2.727666 | 3.654894 | 2.193765 | 2.879342 | 2.309592 | 2.613831 | 2.272776 |
| 30827_at | 4.444661 | 4.581637 | 4.5377   | 3.974818 | 3.562149 | 3.517426 | 3.597006 | 4.349849 |
| 3082_at  | 2.569965 | 2.422395 | 1.383859 | 2.18757  | 2.07451  | 2.780452 | 1.368978 | 2.304815 |
| 30832_at | 3.871081 | 4.08251  | 5.035921 | 5.003633 | 4.224041 | 3.815638 | 4.785827 | 5.223927 |
| 30833_at | 4.926796 | 4.534346 | 3.826899 | 4.766295 | 4.400455 | 4.670264 | 4.349165 | 3.501446 |
| 30834_at | 5.527153 | 5.669354 | 5.920208 | 6.132866 | 5.277443 | 5.898522 | 5.875661 | 5.865215 |
| 30835_at | 0.659309 | 1.500446 | 1.733556 | 1.277354 | 1.726222 | 1.254339 | 3.587154 | 1.68144  |
| 30836_at | 7.28148  | 7.356266 | 6.728812 | 6.617916 | 7.116904 | 6.298916 | 6.84177  | 7.293299 |
| 30837_at | 6.708562 | 6.09952  | 6.695349 | 6.400693 | 6.057032 | 6.820187 | 5.995224 | 5.053774 |
| 3083_at  | 1.959262 | 2.161686 | 1.98416  | 2.052782 | 2.047253 | 1.724868 | 2.052782 | 1.153594 |
| 30844_at | 6.84565  | 7.166159 | 6.739082 | 6.287591 | 6.690182 | 6.000264 | 6.545427 | 6.907803 |

|          |          |          |          |          |          |          |          |          |
|----------|----------|----------|----------|----------|----------|----------|----------|----------|
| 30845_at | 7.606474 | 7.749102 | 7.510457 | 8.011524 | 7.60518  | 7.460125 | 7.311471 | 7.33503  |
| 30846_at | 6.910258 | 6.687871 | 7.02032  | 7.104138 | 5.960005 | 7.000651 | 7.653348 | 5.924634 |
| 30848_at | 4.072226 | 4.5406   | 3.599574 | 4.004119 | 3.761568 | 4.969942 | 4.055574 | 4.236916 |
| 30849_at | 6.422313 | 6.239635 | 6.288646 | 5.920538 | 6.080636 | 6.091126 | 6.095089 | 5.823457 |
| 3084_at  | 2.807485 | 2.530913 | 2.270535 | 2.427574 | 2.707266 | 1.915061 | 2.258607 | 2.438602 |
| 30850_at | 3.349956 | 3.396702 | 3.81078  | 3.625522 | 4.628582 | 3.661422 | 3.53961  | 3.741257 |
| 3087_at  | 6.328158 | 5.979061 | 6.167788 | 5.913874 | 6.006611 | 5.611748 | 5.843624 | 5.908203 |
| 308_at   | 9.735118 | 10.04536 | 9.77568  | 9.912792 | 9.504397 | 9.895974 | 9.675754 | 9.940718 |
| 3090_at  | 2.440066 | 1.781311 | 1.96123  | 2.641502 | 2.600211 | 1.488552 | 1.957567 | 1.948263 |
| 3091_at  | 7.989697 | 7.755007 | 7.881234 | 8.008799 | 7.970027 | 8.10008  | 8.156283 | 8.24934  |
| 3092_at  | 5.792589 | 6.272672 | 6.188291 | 6.479779 | 5.681222 | 6.08578  | 6.472926 | 6.289828 |
| 3093_at  | 8.197041 | 8.555661 | 8.542711 | 8.261166 | 8.335036 | 8.635735 | 8.310357 | 7.938566 |
| 3094_at  | 9.863761 | 9.709276 | 9.623716 | 9.555767 | 9.38164  | 9.623151 | 9.67117  | 9.359724 |
| 30968_at | 7.246352 | 7.397253 | 6.445004 | 5.894827 | 6.307562 | 6.878177 | 6.219743 | 6.705538 |
| 3096_at  | 6.574261 | 6.952819 | 6.428395 | 6.346113 | 6.812297 | 5.89811  | 6.951917 | 7.093196 |
| 3097_at  | 6.164665 | 7.052766 | 6.937237 | 7.151527 | 6.607536 | 6.766547 | 7.433668 | 6.735913 |
| 3098_at  | 6.108034 | 6.222067 | 6.178143 | 6.252247 | 6.506063 | 5.979113 | 5.910747 | 5.903805 |
| 3099_at  | 4.395589 | 5.240634 | 4.194467 | 3.621245 | 4.862805 | 4.130892 | 3.446262 | 5.123015 |
| 309_at   | 6.694771 | 7.003442 | 6.699171 | 7.273483 | 7.024499 | 7.046237 | 7.084647 | 5.773515 |
| 30_at    | 4.847448 | 4.728944 | 4.681442 | 4.176312 | 4.816371 | 5.097171 | 4.721697 | 4.721509 |
| 3101_at  | 1.279387 | 1.782948 | 1.571008 | 1.449057 | 1.414099 | 1.260891 | 1.101792 | 1.968442 |
| 3104_at  | 4.520577 | 3.75452  | 3.332486 | 3.496582 | 4.763708 | 3.73086  | 3.815153 | 4.295917 |
| 3105_at  | 7.345107 | 7.275547 | 7.845926 | 7.200265 | 6.905292 | 7.059841 | 7.493667 | 6.812807 |
| 3106_at  | 7.561417 | 7.994943 | 7.708027 | 8.171717 | 7.481197 | 7.80811  | 7.942536 | 7.526633 |
| 3107_at  | 9.593343 | 8.975136 | 8.729404 | 8.724066 | 8.131542 | 8.246698 | 8.878912 | 8.028027 |
| 3108_at  | 8.113764 | 7.656506 | 8.004042 | 8.229128 | 7.772134 | 8.107493 | 8.267856 | 7.16058  |
| 3109_at  | 7.392336 | 6.771463 | 6.552131 | 7.092294 | 6.712063 | 6.473257 | 6.902738 | 5.55398  |
| 310_at   | 8.840996 | 8.922976 | 8.681414 | 8.358475 | 8.99483  | 8.235126 | 8.488364 | 9.250221 |
| 3110_at  | 2.409719 | 2.859538 | 3.050679 | 2.812882 | 3.38646  | 2.966548 | 3.818644 | 3.250854 |
| 3111_at  | 6.027897 | 5.245462 | 4.931752 | 5.914338 | 5.95477  | 5.428635 | 6.821023 | 5.888975 |
| 3112_at  | 2.117148 | 2.180793 | 2.200226 | 2.247306 | 1.833489 | 1.961269 | 1.599923 | 1.521933 |
| 3113_at  | 8.674739 | 9.1107   | 9.149799 | 9.473465 | 8.872547 | 8.923559 | 9.238214 | 8.981064 |
| 3115_at  | 6.019124 | 5.509977 | 6.404664 | 7.012763 | 7.049645 | 6.926545 | 6.819463 | 6.760082 |
| 3116_at  | 2.606057 | 2.835255 | 2.465154 | 2.871051 | 2.367084 | 2.823671 | 2.049307 | 2.545941 |
| 3117_at  | 7.847254 | 8.28815  | 7.251219 | 7.92876  | 8.210752 | 7.867076 | 8.263537 | 7.344858 |
| 3118_at  | 3.934375 | 3.892705 | 3.140912 | 4.391505 | 3.903234 | 3.321286 | 3.941467 | 3.71879  |
| 3119_at  | 4.774927 | 5.997302 | 6.158654 | 5.912188 | 7.151746 | 5.295004 | 6.691849 | 4.908132 |
| 311_at   | 6.054421 | 5.455346 | 5.638462 | 5.873592 | 5.777089 | 5.572022 | 5.45187  | 5.283962 |
| 3120_at  | 2.457997 | 2.924605 | 3.778566 | 3.265181 | 3.602203 | 3.247034 | 3.134308 | 2.89819  |
| 3122_at  | 9.570579 | 9.618819 | 9.44596  | 9.738251 | 9.662405 | 9.547649 | 9.667146 | 9.50922  |
| 3123_at  | 5.507877 | 6.166113 | 6.365721 | 6.099726 | 7.277337 | 6.951467 | 7.398094 | 5.891657 |
| 3127_at  | 2.170975 | 1.018101 | 7.049728 | 1.719003 | 7.845397 | 7.948028 | 8.155808 | 1.763382 |
| 3128_at  | 2.702517 | 3.214054 | 2.892693 | 3.477066 | 2.597467 | 2.105702 | 2.241458 | 3.192179 |
| 312_at   | 2.458739 | 1.934737 | 2.644036 | 2.13407  | 3.514729 | 2.564901 | 2.124131 | 2.64474  |
| 3131_at  | 5.945266 | 4.519259 | 4.629255 | 4.680561 | 5.865295 | 4.314399 | 4.40922  | 5.378224 |
| 3133_at  | 8.627422 | 8.443322 | 8.94338  | 9.028311 | 8.932628 | 9.135033 | 9.249722 | 8.245725 |
| 3134_at  | 7.291329 | 6.821244 | 6.599962 | 7.230958 | 7.141334 | 6.445141 | 6.735529 | 6.88373  |
| 3135_at  | 3.252803 | 3.74158  | 3.359036 | 3.851886 | 3.553961 | 3.266641 | 3.915619 | 3.131207 |
| 3136_at  | 4.600767 | 4.324738 | 3.775487 | 5.429688 | 5.170157 | 2.981048 | 3.381614 | 4.753653 |
| 3137_at  | 2.535692 | 2.653945 | 1.274734 | 1.958513 | 2.119053 | 1.540366 | 1.582099 | 1.6994   |
| 3139_at  | 2.911836 | 2.862123 | 2.297728 | 3.144381 | 3.227975 | 3.205127 | 2.989879 | 2.697292 |



|           |          |          |          |          |          |          |          |          |
|-----------|----------|----------|----------|----------|----------|----------|----------|----------|
| 313_at    | 3.322034 | 3.437475 | 1.769275 | 2.836316 | 2.438638 | 3.950453 | 2.707367 | 3.758496 |
| 3140_at   | 5.72953  | 5.892969 | 5.592989 | 5.408261 | 5.17029  | 5.330137 | 4.998291 | 6.015623 |
| 3141_at   | 3.935748 | 3.885576 | 4.761332 | 3.925602 | 2.881476 | 4.20441  | 3.405179 | 3.395961 |
| 3142_at   | 5.477958 | 5.162101 | 5.05422  | 5.24175  | 3.943945 | 4.887802 | 5.260338 | 4.451358 |
| 3145_at   | 2.485467 | 2.697247 | 3.395547 | 2.43037  | 2.641655 | 2.306472 | 2.003986 | 2.564188 |
| 3146_at   | 6.893772 | 5.764029 | 4.144038 | 5.057609 | 5.435362 | 4.016295 | 3.631703 | 6.184905 |
| 3148_at   | 7.529233 | 6.614385 | 5.506227 | 6.644481 | 5.519308 | 5.793981 | 6.669646 | 5.089381 |
| 3149_at   | 3.682544 | 2.58307  | 3.33262  | 2.848161 | 3.14269  | 3.249251 | 3.764356 | 3.545979 |
| 314_at    | 1.507188 | 1.97797  | 2.262108 | 1.592246 | 2.274882 | 2.045234 | 1.897237 | 1.391384 |
| 3151_at   | 3.830127 | 4.591684 | 2.423731 | 2.38608  | 5.32052  | 2.363829 | 3.939069 | 4.008191 |
| 3155_at   | 5.155779 | 4.525553 | 5.111994 | 4.864467 | 5.22346  | 5.396113 | 5.139373 | 4.88077  |
| 3156_at   | 4.809476 | 5.479663 | 5.714301 | 4.99018  | 5.703605 | 5.202136 | 5.778926 | 5.02946  |
| 3157_at   | 6.433782 | 6.604981 | 6.951621 | 5.866498 | 6.825374 | 5.234174 | 6.622438 | 6.489707 |
| 3158_at   | 1.917534 | 2.411182 | 2.779202 | 2.931718 | 4.230108 | 2.328877 | 2.304431 | 1.920108 |
| 3159_at   | 4.57637  | 4.661554 | 4.62662  | 4.398222 | 4.737546 | 4.577703 | 5.369474 | 4.179322 |
| 3161_at   | 2.264901 | 2.611038 | 1.801365 | 3.168    | 2.128526 | 1.863602 | 2.732233 | 3.192364 |
| 3162_at   | 6.447716 | 5.75572  | 5.991425 | 6.147016 | 6.226549 | 7.561081 | 6.598292 | 4.846858 |
| 3163_at   | 6.426192 | 5.261265 | 6.627177 | 5.791481 | 5.331098 | 6.062466 | 5.760195 | 5.052761 |
| 3164_at   | 4.456746 | 4.455353 | 4.045071 | 3.704926 | 3.860114 | 3.977707 | 4.879029 | 3.460921 |
| 3166_at   | 1.839224 | 2.490431 | 2.924554 | 2.49567  | 2.739068 | 2.55659  | 2.882554 | 2.756335 |
| 3167_at   | 1.975758 | 1.603983 | 1.778357 | 1.662272 | 1.658043 | 1.443455 | 1.514948 | 1.741827 |
| 3169_at   | 1.765424 | 2.256207 | 1.246888 | 1.826339 | 2.779609 | 1.417194 | 2.018408 | 3.445062 |
| 316_at    | 5.291806 | 4.936832 | 5.216526 | 3.753643 | 5.51285  | 4.511652 | 3.893255 | 5.726584 |
| 3170_at   | 2.732434 | 3.455817 | 2.841578 | 2.675656 | 3.297427 | 2.993291 | 2.792586 | 3.215233 |
| 3171_at   | 2.514212 | 2.326816 | 2.682182 | 2.481159 | 3.014082 | 3.144818 | 2.349241 | 2.782541 |
| 3172_at   | 4.3459   | 4.426441 | 4.190422 | 3.521285 | 5.067267 | 4.798734 | 3.898692 | 4.106266 |
| 3174_at   | 4.063258 | 3.455236 | 3.563445 | 2.137456 | 5.329627 | 2.14014  | 1.900453 | 3.297026 |
| 3175_at   | 1.178015 | 1.403843 | 1.687835 | 1.34467  | 1.804758 | 1.403491 | 1.865661 | 1.94653  |
| 317648_at | 4.226527 | 4.63639  | 3.630204 | 4.243381 | 3.488323 | 3.875442 | 4.109744 | 4.621802 |
| 317649_at | 5.015944 | 4.170866 | 4.913604 | 5.496504 | 5.292578 | 5.554005 | 4.948819 | 5.449167 |
| 317662_at | 6.263178 | 6.407091 | 5.979792 | 5.843058 | 5.824029 | 5.77313  | 6.008491 | 5.690712 |
| 317671_at | 1.118505 | 1.317654 | 1.883729 | 1.091245 | 1.755815 | 1.456773 | 1.276979 | 2.923842 |
| 3176_at   | 6.64998  | 6.683236 | 6.386614 | 5.926063 | 6.928678 | 5.957638 | 5.90667  | 6.172764 |
| 317701_at | 1.200694 | 1.470307 | 1.019162 | 1.550719 | 1.260958 | 1.443493 | 1.265101 | 1.130776 |
| 317703_at | 0.935382 | 1.488878 | 0.514832 | 0.935081 | 1.376414 | 2.134579 | 1.231837 | 0.914533 |
| 317705_at | 1.036253 | 0.95428  | 1.374678 | 1.027745 | 2.114132 | 1.590066 | 2.474268 | 1.3575   |
| 317716_at | 1.931637 | 1.344827 | 1.47614  | 1.739604 | 2.055054 | 1.977611 | 1.842485 | 1.610903 |
| 317719_at | 1.921736 | 1.953229 | 1.729351 | 1.633562 | 2.447908 | 2.264658 | 1.812713 | 2.445722 |
| 317751_at | 2.000144 | 1.618984 | 1.844186 | 1.182899 | 2.008436 | 1.938772 | 1.908136 | 1.280003 |
| 317754_at | 3.194949 | 2.499598 | 3.899458 | 2.687207 | 3.94575  | 2.626972 | 2.224328 | 4.22495  |
| 317760_at | 1.492132 | 1.062181 | 1.984696 | 1.851569 | 2.641374 | 2.045196 | 1.183976 | 3.001509 |
| 317761_at | 1.104642 | 0.870461 | 1.044099 | 1.042407 | 1.098983 | 1.144799 | 1.044335 | 1.04311  |
| 317762_at | 4.947773 | 5.549057 | 5.381004 | 4.946672 | 5.60537  | 5.149947 | 6.448386 | 4.905036 |
| 317772_at | 9.33704  | 8.286978 | 7.933784 | 8.417499 | 7.765074 | 7.632702 | 8.398676 | 9.024135 |
| 317781_at | 3.138933 | 3.136854 | 2.980615 | 2.832801 | 2.710683 | 2.57607  | 2.423206 | 2.933628 |
| 3177_at   | 2.739927 | 1.968314 | 3.477428 | 3.356418 | 3.189009 | 3.120468 | 2.793838 | 2.307108 |
| 3178_at   | 8.970931 | 7.88152  | 7.400542 | 7.423766 | 7.500837 | 6.764745 | 6.432611 | 7.918386 |
| 317_at    | 4.485287 | 4.601918 | 4.146615 | 4.643354 | 4.977063 | 4.163924 | 4.41975  | 3.209311 |
| 3181_at   | 9.15702  | 9.326317 | 9.148132 | 9.027033 | 9.290454 | 9.057901 | 8.555762 | 9.347843 |
| 3182_at   | 7.674788 | 8.072654 | 8.091991 | 7.902305 | 8.071384 | 7.981546 | 7.465208 | 7.905291 |
| 3183_at   | 7.580931 | 7.07745  | 7.97987  | 7.102588 | 7.62285  | 6.639657 | 7.63931  | 7.766856 |

|           |          |          |          |          |          |          |          |          |
|-----------|----------|----------|----------|----------|----------|----------|----------|----------|
| 3184_at   | 8.973886 | 9.24795  | 8.400956 | 9.344213 | 9.200183 | 9.02986  | 8.968439 | 9.504288 |
| 3185_at   | 6.00958  | 6.068225 | 6.787708 | 6.75962  | 5.815625 | 6.110996 | 5.54851  | 5.849686 |
| 3187_at   | 8.616986 | 8.715202 | 8.921485 | 8.542472 | 8.557296 | 8.289847 | 8.424798 | 9.30003  |
| 3189_at   | 9.066632 | 10.06484 | 9.617038 | 9.697578 | 9.696551 | 9.375606 | 9.585033 | 10.14837 |
| 318_at    | 4.914601 | 5.268942 | 4.174807 | 4.674175 | 3.677031 | 4.287806 | 2.783235 | 3.331686 |
| 319085_at | 1.826073 | 1.539472 | 1.177807 | 1.439171 | 1.752397 | 2.168206 | 2.15627  | 2.067242 |
| 319089_at | 2.133017 | 1.851058 | 1.18542  | 1.216338 | 1.650477 | 1.427432 | 1.649768 | 1.518198 |
| 3190_at   | 10.1031  | 10.32946 | 10.35075 | 10.4219  | 10.33217 | 9.980782 | 10.07199 | 10.37698 |
| 319100_at | 0.920456 | 1.033853 | 1.761542 | 1.357355 | 1.242724 | 0.824014 | 1.015261 | 1.104754 |
| 319101_at | 2.639348 | 1.386439 | 1.779164 | 1.342829 | 2.018741 | 1.450004 | 2.012649 | 1.997146 |
| 319103_at | 0.612922 | 4.489426 | 4.562279 | 5.549861 | 1.801633 | 4.409123 | 2.486906 | 2.658834 |
| 319139_at | 1.50729  | 1.376041 | 1.369358 | 2.379537 | 4.183589 | 1.199837 | 2.421286 | 1.309724 |
| 3191_at   | 7.372318 | 7.498806 | 7.695001 | 7.774657 | 7.224097 | 7.099936 | 7.806536 | 7.525082 |
| 3192_at   | 8.630453 | 9.274044 | 8.674469 | 8.946083 | 9.143201 | 8.458771 | 8.719376 | 9.146403 |
| 3195_at   | 1.652426 | 2.78274  | 1.361582 | 1.702303 | 3.029448 | 1.624117 | 1.683882 | 1.754966 |
| 3196_at   | 2.762146 | 2.49465  | 1.921288 | 2.070432 | 2.913981 | 2.105835 | 2.117828 | 2.355067 |
| 3198_at   | 4.257824 | 4.132252 | 4.084175 | 3.834609 | 2.484605 | 3.946848 | 3.66413  | 5.087957 |
| 3199_at   | 3.195571 | 3.441742 | 4.10531  | 2.447132 | 2.635279 | 3.608191 | 2.022966 | 2.443446 |
| 319_at    | 2.812295 | 1.792763 | 2.440276 | 2.08299  | 2.138088 | 1.948697 | 1.857904 | 2.052554 |
| 31_at     | 4.507032 | 5.502029 | 5.36069  | 5.303056 | 5.224398 | 4.809617 | 5.292568 | 5.329021 |
| 3200_at   | 2.305436 | 3.14175  | 2.848256 | 3.323165 | 2.735876 | 3.191261 | 2.110952 | 1.836741 |
| 3201_at   | 5.637639 | 5.284825 | 4.72972  | 5.109862 | 4.737812 | 5.385645 | 4.9382   | 4.933358 |
| 3202_at   | 7.003467 | 6.551906 | 5.940048 | 6.470607 | 5.59184  | 6.508859 | 5.853983 | 5.190722 |
| 3203_at   | 3.376856 | 3.045253 | 2.656557 | 3.558429 | 2.773119 | 3.230761 | 3.552709 | 2.470478 |
| 3204_at   | 6.418993 | 7.124534 | 6.902335 | 6.716884 | 6.120997 | 6.550785 | 7.589517 | 6.227474 |
| 3205_at   | 5.317076 | 2.527115 | 3.927985 | 2.887825 | 2.339177 | 3.869169 | 2.563832 | 1.766477 |
| 3206_at   | 5.825652 | 6.298585 | 5.716835 | 5.610705 | 5.716727 | 5.952518 | 5.9695   | 6.206928 |
| 3207_at   | 3.759689 | 4.687844 | 2.913398 | 3.17076  | 2.890403 | 3.035686 | 2.608874 | 2.050166 |
| 3208_at   | 1.357684 | 1.380474 | 2.445121 | 1.095606 | 1.832603 | 0.491286 | 2.193243 | 2.714079 |
| 3209_at   | 1.653811 | 2.482833 | 2.577702 | 3.640695 | 3.331226 | 2.907114 | 3.477364 | 2.407243 |
| 320_at    | 5.764372 | 4.882437 | 6.119797 | 6.482749 | 5.266032 | 6.286356 | 6.268691 | 4.951351 |
| 3211_at   | 2.021407 | 2.141751 | 2.416115 | 1.87774  | 2.291406 | 1.96349  | 3.163192 | 2.383963 |
| 3212_at   | 8.275107 | 7.363556 | 6.520886 | 6.960072 | 8.502847 | 7.484946 | 7.069281 | 7.073578 |
| 3213_at   | 3.952106 | 3.288663 | 4.260164 | 4.39063  | 4.228702 | 4.039209 | 3.652273 | 3.630322 |
| 3214_at   | 2.917085 | 2.626184 | 2.674124 | 2.816468 | 3.15871  | 3.386037 | 3.869333 | 3.241624 |
| 3215_at   | 3.577611 | 2.864176 | 4.255203 | 4.474302 | 4.413195 | 4.160279 | 3.163239 | 3.094102 |
| 3216_at   | 4.715367 | 4.030388 | 4.838019 | 4.577937 | 3.767542 | 3.792545 | 4.482289 | 3.175295 |
| 3217_at   | 6.627211 | 6.834867 | 5.706051 | 6.145572 | 5.246504 | 7.209119 | 6.400377 | 6.579694 |
| 3218_at   | 4.054764 | 4.762556 | 5.027588 | 4.475519 | 5.02467  | 3.439564 | 2.952444 | 3.06421  |
| 3219_at   | 4.760159 | 3.570293 | 3.344214 | 2.773485 | 2.701441 | 3.126176 | 3.033064 | 3.275737 |
| 321_at    | 1.770833 | 1.843461 | 1.82954  | 2.691312 | 2.355372 | 2.051674 | 1.438437 | 2.02483  |
| 3221_at   | 5.147226 | 5.888204 | 6.043937 | 5.654044 | 3.690874 | 6.772771 | 6.157631 | 5.548959 |
| 3222_at   | 3.523225 | 3.988909 | 3.590628 | 3.197838 | 2.930512 | 4.468597 | 3.942965 | 2.617065 |
| 3223_at   | 7.18938  | 6.757247 | 6.773468 | 7.070219 | 6.559628 | 6.760573 | 5.867208 | 7.088025 |
| 3224_at   | 3.677383 | 2.330379 | 3.03635  | 4.20375  | 2.189628 | 3.842087 | 4.24503  | 2.611704 |
| 3225_at   | 4.103981 | 3.285753 | 4.782605 | 4.845144 | 4.997906 | 3.982931 | 4.35121  | 4.668857 |
| 3226_at   | 5.569172 | 5.377389 | 5.406625 | 4.845936 | 3.650499 | 5.518176 | 3.751629 | 4.604936 |
| 3227_at   | 3.614808 | 1.853438 | 2.572213 | 2.954424 | 4.04639  | 2.896905 | 1.58352  | 3.05695  |
| 3228_at   | 1.694269 | 1.769545 | 1.713638 | 1.831391 | 1.543324 | 1.30072  | 0.983003 | 1.958966 |
| 3229_at   | 1.867808 | 2.826847 | 2.109903 | 2.091757 | 2.304412 | 2.582254 | 2.772668 | 1.624877 |
| 322_at    | 4.354627 | 4.759413 | 4.507012 | 4.371687 | 4.090319 | 4.589791 | 4.012336 | 3.994428 |

|           |          |          |          |          |          |          |          |          |
|-----------|----------|----------|----------|----------|----------|----------|----------|----------|
| 3231_at   | 4.252713 | 4.548109 | 3.787405 | 3.183471 | 3.050732 | 3.267263 | 3.391831 | 4.210842 |
| 3232_at   | 4.775098 | 3.639467 | 2.249348 | 3.060838 | 3.313532 | 2.4829   | 2.258271 | 2.600821 |
| 3233_at   | 3.537004 | 2.775844 | 2.814144 | 3.484538 | 3.688037 | 4.11633  | 2.64008  | 1.731446 |
| 3234_at   | 3.225612 | 3.391058 | 3.108024 | 3.78462  | 4.92304  | 3.073755 | 2.587142 | 3.402598 |
| 3235_at   | 4.136729 | 3.452248 | 3.193998 | 3.739656 | 3.885065 | 2.729803 | 2.788249 | 3.540349 |
| 3236_at   | 5.437874 | 3.820055 | 3.714091 | 3.556761 | 5.466272 | 3.726554 | 3.178658 | 3.503863 |
| 3237_at   | 4.211359 | 3.539423 | 4.317688 | 2.854428 | 2.665822 | 3.58515  | 3.474747 | 3.091794 |
| 3238_at   | 2.345384 | 1.896405 | 1.521775 | 1.757292 | 1.452046 | 2.57808  | 1.757292 | 1.712837 |
| 3239_at   | 1.994155 | 1.358611 | 1.309756 | 1.468344 | 1.29777  | 1.442015 | 1.882595 | 1.832011 |
| 323_at    | 7.593308 | 8.017659 | 8.422612 | 7.597753 | 7.955951 | 7.85663  | 8.295928 | 7.892129 |
| 3240_at   | 0.986157 | 2.581679 | 1.496171 | 1.249284 | 1.769588 | 1.496171 | 0.727624 | 1.28899  |
| 3241_at   | 4.406205 | 3.453024 | 3.931824 | 4.81723  | 3.800036 | 4.521265 | 4.214454 | 3.584021 |
| 3242_at   | 7.451352 | 6.953716 | 6.57942  | 4.564736 | 7.581681 | 7.364118 | 4.570281 | 6.910206 |
| 3248_at   | 8.606613 | 8.604118 | 8.426987 | 8.500971 | 7.406917 | 8.603577 | 8.877669 | 8.331433 |
| 3249_at   | 3.97581  | 4.695505 | 4.52329  | 3.906792 | 3.912434 | 4.198543 | 3.021358 | 3.885618 |
| 324_at    | 4.860917 | 5.126764 | 5.252599 | 5.195765 | 4.634    | 4.64059  | 5.508809 | 4.463759 |
| 3250_at   | 0.675517 | 1.176793 | 0.968269 | 1.259557 | 1.53341  | 1.956325 | 1.759501 | 0.875219 |
| 3251_at   | 6.543129 | 6.027754 | 5.910089 | 5.808447 | 6.5817   | 5.258762 | 4.725927 | 6.197484 |
| 3257_at   | 3.903561 | 4.016484 | 4.418643 | 4.826363 | 4.099784 | 4.589524 | 3.839946 | 4.083885 |
| 325_at    | 1.586218 | 1.707497 | 1.373755 | 1.745339 | 2.642934 | 1.287203 | 2.299909 | 1.459084 |
| 3262_at   | 1.444579 | 1.279243 | 1.301961 | 1.457981 | 1.576305 | 1.092652 | 1.180369 | 1.251772 |
| 326340_at | 1.73413  | 2.097536 | 2.081626 | 1.468619 | 2.376454 | 1.80961  | 1.385957 | 2.359552 |
| 326342_at | 1.579486 | 1.638367 | 1.737178 | 1.483386 | 1.737724 | 2.020315 | 1.666563 | 2.007433 |
| 326343_at | 3.554461 | 4.181602 | 2.888472 | 2.809637 | 2.450499 | 4.479961 | 3.633122 | 3.056645 |
| 3263_at   | 2.210517 | 1.453066 | 1.852565 | 2.567201 | 2.311627 | 1.811655 | 2.752963 | 2.136384 |
| 3265_at   | 6.534551 | 6.607832 | 6.790553 | 6.055218 | 6.532078 | 6.650196 | 6.59305  | 5.917899 |
| 326624_at | 2.352202 | 2.765058 | 2.623866 | 2.78249  | 3.081681 | 2.929617 | 2.363487 | 2.65244  |
| 326625_at | 6.331808 | 5.942964 | 5.433805 | 6.173776 | 5.373975 | 5.259195 | 5.779111 | 6.084439 |
| 3266_at   | 3.112674 | 1.241007 | 1.932455 | 2.999165 | 0.405444 | 2.18093  | 2.882085 | 1.236121 |
| 3267_at   | 7.465804 | 6.917513 | 7.811253 | 7.386395 | 6.66634  | 7.224755 | 7.425475 | 7.52258  |
| 3268_at   | 5.295424 | 5.881876 | 5.164842 | 6.389795 | 4.205114 | 5.930531 | 6.298666 | 5.15157  |
| 3269_at   | 2.999674 | 2.650437 | 3.111852 | 3.015926 | 3.114256 | 3.075838 | 2.65668  | 2.224995 |
| 326_at    | 2.128944 | 2.376914 | 2.478933 | 2.784838 | 2.310205 | 1.898353 | 2.950552 | 2.452519 |
| 3270_at   | 3.897651 | 4.611985 | 4.427226 | 4.623313 | 4.33423  | 5.264862 | 3.6381   | 3.423206 |
| 3273_at   | 3.137688 | 1.445285 | 4.069715 | 1.12185  | 5.585728 | 1.469599 | 1.38002  | 2.605553 |
| 3274_at   | 2.752538 | 2.239858 | 2.068697 | 2.781439 | 1.713136 | 3.055028 | 2.883895 | 2.590401 |
| 3275_at   | 6.949279 | 7.218007 | 6.591277 | 6.969813 | 6.541756 | 6.771084 | 6.450366 | 6.989391 |
| 327657_at | 1.671074 | 1.761194 | 1.787843 | 1.861305 | 2.163779 | 2.036431 | 2.304446 | 1.377203 |
| 3276_at   | 6.078357 | 5.665715 | 6.337339 | 6.570129 | 6.109693 | 5.345836 | 5.802641 | 5.862858 |
| 327_at    | 6.744852 | 6.246566 | 6.591065 | 6.361745 | 7.23332  | 6.384556 | 5.987315 | 6.348526 |
| 3280_at   | 7.533264 | 7.316294 | 7.959325 | 7.735037 | 7.057272 | 7.560002 | 7.50688  | 6.958101 |
| 3281_at   | 9.70896  | 9.648253 | 9.855056 | 9.581475 | 10.04283 | 9.751426 | 9.347798 | 9.814877 |
| 3283_at   | 1.04325  | 0.898296 | 1.846289 | 2.613415 | 2.931879 | 4.634682 | 2.264332 | 4.217341 |
| 3284_at   | 2.573926 | 0.873356 | 2.771888 | 2.07154  | 3.653631 | 0.810855 | 3.160256 | 1.058694 |
| 328_at    | 6.736284 | 6.931045 | 7.100548 | 6.90449  | 6.982506 | 6.544935 | 6.361239 | 7.700831 |
| 3290_at   | 1.767804 | 3.218931 | 2.755506 | 2.648892 | 1.875887 | 2.254989 | 2.745638 | 3.078295 |
| 3291_at   | 6.031009 | 4.633215 | 5.135788 | 5.52603  | 7.167829 | 4.925206 | 3.025191 | 3.577213 |
| 3292_at   | 3.068713 | 4.334731 | 4.37334  | 3.3065   | 2.493231 | 3.891505 | 3.289214 | 4.141077 |
| 3293_at   | 1.831955 | 1.564464 | 2.134801 | 1.472473 | 2.577027 | 1.909558 | 1.737064 | 1.757957 |
| 3294_at   | 2.070984 | 1.535692 | 3.940401 | 2.765804 | 1.847889 | 2.512211 | 1.882156 | 2.03939  |
| 3295_at   | 7.531994 | 8.349156 | 7.863503 | 8.013971 | 8.30257  | 8.247253 | 8.052944 | 7.953786 |

|           |          |          |          |          |          |          |          |          |
|-----------|----------|----------|----------|----------|----------|----------|----------|----------|
| 3297_at   | 5.990964 | 5.601618 | 4.921595 | 5.236843 | 5.764544 | 5.559367 | 6.098659 | 5.113105 |
| 3298_at   | 4.813849 | 4.803675 | 5.309926 | 4.942493 | 4.303679 | 4.854418 | 5.496788 | 5.74485  |
| 3299_at   | 3.095565 | 3.010017 | 3.196561 | 2.957164 | 3.06387  | 3.326287 | 3.043626 | 2.476574 |
| 329_at    | 6.084218 | 6.236375 | 5.995697 | 6.14218  | 6.104502 | 5.968222 | 5.723708 | 6.241786 |
| 32_at     | 4.616161 | 4.601403 | 4.541341 | 4.360931 | 4.624164 | 4.336272 | 4.637975 | 4.258537 |
| 3300_at   | 4.005424 | 4.254346 | 5.421324 | 3.931348 | 3.375005 | 4.132728 | 4.738264 | 3.776274 |
| 3301_at   | 8.739325 | 9.255201 | 8.46021  | 8.838782 | 8.815677 | 8.931279 | 8.606049 | 8.947662 |
| 3303_at   | 9.310235 | 9.607718 | 8.944363 | 9.225941 | 9.572151 | 9.072796 | 8.683374 | 9.361653 |
| 3304_at   | 9.233837 | 10.06314 | 9.448195 | 9.527095 | 9.763369 | 9.606684 | 8.995159 | 10.13705 |
| 3305_at   | 2.962993 | 3.670172 | 3.365533 | 3.458062 | 2.717358 | 2.792386 | 3.883824 | 3.457572 |
| 3306_at   | 4.361838 | 5.563152 | 5.209156 | 5.469231 | 5.286539 | 6.096843 | 6.87975  | 5.08403  |
| 3308_at   | 7.231459 | 7.329193 | 7.541221 | 7.226367 | 7.648953 | 7.046119 | 7.360607 | 7.779315 |
| 3309_at   | 9.244681 | 9.797527 | 9.688808 | 9.699823 | 9.64853  | 9.384754 | 9.797389 | 9.580851 |
| 330_at    | 4.617923 | 5.396502 | 4.584844 | 5.427105 | 4.812443 | 5.106364 | 4.525514 | 5.675454 |
| 3310_at   | 3.118418 | 4.030048 | 3.000814 | 2.932999 | 2.996221 | 2.886109 | 3.464311 | 3.363147 |
| 3311_at   | 1.172899 | 1.66124  | 1.767188 | 2.037076 | 1.498659 | 3.004635 | 1.218043 | 1.654864 |
| 3312_at   | 10.59012 | 10.75487 | 10.42315 | 10.64788 | 10.81582 | 10.80757 | 10.37149 | 10.78774 |
| 3313_at   | 8.688482 | 8.539045 | 8.55819  | 8.563292 | 9.078737 | 8.47904  | 9.003038 | 8.985941 |
| 3315_at   | 8.915846 | 8.63556  | 8.522455 | 8.690585 | 8.244371 | 8.774405 | 8.210097 | 8.296317 |
| 3316_at   | 6.523577 | 6.759633 | 6.053131 | 6.070674 | 5.58358  | 5.031385 | 5.392606 | 6.548904 |
| 331_at    | 4.460252 | 4.169675 | 4.814915 | 5.187063 | 4.924597 | 4.174079 | 4.523891 | 5.098288 |
| 3320_at   | 5.997546 | 6.229748 | 6.299249 | 6.078278 | 5.994725 | 5.855112 | 5.69214  | 6.005578 |
| 3321_at   | 2.985039 | 3.200151 | 3.458909 | 3.743082 | 4.149424 | 3.573575 | 3.160957 | 2.670053 |
| 3326_at   | 10.42256 | 10.83053 | 10.42664 | 10.43087 | 10.69934 | 10.76967 | 10.77104 | 10.4593  |
| 3329_at   | 7.810059 | 8.12628  | 8.294924 | 8.245723 | 8.151954 | 8.15821  | 7.522564 | 7.859198 |
| 332_at    | 2.613197 | 3.119125 | 2.206328 | 4.503774 | 3.490502 | 3.05193  | 3.571356 | 3.900702 |
| 3337_at   | 5.490196 | 5.339178 | 4.528194 | 4.752829 | 4.510847 | 5.837184 | 4.93743  | 5.094558 |
| 3338_at   | 7.555594 | 6.546665 | 6.96973  | 7.29623  | 5.069195 | 7.234035 | 7.337624 | 5.148537 |
| 333926_at | 3.056629 | 2.319367 | 2.008915 | 2.017401 | 3.188221 | 1.6225   | 2.334421 | 2.147434 |
| 333929_at | 3.778888 | 3.408291 | 3.289001 | 2.682013 | 3.049359 | 2.890936 | 3.287409 | 3.266859 |
| 3339_at   | 4.244237 | 5.107996 | 5.569486 | 5.783838 | 5.180143 | 5.211245 | 5.323985 | 4.256817 |
| 333_at    | 4.410214 | 4.477885 | 4.746873 | 4.14055  | 4.263622 | 4.931217 | 4.622268 | 3.248118 |
| 3340_at   | 5.813145 | 5.134084 | 5.197587 | 5.804494 | 5.348199 | 6.173719 | 5.661677 | 5.104099 |
| 3344_at   | 6.466672 | 6.639896 | 6.921688 | 6.963221 | 6.712377 | 6.361266 | 6.848222 | 6.742258 |
| 3346_at   | 2.495046 | 0.652227 | 1.125883 | 0.917677 | 0.707985 | 1.833758 | 0.421816 | 0.954184 |
| 3347_at   | 0.736845 | 1.323968 | 0.700976 | 0.939483 | 1.227157 | 0.794747 | 1.790487 | 1.350162 |
| 334_at    | 9.54646  | 9.948311 | 9.992953 | 10.00555 | 10.01221 | 9.209525 | 9.686545 | 9.853585 |
| 3350_at   | 1.166588 | 1.745411 | 2.069676 | 1.864121 | 1.606532 | 2.521412 | 1.785564 | 1.906207 |
| 3351_at   | 2.132142 | 1.962657 | 1.876541 | 1.52239  | 1.361849 | 1.923325 | 1.875107 | 2.449314 |
| 3352_at   | 0.901408 | 1.197302 | 0.6365   | 0.993203 | 1.379834 | 0.854033 | 2.502006 | 0.911367 |
| 3354_at   | 1.328823 | 1.362255 | 1.433102 | 1.439101 | 1.878769 | 1.563052 | 1.221737 | 1.747922 |
| 3355_at   | 1.2819   | 1.254661 | 1.270613 | 1.67433  | 1.308288 | 1.459988 | 1.700121 | 1.67433  |
| 3356_at   | 1.731235 | 2.037156 | 1.482933 | 1.446905 | 1.454642 | 0.969876 | 1.374242 | 1.517493 |
| 3357_at   | 4.502134 | 4.350906 | 5.167594 | 3.170594 | 4.568229 | 3.627367 | 3.544165 | 6.055235 |
| 3358_at   | 1.069325 | 1.328689 | 1.599808 | 1.458997 | 1.821028 | 1.721353 | 1.710721 | 1.357641 |
| 3359_at   | 1.17391  | 1.806177 | 1.78929  | 2.262765 | 1.380663 | 1.50198  | 1.817069 | 1.727271 |
| 335_at    | 4.091544 | 2.369183 | 4.727492 | 2.364098 | 3.94019  | 2.494663 | 3.585638 | 5.300069 |
| 3360_at   | 1.962086 | 1.834994 | 1.798401 | 2.334212 | 1.745413 | 1.397612 | 2.520876 | 2.059122 |
| 3361_at   | 1.092931 | 1.925927 | 2.464423 | 1.428506 | 1.158617 | 1.421629 | 2.31379  | 2.394058 |
| 3362_at   | 1.525121 | 1.683383 | 1.825791 | 1.418217 | 2.037322 | 1.319689 | 2.25686  | 2.27573  |
| 3363_at   | 2.277656 | 1.847804 | 2.758851 | 2.262535 | 2.212415 | 1.399911 | 3.783516 | 1.919061 |

|           |          |          |          |          |          |          |          |          |
|-----------|----------|----------|----------|----------|----------|----------|----------|----------|
| 3364_at   | 6.30782  | 5.835766 | 6.487645 | 6.629422 | 6.74258  | 6.351295 | 6.250178 | 6.21445  |
| 336_at    | 2.276449 | 2.839047 | 2.911549 | 3.164319 | 3.639457 | 2.999694 | 3.42076  | 2.917182 |
| 3371_at   | 5.332236 | 7.116744 | 6.95109  | 7.161362 | 5.760387 | 7.570012 | 6.245114 | 6.760975 |
| 3373_at   | 5.178621 | 4.303504 | 4.303504 | 4.455008 | 3.540214 | 4.690073 | 3.54905  | 4.064007 |
| 3375_at   | 1.506896 | 1.381022 | 1.337591 | 1.26228  | 1.892569 | 2.040689 | 1.825627 | 1.237716 |
| 3376_at   | 7.126221 | 7.48531  | 7.201653 | 7.302187 | 7.877276 | 7.091798 | 7.804393 | 7.374321 |
| 337867_at | 4.92545  | 5.067203 | 5.572438 | 5.587086 | 4.521959 | 5.762149 | 4.983826 | 5.179782 |
| 337873_at | 3.711998 | 4.195151 | 1.620899 | 3.284846 | 2.123631 | 2.859025 | 2.635797 | 1.738915 |
| 337875_at | 6.460293 | 5.689621 | 5.803314 | 6.893518 | 4.822048 | 4.893633 | 6.081565 | 5.036034 |
| 337876_at | 1.810577 | 2.711303 | 2.073646 | 1.9603   | 2.399024 | 1.360431 | 2.510441 | 3.249758 |
| 337878_at | 1.097793 | 1.123681 | 1.685097 | 2.633097 | 1.913209 | 1.512043 | 1.828128 | 1.152771 |
| 337879_at | 1.746722 | 1.844009 | 1.59593  | 1.307872 | 1.500863 | 1.128784 | 2.369695 | 1.327402 |
| 337880_at | 1.978476 | 2.426181 | 1.928361 | 2.063074 | 1.973066 | 1.998171 | 1.641892 | 1.968492 |
| 337959_at | 0.554272 | 1.536563 | 1.717961 | 1.02979  | 1.200161 | 0.790278 | 0.998262 | 1.152523 |
| 337960_at | 1.422263 | 2.60344  | 1.961707 | 2.002047 | 2.269443 | 1.542984 | 1.58235  | 1.763974 |
| 337963_at | 1.672093 | 2.292992 | 1.598524 | 2.458121 | 2.828721 | 2.350353 | 2.485757 | 2.11952  |
| 337967_at | 2.52157  | 2.21554  | 3.467349 | 3.222176 | 3.867231 | 2.166332 | 2.878161 | 2.656928 |
| 337968_at | 1.071808 | 1.326554 | 0.67872  | 1.428288 | 1.942064 | 2.56961  | 1.216966 | 0.949864 |
| 337969_at | 0.727933 | 1.363784 | 0.901521 | 1.149542 | 1.366128 | 0.902898 | 1.177035 | 1.05747  |
| 337970_at | 0.703322 | 1.062334 | 0.967921 | 0.675574 | 0.978062 | 0.69158  | 0.915303 | 0.562542 |
| 337971_at | 1.875987 | 1.55125  | 0.925826 | 1.374468 | 3.644738 | 1.251274 | 1.242923 | 1.192637 |
| 337972_at | 4.214919 | 2.877182 | 3.1444   | 3.194535 | 2.813109 | 3.123741 | 2.729714 | 3.570917 |
| 337973_at | 0.732599 | 0.86159  | 1.214274 | 1.14813  | 1.194547 | 1.554742 | 1.466219 | 1.871869 |
| 337975_at | 1.339177 | 1.298318 | 1.501221 | 1.498449 | 2.422591 | 0.994424 | 1.689444 | 1.816539 |
| 337976_at | 2.245897 | 2.756632 | 2.829057 | 2.251231 | 4.464721 | 2.278856 | 2.532527 | 3.309078 |
| 337977_at | 3.139627 | 2.166613 | 2.645792 | 1.872529 | 2.772156 | 1.578853 | 3.996659 | 3.056348 |
| 337978_at | 1.075726 | 1.162775 | 2.119946 | 0.838522 | 0.642098 | 0.941561 | 2.929702 | 2.001423 |
| 337979_at | 0.913288 | 1.030822 | 1.019601 | 0.717979 | 0.75277  | 1.132538 | 1.224872 | 1.32161  |
| 337985_at | 1.345997 | 1.351689 | 1.965333 | 1.251008 | 1.304403 | 1.05869  | 1.062239 | 1.441695 |
| 337_at    | 1.409971 | 1.83488  | 1.890873 | 1.339706 | 1.640347 | 1.890317 | 1.299702 | 1.578633 |
| 338004_at | 2.253293 | 2.496597 | 2.644278 | 2.809274 | 1.859808 | 3.806131 | 2.464506 | 2.512642 |
| 338005_at | 1.139203 | 1.43665  | 1.365265 | 1.774693 | 1.468028 | 2.386362 | 1.816557 | 1.90086  |
| 338069_at | 2.150908 | 3.341171 | 2.376249 | 2.651353 | 3.394501 | 2.094304 | 2.470125 | 2.16897  |
| 338094_at | 6.618567 | 5.568219 | 5.467284 | 3.337151 | 6.529323 | 6.587588 | 4.091476 | 5.783644 |
| 3381_at   | 1.087422 | 1.104349 | 1.369157 | 1.062882 | 1.240283 | 1.692194 | 1.408212 | 1.170946 |
| 3382_at   | 5.217305 | 5.335873 | 4.982633 | 5.248127 | 5.888564 | 4.716642 | 4.81242  | 4.947344 |
| 338321_at | 1.394783 | 1.211848 | 1.570561 | 2.026789 | 1.338889 | 1.110522 | 1.587696 | 1.292328 |
| 338322_at | 2.357579 | 1.192622 | 1.677182 | 2.393305 | 0.98957  | 1.590426 | 1.30461  | 1.275755 |
| 338323_at | 1.227517 | 1.05356  | 1.079726 | 0.952547 | 1.430124 | 1.485044 | 1.602354 | 2.353547 |
| 338324_at | 0.911317 | 1.633183 | 1.729087 | 2.31413  | 0.796982 | 3.500771 | 1.169277 | 2.22495  |
| 338328_at | 2.988238 | 2.644877 | 3.321561 | 4.301089 | 2.523963 | 3.148087 | 3.0614   | 2.523384 |
| 338339_at | 1.127033 | 1.387779 | 1.535679 | 1.347563 | 1.189892 | 1.574393 | 2.180404 | 1.380884 |
| 338376_at | 1.415249 | 1.028741 | 1.143701 | 0.924983 | 1.075695 | 1.081136 | 1.304593 | 1.234194 |
| 338382_at | 2.17181  | 2.606862 | 2.307815 | 2.388597 | 2.412453 | 1.946354 | 3.687743 | 2.68232  |
| 338398_at | 1.859414 | 2.043212 | 1.81854  | 1.794604 | 2.339139 | 1.714128 | 2.494893 | 2.12837  |
| 3383_at   | 4.997909 | 4.734633 | 5.107709 | 5.544125 | 4.926746 | 5.189085 | 5.600993 | 4.292161 |
| 338436_at | 1.139    | 1.569187 | 1.805241 | 2.299002 | 1.669994 | 1.887641 | 1.790549 | 1.735376 |
| 338440_at | 1.556578 | 2.536078 | 2.268332 | 1.593019 | 2.341187 | 2.329793 | 1.987761 | 1.693479 |
| 338442_at | 3.020948 | 1.012324 | 1.138996 | 1.671282 | 1.772444 | 1.288053 | 0.975831 | 0.530965 |
| 3384_at   | 7.376381 | 7.189772 | 7.474963 | 7.69426  | 6.8041   | 7.587338 | 7.689221 | 6.763173 |
| 338557_at | 1.510223 | 2.546205 | 1.681709 | 1.278415 | 1.713512 | 1.585982 | 1.167796 | 1.606726 |

338567\_at 1.918899 1.666169 1.174512 1.657333 2.033059 1.483772 1.809699 1.507758  
338579\_at 1.652973 1.486621 1.534713 1.105886 1.407238 1.673853 2.513355 1.414655  
338588\_at 1.453026 1.335147 1.563037 2.213454 3.009445 2.049827 2.510431 2.47491  
338596\_at 2.305508 3.411439 2.270762 1.882884 3.980282 3.210484 4.290531 3.377251  
338599\_at 1.837237 1.655753 1.926996 1.453144 1.649785 1.364432 1.754369 2.189298  
3385\_at 4.090485 2.956353 3.767864 3.309894 3.382017 3.503162 3.576394 2.802363  
338645\_at 1.138796 1.732071 1.841009 2.115342 1.259446 1.214747 1.210156 1.656161  
338651\_at 2.449377 3.702262 1.542867 1.564175 2.827587 2.004217 1.831514 2.133103  
338657\_at 4.410147 4.315419 5.254829 5.794134 4.719072 6.231875 4.462387 4.57976  
338661\_at 0.7632 0.94033 1.329239 1.205405 1.140784 1.223461 1.313625 1.129714  
338662\_at 1.913313 1.753873 1.041102 0.929044 2.16995 1.196286 1.951846 1.312827  
338667\_at 2.223163 1.320919 1.887375 2.219545 2.316122 2.180492 2.23925 1.58105  
338674\_at 1.230857 1.1073 1.385179 1.220231 1.848499 0.90889 2.043455 1.155952  
338675\_at 1.273157 1.647761 1.261497 1.335796 1.166144 1.637411 2.264284 1.371519  
338692\_at 3.669258 3.641667 3.412458 3.478124 3.825252 4.099112 3.970988 3.169075  
338699\_at 4.49302 5.013509 5.215269 4.598806 5.060531 3.665761 3.256502 5.054505  
3386\_at 2.927251 2.691953 1.587865 1.542031 2.743829 1.606505 2.148145 2.31064  
338707\_at 2.289249 2.45382 1.764678 2.136834 2.304343 2.403284 2.386932 2.144991  
338739\_at 0.960052 1.207563 1.44778 1.028089 1.411846 1.439682 1.639223 1.33466  
338751\_at 2.162722 1.346066 1.624191 1.886772 1.339316 1.164571 1.433316 1.712081  
338755\_at 1.602152 1.355295 1.036033 1.879968 1.588271 2.317332 1.739657 1.173829  
338758\_at 5.215753 4.625871 3.772087 3.454491 4.498047 3.316194 3.821372 2.892763  
338761\_at 1.774124 1.577453 1.697587 1.866195 1.568919 2.030796 2.051835 1.39328  
338773\_at 2.118524 2.238072 2.05718 2.19474 2.331676 2.10873 2.882609 2.605715  
338785\_at 1.600629 1.817956 0.7462 2.835935 1.451923 1.805829 1.59304 3.079723  
338797\_at 2.702703 2.688572 2.927148 2.104682 2.464214 2.136117 2.340331 1.916016  
338799\_at 4.051865 3.544482 3.365102 4.693625 4.669562 5.45633 4.183159 3.628173  
338809\_at 1.823035 1.608794 1.592133 1.540723 1.934389 2.593303 1.770303 1.788534  
338811\_at 2.22695 1.758561 1.188377 1.096463 2.428106 2.559197 1.654713 3.767242  
338817\_at 3.612831 3.129182 3.490077 2.385552 2.624011 2.295206 2.945858 2.653664  
338821\_at 0.830444 0.730316 0.717525 0.839746 1.042713 0.839525 1.375451 1.104419  
338862\_at 0.897706 1.3651 1.427122 1.408554 1.487304 1.092042 1.20788 1.215842  
338864\_at 0.780935 1.541911 1.083361 1.267692 1.182145 1.454938 1.955937 0.995089  
338872\_at 3.642027 2.085185 3.915503 1.395115 1.090566 1.221493 0.252365 4.669982  
338879\_at 0.783485 1.474837 1.458157 1.303109 1.932713 1.406377 1.546014 2.138243  
338917\_at 1.94716 2.436451 2.398864 2.041201 2.497399 2.089375 1.421389 2.829927  
338949\_at 1.23195 1.529504 1.203223 1.156256 1.388166 1.867151 1.452274 1.823841  
338963\_at 1.771751 1.871257 1.77554 2.018211 1.432843 1.9516 2.340168 1.916132  
338\_at 2.347232 2.173937 2.649171 1.967197 2.888987 3.528001 2.698863 2.628628  
339005\_at 3.074441 2.82194 3.069404 3.065478 2.262588 2.437094 3.329845 3.51952  
339059\_at 2.316403 3.043345 2.775663 2.289199 2.729171 3.000486 2.500043 2.960906  
339105\_at 2.591143 2.649422 3.6877 2.089185 3.711104 1.87555 3.238228 2.120983  
339123\_at 7.264254 6.611854 7.48994 7.293616 6.405428 7.192259 7.907706 6.165579  
339145\_at 1.611512 1.730597 1.102561 1.707493 1.62796 2.484863 2.695581 1.823229  
339166\_at 1.121704 2.420818 1.651129 1.804153 2.474963 1.931319 2.790731 3.693144  
339168\_at 1.898789 1.629731 1.197004 1.503896 2.19388 1.386107 1.968885 2.144002  
339175\_at 5.029424 4.29021 4.260535 5.023572 5.944666 4.93723 5.600069 4.255059  
339192\_at 1.725154 2.314392 1.78818 1.723864 2.967304 1.838025 1.927836 2.165792  
339201\_at 4.990613 5.293285 4.778831 5.484215 3.582753 5.134881 5.275715 2.774966  
339210\_at 2.354696 2.320563 3.106043 2.323994 3.205809 2.179796 3.192272 1.698575  
339221\_at 2.067952 1.88898 2.380979 1.838729 2.15795 2.203397 2.214994 2.732052

339229\_at 6.849812 6.63179 5.369797 4.742572 5.721967 6.20912 5.263245 6.837666  
339230\_at 4.289282 4.673889 3.402548 4.530744 3.617048 4.050791 4.255171 3.708341  
339231\_at 4.856005 4.923545 5.257372 4.281659 4.397889 4.271528 4.162697 4.289669  
339240\_at 0.914889 2.109844 3.374465 0.655445 2.761039 0.892316 1.101801 2.548702  
339260\_at 1.460098 2.103205 1.646687 2.349085 3.141422 1.240941 1.583788 2.838919  
339263\_at 3.37745 4.647687 4.275185 3.622344 4.996889 3.682969 4.807326 4.319685  
339287\_at 5.989509 6.299707 5.259838 6.321169 5.491914 6.072852 4.988139 5.579618  
339290\_at 4.314003 3.59967 3.565504 4.927106 4.353378 3.842328 4.53069 5.728642  
339291\_at 2.640298 2.134581 2.318933 3.260094 2.895784 2.838953 2.251262 2.772125  
339298\_at 0.900469 1.427505 1.363238 1.359072 1.33015 1.732143 1.601297 1.755215  
339302\_at 0.987745 0.834425 1.056988 1.06386 1.106366 1.508452 0.938826 1.41261  
339318\_at 3.984461 4.005211 3.727831 4.053479 3.914131 3.930046 4.082612 3.734058  
339324\_at 6.418675 6.265739 6.922262 6.257398 6.994375 5.978437 6.164698 6.256099  
339327\_at 1.506065 3.108786 2.053416 3.001258 2.704823 2.076172 3.880345 3.61106  
339344\_at 3.924623 3.769262 3.292613 3.874378 3.22215 3.66898 3.528804 3.743331  
339345\_at 1.843413 2.221259 1.495429 2.485465 1.423993 2.294034 3.06748 1.697476  
339366\_at 2.209732 3.53996 2.383547 2.496283 2.941284 3.146344 2.188596 2.655184  
339390\_at 1.380051 2.358583 1.297143 1.777167 3.003972 2.259298 2.537527 2.403627  
339398\_at 2.272606 2.285381 2.083787 1.921728 1.983363 2.29534 2.117674 2.024418  
339400\_at 1.613723 2.974452 2.878768 1.636939 1.621358 1.504842 2.914424 3.440385  
339403\_at 2.350629 2.73719 3.187707 2.477539 2.525193 1.982658 3.15137 3.213535  
339416\_at 1.902008 3.876804 2.775124 1.992057 2.392247 3.315453 1.889005 3.747126  
339442\_at 1.533787 1.150184 0.833181 0.974741 1.125373 1.384118 0.891443 2.559483  
339448\_at 5.423944 5.718952 4.96493 6.259773 5.057166 4.103168 5.088026 4.873484  
339451\_at 3.268431 2.897774 3.348503 3.222497 3.107584 3.110374 3.103748 2.772655  
339453\_at 1.799659 1.678931 2.342977 2.143847 1.55538 1.945022 2.649965 1.985874  
339456\_at 2.668614 1.625181 3.303902 2.189541 2.859589 2.272654 3.176409 2.256086  
339468\_at 2.179509 1.251463 1.138489 1.136479 1.452935 1.591392 1.758692 1.032951  
339479\_at 2.186799 1.801655 1.329799 1.459128 2.232309 1.877413 1.442952 2.094172  
339483\_at 3.697407 2.623604 2.438448 3.88504 2.420753 3.004723 2.511738 1.602245  
339487\_at 4.054738 4.098675 3.991479 3.615319 4.452018 3.898847 3.775426 4.516561  
339488\_at 2.109509 2.487494 2.003234 3.215958 3.389915 2.576415 3.440507 2.693747  
3394\_at 2.689909 2.58169 3.139968 2.08961 2.555283 2.773957 3.703247 2.542999  
339500\_at 5.011776 4.711723 4.8527 4.543283 5.799622 4.3734 4.245497 5.604405  
339501\_at 1.507004 1.782271 1.471584 1.536179 1.880861 1.879257 1.707787 2.415468  
339505\_at 1.247448 1.380147 2.333575 1.690724 1.559794 1.859318 1.578009 1.631653  
339512\_at 1.189554 1.262201 1.534749 1.224126 1.71662 2.028711 1.27185 1.786605  
339524\_at 1.506948 2.690915 1.074649 1.516744 1.794882 2.060718 1.595886 0.777272  
339529\_at 1.772722 2.241378 1.655296 1.271655 1.335925 2.003489 1.848949 1.582204  
339535\_at 5.474355 4.414072 7.275888 6.276771 5.243597 5.064272 3.92538 6.665946  
339539\_at 2.093822 2.562518 2.153009 2.426336 1.855887 2.338003 2.147047 2.921455  
339541\_at 2.785341 1.596247 1.909579 1.846198 1.532642 1.723083 1.558457 0.895699  
339559\_at 3.99774 2.67614 3.274698 3.004823 3.406267 3.070118 2.794139 3.097257  
339568\_at 1.989237 1.1498 1.609094 1.718423 1.49431 1.732807 1.439608 1.815631  
339593\_at 1.034395 0.726774 1.017643 0.974151 0.907256 1.046945 1.151534 0.927662  
339622\_at 0.931902 0.856957 1.012961 0.803845 1.1065 1.444411 1.128476 1.102805  
339665\_at 2.256524 2.354025 2.508334 2.968375 2.556033 3.571055 1.292989 2.230545  
339666\_at 1.73298 1.338013 1.479036 1.923447 1.813318 1.904437 2.040399 1.671977  
339669\_at 1.860729 2.220593 2.268165 2.781344 2.277761 1.914193 2.112263 2.336477  
339674\_at 2.765318 3.063998 2.32464 2.791976 2.261061 2.695071 1.777483 2.558744  
3396\_at 7.772801 7.261861 7.77908 7.052944 6.125725 7.664311 7.565799 6.029857

339745\_at 5.704786 6.170875 6.426791 6.27147 6.582344 5.839589 5.91242 6.336405  
339751\_at 1.841835 2.176301 2.357718 2.034586 1.497595 1.519581 1.701057 1.889469  
339761\_at 2.06191 1.815141 2.093213 1.770225 2.416031 1.934782 2.08659 2.411486  
339766\_at 1.754583 1.771238 1.830709 1.926036 2.025797 1.760317 1.579473 2.022405  
339768\_at 1.634787 1.627716 1.850115 2.190405 2.075644 2.433706 2.271358 1.172807  
339778\_at 3.586098 1.938472 1.938472 1.914706 1.936031 2.309251 1.734841 1.917046  
339779\_at 2.047997 2.064453 2.356731 2.356014 2.231739 2.187333 2.19051 1.752728  
339788\_at 1.034259 1.25819 1.035195 1.400535 2.779779 0.991684 1.200613 1.625599  
339789\_at 2.359015 1.334356 1.484306 1.553962 1.671851 1.912626 0.931566 0.95577  
3397\_at 8.414091 8.127648 7.951822 8.309871 7.533557 8.698286 8.44897 7.312255  
339803\_at 5.771971 5.891349 6.399047 5.358487 3.827852 5.6195 6.499073 4.597896  
339804\_at 6.647121 6.998209 6.296995 6.558903 7.088993 6.143971 6.279591 6.356964  
339807\_at 2.983334 1.444786 1.205331 1.616548 1.759119 1.616548 1.696173 1.591549  
339822\_at 1.676073 1.283987 1.402532 1.676276 1.709886 1.336544 1.703286 1.936844  
339829\_at 1.75894 2.140974 1.968619 1.545312 2.560958 2.017914 1.50898 2.365717  
339834\_at 2.67535 1.646682 1.909723 2.567003 2.296232 2.830731 2.337052 2.185521  
339855\_at 2.054187 2.582806 2.868294 2.719393 2.483103 2.484366 2.452896 3.035681  
339874\_at 2.314059 1.521561 3.051646 2.441282 1.572115 2.045332 1.784478 2.688085  
339883\_at 1.223007 1.335278 1.425112 2.119034 3.436391 1.506911 2.190778 1.658391  
339894\_at 1.202683 1.929862 1.153267 1.155207 1.343373 1.107874 1.880026 1.907233  
339896\_at 2.302242 2.985346 2.501241 2.854573 2.715605 2.670481 2.658521 2.897773  
339906\_at 4.468157 3.476412 2.558398 2.807909 2.734232 2.150626 3.095679 2.230219  
339926\_at 2.264465 1.515847 2.160361 1.315787 2.109083 2.035022 2.795873 1.816906  
339929\_at 4.462324 4.69408 4.817554 4.650185 3.733057 4.82713 4.499689 3.499551  
339942\_at 3.872681 3.588354 3.125951 3.865235 3.567199 2.916139 3.081688 2.258264  
339965\_at 2.716145 1.895375 2.084053 1.399571 1.814643 1.535273 1.800279 1.500747  
339967\_at 2.281099 1.516919 1.457994 1.454771 1.664724 2.964433 2.001621 1.878059  
339975\_at 1.416598 1.353514 2.07047 1.158886 2.109906 2.081503 1.87617 1.299229  
339976\_at 1.432961 2.099755 1.740331 1.236799 2.102411 1.852942 2.631741 2.184638  
339977\_at 2.424853 2.031958 2.128578 1.784647 1.557174 1.856654 1.226656 1.682472  
339978\_at 2.225262 2.557297 2.474423 2.325358 3.124471 2.19385 2.170201 2.512345  
339983\_at 2.327644 2.384444 2.665697 2.506289 2.966819 1.710031 1.748992 1.972206  
339988\_at 2.130808 1.813403 1.68045 2.034699 1.984157 2.212446 1.57503 1.547919  
3399\_at 7.069372 6.77525 6.543181 7.128112 6.417173 6.981322 6.949979 6.362853  
339\_at 1.524857 1.056218 1.829926 0.915788 1.634538 1.532772 1.134696 1.343114  
33\_at 1.821019 1.12775 1.599384 1.305133 1.732734 2.646162 1.427424 2.22243  
340017\_at 0.952568 0.491624 1.555825 1.198312 1.416686 1.224362 0.97681 1.16582  
340024\_at 5.85303 4.45279 4.956501 2.606861 5.927796 6.769991 3.814167 5.328302  
340037\_at 2.274653 2.701848 2.18773 1.835225 3.019347 3.622458 3.13781 3.035523  
340061\_at 6.170055 5.841602 6.587589 6.799532 5.582838 6.294958 6.328108 5.461902  
340069\_at 1.332494 2.561045 1.659128 1.783886 1.544271 1.56361 1.255394 2.593499  
340073\_at 1.36172 1.15197 1.449801 1.845286 2.001303 2.202525 1.48726 1.807267  
340074\_at 1.191961 2.567343 1.400011 1.546798 2.41615 1.917383 1.535341 2.039049  
340075\_at 1.655875 2.484297 1.887347 2.297054 2.319172 3.155349 2.736973 2.42588  
340094\_at 3.192338 1.952622 1.917733 2.620076 3.106451 2.16021 1.806511 1.682684  
3400\_at 3.113216 4.103896 4.808141 4.793983 5.354933 5.336145 4.455377 4.400655  
340107\_at 1.136679 1.054432 1.307698 0.751111 2.160159 0.824208 1.324385 0.75657  
340113\_at 1.26128 1.576942 1.697146 1.820477 1.796247 1.855135 1.220069 1.358884  
340120\_at 2.828178 1.998455 1.597422 1.867336 1.345922 1.817506 1.920459 1.803026  
340146\_at 2.140802 2.602312 2.173972 2.600826 2.807285 1.825001 1.964607 2.73756  
340152\_at 2.93521 1.662626 1.745092 2.108805 1.482368 2.656285 1.771971 2.00268



340156\_at 3.185625 1.741235 2.939284 2.217672 3.022433 3.013693 2.00561 2.839078  
340168\_at 1.774715 2.021714 1.818959 1.618713 1.99982 2.61767 1.713354 1.722706  
340198\_at 3.287308 3.824241 3.817334 3.722584 3.960831 3.299216 3.521059 3.353957  
340204\_at 2.815761 1.805607 1.728708 2.326877 2.559177 2.711715 1.306093 2.692229  
340205\_at 2.138312 2.242723 1.923662 4.020233 2.249436 1.899524 3.552192 3.570468  
340206\_at 3.574111 3.701779 3.6515 4.571681 4.109377 4.238917 4.393616 4.267049  
340252\_at 2.643555 1.829064 2.217846 1.967968 0.851697 2.620232 3.008792 2.523523  
340260\_at 2.419265 3.160224 3.346358 3.418226 3.48046 3.564592 3.124736 4.041285  
340267\_at 2.973612 1.7283 2.177397 1.654729 2.588896 2.007981 2.558909 3.92079  
340273\_at 2.325253 2.267455 2.227884 2.751651 1.934089 2.18821 1.677788 2.061592  
340277\_at 2.473821 2.85309 2.028873 3.822661 2.489163 1.781184 1.628942 1.971416  
340286\_at 1.973097 1.844988 1.326929 1.550666 2.222243 1.765805 1.846597 1.593286  
340348\_at 6.945851 6.036426 6.760372 6.060116 6.337657 6.293453 5.849434 6.448984  
340351\_at 2.087533 1.971555 1.634403 1.707623 1.496863 1.92423 1.855187 1.688852  
340357\_at 1.588757 1.488144 1.317511 1.93356 1.677608 1.232028 1.402868 1.767421  
340359\_at 2.713243 1.526236 1.44376 1.038015 0.749429 1.360249 1.814642 1.14694  
340371\_at 4.251488 4.084934 4.271816 3.191659 4.011267 4.084044 3.587629 3.608009  
340385\_at 2.922176 2.573555 2.303384 2.489234 2.579372 2.206681 3.157623 2.289285  
340390\_at 2.416254 1.870623 2.372162 2.173001 2.304373 2.784644 2.38238 2.100492  
340393\_at 1.676008 2.950691 1.811998 1.854514 1.850827 1.883012 2.567176 2.717473  
340419\_at 2.023667 1.767717 1.534815 1.861566 1.143707 1.259721 1.46408 1.950533  
340441\_at 1.034006 0.754494 1.217273 0.893365 1.168299 0.796349 1.219565 1.119435  
340481\_at 4.996199 5.59114 4.752188 5.265182 6.348034 4.977659 3.52793 5.546145  
340485\_at 4.27123 3.765856 4.650795 5.428346 5.137428 4.372335 4.984613 4.211992  
340508\_at 1.055454 0.768794 0.67974 1.076764 0.842268 1.612904 1.691968 1.894175  
340512\_at 2.287236 1.769948 2.311468 1.244803 1.445883 1.279498 1.316527 1.53102  
340515\_at 1.221777 1.432035 2.141195 1.767892 1.225683 1.363263 2.240694 1.502844  
340526\_at 3.635055 3.957614 2.78177 3.992325 3.302389 3.661664 3.878183 3.308749  
340527\_at 4.59504 4.19284 4.87113 3.8317 3.506372 3.267664 3.931486 3.664925  
340529\_at 0.798235 0.91471 1.99723 0.849867 0.965734 0.837568 1.111577 0.894318  
340533\_at 2.512123 1.898267 3.1193 2.041288 3.110808 3.643478 3.181245 2.820531  
340542\_at 7.624433 8.088945 8.190001 7.671609 8.722688 8.367849 7.996132 8.595046  
340543\_at 1.77348 1.42873 1.496005 1.323633 1.398365 1.726545 1.966679 2.771048  
340544\_at 2.864292 2.630591 2.080948 2.241227 1.319562 2.283418 2.838292 3.23578  
340547\_at 2.123621 1.326308 1.786409 1.475388 1.241061 1.533865 1.781668 1.823622  
340554\_at 3.038951 3.203029 3.055035 3.201299 3.185834 3.834676 2.974549 2.566628  
340562\_at 2.84862 3.183783 2.764553 3.025992 3.401846 2.577274 2.783956 3.299071  
340578\_at 1.803871 3.517215 2.446421 1.846401 1.46851 1.519499 1.676244 3.368305  
340581\_at 1.207183 1.185375 1.07087 1.184944 1.162698 1.298091 1.201723 1.31494  
340591\_at 4.827089 3.479981 2.789315 4.677756 2.631362 4.323727 3.37148 2.010996  
340595\_at 2.38236 1.4114 1.75309 1.843063 1.460362 2.559418 3.559909 2.523265  
340596\_at 2.407395 1.937779 1.99999 2.303498 2.018482 2.50699 2.640368 2.191491  
340602\_at 1.977216 1.597702 2.587246 1.128615 1.706781 1.567124 1.907242 1.961699  
340654\_at 1.853969 1.659904 1.233801 1.521575 2.09452 1.755894 1.675644 1.953525  
340665\_at 1.140417 1.483595 1.463937 1.092374 1.13408 1.712545 1.140388 1.269732  
340706\_at 2.492108 2.639011 1.658718 2.351798 2.669368 2.676036 2.478539 2.148851  
340719\_at 3.375868 3.745835 3.735642 3.973596 3.388652 4.233809 2.973686 3.816354  
340745\_at 1.137892 1.499445 1.570184 1.15049 1.493144 1.068334 1.432801 1.17833  
340784\_at 3.573292 2.251422 3.254119 3.850213 2.849234 3.821301 3.248182 2.683087  
340811\_at 1.034186 2.318666 1.815256 0.756044 1.978852 1.638141 1.71308 1.415593  
340895\_at 1.323782 1.407499 1.536959 1.286466 1.515052 1.27426 1.322345 1.422958

340900\_at 2.519557 1.200456 1.288304 1.743384 1.755012 0.858906 1.807817 1.552321  
340980\_at 1.234204 1.412172 1.379181 1.584584 3.439896 1.751525 2.040325 1.895709  
340990\_at 1.840395 1.991801 2.505863 2.197912 2.000395 2.376299 2.431689 1.940542  
341019\_at 1.359236 1.534549 1.449993 1.456469 1.073094 1.530055 1.425494 2.153566  
341032\_at 1.799109 2.318085 1.540738 1.967055 1.929228 2.515816 1.564643 1.509945  
341056\_at 2.072496 1.758588 1.38358 2.139397 2.168216 1.590603 1.577357 1.626438  
341116\_at 2.144038 2.878368 1.619492 1.774379 1.808425 2.063305 1.662974 1.921842  
341152\_at 1.246901 0.997105 1.665197 1.442683 1.177023 1.130032 3.854132 1.189405  
341208\_at 1.371789 1.594332 2.067648 2.219486 1.631846 1.657289 1.662939 1.926742  
341276\_at 1.954831 1.047149 1.788071 1.409399 1.484541 1.919761 2.114369 2.668759  
341277\_at 1.326713 1.506969 1.877652 2.11652 1.42011 1.591389 1.377569 1.595066  
341346\_at 1.432711 1.439443 1.151942 1.374109 2.473661 1.321226 1.770006 0.93192  
341350\_at 1.553679 2.311813 1.525147 1.405077 1.011018 1.639395 1.956158 1.386713  
341359\_at 1.887221 2.61108 3.017308 2.306077 2.263957 2.598532 2.553957 2.960138  
341392\_at 2.228905 1.930481 1.747042 1.569135 2.598025 2.353896 1.658808 2.430182  
341405\_at 2.822185 1.734081 2.632601 1.013017 1.982108 1.851318 1.887634 2.499543  
341416\_at 1.38517 1.511505 1.157055 1.087499 2.351116 1.740914 1.413955 1.118503  
341418\_at 1.813804 1.863302 2.780829 1.408763 1.990702 2.883928 1.04594 2.761606  
341567\_at 1.852703 1.634167 1.407967 1.633162 1.620206 1.334026 1.55642 2.136844  
341568\_at 2.284705 2.797718 2.556519 2.857814 3.030865 2.928129 2.298033 4.135839  
341640\_at 3.353316 3.349159 3.506662 3.360618 4.758887 3.720399 2.26543 4.851816  
341676\_at 1.972757 1.608985 1.767247 1.405752 1.846547 1.81086 2.062141 1.7918  
3416\_at 5.713289 6.157541 6.28562 6.516712 6.448519 6.147816 6.4826 6.321573  
341799\_at 1.081606 1.25841 2.000048 1.567477 1.735211 1.620079 2.093343 2.093649  
3417\_at 6.34526 6.264375 6.088748 5.743322 7.307595 5.999263 6.148229 6.782157  
341880\_at 3.025165 2.339185 2.124699 2.500643 2.680488 2.613051 2.42023 2.820391  
341883\_at 1.012711 0.950902 1.038109 0.951471 1.395662 1.540143 1.391646 1.08123  
3418\_at 6.458171 5.464746 5.82282 6.236233 6.637626 5.416215 6.140495 4.980489  
341947\_at 1.274616 1.774539 2.345382 1.289798 1.278007 1.775215 1.258028 1.189226  
3419\_at 6.058359 7.036829 5.981148 6.110788 6.480622 6.195207 5.798071 6.62969  
341\_at 7.813064 3.073663 4.359731 6.464713 4.73781 4.080158 4.152768 4.434275  
342035\_at 2.41021 2.03253 2.765015 2.324122 2.463638 2.066221 2.675439 2.9451  
342096\_at 1.864368 3.946454 2.184386 3.503603 1.983801 2.527893 3.136808 2.410448  
3420\_at 6.987955 6.549917 6.929184 6.590937 6.801594 6.31669 6.578442 6.982144  
342125\_at 1.876951 2.678888 1.480754 1.535414 1.810206 2.415198 1.781054 2.051266  
342132\_at 2.257806 2.565471 4.838327 2.153574 1.627919 2.847676 3.521665 2.051012  
342184\_at 2.014781 1.910219 2.687781 2.241191 2.867475 1.763778 2.323427 2.011024  
3421\_at 7.541321 6.473569 7.023003 6.970677 6.190487 7.129806 6.853204 6.556829  
3422\_at 3.494345 3.598818 4.519512 4.227475 3.028398 3.010429 3.288813 3.654438  
342346\_at 1.656877 1.394406 1.709349 1.084268 1.151882 1.861783 1.539426 1.397761  
342357\_at 3.801641 3.527313 3.432738 4.543191 3.556722 3.784909 3.126907 3.711238  
342371\_at 6.275101 6.628208 5.674823 5.937735 4.709383 5.275081 5.514317 5.876703  
342372\_at 1.986965 1.709681 2.178225 1.515521 1.797943 1.461743 1.478814 1.052927  
3423\_at 7.857406 7.554687 7.388369 7.507589 7.40932 8.012012 7.720049 6.410685  
342510\_at 1.678389 1.721665 1.710353 1.785482 3.174606 1.571322 1.884204 1.605781  
342527\_at 2.56755 2.666182 2.76539 2.177 3.831463 2.842285 2.31647 3.070679  
342538\_at 2.66673 2.658255 2.669802 2.748881 3.562029 3.612829 3.542235 3.103809  
342574\_at 2.561059 1.700048 1.194007 1.639015 1.908887 2.723667 2.283418 2.806896  
3425\_at 3.179921 3.798332 3.681449 3.82128 2.61157 4.665663 4.006642 2.400357  
342618\_at 1.734584 1.630038 1.605577 1.368554 1.447162 1.438139 2.267675 2.182851  
342666\_at 1.789832 1.742819 1.361602 1.301193 2.261936 1.919332 1.472348 1.492869

342667\_at 2.46644 2.473732 3.116918 2.398737 3.043848 2.26789 2.804194 3.067949  
3426\_at 6.085373 5.359135 5.936512 5.118804 6.569802 6.378174 5.180179 6.073225  
342850\_at 0.960539 1.241078 1.107693 0.866439 1.154244 0.801451 0.72933 0.666383  
342865\_at 1.217414 1.758123 1.93645 2.173875 2.020608 1.960904 2.047202 1.597939  
342892\_at 2.916168 1.464501 3.270103 3.021046 3.684643 2.37583 4.039339 2.090758  
342897\_at 3.234636 3.158565 3.533654 3.108733 5.226087 3.854935 3.630323 4.104367  
342898\_at 1.554365 1.829533 1.911091 1.770478 2.942792 1.978645 2.098266 1.945956  
3428\_at 7.662921 7.874378 7.250423 8.019104 7.244991 7.835639 7.387303 7.403373  
342900\_at 2.026543 2.661293 2.419452 2.09415 2.083293 2.115303 1.981856 2.455569  
342908\_at 3.898338 3.665847 3.288107 4.555524 2.692415 4.080117 2.346575 4.036613  
342909\_at 1.391057 1.623049 2.750102 2.172521 2.497249 3.983187 2.294728 3.525013  
342918\_at 2.187205 2.392529 1.820233 3.407812 2.552607 3.346174 2.430204 3.468473  
342926\_at 4.66136 4.675831 4.767587 3.492461 3.764506 3.927991 4.421678 4.836586  
342933\_at 1.408181 1.331977 0.725977 0.953691 1.621373 1.072233 1.227838 1.399526  
342945\_at 2.31592 2.738278 2.867692 2.035337 2.4516 3.384889 3.022175 2.59137  
342977\_at 2.883858 3.788415 2.794633 3.766609 3.44078 3.499223 3.454042 3.99506  
342979\_at 2.057626 1.835179 2.172536 2.021543 3.042911 1.643403 2.149943 2.322928  
3429\_at 9.523753 9.11042 9.257472 9.47248 8.973471 9.457911 9.282821 8.954136  
342\_at 1.578023 1.684 1.830135 2.084674 2.697098 1.893269 1.725711 2.054094  
343035\_at 1.536902 1.054996 1.411581 1.559697 1.468233 1.363656 1.38199 2.166108  
343066\_at 1.813764 2.388824 1.01019 1.997646 2.773916 1.883589 1.569449 1.610439  
343069\_at 2.929181 1.506053 0.959516 1.312672 0.849955 1.428203 3.253118 1.532934  
343070\_at 2.183458 3.999858 2.425862 4.048188 2.653869 2.593588 1.502319 4.871486  
343099\_at 2.237922 2.645351 2.787016 2.453557 1.401151 1.775281 1.806658 2.685227  
3430\_at 7.279786 6.172031 6.47612 6.39171 5.729473 6.955646 6.056962 6.474462  
343169\_at 2.73084 2.47159 1.685901 2.61025 2.367516 1.89122 2.084794 1.518339  
343171\_at 2.658824 2.953409 3.218426 3.783652 2.667269 2.820781 3.712738 3.018142  
343172\_at 0.919286 0.598406 0.873307 1.016046 1.441635 0.851014 1.554464 1.955274  
343173\_at 2.871601 2.672766 3.190638 2.684698 3.466232 3.824562 2.86197 2.384202  
3431\_at 6.328018 6.101455 5.692245 6.149018 5.08662 6.151017 6.03704 5.901944  
343263\_at 2.212578 1.74245 1.869412 1.152397 2.079144 1.385122 2.163377 2.989606  
3433\_at 4.532292 4.604762 3.82403 4.844328 5.068626 4.327583 4.412932 4.491638  
343406\_at 1.262862 1.07541 2.454165 1.362378 2.278844 1.731249 1.16587 1.599292  
343413\_at 2.38441 1.525505 1.857704 1.511737 1.429241 1.783852 1.308599 1.317351  
343450\_at 3.478582 2.409449 3.156587 2.316238 2.583727 3.83448 3.68078 3.135286  
343472\_at 2.285882 3.077454 2.032999 2.371583 2.38616 2.125181 3.107295 1.835078  
3434\_at 6.541206 6.832386 6.551477 6.639247 6.25417 6.488677 6.861064 7.191325  
343505\_at 0.983569 1.114479 1.354683 1.910557 1.353272 1.182666 1.375601 1.676335  
343521\_at 4.035656 3.744713 3.109369 3.174853 3.293756 3.46954 2.978096 3.399442  
343563\_at 0.91553 0.822354 1.017394 0.856214 1.266372 1.239844 1.8865 1.318103  
343578\_at 2.07313 2.081843 2.265333 1.788094 1.906447 1.799014 1.897131 2.062278  
343637\_at 2.116485 3.084298 1.855419 2.398342 3.039098 2.198097 3.154393 3.072625  
343641\_at 2.200945 1.625414 2.628569 1.878975 1.499539 2.334693 2.357774 3.082855  
343702\_at 1.838213 1.089582 1.310043 1.203771 1.576166 1.465435 1.142862 1.943682  
3437\_at 6.477822 6.634702 6.059203 6.822386 6.82425 6.323516 6.353097 6.451225  
343930\_at 1.959709 2.016731 1.799427 2.023168 1.892442 1.904348 1.668782 2.854544  
343990\_at 2.194912 2.440076 2.536521 2.887797 2.553921 2.763645 2.07199 2.125105  
343\_at 1.824291 1.49099 1.992788 2.147684 2.221182 1.845611 2.08012 1.655448  
344018\_at 1.287792 1.076038 0.907431 1.23174 1.158645 1.476227 2.225251 1.208121  
344022\_at 2.290456 2.16543 2.006642 2.536594 1.873829 1.554387 1.747902 2.045586  
3440\_at 1.873895 1.688466 1.35085 1.971388 1.304821 1.675085 1.29062 1.197919

344148\_at 3.686501 3.910538 4.322978 4.113319 4.587206 4.453635 5.05545 4.552467  
344167\_at 1.557347 2.066634 1.978898 1.466355 1.186827 1.485281 1.620384 2.223342  
344191\_at 2.450644 2.922367 3.276677 2.7802 3.496955 3.652349 3.227227 2.570464  
3441\_at 1.027575 1.19305 0.854872 0.9656 1.05077 0.879422 0.923965 1.431299  
3442\_at 2.140246 2.725221 1.952913 2.610122 2.689529 1.426086 1.244486 2.724693  
344387\_at 1.33982 1.480281 0.932459 1.128256 1.489757 0.959125 1.611101 1.074574  
344405\_at 2.189808 3.13197 2.674356 2.554328 3.510794 2.059615 1.797932 2.972677  
344454\_at 1.479982 1.590187 1.509755 1.525675 1.839115 1.69048 1.820029 1.582018  
3444\_at 3.029125 0.639394 1.270657 0.943098 1.092369 1.884158 1.175446 1.175132  
344558\_at 3.660903 3.20152 3.093947 3.912474 3.111984 3.913474 3.930063 2.943667  
344561\_at 1.913409 1.931027 2.250696 1.784616 1.858845 2.067572 1.051199 2.171741  
344595\_at 3.927121 3.312146 3.478945 3.01954 3.102072 3.973432 3.422244 2.949661  
3445\_at 1.151981 1.502238 1.642638 0.940646 1.756426 1.196964 1.505081 1.787765  
344657\_at 1.083349 2.143655 1.842492 1.030458 1.414644 1.443441 1.591886 2.002506  
344658\_at 1.550388 1.252312 0.98243 1.300906 1.358275 1.236139 1.694526 2.270929  
3446\_at 1.583723 0.717883 1.575977 1.06303 1.264341 1.090909 1.015597 2.227219  
344752\_at 1.640383 1.660199 1.660019 1.271331 1.713327 1.80949 1.992288 2.098484  
344758\_at 1.833455 1.859417 1.739486 1.596622 1.586227 1.48355 1.865901 1.887681  
344787\_at 4.011728 4.137939 5.461611 2.392641 3.59646 3.816649 2.296069 3.398217  
3447\_at 0.915423 1.344886 1.433555 2.109619 2.398329 0.946815 1.118931 2.145332  
344805\_at 1.642981 1.956891 1.518538 1.735754 2.135718 1.355741 1.847497 2.248784  
344807\_at 1.150569 1.069452 1.156502 1.283546 1.884432 1.702625 2.248403 1.300144  
344838\_at 1.128057 1.163388 1.525125 1.119455 1.202327 1.214649 3.988098 1.323965  
344875\_at 2.351155 1.053704 1.996157 1.413816 1.067255 1.038735 1.29126 1.19358  
344887\_at 1.247347 1.163242 1.317566 1.189185 2.187321 2.603478 1.850586 2.250869  
344892\_at 1.592672 1.543254 2.192435 1.79538 1.657177 1.683098 1.919145 1.370017  
3448\_at 3.553386 3.990823 2.870099 4.383191 3.575342 3.17295 4.450527 3.714069  
344901\_at 0.766201 1.107991 1.005571 1.102982 2.577421 0.817217 1.122608 1.019079  
344905\_at 1.585796 1.988777 1.144722 1.467564 1.706784 1.855833 1.383083 2.525758  
344967\_at 1.226812 1.953684 2.154797 1.464972 2.150864 2.483897 1.793937 1.699117  
3449\_at 1.4406 1.605713 1.339856 1.67591 0.547607 0.703399 1.133229 2.274704  
345051\_at 1.379219 1.786138 1.694193 1.617493 1.583071 1.94809 1.666057 1.883151  
345062\_at 2.043052 2.283293 2.459902 1.54111 2.544946 2.288331 2.581033 1.842334  
345079\_at 2.13523 2.015982 1.973003 2.105347 3.203104 3.296489 2.46272 2.672255  
345193\_at 1.457766 1.543815 1.678872 1.157346 1.687965 1.375411 1.106756 1.254449  
3451\_at 1.173415 2.95786 1.831333 0.962556 1.350219 1.588924 1.151339 2.395627  
345222\_at 2.379694 1.303906 1.800134 1.669035 2.139164 1.1966 2.10705 1.894271  
345274\_at 0.782174 1.253256 1.767119 1.527792 1.131436 1.263569 1.377493 1.250977  
345275\_at 0.744735 1.029507 1.278405 0.885637 1.286194 1.687194 1.027594 1.212404  
3452\_at 0.798116 0.869043 1.101635 0.993764 1.381423 1.549945 1.535576 0.808909  
3453\_at 1.624408 0.772687 1.250348 0.936446 1.697328 1.138557 1.425746 1.273508  
345456\_at 1.671437 2.602699 2.453232 2.321608 2.219127 2.053982 2.659655 2.464098  
345462\_at 3.617225 4.605729 3.177869 3.592595 2.431213 4.063423 3.409336 3.591228  
3454\_at 7.733554 8.009779 8.165229 8.299499 7.88649 7.755606 7.929905 7.971496  
345557\_at 3.856322 3.396162 3.917033 4.421155 2.469277 3.094886 4.316475 2.521774  
3455\_at 6.396208 5.691837 5.634141 6.052873 5.490811 5.787623 5.874914 6.06233  
345611\_at 1.188448 1.234295 0.771632 1.233362 1.045582 1.063261 0.958094 1.615802  
345630\_at 1.792632 2.319932 2.812332 2.268431 2.45729 2.780021 2.764455 2.046124  
345643\_at 1.606993 1.652726 1.735769 1.429737 2.389839 1.76324 1.8154 1.942158  
345651\_at 2.156512 1.000705 0.960583 1.160543 0.993477 1.339151 2.055281 1.597865  
3456\_at 0.869697 1.208455 0.983123 1.300277 1.498112 1.509664 1.308971 1.271082

345757\_at 5.558955 5.634715 5.628897 5.221287 5.539874 5.536661 4.881017 6.035729  
345778\_at 5.997208 6.992001 6.758124 7.301002 5.893805 6.61814 6.92281 6.870922  
345895\_at 2.885675 2.096029 1.901626 2.004861 1.668824 1.594578 1.28644 1.74469  
3458\_at 1.668674 1.415575 1.300267 2.046522 1.34509 1.817438 1.068128 1.929139  
345930\_at 1.016806 1.105086 0.942751 1.608706 1.298586 1.651037 1.534206 1.530992  
3459\_at 6.984341 7.628679 6.661775 7.128159 7.230153 6.941504 7.040533 7.470263  
345\_at 4.241977 4.119276 6.301642 3.634934 4.099732 4.494995 4.175929 3.953559  
346007\_at 1.412967 1.51048 1.667334 1.336585 1.854597 0.891926 1.437039 1.842549  
3460\_at 6.892795 6.319374 6.914693 6.900366 6.183277 6.868368 6.615856 6.40719  
346157\_at 3.817641 3.15598 2.731711 4.020334 2.808961 3.21991 2.679035 3.007196  
346171\_at 1.955338 1.640478 1.667804 1.67978 1.716697 2.303222 1.84726 1.719804  
346288\_at 1.423985 0.914815 1.054389 2.110559 1.586984 1.864931 1.479646 1.408024  
346389\_at 2.135771 2.68169 4.738285 3.367865 4.213188 3.26706 5.757465 3.439076  
346517\_at 1.354712 2.309661 2.184639 1.550163 2.564175 2.096323 1.460094 2.139516  
346525\_at 1.073016 0.758703 0.81869 1.0261 1.352612 1.600047 0.765434 0.70465  
346528\_at 4.814405 4.110928 3.187634 1.970678 5.053889 2.35985 3.977573 5.112639  
346562\_at 1.249001 1.574477 1.266195 1.296093 2.592615 1.100691 1.170958 2.127469  
346606\_at 1.841971 1.767568 2.272155 3.292353 2.064573 2.691267 1.957243 2.54276  
346653\_at 1.542317 1.00979 1.424849 1.722628 2.171062 2.319045 1.970203 1.03486  
346673\_at 1.703772 1.522239 2.117256 1.213542 1.316428 1.50493 1.628315 1.375394  
346689\_at 2.331931 1.959316 2.135866 1.784211 2.194966 2.581253 2.402435 2.584045  
3467\_at 1.232191 1.194308 1.005948 1.160706 1.660069 0.917735 1.135671 1.241269  
347051\_at 3.80456 2.30242 5.26271 3.204379 4.422633 3.973347 2.510135 4.24125  
347088\_at 2.421894 1.908481 2.420692 2.529912 2.957942 2.749839 2.156997 1.550572  
347127\_at 1.823871 2.501675 1.787225 1.270016 1.320459 2.307073 3.0535 1.749609  
347148\_at 2.469237 3.036298 2.112841 2.107847 2.98149 2.30148 2.721338 3.256956  
347168\_at 0.800659 1.092772 1.45016 1.372309 1.03918 1.491435 2.200599 2.432572  
347169\_at 1.345421 1.939117 1.018556 1.274162 1.763135 1.158514 1.335267 1.580953  
347240\_at 2.75538 2.262127 2.758592 3.082795 2.290129 1.964598 2.208228 2.466106  
347252\_at 1.498504 2.302655 1.640475 1.908987 2.043374 1.229675 3.385105 1.826874  
347273\_at 2.321823 1.939252 1.429515 1.562819 1.645868 1.683103 1.76604 1.479332  
347344\_at 3.072198 2.7037 3.619026 5.264371 5.777818 4.508733 4.391032 2.737637  
347365\_at 1.584841 1.444679 1.66737 1.779792 2.033405 2.577713 1.457129 1.400061  
347404\_at 1.126971 2.099225 2.21614 1.84863 1.328594 1.112428 1.517018 1.73189  
347411\_at 1.632569 2.125332 2.343253 1.787553 2.559879 2.302137 2.432223 2.233518  
347442\_at 1.956313 2.856073 2.196738 1.652653 2.716282 2.248222 2.814379 2.302164  
347454\_at 1.414558 1.780748 1.936376 2.187686 2.417492 1.802528 2.762634 2.411818  
347468\_at 1.241533 1.094382 2.500448 1.322733 1.987786 1.142344 1.772578 1.846864  
347475\_at 3.586866 3.660044 2.819158 2.220672 3.268246 2.233094 1.947361 3.796211  
347487\_at 1.076528 1.037177 0.896858 0.744696 1.219679 0.91007 1.428175 1.428895  
347516\_at 2.631061 1.978179 1.095617 1.75316 1.441897 1.236817 1.381383 1.510639  
347517\_at 1.563932 1.643531 2.491225 1.541626 1.851553 1.851749 1.563174 1.670965  
347527\_at 1.6815 2.332263 1.595001 1.586266 2.623678 1.87266 1.360342 2.121937  
347541\_at 1.708523 1.850885 1.560739 1.37892 1.675498 1.63094 2.195158 1.665478  
3475\_at 4.871461 5.004139 4.562897 5.57649 4.600186 4.319642 3.616597 5.227264  
347689\_at 2.297404 1.532609 2.272273 4.204977 3.087677 2.560685 3.220975 1.687182  
347694\_at 1.684149 1.289185 1.147171 1.584011 1.254141 2.341183 2.63219 1.739017  
3476\_at 5.529158 4.291022 4.971797 5.854833 4.574949 5.223717 5.365041 4.848691  
347730\_at 2.312253 1.591899 2.0739 3.681982 1.168044 1.282398 2.009155 1.816112  
347731\_at 1.952026 2.491681 2.073276 2.283488 2.265759 2.02682 2.844666 1.788205  
347732\_at 2.767194 2.106153 2.608981 3.039547 2.930921 1.926992 2.231807 2.678067

347733\_at 5.100689 4.839262 4.54972 4.637722 4.409749 4.258375 3.460514 3.813268  
347734\_at 5.746037 5.470255 5.557989 4.980994 5.480922 5.618642 5.812006 5.284017  
347735\_at 5.279655 4.43868 5.244111 4.340317 5.248285 5.727882 4.011 4.492417  
347736\_at 1.959479 1.677618 1.515749 1.468596 1.927699 2.202201 1.884312 2.058499  
347741\_at 2.048152 1.879354 2.345471 1.837086 2.64989 2.608862 1.661262 2.249803  
347744\_at 2.466875 3.042771 2.350185 4.444719 2.115738 1.774651 2.263432 1.707045  
347745\_at 1.351949 1.744933 1.232779 1.722138 1.171619 0.87756 2.110484 1.713238  
347746\_at 4.800349 4.926054 5.918285 4.602235 5.50151 5.096194 3.86725 5.15853  
347853\_at 2.230923 2.248573 2.587886 2.42536 2.599299 3.049281 3.040954 3.046878  
347862\_at 5.458254 4.513808 4.947653 5.051294 4.908997 5.339278 5.259609 4.649375  
347902\_at 7.637721 7.483457 6.754213 6.727961 7.012262 6.668302 7.034273 7.576628  
347918\_at 2.490365 2.144684 2.698576 2.283775 2.811603 2.738957 2.564573 3.154955  
3479\_at 3.569065 7.030813 6.730133 5.472347 5.727975 4.635041 6.007401 5.271504  
347\_at 10.05925 10.29351 10.11439 9.934661 9.845271 10.55057 10.28277 9.341106  
348013\_at 4.5444 4.244465 5.189224 4.657144 5.195786 4.39446 4.632606 3.403737  
348021\_at 1.644178 1.498154 1.232225 1.441225 1.667518 1.37331 1.918584 1.270343  
348093\_at 6.367618 5.252864 4.9309 5.577466 6.20209 6.420579 5.806455 5.167085  
348094\_at 3.135727 2.659753 2.850928 3.46085 2.125855 4.215963 4.199166 2.869772  
3480\_at 6.918183 7.229663 7.54904 6.898342 7.332403 7.508832 7.446236 7.060364  
348110\_at 6.266216 7.410681 7.182834 6.934952 7.581542 7.122694 6.692155 7.266212  
348120\_at 2.165739 0.917577 1.471451 1.038992 1.011066 1.005169 1.929064 1.015587  
348158\_at 6.091312 6.376387 5.782234 1.551141 7.06765 6.837661 3.485539 5.806155  
348174\_at 3.285465 1.130048 3.000509 1.928074 2.166506 1.610366 1.712343 1.43873  
348180\_at 3.092423 3.235488 2.701415 3.052843 3.433041 2.607686 3.439301 3.420961  
3481\_at 2.013474 1.790723 1.911204 2.60308 3.385087 3.186103 2.905843 1.772373  
348235\_at 5.544239 5.888877 5.687761 6.224849 5.726372 5.053067 5.665722 6.270001  
348254\_at 2.224162 2.140256 2.867506 1.666764 3.205634 1.999883 2.025596 3.349938  
348262\_at 5.603182 5.793558 5.691617 5.914782 4.396819 6.124404 5.642021 4.905753  
3482\_at 5.69465 6.36511 6.463788 6.58209 6.829862 6.450558 6.72081 6.266355  
348303\_at 1.226328 2.04126 1.743627 1.860275 1.714161 2.366584 1.742833 1.903488  
348327\_at 2.647692 2.746188 2.533652 3.838728 2.621458 3.707868 2.735687 2.929096  
348378\_at 3.664909 3.233253 3.279335 3.507749 2.110054 3.437281 2.167327 3.51506  
3483\_at 2.804331 2.918188 2.812143 2.48905 3.087214 2.762047 3.39434 2.427727  
348487\_at 2.883718 2.237669 2.608214 3.293849 2.488089 2.642627 3.540152 2.155998  
3484\_at 2.956111 5.463346 2.976627 3.078254 2.080285 3.108098 3.700943 4.623577  
3485\_at 9.147973 8.603269 9.47534 9.152588 8.269655 9.706621 9.940769 7.627823  
348645\_at 2.87724 2.849693 2.296385 3.44039 2.026706 3.133215 2.350444 3.24009  
348654\_at 2.693901 4.387763 4.349466 2.807817 3.622183 2.642547 3.19752 2.040773  
3486\_at 6.525233 6.611132 5.59383 6.486041 6.297264 5.485098 4.008938 6.308031  
348738\_at 1.92987 2.549899 2.14664 2.114715 2.975083 2.633402 1.92938 2.523872  
348751\_at 3.269138 2.502453 3.07691 2.845648 2.857897 3.238831 2.574749 3.032581  
348761\_at 1.328921 1.105889 0.965509 2.283094 2.065567 2.306742 1.995339 3.054885  
348793\_at 5.103182 4.683306 3.955565 4.296536 3.18607 4.582933 4.604022 5.14551  
3487\_at 8.466642 7.991452 8.246972 8.31607 7.931927 8.345325 8.705546 7.243482  
348801\_at 4.159791 3.809603 3.255032 3.525725 4.899547 3.266594 3.17047 3.47585  
348807\_at 1.739955 2.62953 2.036931 1.399257 1.93642 1.512934 2.141631 1.643375  
348808\_at 1.358487 1.356928 1.440468 1.470814 1.396653 1.2466 1.228626 1.451635  
348825\_at 1.682348 2.727766 1.987403 3.251906 2.905568 1.090328 3.479715 1.205556  
348840\_at 0.959962 1.017625 1.107903 1.037882 1.049089 0.858671 1.342257 1.412235  
3488\_at 11.37941 11.39403 11.40332 11.71475 11.61354 11.57265 11.49835 11.11619  
348926\_at 2.30639 2.126528 2.691839 1.829391 2.154338 2.332661 3.093319 2.387877

348932\_at 5.1748 2.715966 3.426154 3.174541 2.604906 3.216138 3.775771 3.354296  
348938\_at 2.276562 1.782043 1.704607 1.862972 1.585202 2.128273 3.336888 1.494963  
348980\_at 1.379821 1.320571 1.418611 1.664176 1.543633 2.235047 1.251151 1.50761  
348995\_at 5.203409 5.559469 4.433835 5.413783 5.087373 4.955072 5.47114 5.559215  
3489\_at 6.731505 6.105814 5.702063 5.4873 5.875089 6.411716 6.660536 5.504414  
348\_at 7.229062 5.946502 6.477973 6.130957 6.89974 6.707874 6.611538 6.16323  
349075\_at 3.717216 5.571162 2.606417 2.58671 3.856648 4.080236 2.898702 3.832674  
3490\_at 10.92976 10.76607 10.79727 11.00779 10.88542 10.99249 10.82831 10.67576  
349114\_at 4.806786 4.028856 3.360822 5.275708 3.772151 1.90977 3.285946 1.921998  
349136\_at 3.494612 3.190489 3.299949 4.48436 3.362408 3.171684 3.31924 2.73497  
349149\_at 2.253235 3.025705 2.316228 1.959601 1.737239 2.225131 1.768446 1.974632  
349152\_at 3.080531 2.736355 1.768334 1.987816 2.890851 2.830778 4.28339 3.552303  
349160\_at 1.28141 1.152794 0.872841 1.377875 0.750951 1.78339 1.15813 1.236879  
3491\_at 5.457873 6.345392 6.177641 6.510565 5.430799 6.630291 6.961703 6.201307  
3493\_at 2.68404 3.263797 6.814945 7.936051 3.676697 4.521881 4.377003 3.8217  
349408\_at 1.341126 1.531073 1.272497 2.919488 1.099675 1.173965 1.272258 1.960268  
3494\_at 3.961022 4.499923 5.491713 4.206607 4.26242 4.738341 3.179501 4.324297  
349565\_at 3.798511 3.308327 3.07715 2.674226 3.847984 2.721342 2.571247 3.484921  
3495\_at 0.9256 1.738232 1.724416 2.882555 1.930011 3.038557 1.436157 1.259314  
349633\_at 1.120883 1.872474 1.721706 1.402745 1.984743 1.892939 1.488656 1.460932  
349667\_at 3.686293 1.854073 1.996658 2.235037 2.75991 2.74338 3.33779 2.954813  
3497\_at 2.994417 3.915691 2.807925 2.036703 3.104298 2.56167 3.614806 1.886856  
34\_at 8.277433 7.879923 7.670631 7.802731 8.625697 7.964916 7.229252 8.524361  
3501\_at 11.2317 4.510929 5.847601 5.445088 3.626295 6.743085 5.037081 4.965068  
3502\_at 3.194324 3.635966 1.90649 3.790081 3.28757 4.469918 4.639883 2.955182  
350383\_at 1.720049 2.754195 2.019042 1.938859 2.785486 2.665378 1.998795 1.973696  
3503\_at 5.861026 3.037637 3.454552 2.540187 3.005094 2.610795 3.254044 1.710153  
3507\_at 3.148669 3.334387 2.026121 3.05775 2.893997 2.538144 3.091596 2.805785  
3508\_at 3.021518 3.353315 2.14828 2.721891 2.048218 2.433882 1.887219 3.008154  
350\_at 4.718738 3.861564 3.554555 1.383506 4.495339 2.429423 1.770662 1.907058  
3512\_at 5.124093 3.282307 4.681147 4.38339 3.754335 4.305931 2.659035 3.825274  
3514\_at 10.5627 3.86834 8.136279 7.588715 9.798197 5.49541 4.287239 5.070291  
3516\_at 7.131481 7.46144 6.942359 7.318396 7.605526 6.865271 7.048582 7.496274  
351\_at 9.660097 10.23694 10.21061 10.36891 10.41476 10.02546 10.2682 10.0422  
352887\_at 2.241931 0.939317 3.070495 1.144513 1.795234 1.652828 1.51315 0.810953  
352909\_at 2.469624 2.394814 2.677511 2.57331 2.915898 2.613584 2.3571 2.301974  
352954\_at 5.082083 4.589047 4.475288 5.48743 5.489982 5.383469 4.806964 4.870022  
352961\_at 2.737872 3.883327 2.378752 2.632744 3.755052 2.229983 2.035841 3.447183  
352999\_at 0.857736 1.928849 0.923584 1.09646 1.316972 1.299588 1.466967 1.414638  
353088\_at 4.25752 5.05616 5.66498 3.625458 3.802144 3.124968 2.667845 4.830061  
353091\_at 3.01812 1.906872 2.408713 2.103337 3.436075 3.01812 4.85496 2.311969  
353116\_at 5.144278 5.718797 4.883144 5.250963 4.982886 5.448952 4.581118 5.343107  
353131\_at 2.223625 2.154763 1.868468 2.406426 1.878028 3.184896 1.955561 1.409828  
353132\_at 1.387789 1.639613 1.720402 1.793992 2.010746 1.708179 2.653886 1.502384  
353133\_at 1.777071 1.98755 1.855535 1.330267 2.477383 2.192786 1.506968 2.044746  
353135\_at 1.857111 2.883222 0.815789 1.985192 2.51791 3.46742 1.199564 3.665827  
353137\_at 1.456989 2.034983 1.423432 1.410771 1.482581 1.696681 2.55344 1.410771  
353139\_at 2.42356 3.10927 3.742695 3.508438 3.958517 3.60936 3.907526 3.710464  
353140\_at 1.206616 1.919658 1.364849 0.773696 1.270067 1.260473 2.739391 1.728551  
353141\_at 1.314268 1.535794 1.152084 1.081258 1.556727 0.639198 1.859606 1.210708  
353142\_at 3.178279 2.993335 2.153582 2.435711 3.734972 3.233665 2.697763 3.64033

|           |          |          |          |          |          |          |          |          |
|-----------|----------|----------|----------|----------|----------|----------|----------|----------|
| 353143_at | 3.294542 | 4.741589 | 4.040543 | 3.255852 | 4.464934 | 4.005797 | 1.98802  | 3.296182 |
| 353144_at | 2.319653 | 1.667775 | 2.232497 | 2.051467 | 1.645145 | 2.035285 | 1.966503 | 1.947782 |
| 353145_at | 1.402671 | 0.495659 | 0.74691  | 0.370581 | 0.463932 | 0.774122 | 1.131308 | 0.893174 |
| 353149_at | 0.759135 | 2.173701 | 2.354662 | 0.804489 | 2.036897 | 1.838203 | 1.42     | 2.01743  |
| 353164_at | 1.034666 | 0.83637  | 1.374628 | 0.850827 | 1.66704  | 2.026438 | 1.139889 | 1.282965 |
| 353174_at | 4.90917  | 4.759281 | 4.292452 | 5.315296 | 4.38578  | 4.8285   | 4.050374 | 4.184552 |
| 353189_at | 4.701181 | 4.231191 | 3.920536 | 3.214808 | 5.890981 | 3.150948 | 2.748174 | 5.388485 |
| 353219_at | 4.748457 | 3.825944 | 4.700462 | 5.959332 | 4.700237 | 5.983153 | 4.914522 | 5.483327 |
| 353238_at | 1.498289 | 1.851661 | 2.221451 | 2.025941 | 2.099448 | 1.427973 | 1.687653 | 1.697279 |
| 353274_at | 4.830714 | 5.655295 | 4.847651 | 4.267611 | 5.014198 | 4.346859 | 4.597345 | 4.734848 |
| 353288_at | 0.953388 | 1.142293 | 1.191043 | 1.217389 | 1.097902 | 0.991735 | 1.773188 | 0.785239 |
| 353299_at | 1.527671 | 1.331807 | 1.061774 | 1.086761 | 2.513138 | 1.465192 | 1.29731  | 0.898474 |
| 353322_at | 6.557725 | 5.704861 | 6.784715 | 6.457064 | 6.350169 | 6.084156 | 6.104877 | 6.356522 |
| 353323_at | 2.303011 | 2.329999 | 1.429971 | 2.043509 | 1.660364 | 1.295472 | 1.815223 | 1.580588 |
| 353324_at | 2.312384 | 1.720725 | 2.054451 | 1.731202 | 2.726382 | 1.972001 | 1.710946 | 2.162223 |
| 353332_at | 1.421774 | 1.588667 | 1.170269 | 1.20557  | 1.05797  | 0.813048 | 2.245781 | 1.415038 |
| 353333_at | 2.466258 | 2.717986 | 3.142003 | 2.435096 | 2.658979 | 3.064578 | 3.131934 | 3.667146 |
| 353345_at | 2.198903 | 2.001122 | 1.800526 | 2.697075 | 1.980042 | 1.27396  | 2.268881 | 1.980915 |
| 353355_at | 1.73346  | 2.891883 | 2.099835 | 1.922815 | 2.724781 | 2.430547 | 2.676076 | 2.253251 |
| 353497_at | 1.838853 | 1.658888 | 2.632411 | 1.859118 | 2.074949 | 2.471482 | 1.796194 | 2.031152 |
| 353500_at | 4.656675 | 4.103238 | 5.496097 | 4.379529 | 5.132026 | 4.298498 | 5.808443 | 5.294846 |
| 353514_at | 2.197006 | 2.895812 | 2.569982 | 2.222246 | 2.309884 | 1.985235 | 2.471628 | 3.370396 |
| 3538_at   | 3.108815 | 3.243283 | 3.474944 | 3.843104 | 3.181254 | 3.366395 | 2.154956 | 4.143319 |
| 353_at    | 7.642885 | 6.322562 | 6.594406 | 6.834583 | 6.146927 | 7.149677 | 6.707449 | 5.733775 |
| 3543_at   | 1.516079 | 1.574297 | 1.37222  | 2.278891 | 2.12115  | 3.505664 | 1.680227 | 2.496714 |
| 3547_at   | 1.925751 | 1.718658 | 1.547249 | 1.494222 | 1.946951 | 1.823043 | 1.46371  | 1.818255 |
| 3549_at   | 3.544114 | 2.260306 | 1.848975 | 2.09461  | 2.170911 | 1.486161 | 1.876022 | 1.106338 |
| 354_at    | 2.573507 | 2.068933 | 2.618892 | 2.081594 | 2.326629 | 2.628758 | 2.731064 | 2.139646 |
| 3550_at   | 8.048507 | 8.311637 | 7.883483 | 8.041634 | 7.956766 | 8.166313 | 7.29896  | 7.864595 |
| 3551_at   | 4.696666 | 5.072221 | 4.753776 | 5.363711 | 3.520298 | 4.746047 | 5.068104 | 5.162404 |
| 3552_at   | 1.859055 | 1.220995 | 1.566671 | 1.292498 | 1.262914 | 1.575729 | 1.754111 | 1.726001 |
| 3553_at   | 3.128844 | 3.132156 | 2.14218  | 1.672753 | 1.545781 | 2.625859 | 1.692739 | 2.222274 |
| 3554_at   | 6.554079 | 6.097849 | 6.18521  | 6.518558 | 6.596436 | 6.562332 | 7.144964 | 6.437231 |
| 3556_at   | 6.195571 | 5.931232 | 6.988336 | 4.484273 | 4.890831 | 5.765651 | 6.16652  | 5.955522 |
| 3557_at   | 1.969447 | 1.8023   | 1.833892 | 1.75181  | 1.978446 | 1.867851 | 1.597506 | 3.457844 |
| 3558_at   | 1.15594  | 0.650397 | 0.920963 | 0.915619 | 2.151876 | 0.968706 | 0.668772 | 1.003207 |
| 3559_at   | 2.083497 | 2.247184 | 2.275647 | 3.562151 | 2.068331 | 2.667798 | 2.573425 | 2.237986 |
| 355_at    | 4.532746 | 3.443703 | 3.902494 | 5.269559 | 4.178376 | 4.613048 | 3.444316 | 3.533483 |
| 3560_at   | 3.86007  | 3.424975 | 5.013074 | 5.825348 | 4.291823 | 4.581418 | 5.371485 | 4.170008 |
| 3561_at   | 4.822197 | 4.346276 | 3.949703 | 5.456768 | 3.924625 | 4.952191 | 5.704326 | 4.265572 |
| 3562_at   | 1.767033 | 1.135256 | 1.195522 | 1.101051 | 1.241426 | 1.054738 | 0.97896  | 1.331353 |
| 3563_at   | 4.437448 | 5.149117 | 5.381324 | 5.610425 | 4.127944 | 5.246805 | 5.347245 | 5.264201 |
| 3565_at   | 1.183005 | 1.35589  | 1.433758 | 1.09582  | 1.491784 | 1.163167 | 2.343472 | 0.920396 |
| 3566_at   | 5.792299 | 6.365606 | 6.022431 | 6.135837 | 5.75088  | 6.060263 | 6.347503 | 5.016139 |
| 3567_at   | 1.523891 | 1.261129 | 1.098997 | 1.345596 | 2.152562 | 2.559178 | 2.09256  | 1.411778 |
| 3568_at   | 2.23584  | 2.037426 | 2.639274 | 2.449539 | 3.170859 | 1.762878 | 3.572484 | 2.480415 |
| 3569_at   | 1.775027 | 1.865889 | 1.428202 | 1.99711  | 2.370321 | 1.771317 | 2.307291 | 1.848966 |
| 356_at    | 1.114599 | 1.594494 | 1.551872 | 2.45159  | 1.330947 | 1.545345 | 1.911177 | 1.331269 |
| 3570_at   | 4.504786 | 3.760896 | 4.761639 | 4.80399  | 2.573415 | 5.208462 | 5.213332 | 5.174569 |
| 3572_at   | 9.074654 | 9.692525 | 9.409337 | 9.785306 | 9.309027 | 9.286617 | 9.445    | 9.535294 |
| 3574_at   | 2.484077 | 3.043169 | 2.269838 | 3.420745 | 2.551934 | 4.961586 | 3.313829 | 2.678515 |



|           |          |          |          |          |          |          |          |          |
|-----------|----------|----------|----------|----------|----------|----------|----------|----------|
| 3575_at   | 4.696373 | 2.951615 | 1.988175 | 4.503402 | 3.935714 | 3.979601 | 3.68303  | 2.450865 |
| 3576_at   | 1.782366 | 4.162928 | 1.875715 | 1.587584 | 1.392905 | 1.813561 | 2.312236 | 2.89106  |
| 3577_at   | 3.076411 | 1.958871 | 2.196929 | 1.543408 | 2.8478   | 2.810148 | 1.743515 | 1.597892 |
| 3578_at   | 1.405058 | 1.357349 | 1.988845 | 1.289948 | 1.676089 | 2.354339 | 2.312629 | 1.71816  |
| 3579_at   | 2.171656 | 2.215008 | 1.568379 | 1.198017 | 2.43618  | 1.506999 | 1.96122  | 1.872529 |
| 357_at    | 3.153841 | 3.726975 | 3.337211 | 4.172462 | 3.742365 | 4.141903 | 3.423129 | 3.428379 |
| 3580_at   | 1.860792 | 2.125022 | 2.40986  | 1.606351 | 1.386499 | 2.127425 | 2.912754 | 4.263093 |
| 3581_at   | 1.861102 | 2.608183 | 2.778249 | 2.14801  | 3.05283  | 2.119741 | 1.688116 | 2.579798 |
| 3586_at   | 1.875947 | 1.376104 | 1.901857 | 2.162462 | 2.087169 | 1.778357 | 1.547377 | 2.175675 |
| 3587_at   | 5.055313 | 3.733485 | 3.695665 | 5.251684 | 2.980822 | 4.413028 | 4.53752  | 3.687137 |
| 3588_at   | 7.04723  | 7.183378 | 6.844701 | 6.43294  | 6.406927 | 6.66836  | 7.250488 | 7.234431 |
| 3589_at   | 1.750562 | 3.157882 | 1.461458 | 1.559983 | 1.914681 | 2.195787 | 2.337827 | 1.977942 |
| 358_at    | 8.205175 | 7.99996  | 8.379843 | 8.50542  | 7.814226 | 8.70856  | 9.064    | 7.700796 |
| 3590_at   | 4.3154   | 4.817383 | 4.757152 | 4.585202 | 2.53532  | 4.399838 | 4.480963 | 4.658985 |
| 3592_at   | 1.164752 | 1.772984 | 2.409922 | 1.827786 | 1.423895 | 1.668155 | 1.961338 | 1.540918 |
| 3593_at   | 1.225816 | 1.323269 | 1.767312 | 1.217394 | 1.230356 | 1.235402 | 1.403794 | 2.102526 |
| 3594_at   | 1.822205 | 2.02691  | 1.849019 | 2.011624 | 1.933741 | 2.113832 | 2.199962 | 2.036164 |
| 3595_at   | 1.2326   | 1.280807 | 1.186032 | 1.17506  | 1.692014 | 1.98522  | 1.951017 | 1.396552 |
| 3596_at   | 1.713688 | 1.322038 | 1.514854 | 1.156972 | 2.204746 | 1.28137  | 1.30364  | 1.707128 |
| 359710_at | 2.086668 | 2.507315 | 1.998455 | 2.489148 | 2.117409 | 2.144773 | 2.874094 | 2.548463 |
| 3597_at   | 8.182121 | 8.303292 | 8.253956 | 8.1333   | 7.819142 | 8.223079 | 8.383157 | 8.007104 |
| 359806_at | 0.949538 | 1.338681 | 1.333481 | 1.093096 | 1.464348 | 1.053727 | 1.048209 | 1.680544 |
| 359821_at | 1.006578 | 3.099879 | 2.04452  | 1.188016 | 2.382089 | 1.241104 | 2.329533 | 0.937356 |
| 359822_at | 1.384268 | 1.394375 | 1.249151 | 1.406132 | 1.936606 | 1.632697 | 2.059848 | 1.469678 |
| 359845_at | 7.278426 | 6.480168 | 7.007064 | 7.459185 | 7.162389 | 6.725959 | 8.212466 | 6.148078 |
| 3598_at   | 7.501396 | 8.202828 | 7.237425 | 7.449928 | 6.775431 | 7.800921 | 7.659161 | 8.118806 |
| 359948_at | 6.594962 | 7.187614 | 6.530005 | 6.72317  | 6.314368 | 6.298102 | 5.726476 | 6.091344 |
| 359_at    | 4.113799 | 3.985013 | 2.916931 | 3.505295 | 5.941325 | 3.877146 | 3.041673 | 3.557563 |
| 35_at     | 3.304162 | 3.506785 | 3.514007 | 3.311302 | 2.646438 | 3.626223 | 3.25014  | 2.900634 |
| 360023_at | 5.340214 | 5.562471 | 5.289254 | 4.669071 | 5.789301 | 4.803036 | 5.613838 | 6.08222  |
| 360030_at | 0.821715 | 0.796743 | 1.169003 | 1.030414 | 0.990994 | 1.261472 | 0.82987  | 0.920624 |
| 3600_at   | 2.758184 | 3.099549 | 1.633823 | 1.800801 | 2.436075 | 2.671086 | 1.561101 | 2.0687   |
| 360132_at | 1.709628 | 1.613981 | 2.634084 | 1.557591 | 2.215803 | 2.155025 | 1.880255 | 1.465329 |
| 360155_at | 1.611543 | 1.593243 | 1.294988 | 2.378877 | 1.376933 | 1.93135  | 2.375128 | 1.568998 |
| 3601_at   | 6.245837 | 6.743275 | 6.653349 | 7.975084 | 6.098758 | 6.955699 | 6.744177 | 5.497476 |
| 360200_at | 2.144584 | 2.548317 | 1.927615 | 2.263261 | 2.02851  | 2.540449 | 2.983188 | 2.235497 |
| 360203_at | 1.660276 | 1.514989 | 2.129089 | 1.460578 | 1.618757 | 2.148054 | 1.894324 | 1.560404 |
| 360205_at | 1.680318 | 1.727797 | 1.748589 | 1.720265 | 2.229969 | 1.470681 | 1.297191 | 2.08457  |
| 360226_at | 1.570483 | 1.55943  | 1.2843   | 1.478283 | 2.0413   | 1.837132 | 1.834948 | 1.53348  |
| 3603_at   | 3.039104 | 3.230411 | 2.938556 | 3.245451 | 3.624543 | 3.089794 | 3.430455 | 3.413169 |
| 3604_at   | 2.037849 | 1.699602 | 3.068619 | 2.451124 | 1.373078 | 2.059485 | 2.168754 | 1.936922 |
| 3605_at   | 1.837762 | 1.830458 | 1.751124 | 1.434879 | 2.245013 | 1.656773 | 2.713304 | 2.091131 |
| 3606_at   | 4.327336 | 2.438527 | 2.532593 | 3.777816 | 2.702271 | 5.184885 | 2.525262 | 2.013327 |
| 3607_at   | 6.418924 | 6.335286 | 6.543133 | 5.762484 | 5.303158 | 6.321116 | 6.58584  | 5.402968 |
| 3608_at   | 8.543429 | 8.106266 | 8.082198 | 8.205299 | 7.919938 | 8.337101 | 8.262194 | 8.357513 |
| 3609_at   | 7.256191 | 6.99362  | 7.048951 | 7.24467  | 6.701862 | 7.316147 | 6.830225 | 7.214824 |
| 360_at    | 7.140284 | 7.196692 | 6.894905 | 7.866411 | 6.882312 | 6.780369 | 7.472367 | 4.044835 |
| 3611_at   | 8.991572 | 8.612136 | 8.407252 | 8.419541 | 7.884936 | 8.598716 | 8.91823  | 8.291411 |
| 3612_at   | 4.151483 | 4.180454 | 3.609258 | 4.276123 | 4.303479 | 3.270006 | 4.892514 | 5.378006 |
| 3613_at   | 6.91257  | 5.813646 | 5.211175 | 5.982267 | 6.49656  | 6.084122 | 4.445106 | 5.722302 |
| 3614_at   | 5.200914 | 5.230793 | 5.424015 | 4.466953 | 4.989179 | 6.056188 | 4.898579 | 4.425246 |

|         |          |          |          |          |          |          |          |          |
|---------|----------|----------|----------|----------|----------|----------|----------|----------|
| 3615_at | 6.137699 | 7.016549 | 5.450437 | 6.852936 | 6.332966 | 6.54023  | 5.62216  | 6.944155 |
| 3617_at | 2.198154 | 1.393297 | 1.725968 | 1.217834 | 1.998761 | 1.512022 | 2.105206 | 1.668614 |
| 3619_at | 2.161645 | 3.30523  | 2.857023 | 3.276514 | 4.410354 | 3.756622 | 4.282157 | 3.258837 |
| 361_at  | 1.647758 | 1.007532 | 1.29394  | 1.993074 | 2.884119 | 1.377203 | 1.77585  | 1.522601 |
| 3620_at | 4.27496  | 4.284599 | 4.897202 | 5.567409 | 5.862939 | 2.986232 | 3.668957 | 4.290626 |
| 3621_at | 1.755337 | 1.678008 | 1.675583 | 1.978228 | 1.641235 | 1.28236  | 2.108615 | 1.939997 |
| 3622_at | 5.594927 | 5.781831 | 5.353562 | 4.450326 | 4.308934 | 5.548319 | 4.770612 | 5.972594 |
| 3623_at | 1.714293 | 1.909176 | 1.806541 | 2.240696 | 2.186285 | 2.573693 | 2.280927 | 2.727352 |
| 3624_at | 1.650184 | 2.376241 | 1.838487 | 2.496016 | 2.958512 | 2.618576 | 4.331984 | 1.366207 |
| 3625_at | 2.825421 | 1.971174 | 1.88739  | 2.133251 | 2.269392 | 3.146332 | 1.779395 | 3.310007 |
| 3626_at | 1.359636 | 1.978383 | 1.78718  | 1.553706 | 2.961058 | 1.977339 | 1.488457 | 1.816886 |
| 3627_at | 7.143387 | 7.032755 | 5.736184 | 8.462832 | 6.140966 | 7.291352 | 7.06667  | 8.45441  |
| 3628_at | 5.014345 | 4.747613 | 5.170512 | 4.432266 | 4.376486 | 4.673397 | 5.493702 | 5.519774 |
| 362_at  | 2.98497  | 3.082013 | 2.56661  | 2.642837 | 2.579254 | 1.819179 | 2.380096 | 2.175713 |
| 3630_at | 2.254197 | 2.13416  | 1.511321 | 2.249731 | 1.927887 | 2.293928 | 1.08938  | 1.657214 |
| 3631_at | 4.606667 | 4.526753 | 4.648782 | 5.122703 | 4.967115 | 4.837006 | 4.845473 | 5.820347 |
| 3632_at | 5.992293 | 5.458473 | 6.282881 | 6.15478  | 5.755037 | 6.406633 | 5.743771 | 6.103352 |
| 3633_at | 5.366687 | 5.062588 | 4.269436 | 4.500443 | 5.413632 | 5.481666 | 5.52999  | 4.615694 |
| 3635_at | 3.796922 | 3.677157 | 4.054302 | 4.685823 | 3.56382  | 3.778992 | 4.787228 | 3.364963 |
| 3636_at | 6.692732 | 6.429473 | 6.369911 | 6.069401 | 6.061393 | 6.285005 | 6.328895 | 6.407042 |
| 3638_at | 4.88176  | 4.318227 | 5.282585 | 5.472915 | 3.897799 | 3.611545 | 5.783091 | 4.896362 |
| 363_at  | 1.875762 | 1.834266 | 1.524332 | 1.514206 | 2.196906 | 1.506368 | 2.071503 | 2.074812 |
| 3640_at | 2.914271 | 2.568306 | 2.629273 | 3.094773 | 2.831303 | 2.886406 | 3.644812 | 3.5482   |
| 3641_at | 4.053994 | 2.837182 | 3.814386 | 2.215394 | 4.16287  | 2.706636 | 5.624962 | 3.527119 |
| 3642_at | 2.454438 | 2.778514 | 2.521983 | 2.258342 | 2.758687 | 1.987496 | 2.581419 | 3.083417 |
| 3643_at | 5.760046 | 5.954944 | 6.181739 | 5.921384 | 5.305361 | 6.274652 | 5.978456 | 5.193824 |
| 3645_at | 1.886897 | 2.78074  | 2.029827 | 1.822929 | 3.180314 | 1.757741 | 2.445106 | 2.737598 |
| 3646_at | 8.911771 | 8.88621  | 8.500757 | 8.522695 | 8.854432 | 8.8441   | 7.913746 | 9.182013 |
| 364_at  | 4.278943 | 3.279595 | 2.380292 | 2.10411  | 4.162791 | 3.412335 | 3.999    | 2.778314 |
| 3651_at | 2.42729  | 2.286515 | 2.546604 | 2.537432 | 2.741447 | 2.400019 | 2.440654 | 2.755059 |
| 3652_at | 4.879414 | 5.72605  | 5.069632 | 4.781582 | 5.341796 | 4.191825 | 4.928569 | 5.330088 |
| 3653_at | 3.572905 | 4.304157 | 4.24617  | 3.913481 | 5.2273   | 3.801955 | 3.032598 | 5.186932 |
| 3654_at | 3.465052 | 3.942253 | 2.930344 | 2.856537 | 3.336482 | 3.615269 | 3.472354 | 2.617291 |
| 3655_at | 6.720209 | 6.691529 | 7.038188 | 7.141641 | 7.513228 | 7.246118 | 6.948861 | 6.606123 |
| 3656_at | 3.584596 | 3.607252 | 3.607702 | 3.574254 | 3.425885 | 3.860887 | 3.937432 | 2.897868 |
| 3658_at | 5.818626 | 6.203499 | 5.771212 | 6.177952 | 5.744882 | 5.223308 | 5.396736 | 6.501855 |
| 3659_at | 6.574997 | 6.880936 | 5.902733 | 7.306372 | 5.590732 | 6.453425 | 7.095595 | 5.791444 |
| 3660_at | 6.927434 | 7.043517 | 7.151218 | 7.350828 | 6.419398 | 7.156321 | 7.122768 | 5.953488 |
| 3661_at | 5.677874 | 4.292836 | 5.396718 | 4.478544 | 4.53028  | 5.19641  | 4.938144 | 4.819167 |
| 3662_at | 2.334784 | 1.81126  | 2.071287 | 1.822171 | 2.081108 | 1.918083 | 1.749963 | 2.063273 |
| 3663_at | 3.016544 | 2.929335 | 3.078049 | 2.694801 | 2.041114 | 2.496386 | 2.93295  | 3.198272 |
| 3664_at | 3.177949 | 4.26535  | 4.862083 | 4.5402   | 5.323095 | 5.051361 | 4.532369 | 3.747472 |
| 3665_at | 3.623353 | 3.435533 | 3.265993 | 3.65396  | 2.912134 | 4.159804 | 3.237242 | 3.195251 |
| 3667_at | 3.724466 | 4.027629 | 3.647661 | 4.068573 | 4.670749 | 4.634313 | 4.885993 | 4.254174 |
| 3669_at | 3.231992 | 3.087944 | 3.490364 | 3.956685 | 3.512116 | 3.792799 | 2.760613 | 2.994656 |
| 366_at  | 2.947099 | 2.065147 | 1.535074 | 2.807479 | 1.886047 | 3.473824 | 3.383403 | 3.146543 |
| 3670_at | 1.450704 | 2.0615   | 2.146987 | 1.589666 | 1.94465  | 1.403002 | 1.762101 | 1.980023 |
| 3671_at | 2.077539 | 1.394471 | 2.018016 | 1.773991 | 1.908444 | 2.086365 | 1.439648 | 2.334546 |
| 3672_at | 7.646765 | 8.005001 | 8.227454 | 7.901009 | 8.243632 | 8.641587 | 8.52835  | 8.175457 |
| 3673_at | 3.211673 | 3.691515 | 5.195804 | 4.802047 | 4.547499 | 4.777997 | 2.901237 | 4.594625 |
| 3674_at | 1.68509  | 1.786673 | 2.161834 | 1.353951 | 1.427278 | 1.58441  | 2.419262 | 2.073942 |

|           |          |          |          |          |          |          |          |          |
|-----------|----------|----------|----------|----------|----------|----------|----------|----------|
| 3675_at   | 9.860777 | 9.715433 | 10.55271 | 10.32894 | 9.637843 | 10.23436 | 10.52511 | 9.029201 |
| 3676_at   | 3.811169 | 4.164566 | 3.353928 | 4.473301 | 3.920201 | 4.242512 | 4.671686 | 4.952942 |
| 3678_at   | 5.346675 | 5.51998  | 5.523035 | 5.635303 | 4.963773 | 5.52702  | 6.041141 | 5.600819 |
| 3679_at   | 2.581049 | 2.371305 | 3.08985  | 2.645431 | 2.280455 | 2.863248 | 3.199428 | 2.298267 |
| 367_at    | 4.565469 | 4.957378 | 4.938052 | 4.925631 | 5.076373 | 5.387929 | 5.878518 | 4.27269  |
| 3680_at   | 4.03584  | 4.927128 | 4.106973 | 4.161567 | 5.102689 | 5.313764 | 4.932342 | 3.233905 |
| 3681_at   | 1.819469 | 1.593512 | 1.687295 | 1.709583 | 1.249673 | 1.799425 | 2.430483 | 2.255696 |
| 3682_at   | 2.024987 | 2.079838 | 2.977594 | 1.814364 | 2.360265 | 1.594717 | 1.436459 | 2.020245 |
| 3683_at   | 3.561717 | 3.960156 | 3.601392 | 4.169969 | 2.887624 | 3.338478 | 4.139517 | 3.485462 |
| 3684_at   | 2.760724 | 2.206111 | 1.850313 | 2.505077 | 1.402546 | 2.310554 | 2.755076 | 1.708249 |
| 3685_at   | 9.220591 | 9.675832 | 9.866215 | 9.513025 | 9.762009 | 9.084659 | 9.751599 | 10.06118 |
| 3687_at   | 3.065683 | 1.8625   | 1.665288 | 2.944304 | 1.991066 | 1.772103 | 3.360452 | 2.716776 |
| 3688_at   | 8.758807 | 9.437    | 9.097747 | 9.151233 | 9.315303 | 9.265654 | 8.821719 | 8.75244  |
| 3689_at   | 4.127177 | 4.447779 | 3.948566 | 4.999914 | 3.170479 | 4.779384 | 4.7393   | 4.18702  |
| 368_at    | 3.389841 | 2.681265 | 4.101203 | 3.398496 | 3.889075 | 4.359766 | 2.718227 | 4.457104 |
| 3690_at   | 8.421877 | 8.038601 | 8.347717 | 8.155814 | 8.288741 | 7.814371 | 8.533695 | 8.944185 |
| 3691_at   | 2.375454 | 2.297594 | 2.10034  | 2.375308 | 2.907623 | 2.5819   | 2.70254  | 2.706605 |
| 3692_at   | 5.152898 | 5.283575 | 5.549159 | 5.42788  | 5.543665 | 6.326986 | 5.769985 | 5.068537 |
| 3693_at   | 6.86614  | 7.227565 | 7.347761 | 7.457173 | 7.023655 | 7.248098 | 7.709029 | 6.848794 |
| 3694_at   | 4.2191   | 2.186641 | 3.187492 | 3.237058 | 5.285045 | 5.577555 | 2.522242 | 4.516004 |
| 3695_at   | 3.426962 | 2.427562 | 3.121404 | 3.426311 | 3.280166 | 3.18958  | 2.680669 | 2.804208 |
| 3696_at   | 9.683487 | 9.415168 | 9.821633 | 9.441761 | 9.630181 | 9.593546 | 9.736393 | 9.690667 |
| 3697_at   | 1.370006 | 1.52656  | 2.362545 | 1.738777 | 1.145148 | 1.556997 | 1.7866   | 2.796982 |
| 3698_at   | 2.567482 | 3.598506 | 2.99866  | 4.418268 | 2.024569 | 4.909253 | 2.722165 | 3.276687 |
| 3699_at   | 1.725652 | 1.73001  | 2.805613 | 1.641298 | 2.076094 | 2.515208 | 1.540363 | 2.784041 |
| 369_at    | 6.566808 | 6.341841 | 6.649553 | 6.793944 | 5.847831 | 6.521322 | 6.923844 | 6.012974 |
| 36_at     | 5.822493 | 6.338652 | 6.067765 | 5.320092 | 7.465224 | 6.105619 | 5.96384  | 6.739143 |
| 3700_at   | 2.544519 | 2.063017 | 1.449411 | 2.316956 | 2.06751  | 2.613399 | 1.56645  | 1.638069 |
| 3702_at   | 1.265684 | 0.938973 | 2.542857 | 2.854458 | 2.073974 | 1.039345 | 2.10524  | 2.231632 |
| 3703_at   | 7.609966 | 8.177533 | 8.27566  | 7.882241 | 7.889109 | 7.910181 | 8.326367 | 8.128822 |
| 3704_at   | 5.794698 | 6.508109 | 5.681859 | 5.774159 | 6.232763 | 6.262826 | 5.609244 | 6.515882 |
| 3705_at   | 4.928475 | 4.920223 | 5.140609 | 4.65928  | 5.172199 | 5.521164 | 5.0895   | 4.719798 |
| 3706_at   | 2.419707 | 2.727009 | 2.3943   | 2.588082 | 2.863849 | 2.569478 | 2.986924 | 2.507362 |
| 3707_at   | 4.0964   | 4.608732 | 3.499794 | 4.830396 | 3.950101 | 4.108602 | 4.675033 | 3.750792 |
| 3708_at   | 5.145807 | 5.92033  | 5.379129 | 5.345745 | 5.685644 | 5.932643 | 5.406838 | 5.398278 |
| 3709_at   | 4.237196 | 4.516645 | 5.189673 | 4.755886 | 5.763636 | 4.901817 | 5.057521 | 5.148886 |
| 3710_at   | 3.924872 | 3.286838 | 3.407287 | 4.215523 | 3.88881  | 4.003922 | 4.328614 | 3.09857  |
| 3712_at   | 5.506448 | 5.348837 | 5.885186 | 5.795749 | 5.706405 | 5.915317 | 5.883034 | 5.300519 |
| 3713_at   | 1.692909 | 1.671046 | 1.58936  | 1.72493  | 2.419145 | 1.971013 | 1.850432 | 1.249608 |
| 3714_at   | 2.83085  | 2.488369 | 2.80426  | 2.722093 | 2.635779 | 3.396373 | 2.258679 | 2.704702 |
| 3716_at   | 8.170511 | 8.381485 | 8.118242 | 8.296386 | 8.043137 | 8.820219 | 8.278374 | 8.417492 |
| 3717_at   | 5.868145 | 5.818191 | 5.416517 | 6.570267 | 5.06398  | 4.851511 | 5.381909 | 5.948441 |
| 3718_at   | 2.837308 | 3.805921 | 3.820321 | 3.438584 | 3.768008 | 4.406881 | 4.087857 | 3.046239 |
| 3720_at   | 5.82815  | 5.723884 | 5.761595 | 5.398453 | 6.666871 | 4.836366 | 5.106076 | 5.976942 |
| 3725_at   | 5.978681 | 6.875327 | 6.5753   | 6.76031  | 5.88831  | 6.580124 | 6.087006 | 5.993334 |
| 3726_at   | 6.997896 | 6.708435 | 6.880015 | 7.266388 | 6.575896 | 7.099022 | 6.736139 | 6.022903 |
| 3727_at   | 6.904847 | 7.328652 | 7.424185 | 7.364951 | 6.958978 | 7.254629 | 7.093493 | 6.975624 |
| 3728_at   | 7.456941 | 6.914365 | 7.691724 | 7.683167 | 7.01233  | 7.685164 | 7.980514 | 6.611151 |
| 372_at    | 8.057011 | 8.640225 | 8.135487 | 8.345164 | 8.574718 | 8.403981 | 8.13497  | 8.538574 |
| 3730_at   | 2.747528 | 2.564662 | 3.121567 | 3.152467 | 2.859873 | 3.32777  | 3.918305 | 3.493534 |
| 373156_at | 8.312749 | 7.469808 | 7.574103 | 8.105242 | 7.374768 | 7.965805 | 7.757114 | 7.04293  |

3732\_at 3.359905 4.074979 2.720899 2.433047 3.472009 2.998299 3.668392 2.446972  
373509\_at 1.660626 1.937638 1.841807 1.832364 2.796438 1.09481 1.65874 2.163113  
3735\_at 7.822529 7.400063 7.352447 7.355803 7.147318 7.911298 7.508961 7.608833  
3736\_at 1.996393 3.893692 2.269587 2.483007 3.274 2.579562 1.828184 1.54536  
3737\_at 1.32777 2.084008 1.456728 1.639368 1.76655 1.542074 2.153177 1.40339  
373861\_at 1.847233 1.668266 2.303037 2.211539 1.681996 2.679062 2.78266 1.980494  
373863\_at 3.069813 3.068509 3.779059 4.54333 3.763457 4.643209 4.223562 3.775342  
3738\_at 2.150102 2.45329 2.520668 2.930064 2.377561 2.013752 2.51603 3.135619  
3739\_at 2.254447 4.03915 4.338525 3.269068 3.888491 4.007547 3.971076 2.586787  
373\_at 5.315639 5.803332 5.459731 5.410827 6.119683 5.248704 5.614546 6.102808  
3741\_at 2.599589 3.110249 2.969988 3.018776 3.569255 2.927326 2.488207 2.579406  
374291\_at 5.831896 5.768624 5.713158 5.674844 5.449069 6.187575 5.549825 5.063245  
3742\_at 1.58204 2.044388 2.240827 2.713132 1.450011 2.406788 1.834683 1.263814  
374308\_at 0.929392 2.117024 1.07775 1.46263 2.566475 1.159586 1.3209 1.743872  
374354\_at 6.883434 6.664181 6.998306 7.00426 7.021317 6.704393 6.681036 6.2811  
374355\_at 1.276151 1.366082 1.378943 1.179638 1.356187 1.107372 1.636265 1.291214  
374378\_at 3.883614 4.003941 3.554785 2.866732 3.891316 3.757993 3.320763 2.308906  
374383\_at 2.991987 4.376959 3.283494 2.291377 3.172097 3.340309 3.151878 3.355154  
374387\_at 2.707448 3.168944 3.508241 2.831684 3.264598 4.129023 3.366062 3.097586  
374393\_at 1.645365 1.472372 3.231868 3.428438 1.759637 1.692967 1.976793 1.973159  
374395\_at 7.735476 7.768432 7.928154 7.943087 7.059945 7.700366 7.842004 6.598808  
3743\_at 1.065372 1.441963 1.248016 1.625876 1.712782 2.587774 0.739713 1.319582  
374403\_at 3.249588 3.422837 2.396301 3.441247 3.359774 3.014689 3.435951 2.56094  
374407\_at 1.687345 1.713784 1.970208 1.908023 1.241838 2.249919 2.014466 2.347704  
374443\_at 4.797344 4.393684 3.821414 3.88753 2.350068 2.887722 3.669209 2.536856  
374454\_at 1.585566 1.803965 1.729846 1.608969 2.19712 1.783708 2.110452 1.777723  
374462\_at 7.977665 7.734759 7.992293 7.309877 7.012415 7.237412 7.705806 8.089899  
374470\_at 1.785556 2.147939 1.725296 2.094504 2.287442 1.774814 2.744537 1.714119  
374491\_at 1.332842 2.66727 1.078191 1.002727 1.205864 1.166262 1.530902 1.495423  
3744\_at 1.977585 2.302863 2.146085 2.356171 2.59282 2.337716 2.253281 2.228755  
374569\_at 3.108871 3.365248 2.238916 2.846733 2.617901 2.753619 3.433508 2.526702  
3745\_at 2.736208 2.317969 2.297252 2.028423 2.193245 2.328442 1.398852 1.823662  
374618\_at 5.317215 4.871583 5.78142 4.795099 4.997685 5.564553 5.200927 5.499729  
374654\_at 2.949931 2.462076 2.44823 2.958287 2.309558 3.281366 2.336943 2.384328  
374655\_at 3.163414 3.061803 3.32304 3.26851 3.064945 2.552348 3.630311 3.429274  
374659\_at 4.801649 4.575667 3.331667 3.530622 2.910395 4.305736 3.911549 4.329081  
374666\_at 3.190625 3.613272 2.859105 3.471228 2.657216 3.617888 3.31579 3.313537  
3746\_at 1.215578 1.793454 1.685209 1.535446 1.481814 1.358904 1.891306 1.559952  
374739\_at 3.066871 2.987237 2.29829 3.078613 1.94998 2.941529 2.636912 1.917002  
374768\_at 2.120791 1.727558 1.426955 1.902157 1.530285 0.942127 3.60802 2.389219  
374786\_at 1.537678 1.402844 1.395155 1.832431 1.847434 1.441092 1.645112 1.942465  
3747\_at 1.654069 1.456337 1.463087 1.459827 1.472261 1.834623 1.720176 1.272133  
374819\_at 2.994381 2.214843 4.117308 4.367474 5.627444 4.997588 3.239787 1.4655  
374860\_at 2.786715 1.225007 1.054762 3.299029 0.890875 1.8754 1.114385 0.924316  
374864\_at 1.95924 1.133498 1.323947 1.53903 1.132745 1.084643 1.80216 2.09794  
374868\_at 4.421001 4.085111 3.602044 3.619335 4.634703 4.026242 4.169923 3.918868  
374872\_at 2.202113 3.380195 3.18966 3.816217 2.663689 2.977792 4.725832 3.49024  
374875\_at 3.401248 3.833993 3.686169 3.435922 3.097605 3.220083 3.664653 3.212998  
374877\_at 1.61867 2.731952 1.51413 2.96327 1.404163 1.51589 1.997086 1.814984  
374879\_at 4.514616 3.667001 4.556317 3.996473 4.003356 3.584641 4.56356 4.592483  
374882\_at 7.895545 7.784966 7.779011 7.74876 7.467667 7.487788 7.246917 7.010461

374887\_at 5.137996 3.62358 4.787273 3.245185 3.746022 3.982742 4.359013 3.449245  
374890\_at 1.207903 3.807978 1.997763 1.667852 1.649026 1.045895 1.867949 1.683434  
374897\_at 2.34024 2.971731 3.557573 2.684696 3.213898 2.981822 2.804807 3.406862  
374899\_at 3.11292 2.40386 4.225459 1.989899 3.291871 3.392725 2.018502 4.197064  
3748\_at 3.560815 4.815579 5.484676 4.628912 4.741556 5.215274 4.752566 4.102759  
374900\_at 3.681514 3.945267 4.790877 4.951635 3.794616 4.855225 4.052135 4.080663  
374907\_at 2.674227 2.183936 2.187066 2.779881 2.185891 2.263156 1.822371 1.951577  
374918\_at 1.594147 1.992444 6.849238 4.310145 4.278729 7.088435 3.72097 2.784375  
374920\_at 4.111509 4.742052 4.810681 4.408305 4.158765 4.315952 4.230961 4.20994  
374928\_at 3.84118 3.172721 3.205795 3.051401 4.219283 3.568859 4.079036 3.916561  
374946\_at 2.274464 2.034946 1.905174 3.060624 2.04623 2.717416 2.315054 2.010913  
374955\_at 3.019257 2.692897 2.089581 2.539051 2.753884 2.652579 2.477104 2.501159  
374969\_at 4.964945 5.384484 5.858133 6.052481 5.639052 4.991056 4.376948 5.87628  
374973\_at 1.401084 2.615977 2.012243 2.35202 1.949005 2.228884 2.061587 3.424402  
374986\_at 5.733867 6.192239 5.874102 6.79679 6.305592 6.057259 5.662489 6.124848  
374987\_at 1.893497 1.042465 1.275595 2.366273 1.523912 1.116622 1.654443 1.217016  
3749\_at 5.33236 4.411724 4.602516 5.170106 5.033379 4.281983 4.624378 3.034384  
374\_at 2.429244 5.822051 2.223373 3.111729 3.016937 2.203479 2.762334 3.748406  
375033\_at 3.853303 2.930699 2.896504 3.766813 2.649144 3.301467 3.941708 2.520629  
375035\_at 6.292281 7.078431 6.699166 7.785068 8.354664 7.257717 7.19612 6.77142  
375056\_at 6.657573 6.695828 6.902688 7.15204 6.874398 7.164435 7.189045 6.868141  
375057\_at 2.491019 2.986493 3.462059 3.529842 2.287637 2.410534 3.378629 3.343049  
375061\_at 5.708114 5.226486 6.064102 5.940747 5.742177 5.977787 6.625815 5.540546  
3750\_at 2.754079 3.058967 2.51923 3.099757 2.662089 2.698982 2.475277 3.026881  
375189\_at 3.443796 2.741357 3.067132 2.200405 2.772151 1.868308 2.522971 2.641347  
375190\_at 4.044163 3.856461 4.207808 3.428409 3.194566 4.592262 4.377365 4.077303  
375196\_at 2.926788 3.329997 2.724439 2.505094 2.373337 2.475982 3.263304 2.830644  
3751\_at 1.369605 1.532341 1.7553 1.470498 1.54139 1.289757 2.208102 1.233185  
375260\_at 5.468989 4.955957 5.075072 3.239184 5.619364 4.831156 4.545093 3.325127  
375287\_at 5.051108 5.543521 5.810514 6.305372 5.873457 5.758605 6.050038 5.085082  
375295\_at 4.405059 2.80719 4.23337 3.823999 4.502929 2.610758 2.351357 3.219286  
375298\_at 1.558245 1.728395 1.181401 1.312597 1.594662 2.635011 1.679836 1.524719  
3752\_at 5.605996 6.277518 6.249208 5.575104 5.733273 5.95406 6.776883 6.916383  
375307\_at 3.55837 3.240878 3.508108 3.705803 3.977799 3.458361 3.755802 3.585093  
375316\_at 2.666596 2.921703 2.298791 1.985595 2.257261 2.018098 1.497996 2.148799  
375318\_at 2.151784 2.847954 3.758431 2.732198 2.339236 2.371786 2.815815 3.765113  
375323\_at 1.471361 3.141272 3.085094 2.583695 2.445561 2.919991 2.967711 3.040585  
375337\_at 1.358445 1.122652 1.071287 0.896126 1.415335 1.768804 1.246149 1.3327  
375341\_at 3.728489 3.248845 2.907886 3.699882 3.845735 3.055382 3.747249 3.439575  
375387\_at 6.079041 4.958044 4.769174 5.543441 4.17326 4.589025 5.35932 4.903026  
3753\_at 2.341166 1.448253 1.225786 1.451648 2.115515 1.16273 3.222543 2.133199  
375444\_at 1.500248 1.539554 1.271495 1.452474 1.497127 1.273648 1.380971 1.685  
375449\_at 4.369606 4.573016 4.332807 4.667525 5.02774 4.213913 4.555296 4.463595  
375484\_at 5.305189 5.085591 4.489918 4.205717 5.160172 5.0146 5.326776 4.944034  
3754\_at 3.042365 3.2742 3.525297 3.318525 3.256523 3.213028 3.64479 3.92622  
375519\_at 1.834713 1.294514 1.113954 1.020357 1.258183 1.473205 1.313653 2.108432  
375567\_at 1.090338 1.384054 2.353783 1.522302 1.766099 1.351373 1.565994 2.256  
3755\_at 1.713484 1.838518 1.272418 2.249537 1.723727 1.40966 1.738943 1.622774  
375607\_at 1.587691 1.337743 1.191672 1.154374 1.289191 2.066867 1.651769 1.53811  
375611\_at 0.948351 1.207455 1.14565 1.127075 1.257851 1.844672 0.872926 1.885238  
375612\_at 1.261153 1.69372 1.897389 1.503249 1.902524 2.041636 1.544093 1.725263

375616\_at 3.077458 3.512102 3.505803 3.229907 3.219461 3.883598 2.692556 2.994794  
375686\_at 2.216814 2.409418 2.749288 2.048016 3.050415 2.531408 2.658427 2.419601  
3756\_at 1.736224 1.903259 1.483642 1.597965 1.826847 1.713431 1.353261 1.484679  
375704\_at 2.467614 2.870452 2.868208 2.823209 2.094422 3.011717 2.01477 2.425912  
375719\_at 1.395756 2.545712 1.7616 4.798045 3.929833 3.387992 2.372422 3.256739  
375743\_at 4.856893 5.97466 6.424916 6.200086 6.32807 5.857702 6.593181 6.126201  
375748\_at 4.611411 5.197891 4.945451 4.323914 3.885908 5.303213 5.582138 5.50499  
375757\_at 6.308453 5.859889 5.396338 5.097608 4.332721 5.736901 5.390893 5.809959  
375759\_at 2.704997 2.353522 2.237071 2.149981 1.77254 2.76659 2.200414 2.18462  
375775\_at 1.964432 2.004908 2.469411 2.524781 2.695641 3.128205 2.837314 1.900904  
375790\_at 5.24325 5.424895 5.736391 5.8314 5.211729 5.584206 5.943464 4.662996  
375791\_at 2.89325 3.343268 2.873721 3.720861 3.105457 2.819488 3.276811 2.994674  
3757\_at 3.65128 3.67177 4.255288 3.795588 3.288691 3.189099 3.890255 2.942244  
3758\_at 2.791148 3.275346 2.236894 3.769792 5.068067 3.112191 1.901939 2.224208  
375940\_at 3.20403 1.881066 1.922451 1.8187 1.830436 1.59891 2.399863 2.381789  
3759\_at 3.873653 3.636017 2.490656 3.883591 3.146705 3.505258 3.234319 2.137167  
375\_at 10.35737 10.27927 10.9054 10.46255 9.774859 10.37098 10.64617 9.931176  
3760\_at 2.696359 3.084927 2.907642 1.567466 2.187865 3.770449 4.972288 2.880244  
376132\_at 1.935746 2.185481 2.303479 2.286275 2.116636 2.026384 2.236591 1.884777  
3761\_at 2.402185 3.119529 3.35918 3.133066 2.866725 3.744737 2.737377 3.734673  
376267\_at 2.762736 3.669309 3.475404 3.114793 2.044687 4.145093 3.672746 2.11555  
3762\_at 2.915822 2.081804 2.628692 2.057219 1.986795 1.968937 3.269557 2.41228  
3763\_at 1.876976 1.037585 1.934231 2.03549 1.457368 1.381475 2.16865 1.630491  
376412\_at 2.671186 2.370355 2.050034 2.88662 1.391216 3.192334 2.857298 2.466055  
376497\_at 3.809927 3.521733 4.058541 3.551086 4.009772 3.286531 4.360761 3.293247  
3764\_at 1.662045 1.792076 1.941332 2.307073 3.027254 2.221766 2.685795 2.182153  
3765\_at 2.277379 1.705421 2.267593 2.294134 2.310556 2.004938 2.387311 1.779297  
376693\_at 4.70673 3.891092 5.117737 5.584494 4.682794 5.423229 4.008411 3.845492  
3766\_at 3.807633 2.01549 2.544431 2.730969 6.162589 1.894741 1.846367 2.518876  
3767\_at 1.670582 2.139769 2.680983 2.916992 1.756018 1.969654 2.188272 1.966437  
376844\_at 1.482403 2.267445 1.36318 1.270224 1.172856 1.967622 1.410358 1.550678  
3768\_at 2.596364 3.34882 2.481587 3.623445 3.600248 3.541231 2.988663 3.446214  
376940\_at 6.376517 6.286607 6.543289 5.901309 6.080254 5.62798 6.011706 6.499789  
3769\_at 2.457975 2.493717 2.854245 3.82039 3.888955 4.350791 2.156046 2.750007  
377007\_at 1.929901 2.22309 2.235794 2.313442 2.158544 2.022753 1.73117 2.521635  
377047\_at 0.613207 0.300878 1.507152 2.415693 0.697074 1.574564 2.741342 1.158877  
3770\_at 2.089457 2.745939 1.972064 2.141476 2.379469 1.681379 2.947943 2.465225  
3772\_at 7.492822 6.985252 6.911438 4.961483 8.219034 7.576409 4.51789 6.881434  
3773\_at 6.427843 6.173543 5.85831 6.435981 7.485638 6.716475 3.96315 6.474047  
3775\_at 2.320014 2.997542 4.112724 3.786348 4.108605 4.278065 3.119745 4.073052  
377677\_at 1.946054 2.474552 4.399839 2.659602 2.416345 3.927715 2.816341 4.447098  
3776\_at 1.773753 2.224936 2.384477 2.04061 2.426704 2.305883 2.346435 2.920606  
3777\_at 3.08403 3.376736 3.122546 2.910343 2.961504 3.787158 3.385859 2.865714  
377841\_at 2.408941 1.80177 2.193375 2.711283 3.206381 2.046793 2.566414 2.626658  
3778\_at 2.743584 2.475257 2.322845 3.17475 2.606459 2.162519 2.82749 2.268466  
3779\_at 5.159265 4.649359 4.312071 3.519126 1.945423 3.506243 3.628592 3.93006  
377\_at 6.604908 7.111613 7.139297 7.348909 6.448166 7.355605 7.029071 6.324745  
3780\_at 1.86199 2.343128 1.641893 1.475114 2.154882 2.676242 2.556361 2.545152  
378108\_at 2.541892 4.119942 2.732612 2.730866 2.938417 2.553213 3.188507 2.78981  
3781\_at 3.432412 2.886467 1.665182 2.606302 2.283628 3.672441 1.4985 1.615808  
3782\_at 2.505991 3.36645 3.969736 3.337484 3.10965 4.063425 3.410636 2.90713

|           |          |          |          |          |          |          |          |          |
|-----------|----------|----------|----------|----------|----------|----------|----------|----------|
| 3783_at   | 1.723795 | 2.322225 | 2.274376 | 2.105108 | 1.777324 | 2.362787 | 1.94461  | 2.220544 |
| 3784_at   | 4.747984 | 4.666084 | 4.508289 | 4.906192 | 4.383756 | 4.38617  | 4.596832 | 3.411922 |
| 3785_at   | 2.223102 | 1.861364 | 1.793744 | 1.918045 | 2.416392 | 2.106381 | 1.667653 | 1.478412 |
| 3786_at   | 1.993461 | 1.694846 | 0.956638 | 1.926843 | 1.967602 | 2.557415 | 1.690145 | 1.367271 |
| 3787_at   | 2.126302 | 1.909641 | 1.757476 | 2.417015 | 1.904966 | 2.139192 | 2.629962 | 2.01406  |
| 378805_at | 4.402397 | 2.413736 | 2.899834 | 4.652056 | 3.1058   | 3.644825 | 2.487917 | 3.274428 |
| 378807_at | 1.70593  | 1.744199 | 1.676211 | 1.563386 | 1.880206 | 2.28699  | 2.551319 | 2.1698   |
| 378825_at | 1.062189 | 2.02431  | 1.850372 | 1.984731 | 2.013243 | 1.405243 | 1.934234 | 3.132768 |
| 378828_at | 1.328714 | 1.556054 | 1.088385 | 0.872543 | 2.138233 | 1.377357 | 1.554018 | 1.915111 |
| 378832_at | 2.063467 | 2.398541 | 2.263707 | 1.915445 | 1.776482 | 2.666927 | 1.95245  | 2.401118 |
| 378881_at | 2.416604 | 1.672394 | 1.481982 | 1.76074  | 1.601364 | 1.571544 | 1.467145 | 2.044605 |
| 378884_at | 3.743467 | 2.643491 | 4.222792 | 3.260075 | 3.584325 | 3.344009 | 3.310086 | 3.945645 |
| 3788_at   | 1.290935 | 2.667668 | 2.348852 | 1.809502 | 1.768618 | 1.130308 | 2.033584 | 2.325084 |
| 378925_at | 1.244951 | 1.189746 | 1.125539 | 1.242352 | 1.641252 | 1.159232 | 1.965986 | 1.115381 |
| 378938_at | 10.62168 | 10.61595 | 10.68615 | 10.9149  | 10.89877 | 10.63003 | 10.27999 | 10.75134 |
| 378_at    | 7.829673 | 8.207227 | 7.874586 | 7.542772 | 7.533505 | 7.982222 | 8.189041 | 7.915432 |
| 379013_at | 2.15262  | 2.71529  | 1.831767 | 2.350287 | 1.289211 | 2.631986 | 1.659019 | 3.04912  |
| 379025_at | 5.591453 | 6.117195 | 4.914474 | 5.867149 | 5.25829  | 5.814716 | 3.46452  | 5.980119 |
| 379034_at | 1.578037 | 1.617998 | 1.413188 | 1.344164 | 1.449791 | 1.372553 | 1.710383 | 1.103537 |
| 3790_at   | 2.943001 | 3.320239 | 2.599322 | 2.749343 | 3.179724 | 1.731648 | 2.532197 | 3.104019 |
| 3791_at   | 7.982286 | 8.567343 | 8.553181 | 8.926861 | 9.069307 | 8.653555 | 8.9007   | 8.435877 |
| 3792_at   | 3.082207 | 2.583187 | 2.286443 | 2.294823 | 2.214775 | 2.359015 | 3.527424 | 1.982339 |
| 3795_at   | 5.484821 | 4.121162 | 4.201809 | 3.891746 | 5.43425  | 3.288339 | 3.160639 | 4.392744 |
| 3796_at   | 7.354441 | 7.523597 | 7.633529 | 7.360714 | 7.672741 | 6.98859  | 7.609819 | 8.031535 |
| 3797_at   | 4.058492 | 3.049446 | 4.723298 | 3.808841 | 3.213234 | 4.449423 | 4.03415  | 2.779754 |
| 3798_at   | 1.69133  | 1.753814 | 1.696409 | 1.343284 | 1.763291 | 1.691033 | 1.527837 | 2.183547 |
| 3799_at   | 8.920458 | 9.222868 | 9.073001 | 9.22931  | 9.105634 | 8.930095 | 8.889115 | 9.367772 |
| 379_at    | 4.640813 | 4.366524 | 4.644075 | 4.144597 | 4.851225 | 3.851796 | 4.352973 | 2.945073 |
| 37_at     | 7.409497 | 7.180064 | 6.834144 | 7.477849 | 7.164265 | 7.585362 | 7.038463 | 7.080496 |
| 3800_at   | 1.381762 | 1.565922 | 2.159025 | 1.869687 | 1.906462 | 1.004896 | 1.501842 | 2.241997 |
| 3801_at   | 4.246714 | 2.918308 | 3.091015 | 3.252071 | 3.622184 | 3.207732 | 3.094597 | 3.018401 |
| 3802_at   | 1.493688 | 2.251091 | 2.728733 | 2.165483 | 3.366534 | 1.841125 | 2.637261 | 1.595853 |
| 3804_at   | 2.814573 | 3.501579 | 4.273938 | 2.719165 | 3.912762 | 3.877345 | 3.131543 | 3.323727 |
| 3805_at   | 1.728493 | 2.252786 | 2.640295 | 2.512098 | 2.579603 | 2.106244 | 2.569801 | 2.638727 |
| 3809_at   | 2.227272 | 2.61873  | 2.979359 | 2.102979 | 3.800826 | 2.382881 | 2.996027 | 2.153733 |
| 3811_at   | 1.598523 | 2.15138  | 2.593528 | 2.433027 | 1.677974 | 2.621748 | 2.212129 | 1.706723 |
| 3812_at   | 1.749808 | 1.430503 | 2.683069 | 1.878286 | 2.230869 | 2.77657  | 2.493279 | 1.769904 |
| 3814_at   | 3.164105 | 2.475258 | 4.874888 | 2.776772 | 2.32525  | 2.835915 | 4.2621   | 3.70143  |
| 3815_at   | 2.401867 | 2.464772 | 3.466685 | 3.731421 | 4.423865 | 2.945765 | 2.495741 | 1.814375 |
| 3816_at   | 3.197243 | 3.358565 | 2.662372 | 4.107423 | 4.373267 | 3.182895 | 2.243207 | 3.68414  |
| 3817_at   | 2.963454 | 2.992848 | 2.762528 | 3.217438 | 2.628708 | 2.56938  | 2.192922 | 2.450349 |
| 3818_at   | 2.028993 | 1.667741 | 1.248691 | 2.358065 | 1.795919 | 2.227543 | 1.652498 | 2.654095 |
| 381_at    | 4.590603 | 4.497927 | 5.219944 | 4.598388 | 3.991186 | 5.333422 | 4.659345 | 5.028606 |
| 3820_at   | 3.908896 | 6.074607 | 5.727004 | 5.053546 | 4.692658 | 5.315573 | 5.269935 | 4.738426 |
| 3821_at   | 2.068316 | 0.731694 | 1.657874 | 0.868812 | 0.636425 | 1.350537 | 0.886476 | 0.664645 |
| 3822_at   | 2.028531 | 1.199983 | 0.880462 | 1.124695 | 2.050504 | 1.165057 | 1.258232 | 2.033032 |
| 3823_at   | 1.334226 | 0.925775 | 1.417457 | 1.002491 | 4.503474 | 1.558999 | 1.05933  | 1.353105 |
| 3824_at   | 2.451739 | 3.279341 | 3.873171 | 4.156099 | 2.014835 | 3.607237 | 2.712177 | 4.110179 |
| 3827_at   | 7.577327 | 5.333269 | 5.963759 | 6.754824 | 9.238317 | 4.362083 | 2.37122  | 5.198976 |
| 382_at    | 8.304992 | 8.214463 | 8.533766 | 8.572734 | 8.638358 | 8.000404 | 8.799534 | 8.325441 |
| 3831_at   | 7.862356 | 7.787333 | 7.521717 | 7.955427 | 7.362757 | 7.702887 | 7.723771 | 8.109895 |

|           |          |          |          |          |          |          |          |          |
|-----------|----------|----------|----------|----------|----------|----------|----------|----------|
| 3832_at   | 1.840512 | 2.550737 | 1.696449 | 3.254775 | 1.747847 | 1.489181 | 2.534884 | 4.09429  |
| 3833_at   | 2.420722 | 2.872621 | 2.808379 | 2.344171 | 2.770211 | 2.547631 | 2.95763  | 3.345515 |
| 3834_at   | 1.72554  | 1.284695 | 1.657526 | 1.6826   | 2.572056 | 1.974867 | 1.840482 | 1.729898 |
| 3835_at   | 5.132791 | 3.561447 | 4.694344 | 4.468487 | 4.289579 | 4.83615  | 4.72238  | 3.897799 |
| 3836_at   | 5.908657 | 5.172555 | 6.14838  | 6.004404 | 5.5735   | 5.517649 | 5.329401 | 5.307986 |
| 3837_at   | 7.708256 | 7.920302 | 7.566462 | 7.781501 | 8.162944 | 7.488633 | 7.974163 | 7.828686 |
| 3838_at   | 5.966571 | 6.705463 | 6.855882 | 7.022607 | 6.359492 | 5.306494 | 6.505126 | 6.455055 |
| 3839_at   | 6.434514 | 6.730713 | 6.623564 | 5.91553  | 6.53252  | 6.18918  | 7.215759 | 6.339444 |
| 383_at    | 2.059005 | 1.958093 | 1.702116 | 2.165863 | 1.964028 | 2.626722 | 1.649196 | 1.608606 |
| 3840_at   | 6.918643 | 6.764463 | 6.924579 | 6.836166 | 6.410069 | 6.642603 | 7.226264 | 6.936877 |
| 3841_at   | 5.393588 | 5.757131 | 4.979836 | 5.667432 | 5.557204 | 5.565999 | 6.128651 | 6.056977 |
| 3842_at   | 8.009951 | 7.762896 | 7.791753 | 7.88622  | 8.237722 | 7.595257 | 8.116976 | 8.339464 |
| 3843_at   | 6.742825 | 6.357652 | 6.405735 | 6.880335 | 6.697928 | 6.353891 | 6.824522 | 7.323381 |
| 3845_at   | 6.45328  | 6.584997 | 6.6172   | 6.838214 | 6.927792 | 6.484641 | 7.236909 | 7.140276 |
| 3846_at   | 1.524542 | 1.33734  | 1.82587  | 1.264146 | 1.041946 | 1.956152 | 1.575364 | 2.4828   |
| 3848_at   | 2.458501 | 2.126167 | 1.991825 | 2.288359 | 2.059851 | 1.548928 | 1.921203 | 1.615563 |
| 3849_at   | 2.52306  | 2.812474 | 1.792907 | 2.629491 | 1.491273 | 1.386179 | 3.403179 | 3.267602 |
| 384_at    | 4.761151 | 5.432085 | 4.299145 | 4.255511 | 4.450183 | 5.052542 | 4.26388  | 4.798335 |
| 3850_at   | 1.981214 | 2.420354 | 2.093762 | 2.149535 | 1.852701 | 1.790927 | 1.532065 | 1.959606 |
| 3851_at   | 1.947821 | 1.995848 | 2.249008 | 1.828593 | 1.528932 | 1.965508 | 2.035315 | 1.844501 |
| 3852_at   | 1.191357 | 2.349372 | 1.78597  | 1.190626 | 1.605466 | 2.166376 | 1.394049 | 1.50531  |
| 3853_at   | 2.121814 | 1.248376 | 0.616467 | 1.600822 | 1.556129 | 1.244088 | 3.762791 | 1.14468  |
| 3854_at   | 2.296874 | 1.757503 | 1.449868 | 0.950222 | 1.740215 | 1.507404 | 1.139142 | 0.641549 |
| 3855_at   | 4.606772 | 5.239979 | 5.780374 | 6.893582 | 7.290109 | 6.423989 | 2.931664 | 4.176285 |
| 3856_at   | 3.311898 | 0.904416 | 3.372253 | 2.657728 | 2.500869 | 0.911102 | 3.999946 | 1.788696 |
| 3857_at   | 2.085969 | 1.336181 | 1.928298 | 1.390968 | 1.368115 | 1.207141 | 1.863154 | 1.61071  |
| 3858_at   | 3.209289 | 3.514128 | 4.061908 | 2.963434 | 3.469089 | 2.930916 | 2.863125 | 3.135593 |
| 3859_at   | 1.885622 | 2.099138 | 1.497283 | 1.1698   | 1.405011 | 1.538143 | 1.425817 | 0.906109 |
| 3860_at   | 1.613498 | 1.891906 | 2.521754 | 2.320987 | 1.93517  | 2.320987 | 2.727077 | 2.78395  |
| 3861_at   | 1.247241 | 2.918274 | 1.538654 | 2.097469 | 3.164311 | 1.81258  | 1.831614 | 2.128192 |
| 386597_at | 1.555859 | 1.805247 | 1.245456 | 1.668403 | 1.03473  | 1.05827  | 3.423159 | 2.201643 |
| 386617_at | 2.345808 | 1.602393 | 1.80083  | 1.674927 | 1.919994 | 2.51839  | 1.955231 | 2.010315 |
| 386618_at | 1.867284 | 1.101127 | 0.841024 | 1.34202  | 1.740744 | 1.831451 | 1.839379 | 1.630325 |
| 386627_at | 1.890904 | 2.248466 | 3.045278 | 1.593473 | 2.914242 | 1.994377 | 2.324591 | 4.481772 |
| 386653_at | 1.06479  | 1.441802 | 1.28854  | 1.420378 | 1.731952 | 1.066178 | 1.290779 | 1.86592  |
| 386672_at | 2.122076 | 1.307031 | 1.960857 | 1.095222 | 1.227604 | 1.321678 | 1.254622 | 0.808985 |
| 386674_at | 2.98774  | 3.195215 | 3.885148 | 3.193404 | 2.709609 | 3.500028 | 2.671818 | 3.829047 |
| 386675_at | 0.992496 | 2.946033 | 2.647544 | 1.916731 | 2.258782 | 3.150806 | 3.000269 | 1.160165 |
| 386676_at | 3.418214 | 3.111761 | 3.27305  | 4.700131 | 3.356387 | 3.239765 | 3.091914 | 3.473682 |
| 386677_at | 1.141343 | 1.627242 | 1.209777 | 1.993497 | 1.304107 | 1.297099 | 2.141286 | 3.084987 |
| 386678_at | 3.50745  | 2.202378 | 2.170064 | 2.471229 | 1.027084 | 2.803526 | 1.887957 | 2.563067 |
| 386679_at | 2.093985 | 2.666048 | 2.87275  | 2.497192 | 2.829798 | 2.193222 | 1.82834  | 2.008985 |
| 386680_at | 3.946337 | 1.982006 | 2.490627 | 2.715731 | 5.040119 | 1.021598 | 2.012943 | 1.537673 |
| 386681_at | 0.977038 | 1.910428 | 1.137648 | 1.367907 | 1.546707 | 0.990255 | 1.601677 | 1.767395 |
| 386683_at | 2.528836 | 2.854407 | 2.659272 | 3.32194  | 2.861281 | 2.755432 | 1.853083 | 2.503864 |
| 386684_at | 2.448911 | 2.561262 | 2.71789  | 2.673038 | 2.481289 | 3.106787 | 1.953869 | 2.631396 |
| 386685_at | 3.060338 | 4.403372 | 4.078387 | 4.310659 | 3.802206 | 2.541806 | 1.50734  | 4.530824 |
| 3866_at   | 1.680695 | 1.494907 | 2.3439   | 1.673412 | 1.750386 | 2.144028 | 1.724476 | 1.807975 |
| 386724_at | 2.482584 | 2.577354 | 3.025252 | 2.729856 | 2.060353 | 2.256391 | 2.501052 | 1.72651  |
| 386746_at | 2.839053 | 1.960429 | 1.871501 | 2.548767 | 2.250214 | 2.456379 | 2.324812 | 3.336649 |
| 386757_at | 3.898874 | 4.304675 | 3.460103 | 3.765078 | 4.732621 | 4.984606 | 3.463163 | 3.28212  |



386758\_at 3.284284 2.842745 2.756007 3.879784 2.178696 3.534178 3.111441 2.821392  
3868\_at 1.059534 2.17912 1.810167 1.796207 2.016834 2.061164 3.039493 2.153102  
387032\_at 3.742509 4.413252 4.21379 5.295494 4.164594 3.807354 3.913204 4.745394  
387036\_at 1.402622 0.985616 1.347512 2.256816 1.143077 1.765836 1.961092 1.800643  
387065\_at 2.067915 2.16584 2.203302 2.260038 2.110235 1.866378 1.724152 2.445524  
387066\_at 7.017305 7.833216 7.533597 6.605888 7.50312 7.923885 7.515104 7.823453  
387082\_at 3.064217 2.188548 2.707717 2.037437 2.501661 2.405198 2.319447 2.421285  
387097\_at 1.965555 1.601434 2.220744 3.071234 2.741424 1.756326 2.896731 2.645513  
387103\_at 3.195848 2.492928 3.414911 4.279042 1.971552 2.03666 3.438514 2.935676  
387104\_at 2.294537 2.509393 1.805264 1.269878 2.001218 1.599423 4.048397 2.267756  
387111\_at 1.501953 1.846275 1.288136 1.136217 1.759803 1.456166 1.955604 1.710629  
387119\_at 2.457058 2.397364 2.915132 2.064005 1.994045 1.390787 2.742195 2.228625  
387129\_at 1.405516 1.483826 1.435055 1.525518 2.128217 1.497905 2.388321 1.815102  
387254\_at 3.383878 2.465445 2.706598 2.949684 2.971417 2.936077 2.200187 3.579449  
387263\_at 6.232571 5.665458 5.757911 5.222544 5.465125 5.244141 5.924555 5.083868  
387264\_at 5.074929 5.13232 5.375369 5.149961 5.335648 4.297778 4.471703 4.641052  
387266\_at 0.957319 1.496178 1.628763 1.188357 1.484416 1.468851 1.716849 2.088246  
387267\_at 0.735175 1.095229 0.66141 0.595361 0.673508 1.446024 1.548929 1.13624  
387273\_at 2.392935 2.042032 2.263845 2.299817 2.456715 2.096482 3.90971 1.676435  
3872\_at 3.210059 3.396024 3.15769 3.413262 3.023195 3.335173 3.887409 3.271449  
387316\_at 1.13862 0.919831 1.105224 0.797426 2.025276 1.312744 1.057883 1.735074  
387319\_at 3.013072 1.832255 2.009555 1.970288 2.114303 2.516627 2.114134 1.726216  
387332\_at 1.256122 1.060837 2.129423 1.417495 1.324384 0.976051 0.891003 1.440669  
387338\_at 4.020512 6.09142 4.578356 4.297033 5.080342 5.121006 3.864601 4.594589  
387357\_at 1.875688 1.820681 1.661322 1.905742 1.48159 1.732164 1.499139 1.982791  
387486\_at 1.354632 1.65626 1.533281 1.721075 1.635528 1.433156 1.420501 2.294923  
387496\_at 6.816954 6.623871 5.647834 6.800639 5.06233 7.138274 6.786656 5.801611  
387509\_at 3.763744 3.813381 3.164519 3.084852 2.088293 3.916851 2.877188 2.541611  
387590\_at 3.917304 3.987881 5.101636 3.637969 5.449107 1.528371 3.787825 4.243806  
387597\_at 5.673498 5.727398 6.03031 5.716336 5.839137 5.810885 5.718702 6.001982  
3875\_at 6.17518 5.248773 6.21261 4.16812 6.199895 6.34878 5.746989 5.645546  
387601\_at 1.497671 2.23327 1.506957 1.181538 1.918381 1.103739 1.782117 1.582939  
387638\_at 1.440837 0.924411 0.834611 0.70489 1.214916 1.781727 1.329517 1.136103  
387640\_at 3.027687 2.160559 3.19268 2.535732 2.089798 2.491631 2.370569 3.203902  
387642\_at 1.456979 1.491923 2.006596 1.755473 1.665142 1.682152 1.695129 1.947953  
387644\_at 2.493189 2.550319 2.882913 2.866852 3.156909 3.571514 2.805156 2.390938  
387646\_at 2.486403 2.188878 4.833849 2.640758 2.152351 2.939064 3.005931 2.933018  
387647\_at 7.170101 6.931932 7.029296 7.209971 7.337569 6.880398 6.69861 7.256724  
387680\_at 6.999541 6.750256 6.673534 6.950351 6.957111 6.846229 6.601895 7.454439  
387694\_at 1.34759 1.371197 2.100523 1.807471 2.001759 1.778196 1.48054 2.245152  
387695\_at 2.45036 2.604443 2.420558 2.744693 3.619782 2.639483 2.532275 3.236  
387700\_at 5.317672 4.702779 2.970356 1.988855 4.11614 4.446195 2.565931 3.992773  
387707\_at 1.73645 1.567564 1.517571 1.018266 1.411411 1.513226 1.347329 1.621237  
387712\_at 2.073085 2.513161 1.738556 2.405062 2.095666 1.776827 2.148858 1.844938  
387715\_at 2.261713 2.09414 2.250022 2.713963 2.06506 2.493264 3.054736 2.624749  
387718\_at 1.457813 1.296571 1.69451 1.50278 1.354178 1.678358 1.645188 1.49547  
387720\_at 1.436751 1.490787 2.020222 1.095656 1.76629 1.25089 1.87742 2.326035  
387723\_at 2.143015 2.66595 2.399817 3.048109 2.703977 2.620167 1.686087 2.007833  
387733\_at 1.574363 1.708377 2.037505 1.776152 2.028976 1.66622 1.557204 2.965696  
387742\_at 2.028973 2.656914 4.076755 2.083885 1.802083 3.328579 2.572551 1.774686  
387748\_at 1.33028 1.006808 1.383193 1.448487 1.508132 1.097559 1.144641 1.115057

387751\_at 4.697523 4.759766 4.779859 5.097149 4.834859 4.409438 4.614513 4.223446  
387755\_at 1.397775 2.326932 2.008279 1.922137 1.602952 1.788036 2.108107 2.271892  
387758\_at 3.206663 4.792997 3.183615 3.675633 4.321588 3.108411 2.536503 2.416235  
387763\_at 3.796606 3.632758 3.634783 4.541462 4.92277 4.242932 3.752768 2.510371  
387775\_at 1.360679 1.050471 1.498626 1.157767 1.460396 1.170043 0.871789 1.522701  
387778\_at 2.328755 2.453641 2.806082 2.530221 1.883164 2.311311 2.829508 2.689722  
387787\_at 4.590153 2.448971 2.835385 3.047538 2.996864 3.964511 3.776918 2.611394  
387804\_at 0.966545 1.326841 2.432879 1.971109 3.981021 3.204404 1.573858 1.675733  
387810\_at 2.210143 2.275727 2.281969 2.259807 2.501312 2.189177 2.327866 2.090738  
387836\_at 1.508046 1.223772 1.089686 1.305288 0.753923 0.844856 1.155579 1.822047  
387837\_at 1.182859 1.875521 1.611419 1.217895 1.731553 1.231115 1.239953 1.81513  
387841\_at 7.099924 7.010271 6.709423 7.511153 6.86417 7.148703 6.323155 6.675404  
387849\_at 1.858861 1.798162 2.184697 2.909318 1.213487 2.296188 2.504626 3.543251  
387856\_at 3.049596 3.644729 2.970686 3.184602 3.471975 3.262086 2.945453 2.972261  
387882\_at 6.97866 5.907437 6.645915 6.417839 6.753267 7.459892 6.115913 6.719942  
387885\_at 2.139743 1.874191 1.940579 1.949035 1.584846 1.530863 1.040679 1.328681  
387890\_at 2.773619 3.169987 2.705913 3.208796 2.469423 2.882383 3.969291 3.34198  
387893\_at 5.608526 6.221639 4.581136 7.212998 4.920187 5.30332 5.556135 5.846517  
387895\_at 1.329257 1.657715 1.183203 3.217236 2.279116 2.175338 2.656892 2.266034  
387911\_at 1.101461 0.87744 0.59327 0.829635 1.394631 1.492443 1.014432 1.483633  
387914\_at 4.920219 5.336904 5.813411 5.157028 4.481689 4.372249 5.127123 4.225918  
387921\_at 6.23081 6.197986 6.506584 6.48884 6.311786 6.151497 6.227968 6.216095  
387923\_at 3.256171 1.551444 2.951209 1.4388 2.463628 2.188566 1.954001 2.888245  
387978\_at 1.265232 1.207829 1.130334 1.227995 2.459708 1.385459 1.624309 1.03284  
387990\_at 2.872472 2.874652 3.208145 2.793147 2.676266 2.343866 2.468036 3.892342  
387\_at 10.55223 10.55359 10.51903 10.66223 10.79717 10.55992 10.6448 10.60307  
388007\_at 1.682666 1.759746 1.809653 1.974527 1.94191 1.745588 1.932154 1.682455  
388011\_at 3.785994 1.479806 3.348809 3.974998 3.916417 3.509996 2.915539 2.27948  
388015\_at 2.624686 1.932218 2.01717 2.944931 2.244082 2.265411 1.825482 2.265411  
388021\_at 2.10151 2.102128 2.172554 2.503425 2.357084 2.253134 2.550872 2.306823  
3880\_at 7.071836 7.172535 6.460697 7.6109 5.519507 7.501665 5.050244 6.918721  
388115\_at 3.857228 3.05666 3.845675 4.579774 5.134784 4.550518 4.887288 4.743123  
388121\_at 1.578412 1.770166 1.85537 1.652356 1.740655 1.308639 1.685366 1.306684  
388125\_at 2.327115 2.650259 1.418581 2.990282 1.984676 1.894759 2.530193 1.160686  
388135\_at 6.307318 6.799497 7.122043 6.580608 6.673264 7.459886 6.747903 6.461811  
388165\_at 2.052575 1.412674 1.486036 1.111911 1.496003 1.945562 1.9244 2.057151  
388182\_at 1.111421 1.448774 1.427319 1.902033 2.239086 1.255474 1.416026 2.321265  
388199\_at 2.737559 3.311573 3.323687 2.592756 3.195358 3.155185 3.296891 3.704259  
3881\_at 1.935427 2.171868 1.990409 1.557517 1.891745 1.264866 1.641984 2.736746  
388210\_at 2.329549 2.946864 3.029994 2.942012 2.298204 2.770912 2.936004 2.730684  
388228\_at 2.774986 2.666973 2.486815 2.835499 2.168923 2.412177 2.724566 2.750859  
388255\_at 2.212937 2.75197 3.792514 1.607578 2.676594 2.886251 1.331085 2.172719  
388272\_at 4.834146 5.062857 3.102219 4.264527 3.911215 4.733154 3.389198 5.810435  
388276\_at 0.661008 1.387273 1.630447 0.883011 1.470894 1.25716 1.5786 1.143612  
388282\_at 1.561278 2.201658 2.017727 2.326294 1.728882 2.660287 1.653824 2.507698  
388284\_at 2.947751 1.122902 4.167431 4.287684 3.780369 1.467599 3.108229 4.083834  
388289\_at 1.678498 1.69741 2.30114 1.94075 1.708867 3.451998 2.278188 1.857579  
3882\_at 1.989595 1.037832 1.14993 1.533505 1.269107 1.669584 1.173429 1.692152  
388323\_at 2.22862 2.689513 2.477025 2.052092 4.338153 3.197118 2.037662 2.849572  
388324\_at 2.885057 3.034815 2.85346 2.946679 3.454811 3.010682 4.031542 3.139387  
388325\_at 4.451365 4.254156 3.733536 5.886817 3.320042 5.288317 5.307062 3.49829

388327\_at 4.229539 3.320736 2.50704 3.019107 2.972726 4.172362 2.885032 3.665893  
388333\_at 1.294658 1.421322 1.361802 1.034739 1.028537 1.593293 0.908318 1.156839  
388335\_at 5.685173 5.033732 3.730212 4.69713 5.298094 4.691104 4.227066 4.645194  
388336\_at 3.024634 3.143988 4.631671 2.910459 3.224161 2.672674 4.307447 1.874809  
388341\_at 3.386158 2.398207 2.524186 3.331067 2.502363 2.408081 3.365947 2.655908  
388364\_at 1.359389 1.730639 1.726145 1.232647 1.705563 0.971805 1.042837 1.493603  
388381\_at 2.86482 2.407951 1.636907 1.319466 2.185202 1.461107 1.744095 2.147644  
388387\_at 3.963032 3.542177 4.405369 3.084403 6.198152 4.997162 2.631936 3.879702  
388389\_at 2.158518 2.061541 1.97815 2.300684 2.091924 2.161543 2.90982 2.260933  
388394\_at 2.639709 2.085842 1.915377 1.952043 2.799021 1.240181 1.972664 2.119355  
3883\_at 1.017989 0.917771 2.161729 1.092896 1.345658 1.113204 0.930796 0.989257  
388403\_at 6.072308 5.66583 6.21995 6.822078 5.075772 5.905704 5.640472 5.670984  
388407\_at 3.441476 2.975542 2.588711 3.07719 3.28236 2.91958 3.403343 2.372193  
388419\_at 1.540423 1.973329 1.997859 2.538343 2.274582 1.887266 2.144259 2.440072  
388428\_at 1.906596 2.095178 2.128781 1.971276 2.134 2.474482 2.909533 1.979917  
388499\_at 0.927931 1.786585 1.666969 1.337836 1.813707 1.197601 2.524043 2.445118  
3884\_at 1.204909 2.59476 1.71395 2.431981 3.306776 1.412695 1.845264 2.996609  
388503\_at 2.47951 1.251988 1.83131 2.110311 2.552031 3.082067 1.820318 2.527567  
388507\_at 4.099077 3.949395 3.556243 4.291356 4.509877 3.797277 3.556555 4.44578  
388512\_at 1.33995 1.729472 1.727959 1.388119 1.540994 1.341138 1.166911 2.015616  
388514\_at 1.285675 1.928907 1.762785 2.224662 1.759915 1.637369 1.399935 1.653657  
388523\_at 1.376073 1.649472 2.156194 3.181222 1.901607 1.410756 1.511519 1.600066  
388524\_at 1.692986 2.128739 2.781072 1.686957 2.603487 3.304533 2.617093 2.586603  
388531\_at 1.43209 1.670589 2.150905 1.94119 1.806284 1.49663 1.982983 1.285648  
388533\_at 2.212195 2.259122 2.725691 2.415354 2.280044 2.921728 2.123022 3.248011  
388536\_at 4.799107 3.553279 4.086774 4.31025 4.410325 4.565234 4.08854 5.069358  
388550\_at 1.349294 1.567041 3.276764 2.204383 2.165358 1.611354 1.924446 1.639288  
388551\_at 1.590444 2.019223 1.525013 2.183441 1.536172 2.925645 1.543445 2.214842  
388552\_at 2.875936 3.880768 3.78297 3.509963 3.877967 3.45418 3.706096 3.081237  
388553\_at 1.641392 2.124519 2.315343 1.493337 1.271143 1.334236 1.664665 1.811348  
388555\_at 0.976716 1.79374 1.651262 1.243102 1.692473 1.799838 2.302066 1.903689  
388558\_at 4.871239 5.250017 7.067665 5.97369 6.402034 5.284469 5.857654 5.663636  
388559\_at 4.424867 3.052255 4.47293 3.230195 3.082902 3.323074 5.502368 3.922195  
388564\_at 5.953454 3.437109 3.466885 2.624006 2.421488 4.328552 2.941585 3.975098  
388566\_at 4.141699 3.299594 3.189539 5.156025 2.86868 3.997978 3.488999 2.423764  
388567\_at 1.260991 0.579297 1.285078 1.571376 2.120404 1.539304 1.322878 1.343296  
388569\_at 3.443303 3.560131 2.984757 3.377867 2.651722 3.585039 2.989178 3.953882  
388581\_at 5.359805 3.826683 4.714991 3.895052 3.33969 4.551217 4.312303 3.862705  
388585\_at 1.518605 1.730693 1.574486 2.740251 2.130132 1.706856 1.434732 1.618328  
388588\_at 3.057234 3.415902 2.749975 2.068619 3.245901 2.579673 2.002663 1.436307  
388591\_at 3.595182 3.988444 4.070093 3.365601 2.787097 3.15875 2.620969 3.599758  
388595\_at 2.889145 2.159197 2.17241 2.278571 1.941102 2.24889 1.941658 2.40123  
3885\_at 1.520682 1.537921 0.881533 1.251785 1.061845 1.950071 1.824247 1.512657  
388610\_at 3.564372 3.138782 3.602335 3.827687 3.298991 3.951873 4.2064 3.829447  
388611\_at 1.554824 1.53224 2.813664 2.456426 1.983657 2.614646 1.609186 2.582475  
388630\_at 3.964947 3.185494 3.574173 4.248079 3.60719 3.881215 4.054613 3.492225  
388633\_at 3.184141 3.001723 3.204306 3.101178 2.849156 3.266386 3.350129 3.069453  
388646\_at 1.118979 1.534226 1.168496 1.647765 1.227423 1.046371 1.971452 2.153194  
388649\_at 0.837205 1.358544 1.640639 0.92401 1.159592 0.967613 1.696087 1.220881  
388650\_at 3.13504 2.725084 3.195413 2.888531 3.800812 3.483255 2.841604 3.267447  
388662\_at 2.032881 2.834071 3.497597 2.481787 2.72422 2.316873 2.266409 3.163857

388667\_at 0.926373 1.0237 1.46423 1.86716 1.745305 1.125521 1.64356 1.788926  
388685\_at 4.856927 6.353674 5.280453 4.087838 4.1544 5.175201 5.849325 6.812886  
388695\_at 3.079887 3.2404 3.265253 3.991169 2.817781 4.230947 3.497475 3.52529  
388697\_at 2.180349 1.470788 2.368911 1.553549 1.493739 1.855113 1.606053 1.405112  
388698\_at 1.078201 1.255099 2.204713 1.056744 1.495358 1.629949 1.548706 1.009868  
3886\_at 1.530575 1.30602 0.997643 1.342334 2.379005 1.202409 1.236173 1.348307  
388701\_at 2.216251 1.655467 1.719449 1.557548 1.579274 1.322146 2.46392 1.267301  
388714\_at 1.391186 1.577425 1.627898 1.241877 1.286717 1.565767 1.667389 2.174228  
388719\_at 2.018343 1.164931 1.46053 1.202821 1.728496 1.11862 1.48566 1.176845  
388722\_at 3.533028 3.706114 3.028242 2.331826 3.550725 3.047564 2.36482 4.438946  
388730\_at 2.788449 2.997443 2.941482 3.614572 2.948708 3.186816 2.416046 2.433288  
388743\_at 4.030988 2.691466 3.541182 2.34907 2.138536 2.865317 3.077821 2.65615  
388753\_at 5.447358 4.499808 4.988517 4.421823 5.3215 5.321404 4.788789 5.221896  
388759\_at 3.236814 3.716933 2.437318 2.994072 3.300678 3.102307 3.743579 2.703201  
388762\_at 1.427188 2.564974 2.115895 1.904028 3.043829 3.264157 2.201264 2.310955  
388780\_at 2.431574 3.228116 4.630643 2.517365 2.276602 3.009643 2.704554 5.055395  
388789\_at 8.622722 8.668874 8.354826 8.280446 7.385447 8.649382 8.271875 8.228929  
388795\_at 2.666196 1.608647 1.465289 1.942884 1.031304 2.1403 2.416208 1.321228  
388796\_at 5.034726 4.361659 4.382575 3.865016 3.202331 4.75916 4.33424 4.297577  
388799\_at 2.138463 1.700992 1.859385 2.291886 3.161667 1.816762 1.602752 2.301943  
3887\_at 2.475315 2.330014 2.881997 2.091036 3.011576 2.453737 2.18093 3.444544  
388813\_at 1.300998 1.252447 1.131222 2.076365 1.238867 1.909968 2.655596 2.353797  
388815\_at 2.069052 2.167087 1.872342 1.477407 1.397579 1.744143 1.693419 1.496087  
388818\_at 1.971097 1.730595 1.291748 2.121809 1.677762 1.61309 1.604206 2.62558  
388830\_at 2.192777 2.800754 3.002599 2.859975 2.466238 2.887765 2.527948 2.393786  
388849\_at 1.680363 3.777387 3.428495 2.81522 3.674639 3.486659 3.375911 2.795829  
388882\_at 1.591422 1.966568 1.777906 2.014891 1.141317 1.349304 2.768906 1.826861  
388886\_at 3.725122 2.558269 3.746545 2.972104 3.152895 4.593963 2.533996 3.150316  
3888\_at 3.189881 1.862477 1.981057 1.928522 2.145517 2.991675 1.707864 1.519465  
388906\_at 1.938858 2.010788 2.18359 2.125746 1.926673 2.110655 2.012524 2.542304  
388910\_at 1.358225 1.515918 0.832649 1.231661 1.882292 1.550581 1.911979 1.752955  
388931\_at 1.312778 1.584423 1.575587 1.745028 1.511484 2.054923 2.021282 1.801652  
388939\_at 3.134765 3.412819 3.443122 3.784175 2.79393 3.683845 3.776826 2.72329  
388942\_at 0.95151 1.411757 1.25589 1.550768 1.582481 2.444684 1.423346 1.608101  
388946\_at 1.638153 1.827257 1.202106 1.308644 2.108396 1.075878 1.589744 1.227054  
388948\_at 1.689563 2.41965 2.527768 1.827983 2.390504 2.020831 1.789418 2.083325  
388951\_at 1.964904 1.8707 1.571439 2.813962 2.00495 1.856756 2.153501 1.478061  
388960\_at 1.472285 1.293474 2.108928 2.035156 2.319349 2.534362 2.732309 2.437852  
388962\_at 6.921708 5.909002 6.412832 7.30494 7.222222 6.677762 7.531792 5.368408  
388963\_at 3.475038 2.952462 4.322777 2.59076 4.652877 3.935162 2.66452 3.395182  
388965\_at 0.964789 1.511345 1.365514 1.625668 0.792713 1.09073 2.157978 2.647883  
388969\_at 6.031075 5.036266 5.531387 4.839491 4.445965 4.496178 5.974747 5.08003  
3889\_at 1.017974 1.878414 2.194088 2.234288 1.902322 2.568458 2.672381 1.41958  
388\_at 7.215402 7.375538 7.085721 7.183843 7.030885 7.357655 7.368012 7.042092  
389015\_at 1.535702 1.84187 1.224068 1.150241 3.350352 1.842536 1.996991 1.494169  
389023\_at 2.527689 1.34384 2.288536 1.297498 2.20539 1.66922 2.099333 1.786302  
389033\_at 2.404431 2.001847 1.035349 2.509123 1.810625 2.618647 2.730809 1.829014  
389043\_at 1.388585 1.052768 1.503219 1.269002 1.36959 1.307649 1.498344 2.294704  
389058\_at 2.406745 2.734021 2.544734 2.93697 3.175454 2.632954 2.318402 3.05143  
389072\_at 4.26711 3.331261 2.86986 3.464698 3.422449 2.821893 3.884953 3.112847  
389073\_at 2.146841 1.812761 1.215108 1.313936 2.068026 1.826836 1.460109 1.562971

389075\_at 1.688918 1.419202 1.568674 1.803859 1.661271 1.624575 1.13959 2.216905  
389084\_at 2.747978 2.842895 3.383873 2.765292 2.641717 2.210696 2.353827 3.02553  
389090\_at 1.880853 1.031995 1.957289 1.861311 1.340983 1.072153 1.752564 1.361753  
3890\_at 2.155498 1.329622 1.555746 1.77821 1.464782 1.357115 1.86705 2.06645  
389102\_at 2.211367 2.444888 1.600967 1.799256 2.377164 2.221492 1.856889 2.50854  
389114\_at 3.373643 3.195769 2.453741 4.340582 2.441987 2.833255 2.232553 3.191285  
389118\_at 1.211576 1.504349 1.59508 1.624103 1.480229 2.003735 1.562901 1.463818  
389119\_at 3.286678 2.486572 2.667099 2.301526 1.437969 2.303058 1.78187 1.749068  
389123\_at 2.275564 1.060461 1.416248 1.121246 1.425302 2.0472 1.892438 1.31692  
389124\_at 0.999198 1.463142 1.193819 1.066795 1.985542 1.154672 2.335884 1.190513  
389125\_at 4.054061 2.631581 3.467754 3.600671 2.568403 3.804457 2.265121 3.303774  
389136\_at 1.9348 2.665245 1.906702 1.756484 2.401186 3.887068 2.575563 2.651499  
389151\_at 1.374791 1.632365 0.959954 1.245723 1.460032 0.934039 1.991393 1.420029  
389152\_at 1.319836 1.099564 1.300404 1.337946 1.663596 1.201904 1.284471 1.523415  
389158\_at 1.900827 1.18413 0.976001 1.168673 1.897758 1.141439 1.292071 1.55597  
389161\_at 1.167383 2.456966 1.160498 1.304954 1.063841 1.327801 1.42186 1.776954  
389170\_at 1.419388 1.225332 2.239774 1.821448 1.529596 1.893962 1.431916 1.37079  
389177\_at 1.040472 1.655298 0.943307 1.211776 1.579827 2.456626 1.042511 1.222261  
389197\_at 1.855883 2.330032 2.143073 2.598421 2.297006 2.481397 2.31787 2.470648  
389199\_at 2.669343 1.877665 2.925675 2.71028 2.822905 2.631432 2.680302 2.192547  
3891\_at 2.313473 2.66467 3.126107 3.019951 2.427792 2.43719 2.567011 3.092917  
389203\_at 5.825254 5.580088 5.592873 4.836011 5.59376 5.408928 6.134698 6.165355  
389206\_at 2.00134 2.462574 1.818136 2.493812 2.217562 2.182438 1.847768 1.587069  
389207\_at 1.024189 1.844537 2.056327 1.125176 1.106481 2.114494 1.324883 1.719953  
389208\_at 1.211048 1.161412 1.455499 1.006611 1.005379 1.170855 1.298932 1.012182  
389247\_at 2.117594 1.433037 1.172252 0.986574 1.148257 1.371364 1.449995 1.374922  
389257\_at 2.947322 1.7104 1.886791 2.211984 2.269812 2.790228 3.000257 2.317897  
389273\_at 2.511901 2.134094 1.828094 2.783035 2.536889 2.192897 2.384011 2.513432  
389289\_at 3.981137 3.306784 4.659081 3.673336 3.34172 4.220798 3.176713 3.335981  
3892\_at 3.041394 2.025592 1.840545 2.966738 2.424798 2.551081 2.601561 2.472569  
389320\_at 1.258071 1.134647 1.128843 1.050942 0.944746 1.499303 1.783989 1.370885  
389332\_at 4.297621 2.936847 3.34851 2.979972 4.704484 3.346412 2.885458 3.082299  
389333\_at 2.114427 2.529576 2.100267 3.024921 1.875804 2.043087 1.445718 2.103104  
389336\_at 2.525747 2.002349 2.924436 2.20874 2.749163 3.295943 2.684838 3.454251  
389337\_at 5.147513 5.198813 5.743918 5.511675 4.734139 5.680948 5.709177 5.083684  
389362\_at 6.911017 6.079327 6.946217 6.376908 6.631347 6.974353 6.707955 4.709459  
389376\_at 3.396514 2.389674 2.693478 3.405209 3.321969 2.22795 4.424177 2.826092  
389383\_at 1.333447 1.445051 1.504233 1.339686 1.404181 2.187365 1.629109 1.295089  
389384\_at 2.162533 1.299945 1.492055 0.833352 0.957478 1.265216 2.083329 1.365331  
389396\_at 1.552879 1.767137 1.555196 1.049081 2.013876 1.519849 1.7329 1.582327  
389400\_at 0.90098 1.11827 1.138902 0.89135 2.373064 1.07541 1.358804 1.698987  
389421\_at 1.084181 1.136904 1.371647 1.349644 1.819287 1.324821 1.455111 1.792771  
389432\_at 2.19131 2.947836 3.16711 2.816629 2.565957 3.250055 3.409011 2.466601  
389434\_at 4.733594 2.858806 3.139182 1.700069 5.047204 2.92699 2.616643 3.249885  
389493\_at 3.243087 3.404437 2.954054 2.783318 6.575724 3.822845 2.144975 3.003691  
389538\_at 6.647819 6.417166 5.915348 5.472888 5.790469 4.850437 5.448602 5.713854  
389541\_at 8.564316 8.49962 8.55179 7.78502 7.765797 8.76378 8.545174 7.17692  
389549\_at 1.359218 1.456877 1.567279 2.221157 1.702845 2.205357 1.922596 1.571799  
389558\_at 5.624877 6.430924 6.478216 5.154138 5.484738 5.735707 4.635247 5.583016  
3895\_at 8.646362 8.830582 8.57991 8.675674 8.619188 8.708305 8.332318 8.866345  
389602\_at 1.071249 1.113541 1.521482 1.278002 1.987089 1.473494 1.376934 1.373909

389607\_at 3.051426 3.344294 3.153306 3.660823 2.966595 2.309311 3.197336 3.475224  
389610\_at 1.284085 1.663234 1.551567 1.466447 2.530125 2.218959 2.752369 1.507014  
389633\_at 0.8503 2.366314 2.251378 1.742619 0.931306 1.095961 1.534685 2.57933  
389634\_at 0.752627 0.8042 1.298401 1.075159 1.157699 0.730489 2.178994 0.697314  
389641\_at 2.45216 2.369201 2.812409 3.031848 3.422367 2.942891 2.292397 2.67782  
389643\_at 1.306553 2.002502 1.887957 1.617883 1.610784 1.601588 1.540842 2.057895  
389649\_at 1.065185 1.489528 1.436959 1.430477 1.878315 1.267091 1.293186 1.855933  
389658\_at 1.396308 1.121592 1.34456 1.115175 1.341551 1.962699 1.197499 1.510504  
389668\_at 1.776104 1.67793 1.229761 2.222456 3.142093 1.597007 1.894085 1.738417  
389676\_at 1.741626 2.538587 1.89394 2.164553 2.004695 2.633522 2.250291 1.997271  
389677\_at 3.173747 4.729079 4.617694 4.872636 4.816921 4.430257 4.114762 5.030601  
389690\_at 2.253927 2.167821 2.47705 1.827011 2.315279 2.317447 2.204004 2.85841  
389692\_at 3.30514 3.986372 2.991384 3.100063 3.651347 3.887129 3.975619 4.166881  
389705\_at 1.99945 1.683316 1.305202 1.438523 2.70846 0.874258 0.949846 1.510361  
389715\_at 1.429725 0.986286 0.925027 1.150226 1.248046 3.098436 1.839311 1.326834  
389730\_at 1.126352 1.238168 1.167959 1.02769 1.190219 1.375768 1.783259 0.940787  
389761\_at 4.613135 4.530943 4.561321 4.527299 5.282962 4.662507 5.818891 5.296295  
389762\_at 0.706433 1.465561 1.707525 1.659549 1.364059 1.61055 2.354062 1.41071  
389763\_at 1.367999 1.366712 1.635806 1.584373 1.548614 1.236616 2.077452 0.465326  
389765\_at 5.15681 4.962369 5.944651 5.269877 5.48725 5.057042 3.398291 3.687173  
389766\_at 1.231609 1.433439 1.281677 1.201071 1.196197 1.967452 1.48157 1.265324  
389791\_at 1.879267 2.198943 2.790926 1.823969 2.725102 3.055745 2.969987 2.662596  
389792\_at 3.880162 3.319176 3.443997 3.434935 3.1378 3.126992 3.558495 3.134746  
389799\_at 2.705798 1.589041 2.113211 1.818804 2.45837 2.182071 1.684953 1.745669  
3897\_at 2.34738 2.995074 2.339992 2.070222 1.99484 3.295851 3.10928 2.857882  
389812\_at 1.780939 2.154642 2.358309 2.308162 1.735733 1.859157 1.702543 2.027783  
389813\_at 2.54888 3.102465 3.479783 3.844451 2.67908 4.248497 3.967078 3.082829  
389816\_at 3.773373 1.65923 1.958783 1.946634 2.495799 2.292543 1.607403 2.314158  
389827\_at 1.940444 1.512883 2.379076 2.487576 2.158359 3.131844 2.864765 2.64809  
389840\_at 2.348696 2.359114 2.133887 2.291861 2.056623 1.60822 2.11025 1.934849  
389856\_at 3.140876 2.943684 3.006795 3.209664 3.058404 3.226088 2.716298 3.23247  
389860\_at 1.796443 2.372364 2.218417 2.211826 1.671456 1.528497 1.656949 2.886928  
389874\_at 1.834285 1.111918 0.982283 1.175775 1.540256 1.292747 1.516884 1.49124  
389898\_at 1.918433 2.527136 2.218936 2.50778 2.0975 2.491577 2.720594 2.079093  
3898\_at 4.080436 4.345724 3.514428 4.058671 4.425321 4.835188 3.056584 3.643092  
389906\_at 1.840833 5.917201 3.795459 3.62524 3.495793 4.45546 2.592073 4.248514  
389932\_at 1.574427 1.279559 1.773473 1.287291 1.958141 2.067774 1.630003 1.755138  
389941\_at 4.440814 3.391476 2.342657 4.364301 1.28969 2.495684 3.044673 1.958826  
3899\_at 3.632848 2.862599 3.641679 3.334455 3.792118 4.149239 2.276887 4.276295  
389\_at 9.222916 8.65699 8.411333 8.843114 8.951299 9.066021 8.377796 8.594033  
38\_at 6.78773 6.107703 6.588184 5.964867 6.972074 5.761737 5.729014 6.798098  
390003\_at 0.830305 1.422956 1.234196 0.967528 1.606045 1.022781 1.738866 2.002926  
390010\_at 3.216836 3.42547 2.775258 2.570907 3.559593 3.918043 2.373651 3.455002  
390036\_at 1.555009 1.44935 1.628245 1.633945 1.259486 2.050902 1.025206 1.391791  
390037\_at 2.033208 1.832764 2.093512 2.106144 2.484362 0.687691 2.374278 2.830562  
390038\_at 1.577035 1.139021 1.307647 0.889783 2.371389 2.501366 1.655137 1.743854  
390054\_at 1.364738 1.108639 1.172668 1.539093 2.40252 1.175075 1.306097 2.203315  
390058\_at 1.399634 1.477521 1.828303 0.90742 1.896758 3.195174 1.807089 2.072315  
390059\_at 2.09788 1.489217 1.890262 1.818313 2.18782 1.813541 1.908821 1.607716  
390061\_at 1.140712 0.986586 0.906846 0.922869 1.61778 1.859869 0.965589 0.799245  
390063\_at 3.148186 2.509533 3.640752 3.192144 1.910545 2.680859 2.757111 1.633824

|           |          |          |          |          |          |          |          |          |
|-----------|----------|----------|----------|----------|----------|----------|----------|----------|
| 390064_at | 1.3796   | 1.755886 | 1.970929 | 1.122843 | 1.314803 | 1.305792 | 1.799687 | 1.60649  |
| 390066_at | 1.147791 | 1.173353 | 1.101534 | 1.249689 | 0.984685 | 1.643827 | 0.877423 | 1.410024 |
| 390067_at | 1.89487  | 2.192277 | 1.674998 | 2.039277 | 2.550515 | 2.595872 | 2.373621 | 2.098943 |
| 390072_at | 2.24973  | 1.133981 | 1.139033 | 0.997545 | 1.521071 | 1.616945 | 2.963524 | 1.167795 |
| 390075_at | 1.28257  | 1.082728 | 0.768704 | 0.972663 | 1.421819 | 0.94204  | 0.947661 | 1.398143 |
| 390077_at | 0.796905 | 1.955175 | 1.497314 | 0.618857 | 2.146175 | 0.994607 | 1.1595   | 0.778636 |
| 390078_at | 1.146528 | 0.977748 | 1.251161 | 1.241442 | 2.724775 | 1.564451 | 1.066264 | 1.216152 |
| 390079_at | 1.626527 | 1.426677 | 1.600985 | 1.525857 | 3.383162 | 3.038607 | 0.984971 | 2.615019 |
| 390081_at | 2.325452 | 0.852692 | 1.470595 | 1.411701 | 1.645018 | 1.140169 | 0.89829  | 2.268193 |
| 390083_at | 1.252935 | 3.232723 | 0.889861 | 1.655299 | 1.462065 | 1.453499 | 1.86918  | 2.148332 |
| 390084_at | 1.209071 | 1.567696 | 1.284498 | 1.466476 | 1.79262  | 2.022229 | 2.776407 | 1.244252 |
| 390093_at | 1.612718 | 1.937433 | 1.837258 | 1.480937 | 2.316212 | 1.550253 | 2.178115 | 2.146204 |
| 390110_at | 1.918513 | 1.525959 | 1.791849 | 1.600504 | 1.849453 | 1.848566 | 1.644507 | 1.927856 |
| 390113_at | 1.674195 | 1.648183 | 2.234631 | 1.714903 | 1.492275 | 1.483703 | 1.43782  | 1.510631 |
| 390142_at | 0.818689 | 0.742129 | 0.875411 | 1.068311 | 0.863403 | 0.981233 | 0.955208 | 0.853979 |
| 390144_at | 1.268787 | 1.786854 | 1.725534 | 1.489004 | 2.198807 | 1.896219 | 2.952602 | 1.621009 |
| 390148_at | 1.14592  | 1.29456  | 1.311122 | 1.10892  | 1.594185 | 1.144479 | 2.366847 | 1.988206 |
| 390151_at | 0.725438 | 1.204343 | 1.204343 | 0.769298 | 0.911505 | 1.355773 | 1.102268 | 1.969369 |
| 390152_at | 0.879564 | 2.115711 | 1.55863  | 1.580755 | 2.081289 | 1.518544 | 3.555369 | 1.825414 |
| 390154_at | 0.866237 | 1.096674 | 1.156565 | 1.389295 | 1.427365 | 1.195657 | 1.114883 | 1.877406 |
| 390155_at | 2.711905 | 2.771895 | 0.876011 | 0.647669 | 0.629829 | 1.715159 | 1.471424 | 0.901178 |
| 390157_at | 1.683601 | 1.703627 | 3.876648 | 0.546714 | -0.00429 | 2.413875 | 3.651921 | 3.23979  |
| 390162_at | 2.117658 | 1.367675 | 1.659913 | 1.098764 | 0.958015 | 1.158691 | 1.308775 | 1.022546 |
| 390167_at | 0.666806 | 0.983514 | 2.981332 | 0.670794 | 2.550188 | 1.182194 | 1.638116 | 3.815615 |
| 390168_at | 1.155541 | 3.317157 | 1.836391 | 3.015458 | 1.695434 | 2.290012 | 2.458112 | 2.312366 |
| 390174_at | 1.204495 | 1.411541 | 1.679162 | 1.642073 | 2.554864 | 2.320905 | 2.461833 | 2.462926 |
| 390181_at | 1.769499 | 2.207492 | 0.957119 | 1.647693 | 2.161095 | 1.861957 | 1.573797 | 5.02719  |
| 390190_at | 1.201925 | 1.292939 | 1.655279 | 1.42263  | 1.535207 | 1.266384 | 1.364666 | 1.956647 |
| 390191_at | 1.456527 | 1.56721  | 1.685418 | 1.158689 | 1.686132 | 1.872223 | 1.568227 | 1.377341 |
| 390195_at | 1.550893 | 2.162741 | 1.313051 | 1.456317 | 0.97966  | 1.457187 | 1.226793 | 1.237304 |
| 390197_at | 2.135706 | 1.951624 | 2.065932 | 1.906134 | 1.913796 | 2.468421 | 1.945218 | 1.695394 |
| 390199_at | 1.222568 | 1.233537 | 1.742619 | 1.183001 | 1.926676 | 1.212994 | 1.119648 | 1.908878 |
| 390201_at | 1.352055 | 2.529351 | 1.472104 | 0.979757 | 1.681528 | 1.915831 | 1.033414 | 1.331714 |
| 390205_at | 2.732503 | 2.32987  | 2.056058 | 1.994855 | 2.950343 | 1.821034 | 2.118772 | 2.659257 |
| 390212_at | 1.960469 | 2.078677 | 1.201221 | 1.537919 | 1.923375 | 1.871739 | 2.703411 | 1.792782 |
| 390213_at | 1.507427 | 2.326021 | 1.744705 | 2.068722 | 3.250262 | 2.039047 | 2.074791 | 2.890036 |
| 390226_at | 3.005389 | 2.533879 | 2.237428 | 2.685304 | 2.986231 | 2.287651 | 2.050043 | 3.4116   |
| 390231_at | 2.07828  | 1.578667 | 1.409133 | 0.993024 | 1.659113 | 2.195246 | 1.150607 | 1.784189 |
| 390243_at | 1.305347 | 1.61566  | 2.232011 | 2.055024 | 1.648633 | 1.509271 | 2.027321 | 2.335912 |
| 390245_at | 1.913577 | 1.625041 | 1.731699 | 1.605602 | 1.52653  | 0.951783 | 1.433392 | 1.418436 |
| 390259_at | 1.802735 | 2.922358 | 2.52041  | 2.8253   | 2.183967 | 2.760755 | 3.469993 | 2.462356 |
| 390260_at | 1.226621 | 1.892375 | 1.820912 | 1.525138 | 2.463937 | 1.829428 | 2.509493 | 2.566292 |
| 390261_at | 1.737261 | 1.198763 | 1.797419 | 1.242397 | 1.218111 | 1.375106 | 2.786262 | 1.096626 |
| 390264_at | 2.121673 | 1.333316 | 0.848849 | 1.052367 | 1.628159 | 0.602883 | 1.062244 | 1.441867 |
| 390265_at | 1.476317 | 1.887677 | 1.892618 | 2.282955 | 1.589933 | 1.548743 | 1.67892  | 2.15832  |
| 390271_at | 1.775167 | 0.694633 | 2.181388 | 1.56912  | 2.152582 | 1.322565 | 1.867705 | 1.647541 |
| 390275_at | 1.217927 | 2.350567 | 2.061805 | 2.217797 | 1.653917 | 3.371529 | 2.675814 | 2.681147 |
| 3902_at   | 2.909854 | 2.756393 | 3.651627 | 2.595561 | 2.919388 | 2.669113 | 2.760514 | 3.290159 |
| 390321_at | 0.774175 | 0.624426 | 0.677561 | 1.537651 | 0.804646 | 0.69211  | 1.139767 | 0.877125 |
| 390323_at | 1.200348 | 0.844162 | 1.485982 | 1.16723  | 1.378055 | 0.6281   | 1.930479 | 0.853575 |
| 390326_at | 1.043265 | 1.155042 | 1.160317 | 0.988743 | 1.25575  | 1.156627 | 1.592685 | 1.596524 |

|           |          |          |          |          |          |          |          |          |
|-----------|----------|----------|----------|----------|----------|----------|----------|----------|
| 390327_at | 0.676522 | 0.62974  | 1.330452 | 1.063871 | 0.694538 | 0.707683 | 1.447341 | 1.570619 |
| 3903_at   | 2.728322 | 0.608539 | 1.236566 | 3.75847  | 2.778193 | 1.765785 | 2.584289 | 1.362201 |
| 390429_at | 0.377512 | 1.753983 | 2.056376 | 1.509888 | 2.77661  | 0.627382 | 1.544658 | 0.702849 |
| 390431_at | 1.171627 | 1.645418 | 2.388933 | 0.726814 | 2.350586 | 1.312865 | 1.501103 | 1.85911  |
| 390433_at | 1.72622  | 1.972191 | 1.744765 | 2.11454  | 1.504409 | 1.589363 | 1.754415 | 2.356919 |
| 390436_at | 1.825091 | 1.382903 | 1.622452 | 1.301122 | 2.111787 | 1.624255 | 2.234172 | 2.03566  |
| 390437_at | 1.179864 | 1.306405 | 1.130144 | 1.469224 | 1.159321 | 1.704131 | 1.812944 | 1.950961 |
| 390439_at | 1.354586 | 0.900024 | 1.243122 | 1.364662 | 2.642693 | 1.400982 | 2.204268 | 1.049135 |
| 390442_at | 2.475607 | 2.796715 | 2.385466 | 1.275101 | 0.755421 | 1.168271 | 2.108549 | 2.374156 |
| 390443_at | 1.34412  | 1.607196 | 2.033013 | 1.690245 | 1.71024  | 0.916849 | 1.653292 | 2.457593 |
| 390445_at | 2.356912 | 2.619078 | 3.000291 | 2.857583 | 3.30933  | 2.867631 | 2.160163 | 2.747133 |
| 3904_at   | 3.771751 | 3.775591 | 1.790111 | 4.696424 | 3.313232 | 0.947308 | 4.452327 | 1.832832 |
| 390561_at | 0.875893 | 2.225189 | 1.687845 | 1.573189 | 1.553562 | 2.39637  | 1.44675  | 1.111133 |
| 390594_at | 1.697971 | 2.026856 | 1.341118 | 2.440649 | 2.465632 | 2.967098 | 1.780365 | 2.81299  |
| 390595_at | 1.115898 | 3.055094 | 1.927225 | 3.023514 | 2.717928 | 2.915313 | 1.705776 | 2.600219 |
| 390598_at | 3.228885 | 1.460553 | 2.288124 | 1.724592 | 1.572283 | 1.415988 | 1.246084 | 1.740328 |
| 390616_at | 1.9302   | 1.970456 | 2.429546 | 1.300524 | 3.122723 | 1.583497 | 1.799896 | 1.594261 |
| 390637_at | 4.004161 | 4.085177 | 4.140522 | 3.565826 | 4.208572 | 5.220067 | 5.298768 | 4.461183 |
| 390648_at | 1.864408 | 2.034096 | 1.292531 | 1.632001 | 2.057149 | 0.723186 | 1.179318 | 2.170719 |
| 390649_at | 1.330984 | 1.232204 | 1.674155 | 1.188647 | 1.063424 | 1.624467 | 1.349429 | 0.961148 |
| 390651_at | 1.026013 | 0.813059 | 1.013847 | 1.180058 | 1.077615 | 1.490127 | 1.866753 | 1.152052 |
| 390660_at | 2.791809 | 3.779578 | 4.400938 | 3.782404 | 3.380996 | 3.498484 | 3.130375 | 3.011827 |
| 390664_at | 2.364882 | 1.893686 | 2.079435 | 2.682565 | 2.76892  | 2.266278 | 3.122937 | 2.64645  |
| 390667_at | 1.824924 | 1.960656 | 2.442172 | 2.354599 | 2.596286 | 3.054575 | 2.962925 | 2.566909 |
| 3906_at   | 1.349974 | 2.596927 | 1.302813 | 1.25497  | 2.13114  | 2.264159 | 1.772745 | 2.473652 |
| 390714_at | 1.593578 | 1.021475 | 2.179867 | 2.158572 | 1.619381 | 2.397603 | 1.081216 | 3.512283 |
| 390732_at | 2.276781 | 1.842473 | 1.752597 | 1.478808 | 1.720606 | 2.008443 | 2.063692 | 1.970229 |
| 390748_at | 1.382021 | 1.564861 | 1.212019 | 1.33661  | 1.643495 | 2.092286 | 2.514089 | 1.564861 |
| 390756_at | 1.797243 | 2.027898 | 2.311477 | 1.969332 | 2.668125 | 1.821053 | 2.596536 | 2.204498 |
| 390790_at | 1.852333 | 1.844371 | 1.824478 | 2.28019  | 1.304561 | 1.408643 | 2.185311 | 1.881414 |
| 390792_at | 2.047355 | 1.757727 | 1.318315 | 1.320785 | 1.948058 | 2.068846 | 1.926414 | 1.958662 |
| 390858_at | 1.763722 | 1.483728 | 1.597936 | 1.646457 | 1.286302 | 1.456417 | 0.908258 | 1.491381 |
| 390874_at | 2.040771 | 2.794446 | 1.635546 | 2.946627 | 2.720526 | 2.607675 | 3.052535 | 2.230161 |
| 390877_at | 1.585031 | 1.09651  | 1.768455 | 1.593875 | 2.381663 | 1.273854 | 1.1125   | 1.258551 |
| 390882_at | 0.9567   | 1.460248 | 1.009061 | 1.427472 | 1.377371 | 1.36025  | 1.475658 | 1.793295 |
| 390883_at | 1.783359 | 2.028748 | 1.934103 | 1.168819 | 1.918405 | 1.26857  | 2.009357 | 1.680103 |
| 390892_at | 2.622917 | 1.371352 | 1.996453 | 2.079257 | 2.289374 | 1.990876 | 1.712276 | 1.614743 |
| 3908_at   | 2.823014 | 4.287703 | 4.481638 | 5.070404 | 4.235266 | 3.86648  | 3.367638 | 3.925915 |
| 390916_at | 6.426537 | 6.385511 | 6.370947 | 7.053935 | 6.346184 | 5.971472 | 6.988364 | 6.553143 |
| 390927_at | 3.024033 | 3.562038 | 2.99943  | 3.683018 | 2.519906 | 2.184527 | 3.559426 | 3.50836  |
| 390928_at | 1.883017 | 1.987876 | 2.043737 | 2.162117 | 2.225548 | 1.613285 | 1.677484 | 2.10998  |
| 390937_at | 1.231378 | 1.928816 | 2.991    | 2.143037 | 1.988225 | 2.586111 | 1.613465 | 2.262787 |
| 390940_at | 4.017676 | 3.265545 | 3.526924 | 2.827022 | 3.082251 | 3.366114 | 2.825706 | 2.868896 |
| 390956_at | 0.870555 | 0.910074 | 0.917431 | 0.96377  | 2.007755 | 1.782679 | 1.356777 | 1.744393 |
| 390963_at | 3.821845 | 3.55718  | 3.396963 | 3.330673 | 2.910979 | 3.089714 | 3.433836 | 4.133517 |
| 390980_at | 4.546615 | 4.896548 | 4.47916  | 4.738063 | 5.164494 | 4.309262 | 5.422544 | 3.877165 |
| 390992_at | 1.526855 | 2.068453 | 1.636851 | 1.420475 | 2.854795 | 1.940431 | 1.857622 | 1.616059 |
| 390999_at | 3.090177 | 0.965495 | 1.051024 | 1.457684 | 1.50892  | 1.132234 | 1.576813 | 1.456429 |
| 3909_at   | 3.011488 | 3.20285  | 3.491976 | 4.148821 | 3.398461 | 4.840331 | 4.287991 | 4.021254 |
| 390_at    | 5.619419 | 5.394264 | 5.515941 | 5.956429 | 3.239119 | 5.398407 | 5.758601 | 6.323525 |
| 391003_at | 0.971671 | 1.317781 | 1.260479 | 1.51207  | 1.595612 | 2.020509 | 2.42235  | 1.536072 |



391004\_at 1.264333 1.392379 1.530401 1.815273 1.19933 1.323391 0.739898 1.558661  
391013\_at 1.990677 1.826677 1.815599 1.975568 2.168261 2.057195 2.486854 2.062714  
391037\_at 1.338409 1.558728 1.962747 1.168205 1.246602 1.031388 1.912193 1.330092  
391051\_at 0.880859 1.034814 1.265052 0.978461 1.179097 1.165323 1.056766 0.973952  
391059\_at 2.155983 3.562432 2.126455 3.005962 3.282251 2.85126 2.981163 2.476757  
3910\_at 4.513842 4.183021 3.791154 4.319731 3.98142 3.352602 3.406653 4.21601  
391104\_at 1.52796 1.943302 1.754425 1.492086 1.836746 1.403409 1.981902 1.649177  
391107\_at 1.781854 1.830805 1.173324 1.152482 2.393511 1.402077 1.893521 3.392327  
391109\_at 2.252201 1.485941 0.662767 1.645178 2.856404 2.850221 1.212011 0.840901  
391112\_at 1.977249 1.444588 1.865166 1.748234 1.932157 1.239979 1.696773 1.865824  
391114\_at 1.107842 1.50617 1.293681 1.280643 1.364916 1.552544 2.334843 2.054588  
391123\_at 5.034822 5.225768 5.238859 5.4087 4.853596 5.006722 5.576747 5.264311  
391189\_at 1.304566 1.82624 1.341892 2.225838 2.276896 1.816384 2.053595 3.281258  
391190\_at 2.796243 2.102807 3.046673 3.416412 2.107334 2.926633 3.148885 2.609341  
391191\_at 1.750185 1.83147 3.159095 2.316542 2.267023 2.324519 2.728843 1.423858  
391192\_at 3.368175 4.917703 4.826922 4.34197 3.994428 4.938893 5.477566 4.357959  
391194\_at 0.85128 0.666829 0.860082 1.606088 0.910308 0.738065 1.004517 1.126947  
391196\_at 2.992852 0.956137 1.35312 1.02928 2.073818 2.503509 1.066206 0.693885  
3911\_at 4.95848 4.958634 5.312212 5.750024 4.907335 5.642568 5.264284 3.792855  
391211\_at 1.170025 0.955625 2.197369 1.304669 1.317547 1.318476 1.085734 1.372312  
391253\_at 0.903583 1.522575 1.053787 1.12736 0.900197 0.945151 1.656952 1.391929  
391257\_at 1.55073 0.78045 1.180795 0.735437 1.065854 0.751259 1.163849 1.534565  
391267\_at 1.927947 1.6129 1.305043 1.017743 1.882491 2.26323 2.032682 2.354221  
3912\_at 4.54957 5.437258 4.908078 5.460204 5.944309 6.353122 4.774495 5.582242  
391356\_at 9.488069 8.882842 8.908618 8.903324 8.411074 8.991521 8.855599 9.11524  
391365\_at 0.925225 0.774035 0.867602 0.658147 1.069598 1.580855 1.418237 0.629172  
3913\_at 6.986436 7.879432 7.874227 8.209278 7.914886 7.668788 8.199834 7.363156  
391475\_at 1.188012 1.337516 1.005966 1.370244 1.306173 2.467741 1.931028 1.40983  
3914\_at 2.905971 2.388523 2.846889 3.026866 3.085303 3.396278 2.894517 2.709807  
391518\_at 1.504572 2.283129 1.849657 1.350679 2.051548 1.354009 2.122879 2.667878  
3915\_at 6.580272 7.529788 7.123365 7.883709 7.340074 7.29602 7.227834 7.599334  
391627\_at 0.962148 2.071116 1.083558 2.525454 2.277537 1.305718 0.832261 1.817025  
3916\_at 8.464717 8.444951 8.995167 8.706033 8.185374 8.695682 8.602021 8.192485  
391712\_at 1.866967 0.976655 1.595304 1.433587 1.520257 1.196114 1.463989 1.76743  
391722\_at 2.454511 1.740164 1.187839 1.513429 1.253834 1.864337 1.497674 1.404877  
391723\_at 1.728176 2.123463 2.091915 2.312265 2.038778 1.851938 2.154366 2.401395  
3918\_at 2.477681 2.292469 2.387203 2.092625 1.560085 2.530505 2.714367 2.327352  
391\_at 5.372552 5.229583 5.17313 5.531809 3.852915 5.354654 5.638924 4.942079  
3920\_at 7.936654 7.981343 8.037166 8.005447 8.02035 7.78716 7.927893 8.311229  
392196\_at 1.402624 3.780889 2.011502 1.080583 1.494106 0.87961 1.076574 1.830207  
392232\_at 1.005967 0.861893 1.127844 0.936245 1.508645 1.043919 1.754633 1.04496  
392255\_at 1.903218 1.408528 1.432417 2.08459 1.694105 1.643167 1.836414 1.733292  
392275\_at 1.85696 2.006657 2.137467 3.114509 2.464622 2.547477 2.396937 2.473711  
392288\_at 1.013362 0.78067 1.200309 1.248492 1.306022 0.913434 1.204016 1.2755  
392307\_at 1.443027 2.056791 2.274591 1.523871 1.81657 1.615753 1.473295 2.695467  
392309\_at 3.685223 1.033138 3.520845 1.98864 2.931541 1.393215 1.591927 1.869006  
392360\_at 1.566183 1.566183 1.411961 1.313668 2.460408 1.833567 1.982062 1.84351  
392364\_at 3.002607 1.923276 2.920968 4.730737 3.420014 3.024999 4.063108 3.069682  
392390\_at 1.083405 1.94621 1.348941 1.355015 1.410968 1.326066 1.699404 1.455672  
392391\_at 2.81098 3.030819 3.30562 3.128302 2.85545 3.040696 3.293482 3.722703  
392392\_at 2.568552 1.779692 2.007674 1.682211 2.007674 1.828715 2.305175 1.801459

|           |          |          |          |          |          |          |          |          |
|-----------|----------|----------|----------|----------|----------|----------|----------|----------|
| 392399_at | 1.390531 | 1.787817 | 1.8674   | 1.519468 | 1.434883 | 1.799955 | 1.849713 | 1.344588 |
| 392459_at | 1.413629 | 1.727667 | 1.89373  | 1.20903  | 2.392202 | 1.369163 | 2.954187 | 1.442817 |
| 392465_at | 3.295986 | 1.887201 | 1.403531 | 1.330032 | 3.462184 | 1.445171 | 2.29039  | 1.8198   |
| 392490_at | 2.130819 | 3.122898 | 2.294412 | 2.093692 | 2.964815 | 2.481083 | 1.431341 | 1.909737 |
| 392509_at | 2.652511 | 1.886449 | 1.646553 | 1.709411 | 2.295766 | 1.780387 | 1.997629 | 2.134886 |
| 3925_at   | 5.088936 | 5.049778 | 5.406275 | 5.319498 | 4.509108 | 5.247647 | 4.258042 | 5.35192  |
| 392617_at | 3.738786 | 2.996234 | 3.433187 | 3.424206 | 3.136498 | 3.645108 | 3.135196 | 3.819271 |
| 392636_at | 3.840959 | 2.33342  | 2.424046 | 3.424481 | 3.16142  | 2.780592 | 2.518997 | 3.448188 |
| 3927_at   | 7.945943 | 8.436937 | 8.425403 | 8.282881 | 8.318068 | 8.506891 | 8.159697 | 7.396242 |
| 392843_at | 0.924225 | 1.349582 | 1.623284 | 1.319005 | 2.839243 | 2.845341 | 1.283556 | 1.818634 |
| 392862_at | 1.602248 | 1.934445 | 2.308728 | 1.67443  | 1.877804 | 2.038789 | 1.513044 | 1.846457 |
| 3929_at   | 2.247974 | 2.126737 | 2.228014 | 1.654398 | 1.773732 | 1.635187 | 1.992421 | 1.948452 |
| 392_at    | 7.958763 | 7.834347 | 8.44449  | 8.540888 | 7.543705 | 8.424881 | 8.456862 | 7.241424 |
| 393046_at | 1.278485 | 0.870243 | 2.232628 | 0.373985 | 1.889013 | 2.697677 | 1.049525 | 0.699054 |
| 3930_at   | 5.414711 | 5.359567 | 5.671374 | 6.292238 | 6.345263 | 5.785392 | 5.243824 | 6.677442 |
| 3931_at   | 3.616992 | 3.217931 | 2.857355 | 5.353043 | 5.126911 | 2.873778 | 4.843989 | 2.662004 |
| 3932_at   | 2.407724 | 2.35947  | 1.13758  | 1.787108 | 3.678075 | 2.234378 | 2.501662 | 1.986006 |
| 3933_at   | 2.489008 | 1.102662 | 2.364343 | 1.381957 | 1.59076  | 1.103095 | 0.922989 | 1.071839 |
| 3934_at   | 4.352875 | 2.516358 | 4.226165 | 4.536814 | 3.649334 | 3.779408 | 3.177077 | 3.324809 |
| 3936_at   | 6.616765 | 7.147906 | 6.875183 | 7.639288 | 6.993307 | 7.652692 | 7.55828  | 7.769818 |
| 3937_at   | 6.602779 | 6.755584 | 6.40405  | 6.394882 | 5.108896 | 7.000954 | 6.271287 | 5.343387 |
| 3938_at   | 1.519885 | 1.421935 | 1.598747 | 1.457425 | 1.614769 | 1.637173 | 1.932518 | 2.053941 |
| 3939_at   | 4.940871 | 4.911767 | 4.792861 | 4.526299 | 3.943352 | 4.896674 | 5.027027 | 4.250642 |
| 393_at    | 3.355033 | 2.995046 | 3.005482 | 3.39459  | 2.979026 | 3.480515 | 3.336271 | 3.354581 |
| 394263_at | 2.019414 | 2.203088 | 2.006665 | 2.169603 | 3.087709 | 2.183675 | 2.628207 | 2.442505 |
| 3945_at   | 9.598283 | 9.197805 | 8.927026 | 8.748557 | 10.00579 | 9.005693 | 8.485134 | 9.437173 |
| 3948_at   | 1.150976 | 1.590926 | 1.161402 | 1.348424 | 1.540792 | 1.087014 | 2.120686 | 1.896664 |
| 3949_at   | 4.223914 | 5.189426 | 5.408537 | 4.907683 | 5.419241 | 4.152902 | 5.456303 | 4.656076 |
| 394_at    | 7.594995 | 7.695143 | 7.493362 | 7.547557 | 7.092047 | 7.241143 | 7.396116 | 7.207393 |
| 3950_at   | 1.446114 | 1.275221 | 1.525539 | 0.938851 | 2.646763 | 0.741666 | 0.758278 | 1.676548 |
| 3952_at   | 1.702202 | 1.772676 | 1.351896 | 1.639518 | 1.583974 | 1.405293 | 1.111244 | 1.579467 |
| 3953_at   | 6.029238 | 6.204104 | 5.402615 | 5.389275 | 5.246257 | 5.268407 | 5.161608 | 5.45842  |
| 3954_at   | 5.637252 | 5.366434 | 5.828033 | 6.033889 | 5.689497 | 5.327668 | 5.464861 | 5.429191 |
| 3955_at   | 1.870672 | 1.868082 | 2.721334 | 2.332838 | 2.097808 | 2.490661 | 2.13516  | 2.404474 |
| 3956_at   | 10.92957 | 10.51321 | 10.9395  | 10.96825 | 10.61155 | 10.74399 | 10.86174 | 10.46586 |
| 3957_at   | 8.230876 | 6.941557 | 6.713299 | 6.285442 | 7.901228 | 7.588318 | 4.777695 | 8.537869 |
| 3958_at   | 7.586899 | 6.453695 | 6.550298 | 6.129317 | 6.968129 | 5.636533 | 6.344409 | 5.92213  |
| 3959_at   | 6.364559 | 6.731507 | 6.473207 | 6.794926 | 6.305107 | 7.228292 | 7.027646 | 5.691652 |
| 395_at    | 4.181983 | 3.080559 | 3.289406 | 3.485443 | 3.303129 | 3.436305 | 3.472112 | 2.933238 |
| 3960_at   | 2.94781  | 2.021514 | 2.313625 | 2.217142 | 2.75401  | 2.467087 | 1.735221 | 2.710716 |
| 3963_at   | 1.390894 | 3.702192 | 2.519094 | 1.614019 | 1.59645  | 2.321505 | 1.693249 | 0.784108 |
| 3964_at   | 8.342968 | 8.204421 | 8.402792 | 8.439251 | 8.057425 | 7.690375 | 8.238878 | 8.36202  |
| 396_at    | 7.465151 | 7.395686 | 7.227944 | 7.819529 | 7.361967 | 7.680382 | 7.727809 | 6.71456  |
| 3973_at   | 1.206013 | 1.810279 | 1.705076 | 2.04289  | 2.880216 | 1.658405 | 2.255901 | 2.660865 |
| 3975_at   | 2.358483 | 2.737313 | 3.059349 | 1.93844  | 2.283655 | 2.512735 | 2.512723 | 2.105731 |
| 3976_at   | 2.337744 | 3.43597  | 2.463231 | 2.732629 | 2.324601 | 2.360148 | 2.583262 | 2.693579 |
| 3977_at   | 8.434339 | 8.398437 | 8.128714 | 8.294126 | 8.413461 | 8.524122 | 8.604506 | 8.38186  |
| 3978_at   | 4.254532 | 4.144345 | 3.9888   | 3.768142 | 3.846102 | 4.292063 | 3.500802 | 3.580989 |
| 397_at    | 9.159015 | 9.285871 | 9.037872 | 9.253273 | 9.24121  | 9.116265 | 9.091516 | 9.121587 |
| 3980_at   | 3.651793 | 4.062538 | 4.358288 | 3.935279 | 4.821065 | 4.704374 | 4.086812 | 3.679131 |
| 3981_at   | 6.079689 | 6.758664 | 6.287182 | 6.317047 | 6.760595 | 5.687748 | 6.796333 | 5.556571 |

|           |          |          |          |          |          |          |          |          |
|-----------|----------|----------|----------|----------|----------|----------|----------|----------|
| 3982_at   | 2.149961 | 1.861667 | 1.796553 | 1.721666 | 1.902163 | 1.413041 | 2.029887 | 2.11865  |
| 3983_at   | 4.802287 | 4.926328 | 5.591831 | 5.042127 | 5.616371 | 5.691035 | 3.893482 | 6.334368 |
| 3984_at   | 3.078341 | 3.130612 | 3.238964 | 4.306749 | 3.664855 | 4.19866  | 3.268626 | 3.653893 |
| 3985_at   | 5.044021 | 4.781039 | 5.608985 | 5.035802 | 3.629805 | 5.447745 | 5.418355 | 4.674059 |
| 3987_at   | 2.529598 | 2.68468  | 3.319565 | 3.379292 | 2.187579 | 2.66097  | 3.07188  | 3.298715 |
| 3988_at   | 6.475895 | 6.62297  | 6.350867 | 6.312113 | 7.094068 | 6.635113 | 6.798036 | 6.840561 |
| 398_at    | 2.313833 | 3.323382 | 2.869322 | 2.666495 | 3.876562 | 2.224133 | 2.938768 | 2.843692 |
| 3990_at   | 3.623946 | 4.36872  | 3.463947 | 3.028542 | 1.983129 | 3.728593 | 1.370776 | 4.150438 |
| 3991_at   | 3.933542 | 3.216837 | 4.414195 | 3.326644 | 3.348028 | 3.400544 | 3.245484 | 3.056552 |
| 3992_at   | 7.505855 | 7.212041 | 7.380347 | 7.630777 | 7.360591 | 6.755841 | 8.037128 | 7.034793 |
| 3993_at   | 3.794424 | 2.45188  | 3.910389 | 3.4743   | 4.772954 | 4.536093 | 4.007505 | 4.17857  |
| 399473_at | 0.870813 | 1.858561 | 1.371432 | 1.07819  | 2.018359 | 1.466925 | 1.224833 | 1.688226 |
| 399474_at | 3.128577 | 3.097928 | 2.62182  | 2.963728 | 3.41363  | 3.278535 | 3.289337 | 3.01821  |
| 399512_at | 5.567866 | 4.962217 | 5.312287 | 5.431089 | 4.544309 | 4.666477 | 5.333085 | 4.33412  |
| 3995_at   | 5.153231 | 5.126496 | 5.829116 | 6.292047 | 5.062023 | 5.759204 | 5.706157 | 4.479497 |
| 399664_at | 4.344113 | 4.54801  | 4.036163 | 4.224055 | 4.624024 | 3.910398 | 4.186743 | 4.823478 |
| 399665_at | 5.23783  | 5.769587 | 5.402047 | 6.422404 | 5.67069  | 5.923358 | 3.932492 | 4.872807 |
| 399668_at | 2.883803 | 3.744038 | 3.237962 | 3.071224 | 2.345994 | 3.26867  | 3.295897 | 5.046906 |
| 399670_at | 1.52283  | 1.537491 | 1.652883 | 1.36668  | 2.227883 | 2.516472 | 1.357201 | 1.622967 |
| 399671_at | 1.48558  | 1.806747 | 1.475786 | 1.565407 | 2.130502 | 1.609184 | 2.273749 | 1.687949 |
| 399687_at | 5.340754 | 5.417704 | 5.872059 | 5.367855 | 5.626678 | 5.793637 | 5.751515 | 5.371572 |
| 399693_at | 2.08598  | 1.528236 | 1.976054 | 1.65788  | 2.657185 | 2.636893 | 2.903749 | 2.123661 |
| 399694_at | 1.814672 | 1.803581 | 2.233544 | 1.624114 | 2.000992 | 1.324278 | 1.84354  | 1.872826 |
| 399697_at | 2.670624 | 1.606067 | 0.854376 | 2.012477 | 1.638795 | 1.559739 | 1.176154 | 1.815753 |
| 3996_at   | 3.017381 | 3.157751 | 3.565471 | 3.254271 | 3.140511 | 2.648539 | 3.842881 | 2.698755 |
| 399706_at | 2.290005 | 2.842018 | 3.122136 | 2.490348 | 2.790989 | 2.716796 | 2.350217 | 2.621484 |
| 399708_at | 1.570505 | 2.422999 | 2.045318 | 2.393278 | 3.213996 | 1.531676 | 1.74909  | 1.953919 |
| 399715_at | 1.414685 | 2.397542 | 1.81718  | 1.317059 | 1.718202 | 1.858946 | 1.44397  | 2.242955 |
| 399716_at | 1.715035 | 1.169905 | 1.172994 | 1.713857 | 0.930507 | 1.302549 | 1.47195  | 1.275809 |
| 399717_at | 4.314194 | 4.333916 | 4.18928  | 4.485004 | 3.24634  | 4.27359  | 4.412917 | 3.586458 |
| 399726_at | 3.280715 | 4.237705 | 4.697766 | 3.555228 | 2.754984 | 4.025068 | 4.333762 | 3.020483 |
| 399746_at | 0.748332 | 1.124143 | 0.763305 | 0.904707 | 1.845552 | 0.701245 | 0.805399 | 1.582332 |
| 399761_at | 4.717373 | 4.107534 | 4.410685 | 4.795412 | 2.902347 | 4.630893 | 4.666169 | 5.849455 |
| 399806_at | 1.305786 | 1.13001  | 1.098489 | 1.803769 | 1.74975  | 2.205728 | 1.346954 | 1.437232 |
| 399814_at | 1.293222 | 1.626204 | 1.400009 | 1.650928 | 2.778094 | 1.75761  | 1.784615 | 1.66732  |
| 399815_at | 2.334512 | 1.746334 | 2.006948 | 1.368121 | 1.608439 | 1.413534 | 1.561768 | 1.941868 |
| 399818_at | 6.182291 | 6.327    | 6.024211 | 5.653928 | 5.845538 | 5.749259 | 5.526602 | 5.412745 |
| 399821_at | 2.604998 | 1.421045 | 3.17742  | 2.248183 | 2.125587 | 2.441125 | 2.191332 | 1.724722 |
| 399823_at | 1.965591 | 2.319821 | 1.245264 | 1.667636 | 1.721764 | 2.013256 | 2.468627 | 1.626304 |
| 399827_at | 2.716118 | 2.323021 | 2.29476  | 2.979076 | 2.193812 | 2.810591 | 3.061676 | 2.581401 |
| 399829_at | 1.436702 | 1.625731 | 1.371949 | 2.224816 | 1.838611 | 1.491439 | 1.514809 | 1.480957 |
| 399833_at | 1.440218 | 2.827105 | 1.507779 | 0.873901 | 2.312489 | 1.818474 | 2.775978 | 0.884372 |
| 399876_at | 1.389073 | 1.87193  | 2.10186  | 1.330584 | 1.533662 | 1.415639 | 1.589077 | 1.703861 |
| 399881_at | 2.324769 | 2.716677 | 2.132504 | 2.565554 | 2.212182 | 1.736013 | 2.529327 | 2.165225 |
| 399886_at | 2.085578 | 2.422639 | 2.572585 | 2.781405 | 2.618495 | 2.338848 | 2.460717 | 2.587243 |
| 399888_at | 1.703794 | 2.296845 | 2.789091 | 1.837481 | 2.175774 | 2.309454 | 2.558139 | 2.694739 |
| 3998_at   | 8.056864 | 7.911613 | 8.286252 | 8.310389 | 8.332751 | 8.135727 | 8.218878 | 8.294609 |
| 399900_at | 1.604828 | 2.345971 | 2.62986  | 1.419754 | 1.81113  | 1.755917 | 1.349738 | 2.096417 |
| 399909_at | 5.621461 | 5.281161 | 5.809518 | 6.054412 | 5.440045 | 5.400242 | 5.320389 | 4.793155 |
| 399923_at | 1.727194 | 2.473547 | 1.88136  | 2.346854 | 2.207789 | 2.224122 | 1.632754 | 2.468175 |
| 399947_at | 1.826845 | 1.915211 | 2.632106 | 2.407125 | 1.945617 | 2.190747 | 1.964057 | 2.803668 |

399948\_at 1.815533 2.653435 1.63721 2.630559 3.48754 1.897015 1.290209 2.363615  
399949\_at 2.275524 1.372206 1.334804 1.578565 1.418702 1.457636 2.172758 3.324508  
399959\_at 5.561894 5.157459 5.301957 4.717159 5.668014 5.37615 6.06584 5.430215  
399967\_at 1.594344 1.380136 1.189094 1.215098 1.723181 1.295679 1.429084 1.573962  
399968\_at 1.397072 1.344819 1.354174 1.432076 0.937592 1.148591 1.390299 1.150499  
399972\_at 4.194173 4.051234 5.263697 3.660659 4.628348 4.203905 4.301272 3.704876  
399979\_at 5.352 5.918193 6.880902 6.119951 6.279885 6.175219 6.906471 6.114457  
399\_at 1.662787 1.836936 2.393489 1.699809 2.570944 1.854135 2.76943 2.550931  
39\_at 4.429496 4.963069 5.328512 4.497842 4.570266 4.037797 4.064027 4.939521  
3\_at 1.683668 1.987657 1.409189 1.173095 1.543727 1.237354 1.685259 1.40606  
400002\_at 1.143207 0.850587 0.871342 0.766619 1.074697 1.389443 0.967808 1.353115  
400027\_at 5.629527 5.815179 5.588882 5.303461 5.136052 5.071014 5.322359 6.011901  
400043\_at 4.676673 3.909186 4.434492 2.920974 4.82704 4.698322 4.338781 3.595005  
400046\_at 1.61432 1.208731 1.955427 1.884099 1.919139 1.897776 1.859888 1.253017  
400058\_at 1.178703 1.29475 0.890127 1.122432 1.363516 0.681477 1.374078 1.159989  
400073\_at 2.573588 3.529559 2.829948 2.923957 2.526926 3.213292 3.906062 3.514361  
400084\_at 2.159822 1.775567 1.118062 1.519343 1.085291 1.341303 1.908103 1.665147  
400087\_at 1.456369 3.168424 2.29129 1.707405 1.768592 1.293406 1.608888 1.398964  
4000\_at 6.164595 5.947107 6.126109 6.219837 6.348544 6.487451 6.089914 6.197767  
400110\_at 2.370854 2.322661 3.062798 1.902869 2.622394 2.430217 2.258981 1.664877  
400120\_at 1.991288 1.729484 1.809629 2.406183 1.807374 2.535872 2.032861 1.926955  
400121\_at 1.410058 1.142663 1.227769 1.279451 1.991276 1.361556 1.357725 1.437214  
400123\_at 2.259721 1.702137 1.451447 1.377973 1.970928 1.013211 1.011566 1.853922  
400128\_at 1.675097 1.418441 2.109766 2.484432 2.235951 2.206222 2.679041 2.672767  
400165\_at 1.705053 1.967039 1.567198 2.081102 1.708026 2.235076 1.696134 1.543819  
4001\_at 2.583065 2.482799 2.712288 1.899475 2.40277 2.091349 2.007111 3.1552  
400221\_at 2.451913 3.435848 1.89919 2.691757 3.418832 2.026327 2.028557 1.418603  
400224\_at 1.101952 1.354673 1.16482 1.192804 0.966772 1.358984 0.970216 2.156664  
400236\_at 3.578118 2.34956 2.283108 1.483585 1.738697 2.00609 1.394868 1.399894  
400238\_at 1.524707 1.671129 1.01077 1.424459 2.262067 2.025345 0.922786 1.914139  
400242\_at 4.058403 4.65329 3.60985 4.163955 2.255421 3.93797 3.223809 3.659042  
400258\_at 1.898996 2.392639 3.439192 2.663569 2.68156 3.368915 2.712924 2.850388  
400322\_at 5.183232 4.59182 5.209777 4.81293 5.378317 5.363508 4.979054 4.433949  
400359\_at 1.767178 1.575496 2.803887 2.447031 3.123756 2.407739 1.622948 1.94548  
400360\_at 1.326964 0.977457 1.718486 0.916363 1.83368 1.566227 1.071425 2.203373  
400410\_at 3.555936 2.387441 2.733063 3.340215 2.653153 2.20446 3.126562 3.320448  
400451\_at 6.10154 5.78653 5.769303 4.751977 4.133407 5.028539 4.69902 5.448695  
400454\_at 1.740158 1.09749 1.003195 1.028549 1.783029 1.030296 1.209328 1.932054  
400456\_at 3.05343 3.905007 2.769199 2.532733 2.826216 2.588354 3.11066 3.031141  
400499\_at 1.317078 1.98132 1.268933 1.352482 2.161169 1.085436 1.444107 1.090149  
4004\_at 1.642559 1.462537 1.290428 1.07982 1.610366 1.22977 1.459157 1.098285  
400500\_at 1.295018 2.128972 1.083334 1.707299 1.902584 1.498712 2.175802 1.312527  
400506\_at 5.978966 6.130379 6.140302 6.268598 6.183743 6.835592 5.443417 6.697822  
400508\_at 1.761249 1.340475 1.279322 1.182261 1.132248 0.87588 1.319833 1.212378  
400511\_at 1.14246 1.905536 1.135919 1.786178 2.027217 1.275244 2.201826 1.595172  
400512\_at 4.100158 3.488813 3.422722 3.219003 3.286856 3.549373 3.76051 3.40257  
400533\_at 2.076032 2.447115 2.082847 2.202097 2.484786 1.315283 2.541932 2.219974  
400548\_at 2.32484 1.869987 1.960103 3.0241 1.625306 2.461772 2.478467 2.795601  
400550\_at 1.756409 1.98795 2.263114 1.765905 1.728159 2.479352 1.690898 1.856682  
400553\_at 2.006527 2.471147 2.397163 2.518097 2.120212 2.522462 3.098727 3.608294  
400558\_at 3.311574 2.599423 1.683349 2.820751 2.234311 1.522974 2.903804 2.22552

400566\_at 5.251639 5.08421 5.162546 4.932563 6.093844 5.703863 5.513859 3.599535  
400569\_at 5.916812 5.996438 5.237212 4.825545 5.726952 5.279758 5.506003 3.666246  
400578\_at 4.366555 4.22797 4.239272 4.035692 4.312404 3.857998 4.175649 4.497512  
400591\_at 1.458165 1.640627 1.701348 1.412745 1.836796 1.467152 1.755812 1.475487  
4005\_at 4.991949 4.193928 4.471696 4.602612 4.818872 4.519762 4.743389 4.119974  
400604\_at 3.3065 4.118643 3.628634 3.418615 4.093616 4.018391 3.125628 2.778483  
400612\_at 2.503001 1.627788 1.506649 2.379357 3.265312 1.743163 1.508767 2.175346  
400617\_at 1.637561 2.713948 2.254979 1.288213 2.050709 1.337033 1.252134 1.979824  
400618\_at 3.087573 1.83707 1.91936 2.082086 1.683558 2.175251 2.727483 3.221455  
400619\_at 1.40439 1.513468 1.282551 1.70353 1.77966 1.470755 1.673105 1.870379  
400620\_at 1.456795 1.806279 1.760271 1.888905 2.163126 1.816833 2.039124 2.104091  
400622\_at 1.414085 1.20157 0.973266 0.867901 1.532568 1.145813 1.620587 1.149746  
400624\_at 1.723108 2.63107 1.874421 1.526902 1.640134 1.601506 2.606328 1.962385  
400627\_at 1.807594 1.287928 1.319809 2.319478 1.041998 1.510848 1.724721 1.25764  
400629\_at 2.269892 2.409721 2.895509 2.756791 2.731609 2.620422 2.778589 2.966791  
400643\_at 2.55694 2.982311 1.939668 1.719993 2.338337 1.80163 3.124112 2.312437  
400654\_at 1.31812 0.875295 1.445552 1.049801 1.649395 1.761519 1.399072 1.56527  
400655\_at 2.416465 1.824302 1.59506 0.990501 2.318581 1.528394 2.340969 0.897448  
400657\_at 3.325758 3.400108 3.676937 3.920434 3.198059 2.6964 3.045513 2.783991  
400658\_at 3.399282 3.295734 2.912305 2.897306 3.08457 3.632991 3.259661 2.753573  
400668\_at 3.067366 3.167103 3.346273 3.512625 3.440936 3.698277 3.78842 3.285822  
400673\_at 3.331526 3.699298 3.309367 2.85504 2.974201 4.012455 2.844635 2.784035  
400680\_at 1.349073 1.421852 1.485533 1.307474 1.692516 1.388626 1.739377 1.294184  
400684\_at 2.616264 1.439157 3.562596 3.215008 3.436402 3.636104 2.192753 1.890734  
400685\_at 3.358871 2.715771 3.164264 2.754513 3.041764 3.211807 3.236765 2.861271  
400696\_at 1.41967 1.240608 2.899087 1.119296 1.577423 1.296174 2.124514 4.901097  
400709\_at 0.994799 1.024611 1.631217 0.494526 1.242507 0.590705 2.093209 1.269366  
400710\_at 1.787767 1.94987 1.501481 1.40204 2.368784 1.288943 3.061495 1.617545  
400713\_at 3.183214 4.268586 4.765396 3.297224 1.73572 3.088136 4.565985 4.394761  
400720\_at 4.635166 4.299165 4.342177 5.086444 4.54481 3.676653 4.351495 4.400115  
400728\_at 3.524336 2.733644 3.171535 2.844515 4.283215 3.329177 2.545736 3.576231  
400735\_at 1.418568 1.045945 1.291819 1.326547 2.098843 1.290191 1.777012 2.172751  
400743\_at 1.606867 1.819488 1.948753 2.479938 2.191329 1.882209 1.805467 3.197179  
400745\_at 2.801787 1.577172 2.023797 2.67697 2.148025 2.084653 2.065151 1.843158  
400746\_at 2.12662 2.561943 3.157759 2.765457 2.361072 3.51123 2.460331 3.431051  
400748\_at 1.299595 1.705776 1.798389 2.296338 1.9535 1.643701 1.858098 2.281824  
400752\_at 2.732577 1.437254 2.460386 1.648115 3.768703 2.229231 2.021988 2.868102  
400756\_at 2.780629 1.529528 1.603344 1.76424 1.746478 1.467149 2.357065 1.939446  
400757\_at 1.427668 1.265736 1.084833 1.367409 1.256129 1.230957 0.933331 1.100486  
400759\_at 3.874986 2.637753 2.226217 2.046519 1.575196 2.843697 1.985256 2.700647  
400761\_at 3.925178 2.590605 4.117991 2.339137 2.503902 3.090516 4.456057 5.16869  
400765\_at 1.320284 1.396537 1.847452 1.5277 2.690969 1.494057 1.22843 1.562633  
400793\_at 3.590686 3.922896 5.058379 4.522236 2.932725 4.094145 4.303812 3.226135  
400794\_at 1.626668 2.669838 1.099743 1.194065 1.550243 1.04562 1.607508 1.48898  
400797\_at 2.200851 3.010964 2.264116 2.368159 2.272538 2.223395 2.038764 2.471229  
400798\_at 1.041616 1.508646 1.183144 1.680912 1.579094 1.351236 2.015565 1.218391  
400799\_at 1.603367 1.416977 1.171355 1.152947 1.379587 0.866327 1.320933 1.029694  
4007\_at 4.229968 3.876726 4.381752 3.738892 5.259374 3.706768 4.096764 4.360441  
400800\_at 1.480325 1.702723 1.935132 1.250482 1.67073 2.086478 1.271132 1.559518  
400804\_at 2.675482 1.679808 2.174939 1.738154 2.577886 1.641263 1.543024 2.577709  
400823\_at 1.498518 1.072099 2.204032 1.530991 2.268761 1.552893 2.16068 1.92744

400830\_at 1.412383 1.456376 2.182112 1.557555 2.312205 2.370155 2.829118 1.677207  
400831\_at 4.154491 2.537056 3.132423 3.525201 3.180141 3.1191 3.106068 2.94195  
400839\_at 1.548822 2.161728 2.064889 1.434955 1.555817 1.972529 1.52145 1.932721  
400850\_at 2.003759 2.068168 1.913022 2.225806 2.185926 3.086586 2.539621 1.665213  
400863\_at 2.229688 2.220246 1.916133 1.926895 1.908838 1.833521 2.300609 2.331641  
400866\_at 1.154022 1.375565 2.207911 0.985977 1.450915 1.166719 1.32 2.248798  
400867\_at 0.866316 1.769378 1.848847 2.030422 3.076272 2.048229 1.826566 2.298767  
400870\_at 2.025724 2.01905 2.230004 1.965043 2.481752 2.623027 2.518114 2.177226  
400891\_at 1.762525 1.718386 1.706114 1.187388 2.02039 1.221487 1.125091 1.298334  
400892\_at 1.693782 1.758341 2.433041 2.100989 2.161355 2.951212 3.706656 1.90034  
4008\_at 7.039762 7.660049 6.865188 7.215957 7.435648 6.284868 6.741706 7.626045  
400916\_at 4.795097 4.599682 4.49083 4.324586 4.221285 5.042311 3.627 3.664134  
400927\_at 3.862025 4.272924 4.069692 3.722558 5.715114 4.652908 3.85537 3.026073  
400931\_at 4.014845 2.317699 2.70206 2.387613 2.968409 3.287739 2.716494 3.238497  
400932\_at 1.609219 1.941816 2.10796 2.584825 2.873102 2.870577 1.734763 2.579327  
400935\_at 1.769804 2.551491 2.742184 2.094013 2.7748 3.029924 1.743115 1.647598  
400940\_at 1.453312 1.169492 1.763422 1.481453 1.289959 1.753606 2.585449 1.924194  
400941\_at 1.27982 1.79282 1.181886 1.173941 1.265484 1.136632 1.080187 1.575945  
400945\_at 1.851633 1.363403 4.200752 1.086855 1.607596 3.073882 4.148081 2.450779  
400946\_at 1.836261 1.776735 1.871639 2.058911 2.478919 1.506934 2.680491 2.477395  
400950\_at 1.711366 1.844886 1.997668 1.782919 1.821913 1.449131 1.476338 2.093025  
400952\_at 3.025465 1.78468 2.050954 2.103222 1.883214 1.311889 2.032091 1.782829  
400954\_at 2.113401 1.81833 2.005977 1.743006 2.472955 1.938708 1.848955 2.159535  
400955\_at 1.095522 1.441426 1.359182 1.09589 1.327972 2.137786 1.720139 1.766888  
400957\_at 3.11628 1.828945 2.741096 2.301 1.622081 1.173879 1.411632 2.018141  
400958\_at 1.105365 1.036662 1.463763 1.056949 1.735556 1.504197 1.027897 1.224336  
400960\_at 5.191611 5.774808 5.655526 5.274455 4.888722 4.492471 4.63651 6.206755  
400961\_at 5.160628 4.008783 4.159619 2.802375 3.868839 3.115644 2.709601 3.549097  
400986\_at 2.648159 1.557496 1.426753 2.833079 0.486115 0.812248 0.676023 0.675421  
400997\_at 2.019888 0.967008 1.53066 0.908811 1.304005 1.927108 1.2934 2.119903  
400999\_at 1.179171 2.694317 1.839508 1.883756 1.314613 1.351844 1.224522 1.665895  
4009\_at 2.256324 1.664131 1.692307 1.945483 1.970783 2.96999 2.322541 2.003265  
400\_at 8.515915 8.358247 8.709088 8.580379 8.469996 8.65227 8.540002 8.13695  
401010\_at 3.459319 3.539419 3.671588 3.214109 2.588962 2.382408 2.295238 4.550327  
401014\_at 1.299635 1.43825 1.4384 2.081897 1.894281 1.251122 1.489245 1.529196  
401022\_at 4.662398 3.769264 4.056292 3.262362 4.005128 2.432618 2.764754 3.825857  
401024\_at 1.470265 1.336711 1.537399 1.76202 2.944153 2.033056 1.244487 1.712735  
401027\_at 1.387401 1.566957 1.153931 1.427655 2.089807 1.320177 2.084938 1.829184  
401036\_at 1.05227 1.880936 1.209172 0.794648 3.193483 1.145918 1.200632 1.98641  
401039\_at 2.689625 1.683744 1.848957 1.553601 1.850982 1.474296 1.660493 1.833678  
401040\_at 1.14161 1.11777 0.855049 1.322306 1.692817 1.704068 1.11777 1.794046  
401052\_at 2.791189 2.215926 3.300719 2.583977 2.52006 2.582372 2.169035 2.543485  
401067\_at 1.310903 1.520369 1.689959 1.835445 1.907481 1.828151 1.46661 1.37413  
401074\_at 1.704277 2.578714 2.960464 3.146364 2.577048 2.503335 2.699449 2.77123  
401081\_at 3.056945 2.159736 3.222251 2.167805 3.825013 1.95218 2.961907 2.02082  
401082\_at 0.890916 1.136093 1.079319 1.013854 1.277747 1.065355 1.488224 1.933518  
401089\_at 2.663453 1.985468 2.657806 2.159127 1.406772 2.221108 1.785936 1.807815  
401093\_at 3.072808 3.432731 2.78052 3.526647 3.372051 2.819835 3.324745 2.715271  
401097\_at 2.311325 1.392554 1.709531 1.765914 2.233932 2.128303 3.067361 2.632339  
4010\_at 6.423981 6.824915 6.916898 6.516166 5.250817 5.979149 6.528918 5.994705  
401103\_at 1.014292 1.27245 1.216104 1.442653 1.950037 1.734676 1.492454 1.453698

401105\_at 1.749425 2.075518 1.959893 2.695897 2.960851 2.738047 1.944491 2.277258  
401106\_at 3.427698 2.887486 2.792475 3.073882 3.303313 3.235287 2.997095 2.242312  
401109\_at 1.784983 1.589805 1.542798 1.420215 1.729384 1.893907 0.889955 2.61998  
401115\_at 6.016338 5.082745 5.481852 5.557926 4.902881 6.221089 5.143847 4.535979  
401124\_at 1.153954 1.33976 1.667391 2.434929 2.098009 1.947479 2.270175 2.730778  
401127\_at 3.606206 1.783439 2.366729 3.247127 2.376356 1.969016 3.109417 2.218447  
401134\_at 1.308122 1.241723 1.853312 1.536919 2.001472 1.861778 1.958727 1.597652  
401135\_at 2.07658 1.066523 1.185626 1.809338 0.820892 0.836585 1.017806 1.783669  
401136\_at 1.278857 1.191012 1.290746 1.544428 1.500175 1.491046 1.259729 1.424377  
401137\_at 1.599339 1.545091 1.565025 1.405832 2.761158 1.472292 2.210648 2.686531  
401138\_at 0.913867 0.957591 1.070825 0.916778 1.949171 1.282149 1.375571 1.286424  
401145\_at 2.816988 1.399899 1.554428 2.001201 3.077737 1.827012 2.3061 1.408732  
401149\_at 3.688952 4.766168 5.333883 2.171408 2.569142 5.767032 5.609231 2.995841  
401152\_at 3.265178 3.874384 3.703196 3.971583 3.823888 3.70677 3.675842 3.60585  
401164\_at 3.992749 1.390765 2.610914 2.213786 1.953615 1.389557 1.63619 2.017004  
401172\_at 2.726389 2.277011 2.25088 2.470142 2.314011 1.630405 2.569 3.090438  
401177\_at 2.24372 2.314673 2.690204 2.288617 2.166521 3.449986 2.167012 2.364184  
401190\_at 2.144218 2.121616 1.707263 1.444221 1.589646 2.266581 1.597377 1.702078  
401207\_at 3.624638 2.615925 2.238837 3.165901 1.754899 1.964239 2.930178 3.020501  
401232\_at 2.086525 1.275801 1.431771 1.82523 1.834444 1.266612 1.967217 1.381488  
401236\_at 1.398477 1.810586 1.79343 1.852979 1.504678 1.090807 1.993472 1.702561  
401237\_at 2.068645 1.871784 1.707118 1.828701 2.820548 2.006259 2.260682 2.766538  
401242\_at 2.364354 2.417461 2.101538 2.338302 2.362973 2.594228 2.335942 2.570402  
401247\_at 2.213911 2.524439 2.474458 2.20006 2.218048 2.13933 2.372606 1.945347  
401250\_at 4.797978 4.129257 4.250119 2.527273 4.669385 4.597471 3.350171 3.826817  
401253\_at 1.66142 1.97213 1.698598 1.833545 2.312798 1.723113 2.132453 2.238909  
401258\_at 2.069046 1.885655 1.845057 2.250492 2.032199 1.999807 2.149787 2.03601  
401260\_at 1.523039 1.556603 1.230996 1.657962 1.247675 1.68435 1.14324 1.953348  
401261\_at 4.556242 2.054906 2.418604 2.473229 0.994294 0.998531 2.401687 2.410838  
401262\_at 4.130074 3.777159 4.106425 3.53874 2.513958 2.531597 3.288571 3.775138  
401264\_at 5.649698 5.732632 5.643288 5.639319 5.340131 4.492309 5.651029 5.258373  
401265\_at 1.260104 1.783067 1.872801 2.002077 2.062948 1.837565 1.606406 1.241924  
401281\_at 3.029054 1.205089 3.126452 2.032955 3.969972 1.506972 2.920658 0.97866  
401282\_at 1.935687 1.651997 1.280389 1.59881 1.385148 2.235293 1.625929 1.698006  
401286\_at 2.451071 2.063345 3.000434 2.508429 1.488652 2.473571 1.672694 1.947965  
401287\_at 4.622984 5.027161 4.512455 3.9376 3.938349 3.011611 2.651857 5.185108  
401288\_at 1.380451 1.497359 1.439003 1.176654 1.678128 1.897208 1.135335 1.206818  
401289\_at 1.185091 2.023698 1.342216 0.924378 1.357521 1.635209 1.183779 1.320497  
401296\_at 2.55682 2.198568 2.256024 1.930921 2.656562 2.054522 2.252651 3.012179  
4012\_at 7.029278 7.247754 6.8611 6.834058 6.529434 6.498848 7.070344 7.043856  
401303\_at 2.87515 2.129183 2.402069 1.78327 3.925734 2.253098 2.845234 2.266242  
401312\_at 1.58419 1.458986 1.874814 1.989639 1.462155 1.138341 1.844442 1.893062  
401320\_at 5.041922 3.735775 4.008368 4.672567 5.843018 2.819661 4.506819 5.944898  
401321\_at 4.645395 5.582479 5.760555 4.351694 5.83491 5.31754 5.379997 5.945754  
401324\_at 1.455831 1.429512 1.743186 1.254074 1.860296 1.548331 1.765476 1.749266  
401331\_at 5.18587 3.558275 3.76563 4.226649 3.826216 3.296221 1.774383 2.33019  
401335\_at 2.646455 2.672758 2.974697 3.031984 2.685417 2.931049 3.588049 3.069661  
401337\_at 1.751301 1.553395 1.88714 1.659889 1.558953 2.479639 1.427575 2.673348  
401357\_at 2.783418 3.66789 2.820412 3.297386 3.110541 3.201865 3.837505 3.587074  
401387\_at 1.171314 1.215705 1.137356 0.902719 1.255457 0.92829 1.192169 1.674262  
401388\_at 1.337733 1.542136 1.499011 1.554606 1.422719 1.083282 1.753826 1.528441

401397\_at 5.56044 5.103485 4.531715 4.842668 4.060739 4.576895 4.422269 5.170204  
401399\_at 1.602693 1.370674 2.580304 2.372089 1.313317 2.356341 1.615294 1.37602  
4013\_at 4.419507 5.376831 4.870214 5.010173 4.245528 5.477676 4.278033 5.524129  
401409\_at 2.756003 2.376996 2.191334 3.430663 2.941232 4.49702 2.544387 2.430386  
401431\_at 2.05736 1.676966 1.964255 1.769516 2.10038 2.645688 1.995572 2.340733  
401442\_at 2.322607 2.082107 1.287488 1.540052 1.709376 1.683473 2.05429 2.359992  
401463\_at 1.092161 1.34683 1.303122 0.956979 1.690582 1.084339 1.952679 1.111436  
401466\_at 7.957085 7.400132 6.633895 6.685727 6.963734 7.186924 6.859131 7.179802  
401474\_at 3.540341 4.80535 3.556111 2.843038 3.587796 3.293824 3.385319 3.105565  
401478\_at 1.744464 1.140678 1.426758 1.175572 1.517432 1.091681 1.66834 1.454312  
401480\_at 3.099132 3.121535 2.762417 2.558557 3.228016 3.707027 3.147297 2.874123  
401491\_at 1.535661 1.856606 1.592853 1.464608 1.775864 1.50649 1.593992 1.415957  
401492\_at 2.571315 2.743148 2.703744 2.402493 2.569468 2.335956 2.571315 3.256483  
401494\_at 5.299526 5.653576 4.946151 5.450025 3.319085 4.620617 5.385818 5.596709  
401498\_at 2.14335 2.320215 2.61154 2.50563 3.027855 2.033601 2.339469 2.152997  
4014\_at 2.571498 2.225359 3.282888 2.453028 2.243445 3.141741 2.266734 1.886546  
401505\_at 6.426814 6.346361 5.311468 5.915437 5.993422 5.697721 5.541095 5.994788  
401535\_at 1.456058 2.682592 1.660275 1.969738 2.089347 1.36757 2.101626 1.736731  
401541\_at 4.663967 4.16624 4.603597 4.7691 3.566039 3.396303 4.920032 4.70902  
401546\_at 1.24434 1.547986 1.137269 1.553472 1.678644 1.70959 1.06357 1.074563  
401548\_at 5.551607 5.547862 5.497329 4.670972 5.790975 6.409309 4.86373 4.505232  
401551\_at 1.651764 1.995263 2.304634 3.297577 2.882866 1.904471 1.837073 1.941271  
401554\_at 2.78103 2.29392 2.079246 2.224565 2.228348 2.370403 2.071001 2.122938  
401561\_at 1.385104 1.790201 2.178828 2.865759 2.563201 3.326403 2.184112 3.619404  
401562\_at 2.400552 2.067955 2.920738 3.381219 2.37271 3.612773 1.995152 2.803908  
401563\_at 2.195361 3.176124 2.584348 2.555629 2.783635 2.436023 2.751878 3.132741  
401565\_at 2.920615 2.395425 2.981197 2.612175 2.991902 3.835848 3.021853 2.435037  
401577\_at 4.715471 5.646854 5.03148 3.421935 3.767371 3.486922 4.316824 4.666268  
401585\_at 3.171709 3.181654 2.963951 3.372805 2.886548 2.990776 2.615593 4.315717  
401588\_at 3.878734 1.690865 4.04617 2.640187 1.261529 1.90179 1.432688 1.620027  
4015\_at 6.675403 6.501679 6.951446 6.529889 4.782609 6.357126 6.379424 6.969585  
401612\_at 2.163363 2.332771 3.098719 2.499112 3.261382 2.533163 2.439582 3.025512  
401613\_at 1.490043 1.304422 1.508879 0.830511 0.959482 1.744882 1.344724 1.739021  
401647\_at 1.361016 1.536727 1.451419 1.646002 1.95337 1.322856 1.529323 2.384905  
401665\_at 1.799502 1.64338 1.515206 2.230903 2.293554 1.739493 1.616095 2.199368  
401666\_at 3.610359 0.759669 3.790441 0.659091 2.931148 1.05245 0.89664 2.418848  
401667\_at 1.668415 1.012122 2.121083 0.992642 1.474948 1.648431 2.084562 1.764882  
4016\_at 7.903188 7.015296 7.460401 6.888196 5.804023 7.360302 7.242099 6.133395  
401720\_at 2.157644 1.512606 1.562747 1.375278 3.373631 2.162533 1.380764 1.52373  
4017\_at 2.924487 4.443053 4.32032 4.197809 4.149632 4.287212 4.043805 4.050186  
401884\_at 4.568865 5.272361 5.397882 6.023684 5.386024 5.791364 5.943746 5.670619  
401898\_at 2.117076 1.867056 3.58458 2.826912 2.797108 2.544086 1.89247 2.062936  
4018\_at 1.235348 0.988585 1.076525 0.678001 0.925376 0.892281 1.788403 1.391541  
401934\_at 2.562069 2.604101 2.718603 2.285162 2.452813 2.281848 1.857564 2.811641  
401944\_at 1.984727 2.278986 2.507538 2.93986 2.566853 2.15431 2.792718 1.860125  
401993\_at 1.07912 1.851861 1.979809 0.715655 2.018743 1.835947 0.807233 1.012422  
401994\_at 1.282533 1.10329 1.337763 0.932224 1.368805 1.332655 1.125505 1.558609  
401\_at 2.271128 2.327338 1.776565 2.363308 2.140825 2.897412 2.005947 2.281853  
402055\_at 5.267585 5.081397 3.92239 4.41999 4.59869 4.148793 4.214882 4.689316  
402117\_at 1.258779 1.297485 1.068666 1.309326 1.428477 1.259062 0.999604 1.176422  
402135\_at 3.163787 1.608793 2.233722 1.979109 1.640307 3.055961 2.457874 3.117358



402160\_at 2.649549 2.327272 2.428165 2.588605 2.711918 2.005302 2.759329 2.531508  
402176\_at 1.312016 2.451206 1.360318 2.255221 1.974214 1.430262 1.367237 1.700265  
402317\_at 1.943026 3.320368 2.10857 3.668095 5.055047 1.268168 2.045604 3.108914  
402381\_at 2.556305 1.668669 2.175439 1.900479 2.170501 1.610019 2.726636 2.31333  
4023\_at 3.940482 2.8298 5.173004 4.134493 3.544462 6.46208 4.253371 4.907855  
402415\_at 1.60124 1.640365 1.384783 1.879876 1.895441 1.768496 1.619776 1.242997  
402483\_at 4.677887 5.274326 4.332143 4.524663 2.440047 5.170974 4.851913 4.313957  
402569\_at 1.667502 1.409072 1.740736 1.461746 1.685455 1.677187 1.901303 1.322437  
402573\_at 2.399695 1.897136 2.558191 2.539566 2.398272 2.71713 2.256823 2.245769  
4025\_at 2.090205 1.651997 1.849762 1.502542 2.632397 1.701206 1.456649 2.253074  
402665\_at 2.286351 2.441116 2.016095 2.779468 2.32387 2.870456 2.908901 2.054645  
402682\_at 4.247429 4.684175 4.185778 5.022804 4.245325 4.044894 3.476746 4.100363  
4026\_at 5.813037 5.795485 5.387039 5.935787 5.726344 5.183031 5.894131 5.585646  
402778\_at 2.518506 3.910223 4.473777 3.485881 3.419828 4.203532 4.850476 3.047568  
402779\_at 0.975467 1.16818 2.448482 2.084433 2.241801 2.238534 1.505312 1.740456  
402\_at 10.70776 10.16157 10.48892 9.96231 9.053124 10.58841 10.35274 9.425613  
403150\_at 1.626822 1.727809 2.700551 1.791571 1.476952 1.603834 1.982781 1.952067  
403239\_at 2.597962 3.178585 2.882602 2.194134 3.168181 2.544456 2.744863 2.192984  
403244\_at 1.531603 1.617613 1.880161 1.369005 1.057179 1.217355 1.133768 0.996441  
403253\_at 0.727281 1.123064 0.806529 0.795924 0.816675 0.914438 0.994469 1.862278  
403257\_at 1.414693 0.834935 0.879083 0.652966 2.132301 0.880466 0.538891 0.752031  
403273\_at 2.087735 1.124458 1.299487 0.457852 1.681251 0.672555 1.183901 0.792877  
403274\_at 0.860317 0.829547 1.05319 0.668208 0.880846 1.399836 1.030444 1.512906  
403277\_at 1.878175 1.38353 0.639995 1.20122 2.048042 0.806866 1.412811 1.583143  
403278\_at 0.948553 0.90509 1.938636 1.077432 1.337422 0.97335 0.54892 1.423893  
403282\_at 1.611438 2.036106 2.015813 1.231676 1.271063 1.118472 1.132058 2.865198  
403284\_at 0.838356 0.718088 0.937723 0.867822 1.04095 1.541251 1.319964 0.94835  
403312\_at 2.653777 2.744631 1.840607 2.701931 1.535589 2.485571 2.51233 2.417528  
403313\_at 3.906181 3.463117 4.017768 4.86669 4.082421 3.646371 3.880074 5.029108  
403314\_at 1.524858 0.95969 1.551152 1.602622 1.919248 1.248416 1.575396 2.39947  
403315\_at 2.328828 1.581344 1.541226 1.638343 1.440539 1.528056 1.349184 2.283785  
403323\_at 1.734799 0.969958 2.200702 1.521049 2.480569 1.417559 1.654932 2.969582  
403339\_at 2.113709 1.218738 1.575068 1.03874 2.120728 1.833669 1.839892 1.757834  
403341\_at 5.124883 5.107989 5.365294 4.618102 6.172031 5.322528 5.670797 5.283147  
4033\_at 4.966015 4.579294 5.081834 4.388532 5.001515 4.961676 5.255409 4.41181  
4034\_at 4.687335 4.480442 4.388207 5.287275 4.643699 5.010995 3.715764 2.957046  
4035\_at 3.772793 4.979786 5.566855 5.558834 4.177706 5.687634 5.471904 4.459642  
4036\_at 6.833153 6.229463 6.662601 5.650559 8.07223 7.528918 5.231224 7.683255  
4037\_at 2.017044 2.611861 2.277202 2.610503 2.667386 3.470644 2.777867 2.210297  
4038\_at 2.392014 1.978883 2.631029 2.18109 2.22583 3.607814 2.72529 2.003916  
403\_at 8.113964 8.123003 8.330806 7.618957 8.585084 7.955845 8.272332 8.158612  
404037\_at 2.056367 1.598296 1.791446 1.826955 1.50196 2.285658 2.485207 1.981353  
404093\_at 4.249069 3.65553 3.922137 3.186331 4.337833 3.777813 4.025665 3.387588  
4040\_at 5.32093 6.395211 5.595703 5.776213 6.504413 5.966223 5.934015 5.865443  
4041\_at 3.834868 4.206256 4.414956 3.900731 4.072493 4.226151 3.852116 2.712117  
404201\_at 5.856472 5.733548 4.924448 5.100426 6.009912 6.230486 4.300915 6.054445  
404203\_at 1.09719 1.703159 1.025728 1.204731 2.102357 0.800035 1.481342 1.616251  
404216\_at 2.195119 1.795679 2.997159 2.209671 2.785979 2.210362 2.44929 2.722874  
404217\_at 3.606341 4.144525 5.342786 4.83844 3.674931 4.156864 4.087861 2.871786  
404220\_at 1.649146 2.087724 2.103478 1.707213 1.463999 2.059375 1.496604 1.255494  
404266\_at 4.159628 4.099216 4.574428 3.512831 5.784082 4.103256 3.55641 3.223531

404281\_at 1.266633 1.353445 1.770698 1.200446 1.642756 1.648484 2.076721 1.437816  
4043\_at 7.620411 7.132728 7.405667 7.619597 6.721001 7.833068 7.379865 6.167309  
404550\_at 3.952886 3.898165 4.539279 3.000686 3.560476 3.68466 3.843174 3.349656  
404552\_at 1.786655 2.369357 2.406739 1.817207 1.152493 1.648522 1.697932 2.052179  
4045\_at 2.107338 2.161288 2.548073 2.213717 2.508546 2.179891 3.018336 1.960197  
404663\_at 2.073925 2.431481 2.115376 4.058371 3.047057 2.777731 0.664283 1.478491  
404665\_at 3.487855 3.000102 2.464354 3.983665 2.340035 3.528013 3.670195 3.319315  
404672\_at 6.160568 5.916146 6.07093 6.241037 5.62994 6.063005 5.939191 5.787145  
4046\_at 3.947523 3.920356 3.89246 4.737258 3.269023 4.455763 3.461979 4.266822  
404744\_at 1.508751 1.076929 1.265127 1.292362 2.436624 1.792974 1.591873 2.547007  
404770\_at 1.01109 1.789521 1.537084 1.18014 1.651378 0.746352 3.245491 1.435505  
4047\_at 4.064508 3.822112 4.121521 3.782061 3.094026 4.252278 4.408648 3.869299  
4048\_at 7.028004 7.008653 6.617194 6.670941 5.553966 6.562096 6.445297 7.28875  
4049\_at 2.99935 3.069419 2.976937 3.334575 3.068173 3.149995 3.572193 2.984439  
4050\_at 4.876285 4.957004 4.072757 5.160893 4.822188 4.545991 4.12456 4.425968  
4051\_at 1.285271 0.849981 1.017526 1.945873 1.190087 1.054527 1.436639 0.92882  
4052\_at 5.459998 4.50952 6.206986 5.963431 6.567146 5.546894 6.752978 5.31116  
4053\_at 2.765849 2.758974 2.791891 3.262758 2.98554 3.917445 3.22642 3.004031  
4054\_at 5.063279 5.15959 4.689433 4.943505 4.401715 5.800859 5.644189 4.202176  
4055\_at 6.928208 6.632017 6.903864 7.009158 6.195246 7.462448 7.079975 5.27181  
4056\_at 5.254898 4.550537 5.397525 5.539182 4.598731 5.658271 5.696304 3.839086  
405753\_at 1.536177 2.021599 1.127551 1.47485 2.875198 1.288692 1.164182 1.655212  
405754\_at 6.34935 2.264244 6.096948 6.679575 7.167928 6.214892 5.777169 3.70324  
4057\_at 2.662302 1.658505 1.510293 3.991185 2.022433 1.317587 1.716156 1.55797  
4058\_at 1.98726 2.401778 1.634876 2.439126 2.709008 2.90202 3.303108 2.366787  
4059\_at 8.21888 8.198623 8.596436 8.622718 8.039218 8.780513 8.718327 7.603083  
405\_at 8.187253 8.383179 8.210061 8.275033 7.977256 8.427186 8.254334 8.446808  
4060\_at 6.646034 4.446472 3.95877 6.928069 8.056483 4.433667 3.368956 5.181824  
4061\_at 7.124787 7.319148 8.187292 7.874132 6.710047 7.898895 8.266767 6.366024  
4062\_at 2.542436 2.400961 2.824812 3.099772 2.630821 3.096563 2.644794 1.966348  
4063\_at 2.334562 2.2965 2.578253 2.940323 2.416672 2.177924 2.399611 2.463968  
4064\_at 3.781217 2.192836 1.838062 3.345283 4.754322 3.712391 3.983672 2.323516  
4066\_at 4.982398 5.000108 3.930517 4.365528 4.485555 4.00641 4.307678 3.701772  
4067\_at 5.785151 5.16072 4.928452 5.640095 5.075991 5.568441 5.955594 5.876104  
406881\_at 2.58207 2.941635 1.78233 2.773831 2.80241 4.118763 3.340336 4.302644  
406882\_at 0.88767 0.782524 1.003042 0.986825 1.285435 0.914998 1.278551 1.320211  
406885\_at 1.836401 2.074775 3.270167 1.867506 1.878157 1.300827 2.708418 1.829219  
406886\_at 1.727107 1.956512 1.366976 1.317154 1.809804 1.977592 1.578188 1.396636  
406887\_at 2.21136 2.752782 3.2479 2.6071 2.587415 3.388072 4.162561 2.745014  
406888\_at 1.310713 0.955215 0.895743 1.149918 3.105429 0.615198 0.745954 1.113939  
406889\_at 1.310002 1.004151 1.148986 0.764623 0.873813 1.70375 1.593607 1.818605  
406890\_at 3.664113 3.229683 3.455817 3.436596 2.42926 3.077407 4.273463 2.522802  
406891\_at 2.052326 1.806672 1.392035 2.171429 1.140263 1.241173 1.610076 1.146005  
406892\_at 1.000192 0.98867 0.970366 0.871715 1.701869 1.342471 1.037767 1.500174  
406893\_at 0.742649 0.95973 1.01126 1.20846 0.727654 0.748432 1.611216 1.115914  
406894\_at 1.108593 0.951797 1.187619 0.811114 1.412625 0.895368 2.041543 1.125549  
406895\_at 1.100417 1.066943 1.15155 0.77356 1.227949 0.9366 1.108324 1.222232  
406896\_at 3.517682 3.60059 4.829691 3.535665 4.648875 3.591334 3.548979 4.865453  
406897\_at 2.75205 3.584877 3.080597 4.099385 4.024069 3.207519 3.22161 3.62334  
406898\_at 2.799635 3.071195 3.434482 3.314603 3.136962 2.718526 2.558838 3.044297  
406899\_at 1.204796 1.101121 0.80164 0.794313 1.008451 0.981122 1.108111 1.853906

|           |          |          |          |          |          |          |          |          |
|-----------|----------|----------|----------|----------|----------|----------|----------|----------|
| 4068_at   | 0.990663 | 1.721718 | 1.375408 | 1.835435 | 1.752509 | 2.202262 | 2.622346 | 1.564629 |
| 406900_at | 2.773447 | 3.512684 | 3.362794 | 3.210118 | 3.101764 | 3.385071 | 3.315123 | 3.680023 |
| 406901_at | 0.956661 | 1.515551 | 3.315617 | 1.85029  | 3.975117 | 1.818232 | 2.005244 | 1.630318 |
| 406903_at | 1.167917 | 1.251626 | 1.121756 | 0.984329 | 1.013924 | 1.129278 | 1.192016 | 1.067908 |
| 406904_at | 1.008615 | 1.264803 | 1.454379 | 1.976353 | 1.403106 | 1.356523 | 1.552947 | 1.116771 |
| 406905_at | 0.758187 | 0.840708 | 1.052666 | 0.813004 | 1.479172 | 0.808991 | 0.829486 | 0.953962 |
| 406906_at | 1.07527  | 1.792748 | 1.879439 | 1.278015 | 1.476283 | 1.405383 | 1.318749 | 1.822321 |
| 406907_at | 0.987514 | 1.046076 | 0.971801 | 1.198695 | 1.687527 | 1.662343 | 0.868698 | 1.426858 |
| 406908_at | 2.713663 | 2.780776 | 3.521999 | 3.19575  | 3.416115 | 2.282219 | 2.689999 | 3.066343 |
| 406909_at | 0.98699  | 0.959864 | 0.741064 | 0.581551 | 1.113912 | 2.428145 | 0.954778 | 1.12822  |
| 406910_at | 1.557732 | 1.11131  | 1.249431 | 1.507362 | 1.418892 | 1.827716 | 2.551239 | 1.520444 |
| 406911_at | 0.846088 | 0.725398 | 2.48652  | 0.896849 | 1.467782 | 1.235776 | 1.886773 | 2.567975 |
| 406912_at | 2.189555 | 1.443174 | 1.330833 | 1.307513 | 1.904354 | 1.783548 | 1.424022 | 1.400023 |
| 406913_at | 1.249916 | 1.140127 | 1.485077 | 1.029985 | 1.206741 | 1.603008 | 1.829081 | 1.36265  |
| 406914_at | 3.057453 | 3.49293  | 3.940369 | 3.154051 | 4.318694 | 3.22344  | 2.497962 | 3.282306 |
| 406915_at | 0.810926 | 1.71007  | 0.885415 | 0.79363  | 2.307237 | 1.211489 | 0.832001 | 1.077817 |
| 406916_at | 0.914776 | 1.159099 | 1.725175 | 0.996405 | 1.544679 | 0.890566 | 0.854004 | 1.492514 |
| 406917_at | 3.228678 | 2.109427 | 2.392301 | 1.961266 | 2.662245 | 1.541388 | 3.780916 | 1.672633 |
| 406918_at | 1.354802 | 1.71584  | 1.458149 | 1.386107 | 2.250634 | 2.605929 | 1.56036  | 1.413253 |
| 406919_at | 1.491415 | 1.8829   | 1.501636 | 1.590639 | 1.627358 | 1.118673 | 2.023438 | 1.460123 |
| 406920_at | 1.457801 | 1.77063  | 2.025136 | 1.717286 | 2.07602  | 1.963511 | 2.065309 | 1.641124 |
| 406921_at | 1.170962 | 1.480661 | 1.389158 | 1.010203 | 2.081367 | 1.043691 | 1.775685 | 1.714967 |
| 406922_at | 0.767942 | 0.804756 | 1.840548 | 1.36794  | 1.366547 | 1.312827 | 1.214578 | 2.455545 |
| 406923_at | 1.392216 | 2.298762 | 0.887997 | 1.598653 | 1.839261 | 1.043315 | 0.88362  | 1.226804 |
| 406924_at | 2.302048 | 2.195764 | 2.15624  | 1.86164  | 2.346294 | 1.724942 | 2.715139 | 2.749147 |
| 406925_at | 0.861971 | 1.176874 | 2.333684 | 1.282612 | 2.112392 | 1.230686 | 1.940201 | 1.776289 |
| 406926_at | 1.14787  | 0.774376 | 0.957499 | 0.885153 | 1.706339 | 1.309323 | 0.850824 | 1.264464 |
| 406927_at | 1.384166 | 0.885088 | 1.095261 | 0.747745 | 1.294728 | 1.793432 | 1.362153 | 1.066074 |
| 406929_at | 1.837422 | 2.289211 | 1.803556 | 1.567021 | 1.762459 | 1.206565 | 3.034247 | 2.121714 |
| 406930_at | 2.594052 | 2.751088 | 2.537913 | 3.115121 | 3.634898 | 3.440801 | 3.705936 | 2.916425 |
| 406931_at | 2.250935 | 3.338471 | 2.888743 | 2.481126 | 2.935268 | 2.76926  | 2.088497 | 2.639948 |
| 406932_at | 2.213244 | 1.349368 | 1.937828 | 1.028072 | 1.417072 | 1.117184 | 1.639994 | 2.520748 |
| 406933_at | 1.580248 | 1.908289 | 1.979123 | 1.590678 | 2.202067 | 1.403386 | 1.647481 | 1.526368 |
| 406934_at | 1.303704 | 1.746325 | 1.825264 | 1.497247 | 1.573804 | 1.881972 | 0.94573  | 1.352173 |
| 406936_at | 0.93127  | 1.091115 | 0.976026 | 0.790781 | 0.729775 | 1.095617 | 1.095432 | 0.800423 |
| 406937_at | 0.858835 | 1.201948 | 1.559186 | 0.657176 | 1.56928  | 0.788062 | 1.662599 | 0.513314 |
| 406938_at | 1.24324  | 1.271042 | 1.211929 | 1.32004  | 0.878524 | 2.617894 | 0.931076 | 1.296742 |
| 406939_at | 1.667717 | 2.170865 | 4.139486 | 3.54778  | 3.329476 | 2.076001 | 1.813661 | 2.841505 |
| 406940_at | 1.328695 | 1.514574 | 0.871899 | 0.927759 | 1.162773 | 1.067286 | 1.483728 | 1.03668  |
| 406941_at | 2.848861 | 2.062586 | 3.251038 | 2.802544 | 3.487281 | 2.733446 | 2.900167 | 2.748156 |
| 406942_at | 2.100195 | 1.481084 | 1.547457 | 1.956197 | 1.480138 | 2.874743 | 2.349567 | 2.415108 |
| 406943_at | 1.914932 | 2.272724 | 2.19521  | 2.527063 | 2.652747 | 2.771102 | 2.85116  | 2.2716   |
| 406944_at | 1.272643 | 2.048784 | 1.537112 | 1.310924 | 1.704622 | 1.208162 | 1.079702 | 2.002003 |
| 406945_at | 0.917906 | 1.064933 | 1.381893 | 1.222224 | 1.392096 | 1.573771 | 1.139339 | 2.161178 |
| 406946_at | 0.982616 | 0.660006 | 1.176631 | 1.174579 | 1.157497 | 1.131976 | 0.721546 | 1.188197 |
| 406948_at | 1.10747  | 3.462603 | 3.289851 | 1.532836 | 2.335967 | 1.937973 | 1.481267 | 3.152801 |
| 406949_at | 1.94017  | 1.040723 | 1.401891 | 0.732883 | 1.590448 | 1.171955 | 1.11354  | 2.362433 |
| 406950_at | 1.240482 | 1.990557 | 0.974    | 1.147738 | 1.351084 | 0.869579 | 1.744579 | 1.30876  |
| 406951_at | 1.950626 | 1.31143  | 3.058832 | 1.422501 | 1.254487 | 1.191864 | 1.263498 | 1.074147 |
| 406954_at | 2.261574 | 1.975803 | 5.351275 | 1.851766 | 1.980862 | 2.20764  | 1.40724  | 1.863267 |
| 406955_at | 0.811652 | 1.688429 | 1.87147  | 1.594697 | 2.151762 | 1.487834 | 2.141163 | 2.728366 |

406956\_at 2.120703 1.1949 1.406483 1.34101 1.515896 2.460656 1.934292 2.38758  
406957\_at 2.225605 2.922901 2.620236 1.560501 3.246486 1.834007 2.472291 2.881397  
406958\_at 1.086673 1.371098 1.126254 0.837801 1.593076 1.081224 1.43465 1.229564  
406959\_at 1.203973 0.968903 1.077988 1.256265 1.478095 1.479566 1.982636 2.112903  
406960\_at 1.992514 1.717764 2.002914 2.486431 1.704505 1.687223 1.93086 1.937791  
406961\_at 4.746479 5.165157 5.633868 5.31107 5.06021 4.873058 5.78486 5.374775  
406963\_at 3.501001 2.951006 3.349334 3.206434 3.569781 3.40981 3.847771 3.113454  
406964\_at 2.151884 1.481073 0.716891 2.244027 2.514382 1.545827 1.212768 2.507529  
406965\_at 0.987306 1.143006 0.85608 0.837952 1.058962 1.054349 1.436971 0.74921  
406966\_at 3.48497 3.147745 3.301319 4.256829 3.584179 4.496216 3.96106 3.801007  
406967\_at 1.270569 1.789776 3.907724 1.477463 3.057795 2.649209 1.450294 2.010017  
406968\_at 1.499039 1.043725 2.677849 2.264729 1.928807 1.380377 1.820036 1.301134  
406969\_at 1.184303 0.916285 2.327256 0.998456 1.346924 3.586239 1.742706 1.651156  
406970\_at 2.908789 5.075212 5.024596 4.028035 5.709621 3.540411 2.276243 1.732689  
406971\_at 1.230565 1.140564 1.401317 1.629204 1.018883 1.082066 1.32775 2.349124  
406973\_at 1.608529 1.767812 1.344951 1.639355 1.68484 2.252627 2.006116 1.498573  
406974\_at 2.729807 3.868521 2.061325 3.144703 3.20419 3.132943 2.970984 2.621681  
406976\_at 1.351048 0.913992 1.091544 1.786885 2.017962 1.468751 1.140702 1.052242  
406978\_at 2.024897 1.173593 1.591063 1.10406 2.225786 2.543776 1.98767 1.553233  
406981\_at 1.49931 1.001261 1.285451 0.627429 0.800049 0.646679 0.601788 1.08552  
406983\_at 1.645536 1.958391 1.371254 1.942999 1.561348 1.845052 1.887201 1.945858  
406984\_at 1.526168 1.329512 1.549743 1.818924 2.178213 1.182443 1.599875 2.130678  
406985\_at 1.479836 1.178172 0.7225 0.927745 1.564463 1.101175 1.489884 0.418767  
406986\_at 1.124865 0.92973 0.864225 0.765576 1.450414 0.668024 1.228656 0.933245  
406987\_at 2.902701 1.160752 1.373379 0.875075 1.940755 1.899954 1.300398 1.354266  
406988\_at 2.242694 2.030607 3.174146 2.404091 2.455653 2.221527 2.129642 2.514803  
406989\_at 1.216366 1.536309 2.105091 1.714377 1.885928 2.501951 2.059243 2.301836  
406990\_at 1.010029 0.995856 1.011167 1.687598 1.430155 1.398176 0.988565 1.493258  
406991\_at 4.50036 4.596202 4.829677 5.783807 6.396309 4.511637 3.271506 4.110586  
406992\_at 3.094835 4.519155 4.870555 4.964581 5.052619 3.703757 5.166846 4.657816  
406993\_at 2.908547 3.244898 2.769712 2.802779 2.410825 3.781377 3.346408 2.926885  
406994\_at 3.278758 3.311403 2.47128 2.42455 3.869326 3.753456 3.11268 3.028312  
406995\_at 1.889382 0.906023 1.059303 1.433698 1.70998 1.106249 1.25 1.194498  
406997\_at 1.532865 1.158137 1.251514 0.934135 5.090351 1.110238 1.199628 1.182634  
406998\_at 0.811071 1.065942 1.028112 0.804429 1.172863 1.385742 1.363303 1.636276  
406999\_at 1.092488 0.943833 1.179921 0.85775 1.239808 1.007586 1.149366 1.505688  
4069\_at 8.141085 8.381536 7.955616 8.94141 6.676624 8.359427 8.362486 8.480603  
406\_at 4.584199 4.106365 4.363036 3.257653 3.79141 3.135745 3.557573 2.642251  
407000\_at 1.759013 1.619349 2.000016 1.565272 1.818646 1.424935 1.623883 1.470037  
407001\_at 1.649715 1.912814 1.136692 1.809794 1.436905 1.208618 1.186861 2.532779  
407002\_at 0.999949 1.418935 0.946639 1.238873 0.977632 1.739558 1.91119 2.14206  
407003\_at 2.344395 1.722996 1.969222 2.099625 1.877478 2.289127 2.771601 1.680363  
407006\_at 1.219419 1.062274 1.222339 2.341415 2.288937 1.402262 1.21166 1.281579  
407007\_at 1.237287 1.255217 1.29729 1.376026 1.500599 1.092979 1.498402 2.061048  
407008\_at 1.350682 2.060636 1.64307 1.05144 1.415179 0.971464 1.458522 2.315276  
407009\_at 0.977048 1.137102 1.284173 1.03542 1.478621 1.301923 1.124963 1.367751  
407010\_at 2.360377 2.501001 2.107962 2.721217 2.629869 1.721814 2.746546 2.938749  
407011\_at 2.523031 1.89257 2.503482 2.47164 3.529033 2.402492 1.93558 2.99987  
407012\_at 1.675431 5.748202 1.241124 1.232461 3.854422 0.856882 2.896006 0.934794  
407013\_at 1.203618 1.139003 1.094972 1.195264 0.63343 1.00911 1.686799 1.021301  
407014\_at 3.440602 1.542082 1.756944 1.377631 2.026536 3.00469 2.973054 2.104828

407015\_at 1.344487 1.61651 1.453743 1.467536 0.993742 1.628755 2.028022 1.61651  
407016\_at 1.059147 1.031352 1.034707 1.395432 1.278018 0.906781 1.126538 2.452011  
407017\_at 2.342611 2.713785 2.741847 3.154472 2.158946 2.853931 2.430878 2.197741  
407018\_at 3.14398 1.421006 2.099889 1.506529 2.144306 1.896442 2.000555 2.652247  
407019\_at 5.605257 4.746071 4.472592 5.293391 4.89494 5.100589 3.030115 4.204069  
407020\_at 2.152739 2.592767 2.223358 2.416596 3.591059 2.419506 2.0279 2.337592  
407021\_at 0.778688 0.82976 1.159664 1.025849 1.168414 1.31268 1.059944 1.195763  
407022\_at 1.333706 1.15626 1.009576 1.235092 1.96596 2.095371 0.990692 1.314144  
407023\_at 2.389613 1.301057 1.411524 1.164547 1.51079 1.633337 2.08636 1.574414  
407024\_at 0.669281 0.867182 0.834931 0.656715 1.950748 0.696767 0.760223 1.267011  
407025\_at 1.427094 1.474899 1.102351 0.943991 1.651656 1.544161 1.736297 1.663084  
407026\_at 5.534641 3.350531 5.2723 5.431464 4.833685 4.200516 4.193157 4.248757  
407027\_at 0.810216 0.984182 0.865971 0.840878 1.037683 2.54285 1.426484 1.026964  
407028\_at 1.36362 2.296868 1.417645 1.206308 1.42433 1.260469 1.326954 1.612127  
407029\_at 1.072936 0.894784 2.651868 1.71694 2.003222 4.30505 1.71694 1.170412  
407030\_at 1.083015 0.859619 1.227346 0.758996 1.230885 2.133997 0.841163 1.242827  
407031\_at 0.934317 0.988564 1.655753 1.502275 1.775179 1.66508 1.809395 1.19074  
407032\_at 4.137677 3.12359 4.47568 3.331535 4.163309 1.104163 0.635499 4.968053  
407033\_at 1.053401 0.932354 1.072318 0.763385 1.080702 0.908126 1.465635 1.044315  
407034\_at 1.127294 1.663779 1.800878 1.11984 1.427493 1.485522 1.926026 2.273532  
407035\_at 2.106377 1.315667 4.313753 0.944559 1.373826 1.04621 2.935855 1.805511  
407036\_at 1.858968 1.884657 1.287981 1.429385 2.045588 1.036835 0.846261 2.331026  
407039\_at 1.301873 1.288418 1.800906 0.998919 1.934864 1.21959 1.630485 1.447184  
407040\_at 1.402654 1.571837 1.57932 3.02172 1.757224 1.415217 1.275585 1.780874  
407041\_at 1.617634 1.321957 1.148118 1.100196 1.097625 1.086475 2.209839 1.191059  
407042\_at 0.800759 0.789929 1.13048 0.757419 1.439094 1.511882 1.317719 1.261191  
407043\_at 3.762283 1.725289 3.099148 4.941066 4.460245 4.978091 3.972338 3.858016  
407044\_at 1.686359 1.866541 1.963033 1.434344 2.618663 2.456781 1.903757 1.134665  
407045\_at 1.565341 1.628701 2.022822 1.446313 1.848564 1.559643 1.874287 1.72396  
407046\_at 2.387425 2.329505 2.172712 2.246383 2.393709 2.008748 1.98044 2.208389  
407049\_at 0.956116 2.240881 1.334041 1.207648 1.108181 1.492112 0.867053 1.419563  
407050\_at 2.265421 2.280106 2.287863 2.281856 2.735567 2.012366 2.577225 2.921238  
407051\_at 1.261458 1.467692 1.323453 2.84316 1.439935 1.663548 2.486738 1.221018  
407052\_at 0.844836 0.914538 1.900937 5.284093 0.957286 1.325582 0.968527 1.088604  
407053\_at 1.851792 1.53921 1.579589 1.549486 1.822034 1.724639 1.842189 1.66093  
407054\_at 2.056925 2.684048 2.526664 1.811125 2.512119 2.108764 2.436554 3.234517  
407055\_at 1.999915 2.068077 3.475837 1.743936 3.736899 1.744654 2.537183 2.141488  
407056\_at 3.973809 4.587987 5.134156 4.885098 3.582635 4.360254 4.017647 4.244867  
4070\_at 3.948305 3.937231 3.35584 4.095583 5.086244 4.093413 2.853429 4.101077  
4071\_at 8.688181 8.656799 8.298546 9.140417 8.877509 9.006992 8.833515 8.197443  
4072\_at 6.023337 5.509112 5.043171 5.989031 7.76248 6.346881 3.915349 5.697502  
4074\_at 7.048921 7.347087 7.00905 7.561182 7.034076 7.626332 7.503899 7.215361  
4076\_at 8.790867 8.875049 8.967478 8.871819 8.646126 8.698145 8.859352 8.867746  
407738\_at 1.779624 1.155925 2.636693 2.035019 4.177748 3.080971 1.715134 3.080241  
4077\_at 7.843151 7.949688 8.055793 7.838107 7.651127 7.560362 7.95145 7.534017  
407835\_at 4.087146 3.684042 3.575051 3.781969 4.264764 3.879521 3.684499 4.183999  
407975\_at 2.373781 2.108103 2.530381 0.829569 1.264705 2.283109 0.976664 1.314941  
407\_at 2.031132 1.656784 2.293793 1.952706 1.859056 1.865971 2.048734 2.574995  
408187\_at 0.867712 0.680586 0.967289 0.93376 1.985616 0.951037 1.098385 0.967289  
4081\_at 1.903857 2.668851 0.944814 1.808772 1.893263 2.238087 2.122274 1.470843  
408263\_at 1.982863 1.690247 2.307089 1.954308 2.034673 1.394411 1.549094 1.875113

|           |          |          |          |          |          |          |          |          |
|-----------|----------|----------|----------|----------|----------|----------|----------|----------|
| 4082_at   | 5.244456 | 5.745807 | 5.192124 | 5.824684 | 5.762815 | 5.421529 | 4.858408 | 5.168823 |
| 4084_at   | 4.219821 | 4.827814 | 4.513787 | 5.467234 | 4.914614 | 5.13345  | 5.373368 | 4.370044 |
| 4085_at   | 2.005924 | 3.17146  | 2.065013 | 4.89468  | 3.276423 | 1.758762 | 1.881121 | 2.325215 |
| 4086_at   | 4.79088  | 4.412412 | 4.60576  | 4.678244 | 5.589629 | 4.694914 | 4.109783 | 4.538376 |
| 4087_at   | 7.488172 | 7.368234 | 7.877638 | 7.770508 | 7.222527 | 7.425094 | 7.706762 | 7.602225 |
| 4088_at   | 4.667811 | 5.890596 | 6.060173 | 6.362181 | 6.167836 | 5.7144   | 5.759824 | 5.483146 |
| 4089_at   | 7.346259 | 7.847399 | 7.356578 | 7.501313 | 7.676931 | 7.181087 | 7.396864 | 7.346865 |
| 408_at    | 8.343637 | 8.076555 | 8.637837 | 8.2701   | 7.087599 | 8.476257 | 9.132022 | 8.498455 |
| 4090_at   | 4.944555 | 5.786861 | 5.671806 | 5.315606 | 5.670379 | 5.632772 | 5.202464 | 6.130345 |
| 4091_at   | 7.383766 | 7.484052 | 7.55314  | 8.110888 | 7.58909  | 7.07809  | 7.494067 | 7.206318 |
| 4092_at   | 3.682549 | 3.717493 | 3.644636 | 4.389559 | 3.717294 | 4.853997 | 4.22677  | 3.647653 |
| 4093_at   | 5.222196 | 5.116572 | 4.052575 | 5.125046 | 4.926479 | 5.215394 | 5.391366 | 4.281679 |
| 4094_at   | 7.123406 | 6.580373 | 6.754455 | 6.718441 | 7.272987 | 7.480202 | 6.479096 | 6.989318 |
| 4097_at   | 2.524716 | 2.936879 | 2.899659 | 3.205139 | 2.717865 | 3.566292 | 3.624431 | 2.60453  |
| 4099_at   | 2.159755 | 1.828947 | 1.662535 | 1.823151 | 1.647577 | 2.315203 | 2.00157  | 2.0496   |
| 409_at    | 5.077263 | 5.481765 | 4.072535 | 5.30633  | 4.56866  | 5.020854 | 4.795291 | 4.740811 |
| 40_at     | 2.053226 | 3.013586 | 1.9754   | 1.655618 | 1.799754 | 2.924808 | 2.308386 | 1.928571 |
| 4100_at   | 1.695035 | 2.057373 | 1.33951  | 1.677266 | 1.182625 | 1.589052 | 1.717691 | 2.193011 |
| 4103_at   | 1.716471 | 2.561974 | 2.001814 | 1.507164 | 1.991431 | 1.912738 | 1.348947 | 2.816484 |
| 4105_at   | 1.113575 | 1.822009 | 1.822009 | 1.574244 | 2.4439   | 1.281834 | 5.155658 | 1.424835 |
| 4107_at   | 1.449627 | 1.877925 | 2.341631 | 1.745785 | 1.363436 | 2.213752 | 1.983595 | 1.970009 |
| 4109_at   | 1.772262 | 0.792084 | 0.961081 | 3.364923 | 1.704936 | 1.475805 | 2.205832 | 3.017123 |
| 410_at    | 5.275363 | 5.393209 | 5.128462 | 4.84454  | 4.62254  | 5.933406 | 5.359537 | 3.363393 |
| 4110_at   | 2.540069 | 2.046531 | 2.571996 | 1.775536 | 1.725792 | 1.178303 | 2.118754 | 2.28039  |
| 4111_at   | 1.129831 | 0.859896 | 1.013789 | 1.679543 | 1.356224 | 1.255408 | 1.997688 | 0.848171 |
| 4112_at   | 1.624404 | 1.586629 | 1.399712 | 1.354883 | 1.789512 | 1.19885  | 1.864618 | 1.138079 |
| 4113_at   | 2.283204 | 1.007126 | 1.191511 | 1.918249 | 1.304315 | 1.564059 | 2.120943 | 1.722398 |
| 4114_at   | 1.334892 | 1.347546 | 1.292381 | 0.628724 | 1.515893 | 2.480933 | 1.276012 | 1.429888 |
| 4115_at   | 2.598916 | 0.786503 | 1.462931 | 1.512745 | 0.628966 | 1.835668 | 1.003634 | 2.040014 |
| 4116_at   | 4.5479   | 5.150451 | 5.464574 | 5.179596 | 5.225043 | 5.549349 | 4.91369  | 5.844506 |
| 4117_at   | 2.711898 | 2.857054 | 2.377242 | 2.336331 | 2.306318 | 2.917142 | 2.782584 | 1.958664 |
| 4118_at   | 8.2755   | 6.893058 | 8.0014   | 8.89182  | 9.521031 | 9.222969 | 4.135556 | 6.761631 |
| 411_at    | 4.250908 | 4.186131 | 4.304608 | 4.229941 | 5.045166 | 4.630768 | 4.275342 | 4.669042 |
| 4121_at   | 6.732865 | 7.128543 | 7.242345 | 6.815227 | 7.711355 | 6.713437 | 6.812459 | 7.732443 |
| 4122_at   | 5.391264 | 4.984005 | 5.909588 | 6.059144 | 5.469746 | 5.70619  | 6.573169 | 5.492066 |
| 4123_at   | 5.258475 | 4.599865 | 4.428736 | 5.107564 | 4.641956 | 4.696582 | 5.201507 | 3.93646  |
| 4124_at   | 5.545274 | 5.949485 | 6.099898 | 6.651826 | 6.377628 | 5.619101 | 5.713057 | 6.578241 |
| 4125_at   | 5.065664 | 5.1268   | 4.648101 | 4.353213 | 4.460718 | 4.86779  | 5.453382 | 4.774019 |
| 4126_at   | 5.676783 | 5.783585 | 6.039707 | 6.7027   | 6.330295 | 5.942795 | 6.884336 | 6.544531 |
| 4128_at   | 5.912738 | 6.517617 | 6.152219 | 5.261269 | 5.446188 | 5.485071 | 6.173731 | 5.762521 |
| 4129_at   | 4.988646 | 4.9356   | 5.13621  | 4.810075 | 5.121718 | 4.503852 | 3.937342 | 3.92768  |
| 412_at    | 5.950177 | 5.832417 | 6.430413 | 6.095738 | 5.748875 | 6.010602 | 6.586835 | 5.855065 |
| 4130_at   | 3.625512 | 3.539762 | 4.394317 | 4.439509 | 4.517579 | 4.355575 | 4.286695 | 3.808056 |
| 4131_at   | 8.231059 | 8.432737 | 8.922477 | 8.980598 | 8.692167 | 8.288118 | 8.823365 | 8.521842 |
| 4133_at   | 5.130298 | 6.159733 | 5.552211 | 5.798455 | 6.479812 | 5.840205 | 4.858921 | 6.176453 |
| 4134_at   | 6.308407 | 6.055247 | 6.372909 | 6.499498 | 6.23753  | 6.45159  | 6.477395 | 5.740022 |
| 4135_at   | 7.558674 | 7.056866 | 7.748058 | 8.065825 | 8.497886 | 7.41356  | 8.036754 | 6.631953 |
| 4137_at   | 5.165421 | 4.43432  | 4.936004 | 4.752278 | 4.538098 | 4.072279 | 4.257119 | 4.466333 |
| 4139_at   | 4.581934 | 4.858125 | 4.540284 | 5.068289 | 4.790946 | 3.780093 | 4.809409 | 5.318824 |
| 414059_at | 2.906972 | 2.753    | 2.165241 | 3.456967 | 1.064516 | 1.557306 | 4.91456  | 2.19236  |
| 414061_at | 1.231656 | 2.166671 | 1.406526 | 0.727809 | 0.990956 | 3.402429 | 0.688709 | 1.792329 |

414062\_at 2.261046 2.166663 2.567416 2.497304 2.459503 3.177493 1.812793 2.902053  
4140\_at 7.812312 7.706754 7.741526 7.483101 7.558384 7.566414 7.747973 8.037513  
414149\_at 3.085501 3.348025 3.857513 3.292189 2.941494 2.938437 2.813341 3.145682  
414152\_at 2.723958 2.26052 3.481467 2.476677 2.977565 2.566407 1.867895 2.908002  
414157\_at 2.304559 2.225701 2.165856 1.784481 1.946581 2.170015 1.959555 1.875924  
414189\_at 3.920758 3.780502 4.333509 3.437612 2.571835 2.85942 3.377912 4.665427  
414194\_at 2.192405 3.024824 3.164896 4.061136 1.970947 4.796322 3.40193 2.560769  
414196\_at 2.790445 1.5787 1.747542 2.345988 2.110648 1.76157 2.067178 1.410916  
414197\_at 4.888483 4.508169 4.300866 4.943914 4.756462 3.913786 3.443542 4.661293  
4141\_at 6.646316 6.936969 6.260707 6.339288 6.005324 6.40959 6.792259 6.657244  
414201\_at 1.275759 2.083088 1.186888 0.911203 1.617099 1.483071 1.948356 1.797296  
414208\_at 2.185441 2.086048 2.843495 2.484434 2.689829 2.138591 2.404955 3.543845  
414224\_at 5.885646 6.211865 6.108721 6.332919 5.328885 5.96634 6.248689 5.967166  
414235\_at 2.925992 2.156341 2.452052 2.140845 2.1887 2.929801 2.297563 2.022539  
414236\_at 2.868353 2.966234 1.435194 1.930503 1.200107 3.003605 1.705159 1.890977  
414243\_at 2.233104 1.69864 1.283828 2.034679 1.600131 1.313921 1.222641 0.959549  
414245\_at 2.108142 1.535394 2.4242 1.905815 2.68488 2.643977 2.238229 3.07965  
414260\_at 1.889537 1.602658 2.123613 1.977359 1.318726 1.675822 2.172388 2.005973  
4142\_at 2.806258 1.614196 1.376515 1.434809 1.884009 1.335139 1.865034 1.823313  
414301\_at 1.428561 1.472628 1.667994 0.910104 1.721048 1.147007 1.887949 1.340431  
414318\_at 3.954568 4.516093 3.319742 4.89221 2.542532 4.905749 3.672725 5.107611  
414319\_at 0.892969 1.275047 1.179755 1.251976 1.539276 1.386881 0.955761 1.862  
414328\_at 3.756363 2.833977 3.005758 3.050313 3.929 3.324186 3.302865 4.150447  
414332\_at 1.788219 2.044405 2.622624 1.92603 1.713862 3.195246 1.593946 1.898616  
414351\_at 1.157152 1.621834 2.331266 2.13737 1.58045 1.437203 1.874245 1.591539  
4143\_at 2.011098 2.26473 2.232157 2.12085 2.367466 1.891539 2.451245 2.76733  
4144\_at 7.559314 8.294464 7.628376 7.943088 7.859922 8.250737 7.75443 8.32853  
4145\_at 3.178276 3.393518 2.922808 3.259564 2.777366 3.401496 3.752821 3.891378  
4146\_at 1.432825 1.582831 1.640933 1.385818 1.55588 1.042287 1.574555 1.473236  
414760\_at 3.295766 2.977243 2.639813 3.037669 4.681985 2.872546 2.111437 5.289126  
414764\_at 2.903521 3.417793 3.563514 3.406055 2.719738 2.523908 2.780593 2.510884  
414765\_at 6.226088 6.191311 5.69704 6.24861 6.643646 5.743269 6.40902 6.368821  
414766\_at 2.731083 3.243178 2.002973 2.050075 2.355607 2.385187 3.188561 2.092061  
414777\_at 4.580188 4.030683 3.737677 4.526467 5.572859 4.314688 4.534363 3.08892  
414778\_at 2.410457 1.561458 1.741331 1.651228 2.121089 1.773143 2.289936 1.890528  
4147\_at 6.363851 6.514988 6.726324 6.085271 6.377694 6.738466 6.918601 6.205396  
414899\_at 2.098602 1.713075 1.354285 1.397455 1.83182 1.505673 1.624753 2.065975  
4148\_at 4.952212 3.565263 5.850746 5.126024 5.943781 4.79558 4.165428 4.913417  
414918\_at 4.290316 4.078845 4.164382 4.194273 3.517344 4.832195 4.728892 3.826101  
414919\_at 3.852718 3.2782 1.982938 2.265855 2.608078 2.814585 2.295958 3.523974  
414926\_at 2.344855 2.27899 1.581973 1.580244 2.006458 1.662393 1.863984 1.592909  
4149\_at 9.267053 8.850868 9.276048 9.700733 9.078948 9.447415 9.356061 9.467553  
414\_at 4.560934 3.985734 4.554758 4.601327 4.734843 3.813544 4.702556 4.151319  
415056\_at 0.577187 1.115895 2.562662 2.953587 2.317312 0.661192 4.48163 0.760791  
4150\_at 5.386017 5.161062 4.659986 5.226628 4.590055 4.619971 5.715109 4.322812  
415116\_at 4.684649 4.563893 4.32685 3.819887 4.539906 4.813326 4.797323 3.646795  
415117\_at 2.796753 2.313944 1.694421 1.997382 1.397598 2.752102 2.123672 3.287777  
4151\_at 3.310313 2.231662 2.024086 2.506845 2.802684 2.409486 2.416023 3.017529  
4152\_at 5.731542 5.067106 4.493999 4.802635 4.361092 4.72707 4.826772 4.863976  
4153\_at 1.882066 1.363114 2.228554 1.453493 1.604788 1.169229 1.845034 1.560871  
4154\_at 7.658392 7.339626 7.930534 7.873543 7.779213 7.559643 7.934423 8.138177

|         |          |          |          |          |          |          |          |          |
|---------|----------|----------|----------|----------|----------|----------|----------|----------|
| 4155_at | 3.27839  | 2.510151 | 2.570675 | 2.86068  | 3.319532 | 4.22807  | 2.890624 | 2.703196 |
| 4157_at | 3.06237  | 2.710183 | 2.41056  | 2.375407 | 1.038109 | 1.735246 | 3.754087 | 3.60333  |
| 4158_at | 1.118798 | 1.571139 | 2.034087 | 1.236637 | 2.457117 | 1.3789   | 1.671586 | 1.703055 |
| 4159_at | 1.214161 | 0.840679 | 0.925021 | 0.999496 | 1.459583 | 2.111948 | 1.130302 | 1.014366 |
| 415_at  | 3.366068 | 2.773481 | 3.046696 | 2.334812 | 3.717403 | 3.03625  | 2.018196 | 3.431934 |
| 4160_at | 1.144234 | 1.0057   | 1.211058 | 1.402382 | 1.030897 | 1.33722  | 1.046512 | 1.424091 |
| 4161_at | 1.641424 | 1.251651 | 1.75826  | 1.576276 | 1.893458 | 1.148864 | 2.251392 | 2.304819 |
| 4162_at | 4.169767 | 4.554885 | 3.690315 | 4.650747 | 3.755946 | 4.310654 | 4.176533 | 4.393855 |
| 4163_at | 5.892546 | 5.571993 | 5.811137 | 5.849001 | 5.299029 | 5.789792 | 5.97522  | 6.043868 |
| 4166_at | 2.55823  | 1.910518 | 2.020361 | 2.394841 | 2.49769  | 2.449177 | 1.556488 | 1.489188 |
| 4168_at | 2.792578 | 2.893336 | 2.466592 | 2.205272 | 2.079104 | 2.096494 | 1.642643 | 1.638067 |
| 416_at  | 1.942571 | 1.340277 | 1.476944 | 1.212533 | 2.802366 | 1.530098 | 1.488035 | 1.079992 |
| 4170_at | 6.704993 | 7.087209 | 6.623414 | 7.237004 | 6.814185 | 6.681953 | 7.063374 | 6.774066 |
| 4171_at | 2.79046  | 2.305677 | 3.771863 | 3.574495 | 3.989772 | 3.161527 | 4.170433 | 3.532789 |
| 4172_at | 4.801844 | 5.808918 | 5.345587 | 5.999917 | 5.568358 | 5.257433 | 4.980347 | 6.056024 |
| 4173_at | 5.005891 | 5.328117 | 4.507171 | 4.54369  | 5.225786 | 4.619656 | 5.254109 | 4.231503 |
| 4174_at | 4.965973 | 4.430477 | 3.919432 | 4.907258 | 3.325962 | 3.853401 | 4.781965 | 3.827182 |
| 4175_at | 7.149224 | 7.760585 | 7.348047 | 7.240684 | 7.440714 | 7.131789 | 8.095887 | 7.322646 |
| 4176_at | 4.493011 | 4.801378 | 5.721534 | 4.659725 | 4.151024 | 4.605596 | 4.059622 | 4.786702 |
| 4179_at | 9.488751 | 9.628482 | 9.72172  | 9.56265  | 9.895963 | 9.030379 | 9.635453 | 9.844748 |
| 417_at  | 1.484265 | 1.212586 | 2.133525 | 2.135471 | 1.819602 | 1.688805 | 1.221237 | 2.48548  |
| 4184_at | 1.205306 | 1.262046 | 1.187597 | 1.257638 | 2.419778 | 1.139531 | 1.567485 | 1.565981 |
| 4185_at | 2.290805 | 2.38503  | 2.364397 | 2.190147 | 2.013544 | 2.190147 | 2.82925  | 2.229228 |
| 4188_at | 1.740651 | 2.699974 | 2.576638 | 2.887504 | 2.726644 | 2.656632 | 2.255852 | 2.302103 |
| 4189_at | 8.041231 | 8.637221 | 8.154636 | 8.079746 | 8.434447 | 7.480764 | 8.021495 | 9.047343 |
| 4190_at | 6.27818  | 6.756576 | 6.106169 | 5.725223 | 6.336038 | 6.119328 | 5.883059 | 6.762411 |
| 4191_at | 8.449917 | 7.865821 | 8.353927 | 8.156151 | 7.823255 | 8.277428 | 7.981068 | 7.381263 |
| 4192_at | 5.60798  | 6.364394 | 5.836112 | 4.721684 | 4.439191 | 4.802785 | 4.55658  | 4.387761 |
| 4193_at | 6.533575 | 6.793048 | 6.979158 | 7.096991 | 7.1236   | 6.247517 | 6.654248 | 7.259492 |
| 4194_at | 3.69485  | 4.739276 | 4.472189 | 4.584404 | 4.089773 | 4.371503 | 4.008874 | 4.547837 |
| 4199_at | 5.333542 | 5.364453 | 5.483829 | 5.410775 | 5.528379 | 5.328179 | 5.566007 | 6.154334 |
| 419_at  | 2.500677 | 1.548341 | 1.360478 | 1.773    | 1.93037  | 1.326719 | 2.124429 | 1.952831 |
| 41_at   | 1.737955 | 1.624065 | 1.831349 | 1.683722 | 1.989581 | 1.879436 | 2.736194 | 1.692324 |
| 4200_at | 5.967775 | 5.900884 | 5.618346 | 5.650464 | 6.140859 | 4.960232 | 5.174374 | 5.94058  |
| 4201_at | 8.326951 | 7.917503 | 7.792132 | 7.701408 | 7.513761 | 7.852344 | 7.677529 | 8.25174  |
| 4204_at | 6.092885 | 5.972834 | 6.125112 | 5.827532 | 5.644015 | 6.135916 | 5.732341 | 5.150349 |
| 4205_at | 7.068639 | 7.016472 | 6.762421 | 7.397118 | 7.07675  | 6.878467 | 6.756426 | 6.925707 |
| 4208_at | 6.24139  | 6.165615 | 6.123997 | 6.946599 | 6.618518 | 6.290554 | 6.750958 | 6.143043 |
| 4209_at | 7.37294  | 7.068994 | 7.242281 | 7.50704  | 6.48568  | 6.448874 | 7.619941 | 6.405012 |
| 420_at  | 4.689948 | 6.260401 | 5.494559 | 5.152897 | 4.638343 | 4.951016 | 4.420693 | 4.765499 |
| 4210_at | 2.429784 | 2.155279 | 2.58913  | 2.757259 | 1.726682 | 3.396034 | 2.740746 | 2.554856 |
| 4211_at | 5.844032 | 6.224659 | 5.933803 | 6.479837 | 6.488042 | 5.463724 | 5.494797 | 5.565466 |
| 4212_at | 6.998715 | 7.202719 | 7.452169 | 6.935003 | 7.918919 | 7.198784 | 7.521307 | 7.030907 |
| 4213_at | 5.84248  | 5.394656 | 3.475918 | 5.777238 | 5.14411  | 4.291334 | 5.086735 | 5.589714 |
| 4214_at | 5.626573 | 5.861642 | 5.095169 | 5.73137  | 5.722111 | 5.819856 | 5.277594 | 5.880063 |
| 4215_at | 5.480285 | 5.9865   | 5.756629 | 5.554042 | 5.413366 | 5.026121 | 6.207634 | 5.451248 |
| 4216_at | 5.307999 | 6.081421 | 5.49094  | 4.981538 | 5.388385 | 5.399365 | 5.097137 | 4.962203 |
| 4217_at | 5.723609 | 5.930573 | 4.98714  | 5.246998 | 4.585887 | 5.637267 | 5.18581  | 5.322145 |
| 4218_at | 6.294377 | 6.78328  | 7.041424 | 6.856314 | 6.812007 | 6.691261 | 6.778182 | 7.172222 |
| 421_at  | 2.60688  | 2.741385 | 3.578627 | 2.46362  | 3.598536 | 3.74183  | 2.724879 | 3.055532 |
| 4221_at | 4.426589 | 4.49645  | 4.69984  | 4.812606 | 4.159    | 4.696378 | 4.983841 | 4.060582 |



|           |          |          |          |          |          |          |          |          |
|-----------|----------|----------|----------|----------|----------|----------|----------|----------|
| 4222_at   | 2.169813 | 1.415024 | 1.985094 | 1.761371 | 1.908084 | 1.920173 | 2.672134 | 1.990635 |
| 4223_at   | 1.256609 | 2.106739 | 2.119479 | 2.054406 | 1.678939 | 1.703504 | 1.812712 | 1.910858 |
| 4224_at   | 1.073404 | 1.121711 | 1.050596 | 1.501329 | 1.311041 | 0.942206 | 1.410994 | 0.902786 |
| 4225_at   | 1.290066 | 1.401593 | 1.604242 | 1.932616 | 1.175239 | 1.894739 | 1.574371 | 1.683119 |
| 4232_at   | 4.41117  | 4.1911   | 3.134367 | 4.515946 | 5.839376 | 5.798825 | 3.541075 | 4.031454 |
| 4233_at   | 5.769768 | 5.550497 | 4.59992  | 5.175009 | 5.767103 | 6.187891 | 4.463759 | 5.043891 |
| 4234_at   | 4.252238 | 3.93501  | 3.554665 | 3.654863 | 4.53212  | 3.585203 | 1.774812 | 3.672886 |
| 4236_at   | 7.760962 | 7.906702 | 7.852581 | 8.589528 | 7.97455  | 7.940503 | 7.74505  | 8.084265 |
| 4237_at   | 3.933777 | 2.597819 | 2.059186 | 3.908603 | 1.977324 | 4.051189 | 2.587679 | 3.160251 |
| 4238_at   | 6.443212 | 6.560322 | 6.620137 | 6.816009 | 7.456746 | 6.378111 | 6.987593 | 7.01088  |
| 4239_at   | 4.619241 | 3.603024 | 5.798008 | 4.486362 | 5.278503 | 4.92998  | 3.565882 | 4.028164 |
| 4240_at   | 6.406348 | 7.567936 | 7.80623  | 7.278579 | 7.053369 | 6.848944 | 7.324327 | 7.245056 |
| 4241_at   | 1.993997 | 1.816685 | 2.556188 | 3.505754 | 4.074235 | 3.013955 | 1.520311 | 2.339395 |
| 4242_at   | 5.445878 | 4.81949  | 4.762945 | 4.938207 | 4.738161 | 5.076766 | 5.141519 | 4.716928 |
| 4245_at   | 3.469833 | 3.653846 | 4.066934 | 3.953723 | 3.964669 | 4.196572 | 4.0412   | 3.21391  |
| 4246_at   | 2.003473 | 1.530297 | 1.016764 | 1.135407 | 3.005345 | 1.21217  | 1.376811 | 1.366199 |
| 4247_at   | 3.36482  | 3.473547 | 3.305645 | 3.030417 | 3.147063 | 3.415106 | 2.987486 | 3.183254 |
| 4248_at   | 2.321268 | 3.791398 | 3.170576 | 2.745792 | 1.713383 | 2.614497 | 2.547804 | 3.356276 |
| 4249_at   | 8.190634 | 8.127624 | 8.655972 | 8.552316 | 8.618807 | 7.957116 | 8.487532 | 8.651665 |
| 425054_at | 1.115326 | 1.557428 | 2.574882 | 1.520315 | 1.697613 | 2.544903 | 1.319106 | 1.052639 |
| 4250_at   | 1.390754 | 1.055536 | 1.380512 | 0.893826 | 1.044212 | 1.848229 | 1.071415 | 2.373304 |
| 4253_at   | 2.588705 | 2.795504 | 2.531862 | 3.37002  | 3.675914 | 1.489287 | 2.731669 | 2.099265 |
| 4254_at   | 4.172549 | 3.795793 | 4.594031 | 5.010661 | 5.677593 | 4.515635 | 2.723168 | 5.214493 |
| 4255_at   | 5.808147 | 4.965736 | 5.557119 | 5.6976   | 4.447085 | 4.464769 | 5.001043 | 4.379584 |
| 4256_at   | 9.597621 | 9.952637 | 9.506748 | 9.847711 | 9.958452 | 9.647062 | 9.601634 | 9.589449 |
| 4257_at   | 4.334826 | 3.335707 | 3.88129  | 2.617679 | 4.237306 | 4.128375 | 2.583308 | 4.106001 |
| 4258_at   | 8.270889 | 8.640597 | 8.321302 | 8.426379 | 8.227736 | 8.598697 | 7.958197 | 8.21887  |
| 4259_at   | 9.260533 | 9.082012 | 9.048184 | 9.098825 | 8.922136 | 9.19784  | 9.057891 | 9.10227  |
| 4261_at   | 2.991261 | 4.317943 | 4.204196 | 3.632208 | 4.678157 | 3.527995 | 3.754883 | 2.859587 |
| 4267_at   | 9.264433 | 8.987636 | 9.301389 | 9.453765 | 8.763268 | 9.508925 | 9.60137  | 8.775881 |
| 4277_at   | 3.181038 | 3.46817  | 3.443484 | 3.161678 | 3.035761 | 3.431504 | 3.198061 | 3.672937 |
| 427_at    | 8.547237 | 8.265942 | 8.234413 | 8.570028 | 8.165061 | 8.141174 | 7.811327 | 8.678691 |
| 4281_at   | 2.581875 | 2.309804 | 2.763064 | 2.396112 | 2.809034 | 2.642197 | 2.410668 | 2.383624 |
| 4282_at   | 10.95705 | 10.18593 | 10.69979 | 10.35198 | 10.0445  | 10.67372 | 10.18063 | 9.831443 |
| 4283_at   | 8.450583 | 8.675109 | 6.614142 | 8.953482 | 7.036255 | 7.971546 | 8.688409 | 8.739034 |
| 4284_at   | 2.254577 | 2.5343   | 1.502025 | 1.706873 | 2.242435 | 1.877986 | 2.68036  | 1.640169 |
| 4285_at   | 4.627819 | 5.390949 | 3.81255  | 3.251125 | 5.687541 | 5.353219 | 3.926878 | 4.472668 |
| 4286_at   | 2.5784   | 2.859465 | 2.801854 | 2.618444 | 3.256741 | 3.029808 | 4.083586 | 2.777418 |
| 4287_at   | 5.201897 | 5.878096 | 6.306388 | 6.535527 | 5.750655 | 6.099001 | 6.14726  | 6.704071 |
| 4288_at   | 1.678627 | 2.765693 | 2.239423 | 3.835466 | 2.804655 | 1.630072 | 3.246006 | 3.799252 |
| 4289_at   | 6.995993 | 7.246649 | 7.005581 | 7.116429 | 7.498736 | 7.379859 | 6.58136  | 7.295533 |
| 4291_at   | 4.634791 | 4.684039 | 3.395875 | 2.9687   | 3.327999 | 3.583761 | 3.640199 | 4.610007 |
| 4292_at   | 5.82786  | 5.957091 | 5.641032 | 5.64809  | 5.838555 | 5.541416 | 5.418863 | 6.714935 |
| 4293_at   | 2.770172 | 2.442847 | 2.682544 | 2.121258 | 2.84845  | 2.181034 | 2.214601 | 2.295679 |
| 4294_at   | 2.87285  | 2.907577 | 2.912372 | 2.371871 | 2.195735 | 2.832122 | 2.180952 | 1.972141 |
| 4295_at   | 1.234392 | 1.899658 | 1.836416 | 1.454757 | 2.077934 | 1.201391 | 1.569354 | 1.489453 |
| 4296_at   | 4.433201 | 4.883698 | 4.090441 | 4.896671 | 4.82632  | 5.152673 | 4.826445 | 3.35233  |
| 4297_at   | 6.871498 | 7.292372 | 7.298238 | 7.647383 | 6.663134 | 7.123182 | 7.521686 | 7.030635 |
| 4298_at   | 6.327866 | 6.052616 | 6.066586 | 6.677262 | 5.669173 | 6.661015 | 6.482994 | 4.606389 |
| 4299_at   | 7.547967 | 7.947739 | 8.167485 | 8.449064 | 7.751405 | 8.200787 | 8.331031 | 7.284486 |
| 429_at    | 2.169104 | 2.952781 | 2.655082 | 1.614875 | 2.494815 | 2.232903 | 2.867753 | 2.753487 |

|           |          |          |          |          |          |          |          |          |
|-----------|----------|----------|----------|----------|----------|----------|----------|----------|
| 4300_at   | 6.159718 | 6.132856 | 5.790337 | 5.95342  | 6.252761 | 5.066666 | 5.94108  | 5.781356 |
| 4301_at   | 7.374648 | 7.204416 | 6.912672 | 7.53855  | 7.662677 | 7.445509 | 7.402412 | 7.587561 |
| 4302_at   | 4.938606 | 5.074405 | 4.401485 | 4.986709 | 4.063213 | 5.132636 | 4.564393 | 4.015884 |
| 4303_at   | 5.760798 | 5.903929 | 6.4142   | 5.608289 | 4.99984  | 5.150255 | 5.679255 | 5.570616 |
| 4306_at   | 5.476735 | 5.058119 | 5.371174 | 5.042844 | 5.206389 | 4.437959 | 5.686374 | 6.13454  |
| 4308_at   | 2.055796 | 2.231834 | 2.041085 | 1.660984 | 2.526914 | 1.901405 | 2.12752  | 2.233628 |
| 430_at    | 2.089272 | 1.751529 | 1.875065 | 2.169274 | 2.396514 | 1.142867 | 2.66529  | 1.784149 |
| 4311_at   | 10.56388 | 10.80331 | 10.69953 | 10.55449 | 10.45613 | 10.39496 | 10.54616 | 10.92777 |
| 4312_at   | 1.48292  | 1.738848 | 1.153445 | 1.342549 | 1.244788 | 1.437533 | 1.050379 | 1.797698 |
| 4313_at   | 4.428372 | 4.675088 | 4.410669 | 5.510118 | 5.348852 | 4.346523 | 3.512517 | 4.205878 |
| 4314_at   | 2.733829 | 1.307866 | 2.248344 | 3.237412 | 2.944652 | 2.400615 | 2.612839 | 3.112248 |
| 4316_at   | 6.578286 | 7.064725 | 6.196472 | 7.191998 | 5.918198 | 6.6115   | 4.388306 | 7.399955 |
| 431704_at | 1.64213  | 1.622899 | 1.413776 | 1.125599 | 0.903107 | 1.444569 | 1.724428 | 2.664592 |
| 431705_at | 1.980873 | 1.527349 | 1.43882  | 1.480813 | 2.070958 | 1.638701 | 1.45698  | 1.24316  |
| 431707_at | 1.6113   | 1.98411  | 1.833471 | 1.730346 | 1.758743 | 1.871041 | 1.902167 | 1.875094 |
| 4317_at   | 1.508986 | 2.02882  | 1.339253 | 1.699278 | 1.313781 | 1.379103 | 1.168149 | 1.115444 |
| 4318_at   | 2.302167 | 2.679447 | 2.390427 | 1.775543 | 1.539244 | 2.171632 | 1.871472 | 2.304415 |
| 4319_at   | 1.419409 | 1.644203 | 1.654631 | 1.532945 | 1.762013 | 1.579768 | 1.770138 | 2.099413 |
| 4320_at   | 3.699387 | 3.298088 | 3.852358 | 3.120169 | 2.538834 | 2.909171 | 3.270315 | 3.184737 |
| 4321_at   | 1.807002 | 1.446338 | 2.474351 | 1.913098 | 1.733886 | 1.394482 | 1.694354 | 1.226314 |
| 4322_at   | 1.020483 | 1.818289 | 2.387539 | 1.420302 | 1.6044   | 0.769806 | 1.755913 | 1.096008 |
| 432369_at | 2.883795 | 2.459008 | 3.24245  | 3.322042 | 2.263283 | 2.767855 | 1.822529 | 2.55805  |
| 4323_at   | 6.091111 | 6.638676 | 6.407568 | 7.148852 | 5.551333 | 7.087716 | 4.692601 | 6.833515 |
| 4324_at   | 4.522712 | 3.263729 | 4.224434 | 4.049767 | 3.1634   | 3.675455 | 5.099078 | 3.239976 |
| 4325_at   | 4.027431 | 4.906691 | 5.287568 | 2.696913 | 3.978086 | 2.972887 | 2.762897 | 3.924152 |
| 4326_at   | 2.553123 | 2.576548 | 2.654301 | 2.18014  | 2.286087 | 1.958276 | 2.704456 | 2.479629 |
| 4327_at   | 2.437287 | 2.287009 | 2.407142 | 2.714848 | 2.897288 | 2.14976  | 2.341894 | 2.395269 |
| 4329_at   | 6.97811  | 6.618751 | 6.273771 | 5.323729 | 7.311245 | 6.411963 | 5.701722 | 7.028732 |
| 432_at    | 2.408049 | 3.597508 | 2.433456 | 2.617083 | 3.02673  | 3.511011 | 2.316413 | 3.344364 |
| 4330_at   | 5.320743 | 5.718535 | 5.570692 | 6.493404 | 5.974581 | 5.643296 | 5.808758 | 5.611268 |
| 4331_at   | 6.19375  | 5.787632 | 5.296564 | 5.422871 | 6.268627 | 5.585378 | 5.635822 | 6.028739 |
| 4332_at   | 5.086739 | 4.958792 | 4.389861 | 5.087343 | 3.681837 | 5.430702 | 4.378009 | 3.955593 |
| 4335_at   | 4.346445 | 5.024485 | 4.754573 | 4.319261 | 4.980072 | 4.716749 | 4.58023  | 4.874884 |
| 4336_at   | 0.91197  | 0.93804  | 1.278556 | 0.73705  | 1.137899 | 0.966906 | 1.541221 | 1.914509 |
| 4337_at   | 4.216262 | 3.032977 | 4.134878 | 4.218513 | 3.258106 | 4.091641 | 3.636793 | 4.134009 |
| 4338_at   | 7.848062 | 7.070567 | 6.854009 | 6.940163 | 7.030552 | 7.122811 | 6.944348 | 7.566788 |
| 433_at    | 3.325768 | 3.150854 | 3.4398   | 2.570761 | 3.434243 | 3.525204 | 3.731551 | 2.982197 |
| 4340_at   | 1.683018 | 1.26446  | 1.422521 | 1.879742 | 2.130517 | 1.842495 | 2.072163 | 1.593983 |
| 4342_at   | 1.765892 | 1.945204 | 1.902822 | 1.98952  | 1.757275 | 1.991459 | 2.589785 | 2.627432 |
| 4343_at   | 4.921908 | 4.935221 | 4.814838 | 5.047779 | 4.194153 | 4.990777 | 4.64499  | 4.278378 |
| 4345_at   | 6.870487 | 6.350601 | 6.883096 | 6.476497 | 7.020628 | 7.091018 | 7.411335 | 6.204586 |
| 434_at    | 1.8105   | 1.983362 | 1.989558 | 1.916412 | 2.335229 | 2.35609  | 2.750184 | 3.343124 |
| 4350_at   | 5.889375 | 5.16878  | 4.950245 | 4.827305 | 4.952846 | 5.457066 | 4.427738 | 4.638333 |
| 4351_at   | 6.10098  | 5.123505 | 6.696996 | 5.499571 | 5.24786  | 6.324784 | 5.965307 | 5.432799 |
| 4352_at   | 2.670116 | 1.851829 | 2.438031 | 1.951597 | 2.642474 | 1.72196  | 2.383388 | 1.376868 |
| 4353_at   | 2.575322 | 2.106459 | 2.027365 | 2.10014  | 2.27057  | 1.9061   | 2.120355 | 2.05152  |
| 4354_at   | 5.026214 | 5.096195 | 5.458307 | 5.71464  | 6.169527 | 5.861915 | 5.35098  | 5.996156 |
| 4355_at   | 2.219986 | 1.77576  | 1.29007  | 1.087286 | 2.440809 | 0.987208 | 1.747658 | 1.913469 |
| 4356_at   | 3.392122 | 3.153465 | 3.00525  | 3.037374 | 2.582199 | 3.858767 | 2.540425 | 2.575017 |
| 4357_at   | 3.739241 | 3.939156 | 3.33384  | 3.647206 | 3.266394 | 4.267222 | 2.943786 | 3.816759 |
| 4358_at   | 6.863921 | 7.242042 | 6.856176 | 7.680933 | 6.493799 | 6.593178 | 6.685459 | 6.629088 |

|           |          |          |          |          |          |          |          |          |
|-----------|----------|----------|----------|----------|----------|----------|----------|----------|
| 4359_at   | 1.846831 | 1.585572 | 1.274086 | 1.511618 | 1.721113 | 1.766416 | 1.150226 | 2.914019 |
| 435_at    | 5.284052 | 4.860226 | 4.807938 | 4.556087 | 4.98379  | 4.679331 | 4.103552 | 3.934479 |
| 4360_at   | 3.048839 | 2.417784 | 4.310022 | 4.111844 | 3.1058   | 3.2557   | 5.705335 | 3.606439 |
| 4361_at   | 6.048975 | 5.754754 | 5.600006 | 5.059355 | 5.371754 | 4.528677 | 4.914908 | 6.751531 |
| 4363_at   | 5.62189  | 6.626581 | 6.07518  | 6.573145 | 5.616017 | 6.336263 | 6.045264 | 5.841859 |
| 43847_at  | 1.832645 | 2.432501 | 2.396717 | 1.44106  | 1.717463 | 2.289403 | 1.35797  | 1.15741  |
| 43849_at  | 2.140176 | 1.458707 | 2.074578 | 1.454023 | 1.527876 | 2.178066 | 1.738818 | 1.957346 |
| 438_at    | 1.236323 | 1.889562 | 1.905647 | 2.071913 | 2.448417 | 2.052523 | 2.330943 | 1.870488 |
| 439915_at | 2.534044 | 2.299975 | 3.077907 | 3.084501 | 2.606379 | 2.239223 | 3.645537 | 3.03646  |
| 439916_at | 1.364274 | 1.309311 | 1.606226 | 1.849061 | 1.124654 | 1.114305 | 1.188117 | 1.421995 |
| 439921_at | 7.09393  | 7.062182 | 7.599127 | 6.886106 | 6.342007 | 6.9747   | 6.356453 | 7.394666 |
| 439927_at | 1.269886 | 1.339012 | 1.748381 | 1.979718 | 2.488802 | 1.475943 | 1.903644 | 1.711501 |
| 439931_at | 3.003777 | 3.143215 | 3.389774 | 3.492698 | 2.979665 | 2.951953 | 3.339094 | 2.146628 |
| 439933_at | 1.885207 | 1.148035 | 1.027897 | 1.191431 | 1.086851 | 0.613838 | 0.658528 | 1.371369 |
| 439934_at | 1.07498  | 1.797148 | 1.786017 | 1.209425 | 1.251878 | 1.235982 | 2.615642 | 1.199037 |
| 439941_at | 1.59686  | 1.497001 | 2.206311 | 2.418676 | 2.194022 | 2.14002  | 1.422008 | 1.427353 |
| 439949_at | 2.589159 | 1.545753 | 1.562575 | 2.399595 | 2.73527  | 3.015044 | 1.497595 | 1.727731 |
| 439950_at | 1.210888 | 1.023411 | 1.748741 | 0.979739 | 1.371304 | 1.221116 | 1.057756 | 1.201878 |
| 439965_at | 0.816225 | 0.86035  | 0.72481  | 1.616854 | 1.818033 | 1.520902 | 2.276072 | 0.678914 |
| 439990_at | 1.112237 | 1.717013 | 1.898983 | 1.503184 | 1.426725 | 1.397312 | 2.033803 | 1.718823 |
| 439994_at | 2.960949 | 3.873416 | 3.731744 | 3.022875 | 1.252923 | 4.12856  | 4.641572 | 3.555357 |
| 439996_at | 1.156293 | 1.08586  | 1.204963 | 1.533354 | 1.128051 | 1.869401 | 1.747301 | 1.562737 |
| 439_at    | 6.271986 | 6.321078 | 6.262496 | 6.242861 | 7.240499 | 6.365068 | 5.877493 | 6.758814 |
| 43_at     | 1.775607 | 2.622342 | 1.890022 | 2.00495  | 2.342735 | 1.130292 | 1.813627 | 2.51439  |
| 440021_at | 2.609122 | 2.458646 | 1.946914 | 3.125761 | 1.683786 | 1.859575 | 1.538352 | 1.995668 |
| 440023_at | 2.4706   | 2.303928 | 2.865102 | 2.533132 | 2.604134 | 3.08734  | 3.07344  | 1.996387 |
| 440026_at | 4.952916 | 5.144947 | 5.562328 | 5.498037 | 5.177679 | 4.960789 | 4.949382 | 5.803933 |
| 440028_at | 0.929511 | 1.693374 | 1.36676  | 1.092251 | 1.197649 | 1.268408 | 1.850962 | 1.586066 |
| 440034_at | 2.584346 | 1.835644 | 2.71393  | 1.704017 | 2.135275 | 1.514864 | 1.961909 | 1.915742 |
| 440040_at | 1.87877  | 3.138508 | 1.790061 | 2.426263 | 4.366976 | 1.533408 | 5.576443 | 3.372552 |
| 440041_at | 0.977389 | 1.415981 | 1.404747 | 1.206235 | 1.786295 | 1.605742 | 1.393924 | 1.513176 |
| 440044_at | 1.634036 | 2.317038 | 2.271399 | 1.890942 | 2.390302 | 1.846666 | 2.266893 | 2.383    |
| 440050_at | 7.214284 | 7.36064  | 7.534451 | 7.499875 | 7.305143 | 6.767898 | 7.537132 | 7.411647 |
| 440068_at | 1.57735  | 1.356246 | 2.813734 | 1.336064 | 2.738897 | 2.839469 | 1.768664 | 2.671604 |
| 440072_at | 1.128245 | 1.339257 | 1.284222 | 1.593123 | 2.540978 | 1.400392 | 1.700915 | 1.626614 |
| 440073_at | 3.798019 | 3.459492 | 4.532142 | 4.47303  | 2.878043 | 4.428061 | 3.820556 | 2.648399 |
| 440077_at | 1.448686 | 1.925001 | 2.530984 | 1.998426 | 2.530038 | 1.088814 | 2.005667 | 1.518141 |
| 440078_at | 2.693448 | 3.905178 | 5.224491 | 4.111235 | 3.551695 | 4.57081  | 3.913211 | 2.853663 |
| 440081_at | 4.663548 | 4.000995 | 3.728057 | 3.105092 | 3.585693 | 3.908055 | 3.565089 | 2.70762  |
| 440087_at | 5.911535 | 5.747841 | 5.470933 | 4.366077 | 3.583378 | 3.993738 | 4.335918 | 5.317801 |
| 440093_at | 1.482201 | 1.263159 | 1.446051 | 1.874591 | 0.782904 | 0.748075 | 0.685013 | 1.28906  |
| 440097_at | 1.859055 | 2.203929 | 2.638595 | 1.714793 | 2.652879 | 1.613472 | 1.809954 | 2.007197 |
| 440101_at | 2.087127 | 1.472739 | 1.848068 | 2.288428 | 1.349404 | 1.517408 | 1.53093  | 1.853001 |
| 440104_at | 3.734358 | 3.206496 | 4.234093 | 4.077386 | 2.984451 | 4.736957 | 3.384423 | 3.264199 |
| 440107_at | 1.242698 | 0.931846 | 1.731713 | 0.89279  | 1.645724 | 1.367412 | 1.310437 | 1.111576 |
| 440117_at | 1.343105 | 1.65119  | 1.736821 | 1.345936 | 1.99107  | 1.518699 | 1.450628 | 1.998427 |
| 440119_at | 1.343658 | 1.19081  | 1.464329 | 2.893581 | 2.323729 | 1.631044 | 2.408391 | 2.341628 |
| 440131_at | 2.256906 | 2.366491 | 2.859603 | 3.092768 | 2.863211 | 3.073941 | 2.583013 | 2.654167 |
| 440132_at | 2.190673 | 2.143107 | 1.660234 | 4.391186 | 2.346802 | 3.419019 | 4.425196 | 0.820033 |
| 440138_at | 6.122214 | 7.508782 | 7.34018  | 7.765766 | 7.975566 | 6.946886 | 6.808888 | 7.678512 |
| 440145_at | 3.722692 | 3.759694 | 3.774511 | 3.756572 | 4.263825 | 3.08917  | 4.388528 | 3.835681 |

440153\_at 1.461185 0.644719 0.646325 1.03557 2.11239 2.195477 0.63795 1.452017  
440163\_at 1.536497 0.829462 1.308195 1.428677 1.796795 2.198758 1.428677 1.373401  
440173\_at 5.362334 4.446973 5.334801 2.527319 3.087803 3.719829 4.658564 4.154779  
440184\_at 2.181166 1.48256 1.21512 0.954059 1.243189 1.501166 1.082948 1.397131  
440193\_at 3.811222 4.338993 4.266258 4.360953 4.149581 3.721398 4.562785 3.522399  
440248\_at 3.677346 3.729736 4.21185 4.115918 3.078113 4.72047 4.441995 4.582284  
440270\_at 7.146306 4.111914 2.298868 6.204106 3.897892 6.286925 4.704275 5.208375  
440275\_at 5.73992 6.011455 5.341789 5.807565 5.239039 5.070673 5.362562 6.120366  
440278\_at 4.602463 3.921673 4.746678 4.065536 1.839816 2.157197 3.903289 5.182445  
440279\_at 1.108524 1.271345 1.057217 1.168963 1.530358 1.352544 1.153511 1.368196  
440288\_at 3.945868 2.047271 3.476079 2.785433 1.962005 3.600481 3.936021 2.245252  
440307\_at 1.572165 1.46393 1.973996 1.509909 2.396713 2.602214 1.754698 2.299759  
440313\_at 2.850546 3.543193 2.833859 3.289593 3.16246 4.080086 3.463437 3.713253  
440335\_at 1.896927 2.215928 2.163114 1.564398 2.657791 2.925374 2.05286 3.220083  
440337\_at 1.004526 1.736709 1.308568 1.544136 2.296718 1.673969 1.843158 1.235473  
440348\_at 3.461194 5.093285 4.305113 3.840874 4.653665 3.354739 3.826969 3.212897  
440356\_at 1.265136 1.649626 1.6683 1.974489 1.819826 2.270617 2.707617 1.670304  
440359\_at 3.896588 4.632056 3.618776 3.894621 3.85252 3.768817 3.649526 3.844331  
440387\_at 2.117526 2.089247 2.82432 2.815361 1.57723 2.27193 1.706793 2.107856  
440390\_at 1.245794 0.946429 1.192056 0.718371 1.158295 1.56026 1.868677 1.182575  
440419\_at 1.302484 0.967093 1.55772 0.799641 1.810555 1.263968 1.730387 1.405401  
440435\_at 2.612848 2.395348 2.700922 2.57532 3.287806 2.391757 2.903913 2.78669  
440446\_at 1.712995 2.128656 1.900224 1.742199 1.977729 2.043927 2.153929 2.026698  
440452\_at 1.41561 1.208845 1.272648 1.846154 1.177056 0.846799 1.136755 2.052529  
440456\_at 4.430279 1.529736 2.794299 4.577177 5.125005 3.600683 6.055078 3.685553  
440461\_at 2.018562 3.113419 1.55131 1.721814 2.692895 2.361438 2.067067 1.612159  
440465\_at 2.727106 3.751981 2.361062 2.763224 2.20794 3.116183 3.618945 2.455819  
440482\_at 1.722518 0.927329 2.770512 0.893414 2.617191 1.221239 0.932992 1.82783  
440498\_at 6.737299 5.892465 6.69455 5.882574 6.345538 6.414347 6.318986 6.127261  
440503\_at 2.968853 2.802521 4.034783 3.447885 3.472267 3.387946 4.24773 3.905559  
440508\_at 1.154242 1.239754 0.84992 2.025553 1.872894 2.184383 1.254512 1.80627  
440515\_at 5.955722 5.330534 6.016791 6.541881 4.91778 4.330908 6.786381 3.771124  
440518\_at 1.425281 1.465506 1.763993 1.363445 1.762231 0.879139 1.843418 1.266053  
440556\_at 3.512374 2.817072 3.531915 3.348043 4.063181 3.11107 2.372269 2.833465  
440560\_at 0.78975 0.976993 1.315123 1.127944 0.790555 1.272723 1.047709 1.585216  
440567\_at 6.693026 7.268104 7.309085 6.997332 7.052623 7.467104 6.44881 7.32122  
440574\_at 3.253289 4.160356 3.214987 2.965092 2.772094 3.283509 3.543702 2.252228  
440584\_at 2.874038 2.203638 1.92829 2.268354 2.64801 2.588603 2.354189 1.568724  
440585\_at 3.158737 3.001927 3.371056 3.293257 2.733953 2.00094 2.852795 2.821412  
440590\_at 1.855416 2.772157 1.566528 1.86535 2.87889 2.211171 2.022082 1.823241  
440594\_at 1.195541 1.299438 2.097594 1.737888 1.936322 1.590422 1.613522 2.104045  
440600\_at 1.495512 1.729995 1.659917 1.817451 1.480237 2.459514 1.571946 1.835404  
440602\_at 1.485668 1.523866 1.781813 1.830509 2.224438 1.989292 2.042878 1.828023  
440603\_at 1.905781 1.372355 1.639386 1.452864 2.935593 2.118805 2.257484 1.39322  
440695\_at 1.235195 1.625597 1.798448 1.789885 1.919424 1.643367 1.360123 1.641765  
440699\_at 1.563578 1.687591 1.473468 1.504333 1.112724 1.553251 2.161569 1.351442  
440700\_at 2.854694 2.256811 2.342852 1.937834 1.776389 2.245004 2.288744 1.58685  
440704\_at 1.119271 1.595751 1.75707 1.625714 1.849112 1.08274 1.296927 1.263964  
440712\_at 3.422052 3.619409 4.391708 5.053492 2.158749 6.406058 2.733464 4.703927  
440730\_at 2.454763 2.266843 2.294463 1.831174 2.114441 2.582387 2.099778 3.05752  
440738\_at 1.917668 2.005549 1.627071 1.756008 1.902517 1.831471 2.809618 3.526207

440742\_at 1.26691 1.351003 2.537539 1.347081 1.301054 0.91335 2.568967 1.759196  
440757\_at 1.539765 1.631957 1.140501 2.009432 1.567037 1.450436 2.023717 1.134496  
440799\_at 1.329151 1.654747 2.03485 0.931285 1.064131 1.863689 2.540567 1.372883  
440822\_at 1.430181 1.660208 2.077337 1.332423 2.134752 1.226617 1.864846 1.447901  
440823\_at 1.588546 1.643046 1.398861 1.960506 2.431177 1.600539 1.657997 2.190156  
440829\_at 3.526632 3.017526 2.440087 3.21303 3.142793 2.936509 3.25816 3.370564  
440836\_at 5.184148 5.133477 4.265619 4.04495 4.043855 4.325839 4.846213 4.770871  
440854\_at 1.457068 1.159366 1.090524 1.022327 1.764564 2.186231 2.189031 1.81101  
440888\_at 1.141931 1.546571 0.852569 1.020208 1.829449 0.748112 1.365994 1.760917  
440900\_at 1.548581 2.472437 2.361383 2.044698 2.936809 1.399479 2.488864 2.121458  
440905\_at 1.654453 1.358318 1.314198 1.830181 1.74583 0.840663 1.324824 0.912077  
440910\_at 1.957985 1.303213 1.392616 2.213275 2.679604 2.107781 2.404333 1.340642  
440925\_at 2.965157 1.830531 2.073486 1.997012 2.228553 2.36275 2.701795 2.328182  
440934\_at 3.075046 3.273285 2.891474 3.318326 3.72819 3.403913 2.735429 3.34392  
440944\_at 3.777431 4.782329 4.468678 4.193255 4.321379 3.431088 5.295692 4.963948  
440952\_at 2.36404 2.372375 2.14435 1.912303 2.426304 1.821274 1.538848 3.254811  
440955\_at 4.670512 4.49291 4.354409 4.250551 5.107902 3.977506 5.56716 5.208053  
440956\_at 1.623189 1.6958 1.346134 1.00067 2.13442 1.480446 1.777832 1.917693  
440957\_at 8.71805 8.706099 8.258371 8.637067 8.217937 9.074601 8.378526 8.124843  
440970\_at 1.226685 1.299321 1.257687 1.009943 1.421 1.371684 1.546628 1.617547  
440982\_at 1.721215 1.426095 1.739272 1.164553 1.807192 2.718353 2.400104 1.39422  
440993\_at 1.802174 1.713765 2.011755 2.944752 2.607485 2.058221 1.621715 3.415657  
440\_at 4.913202 3.480869 4.531544 3.806082 4.958504 4.092476 4.760602 4.390013  
441009\_at 0.593103 1.188582 1.276424 1.196368 1.461585 1.295365 0.906442 0.957562  
441024\_at 2.639656 2.966236 2.015876 1.691573 2.578696 1.888755 2.374554 2.370189  
441025\_at 0.976125 1.171152 1.128237 1.094408 1.22685 1.525806 1.252101 1.417779  
441027\_at 7.743979 7.99084 8.564655 8.046989 7.254121 7.448781 7.631885 7.693054  
441046\_at 1.944808 1.533712 2.576677 1.714627 1.890986 1.378884 1.610946 2.669278  
441054\_at 2.619588 2.608818 2.778275 2.482819 2.066149 3.383282 2.368414 2.094302  
441061\_at 1.014159 1.610696 1.331572 2.288295 2.300149 1.358107 1.639402 2.225699  
441072\_at 2.164378 2.258992 2.350424 1.659876 1.695736 1.779126 2.921982 1.997213  
441089\_at 2.382867 1.149124 1.079132 1.560196 0.705439 1.266963 0.85898 1.188975  
441094\_at 2.609433 2.528966 2.369581 2.289635 2.183144 2.475686 2.534085 2.940446  
441108\_at 7.052291 7.181922 6.266838 6.325866 5.541633 6.68367 6.833368 5.884125  
441116\_at 1.006704 1.241159 1.392674 0.94299 1.448491 1.36674 0.984132 1.161938  
441150\_at 6.686689 5.773117 6.107117 5.815129 5.352288 5.828563 5.295265 5.664813  
441151\_at 1.594102 3.119064 2.439298 1.113088 1.571249 1.132262 1.279294 1.942967  
441161\_at 1.338205 1.266084 1.336276 1.285846 4.621685 1.131341 2.007298 2.391587  
441168\_at 3.672863 3.385603 4.393592 3.985324 4.063306 3.391685 3.179069 3.657961  
441172\_at 2.875932 2.349309 2.741744 3.404418 2.647136 3.723057 2.996193 1.65541  
441177\_at 1.663898 2.867412 2.127905 1.803663 2.411542 3.314624 2.656166 2.638553  
441179\_at 1.758668 1.544635 1.674678 1.121952 2.145535 1.206272 2.171193 1.656761  
441191\_at 1.270041 0.834067 1.223127 1.334012 0.741329 2.136561 1.642992 2.281633  
441194\_at 2.36727 2.992001 1.939301 4.462537 4.941246 3.020884 3.394432 4.028291  
441204\_at 4.569115 5.241668 5.010122 3.615666 4.86155 3.306835 4.873446 4.966573  
441208\_at 1.767998 2.902472 4.672748 4.429994 3.206064 4.045403 3.836006 3.444026  
441212\_at 4.188273 3.507761 4.138052 4.19825 2.623683 3.465075 4.128747 4.466353  
441234\_at 1.36117 1.447477 2.168837 1.848428 1.341329 1.532052 2.505753 1.835136  
441239\_at 1.806177 2.25472 1.603994 2.02608 3.263591 1.945161 1.483832 2.05161  
441250\_at 2.523574 2.988376 1.95236 3.052198 3.713785 2.888823 3.158549 2.885861  
441263\_at 6.176763 3.643531 5.087684 3.422211 2.226016 5.580572 3.944985 3.523409

441272\_at 1.674987 1.193505 1.382855 1.319567 1.550812 2.148668 0.958972 1.602893  
441282\_at 1.284669 2.640242 1.28591 2.044965 1.99792 1.461801 3.280727 2.523016  
441307\_at 3.122614 3.918159 4.043986 3.44306 3.177531 3.063976 3.893117 2.616814  
441328\_at 4.276324 4.774276 4.980616 4.393085 5.998073 5.451324 5.815968 3.777256  
441355\_at 1.273553 1.644875 1.147781 1.47177 1.269697 0.954724 1.029877 1.614215  
441369\_at 1.377484 1.260719 1.677319 1.233862 1.762512 1.185948 1.6065 1.497059  
441374\_at 1.084401 1.494973 1.52393 1.690916 1.791841 1.982077 1.837522 1.504624  
441376\_at 1.519455 1.032431 0.872427 0.941723 1.365213 1.483721 2.186081 1.386987  
441381\_at 3.48923 3.126314 3.405457 3.33788 5.491001 4.255205 2.85646 1.590416  
441389\_at 1.321122 1.351671 1.32205 1.225214 1.349025 1.299481 1.869107 2.350458  
441394\_at 3.246424 4.530502 3.944411 4.762754 2.836807 2.773129 3.310299 3.301777  
441452\_at 1.150275 2.668092 1.977356 2.384158 3.26774 3.094436 2.8192 3.377911  
441454\_at 2.808883 1.902595 3.044046 3.528278 6.155812 2.466971 3.930305 3.226995  
441455\_at 1.54972 1.771299 1.128632 1.501367 2.418733 0.843296 1.901274 1.076372  
441457\_at 2.238215 2.250056 2.577527 2.301077 3.096589 2.512071 2.986571 2.293637  
441461\_at 2.028324 4.903336 1.603517 0.965901 1.245051 2.74027 3.387505 1.289283  
441476\_at 1.762046 2.123678 2.331585 2.261596 2.426785 2.294606 2.424163 1.90958  
441478\_at 4.629656 4.144173 4.697268 4.479038 5.203183 3.917154 3.719652 4.158116  
441493\_at 2.952952 1.772721 1.348433 1.248673 1.249302 1.446088 2.545603 1.754224  
441502\_at 1.619228 2.155363 2.141418 2.088699 2.010855 2.288 2.818026 1.892697  
441509\_at 2.12435 1.212038 2.014162 1.686603 1.404804 1.782958 1.917969 1.102882  
441518\_at 2.344029 2.908328 3.515894 2.911459 1.750024 2.692192 3.34368 2.307835  
441525\_at 1.326199 1.347607 2.236004 1.346624 1.957452 1.871886 0.921862 1.373251  
441531\_at 3.289074 4.220247 3.97294 3.959419 4.795158 3.629843 3.838327 4.1434  
441549\_at 2.450742 2.598594 2.809804 2.936547 2.085282 2.618262 2.816046 3.217282  
441601\_at 2.084572 2.284322 2.340061 1.690615 2.45813 1.713857 2.670976 1.493931  
441608\_at 1.239607 1.332559 0.436316 1.21478 2.164532 0.993225 1.526704 2.367816  
441631\_at 3.394657 2.615411 3.904782 2.567236 2.764928 2.083645 2.858196 2.767504  
441639\_at 1.964315 1.503668 1.371656 1.172019 1.135917 1.827993 2.292982 1.25897  
441666\_at 0.831106 2.037443 1.000385 1.120595 0.896208 1.150351 1.244407 1.029248  
441669\_at 1.608235 1.784945 1.282942 1.293853 1.769094 0.841012 1.771511 1.869884  
441687\_at 1.034067 0.779333 0.929841 0.723754 1.007417 1.111141 0.9239 1.143858  
441728\_at 1.76398 2.050935 2.215595 1.999265 2.739068 3.565374 1.522294 3.817819  
441733\_at 1.663487 2.729056 2.37175 2.676926 2.571342 1.946826 2.104701 1.946455  
441818\_at 1.155462 1.451585 1.359373 1.774624 1.805891 2.38959 1.702706 1.824191  
441864\_at 2.544629 2.471969 1.877143 1.749027 2.528296 2.935363 2.175028 2.570299  
441869\_at 4.85681 5.334916 5.084077 5.121291 5.301101 4.72437 5.34838 4.699319  
441897\_at 1.879352 1.723697 1.324689 1.866661 2.436847 1.321067 2.018516 2.244816  
441908\_at 1.807613 1.717558 1.951105 2.103072 2.315051 2.076827 2.91414 1.335366  
441911\_at 1.517333 2.072582 1.85784 1.7122 2.13472 1.288439 1.533499 2.4895  
441932\_at 1.488652 0.932704 1.475678 1.212461 1.380717 1.052641 1.319635 1.113041  
441933\_at 1.36612 2.702169 2.411189 1.512016 2.684227 1.93185 1.500549 1.616158  
441951\_at 8.315284 7.283457 7.899445 8.557051 8.354136 8.22418 7.723239 8.775234  
442028\_at 2.037811 1.566779 1.499314 1.19499 1.970664 1.430603 1.25783 2.042368  
442038\_at 1.745803 0.839952 1.526479 0.787271 1.537243 2.390984 1.030844 1.235433  
442075\_at 2.235263 2.277661 2.021554 2.034181 1.878276 2.029378 2.213528 1.779473  
442117\_at 1.391993 1.533556 1.7135 1.604277 1.948588 1.474449 1.873131 1.607491  
442132\_at 1.608464 1.08494 2.422531 0.733705 1.215129 1.161226 1.394328 0.939529  
442184\_at 0.863765 0.900881 1.026497 1.412657 1.344649 0.938515 1.289591 1.287255  
442186\_at 1.158723 1.217725 1.270481 0.811159 1.553971 1.399701 1.127546 1.560786  
442191\_at 1.118075 1.547264 1.528823 0.897692 1.880908 0.607274 0.837346 1.537251

442194\_at 1.554686 1.867481 1.813213 1.715877 1.831833 1.453256 2.177637 2.334769  
442211\_at 4.233097 3.652095 3.465979 3.820964 4.331755 3.827809 3.962675 3.797518  
442213\_at 4.259084 2.953977 3.21999 2.175082 2.046876 2.180909 3.301032 2.049061  
442229\_at 2.395342 1.808832 1.300418 1.517716 1.810453 1.661554 1.738632 1.827854  
442245\_at 4.663602 4.543334 4.094989 4.666111 3.631062 4.055827 4.278575 4.175268  
442247\_at 1.37231 1.488334 1.380186 1.202268 1.510039 1.06332 1.469831 1.767849  
442319\_at 3.857196 4.043222 4.85527 2.47473 4.548316 3.604688 3.319249 5.484177  
442361\_at 1.532818 0.969372 1.324053 2.957098 1.967953 1.971582 1.370326 1.366179  
442388\_at 1.861863 1.147806 1.719646 1.098286 2.694566 1.272792 3.435444 2.096364  
442421\_at 3.109643 2.684718 3.066654 2.358967 3.726625 2.303312 2.587883 2.713853  
442425\_at 1.60481 1.874672 2.201904 1.894399 2.065628 2.181814 1.655848 1.600332  
442444\_at 2.207897 1.482034 1.693711 1.456383 1.792422 1.693711 1.419573 1.221357  
442454\_at 3.490119 3.62847 2.644549 4.138045 3.348998 3.678174 3.947807 2.556541  
442459\_at 1.883308 2.619097 1.798577 1.850626 1.281491 1.158136 1.599091 1.388185  
442497\_at 2.040578 1.263948 1.274038 1.397418 1.510967 1.151427 1.427606 1.606445  
442523\_at 1.583943 1.692388 1.482998 1.414793 1.49968 1.466924 1.401304 1.706131  
442524\_at 3.482279 2.644435 3.155381 2.657276 3.393882 1.776743 3.589638 2.332073  
442590\_at 4.811505 3.154003 5.140513 3.356004 2.928033 3.484112 4.696082 4.081433  
442720\_at 1.126599 1.335545 0.900174 1.460848 0.946278 2.073056 1.436963 1.541965  
442721\_at 1.586712 1.601705 2.427758 1.956816 1.719654 2.136019 1.793541 2.37809  
442890\_at 3.602827 2.69743 2.489777 2.788837 3.535042 2.704038 1.961019 2.95218  
442891\_at 2.182783 2.825223 2.156701 2.042766 2.366986 2.087277 2.891483 2.783998  
442892\_at 2.057989 1.785346 1.221877 0.822766 1.591123 1.495915 1.067839 1.272669  
442893\_at 1.751441 1.30263 0.728369 0.888628 1.18534 1.229208 0.748531 0.903135  
442894\_at 0.566931 2.349584 0.832618 0.960064 1.10408 0.873285 1.008223 0.697191  
442895\_at 2.256511 4.110231 1.274439 1.536449 2.271662 1.335786 1.772382 2.038261  
442896\_at 2.157181 1.39196 1.192728 4.075618 2.240674 1.81681 1.774093 6.288132  
442897\_at 0.8078 2.000735 1.537975 0.829021 1.319115 1.275551 1.741965 1.057753  
442898\_at 4.483513 5.06173 3.991647 3.917097 4.373238 4.315582 4.044084 3.759895  
442899\_at 2.192561 2.538607 1.602726 1.549274 1.948102 1.805729 1.96482 1.918864  
442900\_at 1.901022 3.715098 3.653434 3.057643 4.000465 2.606389 3.637191 3.596308  
442901\_at 4.00816 1.332552 3.487751 3.299591 2.606451 3.988892 2.236064 3.720862  
442902\_at 2.557474 2.840798 3.23135 2.994653 3.084987 3.069171 2.969094 3.070928  
442903\_at 1.791673 2.619405 2.522516 1.79612 1.370278 3.117838 2.199191 1.67786  
442904\_at 2.055718 2.032485 3.144939 1.955173 2.721239 2.335943 1.981551 2.386992  
442905\_at 1.563021 1.901001 1.242979 1.975031 1.175504 2.503515 1.95067 2.28265  
442906\_at 3.948369 2.666756 2.955556 1.915479 2.551566 2.301387 2.143972 2.570685  
442907\_at 3.843136 5.151806 4.826667 4.403303 5.371559 4.160169 4.78134 4.039751  
442908\_at 0.877656 1.260542 1.224904 1.844893 1.05701 0.940627 1.31652 1.08233  
442909\_at 3.142168 3.36415 3.973454 3.574579 4.049175 3.375064 3.071397 3.372948  
442910\_at 2.882126 1.836774 2.416336 2.726977 1.661948 1.152915 1.300534 1.537502  
442911\_at 4.886996 5.26339 5.769311 5.444135 4.568161 4.972099 5.015789 5.571044  
442912\_at 0.830695 0.967319 0.909745 1.436708 0.746207 0.800632 1.482505 2.482724  
442913\_at 1.249594 0.783598 0.821439 0.529707 1.121336 0.635931 1.308648 0.651687  
442914\_at 1.438356 0.757057 0.982229 0.911429 1.060047 1.055007 1.315413 1.141359  
442915\_at 1.659399 1.356502 1.168456 1.084312 1.749981 1.710755 1.161009 1.120809  
442916\_at 1.409636 1.724856 1.836929 1.539118 2.36463 1.562808 1.315 1.481303  
442917\_at 1.190228 1.675122 0.713648 0.782912 1.150493 1.103131 1.113926 0.976436  
442918\_at 1.226132 1.120532 1.396736 0.944341 1.217114 1.550458 2.291495 1.096208  
442919\_at 1.023208 1.167476 1.699754 0.959616 0.963854 1.137975 0.78864 1.696543  
442920\_at 4.89016 4.617138 2.601076 4.838159 2.145277 3.087074 3.694228 2.896257

|           |          |          |          |          |          |          |          |          |
|-----------|----------|----------|----------|----------|----------|----------|----------|----------|
| 4430_at   | 8.704666 | 8.511662 | 8.892266 | 8.663817 | 8.366474 | 8.387333 | 9.373947 | 8.775879 |
| 4435_at   | 1.72405  | 1.681978 | 1.324948 | 2.243717 | 1.903675 | 1.875309 | 2.069839 | 1.95734  |
| 4436_at   | 4.982324 | 5.265037 | 3.650533 | 5.192725 | 5.926992 | 5.141098 | 4.61353  | 5.188729 |
| 4437_at   | 5.476398 | 5.82104  | 5.355771 | 5.306506 | 5.116885 | 5.555314 | 5.938774 | 5.584296 |
| 4438_at   | 1.154361 | 1.142526 | 1.252882 | 1.156149 | 1.289898 | 2.172593 | 1.407497 | 1.43442  |
| 4439_at   | 4.62917  | 4.500578 | 5.646488 | 5.726834 | 5.645363 | 4.317779 | 3.927991 | 4.466696 |
| 443_at    | 6.051338 | 4.374034 | 4.331846 | 4.77393  | 5.696501 | 5.461762 | 4.929993 | 5.952266 |
| 4440_at   | 2.427005 | 2.590104 | 1.639201 | 2.135348 | 2.718118 | 2.844624 | 2.469073 | 3.258204 |
| 444882_at | 1.755178 | 1.397046 | 1.185957 | 1.616276 | 1.953836 | 1.753146 | 1.732819 | 1.948316 |
| 444_at    | 4.869383 | 4.660157 | 5.261366 | 4.6546   | 5.067509 | 4.752549 | 4.93182  | 4.990339 |
| 445577_at | 1.589068 | 1.624604 | 1.962945 | 1.34859  | 1.741511 | 2.215648 | 1.696482 | 2.625128 |
| 445_at    | 9.172453 | 8.448114 | 8.242484 | 7.697582 | 8.755755 | 8.700347 | 7.718681 | 8.610067 |
| 4477_at   | 0.956212 | 2.099679 | 1.171768 | 1.323379 | 1.351562 | 1.065515 | 1.901684 | 0.844633 |
| 4478_at   | 8.406006 | 8.817331 | 8.521708 | 9.218506 | 9.061728 | 9.032676 | 9.065847 | 8.749147 |
| 4481_at   | 3.213093 | 1.574701 | 2.210506 | 3.795492 | 2.01085  | 2.082686 | 1.59073  | 1.955383 |
| 4482_at   | 6.664875 | 5.287968 | 5.462411 | 5.725203 | 6.051024 | 5.819077 | 4.974397 | 5.965423 |
| 4486_at   | 1.104926 | 1.648573 | 2.12475  | 1.540736 | 1.155031 | 1.635073 | 1.95185  | 1.957361 |
| 4487_at   | 3.642419 | 4.177428 | 3.21467  | 4.151178 | 4.097734 | 3.814212 | 4.273992 | 3.899261 |
| 448834_at | 1.433343 | 2.116738 | 1.770831 | 1.670914 | 1.352251 | 2.12851  | 1.630482 | 1.705682 |
| 448835_at | 2.022821 | 1.359674 | 2.596497 | 1.359722 | 1.603913 | 1.718231 | 2.737523 | 1.810358 |
| 4488_at   | 4.023652 | 2.36748  | 4.169587 | 2.811856 | 3.2268   | 3.161583 | 4.316862 | 3.19927  |
| 4489_at   | 1.603458 | 4.148011 | 3.518176 | 4.027926 | 3.132325 | 5.80655  | 2.580114 | 2.777053 |
| 4490_at   | 1.838165 | 0.971884 | 0.933517 | 1.275129 | 1.602262 | 2.767897 | 1.124478 | 1.332629 |
| 4493_at   | 2.542553 | 3.014602 | 3.236018 | 3.302984 | 3.775308 | 3.305108 | 2.897077 | 2.622481 |
| 449493_at | 1.264139 | 1.310029 | 1.605461 | 0.791371 | 0.915316 | 0.850152 | 1.03762  | 1.209016 |
| 4494_at   | 9.651189 | 9.326703 | 9.417805 | 9.091422 | 9.657834 | 9.687865 | 8.824144 | 9.565798 |
| 449520_at | 1.489212 | 1.566622 | 2.543114 | 2.483897 | 1.384164 | 1.997996 | 1.58949  | 2.016725 |
| 4495_at   | 10.10088 | 9.176139 | 9.115601 | 6.784012 | 9.628503 | 8.970467 | 5.678782 | 9.164118 |
| 4496_at   | 10.00958 | 9.164616 | 9.615318 | 8.421784 | 9.80663  | 9.063911 | 6.617969 | 9.389972 |
| 4498_at   | 1.852811 | 2.713328 | 2.551134 | 2.227829 | 2.033098 | 2.410531 | 2.542486 | 2.125441 |
| 4499_at   | 6.488577 | 6.347812 | 6.291539 | 6.81319  | 5.954289 | 6.917217 | 6.534699 | 5.399941 |
| 4500_at   | 6.086406 | 6.294819 | 6.114213 | 6.268862 | 5.725241 | 6.782574 | 4.573456 | 5.363674 |
| 4501_at   | 9.382103 | 8.809376 | 8.941326 | 8.199972 | 9.086175 | 8.752086 | 7.898456 | 8.777027 |
| 4502_at   | 7.80855  | 11.71871 | 11.38668 | 11.84583 | 11.17773 | 11.21597 | 11.59511 | 11.61976 |
| 4504_at   | 2.398969 | 1.752442 | 2.329778 | 1.805821 | 5.089791 | 1.380205 | 1.698081 | 2.120857 |
| 4507_at   | 3.697588 | 3.840778 | 4.284285 | 5.123607 | 3.610337 | 3.617547 | 2.95442  | 4.704583 |
| 4515_at   | 2.485744 | 1.927329 | 3.472432 | 2.665862 | 1.794064 | 2.493964 | 1.822123 | 1.837303 |
| 4520_at   | 7.0976   | 6.661878 | 7.051412 | 7.282392 | 6.266494 | 6.514797 | 6.540615 | 6.691874 |
| 4521_at   | 6.721061 | 6.847688 | 6.521137 | 7.031149 | 6.885582 | 5.543839 | 5.854678 | 6.605836 |
| 4522_at   | 6.252886 | 6.248943 | 5.781329 | 6.363253 | 6.422587 | 6.4962   | 5.887013 | 4.355156 |
| 4524_at   | 4.39692  | 3.855977 | 3.625043 | 3.912756 | 3.388688 | 3.505982 | 4.670467 | 3.420158 |
| 4528_at   | 5.543895 | 5.957531 | 5.588229 | 6.452688 | 6.450924 | 5.981855 | 5.119532 | 5.899242 |
| 4534_at   | 5.416072 | 6.230933 | 4.559666 | 6.017776 | 5.778913 | 5.247753 | 5.950109 | 6.316401 |
| 4542_at   | 3.710603 | 3.418051 | 4.49892  | 4.409481 | 3.114687 | 3.808784 | 4.836731 | 3.670623 |
| 4543_at   | 3.472919 | 1.855461 | 1.288335 | 1.852873 | 1.508036 | 1.424696 | 1.410388 | 2.73652  |
| 4544_at   | 3.429129 | 3.064088 | 2.110018 | 1.398848 | 1.569228 | 2.395061 | 2.643593 | 1.98329  |
| 4547_at   | 3.453162 | 2.334343 | 2.66278  | 2.23133  | 2.965347 | 3.153458 | 2.113804 | 1.815187 |
| 4548_at   | 5.630497 | 6.562284 | 6.279888 | 6.528599 | 6.1708   | 6.377979 | 6.714349 | 5.994296 |
| 4552_at   | 6.79376  | 6.86415  | 6.246882 | 6.115961 | 5.933181 | 6.721907 | 6.081919 | 6.758075 |
| 4580_at   | 1.475273 | 0.601492 | 1.329473 | 2.447992 | 2.968391 | 1.674267 | 0.926717 | 1.9916   |
| 4582_at   | 6.552176 | 5.259296 | 6.020047 | 7.197584 | 8.128464 | 7.743151 | 5.931513 | 5.857202 |



|         |          |          |          |          |          |          |          |          |
|---------|----------|----------|----------|----------|----------|----------|----------|----------|
| 4583_at | 1.877982 | 1.974172 | 1.77178  | 2.191817 | 2.176952 | 2.547015 | 2.276528 | 2.067273 |
| 4584_at | 2.276572 | 2.635004 | 1.622159 | 1.818967 | 2.08714  | 3.29719  | 2.083501 | 2.545623 |
| 4585_at | 2.031214 | 2.612073 | 1.849287 | 1.760462 | 2.201334 | 2.086655 | 2.041741 | 1.694016 |
| 4586_at | 2.525307 | 2.63629  | 2.378247 | 2.572354 | 3.002352 | 3.32721  | 2.817062 | 3.001713 |
| 4588_at | 1.481022 | 2.389805 | 1.697165 | 2.820444 | 2.664416 | 2.018085 | 2.691771 | 2.383157 |
| 4589_at | 1.552515 | 1.413176 | 2.300823 | 1.812683 | 1.971188 | 1.959692 | 1.581951 | 1.563844 |
| 4591_at | 6.140304 | 6.131653 | 6.461866 | 6.080095 | 6.014445 | 5.369043 | 6.809906 | 6.235978 |
| 4593_at | 1.99402  | 2.559083 | 2.00863  | 1.354387 | 1.357377 | 2.256838 | 1.781804 | 2.154239 |
| 4594_at | 6.631469 | 6.989731 | 6.446303 | 6.507435 | 7.157111 | 6.605469 | 6.455935 | 7.115846 |
| 4595_at | 3.276986 | 2.583695 | 3.395631 | 2.687133 | 3.539497 | 2.618846 | 2.231431 | 2.846328 |
| 4597_at | 4.904907 | 5.441896 | 4.481344 | 3.884323 | 4.48374  | 4.155863 | 5.102934 | 3.752385 |
| 4598_at | 3.640132 | 2.552587 | 3.321953 | 2.56641  | 3.715258 | 2.547294 | 2.458782 | 2.597628 |
| 4599_at | 6.489996 | 6.511692 | 6.08594  | 6.393399 | 6.416115 | 6.726472 | 6.444808 | 6.430077 |
| 4600_at | 5.69575  | 4.968212 | 4.425834 | 5.662162 | 5.990574 | 5.394072 | 4.064549 | 4.814541 |
| 4601_at | 5.474858 | 4.115492 | 3.892102 | 4.168827 | 4.224775 | 5.258441 | 3.305204 | 4.736482 |
| 4602_at | 1.99895  | 2.025265 | 1.874473 | 1.370836 | 2.805811 | 1.641312 | 3.030351 | 2.144769 |
| 4603_at | 2.426098 | 1.938612 | 3.716523 | 3.686796 | 2.355425 | 2.179765 | 2.321021 | 3.190175 |
| 4604_at | 1.11198  | 1.658692 | 1.300532 | 1.383771 | 1.621615 | 1.973914 | 0.998076 | 1.514899 |
| 4605_at | 2.160996 | 2.994851 | 2.780943 | 3.249462 | 3.263707 | 2.559801 | 2.231164 | 2.654421 |
| 4606_at | 1.860363 | 1.562902 | 1.747066 | 1.593886 | 1.630421 | 1.807437 | 2.272474 | 2.254923 |
| 4607_at | 1.806598 | 2.650293 | 1.948461 | 2.233605 | 1.453458 | 1.60029  | 1.20345  | 2.195877 |
| 4608_at | 5.899178 | 5.665097 | 6.291225 | 5.154322 | 4.45747  | 4.452663 | 5.390694 | 5.755744 |
| 4609_at | 4.83207  | 4.111842 | 4.47839  | 3.63594  | 3.280325 | 4.697856 | 4.9571   | 4.187822 |
| 460_at  | 2.843328 | 2.355017 | 2.381832 | 2.718054 | 2.961086 | 2.115247 | 2.298813 | 2.641608 |
| 4610_at | 2.502996 | 2.193322 | 2.982741 | 2.784018 | 2.623487 | 2.270061 | 2.449957 | 3.303827 |
| 4613_at | 3.24316  | 4.004518 | 3.753271 | 3.146911 | 3.573171 | 3.484187 | 3.512651 | 2.899092 |
| 4615_at | 4.963268 | 4.948505 | 4.522932 | 5.216506 | 4.920431 | 4.717971 | 5.028649 | 3.869634 |
| 4616_at | 7.627737 | 7.928663 | 7.127736 | 7.699485 | 5.757955 | 7.024482 | 8.080079 | 6.121043 |
| 4617_at | 1.440034 | 2.119152 | 1.873716 | 1.963668 | 2.229502 | 2.057321 | 1.443285 | 2.664278 |
| 4618_at | 1.291806 | 1.016285 | 1.308574 | 1.044211 | 0.905827 | 1.528285 | 1.282079 | 1.589728 |
| 4619_at | 1.593368 | 2.576002 | 1.720842 | 2.138999 | 0.943454 | 1.331539 | 1.415625 | 1.925901 |
| 4620_at | 1.655406 | 1.329934 | 1.140305 | 2.346648 | 1.859294 | 1.472101 | 0.906365 | 3.501997 |
| 4621_at | 1.951977 | 2.200192 | 1.811885 | 2.609794 | 2.272211 | 2.143762 | 1.814696 | 1.844206 |
| 4622_at | 1.635165 | 1.262099 | 1.122536 | 1.392638 | 2.25325  | 1.482395 | 2.118823 | 1.365087 |
| 4624_at | 1.08698  | 1.116862 | 1.37272  | 0.835529 | 1.502416 | 1.234561 | 1.599313 | 1.840156 |
| 4625_at | 2.082905 | 1.262811 | 2.064087 | 1.234327 | 1.807603 | 1.07714  | 2.419629 | 2.132781 |
| 4626_at | 1.151076 | 2.175853 | 1.386538 | 1.189829 | 1.337288 | 1.447032 | 2.137025 | 1.446359 |
| 4627_at | 8.389166 | 8.70775  | 9.145029 | 9.239514 | 8.461003 | 8.939525 | 9.321413 | 8.376272 |
| 4628_at | 5.703627 | 6.54668  | 5.911408 | 6.243828 | 6.705169 | 5.882049 | 5.804423 | 6.347863 |
| 4629_at | 4.966217 | 4.771721 | 4.048093 | 4.891232 | 4.524653 | 5.145697 | 4.538872 | 3.966206 |
| 462_at  | 2.134989 | 2.271319 | 2.055685 | 1.719154 | 2.125188 | 2.143246 | 2.143246 | 2.498812 |
| 4632_at | 2.124034 | 2.207143 | 2.168934 | 2.01747  | 2.068709 | 1.69726  | 1.503081 | 2.657713 |
| 4633_at | 2.739397 | 2.766381 | 1.593487 | 2.859528 | 2.038575 | 2.523181 | 2.598988 | 3.389378 |
| 4634_at | 5.103216 | 5.974804 | 5.364277 | 4.766566 | 4.141553 | 5.440291 | 2.509743 | 4.676562 |
| 4635_at | 4.255835 | 3.38518  | 3.573775 | 2.857577 | 3.873246 | 3.455817 | 3.18416  | 3.274708 |
| 4636_at | 5.194675 | 4.559215 | 5.263195 | 3.891905 | 4.996996 | 4.668628 | 5.620871 | 4.149657 |
| 4637_at | 10.65527 | 10.8077  | 10.70117 | 10.87942 | 10.83638 | 10.983   | 10.87861 | 10.89121 |
| 4638_at | 8.761697 | 8.713273 | 8.493262 | 8.6541   | 8.570917 | 8.443621 | 8.323716 | 8.790022 |
| 463_at  | 6.101683 | 6.283191 | 5.796887 | 5.538132 | 6.272056 | 6.682293 | 5.440816 | 5.087734 |
| 4640_at | 1.740722 | 1.547779 | 2.076591 | 1.403263 | 1.113568 | 1.050531 | 1.281564 | 1.880134 |
| 4641_at | 8.101917 | 7.991654 | 7.777119 | 7.995669 | 7.841725 | 8.115612 | 8.409162 | 7.590294 |

|         |          |          |          |          |          |          |          |          |
|---------|----------|----------|----------|----------|----------|----------|----------|----------|
| 4642_at | 8.11185  | 7.908641 | 8.570123 | 8.209567 | 7.870959 | 8.117357 | 8.585783 | 8.007692 |
| 4643_at | 8.963602 | 9.013108 | 9.330204 | 9.123723 | 9.315126 | 8.296635 | 9.018419 | 8.998905 |
| 4644_at | 5.216456 | 5.306288 | 5.366996 | 5.212708 | 5.058817 | 4.832393 | 5.676596 | 5.971941 |
| 4645_at | 5.238464 | 4.896792 | 4.85043  | 4.302351 | 4.902237 | 5.293461 | 4.288178 | 5.15352  |
| 4646_at | 7.039057 | 6.837713 | 7.217127 | 6.757915 | 7.443861 | 7.121861 | 7.372085 | 7.361682 |
| 4647_at | 2.865633 | 2.353309 | 2.443505 | 2.62159  | 2.245669 | 2.462021 | 2.714869 | 2.579856 |
| 4648_at | 4.169026 | 2.546285 | 3.361254 | 2.763157 | 2.365634 | 3.228834 | 3.486077 | 3.218964 |
| 4649_at | 5.777817 | 6.044594 | 5.938049 | 6.1396   | 6.247871 | 5.62691  | 5.746856 | 6.119759 |
| 4650_at | 5.276809 | 5.12603  | 5.093317 | 5.13249  | 4.864866 | 5.227228 | 5.014674 | 3.915262 |
| 4651_at | 4.646695 | 4.673538 | 5.047458 | 5.255134 | 5.319698 | 5.141386 | 5.151436 | 4.981811 |
| 4653_at | 1.543275 | 1.668806 | 1.535148 | 2.08896  | 1.469246 | 1.754433 | 1.257805 | 1.620389 |
| 4654_at | 2.552491 | 1.680775 | 2.103309 | 2.719329 | 2.069238 | 2.125966 | 2.643305 | 2.040436 |
| 4656_at | 3.14956  | 2.450242 | 2.750817 | 3.464367 | 2.898352 | 2.888879 | 2.17919  | 3.713408 |
| 4659_at | 6.629203 | 7.191966 | 6.57695  | 7.085549 | 5.960133 | 6.980898 | 6.389183 | 7.356697 |
| 4660_at | 4.435964 | 4.925763 | 4.506182 | 4.810487 | 4.250897 | 5.229998 | 3.618154 | 4.104278 |
| 4661_at | 2.821768 | 2.17454  | 3.301683 | 2.334964 | 3.40174  | 2.468488 | 2.857903 | 3.184638 |
| 4664_at | 5.72479  | 6.079269 | 6.279597 | 6.089564 | 6.215052 | 6.066237 | 5.654492 | 6.026654 |
| 4665_at | 4.598142 | 5.183693 | 3.901965 | 4.480076 | 4.540966 | 3.826447 | 4.352345 | 3.777813 |
| 4666_at | 3.086768 | 3.22973  | 3.962466 | 4.740853 | 3.501    | 4.166299 | 3.61111  | 2.912351 |
| 4668_at | 6.184545 | 5.133937 | 6.295729 | 6.868293 | 5.947013 | 5.128049 | 7.475034 | 5.636973 |
| 4669_at | 5.283504 | 5.567272 | 5.464562 | 6.066496 | 4.854619 | 5.08815  | 4.772441 | 4.253654 |
| 466_at  | 7.681404 | 6.746828 | 6.666027 | 6.99912  | 6.931788 | 7.304141 | 7.426282 | 7.017807 |
| 4670_at | 8.624153 | 9.196224 | 8.704341 | 8.904014 | 8.551073 | 8.638183 | 8.770215 | 9.050615 |
| 4671_at | 1.524197 | 1.333492 | 1.154075 | 0.546611 | 1.723525 | 2.180559 | 1.303391 | 2.542371 |
| 4673_at | 7.791109 | 7.93413  | 7.66056  | 7.69683  | 7.564185 | 6.536064 | 7.560174 | 7.824946 |
| 4674_at | 4.899948 | 5.096079 | 4.603196 | 5.005613 | 6.349796 | 4.722995 | 5.342956 | 6.247024 |
| 4675_at | 2.891573 | 2.323153 | 1.802412 | 1.578856 | 3.20637  | 1.631404 | 2.292769 | 1.986655 |
| 4676_at | 7.100358 | 7.524742 | 7.744051 | 7.443848 | 6.901234 | 6.747139 | 6.008565 | 6.987175 |
| 4677_at | 7.852607 | 8.329242 | 8.388916 | 8.096618 | 8.465447 | 8.104047 | 8.461565 | 8.941509 |
| 4678_at | 6.233867 | 6.462743 | 7.215223 | 5.879116 | 6.939915 | 6.683367 | 6.214102 | 7.578369 |
| 467_at  | 2.898067 | 3.915001 | 3.467705 | 4.151038 | 3.700752 | 2.633082 | 2.074697 | 3.827085 |
| 4680_at | 2.099293 | 1.323245 | 1.294679 | 1.398853 | 1.005974 | 1.433838 | 1.908965 | 1.690028 |
| 4681_at | 2.633015 | 3.03526  | 2.235184 | 2.579698 | 2.407303 | 1.804892 | 2.494546 | 1.756966 |
| 4682_at | 6.053624 | 5.453437 | 5.532982 | 5.356259 | 6.099064 | 5.915394 | 5.425746 | 5.182848 |
| 4683_at | 6.039512 | 5.998133 | 6.31068  | 5.524362 | 5.532185 | 5.385759 | 6.357774 | 6.557437 |
| 4684_at | 4.016109 | 5.098335 | 4.660867 | 3.959983 | 5.599388 | 3.821797 | 4.522014 | 3.286744 |
| 4685_at | 1.31163  | 2.623754 | 1.986086 | 1.391853 | 1.608929 | 1.223346 | 3.043623 | 1.229386 |
| 4686_at | 7.073736 | 7.09055  | 6.433735 | 6.849216 | 6.687532 | 7.018894 | 6.760478 | 7.48175  |
| 4688_at | 3.77682  | 4.677441 | 3.21702  | 4.40286  | 2.094407 | 4.329594 | 2.916403 | 2.993944 |
| 4689_at | 2.955226 | 1.887704 | 2.227055 | 3.15585  | 2.815592 | 3.529155 | 3.088766 | 2.798105 |
| 468_at  | 8.831537 | 8.693758 | 8.595217 | 8.435668 | 7.95237  | 8.941419 | 8.327569 | 7.897064 |
| 4690_at | 5.426379 | 5.869591 | 5.623137 | 5.299862 | 5.378199 | 5.581102 | 5.600088 | 5.926131 |
| 4691_at | 10.06921 | 10.20522 | 10.40772 | 10.24844 | 10.31656 | 9.919879 | 10.07322 | 10.48901 |
| 4692_at | 3.128353 | 3.153174 | 2.879323 | 2.94988  | 3.448924 | 2.432598 | 2.365207 | 3.344736 |
| 4693_at | 2.030006 | 1.83659  | 1.819406 | 2.018736 | 1.532124 | 1.792232 | 1.792139 | 1.94766  |
| 4694_at | 10.13283 | 10.45335 | 10.48321 | 10.56263 | 10.52855 | 10.31091 | 9.958726 | 10.41964 |
| 4695_at | 9.141428 | 8.978152 | 9.009007 | 8.768359 | 9.197654 | 9.157803 | 8.918856 | 8.995256 |
| 4696_at | 10.24094 | 9.756251 | 10.26911 | 10.20074 | 9.83274  | 10.16256 | 9.963409 | 9.886027 |
| 4697_at | 5.605293 | 5.870142 | 6.948442 | 5.705242 | 6.187966 | 6.338204 | 5.379678 | 6.445287 |
| 4698_at | 4.286173 | 3.357048 | 3.932359 | 3.954671 | 3.553875 | 3.398454 | 3.479553 | 3.603758 |
| 4700_at | 8.541076 | 8.328836 | 8.33992  | 8.051955 | 8.180735 | 8.398554 | 8.051425 | 8.312942 |

|           |          |          |          |          |          |          |          |          |
|-----------|----------|----------|----------|----------|----------|----------|----------|----------|
| 4701_at   | 8.851521 | 8.484775 | 8.625316 | 8.628604 | 7.895833 | 8.693649 | 8.836098 | 7.582457 |
| 4702_at   | 7.32823  | 7.31215  | 7.341325 | 7.188247 | 7.881222 | 7.32923  | 7.3267   | 7.633006 |
| 4703_at   | 1.771062 | 1.66907  | 1.713009 | 1.595588 | 1.883946 | 1.509536 | 1.639316 | 1.595749 |
| 4704_at   | 7.61185  | 7.588321 | 7.718469 | 7.043431 | 7.910565 | 7.878376 | 7.501697 | 7.595422 |
| 4705_at   | 7.456122 | 7.480363 | 7.557969 | 7.794216 | 8.288982 | 7.401728 | 7.483474 | 6.978401 |
| 4706_at   | 9.475852 | 9.545504 | 9.6385   | 9.202867 | 9.367458 | 9.476025 | 9.018956 | 8.963794 |
| 4707_at   | 10.16396 | 10.17979 | 9.61681  | 10.02355 | 9.912234 | 10.17518 | 9.820259 | 9.783601 |
| 4708_at   | 10.295   | 10.79185 | 10.83503 | 10.54483 | 10.92327 | 10.91979 | 10.48108 | 10.75848 |
| 4709_at   | 6.035888 | 6.027976 | 5.68187  | 5.996466 | 6.111792 | 5.654878 | 5.271884 | 5.606729 |
| 4710_at   | 4.602838 | 4.381788 | 4.315105 | 4.631686 | 4.286733 | 4.328143 | 4.829316 | 4.376795 |
| 4711_at   | 7.885348 | 7.810187 | 7.28192  | 7.774657 | 8.032539 | 7.688289 | 7.744756 | 7.788395 |
| 4712_at   | 7.970062 | 7.884126 | 7.898721 | 7.091204 | 7.859344 | 7.913997 | 7.301218 | 7.988051 |
| 4713_at   | 9.221442 | 8.689592 | 8.534974 | 8.732171 | 8.018545 | 9.070996 | 8.982712 | 8.256745 |
| 4714_at   | 7.505703 | 7.237151 | 6.956584 | 7.068923 | 7.453848 | 7.628938 | 7.194028 | 6.971174 |
| 4715_at   | 7.939894 | 7.229771 | 7.75339  | 7.871037 | 7.828842 | 7.71883  | 8.036011 | 7.372884 |
| 4716_at   | 8.951722 | 8.36628  | 9.032008 | 8.496698 | 7.988901 | 8.588102 | 8.603355 | 6.994451 |
| 4717_at   | 5.169191 | 5.114241 | 4.679188 | 4.480619 | 5.185901 | 4.349993 | 4.752758 | 4.569743 |
| 4719_at   | 5.956091 | 6.90793  | 6.327066 | 6.610137 | 6.527954 | 5.92945  | 6.07914  | 6.99301  |
| 471_at    | 8.002966 | 7.894602 | 7.8976   | 7.045929 | 7.618305 | 7.78864  | 7.44842  | 8.080655 |
| 4720_at   | 7.267032 | 6.859925 | 6.929373 | 6.854906 | 7.828755 | 6.925414 | 7.212839 | 6.77214  |
| 4722_at   | 8.322842 | 8.063652 | 8.008671 | 8.101203 | 8.580279 | 8.400042 | 7.973867 | 7.968836 |
| 4723_at   | 7.469288 | 7.207421 | 6.746423 | 6.810055 | 7.256035 | 6.693926 | 6.47376  | 6.783008 |
| 4724_at   | 8.476645 | 8.060008 | 8.294564 | 7.989965 | 8.14699  | 8.413044 | 7.737242 | 7.590107 |
| 4725_at   | 8.916112 | 8.379507 | 8.54549  | 8.586366 | 8.774464 | 8.703376 | 8.650197 | 8.458078 |
| 4726_at   | 8.963723 | 8.889845 | 8.812521 | 8.860079 | 8.894139 | 8.924129 | 8.71423  | 8.613581 |
| 4728_at   | 6.851806 | 6.375379 | 6.37465  | 6.288709 | 6.09295  | 6.609801 | 6.578696 | 6.084174 |
| 4729_at   | 6.45725  | 6.999623 | 6.001561 | 6.311799 | 7.353859 | 7.045551 | 5.529854 | 6.7262   |
| 472_at    | 5.71513  | 5.782897 | 5.938852 | 6.004151 | 6.416267 | 4.746511 | 5.828189 | 6.16667  |
| 4731_at   | 7.621275 | 7.622729 | 7.040896 | 7.980568 | 8.023964 | 7.056247 | 7.957286 | 7.313151 |
| 4733_at   | 7.955829 | 7.927376 | 8.207386 | 7.59511  | 8.153131 | 7.522385 | 7.68492  | 8.043062 |
| 4734_at   | 6.131991 | 6.635597 | 6.124953 | 6.562849 | 7.089672 | 6.479039 | 6.304989 | 6.191017 |
| 4735_at   | 7.395456 | 7.762831 | 8.052296 | 7.954507 | 7.855463 | 7.349353 | 8.006117 | 7.806102 |
| 4738_at   | 10.12644 | 10.09226 | 9.930284 | 9.80328  | 10.22844 | 9.450285 | 9.587862 | 10.32851 |
| 4739_at   | 4.932801 | 4.730447 | 4.839897 | 4.777803 | 4.427814 | 4.923392 | 5.097824 | 3.715207 |
| 473_at    | 6.658834 | 7.166863 | 7.121012 | 7.564297 | 6.888882 | 7.075771 | 7.169101 | 6.825253 |
| 4741_at   | 1.954227 | 1.684858 | 1.718873 | 3.38988  | 2.561922 | 2.559727 | 1.668584 | 1.729727 |
| 474338_at | 2.049382 | 1.574793 | 4.834703 | 0.895722 | 2.296307 | 2.580154 | 2.839887 | 1.682881 |
| 474343_at | 5.660479 | 5.754831 | 6.149366 | 6.075717 | 3.979342 | 6.722319 | 6.116332 | 3.874196 |
| 474344_at | 6.640794 | 6.200289 | 5.984351 | 7.628596 | 5.531086 | 6.455393 | 6.799551 | 5.173638 |
| 474354_at | 1.56157  | 0.893281 | 1.626008 | 1.956798 | 1.205842 | 1.520888 | 1.372499 | 1.218122 |
| 474382_at | 3.281262 | 1.310948 | 2.105804 | 3.404841 | 3.863749 | 1.325661 | 4.322981 | 3.789175 |
| 4744_at   | 2.368383 | 2.393743 | 2.941667 | 2.345639 | 2.855353 | 1.989119 | 1.972365 | 3.047078 |
| 4745_at   | 6.891237 | 5.087184 | 7.689032 | 7.638375 | 7.573089 | 6.906855 | 8.150674 | 5.570114 |
| 4747_at   | 2.531307 | 2.747    | 2.590214 | 2.232566 | 2.28817  | 2.812654 | 1.815151 | 3.009894 |
| 474_at    | 2.896382 | 1.445239 | 1.810949 | 1.663599 | 2.821917 | 1.722728 | 2.981894 | 1.868288 |
| 4750_at   | 5.593642 | 6.754985 | 6.245205 | 6.086795 | 6.088442 | 6.156976 | 6.057448 | 6.177049 |
| 4751_at   | 1.703072 | 1.103642 | 1.278816 | 1.422804 | 1.955094 | 1.233567 | 1.648332 | 3.607393 |
| 4752_at   | 4.618982 | 3.663776 | 4.18821  | 4.728566 | 5.418948 | 4.193539 | 4.269834 | 4.933974 |
| 4753_at   | 1.172403 | 1.374628 | 1.512714 | 1.695238 | 1.897618 | 1.406011 | 1.859927 | 1.70426  |
| 4756_at   | 6.946212 | 7.209034 | 7.612451 | 7.037066 | 7.174846 | 7.129355 | 7.030845 | 7.397539 |
| 4758_at   | 6.288272 | 6.311297 | 6.053143 | 6.241195 | 6.627795 | 6.133723 | 6.540439 | 7.030137 |

|         |          |          |          |          |          |          |          |          |
|---------|----------|----------|----------|----------|----------|----------|----------|----------|
| 4759_at | 2.099431 | 2.862036 | 2.341221 | 2.45435  | 2.15402  | 3.102179 | 2.281487 | 2.293349 |
| 475_at  | 10.85991 | 10.55729 | 10.53526 | 10.628   | 10.34815 | 10.75154 | 10.73195 | 10.34774 |
| 4760_at | 1.120369 | 3.041944 | 2.88593  | 1.300363 | 1.576696 | 0.966108 | 1.276693 | 1.860176 |
| 4761_at | 1.218341 | 2.23337  | 1.418099 | 1.819117 | 2.145284 | 1.811733 | 2.382987 | 1.420178 |
| 4762_at | 1.484482 | 2.660062 | 1.935695 | 1.924517 | 2.302087 | 2.164399 | 1.702985 | 2.810848 |
| 4763_at | 6.825081 | 7.525681 | 7.272351 | 6.963509 | 7.145142 | 7.140219 | 7.278831 | 7.175204 |
| 476_at  | 10.04729 | 10.12599 | 10.11643 | 9.989015 | 10.15759 | 9.969544 | 9.730592 | 9.666568 |
| 4771_at | 5.381811 | 5.467633 | 5.661701 | 5.191665 | 5.263983 | 5.423628 | 5.383578 | 4.569152 |
| 4772_at | 5.486688 | 5.385428 | 4.265822 | 3.529698 | 3.747227 | 4.128574 | 4.920296 | 4.718378 |
| 4773_at | 3.962383 | 4.654794 | 4.74171  | 4.644027 | 4.816869 | 3.899912 | 4.061082 | 4.276489 |
| 4774_at | 6.23739  | 6.137969 | 6.200332 | 6.733745 | 6.712636 | 5.6983   | 5.713634 | 5.290444 |
| 4775_at | 6.062156 | 6.458098 | 6.437287 | 6.012265 | 6.53514  | 6.148736 | 6.546471 | 6.746922 |
| 4776_at | 3.043761 | 2.902615 | 3.444213 | 2.941937 | 2.367186 | 3.927582 | 3.989563 | 3.411461 |
| 4778_at | 1.84702  | 2.296142 | 1.618676 | 1.359813 | 1.723887 | 1.161878 | 1.668308 | 2.357904 |
| 4779_at | 9.217607 | 9.517597 | 9.431642 | 9.580221 | 9.545897 | 9.539898 | 9.407068 | 9.602292 |
| 477_at  | 3.90244  | 3.983529 | 4.564208 | 3.318448 | 4.355829 | 4.023318 | 2.997403 | 3.063249 |
| 4780_at | 8.175548 | 8.137769 | 7.677023 | 7.785825 | 8.009028 | 7.645727 | 7.822715 | 8.435727 |
| 4781_at | 6.010518 | 5.722242 | 6.067558 | 5.964014 | 6.855136 | 6.001411 | 6.27402  | 5.900056 |
| 4782_at | 7.881043 | 7.519987 | 7.880336 | 7.879191 | 7.088322 | 7.831758 | 8.225785 | 6.840554 |
| 4783_at | 4.942636 | 5.257995 | 4.449087 | 4.209435 | 3.897848 | 5.129171 | 3.072716 | 4.984732 |
| 4784_at | 7.524471 | 6.980596 | 7.216178 | 8.063812 | 7.217421 | 7.565816 | 7.431526 | 6.787943 |
| 478_at  | 2.067507 | 2.821732 | 2.942703 | 2.058603 | 2.356369 | 2.857296 | 2.694683 | 2.54662  |
| 4790_at | 6.426383 | 6.677619 | 6.399671 | 5.826352 | 6.236647 | 5.665915 | 5.630941 | 5.764599 |
| 4791_at | 4.438027 | 4.363212 | 4.02552  | 3.930232 | 3.762579 | 4.297344 | 3.883488 | 4.459016 |
| 4792_at | 9.099888 | 9.124097 | 9.105172 | 9.199129 | 8.284415 | 9.88529  | 9.219329 | 8.551742 |
| 4793_at | 3.267678 | 3.348668 | 3.723338 | 3.930743 | 3.369202 | 3.489313 | 3.485487 | 3.659446 |
| 4794_at | 3.894927 | 4.552612 | 3.622985 | 3.506401 | 2.738255 | 3.768638 | 2.774592 | 3.833135 |
| 4795_at | 3.145166 | 2.990837 | 2.334281 | 2.635329 | 2.387053 | 2.754977 | 2.225369 | 2.416093 |
| 4796_at | 3.356702 | 2.277047 | 2.746681 | 2.287855 | 3.188863 | 2.076673 | 3.422165 | 2.758258 |
| 4798_at | 3.973507 | 4.301769 | 4.475763 | 4.615383 | 3.990724 | 4.715242 | 4.541917 | 3.815193 |
| 4799_at | 6.282156 | 5.465621 | 5.719945 | 5.807503 | 5.90286  | 5.568449 | 5.036041 | 5.499671 |
| 479_at  | 1.477578 | 1.525887 | 1.716435 | 1.811004 | 1.692401 | 2.086082 | 1.860905 | 1.561316 |
| 47_at   | 6.929252 | 6.867091 | 6.851994 | 7.075636 | 6.788418 | 6.678122 | 6.86576  | 6.671419 |
| 4800_at | 5.323169 | 5.430714 | 5.257732 | 4.930163 | 5.183724 | 5.326705 | 5.69614  | 5.747904 |
| 4801_at | 5.899971 | 6.494415 | 5.991314 | 5.921617 | 5.74733  | 6.139693 | 5.968317 | 6.464459 |
| 4802_at | 3.892329 | 3.259818 | 3.380218 | 3.140575 | 4.017688 | 4.013828 | 3.866595 | 3.736327 |
| 4803_at | 3.556439 | 3.872614 | 4.832122 | 3.836094 | 4.165228 | 4.771696 | 4.30448  | 2.255771 |
| 4804_at | 2.328507 | 2.64075  | 3.235407 | 2.538961 | 2.381682 | 4.036416 | 1.996828 | 2.271798 |
| 4807_at | 1.525586 | 2.168096 | 1.549189 | 1.864101 | 2.168315 | 2.659734 | 1.338643 | 1.840682 |
| 4808_at | 1.595561 | 1.872947 | 1.2095   | 1.459887 | 1.68282  | 1.152324 | 1.446291 | 1.677563 |
| 4809_at | 6.977987 | 7.405072 | 7.565253 | 8.109101 | 7.318311 | 7.609995 | 7.448708 | 7.318117 |
| 480_at  | 2.273213 | 2.34384  | 1.399329 | 1.587274 | 2.063962 | 1.666034 | 2.027732 | 1.683884 |
| 4810_at | 3.666321 | 3.788175 | 4.38645  | 4.609201 | 4.09549  | 5.199679 | 3.622629 | 4.390332 |
| 4811_at | 4.958767 | 6.208124 | 5.950642 | 6.519803 | 5.94439  | 6.362318 | 6.051617 | 5.336677 |
| 4814_at | 7.459951 | 6.914107 | 6.815217 | 7.074631 | 6.194874 | 7.31279  | 6.767326 | 6.348099 |
| 4815_at | 2.646919 | 3.123227 | 2.588001 | 2.978208 | 3.103894 | 2.446873 | 2.396973 | 2.718896 |
| 4817_at | 5.752093 | 5.957409 | 4.733287 | 5.677299 | 4.837998 | 6.126061 | 5.249917 | 5.076385 |
| 4818_at | 7.550774 | 5.876717 | 7.41048  | 7.98866  | 6.966789 | 7.841217 | 7.628883 | 5.976272 |
| 481_at  | 9.782559 | 9.752674 | 9.845305 | 9.594994 | 10.48671 | 9.900683 | 9.719085 | 9.850895 |
| 4820_at | 5.87264  | 4.587848 | 5.173706 | 6.413242 | 4.938727 | 6.015824 | 5.041167 | 5.811831 |
| 4821_at | 1.575441 | 1.862708 | 2.108199 | 2.013927 | 2.944069 | 1.986428 | 1.782373 | 2.254005 |

|         |          |          |          |          |          |          |          |          |
|---------|----------|----------|----------|----------|----------|----------|----------|----------|
| 4824_at | 3.665862 | 3.368602 | 2.420448 | 4.485504 | 3.00317  | 3.285907 | 3.422118 | 4.378242 |
| 4825_at | 2.252954 | 1.621716 | 2.461582 | 1.66928  | 1.957718 | 1.564638 | 2.037548 | 1.989819 |
| 4826_at | 3.301076 | 2.274519 | 2.016144 | 2.121434 | 2.420747 | 2.531491 | 3.185601 | 1.950073 |
| 4828_at | 5.469603 | 3.83554  | 3.734689 | 4.009421 | 3.914853 | 4.286066 | 3.293262 | 3.077375 |
| 4829_at | 2.469285 | 1.599591 | 2.28742  | 1.063423 | 2.448811 | 2.262738 | 1.529928 | 2.593798 |
| 482_at  | 7.646521 | 7.208963 | 6.813617 | 7.73343  | 6.964634 | 7.083819 | 6.5058   | 6.786354 |
| 4830_at | 8.539223 | 8.746345 | 8.867392 | 7.457753 | 8.283893 | 8.04361  | 7.027867 | 8.805414 |
| 4831_at | 4.009281 | 2.862322 | 2.750912 | 3.848515 | 1.953809 | 3.906974 | 2.956964 | 1.782185 |
| 4832_at | 5.418536 | 4.565107 | 4.598219 | 5.264026 | 4.49963  | 4.909236 | 5.023869 | 4.461925 |
| 4833_at | 3.910795 | 2.872094 | 3.183193 | 2.459445 | 2.718084 | 3.397314 | 2.949382 | 2.028284 |
| 4835_at | 7.533041 | 6.742276 | 6.95581  | 6.60961  | 7.366672 | 6.983717 | 5.311505 | 6.881571 |
| 4836_at | 7.682864 | 7.767936 | 7.806208 | 7.870709 | 7.399454 | 7.656053 | 7.562225 | 7.217978 |
| 4837_at | 4.570098 | 5.115849 | 4.205835 | 4.110579 | 4.333156 | 6.29111  | 5.003337 | 5.103925 |
| 4838_at | 2.1865   | 2.281344 | 1.368031 | 1.948976 | 1.923657 | 1.714666 | 1.753697 | 2.252048 |
| 4839_at | 3.69759  | 3.676019 | 3.47018  | 5.425394 | 2.671778 | 3.652221 | 2.852706 | 4.197427 |
| 483_at  | 6.99614  | 7.606106 | 6.776877 | 6.970289 | 7.62111  | 7.263106 | 6.636564 | 7.29312  |
| 4841_at | 6.505408 | 6.264356 | 6.459296 | 6.888103 | 6.149509 | 6.71969  | 6.461519 | 5.683085 |
| 4842_at | 1.934138 | 2.03567  | 3.187618 | 2.144156 | 2.499478 | 3.382577 | 1.535662 | 2.112931 |
| 4843_at | 2.182172 | 1.837845 | 2.135075 | 3.576914 | 3.549311 | 3.640897 | 1.831456 | 2.964721 |
| 4846_at | 4.544451 | 3.487777 | 4.311741 | 4.965351 | 4.187951 | 3.108602 | 3.828652 | 3.119684 |
| 4848_at | 4.905212 | 5.440217 | 5.091456 | 5.693951 | 5.840359 | 5.704429 | 5.056666 | 5.628473 |
| 4849_at | 6.531816 | 6.096881 | 6.278414 | 6.176707 | 6.477013 | 6.592343 | 5.916477 | 6.456527 |
| 4850_at | 6.875418 | 6.953032 | 7.047537 | 6.764263 | 6.844453 | 6.916975 | 6.808029 | 6.645148 |
| 4851_at | 5.01072  | 4.210983 | 5.16489  | 5.904851 | 5.929195 | 5.480305 | 5.88632  | 4.365845 |
| 4852_at | 1.393851 | 1.678001 | 2.209913 | 1.9534   | 1.692334 | 1.808428 | 1.980861 | 2.262936 |
| 4853_at | 6.507049 | 7.367549 | 7.465677 | 7.441673 | 6.592201 | 7.015732 | 7.423556 | 7.188102 |
| 4854_at | 2.636835 | 4.383714 | 4.758687 | 4.527041 | 4.090531 | 4.504876 | 4.749543 | 3.992612 |
| 4855_at | 4.332452 | 4.652559 | 5.190886 | 5.23335  | 4.119542 | 4.915816 | 5.343967 | 4.010074 |
| 4856_at | 2.444667 | 3.291778 | 4.101284 | 3.388888 | 3.583733 | 3.506754 | 3.784919 | 2.341466 |
| 4857_at | 4.126521 | 3.611182 | 4.446095 | 5.069924 | 4.630935 | 3.404821 | 4.317994 | 5.446519 |
| 4858_at | 4.182574 | 3.634438 | 4.08971  | 4.595952 | 4.071911 | 4.217042 | 4.548986 | 3.37951  |
| 4860_at | 5.40958  | 5.589572 | 4.774808 | 4.660393 | 5.963934 | 5.127677 | 4.595031 | 6.350084 |
| 4861_at | 2.989751 | 2.270518 | 2.236167 | 2.276456 | 2.455701 | 2.459224 | 2.077192 | 2.757345 |
| 4862_at | 2.606436 | 3.81428  | 3.374613 | 3.995502 | 4.412446 | 3.558038 | 4.09874  | 4.400396 |
| 4863_at | 6.204615 | 6.257896 | 5.878833 | 5.842982 | 6.934093 | 6.445023 | 6.570628 | 6.339231 |
| 4864_at | 4.265246 | 5.610479 | 5.775996 | 5.507862 | 5.360379 | 4.899982 | 4.81608  | 5.45391  |
| 4867_at | 3.244695 | 3.74742  | 4.233203 | 3.246813 | 4.054699 | 4.125747 | 2.763478 | 3.950331 |
| 4868_at | 8.242414 | 8.23927  | 8.099045 | 7.850092 | 7.066051 | 8.195718 | 7.999942 | 7.423674 |
| 4869_at | 3.409273 | 4.578284 | 5.061193 | 4.880976 | 4.504419 | 4.036007 | 5.045776 | 5.487981 |
| 4878_at | 2.278788 | 2.035985 | 1.751326 | 1.782495 | 2.463014 | 1.695437 | 2.219956 | 1.717199 |
| 4879_at | 1.758234 | 2.133905 | 2.130368 | 1.80212  | 2.368526 | 2.035441 | 2.561507 | 2.484662 |
| 487_at  | 2.66094  | 2.452059 | 2.365851 | 3.130264 | 3.100847 | 2.263265 | 1.769848 | 3.032896 |
| 4880_at | 2.488953 | 1.763363 | 1.985023 | 1.604181 | 2.469086 | 1.767225 | 2.517665 | 2.406678 |
| 4881_at | 6.77347  | 6.422798 | 7.216871 | 7.173179 | 6.290237 | 6.934337 | 7.571796 | 6.698531 |
| 4882_at | 5.533571 | 3.228729 | 4.732391 | 5.708372 | 4.937195 | 5.554196 | 5.595845 | 5.434351 |
| 4883_at | 8.897074 | 8.763309 | 9.028257 | 8.875081 | 8.980455 | 8.935672 | 9.212304 | 8.870209 |
| 4884_at | 2.667433 | 2.111079 | 2.465351 | 2.462856 | 2.128868 | 2.526404 | 2.21989  | 2.251526 |
| 4885_at | 2.421297 | 2.215301 | 3.555132 | 2.575257 | 2.932205 | 2.794136 | 2.650417 | 2.736113 |
| 4886_at | 6.64962  | 7.097695 | 6.867471 | 6.996078 | 6.871743 | 5.944911 | 6.480967 | 6.380479 |
| 4887_at | 1.847334 | 2.245729 | 2.007116 | 1.520324 | 1.672673 | 1.984729 | 1.671195 | 2.190482 |
| 4888_at | 4.262485 | 3.457232 | 3.031363 | 3.27535  | 4.056456 | 3.527855 | 3.359688 | 2.423841 |

|           |          |          |          |          |          |          |          |          |
|-----------|----------|----------|----------|----------|----------|----------|----------|----------|
| 4889_at   | 4.014537 | 2.832748 | 1.994461 | 2.36892  | 2.865328 | 1.755707 | 2.352422 | 2.930542 |
| 488_at    | 8.660441 | 9.435732 | 8.989018 | 8.785259 | 9.243785 | 8.384849 | 9.145638 | 9.175441 |
| 4891_at   | 4.120282 | 4.285161 | 4.084688 | 4.296972 | 3.430134 | 4.348039 | 4.244668 | 5.612309 |
| 4892_at   | 1.335454 | 2.000931 | 1.47852  | 1.888464 | 1.59168  | 1.35842  | 1.949362 | 1.698733 |
| 4893_at   | 7.085466 | 6.686114 | 6.720493 | 7.423067 | 7.067892 | 7.545426 | 6.915011 | 7.58303  |
| 4897_at   | 1.82518  | 1.51032  | 1.456949 | 1.687741 | 2.56731  | 2.538003 | 1.891987 | 1.654178 |
| 4898_at   | 7.70176  | 7.808192 | 7.544596 | 7.831276 | 7.819461 | 7.288138 | 7.554283 | 8.148412 |
| 4899_at   | 4.66536  | 4.627369 | 5.187517 | 4.825031 | 5.099855 | 4.879809 | 3.946323 | 4.530131 |
| 489_at    | 4.588388 | 4.253736 | 4.51907  | 5.209727 | 4.748667 | 5.319329 | 4.586797 | 3.215303 |
| 48_at     | 7.197587 | 7.13712  | 7.184093 | 7.262152 | 8.24225  | 7.325656 | 6.331003 | 7.658735 |
| 4900_at   | 7.174701 | 7.220287 | 7.212298 | 8.177227 | 7.508086 | 8.12342  | 6.842464 | 6.731893 |
| 4901_at   | 4.287931 | 2.561498 | 3.250836 | 3.350936 | 3.762557 | 3.553205 | 2.863002 | 2.000744 |
| 4902_at   | 3.80738  | 3.378054 | 2.965252 | 3.58704  | 3.44632  | 3.029557 | 1.675036 | 2.856551 |
| 4904_at   | 2.426501 | 2.512357 | 1.926923 | 2.387384 | 2.842192 | 2.524133 | 2.560618 | 2.250438 |
| 4905_at   | 5.833344 | 6.733453 | 6.119461 | 6.053088 | 5.869116 | 6.225607 | 6.543045 | 6.063691 |
| 4907_at   | 6.061323 | 7.213269 | 6.729671 | 6.182721 | 6.667351 | 5.92193  | 7.795308 | 5.680946 |
| 4908_at   | 1.894979 | 2.509772 | 2.19935  | 3.327514 | 4.012351 | 1.832624 | 1.971664 | 1.97852  |
| 4909_at   | 1.953451 | 3.189396 | 3.649761 | 2.59465  | 3.577698 | 3.063048 | 3.711849 | 2.832335 |
| 490_at    | 6.408275 | 6.898643 | 6.672647 | 7.47043  | 6.885231 | 6.76194  | 6.739971 | 7.196046 |
| 4913_at   | 6.304408 | 5.341239 | 5.522974 | 4.877339 | 3.984182 | 5.839014 | 5.595973 | 4.556428 |
| 4914_at   | 3.04352  | 1.394303 | 1.712872 | 1.223324 | 3.602276 | 1.991098 | 1.954401 | 2.562439 |
| 4915_at   | 5.323951 | 6.217521 | 6.246589 | 5.398198 | 5.594498 | 5.37996  | 6.093937 | 6.170906 |
| 4916_at   | 3.518456 | 3.857718 | 3.406793 | 2.428513 | 3.427763 | 3.911574 | 4.36146  | 2.703194 |
| 4917_at   | 2.767798 | 2.186835 | 2.64308  | 2.636375 | 2.125073 | 2.598672 | 2.662438 | 2.106396 |
| 4919_at   | 3.307486 | 4.658616 | 3.759113 | 3.526613 | 2.206975 | 3.373841 | 1.753073 | 2.561197 |
| 491_at    | 2.640618 | 1.92158  | 2.502141 | 2.201022 | 1.981537 | 1.671144 | 2.589712 | 2.654763 |
| 4920_at   | 2.668673 | 2.447738 | 2.12171  | 3.284351 | 2.180615 | 3.066801 | 2.858634 | 2.024365 |
| 4921_at   | 3.997337 | 5.444922 | 5.419462 | 5.18712  | 5.372295 | 4.812509 | 4.10454  | 3.864851 |
| 4922_at   | 1.514759 | 1.635909 | 1.862825 | 1.431766 | 1.895558 | 1.857476 | 2.673378 | 1.714961 |
| 492303_at | 1.46649  | 1.681076 | 1.645294 | 1.991321 | 1.305067 | 1.543308 | 2.65886  | 1.255354 |
| 492307_at | 1.034288 | 1.578219 | 1.586961 | 1.498399 | 1.735423 | 1.441809 | 1.273941 | 1.376499 |
| 492311_at | 6.840519 | 7.982034 | 7.354733 | 7.27977  | 7.094165 | 7.188645 | 7.171226 | 7.794461 |
| 4923_at   | 2.225028 | 1.926109 | 2.688349 | 2.678946 | 2.230025 | 1.800655 | 2.113339 | 2.257646 |
| 4924_at   | 7.755096 | 7.853533 | 8.383755 | 8.34333  | 7.63467  | 8.138989 | 8.140575 | 7.594281 |
| 4925_at   | 5.885861 | 6.382633 | 6.08036  | 6.156512 | 6.191362 | 6.126989 | 6.657501 | 6.368746 |
| 4926_at   | 6.090206 | 6.344043 | 6.569352 | 6.507272 | 6.097577 | 6.541387 | 6.528859 | 6.485884 |
| 4927_at   | 5.711681 | 5.020575 | 5.069611 | 4.964113 | 5.028267 | 4.167549 | 3.825771 | 5.878368 |
| 4928_at   | 6.36188  | 6.85013  | 6.421291 | 6.496545 | 6.249807 | 6.555837 | 7.02065  | 6.646192 |
| 4929_at   | 2.594339 | 1.967869 | 4.636674 | 4.125194 | 2.802974 | 2.634999 | 3.354257 | 1.838649 |
| 492_at    | 2.632082 | 2.379049 | 2.172976 | 1.402172 | 1.057862 | 1.229246 | 1.684935 | 1.340084 |
| 4931_at   | 4.757759 | 4.827433 | 4.294393 | 4.041898 | 4.259393 | 4.966121 | 5.302384 | 4.166953 |
| 4935_at   | 3.124555 | 2.557441 | 4.496973 | 2.985963 | 2.816183 | 2.979848 | 2.703398 | 2.348406 |
| 493753_at | 5.661472 | 6.54485  | 5.647972 | 5.694177 | 6.052294 | 5.762867 | 5.65877  | 6.860254 |
| 493754_at | 4.083226 | 4.978337 | 5.036959 | 5.216824 | 5.046399 | 5.356889 | 4.802279 | 4.890236 |
| 493812_at | 5.598214 | 6.297735 | 5.476693 | 6.011045 | 6.181518 | 4.814629 | 5.601346 | 5.620477 |
| 493829_at | 1.925137 | 1.874536 | 1.87935  | 2.25503  | 2.125247 | 1.67564  | 2.226954 | 2.095155 |
| 493856_at | 5.821831 | 5.644873 | 6.700882 | 6.761017 | 5.889444 | 6.206079 | 6.458735 | 6.954075 |
| 493860_at | 0.868169 | 1.266744 | 1.05614  | 1.042207 | 1.267484 | 1.312683 | 1.067888 | 1.441096 |
| 493861_at | 3.641182 | 3.594277 | 3.506003 | 3.745394 | 2.168943 | 3.379688 | 3.798912 | 3.737127 |
| 493869_at | 6.702265 | 6.331922 | 6.766275 | 7.024229 | 6.184369 | 6.84288  | 6.839348 | 6.467392 |
| 4938_at   | 7.303934 | 8.280017 | 8.024247 | 7.366312 | 8.038742 | 8.041577 | 8.486014 | 8.139905 |

493900\_at 3.487257 2.660399 4.13177 3.792044 3.445263 2.185362 2.792654 3.135113  
493901\_at 0.925073 1.09498 1.013699 1.334325 1.568402 0.889869 0.925623 0.721446  
493911\_at 3.663735 2.144134 1.999201 3.147257 1.046212 1.664683 2.006686 2.217305  
493913\_at 4.35085 5.932938 4.282402 3.933918 5.92332 6.147067 5.831133 5.269349  
4939\_at 5.842364 5.036994 4.620779 5.331164 5.616276 6.05352 5.788256 5.491403  
493\_at 6.978125 7.177675 7.106869 7.826843 7.375827 7.373136 7.362674 7.081045  
4940\_at 4.471156 5.710188 4.845363 6.229843 5.520021 5.885222 5.816207 3.588474  
494115\_at 6.033046 5.645821 5.814402 5.541907 5.723868 4.947503 4.763792 6.422838  
494118\_at 0.683578 0.909954 0.772747 0.999974 0.760215 0.66418 1.141438 0.856606  
494119\_at 0.883865 1.054332 1.251339 1.524425 1.430608 1.115642 1.758321 0.752249  
494127\_at 1.718037 1.976209 1.260467 1.029222 1.774887 1.941328 2.1747 1.502044  
494141\_at 1.616356 0.83232 0.884646 0.818271 0.983681 1.201769 1.619986 1.402716  
494143\_at 2.040401 1.925865 2.203415 2.863342 2.383679 1.327522 1.950978 3.27293  
494188\_at 1.022442 1.044144 0.802211 0.774858 2.087864 0.956026 1.443651 1.180665  
494197\_at 1.960571 0.95579 1.248382 0.894861 2.003603 1.297108 3.161958 1.356106  
4942\_at 6.179638 6.0912 6.32037 6.173694 7.088444 6.736084 6.498793 7.165205  
494323\_at 1.149334 1.005145 1.89046 1.224005 1.211207 2.67002 2.600004 1.038058  
494324\_at 1.747936 5.005502 4.417679 4.648862 5.568049 3.732307 4.010987 5.052678  
494325\_at 0.853868 0.849019 0.758799 0.769169 1.176224 1.194452 0.971685 1.480971  
494326\_at 1.727984 1.833434 3.26214 1.15818 1.265814 1.449215 2.376611 2.286348  
494327\_at 1.253971 1.058384 0.835522 1.066611 2.17694 0.888009 1.246511 1.269626  
494328\_at 1.253758 1.777804 1.345159 1.462673 1.373247 1.384808 2.170946 1.959686  
494329\_at 0.73967 1.134689 1.052724 0.898998 1.198076 0.963236 1.126713 1.250989  
494330\_at 0.895072 1.216457 1.318866 1.05368 1.268692 1.131543 1.685417 1.676808  
494331\_at 1.212435 1.431631 1.974769 1.876638 2.112462 1.685649 1.993876 1.151126  
494332\_at 2.206989 1.969192 1.99774 1.225943 1.817039 1.693173 2.344432 1.20068  
494333\_at 0.972081 1.110081 0.866376 0.660462 1.396598 0.72934 1.018398 0.879489  
494334\_at 1.787236 2.258509 2.638604 2.80769 2.469881 2.603115 2.861373 2.833351  
494335\_at 2.716324 2.249992 1.825459 1.802574 1.594816 2.666651 3.983624 2.540898  
494336\_at 1.41261 1.335592 0.943371 0.709516 1.529431 0.930921 1.263877 0.959434  
494337\_at 3.438563 2.826124 3.29148 3.450283 2.635952 3.099113 3.12491 3.164031  
4943\_at 4.241087 4.559327 4.800218 5.57804 4.731986 4.166225 3.351371 3.190094  
494470\_at 1.992035 1.875961 2.413584 2.104296 2.744237 2.207368 2.713662 2.094278  
494513\_at 2.385896 2.265143 2.341026 1.985535 2.887371 3.034663 2.427973 3.389899  
494514\_at 4.649366 3.213647 3.010576 3.755054 3.051182 3.649448 3.393772 3.584854  
494551\_at 1.47642 1.741477 1.800926 1.74332 2.413055 1.398029 1.982047 1.538293  
494558\_at 1.201418 0.806059 1.1355 1.177379 1.332765 1.201418 1.061616 1.600657  
4946\_at 9.7418 8.969291 9.343572 9.166008 9.1756 9.607414 9.366571 8.95686  
4947\_at 7.479605 7.513141 7.601984 7.965079 7.311218 7.480291 7.751724 7.474198  
4948\_at 1.364492 1.623247 1.323069 2.585731 2.689644 1.521765 2.055946 1.29156  
4952\_at 6.356017 6.623279 6.454074 6.785939 5.514705 6.101484 6.630525 6.902996  
4953\_at 8.168954 8.434493 8.187193 8.059752 7.994987 7.666818 7.752076 8.70236  
4956\_at 1.515027 1.927618 1.476707 1.7285 1.878749 1.928386 2.002288 1.463296  
4957\_at 4.521806 4.53689 5.291845 4.374781 4.298764 4.806934 4.835569 4.542216  
4958\_at 4.395891 3.436635 4.827774 4.744488 3.542668 4.155016 7.022083 3.09616  
495\_at 2.061147 2.187196 2.130019 1.703798 2.313794 1.840378 1.980003 1.969353  
4967\_at 6.581951 6.640573 6.365398 6.852558 7.15011 7.158837 6.680398 6.556007  
4968\_at 4.117688 3.99588 5.144935 5.074419 4.00961 3.922402 3.642692 4.49137  
4969\_at 2.585522 1.500195 2.412253 2.495781 2.195378 3.226292 3.031998 3.237473  
496\_at 1.511986 1.64725 1.282904 1.339914 1.464605 1.869183 1.876039 1.783923  
497049\_at 1.814406 1.578166 1.584851 0.933389 1.473936 1.187173 1.939656 2.064646

|           |          |          |          |          |          |          |          |          |
|-----------|----------|----------|----------|----------|----------|----------|----------|----------|
| 497189_at | 2.129124 | 2.056762 | 2.643146 | 1.553332 | 2.091022 | 2.802992 | 3.39558  | 2.25433  |
| 497190_at | 3.138487 | 3.655382 | 2.732294 | 3.227929 | 3.913026 | 3.426391 | 2.890874 | 3.615902 |
| 497258_at | 4.365916 | 4.837267 | 4.335101 | 4.358355 | 4.659985 | 3.218755 | 3.193151 | 2.960178 |
| 497259_at | 1.086991 | 1.329404 | 1.887952 | 0.907529 | 2.013212 | 0.751517 | 1.830161 | 0.723797 |
| 4973_at   | 2.802931 | 1.903018 | 2.012111 | 2.214446 | 1.439601 | 1.766467 | 1.421466 | 1.269704 |
| 4974_at   | 1.789751 | 1.556691 | 1.565297 | 1.526966 | 1.916451 | 1.50899  | 1.460381 | 2.034169 |
| 4975_at   | 1.769986 | 2.586082 | 2.442892 | 2.842399 | 3.011815 | 2.336257 | 2.097396 | 2.818596 |
| 497634_at | 2.163124 | 1.724902 | 1.044367 | 0.877889 | 1.123419 | 2.831208 | 1.471048 | 1.328071 |
| 497661_at | 3.768336 | 3.591448 | 2.702887 | 3.521481 | 4.411911 | 2.26242  | 3.676801 | 3.34236  |
| 4976_at   | 6.443279 | 7.00998  | 6.933062 | 6.752016 | 7.202231 | 6.757339 | 6.80022  | 7.222688 |
| 4978_at   | 2.310549 | 3.271042 | 3.331671 | 2.159922 | 3.403714 | 1.992098 | 2.428915 | 2.29219  |
| 4982_at   | 6.597158 | 6.93858  | 6.9997   | 5.876116 | 7.00077  | 6.951555 | 5.417628 | 7.189322 |
| 4983_at   | 4.763689 | 4.333235 | 3.78419  | 4.118123 | 3.21979  | 3.500328 | 3.736563 | 5.14749  |
| 49854_at  | 4.57999  | 5.571735 | 5.687773 | 4.790093 | 4.43844  | 5.129138 | 5.079212 | 3.783279 |
| 49855_at  | 6.278536 | 6.332994 | 6.17085  | 5.769728 | 6.167761 | 6.008615 | 6.151143 | 6.894047 |
| 49856_at  | 3.567444 | 3.826967 | 3.226444 | 2.802763 | 2.470393 | 3.285476 | 2.920066 | 3.734478 |
| 4985_at   | 2.359887 | 2.548271 | 2.642541 | 2.611004 | 2.294735 | 2.18778  | 2.831156 | 2.65757  |
| 49860_at  | 2.287584 | 1.814794 | 1.355574 | 2.100381 | 1.727763 | 2.126475 | 2.307217 | 2.088271 |
| 49861_at  | 3.611309 | 2.836812 | 2.579276 | 1.516596 | 4.313017 | 3.518368 | 1.829661 | 3.343279 |
| 4986_at   | 1.927046 | 1.692046 | 1.553992 | 1.685099 | 2.295728 | 1.708988 | 1.969911 | 1.896905 |
| 4987_at   | 1.274839 | 2.279792 | 1.981815 | 1.998411 | 2.001808 | 1.978901 | 1.496784 | 2.286085 |
| 4988_at   | 1.477834 | 2.025294 | 1.63338  | 1.646818 | 1.441707 | 1.293881 | 1.514128 | 1.702391 |
| 498_at    | 9.131236 | 8.938587 | 8.768173 | 8.736419 | 9.28199  | 9.171964 | 8.412291 | 9.079492 |
| 4990_at   | 2.248623 | 2.633291 | 2.581178 | 2.475122 | 2.689257 | 2.382774 | 2.876716 | 2.339901 |
| 4991_at   | 1.509515 | 1.900757 | 2.752453 | 1.674198 | 1.91053  | 2.017994 | 1.969756 | 2.373528 |
| 4992_at   | 0.391256 | 0.92401  | 1.247871 | 1.186808 | 1.013782 | 1.613231 | 3.451751 | 1.372048 |
| 4993_at   | 1.465441 | 1.294334 | 2.308938 | 1.814913 | 1.236568 | 1.311451 | 1.403333 | 1.466067 |
| 4994_at   | 1.880218 | 1.933351 | 1.214645 | 2.423273 | 3.126565 | 1.420878 | 2.335815 | 2.929204 |
| 4995_at   | 1.252519 | 1.007081 | 0.644051 | 0.844473 | 1.566824 | 2.781148 | 1.175405 | 1.245144 |
| 4998_at   | 2.546378 | 2.294761 | 2.859709 | 2.619196 | 2.639108 | 1.788682 | 2.527597 | 2.236697 |
| 4999_at   | 5.336893 | 5.17391  | 5.388973 | 5.512264 | 4.968363 | 5.366113 | 5.702376 | 5.13712  |
| 49_at     | 1.660354 | 2.888327 | 1.77088  | 2.365068 | 2.114988 | 1.795356 | 1.671668 | 2.575333 |
| 5000_at   | 5.409743 | 5.80271  | 5.442214 | 5.445746 | 4.918392 | 5.383915 | 5.416175 | 6.008272 |
| 5001_at   | 4.719101 | 5.232545 | 4.843125 | 3.735588 | 4.770045 | 5.182774 | 4.001911 | 4.884869 |
| 5002_at   | 4.518104 | 4.878031 | 4.601909 | 4.744173 | 5.483923 | 5.333327 | 3.992312 | 4.314713 |
| 5003_at   | 2.010043 | 2.969678 | 2.380566 | 1.966249 | 1.865932 | 2.986972 | 1.902773 | 2.030011 |
| 5004_at   | 1.834041 | 2.06794  | 2.759647 | 1.691482 | 1.334123 | 3.966902 | 1.252692 | 2.231533 |
| 5005_at   | 1.417574 | 1.581325 | 1.223794 | 1.683061 | 1.847174 | 1.969249 | 3.093849 | 1.692575 |
| 5007_at   | 6.725739 | 6.711776 | 6.680667 | 6.892718 | 6.851133 | 6.840489 | 6.112886 | 7.059196 |
| 5008_at   | 1.29347  | 1.23773  | 1.872077 | 1.637798 | 1.782452 | 1.737688 | 2.114759 | 1.990471 |
| 5009_at   | 1.511346 | 1.617975 | 1.648912 | 0.99596  | 1.042418 | 1.481257 | 1.609393 | 1.615634 |
| 5010_at   | 8.086686 | 8.357448 | 8.802105 | 7.192129 | 5.004027 | 6.977248 | 9.724211 | 8.678309 |
| 5013_at   | 1.831825 | 1.495319 | 2.661576 | 1.728746 | 2.152639 | 1.713286 | 2.395036 | 2.091069 |
| 5015_at   | 1.388321 | 2.053218 | 1.167095 | 1.872464 | 1.872464 | 2.106896 | 1.332938 | 2.081109 |
| 5016_at   | 2.329258 | 2.168118 | 2.74344  | 2.502322 | 2.308684 | 2.074212 | 1.809903 | 2.308159 |
| 5017_at   | 2.572893 | 2.611373 | 2.948273 | 2.298812 | 2.483944 | 3.042278 | 3.010524 | 2.301346 |
| 5018_at   | 8.577139 | 7.878059 | 7.883694 | 8.143334 | 8.028564 | 7.861786 | 7.263988 | 7.853676 |
| 5019_at   | 4.564358 | 4.933337 | 5.301764 | 6.368164 | 4.808924 | 5.269336 | 5.018441 | 5.371168 |
| 501_at    | 6.479146 | 6.644421 | 6.683768 | 6.623365 | 7.075545 | 6.811788 | 7.233248 | 6.892309 |
| 5020_at   | 2.788654 | 5.737797 | 4.013645 | 3.806655 | 3.240803 | 4.688262 | 4.684341 | 3.696508 |
| 5021_at   | 1.792765 | 2.118799 | 2.870384 | 2.608074 | 2.533615 | 2.093678 | 2.969855 | 2.932583 |



|           |          |          |          |          |          |          |          |          |
|-----------|----------|----------|----------|----------|----------|----------|----------|----------|
| 5023_at   | 1.534404 | 2.084593 | 2.637337 | 1.655551 | 1.829144 | 3.226493 | 1.79057  | 3.123543 |
| 5024_at   | 1.757918 | 2.166788 | 1.774698 | 2.292641 | 1.953093 | 1.396734 | 1.485711 | 1.935843 |
| 5025_at   | 6.26592  | 5.63731  | 5.889183 | 5.680137 | 5.74696  | 6.129219 | 6.912315 | 4.715427 |
| 5027_at   | 2.961067 | 1.89563  | 3.430898 | 2.945214 | 3.960631 | 4.428401 | 2.572657 | 3.460636 |
| 5028_at   | 3.986356 | 3.53741  | 3.441814 | 3.960302 | 3.584845 | 2.389175 | 2.628459 | 2.711531 |
| 5029_at   | 3.818425 | 2.221796 | 2.798996 | 3.03275  | 3.631104 | 2.735026 | 3.245719 | 2.213929 |
| 5030_at   | 2.561324 | 2.313494 | 1.982755 | 1.784407 | 2.279966 | 1.765024 | 1.682514 | 1.648921 |
| 5031_at   | 2.471558 | 2.995258 | 1.945199 | 1.962009 | 3.738307 | 2.060546 | 2.223289 | 1.841199 |
| 5033_at   | 5.730674 | 6.57428  | 6.353192 | 5.929315 | 5.535208 | 6.539257 | 6.677401 | 6.155906 |
| 503497_at | 0.649696 | 1.412041 | 0.921354 | 0.905295 | 1.02623  | 0.760018 | 1.283977 | 1.05363  |
| 5034_at   | 8.416959 | 7.901329 | 8.375154 | 8.143935 | 8.013609 | 7.993682 | 8.54157  | 8.037751 |
| 503519_at | 1.350188 | 1.358829 | 1.462973 | 1.333909 | 1.596332 | 2.115258 | 0.942557 | 0.926794 |
| 503538_at | 2.826711 | 3.008164 | 3.2023   | 3.35083  | 4.011292 | 3.559559 | 3.129044 | 2.661889 |
| 503542_at | 4.121897 | 3.011454 | 3.243772 | 3.029034 | 4.032668 | 3.264426 | 4.070012 | 4.450005 |
| 503569_at | 1.626358 | 1.358229 | 2.300976 | 1.793456 | 1.830659 | 1.158864 | 1.514573 | 2.103289 |
| 503582_at | 1.904786 | 1.404193 | 2.16598  | 1.473901 | 1.285743 | 2.272002 | 2.117768 | 2.092751 |
| 503640_at | 1.032245 | 1.29059  | 1.626339 | 2.225167 | 1.592547 | 1.673328 | 1.45251  | 1.941547 |
| 503645_at | 2.012087 | 2.053033 | 4.341171 | 1.07889  | 1.459019 | 2.720011 | 1.822775 | 2.016372 |
| 503693_at | 3.670997 | 4.795124 | 2.783641 | 2.007363 | 2.30378  | 2.691172 | 2.703158 | 2.777237 |
| 5036_at   | 3.574907 | 3.514995 | 3.939786 | 3.924447 | 3.268485 | 3.858331 | 4.324817 | 2.955182 |
| 5037_at   | 9.264819 | 9.303452 | 9.305584 | 9.137507 | 8.992791 | 9.535466 | 9.279151 | 8.734081 |
| 503834_at | 2.126178 | 1.580488 | 1.046813 | 1.032152 | 1.176484 | 1.228998 | 1.539601 | 1.41881  |
| 503835_at | 0.857258 | 1.467201 | 1.622396 | 1.217929 | 1.853359 | 1.519651 | 1.494977 | 1.277302 |
| 5042_at   | 1.815629 | 0.88732  | 0.814166 | 1.85749  | 2.125448 | 1.420181 | 0.969987 | 0.666331 |
| 5045_at   | 5.294501 | 5.23116  | 5.695266 | 5.306238 | 4.516108 | 5.515158 | 5.392474 | 4.714361 |
| 5046_at   | 4.094579 | 2.836192 | 3.773791 | 4.504583 | 4.953241 | 3.99603  | 4.912738 | 3.407908 |
| 5047_at   | 1.380139 | 1.817187 | 2.884639 | 2.18715  | 2.54397  | 2.304615 | 1.270951 | 1.959519 |
| 50484_at  | 4.428559 | 4.120382 | 4.364135 | 4.600761 | 4.824447 | 5.074605 | 4.771901 | 5.446416 |
| 50485_at  | 3.949362 | 4.925322 | 5.252632 | 5.081529 | 4.767854 | 4.953017 | 4.544333 | 4.431912 |
| 50486_at  | 5.355486 | 5.260784 | 5.915795 | 4.321926 | 5.024698 | 5.598136 | 4.918621 | 4.630303 |
| 50487_at  | 1.494797 | 1.648527 | 2.173239 | 1.820546 | 1.798613 | 1.824287 | 1.697161 | 2.464757 |
| 50488_at  | 6.063107 | 5.959417 | 5.69887  | 5.948446 | 5.226886 | 5.681282 | 6.176124 | 5.166215 |
| 50489_at  | 1.554994 | 2.652167 | 1.38272  | 1.738405 | 2.095828 | 1.851016 | 2.026564 | 1.26822  |
| 5048_at   | 7.976013 | 8.33781  | 7.969699 | 8.173249 | 7.947041 | 7.905802 | 8.107962 | 8.333105 |
| 5049_at   | 6.250558 | 5.773421 | 6.123737 | 6.201298 | 6.388974 | 6.331128 | 6.404509 | 5.994916 |
| 50506_at  | 2.360657 | 2.451657 | 3.524197 | 1.664174 | 3.119519 | 2.27909  | 1.704567 | 1.294211 |
| 50507_at  | 6.728476 | 5.870715 | 5.786402 | 5.637776 | 6.358626 | 6.593318 | 4.996884 | 6.349263 |
| 50508_at  | 1.375534 | 1.384834 | 1.35404  | 1.624576 | 1.329098 | 1.793933 | 1.855632 | 2.619633 |
| 50509_at  | 1.945767 | 2.919367 | 2.435664 | 2.417848 | 2.932408 | 2.803745 | 2.342658 | 2.365339 |
| 5050_at   | 4.637244 | 4.681089 | 4.4952   | 4.905598 | 4.708244 | 4.300069 | 3.569508 | 4.314898 |
| 50511_at  | 2.373619 | 2.250873 | 2.682537 | 2.030929 | 2.630327 | 2.11491  | 1.389133 | 2.556856 |
| 50512_at  | 2.593615 | 3.366844 | 3.768846 | 3.405956 | 2.546953 | 3.4059   | 2.140026 | 2.925917 |
| 50514_at  | 3.076278 | 1.783755 | 1.408655 | 1.821439 | 1.895062 | 1.747694 | 2.762756 | 1.820661 |
| 50515_at  | 4.542583 | 5.325942 | 4.663282 | 6.101728 | 4.111506 | 6.047563 | 5.376796 | 4.585168 |
| 5051_at   | 3.945286 | 4.601734 | 3.863419 | 4.811265 | 4.131771 | 3.633677 | 4.155074 | 4.077961 |
| 5052_at   | 8.349159 | 8.93251  | 8.574526 | 8.506168 | 8.643596 | 8.642151 | 8.55629  | 9.141062 |
| 5053_at   | 7.102659 | 6.443007 | 6.528106 | 3.682934 | 7.378292 | 7.200293 | 4.702006 | 7.559669 |
| 5054_at   | 4.860215 | 6.231863 | 4.616959 | 5.727245 | 4.294103 | 5.900156 | 4.303447 | 5.272012 |
| 5055_at   | 2.355011 | 2.415045 | 1.678178 | 1.710378 | 2.490712 | 2.421573 | 1.706023 | 1.615505 |
| 5058_at   | 8.911522 | 9.257192 | 9.305805 | 8.799487 | 7.999345 | 8.606083 | 8.902337 | 9.259108 |
| 50604_at  | 0.959531 | 1.135224 | 0.933293 | 1.406742 | 1.381121 | 1.694965 | 1.260588 | 1.316688 |

|          |          |          |          |          |          |          |          |          |
|----------|----------|----------|----------|----------|----------|----------|----------|----------|
| 50613_at | 1.722887 | 1.535763 | 1.943646 | 2.537273 | 1.705117 | 2.006473 | 1.64667  | 2.274154 |
| 50614_at | 2.368747 | 2.246756 | 2.945686 | 2.350141 | 3.670754 | 2.708385 | 2.014487 | 2.920601 |
| 50615_at | 3.575711 | 2.881552 | 3.062826 | 2.741068 | 4.258917 | 2.893912 | 3.580047 | 2.099219 |
| 50616_at | 1.609899 | 1.056418 | 0.988401 | 1.777885 | 1.414019 | 0.939925 | 1.259819 | 1.584945 |
| 50617_at | 4.82563  | 4.281712 | 4.213358 | 4.625467 | 6.895767 | 4.601921 | 3.051522 | 3.686458 |
| 50618_at | 6.438435 | 6.471488 | 6.263603 | 6.768152 | 5.963937 | 6.19592  | 7.037807 | 6.368433 |
| 50619_at | 1.458557 | 2.412713 | 2.19205  | 1.819903 | 1.668686 | 2.862393 | 2.058496 | 1.36162  |
| 50626_at | 4.73014  | 4.291817 | 4.535463 | 4.356193 | 4.127943 | 3.852443 | 4.135154 | 4.821236 |
| 50628_at | 4.121576 | 3.648815 | 3.991734 | 4.174891 | 2.500374 | 3.823602 | 3.746371 | 2.651784 |
| 5062_at  | 6.852438 | 6.753533 | 7.045084 | 6.799796 | 7.080275 | 6.688666 | 7.330198 | 7.397171 |
| 50632_at | 2.431994 | 3.634465 | 3.151465 | 2.8082   | 2.287715 | 1.624218 | 2.385057 | 3.118968 |
| 50636_at | 2.329601 | 3.081464 | 2.793293 | 2.230289 | 2.185577 | 2.617743 | 2.717021 | 2.251109 |
| 5063_at  | 1.542181 | 1.604996 | 1.724981 | 2.359644 | 1.337245 | 2.365444 | 3.017488 | 2.308663 |
| 50640_at | 6.299401 | 6.514444 | 5.80103  | 5.535627 | 6.268616 | 5.84914  | 5.84941  | 6.192606 |
| 50649_at | 1.498119 | 2.150514 | 1.615039 | 1.822908 | 1.57286  | 2.027993 | 2.806941 | 2.038305 |
| 5064_at  | 3.750269 | 3.490166 | 3.316848 | 3.330793 | 3.42912  | 4.01545  | 3.391766 | 3.298345 |
| 50650_at | 8.541012 | 8.566948 | 8.491574 | 7.860839 | 8.033891 | 7.105706 | 7.758133 | 8.244028 |
| 50651_at | 7.109607 | 6.707911 | 7.662193 | 6.704923 | 5.921222 | 7.389702 | 7.214247 | 5.919628 |
| 50652_at | 1.696429 | 1.704444 | 2.671323 | 1.274869 | 2.242937 | 1.165854 | 1.695873 | 1.748415 |
| 5066_at  | 8.455364 | 8.828018 | 9.394891 | 8.736658 | 8.717563 | 8.822095 | 9.299707 | 8.768624 |
| 50674_at | 2.287097 | 2.292178 | 1.547326 | 2.716222 | 1.867081 | 2.755765 | 2.68013  | 2.366703 |
| 5067_at  | 4.661898 | 5.045965 | 4.630008 | 4.848719 | 5.313434 | 3.894183 | 4.333548 | 4.982797 |
| 5068_at  | 2.257083 | 0.942073 | 1.429992 | 1.144208 | 0.748644 | 0.987443 | 1.979843 | 1.532434 |
| 5069_at  | 4.0497   | 3.88977  | 3.786443 | 4.147915 | 4.351102 | 5.028606 | 4.284779 | 4.075606 |
| 506_at   | 9.695804 | 9.60443  | 9.637837 | 9.624049 | 10.00889 | 9.429946 | 9.457507 | 9.692374 |
| 50700_at | 2.114877 | 2.496069 | 1.784996 | 1.680498 | 1.843162 | 2.019947 | 1.977424 | 2.044875 |
| 50717_at | 5.994575 | 5.79874  | 5.292855 | 5.021995 | 5.408401 | 5.609255 | 5.733197 | 5.544365 |
| 5071_at  | 3.518886 | 2.732943 | 4.577913 | 4.048466 | 2.422336 | 2.304469 | 3.089686 | 2.378585 |
| 5073_at  | 6.13868  | 6.240828 | 6.377262 | 6.396219 | 6.729585 | 6.318083 | 6.746626 | 7.016282 |
| 5074_at  | 4.942456 | 4.959043 | 4.912199 | 4.921212 | 5.240952 | 5.665183 | 4.846458 | 5.311845 |
| 5075_at  | 2.447216 | 1.715859 | 2.34389  | 2.255861 | 2.608564 | 1.358706 | 1.989692 | 1.406592 |
| 5076_at  | 4.770685 | 3.69931  | 3.449394 | 4.508938 | 4.456245 | 5.347824 | 3.971568 | 4.226793 |
| 5077_at  | 1.47215  | 1.475153 | 1.173331 | 1.089818 | 1.666737 | 1.810439 | 1.428751 | 1.799158 |
| 5078_at  | 1.903486 | 2.405725 | 2.156856 | 2.139343 | 2.779388 | 2.139343 | 2.163251 | 2.546809 |
| 5079_at  | 2.386766 | 2.057347 | 2.33441  | 2.159267 | 2.239922 | 2.362309 | 2.217203 | 2.347592 |
| 50801_at | 3.37604  | 3.088367 | 3.573706 | 3.597463 | 3.002775 | 3.54188  | 3.781602 | 3.219364 |
| 50804_at | 5.443611 | 5.333537 | 5.940136 | 5.526701 | 5.960661 | 6.013424 | 5.966474 | 6.980681 |
| 50805_at | 2.222317 | 2.268034 | 2.220979 | 1.682764 | 2.613834 | 1.59683  | 2.364875 | 1.938433 |
| 50807_at | 6.866381 | 7.318416 | 7.266294 | 7.377008 | 7.063996 | 7.511332 | 7.222751 | 7.081504 |
| 50808_at | 7.003883 | 6.774428 | 6.468796 | 7.105708 | 7.000599 | 6.335999 | 6.470391 | 6.469639 |
| 50809_at | 7.670106 | 7.594218 | 7.775203 | 7.758921 | 7.726576 | 7.779407 | 7.864948 | 7.618106 |
| 5080_at  | 1.884564 | 1.656643 | 1.390543 | 1.449279 | 1.685467 | 2.069143 | 2.498803 | 1.685467 |
| 50810_at | 6.745494 | 7.037477 | 6.094265 | 6.793226 | 7.334273 | 7.05742  | 6.272482 | 6.763274 |
| 50813_at | 6.808778 | 6.903596 | 6.486381 | 6.623491 | 6.605854 | 6.527587 | 7.044961 | 6.830223 |
| 50814_at | 5.407361 | 5.58199  | 5.315267 | 4.908193 | 4.57426  | 5.287464 | 5.737891 | 6.159317 |
| 5081_at  | 2.652695 | 2.521319 | 2.231108 | 2.248812 | 1.774696 | 2.319504 | 2.175683 | 2.222943 |
| 5082_at  | 5.211952 | 5.264062 | 5.864156 | 5.800035 | 5.523758 | 4.854096 | 5.438499 | 6.335069 |
| 50831_at | 2.164064 | 1.585062 | 1.496398 | 2.227967 | 1.95508  | 1.448318 | 1.313139 | 1.276416 |
| 50832_at | 1.199457 | 2.963085 | 2.450885 | 1.334477 | 1.861035 | 1.918371 | 3.303468 | 2.302258 |
| 50833_at | 1.279607 | 1.688324 | 1.277839 | 1.207645 | 1.264076 | 1.679772 | 1.168468 | 1.187472 |
| 50834_at | 1.434697 | 1.779827 | 1.808179 | 1.502074 | 1.12026  | 1.646264 | 1.549439 | 2.484493 |

|          |          |          |          |          |          |          |          |          |
|----------|----------|----------|----------|----------|----------|----------|----------|----------|
| 50835_at | 1.420447 | 1.485412 | 1.804912 | 1.404208 | 1.591015 | 0.909003 | 1.151907 | 2.247096 |
| 50836_at | 1.234751 | 0.632954 | 1.420345 | 0.828753 | 1.407027 | 1.019229 | 1.157795 | 0.916796 |
| 50837_at | 1.124537 | 1.138026 | 1.190379 | 1.036737 | 1.457199 | 1.175131 | 1.583834 | 1.032284 |
| 50838_at | 1.841239 | 1.210908 | 1.353377 | 1.295478 | 1.220538 | 0.875497 | 1.350207 | 1.132634 |
| 50839_at | 1.47123  | 3.472339 | 1.905928 | 1.227887 | 1.586189 | 1.577537 | 1.588507 | 1.329287 |
| 5083_at  | 2.302086 | 2.626853 | 3.388089 | 1.99089  | 3.382603 | 1.467835 | 2.434213 | 3.639367 |
| 50840_at | 1.825014 | 2.109459 | 3.398843 | 1.667855 | 1.149634 | 1.986123 | 1.794266 | 2.519132 |
| 50846_at | 2.010512 | 1.668935 | 1.789392 | 1.374072 | 2.074093 | 2.608626 | 3.456955 | 2.209623 |
| 50848_at | 6.232057 | 6.531608 | 6.742949 | 6.761731 | 6.821698 | 6.769762 | 6.956261 | 6.965576 |
| 50852_at | 1.500282 | 1.579011 | 1.092255 | 0.964327 | 1.568957 | 1.289095 | 1.536233 | 1.692834 |
| 50853_at | 2.53168  | 2.975975 | 4.692784 | 2.898374 | 2.251605 | 3.331992 | 4.129036 | 2.693497 |
| 50854_at | 9.68839  | 9.863755 | 9.673999 | 9.79831  | 9.633307 | 9.481535 | 9.466935 | 9.93263  |
| 50855_at | 2.527125 | 3.0681   | 3.044249 | 2.601619 | 3.00326  | 3.171313 | 2.58428  | 2.807483 |
| 50856_at | 3.211174 | 2.890186 | 1.874927 | 3.306051 | 2.487603 | 1.89005  | 3.02201  | 3.711289 |
| 50859_at | 3.407258 | 1.884791 | 2.652755 | 1.493608 | 1.622901 | 1.470855 | 1.797055 | 1.771625 |
| 50861_at | 4.393435 | 2.886204 | 3.39237  | 3.847334 | 2.260696 | 4.825738 | 3.328813 | 3.687918 |
| 50862_at | 7.14204  | 7.47768  | 7.564176 | 7.874402 | 7.66865  | 6.853198 | 7.456791 | 7.743815 |
| 50863_at | 1.568053 | 2.068321 | 2.375481 | 2.812232 | 2.077348 | 2.271737 | 2.080983 | 2.11517  |
| 50865_at | 8.251526 | 7.464161 | 8.112904 | 7.690452 | 7.219903 | 8.163889 | 8.198017 | 6.905192 |
| 5087_at  | 8.693536 | 8.390359 | 8.5759   | 9.217194 | 8.623513 | 8.553619 | 8.895981 | 8.5897   |
| 5089_at  | 7.503845 | 7.127825 | 7.200856 | 7.131912 | 6.350845 | 7.222647 | 7.455553 | 7.21572  |
| 5090_at  | 4.711838 | 5.025577 | 4.722128 | 4.841785 | 4.244384 | 4.828719 | 5.308744 | 4.726216 |
| 5091_at  | 5.644233 | 5.710562 | 4.94347  | 4.939543 | 4.306495 | 5.01091  | 4.851126 | 4.617409 |
| 5092_at  | 8.289077 | 7.290741 | 7.399722 | 7.398979 | 6.75765  | 7.752424 | 7.024864 | 7.469073 |
| 50937_at | 3.841721 | 5.960487 | 4.92286  | 4.802106 | 5.537758 | 4.488258 | 5.964559 | 6.509673 |
| 50939_at | 3.100138 | 2.076631 | 2.593153 | 1.830115 | 1.872673 | 2.789084 | 2.194344 | 1.764978 |
| 5093_at  | 8.038479 | 8.17976  | 7.839843 | 7.989359 | 7.496029 | 8.50234  | 7.435985 | 7.955692 |
| 50940_at | 1.360048 | 1.382563 | 1.612045 | 1.50423  | 1.322094 | 1.582862 | 1.254999 | 1.430599 |
| 50943_at | 2.194107 | 2.4088   | 2.549566 | 2.443349 | 2.949444 | 2.322285 | 2.375325 | 2.859139 |
| 50944_at | 1.59082  | 2.430128 | 2.07606  | 1.740282 | 2.456825 | 1.524256 | 1.788794 | 1.540229 |
| 50945_at | 1.22685  | 1.669177 | 1.531089 | 1.40086  | 1.300752 | 1.775627 | 1.930818 | 1.461592 |
| 5094_at  | 9.393278 | 9.399647 | 9.22423  | 9.364972 | 9.864171 | 9.398148 | 8.800913 | 9.421997 |
| 5095_at  | 5.488119 | 5.84069  | 5.610168 | 5.394385 | 6.494352 | 6.277564 | 4.659903 | 6.017406 |
| 50964_at | 8.784215 | 8.887725 | 8.458218 | 9.338162 | 8.418982 | 8.369981 | 9.199055 | 8.381383 |
| 5096_at  | 6.210473 | 5.896942 | 6.119413 | 5.265572 | 6.79588  | 5.974234 | 5.64374  | 6.248121 |
| 5097_at  | 5.333956 | 6.079201 | 5.182608 | 6.357515 | 5.077977 | 6.083079 | 6.255659 | 5.516868 |
| 5098_at  | 3.364023 | 3.105627 | 3.967866 | 3.78287  | 3.256234 | 2.883994 | 4.543453 | 3.544394 |
| 50999_at | 8.006225 | 7.548543 | 7.982545 | 8.036597 | 7.717525 | 7.492608 | 7.914957 | 7.882875 |
| 5099_at  | 2.385496 | 2.611881 | 2.700959 | 2.40522  | 2.289405 | 2.602168 | 4.39068  | 1.976696 |
| 509_at   | 8.964503 | 8.685134 | 8.553352 | 8.639857 | 8.662609 | 8.797078 | 8.197642 | 9.004351 |
| 50_at    | 6.589778 | 6.235768 | 6.892902 | 6.775209 | 6.656376 | 6.854312 | 6.570227 | 6.470628 |
| 51000_at | 5.944972 | 5.838122 | 6.561572 | 5.970168 | 5.274534 | 5.846612 | 5.913677 | 6.517125 |
| 51001_at | 5.052468 | 5.242727 | 5.02076  | 5.016095 | 5.141708 | 5.285139 | 4.444613 | 4.088286 |
| 51002_at | 7.58717  | 7.153348 | 6.957509 | 6.38073  | 6.470561 | 7.439194 | 7.072064 | 7.285086 |
| 51003_at | 6.184388 | 6.52438  | 6.080248 | 5.785268 | 6.245968 | 5.489353 | 6.191229 | 6.755004 |
| 51004_at | 5.96956  | 5.496894 | 4.917971 | 5.196935 | 5.904729 | 5.70801  | 5.392718 | 5.33276  |
| 51005_at | 3.129862 | 3.238641 | 3.335366 | 3.86255  | 2.714045 | 3.741995 | 4.031161 | 3.135264 |
| 51006_at | 6.641982 | 6.380018 | 6.524587 | 6.185298 | 6.032142 | 6.39525  | 7.024992 | 5.996318 |
| 51008_at | 6.521431 | 5.960011 | 6.163513 | 6.004055 | 7.091847 | 6.005089 | 6.38031  | 6.138008 |
| 51009_at | 7.654268 | 8.02253  | 7.415536 | 7.750143 | 7.211643 | 7.536578 | 7.747157 | 7.703068 |
| 5100_at  | 1.222133 | 1.338459 | 1.598608 | 1.473493 | 1.883841 | 1.232945 | 2.550343 | 1.950299 |

|          |          |          |          |          |          |          |          |          |
|----------|----------|----------|----------|----------|----------|----------|----------|----------|
| 51010_at | 5.950006 | 6.283274 | 6.282457 | 6.479322 | 6.226561 | 5.622497 | 5.05607  | 6.592131 |
| 51011_at | 3.136448 | 3.219548 | 2.276386 | 2.958416 | 2.56539  | 3.27394  | 2.376028 | 4.205723 |
| 51013_at | 6.189383 | 6.39915  | 6.638701 | 6.53308  | 7.202558 | 6.062844 | 6.922336 | 6.623573 |
| 51014_at | 8.638675 | 8.942549 | 8.829059 | 8.169071 | 9.021411 | 7.90159  | 8.425983 | 9.226207 |
| 51015_at | 6.374079 | 6.001926 | 4.7651   | 6.103371 | 5.874331 | 5.061088 | 5.930876 | 5.9076   |
| 51016_at | 5.474046 | 5.757923 | 4.980456 | 5.429115 | 5.439908 | 5.554168 | 4.974933 | 5.172425 |
| 51018_at | 5.548764 | 6.236106 | 5.526189 | 6.64286  | 6.24782  | 6.376831 | 6.511527 | 6.681007 |
| 51019_at | 7.681271 | 7.101347 | 6.859763 | 6.979003 | 7.694638 | 7.015516 | 6.748382 | 7.273115 |
| 5101_at  | 5.015501 | 4.622652 | 4.598459 | 4.571554 | 5.085894 | 4.010299 | 4.52958  | 3.519174 |
| 51020_at | 8.115933 | 7.61021  | 7.447695 | 6.98599  | 6.032756 | 7.220714 | 7.634325 | 8.006737 |
| 51021_at | 7.363512 | 7.251562 | 7.184058 | 7.587976 | 7.230304 | 7.15523  | 7.426983 | 6.254488 |
| 51022_at | 5.410768 | 5.401718 | 5.283452 | 5.185559 | 5.172627 | 4.872994 | 4.147751 | 4.759413 |
| 51023_at | 5.21462  | 5.512463 | 5.263526 | 5.254627 | 5.391846 | 6.148916 | 6.004047 | 5.578778 |
| 51024_at | 9.359703 | 8.822153 | 9.050556 | 8.950561 | 8.141599 | 9.342214 | 9.259024 | 8.143798 |
| 51026_at | 6.680256 | 7.029479 | 6.604977 | 6.506084 | 6.530904 | 6.208911 | 7.373135 | 6.815065 |
| 51027_at | 4.182418 | 3.999065 | 4.283528 | 3.794778 | 3.913765 | 3.576808 | 4.062873 | 3.127407 |
| 51028_at | 7.382024 | 7.29168  | 7.243351 | 7.314145 | 7.485843 | 7.139945 | 7.078085 | 7.427767 |
| 51029_at | 6.765641 | 6.767782 | 6.746054 | 6.344776 | 6.936662 | 6.27916  | 6.529501 | 6.243252 |
| 51031_at | 7.124142 | 7.03073  | 6.567279 | 6.589988 | 7.147895 | 7.008597 | 7.050041 | 7.167354 |
| 51032_at | 1.202627 | 1.990136 | 1.618018 | 1.242896 | 1.338473 | 2.422765 | 2.111204 | 1.942149 |
| 51035_at | 7.824521 | 7.588321 | 7.348446 | 7.541898 | 6.61267  | 7.713029 | 7.238977 | 7.044668 |
| 51042_at | 7.182808 | 6.454717 | 6.036057 | 6.590109 | 6.041758 | 7.066145 | 5.656313 | 5.080612 |
| 51043_at | 4.203034 | 3.793691 | 3.99188  | 3.841321 | 4.122432 | 3.990782 | 3.952578 | 4.034254 |
| 51046_at | 1.302698 | 1.350383 | 2.078606 | 1.362995 | 1.779509 | 1.628912 | 1.657012 | 2.347083 |
| 5104_at  | 5.338249 | 3.020637 | 3.259862 | 4.243165 | 7.172807 | 4.798504 | 2.584539 | 4.177401 |
| 51050_at | 1.531713 | 2.03439  | 1.291426 | 0.954981 | 1.74481  | 0.986711 | 1.083919 | 1.309178 |
| 51052_at | 1.808328 | 2.45957  | 3.162884 | 1.505876 | 1.843824 | 1.894275 | 2.357044 | 1.425243 |
| 51053_at | 5.330123 | 5.090101 | 4.309589 | 5.365167 | 4.56829  | 5.263129 | 4.429817 | 5.516849 |
| 51054_at | 4.013351 | 2.933642 | 4.309957 | 3.301393 | 2.221852 | 1.808349 | 3.076199 | 5.780779 |
| 51056_at | 7.754064 | 7.102462 | 7.516096 | 8.12951  | 8.274172 | 7.926678 | 8.103498 | 7.811682 |
| 51057_at | 3.715394 | 3.594996 | 1.966581 | 2.887434 | 2.09015  | 1.540464 | 3.207718 | 3.693837 |
| 51058_at | 3.579658 | 3.746767 | 2.905573 | 4.181818 | 2.779356 | 3.525276 | 3.207848 | 1.857263 |
| 51059_at | 1.463953 | 1.536544 | 1.628276 | 1.770411 | 1.681809 | 2.360605 | 2.218445 | 1.709421 |
| 5105_at  | 5.580365 | 5.008997 | 5.708117 | 3.342259 | 5.886361 | 4.841535 | 2.98992  | 4.643654 |
| 51060_at | 5.328785 | 5.337496 | 4.60633  | 5.772746 | 4.611    | 4.972427 | 4.644223 | 4.687706 |
| 51061_at | 6.71068  | 6.74179  | 6.778117 | 7.098652 | 6.934683 | 6.779029 | 7.077489 | 6.844959 |
| 51062_at | 5.1159   | 5.135009 | 4.923818 | 5.313817 | 4.924791 | 4.455277 | 4.605636 | 5.720683 |
| 51063_at | 4.47731  | 3.735284 | 4.440167 | 4.812839 | 4.655994 | 5.236397 | 4.319529 | 4.199919 |
| 51065_at | 8.884444 | 8.792856 | 8.617211 | 9.007152 | 8.709911 | 8.63434  | 8.338897 | 8.490309 |
| 51066_at | 1.912621 | 1.339223 | 2.273331 | 1.859503 | 2.028548 | 2.293095 | 2.564585 | 2.374981 |
| 51067_at | 4.630244 | 4.761561 | 4.152769 | 2.875432 | 4.856885 | 2.934738 | 4.121847 | 5.274046 |
| 51068_at | 6.936784 | 7.037068 | 6.7725   | 7.379891 | 7.38572  | 6.954526 | 7.166448 | 6.702844 |
| 51069_at | 6.30287  | 5.369535 | 5.540016 | 5.469758 | 4.651947 | 5.788511 | 5.819712 | 4.777486 |
| 5106_at  | 5.653494 | 4.739497 | 5.630377 | 3.97411  | 5.331324 | 4.315007 | 3.451622 | 5.273209 |
| 51070_at | 7.291324 | 6.267072 | 6.916912 | 6.769694 | 6.653138 | 7.547364 | 6.475919 | 6.6767   |
| 51071_at | 6.314003 | 6.167602 | 5.78862  | 5.611651 | 6.113906 | 5.66077  | 5.387311 | 6.483001 |
| 51072_at | 5.523196 | 5.614701 | 5.300972 | 5.11061  | 5.167167 | 5.329337 | 3.615353 | 6.037352 |
| 51073_at | 5.561547 | 4.871334 | 5.215923 | 4.580998 | 4.754875 | 4.539686 | 5.210886 | 4.2692   |
| 51074_at | 5.066396 | 4.249331 | 4.955487 | 5.42265  | 4.464447 | 4.732197 | 4.613016 | 5.530014 |
| 51075_at | 7.727761 | 7.988913 | 7.371074 | 7.018844 | 7.781971 | 7.205586 | 7.672824 | 7.601813 |
| 51076_at | 5.907826 | 6.275624 | 6.144978 | 5.704236 | 6.260369 | 5.046867 | 6.331523 | 6.663858 |

|          |          |          |          |          |          |          |          |          |
|----------|----------|----------|----------|----------|----------|----------|----------|----------|
| 51077_at | 4.24021  | 4.925478 | 4.190521 | 4.294574 | 4.061023 | 4.106775 | 4.226158 | 4.02134  |
| 51078_at | 5.483166 | 5.232419 | 4.868857 | 4.963883 | 3.997504 | 4.838477 | 4.573333 | 4.754068 |
| 51079_at | 9.512419 | 8.79651  | 8.97595  | 9.646226 | 9.014565 | 9.309673 | 9.010183 | 8.959735 |
| 51081_at | 7.186313 | 6.78376  | 6.767413 | 6.218279 | 7.095634 | 6.536501 | 6.655773 | 6.408976 |
| 51082_at | 7.940124 | 7.278786 | 7.159098 | 7.661482 | 7.222785 | 7.330936 | 7.62832  | 7.43577  |
| 51083_at | 3.165418 | 1.725478 | 2.41608  | 1.885685 | 1.904234 | 1.466072 | 3.373444 | 3.1043   |
| 51084_at | 7.346702 | 6.574046 | 6.354315 | 5.398051 | 7.935152 | 6.282442 | 5.869043 | 7.174968 |
| 51085_at | 3.320733 | 3.936155 | 2.344646 | 2.450971 | 2.128438 | 4.402384 | 4.148993 | 3.257453 |
| 51087_at | 2.853289 | 3.003308 | 2.259046 | 2.641989 | 2.953003 | 2.531691 | 3.277688 | 3.441946 |
| 51088_at | 5.519775 | 5.886303 | 6.018215 | 6.008685 | 6.382115 | 6.23103  | 5.743303 | 5.947521 |
| 5108_at  | 8.066585 | 8.253789 | 8.178456 | 8.188817 | 8.117426 | 7.829411 | 8.03582  | 8.406614 |
| 51090_at | 4.359609 | 3.790971 | 4.773782 | 5.866437 | 5.668634 | 5.220603 | 4.153472 | 3.591008 |
| 51091_at | 5.011274 | 4.418717 | 5.417139 | 5.146674 | 4.717631 | 4.230755 | 5.198888 | 4.464315 |
| 51092_at | 6.716633 | 7.125822 | 7.145958 | 6.739691 | 6.716933 | 5.842774 | 6.991528 | 6.729089 |
| 51093_at | 4.222129 | 3.994408 | 3.513136 | 3.346078 | 2.904074 | 4.231018 | 4.197675 | 4.214205 |
| 51094_at | 8.433318 | 8.444431 | 7.746297 | 8.146871 | 7.871737 | 8.225891 | 8.507974 | 8.072805 |
| 51095_at | 5.407355 | 5.545636 | 5.340302 | 5.606819 | 5.726945 | 5.460091 | 5.394084 | 5.739813 |
| 51096_at | 5.48929  | 5.114294 | 4.30601  | 4.891671 | 5.17244  | 5.279451 | 4.307227 | 5.053088 |
| 51097_at | 7.06788  | 6.932188 | 6.471247 | 6.594797 | 7.011364 | 6.654051 | 5.931226 | 6.951514 |
| 51098_at | 5.701082 | 5.368018 | 5.042311 | 5.890395 | 5.533636 | 5.325793 | 5.20699  | 6.055599 |
| 51099_at | 6.048799 | 5.950758 | 5.360048 | 5.885851 | 6.220242 | 6.198329 | 5.085505 | 5.66102  |
| 51100_at | 8.457516 | 8.355405 | 8.317784 | 8.339843 | 8.356544 | 8.23156  | 8.461011 | 8.559229 |
| 51101_at | 6.010436 | 5.692571 | 5.641796 | 5.176409 | 5.266137 | 5.215015 | 5.596327 | 6.383933 |
| 51102_at | 4.766138 | 3.166827 | 4.612203 | 3.460042 | 4.989208 | 4.17418  | 3.65507  | 5.065209 |
| 51103_at | 3.095996 | 3.304126 | 2.114416 | 2.587017 | 3.700583 | 2.509912 | 2.825478 | 2.977788 |
| 51104_at | 4.133635 | 5.031402 | 4.535317 | 4.575743 | 4.570462 | 3.665599 | 4.180422 | 4.409088 |
| 51105_at | 6.259454 | 6.066278 | 5.889701 | 6.142796 | 6.450334 | 6.42533  | 6.041312 | 6.422098 |
| 51106_at | 3.866642 | 4.116871 | 3.715669 | 4.411913 | 4.938594 | 2.914555 | 4.961741 | 5.083937 |
| 51107_at | 5.831852 | 6.067868 | 5.762054 | 6.770838 | 6.446857 | 6.10256  | 5.453542 | 5.252362 |
| 51108_at | 7.231498 | 6.74366  | 6.522376 | 7.025839 | 6.481793 | 6.971201 | 6.622725 | 6.734429 |
| 51109_at | 6.389442 | 7.096158 | 6.842757 | 5.973275 | 6.762126 | 6.112864 | 5.449016 | 7.127009 |
| 5110_at  | 7.74783  | 7.733012 | 7.2778   | 7.651203 | 7.390197 | 7.341071 | 7.404244 | 7.797622 |
| 51110_at | 5.775624 | 5.190182 | 5.183797 | 4.969951 | 6.829607 | 5.602096 | 5.313123 | 6.052586 |
| 51111_at | 7.355468 | 7.61563  | 7.595282 | 7.408877 | 7.920979 | 7.57881  | 7.559151 | 8.048424 |
| 51112_at | 5.724104 | 5.634174 | 5.525423 | 5.800439 | 6.009804 | 6.02982  | 4.86229  | 5.070819 |
| 51114_at | 7.518561 | 7.41334  | 7.945879 | 7.45107  | 7.287026 | 7.601538 | 8.104755 | 7.429771 |
| 51115_at | 6.737062 | 7.015142 | 6.636416 | 6.363135 | 6.288543 | 6.297438 | 6.644216 | 6.794635 |
| 51116_at | 3.284642 | 3.170823 | 3.62671  | 3.102851 | 3.058952 | 3.317872 | 4.005921 | 2.736032 |
| 51117_at | 6.466783 | 6.056752 | 6.21278  | 6.223378 | 4.212082 | 6.487972 | 5.944191 | 5.748155 |
| 51118_at | 7.129078 | 6.666847 | 6.514925 | 6.710017 | 6.089956 | 6.56942  | 6.653847 | 6.619264 |
| 51119_at | 10.20956 | 10.39102 | 10.23261 | 10.14534 | 10.25573 | 9.905874 | 9.825504 | 10.39512 |
| 5111_at  | 6.901326 | 5.550919 | 6.419271 | 6.17053  | 6.061996 | 6.719302 | 5.595907 | 6.645307 |
| 51121_at | 4.597558 | 4.595671 | 4.034114 | 3.509259 | 4.58345  | 4.103741 | 3.964637 | 4.540113 |
| 51122_at | 6.988536 | 7.418293 | 7.508333 | 7.442526 | 7.124106 | 6.995527 | 7.608983 | 7.159228 |
| 51123_at | 5.633983 | 4.599046 | 4.606491 | 5.746393 | 4.474154 | 5.137759 | 4.643592 | 3.785247 |
| 51124_at | 7.780055 | 7.752626 | 7.606988 | 7.522938 | 7.735852 | 7.505057 | 7.250942 | 6.464044 |
| 51125_at | 8.956319 | 8.977154 | 8.754025 | 8.897129 | 8.897145 | 8.497362 | 8.992436 | 8.550815 |
| 51126_at | 7.842125 | 7.620858 | 7.086067 | 7.592431 | 7.187073 | 7.15966  | 7.639004 | 7.060467 |
| 51127_at | 2.883986 | 3.824142 | 2.560793 | 2.388592 | 2.193609 | 2.188493 | 2.565278 | 2.67133  |
| 51128_at | 6.94806  | 7.094249 | 6.788851 | 6.610446 | 7.192136 | 6.36261  | 6.737756 | 7.061036 |
| 51129_at | 3.667811 | 3.82672  | 4.754613 | 3.81978  | 3.431448 | 4.189956 | 5.142483 | 4.368824 |

|          |          |          |          |          |          |          |          |          |
|----------|----------|----------|----------|----------|----------|----------|----------|----------|
| 51131_at | 5.663571 | 5.589901 | 5.533031 | 5.47908  | 5.145    | 4.402943 | 4.783201 | 5.615702 |
| 51132_at | 6.171142 | 6.390839 | 6.491416 | 6.850266 | 6.081459 | 6.491916 | 5.895527 | 6.228262 |
| 51133_at | 6.36876  | 6.892796 | 6.800804 | 6.730515 | 6.488116 | 6.868763 | 6.09521  | 7.273196 |
| 51134_at | 3.40111  | 3.766113 | 3.815829 | 3.308722 | 4.08666  | 3.535984 | 3.047748 | 3.364437 |
| 51135_at | 5.06925  | 4.839734 | 4.835218 | 4.745045 | 4.763017 | 4.51191  | 4.820865 | 4.755049 |
| 51136_at | 5.047501 | 6.087869 | 5.928439 | 3.988581 | 5.518055 | 3.634268 | 3.551578 | 5.061721 |
| 51138_at | 7.75117  | 7.507477 | 7.679261 | 7.235395 | 7.490101 | 7.035976 | 7.537137 | 7.392455 |
| 51141_at | 4.175531 | 5.787063 | 6.212411 | 7.033471 | 6.509523 | 5.361557 | 5.61265  | 6.722121 |
| 51142_at | 9.504665 | 9.099234 | 9.235378 | 9.221843 | 8.665276 | 9.285994 | 9.280694 | 8.588393 |
| 51143_at | 7.009052 | 6.626791 | 6.887385 | 6.821753 | 6.985308 | 7.012948 | 6.932854 | 7.362687 |
| 51144_at | 8.145443 | 8.924428 | 9.004699 | 8.753282 | 9.048251 | 8.174269 | 8.39711  | 8.409557 |
| 51145_at | 1.797014 | 2.276996 | 2.538619 | 2.812368 | 2.26349  | 2.155907 | 2.742144 | 1.787659 |
| 51146_at | 1.378268 | 1.296826 | 1.402433 | 1.75052  | 1.981026 | 1.338643 | 1.423173 | 1.250723 |
| 51147_at | 5.663386 | 6.417277 | 5.687162 | 6.633119 | 6.167303 | 6.704994 | 6.402404 | 6.795522 |
| 51148_at | 3.326505 | 3.183148 | 2.835599 | 3.446644 | 3.055186 | 3.706171 | 4.127487 | 3.230583 |
| 51149_at | 4.430518 | 5.75117  | 4.294392 | 4.792776 | 4.877304 | 4.009458 | 4.205044 | 5.591112 |
| 51150_at | 6.965992 | 6.67494  | 7.220722 | 6.951846 | 6.779736 | 7.516599 | 6.513422 | 6.623617 |
| 51151_at | 1.877313 | 1.989093 | 1.901588 | 1.065488 | 1.739088 | 1.656021 | 1.505576 | 2.08073  |
| 51154_at | 4.273726 | 4.232518 | 4.744667 | 3.865142 | 4.95767  | 4.354686 | 4.498169 | 4.026755 |
| 51155_at | 4.866715 | 4.65736  | 4.026231 | 4.381223 | 3.891444 | 5.567441 | 4.694264 | 4.844637 |
| 51156_at | 1.818271 | 1.441682 | 2.358101 | 1.952523 | 2.313968 | 2.022423 | 3.017055 | 2.027619 |
| 51157_at | 4.168739 | 3.473228 | 3.745861 | 3.585023 | 3.336119 | 4.393603 | 3.567839 | 4.147456 |
| 51160_at | 8.039157 | 6.739757 | 7.509539 | 7.757784 | 6.865884 | 8.176575 | 7.687872 | 6.986653 |
| 51161_at | 3.36173  | 4.0708   | 2.487273 | 3.039998 | 3.025146 | 3.033566 | 2.838279 | 3.785086 |
| 51162_at | 5.239975 | 4.176341 | 4.475855 | 4.900652 | 4.385869 | 4.678438 | 4.743729 | 3.42846  |
| 51163_at | 5.481986 | 5.854246 | 5.670784 | 6.301416 | 5.741121 | 5.109618 | 5.760275 | 5.625714 |
| 51164_at | 5.995071 | 5.67056  | 6.207147 | 5.753438 | 6.271013 | 5.687793 | 6.560386 | 5.945521 |
| 51166_at | 3.899211 | 4.455342 | 3.461031 | 3.234256 | 4.269303 | 3.843778 | 3.196986 | 4.032935 |
| 51167_at | 4.040997 | 3.712579 | 4.256871 | 3.748132 | 4.256871 | 3.432655 | 3.125992 | 4.515842 |
| 51168_at | 2.627324 | 2.134128 | 2.318457 | 2.376815 | 2.370402 | 2.130086 | 2.39982  | 2.066093 |
| 5116_at  | 3.323473 | 4.329826 | 4.201617 | 4.360985 | 3.758655 | 3.72961  | 4.208315 | 4.145523 |
| 51170_at | 7.314257 | 6.910183 | 6.432609 | 6.821193 | 6.707196 | 7.162798 | 6.36315  | 7.156096 |
| 51171_at | 5.190084 | 3.059286 | 4.82392  | 2.756737 | 3.217852 | 4.866122 | 2.999493 | 3.53099  |
| 51172_at | 2.056776 | 3.127825 | 2.026728 | 2.707441 | 2.922385 | 3.204588 | 4.123458 | 2.396586 |
| 51174_at | 4.517974 | 4.570118 | 4.196806 | 4.426046 | 3.482748 | 3.277393 | 3.351128 | 3.036161 |
| 51175_at | 5.380506 | 5.50915  | 4.908492 | 4.761318 | 5.707713 | 5.043947 | 5.117822 | 5.732079 |
| 51176_at | 3.64465  | 3.122851 | 1.789203 | 2.668062 | 2.070154 | 4.986969 | 1.819319 | 1.665731 |
| 51177_at | 7.529024 | 7.416281 | 6.331271 | 6.27521  | 6.8062   | 7.296622 | 6.666001 | 7.549585 |
| 51179_at | 6.848007 | 5.304719 | 4.670018 | 3.313975 | 6.556854 | 5.213388 | 2.897571 | 5.960121 |
| 51181_at | 8.891883 | 7.403242 | 8.097857 | 7.168651 | 7.954645 | 7.972913 | 6.989269 | 7.837151 |
| 51182_at | 5.104307 | 4.783397 | 4.924287 | 5.015867 | 4.720751 | 4.906993 | 3.403296 | 4.837736 |
| 51184_at | 5.223914 | 5.275616 | 5.13471  | 5.266732 | 5.177031 | 4.159247 | 3.605249 | 5.786212 |
| 51185_at | 8.228692 | 7.946799 | 6.953146 | 7.704047 | 7.724575 | 7.78919  | 7.74525  | 7.835627 |
| 51186_at | 9.228393 | 9.599895 | 9.312037 | 9.355549 | 9.179703 | 9.35471  | 9.177271 | 9.44438  |
| 51187_at | 7.135494 | 7.226017 | 7.526613 | 7.249986 | 7.681687 | 7.305123 | 7.360201 | 7.993861 |
| 51188_at | 5.328721 | 6.078481 | 5.517117 | 6.103163 | 6.280172 | 5.633279 | 5.329986 | 6.516348 |
| 5118_at  | 3.863285 | 4.629481 | 4.145036 | 3.157858 | 3.601952 | 4.751055 | 4.250243 | 2.436634 |
| 51191_at | 4.461506 | 4.039209 | 4.008311 | 4.593121 | 4.902786 | 4.701205 | 3.907233 | 4.82237  |
| 51192_at | 4.102822 | 5.902035 | 5.596693 | 5.56135  | 5.330371 | 5.322704 | 5.635916 | 5.091883 |
| 51193_at | 5.648584 | 5.160726 | 5.40168  | 5.378687 | 5.034337 | 4.785164 | 5.389784 | 5.642288 |
| 51194_at | 5.219286 | 5.43028  | 5.145381 | 4.776562 | 5.520194 | 5.098303 | 4.6822   | 5.554927 |

|          |          |          |          |          |          |          |          |          |
|----------|----------|----------|----------|----------|----------|----------|----------|----------|
| 51195_at | 1.382855 | 1.6101   | 1.566343 | 1.582267 | 3.185647 | 1.979704 | 2.66699  | 2.415694 |
| 51196_at | 8.840829 | 8.751609 | 9.144627 | 8.907764 | 8.576907 | 8.728593 | 9.181439 | 8.811955 |
| 51198_at | 1.376399 | 2.794072 | 1.609106 | 2.336593 | 2.744853 | 2.037764 | 1.981375 | 2.499957 |
| 51199_at | 6.8023   | 6.445226 | 6.45866  | 6.955842 | 7.338698 | 6.907548 | 7.037538 | 7.158951 |
| 5119_at  | 5.305391 | 4.903351 | 4.107989 | 4.7236   | 4.845236 | 5.007742 | 4.603723 | 3.883331 |
| 51200_at | 2.645951 | 2.552955 | 3.386675 | 3.011361 | 2.394437 | 3.370826 | 3.059266 | 3.547001 |
| 51201_at | 5.862035 | 5.931092 | 5.910801 | 5.096845 | 5.601687 | 5.57925  | 5.049181 | 6.01675  |
| 51202_at | 6.750929 | 6.980781 | 6.475102 | 6.78561  | 7.137745 | 7.184935 | 6.797965 | 7.658741 |
| 51203_at | 4.142089 | 3.368029 | 2.7146   | 2.989985 | 2.441723 | 2.853733 | 3.504723 | 3.238455 |
| 51204_at | 6.271582 | 6.375674 | 5.810161 | 5.219269 | 6.582351 | 5.4074   | 5.550828 | 5.882421 |
| 51205_at | 5.238729 | 4.590498 | 4.594459 | 5.265696 | 4.742983 | 4.595265 | 4.040216 | 5.657451 |
| 51206_at | 2.020135 | 1.839229 | 2.069744 | 2.439098 | 2.20949  | 1.948861 | 2.919137 | 1.559869 |
| 51207_at | 2.542143 | 2.645257 | 2.279616 | 1.82769  | 2.712516 | 2.192151 | 2.440903 | 2.477842 |
| 51208_at | 2.013431 | 2.299949 | 2.667609 | 3.145199 | 2.559285 | 2.309387 | 2.258825 | 2.497475 |
| 51209_at | 2.51042  | 3.468502 | 2.03575  | 2.448772 | 2.701125 | 2.249927 | 2.170439 | 2.196413 |
| 51213_at | 1.169231 | 1.663815 | 1.849015 | 1.269248 | 1.349077 | 1.680158 | 0.811652 | 1.223927 |
| 51214_at | 1.86715  | 2.563568 | 2.073555 | 2.048618 | 3.164822 | 2.439697 | 2.528106 | 2.742909 |
| 51218_at | 7.274298 | 6.931653 | 6.642844 | 6.612697 | 6.400418 | 6.780696 | 6.68484  | 6.185853 |
| 5121_at  | 7.270742 | 6.626617 | 2.292587 | 6.141544 | 6.425808 | 7.461991 | 6.485472 | 6.497457 |
| 51222_at | 2.648472 | 2.141769 | 2.922436 | 2.411274 | 2.621229 | 2.897398 | 2.824713 | 2.685529 |
| 51224_at | 1.32246  | 1.483293 | 1.536548 | 1.056092 | 1.055721 | 1.152236 | 1.16099  | 1.560822 |
| 51225_at | 4.933865 | 4.465799 | 4.928647 | 5.349322 | 3.128715 | 4.9078   | 4.9419   | 3.582589 |
| 51226_at | 6.76095  | 6.384758 | 6.741872 | 5.961808 | 6.644368 | 6.68329  | 6.535903 | 6.558555 |
| 51227_at | 6.607614 | 5.80712  | 5.996886 | 5.060796 | 6.607955 | 5.137957 | 6.311484 | 5.660207 |
| 51228_at | 5.573769 | 4.688839 | 5.267305 | 6.456627 | 3.44823  | 5.955884 | 5.694568 | 5.09712  |
| 5122_at  | 1.521555 | 2.029637 | 2.527321 | 2.387025 | 1.645719 | 1.609273 | 1.928895 | 2.087303 |
| 51230_at | 5.567498 | 5.704951 | 5.418415 | 4.302971 | 4.913292 | 5.455006 | 4.814988 | 5.486393 |
| 51231_at | 5.430221 | 4.857515 | 5.631228 | 5.274141 | 4.969204 | 4.778741 | 5.107841 | 4.853192 |
| 51232_at | 9.299069 | 9.445365 | 9.974034 | 9.857358 | 10.02497 | 9.867985 | 10.30214 | 9.386542 |
| 51233_at | 2.10647  | 2.181643 | 1.677002 | 1.744447 | 1.477609 | 2.19738  | 1.69713  | 1.860423 |
| 51234_at | 7.434237 | 7.709848 | 7.832591 | 7.267751 | 7.756192 | 7.876594 | 7.35864  | 7.83554  |
| 51236_at | 2.354722 | 2.210952 | 2.19386  | 2.296793 | 1.829551 | 2.491274 | 1.977469 | 2.208757 |
| 51237_at | 3.152021 | 2.378032 | 3.248893 | 2.095062 | 2.875862 | 2.131298 | 1.876092 | 2.752522 |
| 51239_at | 4.878678 | 3.688837 | 4.081809 | 4.64526  | 4.001402 | 3.981042 | 5.281343 | 3.331575 |
| 51241_at | 7.460584 | 8.189248 | 7.756432 | 8.242163 | 8.226738 | 7.897693 | 7.74931  | 8.809433 |
| 51244_at | 6.499905 | 6.276333 | 5.750976 | 6.207224 | 5.437556 | 5.726037 | 5.768563 | 6.261723 |
| 51246_at | 5.187283 | 5.082144 | 5.105619 | 5.865052 | 5.159645 | 5.244465 | 5.117968 | 4.996229 |
| 51247_at | 9.537505 | 9.386672 | 9.297967 | 9.152673 | 9.078134 | 8.928739 | 9.433215 | 9.336187 |
| 51248_at | 5.721467 | 5.498221 | 5.931453 | 5.300211 | 5.616236 | 4.934476 | 5.550409 | 5.731792 |
| 51249_at | 7.065469 | 6.569519 | 7.393919 | 7.10092  | 6.140368 | 5.565463 | 6.41153  | 6.534483 |
| 51250_at | 5.891096 | 6.538315 | 5.923408 | 5.908377 | 5.545534 | 5.561305 | 5.105777 | 6.36066  |
| 51251_at | 2.994745 | 3.573956 | 3.929498 | 3.001952 | 4.300999 | 2.675908 | 3.082268 | 3.247884 |
| 51252_at | 2.119731 | 2.845245 | 2.670986 | 2.972923 | 2.621819 | 2.539447 | 2.400947 | 2.516806 |
| 51253_at | 8.544769 | 8.164838 | 8.304547 | 8.449918 | 7.699988 | 7.970423 | 8.197366 | 7.60975  |
| 51255_at | 8.088383 | 7.721357 | 7.806427 | 7.609601 | 7.985257 | 7.922845 | 7.277978 | 7.688188 |
| 51256_at | 5.935743 | 4.877181 | 5.193332 | 4.445773 | 4.848064 | 5.281511 | 4.127431 | 5.612605 |
| 51257_at | 6.366371 | 5.778265 | 4.984269 | 5.551565 | 5.396278 | 5.832683 | 6.042039 | 4.904015 |
| 51258_at | 9.320864 | 9.606667 | 9.645562 | 9.478789 | 9.65661  | 9.654693 | 9.89202  | 9.375623 |
| 51259_at | 5.523868 | 5.737322 | 3.86067  | 2.529725 | 3.860059 | 3.982729 | 3.593066 | 4.900948 |
| 5125_at  | 2.805221 | 3.724298 | 3.561173 | 2.239452 | 3.904064 | 2.454185 | 3.445322 | 2.752148 |
| 51260_at | 6.049138 | 6.530642 | 6.109901 | 6.058216 | 5.82894  | 6.138267 | 6.072902 | 6.819973 |

|          |          |          |          |          |          |          |          |          |
|----------|----------|----------|----------|----------|----------|----------|----------|----------|
| 51263_at | 6.279287 | 6.423456 | 6.727223 | 6.98165  | 6.680029 | 6.355651 | 6.627688 | 6.289818 |
| 51264_at | 8.348217 | 7.85946  | 7.529973 | 7.316276 | 5.973179 | 7.549551 | 7.687052 | 8.152742 |
| 51265_at | 2.662355 | 2.118728 | 1.807429 | 2.017301 | 2.102303 | 1.654047 | 1.712827 | 2.203462 |
| 51266_at | 1.781645 | 1.310341 | 1.772173 | 2.45379  | 1.107135 | 1.445096 | 1.597207 | 4.269258 |
| 51267_at | 2.616755 | 3.140539 | 3.250435 | 3.58127  | 1.92197  | 2.837597 | 2.205535 | 2.887683 |
| 51268_at | 6.382582 | 5.53242  | 5.828949 | 4.533593 | 5.720266 | 4.887824 | 3.02882  | 5.620246 |
| 5126_at  | 2.314024 | 2.458092 | 2.27421  | 2.458547 | 3.104722 | 2.611523 | 2.118082 | 2.370113 |
| 51270_at | 0.930301 | 1.735642 | 1.126417 | 1.158327 | 1.613985 | 1.346514 | 1.855937 | 1.754459 |
| 51271_at | 5.32917  | 6.124672 | 6.135532 | 6.942897 | 5.639931 | 5.330836 | 5.798663 | 5.595909 |
| 51272_at | 3.889802 | 4.71523  | 3.611406 | 5.18148  | 3.535071 | 3.994768 | 5.393421 | 3.760958 |
| 51274_at | 7.353088 | 7.967556 | 7.341021 | 7.787866 | 7.328509 | 7.641832 | 8.096006 | 7.0264   |
| 51275_at | 4.175197 | 4.120567 | 4.703747 | 4.976565 | 3.477314 | 4.495376 | 3.928988 | 4.158917 |
| 51276_at | 3.679129 | 1.301947 | 3.11005  | 2.673537 | 1.767233 | 2.848998 | 2.414177 | 3.794444 |
| 51277_at | 4.26571  | 3.143964 | 3.794711 | 4.343416 | 3.975723 | 4.485459 | 2.484342 | 4.438621 |
| 51278_at | 3.984186 | 3.448789 | 4.374378 | 4.067926 | 3.604636 | 4.054312 | 3.250168 | 3.262018 |
| 51279_at | 3.861136 | 4.027331 | 4.03067  | 5.114212 | 4.034687 | 4.739949 | 4.113437 | 3.646457 |
| 5127_at  | 6.868265 | 6.455913 | 6.446028 | 6.50857  | 6.41151  | 6.836612 | 6.611355 | 6.454851 |
| 51280_at | 4.95699  | 4.783534 | 5.661283 | 4.931941 | 5.969285 | 4.989335 | 4.859991 | 5.037527 |
| 51281_at | 2.637058 | 2.635477 | 2.201749 | 2.38849  | 3.228071 | 3.003412 | 2.962524 | 2.605257 |
| 51282_at | 4.830023 | 4.669783 | 4.142056 | 4.404155 | 4.705319 | 3.327578 | 3.872162 | 4.351113 |
| 51283_at | 6.611015 | 6.292646 | 6.896533 | 6.694885 | 5.995203 | 6.063919 | 5.702348 | 6.007498 |
| 51284_at | 1.864235 | 4.334141 | 4.148618 | 4.354449 | 2.190852 | 3.225053 | 1.554293 | 1.630746 |
| 51285_at | 2.012497 | 2.124529 | 2.010644 | 1.321602 | 2.152467 | 1.625234 | 2.058609 | 1.708404 |
| 51286_at | 3.199031 | 2.533632 | 2.679125 | 2.619656 | 2.874515 | 2.849724 | 2.802767 | 2.839951 |
| 51287_at | 8.114332 | 7.350951 | 8.175616 | 7.742565 | 6.766394 | 7.895303 | 7.865059 | 6.639274 |
| 51289_at | 1.794849 | 1.877659 | 1.831541 | 1.312474 | 1.915076 | 2.842838 | 1.885652 | 2.411701 |
| 5128_at  | 6.422222 | 5.649008 | 6.234958 | 6.527843 | 5.989079 | 6.100967 | 6.21093  | 6.437933 |
| 51290_at | 6.478141 | 6.521874 | 6.652421 | 6.471095 | 6.608799 | 6.131403 | 5.916913 | 7.640605 |
| 51291_at | 2.729716 | 2.490954 | 2.093723 | 3.739282 | 2.530531 | 3.419026 | 2.5947   | 2.382577 |
| 51292_at | 6.61202  | 6.885744 | 6.530144 | 6.399965 | 6.090362 | 6.192676 | 6.130425 | 6.442785 |
| 51293_at | 5.613406 | 4.808974 | 5.380775 | 5.086988 | 4.359532 | 5.503105 | 4.872781 | 4.086526 |
| 51294_at | 4.651608 | 4.428527 | 4.249789 | 5.350938 | 5.028287 | 4.651833 | 4.789702 | 4.654533 |
| 51295_at | 5.137241 | 4.615015 | 3.998949 | 4.92195  | 3.99913  | 4.778111 | 3.757676 | 4.71106  |
| 51296_at | 6.459044 | 6.331597 | 6.507644 | 6.683921 | 5.611077 | 6.611682 | 6.606677 | 5.832643 |
| 51297_at | 1.6093   | 1.780608 | 2.007068 | 1.784469 | 2.072854 | 1.621066 | 2.599061 | 2.094394 |
| 51298_at | 1.202893 | 1.493729 | 1.194157 | 1.515784 | 1.595864 | 1.639231 | 1.83674  | 2.114169 |
| 51299_at | 6.844687 | 5.532718 | 7.047767 | 5.444185 | 6.492884 | 7.273525 | 7.954287 | 6.091086 |
| 5129_at  | 4.538732 | 5.48921  | 4.534802 | 4.870368 | 4.113317 | 4.432093 | 3.999762 | 3.847655 |
| 51300_at | 7.229947 | 7.180282 | 7.077833 | 7.270011 | 6.809676 | 6.933916 | 6.467516 | 7.17778  |
| 51301_at | 3.81744  | 2.382091 | 4.529267 | 4.217414 | 4.38518  | 4.718291 | 5.271224 | 2.908078 |
| 51302_at | 2.279742 | 2.786645 | 2.314938 | 1.467812 | 2.786288 | 2.137599 | 3.993248 | 3.364275 |
| 51303_at | 6.069552 | 5.247005 | 5.253198 | 5.925398 | 5.16207  | 5.99945  | 5.248244 | 3.876299 |
| 51304_at | 4.969703 | 4.273599 | 4.326657 | 4.011197 | 3.986264 | 3.959389 | 4.137086 | 4.261113 |
| 51305_at | 1.250293 | 1.572438 | 1.982641 | 1.758758 | 2.088412 | 1.754795 | 1.885227 | 1.744165 |
| 51306_at | 6.714392 | 6.552453 | 6.629339 | 5.85658  | 6.098587 | 6.052781 | 6.29085  | 7.03433  |
| 51307_at | 4.490342 | 3.961396 | 5.22662  | 5.423899 | 4.295317 | 4.461639 | 4.866297 | 3.880782 |
| 51308_at | 3.975889 | 4.120736 | 1.883246 | 3.927395 | 2.368482 | 2.709292 | 4.679058 | 2.783402 |
| 51309_at | 5.828914 | 5.996943 | 5.689918 | 5.958919 | 5.469042 | 5.600008 | 5.501286 | 5.000344 |
| 5130_at  | 5.81684  | 5.504549 | 6.778474 | 6.599256 | 6.150581 | 6.521705 | 6.695697 | 7.135584 |
| 51310_at | 5.823212 | 4.640419 | 4.909806 | 5.441806 | 5.053036 | 5.571495 | 4.353328 | 4.347335 |
| 51311_at | 2.301275 | 2.726235 | 2.556064 | 2.324145 | 3.083715 | 2.611275 | 4.284359 | 2.553439 |



|          |          |          |          |          |          |          |          |          |
|----------|----------|----------|----------|----------|----------|----------|----------|----------|
| 51312_at | 6.23468  | 5.329643 | 6.841763 | 6.242665 | 6.728538 | 6.163573 | 6.734764 | 6.515238 |
| 51313_at | 5.321392 | 5.212063 | 5.382907 | 4.219841 | 5.165202 | 3.737172 | 5.134629 | 5.43814  |
| 51314_at | 1.265343 | 1.435539 | 1.289202 | 0.973623 | 1.310897 | 1.106178 | 1.68328  | 1.192235 |
| 51315_at | 6.003534 | 6.458526 | 6.248058 | 6.434326 | 6.593993 | 6.390061 | 6.332373 | 6.466281 |
| 51316_at | 4.850261 | 4.837006 | 5.362507 | 4.904825 | 4.404148 | 5.495729 | 5.921958 | 4.360552 |
| 51317_at | 6.399566 | 6.161387 | 6.410277 | 6.644306 | 6.087584 | 6.695428 | 6.455781 | 6.410277 |
| 51318_at | 8.036997 | 8.22717  | 7.702318 | 7.62447  | 8.149354 | 7.808232 | 7.627839 | 8.315883 |
| 51319_at | 5.083816 | 4.892606 | 4.324895 | 4.053714 | 3.409264 | 5.045847 | 4.451817 | 4.620242 |
| 51320_at | 7.261346 | 7.118859 | 6.965074 | 7.32071  | 7.407186 | 7.12966  | 7.190646 | 7.311327 |
| 51321_at | 5.099667 | 5.107161 | 4.89996  | 4.578352 | 4.875824 | 4.683729 | 4.739983 | 4.831782 |
| 51322_at | 8.037155 | 8.077897 | 8.142294 | 7.954635 | 7.850353 | 8.204022 | 8.075877 | 8.066478 |
| 51324_at | 6.160311 | 6.889174 | 6.379569 | 6.605882 | 6.32002  | 6.253171 | 6.154707 | 6.432673 |
| 51327_at | 1.422957 | 2.37984  | 1.602837 | 2.037859 | 2.066993 | 2.20555  | 2.031254 | 1.506766 |
| 51329_at | 7.395433 | 6.87173  | 6.96833  | 6.513716 | 6.151937 | 7.034974 | 6.731042 | 6.051145 |
| 5132_at  | 1.305413 | 1.92067  | 1.210205 | 0.832819 | 1.598342 | 1.897659 | 3.059123 | 1.23269  |
| 51330_at | 7.079746 | 7.936212 | 6.956623 | 6.948666 | 5.911272 | 6.588894 | 7.836735 | 7.186764 |
| 51332_at | 2.482765 | 3.113107 | 3.213873 | 3.568545 | 3.172285 | 2.689198 | 2.753352 | 3.189609 |
| 51333_at | 3.067522 | 3.787895 | 3.276046 | 2.763797 | 1.9118   | 2.261185 | 2.585194 | 3.196767 |
| 51334_at | 3.57186  | 3.463321 | 2.539931 | 3.186268 | 2.951752 | 2.845304 | 2.463289 | 2.889851 |
| 51335_at | 6.500571 | 7.397265 | 7.321485 | 7.399143 | 7.010682 | 7.202017 | 7.114682 | 6.500571 |
| 51337_at | 4.293902 | 4.262273 | 3.920674 | 5.019626 | 4.82898  | 4.922145 | 3.998831 | 3.512106 |
| 51338_at | 2.422138 | 3.091117 | 1.864237 | 2.508183 | 1.353688 | 1.345317 | 1.976229 | 2.236971 |
| 51339_at | 1.965603 | 2.32763  | 1.886914 | 1.955449 | 1.529642 | 2.376353 | 1.879822 | 1.192639 |
| 5133_at  | 2.672939 | 2.665744 | 2.5979   | 3.640939 | 3.015704 | 2.344451 | 2.677111 | 3.189278 |
| 51340_at | 6.366344 | 7.131886 | 6.638695 | 6.67358  | 6.789869 | 6.451626 | 6.654958 | 7.036788 |
| 51341_at | 5.082225 | 5.230186 | 5.048532 | 5.552704 | 4.701619 | 5.077228 | 5.51959  | 5.294319 |
| 51343_at | 5.888012 | 5.317697 | 5.165754 | 5.045542 | 5.049041 | 5.145176 | 6.012677 | 5.190956 |
| 51347_at | 6.651702 | 6.839256 | 6.636138 | 5.980023 | 5.51805  | 6.365436 | 6.268866 | 6.535654 |
| 51348_at | 3.259633 | 1.214926 | 2.772893 | 2.899091 | 1.804571 | 2.717414 | 1.3677   | 1.429581 |
| 5134_at  | 5.133141 | 5.620554 | 5.345902 | 4.407852 | 4.634499 | 4.446023 | 4.500922 | 5.123833 |
| 51350_at | 1.488569 | 1.293619 | 1.024982 | 1.773684 | 1.970093 | 1.390019 | 1.668164 | 1.470019 |
| 51351_at | 4.439318 | 2.620734 | 3.459128 | 3.680961 | 4.242908 | 2.598978 | 2.979339 | 3.778321 |
| 51352_at | 5.932139 | 6.392596 | 4.525227 | 4.935507 | 4.950364 | 4.666684 | 4.924024 | 5.172036 |
| 51360_at | 4.998852 | 5.935705 | 6.061925 | 4.663248 | 5.704097 | 5.134674 | 5.705981 | 5.617498 |
| 51361_at | 4.451368 | 4.279735 | 3.608434 | 3.744674 | 5.501111 | 4.557398 | 3.393005 | 5.728754 |
| 51362_at | 6.492297 | 6.456264 | 6.543395 | 6.559009 | 6.258601 | 6.111479 | 6.580342 | 6.704613 |
| 51363_at | 3.885312 | 4.558132 | 3.653175 | 4.159108 | 4.546116 | 4.348011 | 3.982973 | 3.797025 |
| 51364_at | 2.195011 | 2.68219  | 2.924506 | 1.907528 | 2.534358 | 2.428995 | 2.254033 | 2.805639 |
| 51365_at | 6.022122 | 6.640666 | 6.422676 | 6.99363  | 6.111236 | 7.103681 | 6.892636 | 6.855021 |
| 51366_at | 5.631941 | 6.062615 | 6.071231 | 6.722576 | 6.903473 | 6.094003 | 5.894717 | 6.936893 |
| 51367_at | 6.729792 | 6.873071 | 7.256881 | 6.274035 | 5.833303 | 5.705111 | 7.243732 | 6.349203 |
| 51368_at | 3.787849 | 3.684653 | 2.987354 | 3.633162 | 3.528567 | 2.710665 | 3.234304 | 2.998011 |
| 5136_at  | 5.273458 | 4.618201 | 4.638563 | 4.679488 | 5.313121 | 5.514405 | 4.677619 | 5.121798 |
| 51371_at | 9.714274 | 10.19128 | 9.883062 | 10.20597 | 10.28022 | 9.777929 | 9.522733 | 10.16226 |
| 51373_at | 6.643468 | 6.63985  | 6.670603 | 6.877219 | 5.820549 | 6.549878 | 6.20876  | 6.717606 |
| 51374_at | 8.684247 | 8.475475 | 8.554753 | 8.281183 | 8.026782 | 8.424442 | 8.393503 | 8.238625 |
| 51375_at | 6.729211 | 6.228508 | 5.194683 | 5.279299 | 5.819724 | 5.846238 | 4.524704 | 5.828162 |
| 51377_at | 4.49232  | 4.746337 | 4.561169 | 4.444095 | 4.873654 | 4.680901 | 4.663102 | 4.63067  |
| 51378_at | 2.338194 | 2.725809 | 2.510813 | 2.508695 | 2.724781 | 3.37798  | 2.670599 | 2.473439 |
| 51379_at | 5.027786 | 5.193931 | 5.289348 | 4.653521 | 5.39923  | 5.264356 | 5.723258 | 4.846544 |
| 5137_at  | 2.835068 | 2.155107 | 2.236829 | 1.706522 | 1.809182 | 2.207378 | 2.309259 | 2.774461 |

|          |          |          |          |          |          |          |          |          |
|----------|----------|----------|----------|----------|----------|----------|----------|----------|
| 51380_at | 4.154864 | 3.324736 | 4.257218 | 5.139706 | 4.263967 | 3.503878 | 3.732954 | 4.803877 |
| 51382_at | 7.781864 | 7.765602 | 7.937959 | 7.102153 | 7.313872 | 7.091418 | 7.262219 | 7.805735 |
| 51384_at | 1.861352 | 1.923578 | 1.979187 | 1.829778 | 1.679357 | 1.732418 | 2.453303 | 2.054426 |
| 51385_at | 4.071951 | 3.825145 | 5.102081 | 3.009355 | 3.390756 | 3.493603 | 3.717483 | 3.062226 |
| 51386_at | 8.247608 | 7.764565 | 8.101193 | 8.455983 | 8.333153 | 8.394613 | 7.99838  | 8.847778 |
| 51388_at | 5.326289 | 5.439779 | 5.678828 | 4.390994 | 5.656697 | 5.272418 | 4.82902  | 4.48016  |
| 51389_at | 7.820295 | 7.291635 | 7.415714 | 7.355746 | 7.405734 | 6.886539 | 7.440057 | 6.838021 |
| 5138_at  | 4.510634 | 4.928746 | 4.316462 | 4.135618 | 4.809084 | 4.634116 | 4.682475 | 4.517541 |
| 51390_at | 6.390834 | 5.462042 | 5.928586 | 5.925709 | 6.186656 | 5.815415 | 6.473324 | 6.002248 |
| 51393_at | 5.121713 | 5.417431 | 4.915509 | 5.563932 | 4.494261 | 5.521007 | 4.984482 | 3.92534  |
| 51397_at | 4.983562 | 4.998384 | 4.280308 | 4.966275 | 5.833348 | 4.563294 | 4.630599 | 5.550736 |
| 51398_at | 8.528927 | 8.05421  | 8.310853 | 8.206417 | 7.73252  | 8.374736 | 8.468336 | 7.829456 |
| 51399_at | 7.340219 | 7.346742 | 7.257961 | 6.742569 | 7.393109 | 7.181439 | 7.028819 | 7.465448 |
| 5139_at  | 5.890438 | 6.51163  | 6.439084 | 6.782962 | 5.880468 | 5.960349 | 6.631433 | 5.838949 |
| 513_at   | 9.277018 | 8.311151 | 8.37892  | 8.26757  | 8.270279 | 9.27227  | 8.472145 | 7.412554 |
| 51400_at | 5.328889 | 6.249053 | 6.479816 | 6.144008 | 7.052148 | 5.637848 | 6.171395 | 5.942168 |
| 51406_at | 8.188322 | 8.103105 | 7.724299 | 7.974437 | 7.796746 | 7.373992 | 7.086944 | 8.0319   |
| 51409_at | 4.651686 | 5.225933 | 3.889599 | 5.209024 | 3.762027 | 3.99475  | 4.292987 | 3.506146 |
| 5140_at  | 2.317996 | 2.450197 | 2.381328 | 1.848877 | 2.875496 | 1.907903 | 1.850299 | 2.155939 |
| 51411_at | 2.91056  | 3.02753  | 3.710253 | 3.979794 | 3.39057  | 4.154801 | 2.773782 | 3.009667 |
| 51412_at | 1.40994  | 1.289568 | 1.138035 | 1.186397 | 1.04426  | 1.665791 | 1.310345 | 1.457967 |
| 5141_at  | 4.864782 | 4.808643 | 5.417717 | 4.418327 | 4.973823 | 5.209734 | 5.32657  | 4.899271 |
| 51421_at | 4.834056 | 4.723185 | 4.569731 | 4.693015 | 4.493176 | 5.146531 | 4.379039 | 4.232594 |
| 51422_at | 3.346096 | 3.014232 | 3.429888 | 3.683381 | 2.699616 | 3.159821 | 3.244448 | 3.609083 |
| 51426_at | 5.658031 | 5.675647 | 5.909445 | 5.836717 | 5.011779 | 5.444511 | 5.362584 | 5.691653 |
| 51427_at | 4.554114 | 3.42689  | 2.974535 | 3.533447 | 3.349958 | 4.609673 | 3.802661 | 3.875342 |
| 51428_at | 6.628209 | 6.190277 | 6.110444 | 5.894099 | 6.250133 | 6.299007 | 5.79684  | 6.959431 |
| 51429_at | 5.46175  | 5.665572 | 5.663058 | 5.820444 | 5.581029 | 5.65197  | 5.870264 | 5.481779 |
| 5142_at  | 3.335188 | 3.401464 | 3.091197 | 3.19635  | 3.917613 | 2.897006 | 4.420177 | 3.287361 |
| 51430_at | 6.878531 | 6.990608 | 6.745884 | 6.529389 | 6.890363 | 6.829544 | 6.722972 | 7.098332 |
| 51433_at | 7.240113 | 7.003199 | 6.339706 | 6.247629 | 5.670669 | 6.728691 | 6.440088 | 6.862592 |
| 51434_at | 5.718576 | 6.151815 | 6.296169 | 6.006918 | 5.827809 | 5.517623 | 6.478363 | 5.811282 |
| 51435_at | 3.344311 | 2.322041 | 1.95444  | 1.974152 | 1.304407 | 1.95444  | 1.847413 | 2.030467 |
| 51438_at | 1.678758 | 1.914031 | 2.33706  | 1.953815 | 2.992921 | 3.28391  | 2.474175 | 2.116181 |
| 51439_at | 5.714095 | 6.043558 | 6.42684  | 5.94338  | 5.948516 | 5.425953 | 5.870145 | 6.539986 |
| 5143_at  | 2.600313 | 2.589178 | 2.329125 | 2.249901 | 2.085753 | 2.291959 | 3.084252 | 2.3642   |
| 51440_at | 2.792162 | 2.457431 | 2.571927 | 2.682944 | 3.009156 | 2.484199 | 1.52349  | 2.578084 |
| 51441_at | 5.087857 | 6.136616 | 5.117113 | 5.910267 | 5.458984 | 5.755381 | 5.87519  | 5.337493 |
| 51442_at | 1.751882 | 2.019908 | 2.410175 | 1.622083 | 1.811936 | 1.913656 | 2.252156 | 2.224211 |
| 51444_at | 4.90454  | 4.906329 | 5.061619 | 4.375555 | 4.154735 | 4.793078 | 5.001472 | 3.900337 |
| 51447_at | 6.65713  | 6.204121 | 6.667155 | 6.614991 | 6.864938 | 6.781063 | 6.112816 | 6.683297 |
| 51449_at | 8.052594 | 8.430599 | 9.077374 | 8.828286 | 9.158458 | 8.69811  | 9.085834 | 8.814535 |
| 5144_at  | 4.016021 | 4.061916 | 4.152656 | 4.009303 | 4.733615 | 4.316607 | 4.271925 | 4.475407 |
| 51450_at | 3.857551 | 4.050279 | 3.42438  | 4.035193 | 3.303416 | 3.603717 | 2.288908 | 3.418961 |
| 51451_at | 6.383481 | 5.965012 | 5.578139 | 5.437253 | 6.335349 | 5.39805  | 6.002621 | 6.901356 |
| 51454_at | 8.029951 | 8.185877 | 8.031057 | 7.250818 | 7.158783 | 7.504481 | 7.804693 | 8.276048 |
| 51455_at | 5.985497 | 6.173623 | 6.054952 | 5.081201 | 5.462461 | 5.444807 | 4.910982 | 5.733682 |
| 51458_at | 1.786205 | 2.930045 | 2.565055 | 4.070397 | 5.423258 | 2.264398 | 1.951539 | 2.468599 |
| 5145_at  | 1.064512 | 1.359171 | 1.63539  | 1.872462 | 1.458434 | 1.71927  | 1.72091  | 2.313789 |
| 51460_at | 4.317345 | 3.911505 | 4.210932 | 5.428735 | 3.797962 | 4.472531 | 4.611657 | 5.503084 |
| 51465_at | 7.885357 | 7.778994 | 7.449202 | 7.628113 | 7.010779 | 7.448124 | 7.756938 | 7.679419 |

|          |          |          |          |          |          |          |          |          |
|----------|----------|----------|----------|----------|----------|----------|----------|----------|
| 51466_at | 5.979987 | 6.115523 | 6.037414 | 6.348959 | 5.293665 | 6.768128 | 5.867301 | 5.803395 |
| 5146_at  | 1.490419 | 1.710649 | 1.299061 | 1.485448 | 2.332561 | 1.577643 | 1.894793 | 2.060572 |
| 51471_at | 7.054271 | 5.904165 | 5.305734 | 2.727552 | 6.829187 | 5.001934 | 5.385285 | 5.576041 |
| 51473_at | 6.968663 | 7.062144 | 7.039753 | 7.462257 | 6.926728 | 7.580361 | 6.43443  | 7.772346 |
| 51474_at | 7.770557 | 7.197816 | 7.203583 | 7.331715 | 7.353291 | 7.681982 | 7.646284 | 7.062475 |
| 51475_at | 2.524002 | 1.352301 | 2.081591 | 2.046411 | 1.334823 | 1.614517 | 1.860828 | 1.756465 |
| 51477_at | 5.730266 | 5.140815 | 5.090807 | 5.147949 | 5.118423 | 5.294441 | 5.349369 | 4.810459 |
| 51479_at | 5.517967 | 5.818474 | 5.465035 | 6.042553 | 5.275827 | 5.361167 | 5.719689 | 5.394894 |
| 5147_at  | 7.05597  | 6.502219 | 6.265559 | 5.69715  | 5.931374 | 6.661762 | 5.926012 | 6.114549 |
| 51480_at | 3.869237 | 3.772489 | 3.326978 | 3.707572 | 3.149804 | 3.197881 | 4.12782  | 4.855857 |
| 5148_at  | 2.563702 | 2.892016 | 3.357011 | 3.913574 | 2.855803 | 3.802951 | 3.962274 | 2.967356 |
| 51490_at | 4.391256 | 3.624523 | 4.481843 | 4.531042 | 3.651877 | 4.922552 | 3.885399 | 4.805752 |
| 51491_at | 4.931683 | 5.971377 | 5.136694 | 4.798448 | 3.907105 | 5.386187 | 5.179932 | 3.776002 |
| 51493_at | 6.935411 | 7.112476 | 7.415736 | 6.923183 | 6.709129 | 7.174244 | 7.486537 | 7.209747 |
| 51495_at | 8.077283 | 8.396716 | 8.114468 | 8.056544 | 8.929127 | 7.705202 | 8.195537 | 8.758786 |
| 51496_at | 6.405849 | 6.316875 | 6.088002 | 7.192423 | 6.139702 | 6.308721 | 6.520166 | 6.278247 |
| 51497_at | 6.924763 | 7.118275 | 6.615399 | 6.595527 | 6.793408 | 6.183928 | 6.267217 | 7.475276 |
| 51499_at | 4.394486 | 4.325109 | 4.551122 | 3.403096 | 4.66104  | 3.250463 | 3.51672  | 4.835238 |
| 5149_at  | 1.266079 | 1.0214   | 1.302843 | 1.219744 | 1.034455 | 1.105165 | 1.122434 | 1.46711  |
| 51501_at | 3.293716 | 4.314295 | 3.370933 | 3.26154  | 3.42468  | 3.987274 | 2.513007 | 4.495392 |
| 51503_at | 7.474245 | 7.527382 | 7.089961 | 7.403735 | 7.067053 | 7.500566 | 7.079171 | 7.775526 |
| 51504_at | 5.695835 | 5.686359 | 6.192612 | 5.919134 | 6.143987 | 5.438175 | 5.196201 | 5.605164 |
| 51506_at | 7.864275 | 8.325755 | 8.24361  | 8.293475 | 8.240328 | 7.956533 | 7.759526 | 8.286546 |
| 51507_at | 6.86237  | 5.981901 | 6.447526 | 6.533333 | 6.098985 | 6.284082 | 6.477443 | 6.889033 |
| 5150_at  | 3.626257 | 4.533339 | 4.363354 | 5.093677 | 4.705673 | 5.208659 | 2.581494 | 4.503924 |
| 51510_at | 8.113114 | 7.928506 | 8.168129 | 7.932803 | 8.20652  | 8.18072  | 7.892106 | 8.407273 |
| 51512_at | 2.281374 | 1.911552 | 1.707798 | 2.595554 | 2.205699 | 2.214186 | 2.101287 | 2.820257 |
| 51513_at | 2.066928 | 2.305775 | 1.808311 | 2.415715 | 2.698108 | 1.744791 | 1.752192 | 1.721546 |
| 51514_at | 1.586487 | 2.946758 | 3.950826 | 3.785185 | 2.966797 | 1.766269 | 2.111233 | 2.465593 |
| 51517_at | 5.348177 | 4.367701 | 4.910207 | 5.438186 | 4.386548 | 4.168535 | 5.139776 | 2.556282 |
| 5151_at  | 5.970492 | 4.949484 | 5.05402  | 5.428988 | 5.541448 | 4.975502 | 5.398676 | 5.914199 |
| 51520_at | 7.08595  | 7.278967 | 7.267389 | 7.385372 | 7.131625 | 6.540432 | 7.279802 | 7.560285 |
| 51522_at | 8.688736 | 8.40743  | 8.399743 | 8.305059 | 8.232239 | 8.695297 | 8.462475 | 8.351612 |
| 51523_at | 8.811574 | 8.024836 | 8.279954 | 8.136866 | 8.105632 | 7.919767 | 8.013017 | 7.988167 |
| 51524_at | 4.980989 | 4.490777 | 4.677756 | 4.44041  | 3.944872 | 4.350111 | 4.631616 | 3.893997 |
| 51526_at | 6.301707 | 6.041804 | 5.756425 | 6.348122 | 6.783597 | 5.719781 | 5.939123 | 6.103587 |
| 51527_at | 5.069028 | 5.401911 | 4.240223 | 3.783057 | 5.731437 | 4.49342  | 3.468344 | 3.859067 |
| 51528_at | 7.296429 | 7.414138 | 7.385567 | 7.888456 | 7.542962 | 6.739439 | 7.556964 | 7.77979  |
| 51529_at | 6.943734 | 6.830687 | 7.161345 | 7.528109 | 6.868247 | 7.22783  | 6.809911 | 6.762644 |
| 5152_at  | 5.555176 | 4.165314 | 4.389405 | 4.879642 | 4.265697 | 5.19367  | 4.023639 | 4.030152 |
| 51530_at | 3.889585 | 3.902822 | 2.913233 | 3.662162 | 3.028592 | 3.659373 | 2.906436 | 4.509518 |
| 51531_at | 4.069977 | 4.680027 | 3.740172 | 5.168465 | 5.184276 | 4.849241 | 4.525784 | 5.545343 |
| 51533_at | 3.068397 | 2.506227 | 2.159654 | 3.091587 | 2.90391  | 2.775982 | 3.158542 | 4.068393 |
| 51534_at | 6.589682 | 6.800555 | 7.207884 | 6.642985 | 6.600778 | 6.193398 | 6.961371 | 7.525656 |
| 51535_at | 7.352643 | 7.36444  | 7.415883 | 7.043725 | 7.68436  | 6.983009 | 7.59962  | 7.574171 |
| 51537_at | 3.629764 | 3.560728 | 3.887081 | 3.64265  | 2.501078 | 3.241675 | 2.587118 | 3.360654 |
| 51538_at | 5.68092  | 5.65145  | 5.091927 | 5.162213 | 5.014756 | 5.38752  | 5.211228 | 5.508321 |
| 5153_at  | 2.802903 | 3.033547 | 3.268569 | 3.293387 | 2.579744 | 2.636491 | 2.778228 | 3.259828 |
| 51542_at | 6.7493   | 6.655867 | 6.116057 | 5.924409 | 6.316584 | 6.077795 | 5.999394 | 6.528924 |
| 51545_at | 5.586474 | 4.638702 | 4.923625 | 5.010398 | 3.893309 | 3.682586 | 4.643197 | 4.720693 |
| 51547_at | 4.600575 | 3.726723 | 4.213677 | 3.239256 | 3.48052  | 4.431992 | 3.305556 | 3.572782 |

|          |          |          |          |          |          |          |          |          |
|----------|----------|----------|----------|----------|----------|----------|----------|----------|
| 51548_at | 3.525783 | 2.174255 | 2.555761 | 3.408861 | 2.659456 | 2.77721  | 2.516999 | 2.485144 |
| 5154_at  | 6.681751 | 6.026231 | 6.224292 | 6.16692  | 6.034964 | 6.278783 | 6.59144  | 5.962429 |
| 51550_at | 6.698957 | 6.033692 | 6.247357 | 6.034387 | 3.85751  | 6.500227 | 6.164213 | 5.904611 |
| 51552_at | 7.35383  | 7.779198 | 7.3382   | 7.486292 | 7.187962 | 7.544358 | 7.452679 | 7.293667 |
| 51554_at | 2.727799 | 1.636076 | 1.505436 | 1.730504 | 2.76668  | 2.561237 | 2.000012 | 3.098709 |
| 51555_at | 2.081573 | 2.696695 | 3.133185 | 3.705797 | 2.419579 | 2.767164 | 2.369232 | 1.860766 |
| 51557_at | 1.530227 | 1.580887 | 0.949057 | 1.093329 | 1.50637  | 1.815701 | 1.618809 | 2.087006 |
| 51559_at | 1.634478 | 1.852954 | 1.73421  | 1.731262 | 2.369498 | 1.87137  | 1.845401 | 1.854932 |
| 5155_at  | 3.88428  | 4.63138  | 3.633553 | 4.903335 | 4.860711 | 3.913838 | 3.663015 | 4.988267 |
| 51560_at | 3.261253 | 3.195542 | 3.333603 | 4.272389 | 3.929357 | 4.399024 | 3.020107 | 3.093919 |
| 51561_at | 1.922593 | 2.674859 | 1.654161 | 1.559276 | 2.193076 | 1.510603 | 2.725124 | 1.719821 |
| 51562_at | 6.160486 | 6.029124 | 6.133461 | 5.575952 | 5.438779 | 5.674878 | 5.352104 | 6.345017 |
| 51564_at | 5.964468 | 5.402846 | 5.877321 | 5.715088 | 5.294283 | 4.825628 | 5.439883 | 5.183738 |
| 51566_at | 5.783465 | 6.692132 | 7.066355 | 7.050143 | 7.095082 | 6.856091 | 6.752625 | 7.818167 |
| 51567_at | 7.683236 | 7.591169 | 6.648609 | 7.006574 | 7.102415 | 7.367313 | 6.421572 | 7.677301 |
| 51569_at | 6.712213 | 6.981035 | 6.341381 | 7.090765 | 6.749496 | 6.981476 | 6.482269 | 6.600862 |
| 5156_at  | 5.974556 | 6.936924 | 6.467771 | 6.469391 | 6.84376  | 7.067251 | 5.338443 | 6.274941 |
| 51571_at | 5.210343 | 4.088336 | 4.755806 | 5.48965  | 4.543896 | 4.133479 | 4.941303 | 5.401527 |
| 51573_at | 7.614411 | 7.586858 | 7.633375 | 7.558811 | 7.546304 | 7.540276 | 7.552631 | 7.384861 |
| 51574_at | 7.567702 | 7.536175 | 6.777849 | 7.319767 | 7.39178  | 6.934833 | 7.299253 | 7.40284  |
| 51575_at | 6.050844 | 7.28673  | 6.927301 | 6.76076  | 7.573106 | 7.108263 | 6.595242 | 7.25862  |
| 5157_at  | 1.808452 | 1.746462 | 1.748155 | 2.333006 | 1.214074 | 1.390566 | 1.589607 | 1.999415 |
| 51582_at | 6.121504 | 6.941008 | 6.994159 | 6.679278 | 7.226686 | 6.87085  | 6.917651 | 6.694275 |
| 51585_at | 5.103906 | 5.713099 | 5.327771 | 5.353023 | 5.384116 | 4.955115 | 4.049542 | 6.094873 |
| 51586_at | 7.434315 | 6.861771 | 7.607749 | 7.534621 | 6.337035 | 7.49271  | 7.417169 | 6.739465 |
| 51588_at | 5.506924 | 5.252515 | 4.769896 | 5.904897 | 4.732118 | 5.414792 | 5.820723 | 4.603948 |
| 5158_at  | 4.024506 | 2.779653 | 2.328256 | 2.667834 | 2.653915 | 3.281439 | 3.138501 | 2.517507 |
| 51592_at | 6.548642 | 6.82191  | 6.281903 | 6.83361  | 6.769176 | 6.552636 | 6.579319 | 7.268056 |
| 51593_at | 5.407328 | 5.449502 | 5.096096 | 4.865414 | 5.096758 | 4.590192 | 5.184752 | 4.437389 |
| 51594_at | 5.755172 | 5.922988 | 6.054494 | 5.983341 | 5.780125 | 5.53957  | 5.718624 | 6.687683 |
| 51596_at | 8.740849 | 8.56686  | 8.415042 | 8.245521 | 8.234979 | 8.482457 | 8.48069  | 8.291066 |
| 51599_at | 5.050082 | 4.785281 | 5.328138 | 4.980861 | 4.931891 | 4.949163 | 4.393024 | 4.847013 |
| 5159_at  | 7.16228  | 7.072725 | 7.699126 | 7.838108 | 7.206523 | 7.40551  | 7.692546 | 6.174047 |
| 515_at   | 9.381647 | 9.31747  | 9.176764 | 9.253188 | 9.290314 | 9.481604 | 9.237914 | 9.198637 |
| 51601_at | 2.17011  | 2.029721 | 2.217552 | 2.365808 | 2.20841  | 2.051668 | 2.250446 | 2.279868 |
| 51602_at | 6.866851 | 6.869584 | 6.307524 | 6.269366 | 6.536854 | 6.129821 | 6.31217  | 6.237834 |
| 51603_at | 5.021338 | 3.856745 | 5.080743 | 4.593378 | 5.162589 | 4.097716 | 4.881772 | 4.269731 |
| 51604_at | 9.281709 | 8.622187 | 9.38075  | 9.451534 | 9.166941 | 9.331246 | 9.920731 | 7.965262 |
| 51605_at | 5.632364 | 5.673895 | 5.52407  | 5.532704 | 3.086062 | 5.146259 | 5.366509 | 4.966451 |
| 51606_at | 6.557711 | 6.266022 | 6.622704 | 6.076678 | 7.096073 | 6.718602 | 6.97794  | 6.47145  |
| 51608_at | 3.928502 | 3.927856 | 4.112867 | 3.411222 | 2.860432 | 4.453616 | 3.90753  | 4.035951 |
| 5160_at  | 6.531152 | 6.204234 | 6.437992 | 6.368296 | 6.714466 | 6.542342 | 5.874189 | 6.406829 |
| 51611_at | 4.344064 | 5.137795 | 4.027182 | 4.673746 | 4.63262  | 3.055421 | 2.565502 | 5.236045 |
| 51614_at | 7.910885 | 7.651181 | 7.883519 | 7.933269 | 7.853925 | 7.719515 | 7.44023  | 7.894512 |
| 51616_at | 8.262964 | 8.249116 | 8.52483  | 8.387435 | 8.11697  | 8.337938 | 8.312    | 8.489735 |
| 51617_at | 2.20024  | 2.133177 | 2.334509 | 3.35336  | 2.956532 | 2.962303 | 3.441526 | 3.28916  |
| 51619_at | 5.866595 | 5.234093 | 6.054453 | 5.152164 | 3.189235 | 5.274087 | 5.32332  | 4.948424 |
| 5161_at  | 1.67333  | 1.42428  | 1.761437 | 1.874537 | 1.619651 | 1.662246 | 2.199854 | 1.579789 |
| 51621_at | 4.692715 | 5.729716 | 5.27832  | 5.576454 | 5.288091 | 5.672283 | 6.192339 | 5.614166 |
| 51626_at | 5.628416 | 4.912879 | 5.223376 | 4.632928 | 5.327727 | 4.872947 | 4.937149 | 5.960365 |
| 51629_at | 6.707297 | 6.640068 | 6.601841 | 6.75944  | 6.483573 | 7.280555 | 6.565238 | 5.958014 |

|          |          |          |          |          |          |          |          |          |
|----------|----------|----------|----------|----------|----------|----------|----------|----------|
| 5162_at  | 8.415564 | 8.38124  | 8.544609 | 8.242781 | 8.809574 | 8.26541  | 8.345959 | 8.81038  |
| 51631_at | 7.976597 | 7.576051 | 7.873013 | 7.955363 | 7.135424 | 7.605481 | 6.279738 | 4.479731 |
| 51633_at | 5.399675 | 5.732746 | 5.307808 | 4.898625 | 5.592691 | 5.408091 | 5.188073 | 4.639093 |
| 51634_at | 6.882365 | 6.091154 | 6.101739 | 6.589319 | 5.522809 | 5.816266 | 6.761046 | 6.461629 |
| 51635_at | 7.864862 | 7.991947 | 8.045484 | 7.757023 | 8.106017 | 7.865662 | 7.675213 | 8.120976 |
| 51637_at | 8.372879 | 7.904221 | 7.442173 | 7.683757 | 7.717761 | 8.142955 | 7.14568  | 7.509309 |
| 51639_at | 8.637661 | 8.195589 | 8.164577 | 8.189903 | 8.148569 | 8.22352  | 8.042615 | 8.20942  |
| 5163_at  | 4.617424 | 5.388985 | 6.129287 | 4.496824 | 5.409887 | 4.259201 | 4.782977 | 5.707562 |
| 51642_at | 7.063854 | 6.198481 | 6.512992 | 6.311974 | 6.550317 | 6.746112 | 5.514301 | 6.700321 |
| 51643_at | 9.594776 | 9.849877 | 9.393943 | 9.897261 | 9.939804 | 9.329768 | 9.337181 | 9.663828 |
| 51645_at | 5.404198 | 6.209521 | 5.306678 | 4.358781 | 5.509803 | 5.125956 | 5.288071 | 5.660368 |
| 51646_at | 5.790705 | 5.799685 | 6.399493 | 6.163395 | 5.330152 | 5.576452 | 6.288601 | 6.008524 |
| 51647_at | 7.850581 | 7.604636 | 7.419565 | 7.265773 | 7.013339 | 7.703822 | 7.128455 | 6.871043 |
| 51649_at | 7.09837  | 6.436604 | 6.423221 | 6.366389 | 6.921722 | 6.647436 | 6.489807 | 6.894723 |
| 5164_at  | 6.100605 | 5.519669 | 5.994755 | 6.037212 | 5.962346 | 5.898088 | 6.044276 | 4.769137 |
| 51650_at | 6.329376 | 6.287313 | 6.366159 | 6.786546 | 6.055085 | 6.625512 | 6.068326 | 6.608859 |
| 51651_at | 4.88421  | 4.968535 | 4.228925 | 3.50334  | 4.737241 | 4.340991 | 3.211915 | 5.581267 |
| 51654_at | 4.39233  | 4.185425 | 4.160888 | 3.71922  | 4.369598 | 4.257203 | 4.289051 | 3.713536 |
| 51655_at | 3.363877 | 3.305802 | 2.594205 | 2.821055 | 5.109918 | 4.435693 | 2.820922 | 3.637587 |
| 51657_at | 5.618925 | 5.694249 | 5.44599  | 6.451096 | 5.1214   | 4.629814 | 4.118158 | 5.743389 |
| 51659_at | 2.716245 | 3.751819 | 2.504696 | 3.172225 | 2.82805  | 1.553081 | 2.883785 | 2.38656  |
| 5165_at  | 3.759558 | 3.952228 | 4.641286 | 5.28431  | 5.21     | 4.956454 | 4.030528 | 4.612381 |
| 51660_at | 5.528296 | 5.45873  | 5.502981 | 5.065513 | 5.850991 | 5.461338 | 4.709677 | 5.516391 |
| 51661_at | 5.555464 | 5.351479 | 5.12993  | 5.090455 | 4.934843 | 4.809918 | 5.188236 | 5.113931 |
| 51663_at | 7.927624 | 7.574916 | 7.990721 | 7.95675  | 8.103043 | 7.80907  | 8.114669 | 8.167369 |
| 51665_at | 5.126236 | 4.538418 | 4.677681 | 4.94694  | 5.432825 | 4.773177 | 5.297664 | 4.825122 |
| 51666_at | 1.444852 | 1.244492 | 1.367374 | 2.192347 | 1.72812  | 2.43132  | 1.439724 | 1.508442 |
| 51667_at | 7.462318 | 7.882728 | 7.624789 | 7.607003 | 7.672307 | 6.9358   | 7.740111 | 7.571956 |
| 51668_at | 7.682964 | 7.385854 | 7.801527 | 7.195291 | 7.211786 | 7.283396 | 6.17875  | 7.942965 |
| 51669_at | 8.920099 | 8.911583 | 9.20748  | 9.108978 | 8.818021 | 8.841701 | 9.250922 | 8.667407 |
| 5166_at  | 8.133869 | 8.825002 | 8.855953 | 8.198881 | 7.965601 | 9.137558 | 8.167043 | 8.463538 |
| 51673_at | 7.719552 | 7.299643 | 7.441393 | 7.165102 | 6.314456 | 6.991312 | 7.140238 | 7.083318 |
| 51676_at | 2.1147   | 2.222622 | 2.6421   | 2.044361 | 2.780816 | 2.717015 | 2.138739 | 2.605743 |
| 51678_at | 5.343774 | 5.381911 | 5.335391 | 3.67749  | 5.129286 | 4.603753 | 4.396503 | 5.900351 |
| 5167_at  | 4.551497 | 4.795878 | 4.590889 | 3.603252 | 3.554355 | 5.109421 | 2.785887 | 4.071477 |
| 51684_at | 3.409922 | 2.952428 | 2.667994 | 3.063394 | 2.866471 | 3.387812 | 3.246376 | 2.454674 |
| 51686_at | 3.716759 | 5.338247 | 4.062215 | 2.829242 | 3.31292  | 4.325211 | 4.668078 | 3.493966 |
| 5168_at  | 6.754894 | 7.022579 | 5.613352 | 7.831041 | 7.730461 | 6.450455 | 6.672254 | 6.463678 |
| 51690_at | 7.372622 | 6.136815 | 7.143863 | 6.843472 | 6.051004 | 7.576215 | 6.312611 | 6.389417 |
| 51691_at | 6.512996 | 7.31077  | 6.005132 | 6.801221 | 6.294693 | 6.972338 | 6.249357 | 6.694486 |
| 51692_at | 6.164495 | 5.863457 | 5.588915 | 6.453134 | 6.418724 | 5.783827 | 5.769018 | 6.036376 |
| 51693_at | 8.78553  | 8.329054 | 8.508934 | 8.288688 | 7.900112 | 9.083354 | 8.271888 | 7.937728 |
| 51696_at | 2.955491 | 3.995683 | 3.577288 | 4.617836 | 4.0654   | 4.078257 | 4.531035 | 3.497747 |
| 51699_at | 7.856343 | 8.160234 | 7.710039 | 7.912811 | 7.994877 | 7.385442 | 7.846882 | 7.759274 |
| 5169_at  | 2.70477  | 3.131894 | 4.235237 | 2.814721 | 3.888114 | 3.883884 | 2.961149 | 3.514804 |
| 516_at   | 6.999136 | 6.472763 | 6.75207  | 7.747047 | 7.197608 | 6.308019 | 6.67073  | 6.567944 |
| 51700_at | 4.813868 | 4.818072 | 4.786506 | 3.894993 | 4.013684 | 4.920562 | 4.159221 | 5.175916 |
| 51701_at | 8.201878 | 7.960931 | 8.382234 | 8.199516 | 7.80579  | 7.84054  | 8.463567 | 8.594417 |
| 51702_at | 1.565518 | 2.125452 | 2.183977 | 2.182957 | 2.480925 | 3.067696 | 2.065639 | 2.137232 |
| 51703_at | 5.751991 | 6.213149 | 5.66093  | 6.155176 | 6.43468  | 5.616721 | 6.636196 | 5.685063 |
| 51704_at | 5.708173 | 5.392004 | 5.579566 | 5.866437 | 6.037284 | 5.317088 | 6.101977 | 4.680954 |

|          |          |          |          |          |          |          |          |          |
|----------|----------|----------|----------|----------|----------|----------|----------|----------|
| 51705_at | 10.32134 | 10.26213 | 10.29923 | 10.45842 | 10.29524 | 10.17638 | 10.33624 | 10.33383 |
| 51706_at | 6.885091 | 5.457495 | 6.137324 | 6.27349  | 6.641564 | 6.164497 | 6.923846 | 6.098591 |
| 5170_at  | 5.408339 | 5.64027  | 5.526315 | 6.240405 | 4.408014 | 5.413093 | 6.398868 | 4.457087 |
| 51710_at | 5.81209  | 5.611536 | 5.176442 | 6.049859 | 5.583196 | 5.671377 | 5.496437 | 7.054152 |
| 51714_at | 9.117991 | 9.418891 | 9.401707 | 9.210708 | 9.501085 | 8.849293 | 9.257904 | 9.517581 |
| 51715_at | 4.860041 | 5.139481 | 4.965988 | 4.837776 | 5.195655 | 5.13281  | 5.483593 | 5.484812 |
| 51716_at | 2.004892 | 2.220178 | 2.081461 | 1.900301 | 1.7009   | 2.062075 | 1.914592 | 4.283434 |
| 51719_at | 6.911794 | 6.244216 | 6.898404 | 6.954367 | 6.447823 | 6.73412  | 6.473989 | 6.88806  |
| 51720_at | 3.911804 | 3.616543 | 3.645765 | 3.865336 | 2.771673 | 3.685195 | 3.294273 | 4.003984 |
| 51725_at | 1.465307 | 1.254658 | 1.947471 | 2.019012 | 1.875552 | 1.857968 | 2.104952 | 1.246628 |
| 51726_at | 8.131855 | 8.503431 | 7.498818 | 7.514845 | 8.420533 | 8.126685 | 7.86607  | 8.41147  |
| 51727_at | 7.243504 | 7.332946 | 7.866223 | 7.677352 | 7.144774 | 7.859048 | 7.835788 | 7.788689 |
| 51728_at | 8.033967 | 7.178219 | 7.029981 | 7.606218 | 5.982668 | 7.43436  | 7.132681 | 6.434117 |
| 51729_at | 8.743757 | 8.466228 | 7.729602 | 9.233284 | 8.934723 | 8.7384   | 8.350535 | 7.605709 |
| 5172_at  | 2.936816 | 3.786506 | 3.556273 | 3.694805 | 4.240573 | 2.671725 | 3.502882 | 3.759718 |
| 51733_at | 3.077235 | 2.937232 | 3.232342 | 1.857647 | 4.581022 | 2.172803 | 2.485007 | 2.774114 |
| 51734_at | 4.939331 | 4.218618 | 4.82703  | 4.278179 | 4.507689 | 4.724829 | 5.107928 | 4.744894 |
| 51735_at | 5.494872 | 5.67342  | 5.403505 | 5.205273 | 4.640218 | 4.912193 | 5.607003 | 5.386073 |
| 51738_at | 1.666962 | 2.095446 | 1.68713  | 1.992433 | 2.471279 | 1.375732 | 2.017592 | 1.752672 |
| 5173_at  | 0.895766 | 1.535355 | 1.501411 | 1.743509 | 1.639524 | 1.383769 | 1.339338 | 1.508774 |
| 51741_at | 4.335712 | 3.996152 | 4.025403 | 3.5168   | 2.997914 | 3.211708 | 3.6567   | 4.609486 |
| 51742_at | 7.111562 | 7.262056 | 6.849486 | 7.182899 | 7.35514  | 7.107322 | 6.156837 | 7.140469 |
| 51744_at | 1.937282 | 1.387311 | 1.286763 | 0.996256 | 1.7102   | 1.632725 | 2.333595 | 2.277397 |
| 51747_at | 7.484564 | 7.192489 | 7.045318 | 7.383772 | 7.339159 | 7.205837 | 6.52829  | 7.873233 |
| 5174_at  | 5.849728 | 5.394145 | 5.951808 | 3.62687  | 6.209761 | 6.011192 | 4.706783 | 4.706783 |
| 51751_at | 2.712184 | 3.419013 | 2.616842 | 1.994327 | 1.623808 | 2.763743 | 2.564509 | 3.009138 |
| 51752_at | 6.59778  | 6.80859  | 6.698255 | 7.167808 | 5.94715  | 5.864973 | 7.444201 | 7.643355 |
| 51754_at | 4.229226 | 4.679529 | 5.067615 | 4.604249 | 4.934628 | 4.953403 | 4.907126 | 3.532927 |
| 51755_at | 4.76019  | 4.572995 | 4.449624 | 4.86174  | 4.580683 | 5.140703 | 4.455701 | 5.11     |
| 51759_at | 7.535783 | 7.289508 | 7.228858 | 7.049125 | 7.444249 | 7.681722 | 6.594807 | 7.607786 |
| 5175_at  | 7.545996 | 7.625567 | 7.420621 | 8.004113 | 7.539435 | 7.701042 | 7.761061 | 7.279463 |
| 51760_at | 4.011217 | 2.788291 | 3.102922 | 3.693693 | 4.830546 | 3.74554  | 3.346636 | 3.32423  |
| 51761_at | 3.736766 | 1.451569 | 3.718936 | 2.97424  | 3.531867 | 4.224626 | 5.943322 | 1.738649 |
| 51762_at | 7.605255 | 7.562342 | 7.533124 | 7.762797 | 7.97977  | 7.623954 | 7.858718 | 7.323817 |
| 51763_at | 6.722222 | 6.573787 | 6.123234 | 6.419087 | 6.312081 | 6.591897 | 6.374282 | 6.368107 |
| 51764_at | 2.443774 | 3.135984 | 3.381671 | 2.73651  | 3.581659 | 3.221577 | 2.876323 | 3.269239 |
| 51765_at | 2.676298 | 3.611076 | 3.520977 | 3.721355 | 3.449431 | 4.122165 | 4.609578 | 2.663603 |
| 51768_at | 8.137361 | 7.676798 | 7.859761 | 7.293381 | 7.907673 | 7.821175 | 7.562447 | 8.122716 |
| 5176_at  | 4.103558 | 2.210315 | 2.266672 | 3.652338 | 5.573113 | 5.286249 | 3.123053 | 2.331297 |
| 51773_at | 6.660778 | 7.448008 | 7.068302 | 7.168758 | 6.960743 | 7.066759 | 7.030467 | 7.174688 |
| 51776_at | 5.114669 | 6.342    | 5.070444 | 5.054684 | 6.131606 | 5.169934 | 4.982418 | 5.619356 |
| 51778_at | 6.91955  | 6.511429 | 5.006694 | 5.32301  | 5.64893  | 2.705935 | 6.275953 | 5.740867 |
| 51780_at | 6.378306 | 7.086475 | 7.104695 | 6.703365 | 7.02369  | 7.005118 | 7.183718 | 7.179525 |
| 5178_at  | 3.241496 | 4.690566 | 3.31834  | 3.243483 | 2.93202  | 4.137564 | 3.733108 | 3.146941 |
| 5179_at  | 3.858509 | 2.534933 | 1.824548 | 2.32174  | 3.014033 | 2.582167 | 3.394002 | 2.187102 |
| 517_at   | 8.043262 | 7.964183 | 7.961241 | 8.135104 | 7.358413 | 7.917426 | 8.006883 | 7.550866 |
| 51802_at | 1.324944 | 1.372347 | 1.565686 | 0.986708 | 1.202365 | 1.249247 | 1.620248 | 1.041911 |
| 51804_at | 2.313031 | 1.728795 | 2.070073 | 2.183232 | 2.752767 | 1.108661 | 1.666478 | 2.115731 |
| 51805_at | 2.262413 | 3.71683  | 2.912167 | 2.837219 | 2.728671 | 1.789462 | 2.713126 | 2.854289 |
| 51806_at | 1.74646  | 1.132452 | 1.314859 | 1.363545 | 1.839214 | 2.075218 | 1.963284 | 1.549956 |
| 51807_at | 1.634805 | 2.610782 | 2.917572 | 1.7038   | 2.136159 | 2.62377  | 2.24382  | 2.156167 |

|          |          |          |          |          |          |          |          |          |
|----------|----------|----------|----------|----------|----------|----------|----------|----------|
| 51808_at | 6.835064 | 7.129557 | 6.985605 | 7.30154  | 7.147915 | 6.44964  | 7.114154 | 7.615752 |
| 51809_at | 3.288421 | 4.112531 | 4.217836 | 4.186151 | 4.893411 | 4.429922 | 4.669281 | 4.037757 |
| 51816_at | 3.547452 | 5.207291 | 4.96005  | 5.945832 | 4.394225 | 4.757769 | 5.036964 | 3.56754  |
| 5184_at  | 8.034262 | 7.42694  | 7.169503 | 7.176493 | 7.798732 | 7.534525 | 6.5938   | 7.136632 |
| 5187_at  | 5.225408 | 4.907196 | 5.77135  | 6.630292 | 4.993082 | 6.507951 | 6.004502 | 4.097576 |
| 5188_at  | 5.321135 | 2.577772 | 4.880068 | 4.736246 | 4.346501 | 4.368841 | 3.522125 | 5.855002 |
| 5189_at  | 4.75622  | 4.60776  | 4.558307 | 4.401952 | 4.763015 | 4.209609 | 3.965426 | 5.127119 |
| 518_at   | 9.192705 | 9.210942 | 9.332915 | 9.221419 | 9.418791 | 9.569919 | 9.182729 | 9.18261  |
| 5190_at  | 3.538061 | 3.524407 | 3.293633 | 3.52604  | 3.28568  | 3.88318  | 2.931208 | 3.567983 |
| 5191_at  | 5.02905  | 6.085945 | 5.009985 | 3.694635 | 5.103388 | 4.357933 | 4.803186 | 5.425335 |
| 5192_at  | 3.414755 | 3.592484 | 3.620588 | 3.871581 | 3.96351  | 3.723411 | 3.460699 | 3.527078 |
| 5193_at  | 5.847205 | 5.943944 | 5.473258 | 5.085201 | 6.007744 | 5.136922 | 5.345872 | 5.147454 |
| 5194_at  | 5.392994 | 4.88157  | 6.239086 | 4.482888 | 5.843255 | 6.122909 | 5.958751 | 6.252292 |
| 5195_at  | 6.917224 | 6.069758 | 7.116525 | 7.383722 | 6.181505 | 6.627976 | 5.970897 | 5.651729 |
| 5196_at  | 3.804345 | 2.703225 | 2.858705 | 2.233188 | 1.053382 | 1.8915   | 3.461594 | 4.842963 |
| 5197_at  | 2.655171 | 1.651923 | 3.944878 | 1.942582 | 2.164524 | 3.160904 | 1.665693 | 4.909391 |
| 5198_at  | 3.284603 | 3.009896 | 2.84106  | 2.741565 | 3.915802 | 2.631387 | 3.764365 | 3.212022 |
| 5199_at  | 3.634723 | 3.324146 | 2.113708 | 3.295743 | 2.924722 | 3.699748 | 3.105827 | 2.473173 |
| 51_at    | 6.048405 | 5.660884 | 5.631321 | 5.389085 | 6.405163 | 5.77757  | 5.867009 | 5.833154 |
| 5201_at  | 6.109347 | 5.940032 | 6.275058 | 5.807624 | 4.659692 | 5.752606 | 6.380559 | 5.158518 |
| 5202_at  | 8.100537 | 7.893246 | 7.901773 | 7.561426 | 7.953067 | 7.948282 | 7.430972 | 7.562563 |
| 5203_at  | 6.345093 | 5.055571 | 5.746961 | 6.240909 | 5.447328 | 6.290849 | 5.95468  | 5.6272   |
| 5204_at  | 9.677878 | 9.426115 | 9.197798 | 9.321633 | 9.236272 | 9.245916 | 9.342029 | 9.066703 |
| 5205_at  | 7.982397 | 8.018572 | 7.747721 | 7.67074  | 7.640566 | 7.335073 | 8.045193 | 7.946559 |
| 5207_at  | 2.585702 | 2.009322 | 1.776372 | 2.040832 | 3.544993 | 2.876155 | 3.044325 | 2.234162 |
| 5208_at  | 4.986201 | 5.473027 | 5.620508 | 5.056512 | 5.543126 | 4.811866 | 6.144783 | 5.485026 |
| 5209_at  | 3.016826 | 4.27242  | 3.52182  | 4.846644 | 4.482895 | 4.424989 | 4.25232  | 3.519944 |
| 5210_at  | 2.178023 | 3.048229 | 3.162259 | 2.394709 | 2.538472 | 1.525256 | 3.098461 | 2.188878 |
| 5211_at  | 5.640644 | 5.655955 | 5.471234 | 5.453624 | 5.142551 | 6.253745 | 5.744329 | 4.769406 |
| 5212_at  | 1.220344 | 1.785997 | 1.821649 | 1.913722 | 1.928735 | 1.711813 | 2.604294 | 2.569749 |
| 5213_at  | 4.502059 | 4.780051 | 4.653881 | 4.238081 | 4.603008 | 4.587705 | 4.937447 | 4.498381 |
| 5214_at  | 4.658777 | 4.484448 | 3.592695 | 3.2193   | 3.900414 | 5.183469 | 3.729357 | 3.45322  |
| 5216_at  | 3.535867 | 2.857146 | 3.967446 | 4.528143 | 3.248668 | 3.192452 | 3.191579 | 3.021276 |
| 5217_at  | 8.517575 | 8.336754 | 8.1691   | 8.812678 | 8.976938 | 8.013671 | 8.562095 | 8.532471 |
| 5218_at  | 5.506671 | 5.790879 | 6.374831 | 5.062497 | 6.66602  | 5.097376 | 6.059561 | 5.840045 |
| 521_at   | 10.55693 | 10.6848  | 10.62765 | 10.66418 | 10.51021 | 10.8379  | 10.31102 | 10.3076  |
| 5224_at  | 5.890682 | 4.977074 | 4.154157 | 3.326493 | 5.15661  | 5.521956 | 4.254043 | 4.549079 |
| 5225_at  | 1.853369 | 1.870982 | 2.466759 | 1.928537 | 2.059473 | 1.916633 | 1.38723  | 1.51377  |
| 5226_at  | 5.531095 | 5.820774 | 6.167142 | 5.963354 | 5.895661 | 5.834819 | 6.143263 | 5.924913 |
| 5228_at  | 4.644738 | 4.134329 | 4.134329 | 4.949537 | 4.304441 | 4.469114 | 3.101106 | 4.064369 |
| 5229_at  | 6.381716 | 6.315428 | 6.89513  | 6.071961 | 6.367664 | 6.497481 | 6.883447 | 7.600286 |
| 522_at   | 5.098133 | 5.321879 | 5.705282 | 5.141582 | 5.32035  | 4.914414 | 4.81557  | 5.510487 |
| 5230_at  | 8.2272   | 8.582274 | 8.659809 | 8.475575 | 8.037999 | 8.51305  | 8.679892 | 7.532141 |
| 5232_at  | 1.500083 | 1.398899 | 1.728623 | 1.391447 | 1.846996 | 1.091365 | 1.322616 | 1.881612 |
| 5236_at  | 4.582366 | 4.305598 | 5.214901 | 4.464912 | 4.873111 | 4.574901 | 4.418391 | 4.737891 |
| 5238_at  | 5.127602 | 4.793755 | 4.897131 | 6.008281 | 5.737061 | 4.981749 | 5.061369 | 6.138815 |
| 5239_at  | 3.051148 | 1.354692 | 3.305694 | 1.834281 | 2.51215  | 4.997642 | 2.61745  | 2.431062 |
| 523_at   | 6.22829  | 6.605123 | 6.71787  | 6.687988 | 6.882616 | 6.400389 | 6.864211 | 6.637376 |
| 5241_at  | 4.437699 | 4.866448 | 5.051812 | 6.374061 | 4.512359 | 3.902937 | 4.216519 | 3.444086 |
| 5243_at  | 4.174986 | 4.524744 | 4.531303 | 5.325645 | 6.49038  | 5.690799 | 3.924229 | 5.16189  |
| 5244_at  | 2.017246 | 2.322608 | 1.645555 | 1.560181 | 1.494266 | 2.104178 | 2.771674 | 2.336902 |

|         |          |          |          |          |          |          |          |          |
|---------|----------|----------|----------|----------|----------|----------|----------|----------|
| 5245_at | 7.157694 | 6.945166 | 6.954211 | 6.932855 | 7.540346 | 7.287235 | 6.877135 | 6.758702 |
| 5250_at | 8.680627 | 8.602573 | 8.724945 | 8.654706 | 9.137942 | 8.800483 | 8.559789 | 8.625293 |
| 5251_at | 1.459943 | 3.506801 | 1.314022 | 1.311759 | 1.358295 | 0.939582 | 2.668292 | 1.246192 |
| 5252_at | 5.911095 | 5.975075 | 6.471437 | 6.201977 | 5.704314 | 5.958566 | 6.395587 | 5.831877 |
| 5253_at | 6.77812  | 6.387465 | 6.098855 | 6.330447 | 5.680894 | 6.863941 | 6.090351 | 6.16257  |
| 5255_at | 3.502203 | 2.714718 | 3.499713 | 3.243822 | 4.778237 | 4.127158 | 3.096536 | 4.049102 |
| 5256_at | 5.126055 | 4.504434 | 4.135904 | 4.392159 | 4.85515  | 4.916114 | 4.1333   | 4.856329 |
| 5257_at | 7.345758 | 7.094218 | 6.869867 | 6.638469 | 7.621184 | 6.847596 | 7.179256 | 7.41503  |
| 525_at  | 5.18934  | 5.306146 | 2.812508 | 5.412368 | 6.733606 | 4.431287 | 1.057167 | 2.425392 |
| 5260_at | 2.335823 | 2.200981 | 1.368992 | 2.005521 | 2.160013 | 1.278346 | 2.714102 | 1.86988  |
| 5261_at | 4.781643 | 4.133617 | 3.710226 | 3.696524 | 4.108408 | 4.441296 | 3.642092 | 3.85701  |
| 5264_at | 6.791016 | 6.399879 | 6.472213 | 5.766601 | 6.539841 | 6.144651 | 6.39305  | 6.336127 |
| 5265_at | 8.106082 | 6.913761 | 7.144358 | 6.237214 | 7.646805 | 7.894738 | 6.61261  | 6.497967 |
| 5266_at | 4.479387 | 2.16147  | 4.365441 | 5.049052 | 1.334569 | 2.716233 | 2.498684 | 2.754516 |
| 5267_at | 2.966166 | 2.033285 | 1.961792 | 2.835103 | 3.100411 | 2.459971 | 1.982644 | 2.290914 |
| 5268_at | 1.518095 | 1.016621 | 1.229486 | 1.22994  | 1.770249 | 1.845038 | 1.225451 | 1.854869 |
| 5269_at | 8.007159 | 7.803408 | 8.009886 | 7.75951  | 7.671699 | 8.137402 | 8.002114 | 7.606026 |
| 526_at  | 6.811828 | 6.73263  | 7.021612 | 7.073819 | 7.121935 | 6.758018 | 6.983925 | 6.482211 |
| 5270_at | 3.767045 | 4.346622 | 3.750692 | 4.271092 | 4.09604  | 4.121977 | 3.849194 | 5.589675 |
| 5271_at | 3.109255 | 3.040029 | 1.942964 | 2.954016 | 2.983954 | 2.935418 | 2.017017 | 3.681701 |
| 5272_at | 4.736443 | 5.369348 | 5.641236 | 5.129139 | 5.535378 | 4.859323 | 5.58717  | 5.918925 |
| 5273_at | 1.396955 | 0.877355 | 1.372847 | 0.930497 | 2.419686 | 1.610577 | 1.682067 | 1.766607 |
| 5274_at | 5.685285 | 5.434875 | 5.806287 | 5.125725 | 5.744081 | 4.392845 | 5.542953 | 5.031849 |
| 5275_at | 1.33702  | 1.421763 | 1.507592 | 1.400436 | 1.730554 | 1.042408 | 0.892822 | 1.460828 |
| 5276_at | 2.258227 | 2.716653 | 1.269615 | 1.912259 | 1.197543 | 1.127674 | 0.981312 | 1.786111 |
| 5277_at | 3.873894 | 4.422554 | 4.12412  | 5.348506 | 5.19257  | 3.654429 | 4.879588 | 4.222623 |
| 5279_at | 6.16423  | 5.838898 | 5.71708  | 6.490376 | 5.823002 | 5.046467 | 5.784296 | 6.101236 |
| 527_at  | 8.401849 | 7.86619  | 8.792141 | 8.681521 | 7.35543  | 8.52334  | 9.039848 | 7.152368 |
| 5281_at | 4.392335 | 3.775021 | 3.718079 | 3.064828 | 4.366255 | 3.282562 | 2.915796 | 3.50898  |
| 5283_at | 7.313698 | 7.913516 | 5.818401 | 7.258584 | 6.045346 | 6.599925 | 6.173966 | 6.364523 |
| 5284_at | 6.027477 | 4.263985 | 5.745085 | 5.104068 | 5.07565  | 6.480578 | 3.354028 | 5.407426 |
| 5286_at | 7.587875 | 8.24963  | 7.869842 | 8.081177 | 7.969268 | 7.867718 | 8.057501 | 8.025859 |
| 5287_at | 5.999893 | 5.88469  | 5.271543 | 6.450825 | 5.970547 | 5.918601 | 6.284557 | 4.015019 |
| 5288_at | 2.407568 | 1.325186 | 1.420713 | 1.477947 | 2.236231 | 1.527711 | 1.942065 | 1.365089 |
| 5289_at | 6.867976 | 7.349502 | 7.172191 | 7.377062 | 7.834311 | 7.526028 | 7.395741 | 7.282293 |
| 528_at  | 7.156929 | 7.493653 | 7.310666 | 7.289341 | 7.718573 | 6.626403 | 7.168431 | 7.87456  |
| 5290_at | 6.71058  | 6.676602 | 6.96348  | 6.209637 | 7.038257 | 6.85456  | 6.670501 | 7.085059 |
| 5291_at | 5.480441 | 5.5123   | 5.550873 | 5.379544 | 5.532195 | 5.355833 | 6.08317  | 6.489355 |
| 5292_at | 3.319862 | 3.930596 | 3.497199 | 3.832929 | 4.192922 | 3.587834 | 4.169415 | 2.97599  |
| 5293_at | 2.886211 | 3.494904 | 3.390415 | 3.740268 | 3.067825 | 3.974883 | 2.316538 | 2.655888 |
| 5294_at | 2.361331 | 4.020148 | 3.212526 | 3.354518 | 4.755893 | 3.210285 | 2.767528 | 3.697994 |
| 5295_at | 7.308968 | 7.56331  | 7.263394 | 7.420885 | 6.429982 | 7.1343   | 7.249382 | 6.717856 |
| 5296_at | 4.460074 | 3.277798 | 3.442234 | 5.014517 | 4.337897 | 3.51054  | 3.663041 | 3.519283 |
| 5297_at | 6.756902 | 6.768081 | 6.881083 | 6.890594 | 6.663704 | 6.727692 | 6.579336 | 6.512078 |
| 5298_at | 5.851136 | 5.225893 | 5.018246 | 5.681943 | 5.85741  | 5.820877 | 5.652298 | 5.119486 |
| 529_at  | 10.15487 | 9.56757  | 9.763256 | 9.642319 | 10.15691 | 9.376571 | 9.602848 | 9.65327  |
| 52_at   | 7.933332 | 8.327903 | 8.332074 | 8.089491 | 8.820389 | 8.239466 | 8.197352 | 8.548143 |
| 5300_at | 7.515088 | 7.203649 | 7.525344 | 6.904528 | 6.903865 | 7.885947 | 6.844217 | 7.345084 |
| 5301_at | 1.545532 | 1.269852 | 1.020329 | 2.05209  | 1.865456 | 1.535787 | 1.667854 | 1.184783 |
| 5303_at | 3.124546 | 2.938849 | 1.816437 | 2.094048 | 1.447059 | 3.348416 | 3.249075 | 3.392449 |
| 5304_at | 1.789274 | 2.06259  | 1.724345 | 1.392002 | 1.68958  | 1.967607 | 2.573019 | 2.495357 |



|          |          |          |          |          |          |          |          |          |
|----------|----------|----------|----------|----------|----------|----------|----------|----------|
| 5305_at  | 6.923609 | 7.426286 | 7.448241 | 7.473008 | 7.914124 | 7.65366  | 7.582645 | 7.371426 |
| 5306_at  | 7.609927 | 7.272555 | 7.197319 | 7.09497  | 7.646451 | 7.507677 | 7.415318 | 7.168782 |
| 5307_at  | 2.025708 | 2.343502 | 2.491977 | 1.934639 | 2.694444 | 1.457193 | 2.011377 | 3.159366 |
| 5308_at  | 1.872025 | 2.310973 | 2.010559 | 2.412163 | 3.055327 | 2.572467 | 2.411719 | 2.454117 |
| 5309_at  | 1.456551 | 1.913898 | 3.24795  | 2.119245 | 2.151488 | 2.331921 | 2.774833 | 2.274894 |
| 5310_at  | 3.463563 | 3.925648 | 3.373529 | 2.963129 | 3.636083 | 3.460422 | 3.397726 | 2.914593 |
| 5311_at  | 5.188877 | 5.834253 | 5.694946 | 5.775187 | 6.443754 | 5.653775 | 5.314347 | 6.556568 |
| 5313_at  | 2.199153 | 2.204668 | 2.674633 | 2.011799 | 2.765728 | 2.818547 | 1.723221 | 2.435825 |
| 5314_at  | 3.762397 | 2.83532  | 3.818387 | 3.141438 | 3.759248 | 4.011408 | 1.642188 | 3.099431 |
| 5315_at  | 7.015135 | 7.047691 | 7.504685 | 7.757189 | 6.92329  | 6.893091 | 7.325378 | 7.231952 |
| 5316_at  | 5.836654 | 5.87688  | 5.046966 | 5.463186 | 4.958978 | 5.696684 | 5.640846 | 5.930507 |
| 5317_at  | 2.61979  | 3.727214 | 3.244164 | 3.683092 | 2.279636 | 4.469334 | 3.390635 | 2.653015 |
| 5318_at  | 4.874874 | 4.262706 | 5.007635 | 4.144004 | 4.245976 | 5.38023  | 4.332971 | 4.957163 |
| 5319_at  | 2.85954  | 2.388385 | 2.966451 | 2.373407 | 3.115198 | 3.937369 | 2.592899 | 3.424294 |
| 5320_at  | 3.618358 | 1.962075 | 2.171519 | 1.68152  | 1.819303 | 2.081212 | 1.61065  | 1.345393 |
| 5321_at  | 4.041489 | 3.437323 | 3.312664 | 4.769944 | 3.934875 | 3.193561 | 3.637981 | 2.896487 |
| 5322_at  | 2.043973 | 2.194613 | 1.757161 | 2.10809  | 1.540784 | 3.010635 | 1.918389 | 2.987473 |
| 5324_at  | 2.943228 | 3.888921 | 2.496563 | 3.777022 | 2.778722 | 4.249793 | 5.198986 | 3.756868 |
| 5325_at  | 4.510965 | 4.833644 | 3.773225 | 3.182932 | 4.370452 | 3.058981 | 3.975481 | 2.971661 |
| 5326_at  | 4.180167 | 3.312941 | 4.375817 | 3.915633 | 4.021    | 3.522753 | 5.237999 | 4.252536 |
| 5327_at  | 9.496594 | 9.76418  | 9.513107 | 10.26046 | 9.501216 | 9.791946 | 9.764957 | 9.273081 |
| 5328_at  | 5.231999 | 5.077152 | 4.3752   | 3.51881  | 3.599832 | 4.856117 | 3.832998 | 4.938306 |
| 5329_at  | 4.915669 | 4.710173 | 4.055408 | 5.02872  | 4.73004  | 5.191155 | 4.540858 | 5.551212 |
| 5330_at  | 1.943773 | 1.837964 | 1.559663 | 1.583696 | 2.137396 | 2.5748   | 1.421313 | 1.650921 |
| 5331_at  | 5.077931 | 4.672498 | 4.752813 | 5.35583  | 3.600218 | 4.380505 | 4.496324 | 4.478848 |
| 5332_at  | 2.813092 | 2.100745 | 2.567635 | 3.819355 | 3.059888 | 3.061159 | 2.193777 | 3.464988 |
| 53335_at | 1.718228 | 1.597468 | 2.403384 | 2.237995 | 2.596218 | 2.892353 | 2.266588 | 2.496345 |
| 53336_at | 1.906066 | 1.545639 | 0.987996 | 1.611509 | 1.105084 | 1.850999 | 2.186886 | 2.020317 |
| 53339_at | 8.001222 | 7.745043 | 7.759333 | 7.964142 | 7.966156 | 7.544608 | 7.943817 | 8.079255 |
| 5333_at  | 4.908383 | 4.334884 | 4.711138 | 5.53975  | 5.686066 | 4.743032 | 4.647395 | 3.92926  |
| 53340_at | 6.23581  | 6.090607 | 5.867797 | 5.555084 | 5.575239 | 6.391927 | 5.300316 | 5.752731 |
| 53342_at | 2.86845  | 2.258069 | 2.537936 | 2.615177 | 2.585666 | 2.054911 | 3.035472 | 2.38085  |
| 53343_at | 5.577195 | 5.361741 | 5.504805 | 5.523078 | 5.708998 | 5.302962 | 5.550553 | 6.033728 |
| 53344_at | 4.331701 | 3.952982 | 5.192184 | 5.024817 | 4.379089 | 4.347322 | 4.411589 | 4.608867 |
| 53345_at | 2.77636  | 2.266727 | 2.994652 | 3.167206 | 1.887622 | 2.658546 | 2.952447 | 2.929757 |
| 53346_at | 3.443943 | 1.987367 | 2.824228 | 3.785332 | 3.925454 | 3.819546 | 2.847213 | 2.121277 |
| 53347_at | 1.714665 | 1.753271 | 1.934808 | 1.507708 | 1.759781 | 1.84785  | 1.590594 | 1.859919 |
| 53349_at | 4.897176 | 4.714809 | 4.334652 | 5.368987 | 4.982853 | 4.75176  | 5.352295 | 3.885771 |
| 5334_at  | 5.246323 | 6.06675  | 5.469122 | 5.864741 | 5.708099 | 5.053943 | 4.819744 | 5.56058  |
| 53353_at | 1.905665 | 1.369989 | 1.310247 | 1.252141 | 1.558434 | 1.808682 | 2.549716 | 1.350235 |
| 53354_at | 3.177479 | 3.566313 | 4.097312 | 2.492118 | 4.338875 | 2.466445 | 2.810966 | 3.719462 |
| 53358_at | 3.174311 | 2.214895 | 2.213615 | 2.433508 | 2.250848 | 2.698752 | 1.822186 | 2.838745 |
| 5335_at  | 5.038544 | 4.929907 | 5.386784 | 5.669121 | 6.030955 | 5.984646 | 5.915548 | 5.7259   |
| 5336_at  | 7.256348 | 7.968739 | 6.103225 | 6.656212 | 5.831418 | 3.295424 | 7.107932 | 6.252669 |
| 53371_at | 4.894673 | 4.638352 | 4.127347 | 3.981285 | 4.586329 | 4.499669 | 3.815447 | 4.891237 |
| 53373_at | 7.096891 | 6.745759 | 7.769165 | 7.548964 | 6.730438 | 7.127843 | 6.412149 | 6.615038 |
| 5337_at  | 4.682135 | 4.659792 | 4.584286 | 4.314703 | 4.842182 | 4.165472 | 4.584562 | 4.364494 |
| 5338_at  | 3.655352 | 3.868044 | 4.307623 | 3.273476 | 4.855699 | 3.720857 | 2.684198 | 4.211548 |
| 5339_at  | 3.837472 | 4.991325 | 4.665808 | 5.548902 | 4.47758  | 4.787786 | 4.902506 | 4.060108 |
| 533_at   | 6.069274 | 5.852663 | 5.908663 | 5.83398  | 5.356011 | 6.104438 | 5.812236 | 5.315086 |
| 53405_at | 8.573898 | 8.342998 | 8.970571 | 8.512381 | 8.094642 | 8.308237 | 8.88882  | 8.727892 |

|          |          |          |          |          |          |          |          |          |
|----------|----------|----------|----------|----------|----------|----------|----------|----------|
| 53407_at | 7.680381 | 7.409727 | 7.193287 | 7.368029 | 7.734509 | 7.594169 | 7.811292 | 8.358032 |
| 5340_at  | 7.425602 | 6.55611  | 5.911004 | 3.032895 | 7.816558 | 6.094795 | 1.733041 | 5.275285 |
| 5341_at  | 3.350232 | 3.36046  | 3.366729 | 3.710411 | 3.07073  | 3.141205 | 3.45104  | 2.766976 |
| 5345_at  | 5.093013 | 3.933154 | 4.136658 | 3.375187 | 5.769745 | 5.110237 | 4.419372 | 4.048766 |
| 5346_at  | 2.155397 | 2.801023 | 1.851398 | 1.565257 | 2.83459  | 2.183604 | 2.255354 | 2.823235 |
| 5347_at  | 2.153954 | 3.078613 | 2.680057 | 3.8051   | 2.933133 | 2.227359 | 2.385149 | 3.565127 |
| 5348_at  | 7.797685 | 6.946267 | 7.659598 | 5.811482 | 3.964671 | 5.807039 | 6.385712 | 6.376798 |
| 5349_at  | 2.173661 | 2.178345 | 2.245665 | 2.061844 | 2.122481 | 2.613357 | 2.947483 | 2.837176 |
| 534_at   | 4.205303 | 3.970753 | 4.358995 | 4.635325 | 4.351291 | 4.751604 | 2.500383 | 2.777543 |
| 5350_at  | 7.436276 | 7.132552 | 7.026173 | 5.660485 | 7.18292  | 6.165645 | 6.777418 | 3.055859 |
| 5351_at  | 7.842413 | 7.995501 | 8.69304  | 8.310137 | 8.50127  | 8.564777 | 8.44079  | 7.959084 |
| 5352_at  | 7.477689 | 7.761962 | 7.597386 | 6.849242 | 7.420339 | 6.861835 | 7.456209 | 8.061981 |
| 5354_at  | 2.840308 | 2.679031 | 2.251505 | 2.358907 | 2.252932 | 2.349003 | 1.674799 | 1.567026 |
| 5355_at  | 9.877616 | 9.381975 | 10.25092 | 10.04385 | 9.192328 | 10.09041 | 10.49296 | 9.192992 |
| 5356_at  | 7.164775 | 7.437686 | 5.952093 | 7.303039 | 6.801848 | 6.992948 | 6.604956 | 6.960282 |
| 5357_at  | 4.301782 | 2.027907 | 4.509016 | 4.424924 | 5.377564 | 3.380685 | 3.115758 | 5.260792 |
| 5358_at  | 8.818898 | 9.088765 | 9.008303 | 8.749601 | 8.910978 | 8.203999 | 8.584998 | 9.409043 |
| 5359_at  | 7.772027 | 8.345786 | 7.532461 | 7.821053 | 7.441382 | 7.584969 | 7.402818 | 7.126574 |
| 535_at   | 5.770838 | 6.512887 | 6.49664  | 6.387355 | 7.469231 | 6.058252 | 6.404021 | 7.177129 |
| 5360_at  | 7.832884 | 7.445192 | 7.684317 | 7.18026  | 6.005134 | 7.288703 | 6.622409 | 7.751163 |
| 53615_at | 3.731947 | 3.657876 | 4.21343  | 3.077179 | 2.785461 | 4.489193 | 3.83376  | 2.485117 |
| 53616_at | 1.384957 | 1.381417 | 1.394543 | 2.397004 | 2.386463 | 1.159475 | 1.164815 | 2.561881 |
| 5361_at  | 4.518877 | 3.317116 | 3.954749 | 4.990623 | 4.632493 | 5.115913 | 4.848208 | 2.991317 |
| 5362_at  | 4.219195 | 4.948352 | 4.970805 | 5.360177 | 4.510792 | 4.294413 | 4.447084 | 3.920116 |
| 53630_at | 1.659662 | 2.212104 | 1.90472  | 2.104582 | 1.763673 | 2.61228  | 1.711453 | 3.14054  |
| 53632_at | 2.160502 | 2.175429 | 1.98653  | 2.59503  | 2.243759 | 2.226002 | 2.211331 | 1.629006 |
| 53635_at | 7.051563 | 6.776417 | 6.807207 | 6.826038 | 6.946081 | 6.673792 | 6.496538 | 6.430514 |
| 53637_at | 1.86894  | 1.919724 | 2.890036 | 2.326257 | 1.927002 | 2.378592 | 2.800796 | 1.917906 |
| 5364_at  | 5.12032  | 5.425741 | 5.721732 | 5.533074 | 5.623299 | 6.233527 | 6.012315 | 5.161509 |
| 5365_at  | 2.075971 | 2.329286 | 1.716328 | 2.563863 | 1.803418 | 2.573924 | 2.182735 | 1.945533 |
| 5366_at  | 2.774457 | 1.40439  | 2.013698 | 2.342256 | 2.332945 | 1.346254 | 1.404537 | 1.725601 |
| 5367_at  | 2.305844 | 1.846549 | 2.017282 | 2.189926 | 2.224036 | 1.793428 | 2.241791 | 2.604643 |
| 5368_at  | 3.164028 | 3.374063 | 2.543809 | 3.888654 | 3.599222 | 2.461522 | 2.732882 | 3.594084 |
| 5370_at  | 3.129205 | 2.696479 | 2.547154 | 2.688174 | 3.849646 | 3.503943 | 2.536537 | 3.716398 |
| 5371_at  | 4.384945 | 3.848279 | 4.019318 | 4.391017 | 4.038246 | 4.438014 | 4.47075  | 3.928092 |
| 5372_at  | 5.380559 | 5.396845 | 5.691618 | 5.1731   | 5.880501 | 3.893001 | 5.962284 | 5.084447 |
| 5373_at  | 4.461889 | 4.691374 | 5.281388 | 4.467566 | 5.557882 | 4.848448 | 4.109595 | 4.204325 |
| 5375_at  | 1.542993 | 1.34884  | 1.929888 | 2.235493 | 1.764912 | 2.490716 | 2.530164 | 1.391548 |
| 5376_at  | 7.048138 | 8.174138 | 8.140334 | 8.396411 | 7.227031 | 8.310135 | 7.218502 | 7.92489  |
| 5378_at  | 4.559697 | 4.725733 | 3.894123 | 3.872687 | 4.817499 | 4.153949 | 4.488461 | 4.32505  |
| 5379_at  | 5.457177 | 4.783185 | 5.687314 | 5.569582 | 5.740802 | 4.853351 | 5.071075 | 4.46426  |
| 537_at   | 8.362576 | 7.762225 | 8.468197 | 8.457238 | 7.857331 | 8.709265 | 9.088473 | 7.435801 |
| 53820_at | 2.452905 | 2.764745 | 3.365021 | 2.011752 | 2.628592 | 2.18202  | 3.057833 | 3.327766 |
| 53822_at | 2.341121 | 2.614824 | 2.338064 | 2.396289 | 2.025172 | 1.872655 | 2.193837 | 2.073688 |
| 53826_at | 7.74942  | 7.77399  | 7.621373 | 7.74614  | 7.986188 | 8.115984 | 7.885189 | 7.513865 |
| 53827_at | 9.05314  | 8.373258 | 8.528982 | 9.205681 | 8.402543 | 8.952498 | 9.40625  | 7.415032 |
| 53828_at | 3.68585  | 3.836487 | 3.549348 | 5.59844  | 5.282215 | 3.585319 | 2.96039  | 4.081677 |
| 53829_at | 4.466861 | 4.176233 | 4.992018 | 5.052171 | 3.475651 | 4.013156 | 4.54055  | 3.451029 |
| 5382_at  | 4.167647 | 6.549188 | 5.192375 | 4.679039 | 5.649179 | 5.253263 | 4.151309 | 6.906748 |
| 53831_at | 1.495139 | 1.397364 | 1.140374 | 1.042899 | 1.286341 | 2.065597 | 2.122867 | 1.214671 |
| 53832_at | 1.5006   | 1.70241  | 2.054513 | 2.008922 | 1.632693 | 2.444588 | 2.70206  | 1.614296 |

|          |          |          |          |          |          |          |          |          |
|----------|----------|----------|----------|----------|----------|----------|----------|----------|
| 53833_at | 1.752088 | 1.777753 | 1.805538 | 1.999885 | 2.149483 | 1.592438 | 1.694395 | 1.411277 |
| 53834_at | 4.539402 | 4.473742 | 5.087992 | 4.573601 | 4.509641 | 5.329759 | 4.68086  | 3.45292  |
| 53836_at | 1.281401 | 0.791699 | 1.359361 | 1.082399 | 1.157494 | 1.233446 | 1.476113 | 1.863153 |
| 53838_at | 6.171778 | 5.541923 | 5.840106 | 6.050179 | 5.55223  | 5.371665 | 5.779942 | 6.146732 |
| 5383_at  | 3.064147 | 3.795481 | 3.434698 | 3.060604 | 2.73822  | 2.909626 | 2.075679 | 3.026149 |
| 53840_at | 3.208549 | 4.423815 | 4.688329 | 2.768477 | 4.594867 | 3.56935  | 3.953056 | 4.472229 |
| 53841_at | 5.199149 | 4.181262 | 4.505763 | 3.548288 | 5.143685 | 3.699483 | 3.522432 | 4.415356 |
| 53842_at | 2.646368 | 2.396831 | 1.842953 | 2.416454 | 4.597348 | 2.503878 | 2.076956 | 2.630682 |
| 53844_at | 1.55461  | 2.754957 | 2.614581 | 2.293237 | 2.318152 | 4.138241 | 1.57582  | 1.527945 |
| 5387_at  | 2.833166 | 3.604671 | 3.14595  | 4.157543 | 3.483234 | 2.934558 | 3.215764 | 4.307566 |
| 538_at   | 4.272514 | 5.220409 | 5.636975 | 5.215766 | 5.392037 | 5.406504 | 4.948323 | 5.840273 |
| 53904_at | 0.985523 | 1.232131 | 1.322845 | 1.28945  | 1.092133 | 1.214076 | 1.274167 | 1.339195 |
| 53905_at | 2.086199 | 2.457171 | 2.338688 | 2.360564 | 1.864999 | 2.222344 | 1.920708 | 2.85928  |
| 53917_at | 4.402509 | 4.538691 | 3.788887 | 4.731935 | 3.893594 | 4.322661 | 3.910809 | 4.664433 |
| 53918_at | 6.43545  | 6.425839 | 6.660057 | 6.068188 | 5.528447 | 6.200722 | 7.206911 | 6.295808 |
| 53919_at | 0.985977 | 0.911351 | 1.152356 | 1.021062 | 1.188999 | 1.135734 | 1.933916 | 2.13248  |
| 53938_at | 4.511081 | 5.2663   | 4.595632 | 4.758857 | 6.038323 | 5.2754   | 3.464265 | 5.815304 |
| 5393_at  | 6.060277 | 5.388962 | 4.965933 | 5.410204 | 5.65667  | 5.139398 | 5.855721 | 5.278965 |
| 53940_at | 1.994634 | 1.352294 | 1.965378 | 2.970589 | 2.223735 | 2.658027 | 2.105379 | 1.977176 |
| 53942_at | 2.131772 | 2.274615 | 3.063359 | 1.757735 | 2.371873 | 1.989875 | 2.427715 | 2.503529 |
| 53944_at | 4.694347 | 5.596651 | 4.839978 | 5.024984 | 4.722821 | 4.804942 | 4.306967 | 4.144983 |
| 53947_at | 4.29918  | 3.709487 | 4.419809 | 3.55291  | 3.340877 | 3.680373 | 4.557378 | 3.895986 |
| 5394_at  | 6.932186 | 6.125886 | 6.748519 | 6.386381 | 6.338582 | 6.717948 | 6.89656  | 6.348255 |
| 5395_at  | 3.857049 | 4.678163 | 3.969124 | 3.175744 | 4.904696 | 4.51908  | 2.947386 | 3.263664 |
| 5396_at  | 2.722391 | 3.546544 | 3.553019 | 2.689649 | 3.873764 | 2.921591 | 2.585576 | 2.70929  |
| 53981_at | 5.686831 | 6.627358 | 6.626925 | 6.550033 | 5.97985  | 6.525962 | 6.173967 | 6.071552 |
| 539_at   | 10.39045 | 10.17265 | 9.948403 | 9.728495 | 10.26899 | 10.05738 | 9.576807 | 10.08367 |
| 53_at    | 5.738503 | 6.187458 | 5.110065 | 5.705587 | 5.368729 | 5.392344 | 5.596366 | 4.909088 |
| 54014_at | 4.506333 | 5.533851 | 5.937235 | 5.36663  | 6.009742 | 5.412462 | 5.409004 | 5.899189 |
| 54020_at | 2.706355 | 3.750126 | 2.914946 | 3.833462 | 2.333276 | 2.943299 | 2.841508 | 3.835536 |
| 54033_at | 2.706189 | 3.443535 | 3.037289 | 2.683831 | 3.163279 | 1.519207 | 4.313617 | 2.715154 |
| 54039_at | 2.623962 | 2.949078 | 3.335974 | 3.606245 | 3.428312 | 3.35643  | 3.482584 | 3.716202 |
| 54058_at | 2.214365 | 2.126548 | 1.881456 | 1.135317 | 2.537947 | 2.205827 | 2.468265 | 2.657229 |
| 54059_at | 5.829587 | 4.226    | 3.965643 | 3.250598 | 3.807232 | 4.410028 | 5.116698 | 5.71624  |
| 54064_at | 1.495142 | 1.570704 | 1.086378 | 1.29962  | 1.9375   | 1.335641 | 1.373785 | 1.558376 |
| 54067_at | 1.942551 | 0.997674 | 1.344139 | 1.600417 | 1.642263 | 1.950198 | 1.112064 | 1.378456 |
| 54069_at | 5.678172 | 5.667273 | 5.445323 | 5.789406 | 4.923069 | 6.735637 | 3.746608 | 5.60607  |
| 5406_at  | 1.01918  | 1.351747 | 1.739971 | 1.322828 | 1.214884 | 1.036371 | 1.025482 | 1.358873 |
| 54072_at | 1.954674 | 1.066712 | 1.203762 | 1.116706 | 1.56196  | 1.522648 | 1.390622 | 1.506481 |
| 54075_at | 1.036236 | 0.972297 | 1.296446 | 1.106026 | 1.57778  | 1.267165 | 1.476598 | 1.909905 |
| 5407_at  | 1.469193 | 2.198119 | 1.002529 | 1.630335 | 0.835133 | 2.026934 | 2.261882 | 1.601698 |
| 54082_at | 2.291473 | 2.371868 | 2.513549 | 2.395683 | 2.92845  | 2.421003 | 2.64551  | 1.864327 |
| 54083_at | 1.635443 | 2.121611 | 1.497947 | 1.917713 | 2.281452 | 2.355796 | 1.904602 | 2.849488 |
| 54084_at | 2.47878  | 3.433358 | 1.852402 | 1.759776 | 2.589464 | 1.566864 | 1.943993 | 2.503038 |
| 54088_at | 1.581237 | 0.8531   | 1.235454 | 1.113053 | 1.003749 | 1.301925 | 3.556679 | 1.428588 |
| 54089_at | 1.157297 | 1.324008 | 1.074147 | 1.643425 | 0.744944 | 1.101822 | 2.414849 | 1.828819 |
| 5408_at  | 1.661763 | 1.513231 | 1.54983  | 1.433792 | 1.3153   | 1.174197 | 1.738077 | 2.056657 |
| 54090_at | 1.120679 | 2.024512 | 1.973868 | 2.073497 | 2.306532 | 1.817197 | 1.714906 | 1.716155 |
| 54093_at | 1.889682 | 2.502752 | 2.325917 | 2.696066 | 2.372044 | 2.842286 | 2.556029 | 2.622492 |
| 54094_at | 2.76469  | 3.808125 | 2.71093  | 2.973293 | 3.520719 | 3.261447 | 3.188508 | 4.397611 |
| 54097_at | 2.912536 | 2.356375 | 2.828831 | 3.055602 | 3.387309 | 2.722734 | 1.682742 | 2.059966 |

|           |          |          |          |          |          |          |          |          |
|-----------|----------|----------|----------|----------|----------|----------|----------|----------|
| 5409_at   | 3.430463 | 3.407718 | 3.564424 | 3.515296 | 1.733267 | 2.835595 | 3.066825 | 2.222602 |
| 540_at    | 2.316257 | 1.663095 | 2.401456 | 2.527746 | 2.3587   | 3.182553 | 2.108924 | 2.332377 |
| 54101_at  | 2.233289 | 3.377235 | 2.740757 | 3.903972 | 4.9509   | 2.742204 | 2.810079 | 2.28836  |
| 54102_at  | 1.30997  | 2.310444 | 2.045875 | 2.420766 | 1.450352 | 3.217584 | 1.589594 | 1.929194 |
| 54103_at  | 4.547595 | 3.664267 | 3.87389  | 4.893724 | 4.171124 | 4.051452 | 3.656538 | 4.046024 |
| 54106_at  | 2.978718 | 2.906085 | 2.896672 | 2.35956  | 2.18781  | 2.822981 | 2.958908 | 2.270356 |
| 54107_at  | 5.378849 | 4.275699 | 4.800584 | 4.704107 | 4.604781 | 4.478805 | 5.221413 | 4.967898 |
| 54108_at  | 4.725076 | 4.559723 | 3.945499 | 4.36852  | 4.296855 | 3.928526 | 4.305205 | 3.659568 |
| 54112_at  | 2.582622 | 2.093463 | 2.318603 | 2.037491 | 1.975779 | 1.885339 | 1.610784 | 2.516095 |
| 5411_at   | 6.611383 | 7.105061 | 7.112004 | 7.514158 | 6.81815  | 7.529024 | 6.658885 | 7.169609 |
| 5412_at   | 7.198964 | 7.357709 | 6.473035 | 7.066428 | 7.681876 | 6.758374 | 6.892337 | 7.302705 |
| 54143_at  | 1.416403 | 1.299927 | 1.870768 | 1.52584  | 1.901708 | 1.07842  | 1.17378  | 2.077554 |
| 541466_at | 6.521845 | 7.121818 | 7.145341 | 7.408023 | 7.104171 | 6.880937 | 7.394305 | 6.968943 |
| 541468_at | 3.114413 | 2.807307 | 2.478873 | 2.807071 | 2.273053 | 3.325892 | 2.598527 | 3.032304 |
| 541471_at | 6.388785 | 6.623527 | 5.598816 | 6.678315 | 6.561637 | 5.971687 | 6.98935  | 7.016109 |
| 54148_at  | 7.350452 | 7.112561 | 7.21274  | 6.716623 | 7.272378 | 6.601569 | 6.742531 | 7.56302  |
| 54149_at  | 6.390257 | 6.794696 | 6.356264 | 6.522968 | 6.85354  | 6.049436 | 6.42855  | 6.805335 |
| 5414_at   | 5.182544 | 4.433265 | 4.499201 | 4.882824 | 4.25332  | 5.020007 | 4.268451 | 4.370849 |
| 541565_at | 4.538358 | 5.14994  | 4.139227 | 4.426695 | 4.129091 | 4.365191 | 4.765388 | 3.353054 |
| 541578_at | 3.224931 | 2.423369 | 1.955709 | 2.829816 | 2.061166 | 2.627478 | 3.086875 | 2.678997 |
| 54165_at  | 6.484741 | 6.297581 | 6.320287 | 6.388724 | 6.590373 | 6.337663 | 5.948419 | 6.839159 |
| 54187_at  | 6.098172 | 5.510829 | 5.83269  | 6.629879 | 6.045728 | 5.749598 | 5.350342 | 5.715102 |
| 54206_at  | 7.414775 | 7.012789 | 7.823297 | 6.502246 | 6.328835 | 8.270385 | 8.06559  | 7.343023 |
| 54207_at  | 1.505286 | 2.166131 | 1.692949 | 1.394522 | 1.473098 | 1.753266 | 1.679684 | 1.423981 |
| 54209_at  | 2.887704 | 3.061555 | 2.66681  | 2.459253 | 1.815736 | 2.442185 | 2.219012 | 3.126726 |
| 5420_at   | 11.19615 | 11.12593 | 11.21248 | 11.19876 | 10.97402 | 11.11001 | 11.15168 | 10.99555 |
| 54210_at  | 2.731283 | 2.485965 | 2.615642 | 2.782168 | 2.108336 | 3.067618 | 2.895101 | 2.316395 |
| 54212_at  | 1.529966 | 1.380455 | 1.853511 | 2.68543  | 2.019512 | 1.721501 | 2.300411 | 2.190011 |
| 54221_at  | 1.18299  | 1.681249 | 1.487752 | 1.06015  | 2.184658 | 1.207103 | 1.257084 | 1.732192 |
| 5422_at   | 4.114135 | 4.598859 | 4.436435 | 4.749081 | 5.309546 | 4.826438 | 4.902714 | 4.989937 |
| 5423_at   | 5.716823 | 5.217316 | 5.870637 | 4.761064 | 5.272741 | 5.309507 | 5.226464 | 6.317558 |
| 5424_at   | 3.37145  | 3.595793 | 3.200359 | 3.195074 | 3.409113 | 3.573959 | 3.595793 | 3.740902 |
| 5425_at   | 6.968398 | 6.481352 | 6.683499 | 6.097137 | 6.238395 | 6.16679  | 5.889239 | 5.69526  |
| 5426_at   | 2.262727 | 2.265256 | 2.840379 | 3.038077 | 3.192481 | 3.013907 | 3.186869 | 3.038077 |
| 542767_at | 2.996742 | 2.240617 | 1.572044 | 2.407201 | 2.60789  | 0.734391 | 1.08759  | 1.670777 |
| 5427_at   | 1.966946 | 1.747829 | 1.052719 | 1.737154 | 2.518621 | 1.095836 | 1.175471 | 2.165028 |
| 5428_at   | 5.130952 | 5.223944 | 5.256743 | 4.984591 | 5.170418 | 5.74879  | 5.527554 | 5.20333  |
| 5429_at   | 5.016719 | 4.667694 | 4.730142 | 4.614544 | 4.663365 | 3.409088 | 4.873042 | 4.371029 |
| 5430_at   | 7.500873 | 7.855779 | 8.320739 | 8.228686 | 7.957124 | 8.061412 | 8.236763 | 7.816331 |
| 5431_at   | 7.159834 | 7.241714 | 7.38714  | 7.390715 | 7.259032 | 6.647415 | 6.689195 | 7.657747 |
| 54328_at  | 3.37145  | 2.22547  | 2.95429  | 3.110246 | 2.684602 | 2.014328 | 2.610431 | 2.442778 |
| 54329_at  | 1.38743  | 1.561061 | 1.241368 | 1.890882 | 2.049108 | 1.840521 | 1.419299 | 1.642093 |
| 5432_at   | 5.915714 | 6.269869 | 6.315726 | 6.829468 | 6.691376 | 6.233938 | 6.230456 | 5.579792 |
| 54331_at  | 7.37672  | 7.220427 | 7.522958 | 9.164913 | 8.177843 | 7.106065 | 7.339391 | 6.528988 |
| 54332_at  | 4.627556 | 5.348706 | 5.193804 | 4.390466 | 3.255569 | 3.810423 | 3.910576 | 4.556844 |
| 5433_at   | 3.718262 | 4.79317  | 3.949034 | 4.823605 | 3.142004 | 5.179725 | 5.061734 | 5.617249 |
| 54344_at  | 3.421413 | 2.807907 | 2.483536 | 2.972316 | 2.388334 | 3.695242 | 3.487844 | 2.541243 |
| 54345_at  | 6.080861 | 5.443146 | 5.563636 | 5.87847  | 5.112408 | 5.266446 | 5.915173 | 4.33415  |
| 54346_at  | 1.973681 | 1.983727 | 1.893362 | 1.660074 | 2.441768 | 1.499992 | 1.65979  | 1.98351  |
| 5434_at   | 5.173753 | 4.124718 | 5.142348 | 4.958803 | 4.070521 | 5.453762 | 5.102211 | 5.158266 |
| 5435_at   | 2.910076 | 3.19324  | 3.196089 | 3.059188 | 3.160443 | 2.751194 | 3.293298 | 3.195231 |

|          |          |          |          |          |          |          |          |          |
|----------|----------|----------|----------|----------|----------|----------|----------|----------|
| 54360_at | 4.881641 | 2.979658 | 3.167929 | 4.500241 | 3.311646 | 3.442073 | 3.059152 | 2.985817 |
| 54361_at | 2.479736 | 1.703053 | 2.275793 | 1.884542 | 2.477005 | 2.237528 | 1.5782   | 3.781236 |
| 54363_at | 1.463459 | 1.359006 | 2.208254 | 1.221504 | 2.696172 | 0.928852 | 1.303524 | 1.604624 |
| 5436_at  | 8.133191 | 8.034622 | 7.528167 | 7.342428 | 8.092988 | 8.058192 | 7.807382 | 7.663585 |
| 5437_at  | 4.78083  | 5.211389 | 4.867097 | 5.043159 | 5.576391 | 5.219259 | 4.296835 | 6.003981 |
| 54386_at | 7.204124 | 6.995861 | 7.064873 | 7.235427 | 6.986956 | 6.711057 | 6.803738 | 6.941658 |
| 5438_at  | 8.87285  | 8.497236 | 8.100685 | 8.423522 | 7.829092 | 8.908156 | 8.258007 | 8.084025 |
| 5439_at  | 6.041968 | 5.054612 | 6.333855 | 3.964736 | 5.036365 | 4.222773 | 5.996651 | 6.390897 |
| 54407_at | 8.45514  | 9.435052 | 8.896484 | 9.391313 | 9.107142 | 8.712772 | 8.636366 | 9.024505 |
| 5440_at  | 7.630978 | 7.155083 | 7.403372 | 6.828212 | 7.355738 | 7.557316 | 6.937945 | 7.870626 |
| 54413_at | 4.213855 | 3.371734 | 4.491559 | 3.628186 | 4.28288  | 5.092216 | 5.530314 | 2.533277 |
| 54414_at | 5.815676 | 6.427886 | 5.889441 | 6.126879 | 6.020778 | 5.830716 | 6.045418 | 6.031418 |
| 5441_at  | 9.965718 | 9.402744 | 9.426611 | 9.580448 | 9.176478 | 9.665747 | 9.518471 | 8.584217 |
| 54429_at | 1.558909 | 1.557979 | 2.985659 | 2.625339 | 1.570865 | 1.932459 | 1.661926 | 2.594401 |
| 5442_at  | 3.990214 | 4.41969  | 3.081393 | 3.549092 | 4.229473 | 4.091463 | 3.359739 | 4.381598 |
| 54431_at | 7.799321 | 8.204951 | 8.132225 | 7.752255 | 8.133963 | 7.70084  | 8.235004 | 8.214828 |
| 54432_at | 5.633531 | 5.42112  | 5.38339  | 6.346185 | 5.958121 | 5.954514 | 4.935935 | 5.477633 |
| 54433_at | 3.244946 | 4.324265 | 4.032572 | 3.929452 | 4.327854 | 4.302836 | 4.210765 | 4.032572 |
| 54434_at | 4.230426 | 3.704377 | 3.295649 | 3.744589 | 3.431603 | 4.334885 | 3.979382 | 3.437849 |
| 54435_at | 1.698278 | 1.946861 | 1.853497 | 3.210836 | 2.692633 | 2.285834 | 2.289159 | 3.028805 |
| 54436_at | 2.680013 | 2.627404 | 2.142997 | 3.538568 | 2.416142 | 2.27023  | 2.285758 | 2.463133 |
| 54437_at | 4.937028 | 4.432925 | 3.65248  | 3.947759 | 4.243995 | 4.694509 | 4.295441 | 3.088677 |
| 54438_at | 1.631259 | 2.631197 | 2.580271 | 2.407844 | 2.079762 | 2.474146 | 2.087859 | 2.415179 |
| 54439_at | 6.91837  | 7.211674 | 7.290255 | 7.288066 | 7.211605 | 7.192385 | 6.743445 | 7.247349 |
| 5443_at  | 2.442674 | 1.595838 | 1.769869 | 1.745902 | 1.983005 | 1.799814 | 2.805385 | 1.347782 |
| 54440_at | 3.463067 | 2.989355 | 2.90718  | 3.590444 | 3.013331 | 3.321117 | 3.620906 | 3.054998 |
| 54442_at | 4.157562 | 2.566752 | 3.957682 | 3.631    | 3.978358 | 3.473182 | 4.22412  | 4.154815 |
| 54443_at | 2.554651 | 2.40324  | 2.750383 | 3.414921 | 3.621648 | 2.466335 | 3.688487 | 3.582775 |
| 5444_at  | 2.138479 | 1.935042 | 1.588554 | 1.385439 | 1.033545 | 2.965421 | 1.332923 | 1.961064 |
| 54453_at | 7.415853 | 7.087879 | 7.454777 | 7.922817 | 7.498426 | 7.400434 | 7.750118 | 6.487164 |
| 54454_at | 4.280832 | 4.947385 | 4.361481 | 4.500011 | 5.551    | 4.472531 | 4.771349 | 4.590571 |
| 54455_at | 4.172833 | 4.247085 | 3.573609 | 3.868667 | 3.659046 | 5.035656 | 4.338062 | 5.607598 |
| 54456_at | 1.996052 | 1.737203 | 1.764332 | 1.78127  | 1.838782 | 1.803132 | 1.705031 | 1.464022 |
| 54457_at | 1.862591 | 3.219284 | 2.448321 | 2.710233 | 1.889671 | 2.716192 | 2.258546 | 2.71863  |
| 54458_at | 6.332579 | 6.403313 | 7.556355 | 6.196992 | 6.026609 | 6.755287 | 6.753437 | 5.113405 |
| 5445_at  | 7.76685  | 7.821325 | 7.885801 | 7.932595 | 7.364154 | 7.398644 | 8.249108 | 7.235377 |
| 54460_at | 8.321193 | 8.293346 | 8.572039 | 8.487038 | 8.214877 | 8.421077 | 8.197858 | 8.446992 |
| 54461_at | 6.433571 | 5.247885 | 5.811205 | 5.435408 | 5.465893 | 5.222607 | 5.838908 | 3.998615 |
| 54462_at | 7.394658 | 7.534283 | 7.89168  | 7.118268 | 7.68661  | 7.943644 | 7.675146 | 8.080564 |
| 54463_at | 7.932312 | 7.817547 | 7.485766 | 6.870053 | 7.288302 | 7.273102 | 7.677728 | 7.857527 |
| 54464_at | 6.825324 | 7.277131 | 6.99736  | 7.238277 | 7.303089 | 6.387551 | 7.203674 | 7.47515  |
| 54465_at | 5.413103 | 5.067222 | 5.156758 | 5.385899 | 4.810194 | 5.292982 | 4.856994 | 5.08825  |
| 54466_at | 4.018658 | 1.896868 | 2.28696  | 4.225643 | 1.579475 | 1.018536 | 2.343067 | 0.952263 |
| 54467_at | 6.815351 | 6.575868 | 5.836262 | 6.388304 | 6.533349 | 6.601619 | 6.197493 | 6.684432 |
| 54468_at | 5.8953   | 6.329105 | 5.673458 | 5.605049 | 5.830912 | 5.765947 | 5.129358 | 6.432997 |
| 54469_at | 3.342658 | 2.762044 | 3.358974 | 2.703504 | 2.920303 | 3.045275 | 2.692054 | 2.784982 |
| 5446_at  | 1.433653 | 1.368026 | 1.76244  | 2.544899 | 1.982298 | 1.102947 | 3.260332 | 2.112219 |
| 54470_at | 5.879876 | 4.677328 | 6.528694 | 6.335327 | 4.894035 | 6.643006 | 5.940435 | 5.227416 |
| 54471_at | 4.935222 | 5.497958 | 5.063805 | 4.806357 | 4.48772  | 5.376882 | 5.749498 | 4.838402 |
| 54472_at | 4.622168 | 4.329102 | 5.167005 | 4.904227 | 4.305097 | 4.307765 | 4.653676 | 4.792113 |
| 54474_at | 1.894717 | 1.318242 | 1.566665 | 1.260718 | 1.942798 | 1.36705  | 2.034617 | 1.214217 |

|          |          |          |          |          |          |          |          |          |
|----------|----------|----------|----------|----------|----------|----------|----------|----------|
| 54475_at | 2.172196 | 3.481168 | 3.815966 | 4.746251 | 2.801462 | 3.299956 | 3.432293 | 3.140594 |
| 54476_at | 6.352998 | 6.286648 | 5.964341 | 6.33076  | 6.249167 | 6.011181 | 6.182824 | 5.678397 |
| 54477_at | 5.468146 | 4.886448 | 5.287098 | 4.149438 | 4.598829 | 4.955264 | 4.890056 | 4.823869 |
| 54478_at | 0.722521 | 1.119747 | 0.761483 | 2.228603 | 1.851177 | 0.97433  | 0.933109 | 1.455628 |
| 5447_at  | 5.709608 | 4.92701  | 5.37053  | 5.542054 | 4.463546 | 5.630713 | 6.623444 | 6.598556 |
| 54480_at | 4.961175 | 4.738104 | 4.828811 | 5.153153 | 4.925204 | 5.622203 | 6.030231 | 4.95586  |
| 54482_at | 5.102261 | 5.184278 | 4.976926 | 5.541137 | 4.53383  | 4.475741 | 4.522981 | 5.258455 |
| 54487_at | 4.846653 | 3.876971 | 5.400731 | 5.142703 | 4.469651 | 4.583603 | 4.494106 | 5.240687 |
| 54490_at | 1.336374 | 1.409478 | 1.409478 | 1.087094 | 1.42783  | 0.800005 | 1.211078 | 1.015786 |
| 54491_at | 2.217742 | 1.698197 | 1.561536 | 1.94015  | 2.049079 | 2.962811 | 1.335336 | 1.178961 |
| 54492_at | 2.690261 | 3.002061 | 2.969583 | 3.074148 | 2.873081 | 3.424299 | 3.491919 | 2.815943 |
| 54494_at | 4.906608 | 4.448366 | 4.643606 | 4.69671  | 4.44612  | 4.855207 | 4.636211 | 5.371517 |
| 54495_at | 5.897786 | 6.479744 | 6.358833 | 6.738902 | 5.721144 | 5.878361 | 6.393011 | 6.875856 |
| 54496_at | 3.045071 | 3.367119 | 3.235796 | 3.578109 | 2.656172 | 2.564196 | 2.485908 | 2.450083 |
| 54497_at | 5.28401  | 6.023878 | 5.472128 | 5.813907 | 5.678216 | 5.526934 | 5.430804 | 6.144276 |
| 54498_at | 4.066323 | 3.921459 | 4.629462 | 5.38566  | 3.292522 | 4.128914 | 3.638033 | 3.031063 |
| 54499_at | 7.055139 | 7.208104 | 7.095781 | 6.942334 | 7.230613 | 7.189096 | 6.736423 | 6.909011 |
| 5449_at  | 1.496491 | 1.512249 | 1.955626 | 1.061799 | 2.336079 | 2.60996  | 2.116    | 2.042847 |
| 54502_at | 4.503901 | 4.271567 | 4.878305 | 4.408968 | 5.145958 | 4.614425 | 4.266837 | 4.721146 |
| 54503_at | 4.563288 | 4.683623 | 4.664793 | 4.105546 | 4.81476  | 4.066125 | 4.34496  | 5.095677 |
| 54504_at | 4.208912 | 3.879436 | 2.556342 | 3.930199 | 5.221339 | 5.083719 | 3.564655 | 3.875717 |
| 54505_at | 6.375837 | 6.497873 | 6.205161 | 6.676065 | 6.611713 | 6.384087 | 6.346696 | 7.00169  |
| 54507_at | 2.728685 | 3.521912 | 2.164435 | 2.788021 | 3.007635 | 2.913442 | 2.948868 | 2.891574 |
| 54508_at | 3.609347 | 3.275534 | 3.349448 | 3.669755 | 3.337031 | 3.326865 | 4.623692 | 2.899622 |
| 54509_at | 4.490014 | 3.917447 | 3.14061  | 4.22841  | 2.360945 | 5.119869 | 2.914821 | 3.146829 |
| 5450_at  | 0.916219 | 2.377776 | 1.746641 | 2.05519  | 1.305858 | 2.361342 | 2.147318 | 0.662316 |
| 54510_at | 5.291384 | 4.192888 | 3.75787  | 4.379196 | 4.740104 | 3.91646  | 4.458509 | 4.314879 |
| 54511_at | 2.040521 | 2.021378 | 2.350132 | 1.631026 | 2.516856 | 1.732584 | 2.16566  | 1.259548 |
| 54512_at | 6.69204  | 5.757619 | 6.503489 | 6.054513 | 5.105486 | 6.44466  | 4.539782 | 5.70856  |
| 54514_at | 1.738227 | 1.397969 | 1.646138 | 1.024777 | 1.853343 | 1.178986 | 2.68547  | 1.125651 |
| 54516_at | 1.656206 | 2.275331 | 2.367121 | 1.902449 | 1.780874 | 2.687758 | 2.326835 | 1.91297  |
| 54517_at | 3.138799 | 3.834243 | 2.70916  | 4.326609 | 3.23331  | 4.057896 | 2.922425 | 2.497393 |
| 54518_at | 3.486841 | 2.208646 | 2.713262 | 3.27612  | 2.720565 | 2.926196 | 3.677712 | 3.555635 |
| 5451_at  | 6.25046  | 6.433004 | 7.16752  | 6.751785 | 6.134558 | 6.492849 | 6.750962 | 5.556726 |
| 54520_at | 6.013965 | 5.964496 | 5.217956 | 5.995171 | 5.799868 | 6.149789 | 5.698065 | 6.520492 |
| 54521_at | 5.807735 | 6.062039 | 5.88989  | 6.155357 | 5.946872 | 5.603936 | 5.919996 | 5.822817 |
| 54522_at | 4.338152 | 3.535188 | 4.024244 | 3.893475 | 3.137485 | 2.956184 | 2.009242 | 3.167869 |
| 54529_at | 6.676123 | 6.901157 | 5.851146 | 6.617192 | 6.109979 | 6.341049 | 6.50634  | 6.947747 |
| 5452_at  | 2.549842 | 1.519499 | 3.672488 | 3.067467 | 3.012358 | 2.894619 | 3.361447 | 2.36096  |
| 54531_at | 3.900277 | 3.777881 | 3.915333 | 3.785768 | 4.257099 | 3.669306 | 4.317391 | 4.047885 |
| 54532_at | 7.811697 | 7.808969 | 7.761526 | 7.93     | 8.184398 | 7.25891  | 7.749745 | 7.504397 |
| 54534_at | 5.586823 | 6.224979 | 6.178352 | 5.872625 | 5.838913 | 5.534659 | 5.590357 | 5.977418 |
| 54535_at | 2.783863 | 2.628793 | 2.0902   | 3.131002 | 2.461225 | 2.133762 | 2.677499 | 2.966243 |
| 54536_at | 5.016779 | 5.187142 | 4.753287 | 5.624529 | 5.856768 | 4.817886 | 5.574778 | 5.401604 |
| 54537_at | 4.16718  | 1.461397 | 4.148488 | 3.920279 | 6.412429 | 2.681392 | 5.167192 | 2.805634 |
| 54538_at | 5.789102 | 6.257202 | 6.497395 | 6.57477  | 5.900036 | 6.863468 | 6.4523   | 5.286465 |
| 54539_at | 8.661772 | 8.1341   | 8.291161 | 8.289964 | 8.025898 | 8.591865 | 7.853565 | 7.350456 |
| 5453_at  | 1.774937 | 2.199015 | 2.278419 | 2.220426 | 1.834414 | 2.343878 | 1.678377 | 2.160946 |
| 54540_at | 4.55457  | 2.836591 | 2.911492 | 3.121694 | 3.429571 | 3.530905 | 3.043601 | 3.687129 |
| 54541_at | 3.985382 | 4.812218 | 4.923618 | 5.298975 | 4.280368 | 6.204321 | 4.43127  | 4.084417 |
| 54542_at | 6.696696 | 7.194091 | 7.402449 | 7.237056 | 6.690001 | 6.97061  | 7.073667 | 6.70491  |

|          |          |          |          |          |          |          |          |          |
|----------|----------|----------|----------|----------|----------|----------|----------|----------|
| 54543_at | 10.64326 | 10.87877 | 10.63718 | 10.71076 | 10.71089 | 10.99741 | 10.67924 | 10.76057 |
| 54544_at | 1.586643 | 1.293221 | 1.257909 | 1.894864 | 1.800127 | 1.28626  | 1.40146  | 1.288786 |
| 54545_at | 6.577784 | 6.754649 | 7.146878 | 6.6457   | 5.842486 | 6.574894 | 6.750548 | 6.771924 |
| 54546_at | 4.510419 | 3.48487  | 3.698904 | 3.847448 | 4.899473 | 3.672579 | 2.85472  | 4.173018 |
| 54549_at | 2.845148 | 2.543598 | 2.349785 | 2.636669 | 2.470393 | 2.669406 | 2.294413 | 2.490663 |
| 5454_at  | 1.783341 | 1.866656 | 2.261891 | 2.05333  | 2.199929 | 2.985394 | 2.810443 | 2.278627 |
| 54550_at | 2.26404  | 2.593158 | 2.959576 | 2.324545 | 3.156123 | 3.67686  | 2.100111 | 2.081498 |
| 54551_at | 2.394212 | 4.054091 | 2.194998 | 2.801526 | 2.351647 | 2.931341 | 2.675811 | 2.519628 |
| 54552_at | 3.953444 | 5.485757 | 4.951604 | 4.38631  | 4.478862 | 4.584622 | 4.199909 | 5.419978 |
| 54553_at | 2.493074 | 1.731249 | 1.766231 | 3.613695 | 1.540319 | 1.587193 | 3.159453 | 2.429195 |
| 54554_at | 4.809322 | 4.68037  | 5.145174 | 4.323855 | 4.797747 | 4.924296 | 4.386955 | 5.82645  |
| 54555_at | 5.105085 | 4.727238 | 3.594867 | 4.73301  | 4.368201 | 4.632328 | 4.71447  | 3.948037 |
| 54556_at | 6.233957 | 6.642035 | 6.540356 | 6.676663 | 6.861943 | 6.232106 | 6.446045 | 6.106772 |
| 54557_at | 6.088479 | 5.676202 | 6.462009 | 5.428121 | 5.152006 | 5.63886  | 6.714133 | 5.919451 |
| 54558_at | 4.159281 | 3.848607 | 3.838455 | 4.157374 | 4.115302 | 4.030149 | 3.744735 | 4.499631 |
| 5455_at  | 2.845549 | 2.403741 | 2.638202 | 4.090943 | 2.129103 | 3.75445  | 2.237622 | 2.848784 |
| 54566_at | 2.166041 | 2.27636  | 1.614682 | 1.929056 | 2.497016 | 2.369573 | 2.91353  | 2.116539 |
| 54567_at | 6.441822 | 5.001024 | 5.776549 | 6.479937 | 5.983946 | 6.365399 | 6.80527  | 4.482684 |
| 5456_at  | 1.277358 | 1.197373 | 1.185562 | 1.18859  | 1.625559 | 1.227325 | 1.175682 | 1.168683 |
| 54575_at | 2.938897 | 2.96998  | 4.002597 | 3.222225 | 2.725506 | 2.438616 | 4.466917 | 3.231919 |
| 54576_at | 1.383303 | 3.111618 | 0.804644 | 0.731989 | 0.703593 | 2.62219  | 0.467708 | 0.755861 |
| 54577_at | 4.936257 | 1.713998 | 4.346289 | 3.205456 | 3.867502 | 0.491812 | 1.203556 | 5.227703 |
| 54578_at | 0.996236 | 1.237254 | 4.4491   | 1.937669 | 3.377886 | 4.162206 | 1.052543 | 4.142171 |
| 54579_at | -0.04325 | 0.90109  | 3.765134 | 3.65928  | 1.139521 | 3.089519 | 1.023921 | 0.393011 |
| 5457_at  | 1.775136 | 2.044912 | 2.106644 | 2.407815 | 2.490027 | 2.477015 | 3.423014 | 2.487429 |
| 54581_at | 3.702649 | 5.089005 | 3.942779 | 3.407806 | 4.323829 | 2.70295  | 3.197506 | 3.643312 |
| 54583_at | 7.494079 | 7.513132 | 6.574194 | 6.640558 | 6.913176 | 6.608314 | 6.722666 | 7.236622 |
| 54584_at | 3.736101 | 3.944283 | 2.870294 | 2.874154 | 3.541903 | 2.454312 | 2.55937  | 2.322005 |
| 54585_at | 6.593237 | 6.486652 | 6.520601 | 6.135859 | 6.531758 | 6.661218 | 6.438823 | 7.184594 |
| 54586_at | 1.303322 | 0.916579 | 1.145733 | 1.16938  | 0.969754 | 0.899871 | 1.668269 | 1.533168 |
| 54587_at | 8.436919 | 8.753776 | 8.398335 | 8.167372 | 7.668637 | 7.873417 | 8.060898 | 7.569272 |
| 5458_at  | 1.794658 | 1.368475 | 1.89447  | 1.465854 | 2.339633 | 1.763144 | 2.567126 | 1.928055 |
| 54596_at | 2.804051 | 1.63974  | 1.95914  | 3.930095 | 2.525387 | 1.787718 | 2.081429 | 2.338144 |
| 5459_at  | 3.841618 | 3.768533 | 4.055639 | 3.962156 | 4.440673 | 4.908124 | 4.249373 | 4.38304  |
| 545_at   | 4.881606 | 4.820496 | 4.395165 | 4.86318  | 5.179669 | 4.711445 | 4.960472 | 5.489128 |
| 54600_at | 7.256991 | 6.443668 | 7.532426 | 5.589837 | 8.78069  | 7.97168  | 4.904375 | 8.141405 |
| 54602_at | 6.345061 | 5.391836 | 6.183565 | 5.994629 | 6.746044 | 6.002459 | 6.223295 | 6.688933 |
| 54606_at | 5.668118 | 6.020982 | 5.580674 | 5.163959 | 5.488366 | 5.41303  | 5.982811 | 5.961062 |
| 5460_at  | 1.747979 | 2.197731 | 2.122702 | 2.437647 | 2.326919 | 2.888515 | 2.503752 | 3.002738 |
| 54617_at | 4.851563 | 4.863573 | 4.884546 | 5.228093 | 4.880819 | 4.800873 | 4.627829 | 4.547067 |
| 54619_at | 4.76018  | 4.476413 | 4.319716 | 4.264129 | 4.556231 | 3.642787 | 4.951547 | 5.003514 |
| 54620_at | 2.934628 | 2.721459 | 2.990401 | 2.763933 | 3.321861 | 3.378192 | 3.288691 | 2.809046 |
| 54621_at | 2.727407 | 1.709866 | 3.398424 | 5.0327   | 2.976939 | 2.647309 | 4.709082 | 3.677126 |
| 54622_at | 6.288107 | 5.380914 | 6.632349 | 6.32366  | 7.566233 | 5.891812 | 6.793766 | 7.183578 |
| 54623_at | 6.61836  | 6.747877 | 6.362045 | 6.665766 | 6.246373 | 6.938432 | 6.942784 | 7.174584 |
| 54625_at | 6.497084 | 6.68999  | 6.489606 | 7.123235 | 6.638784 | 6.306472 | 5.850976 | 6.895277 |
| 54626_at | 1.963978 | 2.860384 | 3.114901 | 1.870894 | 1.840899 | 1.837753 | 1.584556 | 2.573849 |
| 54627_at | 2.338792 | 1.466213 | 2.456116 | 1.669097 | 1.75907  | 1.601196 | 1.528094 | 1.440614 |
| 54629_at | 5.417337 | 5.495248 | 5.605182 | 6.281093 | 5.880072 | 5.718363 | 5.047795 | 5.904436 |
| 5462_at  | 1.590864 | 2.323905 | 2.46635  | 1.49459  | 1.612166 | 1.101418 | 2.766689 | 1.191766 |
| 5463_at  | 3.80795  | 2.986512 | 4.826499 | 4.097936 | 3.848662 | 3.306454 | 3.09999  | 3.567132 |

|          |          |          |          |          |          |          |          |          |
|----------|----------|----------|----------|----------|----------|----------|----------|----------|
| 5464_at  | 9.057141 | 8.209394 | 8.012011 | 8.625225 | 8.700868 | 8.563127 | 7.88182  | 8.563127 |
| 54657_at | 2.647659 | 3.365615 | 4.034756 | 2.54571  | 3.250807 | 2.769463 | 2.308097 | 2.228205 |
| 54658_at | 1.824997 | 1.226976 | 4.295043 | 2.787896 | 1.06617  | 1.021305 | 3.431055 | 1.337056 |
| 5465_at  | 4.78767  | 4.83784  | 3.892922 | 4.486545 | 5.355245 | 5.084272 | 3.821848 | 4.367928 |
| 54660_at | 1.673166 | 1.884782 | 1.589066 | 2.214061 | 1.96589  | 1.367344 | 3.264436 | 1.732152 |
| 54661_at | 2.339698 | 3.026662 | 1.719706 | 2.501118 | 2.529184 | 2.849475 | 1.833759 | 0.934657 |
| 54662_at | 5.83431  | 5.527571 | 5.516983 | 4.260367 | 4.488794 | 4.968358 | 5.143625 | 5.202622 |
| 54663_at | 5.622836 | 5.586985 | 4.245847 | 5.010864 | 4.175765 | 4.419471 | 4.33109  | 4.866608 |
| 54664_at | 8.22747  | 8.076974 | 8.2333   | 7.916346 | 7.725196 | 7.354081 | 8.050431 | 8.169755 |
| 54665_at | 6.769356 | 6.330466 | 6.064805 | 6.07835  | 5.995583 | 6.484866 | 6.479592 | 5.996475 |
| 54674_at | 1.491076 | 1.383718 | 2.093877 | 0.823147 | 1.797228 | 1.716248 | 2.353993 | 1.234751 |
| 54675_at | 6.230331 | 6.015842 | 5.996703 | 5.532259 | 5.906138 | 5.471349 | 5.824799 | 6.105097 |
| 54676_at | 5.156417 | 4.412125 | 4.679309 | 4.832392 | 4.926033 | 4.920199 | 5.326756 | 6.068852 |
| 54677_at | 2.914767 | 3.718617 | 3.359476 | 4.032918 | 3.657244 | 2.580181 | 3.544134 | 4.026313 |
| 5467_at  | 4.958673 | 4.652308 | 3.887034 | 5.161821 | 4.442794 | 4.667885 | 4.825629 | 4.310211 |
| 54680_at | 5.579843 | 5.284875 | 5.309526 | 5.69702  | 5.47789  | 4.914392 | 5.254414 | 5.586859 |
| 54681_at | 5.631734 | 4.885337 | 5.489378 | 4.899685 | 4.111459 | 5.27348  | 5.437941 | 4.317688 |
| 54682_at | 7.585129 | 7.275817 | 7.119584 | 6.364677 | 5.70927  | 6.135386 | 7.838874 | 7.214996 |
| 5468_at  | 6.521126 | 6.298084 | 6.181121 | 6.698963 | 6.162545 | 6.672652 | 5.973283 | 5.992279 |
| 5469_at  | 5.574392 | 5.616716 | 5.546866 | 5.117703 | 5.351513 | 5.580795 | 4.67493  | 5.079347 |
| 546_at   | 6.854816 | 7.585044 | 7.36881  | 7.378793 | 7.565689 | 7.078571 | 7.560092 | 7.945329 |
| 54700_at | 3.739337 | 4.79267  | 4.919915 | 4.108283 | 5.86268  | 4.359026 | 3.821069 | 5.539339 |
| 54704_at | 4.525437 | 4.459482 | 5.264396 | 5.423851 | 4.190613 | 4.614177 | 5.772716 | 4.932642 |
| 54707_at | 5.605772 | 5.469005 | 5.438277 | 6.639428 | 4.470286 | 5.326789 | 6.128107 | 4.198755 |
| 54708_at | 5.922143 | 5.840971 | 5.800943 | 6.192149 | 6.142454 | 5.818043 | 6.168114 | 5.61321  |
| 5470_at  | 1.300468 | 1.360549 | 1.193756 | 1.674439 | 1.760541 | 1.506341 | 1.506561 | 1.359052 |
| 54714_at | 1.398759 | 1.867482 | 1.354322 | 1.790389 | 1.640155 | 1.580732 | 1.883539 | 1.671724 |
| 54715_at | 2.336861 | 1.965115 | 2.50891  | 2.557652 | 2.263341 | 2.777422 | 3.146312 | 2.842703 |
| 54716_at | 2.045235 | 2.951722 | 2.637968 | 2.857252 | 2.434466 | 2.46553  | 2.952459 | 2.623307 |
| 54718_at | 1.794187 | 2.614965 | 2.391475 | 2.307536 | 1.852715 | 1.997038 | 3.149027 | 1.953179 |
| 5471_at  | 3.104898 | 4.785498 | 4.804208 | 5.246403 | 3.603177 | 5.027376 | 5.775929 | 5.021414 |
| 54726_at | 5.660603 | 5.720161 | 6.296581 | 5.918217 | 5.114829 | 6.154328 | 5.909733 | 6.280133 |
| 54732_at | 6.661094 | 6.021788 | 6.340592 | 7.137279 | 6.479291 | 7.085665 | 5.435661 | 5.996704 |
| 54733_at | 2.822099 | 3.253924 | 2.895045 | 3.303798 | 2.419628 | 2.8774   | 2.550805 | 2.573029 |
| 54734_at | 1.415156 | 2.500564 | 1.865649 | 1.67847  | 2.701735 | 2.030521 | 2.063243 | 2.614817 |
| 54737_at | 5.916783 | 6.02057  | 6.279472 | 5.802377 | 5.886984 | 5.867785 | 5.739019 | 6.267228 |
| 54738_at | 1.086177 | 1.564664 | 1.275518 | 1.309256 | 2.168283 | 1.594717 | 2.585244 | 1.348989 |
| 54739_at | 5.271495 | 5.687113 | 4.668104 | 4.798462 | 5.487811 | 4.867345 | 5.006172 | 5.296689 |
| 5473_at  | 6.051029 | 5.980469 | 5.592227 | 5.747384 | 3.351109 | 4.091471 | 6.515495 | 6.841459 |
| 54741_at | 4.89712  | 5.309229 | 4.847869 | 4.62766  | 4.771474 | 5.121861 | 5.056334 | 5.057247 |
| 54742_at | 3.83976  | 4.601188 | 3.741491 | 4.021482 | 2.123721 | 2.886489 | 3.583713 | 3.257068 |
| 54749_at | 4.491771 | 4.081512 | 4.459186 | 4.828399 | 4.559852 | 4.430701 | 4.828516 | 4.459186 |
| 54751_at | 2.853778 | 3.214885 | 3.060597 | 2.584036 | 2.279049 | 3.489728 | 2.032219 | 2.299748 |
| 54752_at | 2.316326 | 2.660414 | 1.490294 | 1.895198 | 2.006003 | 2.020686 | 1.895198 | 1.893228 |
| 54753_at | 3.340361 | 2.971512 | 3.743233 | 2.745589 | 2.771447 | 3.071303 | 3.592428 | 2.604077 |
| 54754_at | 3.096146 | 3.251967 | 3.1543   | 3.012034 | 2.665792 | 3.618639 | 5.432334 | 2.855924 |
| 54756_at | 6.690909 | 5.87225  | 6.452199 | 6.45213  | 5.024289 | 6.164269 | 6.020317 | 5.662684 |
| 54757_at | 2.808983 | 2.089228 | 2.354414 | 2.091891 | 3.071943 | 2.759731 | 2.914207 | 2.490999 |
| 54758_at | 4.174336 | 3.597013 | 3.32739  | 4.060481 | 2.938424 | 4.083779 | 3.023212 | 4.480351 |
| 5475_at  | 1.871554 | 1.562129 | 1.06308  | 1.232016 | 1.702554 | 1.261843 | 1.253694 | 1.215073 |
| 54760_at | 3.227337 | 2.871361 | 3.110034 | 2.725429 | 3.124029 | 2.847508 | 3.156105 | 3.153565 |



|          |          |          |          |          |          |          |          |          |
|----------|----------|----------|----------|----------|----------|----------|----------|----------|
| 54762_at | 3.495602 | 2.525508 | 2.79149  | 1.926312 | 4.110709 | 3.892014 | 3.379131 | 3.7339   |
| 54764_at | 6.96896  | 6.806193 | 7.249635 | 6.953771 | 8.009272 | 6.954123 | 7.020444 | 7.379806 |
| 54765_at | 7.566519 | 8.036674 | 7.955486 | 8.034052 | 7.581216 | 7.820114 | 7.534408 | 8.109167 |
| 54766_at | 0.896981 | 1.024319 | 1.250962 | 0.935526 | 2.147783 | 1.498948 | 1.611307 | 1.484207 |
| 54768_at | 3.586775 | 2.760479 | 3.832664 | 3.507332 | 1.73185  | 3.580376 | 2.677659 | 2.125382 |
| 54769_at | 1.902142 | 1.768896 | 2.199211 | 2.571772 | 2.289962 | 2.483472 | 2.93233  | 1.883695 |
| 5476_at  | 9.65359  | 9.392422 | 10.00041 | 9.639834 | 9.672239 | 9.723703 | 9.742322 | 9.089681 |
| 54776_at | 4.809423 | 4.562974 | 5.573921 | 5.021409 | 4.712783 | 5.061376 | 5.61149  | 4.390877 |
| 54777_at | 1.757214 | 1.829606 | 1.911863 | 2.190141 | 2.091055 | 2.014427 | 1.385785 | 1.676496 |
| 54778_at | 6.218508 | 6.336247 | 6.337089 | 6.470897 | 6.076652 | 5.99765  | 6.3841   | 6.369222 |
| 54780_at | 5.850022 | 5.815517 | 4.888848 | 5.412883 | 5.733327 | 4.693535 | 4.947365 | 5.997624 |
| 54784_at | 2.909082 | 3.035542 | 3.116665 | 2.773152 | 3.179302 | 2.232776 | 3.34618  | 2.96739  |
| 54785_at | 3.981908 | 3.3542   | 3.443751 | 3.752164 | 3.726057 | 3.142335 | 3.378468 | 3.371317 |
| 54788_at | 7.962858 | 6.919236 | 7.585685 | 7.449908 | 6.833319 | 7.295486 | 7.660484 | 6.437999 |
| 5478_at  | 5.657616 | 4.725056 | 5.113009 | 5.395398 | 5.879143 | 4.946231 | 5.358241 | 5.233903 |
| 54790_at | 5.461025 | 5.493853 | 6.127833 | 6.065533 | 5.681555 | 5.934759 | 5.871127 | 6.004569 |
| 54793_at | 7.068828 | 6.668818 | 6.635624 | 4.407936 | 7.004659 | 6.492061 | 6.805345 | 6.739226 |
| 54795_at | 3.250905 | 4.006032 | 4.860678 | 4.22131  | 2.315084 | 3.60049  | 4.199773 | 3.618526 |
| 54796_at | 3.525413 | 2.187225 | 2.871315 | 3.240429 | 2.891832 | 3.249543 | 2.247051 | 2.706913 |
| 54797_at | 2.211966 | 2.955712 | 2.85821  | 2.408884 | 1.996702 | 2.092457 | 2.110066 | 3.025499 |
| 54798_at | 1.263176 | 1.713656 | 1.374403 | 1.647377 | 1.803539 | 1.833463 | 1.988298 | 1.371048 |
| 54799_at | 4.363632 | 4.652666 | 4.324409 | 4.360484 | 3.991664 | 5.136005 | 3.891229 | 5.411462 |
| 5479_at  | 9.438955 | 9.34316  | 9.076428 | 9.189017 | 9.549715 | 9.440121 | 9.330711 | 9.211058 |
| 547_at   | 2.86576  | 3.292922 | 3.262186 | 3.467323 | 3.357911 | 4.094647 | 4.635343 | 2.932237 |
| 54800_at | 5.510912 | 6.157097 | 6.034665 | 5.993691 | 6.844226 | 5.417737 | 5.597267 | 6.273623 |
| 54801_at | 4.588874 | 4.53374  | 5.19781  | 4.022173 | 4.622277 | 4.385583 | 4.042787 | 4.823672 |
| 54802_at | 5.003262 | 6.191917 | 5.021129 | 3.993622 | 5.810536 | 5.199807 | 3.641338 | 6.102336 |
| 54805_at | 4.338828 | 3.439697 | 4.513241 | 4.353794 | 4.141731 | 4.327033 | 4.030402 | 3.677539 |
| 54806_at | 5.081879 | 5.435481 | 4.818294 | 5.366401 | 5.01949  | 4.801534 | 5.219552 | 5.936283 |
| 54807_at | 5.05643  | 4.866045 | 4.128558 | 4.766277 | 4.607647 | 4.502656 | 4.99297  | 3.991275 |
| 54808_at | 6.791107 | 6.332311 | 6.914567 | 6.332419 | 6.474103 | 6.553819 | 6.232509 | 6.242219 |
| 54809_at | 6.054861 | 6.144595 | 6.171684 | 5.846677 | 5.854917 | 5.731758 | 5.694041 | 5.982726 |
| 5480_at  | 6.517513 | 6.687125 | 7.288889 | 7.107079 | 6.960516 | 6.412443 | 6.865792 | 6.894376 |
| 54810_at | 5.844857 | 4.850108 | 4.966774 | 3.495888 | 5.81888  | 4.788346 | 3.280386 | 5.296653 |
| 54811_at | 6.103834 | 5.853464 | 5.845623 | 5.702209 | 5.965988 | 5.900562 | 6.286691 | 5.695783 |
| 54812_at | 7.55748  | 7.400811 | 7.364566 | 7.206404 | 7.541436 | 7.394031 | 6.541426 | 7.376488 |
| 54813_at | 5.471279 | 5.418481 | 5.459987 | 5.607689 | 4.108192 | 4.901093 | 4.352636 | 5.446847 |
| 54814_at | 4.464492 | 4.018417 | 3.373424 | 2.840104 | 3.276764 | 2.903782 | 4.412542 | 3.292194 |
| 54815_at | 6.261158 | 5.856032 | 6.340025 | 6.602884 | 5.488317 | 5.913    | 5.847873 | 5.017973 |
| 54816_at | 5.968122 | 5.584851 | 5.415219 | 4.786877 | 5.168715 | 5.398325 | 4.951074 | 5.727486 |
| 54819_at | 6.548173 | 5.973239 | 6.086765 | 6.293133 | 6.095309 | 6.526309 | 6.193759 | 5.43846  |
| 5481_at  | 7.012815 | 7.076455 | 6.709103 | 6.819156 | 7.360654 | 6.021103 | 6.385042 | 7.391763 |
| 54820_at | 4.946913 | 4.896529 | 3.932149 | 4.718761 | 3.74492  | 3.593603 | 4.419019 | 3.722678 |
| 54821_at | 1.37179  | 1.710779 | 1.534264 | 1.570555 | 1.589613 | 2.33568  | 1.565236 | 1.0727   |
| 54822_at | 6.354352 | 6.236915 | 6.061445 | 6.153915 | 6.721669 | 6.347812 | 5.337124 | 6.716769 |
| 54823_at | 4.521777 | 3.845924 | 3.539562 | 3.475974 | 3.74245  | 3.467953 | 4.189679 | 4.639417 |
| 54825_at | 3.683572 | 3.094303 | 2.98415  | 3.158021 | 2.703942 | 3.485486 | 3.270943 | 3.477023 |
| 54826_at | 4.592907 | 4.695813 | 4.090324 | 4.224724 | 4.789911 | 4.25087  | 4.275731 | 4.680689 |
| 54827_at | 1.908991 | 1.925986 | 1.019679 | 1.020123 | 1.460503 | 1.532729 | 1.873564 | 1.837684 |
| 54828_at | 5.812014 | 5.93961  | 6.11371  | 6.188439 | 6.243931 | 5.930087 | 6.930867 | 5.356996 |
| 54829_at | 3.185449 | 3.374833 | 4.625716 | 3.975565 | 4.680342 | 3.649584 | 4.098452 | 5.27833  |

|           |          |          |          |          |          |          |          |          |
|-----------|----------|----------|----------|----------|----------|----------|----------|----------|
| 54830_at  | 2.654075 | 1.97024  | 2.572882 | 1.473995 | 1.932102 | 3.62919  | 2.207679 | 2.176497 |
| 54831_at  | 1.154834 | 1.232791 | 1.673624 | 1.370095 | 1.107353 | 1.481317 | 1.574662 | 2.200005 |
| 54832_at  | 6.260578 | 6.791194 | 6.871853 | 7.039851 | 6.601469 | 6.651851 | 6.653193 | 7.290083 |
| 54834_at  | 4.824007 | 5.312617 | 4.949974 | 4.647185 | 5.049307 | 4.596424 | 5.119008 | 6.145134 |
| 54836_at  | 2.92796  | 2.851163 | 2.671446 | 2.034531 | 3.15142  | 1.986735 | 3.043141 | 2.875764 |
| 54838_at  | 7.644338 | 8.030431 | 8.25052  | 8.41574  | 6.925086 | 8.142413 | 7.841593 | 7.900364 |
| 54839_at  | 5.166199 | 5.312293 | 4.336347 | 4.955452 | 4.586412 | 3.709089 | 3.684835 | 5.252979 |
| 54840_at  | 4.570208 | 5.639729 | 5.185839 | 4.744135 | 6.070899 | 4.892721 | 4.494537 | 5.960808 |
| 54841_at  | 6.125547 | 4.726703 | 4.633672 | 5.722712 | 5.666709 | 5.545223 | 5.863039 | 6.555707 |
| 54842_at  | 9.121929 | 8.418703 | 9.098411 | 8.676038 | 8.680444 | 8.755518 | 9.230643 | 8.684163 |
| 54843_at  | 5.41734  | 4.840838 | 5.370929 | 5.688373 | 4.935377 | 5.698413 | 3.822046 | 4.738587 |
| 54845_at  | 1.994959 | 1.889279 | 1.985432 | 1.69368  | 3.004605 | 2.366538 | 1.80997  | 2.208331 |
| 54847_at  | 1.486394 | 1.719123 | 1.749142 | 3.309089 | 1.781418 | 2.597634 | 2.936667 | 1.802373 |
| 54848_at  | 2.487588 | 1.628856 | 1.152283 | 1.703263 | 2.61472  | 1.752481 | 1.378345 | 1.513312 |
| 54849_at  | 4.262792 | 4.22458  | 4.21917  | 4.381501 | 4.542747 | 4.545081 | 4.477694 | 4.27526  |
| 54850_at  | 4.336199 | 5.038804 | 4.308669 | 4.382057 | 3.761666 | 3.625669 | 4.416197 | 2.615689 |
| 54851_at  | 4.634771 | 4.490038 | 4.061088 | 4.747032 | 4.067739 | 4.659158 | 3.885196 | 4.25539  |
| 54852_at  | 6.032451 | 4.897607 | 6.052474 | 4.401862 | 6.720384 | 6.70028  | 4.567761 | 5.574673 |
| 54853_at  | 3.770512 | 2.988702 | 3.033908 | 2.895789 | 2.59689  | 3.505332 | 3.35903  | 2.350624 |
| 54854_at  | 1.796974 | 1.810366 | 2.545217 | 2.249993 | 2.423901 | 2.347492 | 2.316312 | 1.708707 |
| 54855_at  | 3.679586 | 4.804051 | 4.635959 | 5.656245 | 5.8593   | 5.688814 | 5.447032 | 4.169185 |
| 54856_at  | 5.097902 | 4.960586 | 4.533271 | 5.200766 | 4.861195 | 4.537323 | 4.983521 | 4.287227 |
| 54857_at  | 1.453909 | 1.648401 | 2.162907 | 2.203074 | 1.63942  | 1.568187 | 1.9973   | 2.577961 |
| 54858_at  | 5.533621 | 4.807308 | 5.42566  | 5.385279 | 3.91193  | 5.109054 | 4.860997 | 4.667641 |
| 54859_at  | 3.682406 | 3.657633 | 3.406101 | 2.834553 | 3.170628 | 3.237158 | 2.401146 | 3.831378 |
| 54860_at  | 3.268796 | 2.497632 | 2.369376 | 1.637753 | 1.499099 | 2.043078 | 2.57621  | 1.709191 |
| 54861_at  | 7.242758 | 7.76141  | 7.129182 | 7.158599 | 7.869697 | 6.761804 | 7.075416 | 7.6399   |
| 54862_at  | 3.621861 | 3.215293 | 3.577487 | 4.325031 | 4.024506 | 4.479927 | 3.292227 | 3.347853 |
| 54863_at  | 4.534615 | 4.653886 | 4.326282 | 4.716359 | 3.473493 | 5.024631 | 4.566385 | 3.703861 |
| 548645_at | 4.808508 | 5.52088  | 4.165026 | 5.202706 | 4.921278 | 3.739291 | 4.506141 | 4.955505 |
| 54865_at  | 5.167139 | 5.173577 | 5.226683 | 4.814332 | 4.508549 | 5.546803 | 4.698315 | 4.740451 |
| 54866_at  | 2.875166 | 1.764372 | 3.519314 | 1.46618  | 2.275492 | 2.469073 | 2.089542 | 1.812245 |
| 54867_at  | 7.400331 | 6.740626 | 7.221494 | 7.02693  | 6.513607 | 6.863121 | 7.389085 | 6.165601 |
| 54868_at  | 4.198935 | 4.318502 | 4.218996 | 4.358551 | 2.213284 | 5.34349  | 4.77863  | 2.401583 |
| 54869_at  | 2.002434 | 2.064009 | 1.73908  | 2.266667 | 2.056348 | 1.839308 | 1.945179 | 2.073827 |
| 54870_at  | 7.626168 | 7.543846 | 7.594257 | 7.316864 | 7.55128  | 7.605529 | 7.771732 | 7.527979 |
| 54872_at  | 4.905398 | 4.261789 | 5.189398 | 4.909973 | 5.126437 | 4.570437 | 3.858514 | 3.77325  |
| 54873_at  | 6.058552 | 7.218766 | 5.752249 | 5.810737 | 6.386156 | 5.386667 | 5.759296 | 6.179437 |
| 54874_at  | 8.581003 | 8.351255 | 8.731505 | 8.692712 | 8.477612 | 8.355308 | 8.701474 | 8.686105 |
| 54875_at  | 4.390281 | 4.138402 | 4.165935 | 4.024505 | 3.648843 | 3.855654 | 3.583199 | 3.850579 |
| 54876_at  | 7.24198  | 7.323082 | 6.982563 | 6.931367 | 7.286663 | 7.35329  | 6.689336 | 7.441282 |
| 54877_at  | 5.949012 | 5.511571 | 5.814307 | 5.829781 | 5.871416 | 5.766593 | 6.4366   | 5.791444 |
| 54878_at  | 6.443741 | 6.093018 | 5.995591 | 6.651167 | 6.609513 | 6.290919 | 5.956707 | 6.056328 |
| 54879_at  | 4.301545 | 4.338133 | 4.573534 | 4.916133 | 4.316008 | 3.932582 | 4.903633 | 4.505198 |
| 54880_at  | 5.487802 | 5.600681 | 5.141312 | 5.646568 | 6.466992 | 5.819175 | 5.563682 | 5.370849 |
| 54881_at  | 4.885011 | 4.104785 | 4.513668 | 3.892635 | 5.339028 | 4.788324 | 4.184435 | 5.030746 |
| 54882_at  | 6.67302  | 7.325712 | 5.982128 | 5.515239 | 6.38246  | 6.847493 | 6.131898 | 6.237038 |
| 54883_at  | 4.767391 | 5.322868 | 4.555197 | 5.189603 | 5.268505 | 5.233469 | 4.744273 | 5.293226 |
| 54884_at  | 6.236986 | 5.870449 | 6.049423 | 6.207168 | 7.450248 | 6.060402 | 6.570579 | 5.85505  |
| 54885_at  | 3.205114 | 3.371242 | 3.556153 | 3.930561 | 3.23028  | 3.243516 | 3.394728 | 3.300213 |
| 54886_at  | 4.631679 | 2.580846 | 4.631451 | 3.119711 | 6.308534 | 4.836572 | 3.209545 | 4.994108 |

|          |          |          |          |          |          |          |          |          |
|----------|----------|----------|----------|----------|----------|----------|----------|----------|
| 54887_at | 4.982099 | 5.065399 | 5.244704 | 5.691605 | 4.322948 | 5.407924 | 4.290593 | 4.346165 |
| 54888_at | 4.696417 | 4.608199 | 5.190842 | 5.354016 | 4.577951 | 4.97947  | 4.930906 | 4.986139 |
| 54890_at | 5.199196 | 5.135123 | 5.335568 | 5.573904 | 4.931871 | 5.280688 | 4.618424 | 4.501061 |
| 54891_at | 5.121383 | 4.880717 | 5.711616 | 5.76398  | 5.817631 | 5.123553 | 5.329085 | 5.434906 |
| 54892_at | 2.871353 | 3.548406 | 2.448988 | 2.374306 | 2.545735 | 3.036005 | 2.295918 | 2.200328 |
| 54893_at | 6.934636 | 6.896445 | 7.229702 | 6.913447 | 7.020617 | 7.083231 | 7.466675 | 6.787534 |
| 54894_at | 1.421522 | 2.480292 | 2.033487 | 2.236058 | 1.564676 | 1.827649 | 1.286564 | 2.201858 |
| 54896_at | 2.732694 | 2.844544 | 2.803365 | 3.431235 | 3.646018 | 3.06225  | 3.080769 | 2.284061 |
| 54897_at | 4.765561 | 5.432682 | 4.853643 | 4.473317 | 4.245975 | 4.330878 | 5.129839 | 4.94585  |
| 54898_at | 1.373284 | 1.238422 | 1.724412 | 1.343452 | 2.217626 | 1.675222 | 1.660244 | 2.44104  |
| 54899_at | 6.697417 | 6.246523 | 5.645771 | 7.022272 | 6.490669 | 6.835624 | 6.118301 | 4.613007 |
| 54900_at | 1.267545 | 1.742011 | 1.841752 | 1.838712 | 1.420409 | 1.680404 | 2.212077 | 2.051519 |
| 54901_at | 5.191389 | 6.026567 | 4.957551 | 4.614169 | 5.360174 | 4.599691 | 4.947362 | 5.241894 |
| 54902_at | 6.152208 | 6.691454 | 6.447339 | 6.458773 | 6.418941 | 5.673945 | 6.741815 | 7.075273 |
| 54903_at | 3.464081 | 2.660935 | 3.104492 | 3.09217  | 2.958606 | 3.11119  | 2.373423 | 2.815418 |
| 54904_at | 6.554579 | 6.573923 | 6.903369 | 7.108654 | 6.533842 | 6.532923 | 6.668451 | 6.307489 |
| 54905_at | 1.921235 | 1.660949 | 1.869228 | 2.099089 | 2.181301 | 2.434542 | 2.346869 | 1.906348 |
| 54906_at | 5.40538  | 5.264256 | 4.939164 | 5.37941  | 5.798736 | 5.291379 | 5.55491  | 5.53101  |
| 54908_at | 3.850038 | 4.115963 | 4.675274 | 3.459696 | 2.871733 | 3.685077 | 3.646215 | 4.614684 |
| 54910_at | 5.184103 | 5.314599 | 5.099951 | 5.202212 | 5.146142 | 5.193477 | 5.821589 | 4.232348 |
| 54913_at | 2.782368 | 3.228581 | 3.214319 | 2.339342 | 3.420166 | 2.132034 | 2.793643 | 2.367697 |
| 54914_at | 5.329306 | 5.533305 | 6.031103 | 5.854649 | 5.242086 | 4.774504 | 5.862822 | 5.492321 |
| 54915_at | 6.391224 | 6.530553 | 6.356957 | 7.15301  | 6.614139 | 6.771281 | 6.385024 | 6.734313 |
| 54916_at | 5.01063  | 5.392581 | 4.411493 | 4.45022  | 5.16525  | 4.71665  | 5.01317  | 5.965009 |
| 54918_at | 6.732429 | 7.058098 | 7.546225 | 7.371976 | 7.044704 | 7.269    | 6.875846 | 7.7904   |
| 54919_at | 5.518146 | 4.290328 | 4.56133  | 4.668668 | 5.015288 | 4.735316 | 5.283906 | 4.532912 |
| 54920_at | 3.302278 | 2.975952 | 2.588957 | 2.888309 | 2.188222 | 2.013738 | 2.533081 | 2.973141 |
| 54921_at | 7.289232 | 7.512743 | 7.420105 | 8.07757  | 7.209785 | 7.707994 | 8.067883 | 7.095906 |
| 54922_at | 4.863077 | 5.495862 | 4.931987 | 5.55601  | 4.504186 | 4.676505 | 4.451691 | 3.534034 |
| 54923_at | 5.59568  | 3.510543 | 3.557211 | 3.175034 | 3.931501 | 4.146811 | 2.737075 | 4.238461 |
| 54925_at | 5.117714 | 5.019252 | 4.301845 | 4.059465 | 4.022721 | 4.02709  | 4.068723 | 4.881668 |
| 54926_at | 7.089118 | 6.677737 | 7.330024 | 6.98246  | 7.008539 | 7.367208 | 6.732514 | 7.585012 |
| 54927_at | 7.456922 | 7.661456 | 7.060931 | 6.261151 | 6.271221 | 7.030066 | 6.750758 | 7.367702 |
| 54928_at | 7.112917 | 6.767246 | 7.75646  | 6.77174  | 7.030439 | 6.818483 | 6.762293 | 7.164675 |
| 54929_at | 5.615307 | 5.254498 | 5.993423 | 5.706713 | 5.096993 | 5.665232 | 6.442469 | 4.204687 |
| 54930_at | 6.203287 | 5.487847 | 4.587113 | 5.492433 | 5.950704 | 5.669075 | 5.349537 | 5.027427 |
| 54931_at | 5.96379  | 6.00214  | 5.656936 | 5.868154 | 6.307401 | 6.550774 | 5.067286 | 6.015973 |
| 54932_at | 2.943451 | 2.91575  | 2.845993 | 2.724261 | 2.435158 | 2.786934 | 2.734726 | 2.772056 |
| 54933_at | 2.393265 | 2.883212 | 2.896    | 2.762021 | 1.63094  | 2.95533  | 4.270404 | 2.673092 |
| 54934_at | 5.167678 | 5.25493  | 5.396655 | 5.763289 | 4.858685 | 4.693271 | 3.651383 | 5.76362  |
| 54935_at | 8.638747 | 8.54404  | 8.152629 | 8.056334 | 6.588466 | 8.176529 | 7.683683 | 8.334872 |
| 54936_at | 2.619035 | 2.861541 | 2.623717 | 3.318268 | 2.651156 | 3.044505 | 3.585592 | 2.261046 |
| 54938_at | 4.253352 | 4.257752 | 3.721314 | 4.493537 | 3.912065 | 3.329732 | 2.895084 | 3.545128 |
| 54939_at | 7.468269 | 6.875012 | 6.583139 | 6.683511 | 6.770817 | 6.842807 | 6.482505 | 6.809488 |
| 5493_at  | 2.457741 | 2.950613 | 2.872057 | 2.331203 | 2.859461 | 3.070315 | 2.08808  | 2.184506 |
| 54940_at | 7.735136 | 7.79379  | 7.573522 | 7.604402 | 7.819303 | 7.612159 | 7.609318 | 7.889851 |
| 54941_at | 4.295066 | 3.002735 | 4.962054 | 4.643387 | 3.41653  | 2.522952 | 3.972703 | 3.182485 |
| 54942_at | 6.038737 | 5.73384  | 6.622131 | 5.533615 | 2.809256 | 5.309195 | 5.118279 | 7.191555 |
| 54943_at | 3.179817 | 3.219202 | 2.936032 | 3.852554 | 3.836169 | 3.279323 | 2.49256  | 4.539728 |
| 54944_at | 2.341761 | 2.20399  | 2.438491 | 2.58014  | 2.314448 | 2.127789 | 2.266997 | 2.823475 |
| 54946_at | 4.173019 | 4.201172 | 3.989608 | 4.206971 | 4.866226 | 5.561072 | 4.37119  | 4.594766 |

|          |          |          |          |          |          |          |          |          |
|----------|----------|----------|----------|----------|----------|----------|----------|----------|
| 54947_at | 7.277594 | 7.879553 | 8.159051 | 6.995087 | 6.938275 | 7.192578 | 8.325958 | 7.806297 |
| 54948_at | 7.394229 | 7.654912 | 7.234025 | 7.540366 | 7.437006 | 7.417616 | 7.698353 | 7.176067 |
| 54949_at | 6.820716 | 6.280396 | 6.187129 | 6.893318 | 6.519045 | 6.379934 | 5.565875 | 5.597556 |
| 5494_at  | 5.32437  | 5.562247 | 5.636135 | 5.359239 | 5.505378 | 5.120875 | 4.607181 | 6.152843 |
| 54951_at | 5.743775 | 5.936546 | 5.554037 | 5.40905  | 6.249312 | 5.618615 | 6.195268 | 6.58287  |
| 54952_at | 4.753412 | 5.562034 | 4.014316 | 4.844304 | 5.776748 | 6.133036 | 4.725382 | 5.827433 |
| 54953_at | 5.878219 | 6.118005 | 5.982735 | 5.75335  | 6.296465 | 5.596769 | 6.097627 | 5.911228 |
| 54954_at | 4.192003 | 4.036474 | 3.654957 | 4.190425 | 2.994633 | 4.242059 | 4.188063 | 3.581744 |
| 54955_at | 2.878265 | 3.036761 | 3.431628 | 3.141652 | 2.344194 | 3.595815 | 4.285794 | 3.671273 |
| 54956_at | 4.467502 | 3.656637 | 4.068018 | 3.705173 | 3.352384 | 4.373207 | 3.708991 | 3.347743 |
| 54957_at | 4.011957 | 4.845455 | 4.85207  | 4.779208 | 4.875644 | 4.541287 | 4.425881 | 4.912235 |
| 54958_at | 5.505156 | 5.982455 | 5.664171 | 5.913055 | 5.124436 | 6.421569 | 5.334823 | 4.175338 |
| 54959_at | 1.126204 | 0.825696 | 1.534661 | 1.747816 | 2.055962 | 1.312163 | 0.825307 | 1.511974 |
| 5495_at  | 5.389378 | 6.260125 | 5.914203 | 6.160254 | 6.014037 | 5.457305 | 5.488159 | 6.269554 |
| 54960_at | 4.171856 | 3.468894 | 4.562818 | 4.348215 | 3.18235  | 3.023063 | 3.983031 | 3.983112 |
| 54961_at | 3.570154 | 3.693291 | 3.820152 | 3.746868 | 4.086076 | 3.760801 | 3.965245 | 3.572296 |
| 54962_at | 3.020797 | 3.587036 | 4.332246 | 3.646891 | 3.537595 | 2.845625 | 4.577908 | 3.805709 |
| 54963_at | 5.71295  | 5.378874 | 4.895034 | 4.637819 | 4.238336 | 5.07316  | 4.64802  | 3.125585 |
| 54964_at | 4.197937 | 4.700599 | 3.99537  | 3.788628 | 4.684757 | 3.066014 | 5.045618 | 4.489302 |
| 54965_at | 5.052721 | 4.052777 | 4.669972 | 4.685462 | 3.863045 | 4.686738 | 4.539293 | 5.776748 |
| 54967_at | 1.161697 | 1.801781 | 1.656906 | 1.317052 | 1.709506 | 1.1621   | 1.618509 | 1.492964 |
| 54968_at | 4.839052 | 3.932114 | 4.413049 | 3.924796 | 2.821382 | 2.905375 | 4.284642 | 4.753882 |
| 54969_at | 7.062684 | 6.963314 | 6.478163 | 6.438394 | 6.647711 | 6.411613 | 6.317669 | 6.700348 |
| 5496_at  | 7.028218 | 7.182572 | 7.436656 | 7.272659 | 6.668525 | 7.844578 | 6.943479 | 6.686529 |
| 54970_at | 3.712115 | 4.814693 | 3.385282 | 3.44291  | 3.520958 | 3.599053 | 2.731947 | 2.194176 |
| 54971_at | 4.659872 | 3.509925 | 3.066155 | 3.808022 | 3.243742 | 3.285433 | 3.405604 | 3.781801 |
| 54972_at | 4.578343 | 3.034481 | 3.930132 | 4.255674 | 3.073535 | 4.333609 | 2.111974 | 3.715427 |
| 54973_at | 5.501329 | 4.743148 | 4.161515 | 4.923159 | 5.007594 | 4.966418 | 4.920944 | 4.832994 |
| 54974_at | 4.66476  | 5.060259 | 4.811435 | 4.863502 | 4.440321 | 6.242914 | 5.356573 | 5.277728 |
| 54976_at | 3.023845 | 3.040298 | 3.348635 | 2.386611 | 2.045175 | 2.928764 | 2.788807 | 3.494516 |
| 54977_at | 6.890043 | 6.556626 | 6.968811 | 6.96295  | 6.735204 | 7.149655 | 7.55174  | 6.292966 |
| 54978_at | 6.103409 | 5.322586 | 6.225138 | 5.74671  | 5.999059 | 6.279037 | 6.153985 | 5.338149 |
| 54979_at | 2.159569 | 2.905757 | 1.64742  | 2.471412 | 3.50953  | 1.75121  | 1.467733 | 2.746035 |
| 54980_at | 4.258013 | 4.709912 | 4.78031  | 3.222094 | 4.131762 | 3.95656  | 4.274913 | 3.804616 |
| 54981_at | 5.487209 | 5.327356 | 4.213915 | 4.700028 | 4.409971 | 4.894106 | 4.619284 | 5.652855 |
| 54982_at | 5.95693  | 4.656736 | 5.733915 | 5.455233 | 5.723024 | 4.992036 | 5.585254 | 3.925459 |
| 54984_at | 4.977075 | 2.970273 | 5.181636 | 4.17847  | 3.021988 | 5.07292  | 5.018783 | 4.164983 |
| 54985_at | 7.503777 | 7.222539 | 7.390529 | 7.400648 | 6.728794 | 7.679337 | 7.325351 | 5.603262 |
| 54986_at | 3.887878 | 3.597634 | 4.163565 | 3.901504 | 3.780821 | 4.28     | 4.568284 | 4.267077 |
| 54987_at | 7.983233 | 7.705266 | 7.989245 | 7.203134 | 7.503257 | 7.47284  | 7.61044  | 7.936735 |
| 54988_at | 4.09954  | 3.299284 | 1.106477 | 3.344711 | 4.547335 | 4.229846 | 3.785851 | 3.812362 |
| 54989_at | 5.610677 | 4.953355 | 5.143541 | 5.293861 | 5.999852 | 4.710481 | 6.406798 | 6.02353  |
| 5498_at  | 3.551157 | 4.877775 | 4.55596  | 3.542922 | 3.379496 | 5.293917 | 5.147284 | 4.736381 |
| 54991_at | 4.376073 | 3.31753  | 3.347582 | 3.819303 | 3.643951 | 4.14773  | 4.236192 | 3.757655 |
| 54993_at | 3.42722  | 3.716852 | 3.418579 | 4.579991 | 4.386885 | 4.313083 | 4.190269 | 2.78223  |
| 54994_at | 7.068967 | 6.759942 | 7.004921 | 7.454614 | 6.853861 | 6.480775 | 6.90529  | 7.390225 |
| 54995_at | 3.31711  | 3.476748 | 2.611016 | 2.175022 | 3.420575 | 2.919793 | 2.755848 | 2.545577 |
| 54996_at | 6.494704 | 6.365638 | 6.646897 | 5.691519 | 6.962524 | 6.985733 | 5.794406 | 6.930717 |
| 54997_at | 3.924677 | 3.461291 | 3.036882 | 3.318877 | 1.213292 | 3.965586 | 3.261435 | 2.838538 |
| 54998_at | 9.324294 | 8.721944 | 8.814012 | 8.898427 | 8.494679 | 9.293077 | 8.735194 | 8.49893  |
| 5499_at  | 8.605296 | 8.430566 | 8.435538 | 8.930656 | 8.094949 | 8.45835  | 8.355556 | 7.788639 |

|           |          |          |          |          |          |          |          |          |
|-----------|----------|----------|----------|----------|----------|----------|----------|----------|
| 549_at    | 4.873105 | 4.996269 | 5.143151 | 4.239384 | 6.057367 | 5.301176 | 4.208404 | 5.201374 |
| 54_at     | 5.468754 | 4.550326 | 4.692018 | 3.595995 | 4.068982 | 5.261554 | 3.628548 | 3.901045 |
| 55000_at  | 8.610552 | 8.944786 | 8.593921 | 8.717498 | 8.883415 | 8.725394 | 8.256374 | 9.056472 |
| 55001_at  | 1.399457 | 1.683691 | 2.406904 | 1.573212 | 2.135243 | 1.274309 | 1.939481 | 1.830218 |
| 55002_at  | 7.047196 | 7.437188 | 7.567345 | 7.425323 | 7.387267 | 6.851449 | 7.619284 | 7.1879   |
| 55003_at  | 5.744465 | 5.976702 | 5.316493 | 5.72591  | 5.490885 | 4.759682 | 5.483729 | 6.034952 |
| 55004_at  | 7.520125 | 6.439324 | 7.475051 | 7.257471 | 6.365423 | 6.762966 | 7.014035 | 6.106174 |
| 55005_at  | 6.187557 | 6.051077 | 5.568663 | 5.822392 | 6.070558 | 5.696407 | 5.748294 | 6.298255 |
| 55006_at  | 4.829915 | 3.836993 | 3.90307  | 3.4883   | 3.74664  | 3.807061 | 3.749646 | 4.861674 |
| 55007_at  | 3.824919 | 3.924426 | 3.028061 | 3.674696 | 3.941628 | 3.233016 | 3.666598 | 3.724011 |
| 55008_at  | 5.078755 | 5.122988 | 4.811942 | 4.66082  | 4.522438 | 4.906727 | 5.558094 | 5.507046 |
| 55009_at  | 6.974312 | 6.242707 | 6.246335 | 5.714025 | 5.649333 | 5.966453 | 6.090666 | 5.747518 |
| 5500_at   | 8.083749 | 8.800313 | 8.783819 | 8.529328 | 8.173149 | 9.016689 | 8.766506 | 8.96089  |
| 55010_at  | 1.728497 | 1.520506 | 1.429845 | 1.597466 | 1.334999 | 0.84807  | 1.80878  | 1.570473 |
| 550112_at | 3.862209 | 6.348049 | 5.066232 | 5.291657 | 6.29803  | 4.65915  | 4.837586 | 5.700339 |
| 55011_at  | 7.020256 | 6.974545 | 6.740855 | 6.980779 | 7.311139 | 6.660734 | 6.561726 | 6.286465 |
| 55012_at  | 5.643165 | 5.990971 | 5.57925  | 5.111419 | 4.917476 | 4.996609 | 4.395096 | 5.90456  |
| 55013_at  | 5.782567 | 5.847296 | 5.308739 | 4.986311 | 4.080463 | 5.412824 | 3.492726 | 6.204661 |
| 55014_at  | 5.770937 | 5.699562 | 4.733139 | 6.189683 | 4.785704 | 4.955658 | 6.138547 | 5.642075 |
| 55015_at  | 5.403129 | 5.238846 | 4.558076 | 4.472543 | 3.378232 | 4.842599 | 5.031534 | 4.83568  |
| 55016_at  | 2.38645  | 2.425483 | 3.240871 | 3.019836 | 2.798719 | 2.544142 | 2.724748 | 3.595975 |
| 55017_at  | 6.423734 | 5.986304 | 5.794131 | 6.152623 | 6.44147  | 6.01021  | 6.373927 | 5.363106 |
| 55018_at  | 2.266873 | 2.247298 | 1.680637 | 2.432274 | 2.228544 | 1.37636  | 1.166829 | 1.993909 |
| 5501_at   | 8.696324 | 8.589892 | 8.552227 | 8.891465 | 8.369798 | 8.375555 | 8.533899 | 8.976273 |
| 55020_at  | 5.06673  | 4.68352  | 4.422203 | 5.008223 | 5.280311 | 5.313322 | 5.20412  | 3.324682 |
| 55022_at  | 3.058244 | 4.555585 | 3.323548 | 4.114784 | 4.319309 | 4.099558 | 4.083127 | 2.927388 |
| 55023_at  | 6.639113 | 6.844661 | 6.797784 | 6.790047 | 6.825751 | 6.857565 | 6.410735 | 7.31068  |
| 55024_at  | 4.555924 | 3.710992 | 4.333988 | 2.220245 | 2.448917 | 2.072962 | 2.994372 | 4.286818 |
| 55025_at  | 2.265016 | 2.262608 | 1.364904 | 1.804669 | 1.498245 | 1.723845 | 3.844866 | 1.299104 |
| 55026_at  | 2.246794 | 2.136379 | 3.300801 | 2.069631 | 2.372268 | 2.495876 | 3.102395 | 2.733919 |
| 55027_at  | 5.515809 | 5.325036 | 5.132818 | 5.478778 | 5.545357 | 4.92523  | 4.651184 | 5.960299 |
| 55028_at  | 4.395991 | 4.891385 | 4.042391 | 4.407397 | 3.674276 | 4.21834  | 3.967243 | 5.240513 |
| 5502_at   | 6.634949 | 5.275111 | 4.270896 | 5.339325 | 6.071754 | 7.843158 | 4.489195 | 6.080086 |
| 55030_at  | 5.486808 | 5.444281 | 5.009503 | 5.189785 | 5.164018 | 5.436369 | 4.781176 | 6.018781 |
| 55031_at  | 6.415732 | 6.745697 | 7.067905 | 6.617414 | 6.728206 | 6.821565 | 6.873199 | 7.020975 |
| 55032_at  | 6.445056 | 6.639435 | 7.076342 | 6.685853 | 6.982806 | 5.84106  | 6.555582 | 7.07134  |
| 55033_at  | 4.902072 | 5.235617 | 5.226    | 4.368864 | 5.106331 | 5.232497 | 5.153787 | 4.731961 |
| 55034_at  | 2.957355 | 2.14193  | 3.403822 | 1.828322 | 3.143662 | 2.507263 | 2.889384 | 3.585544 |
| 55035_at  | 5.402569 | 4.823981 | 5.722127 | 5.132387 | 5.536699 | 4.7363   | 5.14996  | 5.340484 |
| 55036_at  | 2.403714 | 2.778632 | 3.009355 | 3.313572 | 2.616614 | 2.697051 | 2.631618 | 2.778509 |
| 55037_at  | 6.523205 | 5.656751 | 5.847848 | 5.940738 | 5.871639 | 6.206577 | 6.393463 | 6.984079 |
| 55038_at  | 4.692728 | 4.642387 | 5.020305 | 4.329923 | 3.477988 | 3.591788 | 3.980663 | 5.160042 |
| 55039_at  | 3.761771 | 3.216727 | 4.230257 | 4.814055 | 3.084615 | 3.479568 | 3.749305 | 4.067487 |
| 55040_at  | 4.124587 | 2.783869 | 3.124926 | 3.669255 | 3.39349  | 3.558926 | 4.264155 | 3.47036  |
| 55041_at  | 6.070638 | 7.106787 | 6.760755 | 6.949511 | 7.547139 | 6.719934 | 7.16182  | 6.931002 |
| 55048_at  | 4.876871 | 5.299679 | 4.837491 | 4.727962 | 3.745595 | 4.066832 | 4.846235 | 4.580508 |
| 55049_at  | 8.371188 | 7.892636 | 7.546863 | 7.804675 | 7.089745 | 8.170156 | 7.175661 | 6.958586 |
| 5504_at   | 3.175808 | 2.702276 | 3.190001 | 4.022558 | 3.760764 | 3.021528 | 3.883192 | 3.917566 |
| 55051_at  | 3.610283 | 4.30411  | 4.318828 | 3.61828  | 3.513816 | 4.41529  | 3.921273 | 5.515568 |
| 55052_at  | 8.201311 | 7.728858 | 7.998818 | 7.700322 | 8.175458 | 8.087944 | 7.967476 | 7.716407 |
| 55054_at  | 3.597429 | 4.316487 | 3.194819 | 4.865124 | 3.404925 | 3.35653  | 3.749549 | 4.27727  |

|           |          |          |          |          |          |          |          |          |
|-----------|----------|----------|----------|----------|----------|----------|----------|----------|
| 55055_at  | 2.64321  | 3.141259 | 3.673202 | 3.206032 | 2.997975 | 3.135411 | 2.503458 | 2.962708 |
| 55056_at  | 5.440276 | 5.48104  | 4.968243 | 5.071587 | 4.427841 | 4.602483 | 5.121279 | 5.401804 |
| 55057_at  | 2.031368 | 2.542884 | 1.596939 | 2.167387 | 1.973594 | 2.645056 | 2.274507 | 2.533555 |
| 55061_at  | 2.38036  | 2.563488 | 3.910483 | 3.309149 | 2.457436 | 3.054887 | 2.586221 | 3.826412 |
| 55062_at  | 7.534586 | 7.126829 | 6.653878 | 6.917854 | 6.842701 | 7.30732  | 7.400756 | 7.148881 |
| 550631_at | 2.737443 | 2.656605 | 3.038903 | 2.542728 | 3.193172 | 2.297233 | 3.005219 | 2.755904 |
| 55063_at  | 2.140456 | 3.180289 | 1.878393 | 2.227955 | 2.539069 | 2.521878 | 1.924114 | 2.481998 |
| 550643_at | 8.720624 | 8.599248 | 8.64729  | 8.611726 | 7.742914 | 8.703634 | 8.248112 | 8.380044 |
| 55064_at  | 2.13074  | 2.546353 | 2.056756 | 2.019049 | 2.141848 | 3.49023  | 2.150891 | 2.815622 |
| 55065_at  | 2.270306 | 1.753233 | 1.705742 | 2.581768 | 1.556756 | 1.914432 | 3.048252 | 1.540727 |
| 55066_at  | 5.974311 | 5.514594 | 5.729328 | 5.566073 | 5.236112 | 5.585373 | 5.765199 | 6.762364 |
| 55068_at  | 2.588914 | 1.713032 | 2.735669 | 2.370058 | 1.928743 | 1.827313 | 1.627767 | 3.260094 |
| 55069_at  | 8.35779  | 8.30749  | 7.98895  | 8.201486 | 7.780292 | 8.080147 | 8.626056 | 7.38696  |
| 5506_at   | 0.957655 | 0.960726 | 1.168254 | 0.968013 | 1.043187 | 1.436203 | 0.821578 | 1.936331 |
| 55070_at  | 4.716167 | 3.411551 | 4.624973 | 5.447818 | 4.55487  | 3.83916  | 3.94681  | 5.169952 |
| 55071_at  | 0.985807 | 2.294709 | 1.350577 | 1.484008 | 1.624682 | 2.040297 | 1.495129 | 1.491051 |
| 55072_at  | 5.147022 | 4.674592 | 4.749793 | 4.238895 | 5.097505 | 4.547237 | 4.44937  | 5.024077 |
| 55073_at  | 2.669444 | 2.953318 | 2.135286 | 2.456497 | 3.283583 | 2.313688 | 1.940316 | 1.77259  |
| 55074_at  | 4.681369 | 4.776615 | 4.49954  | 4.794253 | 3.791286 | 4.320815 | 4.226313 | 4.743377 |
| 55075_at  | 9.42143  | 9.996452 | 9.849079 | 9.569517 | 9.709127 | 9.282963 | 9.49208  | 10.38872 |
| 55076_at  | 5.357744 | 5.21075  | 4.727267 | 3.884332 | 5.710005 | 4.093051 | 4.375742 | 4.905519 |
| 55079_at  | 1.997577 | 1.50057  | 2.77642  | 1.604951 | 2.514645 | 1.657405 | 2.14699  | 2.090566 |
| 5507_at   | 7.159166 | 7.282492 | 7.000526 | 6.503519 | 5.61935  | 7.349472 | 6.957464 | 7.599377 |
| 55080_at  | 5.085602 | 5.19885  | 4.310909 | 5.050104 | 4.941602 | 4.545352 | 5.272425 | 4.772675 |
| 55081_at  | 7.531466 | 6.867561 | 7.363578 | 6.681317 | 7.421927 | 7.239351 | 6.476396 | 7.502949 |
| 55082_at  | 6.908123 | 6.293197 | 6.171955 | 6.26156  | 6.389037 | 6.725461 | 5.515259 | 6.440121 |
| 55083_at  | 2.933465 | 3.743737 | 3.246626 | 3.831393 | 2.693424 | 3.484949 | 2.400765 | 2.623108 |
| 55084_at  | 4.398009 | 4.85226  | 4.902758 | 4.521785 | 4.293613 | 3.549865 | 4.891619 | 4.312444 |
| 55086_at  | 1.808525 | 1.902596 | 1.800791 | 1.042896 | 1.592858 | 1.821616 | 1.249922 | 2.917533 |
| 55088_at  | 6.596866 | 6.408791 | 7.006105 | 6.986814 | 6.814283 | 6.516559 | 6.794103 | 6.955107 |
| 55089_at  | 2.200285 | 1.213946 | 1.932739 | 2.537425 | 3.118747 | 1.617416 | 1.082854 | 3.159503 |
| 55090_at  | 5.145964 | 5.448764 | 5.048984 | 5.461176 | 4.498207 | 4.818233 | 5.039127 | 4.703894 |
| 55092_at  | 3.018725 | 3.878009 | 3.248045 | 4.359698 | 4.738163 | 4.088121 | 3.296766 | 3.399663 |
| 55093_at  | 4.206174 | 4.397183 | 3.532046 | 3.751531 | 4.215922 | 3.299126 | 3.287903 | 3.537266 |
| 55094_at  | 4.660885 | 4.784665 | 4.450472 | 4.208403 | 4.662158 | 3.185617 | 4.976445 | 3.976088 |
| 55095_at  | 5.455937 | 5.248693 | 5.703633 | 5.731817 | 4.985747 | 5.764511 | 5.487821 | 4.921713 |
| 55096_at  | 3.702626 | 1.637176 | 2.171555 | 2.590939 | 1.18415  | 1.746984 | 1.652266 | 2.792539 |
| 5509_at   | 4.636169 | 4.588607 | 4.598552 | 5.230054 | 3.593495 | 4.606333 | 3.796134 | 4.62483  |
| 550_at    | 7.901745 | 7.401931 | 6.867437 | 8.002004 | 5.831259 | 7.936972 | 6.848134 | 7.04841  |
| 55100_at  | 5.848066 | 4.980637 | 5.353986 | 5.161082 | 5.950059 | 5.261349 | 4.918308 | 6.195444 |
| 55101_at  | 4.390385 | 3.799947 | 4.77314  | 4.352428 | 3.919391 | 4.232629 | 4.858653 | 4.327852 |
| 55102_at  | 5.77845  | 5.618666 | 5.833189 | 5.536311 | 5.750377 | 5.533366 | 5.875935 | 6.044544 |
| 55103_at  | 3.545869 | 4.257423 | 4.098733 | 3.385739 | 3.748678 | 4.451859 | 3.263452 | 5.60256  |
| 55105_at  | 4.554104 | 4.564492 | 4.852638 | 4.058952 | 5.252937 | 4.04678  | 4.238091 | 5.305926 |
| 55106_at  | 5.622122 | 5.929635 | 5.510121 | 4.682867 | 5.381379 | 5.083975 | 4.357654 | 6.025066 |
| 55107_at  | 3.936604 | 3.53143  | 4.201383 | 4.039796 | 3.753421 | 3.130972 | 2.737997 | 3.819359 |
| 55108_at  | 4.667911 | 3.849401 | 4.574735 | 4.465543 | 4.84884  | 4.713467 | 4.437563 | 3.502688 |
| 55109_at  | 7.361714 | 7.046462 | 7.048929 | 6.552327 | 7.06252  | 6.905786 | 6.678724 | 7.203113 |
| 5510_at   | 7.370124 | 7.525919 | 7.192445 | 6.924474 | 7.591013 | 7.513511 | 7.145143 | 7.355719 |
| 55110_at  | 2.012778 | 2.44368  | 2.423205 | 2.729218 | 2.927805 | 2.016517 | 2.061834 | 2.539968 |
| 55111_at  | 5.53396  | 5.681511 | 5.32916  | 5.507484 | 5.304244 | 5.11039  | 5.122146 | 4.539796 |

|          |          |          |          |          |          |          |          |          |
|----------|----------|----------|----------|----------|----------|----------|----------|----------|
| 55112_at | 6.13645  | 6.521181 | 6.456199 | 5.899617 | 6.100345 | 6.345893 | 5.901108 | 6.413142 |
| 55113_at | 3.829155 | 4.072292 | 4.431704 | 3.963407 | 4.575625 | 3.523498 | 3.712265 | 3.133367 |
| 55114_at | 5.136699 | 5.57101  | 5.97476  | 5.451655 | 5.831151 | 5.856914 | 5.183279 | 5.505941 |
| 55116_at | 5.477933 | 5.082313 | 5.43938  | 5.264402 | 5.533955 | 5.344674 | 4.882367 | 4.390872 |
| 55117_at | 1.188155 | 1.050491 | 1.242547 | 0.928054 | 1.387072 | 1.344745 | 1.3661   | 1.752609 |
| 55118_at | 4.080843 | 4.293658 | 3.176049 | 2.945989 | 3.358019 | 3.777786 | 2.565387 | 3.698489 |
| 55119_at | 5.947419 | 5.091702 | 4.841825 | 5.274929 | 6.145927 | 5.595015 | 5.051401 | 5.404968 |
| 5511_at  | 3.737928 | 3.629183 | 4.381828 | 4.53398  | 3.953538 | 4.601732 | 4.819502 | 5.600986 |
| 55120_at | 5.243019 | 5.153984 | 5.770694 | 4.866322 | 4.844949 | 5.581032 | 4.724413 | 6.039368 |
| 55122_at | 7.591124 | 7.351192 | 7.175445 | 7.476226 | 7.149554 | 7.733902 | 8.156106 | 7.320758 |
| 55124_at | 1.097274 | 1.297226 | 1.544131 | 1.189401 | 1.774912 | 1.320022 | 1.308331 | 1.504985 |
| 55125_at | 4.897399 | 5.450144 | 5.404244 | 4.733911 | 5.520025 | 5.006195 | 5.359908 | 5.545792 |
| 55127_at | 4.761096 | 5.298848 | 5.57686  | 5.623012 | 5.074026 | 5.147719 | 5.520457 | 5.370116 |
| 55128_at | 5.011241 | 4.368398 | 4.141505 | 5.289115 | 4.836604 | 5.079464 | 5.53928  | 5.120997 |
| 55129_at | 4.710343 | 4.847795 | 5.314915 | 5.755224 | 6.449224 | 5.017217 | 4.998246 | 5.114793 |
| 55130_at | 1.40564  | 2.233271 | 1.773008 | 1.493993 | 1.746646 | 2.410875 | 1.941148 | 3.549997 |
| 55131_at | 4.230269 | 4.886828 | 5.471686 | 4.859456 | 5.604969 | 4.799042 | 4.421978 | 5.610588 |
| 55132_at | 5.675072 | 5.096924 | 4.872691 | 5.158896 | 5.62537  | 5.655389 | 4.633592 | 6.161452 |
| 55133_at | 3.980023 | 4.121337 | 4.303926 | 4.330788 | 3.802898 | 3.885802 | 4.304289 | 5.022216 |
| 55135_at | 2.591181 | 2.947317 | 2.920022 | 3.566468 | 2.665217 | 3.887722 | 2.325219 | 2.721769 |
| 55137_at | 6.338827 | 6.938614 | 6.046776 | 4.993298 | 5.411559 | 6.634391 | 6.626051 | 7.267985 |
| 55138_at | 3.116286 | 1.757843 | 1.02908  | 1.504377 | 1.4942   | 1.763127 | 2.280535 | 1.908261 |
| 55139_at | 4.849351 | 4.318661 | 2.573258 | 4.25577  | 3.953135 | 3.608382 | 4.989786 | 3.960269 |
| 55140_at | 6.533017 | 7.31881  | 7.524463 | 6.421173 | 7.716457 | 6.612269 | 7.383914 | 7.620513 |
| 55142_at | 5.315574 | 4.551545 | 5.388714 | 5.179417 | 5.50138  | 5.398981 | 5.447236 | 4.924643 |
| 55143_at | 3.192693 | 2.026027 | 2.595119 | 2.39423  | 2.020795 | 2.340313 | 2.508498 | 2.773058 |
| 55144_at | 4.699174 | 4.474063 | 4.992047 | 3.830627 | 4.358536 | 3.978173 | 3.878174 | 4.824058 |
| 55145_at | 6.51869  | 5.920208 | 6.017911 | 6.166417 | 5.649479 | 6.180289 | 5.959312 | 6.431968 |
| 55146_at | 6.8691   | 6.302451 | 5.955498 | 5.21824  | 6.445679 | 5.905851 | 4.996665 | 6.185537 |
| 55147_at | 5.858536 | 5.910677 | 6.139869 | 5.786445 | 6.333427 | 5.793441 | 6.006826 | 6.229423 |
| 55148_at | 4.797342 | 4.416301 | 4.977569 | 4.549444 | 5.099122 | 4.065324 | 3.668931 | 4.751807 |
| 55149_at | 7.333713 | 7.188398 | 7.452032 | 7.879839 | 7.570291 | 6.873178 | 7.314106 | 7.678412 |
| 5514_at  | 5.482797 | 5.520985 | 5.803369 | 5.623846 | 5.831737 | 5.795206 | 5.78159  | 5.900972 |
| 55150_at | 3.903108 | 3.773871 | 3.371661 | 4.00455  | 3.278927 | 4.322605 | 3.788091 | 3.137738 |
| 55151_at | 3.976826 | 5.403623 | 4.127568 | 4.72764  | 4.465597 | 4.551746 | 4.459351 | 5.941771 |
| 55152_at | 4.981192 | 5.300275 | 5.075183 | 5.21278  | 5.092707 | 4.977157 | 4.091379 | 5.493947 |
| 55153_at | 7.021585 | 7.292995 | 6.647249 | 6.69822  | 6.817095 | 6.399336 | 7.020204 | 6.732141 |
| 55156_at | 6.279863 | 6.27536  | 5.158401 | 5.846672 | 5.898971 | 6.249367 | 6.071397 | 6.78124  |
| 55157_at | 4.646134 | 4.515337 | 4.472299 | 3.92017  | 4.738139 | 5.04627  | 3.870937 | 5.280005 |
| 55159_at | 4.505389 | 5.049972 | 4.798668 | 5.048935 | 4.349366 | 4.734962 | 4.452896 | 4.410347 |
| 5515_at  | 8.170238 | 8.470658 | 7.661661 | 8.033723 | 8.243862 | 7.399474 | 7.790893 | 8.319721 |
| 55160_at | 2.614955 | 2.842903 | 2.662521 | 2.66381  | 3.656056 | 3.104571 | 2.69511  | 3.025914 |
| 55161_at | 7.278687 | 7.401119 | 7.565872 | 7.380958 | 7.800281 | 6.92826  | 7.445483 | 7.82542  |
| 55163_at | 5.006783 | 5.143074 | 5.085118 | 4.1737   | 4.949007 | 4.578438 | 4.621356 | 5.484237 |
| 55164_at | 5.230457 | 5.766913 | 5.709445 | 5.137203 | 6.208613 | 5.102261 | 5.553858 | 6.497464 |
| 55165_at | 2.437389 | 2.524097 | 3.2155   | 3.283165 | 2.810249 | 2.649119 | 2.97781  | 4.166379 |
| 55166_at | 4.465381 | 4.169796 | 3.325999 | 3.236519 | 3.909082 | 4.334594 | 4.053317 | 5.153343 |
| 55167_at | 7.168488 | 7.481723 | 6.900194 | 7.210868 | 6.52549  | 6.554824 | 7.112769 | 6.651103 |
| 55168_at | 8.525471 | 8.374406 | 8.458588 | 9.0186   | 8.318827 | 8.832918 | 8.908171 | 8.225423 |
| 5516_at  | 8.969753 | 9.033157 | 8.669337 | 8.959911 | 8.776376 | 8.630572 | 8.537214 | 9.210777 |
| 55170_at | 6.87     | 6.00831  | 6.655679 | 5.895902 | 6.515218 | 6.219218 | 5.895902 | 5.463364 |

|          |          |          |          |          |          |          |          |          |
|----------|----------|----------|----------|----------|----------|----------|----------|----------|
| 55171_at | 5.050286 | 5.613882 | 5.02121  | 5.561855 | 6.333379 | 4.745967 | 4.626804 | 4.463952 |
| 55172_at | 3.408409 | 3.233967 | 3.178257 | 3.045317 | 4.229315 | 3.547665 | 3.132584 | 3.430183 |
| 55173_at | 6.563336 | 6.681401 | 5.637054 | 6.143512 | 6.661654 | 6.731051 | 7.011197 | 6.643305 |
| 55174_at | 6.093178 | 6.092137 | 5.702851 | 6.059127 | 6.364079 | 5.911793 | 5.713601 | 6.549326 |
| 55175_at | 5.399066 | 4.866698 | 4.85837  | 4.852941 | 4.441452 | 5.379128 | 5.206557 | 4.180252 |
| 55176_at | 2.468421 | 2.312612 | 2.992375 | 2.684105 | 3.236428 | 1.783935 | 3.056669 | 1.488463 |
| 55177_at | 5.564838 | 4.62991  | 4.389235 | 5.42211  | 5.368789 | 5.867334 | 5.022002 | 4.356652 |
| 55178_at | 3.81044  | 2.858713 | 3.492355 | 3.615043 | 3.705695 | 4.469512 | 3.453418 | 3.935328 |
| 55179_at | 5.174476 | 4.712362 | 3.742256 | 4.901308 | 3.65662  | 5.006393 | 4.819733 | 4.867834 |
| 55180_at | 4.658762 | 4.399662 | 3.104714 | 4.079991 | 4.054414 | 4.601712 | 3.472001 | 5.729156 |
| 55181_at | 5.221219 | 5.335519 | 4.221921 | 4.259331 | 4.725714 | 4.060499 | 4.908067 | 4.573564 |
| 55182_at | 5.522495 | 5.670772 | 5.812807 | 5.886743 | 5.589961 | 5.338668 | 5.948216 | 5.506202 |
| 55183_at | 5.266896 | 5.83413  | 6.141524 | 6.459751 | 5.855801 | 5.138021 | 5.703262 | 5.908545 |
| 55184_at | 3.612392 | 3.119551 | 3.501084 | 2.953309 | 2.141906 | 3.752828 | 3.18752  | 3.505137 |
| 55186_at | 6.049489 | 6.065195 | 6.160477 | 6.345383 | 5.46516  | 5.158638 | 6.397102 | 6.565834 |
| 55187_at | 5.112362 | 5.464647 | 5.367933 | 5.594707 | 5.551779 | 5.364839 | 5.360224 | 6.07571  |
| 55188_at | 4.781929 | 4.545294 | 4.614987 | 5.290628 | 4.258609 | 4.829233 | 4.502563 | 5.691056 |
| 5518_at  | 8.491175 | 8.034391 | 8.332337 | 8.387747 | 7.70814  | 8.062421 | 8.125182 | 7.810541 |
| 55190_at | 2.369623 | 2.258468 | 1.831605 | 1.584835 | 2.008762 | 3.890979 | 2.486894 | 2.348532 |
| 55191_at | 5.381782 | 4.6409   | 4.893854 | 4.514839 | 4.530833 | 5.333754 | 5.164665 | 5.455069 |
| 55192_at | 5.358465 | 4.114266 | 4.821368 | 3.489258 | 5.187866 | 3.852384 | 3.755934 | 4.208016 |
| 55193_at | 6.486279 | 6.138393 | 6.075177 | 6.224036 | 6.558034 | 5.768008 | 6.356198 | 6.128613 |
| 55194_at | 7.301184 | 6.064012 | 6.578202 | 5.942841 | 5.234296 | 6.290728 | 6.414247 | 4.868389 |
| 55195_at | 5.213299 | 4.240684 | 4.900259 | 3.930706 | 4.472248 | 5.662837 | 2.939283 | 5.325401 |
| 55196_at | 6.814161 | 7.480247 | 6.785903 | 7.605561 | 7.427257 | 7.559692 | 6.715781 | 7.13258  |
| 55197_at | 6.267879 | 6.265743 | 6.381963 | 6.426127 | 6.455521 | 6.349347 | 6.327263 | 6.351629 |
| 55198_at | 5.767824 | 5.616944 | 5.039995 | 5.85308  | 4.953496 | 5.730948 | 5.747761 | 5.963919 |
| 55199_at | 0.435584 | 1.830244 | 4.131343 | 0.321572 | 0.652855 | 2.984561 | 3.626367 | 3.880096 |
| 5519_at  | 5.243436 | 5.283354 | 5.277743 | 5.448077 | 5.753156 | 5.214219 | 5.334961 | 5.589259 |
| 551_at   | 1.999807 | 1.763974 | 2.739388 | 3.141993 | 2.251026 | 2.631448 | 3.032212 | 3.076961 |
| 55200_at | 1.729689 | 1.911819 | 2.337677 | 1.776261 | 2.331717 | 2.144442 | 2.097782 | 2.320844 |
| 55201_at | 6.249074 | 5.659581 | 6.019703 | 5.691824 | 5.136848 | 5.691401 | 5.774394 | 4.630302 |
| 55203_at | 4.59712  | 3.980891 | 3.488409 | 4.469036 | 4.25839  | 3.838057 | 4.64837  | 2.918973 |
| 55204_at | 7.226055 | 7.135802 | 7.098504 | 6.973143 | 7.104977 | 7.144087 | 7.349899 | 7.001005 |
| 55205_at | 6.448945 | 7.314189 | 7.071804 | 8.114925 | 7.084972 | 7.018297 | 6.710728 | 6.961164 |
| 55206_at | 5.946528 | 6.421322 | 6.841994 | 6.527346 | 6.546282 | 5.807967 | 6.711831 | 6.898764 |
| 55207_at | 7.960131 | 7.648932 | 7.796004 | 7.429632 | 8.345105 | 7.767347 | 8.317024 | 7.507269 |
| 55208_at | 3.787096 | 4.423926 | 3.484596 | 3.268693 | 3.105051 | 4.221057 | 4.784609 | 3.704148 |
| 55209_at | 6.565478 | 6.68244  | 5.833158 | 6.732602 | 6.381508 | 6.974326 | 6.004749 | 6.915212 |
| 5520_at  | 5.756068 | 6.152832 | 6.148724 | 6.086561 | 6.159782 | 5.443774 | 5.689076 | 5.271393 |
| 55210_at | 3.748319 | 4.840357 | 2.290583 | 3.741292 | 4.207074 | 3.947903 | 1.96111  | 4.064337 |
| 55211_at | 2.506852 | 2.1189   | 2.65664  | 2.207987 | 2.425126 | 2.289685 | 3.152663 | 2.897388 |
| 55212_at | 6.197325 | 6.491878 | 6.183196 | 5.027224 | 6.621748 | 5.452744 | 5.329588 | 6.394317 |
| 55213_at | 5.44381  | 5.601656 | 5.313456 | 6.116882 | 5.880684 | 5.53532  | 5.944993 | 5.615047 |
| 55214_at | 8.010387 | 8.329386 | 8.689368 | 8.492917 | 8.392232 | 7.78153  | 8.787697 | 8.719304 |
| 55215_at | 2.766399 | 2.107742 | 2.453904 | 3.040025 | 3.259159 | 2.472403 | 3.706035 | 2.631125 |
| 55216_at | 5.817218 | 5.444212 | 5.637331 | 5.796213 | 5.457875 | 5.718238 | 5.340051 | 6.033525 |
| 55217_at | 5.694401 | 5.818932 | 5.160427 | 5.076079 | 5.165531 | 6.097656 | 5.506112 | 5.490352 |
| 55218_at | 3.829274 | 4.751307 | 4.092098 | 4.319768 | 4.739042 | 4.443306 | 4.353408 | 4.81145  |
| 55219_at | 7.100415 | 7.229873 | 7.037629 | 6.725788 | 6.639464 | 7.357046 | 7.206126 | 7.178803 |
| 5521_at  | 4.284778 | 4.590398 | 5.22674  | 4.102306 | 5.441967 | 4.323344 | 4.867068 | 4.396551 |



|          |          |          |          |          |          |          |          |          |
|----------|----------|----------|----------|----------|----------|----------|----------|----------|
| 55220_at | 2.657674 | 2.050616 | 1.789195 | 1.530709 | 1.345953 | 1.718919 | 1.495688 | 1.114577 |
| 55222_at | 3.179986 | 3.261976 | 3.797971 | 3.01702  | 3.118632 | 3.284276 | 3.480251 | 3.183321 |
| 55223_at | 2.734577 | 2.347589 | 3.607392 | 2.427943 | 2.497863 | 3.240955 | 3.534932 | 3.114608 |
| 55224_at | 5.724599 | 5.208972 | 5.362586 | 4.89083  | 6.542137 | 5.799969 | 4.94717  | 6.143627 |
| 55225_at | 4.531    | 4.119673 | 3.532481 | 3.912668 | 4.659361 | 4.517857 | 4.341831 | 5.341263 |
| 55226_at | 4.352777 | 4.33409  | 4.691341 | 5.560779 | 3.005535 | 5.419954 | 5.169253 | 4.417837 |
| 55227_at | 5.607851 | 5.118639 | 5.530934 | 5.657625 | 5.401645 | 5.54591  | 5.697066 | 6.409139 |
| 55228_at | 2.592321 | 2.79277  | 3.210692 | 3.897771 | 3.705867 | 3.228712 | 2.802946 | 1.730244 |
| 55229_at | 4.134315 | 4.047254 | 4.609575 | 3.173503 | 3.853725 | 4.499885 | 3.796895 | 3.814127 |
| 5522_at  | 2.775856 | 1.863659 | 1.979654 | 1.679535 | 1.594002 | 2.12522  | 2.291458 | 1.506134 |
| 55230_at | 4.446065 | 5.010513 | 5.036468 | 4.085419 | 5.14515  | 4.320229 | 4.675605 | 5.545609 |
| 55231_at | 4.265605 | 1.854717 | 2.597764 | 3.005439 | 2.417776 | 3.177452 | 2.212008 | 4.006888 |
| 55233_at | 8.662558 | 8.536504 | 8.670559 | 8.543    | 8.874641 | 8.784854 | 8.739121 | 8.609588 |
| 55234_at | 5.42846  | 6.81371  | 6.073352 | 6.31853  | 6.725274 | 6.031366 | 5.887014 | 6.411224 |
| 55236_at | 5.920266 | 6.162492 | 5.598049 | 6.357447 | 5.378742 | 5.96027  | 6.103613 | 5.784288 |
| 55237_at | 1.216917 | 1.504681 | 1.841802 | 1.128407 | 1.674678 | 0.935699 | 1.52301  | 1.339764 |
| 55238_at | 2.829194 | 3.474547 | 3.692792 | 3.074215 | 3.248997 | 3.854856 | 3.836723 | 2.594034 |
| 55239_at | 6.489556 | 7.067656 | 5.716795 | 6.498439 | 5.956325 | 6.767315 | 6.528754 | 7.283274 |
| 5523_at  | 4.714051 | 4.840618 | 4.275273 | 4.283508 | 5.196851 | 4.931145 | 4.174997 | 5.295993 |
| 55240_at | 6.10468  | 4.943115 | 4.811371 | 5.055268 | 4.060586 | 4.568304 | 4.947586 | 5.138261 |
| 55243_at | 7.43186  | 7.536367 | 8.420684 | 8.354719 | 7.642717 | 7.951012 | 8.425861 | 7.52263  |
| 55244_at | 6.02178  | 4.634279 | 5.459956 | 3.323005 | 5.820414 | 6.043942 | 3.209399 | 5.002956 |
| 55245_at | 4.564183 | 4.48289  | 4.857396 | 4.445767 | 4.379373 | 4.042476 | 3.73398  | 4.462988 |
| 55246_at | 6.577049 | 6.98744  | 7.115438 | 7.087709 | 5.682766 | 6.935747 | 7.643465 | 7.485501 |
| 55247_at | 2.375972 | 2.988118 | 2.374836 | 2.633316 | 2.031803 | 2.42557  | 2.083418 | 3.083961 |
| 55248_at | 5.159373 | 4.450807 | 4.24885  | 4.643387 | 5.417002 | 4.786131 | 4.446954 | 5.166447 |
| 55249_at | 4.478739 | 4.337021 | 4.543866 | 3.517441 | 3.126682 | 3.66635  | 3.971836 | 5.156761 |
| 5524_at  | 4.950546 | 4.04334  | 4.949407 | 3.79434  | 4.234231 | 3.98974  | 4.41321  | 4.208051 |
| 55250_at | 5.880609 | 6.015787 | 6.248546 | 6.531554 | 6.648843 | 6.256043 | 5.73367  | 6.289897 |
| 55251_at | 7.822907 | 8.020868 | 7.339689 | 7.318251 | 7.847287 | 6.906305 | 7.430257 | 8.047741 |
| 55252_at | 4.653655 | 5.322112 | 5.290963 | 5.574096 | 5.575586 | 5.364101 | 5.042312 | 5.838489 |
| 55254_at | 5.283239 | 6.132148 | 5.736621 | 5.649098 | 5.884836 | 5.398527 | 5.950596 | 5.403022 |
| 55255_at | 6.790089 | 6.920238 | 7.22711  | 6.77477  | 6.267353 | 6.80789  | 6.734303 | 7.244486 |
| 55256_at | 7.059915 | 6.720696 | 6.911372 | 6.58013  | 7.339185 | 7.06538  | 6.33026  | 7.495873 |
| 55257_at | 4.440689 | 4.556517 | 4.694751 | 2.252077 | 3.755219 | 3.886619 | 5.807722 | 4.607938 |
| 55258_at | 5.083995 | 4.549669 | 5.128369 | 4.111658 | 5.878729 | 4.643699 | 5.343333 | 5.724994 |
| 55259_at | 2.272644 | 1.589485 | 1.683715 | 1.513881 | 1.463399 | 2.75174  | 1.167759 | 3.915082 |
| 5525_at  | 6.01789  | 5.680008 | 5.771613 | 5.637166 | 5.753854 | 5.149776 | 5.93573  | 5.772269 |
| 55260_at | 3.076499 | 2.465109 | 2.856569 | 2.280773 | 2.546404 | 3.202919 | 2.966256 | 2.626987 |
| 55262_at | 5.291472 | 4.994547 | 3.079156 | 4.611006 | 4.034722 | 4.925096 | 5.193929 | 5.061855 |
| 55266_at | 7.025845 | 7.133903 | 6.846919 | 6.80635  | 6.847341 | 5.951776 | 6.937043 | 7.356756 |
| 55267_at | 3.022032 | 2.177769 | 2.348408 | 2.349335 | 1.991072 | 2.648616 | 1.68257  | 1.965706 |
| 55268_at | 5.216104 | 5.549151 | 5.658248 | 5.802452 | 5.710604 | 5.559633 | 6.067678 | 4.089851 |
| 55269_at | 5.064441 | 5.708826 | 5.021786 | 5.121834 | 5.316375 | 5.635606 | 6.022384 | 5.848357 |
| 5526_at  | 4.13203  | 4.218781 | 3.57071  | 3.320543 | 3.283396 | 3.248429 | 4.488983 | 3.45084  |
| 55270_at | 3.82332  | 5.128359 | 5.100158 | 3.872704 | 5.410057 | 4.819929 | 4.555888 | 5.396543 |
| 55272_at | 4.077877 | 4.676436 | 3.920377 | 3.899602 | 4.274247 | 4.360607 | 4.854208 | 4.220756 |
| 55273_at | 2.060369 | 2.489584 | 2.42106  | 1.686878 | 1.836496 | 2.299382 | 2.285809 | 1.911548 |
| 55274_at | 7.786711 | 7.503457 | 7.061029 | 7.283768 | 7.603141 | 7.178943 | 6.052104 | 7.560657 |
| 55275_at | 6.854838 | 6.415719 | 7.324959 | 7.23914  | 6.845686 | 6.667165 | 7.314827 | 6.666878 |
| 55276_at | 6.165794 | 6.020711 | 6.249409 | 5.408093 | 6.253859 | 5.859349 | 6.366559 | 6.130017 |

|           |          |          |          |          |          |          |          |          |
|-----------|----------|----------|----------|----------|----------|----------|----------|----------|
| 55277_at  | 3.963774 | 3.597549 | 3.275966 | 3.628883 | 2.372193 | 3.227927 | 3.708765 | 2.535192 |
| 55278_at  | 5.476756 | 5.544485 | 5.095327 | 5.449511 | 5.426254 | 5.167219 | 5.234686 | 5.495773 |
| 55279_at  | 4.449976 | 5.414129 | 4.258526 | 4.074467 | 4.531525 | 3.740437 | 5.27831  | 5.659561 |
| 5527_at   | 6.42977  | 6.706857 | 6.712823 | 6.798712 | 7.077178 | 6.816798 | 6.552231 | 6.940693 |
| 55280_at  | 2.73712  | 4.060863 | 3.55437  | 3.395802 | 3.367031 | 3.79693  | 2.147134 | 4.084774 |
| 55281_at  | 5.307106 | 5.743247 | 5.102691 | 5.356103 | 4.544216 | 4.680573 | 5.43503  | 4.064323 |
| 55282_at  | 1.702203 | 1.687402 | 1.703702 | 0.854308 | 1.264489 | 1.492783 | 1.67215  | 1.303445 |
| 55283_at  | 2.862948 | 2.869212 | 3.199197 | 2.619929 | 2.835623 | 2.592304 | 3.046202 | 2.600184 |
| 55284_at  | 5.229333 | 5.601651 | 5.514767 | 5.997845 | 5.803107 | 5.188313 | 5.624851 | 5.024399 |
| 552859_at | 1.806753 | 2.197184 | 2.603895 | 1.577749 | 3.034582 | 2.481665 | 1.695296 | 2.017718 |
| 55285_at  | 3.677762 | 4.044694 | 3.527528 | 4.437039 | 3.681015 | 3.308689 | 4.578899 | 4.130046 |
| 552860_at | 3.349906 | 2.133591 | 2.952064 | 2.720955 | 2.214117 | 1.546344 | 1.408488 | 1.731221 |
| 55286_at  | 1.893099 | 2.45135  | 2.299392 | 1.646645 | 3.155449 | 1.884749 | 2.185011 | 1.766601 |
| 55287_at  | 3.522535 | 4.003074 | 3.222804 | 2.92314  | 2.506444 | 3.866102 | 3.40994  | 4.490988 |
| 552889_at | 7.301938 | 7.914096 | 7.662841 | 7.485127 | 8.135305 | 7.655464 | 7.95488  | 7.847669 |
| 55288_at  | 5.970021 | 6.575678 | 5.372186 | 5.816623 | 6.390267 | 5.785584 | 6.085715 | 6.572214 |
| 55289_at  | 1.646323 | 1.892242 | 1.904141 | 1.556274 | 2.251627 | 1.80031  | 2.647343 | 1.208703 |
| 5528_at   | 5.608048 | 5.474196 | 5.583636 | 5.277193 | 4.667885 | 5.733733 | 5.543711 | 5.05172  |
| 55290_at  | 4.139493 | 4.136734 | 4.410863 | 3.195183 | 4.354835 | 4.591338 | 5.930573 | 4.514068 |
| 55291_at  | 6.612594 | 6.434093 | 6.797201 | 7.276588 | 7.039679 | 6.614504 | 6.63525  | 6.904616 |
| 55293_at  | 5.464572 | 5.443817 | 5.587091 | 5.339523 | 5.250716 | 5.479253 | 4.840007 | 5.745861 |
| 55294_at  | 5.06381  | 5.227855 | 5.049726 | 5.074958 | 5.190189 | 5.044013 | 5.298121 | 4.603054 |
| 55295_at  | 3.61772  | 2.443147 | 3.6722   | 3.526365 | 2.760893 | 3.018639 | 4.854887 | 4.022982 |
| 55296_at  | 4.89725  | 4.417773 | 4.316267 | 4.999681 | 5.218132 | 3.832638 | 4.665777 | 5.527707 |
| 55297_at  | 7.203986 | 7.656054 | 7.372311 | 6.991731 | 6.880874 | 7.21596  | 6.411699 | 7.371103 |
| 55298_at  | 5.126356 | 5.559091 | 5.571823 | 5.618344 | 6.531655 | 5.882422 | 4.165106 | 5.73742  |
| 55299_at  | 6.448991 | 7.055697 | 6.930631 | 6.318672 | 6.049837 | 6.335756 | 5.563202 | 6.68512  |
| 5529_at   | 5.733923 | 6.268717 | 6.592939 | 6.00647  | 5.379643 | 6.485351 | 5.228234 | 6.700531 |
| 552_at    | 1.725917 | 1.524439 | 3.40171  | 3.488849 | 2.065142 | 1.412461 | 1.526314 | 2.218977 |
| 55300_at  | 4.123118 | 3.842809 | 5.394741 | 5.095211 | 4.190731 | 4.45613  | 4.430741 | 5.47892  |
| 55301_at  | 3.634603 | 2.670111 | 3.807982 | 2.005044 | 1.320898 | 2.571966 | 3.682316 | 1.573485 |
| 55303_at  | 8.336225 | 8.564575 | 8.424835 | 8.8489   | 8.302486 | 8.889868 | 8.60013  | 7.947354 |
| 55304_at  | 5.689507 | 5.164727 | 5.798256 | 5.339169 | 6.589704 | 4.562788 | 5.63049  | 5.740842 |
| 55308_at  | 5.971672 | 5.972801 | 5.835217 | 6.435434 | 3.398238 | 6.197327 | 6.500487 | 5.444279 |
| 5530_at   | 5.946323 | 6.317435 | 6.043934 | 6.914648 | 6.088674 | 6.296142 | 6.112364 | 6.748971 |
| 553103_at | 2.269411 | 1.92652  | 2.01716  | 3.120356 | 2.437131 | 3.221512 | 1.893494 | 2.670873 |
| 553115_at | 5.344202 | 5.054393 | 4.587068 | 4.401239 | 5.329181 | 4.35159  | 5.125443 | 4.746701 |
| 55311_at  | 2.866317 | 2.599562 | 3.615026 | 2.506511 | 2.930629 | 3.036258 | 2.118728 | 2.986069 |
| 55312_at  | 6.219862 | 6.141079 | 6.360207 | 5.482579 | 6.171961 | 5.502107 | 6.102712 | 6.571185 |
| 55313_at  | 5.098747 | 4.536295 | 5.257351 | 5.232315 | 3.862726 | 5.660332 | 4.80624  | 3.931106 |
| 55314_at  | 1.790397 | 2.017173 | 2.540076 | 2.476601 | 1.82931  | 1.757452 | 2.83827  | 2.013736 |
| 55315_at  | 5.010819 | 4.242717 | 3.967536 | 3.201182 | 3.187666 | 4.105521 | 3.499041 | 3.677617 |
| 55316_at  | 3.638973 | 2.572353 | 3.913946 | 4.153916 | 3.053457 | 3.827677 | 3.362964 | 2.610724 |
| 55317_at  | 3.398795 | 3.505641 | 2.834097 | 2.870206 | 3.123862 | 3.445283 | 3.1795   | 4.126787 |
| 55319_at  | 6.504565 | 6.846415 | 6.757552 | 6.961529 | 7.265082 | 6.360415 | 6.542266 | 6.783617 |
| 5531_at   | 6.604842 | 6.47497  | 6.548808 | 7.047109 | 6.038967 | 6.182104 | 6.556172 | 6.261005 |
| 55320_at  | 6.301882 | 5.093227 | 5.472311 | 5.629187 | 5.386167 | 5.209578 | 5.167358 | 5.914122 |
| 55321_at  | 2.378834 | 2.028131 | 1.973861 | 2.982771 | 2.379648 | 1.656647 | 2.812692 | 1.698199 |
| 55322_at  | 6.270801 | 5.994711 | 6.509109 | 6.471289 | 6.437128 | 6.693794 | 6.960225 | 6.64033  |
| 55323_at  | 3.76681  | 4.202166 | 3.87418  | 5.308902 | 3.832546 | 3.150754 | 3.71109  | 3.131347 |
| 55324_at  | 5.990385 | 5.904057 | 5.870177 | 6.443573 | 5.49239  | 6.198864 | 6.161829 | 5.650929 |

|          |          |          |          |          |          |          |          |          |
|----------|----------|----------|----------|----------|----------|----------|----------|----------|
| 55325_at | 6.655778 | 6.434524 | 6.072947 | 6.308328 | 6.337433 | 5.972178 | 5.807104 | 6.842059 |
| 55326_at | 5.618658 | 6.065828 | 4.93297  | 5.495425 | 4.61729  | 5.122916 | 5.035352 | 5.380986 |
| 55327_at | 7.9907   | 8.602493 | 8.682803 | 8.828092 | 9.178718 | 7.940761 | 8.607587 | 9.336225 |
| 55328_at | 3.718131 | 3.785982 | 2.790842 | 2.451567 | 3.24617  | 3.597813 | 3.5452   | 3.334977 |
| 55329_at | 4.865443 | 4.096179 | 4.135688 | 4.071666 | 3.198867 | 4.697938 | 4.560372 | 5.392224 |
| 5532_at  | 6.0538   | 6.54553  | 6.428912 | 6.173324 | 6.472635 | 6.434835 | 6.372525 | 6.710017 |
| 55330_at | 4.507352 | 3.864582 | 4.016783 | 4.252133 | 4.456954 | 3.870418 | 3.728867 | 3.990348 |
| 55331_at | 4.263941 | 3.267433 | 4.251781 | 3.950939 | 5.110988 | 3.775638 | 4.32651  | 4.008012 |
| 55332_at | 5.273849 | 4.484165 | 5.049746 | 5.459279 | 5.243686 | 5.065717 | 4.54781  | 4.672049 |
| 55333_at | 8.939318 | 8.899071 | 9.000387 | 9.236825 | 9.434813 | 9.181854 | 8.880252 | 8.968101 |
| 55334_at | 7.107368 | 6.735811 | 7.476154 | 6.854093 | 7.029753 | 6.513556 | 7.606039 | 6.896945 |
| 55335_at | 4.212281 | 4.66185  | 3.655551 | 4.171448 | 3.233763 | 3.889567 | 2.555696 | 3.507175 |
| 55336_at | 3.534585 | 3.968865 | 3.868285 | 3.702582 | 4.139864 | 3.319399 | 2.67161  | 4.060423 |
| 55337_at | 5.813087 | 4.997325 | 5.345369 | 5.015505 | 4.84608  | 5.711135 | 5.205761 | 4.769619 |
| 55339_at | 6.23381  | 6.473261 | 6.279285 | 6.266473 | 7.027282 | 6.703918 | 6.696665 | 7.009641 |
| 5533_at  | 6.172755 | 6.547107 | 6.030647 | 5.652237 | 5.455433 | 5.812605 | 4.8599   | 6.35026  |
| 55341_at | 6.005158 | 5.689088 | 4.710742 | 5.29317  | 4.856182 | 5.343624 | 5.273839 | 5.651177 |
| 55342_at | 4.621814 | 5.693163 | 4.352494 | 4.999228 | 5.234671 | 4.541602 | 4.53524  | 5.835964 |
| 55343_at | 4.621454 | 5.04863  | 5.531847 | 5.253298 | 3.159867 | 4.291664 | 3.98481  | 4.780897 |
| 55344_at | 1.951846 | 2.044117 | 2.448104 | 2.86686  | 2.272966 | 2.763056 | 2.89344  | 2.710291 |
| 55345_at | 2.477984 | 2.995897 | 2.623835 | 1.981615 | 2.967592 | 2.200255 | 1.955852 | 2.385738 |
| 55346_at | 5.166948 | 5.45286  | 5.325357 | 5.764553 | 5.623589 | 5.594761 | 5.858034 | 5.389324 |
| 55347_at | 5.438381 | 5.380497 | 5.130175 | 5.36746  | 5.695152 | 5.037462 | 5.428749 | 5.78172  |
| 55349_at | 2.911775 | 3.088576 | 3.337578 | 2.508575 | 4.544326 | 3.83564  | 1.851657 | 3.331804 |
| 5534_at  | 6.802725 | 7.186265 | 7.198808 | 7.857958 | 6.869653 | 7.217853 | 6.768393 | 7.432214 |
| 55350_at | 2.866682 | 1.632439 | 1.999208 | 1.134344 | 1.28502  | 1.970051 | 2.122844 | 1.97859  |
| 55351_at | 2.765906 | 1.6292   | 1.200954 | 2.0236   | 2.412737 | 2.959887 | 2.145052 | 1.488931 |
| 55352_at | 5.915495 | 5.618145 | 5.746985 | 5.942603 | 6.123974 | 5.762293 | 5.502488 | 5.899219 |
| 55353_at | 7.264946 | 7.689168 | 7.393117 | 7.263408 | 8.043369 | 7.192775 | 7.230055 | 8.168248 |
| 55355_at | 2.521233 | 2.561938 | 2.642154 | 2.61073  | 2.117667 | 2.13158  | 4.15341  | 3.473809 |
| 55356_at | 1.956586 | 1.640567 | 2.48862  | 1.29604  | 2.278541 | 3.374924 | 2.780535 | 1.514007 |
| 55357_at | 4.048013 | 3.356298 | 3.171682 | 2.548479 | 2.68202  | 2.924669 | 2.860609 | 2.729407 |
| 55359_at | 1.808686 | 1.507368 | 1.51047  | 1.717716 | 1.346773 | 1.286413 | 1.438945 | 1.200012 |
| 5535_at  | 3.185514 | 2.322013 | 2.503625 | 2.890297 | 2.477728 | 2.653876 | 2.857464 | 2.217367 |
| 55361_at | 4.912219 | 4.61759  | 4.748075 | 4.831028 | 4.753159 | 4.959051 | 5.168916 | 4.571677 |
| 55362_at | 4.990274 | 5.070433 | 5.21872  | 4.604769 | 3.912449 | 4.870881 | 5.679791 | 5.085014 |
| 55363_at | 2.225896 | 2.129977 | 1.412937 | 1.601591 | 1.935508 | 2.417503 | 1.80961  | 1.669277 |
| 55364_at | 6.899428 | 7.121554 | 7.241031 | 6.933423 | 7.297307 | 7.215086 | 7.317905 | 7.427463 |
| 55365_at | 8.083314 | 6.871121 | 6.609314 | 4.725865 | 8.120749 | 7.899861 | 4.881938 | 6.821536 |
| 55366_at | 7.520124 | 7.733803 | 7.900321 | 7.29009  | 7.734995 | 7.131719 | 7.746272 | 8.062579 |
| 55367_at | 2.796486 | 2.723781 | 2.023119 | 2.377403 | 3.320906 | 2.882952 | 2.374131 | 2.574931 |
| 5536_at  | 6.965681 | 6.615371 | 7.316817 | 7.468569 | 6.945665 | 7.047593 | 7.521359 | 6.587762 |
| 55370_at | 2.383813 | 3.702771 | 2.850989 | 2.989167 | 3.056508 | 2.890515 | 3.916813 | 1.246791 |
| 55374_at | 4.479532 | 2.73458  | 4.055826 | 5.217052 | 3.520031 | 4.992425 | 3.241712 | 4.677891 |
| 55379_at | 5.712903 | 6.121234 | 6.148266 | 6.152516 | 5.20586  | 6.007778 | 5.364523 | 6.203887 |
| 5537_at  | 7.01368  | 7.26079  | 7.68968  | 7.360346 | 7.692467 | 7.109444 | 7.320975 | 7.446038 |
| 55384_at | 1.895405 | 2.049898 | 1.382486 | 1.588792 | 1.604821 | 1.874064 | 1.724836 | 1.651284 |
| 55388_at | 2.84572  | 1.860615 | 2.485708 | 2.305016 | 1.633908 | 2.443425 | 1.91077  | 2.572094 |
| 5538_at  | 6.818566 | 6.745581 | 7.154948 | 6.480058 | 6.955942 | 6.687342 | 7.019403 | 7.019852 |
| 5539_at  | 1.382495 | 1.195448 | 2.293758 | 1.706496 | 1.84044  | 1.323006 | 1.75362  | 1.250006 |
| 553_at   | 1.600842 | 1.868361 | 1.499461 | 1.612557 | 1.125806 | 1.66916  | 2.48193  | 2.089283 |

|           |          |          |          |          |          |          |          |          |
|-----------|----------|----------|----------|----------|----------|----------|----------|----------|
| 55410_at  | 1.772206 | 1.696175 | 2.813167 | 1.288579 | 1.294253 | 1.35444  | 1.489283 | 3.44661  |
| 554201_at | 1.588443 | 1.1279   | 0.975359 | 1.230486 | 1.182716 | 1.739803 | 1.445161 | 2.673652 |
| 554202_at | 2.445437 | 1.386674 | 1.212752 | 1.62457  | 1.285652 | 1.76397  | 2.039258 | 1.341793 |
| 554203_at | 6.508501 | 5.569983 | 6.270941 | 5.986086 | 6.233033 | 6.675257 | 5.223786 | 7.291221 |
| 554206_at | 3.026104 | 2.853743 | 2.903686 | 3.328067 | 4.029366 | 2.534501 | 3.098418 | 2.924136 |
| 554210_at | 0.986637 | 1.562283 | 2.005108 | 1.813984 | 2.156946 | 1.376477 | 1.422277 | 1.499708 |
| 554212_at | 1.447774 | 1.817231 | 1.370946 | 1.321267 | 1.61252  | 1.192795 | 2.150143 | 2.440597 |
| 554213_at | 0.864309 | 1.03029  | 1.441613 | 1.028242 | 1.787815 | 2.488554 | 1.33357  | 1.185031 |
| 554214_at | 0.563049 | 1.332364 | 2.005034 | 0.990843 | 0.997472 | 1.121263 | 0.672219 | 1.26565  |
| 55421_at  | 5.700925 | 5.704282 | 5.679337 | 5.447044 | 6.124089 | 5.567838 | 5.360066 | 5.567189 |
| 554223_at | 2.304124 | 2.886823 | 2.74156  | 2.469774 | 2.663377 | 2.181559 | 2.618371 | 3.134464 |
| 55422_at  | 4.551936 | 4.414158 | 4.389729 | 4.469592 | 5.188103 | 4.268107 | 4.519949 | 4.254499 |
| 554235_at | 3.161236 | 3.081956 | 3.122059 | 4.145597 | 4.608195 | 3.097931 | 2.659647 | 2.720795 |
| 55423_at  | 2.976165 | 3.508605 | 3.530567 | 1.574955 | 2.993273 | 3.300999 | 2.97749  | 1.76616  |
| 554251_at | 4.531469 | 3.995752 | 3.941691 | 4.790833 | 4.663706 | 3.790597 | 4.816671 | 3.827778 |
| 55425_at  | 5.764814 | 5.207861 | 5.342815 | 5.385886 | 6.020158 | 5.299474 | 5.5514   | 5.675132 |
| 554279_at | 1.285149 | 1.197527 | 1.407301 | 1.290211 | 1.461549 | 1.295164 | 1.723986 | 1.939157 |
| 554282_at | 2.220858 | 0.516812 | 0.440667 | 0.833584 | 1.082042 | 1.350602 | 0.921503 | 0.387585 |
| 5542_at   | 3.716414 | 2.807865 | 3.012834 | 2.990695 | 3.827719 | 4.745831 | 2.754547 | 3.236547 |
| 55432_at  | 3.270525 | 3.616967 | 3.031777 | 2.969043 | 3.028422 | 3.19755  | 2.905865 | 3.150432 |
| 55435_at  | 4.092857 | 5.553405 | 4.516134 | 5.446799 | 5.261157 | 4.543657 | 4.626174 | 4.904286 |
| 55437_at  | 5.45004  | 6.221016 | 5.507098 | 5.712923 | 6.169766 | 6.044725 | 4.669531 | 5.342525 |
| 55449_at  | 4.945423 | 4.108342 | 4.753031 | 4.853812 | 4.118771 | 5.278743 | 4.42134  | 4.074842 |
| 5544_at   | 0.923574 | 1.185399 | 1.067616 | 1.038789 | 1.475775 | 0.779444 | 0.900475 | 1.011978 |
| 55450_at  | 7.283689 | 6.899433 | 6.809027 | 6.320507 | 8.325338 | 7.808827 | 5.79539  | 7.169653 |
| 55454_at  | 5.890028 | 6.200328 | 6.346989 | 6.15488  | 5.781548 | 6.282761 | 5.828367 | 5.982651 |
| 5545_at   | 0.95537  | 0.677101 | 0.645956 | 1.375607 | 1.801954 | 0.887203 | 4.097693 | 0.993442 |
| 55466_at  | 5.079941 | 4.116548 | 5.512468 | 4.018329 | 4.713617 | 4.584135 | 4.503839 | 4.603776 |
| 5546_at   | 5.724086 | 5.543567 | 5.024912 | 5.189121 | 5.732227 | 4.959336 | 4.571095 | 4.464406 |
| 55471_at  | 3.972926 | 4.266774 | 3.275342 | 5.703833 | 4.055517 | 3.387881 | 3.809028 | 4.805737 |
| 55472_at  | 3.629661 | 3.632776 | 5.071363 | 3.777846 | 4.20185  | 3.799072 | 3.09589  | 3.08663  |
| 5547_at   | 7.561843 | 7.798853 | 7.606999 | 7.893191 | 7.777295 | 7.357196 | 7.834658 | 7.872457 |
| 55486_at  | 6.005729 | 6.019209 | 6.124505 | 6.18537  | 6.904542 | 5.539167 | 5.766738 | 5.95121  |
| 5549_at   | 5.300958 | 6.131296 | 6.668705 | 6.592329 | 5.153748 | 5.91136  | 6.03443  | 4.13625  |
| 554_at    | 2.172198 | 2.113022 | 2.274343 | 2.769661 | 2.165316 | 2.346032 | 1.841992 | 1.731774 |
| 55500_at  | 5.398794 | 5.512456 | 6.103805 | 5.630888 | 6.205703 | 5.76927  | 5.919476 | 5.967931 |
| 55501_at  | 5.511694 | 5.011241 | 5.726056 | 4.27122  | 5.102295 | 5.28772  | 5.266982 | 4.249492 |
| 55502_at  | 2.595566 | 3.12222  | 2.878735 | 3.1994   | 2.76767  | 3.06592  | 3.104996 | 3.265199 |
| 55503_at  | 1.195484 | 2.775335 | 1.337403 | 1.553715 | 1.60747  | 1.413072 | 2.193291 | 2.386788 |
| 55504_at  | 3.53054  | 3.350328 | 3.14816  | 2.72259  | 3.396692 | 4.285533 | 3.434164 | 2.838172 |
| 55505_at  | 10.01696 | 9.72278  | 9.830415 | 9.971375 | 9.122193 | 9.690314 | 9.321861 | 9.377713 |
| 55506_at  | 3.849515 | 4.312265 | 2.739269 | 3.50673  | 3.918384 | 4.551758 | 3.479453 | 4.460471 |
| 55507_at  | 2.023966 | 1.484651 | 2.208485 | 2.206745 | 2.251239 | 1.468857 | 2.565015 | 1.898641 |
| 55508_at  | 3.685253 | 5.262831 | 4.982956 | 5.0002   | 5.130151 | 5.305145 | 4.261001 | 4.364957 |
| 55509_at  | 3.749288 | 4.933252 | 2.954738 | 3.592887 | 2.003635 | 3.880033 | 4.158691 | 4.900438 |
| 5550_at   | 5.305727 | 5.791181 | 5.49482  | 5.224363 | 5.461866 | 4.598408 | 5.017882 | 4.661892 |
| 55510_at  | 1.24693  | 1.391004 | 1.374583 | 1.372843 | 2.579827 | 1.291605 | 2.332052 | 1.347281 |
| 55511_at  | 1.407562 | 1.181736 | 1.171451 | 0.872428 | 1.384778 | 2.157006 | 2.491511 | 1.236152 |
| 55512_at  | 2.29763  | 2.193452 | 3.057522 | 1.867641 | 2.299889 | 2.365335 | 2.249803 | 2.704108 |
| 55515_at  | 1.110924 | 1.421812 | 2.035554 | 1.234464 | 1.529692 | 2.307302 | 1.201117 | 1.93669  |
| 5551_at   | 3.725667 | 3.104427 | 4.252026 | 4.67397  | 3.71033  | 4.557881 | 3.705407 | 3.942727 |

|          |          |          |          |          |          |          |          |          |
|----------|----------|----------|----------|----------|----------|----------|----------|----------|
| 55520_at | 5.146713 | 5.597188 | 4.456289 | 4.040787 | 4.33434  | 3.473691 | 4.422148 | 4.468554 |
| 55521_at | 1.45137  | 1.523363 | 1.740709 | 1.58816  | 2.226363 | 1.994624 | 1.739778 | 1.650073 |
| 55526_at | 6.214463 | 5.56316  | 4.985548 | 5.594092 | 6.153799 | 6.054263 | 5.236931 | 4.964323 |
| 55527_at | 4.934603 | 4.243966 | 5.216637 | 4.849868 | 4.15185  | 4.987438 | 4.99697  | 4.350456 |
| 55529_at | 7.415264 | 7.121279 | 7.488531 | 6.983552 | 6.511287 | 6.492091 | 7.181332 | 7.075267 |
| 5552_at  | 8.229565 | 7.599011 | 7.95641  | 7.824074 | 8.029815 | 8.36306  | 7.763671 | 8.049643 |
| 55530_at | 2.507832 | 1.683873 | 1.673858 | 1.433711 | 1.494029 | 1.886187 | 1.907868 | 1.612477 |
| 55531_at | 2.049046 | 1.962829 | 1.522495 | 1.470718 | 1.875974 | 1.785922 | 2.157815 | 2.042202 |
| 55532_at | 1.429175 | 1.047318 | 1.296067 | 1.050508 | 2.262104 | 1.424856 | 1.103684 | 1.046848 |
| 55534_at | 5.05528  | 5.487751 | 5.647144 | 5.717415 | 5.299506 | 5.615727 | 5.517024 | 4.974131 |
| 55536_at | 3.441372 | 2.773201 | 3.193123 | 2.970324 | 3.674475 | 3.758986 | 2.117905 | 2.394352 |
| 55539_at | 2.558444 | 3.118104 | 2.956926 | 2.940178 | 2.645496 | 3.036782 | 2.800731 | 3.720819 |
| 5553_at  | 1.611891 | 1.344917 | 1.498015 | 2.060624 | 1.58208  | 1.450669 | 2.00971  | 1.371297 |
| 55540_at | 5.026302 | 4.014441 | 2.952479 | 2.303769 | 4.700893 | 3.834757 | 2.360663 | 3.741092 |
| 55544_at | 4.885726 | 3.934287 | 4.135789 | 4.713268 | 4.233738 | 4.70106  | 4.820178 | 4.318602 |
| 55545_at | 2.285967 | 2.343211 | 1.791154 | 1.074526 | 2.566395 | 1.792652 | 2.714355 | 1.344813 |
| 55552_at | 5.052536 | 5.209905 | 4.867398 | 4.785264 | 4.846919 | 5.540437 | 4.361574 | 3.237228 |
| 55553_at | 4.501413 | 5.108293 | 5.073473 | 4.737544 | 4.784957 | 4.672904 | 4.238542 | 5.409022 |
| 55554_at | 2.179787 | 2.025066 | 1.745175 | 1.94889  | 1.64395  | 1.509337 | 2.270936 | 1.59968  |
| 55556_at | 5.823727 | 5.445242 | 4.34044  | 5.129793 | 4.847134 | 5.323655 | 4.057269 | 4.893654 |
| 55558_at | 4.480063 | 3.722829 | 4.564387 | 4.387056 | 4.065864 | 3.670457 | 4.699404 | 3.841729 |
| 55559_at | 3.809878 | 3.688207 | 2.866091 | 2.186015 | 2.849725 | 3.013836 | 2.965745 | 2.470458 |
| 5555_at  | 1.363513 | 1.242527 | 1.933023 | 0.799399 | 1.282595 | 0.907303 | 1.190753 | 1.570895 |
| 55561_at | 1.819388 | 2.516739 | 1.53577  | 1.728013 | 2.247907 | 2.152306 | 1.788371 | 2.174316 |
| 55565_at | 2.972736 | 2.227279 | 2.659796 | 2.666179 | 3.213808 | 2.587605 | 2.911398 | 2.459319 |
| 55567_at | 1.643423 | 1.529323 | 1.778213 | 1.193317 | 1.535103 | 1.562784 | 1.325728 | 1.220387 |
| 55568_at | 4.994979 | 4.567708 | 4.605535 | 5.469364 | 5.020461 | 5.486076 | 5.501377 | 2.807086 |
| 55571_at | 7.663902 | 7.457027 | 7.022816 | 6.896127 | 6.83328  | 6.746818 | 7.349889 | 7.543984 |
| 55572_at | 3.534683 | 2.616229 | 3.368887 | 2.475344 | 3.230201 | 2.166802 | 3.010145 | 1.680593 |
| 55573_at | 5.929495 | 6.043548 | 6.058059 | 6.048127 | 5.542959 | 5.670885 | 6.273427 | 5.697561 |
| 55576_at | 1.82872  | 2.031537 | 1.682308 | 2.152554 | 2.179308 | 1.999969 | 1.769107 | 1.422822 |
| 55577_at | 6.302611 | 6.637883 | 5.820426 | 6.931966 | 6.341127 | 6.488478 | 6.338503 | 6.409877 |
| 55578_at | 6.623701 | 6.498394 | 6.005177 | 6.223889 | 6.52191  | 6.324014 | 6.420329 | 6.265474 |
| 5557_at  | 5.533114 | 4.979523 | 5.468873 | 3.427758 | 3.153813 | 3.330537 | 5.293273 | 4.862437 |
| 55582_at | 3.52141  | 3.948526 | 2.359999 | 3.161172 | 4.953038 | 5.270478 | 3.262712 | 2.13568  |
| 55584_at | 2.169913 | 2.663851 | 2.022274 | 1.56069  | 2.244608 | 2.135173 | 1.864036 | 2.408111 |
| 55585_at | 7.363076 | 7.181827 | 7.087183 | 6.746633 | 7.349906 | 6.718894 | 7.264452 | 6.943326 |
| 55586_at | 9.553012 | 7.625761 | 7.227331 | 6.219904 | 8.081086 | 7.729759 | 5.282484 | 7.442228 |
| 55588_at | 6.6646   | 6.541783 | 6.947416 | 6.328232 | 5.497289 | 6.634033 | 6.807468 | 6.127201 |
| 55589_at | 6.170568 | 5.913458 | 5.844296 | 5.215306 | 6.383846 | 5.324935 | 5.594464 | 6.850276 |
| 5558_at  | 2.635658 | 3.576586 | 3.381532 | 2.826968 | 2.754943 | 2.57984  | 3.107759 | 3.316708 |
| 55591_at | 7.147963 | 7.374942 | 7.213288 | 6.987162 | 7.467641 | 6.871355 | 6.847334 | 7.660756 |
| 55592_at | 1.215924 | 1.270633 | 0.823735 | 1.398635 | 1.871705 | 2.31528  | 1.012322 | 0.809337 |
| 55593_at | 7.082899 | 6.823667 | 7.093541 | 7.045077 | 6.410745 | 6.565152 | 6.567781 | 6.510989 |
| 55596_at | 5.631225 | 5.393706 | 5.393439 | 4.261183 | 4.886103 | 4.299486 | 4.962684 | 5.428865 |
| 55599_at | 6.334854 | 6.623945 | 5.736743 | 5.460309 | 6.08056  | 5.314843 | 6.076809 | 6.040349 |
| 55600_at | 2.875734 | 2.465633 | 2.566859 | 1.848628 | 4.980518 | 1.789902 | 1.602523 | 4.174086 |
| 55601_at | 5.829089 | 6.263551 | 6.116729 | 5.774957 | 6.163516 | 5.373303 | 5.831701 | 6.686228 |
| 55602_at | 5.996105 | 6.031823 | 5.253551 | 5.551695 | 5.591678 | 5.264601 | 5.781575 | 4.765737 |
| 55603_at | 5.075851 | 4.064684 | 3.614859 | 3.973155 | 4.689622 | 4.621881 | 4.610642 | 4.824729 |
| 55604_at | 5.282868 | 4.487018 | 5.865602 | 6.121923 | 6.027368 | 5.623305 | 5.433755 | 5.96052  |

|          |          |          |          |          |          |          |          |          |
|----------|----------|----------|----------|----------|----------|----------|----------|----------|
| 55605_at | 5.805978 | 4.739722 | 5.564164 | 5.272563 | 5.333245 | 4.935851 | 5.570712 | 5.110487 |
| 55607_at | 4.740217 | 4.53754  | 5.291766 | 5.847227 | 5.257554 | 5.04107  | 3.654881 | 5.520692 |
| 55608_at | 5.702442 | 5.313381 | 6.134561 | 5.711339 | 5.635977 | 5.830974 | 5.069292 | 5.056197 |
| 55609_at | 3.400209 | 5.54543  | 4.575347 | 4.802799 | 4.498548 | 4.891897 | 4.544978 | 5.49551  |
| 55610_at | 5.474108 | 5.85738  | 5.47856  | 5.889293 | 5.522585 | 5.551904 | 5.496745 | 5.911287 |
| 55611_at | 5.86426  | 5.926258 | 6.313682 | 6.044419 | 5.939195 | 5.874519 | 6.095956 | 5.573303 |
| 55612_at | 4.251194 | 3.420025 | 3.315814 | 2.872905 | 3.221795 | 3.886114 | 2.831216 | 2.946215 |
| 55613_at | 1.461112 | 1.414097 | 1.409496 | 1.894412 | 2.218833 | 1.676654 | 1.383989 | 2.249614 |
| 55614_at | 5.578413 | 6.456755 | 6.032103 | 5.540987 | 5.333471 | 5.724264 | 5.341499 | 6.287473 |
| 55615_at | 3.356293 | 2.14545  | 2.337864 | 3.185877 | 2.093989 | 3.268427 | 2.345303 | 3.288381 |
| 55616_at | 2.225797 | 2.942451 | 3.039734 | 2.457494 | 3.43948  | 3.145445 | 2.675282 | 2.155374 |
| 55617_at | 4.033995 | 4.974226 | 4.820584 | 4.463879 | 5.473307 | 4.370277 | 4.661235 | 5.246971 |
| 55619_at | 4.50699  | 5.292419 | 4.865608 | 4.722605 | 3.89608  | 4.496289 | 4.160527 | 4.320104 |
| 55620_at | 4.990604 | 4.296411 | 4.125583 | 4.632802 | 4.050518 | 4.118377 | 4.008911 | 4.748224 |
| 55621_at | 3.968689 | 3.272694 | 3.742023 | 3.73293  | 3.594054 | 3.640885 | 3.530263 | 3.097936 |
| 55622_at | 5.83484  | 5.728088 | 5.640851 | 5.174301 | 4.82458  | 4.908217 | 5.478152 | 5.786453 |
| 55623_at | 5.040654 | 5.270513 | 5.052538 | 5.171333 | 5.324673 | 5.250617 | 5.331798 | 5.727279 |
| 55624_at | 6.363563 | 6.219334 | 5.602484 | 6.272294 | 5.22034  | 6.056497 | 6.448961 | 5.622444 |
| 55625_at | 5.235951 | 6.159445 | 6.647074 | 6.695265 | 5.96682  | 5.417382 | 6.741106 | 6.289985 |
| 55626_at | 4.484689 | 4.663808 | 4.858115 | 5.246524 | 3.429311 | 4.576663 | 3.832942 | 3.800946 |
| 55628_at | 3.741535 | 5.322218 | 5.287068 | 4.988839 | 5.113281 | 5.280071 | 4.102246 | 5.861233 |
| 55629_at | 5.904426 | 6.379057 | 7.593867 | 7.878936 | 8.000925 | 8.622642 | 9.294889 | 8.102059 |
| 5562_at  | 6.692252 | 6.784282 | 6.933116 | 6.778566 | 7.652822 | 7.226666 | 6.973931 | 7.209955 |
| 55630_at | 3.685893 | 2.377892 | 2.921346 | 2.820596 | 3.1797   | 2.976411 | 2.924144 | 3.252048 |
| 55631_at | 6.405291 | 5.937402 | 6.013988 | 5.457704 | 6.123511 | 5.368257 | 4.465577 | 5.435026 |
| 55632_at | 5.352185 | 5.468136 | 5.717373 | 5.967398 | 5.483071 | 5.313116 | 4.612649 | 5.655897 |
| 55633_at | 5.100082 | 3.826909 | 4.740148 | 4.3912   | 4.165657 | 3.888217 | 4.53427  | 3.640159 |
| 55634_at | 6.293084 | 6.230822 | 6.34262  | 6.323215 | 6.101619 | 6.404168 | 5.929379 | 6.176211 |
| 55635_at | 1.438488 | 1.665043 | 1.735614 | 1.910954 | 1.280464 | 1.335276 | 2.138518 | 1.687718 |
| 55636_at | 5.037279 | 5.499807 | 5.182757 | 4.716054 | 4.897864 | 4.554099 | 5.818923 | 5.615978 |
| 55638_at | 2.609509 | 2.443092 | 3.4632   | 2.600287 | 2.549483 | 3.193526 | 2.530995 | 3.624191 |
| 5563_at  | 5.449174 | 6.014947 | 5.233561 | 5.3696   | 6.339678 | 4.839201 | 6.032022 | 6.50691  |
| 55640_at | 2.05764  | 3.023334 | 2.299734 | 2.308762 | 1.870112 | 2.612175 | 2.789196 | 2.459452 |
| 55643_at | 6.779517 | 5.471131 | 7.021085 | 6.009797 | 6.425095 | 6.309542 | 6.537564 | 5.544251 |
| 55644_at | 5.767832 | 5.673913 | 4.830458 | 4.409607 | 4.89381  | 4.092549 | 4.175875 | 5.820944 |
| 55646_at | 4.373377 | 3.587201 | 3.55948  | 3.983977 | 4.134264 | 3.721573 | 3.442008 | 5.939776 |
| 55647_at | 4.475062 | 4.044554 | 3.58802  | 3.959424 | 4.143555 | 4.135924 | 3.8526   | 3.729282 |
| 5564_at  | 7.16308  | 7.000213 | 6.960672 | 7.323982 | 6.967711 | 6.158172 | 6.404207 | 7.119289 |
| 55650_at | 4.578299 | 3.516129 | 3.728503 | 5.076175 | 4.087955 | 4.652441 | 3.317509 | 3.935888 |
| 55651_at | 8.542947 | 8.510432 | 7.948448 | 8.247018 | 7.993476 | 8.289328 | 7.932326 | 8.216405 |
| 55652_at | 8.39785  | 8.259013 | 8.276951 | 8.17174  | 7.830937 | 8.121078 | 8.775526 | 8.234216 |
| 55653_at | 2.451429 | 2.064431 | 2.536541 | 2.406019 | 1.791593 | 2.208466 | 1.982664 | 2.679562 |
| 55654_at | 7.404614 | 7.164425 | 7.57235  | 7.324953 | 5.954574 | 7.245929 | 7.31581  | 6.124814 |
| 55655_at | 2.169032 | 1.675012 | 2.487332 | 2.289786 | 2.265808 | 1.552419 | 2.178423 | 2.57752  |
| 55656_at | 4.745474 | 4.871226 | 3.538295 | 3.778328 | 4.304432 | 4.502383 | 3.0462   | 5.19146  |
| 55657_at | 2.684069 | 2.421358 | 1.88902  | 3.649303 | 2.092095 | 3.188164 | 2.583686 | 2.489616 |
| 55658_at | 4.386499 | 4.200775 | 4.578962 | 4.941863 | 3.351273 | 4.717436 | 5.390308 | 3.275588 |
| 55659_at | 3.698844 | 3.686102 | 2.820882 | 3.494729 | 3.556003 | 2.747591 | 3.994474 | 3.392526 |
| 5565_at  | 6.044763 | 6.137459 | 5.216354 | 6.081597 | 5.815849 | 5.912421 | 5.792758 | 6.215064 |
| 55660_at | 7.711847 | 7.749955 | 7.507516 | 7.28696  | 7.642911 | 7.62714  | 7.537607 | 8.010507 |
| 55661_at | 5.374974 | 5.722271 | 5.332907 | 5.534324 | 5.720378 | 5.616578 | 4.879171 | 5.664977 |

|          |          |          |          |          |          |          |          |          |
|----------|----------|----------|----------|----------|----------|----------|----------|----------|
| 55662_at | 4.97273  | 5.047132 | 5.211346 | 4.988308 | 5.51879  | 4.319865 | 6.206856 | 5.852488 |
| 55663_at | 3.664466 | 3.333746 | 3.248027 | 3.02806  | 2.944704 | 4.097509 | 3.556266 | 3.149071 |
| 55664_at | 6.665372 | 6.493468 | 5.833196 | 6.075183 | 7.015567 | 6.013419 | 5.556537 | 7.102585 |
| 55665_at | 5.280632 | 4.861472 | 4.437328 | 5.542974 | 5.428814 | 5.322393 | 4.708476 | 5.097803 |
| 55666_at | 6.155236 | 5.164281 | 5.414931 | 6.133702 | 6.304188 | 6.345006 | 5.190465 | 5.957733 |
| 55667_at | 6.218277 | 6.592808 | 6.48143  | 6.892864 | 6.464451 | 6.279584 | 6.80334  | 6.578676 |
| 55668_at | 5.264745 | 5.131386 | 6.231768 | 4.839354 | 5.589019 | 5.148687 | 5.191574 | 5.422444 |
| 55669_at | 6.558227 | 6.406268 | 5.733853 | 6.527496 | 6.433643 | 6.030208 | 5.99261  | 6.33681  |
| 5566_at  | 8.021457 | 7.836889 | 8.085137 | 8.460779 | 7.342399 | 8.278399 | 8.558092 | 7.375761 |
| 55670_at | 5.372326 | 5.814108 | 5.114004 | 5.562007 | 5.10705  | 5.672844 | 6.088453 | 5.536683 |
| 55671_at | 6.651506 | 7.07034  | 6.780441 | 6.664754 | 7.027792 | 6.750504 | 6.714327 | 6.82639  |
| 55672_at | 4.162813 | 5.240192 | 5.779935 | 5.656336 | 4.348003 | 6.329989 | 5.283151 | 4.210425 |
| 55676_at | 5.032299 | 5.040601 | 5.554987 | 5.367863 | 4.879336 | 4.719813 | 4.792825 | 5.788285 |
| 55677_at | 6.70373  | 6.825426 | 6.540015 | 6.820986 | 7.046016 | 7.479211 | 7.173764 | 7.237938 |
| 55679_at | 6.29005  | 6.699407 | 6.709126 | 6.333354 | 5.764713 | 6.609369 | 7.017695 | 4.992593 |
| 5567_at  | 6.138563 | 6.20104  | 5.927721 | 5.944782 | 5.590504 | 5.845395 | 6.196396 | 6.554939 |
| 55680_at | 6.150158 | 6.135671 | 6.602349 | 5.849472 | 6.045972 | 5.828083 | 6.389007 | 6.473009 |
| 55681_at | 5.994116 | 5.859831 | 5.969202 | 5.603616 | 6.033364 | 5.698079 | 5.447411 | 6.385438 |
| 55683_at | 5.416453 | 5.110329 | 5.567605 | 5.915018 | 4.874044 | 5.175441 | 5.625279 | 4.454852 |
| 55684_at | 5.447476 | 5.46311  | 4.907118 | 5.285886 | 4.878019 | 5.542826 | 5.195221 | 4.680833 |
| 55686_at | 2.718701 | 3.043023 | 2.33909  | 3.010652 | 3.32759  | 3.255829 | 2.573998 | 2.431649 |
| 55687_at | 5.154525 | 5.663738 | 4.840995 | 5.293568 | 4.796714 | 4.856819 | 3.598457 | 6.139939 |
| 55689_at | 6.078186 | 6.412889 | 5.47883  | 6.924446 | 5.175717 | 6.357233 | 6.633025 | 4.640972 |
| 5568_at  | 2.249428 | 0.98764  | 1.53091  | 1.211345 | 1.537134 | 1.7242   | 0.844472 | 1.124306 |
| 55690_at | 6.83095  | 6.601067 | 6.288652 | 6.306961 | 6.432082 | 6.693289 | 6.446565 | 5.53954  |
| 55691_at | 4.566009 | 4.951788 | 5.487199 | 5.48998  | 4.827134 | 5.162835 | 5.66847  | 4.470023 |
| 55692_at | 5.249728 | 4.609496 | 4.299999 | 5.402462 | 3.848305 | 5.164512 | 4.537215 | 5.904462 |
| 55693_at | 2.426805 | 2.215414 | 2.564097 | 2.05969  | 4.084621 | 2.298143 | 2.879896 | 2.986033 |
| 55695_at | 5.381997 | 4.314291 | 3.099062 | 2.392497 | 3.378374 | 3.938473 | 4.86914  | 3.804657 |
| 55696_at | 6.375889 | 6.380509 | 5.632987 | 6.146384 | 5.474757 | 6.442983 | 6.235002 | 5.944249 |
| 55697_at | 5.632424 | 5.900027 | 5.51323  | 5.290535 | 4.021307 | 5.984668 | 5.149493 | 5.68204  |
| 55698_at | 1.977441 | 1.891495 | 2.374959 | 1.774188 | 2.241132 | 1.47332  | 1.219769 | 1.799232 |
| 55699_at | 6.701438 | 6.83153  | 6.745111 | 6.541978 | 6.792649 | 6.637213 | 6.867049 | 7.337457 |
| 5569_at  | 2.850586 | 2.466779 | 1.997493 | 2.591444 | 2.581565 | 2.814135 | 3.004822 | 2.693551 |
| 55700_at | 5.997254 | 5.59806  | 5.318919 | 5.72542  | 5.478413 | 5.275717 | 6.476644 | 5.423834 |
| 55701_at | 4.200813 | 4.265955 | 4.751229 | 4.747889 | 4.083909 | 4.798411 | 4.6233   | 4.864082 |
| 55702_at | 5.153227 | 5.696784 | 4.649033 | 4.60009  | 3.482414 | 5.541662 | 4.835001 | 4.883149 |
| 55703_at | 4.866806 | 4.984828 | 5.510049 | 4.795388 | 4.481619 | 4.648703 | 4.879776 | 4.888762 |
| 55704_at | 5.431988 | 5.419743 | 5.658129 | 5.546247 | 4.996831 | 5.789354 | 5.410744 | 6.377234 |
| 55705_at | 6.108194 | 6.502394 | 5.930593 | 6.347852 | 6.492211 | 6.524015 | 6.140037 | 6.225752 |
| 55706_at | 5.633119 | 6.066337 | 5.323447 | 6.450808 | 4.853386 | 5.757945 | 5.28735  | 5.22401  |
| 55707_at | 7.077448 | 6.726273 | 6.820267 | 6.883424 | 6.961095 | 6.784891 | 7.001775 | 6.20979  |
| 55709_at | 5.228767 | 5.717805 | 5.626409 | 5.948096 | 5.048391 | 5.461413 | 5.104589 | 6.269209 |
| 5570_at  | 1.720283 | 2.131842 | 2.005716 | 1.341309 | 0.998454 | 2.393935 | 1.073258 | 1.598469 |
| 55711_at | 4.396069 | 4.536295 | 4.522852 | 4.555801 | 4.310756 | 4.59676  | 4.62877  | 4.39295  |
| 55713_at | 4.1519   | 4.284891 | 2.479492 | 2.383009 | 2.675833 | 1.425733 | 3.145859 | 4.475091 |
| 55714_at | 4.982027 | 5.261306 | 5.908599 | 4.568157 | 3.927311 | 4.71967  | 4.607961 | 5.74833  |
| 55715_at | 4.844642 | 5.050582 | 4.769261 | 3.830028 | 4.560012 | 4.089189 | 5.017167 | 4.48794  |
| 55716_at | 4.531558 | 4.738702 | 4.244678 | 4.236268 | 3.104838 | 4.159562 | 4.12678  | 4.184094 |
| 55717_at | 6.015172 | 5.664045 | 5.70448  | 5.724256 | 6.082927 | 5.587636 | 5.517175 | 5.887203 |
| 55718_at | 4.560822 | 4.271994 | 4.342822 | 4.803609 | 3.249745 | 5.117914 | 4.023755 | 3.663613 |

|          |          |          |          |          |          |          |          |          |
|----------|----------|----------|----------|----------|----------|----------|----------|----------|
| 55719_at | 5.098909 | 5.659405 | 5.083764 | 5.262644 | 4.251439 | 5.176331 | 4.861619 | 5.343722 |
| 5571_at  | 8.471881 | 8.142529 | 8.274879 | 8.347841 | 7.95882  | 7.558083 | 8.786739 | 8.652065 |
| 55720_at | 5.014895 | 5.655988 | 5.397185 | 5.373389 | 5.856442 | 5.838846 | 5.794238 | 5.750792 |
| 55721_at | 2.677685 | 3.553665 | 2.987306 | 3.481332 | 3.084787 | 2.555218 | 2.268951 | 2.607928 |
| 55722_at | 2.40094  | 2.815544 | 2.836254 | 2.784291 | 2.940254 | 3.069414 | 3.081622 | 2.805676 |
| 55723_at | 1.980854 | 1.852287 | 4.028231 | 2.773937 | 2.724669 | 2.404627 | 2.309813 | 2.113757 |
| 55726_at | 5.759149 | 4.914091 | 3.576036 | 5.443438 | 4.94745  | 4.843283 | 4.343238 | 6.534059 |
| 55727_at | 5.538523 | 5.378758 | 5.009515 | 4.836031 | 5.569317 | 4.931719 | 5.302757 | 5.790723 |
| 55728_at | 4.873972 | 5.44606  | 4.816982 | 4.492059 | 5.051875 | 5.036785 | 5.014863 | 6.136633 |
| 55729_at | 7.16397  | 7.445583 | 7.526546 | 7.936858 | 7.612796 | 7.206595 | 7.755055 | 7.148035 |
| 55731_at | 6.270941 | 6.239648 | 6.504495 | 6.43713  | 6.392318 | 5.466813 | 7.322096 | 6.961455 |
| 55732_at | 2.684039 | 3.10893  | 2.829722 | 2.502615 | 3.021526 | 1.682407 | 2.437357 | 3.009906 |
| 55733_at | 2.448351 | 3.047477 | 3.317611 | 2.030153 | 3.704226 | 2.567009 | 2.741083 | 2.373939 |
| 55734_at | 4.491556 | 4.274356 | 5.008617 | 4.929207 | 3.976969 | 4.930826 | 5.390605 | 4.526841 |
| 55735_at | 6.575271 | 6.005453 | 6.421542 | 6.581183 | 6.199843 | 6.298373 | 6.166342 | 6.613575 |
| 55737_at | 7.48369  | 7.545584 | 7.097579 | 7.402402 | 7.562039 | 7.491267 | 6.919208 | 7.74931  |
| 55738_at | 3.912326 | 5.345087 | 5.729701 | 4.898309 | 4.74625  | 4.336133 | 4.392753 | 4.283856 |
| 55739_at | 4.606205 | 4.027616 | 3.960051 | 4.483421 | 3.852529 | 4.669952 | 4.146156 | 3.641038 |
| 5573_at  | 9.899418 | 10.23768 | 10.18964 | 10.17609 | 10.39876 | 10.14124 | 10.3555  | 10.39146 |
| 55740_at | 5.19575  | 5.59324  | 4.594823 | 6.016671 | 5.639714 | 5.613079 | 5.459016 | 5.310854 |
| 55741_at | 5.246033 | 5.06477  | 4.657482 | 4.914455 | 5.602289 | 5.403828 | 4.509376 | 4.194822 |
| 55742_at | 9.065341 | 9.18004  | 9.420836 | 9.160829 | 9.329277 | 8.828638 | 9.326697 | 8.997783 |
| 55743_at | 4.400532 | 4.190887 | 3.289175 | 4.767714 | 3.483262 | 2.898122 | 4.022748 | 3.892354 |
| 55744_at | 5.870605 | 5.418052 | 7.106    | 5.950412 | 6.21297  | 5.185996 | 5.720326 | 5.496061 |
| 55745_at | 5.509715 | 5.507164 | 4.886994 | 4.660981 | 5.339883 | 5.427647 | 5.810862 | 6.067802 |
| 55746_at | 5.772499 | 5.8829   | 5.591577 | 5.215224 | 5.709273 | 5.886354 | 4.614067 | 5.964097 |
| 55748_at | 6.611171 | 6.968847 | 6.950585 | 6.817116 | 6.923848 | 6.739643 | 7.02412  | 7.095539 |
| 55749_at | 7.600896 | 7.353226 | 7.076573 | 7.668954 | 6.639606 | 7.89393  | 7.298243 | 7.798932 |
| 55750_at | 6.622303 | 6.317055 | 6.644009 | 6.563093 | 5.668247 | 6.389389 | 5.884687 | 6.720015 |
| 55751_at | 6.328576 | 6.31042  | 5.887438 | 6.147292 | 6.490521 | 5.959877 | 5.974888 | 6.37465  |
| 55752_at | 8.857892 | 9.130543 | 8.91163  | 8.778536 | 8.925605 | 8.593959 | 8.887097 | 9.349852 |
| 55753_at | 5.042581 | 4.307079 | 3.965432 | 3.590076 | 5.403161 | 5.491362 | 4.296181 | 4.658439 |
| 55754_at | 8.225556 | 8.403988 | 8.52034  | 8.62281  | 8.148089 | 8.017079 | 8.582915 | 8.668987 |
| 55755_at | 5.591425 | 5.906283 | 6.121738 | 5.52669  | 5.856299 | 5.406705 | 5.017983 | 6.07293  |
| 55756_at | 4.599203 | 5.20883  | 4.471752 | 4.44068  | 3.994019 | 4.067648 | 4.984651 | 4.758601 |
| 55757_at | 6.07977  | 6.375854 | 6.857615 | 6.109797 | 5.975234 | 5.956871 | 6.180453 | 6.633485 |
| 55758_at | 5.007503 | 5.140648 | 5.23315  | 5.765354 | 5.618818 | 5.547461 | 5.519498 | 5.667372 |
| 55759_at | 5.066688 | 5.800654 | 6.339295 | 6.313758 | 7.237273 | 5.816056 | 5.616427 | 6.251934 |
| 5575_at  | 3.723006 | 4.557856 | 4.621428 | 4.957072 | 4.429973 | 4.252028 | 4.467444 | 3.187675 |
| 55760_at | 5.657454 | 5.795672 | 5.764671 | 5.797583 | 5.981927 | 6.018614 | 5.736462 | 6.594096 |
| 55761_at | 7.025808 | 7.162949 | 7.305239 | 7.185552 | 6.699392 | 7.388519 | 7.140541 | 7.168295 |
| 55762_at | 2.032496 | 2.387528 | 3.4893   | 1.703736 | 4.275215 | 2.448687 | 3.651388 | 3.186473 |
| 55763_at | 7.14861  | 7.065282 | 7.318186 | 6.985186 | 7.431561 | 7.154785 | 7.123408 | 7.718032 |
| 55764_at | 4.99683  | 5.490162 | 5.045086 | 5.75269  | 4.243272 | 5.09207  | 4.505554 | 5.023121 |
| 55765_at | 4.208498 | 4.049034 | 4.250144 | 3.41764  | 3.689138 | 4.711046 | 2.957716 | 3.57333  |
| 55766_at | 5.286352 | 5.173982 | 5.388718 | 4.355147 | 4.768429 | 4.176506 | 5.687238 | 5.489335 |
| 55768_at | 5.143655 | 5.301723 | 5.293892 | 4.916743 | 6.334767 | 5.743806 | 5.906145 | 5.693755 |
| 55769_at | 5.434075 | 4.09703  | 4.154718 | 5.074678 | 5.59341  | 4.695215 | 5.193977 | 5.849986 |
| 5576_at  | 6.326573 | 6.482667 | 6.753306 | 7.180895 | 6.215205 | 6.141801 | 6.168101 | 6.335129 |
| 55770_at | 5.927961 | 5.919832 | 6.218471 | 5.961988 | 6.331686 | 5.601288 | 6.421309 | 6.239149 |
| 55771_at | 3.773815 | 4.504422 | 2.828488 | 3.429924 | 3.049656 | 3.76287  | 5.553573 | 3.534088 |



|          |          |          |          |          |          |          |          |          |
|----------|----------|----------|----------|----------|----------|----------|----------|----------|
| 55773_at | 6.211488 | 5.999265 | 6.325342 | 6.936486 | 7.17204  | 5.787516 | 6.308038 | 7.000564 |
| 55775_at | 4.790074 | 3.953189 | 4.021169 | 4.179681 | 3.574063 | 3.568583 | 4.741358 | 4.609689 |
| 55776_at | 5.382839 | 4.790778 | 3.717706 | 4.257178 | 4.989958 | 4.311117 | 4.105768 | 4.427116 |
| 55777_at | 5.66891  | 5.296764 | 5.63276  | 5.509634 | 5.418188 | 5.272161 | 5.585949 | 5.810249 |
| 55778_at | 3.889892 | 4.240294 | 4.021142 | 3.45069  | 2.889259 | 3.733967 | 3.403386 | 3.304503 |
| 55779_at | 2.351275 | 1.986361 | 2.189628 | 2.139788 | 2.571605 | 3.109414 | 1.844654 | 2.692201 |
| 5577_at  | 7.409421 | 7.861894 | 7.726326 | 7.852204 | 6.598971 | 7.802958 | 7.904596 | 8.184036 |
| 55780_at | 6.764838 | 6.181828 | 6.619996 | 6.328005 | 6.432954 | 5.331398 | 6.027676 | 6.730851 |
| 55781_at | 5.144812 | 5.332176 | 4.977595 | 4.405094 | 5.03128  | 5.099145 | 4.671444 | 4.907608 |
| 55783_at | 3.508166 | 4.294456 | 4.164823 | 4.534551 | 4.094735 | 4.202706 | 3.951867 | 4.93403  |
| 55784_at | 4.65721  | 3.098428 | 4.929272 | 4.159621 | 4.085604 | 4.382814 | 4.159621 | 3.836095 |
| 55785_at | 5.536513 | 6.261848 | 4.90996  | 6.015337 | 5.06834  | 4.971177 | 5.902638 | 6.193267 |
| 55786_at | 3.916667 | 4.13691  | 2.964189 | 4.149415 | 3.281022 | 3.202684 | 4.103833 | 4.394379 |
| 55787_at | 5.026425 | 4.856258 | 4.489356 | 5.456564 | 3.406239 | 4.650845 | 4.675326 | 4.420233 |
| 55788_at | 8.356221 | 8.5446   | 8.186355 | 8.074579 | 8.562119 | 8.259806 | 7.963586 | 8.375152 |
| 55789_at | 2.828885 | 2.009397 | 1.894045 | 2.474869 | 1.989649 | 1.837822 | 1.849751 | 2.047093 |
| 5578_at  | 5.796579 | 6.606987 | 6.418843 | 5.887492 | 6.649479 | 6.707717 | 6.240031 | 6.9697   |
| 55790_at | 2.899748 | 2.587426 | 2.778566 | 2.657959 | 3.011458 | 2.93576  | 2.582795 | 2.208272 |
| 55791_at | 5.340081 | 5.82328  | 5.565211 | 5.937508 | 5.243477 | 4.84176  | 5.236953 | 5.879006 |
| 55793_at | 4.951725 | 5.150679 | 5.037515 | 5.286117 | 4.667846 | 4.918107 | 5.193418 | 4.618494 |
| 55794_at | 4.127144 | 4.404575 | 3.789294 | 2.971386 | 3.540959 | 4.024912 | 3.170605 | 3.761585 |
| 55795_at | 5.179231 | 5.256757 | 5.504669 | 5.721918 | 5.007447 | 4.976846 | 5.354713 | 5.584356 |
| 55796_at | 5.425092 | 6.004455 | 6.548482 | 6.292948 | 6.863366 | 6.537748 | 6.469538 | 6.144181 |
| 55799_at | 1.470956 | 1.423112 | 2.242443 | 2.386124 | 1.863776 | 1.695229 | 1.449163 | 1.733223 |
| 5579_at  | 4.439395 | 4.298412 | 2.786489 | 3.366899 | 4.213302 | 3.16078  | 4.261369 | 4.791407 |
| 55800_at | 2.50356  | 3.306025 | 2.592337 | 2.933084 | 1.861135 | 2.705858 | 3.156247 | 2.655526 |
| 55801_at | 1.115841 | 1.962102 | 1.067085 | 0.779531 | 0.835083 | 0.856209 | 1.503028 | 1.281449 |
| 55802_at | 5.137256 | 5.552241 | 5.125268 | 5.052052 | 5.319455 | 5.649074 | 5.533897 | 5.131604 |
| 55803_at | 3.612854 | 4.127722 | 3.517234 | 2.892643 | 3.227051 | 3.643724 | 2.844765 | 3.911477 |
| 55805_at | 4.553834 | 3.406619 | 4.220688 | 4.017302 | 4.52503  | 4.022275 | 4.033098 | 4.406243 |
| 55806_at | 3.333352 | 2.933985 | 2.42776  | 1.939298 | 3.289013 | 2.988972 | 2.643536 | 2.875873 |
| 55808_at | 2.354021 | 1.509548 | 1.719993 | 1.707933 | 1.346481 | 2.2922   | 1.583892 | 2.165206 |
| 55809_at | 4.063378 | 3.908753 | 4.499017 | 4.091946 | 3.44066  | 3.322377 | 3.17594  | 4.188101 |
| 5580_at  | 5.203611 | 5.308371 | 3.600987 | 4.68056  | 5.103576 | 4.903764 | 4.412373 | 4.842816 |
| 55810_at | 6.514373 | 6.748784 | 7.126057 | 7.048473 | 6.779562 | 6.793684 | 7.669659 | 5.593333 |
| 55811_at | 1.132532 | 1.746437 | 1.198774 | 0.978369 | 1.523747 | 1.522731 | 1.360781 | 1.755905 |
| 55812_at | 6.898042 | 6.380692 | 5.560377 | 5.870988 | 5.797952 | 6.490702 | 5.527594 | 6.055652 |
| 55813_at | 5.214039 | 4.735228 | 4.46143  | 4.822084 | 5.356254 | 4.924929 | 5.920523 | 6.490805 |
| 55814_at | 5.975426 | 6.349286 | 6.128834 | 6.546121 | 6.359638 | 6.557927 | 6.347002 | 6.5955   |
| 55815_at | 2.17566  | 2.199473 | 1.773023 | 1.301631 | 2.724647 | 2.023755 | 1.992073 | 1.75865  |
| 55816_at | 2.8449   | 1.994252 | 1.586437 | 2.700034 | 1.790133 | 2.058628 | 1.956557 | 1.94014  |
| 55818_at | 6.142218 | 6.021429 | 5.559079 | 6.102481 | 6.604061 | 5.672606 | 5.910654 | 6.53992  |
| 55819_at | 7.545318 | 7.537119 | 7.493363 | 6.873139 | 7.260192 | 7.715242 | 6.981398 | 6.984221 |
| 5581_at  | 3.751735 | 4.779189 | 4.881776 | 4.265305 | 4.133741 | 4.142364 | 4.553384 | 4.071599 |
| 55821_at | 1.682139 | 1.831558 | 1.775118 | 1.281793 | 1.680134 | 1.881269 | 2.075857 | 2.626282 |
| 55823_at | 6.766368 | 6.690815 | 6.415633 | 6.397463 | 6.227544 | 6.868748 | 6.5939   | 7.036441 |
| 55824_at | 3.934051 | 2.95582  | 3.566265 | 4.345819 | 3.707367 | 4.07798  | 3.739098 | 3.806077 |
| 55825_at | 4.993655 | 4.412216 | 3.359284 | 4.0441   | 3.036946 | 5.206883 | 3.365728 | 2.62157  |
| 55827_at | 7.503782 | 7.432703 | 7.419444 | 7.281141 | 7.699338 | 7.085804 | 7.02192  | 7.751235 |
| 55829_at | 7.798923 | 7.67996  | 7.732897 | 7.472388 | 7.298324 | 7.622022 | 7.534682 | 7.532031 |
| 5582_at  | 1.872101 | 1.853737 | 1.897164 | 1.473703 | 1.489744 | 1.838097 | 2.112323 | 2.49684  |

|          |          |          |          |          |          |          |          |          |
|----------|----------|----------|----------|----------|----------|----------|----------|----------|
| 55830_at | 8.24138  | 7.640432 | 7.28723  | 7.26556  | 6.838345 | 7.511933 | 7.445651 | 7.310411 |
| 55831_at | 7.295056 | 7.170059 | 6.870962 | 6.865955 | 6.756595 | 6.762396 | 6.653573 | 6.853063 |
| 55832_at | 6.832234 | 6.803557 | 6.954033 | 6.458796 | 7.153881 | 6.837319 | 6.39778  | 6.943422 |
| 55833_at | 7.538564 | 7.739643 | 7.782768 | 7.521118 | 7.320423 | 7.812427 | 7.821406 | 7.467624 |
| 55835_at | 3.499109 | 2.905615 | 2.618271 | 2.973376 | 2.492189 | 3.544766 | 2.836804 | 2.710678 |
| 55837_at | 7.274502 | 7.093854 | 6.948119 | 6.741768 | 6.883187 | 6.841454 | 6.581032 | 7.578342 |
| 55839_at | 4.274681 | 3.439943 | 3.750988 | 3.960335 | 2.673952 | 3.209764 | 4.28849  | 3.56924  |
| 5583_at  | 6.276507 | 6.399818 | 6.898849 | 7.298187 | 7.085749 | 6.919327 | 7.320193 | 6.962736 |
| 55840_at | 3.840344 | 3.551683 | 3.056691 | 4.141439 | 2.871776 | 3.242917 | 3.214227 | 4.033976 |
| 55841_at | 4.623663 | 5.406821 | 5.171188 | 5.39915  | 5.367557 | 5.59776  | 5.305051 | 4.710312 |
| 55843_at | 4.487968 | 4.16415  | 3.701032 | 3.11123  | 1.671737 | 4.414784 | 2.795739 | 3.375532 |
| 55844_at | 5.747203 | 5.699209 | 5.555725 | 5.145708 | 5.535556 | 5.191493 | 4.535264 | 5.710002 |
| 55845_at | 8.861495 | 8.886294 | 8.765392 | 9.028831 | 8.793873 | 8.670172 | 8.697501 | 8.396407 |
| 55846_at | 6.166352 | 5.56359  | 5.899002 | 5.235036 | 6.404947 | 6.214331 | 6.409894 | 5.524415 |
| 55847_at | 5.082525 | 4.904206 | 4.886571 | 4.581432 | 5.350728 | 4.761397 | 4.105023 | 5.156271 |
| 55848_at | 5.693378 | 5.520011 | 5.389793 | 4.86282  | 4.614775 | 5.294738 | 5.615487 | 5.528542 |
| 5584_at  | 7.8975   | 7.087918 | 7.828743 | 7.010727 | 7.208787 | 7.248837 | 6.665487 | 7.765098 |
| 55850_at | 7.09893  | 6.310803 | 5.905818 | 5.796877 | 6.309665 | 6.168661 | 6.116718 | 5.919911 |
| 55851_at | 6.460693 | 5.458664 | 5.834604 | 5.976728 | 4.877592 | 5.045974 | 5.414679 | 4.795138 |
| 55852_at | 5.407377 | 5.219427 | 5.188483 | 4.940426 | 5.144014 | 5.620249 | 5.359681 | 5.787234 |
| 55853_at | 1.402641 | 1.913702 | 1.465654 | 1.025578 | 1.748184 | 1.60861  | 1.614818 | 1.490576 |
| 55854_at | 7.969392 | 8.147096 | 7.712763 | 7.89968  | 8.084388 | 7.848855 | 7.662701 | 7.737694 |
| 55855_at | 2.159437 | 2.012833 | 2.514528 | 2.470467 | 1.895285 | 2.595578 | 2.366121 | 1.655656 |
| 55856_at | 6.865292 | 5.903553 | 5.907531 | 5.428317 | 6.942577 | 5.998251 | 5.398764 | 6.008302 |
| 55857_at | 6.271497 | 5.449785 | 6.201772 | 5.278158 | 5.316534 | 5.706606 | 5.867045 | 5.741056 |
| 55858_at | 6.953974 | 7.212701 | 7.181374 | 7.223081 | 6.575667 | 6.597209 | 7.160992 | 7.472248 |
| 55859_at | 7.39274  | 7.860682 | 7.279855 | 7.545909 | 8.018031 | 6.635416 | 7.158328 | 6.609882 |
| 5585_at  | 6.929142 | 6.113038 | 5.983748 | 6.696545 | 6.267618 | 6.003291 | 6.350665 | 5.87873  |
| 55860_at | 6.798477 | 6.805992 | 6.506283 | 6.418992 | 6.392012 | 6.409005 | 6.151699 | 6.543413 |
| 55861_at | 1.307514 | 2.910573 | 2.072726 | 3.119672 | 2.587582 | 2.607923 | 2.82755  | 3.79954  |
| 55862_at | 5.81329  | 6.39109  | 6.172032 | 6.088019 | 6.001342 | 4.996387 | 5.665038 | 6.05092  |
| 55863_at | 7.362018 | 6.905986 | 6.78596  | 7.221437 | 6.611402 | 6.66645  | 6.850919 | 7.752693 |
| 55867_at | 4.48516  | 4.404561 | 4.401537 | 2.381652 | 4.363112 | 4.550475 | 3.767065 | 4.912156 |
| 55869_at | 5.10684  | 4.576208 | 4.947005 | 4.623341 | 4.461638 | 4.613054 | 5.352555 | 4.580052 |
| 5586_at  | 6.924736 | 7.064996 | 6.775507 | 7.047306 | 7.393754 | 6.770652 | 6.801877 | 7.619055 |
| 55870_at | 6.217053 | 6.793069 | 7.12736  | 7.015543 | 7.097414 | 6.904641 | 6.696049 | 6.942975 |
| 55872_at | 1.889875 | 1.545401 | 1.780727 | 2.495129 | 2.428974 | 1.828632 | 1.81385  | 2.63201  |
| 55876_at | 2.092279 | 1.713743 | 1.92974  | 2.081964 | 2.113792 | 1.39677  | 1.626622 | 2.075159 |
| 55879_at | 1.749872 | 1.402486 | 1.815365 | 1.493323 | 1.37701  | 2.398731 | 2.84566  | 1.68623  |
| 5587_at  | 6.216449 | 6.126338 | 5.529235 | 5.925694 | 5.51971  | 6.07844  | 5.9077   | 6.013117 |
| 55884_at | 8.0882   | 7.931157 | 7.68998  | 7.509592 | 7.602695 | 8.111681 | 7.463825 | 8.282997 |
| 55885_at | 3.976001 | 3.680126 | 2.760178 | 3.603607 | 3.495319 | 3.798591 | 3.859559 | 3.549729 |
| 55888_at | 3.462732 | 2.488193 | 3.816443 | 2.710602 | 2.744925 | 2.839774 | 3.272524 | 3.596205 |
| 55889_at | 0.650932 | 1.799067 | 0.562853 | 0.759881 | 0.445117 | 1.048068 | 0.606299 | 0.51494  |
| 5588_at  | 1.855675 | 1.19566  | 1.834302 | 1.619013 | 1.683754 | 1.968194 | 1.462537 | 1.531711 |
| 55890_at | 4.458306 | 4.00678  | 3.535168 | 4.359453 | 4.195577 | 4.030036 | 2.863452 | 3.99055  |
| 55891_at | 1.327373 | 1.443739 | 2.085313 | 2.41559  | 2.526287 | 1.842808 | 0.860955 | 1.416329 |
| 55892_at | 5.273275 | 5.857196 | 4.856427 | 5.034702 | 6.060931 | 5.398734 | 5.116978 | 6.108355 |
| 55893_at | 4.881305 | 4.986133 | 4.947371 | 4.518683 | 4.673479 | 5.020344 | 4.944555 | 4.981181 |
| 55897_at | 4.352351 | 2.630872 | 4.5963   | 3.370527 | 4.498902 | 4.397618 | 3.573189 | 3.60731  |
| 55898_at | 3.883507 | 4.535377 | 4.593203 | 3.967953 | 4.202389 | 3.750929 | 3.735841 | 3.864734 |

|          |          |          |          |          |          |          |          |          |
|----------|----------|----------|----------|----------|----------|----------|----------|----------|
| 5589_at  | 6.458622 | 6.684569 | 6.93958  | 6.990582 | 6.196484 | 7.013096 | 6.994384 | 6.196533 |
| 558_at   | 6.109102 | 6.592108 | 7.138636 | 6.723811 | 5.913893 | 5.882257 | 6.674462 | 6.92439  |
| 55900_at | 4.052411 | 3.995474 | 4.248828 | 4.687881 | 4.090027 | 4.019141 | 4.290434 | 4.229514 |
| 55901_at | 1.577136 | 3.103545 | 3.494655 | 2.62738  | 2.624668 | 2.189127 | 3.152994 | 2.933789 |
| 55902_at | 5.384655 | 5.479709 | 5.080114 | 5.288924 | 4.384216 | 4.763474 | 5.146444 | 6.061647 |
| 55904_at | 7.612762 | 7.944539 | 7.889687 | 8.264837 | 8.015533 | 7.910406 | 7.654326 | 7.731421 |
| 55905_at | 7.637174 | 7.257886 | 7.406974 | 7.834614 | 6.955809 | 7.334315 | 7.456456 | 6.725688 |
| 55906_at | 3.83923  | 4.522293 | 5.064295 | 3.901241 | 4.403198 | 5.037052 | 3.302617 | 3.763346 |
| 55907_at | 7.076004 | 7.262494 | 6.929677 | 7.396473 | 7.072231 | 6.6543   | 6.187894 | 7.512767 |
| 55908_at | 2.920831 | 2.931447 | 2.021283 | 3.193836 | 3.077335 | 3.071614 | 3.226715 | 3.090152 |
| 55909_at | 3.932985 | 3.231569 | 2.699004 | 2.66757  | 2.980927 | 4.361651 | 4.783423 | 2.772085 |
| 5590_at  | 3.828718 | 2.384834 | 3.615259 | 3.0924   | 2.712315 | 3.688559 | 3.193572 | 3.686506 |
| 55911_at | 4.143578 | 2.754938 | 2.747244 | 3.638664 | 2.661657 | 2.944093 | 3.019903 | 2.921714 |
| 55914_at | 7.742093 | 7.828595 | 7.755473 | 7.62439  | 7.916359 | 7.392355 | 7.820588 | 8.056318 |
| 55915_at | 5.350938 | 5.405361 | 5.288705 | 5.159323 | 5.732467 | 4.542506 | 5.206907 | 5.707293 |
| 55916_at | 4.315647 | 3.647438 | 4.116238 | 3.790248 | 4.059285 | 4.361254 | 4.401529 | 3.603146 |
| 55917_at | 7.206486 | 7.366249 | 6.951483 | 7.799555 | 7.104904 | 7.116077 | 7.324924 | 7.269806 |
| 5591_at  | 5.151984 | 6.018697 | 6.392969 | 6.183959 | 5.939972 | 5.779995 | 6.464607 | 6.675781 |
| 55920_at | 6.244465 | 6.338093 | 5.913291 | 6.897218 | 6.562977 | 6.439811 | 6.670091 | 6.241387 |
| 55922_at | 3.839272 | 3.768731 | 4.188644 | 4.27483  | 4.201885 | 3.854275 | 3.976169 | 4.318579 |
| 55924_at | 2.828274 | 3.175956 | 2.273451 | 2.644542 | 3.146835 | 2.027288 | 2.870008 | 2.584838 |
| 55929_at | 4.764472 | 4.810247 | 5.033019 | 5.058516 | 4.814752 | 4.705574 | 4.506343 | 5.341784 |
| 5592_at  | 5.398112 | 5.419421 | 5.012088 | 5.452549 | 6.009821 | 5.654132 | 5.606401 | 6.298171 |
| 55930_at | 5.296029 | 5.462783 | 5.446885 | 5.159967 | 5.176131 | 4.594871 | 4.652536 | 5.669083 |
| 55937_at | 7.778349 | 6.506653 | 6.765759 | 5.492667 | 7.891378 | 7.19338  | 5.571122 | 7.14385  |
| 5593_at  | 4.580177 | 4.198035 | 4.79336  | 4.306885 | 3.525375 | 3.156637 | 2.893351 | 2.968794 |
| 5594_at  | 8.439077 | 8.119994 | 7.980498 | 8.398953 | 7.994382 | 8.182556 | 8.316696 | 8.198922 |
| 55954_at | 5.832262 | 4.227132 | 4.340436 | 3.928721 | 4.219577 | 4.286234 | 4.441905 | 4.491926 |
| 55957_at | 6.250349 | 6.307948 | 5.272244 | 5.862423 | 5.745727 | 5.603212 | 5.575388 | 5.551771 |
| 55958_at | 6.462116 | 6.526677 | 6.545815 | 6.078412 | 6.79315  | 5.889492 | 6.908312 | 6.78129  |
| 55959_at | 8.720245 | 8.431663 | 9.236128 | 7.678029 | 7.619204 | 8.925919 | 8.886294 | 8.200312 |
| 5595_at  | 7.867249 | 7.511981 | 7.510042 | 7.847104 | 7.241454 | 8.288292 | 8.342415 | 7.258338 |
| 55964_at | 2.393337 | 2.17804  | 2.385534 | 1.570463 | 1.699338 | 1.930341 | 1.783451 | 2.475467 |
| 55966_at | 6.144098 | 5.812965 | 5.99187  | 6.353684 | 5.530519 | 6.06622  | 5.269917 | 4.974537 |
| 55967_at | 9.192314 | 8.802051 | 9.228755 | 9.180902 | 9.375569 | 9.36421  | 9.141062 | 8.935306 |
| 55968_at | 6.854886 | 6.03468  | 6.588305 | 6.653019 | 6.356675 | 6.825316 | 6.491494 | 6.994274 |
| 55969_at | 2.549046 | 2.723593 | 2.015167 | 1.497034 | 2.151632 | 1.791046 | 1.748235 | 1.739991 |
| 5596_at  | 1.640752 | 2.525679 | 1.671031 | 1.753208 | 2.171819 | 1.195275 | 1.832412 | 2.024189 |
| 55970_at | 7.992407 | 8.275216 | 8.2766   | 8.562238 | 8.827045 | 7.961113 | 7.891318 | 9.08214  |
| 55971_at | 5.461447 | 4.830966 | 5.600176 | 5.211321 | 4.634765 | 5.658926 | 3.951839 | 4.05524  |
| 55972_at | 6.447245 | 6.062486 | 6.133308 | 6.366508 | 5.723656 | 5.491329 | 5.34769  | 6.923643 |
| 55973_at | 6.267413 | 6.289634 | 6.139438 | 5.936713 | 6.156556 | 5.99376  | 5.71446  | 6.561749 |
| 55974_at | 6.581288 | 6.908947 | 7.135493 | 6.511096 | 6.490032 | 6.405486 | 7.037447 | 6.72479  |
| 55975_at | 4.796931 | 5.284463 | 5.209344 | 4.729471 | 5.502986 | 4.336664 | 5.240422 | 4.689569 |
| 5597_at  | 3.720633 | 3.808388 | 3.9079   | 3.711692 | 3.739604 | 3.260602 | 4.704726 | 4.19392  |
| 5598_at  | 5.827119 | 5.041989 | 5.36403  | 5.668985 | 4.599848 | 5.052696 | 5.251821 | 4.844104 |
| 55998_at | 1.070946 | 2.146609 | 2.601435 | 1.722831 | 1.856374 | 2.370831 | 2.661239 | 2.882588 |
| 55999_at | 2.077589 | 1.429378 | 1.431454 | 1.570128 | 2.934973 | 1.535722 | 1.155756 | 1.349627 |
| 5599_at  | 5.299304 | 4.053918 | 5.696231 | 4.844122 | 4.777766 | 5.669285 | 5.321411 | 5.474422 |
| 55_at    | 4.256437 | 2.617579 | 4.273229 | 2.422159 | 5.831769 | 5.283248 | 2.100213 | 2.158544 |
| 56000_at | 4.110225 | 3.049319 | 2.936884 | 3.622995 | 4.062023 | 4.049265 | 2.879788 | 4.091565 |

|          |          |          |          |          |          |          |          |          |
|----------|----------|----------|----------|----------|----------|----------|----------|----------|
| 56005_at | 6.200239 | 5.668617 | 5.695232 | 5.666024 | 6.546322 | 5.845496 | 5.850156 | 4.809314 |
| 56006_at | 5.456884 | 5.909192 | 5.718491 | 5.939705 | 5.048083 | 5.555273 | 4.953433 | 5.75882  |
| 5600_at  | 2.886571 | 2.461138 | 2.520965 | 2.770701 | 2.198594 | 3.931733 | 2.75675  | 1.76206  |
| 5601_at  | 6.270927 | 6.678166 | 5.757145 | 6.178835 | 5.818317 | 6.110566 | 5.951019 | 5.91956  |
| 5602_at  | 3.902432 | 3.755956 | 4.136137 | 3.321665 | 3.199644 | 4.187114 | 2.703155 | 4.063154 |
| 56033_at | 1.488072 | 2.764082 | 1.548009 | 1.721354 | 2.186636 | 2.651672 | 2.623744 | 1.606491 |
| 56034_at | 6.508384 | 4.946305 | 6.284488 | 5.969849 | 5.878467 | 6.472143 | 6.476123 | 6.995131 |
| 5603_at  | 2.374842 | 2.22842  | 2.168593 | 2.988968 | 2.033561 | 2.820339 | 1.800908 | 2.311799 |
| 5604_at  | 4.940616 | 5.51009  | 5.881005 | 5.507429 | 5.672038 | 5.009771 | 5.842354 | 5.605465 |
| 56052_at | 3.994199 | 2.988311 | 5.924146 | 2.953291 | 5.728755 | 5.263714 | 5.94068  | 3.770355 |
| 56061_at | 5.304578 | 5.440462 | 5.559464 | 5.31771  | 5.722827 | 4.856404 | 5.585429 | 5.629765 |
| 56062_at | 1.261854 | 1.483529 | 1.275818 | 1.225955 | 2.358981 | 1.27943  | 1.78221  | 1.276098 |
| 56063_at | 5.224914 | 5.240852 | 4.983122 | 4.888142 | 4.212328 | 4.493813 | 3.894443 | 4.754555 |
| 5606_at  | 4.070654 | 3.293694 | 4.64492  | 4.045785 | 3.042208 | 3.446512 | 3.994364 | 3.030509 |
| 5607_at  | 4.759482 | 4.452101 | 5.868563 | 4.693506 | 5.582371 | 5.365928 | 5.36012  | 5.542599 |
| 5608_at  | 3.746527 | 4.5182   | 2.890621 | 2.446801 | 4.838456 | 4.116331 | 2.992199 | 3.06583  |
| 56097_at | 1.982916 | 0.94906  | 1.694766 | 2.13227  | 3.12481  | 1.18438  | 1.254003 | 1.633464 |
| 56098_at | 1.20378  | 1.148031 | 1.08191  | 1.484948 | 1.5736   | 1.34071  | 1.045555 | 1.055393 |
| 56099_at | 4.712236 | 5.422868 | 4.186856 | 5.830999 | 5.742024 | 4.930216 | 4.5404   | 5.583453 |
| 5609_at  | 5.528201 | 5.042433 | 4.878049 | 5.017823 | 4.331122 | 4.869603 | 4.531443 | 4.098143 |
| 56100_at | 3.77789  | 4.415951 | 2.148792 | 3.643795 | 2.761975 | 4.437822 | 3.451436 | 4.610473 |
| 56101_at | 5.330467 | 5.878914 | 5.127906 | 5.294901 | 5.720315 | 4.881698 | 5.130687 | 5.243169 |
| 56102_at | 3.197531 | 3.296807 | 2.533716 | 3.400578 | 2.068905 | 2.340928 | 2.71378  | 3.884952 |
| 56103_at | 4.000274 | 3.844222 | 4.00851  | 3.32234  | 2.991651 | 3.287177 | 3.221091 | 3.776065 |
| 56104_at | 4.928951 | 4.610482 | 5.548659 | 3.942737 | 3.697935 | 5.013173 | 4.999443 | 4.456096 |
| 56105_at | 2.510447 | 2.789674 | 3.635648 | 3.230202 | 3.442597 | 3.532504 | 4.727332 | 2.67081  |
| 56106_at | 3.963064 | 4.719735 | 4.879322 | 4.469509 | 3.550989 | 4.262413 | 4.955057 | 4.63744  |
| 56107_at | 3.342359 | 3.967117 | 4.911159 | 3.771064 | 3.472499 | 4.647314 | 3.892512 | 3.636664 |
| 56108_at | 3.922502 | 4.882869 | 4.783459 | 4.671561 | 2.922597 | 4.861682 | 5.205492 | 3.80113  |
| 56109_at | 2.87407  | 4.207211 | 4.605784 | 4.50594  | 3.523817 | 4.157992 | 4.840221 | 3.990471 |
| 5610_at  | 6.345456 | 6.527899 | 6.518785 | 6.345527 | 6.568267 | 6.276623 | 6.392013 | 6.240438 |
| 56110_at | 2.803599 | 4.253609 | 1.850114 | 2.26549  | 2.832372 | 3.80433  | 3.813084 | 2.412984 |
| 56111_at | 2.557877 | 1.674373 | 3.336717 | 3.674329 | 3.351799 | 2.667101 | 3.758605 | 3.338145 |
| 56112_at | 3.258907 | 4.383544 | 4.372569 | 2.877146 | 4.141323 | 3.620559 | 4.629526 | 3.708059 |
| 56113_at | 3.285708 | 5.20045  | 3.564052 | 2.648527 | 1.502082 | 4.182022 | 2.861902 | 1.715369 |
| 56114_at | 1.9126   | 3.138123 | 1.609915 | 1.353262 | 1.010812 | 2.264149 | 1.753875 | 2.057591 |
| 5611_at  | 7.873419 | 8.17517  | 8.332276 | 8.098395 | 8.035353 | 7.814935 | 8.140657 | 8.196741 |
| 56120_at | 1.838113 | 1.539068 | 1.579984 | 1.45588  | 1.201968 | 1.768418 | 1.821634 | 2.008712 |
| 56121_at | 3.849955 | 3.273397 | 3.148924 | 3.570306 | 1.969879 | 4.464509 | 2.995758 | 3.334219 |
| 56122_at | 1.97575  | 5.173303 | 3.543326 | 4.439117 | 3.939054 | 2.524318 | 2.14534  | 4.883917 |
| 56123_at | 3.496882 | 5.174627 | 4.062756 | 4.615457 | 4.80669  | 3.429713 | 4.905352 | 4.461228 |
| 56124_at | 4.429394 | 6.334837 | 3.009041 | 5.562805 | 4.33324  | 5.448695 | 3.328668 | 6.596975 |
| 56125_at | 1.733361 | 4.848478 | 3.67088  | 1.439918 | 2.340913 | 2.463263 | 1.404202 | 3.523259 |
| 56126_at | 4.052932 | 5.725557 | 5.893944 | 4.040762 | 5.409727 | 4.033609 | 4.267299 | 5.193945 |
| 56127_at | 3.027444 | 5.198635 | 4.856714 | 4.098963 | 4.207663 | 3.028348 | 4.304443 | 3.491078 |
| 56128_at | 3.180906 | 1.37374  | 1.053077 | 3.335542 | 2.542435 | 0.949184 | 1.430357 | 0.921093 |
| 56129_at | 2.825899 | 3.319293 | 4.430796 | 2.446723 | 2.755899 | 2.44438  | 3.325415 | 2.943151 |
| 56130_at | 1.579252 | 1.638443 | 3.466233 | 0.977509 | 1.887191 | 1.525975 | 2.7123   | 4.002971 |
| 56131_at | 4.066319 | 3.516242 | 4.228521 | 3.884039 | 3.833654 | 4.353747 | 3.083759 | 4.985183 |
| 56132_at | 3.466016 | 4.352883 | 3.713732 | 2.874317 | 5.321389 | 2.578312 | 3.08063  | 4.090813 |
| 56133_at | 4.21806  | 4.805379 | 3.791818 | 3.594753 | 3.856142 | 2.839201 | 4.196579 | 5.38196  |

|          |          |          |          |          |          |          |          |          |
|----------|----------|----------|----------|----------|----------|----------|----------|----------|
| 56134_at | 2.854098 | 2.415575 | 2.156349 | 1.777198 | 4.237464 | 3.853523 | 2.398633 | 2.535112 |
| 56135_at | 1.436956 | 2.659553 | 1.605494 | 4.144433 | 4.50123  | 2.554738 | 2.4686   | 1.706945 |
| 56136_at | 0.417724 | 1.625564 | 1.436481 | 1.964018 | 2.574351 | 1.447297 | 1.847792 | 2.912282 |
| 56137_at | 2.970739 | 3.511299 | 3.376685 | 3.297553 | 3.732417 | 2.932123 | 3.206074 | 4.115422 |
| 56138_at | 2.301452 | 2.521164 | 1.600847 | 1.718031 | 1.514131 | 2.612666 | 3.390936 | 1.887227 |
| 56139_at | 2.333404 | 2.307756 | 2.158823 | 2.4326   | 2.441081 | 2.872053 | 2.491543 | 2.587048 |
| 5613_at  | 3.605432 | 3.902075 | 2.3727   | 2.36824  | 5.112654 | 5.405296 | 3.897507 | 3.641356 |
| 56140_at | 2.336374 | 1.665777 | 3.2514   | 1.446324 | 2.220516 | 1.494898 | 1.833722 | 1.628952 |
| 56141_at | 1.43676  | 1.088092 | 1.835772 | 1.062949 | 1.832917 | 0.974514 | 1.970924 | 1.604749 |
| 56142_at | 1.522156 | 0.909638 | 1.318109 | 3.052572 | 1.65508  | 2.757124 | 2.070601 | 1.18937  |
| 56143_at | 2.84976  | 1.579388 | 1.529536 | 2.016945 | 1.273637 | 2.777681 | 2.031169 | 2.068022 |
| 56144_at | 1.686187 | 1.485962 | 2.263424 | 1.977442 | 1.314296 | 1.113299 | 2.578043 | 3.759988 |
| 56145_at | 2.821158 | 2.051186 | 2.679199 | 1.746491 | 3.379293 | 2.158077 | 2.942005 | 2.972475 |
| 56146_at | 0.917324 | 1.811962 | 1.281944 | 1.561949 | 1.384096 | 1.895904 | 1.139722 | 1.752633 |
| 56147_at | 2.19522  | 1.358322 | 1.611702 | 1.663192 | 1.450137 | 3.306181 | 2.832554 | 2.215556 |
| 56154_at | 1.182536 | 0.611078 | 1.678422 | 1.397659 | 1.735493 | 0.819338 | 0.77792  | 1.452896 |
| 56155_at | 1.66627  | 1.735334 | 1.793839 | 2.024479 | 2.469839 | 1.818988 | 1.756995 | 2.03069  |
| 56156_at | 1.664952 | 1.377915 | 1.323406 | 1.406362 | 1.517172 | 1.509934 | 1.894601 | 1.750932 |
| 56157_at | 1.995557 | 2.40697  | 1.714178 | 1.252036 | 1.796978 | 1.384443 | 1.498866 | 2.039446 |
| 56158_at | 1.002363 | 0.872781 | 1.167206 | 1.120014 | 2.330145 | 2.033865 | 1.053112 | 1.224287 |
| 56159_at | 1.556025 | 1.303834 | 0.991897 | 0.982351 | 1.522445 | 0.910115 | 1.249896 | 1.591807 |
| 56160_at | 5.022682 | 5.268634 | 4.983691 | 5.275972 | 5.188378 | 4.576899 | 4.613687 | 5.031772 |
| 56163_at | 1.305069 | 1.125102 | 1.034431 | 0.894829 | 1.406348 | 1.441705 | 0.949223 | 1.159778 |
| 56164_at | 2.097571 | 1.393207 | 1.105955 | 1.717026 | 2.056155 | 1.408445 | 1.142013 | 1.728141 |
| 56165_at | 1.40314  | 1.917802 | 1.552677 | 1.479317 | 1.257203 | 1.172863 | 1.507266 | 2.291734 |
| 56169_at | 1.516781 | 1.802853 | 1.582005 | 1.026865 | 2.420746 | 0.983905 | 1.663429 | 1.703237 |
| 5616_at  | 2.20386  | 2.756093 | 2.57592  | 3.108854 | 4.552479 | 2.801524 | 3.258186 | 2.623761 |
| 56171_at | 2.06768  | 2.052672 | 2.66919  | 1.726072 | 1.941006 | 2.141771 | 2.520926 | 2.490078 |
| 56172_at | 6.880889 | 6.789424 | 6.739728 | 6.591713 | 5.67134  | 6.736814 | 7.010388 | 6.811003 |
| 5617_at  | 1.074729 | 1.976226 | 1.086403 | 1.564301 | 1.295059 | 1.341814 | 1.404444 | 1.514133 |
| 56180_at | 4.822687 | 4.832473 | 4.183896 | 4.467026 | 3.619543 | 3.906145 | 4.256712 | 4.609285 |
| 56181_at | 7.37827  | 7.18849  | 6.741293 | 6.874125 | 7.014434 | 6.476265 | 6.699778 | 6.90087  |
| 5618_at  | 2.946478 | 2.388926 | 2.506251 | 1.037575 | 3.722038 | 2.637371 | 2.12038  | 1.929519 |
| 5619_at  | 1.60669  | 1.999468 | 1.680648 | 1.694226 | 2.560709 | 1.681394 | 1.711982 | 0.940484 |
| 56203_at | 1.172798 | 2.012685 | 1.195962 | 1.496024 | 1.685734 | 2.665103 | 1.89003  | 1.762387 |
| 56204_at | 5.740865 | 5.842865 | 6.633016 | 6.354515 | 6.648101 | 5.389104 | 6.191712 | 6.29655  |
| 5620_at  | 1.965195 | 1.941066 | 1.624021 | 1.570468 | 2.060269 | 1.813184 | 2.35739  | 2.710135 |
| 5621_at  | 5.916397 | 5.63403  | 5.288184 | 5.248316 | 5.361182 | 5.29381  | 5.582473 | 5.913874 |
| 5623_at  | 3.518461 | 2.255628 | 3.002539 | 1.835195 | 1.591796 | 3.431094 | 2.975004 | 1.599868 |
| 56241_at | 4.532936 | 3.758773 | 5.166329 | 4.125149 | 5.846972 | 3.501701 | 3.884462 | 4.615978 |
| 56242_at | 4.741191 | 4.868328 | 4.686163 | 4.630678 | 5.175085 | 5.686269 | 5.113862 | 4.394332 |
| 56243_at | 5.787235 | 5.760967 | 5.959641 | 5.947957 | 5.715701 | 5.835549 | 5.428351 | 5.306881 |
| 56244_at | 2.034471 | 2.161732 | 2.194602 | 2.336173 | 2.248807 | 1.783324 | 2.338104 | 1.82491  |
| 56245_at | 4.013217 | 3.763422 | 3.992385 | 4.290921 | 3.405952 | 6.550062 | 4.642992 | 4.65623  |
| 56246_at | 1.607382 | 2.343663 | 2.275491 | 2.087393 | 1.882392 | 2.051397 | 1.856952 | 1.634774 |
| 5624_at  | 2.856979 | 3.907227 | 3.257188 | 3.820573 | 3.123623 | 3.602733 | 3.486388 | 3.287421 |
| 56252_at | 7.289295 | 7.766922 | 7.653241 | 7.771413 | 7.446291 | 7.722703 | 7.409657 | 7.371352 |
| 56253_at | 1.292893 | 1.148714 | 1.143146 | 1.420828 | 3.312557 | 0.87509  | 1.476438 | 1.050279 |
| 56254_at | 5.947992 | 6.342315 | 6.329491 | 6.168799 | 5.819187 | 6.507673 | 5.983706 | 6.430306 |
| 56255_at | 6.654751 | 6.127863 | 6.235151 | 6.599486 | 7.334457 | 6.566402 | 6.866585 | 7.316667 |
| 56256_at | 3.062338 | 2.533182 | 1.677958 | 2.614806 | 1.435319 | 2.541117 | 1.441854 | 1.471788 |

|          |          |          |          |          |          |          |          |          |
|----------|----------|----------|----------|----------|----------|----------|----------|----------|
| 56257_at | 6.170292 | 5.709827 | 5.766809 | 5.703535 | 5.778568 | 5.562693 | 5.409147 | 5.797644 |
| 56259_at | 4.839595 | 5.728721 | 5.348665 | 5.058557 | 6.518466 | 5.704098 | 5.55812  | 5.914497 |
| 5625_at  | 3.118511 | 1.590849 | 1.313938 | 2.292841 | 1.837794 | 1.374302 | 1.037891 | 1.871773 |
| 56260_at | 4.261615 | 2.811414 | 5.303014 | 2.008906 | 3.373564 | 4.25103  | 0.923836 | 1.249965 |
| 56261_at | 5.716966 | 5.283912 | 5.382942 | 5.628092 | 5.77747  | 5.168162 | 6.447573 | 5.832411 |
| 56262_at | 4.353169 | 4.821251 | 4.930842 | 5.222671 | 4.716921 | 4.954564 | 4.402959 | 4.82943  |
| 56265_at | 6.080878 | 6.469394 | 6.059232 | 4.57481  | 3.827807 | 7.057205 | 3.458715 | 5.21934  |
| 56267_at | 6.716023 | 6.275105 | 6.475085 | 5.561479 | 6.628215 | 5.915732 | 5.739347 | 6.721316 |
| 56269_at | 2.035289 | 1.572312 | 1.447479 | 1.990609 | 1.9377   | 1.651892 | 1.50159  | 1.359202 |
| 5626_at  | 2.232802 | 2.915083 | 3.09058  | 2.947017 | 2.49938  | 2.157222 | 2.858454 | 2.942873 |
| 56270_at | 6.591997 | 7.246456 | 6.187286 | 6.474553 | 6.864545 | 6.293853 | 6.645036 | 6.468718 |
| 56271_at | 8.280005 | 9.049166 | 8.286826 | 8.491465 | 8.307    | 8.180238 | 8.07276  | 9.461006 |
| 5627_at  | 6.851416 | 6.971239 | 6.922677 | 7.050531 | 7.240376 | 7.152839 | 6.986377 | 6.943264 |
| 56287_at | 1.654472 | 1.002551 | 1.435002 | 1.36301  | 1.178098 | 1.377534 | 2.114302 | 1.391269 |
| 56288_at | 7.440196 | 7.525091 | 7.746394 | 7.407196 | 7.909923 | 7.847525 | 8.057021 | 8.339795 |
| 5629_at  | 2.453595 | 1.937367 | 3.404214 | 2.300011 | 2.641524 | 2.867418 | 3.536564 | 3.11493  |
| 56300_at | 1.98936  | 1.782795 | 3.612281 | 1.923751 | 3.159342 | 1.750486 | 3.369894 | 1.969931 |
| 56301_at | 3.199196 | 3.517171 | 3.552619 | 4.027797 | 3.701223 | 4.650038 | 3.837836 | 3.387554 |
| 56302_at | 1.318483 | 1.766366 | 1.819832 | 1.160411 | 2.13395  | 1.7      | 1.239944 | 2.289067 |
| 5630_at  | 1.377924 | 1.71223  | 1.835166 | 1.712736 | 1.387314 | 2.255736 | 1.357696 | 2.265677 |
| 56311_at | 1.045191 | 1.144288 | 1.067449 | 1.342103 | 0.979991 | 0.984774 | 0.806107 | 1.338781 |
| 5631_at  | 4.89555  | 5.284263 | 6.787142 | 5.43611  | 6.1388   | 5.299805 | 5.945809 | 6.087745 |
| 56339_at | 6.602055 | 6.795795 | 6.056128 | 6.171722 | 5.854062 | 6.125025 | 5.713992 | 5.240869 |
| 56341_at | 1.780384 | 1.767868 | 1.74712  | 1.982863 | 2.436378 | 2.26568  | 1.935154 | 2.315577 |
| 56344_at | 1.362437 | 1.86553  | 2.29261  | 1.446869 | 2.463856 | 1.068999 | 1.638295 | 2.094421 |
| 5634_at  | 5.868954 | 5.665594 | 5.92001  | 6.016674 | 5.355778 | 5.598565 | 5.870838 | 5.425759 |
| 5635_at  | 5.287637 | 4.911317 | 4.76212  | 4.281912 | 4.798648 | 5.55127  | 5.298095 | 5.625674 |
| 5636_at  | 5.268597 | 5.272381 | 5.246278 | 5.448295 | 4.421186 | 4.60361  | 4.63349  | 5.75072  |
| 5638_at  | 4.535874 | 4.773339 | 3.555084 | 3.767257 | 4.176203 | 4.147775 | 4.309122 | 5.485919 |
| 5639_at  | 2.527109 | 2.407173 | 2.179489 | 2.002018 | 1.881975 | 1.770664 | 2.440415 | 2.235341 |
| 563_at   | 6.678725 | 5.943897 | 6.244835 | 3.674462 | 7.422847 | 6.678111 | 2.618672 | 7.142388 |
| 56413_at | 3.036661 | 3.039624 | 3.61338  | 2.859817 | 3.350571 | 2.459057 | 3.442543 | 2.895338 |
| 5641_at  | 7.776361 | 7.745645 | 8.09013  | 7.461039 | 8.412093 | 8.204924 | 8.210774 | 7.677102 |
| 5646_at  | 1.103952 | 2.82762  | 1.438879 | 2.190637 | 1.795551 | 1.5672   | 2.726058 | 1.741594 |
| 56474_at | 4.211353 | 4.169403 | 4.325677 | 4.643183 | 4.295995 | 4.105112 | 3.995909 | 5.5534   |
| 56475_at | 1.060267 | 1.611251 | 1.465764 | 1.657272 | 1.458187 | 1.613734 | 2.20934  | 2.133304 |
| 56477_at | 2.83097  | 3.408888 | 3.665547 | 2.759551 | 2.916166 | 2.915869 | 3.967256 | 2.955013 |
| 56478_at | 5.90969  | 6.235813 | 6.416325 | 5.900287 | 5.757272 | 6.472636 | 6.444816 | 6.029202 |
| 56479_at | 2.188595 | 1.496618 | 1.373784 | 2.295594 | 3.424986 | 1.573913 | 1.209514 | 2.2936   |
| 5648_at  | 2.233066 | 2.024882 | 2.069145 | 1.771799 | 2.95471  | 2.717521 | 2.356266 | 1.850451 |
| 5649_at  | 3.167846 | 2.691379 | 2.425389 | 2.589439 | 2.69327  | 4.950028 | 2.644493 | 2.996091 |
| 5650_at  | 8.721574 | 7.956719 | 9.025176 | 8.745023 | 8.23344  | 8.827686 | 9.219701 | 7.676099 |
| 5651_at  | 1.31814  | 1.569579 | 1.518857 | 1.337422 | 2.108355 | 1.536325 | 1.796216 | 2.021963 |
| 56521_at | 3.087393 | 2.947143 | 2.568493 | 2.695428 | 3.754538 | 4.742617 | 2.781388 | 4.711711 |
| 5652_at  | 4.810494 | 5.17625  | 3.867986 | 4.783068 | 5.12992  | 4.635793 | 4.068892 | 3.59611  |
| 5653_at  | 9.199962 | 8.927674 | 9.104935 | 9.340025 | 8.708066 | 9.075837 | 8.829681 | 8.352678 |
| 56547_at | 0.77859  | 1.115934 | 1.011082 | 1.302312 | 0.827089 | 1.070336 | 1.048158 | 0.984565 |
| 56548_at | 2.985075 | 3.570743 | 3.208132 | 2.710745 | 3.650134 | 3.195772 | 2.678061 | 2.842159 |
| 5654_at  | 10.73109 | 10.36455 | 10.43675 | 10.25983 | 10.03672 | 10.25826 | 10.20835 | 10.52275 |
| 5655_at  | 2.575901 | 1.799461 | 1.863145 | 1.774382 | 1.65386  | 2.009792 | 2.373093 | 2.617518 |
| 5657_at  | 1.266548 | 2.329712 | 2.366249 | 1.922552 | 1.910118 | 2.038154 | 2.24197  | 1.652572 |

|          |          |          |          |          |          |          |          |          |
|----------|----------|----------|----------|----------|----------|----------|----------|----------|
| 56603_at | 4.240177 | 3.141753 | 3.001619 | 3.294016 | 3.452589 | 2.953146 | 3.468301 | 2.655222 |
| 56605_at | 5.669112 | 6.310456 | 6.041028 | 5.663343 | 6.545252 | 5.136575 | 6.274337 | 6.261111 |
| 56606_at | 2.971016 | 3.058467 | 3.28741  | 4.254531 | 3.049452 | 4.549405 | 3.236462 | 2.621893 |
| 5660_at  | 9.987269 | 10.22521 | 10.30291 | 10.3935  | 9.96335  | 10.2668  | 10.28023 | 10.10783 |
| 56616_at | 6.0695   | 6.673797 | 6.148532 | 6.335351 | 6.159251 | 6.086382 | 6.565511 | 5.202601 |
| 56623_at | 3.939206 | 2.78277  | 3.638241 | 3.715569 | 3.330738 | 3.593893 | 3.490891 | 3.206253 |
| 56624_at | 2.220877 | 1.131115 | 2.071751 | 1.964728 | 1.712301 | 0.98633  | 1.54221  | 2.312782 |
| 5662_at  | 2.450961 | 2.795961 | 2.757979 | 3.389073 | 3.3597   | 2.522417 | 1.981402 | 2.517905 |
| 5663_at  | 6.777889 | 6.893387 | 6.37629  | 6.147676 | 6.445928 | 6.434318 | 6.794052 | 7.196278 |
| 56647_at | 6.526039 | 6.07993  | 5.6623   | 5.812551 | 6.913955 | 5.577431 | 4.375839 | 6.715082 |
| 56648_at | 6.669269 | 5.857079 | 6.760092 | 6.46091  | 5.007195 | 5.894036 | 7.608361 | 6.957215 |
| 56649_at | 2.846462 | 1.910518 | 2.614169 | 2.040535 | 2.870721 | 2.779393 | 2.125245 | 2.52962  |
| 5664_at  | 6.160656 | 5.780929 | 5.809998 | 6.174676 | 5.852666 | 5.153085 | 5.904264 | 6.267534 |
| 56650_at | 7.293199 | 7.408737 | 6.526134 | 7.530189 | 7.385058 | 6.765248 | 6.666205 | 7.551166 |
| 56651_at | 1.577318 | 2.14608  | 1.355587 | 1.09111  | 2.446419 | 0.869862 | 1.400649 | 1.702732 |
| 56652_at | 2.694271 | 2.636792 | 2.834238 | 2.274271 | 2.315554 | 3.331869 | 2.80894  | 2.622729 |
| 56654_at | 6.889507 | 6.615889 | 6.483616 | 6.852512 | 5.863156 | 6.757212 | 6.583212 | 4.29543  |
| 56655_at | 7.20548  | 7.740425 | 6.934851 | 7.323663 | 5.444522 | 7.423099 | 7.646971 | 7.722705 |
| 56656_at | 1.301582 | 1.138174 | 1.505813 | 1.242384 | 2.116474 | 1.717356 | 2.738938 | 1.251453 |
| 56658_at | 4.210372 | 2.224672 | 3.271849 | 3.408394 | 3.108837 | 2.617042 | 2.177783 | 3.48771  |
| 56659_at | 2.041694 | 1.762298 | 1.529386 | 2.511438 | 3.053964 | 1.975228 | 2.306726 | 1.979953 |
| 56660_at | 2.524477 | 1.118354 | 3.794165 | 1.761421 | 2.508162 | 2.824328 | 2.116379 | 2.553849 |
| 56662_at | 6.842409 | 6.664773 | 6.080573 | 6.772606 | 5.855983 | 7.005176 | 6.804047 | 4.996436 |
| 56663_at | 2.153305 | 1.928735 | 1.920609 | 1.945162 | 2.087329 | 3.193047 | 1.693266 | 2.126942 |
| 56664_at | 0.805754 | 0.758759 | 1.609161 | 0.886579 | 1.003474 | 2.479716 | 0.891416 | 0.873622 |
| 56666_at | 2.058162 | 2.784859 | 2.614951 | 2.459929 | 3.04055  | 3.40526  | 2.594386 | 2.705064 |
| 56667_at | 5.090047 | 2.844445 | 2.480019 | 1.220956 | 6.265702 | 4.482088 | 1.384474 | 1.581004 |
| 56670_at | 5.811034 | 5.355519 | 4.127951 | 4.282534 | 6.318653 | 5.390186 | 4.066346 | 4.79028  |
| 56672_at | 5.252868 | 5.318065 | 5.067338 | 5.539138 | 4.985569 | 5.149236 | 5.051327 | 4.433575 |
| 56673_at | 2.053443 | 2.535952 | 2.076838 | 1.924443 | 2.315052 | 1.660423 | 1.144682 | 1.533738 |
| 56674_at | 8.476586 | 8.353437 | 8.782504 | 8.689604 | 8.289952 | 8.318758 | 9.048157 | 7.85444  |
| 56675_at | 1.918894 | 1.601008 | 1.527919 | 1.667149 | 1.763078 | 1.547416 | 2.060016 | 2.567257 |
| 56676_at | 1.947186 | 1.964246 | 1.771142 | 1.576855 | 1.967366 | 1.768144 | 2.080201 | 1.449034 |
| 56681_at | 7.823704 | 8.861229 | 9.050273 | 8.992435 | 8.585311 | 8.605702 | 8.971023 | 8.782318 |
| 56683_at | 7.083774 | 7.624111 | 7.022846 | 6.802797 | 6.904221 | 6.727578 | 7.196156 | 7.332191 |
| 5669_at  | 2.192801 | 0.80407  | 1.15973  | 0.885724 | 1.541161 | 1.684141 | 1.07746  | 2.806247 |
| 566_at   | 2.723984 | 3.067928 | 2.778396 | 2.682847 | 3.009348 | 2.64468  | 2.959187 | 3.2181   |
| 56704_at | 3.710813 | 3.777868 | 4.746501 | 3.666075 | 4.303654 | 3.27667  | 4.5267   | 4.706045 |
| 5670_at  | 0.856224 | 1.18737  | 1.661765 | 1.053765 | 1.865613 | 1.021355 | 1.752912 | 1.152332 |
| 5671_at  | 3.331887 | 1.702011 | 1.496878 | 1.448685 | 1.895934 | 1.594907 | 2.263991 | 2.07566  |
| 56729_at | 2.799796 | 2.047519 | 2.480945 | 2.490273 | 2.959288 | 2.88716  | 2.056744 | 2.732786 |
| 5672_at  | 3.168721 | 3.002556 | 1.623674 | 2.361202 | 1.179801 | 3.30959  | 1.503654 | 1.9222   |
| 56731_at | 5.881066 | 6.233552 | 6.198683 | 6.958575 | 5.145378 | 6.030993 | 6.226463 | 4.511313 |
| 56751_at | 2.116356 | 1.779197 | 2.116186 | 2.149337 | 3.505719 | 2.257359 | 2.221512 | 2.094976 |
| 5676_at  | 1.217013 | 0.912292 | 1.278929 | 0.793641 | 1.224991 | 0.738873 | 1.025259 | 0.733995 |
| 56776_at | 5.959505 | 6.223694 | 5.950437 | 5.821432 | 5.162438 | 5.413911 | 5.90369  | 6.182191 |
| 5678_at  | 1.157427 | 2.630981 | 0.956457 | 0.988036 | 1.300075 | 0.99755  | 1.566261 | 1.728986 |
| 567_at   | 11.19193 | 11.38845 | 11.11338 | 11.2775  | 11.46376 | 10.74994 | 10.97462 | 11.43365 |
| 5680_at  | 1.084909 | 1.540978 | 1.316499 | 0.692549 | 2.407408 | 0.505162 | 0.780878 | 0.752868 |
| 5681_at  | 5.232126 | 4.926645 | 4.10989  | 5.718972 | 4.860476 | 4.528235 | 4.771681 | 4.652741 |
| 56829_at | 5.691285 | 6.881045 | 6.390187 | 6.157398 | 6.625242 | 6.224346 | 6.690127 | 6.414538 |

|          |          |          |          |          |          |          |          |          |
|----------|----------|----------|----------|----------|----------|----------|----------|----------|
| 5682_at  | 6.55575  | 6.37332  | 6.096661 | 6.250962 | 5.972465 | 5.728154 | 5.829171 | 6.354313 |
| 56832_at | 1.311414 | 1.266637 | 1.498969 | 1.601785 | 1.591756 | 1.208167 | 1.703082 | 1.818718 |
| 56833_at | 5.454259 | 6.619556 | 4.510518 | 4.719314 | 2.578794 | 4.116611 | 5.225851 | 6.366263 |
| 56834_at | 4.491854 | 4.576232 | 5.123537 | 4.448873 | 4.710726 | 4.549949 | 3.842315 | 5.126481 |
| 5683_at  | 6.923002 | 7.910143 | 6.852358 | 6.999406 | 7.482853 | 6.752613 | 6.578341 | 7.30105  |
| 56848_at | 3.709656 | 2.475262 | 2.962912 | 2.372677 | 2.841345 | 2.85937  | 2.959695 | 2.176849 |
| 56849_at | 5.970848 | 5.995394 | 6.061488 | 5.688427 | 5.765435 | 5.472749 | 5.385306 | 6.178947 |
| 5684_at  | 8.626666 | 8.780644 | 8.377123 | 8.735402 | 8.720479 | 8.39241  | 8.225444 | 8.956935 |
| 56850_at | 5.367412 | 5.260806 | 5.462282 | 4.950029 | 5.497448 | 5.130808 | 5.208102 | 3.959892 |
| 56851_at | 9.074025 | 9.553439 | 9.213033 | 9.115394 | 9.322796 | 8.836613 | 9.638744 | 9.115556 |
| 56852_at | 4.432201 | 4.396257 | 3.860849 | 4.608008 | 4.008661 | 4.253836 | 4.919195 | 4.440607 |
| 56853_at | 1.058354 | 1.668445 | 1.925778 | 2.415899 | 2.869439 | 2.223796 | 1.748544 | 1.555688 |
| 5685_at  | 7.712104 | 7.962741 | 7.655637 | 7.921715 | 8.075132 | 7.273505 | 7.576918 | 8.377971 |
| 5686_at  | 7.859076 | 8.039751 | 7.931864 | 7.540926 | 7.574714 | 7.199456 | 7.478964 | 8.194664 |
| 5687_at  | 7.506509 | 7.601012 | 6.64486  | 7.59765  | 7.029961 | 7.235604 | 7.260073 | 8.271453 |
| 56882_at | 7.052925 | 7.102789 | 6.53065  | 7.19851  | 7.000744 | 7.100477 | 7.089335 | 6.435329 |
| 56884_at | 1.522541 | 1.271352 | 1.419716 | 0.807193 | 1.281282 | 1.20021  | 1.408453 | 1.423965 |
| 56886_at | 5.251084 | 6.618131 | 6.480862 | 6.427372 | 5.643145 | 5.939514 | 6.617464 | 6.569964 |
| 56888_at | 6.919921 | 7.053601 | 6.664728 | 6.5582   | 7.034273 | 6.314583 | 6.450117 | 7.35621  |
| 56889_at | 8.044487 | 8.533673 | 8.463999 | 8.477144 | 8.418606 | 8.145477 | 8.476101 | 8.563649 |
| 5688_at  | 9.861332 | 9.614509 | 9.505895 | 9.467653 | 9.07911  | 9.66257  | 9.320085 | 9.313799 |
| 56890_at | 4.180977 | 4.353816 | 3.856874 | 2.83231  | 3.819431 | 4.448367 | 4.020553 | 4.224863 |
| 56891_at | 1.25764  | 0.791423 | 0.47844  | 0.694805 | 0.699618 | 0.991901 | 0.656303 | 1.058065 |
| 56892_at | 8.129636 | 8.213885 | 7.544799 | 8.102027 | 7.641922 | 7.719582 | 7.90526  | 7.964376 |
| 56893_at | 1.886098 | 4.662958 | 4.97802  | 4.746413 | 3.399455 | 3.515451 | 4.632211 | 4.127264 |
| 56894_at | 5.640273 | 6.135378 | 6.126253 | 5.519568 | 6.12471  | 6.075257 | 5.707026 | 6.163681 |
| 56895_at | 3.101848 | 3.686284 | 3.533998 | 4.135855 | 3.217398 | 4.598837 | 3.586649 | 3.97566  |
| 56896_at | 1.737805 | 1.560368 | 1.603812 | 1.111262 | 1.726471 | 1.573691 | 1.71908  | 1.655138 |
| 56897_at | 6.095192 | 6.055037 | 5.899381 | 5.699119 | 5.835103 | 6.043516 | 5.808185 | 6.197578 |
| 56898_at | 6.637447 | 6.173884 | 5.900764 | 5.665523 | 6.508419 | 5.723747 | 4.224492 | 5.612476 |
| 56899_at | 2.850315 | 2.531443 | 2.044722 | 2.251081 | 1.906034 | 2.263366 | 1.873606 | 3.152769 |
| 5689_at  | 8.912378 | 8.898414 | 9.122249 | 8.699079 | 8.763762 | 9.187367 | 8.7916   | 8.878884 |
| 56900_at | 7.688851 | 8.167507 | 8.35331  | 9.075782 | 8.257824 | 8.53059  | 8.770089 | 8.19676  |
| 56901_at | 6.434467 | 5.422592 | 5.995575 | 6.256487 | 5.75673  | 6.176063 | 6.453338 | 5.596099 |
| 56902_at | 4.682378 | 4.855623 | 4.239177 | 4.277687 | 3.539073 | 3.780713 | 5.156306 | 3.933591 |
| 56903_at | 1.257652 | 0.832985 | 1.600082 | 0.913328 | 1.382193 | 1.341339 | 1.178937 | 2.200284 |
| 56904_at | 6.220313 | 5.741047 | 5.934878 | 4.849387 | 5.306085 | 5.89222  | 4.841978 | 5.172966 |
| 56905_at | 4.922216 | 4.395557 | 4.666806 | 4.785523 | 3.968653 | 3.869093 | 4.816019 | 3.603813 |
| 56906_at | 3.564374 | 2.659259 | 3.412356 | 2.954412 | 2.088638 | 2.559107 | 3.536678 | 3.433644 |
| 56907_at | 6.975381 | 6.837299 | 7.058765 | 6.668635 | 6.422847 | 6.826638 | 6.881838 | 6.509356 |
| 5690_at  | 7.884271 | 8.138425 | 8.042627 | 8.02176  | 7.968696 | 8.105875 | 8.016308 | 8.035391 |
| 56910_at | 7.92731  | 8.493706 | 8.641731 | 8.743992 | 8.577693 | 8.273822 | 8.595554 | 8.95634  |
| 56911_at | 2.55682  | 1.870373 | 2.789791 | 3.10983  | 1.520364 | 1.538519 | 1.634514 | 3.395745 |
| 56912_at | 5.926193 | 6.197039 | 5.734188 | 5.710639 | 5.283678 | 5.727788 | 5.525888 | 5.609779 |
| 56913_at | 6.781892 | 6.344666 | 6.535962 | 6.286686 | 5.504656 | 6.391507 | 6.217006 | 6.69614  |
| 56914_at | 1.541025 | 1.970665 | 0.866028 | 1.491751 | 1.03826  | 1.662901 | 1.347645 | 1.59527  |
| 56915_at | 2.999356 | 2.457437 | 5.253007 | 2.868024 | 4.125953 | 3.820384 | 2.316329 | 1.942605 |
| 56916_at | 6.29636  | 6.915422 | 6.640775 | 6.640094 | 6.95908  | 6.458036 | 6.509018 | 6.742848 |
| 56918_at | 2.12898  | 1.917965 | 1.977464 | 2.0668   | 2.591585 | 1.763533 | 1.368651 | 2.427875 |
| 56919_at | 5.257577 | 5.452888 | 4.794134 | 5.185097 | 3.928437 | 5.199519 | 5.696926 | 4.532978 |
| 5691_at  | 8.561461 | 7.855926 | 7.703513 | 7.930129 | 8.052752 | 8.529621 | 7.648463 | 7.850329 |



|          |          |          |          |          |          |          |          |          |
|----------|----------|----------|----------|----------|----------|----------|----------|----------|
| 56920_at | 6.738089 | 5.694106 | 6.881646 | 6.162547 | 5.551234 | 6.846798 | 6.901282 | 5.634722 |
| 56922_at | 6.481273 | 5.855754 | 6.220877 | 5.398593 | 6.01778  | 5.553006 | 4.886331 | 6.210502 |
| 56923_at | 1.503977 | 1.494693 | 1.426965 | 1.451755 | 1.582311 | 1.508573 | 1.503977 | 2.655414 |
| 56924_at | 3.609833 | 2.76821  | 2.492085 | 2.621058 | 2.504984 | 2.651075 | 2.402812 | 1.688027 |
| 56925_at | 6.235143 | 5.899803 | 6.13967  | 6.114158 | 5.444858 | 6.085251 | 5.538142 | 6.308081 |
| 56926_at | 3.898314 | 4.158261 | 4.471487 | 4.226709 | 3.681704 | 3.423184 | 4.902097 | 3.670643 |
| 56927_at | 7.176859 | 7.286293 | 7.299273 | 7.2952   | 6.921594 | 7.305182 | 6.977334 | 6.021568 |
| 56928_at | 4.312224 | 4.420491 | 4.390476 | 4.314776 | 2.964376 | 4.992576 | 5.200361 | 3.901654 |
| 56929_at | 5.295614 | 4.720839 | 4.624063 | 4.950418 | 5.025542 | 5.328779 | 4.527199 | 4.989515 |
| 5692_at  | 10.0505  | 9.834545 | 9.652159 | 9.901192 | 10.17306 | 9.517801 | 9.44361  | 10.21045 |
| 56931_at | 3.757406 | 3.447121 | 3.482619 | 3.927954 | 3.85011  | 3.764847 | 4.069612 | 3.145184 |
| 56934_at | 6.986684 | 7.536251 | 7.18817  | 5.785298 | 6.075947 | 6.471708 | 5.808597 | 6.920761 |
| 56935_at | 3.094347 | 2.651796 | 3.334718 | 4.372265 | 2.591319 | 3.448732 | 3.212739 | 3.171775 |
| 56936_at | 1.481208 | 1.720439 | 1.562876 | 1.491998 | 1.574211 | 1.782572 | 1.771072 | 1.910902 |
| 56937_at | 6.020214 | 4.467775 | 4.779873 | 5.559272 | 5.632818 | 4.801222 | 5.089088 | 6.060133 |
| 56938_at | 2.315448 | 1.712394 | 1.80973  | 3.385976 | 1.804357 | 2.79976  | 1.773288 | 1.468944 |
| 5693_at  | 7.260586 | 7.392206 | 7.02344  | 6.612517 | 6.820466 | 7.428354 | 7.463117 | 7.542698 |
| 56940_at | 6.400892 | 6.020628 | 5.866274 | 6.316062 | 5.829992 | 6.134627 | 7.033439 | 6.110628 |
| 56941_at | 6.488806 | 5.775623 | 6.5213   | 6.421445 | 6.799841 | 6.660729 | 6.536659 | 6.014586 |
| 56942_at | 7.991242 | 7.980745 | 8.013186 | 7.495027 | 7.525364 | 7.383928 | 7.190209 | 7.630223 |
| 56943_at | 8.550948 | 8.892362 | 8.899561 | 8.738583 | 8.963123 | 8.642595 | 8.302653 | 9.072458 |
| 56944_at | 1.925723 | 2.117766 | 1.822835 | 1.522718 | 2.118494 | 2.047684 | 1.988475 | 2.196197 |
| 56945_at | 7.575257 | 7.529896 | 7.020681 | 7.424996 | 7.704826 | 6.913621 | 7.002009 | 7.647405 |
| 56946_at | 4.797802 | 4.720431 | 4.683229 | 4.524014 | 5.329671 | 4.678398 | 4.227427 | 4.036839 |
| 56947_at | 7.121734 | 6.839597 | 6.61277  | 6.753297 | 7.407341 | 6.600974 | 6.323012 | 6.887159 |
| 56948_at | 3.929212 | 4.348823 | 4.982494 | 3.89633  | 4.324145 | 5.20688  | 4.3211   | 4.10481  |
| 56949_at | 5.752067 | 6.118921 | 5.615654 | 5.325218 | 5.246273 | 5.777874 | 5.851505 | 5.27822  |
| 5694_at  | 9.059966 | 8.90122  | 8.902637 | 8.674487 | 9.014795 | 8.853276 | 8.429353 | 9.077252 |
| 56950_at | 6.544923 | 6.240055 | 6.395726 | 5.965172 | 5.874377 | 5.56148  | 5.844605 | 6.33361  |
| 56951_at | 8.29345  | 8.189827 | 8.102993 | 8.164518 | 7.638143 | 7.765371 | 7.950526 | 8.186442 |
| 56952_at | 3.740496 | 3.081364 | 1.726358 | 3.213583 | 1.466936 | 1.513306 | 1.814325 | 2.593874 |
| 56953_at | 2.202179 | 2.258129 | 1.273056 | 1.308419 | 2.476017 | 1.463527 | 1.686741 | 2.092192 |
| 56954_at | 6.488606 | 5.969918 | 6.7888   | 6.230548 | 6.970793 | 5.816633 | 5.607682 | 6.971356 |
| 56955_at | 1.957763 | 1.272685 | 1.020404 | 1.132219 | 0.941558 | 1.344822 | 1.145674 | 0.767939 |
| 56956_at | 1.323455 | 0.956215 | 1.240959 | 1.631892 | 1.851576 | 1.734407 | 1.374088 | 1.236307 |
| 56957_at | 4.561202 | 4.217076 | 4.778686 | 5.224767 | 5.033857 | 4.918221 | 3.909783 | 5.439015 |
| 5695_at  | 8.867742 | 9.004736 | 8.640861 | 8.976806 | 8.759791 | 8.757587 | 8.312271 | 9.155206 |
| 56961_at | 1.756101 | 2.22322  | 2.216882 | 1.798072 | 2.276478 | 1.685322 | 2.545723 | 1.949112 |
| 56963_at | 2.882039 | 3.117095 | 2.601336 | 3.282169 | 2.009533 | 3.084119 | 3.55967  | 2.555748 |
| 56964_at | 1.422202 | 1.606843 | 2.580336 | 1.204496 | 2.155053 | 1.232309 | 1.302143 | 1.558301 |
| 56965_at | 6.329099 | 6.090895 | 6.230361 | 5.573003 | 5.56522  | 6.377594 | 6.192244 | 5.351133 |
| 56967_at | 3.391533 | 4.185007 | 4.118164 | 2.954681 | 3.664512 | 3.286166 | 4.712808 | 3.71799  |
| 56969_at | 4.679923 | 6.418163 | 5.710108 | 5.537033 | 7.342658 | 3.524077 | 4.52056  | 3.521702 |
| 5696_at  | 6.719902 | 5.791745 | 6.313668 | 6.084639 | 6.137285 | 5.993268 | 6.187526 | 6.280853 |
| 56970_at | 5.023053 | 5.073854 | 3.703812 | 5.191509 | 3.88899  | 4.448118 | 5.171347 | 5.349498 |
| 56971_at | 4.945278 | 4.579155 | 4.539874 | 3.97417  | 3.770445 | 3.966569 | 5.501362 | 4.23406  |
| 56975_at | 6.487966 | 6.242673 | 6.494689 | 5.682735 | 6.325873 | 6.809625 | 6.453764 | 6.384376 |
| 56977_at | 3.871028 | 3.735442 | 3.793264 | 4.761514 | 4.246338 | 3.614508 | 4.543036 | 4.204303 |
| 56978_at | 2.001888 | 2.198269 | 1.896864 | 2.086536 | 1.927386 | 1.765973 | 1.315297 | 2.638567 |
| 56979_at | 1.285992 | 2.26028  | 1.864035 | 1.293252 | 1.556011 | 1.499896 | 1.250659 | 1.884325 |
| 5697_at  | 3.194224 | 3.190807 | 2.352447 | 3.328963 | 2.941588 | 3.270662 | 2.893924 | 3.67931  |

|          |          |          |          |          |          |          |          |          |
|----------|----------|----------|----------|----------|----------|----------|----------|----------|
| 56980_at | 2.935948 | 2.823502 | 3.553273 | 3.447628 | 3.473386 | 3.126912 | 2.753487 | 3.104209 |
| 56981_at | 3.419077 | 2.797938 | 2.918905 | 3.624349 | 2.782043 | 3.633865 | 3.285354 | 2.391891 |
| 56983_at | 5.040892 | 5.715253 | 5.240739 | 5.172002 | 4.386281 | 5.174633 | 5.931247 | 5.445216 |
| 56984_at | 7.226281 | 7.355917 | 7.018228 | 6.450586 | 6.521939 | 6.686019 | 6.533952 | 7.386839 |
| 56985_at | 4.459293 | 3.841572 | 3.182729 | 3.642571 | 3.495062 | 4.168541 | 2.905294 | 4.241972 |
| 56986_at | 5.698077 | 6.279352 | 5.150239 | 4.935335 | 5.597315 | 5.359601 | 4.119721 | 5.916991 |
| 56987_at | 6.716334 | 6.670699 | 6.296538 | 6.905231 | 6.689306 | 6.758614 | 6.657891 | 6.853309 |
| 5698_at  | 8.938674 | 9.027914 | 8.639108 | 9.202634 | 8.950652 | 8.766296 | 8.860391 | 9.266211 |
| 56990_at | 7.389317 | 7.484557 | 7.700328 | 7.517699 | 8.022195 | 7.827776 | 6.980792 | 7.72914  |
| 56992_at | 1.839697 | 2.186705 | 2.351258 | 1.672884 | 2.1637   | 1.75452  | 1.8512   | 1.839675 |
| 56993_at | 6.634856 | 6.396554 | 6.314854 | 7.040685 | 6.381536 | 6.594423 | 6.350707 | 6.395    |
| 56994_at | 8.138368 | 8.256103 | 8.028954 | 8.290845 | 7.741832 | 8.000874 | 7.954389 | 8.408891 |
| 56995_at | 7.619342 | 7.456092 | 7.50712  | 7.529554 | 7.294346 | 7.676934 | 7.057186 | 7.545111 |
| 56996_at | 3.403615 | 3.727804 | 3.442304 | 3.10671  | 2.333992 | 2.981456 | 3.533742 | 2.765516 |
| 56997_at | 4.49866  | 3.690964 | 3.647279 | 2.859577 | 3.878052 | 3.726545 | 3.901724 | 3.422847 |
| 56998_at | 6.27496  | 6.384293 | 6.188562 | 6.000249 | 4.959145 | 6.507403 | 5.995308 | 5.547866 |
| 56999_at | 6.676255 | 7.028353 | 6.461347 | 5.820473 | 5.511719 | 5.819002 | 6.691211 | 6.867147 |
| 5699_at  | 7.084836 | 6.674832 | 6.631006 | 7.284869 | 6.367534 | 6.953943 | 7.110921 | 5.937321 |
| 56_at    | 1.702894 | 1.400373 | 1.480173 | 1.485655 | 1.778355 | 1.494605 | 1.833849 | 1.580392 |
| 57000_at | 4.09687  | 4.553311 | 3.895242 | 3.58526  | 3.457207 | 3.745156 | 2.889988 | 3.379993 |
| 57001_at | 5.875659 | 5.458597 | 5.161458 | 5.287981 | 6.028272 | 5.431416 | 5.06358  | 6.853102 |
| 57002_at | 5.253216 | 5.003009 | 5.352263 | 5.112856 | 5.872151 | 5.428229 | 4.986281 | 5.274137 |
| 57003_at | 7.803054 | 8.301897 | 8.378607 | 8.474605 | 9.032004 | 8.285628 | 8.362622 | 8.836485 |
| 57007_at | 2.998745 | 3.931574 | 4.800195 | 2.992623 | 4.0331   | 3.519411 | 4.339807 | 3.229696 |
| 57010_at | 1.794526 | 2.547776 | 3.093078 | 2.441982 | 3.198409 | 2.536191 | 3.179005 | 2.576789 |
| 57016_at | 1.832354 | 1.853939 | 1.962783 | 1.4284   | 1.862917 | 2.585798 | 2.769468 | 1.326987 |
| 57017_at | 5.853958 | 4.936551 | 5.483201 | 4.453858 | 5.86268  | 5.486581 | 4.916443 | 4.903721 |
| 57018_at | 5.789932 | 5.756398 | 5.064125 | 4.984768 | 5.015642 | 6.072767 | 5.328754 | 6.037087 |
| 57019_at | 5.386514 | 5.45042  | 4.881918 | 4.731516 | 5.211059 | 4.433261 | 5.374751 | 5.430167 |
| 5701_at  | 7.879956 | 7.959128 | 7.806388 | 7.706305 | 8.14919  | 7.573087 | 7.527788 | 8.232519 |
| 57020_at | 7.371222 | 7.535558 | 7.482545 | 7.356105 | 7.434167 | 7.006729 | 7.157673 | 7.304722 |
| 57026_at | 5.923745 | 5.075943 | 5.131243 | 5.514525 | 4.54692  | 4.706148 | 6.108566 | 4.562459 |
| 5702_at  | 7.156112 | 6.969223 | 6.570695 | 6.967765 | 7.207615 | 7.47784  | 7.224591 | 7.47783  |
| 57030_at | 1.517148 | 1.828779 | 1.440517 | 1.735775 | 1.685813 | 2.073621 | 2.447943 | 2.08782  |
| 57035_at | 6.202375 | 6.745376 | 5.22731  | 5.973498 | 5.067641 | 6.319496 | 4.835403 | 5.474929 |
| 57037_at | 5.661706 | 5.678195 | 5.618105 | 5.834898 | 5.064918 | 5.504479 | 5.69908  | 6.383185 |
| 57038_at | 7.187404 | 6.831737 | 6.888889 | 7.160742 | 7.254163 | 6.180962 | 6.468998 | 7.084817 |
| 57045_at | 7.167858 | 7.22401  | 7.77398  | 7.078943 | 7.231225 | 6.86755  | 7.164868 | 6.720241 |
| 57047_at | 1.619611 | 1.035807 | 0.973899 | 1.199506 | 0.983854 | 2.13191  | 2.316705 | 1.844023 |
| 5704_at  | 7.322632 | 7.117321 | 6.955978 | 7.067142 | 6.926975 | 7.00814  | 6.910968 | 6.754324 |
| 57050_at | 6.633327 | 6.152035 | 6.274033 | 5.989337 | 6.470016 | 6.903383 | 6.162989 | 6.7144   |
| 57053_at | 2.963036 | 2.852195 | 3.793492 | 3.719801 | 3.46632  | 2.480513 | 2.71214  | 3.73322  |
| 57057_at | 2.028975 | 2.563473 | 2.07221  | 2.378854 | 3.632335 | 2.53981  | 2.285112 | 2.55514  |
| 5705_at  | 8.049203 | 7.673008 | 7.781915 | 8.023086 | 7.779195 | 8.428786 | 7.712547 | 8.218589 |
| 57060_at | 4.380949 | 3.837685 | 3.946051 | 3.469245 | 2.852615 | 2.084406 | 3.329703 | 2.419177 |
| 57061_at | 2.092817 | 2.138497 | 1.978985 | 2.398305 | 1.791147 | 2.776341 | 1.914065 | 2.689606 |
| 57062_at | 7.337998 | 7.912418 | 7.779137 | 7.502014 | 7.448043 | 7.290692 | 7.513454 | 7.613877 |
| 5706_at  | 7.453491 | 7.152984 | 6.339107 | 6.325795 | 6.586251 | 6.528387 | 6.421141 | 7.630423 |
| 5707_at  | 8.343497 | 8.540285 | 8.396934 | 7.942773 | 8.288617 | 7.92676  | 7.588737 | 8.879574 |
| 57082_at | 2.493585 | 2.00343  | 2.591201 | 1.599795 | 2.189376 | 2.883487 | 3.218443 | 2.217701 |
| 57084_at | 0.971232 | 1.167048 | 1.367548 | 1.155486 | 1.377823 | 1.183907 | 1.835264 | 1.701378 |

|          |          |          |          |          |          |          |          |          |
|----------|----------|----------|----------|----------|----------|----------|----------|----------|
| 57085_at | 5.835304 | 5.212465 | 5.229771 | 5.711194 | 4.853928 | 5.543934 | 5.205273 | 4.900934 |
| 57088_at | 6.739565 | 6.808973 | 5.876592 | 6.793565 | 6.962572 | 6.484083 | 6.907673 | 7.145734 |
| 57089_at | 4.458055 | 5.45956  | 3.980504 | 4.140227 | 4.651696 | 4.096208 | 4.108026 | 4.829449 |
| 5708_at  | 7.225345 | 7.506364 | 7.595433 | 7.55966  | 7.610632 | 7.014902 | 7.20661  | 7.859395 |
| 57091_at | 1.77426  | 1.833394 | 2.3157   | 2.74042  | 2.424835 | 1.636565 | 1.674044 | 1.771641 |
| 57092_at | 8.954449 | 9.079313 | 8.750065 | 8.914895 | 8.734281 | 8.804886 | 8.862071 | 9.259095 |
| 57093_at | 0.963783 | 1.25066  | 0.477972 | 1.890287 | 1.033718 | 1.500286 | 1.088073 | 2.0825   |
| 57094_at | 1.611871 | 2.868102 | 1.862554 | 1.979467 | 1.12722  | 2.326112 | 1.99164  | 1.554629 |
| 57095_at | 5.940103 | 5.685111 | 5.894658 | 6.014457 | 4.317485 | 5.836191 | 6.087662 | 5.82631  |
| 57096_at | 1.376697 | 2.084183 | 2.150935 | 1.566918 | 1.497747 | 1.551377 | 1.513168 | 1.432072 |
| 57097_at | 5.225156 | 5.510382 | 5.607989 | 5.60439  | 5.492338 | 4.035008 | 5.918234 | 5.712515 |
| 57099_at | 4.545339 | 4.323892 | 3.525752 | 4.722006 | 4.236117 | 4.976759 | 4.10838  | 4.881249 |
| 5709_at  | 7.44194  | 6.992971 | 7.143601 | 7.032175 | 6.943119 | 6.850073 | 7.210206 | 6.489463 |
| 570_at   | 2.333446 | 1.626748 | 1.912649 | 1.766249 | 1.535932 | 2.680412 | 1.683096 | 2.105239 |
| 57101_at | 1.089915 | 1.507129 | 1.664608 | 1.973359 | 1.698767 | 1.731442 | 1.886966 | 1.779972 |
| 57102_at | 4.906513 | 4.67376  | 5.518114 | 5.084202 | 5.415559 | 4.215868 | 4.641137 | 5.685236 |
| 57103_at | 3.369214 | 3.770499 | 2.929551 | 3.111811 | 4.165566 | 4.62975  | 4.285795 | 4.923804 |
| 57104_at | 6.676289 | 5.920598 | 6.456289 | 6.8248   | 5.905914 | 6.944785 | 6.042584 | 4.702618 |
| 57105_at | 1.22778  | 1.716995 | 1.4759   | 1.315419 | 3.319262 | 2.913141 | 1.259346 | 1.848337 |
| 57106_at | 4.108343 | 4.618917 | 4.223437 | 3.790452 | 3.527445 | 4.176478 | 4.119934 | 4.584904 |
| 57107_at | 3.764373 | 4.863265 | 3.615923 | 3.862397 | 4.774585 | 4.182129 | 3.832659 | 4.643575 |
| 57109_at | 3.836207 | 4.838039 | 4.398717 | 3.741113 | 3.845096 | 4.778286 | 3.855664 | 4.148153 |
| 57110_at | 1.156327 | 1.557754 | 1.089825 | 2.711814 | 1.168632 | 2.114431 | 1.027045 | 1.301817 |
| 57111_at | 4.200183 | 3.845676 | 3.143738 | 3.641317 | 5.106968 | 3.744878 | 2.895079 | 2.195038 |
| 57113_at | 1.304338 | 1.63828  | 1.405935 | 1.177297 | 1.28647  | 1.184052 | 1.674508 | 1.848872 |
| 57115_at | 0.961872 | 1.821617 | 1.731135 | 1.282791 | 1.878511 | 1.783651 | 1.641747 | 2.153737 |
| 57116_at | 1.096411 | 1.724364 | 1.380436 | 1.440926 | 0.715675 | 1.156642 | 1.260493 | 1.893593 |
| 57117_at | 6.482798 | 5.56808  | 5.691699 | 4.868616 | 5.384498 | 5.535059 | 5.621931 | 5.081821 |
| 57118_at | 4.330992 | 3.66585  | 3.347877 | 4.211507 | 4.687275 | 4.416697 | 4.068303 | 4.696732 |
| 5711_at  | 5.496214 | 5.463878 | 5.483056 | 4.12248  | 5.883204 | 3.857994 | 4.016456 | 5.562722 |
| 57120_at | 6.390601 | 6.745831 | 6.707962 | 6.350617 | 6.480605 | 6.029424 | 5.933176 | 6.960688 |
| 57121_at | 2.449958 | 1.88903  | 2.019828 | 3.744487 | 2.370746 | 2.035655 | 2.963335 | 2.167474 |
| 57122_at | 4.865759 | 5.595622 | 4.598634 | 4.844375 | 5.905191 | 4.626489 | 4.553092 | 5.648226 |
| 57124_at | 7.748151 | 7.628999 | 7.338991 | 7.890906 | 7.423635 | 8.366783 | 6.837836 | 7.009144 |
| 57125_at | 2.907516 | 3.141339 | 4.020194 | 2.157456 | 2.937301 | 2.588199 | 2.796094 | 2.569006 |
| 57126_at | 1.44228  | 1.824031 | 1.919871 | 2.357102 | 2.073014 | 2.117097 | 2.490123 | 1.804201 |
| 57127_at | 3.146145 | 2.841856 | 2.739026 | 3.727636 | 4.31718  | 3.354112 | 3.972904 | 3.103899 |
| 57128_at | 3.228553 | 3.152866 | 2.52895  | 3.052939 | 2.577131 | 3.477684 | 2.557719 | 3.534947 |
| 57129_at | 8.058788 | 8.176732 | 7.783063 | 7.075284 | 7.061507 | 8.039898 | 7.168531 | 8.175226 |
| 57130_at | 5.063018 | 4.414636 | 4.831238 | 4.642383 | 4.398716 | 4.273994 | 5.389956 | 4.940438 |
| 57132_at | 7.375373 | 7.319053 | 7.554935 | 7.451193 | 7.519988 | 7.371471 | 7.343865 | 7.021811 |
| 57134_at | 3.835066 | 3.40904  | 3.348434 | 2.607841 | 3.077067 | 3.716319 | 2.496476 | 2.182952 |
| 57136_at | 6.272037 | 6.829504 | 7.303172 | 6.699737 | 6.879234 | 6.871845 | 7.070874 | 6.796316 |
| 57139_at | 3.905889 | 3.101578 | 4.713138 | 3.373048 | 2.935741 | 5.10979  | 3.510471 | 2.711117 |
| 5713_at  | 7.551923 | 7.530462 | 7.450056 | 7.971529 | 8.459395 | 7.923113 | 7.618882 | 7.808154 |
| 57140_at | 6.354992 | 5.979584 | 6.432069 | 5.825598 | 5.578471 | 6.194008 | 6.914641 | 4.994541 |
| 57142_at | 6.678432 | 6.460215 | 6.506516 | 6.468139 | 6.677263 | 6.047043 | 6.531309 | 6.873235 |
| 57143_at | 3.564134 | 3.396595 | 3.635446 | 3.131282 | 2.549131 | 3.33991  | 3.148351 | 2.980711 |
| 57144_at | 1.584425 | 1.750638 | 1.41671  | 1.894807 | 1.613133 | 1.911808 | 1.514634 | 1.831022 |
| 57146_at | 4.599287 | 4.684158 | 4.619446 | 4.307169 | 4.73032  | 5.50812  | 3.990302 | 5.026693 |
| 57147_at | 4.362644 | 4.301251 | 4.097896 | 5.332162 | 4.80346  | 5.326355 | 4.12782  | 5.76033  |

|          |          |          |          |          |          |          |          |          |
|----------|----------|----------|----------|----------|----------|----------|----------|----------|
| 57148_at | 6.612365 | 7.013047 | 6.968447 | 6.999778 | 7.307083 | 6.884512 | 7.025976 | 7.215903 |
| 57149_at | 5.948535 | 6.025663 | 5.770404 | 5.771054 | 5.913647 | 5.791245 | 5.700846 | 5.822115 |
| 5714_at  | 9.395371 | 9.007966 | 9.103466 | 9.015375 | 8.547608 | 9.056388 | 9.170055 | 9.089302 |
| 57150_at | 5.488494 | 4.401759 | 4.597978 | 4.48084  | 4.740114 | 5.568139 | 5.701071 | 4.344032 |
| 57151_at | 2.235141 | 1.848594 | 1.551502 | 1.185735 | 1.512058 | 1.543391 | 1.471992 | 1.395215 |
| 57152_at | 1.787604 | 2.036032 | 2.162349 | 1.953406 | 2.159458 | 1.888419 | 2.466357 | 2.081118 |
| 57153_at | 9.35752  | 9.260034 | 9.404022 | 9.847338 | 9.028435 | 9.843961 | 9.847983 | 9.155548 |
| 57154_at | 5.647888 | 5.54812  | 5.445966 | 5.298887 | 5.666804 | 6.075313 | 5.301577 | 5.429961 |
| 57156_at | 3.175866 | 2.60072  | 3.708612 | 2.95895  | 4.016923 | 4.046665 | 3.461562 | 2.402671 |
| 57157_at | 5.386375 | 6.395516 | 5.6358   | 6.02666  | 5.308817 | 5.41391  | 5.085128 | 5.914325 |
| 57158_at | 1.956484 | 2.111383 | 2.343422 | 2.279614 | 2.109259 | 3.206119 | 2.201169 | 2.567745 |
| 57159_at | 5.667247 | 6.018903 | 4.546714 | 2.987562 | 4.303699 | 3.819361 | 3.621611 | 5.065553 |
| 5715_at  | 5.779904 | 4.668839 | 4.993832 | 4.99169  | 4.177903 | 5.422062 | 3.771002 | 4.640361 |
| 57161_at | 5.693388 | 4.986909 | 5.829907 | 5.973179 | 5.693048 | 4.820916 | 4.896319 | 5.326133 |
| 57162_at | 5.13319  | 5.480578 | 4.899129 | 4.683191 | 5.553346 | 5.745924 | 5.527615 | 4.821111 |
| 57165_at | 2.306292 | 2.681406 | 2.486577 | 3.412676 | 2.479278 | 2.897266 | 2.217592 | 2.209529 |
| 57167_at | 2.214299 | 2.728298 | 2.674322 | 2.710294 | 2.145448 | 3.08816  | 2.450325 | 3.127144 |
| 57168_at | 1.445039 | 2.271851 | 1.544431 | 1.489502 | 1.908268 | 1.334717 | 2.596003 | 1.593431 |
| 57169_at | 6.444441 | 6.969992 | 6.62209  | 7.190117 | 6.952043 | 7.032904 | 7.115604 | 6.744441 |
| 5716_at  | 6.985965 | 6.365659 | 6.472759 | 6.013113 | 6.836747 | 6.149673 | 5.885077 | 6.960564 |
| 57171_at | 5.640437 | 6.128326 | 5.586381 | 4.492527 | 4.816711 | 6.480391 | 5.762375 | 4.012527 |
| 57172_at | 4.643726 | 5.31226  | 4.804455 | 5.69866  | 3.976477 | 4.918738 | 4.465835 | 3.615049 |
| 57175_at | 4.478353 | 5.08149  | 4.095181 | 4.752206 | 3.94158  | 3.75325  | 4.768914 | 3.677946 |
| 57176_at | 3.15091  | 2.64549  | 2.972189 | 3.381262 | 2.807064 | 3.899295 | 3.394981 | 2.155736 |
| 57178_at | 6.806525 | 6.672116 | 7.082887 | 7.581535 | 6.638522 | 7.748754 | 7.259316 | 6.474026 |
| 57179_at | 8.993024 | 8.624647 | 8.580547 | 8.885292 | 8.497803 | 9.180539 | 9.090206 | 8.284246 |
| 5717_at  | 6.669435 | 7.163532 | 6.917551 | 6.8227   | 7.517516 | 6.633628 | 6.802165 | 6.981317 |
| 57180_at | 4.103286 | 4.205581 | 3.518338 | 3.885478 | 4.839187 | 2.96456  | 3.414941 | 5.059658 |
| 57181_at | 6.771987 | 6.297985 | 6.089431 | 6.293138 | 6.398022 | 5.703066 | 6.651765 | 6.559709 |
| 57182_at | 5.466665 | 6.916396 | 5.647646 | 6.596763 | 6.619041 | 6.060535 | 6.293213 | 6.671916 |
| 57184_at | 2.157873 | 3.094368 | 2.971479 | 3.715299 | 2.284515 | 3.013957 | 3.267679 | 3.297935 |
| 57185_at | 5.980222 | 5.988267 | 6.279413 | 6.37262  | 6.167149 | 5.883773 | 6.823492 | 6.656945 |
| 57186_at | 5.023749 | 5.167442 | 5.439564 | 5.228558 | 6.081572 | 5.845353 | 5.794742 | 5.002873 |
| 57187_at | 6.199196 | 6.61537  | 6.293233 | 6.077219 | 6.46817  | 6.46817  | 6.378234 | 6.376953 |
| 57188_at | 1.733133 | 1.9121   | 1.764911 | 2.106393 | 2.535246 | 2.006674 | 2.394533 | 1.601688 |
| 57189_at | 4.341608 | 4.964494 | 5.079469 | 4.400819 | 4.615689 | 5.103439 | 3.234946 | 1.102224 |
| 5718_at  | 7.808647 | 7.794993 | 7.713033 | 7.965098 | 7.799399 | 7.930367 | 7.876216 | 8.171121 |
| 57190_at | 7.544275 | 7.324423 | 7.563056 | 7.399461 | 7.282361 | 7.914646 | 7.760357 | 6.648978 |
| 57191_at | 4.63733  | 2.128006 | 1.873746 | 2.001869 | 2.980679 | 2.742154 | 2.686599 | 1.981523 |
| 57192_at | 6.438537 | 5.549839 | 6.108037 | 5.533942 | 5.419788 | 6.075396 | 5.773806 | 5.383209 |
| 57194_at | 7.698488 | 7.769465 | 8.188901 | 7.641591 | 7.615331 | 7.699969 | 8.828974 | 7.540459 |
| 57198_at | 4.778661 | 4.271881 | 5.057292 | 4.65202  | 3.995236 | 5.457914 | 4.498075 | 5.089219 |
| 5719_at  | 6.925645 | 7.200964 | 6.87168  | 7.054695 | 7.183826 | 7.309509 | 7.299644 | 7.72139  |
| 571_at   | 3.71221  | 3.305965 | 3.459163 | 2.838902 | 3.796815 | 2.936979 | 3.647483 | 2.912513 |
| 57205_at | 6.458522 | 7.273491 | 6.308908 | 6.675116 | 6.596843 | 7.272804 | 6.961192 | 6.782531 |
| 57209_at | 2.815782 | 2.952256 | 2.978364 | 3.369392 | 2.893794 | 2.78597  | 2.45781  | 3.228873 |
| 5720_at  | 9.335008 | 9.219549 | 8.758233 | 9.302004 | 9.28718  | 9.20225  | 9.077938 | 9.076844 |
| 57210_at | 3.821064 | 3.33985  | 3.7715   | 3.841275 | 3.27814  | 3.749741 | 3.115049 | 2.608102 |
| 57211_at | 5.332939 | 5.463307 | 4.389649 | 5.172507 | 3.692592 | 6.149344 | 3.731841 | 5.840181 |
| 57212_at | 3.97076  | 4.061301 | 3.544851 | 4.257462 | 3.344319 | 3.596978 | 3.867692 | 4.146462 |
| 57213_at | 5.649357 | 5.791017 | 5.848145 | 5.627894 | 5.749865 | 5.446514 | 6.139318 | 5.369226 |

|           |          |          |          |          |          |          |          |          |
|-----------|----------|----------|----------|----------|----------|----------|----------|----------|
| 57214_at  | 1.984257 | 2.039144 | 2.403072 | 2.446373 | 2.270499 | 2.0153   | 1.985293 | 1.523245 |
| 57215_at  | 4.702295 | 4.234488 | 3.449836 | 3.58556  | 3.953815 | 4.386557 | 3.563308 | 3.820384 |
| 57216_at  | 2.951499 | 2.695929 | 3.674254 | 3.160377 | 3.953403 | 3.506162 | 4.131938 | 3.143207 |
| 57217_at  | 2.870129 | 2.9235   | 2.39452  | 3.775893 | 2.499763 | 4.130658 | 3.173906 | 2.201839 |
| 5721_at   | 4.894073 | 5.042271 | 4.986387 | 4.83086  | 3.715015 | 4.785872 | 4.80445  | 3.823381 |
| 57221_at  | 3.051207 | 2.952114 | 3.463575 | 2.908955 | 3.517592 | 2.964479 | 2.858687 | 2.877469 |
| 57222_at  | 5.839434 | 4.745241 | 5.471763 | 6.033616 | 5.459219 | 5.659007 | 5.307254 | 4.440738 |
| 57223_at  | 5.778904 | 6.341084 | 6.073733 | 6.206205 | 6.251506 | 6.088647 | 6.24461  | 6.557188 |
| 57224_at  | 3.985328 | 3.902056 | 4.115785 | 3.381952 | 3.352366 | 4.014703 | 4.027949 | 2.71602  |
| 57226_at  | 4.651872 | 5.724991 | 5.593986 | 5.116492 | 5.741064 | 5.574049 | 5.57497  | 5.865703 |
| 57228_at  | 6.304588 | 5.499886 | 5.729741 | 6.632691 | 5.20343  | 5.712921 | 6.614272 | 4.942918 |
| 57231_at  | 6.718795 | 6.484696 | 6.241283 | 6.610637 | 6.360161 | 6.456282 | 6.091538 | 7.344316 |
| 57232_at  | 2.592447 | 2.913975 | 2.531881 | 1.995297 | 3.331528 | 2.592868 | 2.482154 | 3.256294 |
| 5723_at   | 4.403674 | 4.610693 | 4.358882 | 4.177035 | 4.475341 | 3.882591 | 3.822334 | 5.104659 |
| 5724_at   | 2.904486 | 2.69844  | 2.48559  | 3.468565 | 3.549131 | 3.576383 | 2.715772 | 2.671326 |
| 572558_at | 4.975077 | 4.142756 | 3.04726  | 2.887191 | 4.118569 | 1.234592 | 3.222889 | 5.669525 |
| 5725_at   | 7.972544 | 7.503352 | 7.901062 | 8.036363 | 7.504247 | 7.460527 | 8.167299 | 7.373149 |
| 5726_at   | 1.432261 | 1.006983 | 0.904544 | 1.194887 | 1.233372 | 1.476289 | 1.431488 | 0.896022 |
| 5727_at   | 5.382624 | 4.958474 | 5.386654 | 5.361132 | 4.708973 | 5.514279 | 4.980712 | 4.253597 |
| 57282_at  | 1.80232  | 1.023211 | 1.647064 | 1.055474 | 1.69905  | 1.125805 | 1.196255 | 1.450734 |
| 5728_at   | 6.771506 | 6.907031 | 7.161268 | 6.507087 | 8.221777 | 6.880981 | 7.058428 | 7.775393 |
| 57291_at  | 7.848335 | 7.549311 | 7.508204 | 6.997942 | 6.781899 | 7.191631 | 7.808365 | 7.302437 |
| 5729_at   | 1.554171 | 1.534063 | 2.169041 | 2.115786 | 1.230647 | 2.542526 | 1.387626 | 1.514787 |
| 572_at    | 6.725395 | 6.076512 | 6.210672 | 6.07516  | 5.140331 | 6.340656 | 5.748998 | 5.13208  |
| 5730_at   | 11.10288 | 10.22826 | 11.28117 | 11.37257 | 10.46577 | 11.29092 | 11.27535 | 9.92525  |
| 5731_at   | 3.3209   | 2.501828 | 1.944984 | 1.833666 | 3.901469 | 3.226657 | 2.660028 | 1.81389  |
| 57325_at  | 4.558843 | 4.625294 | 4.497821 | 5.592751 | 5.29168  | 4.636285 | 4.781451 | 5.830305 |
| 57326_at  | 2.878314 | 4.292026 | 5.542096 | 4.189119 | 2.440214 | 4.395599 | 4.818201 | 2.454068 |
| 5732_at   | 3.948659 | 3.412481 | 3.79704  | 2.667111 | 2.971667 | 3.622094 | 3.231008 | 2.755193 |
| 57332_at  | 2.82901  | 3.590122 | 3.407076 | 3.210834 | 4.018819 | 3.078766 | 4.542323 | 4.253186 |
| 57333_at  | 3.121744 | 2.871156 | 2.803026 | 3.723576 | 2.778545 | 4.443549 | 2.613801 | 2.680373 |
| 57335_at  | 5.17141  | 4.944314 | 5.123073 | 5.302388 | 2.972411 | 5.754954 | 4.704826 | 4.469954 |
| 57336_at  | 4.853972 | 3.946812 | 4.126971 | 3.008353 | 3.544035 | 3.455481 | 4.824421 | 4.863189 |
| 57337_at  | 6.000958 | 6.261448 | 6.357356 | 6.345475 | 5.828089 | 6.02153  | 5.840432 | 6.438414 |
| 57338_at  | 1.859108 | 1.994872 | 1.157235 | 1.524461 | 2.073911 | 1.960736 | 1.075677 | 2.309652 |
| 5733_at   | 3.305373 | 2.272799 | 4.195353 | 3.593297 | 4.164184 | 2.8365   | 3.874703 | 2.492986 |
| 57343_at  | 3.314351 | 3.796484 | 3.481407 | 3.399305 | 3.775389 | 4.76078  | 3.230632 | 3.229772 |
| 57348_at  | 2.053572 | 2.800604 | 1.979594 | 2.032615 | 3.093853 | 1.847059 | 2.995058 | 1.714542 |
| 5734_at   | 7.501495 | 7.590599 | 7.761566 | 7.305795 | 6.667508 | 6.778476 | 7.355867 | 7.651439 |
| 57369_at  | 4.872067 | 4.346677 | 4.173195 | 4.716235 | 5.536972 | 3.830457 | 4.169453 | 4.201854 |
| 57379_at  | 0.953762 | 0.872344 | 1.235381 | 1.042564 | 1.272895 | 1.706835 | 1.013767 | 1.751319 |
| 5737_at   | 1.619007 | 1.454318 | 1.866006 | 1.694826 | 3.436954 | 1.439602 | 1.464563 | 1.691946 |
| 57380_at  | 6.565356 | 6.089281 | 6.580496 | 6.189532 | 6.624165 | 6.534195 | 7.498665 | 6.612018 |
| 57381_at  | 5.868762 | 5.610675 | 4.815138 | 5.857064 | 6.734594 | 5.595597 | 5.219793 | 4.317407 |
| 5738_at   | 4.114067 | 4.155976 | 3.44671  | 4.179375 | 3.330168 | 4.075516 | 3.888989 | 4.56805  |
| 57393_at  | 6.755509 | 5.882993 | 6.488507 | 4.70603  | 7.417435 | 6.246432 | 2.606216 | 6.420969 |
| 57396_at  | 5.785624 | 6.034241 | 5.962873 | 5.691161 | 4.70503  | 6.141462 | 3.199092 | 5.987547 |
| 5739_at   | 2.482757 | 2.901007 | 2.746723 | 3.223521 | 2.778973 | 2.348643 | 3.589925 | 2.778562 |
| 573_at    | 8.933771 | 8.42044  | 8.129916 | 8.546417 | 8.485932 | 8.671821 | 8.125306 | 8.556231 |
| 574016_at | 1.397188 | 1.414163 | 2.678188 | 1.242802 | 1.185605 | 1.762234 | 1.690545 | 2.071718 |
| 574028_at | 1.349938 | 1.229761 | 1.195277 | 1.316282 | 1.430254 | 1.405323 | 1.155294 | 1.999576 |

574029\_at 1.93188 2.019429 3.223171 2.190023 2.876935 1.240007 2.273875 1.779316  
57402\_at 2.664617 3.318046 2.015949 2.765032 2.577319 2.985227 2.687025 2.484201  
574030\_at 2.005522 2.108545 2.790325 1.763168 2.399964 1.78155 2.206063 2.345969  
574031\_at 1.054269 1.320693 1.039069 1.047009 1.264873 1.361857 1.909468 1.205598  
574032\_at 1.031035 1.020946 1.063818 0.776175 1.291337 1.014035 0.580215 1.656608  
574033\_at 1.342953 0.760952 1.06923 0.792451 1.765699 0.866589 2.447337 0.606342  
574034\_at 1.21595 0.602642 2.688285 0.686157 1.247517 1.351594 0.399556 1.348405  
574036\_at 2.920564 2.676959 3.278914 2.869606 2.233416 2.91831 2.12233 3.03781  
574038\_at 1.716774 2.27646 1.400175 1.874367 2.714237 1.800393 1.745619 1.842056  
57403\_at 8.273533 8.613829 8.943917 8.702071 8.629261 8.371002 8.896174 8.44351  
574040\_at 1.844411 1.329761 1.604557 1.698035 2.217057 2.490381 4.368893 1.972231  
57404\_at 6.611442 6.671584 7.197748 6.76218 6.888567 6.731685 6.487895 6.863332  
57405\_at 1.637685 4.341387 1.7934 2.334433 2.339298 2.061835 2.136902 1.655665  
57406\_at 4.982656 4.97915 4.564056 4.716568 4.88446 4.786939 4.37757 4.438336  
57407\_at 5.586589 4.290966 4.960233 4.397297 4.144957 5.364149 4.280393 4.096412  
57408\_at 2.151241 3.107893 2.062428 2.047 2.961581 2.295102 2.538884 2.499048  
57409\_at 3.858954 3.407509 3.84307 3.29789 3.551434 3.2981 3.057538 4.290727  
5740\_at 6.411039 5.37557 6.172446 5.580494 4.573374 7.398476 6.796544 5.417785  
57410\_at 6.461957 6.302405 5.550509 6.160523 4.868147 5.747627 6.213922 5.34732  
57414\_at 8.307335 7.816898 8.738339 8.350284 7.796468 8.289614 8.867558 6.799733  
57415\_at 5.206114 6.187569 4.924575 4.913086 4.543978 5.078445 4.643066 5.38619  
57418\_at 5.041478 4.551618 4.014425 4.315544 4.777141 4.825785 4.651046 4.039765  
57419\_at 1.992621 2.950566 1.867049 2.383741 1.563686 1.773162 1.45299 3.182822  
5741\_at 0.950738 1.010181 0.712741 1.035548 0.887812 0.726846 1.539011 1.011717  
5742\_at 4.58356 4.172939 4.427236 6.399942 4.326293 3.548811 3.599602 5.136343  
5743\_at 3.70643 4.006528 3.587913 4.867418 2.912825 4.381631 3.803925 3.390143  
574406\_at 2.214462 2.111405 2.113777 2.81695 1.833764 3.352511 2.85224 5.019333  
574407\_at 2.580551 4.007125 2.734692 2.359389 3.578899 2.12988 2.04793 2.535776  
574408\_at 4.225489 2.442904 2.399244 2.05087 1.822546 2.729263 2.667217 2.469804  
574409\_at 1.214415 1.198565 1.553251 1.908754 1.639903 1.207334 2.230564 0.857341  
574411\_at 1.143454 0.986815 1.114694 1.471922 1.866783 0.773211 1.821081 2.11803  
574412\_at 1.262089 1.452051 1.293996 0.714121 1.818706 1.127173 1.038982 1.746373  
574413\_at 1.268641 1.324126 1.363054 1.040168 1.161712 1.667556 2.16135 1.794686  
574414\_at 2.705153 1.471043 1.757272 1.283978 2.160827 2.165362 1.651546 1.511331  
574432\_at 4.169108 4.804385 2.451301 3.459398 3.413686 3.665465 2.949742 4.662081  
574433\_at 3.232615 3.291211 3.406309 3.353093 3.039649 3.42105 3.256246 3.25037  
574434\_at 1.686795 1.586244 1.061216 1.248495 1.044944 0.692968 0.871688 1.465982  
574435\_at 1.196252 1.042049 1.140378 0.683918 1.478999 1.296571 1.131917 1.527375  
574436\_at 0.90814 0.905654 1.236219 1.057393 1.135304 1.247516 1.462691 1.127602  
574441\_at 1.641668 1.818881 1.402201 1.155137 1.715615 1.360631 1.893729 2.829538  
574442\_at 1.361405 1.50691 1.961755 0.968338 1.749175 1.359172 1.117397 1.627754  
574443\_at 1.293779 1.902925 2.449347 1.198342 0.951462 1.74465 1.038488 1.332686  
574444\_at 2.835513 1.203821 1.383201 1.236882 0.957986 1.296417 2.549738 1.773209  
574445\_at 1.192149 1.646761 1.023553 1.459456 2.601637 1.446599 1.786456 2.033524  
574447\_at 1.93274 1.233671 1.204455 1.045124 1.268437 1.581567 1.30997 1.50926  
574450\_at 1.095176 0.985997 1.151662 0.734194 1.401299 0.848992 1.200119 1.326154  
574451\_at 1.31067 0.902428 1.134335 1.001203 0.987341 1.007517 1.613777 1.198457  
574452\_at 2.823439 2.320111 2.181233 2.472249 2.66761 1.705711 2.23732 2.121846  
574453\_at 1.403727 1.111481 1.420064 1.078704 2.062688 0.727468 1.313861 2.85643  
574454\_at 1.05154 1.083351 1.280816 1.083103 1.787381 1.459184 2.07381 1.393263  
574455\_at 2.762418 2.524067 3.564765 3.089569 3.368649 3.627529 4.022302 3.109048

574456\_at 1.549113 1.537424 1.746522 1.269285 1.668501 1.652868 1.61795 1.568923  
574457\_at 2.563371 2.958034 2.750987 2.977376 3.842237 3.825803 3.590972 3.348712  
574460\_at 0.653168 1.173847 1.968558 0.899522 1.332404 1.085575 1.115775 1.110424  
574461\_at 1.939321 1.39492 2.295559 1.764768 2.284503 1.610296 1.748476 2.016375  
574463\_at 0.828733 1.138035 0.761065 0.80633 1.489642 2.032486 0.675486 1.000937  
574464\_at 4.186282 4.402421 3.812333 4.3739 4.5387 3.626884 4.912604 4.741511  
574466\_at 0.843113 0.902838 0.898029 0.59975 0.999367 1.074693 0.732596 2.571927  
574467\_at 1.249649 1.790483 1.30945 2.280558 2.045405 1.647191 1.598391 1.523658  
574468\_at 1.645953 1.279815 1.17808 1.115816 2.508684 1.871862 1.798412 0.77444  
574469\_at 0.852681 0.823999 0.854797 0.699547 1.057737 0.706447 0.861983 1.375649  
57446\_at 6.023302 6.205586 6.4231 6.422531 6.243987 6.433763 5.868264 6.25804  
574470\_at 1.249827 0.608627 1.381038 0.852552 1.975499 1.636747 2.145229 1.678617  
574471\_at 1.328068 1.20886 1.05015 1.487674 1.350945 2.107202 1.314535 1.292746  
574472\_at 1.349532 1.050944 0.996594 0.643752 1.190275 1.072055 0.94806 0.533874  
574474\_at 2.552468 2.447892 1.581396 1.579722 1.379668 1.536202 1.774474 1.100349  
574475\_at 0.873663 1.219083 0.683801 0.814025 1.300263 0.934162 3.184288 1.147316  
574476\_at 1.531 1.7193 1.109314 1.314714 1.307973 0.917876 0.568889 0.975929  
574477\_at 0.872438 0.967154 1.900359 0.823133 1.316338 1.110834 1.075113 1.192311  
574478\_at 1.24944 1.754387 2.611594 1.256303 1.111814 0.797169 2.212385 0.990849  
574479\_at 1.195037 1.756763 3.031592 1.241098 2.472382 1.392301 2.478526 2.092237  
57447\_at 9.874338 9.684645 10.05877 9.566748 9.713588 8.980251 10.00401 10.13717  
574480\_at 2.263157 1.984358 2.028021 2.868474 2.469738 2.885996 3.997424 2.784752  
574481\_at 1.388902 1.170968 1.058468 1.498216 1.08399 1.287522 2.215206 2.804092  
574484\_at 0.845777 0.282282 3.943214 0.613652 1.032521 2.169905 1.415519 0.872724  
574485\_at 1.382548 1.203277 0.764675 1.123741 1.038972 2.754119 0.930181 1.504019  
574486\_at 1.231673 1.723433 1.139365 2.527324 2.924313 2.601434 1.496457 2.264361  
574487\_at 0.798863 1.117472 1.20058 1.635344 1.006303 0.898253 2.749357 0.841072  
574489\_at 2.217099 2.010208 2.07585 1.534165 2.704555 2.144659 1.909136 2.05434  
57448\_at 6.267925 6.423261 6.554475 6.140618 6.548662 6.088517 6.289254 6.819018  
574490\_at 1.327285 1.09527 1.293162 1.599402 1.383962 0.77543 1.091986 1.59471  
574491\_at 2.709273 2.45543 1.488989 1.190215 1.545165 2.411241 1.334481 2.715356  
574492\_at 1.006484 0.726972 0.970805 0.8165 1.661403 0.812121 1.018787 1.191119  
574493\_at 1.982885 1.042311 2.67016 0.696184 1.44899 0.734848 1.244989 1.102851  
574494\_at 0.915758 1.003107 0.688075 2.806333 4.036662 2.19398 4.154399 2.095716  
574495\_at 1.521647 1.189082 1.366789 1.040125 1.341814 1.365536 1.286489 1.590173  
574496\_at 0.832071 1.28932 1.201089 0.831911 0.959422 1.014462 1.190571 1.277524  
574497\_at 1.383743 1.047154 0.896749 0.815842 0.616411 2.252887 1.042866 1.072168  
574498\_at 0.848186 2.394392 3.589063 0.438681 1.480733 0.822015 3.471746 1.82067  
574499\_at 0.742892 0.238379 1.466477 0.391858 1.220845 0.391668 0.783639 1.679573  
57449\_at 2.311099 2.132655 1.797857 2.313059 1.950282 1.618681 2.142788 2.435056  
5744\_at 3.739162 3.181674 3.071955 2.991874 3.181015 2.319209 2.408942 2.356909  
574501\_at 1.665696 2.45307 2.608929 1.807276 2.362688 2.464567 1.923216 2.375704  
574502\_at 1.636279 1.306303 1.617871 1.636279 1.848914 1.061022 1.197298 1.700636  
574503\_at 1.226542 1.888322 2.672975 2.177233 1.415093 1.021488 2.216303 1.166322  
574504\_at 2.46362 2.872578 2.896044 3.661802 2.161494 2.483694 1.649431 3.422684  
574505\_at 0.960019 1.443332 1.662258 1.13582 1.116642 0.902883 0.751096 1.557485  
574506\_at 1.940772 2.810833 2.193667 1.75405 2.658281 2.069714 1.997463 1.839268  
574507\_at 2.085309 2.714458 1.9748 2.51052 2.700088 2.393301 1.536974 2.736934  
574508\_at 1.405418 1.455031 3.48387 1.00628 1.67676 1.769928 1.277307 1.564291  
574510\_at 2.180803 3.204827 2.329355 2.871903 3.030553 2.111004 2.878499 2.820264  
574511\_at 1.312231 1.503287 1.494584 1.424392 1.412785 2.20108 1.171986 1.145065

|           |          |          |          |          |          |          |          |          |
|-----------|----------|----------|----------|----------|----------|----------|----------|----------|
| 574512_at | 0.604456 | 0.662918 | 0.785177 | 0.607735 | 0.83763  | 1.143439 | 0.64873  | 0.665519 |
| 574513_at | 1.456688 | 0.717655 | 0.91682  | 1.07432  | 1.791044 | 2.085532 | 1.086364 | 1.653891 |
| 574515_at | 1.425731 | 0.938574 | 0.790319 | 1.008931 | 0.900567 | 0.930357 | 1.350547 | 1.024455 |
| 57451_at  | 4.791899 | 5.300639 | 6.122121 | 4.846605 | 5.408833 | 4.966248 | 5.8568   | 5.568856 |
| 57452_at  | 1.274205 | 2.116089 | 2.091704 | 1.491131 | 2.828522 | 2.085458 | 1.614851 | 1.506923 |
| 574538_at | 2.500165 | 1.217036 | 2.025691 | 1.745527 | 1.766247 | 1.02219  | 1.66885  | 1.214316 |
| 57453_at  | 2.378115 | 2.120764 | 3.214466 | 2.957383 | 2.13366  | 2.500511 | 1.759626 | 2.444639 |
| 57455_at  | 4.263828 | 4.156162 | 4.245143 | 3.667482 | 3.98971  | 4.579882 | 4.309161 | 3.619283 |
| 57456_at  | 6.410382 | 6.800587 | 7.476186 | 6.645795 | 7.043272 | 7.109035 | 7.196999 | 7.30932  |
| 57458_at  | 6.998174 | 6.614948 | 7.081601 | 6.790717 | 6.370239 | 6.500791 | 7.035263 | 6.155303 |
| 57459_at  | 7.471957 | 7.810791 | 7.930251 | 8.296825 | 7.719633 | 7.804615 | 7.761944 | 7.645631 |
| 5745_at   | 9.059409 | 8.599742 | 8.813079 | 8.213209 | 8.166012 | 8.723646 | 8.832653 | 8.152814 |
| 57460_at  | 3.942194 | 4.490986 | 5.255287 | 4.436097 | 4.792091 | 3.662415 | 3.829084 | 4.269624 |
| 57462_at  | 4.507348 | 4.72115  | 4.552541 | 4.547929 | 5.041715 | 4.72698  | 4.715422 | 3.675246 |
| 57463_at  | 5.217251 | 5.716115 | 6.161009 | 4.951548 | 3.244383 | 5.332057 | 4.796192 | 5.407444 |
| 57464_at  | 3.904971 | 2.748222 | 3.055627 | 3.439997 | 2.409419 | 2.884616 | 2.436031 | 3.626295 |
| 57465_at  | 3.776756 | 2.752725 | 3.167948 | 3.805268 | 2.906386 | 3.660729 | 3.717566 | 3.087375 |
| 57466_at  | 7.243806 | 7.151491 | 7.334787 | 7.698673 | 7.041002 | 7.510388 | 7.643802 | 6.437395 |
| 57467_at  | 4.203043 | 3.292896 | 2.377979 | 3.063081 | 3.207551 | 2.295015 | 3.066738 | 3.742307 |
| 57468_at  | 1.136385 | 1.86792  | 2.016209 | 1.358179 | 2.000711 | 1.390905 | 1.481123 | 1.579569 |
| 57469_at  | 2.169504 | 2.040453 | 3.453775 | 2.802376 | 2.558922 | 2.143505 | 2.587531 | 1.79802  |
| 5746_at   | 1.69066  | 2.139567 | 2.834111 | 2.132235 | 1.876375 | 2.833393 | 1.679426 | 1.9384   |
| 57470_at  | 6.063541 | 6.024684 | 6.288944 | 6.725296 | 6.153999 | 6.011809 | 6.485861 | 6.097632 |
| 57471_at  | 1.542273 | 1.410706 | 1.831225 | 1.445546 | 1.424413 | 1.168779 | 1.193998 | 1.685951 |
| 57472_at  | 5.018848 | 5.682062 | 5.879281 | 5.8517   | 4.979837 | 5.757881 | 5.442291 | 5.963356 |
| 57473_at  | 5.115748 | 4.588748 | 4.772986 | 4.3431   | 4.807183 | 5.502104 | 4.746781 | 4.303886 |
| 57474_at  | 4.901956 | 4.402866 | 4.356613 | 4.541674 | 4.38665  | 3.867705 | 4.498772 | 6.294045 |
| 57475_at  | 2.809657 | 2.12419  | 2.251474 | 1.832329 | 2.234454 | 2.596602 | 3.251604 | 1.91246  |
| 57476_at  | 3.18696  | 2.432881 | 2.683029 | 2.75424  | 2.724805 | 2.5901   | 2.748047 | 2.741421 |
| 57477_at  | 4.421788 | 5.042625 | 5.499452 | 6.067729 | 5.172748 | 5.922952 | 5.526819 | 4.293437 |
| 57478_at  | 5.729313 | 5.427498 | 6.001454 | 6.215697 | 6.409743 | 5.627589 | 5.989648 | 5.949363 |
| 57479_at  | 5.926065 | 6.051352 | 6.186262 | 6.211931 | 5.416438 | 5.394567 | 5.214141 | 4.581389 |
| 5747_at   | 7.196145 | 7.253455 | 7.511623 | 7.480546 | 7.330764 | 7.238369 | 7.213029 | 7.559327 |
| 57480_at  | 5.746413 | 6.009329 | 6.024544 | 5.789487 | 5.805689 | 5.456679 | 5.796499 | 5.89571  |
| 57481_at  | 2.137822 | 2.261767 | 1.536867 | 1.817132 | 1.79481  | 1.627929 | 2.330526 | 1.444176 |
| 57482_at  | 3.870984 | 4.474054 | 4.13341  | 3.811123 | 2.620418 | 3.937323 | 4.121033 | 4.500462 |
| 57484_at  | 3.788012 | 4.641416 | 4.272457 | 4.929618 | 4.057674 | 4.105676 | 4.83555  | 4.51628  |
| 57486_at  | 4.703209 | 4.998479 | 5.372341 | 4.683402 | 5.059835 | 5.108136 | 4.473506 | 5.831464 |
| 57488_at  | 8.092514 | 8.41642  | 8.478857 | 8.391963 | 8.18597  | 8.388675 | 8.392421 | 8.423806 |
| 57489_at  | 5.762625 | 5.180131 | 4.779849 | 5.768089 | 5.44643  | 5.601449 | 4.857083 | 5.678091 |
| 57491_at  | 2.659643 | 2.604713 | 2.094898 | 3.715383 | 2.177542 | 2.175359 | 2.611978 | 2.39948  |
| 57492_at  | 7.050136 | 6.544815 | 6.821117 | 6.852252 | 6.820187 | 6.777742 | 6.930444 | 5.810023 |
| 57493_at  | 8.342168 | 8.847609 | 8.849482 | 9.258727 | 9.153214 | 9.178458 | 9.358675 | 8.558298 |
| 57494_at  | 6.12398  | 5.951028 | 5.578889 | 5.568662 | 6.382158 | 5.570626 | 5.222361 | 6.211096 |
| 57495_at  | 1.620173 | 1.4372   | 1.61092  | 1.044859 | 1.741157 | 1.744771 | 1.605115 | 2.092951 |
| 57496_at  | 5.470849 | 4.576095 | 5.280095 | 6.008063 | 5.322719 | 5.579688 | 5.659536 | 4.912011 |
| 57497_at  | 1.705924 | 1.780708 | 2.07586  | 1.55992  | 1.117273 | 1.620555 | 1.702896 | 1.505457 |
| 57498_at  | 6.804304 | 7.217906 | 6.748364 | 6.992206 | 7.271805 | 6.826815 | 7.144168 | 7.126503 |
| 57501_at  | 1.555684 | 1.951945 | 1.986981 | 3.355383 | 3.442199 | 2.395653 | 2.818334 | 1.049076 |
| 57502_at  | 1.131435 | 2.347129 | 2.072412 | 1.688942 | 1.728536 | 1.912948 | 2.339993 | 2.079099 |
| 57504_at  | 3.537574 | 3.331032 | 3.528115 | 3.206757 | 3.856648 | 2.901228 | 3.27873  | 3.742817 |



|          |          |          |          |          |          |          |          |          |
|----------|----------|----------|----------|----------|----------|----------|----------|----------|
| 57505_at | 2.232358 | 3.029668 | 1.917182 | 2.289121 | 1.930029 | 2.337215 | 2.824363 | 2.72251  |
| 57506_at | 5.479577 | 5.773058 | 5.672111 | 6.036573 | 5.268108 | 5.593294 | 5.499874 | 5.737771 |
| 57507_at | 5.9132   | 5.311864 | 5.621352 | 5.069928 | 4.986291 | 5.121815 | 5.1105   | 6.185576 |
| 57508_at | 4.088056 | 4.827866 | 5.498647 | 4.794982 | 5.026119 | 4.309413 | 4.481022 | 4.762709 |
| 57509_at | 6.049628 | 5.471627 | 5.338382 | 6.497411 | 5.552363 | 5.283216 | 5.002043 | 5.623662 |
| 57510_at | 5.959444 | 6.61061  | 6.640164 | 6.643084 | 5.668087 | 5.833173 | 6.281422 | 6.590893 |
| 57511_at | 6.162944 | 5.53556  | 5.582284 | 4.911806 | 4.730889 | 5.237481 | 5.400134 | 5.660885 |
| 57512_at | 1.492983 | 1.342946 | 2.350612 | 1.413798 | 2.186824 | 1.229949 | 1.801453 | 1.957441 |
| 57513_at | 5.908533 | 6.150901 | 6.46899  | 6.295425 | 5.57354  | 5.967865 | 6.763912 | 4.165828 |
| 57514_at | 6.592263 | 6.916928 | 6.808723 | 7.361033 | 6.879402 | 6.734914 | 6.887731 | 6.218482 |
| 57515_at | 8.863197 | 9.346698 | 9.42198  | 9.524703 | 9.85019  | 8.848279 | 9.409777 | 9.833021 |
| 57519_at | 3.79461  | 3.290853 | 3.665711 | 3.624391 | 4.008182 | 3.021324 | 3.731125 | 3.882069 |
| 57520_at | 6.790918 | 7.464554 | 7.504711 | 7.98937  | 7.289674 | 7.757542 | 8.01759  | 6.725515 |
| 57521_at | 4.077533 | 4.439767 | 4.597759 | 4.895763 | 4.266706 | 5.06264  | 4.347398 | 3.964824 |
| 57522_at | 7.369922 | 7.131946 | 7.812443 | 7.373883 | 6.914584 | 7.231475 | 7.107587 | 7.74811  |
| 57523_at | 2.60353  | 3.923679 | 2.975143 | 3.698093 | 3.411656 | 2.770035 | 3.153823 | 3.453007 |
| 57524_at | 2.225787 | 2.297108 | 2.526017 | 2.321631 | 1.985306 | 1.947346 | 2.103549 | 1.885653 |
| 57526_at | 1.471696 | 2.042516 | 1.542179 | 1.955739 | 2.354131 | 2.223809 | 2.021735 | 2.424782 |
| 57528_at | 1.586615 | 1.300447 | 1.711393 | 1.763763 | 1.389909 | 1.523751 | 2.280538 | 2.467889 |
| 57529_at | 1.825284 | 1.890234 | 1.98591  | 2.235062 | 2.822729 | 2.345018 | 2.432446 | 2.308494 |
| 57530_at | 1.851214 | 2.456223 | 1.961192 | 2.738796 | 1.874156 | 1.767658 | 2.460261 | 1.726725 |
| 57531_at | 4.474426 | 4.802288 | 4.970711 | 4.678928 | 5.499351 | 5.586193 | 3.818835 | 5.405854 |
| 57532_at | 7.053084 | 7.597061 | 7.58235  | 7.531328 | 6.916799 | 6.952171 | 7.638978 | 7.526912 |
| 57533_at | 5.932252 | 6.075762 | 5.84682  | 5.867759 | 6.219229 | 5.606466 | 5.699861 | 5.689215 |
| 57534_at | 7.368874 | 7.651263 | 7.83264  | 7.875957 | 7.249112 | 7.583948 | 7.963097 | 8.073266 |
| 57535_at | 2.408561 | 2.755763 | 1.988512 | 2.286749 | 3.18516  | 1.574225 | 1.345672 | 2.276751 |
| 57536_at | 4.994401 | 5.067382 | 5.052738 | 4.416885 | 3.826756 | 5.266138 | 5.098048 | 4.636024 |
| 57537_at | 2.577766 | 2.265379 | 1.935435 | 1.800048 | 1.822276 | 1.667105 | 1.973234 | 1.631193 |
| 57538_at | 3.558534 | 3.659387 | 3.460906 | 3.975536 | 4.164221 | 3.796632 | 3.932087 | 2.90928  |
| 57539_at | 4.846412 | 5.519489 | 4.90881  | 5.678891 | 4.399041 | 5.148043 | 4.887835 | 6.304418 |
| 5753_at  | 2.230597 | 3.349173 | 2.449942 | 2.37207  | 2.683398 | 3.00306  | 3.002154 | 2.629056 |
| 57540_at | 1.384059 | 1.823887 | 1.759319 | 1.543626 | 1.035345 | 1.870898 | 1.509079 | 2.502138 |
| 57541_at | 5.092886 | 5.647975 | 5.179761 | 5.880877 | 3.123767 | 5.675308 | 5.071586 | 2.969662 |
| 57542_at | 8.313685 | 7.759361 | 7.83701  | 7.312059 | 7.663015 | 6.990281 | 8.352723 | 7.90441  |
| 57544_at | 4.379276 | 4.064146 | 3.918895 | 3.682161 | 3.42668  | 3.912802 | 3.430245 | 3.986477 |
| 57545_at | 5.44957  | 5.059738 | 5.203824 | 5.03013  | 4.982432 | 5.398952 | 4.704153 | 5.665235 |
| 57546_at | 4.622839 | 5.246638 | 4.757627 | 5.096756 | 5.072522 | 4.370215 | 4.558333 | 5.006143 |
| 57547_at | 4.664736 | 5.870784 | 3.920077 | 4.114149 | 3.922204 | 5.240432 | 4.106006 | 3.953261 |
| 57549_at | 1.805263 | 2.562385 | 3.078914 | 3.009851 | 2.844329 | 2.953942 | 3.039773 | 2.937494 |
| 5754_at  | 3.461813 | 4.128472 | 4.777547 | 4.186303 | 3.61913  | 4.332994 | 3.680124 | 3.753542 |
| 57551_at | 6.850825 | 6.971671 | 7.011078 | 7.088856 | 7.060629 | 7.043776 | 7.53505  | 6.915813 |
| 57552_at | 5.006594 | 4.337706 | 4.485831 | 4.306718 | 4.559886 | 4.600713 | 3.849198 | 4.874803 |
| 57553_at | 4.257661 | 5.171776 | 4.383903 | 4.786805 | 3.765063 | 4.448741 | 4.214648 | 3.940058 |
| 57554_at | 1.072494 | 1.252264 | 1.326454 | 1.473464 | 1.481713 | 2.013451 | 1.642212 | 2.007053 |
| 57555_at | 3.537077 | 3.737207 | 4.09487  | 4.518059 | 3.325573 | 5.17164  | 3.494066 | 3.511853 |
| 57556_at | 6.654972 | 7.383015 | 6.931139 | 7.127102 | 7.403137 | 7.071913 | 7.21952  | 7.108181 |
| 57558_at | 2.182331 | 2.724864 | 3.408959 | 3.031596 | 2.923735 | 3.828526 | 3.056709 | 2.619165 |
| 57559_at | 4.479492 | 2.802672 | 2.766283 | 3.588216 | 2.602317 | 3.134134 | 1.678785 | 2.632195 |
| 57560_at | 5.076239 | 5.682596 | 4.462883 | 4.747887 | 4.65514  | 5.536106 | 4.923078 | 5.132082 |
| 57561_at | 7.886587 | 7.608827 | 6.868104 | 6.606811 | 7.410151 | 6.311083 | 7.053344 | 7.925807 |
| 57562_at | 5.578861 | 5.292071 | 5.681353 | 5.31693  | 4.022094 | 5.091026 | 5.313363 | 5.80038  |

|          |          |          |          |          |          |          |          |          |
|----------|----------|----------|----------|----------|----------|----------|----------|----------|
| 57563_at | 5.067332 | 4.887138 | 5.678031 | 5.573427 | 5.983392 | 4.128319 | 5.731285 | 5.825365 |
| 57565_at | 2.72549  | 2.776607 | 2.724612 | 2.871615 | 2.966608 | 2.689275 | 2.660427 | 2.742807 |
| 57567_at | 3.640973 | 3.198914 | 3.913293 | 3.461319 | 1.879095 | 4.602814 | 2.920398 | 2.822068 |
| 57568_at | 5.644955 | 5.908098 | 4.908145 | 4.718923 | 4.472795 | 6.144723 | 5.210464 | 5.019349 |
| 57569_at | 2.800621 | 3.917982 | 2.72011  | 3.49121  | 2.953978 | 2.271595 | 3.465197 | 3.287449 |
| 5756_at  | 6.409541 | 5.919343 | 5.581172 | 5.58663  | 5.415299 | 6.083263 | 5.331189 | 6.657033 |
| 57570_at | 5.641833 | 5.61558  | 5.764247 | 4.789972 | 4.074312 | 4.644202 | 5.583088 | 6.040837 |
| 57571_at | 3.123492 | 3.933731 | 3.798154 | 3.36133  | 4.051457 | 2.85676  | 3.279618 | 3.556462 |
| 57572_at | 5.248128 | 5.599451 | 5.24145  | 5.674088 | 5.098746 | 5.537829 | 5.501285 | 4.087846 |
| 57573_at | 3.095217 | 4.010369 | 2.699282 | 2.41617  | 3.27573  | 0.962779 | 0.698504 | 3.535997 |
| 57574_at | 2.899658 | 3.673608 | 1.642984 | 3.072117 | 2.757311 | 2.996666 | 2.367263 | 2.50573  |
| 57575_at | 3.272104 | 2.98653  | 4.867886 | 3.391993 | 2.625825 | 2.488848 | 2.487395 | 3.079817 |
| 57576_at | 3.779878 | 3.493808 | 2.602041 | 3.906535 | 3.738108 | 2.847496 | 2.672655 | 2.909139 |
| 57577_at | 4.003683 | 3.915557 | 4.539697 | 4.083527 | 3.049129 | 3.705494 | 4.11964  | 4.135298 |
| 57578_at | 1.438408 | 1.776171 | 1.962845 | 1.580873 | 1.727323 | 1.78098  | 1.902036 | 2.13062  |
| 57579_at | 5.379572 | 5.46986  | 5.097834 | 5.565638 | 5.674756 | 5.527926 | 5.057309 | 6.214172 |
| 57580_at | 4.336398 | 5.107925 | 4.622937 | 4.943293 | 4.496751 | 4.810328 | 4.143757 | 3.723985 |
| 57582_at | 2.468057 | 2.390719 | 2.505101 | 2.459992 | 2.640429 | 2.465313 | 2.136996 | 2.453547 |
| 57583_at | 5.508076 | 5.746486 | 5.476885 | 6.087244 | 5.388753 | 5.898684 | 6.713728 | 5.80896  |
| 57584_at | 6.007391 | 5.715793 | 6.64214  | 6.017859 | 5.590598 | 5.701069 | 5.432001 | 6.303287 |
| 57585_at | 4.342639 | 4.466995 | 4.993786 | 4.974027 | 4.745632 | 4.617857 | 4.626901 | 4.646985 |
| 57586_at | 1.839165 | 2.409581 | 2.171336 | 2.073096 | 1.934261 | 2.940423 | 2.247565 | 1.880292 |
| 57587_at | 5.786448 | 5.85056  | 6.043589 | 5.733516 | 5.95523  | 5.157418 | 6.022332 | 6.006068 |
| 57589_at | 4.807719 | 4.566641 | 5.199483 | 4.911676 | 3.604654 | 4.618323 | 5.339003 | 5.481196 |
| 57590_at | 5.732909 | 5.254483 | 5.490282 | 5.440691 | 6.124559 | 5.441291 | 5.574014 | 4.757942 |
| 57591_at | 4.995432 | 4.696262 | 5.224552 | 5.486415 | 4.49626  | 5.567243 | 5.443787 | 4.616145 |
| 57592_at | 4.692544 | 4.043676 | 4.394341 | 5.026268 | 4.649067 | 4.816823 | 4.90559  | 4.409099 |
| 57593_at | 4.109245 | 4.58384  | 4.278118 | 4.356605 | 3.926703 | 4.470467 | 4.744267 | 2.797979 |
| 57594_at | 4.72347  | 3.516656 | 5.268583 | 3.509857 | 4.432876 | 5.086797 | 5.238292 | 4.559287 |
| 57595_at | 2.139881 | 3.252774 | 2.288346 | 1.981361 | 2.317636 | 2.40643  | 2.165454 | 2.316489 |
| 57596_at | 2.063369 | 2.099067 | 1.77624  | 1.612714 | 1.842082 | 1.691485 | 4.071483 | 2.980335 |
| 57597_at | 3.462703 | 3.605284 | 2.898475 | 2.805914 | 3.931947 | 3.463566 | 3.21691  | 2.587527 |
| 57599_at | 6.705288 | 6.676236 | 6.622812 | 6.306194 | 6.363513 | 6.343403 | 6.011981 | 6.766199 |
| 575_at   | 2.155757 | 3.161291 | 1.818219 | 2.011077 | 2.443974 | 2.052321 | 2.422825 | 2.073855 |
| 57600_at | 5.123455 | 5.127684 | 5.004619 | 5.479579 | 6.101375 | 4.789772 | 5.194398 | 5.131222 |
| 57602_at | 6.265799 | 5.646584 | 6.453079 | 6.095319 | 6.137637 | 6.934632 | 6.301879 | 6.243545 |
| 57604_at | 1.785447 | 2.037034 | 1.841311 | 1.897933 | 2.724541 | 1.903135 | 2.672391 | 1.620882 |
| 57605_at | 3.149688 | 3.646187 | 3.026638 | 3.822269 | 4.233947 | 3.269342 | 3.93708  | 3.491767 |
| 57606_at | 8.985438 | 8.738023 | 8.835342 | 8.976145 | 8.899515 | 8.876265 | 9.135326 | 8.823298 |
| 57608_at | 7.109118 | 7.263844 | 7.569884 | 7.589709 | 7.058978 | 6.876452 | 6.761431 | 7.142803 |
| 57609_at | 3.852174 | 4.916603 | 4.401476 | 4.894463 | 5.593066 | 4.092956 | 4.705243 | 4.404428 |
| 57610_at | 5.360566 | 4.725434 | 5.733687 | 4.865281 | 4.542525 | 6.008776 | 5.668603 | 5.067298 |
| 57611_at | 1.848938 | 1.373899 | 1.491987 | 1.780876 | 1.464307 | 1.535061 | 1.700923 | 1.730162 |
| 57613_at | 2.711507 | 2.693505 | 3.040329 | 3.288597 | 3.275089 | 3.027519 | 4.163616 | 2.062851 |
| 57614_at | 6.589695 | 6.560159 | 7.001424 | 6.191639 | 6.264657 | 6.504404 | 6.380869 | 6.774311 |
| 57615_at | 1.112992 | 1.688848 | 1.537305 | 2.562583 | 1.932722 | 1.205448 | 2.785096 | 1.539995 |
| 57616_at | 6.045847 | 6.145788 | 6.387946 | 6.443755 | 5.628892 | 6.131377 | 5.142202 | 6.325693 |
| 57617_at | 5.002136 | 5.308514 | 4.807851 | 4.099083 | 4.852023 | 5.435555 | 4.453786 | 5.138261 |
| 57619_at | 5.034382 | 5.220203 | 5.148596 | 4.945777 | 3.630095 | 4.961195 | 5.248457 | 4.40368  |
| 57620_at | 6.472994 | 7.031718 | 7.034105 | 6.716399 | 7.748604 | 6.013337 | 6.792827 | 6.801119 |
| 57621_at | 4.9484   | 5.560464 | 4.65178  | 5.712319 | 5.513948 | 5.273266 | 4.633865 | 4.117432 |

|          |          |          |          |          |          |          |          |          |
|----------|----------|----------|----------|----------|----------|----------|----------|----------|
| 57622_at | 2.710636 | 2.364078 | 2.756085 | 2.993705 | 2.483111 | 2.936394 | 2.882415 | 2.999248 |
| 57623_at | 4.353102 | 4.756698 | 3.811387 | 4.351804 | 4.042206 | 3.67428  | 4.493484 | 4.046559 |
| 57624_at | 1.968559 | 1.608276 | 1.566206 | 1.382169 | 1.673372 | 1.461103 | 1.288892 | 2.04224  |
| 57626_at | 1.152376 | 1.653825 | 1.876862 | 1.512967 | 2.135751 | 1.143519 | 2.015982 | 2.213929 |
| 57628_at | 1.12211  | 1.163056 | 1.266353 | 1.004397 | 1.607922 | 1.411507 | 1.358895 | 1.329281 |
| 57630_at | 7.212282 | 6.860561 | 7.115783 | 6.460411 | 6.488041 | 6.524991 | 6.914168 | 7.004146 |
| 57631_at | 4.56773  | 4.280836 | 3.887351 | 5.672191 | 4.052113 | 4.063054 | 4.381216 | 5.594779 |
| 57633_at | 1.717161 | 1.684048 | 2.299199 | 2.540281 | 2.218491 | 1.920951 | 3.40183  | 2.671853 |
| 57634_at | 5.154    | 5.304912 | 5.419379 | 5.193809 | 5.447673 | 5.808571 | 5.922671 | 4.844371 |
| 57636_at | 6.164521 | 6.526434 | 7.136264 | 6.766757 | 5.924833 | 6.754983 | 7.630412 | 5.72128  |
| 57639_at | 4.808832 | 4.118428 | 4.677618 | 3.81211  | 3.644692 | 5.018276 | 3.505765 | 4.757353 |
| 5763_at  | 9.937679 | 9.577439 | 9.699704 | 9.719126 | 9.689167 | 9.881001 | 9.582359 | 9.633919 |
| 57642_at | 2.034213 | 2.714135 | 2.476455 | 2.6496   | 2.368523 | 2.677391 | 1.775794 | 2.845175 |
| 57643_at | 4.051381 | 4.234383 | 4.804044 | 4.033212 | 3.58024  | 4.026297 | 5.157814 | 4.978811 |
| 57644_at | 1.850383 | 1.559791 | 1.802917 | 1.925037 | 1.93247  | 1.470835 | 2.403961 | 1.439023 |
| 57645_at | 4.754723 | 5.363655 | 3.929724 | 4.76924  | 4.664336 | 4.671876 | 4.071681 | 4.591149 |
| 57646_at | 4.664508 | 5.38488  | 4.391549 | 5.235107 | 4.751215 | 5.516565 | 3.836147 | 5.529655 |
| 57647_at | 3.096372 | 2.384664 | 2.833036 | 2.205688 | 2.91895  | 3.269379 | 3.430648 | 2.585551 |
| 57648_at | 2.804077 | 3.533089 | 2.900517 | 3.559005 | 3.195918 | 2.741548 | 2.884168 | 3.41117  |
| 57649_at | 6.713159 | 6.638928 | 6.897008 | 7.125303 | 6.746352 | 6.765872 | 7.440654 | 5.539307 |
| 5764_at  | 6.466116 | 6.82489  | 6.201091 | 5.877897 | 5.449484 | 5.97847  | 5.623025 | 5.664036 |
| 57650_at | 1.595302 | 2.059817 | 1.940319 | 2.034971 | 2.443621 | 2.381209 | 1.932891 | 1.981929 |
| 57654_at | 2.343659 | 1.655087 | 2.136638 | 2.297499 | 2.510227 | 3.757838 | 1.689611 | 1.761258 |
| 57655_at | 5.299998 | 4.608849 | 4.698539 | 5.033218 | 3.376583 | 4.676093 | 5.055371 | 4.775595 |
| 57657_at | 2.358845 | 2.40605  | 3.229423 | 2.376177 | 2.739915 | 3.546904 | 2.788187 | 3.364515 |
| 57658_at | 6.50747  | 6.130872 | 6.663046 | 6.874192 | 6.006734 | 6.647243 | 6.386983 | 5.458584 |
| 57659_at | 6.958246 | 7.035017 | 7.216559 | 8.168987 | 7.633567 | 7.3964   | 7.946035 | 6.977599 |
| 57661_at | 3.874336 | 3.613271 | 3.593223 | 3.517995 | 3.700323 | 3.831701 | 3.972402 | 4.209504 |
| 57662_at | 2.745074 | 2.971887 | 2.632668 | 2.65487  | 3.030754 | 3.10266  | 3.078722 | 3.071022 |
| 57663_at | 1.717515 | 1.364181 | 1.127731 | 1.560345 | 1.392692 | 1.712672 | 1.346952 | 1.392526 |
| 57664_at | 5.060781 | 4.271264 | 4.586896 | 4.554867 | 4.335119 | 4.211176 | 4.18459  | 4.629679 |
| 57665_at | 0.688987 | 1.455107 | 2.123635 | 3.768346 | 3.828882 | 1.720704 | 1.301501 | 0.804692 |
| 57666_at | 3.287588 | 3.514288 | 3.566477 | 3.775419 | 2.878756 | 3.506328 | 3.015751 | 2.827036 |
| 57669_at | 8.551791 | 8.966525 | 9.023073 | 8.690424 | 8.597198 | 8.453413 | 8.985162 | 9.125067 |
| 57670_at | 4.256907 | 4.419051 | 4.490417 | 4.799    | 3.841682 | 5.364623 | 4.909993 | 4.520148 |
| 57673_at | 2.191283 | 2.521326 | 2.692325 | 3.272498 | 2.070626 | 2.377178 | 1.894784 | 2.26992  |
| 57674_at | 5.804195 | 6.354549 | 6.172952 | 6.333206 | 6.391067 | 5.890762 | 6.370221 | 5.855718 |
| 57677_at | 5.015329 | 4.21378  | 3.750097 | 5.20161  | 4.439053 | 4.267429 | 4.642606 | 5.347715 |
| 57678_at | 3.374762 | 4.532639 | 4.54649  | 4.536496 | 2.860161 | 4.384117 | 3.887374 | 4.13762  |
| 57679_at | 5.469986 | 5.352367 | 5.673665 | 4.892547 | 5.188131 | 5.68137  | 5.192075 | 5.379812 |
| 57680_at | 6.490883 | 6.939592 | 6.617736 | 6.991359 | 6.782227 | 6.642194 | 7.127359 | 7.01848  |
| 57683_at | 5.179731 | 5.566599 | 5.75081  | 5.366979 | 4.535702 | 4.43989  | 5.508534 | 6.162481 |
| 57684_at | 3.12025  | 3.260392 | 1.876947 | 3.357282 | 3.43107  | 3.784171 | 3.204062 | 2.273445 |
| 57685_at | 5.461368 | 4.36701  | 4.468615 | 5.690415 | 4.185967 | 4.644159 | 3.394915 | 3.480965 |
| 57687_at | 3.666287 | 4.226837 | 3.804282 | 2.769382 | 3.644057 | 3.886633 | 3.98932  | 2.549381 |
| 57688_at | 7.340015 | 7.344897 | 7.62189  | 7.366873 | 7.139991 | 6.476958 | 6.985393 | 7.36709  |
| 57689_at | 1.899952 | 2.419605 | 1.572785 | 1.750255 | 1.982942 | 1.968191 | 1.564242 | 1.669509 |
| 5768_at  | 5.354406 | 6.030756 | 6.62273  | 5.810351 | 6.022994 | 6.048355 | 5.904786 | 5.164167 |
| 57690_at | 5.673472 | 5.069205 | 6.012832 | 6.203298 | 5.267578 | 5.89435  | 5.855038 | 4.512005 |
| 57691_at | 6.113288 | 7.080512 | 5.542387 | 6.241983 | 6.247755 | 5.549279 | 5.326793 | 6.314373 |
| 57692_at | 3.700824 | 4.640351 | 4.384319 | 3.529429 | 3.937566 | 3.64189  | 3.796482 | 3.943621 |

|          |          |          |          |          |          |          |          |          |
|----------|----------|----------|----------|----------|----------|----------|----------|----------|
| 57693_at | 3.91081  | 4.60425  | 5.349532 | 4.597777 | 4.632742 | 4.716558 | 4.972831 | 4.097354 |
| 57695_at | 4.826128 | 4.866486 | 4.275631 | 4.446483 | 4.656761 | 4.249083 | 5.20971  | 5.10348  |
| 57696_at | 4.34979  | 2.867114 | 4.699366 | 4.693427 | 2.634985 | 4.045282 | 4.96241  | 3.877798 |
| 57697_at | 3.692587 | 2.150029 | 2.602846 | 2.266454 | 3.502437 | 2.176631 | 2.690987 | 3.382302 |
| 57698_at | 6.428454 | 6.619845 | 6.761831 | 6.689541 | 5.934784 | 6.65431  | 6.489131 | 6.610065 |
| 57699_at | 2.933265 | 2.305156 | 2.385759 | 2.40946  | 2.152202 | 2.403821 | 3.08381  | 2.59194  |
| 576_at   | 2.688879 | 2.801297 | 3.595787 | 3.087602 | 2.885788 | 3.590491 | 3.101311 | 3.522912 |
| 57700_at | 5.862663 | 5.62371  | 5.318026 | 5.651422 | 5.601063 | 5.769082 | 5.902327 | 6.04866  |
| 57701_at | 3.546084 | 3.01082  | 3.596823 | 3.21619  | 3.819716 | 4.222902 | 3.609218 | 3.55397  |
| 57703_at | 5.753476 | 5.77195  | 5.760151 | 5.360038 | 5.804667 | 5.357901 | 5.258032 | 5.826097 |
| 57704_at | 5.271954 | 5.052263 | 4.694941 | 4.943957 | 4.843614 | 5.490576 | 5.182321 | 5.500664 |
| 57705_at | 1.857952 | 1.511759 | 1.356999 | 1.75171  | 1.67962  | 2.031532 | 1.593362 | 2.240995 |
| 57706_at | 4.717305 | 4.731606 | 3.863349 | 5.84859  | 3.671322 | 4.961407 | 5.77868  | 5.141472 |
| 57707_at | 3.193631 | 3.631215 | 4.087227 | 4.346329 | 3.472338 | 3.36011  | 3.044631 | 2.857913 |
| 57708_at | 6.137063 | 6.371377 | 6.281312 | 6.59984  | 6.431753 | 6.014179 | 6.4807   | 6.637603 |
| 57709_at | 3.528889 | 3.274122 | 2.364218 | 3.027026 | 2.679769 | 3.71555  | 4.691905 | 2.008481 |
| 5770_at  | 7.107705 | 6.987537 | 7.099631 | 7.032069 | 6.905728 | 7.326114 | 7.313314 | 6.905728 |
| 57710_at | 3.204768 | 3.267773 | 4.246065 | 3.70435  | 4.747814 | 2.712352 | 3.704013 | 3.788025 |
| 57711_at | 3.334444 | 3.821156 | 4.001944 | 3.668951 | 3.779716 | 3.949791 | 3.462637 | 3.983792 |
| 57713_at | 5.845533 | 5.760711 | 4.941054 | 4.734363 | 5.001365 | 5.502479 | 4.984947 | 5.623975 |
| 57715_at | 6.137846 | 5.859971 | 6.042565 | 6.616682 | 6.207066 | 5.619345 | 5.596337 | 5.833533 |
| 57716_at | 4.789953 | 4.88142  | 5.023374 | 4.70866  | 3.893027 | 4.727771 | 4.255873 | 3.061709 |
| 57717_at | 3.889228 | 5.169656 | 4.865214 | 4.459293 | 4.565814 | 4.16623  | 3.7778   | 4.053914 |
| 57718_at | 0.997393 | 0.898118 | 0.98905  | 0.932837 | 1.283983 | 1.494639 | 0.932837 | 1.646491 |
| 57719_at | 4.635887 | 4.181414 | 4.869268 | 3.764562 | 3.692384 | 4.196406 | 4.896279 | 3.983333 |
| 5771_at  | 5.494484 | 5.422845 | 5.370482 | 5.063463 | 4.4924   | 4.681472 | 5.541763 | 5.583005 |
| 57720_at | 6.446991 | 6.731822 | 7.051888 | 7.619487 | 6.949026 | 7.166222 | 7.472659 | 7.022666 |
| 57721_at | 5.778542 | 5.782954 | 6.754669 | 6.767762 | 6.805047 | 6.273325 | 6.628884 | 7.080989 |
| 57722_at | 1.889305 | 2.106989 | 1.797902 | 1.280716 | 1.719886 | 1.1629   | 1.434187 | 1.580113 |
| 57724_at | 4.521179 | 4.403781 | 4.800602 | 4.968198 | 5.146034 | 4.402455 | 4.916754 | 4.834261 |
| 57727_at | 5.085415 | 5.404383 | 5.441139 | 4.936183 | 5.897909 | 4.720127 | 5.52689  | 4.66387  |
| 57728_at | 5.294815 | 4.569546 | 4.359042 | 4.43463  | 4.954817 | 4.395621 | 4.570788 | 5.195039 |
| 57730_at | 4.596122 | 2.316296 | 2.024048 | 3.772183 | 4.747619 | 3.269085 | 1.356774 | 2.836517 |
| 57731_at | 2.106802 | 2.922067 | 2.055943 | 2.258556 | 2.224487 | 2.18638  | 1.885384 | 2.289402 |
| 57732_at | 2.927968 | 2.166191 | 2.066499 | 2.236903 | 1.830003 | 2.564088 | 2.51212  | 1.986398 |
| 57733_at | 5.21237  | 4.960205 | 3.733533 | 2.805848 | 5.788477 | 4.858805 | 1.891961 | 5.744369 |
| 5774_at  | 5.88247  | 5.684087 | 5.489835 | 4.915702 | 6.244375 | 5.550977 | 5.347881 | 5.749784 |
| 57758_at | 1.633209 | 1.339319 | 1.952054 | 1.387729 | 1.940749 | 3.420241 | 2.744015 | 1.921124 |
| 5775_at  | 5.524526 | 5.612359 | 5.494773 | 4.815028 | 5.390414 | 5.076012 | 5.688394 | 5.913779 |
| 57761_at | 2.521859 | 2.083651 | 2.495874 | 1.928514 | 3.026041 | 2.777992 | 3.109917 | 3.373702 |
| 57763_at | 5.21134  | 4.256466 | 4.741937 | 4.148074 | 3.715831 | 4.92448  | 2.382924 | 4.959794 |
| 5777_at  | 4.867003 | 4.199245 | 4.241194 | 4.547295 | 4.977337 | 5.378364 | 4.817847 | 4.523538 |
| 57786_at | 6.182836 | 6.853255 | 4.440074 | 6.043785 | 5.293326 | 4.780473 | 4.553788 | 5.005314 |
| 57787_at | 4.902636 | 4.612335 | 5.16539  | 4.767794 | 4.490248 | 5.326374 | 5.372811 | 4.448733 |
| 5778_at  | 4.713601 | 4.007735 | 4.000765 | 4.163988 | 3.631227 | 4.745361 | 5.433244 | 3.19931  |
| 57794_at | 4.788605 | 4.441425 | 4.348065 | 5.112937 | 3.330558 | 4.83379  | 4.510925 | 5.19779  |
| 57795_at | 1.623281 | 1.345793 | 2.673887 | 2.300521 | 1.373372 | 2.363075 | 1.978266 | 2.419623 |
| 57798_at | 5.993526 | 4.944409 | 5.798368 | 5.847985 | 5.480132 | 5.948502 | 6.363745 | 6.333711 |
| 57799_at | 3.321104 | 3.800918 | 2.995544 | 3.308529 | 3.137236 | 3.637141 | 4.085859 | 2.583529 |
| 577_at   | 1.364324 | 2.831059 | 2.168483 | 2.12194  | 3.450413 | 2.413405 | 1.967    | 1.834907 |
| 57801_at | 3.3987   | 4.168212 | 3.577342 | 3.634115 | 2.634708 | 3.857149 | 3.721688 | 2.6339   |

|          |          |          |          |          |          |          |          |          |
|----------|----------|----------|----------|----------|----------|----------|----------|----------|
| 57804_at | 5.873622 | 5.550962 | 5.123733 | 5.77864  | 5.698974 | 5.670637 | 5.569315 | 5.183994 |
| 57805_at | 5.718769 | 5.377576 | 5.527922 | 5.646095 | 5.53632  | 5.907053 | 5.910679 | 4.527201 |
| 5780_at  | 5.431414 | 6.220101 | 5.514489 | 5.712716 | 5.537054 | 5.706935 | 5.938544 | 4.964914 |
| 57817_at | 3.570538 | 3.598824 | 3.001533 | 3.954216 | 3.569449 | 4.180148 | 3.521815 | 3.737178 |
| 57818_at | 1.370596 | 1.467917 | 0.941945 | 1.439373 | 1.145718 | 1.6831   | 1.678578 | 1.900606 |
| 57819_at | 7.881688 | 7.830661 | 8.191284 | 8.322271 | 7.219345 | 7.889272 | 7.829478 | 6.109567 |
| 5781_at  | 8.063126 | 8.305379 | 8.39341  | 8.472631 | 8.371677 | 8.814138 | 8.476651 | 8.45658  |
| 57820_at | 5.894195 | 5.264238 | 5.905244 | 5.240305 | 6.15085  | 5.651447 | 5.032624 | 6.104979 |
| 57821_at | 3.341808 | 3.168868 | 2.882494 | 2.772692 | 3.775444 | 2.525245 | 2.429579 | 2.413349 |
| 57822_at | 1.847548 | 1.817731 | 2.182719 | 1.976893 | 1.618303 | 2.072732 | 1.782497 | 2.006788 |
| 57823_at | 3.036372 | 2.455775 | 3.718643 | 2.974676 | 3.402104 | 3.944306 | 2.851823 | 4.932394 |
| 57824_at | 1.950847 | 2.043163 | 3.561624 | 1.937986 | 2.761677 | 2.269894 | 1.53876  | 1.893423 |
| 57826_at | 4.493131 | 3.966245 | 3.581941 | 4.309992 | 5.00264  | 3.820351 | 4.576261 | 4.511453 |
| 57827_at | 3.143956 | 3.405798 | 2.475811 | 3.389272 | 3.517792 | 3.272395 | 3.37444  | 3.376858 |
| 57828_at | 2.212249 | 1.318163 | 2.187847 | 1.389963 | 2.209857 | 1.523185 | 1.753076 | 1.654139 |
| 57829_at | 1.633759 | 0.992842 | 1.189204 | 1.05045  | 1.648468 | 1.887631 | 1.349621 | 0.926495 |
| 5782_at  | 7.957358 | 8.286622 | 7.617551 | 8.273718 | 8.070788 | 7.714144 | 7.747564 | 7.88668  |
| 57830_at | 3.473301 | 2.045554 | 4.622784 | 3.483069 | 2.553825 | 1.68363  | 1.616411 | 1.652747 |
| 57834_at | 2.623949 | 2.140729 | 1.778824 | 1.607035 | 2.031327 | 2.808484 | 1.857847 | 2.223787 |
| 57835_at | 2.301111 | 1.672264 | 2.12909  | 2.856944 | 2.264865 | 1.68442  | 1.664874 | 3.000345 |
| 5783_at  | 7.643604 | 7.922296 | 7.432815 | 7.228876 | 6.965842 | 7.870309 | 7.526799 | 8.171495 |
| 5784_at  | 7.800799 | 8.174874 | 8.55935  | 8.102384 | 7.982664 | 8.55229  | 8.556679 | 7.744167 |
| 57862_at | 5.969509 | 5.78271  | 6.040669 | 5.869422 | 6.428944 | 5.148336 | 5.316973 | 6.035656 |
| 57863_at | 3.614225 | 3.35094  | 3.045784 | 4.506985 | 1.969999 | 2.935023 | 3.391103 | 4.520648 |
| 57864_at | 2.419748 | 3.005099 | 3.027374 | 3.572271 | 3.288819 | 2.959148 | 2.661564 | 2.931042 |
| 5786_at  | 7.388092 | 6.963387 | 7.51885  | 7.364642 | 7.224058 | 7.391567 | 7.154262 | 6.863288 |
| 5787_at  | 7.784707 | 8.475473 | 8.377972 | 8.356763 | 8.351663 | 8.54022  | 8.512315 | 7.976111 |
| 5788_at  | 5.587616 | 4.825169 | 4.72972  | 6.098719 | 4.448192 | 4.855988 | 5.631751 | 5.164873 |
| 5789_at  | 6.557115 | 7.176069 | 6.999294 | 6.589634 | 6.554748 | 6.632645 | 7.206529 | 7.535764 |
| 578_at   | 6.406857 | 5.75574  | 5.545337 | 5.784662 | 5.382996 | 6.005411 | 4.842021 | 4.602555 |
| 5790_at  | 5.496179 | 3.392558 | 5.271811 | 4.178116 | 3.811958 | 5.338908 | 3.765399 | 4.505515 |
| 5791_at  | 4.634262 | 3.806477 | 3.944713 | 4.223012 | 3.369377 | 4.867101 | 4.225532 | 4.368594 |
| 5792_at  | 5.138153 | 4.886369 | 5.343932 | 5.138388 | 4.709376 | 5.611239 | 5.085444 | 4.946553 |
| 5793_at  | 6.933245 | 7.261609 | 7.62508  | 7.634655 | 7.860851 | 6.903943 | 7.723061 | 7.066903 |
| 5794_at  | 1.590261 | 1.949296 | 2.193351 | 1.449452 | 2.408078 | 2.197605 | 1.90723  | 1.596092 |
| 5795_at  | 5.599866 | 6.059164 | 6.076362 | 5.881101 | 6.404901 | 6.340262 | 6.066501 | 6.388376 |
| 5796_at  | 6.074267 | 6.344749 | 6.422059 | 6.084464 | 6.118831 | 5.933833 | 6.516344 | 6.041964 |
| 5797_at  | 8.075993 | 7.947347 | 8.079408 | 8.339395 | 8.488849 | 8.238421 | 8.518278 | 7.59703  |
| 5798_at  | 2.530841 | 2.919882 | 2.143694 | 2.314513 | 2.399273 | 1.86624  | 2.557535 | 2.526359 |
| 5799_at  | 2.692068 | 2.610023 | 2.43535  | 2.836785 | 1.948736 | 2.493708 | 2.605931 | 2.166527 |
| 579_at   | 1.982046 | 1.519996 | 1.515313 | 2.766272 | 2.390338 | 1.819865 | 2.570164 | 1.982867 |
| 5800_at  | 9.184276 | 9.501676 | 9.59023  | 9.385921 | 9.306871 | 8.4108   | 9.444223 | 9.502301 |
| 5801_at  | 1.712415 | 1.259556 | 1.06395  | 0.926306 | 1.155148 | 2.050681 | 2.215724 | 1.489436 |
| 5802_at  | 4.136197 | 4.890469 | 4.402457 | 4.91183  | 4.477137 | 4.296461 | 3.636598 | 4.432505 |
| 5803_at  | 1.496436 | 1.53758  | 1.374979 | 1.169082 | 1.498429 | 1.846932 | 1.140465 | 1.370764 |
| 5805_at  | 6.711298 | 6.895779 | 6.837691 | 6.77704  | 6.889676 | 6.694083 | 6.321439 | 6.918157 |
| 5806_at  | 2.872119 | 2.217002 | 2.096684 | 2.008581 | 2.587338 | 2.096076 | 2.069614 | 3.128445 |
| 580_at   | 4.752958 | 5.39761  | 3.611618 | 5.379614 | 4.476605 | 4.56012  | 5.103889 | 5.50575  |
| 5810_at  | 5.718581 | 6.461684 | 6.342123 | 6.973598 | 4.864629 | 5.950701 | 6.521939 | 5.770641 |
| 5813_at  | 7.80247  | 7.846128 | 7.646261 | 7.985083 | 8.364124 | 8.001451 | 7.928914 | 7.872282 |
| 5814_at  | 5.947477 | 6.226985 | 6.080237 | 6.543008 | 6.011873 | 5.949043 | 5.930781 | 6.266934 |

|          |          |          |          |          |          |          |          |          |
|----------|----------|----------|----------|----------|----------|----------|----------|----------|
| 58155_at | 4.510852 | 4.873372 | 5.08003  | 4.031378 | 3.507788 | 3.88939  | 4.909012 | 4.975838 |
| 58157_at | 1.516767 | 2.881583 | 2.812126 | 2.872084 | 2.891964 | 2.527611 | 2.305088 | 3.178838 |
| 58158_at | 2.13309  | 1.508742 | 1.482739 | 1.359829 | 1.543192 | 1.085909 | 1.472536 | 1.655917 |
| 58160_at | 2.488711 | 1.018696 | 2.114464 | 1.744923 | 2.874572 | 1.239182 | 1.089132 | 1.334046 |
| 5816_at  | 4.255789 | 2.873854 | 2.203154 | 5.841463 | 4.560651 | 1.032149 | 1.064775 | 2.331405 |
| 5817_at  | 4.901875 | 4.901414 | 4.977244 | 4.700468 | 4.750441 | 4.678899 | 5.866429 | 5.368784 |
| 58189_at | 7.094266 | 5.87727  | 5.066553 | 5.786778 | 5.264455 | 6.099253 | 6.242864 | 5.122336 |
| 5818_at  | 2.16338  | 2.707264 | 2.058913 | 2.59489  | 2.325841 | 2.123788 | 3.015972 | 1.817853 |
| 58190_at | 6.024036 | 5.317476 | 6.436135 | 6.345467 | 5.438863 | 5.611895 | 6.376028 | 5.582713 |
| 58191_at | 5.878929 | 5.312745 | 6.717127 | 6.837662 | 5.792899 | 6.466995 | 5.859714 | 5.270567 |
| 5819_at  | 7.442136 | 7.282395 | 7.88844  | 7.364894 | 7.286529 | 7.043403 | 8.182011 | 6.227308 |
| 581_at   | 5.222389 | 5.052469 | 6.194608 | 5.886274 | 4.035183 | 4.853032 | 5.11503  | 4.85888  |
| 5820_at  | 1.520956 | 1.550419 | 1.50256  | 1.82045  | 2.441414 | 1.149745 | 1.272582 | 2.834008 |
| 5824_at  | 7.180948 | 7.428132 | 7.464624 | 6.986515 | 7.206246 | 6.483664 | 6.73614  | 6.903324 |
| 5825_at  | 6.386006 | 6.229486 | 6.24583  | 6.137896 | 6.70281  | 6.142695 | 6.22769  | 7.19394  |
| 5826_at  | 6.277766 | 5.740774 | 5.665518 | 4.313344 | 4.831762 | 5.276524 | 4.255269 | 5.144909 |
| 5827_at  | 6.440433 | 5.616361 | 4.817495 | 4.741376 | 6.592767 | 6.282115 | 4.957358 | 5.491883 |
| 5828_at  | 3.493992 | 4.296414 | 3.868383 | 3.463558 | 2.853801 | 4.012109 | 4.309687 | 4.637292 |
| 5829_at  | 4.843836 | 4.329158 | 5.000417 | 5.146226 | 4.218507 | 4.422371 | 5.349069 | 3.823933 |
| 582_at   | 7.222502 | 6.509266 | 7.749668 | 7.217374 | 6.199925 | 7.120002 | 7.011822 | 6.068712 |
| 5830_at  | 4.632143 | 5.245582 | 4.982038 | 4.592062 | 6.008557 | 4.687854 | 4.437475 | 4.143521 |
| 5831_at  | 2.81981  | 3.135191 | 2.996912 | 3.248516 | 3.167624 | 3.256624 | 3.415767 | 2.599272 |
| 5832_at  | 4.19457  | 4.9642   | 4.633295 | 5.450492 | 5.375672 | 3.731119 | 3.834484 | 4.560161 |
| 5833_at  | 3.866759 | 4.292786 | 3.968312 | 3.307694 | 3.919721 | 4.191419 | 4.250067 | 2.752374 |
| 5834_at  | 5.30039  | 4.18567  | 5.172549 | 5.301951 | 4.663504 | 4.623385 | 3.735161 | 5.009784 |
| 5836_at  | 5.859137 | 5.994098 | 4.61195  | 3.622411 | 5.698179 | 3.728409 | 4.660787 | 4.061311 |
| 5837_at  | 3.389432 | 2.57872  | 2.150879 | 2.144479 | 1.846857 | 2.110658 | 2.907339 | 1.986953 |
| 583_at   | 4.755604 | 5.309261 | 5.617347 | 5.805814 | 5.254488 | 5.147721 | 5.866906 | 6.135525 |
| 58472_at | 8.559181 | 8.630793 | 8.162225 | 8.036555 | 8.428255 | 8.015216 | 8.341466 | 8.582476 |
| 58473_at | 5.191987 | 3.743635 | 5.59426  | 4.592648 | 4.93385  | 5.452758 | 5.775271 | 4.57012  |
| 58475_at | 5.383619 | 5.421878 | 3.600679 | 5.237368 | 4.123276 | 4.409205 | 5.492288 | 3.736915 |
| 58476_at | 4.9609   | 4.828147 | 4.886365 | 5.064297 | 5.224572 | 5.044674 | 5.316839 | 4.199672 |
| 58477_at | 5.825826 | 6.069444 | 5.924964 | 5.954728 | 6.311963 | 5.822942 | 6.24222  | 6.102618 |
| 58478_at | 6.824314 | 7.007336 | 7.053771 | 5.853365 | 6.838841 | 6.110589 | 6.547355 | 6.809032 |
| 58480_at | 6.008387 | 5.951621 | 6.016863 | 6.427137 | 5.939262 | 5.461599 | 6.168821 | 5.070832 |
| 58483_at | 1.066028 | 1.641566 | 1.015884 | 1.264238 | 2.744935 | 0.637899 | 1.03164  | 1.321331 |
| 58484_at | 1.288947 | 1.159089 | 1.36939  | 0.914841 | 1.346779 | 1.657079 | 2.525275 | 2.267553 |
| 58485_at | 9.48043  | 9.316332 | 9.147519 | 9.268887 | 9.100937 | 9.004094 | 9.499992 | 8.603283 |
| 58486_at | 7.400557 | 7.080786 | 7.262366 | 7.344945 | 6.940801 | 6.754929 | 6.628358 | 7.482304 |
| 58487_at | 5.20989  | 3.633301 | 4.312422 | 4.602194 | 5.317941 | 4.133666 | 4.535209 | 5.500673 |
| 58488_at | 5.141491 | 4.405327 | 4.406675 | 4.517525 | 4.100917 | 4.240831 | 3.981121 | 4.873029 |
| 58489_at | 6.493391 | 6.853481 | 6.346078 | 6.243928 | 6.259091 | 6.290346 | 6.342782 | 5.657054 |
| 58490_at | 5.599748 | 5.046444 | 5.002524 | 6.412998 | 6.103889 | 5.030985 | 5.455777 | 5.756467 |
| 58491_at | 4.54787  | 3.635617 | 4.368073 | 4.328657 | 3.208086 | 4.150564 | 3.601821 | 4.366982 |
| 58492_at | 3.769254 | 3.107724 | 3.414239 | 2.838516 | 2.990235 | 3.461591 | 3.850348 | 2.429916 |
| 58493_at | 6.819856 | 7.266708 | 6.715602 | 7.054912 | 7.589469 | 6.690041 | 6.001697 | 7.397512 |
| 58494_at | 6.580874 | 6.043288 | 5.904794 | 6.196627 | 5.070626 | 5.452369 | 6.246786 | 5.695981 |
| 58495_at | 2.615863 | 2.568553 | 1.89506  | 1.551612 | 1.848773 | 2.749418 | 2.617189 | 2.207391 |
| 58496_at | 1.944946 | 3.581481 | 2.098775 | 5.52679  | 2.287957 | 2.260605 | 3.537001 | 2.604183 |
| 58497_at | 6.102668 | 5.942892 | 5.948717 | 5.702051 | 6.344541 | 6.217211 | 6.086989 | 5.593539 |
| 58498_at | 2.246551 | 1.540385 | 1.677846 | 1.999106 | 1.931435 | 3.522456 | 1.47089  | 1.625565 |

|          |          |          |          |          |          |          |          |          |
|----------|----------|----------|----------|----------|----------|----------|----------|----------|
| 58499_at | 6.827282 | 7.239794 | 7.683236 | 7.229471 | 7.475553 | 7.5203   | 6.991001 | 7.035534 |
| 58500_at | 4.114147 | 5.209573 | 5.181622 | 4.774372 | 4.185298 | 4.081288 | 3.956253 | 5.795885 |
| 58503_at | 1.092712 | 1.060786 | 1.32896  | 0.857242 | 1.758345 | 0.953996 | 1.02281  | 1.489859 |
| 58504_at | 2.004683 | 2.894521 | 2.273441 | 2.909341 | 2.877587 | 1.96603  | 2.214619 | 2.160653 |
| 58505_at | 9.440467 | 9.159573 | 8.92851  | 9.263036 | 9.217842 | 8.527295 | 8.135176 | 9.850881 |
| 58506_at | 6.207956 | 5.706488 | 6.397621 | 6.591776 | 6.058534 | 7.335896 | 6.281175 | 4.822984 |
| 58508_at | 6.670431 | 7.308143 | 7.172696 | 7.322653 | 7.230627 | 7.518074 | 7.328498 | 6.60756  |
| 58509_at | 3.886325 | 3.526609 | 2.933548 | 3.828787 | 3.464832 | 3.304313 | 2.369191 | 3.938823 |
| 58510_at | 5.058997 | 4.891936 | 4.544748 | 2.633717 | 6.070374 | 5.295804 | 2.635976 | 4.042104 |
| 58511_at | 1.296705 | 1.316955 | 1.475318 | 1.475318 | 1.683265 | 1.419674 | 1.30834  | 1.632478 |
| 58512_at | 2.125435 | 1.710727 | 1.321135 | 1.43342  | 1.96577  | 2.005211 | 1.902252 | 2.017379 |
| 58513_at | 6.119775 | 6.545781 | 6.781382 | 6.590711 | 6.333291 | 6.633773 | 6.731453 | 5.895162 |
| 58515_at | 8.100418 | 8.420141 | 7.646944 | 8.259223 | 7.959944 | 8.507907 | 9.270578 | 8.044572 |
| 58517_at | 6.844994 | 5.959043 | 5.962345 | 6.326691 | 6.36605  | 6.729278 | 5.855757 | 6.731805 |
| 58524_at | 2.111411 | 2.193546 | 2.72574  | 2.176855 | 1.99089  | 1.898748 | 1.97413  | 3.181623 |
| 58525_at | 4.733435 | 4.893821 | 4.082572 | 4.284526 | 4.448003 | 4.163627 | 4.9963   | 4.706701 |
| 58526_at | 4.824512 | 4.924818 | 4.939876 | 5.47601  | 4.21972  | 4.883034 | 5.007845 | 5.187838 |
| 58527_at | 7.682146 | 7.24139  | 7.50911  | 7.341894 | 7.262679 | 8.031413 | 7.196263 | 7.519046 |
| 58528_at | 5.787725 | 5.285648 | 5.613282 | 5.232616 | 6.982695 | 6.161415 | 4.932093 | 6.427253 |
| 58529_at | 4.652193 | 3.890448 | 5.435146 | 4.206559 | 1.468421 | 4.284811 | 3.104293 | 5.123734 |
| 58530_at | 2.207516 | 2.459333 | 2.037026 | 2.81142  | 2.516398 | 2.58586  | 2.631706 | 2.50494  |
| 58531_at | 2.168768 | 3.030565 | 1.906891 | 2.147258 | 2.842668 | 2.921161 | 2.405321 | 2.663927 |
| 58533_at | 7.239534 | 7.684477 | 7.557727 | 7.582382 | 7.277671 | 7.421521 | 7.715741 | 7.823598 |
| 58538_at | 1.35578  | 1.426218 | 1.111847 | 1.179724 | 1.586563 | 1.148143 | 1.317046 | 1.450681 |
| 5858_at  | 2.432837 | 1.704814 | 1.670958 | 1.693177 | 1.670376 | 1.735549 | 1.487394 | 2.308575 |
| 5859_at  | 6.171461 | 6.376697 | 5.775457 | 5.660519 | 6.402391 | 6.469142 | 6.1599   | 6.134862 |
| 585_at   | 5.495907 | 6.099894 | 5.547573 | 5.296001 | 4.842381 | 4.968846 | 5.522419 | 4.944174 |
| 5860_at  | 6.844038 | 6.192274 | 5.247768 | 5.388377 | 6.453451 | 5.887767 | 5.555594 | 7.107585 |
| 5861_at  | 9.075367 | 9.121666 | 9.313049 | 9.294084 | 9.512072 | 9.273634 | 9.191553 | 9.687176 |
| 5862_at  | 8.225574 | 8.436009 | 8.324938 | 8.37746  | 8.597302 | 8.033728 | 8.109515 | 8.163963 |
| 5863_at  | 4.51731  | 4.320486 | 4.409557 | 4.721718 | 3.948608 | 4.299908 | 4.405797 | 4.384952 |
| 5864_at  | 3.312585 | 2.645346 | 3.97191  | 4.123389 | 4.010661 | 4.214716 | 3.862302 | 3.098458 |
| 5865_at  | 3.409955 | 3.251639 | 2.743519 | 3.98339  | 3.768251 | 4.145149 | 3.715534 | 4.735195 |
| 5866_at  | 3.820418 | 4.122194 | 4.129009 | 3.759442 | 4.824425 | 3.167375 | 4.687104 | 3.826796 |
| 5867_at  | 7.014214 | 7.303591 | 6.711285 | 6.671283 | 6.635178 | 5.967188 | 6.607487 | 6.428347 |
| 5868_at  | 7.798169 | 7.529414 | 7.746252 | 7.907346 | 7.840546 | 7.619898 | 7.850933 | 7.32672  |
| 5869_at  | 6.835044 | 6.719835 | 7.010861 | 7.140554 | 6.864995 | 6.904641 | 7.113342 | 6.560354 |
| 586_at   | 2.497669 | 2.573331 | 2.973275 | 3.267238 | 2.82002  | 1.781856 | 1.788078 | 1.79375  |
| 5870_at  | 7.32171  | 7.213551 | 7.762925 | 7.177271 | 7.297    | 7.203554 | 7.980963 | 7.122135 |
| 5871_at  | 4.785426 | 4.468917 | 5.110335 | 5.053565 | 4.577423 | 5.118765 | 4.657309 | 5.454559 |
| 5872_at  | 6.598102 | 6.219008 | 5.757394 | 6.375557 | 5.681454 | 6.37398  | 6.611838 | 6.046436 |
| 5873_at  | 3.5035   | 4.575765 | 4.501014 | 5.380257 | 4.411189 | 3.759549 | 4.5369   | 4.451592 |
| 5874_at  | 2.003498 | 1.973943 | 1.233454 | 1.834371 | 1.948851 | 2.327144 | 1.606803 | 3.509787 |
| 5875_at  | 5.468149 | 5.213885 | 5.694794 | 5.163495 | 4.93627  | 6.105534 | 5.703733 | 4.744605 |
| 5876_at  | 7.046482 | 7.357471 | 7.013223 | 6.626866 | 7.252009 | 6.868489 | 6.837325 | 7.478036 |
| 5877_at  | 4.905835 | 4.898831 | 4.747722 | 5.530865 | 5.155186 | 4.368285 | 5.093345 | 4.769753 |
| 5878_at  | 9.125014 | 8.37475  | 8.969197 | 9.015382 | 8.665658 | 8.825804 | 8.714754 | 7.842307 |
| 5879_at  | 9.691409 | 9.882389 | 9.317515 | 9.620873 | 9.79177  | 9.840145 | 9.517891 | 9.546963 |
| 587_at   | 4.541857 | 4.880354 | 5.87924  | 4.523567 | 4.625544 | 5.491623 | 4.772847 | 4.447242 |
| 5880_at  | 6.172993 | 4.996787 | 4.881424 | 5.680183 | 5.296261 | 5.36104  | 6.293713 | 5.593782 |
| 5881_at  | 1.871723 | 3.220033 | 3.843331 | 2.699544 | 2.044837 | 2.482038 | 2.716965 | 3.26822  |

|          |          |          |          |          |          |          |          |          |
|----------|----------|----------|----------|----------|----------|----------|----------|----------|
| 5883_at  | 4.840841 | 3.581566 | 3.843639 | 2.520067 | 4.201794 | 4.019625 | 4.309293 | 3.944339 |
| 5884_at  | 6.179263 | 5.424421 | 5.432933 | 5.354431 | 5.694812 | 5.454298 | 5.713802 | 6.224778 |
| 5885_at  | 9.100647 | 9.378247 | 8.89842  | 8.949196 | 9.420194 | 8.99699  | 9.017304 | 9.250348 |
| 5886_at  | 6.845745 | 6.401693 | 6.77636  | 6.832167 | 6.443191 | 6.516818 | 6.605937 | 5.760223 |
| 5887_at  | 7.634506 | 7.790799 | 7.924077 | 7.916484 | 7.157851 | 7.369294 | 7.962271 | 7.340179 |
| 5888_at  | 1.304031 | 1.836663 | 1.34715  | 3.805661 | 1.89043  | 1.992737 | 2.0901   | 1.414777 |
| 5889_at  | 6.597082 | 6.558107 | 5.200685 | 6.609571 | 6.252056 | 5.913024 | 5.916276 | 5.313248 |
| 5890_at  | 4.148492 | 4.191542 | 3.107535 | 3.6552   | 3.598826 | 2.737516 | 3.358993 | 2.604626 |
| 5891_at  | 3.841767 | 3.720695 | 2.528241 | 3.814697 | 2.085091 | 3.788939 | 3.724599 | 2.322949 |
| 5892_at  | 3.295135 | 3.898145 | 3.929787 | 2.807013 | 1.977959 | 4.912841 | 3.525325 | 3.387865 |
| 5893_at  | 4.247311 | 3.801132 | 4.308577 | 4.119773 | 2.898844 | 3.790059 | 2.494827 | 3.075851 |
| 5894_at  | 7.307747 | 7.255975 | 6.506823 | 6.670869 | 5.976995 | 6.925343 | 7.03956  | 7.226191 |
| 5896_at  | 2.556648 | 2.848798 | 2.891811 | 1.978242 | 3.08973  | 3.349496 | 3.624175 | 3.526222 |
| 5897_at  | 2.368301 | 1.492475 | 1.369085 | 2.334325 | 1.856253 | 1.904637 | 1.288482 | 2.562091 |
| 58985_at | 2.635641 | 1.473073 | 2.572291 | 2.311202 | 2.048402 | 2.332906 | 2.009579 | 2.010877 |
| 58986_at | 6.749718 | 5.524049 | 5.656963 | 6.258559 | 6.249352 | 6.798715 | 5.611182 | 5.050621 |
| 5898_at  | 6.872369 | 7.037017 | 6.644641 | 6.411241 | 6.950145 | 6.798121 | 6.888323 | 7.387125 |
| 5899_at  | 6.414334 | 6.627809 | 6.318381 | 6.695826 | 6.040704 | 6.478897 | 6.168477 | 6.18944  |
| 58_at    | 1.529972 | 2.18123  | 2.835186 | 3.129402 | 2.326253 | 3.486652 | 2.549925 | 2.310372 |
| 5900_at  | 5.67064  | 5.020358 | 5.131235 | 5.1197   | 5.00007  | 5.299874 | 5.689441 | 4.487952 |
| 5901_at  | 9.101438 | 9.266787 | 8.714612 | 9.12672  | 9.052613 | 9.12884  | 9.039772 | 9.129767 |
| 5902_at  | 3.637504 | 3.141133 | 4.789002 | 2.532697 | 2.993481 | 3.503866 | 4.221924 | 3.837913 |
| 5903_at  | 6.550825 | 7.073264 | 7.329232 | 7.03758  | 7.111375 | 6.652203 | 6.432357 | 7.466237 |
| 5905_at  | 5.839539 | 5.80099  | 6.006028 | 5.157813 | 5.204207 | 5.72497  | 6.741939 | 5.529198 |
| 59067_at | 1.087572 | 0.90152  | 1.378319 | 1.547761 | 1.488277 | 1.175294 | 1.252275 | 1.156843 |
| 5906_at  | 5.860929 | 5.863491 | 6.461152 | 6.527699 | 6.209856 | 5.608265 | 5.519977 | 6.369394 |
| 59082_at | 1.395284 | 1.476329 | 1.378081 | 1.689713 | 1.535996 | 1.520854 | 0.966607 | 1.550639 |
| 59084_at | 5.981082 | 5.353392 | 6.715251 | 6.151781 | 5.402741 | 5.928563 | 6.742161 | 5.712895 |
| 5908_at  | 6.167614 | 5.42021  | 5.264545 | 5.941903 | 4.919377 | 5.227887 | 5.592508 | 5.993401 |
| 5909_at  | 4.50761  | 3.741297 | 2.849335 | 3.842367 | 3.244136 | 4.781417 | 3.655348 | 3.741849 |
| 590_at   | 4.248435 | 2.390698 | 2.999141 | 1.426013 | 2.368056 | 1.216889 | 1.506057 | 1.717954 |
| 5910_at  | 6.372975 | 6.736786 | 6.410017 | 6.741968 | 6.473055 | 6.724069 | 6.804257 | 6.73474  |
| 5911_at  | 8.285924 | 7.936522 | 7.359451 | 7.566046 | 7.445782 | 7.290461 | 8.301009 | 7.502295 |
| 5912_at  | 3.973371 | 3.889539 | 4.118728 | 4.676846 | 4.301294 | 4.05964  | 4.923764 | 4.401938 |
| 5913_at  | 2.353519 | 2.681758 | 3.10002  | 2.712695 | 3.053107 | 3.122647 | 2.737908 | 2.896159 |
| 5914_at  | 5.267853 | 5.026563 | 5.28371  | 5.692545 | 4.045721 | 5.717747 | 5.425327 | 4.487837 |
| 5915_at  | 6.437273 | 5.593861 | 7.244667 | 6.391025 | 6.853987 | 6.808909 | 5.863744 | 5.752925 |
| 5916_at  | 4.998788 | 3.577398 | 4.804784 | 5.07148  | 4.252002 | 4.626989 | 4.738451 | 2.875024 |
| 5917_at  | 7.020936 | 7.353428 | 7.305722 | 6.907027 | 7.681125 | 7.482394 | 7.377996 | 7.729597 |
| 5918_at  | 2.699967 | 1.85425  | 1.969634 | 2.682461 | 2.517495 | 1.91814  | 1.57395  | 2.017467 |
| 5919_at  | 9.831354 | 9.699759 | 10.04423 | 9.255752 | 9.556752 | 9.976801 | 9.835266 | 9.061905 |
| 5920_at  | 9.043441 | 8.647194 | 8.833579 | 8.749589 | 8.805527 | 9.026349 | 8.108959 | 8.713597 |
| 5921_at  | 6.758366 | 7.140169 | 7.036674 | 6.949495 | 7.004913 | 6.484403 | 6.294972 | 7.127869 |
| 5922_at  | 4.47923  | 3.877418 | 4.756767 | 4.93442  | 4.729625 | 4.587891 | 3.942473 | 5.059859 |
| 5923_at  | 1.743948 | 2.14418  | 1.858851 | 1.659616 | 2.665578 | 1.400335 | 1.662569 | 1.993116 |
| 5924_at  | 4.784769 | 4.653374 | 4.444081 | 4.611994 | 4.653476 | 4.02063  | 4.691947 | 3.598506 |
| 5925_at  | 7.317478 | 6.967897 | 7.50992  | 7.319984 | 6.866944 | 6.811642 | 7.448634 | 7.218523 |
| 59269_at | 4.329241 | 3.698712 | 3.698712 | 4.019905 | 4.820013 | 4.396271 | 4.905102 | 3.989524 |
| 5926_at  | 5.916752 | 6.194277 | 5.924056 | 6.509851 | 6.04738  | 5.905976 | 6.158712 | 6.183747 |
| 59271_at | 5.51252  | 5.361594 | 5.120002 | 5.257234 | 3.748383 | 6.028684 | 4.796595 | 4.877567 |
| 59272_at | 5.279642 | 4.837688 | 4.722806 | 1.794999 | 6.543227 | 4.707539 | 2.104774 | 5.278759 |



|           |          |          |          |          |          |          |          |          |
|-----------|----------|----------|----------|----------|----------|----------|----------|----------|
| 59274_at  | 6.109028 | 6.340028 | 6.166734 | 6.51301  | 5.855689 | 6.309519 | 5.934184 | 5.9374   |
| 59277_at  | 8.693323 | 8.566476 | 8.403086 | 8.684067 | 8.808882 | 9.669468 | 8.958959 | 7.974946 |
| 5927_at   | 6.650675 | 6.905628 | 6.949082 | 7.076896 | 7.324179 | 6.62288  | 6.7772   | 7.083407 |
| 59283_at  | 1.383073 | 1.862141 | 1.096443 | 2.411869 | 1.348558 | 2.056276 | 2.188007 | 1.798259 |
| 59284_at  | 1.386868 | 1.318048 | 1.53414  | 2.08089  | 1.955828 | 1.667879 | 1.70886  | 1.686932 |
| 59285_at  | 1.975036 | 1.405155 | 1.831836 | 1.371455 | 1.737419 | 2.055036 | 1.931898 | 1.696708 |
| 59286_at  | 7.811308 | 7.584342 | 7.71531  | 7.64574  | 7.643099 | 7.778683 | 7.636136 | 7.197479 |
| 5928_at   | 7.055337 | 6.901631 | 6.682402 | 7.211006 | 7.037389 | 6.78703  | 7.15906  | 7.846317 |
| 5929_at   | 5.868086 | 5.146855 | 5.54948  | 5.633365 | 4.873917 | 5.659867 | 5.516622 | 5.679866 |
| 59307_at  | 5.12565  | 4.29781  | 4.260151 | 4.874895 | 4.958722 | 4.281226 | 3.858413 | 4.557427 |
| 5930_at   | 6.630751 | 5.579602 | 5.926989 | 6.444938 | 6.043767 | 6.199242 | 5.90435  | 6.501025 |
| 5931_at   | 7.883726 | 7.706005 | 7.617488 | 7.155511 | 7.701178 | 7.258403 | 7.062426 | 7.846351 |
| 5932_at   | 6.559129 | 6.248098 | 5.823219 | 6.095007 | 6.263537 | 6.39331  | 5.958658 | 6.676055 |
| 59335_at  | 2.100682 | 2.673578 | 1.970249 | 2.22768  | 1.975062 | 2.072423 | 2.436995 | 2.355597 |
| 59336_at  | 1.286787 | 1.158212 | 1.429703 | 1.843821 | 1.448084 | 1.357568 | 1.517957 | 2.725157 |
| 59338_at  | 6.560993 | 6.382216 | 6.432918 | 6.506578 | 6.546383 | 6.714134 | 6.730773 | 6.755193 |
| 59339_at  | 5.94167  | 5.823771 | 6.373918 | 7.144392 | 5.252531 | 6.195868 | 5.46075  | 6.287402 |
| 5933_at   | 4.952173 | 4.552914 | 2.842736 | 4.899703 | 4.511603 | 3.311945 | 3.944013 | 3.710242 |
| 59340_at  | 1.062156 | 1.40259  | 0.872406 | 0.828299 | 1.242422 | 1.094242 | 1.220694 | 1.346509 |
| 59341_at  | 4.720245 | 4.34376  | 4.860442 | 3.056426 | 3.25104  | 4.79299  | 2.969359 | 3.554126 |
| 59342_at  | 6.567087 | 6.598071 | 6.816023 | 6.387726 | 7.192114 | 6.564423 | 7.025513 | 6.92961  |
| 59343_at  | 6.933688 | 6.231213 | 6.457598 | 6.429031 | 5.975517 | 6.161214 | 6.968608 | 6.801578 |
| 59344_at  | 1.992771 | 2.371772 | 1.789322 | 1.482063 | 2.099967 | 1.490042 | 1.910718 | 2.296673 |
| 59345_at  | 4.504362 | 5.146796 | 5.639985 | 5.664181 | 4.542933 | 5.032997 | 5.04936  | 3.551198 |
| 59348_at  | 4.541604 | 5.407577 | 4.855825 | 4.170111 | 4.995101 | 3.972884 | 4.263577 | 5.360261 |
| 59349_at  | 3.426981 | 4.143559 | 3.954468 | 3.728336 | 4.039802 | 3.560515 | 3.492967 | 3.946439 |
| 5934_at   | 6.150449 | 6.193177 | 6.094626 | 6.198361 | 5.817352 | 6.387888 | 5.783708 | 6.701189 |
| 59350_at  | 7.264409 | 7.405605 | 6.286089 | 7.02473  | 6.923827 | 7.083401 | 7.145618 | 7.122157 |
| 59351_at  | 1.451545 | 1.218177 | 1.321145 | 1.138386 | 1.175925 | 1.222072 | 1.280059 | 2.228816 |
| 59352_at  | 1.324338 | 1.573541 | 1.155295 | 1.913719 | 1.751361 | 2.810641 | 1.649688 | 1.808186 |
| 59353_at  | 1.788527 | 1.802728 | 1.940063 | 1.695825 | 1.702285 | 1.87727  | 2.41459  | 1.743665 |
| 5935_at   | 7.29221  | 6.895997 | 7.453228 | 8.103583 | 7.136684 | 7.267252 | 7.328754 | 7.589417 |
| 5936_at   | 6.051583 | 5.429053 | 6.163868 | 5.651439 | 5.71602  | 5.26698  | 5.352076 | 5.993557 |
| 5937_at   | 7.817987 | 8.159563 | 8.151902 | 8.355697 | 8.0207   | 8.157791 | 7.595883 | 7.366618 |
| 5939_at   | 8.548103 | 8.788717 | 8.693787 | 8.721247 | 8.293331 | 8.378211 | 8.7158   | 7.47322  |
| 593_at    | 6.123106 | 5.331223 | 6.052963 | 5.274533 | 4.976114 | 5.997455 | 5.793356 | 4.805572 |
| 5947_at   | 7.330565 | 6.682006 | 6.583159 | 7.011306 | 6.534564 | 7.214106 | 6.883493 | 6.962933 |
| 594837_at | 1.299534 | 0.398406 | 1.939539 | 0.856002 | 0.918063 | 0.861794 | 1.552807 | 3.813654 |
| 594838_at | 4.58932  | 3.310983 | 2.914952 | 3.333786 | 1.180325 | 5.483994 | 6.23299  | 1.264871 |
| 594839_at | 4.414084 | 1.63257  | 3.380885 | 4.765045 | 3.321247 | 2.761805 | 2.937626 | 2.266239 |
| 594840_at | 2.825303 | 2.877592 | 3.130587 | 3.371124 | 3.241694 | 3.122737 | 2.632736 | 2.504852 |
| 594842_at | 1.359263 | 1.338079 | 1.684583 | 1.162166 | 1.14811  | 1.363664 | 1.124291 | 1.581578 |
| 594855_at | 1.959241 | 2.581811 | 1.815595 | 1.453717 | 2.215991 | 1.707684 | 1.337878 | 1.667814 |
| 594857_at | 1.127044 | 1.550096 | 1.692364 | 0.934175 | 1.641805 | 1.472567 | 1.760706 | 1.498932 |
| 5948_at   | 1.547595 | 1.553847 | 1.865061 | 1.787496 | 2.889102 | 1.47641  | 1.929891 | 2.048048 |
| 5949_at   | 1.759822 | 1.698864 | 1.192553 | 1.193707 | 1.204058 | 1.10121  | 2.142769 | 1.631494 |
| 594_at    | 5.779582 | 5.266724 | 5.949054 | 5.707089 | 6.521307 | 5.038658 | 6.098927 | 5.783421 |
| 595097_at | 1.640549 | 3.993363 | 2.294044 | 1.84679  | 1.537689 | 1.082722 | 3.063558 | 2.977119 |
| 595098_at | 1.088829 | 0.657623 | 1.047005 | 1.195642 | 1.435995 | 0.66651  | 1.545036 | 2.344302 |
| 595099_at | 0.918808 | 0.988389 | 2.075885 | 0.782238 | 1.38482  | 1.810597 | 1.696961 | 1.409067 |
| 5950_at   | 7.884745 | 7.187872 | 6.68596  | 5.074114 | 5.973717 | 3.591165 | 4.078769 | 6.327011 |

|           |          |          |          |          |          |          |          |          |
|-----------|----------|----------|----------|----------|----------|----------|----------|----------|
| 595100_at | 3.408197 | 1.771129 | 1.081797 | 0.759908 | 1.090922 | 1.311447 | 0.752679 | 2.083546 |
| 5954_at   | 8.289164 | 8.451298 | 7.457747 | 7.930713 | 7.9147   | 8.093258 | 8.367037 | 8.055014 |
| 5955_at   | 7.949848 | 8.030743 | 8.046055 | 8.078815 | 8.195475 | 7.432115 | 7.862285 | 8.44873  |
| 5956_at   | 2.476609 | 3.050275 | 2.721732 | 2.801944 | 2.339466 | 2.639654 | 2.627666 | 3.388679 |
| 5957_at   | 2.158971 | 1.816016 | 2.556653 | 1.704086 | 1.856482 | 1.789046 | 1.889758 | 1.679127 |
| 5959_at   | 2.981386 | 2.719452 | 3.570765 | 3.29603  | 2.554224 | 2.678891 | 5.660201 | 2.563697 |
| 595_at    | 8.36098  | 8.059317 | 8.96457  | 9.182109 | 8.238889 | 8.754137 | 8.960465 | 7.645278 |
| 5961_at   | 2.534731 | 2.305891 | 2.810155 | 2.052252 | 3.003357 | 2.50752  | 3.705743 | 1.782879 |
| 5962_at   | 6.902084 | 6.88369  | 7.007404 | 7.037534 | 6.92593  | 6.837669 | 6.742633 | 6.793443 |
| 5965_at   | 5.251535 | 5.989826 | 6.014212 | 6.055164 | 5.654352 | 6.083235 | 4.981371 | 6.802754 |
| 5966_at   | 4.701995 | 5.409372 | 5.589944 | 5.845117 | 4.512672 | 5.199809 | 6.054226 | 5.20662  |
| 5967_at   | 4.526828 | 1.327001 | 1.507041 | 1.469442 | 6.175309 | 5.349096 | 3.399225 | 3.2934   |
| 5968_at   | 4.359296 | 3.93419  | 4.13751  | 3.850533 | 4.235308 | 4.273741 | 4.899401 | 3.946461 |
| 5969_at   | 1.531648 | 1.289413 | 1.411861 | 1.391439 | 1.73188  | 1.837951 | 1.6712   | 1.808998 |
| 596_at    | 4.506987 | 5.52716  | 4.218708 | 4.894197 | 4.433703 | 5.022243 | 4.058299 | 5.317405 |
| 5970_at   | 7.609217 | 7.167783 | 7.522576 | 7.690345 | 7.167582 | 7.424662 | 7.335802 | 6.916771 |
| 5971_at   | 4.212957 | 5.54216  | 4.72795  | 5.14314  | 4.57086  | 4.939333 | 5.422187 | 4.058986 |
| 5972_at   | 9.551244 | 8.395738 | 9.825764 | 9.209961 | 9.34381  | 9.465054 | 9.154495 | 6.804406 |
| 5973_at   | 2.270551 | 3.105172 | 1.735628 | 2.240089 | 2.360442 | 2.618344 | 4.146273 | 2.368907 |
| 5976_at   | 5.868351 | 5.765982 | 6.114106 | 5.79129  | 4.635615 | 6.17095  | 6.000321 | 4.544234 |
| 5977_at   | 7.216705 | 7.158199 | 6.979622 | 7.227322 | 6.627586 | 6.959988 | 6.824903 | 5.881777 |
| 5978_at   | 7.730159 | 8.065521 | 7.520035 | 7.621685 | 7.721338 | 7.83796  | 7.483504 | 7.811896 |
| 5979_at   | 3.005592 | 2.176319 | 1.685519 | 2.165934 | 2.246682 | 2.139053 | 2.381061 | 2.345064 |
| 597_at    | 3.795687 | 3.778964 | 1.497593 | 3.516684 | 3.736205 | 3.817757 | 2.871072 | 3.323198 |
| 5980_at   | 5.048527 | 5.003974 | 5.430409 | 4.906528 | 5.35264  | 5.054516 | 5.339656 | 4.606347 |
| 5981_at   | 7.484891 | 7.928646 | 7.944245 | 7.411189 | 7.191589 | 7.178328 | 7.512382 | 7.54759  |
| 5982_at   | 5.145079 | 3.655776 | 4.112767 | 3.990858 | 3.819554 | 3.571157 | 5.34732  | 3.660702 |
| 5983_at   | 3.979182 | 3.55609  | 4.365606 | 4.46486  | 3.908322 | 4.094734 | 3.400336 | 3.960193 |
| 5984_at   | 4.404387 | 4.350583 | 4.021043 | 4.198828 | 3.655953 | 4.399975 | 4.78268  | 4.731974 |
| 5985_at   | 4.935044 | 5.231518 | 5.106171 | 4.764727 | 3.239248 | 4.342559 | 3.999749 | 5.154878 |
| 5986_at   | 5.13188  | 4.959289 | 4.201079 | 4.432633 | 4.812727 | 4.28768  | 4.26734  | 3.030805 |
| 5987_at   | 5.266757 | 5.586121 | 5.308987 | 5.193801 | 5.415666 | 4.863672 | 5.198593 | 5.306545 |
| 5988_at   | 1.660457 | 1.987897 | 1.679878 | 1.847933 | 1.834258 | 1.824503 | 2.59612  | 1.525621 |
| 5989_at   | 3.680701 | 3.977838 | 3.832869 | 3.97703  | 3.827178 | 3.813491 | 2.986677 | 3.907524 |
| 598_at    | 5.588464 | 6.086325 | 5.729942 | 6.151619 | 5.71001  | 5.546645 | 6.002802 | 6.001583 |
| 5990_at   | 2.632077 | 3.234697 | 2.833972 | 2.375993 | 2.368977 | 2.571192 | 3.393195 | 3.330239 |
| 5991_at   | 4.248224 | 4.732822 | 4.428833 | 4.523017 | 4.32305  | 5.116438 | 4.055134 | 4.602308 |
| 5992_at   | 1.812183 | 1.978601 | 2.134848 | 2.058721 | 2.050239 | 2.7383   | 2.681245 | 1.902314 |
| 5993_at   | 4.959311 | 4.804388 | 5.121318 | 4.818194 | 5.029887 | 4.859644 | 5.457019 | 5.187613 |
| 5994_at   | 3.816845 | 3.224164 | 3.120418 | 3.085614 | 3.043866 | 2.651487 | 3.055763 | 3.430173 |
| 5995_at   | 1.961894 | 2.680729 | 2.683356 | 2.207656 | 3.651515 | 3.103276 | 2.587299 | 1.730504 |
| 5996_at   | 1.168164 | 1.895453 | 1.699042 | 4.329486 | 2.016893 | 1.955794 | 2.123275 | 1.547003 |
| 5997_at   | 8.30852  | 7.442669 | 8.573137 | 9.165465 | 8.874361 | 9.221422 | 7.276712 | 6.723918 |
| 5998_at   | 4.070332 | 4.075852 | 3.397636 | 3.773065 | 3.961413 | 4.305482 | 4.822274 | 3.01414  |
| 5999_at   | 2.995095 | 3.835829 | 3.988139 | 3.595855 | 2.70283  | 3.100284 | 2.131495 | 2.234706 |
| 599_at    | 3.257435 | 4.045221 | 4.916724 | 4.999532 | 4.530873 | 4.111329 | 4.487666 | 4.230747 |
| 59_at     | 7.915142 | 8.553486 | 6.648869 | 8.017386 | 7.015453 | 7.322    | 7.48843  | 7.591269 |
| 6000_at   | 1.898367 | 1.279239 | 1.527402 | 1.294221 | 2.255141 | 1.488879 | 3.107303 | 1.895451 |
| 6001_at   | 7.940609 | 7.42841  | 7.004202 | 6.695407 | 6.545796 | 7.401672 | 7.070745 | 7.154772 |
| 6002_at   | 3.813527 | 3.711281 | 2.358009 | 3.0592   | 2.699401 | 3.672618 | 2.856254 | 3.151352 |
| 6003_at   | 1.346465 | 1.126484 | 1.280834 | 1.247058 | 1.471925 | 0.974719 | 1.005367 | 1.835629 |

|          |          |          |          |          |          |          |          |          |
|----------|----------|----------|----------|----------|----------|----------|----------|----------|
| 6004_at  | 4.946314 | 5.203633 | 4.312014 | 5.639433 | 6.157634 | 5.043444 | 5.319474 | 4.530081 |
| 6005_at  | 1.611876 | 1.994062 | 1.781144 | 1.495489 | 2.434446 | 1.739374 | 1.326018 | 2.265188 |
| 6007_at  | 1.454257 | 0.955493 | 1.760908 | 2.388866 | 3.014179 | 1.235858 | 1.332564 | 3.21199  |
| 6009_at  | 4.756344 | 5.251446 | 4.844159 | 4.411123 | 4.741181 | 4.891854 | 5.254823 | 5.000616 |
| 6010_at  | 1.723993 | 1.628573 | 2.179981 | 1.442062 | 2.982455 | 2.650265 | 1.950108 | 1.770171 |
| 6011_at  | 1.757365 | 1.882408 | 1.535841 | 1.942149 | 1.349192 | 2.485829 | 2.446971 | 2.346341 |
| 6013_at  | 0.875439 | 1.426182 | 1.554811 | 1.148165 | 1.545132 | 1.146823 | 1.337782 | 1.393518 |
| 6014_at  | 2.160778 | 1.456304 | 1.712856 | 2.355546 | 2.527948 | 2.080366 | 1.726956 | 2.208653 |
| 6015_at  | 6.310457 | 6.167293 | 6.037437 | 6.022469 | 5.2827   | 6.715798 | 5.677872 | 5.345341 |
| 6016_at  | 6.702843 | 6.553585 | 6.950268 | 6.78892  | 6.834023 | 6.467172 | 7.01295  | 6.479704 |
| 6017_at  | 1.442774 | 1.67187  | 1.134949 | 1.562957 | 1.394532 | 1.643016 | 1.222451 | 2.055635 |
| 6018_at  | 4.194572 | 6.144083 | 4.356753 | 5.122215 | 5.155572 | 5.488486 | 5.612805 | 4.765685 |
| 6019_at  | 0.672477 | 1.619099 | 1.918693 | 1.012282 | 2.968463 | 1.114861 | 1.234085 | 1.497106 |
| 6023_at  | 10.08482 | 10.07975 | 10.29963 | 10.52146 | 10.1646  | 10.18452 | 10.44056 | 10.07065 |
| 602_at   | 5.966006 | 5.423311 | 5.771686 | 5.561323 | 5.460703 | 5.455625 | 5.607227 | 5.416096 |
| 60312_at | 4.623174 | 3.697104 | 5.338204 | 4.903469 | 3.826128 | 4.807912 | 4.91758  | 3.759342 |
| 60313_at | 7.362343 | 7.596272 | 8.012852 | 7.734022 | 7.835575 | 7.640361 | 7.853955 | 7.7266   |
| 60314_at | 6.811491 | 6.885818 | 6.253183 | 6.283259 | 6.402859 | 7.000238 | 6.795365 | 6.317604 |
| 60343_at | 4.056183 | 3.714991 | 4.022837 | 5.280256 | 5.006159 | 4.169156 | 6.024606 | 4.392194 |
| 6035_at  | 8.591695 | 8.338072 | 8.542312 | 8.812021 | 8.793423 | 8.751956 | 8.756654 | 8.339142 |
| 6036_at  | 2.576784 | 3.327412 | 3.124246 | 5.406054 | 2.138405 | 3.914615 | 2.883489 | 2.658297 |
| 60370_at | 4.434932 | 3.796221 | 4.123461 | 3.670963 | 3.497034 | 4.606927 | 3.996102 | 3.448117 |
| 6037_at  | 1.0589   | 0.995128 | 1.536167 | 2.245035 | 1.412863 | 1.220817 | 1.477995 | 1.10313  |
| 60385_at | 2.153484 | 2.162174 | 2.104903 | 2.197355 | 2.338905 | 1.439387 | 2.03619  | 2.078062 |
| 60386_at | 2.244871 | 1.533178 | 1.547971 | 1.766133 | 2.933462 | 1.418382 | 2.248774 | 1.450294 |
| 6038_at  | 7.868691 | 7.618321 | 7.71668  | 8.151277 | 6.536097 | 7.311858 | 6.768525 | 7.703359 |
| 6039_at  | 5.103771 | 5.059564 | 4.907743 | 4.433925 | 3.890397 | 4.253027 | 3.47259  | 3.398199 |
| 60401_at | 1.849183 | 1.929879 | 2.574143 | 1.80542  | 2.67363  | 2.244626 | 2.015843 | 2.118084 |
| 60412_at | 6.501065 | 5.619851 | 6.595454 | 6.706194 | 6.380499 | 6.451492 | 6.72635  | 6.738989 |
| 6041_at  | 4.844031 | 4.896309 | 4.927622 | 4.180867 | 6.088402 | 4.395798 | 5.010683 | 5.090842 |
| 60436_at | 4.428409 | 4.753751 | 5.165033 | 5.331844 | 3.61795  | 3.929841 | 4.679855 | 5.536241 |
| 60437_at | 2.17532  | 1.963151 | 2.028055 | 1.877997 | 2.089357 | 2.257029 | 1.687583 | 2.702802 |
| 6045_at  | 6.397356 | 6.173614 | 6.638111 | 6.581385 | 6.636031 | 5.702771 | 6.877812 | 6.46111  |
| 60467_at | 1.325728 | 1.452482 | 1.583023 | 1.695102 | 2.041508 | 1.46664  | 1.410479 | 2.284105 |
| 60468_at | 3.19694  | 3.228363 | 3.247916 | 3.397369 | 3.120335 | 2.828296 | 3.30069  | 3.881786 |
| 6046_at  | 8.165078 | 8.181642 | 8.095589 | 8.088356 | 7.773165 | 7.972154 | 8.188379 | 7.707406 |
| 6047_at  | 6.689682 | 6.85158  | 6.402792 | 6.734067 | 6.506764 | 6.24731  | 6.644573 | 6.966624 |
| 60481_at | 7.569739 | 7.621505 | 8.036897 | 7.858562 | 7.904142 | 7.5403   | 7.932876 | 7.789848 |
| 60482_at | 1.753677 | 1.343392 | 1.247982 | 1.487351 | 2.194027 | 1.416022 | 2.094035 | 1.834605 |
| 60484_at | 2.138694 | 1.813093 | 2.074037 | 1.899036 | 3.436397 | 2.000842 | 2.707823 | 1.398083 |
| 60485_at | 7.130272 | 7.068682 | 7.690131 | 7.508448 | 6.024931 | 7.87899  | 7.065457 | 6.695044 |
| 60487_at | 4.801122 | 4.836877 | 4.895218 | 4.601708 | 3.840422 | 4.06463  | 3.849358 | 4.704535 |
| 60488_at | 7.234378 | 6.710695 | 6.240486 | 7.206956 | 6.95855  | 7.192277 | 6.473217 | 6.355916 |
| 60489_at | 6.352516 | 5.391228 | 5.524176 | 6.5925   | 5.848763 | 6.049269 | 5.819688 | 4.882861 |
| 6048_at  | 5.817654 | 5.02585  | 4.581735 | 5.124284 | 5.153867 | 5.445575 | 4.324511 | 5.170956 |
| 60490_at | 3.969757 | 3.657743 | 3.800799 | 3.541635 | 3.466337 | 4.253356 | 3.657743 | 3.85333  |
| 60491_at | 6.705089 | 6.64944  | 6.604208 | 6.121389 | 6.508101 | 6.630184 | 6.057028 | 7.305008 |
| 60492_at | 5.366694 | 5.273968 | 5.617118 | 5.42478  | 4.829447 | 5.369381 | 4.944723 | 5.476165 |
| 60493_at | 6.691567 | 7.827412 | 5.456046 | 7.309403 | 6.72331  | 6.808188 | 7.039787 | 7.638105 |
| 60494_at | 1.574617 | 1.47328  | 2.672192 | 1.697941 | 2.01425  | 1.096806 | 2.330519 | 2.574055 |
| 60495_at | 1.766719 | 2.084705 | 1.860707 | 2.502496 | 2.277127 | 1.495983 | 1.124503 | 1.74819  |

|           |          |          |          |          |          |          |          |          |
|-----------|----------|----------|----------|----------|----------|----------|----------|----------|
| 60496_at  | 5.836281 | 5.45866  | 5.245998 | 5.538931 | 6.630214 | 5.576165 | 5.128407 | 6.351218 |
| 6049_at   | 6.937863 | 6.958742 | 6.913319 | 6.543947 | 6.797885 | 6.917803 | 6.576175 | 6.889477 |
| 604_at    | 4.840085 | 4.656538 | 4.822862 | 5.540864 | 4.674201 | 5.397424 | 4.300602 | 4.988452 |
| 60506_at  | 2.147167 | 3.036704 | 2.669934 | 3.169248 | 2.817925 | 2.584648 | 2.527681 | 2.744109 |
| 60509_at  | 5.766651 | 6.221824 | 6.472915 | 5.736954 | 6.010417 | 5.642361 | 5.68167  | 6.155421 |
| 6050_at   | 6.670445 | 6.220166 | 6.377923 | 6.316522 | 5.847497 | 6.489184 | 5.952243 | 5.543358 |
| 6051_at   | 6.467747 | 6.089683 | 5.924954 | 6.02254  | 6.270153 | 6.208906 | 6.001722 | 6.503693 |
| 60526_at  | 6.133423 | 4.785519 | 4.600983 | 5.500842 | 5.772917 | 5.379732 | 5.190141 | 5.235549 |
| 60528_at  | 6.005777 | 6.191036 | 6.104228 | 6.053383 | 6.010145 | 6.015714 | 6.406137 | 6.115026 |
| 60529_at  | 2.309104 | 2.409427 | 2.293101 | 2.233582 | 2.704835 | 2.315015 | 3.088698 | 2.022907 |
| 60558_at  | 5.853717 | 6.263264 | 5.749537 | 5.570052 | 4.536199 | 5.836147 | 5.964026 | 6.091777 |
| 60559_at  | 7.519234 | 7.748164 | 7.603312 | 7.6749   | 7.880586 | 7.880224 | 8.303495 | 8.238777 |
| 60560_at  | 5.790029 | 5.825052 | 5.361894 | 6.404478 | 6.303401 | 4.803122 | 5.640966 | 5.899914 |
| 60561_at  | 5.344507 | 4.848094 | 5.27656  | 5.233914 | 5.760803 | 5.004889 | 5.749129 | 5.700276 |
| 60592_at  | 6.338582 | 6.980904 | 6.729805 | 7.05195  | 7.391802 | 6.686616 | 6.564279 | 7.233077 |
| 60598_at  | 2.423222 | 1.426549 | 2.861733 | 2.424323 | 2.389132 | 2.237633 | 2.06693  | 1.621822 |
| 6059_at   | 4.685804 | 6.498599 | 6.276324 | 5.856289 | 6.569765 | 5.475076 | 4.665915 | 6.506975 |
| 605_at    | 5.35104  | 4.667741 | 3.397231 | 5.451572 | 4.770577 | 4.736617 | 4.480365 | 2.869177 |
| 60625_at  | 3.84268  | 3.961763 | 4.158726 | 4.138463 | 4.714591 | 3.831485 | 3.852989 | 4.137638 |
| 60626_at  | 5.379048 | 5.72747  | 5.674046 | 5.550545 | 5.622889 | 5.300945 | 4.733663 | 5.038579 |
| 606293_at | 2.288089 | 1.437219 | 1.94438  | 1.452867 | 1.687885 | 1.803281 | 2.316574 | 2.330104 |
| 606495_at | 3.010127 | 2.41221  | 3.234876 | 3.247318 | 2.188304 | 2.363759 | 3.51258  | 1.852512 |
| 606500_at | 5.135223 | 5.39796  | 5.015908 | 4.177833 | 2.421341 | 4.925718 | 2.85952  | 5.37953  |
| 606551_at | 4.991571 | 4.638474 | 3.745139 | 3.962025 | 3.708149 | 4.326676 | 3.947098 | 3.735891 |
| 606553_at | 1.122351 | 1.505305 | 1.363208 | 1.469029 | 1.360638 | 1.173491 | 1.587679 | 1.623769 |
| 60672_at  | 4.222969 | 3.563914 | 3.806134 | 3.085755 | 3.479346 | 3.466437 | 3.14487  | 3.149377 |
| 60673_at  | 4.916424 | 4.580326 | 4.307015 | 4.653144 | 4.999973 | 5.207045 | 5.111468 | 4.6475   |
| 60674_at  | 7.473102 | 8.285716 | 7.845967 | 7.647325 | 7.467514 | 6.158052 | 7.22978  | 8.870184 |
| 60675_at  | 1.561876 | 2.490226 | 2.495764 | 1.796998 | 1.937165 | 2.511831 | 2.084075 | 1.434683 |
| 60676_at  | 1.905844 | 2.541834 | 3.360705 | 2.315227 | 3.991924 | 2.73491  | 1.887307 | 2.388597 |
| 60677_at  | 2.767582 | 3.227131 | 2.809692 | 3.079585 | 2.769939 | 3.221332 | 3.20758  | 2.277136 |
| 60678_at  | 4.838872 | 4.516059 | 5.608702 | 4.449501 | 4.048672 | 4.686948 | 4.784722 | 4.185447 |
| 60680_at  | 2.668845 | 2.425201 | 2.857782 | 3.196285 | 3.026019 | 1.805774 | 3.810509 | 2.973579 |
| 60681_at  | 5.488149 | 5.532114 | 5.025646 | 5.49217  | 4.932037 | 5.953373 | 5.112276 | 4.128926 |
| 60682_at  | 6.210113 | 5.996692 | 5.942611 | 5.996719 | 6.141651 | 6.090174 | 5.936405 | 5.481154 |
| 60684_at  | 6.419627 | 7.015902 | 6.400017 | 6.42764  | 6.436913 | 6.285932 | 6.62149  | 6.291148 |
| 60685_at  | 7.540058 | 7.071482 | 7.762638 | 7.438968 | 7.167628 | 7.389879 | 7.632208 | 7.435928 |
| 60686_at  | 3.764824 | 3.088823 | 2.926133 | 3.268577 | 3.83386  | 3.654018 | 2.825046 | 2.67495  |
| 606_at    | 1.444326 | 1.926749 | 1.423004 | 1.059394 | 1.179961 | 1.467547 | 1.09994  | 0.872306 |
| 6079_at   | 4.060198 | 2.466365 | 2.553096 | 2.485482 | 2.493999 | 2.266682 | 2.644292 | 3.990254 |
| 607_at    | 5.678658 | 5.158421 | 4.985501 | 4.93227  | 5.888268 | 5.954702 | 5.549223 | 5.643942 |
| 6082_at   | 1.149262 | 3.052288 | 1.255244 | 1.747023 | 1.221122 | 0.916535 | 1.118699 | 1.193977 |
| 6083_at   | 3.67963  | 3.491507 | 5.532202 | 3.207121 | 4.820889 | 4.857835 | 5.513559 | 3.984034 |
| 608_at    | 1.563298 | 1.615324 | 1.38151  | 1.095748 | 1.674762 | 0.97528  | 1.617592 | 1.232141 |
| 6091_at   | 7.28157  | 6.835099 | 7.41601  | 7.220973 | 7.025378 | 6.993816 | 7.787581 | 7.564539 |
| 6092_at   | 6.017881 | 5.953734 | 5.385848 | 6.185047 | 5.731583 | 5.783201 | 5.176485 | 7.126617 |
| 6093_at   | 7.923697 | 7.974544 | 8.00981  | 8.043229 | 7.915247 | 7.675216 | 7.812137 | 8.170541 |
| 6094_at   | 1.855028 | 1.884215 | 3.328754 | 2.291767 | 2.581404 | 2.361301 | 1.879198 | 2.395912 |
| 6095_at   | 3.740382 | 4.33993  | 4.384848 | 4.417028 | 4.851758 | 3.96533  | 3.744266 | 4.200695 |
| 6096_at   | 2.40621  | 1.943926 | 2.164694 | 1.719644 | 1.608406 | 1.271791 | 1.930036 | 1.524608 |
| 6097_at   | 5.433732 | 3.927127 | 4.160932 | 3.752838 | 4.631274 | 4.998117 | 4.613924 | 4.055765 |

|           |           |           |           |           |           |           |           |           |
|-----------|-----------|-----------|-----------|-----------|-----------|-----------|-----------|-----------|
| 6098_at   | 1. 347294 | 1. 654587 | 1. 482429 | 1. 61182  | 1. 850109 | 1. 485696 | 2. 141437 | 2. 109943 |
| 60_at     | 9. 370697 | 10. 0547  | 9. 729634 | 10. 14702 | 8. 935888 | 9. 949107 | 9. 865732 | 9. 72228  |
| 6100_at   | 6. 006031 | 6. 992465 | 5. 754017 | 4. 271662 | 6. 832658 | 5. 152964 | 4. 741751 | 6. 083051 |
| 6101_at   | 2. 466885 | 1. 203225 | 1. 488457 | 1. 463191 | 1. 831126 | 1. 514824 | 1. 830885 | 1. 369548 |
| 6102_at   | 4. 970042 | 5. 598609 | 5. 297694 | 4. 976176 | 6. 21374  | 4. 963981 | 5. 128271 | 5. 453019 |
| 6103_at   | 4. 789443 | 5. 228462 | 4. 432208 | 5. 08919  | 5. 461451 | 4. 98186  | 5. 462589 | 5. 642975 |
| 610_at    | 1. 079511 | 1. 469388 | 1. 148497 | 1. 884076 | 1. 291802 | 2. 129346 | 1. 573653 | 0. 985637 |
| 6117_at   | 5. 7271   | 5. 973651 | 5. 468318 | 5. 927182 | 4. 716193 | 5. 498613 | 5. 809023 | 5. 416584 |
| 6118_at   | 6. 019078 | 6. 047432 | 5. 921354 | 6. 479517 | 6. 219185 | 5. 629523 | 6. 51154  | 5. 946321 |
| 6119_at   | 7. 241063 | 6. 262698 | 7. 456283 | 6. 775243 | 6. 617288 | 6. 883858 | 6. 123592 | 6. 910629 |
| 611_at    | 2. 725051 | 2. 819392 | 2. 711639 | 2. 535874 | 3. 246357 | 2. 775849 | 2. 582168 | 4. 040459 |
| 6120_at   | 2. 908935 | 2. 254945 | 2. 65924  | 2. 39293  | 2. 534504 | 1. 738045 | 2. 580867 | 2. 993088 |
| 6121_at   | 1. 724836 | 1. 430517 | 1. 315014 | 1. 185334 | 2. 307562 | 1. 383747 | 1. 332168 | 1. 833743 |
| 6122_at   | 4. 902802 | 4. 503586 | 4. 530981 | 4. 515513 | 4. 87556  | 4. 643037 | 4. 37106  | 5. 187583 |
| 6123_at   | 1. 832068 | 2. 259273 | 1. 577564 | 1. 967261 | 1. 72781  | 2. 517669 | 1. 659177 | 1. 974696 |
| 6124_at   | 10. 66507 | 10. 17716 | 10. 11989 | 10. 33891 | 10. 1327  | 10. 27609 | 9. 95205  | 10. 00042 |
| 6125_at   | 11. 24558 | 10. 77489 | 10. 80353 | 11. 00506 | 10. 91464 | 11. 27746 | 10. 66657 | 11. 12415 |
| 6128_at   | 2. 873449 | 3. 695745 | 3. 418027 | 3. 751449 | 3. 594866 | 3. 653738 | 3. 268192 | 3. 360864 |
| 6129_at   | 1. 579076 | 2. 434118 | 0. 882219 | 0. 948473 | 1. 719028 | 0. 715885 | 3. 41494  | 0. 939441 |
| 613209_at | 1. 594928 | 1. 718997 | 1. 879677 | 2. 298234 | 2. 122955 | 1. 526824 | 2. 168484 | 1. 90954  |
| 613210_at | 1. 373746 | 1. 419956 | 0. 908869 | 0. 959029 | 1. 162412 | 1. 24118  | 2. 841191 | 1. 452331 |
| 613211_at | 2. 588066 | 2. 31819  | 1. 797983 | 3. 067536 | 3. 545962 | 2. 251662 | 2. 316856 | 1. 995829 |
| 613212_at | 4. 145046 | 4. 257645 | 3. 727435 | 2. 281694 | 6. 306449 | 3. 008426 | 2. 631869 | 4. 469926 |
| 613227_at | 1. 893472 | 0. 927447 | 1. 703981 | 1. 964433 | 1. 790603 | 1. 793682 | 1. 663799 | 1. 374373 |
| 6132_at   | 10. 9543  | 10. 1916  | 10. 44525 | 10. 54976 | 10. 53964 | 10. 81988 | 10. 70633 | 10. 42366 |
| 6133_at   | 8. 440992 | 8. 4396   | 8. 203171 | 6. 586381 | 7. 003125 | 6. 69096  | 6. 214958 | 6. 120994 |
| 6134_at   | 4. 498575 | 4. 376366 | 5. 934002 | 4. 465298 | 4. 851342 | 5. 108844 | 4. 440597 | 4. 426295 |
| 6135_at   | 10. 88661 | 10. 73102 | 10. 33726 | 10. 70475 | 10. 69732 | 10. 89278 | 10. 66664 | 10. 48686 |
| 6137_at   | 2. 861311 | 1. 759469 | 2. 366358 | 2. 148822 | 1. 437851 | 2. 411899 | 3. 868507 | 2. 5592   |
| 6138_at   | 4. 020501 | 4. 139821 | 3. 955763 | 4. 209696 | 3. 893014 | 4. 203376 | 3. 940179 | 4. 335156 |
| 6139_at   | 5. 74436  | 6. 239601 | 5. 72895  | 4. 706962 | 6. 1866   | 6. 25527  | 6. 249251 | 5. 032659 |
| 613_at    | 5. 091039 | 5. 669318 | 4. 792442 | 4. 897111 | 5. 06234  | 5. 297437 | 5. 09028  | 4. 795613 |
| 6141_at   | 10. 4406  | 9. 741957 | 9. 783228 | 10. 13902 | 9. 92054  | 10. 27237 | 9. 753293 | 9. 810997 |
| 6143_at   | 4. 101918 | 3. 599159 | 4. 526603 | 3. 571624 | 4. 583027 | 3. 092326 | 3. 805683 | 4. 533933 |
| 6146_at   | 6. 051001 | 6. 05942  | 5. 982296 | 6. 067116 | 6. 523426 | 6. 016074 | 5. 943029 | 6. 061005 |
| 6147_at   | 7. 336715 | 6. 720642 | 6. 941725 | 7. 771608 | 6. 919399 | 6. 952273 | 5. 136316 | 6. 145603 |
| 6150_at   | 6. 005172 | 5. 446813 | 5. 335834 | 5. 495587 | 5. 270915 | 5. 874225 | 5. 080174 | 4. 619572 |
| 6152_at   | 11. 0947  | 11. 3582  | 11. 04637 | 11. 05355 | 11. 39774 | 10. 9205  | 11. 26807 | 11. 35613 |
| 6154_at   | 3. 236363 | 2. 280567 | 2. 35951  | 2. 571267 | 2. 591779 | 3. 196371 | 2. 587063 | 2. 922375 |
| 6155_at   | 11. 62357 | 11. 11432 | 11. 33335 | 11. 39684 | 11. 42688 | 11. 76072 | 11. 3808  | 11. 64302 |
| 6156_at   | 10. 92795 | 10. 6735  | 10. 34741 | 10. 52232 | 10. 43279 | 10. 23207 | 10. 37382 | 10. 27089 |
| 6157_at   | 4. 733982 | 3. 493875 | 3. 355232 | 3. 499514 | 3. 628491 | 3. 210446 | 3. 31674  | 4. 139387 |
| 6158_at   | 3. 215761 | 3. 715789 | 2. 933928 | 2. 889013 | 3. 010149 | 3. 01092  | 2. 582113 | 3. 689314 |
| 6159_at   | 3. 773069 | 4. 185169 | 2. 957474 | 2. 677673 | 4. 091423 | 4. 088218 | 4. 146936 | 3. 932314 |
| 6160_at   | 6. 011859 | 4. 741519 | 4. 84467  | 5. 457582 | 5. 411036 | 5. 919829 | 4. 741832 | 5. 371018 |
| 6161_at   | 3. 111649 | 4. 089914 | 2. 999714 | 2. 796315 | 2. 88473  | 2. 91228  | 3. 571721 | 5. 157877 |
| 6164_at   | 5. 961201 | 6. 317097 | 6. 152844 | 5. 948464 | 6. 802626 | 6. 28756  | 5. 252801 | 6. 812167 |
| 6165_at   | 8. 345201 | 8. 376102 | 8. 371809 | 8. 364564 | 8. 537151 | 8. 156592 | 8. 145789 | 8. 409563 |
| 6166_at   | 8. 83101  | 8. 874621 | 8. 795878 | 8. 790739 | 8. 601765 | 9. 309173 | 8. 763201 | 8. 83101  |
| 6167_at   | 5. 04901  | 5. 666262 | 4. 490815 | 5. 263093 | 6. 745585 | 4. 450537 | 5. 626289 | 6. 100186 |
| 6169_at   | 11. 5534  | 11. 61881 | 11. 60333 | 11. 515   | 11. 46577 | 11. 49785 | 11. 2829  | 11. 61822 |

|           |          |          |          |          |          |          |          |          |
|-----------|----------|----------|----------|----------|----------|----------|----------|----------|
| 6171_at   | 7.739425 | 7.788804 | 7.602716 | 8.052839 | 7.589418 | 8.101775 | 7.882225 | 8.259451 |
| 6173_at   | 2.001785 | 1.798024 | 1.060938 | 1.885756 | 1.829284 | 4.032911 | 3.494913 | 1.437522 |
| 6175_at   | 6.650931 | 5.036588 | 5.25851  | 6.27478  | 5.321914 | 6.356505 | 5.183579 | 5.832226 |
| 617_at    | 2.905767 | 2.459476 | 2.870664 | 2.932944 | 2.421225 | 2.892079 | 3.014646 | 3.377319 |
| 6182_at   | 6.480144 | 5.887752 | 5.908967 | 5.590159 | 5.664569 | 6.522943 | 5.110613 | 5.601897 |
| 6183_at   | 4.799773 | 4.500872 | 4.00438  | 4.408942 | 4.036907 | 3.865467 | 3.610279 | 3.920563 |
| 6184_at   | 9.388101 | 9.310166 | 9.621626 | 9.581743 | 9.665495 | 9.233272 | 9.755518 | 9.681689 |
| 6185_at   | 9.143383 | 9.183866 | 9.530377 | 9.200676 | 9.044858 | 8.863043 | 9.373357 | 8.916124 |
| 6188_at   | 6.101231 | 5.510599 | 5.526651 | 6.403035 | 6.042559 | 5.391387 | 5.412263 | 5.666406 |
| 6189_at   | 2.437394 | 2.755799 | 2.995477 | 3.484261 | 2.695231 | 2.621295 | 2.92494  | 2.453089 |
| 619189_at | 3.846122 | 3.685316 | 4.668089 | 3.452627 | 3.750885 | 3.439227 | 3.822443 | 3.313069 |
| 619190_at | 1.215526 | 1.238881 | 1.48277  | 1.480806 | 3.027903 | 1.735185 | 1.019992 | 1.765575 |
| 6191_at   | 4.776756 | 4.964137 | 4.856698 | 5.019022 | 4.040187 | 4.516002 | 4.189511 | 4.475574 |
| 619207_at | 1.691193 | 1.63846  | 1.762302 | 2.372895 | 1.344988 | 2.67045  | 2.583603 | 1.933437 |
| 619208_at | 5.626958 | 5.75097  | 5.974366 | 4.626786 | 5.897496 | 5.250828 | 5.192797 | 5.461367 |
| 619279_at | 5.822776 | 6.186396 | 6.432606 | 5.439267 | 6.077203 | 5.9585   | 5.982811 | 5.890851 |
| 6192_at   | 7.59868  | 7.403597 | 7.313047 | 7.521768 | 7.486193 | 7.360993 | 7.231574 | 7.664064 |
| 619343_at | 1.602979 | 1.158    | 1.088752 | 1.146334 | 1.364851 | 1.337985 | 1.64349  | 1.395719 |
| 619344_at | 0.644544 | 2.410049 | 0.943577 | 0.988665 | 1.259549 | 1.007986 | 1.686246 | 2.004286 |
| 619351_at | 1.890752 | 2.169509 | 2.304208 | 2.009864 | 2.466274 | 1.869655 | 2.313713 | 1.922223 |
| 619373_at | 1.130584 | 1.612444 | 1.268514 | 1.561565 | 1.515607 | 0.941237 | 1.639088 | 1.098868 |
| 619383_at | 8.430025 | 8.19502  | 7.971496 | 9.017318 | 8.567928 | 7.934047 | 7.304905 | 8.864649 |
| 6193_at   | 10.85222 | 10.17219 | 9.939408 | 10.25091 | 9.774534 | 10.54366 | 10.30957 | 9.637288 |
| 619423_at | 4.235467 | 3.924311 | 4.057276 | 1.618704 | 1.241579 | 5.480648 | 3.226906 | 3.503018 |
| 619434_at | 1.628947 | 1.892013 | 1.6376   | 1.887416 | 2.040857 | 1.786378 | 2.514077 | 1.765762 |
| 619455_at | 1.330363 | 1.174837 | 1.799768 | 0.969227 | 1.07036  | 0.997299 | 1.794091 | 3.534652 |
| 619498_at | 3.896905 | 3.813313 | 4.345339 | 5.296185 | 1.995918 | 1.886524 | 3.365607 | 1.290493 |
| 6194_at   | 9.589692 | 9.686024 | 9.386312 | 9.490777 | 9.391522 | 9.435487 | 9.445391 | 9.500385 |
| 619505_at | 3.425319 | 4.499251 | 2.889508 | 4.174113 | 3.9359   | 5.091212 | 2.51171  | 2.475345 |
| 619518_at | 2.040586 | 1.431623 | 2.100712 | 2.031574 | 2.378153 | 2.054403 | 1.756628 | 1.456105 |
| 619552_at | 3.528546 | 3.163257 | 3.319165 | 3.629937 | 3.66366  | 3.456428 | 3.329583 | 3.519033 |
| 619554_at | 2.719458 | 4.638567 | 4.821079 | 3.451246 | 4.77279  | 3.806622 | 3.56823  | 4.439092 |
| 619555_at | 1.521696 | 1.137182 | 1.107823 | 1.409894 | 2.033251 | 1.185824 | 1.276641 | 1.359006 |
| 619556_at | 1.391693 | 1.568521 | 1.614221 | 1.079358 | 1.106854 | 0.964604 | 1.620108 | 1.606953 |
| 619562_at | 1.851171 | 1.887371 | 1.905451 | 3.561495 | 2.924845 | 1.798074 | 2.307062 | 2.164276 |
| 619564_at | 1.101714 | 0.70734  | 1.353626 | 0.926706 | 1.000363 | 1.593979 | 1.198412 | 1.695017 |
| 619565_at | 2.886257 | 2.524971 | 3.007585 | 4.114848 | 3.035569 | 1.83134  | 4.560764 | 3.832655 |
| 619568_at | 1.410583 | 1.069354 | 1.101608 | 1.028336 | 1.618071 | 2.17728  | 1.078396 | 2.870395 |
| 619569_at | 1.214789 | 2.017702 | 1.965063 | 1.361315 | 2.110995 | 1.586916 | 1.55238  | 1.684879 |
| 619570_at | 3.721476 | 3.430852 | 2.683505 | 5.659302 | 6.157219 | 4.531595 | 3.762689 | 5.25601  |
| 619571_at | 2.522866 | 1.314763 | 1.743119 | 1.942307 | 2.163264 | 1.216181 | 3.28615  | 3.905919 |
| 6195_at   | 4.210933 | 3.404151 | 3.096022 | 3.937427 | 3.713453 | 4.083171 | 3.560087 | 3.498978 |
| 6196_at   | 5.983909 | 6.154465 | 5.557165 | 5.747258 | 5.859884 | 5.900699 | 5.749383 | 5.403671 |
| 6197_at   | 5.996575 | 6.547691 | 6.047223 | 6.548595 | 6.678254 | 6.18643  | 6.818301 | 6.681061 |
| 6198_at   | 6.334643 | 6.2959   | 5.94745  | 7.273508 | 6.98118  | 6.699281 | 6.789153 | 6.485953 |
| 6199_at   | 5.048254 | 4.426903 | 5.104074 | 5.132345 | 4.642422 | 4.605955 | 4.813971 | 3.265895 |
| 6203_at   | 5.529499 | 4.916217 | 3.901381 | 5.211834 | 4.888356 | 5.16513  | 6.136329 | 4.788737 |
| 6205_at   | 11.72975 | 11.70597 | 11.51544 | 11.62754 | 11.76193 | 11.66703 | 11.52294 | 11.59352 |
| 6207_at   | 10.54327 | 10.67536 | 10.4437  | 10.75059 | 10.41658 | 10.61248 | 10.25386 | 10.71634 |
| 6208_at   | 4.077642 | 3.391373 | 3.704919 | 3.782768 | 3.74813  | 4.003112 | 3.841528 | 3.960314 |
| 6209_at   | 8.05875  | 7.51663  | 7.809441 | 7.822431 | 6.917696 | 7.914206 | 7.462281 | 7.628124 |

|         |          |          |          |          |          |          |          |          |
|---------|----------|----------|----------|----------|----------|----------|----------|----------|
| 6210_at | 8.375189 | 7.318302 | 7.574071 | 7.337797 | 7.68108  | 7.467814 | 7.234118 | 8.031988 |
| 6217_at | 7.130908 | 6.704575 | 6.699724 | 6.871323 | 6.689914 | 6.927027 | 6.666801 | 7.577244 |
| 6223_at | 10.76548 | 10.14049 | 10.15503 | 10.43916 | 9.877146 | 10.51077 | 10.3006  | 10.06288 |
| 6224_at | 4.015151 | 4.454803 | 4.211292 | 4.911062 | 3.450048 | 4.345799 | 4.470955 | 4.434506 |
| 6227_at | 10.38844 | 10.58789 | 10.36659 | 10.38173 | 10.20918 | 10.15963 | 10.39819 | 10.6034  |
| 6228_at | 5.94322  | 5.191424 | 6.689059 | 6.744654 | 6.587139 | 6.191706 | 6.065397 | 6.844208 |
| 6229_at | 3.052038 | 2.623573 | 3.143929 | 3.091655 | 2.989911 | 2.969435 | 2.718655 | 3.142939 |
| 622_at  | 3.37114  | 3.519874 | 2.962784 | 2.494666 | 4.463979 | 3.182984 | 2.211329 | 2.908306 |
| 6231_at | 4.977385 | 4.739419 | 3.997965 | 5.358114 | 3.776299 | 3.086074 | 3.387163 | 4.532284 |
| 6233_at | 1.603538 | 2.625048 | 1.918707 | 2.671313 | 2.123457 | 2.144162 | 1.55447  | 2.909041 |
| 6235_at | 10.25571 | 10.39048 | 10.74737 | 10.23819 | 10.24311 | 9.830153 | 9.839744 | 10.19556 |
| 6236_at | 2.812026 | 3.238951 | 2.421891 | 3.363085 | 2.541381 | 3.030314 | 2.652493 | 2.714006 |
| 6237_at | 9.19203  | 8.258018 | 8.272643 | 8.701667 | 7.962738 | 8.087128 | 8.554237 | 7.255753 |
| 6238_at | 7.05497  | 7.285668 | 7.13868  | 7.10726  | 6.851786 | 7.297731 | 7.451906 | 6.777413 |
| 6239_at | 6.583616 | 7.165752 | 6.992844 | 6.900108 | 6.378843 | 7.069718 | 7.218547 | 6.191826 |
| 623_at  | 1.451543 | 1.274793 | 0.921823 | 1.630777 | 1.333692 | 1.130766 | 1.615703 | 1.147283 |
| 6240_at | 5.764928 | 6.291396 | 5.915324 | 5.833813 | 5.276387 | 5.984304 | 5.092786 | 6.698085 |
| 6241_at | 2.180313 | 3.381383 | 2.869754 | 4.77012  | 3.121864 | 1.666126 | 3.154855 | 3.804648 |
| 6242_at | 3.953489 | 3.043528 | 3.468599 | 3.684722 | 3.520824 | 3.015812 | 3.739758 | 3.400956 |
| 6247_at | 1.443737 | 1.679003 | 1.378596 | 1.996333 | 1.625092 | 1.844654 | 1.883433 | 1.417904 |
| 6248_at | 7.836166 | 7.625327 | 7.891263 | 7.12764  | 6.739018 | 7.036745 | 7.085166 | 7.775439 |
| 6249_at | 7.985303 | 7.609981 | 7.791287 | 7.671943 | 7.524405 | 8.136162 | 7.94463  | 7.879979 |
| 624_at  | 2.857275 | 2.382356 | 2.876044 | 2.446342 | 3.192127 | 2.521311 | 3.509177 | 3.130054 |
| 6251_at | 8.786616 | 8.84694  | 9.451388 | 9.630378 | 8.889508 | 9.191826 | 8.870034 | 8.708129 |
| 6252_at | 2.906404 | 2.64849  | 2.793793 | 1.987551 | 2.502389 | 3.262215 | 2.3462   | 2.753606 |
| 6253_at | 4.926208 | 4.682736 | 5.422387 | 4.484458 | 4.924274 | 4.811274 | 5.55939  | 4.680283 |
| 6256_at | 6.520709 | 6.015916 | 6.145128 | 7.029931 | 6.069394 | 6.509646 | 6.19038  | 4.659154 |
| 6257_at | 5.632322 | 5.753165 | 6.084643 | 4.81427  | 5.783864 | 6.02284  | 5.644864 | 6.307506 |
| 6258_at | 2.220185 | 1.845564 | 1.51599  | 1.73964  | 1.509357 | 1.906104 | 1.659247 | 1.275194 |
| 6259_at | 7.232873 | 7.233968 | 6.929002 | 6.919349 | 6.893416 | 6.717243 | 6.633264 | 6.944825 |
| 6261_at | 1.722734 | 1.709016 | 1.587617 | 1.769108 | 1.946393 | 1.607472 | 2.087772 | 1.66685  |
| 6262_at | 1.683156 | 1.287828 | 1.258883 | 1.359983 | 1.079208 | 1.504527 | 1.563563 | 1.962893 |
| 6263_at | 3.76751  | 3.806882 | 3.462212 | 2.477689 | 2.705696 | 3.040346 | 2.280093 | 3.269729 |
| 6271_at | 3.393582 | 3.103655 | 3.546442 | 2.991652 | 4.166763 | 5.540089 | 4.928653 | 3.977289 |
| 6272_at | 8.319799 | 8.666303 | 8.674966 | 8.403242 | 8.625965 | 8.413292 | 9.011365 | 8.591565 |
| 6273_at | 6.021406 | 5.656711 | 6.336832 | 5.336513 | 7.897603 | 8.548403 | 3.497122 | 5.443466 |
| 6274_at | 4.317512 | 4.655451 | 2.295181 | 5.128548 | 2.430652 | 4.221252 | 4.783215 | 4.081645 |
| 6275_at | 8.30634  | 8.513124 | 8.58787  | 8.215221 | 7.303322 | 8.734641 | 7.938388 | 8.496489 |
| 6276_at | 1.92832  | 1.257566 | 1.698267 | 1.758974 | 1.71622  | 1.852098 | 1.261153 | 1.682579 |
| 6277_at | 9.213874 | 9.214214 | 9.330374 | 9.481774 | 9.061021 | 9.551737 | 9.362366 | 8.838324 |
| 6278_at | 1.741264 | 2.456435 | 1.983491 | 2.671259 | 2.370042 | 3.851036 | 3.096812 | 2.603637 |
| 6279_at | 7.368837 | 7.164831 | 7.106231 | 7.057709 | 6.747599 | 7.812112 | 7.421048 | 6.645544 |
| 627_at  | 2.142306 | 2.580001 | 2.203141 | 1.705145 | 2.071748 | 2.130624 | 3.01553  | 2.397368 |
| 6280_at | 7.574478 | 6.723421 | 7.141927 | 7.147585 | 5.429672 | 7.597603 | 7.12246  | 5.627523 |
| 6281_at | 9.285862 | 9.344387 | 9.643304 | 9.53209  | 8.994252 | 9.567121 | 9.155612 | 9.263732 |
| 6282_at | 9.897841 | 9.797055 | 9.889318 | 9.786495 | 9.233915 | 9.681426 | 9.804045 | 8.981122 |
| 6283_at | 4.474839 | 4.748144 | 4.992738 | 4.696345 | 2.698273 | 4.143859 | 4.463573 | 5.724656 |
| 6284_at | 4.621234 | 4.93339  | 4.47747  | 4.789107 | 4.254409 | 4.737456 | 4.423248 | 4.691696 |
| 6285_at | 3.04444  | 2.214573 | 2.196626 | 2.433871 | 1.946821 | 2.14554  | 2.156935 | 2.672896 |
| 6286_at | 4.723523 | 5.54181  | 3.570363 | 3.878303 | 2.800613 | 3.089535 | 4.99845  | 2.736908 |
| 6288_at | 3.504029 | 1.343626 | 4.767966 | 2.088794 | 4.084428 | 3.14434  | 1.254504 | 4.72443  |

|          |          |          |          |          |          |          |          |          |
|----------|----------|----------|----------|----------|----------|----------|----------|----------|
| 6289_at  | 1.113662 | 0.86977  | 1.853109 | 0.955398 | 0.734329 | 1.554713 | 1.135765 | 1.749968 |
| 6290_at  | 1.032321 | 1.154911 | 1.102566 | 0.991546 | 1.281833 | 1.199136 | 1.806883 | 2.148689 |
| 6293_at  | 6.598741 | 7.082813 | 7.155607 | 7.418204 | 7.456518 | 6.470463 | 7.125526 | 7.251929 |
| 6294_at  | 6.944511 | 7.193191 | 6.605612 | 6.98973  | 6.797113 | 6.922377 | 7.22018  | 6.562422 |
| 6295_at  | 1.961501 | 2.627299 | 2.538248 | 2.695687 | 3.475706 | 2.754135 | 2.871039 | 2.010381 |
| 6296_at  | 5.480142 | 4.438236 | 4.065135 | 5.48927  | 6.668199 | 4.519399 | 3.128519 | 4.910205 |
| 6297_at  | 3.727718 | 3.411347 | 4.095736 | 3.869537 | 3.825528 | 4.257969 | 3.740383 | 3.872268 |
| 6299_at  | 5.724029 | 6.001282 | 5.572459 | 4.610324 | 5.842651 | 6.276571 | 5.942066 | 6.342939 |
| 629_at   | 4.790075 | 4.323641 | 4.308852 | 4.814793 | 4.928752 | 4.833007 | 4.548485 | 5.758894 |
| 6300_at  | 3.984945 | 3.205897 | 3.508183 | 2.526377 | 3.005141 | 3.315009 | 2.432808 | 2.444284 |
| 6301_at  | 6.937924 | 6.932146 | 6.865806 | 6.691406 | 6.874354 | 6.932646 | 6.44339  | 7.119209 |
| 63027_at | 3.26079  | 2.845617 | 3.271494 | 2.528759 | 2.857178 | 3.732072 | 4.000681 | 2.57589  |
| 6302_at  | 7.689235 | 7.673415 | 7.957124 | 7.819023 | 6.863812 | 7.631583 | 7.867934 | 7.415327 |
| 63035_at | 3.864604 | 2.999378 | 2.870926 | 2.382179 | 2.954447 | 3.504718 | 4.171531 | 3.197912 |
| 63036_at | 2.328786 | 2.709302 | 3.011482 | 1.42104  | 1.426701 | 2.460732 | 1.297452 | 2.724855 |
| 6303_at  | 8.180421 | 8.243826 | 8.509211 | 8.191795 | 8.529478 | 7.926318 | 7.962727 | 8.564872 |
| 6304_at  | 6.638697 | 5.866243 | 6.318382 | 6.632268 | 6.241368 | 6.276283 | 6.051667 | 6.391193 |
| 6305_at  | 3.860693 | 4.15899  | 4.212344 | 4.570188 | 4.047369 | 3.846099 | 4.526077 | 4.056058 |
| 6307_at  | 7.030462 | 6.995498 | 7.288005 | 6.678441 | 7.055409 | 6.240207 | 7.417581 | 6.97164  |
| 6309_at  | 7.138627 | 6.588311 | 6.843521 | 6.460816 | 7.060168 | 7.46307  | 6.826977 | 7.038525 |
| 6310_at  | 5.259785 | 5.577149 | 4.931774 | 5.096667 | 5.600247 | 4.962711 | 5.964491 | 5.404318 |
| 6311_at  | 7.651302 | 7.524587 | 8.129147 | 7.710077 | 7.608608 | 7.52345  | 7.855643 | 7.277291 |
| 6314_at  | 6.148255 | 6.556694 | 6.114903 | 6.475638 | 6.675465 | 6.56614  | 6.968263 | 6.397843 |
| 6315_at  | 1.372662 | 1.633957 | 1.651841 | 1.55487  | 1.30755  | 1.658828 | 1.652976 | 1.331434 |
| 6317_at  | 0.846984 | 0.615471 | 1.024144 | 0.563822 | 1.160593 | 2.092249 | 1.100074 | 1.097202 |
| 6318_at  | 1.177912 | 1.406707 | 0.878082 | 1.300845 | 0.752383 | 1.176839 | 0.911744 | 1.630697 |
| 6319_at  | 6.859532 | 6.172894 | 6.827621 | 6.439632 | 6.136312 | 5.369178 | 7.853622 | 6.513344 |
| 631_at   | 3.367332 | 3.857736 | 3.398308 | 3.187055 | 4.406676 | 2.93065  | 3.711378 | 4.29548  |
| 6320_at  | 5.294784 | 4.983272 | 4.425819 | 4.429978 | 3.901594 | 4.750032 | 4.234856 | 4.205851 |
| 6322_at  | 5.447282 | 3.722977 | 4.263391 | 5.032025 | 3.483529 | 4.103786 | 4.670086 | 4.185494 |
| 6323_at  | 0.782846 | 1.0491   | 1.269468 | 1.091238 | 1.544988 | 1.249875 | 1.335077 | 1.168883 |
| 6324_at  | 1.7718   | 2.419436 | 2.166895 | 2.617906 | 2.078079 | 2.50484  | 1.758608 | 1.813029 |
| 6326_at  | 1.999718 | 1.133296 | 1.489711 | 1.177174 | 2.132691 | 0.967873 | 1.135709 | 1.243179 |
| 6327_at  | 2.993734 | 4.72272  | 3.023762 | 4.010339 | 2.478738 | 2.38916  | 3.06116  | 2.42553  |
| 6328_at  | 1.23107  | 1.964444 | 1.40794  | 1.074168 | 3.267757 | 1.595622 | 1.378477 | 2.714851 |
| 6329_at  | 2.865743 | 2.00323  | 2.302046 | 3.099485 | 2.410962 | 2.425643 | 3.30342  | 1.973225 |
| 6330_at  | 2.705685 | 2.807392 | 2.759945 | 2.949673 | 3.318806 | 2.65803  | 3.580565 | 3.594649 |
| 6331_at  | 1.42027  | 1.571592 | 1.918212 | 1.752546 | 1.545534 | 1.46427  | 2.96947  | 1.950057 |
| 6332_at  | 4.755587 | 4.882288 | 4.467327 | 4.152044 | 5.503881 | 2.649856 | 4.152261 | 6.248243 |
| 6334_at  | 1.836599 | 1.690426 | 1.243106 | 1.188441 | 2.054045 | 1.734951 | 1.743267 | 1.229209 |
| 6335_at  | 3.324055 | 2.800602 | 4.149235 | 3.783738 | 4.041478 | 2.793394 | 3.652517 | 2.807641 |
| 6336_at  | 0.988804 | 1.611748 | 1.396915 | 1.831834 | 1.872877 | 1.923972 | 2.609928 | 1.804797 |
| 6337_at  | 4.877904 | 2.976866 | 2.994924 | 4.279523 | 6.339468 | 4.857672 | 2.745162 | 2.737184 |
| 6338_at  | 2.415568 | 2.564139 | 4.157157 | 2.875407 | 3.289589 | 2.552365 | 2.968076 | 3.52731  |
| 6339_at  | 3.141021 | 2.82239  | 2.686198 | 4.199944 | 2.285101 | 3.263434 | 3.061188 | 2.619627 |
| 633_at   | 10.76221 | 10.19673 | 11.11169 | 10.99166 | 10.12861 | 11.00683 | 11.20303 | 9.063127 |
| 6340_at  | 2.787865 | 2.454974 | 3.272345 | 3.083988 | 6.094189 | 2.765255 | 2.947839 | 2.36771  |
| 6341_at  | 5.771276 | 6.145412 | 6.392309 | 6.204149 | 6.033229 | 5.936545 | 6.158751 | 5.936615 |
| 6342_at  | 7.7524   | 7.849178 | 7.643714 | 7.66015  | 8.083104 | 7.604273 | 7.809074 | 8.132812 |
| 6343_at  | 2.829514 | 3.680085 | 4.095958 | 3.650892 | 2.652324 | 2.120473 | 3.299041 | 3.216047 |
| 6344_at  | 2.743809 | 1.739105 | 1.842682 | 2.728608 | 1.893553 | 2.285288 | 1.938593 | 1.605401 |



|          |          |          |          |          |          |          |          |          |
|----------|----------|----------|----------|----------|----------|----------|----------|----------|
| 6345_at  | 2.146912 | 4.244692 | 4.084426 | 3.249941 | 1.800323 | 3.035933 | 2.862302 | 1.826304 |
| 6346_at  | 2.392399 | 1.447217 | 1.318149 | 1.667346 | 2.100397 | 2.077161 | 1.378271 | 1.069023 |
| 6347_at  | 8.423337 | 8.202395 | 7.690712 | 7.93756  | 7.844105 | 8.500111 | 8.453944 | 8.076438 |
| 6348_at  | 2.618114 | 1.57433  | 2.656268 | 4.287007 | 3.342771 | 1.977611 | 2.890517 | 3.91031  |
| 634_at   | 8.162327 | 8.752656 | 8.927092 | 8.66584  | 9.359311 | 9.003439 | 9.243155 | 7.48697  |
| 6351_at  | 4.868111 | 4.682982 | 4.991985 | 6.194005 | 4.024811 | 5.958934 | 4.837574 | 6.251012 |
| 6352_at  | 7.953184 | 6.823151 | 7.837312 | 8.224684 | 4.726788 | 7.32753  | 7.830695 | 7.443034 |
| 6354_at  | 0.999795 | 0.759025 | 0.96841  | 1.460737 | 2.381625 | 2.452554 | 1.609369 | 2.861308 |
| 6355_at  | 1.449441 | 1.067982 | 1.159333 | 1.037664 | 1.412227 | 1.224678 | 1.457846 | 1.693377 |
| 6356_at  | 1.02721  | 1.217506 | 1.830208 | 1.184641 | 4.910853 | 0.925524 | 1.452283 | 5.024937 |
| 6357_at  | 4.073979 | 2.957362 | 4.536146 | 4.118566 | 3.088181 | 4.382602 | 2.898406 | 2.46936  |
| 635_at   | 9.436283 | 7.339693 | 8.515034 | 6.285515 | 9.632069 | 8.689041 | 5.73575  | 8.761129 |
| 6360_at  | 1.449157 | 1.617974 | 2.167838 | 1.501386 | 1.558734 | 1.732087 | 2.053211 | 2.023931 |
| 6361_at  | 1.815977 | 2.792443 | 2.933393 | 2.165448 | 1.965929 | 2.010156 | 1.675512 | 2.439426 |
| 6362_at  | 5.633098 | 3.541268 | 4.342713 | 4.336711 | 3.348561 | 4.335307 | 4.600361 | 3.621496 |
| 6363_at  | 3.354746 | 2.486692 | 3.419373 | 2.36408  | 2.742216 | 2.335364 | 3.754788 | 3.702285 |
| 6364_at  | 2.717574 | 5.071417 | 4.490186 | 4.473749 | 3.809606 | 2.846041 | 3.650269 | 3.957351 |
| 6366_at  | 2.918555 | 4.27956  | 6.191479 | 4.706883 | 4.661515 | 3.221397 | 3.567917 | 4.774619 |
| 6367_at  | 3.16245  | 1.911132 | 2.011613 | 2.454101 | 2.06357  | 1.175326 | 2.248174 | 2.307882 |
| 6368_at  | 2.654631 | 3.574977 | 2.74134  | 2.170315 | 1.625583 | 4.405525 | 5.113648 | 2.250431 |
| 6369_at  | 1.308479 | 2.728019 | 3.129605 | 1.447666 | 1.044593 | 1.628173 | 2.286293 | 2.044885 |
| 636_at   | 5.352615 | 5.556185 | 5.441349 | 5.218644 | 5.241153 | 6.173549 | 5.052128 | 5.434642 |
| 6370_at  | 2.286639 | 2.693255 | 1.802345 | 1.689166 | 2.884887 | 2.606775 | 2.091159 | 2.059095 |
| 6372_at  | 1.873521 | 2.909624 | 4.926896 | 3.11196  | 1.952737 | 2.182217 | 2.078757 | 3.954017 |
| 6373_at  | 5.692489 | 6.599697 | 4.131905 | 7.160814 | 2.772599 | 4.193951 | 5.986786 | 6.505981 |
| 6374_at  | 1.609708 | 1.63014  | 1.680851 | 1.608839 | 2.407025 | 2.118098 | 2.709233 | 1.858864 |
| 6375_at  | 0.830155 | 1.303755 | 3.635288 | 2.049782 | 1.767043 | 2.014541 | 2.02458  | 1.186151 |
| 6376_at  | 7.532446 | 7.48241  | 8.067461 | 8.93662  | 7.189398 | 8.28534  | 7.813424 | 6.468241 |
| 637_at   | 4.246097 | 3.794641 | 4.334516 | 4.821592 | 3.489046 | 4.149796 | 4.431336 | 3.987259 |
| 63826_at | 5.073128 | 5.699633 | 5.00937  | 5.00508  | 4.798041 | 4.988567 | 4.37815  | 5.637162 |
| 63827_at | 2.227616 | 1.844072 | 2.533523 | 1.827646 | 2.70537  | 2.067804 | 2.117445 | 1.843015 |
| 6382_at  | 5.23947  | 5.495017 | 4.861901 | 3.836443 | 5.15567  | 5.450905 | 2.680484 | 4.736761 |
| 6383_at  | 8.728372 | 8.592023 | 8.856142 | 8.537748 | 8.763696 | 8.517204 | 9.14117  | 8.690715 |
| 6385_at  | 9.569584 | 9.495035 | 9.870418 | 9.528311 | 9.160389 | 9.39585  | 10.03478 | 9.077371 |
| 6386_at  | 7.241088 | 6.736942 | 7.193    | 6.306571 | 6.645292 | 6.611757 | 6.30628  | 7.233494 |
| 63874_at | 6.115834 | 6.876378 | 6.350925 | 6.103323 | 5.251464 | 5.779482 | 6.290015 | 6.089881 |
| 63875_at | 5.482341 | 6.478552 | 4.944323 | 5.345614 | 5.53851  | 5.516875 | 5.425361 | 4.953141 |
| 63876_at | 4.589598 | 4.659621 | 3.932858 | 4.220382 | 3.331392 | 3.357378 | 4.310175 | 3.047493 |
| 63877_at | 6.711404 | 7.196503 | 7.298457 | 7.094    | 7.021114 | 7.134285 | 7.394075 | 7.222382 |
| 6387_at  | 5.242942 | 5.846704 | 4.760883 | 5.391665 | 5.764676 | 4.660214 | 4.134624 | 3.468695 |
| 6388_at  | 6.811212 | 6.339915 | 6.874385 | 6.786886 | 6.862575 | 6.195775 | 6.969531 | 6.474933 |
| 63891_at | 4.492463 | 3.878401 | 4.253968 | 4.675962 | 3.749772 | 4.763892 | 3.974591 | 3.811478 |
| 63892_at | 4.759985 | 5.486786 | 4.366483 | 5.17713  | 5.691672 | 5.158063 | 4.553921 | 4.951953 |
| 63893_at | 4.594984 | 4.051939 | 3.867854 | 4.238282 | 3.902387 | 4.457995 | 4.066733 | 4.324238 |
| 63894_at | 6.452829 | 6.113157 | 6.10445  | 5.39798  | 5.522641 | 5.728682 | 6.396779 | 5.812718 |
| 63895_at | 4.758416 | 4.606596 | 4.697198 | 4.906496 | 4.507933 | 4.29375  | 4.585473 | 4.893733 |
| 63897_at | 6.004877 | 5.486093 | 5.836613 | 4.891732 | 5.993134 | 5.038535 | 5.865722 | 5.103798 |
| 63898_at | 4.117348 | 4.989225 | 4.375558 | 4.975922 | 4.739634 | 5.394563 | 4.592881 | 5.272899 |
| 63899_at | 5.12353  | 4.576315 | 5.249317 | 6.006677 | 5.387899 | 4.700964 | 5.356847 | 5.982413 |
| 638_at   | 2.409724 | 2.585499 | 1.986778 | 1.913835 | 1.682056 | 1.380563 | 1.512369 | 3.120816 |
| 63901_at | 5.887326 | 6.400591 | 5.528416 | 6.917229 | 4.862795 | 5.898079 | 5.840664 | 6.624016 |

|          |           |           |           |           |           |           |           |           |
|----------|-----------|-----------|-----------|-----------|-----------|-----------|-----------|-----------|
| 63904_at | 1. 371022 | 1. 5065   | 1. 736709 | 1. 332728 | 1. 681406 | 1. 734296 | 1. 789055 | 1. 934854 |
| 63905_at | 5. 959746 | 5. 783455 | 6. 323997 | 5. 723052 | 5. 674106 | 6. 306952 | 5. 899609 | 5. 839296 |
| 63906_at | 4. 743601 | 3. 871229 | 5. 083646 | 3. 902339 | 4. 176798 | 3. 813448 | 4. 842116 | 4. 003885 |
| 63908_at | 2. 877034 | 2. 218427 | 3. 221574 | 3. 246046 | 3. 110751 | 2. 145628 | 1. 971142 | 2. 010318 |
| 6390_at  | 8. 814463 | 8. 259131 | 8. 501493 | 8. 632577 | 8. 337513 | 8. 997024 | 8. 187344 | 7. 896703 |
| 63910_at | 2. 266401 | 2. 305603 | 2. 210123 | 2. 277468 | 2. 777906 | 2. 040328 | 3. 047815 | 3. 245224 |
| 63914_at | 2. 304968 | 1. 888541 | 2. 611135 | 1. 881998 | 2. 873504 | 1. 369651 | 1. 886058 | 3. 241639 |
| 63915_at | 3. 045114 | 2. 181861 | 1. 031124 | 3. 076013 | 1. 998964 | 1. 606077 | 1. 864975 | 2. 239428 |
| 63916_at | 6. 476039 | 6. 417697 | 6. 725655 | 6. 521864 | 5. 908217 | 5. 929819 | 6. 075775 | 6. 362347 |
| 63917_at | 6. 540603 | 5. 91501  | 5. 915896 | 5. 689705 | 6. 793222 | 6. 341408 | 6. 040059 | 7. 044942 |
| 6391_at  | 7. 112136 | 7. 335738 | 7. 614184 | 7. 713733 | 7. 539512 | 7. 775284 | 7. 632756 | 7. 435914 |
| 63920_at | 4. 108553 | 4. 188197 | 4. 278017 | 4. 74395  | 3. 785101 | 4. 115593 | 3. 646154 | 5. 400315 |
| 63922_at | 2. 510192 | 2. 428996 | 2. 040869 | 2. 789178 | 3. 356898 | 2. 397026 | 2. 689983 | 2. 513536 |
| 63923_at | 1. 684022 | 1. 793292 | 2. 016947 | 2. 014761 | 1. 884052 | 1. 558456 | 1. 585619 | 1. 911668 |
| 63924_at | 2. 55783  | 1. 762857 | 1. 38525  | 1. 022266 | 1. 877187 | 1. 382745 | 2. 404743 | 2. 639855 |
| 63925_at | 3. 951882 | 3. 467015 | 3. 614272 | 4. 722845 | 2. 34188  | 4. 797881 | 4. 260448 | 3. 907258 |
| 63926_at | 3. 060365 | 3. 40124  | 3. 985813 | 2. 838882 | 3. 32909  | 4. 012088 | 3. 707532 | 4. 100609 |
| 63928_at | 1. 519467 | 1. 299999 | 1. 569893 | 1. 509558 | 1. 559838 | 1. 473942 | 1. 908439 | 1. 715004 |
| 63929_at | 5. 1988   | 5. 574705 | 5. 290507 | 5. 779971 | 4. 794892 | 4. 265225 | 5. 012089 | 4. 767506 |
| 6392_at  | 5. 71839  | 6. 073462 | 6. 15402  | 5. 880321 | 6. 782629 | 5. 448142 | 6. 199175 | 6. 419059 |
| 63930_at | 2. 477822 | 1. 879799 | 3. 104258 | 2. 047057 | 2. 209145 | 1. 78907  | 2. 68429  | 2. 340837 |
| 63931_at | 6. 438088 | 6. 522558 | 5. 925674 | 6. 341828 | 6. 552588 | 6. 264779 | 6. 848905 | 6. 604181 |
| 63932_at | 2. 086661 | 2. 764177 | 2. 634886 | 2. 349706 | 3. 829763 | 1. 782208 | 2. 045413 | 2. 611129 |
| 63933_at | 7. 088976 | 6. 613548 | 6. 832169 | 6. 730903 | 6. 291141 | 6. 713661 | 6. 806723 | 6. 707684 |
| 63934_at | 2. 94954  | 3. 606776 | 3. 608118 | 2. 748884 | 3. 081599 | 3. 314961 | 4. 308063 | 4. 001462 |
| 63935_at | 4. 584409 | 4. 405413 | 4. 236879 | 4. 230977 | 3. 86287  | 4. 195272 | 4. 963676 | 4. 522696 |
| 63939_at | 4. 956984 | 5. 168179 | 4. 644496 | 5. 471423 | 4. 385154 | 4. 446699 | 4. 414735 | 4. 657693 |
| 63940_at | 4. 358941 | 3. 412653 | 3. 890062 | 4. 111323 | 3. 275851 | 3. 673841 | 4. 932072 | 3. 415927 |
| 63941_at | 3. 876047 | 3. 160933 | 2. 316654 | 3. 048695 | 3. 058434 | 3. 361684 | 1. 931122 | 4. 112249 |
| 63943_at | 2. 402734 | 2. 811638 | 2. 712802 | 2. 661011 | 2. 190461 | 4. 142913 | 2. 805862 | 2. 493663 |
| 63946_at | 2. 327556 | 2. 633893 | 2. 164304 | 3. 132954 | 2. 848864 | 2. 356688 | 2. 209162 | 2. 205117 |
| 63948_at | 2. 636242 | 1. 844096 | 2. 352333 | 2. 320274 | 2. 600813 | 2. 373688 | 2. 073361 | 2. 800094 |
| 63950_at | 2. 249677 | 1. 680167 | 1. 260854 | 1. 690164 | 1. 890663 | 1. 755034 | 1. 095222 | 1. 056497 |
| 63951_at | 3. 802071 | 3. 363506 | 3. 051013 | 2. 66128  | 3. 480793 | 2. 322117 | 2. 44141  | 3. 724467 |
| 63967_at | 1. 611322 | 2. 10767  | 1. 129208 | 4. 015536 | 2. 580133 | 2. 095286 | 2. 321916 | 2. 430347 |
| 6396_at  | 7. 784512 | 7. 223098 | 7. 377906 | 6. 940661 | 7. 434269 | 7. 883768 | 6. 901494 | 7. 312439 |
| 63970_at | 1. 632083 | 1. 155543 | 1. 164336 | 1. 242117 | 2. 053229 | 1. 624262 | 1. 856934 | 2. 000031 |
| 63971_at | 5. 971812 | 6. 537711 | 6. 39643  | 6. 569005 | 6. 047072 | 6. 521184 | 6. 362203 | 6. 567538 |
| 63973_at | 1. 944671 | 1. 904642 | 1. 92761  | 1. 652187 | 2. 345597 | 2. 087194 | 1. 594896 | 2. 329418 |
| 63974_at | 1. 318458 | 1. 367058 | 1. 299617 | 0. 98224  | 1. 165059 | 0. 922012 | 1. 07245  | 0. 975898 |
| 63976_at | 2. 092483 | 1. 780882 | 1. 680474 | 1. 881283 | 2. 047552 | 1. 467791 | 1. 270053 | 2. 595422 |
| 63977_at | 2. 748002 | 2. 066011 | 1. 981403 | 2. 932354 | 2. 958735 | 2. 484746 | 2. 397222 | 2. 025059 |
| 63978_at | 2. 426834 | 1. 113763 | 1. 381251 | 1. 463571 | 1. 83348  | 2. 263626 | 1. 938045 | 1. 570909 |
| 63979_at | 1. 314886 | 2. 572139 | 3. 429895 | 3. 171287 | 2. 661375 | 2. 236954 | 2. 41338  | 3. 171761 |
| 6397_at  | 7. 403297 | 8. 00488  | 7. 957791 | 8. 385461 | 7. 732606 | 8. 036165 | 8. 595536 | 7. 625844 |
| 63982_at | 3. 958004 | 4. 573014 | 4. 574493 | 4. 513064 | 3. 368471 | 3. 134618 | 3. 454265 | 3. 764278 |
| 6398_at  | 3. 654641 | 5. 450135 | 4. 586421 | 4. 406176 | 4. 425904 | 5. 195823 | 4. 533643 | 3. 934672 |
| 6399_at  | 3. 378463 | 3. 3911   | 3. 059517 | 3. 33717  | 4. 274649 | 4. 068044 | 2. 021579 | 4. 434976 |
| 639_at   | 3. 909062 | 4. 248727 | 5. 048546 | 4. 65847  | 4. 718164 | 4. 330875 | 4. 258728 | 3. 972402 |
| 64002_at | 1. 322122 | 1. 612895 | 1. 124998 | 1. 483846 | 1. 250063 | 1. 307471 | 1. 369165 | 1. 570223 |
| 64005_at | 2. 826919 | 3. 584773 | 3. 140398 | 3. 534117 | 1. 612211 | 3. 588804 | 2. 88583  | 2. 518358 |

|          |          |          |          |          |          |          |          |          |
|----------|----------|----------|----------|----------|----------|----------|----------|----------|
| 6400_at  | 7.401642 | 7.879655 | 7.812371 | 7.359095 | 7.965654 | 7.896956 | 8.020515 | 7.943555 |
| 6401_at  | 2.363675 | 1.574715 | 1.863407 | 0.902863 | 4.322562 | 3.187526 | 4.028821 | 2.645247 |
| 6402_at  | 4.277966 | 3.99652  | 2.398081 | 4.02525  | 3.605324 | 4.618761 | 5.534552 | 3.4308   |
| 6403_at  | 1.76988  | 2.711858 | 2.358416 | 2.562359 | 3.808348 | 2.710596 | 4.213731 | 3.073602 |
| 6404_at  | 4.123719 | 4.737381 | 4.009895 | 4.649099 | 3.42987  | 4.263383 | 4.941299 | 3.915503 |
| 6405_at  | 4.000552 | 4.595895 | 5.466854 | 4.988134 | 4.274519 | 5.591787 | 4.764394 | 3.61254  |
| 64061_at | 5.861072 | 4.949636 | 4.98734  | 4.703898 | 4.82237  | 4.909186 | 5.352794 | 4.845284 |
| 64062_at | 6.596769 | 6.484807 | 6.385163 | 6.500848 | 6.280523 | 6.558696 | 6.36862  | 6.393995 |
| 64063_at | 2.858549 | 2.253325 | 2.605623 | 2.586743 | 2.51471  | 2.233273 | 2.978185 | 2.021848 |
| 64064_at | 2.581964 | 0.913024 | 1.139357 | 0.528479 | 1.724288 | 0.919259 | 1.207132 | 1.604258 |
| 64065_at | 5.895916 | 5.768376 | 6.442701 | 6.734541 | 6.618076 | 6.345401 | 6.691182 | 5.607132 |
| 64066_at | 1.654437 | 1.476722 | 1.722836 | 1.500145 | 1.838044 | 1.536263 | 1.870943 | 1.564436 |
| 64067_at | 5.48815  | 5.123304 | 5.845768 | 5.075675 | 4.997941 | 5.529741 | 6.55811  | 5.571916 |
| 6406_at  | 1.437678 | 1.760554 | 1.85004  | 1.337103 | 2.335068 | 1.05731  | 1.176044 | 1.520204 |
| 64072_at | 2.392254 | 1.707756 | 1.999091 | 2.05777  | 1.999091 | 2.345146 | 1.925672 | 1.890593 |
| 64073_at | 6.698944 | 5.422733 | 5.438871 | 6.419416 | 4.731602 | 7.299497 | 4.837728 | 4.404274 |
| 64077_at | 5.534467 | 3.763048 | 5.692802 | 5.987482 | 5.528671 | 4.702663 | 5.992811 | 4.372355 |
| 64078_at | 1.501476 | 2.147639 | 1.757385 | 1.412434 | 1.916238 | 1.743185 | 1.486636 | 1.396418 |
| 6407_at  | 1.512343 | 1.919255 | 1.005854 | 2.070878 | 1.674702 | 1.235907 | 1.684552 | 1.328702 |
| 64080_at | 4.370958 | 4.660655 | 4.183106 | 4.19245  | 5.279635 | 4.192791 | 4.126125 | 3.44625  |
| 64081_at | 7.346132 | 5.926503 | 6.681342 | 4.527478 | 7.766583 | 6.93939  | 6.159794 | 7.25735  |
| 64083_at | 7.752251 | 7.875753 | 7.642255 | 7.985788 | 7.407369 | 7.649451 | 7.776017 | 8.004163 |
| 64084_at | 3.55021  | 4.494831 | 4.677019 | 4.662824 | 3.495662 | 5.671035 | 4.376805 | 4.109512 |
| 64087_at | 6.101042 | 5.187435 | 4.967233 | 5.049877 | 5.609241 | 5.684455 | 4.050304 | 5.489068 |
| 64089_at | 4.348169 | 4.858538 | 4.252048 | 4.019956 | 2.625741 | 4.471031 | 3.753192 | 4.101086 |
| 64090_at | 4.64346  | 4.951221 | 5.773722 | 5.089599 | 4.097154 | 4.846467 | 4.256775 | 4.47014  |
| 64091_at | 5.579659 | 5.359596 | 5.35212  | 6.050672 | 4.479702 | 6.088431 | 4.316859 | 5.722754 |
| 64092_at | 3.084966 | 2.519072 | 1.980209 | 2.06332  | 2.707273 | 2.074981 | 2.066735 | 2.112284 |
| 64093_at | 2.509458 | 2.563037 | 2.047139 | 2.141844 | 3.134503 | 2.311063 | 1.735092 | 2.048655 |
| 64094_at | 1.776055 | 1.472473 | 1.570871 | 1.715283 | 3.376529 | 2.570162 | 2.21906  | 1.560597 |
| 64096_at | 1.863966 | 2.435424 | 2.13195  | 2.414268 | 3.405179 | 2.203762 | 1.616916 | 2.455273 |
| 64097_at | 6.208282 | 6.215522 | 6.398552 | 6.560178 | 6.416701 | 6.215454 | 6.958758 | 5.932952 |
| 64098_at | 2.756123 | 2.058334 | 1.520091 | 2.439272 | 2.245129 | 2.242715 | 2.642689 | 2.306151 |
| 640_at   | 1.936836 | 1.64875  | 1.693604 | 2.450642 | 2.732716 | 2.029554 | 2.237062 | 1.863035 |
| 64100_at | 1.341411 | 1.481474 | 1.582929 | 1.338385 | 1.785791 | 2.706772 | 1.895613 | 1.79835  |
| 64101_at | 5.744545 | 5.888128 | 6.365677 | 5.976656 | 3.924574 | 6.923086 | 5.455621 | 5.561646 |
| 64102_at | 2.201744 | 1.864405 | 2.993891 | 1.324348 | 1.417402 | 3.083171 | 1.710146 | 1.779898 |
| 64105_at | 2.626895 | 1.758983 | 1.825634 | 2.519779 | 3.27845  | 2.114511 | 1.573831 | 3.547377 |
| 64106_at | 2.264916 | 2.360737 | 1.580267 | 2.476253 | 2.021506 | 2.618034 | 1.666788 | 1.900767 |
| 64108_at | 4.813241 | 4.30372  | 4.163642 | 4.683067 | 3.772665 | 4.255288 | 4.202045 | 3.790998 |
| 64109_at | 1.3008   | 1.833131 | 1.332772 | 1.941761 | 1.904434 | 1.734769 | 1.532155 | 1.376105 |
| 64110_at | 6.119036 | 6.448709 | 6.204252 | 6.081615 | 5.771245 | 6.121208 | 5.807671 | 6.365343 |
| 64111_at | 2.173947 | 1.175009 | 1.954809 | 1.082371 | 1.376528 | 1.371098 | 1.374058 | 1.127906 |
| 64112_at | 4.107184 | 5.466232 | 4.779508 | 4.982637 | 4.67593  | 5.366241 | 4.447907 | 5.588032 |
| 64114_at | 8.450593 | 8.376806 | 8.889644 | 8.523143 | 8.488983 | 8.548617 | 8.511308 | 8.722346 |
| 64115_at | 4.819877 | 4.927053 | 5.424014 | 5.324171 | 3.640188 | 5.710246 | 5.591859 | 3.919235 |
| 64116_at | 4.469502 | 3.297635 | 4.035431 | 3.864197 | 4.464796 | 4.012665 | 3.614104 | 4.103113 |
| 64118_at | 4.389008 | 2.963329 | 3.159093 | 3.959597 | 2.727267 | 4.172996 | 3.612507 | 2.715996 |
| 64121_at | 5.680319 | 5.639681 | 5.77147  | 4.929479 | 6.672548 | 5.331057 | 5.968111 | 5.920251 |
| 64122_at | 5.937963 | 6.743367 | 5.4946   | 5.89017  | 7.140525 | 5.606719 | 5.659624 | 5.174173 |
| 64123_at | 7.951462 | 8.231271 | 8.222141 | 8.515736 | 8.068441 | 8.133973 | 8.502493 | 7.848528 |

|           |          |          |          |          |          |          |          |          |
|-----------|----------|----------|----------|----------|----------|----------|----------|----------|
| 64127_at  | 1.664862 | 1.616584 | 1.314032 | 1.197826 | 1.602213 | 2.035263 | 2.45919  | 1.432892 |
| 64129_at  | 6.959049 | 6.78187  | 6.434931 | 6.888966 | 5.490173 | 6.791127 | 7.081537 | 6.052672 |
| 64130_at  | 5.535242 | 5.773297 | 5.150027 | 5.399402 | 5.149582 | 5.214129 | 5.977492 | 5.039237 |
| 641311_at | 1.170263 | 0.855757 | 0.668371 | 0.884275 | 1.153246 | 1.804875 | 0.875156 | 0.891324 |
| 64131_at  | 4.237167 | 4.329666 | 4.375588 | 4.693126 | 3.374728 | 4.55445  | 4.364587 | 3.47554  |
| 64132_at  | 4.62051  | 3.552066 | 3.977101 | 3.252552 | 4.030374 | 4.409047 | 4.581814 | 4.037712 |
| 641339_at | 3.468305 | 3.363324 | 4.756086 | 2.704853 | 1.169388 | 2.487945 | 3.41265  | 3.993665 |
| 64135_at  | 6.728385 | 6.614533 | 6.416837 | 6.506873 | 6.41389  | 6.382703 | 6.036173 | 6.404233 |
| 641364_at | 1.498493 | 1.200699 | 1.679791 | 1.392946 | 1.347306 | 1.379035 | 2.177732 | 1.0394   |
| 641365_at | 1.144346 | 1.164657 | 1.200896 | 1.082991 | 1.1384   | 1.242485 | 1.513763 | 1.528639 |
| 641367_at | 2.052656 | 1.48115  | 2.108067 | 1.876527 | 2.214808 | 2.607011 | 1.571056 | 2.037008 |
| 641371_at | 1.764679 | 1.242315 | 1.00887  | 1.057267 | 3.286271 | 1.255877 | 1.503577 | 1.23965  |
| 641372_at | 2.786858 | 2.988284 | 2.209466 | 1.772897 | 3.152695 | 1.199138 | 2.178129 | 3.292461 |
| 641373_at | 1.601155 | 1.44655  | 1.334573 | 1.254864 | 1.923846 | 1.260339 | 1.276722 | 1.761642 |
| 64137_at  | 1.393319 | 2.166151 | 1.628684 | 1.712756 | 2.412652 | 1.893427 | 2.096058 | 1.900114 |
| 641384_at | 1.93416  | 2.453449 | 1.446768 | 1.836105 | 1.69427  | 1.677155 | 2.053436 | 1.797827 |
| 641451_at | 0.915816 | 0.596678 | 0.761036 | 0.823224 | 0.781643 | 1.304747 | 0.671418 | 1.244511 |
| 64145_at  | 2.537295 | 4.088259 | 4.388648 | 4.476602 | 4.515863 | 4.099274 | 4.50442  | 3.613981 |
| 641467_at | 4.884924 | 4.087398 | 4.120487 | 4.470933 | 4.44349  | 3.67994  | 4.769148 | 3.925345 |
| 64146_at  | 1.091565 | 4.059696 | 1.341523 | 2.725161 | 1.889313 | 2.918429 | 3.283624 | 3.124625 |
| 64147_at  | 2.323747 | 1.987304 | 1.974007 | 2.479392 | 2.023211 | 1.740965 | 1.65441  | 2.441904 |
| 64149_at  | 5.144558 | 5.750174 | 4.986711 | 5.976302 | 5.427691 | 5.193436 | 5.387627 | 5.551756 |
| 6414_at   | 9.457147 | 9.630434 | 9.664742 | 9.174133 | 9.263431 | 9.097261 | 8.293439 | 9.359459 |
| 64150_at  | 1.881049 | 1.305584 | 1.305584 | 2.625836 | 2.474331 | 1.350481 | 1.464114 | 2.371352 |
| 641515_at | 1.485671 | 2.578986 | 2.775744 | 2.507314 | 2.167954 | 2.080512 | 2.772221 | 1.77539  |
| 641516_at | 1.025663 | 1.598325 | 1.200419 | 1.310896 | 1.317746 | 1.468953 | 1.072464 | 1.525767 |
| 641518_at | 1.654493 | 1.774315 | 2.181743 | 1.601748 | 1.454262 | 1.97269  | 1.431641 | 1.680386 |
| 64151_at  | 2.447636 | 3.436647 | 2.297075 | 2.202846 | 2.457806 | 2.104377 | 2.800534 | 3.237789 |
| 6415_at   | 8.802439 | 8.523039 | 8.878275 | 8.696936 | 8.516245 | 9.38666  | 8.784851 | 8.306242 |
| 641638_at | 9.302024 | 9.571259 | 9.56788  | 9.33694  | 9.11962  | 9.258143 | 8.967242 | 9.624663 |
| 641648_at | 4.556824 | 6.681864 | 5.143064 | 4.955037 | 4.057843 | 5.933193 | 6.601556 | 4.406154 |
| 641649_at | 3.976413 | 3.597875 | 4.217588 | 3.823979 | 4.899732 | 4.051044 | 3.451879 | 3.38581  |
| 641654_at | 3.005595 | 3.531028 | 4.319069 | 2.845868 | 3.807079 | 2.406515 | 2.076744 | 3.430649 |
| 64167_at  | 7.162142 | 8.340436 | 7.955111 | 4.877136 | 3.723735 | 2.72805  | 8.075308 | 4.918671 |
| 64168_at  | 7.36535  | 7.388418 | 6.766646 | 6.093568 | 6.767631 | 6.094098 | 6.990338 | 6.969703 |
| 6416_at   | 3.226256 | 2.646658 | 3.981266 | 3.699613 | 3.338256 | 2.719489 | 5.10751  | 3.928117 |
| 641700_at | 7.314066 | 7.119807 | 6.267594 | 7.470341 | 6.395231 | 7.324207 | 6.781432 | 6.345269 |
| 64170_at  | 2.713163 | 2.392019 | 2.705087 | 2.619559 | 2.15882  | 2.692276 | 2.406036 | 2.880196 |
| 64172_at  | 3.501378 | 4.257262 | 3.009424 | 4.126956 | 2.94713  | 4.090206 | 3.685495 | 4.040183 |
| 641746_at | 2.280827 | 1.982111 | 2.612853 | 2.176271 | 1.383109 | 1.666901 | 2.766256 | 4.165109 |
| 64174_at  | 4.110128 | 2.526944 | 3.188382 | 4.109867 | 2.991344 | 3.748459 | 2.862757 | 3.139088 |
| 64175_at  | 6.480842 | 6.214481 | 6.723605 | 6.700733 | 5.790626 | 6.79502  | 7.043662 | 6.552019 |
| 64180_at  | 1.624807 | 2.236408 | 1.450755 | 1.950915 | 2.8719   | 2.330153 | 2.569465 | 1.991948 |
| 64184_at  | 0.827145 | 1.504964 | 1.542756 | 0.928586 | 1.391844 | 1.208406 | 1.577171 | 1.075267 |
| 6418_at   | 5.835218 | 5.287353 | 5.710564 | 5.404964 | 4.940551 | 5.315059 | 6.36043  | 6.010406 |
| 641977_at | 2.293875 | 2.031517 | 2.506281 | 2.292078 | 2.083948 | 2.054243 | 2.045233 | 1.989897 |
| 6419_at   | 3.703979 | 2.47342  | 2.930965 | 2.67598  | 2.990322 | 2.971144 | 2.326899 | 2.747484 |
| 641_at    | 1.645767 | 1.072418 | 2.592032 | 1.167761 | 1.636364 | 1.133998 | 1.684096 | 1.832992 |
| 642006_at | 1.526911 | 1.330844 | 1.819329 | 0.94451  | 0.926977 | 1.057012 | 1.313518 | 0.82765  |
| 64207_at  | 5.15309  | 4.872228 | 5.069369 | 5.042309 | 4.965129 | 5.191096 | 5.366215 | 4.986955 |
| 64208_at  | 1.811698 | 1.595875 | 1.526122 | 1.990146 | 1.994252 | 1.815679 | 2.97991  | 1.450263 |

|           |          |          |          |          |          |          |          |          |
|-----------|----------|----------|----------|----------|----------|----------|----------|----------|
| 64210_at  | 3.806303 | 4.816531 | 4.947936 | 4.366511 | 3.831512 | 4.867587 | 4.526695 | 4.809347 |
| 64211_at  | 1.102572 | 1.72797  | 1.076386 | 1.114409 | 1.917414 | 1.610286 | 1.544059 | 1.335461 |
| 64215_at  | 7.526541 | 7.569563 | 7.198486 | 7.021589 | 7.410698 | 7.419757 | 7.249579 | 7.433594 |
| 64216_at  | 5.047104 | 4.15846  | 3.697352 | 4.081046 | 4.708712 | 5.208905 | 4.042228 | 4.343609 |
| 64218_at  | 2.751788 | 2.119637 | 2.267804 | 1.992671 | 1.905704 | 3.687364 | 2.205638 | 2.629419 |
| 64219_at  | 5.62097  | 5.984607 | 6.388753 | 6.043255 | 5.373022 | 6.25233  | 5.775636 | 6.322267 |
| 6421_at   | 6.292545 | 6.544498 | 6.25347  | 6.634469 | 6.151605 | 6.398442 | 5.825946 | 6.393414 |
| 64220_at  | 2.618009 | 2.79473  | 3.927291 | 2.52949  | 3.270064 | 3.293781 | 2.338306 | 2.914253 |
| 64221_at  | 2.383111 | 2.214821 | 2.511156 | 2.29295  | 2.423439 | 2.238429 | 2.666177 | 2.46881  |
| 64222_at  | 4.470289 | 4.539529 | 3.811215 | 4.500635 | 5.224649 | 3.868112 | 4.672798 | 3.238836 |
| 642236_at | 1.506319 | 2.21129  | 2.998754 | 1.971952 | 1.294011 | 1.695657 | 1.52571  | 2.252118 |
| 64223_at  | 5.906932 | 5.436984 | 4.98249  | 5.717267 | 4.781546 | 5.625938 | 5.620473 | 4.807619 |
| 64224_at  | 7.63301  | 7.617557 | 7.306914 | 7.337135 | 7.296796 | 7.614269 | 7.830984 | 7.044671 |
| 64225_at  | 4.399817 | 3.960351 | 4.983763 | 4.080048 | 5.190509 | 4.629159 | 3.901388 | 5.445073 |
| 642273_at | 2.690357 | 1.884564 | 1.558939 | 1.631756 | 1.205221 | 2.445632 | 1.728188 | 2.387387 |
| 642280_at | 2.034449 | 2.574179 | 2.122513 | 4.162656 | 3.169351 | 3.432985 | 2.600265 | 2.705294 |
| 6422_at   | 6.645356 | 5.262643 | 5.884154 | 6.690265 | 8.26358  | 6.718665 | 5.439355 | 5.515316 |
| 64231_at  | 5.437163 | 3.760832 | 4.968536 | 5.039625 | 4.643099 | 5.623204 | 5.585122 | 5.552965 |
| 64232_at  | 1.526799 | 1.625831 | 1.907222 | 1.689784 | 1.414723 | 1.575096 | 1.427182 | 1.176694 |
| 642345_at | 1.3244   | 1.34193  | 1.624434 | 2.175451 | 1.786506 | 1.715992 | 1.811179 | 2.472281 |
| 642361_at | 2.339326 | 3.972326 | 2.817826 | 1.805128 | 1.154728 | 4.152887 | 3.539074 | 2.315515 |
| 642366_at | 1.546814 | 1.488891 | 1.61382  | 1.216679 | 1.641418 | 1.342642 | 1.397849 | 1.75548  |
| 64236_at  | 7.489452 | 6.898784 | 7.274935 | 6.572598 | 5.852067 | 6.629979 | 7.431361 | 5.855269 |
| 642394_at | 1.175702 | 1.650464 | 1.877505 | 2.195565 | 2.153331 | 1.976559 | 1.087816 | 2.845107 |
| 6423_at   | 4.810405 | 6.570666 | 3.629261 | 5.768413 | 3.027128 | 4.213401 | 1.850722 | 3.660502 |
| 64240_at  | 1.233268 | 1.883729 | 1.446788 | 1.603066 | 2.187859 | 1.600641 | 1.350717 | 1.563887 |
| 64241_at  | 2.104076 | 1.636013 | 1.46375  | 1.592577 | 1.645515 | 1.3476   | 1.793826 | 1.289881 |
| 642426_at | 2.113463 | 1.380158 | 1.298693 | 0.666408 | 1.619677 | 1.176821 | 2.264705 | 1.567459 |
| 642475_at | 3.179258 | 3.697762 | 3.46741  | 3.760188 | 3.362341 | 3.592332 | 3.28383  | 3.05818  |
| 642484_at | 1.541535 | 1.480325 | 1.227075 | 1.405038 | 2.495582 | 3.077334 | 1.109778 | 1.486589 |
| 6424_at   | 2.823032 | 2.586843 | 1.490066 | 3.753345 | 1.408661 | 2.792741 | 1.526509 | 2.547372 |
| 642559_at | 3.690295 | 3.101821 | 3.395493 | 2.957097 | 2.989885 | 1.844916 | 2.90451  | 1.977223 |
| 642569_at | 6.346245 | 5.932946 | 6.273007 | 4.835696 | 4.486343 | 5.126757 | 6.335996 | 4.444248 |
| 642587_at | 1.924511 | 1.654159 | 2.606967 | 1.179319 | 1.611892 | 1.037698 | 1.587092 | 2.260151 |
| 642597_at | 0.920828 | 1.427712 | 2.203904 | 1.382756 | 1.554194 | 1.20822  | 1.205463 | 1.088926 |
| 6425_at   | 1.642159 | 1.837716 | 1.554103 | 1.770579 | 1.513729 | 1.902537 | 2.296283 | 2.769328 |
| 642623_at | 0.86323  | 1.190148 | 1.926187 | 1.322412 | 1.601412 | 1.330054 | 1.223617 | 0.71448  |
| 642633_at | 1.357845 | 1.780416 | 3.376087 | 2.050092 | 2.516384 | 1.535522 | 1.773014 | 4.3958   |
| 642636_at | 1.181742 | 1.90158  | 1.132771 | 1.048116 | 1.53128  | 0.911879 | 1.200125 | 1.264978 |
| 642648_at | 4.036485 | 4.655479 | 3.167391 | 3.077246 | 4.018703 | 3.777176 | 4.321703 | 3.844327 |
| 642658_at | 2.747656 | 3.200151 | 1.951968 | 4.669402 | 2.150427 | 3.599342 | 2.527913 | 2.36152  |
| 642696_at | 1.634265 | 1.527878 | 1.805379 | 1.557746 | 1.375649 | 1.595738 | 2.221729 | 1.344813 |
| 6426_at   | 5.785899 | 6.524209 | 6.326736 | 6.43269  | 6.267126 | 6.480585 | 6.083721 | 6.759754 |
| 642757_at | 1.442394 | 2.382733 | 1.573018 | 2.313104 | 1.789062 | 1.546469 | 3.421926 | 1.478563 |
| 6427_at   | 5.577664 | 5.093041 | 5.081528 | 6.473728 | 5.325521 | 4.991655 | 4.577214 | 5.518524 |
| 642819_at | 2.516432 | 3.946309 | 2.991794 | 3.129125 | 1.780643 | 1.373575 | 1.716364 | 2.794221 |
| 64282_at  | 5.756555 | 6.141522 | 5.575219 | 6.290319 | 6.045304 | 5.576882 | 5.347869 | 6.293604 |
| 64283_at  | 4.378451 | 4.288605 | 4.501637 | 4.450191 | 5.08169  | 4.69589  | 3.890083 | 5.321154 |
| 642843_at | 1.954334 | 2.062623 | 2.269855 | 2.507786 | 2.365074 | 2.367262 | 2.231381 | 2.45415  |
| 642846_at | 2.337129 | 3.055285 | 2.757797 | 2.938568 | 4.088036 | 3.205618 | 3.193145 | 2.557054 |
| 64284_at  | 3.581071 | 3.376511 | 3.755067 | 2.834086 | 3.908508 | 3.445713 | 2.160909 | 2.735269 |

642852\_at 3.799606 4.301732 4.249633 4.545138 3.747174 4.827582 3.53446 4.780209  
64285\_at 4.501932 2.739415 3.28148 3.414578 2.650542 2.533736 3.546586 3.430797  
642864\_at 0.94306 1.188901 1.198468 1.214521 1.262236 1.563025 1.371277 1.201046  
64288\_at 3.618451 3.425043 2.761848 3.01046 3.26821 3.397694 2.979319 3.781754  
6428\_at 8.059039 8.673455 7.765109 8.818623 8.357128 8.371204 8.483697 8.5727  
642924\_at 1.073363 2.47005 1.851973 1.523685 3.282077 1.684397 1.865736 1.169206  
642934\_at 2.142815 1.181836 3.622975 2.592142 0.790252 1.812625 1.397447 3.267529  
642938\_at 1.965294 2.00589 2.353742 2.363656 2.302773 2.623915 1.57595 2.394033  
642946\_at 4.004056 3.37644 2.783348 2.483032 3.115671 3.503344 3.436027 1.678906  
642968\_at 1.949615 2.238172 1.947823 2.406656 1.92748 2.252507 2.122522 1.981729  
642976\_at 2.426058 2.803895 2.249697 2.954367 2.108283 3.56027 3.030625 2.138838  
642987\_at 3.642523 4.213398 2.604743 4.102554 3.127439 2.166769 2.999564 4.138128  
6429\_at 6.78551 7.040992 6.996834 7.227625 7.08648 7.178933 6.401533 6.980393  
642\_at 6.547517 6.750011 6.340433 6.224763 6.692136 6.868619 6.913832 6.592897  
643008\_at 2.666235 2.222901 2.534134 1.79612 1.946992 2.663103 3.177374 1.689505  
643036\_at 1.234347 1.548742 1.428971 1.001556 1.496215 1.52659 2.509894 1.424788  
643037\_at 1.648694 1.903151 1.440971 1.117922 1.64852 1.043942 1.135441 1.256965  
643072\_at 5.214136 4.08499 5.228006 4.667706 5.198548 3.25542 4.788779 4.546467  
6430\_at 8.773926 8.866746 8.710134 9.134558 9.353096 8.945813 8.633481 9.183124  
643155\_at 7.116862 7.113487 7.650179 6.854553 7.174695 7.545029 7.356678 7.072523  
643160\_at 2.173819 1.513036 1.655922 2.866438 2.039891 2.005385 2.120884 2.134954  
643161\_at 1.983723 4.216078 4.624486 1.647689 2.100309 4.922662 2.063709 4.259607  
643180\_at 2.596863 1.961361 1.321417 2.010829 2.129816 1.842605 3.813279 2.771211  
64318\_at 5.696632 5.66845 4.101316 4.768923 4.758421 5.485059 4.582322 5.950226  
64319\_at 5.41529 5.039642 5.346021 5.608135 4.71285 5.890369 6.382535 3.258426  
6431\_at 6.11952 6.518659 6.141424 6.283984 5.639711 6.208203 5.962828 6.289736  
643201\_at 1.668683 1.798269 1.25498 1.505872 1.508895 1.989981 1.689736 1.38065  
64320\_at 5.156506 4.852049 4.343052 4.172659 4.64828 5.184855 4.654337 3.975419  
643210\_at 2.433759 1.861502 2.256118 2.962834 2.848248 2.256118 1.969875 2.256118  
64321\_at 5.157207 4.945884 4.402335 4.199569 4.702023 4.303193 4.695247 4.674238  
643224\_at 1.27379 1.538937 0.930106 4.140643 1.519335 6.220053 4.647413 1.98288  
643226\_at 1.620778 1.547338 1.770195 1.055553 2.505376 1.571231 1.405288 2.477947  
643236\_at 4.864825 3.46698 2.403546 5.219837 3.997655 3.770363 2.189704 3.197526  
643246\_at 1.460043 2.201863 2.03989 3.798935 3.413721 2.966983 2.090555 3.920454  
64324\_at 5.720199 6.661348 5.945254 6.179278 6.248943 5.631212 6.146729 6.531661  
643253\_at 3.255279 3.616965 2.386391 2.95482 2.358543 2.96388 1.577833 3.407211  
64326\_at 6.999293 7.02275 6.83073 7.038072 5.615006 6.627916 6.762258 7.024154  
64327\_at 5.22424 6.431018 5.972864 5.245216 6.389869 5.473901 5.79772 6.257715  
64328\_at 4.520651 5.159823 5.037413 4.955981 3.472545 5.112383 4.554423 5.54272  
6432\_at 6.958755 7.199767 6.606419 6.71121 6.896185 7.563068 6.700855 6.773843  
643311\_at 2.533548 2.067114 3.270228 2.579165 3.341424 2.203137 3.506717 3.079222  
643314\_at 4.654104 4.468515 4.738893 4.852965 4.612695 4.909671 4.495964 4.211964  
64332\_at 5.840093 5.656483 4.801324 5.566417 4.098136 5.245005 5.095265 5.367486  
643332\_at 0.939934 1.027029 4.495272 2.688202 1.295038 4.174672 1.469515 1.219774  
643338\_at 2.384372 1.842055 2.083545 2.153067 1.567792 2.143987 1.745871 1.812861  
643339\_at 1.379466 1.421591 1.46412 0.854234 1.009278 2.376183 2.659605 2.095646  
64333\_at 2.975028 2.452748 2.401132 2.879277 2.337195 3.186544 3.097994 3.413379  
643355\_at 1.670269 2.159391 1.962697 1.315692 1.480607 1.156543 2.38344 1.612564  
643365\_at 1.413528 1.564843 1.382593 1.806275 1.52992 1.261654 2.117265 1.543106  
643376\_at 2.021983 1.490514 1.824553 1.862223 1.515649 1.595234 1.788536 1.694854  
643382\_at 1.478975 1.123246 1.551379 1.722349 1.904501 1.82114 1.877408 2.174865

643387\_at 2.555719 1.817114 1.552735 2.166691 1.528422 3.256955 2.467789 1.344185  
643394\_at 1.261225 3.147177 1.585031 1.394255 1.761627 1.762315 2.018495 1.938476  
6433\_at 5.694569 5.458055 4.736901 5.464278 6.03643 5.437329 5.442876 4.987735  
643401\_at 3.196565 2.09687 3.126161 4.263221 2.598964 2.435792 1.697646 1.447424  
643406\_at 1.260179 1.436985 1.453719 1.429038 1.136841 2.77853 2.369466 1.623801  
643414\_at 1.421051 1.089091 1.688348 1.693163 1.310631 2.052228 1.871377 2.048418  
643418\_at 1.635963 1.099594 1.520093 2.075283 0.914761 1.19625 1.361024 2.058892  
64342\_at 4.110522 4.47481 4.25919 4.551231 3.968555 4.089779 5.301521 3.718271  
643432\_at 2.113666 2.327552 1.992216 1.960253 2.526458 1.412063 3.182007 2.141361  
64343\_at 5.473755 5.856804 5.617645 5.684963 5.478505 5.366302 4.951895 5.900096  
643441\_at 1.765278 2.722995 2.011072 1.982308 2.996781 2.669354 2.159348 3.011044  
64344\_at 3.537479 3.141947 4.88617 3.358142 1.797509 4.331645 3.141538 1.984744  
643486\_at 1.182371 0.893874 1.501836 1.125409 2.430735 2.372831 1.300088 0.901633  
6434\_at 7.463516 7.495528 7.364391 7.293702 7.283397 7.012769 7.364045 7.843618  
643529\_at 1.285388 1.550546 1.071818 1.394017 1.522409 1.789064 1.350302 1.14938  
643542\_at 1.548697 1.363393 1.274683 1.174663 1.568721 1.909124 1.211906 1.668673  
643596\_at 3.086787 3.717039 3.080043 3.004753 3.025666 3.037325 3.271331 3.649377  
64359\_at 4.052138 4.148953 4.427529 4.100489 3.627694 3.878433 4.146155 4.112525  
643623\_at 1.58002 1.153114 1.572083 1.69841 1.423211 1.295577 1.084366 1.523106  
643641\_at 3.560534 3.180761 3.355572 3.85226 4.173772 4.287733 4.607825 3.844652  
643650\_at 0.767586 1.415231 0.783521 0.384096 1.507387 1.046954 1.21132 1.001584  
643664\_at 2.12559 1.703689 1.05508 0.980942 1.941649 0.814132 1.266483 2.788275  
643669\_at 2.589726 2.534467 2.947537 3.227048 2.643286 2.322328 2.654293 3.563651  
643677\_at 1.12841 1.070319 0.998505 0.739045 0.93981 0.880184 1.166886 1.268361  
643680\_at 0.750433 0.80381 0.802383 0.71528 0.799892 1.185568 0.984424 1.178358  
643714\_at 2.286237 1.580061 1.642896 2.119241 2.289709 1.038394 1.988258 2.399456  
643719\_at 3.083084 3.264218 3.284007 3.314577 3.091248 3.484454 2.801347 2.336364  
643723\_at 1.444775 1.43253 1.207046 0.841461 1.375243 0.857603 1.222358 1.34403  
643733\_at 5.325105 4.974564 3.967149 3.444092 4.540404 3.927032 3.412724 2.962995  
643749\_at 3.894857 3.871442 4.125011 3.942107 2.741271 3.107579 3.172396 4.838169  
64374\_at 5.934003 6.191551 6.645595 6.783658 5.265621 5.785346 7.26423 5.822323  
64375\_at 2.92234 3.563954 3.304345 2.420503 2.776728 3.145095 3.10084 2.925439  
643763\_at 1.127891 2.057235 1.925125 1.713318 2.412817 1.335685 1.690726 1.713318  
64376\_at 5.484728 5.972594 5.704257 6.370107 5.569766 5.6083 5.35485 6.050335  
643770\_at 1.410094 1.133633 0.795605 1.664986 1.229443 1.733345 1.140678 1.159882  
64377\_at 1.888195 2.859272 2.02478 2.14799 2.367445 2.604952 2.45855 1.99071  
643783\_at 4.806027 7.722021 5.019057 5.405236 4.741305 8.614576 3.235831 1.939693  
643797\_at 2.134623 2.439763 1.815369 2.198232 1.724303 1.91783 1.887676 2.350479  
643802\_at 1.27297 1.323756 1.402147 0.90996 1.918077 0.802957 0.828031 0.943332  
643803\_at 1.941351 1.463111 1.323032 1.089765 1.804579 0.824996 0.996106 1.609106  
643812\_at 1.121637 1.337345 1.927879 1.282639 2.07919 2.320657 1.432553 1.925664  
643836\_at 5.632518 6.490588 5.909713 6.065883 6.172247 5.510625 5.346602 6.285269  
643837\_at 5.196143 4.522257 5.611138 3.98116 5.520054 4.946008 5.949593 5.258767  
643853\_at 4.12013 4.65161 4.65161 4.366597 3.011835 3.898797 4.349971 4.434827  
643854\_at 2.652523 2.42353 2.139534 1.046328 2.721803 3.088439 3.53436 2.595229  
643866\_at 5.49001 3.677782 4.983694 4.480232 3.744833 3.805661 4.253074 2.454174  
64386\_at 2.073928 2.268375 1.727979 1.901481 1.812079 2.503813 2.520569 2.62011  
64388\_at 2.367476 1.445589 1.743064 1.64828 1.855214 1.664489 2.016188 1.844854  
643904\_at 2.008077 2.245373 2.516504 2.573754 2.897647 2.218715 2.453774 2.805483  
643905\_at 1.710441 1.176954 2.016759 1.492939 1.400758 1.584588 1.308212 1.417131  
643911\_at 3.715882 4.031579 4.111731 4.545233 3.670382 4.464247 3.096944 4.010792

643923\_at 1.326416 2.111718 1.551885 1.974694 1.994431 1.58406 1.965434 1.887797  
64393\_at 5.572157 5.018651 5.926018 6.336469 5.084818 4.65464 5.742926 5.268565  
643965\_at 3.049208 4.462524 4.6979 4.01332 4.069146 4.289297 4.304069 4.37363  
64396\_at 2.061214 0.7855 0.835923 1.106637 1.322765 2.253952 1.228484 2.650359  
643977\_at 6.066229 5.098603 4.955158 5.171699 5.483884 3.937839 5.049175 4.729587  
64397\_at 6.6343 6.890572 7.528603 7.417179 7.610024 7.477214 7.552069 7.016985  
643988\_at 2.663784 3.13455 3.494959 3.473943 4.291941 3.237031 3.267808 3.332253  
64398\_at 8.721725 9.059005 8.828688 8.999389 8.92061 8.294209 8.307135 9.240728  
64399\_at 2.278994 2.212899 2.748495 2.546655 3.569081 2.588979 2.234723 2.577521  
6439\_at 2.145636 1.432704 2.506833 1.913656 1.97729 2.010292 1.772761 1.981662  
643\_at 1.364138 2.03354 1.527937 1.301829 1.980218 1.243285 2.549947 1.488961  
64400\_at 5.857188 5.679628 5.86704 5.967078 6.320151 6.127569 5.37751 6.070556  
64403\_at 2.955025 3.435569 3.301146 3.368782 4.127915 3.302597 3.855562 2.949559  
644041\_at 1.315466 1.25433 0.769347 0.910374 1.161793 0.657485 1.299274 1.522127  
644050\_at 1.833908 1.931725 2.081212 1.864904 1.995713 2.393504 1.876324 1.679054  
64405\_at 1.157901 2.065348 1.348813 1.496046 1.913545 1.131899 1.81003 2.29603  
644070\_at 1.877027 2.473672 1.584963 2.393626 1.984 2.189524 1.643894 2.530349  
644076\_at 1.653572 1.943811 1.875461 1.702715 2.01432 2.140927 2.207702 1.696334  
64407\_at 3.033933 2.887263 2.457144 3.929916 2.449348 2.400049 3.685087 5.52056  
644083\_at 1.297526 2.373038 1.710456 1.059626 1.980368 2.318716 2.359592 1.59255  
644090\_at 1.999423 1.2132 1.164978 0.975245 1.983203 1.285378 1.031644 1.757978  
644096\_at 3.684237 2.918143 2.900646 2.650128 2.918856 2.198149 3.394555 2.533882  
64409\_at 1.048179 1.602963 1.801116 1.315067 1.551682 1.253383 2.142743 1.432335  
6440\_at 3.480331 2.747695 3.122117 2.842543 3.348779 2.175218 3.680845 2.271133  
644100\_at 1.35518 1.63063 1.187337 0.976975 0.895445 1.115639 1.897581 1.16045  
64410\_at 3.1224 2.240553 3.029702 3.44705 2.291452 3.757629 2.947015 3.160949  
64411\_at 3.930959 4.681324 4.473572 5.289173 4.25158 4.733689 5.003383 3.304174  
644128\_at 3.048629 4.309142 4.334975 3.323006 4.661051 2.249052 3.569111 4.03292  
64412\_at 3.295453 3.047564 3.365503 3.601021 3.126936 2.892121 3.573766 3.623295  
644135\_at 1.505099 1.997687 2.677552 1.641484 1.129491 2.0494 2.972909 1.605675  
644139\_at 2.100854 1.742506 2.158873 1.807889 2.296073 3.190323 1.793471 1.797803  
644145\_at 0.799956 0.954846 0.890545 0.82008 2.645522 0.790236 0.724044 0.920651  
644150\_at 8.023838 8.138951 7.487232 7.340247 5.535611 7.464925 7.497683 7.484214  
644165\_at 0.711553 1.747279 1.21382 1.389983 1.671256 0.931311 1.542546 3.814572  
644168\_at 1.401796 1.66412 1.05127 1.512134 1.901689 2.606349 2.319875 1.281967  
644172\_at 0.942806 1.668808 1.19179 0.827615 2.127229 1.213819 1.57615 1.241301  
64417\_at 3.631091 3.878657 2.949298 2.629553 3.559848 3.199123 3.172984 3.794086  
644186\_at 2.755448 2.224606 2.1522 1.97781 1.798448 2.012557 2.30558 2.580716  
644189\_at 2.064872 1.861923 1.713711 2.136977 3.162026 1.934602 2.661166 1.539559  
64418\_at 4.890934 5.026679 4.802437 5.493579 5.900355 4.330975 5.075773 5.60513  
644192\_at 3.281289 2.939381 4.364507 4.632566 2.835463 2.371078 3.911777 3.693708  
64419\_at 5.94374 5.683117 5.446407 5.607019 5.126935 5.509282 5.960088 6.290596  
6441\_at 3.088302 2.115468 3.580892 2.841582 3.476864 3.917068 2.890335 3.165159  
64420\_at 5.952747 5.578459 5.882026 6.302939 6.553607 5.961547 6.848209 6.037129  
64421\_at 3.306858 2.91405 3.886565 2.915867 4.967153 3.636365 3.698543 2.144603  
64422\_at 8.044492 8.001654 7.514205 8.085254 7.813257 7.618475 7.485102 8.107247  
64423\_at 5.863701 6.016074 6.097771 5.232059 5.116106 5.61002 6.128922 4.941015  
644242\_at 4.359243 4.761014 3.974644 4.758376 4.905649 4.056267 4.416036 4.619825  
644246\_at 4.462817 5.861803 4.20196 6.061286 4.39353 6.018369 3.786825 3.643438  
644248\_at 1.427124 1.136024 1.442434 1.453194 1.215923 1.067974 1.758314 1.324299  
64425\_at 4.581763 5.50188 4.937638 4.683697 3.597196 5.136117 4.789484 4.793847



|           |          |          |          |          |          |          |          |          |
|-----------|----------|----------|----------|----------|----------|----------|----------|----------|
| 64426_at  | 5.693608 | 5.882671 | 5.79837  | 5.494142 | 4.927558 | 5.674326 | 5.454755 | 5.089828 |
| 644277_at | 1.60314  | 1.791691 | 1.43795  | 2.050174 | 2.979432 | 2.739684 | 2.754868 | 2.637487 |
| 64427_at  | 3.797389 | 3.269071 | 3.943797 | 3.782809 | 2.757999 | 3.709982 | 3.452592 | 3.411718 |
| 64428_at  | 3.398999 | 2.757854 | 2.638663 | 2.725328 | 3.022209 | 2.407422 | 3.606854 | 2.686988 |
| 64429_at  | 9.484229 | 9.557208 | 9.461226 | 9.001656 | 9.119137 | 9.094918 | 8.832678 | 9.525608 |
| 6442_at   | 2.644825 | 2.581078 | 2.77516  | 2.604237 | 3.859486 | 3.264455 | 2.915825 | 2.963097 |
| 64430_at  | 7.813749 | 8.356397 | 8.132521 | 8.238505 | 7.918533 | 8.007027 | 8.113098 | 7.945946 |
| 644316_at | 1.746476 | 1.524032 | 1.690052 | 1.538084 | 1.163156 | 1.697435 | 1.359226 | 1.259981 |
| 64431_at  | 4.945187 | 5.300351 | 5.338293 | 4.948203 | 5.842611 | 4.869952 | 4.661576 | 5.821287 |
| 64432_at  | 5.439667 | 5.260499 | 5.188514 | 5.068411 | 4.546049 | 5.39441  | 4.51902  | 4.064343 |
| 64433_at  | 1.4246   | 1.623348 | 1.214789 | 1.301606 | 1.175286 | 1.59806  | 1.113144 | 1.275511 |
| 64434_at  | 4.700301 | 5.842541 | 5.389595 | 5.421002 | 3.626105 | 4.5261   | 5.18921  | 3.642091 |
| 644353_at | 1.755759 | 1.941772 | 2.127184 | 2.207034 | 3.005661 | 1.683239 | 2.073771 | 3.653186 |
| 6443_at   | 9.033201 | 9.081748 | 9.533346 | 9.324812 | 9.430385 | 8.858974 | 9.380527 | 9.843568 |
| 644414_at | 2.776193 | 2.632847 | 1.129538 | 1.947469 | 2.381431 | 1.392389 | 4.5905   | 0.770146 |
| 644444_at | 1.20822  | 0.977694 | 1.425638 | 1.060586 | 1.359778 | 0.891033 | 1.216419 | 1.458587 |
| 64446_at  | 1.826748 | 2.132684 | 1.662336 | 2.496454 | 2.656904 | 1.865335 | 2.327941 | 2.640952 |
| 6444_at   | 1.924496 | 2.111248 | 2.326743 | 1.46955  | 2.06376  | 1.833825 | 1.78776  | 2.006726 |
| 644511_at | 3.238443 | 1.728368 | 1.069608 | 4.585306 | 1.489753 | 3.54469  | 0.851039 | 3.431701 |
| 644524_at | 1.43576  | 2.001811 | 1.463994 | 1.472208 | 2.524145 | 1.747967 | 1.906045 | 2.187739 |
| 644538_at | 6.452893 | 6.432675 | 5.972563 | 6.105274 | 4.784478 | 5.593952 | 5.409186 | 5.279229 |
| 644554_at | 2.010408 | 1.44433  | 1.557361 | 2.09726  | 2.495315 | 2.184786 | 1.553536 | 1.729146 |
| 644591_at | 1.228045 | 2.348414 | 2.642361 | 1.696536 | 2.130064 | 2.848112 | 2.194973 | 1.838601 |
| 644596_at | 3.974767 | 4.113282 | 3.339113 | 4.367137 | 3.70847  | 3.414312 | 2.983933 | 2.930802 |
| 6445_at   | 1.420147 | 1.169032 | 1.613504 | 1.671926 | 2.0187   | 1.168193 | 1.323629 | 1.674406 |
| 644649_at | 1.656404 | 1.519388 | 0.876687 | 1.476108 | 1.385236 | 2.29278  | 1.751952 | 1.260941 |
| 644656_at | 2.021114 | 1.568813 | 1.457972 | 1.64852  | 1.428489 | 2.10401  | 1.837952 | 2.058511 |
| 644660_at | 2.061491 | 2.224086 | 2.799641 | 2.511846 | 2.523267 | 2.495604 | 2.998557 | 3.124254 |
| 644662_at | 4.341522 | 4.431352 | 5.156248 | 3.952932 | 2.740844 | 3.912847 | 4.184578 | 3.449908 |
| 644669_at | 1.36703  | 2.137168 | 1.542759 | 1.559395 | 1.610051 | 1.901927 | 1.033544 | 1.459853 |
| 644672_at | 4.412916 | 2.096198 | 2.398406 | 1.92044  | 2.093522 | 1.816285 | 1.796377 | 1.6391   |
| 644694_at | 1.164353 | 1.203431 | 2.523624 | 2.133615 | 2.347506 | 1.497649 | 2.354798 | 2.802456 |
| 6446_at   | 7.280732 | 8.020962 | 7.372992 | 7.768488 | 7.316784 | 7.670109 | 7.609542 | 7.606747 |
| 644714_at | 3.448566 | 3.447306 | 3.532296 | 4.199105 | 4.602824 | 3.20793  | 3.799246 | 4.287824 |
| 644717_at | 1.715082 | 0.882831 | 0.979955 | 1.268966 | 1.205043 | 1.031701 | 1.638216 | 1.392042 |
| 644767_at | 1.240664 | 2.155194 | 2.220931 | 1.491463 | 1.579096 | 1.459242 | 1.6726   | 1.718382 |
| 64478_at  | 1.673453 | 1.697993 | 1.876764 | 1.697163 | 2.001598 | 2.079551 | 2.005365 | 1.724356 |
| 644794_at | 2.636544 | 3.222166 | 2.791065 | 2.880598 | 4.396994 | 2.865688 | 3.583887 | 3.252923 |
| 6447_at   | 3.488715 | 3.595479 | 2.22851  | 2.168802 | 3.28196  | 2.683359 | 2.1566   | 2.913047 |
| 644809_at | 2.643962 | 2.631431 | 2.369279 | 3.247045 | 2.711626 | 2.997408 | 2.027233 | 2.509609 |
| 644815_at | 1.710843 | 1.235612 | 1.74191  | 2.097486 | 2.605608 | 2.247516 | 1.816599 | 1.348387 |
| 644838_at | 2.452522 | 1.924577 | 1.570109 | 1.421908 | 1.482356 | 1.653342 | 2.94054  | 1.665343 |
| 644844_at | 1.5177   | 1.092031 | 2.304134 | 1.699744 | 1.942881 | 2.198923 | 0.884024 | 2.031881 |
| 644873_at | 5.966827 | 4.866561 | 5.183578 | 4.842854 | 6.050342 | 5.410947 | 6.200649 | 4.867841 |
| 644890_at | 0.960847 | 1.860886 | 3.006491 | 1.141528 | 1.477292 | 1.225775 | 1.321592 | 1.044301 |
| 6448_at   | 5.181681 | 5.424389 | 6.029369 | 5.516524 | 4.591411 | 6.375157 | 6.152086 | 4.846665 |
| 644903_at | 2.723593 | 2.154936 | 2.07711  | 2.306656 | 2.154697 | 4.889552 | 2.049642 | 2.342271 |
| 644919_at | 2.759112 | 2.804544 | 2.366132 | 3.24344  | 2.638166 | 3.736427 | 2.240139 | 3.095811 |
| 644936_at | 2.207642 | 1.334775 | 2.44793  | 0.842156 | 1.820839 | 1.663857 | 0.93479  | 3.087449 |
| 64493_at  | 1.312508 | 1.782693 | 1.619353 | 1.816061 | 2.918058 | 2.345909 | 1.535281 | 1.863747 |
| 644943_at | 3.587985 | 3.448959 | 2.900379 | 2.624609 | 4.429744 | 4.017837 | 3.172371 | 2.867216 |

644961\_at 3.01862 1.930671 1.674157 1.691321 2.467866 1.955717 1.907435 1.692892  
644974\_at 0.925568 1.874519 2.42684 4.778898 1.927118 3.942228 3.214679 4.135731  
644990\_at 1.478665 1.388612 2.388098 1.290185 1.898853 2.037021 1.329815 1.307543  
644994\_at 3.918571 3.617512 3.564341 3.414796 3.285852 2.975919 3.2295 3.653313  
644997\_at 2.316016 2.090358 1.464416 2.006901 1.989685 1.841124 2.274221 2.105467  
64499\_at 2.483141 2.036521 3.264147 3.172997 2.585509 4.442441 3.045573 3.377768  
6449\_at 6.271663 5.88575 6.383332 5.883365 4.777934 6.249946 6.221243 5.649554  
644\_at 6.877354 7.830571 7.015881 7.294177 7.467104 7.310442 7.299889 7.264841  
645027\_at 1.208563 3.017872 1.30183 1.080038 2.309581 1.431994 1.416853 1.378297  
645030\_at 1.7283 2.136195 1.511415 1.215206 1.991837 1.535923 1.613127 2.072684  
64506\_at 3.444401 3.702277 3.778522 3.634516 4.057221 3.780134 4.416414 4.595183  
645079\_at 1.00242 0.541874 0.937338 1.390091 0.908684 0.942969 1.774882 1.625339  
645090\_at 0.818919 0.896742 1.497114 1.253199 1.681732 1.229474 1.376697 0.999056  
6450\_at 3.648917 3.187091 3.231283 3.090346 2.951406 3.759724 3.138777 2.67665  
645104\_at 3.190733 1.93751 2.616478 1.993968 2.023689 1.934822 1.803319 3.334913  
645121\_at 2.463499 3.364612 3.129424 3.487138 2.73898 3.59222 3.407465 2.960259  
645158\_at 2.128183 1.704592 1.944811 2.130363 2.022251 2.314246 2.158884 2.464789  
645177\_at 1.154538 0.227539 0.721617 2.973263 0.57528 1.359995 1.856138 0.615702  
645188\_at 1.30865 1.498665 1.526999 1.102637 1.379117 1.595555 1.341261 1.064052  
64518\_at 1.361114 1.600714 1.704236 1.592046 0.830099 1.421029 0.887641 1.677338  
645191\_at 2.44571 2.730044 2.739214 2.325693 3.099617 2.792692 2.373108 3.173974  
6451\_at 8.375258 7.826796 8.220856 8.122822 7.898019 8.278168 8.238557 7.92545  
645206\_at 3.170607 3.315074 3.285925 2.786081 2.51553 3.42128 3.524113 3.199777  
645212\_at 5.453393 4.975785 5.283113 5.546026 5.529193 5.475224 5.913071 4.546448  
645249\_at 2.517095 2.488288 2.892081 2.357471 1.933333 2.617064 1.996378 1.904887  
6452\_at 3.215887 2.204131 2.143514 2.400304 1.571853 2.287212 2.988404 2.512664  
645321\_at 2.525454 2.688214 2.160381 2.911358 2.915054 2.247542 2.191811 2.22921  
645323\_at 2.024659 1.753775 2.271334 1.619804 1.855026 1.732414 1.909195 1.65091  
645332\_at 3.022835 2.741789 4.411216 2.231122 2.003044 3.725169 3.24392 4.073755  
645339\_at 1.761782 1.762227 2.065862 1.939381 2.005966 2.01531 2.247157 1.75113  
645355\_at 1.327636 0.92436 1.283567 1.061478 1.16141 1.37006 0.873929 1.963838  
645367\_at 0.992189 2.110574 3.231364 1.617589 2.364533 1.267169 1.580784 1.371335  
645369\_at 3.920454 4.814099 2.917892 3.441676 3.784927 4.058528 3.558103 3.192221  
6453\_at 5.988729 6.256457 5.783474 5.617403 6.46479 6.167682 5.928052 6.061954  
645414\_at 1.543061 1.219335 1.299734 1.491304 1.102244 1.206421 1.563024 0.987844  
645425\_at 1.077148 2.195111 1.697088 1.507384 1.05604 1.518906 1.870102 1.387411  
645426\_at 3.915919 1.585023 3.483991 3.046322 4.080543 2.623804 4.143672 3.690358  
645431\_at 3.568336 2.259894 2.638579 1.674443 1.832709 1.702724 2.773464 2.02798  
645432\_at 1.674417 1.529109 1.480143 1.159106 1.78372 1.815324 2.17222 1.338703  
645434\_at 1.381175 1.600819 1.41617 1.007116 1.715151 0.830035 1.110472 1.835889  
645455\_at 2.436303 4.264825 1.78867 2.313587 3.214046 2.195858 2.100823 2.172515  
645460\_at 3.52687 3.937961 3.792082 4.621855 5.107983 3.591314 1.370177 2.843219  
645485\_at 1.043395 1.030077 1.669847 1.639334 1.532737 1.273423 1.786047 0.897595  
645513\_at 4.909986 5.185734 6.146582 5.498028 5.91193 6.507445 3.794897 5.233006  
645528\_at 2.65953 0.900568 0.952842 1.038827 2.473033 3.85749 3.258189 1.863278  
645553\_at 0.931412 0.741071 2.093942 1.228533 1.26395 1.410055 1.692263 1.127702  
645591\_at 1.553057 1.779579 2.485032 2.004692 2.28293 1.532416 2.243863 2.67186  
6455\_at 4.449068 3.792551 3.909064 3.189831 3.030794 3.686984 4.028989 3.992031  
645638\_at 3.019111 2.862029 2.137834 1.677394 1.919701 3.247377 2.202067 2.871153  
645644\_at 3.640472 4.240508 3.626117 3.534012 4.6615 4.800916 4.402096 4.353037  
645676\_at 2.521354 2.619546 2.206033 2.058792 1.911371 2.488226 1.777793 3.01108

645682\_at 5.128672 4.399819 3.763943 4.539118 5.071155 4.3152 4.899841 4.79062  
645683\_at 1.378852 1.073635 1.011639 1.145726 2.116855 1.547547 0.937642 1.725331  
645687\_at 1.140503 1.518738 2.974704 1.906562 3.301086 1.875798 1.938702 2.184731  
6456\_at 3.215649 2.168811 1.312232 1.582771 2.561361 3.156036 2.478111 2.420493  
645700\_at 1.436592 1.363809 1.287611 1.225441 1.06262 2.033026 1.057533 1.79724  
645752\_at 1.346697 2.012395 2.115932 1.25051 2.701069 0.970333 2.171224 1.475583  
64577\_at 3.390195 2.578413 2.433813 2.204887 1.708653 1.882193 1.781136 3.287447  
645784\_at 1.691855 2.331862 2.031347 1.75241 1.972911 1.272761 0.974974 1.84752  
64579\_at 1.598174 1.271189 0.865242 1.293304 1.217264 1.210809 1.529407 1.680694  
6457\_at 1.725943 1.855111 2.398044 1.782303 3.46662 2.019853 2.023409 1.694624  
645811\_at 2.246983 2.090695 2.235224 2.032199 2.160338 2.355421 2.246983 2.578901  
64581\_at 2.924744 3.185287 2.137323 2.721003 2.412254 3.175758 2.132614 2.631206  
64582\_at 4.340626 4.946008 2.934514 4.401314 2.679002 2.405462 2.521333 3.737093  
645832\_at 3.52458 2.617177 2.292034 2.648737 3.15199 3.211385 2.466991 2.972909  
645840\_at 2.429815 3.306943 2.860513 2.156674 3.459586 2.29256 4.444362 4.288446  
645843\_at 2.722773 1.894947 2.38405 2.459319 3.929738 3.269523 2.201211 2.919017  
645864\_at 1.329426 1.917412 0.918219 0.908501 1.679075 1.687589 1.536573 1.476319  
645884\_at 2.310392 2.106038 1.946996 2.441039 2.493411 2.389628 1.433165 1.658614  
6458\_at 2.870183 2.689444 2.235873 2.489063 2.474704 3.302795 2.3897 2.848997  
645922\_at 1.535133 1.794681 1.364083 1.179989 2.130705 1.839575 3.31562 1.322498  
64593\_at 1.064739 1.06142 1.223919 1.416446 1.296655 1.301723 2.723603 1.353828  
645949\_at 1.49958 1.277938 1.485064 4.03658 1.424759 1.498352 1.519378 1.573682  
64595\_at 4.96572 5.809105 4.323371 5.278555 6.214454 5.211577 5.78004 5.917719  
645961\_at 1.920507 2.157211 2.744701 2.734867 3.144624 2.678047 2.017288 1.877807  
645974\_at 1.17674 1.074147 1.264771 2.280466 1.580467 1.505449 3.121896 1.105272  
64598\_at 6.141168 6.133353 6.000148 5.853483 5.684986 5.877688 5.963417 5.505524  
645996\_at 1.263312 1.880664 2.061101 2.629392 2.185472 2.678355 2.288225 2.487218  
64599\_at 2.596243 2.557784 3.344192 3.355408 2.168284 3.192401 2.634379 2.747947  
6459\_at 1.464039 2.100672 1.078869 1.423451 1.846903 1.115838 1.870651 3.085104  
645\_at 6.183166 5.467173 5.485631 5.256783 5.731133 6.386328 6.331714 5.292045  
646000\_at 2.968441 3.400186 3.613664 4.046269 4.05633 2.508274 3.347349 2.335872  
64600\_at 2.250052 2.286494 2.042041 1.789403 2.030537 1.93824 2.082999 1.76287  
646019\_at 2.802774 2.401708 1.77944 1.316324 1.527083 1.466373 2.122668 2.601348  
64601\_at 4.389446 3.887895 4.72782 4.725523 2.717922 4.454141 4.400827 3.264074  
646021\_at 3.930233 4.387627 4.291014 3.797023 4.537203 3.27605 3.423299 4.293629  
646023\_at 3.562591 3.008402 3.030303 2.594541 3.250539 3.167384 2.560733 2.623304  
646024\_at 1.192927 0.99799 0.673964 0.713451 1.258765 0.709043 2.358351 0.85408  
646034\_at 1.104278 1.997475 1.558037 1.599501 1.002485 1.642319 1.84842 1.438478  
646074\_at 2.498651 4.053863 4.42846 3.314231 3.932975 3.538154 4.181649 3.21465  
646096\_at 0.823681 1.021725 0.637905 2.447721 2.081667 0.992179 2.138227 0.709952  
646113\_at 1.641585 1.625056 2.092906 1.541224 1.794045 1.949796 1.489059 1.81186  
646168\_at 0.767281 1.088071 1.150496 1.071717 1.133805 1.114818 1.162297 1.020876  
646174\_at 2.148804 3.28366 3.218105 2.659122 2.658922 3.26123 2.252318 3.659999  
6461\_at 5.769341 5.619601 5.038668 5.403402 5.899073 6.337085 5.31257 5.191492  
646201\_at 2.742514 2.802054 3.669016 1.925709 2.063991 2.512356 2.431201 3.529301  
646214\_at 1.537821 1.55401 1.827996 3.459742 1.6393 1.676109 2.394285 2.876904  
646241\_at 2.288665 1.391781 2.455447 2.355612 1.679747 2.091623 2.182824 1.602818  
646243\_at 2.522341 1.762663 0.851627 1.854604 1.824458 2.067832 3.089846 1.928941  
646262\_at 1.821958 1.855627 2.158895 2.019802 2.325025 2.276448 2.02625 2.490615  
646268\_at 1.446455 2.400893 2.302089 1.393842 2.477801 1.522326 1.98377 1.99034  
646278\_at 3.011667 2.598587 1.966726 1.599998 1.478093 3.531631 3.693683 3.852699

646282\_at 1.564228 3.331889 2.174282 2.101044 2.060987 3.441124 2.261093 2.570677  
6462\_at 2.921692 2.263186 2.359721 2.185442 4.050306 2.566787 2.843476 2.547856  
646300\_at 1.224472 1.486457 1.718403 1.444653 1.446798 1.674599 1.466037 1.556952  
646324\_at 1.055772 1.029077 1.487903 1.44616 1.769992 1.217178 1.210397 1.044102  
646329\_at 2.070682 1.89031 1.62945 1.805764 1.775058 2.379325 1.752515 2.071946  
646396\_at 6.144284 6.557457 6.183105 6.20708 6.230272 5.87384 5.984217 6.305137  
646405\_at 1.464261 1.954686 1.652961 3.429159 1.497041 2.742818 3.261107 2.108446  
64641\_at 1.31258 1.923405 1.087837 1.114946 2.969144 1.596305 1.730226 1.505477  
646424\_at 1.077987 0.669025 1.132723 1.504079 1.32205 0.761737 1.50737 1.258258  
646450\_at 2.445142 2.579064 2.626132 2.140331 1.954175 2.438601 2.249705 1.572074  
646457\_at 2.210134 1.962486 2.181443 1.995574 2.128013 2.184745 2.73571 1.674983  
64645\_at 6.687935 7.296437 7.011389 6.88194 7.060502 6.819302 6.879837 6.930049  
646471\_at 3.266436 2.676598 3.467497 2.447336 3.327385 2.240027 1.495112 2.493182  
646480\_at 0.897279 0.884903 1.10107 0.666142 1.651784 1.35411 2.559366 0.939913  
646486\_at 1.398023 1.411385 1.539943 1.347457 1.322166 0.71733 1.564668 1.240681  
646498\_at 1.176538 2.140582 1.555266 2.570336 2.343302 2.280179 1.734653 1.188739  
6464\_at 8.244706 7.230077 7.918241 7.708097 6.249702 7.162164 7.860824 7.236173  
646508\_at 1.395273 1.152704 1.212976 2.791342 2.628993 1.600249 1.565155 2.384257  
646513\_at 3.684803 4.394817 3.863405 5.512676 4.795777 4.389456 5.43875 5.400686  
64651\_at 3.5681 3.63283 3.777868 4.33409 2.698498 2.901867 3.839896 3.363887  
646576\_at 3.709827 3.106431 3.316069 2.609683 4.295932 3.364992 3.011895 2.396209  
646588\_at 1.032962 1.060177 1.441468 1.295556 1.47785 1.136502 1.276723 1.489723  
646600\_at 0.849721 1.188326 1.777654 1.954623 0.973607 1.26958 1.488871 1.406934  
646603\_at 1.448356 1.66016 1.627134 2.026027 2.996476 1.668668 1.586292 1.993531  
646625\_at 1.712895 2.923642 2.167914 2.295579 2.145389 1.570792 2.120182 2.02998  
646626\_at 2.658221 2.010045 1.587803 1.577709 1.978608 2.17482 3.167544 1.634982  
646627\_at 2.572006 2.736091 2.036991 2.208717 3.011781 1.238514 2.143536 2.828581  
646643\_at 1.422998 2.162614 2.327377 1.314697 2.310611 1.802421 2.123373 1.517992  
646658\_at 1.678726 2.018333 2.701013 2.463616 2.572742 1.917717 1.883022 1.929503  
646719\_at 3.991357 4.229452 4.304391 4.355441 5.266786 2.29539 4.589158 5.172952  
646730\_at 1.56456 1.664362 1.957856 1.841628 1.438134 1.371293 1.559304 2.351459  
646736\_at 2.026126 1.050467 1.272121 0.812829 2.23297 1.60258 1.759095 1.675555  
646754\_at 2.046049 1.273291 1.448234 2.596512 2.212022 1.822884 1.497909 2.410728  
646762\_at 5.560338 6.312197 6.884107 6.650739 7.008564 6.541396 6.768301 4.877049  
646799\_at 2.081432 2.412103 1.671136 1.815817 2.111728 2.438761 2.212347 1.7879  
64682\_at 5.16209 2.890658 4.275681 4.398577 4.018156 4.941599 4.722818 4.687549  
646851\_at 1.682517 1.878434 1.353631 1.641898 1.502823 2.122027 1.513284 2.798926  
646862\_at 2.210292 2.999669 3.612152 2.67922 2.449319 1.951447 2.146308 2.368251  
646892\_at 2.567257 2.021493 2.271037 1.794318 1.510948 1.753639 2.285259 1.898231  
64689\_at 4.919715 3.521257 3.943417 4.837886 4.042235 4.21575 4.312457 4.657197  
6468\_at 6.317674 6.141086 6.196004 5.24744 5.408608 5.706317 5.275629 5.248312  
646903\_at 2.034437 1.654595 1.90416 2.001607 1.611804 1.576443 1.781436 1.960293  
646938\_at 5.330206 5.213968 5.341075 5.36004 4.645077 5.19131 4.860719 5.545492  
64693\_at 2.54941 1.537764 1.556885 1.267498 1.936099 1.506637 1.634226 1.772914  
646960\_at 2.604099 3.009637 2.837757 2.841199 3.036369 3.077509 2.92361 3.326724  
646962\_at 5.161185 3.3378 4.103692 5.791612 3.471987 5.181429 3.05239 2.337027  
646982\_at 1.185127 2.093976 1.166462 1.673667 1.859974 1.096171 1.597095 1.734284  
64699\_at 1.270065 3.284729 1.8739 3.721996 4.401061 1.185167 1.589582 2.010784  
6469\_at 1.862981 3.389209 3.618742 2.242671 1.848649 1.722557 1.988948 2.636886  
646\_at 1.12072 1.69582 0.92326 1.561753 1.904204 1.360056 1.048569 1.276201  
647012\_at 2.084307 1.352048 1.371837 1.825588 1.656307 1.24444 1.891076 1.457278

647024\_at 1.885171 1.90052 2.357176 2.630163 2.039144 2.704503 2.228518 2.87612  
647033\_at 1.354589 1.119037 1.28667 2.377142 1.372831 2.448244 1.644217 2.091707  
647044\_at 2.213492 1.78194 1.861693 2.677678 2.297876 1.752695 3.713742 2.316249  
647060\_at 1.385136 1.058856 0.716389 2.280483 2.163898 0.91695 1.570601 1.357112  
647087\_at 8.22811 7.984051 8.213568 8.457549 7.035413 8.240843 8.255432 6.849285  
64708\_at 5.735938 5.809743 5.527468 5.976889 5.252753 6.408342 5.578753 5.631197  
6470\_at 5.753492 4.744443 3.836835 5.176413 6.194235 5.882073 4.205091 4.823204  
647107\_at 1.439146 1.295748 1.213323 1.235087 1.314681 1.1253 1.302643 1.213323  
64710\_at 8.484318 8.933225 9.004832 9.16292 8.850393 9.130793 8.795821 8.954897  
64711\_at 1.689905 1.650848 1.056212 1.142489 1.750012 1.547205 1.765194 1.256423  
647121\_at 3.618363 2.606217 3.430415 1.846004 2.136097 2.390692 2.622556 2.987351  
64714\_at 2.355789 2.207696 3.131534 2.22521 2.824559 2.538607 2.731517 2.253413  
647166\_at 0.923558 1.617074 1.649471 1.518835 1.683037 1.512992 1.080576 1.394409  
647174\_at 2.407879 2.363775 2.309179 1.598105 2.375485 1.397356 1.763588 2.556488  
64718\_at 2.106456 3.547316 3.487729 3.309352 3.017503 2.827217 3.748169 2.757724  
647215\_at 1.798743 1.809055 1.749594 1.745717 1.960315 1.905339 1.742413 1.739253  
647264\_at 2.502345 4.35132 5.13289 4.943765 4.33777 4.356052 4.630289 4.149495  
647286\_at 1.59546 1.872068 1.422249 1.537694 2.104274 1.963113 2.067945 2.327469  
647288\_at 1.61145 1.110296 2.029777 0.399839 1.165879 1.469911 1.087963 2.43591  
6472\_at 5.5642 5.499286 5.581891 5.517341 5.17218 5.55524 4.488838 4.833498  
647309\_at 2.877598 1.792219 1.616466 1.440602 5.72464 4.311764 1.78552 4.262564  
647310\_at 1.547357 1.796793 2.561904 1.425096 1.764758 1.730824 2.049643 1.783497  
647323\_at 1.023199 1.555231 0.986347 1.530977 1.465249 0.827691 1.091839 0.979978  
64735\_at 1.135602 0.913738 1.213298 1.002524 1.397132 1.621026 0.920501 1.081836  
6473\_at 1.396697 1.429872 1.469273 2.458036 2.006078 1.815029 1.953401 1.762844  
64743\_at 5.732917 4.978612 4.863557 5.104121 4.446768 5.244269 4.890614 4.71154  
64744\_at 5.325413 5.509527 4.820133 5.41728 4.123729 5.474318 5.424269 5.740858  
64745\_at 4.821986 3.420942 4.383157 4.970431 4.9715 4.979608 4.45621 4.681279  
64746\_at 7.437938 7.85394 7.545643 7.646475 7.748769 7.445851 7.936617 7.439972  
64747\_at 7.40201 7.538268 7.395042 7.838114 7.685267 7.385596 7.763627 7.632423  
64748\_at 4.836191 4.121609 3.673268 4.234041 2.668152 4.969591 4.685772 3.711376  
6474\_at 1.763379 2.75353 2.2138 2.428176 2.837247 1.885059 2.394088 2.798877  
64750\_at 6.57789 6.780993 6.815468 6.561211 6.643891 6.345612 6.411058 5.778332  
64753\_at 2.017111 2.431752 2.63066 2.006508 2.303814 2.20151 2.214274 2.099036  
64754\_at 4.753664 4.016185 5.003459 4.191884 3.887175 4.610594 3.676146 3.979673  
64755\_at 5.448382 5.577304 5.291946 5.911486 5.527976 5.818815 5.104935 4.387886  
64756\_at 6.843899 6.610053 6.910252 6.30049 6.147256 6.619827 6.196402 6.471318  
64757\_at 3.274295 3.159167 4.337719 4.02799 3.506663 3.805257 2.661183 3.511504  
647589\_at 2.256692 2.262085 2.289682 2.663994 2.206731 1.770679 2.335499 2.320738  
64759\_at 7.526083 7.851517 8.029612 7.67012 7.157701 7.648277 8.174498 6.687682  
64760\_at 5.005656 4.850354 5.150371 5.450619 4.063957 5.172058 5.141137 4.205482  
64761\_at 5.752185 5.784173 5.29148 6.41746 4.956631 5.970245 5.474561 5.282225  
64762\_at 6.150303 6.117111 6.050768 4.897768 6.361579 6.22726 5.820276 5.681315  
64763\_at 5.611147 6.430333 6.625136 5.289826 5.535465 5.820541 6.060319 6.184801  
64764\_at 7.139197 7.182416 7.356237 7.196522 7.027071 6.917722 7.641374 7.100964  
64766\_at 6.352724 3.317442 5.153485 5.345718 4.886515 5.461612 4.841693 4.91563  
64768\_at 3.335571 4.645579 3.904844 3.037587 3.965244 4.769337 4.352857 3.123072  
64769\_at 7.015274 6.532394 6.770455 6.651253 6.581576 7.067709 6.901277 7.21682  
6476\_at 1.076873 0.860366 1.438466 1.233419 1.479148 1.258025 1.204025 1.218722  
64770\_at 6.726615 6.756364 6.599906 5.73846 6.738817 6.893883 5.05033 6.87263  
64771\_at 6.65149 6.851695 7.054196 6.685486 7.061463 7.231283 7.032916 6.968523

|           |          |          |          |          |          |          |          |          |
|-----------|----------|----------|----------|----------|----------|----------|----------|----------|
| 64772_at  | 2.52285  | 3.211495 | 2.865082 | 3.257423 | 2.089434 | 3.060216 | 3.961801 | 2.787068 |
| 64773_at  | 6.57464  | 5.596914 | 5.506021 | 5.709479 | 5.396391 | 5.316903 | 5.441404 | 4.623868 |
| 64776_at  | 8.529043 | 7.600546 | 8.350344 | 7.830591 | 7.681127 | 7.8128   | 7.841522 | 7.695082 |
| 64777_at  | 4.329403 | 4.274923 | 3.953203 | 4.148856 | 4.499494 | 4.272303 | 4.003718 | 3.300744 |
| 64778_at  | 7.987874 | 8.146248 | 8.599716 | 7.933078 | 8.19528  | 8.000486 | 8.344474 | 8.411431 |
| 64779_at  | 2.388903 | 3.133925 | 2.5178   | 2.374542 | 2.720821 | 4.064506 | 2.248633 | 2.850074 |
| 6477_at   | 4.251153 | 5.047256 | 4.27527  | 4.133121 | 5.03222  | 5.039206 | 4.350868 | 4.910036 |
| 64780_at  | 4.228214 | 4.075559 | 3.512719 | 3.938849 | 3.852915 | 3.924859 | 3.674943 | 4.234837 |
| 64781_at  | 5.145507 | 6.210236 | 5.679051 | 5.620484 | 6.565904 | 5.644143 | 5.943904 | 5.38051  |
| 64782_at  | 3.774358 | 2.901448 | 2.412279 | 3.019911 | 2.931077 | 2.741623 | 3.803213 | 2.131126 |
| 64783_at  | 5.74431  | 5.6213   | 5.525459 | 4.997883 | 5.119292 | 3.700885 | 4.938749 | 5.855429 |
| 64784_at  | 5.401363 | 6.118962 | 5.327759 | 5.880744 | 5.353732 | 5.928788 | 6.015871 | 4.979341 |
| 647859_at | 2.55376  | 2.45526  | 2.976781 | 2.941186 | 2.938014 | 2.416956 | 2.813443 | 4.053762 |
| 64785_at  | 4.915887 | 3.499908 | 3.034955 | 2.857315 | 2.920064 | 3.443823 | 3.014762 | 3.643076 |
| 64786_at  | 7.229408 | 7.438665 | 7.359887 | 7.735586 | 8.109009 | 7.351765 | 7.163994 | 7.637432 |
| 64787_at  | 5.304645 | 4.079768 | 4.960378 | 4.756055 | 4.439313 | 5.033127 | 3.671551 | 3.493876 |
| 64788_at  | 4.286363 | 4.122533 | 4.021024 | 3.966402 | 3.810101 | 3.902221 | 4.031641 | 3.114771 |
| 64789_at  | 4.859683 | 5.176584 | 5.068266 | 4.417729 | 4.177813 | 4.948887 | 3.872062 | 4.187909 |
| 6478_at   | 4.808249 | 5.318235 | 4.750358 | 4.908627 | 4.685502 | 5.17197  | 4.42596  | 4.82467  |
| 64792_at  | 6.039132 | 5.461101 | 5.718011 | 5.48597  | 5.217205 | 6.139026 | 5.174207 | 5.852323 |
| 64793_at  | 3.957727 | 3.926114 | 3.900995 | 4.60046  | 4.453237 | 3.999982 | 4.138562 | 3.131955 |
| 647946_at | 1.127863 | 1.182707 | 1.291178 | 1.010521 | 1.354836 | 1.222213 | 1.048012 | 1.527156 |
| 64794_at  | 3.752178 | 2.994269 | 3.897365 | 3.941198 | 4.270828 | 4.743899 | 4.591699 | 4.387839 |
| 64795_at  | 6.611736 | 7.537796 | 7.084671 | 7.186312 | 6.989812 | 6.412163 | 6.771472 | 7.341889 |
| 647979_at | 7.534094 | 8.606804 | 8.309411 | 8.423411 | 8.071191 | 7.569368 | 8.024294 | 8.166095 |
| 64798_at  | 6.006509 | 5.041473 | 5.755418 | 6.510468 | 5.967057 | 6.352475 | 4.789462 | 6.056399 |
| 64799_at  | 3.017369 | 2.943056 | 2.927335 | 3.236674 | 2.439561 | 2.535836 | 2.67821  | 3.210813 |
| 64800_at  | 2.603974 | 3.184516 | 2.264029 | 2.014416 | 4.158442 | 3.200803 | 2.256333 | 3.185716 |
| 64801_at  | 7.83202  | 7.382091 | 6.787938 | 7.265029 | 7.011037 | 7.277479 | 6.413238 | 7.384981 |
| 64802_at  | 4.360826 | 4.568761 | 4.576926 | 5.134383 | 4.070581 | 4.034622 | 4.055878 | 4.955538 |
| 648044_at | 2.650741 | 2.99763  | 2.63375  | 3.705366 | 3.326138 | 2.645873 | 3.952285 | 3.539501 |
| 64805_at  | 1.712828 | 1.806534 | 1.382977 | 1.0194   | 1.365247 | 1.748059 | 2.442279 | 2.646123 |
| 64806_at  | 1.370177 | 1.494129 | 1.56315  | 1.354151 | 1.14903  | 1.454737 | 2.148582 | 1.323016 |
| 6480_at   | 7.596478 | 7.915191 | 8.050369 | 8.47719  | 8.276888 | 7.868916 | 7.962149 | 7.704414 |
| 64816_at  | 1.384995 | 2.005546 | 1.787609 | 1.431509 | 1.523257 | 2.265184 | 1.439228 | 1.752541 |
| 6482_at   | 5.647571 | 6.319454 | 6.308367 | 7.233295 | 6.503296 | 5.917241 | 6.95067  | 6.042815 |
| 64834_at  | 8.587119 | 7.900542 | 8.278499 | 8.423487 | 7.68303  | 7.927858 | 8.396466 | 7.241357 |
| 64837_at  | 4.539482 | 4.239704 | 4.012813 | 3.533649 | 3.533605 | 4.704548 | 4.15336  | 3.05952  |
| 64838_at  | 2.460376 | 2.738729 | 2.225962 | 4.367931 | 1.910074 | 3.05295  | 3.469332 | 1.976924 |
| 64839_at  | 5.629661 | 5.499847 | 5.847391 | 5.366926 | 4.842014 | 5.601531 | 5.493863 | 5.824868 |
| 6483_at   | 4.991561 | 4.531002 | 3.861869 | 4.631604 | 4.086877 | 4.856291 | 4.327183 | 3.992611 |
| 64840_at  | 3.544165 | 3.820671 | 4.419018 | 4.035449 | 3.664945 | 3.8897   | 3.763899 | 3.316935 |
| 64841_at  | 6.2202   | 6.554916 | 6.443151 | 5.635959 | 7.344965 | 5.565142 | 6.199017 | 8.028451 |
| 64843_at  | 2.883877 | 3.104732 | 3.584248 | 3.030373 | 3.727678 | 3.464503 | 3.525288 | 3.046733 |
| 64844_at  | 6.774401 | 6.774888 | 6.793458 | 6.749271 | 6.413075 | 6.649029 | 6.988595 | 7.254756 |
| 64847_at  | 5.464647 | 4.931588 | 5.201459 | 5.432636 | 4.40799  | 4.444646 | 4.924639 | 3.739907 |
| 64848_at  | 5.737808 | 5.465865 | 5.362049 | 5.579572 | 5.740431 | 4.908109 | 5.146465 | 6.092784 |
| 64849_at  | 7.42853  | 6.851033 | 7.125296 | 4.680467 | 8.085396 | 7.627844 | 4.96714  | 6.674878 |
| 6484_at   | 5.490983 | 4.500616 | 5.911857 | 4.572794 | 4.849598 | 5.229777 | 4.993315 | 5.677947 |
| 64850_at  | 1.696156 | 1.543654 | 1.597478 | 1.650508 | 1.622918 | 1.41309  | 1.440513 | 1.522404 |
| 64852_at  | 3.149978 | 3.414005 | 3.783722 | 3.786222 | 3.519896 | 4.038492 | 4.10329  | 3.533951 |

|           |          |          |          |          |          |          |          |          |
|-----------|----------|----------|----------|----------|----------|----------|----------|----------|
| 64853_at  | 5.69384  | 5.312684 | 5.469015 | 5.89444  | 6.032717 | 4.404535 | 4.322874 | 4.996871 |
| 64854_at  | 6.323216 | 5.902052 | 6.616799 | 6.3262   | 5.76068  | 6.851141 | 6.730442 | 5.790318 |
| 64855_at  | 5.233847 | 5.537328 | 5.569096 | 6.337299 | 5.271287 | 5.517385 | 5.90651  | 5.290323 |
| 64856_at  | 4.454673 | 3.730601 | 4.100076 | 3.367697 | 2.97657  | 3.970997 | 4.621214 | 2.821127 |
| 64857_at  | 3.866233 | 4.359401 | 4.204666 | 4.4847   | 4.225036 | 4.421076 | 3.629799 | 3.592316 |
| 64858_at  | 5.562189 | 5.090166 | 5.642592 | 5.979454 | 5.205104 | 5.583969 | 6.195999 | 4.253385 |
| 64859_at  | 3.566139 | 5.203368 | 3.20109  | 3.090838 | 4.232605 | 4.431589 | 2.56284  | 3.79199  |
| 64860_at  | 4.099454 | 4.512947 | 4.003716 | 3.509874 | 3.845532 | 3.151201 | 3.57005  | 4.981058 |
| 64863_at  | 4.998089 | 4.236189 | 4.263182 | 4.630007 | 5.069982 | 3.478672 | 4.504928 | 4.266073 |
| 64864_at  | 5.040687 | 5.408013 | 5.327629 | 5.366704 | 6.497184 | 5.976617 | 6.178137 | 5.383018 |
| 64866_at  | 2.494128 | 2.87823  | 2.538904 | 2.190519 | 3.481547 | 2.614824 | 2.293613 | 2.329825 |
| 648691_at | 1.873527 | 2.286427 | 1.319964 | 2.548905 | 1.697483 | 2.028159 | 1.449387 | 1.929729 |
| 648740_at | 2.151601 | 1.944091 | 1.864131 | 1.751753 | 1.586293 | 1.423947 | 3.938695 | 1.549371 |
| 648791_at | 3.350046 | 1.930984 | 2.049521 | 1.800994 | 1.859454 | 2.62223  | 2.561727 | 1.763134 |
| 6487_at   | 3.801864 | 4.103114 | 4.181605 | 3.00155  | 4.090769 | 4.156695 | 4.60247  | 5.3566   |
| 648809_at | 1.129745 | 1.26774  | 2.414836 | 1.422229 | 2.023761 | 1.777342 | 1.623552 | 1.215373 |
| 64881_at  | 2.456241 | 3.09895  | 2.022654 | 2.18105  | 2.41957  | 2.328001 | 2.906385 | 1.868142 |
| 64895_at  | 5.823147 | 6.277016 | 4.959105 | 5.530091 | 5.455159 | 5.48331  | 5.823401 | 5.82137  |
| 64897_at  | 4.240049 | 5.050132 | 4.109716 | 4.293007 | 3.670869 | 3.923788 | 4.857738 | 4.015119 |
| 648987_at | 6.114009 | 4.706403 | 6.221132 | 7.437374 | 6.190417 | 6.105068 | 5.55699  | 4.051711 |
| 6489_at   | 1.701933 | 2.065528 | 2.194579 | 1.988958 | 2.55284  | 1.246743 | 1.579494 | 1.403549 |
| 64900_at  | 3.80294  | 4.551639 | 2.475393 | 3.936516 | 3.70443  | 4.084886 | 3.61451  | 3.191715 |
| 64901_at  | 2.815701 | 3.009557 | 2.435005 | 2.624111 | 3.408873 | 2.377326 | 2.511083 | 3.051105 |
| 64902_at  | 7.241266 | 5.462398 | 5.773554 | 4.152546 | 7.291267 | 4.783648 | 3.154457 | 6.470398 |
| 6490_at   | 2.197971 | 2.566268 | 2.802246 | 2.754499 | 3.23712  | 2.918447 | 3.526647 | 3.078666 |
| 649133_at | 1.906334 | 1.993416 | 2.420808 | 1.514725 | 2.179812 | 1.934172 | 1.530026 | 1.721225 |
| 649159_at | 2.740359 | 1.970073 | 2.388011 | 1.853444 | 2.341079 | 1.541868 | 2.127674 | 1.3935   |
| 649179_at | 2.29953  | 2.605068 | 1.996988 | 2.854037 | 2.556953 | 2.745432 | 2.455559 | 1.886833 |
| 64919_at  | 1.169414 | 2.071655 | 2.368493 | 3.407707 | 1.803375 | 2.366559 | 2.710105 | 1.92675  |
| 6491_at   | 2.538219 | 3.267738 | 1.469259 | 2.66921  | 2.312532 | 2.403132 | 1.981832 | 3.023453 |
| 64921_at  | 5.47906  | 5.752367 | 5.284226 | 5.587547 | 5.843943 | 4.888698 | 5.196599 | 6.092591 |
| 64922_at  | 5.991883 | 5.158145 | 4.872453 | 2.685465 | 5.748506 | 4.910026 | 2.36077  | 6.501381 |
| 64924_at  | 5.405802 | 6.035135 | 5.122553 | 5.281953 | 5.949473 | 5.078231 | 5.064064 | 5.937821 |
| 64925_at  | 5.544183 | 5.28625  | 4.991391 | 4.667719 | 4.493871 | 5.199154 | 4.44868  | 4.026754 |
| 649264_at | 1.313685 | 1.270739 | 1.425666 | 1.063345 | 1.499307 | 1.218753 | 1.37505  | 2.58639  |
| 64926_at  | 3.681929 | 3.73886  | 4.208706 | 3.272632 | 3.114516 | 4.342052 | 3.475213 | 3.75638  |
| 64927_at  | 5.032685 | 5.121428 | 5.035017 | 5.195467 | 5.000569 | 5.237094 | 4.981048 | 4.839146 |
| 64928_at  | 6.564839 | 7.201447 | 5.872407 | 6.55869  | 6.270141 | 6.414991 | 5.410766 | 7.082413 |
| 6492_at   | 2.285032 | 1.7113   | 2.343022 | 2.495879 | 3.114621 | 1.383285 | 1.85962  | 2.274486 |
| 649395_at | 2.417071 | 1.424924 | 1.511285 | 2.03233  | 1.385175 | 1.922107 | 1.394239 | 2.179347 |
| 6493_at   | 3.004135 | 2.479801 | 3.263392 | 2.656763 | 2.942424 | 2.494322 | 1.950842 | 2.598104 |
| 64940_at  | 5.335636 | 5.389029 | 4.431643 | 4.681549 | 5.898309 | 4.667194 | 4.631678 | 4.34405  |
| 64943_at  | 5.655159 | 4.627407 | 5.207674 | 4.914752 | 4.910701 | 5.181267 | 4.997656 | 4.53569  |
| 649446_at | 6.796212 | 6.420778 | 6.313531 | 5.575297 | 5.295891 | 6.056288 | 5.778255 | 5.680331 |
| 64946_at  | 2.25186  | 2.316431 | 2.415002 | 2.58888  | 2.936863 | 2.479811 | 1.668214 | 3.860579 |
| 64949_at  | 6.598086 | 5.542219 | 5.862826 | 5.545631 | 5.389347 | 5.69148  | 4.820142 | 6.206892 |
| 6494_at   | 5.407301 | 4.151949 | 4.719327 | 4.42886  | 4.812654 | 5.335744 | 4.513452 | 3.51766  |
| 6495_at   | 4.38457  | 3.536738 | 3.502794 | 3.627289 | 4.169847 | 3.329409 | 4.040853 | 4.078397 |
| 64960_at  | 8.25877  | 7.765887 | 7.960085 | 7.267718 | 8.317917 | 7.621433 | 7.549535 | 7.890481 |
| 64963_at  | 7.046256 | 6.726573 | 7.445203 | 6.925912 | 6.84493  | 7.025581 | 6.765731 | 6.480827 |
| 64965_at  | 6.969718 | 6.618757 | 7.0514   | 5.798477 | 5.565577 | 6.535218 | 6.699966 | 6.071481 |

|           |          |          |          |          |          |          |          |          |
|-----------|----------|----------|----------|----------|----------|----------|----------|----------|
| 64968_at  | 6.843705 | 6.223234 | 6.58438  | 5.807721 | 6.282551 | 6.304587 | 6.003818 | 6.96413  |
| 64969_at  | 5.922012 | 6.404614 | 6.136351 | 6.354629 | 6.92803  | 5.905291 | 4.975919 | 6.569749 |
| 6496_at   | 2.992484 | 2.153224 | 2.057114 | 1.659742 | 2.381611 | 1.813992 | 2.820801 | 1.788228 |
| 64975_at  | 9.576413 | 9.002882 | 9.082311 | 9.102982 | 8.618358 | 9.672468 | 8.706602 | 8.875167 |
| 64976_at  | 6.213562 | 5.200597 | 5.454128 | 5.350238 | 4.84504  | 5.458329 | 5.084342 | 5.696257 |
| 64978_at  | 6.759935 | 5.785977 | 5.963495 | 6.363853 | 5.449473 | 6.68618  | 6.284838 | 5.613204 |
| 64979_at  | 7.595162 | 7.507174 | 7.450178 | 7.320054 | 7.029085 | 7.301101 | 6.470889 | 5.857473 |
| 6497_at   | 5.614602 | 4.898908 | 5.803071 | 5.322651 | 4.268836 | 5.93155  | 6.059518 | 4.556146 |
| 64981_at  | 6.752998 | 5.887789 | 6.310478 | 5.876381 | 5.742648 | 6.492095 | 5.598924 | 5.509087 |
| 64983_at  | 4.60189  | 4.146546 | 4.359113 | 4.027067 | 3.857113 | 4.578717 | 4.333076 | 4.172402 |
| 6498_at   | 6.950934 | 7.204942 | 6.803428 | 6.659317 | 7.264922 | 6.976489 | 6.927033 | 7.370578 |
| 649946_at | 2.605172 | 2.592152 | 3.719292 | 3.863776 | 3.521288 | 3.740844 | 3.175967 | 3.219193 |
| 6499_at   | 4.724678 | 4.474254 | 5.148727 | 4.294128 | 4.650433 | 5.177492 | 4.001204 | 3.9654   |
| 649_at    | 4.835913 | 4.351125 | 6.476613 | 5.044201 | 5.441776 | 5.874942 | 5.931318 | 4.47787  |
| 65003_at  | 6.829892 | 7.036215 | 7.021054 | 6.682722 | 6.479613 | 6.545497 | 6.687054 | 6.24718  |
| 65005_at  | 7.6815   | 7.039002 | 7.182264 | 7.176998 | 6.956215 | 7.805552 | 6.924763 | 7.530713 |
| 65008_at  | 6.461046 | 6.636675 | 6.195136 | 6.469797 | 6.11762  | 5.984757 | 5.07039  | 6.327559 |
| 65009_at  | 2.325952 | 2.241203 | 2.973721 | 2.496869 | 2.44364  | 2.560864 | 2.746332 | 2.44364  |
| 6500_at   | 2.880788 | 1.446203 | 2.795842 | 2.131209 | 1.243824 | 1.41024  | 2.63306  | 2.040927 |
| 65010_at  | 3.102456 | 2.933023 | 3.471969 | 3.832806 | 4.136143 | 3.79289  | 3.071713 | 3.23684  |
| 65012_at  | 1.084526 | 1.836287 | 1.18342  | 3.182035 | 1.91121  | 1.797785 | 1.732487 | 2.323597 |
| 650157_at | 1.29368  | 1.207835 | 1.338845 | 1.042914 | 1.309593 | 1.10692  | 1.497493 | 1.44723  |
| 65018_at  | 7.7844   | 7.51036  | 8.1421   | 7.765478 | 7.21329  | 8.695985 | 7.651779 | 6.816104 |
| 650226_at | 1.20438  | 1.400266 | 1.153286 | 1.460095 | 1.665751 | 2.265727 | 1.340859 | 1.207648 |
| 650293_at | 1.986384 | 3.286253 | 3.157855 | 5.01352  | 2.016836 | 1.462574 | 3.210504 | 3.187163 |
| 6502_at   | 5.433558 | 5.437875 | 6.263227 | 6.76178  | 5.298745 | 4.715383 | 3.97528  | 5.886887 |
| 650368_at | 2.01651  | 2.525981 | 2.292922 | 1.88631  | 2.781978 | 2.145732 | 3.348766 | 2.643149 |
| 6503_at   | 5.672359 | 4.792301 | 4.842729 | 5.131992 | 5.903054 | 5.255931 | 5.41523  | 5.145916 |
| 6504_at   | 2.496749 | 2.765437 | 2.61451  | 2.320516 | 2.795381 | 2.756587 | 2.58541  | 2.400274 |
| 65055_at  | 2.295392 | 1.662983 | 1.10193  | 2.278606 | 2.539057 | 2.592572 | 2.599958 | 1.830616 |
| 65056_at  | 7.989581 | 8.165741 | 7.836445 | 7.69411  | 7.810032 | 7.628895 | 7.799862 | 8.157021 |
| 65057_at  | 5.351627 | 5.351885 | 4.982569 | 5.078189 | 4.710241 | 5.498224 | 5.017607 | 4.680516 |
| 65059_at  | 6.740064 | 7.497042 | 7.096753 | 7.210015 | 7.709978 | 6.787775 | 6.738153 | 6.648681 |
| 6505_at   | 4.818885 | 2.527153 | 4.037617 | 3.389574 | 6.325071 | 3.656794 | 3.94237  | 3.19625  |
| 65061_at  | 0.962439 | 1.239102 | 1.335789 | 1.162838 | 2.318018 | 0.723191 | 1.138526 | 1.803537 |
| 650623_at | 2.718372 | 2.104607 | 1.41456  | 2.593376 | 1.400656 | 2.051774 | 1.688916 | 1.762842 |
| 65062_at  | 4.527964 | 4.873127 | 3.448872 | 4.829388 | 5.044622 | 3.039944 | 3.899541 | 4.376241 |
| 650655_at | 1.259956 | 1.272531 | 0.854051 | 1.672904 | 1.251866 | 1.347675 | 1.620679 | 1.553398 |
| 65065_at  | 6.320333 | 6.842737 | 6.989917 | 6.514117 | 6.70031  | 6.189204 | 6.675551 | 6.891583 |
| 650669_at | 3.354094 | 2.622806 | 2.55425  | 2.648658 | 3.76382  | 3.131783 | 3.605457 | 2.480415 |
| 6506_at   | 1.859238 | 2.162946 | 2.235381 | 2.071861 | 1.858538 | 1.849297 | 2.460756 | 2.56124  |
| 65072_at  | 2.009271 | 2.155066 | 2.408576 | 2.268471 | 2.750759 | 2.447081 | 1.987991 | 2.703215 |
| 65078_at  | 3.076907 | 3.269229 | 2.679716 | 3.270487 | 1.985256 | 3.815624 | 2.067567 | 3.681918 |
| 6507_at   | 1.855016 | 2.198763 | 2.871007 | 2.469664 | 1.861118 | 2.266619 | 1.655359 | 2.70527  |
| 65080_at  | 5.935297 | 5.270458 | 5.716064 | 5.252639 | 5.507422 | 5.930731 | 6.015453 | 5.581655 |
| 65082_at  | 5.656908 | 5.485048 | 5.09734  | 5.180534 | 6.658564 | 5.418657 | 4.761855 | 5.617777 |
| 65083_at  | 4.305332 | 3.62674  | 4.001496 | 4.306818 | 3.506825 | 4.516614 | 3.328262 | 3.23362  |
| 65084_at  | 5.053461 | 5.26309  | 4.734148 | 5.848042 | 5.216901 | 3.877535 | 4.690411 | 5.464264 |
| 6508_at   | 2.844124 | 2.500258 | 2.806431 | 2.889015 | 2.722574 | 2.908651 | 2.68246  | 3.415586 |
| 65094_at  | 4.334238 | 2.766786 | 3.826743 | 2.348369 | 3.306597 | 4.023308 | 3.88703  | 3.439575 |
| 65095_at  | 4.428686 | 5.199923 | 3.867756 | 4.016474 | 3.080203 | 4.83382  | 4.422218 | 4.311362 |



|           |          |          |          |          |          |          |          |          |
|-----------|----------|----------|----------|----------|----------|----------|----------|----------|
| 6509_at   | 3.892039 | 3.5566   | 4.258824 | 4.748221 | 3.15525  | 4.167699 | 4.472935 | 4.218575 |
| 650_at    | 6.991673 | 7.397132 | 6.46667  | 5.803058 | 7.960929 | 5.039067 | 7.946381 | 7.11291  |
| 65108_at  | 6.893142 | 6.475697 | 6.448553 | 6.368192 | 6.689845 | 6.509982 | 6.531216 | 6.142334 |
| 65109_at  | 3.406255 | 3.528806 | 3.885159 | 3.467968 | 2.964966 | 3.222194 | 3.618189 | 3.660701 |
| 6510_at   | 5.299119 | 5.522038 | 5.777436 | 4.752572 | 3.572139 | 5.348148 | 6.177483 | 5.050013 |
| 65110_at  | 5.618518 | 5.865673 | 5.781739 | 5.457431 | 5.477228 | 6.162455 | 5.866342 | 5.994881 |
| 65117_at  | 8.067641 | 8.021192 | 8.193679 | 8.131361 | 8.637735 | 7.561594 | 7.535686 | 8.869335 |
| 6511_at   | 1.255668 | 1.129722 | 1.313311 | 1.824176 | 2.351905 | 1.513474 | 1.29147  | 1.997273 |
| 65122_at  | 2.156297 | 1.181721 | 1.525924 | 2.547278 | 2.456163 | 1.570862 | 1.630678 | 2.10821  |
| 65123_at  | 7.27031  | 7.389835 | 7.200831 | 7.174568 | 6.880321 | 7.198118 | 6.632411 | 6.669304 |
| 65124_at  | 4.362758 | 3.866551 | 3.841983 | 3.582185 | 3.239629 | 4.392708 | 3.744329 | 4.548146 |
| 65125_at  | 8.604684 | 8.503244 | 8.963169 | 9.236104 | 8.798229 | 8.808864 | 8.864011 | 8.268134 |
| 6512_at   | 2.03831  | 2.167899 | 2.665985 | 2.127223 | 2.626538 | 1.880488 | 2.165277 | 2.297223 |
| 651302_at | 2.102436 | 2.171319 | 2.181785 | 1.759904 | 2.489765 | 2.417634 | 2.11867  | 2.369365 |
| 6513_at   | 4.37301  | 4.18151  | 3.399152 | 3.449538 | 4.382521 | 2.88057  | 4.678061 | 4.068827 |
| 651430_at | 2.256644 | 2.344804 | 1.955932 | 1.260497 | 2.094184 | 2.062885 | 1.659284 | 1.450356 |
| 6514_at   | 4.121371 | 3.352414 | 3.143999 | 1.495394 | 5.577224 | 5.569046 | 1.447886 | 2.515068 |
| 6515_at   | 4.989247 | 6.659871 | 5.438827 | 5.697995 | 5.730645 | 4.836733 | 6.533333 | 6.17429  |
| 651746_at | 3.174089 | 4.164324 | 5.392674 | 3.614939 | 2.363966 | 4.984324 | 3.461182 | 3.790755 |
| 6517_at   | 1.785537 | 1.486136 | 1.643633 | 2.368495 | 2.200543 | 2.434286 | 1.867868 | 2.068307 |
| 6518_at   | 2.992615 | 2.747329 | 2.026396 | 2.009503 | 3.563681 | 1.969376 | 2.683277 | 2.775598 |
| 6519_at   | 8.044766 | 6.468849 | 5.621898 | 6.267283 | 8.165495 | 7.771355 | 4.624056 | 8.211907 |
| 651_at    | 2.644222 | 3.073494 | 2.212615 | 2.494875 | 2.816389 | 2.593872 | 2.449963 | 2.411605 |
| 6520_at   | 6.10814  | 7.006784 | 6.953125 | 6.642519 | 7.326716 | 6.884771 | 6.60177  | 6.542507 |
| 65217_at  | 1.373295 | 1.309487 | 1.433067 | 1.337452 | 1.465117 | 1.41499  | 1.622873 | 2.017751 |
| 6521_at   | 1.802947 | 2.148898 | 3.103098 | 3.330091 | 5.123914 | 1.565159 | 1.789064 | 2.104704 |
| 65220_at  | 4.358436 | 4.319274 | 3.940636 | 4.275255 | 4.195266 | 4.572265 | 4.153001 | 3.077289 |
| 652276_at | 4.484424 | 4.282371 | 4.01097  | 4.110017 | 4.271257 | 3.513983 | 4.194421 | 2.753258 |
| 6522_at   | 2.544966 | 2.777172 | 3.210543 | 2.544278 | 2.608604 | 2.997687 | 2.465751 | 2.245807 |
| 6523_at   | 2.320468 | 2.511778 | 2.20609  | 2.487637 | 2.436256 | 2.537124 | 1.788994 | 2.590399 |
| 65243_at  | 1.416215 | 1.681766 | 2.203345 | 0.973616 | 1.010493 | 1.012041 | 1.917493 | 2.249924 |
| 65244_at  | 6.021014 | 5.333469 | 5.01622  | 5.361824 | 5.490439 | 5.926962 | 4.727738 | 6.158566 |
| 65249_at  | 3.180315 | 2.128237 | 1.97243  | 3.018723 | 1.923348 | 2.301848 | 3.30518  | 2.157387 |
| 6524_at   | 4.534604 | 3.918919 | 4.320172 | 3.029742 | 4.179464 | 3.997638 | 2.743799 | 4.38826  |
| 65250_at  | 5.393804 | 5.971519 | 5.661705 | 5.311058 | 5.422282 | 5.380526 | 5.427697 | 6.048572 |
| 65251_at  | 4.673029 | 3.973901 | 4.159146 | 4.562758 | 4.688948 | 3.294106 | 3.888136 | 5.617761 |
| 65258_at  | 7.144538 | 7.064778 | 7.126197 | 6.43732  | 7.121177 | 6.623039 | 6.800258 | 7.146949 |
| 6525_at   | 3.633205 | 4.598524 | 3.662381 | 4.677729 | 3.864095 | 3.817642 | 4.227793 | 2.814279 |
| 65260_at  | 3.566203 | 3.342921 | 3.509271 | 3.201162 | 4.538816 | 2.86016  | 3.197998 | 3.047154 |
| 65263_at  | 3.231692 | 3.313801 | 2.977307 | 3.553456 | 3.398733 | 2.815759 | 2.999104 | 3.8472   |
| 65264_at  | 7.317139 | 7.199851 | 8.184352 | 8.007265 | 7.069548 | 7.623497 | 7.484531 | 7.206421 |
| 65265_at  | 6.778428 | 6.136427 | 7.027808 | 6.877238 | 6.377878 | 6.973093 | 6.823445 | 6.786217 |
| 65266_at  | 2.521695 | 2.388703 | 3.520619 | 2.571644 | 3.915237 | 2.464705 | 2.227966 | 2.857515 |
| 65267_at  | 2.290349 | 3.023692 | 2.76198  | 2.478915 | 2.565065 | 2.011266 | 2.459122 | 2.478356 |
| 65268_at  | 1.962038 | 2.293554 | 2.483327 | 2.176626 | 2.778086 | 2.15221  | 2.691532 | 2.023634 |
| 6526_at   | 4.863736 | 5.70856  | 5.875821 | 5.260282 | 6.450387 | 5.910319 | 6.078388 | 6.253903 |
| 6527_at   | 3.062954 | 1.96074  | 2.666968 | 3.624383 | 3.165875 | 2.297286 | 1.811081 | 1.393054 |
| 6528_at   | 1.724528 | 1.941542 | 1.940088 | 1.853167 | 2.211194 | 1.72986  | 2.593049 | 1.797412 |
| 652965_at | 10.4681  | 10.3348  | 10.66193 | 10.84173 | 9.560832 | 10.46155 | 10.9105  | 9.610087 |
| 652966_at | 5.161638 | 4.83485  | 5.855576 | 4.591721 | 2.529531 | 5.248378 | 5.615603 | 2.530086 |
| 652968_at | 5.907848 | 4.88263  | 5.700581 | 5.54104  | 4.778543 | 5.255258 | 4.219459 | 5.117252 |

|           |          |          |          |          |          |          |          |          |
|-----------|----------|----------|----------|----------|----------|----------|----------|----------|
| 652972_at | 1.631348 | 1.09246  | 1.358493 | 0.83926  | 0.783417 | 2.126669 | 0.944502 | 1.010903 |
| 652991_at | 1.42494  | 1.274457 | 1.28009  | 1.579183 | 1.500007 | 1.456322 | 2.479033 | 1.427341 |
| 652995_at | 2.183898 | 1.426466 | 1.847081 | 1.986043 | 2.084064 | 1.417719 | 1.775433 | 1.926361 |
| 6529_at   | 1.46475  | 1.84058  | 2.950896 | 1.946463 | 1.827421 | 2.450946 | 1.87085  | 2.235665 |
| 652_at    | 3.647477 | 4.053838 | 3.10804  | 3.895496 | 4.482846 | 2.911307 | 3.045109 | 2.231905 |
| 653061_at | 0.777169 | 2.260003 | 4.027285 | 3.011193 | 1.127208 | 2.669047 | 1.882152 | 2.013619 |
| 653075_at | 1.010663 | 1.055611 | 0.751746 | 0.607277 | 0.402547 | 1.115178 | 1.111915 | 2.022527 |
| 653082_at | 2.461777 | 1.774368 | 2.431157 | 1.707719 | 2.564301 | 2.026366 | 1.450628 | 2.007516 |
| 6530_at   | 2.19544  | 3.311839 | 2.709241 | 2.280328 | 2.845975 | 2.240542 | 3.918723 | 1.770825 |
| 653121_at | 4.329643 | 4.532746 | 3.614267 | 4.169987 | 4.101729 | 3.798661 | 4.233567 | 3.874041 |
| 653125_at | 1.566926 | 0.974615 | 2.3964   | 2.58487  | 1.354788 | 0.650382 | 1.719069 | 1.141737 |
| 653140_at | 1.743524 | 1.725337 | 2.890425 | 2.558455 | 2.033984 | 2.31412  | 3.150364 | 2.749733 |
| 653145_at | 3.061436 | 2.931555 | 2.491861 | 3.081913 | 3.526212 | 3.22717  | 3.219147 | 4.141974 |
| 653160_at | 3.361266 | 3.936324 | 2.886387 | 3.572292 | 3.958204 | 3.009696 | 3.396008 | 2.29868  |
| 653162_at | 1.033468 | 1.465326 | 1.557612 | 0.900997 | 2.056508 | 1.25148  | 2.354262 | 1.509612 |
| 653166_at | 1.941961 | 1.770041 | 2.681846 | 2.377123 | 1.282619 | 1.63672  | 1.711188 | 1.693391 |
| 653192_at | 0.54731  | 1.993043 | 2.863801 | 1.32508  | 1.051062 | 1.075518 | 1.438582 | 1.373198 |
| 6531_at   | 1.980573 | 1.951472 | 2.884987 | 2.482964 | 2.429034 | 2.375414 | 2.573778 | 2.121995 |
| 653240_at | 2.32371  | 1.104258 | 2.304007 | 1.176129 | 1.68488  | 2.892226 | 2.033655 | 1.984035 |
| 653268_at | 4.543281 | 2.339027 | 3.848398 | 4.009031 | 2.485616 | 4.805281 | 3.062473 | 5.236779 |
| 6532_at   | 2.578849 | 2.659778 | 2.475917 | 1.917002 | 3.054119 | 2.426481 | 3.028571 | 1.961011 |
| 653319_at | 2.30549  | 2.390092 | 1.899758 | 2.538689 | 2.350047 | 3.557304 | 1.892861 | 2.300918 |
| 653390_at | 4.437823 | 3.943192 | 3.085579 | 4.015331 | 2.017103 | 1.942548 | 1.273804 | 1.170215 |
| 6533_at   | 6.490888 | 7.016221 | 7.366203 | 7.770291 | 7.878786 | 7.092548 | 7.839943 | 7.40165  |
| 653404_at | 3.620404 | 3.875755 | 3.915608 | 3.350666 | 3.340841 | 4.024598 | 2.389702 | 3.994876 |
| 653423_at | 2.152869 | 1.572982 | 1.557846 | 1.740503 | 1.979369 | 1.436658 | 2.452161 | 2.267118 |
| 653427_at | 2.217819 | 2.155909 | 1.896429 | 1.985937 | 1.196166 | 1.196098 | 1.827502 | 1.327395 |
| 653437_at | 3.872397 | 3.224441 | 4.152674 | 3.999253 | 2.932615 | 4.456994 | 3.818415 | 2.615846 |
| 653479_at | 2.895912 | 2.58961  | 2.941894 | 2.384155 | 4.191772 | 2.396343 | 2.313743 | 3.004605 |
| 653483_at | 1.722976 | 2.496758 | 1.206528 | 1.480277 | 1.249312 | 1.32443  | 1.719643 | 1.172732 |
| 653489_at | 2.892304 | 3.559148 | 3.35868  | 4.573557 | 4.500482 | 2.885278 | 3.659306 | 4.219568 |
| 653492_at | 2.354002 | 1.968594 | 2.105664 | 1.288659 | 1.756167 | 2.640211 | 1.421677 | 2.699428 |
| 6534_at   | 2.186401 | 2.326979 | 2.242802 | 2.146764 | 2.242444 | 2.50125  | 1.981876 | 1.830792 |
| 653505_at | 3.262052 | 3.102584 | 3.51592  | 3.50203  | 4.11156  | 3.838806 | 3.914421 | 3.855105 |
| 653509_at | 1.23474  | 1.347398 | 1.298214 | 2.192527 | 1.135428 | 1.52016  | 1.37181  | 1.345623 |
| 653513_at | 5.443775 | 2.120661 | 0.975552 | 2.580782 | -0.03237 | 1.859025 | 2.383761 | 3.78168  |
| 653519_at | 1.477358 | 2.679478 | 2.710946 | 3.270319 | 4.549659 | 3.553245 | 3.09868  | 2.61671  |
| 653567_at | 1.835364 | 2.217797 | 1.595028 | 1.728145 | 3.613119 | 1.739924 | 1.879089 | 1.550915 |
| 653583_at | 2.696026 | 2.871017 | 2.877479 | 3.560895 | 2.769033 | 3.356068 | 3.123256 | 1.85499  |
| 6535_at   | 6.265807 | 5.647916 | 6.485194 | 3.72657  | 6.419839 | 7.446988 | 4.394827 | 4.817508 |
| 653604_at | 2.05501  | 1.326156 | 0.964499 | 3.04498  | 0.711011 | 0.72315  | 0.601847 | 1.042763 |
| 653645_at | 2.434815 | 2.559225 | 2.88422  | 2.997308 | 2.637209 | 2.933146 | 3.12482  | 2.50754  |
| 653653_at | 1.714164 | 1.753053 | 2.945133 | 2.272896 | 2.740757 | 1.70615  | 1.734337 | 1.424695 |
| 653659_at | 3.111187 | 3.738261 | 3.274454 | 3.261703 | 3.57225  | 2.738462 | 3.822924 | 3.97079  |
| 653677_at | 3.356394 | 3.198996 | 2.888961 | 2.364774 | 2.164409 | 3.427006 | 2.681702 | 2.212682 |
| 6536_at   | 3.33198  | 3.493093 | 2.878666 | 3.159986 | 3.28747  | 2.445376 | 2.826713 | 2.389402 |
| 653712_at | 2.104271 | 2.423467 | 1.988366 | 2.187213 | 1.475106 | 2.208316 | 1.650421 | 2.52115  |
| 653786_at | 3.154458 | 1.511744 | 2.895921 | 2.146333 | 2.933192 | 1.70642  | 2.248297 | 1.660713 |
| 653808_at | 1.209005 | 1.436048 | 1.557362 | 1.004217 | 1.80976  | 0.95394  | 1.175514 | 2.199955 |
| 653857_at | 3.243801 | 4.19218  | 1.010521 | 3.515218 | 3.435977 | 5.077317 | 4.396533 | 1.730558 |
| 6538_at   | 1.877821 | 1.765753 | 1.551001 | 2.182664 | 1.637343 | 1.105877 | 1.661402 | 1.203434 |

|           |          |          |          |          |          |          |          |          |
|-----------|----------|----------|----------|----------|----------|----------|----------|----------|
| 6539_at   | 3.070452 | 2.863566 | 3.825377 | 3.124682 | 4.716429 | 3.550397 | 4.053074 | 3.023275 |
| 653_at    | 1.794786 | 1.780201 | 2.362288 | 1.965782 | 3.674089 | 2.028047 | 2.642547 | 2.976176 |
| 6540_at   | 3.657954 | 2.963362 | 3.351466 | 2.809973 | 4.523327 | 3.40326  | 2.860366 | 3.508333 |
| 6541_at   | 4.318718 | 4.646736 | 3.764351 | 4.309861 | 5.549803 | 3.90781  | 4.776628 | 3.98359  |
| 654231_at | 1.311912 | 2.122605 | 1.196769 | 1.030276 | 1.468857 | 2.73411  | 1.748293 | 1.749272 |
| 654254_at | 1.847552 | 1.454147 | 1.83161  | 2.695497 | 4.556568 | 1.411864 | 2.912356 | 2.992379 |
| 6542_at   | 3.075663 | 3.758271 | 3.609629 | 2.581919 | 5.212442 | 4.371202 | 2.338256 | 3.080556 |
| 654319_at | 5.496185 | 6.164862 | 5.644163 | 6.567686 | 6.439735 | 6.136405 | 5.446825 | 6.718615 |
| 654320_at | 3.835057 | 5.338823 | 3.257279 | 3.191892 | 2.823497 | 4.34537  | 3.071157 | 1.571197 |
| 654321_at | 1.345717 | 1.096366 | 3.62705  | 2.295854 | 0.716973 | 1.290495 | 1.338056 | 3.775368 |
| 654322_at | 1.180149 | 1.501166 | 2.421487 | 1.191643 | 1.771008 | 1.334363 | 2.90384  | 1.316263 |
| 654346_at | 2.54561  | 3.226411 | 3.403515 | 3.238595 | 3.276115 | 2.997067 | 2.03225  | 2.967023 |
| 6543_at   | 1.243749 | 1.765396 | 2.046688 | 2.315306 | 2.207402 | 1.810279 | 2.541005 | 1.538394 |
| 654429_at | 1.220416 | 2.23207  | 1.936437 | 2.109871 | 2.367058 | 1.376388 | 2.125557 | 1.785595 |
| 654433_at | 5.956307 | 4.7407   | 5.899119 | 5.622214 | 5.262548 | 5.34656  | 3.916337 | 4.949015 |
| 654434_at | 4.277841 | 4.45136  | 4.015593 | 6.294832 | 5.969747 | 4.443026 | 5.3145   | 4.805565 |
| 654463_at | 2.219184 | 1.912402 | 1.880359 | 1.709725 | 2.963355 | 2.818628 | 2.299327 | 2.250965 |
| 654502_at | 3.713974 | 3.172423 | 3.559517 | 1.86141  | 1.951945 | 2.981073 | 2.51096  | 5.114165 |
| 6545_at   | 1.42201  | 1.863571 | 2.032453 | 1.605637 | 1.857213 | 1.667815 | 1.881044 | 2.290566 |
| 6546_at   | 2.460056 | 2.014325 | 1.697205 | 2.327762 | 3.797865 | 1.94275  | 2.392733 | 2.08585  |
| 654790_at | 1.780162 | 1.720968 | 1.891691 | 2.45689  | 2.610464 | 2.822758 | 2.049327 | 2.375588 |
| 6547_at   | 1.326187 | 1.672338 | 1.03817  | 1.259078 | 1.394467 | 1.859182 | 2.811096 | 1.721008 |
| 654817_at | 2.981719 | 2.155162 | 1.818886 | 3.156165 | 1.751064 | 2.276536 | 2.478091 | 2.800097 |
| 654835_at | 1.214964 | 1.914258 | 0.611678 | 0.762041 | 1.07286  | 0.721535 | 1.712329 | 1.118114 |
| 654841_at | 3.340043 | 2.831521 | 2.929892 | 1.793982 | 1.270198 | 2.156907 | 1.9065   | 1.972395 |
| 6548_at   | 5.42903  | 4.645069 | 5.234599 | 5.357861 | 5.619401 | 5.225878 | 5.493065 | 3.88079  |
| 6549_at   | 1.86081  | 1.656559 | 1.814073 | 2.813294 | 4.216968 | 2.561336 | 1.446328 | 2.482898 |
| 654_at    | 4.108267 | 5.515551 | 4.620537 | 5.275243 | 4.913825 | 5.832612 | 4.517162 | 4.38651  |
| 6550_at   | 3.741928 | 4.318538 | 3.571232 | 1.951582 | 4.876912 | 3.915178 | 3.359653 | 3.481824 |
| 6553_at   | 1.928909 | 2.129297 | 1.149391 | 2.173752 | 1.880007 | 2.743152 | 2.262107 | 2.614654 |
| 6554_at   | 1.322693 | 1.539562 | 1.652176 | 3.153989 | 1.955937 | 1.950393 | 2.46589  | 3.788481 |
| 6555_at   | 3.63115  | 2.448202 | 3.474173 | 2.736822 | 3.771308 | 3.827074 | 2.736403 | 3.816637 |
| 6556_at   | 2.666883 | 2.937028 | 2.600021 | 3.392327 | 2.563761 | 3.028075 | 3.325572 | 3.107778 |
| 6557_at   | 6.179329 | 6.061334 | 5.938958 | 4.561116 | 8.530187 | 6.739328 | 1.843153 | 6.929017 |
| 6558_at   | 5.419225 | 5.761334 | 5.908802 | 5.403448 | 6.446636 | 5.955675 | 5.604525 | 5.985589 |
| 6559_at   | 7.216654 | 3.341282 | 4.513882 | 4.317491 | 7.996908 | 2.931048 | 1.904744 | 4.677632 |
| 655_at    | 5.936943 | 5.065908 | 6.552668 | 5.027322 | 5.134524 | 6.157869 | 6.387727 | 4.777454 |
| 6560_at   | 5.625287 | 5.253195 | 5.671158 | 5.352303 | 4.80267  | 5.390608 | 5.4653   | 4.727981 |
| 6561_at   | 5.942706 | 5.326064 | 5.668387 | 4.565978 | 7.566194 | 5.835683 | 3.199425 | 6.373657 |
| 6563_at   | 2.507311 | 2.417043 | 2.266673 | 2.817592 | 3.175887 | 2.534926 | 3.042258 | 2.591765 |
| 6564_at   | 3.685459 | 2.630078 | 3.635448 | 3.056483 | 5.017229 | 3.21418  | 3.62168  | 2.735732 |
| 6565_at   | 1.531841 | 1.560823 | 1.824074 | 1.379851 | 1.467552 | 1.935393 | 1.629824 | 2.532709 |
| 6566_at   | 3.597622 | 3.788936 | 5.250389 | 2.956531 | 3.463717 | 2.866648 | 3.320926 | 4.819164 |
| 6567_at   | 5.746685 | 5.561371 | 5.852625 | 5.663301 | 5.78716  | 5.994319 | 5.297999 | 4.998124 |
| 6568_at   | 5.079609 | 3.694165 | 5.432783 | 2.486085 | 5.567203 | 6.006196 | 2.296674 | 5.678827 |
| 6569_at   | 7.088693 | 5.897853 | 5.517446 | 3.828338 | 5.366134 | 6.768643 | 3.355832 | 6.082517 |
| 656_at    | 1.040064 | 2.57506  | 3.575851 | 2.495926 | 2.872279 | 3.124948 | 2.324617 | 3.35404  |
| 6570_at   | 1.265089 | 1.454165 | 1.561189 | 1.36161  | 1.506151 | 1.44608  | 1.325564 | 2.01615  |
| 6571_at   | 2.090362 | 2.102338 | 1.831152 | 1.904001 | 2.435004 | 2.022888 | 2.753079 | 2.453491 |
| 6572_at   | 1.792714 | 2.423176 | 1.957639 | 2.262141 | 1.538739 | 2.557143 | 3.153483 | 2.040249 |
| 6573_at   | 2.627926 | 2.819307 | 2.69447  | 3.735307 | 2.30278  | 2.834532 | 3.333394 | 2.248781 |

|          |          |          |          |          |          |          |          |          |
|----------|----------|----------|----------|----------|----------|----------|----------|----------|
| 6574_at  | 4.472045 | 6.675037 | 5.593735 | 4.168794 | 6.017305 | 4.211264 | 4.664424 | 5.669752 |
| 6575_at  | 5.407777 | 5.434443 | 5.281841 | 5.231491 | 5.386305 | 5.464179 | 4.909969 | 4.459339 |
| 6576_at  | 4.395123 | 4.879034 | 4.961483 | 4.907557 | 3.792875 | 4.574951 | 4.714502 | 4.231454 |
| 6578_at  | 9.061792 | 9.310819 | 9.931871 | 9.970082 | 9.884578 | 10.11382 | 10.36771 | 8.43594  |
| 6579_at  | 1.480468 | 1.346193 | 1.474244 | 1.356335 | 2.294785 | 1.29842  | 2.381808 | 1.99994  |
| 657_at   | 6.277566 | 5.5227   | 5.48251  | 5.607177 | 6.413369 | 4.987903 | 6.352026 | 6.335602 |
| 6580_at  | 1.517176 | 1.827109 | 1.84311  | 2.048955 | 2.453826 | 2.66814  | 1.572095 | 1.969291 |
| 6581_at  | 2.434121 | 2.298904 | 1.617755 | 2.405611 | 3.359841 | 3.336867 | 2.105112 | 3.090471 |
| 6582_at  | 7.058667 | 6.173501 | 6.288368 | 6.405809 | 7.498797 | 6.977885 | 5.062917 | 6.779144 |
| 6583_at  | 2.518175 | 1.877008 | 2.017506 | 1.559827 | 2.350525 | 2.081969 | 1.611816 | 2.458611 |
| 6584_at  | 4.115268 | 3.46791  | 3.569707 | 3.825572 | 5.520153 | 4.585149 | 3.26561  | 5.524778 |
| 6585_at  | 2.730842 | 3.063916 | 2.802987 | 3.064062 | 3.202496 | 2.514354 | 3.18217  | 3.265689 |
| 6586_at  | 6.405596 | 6.550308 | 6.716011 | 6.287243 | 5.981467 | 7.556603 | 7.01394  | 6.11302  |
| 6588_at  | 1.601553 | 2.391508 | 1.610674 | 1.745539 | 1.481944 | 0.883683 | 1.333145 | 1.72121  |
| 658_at   | 1.507194 | 1.97419  | 2.103629 | 2.22483  | 3.104468 | 2.489058 | 2.541044 | 1.589254 |
| 6590_at  | 8.043557 | 6.090311 | 5.219629 | 6.111227 | 4.773147 | 8.7134   | 6.479593 | 4.846656 |
| 6591_at  | 9.373354 | 9.669989 | 9.49264  | 9.790564 | 9.588481 | 9.671535 | 9.494173 | 8.81328  |
| 6594_at  | 7.611755 | 8.202655 | 7.862372 | 7.965805 | 8.308132 | 8.110884 | 8.017631 | 8.13062  |
| 6595_at  | 7.46447  | 7.487099 | 7.502617 | 7.153433 | 6.897446 | 7.210454 | 7.261111 | 7.462881 |
| 6596_at  | 6.196642 | 6.526187 | 6.424228 | 6.091795 | 6.136284 | 6.033375 | 6.297052 | 6.331042 |
| 65975_at | 5.463577 | 5.690991 | 5.234155 | 4.279792 | 5.013235 | 4.708121 | 5.424311 | 5.293123 |
| 65977_at | 6.46829  | 6.568131 | 6.525632 | 6.595071 | 6.991533 | 6.545873 | 5.780584 | 7.114384 |
| 65979_at | 8.375401 | 8.427973 | 8.656647 | 8.427148 | 8.452584 | 8.752247 | 8.674953 | 8.299887 |
| 6597_at  | 5.672644 | 4.852764 | 6.163942 | 6.042034 | 5.676547 | 6.224007 | 6.007289 | 5.641499 |
| 65980_at | 4.038015 | 2.993355 | 4.06069  | 4.164114 | 4.558939 | 4.66837  | 3.278015 | 4.238172 |
| 65981_at | 5.473209 | 4.882613 | 4.786496 | 5.165793 | 4.819937 | 4.881592 | 5.476002 | 5.09202  |
| 65982_at | 4.077106 | 3.905217 | 3.909578 | 3.462615 | 3.980159 | 3.857613 | 3.510368 | 3.336408 |
| 65983_at | 4.995958 | 5.858798 | 5.601295 | 5.648414 | 4.344157 | 5.704795 | 6.026191 | 5.683109 |
| 65985_at | 4.553749 | 4.640481 | 5.071905 | 4.472161 | 4.573416 | 4.721321 | 4.744378 | 4.545891 |
| 65986_at | 5.128991 | 5.838107 | 6.048385 | 5.664274 | 5.461107 | 5.456452 | 6.017203 | 5.999501 |
| 65988_at | 3.224259 | 3.797995 | 3.898588 | 4.193977 | 2.896594 | 3.070444 | 4.087792 | 3.368889 |
| 65989_at | 3.597548 | 2.885783 | 3.180554 | 3.416298 | 3.660263 | 2.990171 | 2.796524 | 2.503935 |
| 6598_at  | 6.843011 | 6.547611 | 7.272716 | 7.021214 | 6.62308  | 6.99738  | 7.144232 | 7.38657  |
| 65990_at | 6.843848 | 6.491478 | 6.508475 | 5.821893 | 5.647799 | 6.096227 | 5.426789 | 5.876874 |
| 65992_at | 8.715032 | 7.850013 | 7.971944 | 8.087877 | 8.062178 | 8.26921  | 7.78796  | 8.428468 |
| 65993_at | 7.512544 | 7.00226  | 6.610957 | 7.350245 | 7.10543  | 7.538241 | 7.802686 | 6.429144 |
| 65996_at | 6.06611  | 6.019854 | 5.831614 | 4.825492 | 5.855179 | 5.900398 | 6.153651 | 5.033212 |
| 65997_at | 6.837228 | 6.267903 | 6.743509 | 6.575095 | 5.454091 | 6.165355 | 6.964443 | 6.17198  |
| 65998_at | 3.451815 | 3.836363 | 3.344139 | 3.051421 | 2.797175 | 3.577457 | 3.154676 | 3.757273 |
| 65999_at | 3.641847 | 2.981829 | 3.241001 | 2.922965 | 2.984519 | 3.276354 | 2.933768 | 2.675581 |
| 6599_at  | 7.310381 | 7.580119 | 7.459229 | 7.626012 | 7.797438 | 7.400143 | 7.797789 | 8.129189 |
| 659_at   | 7.750356 | 8.470637 | 8.270317 | 8.59321  | 8.811937 | 8.396318 | 8.707197 | 8.289562 |
| 66000_at | 1.348908 | 1.48314  | 1.099758 | 2.338207 | 1.938295 | 2.453054 | 1.096324 | 1.747195 |
| 66002_at | 3.687897 | 2.27227  | 1.193828 | 3.06294  | 1.785345 | 1.47567  | 1.938026 | 0.908927 |
| 66004_at | 4.146182 | 2.985286 | 3.820837 | 2.451935 | 1.894263 | 2.781114 | 3.311155 | 3.141119 |
| 66005_at | 7.358268 | 6.651763 | 7.548118 | 7.193908 | 7.488637 | 7.005229 | 6.851238 | 6.761791 |
| 66008_at | 8.035325 | 8.303272 | 8.138303 | 8.187537 | 7.926157 | 7.915088 | 8.191367 | 8.625807 |
| 6601_at  | 8.260934 | 7.943548 | 8.195397 | 7.994719 | 8.15887  | 7.939263 | 8.373855 | 7.850586 |
| 6602_at  | 6.423898 | 6.415764 | 6.528034 | 6.535503 | 6.643317 | 6.171054 | 6.27716  | 6.239768 |
| 66035_at | 3.556572 | 2.869115 | 3.312431 | 3.583861 | 3.777548 | 2.743433 | 3.283632 | 2.801817 |
| 66036_at | 5.128069 | 4.978065 | 4.371051 | 6.615321 | 4.410098 | 5.215821 | 4.525098 | 5.898729 |

|           |          |          |          |          |          |          |          |          |
|-----------|----------|----------|----------|----------|----------|----------|----------|----------|
| 66037_at  | 1.903119 | 1.408606 | 1.753066 | 1.176937 | 1.967775 | 1.683191 | 1.691299 | 1.861887 |
| 6603_at   | 4.73095  | 4.237901 | 4.879266 | 4.823739 | 4.218064 | 4.629314 | 4.225039 | 4.592613 |
| 6604_at   | 5.896324 | 5.547959 | 5.774078 | 4.36403  | 4.637908 | 6.147185 | 4.436669 | 4.84441  |
| 6605_at   | 8.717696 | 8.572229 | 8.372239 | 8.400542 | 8.279197 | 8.690703 | 7.93976  | 8.271183 |
| 6608_at   | 4.309348 | 4.698219 | 4.735411 | 3.29038  | 4.232212 | 4.660958 | 4.252422 | 4.024577 |
| 6609_at   | 6.368365 | 5.599588 | 6.203651 | 6.45442  | 6.231308 | 6.403742 | 7.494972 | 4.029926 |
| 660_at    | 1.418583 | 1.219472 | 1.65653  | 1.30075  | 1.715129 | 1.230957 | 1.086369 | 1.108952 |
| 6610_at   | 3.736705 | 3.268056 | 2.515059 | 2.751293 | 2.687222 | 2.652547 | 2.811618 | 2.284199 |
| 6611_at   | 3.421754 | 4.078482 | 3.938701 | 4.100995 | 3.272273 | 4.002503 | 3.595618 | 3.569327 |
| 6612_at   | 6.920865 | 6.898038 | 6.876093 | 6.789001 | 5.633855 | 6.90954  | 6.688049 | 7.220019 |
| 6614_at   | 2.631769 | 1.935638 | 2.883066 | 1.780349 | 2.752715 | 1.689773 | 1.922094 | 1.8778   |
| 6615_at   | 3.769698 | 4.012496 | 2.756158 | 3.613397 | 2.680748 | 4.489104 | 4.816213 | 2.735227 |
| 6616_at   | 3.858824 | 2.702845 | 2.311071 | 3.155392 | 2.842453 | 2.464959 | 2.828229 | 3.050901 |
| 6617_at   | 4.599554 | 4.756108 | 4.825512 | 3.727264 | 4.688113 | 4.726559 | 4.068627 | 5.325258 |
| 6618_at   | 2.953221 | 3.553901 | 4.332896 | 3.71916  | 2.784287 | 3.368923 | 4.123738 | 3.85347  |
| 6619_at   | 7.160161 | 7.002467 | 7.10434  | 7.564398 | 7.334872 | 6.450745 | 7.101528 | 7.409837 |
| 661_at    | 4.672777 | 3.761449 | 3.725564 | 6.079313 | 4.242946 | 4.408937 | 4.067293 | 4.868747 |
| 6620_at   | 2.401457 | 1.576296 | 2.678017 | 1.50413  | 2.049736 | 1.801878 | 2.594473 | 2.033341 |
| 6621_at   | 4.072075 | 3.634478 | 3.045143 | 4.253763 | 3.716156 | 4.059878 | 3.164715 | 3.421538 |
| 6622_at   | 8.055393 | 7.274093 | 7.92557  | 7.201451 | 7.457644 | 7.547317 | 8.201382 | 7.801475 |
| 6623_at   | 5.400441 | 5.026689 | 5.493234 | 5.434338 | 6.045988 | 4.933374 | 6.102833 | 4.801342 |
| 6624_at   | 8.039337 | 6.990577 | 8.2904   | 8.349823 | 7.788348 | 7.732339 | 8.036983 | 6.927711 |
| 6625_at   | 6.304989 | 7.169663 | 6.349351 | 7.004942 | 6.582905 | 6.899031 | 6.222798 | 7.004088 |
| 6626_at   | 7.814541 | 7.720359 | 7.618359 | 8.204112 | 7.110635 | 7.450759 | 7.004215 | 6.032608 |
| 6627_at   | 5.522285 | 5.853773 | 5.767693 | 5.639017 | 4.834597 | 5.337914 | 5.205697 | 4.968477 |
| 6628_at   | 7.088924 | 6.498433 | 6.155221 | 6.46716  | 5.921167 | 6.584951 | 6.384444 | 6.060982 |
| 6629_at   | 7.41319  | 7.974577 | 7.189029 | 7.564086 | 7.582643 | 7.462187 | 7.569484 | 7.394378 |
| 662_at    | 3.376057 | 2.805275 | 3.424984 | 3.5651   | 4.608779 | 4.077238 | 3.885629 | 3.986648 |
| 6631_at   | 7.176279 | 5.988773 | 6.43352  | 6.632464 | 5.529737 | 5.4999   | 6.929658 | 5.520316 |
| 6632_at   | 6.014716 | 6.532675 | 5.405958 | 6.026887 | 6.723254 | 6.694026 | 6.043494 | 6.161247 |
| 6633_at   | 4.684146 | 4.644264 | 4.840516 | 4.876595 | 4.377368 | 4.943421 | 4.637203 | 4.472668 |
| 6634_at   | 8.715183 | 8.450202 | 8.304112 | 8.056242 | 8.485647 | 8.644495 | 8.302185 | 8.221268 |
| 6635_at   | 6.299379 | 5.756649 | 2.990582 | 4.402904 | 3.618998 | 2.879207 | 3.363151 | 6.402311 |
| 6636_at   | 6.920415 | 7.834666 | 7.167215 | 7.732201 | 7.383949 | 7.685915 | 7.352389 | 7.354869 |
| 6638_at   | 3.208859 | 3.53236  | 2.298805 | 1.62432  | 1.796783 | 1.89988  | 1.873027 | 2.666203 |
| 663_at    | 6.892161 | 7.303027 | 6.694837 | 6.841983 | 6.517139 | 6.542494 | 6.884509 | 7.586271 |
| 6640_at   | 5.587757 | 4.975881 | 5.107765 | 4.502452 | 3.57151  | 4.864958 | 4.215281 | 5.365855 |
| 6641_at   | 6.190793 | 6.058461 | 5.556694 | 5.918071 | 6.23311  | 4.657265 | 5.959764 | 5.705982 |
| 6642_at   | 7.034507 | 7.123173 | 7.065671 | 7.570645 | 6.982883 | 7.419792 | 7.061118 | 6.515143 |
| 6643_at   | 5.603149 | 5.649223 | 5.311449 | 5.699055 | 5.510067 | 5.447176 | 5.179718 | 5.819073 |
| 6645_at   | 5.903492 | 5.387659 | 5.978433 | 5.678847 | 5.923367 | 5.650541 | 5.46803  | 5.910569 |
| 664612_at | 2.479574 | 3.621532 | 3.204775 | 3.313035 | 4.575951 | 3.08366  | 4.554088 | 3.160974 |
| 664613_at | 1.405362 | 0.932788 | 0.780791 | 1.175659 | 3.688323 | 2.082195 | 1.979488 | 1.654743 |
| 664614_at | 2.031218 | 1.178174 | 1.725929 | 1.105633 | 2.322106 | 1.302071 | 2.27972  | 3.016222 |
| 664615_at | 2.62271  | 2.946841 | 2.23285  | 3.007701 | 3.057377 | 3.282604 | 2.485572 | 3.871258 |
| 664616_at | 1.596507 | 1.426202 | 1.06383  | 1.101836 | 1.707316 | 1.150363 | 1.478843 | 0.997559 |
| 664617_at | 1.115966 | 4.25384  | 2.507533 | 2.004403 | 2.156203 | 1.075722 | 1.559077 | 1.438797 |
| 664618_at | 1.926829 | 2.985355 | 2.003681 | 2.039692 | 2.133131 | 1.936993 | 3.164861 | 2.032673 |
| 6646_at   | 5.671379 | 5.706233 | 5.577793 | 6.197313 | 6.310386 | 5.624368 | 5.717363 | 6.129535 |
| 664701_at | 4.190316 | 3.398757 | 4.278449 | 3.112549 | 4.690977 | 3.657537 | 4.227854 | 3.378213 |
| 664709_at | 10.23249 | 10.4801  | 10.37552 | 10.62571 | 10.71206 | 10.54778 | 10.29805 | 10.73501 |

|         |          |          |          |          |          |          |          |          |
|---------|----------|----------|----------|----------|----------|----------|----------|----------|
| 6647_at | 10.00791 | 9.90691  | 9.944082 | 9.948645 | 10.05964 | 9.85267  | 9.821807 | 9.865816 |
| 6648_at | 8.521377 | 7.42973  | 8.169665 | 8.065048 | 7.363181 | 8.53884  | 8.323953 | 7.517477 |
| 6649_at | 4.49231  | 4.480809 | 4.585874 | 5.184508 | 4.184299 | 4.633421 | 3.935958 | 2.886337 |
| 664_at  | 7.402147 | 7.916038 | 7.578235 | 7.57154  | 7.455068 | 7.242971 | 7.040531 | 7.773984 |
| 6650_at | 2.146016 | 2.278615 | 2.539348 | 2.707188 | 2.218949 | 3.04645  | 2.822736 | 2.434754 |
| 6651_at | 6.481747 | 6.859675 | 6.795399 | 6.644392 | 6.832606 | 6.63863  | 6.733734 | 7.567139 |
| 6652_at | 5.032994 | 5.721056 | 4.607247 | 4.541396 | 2.901612 | 4.682304 | 4.797398 | 4.8292   |
| 6653_at | 4.214053 | 5.130906 | 6.15679  | 5.287228 | 6.244565 | 5.565523 | 5.156063 | 5.888404 |
| 6654_at | 6.429753 | 6.60656  | 6.784967 | 6.634449 | 6.596894 | 6.139494 | 6.11475  | 6.743317 |
| 6655_at | 7.106229 | 7.145982 | 6.60958  | 6.997737 | 6.850685 | 6.269329 | 6.069719 | 6.589825 |
| 6656_at | 1.553643 | 1.398148 | 1.063824 | 1.556845 | 1.726441 | 1.363456 | 1.557419 | 1.508396 |
| 6657_at | 2.331356 | 2.245283 | 2.649826 | 2.136311 | 1.613084 | 2.830054 | 2.220491 | 2.113765 |
| 6658_at | 1.601749 | 1.277439 | 1.506179 | 1.95251  | 1.869581 | 1.866341 | 1.654395 | 1.605311 |
| 6659_at | 5.635676 | 5.714519 | 5.384656 | 5.905547 | 6.004939 | 5.511356 | 5.43169  | 5.830163 |
| 665_at  | 9.289922 | 8.677288 | 9.266813 | 9.031691 | 8.967834 | 8.961238 | 9.409605 | 9.420561 |
| 6660_at | 3.489185 | 3.200062 | 2.808995 | 3.104871 | 2.965028 | 3.637471 | 2.509091 | 2.201506 |
| 6662_at | 5.89727  | 5.097269 | 4.884954 | 5.560784 | 4.728203 | 5.124912 | 4.806037 | 4.594143 |
| 6663_at | 2.754499 | 1.696546 | 2.75291  | 2.944856 | 2.856344 | 2.653756 | 3.411278 | 3.183871 |
| 6664_at | 1.89737  | 2.474394 | 1.973353 | 1.61707  | 2.356361 | 1.454126 | 1.370434 | 1.563835 |
| 6665_at | 3.00698  | 2.403728 | 2.285981 | 2.788483 | 2.970184 | 3.036739 | 3.263988 | 2.327706 |
| 6666_at | 4.163604 | 4.093884 | 4.243468 | 4.638902 | 3.898972 | 4.198776 | 4.261823 | 4.879717 |
| 6667_at | 6.609699 | 6.589195 | 6.804593 | 6.63604  | 6.521664 | 6.741088 | 6.951479 | 6.577266 |
| 6668_at | 5.617153 | 6.284776 | 6.321665 | 5.933397 | 5.60858  | 5.580095 | 5.990846 | 5.290639 |
| 666_at  | 5.197954 | 5.191339 | 5.959809 | 6.107392 | 3.196814 | 6.012381 | 6.537835 | 4.810604 |
| 6670_at | 4.778154 | 5.088494 | 4.723828 | 4.744177 | 4.294729 | 4.90037  | 5.031763 | 4.78129  |
| 6671_at | 4.682968 | 5.249245 | 4.692303 | 5.049841 | 5.623128 | 4.886884 | 4.738978 | 5.944502 |
| 6672_at | 7.062649 | 6.789884 | 6.409351 | 6.409792 | 6.571713 | 6.844413 | 6.455751 | 6.727599 |
| 6674_at | 3.524988 | 4.070174 | 2.322031 | 3.685278 | 4.618581 | 4.296159 | 3.834276 | 4.50571  |
| 6675_at | 5.985649 | 6.039895 | 5.800625 | 4.942491 | 5.876497 | 5.490137 | 5.40024  | 6.559131 |
| 6676_at | 1.959517 | 2.343047 | 2.089918 | 3.02431  | 3.21322  | 2.013322 | 2.236063 | 3.407605 |
| 6677_at | 1.059096 | 0.956892 | 0.814603 | 1.123028 | 1.110062 | 1.323526 | 1.955845 | 1.461601 |
| 6678_at | 10.17744 | 10.26638 | 10.42797 | 10.65094 | 10.41672 | 10.04328 | 10.57768 | 10.08891 |
| 667_at  | 8.081852 | 8.745014 | 8.408892 | 8.051921 | 8.235087 | 7.534039 | 8.264561 | 9.037073 |
| 6683_at | 5.484384 | 5.891777 | 5.390834 | 5.269459 | 6.064006 | 5.508807 | 5.90718  | 5.786285 |
| 6687_at | 5.191634 | 4.623159 | 4.293904 | 4.282073 | 4.634354 | 5.123015 | 5.349003 | 4.79033  |
| 6688_at | 4.139676 | 3.167974 | 3.283664 | 3.861442 | 3.761682 | 3.646822 | 3.711229 | 3.023832 |
| 6689_at | 2.587137 | 2.996108 | 3.129042 | 3.337683 | 3.008306 | 3.046727 | 3.243832 | 3.531446 |
| 668_at  | 1.711339 | 1.151772 | 1.855083 | 1.759451 | 1.218348 | 1.952833 | 1.750847 | 1.370949 |
| 6690_at | 1.236385 | 1.837665 | 3.245116 | 6.212503 | 1.535372 | 3.776338 | 2.118736 | 2.901035 |
| 6691_at | 1.467129 | 1.084846 | 1.299753 | 1.108722 | 1.605218 | 1.476373 | 3.172912 | 1.542074 |
| 6692_at | 5.502083 | 4.258273 | 4.734369 | 4.550741 | 4.611748 | 6.023919 | 5.416275 | 4.252538 |
| 6693_at | 4.166601 | 4.450529 | 4.213076 | 5.039751 | 4.82159  | 4.487276 | 5.536583 | 5.205747 |
| 6694_at | 1.542547 | 1.199089 | 0.752307 | 1.235643 | 1.222111 | 0.893461 | 0.979837 | 1.454988 |
| 6695_at | 8.698919 | 8.8909   | 9.519231 | 9.053568 | 8.457608 | 8.978466 | 9.70393  | 8.631277 |
| 6696_at | 10.0092  | 8.487925 | 8.4949   | 8.966554 | 10.64556 | 9.84739  | 6.717803 | 9.521292 |
| 6697_at | 5.746911 | 5.540264 | 5.973756 | 5.778756 | 4.980019 | 5.836891 | 5.241917 | 4.33265  |
| 6698_at | 2.302489 | 2.013178 | 2.177195 | 2.068288 | 2.070685 | 1.728269 | 2.44549  | 3.083201 |
| 6699_at | 1.84214  | 0.612854 | 0.957553 | 0.997818 | 2.232205 | 1.839377 | 2.26402  | 2.165239 |
| 669_at  | 5.416089 | 4.90446  | 5.769943 | 5.653846 | 5.393158 | 5.030386 | 5.317665 | 5.421372 |
| 6701_at | 1.483304 | 1.976786 | 1.593116 | 1.273306 | 2.190996 | 2.190399 | 1.45322  | 1.305405 |
| 6702_at | 2.251565 | 1.693383 | 1.500547 | 1.813216 | 2.536963 | 1.064564 | 0.879443 | 1.301046 |

|         |          |          |          |          |          |          |          |          |
|---------|----------|----------|----------|----------|----------|----------|----------|----------|
| 6704_at | 1.363672 | 1.081429 | 1.374571 | 1.097289 | 1.70747  | 2.506632 | 0.956144 | 1.229997 |
| 6705_at | 0.848623 | 1.098827 | 1.77431  | 1.921519 | 1.78564  | 1.405825 | 1.845648 | 1.665837 |
| 6706_at | 0.963924 | 1.636553 | 1.554823 | 1.116585 | 1.561368 | 1.59068  | 2.126104 | 1.762341 |
| 6707_at | 2.022102 | 1.775947 | 2.027853 | 1.892176 | 2.154778 | 2.025307 | 1.875256 | 2.131039 |
| 6708_at | 1.620094 | 1.470219 | 1.753161 | 2.012837 | 1.634923 | 1.375347 | 1.659897 | 1.823558 |
| 6709_at | 8.275781 | 8.602045 | 8.817383 | 8.516646 | 8.423333 | 8.402796 | 8.635784 | 8.598065 |
| 670_at  | 6.961119 | 5.768229 | 6.850097 | 4.240745 | 6.09188  | 6.015334 | 5.421741 | 6.062915 |
| 6710_at | 5.74259  | 6.019751 | 5.683824 | 4.931831 | 4.421288 | 4.940623 | 5.924545 | 5.234765 |
| 6711_at | 9.368084 | 9.627149 | 9.532676 | 9.880521 | 9.815225 | 9.856436 | 9.81675  | 9.5367   |
| 6712_at | 2.047002 | 2.259122 | 2.785491 | 3.369738 | 2.671233 | 2.108911 | 1.889786 | 2.139328 |
| 6713_at | 6.679665 | 7.021958 | 6.950485 | 6.871534 | 7.453409 | 5.846895 | 7.487487 | 6.775899 |
| 6714_at | 2.258204 | 3.432407 | 3.814122 | 3.935779 | 3.055218 | 3.048454 | 3.496698 | 2.854586 |
| 6715_at | 2.739139 | 2.137006 | 1.881851 | 1.51517  | 1.813304 | 1.950156 | 2.419768 | 1.96771  |
| 6716_at | 1.204099 | 1.954081 | 1.370284 | 1.659295 | 1.510726 | 1.259802 | 1.712965 | 1.493885 |
| 6717_at | 8.573592 | 8.649867 | 8.631832 | 8.720717 | 8.973669 | 8.301533 | 8.172709 | 8.618577 |
| 6718_at | 1.582044 | 1.248205 | 1.30235  | 1.413883 | 2.035981 | 1.91817  | 1.674596 | 1.681624 |
| 6719_at | 1.71576  | 0.995902 | 1.42189  | 1.303289 | 1.356118 | 1.628917 | 1.197591 | 2.733657 |
| 671_at  | 1.933921 | 1.928919 | 1.635005 | 1.919889 | 2.941043 | 1.376246 | 1.802327 | 1.898535 |
| 6720_at | 4.336136 | 4.089273 | 4.116616 | 4.09091  | 3.444423 | 3.594684 | 3.684531 | 3.732344 |
| 6721_at | 6.083682 | 6.061749 | 6.47198  | 5.491422 | 5.928857 | 5.555235 | 6.393418 | 5.225786 |
| 6722_at | 7.198778 | 7.355183 | 6.776241 | 6.829912 | 6.160098 | 7.09616  | 6.852276 | 6.395411 |
| 6723_at | 6.418457 | 6.498096 | 6.554311 | 6.953287 | 6.91641  | 6.613095 | 6.493822 | 5.892156 |
| 6725_at | 2.427722 | 2.158592 | 2.114098 | 1.80186  | 2.315224 | 1.425344 | 2.522124 | 1.711248 |
| 6726_at | 9.440124 | 9.662393 | 9.602909 | 9.783113 | 10.05702 | 8.964173 | 9.187872 | 9.883862 |
| 6727_at | 9.157735 | 9.249457 | 9.374127 | 9.135728 | 8.991446 | 9.387926 | 9.030886 | 8.957806 |
| 6728_at | 4.957945 | 5.030877 | 4.093141 | 4.370168 | 4.796822 | 4.634208 | 4.122637 | 5.008068 |
| 6729_at | 6.866028 | 6.956893 | 6.727771 | 6.937173 | 6.454027 | 7.158021 | 6.305081 | 6.659765 |
| 672_at  | 3.352429 | 3.076516 | 2.26035  | 3.664525 | 2.791578 | 3.01533  | 2.033078 | 1.986958 |
| 6730_at | 6.847225 | 7.288689 | 6.800547 | 7.153866 | 6.261954 | 7.048016 | 6.163031 | 6.716176 |
| 6731_at | 8.371065 | 8.238176 | 8.160491 | 7.673142 | 8.011889 | 7.758815 | 7.803836 | 8.262327 |
| 6732_at | 5.540588 | 5.816586 | 6.107788 | 5.650118 | 5.121747 | 6.149627 | 6.032605 | 5.996873 |
| 6733_at | 5.87428  | 5.188709 | 6.016598 | 5.488383 | 5.713094 | 6.031283 | 5.707883 | 6.180365 |
| 6734_at | 7.116532 | 7.505078 | 7.472186 | 7.349329 | 6.80283  | 7.576693 | 7.174946 | 7.063834 |
| 6736_at | 1.498467 | 1.495872 | 1.440221 | 2.59246  | 1.725399 | 0.918385 | 1.447801 | 1.558538 |
| 6737_at | 5.113369 | 4.37932  | 4.795939 | 5.449332 | 4.041431 | 5.308114 | 4.635915 | 5.399923 |
| 6738_at | 7.155256 | 6.956237 | 6.776093 | 7.265203 | 6.769454 | 6.67998  | 6.948806 | 7.28329  |
| 673_at  | 6.830036 | 7.077014 | 6.500411 | 6.431266 | 6.555864 | 6.901959 | 7.1394   | 6.882555 |
| 6741_at | 9.247599 | 9.534958 | 9.290552 | 9.25152  | 9.506123 | 9.300225 | 9.004776 | 9.583991 |
| 6742_at | 6.499013 | 6.354484 | 6.353215 | 6.334284 | 6.368638 | 6.004891 | 6.098037 | 6.511056 |
| 6744_at | 6.927856 | 6.915597 | 6.532705 | 6.494608 | 6.240389 | 6.787782 | 6.460657 | 6.859962 |
| 6745_at | 7.730973 | 8.137615 | 8.084534 | 8.371302 | 8.501765 | 8.142835 | 8.296727 | 8.447183 |
| 6746_at | 9.716396 | 9.467772 | 9.564882 | 9.606696 | 9.150211 | 9.323122 | 9.402273 | 9.295389 |
| 6747_at | 8.526481 | 8.741592 | 8.629538 | 8.269448 | 8.221271 | 8.388867 | 8.296918 | 8.076903 |
| 6748_at | 9.913252 | 9.85211  | 9.852543 | 9.567647 | 9.637467 | 9.701883 | 9.93812  | 9.156156 |
| 6749_at | 7.36491  | 7.268225 | 6.890615 | 7.08177  | 6.523336 | 6.732135 | 6.884543 | 7.480625 |
| 6750_at | 6.461954 | 6.143372 | 5.525219 | 6.09959  | 6.783065 | 6.930267 | 11.0687  | 6.932877 |
| 6751_at | 2.499651 | 2.048378 | 2.238649 | 3.233413 | 2.220378 | 2.550032 | 2.311356 | 1.865001 |
| 6752_at | 2.037474 | 1.673264 | 1.867    | 2.260153 | 1.481305 | 1.408271 | 2.020156 | 2.211297 |
| 6753_at | 3.655162 | 1.958606 | 2.15092  | 1.660622 | 1.595434 | 1.267141 | 1.196099 | 1.473091 |
| 6754_at | 2.225388 | 1.603369 | 1.684781 | 2.64615  | 1.990752 | 2.186882 | 2.191908 | 1.664725 |
| 6755_at | 3.266589 | 2.387003 | 2.858406 | 2.647141 | 3.058817 | 2.557123 | 2.906432 | 2.330938 |

|           |          |          |          |          |          |          |          |          |
|-----------|----------|----------|----------|----------|----------|----------|----------|----------|
| 6756_at   | 0.766005 | 0.503799 | 0.57748  | 0.647045 | 0.722835 | 0.866155 | 1.539201 | 1.48859  |
| 6758_at   | 1.518211 | 1.556247 | 1.556247 | 1.155637 | 1.270037 | 0.646841 | 1.267266 | 1.289486 |
| 675_at    | 1.936306 | 2.377288 | 1.956896 | 1.6906   | 2.510179 | 1.575647 | 1.813958 | 1.661585 |
| 6760_at   | 8.043375 | 8.022675 | 7.975334 | 8.247618 | 7.944545 | 8.366251 | 8.4079   | 7.848768 |
| 6764_at   | 4.787658 | 5.007371 | 4.947186 | 4.887269 | 4.288482 | 4.342999 | 4.767571 | 4.420794 |
| 6767_at   | 5.898956 | 6.546219 | 6.303183 | 6.036142 | 6.223958 | 5.989015 | 6.309021 | 6.81441  |
| 6768_at   | 2.628282 | 1.948626 | 2.950713 | 2.306054 | 3.425012 | 2.807927 | 2.429303 | 2.433413 |
| 6769_at   | 4.119997 | 3.12303  | 4.302935 | 2.788216 | 3.239489 | 2.337305 | 2.450086 | 3.342871 |
| 676_at    | 1.151966 | 1.13572  | 1.051862 | 1.190402 | 1.353597 | 1.079946 | 1.203945 | 1.778108 |
| 6770_at   | 1.440372 | 1.910276 | 1.403021 | 2.180087 | 1.96078  | 1.16703  | 2.271746 | 2.995986 |
| 6772_at   | 8.36456  | 8.252791 | 8.247846 | 8.362852 | 7.310483 | 7.856162 | 8.110549 | 8.473627 |
| 6773_at   | 5.88586  | 5.721884 | 5.486992 | 5.787022 | 5.056356 | 5.972055 | 5.856458 | 6.074718 |
| 6774_at   | 8.209387 | 8.143083 | 8.032148 | 7.934646 | 8.123895 | 8.028235 | 8.320151 | 7.861139 |
| 6775_at   | 2.437742 | 1.749536 | 2.359997 | 1.602864 | 1.941503 | 2.024909 | 1.630086 | 2.065172 |
| 677679_at | 0.850744 | 4.482025 | 1.596612 | 5.382888 | 1.352855 | 3.566049 | 0.846082 | 3.024453 |
| 677681_at | 2.443192 | 1.09747  | 2.135815 | 1.126457 | 1.862102 | 1.947392 | 2.831609 | 2.511669 |
| 6776_at   | 4.985841 | 3.802905 | 2.702424 | 4.111295 | 4.319912 | 4.435667 | 4.413834 | 2.77191  |
| 677763_at | 2.184086 | 2.049062 | 3.965561 | 4.892545 | 3.726102 | 2.252361 | 2.490798 | 2.218574 |
| 677765_at | 0.884527 | 0.764935 | 1.147595 | 3.010028 | 0.764935 | 1.641706 | 1.187782 | 0.905529 |
| 677766_at | 4.507084 | 5.215036 | 4.155023 | 5.717277 | 6.166248 | 4.916432 | 4.338944 | 4.245479 |
| 677767_at | 6.811033 | 5.807053 | 6.627074 | 6.982632 | 7.600873 | 7.087319 | 4.580728 | 7.599995 |
| 677769_at | 6.002009 | 5.536229 | 6.001395 | 4.756214 | 4.242149 | 7.109419 | 3.341234 | 7.092284 |
| 677770_at | 1.851661 | 2.361928 | 2.686318 | 3.484985 | 1.249921 | 4.861858 | 2.587604 | 3.037503 |
| 677771_at | 3.684599 | 2.768011 | 3.891459 | 3.293493 | 3.104659 | 4.101294 | 2.675174 | 4.739021 |
| 677772_at | 3.407706 | 2.090295 | 1.501571 | 2.108433 | 3.704156 | 3.279883 | 2.616199 | 3.514785 |
| 677773_at | 1.286043 | 1.43141  | 1.613149 | 1.53943  | 2.058252 | 1.518945 | 1.524612 | 1.508518 |
| 677774_at | 2.258077 | 1.161153 | 1.325927 | 1.165571 | 1.863294 | 2.011486 | 2.38388  | 2.866848 |
| 677775_at | 3.443405 | 6.595348 | 5.78832  | 2.913067 | 5.318257 | 6.103444 | 4.600759 | 6.741805 |
| 677776_at | 3.501503 | 1.976889 | 1.954986 | 2.057039 | 2.022303 | 1.498406 | 2.066885 | 1.320066 |
| 677777_at | 4.697047 | 5.634609 | 4.95296  | 6.103389 | 5.695106 | 5.080851 | 5.872749 | 7.332739 |
| 677778_at | 1.586369 | 1.071401 | 0.943759 | 1.249082 | 1.337929 | 1.057672 | 1.282671 | 1.240015 |
| 677779_at | 1.593302 | 1.182888 | 1.440076 | 1.834373 | 1.83774  | 1.78517  | 2.218193 | 1.647808 |
| 677780_at | 1.036689 | 1.942415 | 2.69612  | 1.789705 | 2.43542  | 1.456578 | 2.864193 | 2.428583 |
| 677781_at | 3.633777 | 4.629868 | 4.090715 | 4.914585 | 4.689651 | 3.486949 | 2.397378 | 5.900314 |
| 677792_at | 1.646507 | 3.454864 | 1.353064 | 0.859252 | 0.942473 | 2.64468  | 1.254502 | 1.613577 |
| 677793_at | 0.754216 | 1.144942 | 5.470946 | 0.915171 | 1.291423 | 0.75863  | 0.99912  | 1.423598 |
| 677794_at | 1.176635 | 0.735574 | 1.67341  | 1.448765 | 1.18471  | 0.95181  | 1.506669 | 1.590674 |
| 677795_at | 2.456318 | 2.98671  | 2.900712 | 2.320881 | 2.234765 | 2.500601 | 2.754901 | 2.599785 |
| 677796_at | 2.927258 | 3.393097 | 3.95543  | 3.461125 | 3.224734 | 3.854273 | 3.173419 | 3.028968 |
| 677797_at | 2.169579 | 1.266702 | 1.016212 | 2.966451 | 1.299714 | 5.454124 | 3.714494 | 3.297537 |
| 677798_at | 1.350536 | 1.390964 | 0.707586 | 3.401099 | 2.624595 | 3.669365 | 1.954815 | 1.661428 |
| 677799_at | 5.186724 | 4.972147 | 2.605762 | 7.983529 | 7.010893 | 4.847273 | 6.260666 | 5.949977 |
| 6777_at   | 5.953244 | 7.250199 | 6.248247 | 7.472828 | 6.081985 | 6.458367 | 6.476854 | 5.377754 |
| 677800_at | 4.725489 | 4.760482 | 6.089532 | 5.261496 | 2.517358 | 5.171233 | 6.516508 | 5.922971 |
| 677801_at | 4.672277 | 4.707684 | 4.618637 | 4.168932 | 1.827852 | 4.342798 | -0.18663 | 5.772985 |
| 677802_at | 1.25307  | 1.189499 | 2.547677 | 0.996109 | 1.79621  | 2.620512 | 2.030185 | 3.279344 |
| 677803_at | 1.24649  | 1.048296 | 1.579836 | 0.734719 | 2.13936  | 1.185771 | 0.768829 | 0.91406  |
| 677805_at | 5.941774 | 4.032172 | 3.401545 | 5.973123 | 5.529021 | 3.405633 | 3.915636 | 4.265788 |
| 677806_at | 2.847048 | 5.171382 | 3.226155 | 1.049574 | 1.919645 | 3.352125 | 3.399248 | 4.515784 |
| 677807_at | 7.880033 | 8.349871 | 7.760529 | 8.493614 | 7.200232 | 8.394414 | 8.129553 | 7.254448 |
| 677808_at | 3.361676 | 6.552222 | 3.049729 | 4.164901 | 4.982819 | 3.305279 | 2.188025 | 6.591624 |



677809\_at 6.14059 6.545133 6.530957 8.013256 6.415727 6.634298 6.167789 7.117928  
677810\_at 2.315933 0.309333 3.066197 3.466658 1.373848 2.990721 3.104933 1.268352  
677811\_at 5.565522 4.69996 5.52859 6.840201 5.49044 4.542915 2.462573 5.652692  
677812\_at 1.205563 1.48135 1.091062 1.332834 1.496519 1.016408 1.072042 1.866337  
677813\_at 0.865871 1.427114 1.427114 2.252235 1.215217 1.275777 2.8457 1.330982  
677814\_at 1.421976 1.06567 1.233809 4.282713 1.051864 0.945413 1.667517 0.934995  
677815\_at 2.031341 0.975082 1.2938 1.53185 1.815367 1.812288 1.298014 1.540219  
677816\_at 1.797625 1.854048 1.866922 1.252495 2.43792 1.986974 2.000131 1.559174  
677818\_at 3.431253 0.616736 1.240107 2.683079 1.36591 4.008106 1.343092 1.060396  
677819\_at 1.959258 1.237929 1.174401 1.346742 1.583939 1.26048 1.24248 1.186144  
677820\_at 2.227527 2.404166 2.542315 2.485339 4.229558 2.006272 2.562953 2.189951  
677821\_at 3.349529 3.341463 3.64053 2.810166 3.067068 3.331585 3.209497 5.007878  
677823\_at 2.352034 2.124704 2.940273 2.305114 2.371907 3.12702 4.706335 3.519014  
677825\_at 1.668565 1.91254 1.00895 2.73018 1.653994 1.336221 1.52846 1.079838  
677826\_at 2.844807 3.890925 3.595976 2.081359 3.211488 2.361029 2.90079 3.269462  
677827\_at 1.61108 1.84914 3.255149 2.598361 3.819052 4.832297 1.650375 2.245278  
677828\_at 5.660877 6.216757 6.15441 7.007419 5.047105 6.304085 6.244135 4.328757  
677829\_at 3.345753 2.098582 1.793161 4.17131 1.462385 3.2396 2.752536 3.196268  
677830\_at 5.895864 7.826106 2.706849 6.752587 3.375517 4.91631 5.220601 5.620028  
677832\_at 2.047832 1.773682 1.165635 1.131517 2.788461 2.20844 3.045007 1.864312  
677833\_at 1.122245 1.472049 1.379635 3.240835 1.482722 1.053372 1.59894 2.148834  
677834\_at 2.325517 2.980417 1.996588 2.008701 2.367002 2.014661 2.541522 4.343825  
677836\_at 1.154766 0.924335 1.125473 1.890135 0.985082 2.103663 1.051327 1.310217  
677837\_at 3.959381 2.174698 2.313236 4.798289 2.509652 4.774007 2.106311 4.319307  
677838\_at 2.19509 1.350054 2.558864 2.369749 2.110772 1.658835 3.916716 2.407673  
677839\_at 4.178951 3.798247 4.316861 5.482716 4.345214 4.655421 5.430272 4.542966  
677840\_at 2.85327 2.668464 1.552546 5.553873 2.059392 2.696016 4.699076 3.980693  
677841\_at 3.803237 2.524354 2.907317 2.080649 2.777877 2.485265 2.755399 2.909075  
677842\_at 1.724802 0.79413 0.647729 1.227597 1.979112 0.932067 1.130514 1.011737  
677843\_at 2.226192 2.179036 1.76766 2.149758 1.948299 2.068257 2.354454 1.782321  
677845\_at 6.234642 6.516026 4.914371 6.508642 5.20919 5.819137 6.997154 7.718777  
677846\_at 3.783255 3.902631 4.564211 3.684022 3.416964 3.863064 1.571078 4.239492  
677847\_at 1.503417 0.884192 1.28147 1.670963 1.174758 1.982109 3.152589 2.965781  
677848\_at 1.596187 1.249521 1.509838 1.355716 1.575321 1.140182 1.349696 1.37442  
677849\_at 0.864889 0.931272 1.202987 3.157562 0.738231 1.29108 2.281779 2.724497  
677850\_at 1.894465 1.800909 1.367526 1.197791 2.138677 1.180525 1.153831 1.193927  
6778\_at 6.471002 7.006365 6.84654 6.983836 6.560326 6.786584 6.360751 6.760252  
6779\_at 2.479548 0.88061 0.730349 0.465121 0.837156 2.290854 1.271247 0.855825  
677\_at 8.719244 8.859324 9.240643 9.127438 7.940222 8.48067 9.154105 7.935601  
6780\_at 7.274004 6.897009 7.020822 7.054225 7.069517 7.207627 6.774495 6.961024  
6781\_at 3.261903 3.113568 3.165124 2.536264 5.26083 3.992855 2.592345 3.738137  
6782\_at 6.872338 7.578984 7.258643 7.139713 7.169929 6.62417 7.459367 8.03234  
6783\_at 1.588338 1.179971 2.038921 1.627462 1.11837 1.304337 1.323044 1.113049  
6785\_at 5.803943 4.31769 5.157462 4.925296 4.655726 3.899185 5.849411 6.086952  
678655\_at 2.685887 3.735139 2.453957 2.932528 3.790272 3.614412 3.247994 4.02225  
6786\_at 6.152302 6.159428 6.04466 5.357071 5.298798 6.254074 5.509119 5.719687  
6787\_at 5.875279 6.057481 5.310928 5.420623 5.880917 5.38951 5.590527 5.816791  
6788\_at 5.429577 5.909142 6.131637 5.791473 5.74213 5.675497 5.339364 5.631753  
6789\_at 6.325679 6.608397 6.427118 6.899046 5.400215 6.338397 6.669893 5.977153  
678\_at 6.547187 6.917019 6.486462 7.993651 6.774829 7.240489 7.246146 5.394703  
6790\_at 2.526199 2.736885 2.071398 2.02691 2.864691 1.872446 1.794863 2.724916

|           |          |          |          |          |          |          |          |          |
|-----------|----------|----------|----------|----------|----------|----------|----------|----------|
| 6791_at   | 1.469366 | 3.27015  | 1.021839 | 1.900747 | 1.971785 | 2.914165 | 1.641486 | 1.119195 |
| 6792_at   | 4.224691 | 4.780959 | 4.483903 | 5.323768 | 5.560417 | 4.420365 | 4.662153 | 4.848914 |
| 6793_at   | 3.884774 | 4.39513  | 4.541192 | 5.451508 | 4.690091 | 3.990357 | 4.904924 | 3.320973 |
| 6794_at   | 4.342259 | 4.961297 | 4.1419   | 5.003263 | 3.881628 | 4.560398 | 3.654718 | 4.044788 |
| 6795_at   | 2.562374 | 2.242509 | 4.286629 | 3.004049 | 2.383662 | 3.513574 | 2.337579 | 2.573503 |
| 6799_at   | 4.311378 | 4.678144 | 5.561536 | 3.944669 | 4.9228   | 4.735248 | 3.823689 | 4.029748 |
| 6801_at   | 5.832269 | 5.727645 | 6.089081 | 6.008244 | 5.910583 | 5.898455 | 6.061122 | 6.266946 |
| 6804_at   | 2.068274 | 1.670003 | 2.760217 | 2.703685 | 1.943511 | 3.312985 | 1.779602 | 2.188623 |
| 6809_at   | 4.138059 | 4.609942 | 3.556504 | 2.870347 | 5.719633 | 5.108022 | 4.998061 | 5.347735 |
| 680_at    | 1.268321 | 1.209309 | 0.700457 | 1.15543  | 1.372194 | 1.599679 | 1.104305 | 1.691045 |
| 6810_at   | 6.277606 | 5.453633 | 5.642294 | 5.870304 | 5.719586 | 6.257915 | 5.582303 | 6.258848 |
| 6811_at   | 5.865499 | 6.0532   | 4.509281 | 6.164439 | 5.829345 | 5.695529 | 5.893309 | 5.878031 |
| 6812_at   | 7.922653 | 7.696588 | 7.226493 | 7.805737 | 7.916258 | 7.595175 | 7.662396 | 7.504829 |
| 6813_at   | 5.936548 | 5.479262 | 4.661176 | 4.95503  | 4.741837 | 5.083409 | 5.884602 | 5.68834  |
| 6814_at   | 6.745303 | 6.881466 | 6.873442 | 6.97569  | 6.795525 | 6.784629 | 5.792102 | 7.294299 |
| 6815_at   | 6.643115 | 7.260951 | 6.676302 | 7.269083 | 6.695911 | 6.714098 | 6.492545 | 6.806953 |
| 6817_at   | 2.09458  | 2.125243 | 2.713087 | 2.568746 | 3.294758 | 2.251911 | 2.239175 | 2.744727 |
| 6819_at   | 3.485063 | 3.253079 | 4.164487 | 3.563328 | 5.522697 | 5.120093 | 3.667945 | 5.406711 |
| 6820_at   | 3.034645 | 2.78607  | 2.612562 | 2.207945 | 2.872957 | 2.455607 | 2.647978 | 2.303092 |
| 6821_at   | 5.806544 | 5.749826 | 6.118053 | 4.896242 | 6.490682 | 6.605102 | 4.973287 | 6.037521 |
| 6822_at   | 2.034972 | 1.70552  | 1.800825 | 1.696756 | 1.637167 | 1.85887  | 1.656814 | 2.176233 |
| 6827_at   | 9.035973 | 8.988572 | 9.260566 | 9.184795 | 9.092932 | 8.646989 | 9.573482 | 9.234446 |
| 6829_at   | 6.388663 | 6.471868 | 6.373394 | 6.326572 | 6.364596 | 6.206849 | 6.310988 | 5.943999 |
| 682_at    | 8.011883 | 8.314127 | 8.459429 | 8.480371 | 8.442782 | 8.724592 | 8.610737 | 7.709709 |
| 6830_at   | 6.847478 | 7.104391 | 7.0976   | 7.051282 | 6.490822 | 6.924177 | 7.072431 | 7.149249 |
| 6832_at   | 4.443274 | 4.017057 | 3.944485 | 4.227638 | 4.75643  | 4.044018 | 4.304994 | 4.806151 |
| 6833_at   | 1.72035  | 2.114324 | 2.381263 | 2.10474  | 1.743356 | 1.851645 | 3.354078 | 2.071833 |
| 6834_at   | 7.66726  | 7.073493 | 7.144657 | 6.921334 | 7.184845 | 7.257697 | 6.884886 | 6.303239 |
| 6835_at   | 6.207554 | 5.721924 | 5.409    | 5.430931 | 5.743403 | 5.911313 | 5.321364 | 6.449387 |
| 6836_at   | 5.867771 | 5.901929 | 5.096588 | 5.383215 | 5.845711 | 5.551217 | 5.095267 | 5.586648 |
| 6837_at   | 4.627559 | 2.77508  | 4.587578 | 4.734794 | 3.74974  | 4.414634 | 4.069565 | 3.903266 |
| 6838_at   | 3.19124  | 4.733745 | 3.978648 | 4.078041 | 3.588233 | 4.143409 | 4.259359 | 3.805332 |
| 6839_at   | 2.812076 | 2.087072 | 2.233028 | 2.953265 | 1.487427 | 2.238118 | 2.307926 | 1.434752 |
| 683_at    | 7.683845 | 6.475255 | 6.86108  | 6.191004 | 6.39601  | 6.39176  | 6.959296 | 6.33877  |
| 6840_at   | 5.936083 | 6.407627 | 6.21256  | 6.503005 | 6.738542 | 6.300367 | 6.40781  | 5.228593 |
| 6843_at   | 4.726941 | 3.217133 | 3.424199 | 3.265245 | 3.960139 | 3.011883 | 3.764897 | 2.876247 |
| 6844_at   | 8.095606 | 7.86763  | 8.173529 | 8.261775 | 7.810409 | 7.284815 | 7.988463 | 8.13092  |
| 6845_at   | 6.861198 | 7.061875 | 6.749405 | 6.818985 | 6.717695 | 6.845529 | 7.061041 | 7.349571 |
| 6846_at   | 3.224553 | 4.187279 | 4.7337   | 4.157168 | 2.763973 | 4.133622 | 3.635017 | 2.815414 |
| 6847_at   | 1.218103 | 0.981384 | 1.646631 | 1.743248 | 1.438592 | 1.564893 | 1.396297 | 1.180007 |
| 684959_at | 2.656741 | 4.247191 | 3.504561 | 3.567442 | 2.24857  | 2.880465 | 2.937975 | 3.585661 |
| 684_at    | 9.115398 | 9.082717 | 9.149317 | 9.407845 | 9.359998 | 9.17905  | 9.195703 | 9.312315 |
| 6850_at   | 3.977756 | 1.849707 | 2.415022 | 2.4942   | 2.00075  | 2.973507 | 2.149299 | 3.276974 |
| 6853_at   | 3.418554 | 2.484881 | 3.840444 | 2.706328 | 3.235756 | 2.867253 | 2.844795 | 3.140003 |
| 6854_at   | 1.828536 | 1.975621 | 1.47837  | 0.729005 | 1.096423 | 1.475616 | 0.994532 | 1.957168 |
| 6855_at   | 4.201196 | 2.989945 | 4.298117 | 2.332366 | 3.523008 | 2.671541 | 2.740479 | 3.090489 |
| 6856_at   | 8.858416 | 9.410546 | 9.070655 | 9.18617  | 9.110333 | 8.832869 | 9.044313 | 9.261409 |
| 6857_at   | 2.190079 | 3.160651 | 4.089697 | 2.865735 | 3.829313 | 2.668736 | 5.047725 | 1.272447 |
| 685_at    | 3.525297 | 4.188844 | 3.30511  | 2.698098 | 3.401066 | 3.164617 | 3.693378 | 3.922162 |
| 6860_at   | 1.390942 | 1.884891 | 1.409992 | 2.501815 | 1.413489 | 1.821227 | 1.460605 | 1.817453 |
| 6861_at   | 2.754315 | 3.033098 | 3.192816 | 3.180156 | 3.128473 | 3.038062 | 3.304751 | 2.949784 |

|         |          |          |          |          |          |          |          |          |
|---------|----------|----------|----------|----------|----------|----------|----------|----------|
| 6862_at | 3.471015 | 2.488075 | 2.870983 | 3.561085 | 2.757416 | 2.997722 | 2.830698 | 2.766442 |
| 6863_at | 1.691568 | 4.212482 | 3.820422 | 2.195493 | 1.315643 | 1.327781 | 3.793799 | 1.359412 |
| 6865_at | 1.497248 | 2.463156 | 2.358641 | 2.697277 | 2.609861 | 1.972699 | 1.607897 | 1.36143  |
| 6866_at | 1.927866 | 2.161515 | 1.839337 | 2.16496  | 3.033687 | 1.797873 | 1.647607 | 2.081434 |
| 6867_at | 7.881605 | 8.50765  | 7.996238 | 7.848707 | 7.569863 | 8.246916 | 8.140672 | 7.827988 |
| 6868_at | 5.982953 | 6.452074 | 6.394425 | 6.797156 | 6.662103 | 6.727516 | 6.732167 | 7.340667 |
| 6869_at | 5.311299 | 5.375205 | 3.3231   | 3.848136 | 4.844532 | 4.274687 | 4.884261 | 5.038119 |
| 686_at  | 2.609536 | 2.621796 | 2.916931 | 2.129564 | 2.832522 | 2.214335 | 2.618184 | 2.569511 |
| 6870_at | 4.552304 | 4.9681   | 5.00519  | 4.983518 | 4.68792  | 2.97425  | 5.0727   | 5.578256 |
| 6871_at | 5.154565 | 5.344001 | 5.165092 | 3.391541 | 4.797362 | 5.355231 | 3.884555 | 4.413798 |
| 6872_at | 3.116611 | 3.164579 | 3.089989 | 4.238834 | 3.781579 | 3.295084 | 4.065392 | 4.259335 |
| 6873_at | 5.43659  | 5.554996 | 4.839103 | 6.051749 | 5.744442 | 5.289268 | 5.850537 | 6.437466 |
| 6874_at | 6.189625 | 6.287407 | 5.828089 | 6.100531 | 5.924481 | 6.157978 | 5.786004 | 5.40388  |
| 6875_at | 3.301292 | 3.174462 | 3.004339 | 3.202326 | 2.016618 | 3.467995 | 3.072909 | 2.818185 |
| 6876_at | 7.250924 | 6.399249 | 6.139031 | 6.87519  | 5.662989 | 6.72335  | 6.679339 | 6.017026 |
| 6877_at | 2.570447 | 3.443938 | 3.743659 | 3.350182 | 1.861663 | 3.432995 | 2.743246 | 3.940495 |
| 6878_at | 5.84387  | 5.317178 | 5.610237 | 5.920668 | 4.633393 | 5.829382 | 6.445693 | 5.422366 |
| 6879_at | 7.929403 | 8.035012 | 7.75088  | 7.769407 | 7.972501 | 7.79453  | 7.39157  | 8.214356 |
| 687_at  | 6.521655 | 6.865084 | 7.234699 | 7.270954 | 6.365192 | 7.224656 | 6.54463  | 6.002603 |
| 6880_at | 7.330791 | 6.84471  | 6.866937 | 6.937697 | 7.987783 | 6.29535  | 6.944266 | 7.966473 |
| 6881_at | 9.451842 | 8.987919 | 8.553278 | 8.686954 | 8.662667 | 8.981657 | 8.698888 | 9.078222 |
| 6882_at | 6.542104 | 6.29703  | 6.238981 | 6.661613 | 6.545192 | 6.838774 | 6.243255 | 6.461077 |
| 6883_at | 6.274162 | 5.003935 | 6.114276 | 5.159484 | 6.575197 | 5.545746 | 5.27441  | 5.159421 |
| 6884_at | 6.895633 | 7.726675 | 7.630273 | 7.429223 | 7.97611  | 7.00605  | 7.637829 | 7.909887 |
| 6885_at | 6.341861 | 6.217418 | 6.319914 | 6.30867  | 6.678831 | 6.879696 | 5.941427 | 6.351971 |
| 6886_at | 2.622856 | 2.469328 | 3.574688 | 2.715536 | 2.853839 | 3.447683 | 2.551784 | 2.594628 |
| 6887_at | 1.800046 | 1.387358 | 1.895179 | 1.511609 | 1.802791 | 3.231465 | 1.825503 | 1.451975 |
| 6888_at | 9.450451 | 9.115445 | 8.473275 | 8.57582  | 8.872335 | 8.984297 | 8.784348 | 9.086573 |
| 688_at  | 3.798237 | 4.514484 | 3.69312  | 3.974091 | 3.91862  | 3.748099 | 3.158003 | 3.583694 |
| 6890_at | 7.010583 | 7.078902 | 6.482745 | 7.51917  | 6.60852  | 6.739087 | 6.533532 | 6.964495 |
| 6891_at | 3.995404 | 4.204974 | 4.734723 | 4.686792 | 4.307321 | 4.384154 | 4.883041 | 4.221204 |
| 6892_at | 8.640125 | 8.657778 | 8.869686 | 8.962451 | 8.295658 | 8.466405 | 8.879886 | 7.826652 |
| 6894_at | 4.581675 | 4.692632 | 4.259528 | 3.017084 | 5.489386 | 4.632704 | 4.045559 | 4.205943 |
| 6895_at | 4.756389 | 4.176828 | 3.818919 | 4.482357 | 4.362187 | 4.003536 | 3.837299 | 4.033888 |
| 6897_at | 6.585798 | 6.824229 | 6.486737 | 6.118632 | 7.025352 | 6.064357 | 6.44074  | 5.956951 |
| 6898_at | 1.50719  | 2.002811 | 1.226813 | 0.801441 | 1.106691 | 0.918137 | 1.039931 | 0.90895  |
| 6899_at | 2.146939 | 1.117139 | 1.537047 | 2.191147 | 1.914967 | 2.481817 | 2.648933 | 1.587878 |
| 689_at  | 5.962289 | 5.802821 | 6.005609 | 5.408413 | 5.351192 | 5.996937 | 5.441678 | 5.120567 |
| 6900_at | 2.167725 | 1.986246 | 1.945814 | 2.13776  | 2.434317 | 2.064678 | 3.175192 | 2.980232 |
| 6901_at | 4.338541 | 3.500333 | 3.450225 | 3.225288 | 2.649418 | 3.12491  | 3.940346 | 2.566582 |
| 6902_at | 3.253376 | 2.821137 | 3.306077 | 3.100775 | 2.74532  | 3.78314  | 3.706786 | 3.219299 |
| 6903_at | 5.630703 | 5.025304 | 5.099617 | 5.155634 | 5.135807 | 4.972616 | 4.340662 | 5.157616 |
| 6904_at | 4.609222 | 4.83027  | 5.549144 | 5.050968 | 4.87812  | 5.08507  | 5.075221 | 3.407538 |
| 6905_at | 5.195292 | 5.448927 | 5.38715  | 5.163453 | 5.584063 | 5.227889 | 5.022791 | 5.725542 |
| 6906_at | 1.695411 | 1.751775 | 1.243383 | 1.848298 | 1.440768 | 1.277894 | 1.938091 | 1.70809  |
| 6907_at | 4.343954 | 4.022819 | 5.020722 | 4.518369 | 3.762882 | 5.097704 | 3.503412 | 4.430865 |
| 6908_at | 6.893723 | 6.196391 | 7.617475 | 7.301075 | 7.165379 | 6.730813 | 6.716738 | 6.472312 |
| 6909_at | 4.501012 | 3.874383 | 3.761636 | 3.777664 | 4.635099 | 4.661052 | 3.734625 | 3.226485 |
| 690_at  | 1.075024 | 2.004562 | 1.564778 | 1.05059  | 1.582771 | 1.785258 | 1.936405 | 2.214794 |
| 6910_at | 1.377988 | 1.281097 | 1.496396 | 1.716252 | 1.966279 | 1.361869 | 2.261721 | 2.026898 |
| 6911_at | 1.691465 | 2.350922 | 2.328825 | 2.381737 | 2.283378 | 2.370612 | 2.453679 | 3.653736 |

|           |          |          |          |          |          |          |          |          |
|-----------|----------|----------|----------|----------|----------|----------|----------|----------|
| 6913_at   | 2.553897 | 1.982783 | 2.264258 | 1.679833 | 1.884423 | 1.861661 | 1.889744 | 1.503505 |
| 6915_at   | 6.030466 | 6.451068 | 6.217196 | 6.680895 | 5.837049 | 6.497687 | 6.075455 | 5.709267 |
| 6916_at   | 5.266487 | 5.121257 | 4.893264 | 4.134887 | 4.759142 | 4.629654 | 4.864728 | 4.188924 |
| 6917_at   | 3.505462 | 4.008001 | 4.084637 | 3.891298 | 3.440292 | 3.722314 | 3.523185 | 4.29497  |
| 6919_at   | 4.224342 | 3.946604 | 3.583325 | 3.208106 | 3.789701 | 4.000256 | 3.886541 | 3.555979 |
| 692053_at | 1.165142 | 0.982704 | 0.699157 | 1.727633 | 1.459464 | 1.86879  | 1.987938 | 2.020775 |
| 692057_at | 1.045687 | 3.00767  | 1.383435 | 1.244573 | 2.103693 | 3.698929 | 1.357063 | 4.415473 |
| 692058_at | 1.379169 | 1.405552 | 2.296935 | 1.621671 | 1.913434 | 1.926454 | 2.233909 | 5.147136 |
| 692063_at | 6.940553 | 4.668947 | 6.856095 | 6.692752 | 6.054105 | 5.507862 | 3.844275 | 5.968381 |
| 692072_at | 5.324659 | 5.359785 | 2.752447 | 2.042401 | 5.775303 | 5.872349 | 2.561352 | 5.474292 |
| 692073_at | 2.089709 | 1.985006 | 1.585245 | 2.238066 | 2.62277  | 2.970729 | 1.736961 | 1.304085 |
| 692075_at | 4.190906 | 1.547177 | 1.79369  | 3.93199  | 5.224869 | 3.652923 | 2.073902 | 1.656127 |
| 692076_at | 2.01286  | 2.362655 | 2.374565 | 1.516684 | 1.543499 | 2.392195 | 1.532926 | 2.028466 |
| 692084_at | 10.25001 | 10.58771 | 10.31031 | 10.49989 | 6.205037 | 10.59595 | 11.11031 | 10.16842 |
| 692085_at | 2.412568 | 1.353675 | 2.483819 | 0.848766 | 2.265768 | 0.864595 | 2.35459  | 4.592165 |
| 692086_at | 5.213222 | 5.998775 | 3.965462 | 5.989171 | 3.157691 | 6.095501 | 6.810811 | 6.698008 |
| 692087_at | 2.585334 | 4.641498 | 2.172818 | 1.329618 | 3.160778 | 1.343398 | 1.472523 | 2.314384 |
| 692088_at | 4.220935 | 5.625504 | 1.789965 | 5.015202 | 4.809066 | 3.240022 | 2.453706 | 4.634656 |
| 692089_at | 0.929457 | 1.253269 | 1.039805 | 1.031259 | 1.18166  | 1.087034 | 0.847143 | 1.36374  |
| 692090_at | 1.269399 | 1.40433  | 4.641349 | 0.98061  | 2.220073 | 0.884146 | 5.09165  | 0.916149 |
| 692091_at | 0.750867 | 3.420433 | 1.880246 | 1.70718  | 1.900472 | 3.555533 | 1.694131 | 0.914414 |
| 692092_at | 2.945782 | 1.706301 | 1.674029 | 3.104665 | 1.893795 | 1.674309 | 1.703535 | 2.092753 |
| 692094_at | 5.958118 | 5.961506 | 6.868538 | 6.30511  | 6.184366 | 5.385928 | 6.044195 | 5.230775 |
| 692099_at | 2.565106 | 4.247421 | 2.724463 | 3.099163 | 3.305968 | 2.933599 | 1.536298 | 2.437083 |
| 6920_at   | 6.595677 | 5.343223 | 5.736505 | 6.189556 | 5.639037 | 5.857315 | 5.615624 | 4.890574 |
| 692106_at | 1.109017 | 1.003242 | 1.391598 | 1.519974 | 1.968746 | 1.478338 | 0.781677 | 0.963908 |
| 692107_at | 2.874896 | 2.253892 | 3.083406 | 1.743897 | 3.039166 | 1.535923 | 3.172992 | 2.462624 |
| 692108_at | 3.367499 | 5.257549 | 2.119159 | 5.65424  | 4.493702 | 3.830481 | 5.554602 | 3.54052  |
| 692109_at | 4.506339 | 4.250773 | 2.948018 | 2.511606 | 5.083505 | 3.785273 | 2.614322 | 2.790361 |
| 692110_at | 1.044725 | 0.674782 | 0.857615 | 0.775114 | 2.218015 | 0.888626 | 0.915694 | 2.519852 |
| 692111_at | 4.989981 | 0.96798  | 2.739546 | 6.508598 | 1.147    | 1.630967 | 2.341233 | 5.093579 |
| 692148_at | 6.895809 | 6.308158 | 6.432038 | 6.279623 | 5.256098 | 7.071253 | 7.166934 | 5.797214 |
| 692149_at | 1.616229 | 1.382591 | 1.52779  | 1.510178 | 1.18298  | 1.192863 | 2.247677 | 1.500728 |
| 692157_at | 1.366148 | 2.389974 | 1.043488 | 2.177442 | 2.860987 | 1.81709  | 1.055229 | 1.861352 |
| 692195_at | 3.589191 | 2.085234 | 2.937652 | 2.239883 | 3.15964  | 1.723034 | 1.768379 | 6.420899 |
| 692196_at | 4.757477 | 5.424609 | 2.876743 | 3.526231 | 4.805773 | 2.843306 | 3.448422 | 3.261497 |
| 692197_at | 1.61387  | 0.406173 | 1.40976  | 0.764713 | 0.884301 | 0.748353 | 0.476415 | 1.740789 |
| 692199_at | 4.67112  | 3.162238 | 2.129304 | 3.769581 | 2.389518 | 1.550932 | 4.563866 | 5.873783 |
| 6921_at   | 2.818044 | 2.836    | 2.854693 | 2.598204 | 2.536983 | 2.685047 | 1.749753 | 2.728244 |
| 692200_at | 1.144654 | 0.71306  | 1.002189 | 1.290503 | 1.171127 | 1.701865 | 1.026735 | 1.053013 |
| 692202_at | 3.238579 | 3.515978 | 3.063918 | 4.137689 | 4.332463 | 2.663652 | 3.675582 | 2.857596 |
| 692203_at | 3.010777 | 3.54929  | 4.235835 | 3.802195 | 4.0044   | 4.749328 | 3.882176 | 4.010574 |
| 692204_at | 3.11179  | 3.494383 | 3.248193 | 3.418307 | 3.718023 | 3.611726 | 4.365375 | 3.182007 |
| 692205_at | 6.546127 | 7.247728 | 5.834435 | 7.802529 | 5.152252 | 6.774213 | 8.275413 | 7.635017 |
| 692206_at | 0.870413 | 0.913537 | 2.470269 | 1.119913 | 1.728136 | 1.052473 | 1.445447 | 2.33818  |
| 692207_at | 2.390847 | 2.962203 | 2.791022 | 2.347248 | 2.826209 | 3.238763 | 2.089583 | 2.383798 |
| 692208_at | 1.468531 | 1.806726 | 1.542479 | 0.892827 | 1.335835 | 0.873358 | 1.373893 | 1.362051 |
| 692209_at | 1.510908 | 1.119371 | 1.653372 | 1.084215 | 2.072283 | 2.249424 | 2.042436 | 4.361004 |
| 692210_at | 0.862751 | 0.906273 | 1.314504 | 1.030006 | 1.023277 | 2.297242 | 1.080655 | 0.60988  |
| 692211_at | 0.937325 | 0.87981  | 1.364768 | 0.832906 | 1.206134 | 1.317182 | 1.579031 | 1.332338 |
| 692212_at | 4.292    | 0.796782 | 0.853338 | 3.909164 | 1.060654 | 2.267022 | 1.160818 | 0.757158 |

692213\_at 3.149588 5.754645 3.899182 5.624257 1.485227 3.245691 5.02557 1.915933  
692214\_at 1.77384 0.649626 1.252542 1.192937 1.15679 2.041573 1.312718 1.851842  
692215\_at 1.187785 1.189427 1.255635 0.965374 1.152907 1.96586 1.055094 1.050216  
692223\_at 4.14584 2.927718 3.082926 4.436945 5.734459 3.715043 1.679077 4.945856  
692224\_at 7.103185 6.709041 6.763216 6.212608 6.948546 5.909672 5.506666 6.93214  
692225\_at 4.681876 5.835365 1.76425 5.71925 5.606853 5.413774 5.978398 5.803764  
692226\_at 1.197841 0.765469 1.11863 0.949552 1.783723 1.06484 1.39745 1.669173  
692227\_at 1.265529 5.636836 0.511472 2.305483 1.184413 0.991998 1.427354 1.665353  
692229\_at 1.799203 1.914096 1.35663 1.570763 1.478522 1.923083 2.027592 2.249548  
692233\_at 2.133702 1.358139 2.510118 1.448552 2.431818 1.976009 1.407153 3.949525  
6923\_at 8.179603 7.850799 8.224034 8.051526 7.892918 8.431251 7.627715 7.193911  
6924\_at 5.045961 4.501183 4.658946 4.757754 4.913702 4.778242 3.981863 4.83014  
6925\_at 5.649151 5.972226 5.690574 6.46424 6.144492 6.399178 6.11971 5.8806  
6926\_at 6.965534 6.491975 6.473485 7.05754 6.73671 6.672858 7.485347 5.870646  
6927\_at 3.486694 3.763591 2.6578 3.358328 3.252689 3.089879 2.01599 3.414195  
6928\_at 6.552908 4.968987 5.970046 5.450058 6.607578 6.195574 3.219012 5.131306  
6929\_at 5.020765 4.280427 4.670054 5.240726 4.305285 4.340069 4.799396 3.815328  
693120\_at 2.571387 3.130578 4.141619 2.265767 1.910194 3.1519 3.048037 2.920282  
693121\_at 1.035774 0.881804 1.299812 0.790526 1.607322 1.126 1.083672 1.071861  
693122\_at 5.126795 2.506154 4.906997 4.640909 3.089417 5.763997 2.831308 4.249848  
693123\_at 4.774755 4.757024 5.123967 4.76966 3.851123 4.821596 5.290505 4.07582  
693125\_at 0.680546 2.140621 1.496755 0.65301 1.324286 0.87477 2.301005 0.56393  
693126\_at 1.333892 1.432719 2.799805 1.458393 1.443671 1.046361 1.418724 1.285284  
693127\_at 2.192194 1.432238 2.165803 1.395993 1.312293 1.528557 1.145788 1.22859  
693128\_at 0.706565 1.615886 1.013023 1.162865 1.371688 0.841681 1.076435 1.215553  
693129\_at 1.799948 0.506767 1.605924 3.349303 0.771892 1.001332 0.922115 1.27831  
693130\_at 1.614525 1.215815 0.751575 1.541753 1.324637 1.76827 2.505804 1.679275  
693132\_at 0.808188 0.721854 0.80069 1.165453 0.86003 1.260877 0.578514 1.082086  
693133\_at 2.463773 1.605193 2.218176 1.528527 1.745705 1.281207 1.299962 1.831034  
693134\_at 1.629804 1.812089 1.711868 2.119281 2.740705 2.185836 1.528767 1.602058  
693135\_at 2.541539 2.519906 2.281523 3.333424 3.150803 3.274551 3.252666 1.912676  
693136\_at 2.371325 3.034075 2.775137 2.934072 2.59795 3.779016 2.980016 3.343456  
693137\_at 2.1557 1.470969 1.417221 1.559634 1.576685 1.864186 2.873385 2.415211  
693138\_at 1.28653 1.198782 1.623266 1.175194 2.020998 1.303045 1.016278 1.57057  
693139\_at 1.927353 1.526418 1.188196 1.263686 3.666147 1.907928 1.037293 1.616695  
693140\_at 0.627264 0.927939 2.249258 2.575736 1.887362 2.131931 3.123278 1.904097  
693141\_at 0.924286 0.921754 1.182391 0.898277 1.447681 1.045926 1.075484 0.964818  
693142\_at 1.888345 3.672575 3.355792 3.777856 3.572126 2.895038 3.783581 3.294503  
693143\_at 1.659392 1.181711 1.37789 4.801712 1.279455 1.06828 1.206179 1.447193  
693144\_at 0.978816 1.231072 1.452644 1.026932 1.240771 1.18063 1.400106 1.018282  
693146\_at 1.024788 0.811422 0.674334 1.76028 0.798676 0.860425 0.818729 1.293373  
693147\_at 0.947943 1.384757 1.340957 1.024548 1.273041 1.170924 0.721521 1.493341  
693148\_at 2.610521 3.014509 2.514755 2.783741 3.573739 2.533579 3.493853 3.244505  
693149\_at 3.856635 3.692887 5.222422 4.151017 4.516593 4.354079 4.019393 3.149674  
693152\_at 1.219561 1.951125 1.411275 2.514772 1.183191 1.349681 1.160997 1.317319  
693154\_at 1.162349 1.224239 1.005402 1.438111 1.341309 1.053021 1.575022 1.286146  
693155\_at 3.034437 2.805279 2.830697 6.273236 1.86775 2.831937 3.046969 6.200974  
693156\_at 3.479409 2.269095 2.869808 3.239445 2.279009 4.047411 1.666876 3.291387  
693158\_at 2.056014 0.835955 4.58531 1.140194 1.256193 3.847671 4.708295 1.513634  
693159\_at 5.237386 4.96214 4.228008 6.091675 5.855281 4.685878 3.798838 5.179664  
693160\_at 1.931605 1.908697 1.576132 1.727428 1.78512 1.863941 2.304484 2.224532

693161\_at 1.275084 0.626636 1.103404 1.144514 1.050474 1.023369 1.335474 0.754207  
693162\_at 1.113684 1.184975 1.159973 1.006219 1.280266 1.105776 1.321436 1.359847  
693163\_at 1.481585 0.983252 1.171968 1.35549 1.84344 1.034237 1.484163 0.964061  
693164\_at 1.177228 0.730979 1.235906 0.956055 0.724917 1.491761 1.455436 1.070874  
693165\_at 3.571017 1.094697 2.443158 1.773822 2.207044 1.116857 1.139601 1.372553  
693166\_at 1.037587 1.488534 1.420644 1.222981 1.756588 2.864933 1.133752 3.716795  
693167\_at 1.143568 1.027133 0.981621 0.881065 1.727693 1.414748 1.751846 1.498967  
693168\_at 0.9439 1.038513 1.266911 1.00106 1.275773 1.573598 1.341958 1.202498  
693169\_at 2.233481 2.673029 2.501943 2.510581 2.657682 2.32307 2.476457 3.045146  
693170\_at 2.457763 2.118127 2.012493 2.479978 2.221325 2.536092 2.487079 2.325821  
693171\_at 1.253717 1.655516 1.129352 1.207618 2.142658 1.269388 1.293822 1.557679  
693172\_at 3.679734 3.255713 3.000097 3.224345 2.027894 2.571333 3.206037 2.562805  
693173\_at 1.203951 0.827739 1.030271 0.876304 1.568352 1.064695 1.303331 0.854081  
693174\_at 2.024843 3.228366 3.81004 2.591645 2.351193 2.286047 3.653537 2.587161  
693175\_at 1.69062 0.934573 0.901626 0.86865 1.690312 1.007442 1.319289 1.191563  
693176\_at 0.866055 1.379467 0.939277 0.876676 1.2442 1.091459 1.234736 0.975719  
693177\_at 0.826833 1.267688 1.578422 1.202268 1.871887 1.010214 1.54718 1.24058  
693178\_at 3.473703 3.933272 3.942476 4.101006 4.342079 4.392619 4.45571 3.351206  
693180\_at 1.349986 1.243012 1.519107 2.328233 1.203235 1.026353 1.326907 1.238106  
693181\_at 1.967206 2.913066 3.364403 2.588196 2.635121 3.340079 0.59002 3.89419  
693182\_at 2.129842 1.556227 2.839814 4.032527 2.640829 2.084555 1.43855 3.002558  
693183\_at 1.888516 1.537502 1.663879 1.584787 1.997319 1.431199 1.779285 1.430194  
693184\_at 1.923035 1.497598 1.95248 1.1871 1.564983 1.281045 1.156381 1.607457  
693186\_at 1.823182 0.985166 1.504869 1.311893 2.465912 2.066022 1.297185 2.143147  
693187\_at 1.612528 0.867332 1.837759 1.164319 2.058643 1.969351 1.573865 2.282571  
693188\_at 2.067025 1.784541 2.523402 1.704974 2.240747 1.857244 1.815419 1.999318  
693189\_at 2.283878 2.023735 1.330614 2.882547 5.515131 6.10891 1.537944 4.157659  
693190\_at 0.940996 1.014871 1.070299 0.853958 1.048752 1.702915 2.288239 0.956919  
693191\_at 2.841864 2.826865 3.523189 3.84967 3.014806 3.491971 3.133872 2.908136  
693192\_at 0.609524 4.183129 0.750172 0.704805 1.046504 0.710533 1.224701 1.146014  
693193\_at 1.519341 1.912388 1.661585 1.8864 1.871562 1.594346 1.456408 2.208899  
693194\_at 1.733557 1.397509 1.260621 1.356323 1.16435 1.661199 1.312643 2.791157  
693195\_at 1.447671 1.729246 1.597363 1.005161 1.87595 1.798662 1.739471 1.940876  
693197\_at 4.041166 5.210423 5.83246 6.02189 5.033023 5.418991 4.305815 0.801868  
693198\_at 2.234106 1.844883 1.405688 1.190863 2.020702 1.648776 1.998834 1.522035  
693199\_at 8.304398 8.760702 8.693972 8.362407 8.985608 7.537285 8.16233 8.792696  
693200\_at 1.505765 1.906338 2.015489 1.446513 2.214852 2.240079 2.332767 1.942073  
693201\_at 1.01319 0.960039 1.214922 1.010265 0.990973 1.663355 1.008648 1.76082  
693202\_at 1.491301 1.47484 1.263073 1.314381 1.805499 1.667067 2.075095 2.176442  
693203\_at 1.64613 1.263864 1.137078 0.963276 1.168571 1.016319 1.408154 3.277579  
693204\_at 2.262212 2.218864 2.090485 3.577063 3.152293 2.47062 2.832633 3.307439  
693205\_at 0.743324 1.263004 1.027382 0.536849 1.113573 1.315994 0.83558 0.97879  
693207\_at 1.800025 1.34848 2.248934 2.390692 2.335014 1.794728 1.337176 0.978043  
693208\_at 1.284112 1.326461 1.059745 1.032396 1.738278 1.281992 1.553429 1.835315  
693209\_at 0.984088 1.127432 0.785975 0.934291 1.440606 1.245359 1.079032 1.604792  
693210\_at 1.222365 0.896951 1.098682 0.861213 1.185741 1.185 1.273056 1.565665  
693211\_at 1.20462 1.429962 1.616668 0.885621 1.653162 1.153041 0.949524 1.460793  
693212\_at 0.997748 0.810175 1.011758 0.822147 1.345881 0.830652 0.87454 1.19874  
693213\_at 1.482972 1.129994 1.427315 1.066653 3.101033 1.697705 1.562308 1.365544  
693215\_at 1.675278 3.014221 1.410845 1.375126 3.644378 1.617111 1.4485 1.43092  
693216\_at 2.204353 2.582754 2.298505 2.662102 2.047828 2.866706 2.427088 2.031383

|           |          |          |          |          |          |          |          |          |
|-----------|----------|----------|----------|----------|----------|----------|----------|----------|
| 693217_at | 2.736751 | 1.098524 | 0.734243 | 2.13987  | 2.229111 | 0.632811 | 1.469059 | 1.789876 |
| 693218_at | 1.289531 | 1.15958  | 0.832705 | 1.055119 | 1.511466 | 0.721412 | 1.641494 | 0.78086  |
| 693219_at | 0.900994 | 1.209241 | 0.678511 | 1.092616 | 1.383727 | 2.936354 | 1.035144 | 1.015086 |
| 693220_at | 2.507775 | 2.022725 | 4.261151 | 1.668773 | 2.021555 | 2.539838 | 4.236204 | 2.74115  |
| 693222_at | 3.700093 | 2.911432 | 3.228735 | 2.899147 | 2.72701  | 2.406146 | 1.381151 | 3.817182 |
| 693225_at | 1.131008 | 1.854883 | 1.467429 | 1.383889 | 2.16585  | 2.831342 | 0.867715 | 1.346123 |
| 693226_at | 1.206314 | 1.388374 | 1.487692 | 1.109826 | 1.077081 | 1.569039 | 1.143104 | 1.198063 |
| 693227_at | 3.667494 | 2.6948   | 3.335467 | 3.726098 | 3.729811 | 3.120232 | 3.600003 | 3.714836 |
| 693228_at | 1.701949 | 0.925668 | 5.021339 | 1.786188 | 0.957706 | 0.779516 | 0.910285 | 2.432882 |
| 693229_at | 4.204677 | 1.334091 | 5.057317 | 1.020249 | 5.700635 | 3.011622 | 2.083865 | 5.350582 |
| 693230_at | 2.877112 | 1.529456 | 1.409275 | 1.504402 | 2.456498 | 2.512368 | 1.517117 | 2.339969 |
| 693231_at | 2.579585 | 3.097078 | 2.268101 | 3.398519 | 2.418464 | 2.944041 | 2.281984 | 2.405053 |
| 693232_at | 4.17427  | 4.821793 | 5.087905 | 5.500797 | 5.006088 | 4.595101 | 4.937939 | 4.998786 |
| 693233_at | 2.61954  | 1.915688 | 2.202952 | 2.546309 | 1.9742   | 2.397831 | 1.775298 | 1.978744 |
| 693234_at | 1.366134 | 0.685746 | 1.878408 | 0.819964 | 0.9835   | 1.161075 | 1.147167 | 0.808163 |
| 693235_at | 3.838128 | 4.942968 | 5.501027 | 4.371956 | 4.498129 | 5.074694 | 5.074398 | 4.719902 |
| 6932_at   | 1.681273 | 1.390615 | 2.266835 | 1.977932 | 3.37855  | 2.313149 | 1.569322 | 2.555734 |
| 6934_at   | 6.167555 | 5.87181  | 6.207286 | 6.683238 | 5.234017 | 5.92534  | 6.324909 | 5.895758 |
| 6935_at   | 7.290175 | 7.141519 | 7.361365 | 7.380243 | 6.941813 | 7.358416 | 6.786751 | 7.476409 |
| 6936_at   | 5.572842 | 4.797917 | 5.068674 | 5.181797 | 5.325002 | 5.206357 | 5.012186 | 5.262298 |
| 6938_at   | 7.217991 | 6.82782  | 6.991044 | 7.239054 | 7.385512 | 7.285323 | 7.45085  | 7.483655 |
| 6939_at   | 3.185231 | 3.413427 | 3.852522 | 3.550526 | 3.270597 | 3.637608 | 3.529753 | 4.130695 |
| 6940_at   | 6.44047  | 6.261196 | 5.903958 | 6.072993 | 5.658706 | 6.076083 | 6.252723 | 6.925609 |
| 6941_at   | 3.101037 | 2.438652 | 3.015751 | 2.87925  | 2.0783   | 3.228785 | 2.512874 | 2.929761 |
| 6942_at   | 6.321859 | 5.627262 | 5.929028 | 6.563346 | 6.950279 | 5.729344 | 6.503288 | 6.279625 |
| 6943_at   | 9.849926 | 9.613663 | 9.926486 | 9.458311 | 8.991794 | 9.68783  | 9.717963 | 9.505092 |
| 6944_at   | 5.617771 | 5.77309  | 4.982041 | 4.925352 | 4.859286 | 4.838032 | 5.39536  | 5.193853 |
| 6945_at   | 6.692732 | 5.321751 | 5.777893 | 6.297757 | 5.578878 | 6.331815 | 6.122461 | 5.689252 |
| 6947_at   | 1.124036 | 1.374875 | 1.443667 | 1.441647 | 1.558605 | 1.430837 | 1.982544 | 1.552471 |
| 6948_at   | 6.214948 | 6.177122 | 6.530394 | 6.186117 | 6.767961 | 7.194339 | 5.95568  | 4.968716 |
| 6949_at   | 4.661073 | 5.126884 | 4.055097 | 4.771294 | 3.075964 | 5.260679 | 3.531568 | 4.533284 |
| 694_at    | 6.694035 | 6.094115 | 5.605432 | 6.053577 | 5.797765 | 6.672725 | 6.004611 | 4.704227 |
| 6950_at   | 8.36474  | 8.242598 | 7.573476 | 8.02396  | 8.22099  | 8.019057 | 7.756997 | 8.331029 |
| 6954_at   | 1.344772 | 1.936967 | 1.281166 | 2.780282 | 2.115068 | 2.13979  | 1.387216 | 2.945227 |
| 6956_at   | 0.875897 | 1.070839 | 1.609953 | 0.979424 | 1.018676 | 1.43184  | 1.032618 | 1.179681 |
| 695_at    | 3.586039 | 3.12235  | 2.269539 | 4.247093 | 2.385943 | 1.80021  | 2.647789 | 2.305656 |
| 6967_at   | 1.157671 | 0.659658 | 1.5563   | 1.05819  | 1.014983 | 1.031007 | 1.038477 | 1.948442 |
| 696_at    | 1.737579 | 1.040568 | 1.712098 | 1.183691 | 2.062681 | 1.011971 | 2.073829 | 1.434045 |
| 6972_at   | 2.247008 | 0.834166 | 1.077251 | 0.789231 | 0.921393 | 1.189021 | 1.006015 | 1.993341 |
| 6974_at   | 2.227519 | 0.78648  | 2.520879 | 2.082552 | 1.880876 | 0.889863 | 0.467163 | 0.313961 |
| 6975_at   | 1.233324 | 1.581467 | 1.867924 | 1.431043 | 1.915847 | 1.275704 | 1.733488 | 2.263213 |
| 6976_at   | 4.400807 | 1.34076  | 3.83955  | 3.998234 | 2.541419 | 1.283628 | 4.048804 | 1.326064 |
| 6978_at   | 4.211484 | 1.372501 | 3.834347 | 5.340967 | 3.325412 | 1.468902 | 4.87008  | 1.905945 |
| 6982_at   | 1.652576 | 1.224747 | 3.799333 | 1.948483 | 3.485578 | 2.152772 | 2.809385 | 2.530882 |
| 6983_at   | 2.960264 | 2.466389 | 2.873995 | 2.517872 | 3.345647 | 2.964718 | 3.079271 | 2.7776   |
| 6988_at   | 7.539672 | 6.955952 | 7.896956 | 7.750849 | 7.319275 | 7.282361 | 7.521583 | 7.152533 |
| 6990_at   | 7.728039 | 8.193127 | 8.578393 | 7.906844 | 8.10525  | 7.360117 | 7.789528 | 8.605187 |
| 6991_at   | 0.832788 | 1.16737  | 1.031399 | 1.287355 | 1.121473 | 1.227456 | 1.026619 | 0.901684 |
| 6992_at   | 6.76155  | 6.566104 | 7.088962 | 6.698867 | 7.074638 | 6.667087 | 6.533355 | 6.532759 |
| 6993_at   | 8.533639 | 8.298436 | 7.941499 | 8.299413 | 8.293825 | 8.275756 | 7.93672  | 8.467227 |
| 6996_at   | 5.494522 | 5.168558 | 6.220205 | 4.089429 | 4.123737 | 6.103645 | 5.404435 | 6.191305 |

|         |          |          |          |          |          |          |          |          |
|---------|----------|----------|----------|----------|----------|----------|----------|----------|
| 6998_at | 1.389494 | 1.756283 | 1.402862 | 1.472529 | 1.182089 | 1.674243 | 1.252839 | 1.640624 |
| 6999_at | 1.780436 | 1.329167 | 1.851891 | 1.820849 | 1.850573 | 1.596688 | 0.937684 | 1.169379 |
| 699_at  | 1.467459 | 1.443289 | 1.702272 | 2.00701  | 1.662899 | 1.510882 | 2.340953 | 2.042446 |
| 7001_at | 9.319659 | 8.678508 | 9.111507 | 8.736704 | 9.124565 | 9.646009 | 8.966492 | 8.086918 |
| 7003_at | 7.450464 | 7.36919  | 7.660787 | 7.485531 | 7.011511 | 7.316071 | 7.734559 | 7.514859 |
| 7004_at | 5.290854 | 5.050869 | 4.853655 | 5.227691 | 4.342701 | 5.596398 | 5.274862 | 4.458368 |
| 7005_at | 5.261786 | 6.1391   | 5.987645 | 5.221431 | 4.511579 | 5.443144 | 4.144326 | 3.829952 |
| 7006_at | 2.682016 | 2.680315 | 3.381794 | 2.008043 | 3.118019 | 3.30862  | 2.546819 | 3.965968 |
| 7007_at | 2.106714 | 1.863058 | 1.672095 | 2.173712 | 2.55765  | 2.541404 | 2.179694 | 2.051839 |
| 7008_at | 5.322035 | 5.584084 | 5.529551 | 5.607238 | 4.134999 | 4.31106  | 5.442542 | 4.993124 |
| 7009_at | 9.115471 | 9.362895 | 9.649207 | 9.560797 | 9.51274  | 9.127297 | 8.878284 | 9.46073  |
| 7010_at | 7.564036 | 7.840114 | 7.811019 | 7.615322 | 8.085087 | 7.608797 | 7.750062 | 7.709019 |
| 7011_at | 2.534251 | 3.076968 | 3.325871 | 3.727435 | 2.483013 | 3.941237 | 2.798686 | 2.870144 |
| 7012_at | 4.146121 | 4.542751 | 4.593825 | 5.223548 | 2.786438 | 4.443099 | 3.850513 | 3.692736 |
| 7013_at | 6.605991 | 6.506267 | 6.40788  | 5.940123 | 5.404201 | 6.076509 | 6.027501 | 6.687726 |
| 7014_at | 6.703961 | 6.228259 | 6.040503 | 6.697815 | 5.687645 | 6.345167 | 5.797471 | 6.430387 |
| 7015_at | 2.147259 | 2.922574 | 2.296983 | 2.097836 | 2.011946 | 2.536172 | 2.489538 | 1.825645 |
| 7016_at | 7.260414 | 7.148274 | 6.93586  | 6.77459  | 6.444412 | 7.413334 | 7.232025 | 6.667197 |
| 7018_at | 2.561285 | 2.299691 | 1.939673 | 1.631717 | 1.874334 | 4.387255 | 1.661343 | 1.641157 |
| 7019_at | 4.758377 | 5.07093  | 5.102257 | 4.788621 | 5.799489 | 4.832715 | 4.540548 | 5.668368 |
| 701_at  | 1.971693 | 1.366648 | 1.985457 | 2.270014 | 2.66924  | 1.982455 | 2.004247 | 1.903979 |
| 7020_at | 3.033573 | 3.400245 | 3.721534 | 3.012209 | 5.007215 | 4.30772  | 3.194885 | 2.86602  |
| 7021_at | 3.021361 | 2.413598 | 2.102417 | 2.100616 | 3.801183 | 3.052204 | 2.272099 | 2.033815 |
| 7022_at | 2.771362 | 1.584578 | 1.692664 | 2.291357 | 2.040331 | 1.926117 | 2.428171 | 2.438182 |
| 7023_at | 3.310905 | 2.913897 | 3.039902 | 3.967253 | 3.524946 | 4.175572 | 2.866732 | 2.931315 |
| 7024_at | 5.978026 | 6.164434 | 6.471951 | 6.078883 | 6.178421 | 5.955585 | 5.982093 | 6.399324 |
| 7025_at | 6.944128 | 7.24023  | 7.012034 | 6.271815 | 6.819082 | 6.398321 | 6.308334 | 7.537625 |
| 7026_at | 6.486722 | 6.600044 | 6.099063 | 6.390919 | 5.602073 | 6.2349   | 5.647948 | 6.098612 |
| 7027_at | 8.093041 | 8.197541 | 7.774149 | 8.014891 | 8.567845 | 7.851995 | 8.28571  | 8.6606   |
| 7029_at | 6.880572 | 7.103507 | 7.625842 | 7.588897 | 7.415921 | 7.110593 | 7.010866 | 7.207953 |
| 7030_at | 5.694281 | 5.164467 | 4.843539 | 4.804393 | 5.091567 | 5.324329 | 5.434269 | 4.520596 |
| 7031_at | 2.468483 | 3.630643 | 2.437255 | 1.992101 | 1.657177 | 1.991247 | 2.720161 | 1.971651 |
| 7032_at | 1.681701 | 1.439802 | 1.439802 | 1.227094 | 1.641986 | 1.800337 | 1.698922 | 1.582852 |
| 7033_at | 4.333073 | 4.517528 | 4.579424 | 3.799459 | 3.724437 | 3.874594 | 4.466267 | 4.526136 |
| 7035_at | 8.189578 | 7.762047 | 7.795878 | 7.631626 | 7.794969 | 7.960719 | 7.84367  | 7.761004 |
| 7036_at | 1.753339 | 1.795028 | 1.649872 | 1.42466  | 1.606359 | 2.286555 | 1.494338 | 2.460215 |
| 7037_at | 3.761017 | 3.524159 | 3.849266 | 2.728356 | 4.915596 | 3.616035 | 3.268    | 4.749861 |
| 7038_at | 2.312202 | 2.236697 | 2.558124 | 2.280951 | 2.394386 | 2.008281 | 2.20523  | 2.365435 |
| 7039_at | 3.054818 | 2.781124 | 3.300681 | 2.772825 | 2.606    | 2.501775 | 2.316882 | 3.144889 |
| 7040_at | 6.645438 | 6.560635 | 6.65035  | 7.117303 | 6.826935 | 6.663885 | 7.136378 | 6.806882 |
| 7041_at | 5.875886 | 6.4572   | 5.87221  | 5.845942 | 6.007813 | 5.764505 | 5.457326 | 5.821655 |
| 7042_at | 5.375625 | 4.888983 | 5.052344 | 5.434684 | 4.569266 | 5.86069  | 6.274913 | 5.489768 |
| 7043_at | 3.402183 | 3.918788 | 2.873855 | 3.250993 | 3.589185 | 3.723091 | 3.553007 | 4.814005 |
| 7044_at | 3.052673 | 2.138568 | 2.30584  | 2.419227 | 2.737883 | 2.304081 | 2.622195 | 2.0388   |
| 7045_at | 4.945019 | 5.492061 | 6.813014 | 4.664398 | 4.391828 | 5.432867 | 5.190672 | 3.961714 |
| 7046_at | 5.90809  | 5.418675 | 5.544716 | 5.97602  | 5.708682 | 4.777374 | 5.574388 | 6.057496 |
| 7047_at | 2.340119 | 1.897157 | 2.672977 | 2.041204 | 2.424085 | 2.466279 | 2.419758 | 2.178356 |
| 7048_at | 9.518558 | 9.385614 | 9.58447  | 9.906339 | 9.525022 | 9.56769  | 9.861437 | 9.392862 |
| 7049_at | 8.529482 | 8.636388 | 8.939116 | 8.575269 | 8.274448 | 8.322463 | 8.644164 | 8.406512 |
| 7050_at | 4.256109 | 3.905627 | 3.863313 | 4.109966 | 3.582857 | 4.144468 | 3.748183 | 4.260231 |
| 7051_at | 2.472886 | 2.517602 | 2.970016 | 2.334767 | 2.772383 | 2.779308 | 2.318889 | 2.656876 |



|         |          |          |          |          |          |          |          |          |
|---------|----------|----------|----------|----------|----------|----------|----------|----------|
| 7052_at | 6.463238 | 6.670358 | 6.489566 | 7.233161 | 7.196514 | 7.485252 | 7.086545 | 5.745933 |
| 7053_at | 2.364642 | 2.366372 | 2.095941 | 2.789462 | 2.26463  | 1.961699 | 2.595193 | 2.592534 |
| 7054_at | 2.245757 | 2.956495 | 3.054785 | 2.179549 | 3.070351 | 3.088226 | 2.593764 | 2.857597 |
| 7056_at | 4.368791 | 4.680454 | 4.916253 | 5.252296 | 4.90138  | 3.814487 | 4.154829 | 4.713426 |
| 7057_at | 8.114213 | 8.545763 | 8.783152 | 8.321161 | 8.088411 | 8.885689 | 8.441388 | 8.427145 |
| 7058_at | 2.249959 | 2.943702 | 3.214162 | 3.721341 | 3.472208 | 2.945921 | 3.541741 | 2.339441 |
| 7059_at | 3.77329  | 3.780098 | 2.778927 | 4.051388 | 2.598718 | 3.054416 | 3.497147 | 3.044011 |
| 705_at  | 3.485145 | 3.553884 | 2.43056  | 3.102205 | 3.428894 | 3.425673 | 3.43193  | 2.871949 |
| 7060_at | 3.5132   | 2.187137 | 2.537112 | 1.787993 | 2.029369 | 2.706905 | 2.109048 | 2.643777 |
| 7062_at | 1.368039 | 1.494677 | 1.080077 | 1.313716 | 1.385764 | 1.232973 | 1.525582 | 2.086109 |
| 7064_at | 2.921415 | 4.215761 | 3.000936 | 3.901461 | 4.605933 | 4.384362 | 2.99312  | 2.846449 |
| 7066_at | 3.342537 | 3.07811  | 3.636947 | 2.992186 | 3.613361 | 2.900891 | 2.520278 | 4.215379 |
| 7067_at | 6.040604 | 6.291953 | 6.201811 | 6.54848  | 6.234744 | 5.536405 | 6.472287 | 5.30291  |
| 7068_at | 4.748358 | 4.485467 | 4.394962 | 5.125078 | 5.386271 | 5.056821 | 5.128499 | 3.68871  |
| 7069_at | 3.394043 | 1.670554 | 2.069103 | 1.95442  | 4.428962 | 1.503459 | 1.68588  | 1.581328 |
| 706_at  | 7.399685 | 6.479611 | 6.720365 | 6.853638 | 6.107813 | 6.897445 | 6.717281 | 5.821329 |
| 7070_at | 8.367394 | 7.893859 | 8.434644 | 7.936285 | 7.673906 | 8.624822 | 7.597162 | 7.101259 |
| 7071_at | 7.067142 | 7.531817 | 7.448313 | 7.496759 | 6.625979 | 6.796755 | 6.801502 | 6.481822 |
| 7072_at | 5.881941 | 5.967307 | 5.540843 | 5.232453 | 5.760311 | 5.346912 | 3.566121 | 7.015006 |
| 7073_at | 7.088081 | 6.998485 | 7.171923 | 7.026184 | 7.502612 | 6.99267  | 6.708654 | 7.372312 |
| 7074_at | 4.078417 | 4.174823 | 4.4652   | 4.557554 | 3.58839  | 3.768552 | 4.616918 | 3.790249 |
| 7075_at | 4.181797 | 4.488402 | 3.992388 | 5.032084 | 4.170988 | 4.520221 | 4.493496 | 4.342724 |
| 7076_at | 9.404684 | 8.703331 | 9.286507 | 9.220037 | 8.853442 | 9.535387 | 9.14232  | 8.761779 |
| 7077_at | 7.195905 | 7.583255 | 7.392184 | 7.693737 | 7.31405  | 7.550405 | 7.373186 | 7.518007 |
| 7078_at | 9.755174 | 9.860051 | 9.903975 | 10.05893 | 9.691113 | 10.28041 | 10.31904 | 9.522425 |
| 7079_at | 3.216085 | 4.872262 | 3.11131  | 2.883459 | 2.385507 | 4.883286 | 3.526912 | 2.836349 |
| 7080_at | 1.785653 | 1.823013 | 1.59745  | 1.94248  | 1.644354 | 1.839186 | 2.672323 | 1.76739  |
| 7082_at | 5.077553 | 5.415446 | 5.203338 | 4.89491  | 4.996723 | 4.928978 | 5.027    | 5.508108 |
| 7083_at | 3.422049 | 3.802595 | 3.027495 | 4.632973 | 2.812621 | 2.54563  | 3.72637  | 4.055842 |
| 7084_at | 4.468233 | 5.267257 | 5.788799 | 5.393659 | 5.478044 | 5.391737 | 5.787491 | 5.083509 |
| 7086_at | 6.905334 | 6.232764 | 6.049172 | 6.043487 | 5.658228 | 6.488258 | 5.905547 | 6.432292 |
| 7087_at | 1.956997 | 2.455878 | 1.614571 | 2.156156 | 2.02104  | 2.221285 | 1.98626  | 2.051959 |
| 7088_at | 4.403678 | 4.148549 | 4.930192 | 4.773604 | 3.901325 | 4.765422 | 4.734119 | 4.537805 |
| 7089_at | 4.985629 | 4.168833 | 4.838652 | 5.531734 | 5.135457 | 5.369301 | 4.953899 | 4.006888 |
| 708_at  | 7.366227 | 7.425148 | 7.220567 | 7.336016 | 7.417872 | 6.998355 | 7.47289  | 7.297896 |
| 7090_at | 4.918629 | 4.766166 | 5.418353 | 5.031815 | 5.16625  | 5.338694 | 5.602939 | 4.687773 |
| 7091_at | 6.575183 | 6.124008 | 6.705941 | 6.618076 | 5.787198 | 6.425444 | 7.234557 | 6.583725 |
| 7092_at | 3.178036 | 2.431607 | 3.010674 | 1.632962 | 3.209239 | 2.836367 | 4.086421 | 1.468296 |
| 7093_at | 1.870114 | 1.093727 | 1.547061 | 1.310224 | 0.973785 | 1.711048 | 1.980894 | 1.866441 |
| 7094_at | 7.074701 | 7.395145 | 7.283106 | 7.549695 | 7.080053 | 7.691089 | 7.809936 | 7.098551 |
| 7095_at | 8.484997 | 8.859385 | 8.790508 | 8.868796 | 8.675871 | 8.904489 | 8.590867 | 9.102479 |
| 7096_at | 3.189299 | 1.782161 | 2.644773 | 3.20118  | 2.815804 | 2.786314 | 3.014175 | 4.323649 |
| 7097_at | 1.899711 | 3.803975 | 3.534841 | 3.932726 | 3.369986 | 2.823495 | 2.906909 | 3.235831 |
| 7098_at | 7.171427 | 7.496955 | 7.491427 | 7.235022 | 7.112597 | 6.495913 | 7.182159 | 6.790476 |
| 7099_at | 7.94217  | 8.235427 | 8.406096 | 8.668445 | 7.701135 | 8.1594   | 8.456819 | 7.541614 |
| 70_at   | 3.328749 | 1.504022 | 0.879564 | 0.625075 | 1.302797 | 1.179383 | 2.295278 | 0.720027 |
| 7100_at | 2.240425 | 3.009149 | 2.584817 | 2.470383 | 2.128363 | 1.628897 | 2.132544 | 2.69353  |
| 7101_at | 1.220535 | 1.469441 | 1.473869 | 1.163256 | 1.171858 | 1.756175 | 1.084658 | 1.702303 |
| 7102_at | 8.690421 | 8.963433 | 8.558898 | 9.116716 | 9.1007   | 9.003378 | 9.367215 | 8.251425 |
| 7103_at | 4.974332 | 4.936001 | 4.495453 | 3.964227 | 5.301353 | 4.79016  | 4.844169 | 4.184367 |
| 7104_at | 2.480504 | 1.710727 | 2.736257 | 1.776283 | 2.603326 | 2.984654 | 1.930462 | 1.566108 |

|         |          |          |          |          |          |          |          |          |
|---------|----------|----------|----------|----------|----------|----------|----------|----------|
| 7105_at | 7.067687 | 6.886893 | 7.795717 | 6.90923  | 6.92645  | 6.079232 | 7.543305 | 7.272686 |
| 7106_at | 6.083828 | 5.894215 | 6.818299 | 6.706279 | 5.422711 | 6.336166 | 6.439862 | 4.210715 |
| 7107_at | 7.120775 | 6.447271 | 6.538972 | 6.738319 | 7.106289 | 6.564167 | 5.625724 | 5.930946 |
| 7108_at | 5.561199 | 4.178901 | 5.559456 | 6.120781 | 4.874319 | 5.488781 | 5.183172 | 5.269822 |
| 7109_at | 6.627505 | 6.662261 | 6.924737 | 6.442917 | 6.278608 | 6.661386 | 7.63634  | 6.642812 |
| 710_at  | 9.141488 | 9.106999 | 9.307663 | 9.62114  | 8.679948 | 9.50513  | 9.4355   | 8.817389 |
| 7110_at | 7.584086 | 7.389239 | 7.366874 | 7.040573 | 7.675807 | 7.513432 | 6.982694 | 7.681958 |
| 7111_at | 9.103749 | 8.40373  | 9.301799 | 9.099197 | 8.261393 | 8.664468 | 9.399477 | 8.042862 |
| 7112_at | 5.887376 | 5.230042 | 5.199211 | 6.228058 | 5.550038 | 6.283999 | 6.314183 | 5.726763 |
| 7113_at | 1.975408 | 1.546646 | 1.753745 | 1.682256 | 3.641824 | 2.206277 | 2.350896 | 2.008889 |
| 7114_at | 11.1221  | 11.21799 | 11.28631 | 11.16908 | 10.90991 | 11.23005 | 11.59595 | 11.11373 |
| 711_at  | 1.762081 | 1.917071 | 1.903754 | 1.540807 | 2.043939 | 1.336249 | 1.549567 | 1.537929 |
| 7122_at | 3.739451 | 3.612803 | 2.986736 | 2.720284 | 2.233621 | 2.588613 | 3.510768 | 2.414043 |
| 7123_at | 8.518553 | 8.196719 | 8.100205 | 8.224848 | 8.36046  | 8.257026 | 8.34185  | 7.071185 |
| 7124_at | 5.03286  | 3.308287 | 3.79671  | 3.80202  | 4.13958  | 3.757383 | 5.263237 | 4.218806 |
| 7125_at | 4.121839 | 4.727795 | 3.692855 | 3.5358   | 5.179286 | 4.487175 | 5.142977 | 5.534868 |
| 7126_at | 7.088174 | 7.096112 | 7.885992 | 7.592294 | 7.412066 | 7.804283 | 7.825736 | 6.134845 |
| 7127_at | 4.637136 | 4.121017 | 4.49108  | 4.431906 | 3.780791 | 4.588863 | 3.746492 | 4.401123 |
| 7128_at | 4.266491 | 4.555917 | 3.838499 | 4.506575 | 2.956472 | 4.733884 | 4.441192 | 4.276925 |
| 712_at  | 3.660283 | 2.661515 | 1.487472 | 3.580227 | 2.718522 | 2.600714 | 1.973082 | 3.142459 |
| 7130_at | 1.607993 | 1.696782 | 2.504676 | 1.507282 | 1.236155 | 1.680087 | 1.456346 | 2.02304  |
| 7132_at | 7.900623 | 7.780552 | 7.813803 | 7.856156 | 7.079686 | 7.912424 | 8.119266 | 7.69271  |
| 7133_at | 3.829659 | 3.410003 | 3.476825 | 4.845239 | 3.627673 | 4.435247 | 5.392077 | 3.542636 |
| 7134_at | 7.840337 | 7.391564 | 7.576147 | 7.007388 | 8.049811 | 7.335348 | 8.401037 | 6.968578 |
| 7135_at | 6.476069 | 6.597545 | 7.075637 | 5.34162  | 5.40643  | 6.474089 | 6.406294 | 6.208259 |
| 7136_at | 3.434734 | 2.064986 | 2.147089 | 2.103632 | 1.965414 | 1.517333 | 1.921713 | 2.258671 |
| 7137_at | 1.36947  | 1.249304 | 1.74573  | 1.171022 | 2.756338 | 1.2894   | 1.638932 | 1.746345 |
| 7138_at | 2.128732 | 2.278606 | 2.755721 | 1.521444 | 2.262574 | 1.7679   | 3.014167 | 1.763162 |
| 7139_at | 7.698991 | 7.991364 | 8.079014 | 8.39886  | 7.808422 | 8.214539 | 7.843658 | 7.673316 |
| 713_at  | 3.596272 | 3.308005 | 3.545635 | 4.734225 | 3.677653 | 3.906543 | 2.903227 | 3.725956 |
| 7140_at | 2.707524 | 2.906939 | 3.134264 | 2.639554 | 2.839783 | 2.983796 | 2.079451 | 3.081635 |
| 7141_at | 2.566202 | 2.139192 | 1.944587 | 2.055627 | 1.358743 | 2.149722 | 2.39736  | 1.929736 |
| 7142_at | 1.28867  | 0.749422 | 1.003325 | 1.678446 | 0.775674 | 1.313493 | 1.308956 | 1.835925 |
| 7143_at | 2.027891 | 1.634872 | 1.937402 | 1.753814 | 1.904426 | 1.580331 | 1.829485 | 1.114974 |
| 7145_at | 7.326312 | 7.738405 | 8.066172 | 8.005139 | 7.426548 | 7.884266 | 8.17769  | 6.963758 |
| 7146_at | 3.645114 | 3.690517 | 2.511213 | 1.417641 | 1.079907 | 2.120026 | 2.704328 | 3.780528 |
| 7148_at | 2.138723 | 2.193494 | 2.259916 | 2.020788 | 2.415731 | 2.51485  | 2.268349 | 2.442977 |
| 714_at  | 4.975527 | 4.722281 | 3.932728 | 4.488486 | 2.189186 | 5.067053 | 3.654427 | 3.261475 |
| 7150_at | 6.804149 | 6.85469  | 6.974471 | 6.869394 | 6.47087  | 6.746274 | 6.923347 | 6.990084 |
| 7151_at | 2.079758 | 1.561966 | 2.424682 | 1.068576 | 1.100376 | 2.115831 | 2.10172  | 1.559967 |
| 7152_at | 1.357424 | 1.7823   | 1.314306 | 1.381274 | 1.278679 | 0.933905 | 1.484097 | 2.267269 |
| 7153_at | 3.543835 | 4.654058 | 3.016714 | 4.996223 | 2.282929 | 2.641969 | 3.846232 | 4.510881 |
| 7155_at | 7.126064 | 7.630273 | 7.38806  | 7.884616 | 7.719129 | 7.250179 | 7.244169 | 7.804878 |
| 7156_at | 3.539082 | 4.025936 | 4.567758 | 3.653417 | 3.223344 | 3.485673 | 3.694553 | 4.473804 |
| 7157_at | 5.463041 | 6.254758 | 5.504572 | 5.841292 | 6.720984 | 6.261217 | 5.821995 | 5.4353   |
| 7158_at | 5.874826 | 6.418434 | 5.959251 | 5.793387 | 5.050532 | 5.120674 | 5.338273 | 5.906512 |
| 7159_at | 5.647609 | 6.097658 | 6.463671 | 5.977725 | 6.315227 | 5.37033  | 6.319859 | 6.731098 |
| 715_at  | 7.655004 | 7.617953 | 8.025506 | 7.686999 | 6.467731 | 7.285642 | 7.90078  | 6.80137  |
| 7161_at | 2.115271 | 1.991008 | 1.855727 | 2.024204 | 1.79149  | 1.823476 | 2.105924 | 1.962928 |
| 7162_at | 1.976279 | 2.756707 | 2.270161 | 2.567876 | 1.958818 | 2.470064 | 2.377903 | 2.561678 |
| 7163_at | 6.842839 | 6.454435 | 6.831036 | 6.255401 | 6.534737 | 6.589311 | 6.623673 | 6.630167 |

|           |          |          |          |          |          |          |          |          |
|-----------|----------|----------|----------|----------|----------|----------|----------|----------|
| 7164_at   | 5.005217 | 4.230526 | 2.760479 | 3.228088 | 4.883959 | 4.592571 | 3.92446  | 3.772495 |
| 7165_at   | 7.375288 | 6.48867  | 7.565752 | 7.263112 | 7.437551 | 7.553338 | 7.590194 | 7.017852 |
| 7166_at   | 1.72166  | 1.437681 | 1.389876 | 2.315572 | 1.106413 | 1.377158 | 1.531438 | 1.133688 |
| 7167_at   | 2.717582 | 2.913529 | 3.41706  | 2.889114 | 3.547909 | 3.843169 | 3.897796 | 3.091213 |
| 7168_at   | 5.334245 | 5.008747 | 5.156844 | 5.311599 | 5.211849 | 5.840979 | 4.956585 | 5.015683 |
| 7169_at   | 7.580191 | 7.569099 | 8.026651 | 7.842107 | 8.036411 | 7.445569 | 7.730236 | 7.37981  |
| 716_at    | 4.895002 | 6.162257 | 5.546956 | 6.762988 | 5.336125 | 5.866646 | 5.857629 | 5.828779 |
| 7170_at   | 1.094229 | 1.665863 | 1.229744 | 1.082892 | 0.860117 | 1.62347  | 1.4449   | 2.451424 |
| 7171_at   | 9.166181 | 9.142424 | 8.700947 | 9.075769 | 8.804907 | 9.426247 | 8.106106 | 8.674569 |
| 7172_at   | 6.242539 | 6.334655 | 5.645868 | 6.425413 | 6.939147 | 4.653169 | 5.22352  | 6.983412 |
| 7173_at   | 1.746566 | 1.207493 | 1.104805 | 1.609169 | 2.193884 | 1.779899 | 1.720417 | 2.178224 |
| 7174_at   | 6.061549 | 6.220699 | 6.164725 | 5.996428 | 6.092009 | 5.924364 | 6.022025 | 6.550673 |
| 7175_at   | 7.763694 | 8.102045 | 7.947124 | 7.968975 | 7.831158 | 7.705967 | 8.103159 | 8.127709 |
| 7178_at   | 5.27132  | 5.181749 | 6.872198 | 6.150439 | 5.837242 | 3.949433 | 3.364745 | 6.621919 |
| 7179_at   | 2.399302 | 2.031399 | 2.389597 | 2.020264 | 3.204293 | 2.274113 | 1.929951 | 1.914595 |
| 717_at    | 3.777497 | 3.507905 | 3.493628 | 4.165887 | 2.611098 | 3.592417 | 3.21162  | 3.575331 |
| 7180_at   | 1.482144 | 1.027043 | 1.811913 | 1.125973 | 1.571539 | 1.215468 | 1.581492 | 1.913359 |
| 7181_at   | 5.062848 | 4.765575 | 4.354291 | 4.739953 | 3.822241 | 4.968026 | 4.964403 | 5.092802 |
| 7182_at   | 6.737768 | 6.622281 | 7.067899 | 7.303556 | 6.503138 | 6.935969 | 7.039705 | 6.656414 |
| 7184_at   | 10.68417 | 11.09015 | 11.07051 | 11.06553 | 11.19755 | 10.89586 | 10.94281 | 10.87797 |
| 7185_at   | 1.573724 | 1.761203 | 1.548681 | 2.565324 | 1.860876 | 2.47516  | 1.663451 | 3.291572 |
| 7186_at   | 2.256812 | 4.053474 | 2.662342 | 3.156107 | 3.147132 | 2.564149 | 2.757907 | 3.047466 |
| 7187_at   | 5.415236 | 5.293331 | 6.218004 | 5.894449 | 4.963262 | 5.579039 | 6.099025 | 5.064487 |
| 7188_at   | 5.572037 | 5.299369 | 5.520506 | 5.113076 | 5.255178 | 5.477341 | 6.252196 | 4.845628 |
| 7189_at   | 6.277316 | 6.100777 | 6.597723 | 5.952384 | 6.183204 | 5.802864 | 5.97945  | 6.298292 |
| 718_at    | 5.158873 | 3.746666 | 4.925616 | 6.988469 | 3.730382 | 4.139418 | 4.162386 | 4.291255 |
| 719_at    | 3.545919 | 3.987531 | 1.634047 | 4.861812 | 3.237991 | 3.575462 | 2.606622 | 3.94801  |
| 71_at     | 9.667703 | 9.954431 | 9.595543 | 9.684302 | 9.830555 | 9.167562 | 9.991725 | 9.647516 |
| 7200_at   | 2.348327 | 2.229785 | 2.404531 | 2.283897 | 2.841452 | 1.586366 | 1.920002 | 3.092812 |
| 7201_at   | 1.31577  | 1.643107 | 1.591297 | 1.098687 | 1.760262 | 0.921079 | 1.42253  | 1.174322 |
| 7203_at   | 7.305888 | 7.664741 | 7.827134 | 7.66169  | 7.597538 | 7.844711 | 7.866646 | 8.29021  |
| 7204_at   | 5.105137 | 5.169178 | 5.454837 | 5.69291  | 5.062134 | 5.472613 | 5.341585 | 5.163362 |
| 7205_at   | 5.677278 | 5.554969 | 5.562445 | 5.46525  | 5.564888 | 5.50902  | 4.845741 | 5.688672 |
| 7216_at   | 3.048613 | 2.87779  | 2.861184 | 3.823842 | 2.867759 | 3.046011 | 3.248318 | 2.528518 |
| 7220_at   | 5.179081 | 5.987151 | 5.274996 | 5.122388 | 4.87008  | 4.48316  | 4.811762 | 5.539398 |
| 7221_at   | 1.489531 | 1.771182 | 1.544002 | 1.155166 | 1.694072 | 1.600152 | 2.264849 | 1.689688 |
| 7222_at   | 1.273024 | 1.374934 | 1.657733 | 1.825774 | 2.288015 | 1.101123 | 1.824612 | 2.852854 |
| 7223_at   | 3.021861 | 2.470584 | 2.883268 | 1.948356 | 2.873936 | 2.642517 | 2.497111 | 1.736874 |
| 7224_at   | 1.987568 | 1.643192 | 1.925607 | 1.143391 | 1.552114 | 1.773411 | 1.58449  | 1.458975 |
| 7225_at   | 6.641392 | 6.768585 | 6.770254 | 5.589528 | 5.804297 | 3.586918 | 5.28448  | 7.241954 |
| 7226_at   | 2.006398 | 1.622856 | 2.160128 | 2.130935 | 2.087707 | 1.878647 | 1.849565 | 1.984906 |
| 7227_at   | 5.343546 | 4.472548 | 5.787052 | 4.522085 | 4.729938 | 5.260695 | 5.957656 | 4.837766 |
| 722_at    | 1.749642 | 1.518331 | 1.385409 | 1.302036 | 1.615673 | 1.697428 | 1.639911 | 1.350073 |
| 723779_at | 1.073131 | 0.835867 | 1.236943 | 0.747605 | 0.832923 | 0.791386 | 1.097828 | 1.222313 |
| 723805_at | 1.337439 | 1.721    | 0.881882 | 2.220239 | 1.375475 | 0.941039 | 1.306909 | 1.710763 |
| 723809_at | 2.560299 | 2.647248 | 3.823916 | 2.97017  | 2.698829 | 2.958846 | 2.820277 | 4.078084 |
| 723972_at | 1.169069 | 1.540411 | 1.199963 | 2.192966 | 0.991525 | 2.296202 | 1.278287 | 1.588834 |
| 724022_at | 1.6487   | 1.816747 | 1.588666 | 0.909613 | 1.756701 | 1.595351 | 1.206461 | 1.246941 |
| 724023_at | 1.085393 | 1.742161 | 1.064309 | 0.881592 | 1.106898 | 1.297564 | 1.577035 | 1.589036 |
| 724024_at | 2.653088 | 2.024193 | 2.134586 | 1.935293 | 2.049811 | 1.740359 | 1.377936 | 2.120399 |
| 724025_at | 1.174428 | 1.662319 | 1.241603 | 1.406676 | 1.645545 | 1.159331 | 1.719316 | 0.816528 |

|           |          |          |          |          |          |          |          |          |
|-----------|----------|----------|----------|----------|----------|----------|----------|----------|
| 724026_at | 1.021646 | 1.284532 | 1.924018 | 2.772421 | 1.967631 | 1.359284 | 2.07867  | 1.726136 |
| 724027_at | 3.788678 | 3.79482  | 3.713897 | 4.053217 | 4.046846 | 4.284641 | 5.028784 | 3.127958 |
| 724029_at | 2.426197 | 2.351924 | 2.677666 | 1.659219 | 2.851477 | 1.607967 | 1.884544 | 2.492669 |
| 724030_at | 1.581851 | 2.524495 | 1.443064 | 1.903882 | 2.027129 | 1.945701 | 2.676774 | 1.878204 |
| 724031_at | 2.944859 | 3.671784 | 3.523256 | 4.364855 | 3.590092 | 2.668858 | 2.479892 | 4.360388 |
| 724032_at | 2.164272 | 3.867726 | 4.152783 | 3.790903 | 3.225352 | 3.466104 | 3.96493  | 4.299548 |
| 724087_at | 2.29205  | 3.461718 | 4.341146 | 1.197622 | 3.189901 | 1.414268 | 1.714412 | 1.937941 |
| 724102_at | 1.019836 | 0.790362 | 0.943451 | 1.456617 | 1.051294 | 1.864959 | 2.057382 | 1.50356  |
| 7247_at   | 6.642057 | 6.992016 | 7.20616  | 7.352641 | 6.885466 | 7.093515 | 7.485627 | 7.457251 |
| 7248_at   | 6.068787 | 6.275418 | 6.149191 | 5.276696 | 6.020677 | 6.153659 | 6.242208 | 6.096435 |
| 7249_at   | 5.73502  | 5.587898 | 5.841158 | 5.673988 | 4.959144 | 5.675948 | 6.216915 | 5.558674 |
| 7251_at   | 8.564651 | 8.642475 | 8.455419 | 8.434264 | 8.492012 | 8.213739 | 7.924339 | 8.248905 |
| 7252_at   | 3.273751 | 4.983909 | 4.559212 | 1.567413 | 4.087482 | 1.938897 | 3.362028 | 2.534007 |
| 7253_at   | 1.609782 | 1.98453  | 1.355242 | 1.720838 | 1.53783  | 1.432661 | 2.447987 | 1.533702 |
| 7257_at   | 7.267407 | 7.8011   | 7.250837 | 6.758283 | 8.049116 | 6.410761 | 6.993755 | 7.913835 |
| 7259_at   | 6.407785 | 6.52645  | 6.927871 | 6.808426 | 6.37917  | 6.645582 | 6.902444 | 6.427919 |
| 725_at    | 1.394163 | 1.766695 | 1.873798 | 1.685164 | 1.472474 | 1.479276 | 1.313243 | 2.436599 |
| 7260_at   | 5.251525 | 4.898265 | 4.81216  | 4.876551 | 5.096956 | 4.951896 | 5.521487 | 3.063281 |
| 7262_at   | 5.29395  | 5.015403 | 4.95386  | 4.581733 | 4.462571 | 5.282139 | 4.549779 | 4.442545 |
| 7263_at   | 8.167965 | 7.504617 | 8.088816 | 7.138297 | 7.498882 | 7.530382 | 6.873085 | 6.698004 |
| 7264_at   | 5.127438 | 5.060307 | 4.600195 | 4.448596 | 3.417646 | 5.202146 | 4.363256 | 4.070144 |
| 7265_at   | 7.079493 | 7.20586  | 7.246057 | 7.040706 | 6.97659  | 7.080573 | 6.858736 | 7.706592 |
| 7266_at   | 7.836738 | 7.945808 | 7.904466 | 8.005676 | 7.709803 | 7.702819 | 7.67632  | 8.115531 |
| 7267_at   | 6.43866  | 6.366122 | 7.066066 | 6.517504 | 7.264838 | 7.000651 | 6.929071 | 6.844275 |
| 726_at    | 4.769012 | 4.184679 | 4.089522 | 4.176161 | 3.259838 | 5.136296 | 3.574618 | 4.195864 |
| 7270_at   | 3.591613 | 3.676466 | 3.343206 | 3.57673  | 4.922496 | 4.023984 | 4.353423 | 4.866235 |
| 7272_at   | 1.220336 | 1.886456 | 1.661327 | 3.473616 | 1.529102 | 0.951841 | 1.683349 | 1.657024 |
| 7273_at   | 2.076589 | 2.107561 | 2.111647 | 2.065052 | 2.323156 | 2.056186 | 2.138139 | 2.270496 |
| 7274_at   | 2.22012  | 2.325337 | 1.54422  | 1.702717 | 2.102493 | 1.642004 | 1.627953 | 1.740369 |
| 7275_at   | 4.194664 | 3.77324  | 3.324587 | 3.912249 | 4.781345 | 4.182603 | 3.702738 | 2.73435  |
| 727677_at | 1.468974 | 1.808    | 1.405677 | 1.918814 | 1.318518 | 1.931764 | 1.791849 | 1.252895 |
| 727684_at | 1.149483 | 1.651373 | 1.614352 | 1.403134 | 1.71229  | 1.367687 | 2.091084 | 0.924371 |
| 727699_at | 2.051298 | 2.431892 | 2.185337 | 2.366241 | 2.108929 | 2.26373  | 2.437664 | 2.698124 |
| 7276_at   | 7.949815 | 7.837544 | 7.886015 | 7.626571 | 9.433231 | 8.32186  | 8.331922 | 7.65797  |
| 727710_at | 2.678956 | 2.612508 | 2.740487 | 2.707171 | 2.773529 | 3.14089  | 2.777599 | 3.137446 |
| 727758_at | 1.236606 | 1.109171 | 0.516657 | 1.499441 | 0.840621 | 0.794798 | 0.56625  | 2.341521 |
| 7277_at   | 5.587211 | 5.88868  | 5.749805 | 5.212045 | 5.155982 | 5.112206 | 4.818356 | 5.835063 |
| 727800_at | 2.033879 | 1.302371 | 2.366458 | 2.594334 | 1.795625 | 1.991027 | 1.63372  | 2.010821 |
| 727832_at | 1.67948  | 1.243368 | 4.185813 | 1.16105  | 1.562735 | 1.252988 | 1.37407  | 1.795251 |
| 727857_at | 0.789161 | 1.535739 | 1.464942 | 1.155615 | 1.675696 | 1.807513 | 3.218957 | 1.419644 |
| 727896_at | 6.11712  | 6.972437 | 6.808053 | 5.467791 | 6.642387 | 6.243332 | 6.52208  | 6.497874 |
| 727897_at | 2.157358 | 2.610818 | 2.434526 | 2.428105 | 2.439898 | 2.422905 | 2.279637 | 2.413737 |
| 7278_at   | 1.28195  | 2.300398 | 2.105239 | 3.592583 | 2.826009 | 2.449197 | 2.066337 | 1.997301 |
| 727910_at | 2.508148 | 3.086343 | 2.662619 | 3.33986  | 4.052322 | 3.811521 | 3.450915 | 3.074186 |
| 727936_at | 3.334844 | 4.757165 | 2.006836 | 3.866505 | 2.807365 | 5.544841 | 3.984787 | 4.728398 |
| 727944_at | 4.220287 | 4.396859 | 2.242687 | 1.709779 | 3.13025  | 3.638772 | 1.858222 | 1.268876 |
| 727957_at | 4.097685 | 4.329573 | 4.173763 | 3.968652 | 3.913132 | 3.881614 | 4.241993 | 3.584056 |
| 727982_at | 1.72977  | 1.773461 | 2.407017 | 1.730324 | 2.141649 | 1.673786 | 1.352771 | 2.037354 |
| 727993_at | 3.567398 | 4.448654 | 4.339465 | 2.387705 | 2.801882 | 3.849142 | 3.206887 | 2.911981 |
| 727_at    | 3.747605 | 4.038402 | 3.98097  | 3.798934 | 3.25727  | 4.351648 | 3.322406 | 3.963245 |
| 728012_at | 1.864301 | 2.415261 | 1.417035 | 1.402334 | 0.604893 | 1.921631 | 1.308655 | 1.094128 |

|           |          |          |          |          |          |          |          |          |
|-----------|----------|----------|----------|----------|----------|----------|----------|----------|
| 728024_at | 3.253322 | 4.536542 | 4.19232  | 3.122301 | 0.584624 | 3.078495 | 3.927751 | 4.817986 |
| 728039_at | 2.738948 | 2.680087 | 1.941241 | 2.989553 | 2.178662 | 2.682496 | 3.0053   | 2.574308 |
| 728040_at | 3.113265 | 3.584597 | 1.293741 | 0.487372 | 3.071077 | 2.568771 | 0.624338 | 4.912685 |
| 728066_at | 3.165323 | 3.653001 | 3.259025 | 3.179539 | 3.232864 | 3.251404 | 3.83552  | 4.711986 |
| 728081_at | 1.280957 | 1.208083 | 1.000371 | 0.687596 | 1.040363 | 1.047698 | 1.264031 | 1.230754 |
| 728084_at | 1.139963 | 1.236093 | 1.081645 | 1.019919 | 1.734788 | 1.092831 | 1.179478 | 1.521823 |
| 728095_at | 1.672904 | 1.668439 | 1.601163 | 2.059624 | 2.011561 | 2.389116 | 2.007303 | 1.436401 |
| 7280_at   | 9.929502 | 10.26146 | 10.0371  | 9.816729 | 10.05918 | 9.605886 | 9.617653 | 10.21486 |
| 728114_at | 1.002753 | 1.10534  | 1.501225 | 1.42098  | 1.573644 | 1.357169 | 1.445795 | 1.228351 |
| 728116_at | 1.644569 | 1.627566 | 2.293777 | 2.274161 | 2.100307 | 2.562788 | 1.553868 | 2.094717 |
| 728130_at | 4.204595 | 5.461363 | 4.824102 | 4.912469 | 4.954922 | 3.867707 | 4.020154 | 5.446963 |
| 728175_at | 1.476181 | 1.471446 | 1.672538 | 1.784931 | 2.353991 | 1.742762 | 2.220638 | 1.398597 |
| 728192_at | 1.564173 | 1.782243 | 2.517694 | 2.186237 | 1.495607 | 2.498165 | 2.072987 | 1.662317 |
| 728194_at | 1.755424 | 0.60082  | 1.751278 | 1.155912 | 1.650535 | 1.420071 | 0.81848  | 2.55674  |
| 728215_at | 1.483867 | 2.623156 | 1.926113 | 2.652677 | 2.173644 | 2.751401 | 1.19366  | 1.757993 |
| 728218_at | 2.374083 | 2.685617 | 2.817113 | 3.563614 | 2.920045 | 4.117136 | 3.097969 | 3.234875 |
| 728224_at | 1.824903 | 2.057577 | 1.373589 | 0.83461  | 0.786402 | 0.973856 | 1.341665 | 1.157201 |
| 728228_at | 2.652912 | 2.525631 | 1.505934 | 2.232458 | 2.975717 | 2.148038 | 2.122279 | 3.370838 |
| 728255_at | 2.012825 | 1.095991 | 1.759578 | 1.396582 | 1.757013 | 2.316239 | 1.32466  | 1.871769 |
| 728262_at | 1.818278 | 1.277359 | 0.951837 | 1.009497 | 0.952965 | 0.659551 | 1.938482 | 1.249158 |
| 728264_at | 3.512119 | 2.469194 | 2.19388  | 2.793228 | 2.507972 | 2.715794 | 2.087122 | 2.861252 |
| 728276_at | 1.088079 | 1.364564 | 1.740343 | 1.48181  | 1.469628 | 2.02851  | 1.24061  | 1.30566  |
| 728279_at | 1.457799 | 1.590299 | 1.381428 | 1.738383 | 1.531959 | 1.635425 | 1.020787 | 0.81275  |
| 728290_at | 2.406045 | 2.111707 | 2.458094 | 0.92051  | 2.476109 | 1.426161 | 0.800118 | 2.780482 |
| 728294_at | 3.434267 | 3.565828 | 3.519336 | 3.071659 | 3.765564 | 3.693813 | 2.854355 | 3.278804 |
| 728299_at | 1.334946 | 1.665943 | 1.245656 | 0.898754 | 1.545775 | 1.410193 | 1.326031 | 1.172786 |
| 728310_at | 1.902499 | 1.012764 | 1.741887 | 1.167689 | 4.587458 | 0.898119 | 0.885035 | 2.976244 |
| 728318_at | 1.237963 | 1.260899 | 1.893535 | 0.974331 | 1.515441 | 1.937794 | 2.098902 | 2.019587 |
| 728323_at | 6.831255 | 7.672277 | 6.624173 | 6.783718 | 6.786645 | 7.099124 | 6.930216 | 7.524279 |
| 728340_at | 5.00397  | 4.115007 | 4.94798  | 4.54026  | 6.12844  | 5.553361 | 3.581488 | 5.300707 |
| 728342_at | 1.056391 | 1.065974 | 0.950365 | 0.99601  | 0.844729 | 1.288412 | 0.934716 | 1.220728 |
| 728361_at | 1.717774 | 1.60164  | 1.894665 | 1.458414 | 2.141269 | 1.794045 | 2.180493 | 2.108019 |
| 728378_at | 0.594328 | 1.851449 | 0.309833 | 1.841901 | 3.3427   | 1.0781   | 1.626808 | 0.420113 |
| 728386_at | 1.620971 | 3.136226 | 2.236514 | 2.223227 | 3.027559 | 3.469517 | 4.632081 | 1.919428 |
| 728392_at | 6.486809 | 6.389351 | 5.876535 | 5.850863 | 5.199795 | 5.522021 | 4.665623 | 7.178663 |
| 7283_at   | 6.696699 | 6.263081 | 6.353999 | 6.565703 | 5.998308 | 6.455558 | 6.056523 | 5.984226 |
| 728402_at | 1.336647 | 1.164124 | 1.998035 | 1.229332 | 1.340976 | 2.186543 | 1.859645 | 1.40737  |
| 728407_at | 5.898863 | 6.025382 | 5.707071 | 4.934486 | 3.727218 | 5.736672 | 6.34977  | 6.464974 |
| 728409_at | 1.311993 | 2.503771 | 1.70981  | 1.668475 | 1.882246 | 1.240314 | 2.166578 | 1.610936 |
| 728411_at | 4.66555  | 3.248219 | 4.541688 | 5.382775 | 5.895224 | 2.672352 | 5.453887 | 4.563252 |
| 728431_at | 1.866167 | 1.776947 | 3.336686 | 2.544856 | 2.093911 | 2.57262  | 2.801555 | 2.074237 |
| 728441_at | 1.962191 | 1.974575 | 3.015872 | 4.448704 | 3.986767 | 2.611196 | 2.041437 | 3.230621 |
| 728448_at | 3.316809 | 2.83881  | 4.516271 | 4.32566  | 3.218618 | 3.918036 | 4.104557 | 3.460258 |
| 728450_at | 1.731934 | 2.554136 | 1.77273  | 2.003838 | 1.272603 | 2.570668 | 2.413971 | 2.056012 |
| 728463_at | 2.060452 | 2.205111 | 2.182874 | 0.847024 | 1.49873  | 1.326087 | 1.653446 | 1.283721 |
| 728464_at | 4.363949 | 4.077438 | 4.855745 | 3.832901 | 5.146024 | 4.121946 | 4.407924 | 5.110589 |
| 728489_at | 6.106388 | 5.588264 | 5.815667 | 4.616849 | 4.915049 | 5.26325  | 5.567479 | 4.200274 |
| 728498_at | 1.459613 | 2.440701 | 1.839789 | 2.310253 | 2.178987 | 1.567466 | 2.210694 | 2.475806 |
| 7284_at   | 7.52889  | 7.002415 | 6.824239 | 6.875011 | 6.916764 | 6.429147 | 6.945174 | 6.848329 |
| 728537_at | 2.514645 | 1.926282 | 3.003171 | 1.61752  | 1.927252 | 2.40169  | 1.920407 | 2.022215 |
| 728554_at | 4.436788 | 4.038672 | 3.61359  | 4.158695 | 5.65592  | 4.042871 | 5.50361  | 5.536575 |

728558\_at 2.26768 2.071655 1.956018 1.346255 1.587982 2.019833 3.738953 2.711202  
728568\_at 4.516917 3.059376 4.21783 4.041952 3.815529 4.679984 5.216924 3.514142  
728577\_at 4.097211 3.816998 1.954004 4.309883 2.80423 4.506784 3.396824 3.679043  
728586\_at 1.496682 1.768145 1.394329 1.703285 1.296459 1.184238 1.711701 1.609017  
728588\_at 1.64404 1.792753 1.918426 1.079179 1.75615 1.638346 1.155198 1.519564  
728591\_at 2.083386 1.740897 3.802899 2.537906 1.820293 3.565457 2.452623 1.460884  
728597\_at 1.670221 1.390396 1.311615 1.35009 1.433496 1.433496 1.571287 1.381471  
728606\_at 0.996935 3.093252 1.177574 1.40576 1.328996 1.31103 2.142001 1.650392  
728609\_at 4.820709 4.013315 2.421695 2.360742 4.205934 3.855211 3.982248 4.483831  
728613\_at 5.105352 4.726793 6.147499 5.823019 5.365524 4.439624 4.533893 3.394775  
728619\_at 1.728165 2.777005 1.53817 1.776319 2.058895 2.143782 2.572097 0.857894  
728621\_at 3.869464 3.482594 3.4097 3.210526 3.314346 4.055582 2.936754 3.34202  
728622\_at 1.973849 1.907872 1.484526 1.475527 1.511571 1.403941 1.093484 1.218522  
728635\_at 2.779584 2.221897 2.613953 2.261516 1.841889 1.798533 1.247351 1.724105  
728637\_at 0.904657 1.032876 1.166781 1.424533 1.437896 1.633856 2.069907 1.901117  
728640\_at 2.626598 2.459593 1.946729 2.529809 2.309081 1.997072 1.74398 2.569882  
728655\_at 1.712412 1.626946 1.252377 1.324739 1.472705 1.473938 2.017885 1.38985  
728661\_at 4.42861 4.248128 5.27971 2.398508 4.628929 5.673306 4.663971 3.713766  
728695\_at 1.840925 1.478194 2.156843 2.051223 4.266941 1.875317 2.030852 2.47372  
7286\_at 3.749504 4.028263 3.534488 3.024804 3.30199 3.40807 3.508801 4.437782  
728716\_at 3.371771 3.225678 3.705685 3.154464 3.223887 2.600654 3.271187 3.923255  
728723\_at 2.889448 3.490632 4.370182 3.6057 1.915051 3.703936 2.23451 4.469561  
728724\_at 1.896118 1.971448 2.075993 1.495116 1.589575 2.753447 1.816862 2.841029  
728728\_at 6.024364 6.357803 6.675244 6.389473 6.313903 6.17598 6.082462 5.794543  
728730\_at 5.673701 5.765663 5.84596 6.333744 5.692951 6.379384 6.130845 5.631043  
728739\_at 3.052979 4.34235 2.596981 2.131966 1.436856 2.340372 1.083237 1.14342  
728741\_at 5.133238 5.564692 5.477788 6.045418 5.985658 5.798992 5.476825 4.881473  
728743\_at 4.606631 2.963461 3.280492 3.258486 2.989107 3.742222 2.92709 3.329432  
728747\_at 1.544079 2.184916 2.190168 1.720432 2.680142 1.819457 3.442596 1.603811  
728752\_at 3.431922 4.305795 2.851436 2.78585 3.388771 4.252115 3.700139 2.991892  
728755\_at 1.203984 0.844667 0.742014 3.931328 0.819604 1.019378 0.948863 2.077207  
728758\_at 1.439037 1.691135 1.403325 1.220557 2.295854 1.615701 1.672625 1.585793  
728763\_at 1.816266 2.999083 2.183634 1.988754 3.366556 2.401669 2.178104 1.93155  
728769\_at 4.176896 3.40889 3.216212 3.498244 3.199805 3.600303 3.478928 3.058778  
728773\_at 2.088753 1.614863 2.030978 2.412095 3.060497 1.245597 2.88575 2.330482  
728780\_at 1.453807 1.275163 1.492181 1.649258 1.957505 1.897029 1.72069 1.626541  
7287\_at 1.958561 2.176406 2.338544 2.520742 2.512462 1.979381 2.145645 3.159118  
728805\_at 2.113779 2.315718 1.559887 1.558197 1.974356 1.89566 1.703525 2.58852  
728819\_at 3.234944 4.571447 3.782829 2.311556 3.077971 3.187773 2.599241 4.746768  
728833\_at 1.696253 3.943476 4.673172 1.783246 4.894079 1.299516 5.428958 2.703084  
728858\_at 1.706555 1.820569 1.351827 2.073293 1.225693 1.599285 2.115799 1.087783  
728888\_at 7.852295 8.019683 8.311503 8.820615 7.599392 8.369893 7.848844 7.072249  
7288\_at 1.443054 1.561011 1.835216 1.586015 1.805481 2.027356 2.349814 1.661139  
728927\_at 2.315822 2.241785 3.754167 1.759642 1.160607 2.172514 3.807758 3.520752  
728957\_at 2.081474 0.83387 1.117636 0.997251 0.753532 1.118922 4.584984 1.274868  
728963\_at 3.153553 3.928325 2.088077 1.340339 2.479661 2.312424 2.763085 2.376647  
728975\_at 4.735098 2.833596 3.507687 3.459122 4.502059 2.944266 2.225518 4.819459  
728978\_at 4.310403 3.351285 3.597122 4.875524 3.045871 3.998291 2.952134 2.987368  
728989\_at 3.55356 2.619595 2.817261 3.362475 2.748351 2.338724 1.924823 2.673976  
7289\_at 5.502451 5.927782 5.892497 5.537839 5.226592 5.599741 5.676468 5.390485  
728\_at 4.587079 4.446449 3.995965 4.100798 3.187257 3.810562 5.049247 2.491863

729013\_at 6.096359 5.677504 6.876104 5.760763 6.394683 5.524234 5.959468 5.619504  
729020\_at 1.014832 0.719291 1.236157 0.951104 0.965347 0.991369 2.015569 1.65108  
729025\_at 1.591976 1.279414 1.431955 1.277709 1.77453 1.222065 1.74139 1.722119  
729040\_at 1.594226 1.726344 2.238655 1.669772 1.506199 1.712946 2.373482 2.995302  
729041\_at 1.613556 2.172262 1.608447 1.932273 2.725006 2.580273 2.514764 2.176816  
729059\_at 2.540678 2.481946 3.470825 1.582358 1.493413 2.330025 2.818184 2.780453  
729080\_at 0.477187 0.629555 1.093508 0.704615 0.686807 1.074032 0.854233 0.745164  
729082\_at 8.323864 8.161135 8.368824 8.274601 8.60461 8.356992 8.283059 8.080619  
729083\_at 2.292939 1.786349 2.080493 3.036325 1.86615 2.491314 4.184858 1.280143  
729085\_at 3.000007 1.867786 2.107473 1.734957 2.184854 2.714925 2.949693 2.362962  
729092\_at 3.394703 2.764005 5.101969 3.488397 3.622132 2.891177 2.443601 3.188326  
729096\_at 1.327853 2.159558 1.020116 2.569657 1.736942 0.913225 3.063661 3.453072  
7290\_at 4.306455 5.031821 4.720994 5.134859 4.92927 4.835903 3.056328 4.889564  
729121\_at 1.374653 1.366824 1.374694 1.390636 0.950947 1.775422 1.986775 2.071828  
729156\_at 6.012492 4.776018 5.213944 5.069196 5.860868 5.244832 5.415606 5.513022  
729159\_at 2.997785 2.176552 0.71188 2.260965 0.924727 1.088288 4.058595 1.598117  
729164\_at 1.706334 3.773843 1.934171 1.336771 2.184448 1.959614 1.908633 1.849833  
729171\_at 0.743097 1.17694 1.488134 1.459595 1.115524 1.989224 0.75122 1.827908  
729173\_at 2.174708 1.918715 1.541648 1.913467 2.296259 2.862899 2.200588 2.228329  
729176\_at 1.542091 1.283336 1.08719 1.512593 1.299684 2.016056 1.513321 1.787627  
729177\_at 2.565262 4.218616 3.66452 5.107246 5.280085 2.288872 3.299681 2.120626  
729178\_at 1.105043 1.285035 1.382662 1.218292 1.487112 1.16595 1.475053 1.532393  
7291\_at 3.967023 3.509819 2.594052 2.347984 2.853763 2.204386 2.220074 2.446363  
729218\_at 4.007551 3.327266 5.723221 4.303746 2.322103 4.199863 3.460642 1.648701  
729220\_at 2.526231 1.840264 2.033099 2.968266 2.092703 1.817969 2.053361 1.992078  
729222\_at 3.961537 2.38446 3.459314 2.70915 2.547043 0.757146 0.968152 4.056257  
729224\_at 1.004751 1.418628 1.237759 1.858779 1.097079 1.134183 1.518552 1.179102  
729230\_at 3.175135 2.914233 1.738955 2.550606 3.160678 2.771692 3.434276 2.205884  
729234\_at 4.783596 4.678863 4.963632 2.555013 3.634353 3.613842 3.860761 3.973799  
729238\_at 1.24964 3.61969 2.183174 0.434438 3.85766 0.940549 0.792017 0.565331  
729291\_at 4.555098 3.482399 5.27277 2.979629 3.548352 4.975153 5.466077 5.245427  
729296\_at 1.424575 1.349234 1.621672 1.349584 1.651066 1.408833 1.321282 1.528608  
7292\_at 1.449986 2.720533 1.740265 3.32016 1.978781 2.597096 3.136533 1.862865  
729307\_at 1.619942 0.823331 0.993356 0.656736 1.059706 1.16719 1.20969 1.004021  
729330\_at 2.730892 1.831524 2.462407 1.818025 2.476866 2.57386 1.924245 1.871038  
729338\_at 1.539955 1.21241 2.032844 1.194927 1.228472 1.46789 2.978198 1.603189  
729359\_at 1.67092 2.061699 1.836611 1.747578 1.877863 1.626582 1.861998 1.908799  
729375\_at 2.233995 3.222101 4.130494 3.346181 2.306537 2.931866 1.687546 3.179358  
729396\_at 3.307247 2.542572 1.455507 2.38943 3.298137 2.00513 2.462542 1.646543  
7293\_at 2.924384 2.186092 2.781066 2.460968 2.191084 2.774393 2.194702 2.535655  
729420\_at 0.947489 1.553454 1.10765 1.041792 1.254006 1.705767 1.568171 1.22855  
729438\_at 5.832858 6.21557 5.472615 6.541395 4.879976 5.610101 4.623709 6.125256  
729440\_at 4.081604 3.398448 3.679886 3.735727 3.942306 3.365495 3.632387 3.763061  
729454\_at 2.742775 1.891087 2.248421 1.859291 2.071823 2.291029 1.816735 2.667699  
729467\_at 1.264408 1.082383 1.355635 1.81674 2.092732 1.329941 1.144742 1.221492  
729468\_at 2.461939 2.389018 1.299231 3.186556 1.187786 2.570307 3.582459 3.297041  
729475\_at 1.103612 1.474955 1.469672 1.185156 1.360833 1.548668 1.113488 1.244365  
7294\_at 1.833488 2.007686 2.983165 3.348299 1.578366 2.349569 2.29804 1.807218  
729506\_at 1.708315 1.676003 2.341564 1.604436 1.882981 1.605206 1.694916 3.413224  
729515\_at 5.576239 5.74598 6.187241 5.923765 5.75702 6.212161 6.451812 4.772284  
729522\_at 1.218087 1.011801 0.936928 1.163176 1.107952 2.034026 3.281924 2.168774

729582\_at 1.478262 2.290005 2.408992 1.50015 1.496683 1.861805 2.287025 1.312163  
729583\_at 1.653429 1.519779 1.796698 1.583636 1.711755 2.542455 1.962593 1.56525  
7295\_at 9.666922 9.374241 9.488716 9.250288 9.467408 9.246631 8.888536 9.011404  
729603\_at 3.536363 2.602637 2.600062 3.65316 2.738542 3.045532 2.134018 2.576803  
729609\_at 1.265567 0.959691 1.189254 1.221519 1.405083 1.72112 1.486912 1.907829  
729614\_at 2.854098 2.875075 3.036211 3.293549 3.085808 3.165418 3.331664 3.050853  
729627\_at 1.051011 1.158432 1.332814 1.408813 2.077799 1.441055 1.210787 3.101334  
729633\_at 1.503015 1.981441 1.336539 2.204047 2.769399 2.034976 1.686582 3.07638  
729648\_at 2.496043 1.834672 1.472239 1.600609 2.195295 2.061544 2.174335 0.964495  
729658\_at 1.740194 2.025277 2.439144 1.884795 3.264259 2.133654 2.194268 2.546291  
729665\_at 2.025953 1.522154 1.486715 2.03224 1.655665 1.407929 1.359397 2.341059  
729678\_at 4.833436 5.302424 3.946288 4.632119 4.910228 3.860482 5.818661 3.951059  
7296\_at 6.049671 6.402093 6.343142 6.759546 6.598081 6.040187 6.742729 6.782842  
729723\_at 1.641543 1.23081 0.858525 1.76855 1.752686 1.449073 2.999274 2.761664  
729737\_at 4.613258 4.68545 4.263035 5.079226 3.499443 4.553149 4.729793 4.301538  
729739\_at 3.506149 2.445285 2.570795 2.445285 2.301803 1.776559 1.226809 1.315143  
729747\_at 1.421851 2.053984 2.274287 1.103087 2.163732 1.542095 1.453217 1.471914  
729756\_at 0.813602 1.83814 3.129631 2.592359 3.436498 1.920564 2.831394 2.013022  
729767\_at 1.209181 1.104024 0.990416 1.120151 1.315567 1.322729 1.619972 1.281427  
729770\_at 2.211859 1.340348 2.772158 2.171712 2.774184 1.457826 2.505511 1.655901  
729799\_at 3.036646 3.321786 3.629361 2.833718 2.833718 2.824526 3.172656 2.323506  
7297\_at 3.971553 4.323924 3.62032 4.587 3.465971 4.145698 3.750154 3.772236  
729800\_at 2.204876 1.514855 1.694168 2.031508 3.021452 1.760395 2.007871 1.675177  
729815\_at 1.62245 1.637796 0.816907 1.04686 2.713294 1.365503 1.148249 1.90783  
729830\_at 2.990601 2.911783 2.21236 2.186829 3.624724 2.797589 2.851395 2.981958  
729852\_at 5.878546 6.113312 5.342741 5.692809 5.080562 5.655374 5.218173 6.323422  
729862\_at 1.172345 1.898028 1.367809 1.950008 1.713813 1.04791 1.519039 2.103236  
729867\_at 2.014275 1.493946 1.342648 1.617543 2.037747 1.129377 1.954749 1.805348  
729870\_at 2.059664 1.945718 1.985621 1.806843 2.088349 2.400994 2.01477 2.975848  
7298\_at 5.385254 3.633601 4.693229 5.175541 2.991813 5.488423 4.071374 6.02183  
729911\_at 0.880331 1.939235 1.376821 2.363031 2.472795 1.502384 1.019236 1.376768  
729920\_at 3.500889 4.245045 3.777636 4.760399 3.743959 2.503179 3.799281 4.152702  
729950\_at 2.722891 1.156155 1.320246 1.254751 1.382545 1.821806 2.106582 1.46028  
729956\_at 1.665794 1.951692 2.579173 1.891996 2.134127 2.505571 2.664793 1.421249  
729966\_at 2.490925 2.096508 1.764227 3.322917 1.7354 2.08239 1.66443 2.145775  
729967\_at 7.670533 7.184941 7.09693 7.036566 7.368463 7.022025 6.779838 7.251841  
729970\_at 6.049208 4.7795 6.122968 5.609268 4.77296 5.583599 5.503457 6.479257  
729974\_at 1.443931 1.540255 2.815357 1.230156 2.250952 1.989022 3.96808 2.000264  
729975\_at 3.090123 2.843912 2.570355 2.536335 2.891349 2.065039 2.229832 3.936259  
729987\_at 1.552216 1.811721 1.794804 1.41978 1.532527 1.414471 1.379374 1.646615  
729991\_at 6.34025 3.462081 2.943734 1.369047 3.191183 2.955187 0.547137 5.404405  
729993\_at 2.329641 2.35823 2.766996 2.303008 2.619968 2.547881 2.439371 2.936569  
7299\_at 2.553459 1.730583 2.073448 3.821937 2.25906 2.699821 2.6987 1.39684  
729\_at 1.945357 2.591458 2.113113 1.325412 2.238342 2.58889 1.743902 1.700722  
72\_at 0.688599 0.618909 1.841001 1.888594 1.439795 0.696304 2.108201 2.000816  
730005\_at 2.937535 1.788913 2.717017 1.70953 2.480517 1.92464 2.281715 2.414576  
730013\_at 6.284598 4.535484 5.283457 4.597436 5.473878 6.083025 4.220302 5.589337  
730051\_at 3.376108 4.406737 4.66906 3.964194 4.338719 3.655388 3.627521 3.539803  
730087\_at 2.318022 1.205115 2.665874 0.606201 2.987186 1.012585 4.1253 1.312782  
730091\_at 2.28119 1.797002 3.682903 2.549481 1.865061 2.388459 4.386211 3.011017  
730094\_at 5.986944 5.623133 5.871747 4.681369 5.344549 4.402037 4.974288 4.394743



|           |          |          |          |          |          |          |          |          |
|-----------|----------|----------|----------|----------|----------|----------|----------|----------|
| 730100_at | 1.063405 | 1.416733 | 1.025959 | 1.007158 | 1.06728  | 1.22986  | 1.586971 | 1.289159 |
| 730101_at | 6.385896 | 5.985173 | 5.416517 | 5.923979 | 6.268689 | 5.122671 | 5.816011 | 6.965301 |
| 730102_at | 4.519369 | 4.151843 | 4.527888 | 3.715889 | 4.206616 | 4.588786 | 5.273706 | 4.128467 |
| 730109_at | 1.610805 | 1.610268 | 1.644189 | 2.04468  | 2.137076 | 1.792903 | 2.561105 | 1.683512 |
| 730112_at | 3.662381 | 2.641336 | 2.30901  | 2.57806  | 3.396108 | 3.71764  | 3.364408 | 3.453985 |
| 730130_at | 1.507565 | 1.952067 | 1.529903 | 1.614964 | 1.899967 | 2.233283 | 1.985943 | 2.180799 |
| 730152_at | 1.620283 | 1.477534 | 1.385482 | 1.712888 | 2.353386 | 1.570514 | 2.489358 | 1.55034  |
| 730159_at | 1.105781 | 1.516653 | 1.160914 | 0.915505 | 1.1677   | 0.868471 | 0.885483 | 1.042901 |
| 730183_at | 5.024687 | 4.613902 | 4.760132 | 4.625312 | 4.359099 | 5.00577  | 3.30557  | 2.757918 |
| 730198_at | 2.211016 | 2.055701 | 2.203969 | 1.302887 | 1.721269 | 1.534698 | 1.690279 | 1.674158 |
| 7301_at   | 7.162381 | 7.117248 | 7.635362 | 7.353484 | 6.271499 | 6.477377 | 8.032351 | 7.148689 |
| 730227_at | 2.075112 | 1.286823 | 1.623804 | 1.536231 | 1.951476 | 1.693462 | 2.155365 | 1.489795 |
| 730249_at | 1.644954 | 2.837603 | 1.865764 | 1.352976 | 1.960219 | 2.297163 | 1.515681 | 1.941663 |
| 730291_at | 1.699079 | 0.975695 | 2.793637 | 1.036801 | 0.97188  | 1.309516 | 1.354114 | 1.194958 |
| 7302_at   | 1.163118 | 2.037974 | 1.079423 | 2.086054 | 2.133868 | 2.597011 | 2.412894 | 2.44099  |
| 730338_at | 0.8107   | 1.994966 | 1.167595 | 1.15664  | 1.925366 | 1.581953 | 0.883369 | 1.91133  |
| 7305_at   | 8.019968 | 7.501804 | 7.385569 | 8.357916 | 6.982747 | 8.118678 | 7.729833 | 7.766723 |
| 730668_at | 1.483112 | 1.57453  | 1.420812 | 1.45611  | 1.340602 | 1.711166 | 1.755572 | 2.025128 |
| 7306_at   | 1.879664 | 1.932137 | 2.659022 | 1.953808 | 4.042109 | 1.419252 | 2.61708  | 2.377209 |
| 730755_at | 3.233537 | 1.701031 | 1.341816 | 2.100664 | 2.817339 | 1.641378 | 1.441307 | 1.171651 |
| 730811_at | 1.754239 | 1.950932 | 1.957347 | 1.711293 | 2.396438 | 2.519017 | 2.109116 | 2.624237 |
| 730971_at | 3.177001 | 1.778647 | 1.919192 | 3.466275 | 1.778876 | 2.117103 | 2.337483 | 1.36241  |
| 730_at    | 5.776499 | 7.029028 | 6.189689 | 6.56193  | 7.585572 | 6.802151 | 7.085917 | 6.108288 |
| 731157_at | 2.042023 | 1.115787 | 1.325751 | 1.561199 | 2.305693 | 2.038169 | 2.946938 | 1.024308 |
| 7311_at   | 10.69796 | 10.89835 | 10.78777 | 10.95039 | 10.83464 | 10.82995 | 10.5208  | 10.86791 |
| 731220_at | 2.013629 | 2.254054 | 2.197332 | 2.222821 | 2.080172 | 2.320805 | 2.831108 | 1.760088 |
| 731223_at | 2.02092  | 3.324944 | 3.091784 | 2.424258 | 2.863051 | 2.557904 | 4.320548 | 1.469568 |
| 731275_at | 2.660279 | 2.298493 | 3.083372 | 1.279029 | 1.738464 | 1.33783  | 1.817717 | 1.758018 |
| 731424_at | 2.107063 | 1.256613 | 1.769766 | 2.669758 | 2.008575 | 1.694175 | 2.298557 | 2.003641 |
| 7314_at   | 1.837475 | 2.304024 | 1.949768 | 2.389022 | 2.270611 | 1.995438 | 1.80116  | 2.14895  |
| 731656_at | 2.010928 | 1.751901 | 1.881499 | 1.937925 | 2.371058 | 1.792928 | 1.464439 | 2.481518 |
| 7316_at   | 2.297937 | 2.607316 | 2.967745 | 4.254301 | 2.82178  | 2.909968 | 1.786436 | 4.460508 |
| 731779_at | 1.641631 | 1.660227 | 1.201251 | 1.125324 | 1.559788 | 2.003208 | 1.936729 | 1.742952 |
| 731789_at | 2.089262 | 1.568774 | 1.432475 | 1.290579 | 1.518922 | 2.374477 | 2.896195 | 2.645755 |
| 7317_at   | 8.408507 | 8.023656 | 8.439499 | 8.123444 | 8.132665 | 8.22375  | 8.121805 | 7.610591 |
| 7318_at   | 5.235052 | 5.268256 | 5.673439 | 5.048767 | 5.204806 | 5.306263 | 5.402648 | 4.591431 |
| 7319_at   | 6.028661 | 6.410006 | 6.317277 | 6.665498 | 6.810143 | 6.66201  | 6.248974 | 6.169792 |
| 731_at    | 2.001105 | 1.709127 | 1.896866 | 1.495533 | 1.986673 | 1.418309 | 2.037018 | 1.769159 |
| 7320_at   | 7.853395 | 7.854035 | 7.523355 | 7.794094 | 8.227734 | 7.589953 | 7.492607 | 8.411227 |
| 7321_at   | 7.220177 | 6.527699 | 6.646539 | 6.790846 | 5.853679 | 6.520323 | 6.111835 | 6.238696 |
| 732253_at | 1.326842 | 0.481425 | 0.980503 | 2.353767 | 0.978879 | 1.631308 | 1.13502  | 2.70574  |
| 732275_at | 1.472361 | 1.654787 | 1.922715 | 2.230679 | 1.711101 | 1.164095 | 2.272314 | 1.545367 |
| 7322_at   | 7.045999 | 7.41485  | 7.158243 | 7.423591 | 7.36626  | 7.6249   | 7.126925 | 7.3652   |
| 7323_at   | 6.231624 | 6.342308 | 6.332046 | 6.519701 | 6.214224 | 6.186375 | 6.099157 | 6.691689 |
| 7324_at   | 4.220264 | 4.287983 | 3.831053 | 4.185618 | 3.384601 | 3.915585 | 4.508202 | 4.228725 |
| 7325_at   | 6.534914 | 6.649009 | 6.234346 | 6.889948 | 6.589978 | 5.464267 | 6.868135 | 5.606266 |
| 7326_at   | 7.562259 | 7.411615 | 6.9839   | 7.187947 | 7.718128 | 6.820365 | 7.330765 | 6.759311 |
| 7327_at   | 6.54686  | 6.769828 | 7.243024 | 6.920379 | 6.242269 | 6.955742 | 6.794065 | 7.137976 |
| 7328_at   | 7.285719 | 8.2254   | 7.170666 | 8.102242 | 7.956661 | 7.959576 | 7.225915 | 7.381467 |
| 7329_at   | 6.190542 | 5.803267 | 5.965121 | 6.30385  | 5.826012 | 6.225587 | 6.381797 | 5.621755 |
| 732_at    | 1.063264 | 1.295503 | 1.702012 | 1.628216 | 1.202633 | 1.403543 | 1.140183 | 1.325117 |

|           |          |          |          |          |          |          |          |          |
|-----------|----------|----------|----------|----------|----------|----------|----------|----------|
| 7332_at   | 4.298194 | 3.796701 | 4.353662 | 4.713511 | 3.587627 | 4.044215 | 4.401345 | 4.387564 |
| 7335_at   | 3.433601 | 3.739748 | 3.846538 | 3.314781 | 1.843453 | 1.836931 | 2.08502  | 3.349388 |
| 7336_at   | 5.30304  | 5.814745 | 5.737748 | 6.548961 | 6.335868 | 5.616645 | 5.865842 | 5.710814 |
| 7337_at   | 6.865271 | 6.601502 | 6.568684 | 6.418524 | 6.811055 | 6.795318 | 6.833178 | 6.870381 |
| 733_at    | 2.744897 | 3.133638 | 2.605058 | 2.331313 | 2.878798 | 2.892603 | 2.085703 | 2.45785  |
| 7341_at   | 7.509644 | 7.572349 | 6.627722 | 6.423573 | 5.719218 | 6.259662 | 5.658533 | 5.837726 |
| 7342_at   | 6.839168 | 6.900131 | 6.977591 | 6.731179 | 6.233743 | 6.379742 | 7.278661 | 6.520986 |
| 7343_at   | 7.287749 | 7.303447 | 7.095213 | 7.049125 | 7.210775 | 7.332796 | 7.640066 | 6.608742 |
| 7345_at   | 8.399081 | 8.030424 | 8.38754  | 8.991384 | 9.492793 | 7.99801  | 9.284019 | 8.35213  |
| 7347_at   | 6.400727 | 6.653898 | 6.172795 | 6.337821 | 6.320911 | 6.297013 | 5.201709 | 5.622265 |
| 7348_at   | 4.187188 | 4.524043 | 4.329301 | 2.646115 | 5.89524  | 3.305043 | 1.357169 | 6.098782 |
| 7349_at   | 2.742564 | 3.572522 | 2.76219  | 2.994112 | 2.869692 | 1.588017 | 2.1304   | 2.552346 |
| 734_at    | 4.384486 | 4.854803 | 4.946274 | 5.114485 | 4.955483 | 4.446142 | 4.925738 | 3.432641 |
| 7350_at   | 1.737054 | 1.471874 | 1.765628 | 1.6913   | 1.761361 | 1.761206 | 1.447788 | 1.512307 |
| 7351_at   | 5.510953 | 4.287169 | 5.971131 | 5.964615 | 4.174593 | 6.155546 | 6.272601 | 4.598335 |
| 7352_at   | 2.045849 | 0.894046 | 1.743748 | 1.035258 | 1.946745 | 1.393057 | 1.700316 | 1.130806 |
| 735301_at | 8.329592 | 8.905761 | 7.587713 | 7.885098 | 7.803131 | 9.008041 | 7.021191 | 6.388531 |
| 7353_at   | 7.749322 | 7.39029  | 7.273922 | 7.07234  | 7.409857 | 6.831387 | 7.050172 | 7.990411 |
| 7355_at   | 5.5638   | 5.438257 | 5.148622 | 5.354566 | 4.556047 | 5.525066 | 5.507297 | 4.72949  |
| 7356_at   | 2.570958 | 2.771799 | 3.370388 | 2.72609  | 2.375852 | 2.673666 | 2.692626 | 2.927971 |
| 7357_at   | 7.101754 | 7.442037 | 7.164919 | 6.916605 | 7.547853 | 6.78668  | 7.223854 | 8.069819 |
| 7358_at   | 7.350468 | 7.829571 | 7.317409 | 7.292226 | 7.635514 | 7.078051 | 6.777759 | 8.150302 |
| 735_at    | 1.44528  | 1.22885  | 1.108396 | 1.535502 | 1.261006 | 1.168887 | 1.20226  | 1.37819  |
| 7360_at   | 7.556446 | 7.373691 | 7.286282 | 6.617505 | 7.212645 | 6.838392 | 7.131715 | 7.189545 |
| 7363_at   | 0.395457 | 1.924833 | 0.80025  | 0.769629 | 1.186399 | 1.771732 | 1.040176 | 2.539767 |
| 7364_at   | 7.080629 | 7.732233 | 5.980583 | 3.000392 | 8.29917  | 7.481239 | 4.072431 | 7.273129 |
| 7365_at   | 3.116704 | 2.769713 | 2.442888 | 2.208591 | 3.125209 | 2.640223 | 1.858521 | 2.666663 |
| 7366_at   | 0.555388 | 0.636194 | 0.93507  | 0.360462 | 0.775609 | 0.641192 | 0.762602 | 0.807548 |
| 7367_at   | 2.448235 | 1.258867 | 0.883564 | 0.892012 | 1.561999 | 0.470706 | 1.024461 | 1.044138 |
| 7368_at   | 6.468179 | 3.32776  | 4.135788 | 4.754906 | 5.211339 | 5.184201 | 5.900139 | 4.800871 |
| 7369_at   | 8.183711 | 8.375697 | 5.637372 | 6.819931 | 8.963939 | 6.254574 | 3.666546 | 6.250582 |
| 7371_at   | 3.912604 | 3.097296 | 3.816882 | 4.610261 | 4.563937 | 3.961355 | 4.786608 | 4.067765 |
| 7372_at   | 3.910544 | 4.932909 | 5.129268 | 4.99965  | 5.65926  | 5.244092 | 5.297119 | 4.742207 |
| 7373_at   | 3.340381 | 2.719202 | 2.923722 | 3.704038 | 4.276256 | 2.935688 | 2.344153 | 3.277158 |
| 7374_at   | 6.040392 | 6.040439 | 6.61239  | 6.430659 | 6.109214 | 6.064525 | 6.239755 | 6.068923 |
| 7375_at   | 6.721911 | 6.888718 | 6.929905 | 6.764492 | 6.807638 | 6.555007 | 6.901005 | 6.805341 |
| 7376_at   | 5.590156 | 6.113117 | 5.42797  | 5.287733 | 4.923357 | 5.650692 | 5.857693 | 4.604649 |
| 7378_at   | 3.872347 | 2.766387 | 1.816842 | 3.191314 | 2.408649 | 2.544573 | 2.692415 | 1.947777 |
| 7379_at   | 2.423008 | 1.919357 | 1.799144 | 1.637682 | 1.971161 | 2.55776  | 2.028699 | 2.932261 |
| 7380_at   | 1.974794 | 1.995728 | 1.92571  | 2.327693 | 3.068427 | 2.230299 | 2.585263 | 2.429472 |
| 7381_at   | 2.940999 | 3.254321 | 2.744489 | 3.20972  | 3.520662 | 3.479817 | 3.015182 | 3.377029 |
| 7384_at   | 7.039663 | 7.106636 | 7.374944 | 6.882917 | 7.060833 | 7.085414 | 6.98229  | 6.798473 |
| 7385_at   | 8.785183 | 8.617203 | 8.440294 | 7.799016 | 8.464605 | 8.089448 | 7.965635 | 8.721002 |
| 7386_at   | 5.034332 | 4.844796 | 4.769281 | 4.229779 | 4.827365 | 4.727167 | 4.451878 | 4.10742  |
| 7388_at   | 5.7622   | 6.577167 | 6.528758 | 6.119212 | 6.763359 | 6.74877  | 6.052584 | 6.062428 |
| 7389_at   | 6.081756 | 6.517706 | 6.456431 | 6.524971 | 6.887476 | 6.457898 | 6.968563 | 5.818785 |
| 738_at    | 4.139931 | 3.595042 | 3.542365 | 3.573429 | 3.375548 | 4.276347 | 3.33035  | 3.186386 |
| 7390_at   | 4.503201 | 3.922064 | 3.916515 | 3.558974 | 3.83746  | 3.96609  | 4.114059 | 4.282594 |
| 7391_at   | 4.850729 | 4.860206 | 3.995423 | 5.049326 | 5.312312 | 4.677402 | 5.418978 | 5.020534 |
| 7392_at   | 6.896754 | 6.735112 | 6.642961 | 6.770017 | 6.163333 | 7.093434 | 6.38036  | 5.976722 |
| 7398_at   | 6.136431 | 6.600667 | 5.377334 | 6.089878 | 6.424657 | 5.638236 | 5.825787 | 6.378293 |

|         |          |          |          |          |          |          |          |          |
|---------|----------|----------|----------|----------|----------|----------|----------|----------|
| 7399_at | 1.687208 | 1.991276 | 1.601583 | 1.34751  | 1.885335 | 1.378183 | 1.563172 | 1.603206 |
| 7401_at | 1.933806 | 1.324122 | 1.884664 | 1.177827 | 1.129887 | 1.723716 | 1.396546 | 2.489922 |
| 7402_at | 7.881412 | 8.381943 | 8.513314 | 8.642031 | 8.300732 | 8.375428 | 8.528676 | 8.377116 |
| 7403_at | 5.179351 | 4.573225 | 4.965147 | 4.564346 | 4.890968 | 4.679477 | 5.159473 | 5.068395 |
| 7404_at | 5.383049 | 5.277404 | 6.071845 | 5.350575 | 5.098138 | 5.729963 | 5.467568 | 5.93234  |
| 7405_at | 6.304744 | 6.633647 | 6.39592  | 6.939268 | 6.577471 | 6.341427 | 6.259595 | 6.644556 |
| 7407_at | 3.635772 | 3.952979 | 3.655141 | 4.062763 | 3.615394 | 3.807205 | 4.054909 | 3.751556 |
| 7408_at | 5.193674 | 4.93489  | 5.106545 | 5.991647 | 4.650742 | 5.082514 | 5.167549 | 4.967469 |
| 7409_at | 2.51208  | 2.444458 | 2.659412 | 2.07299  | 1.965683 | 2.139729 | 2.900676 | 1.687308 |
| 740_at  | 4.834329 | 4.524237 | 5.109586 | 4.181208 | 3.936749 | 3.916344 | 4.610832 | 4.730057 |
| 7410_at | 4.923376 | 5.844751 | 5.596541 | 5.886386 | 4.954723 | 5.898983 | 5.77748  | 4.51931  |
| 7411_at | 5.892226 | 6.33615  | 6.811769 | 6.372837 | 6.47727  | 5.995821 | 6.603108 | 6.86516  |
| 7412_at | 6.845793 | 6.883392 | 6.967426 | 7.654127 | 6.919407 | 7.837703 | 6.385312 | 7.031604 |
| 7414_at | 7.206076 | 7.978699 | 7.614761 | 7.484889 | 7.620784 | 7.18965  | 7.797067 | 7.473145 |
| 7415_at | 7.43978  | 7.364463 | 7.474411 | 7.788947 | 7.263414 | 7.356919 | 7.420915 | 7.733527 |
| 7416_at | 2.095889 | 4.152312 | 2.88925  | 3.141895 | 2.577882 | 3.571352 | 4.063152 | 2.655732 |
| 7417_at | 3.810309 | 3.569359 | 3.747847 | 3.717292 | 3.372407 | 3.565972 | 3.730778 | 3.724409 |
| 7419_at | 8.027657 | 7.581904 | 8.744119 | 7.831066 | 6.913662 | 7.231402 | 7.929324 | 6.762187 |
| 741_at  | 3.373884 | 2.858923 | 2.928675 | 3.373803 | 2.145483 | 2.83832  | 3.022173 | 3.708582 |
| 7421_at | 3.259005 | 4.111012 | 3.73842  | 2.432573 | 4.454263 | 4.260723 | 3.138075 | 2.711901 |
| 7422_at | 9.52613  | 9.349925 | 9.271088 | 9.568353 | 8.962765 | 9.177936 | 9.486899 | 9.341085 |
| 7423_at | 5.856989 | 5.361818 | 5.629214 | 5.518569 | 4.912755 | 5.981445 | 5.177719 | 5.983567 |
| 7424_at | 6.61698  | 6.33088  | 4.178449 | 5.821893 | 5.774115 | 4.726363 | 6.133632 | 6.051121 |
| 7425_at | 2.138753 | 2.85941  | 2.162966 | 3.069174 | 2.972264 | 2.970866 | 2.707369 | 2.421255 |
| 7428_at | 3.310482 | 3.202533 | 5.02405  | 3.95047  | 2.749635 | 3.988048 | 3.197384 | 2.174293 |
| 7429_at | 2.905482 | 2.262772 | 2.924599 | 2.234251 | 2.809861 | 3.088203 | 3.20849  | 2.729452 |
| 7430_at | 8.426189 | 8.884314 | 8.497362 | 8.3264   | 8.335618 | 8.621481 | 8.415679 | 8.800006 |
| 7431_at | 9.761283 | 9.712011 | 9.655355 | 9.554505 | 8.483802 | 9.432415 | 9.956542 | 9.231813 |
| 7432_at | 1.347276 | 1.811107 | 2.087399 | 1.508471 | 1.667838 | 2.556784 | 1.975392 | 1.645244 |
| 7433_at | 5.679911 | 5.922386 | 4.601118 | 5.52038  | 4.691144 | 4.71966  | 4.736959 | 3.847923 |
| 7434_at | 3.144521 | 2.389549 | 2.029681 | 2.004687 | 2.303211 | 2.004671 | 2.22132  | 2.517582 |
| 7436_at | 5.314946 | 5.990974 | 5.696801 | 5.448474 | 5.645269 | 5.058183 | 5.954943 | 5.950536 |
| 7439_at | 1.789757 | 2.377519 | 1.846355 | 1.688949 | 2.163722 | 1.482539 | 2.057713 | 1.952332 |
| 7441_at | 2.279118 | 2.069452 | 1.905189 | 2.023713 | 1.906676 | 2.13335  | 1.878749 | 1.932926 |
| 7442_at | 1.415029 | 1.69146  | 1.747178 | 1.829568 | 1.239844 | 2.109645 | 2.286593 | 1.771368 |
| 7443_at | 4.311719 | 4.769258 | 6.043663 | 4.833066 | 4.802812 | 5.528217 | 5.519051 | 6.035983 |
| 7444_at | 4.013934 | 4.545123 | 4.437856 | 3.993637 | 4.636344 | 4.351189 | 4.162837 | 4.948569 |
| 7447_at | 2.352516 | 2.602053 | 3.698812 | 3.106492 | 1.858504 | 2.077007 | 3.322064 | 4.252204 |
| 7448_at | 3.211438 | 2.408234 | 2.741161 | 2.6383   | 2.625277 | 2.422385 | 2.304371 | 2.877322 |
| 744_at  | 3.875323 | 3.330453 | 3.469126 | 3.79587  | 4.627639 | 2.588125 | 3.457223 | 4.214729 |
| 7450_at | 3.028487 | 2.389748 | 2.441022 | 3.773204 | 2.695616 | 2.476631 | 2.842257 | 1.707091 |
| 7453_at | 8.188503 | 8.015481 | 7.673248 | 8.181614 | 7.680988 | 8.149129 | 8.39366  | 8.001526 |
| 7454_at | 3.307199 | 3.894563 | 3.823212 | 3.343234 | 1.487804 | 2.679196 | 4.547283 | 4.072693 |
| 7455_at | 1.608477 | 1.807924 | 1.728391 | 1.844404 | 2.041526 | 1.976417 | 1.509427 | 1.733141 |
| 7456_at | 5.81582  | 6.295445 | 6.460841 | 6.635495 | 6.810613 | 6.299305 | 7.260224 | 6.383583 |
| 7458_at | 6.257363 | 6.307476 | 6.144177 | 6.087327 | 6.23305  | 6.379887 | 6.658978 | 6.846335 |
| 745_at  | 3.457237 | 2.952641 | 4.034876 | 3.392369 | 2.732376 | 3.744119 | 3.144251 | 2.592067 |
| 7461_at | 3.635268 | 3.83869  | 3.49791  | 3.827331 | 3.628345 | 3.72148  | 4.205011 | 3.924808 |
| 7462_at | 1.88808  | 2.584065 | 3.390502 | 2.973677 | 3.396515 | 2.58669  | 4.100427 | 2.652067 |
| 7464_at | 3.522811 | 2.687933 | 4.006365 | 3.47139  | 3.465865 | 3.434242 | 4.164757 | 4.104129 |
| 7465_at | 6.499344 | 6.261765 | 5.813607 | 6.360343 | 6.194244 | 6.910437 | 6.916258 | 6.45606  |

|           |          |          |          |          |          |          |          |          |
|-----------|----------|----------|----------|----------|----------|----------|----------|----------|
| 7466_at   | 6.05298  | 6.583004 | 6.805078 | 5.925476 | 5.491849 | 6.266452 | 6.888583 | 5.468065 |
| 7468_at   | 4.711635 | 3.844504 | 4.005113 | 4.95946  | 3.050086 | 3.628846 | 4.902598 | 4.1926   |
| 7469_at   | 3.884179 | 5.205836 | 5.249964 | 5.16198  | 4.397909 | 4.771479 | 5.341014 | 3.541732 |
| 746_at    | 10.21374 | 10.37742 | 10.26318 | 10.26636 | 10.22339 | 10.02531 | 10.08996 | 10.08104 |
| 7471_at   | 2.425888 | 2.717065 | 2.64914  | 2.949302 | 3.262359 | 2.497744 | 2.198143 | 2.615044 |
| 7472_at   | 1.596691 | 1.699914 | 2.334494 | 2.152732 | 1.496893 | 2.054458 | 2.039246 | 1.619111 |
| 7473_at   | 3.810196 | 3.530499 | 5.233199 | 3.877527 | 4.275972 | 2.631096 | 4.619992 | 3.569608 |
| 7474_at   | 2.83437  | 4.527123 | 3.539386 | 3.805918 | 3.229299 | 3.916536 | 3.78805  | 3.819646 |
| 7475_at   | 2.143759 | 1.697219 | 2.796598 | 2.112326 | 1.50754  | 2.943388 | 1.443862 | 2.517015 |
| 7476_at   | 2.396457 | 2.95871  | 2.512921 | 2.183826 | 3.22298  | 2.068619 | 3.097394 | 2.205727 |
| 7477_at   | 3.106112 | 1.700048 | 2.31611  | 2.144509 | 2.419901 | 1.804314 | 1.620962 | 2.842524 |
| 7478_at   | 1.391882 | 1.976041 | 1.320972 | 2.390074 | 1.620236 | 1.99688  | 2.469487 | 1.90987  |
| 7479_at   | 3.334048 | 3.258388 | 4.752607 | 3.481455 | 4.234257 | 4.892393 | 4.791046 | 1.789997 |
| 747_at    | 2.807521 | 2.814931 | 3.269619 | 2.701043 | 2.602672 | 3.489698 | 2.538312 | 2.470111 |
| 7480_at   | 2.5166   | 2.446417 | 2.57723  | 2.706464 | 2.411747 | 2.42303  | 3.090719 | 2.804881 |
| 7481_at   | 2.714227 | 2.868807 | 3.239161 | 2.988679 | 2.283358 | 2.38184  | 2.932996 | 2.754385 |
| 7482_at   | 2.574097 | 3.098596 | 3.997617 | 3.882071 | 2.183263 | 2.760038 | 2.693642 | 2.721742 |
| 7483_at   | 3.002196 | 2.754024 | 3.110004 | 2.503281 | 2.496466 | 3.756482 | 3.581689 | 3.046249 |
| 7484_at   | 2.408486 | 2.291038 | 2.40732  | 3.205306 | 2.781167 | 3.512232 | 2.527962 | 1.983316 |
| 7485_at   | 6.718026 | 6.700341 | 6.249814 | 6.608004 | 6.383378 | 6.453679 | 5.801403 | 6.545323 |
| 7486_at   | 5.244171 | 5.257785 | 5.188271 | 4.996311 | 5.635371 | 4.884677 | 5.622179 | 4.829351 |
| 7490_at   | 9.971138 | 9.818415 | 9.644366 | 9.370612 | 8.973171 | 9.535946 | 9.279326 | 9.555067 |
| 7494_at   | 7.458931 | 7.380949 | 6.972833 | 6.885655 | 7.417205 | 7.199689 | 6.669986 | 7.033605 |
| 7498_at   | 2.203    | 2.164464 | 1.77708  | 1.758743 | 2.248621 | 1.759413 | 2.021658 | 1.788377 |
| 7499_at   | 3.809706 | 3.554194 | 1.835475 | 4.014779 | 2.865333 | 2.892837 | 3.451869 | 3.610397 |
| 7503_at   | 1.900083 | 1.539604 | 1.414986 | 1.523081 | 2.224969 | 1.45296  | 1.535653 | 1.66297  |
| 7504_at   | 2.288993 | 1.511808 | 2.240752 | 2.114342 | 1.707017 | 2.423025 | 2.339028 | 2.962957 |
| 7507_at   | 4.373574 | 3.98506  | 4.751753 | 4.653654 | 4.544913 | 4.105093 | 4.086666 | 4.245198 |
| 7508_at   | 5.922998 | 6.363187 | 5.977763 | 6.112649 | 5.731604 | 6.001916 | 5.989963 | 5.903084 |
| 750_at    | 1.285654 | 2.082878 | 1.728836 | 1.368904 | 2.384935 | 1.611989 | 2.067984 | 2.672395 |
| 751071_at | 2.33956  | 2.389326 | 2.574227 | 2.71415  | 3.292783 | 2.840949 | 2.470419 | 2.495173 |
| 7511_at   | 5.812156 | 6.009282 | 6.239758 | 6.242203 | 5.972434 | 5.662163 | 5.371814 | 5.714534 |
| 7512_at   | 6.560858 | 5.702289 | 6.26633  | 3.800325 | 6.771323 | 6.598003 | 2.805717 | 5.832624 |
| 7514_at   | 6.762072 | 7.003776 | 6.525381 | 6.336022 | 7.025623 | 6.182541 | 6.250664 | 7.080566 |
| 7515_at   | 6.0737   | 6.046782 | 5.813637 | 5.966145 | 5.583098 | 5.790246 | 5.82586  | 5.65932  |
| 7516_at   | 1.631165 | 1.994165 | 1.811919 | 1.666889 | 1.956013 | 2.65988  | 1.125693 | 2.391239 |
| 7517_at   | 2.896553 | 2.186117 | 2.023355 | 3.596289 | 2.217502 | 2.319999 | 2.57672  | 2.04095  |
| 751816_at | 1.173517 | 4.297032 | 1.903006 | 1.429133 | 1.836776 | 2.327482 | 1.530996 | 0.977466 |
| 7518_at   | 3.738501 | 4.394876 | 4.036569 | 4.811726 | 5.003262 | 4.60724  | 4.053928 | 4.775717 |
| 752014_at | 3.480788 | 4.179534 | 3.113828 | 3.495488 | 4.213266 | 3.677755 | 3.368224 | 2.604275 |
| 7520_at   | 9.035785 | 9.064262 | 8.662822 | 8.944471 | 8.985433 | 9.122096 | 8.937963 | 9.409272 |
| 7525_at   | 7.605534 | 7.878784 | 7.775564 | 7.777084 | 8.330818 | 7.848158 | 7.760094 | 8.326128 |
| 7528_at   | 6.894308 | 6.300715 | 6.353894 | 6.625859 | 6.533541 | 6.640004 | 6.22173  | 6.216548 |
| 7529_at   | 9.080467 | 8.972091 | 8.666513 | 9.072096 | 9.284935 | 9.144289 | 8.667779 | 8.700098 |
| 752_at    | 3.928545 | 2.759741 | 3.067335 | 3.737172 | 3.291295 | 3.124365 | 3.632103 | 2.509064 |
| 7531_at   | 8.341714 | 9.138917 | 8.772411 | 9.098623 | 8.972544 | 8.903954 | 8.874652 | 8.9665   |
| 7532_at   | 7.484798 | 7.817385 | 7.977283 | 7.807186 | 7.547765 | 7.814196 | 8.203251 | 7.651974 |
| 7533_at   | 9.681917 | 10.00648 | 9.501337 | 10.01794 | 9.680005 | 9.56306  | 9.753246 | 9.810575 |
| 7534_at   | 2.503538 | 3.496628 | 4.358162 | 3.505852 | 3.757005 | 3.170523 | 4.748409 | 3.311604 |
| 7535_at   | 3.495898 | 2.656166 | 2.911642 | 2.936722 | 2.81081  | 2.877153 | 3.755236 | 3.333222 |
| 7536_at   | 7.568598 | 7.288227 | 7.335084 | 8.031371 | 6.893093 | 7.058364 | 7.469509 | 6.879038 |

|         |          |          |          |          |          |          |          |          |
|---------|----------|----------|----------|----------|----------|----------|----------|----------|
| 7538_at | 7.673061 | 7.978758 | 7.724808 | 8.451973 | 7.411287 | 8.006121 | 8.065662 | 7.009582 |
| 7539_at | 4.869467 | 4.387177 | 3.592039 | 4.284304 | 2.910879 | 3.883268 | 3.970601 | 4.436232 |
| 753_at  | 2.667174 | 2.817823 | 3.013527 | 2.808852 | 3.276614 | 2.810711 | 2.681771 | 2.419851 |
| 7541_at | 4.179511 | 5.704429 | 4.403789 | 4.468652 | 4.679984 | 4.707642 | 4.6973   | 4.989234 |
| 7542_at | 6.293936 | 5.195916 | 6.450595 | 5.922764 | 4.901161 | 6.232337 | 6.560089 | 4.585109 |
| 7543_at | 5.109093 | 5.709833 | 4.916952 | 5.46318  | 4.837933 | 5.804    | 5.077142 | 5.677828 |
| 7544_at | 4.735588 | 4.867978 | 4.130775 | 4.3476   | 5.329822 | 3.946641 | 4.05607  | 5.258436 |
| 7545_at | 2.470858 | 2.664996 | 2.598245 | 1.888499 | 2.118278 | 1.766247 | 1.90241  | 2.613631 |
| 7546_at | 2.658244 | 3.643835 | 2.638529 | 1.907226 | 2.747045 | 1.458036 | 2.230702 | 2.662968 |
| 7547_at | 1.293807 | 2.298377 | 1.957709 | 2.299112 | 2.690037 | 2.001382 | 1.95483  | 2.433969 |
| 7549_at | 2.732932 | 2.616361 | 2.047465 | 2.881054 | 3.591018 | 3.308616 | 2.818963 | 3.247679 |
| 754_at  | 8.505565 | 8.490646 | 8.671798 | 8.709196 | 8.142926 | 8.333614 | 8.362152 | 8.167103 |
| 7551_at | 4.747907 | 5.220656 | 5.000417 | 5.490899 | 4.314242 | 4.753729 | 4.745896 | 4.886911 |
| 7552_at | 3.016836 | 2.86735  | 2.10856  | 3.471602 | 3.160311 | 3.117556 | 2.519284 | 2.989238 |
| 7553_at | 4.315445 | 4.47651  | 4.155007 | 3.909984 | 3.88297  | 4.173102 | 3.393433 | 3.439763 |
| 7554_at | 4.541862 | 2.141268 | 4.621073 | 4.280183 | 2.722615 | 4.51835  | 3.403478 | 4.287684 |
| 7555_at | 8.752212 | 8.673072 | 8.94016  | 9.120014 | 9.017874 | 8.834538 | 9.242541 | 8.788642 |
| 7556_at | 3.866509 | 4.373552 | 2.54577  | 3.881227 | 3.731872 | 3.901746 | 3.262449 | 3.829748 |
| 7559_at | 5.90104  | 5.732114 | 5.28536  | 5.905853 | 5.098011 | 5.205763 | 4.976258 | 5.709155 |
| 755_at  | 5.16319  | 4.884994 | 4.917341 | 5.452118 | 4.524593 | 5.334938 | 4.636625 | 4.875588 |
| 7561_at | 4.524102 | 4.038114 | 5.016456 | 4.700064 | 5.582867 | 4.955622 | 5.199806 | 4.806759 |
| 7562_at | 1.752302 | 1.814812 | 2.321639 | 2.14554  | 1.318766 | 2.33231  | 2.770886 | 1.943609 |
| 7564_at | 3.754888 | 5.648247 | 4.183728 | 3.200081 | 2.890957 | 3.333245 | 3.810924 | 3.291757 |
| 7565_at | 2.231217 | 2.265479 | 1.925681 | 2.224121 | 2.972813 | 2.930366 | 2.132351 | 2.145427 |
| 7566_at | 3.307093 | 2.536245 | 2.600852 | 2.533198 | 1.511687 | 2.744493 | 2.802529 | 3.353665 |
| 7567_at | 2.874324 | 3.124973 | 3.407972 | 2.738427 | 2.596847 | 3.290974 | 2.864056 | 2.798551 |
| 7569_at | 4.747635 | 4.474153 | 4.344782 | 4.411865 | 4.737212 | 5.063456 | 5.114871 | 5.085651 |
| 7570_at | 5.315639 | 4.945252 | 5.067788 | 5.256671 | 4.817461 | 4.80138  | 4.361764 | 4.477103 |
| 7571_at | 1.77368  | 2.273242 | 2.630277 | 2.350044 | 2.103398 | 1.816242 | 1.667791 | 1.95191  |
| 7572_at | 5.763965 | 6.464667 | 5.668843 | 5.865098 | 6.717625 | 5.735921 | 6.3258   | 6.493093 |
| 7574_at | 3.512306 | 2.773517 | 2.325165 | 3.074412 | 2.872789 | 2.540202 | 2.721412 | 2.534279 |
| 7579_at | 2.350863 | 3.101733 | 3.463552 | 2.336739 | 2.654493 | 2.464605 | 3.974806 | 3.324441 |
| 757_at  | 6.269516 | 6.321367 | 6.626603 | 6.345771 | 6.61133  | 5.951441 | 5.750417 | 6.510531 |
| 7580_at | 5.504734 | 4.975261 | 5.735673 | 5.231302 | 6.107472 | 4.945351 | 4.545023 | 6.208628 |
| 7581_at | 5.16467  | 4.750381 | 5.222893 | 4.517223 | 4.8321   | 5.543214 | 5.218137 | 5.755565 |
| 7582_at | 4.614263 | 5.526851 | 5.882768 | 6.097739 | 4.237289 | 6.029054 | 3.62606  | 4.746354 |
| 7584_at | 2.779072 | 3.822658 | 4.347025 | 3.298642 | 4.24189  | 3.863951 | 3.553144 | 2.714895 |
| 7586_at | 6.271841 | 6.215239 | 7.586699 | 6.90315  | 6.321346 | 7.1142   | 7.382697 | 7.104051 |
| 7587_at | 3.0539   | 3.582046 | 3.715668 | 2.914572 | 2.901566 | 3.932638 | 3.576214 | 4.676836 |
| 7589_at | 5.374858 | 4.178707 | 3.707494 | 3.959942 | 4.865197 | 4.968584 | 3.896099 | 4.446627 |
| 758_at  | 1.029949 | 1.784561 | 1.650343 | 1.794297 | 1.50381  | 1.121304 | 3.118787 | 1.989941 |
| 7592_at | 2.705429 | 2.670011 | 3.348735 | 2.659337 | 2.991002 | 3.224784 | 2.874951 | 2.835907 |
| 7593_at | 1.717998 | 2.834093 | 2.23624  | 2.664579 | 2.829255 | 2.612454 | 2.348234 | 2.617524 |
| 7594_at | 2.433303 | 3.307741 | 4.619443 | 5.007712 | 4.262646 | 3.99717  | 3.652966 | 4.183385 |
| 7596_at | 3.107566 | 3.521247 | 3.051366 | 3.493104 | 2.664121 | 2.352496 | 2.123234 | 2.45962  |
| 7597_at | 5.114684 | 4.920752 | 5.162472 | 5.993092 | 4.589065 | 4.579484 | 5.274418 | 4.527389 |
| 759_at  | 1.313219 | 1.5      | 2.813348 | 0.933373 | 1.493851 | 1.158336 | 1.123363 | 1.731516 |
| 760_at  | 8.005471 | 8.198772 | 6.751847 | 6.85728  | 7.674286 | 7.441523 | 6.467257 | 7.84853  |
| 761_at  | 1.535145 | 1.608235 | 1.908526 | 2.440516 | 1.945738 | 2.200704 | 2.962674 | 2.147196 |
| 7620_at | 1.986813 | 2.404004 | 2.911501 | 3.311808 | 2.79402  | 3.012092 | 2.336651 | 2.257481 |
| 7621_at | 3.830545 | 3.439958 | 3.461844 | 3.232561 | 3.062668 | 3.247439 | 3.799489 | 4.058716 |

|           |          |          |          |          |          |          |          |          |
|-----------|----------|----------|----------|----------|----------|----------|----------|----------|
| 7625_at   | 3.020194 | 3.096041 | 2.180608 | 2.624041 | 2.84172  | 2.951181 | 2.3466   | 2.668855 |
| 7626_at   | 2.092136 | 2.761139 | 2.889515 | 1.690899 | 2.524396 | 1.583476 | 2.83937  | 4.082316 |
| 7627_at   | 5.778432 | 5.064394 | 4.426259 | 5.010033 | 3.233328 | 5.53568  | 5.624249 | 4.803135 |
| 7629_at   | 4.89383  | 3.303985 | 4.817565 | 4.106214 | 4.910979 | 4.54337  | 4.401222 | 4.188568 |
| 762_at    | 4.572033 | 2.896341 | 3.987316 | 3.088263 | 4.501237 | 5.156508 | 2.627462 | 4.287265 |
| 7633_at   | 2.909255 | 2.992565 | 2.898792 | 2.491706 | 2.48596  | 3.13996  | 1.902801 | 2.597738 |
| 7634_at   | 1.128458 | 1.566242 | 1.155579 | 1.672518 | 2.215309 | 2.335422 | 1.880008 | 2.080377 |
| 7637_at   | 3.148891 | 3.857759 | 3.955463 | 3.926909 | 4.375086 | 3.697556 | 3.466599 | 3.834142 |
| 7638_at   | 2.415737 | 2.905055 | 3.001469 | 2.596297 | 3.122166 | 2.157499 | 1.263759 | 1.553117 |
| 7639_at   | 5.286091 | 4.861365 | 5.065473 | 4.548592 | 4.926735 | 4.083368 | 3.911598 | 5.838073 |
| 763_at    | 0.907369 | 1.420766 | 1.104005 | 1.374146 | 1.329682 | 0.975448 | 1.541047 | 1.876715 |
| 7643_at   | 4.123497 | 2.262351 | 2.355242 | 2.696517 | 2.049244 | 1.845249 | 2.370676 | 2.028113 |
| 7644_at   | 4.540453 | 3.489234 | 4.534537 | 3.819082 | 2.997926 | 3.612716 | 4.514439 | 3.277439 |
| 7652_at   | 1.270702 | 0.832537 | 1.047144 | 0.766978 | 0.702028 | 0.562435 | 0.870561 | 1.078059 |
| 765_at    | 1.937269 | 1.40022  | 1.093203 | 1.513774 | 2.220436 | 1.460105 | 1.127227 | 1.583716 |
| 766_at    | 1.226636 | 1.314729 | 1.665198 | 1.682217 | 0.975026 | 1.566958 | 1.160984 | 1.796634 |
| 7673_at   | 2.366881 | 1.169639 | 1.826685 | 1.382286 | 2.251996 | 2.581313 | 1.928738 | 2.629642 |
| 767561_at | 0.916156 | 0.98374  | 0.843629 | 0.85049  | 1.007535 | 0.797575 | 0.926772 | 1.21953  |
| 767562_at | 0.897376 | 1.137315 | 0.851839 | 0.619481 | 0.698865 | 0.920189 | 1.080544 | 0.830735 |
| 767563_at | 1.164406 | 1.358146 | 2.865964 | 1.482227 | 1.368136 | 1.875543 | 1.212248 | 1.169121 |
| 767564_at | 0.933498 | 0.872896 | 1.299545 | 1.131384 | 1.132717 | 0.90016  | 1.031899 | 2.239369 |
| 767565_at | 1.084198 | 1.059825 | 1.12379  | 2.857443 | 1.446549 | 1.303967 | 2.143749 | 1.585619 |
| 767566_at | 0.34551  | 0.692184 | 0.626148 | 0.664791 | 0.505552 | 0.379216 | 0.897387 | 0.769347 |
| 767567_at | 1.328872 | 1.617037 | 0.930941 | 1.946688 | 1.840458 | 1.622947 | 1.356714 | 2.27919  |
| 767568_at | 1.040967 | 1.189473 | 1.902505 | 1.131021 | 1.779759 | 2.911177 | 2.001094 | 2.204014 |
| 767569_at | 1.44021  | 1.425946 | 0.947251 | 1.436997 | 1.218602 | 0.875304 | 2.400069 | 1.18216  |
| 767577_at | 1.705079 | 3.928906 | 1.054793 | 0.539105 | 0.773927 | 3.229814 | 1.933954 | 1.678022 |
| 767578_at | 1.012236 | 0.762757 | 1.030078 | 1.16772  | 1.102767 | 0.84359  | 1.139836 | 1.642979 |
| 767579_at | 1.062532 | 1.423246 | 1.339063 | 1.356942 | 1.701164 | 1.39741  | 1.272281 | 1.515604 |
| 767580_at | 0.749334 | 1.1039   | 1.051535 | 1.367265 | 1.415181 | 2.257719 | 1.575374 | 0.826318 |
| 767581_at | 0.978334 | 0.796131 | 0.666788 | 0.721874 | 1.967112 | 0.615786 | 3.223425 | 1.592845 |
| 767582_at | 0.865453 | 0.550719 | 1.003157 | 0.569705 | 1.145199 | 0.691865 | 1.594826 | 1.793711 |
| 767583_at | 1.441496 | 1.163263 | 0.636952 | 0.862711 | 0.987395 | 0.901864 | 1.059106 | 1.026461 |
| 767584_at | 0.982855 | 0.819166 | 1.077489 | 0.628743 | 0.968353 | 0.782796 | 2.137071 | 1.48712  |
| 767585_at | 0.771116 | 0.902292 | 1.269224 | 0.813782 | 1.812122 | 0.919115 | 0.827555 | 1.630917 |
| 767588_at | 1.856024 | 0.796102 | 1.494124 | 0.687088 | 0.851361 | 1.051243 | 1.601319 | 0.767116 |
| 767589_at | 0.849341 | 0.623548 | 1.087622 | 0.896191 | 1.545579 | 1.420901 | 0.941012 | 1.510533 |
| 767590_at | 0.880568 | 1.279564 | 0.830011 | 0.916283 | 1.440045 | 0.842025 | 1.219991 | 0.885221 |
| 767591_at | 2.924144 | 1.334484 | 1.156853 | 0.920697 | 0.774054 | 1.604863 | 0.912836 | 2.568349 |
| 767592_at | 1.268456 | 1.645582 | 1.119908 | 1.351321 | 1.888184 | 4.25117  | 2.941939 | 1.915889 |
| 767593_at | 0.835875 | 0.848199 | 1.125742 | 1.300638 | 3.574207 | 1.035268 | 0.80006  | 1.084896 |
| 767594_at | 1.566993 | 0.877833 | 2.107817 | 1.886891 | 1.014034 | 1.692752 | 1.39651  | 1.691379 |
| 767595_at | 1.243338 | 1.032945 | 1.559235 | 1.05867  | 1.648951 | 2.564724 | 1.41119  | 2.271394 |
| 767596_at | 0.826832 | 1.00843  | 0.954955 | 0.733576 | 1.195282 | 1.24029  | 1.115139 | 3.52476  |
| 767597_at | 0.847347 | 0.871062 | 1.032082 | 0.878948 | 0.916979 | 2.529215 | 0.617656 | 1.394158 |
| 767598_at | 1.007206 | 0.818718 | 1.347834 | 1.161043 | 0.990141 | 1.258647 | 0.815193 | 1.217309 |
| 767599_at | 2.009163 | 1.026703 | 0.819772 | 0.976089 | 1.095341 | 0.98223  | 2.132796 | 1.351039 |
| 7675_at   | 6.402091 | 6.273446 | 6.636811 | 6.824609 | 6.009651 | 6.197357 | 6.903502 | 6.162732 |
| 767600_at | 1.079071 | 1.268864 | 0.85931  | 1.119262 | 1.556387 | 0.677577 | 1.512782 | 1.574465 |
| 767603_at | 1.574528 | 0.570604 | 1.066753 | 1.028684 | 0.776729 | 0.69085  | 1.136631 | 0.671456 |
| 767604_at | 1.261546 | 0.899888 | 1.4744   | 0.984259 | 1.066752 | 1.534219 | 1.011307 | 1.167273 |

|           |          |          |          |          |          |          |          |          |
|-----------|----------|----------|----------|----------|----------|----------|----------|----------|
| 767605_at | 1.119341 | 0.88779  | 1.495182 | 0.709967 | 0.879424 | 1.12378  | 2.432176 | 2.988759 |
| 767606_at | 1.398228 | 0.600282 | 1.437997 | 1.094208 | 2.18714  | 2.149283 | 1.264968 | 1.390135 |
| 767608_at | 2.280521 | 3.43421  | 2.598609 | 2.925146 | 2.637721 | 3.313097 | 2.487145 | 2.854575 |
| 767609_at | 1.091061 | 2.057634 | 0.91931  | 0.878718 | 0.800898 | 1.133647 | 1.077385 | 1.732429 |
| 767610_at | 1.029766 | 0.661535 | 0.507851 | 0.579192 | 1.67547  | 0.68391  | 1.432917 | 0.936551 |
| 767611_at | 0.897162 | 1.134112 | 1.341323 | 1.000679 | 2.484918 | 1.327318 | 0.93742  | 0.965724 |
| 767612_at | 0.71377  | 0.945151 | 0.899039 | 1.423764 | 1.139782 | 0.909619 | 1.084386 | 0.847524 |
| 767846_at | 1.659901 | 1.223861 | 2.330107 | 1.733666 | 2.850287 | 1.432651 | 1.802664 | 2.768299 |
| 7678_at   | 5.348098 | 5.578365 | 5.522754 | 5.305348 | 4.714537 | 4.873419 | 5.1388   | 5.588572 |
| 767_at    | 3.505319 | 4.261227 | 4.334403 | 5.163589 | 3.383883 | 4.491835 | 4.764654 | 4.987611 |
| 768096_at | 1.592906 | 2.247066 | 1.758264 | 2.93344  | 2.103315 | 1.883058 | 2.382835 | 2.358593 |
| 768097_at | 1.923517 | 1.831352 | 2.252202 | 1.860141 | 2.467087 | 2.222736 | 2.129415 | 2.5391   |
| 7681_at   | 1.430875 | 1.955257 | 1.276593 | 1.270671 | 1.842955 | 2.050842 | 1.313423 | 1.467159 |
| 768206_at | 2.406854 | 2.397667 | 3.944381 | 2.814701 | 2.550783 | 2.318109 | 2.412951 | 3.025649 |
| 768211_at | 5.530251 | 5.636757 | 5.773656 | 5.684607 | 5.287863 | 5.997746 | 5.279934 | 6.165151 |
| 768212_at | 2.286733 | 2.046073 | 2.26578  | 2.280081 | 1.998614 | 1.572383 | 3.388926 | 2.694642 |
| 768214_at | 2.075864 | 1.433507 | 1.517936 | 1.123913 | 1.710926 | 1.165244 | 1.409135 | 1.492843 |
| 768215_at | 1.162819 | 1.121482 | 1.06245  | 1.389586 | 1.772127 | 1.496596 | 1.720765 | 1.177865 |
| 768216_at | 2.926423 | 1.26955  | 1.063527 | 1.430046 | 1.130959 | 1.483476 | 1.418632 | 1.663845 |
| 768217_at | 1.543604 | 1.401274 | 1.49637  | 2.581174 | 1.703967 | 1.17945  | 1.817125 | 1.605962 |
| 768218_at | 1.255464 | 1.230762 | 1.462427 | 1.519294 | 1.950575 | 1.149358 | 1.506456 | 1.637202 |
| 768219_at | 1.062574 | 1.465544 | 1.442667 | 1.471255 | 1.7758   | 1.130031 | 0.924341 | 2.320363 |
| 768220_at | 1.874823 | 1.214778 | 1.617946 | 1.721314 | 1.65366  | 4.018853 | 2.274621 | 1.600317 |
| 768239_at | 2.639651 | 2.39504  | 2.865046 | 2.259819 | 2.06678  | 2.702895 | 2.658626 | 1.921658 |
| 7686_at   | 1.676536 | 1.355842 | 1.272143 | 1.04644  | 2.443971 | 0.64368  | 1.983752 | 1.763515 |
| 768_at    | 2.089873 | 2.100439 | 2.109434 | 2.874488 | 2.414146 | 2.451922 | 2.314159 | 1.55286  |
| 7690_at   | 5.615096 | 5.872957 | 5.045784 | 5.080681 | 5.058405 | 5.220106 | 4.620123 | 5.293203 |
| 7691_at   | 3.163537 | 3.063876 | 3.174575 | 4.441268 | 4.908434 | 3.527689 | 3.290818 | 2.902542 |
| 7692_at   | 2.195503 | 2.108113 | 1.927337 | 2.23844  | 2.338878 | 2.466324 | 2.330311 | 1.8444   |
| 7693_at   | 4.534018 | 4.62189  | 4.219882 | 4.744241 | 4.923666 | 3.670325 | 4.171143 | 4.652812 |
| 7694_at   | 5.186891 | 5.250213 | 3.956294 | 4.815481 | 4.850509 | 5.355347 | 3.802581 | 4.058085 |
| 7695_at   | 5.448541 | 4.390034 | 5.618775 | 6.002978 | 5.487687 | 6.108327 | 5.517958 | 5.879433 |
| 7696_at   | 2.451447 | 2.150468 | 2.135644 | 2.058221 | 2.816187 | 2.531948 | 2.59883  | 1.808088 |
| 7697_at   | 0.999374 | 2.605236 | 3.927956 | 2.961369 | 3.804073 | 1.584647 | 3.274473 | 2.025612 |
| 7699_at   | 3.463632 | 3.664895 | 3.854795 | 2.800636 | 2.986607 | 3.494339 | 2.491399 | 5.015967 |
| 7700_at   | 3.165515 | 2.384401 | 3.943786 | 2.18717  | 3.223969 | 3.299814 | 2.355155 | 5.070836 |
| 7701_at   | 4.713332 | 5.185596 | 5.132904 | 4.980226 | 4.820569 | 5.695395 | 4.902451 | 4.438643 |
| 7702_at   | 5.111899 | 5.704042 | 4.29223  | 5.023848 | 4.422897 | 4.73622  | 5.120346 | 5.82201  |
| 7703_at   | 7.879621 | 8.049607 | 7.74656  | 8.307806 | 6.974061 | 7.996858 | 8.113893 | 7.003849 |
| 7704_at   | 4.976168 | 5.778018 | 6.063494 | 6.549166 | 2.889318 | 5.490906 | 5.433643 | 2.748842 |
| 7705_at   | 5.591005 | 5.015164 | 4.49088  | 5.328312 | 5.452924 | 4.189547 | 5.223995 | 5.291449 |
| 7706_at   | 6.79122  | 6.220996 | 6.842548 | 7.008799 | 7.241709 | 7.253172 | 7.101269 | 6.438691 |
| 7707_at   | 6.975564 | 6.896391 | 6.845751 | 7.331917 | 7.05875  | 6.943563 | 7.10622  | 7.320793 |
| 7709_at   | 4.941523 | 4.27731  | 5.049403 | 3.610328 | 4.234668 | 4.474322 | 4.22942  | 3.91997  |
| 770_at    | 7.772854 | 6.814481 | 7.516142 | 6.846103 | 7.079072 | 7.943771 | 7.095838 | 7.253664 |
| 7710_at   | 3.971949 | 4.57748  | 3.579105 | 4.537233 | 3.808425 | 4.182641 | 4.837354 | 4.524718 |
| 7711_at   | 2.973133 | 2.885724 | 2.509208 | 2.649476 | 2.070591 | 2.303323 | 2.452932 | 2.773864 |
| 7712_at   | 3.099296 | 2.934398 | 1.842485 | 1.312123 | 2.103187 | 2.267074 | 1.87134  | 1.332983 |
| 7716_at   | 7.625916 | 7.892369 | 7.380169 | 7.556737 | 7.678052 | 7.659933 | 7.549121 | 7.507137 |
| 7718_at   | 2.488115 | 2.548158 | 2.953007 | 2.046651 | 3.468348 | 2.642008 | 2.85781  | 2.741845 |
| 771_at    | 7.148651 | 5.970893 | 6.896722 | 6.772912 | 7.951083 | 7.551114 | 5.682654 | 5.86802  |

|         |          |          |          |          |          |          |          |          |
|---------|----------|----------|----------|----------|----------|----------|----------|----------|
| 7726_at | 4.245309 | 4.314758 | 4.381034 | 4.750167 | 3.285542 | 4.127542 | 4.604451 | 3.897772 |
| 7727_at | 4.919231 | 4.299024 | 3.716293 | 4.970685 | 3.536048 | 3.857157 | 2.692784 | 4.984915 |
| 7728_at | 3.951175 | 5.532227 | 4.619415 | 4.688835 | 4.888644 | 5.136178 | 5.283321 | 4.888644 |
| 7732_at | 2.265236 | 2.749946 | 2.528131 | 2.319488 | 2.872477 | 2.839481 | 2.257046 | 2.864308 |
| 7733_at | 4.065295 | 3.957419 | 3.859299 | 3.799598 | 3.934062 | 3.914192 | 3.976911 | 4.525326 |
| 7737_at | 5.982577 | 4.783309 | 4.675212 | 5.196319 | 4.812058 | 4.653799 | 4.062844 | 4.57146  |
| 7738_at | 3.7626   | 4.1666   | 4.916719 | 4.000266 | 4.506472 | 4.411049 | 3.08413  | 4.828815 |
| 7739_at | 5.681362 | 5.397939 | 6.250922 | 5.967768 | 4.587207 | 6.207372 | 6.377869 | 5.260982 |
| 773_at  | 1.460895 | 1.50792  | 1.637939 | 1.561148 | 2.138496 | 1.887487 | 1.57097  | 1.47397  |
| 7741_at | 4.436713 | 4.653269 | 4.98167  | 4.372671 | 2.995879 | 3.968391 | 4.956748 | 4.712784 |
| 7743_at | 4.291706 | 4.383503 | 3.748654 | 4.036456 | 3.016894 | 4.150368 | 4.496344 | 4.426123 |
| 7745_at | 4.693696 | 3.687257 | 4.361335 | 4.409475 | 4.092031 | 4.324446 | 4.170719 | 5.563709 |
| 7746_at | 3.377935 | 3.187782 | 2.740075 | 2.790398 | 3.500862 | 2.65566  | 2.159361 | 3.699359 |
| 7748_at | 2.748921 | 2.347575 | 2.539711 | 3.225503 | 3.136121 | 2.695977 | 2.318047 | 3.536916 |
| 774_at  | 1.803605 | 1.662371 | 2.749488 | 1.663027 | 2.71045  | 1.763928 | 1.86903  | 2.95573  |
| 7750_at | 6.866329 | 7.001343 | 7.236392 | 7.150865 | 7.25571  | 6.880724 | 7.310056 | 7.692386 |
| 7752_at | 4.120309 | 3.962873 | 3.412502 | 3.252941 | 3.830194 | 3.144725 | 3.341073 | 4.048364 |
| 7753_at | 3.614121 | 4.160273 | 2.893599 | 3.99032  | 4.171044 | 3.237377 | 3.027179 | 3.145811 |
| 7754_at | 3.586126 | 3.569584 | 4.506817 | 3.71522  | 3.364259 | 4.170588 | 4.803415 | 3.864879 |
| 7755_at | 3.497763 | 3.675118 | 3.293003 | 3.56536  | 3.452227 | 3.015602 | 2.654229 | 3.712559 |
| 7756_at | 7.703218 | 7.392742 | 7.605905 | 7.72896  | 7.152594 | 8.045879 | 7.513301 | 7.41096  |
| 7757_at | 1.460747 | 3.481061 | 3.903102 | 3.417031 | 3.102618 | 2.861188 | 2.099811 | 4.836647 |
| 775_at  | 3.117255 | 3.178744 | 3.699114 | 3.972259 | 3.007926 | 3.488597 | 4.241571 | 3.038655 |
| 7760_at | 3.341397 | 2.813396 | 3.401104 | 3.257096 | 2.94898  | 2.972343 | 2.885682 | 2.387454 |
| 7761_at | 3.184744 | 1.83928  | 2.153761 | 1.790995 | 3.776929 | 2.694861 | 2.902602 | 5.065751 |
| 7762_at | 2.268235 | 1.941003 | 1.589182 | 1.639772 | 2.374129 | 2.511182 | 2.107434 | 1.702666 |
| 7763_at | 7.654181 | 7.177592 | 7.18621  | 7.097018 | 6.64576  | 6.840517 | 7.056362 | 7.174773 |
| 7764_at | 4.810002 | 5.105809 | 4.781266 | 5.163826 | 6.283583 | 4.353915 | 5.116857 | 5.090352 |
| 7766_at | 2.559121 | 2.324813 | 2.163975 | 3.375775 | 2.276971 | 2.270951 | 3.536573 | 2.122405 |
| 7767_at | 2.130855 | 3.473037 | 3.083719 | 2.754234 | 2.931518 | 3.92446  | 3.711126 | 2.244361 |
| 7768_at | 1.573571 | 3.654528 | 2.641354 | 1.489192 | 3.826655 | 1.329087 | 1.723613 | 2.520153 |
| 7769_at | 3.881829 | 4.402135 | 3.649421 | 4.908366 | 3.229314 | 3.31328  | 4.057515 | 3.83461  |
| 776_at  | 1.865054 | 2.278611 | 1.653266 | 1.91424  | 2.247736 | 2.90321  | 1.836862 | 1.694615 |
| 7770_at | 5.229222 | 5.526191 | 5.886427 | 4.861725 | 4.87732  | 4.522135 | 4.743553 | 5.583379 |
| 7771_at | 4.078525 | 5.566498 | 4.458903 | 4.08749  | 4.596286 | 5.483034 | 3.962088 | 5.666328 |
| 7772_at | 2.137007 | 1.881834 | 3.120669 | 1.78604  | 4.001431 | 1.753156 | 2.797183 | 4.09997  |
| 7773_at | 3.286315 | 1.353194 | 3.066038 | 1.742168 | 1.915871 | 1.366796 | 3.721776 | 3.356334 |
| 7775_at | 4.259452 | 3.801759 | 3.851825 | 4.221942 | 4.179993 | 4.9396   | 2.951519 | 3.401262 |
| 7776_at | 4.735369 | 4.314943 | 4.46439  | 4.538458 | 4.261905 | 5.046471 | 4.604336 | 4.867221 |
| 7779_at | 6.512451 | 6.324453 | 6.81286  | 6.766011 | 5.536274 | 6.118444 | 6.521503 | 6.70373  |
| 777_at  | 1.827212 | 1.39915  | 1.565977 | 1.326509 | 1.278835 | 1.475845 | 1.725049 | 1.774157 |
| 7780_at | 1.887234 | 3.414923 | 2.019953 | 2.125587 | 2.980363 | 1.94315  | 1.763206 | 2.21234  |
| 7781_at | 1.651269 | 1.257312 | 1.444464 | 1.234079 | 1.973567 | 1.843578 | 1.731096 | 2.314855 |
| 7782_at | 4.767609 | 4.361272 | 5.185108 | 5.217172 | 5.098252 | 3.82784  | 4.783037 | 4.093205 |
| 7783_at | 1.537547 | 1.379971 | 1.414478 | 1.466442 | 1.971857 | 1.707797 | 2.179577 | 2.091137 |
| 7784_at | 2.446572 | 2.012665 | 3.023877 | 2.593584 | 2.740816 | 2.751134 | 2.866928 | 2.248998 |
| 7786_at | 4.858    | 5.520461 | 5.301605 | 5.965201 | 5.215395 | 5.480924 | 5.130556 | 5.247864 |
| 7789_at | 4.516411 | 5.487802 | 5.535682 | 4.201954 | 5.438642 | 4.411504 | 4.109502 | 5.201197 |
| 778_at  | 1.658503 | 1.790752 | 1.538583 | 1.761696 | 2.420075 | 2.143799 | 2.762011 | 1.47105  |
| 7791_at | 7.001047 | 6.714409 | 7.014628 | 6.835871 | 5.255436 | 6.678497 | 6.375856 | 5.940071 |
| 7798_at | 6.367151 | 6.973324 | 6.602478 | 6.917296 | 6.508286 | 6.26471  | 7.088855 | 6.662334 |



|           |          |          |          |          |          |          |          |          |
|-----------|----------|----------|----------|----------|----------|----------|----------|----------|
| 7799_at   | 4.290168 | 4.572971 | 4.660896 | 5.192625 | 3.806293 | 4.400239 | 4.685814 | 3.873045 |
| 779_at    | 2.909996 | 2.601535 | 3.955451 | 3.306918 | 2.202724 | 2.447687 | 3.964092 | 2.760222 |
| 7802_at   | 5.094131 | 5.341541 | 6.503782 | 4.525055 | 6.229451 | 5.105669 | 4.897525 | 4.980582 |
| 7803_at   | 6.66949  | 6.302741 | 6.336434 | 6.7146   | 7.11074  | 6.333969 | 5.3315   | 7.448704 |
| 7804_at   | 3.587567 | 3.663881 | 3.906351 | 4.005018 | 3.67503  | 3.663543 | 3.44017  | 3.438379 |
| 7805_at   | 8.329322 | 7.377003 | 7.522332 | 8.609782 | 6.968631 | 7.910133 | 8.471303 | 6.856381 |
| 780776_at | 1.688691 | 1.941566 | 1.793197 | 1.835646 | 1.548403 | 2.387096 | 1.866234 | 1.577011 |
| 780853_at | 5.57661  | 5.195539 | 5.227545 | 5.192145 | 5.422455 | 2.363328 | 6.341225 | 5.869959 |
| 780854_at | 1.244102 | 1.422472 | 0.749919 | 1.037304 | 0.758268 | 1.172947 | 1.666732 | 1.402774 |
| 7809_at   | 1.498509 | 1.988483 | 1.758342 | 1.101712 | 2.992941 | 1.533959 | 1.238663 | 2.344042 |
| 780_at    | 4.877969 | 4.769212 | 5.696935 | 4.712529 | 4.8987   | 4.73851  | 5.554356 | 4.375169 |
| 7812_at   | 9.603088 | 9.76198  | 9.636133 | 9.882572 | 10.0259  | 9.698639 | 9.725693 | 9.974202 |
| 7813_at   | 6.868698 | 7.269559 | 7.335511 | 7.556046 | 7.583394 | 7.145287 | 6.898841 | 7.561641 |
| 7818_at   | 7.02534  | 6.789826 | 6.169244 | 7.18211  | 7.411327 | 6.806155 | 6.84276  | 6.315047 |
| 781_at    | 4.802939 | 5.309748 | 5.236822 | 5.857332 | 5.543068 | 4.95203  | 5.947615 | 5.669675 |
| 7827_at   | 10.34413 | 10.46768 | 10.71235 | 10.75835 | 10.91843 | 10.571   | 10.59602 | 10.5238  |
| 782_at    | 4.082057 | 4.100725 | 3.535309 | 4.011756 | 4.221812 | 4.616659 | 4.358522 | 3.552292 |
| 7832_at   | 7.596242 | 7.631414 | 7.376188 | 7.39735  | 7.145974 | 7.249277 | 7.560519 | 7.689129 |
| 7837_at   | 5.974585 | 6.459949 | 6.330769 | 6.964701 | 6.154679 | 6.669454 | 6.332102 | 5.449902 |
| 783_at    | 5.094978 | 5.08703  | 5.066457 | 4.973922 | 5.125188 | 4.931281 | 5.507142 | 5.214087 |
| 7840_at   | 5.425368 | 5.626856 | 5.075214 | 5.350842 | 5.649381 | 5.942006 | 5.390898 | 5.788183 |
| 7841_at   | 3.061643 | 3.979029 | 4.057752 | 3.387927 | 4.037045 | 4.274123 | 4.225391 | 2.885072 |
| 7844_at   | 4.992726 | 5.373469 | 5.000984 | 5.348319 | 5.394922 | 4.978064 | 4.624082 | 5.408574 |
| 7846_at   | 4.303634 | 5.030653 | 4.376418 | 5.083762 | 4.888523 | 4.167006 | 4.880449 | 4.293513 |
| 7849_at   | 7.342171 | 5.826198 | 6.344417 | 7.471836 | 5.847553 | 7.755368 | 5.555066 | 5.78494  |
| 784_at    | 3.747715 | 3.791788 | 4.71056  | 3.294365 | 2.728128 | 3.485928 | 3.994657 | 3.833631 |
| 7850_at   | 2.344624 | 2.371315 | 2.118273 | 2.013063 | 1.830396 | 3.486438 | 2.916766 | 2.45424  |
| 7851_at   | 3.379443 | 3.923679 | 3.887919 | 3.559732 | 3.317049 | 3.711833 | 3.887919 | 4.617922 |
| 7852_at   | 7.149775 | 5.709206 | 6.690198 | 6.071675 | 6.68135  | 5.440351 | 4.535346 | 6.018674 |
| 7855_at   | 3.762187 | 4.128797 | 3.402455 | 4.233991 | 3.817729 | 3.809946 | 3.916041 | 3.409512 |
| 7857_at   | 1.621886 | 2.472412 | 2.58748  | 1.807592 | 1.000917 | 1.778376 | 1.846477 | 2.061526 |
| 785_at    | 1.799972 | 1.24632  | 1.182168 | 1.592454 | 2.19305  | 1.257647 | 2.376212 | 2.21084  |
| 7862_at   | 4.195681 | 3.915337 | 4.202944 | 4.96674  | 4.099344 | 4.009028 | 4.457503 | 3.841878 |
| 7866_at   | 2.717274 | 2.363589 | 2.710785 | 3.604648 | 3.615522 | 4.489404 | 3.07733  | 3.537995 |
| 7867_at   | 5.407938 | 5.19227  | 4.398489 | 4.850457 | 4.244881 | 4.92036  | 5.220119 | 4.318026 |
| 7869_at   | 6.671012 | 6.74666  | 6.871251 | 6.496262 | 6.470699 | 6.457014 | 7.133064 | 6.201615 |
| 786_at    | 2.254541 | 1.818777 | 1.446642 | 2.158104 | 2.117133 | 1.875193 | 1.847754 | 2.273626 |
| 7871_at   | 6.803608 | 6.825425 | 6.49824  | 6.824849 | 7.389935 | 6.718099 | 6.934527 | 7.09692  |
| 7873_at   | 8.624458 | 8.702497 | 7.531697 | 7.875572 | 7.68186  | 8.400243 | 7.579064 | 8.530701 |
| 7874_at   | 7.393625 | 7.859144 | 7.504456 | 7.500773 | 7.602584 | 7.539943 | 7.494364 | 7.956171 |
| 7879_at   | 9.464503 | 9.222933 | 9.446103 | 9.714424 | 9.391379 | 9.016495 | 9.438877 | 9.17375  |
| 7881_at   | 1.964122 | 2.359853 | 2.558652 | 1.555987 | 2.240227 | 1.95543  | 2.355105 | 2.273539 |
| 7884_at   | 7.369247 | 7.437034 | 7.197964 | 7.027458 | 6.861158 | 7.003424 | 7.709346 | 6.496644 |
| 788_at    | 4.622659 | 4.752434 | 3.804854 | 4.287106 | 4.324562 | 4.930841 | 5.901849 | 4.784945 |
| 78986_at  | 2.750305 | 3.030063 | 3.3596   | 2.976526 | 2.873055 | 3.014953 | 3.010508 | 3.083687 |
| 78987_at  | 5.385869 | 5.322943 | 5.47689  | 5.774675 | 5.985697 | 5.026575 | 6.179299 | 4.824792 |
| 78988_at  | 7.110638 | 6.4866   | 6.485945 | 6.548501 | 6.514839 | 6.347333 | 6.611886 | 6.743185 |
| 78989_at  | 2.580368 | 2.575064 | 3.867021 | 2.971218 | 3.196888 | 3.148977 | 3.409066 | 2.645416 |
| 78990_at  | 2.526831 | 2.827385 | 2.159839 | 2.862369 | 3.877181 | 3.091268 | 2.85669  | 2.237555 |
| 78991_at  | 4.902318 | 4.722287 | 4.866581 | 5.47352  | 4.660026 | 4.728208 | 5.375977 | 4.454968 |
| 78992_at  | 7.316664 | 6.956373 | 7.586807 | 7.028606 | 6.905809 | 7.246142 | 7.393029 | 5.739081 |

|          |          |          |          |          |          |          |          |          |
|----------|----------|----------|----------|----------|----------|----------|----------|----------|
| 78994_at | 7.036227 | 6.615631 | 6.663046 | 6.958818 | 6.087346 | 7.460098 | 7.01875  | 6.056196 |
| 78995_at | 1.759213 | 2.747192 | 2.309689 | 2.824163 | 2.52971  | 2.770803 | 3.288792 | 2.422726 |
| 78996_at | 5.499461 | 6.153257 | 5.783086 | 5.977471 | 5.199562 | 6.158213 | 5.630317 | 4.415026 |
| 78997_at | 1.942379 | 2.291855 | 2.316505 | 1.690176 | 2.664801 | 2.80151  | 2.258539 | 1.223382 |
| 78998_at | 2.997425 | 2.542381 | 2.959443 | 3.009864 | 3.04981  | 2.069008 | 2.7405   | 2.891601 |
| 78999_at | 5.057457 | 4.904581 | 5.165618 | 4.753916 | 4.53873  | 4.504868 | 5.177271 | 5.1099   |
| 79000_at | 3.210162 | 3.495738 | 3.40953  | 3.662841 | 4.162064 | 3.372483 | 3.842975 | 3.709925 |
| 79001_at | 8.259779 | 8.124316 | 8.659946 | 7.949054 | 7.611037 | 7.89038  | 8.329563 | 8.466377 |
| 79002_at | 9.141044 | 8.714517 | 8.638397 | 8.431274 | 8.53638  | 8.799018 | 8.5545   | 8.7057   |
| 79003_at | 6.794797 | 6.930167 | 6.505935 | 7.525818 | 6.316546 | 6.263344 | 6.183566 | 6.833281 |
| 79004_at | 6.067455 | 5.927338 | 5.594411 | 5.462584 | 5.633988 | 6.470391 | 5.547151 | 5.751499 |
| 79005_at | 4.945974 | 3.909681 | 4.276046 | 4.247237 | 2.71248  | 4.206439 | 5.031721 | 3.321677 |
| 79006_at | 7.809901 | 7.650458 | 7.812943 | 8.131336 | 7.810145 | 7.581348 | 7.492642 | 7.197567 |
| 79007_at | 2.474544 | 2.062561 | 2.296677 | 2.349882 | 2.534551 | 2.955977 | 2.581091 | 3.084157 |
| 79009_at | 6.683147 | 6.960242 | 6.560677 | 6.884464 | 6.731832 | 6.341289 | 6.441089 | 6.803088 |
| 79012_at | 1.509466 | 1.445544 | 1.836871 | 1.700117 | 1.283126 | 1.604351 | 1.860428 | 1.716698 |
| 79015_at | 0.847484 | 1.209014 | 0.84911  | 1.027336 | 2.064495 | 1.004735 | 2.024893 | 1.503034 |
| 79016_at | 8.003023 | 6.842066 | 7.958509 | 8.187225 | 8.29372  | 8.001245 | 8.235651 | 7.452817 |
| 79017_at | 6.57962  | 6.032998 | 6.431682 | 6.278209 | 6.218166 | 5.971336 | 6.377008 | 6.071739 |
| 79018_at | 4.015245 | 4.315963 | 4.4829   | 4.225416 | 4.650828 | 3.946842 | 4.700277 | 4.306711 |
| 79019_at | 2.795672 | 2.895423 | 2.59806  | 4.425581 | 2.435552 | 2.940257 | 2.593365 | 2.973954 |
| 79020_at | 5.59984  | 5.235321 | 5.208795 | 5.157185 | 4.756854 | 4.571315 | 4.607072 | 5.243772 |
| 79022_at | 6.416287 | 6.650422 | 6.077101 | 5.929399 | 6.102926 | 5.538927 | 5.942537 | 6.919759 |
| 79023_at | 5.61654  | 6.598277 | 6.082718 | 6.124168 | 4.87431  | 5.937806 | 5.851353 | 7.007647 |
| 79024_at | 1.96372  | 1.929258 | 2.428873 | 2.272646 | 3.531854 | 2.242713 | 2.418461 | 2.63621  |
| 79025_at | 2.33324  | 1.622685 | 2.922375 | 2.115951 | 2.265155 | 2.611538 | 2.142883 | 3.095801 |
| 79026_at | 7.128688 | 7.67577  | 7.981582 | 7.695079 | 7.421928 | 7.694963 | 7.757231 | 7.822608 |
| 79027_at | 4.373115 | 3.701668 | 4.843612 | 3.916782 | 3.674168 | 4.696317 | 3.703694 | 3.57268  |
| 79029_at | 4.537943 | 4.311412 | 2.894355 | 3.139409 | 3.916968 | 3.888259 | 2.876993 | 3.504812 |
| 79033_at | 6.091966 | 6.153805 | 6.073776 | 4.988088 | 5.90927  | 5.366932 | 5.623827 | 5.088973 |
| 79034_at | 6.127332 | 5.169239 | 6.012578 | 5.637118 | 5.362555 | 6.063206 | 6.314205 | 4.834511 |
| 79035_at | 6.490408 | 6.666923 | 6.761471 | 6.245624 | 6.58368  | 6.276384 | 6.118103 | 7.134612 |
| 79036_at | 5.649062 | 5.758273 | 6.081409 | 6.693098 | 4.238216 | 6.832128 | 6.862459 | 6.110344 |
| 79037_at | 3.894531 | 1.532412 | 3.358712 | 3.288785 | 3.229352 | 2.913688 | 2.994317 | 2.301384 |
| 79038_at | 6.045379 | 5.734904 | 5.958028 | 5.760584 | 4.008701 | 5.505666 | 6.461146 | 5.36211  |
| 79039_at | 5.601469 | 4.999602 | 5.570604 | 5.059226 | 5.163774 | 5.5542   | 5.560964 | 4.915765 |
| 7903_at  | 3.956825 | 4.104971 | 4.131619 | 4.02513  | 5.004612 | 3.77789  | 3.841299 | 5.612791 |
| 79041_at | 2.934812 | 3.455344 | 2.057376 | 2.201664 | 3.624014 | 3.492005 | 3.486697 | 2.943792 |
| 79042_at | 4.579677 | 4.450627 | 4.042909 | 4.093243 | 4.183541 | 4.092945 | 4.150012 | 4.302157 |
| 79047_at | 3.473985 | 3.704438 | 3.095463 | 3.531257 | 3.947292 | 3.523241 | 2.951303 | 3.891395 |
| 79048_at | 5.930999 | 6.297228 | 6.398028 | 5.297968 | 5.846195 | 5.84251  | 5.88377  | 6.0931   |
| 79050_at | 4.258258 | 4.312258 | 4.224157 | 4.888849 | 3.75398  | 3.574759 | 3.327984 | 4.551433 |
| 79053_at | 6.149844 | 7.005833 | 6.343295 | 6.302337 | 6.763243 | 6.33742  | 6.73272  | 7.627402 |
| 79054_at | 1.797483 | 1.267693 | 1.607202 | 1.093606 | 1.298695 | 1.294025 | 1.615592 | 1.727649 |
| 79056_at | 4.644851 | 4.322207 | 4.098234 | 4.525135 | 4.887256 | 4.529319 | 4.765638 | 5.432712 |
| 79057_at | 1.475855 | 1.986371 | 1.651892 | 1.462625 | 1.869077 | 1.397018 | 1.327646 | 1.682674 |
| 79058_at | 4.897224 | 4.447183 | 4.363027 | 4.036221 | 4.215739 | 4.280419 | 3.901742 | 4.364004 |
| 7905_at  | 9.24637  | 9.458381 | 9.348735 | 9.746956 | 9.323585 | 9.281958 | 9.529031 | 9.152313 |
| 79064_at | 7.099212 | 6.874481 | 6.444308 | 5.731803 | 6.840282 | 6.984444 | 7.148214 | 6.436898 |
| 79065_at | 6.803285 | 6.531082 | 6.598456 | 6.948755 | 6.749461 | 7.477392 | 7.38342  | 5.811686 |
| 79066_at | 3.962691 | 3.963118 | 4.749308 | 4.240078 | 3.898552 | 4.400567 | 3.649961 | 4.112916 |

|           |          |          |          |          |          |          |          |          |
|-----------|----------|----------|----------|----------|----------|----------|----------|----------|
| 79068_at  | 7.693706 | 8.111153 | 8.215071 | 7.964971 | 7.402046 | 8.025779 | 8.154823 | 8.224564 |
| 79070_at  | 5.627749 | 4.70295  | 4.236676 | 4.069396 | 5.09462  | 5.422364 | 3.924412 | 5.014026 |
| 79071_at  | 4.215074 | 5.353265 | 3.301891 | 3.969098 | 4.533087 | 3.411159 | 3.678896 | 5.525564 |
| 79072_at  | 4.150673 | 4.072576 | 3.690577 | 4.027309 | 4.684237 | 3.537202 | 3.06406  | 5.139991 |
| 79073_at  | 7.290292 | 7.525539 | 7.724345 | 7.632708 | 7.114564 | 7.461095 | 7.922175 | 6.345031 |
| 79074_at  | 5.271033 | 5.530737 | 4.906723 | 4.874368 | 4.995875 | 4.874884 | 5.294236 | 5.295117 |
| 79075_at  | 2.913813 | 1.935211 | 2.181433 | 2.864282 | 1.772386 | 1.770656 | 2.102907 | 2.569191 |
| 79077_at  | 6.214383 | 5.707555 | 5.941156 | 6.904567 | 5.342987 | 5.554686 | 5.909088 | 6.176356 |
| 79078_at  | 5.805993 | 4.929245 | 5.493114 | 5.796854 | 4.586859 | 5.381329 | 4.692256 | 6.052276 |
| 79080_at  | 4.053351 | 3.91373  | 3.256967 | 3.76291  | 4.401765 | 3.761338 | 3.968539 | 4.087973 |
| 79081_at  | 4.613098 | 2.591257 | 3.097623 | 1.545691 | 3.796501 | 4.056323 | 1.991573 | 3.929896 |
| 79083_at  | 2.297021 | 2.619306 | 3.100993 | 2.779546 | 3.284456 | 2.833673 | 2.97173  | 2.918781 |
| 79084_at  | 4.801456 | 4.448799 | 5.092687 | 4.720491 | 3.905301 | 4.406159 | 4.272349 | 5.058786 |
| 79085_at  | 4.926518 | 4.285853 | 4.486646 | 4.476036 | 4.850868 | 5.295445 | 4.805775 | 5.034731 |
| 79086_at  | 5.094192 | 4.813977 | 5.209583 | 4.495592 | 4.758174 | 4.81161  | 5.98679  | 5.606489 |
| 79087_at  | 5.421352 | 5.501807 | 6.074328 | 5.655519 | 5.361476 | 5.586798 | 5.473723 | 4.745361 |
| 79088_at  | 5.558927 | 6.418433 | 4.843614 | 4.259935 | 5.560279 | 5.25954  | 4.571078 | 5.249862 |
| 79089_at  | 5.245169 | 5.473273 | 5.032133 | 5.5822   | 4.865957 | 4.450345 | 5.24448  | 5.231758 |
| 79090_at  | 6.341281 | 3.591712 | 5.12554  | 4.925928 | 4.595139 | 5.475723 | 5.026123 | 4.912047 |
| 79091_at  | 5.87803  | 3.330023 | 5.487134 | 4.951099 | 4.008817 | 4.928905 | 4.725702 | 4.331647 |
| 79092_at  | 1.545503 | 1.865964 | 2.439472 | 2.241245 | 2.732463 | 2.697772 | 1.928795 | 2.128778 |
| 79094_at  | 3.686396 | 2.951364 | 2.798242 | 2.256277 | 2.796043 | 2.189933 | 3.744088 | 2.438847 |
| 790952_at | 1.969801 | 2.487968 | 2.293889 | 2.096968 | 2.388128 | 2.380391 | 2.976475 | 2.987555 |
| 790955_at | 3.601786 | 4.270901 | 3.605726 | 3.483947 | 2.692204 | 4.637992 | 4.374248 | 3.955808 |
| 79095_at  | 7.235761 | 6.517299 | 6.283319 | 6.389603 | 5.276121 | 6.567653 | 4.49261  | 5.562532 |
| 79096_at  | 5.732282 | 5.435086 | 5.824044 | 5.62858  | 5.301682 | 4.901883 | 5.015441 | 5.607923 |
| 79097_at  | 2.052216 | 1.163999 | 1.11994  | 1.715974 | 3.374667 | 2.967269 | 2.6143   | 2.935456 |
| 79098_at  | 2.891439 | 2.07594  | 2.695478 | 2.982697 | 2.870267 | 2.461475 | 2.770058 | 1.90495  |
| 790_at    | 4.018745 | 3.414946 | 3.812714 | 3.618755 | 2.830968 | 3.202158 | 3.989079 | 3.394008 |
| 79100_at  | 1.341793 | 1.494683 | 1.661266 | 1.093848 | 1.959561 | 1.911642 | 1.59933  | 1.532888 |
| 79101_at  | 6.095814 | 5.443551 | 5.719444 | 6.498796 | 6.513516 | 6.628153 | 5.221275 | 4.579727 |
| 79102_at  | 6.303163 | 5.880518 | 5.714025 | 6.103643 | 5.774628 | 5.923398 | 6.134122 | 6.190732 |
| 79104_at  | 2.32368  | 1.665527 | 2.031958 | 3.203052 | 1.307714 | 1.720376 | 1.92264  | 3.84468  |
| 79109_at  | 7.796094 | 7.966541 | 8.035943 | 8.031725 | 7.860114 | 7.730343 | 8.17069  | 8.340328 |
| 791115_at | 1.353181 | 1.266831 | 0.705157 | 0.746778 | 0.941538 | 2.403003 | 1.373347 | 1.212245 |
| 79132_at  | 3.555962 | 3.099056 | 3.468925 | 3.830319 | 2.992453 | 3.593216 | 3.366098 | 3.605233 |
| 79133_at  | 3.882364 | 4.002977 | 2.831306 | 2.685626 | 3.399054 | 2.559478 | 2.730147 | 2.284538 |
| 79134_at  | 2.762935 | 3.384175 | 3.853509 | 3.90906  | 3.730113 | 3.147288 | 3.553704 | 2.874258 |
| 79135_at  | 5.869097 | 5.886056 | 5.79152  | 5.950063 | 5.267283 | 5.531917 | 6.046466 | 5.711518 |
| 79136_at  | 2.560988 | 2.479993 | 3.213793 | 2.544773 | 3.113023 | 2.445003 | 2.228739 | 2.358655 |
| 79137_at  | 5.99815  | 5.324848 | 5.520389 | 5.915332 | 4.727358 | 5.349761 | 5.74362  | 4.606789 |
| 79139_at  | 6.729453 | 7.235519 | 7.037437 | 7.751694 | 7.469676 | 7.521003 | 7.207167 | 7.53101  |
| 7913_at   | 7.81659  | 8.040485 | 7.5633   | 7.832488 | 7.813558 | 7.457058 | 7.136231 | 8.441237 |
| 79140_at  | 4.733469 | 3.251905 | 3.473755 | 4.001521 | 3.552571 | 3.528341 | 3.10179  | 3.746368 |
| 79142_at  | 5.088537 | 4.635979 | 5.554113 | 4.789916 | 4.455216 | 5.212172 | 4.533161 | 4.362561 |
| 79143_at  | 5.671531 | 5.898212 | 5.785278 | 4.788716 | 4.288012 | 5.12581  | 6.345994 | 4.485767 |
| 79144_at  | 10.40744 | 10.22386 | 10.58435 | 10.39931 | 8.75817  | 10.30598 | 10.83736 | 9.216266 |
| 79145_at  | 5.681998 | 6.002031 | 5.87796  | 6.873504 | 6.441024 | 5.958838 | 6.115935 | 5.602049 |
| 79147_at  | 4.203246 | 4.350784 | 4.412429 | 5.329475 | 5.134179 | 4.599946 | 4.122199 | 4.982002 |
| 79148_at  | 4.574405 | 3.754428 | 3.920902 | 4.124447 | 3.027069 | 4.521146 | 4.206989 | 2.980574 |
| 79149_at  | 2.011814 | 1.341398 | 2.055456 | 1.703554 | 1.964135 | 2.833443 | 1.916352 | 2.698945 |

|          |          |          |          |          |          |          |          |          |
|----------|----------|----------|----------|----------|----------|----------|----------|----------|
| 79152_at | 3.408758 | 2.570154 | 2.716532 | 3.027681 | 2.59902  | 2.757515 | 2.761809 | 2.313397 |
| 79153_at | 4.757978 | 4.365776 | 3.166077 | 3.657909 | 3.405663 | 3.962423 | 3.216435 | 4.422478 |
| 79154_at | 4.645893 | 3.975416 | 4.144572 | 4.191497 | 4.170803 | 4.084693 | 3.701751 | 3.731235 |
| 79155_at | 6.26715  | 6.557595 | 6.29363  | 6.396232 | 4.653917 | 5.772794 | 6.51059  | 6.703931 |
| 79156_at | 2.738974 | 2.160742 | 1.629096 | 2.108267 | 2.26714  | 3.139101 | 2.796418 | 1.558689 |
| 79157_at | 4.93756  | 4.841806 | 4.112194 | 4.242914 | 4.247988 | 3.584199 | 4.697197 | 3.873701 |
| 79158_at | 8.162853 | 7.919737 | 8.337394 | 7.921274 | 7.94868  | 8.025321 | 8.105016 | 7.895303 |
| 79159_at | 6.385059 | 6.223687 | 5.620935 | 5.401608 | 5.20063  | 5.775145 | 5.143507 | 5.574827 |
| 7915_at  | 4.056937 | 3.774623 | 4.205569 | 4.624402 | 5.338953 | 3.240341 | 3.571693 | 4.141315 |
| 79161_at | 6.493534 | 5.42334  | 6.329795 | 6.177667 | 6.151934 | 6.14243  | 5.122413 | 5.9467   |
| 79165_at | 6.526663 | 5.913723 | 5.571712 | 5.498638 | 5.131748 | 5.174978 | 5.416944 | 5.53696  |
| 79166_at | 1.622601 | 0.983063 | 1.291611 | 1.194698 | 2.361473 | 2.039534 | 0.928015 | 2.278258 |
| 79169_at | 4.854219 | 4.585116 | 4.496037 | 4.258019 | 4.652824 | 4.933409 | 4.833754 | 4.074903 |
| 7916_at  | 7.55833  | 7.705289 | 7.929579 | 8.070101 | 6.926525 | 7.494954 | 7.981422 | 6.861226 |
| 79170_at | 3.710361 | 2.805772 | 2.687708 | 3.316514 | 3.296349 | 4.455507 | 2.281328 | 3.318028 |
| 79171_at | 5.202872 | 5.136108 | 4.845729 | 4.464356 | 4.847339 | 5.042701 | 4.101749 | 4.543322 |
| 79172_at | 4.954535 | 4.100536 | 3.182239 | 4.629001 | 4.427849 | 2.802412 | 3.233116 | 4.796961 |
| 79173_at | 2.636272 | 2.683792 | 2.240205 | 2.132852 | 1.922679 | 3.332361 | 2.493453 | 2.427262 |
| 79174_at | 4.872698 | 4.418289 | 3.968861 | 3.940524 | 4.812426 | 4.460355 | 4.88184  | 3.98865  |
| 79175_at | 3.697288 | 3.470277 | 4.611674 | 3.819384 | 3.688517 | 3.54379  | 3.544868 | 3.095285 |
| 79176_at | 2.522279 | 2.105729 | 2.054173 | 2.124015 | 2.727938 | 2.651544 | 1.891745 | 2.294821 |
| 79177_at | 4.037067 | 4.057962 | 3.782564 | 4.345421 | 5.197221 | 3.594718 | 4.393972 | 4.175751 |
| 79178_at | 5.399888 | 4.084378 | 4.147043 | 3.434137 | 4.618909 | 3.830247 | 4.689275 | 3.586201 |
| 7917_at  | 7.056526 | 6.835435 | 6.68971  | 7.077281 | 6.989225 | 6.877147 | 7.394849 | 6.459452 |
| 79180_at | 6.120619 | 6.697018 | 6.060138 | 6.031921 | 4.473891 | 5.876202 | 5.750381 | 5.478845 |
| 79183_at | 4.132359 | 3.364926 | 3.608841 | 3.723455 | 2.58175  | 3.979994 | 4.313893 | 4.173537 |
| 79184_at | 5.054802 | 4.964172 | 5.657594 | 5.928621 | 5.11216  | 5.405722 | 5.65157  | 5.666644 |
| 79187_at | 2.247894 | 2.15882  | 1.856218 | 2.32858  | 2.061457 | 2.21737  | 2.132615 | 2.149264 |
| 79188_at | 5.548574 | 6.346053 | 6.780662 | 7.010805 | 5.701634 | 6.310342 | 7.011796 | 6.100578 |
| 7918_at  | 2.823248 | 3.37108  | 3.653056 | 2.584267 | 3.5216   | 3.27932  | 2.77586  | 2.3103   |
| 79190_at | 1.975886 | 1.618497 | 1.5674   | 2.307299 | 1.566885 | 1.097247 | 1.622497 | 1.564166 |
| 79191_at | 3.633272 | 3.930393 | 3.81634  | 4.031298 | 3.914011 | 4.471022 | 4.356224 | 4.140009 |
| 79192_at | 3.877691 | 2.595611 | 2.331172 | 2.691368 | 2.739206 | 3.662232 | 2.909333 | 3.040959 |
| 7919_at  | 1.250444 | 1.445267 | 2.836949 | 1.183601 | 2.049261 | 1.31677  | 1.679654 | 1.340617 |
| 7920_at  | 5.206994 | 5.729475 | 5.244675 | 5.301791 | 5.098064 | 4.808569 | 5.201266 | 5.096313 |
| 79228_at | 4.542607 | 4.40745  | 3.442349 | 3.163249 | 4.273901 | 4.128616 | 4.890524 | 4.320375 |
| 7922_at  | 6.159933 | 6.419252 | 5.646318 | 6.203959 | 6.01689  | 6.633701 | 6.563848 | 6.258528 |
| 79230_at | 3.831596 | 3.212065 | 3.732027 | 4.805857 | 4.770324 | 3.236341 | 3.801875 | 3.06464  |
| 7923_at  | 6.245486 | 6.178203 | 4.904702 | 5.861432 | 4.610476 | 5.144981 | 4.901035 | 5.384141 |
| 79258_at | 2.891083 | 2.767485 | 2.680598 | 3.286296 | 2.620112 | 3.821565 | 3.056081 | 2.64168  |
| 79269_at | 6.077213 | 6.300132 | 5.72849  | 6.162121 | 5.571749 | 5.609748 | 6.316314 | 5.718192 |
| 79290_at | 1.585899 | 1.683083 | 1.716227 | 1.529651 | 2.048539 | 1.465793 | 1.488622 | 1.769074 |
| 79295_at | 1.357538 | 1.835856 | 1.733486 | 0.537689 | 1.115317 | 2.547023 | 2.028323 | 1.05144  |
| 79310_at | 0.776414 | 1.340359 | 0.692235 | 0.931933 | 2.255251 | 1.809106 | 0.693611 | 1.881816 |
| 79315_at | 2.382737 | 1.459342 | 2.808061 | 2.227266 | 1.338232 | 1.328675 | 1.478431 | 1.720745 |
| 79317_at | 1.968643 | 2.158289 | 1.788706 | 1.474705 | 1.709407 | 1.20686  | 1.440546 | 0.496479 |
| 79324_at | 2.30552  | 2.547789 | 3.156989 | 2.496419 | 1.35279  | 2.643429 | 1.872655 | 2.098711 |
| 7932_at  | 1.00583  | 1.516195 | 1.746617 | 1.320973 | 2.170625 | 2.483722 | 0.996802 | 1.393544 |
| 79334_at | 1.630781 | 0.629285 | 1.131587 | 1.898249 | 1.791688 | 1.134407 | 0.987138 | 1.863483 |
| 79339_at | 1.694326 | 1.967372 | 2.093342 | 2.179223 | 1.819565 | 2.839677 | 2.656427 | 2.617221 |
| 79345_at | 1.738452 | 1.097101 | 1.145135 | 1.460919 | 1.722642 | 0.777994 | 1.018684 | 1.546097 |

|          |          |          |          |          |          |          |          |          |
|----------|----------|----------|----------|----------|----------|----------|----------|----------|
| 79363_at | 2.44134  | 2.43194  | 2.687618 | 2.536769 | 2.446051 | 3.038292 | 2.797887 | 2.919945 |
| 79364_at | 6.103892 | 5.692688 | 4.96038  | 5.496238 | 5.702116 | 5.583785 | 5.34812  | 5.151424 |
| 79365_at | 5.601098 | 4.997569 | 4.442444 | 5.744882 | 5.526917 | 5.273258 | 3.661924 | 4.105379 |
| 79366_at | 6.184298 | 5.225899 | 5.312059 | 5.837879 | 5.940749 | 5.328948 | 5.129189 | 5.068676 |
| 79368_at | 0.764519 | 1.386072 | 1.149472 | 0.959494 | 1.775409 | 1.494694 | 2.069549 | 2.136886 |
| 79369_at | 1.178669 | 2.700016 | 1.229319 | 1.07755  | 1.396599 | 1.843169 | 1.004657 | 1.161691 |
| 7936_at  | 7.239161 | 6.783577 | 6.352108 | 7.106412 | 6.379577 | 6.503224 | 6.777562 | 7.073888 |
| 79370_at | 1.364269 | 2.468031 | 1.661397 | 1.64576  | 1.996075 | 1.212977 | 1.63727  | 1.682116 |
| 793_at   | 6.279033 | 3.744013 | 6.224876 | 6.256888 | 8.599799 | 5.116678 | 2.173678 | 5.059732 |
| 79400_at | 2.044354 | 2.262923 | 2.701481 | 2.38569  | 1.512319 | 2.046425 | 2.467287 | 2.180001 |
| 7940_at  | 6.429311 | 6.036894 | 5.361842 | 6.387441 | 5.80755  | 6.462478 | 5.700887 | 5.932337 |
| 79411_at | 4.706686 | 4.510169 | 5.080126 | 3.365836 | 4.542534 | 4.728704 | 6.232277 | 4.038394 |
| 79412_at | 2.816005 | 2.431047 | 2.64964  | 2.877365 | 3.038747 | 2.274405 | 2.636796 | 2.679665 |
| 79413_at | 2.951267 | 3.418436 | 3.082271 | 2.898345 | 2.306474 | 3.218013 | 2.939799 | 2.787264 |
| 79414_at | 5.215893 | 5.7338   | 5.349406 | 5.085466 | 4.547385 | 5.926615 | 5.660858 | 4.672683 |
| 79415_at | 4.890187 | 4.193876 | 4.299834 | 4.52979  | 3.678621 | 4.280132 | 3.445753 | 3.727414 |
| 7941_at  | 2.510753 | 1.916548 | 1.557891 | 2.426114 | 1.806139 | 2.30448  | 2.114256 | 2.456383 |
| 7942_at  | 3.203509 | 2.823246 | 1.81704  | 1.910429 | 1.562122 | 3.261679 | 3.191065 | 2.452094 |
| 79441_at | 3.949533 | 5.139918 | 3.55239  | 4.913073 | 4.066599 | 3.451153 | 3.232001 | 4.700199 |
| 79442_at | 7.185178 | 6.881931 | 6.899585 | 6.729377 | 6.144645 | 7.086246 | 6.496652 | 7.236481 |
| 79443_at | 5.725728 | 6.022733 | 6.077968 | 5.698016 | 5.732097 | 6.067135 | 5.859202 | 5.276839 |
| 79444_at | 2.72663  | 3.351112 | 3.921426 | 2.978729 | 2.735875 | 2.849641 | 2.70256  | 2.617722 |
| 79446_at | 3.433506 | 3.853737 | 3.495751 | 3.782638 | 3.074702 | 4.103529 | 3.617907 | 3.550212 |
| 79447_at | 4.447969 | 4.057043 | 4.414392 | 4.41288  | 3.861887 | 4.21175  | 2.999174 | 4.085513 |
| 79465_at | 1.735959 | 1.782848 | 2.763249 | 2.213603 | 2.402564 | 2.288476 | 1.649589 | 1.380995 |
| 79469_at | 2.908397 | 0.974739 | 0.70226  | 0.826652 | 0.851059 | 1.479588 | 0.546628 | 2.133897 |
| 79473_at | 2.014642 | 1.150107 | 1.317342 | 1.005406 | 1.436193 | 1.387289 | 1.524934 | 1.929895 |
| 794_at   | 1.603879 | 1.580714 | 1.345894 | 1.40098  | 1.156018 | 1.229733 | 1.153878 | 1.320434 |
| 79501_at | 1.924586 | 0.999461 | 2.342101 | 0.860874 | 1.769307 | 1.093127 | 1.47319  | 0.919851 |
| 79541_at | 1.565117 | 2.653126 | 3.944118 | 1.800887 | 2.834281 | 1.096747 | 2.329687 | 1.803775 |
| 79544_at | 1.226251 | 1.31842  | 1.512347 | 0.933792 | 1.946568 | 1.545782 | 1.061714 | 1.601681 |
| 7955_at  | 1.730403 | 2.993967 | 2.08394  | 1.388856 | 4.285163 | 1.360451 | 1.464762 | 1.637598 |
| 79567_at | 8.277586 | 8.224455 | 8.276733 | 8.088732 | 7.753462 | 7.838612 | 8.388024 | 7.700838 |
| 79568_at | 7.505342 | 6.964091 | 6.649897 | 6.634952 | 6.395237 | 7.095031 | 5.487061 | 6.139539 |
| 79570_at | 2.519552 | 1.6883   | 1.837893 | 2.239688 | 1.757529 | 2.286111 | 2.676533 | 2.565058 |
| 79571_at | 4.918046 | 5.18522  | 4.567188 | 5.466048 | 4.751871 | 4.618459 | 4.735764 | 5.625421 |
| 79572_at | 7.115228 | 7.366731 | 6.97733  | 7.672506 | 7.731892 | 7.164576 | 7.350696 | 8.04519  |
| 79573_at | 3.883763 | 4.68311  | 3.734755 | 3.639353 | 2.130404 | 4.32129  | 5.252873 | 4.400412 |
| 79574_at | 2.412947 | 2.147021 | 2.816877 | 2.237382 | 1.949453 | 1.900462 | 2.027343 | 2.050227 |
| 79575_at | 3.150005 | 3.695675 | 3.402754 | 3.440795 | 3.007519 | 4.246392 | 3.557393 | 3.412951 |
| 79576_at | 5.913665 | 6.056333 | 5.728752 | 4.928891 | 5.770262 | 5.508088 | 5.786389 | 4.981968 |
| 79577_at | 7.318735 | 7.417196 | 7.658508 | 7.508844 | 7.57242  | 7.753447 | 7.324505 | 7.885584 |
| 7957_at  | 3.653679 | 2.961809 | 3.382866 | 4.093726 | 3.721996 | 3.18767  | 2.581918 | 2.958656 |
| 79581_at | 4.433714 | 3.150934 | 4.307701 | 3.982251 | 2.794713 | 3.970825 | 3.185212 | 2.928344 |
| 79582_at | 5.996721 | 6.073545 | 5.129797 | 5.524839 | 5.867017 | 6.094728 | 5.356446 | 6.292386 |
| 79583_at | 3.408784 | 3.545312 | 4.36463  | 2.906312 | 3.99889  | 3.353337 | 5.105482 | 3.857019 |
| 79586_at | 4.582717 | 4.426951 | 4.795685 | 4.223162 | 3.983547 | 4.184604 | 4.508669 | 4.168311 |
| 79587_at | 4.279552 | 4.220419 | 3.97299  | 4.181546 | 4.405554 | 4.833222 | 4.475723 | 4.767198 |
| 79589_at | 3.295956 | 2.58916  | 2.834246 | 2.753257 | 3.622229 | 2.121403 | 2.281142 | 3.686553 |
| 79590_at | 6.433808 | 6.167162 | 5.534288 | 6.466708 | 6.846637 | 6.340969 | 6.175064 | 6.294713 |
| 79591_at | 5.761723 | 5.150469 | 5.930402 | 6.055461 | 6.190142 | 5.76662  | 5.053095 | 5.971444 |

|          |          |          |          |          |          |          |          |          |
|----------|----------|----------|----------|----------|----------|----------|----------|----------|
| 79594_at | 4.160911 | 3.451065 | 4.475985 | 4.608801 | 4.2602   | 4.142925 | 4.569918 | 4.261263 |
| 79595_at | 7.155899 | 7.628469 | 7.455499 | 7.298605 | 6.450245 | 7.741773 | 7.469742 | 6.759778 |
| 79596_at | 6.062611 | 6.802703 | 6.772807 | 6.381289 | 7.036376 | 6.367803 | 6.990267 | 6.561387 |
| 79598_at | 5.130727 | 4.610167 | 4.698304 | 4.771493 | 5.591403 | 4.926033 | 5.455725 | 4.458607 |
| 795_at   | 0.988568 | 0.810344 | 0.838931 | 0.986494 | 2.39745  | 1.275297 | 0.872429 | 1.020846 |
| 79600_at | 6.326198 | 6.062242 | 6.486401 | 5.428838 | 5.443113 | 5.692784 | 6.043964 | 4.910393 |
| 79602_at | 5.42013  | 5.710609 | 6.1705   | 5.171163 | 5.223594 | 5.218852 | 5.828026 | 5.348692 |
| 79603_at | 4.245901 | 3.851033 | 3.270967 | 3.743169 | 3.808927 | 4.111194 | 3.56263  | 2.456708 |
| 79605_at | 2.851815 | 2.358602 | 3.507157 | 2.219246 | 2.132442 | 1.96153  | 2.384159 | 2.437955 |
| 79607_at | 6.151982 | 5.799823 | 6.186585 | 6.112031 | 5.185635 | 5.303002 | 5.55086  | 5.809246 |
| 79608_at | 5.039218 | 4.750441 | 4.416119 | 4.736231 | 4.468468 | 4.307228 | 5.046814 | 4.764599 |
| 79609_at | 2.04752  | 1.365402 | 1.807432 | 1.61863  | 2.236327 | 1.307526 | 1.951502 | 1.963751 |
| 79611_at | 4.733437 | 5.304131 | 4.186072 | 3.316698 | 5.711442 | 4.440356 | 3.81012  | 4.221524 |
| 79612_at | 5.133484 | 4.011972 | 4.355353 | 4.064921 | 4.037508 | 4.37754  | 4.426041 | 5.096671 |
| 79613_at | 4.59911  | 2.345937 | 3.142886 | 4.084459 | 3.853305 | 4.588823 | 4.591919 | 4.228927 |
| 79616_at | 3.906277 | 3.71766  | 4.223575 | 4.500722 | 3.997667 | 5.015055 | 4.484154 | 4.353145 |
| 79618_at | 6.496384 | 7.347242 | 7.298257 | 7.672368 | 7.679927 | 7.218386 | 7.50977  | 7.369159 |
| 79621_at | 5.778828 | 5.505901 | 5.11899  | 4.899461 | 4.834685 | 4.672902 | 4.060556 | 6.114682 |
| 79622_at | 6.919445 | 6.233481 | 6.377707 | 6.271392 | 5.760333 | 6.511837 | 5.820878 | 5.839266 |
| 79623_at | 6.599987 | 6.514847 | 5.872678 | 6.445411 | 6.325938 | 6.633984 | 5.679257 | 5.916603 |
| 79624_at | 5.209797 | 5.159025 | 5.239652 | 5.678089 | 5.493223 | 4.826132 | 4.168571 | 5.467619 |
| 79625_at | 9.914377 | 10.33221 | 10.39674 | 10.21108 | 10.31951 | 10.02202 | 10.20327 | 10.51264 |
| 79626_at | 2.847822 | 2.99167  | 3.161548 | 4.27814  | 2.457732 | 3.025146 | 2.21039  | 3.038005 |
| 79627_at | 7.280663 | 6.694145 | 7.135897 | 7.422818 | 6.533661 | 6.789953 | 7.065394 | 7.293138 |
| 79628_at | 1.762305 | 1.658402 | 2.387738 | 1.439035 | 2.435573 | 1.8252   | 1.870659 | 1.703519 |
| 79629_at | 5.679121 | 5.844329 | 5.817839 | 4.566066 | 5.814566 | 5.534712 | 5.003119 | 4.517429 |
| 79630_at | 7.91408  | 7.750468 | 7.501416 | 8.070732 | 7.15979  | 7.817324 | 7.424206 | 7.809513 |
| 79631_at | 5.503776 | 6.00705  | 4.626542 | 4.954397 | 6.270686 | 6.10846  | 4.166165 | 4.029348 |
| 79632_at | 2.626781 | 3.006661 | 3.058876 | 2.218648 | 2.530174 | 2.665353 | 2.434048 | 2.984102 |
| 79633_at | 3.506982 | 4.298296 | 4.663509 | 5.428485 | 4.162008 | 3.912067 | 4.788341 | 4.87882  |
| 79634_at | 5.092283 | 4.635471 | 5.055031 | 4.519218 | 3.38274  | 4.62399  | 4.667234 | 4.831017 |
| 79635_at | 5.365481 | 3.99112  | 3.208559 | 3.30108  | 2.460172 | 4.221902 | 3.751947 | 3.6813   |
| 79637_at | 2.946445 | 4.035639 | 2.64052  | 3.880371 | 3.422903 | 3.780446 | 3.500081 | 3.006251 |
| 79639_at | 5.461854 | 4.418915 | 5.212439 | 4.797738 | 4.826033 | 4.921765 | 5.157145 | 3.635217 |
| 79640_at | 3.716731 | 3.384306 | 4.873556 | 4.291154 | 2.984675 | 3.144151 | 4.287773 | 3.649119 |
| 79641_at | 4.749825 | 4.333037 | 4.786283 | 4.832975 | 5.424244 | 4.092675 | 4.442876 | 4.220065 |
| 79642_at | 2.378004 | 1.86322  | 1.539358 | 3.865135 | 1.842074 | 1.586361 | 1.263684 | 2.735715 |
| 79643_at | 3.980817 | 2.644674 | 3.922994 | 4.317655 | 4.102861 | 4.044236 | 3.88797  | 2.951157 |
| 79644_at | 5.152455 | 5.560596 | 4.968148 | 5.409604 | 5.170409 | 4.771485 | 5.041196 | 5.011534 |
| 79645_at | 2.165351 | 1.052796 | 1.219411 | 1.006836 | 2.278505 | 1.463229 | 1.413364 | 1.047007 |
| 79646_at | 6.363071 | 7.055085 | 6.798839 | 6.717567 | 6.763743 | 6.368392 | 6.963315 | 6.838365 |
| 79647_at | 7.02522  | 6.985727 | 7.493426 | 6.44988  | 6.868531 | 7.237601 | 7.412669 | 6.403556 |
| 79648_at | 5.465264 | 5.457084 | 5.885771 | 5.716279 | 5.576798 | 5.447473 | 5.354822 | 5.850154 |
| 79649_at | 5.65943  | 6.343976 | 5.641616 | 5.197475 | 6.021554 | 5.875393 | 5.667366 | 5.829343 |
| 79650_at | 4.929909 | 5.209044 | 4.938462 | 5.419334 | 5.44942  | 5.110669 | 4.963734 | 5.16263  |
| 79651_at | 3.509887 | 3.733447 | 3.526923 | 3.405147 | 2.921554 | 3.144572 | 3.497458 | 3.092326 |
| 79652_at | 7.12365  | 6.899321 | 6.735718 | 7.283438 | 6.221623 | 7.231206 | 6.782593 | 5.333922 |
| 79654_at | 3.891807 | 4.22225  | 3.815804 | 4.989316 | 4.494725 | 3.753731 | 3.672641 | 3.229191 |
| 79656_at | 4.165103 | 2.485187 | 2.430362 | 2.126192 | 2.304939 | 3.489147 | 1.497757 | 1.632656 |
| 79657_at | 6.546751 | 5.829037 | 6.185647 | 6.308332 | 5.856134 | 5.459812 | 6.088295 | 6.153913 |
| 79658_at | 4.263296 | 4.940813 | 3.291226 | 4.510244 | 3.643779 | 5.087684 | 4.706744 | 3.673317 |

|          |          |          |          |          |          |          |          |          |
|----------|----------|----------|----------|----------|----------|----------|----------|----------|
| 79659_at | 5.143304 | 5.400947 | 5.264205 | 5.180075 | 5.172235 | 5.256731 | 5.08325  | 5.99613  |
| 7965_at  | 7.637804 | 7.158432 | 7.090685 | 7.177353 | 7.877747 | 6.886622 | 7.51335  | 7.55158  |
| 79660_at | 5.044056 | 5.266915 | 4.895656 | 4.676276 | 4.392376 | 4.881871 | 5.205036 | 4.931989 |
| 79661_at | 3.240516 | 2.346113 | 2.60457  | 2.940019 | 2.869121 | 3.011751 | 2.094518 | 1.571724 |
| 79663_at | 3.107124 | 2.988493 | 5.004351 | 3.992412 | 3.930124 | 3.826869 | 3.129562 | 4.663717 |
| 79664_at | 7.360199 | 7.558677 | 7.249488 | 6.946442 | 7.075965 | 6.828107 | 6.269666 | 7.987078 |
| 79665_at | 6.404991 | 6.123173 | 6.252675 | 6.501068 | 6.248417 | 6.137422 | 6.137769 | 6.308373 |
| 79666_at | 6.424689 | 6.770835 | 6.284479 | 5.950821 | 5.305532 | 5.87311  | 5.598845 | 6.109473 |
| 79667_at | 1.981669 | 2.248608 | 1.937016 | 2.741336 | 1.321097 | 2.379762 | 2.237362 | 2.510422 |
| 79668_at | 5.468552 | 5.824245 | 5.72222  | 5.193816 | 6.221686 | 5.211795 | 4.710955 | 6.104512 |
| 79669_at | 3.184253 | 1.837547 | 2.131481 | 1.831754 | 2.735122 | 3.442571 | 2.3192   | 3.382188 |
| 79670_at | 5.926555 | 6.648403 | 6.342918 | 6.833487 | 6.119889 | 5.952465 | 6.488551 | 6.827586 |
| 79671_at | 3.966001 | 3.994374 | 3.471708 | 4.129132 | 3.287775 | 3.788011 | 4.211376 | 3.612232 |
| 79672_at | 5.272966 | 4.660144 | 5.869139 | 5.572096 | 5.58273  | 5.188816 | 6.123958 | 4.812541 |
| 79673_at | 4.6341   | 5.059234 | 6.19573  | 5.189476 | 5.225597 | 5.194688 | 4.516581 | 5.71036  |
| 79674_at | 4.580818 | 2.888532 | 2.713292 | 4.105872 | 4.105872 | 4.153888 | 3.668721 | 5.28164  |
| 79675_at | 5.121462 | 5.246628 | 5.026715 | 5.246643 | 5.200979 | 4.996623 | 5.181895 | 5.414615 |
| 79676_at | 4.305069 | 3.665937 | 4.130756 | 4.154839 | 3.502703 | 3.227674 | 3.87457  | 4.028494 |
| 79677_at | 5.057016 | 5.125725 | 5.186436 | 5.389564 | 4.576204 | 5.177573 | 4.714989 | 5.952272 |
| 79679_at | 1.65211  | 1.729966 | 1.554167 | 1.265088 | 3.226653 | 2.351481 | 2.14482  | 2.705095 |
| 79680_at | 4.46923  | 3.872858 | 4.459992 | 3.466928 | 3.897859 | 4.37265  | 3.663182 | 3.83203  |
| 79682_at | 1.996146 | 3.821846 | 2.54394  | 3.267523 | 2.24949  | 2.713456 | 3.859188 | 3.635384 |
| 79683_at | 4.484586 | 4.77183  | 4.953027 | 4.687301 | 5.246689 | 5.070034 | 5.037913 | 4.30075  |
| 79684_at | 4.532339 | 5.017293 | 4.795787 | 4.872203 | 5.085303 | 4.477422 | 4.796255 | 5.352913 |
| 79685_at | 6.420785 | 6.713559 | 5.567844 | 6.981748 | 4.788619 | 6.229745 | 5.730568 | 6.19021  |
| 79686_at | 2.932579 | 2.721641 | 3.414318 | 3.251413 | 2.911761 | 3.505945 | 3.758143 | 3.219453 |
| 79689_at | 2.08767  | 1.889086 | 2.938303 | 5.570792 | 6.70264  | 2.746334 | 4.418226 | 3.334836 |
| 79690_at | 3.729832 | 1.397472 | 2.027941 | 4.281834 | 2.505161 | 2.079631 | 2.344579 | 3.154872 |
| 79691_at | 5.446858 | 5.382414 | 5.763123 | 6.572776 | 5.734777 | 4.333744 | 6.328989 | 5.861492 |
| 79692_at | 5.81155  | 4.389812 | 4.745952 | 4.949348 | 4.917907 | 4.392237 | 4.527739 | 5.022777 |
| 79693_at | 5.901365 | 5.616101 | 5.519172 | 5.37792  | 7.016721 | 6.43715  | 4.819335 | 5.31058  |
| 79694_at | 7.56816  | 7.503085 | 7.599249 | 7.441808 | 6.250135 | 7.09721  | 7.504777 | 7.349379 |
| 79695_at | 2.439566 | 3.088377 | 2.79307  | 3.668958 | 2.666885 | 2.287406 | 2.735045 | 2.545552 |
| 79696_at | 2.985024 | 3.080524 | 2.865369 | 2.094048 | 3.896962 | 3.31942  | 2.798224 | 2.253266 |
| 79697_at | 4.135813 | 4.14249  | 3.466775 | 3.517671 | 3.903486 | 3.692456 | 3.901644 | 4.353062 |
| 79698_at | 2.322555 | 1.467309 | 1.911373 | 2.138317 | 2.749696 | 3.012596 | 2.246224 | 2.738798 |
| 79699_at | 6.522869 | 6.686447 | 6.680024 | 6.782434 | 6.80933  | 6.657169 | 7.055505 | 7.283943 |
| 796_at   | 1.652541 | 1.759546 | 1.295252 | 1.490834 | 1.422342 | 1.279634 | 1.551907 | 2.032726 |
| 79701_at | 5.028427 | 5.081712 | 4.854125 | 4.906286 | 4.98999  | 5.241603 | 5.136364 | 4.885677 |
| 79703_at | 3.386283 | 4.276012 | 2.266247 | 3.419429 | 2.394894 | 2.359498 | 3.138946 | 3.353061 |
| 79705_at | 3.411034 | 3.176698 | 3.269656 | 3.434086 | 3.551644 | 3.248018 | 3.270143 | 2.456415 |
| 79707_at | 5.77552  | 5.439345 | 5.846714 | 5.855107 | 5.234738 | 5.83769  | 5.793198 | 5.003577 |
| 79709_at | 5.298066 | 5.258076 | 5.969133 | 5.702904 | 4.509476 | 6.052873 | 5.658408 | 4.754028 |
| 79710_at | 4.311886 | 4.473011 | 3.874816 | 4.550432 | 4.626058 | 4.557779 | 3.580387 | 3.965405 |
| 79711_at | 4.506526 | 4.719029 | 4.415315 | 4.572425 | 4.540544 | 5.297178 | 4.612293 | 4.286853 |
| 79712_at | 5.590209 | 6.07088  | 5.594553 | 6.024629 | 5.515445 | 5.391674 | 5.551394 | 5.932424 |
| 79713_at | 4.272108 | 3.358475 | 3.318467 | 4.064984 | 3.451703 | 4.248575 | 3.736417 | 3.929013 |
| 79714_at | 3.016305 | 3.528142 | 3.434782 | 3.475387 | 2.654936 | 3.369145 | 3.966769 | 3.621515 |
| 79716_at | 1.69605  | 3.190856 | 1.71642  | 2.08427  | 3.409741 | 3.489433 | 2.459054 | 1.993151 |
| 79717_at | 6.231166 | 6.09572  | 6.475827 | 6.424093 | 6.679079 | 5.726157 | 5.927127 | 6.032238 |
| 79718_at | 6.599492 | 6.700833 | 6.381732 | 6.864586 | 6.970287 | 6.669874 | 7.489812 | 7.545263 |

|          |          |          |          |          |          |          |          |          |
|----------|----------|----------|----------|----------|----------|----------|----------|----------|
| 79719_at | 5.739447 | 5.4213   | 5.50801  | 5.452869 | 5.582112 | 5.236623 | 5.122924 | 5.703286 |
| 79720_at | 4.405667 | 5.200835 | 4.201245 | 3.554759 | 3.423421 | 4.663479 | 4.075536 | 4.500215 |
| 79722_at | 2.31753  | 1.794042 | 1.906616 | 1.530225 | 2.54185  | 1.726007 | 1.847134 | 1.905667 |
| 79723_at | 2.715457 | 2.808507 | 2.456232 | 4.335045 | 4.148106 | 3.552905 | 2.352702 | 3.347715 |
| 79724_at | 3.260045 | 3.78365  | 4.028006 | 4.007359 | 3.607694 | 3.859942 | 3.437083 | 3.276049 |
| 79725_at | 3.690098 | 2.562277 | 3.52865  | 2.551359 | 2.672184 | 2.268347 | 3.527202 | 2.410279 |
| 79726_at | 5.673618 | 5.129918 | 5.671451 | 5.84802  | 4.914869 | 5.231931 | 5.436841 | 4.845005 |
| 79727_at | 1.82989  | 2.002886 | 2.628507 | 1.659749 | 2.691487 | 1.841583 | 1.791711 | 1.93714  |
| 79728_at | 4.543746 | 5.148084 | 3.863923 | 3.362767 | 5.395962 | 4.636331 | 4.684634 | 3.636558 |
| 79729_at | 5.343661 | 4.709024 | 4.619121 | 4.823589 | 5.850202 | 4.533269 | 4.820196 | 4.136608 |
| 79730_at | 2.259752 | 1.982727 | 2.587451 | 2.814659 | 2.716933 | 3.307226 | 2.053715 | 2.579287 |
| 79731_at | 5.118325 | 3.868703 | 3.564463 | 3.624525 | 2.594141 | 4.038587 | 3.737986 | 3.866351 |
| 79733_at | 2.138591 | 2.508871 | 1.807146 | 2.101736 | 1.712957 | 2.145084 | 3.164268 | 2.132611 |
| 79734_at | 4.476376 | 4.501869 | 3.344695 | 4.337947 | 5.04948  | 3.132221 | 2.79073  | 2.182456 |
| 79735_at | 5.948313 | 6.19762  | 5.639178 | 6.651338 | 5.337008 | 5.926113 | 6.089194 | 5.715212 |
| 79736_at | 5.604593 | 5.521433 | 4.967076 | 4.283919 | 4.81944  | 5.304512 | 4.424939 | 4.995227 |
| 79738_at | 4.469452 | 3.995793 | 4.233638 | 4.307152 | 4.852359 | 3.655835 | 3.609512 | 5.295021 |
| 79739_at | 4.008694 | 3.039515 | 5.083752 | 4.299051 | 3.803131 | 3.915012 | 4.084271 | 3.907551 |
| 79740_at | 1.199454 | 1.879719 | 1.806906 | 1.348637 | 1.474916 | 1.233478 | 1.212922 | 1.378508 |
| 79741_at | 3.412094 | 2.839623 | 3.120527 | 3.191833 | 2.549172 | 2.981599 | 3.459565 | 3.072404 |
| 79742_at | 2.780843 | 2.885585 | 3.977961 | 3.068322 | 3.297483 | 3.530923 | 4.024813 | 3.421973 |
| 79744_at | 2.345682 | 2.619399 | 2.142925 | 2.698562 | 3.022694 | 2.939537 | 2.615468 | 2.780276 |
| 79745_at | 6.710023 | 7.097303 | 7.352762 | 6.659889 | 6.967678 | 6.548989 | 7.032808 | 7.451878 |
| 79746_at | 4.164778 | 3.25908  | 3.01398  | 3.944529 | 3.29804  | 2.951762 | 2.72235  | 3.216898 |
| 79747_at | 1.323728 | 1.106726 | 1.053118 | 0.755377 | 1.496685 | 1.63552  | 1.664514 | 1.371757 |
| 79748_at | 2.237189 | 1.796883 | 1.795814 | 1.088809 | 1.288873 | 1.650517 | 1.372356 | 1.207673 |
| 79750_at | 2.326629 | 1.618377 | 1.279566 | 1.295279 | 1.659421 | 1.226941 | 1.04559  | 2.331145 |
| 79751_at | 3.316544 | 4.052027 | 4.178938 | 3.180195 | 2.893379 | 2.597323 | 3.392187 | 2.467737 |
| 79752_at | 5.303046 | 5.306473 | 4.936384 | 5.89756  | 4.95446  | 4.656274 | 5.061165 | 4.341169 |
| 79753_at | 5.995823 | 5.932262 | 6.423488 | 5.500872 | 6.099786 | 6.339271 | 6.643006 | 6.048047 |
| 79754_at | 5.907243 | 5.888961 | 5.065442 | 4.545831 | 5.375874 | 5.259097 | 5.039872 | 4.49941  |
| 79755_at | 2.270525 | 2.011367 | 1.616913 | 1.32683  | 1.95855  | 2.347529 | 1.799446 | 2.164114 |
| 79758_at | 3.85741  | 3.996392 | 4.160681 | 3.754022 | 3.446985 | 4.170533 | 3.335321 | 3.896871 |
| 79759_at | 3.818403 | 2.277256 | 2.546219 | 3.042713 | 2.342372 | 2.610884 | 3.041252 | 2.690164 |
| 7975_at  | 3.893452 | 3.905597 | 3.738994 | 4.07589  | 4.364408 | 3.125718 | 4.387378 | 4.077499 |
| 79760_at | 3.698239 | 3.133345 | 3.355466 | 3.927817 | 3.361155 | 4.602603 | 3.220649 | 3.157718 |
| 79762_at | 6.99038  | 7.870502 | 8.019485 | 8.154893 | 7.463369 | 7.746113 | 8.5417   | 7.689681 |
| 79763_at | 7.207154 | 6.496173 | 6.436573 | 6.035338 | 5.95202  | 6.669305 | 5.919544 | 5.810747 |
| 79767_at | 3.513651 | 2.534655 | 1.926375 | 2.038172 | 3.244789 | 2.116118 | 2.372038 | 2.530712 |
| 79768_at | 2.468376 | 1.168307 | 2.231516 | 1.857201 | 3.05286  | 0.411271 | 1.741868 | 2.583996 |
| 7976_at  | 2.81891  | 2.434566 | 2.469533 | 1.957087 | 1.851381 | 2.009588 | 1.856262 | 4.107519 |
| 79770_at | 8.439456 | 8.32885  | 8.491523 | 8.644467 | 8.126084 | 8.085851 | 8.595847 | 8.371157 |
| 79772_at | 2.449599 | 2.697424 | 1.86418  | 2.649949 | 1.868259 | 2.085245 | 2.019476 | 1.414368 |
| 79774_at | 2.601936 | 3.477955 | 2.969886 | 3.476326 | 3.814441 | 3.048081 | 3.28669  | 3.257846 |
| 79776_at | 1.497464 | 1.654464 | 1.515273 | 1.144153 | 1.583893 | 1.278326 | 1.712092 | 1.197993 |
| 79777_at | 4.011612 | 3.447273 | 3.137546 | 2.821376 | 2.384608 | 2.908743 | 2.58017  | 2.637984 |
| 79778_at | 2.094484 | 2.592425 | 2.545672 | 2.312753 | 1.749959 | 2.190132 | 2.046384 | 2.580492 |
| 79780_at | 5.947758 | 6.322117 | 6.170602 | 6.236908 | 6.223097 | 6.177329 | 6.091922 | 6.89312  |
| 79781_at | 3.820961 | 4.227044 | 3.422786 | 3.728521 | 4.711655 | 4.280167 | 3.550279 | 4.652597 |
| 79782_at | 1.459727 | 1.603358 | 1.90584  | 1.844238 | 1.303432 | 2.326212 | 2.248546 | 1.502315 |
| 79783_at | 3.331028 | 3.57822  | 4.323237 | 1.860697 | 3.802754 | 3.653822 | 2.630026 | 3.75724  |



|          |          |          |          |          |          |          |          |          |
|----------|----------|----------|----------|----------|----------|----------|----------|----------|
| 79784_at | 3.492324 | 3.050347 | 3.580041 | 2.875695 | 3.147912 | 3.394191 | 4.01578  | 2.75144  |
| 79785_at | 2.631114 | 2.210279 | 2.103074 | 2.302894 | 1.846741 | 2.326619 | 2.315432 | 1.610312 |
| 79786_at | 4.499739 | 4.041703 | 4.923462 | 4.369852 | 3.237046 | 4.569354 | 3.436003 | 3.474942 |
| 79788_at | 1.25922  | 2.308556 | 1.851624 | 1.638203 | 1.460722 | 1.977282 | 2.192788 | 3.921043 |
| 79789_at | 5.1996   | 5.124526 | 3.895207 | 4.473566 | 3.683142 | 5.774041 | 3.639943 | 4.573481 |
| 7978_at  | 4.173254 | 5.818364 | 5.11265  | 4.454746 | 3.662323 | 5.037947 | 5.047681 | 4.657263 |
| 79791_at | 4.072936 | 3.484956 | 4.16208  | 3.595945 | 4.14542  | 3.520988 | 4.347916 | 3.511655 |
| 79792_at | 5.000213 | 4.726763 | 4.761583 | 4.38716  | 3.213739 | 4.547153 | 3.941045 | 3.628409 |
| 79794_at | 6.333119 | 5.892712 | 6.583274 | 5.960653 | 5.942922 | 6.153918 | 6.006148 | 5.342525 |
| 79796_at | 4.511924 | 4.995892 | 5.014221 | 6.375255 | 5.348983 | 5.401052 | 5.068301 | 5.152921 |
| 79797_at | 2.60698  | 2.184105 | 1.762848 | 2.106801 | 1.619442 | 1.939998 | 2.133177 | 2.039024 |
| 79798_at | 1.946828 | 1.94738  | 2.913654 | 2.349809 | 3.030981 | 2.813097 | 1.96811  | 2.933163 |
| 79799_at | 4.589969 | 3.978831 | 4.543454 | 3.509395 | 5.218765 | 5.296373 | 3.405144 | 3.737344 |
| 7979_at  | 9.904106 | 10.4106  | 10.21205 | 10.40951 | 10.57841 | 9.978957 | 9.966027 | 10.58618 |
| 797_at   | 3.632886 | 2.476965 | 1.698335 | 2.98199  | 2.453533 | 1.469389 | 2.338456 | 3.404671 |
| 79800_at | 5.246632 | 4.4582   | 5.656656 | 4.548345 | 5.496066 | 4.980524 | 5.04257  | 4.682612 |
| 79801_at | 0.840452 | 2.182361 | 1.33492  | 1.322075 | 1.555925 | 1.095128 | 2.189059 | 2.608102 |
| 79802_at | 2.061003 | 2.169951 | 2.043043 | 1.561294 | 1.525752 | 1.489684 | 1.709799 | 1.597133 |
| 79803_at | 5.743364 | 5.708062 | 5.2234   | 5.632552 | 5.544147 | 5.680731 | 5.387649 | 5.630919 |
| 79804_at | 1.26123  | 1.966226 | 1.488568 | 1.445936 | 1.857376 | 1.330041 | 1.430457 | 1.153116 |
| 79805_at | 2.635662 | 2.600189 | 2.599413 | 2.350155 | 2.870623 | 2.564492 | 2.63124  | 2.398168 |
| 79807_at | 3.989154 | 4.456677 | 5.006939 | 4.306114 | 3.427351 | 3.774704 | 4.434672 | 3.552722 |
| 79809_at | 4.835867 | 5.227938 | 5.535001 | 4.834539 | 6.197452 | 5.1576   | 5.300524 | 6.130976 |
| 7980_at  | 6.99692  | 5.906642 | 5.348054 | 7.850179 | 7.32114  | 6.203203 | 5.341003 | 7.809817 |
| 79810_at | 4.799902 | 5.674936 | 4.652981 | 5.502039 | 4.701413 | 3.634134 | 3.722968 | 5.74364  |
| 79811_at | 7.893496 | 7.729757 | 7.226017 | 7.914959 | 7.277719 | 7.43355  | 6.987671 | 8.04495  |
| 79812_at | 4.139752 | 4.546171 | 4.360265 | 4.508608 | 4.18476  | 4.560985 | 4.080501 | 4.463549 |
| 79813_at | 4.507326 | 4.238674 | 4.175466 | 4.703849 | 2.743688 | 4.339871 | 3.346755 | 3.939005 |
| 79814_at | 6.127968 | 4.892559 | 5.499248 | 5.188391 | 7.250892 | 6.11728  | 3.742932 | 5.908325 |
| 79815_at | 5.613053 | 5.846861 | 5.72209  | 5.651622 | 4.501769 | 4.322582 | 5.974277 | 4.432344 |
| 79816_at | 2.128162 | 1.833436 | 1.875374 | 2.117576 | 2.050759 | 1.56577  | 1.99657  | 1.552579 |
| 79817_at | 4.953755 | 4.435824 | 3.43763  | 4.534525 | 3.789055 | 3.604462 | 4.483241 | 5.844091 |
| 79818_at | 2.159388 | 3.083587 | 3.796393 | 3.578172 | 2.275496 | 1.587261 | 1.425279 | 2.582781 |
| 79819_at | 6.128347 | 5.828912 | 5.377118 | 4.91699  | 3.90198  | 5.556712 | 5.521582 | 5.136704 |
| 79820_at | 1.567897 | 1.389322 | 1.245165 | 1.348757 | 2.575481 | 1.347126 | 1.621459 | 1.191613 |
| 79822_at | 8.976577 | 9.107423 | 8.852526 | 8.424582 | 8.501742 | 7.898381 | 9.105648 | 9.138775 |
| 79823_at | 5.511816 | 4.36683  | 5.108087 | 3.234338 | 4.968662 | 5.595504 | 5.241709 | 5.178024 |
| 79825_at | 3.377101 | 2.535492 | 2.518145 | 3.020831 | 3.247877 | 2.697292 | 3.514021 | 3.490848 |
| 79827_at | 2.495697 | 3.289348 | 3.058025 | 2.364405 | 3.559665 | 2.093026 | 2.732505 | 2.656096 |
| 79828_at | 4.724999 | 4.721421 | 4.996611 | 4.300951 | 5.54232  | 5.265067 | 5.230668 | 5.145569 |
| 79829_at | 4.738512 | 5.749262 | 4.280207 | 4.924469 | 4.998203 | 4.853952 | 5.088984 | 5.036122 |
| 7982_at  | 6.563664 | 6.374156 | 6.870155 | 6.091746 | 6.36635  | 6.741239 | 6.127943 | 6.429153 |
| 79830_at | 4.515404 | 4.445579 | 5.115959 | 5.254665 | 5.259192 | 4.550351 | 6.015019 | 4.293782 |
| 79831_at | 2.96255  | 3.473699 | 3.441393 | 3.292997 | 3.465501 | 3.190672 | 3.006504 | 4.1828   |
| 79832_at | 5.874992 | 7.067828 | 6.868641 | 6.315829 | 6.617866 | 6.304816 | 6.843379 | 6.180195 |
| 79833_at | 5.19386  | 4.896148 | 4.895228 | 5.529119 | 5.096661 | 4.650665 | 6.134065 | 5.344534 |
| 79834_at | 7.042767 | 6.885229 | 7.102958 | 7.672856 | 6.708172 | 7.089331 | 7.201483 | 6.760865 |
| 79836_at | 3.522299 | 4.13666  | 3.368436 | 3.391016 | 3.785221 | 3.652159 | 3.794488 | 4.605904 |
| 79837_at | 6.158868 | 5.596789 | 6.315931 | 6.096139 | 6.404939 | 6.046114 | 5.939205 | 5.733572 |
| 79838_at | 1.813695 | 1.569204 | 1.333083 | 1.477791 | 1.528352 | 1.704011 | 2.274597 | 1.285702 |
| 79839_at | 1.818466 | 3.046119 | 3.259689 | 2.844689 | 2.700374 | 2.439062 | 2.792453 | 2.976742 |

|          |          |          |          |          |          |          |          |          |
|----------|----------|----------|----------|----------|----------|----------|----------|----------|
| 79840_at | 3.973372 | 4.500131 | 3.33174  | 3.937076 | 3.447732 | 3.150017 | 3.576035 | 4.408542 |
| 79841_at | 1.476053 | 1.167213 | 1.449155 | 1.277983 | 1.499597 | 1.304785 | 2.019662 | 2.273087 |
| 79842_at | 4.29635  | 4.237851 | 4.089882 | 4.426673 | 3.064442 | 4.584767 | 4.196921 | 4.984928 |
| 79843_at | 1.865693 | 2.468769 | 1.203404 | 1.43795  | 2.331799 | 1.958263 | 1.748545 | 1.81537  |
| 79844_at | 2.234796 | 2.059649 | 2.17395  | 1.805375 | 1.971661 | 1.89921  | 1.402082 | 3.873049 |
| 79845_at | 1.671838 | 1.996306 | 1.938836 | 1.896371 | 2.386558 | 1.43885  | 2.605681 | 2.609707 |
| 79846_at | 2.656355 | 2.82243  | 2.610916 | 2.718686 | 3.022916 | 2.380011 | 2.449037 | 4.194239 |
| 79847_at | 4.627312 | 3.325882 | 3.895497 | 3.90502  | 3.363716 | 4.133539 | 3.600478 | 3.626723 |
| 79848_at | 5.872775 | 5.920906 | 6.55689  | 6.104918 | 6.086201 | 5.958763 | 6.371471 | 6.014923 |
| 79849_at | 3.184829 | 2.201299 | 2.821505 | 2.393664 | 2.666113 | 2.662998 | 2.648478 | 2.335478 |
| 7984_at  | 4.968756 | 4.560597 | 4.780336 | 3.13665  | 4.612844 | 4.836076 | 3.7152   | 2.368324 |
| 79850_at | 5.900639 | 4.682518 | 5.26649  | 5.730276 | 5.388369 | 4.786099 | 4.349586 | 4.521596 |
| 79852_at | 2.814156 | 2.137322 | 2.497424 | 2.160575 | 2.57258  | 2.713799 | 1.767092 | 2.042388 |
| 79853_at | 1.341379 | 0.681376 | 0.918424 | 0.916771 | 1.662931 | 1.217438 | 1.50381  | 1.191947 |
| 79854_at | 1.032931 | 1.057044 | 0.741219 | 1.469917 | 0.931999 | 1.387009 | 0.930224 | 0.987469 |
| 79856_at | 3.267869 | 3.179638 | 3.422086 | 3.604148 | 2.895133 | 2.530784 | 2.788551 | 3.760015 |
| 79857_at | 1.824279 | 2.672105 | 2.508791 | 2.747333 | 3.68778  | 2.85821  | 2.828922 | 2.925835 |
| 79858_at | 4.738239 | 5.475533 | 4.742908 | 4.796001 | 3.92247  | 4.946237 | 5.382671 | 5.609126 |
| 79861_at | 1.038307 | 3.086636 | 1.702565 | 1.683122 | 1.695337 | 1.35316  | 1.673378 | 3.046718 |
| 79862_at | 4.273426 | 4.622265 | 4.007856 | 3.657157 | 4.266118 | 3.929594 | 4.75226  | 5.703345 |
| 79863_at | 3.49037  | 3.73951  | 3.446085 | 2.850985 | 2.034476 | 2.492904 | 3.844048 | 3.109045 |
| 79864_at | 6.257731 | 6.347969 | 5.965678 | 6.11942  | 6.045082 | 6.160446 | 6.144704 | 5.976616 |
| 79865_at | 2.025017 | 1.19034  | 1.775758 | 2.174308 | 1.704338 | 1.360191 | 1.660085 | 1.869217 |
| 79866_at | 3.066804 | 3.106145 | 3.014133 | 2.520037 | 3.107324 | 3.352714 | 3.068212 | 3.570138 |
| 79867_at | 6.38574  | 6.425207 | 6.670774 | 6.827834 | 6.373211 | 6.194961 | 6.688128 | 6.360681 |
| 79868_at | 4.711828 | 4.938061 | 5.131705 | 4.515368 | 4.814585 | 4.431412 | 4.313247 | 5.562379 |
| 79869_at | 5.977244 | 5.667169 | 6.24245  | 6.526357 | 6.089321 | 6.234488 | 6.045897 | 6.10437  |
| 79870_at | 2.841719 | 2.180921 | 2.791405 | 2.548785 | 2.369096 | 1.622206 | 2.647269 | 2.190547 |
| 79871_at | 5.259286 | 5.437903 | 5.234503 | 4.97609  | 5.10919  | 5.207773 | 4.407809 | 5.107981 |
| 79872_at | 5.936984 | 5.958591 | 6.740781 | 6.540364 | 6.264476 | 5.925129 | 6.636772 | 6.098112 |
| 79873_at | 2.788121 | 2.863004 | 2.246575 | 2.781569 | 2.236302 | 2.186223 | 3.493287 | 3.214462 |
| 79874_at | 3.492811 | 2.667695 | 2.940454 | 2.568798 | 3.168015 | 3.111983 | 2.547058 | 2.525756 |
| 79875_at | 3.235596 | 3.386473 | 3.267369 | 2.930342 | 2.911682 | 3.288719 | 2.763145 | 2.877566 |
| 79876_at | 5.75306  | 5.955728 | 6.023972 | 5.42012  | 7.206204 | 6.113171 | 6.766493 | 6.593142 |
| 79877_at | 5.988141 | 5.350096 | 5.86923  | 6.039492 | 5.717603 | 5.56542  | 6.59957  | 5.082197 |
| 79879_at | 3.279374 | 3.061525 | 3.823186 | 3.274286 | 3.825778 | 3.328333 | 2.535632 | 3.783302 |
| 79882_at | 7.831868 | 7.314299 | 7.557999 | 7.473211 | 7.346003 | 6.936981 | 7.30081  | 8.069413 |
| 79883_at | 2.663844 | 3.063143 | 3.623041 | 2.812925 | 2.347639 | 3.462238 | 3.272402 | 2.887537 |
| 79884_at | 5.945938 | 5.835402 | 5.89487  | 5.697697 | 5.54743  | 5.201354 | 5.903254 | 6.286528 |
| 79885_at | 3.2673   | 3.544938 | 2.792629 | 3.609371 | 2.592698 | 3.729569 | 3.586137 | 2.2873   |
| 79886_at | 4.15953  | 5.660345 | 4.588119 | 4.927707 | 5.534807 | 4.357911 | 3.965802 | 4.178116 |
| 79887_at | 7.574019 | 6.895473 | 7.484555 | 6.458122 | 6.695811 | 6.518474 | 7.113952 | 7.038288 |
| 79888_at | 6.331866 | 5.921054 | 6.199564 | 5.657248 | 5.921223 | 6.12922  | 5.523978 | 5.712252 |
| 7988_at  | 3.33085  | 3.819116 | 3.371807 | 4.364626 | 4.30556  | 4.545449 | 4.191804 | 3.527337 |
| 79890_at | 5.486243 | 6.140768 | 5.824605 | 6.189831 | 6.491711 | 5.551351 | 5.532507 | 4.837989 |
| 79891_at | 3.841472 | 4.373797 | 3.786977 | 3.34397  | 5.506757 | 4.035539 | 3.71244  | 2.976473 |
| 79892_at | 6.69443  | 6.748542 | 6.797566 | 6.578795 | 6.579092 | 6.637502 | 6.407884 | 6.180325 |
| 79893_at | 7.673844 | 7.461594 | 7.08085  | 7.539734 | 7.817724 | 7.177322 | 7.076104 | 8.016253 |
| 79894_at | 3.925763 | 5.009614 | 4.053748 | 3.997976 | 4.344647 | 4.750908 | 3.934256 | 4.204138 |
| 79895_at | 1.334011 | 1.501162 | 1.739758 | 1.751591 | 2.382882 | 2.006816 | 2.843679 | 3.352921 |
| 79896_at | 4.044554 | 4.26126  | 3.537172 | 2.963473 | 4.228025 | 3.770635 | 2.388735 | 2.966328 |

|          |          |          |          |          |          |          |          |          |
|----------|----------|----------|----------|----------|----------|----------|----------|----------|
| 79897_at | 5.454409 | 5.756595 | 5.297412 | 5.146297 | 4.18802  | 5.204642 | 4.576597 | 5.274848 |
| 79898_at | 5.308875 | 4.323726 | 4.808949 | 5.190918 | 4.256689 | 4.735757 | 3.698154 | 5.040454 |
| 79899_at | 1.332276 | 2.079887 | 1.811863 | 2.394542 | 2.630632 | 1.788976 | 2.561575 | 1.670208 |
| 79901_at | 6.60349  | 6.45823  | 6.166496 | 6.765514 | 7.022118 | 6.534966 | 7.182403 | 6.325419 |
| 79902_at | 5.534076 | 5.874154 | 5.151053 | 4.835824 | 4.253395 | 5.081413 | 5.607216 | 5.124288 |
| 79903_at | 7.773036 | 6.863907 | 7.673371 | 7.388663 | 7.595266 | 8.00346  | 7.995861 | 7.264411 |
| 79905_at | 2.246846 | 1.696344 | 1.979526 | 1.49624  | 2.430647 | 1.600415 | 1.82832  | 1.686676 |
| 79906_at | 1.852036 | 3.019972 | 2.555328 | 2.981608 | 2.128751 | 2.725373 | 2.647494 | 3.741497 |
| 79908_at | 2.352481 | 3.173358 | 2.458204 | 3.258546 | 2.230714 | 2.629305 | 2.448979 | 2.866491 |
| 79912_at | 5.713811 | 5.873144 | 5.572579 | 5.557065 | 5.986873 | 5.02414  | 6.049324 | 5.831006 |
| 79913_at | 3.732979 | 3.218998 | 3.041418 | 3.544992 | 2.248466 | 3.75615  | 3.431888 | 3.418276 |
| 79915_at | 3.023279 | 3.306364 | 2.166622 | 3.802518 | 2.782752 | 2.89227  | 2.935608 | 4.200673 |
| 79917_at | 2.113364 | 2.414675 | 2.608922 | 2.648408 | 2.730195 | 3.279365 | 2.538399 | 2.340239 |
| 79918_at | 3.355627 | 2.515369 | 3.552637 | 3.709089 | 2.446316 | 2.706716 | 3.418155 | 2.963073 |
| 79919_at | 1.937929 | 1.973139 | 1.920406 | 1.602133 | 1.902472 | 1.989103 | 2.114582 | 1.916519 |
| 7991_at  | 7.575564 | 7.953478 | 7.837996 | 7.377177 | 7.41823  | 7.235502 | 7.750515 | 7.407627 |
| 79921_at | 4.671506 | 4.706301 | 4.445849 | 4.560755 | 4.594083 | 4.249995 | 4.753642 | 4.445849 |
| 79922_at | 2.205089 | 1.887157 | 1.990782 | 1.676599 | 2.336306 | 2.630167 | 2.806473 | 1.674124 |
| 79923_at | 0.318809 | 2.808069 | 1.353436 | 2.048818 | 1.898431 | 1.354992 | 0.668508 | 1.933678 |
| 79924_at | 2.655408 | 2.299891 | 2.469536 | 1.823523 | 1.870545 | 2.531451 | 2.366378 | 1.492085 |
| 79925_at | 3.325179 | 2.864596 | 3.314916 | 3.188517 | 2.46525  | 2.499432 | 2.451418 | 2.783099 |
| 79927_at | 2.636751 | 3.100515 | 3.008962 | 3.597258 | 3.792926 | 2.957216 | 4.697249 | 2.986489 |
| 79929_at | 1.513766 | 2.8277   | 2.155259 | 2.315674 | 2.662234 | 2.126683 | 1.759183 | 2.449404 |
| 79930_at | 2.199426 | 2.881465 | 2.31346  | 3.003756 | 2.855686 | 3.28577  | 2.659695 | 2.544075 |
| 79931_at | 1.853601 | 1.580657 | 1.182481 | 1.081008 | 1.397273 | 1.720409 | 2.433723 | 1.627737 |
| 79932_at | 7.522321 | 7.460213 | 7.7388   | 7.610647 | 6.605717 | 7.612688 | 7.226952 | 7.486804 |
| 79933_at | 1.709015 | 1.503068 | 2.410362 | 1.996407 | 2.37423  | 1.779263 | 1.883034 | 1.670035 |
| 79934_at | 3.628376 | 4.44136  | 3.312799 | 3.531384 | 3.220195 | 3.509052 | 2.933712 | 4.014424 |
| 79935_at | 2.326798 | 2.650222 | 2.477741 | 2.512319 | 2.217682 | 2.80531  | 2.503321 | 3.244211 |
| 79937_at | 3.547433 | 3.268526 | 0.631189 | 3.611784 | 2.872151 | 3.078295 | 1.575732 | 2.844543 |
| 79939_at | 6.847193 | 6.595804 | 6.906301 | 6.635332 | 6.227919 | 6.893855 | 6.699741 | 5.843508 |
| 7993_at  | 5.240797 | 4.562489 | 4.547966 | 3.500758 | 6.050965 | 5.017308 | 4.92594  | 3.265806 |
| 79940_at | 5.375158 | 6.104254 | 5.802921 | 6.070528 | 5.49165  | 6.192746 | 4.171693 | 6.28973  |
| 79943_at | 1.89868  | 2.209718 | 2.056032 | 2.105926 | 1.481677 | 1.358963 | 2.100484 | 0.93805  |
| 79944_at | 3.43834  | 3.19381  | 4.068666 | 2.593037 | 2.982251 | 2.255145 | 3.110624 | 3.48671  |
| 79946_at | 2.834357 | 3.053733 | 3.493581 | 2.681085 | 3.491992 | 3.641952 | 2.846094 | 2.714377 |
| 79947_at | 4.223491 | 5.129044 | 4.311865 | 4.758955 | 3.968879 | 4.208884 | 4.262969 | 5.308566 |
| 79948_at | 2.059252 | 2.140629 | 1.196961 | 2.035885 | 2.719456 | 1.593865 | 3.061712 | 2.840608 |
| 79949_at | 1.374983 | 1.34819  | 1.533655 | 1.093457 | 1.384247 | 1.076729 | 1.086484 | 1.532471 |
| 7994_at  | 6.108478 | 6.892709 | 7.110289 | 6.587894 | 6.354934 | 6.400921 | 6.437358 | 6.955983 |
| 79953_at | 2.278918 | 2.321911 | 2.794405 | 2.531455 | 3.081892 | 2.713167 | 1.471186 | 2.319499 |
| 79954_at | 5.761076 | 6.144702 | 5.405377 | 5.132801 | 5.630413 | 6.055367 | 5.914385 | 6.358527 |
| 79955_at | 2.931251 | 2.466448 | 2.890487 | 2.076047 | 1.009756 | 2.25249  | 2.546781 | 2.669471 |
| 79956_at | 5.376753 | 6.160949 | 6.12955  | 5.84695  | 6.501575 | 5.883955 | 6.371016 | 6.20441  |
| 79957_at | 3.875203 | 3.941972 | 2.896389 | 3.518439 | 3.420993 | 4.057947 | 3.18093  | 3.418967 |
| 79958_at | 2.889843 | 3.645825 | 2.432875 | 3.573459 | 4.183145 | 3.538888 | 3.572437 | 2.815147 |
| 79959_at | 3.933307 | 4.087069 | 3.994338 | 2.223819 | 3.748229 | 3.526362 | 3.554813 | 4.261945 |
| 79960_at | 6.355169 | 6.393949 | 6.778146 | 6.167727 | 6.03006  | 6.48541  | 6.212046 | 6.32654  |
| 79961_at | 2.589834 | 2.634085 | 2.73679  | 3.24788  | 3.045161 | 2.763836 | 2.829639 | 2.695656 |
| 79962_at | 1.77588  | 2.682818 | 3.000995 | 1.887733 | 3.588683 | 2.945913 | 3.152855 | 2.600417 |
| 79966_at | 6.547462 | 6.53264  | 6.622788 | 6.332794 | 6.274536 | 6.295683 | 6.953471 | 6.221037 |

|          |          |          |          |          |          |          |          |          |
|----------|----------|----------|----------|----------|----------|----------|----------|----------|
| 79968_at | 4.88786  | 4.944401 | 4.305345 | 5.700611 | 3.934335 | 4.368688 | 5.019845 | 5.386159 |
| 79969_at | 4.268    | 3.076967 | 4.184692 | 3.391157 | 2.887847 | 3.988442 | 2.441775 | 3.46412  |
| 79970_at | 3.917984 | 3.091787 | 4.380637 | 5.000256 | 4.843525 | 3.712837 | 3.412268 | 4.782369 |
| 79971_at | 6.617342 | 6.351454 | 6.814847 | 6.493093 | 7.96671  | 6.862712 | 6.39955  | 6.154088 |
| 79973_at | 3.68794  | 2.992257 | 4.301661 | 3.403174 | 3.436768 | 3.230507 | 3.704047 | 3.981186 |
| 79974_at | 5.68944  | 5.398522 | 5.035948 | 6.115589 | 6.388022 | 5.345827 | 5.647303 | 5.586018 |
| 79977_at | 2.114991 | 2.364949 | 1.752283 | 1.791582 | 3.057146 | 1.802063 | 1.747324 | 2.153456 |
| 79979_at | 4.203164 | 4.965889 | 4.294877 | 4.990007 | 3.627068 | 4.087012 | 3.690655 | 4.299973 |
| 79980_at | 2.946554 | 2.837144 | 3.846598 | 2.069243 | 3.010816 | 4.03408  | 3.23409  | 2.230777 |
| 79981_at | 4.385127 | 4.500437 | 4.652967 | 4.285392 | 5.041859 | 4.097101 | 3.550203 | 4.262811 |
| 79982_at | 6.579594 | 6.161457 | 6.27706  | 6.79293  | 6.560135 | 6.260191 | 6.492968 | 6.619382 |
| 79983_at | 1.119006 | 1.173125 | 1.524473 | 1.829673 | 1.536624 | 1.17584  | 1.910455 | 1.414118 |
| 79986_at | 2.315109 | 2.691636 | 3.733741 | 3.18847  | 3.493479 | 2.081707 | 1.96233  | 2.663447 |
| 79987_at | 1.386435 | 1.839516 | 1.832508 | 2.345548 | 2.326582 | 1.789424 | 2.273374 | 1.774212 |
| 79989_at | 3.686064 | 3.106422 | 3.509893 | 3.142334 | 3.72335  | 3.500239 | 3.894249 | 4.530824 |
| 79990_at | 2.498442 | 2.731241 | 3.544451 | 3.763127 | 3.256854 | 2.882775 | 3.405178 | 3.165757 |
| 79991_at | 8.030314 | 7.583638 | 7.69645  | 7.936586 | 7.732755 | 7.094479 | 7.753427 | 7.798156 |
| 79992_at | 1.555927 | 2.711191 | 1.862631 | 1.454669 | 1.541179 | 2.964924 | 2.540636 | 2.561363 |
| 79993_at | 1.953191 | 2.360263 | 2.371157 | 2.318688 | 3.224802 | 2.753433 | 1.947416 | 2.473279 |
| 79998_at | 2.167578 | 2.40319  | 1.992845 | 2.536562 | 2.124702 | 2.5718   | 1.521441 | 2.355004 |
| 799_at   | 1.958472 | 1.701309 | 1.861166 | 1.942458 | 3.087703 | 1.510435 | 2.148004 | 2.390693 |
| 80000_at | 1.613356 | 1.781978 | 1.754472 | 1.826706 | 2.028531 | 1.509134 | 1.769085 | 1.964851 |
| 80003_at | 4.551193 | 3.904328 | 4.376275 | 3.933586 | 4.225462 | 4.407633 | 4.035963 | 3.886208 |
| 80004_at | 2.692006 | 2.437723 | 3.002716 | 3.276086 | 2.96902  | 2.767618 | 3.797674 | 1.690351 |
| 80005_at | 6.490092 | 6.456397 | 7.070338 | 6.564291 | 6.31272  | 6.670205 | 7.249793 | 7.080904 |
| 80006_at | 5.044799 | 5.031134 | 4.557787 | 4.181194 | 5.037695 | 3.912815 | 3.82234  | 5.867541 |
| 80007_at | 4.575304 | 4.070859 | 5.504547 | 5.069154 | 6.028242 | 4.239197 | 3.601034 | 6.405687 |
| 80008_at | 1.058503 | 1.105384 | 1.123301 | 0.553857 | 1.851284 | 1.271498 | 2.015161 | 1.832288 |
| 8000_at  | 2.090884 | 2.59827  | 1.615922 | 3.03568  | 2.754896 | 1.690792 | 2.21255  | 2.5851   |
| 80010_at | 3.434797 | 4.092983 | 4.258478 | 6.143241 | 4.577448 | 4.318807 | 5.214426 | 4.394469 |
| 80011_at | 7.796765 | 7.921766 | 7.686604 | 7.62632  | 7.580683 | 7.49575  | 7.512094 | 7.598206 |
| 80012_at | 6.494747 | 7.16664  | 7.092527 | 7.045868 | 7.021786 | 6.80376  | 7.005201 | 6.698871 |
| 80013_at | 5.349795 | 5.615182 | 5.781079 | 5.812754 | 5.514213 | 5.339265 | 5.99025  | 5.925537 |
| 80014_at | 6.616252 | 6.440694 | 6.583581 | 6.641928 | 6.128836 | 6.822697 | 6.526232 | 6.971608 |
| 80017_at | 5.675854 | 4.947613 | 5.247232 | 5.261282 | 5.055501 | 4.343755 | 4.726617 | 3.932282 |
| 80018_at | 4.912062 | 4.546182 | 4.472741 | 5.665666 | 4.072965 | 4.51246  | 3.793472 | 4.623563 |
| 80019_at | 2.158607 | 2.142025 | 2.460447 | 3.012041 | 2.680635 | 2.908433 | 3.342425 | 2.342543 |
| 8001_at  | 2.356762 | 1.450334 | 3.071758 | 2.815937 | 1.594093 | 3.392674 | 5.857998 | 1.882551 |
| 80020_at | 4.571478 | 4.270011 | 3.725697 | 5.111531 | 4.256886 | 4.044096 | 4.616402 | 3.202116 |
| 80021_at | 4.832336 | 4.423576 | 4.954871 | 4.431597 | 4.668411 | 4.221805 | 4.501411 | 4.13521  |
| 80022_at | 3.569913 | 3.399297 | 2.891134 | 3.209855 | 2.958387 | 3.73957  | 3.485155 | 3.745457 |
| 80023_at | 5.647505 | 4.963334 | 5.204371 | 5.369406 | 4.281933 | 5.496733 | 5.486106 | 5.738752 |
| 80024_at | 5.825701 | 5.51705  | 5.672635 | 6.029645 | 5.274081 | 5.441644 | 4.688884 | 4.527881 |
| 80025_at | 5.224307 | 5.105099 | 5.165521 | 5.806715 | 5.395385 | 4.231834 | 4.880293 | 5.235995 |
| 80028_at | 1.297989 | 2.535805 | 2.595435 | 2.88031  | 2.990501 | 2.469949 | 3.153966 | 2.860042 |
| 80031_at | 5.778224 | 5.578877 | 5.589356 | 5.606941 | 6.361714 | 5.606114 | 5.564321 | 5.379605 |
| 80032_at | 3.163634 | 3.455194 | 2.71419  | 1.957741 | 3.102236 | 2.774931 | 2.340419 | 2.705668 |
| 80034_at | 2.646972 | 2.458201 | 3.019601 | 1.998542 | 2.532277 | 3.498396 | 2.455662 | 2.539446 |
| 80035_at | 2.369291 | 3.419573 | 1.907039 | 2.444236 | 2.504575 | 2.606861 | 2.188502 | 3.169794 |
| 80036_at | 3.73181  | 3.845005 | 2.997836 | 3.415412 | 4.412921 | 3.769528 | 2.799303 | 3.67975  |
| 80045_at | 3.470916 | 2.846433 | 4.155937 | 3.458876 | 3.020742 | 2.93166  | 3.134916 | 4.595914 |

|          |          |          |          |          |          |          |          |          |
|----------|----------|----------|----------|----------|----------|----------|----------|----------|
| 80054_at | 2.903441 | 2.181924 | 1.783201 | 1.546047 | 2.288863 | 1.641141 | 1.012834 | 1.651882 |
| 80055_at | 4.558075 | 5.003343 | 5.012872 | 4.106094 | 4.805128 | 4.231909 | 4.527832 | 5.088831 |
| 80059_at | 2.79234  | 1.230816 | 1.790702 | 2.203698 | 1.751279 | 1.502495 | 1.934462 | 2.445369 |
| 80063_at | 4.38278  | 5.104656 | 4.295073 | 5.801416 | 5.545732 | 4.819274 | 4.245117 | 4.325421 |
| 80067_at | 4.026557 | 4.64247  | 4.171163 | 4.133126 | 3.691327 | 3.686155 | 4.766895 | 4.582492 |
| 80069_at | 2.31685  | 1.023695 | 1.639022 | 1.137109 | 1.751495 | 1.766538 | 1.6733   | 2.255661 |
| 80070_at | 1.608365 | 1.15956  | 1.129839 | 1.346267 | 2.159186 | 1.151807 | 1.483766 | 1.56884  |
| 80071_at | 2.266203 | 1.117322 | 2.49563  | 2.725931 | 1.842323 | 2.099696 | 1.878903 | 2.331426 |
| 80072_at | 1.729849 | 1.991469 | 1.455574 | 1.610104 | 2.035345 | 1.842595 | 1.382082 | 1.58035  |
| 80086_at | 2.912352 | 2.895164 | 2.489658 | 1.624175 | 3.535488 | 2.405933 | 1.85368  | 2.367751 |
| 80094_at | 2.335937 | 2.558888 | 2.810999 | 2.311819 | 2.351267 | 2.851796 | 2.428779 | 1.941812 |
| 80095_at | 4.529184 | 4.291658 | 4.370649 | 4.828983 | 5.229586 | 4.724583 | 4.817702 | 4.946497 |
| 80097_at | 4.685992 | 2.771577 | 3.951173 | 3.955482 | 3.8327   | 4.194494 | 3.404154 | 3.052811 |
| 80099_at | 1.759372 | 1.723169 | 0.705582 | 1.233814 | 1.007786 | 1.246216 | 0.64512  | 1.537664 |
| 800_at   | 9.243109 | 9.193527 | 9.002589 | 8.973122 | 9.155924 | 9.126566 | 9.12969  | 8.809374 |
| 80108_at | 3.428728 | 4.845803 | 4.341228 | 3.14171  | 2.699787 | 3.277874 | 3.008905 | 2.182531 |
| 80110_at | 5.684551 | 5.606445 | 5.184261 | 5.340668 | 5.966927 | 5.265217 | 4.682882 | 4.170481 |
| 80111_at | 2.830434 | 3.575137 | 2.404935 | 4.397593 | 3.700011 | 2.219845 | 2.410555 | 2.051712 |
| 80114_at | 6.359678 | 6.258943 | 5.467983 | 5.964858 | 6.745668 | 7.096404 | 3.699985 | 6.899283 |
| 80115_at | 3.444231 | 3.601377 | 3.342379 | 3.703381 | 4.091314 | 4.237036 | 2.994793 | 3.550139 |
| 80117_at | 1.611373 | 1.643121 | 1.422193 | 1.478959 | 2.316627 | 2.605172 | 1.570702 | 2.153808 |
| 80119_at | 2.940133 | 2.563223 | 1.757814 | 2.9109   | 3.200391 | 2.46527  | 2.032688 | 2.854992 |
| 80122_at | 1.348445 | 2.066969 | 1.078291 | 1.386472 | 0.818992 | 1.489135 | 1.042419 | 0.944856 |
| 80124_at | 3.884837 | 5.388121 | 5.029691 | 5.51749  | 5.900547 | 5.294647 | 5.156333 | 5.253853 |
| 80125_at | 1.882374 | 1.36087  | 1.517645 | 1.922361 | 1.992159 | 2.297415 | 2.315563 | 1.879336 |
| 80127_at | 3.017026 | 2.970509 | 3.994664 | 3.963865 | 3.362494 | 4.04148  | 3.591465 | 4.794873 |
| 80128_at | 1.243301 | 1.622596 | 2.200181 | 1.852058 | 2.550718 | 2.146052 | 1.932114 | 1.578502 |
| 80129_at | 2.58775  | 2.092275 | 2.526075 | 1.820132 | 1.624191 | 2.784365 | 3.248577 | 2.320448 |
| 80131_at | 3.482698 | 2.398634 | 2.530668 | 3.61203  | 3.329564 | 3.053681 | 3.050273 | 2.156072 |
| 80133_at | 1.821508 | 1.350668 | 1.307619 | 0.957025 | 1.162217 | 1.025915 | 1.44617  | 1.338441 |
| 80135_at | 7.389985 | 6.625316 | 5.883187 | 6.493366 | 6.733716 | 6.974462 | 6.785151 | 6.73274  |
| 80139_at | 4.211351 | 4.471817 | 4.157105 | 4.393075 | 3.855304 | 4.219967 | 4.767446 | 3.286484 |
| 8013_at  | 2.586726 | 1.741768 | 2.15295  | 1.860051 | 2.725757 | 2.751014 | 3.642868 | 2.002752 |
| 80142_at | 2.547285 | 2.841407 | 2.7279   | 3.277871 | 2.764437 | 4.142194 | 3.527675 | 2.736951 |
| 80143_at | 4.890817 | 4.73219  | 5.03112  | 4.623825 | 6.082208 | 4.559727 | 4.303359 | 5.276936 |
| 80144_at | 3.843377 | 3.913912 | 3.442205 | 4.085217 | 4.316599 | 3.544947 | 3.029795 | 4.122524 |
| 80145_at | 8.205748 | 8.116526 | 7.400944 | 7.50102  | 7.656796 | 7.955804 | 7.644046 | 8.077589 |
| 80146_at | 7.353602 | 6.76224  | 6.829462 | 6.822057 | 6.639039 | 6.849555 | 6.854345 | 6.634999 |
| 80148_at | 3.972797 | 3.859175 | 3.876409 | 3.960205 | 3.581655 | 3.24013  | 3.58796  | 3.522588 |
| 80149_at | 3.447278 | 2.962388 | 3.234014 | 3.093158 | 3.855133 | 3.364418 | 3.965812 | 3.370432 |
| 80150_at | 4.615583 | 3.937754 | 3.959177 | 4.060137 | 4.901191 | 3.884717 | 3.718464 | 5.750896 |
| 80152_at | 3.562263 | 4.003522 | 3.276351 | 3.910751 | 3.460635 | 3.99258  | 3.59465  | 3.211694 |
| 80153_at | 4.454262 | 3.947509 | 4.653809 | 4.29828  | 3.737725 | 4.011074 | 3.919444 | 5.764825 |
| 80155_at | 6.555776 | 6.125878 | 5.361043 | 5.685599 | 5.896366 | 5.905206 | 5.635293 | 5.900815 |
| 80157_at | 1.596581 | 1.613827 | 1.517636 | 1.52907  | 2.504596 | 1.697638 | 1.558019 | 1.960899 |
| 80161_at | 2.979246 | 2.95637  | 2.739467 | 2.794929 | 3.480675 | 2.775814 | 2.859991 | 2.4892   |
| 80162_at | 2.193188 | 2.74409  | 2.132275 | 3.089398 | 2.004523 | 3.295496 | 2.31688  | 2.550223 |
| 80164_at | 2.961062 | 3.177119 | 3.052165 | 2.844872 | 2.814392 | 2.997768 | 3.225977 | 3.400552 |
| 80167_at | 5.028192 | 4.806573 | 4.417623 | 5.010318 | 5.352164 | 4.363618 | 4.713134 | 5.386584 |
| 80168_at | 2.104851 | 1.611141 | 3.049208 | 1.381042 | 2.091695 | 1.308081 | 1.469567 | 1.542448 |
| 80169_at | 4.48655  | 5.69748  | 5.411893 | 4.340963 | 5.044093 | 5.152196 | 4.964849 | 3.478784 |

|          |          |          |          |          |          |          |          |          |
|----------|----------|----------|----------|----------|----------|----------|----------|----------|
| 80173_at | 5.883645 | 4.627096 | 5.442651 | 5.736989 | 5.706785 | 5.592899 | 4.030975 | 6.286594 |
| 80174_at | 2.135846 | 2.503954 | 2.995585 | 3.296221 | 2.934455 | 2.757072 | 1.904244 | 2.397492 |
| 80176_at | 4.308216 | 5.021306 | 5.136658 | 4.969156 | 3.77014  | 4.63565  | 4.501989 | 4.005018 |
| 80177_at | 7.889149 | 8.147069 | 8.170346 | 8.134916 | 8.569522 | 8.610919 | 8.331778 | 8.025415 |
| 80178_at | 1.943936 | 2.132966 | 1.845314 | 1.530324 | 1.935041 | 2.000943 | 2.098415 | 1.563876 |
| 80179_at | 4.47433  | 3.727005 | 3.207521 | 3.345191 | 2.487887 | 3.856934 | 3.573676 | 2.999146 |
| 80183_at | 1.351511 | 2.116941 | 1.465779 | 1.39834  | 2.182518 | 1.410061 | 2.029245 | 1.601765 |
| 80184_at | 5.941465 | 5.816589 | 5.876387 | 5.770643 | 5.270711 | 5.473629 | 5.262432 | 6.075159 |
| 80185_at | 5.019935 | 5.541693 | 4.77435  | 5.399832 | 4.398097 | 4.549583 | 4.969057 | 5.73022  |
| 80194_at | 4.946781 | 4.485094 | 4.80536  | 4.475854 | 4.554543 | 4.274812 | 4.029917 | 4.392684 |
| 80195_at | 3.791244 | 2.759057 | 3.371205 | 3.844227 | 3.430618 | 3.890914 | 2.867008 | 3.317551 |
| 80196_at | 6.382115 | 5.970448 | 6.252199 | 6.145644 | 6.006875 | 5.552263 | 6.109635 | 6.417738 |
| 80198_at | 5.491732 | 5.047877 | 4.627973 | 5.2386   | 4.966658 | 4.832397 | 5.288886 | 4.198652 |
| 80199_at | 4.79344  | 3.991825 | 4.356623 | 4.087379 | 4.407412 | 4.048398 | 3.407682 | 3.996662 |
| 8019_at  | 5.703546 | 5.345771 | 5.429681 | 5.470964 | 6.162779 | 5.882432 | 5.664076 | 5.277732 |
| 801_at   | 8.347117 | 8.316092 | 8.288534 | 8.168759 | 8.466375 | 8.590825 | 9.052744 | 8.10285  |
| 80201_at | 3.5899   | 3.394689 | 2.022752 | 3.344323 | 3.502028 | 4.355274 | 2.476639 | 3.089106 |
| 80204_at | 7.588947 | 7.542071 | 7.390142 | 7.343596 | 7.68508  | 7.376373 | 7.247243 | 7.591532 |
| 80205_at | 6.545652 | 7.262606 | 6.978415 | 7.391747 | 7.161516 | 6.975579 | 7.220381 | 7.389074 |
| 80206_at | 4.202643 | 4.117209 | 4.016029 | 4.05713  | 4.6311   | 5.597371 | 4.075648 | 4.687266 |
| 80207_at | 3.557713 | 4.102993 | 3.981029 | 4.20727  | 3.784182 | 3.956499 | 4.619833 | 3.989307 |
| 80208_at | 6.409711 | 6.588696 | 6.478796 | 6.132233 | 6.737516 | 6.152102 | 6.251079 | 6.575211 |
| 80209_at | 5.791467 | 6.390447 | 6.293048 | 6.903387 | 6.92004  | 6.401925 | 5.251594 | 6.800455 |
| 80210_at | 3.520898 | 4.087852 | 3.356711 | 4.118408 | 3.577961 | 3.545215 | 3.789632 | 4.54043  |
| 80212_at | 4.909412 | 4.553433 | 4.776657 | 5.049187 | 4.864195 | 5.034002 | 4.699915 | 5.20898  |
| 80213_at | 6.428988 | 7.223422 | 6.813954 | 6.905038 | 5.914174 | 6.677805 | 6.317731 | 7.014937 |
| 80215_at | 2.315423 | 1.602506 | 1.484174 | 1.482269 | 1.200778 | 1.694462 | 2.737246 | 1.765974 |
| 80216_at | 4.69057  | 3.956727 | 3.831359 | 3.983834 | 4.296454 | 3.899134 | 3.938249 | 4.559684 |
| 80217_at | 2.06518  | 1.439801 | 1.759252 | 1.398165 | 1.109083 | 2.421958 | 1.235121 | 1.393654 |
| 80218_at | 7.414431 | 7.727135 | 7.869581 | 7.557934 | 7.590734 | 8.100799 | 7.028594 | 7.885044 |
| 80219_at | 6.437203 | 6.004462 | 6.342039 | 6.56663  | 7.299051 | 6.539346 | 7.150292 | 6.985265 |
| 8021_at  | 6.089421 | 7.294667 | 6.848541 | 6.447178 | 5.863923 | 6.9415   | 6.757972 | 6.614612 |
| 80221_at | 5.433241 | 4.302785 | 4.791432 | 3.476725 | 5.069772 | 5.854888 | 3.517801 | 4.649966 |
| 80222_at | 3.096317 | 3.359643 | 4.446436 | 4.351657 | 3.981757 | 3.530927 | 4.538246 | 4.115671 |
| 80223_at | 4.077795 | 4.735482 | 3.744605 | 4.760294 | 4.674186 | 4.651723 | 5.14138  | 3.890261 |
| 80224_at | 4.709494 | 5.069212 | 4.513144 | 4.934959 | 5.112576 | 3.876614 | 5.002556 | 5.135655 |
| 80227_at | 4.828195 | 5.199162 | 5.539373 | 5.471475 | 4.229153 | 5.535411 | 4.431666 | 4.609648 |
| 80228_at | 4.417057 | 4.913616 | 4.366909 | 4.353192 | 2.612827 | 3.754074 | 4.393619 | 2.146294 |
| 8022_at  | 1.983756 | 1.76359  | 2.065507 | 1.656083 | 3.035232 | 2.113361 | 1.76746  | 2.588347 |
| 80230_at | 6.48252  | 6.26759  | 6.316653 | 5.798869 | 5.918926 | 5.907903 | 5.870518 | 6.290931 |
| 80231_at | 1.390525 | 1.585313 | 1.195695 | 1.959544 | 1.234042 | 1.530738 | 1.774855 | 1.807356 |
| 80232_at | 7.929211 | 8.297981 | 7.899693 | 8.022534 | 8.534189 | 8.003549 | 8.200397 | 8.079271 |
| 80233_at | 2.343362 | 2.582075 | 2.871311 | 4.071737 | 2.897977 | 3.207645 | 2.706934 | 2.667671 |
| 80235_at | 3.022198 | 2.545326 | 3.155953 | 3.652027 | 2.326797 | 4.313572 | 2.64577  | 2.956901 |
| 80237_at | 2.058602 | 2.401621 | 2.607521 | 2.513414 | 2.690102 | 3.434232 | 2.429498 | 2.852112 |
| 80243_at | 6.103808 | 6.573241 | 6.418783 | 6.894877 | 6.522953 | 6.731909 | 6.594636 | 6.066982 |
| 80254_at | 5.584885 | 5.647408 | 5.24496  | 5.061329 | 5.462317 | 4.983533 | 4.897587 | 5.676079 |
| 80255_at | 7.490868 | 7.670154 | 7.220426 | 7.438776 | 8.08385  | 7.450013 | 7.375819 | 8.184347 |
| 80256_at | 5.24555  | 4.244651 | 4.843347 | 4.597788 | 4.611944 | 4.7127   | 5.211316 | 3.781111 |
| 80258_at | 1.561747 | 1.09066  | 1.462113 | 1.468918 | 1.617332 | 1.165529 | 1.76416  | 2.046753 |
| 80262_at | 6.084652 | 4.965523 | 5.70766  | 6.57629  | 4.943265 | 6.105591 | 5.586045 | 5.734659 |

|          |          |          |          |          |          |          |          |          |
|----------|----------|----------|----------|----------|----------|----------|----------|----------|
| 80263_at | 3.251614 | 3.77554  | 1.849172 | 2.355834 | 2.267995 | 2.591748 | 2.239924 | 1.856606 |
| 80264_at | 2.477265 | 3.430243 | 4.057603 | 3.488124 | 1.23858  | 2.144882 | 3.620751 | 3.40324  |
| 80267_at | 5.491637 | 6.377022 | 6.208731 | 5.788352 | 6.314853 | 5.284349 | 6.289892 | 6.67765  |
| 80270_at | 2.657531 | 2.328492 | 3.091993 | 3.27689  | 2.797998 | 3.386693 | 2.576574 | 2.23422  |
| 80271_at | 1.886116 | 2.171847 | 2.218621 | 2.270081 | 2.17544  | 2.892292 | 1.576813 | 2.478731 |
| 80273_at | 6.216007 | 6.426585 | 6.454488 | 6.168398 | 6.082379 | 5.833086 | 6.412165 | 6.873993 |
| 80274_at | 3.788188 | 3.867848 | 4.100893 | 4.325713 | 2.893615 | 3.421337 | 3.730409 | 3.65749  |
| 80279_at | 4.221471 | 4.843314 | 4.561565 | 4.971954 | 4.492908 | 4.607706 | 4.212134 | 4.799622 |
| 8027_at  | 6.437214 | 6.522334 | 6.700169 | 5.87288  | 6.723526 | 6.348182 | 6.156218 | 7.294985 |
| 8028_at  | 5.192596 | 5.476466 | 5.477023 | 5.042033 | 5.656402 | 5.064149 | 5.111272 | 5.630705 |
| 80298_at | 2.726742 | 3.899437 | 2.317484 | 1.764506 | 2.918694 | 2.824383 | 2.991304 | 3.451884 |
| 8029_at  | 7.443011 | 6.705371 | 7.593227 | 4.83315  | 8.145204 | 7.699867 | 5.357273 | 7.852751 |
| 80301_at | 5.551242 | 5.83562  | 5.312738 | 6.150235 | 4.058382 | 5.049568 | 5.850514 | 5.43437  |
| 80303_at | 7.052027 | 7.148713 | 7.146246 | 7.167704 | 7.483335 | 7.394549 | 6.48371  | 6.328985 |
| 80304_at | 3.449474 | 3.700678 | 3.960781 | 3.942318 | 3.254279 | 3.835175 | 3.535184 | 4.694755 |
| 80305_at | 3.869767 | 4.139887 | 3.646058 | 3.290823 | 4.114416 | 4.497173 | 2.787062 | 3.517505 |
| 80306_at | 5.851452 | 6.981126 | 5.908017 | 6.275651 | 7.244309 | 6.331829 | 6.073322 | 7.406705 |
| 80307_at | 2.19278  | 1.832478 | 2.209633 | 2.028585 | 1.844887 | 2.057704 | 1.995493 | 1.800107 |
| 80308_at | 4.793539 | 3.367116 | 3.625702 | 4.171321 | 3.549919 | 3.766148 | 4.213597 | 3.603646 |
| 80309_at | 2.464516 | 1.867109 | 1.540679 | 2.021544 | 2.538848 | 1.998479 | 1.547395 | 1.812379 |
| 8030_at  | 8.092324 | 8.056244 | 8.006691 | 7.508569 | 7.358173 | 7.916996 | 7.669799 | 7.841556 |
| 80310_at | 6.556431 | 6.486421 | 6.88075  | 7.273931 | 6.608587 | 6.975066 | 6.392377 | 7.733512 |
| 80311_at | 3.77627  | 4.825868 | 4.01259  | 4.405307 | 4.757762 | 3.40914  | 4.245399 | 4.458674 |
| 80312_at | 4.084503 | 4.453754 | 3.976798 | 4.233441 | 3.173931 | 4.139692 | 4.232487 | 3.126921 |
| 80313_at | 4.09208  | 2.992665 | 4.181857 | 4.445753 | 4.200136 | 3.907962 | 3.924237 | 4.193786 |
| 80314_at | 6.340239 | 5.485149 | 6.281282 | 5.224173 | 6.329286 | 5.850839 | 6.187216 | 5.978767 |
| 80315_at | 7.385936 | 7.351788 | 7.50502  | 7.047555 | 7.211794 | 7.245884 | 7.24538  | 7.873315 |
| 80316_at | 1.293754 | 1.536342 | 0.968051 | 1.741858 | 2.326718 | 1.663148 | 1.634677 | 2.187534 |
| 80317_at | 4.209752 | 4.073709 | 4.384642 | 4.995048 | 3.244272 | 4.485457 | 4.889489 | 3.4161   |
| 80318_at | 4.553648 | 3.995752 | 2.82583  | 4.004472 | 3.603354 | 3.832539 | 2.922412 | 4.660424 |
| 80319_at | 4.34321  | 4.016239 | 3.419219 | 3.025719 | 4.027558 | 3.239582 | 2.487464 | 3.183833 |
| 8031_at  | 7.205003 | 6.735399 | 7.394578 | 7.439868 | 7.230469 | 7.043077 | 6.98732  | 7.207838 |
| 80320_at | 1.369438 | 2.058    | 2.122658 | 1.785167 | 1.869055 | 2.101111 | 2.669592 | 2.046417 |
| 80321_at | 5.279078 | 5.387452 | 5.32701  | 5.355802 | 5.00815  | 5.353542 | 4.53032  | 5.161562 |
| 80323_at | 4.845026 | 5.548849 | 5.015776 | 3.237332 | 4.596545 | 3.80864  | 4.634146 | 4.96375  |
| 80324_at | 2.123213 | 2.680197 | 3.727569 | 2.287876 | 3.897681 | 3.508379 | 3.573013 | 1.665982 |
| 80325_at | 3.420811 | 2.344028 | 2.940823 | 2.75958  | 2.626495 | 2.511782 | 3.88615  | 2.646111 |
| 80326_at | 3.531538 | 2.367904 | 2.046024 | 1.700598 | 2.931315 | 2.974595 | 2.616846 | 2.47496  |
| 80328_at | 2.57321  | 2.886891 | 2.809051 | 3.607977 | 3.174043 | 2.648924 | 3.437259 | 3.61705  |
| 80329_at | 1.951623 | 0.772477 | 1.708715 | 0.670538 | 2.962193 | 0.175722 | 0.692428 | 3.589778 |
| 80331_at | 6.135986 | 5.501502 | 6.614619 | 6.442544 | 6.695208 | 6.527301 | 6.030184 | 6.427231 |
| 80332_at | 3.273171 | 3.324245 | 3.243085 | 4.187256 | 2.777931 | 2.979401 | 4.443804 | 4.201552 |
| 80333_at | 1.868346 | 1.566358 | 2.332595 | 1.996968 | 1.747086 | 2.106472 | 1.826406 | 1.836439 |
| 80335_at | 6.76992  | 6.710254 | 7.060286 | 6.740772 | 7.217766 | 6.788976 | 7.144752 | 6.645229 |
| 80336_at | 4.417782 | 2.40725  | 2.445026 | 2.079291 | 4.466041 | 3.665664 | 2.692105 | 3.281145 |
| 80339_at | 1.523793 | 3.421726 | 1.742316 | 1.810398 | 2.216289 | 1.430803 | 1.95413  | 3.228751 |
| 80341_at | 2.206337 | 2.742801 | 2.674298 | 2.918501 | 2.645275 | 3.131685 | 2.56101  | 2.602456 |
| 80342_at | 3.467598 | 3.68302  | 3.864952 | 3.50987  | 3.65216  | 3.688819 | 3.753301 | 3.495168 |
| 80343_at | 1.089078 | 1.605267 | 0.996622 | 1.562554 | 1.593011 | 1.78421  | 1.753649 | 1.851824 |
| 80344_at | 5.436117 | 5.514324 | 5.242809 | 5.693118 | 5.370165 | 4.685416 | 5.273117 | 6.179219 |
| 80345_at | 3.039462 | 3.047276 | 2.438488 | 2.829009 | 3.240939 | 3.455363 | 3.230188 | 1.889511 |

|          |          |          |          |          |          |          |          |          |
|----------|----------|----------|----------|----------|----------|----------|----------|----------|
| 80346_at | 3.890395 | 2.983421 | 3.766182 | 4.051097 | 3.290726 | 3.985402 | 2.127891 | 3.487568 |
| 80347_at | 5.85134  | 5.702839 | 5.909259 | 5.753191 | 5.213198 | 5.717545 | 5.9431   | 5.424655 |
| 80349_at | 7.418802 | 7.49282  | 6.763698 | 7.385273 | 7.346937 | 6.75337  | 6.760991 | 7.215774 |
| 8034_at  | 4.904545 | 5.237113 | 4.716909 | 4.34377  | 5.42807  | 5.308662 | 4.611316 | 5.397541 |
| 80350_at | 0.707752 | 1.732535 | 0.962202 | 3.536043 | 0.977482 | 0.957223 | 0.828072 | 1.579805 |
| 80351_at | 7.164779 | 7.344665 | 7.113381 | 7.416998 | 7.286523 | 7.145189 | 7.300893 | 7.635577 |
| 80352_at | 2.997206 | 2.527669 | 2.494836 | 2.828432 | 3.305971 | 3.140744 | 3.888564 | 2.877437 |
| 8036_at  | 7.988339 | 7.494296 | 7.871421 | 8.018624 | 7.832255 | 7.94497  | 7.61129  | 8.146882 |
| 80380_at | 4.817459 | 6.036458 | 5.017639 | 6.548144 | 5.892379 | 6.846909 | 6.032614 | 4.60075  |
| 80381_at | 5.72546  | 5.219147 | 5.100885 | 5.743256 | 4.786714 | 6.425184 | 5.146233 | 4.611617 |
| 8038_at  | 3.722054 | 4.894623 | 3.342079 | 4.916089 | 4.796472 | 3.658706 | 4.484357 | 3.291546 |
| 8045_at  | 2.703075 | 3.315046 | 3.282099 | 3.017052 | 2.373774 | 3.778153 | 2.169561 | 2.526657 |
| 8048_at  | 1.335948 | 1.700532 | 1.361284 | 1.300936 | 1.450254 | 1.332329 | 1.326944 | 1.22702  |
| 8050_at  | 5.981848 | 6.068841 | 6.203556 | 6.39499  | 6.097912 | 6.035099 | 5.730826 | 6.530031 |
| 805_at   | 9.426702 | 9.905939 | 9.808502 | 9.843678 | 9.865364 | 9.223211 | 9.479163 | 9.899682 |
| 8061_at  | 2.884014 | 2.990593 | 3.235083 | 2.847046 | 2.488488 | 2.440514 | 2.857696 | 3.160762 |
| 8065_at  | 6.821597 | 6.562946 | 6.511702 | 6.454618 | 7.040059 | 6.282775 | 6.399111 | 6.785888 |
| 80700_at | 6.832155 | 6.50612  | 6.616805 | 5.982169 | 6.245303 | 6.490306 | 6.367753 | 5.887273 |
| 80704_at | 3.257609 | 2.479717 | 2.930492 | 2.577493 | 2.472177 | 2.962959 | 2.54369  | 3.117718 |
| 80705_at | 3.056721 | 2.914958 | 2.47704  | 2.576699 | 3.363718 | 3.292629 | 1.935575 | 3.178666 |
| 80709_at | 2.923211 | 3.00664  | 3.122132 | 2.94512  | 2.927561 | 3.24664  | 3.110713 | 2.816163 |
| 80712_at | 1.717648 | 1.81688  | 1.587943 | 1.410955 | 1.666733 | 2.302405 | 2.251944 | 1.371628 |
| 80714_at | 2.244132 | 2.165029 | 2.836722 | 2.774373 | 2.168575 | 3.831053 | 1.893623 | 1.950222 |
| 80723_at | 1.669976 | 1.70432  | 2.778927 | 2.657836 | 2.738636 | 3.00604  | 2.149214 | 2.970213 |
| 80724_at | 4.149981 | 2.528092 | 3.525861 | 3.152748 | 4.00133  | 3.801807 | 2.528449 | 3.128591 |
| 80725_at | 2.2576   | 2.138443 | 2.280429 | 2.220895 | 2.149216 | 2.275451 | 2.017859 | 2.060095 |
| 80726_at | 2.526376 | 2.742637 | 2.672864 | 3.273549 | 3.210711 | 2.277045 | 2.152831 | 2.343894 |
| 80727_at | 5.74069  | 5.291758 | 5.483197 | 6.31158  | 5.468299 | 5.950207 | 5.210296 | 4.976771 |
| 80728_at | 1.622512 | 1.959044 | 2.396892 | 1.972665 | 1.877742 | 1.433244 | 1.779253 | 2.000213 |
| 80731_at | 1.203355 | 1.413132 | 1.402956 | 1.415889 | 1.562709 | 1.314264 | 1.028568 | 1.519977 |
| 80736_at | 5.262412 | 4.276734 | 4.580095 | 4.107886 | 5.26348  | 5.172702 | 3.556356 | 3.732108 |
| 80737_at | 3.737847 | 3.673572 | 4.345    | 3.661548 | 3.273125 | 4.015656 | 4.448838 | 4.459336 |
| 80739_at | 2.968565 | 2.161802 | 2.443534 | 2.372187 | 2.025014 | 2.14242  | 2.180626 | 3.503484 |
| 8073_at  | 3.708536 | 4.129198 | 4.137956 | 4.68215  | 4.402086 | 3.800012 | 4.350407 | 4.304768 |
| 80740_at | 1.798865 | 2.803103 | 2.767323 | 2.99832  | 3.34194  | 3.26424  | 2.845504 | 3.648204 |
| 80741_at | 4.819234 | 3.393825 | 2.367187 | 3.128925 | 3.080371 | 3.191298 | 3.113456 | 2.964956 |
| 80742_at | 4.79632  | 2.966086 | 3.75572  | 4.67433  | 3.671592 | 4.435658 | 3.850728 | 4.436694 |
| 80745_at | 3.512302 | 3.770205 | 2.82896  | 3.581312 | 2.635748 | 2.884791 | 2.884483 | 3.454922 |
| 80746_at | 3.895871 | 4.448601 | 3.821211 | 4.598981 | 3.763732 | 3.947485 | 3.98767  | 4.075401 |
| 8074_at  | 2.240977 | 1.891914 | 1.765584 | 1.890142 | 2.143091 | 1.756733 | 1.753584 | 2.680723 |
| 80757_at | 1.766224 | 2.161209 | 2.028153 | 2.286515 | 2.376959 | 2.118105 | 2.056583 | 2.010746 |
| 80758_at | 3.403408 | 4.46775  | 3.396228 | 3.619402 | 3.485781 | 4.046118 | 3.67731  | 4.193605 |
| 80759_at | 2.529486 | 2.605755 | 2.835416 | 3.794972 | 2.129084 | 2.149534 | 1.766694 | 2.449233 |
| 80760_at | 8.233713 | 8.80171  | 8.97285  | 8.429149 | 8.437074 | 7.031567 | 8.811992 | 7.732175 |
| 80761_at | 2.914064 | 3.50553  | 3.411856 | 3.732148 | 3.845748 | 3.424497 | 3.287788 | 3.857397 |
| 80762_at | 7.484178 | 7.645082 | 7.792937 | 7.290726 | 7.560196 | 7.843359 | 7.575399 | 7.63384  |
| 80763_at | 5.015242 | 3.800674 | 2.532419 | 3.290207 | 4.187045 | 3.113698 | 2.863768 | 4.912642 |
| 80764_at | 6.619503 | 5.731533 | 5.692704 | 5.25982  | 4.865867 | 6.356939 | 6.101527 | 4.9047   |
| 80765_at | 2.881771 | 2.896583 | 2.443274 | 2.495364 | 3.006571 | 2.215735 | 3.789305 | 2.841851 |
| 8076_at  | 1.811457 | 1.821161 | 1.727788 | 1.407853 | 1.340663 | 1.480857 | 2.033949 | 1.398278 |
| 80772_at | 3.150658 | 2.327185 | 2.81938  | 3.748044 | 2.61783  | 4.209028 | 3.717572 | 2.253406 |



|          |          |          |          |          |          |          |          |          |
|----------|----------|----------|----------|----------|----------|----------|----------|----------|
| 80774_at | 5.455532 | 5.034137 | 5.191907 | 5.363243 | 4.807777 | 5.984406 | 5.154108 | 4.611016 |
| 80775_at | 4.031201 | 3.805941 | 2.74057  | 2.848954 | 2.877008 | 4.03237  | 3.191017 | 4.551485 |
| 80776_at | 4.749852 | 3.912205 | 3.955531 | 4.040427 | 5.055211 | 4.467018 | 4.0084   | 3.820885 |
| 80777_at | 8.473765 | 8.426973 | 8.319662 | 8.615861 | 8.239764 | 7.853472 | 8.610955 | 8.701071 |
| 80778_at | 5.198487 | 3.205158 | 4.656692 | 2.508094 | 3.032834 | 3.571065 | 2.342363 | 3.329322 |
| 80781_at | 4.065739 | 3.721309 | 3.085675 | 3.85636  | 3.557504 | 5.0417   | 4.23862  | 3.085146 |
| 80789_at | 5.916393 | 6.737274 | 5.346244 | 5.817338 | 6.524884 | 5.698173 | 6.300424 | 6.033704 |
| 8078_at  | 5.429026 | 4.91013  | 6.09803  | 5.193954 | 5.50542  | 5.597245 | 5.532273 | 6.027878 |
| 80790_at | 7.035363 | 6.83077  | 6.59319  | 6.488619 | 6.497338 | 6.679875 | 7.41728  | 5.696103 |
| 8079_at  | 5.978718 | 6.407699 | 5.583185 | 5.749149 | 3.571276 | 5.955197 | 5.138205 | 6.257375 |
| 80816_at | 1.515954 | 1.637171 | 2.877534 | 1.644612 | 2.012756 | 2.112797 | 1.771067 | 2.266196 |
| 80817_at | 4.746857 | 3.973349 | 4.709275 | 4.413489 | 3.679397 | 4.350789 | 4.837625 | 4.875304 |
| 80818_at | 4.714026 | 4.781403 | 4.5777   | 4.933812 | 4.171198 | 4.409393 | 5.514091 | 4.855875 |
| 80820_at | 3.569566 | 2.382635 | 2.854258 | 3.560724 | 3.495484 | 3.599312 | 3.018687 | 2.769973 |
| 80821_at | 4.840866 | 5.37364  | 5.492332 | 4.915522 | 4.952368 | 5.883538 | 5.617581 | 4.996687 |
| 80823_at | 3.565677 | 1.784541 | 2.14299  | 2.59887  | 3.716306 | 2.495791 | 3.49301  | 2.919576 |
| 80824_at | 6.801044 | 7.186629 | 6.728909 | 6.759253 | 6.936222 | 6.65888  | 7.473561 | 7.005002 |
| 80829_at | 7.271207 | 8.174522 | 7.559854 | 7.467672 | 7.430273 | 8.07862  | 7.532106 | 7.071301 |
| 8082_at  | 5.222482 | 5.20623  | 6.172708 | 5.766985 | 5.447443 | 5.615641 | 6.589726 | 6.141006 |
| 80830_at | 5.471053 | 7.003728 | 6.369788 | 7.155415 | 6.524779 | 6.499652 | 6.960737 | 6.151734 |
| 80831_at | 1.048107 | 1.011141 | 1.003092 | 1.059958 | 2.160265 | 0.838356 | 0.983213 | 1.230319 |
| 80832_at | 2.469433 | 1.752609 | 2.382588 | 3.278083 | 3.157899 | 2.383874 | 2.2148   | 2.910601 |
| 80833_at | 2.121137 | 3.240689 | 2.174855 | 3.12677  | 2.236663 | 2.201566 | 2.751062 | 2.916038 |
| 80834_at | 2.109589 | 2.486739 | 1.827022 | 1.649305 | 2.129835 | 1.22994  | 1.217409 | 2.658723 |
| 80835_at | 1.575522 | 2.05486  | 2.145775 | 1.759565 | 2.461289 | 1.997154 | 1.450458 | 2.142448 |
| 80851_at | 3.320955 | 3.362372 | 3.435955 | 3.493467 | 2.585967 | 3.035525 | 4.62451  | 3.579098 |
| 80852_at | 2.303334 | 2.011555 | 1.958428 | 2.702043 | 2.096576 | 2.585632 | 1.970743 | 2.148069 |
| 80853_at | 5.184672 | 5.604569 | 5.021768 | 5.552002 | 5.181226 | 5.061776 | 5.97294  | 5.304608 |
| 80854_at | 6.577166 | 7.247281 | 7.46887  | 7.266356 | 7.715215 | 7.151163 | 7.102649 | 7.480105 |
| 80856_at | 5.355836 | 4.964789 | 5.845204 | 5.6215   | 5.800667 | 5.21456  | 6.035647 | 5.768358 |
| 8085_at  | 5.014467 | 5.347747 | 5.58901  | 5.736054 | 5.638073 | 5.632705 | 5.810012 | 4.64014  |
| 80862_at | 3.361859 | 3.896429 | 4.072632 | 2.719884 | 4.405813 | 3.856461 | 3.342574 | 3.190358 |
| 80863_at | 3.183746 | 3.364981 | 3.900367 | 3.264973 | 2.403951 | 3.456393 | 3.716876 | 3.277819 |
| 80868_at | 1.844736 | 2.076554 | 1.637081 | 1.323164 | 2.805151 | 1.632996 | 1.799195 | 1.556513 |
| 8086_at  | 6.220029 | 6.471158 | 7.315299 | 6.03413  | 7.063909 | 6.394687 | 6.708579 | 5.334962 |
| 8087_at  | 7.851304 | 7.934577 | 8.001697 | 7.821298 | 7.672696 | 7.950107 | 8.372339 | 8.55735  |
| 80895_at | 6.277389 | 5.554797 | 5.837222 | 5.827185 | 5.368491 | 5.777557 | 5.985664 | 6.052953 |
| 80896_at | 4.490511 | 4.536266 | 4.805023 | 3.749285 | 6.753709 | 4.198949 | 2.661723 | 5.473352 |
| 8089_at  | 5.326582 | 5.114343 | 4.106481 | 4.196399 | 4.613489 | 4.239634 | 5.52824  | 5.703552 |
| 808_at   | 9.040263 | 9.382674 | 9.221311 | 9.527273 | 9.250187 | 9.121196 | 9.145382 | 9.055387 |
| 8091_at  | 2.14391  | 3.16392  | 2.259688 | 2.416659 | 3.025942 | 2.607886 | 1.747992 | 2.246948 |
| 8092_at  | 1.761846 | 1.273914 | 1.803817 | 1.847871 | 1.388071 | 1.704089 | 1.51689  | 1.648737 |
| 80975_at | 1.471958 | 1.839959 | 2.090751 | 1.935288 | 2.040605 | 1.573835 | 1.930648 | 1.814957 |
| 8099_at  | 6.592635 | 6.465308 | 6.528377 | 6.408728 | 6.673679 | 6.49213  | 6.55108  | 6.604143 |
| 8100_at  | 5.527651 | 5.755428 | 5.2222   | 4.610358 | 5.722074 | 5.308049 | 5.034655 | 5.624154 |
| 81027_at | 2.93898  | 4.022457 | 1.386507 | 2.701198 | 2.579934 | 2.845455 | 2.823251 | 2.91101  |
| 81029_at | 2.903265 | 4.061713 | 3.124088 | 3.355466 | 2.338868 | 3.212813 | 3.058238 | 4.7984   |
| 81030_at | 1.682379 | 1.716769 | 2.193446 | 2.099192 | 2.00438  | 2.324407 | 1.726724 | 2.08383  |
| 81031_at | 5.00049  | 5.643268 | 4.30589  | 4.635487 | 3.829645 | 5.530257 | 5.663136 | 4.671181 |
| 81033_at | 2.026396 | 2.707347 | 1.319068 | 2.041008 | 3.055797 | 1.478541 | 2.492234 | 1.398461 |
| 81034_at | 5.681367 | 6.419331 | 4.415331 | 5.278895 | 5.970017 | 5.947792 | 5.201992 | 5.171641 |

|          |          |          |          |          |          |          |          |          |
|----------|----------|----------|----------|----------|----------|----------|----------|----------|
| 81035_at | 1.621804 | 1.852198 | 5.412349 | 7.036626 | 7.069282 | 4.746793 | 7.45913  | 2.398148 |
| 81037_at | 6.801768 | 6.868833 | 6.72899  | 6.362528 | 6.80737  | 6.56514  | 6.395208 | 6.359453 |
| 81050_at | 1.380914 | 0.807063 | 1.178882 | 0.822408 | 0.972427 | 1.122957 | 1.521775 | 1.699473 |
| 81061_at | 1.691282 | 1.180786 | 1.128317 | 1.366006 | 1.239687 | 2.655879 | 1.268436 | 1.378722 |
| 810_at   | 4.087614 | 2.908579 | 3.944781 | 3.212816 | 5.50689  | 4.49297  | 3.315463 | 3.16485  |
| 8110_at  | 2.021396 | 3.468231 | 3.248027 | 2.755533 | 2.503867 | 3.629309 | 2.970131 | 3.476336 |
| 8111_at  | 3.07396  | 2.253    | 2.225921 | 1.94023  | 1.728394 | 2.486527 | 2.025517 | 2.025677 |
| 81127_at | 2.245781 | 1.022513 | 0.993296 | 0.644614 | 1.127299 | 1.257756 | 3.957193 | 1.148455 |
| 8115_at  | 2.074411 | 1.641129 | 2.190996 | 1.987772 | 2.298383 | 2.740664 | 2.020527 | 2.46672  |
| 81168_at | 1.015942 | 0.948505 | 0.880468 | 0.674754 | 1.744877 | 1.145156 | 0.794608 | 0.859125 |
| 811_at   | 10.48183 | 10.63264 | 10.56567 | 10.69362 | 10.33885 | 10.56358 | 10.5373  | 10.61199 |
| 8120_at  | 2.596269 | 2.820673 | 1.980538 | 2.545465 | 2.374139 | 2.127207 | 2.493767 | 2.850197 |
| 8123_at  | 5.799322 | 6.514074 | 7.276349 | 7.370302 | 7.525357 | 6.915508 | 6.631265 | 6.338449 |
| 8125_at  | 7.985025 | 8.584401 | 8.541506 | 7.866153 | 7.494624 | 7.961507 | 8.251653 | 7.577612 |
| 81282_at | 2.263121 | 1.741547 | 2.520626 | 1.377716 | 3.753371 | 2.168867 | 1.824397 | 2.117013 |
| 81285_at | 2.481006 | 3.61532  | 4.375018 | 4.202104 | 5.130973 | 2.890613 | 6.868546 | 2.57119  |
| 8128_at  | 1.892501 | 2.179221 | 2.127999 | 2.164202 | 1.845107 | 2.082995 | 2.341449 | 2.415618 |
| 81300_at | 1.320679 | 1.167823 | 1.128864 | 0.919906 | 1.029454 | 1.524153 | 1.141972 | 1.397128 |
| 81309_at | 1.294239 | 1.079106 | 1.029782 | 0.82754  | 1.462619 | 1.50687  | 1.694047 | 1.237579 |
| 81318_at | 1.739899 | 1.22168  | 1.220557 | 1.360186 | 1.453403 | 2.042953 | 1.762555 | 1.995552 |
| 8131_at  | 5.684053 | 5.541267 | 5.032135 | 5.136717 | 3.761358 | 4.904937 | 4.635257 | 3.764654 |
| 81327_at | 1.02042  | 0.951658 | 0.824955 | 0.868046 | 0.530335 | 1.779462 | 1.860988 | 1.4154   |
| 81328_at | 1.235788 | 1.883645 | 1.98728  | 1.297264 | 1.427643 | 1.010486 | 1.95319  | 1.30597  |
| 81341_at | 1.516307 | 1.616682 | 1.575072 | 1.089488 | 1.404303 | 1.629917 | 1.999968 | 1.955464 |
| 81343_at | 2.604283 | 2.090113 | 1.897808 | 2.135851 | 3.261069 | 2.050538 | 2.579417 | 2.604283 |
| 81392_at | 3.426065 | 2.523895 | 2.711159 | 2.471266 | 2.875883 | 3.344411 | 3.187024 | 2.743995 |
| 8139_at  | 3.343041 | 2.375324 | 3.803745 | 3.433571 | 3.512416 | 3.218219 | 4.318953 | 3.569315 |
| 813_at   | 7.384824 | 7.842395 | 7.858805 | 7.953781 | 7.985351 | 7.592152 | 7.837921 | 8.405489 |
| 8140_at  | 4.032669 | 3.234072 | 2.293617 | 2.971972 | 3.225571 | 2.734428 | 4.003916 | 3.181072 |
| 81442_at | 1.23697  | 1.299579 | 1.193329 | 1.931973 | 1.886751 | 1.54512  | 1.133187 | 1.278124 |
| 81448_at | 2.534371 | 2.983697 | 1.947449 | 2.019478 | 3.072288 | 3.70535  | 3.120096 | 2.208915 |
| 81466_at | 1.985421 | 0.929639 | 1.735269 | 1.071153 | 1.819607 | 1.225093 | 1.637907 | 1.119482 |
| 81469_at | 1.364798 | 1.829664 | 2.433544 | 1.299979 | 1.673354 | 1.132883 | 1.766221 | 1.522341 |
| 81470_at | 1.890035 | 2.325542 | 1.319489 | 1.278205 | 1.370338 | 1.496658 | 1.600765 | 1.26718  |
| 81472_at | 1.33975  | 0.970169 | 1.22485  | 0.90791  | 1.41947  | 2.012894 | 1.041804 | 1.136162 |
| 8148_at  | 8.067304 | 8.618589 | 8.81992  | 8.805175 | 8.546537 | 8.382104 | 8.677037 | 8.360721 |
| 81490_at | 5.1811   | 5.147679 | 4.420749 | 3.966331 | 3.850831 | 5.310197 | 5.1897   | 4.10612  |
| 81491_at | 4.253579 | 2.368641 | 5.054725 | 4.544288 | 5.085334 | 3.420972 | 4.231093 | 4.740451 |
| 81492_at | 1.71247  | 3.00114  | 2.17159  | 1.97065  | 2.499574 | 2.632831 | 2.39949  | 3.148814 |
| 81493_at | 4.48228  | 4.822332 | 4.544548 | 4.959746 | 4.771893 | 4.778288 | 4.713522 | 4.54419  |
| 81494_at | 2.175056 | 1.287033 | 1.427041 | 1.819829 | 1.473284 | 1.265196 | 1.803673 | 1.181626 |
| 814_at   | 1.929615 | 1.839167 | 1.782463 | 1.74384  | 1.927565 | 2.291776 | 1.477239 | 1.772169 |
| 81501_at | 0.865714 | 1.617305 | 1.259827 | 1.258254 | 0.930835 | 1.485105 | 0.990566 | 0.965689 |
| 81502_at | 6.433128 | 6.250508 | 6.711151 | 6.493946 | 5.598693 | 6.147259 | 6.478388 | 6.319528 |
| 81532_at | 2.905482 | 3.418975 | 3.49403  | 3.260119 | 3.125275 | 3.005514 | 2.801398 | 2.916587 |
| 81533_at | 8.266669 | 8.505996 | 8.587788 | 8.155601 | 8.471872 | 7.8883   | 8.710785 | 8.314024 |
| 81537_at | 5.518356 | 5.267246 | 5.624786 | 5.097886 | 5.802075 | 4.933067 | 5.431858 | 4.414231 |
| 81539_at | 4.87658  | 5.666495 | 5.802877 | 4.84126  | 4.541334 | 5.065537 | 4.876733 | 5.446948 |
| 8153_at  | 0.894061 | 1.426406 | 1.506835 | 1.394731 | 1.289985 | 1.914777 | 2.49528  | 1.464908 |
| 81542_at | 6.634787 | 7.85246  | 7.559337 | 7.554965 | 7.334427 | 6.831152 | 7.388939 | 7.81578  |
| 81543_at | 2.319178 | 2.527799 | 1.883418 | 2.159862 | 2.182217 | 1.755625 | 2.40523  | 2.219131 |

|          |          |          |          |          |          |          |          |          |
|----------|----------|----------|----------|----------|----------|----------|----------|----------|
| 81544_at | 3.375852 | 2.275017 | 3.144504 | 4.685375 | 3.367224 | 3.39329  | 2.993855 | 3.050761 |
| 81545_at | 6.23833  | 6.047522 | 6.172083 | 6.530323 | 6.007331 | 6.216726 | 6.135867 | 5.738558 |
| 81550_at | 6.742343 | 6.654518 | 6.651762 | 6.2809   | 6.294541 | 6.492011 | 5.998569 | 6.55527  |
| 81551_at | 1.521707 | 2.27598  | 2.382632 | 1.839425 | 2.761036 | 1.938441 | 2.567759 | 2.009122 |
| 81552_at | 2.157461 | 3.566627 | 3.02692  | 3.203265 | 3.452234 | 3.372996 | 3.488692 | 2.749393 |
| 81553_at | 3.084873 | 2.792035 | 2.260153 | 3.964153 | 3.034495 | 2.850672 | 2.895245 | 1.798208 |
| 81554_at | 4.870453 | 5.57956  | 5.866825 | 5.273201 | 6.122408 | 5.047942 | 4.675105 | 6.277223 |
| 81555_at | 7.768805 | 8.42194  | 8.252876 | 8.298725 | 8.211769 | 8.147535 | 8.535246 | 8.582464 |
| 81556_at | 5.975479 | 6.762953 | 5.738055 | 6.113592 | 5.909846 | 6.330623 | 5.616031 | 6.35236  |
| 81558_at | 4.327631 | 3.563863 | 3.811078 | 5.02548  | 3.831872 | 3.924332 | 4.777041 | 3.529997 |
| 81559_at | 2.962584 | 3.396439 | 1.355674 | 2.353515 | 3.043235 | 3.060405 | 3.467937 | 2.16923  |
| 81562_at | 2.726203 | 3.745833 | 2.328377 | 3.012871 | 3.650257 | 2.505431 | 2.633434 | 2.396527 |
| 81563_at | 8.117843 | 8.205264 | 8.098488 | 7.124651 | 7.210887 | 6.475412 | 7.313521 | 8.151166 |
| 81565_at | 6.373991 | 7.206683 | 7.057019 | 7.295252 | 7.443743 | 7.104253 | 7.103718 | 7.12901  |
| 81566_at | 4.273939 | 3.670348 | 4.399353 | 4.241917 | 4.2909   | 3.72976  | 3.880722 | 4.122654 |
| 81569_at | 1.179807 | 1.81404  | 2.45178  | 1.597196 | 2.456915 | 2.56239  | 1.501087 | 1.623049 |
| 81570_at | 3.977097 | 4.305954 | 3.721701 | 4.153986 | 4.390335 | 4.621447 | 4.427862 | 3.356365 |
| 81571_at | 2.570995 | 2.934125 | 1.334711 | 2.456647 | 1.873841 | 1.637105 | 1.391758 | 2.540802 |
| 81572_at | 5.302201 | 4.542523 | 5.236735 | 4.66274  | 4.169299 | 3.928646 | 5.266869 | 4.56481  |
| 81573_at | 6.573208 | 6.798193 | 6.218733 | 6.511404 | 5.996069 | 6.174151 | 5.89837  | 6.384645 |
| 81575_at | 2.288643 | 3.994731 | 2.981324 | 3.234999 | 2.965588 | 2.332632 | 3.51236  | 2.832847 |
| 81576_at | 3.863069 | 4.760058 | 3.988872 | 4.490681 | 3.003716 | 4.771943 | 3.444358 | 4.425895 |
| 81577_at | 4.547659 | 3.226795 | 3.160121 | 3.751975 | 3.49388  | 4.090837 | 4.296327 | 2.89626  |
| 81578_at | 2.328609 | 3.263747 | 2.445679 | 3.810797 | 3.135705 | 2.059904 | 2.239172 | 2.321276 |
| 81579_at | 5.09332  | 5.269419 | 5.907099 | 5.603777 | 5.992993 | 5.376812 | 4.70651  | 5.654131 |
| 815_at   | 3.539818 | 3.711625 | 3.285432 | 2.793715 | 3.780195 | 3.092192 | 3.111408 | 3.800243 |
| 81602_at | 3.83297  | 3.987935 | 4.857787 | 4.583399 | 4.861697 | 4.00546  | 4.662774 | 3.647744 |
| 81603_at | 7.868142 | 7.349283 | 6.913296 | 7.500195 | 6.752265 | 6.992133 | 7.256839 | 6.893052 |
| 81605_at | 4.841192 | 4.913446 | 5.716297 | 5.563394 | 4.049732 | 5.233239 | 4.307338 | 4.086913 |
| 81606_at | 6.374347 | 6.908891 | 7.923683 | 7.713984 | 7.248404 | 7.326231 | 8.114002 | 6.692961 |
| 81607_at | 2.377907 | 2.219551 | 2.275642 | 2.207243 | 2.793702 | 2.577519 | 2.374096 | 2.572152 |
| 81608_at | 7.546927 | 7.586466 | 7.584688 | 7.289642 | 7.200699 | 7.47578  | 7.396756 | 7.878057 |
| 81609_at | 7.588951 | 7.323593 | 7.68008  | 7.293169 | 7.57006  | 7.871058 | 7.28533  | 7.914074 |
| 81610_at | 0.930516 | 3.12087  | 1.001605 | 2.47714  | 2.485751 | 2.186613 | 1.723086 | 1.956965 |
| 81611_at | 7.273991 | 7.813746 | 7.576659 | 7.787447 | 8.115909 | 7.619718 | 8.030233 | 8.061779 |
| 81614_at | 3.63109  | 5.405369 | 4.841681 | 5.172304 | 4.398167 | 3.429787 | 4.890894 | 4.864619 |
| 81615_at | 2.480509 | 3.393112 | 2.017422 | 3.114555 | 2.975268 | 3.276734 | 2.785117 | 2.637512 |
| 81616_at | 1.65524  | 1.723252 | 1.389454 | 1.443403 | 1.420378 | 1.481307 | 1.372688 | 1.623035 |
| 81617_at | 4.629735 | 4.528502 | 4.010685 | 3.882168 | 4.477017 | 5.018773 | 3.410839 | 4.442815 |
| 81618_at | 6.259751 | 6.779324 | 5.714765 | 5.943006 | 6.422818 | 6.530748 | 5.246815 | 5.368837 |
| 81619_at | 5.572715 | 7.330757 | 6.652066 | 7.203214 | 5.615936 | 6.382384 | 6.713016 | 6.083546 |
| 8161_at  | 4.450756 | 4.792313 | 4.769956 | 4.841065 | 5.706909 | 5.257154 | 3.473742 | 5.365522 |
| 81620_at | 3.160082 | 3.437496 | 2.306878 | 3.570537 | 3.31654  | 2.848175 | 2.88997  | 2.127185 |
| 81621_at | 2.511841 | 2.285143 | 2.27108  | 2.549723 | 3.072341 | 1.70527  | 2.426742 | 1.875824 |
| 81622_at | 5.657872 | 5.543697 | 5.92718  | 4.350273 | 4.164852 | 5.738109 | 4.424056 | 5.074562 |
| 81623_at | 1.984757 | 1.548546 | 1.166434 | 1.487625 | 1.606717 | 1.75777  | 1.637692 | 1.686003 |
| 81624_at | 1.781332 | 2.222441 | 2.273072 | 2.828974 | 2.192285 | 1.666306 | 2.208154 | 1.86535  |
| 81626_at | 1.243313 | 0.83049  | 1.373051 | 0.935561 | 0.987706 | 1.182115 | 1.44288  | 1.14998  |
| 81627_at | 5.714622 | 6.091255 | 5.54897  | 5.417997 | 5.484259 | 5.131163 | 4.415828 | 5.796946 |
| 81628_at | 3.213626 | 4.319876 | 3.346987 | 3.962157 | 3.253198 | 3.668549 | 2.710833 | 3.024577 |
| 81629_at | 1.398033 | 2.438169 | 1.621499 | 1.623399 | 2.758051 | 1.783412 | 1.659595 | 1.390352 |

|          |          |          |          |          |          |          |          |          |
|----------|----------|----------|----------|----------|----------|----------|----------|----------|
| 81631_at | 4.217652 | 4.109685 | 4.55955  | 4.500583 | 4.684632 | 4.708859 | 4.535872 | 5.455889 |
| 8165_at  | 4.337806 | 3.975644 | 4.530028 | 4.587175 | 4.035977 | 5.501394 | 4.542245 | 4.261843 |
| 81669_at | 6.376847 | 5.127866 | 5.999422 | 5.817631 | 5.583157 | 6.35995  | 5.303479 | 6.354486 |
| 81671_at | 7.526951 | 7.793848 | 6.603042 | 6.922713 | 7.768915 | 7.306193 | 7.198887 | 8.1383   |
| 81688_at | 6.692132 | 6.831928 | 6.442364 | 6.584816 | 6.775393 | 5.945785 | 6.810884 | 6.903901 |
| 81689_at | 5.559166 | 6.218664 | 5.986754 | 5.354522 | 5.090061 | 5.698266 | 6.186516 | 4.537345 |
| 81691_at | 3.050423 | 2.616959 | 2.531187 | 2.547887 | 2.274943 | 2.332602 | 2.849396 | 2.845218 |
| 81693_at | 2.597375 | 3.386229 | 2.759265 | 1.979164 | 4.601938 | 3.551382 | 2.62155  | 2.317544 |
| 81696_at | 0.982511 | 1.181926 | 1.297402 | 1.284147 | 1.631723 | 1.283873 | 1.505036 | 1.5086   |
| 81697_at | 1.037591 | 0.883063 | 1.659512 | 1.31405  | 1.675574 | 1.052512 | 1.168168 | 1.140157 |
| 81698_at | 1.826262 | 1.725529 | 1.807453 | 2.135273 | 2.379692 | 1.691593 | 1.956682 | 2.328069 |
| 816_at   | 3.095131 | 4.082475 | 3.212525 | 2.750247 | 3.223845 | 3.350505 | 3.770313 | 3.360808 |
| 81704_at | 5.267923 | 5.033672 | 5.379192 | 5.364939 | 5.186388 | 5.360328 | 5.083223 | 4.839584 |
| 81706_at | 1.796791 | 1.080717 | 1.185629 | 1.394185 | 1.971862 | 1.581923 | 1.399789 | 1.776311 |
| 8170_at  | 1.985087 | 1.414791 | 1.543937 | 1.422917 | 1.882327 | 2.03265  | 1.905873 | 2.074642 |
| 8174_at  | 2.464683 | 1.889216 | 2.625827 | 2.693797 | 3.263152 | 2.556178 | 3.022413 | 3.043349 |
| 8175_at  | 5.874683 | 6.152936 | 6.162257 | 6.283462 | 5.33923  | 7.05232  | 6.37968  | 5.352088 |
| 81786_at | 1.94211  | 1.67146  | 1.981705 | 2.048429 | 2.061432 | 1.624997 | 1.428779 | 1.633417 |
| 81788_at | 5.525886 | 5.038278 | 5.7688   | 4.601705 | 3.256843 | 5.659873 | 4.7197   | 5.205483 |
| 81789_at | 3.521535 | 2.816952 | 2.951567 | 2.951739 | 3.173774 | 3.532874 | 3.692632 | 3.692632 |
| 8178_at  | 3.518396 | 4.102082 | 3.166283 | 3.025707 | 2.52512  | 3.661211 | 3.726717 | 2.048094 |
| 81790_at | 5.712497 | 4.774743 | 5.506643 | 5.406401 | 5.652341 | 4.9709   | 4.538213 | 5.176282 |
| 81792_at | 1.483313 | 1.600115 | 1.020938 | 1.657553 | 1.732951 | 1.461489 | 1.635856 | 1.301562 |
| 81793_at | 1.21051  | 1.920039 | 1.415681 | 1.733186 | 1.733984 | 1.294903 | 1.397593 | 1.429653 |
| 81794_at | 2.678798 | 3.09832  | 2.563915 | 2.404138 | 2.935997 | 2.794643 | 2.45056  | 3.003859 |
| 81796_at | 2.33774  | 2.164322 | 1.323796 | 1.111898 | 1.3911   | 1.938471 | 1.242872 | 1.945422 |
| 81797_at | 0.793841 | 1.021196 | 1.24811  | 0.992654 | 1.030363 | 0.949172 | 1.36627  | 1.280713 |
| 817_at   | 5.071452 | 5.64583  | 5.740776 | 4.831576 | 5.17322  | 4.968989 | 5.205115 | 5.062504 |
| 81831_at | 4.472397 | 5.158324 | 3.451373 | 5.019906 | 4.037406 | 5.358397 | 4.509632 | 3.99091  |
| 81832_at | 1.737613 | 2.257381 | 1.996316 | 2.653529 | 2.440602 | 2.657793 | 1.412156 | 2.22361  |
| 81833_at | 1.201357 | 1.175711 | 1.420928 | 1.208273 | 1.985513 | 0.718257 | 1.441315 | 1.553177 |
| 81839_at | 4.831077 | 4.916945 | 5.605116 | 5.673059 | 4.944024 | 5.339813 | 5.23017  | 5.239355 |
| 81844_at | 5.309303 | 6.013095 | 6.330296 | 6.284252 | 6.002098 | 5.920073 | 5.653641 | 6.213624 |
| 81846_at | 7.079944 | 7.04673  | 7.014613 | 7.383865 | 6.95429  | 7.282523 | 7.107225 | 7.146693 |
| 81847_at | 5.810968 | 6.035627 | 5.459416 | 6.341913 | 5.808861 | 5.333093 | 5.146825 | 5.58326  |
| 81848_at | 5.879079 | 5.575683 | 6.458844 | 6.739167 | 6.280279 | 6.758271 | 7.203141 | 4.771049 |
| 81849_at | 1.386089 | 1.269637 | 2.107944 | 1.712071 | 2.300451 | 1.295863 | 1.684889 | 1.461004 |
| 81850_at | 1.799668 | 1.82152  | 2.005346 | 1.69031  | 1.842386 | 1.855676 | 2.266821 | 2.016572 |
| 81851_at | 1.65376  | 1.431292 | 1.91922  | 1.366839 | 2.006918 | 1.799209 | 1.971827 | 1.800319 |
| 81853_at | 3.21344  | 4.469582 | 4.273581 | 4.049002 | 2.107254 | 4.645953 | 4.03947  | 3.975339 |
| 81854_at | 2.883432 | 3.372622 | 3.197705 | 2.99903  | 2.885185 | 2.951265 | 2.764831 | 2.6906   |
| 81855_at | 6.099089 | 5.591025 | 6.063707 | 6.235283 | 5.231418 | 5.538308 | 5.622054 | 5.578209 |
| 81856_at | 4.450007 | 4.34354  | 5.002603 | 5.274119 | 4.759862 | 3.728552 | 4.626522 | 5.368666 |
| 81857_at | 4.42158  | 4.02391  | 5.104481 | 5.34459  | 4.257608 | 4.58367  | 4.672972 | 4.599231 |
| 81858_at | 4.148266 | 4.257928 | 4.92874  | 4.052999 | 4.470255 | 4.552682 | 4.253405 | 4.413184 |
| 81870_at | 1.057958 | 1.305266 | 0.584887 | 0.831069 | 0.910719 | 1.037561 | 1.323914 | 1.244228 |
| 81871_at | 1.941851 | 1.288027 | 1.233451 | 1.355957 | 1.04834  | 2.338192 | 1.397768 | 1.938447 |
| 81872_at | 1.757167 | 1.966723 | 1.899081 | 1.13547  | 2.253347 | 2.158623 | 1.484033 | 1.761706 |
| 81873_at | 5.374995 | 5.878872 | 5.34087  | 5.820843 | 5.334169 | 5.79761  | 5.928213 | 5.467404 |
| 81875_at | 5.896168 | 5.864587 | 6.964834 | 6.836566 | 5.802429 | 6.512851 | 6.472608 | 5.750764 |
| 81876_at | 8.009447 | 6.981211 | 7.747719 | 7.667789 | 7.127253 | 7.891344 | 7.975632 | 7.373404 |

|          |          |          |          |          |          |          |          |          |
|----------|----------|----------|----------|----------|----------|----------|----------|----------|
| 8187_at  | 2.736396 | 2.662021 | 2.173177 | 1.67515  | 2.109125 | 3.205642 | 2.081642 | 1.296414 |
| 81887_at | 5.468521 | 5.393367 | 5.766994 | 5.288238 | 5.683208 | 5.309656 | 5.766519 | 4.898483 |
| 81888_at | 6.257856 | 5.504954 | 5.276603 | 5.47328  | 5.409331 | 5.890802 | 5.188038 | 5.116174 |
| 81889_at | 5.288746 | 4.244964 | 4.317909 | 5.355901 | 5.005023 | 4.786668 | 3.896039 | 4.966955 |
| 81890_at | 5.129784 | 4.625875 | 4.097488 | 4.535143 | 5.244062 | 4.840034 | 3.534171 | 4.629734 |
| 81892_at | 8.144309 | 8.562219 | 7.76305  | 8.364496 | 8.559816 | 8.700934 | 7.980752 | 8.682871 |
| 81893_at | 3.458102 | 3.975725 | 4.531331 | 4.51308  | 4.256296 | 4.148157 | 4.246597 | 4.099297 |
| 81894_at | 3.695075 | 3.514242 | 3.27686  | 3.073492 | 3.454862 | 3.145984 | 3.201103 | 3.00351  |
| 8189_at  | 5.193561 | 5.364916 | 4.927149 | 5.182731 | 4.458445 | 5.018122 | 4.817919 | 4.231556 |
| 818_at   | 5.910986 | 4.87982  | 6.292851 | 5.328967 | 4.84338  | 5.816841 | 6.890879 | 5.246187 |
| 81926_at | 4.320624 | 3.632755 | 2.672891 | 2.887564 | 3.041898 | 2.700505 | 3.299681 | 3.673255 |
| 81928_at | 3.133995 | 3.234317 | 4.097613 | 2.877029 | 3.89911  | 3.119398 | 3.637177 | 3.255541 |
| 81929_at | 6.357628 | 6.502862 | 6.864963 | 5.956477 | 6.265289 | 6.639333 | 6.361084 | 6.919674 |
| 8192_at  | 6.913845 | 6.752259 | 6.770483 | 6.769791 | 5.8985   | 6.854904 | 7.336398 | 5.703474 |
| 81930_at | 1.953743 | 2.328236 | 1.851808 | 1.739666 | 1.779861 | 1.789428 | 1.558396 | 1.867297 |
| 81931_at | 5.288734 | 4.693727 | 2.828863 | 4.577806 | 2.335489 | 3.741979 | 4.643606 | 2.572454 |
| 81932_at | 5.104056 | 4.239606 | 4.661607 | 3.700399 | 4.686726 | 4.346917 | 4.292075 | 4.890119 |
| 8193_at  | 2.523263 | 2.20498  | 3.313828 | 3.271116 | 3.21618  | 2.793067 | 3.250109 | 2.115658 |
| 8195_at  | 6.349154 | 6.490701 | 5.960937 | 6.161755 | 6.491714 | 6.315604 | 5.928648 | 6.406227 |
| 819_at   | 7.422457 | 7.006019 | 6.323988 | 6.397096 | 6.593402 | 7.221251 | 6.31989  | 6.813867 |
| 81_at    | 10.48424 | 10.44246 | 10.58504 | 10.30004 | 10.06479 | 10.22071 | 10.4522  | 10.25247 |
| 8200_at  | 1.90985  | 1.973258 | 1.889777 | 1.950323 | 3.476007 | 1.825998 | 1.825414 | 2.052922 |
| 8202_at  | 6.648792 | 6.826622 | 6.909579 | 7.307748 | 7.224256 | 7.10173  | 7.382395 | 6.831712 |
| 8204_at  | 7.237245 | 8.44008  | 8.30535  | 7.707416 | 7.846819 | 7.458895 | 7.673333 | 8.467439 |
| 8208_at  | 2.745005 | 2.603967 | 2.608122 | 2.667458 | 3.231698 | 3.340387 | 2.073154 | 3.552032 |
| 820_at   | 2.26111  | 3.03243  | 3.056676 | 2.511386 | 3.035241 | 2.642363 | 2.592092 | 3.053139 |
| 8214_at  | 0.475212 | 0.665945 | 0.591515 | 1.398675 | 1.017487 | 0.830502 | 0.85822  | 0.692647 |
| 8216_at  | 4.820551 | 4.409409 | 4.350753 | 5.206107 | 3.227329 | 4.732816 | 4.675119 | 3.983358 |
| 8218_at  | 2.098356 | 2.515445 | 2.056817 | 1.840983 | 2.182136 | 1.477762 | 3.160107 | 2.320608 |
| 821_at   | 9.598241 | 10.0277  | 10.07398 | 10.19049 | 10.00467 | 9.751551 | 10.02733 | 10.02727 |
| 8220_at  | 3.167629 | 2.163758 | 4.278382 | 3.703552 | 2.759977 | 3.785444 | 3.422149 | 3.104913 |
| 8224_at  | 2.072564 | 2.930121 | 2.757454 | 3.174222 | 3.583629 | 2.095197 | 2.122447 | 2.502728 |
| 8225_at  | 4.489089 | 4.088553 | 3.662639 | 3.87815  | 3.214479 | 4.437692 | 3.431367 | 4.398415 |
| 8226_at  | 5.081781 | 4.572147 | 4.847446 | 5.055542 | 4.27792  | 5.335297 | 4.743416 | 5.253922 |
| 8227_at  | 4.009963 | 3.913339 | 3.805141 | 4.741598 | 4.624873 | 4.849103 | 4.090326 | 3.193269 |
| 8228_at  | 6.304744 | 5.823523 | 5.746378 | 5.887219 | 6.162821 | 6.567565 | 4.557796 | 5.568639 |
| 822_at   | 5.088704 | 2.700192 | 3.085128 | 5.07516  | 4.274653 | 2.89219  | 2.188934 | 3.765646 |
| 8233_at  | 5.78814  | 7.416444 | 4.941178 | 4.984353 | 5.022265 | 6.130298 | 6.58119  | 3.837638 |
| 8237_at  | 6.314326 | 6.704058 | 6.425752 | 6.603891 | 6.097184 | 6.313154 | 7.015601 | 6.209623 |
| 8239_at  | 7.175341 | 7.490904 | 7.187489 | 7.524016 | 7.56004  | 6.998298 | 7.188709 | 7.589995 |
| 823_at   | 6.239342 | 6.504974 | 6.670112 | 6.111905 | 5.956904 | 6.27477  | 6.379501 | 5.917227 |
| 8241_at  | 5.779503 | 5.649191 | 5.796115 | 5.307582 | 5.565281 | 6.216526 | 6.396928 | 5.660634 |
| 8242_at  | 5.79901  | 5.814402 | 5.016471 | 5.679302 | 4.511653 | 5.534861 | 6.605958 | 5.527705 |
| 8243_at  | 5.87991  | 5.942523 | 6.500206 | 6.293621 | 6.381559 | 6.316177 | 6.171076 | 6.640833 |
| 824_at   | 9.657659 | 9.71762  | 10.05095 | 9.728315 | 9.413428 | 9.444567 | 10.09667 | 9.833856 |
| 825_at   | 4.430987 | 2.586874 | 2.828726 | 2.394259 | 4.434966 | 2.596232 | 3.052794 | 3.852971 |
| 8260_at  | 7.609044 | 5.871902 | 6.391945 | 6.915186 | 5.87303  | 7.083731 | 6.757056 | 6.28141  |
| 8263_at  | 10.07019 | 10.0148  | 9.730855 | 9.748554 | 9.12476  | 9.808523 | 7.607551 | 9.788803 |
| 8266_at  | 4.787923 | 3.888694 | 4.412926 | 4.637526 | 2.954401 | 4.611092 | 4.125774 | 3.900425 |
| 8269_at  | 3.927953 | 3.583924 | 3.202595 | 3.803486 | 3.894927 | 3.564153 | 3.762516 | 4.107514 |
| 826_at   | 10.11971 | 9.966097 | 10.07392 | 10.16141 | 10.00305 | 9.866654 | 10.07975 | 9.717529 |

|          |          |          |          |          |          |          |          |          |
|----------|----------|----------|----------|----------|----------|----------|----------|----------|
| 8270_at  | 3.958903 | 3.500736 | 3.378159 | 3.044065 | 4.417413 | 3.559472 | 2.239538 | 3.026407 |
| 8273_at  | 5.759755 | 5.385048 | 5.714653 | 5.513154 | 4.9059   | 5.675928 | 5.994269 | 5.328245 |
| 8277_at  | 2.073615 | 2.906511 | 2.576646 | 2.43163  | 3.042518 | 4.190078 | 3.446617 | 2.770157 |
| 827_at   | 2.193638 | 3.59961  | 4.821021 | 2.571346 | 2.416027 | 4.853975 | 4.177326 | 1.939472 |
| 8284_at  | 3.177455 | 5.142266 | 3.570171 | 3.838842 | 4.44714  | 4.317233 | 3.351976 | 4.247626 |
| 8287_at  | 4.583315 | 4.869738 | 4.136476 | 4.655175 | 4.811955 | 4.935536 | 4.624439 | 5.065045 |
| 8288_at  | 1.901979 | 1.304905 | 1.134169 | 1.491956 | 0.857348 | 1.960194 | 1.745086 | 1.885774 |
| 8289_at  | 4.85232  | 5.372334 | 5.026328 | 5.685118 | 5.197916 | 5.484997 | 5.604538 | 4.923116 |
| 828_at   | 2.372016 | 3.34948  | 2.783278 | 1.951107 | 2.429406 | 2.73288  | 3.122362 | 2.785367 |
| 8290_at  | 1.443645 | 1.38587  | 1.121751 | 1.827323 | 1.522817 | 1.315129 | 1.395574 | 1.085633 |
| 8291_at  | 4.749897 | 5.652982 | 5.782504 | 6.577022 | 6.218217 | 5.859027 | 5.884656 | 5.254298 |
| 8292_at  | 2.479842 | 2.027134 | 2.134777 | 2.955185 | 2.318769 | 2.87809  | 1.999336 | 2.835005 |
| 8295_at  | 5.437139 | 5.472533 | 5.748789 | 5.431449 | 5.212953 | 6.004987 | 5.948052 | 4.759095 |
| 829_at   | 7.533795 | 7.425021 | 7.844308 | 7.926354 | 6.716789 | 7.691062 | 7.902448 | 7.302052 |
| 8301_at  | 9.024446 | 9.176561 | 9.33283  | 9.325606 | 8.965044 | 8.846914 | 8.902478 | 9.179494 |
| 8303_at  | 3.595214 | 4.039889 | 3.480204 | 4.408292 | 4.101863 | 3.573104 | 3.722686 | 3.391105 |
| 8309_at  | 5.876652 | 5.143758 | 5.311142 | 4.572382 | 5.086945 | 5.75918  | 4.782882 | 5.73803  |
| 830_at   | 7.666852 | 8.030575 | 7.514691 | 7.756167 | 8.023175 | 7.213409 | 7.606445 | 8.162289 |
| 8310_at  | 4.19999  | 3.712857 | 3.725319 | 3.976049 | 4.102501 | 4.346307 | 4.183234 | 3.081031 |
| 8312_at  | 3.350244 | 3.068415 | 2.801349 | 3.094934 | 2.279699 | 3.574954 | 3.275235 | 3.087391 |
| 8313_at  | 3.314475 | 4.263879 | 4.471234 | 4.409642 | 3.970079 | 3.477169 | 4.320895 | 4.464982 |
| 8314_at  | 5.464297 | 5.405804 | 5.9419   | 5.371527 | 5.07467  | 5.603996 | 5.55024  | 5.950357 |
| 8315_at  | 6.431142 | 6.606229 | 6.781691 | 6.10771  | 5.995468 | 6.782476 | 5.812875 | 6.031845 |
| 8317_at  | 1.952916 | 2.017057 | 2.733535 | 2.145476 | 2.83672  | 2.373821 | 3.75141  | 3.65296  |
| 8318_at  | 2.346796 | 3.250207 | 2.440526 | 2.157988 | 1.55495  | 2.384182 | 1.496405 | 2.73152  |
| 831_at   | 8.499709 | 8.246932 | 8.125048 | 8.234823 | 8.226906 | 8.214852 | 8.248098 | 8.11799  |
| 8320_at  | 2.05959  | 2.038829 | 2.164269 | 2.767466 | 2.048542 | 1.869212 | 3.00158  | 1.525774 |
| 8321_at  | 3.817494 | 2.992097 | 3.985519 | 3.848801 | 3.948546 | 3.833481 | 3.109201 | 3.150009 |
| 8322_at  | 5.711637 | 6.573176 | 6.260038 | 6.856304 | 6.020132 | 6.540681 | 6.242314 | 5.680228 |
| 8323_at  | 5.943399 | 5.645442 | 5.790705 | 5.535567 | 6.069645 | 5.022992 | 5.846609 | 6.799625 |
| 8324_at  | 4.966149 | 5.352799 | 4.795344 | 4.093477 | 4.42318  | 4.158647 | 4.228151 | 5.661543 |
| 83259_at | 1.029102 | 1.776347 | 1.77069  | 2.0472   | 1.92093  | 1.624188 | 0.888182 | 2.65322  |
| 8325_at  | 4.613646 | 4.725033 | 5.564675 | 5.138183 | 5.251242 | 6.732484 | 5.654469 | 3.792402 |
| 8326_at  | 1.728089 | 3.214239 | 2.75418  | 3.662909 | 2.187019 | 2.873977 | 3.407011 | 2.236825 |
| 8328_at  | 4.000081 | 4.132829 | 3.873284 | 3.553501 | 3.468624 | 4.076135 | 3.90061  | 5.009378 |
| 8329_at  | 2.587126 | 2.418739 | 3.322943 | 3.655943 | 1.875039 | 2.117645 | 3.954472 | 2.90061  |
| 832_at   | 7.356631 | 7.215697 | 7.566021 | 7.403446 | 7.055137 | 7.111121 | 7.212049 | 7.424663 |
| 8330_at  | 4.428113 | 1.86067  | 2.61778  | 4.320659 | 3.135245 | 4.174174 | 5.463588 | 2.782814 |
| 8331_at  | 1.805985 | 3.445656 | 2.068907 | 2.260166 | 3.184207 | 2.598207 | 1.901788 | 1.993621 |
| 8334_at  | 10.27719 | 10.27042 | 10.24651 | 10.35314 | 10.70824 | 9.94904  | 10.00805 | 11.01456 |
| 8335_at  | 0.915385 | 3.061181 | 1.107604 | 1.506552 | 1.661599 | 1.497652 | 1.235921 | 3.055493 |
| 8336_at  | 4.284225 | 2.715516 | 4.643513 | 5.475498 | 2.067482 | 1.276068 | 4.425095 | 4.68314  |
| 8338_at  | 11.16397 | 11.13976 | 10.91189 | 10.83571 | 10.84762 | 10.73366 | 11.05233 | 11.09054 |
| 83394_at | 5.094699 | 4.573869 | 5.069304 | 4.61434  | 4.633634 | 5.011489 | 5.877003 | 3.904374 |
| 8339_at  | 1.962767 | 1.353606 | 0.882659 | 2.952021 | 2.666413 | 0.914154 | 2.490136 | 4.238499 |
| 833_at   | 6.092447 | 5.660123 | 5.353446 | 4.999527 | 5.791167 | 6.148883 | 5.747688 | 5.333347 |
| 83401_at | 1.349989 | 1.821582 | 1.668148 | 1.670975 | 2.650026 | 1.630386 | 1.370531 | 1.449566 |
| 8340_at  | 2.665878 | 2.998438 | 3.721261 | 3.390762 | 3.610465 | 4.222982 | 3.53819  | 3.390762 |
| 83416_at | 1.539447 | 1.392217 | 1.137143 | 1.266575 | 0.892799 | 1.301902 | 1.205821 | 2.048428 |
| 83417_at | 1.679441 | 1.674705 | 1.254623 | 1.295015 | 2.010181 | 1.67471  | 1.57437  | 1.251151 |
| 8341_at  | 5.124861 | 4.556875 | 4.159929 | 4.321613 | 6.099455 | 5.790672 | 4.825084 | 6.688831 |

|          |          |          |          |          |          |          |          |          |
|----------|----------|----------|----------|----------|----------|----------|----------|----------|
| 8342_at  | 3.638935 | 2.842719 | 6.469992 | 5.217058 | 3.971116 | 3.931417 | 6.812851 | 7.892093 |
| 83439_at | 6.14575  | 6.483872 | 6.703644 | 6.319073 | 5.549719 | 6.345708 | 7.085331 | 5.826302 |
| 83440_at | 4.504329 | 5.035749 | 4.331629 | 5.383527 | 3.762524 | 4.773917 | 5.279407 | 5.015674 |
| 83442_at | 10.10067 | 9.700623 | 10.11591 | 10.28865 | 9.566394 | 10.30747 | 10.3398  | 9.253583 |
| 83443_at | 8.198359 | 7.276992 | 8.180153 | 7.96799  | 7.076275 | 7.982686 | 7.724251 | 7.135126 |
| 83445_at | 1.011496 | 1.49996  | 2.06608  | 1.479422 | 1.037398 | 1.575568 | 2.259916 | 0.89615  |
| 83446_at | 1.805119 | 1.858672 | 1.615924 | 1.682721 | 1.739284 | 1.563101 | 2.20407  | 2.196002 |
| 83447_at | 1.851032 | 1.721951 | 1.32422  | 1.678391 | 1.131966 | 0.971942 | 1.909801 | 1.533383 |
| 83448_at | 4.347788 | 4.266854 | 4.660125 | 4.259475 | 4.748495 | 3.836802 | 4.433168 | 4.970576 |
| 83449_at | 2.424687 | 1.389001 | 1.389001 | 1.448676 | 1.764113 | 1.618098 | 1.611918 | 1.873936 |
| 8344_at  | 1.408122 | 1.235058 | 2.26374  | 3.090088 | 1.959474 | 1.162386 | 1.377256 | 0.903779 |
| 83450_at | 2.753062 | 3.283482 | 2.815287 | 3.74715  | 3.598417 | 4.366341 | 2.704301 | 3.650004 |
| 83451_at | 3.838602 | 3.819178 | 2.907376 | 3.452721 | 2.937442 | 3.117499 | 3.672172 | 3.520929 |
| 83452_at | 5.714477 | 5.033446 | 5.487001 | 6.009425 | 5.461365 | 3.968736 | 6.129773 | 5.842942 |
| 8345_at  | 6.567686 | 5.894515 | 6.530269 | 6.868072 | 6.627456 | 6.743107 | 6.188686 | 6.382124 |
| 83460_at | 5.842336 | 5.473709 | 5.716719 | 5.086115 | 5.016455 | 5.720682 | 5.157079 | 5.013561 |
| 83461_at | 3.807119 | 2.415239 | 3.677497 | 3.521374 | 3.065177 | 4.044666 | 4.770451 | 3.46035  |
| 83463_at | 2.552633 | 1.674358 | 2.919905 | 3.352618 | 2.131016 | 2.308988 | 2.91365  | 2.069769 |
| 83464_at | 4.341253 | 5.301118 | 4.444518 | 4.790717 | 6.267222 | 5.016122 | 5.322877 | 5.960069 |
| 83468_at | 4.947716 | 4.822589 | 4.287572 | 4.787788 | 5.342386 | 4.776324 | 4.260234 | 3.878886 |
| 8346_at  | 0.990036 | 1.847593 | 1.810796 | 1.059689 | 2.102242 | 1.678894 | 1.723463 | 2.396993 |
| 83473_at | 3.225391 | 3.536016 | 3.425284 | 2.310743 | 2.53871  | 2.75295  | 2.927375 | 3.232174 |
| 83475_at | 2.5486   | 2.558209 | 2.5826   | 2.659277 | 3.123046 | 3.096559 | 2.86169  | 2.647623 |
| 83478_at | 6.046982 | 5.447661 | 5.933297 | 4.69336  | 5.966738 | 5.359976 | 5.138209 | 5.8249   |
| 83479_at | 4.192683 | 3.963229 | 4.785892 | 4.72411  | 3.563541 | 4.880753 | 4.44543  | 4.695311 |
| 83480_at | 3.515095 | 3.869626 | 3.82038  | 3.241527 | 3.686092 | 3.208623 | 3.72522  | 3.004716 |
| 83481_at | 2.348533 | 2.814172 | 2.117683 | 2.720963 | 3.528449 | 2.291106 | 1.818784 | 3.00096  |
| 83482_at | 2.551694 | 1.680771 | 1.330863 | 1.664808 | 1.424004 | 1.566484 | 1.789485 | 1.456607 |
| 83483_at | 3.099663 | 2.457239 | 3.755275 | 4.326608 | 4.325217 | 2.598314 | 2.223825 | 2.523186 |
| 8348_at  | 2.212758 | 3.861964 | 3.031428 | 2.69133  | 3.045899 | 2.459111 | 3.529537 | 3.52025  |
| 8349_at  | 7.111406 | 7.105896 | 7.471288 | 7.543093 | 6.371509 | 6.86955  | 7.442549 | 7.036446 |
| 834_at   | 5.25661  | 5.467655 | 4.249509 | 5.19869  | 4.371109 | 5.466851 | 5.179531 | 5.635752 |
| 8350_at  | 2.473785 | 2.026491 | 2.266884 | 1.489573 | 1.786536 | 1.590431 | 4.575845 | 2.962031 |
| 8351_at  | 5.52932  | 2.766199 | 4.02756  | 5.938542 | 4.489129 | 4.333298 | 3.736235 | 5.043005 |
| 8352_at  | 1.518858 | 2.117446 | 1.373557 | 1.458054 | 1.580032 | 0.899717 | 2.505954 | 1.495641 |
| 83538_at | 3.277865 | 2.364733 | 1.711431 | 3.136129 | 2.068287 | 2.114588 | 1.532743 | 3.735903 |
| 83539_at | 3.55237  | 1.441181 | 2.596309 | 2.240987 | 2.580181 | 2.067383 | 2.278986 | 3.447252 |
| 8353_at  | 4.582361 | 4.484162 | 4.371057 | 4.829716 | 4.124347 | 5.205036 | 3.873647 | 2.164338 |
| 83540_at | 1.903037 | 3.022887 | 1.80553  | 4.025055 | 2.973255 | 1.622103 | 1.772678 | 4.63093  |
| 83541_at | 7.004672 | 6.658054 | 6.533975 | 7.617195 | 6.276995 | 7.078623 | 7.423969 | 6.755963 |
| 83543_at | 8.621987 | 8.434734 | 8.039184 | 8.096715 | 7.874827 | 8.771444 | 7.738595 | 8.436797 |
| 83544_at | 4.217769 | 5.072957 | 5.622458 | 5.384838 | 5.00361  | 4.674419 | 4.793889 | 5.303716 |
| 83546_at | 2.566125 | 2.241031 | 2.205676 | 2.737266 | 2.475076 | 2.284083 | 1.960478 | 2.461281 |
| 83547_at | 3.821975 | 3.242048 | 3.193535 | 3.449151 | 2.634984 | 3.611412 | 3.873686 | 2.484247 |
| 83548_at | 6.24916  | 6.02021  | 6.193876 | 6.027163 | 5.798258 | 5.967425 | 6.281631 | 6.311927 |
| 83549_at | 4.670842 | 4.312104 | 4.229134 | 4.281937 | 3.707339 | 4.022614 | 3.734574 | 5.22895  |
| 8354_at  | 6.58622  | 5.432342 | 6.898234 | 7.163084 | 6.877253 | 6.074829 | 7.489931 | 5.033425 |
| 83550_at | 2.398974 | 2.278    | 2.415689 | 2.171101 | 2.416989 | 2.409805 | 2.553946 | 2.198439 |
| 83551_at | 1.073586 | 1.656028 | 1.319771 | 1.764721 | 1.801244 | 2.078073 | 1.49488  | 1.43599  |
| 8355_at  | 1.563861 | 5.584618 | 1.273487 | 5.733684 | 0.941044 | 1.644653 | 5.990544 | 0.996424 |
| 8356_at  | 1.216943 | 1.390831 | 1.85728  | 2.573468 | 1.162587 | 2.215817 | 1.464373 | 1.803133 |

|          |          |          |          |          |          |          |          |          |
|----------|----------|----------|----------|----------|----------|----------|----------|----------|
| 8357_at  | 1.587266 | 3.55881  | 2.498521 | 1.350116 | 1.741092 | 3.108054 | 1.932239 | 3.35834  |
| 8358_at  | 1.463357 | 1.743478 | 2.324231 | 1.646904 | 0.733442 | 0.759046 | 1.486726 | 1.465074 |
| 83590_at | 4.887139 | 5.143964 | 4.045291 | 4.853515 | 4.085403 | 4.656437 | 4.286088 | 3.92794  |
| 83591_at | 4.683789 | 5.265846 | 4.793746 | 2.99619  | 3.853553 | 4.725795 | 3.938846 | 5.716999 |
| 83592_at | 2.978381 | 5.187438 | 3.319137 | 4.095049 | 3.917011 | 3.775102 | 4.086705 | 4.248607 |
| 83593_at | 5.181903 | 4.437084 | 4.855055 | 5.477692 | 4.930953 | 4.236766 | 5.271866 | 4.071807 |
| 83594_at | 4.991617 | 5.122687 | 4.721994 | 4.326843 | 5.126805 | 4.787328 | 5.497583 | 4.558848 |
| 83595_at | 4.800268 | 4.214283 | 4.039124 | 4.045027 | 4.076675 | 4.721258 | 5.068778 | 3.953034 |
| 83596_at | 5.65767  | 4.50327  | 4.889723 | 5.157684 | 5.239874 | 4.861627 | 4.036798 | 4.604517 |
| 83597_at | 1.499914 | 1.606579 | 1.250274 | 1.752848 | 1.707984 | 1.500257 | 1.264137 | 1.051247 |
| 83598_at | 2.922795 | 2.587252 | 2.880828 | 1.890932 | 1.729287 | 3.086874 | 2.339011 | 1.501374 |
| 8359_at  | 0.524539 | 0.590394 | 1.565238 | 0.161732 | 0.783846 | 1.374675 | 2.357281 | 4.090347 |
| 835_at   | 5.000038 | 6.081779 | 5.640196 | 5.127112 | 6.043598 | 5.289356 | 5.315508 | 5.374234 |
| 83604_at | 9.099817 | 9.564575 | 9.144207 | 9.261597 | 9.400551 | 9.327594 | 9.356284 | 9.682221 |
| 83605_at | 3.844878 | 3.822023 | 3.109539 | 4.357973 | 4.764772 | 1.840188 | 5.226986 | 2.994831 |
| 83606_at | 5.01374  | 4.823163 | 4.997502 | 4.592483 | 6.050705 | 5.022649 | 4.943706 | 4.540711 |
| 83607_at | 6.565776 | 6.447404 | 5.346722 | 6.616299 | 5.907119 | 6.353779 | 6.752203 | 6.225223 |
| 83608_at | 5.944306 | 4.727426 | 5.189239 | 4.757258 | 4.955825 | 5.432818 | 4.607778 | 5.014554 |
| 8360_at  | 3.445596 | 3.805823 | 3.740233 | 4.176605 | 0.989774 | 3.499016 | 3.16316  | 3.800638 |
| 8361_at  | 3.08319  | 1.896338 | 2.366451 | 2.612145 | 1.595317 | 2.374537 | 3.853627 | 2.443969 |
| 83636_at | 3.049856 | 3.101141 | 3.095013 | 2.839779 | 2.299407 | 2.92253  | 3.053221 | 3.237104 |
| 83637_at | 5.674497 | 5.149629 | 5.466874 | 6.070379 | 5.053343 | 5.007401 | 5.91029  | 5.463426 |
| 83638_at | 6.481169 | 5.491947 | 6.5999   | 6.848787 | 5.63358  | 6.226169 | 6.321627 | 6.108905 |
| 83639_at | 1.935668 | 1.374709 | 1.791933 | 1.291884 | 1.436596 | 1.140175 | 1.736085 | 1.431882 |
| 8363_at  | 1.7471   | 1.534022 | 1.773291 | 1.836274 | 2.04178  | 1.293815 | 3.636419 | 2.440674 |
| 83640_at | 6.670171 | 6.967058 | 7.237471 | 6.953849 | 6.970746 | 6.725013 | 6.03126  | 7.51305  |
| 83641_at | 2.597096 | 2.617724 | 1.834318 | 2.378086 | 2.956274 | 2.623996 | 2.456603 | 2.720199 |
| 83642_at | 3.676993 | 3.258476 | 3.429739 | 4.335815 | 3.881426 | 3.598948 | 2.965576 | 3.064608 |
| 83643_at | 1.766687 | 1.572408 | 1.964571 | 1.469439 | 1.488255 | 1.974564 | 1.641334 | 1.580171 |
| 83648_at | 1.764302 | 1.266305 | 2.163669 | 1.311401 | 2.447539 | 2.727763 | 1.479094 | 1.50602  |
| 8364_at  | 10.01439 | 9.156703 | 9.100743 | 10.06647 | 9.534468 | 9.250729 | 9.410685 | 9.714523 |
| 83655_at | 1.729892 | 1.555384 | 1.921405 | 1.641473 | 1.818421 | 2.306486 | 1.812971 | 2.601606 |
| 83656_at | 1.415032 | 2.158725 | 1.593069 | 1.411858 | 1.78953  | 1.938686 | 1.786352 | 1.832042 |
| 83657_at | 4.334139 | 3.403194 | 3.917716 | 3.354617 | 3.497313 | 3.690711 | 2.457978 | 3.150404 |
| 83658_at | 6.935793 | 6.643709 | 6.859519 | 6.970607 | 6.740295 | 7.013006 | 6.576083 | 6.66661  |
| 83659_at | 2.684938 | 1.907043 | 1.621334 | 1.131621 | 1.624896 | 1.775429 | 1.307579 | 2.638054 |
| 83660_at | 3.572075 | 3.984913 | 3.784932 | 3.195277 | 3.824115 | 3.46254  | 2.988838 | 3.718715 |
| 83661_at | 2.864013 | 2.403127 | 3.71684  | 2.578925 | 2.934175 | 2.993719 | 2.461115 | 3.044336 |
| 83666_at | 6.214649 | 6.427811 | 6.059839 | 6.35149  | 5.866534 | 6.186553 | 6.649239 | 6.434562 |
| 83667_at | 4.400454 | 4.262558 | 3.360146 | 3.516577 | 4.598374 | 3.060229 | 3.907836 | 3.997645 |
| 8366_at  | 1.472872 | 1.723139 | 2.513952 | 1.559319 | 1.979679 | 1.820902 | 2.179895 | 3.214834 |
| 8367_at  | 8.08216  | 8.765245 | 8.98099  | 9.773228 | 8.304782 | 8.451658 | 8.107208 | 8.987428 |
| 8368_at  | 1.714677 | 0.596668 | 1.740857 | 4.48571  | 1.02831  | 1.802176 | 4.419859 | 3.149698 |
| 83690_at | 1.594519 | 1.530412 | 1.726033 | 1.468657 | 2.145158 | 1.706818 | 1.696826 | 1.635794 |
| 83692_at | 6.155896 | 6.327073 | 6.141272 | 6.132952 | 5.018126 | 6.758847 | 6.439279 | 5.534909 |
| 83693_at | 4.723758 | 4.399895 | 4.447692 | 4.901064 | 2.343168 | 3.564597 | 3.158143 | 4.309382 |
| 83694_at | 2.794263 | 2.780928 | 3.369565 | 2.505283 | 1.954594 | 2.146663 | 2.425586 | 1.918813 |
| 83695_at | 4.466495 | 3.799517 | 4.055551 | 4.359155 | 3.430966 | 4.433663 | 4.275686 | 4.515719 |
| 83696_at | 5.665115 | 5.642069 | 6.020319 | 5.947799 | 5.400931 | 6.266942 | 6.068015 | 5.111912 |
| 83697_at | 1.52469  | 2.066825 | 1.914678 | 2.057629 | 0.912873 | 2.605325 | 1.694002 | 1.319755 |
| 83698_at | 1.696297 | 1.713527 | 1.858604 | 1.372854 | 1.75975  | 1.71282  | 1.211688 | 1.235101 |



|          |          |          |          |          |          |          |          |          |
|----------|----------|----------|----------|----------|----------|----------|----------|----------|
| 83699_at | 8.082471 | 8.758695 | 8.499905 | 8.219737 | 8.390017 | 8.093638 | 8.743828 | 8.299487 |
| 8369_at  | 1.143153 | 1.646924 | 1.074856 | 1.18034  | 1.47725  | 2.29395  | 1.903081 | 1.325121 |
| 836_at   | 4.859299 | 4.872488 | 5.746956 | 5.372248 | 5.259971 | 5.592853 | 5.258091 | 5.716611 |
| 83700_at | 7.199631 | 6.702841 | 7.534783 | 6.918249 | 7.036646 | 7.435487 | 7.75769  | 6.628092 |
| 83706_at | 3.44958  | 2.8296   | 3.086632 | 3.525688 | 2.630004 | 2.88216  | 2.349769 | 3.233694 |
| 83707_at | 6.594161 | 6.505464 | 6.11884  | 6.348688 | 6.145122 | 6.444845 | 5.07369  | 6.127715 |
| 83714_at | 6.923048 | 6.61911  | 6.405243 | 6.50764  | 5.894726 | 6.419402 | 6.992904 | 6.524283 |
| 83715_at | 4.529271 | 3.671077 | 3.631845 | 3.036661 | 3.384519 | 3.354357 | 1.733142 | 3.631731 |
| 83716_at | 1.87388  | 4.669415 | 2.520083 | 3.833873 | 2.14223  | 3.953244 | 2.677444 | 2.95923  |
| 83719_at | 6.644128 | 6.187195 | 6.731896 | 6.363448 | 6.598052 | 6.675369 | 6.057632 | 5.990325 |
| 83723_at | 2.104897 | 1.86939  | 1.933756 | 2.706371 | 2.298288 | 2.789042 | 2.49211  | 2.765391 |
| 83729_at | 1.631068 | 2.042367 | 1.51834  | 3.027111 | 1.862967 | 1.568689 | 1.735799 | 2.776123 |
| 8372_at  | 2.805201 | 3.003935 | 2.955355 | 3.218402 | 5.816592 | 3.109843 | 3.011492 | 1.934402 |
| 83732_at | 6.131056 | 6.064681 | 5.589152 | 4.888586 | 5.786224 | 6.280904 | 5.72807  | 6.482591 |
| 83733_at | 2.891902 | 2.975748 | 2.834164 | 2.677295 | 2.647251 | 3.400229 | 2.871981 | 2.427549 |
| 83734_at | 4.338688 | 4.120763 | 3.145537 | 3.959495 | 3.755706 | 3.408427 | 4.59883  | 4.122313 |
| 83737_at | 7.344536 | 7.124418 | 7.258316 | 7.515912 | 7.548789 | 7.543605 | 7.524958 | 7.342532 |
| 83741_at | 1.081496 | 1.49046  | 1.266733 | 1.717417 | 2.00618  | 1.472449 | 1.625231 | 1.884199 |
| 83742_at | 5.967516 | 6.218213 | 5.569164 | 6.14501  | 5.316182 | 5.479325 | 6.081867 | 5.109677 |
| 83743_at | 4.027769 | 4.265365 | 3.657779 | 3.801057 | 3.934233 | 4.825267 | 3.365286 | 4.078673 |
| 83744_at | 5.461726 | 5.380331 | 5.201991 | 5.891408 | 5.94932  | 4.948705 | 5.717712 | 5.15375  |
| 83746_at | 4.02148  | 3.18364  | 2.876837 | 3.880028 | 2.071049 | 4.517688 | 3.601657 | 2.721411 |
| 83747_at | 1.066215 | 2.437015 | 0.904749 | 2.193257 | 1.232189 | 2.445403 | 0.413333 | 1.896673 |
| 83752_at | 7.076491 | 6.996089 | 7.346444 | 6.52053  | 7.50797  | 6.916246 | 7.309411 | 6.798929 |
| 83755_at | 0.816089 | 1.244023 | 1.062195 | 1.756344 | 1.14354  | 1.016087 | 2.418735 | 1.31723  |
| 83756_at | 3.115877 | 2.71519  | 3.15582  | 3.302338 | 2.997258 | 2.290568 | 2.519189 | 2.645968 |
| 83758_at | 8.354638 | 6.676672 | 8.139896 | 4.772095 | 8.533252 | 8.127923 | 4.883859 | 6.985081 |
| 83759_at | 5.125341 | 4.668939 | 5.845445 | 4.749701 | 5.144357 | 4.534308 | 4.408361 | 3.858005 |
| 83786_at | 4.092974 | 4.155675 | 3.479552 | 3.598341 | 1.983061 | 4.920947 | 4.700942 | 1.833602 |
| 83787_at | 5.294891 | 4.751695 | 5.173859 | 5.299165 | 4.69172  | 5.04199  | 5.393142 | 5.26978  |
| 83795_at | 2.344659 | 2.608161 | 1.96377  | 2.442267 | 3.222928 | 2.769347 | 3.01486  | 2.531976 |
| 8379_at  | 4.435718 | 4.551873 | 4.221424 | 4.473577 | 3.417732 | 4.126876 | 4.831336 | 3.55849  |
| 837_at   | 8.154263 | 7.570648 | 7.826784 | 7.772351 | 7.002687 | 7.822387 | 7.678841 | 7.582511 |
| 8382_at  | 5.816407 | 5.307352 | 4.676942 | 4.806576 | 4.678963 | 5.35151  | 4.75715  | 5.912385 |
| 8383_at  | 1.933511 | 1.655192 | 1.601953 | 1.413598 | 1.789413 | 1.717032 | 1.906071 | 2.003738 |
| 83844_at | 1.279958 | 1.685761 | 1.317567 | 1.243925 | 1.498824 | 1.815924 | 1.476751 | 1.278382 |
| 83850_at | 1.430918 | 1.688371 | 1.37719  | 1.54275  | 1.187033 | 2.344151 | 2.020479 | 1.537579 |
| 83851_at | 2.025369 | 1.595325 | 1.578927 | 1.637665 | 1.420628 | 1.333556 | 1.637665 | 1.609202 |
| 83852_at | 5.071093 | 5.197625 | 4.594874 | 5.210071 | 5.498504 | 4.324008 | 5.225243 | 5.763042 |
| 83853_at | 2.799726 | 2.609719 | 2.31736  | 2.198294 | 2.177439 | 2.155987 | 1.9908   | 2.19461  |
| 83854_at | 4.171838 | 4.505172 | 3.393778 | 4.054984 | 3.049756 | 3.898998 | 3.139834 | 3.862149 |
| 83855_at | 4.368482 | 4.759308 | 4.296992 | 3.672792 | 3.773414 | 4.381365 | 4.474337 | 4.134825 |
| 83856_at | 2.703854 | 2.799517 | 3.247115 | 2.725126 | 2.548736 | 2.73438  | 2.766473 | 3.418415 |
| 83857_at | 7.2602   | 7.880732 | 7.27714  | 7.631056 | 6.888713 | 7.962934 | 7.6888   | 6.797152 |
| 83858_at | 1.721231 | 3.372281 | 2.994998 | 2.701002 | 2.366308 | 2.815997 | 2.868558 | 2.220741 |
| 83860_at | 5.24331  | 5.726824 | 5.595468 | 6.260006 | 5.274202 | 5.627324 | 5.862935 | 6.022863 |
| 83861_at | 5.099616 | 6.126909 | 6.644051 | 5.901537 | 5.971469 | 5.837521 | 6.461928 | 6.318503 |
| 83862_at | 7.091439 | 5.847317 | 6.494529 | 6.175283 | 6.478146 | 6.33996  | 6.233933 | 6.051714 |
| 83863_at | 1.414786 | 2.377355 | 1.882688 | 2.126395 | 2.754034 | 1.914822 | 2.731807 | 1.698867 |
| 83866_at | 1.835312 | 0.831031 | 1.512709 | 1.392656 | 2.189123 | 1.093557 | 1.149338 | 2.307659 |
| 83867_at | 1.107999 | 1.238308 | 1.133221 | 1.145194 | 1.067668 | 1.567462 | 1.859741 | 1.15378  |

|          |          |          |          |          |          |          |          |          |
|----------|----------|----------|----------|----------|----------|----------|----------|----------|
| 83868_at | 1.69455  | 3.141936 | 1.635354 | 1.68739  | 1.892251 | 1.904815 | 2.180167 | 1.48016  |
| 83869_at | 3.07043  | 4.800821 | 2.093753 | 3.684552 | 4.418485 | 3.751796 | 4.737836 | 2.869114 |
| 8386_at  | 1.337003 | 1.188509 | 2.722929 | 1.27997  | 1.028774 | 2.00953  | 1.294994 | 0.932089 |
| 83871_at | 7.088505 | 6.769706 | 5.91255  | 6.697239 | 7.177673 | 6.341804 | 6.230301 | 6.637357 |
| 83872_at | 1.765294 | 1.626423 | 1.76215  | 1.986912 | 2.886644 | 2.245275 | 1.978646 | 1.745651 |
| 83873_at | 2.584093 | 2.493734 | 2.23837  | 2.246733 | 2.554866 | 1.478638 | 2.222576 | 1.401937 |
| 83874_at | 4.317367 | 4.99948  | 5.568555 | 4.203736 | 3.53156  | 3.813959 | 4.796087 | 2.873991 |
| 83875_at | 1.56539  | 1.956983 | 1.088665 | 1.270635 | 1.415063 | 1.58642  | 1.34976  | 1.998141 |
| 83876_at | 3.705291 | 2.657803 | 3.590642 | 2.540729 | 4.083209 | 3.994875 | 3.329453 | 2.530469 |
| 83877_at | 5.369078 | 5.625101 | 5.826884 | 5.31406  | 5.468243 | 5.49845  | 6.340389 | 5.316124 |
| 83878_at | 3.790329 | 4.710271 | 3.195435 | 3.334644 | 3.129138 | 3.963575 | 2.700974 | 3.173958 |
| 83879_at | 2.11105  | 1.736454 | 2.585229 | 2.508807 | 2.085724 | 2.79019  | 2.327342 | 2.330822 |
| 8387_at  | 1.380665 | 1.835166 | 2.679526 | 1.032396 | 1.79043  | 1.670571 | 2.249201 | 2.16619  |
| 83881_at | 2.004812 | 1.659645 | 1.919234 | 2.353916 | 2.053569 | 1.380655 | 2.527153 | 1.550612 |
| 83882_at | 2.040212 | 2.079146 | 2.094576 | 2.355059 | 1.747968 | 1.689688 | 1.978407 | 2.570658 |
| 83884_at | 3.287019 | 1.465079 | 1.809592 | 2.428687 | 2.202569 | 2.579777 | 2.041729 | 1.832913 |
| 83886_at | 1.666574 | 2.459675 | 0.92612  | 2.318614 | 2.21008  | 2.032224 | 2.665116 | 3.015066 |
| 83887_at | 1.141085 | 1.149876 | 1.661051 | 1.253288 | 1.616049 | 1.506555 | 1.135481 | 1.157285 |
| 83888_at | 4.001336 | 2.858663 | 4.393169 | 4.301089 | 3.917933 | 4.065647 | 3.009756 | 4.603091 |
| 83889_at | 1.359095 | 1.426045 | 1.832918 | 1.090974 | 1.44676  | 1.503603 | 1.944843 | 0.868689 |
| 8388_at  | 2.173577 | 1.831152 | 3.410758 | 2.639688 | 1.802507 | 2.563849 | 0.945317 | 3.151636 |
| 83890_at | 1.817949 | 1.441859 | 1.487452 | 1.558581 | 1.485992 | 1.459343 | 1.394794 | 1.342731 |
| 83891_at | 7.625941 | 7.779527 | 8.346652 | 7.933691 | 8.641175 | 7.37757  | 8.051303 | 7.799159 |
| 83892_at | 5.952208 | 6.175178 | 6.136567 | 6.088934 | 5.773945 | 5.979745 | 6.743838 | 5.324486 |
| 83893_at | 1.205625 | 1.347046 | 1.173492 | 1.16788  | 1.103373 | 2.108848 | 2.299817 | 1.400058 |
| 83894_at | 1.166683 | 0.955058 | 0.870439 | 0.943222 | 1.527281 | 1.628838 | 1.186905 | 1.145869 |
| 83895_at | 3.093052 | 1.984278 | 1.944523 | 1.790852 | 2.317609 | 3.017279 | 1.401321 | 1.477092 |
| 83896_at | 2.302242 | 1.951367 | 1.279339 | 1.628032 | 1.692128 | 1.244635 | 1.275474 | 1.391416 |
| 83897_at | 1.368916 | 1.815009 | 1.353303 | 1.42239  | 1.570213 | 1.354776 | 1.826175 | 1.611088 |
| 838_at   | 1.90686  | 1.466375 | 1.677371 | 1.128657 | 1.225085 | 2.338702 | 1.836049 | 1.271526 |
| 83900_at | 1.067876 | 2.353089 | 0.92511  | 1.059257 | 1.299271 | 1.302808 | 1.030191 | 2.18491  |
| 83901_at | 4.180307 | 1.908186 | 2.398071 | 2.64117  | 3.299967 | 1.74511  | 1.228453 | 3.484948 |
| 83902_at | 2.483472 | 2.141247 | 1.617826 | 2.315049 | 1.968489 | 1.895312 | 2.229107 | 2.219128 |
| 83903_at | 1.82013  | 1.900798 | 1.897884 | 3.302972 | 1.553906 | 1.530775 | 1.893473 | 1.567224 |
| 8390_at  | 1.284557 | 2.138255 | 1.561582 | 1.715471 | 1.303239 | 2.614123 | 1.760698 | 2.265298 |
| 8392_at  | 1.009735 | 1.454614 | 2.498921 | 1.43185  | 2.418386 | 1.758142 | 1.282912 | 1.259877 |
| 83930_at | 5.998042 | 5.661203 | 5.986639 | 5.205548 | 6.002191 | 4.747378 | 6.503891 | 6.594959 |
| 83931_at | 5.42054  | 5.3524   | 5.402392 | 4.864009 | 4.676068 | 4.981031 | 4.837784 | 4.607063 |
| 83932_at | 4.774735 | 4.127034 | 4.038599 | 4.691841 | 3.937646 | 3.883698 | 4.548786 | 5.914008 |
| 83933_at | 3.094857 | 4.203673 | 3.579209 | 4.443153 | 4.470952 | 4.128934 | 4.16079  | 4.121205 |
| 83935_at | 4.622396 | 5.272039 | 4.72892  | 4.027794 | 5.127457 | 3.465042 | 4.621345 | 4.918028 |
| 83937_at | 5.323039 | 5.264174 | 5.576719 | 4.563038 | 5.554595 | 4.813671 | 3.533775 | 4.349123 |
| 83938_at | 4.82165  | 5.264022 | 4.2349   | 3.979722 | 3.678548 | 3.859382 | 4.945505 | 5.200784 |
| 83939_at | 7.611693 | 6.730694 | 6.917877 | 7.569255 | 6.526668 | 7.020984 | 6.47528  | 7.12641  |
| 83940_at | 7.674457 | 6.968318 | 6.848968 | 6.474024 | 5.622359 | 6.526739 | 6.2675   | 6.446565 |
| 83941_at | 7.484406 | 7.805302 | 7.314173 | 7.626172 | 7.3495   | 7.020127 | 7.652882 | 7.208507 |
| 83942_at | 1.821885 | 1.760057 | 1.616714 | 1.727772 | 1.273174 | 1.172288 | 1.414156 | 1.103209 |
| 83943_at | 3.863769 | 3.999324 | 4.104157 | 4.28601  | 3.181941 | 3.326203 | 4.247847 | 4.002024 |
| 8394_at  | 1.094322 | 3.368941 | 1.608037 | 1.471833 | 3.702145 | 1.456583 | 2.163455 | 2.782433 |
| 83953_at | 4.821542 | 4.054247 | 5.370862 | 3.201628 | 5.03264  | 3.963729 | 2.541164 | 4.034404 |
| 83955_at | 1.514226 | 2.627182 | 2.648237 | 2.004044 | 2.814758 | 1.3075   | 2.988842 | 2.48716  |

|          |          |          |          |          |          |          |          |          |
|----------|----------|----------|----------|----------|----------|----------|----------|----------|
| 83956_at | 1.309034 | 1.097819 | 1.444228 | 1.283742 | 1.825598 | 0.469622 | 1.826899 | 1.302217 |
| 83957_at | 3.165811 | 3.312972 | 4.090216 | 2.862258 | 4.773443 | 4.195687 | 3.263032 | 2.559696 |
| 83959_at | 6.3674   | 5.143004 | 5.605692 | 6.033664 | 4.388818 | 8.086062 | 5.477943 | 5.344517 |
| 8395_at  | 5.751248 | 5.870604 | 5.673119 | 5.41576  | 5.948223 | 5.890512 | 5.304048 | 5.345747 |
| 8396_at  | 6.366971 | 6.080344 | 6.467917 | 6.445916 | 6.997026 | 6.641871 | 6.355508 | 5.882037 |
| 83982_at | 9.886798 | 9.621677 | 9.913044 | 9.665764 | 9.553532 | 9.54132  | 9.747488 | 10.35157 |
| 83983_at | 2.305318 | 1.403805 | 1.783535 | 2.364265 | 1.538632 | 1.297899 | 1.233582 | 1.112575 |
| 83985_at | 5.740635 | 5.069005 | 5.483926 | 5.436681 | 5.652732 | 5.363352 | 5.355148 | 4.41345  |
| 83986_at | 6.452241 | 6.288746 | 6.835722 | 6.607588 | 5.833132 | 6.456887 | 6.963771 | 5.513675 |
| 83987_at | 2.947734 | 2.853736 | 3.113554 | 3.816332 | 2.88893  | 3.245382 | 3.210239 | 3.325927 |
| 83988_at | 2.191738 | 1.99876  | 2.964108 | 2.026024 | 3.711104 | 1.595597 | 1.982164 | 3.114455 |
| 83989_at | 6.22929  | 6.321919 | 5.558558 | 6.4632   | 5.419192 | 6.077052 | 6.279036 | 6.989718 |
| 8398_at  | 1.942328 | 2.481074 | 2.624252 | 3.03412  | 2.047944 | 2.84691  | 2.187839 | 2.407633 |
| 83990_at | 1.21309  | 1.239578 | 2.187751 | 1.298649 | 1.466531 | 1.655945 | 1.695596 | 1.655783 |
| 83992_at | 5.684966 | 5.2482   | 6.221276 | 6.27012  | 4.965021 | 5.722843 | 5.845955 | 5.51035  |
| 83998_at | 1.608871 | 1.372255 | 1.119265 | 1.122942 | 1.192814 | 1.159329 | 1.063183 | 1.107617 |
| 83999_at | 4.040099 | 4.646349 | 4.96309  | 4.384052 | 3.892439 | 4.865392 | 5.249319 | 3.606299 |
| 8399_at  | 1.279187 | 3.020174 | 1.56304  | 2.075039 | 1.539591 | 1.161691 | 1.684551 | 1.37834  |
| 839_at   | 4.312063 | 4.802664 | 2.94147  | 5.105912 | 4.388345 | 4.292309 | 3.912244 | 5.065976 |
| 84000_at | 2.269085 | 1.568674 | 1.263297 | 1.29383  | 1.717649 | 1.086046 | 1.487932 | 1.725396 |
| 84002_at | 2.908837 | 2.193455 | 3.186555 | 2.450253 | 2.327539 | 2.515851 | 3.488587 | 3.118249 |
| 8402_at  | 7.181985 | 6.771042 | 6.867452 | 6.889518 | 7.17161  | 6.578502 | 7.079198 | 6.18651  |
| 84033_at | 2.723606 | 2.49274  | 2.619253 | 2.459768 | 2.428671 | 2.782607 | 2.384894 | 2.860891 |
| 84034_at | 2.825863 | 3.718512 | 2.487915 | 2.916454 | 2.376403 | 2.490858 | 1.992843 | 2.394276 |
| 8403_at  | 1.971308 | 1.69931  | 1.557231 | 2.054978 | 1.474239 | 1.300151 | 1.95035  | 1.975282 |
| 8404_at  | 6.181603 | 4.584193 | 6.35826  | 6.297379 | 5.805394 | 5.038518 | 3.791877 | 3.774306 |
| 84054_at | 1.997828 | 1.586721 | 1.368646 | 2.549328 | 1.44523  | 1.745812 | 2.195781 | 1.54706  |
| 84056_at | 4.533156 | 4.628399 | 5.415004 | 4.956428 | 5.200241 | 4.55037  | 5.634153 | 5.770258 |
| 84057_at | 2.049397 | 2.622365 | 1.910965 | 3.282104 | 2.716968 | 1.550566 | 1.285864 | 4.799854 |
| 84058_at | 6.297262 | 6.336868 | 6.705722 | 5.562329 | 4.872773 | 5.958422 | 4.740484 | 6.088532 |
| 84059_at | 1.52236  | 1.857686 | 1.558418 | 1.340606 | 1.754796 | 1.388151 | 1.618697 | 1.826047 |
| 8405_at  | 7.469281 | 7.514651 | 7.583196 | 7.222364 | 6.829414 | 7.291647 | 6.931145 | 7.777641 |
| 84060_at | 4.830492 | 4.945124 | 5.088149 | 4.546132 | 5.237837 | 4.794656 | 4.73945  | 4.66368  |
| 84061_at | 7.605372 | 7.812618 | 7.815117 | 7.644258 | 7.960645 | 7.195411 | 7.908519 | 8.232328 |
| 84062_at | 5.415097 | 4.699683 | 4.082146 | 4.372316 | 5.551778 | 4.792353 | 5.066518 | 4.602381 |
| 84063_at | 2.764023 | 3.958003 | 2.682251 | 3.0554   | 2.71363  | 3.161918 | 3.671334 | 3.175347 |
| 84064_at | 6.629669 | 7.111979 | 7.101146 | 6.841823 | 7.44181  | 6.648788 | 7.359436 | 6.143035 |
| 84065_at | 5.031006 | 5.213546 | 4.623277 | 3.918259 | 3.736286 | 3.626243 | 4.500056 | 3.245671 |
| 84066_at | 1.526464 | 1.028803 | 1.701308 | 1.568679 | 1.854688 | 1.160786 | 3.832181 | 1.556787 |
| 84067_at | 4.135728 | 3.562139 | 4.770265 | 4.163108 | 3.49081  | 3.756689 | 4.751501 | 3.655328 |
| 84068_at | 3.72375  | 3.821595 | 3.216116 | 3.297925 | 3.454869 | 3.987023 | 3.432934 | 3.381073 |
| 84069_at | 2.399116 | 3.352496 | 2.661462 | 2.658898 | 2.13728  | 2.236899 | 2.517616 | 2.819226 |
| 8406_at  | 3.13235  | 2.115163 | 3.386042 | 3.520384 | 3.163533 | 2.896074 | 3.737823 | 3.448768 |
| 84070_at | 1.81278  | 1.841578 | 2.002671 | 1.864233 | 2.109932 | 2.082444 | 1.891865 | 2.169698 |
| 84071_at | 3.823629 | 1.950583 | 3.377493 | 2.772853 | 3.342708 | 3.328169 | 2.617478 | 3.809772 |
| 84072_at | 0.984885 | 1.403069 | 1.540605 | 1.031882 | 1.582074 | 1.069352 | 1.234712 | 1.664507 |
| 84073_at | 1.045145 | 2.042238 | 2.399828 | 1.077766 | 1.724627 | 1.660978 | 1.571723 | 1.301791 |
| 84074_at | 2.183311 | 2.226233 | 2.568612 | 2.840695 | 2.562711 | 2.082076 | 1.948979 | 2.702286 |
| 84075_at | 1.103133 | 1.367395 | 1.245665 | 1.095497 | 2.413163 | 1.367699 | 2.708557 | 1.140143 |
| 84076_at | 1.299876 | 1.260432 | 1.192569 | 1.439186 | 1.487633 | 1.647924 | 1.647941 | 1.820514 |
| 84077_at | 1.615998 | 1.682988 | 2.044851 | 1.483267 | 2.065267 | 2.247465 | 1.309415 | 1.951304 |

|          |          |          |          |          |          |          |          |          |
|----------|----------|----------|----------|----------|----------|----------|----------|----------|
| 84078_at | 4.526783 | 4.796378 | 4.245483 | 5.555226 | 4.570717 | 4.451251 | 4.329774 | 4.5495   |
| 84079_at | 5.099964 | 5.45506  | 5.460209 | 5.342937 | 3.987931 | 5.378867 | 5.118239 | 5.278123 |
| 8407_at  | 6.661011 | 5.713042 | 6.325176 | 6.583228 | 5.70255  | 6.200607 | 6.297038 | 5.998949 |
| 84080_at | 3.168667 | 4.158847 | 3.684208 | 3.02796  | 3.060237 | 4.573398 | 2.399831 | 3.39055  |
| 84081_at | 6.745895 | 6.956523 | 6.972119 | 6.809507 | 7.372507 | 7.053235 | 6.743456 | 7.419176 |
| 84083_at | 3.32345  | 2.752461 | 2.371407 | 2.08952  | 3.074251 | 1.907361 | 2.761071 | 2.310322 |
| 84084_at | 4.640253 | 1.584012 | 3.21523  | 1.787371 | 2.267666 | 2.018381 | 1.543222 | 2.823937 |
| 84085_at | 5.614422 | 6.336688 | 5.853843 | 5.441667 | 6.283238 | 5.684201 | 5.114603 | 6.469917 |
| 8408_at  | 4.623705 | 4.721347 | 4.92042  | 4.689579 | 3.814368 | 3.916589 | 3.603914 | 4.178922 |
| 84097_at | 0.529135 | 1.859276 | 0.773849 | 2.042205 | 0.989977 | 0.477034 | 1.394589 | 2.011099 |
| 8409_at  | 7.772577 | 7.438501 | 7.341832 | 7.552491 | 6.347471 | 7.277276 | 6.815111 | 7.414726 |
| 840_at   | 4.802392 | 4.912474 | 5.521105 | 5.249802 | 3.823725 | 4.5914   | 4.790004 | 4.978606 |
| 84100_at | 5.146271 | 4.862607 | 4.862739 | 4.934379 | 4.987638 | 3.734587 | 4.027594 | 4.477646 |
| 84101_at | 2.676366 | 1.489586 | 1.724334 | 1.278901 | 0.955374 | 2.413426 | 1.78081  | 1.530832 |
| 84102_at | 3.071377 | 3.674412 | 3.908362 | 4.539173 | 4.245426 | 4.055726 | 4.85107  | 4.888385 |
| 84103_at | 1.271588 | 1.544053 | 1.52495  | 1.37198  | 1.503962 | 0.83322  | 1.005665 | 2.252015 |
| 84105_at | 4.611399 | 4.590356 | 5.177364 | 4.341021 | 3.557273 | 3.093003 | 4.686541 | 4.279099 |
| 84106_at | 3.899097 | 4.774558 | 3.507382 | 4.193475 | 1.850227 | 3.833341 | 3.1447   | 2.810402 |
| 84107_at | 1.488411 | 1.699478 | 1.282899 | 1.598588 | 1.660385 | 1.051784 | 1.488411 | 1.488411 |
| 84108_at | 4.269858 | 2.546976 | 2.724051 | 3.432703 | 3.181585 | 3.196021 | 3.661467 | 2.429991 |
| 84109_at | 1.389038 | 1.60477  | 1.711132 | 1.62835  | 0.889224 | 1.525222 | 3.193588 | 3.57181  |
| 8411_at  | 7.086502 | 6.692728 | 7.264339 | 7.533395 | 7.096922 | 7.268082 | 7.385071 | 7.333896 |
| 84124_at | 3.277472 | 3.848472 | 4.379551 | 3.201856 | 4.067983 | 4.399563 | 3.966185 | 3.140072 |
| 84125_at | 3.33464  | 2.31924  | 1.616292 | 2.414227 | 1.683277 | 2.67445  | 1.939631 | 2.443745 |
| 84126_at | 3.412155 | 2.907452 | 4.289169 | 4.125407 | 2.266589 | 3.897917 | 2.596149 | 3.766238 |
| 84128_at | 5.359026 | 5.855224 | 5.3677   | 5.869495 | 5.479436 | 4.692291 | 5.551572 | 5.991823 |
| 8412_at  | 5.420449 | 5.483126 | 5.544528 | 5.46243  | 5.657531 | 5.462158 | 5.537955 | 6.162444 |
| 84131_at | 4.674744 | 4.734874 | 3.876087 | 5.251982 | 4.334219 | 4.301501 | 4.12483  | 4.508714 |
| 84132_at | 3.916718 | 4.031321 | 3.939524 | 3.846309 | 4.099204 | 4.578554 | 4.401363 | 4.112493 |
| 84133_at | 5.684544 | 6.323864 | 6.99166  | 6.338339 | 6.011961 | 6.418703 | 6.519147 | 6.414947 |
| 84134_at | 4.388767 | 3.533816 | 4.896279 | 3.436887 | 3.609469 | 3.955737 | 4.613335 | 2.694184 |
| 84135_at | 3.960412 | 4.191706 | 3.344909 | 3.703995 | 4.308696 | 3.675859 | 3.728962 | 3.967922 |
| 84138_at | 5.417418 | 5.036018 | 4.828246 | 5.573671 | 5.067236 | 4.611635 | 4.706058 | 5.183688 |
| 84140_at | 3.809501 | 3.267959 | 2.844629 | 3.658568 | 3.172082 | 3.510311 | 4.146469 | 3.509019 |
| 84141_at | 2.630649 | 3.965095 | 2.784255 | 2.661681 | 3.651829 | 2.969377 | 2.808462 | 4.324496 |
| 84142_at | 5.110532 | 5.960388 | 5.35371  | 5.295576 | 5.287878 | 4.843387 | 4.548288 | 5.302707 |
| 84144_at | 6.323573 | 5.983043 | 5.725556 | 5.918736 | 5.250405 | 5.247776 | 5.990033 | 6.542917 |
| 84146_at | 6.437406 | 5.91643  | 5.832028 | 6.429632 | 6.094284 | 5.825796 | 5.80694  | 6.47944  |
| 84148_at | 6.235928 | 5.663539 | 5.79222  | 5.082795 | 5.492211 | 6.149902 | 5.381617 | 4.861899 |
| 84152_at | 2.371046 | 2.618465 | 2.776742 | 2.8147   | 2.628565 | 2.875367 | 2.614355 | 2.723306 |
| 84153_at | 8.464162 | 8.379787 | 8.054919 | 8.119865 | 7.967375 | 8.262737 | 7.741984 | 8.08687  |
| 84154_at | 5.886067 | 5.571832 | 6.059028 | 6.04839  | 5.968997 | 6.257707 | 5.823611 | 6.277392 |
| 84159_at | 6.379395 | 6.169889 | 5.807807 | 6.176681 | 6.289854 | 6.834266 | 6.019346 | 5.80769  |
| 84162_at | 6.086265 | 6.382815 | 6.552981 | 6.156648 | 6.572171 | 6.20786  | 6.244322 | 6.585852 |
| 84164_at | 5.719711 | 5.46077  | 5.335663 | 5.192527 | 4.594368 | 4.917537 | 4.849032 | 4.742044 |
| 84166_at | 3.503255 | 2.79393  | 3.583332 | 3.469894 | 3.07205  | 3.245472 | 3.132396 | 3.096651 |
| 84167_at | 2.751779 | 3.133176 | 2.876908 | 3.166126 | 2.532281 | 2.954409 | 2.459455 | 2.793196 |
| 84168_at | 7.030768 | 7.253416 | 6.956288 | 8.260171 | 7.457659 | 7.025782 | 7.076435 | 5.869383 |
| 8416_at  | 4.449592 | 3.9684   | 5.337721 | 4.125301 | 4.709126 | 4.821859 | 4.881709 | 2.771441 |
| 84171_at | 3.265094 | 3.338239 | 3.808568 | 4.390134 | 3.821898 | 4.521241 | 3.940633 | 3.932585 |
| 84172_at | 2.580074 | 3.772993 | 2.656668 | 3.143016 | 3.617592 | 2.472109 | 3.333834 | 2.905992 |

|          |          |          |          |          |          |          |          |          |
|----------|----------|----------|----------|----------|----------|----------|----------|----------|
| 84173_at | 3.281847 | 3.557606 | 3.431551 | 4.309012 | 2.220377 | 3.527538 | 3.071293 | 3.776511 |
| 84174_at | 1.905055 | 1.566796 | 1.472802 | 2.196246 | 2.025515 | 1.50557  | 2.005918 | 2.594492 |
| 84176_at | 1.989173 | 1.267688 | 1.44744  | 1.514768 | 2.460093 | 1.53432  | 1.566946 | 1.535689 |
| 84179_at | 3.787045 | 3.227814 | 3.122384 | 3.155003 | 3.626572 | 3.275953 | 2.360185 | 3.928519 |
| 8417_at  | 8.565989 | 8.278079 | 8.631996 | 8.890813 | 8.087784 | 8.041121 | 8.448549 | 8.888793 |
| 84181_at | 5.504043 | 6.048119 | 6.062311 | 6.386703 | 6.169661 | 6.058179 | 5.984765 | 6.410069 |
| 84186_at | 7.137319 | 6.816084 | 7.141147 | 6.526792 | 6.71813  | 6.622752 | 6.965492 | 7.193082 |
| 84187_at | 4.669298 | 5.375717 | 5.188893 | 4.253531 | 3.191418 | 3.891502 | 4.199324 | 4.208223 |
| 84188_at | 6.453468 | 6.606443 | 5.703457 | 6.640271 | 6.463823 | 6.512938 | 6.483141 | 7.138755 |
| 84189_at | 1.266029 | 1.120252 | 0.805389 | 1.160657 | 1.131454 | 1.067349 | 1.091837 | 1.147349 |
| 8418_at  | 6.752469 | 6.447793 | 7.57953  | 6.213094 | 6.270591 | 7.815627 | 7.382029 | 6.96011  |
| 84190_at | 4.920227 | 5.440851 | 5.544728 | 4.361672 | 5.144709 | 4.685354 | 4.437663 | 6.18897  |
| 84191_at | 5.271778 | 5.010837 | 4.620217 | 4.814902 | 4.932173 | 5.398949 | 5.104919 | 5.036021 |
| 84193_at | 6.845413 | 7.437149 | 6.927279 | 6.586411 | 7.098254 | 6.902238 | 7.04922  | 7.683281 |
| 84196_at | 6.026211 | 6.37239  | 6.310782 | 6.238277 | 5.942556 | 5.949469 | 5.792459 | 6.510301 |
| 84197_at | 4.3915   | 5.497705 | 5.193609 | 5.758137 | 4.096343 | 5.631668 | 5.94481  | 5.760114 |
| 8419_at  | 2.203773 | 1.562117 | 1.950133 | 1.815188 | 2.496089 | 2.688455 | 1.709351 | 3.10179  |
| 841_at   | 3.329656 | 3.277378 | 3.320671 | 3.364394 | 3.997381 | 3.034137 | 3.031515 | 4.42472  |
| 84203_at | 1.146994 | 2.055449 | 1.277158 | 1.699811 | 1.477085 | 1.82157  | 1.486951 | 1.457674 |
| 84206_at | 1.746478 | 2.808481 | 2.445545 | 2.709272 | 2.521287 | 2.660404 | 2.000731 | 3.437107 |
| 8420_at  | 3.461914 | 3.179064 | 3.507125 | 4.577551 | 3.027365 | 3.709725 | 2.981595 | 3.286721 |
| 84214_at | 2.231871 | 2.253503 | 2.49941  | 1.484162 | 2.239961 | 2.468912 | 2.337726 | 1.862182 |
| 84215_at | 1.595784 | 1.553238 | 1.863488 | 2.217812 | 1.739338 | 1.643377 | 1.787417 | 2.427669 |
| 84216_at | 3.447169 | 2.656332 | 3.7964   | 2.320109 | 2.962908 | 2.52606  | 3.710781 | 3.210926 |
| 84217_at | 4.41105  | 3.156884 | 4.07982  | 2.685781 | 4.516861 | 3.284303 | 2.343064 | 4.069303 |
| 84219_at | 4.357627 | 3.80779  | 3.005234 | 2.889048 | 4.318341 | 4.669947 | 4.251996 | 3.415379 |
| 84221_at | 2.532585 | 3.219026 | 2.256133 | 2.493434 | 2.614765 | 1.692206 | 3.233004 | 2.421983 |
| 84223_at | 4.358335 | 4.945623 | 3.941637 | 3.599931 | 3.17899  | 2.977375 | 4.83307  | 5.055553 |
| 84224_at | 2.762992 | 3.36691  | 2.976822 | 4.018285 | 2.964325 | 2.94329  | 3.666104 | 3.225965 |
| 84225_at | 2.502576 | 2.855823 | 2.148831 | 2.388773 | 2.167761 | 2.647324 | 1.925754 | 2.050835 |
| 84226_at | 1.801575 | 1.205907 | 1.337607 | 1.726676 | 2.028765 | 1.297739 | 1.57369  | 1.563862 |
| 84229_at | 1.222004 | 1.753985 | 2.030469 | 1.835394 | 1.700736 | 1.697099 | 1.090831 | 1.984003 |
| 84230_at | 5.731214 | 5.789784 | 5.952465 | 6.406165 | 6.329153 | 5.823152 | 6.390276 | 5.954539 |
| 84231_at | 5.425634 | 4.727274 | 4.687873 | 4.90802  | 5.176205 | 4.782082 | 4.878103 | 4.111931 |
| 84232_at | 8.264671 | 7.377872 | 7.34202  | 7.840387 | 6.412732 | 7.374563 | 7.776877 | 6.369741 |
| 84233_at | 7.178292 | 7.083004 | 5.992607 | 6.87365  | 6.20445  | 7.024558 | 6.441849 | 6.479392 |
| 84236_at | 3.471051 | 4.108867 | 3.638765 | 4.356951 | 3.592012 | 4.215109 | 4.356675 | 4.586576 |
| 84239_at | 1.730628 | 1.52701  | 1.378854 | 1.514799 | 1.641842 | 1.587561 | 1.580592 | 1.846574 |
| 84240_at | 6.965035 | 6.857184 | 7.042372 | 6.875011 | 6.664861 | 6.424084 | 6.219696 | 7.082892 |
| 84243_at | 5.281741 | 5.512207 | 6.58363  | 6.171093 | 5.678263 | 6.408415 | 6.12261  | 5.504944 |
| 84245_at | 4.727977 | 3.284656 | 4.028233 | 3.461295 | 3.128081 | 4.04539  | 4.110239 | 3.37071  |
| 84246_at | 7.657822 | 7.542325 | 7.606578 | 7.189999 | 8.745501 | 7.47715  | 7.298475 | 7.490557 |
| 84247_at | 5.124861 | 5.128365 | 4.473807 | 4.455399 | 3.972041 | 4.88753  | 4.913722 | 3.77518  |
| 84248_at | 7.043196 | 7.471379 | 6.917281 | 7.445755 | 6.143851 | 7.171989 | 7.208798 | 7.020413 |
| 84249_at | 1.807095 | 2.45303  | 2.108193 | 2.231295 | 1.805577 | 2.665963 | 2.231295 | 2.149644 |
| 8424_at  | 7.881475 | 6.68603  | 6.195027 | 3.857041 | 8.06096  | 7.309072 | 4.580946 | 7.338416 |
| 84250_at | 4.039961 | 3.537804 | 3.419974 | 4.118579 | 3.700818 | 3.913602 | 4.522498 | 3.655956 |
| 84251_at | 6.413986 | 6.205096 | 5.669924 | 5.438801 | 5.328946 | 5.280462 | 5.747005 | 5.790112 |
| 84253_at | 2.562556 | 2.949333 | 2.538656 | 2.060113 | 2.546102 | 2.421018 | 3.025971 | 3.177191 |
| 84254_at | 1.888443 | 2.631645 | 1.843325 | 3.291623 | 1.714882 | 2.334518 | 1.940995 | 1.88754  |
| 84255_at | 4.554454 | 6.204082 | 4.671133 | 4.848691 | 5.536009 | 5.216258 | 4.928692 | 5.620972 |

|          |          |          |          |          |          |          |          |          |
|----------|----------|----------|----------|----------|----------|----------|----------|----------|
| 84256_at | 3.188475 | 3.74662  | 3.737553 | 3.751228 | 3.849494 | 3.679893 | 3.433128 | 4.004573 |
| 84258_at | 1.899068 | 2.049916 | 1.799448 | 2.30089  | 1.983157 | 2.030509 | 3.085831 | 2.52358  |
| 84259_at | 6.089995 | 5.770592 | 5.900846 | 5.83269  | 5.370425 | 5.499333 | 5.13017  | 6.183859 |
| 8425_at  | 4.871905 | 4.904017 | 5.303308 | 5.060072 | 4.233859 | 4.982443 | 5.092771 | 4.652298 |
| 84260_at | 4.302747 | 4.217711 | 3.717574 | 3.522311 | 2.751819 | 3.355214 | 4.0106   | 3.590443 |
| 84261_at | 3.57005  | 3.409184 | 2.931764 | 3.716612 | 4.404113 | 2.485363 | 2.327205 | 2.284167 |
| 84262_at | 6.424532 | 5.682951 | 5.190982 | 5.89298  | 5.551575 | 6.031514 | 4.083236 | 6.162381 |
| 84263_at | 6.625229 | 6.901553 | 6.767199 | 6.046185 | 6.272984 | 6.77935  | 5.868217 | 6.806618 |
| 84264_at | 2.289662 | 2.189179 | 2.535107 | 2.110371 | 2.24898  | 2.637358 | 2.956986 | 1.905543 |
| 84265_at | 6.532453 | 6.366244 | 6.213214 | 6.257628 | 6.227744 | 6.158435 | 5.715931 | 6.469679 |
| 84266_at | 6.832011 | 5.5879   | 6.407703 | 5.945904 | 5.448193 | 6.413118 | 5.319541 | 4.530474 |
| 84267_at | 4.348525 | 4.478221 | 4.173336 | 3.887644 | 4.171895 | 4.060841 | 3.225464 | 3.296555 |
| 84268_at | 5.074775 | 4.517963 | 4.882283 | 4.712714 | 3.26012  | 4.326682 | 4.152794 | 5.496373 |
| 84269_at | 7.335096 | 6.910704 | 6.180328 | 6.24738  | 5.610495 | 6.437794 | 6.713944 | 6.823389 |
| 84270_at | 5.270476 | 4.988789 | 4.508878 | 4.812725 | 4.540457 | 4.89324  | 4.463611 | 4.742559 |
| 84271_at | 7.096413 | 7.353695 | 7.691867 | 6.986842 | 6.976565 | 7.061708 | 7.098891 | 6.716094 |
| 84272_at | 5.76462  | 6.403155 | 5.984623 | 6.032126 | 6.388027 | 5.549057 | 6.064636 | 6.516167 |
| 84273_at | 5.231057 | 6.174381 | 5.448906 | 4.602922 | 5.894902 | 5.328533 | 4.51837  | 5.1866   |
| 84274_at | 6.034276 | 6.117828 | 6.10626  | 6.073376 | 6.438805 | 5.976872 | 5.919527 | 5.825508 |
| 84275_at | 5.658217 | 5.82224  | 5.073633 | 4.909039 | 5.776845 | 4.917147 | 3.720735 | 5.891105 |
| 84276_at | 6.341095 | 6.458359 | 6.103964 | 6.377226 | 4.902151 | 6.315308 | 6.570558 | 5.961418 |
| 84277_at | 4.543459 | 4.273866 | 4.438308 | 4.110845 | 3.770508 | 4.218597 | 4.468395 | 4.137923 |
| 84279_at | 4.392518 | 4.584331 | 4.383331 | 3.746787 | 1.129407 | 3.685658 | 2.913355 | 1.852701 |
| 8427_at  | 2.932253 | 3.27237  | 2.096269 | 2.103302 | 2.659039 | 1.796635 | 2.706784 | 2.526259 |
| 84280_at | 4.331523 | 4.554246 | 4.504704 | 5.247685 | 5.16202  | 5.089997 | 4.125752 | 4.692929 |
| 84281_at | 4.811051 | 4.259523 | 3.867592 | 3.792552 | 4.70334  | 4.330997 | 3.961219 | 4.284724 |
| 84282_at | 3.782081 | 3.956106 | 5.001427 | 4.436182 | 4.55525  | 3.987315 | 4.423435 | 4.000607 |
| 84283_at | 3.776291 | 3.132079 | 3.621855 | 2.552767 | 2.548635 | 3.082217 | 2.584749 | 2.572015 |
| 84284_at | 6.998725 | 6.331264 | 6.054146 | 6.399164 | 6.216246 | 6.19658  | 5.398105 | 6.874548 |
| 84285_at | 5.464457 | 5.33416  | 6.118414 | 4.71562  | 5.253793 | 5.605624 | 6.107397 | 5.153938 |
| 84286_at | 5.356561 | 5.125764 | 6.00706  | 5.067141 | 4.758309 | 5.833039 | 5.623586 | 4.618313 |
| 84287_at | 5.348505 | 4.853382 | 4.168003 | 4.212465 | 4.68272  | 4.525356 | 4.852753 | 4.825879 |
| 84288_at | 3.969199 | 4.736797 | 3.837163 | 3.127733 | 3.920555 | 3.330401 | 4.314002 | 4.429729 |
| 84289_at | 3.344651 | 3.632464 | 3.68797  | 4.227659 | 2.926736 | 4.322636 | 3.934176 | 3.871568 |
| 8428_at  | 4.859637 | 5.245544 | 4.787119 | 4.892761 | 4.227801 | 4.87623  | 4.738813 | 5.102798 |
| 84290_at | 1.348723 | 0.968235 | 1.018213 | 1.489021 | 1.133488 | 1.312635 | 1.072936 | 1.729734 |
| 84292_at | 4.228935 | 3.672971 | 3.679156 | 3.773894 | 3.877776 | 4.376516 | 4.402384 | 3.438582 |
| 84293_at | 4.73238  | 4.402445 | 4.824348 | 4.521254 | 4.14434  | 4.926079 | 4.590755 | 4.210425 |
| 84294_at | 4.820856 | 5.87922  | 4.918528 | 5.284228 | 5.192914 | 5.107979 | 4.472908 | 6.539447 |
| 84295_at | 5.39352  | 5.18631  | 5.705347 | 5.268608 | 5.276849 | 5.44093  | 5.362454 | 5.87683  |
| 84296_at | 2.588804 | 2.021304 | 1.744915 | 2.125824 | 1.572229 | 2.648316 | 2.689559 | 2.690882 |
| 84298_at | 6.096557 | 6.594168 | 5.939498 | 5.623728 | 6.809891 | 6.222414 | 5.945848 | 5.868508 |
| 84299_at | 6.309083 | 6.198601 | 5.454471 | 6.298964 | 6.089905 | 6.701476 | 5.094186 | 5.923535 |
| 842_at   | 4.183538 | 4.4228   | 4.41147  | 4.120746 | 4.141154 | 4.506432 | 5.18888  | 5.126789 |
| 84300_at | 8.817596 | 8.441558 | 8.323163 | 8.181929 | 8.001874 | 8.694356 | 8.632245 | 8.449302 |
| 84301_at | 5.717349 | 6.343156 | 5.810489 | 5.75015  | 5.691238 | 6.048111 | 6.038134 | 5.304792 |
| 84302_at | 5.913241 | 5.657836 | 6.004632 | 5.62277  | 4.627825 | 5.609556 | 5.879618 | 5.271549 |
| 84303_at | 7.328792 | 6.464395 | 5.208663 | 4.966289 | 4.427119 | 5.639838 | 6.027485 | 5.872342 |
| 84304_at | 5.790073 | 5.361382 | 5.556079 | 4.282021 | 4.190164 | 5.427513 | 5.384664 | 4.42784  |
| 84305_at | 5.582086 | 5.5768   | 5.911081 | 5.072261 | 4.729421 | 5.462618 | 5.343226 | 5.242871 |
| 84306_at | 4.891977 | 5.034433 | 4.319924 | 4.368973 | 4.864699 | 3.973327 | 4.383284 | 5.482477 |

|          |          |          |          |          |          |          |          |          |
|----------|----------|----------|----------|----------|----------|----------|----------|----------|
| 84307_at | 5.184517 | 5.382061 | 4.975972 | 5.575911 | 5.072116 | 5.301877 | 5.276132 | 4.8632   |
| 84309_at | 5.460824 | 4.88851  | 5.519348 | 5.057118 | 5.032508 | 4.95516  | 4.706396 | 5.080823 |
| 84310_at | 3.146217 | 2.643975 | 2.924661 | 2.707125 | 2.651266 | 3.176779 | 2.621566 | 2.883209 |
| 84311_at | 6.280819 | 6.045173 | 6.143282 | 6.369457 | 6.12544  | 5.859376 | 6.897351 | 5.910352 |
| 84312_at | 4.110812 | 5.104191 | 5.028147 | 4.627045 | 5.140593 | 3.762787 | 3.890108 | 5.715345 |
| 84313_at | 7.398567 | 6.69632  | 6.431778 | 6.939204 | 5.837627 | 6.726456 | 6.307229 | 5.56148  |
| 84314_at | 5.673543 | 5.965461 | 5.957286 | 4.697717 | 4.43515  | 4.847679 | 5.757829 | 5.824018 |
| 84315_at | 3.31289  | 3.2062   | 3.031345 | 3.647245 | 3.852295 | 3.227243 | 3.679669 | 3.538997 |
| 84316_at | 8.879209 | 8.681124 | 8.721251 | 8.7254   | 8.307087 | 8.655075 | 8.413167 | 8.416598 |
| 84317_at | 2.725302 | 2.541295 | 3.365872 | 2.54355  | 2.545737 | 2.767    | 3.751945 | 3.219831 |
| 84318_at | 4.873225 | 4.250872 | 3.634319 | 4.222297 | 5.136435 | 4.506411 | 4.466323 | 4.250185 |
| 84319_at | 5.873138 | 5.624652 | 5.271383 | 5.244805 | 4.721813 | 5.51045  | 3.804549 | 4.391942 |
| 8431_at  | 2.748346 | 2.09355  | 2.392907 | 2.222901 | 3.505325 | 2.806642 | 2.513762 | 2.562764 |
| 84320_at | 6.47952  | 7.10671  | 6.154088 | 6.585775 | 6.985137 | 6.046432 | 6.321879 | 6.810715 |
| 84322_at | 1.753255 | 1.257943 | 1.503437 | 1.811014 | 1.254503 | 1.465096 | 1.232413 | 1.949567 |
| 84324_at | 7.164574 | 7.179928 | 7.120394 | 7.004866 | 7.332746 | 6.391853 | 7.072692 | 7.660905 |
| 84326_at | 8.283968 | 7.180273 | 7.723947 | 7.589283 | 7.434281 | 8.289402 | 7.471726 | 6.415161 |
| 84327_at | 2.488983 | 4.120689 | 4.270972 | 4.034822 | 3.707222 | 3.103179 | 3.772695 | 3.299861 |
| 84328_at | 6.97624  | 7.454046 | 7.388158 | 6.98681  | 7.050295 | 6.820659 | 7.052278 | 7.04132  |
| 84329_at | 5.773254 | 4.298895 | 5.690882 | 5.92889  | 4.578077 | 4.634365 | 5.103346 | 5.859335 |
| 84330_at | 5.318071 | 4.892221 | 4.911846 | 5.389097 | 4.371258 | 5.067159 | 4.963349 | 4.749338 |
| 84331_at | 4.397185 | 3.359921 | 2.576993 | 3.801328 | 3.841684 | 3.799813 | 2.964458 | 3.617878 |
| 84332_at | 2.686159 | 1.028918 | 0.767781 | 1.462189 | 0.891639 | 0.903918 | 1.300764 | 1.669101 |
| 84333_at | 5.802214 | 6.22071  | 6.288995 | 6.219914 | 6.405261 | 6.296887 | 6.173681 | 6.498205 |
| 84334_at | 6.114955 | 6.453739 | 7.118898 | 6.702323 | 5.693022 | 6.625774 | 7.06576  | 6.117325 |
| 84335_at | 4.369176 | 5.02002  | 4.848883 | 4.581661 | 3.853193 | 3.684471 | 4.649408 | 4.235015 |
| 84336_at | 4.032242 | 3.00365  | 3.448028 | 3.653138 | 4.028909 | 4.091494 | 3.844529 | 2.549282 |
| 84337_at | 5.072591 | 5.160342 | 5.896294 | 5.843648 | 5.885788 | 6.201971 | 4.891781 | 5.257975 |
| 8433_at  | 2.082801 | 2.004079 | 2.35332  | 1.928009 | 2.363625 | 1.834015 | 1.936428 | 2.330626 |
| 84340_at | 6.444587 | 6.729062 | 5.967418 | 6.161662 | 6.673015 | 6.216095 | 6.570721 | 6.919871 |
| 84342_at | 3.871257 | 4.494876 | 4.057992 | 4.401637 | 4.708423 | 5.275338 | 4.074335 | 3.094752 |
| 84343_at | 6.621786 | 7.238491 | 6.330804 | 6.187969 | 6.287492 | 6.421569 | 6.449927 | 7.100759 |
| 8434_at  | 6.087455 | 6.914519 | 7.101132 | 6.530216 | 7.223805 | 6.932584 | 7.153637 | 7.01343  |
| 8435_at  | 1.915665 | 2.700044 | 3.106749 | 2.218727 | 2.714301 | 1.975685 | 2.646963 | 2.762504 |
| 84364_at | 4.850416 | 4.663027 | 4.727452 | 4.702539 | 3.719502 | 4.330509 | 3.841462 | 5.391019 |
| 84365_at | 6.550008 | 6.217854 | 5.967059 | 6.533361 | 6.182239 | 6.848697 | 6.344129 | 7.168858 |
| 84366_at | 1.768235 | 1.433531 | 1.742087 | 3.133373 | 1.300503 | 1.735521 | 2.219619 | 1.53157  |
| 8436_at  | 6.006161 | 6.17788  | 6.358723 | 6.312761 | 5.856756 | 5.944396 | 5.856933 | 6.364273 |
| 84376_at | 6.633936 | 6.819906 | 6.90236  | 7.193118 | 6.224465 | 7.005614 | 7.264704 | 7.054516 |
| 8437_at  | 3.242221 | 2.051079 | 2.376168 | 3.484616 | 2.971604 | 3.738004 | 2.077242 | 2.30418  |
| 8438_at  | 1.383471 | 2.277111 | 2.34974  | 1.781956 | 2.181049 | 1.962239 | 2.567644 | 2.455081 |
| 8439_at  | 5.674023 | 5.918652 | 5.37411  | 5.116446 | 5.42799  | 5.249383 | 5.693344 | 5.568068 |
| 843_at   | 3.239464 | 4.044816 | 3.837346 | 4.178525 | 4.227017 | 4.493821 | 3.747469 | 4.552469 |
| 8440_at  | 6.236097 | 6.199945 | 6.46464  | 6.164585 | 5.942609 | 6.501377 | 6.377291 | 5.430414 |
| 84417_at | 3.53459  | 4.772431 | 5.380215 | 5.451937 | 5.230761 | 5.394249 | 5.301269 | 4.010106 |
| 84418_at | 9.67514  | 9.233257 | 9.441419 | 9.383713 | 9.17883  | 9.230463 | 9.226548 | 8.812741 |
| 84419_at | 2.566645 | 3.525781 | 1.921849 | 1.278648 | 1.210062 | 1.569239 | 1.669708 | 1.151656 |
| 84432_at | 1.603517 | 1.92526  | 1.735406 | 1.584584 | 2.235999 | 2.407092 | 2.604244 | 1.466438 |
| 84433_at | 2.455431 | 2.326677 | 1.704681 | 2.184761 | 1.601887 | 2.258016 | 2.246933 | 1.43147  |
| 84435_at | 2.051793 | 2.822739 | 2.52685  | 2.73669  | 2.601616 | 2.17983  | 2.498673 | 1.822431 |
| 84436_at | 4.98694  | 4.412084 | 5.033089 | 5.492879 | 4.846504 | 4.554891 | 4.421556 | 4.622523 |

|          |          |          |          |          |          |          |          |          |
|----------|----------|----------|----------|----------|----------|----------|----------|----------|
| 84437_at | 5.150447 | 6.117016 | 4.926233 | 5.580361 | 6.261967 | 5.286113 | 5.601664 | 4.90027  |
| 84439_at | 1.901231 | 2.215119 | 1.209547 | 2.079822 | 1.542984 | 1.317612 | 1.52729  | 1.638095 |
| 8443_at  | 6.619299 | 6.342744 | 6.599645 | 6.032541 | 6.885669 | 6.549798 | 6.332388 | 7.005105 |
| 84440_at | 4.159625 | 4.393385 | 3.523777 | 3.238129 | 3.082259 | 3.094012 | 3.249981 | 2.785506 |
| 84441_at | 5.998638 | 6.434746 | 6.673105 | 7.104263 | 6.500295 | 5.984125 | 6.739268 | 6.360978 |
| 84443_at | 2.499075 | 1.324504 | 0.843362 | 0.855958 | 1.33614  | 1.32625  | 1.36977  | 1.394547 |
| 84444_at | 4.422555 | 4.644391 | 4.215256 | 5.542415 | 4.738364 | 5.327161 | 6.050353 | 4.727524 |
| 84445_at | 5.601362 | 4.94859  | 4.645449 | 4.775772 | 3.965047 | 4.39617  | 4.626997 | 4.843021 |
| 84446_at | 4.007485 | 3.824131 | 3.431664 | 2.45382  | 3.75876  | 2.596722 | 3.105338 | 2.140555 |
| 84447_at | 7.849084 | 7.900052 | 8.179533 | 7.778548 | 7.889931 | 7.49948  | 8.396621 | 7.501573 |
| 84448_at | 5.968391 | 5.897463 | 6.139775 | 5.589818 | 4.709849 | 5.801652 | 6.454305 | 5.56592  |
| 84449_at | 4.128967 | 3.624167 | 2.960409 | 3.041182 | 3.186849 | 2.597915 | 3.211854 | 3.652088 |
| 8444_at  | 3.869169 | 3.740293 | 3.519608 | 3.19603  | 3.443786 | 3.574121 | 3.879448 | 3.493396 |
| 84450_at | 5.688513 | 4.370327 | 5.429801 | 5.800536 | 4.914381 | 5.403485 | 5.766441 | 4.975164 |
| 84451_at | 3.948385 | 3.449986 | 3.039998 | 3.083604 | 4.495185 | 3.592573 | 2.459147 | 4.086539 |
| 84455_at | 5.006774 | 4.904265 | 5.430761 | 4.412776 | 5.215309 | 4.838279 | 4.477872 | 5.278091 |
| 84456_at | 5.166441 | 5.672379 | 5.421571 | 5.596757 | 6.099749 | 6.092692 | 5.906139 | 5.804006 |
| 84457_at | 4.398303 | 3.511622 | 3.815406 | 3.897133 | 4.691667 | 4.042763 | 1.59677  | 4.279374 |
| 84458_at | 5.820594 | 5.773286 | 6.21416  | 6.862426 | 5.873216 | 6.281016 | 6.203463 | 6.901014 |
| 8445_at  | 4.526654 | 3.944378 | 4.637556 | 4.592524 | 2.82273  | 3.565811 | 3.883176 | 3.979718 |
| 84460_at | 3.090635 | 3.15504  | 3.326897 | 4.001524 | 3.445438 | 3.070287 | 3.344283 | 3.023005 |
| 84461_at | 3.241052 | 2.436792 | 3.464953 | 2.892422 | 2.369493 | 2.966103 | 2.786854 | 3.088517 |
| 84464_at | 2.221119 | 2.410745 | 2.560858 | 3.06357  | 2.208237 | 2.397175 | 3.055278 | 2.573415 |
| 84465_at | 1.750113 | 2.236496 | 2.161117 | 2.078466 | 1.872074 | 2.073414 | 2.386603 | 2.243115 |
| 84466_at | 2.447407 | 1.878822 | 2.937384 | 3.690521 | 2.794774 | 3.0866   | 3.351394 | 2.881483 |
| 84467_at | 2.249189 | 2.484742 | 2.10259  | 2.430284 | 2.451861 | 2.228032 | 1.587969 | 2.220388 |
| 8446_at  | 7.018358 | 6.903235 | 7.167929 | 7.207383 | 7.112882 | 7.541196 | 7.048317 | 6.697973 |
| 8447_at  | 5.14815  | 2.607175 | 3.422558 | 4.136014 | 5.087093 | 5.44817  | 4.836589 | 2.636645 |
| 8448_at  | 2.194489 | 2.16651  | 2.06884  | 2.192525 | 1.545789 | 2.070773 | 1.907498 | 2.122277 |
| 84498_at | 5.467877 | 6.163845 | 5.845774 | 5.492721 | 5.864827 | 5.447193 | 5.949807 | 5.324025 |
| 8449_at  | 4.67773  | 5.012594 | 4.327985 | 5.19597  | 4.392489 | 4.459545 | 4.478778 | 4.424866 |
| 844_at   | 1.831254 | 2.059584 | 1.731632 | 2.302996 | 2.001682 | 1.393421 | 1.572614 | 1.866201 |
| 84501_at | 3.772291 | 2.246219 | 2.801105 | 2.502398 | 3.150996 | 3.345425 | 3.241922 | 2.738656 |
| 84502_at | 2.508587 | 3.275586 | 2.667095 | 3.395624 | 3.169685 | 3.545731 | 3.007366 | 3.514445 |
| 84503_at | 2.615352 | 4.494669 | 3.305482 | 2.816961 | 4.076341 | 4.009082 | 3.116489 | 4.063772 |
| 84504_at | 2.951253 | 3.450824 | 3.092032 | 3.452609 | 3.751326 | 3.608079 | 3.403715 | 3.303732 |
| 8450_at  | 7.179741 | 7.269297 | 7.534058 | 7.057339 | 7.164903 | 6.292873 | 7.348342 | 7.548401 |
| 84513_at | 5.716319 | 4.568091 | 5.332914 | 5.212203 | 5.744058 | 5.962031 | 4.439382 | 5.785871 |
| 84514_at | 4.009924 | 3.26756  | 3.950518 | 4.385485 | 3.479256 | 3.887375 | 3.465901 | 2.286216 |
| 84515_at | 3.866442 | 2.908027 | 3.179638 | 3.788924 | 3.761752 | 2.70935  | 2.926221 | 2.772966 |
| 84516_at | 6.629395 | 7.400432 | 6.839918 | 7.276291 | 8.390062 | 6.989915 | 6.863872 | 7.047932 |
| 84517_at | 1.268184 | 2.124776 | 1.696165 | 1.390247 | 1.185129 | 1.666356 | 2.067745 | 1.886225 |
| 84518_at | 2.984078 | 3.324528 | 3.871673 | 3.774503 | 3.206425 | 2.999657 | 2.24705  | 3.472105 |
| 84519_at | 3.342609 | 2.709434 | 3.686806 | 3.263282 | 1.318649 | 2.103646 | 3.347337 | 3.625939 |
| 8451_at  | 6.520833 | 6.854381 | 6.651071 | 6.69013  | 6.495116 | 6.152563 | 6.466561 | 6.52609  |
| 84520_at | 2.890976 | 3.88518  | 3.548173 | 3.249756 | 3.216844 | 4.593345 | 3.27088  | 3.477683 |
| 84522_at | 6.199681 | 5.384552 | 5.52814  | 5.412409 | 5.44862  | 5.41039  | 5.858673 | 5.287919 |
| 84524_at | 4.44058  | 4.710898 | 5.422453 | 4.452509 | 5.271354 | 5.241975 | 4.668719 | 4.821627 |
| 84525_at | 1.542986 | 1.163625 | 1.679104 | 2.118467 | 1.56623  | 2.571307 | 1.6528   | 2.369569 |
| 84527_at | 5.042278 | 4.684582 | 4.255329 | 4.970098 | 4.013359 | 3.631775 | 4.436566 | 5.159784 |
| 84529_at | 5.146337 | 5.880672 | 5.217189 | 5.050183 | 5.033457 | 4.278845 | 5.720489 | 4.947839 |



|          |          |          |          |          |          |          |          |          |
|----------|----------|----------|----------|----------|----------|----------|----------|----------|
| 8452_at  | 7.220197 | 7.487824 | 6.806131 | 6.896645 | 7.483187 | 6.809169 | 6.713979 | 7.355942 |
| 84530_at | 2.232477 | 2.460821 | 2.13351  | 2.215453 | 2.253152 | 2.658599 | 2.390903 | 2.6015   |
| 84532_at | 2.681662 | 3.744079 | 2.905168 | 3.234874 | 3.069492 | 3.339323 | 2.439195 | 2.80022  |
| 84536_at | 2.561804 | 2.73393  | 3.043903 | 2.949589 | 2.567595 | 2.928148 | 2.5211   | 3.043424 |
| 84539_at | 1.50388  | 1.622762 | 1.233455 | 1.467066 | 1.294443 | 1.667792 | 1.952326 | 1.681627 |
| 8453_at  | 6.214166 | 5.578412 | 5.988758 | 6.035841 | 6.864901 | 6.11111  | 6.090482 | 6.241836 |
| 84541_at | 1.361383 | 2.17652  | 2.389054 | 1.655177 | 1.764221 | 1.87089  | 2.787863 | 1.440602 |
| 84542_at | 2.885248 | 2.993683 | 2.894386 | 4.197494 | 4.084662 | 2.858872 | 4.603266 | 4.449156 |
| 84545_at | 7.761518 | 7.835715 | 7.499868 | 7.041428 | 7.386395 | 7.964247 | 6.607044 | 7.534564 |
| 84546_at | 1.453339 | 2.473645 | 1.666121 | 2.142416 | 2.492917 | 3.293443 | 3.200325 | 3.103222 |
| 84547_at | 3.548718 | 4.885388 | 3.883532 | 3.254613 | 4.264275 | 3.447379 | 3.435543 | 2.612436 |
| 84548_at | 3.739859 | 4.712558 | 4.337277 | 4.099988 | 3.428173 | 4.514612 | 4.518012 | 4.038625 |
| 84549_at | 6.112307 | 5.932767 | 4.38218  | 5.339281 | 4.646225 | 6.08626  | 5.766956 | 5.348567 |
| 8454_at  | 6.85007  | 6.725532 | 6.812966 | 6.154144 | 6.473478 | 6.636808 | 6.75625  | 6.793639 |
| 84552_at | 6.568079 | 6.487849 | 6.72581  | 6.03968  | 5.344504 | 7.044997 | 5.688034 | 5.623199 |
| 84553_at | 1.454586 | 1.159264 | 1.991158 | 0.893108 | 1.468828 | 1.503936 | 1.662662 | 1.475232 |
| 84557_at | 4.870714 | 4.837139 | 4.786958 | 5.635875 | 5.233401 | 3.761172 | 4.672535 | 3.508931 |
| 8455_at  | 5.788661 | 6.598063 | 6.852679 | 6.440892 | 6.431962 | 6.492102 | 6.676227 | 6.563322 |
| 84560_at | 2.670096 | 3.600976 | 3.553786 | 2.916692 | 3.701518 | 3.275827 | 3.73494  | 3.727264 |
| 84561_at | 3.202012 | 1.545654 | 2.140665 | 1.838884 | 2.694603 | 2.393745 | 1.930751 | 1.749385 |
| 84569_at | 0.920498 | 0.789828 | 1.252872 | 0.847857 | 1.586119 | 2.110814 | 1.111559 | 1.18077  |
| 8456_at  | 1.823825 | 2.369236 | 2.193526 | 2.215902 | 2.697734 | 2.319969 | 2.668868 | 1.858893 |
| 84570_at | 3.190136 | 3.515882 | 3.948571 | 3.600824 | 2.905453 | 3.321252 | 3.41864  | 3.214281 |
| 84572_at | 7.864068 | 7.600088 | 7.933141 | 6.898554 | 7.298682 | 7.475457 | 7.821247 | 6.913543 |
| 8458_at  | 3.319679 | 4.317851 | 3.254202 | 3.558993 | 4.004614 | 3.288583 | 3.368501 | 4.532139 |
| 8459_at  | 3.503251 | 3.662312 | 3.763125 | 3.934701 | 3.046001 | 4.81621  | 4.445354 | 2.565561 |
| 845_at   | 1.429631 | 1.960194 | 2.740233 | 1.27786  | 1.565925 | 1.480014 | 1.624583 | 1.343759 |
| 8460_at  | 5.037256 | 5.310543 | 4.645047 | 5.237877 | 6.163921 | 4.574776 | 3.316351 | 5.051305 |
| 84612_at | 7.105342 | 6.976203 | 7.420612 | 6.792562 | 6.698792 | 6.756807 | 6.724395 | 7.272155 |
| 84614_at | 4.408674 | 3.903232 | 4.812249 | 4.676057 | 3.980358 | 4.796332 | 4.966017 | 4.515993 |
| 84616_at | 1.200152 | 2.052377 | 1.490987 | 1.768571 | 1.760242 | 2.402484 | 2.022708 | 1.28874  |
| 84617_at | 6.072258 | 5.950563 | 5.340944 | 5.316713 | 5.147842 | 5.559318 | 5.688196 | 5.702245 |
| 84618_at | 1.339853 | 1.908554 | 1.762769 | 1.766415 | 2.21121  | 1.560214 | 2.597731 | 1.758447 |
| 84619_at | 3.201584 | 4.915957 | 4.181487 | 4.452938 | 4.059374 | 4.22049  | 5.45314  | 3.899202 |
| 84620_at | 2.145947 | 1.949792 | 2.021574 | 1.527245 | 4.043438 | 2.371467 | 3.089147 | 1.717937 |
| 84622_at | 2.309325 | 3.252112 | 3.352917 | 4.014045 | 3.721169 | 3.520916 | 3.449346 | 4.873401 |
| 84623_at | 2.512961 | 2.255124 | 2.128308 | 2.056067 | 1.806381 | 2.944957 | 2.095817 | 2.421274 |
| 84624_at | 1.65673  | 1.150751 | 1.215318 | 1.500537 | 2.071395 | 1.282509 | 1.831916 | 1.578896 |
| 84626_at | 2.956249 | 3.01794  | 2.104161 | 3.557262 | 2.290701 | 1.945528 | 2.325573 | 2.851102 |
| 84627_at | 2.304412 | 3.059625 | 3.202577 | 2.705385 | 3.296639 | 2.753311 | 2.326639 | 3.957063 |
| 84628_at | 2.124886 | 1.891446 | 2.892185 | 2.706103 | 1.672415 | 1.974619 | 3.565084 | 2.349601 |
| 84629_at | 4.596125 | 4.588614 | 4.41543  | 4.706074 | 3.836982 | 3.746973 | 4.093009 | 3.696143 |
| 8462_at  | 6.946042 | 7.363824 | 7.345947 | 7.736333 | 7.159778 | 7.1849   | 7.733043 | 7.077528 |
| 84630_at | 2.694198 | 2.716197 | 2.787375 | 2.785604 | 3.027666 | 2.519134 | 2.796648 | 3.334284 |
| 84631_at | 3.039578 | 3.561857 | 5.093677 | 3.845155 | 4.746039 | 4.427666 | 3.990725 | 3.145401 |
| 84632_at | 7.059167 | 6.338297 | 6.685634 | 7.179445 | 6.729599 | 6.924948 | 7.128041 | 6.222275 |
| 84634_at | 2.531198 | 2.437063 | 2.686067 | 2.552143 | 2.131001 | 2.58622  | 2.948223 | 2.402537 |
| 84636_at | 1.883289 | 1.239656 | 3.176403 | 2.628309 | 1.754945 | 2.291586 | 1.225834 | 2.773421 |
| 84639_at | 2.564572 | 1.644023 | 1.625608 | 2.372364 | 2.686391 | 2.315283 | 2.517267 | 1.740473 |
| 8463_at  | 5.566087 | 5.93387  | 6.285976 | 6.196396 | 5.997885 | 6.576701 | 5.778701 | 5.971907 |
| 84640_at | 6.360793 | 6.122165 | 6.06688  | 5.56533  | 6.054398 | 5.376617 | 6.26477  | 5.543809 |

|          |          |          |          |          |          |          |          |          |
|----------|----------|----------|----------|----------|----------|----------|----------|----------|
| 84641_at | 5.953127 | 6.404834 | 6.365653 | 5.903587 | 6.142214 | 5.94853  | 6.006863 | 6.236317 |
| 84643_at | 2.04495  | 1.885149 | 2.787659 | 2.611351 | 2.688082 | 2.181017 | 2.774131 | 2.598734 |
| 84645_at | 3.52129  | 3.01059  | 2.747357 | 3.637981 | 3.295061 | 3.157763 | 2.637055 | 2.941392 |
| 84647_at | 4.666679 | 3.847234 | 4.340001 | 2.946474 | 4.631817 | 4.801323 | 2.947487 | 3.827305 |
| 84648_at | 1.730465 | 1.099801 | 1.868426 | 1.941471 | 1.760303 | 1.693087 | 2.050266 | 2.162242 |
| 84649_at | 1.644263 | 2.399762 | 2.582667 | 2.620546 | 2.628748 | 2.509271 | 2.809603 | 1.879169 |
| 8464_at  | 4.322403 | 4.306172 | 4.465543 | 3.422742 | 2.741353 | 3.216354 | 4.107974 | 4.025609 |
| 84650_at | 5.104688 | 5.61999  | 5.573601 | 4.7514   | 5.264181 | 5.200805 | 4.98154  | 6.098952 |
| 84651_at | 1.129027 | 0.792017 | 0.800073 | 0.979653 | 1.3184   | 1.037637 | 2.014824 | 1.527474 |
| 84654_at | 1.24321  | 1.458811 | 1.747935 | 1.432038 | 1.210005 | 1.553584 | 1.104963 | 1.569086 |
| 84656_at | 7.257026 | 7.263598 | 7.299414 | 7.409183 | 6.89991  | 7.500972 | 7.508168 | 7.514467 |
| 84657_at | 3.862914 | 3.308623 | 3.558865 | 3.110578 | 2.404671 | 2.517077 | 3.14396  | 3.681555 |
| 84658_at | 1.642771 | 4.12089  | 1.809917 | 2.09126  | 1.098848 | 1.535055 | 2.003578 | 2.343643 |
| 84659_at | 2.418799 | 3.965834 | 2.600821 | 2.492759 | 2.886335 | 1.950585 | 2.411803 | 2.18145  |
| 84660_at | 1.883069 | 1.31866  | 1.727116 | 1.426643 | 1.41225  | 1.138451 | 1.488999 | 1.731092 |
| 84661_at | 7.66622  | 7.660808 | 7.853516 | 8.049181 | 7.35807  | 8.001843 | 7.491374 | 7.156153 |
| 84662_at | 6.591727 | 6.223459 | 6.281188 | 6.924186 | 5.480375 | 6.770864 | 6.378157 | 4.850835 |
| 84665_at | 1.121577 | 1.35526  | 1.815531 | 1.58149  | 1.220489 | 1.993114 | 1.475446 | 1.611467 |
| 84666_at | 0.963252 | 3.120544 | 1.434178 | 0.661139 | 2.143864 | 1.372924 | 1.389271 | 1.590271 |
| 84667_at | 2.417134 | 1.733752 | 1.522503 | 1.39857  | 1.675363 | 1.284761 | 1.506251 | 1.830202 |
| 84668_at | 5.566988 | 5.977691 | 6.35643  | 6.263387 | 6.049929 | 5.615902 | 5.688858 | 6.446867 |
| 84669_at | 5.839118 | 6.212021 | 6.568255 | 6.495603 | 6.502883 | 5.59013  | 6.231643 | 6.710631 |
| 84671_at | 4.689486 | 3.815784 | 4.209931 | 4.117702 | 3.997227 | 3.68843  | 4.568496 | 4.253697 |
| 84674_at | 5.406313 | 5.988967 | 5.966271 | 5.497262 | 5.521058 | 5.102939 | 6.079847 | 5.829278 |
| 84675_at | 3.143096 | 1.865314 | 1.449542 | 1.311291 | 1.758231 | 1.285956 | 2.292878 | 2.425544 |
| 84676_at | 2.197644 | 2.519742 | 1.9674   | 2.154627 | 2.385471 | 2.065572 | 2.673462 | 2.13483  |
| 84677_at | 3.384018 | 1.676424 | 1.782548 | 0.603957 | 3.593963 | 3.354162 | 1.773363 | 1.273589 |
| 84678_at | 4.134649 | 3.911476 | 3.595451 | 3.990673 | 4.357182 | 4.721231 | 4.254201 | 4.421413 |
| 84679_at | 3.467678 | 3.493419 | 3.734131 | 2.242279 | 2.824457 | 2.576601 | 3.00346  | 3.151469 |
| 8467_at  | 8.19588  | 8.579444 | 8.291807 | 8.58746  | 8.060891 | 8.343964 | 8.365271 | 8.564548 |
| 84680_at | 3.415835 | 3.533217 | 3.431399 | 3.130212 | 1.606321 | 2.881223 | 2.395023 | 3.184408 |
| 84681_at | 7.95596  | 7.443701 | 7.295634 | 7.628657 | 6.973706 | 7.279131 | 7.577447 | 6.768775 |
| 84684_at | 1.750833 | 1.563528 | 2.716719 | 1.818687 | 1.490173 | 0.963445 | 1.12043  | 1.761499 |
| 84687_at | 5.060553 | 5.736949 | 5.651425 | 5.676643 | 5.677366 | 5.982378 | 5.507929 | 5.878074 |
| 84688_at | 3.44421  | 2.485593 | 2.127716 | 2.934875 | 2.547698 | 2.948754 | 2.486849 | 2.570986 |
| 84689_at | 1.47808  | 2.005302 | 1.606492 | 1.773672 | 2.87034  | 1.684147 | 1.663048 | 1.662418 |
| 8468_at  | 1.046915 | 1.299964 | 2.290088 | 1.75302  | 1.853769 | 1.093614 | 2.221178 | 1.438349 |
| 84690_at | 1.758203 | 1.166292 | 0.886768 | 1.632444 | 1.019194 | 1.176371 | 1.331749 | 0.811229 |
| 84691_at | 1.771793 | 2.221767 | 2.286623 | 1.901394 | 2.081262 | 1.811146 | 1.807002 | 2.314976 |
| 84692_at | 1.358612 | 1.263991 | 0.862919 | 1.402281 | 2.113655 | 0.893971 | 1.264557 | 1.423144 |
| 84693_at | 5.848359 | 5.025586 | 5.016448 | 4.925459 | 5.746013 | 5.012407 | 4.582224 | 6.229012 |
| 84694_at | 1.746084 | 1.305063 | 1.804311 | 2.076154 | 2.414436 | 1.492375 | 1.865339 | 2.110238 |
| 84695_at | 3.512002 | 3.882937 | 3.901821 | 4.223031 | 3.316973 | 3.930273 | 3.46875  | 4.48641  |
| 84696_at | 1.820842 | 3.095927 | 2.085171 | 2.357989 | 1.841929 | 3.34265  | 2.287367 | 2.963063 |
| 84698_at | 2.804137 | 3.457181 | 3.838328 | 3.429512 | 3.888863 | 4.173819 | 3.543513 | 3.459405 |
| 84699_at | 2.520419 | 1.960599 | 2.230841 | 1.709049 | 1.729257 | 2.662529 | 2.500439 | 1.370487 |
| 846_at   | 3.013782 | 2.338189 | 2.633588 | 2.958118 | 3.120759 | 3.549949 | 3.304292 | 3.202304 |
| 84700_at | 1.956582 | 2.041659 | 1.884464 | 1.79691  | 1.703703 | 1.423871 | 2.15722  | 2.002309 |
| 84701_at | 5.084245 | 3.820067 | 4.737039 | 4.232563 | 2.181211 | 5.030279 | 4.664008 | 4.845626 |
| 84705_at | 2.313424 | 2.040769 | 2.434951 | 2.818049 | 2.88311  | 2.151342 | 3.207042 | 3.299684 |
| 84706_at | 2.842438 | 2.61147  | 2.060271 | 2.11638  | 2.987409 | 2.609035 | 3.339419 | 2.494919 |

|          |          |          |          |          |          |          |          |          |
|----------|----------|----------|----------|----------|----------|----------|----------|----------|
| 84707_at | 4.898789 | 5.076245 | 6.012771 | 5.787544 | 4.98497  | 5.482596 | 5.248355 | 5.697428 |
| 84708_at | 3.433705 | 2.777131 | 2.658415 | 2.390426 | 4.964346 | 2.558685 | 3.451109 | 3.871619 |
| 84709_at | 2.337486 | 2.61321  | 3.665392 | 2.176744 | 3.084817 | 2.117076 | 2.884534 | 2.467105 |
| 8470_at  | 5.107219 | 4.870214 | 5.145943 | 5.26043  | 4.635612 | 5.284717 | 5.220667 | 4.978074 |
| 84717_at | 5.062864 | 4.957424 | 4.185756 | 4.769334 | 5.034161 | 5.478471 | 5.322667 | 5.010134 |
| 8471_at  | 1.879443 | 1.33678  | 1.816124 | 1.204313 | 1.660328 | 1.377249 | 1.517817 | 1.677701 |
| 84720_at | 5.656943 | 4.591803 | 4.703077 | 5.081038 | 4.85156  | 4.075054 | 4.379572 | 5.427483 |
| 84722_at | 2.187395 | 2.178287 | 2.019145 | 2.096458 | 2.826821 | 2.744825 | 2.222704 | 2.811574 |
| 84725_at | 2.676903 | 2.64172  | 3.049848 | 1.893487 | 4.16597  | 2.07991  | 2.622505 | 3.701979 |
| 84726_at | 6.562476 | 6.997188 | 7.351816 | 7.312011 | 6.856566 | 7.300611 | 7.656509 | 6.170531 |
| 84727_at | 3.776762 | 3.288173 | 3.176393 | 2.462969 | 3.374448 | 3.716783 | 3.077973 | 3.477702 |
| 84733_at | 1.680822 | 3.250662 | 2.166899 | 2.227129 | 3.137926 | 2.712225 | 3.465003 | 2.256129 |
| 84734_at | 6.129117 | 6.483481 | 6.197203 | 5.96872  | 5.384794 | 6.13222  | 6.028091 | 4.198825 |
| 84735_at | 3.088052 | 1.845185 | 1.676996 | 1.753285 | 1.694273 | 2.986919 | 1.70976  | 2.360795 |
| 8473_at  | 6.676304 | 6.21605  | 6.494138 | 6.366364 | 6.12509  | 6.692427 | 6.40961  | 6.913654 |
| 84740_at | 2.297329 | 2.005981 | 3.410549 | 2.835091 | 2.633512 | 1.659347 | 3.062749 | 2.919565 |
| 84747_at | 5.326763 | 6.133172 | 6.312579 | 5.467301 | 5.916634 | 6.081334 | 5.219858 | 6.331164 |
| 84749_at | 6.326096 | 4.71011  | 7.496305 | 5.788966 | 6.310449 | 6.288368 | 5.715605 | 5.72625  |
| 84750_at | 5.086028 | 4.683278 | 4.997786 | 4.733455 | 5.189647 | 5.32905  | 4.509987 | 4.370785 |
| 84752_at | 4.486179 | 3.567991 | 4.331923 | 3.746436 | 3.781768 | 4.014854 | 4.785365 | 4.41371  |
| 84759_at | 5.650525 | 5.869411 | 6.637632 | 5.354814 | 5.76072  | 5.994307 | 6.659435 | 6.091107 |
| 84765_at | 4.360334 | 4.918122 | 4.667056 | 3.851227 | 4.321632 | 4.606708 | 4.390091 | 4.257551 |
| 84766_at | 2.182373 | 1.373434 | 1.808367 | 1.125803 | 1.479273 | 1.949402 | 1.583285 | 2.034335 |
| 84769_at | 6.590194 | 5.451105 | 6.956558 | 6.471057 | 4.372701 | 6.522027 | 6.466257 | 6.00009  |
| 8476_at  | 7.75109  | 7.924402 | 8.059411 | 8.066109 | 7.904434 | 7.636661 | 7.830783 | 7.997789 |
| 84771_at | 2.192796 | 1.296381 | 2.30848  | 1.982882 | 2.476583 | 1.767365 | 1.904105 | 1.441286 |
| 84775_at | 4.107656 | 5.425715 | 4.582068 | 3.232428 | 4.228802 | 2.862986 | 3.57929  | 3.055874 |
| 84779_at | 1.286183 | 2.077449 | 1.068131 | 0.94646  | 1.256088 | 1.867132 | 2.565447 | 1.502314 |
| 8477_at  | 4.299443 | 2.620234 | 2.903834 | 4.740212 | 4.133608 | 3.217648 | 4.339614 | 2.477333 |
| 84787_at | 2.959099 | 2.062901 | 1.652777 | 2.288876 | 4.318397 | 2.294098 | 2.757813 | 2.078376 |
| 84789_at | 1.306512 | 1.000955 | 1.222234 | 1.111883 | 2.03368  | 1.195864 | 1.214474 | 1.469408 |
| 84790_at | 8.415851 | 9.061569 | 8.826709 | 9.057883 | 8.972221 | 9.284035 | 8.375747 | 9.057883 |
| 84791_at | 5.921118 | 5.423351 | 4.717966 | 5.328666 | 4.360638 | 5.703162 | 5.59748  | 5.04853  |
| 84792_at | 4.877488 | 6.362663 | 5.067493 | 4.649265 | 4.900503 | 5.307222 | 4.810238 | 6.893918 |
| 84793_at | 3.779273 | 5.029949 | 4.043231 | 4.663831 | 2.67163  | 5.086118 | 3.203526 | 3.308009 |
| 84795_at | 4.46842  | 3.119415 | 4.244458 | 3.551371 | 3.513097 | 2.869902 | 4.980528 | 4.079887 |
| 84798_at | 2.604003 | 3.285021 | 2.610428 | 3.096303 | 3.555982 | 3.265232 | 3.818977 | 2.815202 |
| 8479_at  | 4.50377  | 5.086401 | 4.872564 | 4.460699 | 4.33811  | 3.911054 | 4.242876 | 4.066384 |
| 847_at   | 7.939426 | 7.709537 | 7.504772 | 7.240481 | 8.154752 | 7.736851 | 7.760093 | 8.099144 |
| 84803_at | 4.929431 | 3.762475 | 3.871792 | 3.131948 | 6.166786 | 4.257698 | 4.048309 | 5.665778 |
| 84804_at | 4.167012 | 3.630204 | 4.385182 | 3.951108 | 3.580657 | 2.108948 | 4.485186 | 3.484145 |
| 84807_at | 3.79662  | 2.638485 | 2.331406 | 2.302376 | 2.123053 | 2.633349 | 3.768987 | 2.652773 |
| 84808_at | 2.167156 | 2.286191 | 3.240766 | 2.659239 | 1.87998  | 2.158578 | 2.939911 | 2.824666 |
| 84809_at | 5.587243 | 5.823806 | 4.497235 | 5.201792 | 4.319121 | 5.808749 | 4.257437 | 5.513514 |
| 8480_at  | 5.440125 | 5.268894 | 5.954922 | 5.446942 | 5.00113  | 5.527798 | 6.423522 | 5.532039 |
| 84811_at | 5.002585 | 5.188174 | 4.790043 | 4.72932  | 4.693016 | 5.380173 | 5.739423 | 5.325134 |
| 84812_at | 2.44711  | 3.637034 | 3.86417  | 2.950912 | 2.849768 | 2.695472 | 2.331156 | 3.298629 |
| 84814_at | 2.77549  | 2.426552 | 2.213625 | 2.750194 | 3.022923 | 3.700701 | 2.526027 | 3.360661 |
| 84815_at | 3.097903 | 2.879721 | 3.468349 | 3.177964 | 4.775792 | 3.423307 | 3.123744 | 1.812271 |
| 84816_at | 5.213554 | 4.556537 | 4.28015  | 3.496472 | 4.638945 | 3.932306 | 5.127257 | 5.524821 |
| 84817_at | 7.78259  | 7.804813 | 7.684135 | 7.595724 | 7.957754 | 7.757072 | 7.392246 | 7.874356 |

|          |          |          |          |          |          |          |          |          |
|----------|----------|----------|----------|----------|----------|----------|----------|----------|
| 84818_at | 4.146526 | 3.672835 | 3.611429 | 3.822727 | 2.479721 | 3.47381  | 2.474828 | 3.217916 |
| 8481_at  | 5.634824 | 4.720503 | 5.261521 | 4.686579 | 4.969932 | 5.266285 | 4.507231 | 4.930936 |
| 84820_at | 4.264269 | 3.761562 | 3.48566  | 4.336439 | 3.723591 | 4.383377 | 4.153314 | 3.134577 |
| 84823_at | 4.667768 | 4.87374  | 3.652174 | 4.815552 | 3.230348 | 4.368424 | 3.988271 | 3.32452  |
| 84824_at | 2.259911 | 2.30705  | 2.529991 | 2.24083  | 2.156838 | 2.137201 | 3.19454  | 2.352364 |
| 84826_at | 4.703591 | 4.185428 | 4.318794 | 4.282003 | 4.487148 | 3.185378 | 4.710987 | 4.319799 |
| 8482_at  | 4.617352 | 4.719882 | 4.863113 | 5.031275 | 4.646449 | 4.787628 | 5.308068 | 4.86742  |
| 84830_at | 1.665802 | 2.228463 | 1.727269 | 1.893811 | 1.81306  | 2.13078  | 2.256742 | 3.124953 |
| 84832_at | 5.539666 | 6.253038 | 6.274711 | 6.616878 | 7.037127 | 6.243699 | 6.221077 | 6.487777 |
| 84833_at | 9.708362 | 9.69212  | 9.560229 | 9.536933 | 9.737729 | 9.464954 | 9.279123 | 9.634533 |
| 84836_at | 6.48407  | 6.149642 | 6.68986  | 5.774044 | 5.414582 | 6.04082  | 6.319228 | 5.416187 |
| 84837_at | 4.201838 | 4.054654 | 5.078255 | 3.35754  | 4.294781 | 5.428972 | 3.193914 | 3.912485 |
| 84838_at | 4.645696 | 4.560838 | 4.596506 | 4.056385 | 4.691243 | 4.64381  | 5.174127 | 3.98219  |
| 84839_at | 1.948699 | 2.660216 | 1.865786 | 2.136876 | 1.779305 | 2.198673 | 2.392854 | 2.181964 |
| 8483_at  | 1.572103 | 2.245424 | 1.72999  | 1.890521 | 2.06059  | 1.491365 | 2.023876 | 2.044615 |
| 84842_at | 2.352446 | 2.823528 | 2.451143 | 2.787203 | 2.462935 | 2.539471 | 2.526259 | 2.586164 |
| 84844_at | 3.880431 | 4.335343 | 5.113968 | 3.783103 | 5.282682 | 3.876112 | 5.18913  | 4.559817 |
| 84847_at | 2.123402 | 2.697883 | 2.135488 | 2.442824 | 2.121597 | 2.975844 | 2.970767 | 2.050566 |
| 84848_at | 6.750088 | 7.50379  | 6.556798 | 5.560405 | 6.29553  | 5.300202 | 4.250317 | 6.314067 |
| 84849_at | 2.478467 | 1.870969 | 2.403112 | 4.376948 | 4.1249   | 2.019857 | 2.368602 | 3.143752 |
| 8484_at  | 2.133878 | 2.731905 | 1.971804 | 1.658882 | 2.034205 | 2.348055 | 2.520306 | 3.271896 |
| 84850_at | 2.520815 | 2.745163 | 2.799569 | 2.594457 | 1.411376 | 1.968507 | 1.525921 | 2.082758 |
| 84851_at | 4.883257 | 4.755622 | 4.627845 | 4.493656 | 3.564829 | 4.073028 | 5.623988 | 5.067017 |
| 84852_at | 3.643223 | 3.38783  | 3.205608 | 3.827932 | 2.949269 | 3.166743 | 3.129896 | 4.262411 |
| 84856_at | 9.292062 | 8.626083 | 9.37809  | 8.894337 | 7.535615 | 9.066387 | 9.190876 | 7.986069 |
| 84858_at | 5.381923 | 5.361874 | 5.443746 | 5.004662 | 5.178544 | 5.522688 | 5.564799 | 4.475832 |
| 84859_at | 6.297388 | 6.358624 | 6.568446 | 6.737566 | 6.358657 | 6.512799 | 6.335633 | 6.409875 |
| 84861_at | 3.898208 | 2.999582 | 3.30138  | 3.115765 | 2.741978 | 3.087264 | 3.681476 | 2.130351 |
| 84864_at | 5.628921 | 5.543377 | 5.49441  | 5.929098 | 5.735158 | 5.931704 | 6.022698 | 5.678215 |
| 84865_at | 3.552775 | 3.747556 | 4.065278 | 3.760139 | 3.227495 | 3.239638 | 3.346077 | 3.777864 |
| 84866_at | 5.35963  | 4.480525 | 5.613161 | 3.932149 | 5.427104 | 5.67922  | 5.919248 | 5.363309 |
| 84867_at | 1.805517 | 1.713413 | 2.556662 | 2.684997 | 2.444388 | 2.509809 | 2.333503 | 2.291313 |
| 84868_at | 4.321336 | 5.246029 | 4.749321 | 4.05339  | 4.17656  | 4.379708 | 3.57698  | 4.201552 |
| 84869_at | 7.186352 | 7.360478 | 7.713093 | 7.489209 | 7.936756 | 6.705901 | 6.783163 | 8.041638 |
| 84870_at | 1.884556 | 1.795791 | 1.59245  | 2.074101 | 2.320845 | 1.953006 | 1.552913 | 1.817748 |
| 84871_at | 1.544476 | 2.43623  | 2.362498 | 2.264808 | 2.072154 | 2.741022 | 2.197549 | 1.695235 |
| 84872_at | 6.129502 | 5.502448 | 5.215587 | 6.350944 | 3.491184 | 5.580931 | 5.743456 | 4.797317 |
| 84873_at | 1.24873  | 1.065784 | 1.23878  | 1.200304 | 1.459235 | 1.255963 | 5.158194 | 1.05701  |
| 84874_at | 2.700029 | 3.521511 | 1.997306 | 3.259461 | 3.614178 | 1.603506 | 2.854264 | 3.728016 |
| 84875_at | 3.915684 | 3.434681 | 3.260695 | 3.20465  | 3.891141 | 2.619052 | 2.708726 | 2.411909 |
| 84876_at | 5.330498 | 4.622602 | 4.67222  | 5.163447 | 5.040764 | 5.153655 | 4.53342  | 4.816939 |
| 84878_at | 5.485293 | 5.527791 | 5.752245 | 5.349607 | 5.540997 | 5.58897  | 5.98348  | 5.069571 |
| 84879_at | 4.59036  | 3.864593 | 5.51946  | 4.157235 | 4.05018  | 4.248829 | 5.542556 | 2.451712 |
| 8487_at  | 1.269168 | 1.638944 | 1.616518 | 1.283731 | 3.492311 | 1.763036 | 0.965146 | 2.79176  |
| 84881_at | 3.295736 | 4.877831 | 2.461186 | 4.549756 | 3.654673 | 3.771138 | 3.780794 | 4.589924 |
| 84883_at | 4.522713 | 3.777516 | 4.882639 | 4.012102 | 2.602833 | 3.188055 | 4.137864 | 5.241438 |
| 84885_at | 6.219483 | 5.288242 | 5.772923 | 5.005565 | 3.915485 | 4.982393 | 5.994295 | 4.67335  |
| 84886_at | 5.525869 | 5.958877 | 5.147614 | 5.593913 | 5.264684 | 5.167897 | 4.796089 | 4.112244 |
| 84888_at | 7.319009 | 7.77336  | 7.582328 | 7.683741 | 7.956896 | 7.343421 | 7.507858 | 8.297239 |
| 84889_at | 1.400571 | 2.293992 | 1.878089 | 2.014732 | 3.403737 | 1.836265 | 2.277154 | 1.634955 |
| 84890_at | 3.590041 | 3.929876 | 4.05984  | 3.802018 | 4.280737 | 3.90885  | 3.155617 | 3.73772  |

|          |          |          |          |          |          |          |          |          |
|----------|----------|----------|----------|----------|----------|----------|----------|----------|
| 84891_at | 2.212643 | 2.741145 | 3.140972 | 2.322833 | 3.200572 | 2.299796 | 2.881149 | 2.370362 |
| 84892_at | 4.185537 | 4.8457   | 4.516707 | 4.239584 | 4.714837 | 3.60277  | 4.600752 | 3.793142 |
| 84893_at | 5.937585 | 6.265337 | 6.189956 | 6.121019 | 5.752215 | 5.733447 | 6.182078 | 5.831235 |
| 84894_at | 4.079615 | 4.282084 | 5.428282 | 4.466913 | 3.880307 | 5.040379 | 4.661605 | 4.199118 |
| 84895_at | 2.781788 | 2.665642 | 2.363086 | 2.884748 | 1.844648 | 1.618903 | 2.170535 | 3.678873 |
| 84896_at | 7.516486 | 7.35795  | 7.52561  | 7.223302 | 7.553562 | 7.286274 | 7.512255 | 7.858705 |
| 84897_at | 5.505499 | 5.495022 | 5.287211 | 5.648448 | 4.44141  | 5.527759 | 5.631998 | 5.938238 |
| 84898_at | 6.942007 | 6.932877 | 7.296283 | 7.499815 | 7.393581 | 7.141336 | 7.356861 | 6.431886 |
| 84899_at | 3.921759 | 3.353995 | 3.773616 | 4.851609 | 3.258979 | 4.852265 | 4.542487 | 5.228976 |
| 84900_at | 3.581115 | 2.863242 | 2.099308 | 4.209053 | 2.637372 | 3.562942 | 2.693949 | 1.707543 |
| 84901_at | 5.109984 | 3.709702 | 5.236954 | 4.602351 | 3.685436 | 4.708701 | 4.204403 | 4.525615 |
| 84902_at | 4.976472 | 5.638509 | 5.388674 | 5.766696 | 5.236638 | 4.899568 | 5.103742 | 5.092737 |
| 84904_at | 2.671139 | 2.630401 | 2.703355 | 2.999806 | 2.832541 | 2.37019  | 3.600739 | 3.686243 |
| 84905_at | 2.760003 | 3.236226 | 4.29926  | 4.632783 | 3.562488 | 3.754479 | 3.949267 | 3.529963 |
| 84908_at | 5.543817 | 4.727424 | 4.52486  | 6.124552 | 4.737335 | 5.340306 | 5.355616 | 5.246451 |
| 84909_at | 2.574369 | 2.619211 | 3.24636  | 3.479054 | 1.950943 | 3.448592 | 2.758631 | 3.167233 |
| 8490_at  | 5.474231 | 5.413688 | 5.34933  | 6.416773 | 5.77375  | 5.040206 | 4.730844 | 4.47591  |
| 84910_at | 5.031652 | 6.012193 | 5.974547 | 6.221606 | 6.488949 | 5.699635 | 6.444379 | 6.017346 |
| 84911_at | 4.690068 | 5.034846 | 4.688998 | 3.74925  | 3.056422 | 3.904983 | 2.57645  | 4.88721  |
| 84912_at | 5.202285 | 5.972301 | 5.757967 | 5.717512 | 5.724274 | 5.832149 | 5.23055  | 5.244471 |
| 84913_at | 2.994728 | 2.455755 | 2.884846 | 3.515692 | 2.353319 | 2.663334 | 3.192133 | 2.269286 |
| 84914_at | 2.380861 | 3.3228   | 4.407938 | 3.404257 | 5.135436 | 2.199061 | 4.30597  | 3.671798 |
| 84915_at | 3.503221 | 4.08191  | 4.386022 | 3.65066  | 3.927418 | 4.152894 | 4.05203  | 3.894965 |
| 84916_at | 6.343474 | 6.050841 | 6.089799 | 5.319753 | 6.381645 | 6.424586 | 6.203134 | 6.887164 |
| 84918_at | 6.891009 | 7.158134 | 6.941181 | 5.654408 | 5.918402 | 6.665517 | 7.199064 | 6.376235 |
| 84919_at | 6.562026 | 6.069187 | 6.111646 | 6.328772 | 6.607668 | 6.457184 | 6.641485 | 6.330513 |
| 8491_at  | 5.577009 | 6.501915 | 5.763698 | 6.302652 | 5.795543 | 5.925694 | 5.601433 | 6.672189 |
| 84920_at | 4.297497 | 4.366286 | 5.224961 | 6.401676 | 5.131554 | 5.432589 | 5.387718 | 5.63723  |
| 84922_at | 3.238161 | 3.368867 | 2.470128 | 2.978096 | 2.544288 | 2.959396 | 3.017749 | 3.023221 |
| 84923_at | 5.459975 | 4.642027 | 5.14287  | 5.461518 | 4.742716 | 5.778157 | 5.535161 | 5.176341 |
| 84924_at | 2.126989 | 3.041795 | 2.007133 | 3.059985 | 1.922962 | 2.648042 | 2.740037 | 3.141615 |
| 84925_at | 5.95425  | 6.184661 | 6.037499 | 6.399156 | 6.746735 | 5.967964 | 6.434564 | 6.688234 |
| 84926_at | 4.4133   | 2.928864 | 3.809975 | 4.478846 | 4.056899 | 4.551968 | 4.570405 | 3.918411 |
| 84928_at | 6.078001 | 6.22287  | 6.252887 | 5.979813 | 6.159531 | 6.045518 | 6.350832 | 6.16489  |
| 84929_at | 1.884277 | 2.044611 | 1.974672 | 2.060757 | 2.232574 | 1.814047 | 2.208387 | 1.874517 |
| 8492_at  | 1.647624 | 2.275554 | 1.590412 | 1.912228 | 2.293308 | 1.894527 | 1.593997 | 1.338955 |
| 84930_at | 5.024058 | 4.656068 | 4.679963 | 4.917997 | 2.790152 | 5.17061  | 4.584161 | 5.176554 |
| 84931_at | 1.331774 | 1.073947 | 1.668879 | 1.24807  | 0.881206 | 1.110125 | 1.602075 | 1.539656 |
| 84932_at | 5.719372 | 5.949767 | 6.131259 | 5.984288 | 5.98879  | 6.119981 | 5.634262 | 6.506896 |
| 84933_at | 3.61073  | 3.858619 | 4.80414  | 3.754099 | 4.89425  | 3.09935  | 3.343242 | 5.340278 |
| 84934_at | 4.24342  | 4.496042 | 3.947553 | 5.144276 | 4.135981 | 4.256988 | 3.849909 | 3.996755 |
| 84935_at | 1.924604 | 2.786526 | 1.64309  | 1.436718 | 2.320647 | 1.989159 | 3.804586 | 2.350121 |
| 84936_at | 4.595589 | 4.076107 | 3.193073 | 3.564617 | 3.355901 | 3.988082 | 3.319001 | 4.192298 |
| 84937_at | 5.872569 | 5.769165 | 5.017174 | 4.899682 | 6.600096 | 5.652459 | 5.980283 | 5.235245 |
| 84938_at | 4.021411 | 4.540152 | 3.23088  | 3.912176 | 5.353971 | 3.287004 | 3.513514 | 4.888121 |
| 84939_at | 4.721555 | 4.843377 | 5.242762 | 4.354171 | 4.471957 | 4.721828 | 5.114877 | 4.65706  |
| 8493_at  | 4.803035 | 4.888391 | 4.911637 | 4.990688 | 4.128709 | 4.867594 | 4.897987 | 4.930349 |
| 84940_at | 2.100252 | 2.125554 | 2.201422 | 1.960762 | 2.324368 | 1.826632 | 1.74732  | 2.002109 |
| 84941_at | 3.681436 | 2.283118 | 3.017055 | 2.951528 | 2.540684 | 2.848051 | 3.996624 | 3.53897  |
| 84942_at | 3.908521 | 4.118439 | 3.973668 | 4.982125 | 3.501118 | 4.090757 | 2.582181 | 4.08514  |
| 84944_at | 3.925223 | 2.159994 | 4.301743 | 2.86953  | 1.841062 | 2.857563 | 3.195788 | 3.80416  |

|          |          |          |          |          |          |          |          |          |
|----------|----------|----------|----------|----------|----------|----------|----------|----------|
| 84945_at | 5.632202 | 5.244274 | 5.518992 | 5.736354 | 6.147897 | 5.59539  | 5.726315 | 6.406714 |
| 84946_at | 5.256022 | 6.366211 | 5.706916 | 6.023225 | 5.939515 | 5.480402 | 5.373489 | 5.345427 |
| 84947_at | 4.209684 | 3.383522 | 3.278739 | 4.420255 | 3.433478 | 5.200951 | 4.650936 | 4.159716 |
| 84948_at | 4.795078 | 4.405496 | 4.025383 | 3.846191 | 3.904548 | 5.280559 | 4.2886   | 4.14639  |
| 84950_at | 6.045814 | 6.154646 | 5.895816 | 5.895514 | 6.267325 | 6.517819 | 6.28252  | 5.884873 |
| 84951_at | 2.127588 | 2.8814   | 2.370781 | 2.62831  | 2.743953 | 2.383459 | 2.241733 | 2.641749 |
| 84952_at | 8.78708  | 8.744385 | 8.923057 | 8.495804 | 8.854366 | 8.915273 | 8.826048 | 8.675884 |
| 84953_at | 1.635082 | 2.402857 | 2.20782  | 1.594803 | 2.412388 | 2.021976 | 2.115393 | 2.430304 |
| 84954_at | 3.854421 | 3.705992 | 3.521518 | 3.286512 | 3.46411  | 3.340605 | 3.871046 | 3.567044 |
| 84955_at | 5.587412 | 5.835016 | 5.189763 | 4.980591 | 4.852768 | 5.364023 | 5.269046 | 5.119743 |
| 84957_at | 2.634336 | 2.667056 | 2.148643 | 2.576658 | 2.393687 | 1.978534 | 2.058162 | 1.994973 |
| 84958_at | 3.111989 | 3.595714 | 2.317457 | 3.187686 | 3.227053 | 2.770143 | 3.517672 | 2.343145 |
| 84959_at | 5.278467 | 4.836165 | 4.541556 | 5.345201 | 4.566944 | 2.802185 | 3.946665 | 4.114887 |
| 8495_at  | 4.799123 | 4.216441 | 4.903689 | 4.200628 | 4.38626  | 3.722107 | 4.20165  | 4.671518 |
| 84960_at | 3.503779 | 2.14986  | 2.749227 | 2.453071 | 2.305513 | 1.762027 | 2.207127 | 2.737219 |
| 84961_at | 6.282959 | 6.008035 | 6.402358 | 7.134346 | 7.207788 | 6.507029 | 6.186039 | 5.178808 |
| 84962_at | 5.828393 | 5.858807 | 6.156155 | 5.613067 | 4.972376 | 5.614875 | 5.863503 | 5.834693 |
| 84964_at | 5.63821  | 6.188898 | 5.704501 | 5.483986 | 5.255896 | 5.267437 | 6.03203  | 5.943986 |
| 84966_at | 1.493312 | 1.747573 | 1.878018 | 1.899842 | 2.054108 | 2.808782 | 2.953401 | 1.938118 |
| 84967_at | 6.83531  | 7.013304 | 6.841946 | 5.821694 | 6.756986 | 6.720303 | 6.462584 | 5.907569 |
| 84969_at | 5.089354 | 5.424371 | 5.907329 | 5.551723 | 3.520718 | 5.102354 | 5.764417 | 3.82513  |
| 8496_at  | 7.452045 | 8.110599 | 7.697879 | 7.890674 | 7.644268 | 7.869335 | 8.20955  | 7.820064 |
| 84970_at | 1.832483 | 2.009404 | 1.987848 | 0.876514 | 1.814278 | 1.500836 | 1.882271 | 1.538939 |
| 84971_at | 4.797542 | 3.941165 | 3.252119 | 4.222099 | 4.315838 | 4.592937 | 3.62566  | 3.769923 |
| 84973_at | 2.560332 | 2.98507  | 2.150827 | 3.869989 | 2.611073 | 1.932464 | 2.46251  | 2.50678  |
| 84975_at | 4.524325 | 4.770841 | 4.605812 | 4.255124 | 3.910527 | 4.260529 | 4.421409 | 4.285293 |
| 84976_at | 4.980425 | 5.246605 | 5.505695 | 3.6404   | 4.664802 | 5.061232 | 5.513923 | 4.709507 |
| 84978_at | 2.138853 | 1.728558 | 1.602938 | 2.422271 | 1.927494 | 1.671756 | 2.677648 | 2.199665 |
| 8497_at  | 5.016807 | 4.442295 | 4.744489 | 4.808419 | 3.323881 | 3.636433 | 3.122066 | 2.818388 |
| 84981_at | 5.707772 | 5.696862 | 5.081898 | 5.71828  | 5.532975 | 5.294394 | 4.990839 | 4.957827 |
| 84983_at | 1.37304  | 1.466194 | 1.081362 | 1.094267 | 1.378869 | 1.740086 | 1.263348 | 1.033161 |
| 84984_at | 3.810222 | 4.550399 | 3.876035 | 3.842905 | 2.524736 | 3.593594 | 3.151525 | 4.038814 |
| 84985_at | 1.913086 | 1.656914 | 2.277662 | 1.818771 | 2.086693 | 1.578678 | 1.916709 | 1.880278 |
| 84987_at | 5.48599  | 4.785146 | 5.541598 | 5.825531 | 4.850175 | 5.122182 | 4.803993 | 4.465752 |
| 84988_at | 3.651806 | 3.729437 | 3.287926 | 3.308789 | 3.691552 | 3.947233 | 3.055853 | 3.168169 |
| 84989_at | 3.385293 | 3.6083   | 3.603071 | 3.627015 | 2.246924 | 2.946017 | 1.791962 | 2.229405 |
| 8498_at  | 6.375633 | 5.811198 | 6.752365 | 6.563605 | 5.675693 | 6.230538 | 5.843646 | 6.596433 |
| 84991_at | 6.476066 | 6.734156 | 6.609289 | 6.597899 | 6.328696 | 6.758908 | 5.942588 | 6.315072 |
| 84993_at | 7.727557 | 6.904107 | 7.187449 | 7.145857 | 6.983373 | 7.207032 | 6.829032 | 6.861196 |
| 84996_at | 3.685146 | 3.80369  | 4.461877 | 2.876783 | 3.649483 | 3.184116 | 4.575643 | 4.958787 |
| 8499_at  | 1.772273 | 1.401974 | 1.60853  | 1.451466 | 1.547349 | 1.422609 | 1.138897 | 1.583419 |
| 85001_at | 2.242628 | 2.162941 | 2.335014 | 2.560444 | 2.410217 | 2.176314 | 2.10996  | 1.941272 |
| 85003_at | 1.416146 | 1.097877 | 2.456826 | 1.625711 | 1.460264 | 1.255447 | 1.692105 | 2.219113 |
| 85004_at | 8.569117 | 8.989497 | 9.256357 | 8.139509 | 7.853203 | 8.846326 | 9.112984 | 8.523772 |
| 85007_at | 4.016853 | 4.038041 | 3.622312 | 2.695684 | 3.602438 | 3.977008 | 2.755795 | 3.138455 |
| 85009_at | 1.612358 | 1.682373 | 1.491983 | 1.5411   | 1.794154 | 1.483736 | 2.443851 | 2.145262 |
| 8500_at  | 6.632897 | 6.098375 | 6.230845 | 6.556961 | 6.57752  | 6.86288  | 6.742971 | 6.50841  |
| 85013_at | 4.042804 | 4.741382 | 4.632282 | 4.435427 | 2.344684 | 4.181928 | 3.73071  | 3.21909  |
| 85014_at | 6.360486 | 6.219612 | 6.469047 | 5.70745  | 5.076177 | 6.530135 | 5.616943 | 5.418461 |
| 85015_at | 4.198166 | 3.411041 | 5.091808 | 4.235988 | 4.75579  | 4.457761 | 4.524192 | 5.515232 |
| 85016_at | 3.455191 | 3.076129 | 4.507485 | 4.434724 | 3.969362 | 3.060725 | 3.840023 | 4.533781 |

|          |          |          |          |          |          |          |          |          |
|----------|----------|----------|----------|----------|----------|----------|----------|----------|
| 85019_at | 5.219817 | 4.522044 | 5.164722 | 3.98978  | 4.40916  | 4.301745 | 4.748311 | 4.743751 |
| 8501_at  | 4.264533 | 3.22225  | 4.193507 | 2.353431 | 3.927801 | 3.034046 | 4.796116 | 2.714616 |
| 85021_at | 7.377937 | 7.09609  | 7.338663 | 6.999911 | 6.706693 | 7.220723 | 7.157502 | 7.204262 |
| 85025_at | 8.337054 | 8.525215 | 8.435546 | 7.989852 | 8.234775 | 8.366305 | 7.726577 | 8.286732 |
| 85026_at | 4.180734 | 2.508553 | 4.283009 | 4.142764 | 1.920447 | 2.859553 | 3.400343 | 3.260285 |
| 85027_at | 3.029467 | 3.439506 | 3.24762  | 3.18724  | 2.861566 | 3.711374 | 2.661778 | 3.024641 |
| 85028_at | 4.577864 | 4.514265 | 3.664401 | 5.511012 | 4.096919 | 5.330299 | 1.886257 | 4.661796 |
| 8502_at  | 7.955223 | 7.857382 | 8.0202   | 7.772318 | 8.004008 | 7.861083 | 8.155927 | 8.148319 |
| 8503_at  | 7.396918 | 7.451849 | 7.450449 | 8.039912 | 8.210911 | 7.434279 | 8.1213   | 7.881243 |
| 8504_at  | 5.498493 | 5.059893 | 5.346613 | 5.400644 | 5.064982 | 5.187647 | 4.625677 | 5.511895 |
| 8505_at  | 5.001707 | 4.346043 | 5.033806 | 4.637038 | 5.489663 | 4.535508 | 4.109939 | 5.403686 |
| 8506_at  | 1.83255  | 1.916405 | 3.255184 | 1.681269 | 1.845512 | 2.60993  | 1.386632 | 1.779248 |
| 8507_at  | 4.113896 | 3.353971 | 5.315796 | 4.429432 | 4.094028 | 3.818104 | 5.726804 | 3.244941 |
| 8508_at  | 6.001093 | 5.160722 | 5.664069 | 6.17723  | 5.476177 | 5.881141 | 4.845534 | 6.136716 |
| 8509_at  | 5.88429  | 5.974293 | 6.515626 | 5.867028 | 5.289697 | 6.271598 | 5.927624 | 4.511343 |
| 8512_at  | 2.823318 | 3.408104 | 2.53665  | 2.605166 | 2.753883 | 3.480877 | 2.985483 | 2.986908 |
| 8513_at  | 1.390771 | 1.518526 | 1.509859 | 1.261764 | 1.249473 | 1.117266 | 1.170632 | 1.94655  |
| 8514_at  | 2.39703  | 3.38995  | 3.244079 | 2.656379 | 3.280958 | 2.890362 | 3.198511 | 2.42708  |
| 8515_at  | 1.934569 | 2.066544 | 2.112017 | 2.272968 | 1.95471  | 1.71182  | 1.83885  | 1.722877 |
| 8516_at  | 7.099491 | 7.505901 | 8.018318 | 7.877401 | 7.84606  | 7.728909 | 7.537401 | 7.195622 |
| 8517_at  | 1.55444  | 1.64479  | 1.93401  | 1.764566 | 1.809004 | 2.066114 | 2.33812  | 2.045046 |
| 8518_at  | 5.608499 | 6.350977 | 5.554043 | 5.775527 | 5.595509 | 5.535049 | 5.926634 | 6.341059 |
| 8519_at  | 10.32859 | 10.08523 | 9.580949 | 10.07669 | 9.771302 | 10.02939 | 9.95953  | 9.760119 |
| 8520_at  | 6.826204 | 6.628744 | 6.776652 | 6.470816 | 7.38223  | 6.092759 | 6.399619 | 6.689305 |
| 8521_at  | 1.443704 | 1.518713 | 1.958087 | 1.284011 | 1.878117 | 1.829759 | 2.05261  | 1.662126 |
| 8522_at  | 3.194397 | 2.603818 | 2.285821 | 2.518675 | 2.674942 | 3.209772 | 3.054616 | 1.855348 |
| 85235_at | 1.092349 | 0.97949  | 1.16296  | 1.180838 | 1.75109  | 1.404287 | 1.494717 | 2.135526 |
| 85236_at | 8.296789 | 8.884508 | 8.47737  | 8.261284 | 7.989337 | 8.623653 | 8.728202 | 7.910658 |
| 8525_at  | 4.342276 | 5.09193  | 4.764158 | 5.104325 | 4.426047 | 5.080872 | 4.819436 | 4.675594 |
| 8526_at  | 5.015334 | 4.860704 | 5.258016 | 6.40284  | 6.026893 | 5.509597 | 5.592033 | 5.745782 |
| 8527_at  | 4.438637 | 3.401364 | 4.410091 | 4.245829 | 2.822896 | 4.039778 | 3.466032 | 3.753405 |
| 85280_at | 2.082799 | 1.854366 | 1.278873 | 2.279703 | 3.109954 | 1.146295 | 2.002312 | 1.803339 |
| 85285_at | 3.487422 | 2.110296 | 1.814487 | 2.301282 | 1.50317  | 2.71486  | 2.63257  | 1.777814 |
| 85289_at | 0.758851 | 1.367751 | 1.11427  | 0.72162  | 1.359624 | 1.815077 | 1.914032 | 1.118716 |
| 8528_at  | 2.214713 | 2.101711 | 2.714829 | 4.070904 | 2.343118 | 3.299496 | 3.093057 | 3.190064 |
| 85290_at | 1.412188 | 1.571359 | 1.754849 | 1.675993 | 1.484084 | 1.519877 | 1.604696 | 1.487089 |
| 85291_at | 1.629381 | 1.742758 | 1.347829 | 1.9974   | 1.562808 | 1.811052 | 1.938861 | 1.305088 |
| 85293_at | 1.00641  | 1.208066 | 0.856989 | 1.120068 | 1.515642 | 1.337617 | 1.40631  | 1.725591 |
| 85294_at | 1.479637 | 1.242862 | 1.50422  | 1.081187 | 1.679849 | 1.27267  | 1.693553 | 0.8899   |
| 8529_at  | 5.542585 | 1.478133 | 3.52557  | 1.940512 | 5.582828 | 3.469646 | 1.709409 | 2.216895 |
| 85300_at | 2.14351  | 2.038178 | 1.863702 | 1.770451 | 2.558359 | 1.758259 | 2.139626 | 1.707753 |
| 85301_at | 2.278496 | 2.140588 | 2.067674 | 2.549273 | 2.534953 | 2.807486 | 2.512147 | 1.967266 |
| 85302_at | 2.398943 | 2.647224 | 2.793434 | 3.353868 | 2.587718 | 2.302852 | 3.120149 | 2.292675 |
| 8530_at  | 5.963605 | 5.88461  | 6.636233 | 6.298884 | 4.566066 | 6.198202 | 6.301764 | 5.764724 |
| 85313_at | 5.645905 | 6.383772 | 5.854307 | 6.506196 | 6.115427 | 5.499423 | 5.979537 | 6.555432 |
| 85315_at | 5.1106   | 5.276592 | 4.937768 | 5.657523 | 6.017273 | 4.069064 | 3.605387 | 6.356176 |
| 85320_at | 1.661338 | 2.168483 | 2.471246 | 2.010825 | 2.760753 | 1.963363 | 2.88793  | 2.608062 |
| 85329_at | 1.44785  | 1.561038 | 1.55118  | 1.56657  | 1.108774 | 1.452423 | 1.46025  | 3.154967 |
| 8532_at  | 3.676173 | 3.419961 | 2.81656  | 3.291465 | 2.47986  | 3.103782 | 2.844107 | 2.816177 |
| 8533_at  | 7.096819 | 6.572651 | 6.990562 | 6.216389 | 5.937537 | 6.458158 | 6.17446  | 6.945997 |
| 8534_at  | 4.992665 | 4.148025 | 6.232006 | 4.572936 | 4.2902   | 4.930135 | 5.263782 | 4.822382 |

|          |          |          |          |          |          |          |          |          |
|----------|----------|----------|----------|----------|----------|----------|----------|----------|
| 85352_at | 1.81791  | 1.419427 | 2.347663 | 1.561209 | 3.052444 | 2.219609 | 2.302786 | 1.792987 |
| 85358_at | 5.128282 | 5.615295 | 5.318228 | 6.223597 | 4.349064 | 6.403309 | 5.292977 | 3.941616 |
| 85359_at | 3.492004 | 3.26352  | 3.960999 | 3.289501 | 3.398702 | 2.511987 | 2.504647 | 3.172278 |
| 8535_at  | 2.829042 | 2.695679 | 3.451943 | 3.92544  | 4.073441 | 3.723195 | 2.757083 | 3.667268 |
| 85360_at | 6.034169 | 5.680897 | 5.777873 | 5.501207 | 5.399384 | 5.939397 | 6.123349 | 4.613348 |
| 85363_at | 5.63573  | 5.890726 | 5.809046 | 5.554143 | 5.862824 | 5.24961  | 5.395453 | 5.076879 |
| 85364_at | 5.311854 | 5.062764 | 5.24486  | 5.077991 | 4.665976 | 4.339214 | 4.872306 | 4.258008 |
| 85365_at | 6.29228  | 6.160748 | 5.736537 | 6.3783   | 6.10811  | 6.42378  | 6.172668 | 6.021517 |
| 85366_at | 1.875492 | 1.687474 | 2.009909 | 1.780797 | 1.557569 | 2.15155  | 1.241535 | 2.082153 |
| 85369_at | 4.151706 | 3.961638 | 4.498228 | 3.647746 | 4.508966 | 4.314873 | 4.045955 | 3.527381 |
| 8536_at  | 5.791279 | 4.972904 | 5.962315 | 6.466894 | 6.072709 | 5.833522 | 4.946317 | 5.642451 |
| 85371_at | 1.623837 | 1.569301 | 1.564159 | 1.877054 | 2.819826 | 1.27168  | 1.957443 | 1.129406 |
| 85376_at | 3.304335 | 2.953503 | 3.519176 | 3.059757 | 4.256656 | 3.043453 | 3.635971 | 3.399338 |
| 85377_at | 4.336658 | 4.494315 | 4.0037   | 4.551135 | 4.475605 | 3.995201 | 4.418281 | 3.176426 |
| 85378_at | 3.674134 | 3.37561  | 3.573933 | 4.240004 | 3.167064 | 4.218132 | 3.269008 | 3.21996  |
| 85379_at | 5.09708  | 5.719815 | 5.059009 | 5.644761 | 5.358029 | 4.766902 | 4.874484 | 4.503898 |
| 8537_at  | 2.365452 | 1.916828 | 2.280227 | 2.742303 | 3.557577 | 2.824873 | 2.203829 | 1.821262 |
| 85388_at | 3.155863 | 1.743975 | 2.360425 | 1.667325 | 1.798872 | 1.557819 | 1.864849 | 2.623803 |
| 85389_at | 3.944766 | 2.181426 | 1.464624 | 6.342989 | 3.862399 | 0.891248 | 1.674105 | 6.966265 |
| 8538_at  | 2.579204 | 2.082807 | 1.952287 | 2.026548 | 2.244085 | 2.335722 | 2.831142 | 1.391102 |
| 85391_at | 2.890244 | 1.246473 | 2.687362 | 1.597552 | 1.312424 | 2.107837 | 2.84582  | 0.832128 |
| 85395_at | 3.32546  | 3.118966 | 3.237141 | 2.706255 | 3.841296 | 3.122634 | 3.83837  | 2.489635 |
| 85397_at | 1.890436 | 2.361925 | 2.67629  | 2.315143 | 2.473998 | 2.807058 | 2.407042 | 2.14897  |
| 8539_at  | 7.333947 | 7.407664 | 7.373627 | 7.817496 | 7.82986  | 7.835913 | 7.51305  | 8.022486 |
| 85403_at | 6.606481 | 6.396712 | 6.587105 | 7.155288 | 6.026739 | 6.64671  | 6.684722 | 6.247974 |
| 85406_at | 5.436611 | 5.240724 | 5.074265 | 6.368024 | 5.520362 | 5.459624 | 5.623347 | 5.86816  |
| 85407_at | 5.684315 | 4.709035 | 6.608036 | 5.429283 | 4.321198 | 6.426585 | 6.353335 | 4.950657 |
| 85409_at | 2.83937  | 2.680966 | 2.859289 | 2.190471 | 2.35175  | 2.835333 | 2.791157 | 3.200742 |
| 8540_at  | 5.52236  | 6.00659  | 5.771999 | 5.979141 | 6.679223 | 5.688693 | 5.511744 | 6.627876 |
| 85413_at | 1.149229 | 1.430729 | 1.799814 | 1.150288 | 1.759238 | 1.609594 | 1.265396 | 1.133401 |
| 85414_at | 2.304602 | 2.71503  | 1.982662 | 2.155084 | 3.811945 | 1.682502 | 2.567491 | 2.100352 |
| 85415_at | 4.201865 | 4.428611 | 4.399168 | 3.214408 | 4.602715 | 4.456456 | 4.21136  | 4.907066 |
| 85416_at | 2.349732 | 3.714794 | 2.96922  | 2.763651 | 3.177315 | 3.496406 | 3.534463 | 2.830955 |
| 85417_at | 1.7473   | 1.924449 | 1.933972 | 2.202506 | 1.918349 | 2.04196  | 3.450709 | 1.362553 |
| 8541_at  | 1.367867 | 1.875973 | 2.357574 | 1.522299 | 2.296553 | 1.884971 | 2.152104 | 2.219921 |
| 8542_at  | 5.242337 | 6.357102 | 7.102837 | 7.985063 | 6.987884 | 5.809223 | 7.861936 | 4.762887 |
| 85437_at | 7.873769 | 7.379424 | 7.599857 | 7.548626 | 7.031545 | 7.866534 | 7.406368 | 7.967237 |
| 85438_at | 1.180842 | 0.990823 | 1.226171 | 0.888895 | 1.660951 | 1.092791 | 1.508521 | 1.148273 |
| 85439_at | 6.402023 | 6.630003 | 6.727427 | 7.078195 | 6.73479  | 6.888128 | 6.792527 | 6.597123 |
| 8543_at  | 5.485394 | 6.176206 | 5.560728 | 6.307869 | 5.649209 | 6.405711 | 5.46948  | 5.248285 |
| 85440_at | 5.286512 | 4.760651 | 5.831129 | 5.448594 | 5.312791 | 5.718689 | 5.414282 | 5.930103 |
| 85441_at | 2.752343 | 3.773105 | 3.213345 | 2.92126  | 2.028191 | 2.208145 | 3.449459 | 2.161262 |
| 85442_at | 2.022774 | 1.475846 | 2.557148 | 1.734999 | 2.140199 | 2.602079 | 1.981028 | 2.576978 |
| 85443_at | 1.062802 | 1.118082 | 0.921909 | 1.201541 | 1.008561 | 1.098142 | 1.342666 | 1.296588 |
| 85444_at | 5.87439  | 5.26695  | 5.256871 | 4.980989 | 4.636606 | 5.04231  | 3.947618 | 4.621708 |
| 85445_at | 1.434598 | 1.384095 | 1.231035 | 1.043858 | 1.600283 | 1.344441 | 1.27966  | 2.290166 |
| 85446_at | 5.195836 | 5.475325 | 5.425959 | 4.440162 | 4.598653 | 5.449939 | 5.50192  | 4.599099 |
| 85449_at | 2.154731 | 2.34258  | 1.385748 | 2.11281  | 2.598449 | 2.559894 | 2.2379   | 2.388175 |
| 85450_at | 4.528588 | 4.949319 | 4.665859 | 5.757702 | 4.805979 | 5.260239 | 4.436689 | 4.197338 |
| 85451_at | 4.907873 | 4.789885 | 4.675707 | 4.976405 | 4.203937 | 4.638392 | 4.147313 | 4.784065 |
| 85452_at | 1.53116  | 1.575362 | 1.578538 | 1.491146 | 2.011646 | 1.463786 | 1.516183 | 1.576072 |



|          |          |          |          |          |          |          |          |          |
|----------|----------|----------|----------|----------|----------|----------|----------|----------|
| 85453_at | 5.005983 | 5.164501 | 5.255467 | 4.952225 | 5.188391 | 4.8789   | 4.742305 | 5.232269 |
| 85455_at | 2.230811 | 2.283258 | 1.839762 | 2.72594  | 2.80803  | 4.121206 | 2.951323 | 2.705545 |
| 85456_at | 6.544347 | 6.257874 | 6.916086 | 6.67961  | 5.397041 | 6.458402 | 6.034774 | 6.13919  |
| 85457_at | 5.600082 | 4.23284  | 5.245506 | 5.120051 | 5.102624 | 5.482068 | 5.359339 | 5.361608 |
| 85458_at | 4.427251 | 5.389812 | 5.014678 | 4.891514 | 3.698199 | 4.405655 | 4.948377 | 3.991748 |
| 85459_at | 4.233114 | 5.001286 | 5.014788 | 5.04673  | 5.098325 | 5.032699 | 4.400465 | 5.341092 |
| 8545_at  | 7.012616 | 7.510662 | 7.133671 | 6.777608 | 7.157831 | 7.031311 | 7.128846 | 7.252438 |
| 85460_at | 5.924247 | 6.615392 | 7.256695 | 7.036554 | 7.517854 | 7.571178 | 6.454457 | 6.804472 |
| 85461_at | 5.811699 | 7.289259 | 6.429793 | 6.606009 | 6.580934 | 6.628648 | 7.443164 | 6.136195 |
| 85462_at | 1.8963   | 1.67532  | 2.727534 | 3.107013 | 2.255027 | 1.322861 | 1.565563 | 1.900972 |
| 85463_at | 4.566843 | 4.602095 | 5.238375 | 4.697331 | 5.291592 | 4.431715 | 4.577109 | 5.495107 |
| 85464_at | 4.075752 | 4.742502 | 4.472792 | 4.868346 | 3.301624 | 5.078634 | 4.578334 | 5.272223 |
| 85465_at | 4.513599 | 5.728878 | 5.40449  | 5.77952  | 5.616655 | 4.983203 | 4.713339 | 6.460661 |
| 8546_at  | 6.218736 | 6.077549 | 6.42674  | 5.486135 | 5.683435 | 6.088098 | 6.202128 | 6.707091 |
| 85474_at | 2.534648 | 1.806248 | 1.622404 | 1.855602 | 3.035457 | 3.100585 | 3.489966 | 1.657404 |
| 85476_at | 6.253677 | 6.832594 | 6.423237 | 6.370186 | 7.353486 | 6.929595 | 6.551867 | 6.021126 |
| 85477_at | 5.260791 | 2.849499 | 3.650228 | 5.147398 | 4.967691 | 3.066725 | 2.150007 | 3.790942 |
| 85478_at | 1.777164 | 1.396821 | 1.53717  | 2.40748  | 1.392264 | 3.362914 | 1.408508 | 2.598624 |
| 85479_at | 1.436127 | 1.254331 | 1.302572 | 1.008428 | 1.354215 | 1.332512 | 1.427141 | 1.94701  |
| 8547_at  | 6.46846  | 7.416298 | 6.537697 | 7.159749 | 5.989273 | 6.247402 | 7.116384 | 6.428254 |
| 85480_at | 2.49299  | 1.69168  | 1.856027 | 1.701573 | 1.364322 | 1.911352 | 1.656975 | 1.75031  |
| 85481_at | 2.986901 | 4.16868  | 2.459407 | 2.579544 | 1.807585 | 2.072356 | 2.386995 | 2.415962 |
| 8548_at  | 5.9903   | 6.183332 | 6.707806 | 6.448298 | 5.903939 | 6.232333 | 5.987882 | 7.589866 |
| 85495_at | 11.14589 | 11.20215 | 11.28482 | 11.51391 | 11.13196 | 11.42071 | 11.18369 | 11.24596 |
| 8549_at  | 2.667644 | 2.796121 | 4.53547  | 1.764382 | 1.880088 | 4.70986  | 2.664817 | 1.409457 |
| 85508_at | 2.06136  | 2.443175 | 2.286157 | 1.868236 | 1.950913 | 2.140144 | 2.545622 | 1.488312 |
| 85509_at | 0.720445 | 0.703446 | 0.999695 | 1.56339  | 1.027762 | 0.957725 | 0.711786 | 1.056026 |
| 8550_at  | 5.929873 | 6.410609 | 6.456714 | 5.833419 | 5.339706 | 6.288735 | 6.233541 | 6.319172 |
| 8551_at  | 5.002908 | 4.813069 | 5.048693 | 5.16425  | 5.057202 | 5.437887 | 4.732291 | 5.731412 |
| 8552_at  | 2.998705 | 3.309369 | 2.713159 | 2.828505 | 2.489135 | 2.412391 | 2.587323 | 2.44797  |
| 8553_at  | 6.788469 | 7.032272 | 6.420057 | 6.323879 | 6.169085 | 6.341705 | 6.622208 | 7.005384 |
| 8554_at  | 7.718906 | 7.597238 | 7.818742 | 7.499199 | 7.302669 | 7.424152 | 8.23955  | 7.199931 |
| 8555_at  | 1.403702 | 1.598139 | 1.88624  | 2.471293 | 2.512611 | 1.423256 | 1.470196 | 2.557838 |
| 85569_at | 2.162671 | 1.970425 | 1.965974 | 1.667984 | 2.731931 | 2.301676 | 1.763862 | 2.113099 |
| 8556_at  | 8.456059 | 8.704728 | 8.50902  | 8.711839 | 8.521117 | 8.196911 | 8.470232 | 8.536804 |
| 8557_at  | 2.746382 | 3.710439 | 4.377623 | 3.680318 | 2.427418 | 2.23056  | 1.788113 | 1.976415 |
| 8558_at  | 4.626677 | 2.659016 | 2.656398 | 3.670764 | 2.533293 | 3.94083  | 3.765879 | 2.514211 |
| 8559_at  | 5.963638 | 5.9472   | 6.048007 | 5.720866 | 5.955538 | 6.16482  | 5.671455 | 7.027602 |
| 8560_at  | 6.854471 | 6.768172 | 6.820043 | 6.74175  | 7.062046 | 7.002606 | 6.597569 | 7.631641 |
| 8562_at  | 7.302512 | 7.50254  | 7.008583 | 7.374523 | 7.611454 | 7.583476 | 6.65123  | 7.252879 |
| 8563_at  | 5.476113 | 5.048682 | 5.015868 | 5.012277 | 5.518022 | 5.873461 | 5.286583 | 5.413142 |
| 8564_at  | 4.016512 | 3.767465 | 3.60988  | 2.22377  | 5.431454 | 3.690281 | 2.072657 | 4.483604 |
| 8565_at  | 6.452478 | 6.147566 | 6.01828  | 5.813304 | 6.704791 | 5.231873 | 5.8776   | 4.498513 |
| 8566_at  | 6.276995 | 7.035046 | 6.407418 | 6.465019 | 6.844637 | 6.200035 | 7.119566 | 6.146796 |
| 8567_at  | 5.581096 | 5.611821 | 5.892643 | 5.681875 | 4.539559 | 5.505163 | 5.301763 | 4.28193  |
| 8568_at  | 2.631737 | 2.950606 | 3.467074 | 2.552448 | 3.417256 | 4.077221 | 4.169799 | 4.365425 |
| 8569_at  | 3.8941   | 3.227112 | 4.033389 | 3.939848 | 3.467068 | 3.905362 | 2.748274 | 4.208483 |
| 8570_at  | 4.142314 | 5.209494 | 4.84168  | 4.949016 | 4.574776 | 4.158184 | 4.404645 | 3.849178 |
| 8572_at  | 4.710458 | 4.778576 | 4.880407 | 5.359423 | 5.097246 | 6.444204 | 4.480039 | 4.28074  |
| 8573_at  | 5.350356 | 5.941406 | 5.618188 | 5.888853 | 6.20372  | 5.623481 | 5.791615 | 6.726093 |
| 8574_at  | 2.581699 | 3.837441 | 3.001786 | 3.598733 | 4.14282  | 2.923743 | 3.69204  | 3.203252 |

|          |          |          |          |          |          |          |          |          |
|----------|----------|----------|----------|----------|----------|----------|----------|----------|
| 8575_at  | 5.489257 | 4.912329 | 4.485151 | 5.355422 | 4.380747 | 4.567343 | 4.885136 | 5.367151 |
| 8576_at  | 4.081447 | 3.425977 | 4.085981 | 3.059953 | 3.4852   | 3.683038 | 4.097239 | 2.430849 |
| 8578_at  | 4.816634 | 4.003428 | 4.699524 | 4.878827 | 4.462525 | 4.80265  | 5.512134 | 4.596217 |
| 857_at   | 5.12433  | 4.327485 | 4.816334 | 4.497704 | 4.036058 | 5.223813 | 3.802227 | 4.647055 |
| 8581_at  | 1.969893 | 2.326313 | 1.898281 | 1.600601 | 1.865402 | 1.717499 | 1.945176 | 1.820648 |
| 85865_at | 6.358381 | 5.789037 | 6.508606 | 6.569285 | 6.349229 | 5.932064 | 6.363403 | 6.600712 |
| 8587_at  | 0.801895 | 1.232826 | 1.114516 | 1.572817 | 3.250276 | 1.499285 | 1.793653 | 1.241815 |
| 858_at   | 6.160495 | 6.018912 | 5.942299 | 5.993451 | 5.551446 | 6.255227 | 6.304636 | 6.07819  |
| 8590_at  | 1.062038 | 0.877279 | 0.91791  | 1.707224 | 1.00305  | 0.928971 | 1.273946 | 1.476676 |
| 859_at   | 1.859811 | 2.047525 | 1.652827 | 1.379184 | 1.973305 | 1.727434 | 2.956386 | 2.592775 |
| 8600_at  | 1.83361  | 1.592219 | 1.785097 | 1.637536 | 1.501602 | 1.739724 | 2.177807 | 1.899994 |
| 8601_at  | 2.947241 | 2.43344  | 1.99937  | 1.847961 | 1.750515 | 2.885791 | 2.112302 | 1.388006 |
| 8602_at  | 4.541302 | 4.729282 | 4.117928 | 5.404449 | 4.876994 | 5.544861 | 4.695371 | 5.213678 |
| 8603_at  | 4.884887 | 5.458291 | 5.381118 | 5.645748 | 4.601181 | 5.44505  | 4.465973 | 4.101051 |
| 8604_at  | 5.512289 | 6.107153 | 4.664552 | 5.303212 | 5.820529 | 5.873922 | 5.821461 | 6.228836 |
| 8605_at  | 4.101877 | 5.38496  | 3.852078 | 4.336466 | 4.779244 | 5.389356 | 4.675551 | 4.452111 |
| 8607_at  | 5.616422 | 5.536088 | 6.049204 | 5.723158 | 6.41942  | 5.597961 | 6.187358 | 6.14084  |
| 8608_at  | 1.406952 | 1.438561 | 1.861375 | 2.00533  | 2.282487 | 1.855288 | 2.634279 | 1.845002 |
| 8609_at  | 7.576737 | 7.650475 | 7.757966 | 7.535495 | 7.34204  | 7.94538  | 8.205466 | 7.465437 |
| 860_at   | 2.428221 | 3.180695 | 1.981807 | 2.614816 | 1.862385 | 3.449105 | 2.240148 | 3.157638 |
| 8611_at  | 9.699747 | 10.0057  | 9.724127 | 9.875203 | 9.545812 | 9.566145 | 9.632914 | 9.509997 |
| 8612_at  | 3.332296 | 3.325393 | 3.514495 | 2.797346 | 3.874451 | 4.308822 | 2.87449  | 3.564217 |
| 8613_at  | 9.638323 | 9.744336 | 9.861652 | 10.15481 | 9.866197 | 9.88399  | 9.928346 | 9.045909 |
| 8614_at  | 2.009311 | 2.938457 | 2.091538 | 1.796163 | 3.63564  | 1.54743  | 2.138622 | 1.862135 |
| 8615_at  | 8.228315 | 8.65629  | 8.111622 | 8.393351 | 8.099645 | 7.850133 | 7.826364 | 8.891818 |
| 8618_at  | 1.609794 | 1.426978 | 1.315346 | 1.279521 | 1.869378 | 1.28611  | 2.436196 | 1.77849  |
| 861_at   | 4.770862 | 4.409038 | 5.030253 | 4.503305 | 3.570724 | 5.419637 | 4.633177 | 3.855974 |
| 8620_at  | 1.56543  | 3.558147 | 2.497    | 2.71169  | 3.235218 | 2.578359 | 2.250007 | 2.926977 |
| 8621_at  | 5.609802 | 5.894286 | 5.829713 | 5.647211 | 5.430584 | 6.306061 | 6.126752 | 6.341385 |
| 8622_at  | 4.509136 | 4.60975  | 4.165146 | 4.765688 | 4.163331 | 4.750562 | 4.004437 | 3.03618  |
| 8623_at  | 5.508751 | 5.096708 | 5.758772 | 5.048461 | 4.861257 | 5.185804 | 5.143086 | 5.338975 |
| 8624_at  | 6.609527 | 6.923086 | 6.728348 | 5.94422  | 6.026251 | 6.657343 | 6.161066 | 6.272447 |
| 8625_at  | 6.475147 | 5.377332 | 6.110973 | 6.417694 | 5.620865 | 6.215732 | 5.684911 | 5.231237 |
| 8626_at  | 3.879979 | 4.013424 | 2.847666 | 3.311557 | 3.017488 | 3.210552 | 2.908408 | 3.577272 |
| 8629_at  | 4.205481 | 3.98215  | 3.540472 | 3.061381 | 3.441044 | 3.971377 | 4.211531 | 3.964618 |
| 862_at   | 3.965436 | 3.336451 | 3.646438 | 3.724216 | 4.434744 | 2.995894 | 4.036776 | 3.775283 |
| 8630_at  | 1.142319 | 0.892661 | 1.073108 | 1.273918 | 1.373889 | 1.259263 | 0.820087 | 1.443196 |
| 8631_at  | 4.497909 | 4.302936 | 3.280614 | 3.748572 | 3.055022 | 3.544826 | 3.42064  | 4.696265 |
| 8632_at  | 1.398527 | 1.815624 | 1.606415 | 1.418817 | 1.85888  | 1.663494 | 1.683207 | 1.845815 |
| 8633_at  | 4.734499 | 5.568407 | 5.516691 | 5.172573 | 3.47037  | 5.557232 | 5.161626 | 4.889416 |
| 8634_at  | 6.649762 | 5.980503 | 6.322671 | 5.812509 | 7.454211 | 5.955161 | 6.308632 | 7.281391 |
| 8635_at  | 6.2071   | 5.630431 | 6.061869 | 5.717831 | 5.884499 | 6.705691 | 5.742487 | 5.069798 |
| 8636_at  | 6.82674  | 5.883597 | 6.549657 | 5.794496 | 5.84444  | 6.560567 | 6.469892 | 5.735788 |
| 8637_at  | 1.249916 | 1.532894 | 3.074283 | 2.359882 | 1.40762  | 1.808818 | 2.669725 | 1.67315  |
| 8638_at  | 2.994682 | 2.931665 | 3.194593 | 3.467224 | 3.137989 | 3.752392 | 3.404488 | 3.508024 |
| 8639_at  | 3.683623 | 2.853073 | 3.317678 | 2.615344 | 2.648435 | 2.968554 | 2.962725 | 2.231454 |
| 863_at   | 2.915955 | 2.611282 | 3.041734 | 3.183892 | 2.936565 | 2.848452 | 3.749908 | 3.25132  |
| 8641_at  | 2.94283  | 4.542369 | 3.752979 | 4.352945 | 4.347461 | 4.754052 | 4.027453 | 4.99521  |
| 8642_at  | 3.356593 | 4.947599 | 4.404894 | 4.806163 | 4.929924 | 4.223252 | 5.264855 | 2.887733 |
| 8643_at  | 1.946188 | 2.530887 | 2.621224 | 1.505585 | 1.914037 | 2.189081 | 3.041037 | 2.350538 |
| 8644_at  | 6.609713 | 4.888084 | 4.964156 | 5.174158 | 6.597891 | 5.490968 | 4.995359 | 6.775432 |

|         |          |          |          |          |          |          |          |          |
|---------|----------|----------|----------|----------|----------|----------|----------|----------|
| 8645_at | 2.061443 | 2.45567  | 3.103675 | 2.881471 | 4.353857 | 3.766755 | 3.68849  | 1.672831 |
| 8646_at | 3.58082  | 3.653395 | 3.752005 | 2.367667 | 2.551498 | 3.445705 | 2.806224 | 2.361502 |
| 8647_at | 1.970515 | 1.510768 | 1.398343 | 1.559031 | 1.174562 | 1.861693 | 1.943168 | 1.241564 |
| 8648_at | 7.383224 | 7.425493 | 7.489538 | 7.373018 | 7.240067 | 7.120462 | 7.375396 | 7.850582 |
| 8649_at | 6.020253 | 6.89039  | 6.983452 | 6.705576 | 7.038023 | 6.638343 | 5.919629 | 6.538698 |
| 864_at  | 2.416161 | 2.30252  | 2.568472 | 2.867586 | 3.374214 | 3.499921 | 3.160056 | 2.065751 |
| 8650_at | 8.826685 | 8.687575 | 9.082521 | 8.86593  | 9.209721 | 8.995784 | 9.023341 | 8.850017 |
| 8651_at | 2.745511 | 2.44174  | 2.135521 | 3.780542 | 2.652727 | 4.740588 | 1.883097 | 3.02159  |
| 8653_at | 5.625205 | 6.885707 | 6.274695 | 6.398812 | 6.533282 | 6.418429 | 6.509328 | 6.887666 |
| 8654_at | 4.292064 | 4.528079 | 4.238156 | 4.619184 | 3.595869 | 4.677391 | 4.090586 | 5.325262 |
| 8655_at | 9.980223 | 9.761861 | 10.11232 | 9.9675   | 9.49096  | 10.01904 | 9.753362 | 9.4575   |
| 8658_at | 5.56462  | 6.102765 | 6.316126 | 5.62225  | 5.876471 | 5.183818 | 6.175453 | 5.967632 |
| 8659_at | 6.32875  | 5.440853 | 4.959734 | 5.048848 | 6.496316 | 5.958889 | 4.273909 | 5.48677  |
| 865_at  | 6.412286 | 5.457087 | 6.18326  | 6.936928 | 5.36409  | 5.643468 | 5.414649 | 5.302364 |
| 8660_at | 3.638194 | 4.824408 | 4.354067 | 4.74611  | 3.599626 | 4.673553 | 3.877952 | 4.461937 |
| 8661_at | 8.212583 | 8.412638 | 8.438948 | 8.366192 | 8.486251 | 8.418413 | 8.650182 | 8.062948 |
| 8662_at | 6.28767  | 6.551348 | 6.238866 | 6.808946 | 6.662643 | 6.235681 | 6.577844 | 6.586608 |
| 8664_at | 9.276934 | 8.433062 | 8.643698 | 9.00353  | 8.805466 | 8.869001 | 8.87481  | 8.632079 |
| 8665_at | 9.953974 | 9.407113 | 9.342035 | 9.140751 | 9.352654 | 9.820256 | 8.354214 | 9.675096 |
| 8666_at | 8.062984 | 7.818978 | 7.534606 | 8.163254 | 7.43531  | 7.753486 | 7.6952   | 7.525575 |
| 8667_at | 10.02019 | 9.926019 | 9.628282 | 9.844749 | 9.626661 | 9.940867 | 9.757014 | 9.995155 |
| 8668_at | 8.100625 | 8.117097 | 8.177504 | 8.132456 | 8.034588 | 7.362482 | 7.833311 | 8.457626 |
| 8669_at | 6.683874 | 6.731421 | 6.361765 | 6.633926 | 6.850863 | 6.637555 | 6.196093 | 6.253833 |
| 866_at  | 4.360923 | 4.959673 | 3.766287 | 2.282884 | 5.029726 | 3.66552  | 3.57394  | 2.660974 |
| 8671_at | 6.33685  | 5.619332 | 6.336502 | 3.800604 | 7.37914  | 6.221842 | 3.27825  | 7.150128 |
| 8672_at | 6.577254 | 7.079166 | 7.396993 | 7.413556 | 7.255592 | 6.802763 | 7.084545 | 7.012709 |
| 8673_at | 8.750077 | 8.690228 | 8.672116 | 8.680259 | 8.546778 | 8.874675 | 8.698003 | 8.94455  |
| 8674_at | 5.824839 | 5.45721  | 5.504409 | 5.426347 | 5.128469 | 5.60795  | 6.387771 | 6.058897 |
| 8676_at | 3.884426 | 4.13482  | 3.926895 | 3.573405 | 3.532381 | 4.029578 | 3.837099 | 4.043712 |
| 8677_at | 5.594241 | 5.32274  | 4.304814 | 5.093246 | 3.508358 | 5.203643 | 4.041453 | 4.863238 |
| 8678_at | 6.252021 | 5.938372 | 5.08867  | 6.426633 | 5.812476 | 6.30544  | 5.611698 | 6.382742 |
| 867_at  | 6.208079 | 6.135925 | 6.658561 | 6.737442 | 6.259413 | 6.748658 | 6.755888 | 6.490226 |
| 8682_at | 9.411919 | 9.319902 | 9.531179 | 9.423908 | 8.704567 | 9.379479 | 9.518696 | 8.56268  |
| 8683_at | 8.984464 | 8.972759 | 9.151506 | 8.921189 | 9.345931 | 8.808001 | 8.61056  | 9.23484  |
| 8685_at | 1.306543 | 1.479956 | 1.441824 | 1.503503 | 1.369813 | 1.861074 | 1.656834 | 1.991624 |
| 8687_at | 1.968162 | 1.791575 | 2.10323  | 2.585443 | 2.190009 | 2.642763 | 2.486241 | 1.591488 |
| 8688_at | 2.330164 | 2.36596  | 1.341238 | 1.913511 | 2.217571 | 2.131925 | 1.129238 | 2.722287 |
| 8689_at | 2.449035 | 2.513209 | 2.761851 | 3.001451 | 1.764138 | 3.312873 | 2.745066 | 2.378923 |
| 868_at  | 7.659197 | 7.863266 | 7.683328 | 7.23541  | 6.867937 | 7.77667  | 7.305828 | 8.07908  |
| 8690_at | 4.010918 | 4.561731 | 4.890597 | 4.768738 | 5.130193 | 4.799927 | 5.268064 | 4.348883 |
| 8692_at | 3.81886  | 4.011568 | 3.799007 | 4.000555 | 3.348367 | 3.789653 | 4.040358 | 3.015259 |
| 8693_at | 4.170713 | 4.648354 | 5.377475 | 6.364722 | 5.82815  | 6.062277 | 0.379143 | 5.019119 |
| 8694_at | 6.767845 | 6.423578 | 6.23959  | 6.427417 | 6.563885 | 6.71567  | 6.155402 | 4.902605 |
| 8697_at | 5.611261 | 6.111678 | 5.478405 | 5.493449 | 6.148543 | 5.618268 | 6.206152 | 6.356381 |
| 8698_at | 4.150409 | 4.453883 | 4.892916 | 4.814928 | 4.007169 | 5.09292  | 3.979361 | 3.862667 |
| 869_at  | 2.299303 | 2.189833 | 1.965022 | 1.741698 | 1.643743 | 1.889658 | 1.757073 | 1.636483 |
| 86_at   | 6.256111 | 7.173732 | 6.457617 | 6.876235 | 6.940318 | 6.459711 | 6.367882 | 7.032466 |
| 8701_at | 1.226266 | 1.302217 | 1.488277 | 1.344496 | 1.705141 | 1.538039 | 1.419697 | 1.89926  |
| 8702_at | 4.643112 | 4.643112 | 4.669313 | 4.826202 | 4.313525 | 4.343058 | 4.10006  | 5.671304 |
| 8703_at | 5.633712 | 5.474401 | 5.053714 | 5.556733 | 4.290383 | 5.209777 | 4.70005  | 4.725246 |
| 8704_at | 6.375785 | 5.352005 | 5.401665 | 5.795482 | 4.734341 | 6.276548 | 5.077308 | 4.734191 |

|          |          |          |          |          |          |          |          |          |
|----------|----------|----------|----------|----------|----------|----------|----------|----------|
| 8705_at  | 5.575614 | 5.438636 | 4.689945 | 4.247126 | 5.025134 | 5.693336 | 4.962236 | 4.936499 |
| 8706_at  | 5.145805 | 4.595329 | 5.239548 | 5.412154 | 5.199798 | 5.552086 | 6.176469 | 4.678973 |
| 8707_at  | 6.715005 | 7.005186 | 6.796723 | 6.477967 | 6.354345 | 6.555356 | 6.316523 | 7.030987 |
| 8708_at  | 1.697279 | 2.38689  | 1.536298 | 2.445431 | 2.194783 | 1.767443 | 2.009702 | 2.113084 |
| 8710_at  | 1.561035 | 1.32593  | 1.236708 | 1.105239 | 1.102221 | 1.212122 | 1.674976 | 1.607438 |
| 8711_at  | 2.251749 | 2.599081 | 3.268266 | 3.787631 | 2.413095 | 2.730206 | 2.192582 | 2.750807 |
| 8712_at  | 1.88351  | 2.823016 | 2.458413 | 2.102197 | 2.186975 | 2.170143 | 1.908286 | 2.483103 |
| 8714_at  | 3.171821 | 3.176958 | 3.525741 | 4.287163 | 3.220419 | 5.197028 | 4.260759 | 3.394352 |
| 8715_at  | 1.639902 | 1.560352 | 1.106279 | 1.020433 | 0.783481 | 1.682366 | 1.210151 | 1.392071 |
| 87178_at | 5.47402  | 5.724839 | 5.120359 | 4.753725 | 5.923737 | 5.509853 | 5.175901 | 5.277387 |
| 8717_at  | 3.113669 | 2.352408 | 2.755222 | 2.929992 | 3.789374 | 2.528752 | 2.825768 | 3.186251 |
| 8718_at  | 4.127878 | 4.128612 | 3.408204 | 4.010862 | 4.319646 | 3.811967 | 4.358526 | 3.986764 |
| 871_at   | 4.987368 | 5.227481 | 4.739436 | 5.521595 | 5.006471 | 4.96743  | 4.892551 | 4.61408  |
| 8720_at  | 7.191012 | 6.748922 | 7.140489 | 6.611608 | 6.62838  | 6.726297 | 7.018988 | 6.951644 |
| 8721_at  | 10.47882 | 10.15041 | 10.03441 | 10.2143  | 9.840717 | 10.1099  | 10.09286 | 10.02926 |
| 8722_at  | 4.812555 | 4.901075 | 4.652636 | 4.493188 | 5.297327 | 5.511732 | 4.44998  | 5.155209 |
| 8723_at  | 5.673143 | 6.20264  | 5.444881 | 5.864983 | 6.664513 | 5.748369 | 5.578357 | 6.448114 |
| 8724_at  | 8.735669 | 8.314022 | 8.288708 | 8.466626 | 8.069582 | 8.435062 | 8.288082 | 8.183684 |
| 8725_at  | 6.694806 | 6.752026 | 6.732188 | 6.647986 | 6.574853 | 6.445976 | 6.633074 | 7.039599 |
| 8726_at  | 7.098191 | 7.454942 | 6.619798 | 6.805254 | 7.460768 | 6.15949  | 6.221287 | 7.901385 |
| 8727_at  | 7.659495 | 7.556473 | 6.61802  | 6.866147 | 7.194206 | 7.16689  | 7.071631 | 7.154743 |
| 8728_at  | 3.427501 | 4.450479 | 4.051388 | 3.122911 | 3.05827  | 3.544278 | 3.292108 | 3.130503 |
| 8729_at  | 6.486963 | 6.563182 | 6.693268 | 6.685144 | 6.451968 | 6.557708 | 6.999138 | 6.09351  |
| 8731_at  | 3.654484 | 4.319356 | 4.05456  | 3.585997 | 4.321909 | 3.941932 | 4.61637  | 4.433655 |
| 8732_at  | 4.742434 | 4.311789 | 5.621478 | 4.591369 | 5.026192 | 4.957719 | 4.997352 | 5.892787 |
| 8733_at  | 5.269391 | 5.650074 | 5.674922 | 5.700657 | 3.693446 | 4.789178 | 6.24541  | 4.306444 |
| 8735_at  | 1.683103 | 1.787703 | 1.693098 | 1.300092 | 1.507236 | 1.540274 | 1.675314 | 1.843259 |
| 8736_at  | 2.984988 | 4.85255  | 4.749762 | 4.063595 | 3.459825 | 2.80758  | 3.148185 | 3.187949 |
| 8737_at  | 6.975756 | 7.081909 | 7.237846 | 7.410372 | 6.910401 | 7.007138 | 7.383182 | 7.342767 |
| 8738_at  | 4.291785 | 4.202512 | 4.226045 | 4.074878 | 4.4648   | 4.411181 | 4.882924 | 4.665845 |
| 8739_at  | 2.049332 | 3.017509 | 2.281245 | 2.666866 | 2.95514  | 1.834763 | 2.386967 | 2.701846 |
| 873_at   | 5.414604 | 4.838435 | 4.295387 | 4.883421 | 4.948469 | 5.734804 | 3.807505 | 4.591404 |
| 8740_at  | 2.484276 | 2.79218  | 2.444049 | 2.698121 | 2.828659 | 2.664257 | 3.054102 | 2.960059 |
| 8741_at  | 3.663296 | 2.183413 | 6.292313 | 5.334687 | 0.94038  | 0.106714 | 5.152146 | 2.824627 |
| 8742_at  | 6.726928 | 7.309275 | 6.501232 | 7.252604 | 7.548917 | 7.218385 | 5.690557 | 6.805958 |
| 8743_at  | 8.824533 | 8.247658 | 7.964867 | 7.525153 | 8.64758  | 8.839807 | 8.777858 | 8.269123 |
| 8744_at  | 1.675032 | 2.289318 | 2.718912 | 1.978565 | 1.791038 | 1.659808 | 2.396659 | 1.535191 |
| 8745_at  | 1.359858 | 1.759291 | 1.0198   | 1.209029 | 1.805655 | 1.299973 | 0.89945  | 1.397342 |
| 8747_at  | 2.616745 | 1.546225 | 2.499574 | 1.931568 | 2.034374 | 2.01398  | 1.37072  | 1.61381  |
| 8748_at  | 1.315049 | 0.936295 | 1.89464  | 1.40505  | 1.788026 | 2.768034 | 1.632167 | 1.226429 |
| 8749_at  | 1.533763 | 0.939002 | 1.698447 | 1.201681 | 1.463054 | 1.565498 | 1.78825  | 0.917097 |
| 874_at   | 4.679157 | 4.100305 | 3.567149 | 4.395819 | 5.046594 | 3.12282  | 4.312582 | 4.379277 |
| 8751_at  | 5.687648 | 5.827273 | 5.734007 | 5.905074 | 5.181964 | 5.561206 | 5.983786 | 5.204021 |
| 8754_at  | 7.567011 | 8.015089 | 7.985673 | 8.041179 | 8.026286 | 7.976242 | 8.026671 | 8.361315 |
| 8755_at  | 2.551608 | 2.067739 | 1.748763 | 1.544303 | 2.192447 | 1.885028 | 2.288357 | 2.20016  |
| 8756_at  | 1.601133 | 1.817274 | 2.360989 | 1.397643 | 2.262183 | 2.00362  | 1.44264  | 1.585567 |
| 8759_at  | 2.94455  | 3.201794 | 3.549566 | 3.315859 | 2.786289 | 2.728951 | 2.937801 | 1.926071 |
| 8760_at  | 7.009847 | 7.515716 | 7.15716  | 7.306884 | 7.143571 | 7.045586 | 7.283298 | 7.106348 |
| 8761_at  | 5.641607 | 5.782549 | 6.488707 | 6.163524 | 6.33224  | 5.493058 | 6.31019  | 6.376205 |
| 8763_at  | 9.753155 | 9.80765  | 9.869786 | 10.19033 | 10.11613 | 10.02161 | 9.810754 | 9.860808 |
| 8764_at  | 4.82995  | 3.717017 | 4.505909 | 5.132224 | 3.604371 | 4.397311 | 4.48443  | 3.866745 |

|          |          |          |          |          |          |          |          |          |
|----------|----------|----------|----------|----------|----------|----------|----------|----------|
| 8766_at  | 8.468461 | 8.465129 | 8.219887 | 9.05712  | 8.792692 | 8.574863 | 9.002    | 8.674515 |
| 8767_at  | 5.203868 | 6.079853 | 5.117106 | 5.588474 | 5.239867 | 5.165195 | 4.977885 | 6.09547  |
| 8772_at  | 4.383288 | 4.326938 | 4.886241 | 4.283981 | 4.583916 | 4.98984  | 4.942254 | 4.49864  |
| 8773_at  | 6.538424 | 6.754779 | 6.841409 | 6.865763 | 7.219561 | 6.770712 | 6.841741 | 6.885251 |
| 8774_at  | 6.40262  | 6.508942 | 6.430505 | 6.476049 | 6.808142 | 6.297118 | 6.866481 | 7.568039 |
| 8775_at  | 7.518558 | 6.618515 | 6.992307 | 6.708788 | 6.791465 | 7.486785 | 7.442447 | 6.758337 |
| 87769_at | 3.447904 | 3.460954 | 2.964433 | 3.137945 | 3.355298 | 3.601635 | 3.009247 | 3.051076 |
| 8776_at  | 4.197344 | 4.562907 | 5.164384 | 4.419147 | 4.7689   | 4.187089 | 4.285264 | 4.363269 |
| 8777_at  | 6.186712 | 6.695267 | 6.881252 | 6.403725 | 7.127318 | 6.424101 | 6.684058 | 6.542811 |
| 8778_at  | 1.418708 | 2.84834  | 1.961294 | 2.991845 | 1.909833 | 2.391997 | 1.62798  | 2.563959 |
| 8780_at  | 7.57472  | 7.171218 | 7.534411 | 7.174661 | 7.278442 | 6.992669 | 7.641745 | 7.237447 |
| 8784_at  | 3.860889 | 3.038074 | 3.242076 | 1.613914 | 3.021071 | 2.781203 | 2.924378 | 3.253806 |
| 8785_at  | 1.760657 | 1.760735 | 2.084115 | 1.663764 | 1.449577 | 1.439685 | 2.23365  | 2.051147 |
| 8786_at  | 2.585789 | 3.049928 | 2.706035 | 3.062069 | 3.09105  | 3.078195 | 3.154844 | 2.889385 |
| 8787_at  | 4.801162 | 5.392049 | 4.551706 | 4.958296 | 5.165039 | 5.315723 | 5.093138 | 4.713312 |
| 8788_at  | 2.323838 | 2.549258 | 2.522211 | 3.140362 | 2.662975 | 2.764177 | 1.972491 | 2.363986 |
| 8789_at  | 2.522804 | 1.09173  | 1.589006 | 1.379539 | 3.284989 | 1.821062 | 2.383321 | 1.659086 |
| 8790_at  | 5.576543 | 6.242503 | 5.059239 | 6.270243 | 6.686786 | 5.445792 | 6.402033 | 6.570011 |
| 8792_at  | 2.599964 | 2.176578 | 2.425664 | 1.774848 | 2.137017 | 2.226077 | 2.16783  | 2.443095 |
| 8793_at  | 3.638562 | 2.842336 | 3.555511 | 3.57959  | 2.980934 | 4.727802 | 3.173605 | 3.004978 |
| 8794_at  | 5.618696 | 4.914457 | 5.557761 | 5.84346  | 4.559409 | 6.253426 | 4.355359 | 4.08926  |
| 8795_at  | 2.754974 | 4.419517 | 3.969811 | 4.147755 | 3.603558 | 4.166243 | 3.348509 | 3.308069 |
| 8796_at  | 0.839559 | 0.771496 | 0.985829 | 0.959122 | 1.19301  | 1.249422 | 1.287304 | 1.223118 |
| 8797_at  | 2.853746 | 3.237392 | 3.508423 | 4.391625 | 3.514763 | 3.602497 | 3.465549 | 3.004314 |
| 8798_at  | 2.278177 | 2.272596 | 1.571555 | 1.833761 | 1.855651 | 2.550715 | 1.88471  | 1.752834 |
| 8799_at  | 6.408132 | 6.406909 | 6.124004 | 6.152558 | 6.972958 | 5.937782 | 5.951394 | 5.757349 |
| 87_at    | 5.047745 | 6.037601 | 4.973131 | 5.977062 | 5.823313 | 4.859829 | 4.435807 | 4.90288  |
| 8800_at  | 4.261311 | 2.874012 | 3.641655 | 3.619057 | 2.126035 | 3.373598 | 3.817301 | 3.03125  |
| 8801_at  | 5.948687 | 5.874042 | 6.186482 | 5.903211 | 7.042504 | 5.782743 | 5.458288 | 6.144204 |
| 8802_at  | 7.842853 | 7.210331 | 6.743688 | 6.429254 | 7.434474 | 7.597713 | 6.364446 | 7.178003 |
| 8803_at  | 6.81012  | 6.820039 | 6.420144 | 6.472225 | 6.234999 | 6.7277   | 5.709741 | 7.098263 |
| 8804_at  | 6.750861 | 6.452327 | 6.196264 | 5.804812 | 5.79761  | 6.15538  | 6.723105 | 6.045521 |
| 8805_at  | 6.770457 | 6.987674 | 6.746194 | 7.136908 | 6.838778 | 6.307233 | 6.712018 | 6.129983 |
| 8807_at  | 1.227987 | 1.234614 | 1.375994 | 1.448614 | 1.061901 | 1.771714 | 1.242211 | 1.364424 |
| 8808_at  | 1.259764 | 1.157023 | 1.392756 | 1.116743 | 1.209609 | 0.984805 | 2.432883 | 1.484912 |
| 8809_at  | 4.656989 | 5.831059 | 4.825222 | 4.881819 | 5.586105 | 5.741891 | 4.766816 | 4.606126 |
| 8811_at  | 3.157291 | 2.591842 | 2.454466 | 1.872492 | 3.115412 | 1.562679 | 2.273303 | 2.400289 |
| 8812_at  | 6.897197 | 6.394899 | 7.201626 | 6.66513  | 7.262622 | 6.929042 | 6.988338 | 6.433121 |
| 8813_at  | 7.229943 | 7.220097 | 7.371385 | 7.361275 | 8.069802 | 7.343062 | 6.390157 | 8.255046 |
| 8814_at  | 4.724318 | 4.483178 | 4.942303 | 5.011848 | 5.561572 | 4.437045 | 3.741614 | 5.062704 |
| 8815_at  | 7.699321 | 7.465277 | 7.706868 | 7.89945  | 7.291824 | 8.25582  | 7.19272  | 7.614442 |
| 8816_at  | 4.902879 | 4.753716 | 5.040151 | 4.540582 | 4.550063 | 4.909921 | 4.705449 | 5.317289 |
| 8817_at  | 1.915829 | 1.414882 | 3.020589 | 2.310269 | 1.807403 | 2.056665 | 2.282637 | 1.986466 |
| 8818_at  | 6.905601 | 7.095558 | 6.655721 | 7.59126  | 7.111785 | 6.864878 | 7.153437 | 7.643252 |
| 8819_at  | 4.567212 | 3.667371 | 4.498268 | 4.888848 | 4.076271 | 4.420492 | 4.179232 | 3.984256 |
| 881_at   | 1.563955 | 2.014125 | 1.843345 | 1.846315 | 1.841376 | 2.245384 | 2.049175 | 1.819913 |
| 8820_at  | 1.352391 | 1.474691 | 1.377051 | 1.283751 | 1.43216  | 1.483533 | 1.345627 | 2.61688  |
| 8821_at  | 3.739004 | 4.000137 | 4.091826 | 4.781361 | 4.619343 | 3.564193 | 3.83412  | 3.404015 |
| 8822_at  | 2.703567 | 2.781728 | 1.924253 | 1.742148 | 2.115178 | 1.771834 | 3.334252 | 2.952478 |
| 8823_at  | 1.118422 | 1.37226  | 1.801768 | 1.29077  | 1.298923 | 0.967546 | 1.553052 | 1.401956 |
| 8824_at  | 5.602025 | 5.788811 | 5.445531 | 5.006308 | 5.46772  | 5.851392 | 4.609935 | 4.746882 |

|          |          |          |          |          |          |          |          |          |
|----------|----------|----------|----------|----------|----------|----------|----------|----------|
| 8825_at  | 3.309479 | 3.392445 | 2.942391 | 3.6905   | 3.786708 | 3.398366 | 2.318513 | 3.661858 |
| 8826_at  | 8.442426 | 8.58963  | 8.535502 | 8.6618   | 8.509792 | 8.293615 | 8.466816 | 8.715071 |
| 8828_at  | 4.472636 | 4.076779 | 3.015295 | 4.460016 | 3.375762 | 4.932855 | 4.507253 | 3.414291 |
| 8829_at  | 7.74105  | 8.355073 | 8.310809 | 8.773835 | 8.860363 | 8.537712 | 8.536892 | 8.195356 |
| 8831_at  | 5.177557 | 4.79842  | 4.765952 | 5.611741 | 4.511196 | 5.902733 | 5.247815 | 4.224331 |
| 8832_at  | 1.939812 | 1.143876 | 1.317543 | 3.46069  | 3.000166 | 1.74784  | 2.481778 | 1.541926 |
| 8833_at  | 5.926213 | 6.733119 | 5.959645 | 6.426875 | 6.062016 | 6.835349 | 6.281499 | 6.158024 |
| 8834_at  | 4.039278 | 3.637104 | 3.950743 | 4.293001 | 3.951356 | 3.961646 | 3.317321 | 3.751201 |
| 8835_at  | 3.897779 | 3.435956 | 3.90555  | 3.369794 | 4.271873 | 3.357512 | 3.845365 | 3.566769 |
| 8836_at  | 6.470364 | 5.372917 | 5.928338 | 5.236944 | 7.661177 | 6.336518 | 5.059897 | 6.156596 |
| 8837_at  | 6.570178 | 7.319549 | 6.772374 | 7.03206  | 6.981283 | 7.347292 | 6.868295 | 7.122203 |
| 8838_at  | 4.470984 | 4.256005 | 5.706752 | 4.335033 | 5.231518 | 4.103487 | 5.927256 | 3.221112 |
| 8839_at  | 3.546306 | 4.279777 | 4.377677 | 3.889054 | 4.246648 | 3.455005 | 3.329999 | 4.794614 |
| 883_at   | 3.556828 | 3.546764 | 3.747689 | 3.464767 | 3.901487 | 3.708477 | 3.847982 | 3.511188 |
| 8840_at  | 4.784087 | 4.158953 | 4.63483  | 4.83795  | 4.524783 | 5.111822 | 4.048086 | 4.384046 |
| 8841_at  | 4.993184 | 5.954174 | 5.636351 | 5.143087 | 4.124799 | 5.104921 | 5.262558 | 5.912898 |
| 8842_at  | 5.671316 | 4.625976 | 4.88446  | 5.030046 | 4.665549 | 5.886513 | 4.049755 | 5.414696 |
| 8843_at  | 1.614614 | 1.997481 | 2.421458 | 1.444127 | 3.775204 | 2.7499   | 1.918287 | 2.021334 |
| 8844_at  | 4.112147 | 4.095988 | 4.51992  | 4.399306 | 4.291209 | 4.464787 | 5.29614  | 4.120676 |
| 88455_at | 6.169543 | 6.513612 | 6.800826 | 6.253562 | 6.272972 | 6.312456 | 5.648531 | 6.7061   |
| 8846_at  | 2.940729 | 3.318176 | 3.625143 | 3.533525 | 2.972169 | 3.386018 | 3.476832 | 3.544092 |
| 8847_at  | 4.603557 | 3.364219 | 2.966793 | 4.893362 | 2.600565 | 3.739126 | 3.475885 | 3.13249  |
| 8848_at  | 6.5055   | 6.556251 | 6.85824  | 6.516136 | 5.764836 | 6.574834 | 6.534919 | 6.14468  |
| 8850_at  | 7.455175 | 7.769258 | 7.716837 | 7.325692 | 6.802363 | 7.23183  | 7.829632 | 7.416363 |
| 8851_at  | 2.331387 | 2.057388 | 1.850552 | 1.757245 | 1.821956 | 2.437362 | 2.498775 | 2.364991 |
| 8852_at  | 2.29618  | 1.715951 | 2.638433 | 2.241609 | 1.87241  | 1.688118 | 2.01413  | 1.800447 |
| 8853_at  | 5.891102 | 5.680455 | 5.458191 | 6.562272 | 6.711431 | 6.212751 | 5.598792 | 6.660422 |
| 8854_at  | 5.260444 | 5.390657 | 5.119719 | 5.298952 | 5.751109 | 5.405165 | 5.862045 | 5.678409 |
| 8856_at  | 1.835721 | 1.402957 | 1.528585 | 1.897792 | 1.557631 | 2.225168 | 2.309913 | 1.288743 |
| 8857_at  | 2.593352 | 3.193321 | 1.294739 | 1.843842 | 3.429271 | 1.382599 | 1.458435 | 2.139248 |
| 8858_at  | 3.686272 | 2.262028 | 2.363054 | 2.943023 | 3.540891 | 2.714999 | 3.13163  | 2.892052 |
| 8859_at  | 3.113218 | 3.660757 | 2.854352 | 2.46673  | 2.959248 | 2.506815 | 3.09206  | 2.738939 |
| 885_at   | 1.527992 | 1.500939 | 2.307518 | 1.582902 | 1.863217 | 2.167691 | 1.819887 | 1.657126 |
| 8861_at  | 6.669616 | 6.465705 | 6.926422 | 6.610277 | 6.443701 | 7.041751 | 6.835959 | 6.361808 |
| 8862_at  | 6.970998 | 6.244279 | 7.315562 | 7.026534 | 6.029729 | 7.331168 | 7.096167 | 6.267039 |
| 8863_at  | 6.77677  | 6.116666 | 6.463259 | 6.043533 | 5.858532 | 6.003642 | 6.555648 | 6.315028 |
| 8864_at  | 4.548652 | 4.477363 | 4.697397 | 4.758175 | 4.311154 | 4.238663 | 4.829488 | 4.085361 |
| 8867_at  | 4.719727 | 5.413176 | 5.440573 | 5.638176 | 5.83545  | 4.968639 | 5.410015 | 5.326251 |
| 8869_at  | 1.556429 | 1.410871 | 1.742406 | 2.428181 | 2.527852 | 1.648642 | 1.378966 | 2.60101  |
| 886_at   | 0.90931  | 1.903047 | 1.490537 | 1.990562 | 1.346565 | 1.230034 | 1.036677 | 1.404125 |
| 8870_at  | 6.041668 | 5.877834 | 6.510302 | 6.03636  | 6.113588 | 7.071021 | 7.335691 | 5.771973 |
| 8871_at  | 4.408199 | 4.737269 | 5.054757 | 3.677806 | 4.521727 | 4.039953 | 4.353653 | 4.852354 |
| 8872_at  | 8.37296  | 8.377406 | 8.106035 | 8.258405 | 8.26036  | 8.22907  | 7.738743 | 8.261277 |
| 88745_at | 5.476659 | 6.371191 | 6.222431 | 5.822498 | 4.923596 | 5.609815 | 5.568875 | 5.892593 |
| 8874_at  | 5.617551 | 5.519808 | 6.249287 | 6.347371 | 5.252946 | 6.256227 | 6.598976 | 5.148897 |
| 8875_at  | 3.656543 | 2.767663 | 3.367721 | 3.227127 | 2.817834 | 3.200414 | 4.236186 | 4.297259 |
| 8876_at  | 4.63512  | 2.367015 | 4.589794 | 3.641846 | 5.759273 | 4.953109 | 2.509029 | 4.487958 |
| 8877_at  | 2.730605 | 3.062166 | 2.98445  | 3.130229 | 3.114992 | 2.608023 | 2.428737 | 2.849746 |
| 8878_at  | 7.079108 | 6.861462 | 7.073689 | 6.654268 | 6.235014 | 6.120861 | 6.855918 | 6.65833  |
| 8879_at  | 6.614975 | 6.626009 | 6.750648 | 6.82428  | 6.860055 | 6.130927 | 6.814242 | 6.732932 |
| 887_at   | 1.628616 | 1.712302 | 2.324161 | 2.292277 | 2.285506 | 2.364024 | 2.368137 | 2.64415  |

|          |          |          |          |          |          |          |          |          |
|----------|----------|----------|----------|----------|----------|----------|----------|----------|
| 8880_at  | 7.374668 | 7.825132 | 7.898963 | 7.701024 | 7.668091 | 7.653985 | 7.921389 | 8.040682 |
| 8881_at  | 6.732498 | 6.666703 | 6.515599 | 5.982946 | 6.233176 | 6.59492  | 6.46471  | 6.810931 |
| 8882_at  | 5.741234 | 6.078948 | 5.317906 | 5.588287 | 5.84328  | 5.415625 | 4.905034 | 5.727208 |
| 8883_at  | 6.05323  | 5.93102  | 5.622978 | 6.132013 | 5.939174 | 5.739673 | 5.367974 | 6.165694 |
| 8884_at  | 3.331262 | 3.76051  | 3.034144 | 3.102373 | 4.17874  | 3.428183 | 4.015612 | 3.132824 |
| 8886_at  | 6.777676 | 7.246561 | 7.263902 | 6.880485 | 7.72471  | 6.946923 | 7.315968 | 6.997138 |
| 8887_at  | 8.703821 | 8.661883 | 8.551882 | 8.414491 | 8.528511 | 8.589055 | 8.333971 | 8.763671 |
| 8888_at  | 4.834977 | 4.061654 | 4.394308 | 4.844896 | 4.271732 | 5.075806 | 4.780438 | 4.809912 |
| 8890_at  | 5.64844  | 6.375962 | 5.223573 | 5.434157 | 5.751801 | 5.665976 | 5.352865 | 5.49933  |
| 8891_at  | 5.865109 | 5.873941 | 5.8259   | 5.666891 | 6.204389 | 5.443169 | 5.768616 | 6.732634 |
| 8892_at  | 5.813555 | 6.817011 | 4.926712 | 5.582199 | 4.981388 | 6.134513 | 5.099233 | 4.888685 |
| 8893_at  | 5.865871 | 5.764908 | 5.936361 | 5.967515 | 5.11232  | 6.164679 | 4.805788 | 5.595137 |
| 8894_at  | 5.610923 | 5.56678  | 4.865288 | 4.770231 | 4.987993 | 5.831002 | 6.146541 | 4.991565 |
| 8895_at  | 7.445749 | 7.99846  | 7.886756 | 7.858457 | 7.786876 | 7.908057 | 7.805698 | 8.103634 |
| 8896_at  | 8.166939 | 7.832148 | 8.223432 | 7.298147 | 7.643352 | 7.949524 | 7.343226 | 7.636318 |
| 8897_at  | 5.861184 | 6.448524 | 6.742009 | 6.911054 | 6.771174 | 6.257429 | 6.265351 | 6.634222 |
| 8898_at  | 6.468836 | 6.116766 | 6.719423 | 6.731989 | 6.128722 | 6.036892 | 6.486738 | 5.973301 |
| 8899_at  | 6.161035 | 5.820134 | 5.77707  | 5.931544 | 5.62567  | 6.165129 | 5.572692 | 6.69517  |
| 889_at   | 6.863263 | 6.3452   | 6.365593 | 6.811862 | 6.585987 | 6.562097 | 7.09709  | 6.666077 |
| 88_at    | 1.113747 | 1.482003 | 1.177434 | 1.339479 | 2.405493 | 1.490772 | 1.720799 | 1.59791  |
| 8900_at  | 1.770021 | 1.681412 | 1.333451 | 1.340787 | 1.575446 | 1.62274  | 1.54473  | 2.954399 |
| 8904_at  | 7.527804 | 6.94147  | 6.83969  | 7.294682 | 7.259763 | 6.823857 | 6.982166 | 7.094282 |
| 8905_at  | 4.728378 | 5.446105 | 4.555471 | 4.941366 | 5.023683 | 4.26622  | 4.449987 | 5.232387 |
| 8906_at  | 5.412738 | 3.849954 | 3.92321  | 3.934543 | 4.695018 | 4.390118 | 3.605259 | 4.02508  |
| 8907_at  | 5.601712 | 5.069621 | 5.279415 | 4.757502 | 3.798436 | 5.286956 | 5.863399 | 4.694585 |
| 8908_at  | 2.356229 | 2.80857  | 2.068208 | 2.121542 | 2.666817 | 4.134592 | 2.629496 | 2.468435 |
| 8909_at  | 1.475237 | 1.768986 | 1.809386 | 1.102654 | 2.343494 | 1.501909 | 1.825638 | 2.106196 |
| 890_at   | 3.656979 | 3.923242 | 3.882541 | 2.934763 | 2.186977 | 2.528881 | 2.29649  | 4.099467 |
| 8910_at  | 6.876583 | 7.070895 | 7.119653 | 6.893243 | 6.420121 | 6.236482 | 6.852024 | 6.95306  |
| 8911_at  | 1.992543 | 2.101722 | 2.360934 | 1.912304 | 1.718172 | 2.085639 | 1.982397 | 2.04716  |
| 89122_at | 5.292542 | 5.173151 | 5.006036 | 4.616968 | 4.683139 | 5.475189 | 5.556371 | 5.638953 |
| 8912_at  | 3.822492 | 3.093001 | 3.739859 | 3.512878 | 3.451745 | 3.151976 | 2.945437 | 3.550065 |
| 8913_at  | 1.735343 | 1.380565 | 1.74754  | 1.407944 | 2.148006 | 1.626455 | 1.467604 | 2.532559 |
| 8914_at  | 2.319767 | 3.327751 | 3.852352 | 3.781096 | 2.42728  | 3.507923 | 4.203708 | 3.319473 |
| 8915_at  | 6.729579 | 6.544872 | 6.599485 | 6.607704 | 6.63709  | 5.613847 | 6.348036 | 6.214734 |
| 8916_at  | 5.486391 | 4.677549 | 5.120115 | 5.80968  | 5.954974 | 5.347073 | 5.131185 | 5.56624  |
| 891_at   | 5.112146 | 4.789491 | 3.174307 | 4.736502 | 4.761497 | 3.268198 | 3.620888 | 5.089369 |
| 8924_at  | 4.371669 | 5.162877 | 4.745259 | 4.801437 | 4.903616 | 5.176617 | 4.728759 | 4.640596 |
| 8925_at  | 5.748219 | 5.760669 | 5.650715 | 6.31808  | 6.578275 | 6.049458 | 5.752122 | 6.111327 |
| 8927_at  | 2.964188 | 1.83903  | 1.982728 | 1.960376 | 2.527999 | 2.651896 | 2.279119 | 1.912473 |
| 8928_at  | 3.592392 | 3.709866 | 4.005253 | 3.991962 | 3.692121 | 3.663966 | 3.813048 | 3.896041 |
| 8929_at  | 2.686414 | 2.296789 | 2.224796 | 2.412891 | 2.479375 | 2.571489 | 2.460271 | 3.050881 |
| 892_at   | 5.926001 | 5.580276 | 4.731175 | 5.399885 | 5.397138 | 4.748679 | 5.367388 | 6.565159 |
| 8930_at  | 6.392287 | 6.611423 | 6.083836 | 6.63874  | 5.687186 | 6.14778  | 5.478844 | 6.517715 |
| 8932_at  | 7.959189 | 7.892663 | 7.890146 | 7.556434 | 7.845058 | 7.89232  | 7.398292 | 7.774524 |
| 8933_at  | 3.139649 | 2.831601 | 2.450477 | 3.062364 | 2.882783 | 3.12786  | 2.594855 | 2.443307 |
| 8934_at  | 3.492463 | 3.575528 | 3.911824 | 3.646811 | 4.21131  | 4.34671  | 3.178179 | 3.278404 |
| 8935_at  | 6.987877 | 7.349751 | 7.198143 | 7.316316 | 6.65734  | 7.327161 | 7.46065  | 7.592616 |
| 8936_at  | 4.04497  | 4.467637 | 4.078233 | 3.96287  | 4.60555  | 4.665409 | 3.974329 | 2.715384 |
| 8938_at  | 2.894804 | 2.999137 | 3.125964 | 3.066887 | 3.982776 | 3.617157 | 3.175567 | 2.95556  |
| 8939_at  | 6.599186 | 7.430822 | 7.263825 | 6.830876 | 7.063322 | 6.819871 | 6.623219 | 7.016853 |

|          |          |          |          |          |          |          |          |          |
|----------|----------|----------|----------|----------|----------|----------|----------|----------|
| 8940_at  | 3.49314  | 3.553804 | 2.96687  | 3.040831 | 2.706646 | 3.946846 | 2.662377 | 3.815975 |
| 8941_at  | 2.803835 | 3.009662 | 2.867683 | 2.357222 | 2.555607 | 3.113716 | 2.997328 | 2.332537 |
| 8942_at  | 4.978823 | 3.769205 | 4.08204  | 2.878361 | 5.065596 | 3.195435 | 4.078794 | 4.071589 |
| 8943_at  | 6.17509  | 6.418018 | 6.190524 | 6.20556  | 5.6121   | 6.449416 | 5.966298 | 5.31386  |
| 8945_at  | 5.831035 | 5.700085 | 5.529136 | 5.847216 | 6.064192 | 5.371744 | 6.456174 | 6.403404 |
| 894_at   | 4.475829 | 4.384507 | 4.590561 | 5.627304 | 4.477287 | 5.848233 | 5.636535 | 3.836595 |
| 8968_at  | 5.513199 | 2.95159  | 4.431732 | 5.759543 | 3.194127 | 6.856206 | 5.729998 | 2.599763 |
| 896_at   | 4.74109  | 3.856155 | 4.932044 | 4.88325  | 3.871642 | 4.588717 | 5.069584 | 4.150179 |
| 8970_at  | 2.19159  | 2.128318 | 2.15963  | 1.434029 | 3.339425 | 1.836831 | 3.46925  | 2.38944  |
| 8971_at  | 7.726209 | 7.076619 | 7.37172  | 7.255075 | 6.896654 | 7.398772 | 7.46561  | 5.595217 |
| 8972_at  | 3.599693 | 3.617978 | 4.84141  | 2.074529 | 5.308472 | 3.860496 | 1.668714 | 4.798095 |
| 8973_at  | 1.337289 | 1.688974 | 1.247107 | 1.796601 | 1.553413 | 1.533427 | 1.774192 | 2.372681 |
| 8974_at  | 5.327998 | 6.077888 | 6.088418 | 6.234114 | 7.257107 | 5.640345 | 6.028119 | 6.180568 |
| 89758_at | 2.330649 | 1.022418 | 1.760642 | 1.119173 | 1.173821 | 1.581245 | 1.401279 | 1.042575 |
| 8975_at  | 4.670447 | 5.455564 | 5.461499 | 5.082267 | 4.211227 | 4.707064 | 5.846773 | 4.846924 |
| 89765_at | 3.179211 | 2.793171 | 2.071924 | 2.314507 | 4.059455 | 4.293537 | 2.069967 | 3.368368 |
| 89766_at | 1.839555 | 1.965673 | 1.613331 | 2.015255 | 2.137808 | 1.904361 | 1.685771 | 2.664219 |
| 8976_at  | 9.127166 | 9.089448 | 8.888296 | 8.640719 | 8.37021  | 8.27942  | 9.279875 | 8.884116 |
| 89777_at | 0.940034 | 1.168995 | 1.045839 | 1.018562 | 1.178454 | 1.002368 | 1.685089 | 0.941204 |
| 89778_at | 1.535924 | 0.973499 | 1.05677  | 1.710992 | 1.511136 | 1.106664 | 1.24534  | 1.282244 |
| 89780_at | 2.00746  | 2.477938 | 1.533553 | 2.396639 | 2.17399  | 1.562348 | 1.776577 | 1.806137 |
| 89781_at | 3.674458 | 3.118501 | 4.752371 | 3.823052 | 4.297972 | 3.475766 | 3.577208 | 4.57158  |
| 89782_at | 3.272216 | 3.70433  | 3.370109 | 4.300546 | 4.242745 | 2.569917 | 4.229201 | 3.307904 |
| 89790_at | 3.927535 | 4.65528  | 3.632665 | 4.45102  | 3.023933 | 3.854833 | 4.86232  | 3.739793 |
| 89792_at | 3.489529 | 3.377783 | 3.531838 | 3.427758 | 2.984418 | 3.730952 | 3.544513 | 3.098698 |
| 89795_at | 1.527885 | 1.867177 | 1.43146  | 1.871809 | 1.941388 | 1.336975 | 1.757635 | 1.439467 |
| 89796_at | 5.148861 | 5.944104 | 5.500282 | 6.300326 | 4.164962 | 5.85795  | 5.871652 | 4.98148  |
| 89797_at | 4.206242 | 4.203269 | 3.975637 | 4.760199 | 4.307113 | 4.754363 | 3.742298 | 3.744941 |
| 89801_at | 3.69247  | 3.921118 | 3.856865 | 3.647109 | 3.002853 | 3.497185 | 4.723748 | 2.347991 |
| 89822_at | 2.127988 | 2.388826 | 2.666163 | 2.786592 | 2.248809 | 1.832158 | 1.727678 | 2.317636 |
| 89837_at | 1.434923 | 2.016843 | 1.438334 | 2.590099 | 0.792541 | 1.751031 | 0.817225 | 2.781982 |
| 89839_at | 1.205007 | 1.396911 | 2.859358 | 1.996863 | 1.752163 | 3.523401 | 2.063375 | 3.60288  |
| 89845_at | 3.72652  | 3.880296 | 4.494507 | 4.493989 | 3.921536 | 4.390813 | 3.279944 | 3.770393 |
| 89846_at | 1.995655 | 3.107601 | 2.450866 | 1.940468 | 1.597861 | 1.761403 | 2.424383 | 1.932377 |
| 89848_at | 2.329581 | 2.39663  | 2.159861 | 2.632125 | 2.482785 | 2.988466 | 2.733567 | 3.349422 |
| 89849_at | 2.793859 | 1.774707 | 2.130663 | 2.940739 | 2.631411 | 2.418477 | 1.602808 | 2.068321 |
| 89853_at | 4.748745 | 4.221758 | 4.508667 | 4.257383 | 3.853429 | 4.760207 | 4.76544  | 3.912954 |
| 89857_at | 2.749986 | 2.995064 | 2.571293 | 3.124246 | 2.812012 | 3.529438 | 3.188022 | 3.062468 |
| 89858_at | 2.166296 | 1.892804 | 2.619092 | 2.307151 | 2.965614 | 2.321679 | 2.387477 | 3.064246 |
| 8985_at  | 6.153164 | 5.9105   | 6.036104 | 6.967904 | 5.603396 | 7.004787 | 7.277202 | 6.095438 |
| 89866_at | 1.842461 | 2.152789 | 2.909034 | 3.375039 | 2.317581 | 3.269917 | 3.093248 | 2.242472 |
| 89869_at | 1.150974 | 1.023284 | 0.766489 | 1.09351  | 1.191289 | 1.292624 | 1.726752 | 0.929187 |
| 8986_at  | 2.865134 | 3.478608 | 2.067112 | 3.242754 | 2.875412 | 2.572693 | 1.9508   | 3.293426 |
| 89870_at | 2.701205 | 3.581679 | 3.401714 | 3.171849 | 3.180363 | 3.394881 | 3.401478 | 3.023207 |
| 89872_at | 2.120152 | 2.123495 | 2.997778 | 2.056212 | 2.437374 | 1.937575 | 2.532241 | 2.522412 |
| 89874_at | 2.128481 | 2.487676 | 2.237976 | 2.510059 | 2.075688 | 1.923497 | 2.347714 | 2.374356 |
| 89876_at | 3.612914 | 3.943499 | 3.848122 | 3.077494 | 3.469708 | 2.750798 | 2.065263 | 3.145544 |
| 8987_at  | 2.622019 | 4.291194 | 4.120077 | 0.450137 | 3.451581 | 2.70392  | 2.463044 | 1.552174 |
| 89882_at | 1.646757 | 1.001275 | 1.500835 | 1.035467 | 2.080884 | 1.90247  | 0.982797 | 1.131976 |
| 89883_at | 1.675664 | 1.843342 | 2.304373 | 1.798097 | 2.992273 | 2.455802 | 2.124356 | 2.756536 |
| 89884_at | 1.426845 | 1.873108 | 2.597175 | 1.266511 | 0.925705 | 1.511845 | 2.2339   | 1.384365 |



|          |          |          |          |          |          |          |          |          |
|----------|----------|----------|----------|----------|----------|----------|----------|----------|
| 89885_at | 2.699884 | 2.788046 | 1.797539 | 2.352854 | 2.14109  | 2.068365 | 1.799939 | 1.623273 |
| 89886_at | 1.51207  | 1.90413  | 1.500468 | 1.448214 | 1.693265 | 1.994748 | 1.668878 | 1.403796 |
| 89887_at | 3.937843 | 5.020442 | 4.368067 | 3.753194 | 3.710931 | 3.401307 | 3.545152 | 3.360764 |
| 8988_at  | 2.890326 | 3.97257  | 1.687978 | 1.55396  | 1.828598 | 1.487105 | 1.821847 | 2.850423 |
| 89890_at | 3.63094  | 3.588931 | 3.350699 | 4.857598 | 3.333419 | 3.816118 | 3.802117 | 3.917687 |
| 89891_at | 4.477928 | 3.581589 | 3.206469 | 3.552931 | 2.966405 | 4.02073  | 3.090013 | 3.401994 |
| 89894_at | 4.984642 | 4.099064 | 3.315832 | 4.021788 | 4.756421 | 2.963209 | 3.195257 | 4.315562 |
| 8989_at  | 1.707864 | 1.727071 | 1.840297 | 1.803327 | 2.012677 | 2.30859  | 2.250468 | 1.970842 |
| 898_at   | 1.47508  | 1.368237 | 2.033535 | 1.919821 | 1.415139 | 2.311148 | 1.918969 | 2.132851 |
| 89910_at | 6.478609 | 6.862294 | 6.520344 | 5.944536 | 6.34767  | 5.917807 | 6.668125 | 6.375085 |
| 8991_at  | 4.630706 | 4.772707 | 5.288324 | 5.184875 | 3.733107 | 3.713041 | 4.836582 | 3.43543  |
| 89927_at | 6.305356 | 5.532541 | 5.669854 | 5.607153 | 5.583499 | 5.607966 | 5.653845 | 4.828732 |
| 8992_at  | 9.606153 | 9.523548 | 10.02385 | 9.842309 | 9.784075 | 9.281374 | 9.939645 | 9.275827 |
| 89932_at | 3.343807 | 2.820987 | 2.939466 | 2.322384 | 3.363141 | 4.780352 | 1.81689  | 2.872303 |
| 8993_at  | 2.736131 | 3.056265 | 2.815201 | 2.567133 | 2.375385 | 2.922442 | 2.189145 | 2.77465  |
| 89941_at | 6.09343  | 5.138827 | 5.333319 | 5.625203 | 4.462673 | 5.860207 | 4.185329 | 4.510353 |
| 89944_at | 4.728779 | 3.820585 | 4.313085 | 3.810578 | 5.103849 | 4.410618 | 4.588838 | 5.485944 |
| 8994_at  | 2.651552 | 3.775343 | 3.366012 | 3.642371 | 3.878184 | 4.983718 | 3.034159 | 3.025497 |
| 89953_at | 3.742163 | 3.397257 | 3.498521 | 3.838818 | 3.601108 | 3.993682 | 2.796411 | 3.96141  |
| 89958_at | 1.878794 | 2.275268 | 2.362997 | 3.047193 | 2.311126 | 2.02045  | 2.265283 | 2.565247 |
| 8995_at  | 1.326205 | 0.92234  | 1.558247 | 0.971726 | 2.028496 | 1.179276 | 1.323276 | 1.92237  |
| 8996_at  | 4.258003 | 3.389901 | 4.319714 | 3.717985 | 2.986316 | 3.871363 | 3.444031 | 3.973656 |
| 89970_at | 5.88233  | 5.85042  | 5.269751 | 5.78142  | 5.531697 | 5.625298 | 5.155935 | 5.106378 |
| 89978_at | 4.03047  | 4.1042   | 2.399851 | 4.297114 | 2.780231 | 4.27286  | 2.89254  | 4.55648  |
| 8997_at  | 3.11573  | 3.944209 | 3.349743 | 3.311242 | 3.27515  | 3.773449 | 3.613414 | 2.5845   |
| 8999_at  | 3.209657 | 2.585595 | 2.85743  | 3.163908 | 2.719742 | 2.945991 | 2.931054 | 4.486184 |
| 899_at   | 2.751877 | 3.113928 | 2.086573 | 3.474737 | 2.960348 | 3.059977 | 3.566518 | 2.591897 |
| 89_at    | 2.067398 | 2.314007 | 2.004285 | 1.888426 | 2.011448 | 1.338667 | 2.284244 | 1.896411 |
| 90007_at | 4.323991 | 4.021986 | 4.435286 | 4.160527 | 4.069284 | 4.163437 | 4.55848  | 3.367715 |
| 90011_at | 2.077065 | 1.982148 | 2.150628 | 2.006784 | 2.337993 | 1.85153  | 2.427755 | 1.896465 |
| 90019_at | 1.623429 | 1.708954 | 2.336428 | 1.026934 | 1.61053  | 1.401425 | 1.495576 | 2.638752 |
| 9001_at  | 1.407592 | 2.245684 | 1.904069 | 2.339578 | 1.881443 | 2.111394 | 2.972695 | 2.068332 |
| 90024_at | 5.45311  | 5.820878 | 4.785518 | 4.66602  | 2.410545 | 4.726665 | 3.906444 | 4.135756 |
| 90025_at | 2.588973 | 2.77736  | 3.445948 | 2.2996   | 4.09232  | 2.250341 | 2.685078 | 2.124307 |
| 9002_at  | 2.476126 | 3.059445 | 3.857479 | 3.707937 | 2.645949 | 3.91134  | 2.794624 | 2.789837 |
| 90050_at | 1.364901 | 0.986214 | 1.121696 | 1.690925 | 1.223158 | 1.663534 | 1.625113 | 1.98989  |
| 90060_at | 2.856066 | 2.874976 | 3.363508 | 2.836527 | 3.294568 | 3.673471 | 3.109292 | 3.220157 |
| 90070_at | 1.894281 | 2.564799 | 2.042669 | 2.335187 | 2.668038 | 2.03493  | 2.566251 | 2.351365 |
| 90075_at | 1.936798 | 2.325442 | 2.516345 | 2.348058 | 2.545184 | 2.421318 | 2.66093  | 3.036934 |
| 900_at   | 7.438902 | 7.199628 | 7.126172 | 6.93563  | 7.05377  | 6.774276 | 6.848806 | 7.289092 |
| 90102_at | 7.194608 | 7.455109 | 6.656537 | 6.83625  | 7.216403 | 7.093287 | 6.650544 | 7.442622 |
| 90113_at | 2.646864 | 2.412186 | 3.029011 | 2.23871  | 2.855929 | 2.720163 | 2.527904 | 2.556849 |
| 90120_at | 4.09306  | 3.776043 | 3.981411 | 4.409797 | 4.180151 | 3.891032 | 4.204921 | 3.342699 |
| 90121_at | 7.299274 | 7.421439 | 7.047837 | 7.83131  | 7.068933 | 7.693951 | 7.440139 | 7.332784 |
| 90134_at | 1.927632 | 1.748414 | 1.326925 | 1.699442 | 2.119129 | 1.941122 | 1.174585 | 1.60196  |
| 90135_at | 4.310115 | 4.62883  | 3.236292 | 4.136229 | 3.997513 | 4.630725 | 4.14412  | 4.752853 |
| 90139_at | 6.484263 | 5.472646 | 5.787194 | 6.684613 | 6.936462 | 5.750584 | 6.045185 | 5.878454 |
| 9013_at  | 3.934071 | 1.848682 | 3.405414 | 3.775808 | 2.290375 | 3.122964 | 3.288594 | 2.776805 |
| 90141_at | 4.267593 | 3.141647 | 3.356314 | 3.406877 | 3.886818 | 2.762271 | 3.453565 | 4.63601  |
| 9014_at  | 5.372997 | 5.875445 | 5.943777 | 5.892212 | 6.287522 | 5.557625 | 5.079505 | 6.352462 |
| 9015_at  | 2.77189  | 3.142031 | 2.384257 | 1.742895 | 3.193499 | 2.142454 | 3.586622 | 3.586939 |

|          |          |          |          |          |          |          |          |          |
|----------|----------|----------|----------|----------|----------|----------|----------|----------|
| 90161_at | 3.337715 | 2.317706 | 2.299756 | 3.756428 | 4.587171 | 1.889807 | 2.143267 | 3.09639  |
| 90167_at | 1.412009 | 1.432797 | 1.639496 | 1.259195 | 1.632318 | 1.765269 | 1.908797 | 1.34839  |
| 9016_at  | 3.278539 | 3.612812 | 2.927037 | 4.236745 | 4.836353 | 3.590793 | 3.763637 | 4.267207 |
| 90187_at | 1.956542 | 2.238792 | 2.380627 | 2.341115 | 2.866151 | 2.224592 | 2.08904  | 2.138038 |
| 90196_at | 5.705156 | 5.635786 | 5.583443 | 5.395638 | 5.25827  | 5.589231 | 4.985281 | 4.901367 |
| 90199_at | 1.428633 | 1.810403 | 1.717314 | 1.225093 | 1.6688   | 1.565037 | 1.565104 | 1.64192  |
| 9019_at  | 7.367354 | 6.954858 | 7.339671 | 7.180152 | 6.920508 | 6.780468 | 7.737123 | 6.841749 |
| 901_at   | 6.257584 | 6.598059 | 6.954186 | 6.920968 | 7.462763 | 6.380294 | 6.277254 | 6.971807 |
| 90203_at | 5.367925 | 5.384151 | 4.523779 | 5.170208 | 4.828675 | 4.782581 | 4.823361 | 4.725302 |
| 90204_at | 3.6635   | 4.761685 | 4.492827 | 4.440642 | 4.160232 | 4.629952 | 4.007812 | 4.16067  |
| 9020_at  | 2.819016 | 2.525071 | 2.322698 | 3.089982 | 2.399616 | 2.936811 | 2.310002 | 2.770994 |
| 9021_at  | 4.375502 | 4.380143 | 3.969991 | 4.336366 | 4.126508 | 4.809183 | 4.729697 | 3.55343  |
| 90226_at | 2.270168 | 1.781767 | 2.30829  | 1.527692 | 2.00942  | 1.86549  | 1.589513 | 1.895385 |
| 9022_at  | 4.475048 | 4.133967 | 4.314419 | 5.711947 | 3.759813 | 4.447345 | 4.076334 | 3.789526 |
| 90231_at | 6.091789 | 5.744656 | 5.703743 | 5.322229 | 4.961071 | 5.583132 | 5.149252 | 4.937133 |
| 90233_at | 3.148688 | 3.065453 | 3.75485  | 3.623601 | 3.759218 | 3.082634 | 2.93129  | 3.414116 |
| 9023_at  | 1.733511 | 1.615369 | 1.64109  | 2.255942 | 1.789013 | 2.621089 | 2.068375 | 1.648587 |
| 90246_at | 3.581165 | 3.875523 | 3.114882 | 2.845317 | 3.250797 | 3.024461 | 4.044186 | 2.050975 |
| 90249_at | 1.762026 | 2.966286 | 2.495413 | 2.857146 | 2.697744 | 2.793649 | 2.486966 | 2.139385 |
| 9024_at  | 2.739715 | 2.571341 | 2.566343 | 2.978244 | 2.349634 | 2.755828 | 2.643068 | 2.623911 |
| 9025_at  | 5.959843 | 6.107008 | 5.673615 | 6.560721 | 5.878807 | 6.202317 | 6.29947  | 6.006932 |
| 90268_at | 5.640038 | 4.432764 | 4.60261  | 5.590213 | 5.206877 | 4.475875 | 5.50564  | 4.697943 |
| 9026_at  | 4.491858 | 3.889228 | 3.872207 | 4.09514  | 3.826081 | 4.267875 | 3.632548 | 3.519531 |
| 90271_at | 7.054302 | 5.374522 | 6.908468 | 6.925048 | 5.329341 | 4.328904 | 5.871743 | 7.157722 |
| 90273_at | 1.487348 | 2.377055 | 2.161759 | 1.781811 | 1.301765 | 0.996486 | 1.352213 | 1.403446 |
| 9027_at  | 4.397552 | 3.162684 | 4.657003 | 1.929794 | 4.69653  | 4.998421 | 4.876185 | 4.331364 |
| 90288_at | 1.345521 | 1.746744 | 1.743424 | 2.060245 | 1.229867 | 1.412051 | 2.058107 | 1.853324 |
| 9028_at  | 1.820954 | 2.152624 | 2.294886 | 3.006362 | 2.557827 | 2.655313 | 2.354183 | 2.867484 |
| 90293_at | 2.566083 | 3.10656  | 2.515223 | 1.653001 | 3.744    | 2.975095 | 1.532582 | 1.747931 |
| 902_at   | 6.409572 | 6.201265 | 5.650281 | 6.247233 | 6.176165 | 5.864161 | 6.012087 | 6.547846 |
| 90313_at | 2.103048 | 3.26344  | 2.924242 | 2.356217 | 2.758429 | 2.941271 | 3.014057 | 2.558877 |
| 90317_at | 3.680011 | 2.981216 | 3.199453 | 3.207762 | 2.398215 | 3.047729 | 2.182234 | 3.332153 |
| 9031_at  | 6.81298  | 7.755303 | 7.768449 | 7.953404 | 7.611796 | 7.747604 | 7.830739 | 8.076039 |
| 90321_at | 5.349184 | 5.924017 | 5.253782 | 5.460877 | 3.888422 | 4.947537 | 4.763421 | 5.107555 |
| 90324_at | 4.5391   | 3.67218  | 3.880857 | 4.005551 | 4.759923 | 4.204051 | 4.082109 | 4.124705 |
| 90326_at | 3.66672  | 3.353978 | 2.77085  | 2.841903 | 3.175586 | 2.815265 | 3.60378  | 2.601554 |
| 9032_at  | 5.489251 | 4.682547 | 5.065394 | 2.731571 | 6.318055 | 5.231004 | 3.282071 | 5.024058 |
| 90332_at | 4.876796 | 4.457674 | 4.511147 | 5.094483 | 4.280856 | 4.653894 | 3.750616 | 4.464216 |
| 90333_at | 6.239717 | 6.566704 | 6.756891 | 6.526715 | 4.759507 | 4.777969 | 5.06376  | 4.204518 |
| 90338_at | 6.007255 | 5.930995 | 6.590877 | 7.115733 | 5.070934 | 6.965406 | 6.095848 | 6.078277 |
| 9033_at  | 2.551226 | 2.430801 | 3.270429 | 2.296387 | 2.316964 | 2.59472  | 2.37646  | 2.469428 |
| 90342_at | 1.677357 | 1.993773 | 2.197614 | 1.934087 | 2.200755 | 1.878302 | 2.41346  | 1.989358 |
| 9034_at  | 4.461955 | 3.433371 | 3.913919 | 5.796197 | 5.483535 | 4.633741 | 3.007333 | 5.479943 |
| 90353_at | 1.690937 | 2.30016  | 2.853235 | 2.408321 | 1.793627 | 2.305248 | 2.007535 | 2.26745  |
| 90355_at | 5.509454 | 5.396875 | 4.912055 | 4.220383 | 3.891119 | 4.859033 | 4.277925 | 5.15048  |
| 90362_at | 3.583846 | 3.504135 | 2.70521  | 2.756448 | 5.088813 | 3.839909 | 3.386212 | 3.483042 |
| 90378_at | 4.521404 | 4.343448 | 4.796855 | 4.841014 | 4.004923 | 4.825225 | 4.974873 | 4.818591 |
| 90379_at | 4.648587 | 4.545099 | 4.375806 | 5.150413 | 4.145868 | 4.940893 | 4.376367 | 3.562567 |
| 9037_at  | 8.578607 | 8.740998 | 9.068181 | 8.408566 | 8.476928 | 8.837052 | 9.012736 | 8.564716 |
| 90381_at | 1.827941 | 2.615722 | 2.126463 | 2.597865 | 1.778891 | 1.733656 | 2.812623 | 1.675959 |
| 9038_at  | 1.734549 | 1.362519 | 1.108376 | 1.195356 | 1.464544 | 1.43051  | 1.10949  | 0.911967 |

|          |          |          |          |          |          |          |          |          |
|----------|----------|----------|----------|----------|----------|----------|----------|----------|
| 90390_at | 5.55148  | 4.678463 | 4.154417 | 5.627633 | 4.608621 | 5.508697 | 4.643647 | 5.406038 |
| 9039_at  | 6.672604 | 6.85392  | 6.856575 | 7.23644  | 7.445597 | 6.643273 | 6.655684 | 7.727717 |
| 90407_at | 6.319213 | 6.765552 | 7.209584 | 5.708416 | 6.679089 | 5.93673  | 6.115332 | 5.952013 |
| 9040_at  | 2.086096 | 1.18929  | 2.469113 | 2.417304 | 1.721477 | 1.169299 | 1.453979 | 1.809519 |
| 90410_at | 7.79669  | 7.31138  | 7.082396 | 7.084165 | 7.782605 | 7.137777 | 7.121901 | 7.522134 |
| 90411_at | 5.995685 | 6.199571 | 6.180975 | 5.573335 | 5.381388 | 6.555869 | 6.419131 | 5.460874 |
| 90416_at | 5.507219 | 6.093723 | 4.752554 | 5.172283 | 4.691466 | 4.668487 | 6.446159 | 5.079362 |
| 90417_at | 2.878787 | 4.068916 | 3.003303 | 2.224077 | 2.719213 | 2.758866 | 3.830206 | 3.366701 |
| 90423_at | 2.906012 | 4.300631 | 2.021811 | 3.306104 | 2.821481 | 2.516347 | 2.510441 | 2.632306 |
| 90427_at | 3.859954 | 3.075339 | 3.937351 | 3.490493 | 4.717989 | 2.964372 | 3.583228 | 2.804297 |
| 9043_at  | 7.05153  | 7.401745 | 6.997324 | 7.591823 | 7.217337 | 7.457479 | 7.479568 | 7.41042  |
| 90441_at | 5.985881 | 5.457588 | 5.063648 | 4.980241 | 5.615534 | 5.469716 | 5.419183 | 5.903754 |
| 9044_at  | 5.376427 | 5.992296 | 5.434617 | 5.470201 | 5.693772 | 5.252185 | 5.541473 | 6.205816 |
| 90459_at | 5.188396 | 3.605583 | 3.514488 | 4.295161 | 4.42517  | 3.995209 | 4.677902 | 4.384537 |
| 9045_at  | 6.52778  | 6.327132 | 6.405007 | 6.246584 | 6.101351 | 5.76046  | 5.871584 | 6.114052 |
| 9046_at  | 3.335854 | 3.611335 | 3.153161 | 3.902714 | 3.495806 | 3.022468 | 3.956806 | 3.889721 |
| 9047_at  | 3.06767  | 3.146205 | 2.819982 | 2.777139 | 2.830396 | 3.968814 | 2.527032 | 3.542957 |
| 90480_at | 8.2858   | 7.923817 | 7.525095 | 7.855657 | 8.18875  | 8.108227 | 7.640369 | 7.50799  |
| 90485_at | 1.957861 | 1.633288 | 2.297246 | 1.910361 | 1.835067 | 1.705322 | 1.779072 | 1.78509  |
| 90488_at | 6.705756 | 6.937496 | 6.611673 | 6.820841 | 6.796469 | 7.013889 | 6.776026 | 6.460504 |
| 9048_at  | 2.209267 | 2.231674 | 1.840844 | 1.532656 | 1.857472 | 2.02107  | 1.655091 | 2.48939  |
| 90499_at | 1.255812 | 1.037377 | 0.819507 | 2.992822 | 1.613136 | 3.035639 | 3.327041 | 1.116241 |
| 9049_at  | 6.312745 | 5.850461 | 5.402574 | 5.601476 | 6.291419 | 6.067491 | 6.045055 | 5.775457 |
| 904_at   | 5.892668 | 6.877395 | 6.358191 | 6.432702 | 6.666391 | 6.047619 | 6.794711 | 6.806013 |
| 90506_at | 1.191719 | 1.355652 | 2.251211 | 2.184092 | 2.53361  | 1.520391 | 1.799729 | 1.446212 |
| 90507_at | 4.562441 | 4.342579 | 3.837714 | 3.686346 | 4.31274  | 4.217095 | 3.161184 | 3.425923 |
| 9050_at  | 2.214954 | 2.93699  | 4.883654 | 3.010098 | 2.607803 | 2.550136 | 1.75968  | 3.879745 |
| 9051_at  | 2.475193 | 3.272168 | 1.83224  | 2.642783 | 1.832659 | 2.041255 | 1.897919 | 1.931674 |
| 90522_at | 5.264261 | 4.70299  | 5.367634 | 5.990092 | 4.666562 | 4.997511 | 5.439669 | 4.876492 |
| 90523_at | 1.739803 | 1.499803 | 1.588319 | 1.771606 | 2.120473 | 2.850639 | 1.702161 | 1.228877 |
| 90525_at | 3.575928 | 3.084529 | 2.351747 | 2.772994 | 2.481679 | 3.019143 | 2.515496 | 2.713677 |
| 90527_at | 1.692647 | 1.749655 | 2.061619 | 1.822032 | 1.841477 | 2.041772 | 2.045538 | 1.685583 |
| 90529_at | 5.431367 | 4.715252 | 5.026978 | 5.088842 | 4.439808 | 5.013779 | 5.442636 | 5.463592 |
| 9052_at  | 9.005112 | 9.299076 | 9.080982 | 8.617795 | 9.024663 | 8.143468 | 8.929426 | 8.759422 |
| 9053_at  | 4.181897 | 3.019684 | 3.733811 | 3.01278  | 3.863909 | 4.006337 | 2.263999 | 3.713159 |
| 9054_at  | 5.875572 | 6.270281 | 6.126154 | 5.514811 | 4.874549 | 5.751337 | 4.866191 | 6.349689 |
| 90550_at | 5.275855 | 5.41249  | 6.47587  | 6.220024 | 5.67933  | 5.349982 | 5.894119 | 6.000352 |
| 9055_at  | 3.217707 | 3.288532 | 2.918662 | 5.407655 | 3.035853 | 3.543314 | 5.024337 | 5.265718 |
| 9056_at  | 6.31371  | 6.414133 | 5.819336 | 4.355201 | 6.554406 | 6.583188 | 5.534447 | 6.119639 |
| 9057_at  | 3.275246 | 4.329648 | 4.163562 | 3.953307 | 3.670216 | 5.027472 | 4.352953 | 2.346319 |
| 90580_at | 3.121843 | 3.482035 | 3.158677 | 3.743744 | 4.018963 | 3.248889 | 3.63513  | 3.149581 |
| 90586_at | 2.542689 | 1.17236  | 1.729784 | 0.992518 | 1.453839 | 1.321066 | 1.849929 | 2.0783   |
| 90589_at | 5.419802 | 4.992845 | 5.555035 | 5.920909 | 5.012684 | 5.283293 | 5.085318 | 5.711006 |
| 9058_at  | 4.708179 | 3.682564 | 4.905125 | 2.419679 | 4.166816 | 4.594215 | 2.777713 | 3.527494 |
| 90592_at | 3.344981 | 3.611217 | 2.947426 | 3.031662 | 5.130432 | 3.506629 | 3.230375 | 4.856218 |
| 90594_at | 4.739065 | 2.71366  | 3.499408 | 4.391968 | 4.324021 | 3.846299 | 3.56193  | 4.857359 |
| 905_at   | 5.283378 | 5.487603 | 5.017955 | 5.506953 | 5.301542 | 5.757447 | 5.507796 | 5.440713 |
| 9060_at  | 5.040033 | 5.99657  | 4.974135 | 4.567758 | 5.049331 | 6.19881  | 5.906228 | 5.119151 |
| 9061_at  | 6.93225  | 6.617355 | 6.851371 | 6.42638  | 6.784799 | 6.765268 | 6.415895 | 7.158036 |
| 90624_at | 5.922001 | 6.442221 | 7.090787 | 6.817525 | 6.519631 | 6.384704 | 5.861506 | 6.634    |
| 90627_at | 3.844251 | 4.085931 | 4.107697 | 4.379552 | 4.11699  | 3.748485 | 3.955122 | 3.320796 |

|          |          |          |          |          |          |          |          |          |
|----------|----------|----------|----------|----------|----------|----------|----------|----------|
| 90632_at | 2.718519 | 2.038711 | 3.300809 | 1.961249 | 3.874384 | 5.028761 | 3.958776 | 4.000185 |
| 90634_at | 5.172492 | 5.214979 | 3.764259 | 4.062858 | 4.487131 | 4.156037 | 5.093267 | 4.39774  |
| 90637_at | 7.571684 | 7.036029 | 7.40177  | 6.740705 | 7.083842 | 7.909366 | 7.299608 | 7.896838 |
| 90639_at | 3.940558 | 2.681894 | 3.684823 | 4.512946 | 3.932687 | 3.546025 | 3.616679 | 2.644248 |
| 9063_at  | 6.14471  | 6.107639 | 6.384014 | 6.570856 | 6.428434 | 6.544569 | 6.082036 | 6.713092 |
| 90649_at | 3.247719 | 5.536764 | 3.802753 | 5.096181 | 5.346053 | 4.166331 | 4.972198 | 3.927653 |
| 9064_at  | 4.416032 | 3.888242 | 4.366424 | 4.728407 | 4.110779 | 4.946643 | 4.512529 | 4.12499  |
| 90655_at | 1.297338 | 1.362168 | 2.339358 | 3.002229 | 3.316905 | 1.302968 | 3.112173 | 1.742868 |
| 90665_at | 1.916611 | 0.986336 | 1.676167 | 1.162688 | 1.233737 | 2.432705 | 0.96303  | 1.523069 |
| 90668_at | 2.247877 | 2.606772 | 2.644917 | 2.066941 | 2.051929 | 2.565736 | 2.424132 | 2.563081 |
| 9066_at  | 2.36337  | 1.837838 | 2.569792 | 2.233079 | 2.098221 | 2.115526 | 2.239176 | 1.702219 |
| 90673_at | 4.793803 | 5.149742 | 4.707514 | 4.42158  | 5.084301 | 4.813648 | 4.756444 | 4.724578 |
| 90678_at | 3.263261 | 2.693084 | 2.954207 | 3.224102 | 3.392678 | 3.595525 | 2.859337 | 2.836488 |
| 9068_at  | 3.987812 | 4.89506  | 3.616417 | 3.307195 | 4.382883 | 3.198891 | 4.163395 | 3.938298 |
| 90693_at | 5.591774 | 4.629549 | 4.95069  | 5.200165 | 5.387222 | 5.627947 | 4.701341 | 5.77063  |
| 9069_at  | 6.779589 | 7.243896 | 7.337254 | 6.715104 | 7.226706 | 6.630214 | 7.269449 | 8.061458 |
| 90701_at | 8.30335  | 8.212701 | 7.99941  | 7.967345 | 8.215479 | 8.129463 | 7.449049 | 8.533282 |
| 9070_at  | 6.367389 | 5.928076 | 6.499565 | 6.186419 | 6.810139 | 6.439247 | 6.351047 | 7.639316 |
| 9071_at  | 6.180752 | 3.878184 | 4.205374 | 2.800367 | 6.948396 | 6.418642 | 1.342459 | 5.368017 |
| 90736_at | 5.460864 | 4.83407  | 5.608855 | 5.056074 | 6.107096 | 5.594864 | 4.992928 | 6.168905 |
| 90737_at | 2.21333  | 1.554628 | 1.648072 | 1.779532 | 1.923586 | 2.393878 | 2.691925 | 2.975229 |
| 9073_at  | 3.343475 | 1.758795 | 1.495665 | 4.745354 | 5.827553 | 1.269308 | 1.530834 | 3.004644 |
| 9074_at  | 2.410241 | 2.341492 | 2.177316 | 2.091961 | 1.964323 | 2.420997 | 2.943156 | 1.903761 |
| 9075_at  | 5.20569  | 4.648261 | 5.370085 | 5.177112 | 5.827399 | 5.386527 | 4.956289 | 5.529406 |
| 90768_at | 3.437229 | 4.311211 | 3.958467 | 1.895554 | 2.64853  | 3.297557 | 2.168286 | 3.316152 |
| 9076_at  | 6.689504 | 5.908393 | 5.430251 | 6.278182 | 4.960829 | 6.808995 | 4.588482 | 5.670766 |
| 9077_at  | 2.517779 | 1.435005 | 1.193814 | 1.134821 | 1.773412 | 1.295922 | 2.019405 | 0.969886 |
| 90780_at | 4.174875 | 4.347358 | 5.024572 | 5.367964 | 4.513117 | 4.412485 | 4.546617 | 5.324046 |
| 90784_at | 3.217455 | 3.409586 | 3.626445 | 3.907167 | 3.157583 | 4.445415 | 4.100211 | 3.32477  |
| 90799_at | 6.168781 | 5.914041 | 5.097725 | 5.088694 | 5.811604 | 5.286585 | 4.806136 | 5.208202 |
| 9079_at  | 8.543441 | 8.614417 | 9.055227 | 8.79611  | 8.935509 | 8.723475 | 8.64504  | 8.006902 |
| 90806_at | 4.002229 | 4.999269 | 4.875056 | 5.820673 | 4.680322 | 5.298358 | 4.923945 | 5.445788 |
| 90809_at | 4.426267 | 3.965038 | 5.319866 | 4.704077 | 4.754386 | 4.093488 | 3.966199 | 5.245343 |
| 9080_at  | 1.767978 | 2.136082 | 1.682442 | 2.486313 | 2.690898 | 2.792541 | 1.849559 | 1.824532 |
| 90826_at | 3.281876 | 2.746907 | 3.118239 | 3.750875 | 5.538517 | 3.75366  | 4.096973 | 3.012888 |
| 90827_at | 1.642015 | 1.033596 | 1.461729 | 0.827828 | 1.371938 | 1.678589 | 1.661657 | 1.47158  |
| 90834_at | 1.49012  | 1.137657 | 2.174262 | 2.43894  | 1.998691 | 1.151477 | 1.565185 | 2.640271 |
| 90835_at | 2.071944 | 2.484874 | 2.446598 | 2.459488 | 2.302148 | 2.522573 | 1.814216 | 2.035573 |
| 90843_at | 7.845619 | 7.629808 | 7.372614 | 7.66242  | 7.689826 | 7.951367 | 6.982783 | 7.553861 |
| 90850_at | 4.225384 | 3.806402 | 3.966103 | 3.506661 | 2.881381 | 3.437122 | 3.682056 | 4.350009 |
| 90853_at | 1.673664 | 2.334073 | 2.363954 | 2.06265  | 1.848048 | 2.803027 | 1.887406 | 2.602772 |
| 90861_at | 6.232401 | 5.56475  | 6.779643 | 6.964051 | 5.003879 | 6.604367 | 5.731369 | 5.26455  |
| 90864_at | 3.456997 | 3.326859 | 3.384081 | 3.633846 | 3.474272 | 3.926569 | 3.313221 | 3.002085 |
| 90865_at | 1.475493 | 1.2317   | 1.476043 | 1.380301 | 1.301393 | 1.255383 | 3.283647 | 1.149102 |
| 9086_at  | 7.962271 | 8.554179 | 8.504173 | 8.427638 | 8.116606 | 7.692336 | 7.782096 | 8.391287 |
| 90871_at | 7.891334 | 7.839887 | 7.871674 | 7.91909  | 7.643152 | 7.800503 | 6.938326 | 7.449277 |
| 90874_at | 3.12828  | 3.295806 | 3.633441 | 2.874403 | 3.389215 | 3.58279  | 3.783018 | 4.250123 |
| 9087_at  | 3.275934 | 2.593623 | 2.012897 | 2.642239 | 2.323581 | 3.268739 | 3.551165 | 4.064422 |
| 9088_at  | 3.351841 | 2.805718 | 2.245484 | 2.24912  | 2.227827 | 1.911912 | 2.945515 | 2.780658 |
| 908_at   | 7.731998 | 7.706198 | 7.771722 | 7.771722 | 7.677273 | 8.36507  | 6.985361 | 7.439942 |
| 9091_at  | 5.477454 | 6.372481 | 5.520483 | 6.012251 | 5.580402 | 5.971871 | 4.903316 | 5.002042 |

|          |          |          |          |          |          |          |          |          |
|----------|----------|----------|----------|----------|----------|----------|----------|----------|
| 9092_at  | 5.73911  | 5.932054 | 5.181085 | 5.460743 | 5.888588 | 5.913122 | 5.621781 | 5.148934 |
| 90933_at | 4.861467 | 4.404212 | 5.131996 | 4.7701   | 4.985801 | 5.060811 | 5.283993 | 5.156567 |
| 9093_at  | 4.549395 | 4.64106  | 4.605288 | 5.432464 | 4.986351 | 4.602993 | 5.092593 | 4.779405 |
| 9094_at  | 6.625129 | 5.324039 | 6.432005 | 6.726051 | 6.272189 | 6.047857 | 6.674815 | 5.62869  |
| 90952_at | 6.97813  | 6.897435 | 6.839569 | 7.259065 | 6.100388 | 6.779244 | 7.355807 | 6.617159 |
| 90956_at | 5.427959 | 4.540045 | 5.32757  | 4.654252 | 4.109257 | 5.13404  | 5.029016 | 5.185324 |
| 90957_at | 4.697475 | 4.535066 | 4.029122 | 4.266607 | 3.567161 | 4.413906 | 4.233148 | 4.033374 |
| 9095_at  | 2.3047   | 2.181202 | 2.227445 | 2.333669 | 2.73219  | 1.596919 | 2.185634 | 2.055017 |
| 9096_at  | 2.096523 | 1.981427 | 2.066224 | 1.923755 | 2.341326 | 1.940708 | 2.472334 | 2.109061 |
| 9097_at  | 6.443441 | 6.241888 | 6.346719 | 6.694158 | 6.620897 | 5.766088 | 6.004383 | 6.879546 |
| 90987_at | 2.348875 | 2.259188 | 4.68952  | 4.241099 | 4.932781 | 3.975592 | 4.271738 | 3.675905 |
| 9098_at  | 1.3375   | 0.943514 | 1.208619 | 2.181056 | 1.348787 | 3.068775 | 2.46728  | 2.239861 |
| 90990_at | 2.129638 | 2.467034 | 2.09281  | 2.55729  | 2.756213 | 2.67255  | 2.937585 | 1.918837 |
| 90993_at | 1.31143  | 2.527056 | 2.978592 | 1.835251 | 1.708661 | 3.089583 | 1.860715 | 2.803788 |
| 9099_at  | 5.021733 | 4.433939 | 4.056493 | 3.23992  | 4.334078 | 3.369013 | 3.457776 | 4.020028 |
| 909_at   | 1.718272 | 2.317643 | 2.193017 | 1.970104 | 2.64024  | 2.084916 | 2.50312  | 2.100074 |
| 90_at    | 5.108241 | 5.741558 | 5.328078 | 5.437832 | 5.092371 | 4.847711 | 4.581825 | 5.538531 |
| 9100_at  | 6.512556 | 7.096094 | 6.293069 | 6.666085 | 7.034714 | 6.198793 | 6.53407  | 6.56972  |
| 91010_at | 5.305582 | 6.53535  | 5.954184 | 6.287494 | 5.577617 | 5.630857 | 6.093446 | 6.098792 |
| 91012_at | 3.154272 | 4.292174 | 4.218431 | 5.472531 | 4.556992 | 3.210876 | 5.411058 | 3.997787 |
| 9101_at  | 7.266014 | 6.96245  | 7.123908 | 6.778446 | 6.067901 | 7.167403 | 7.261931 | 7.147988 |
| 91039_at | 4.746806 | 4.459088 | 4.928029 | 5.252881 | 2.594012 | 5.348462 | 4.448355 | 4.462815 |
| 9104_at  | 5.148554 | 5.227298 | 4.619933 | 3.829724 | 5.086673 | 4.474967 | 3.481832 | 5.19714  |
| 91050_at | 4.217705 | 4.307627 | 4.102875 | 4.066359 | 3.67989  | 4.43076  | 4.222759 | 3.624982 |
| 91056_at | 2.696947 | 3.436306 | 3.595097 | 3.708497 | 2.731207 | 2.686303 | 4.135165 | 2.631605 |
| 91057_at | 3.961035 | 3.023777 | 3.343873 | 4.461157 | 2.967141 | 4.345382 | 3.20281  | 3.971702 |
| 91074_at | 1.218852 | 2.214548 | 1.932515 | 0.891326 | 1.151564 | 1.540131 | 2.94976  | 1.064677 |
| 9107_at  | 6.311207 | 5.915956 | 6.122892 | 5.955714 | 6.117822 | 6.440405 | 6.437463 | 6.182945 |
| 9108_at  | 2.748988 | 1.793734 | 1.48515  | 2.974581 | 3.38581  | 1.482392 | 2.134442 | 2.716587 |
| 910_at   | 1.9262   | 2.156444 | 1.794936 | 1.830606 | 2.127407 | 1.080413 | 2.034834 | 1.52957  |
| 91107_at | 5.829961 | 6.226795 | 5.360957 | 6.065739 | 4.111972 | 5.583985 | 5.326629 | 5.11564  |
| 9110_at  | 4.547453 | 5.246526 | 4.862638 | 4.39047  | 4.649462 | 4.787824 | 4.731354 | 5.224798 |
| 9111_at  | 6.50172  | 6.455208 | 6.062863 | 6.305878 | 6.173829 | 6.505776 | 5.876139 | 6.765851 |
| 91120_at | 1.834077 | 3.014276 | 2.011675 | 2.070104 | 3.785843 | 2.852408 | 1.700159 | 2.121318 |
| 9112_at  | 5.995953 | 5.259667 | 5.406928 | 5.386752 | 4.907504 | 5.553793 | 5.18306  | 5.612108 |
| 91133_at | 3.719194 | 4.131458 | 4.244578 | 3.431764 | 2.83697  | 3.526353 | 2.708628 | 3.710124 |
| 91137_at | 6.411291 | 6.285364 | 6.556302 | 6.336853 | 6.470823 | 6.048098 | 6.710131 | 6.596741 |
| 9113_at  | 5.745695 | 6.261762 | 6.19813  | 6.514548 | 6.374136 | 6.098739 | 5.80459  | 5.994587 |
| 91147_at | 3.470204 | 3.570592 | 3.856507 | 3.919825 | 4.192183 | 2.907186 | 2.991569 | 4.301329 |
| 91149_at | 1.379766 | 1.41546  | 1.359508 | 2.592818 | 2.410466 | 1.883644 | 1.115965 | 0.97905  |
| 9114_at  | 8.310886 | 7.638564 | 7.87035  | 8.159139 | 7.401455 | 7.831974 | 7.734502 | 7.486114 |
| 91151_at | 3.691114 | 4.243277 | 2.246569 | 4.125876 | 3.574946 | 2.836411 | 3.356184 | 4.598129 |
| 91156_at | 1.689179 | 1.663977 | 1.320605 | 1.875282 | 2.28877  | 1.269866 | 1.484371 | 2.049919 |
| 91179_at | 2.980394 | 3.356853 | 2.415831 | 3.454069 | 1.612969 | 2.841735 | 2.70865  | 1.629727 |
| 9117_at  | 6.077518 | 6.026718 | 6.382976 | 6.078849 | 6.391657 | 5.884375 | 6.192867 | 6.365956 |
| 91181_at | 1.29316  | 1.315095 | 1.919645 | 1.442347 | 2.531464 | 1.637484 | 1.438533 | 1.57706  |
| 9118_at  | 2.633317 | 2.096961 | 2.771153 | 1.963805 | 1.873556 | 2.192691 | 3.132445 | 2.458289 |
| 9119_at  | 1.104844 | 1.97599  | 2.580138 | 1.93434  | 1.600283 | 1.795968 | 2.898032 | 1.84568  |
| 911_at   | 2.422422 | 2.753449 | 2.005118 | 2.60563  | 2.035616 | 3.124958 | 0.793718 | 3.06127  |
| 9120_at  | 1.716981 | 1.411644 | 2.033318 | 2.567436 | 2.779407 | 2.144644 | 2.715014 | 2.744801 |
| 9121_at  | 4.917195 | 4.495718 | 4.356758 | 3.964547 | 4.611066 | 4.472144 | 3.859938 | 4.213333 |

|          |          |          |          |          |          |          |          |          |
|----------|----------|----------|----------|----------|----------|----------|----------|----------|
| 91227_at | 4.055327 | 3.789162 | 3.381232 | 3.184692 | 4.55875  | 3.867226 | 2.839884 | 4.476486 |
| 9122_at  | 7.633992 | 7.410069 | 7.537762 | 7.93394  | 8.287742 | 8.088346 | 7.855365 | 8.39192  |
| 9123_at  | 3.568226 | 3.631754 | 3.979766 | 3.4271   | 3.813459 | 3.606728 | 4.337579 | 3.042457 |
| 9124_at  | 8.288201 | 8.28538  | 8.38906  | 8.829174 | 8.72582  | 8.386541 | 8.599312 | 7.57894  |
| 91252_at | 6.050814 | 4.458067 | 5.303102 | 4.924995 | 5.364212 | 5.581827 | 5.041558 | 4.447758 |
| 9125_at  | 6.640792 | 7.087433 | 6.331785 | 6.354195 | 6.338666 | 6.385046 | 6.646201 | 6.145791 |
| 9126_at  | 7.646556 | 7.799932 | 7.393487 | 7.503855 | 7.254412 | 7.316996 | 7.86214  | 8.001914 |
| 91272_at | 4.737014 | 5.393614 | 5.504964 | 5.408379 | 3.981903 | 4.753672 | 5.388451 | 3.407091 |
| 9127_at  | 3.597433 | 3.384099 | 3.132364 | 2.948134 | 3.036164 | 3.373037 | 3.31818  | 3.50301  |
| 91283_at | 4.642523 | 4.412799 | 3.929283 | 4.971199 | 4.901976 | 4.243862 | 3.758887 | 5.190797 |
| 91289_at | 4.684462 | 3.69744  | 4.87961  | 4.334177 | 4.339461 | 4.539965 | 4.667925 | 4.036937 |
| 9128_at  | 5.169859 | 5.198229 | 4.24725  | 4.067483 | 5.023732 | 4.928301 | 5.048202 | 6.160707 |
| 91298_at | 6.934519 | 6.309989 | 6.667271 | 6.271962 | 7.070452 | 6.551737 | 6.240579 | 7.181918 |
| 9129_at  | 5.635199 | 6.452711 | 5.563265 | 5.499321 | 5.312101 | 5.401023 | 5.657403 | 6.305301 |
| 912_at   | 1.640455 | 1.901962 | 1.846587 | 1.857181 | 2.254182 | 1.821644 | 1.845215 | 2.441146 |
| 91300_at | 3.797998 | 3.781463 | 3.579623 | 3.953793 | 3.515517 | 3.453284 | 3.718431 | 3.861798 |
| 91304_at | 7.975068 | 7.445849 | 7.953394 | 7.722849 | 7.619261 | 7.658346 | 7.98636  | 6.647559 |
| 9130_at  | 8.390664 | 8.764549 | 8.239905 | 7.99292  | 7.961115 | 7.86591  | 7.936344 | 8.113343 |
| 91316_at | 2.128882 | 1.927971 | 2.569285 | 3.081518 | 2.777743 | 2.945518 | 1.867639 | 2.857193 |
| 91319_at | 2.791339 | 3.018807 | 3.274109 | 2.996288 | 3.325022 | 2.641957 | 2.213828 | 3.683081 |
| 9131_at  | 6.829375 | 6.362238 | 6.644377 | 5.518742 | 6.692534 | 6.179995 | 5.909666 | 7.268771 |
| 9132_at  | 1.495265 | 1.997107 | 2.053646 | 2.260736 | 2.394681 | 2.655229 | 1.669222 | 1.977991 |
| 9133_at  | 3.056503 | 3.694834 | 2.896392 | 4.129913 | 2.973121 | 2.858549 | 3.102827 | 4.643431 |
| 9134_at  | 3.02913  | 2.030788 | 2.140642 | 3.094906 | 3.9318   | 1.815806 | 2.539734 | 3.061669 |
| 91351_at | 3.459453 | 4.373225 | 3.570535 | 3.149792 | 3.718911 | 3.328946 | 3.930113 | 3.031113 |
| 91353_at | 6.344749 | 4.46361  | 1.814407 | 0.970369 | 0.95275  | 5.541676 | 1.520249 | 1.946652 |
| 91355_at | 1.968    | 2.397258 | 2.157056 | 1.947976 | 1.935264 | 2.949297 | 2.095378 | 1.776563 |
| 9135_at  | 7.185191 | 7.23399  | 7.212363 | 7.292399 | 7.775407 | 6.613158 | 7.514092 | 7.60836  |
| 91368_at | 7.58212  | 8.141778 | 7.714481 | 7.33882  | 7.756033 | 7.353279 | 7.708768 | 8.283197 |
| 91369_at | 7.898216 | 8.342185 | 7.943114 | 8.179069 | 8.44446  | 7.97214  | 8.041905 | 8.12719  |
| 9136_at  | 4.043563 | 3.073973 | 3.505427 | 3.664813 | 3.054292 | 4.515123 | 3.654208 | 4.045372 |
| 91373_at | 2.675028 | 2.571771 | 2.450941 | 2.087457 | 2.524599 | 2.263812 | 2.484628 | 1.933481 |
| 9138_at  | 4.889999 | 4.400174 | 4.781943 | 4.535179 | 4.030052 | 4.795005 | 4.179686 | 4.08212  |
| 91392_at | 2.457859 | 4.219786 | 3.465041 | 2.835203 | 2.091413 | 3.592099 | 1.301496 | 2.280792 |
| 9139_at  | 4.936222 | 5.506222 | 4.761114 | 4.423559 | 4.257553 | 3.820658 | 3.759908 | 4.103314 |
| 913_at   | 1.601032 | 1.445199 | 2.495704 | 1.655993 | 1.756119 | 2.655463 | 2.550906 | 1.993725 |
| 91404_at | 6.2813   | 6.61944  | 6.699421 | 6.527626 | 6.602244 | 5.721801 | 6.384861 | 6.757891 |
| 91408_at | 5.051012 | 5.994882 | 5.810513 | 5.961128 | 5.510293 | 5.396218 | 5.886101 | 6.525556 |
| 91409_at | 2.10141  | 2.54078  | 3.209844 | 3.151584 | 3.027385 | 2.738857 | 1.802182 | 1.775053 |
| 9140_at  | 5.172545 | 5.084806 | 4.821429 | 5.694416 | 4.788254 | 4.818057 | 4.852023 | 4.553587 |
| 91419_at | 4.09901  | 3.497606 | 3.52316  | 1.971185 | 3.224984 | 3.539481 | 3.385086 | 1.945085 |
| 9141_at  | 4.175254 | 3.507253 | 3.333023 | 2.276711 | 2.767851 | 2.501114 | 3.463258 | 2.294561 |
| 9142_at  | 1.525279 | 1.394856 | 1.165849 | 0.934296 | 1.234565 | 1.73988  | 1.607214 | 1.156675 |
| 91433_at | 2.937833 | 2.229075 | 2.604872 | 2.946418 | 1.971845 | 2.81066  | 2.514392 | 3.086245 |
| 9143_at  | 1.530565 | 2.288753 | 2.174316 | 2.435465 | 2.703274 | 1.976284 | 3.054648 | 2.721612 |
| 91442_at | 1.963399 | 2.102997 | 1.69387  | 1.691568 | 1.822781 | 1.555111 | 1.945322 | 1.670987 |
| 91445_at | 5.229764 | 5.004646 | 5.159215 | 5.292255 | 5.413572 | 5.573797 | 4.798324 | 4.586109 |
| 9144_at  | 8.529072 | 8.488089 | 9.18679  | 8.96328  | 8.096654 | 8.545345 | 8.655919 | 7.541992 |
| 91450_at | 3.224168 | 3.007614 | 2.156135 | 2.268314 | 1.729828 | 1.789461 | 2.511465 | 2.786589 |
| 91452_at | 6.887759 | 6.772964 | 7.085282 | 7.031766 | 7.356976 | 6.770284 | 7.277802 | 7.619381 |
| 9145_at  | 4.025036 | 3.66674  | 3.950645 | 3.679479 | 4.008247 | 4.874441 | 4.183972 | 3.751223 |

|          |          |          |          |          |          |          |          |          |
|----------|----------|----------|----------|----------|----------|----------|----------|----------|
| 91461_at | 4.131094 | 3.881235 | 3.724382 | 4.010582 | 4.257828 | 4.927053 | 4.398951 | 4.431215 |
| 91464_at | 3.143695 | 1.183215 | 2.736802 | 1.344196 | 1.40283  | 1.175738 | 2.594888 | 1.300578 |
| 9146_at  | 4.853834 | 4.370739 | 5.097146 | 4.962721 | 3.722729 | 4.893741 | 4.855343 | 3.926914 |
| 9147_at  | 6.967557 | 7.140463 | 6.879638 | 7.035122 | 7.272593 | 7.150725 | 7.023219 | 7.607197 |
| 9148_at  | 3.272414 | 3.469924 | 2.977878 | 3.965393 | 3.32264  | 3.354329 | 3.68096  | 2.933242 |
| 9149_at  | 5.251366 | 4.9285   | 5.385732 | 5.475044 | 4.766628 | 5.310622 | 5.446407 | 4.272883 |
| 914_at   | 3.811804 | 2.598585 | 2.389365 | 3.126878 | 2.52438  | 3.853845 | 2.464542 | 2.698413 |
| 9150_at  | 3.302269 | 3.236902 | 3.317836 | 3.410971 | 4.554793 | 3.308047 | 4.288759 | 3.89217  |
| 91522_at | 3.692431 | 3.917653 | 4.219472 | 3.891255 | 4.706892 | 3.396334 | 4.20506  | 4.277629 |
| 91523_at | 4.537237 | 3.889573 | 4.062273 | 4.17488  | 3.01294  | 4.110845 | 3.5079   | 3.08799  |
| 91526_at | 4.918268 | 5.416107 | 5.380032 | 5.083771 | 5.149162 | 4.504802 | 4.328295 | 5.490244 |
| 9152_at  | 1.949155 | 0.923301 | 1.354505 | 1.806676 | 1.962954 | 2.1564   | 1.423028 | 1.635474 |
| 9153_at  | 1.972235 | 1.645605 | 2.270573 | 2.277434 | 2.866986 | 1.985963 | 2.421167 | 1.984647 |
| 91543_at | 5.308351 | 4.445487 | 5.09654  | 4.805684 | 5.992142 | 5.506527 | 4.991153 | 5.362375 |
| 91544_at | 2.873999 | 2.540089 | 2.197587 | 2.46114  | 2.799977 | 2.899946 | 1.793635 | 2.051839 |
| 91548_at | 1.880655 | 1.217039 | 1.127752 | 1.690381 | 1.039257 | 1.429661 | 2.02171  | 1.688253 |
| 9154_at  | 2.972506 | 2.236205 | 2.445205 | 2.18554  | 3.853246 | 3.136057 | 2.144145 | 3.14867  |
| 9156_at  | 1.944456 | 2.375059 | 1.830561 | 1.902135 | 2.714552 | 2.032313 | 2.149559 | 1.704826 |
| 91574_at | 5.23564  | 4.97302  | 5.102004 | 4.297205 | 5.244747 | 5.282916 | 4.501758 | 5.718264 |
| 91582_at | 6.671343 | 5.802345 | 5.789238 | 5.803574 | 5.737809 | 6.652751 | 6.023069 | 5.419443 |
| 91584_at | 2.832539 | 3.438472 | 3.254959 | 2.992484 | 2.704376 | 2.867147 | 3.61085  | 3.130412 |
| 9158_at  | 8.076458 | 7.427853 | 6.754605 | 7.321848 | 7.09496  | 6.976707 | 6.944575 | 6.970882 |
| 9159_at  | 4.351937 | 4.832485 | 3.80765  | 4.079877 | 3.546712 | 3.940889 | 5.076384 | 3.765493 |
| 915_at   | 5.238358 | 3.856786 | 3.763389 | 5.700561 | 3.751067 | 4.196837 | 2.975344 | 3.045686 |
| 91603_at | 5.014055 | 5.648873 | 5.919616 | 5.542285 | 4.989241 | 4.877182 | 4.015856 | 5.529036 |
| 91607_at | 4.02798  | 4.653418 | 4.684405 | 4.155236 | 4.025703 | 4.267057 | 4.676004 | 5.273524 |
| 91608_at | 2.285371 | 2.854198 | 2.043417 | 2.846128 | 3.154846 | 3.548158 | 1.63714  | 2.954318 |
| 91614_at | 3.328476 | 2.223743 | 2.304163 | 1.436215 | 2.554037 | 2.150527 | 2.429902 | 2.366913 |
| 91624_at | 5.655331 | 6.603629 | 5.776589 | 5.126463 | 4.597481 | 4.151646 | 5.379296 | 5.734786 |
| 9162_at  | 1.89172  | 1.887622 | 1.354397 | 1.280705 | 1.397317 | 1.680128 | 2.343882 | 1.704478 |
| 91646_at | 1.714326 | 2.141669 | 1.46169  | 1.731997 | 2.149083 | 1.317963 | 3.090726 | 2.150114 |
| 91647_at | 5.327233 | 4.318803 | 4.856165 | 5.640808 | 4.469599 | 5.274545 | 4.585358 | 3.464656 |
| 91653_at | 5.149328 | 4.573886 | 5.251905 | 5.285785 | 4.265802 | 4.88387  | 4.665763 | 4.45197  |
| 91661_at | 3.732734 | 4.594493 | 3.976638 | 4.765119 | 3.753868 | 3.384609 | 4.730438 | 4.337276 |
| 91662_at | 2.066986 | 2.052934 | 1.618255 | 2.578049 | 2.544983 | 2.154528 | 2.836953 | 1.813847 |
| 91663_at | 7.492497 | 8.462664 | 7.991722 | 7.981035 | 7.537563 | 7.729426 | 8.220487 | 7.553249 |
| 91664_at | 4.778697 | 4.366739 | 5.325486 | 5.315928 | 4.730521 | 5.115524 | 5.008137 | 4.800929 |
| 9166_at  | 7.504911 | 6.797926 | 7.241762 | 6.916137 | 7.243704 | 6.189167 | 6.597251 | 7.155984 |
| 9167_at  | 8.668165 | 8.965821 | 8.955749 | 8.867784 | 8.706649 | 8.184108 | 8.950804 | 8.751292 |
| 91683_at | 1.992852 | 2.059516 | 1.613375 | 2.637148 | 2.123869 | 3.245661 | 2.518763 | 2.054349 |
| 91687_at | 2.946766 | 3.401341 | 4.747499 | 3.828164 | 4.702724 | 3.411656 | 2.473596 | 4.345441 |
| 91689_at | 8.367625 | 7.957764 | 8.194239 | 8.288227 | 8.210539 | 8.156618 | 7.237913 | 7.464197 |
| 9168_at  | 10.74045 | 10.55406 | 10.72258 | 10.80343 | 10.68621 | 10.97048 | 10.69024 | 10.75803 |
| 91694_at | 5.19887  | 5.967052 | 5.690785 | 5.054497 | 4.806398 | 4.475731 | 4.640872 | 5.852717 |
| 91695_at | 1.835868 | 1.221682 | 1.660364 | 0.910434 | 1.959025 | 3.134608 | 2.681356 | 1.941753 |
| 9169_at  | 7.290134 | 7.197659 | 6.962413 | 7.207262 | 6.67594  | 7.143953 | 7.108669 | 7.571092 |
| 916_at   | 1.784093 | 2.134781 | 2.859954 | 2.628531 | 4.034467 | 2.863422 | 2.74247  | 1.233239 |
| 91703_at | 5.817199 | 4.463937 | 4.799989 | 3.883336 | 4.723272 | 4.598242 | 4.469641 | 4.369531 |
| 9170_at  | 2.43172  | 2.725418 | 3.66313  | 2.87891  | 3.030751 | 3.638612 | 2.450783 | 2.739878 |
| 9172_at  | 3.367396 | 1.917055 | 1.736272 | 1.972765 | 2.243061 | 2.959507 | 1.329423 | 2.598865 |
| 91734_at | 1.887169 | 2.65711  | 2.434326 | 2.044186 | 2.392399 | 1.891725 | 2.075027 | 2.438265 |

|          |          |          |          |          |          |          |          |          |
|----------|----------|----------|----------|----------|----------|----------|----------|----------|
| 9173_at  | 7.781031 | 8.303119 | 7.551587 | 8.202948 | 7.905629 | 8.451702 | 7.725424 | 8.097879 |
| 91746_at | 6.929624 | 7.107245 | 6.885484 | 7.133363 | 7.309285 | 7.270481 | 7.012601 | 7.089804 |
| 91748_at | 4.537935 | 4.731949 | 5.036358 | 4.88705  | 4.270254 | 4.436587 | 5.042031 | 3.906827 |
| 91749_at | 5.403416 | 5.947546 | 6.376639 | 4.999496 | 6.763043 | 5.490307 | 4.964649 | 6.271021 |
| 91750_at | 3.336617 | 4.742661 | 3.670325 | 4.002402 | 3.737191 | 3.246575 | 4.562573 | 4.534634 |
| 91752_at | 5.017925 | 4.541308 | 6.127712 | 5.761683 | 4.578585 | 5.671109 | 4.709872 | 3.931029 |
| 91754_at | 5.183368 | 5.621632 | 5.48394  | 5.913886 | 5.306623 | 5.649055 | 4.997962 | 6.106644 |
| 9175_at  | 4.633802 | 4.755454 | 4.463634 | 4.186907 | 4.78938  | 4.720203 | 4.540046 | 4.110103 |
| 91768_at | 6.572063 | 6.497324 | 6.252431 | 6.250477 | 6.852268 | 6.698896 | 6.218233 | 5.82274  |
| 91775_at | 4.613303 | 5.204977 | 4.630821 | 5.388033 | 3.109676 | 4.077087 | 5.665629 | 4.362221 |
| 9177_at  | 1.473122 | 1.458074 | 1.571087 | 1.622025 | 1.647206 | 1.7262   | 1.369925 | 2.030066 |
| 91782_at | 5.243329 | 5.396547 | 4.786218 | 4.432884 | 4.843966 | 4.480944 | 5.583875 | 5.099965 |
| 9179_at  | 3.754618 | 3.364061 | 3.745824 | 4.319456 | 2.287763 | 3.922614 | 4.051893 | 3.705208 |
| 917_at   | 3.341134 | 2.278086 | 2.643417 | 2.648919 | 2.16116  | 2.646116 | 3.872278 | 4.084384 |
| 91801_at | 3.972964 | 5.488617 | 4.689716 | 4.326008 | 3.354848 | 5.047718 | 4.973378 | 3.021587 |
| 91807_at | 6.540664 | 5.798482 | 6.924015 | 6.595022 | 6.516667 | 6.761527 | 7.069783 | 5.70059  |
| 9180_at  | 5.215312 | 6.106395 | 5.656381 | 5.453583 | 5.120429 | 6.269677 | 6.454093 | 5.715797 |
| 9181_at  | 4.234153 | 4.207511 | 4.516062 | 4.441131 | 3.018629 | 4.257148 | 4.803203 | 4.452849 |
| 91828_at | 2.241005 | 1.713464 | 3.272823 | 3.530888 | 3.306329 | 2.258888 | 1.407521 | 2.514702 |
| 9182_at  | 3.694892 | 2.979175 | 3.354325 | 3.820453 | 4.378981 | 2.911083 | 2.221293 | 2.49297  |
| 91833_at | 3.541775 | 3.670311 | 3.445078 | 2.597751 | 4.05419  | 4.035285 | 3.199422 | 3.421535 |
| 9183_at  | 4.37362  | 4.013749 | 4.46212  | 4.435692 | 5.174019 | 4.684846 | 3.668754 | 4.707183 |
| 9184_at  | 7.49857  | 7.358133 | 7.075061 | 7.288138 | 7.317298 | 7.313901 | 6.677905 | 7.985637 |
| 91851_at | 6.994606 | 7.714453 | 6.701042 | 7.536003 | 7.217489 | 7.71223  | 6.986594 | 6.9734   |
| 9185_at  | 5.4928   | 4.795435 | 3.653785 | 4.871684 | 4.084481 | 5.506749 | 4.466257 | 5.420542 |
| 91860_at | 5.618221 | 5.549328 | 4.659495 | 3.958736 | 5.668674 | 5.261922 | 4.551304 | 5.259623 |
| 91862_at | 2.745688 | 2.358876 | 1.849974 | 2.282239 | 3.465548 | 2.7895   | 1.754215 | 3.409648 |
| 91869_at | 5.075551 | 4.771155 | 5.197099 | 5.450103 | 5.287079 | 5.597833 | 4.954685 | 5.057536 |
| 91875_at | 4.65951  | 4.875429 | 3.78242  | 4.899372 | 4.98173  | 5.28596  | 5.076105 | 6.284332 |
| 9187_at  | 3.863418 | 4.426383 | 4.93374  | 4.113844 | 4.497366 | 3.85232  | 3.542827 | 4.535707 |
| 9188_at  | 6.115926 | 6.128562 | 6.375088 | 6.353365 | 6.018278 | 6.077662 | 6.242495 | 6.314373 |
| 91893_at | 2.23769  | 2.713605 | 2.606992 | 1.555309 | 2.67151  | 2.166402 | 1.545306 | 2.270648 |
| 9189_at  | 3.67932  | 3.614383 | 3.27148  | 4.183473 | 2.907272 | 3.38544  | 4.21051  | 3.519595 |
| 9191_at  | 5.40335  | 5.216359 | 5.506194 | 4.712114 | 4.695936 | 5.258308 | 4.736444 | 4.807378 |
| 91937_at | 1.220986 | 1.350242 | 1.244061 | 1.538381 | 1.481521 | 2.034573 | 1.801803 | 1.441509 |
| 91942_at | 6.773818 | 6.767064 | 6.019892 | 5.549035 | 6.200069 | 6.487094 | 4.582598 | 6.266044 |
| 91947_at | 8.993888 | 8.667839 | 9.212611 | 8.381838 | 9.319743 | 8.845728 | 9.0179   | 8.793941 |
| 91948_at | 1.373865 | 2.002768 | 1.05763  | 2.140729 | 1.470255 | 1.065875 | 1.227312 | 1.064963 |
| 91949_at | 6.887365 | 6.597676 | 6.135152 | 6.083105 | 5.629337 | 5.737279 | 6.8317   | 6.39744  |
| 9194_at  | 2.932457 | 3.151989 | 2.929095 | 2.885179 | 4.137928 | 3.203082 | 3.007345 | 3.523519 |
| 9196_at  | 2.602359 | 2.068334 | 2.192561 | 1.497905 | 2.550472 | 1.82483  | 2.234334 | 1.761819 |
| 91975_at | 2.379686 | 3.754069 | 2.678396 | 3.445945 | 3.081119 | 3.574057 | 4.376849 | 2.834887 |
| 91977_at | 2.832188 | 2.642036 | 2.747487 | 2.8641   | 2.401968 | 4.586418 | 3.941748 | 3.703294 |
| 91978_at | 3.112164 | 3.056493 | 3.342126 | 2.251942 | 2.126202 | 2.268809 | 2.097711 | 2.481548 |
| 9197_at  | 6.814451 | 6.961668 | 6.284522 | 6.595237 | 6.846215 | 6.175909 | 6.206534 | 7.00057  |
| 919_at   | 2.776052 | 2.826156 | 4.350813 | 3.421678 | 4.005806 | 3.167931 | 2.559817 | 2.1842   |
| 91_at    | 4.066447 | 4.267103 | 4.71934  | 5.306025 | 5.13674  | 5.02462  | 4.714777 | 4.95761  |
| 92002_at | 3.319269 | 3.551964 | 3.691392 | 3.233431 | 3.223033 | 3.361576 | 3.183921 | 3.450512 |
| 9200_at  | 2.078944 | 5.048858 | 2.342801 | 4.764668 | 1.660999 | 4.216677 | 4.961004 | 4.245893 |
| 92014_at | 4.506713 | 4.342891 | 4.741254 | 4.610983 | 4.462529 | 5.434728 | 4.925862 | 5.256829 |
| 92017_at | 6.574561 | 6.769087 | 5.885855 | 6.275603 | 6.474023 | 6.56854  | 5.5557   | 6.000865 |



|          |          |          |          |          |          |          |          |          |
|----------|----------|----------|----------|----------|----------|----------|----------|----------|
| 9201_at  | 1.981103 | 2.060847 | 2.892117 | 1.591466 | 1.506075 | 1.676738 | 2.008103 | 1.672765 |
| 9202_at  | 7.373533 | 7.493715 | 7.507249 | 7.092074 | 6.813963 | 7.805138 | 7.64745  | 7.688595 |
| 9203_at  | 4.895123 | 5.114453 | 5.16389  | 4.978841 | 4.662715 | 4.912937 | 5.8309   | 5.026429 |
| 9204_at  | 6.373753 | 6.782712 | 6.282977 | 6.121534 | 7.103148 | 5.505742 | 7.253317 | 7.267452 |
| 9205_at  | 4.006201 | 3.233309 | 4.098878 | 3.886173 | 3.112528 | 3.716695 | 3.615237 | 2.97625  |
| 92070_at | 3.292609 | 3.301869 | 3.836548 | 3.83627  | 4.299252 | 3.415544 | 2.992808 | 3.692125 |
| 92086_at | 2.3421   | 2.215885 | 2.371272 | 2.848997 | 3.304752 | 3.843918 | 2.322967 | 2.261439 |
| 9208_at  | 6.284946 | 6.029436 | 5.654391 | 6.124897 | 5.454491 | 5.650161 | 6.230122 | 6.043791 |
| 92092_at | 5.222638 | 6.01165  | 5.685476 | 6.626834 | 6.097089 | 5.323173 | 6.286547 | 5.59452  |
| 9209_at  | 5.490427 | 5.513427 | 5.494532 | 5.506062 | 5.394929 | 5.321097 | 4.898474 | 5.106576 |
| 920_at   | 6.20387  | 5.755648 | 6.593146 | 6.828261 | 6.10388  | 6.328298 | 7.029829 | 5.55716  |
| 92104_at | 4.469184 | 5.187472 | 4.86291  | 4.135998 | 4.596197 | 4.658416 | 3.635224 | 5.566738 |
| 92105_at | 4.430862 | 5.151353 | 4.191379 | 4.700656 | 4.476752 | 4.752492 | 4.701177 | 5.402442 |
| 92106_at | 5.018305 | 4.998699 | 4.33009  | 4.301191 | 5.048081 | 4.939723 | 4.629116 | 4.493051 |
| 9210_at  | 1.904975 | 1.851088 | 1.756899 | 2.106822 | 1.660556 | 1.932691 | 1.449877 | 2.425885 |
| 9211_at  | 2.857619 | 1.85281  | 2.033132 | 1.514577 | 1.533602 | 1.928415 | 1.869145 | 1.578804 |
| 92126_at | 4.291065 | 3.65847  | 4.169296 | 3.215796 | 4.32097  | 5.065092 | 2.740535 | 4.4882   |
| 92129_at | 6.424714 | 6.292418 | 5.38231  | 5.796809 | 5.582314 | 6.947725 | 6.087892 | 5.615281 |
| 9212_at  | 2.248797 | 2.148259 | 2.658543 | 2.638086 | 2.306912 | 1.848819 | 2.781463 | 2.225896 |
| 9213_at  | 6.775036 | 6.911403 | 6.397119 | 6.669005 | 7.083422 | 6.933823 | 6.634926 | 6.939604 |
| 92140_at | 8.239822 | 8.378982 | 8.053733 | 8.021745 | 8.457961 | 8.394862 | 7.818685 | 7.997871 |
| 9214_at  | 2.487158 | 2.414909 | 3.863083 | 2.863192 | 2.918845 | 2.622636 | 3.38649  | 1.823617 |
| 92154_at | 6.722278 | 6.947909 | 7.551979 | 7.447043 | 6.653544 | 7.003856 | 7.681598 | 6.153954 |
| 9215_at  | 6.929429 | 6.754586 | 6.759345 | 6.204507 | 6.424629 | 6.06728  | 7.12035  | 6.76943  |
| 92162_at | 8.217742 | 7.506101 | 9.248951 | 9.15266  | 6.531534 | 8.078932 | 9.345872 | 6.548248 |
| 92170_at | 6.075637 | 5.6526   | 5.643484 | 5.91457  | 5.37305  | 6.24346  | 5.404873 | 4.022635 |
| 9217_at  | 6.228308 | 7.386447 | 7.141676 | 6.769829 | 6.893918 | 6.249462 | 6.415441 | 7.296844 |
| 92181_at | 4.910353 | 5.132612 | 5.057003 | 5.558015 | 5.177267 | 4.453236 | 4.833603 | 5.382828 |
| 9218_at  | 7.911024 | 7.874682 | 7.566555 | 7.669037 | 7.550328 | 7.530566 | 7.660345 | 7.650977 |
| 92196_at | 6.711152 | 5.006704 | 4.80655  | 7.042496 | 2.269777 | 7.733631 | 5.294109 | 2.649362 |
| 9219_at  | 6.122207 | 6.552446 | 6.39993  | 6.51739  | 6.337628 | 6.590407 | 6.456117 | 5.574463 |
| 921_at   | 3.22556  | 2.917715 | 2.579645 | 2.601733 | 2.819064 | 3.525593 | 2.429493 | 2.291486 |
| 9220_at  | 2.659456 | 1.149226 | 1.62989  | 2.929471 | 2.917451 | 1.997219 | 4.05638  | 3.166067 |
| 92211_at | 2.266644 | 2.744196 | 2.892632 | 2.78424  | 2.6713   | 1.87099  | 2.652751 | 2.572509 |
| 9221_at  | 5.632846 | 5.534969 | 5.8827   | 5.799427 | 5.585028 | 5.656257 | 5.34978  | 6.588072 |
| 92235_at | 1.314563 | 1.065037 | 1.046786 | 2.027527 | 1.246578 | 1.162139 | 1.34549  | 1.756056 |
| 9223_at  | 4.691285 | 3.987138 | 5.143415 | 4.279128 | 5.092042 | 4.966784 | 4.56559  | 4.307774 |
| 92241_at | 3.70972  | 4.000334 | 3.701474 | 4.775578 | 5.228917 | 4.461065 | 3.433896 | 2.350525 |
| 92249_at | 6.329898 | 6.835319 | 6.707505 | 7.048339 | 6.660913 | 6.87703  | 7.151161 | 5.819075 |
| 92255_at | 4.829022 | 5.724501 | 5.949416 | 5.538263 | 6.134801 | 5.485902 | 5.494999 | 6.296325 |
| 92259_at | 6.737711 | 6.655196 | 6.231382 | 6.100679 | 6.226624 | 5.858481 | 4.933571 | 6.148439 |
| 92270_at | 6.446751 | 5.266371 | 5.040771 | 3.80652  | 5.860642 | 4.989896 | 4.774499 | 5.827236 |
| 9227_at  | 1.008164 | 1.291919 | 1.611566 | 1.685281 | 1.579027 | 2.251227 | 1.260117 | 1.672526 |
| 92283_at | 4.334688 | 2.910757 | 4.163852 | 2.698459 | 2.789003 | 4.145591 | 3.493163 | 3.792541 |
| 92285_at | 5.976486 | 4.547711 | 5.39309  | 5.133642 | 4.772344 | 5.672783 | 6.042263 | 4.791472 |
| 9228_at  | 1.590017 | 2.176844 | 1.501009 | 1.853621 | 2.196123 | 2.106761 | 1.339414 | 1.83249  |
| 92291_at | 2.683959 | 1.786536 | 1.965564 | 2.017302 | 2.590056 | 2.150761 | 2.292266 | 2.68421  |
| 92292_at | 6.141456 | 5.049819 | 4.905232 | 1.453082 | 5.730521 | 4.974201 | 2.409733 | 5.376621 |
| 92293_at | 1.909575 | 2.44495  | 2.673577 | 2.508557 | 1.919715 | 2.83114  | 2.876832 | 2.469925 |
| 9229_at  | 1.670944 | 1.495748 | 1.985381 | 2.92278  | 2.059725 | 1.778578 | 2.157134 | 2.857518 |
| 922_at   | 1.735992 | 2.339739 | 1.383038 | 1.72378  | 2.202097 | 1.728706 | 2.41344  | 1.681255 |

|          |          |          |          |          |          |          |          |          |
|----------|----------|----------|----------|----------|----------|----------|----------|----------|
| 92304_at | 6.557181 | 4.606261 | 5.3819   | 5.598165 | 6.290814 | 6.855218 | 6.027139 | 4.18991  |
| 92305_at | 4.188106 | 3.805708 | 4.176565 | 4.325068 | 3.431556 | 4.473094 | 4.702088 | 3.853096 |
| 9230_at  | 8.555491 | 7.82882  | 7.960695 | 8.084481 | 7.496556 | 8.675459 | 8.169112 | 7.228189 |
| 92312_at | 2.707096 | 2.611857 | 2.862501 | 2.79458  | 2.757907 | 2.599531 | 2.06385  | 3.062747 |
| 9231_at  | 5.62786  | 6.076732 | 6.206004 | 5.932275 | 5.620959 | 6.467534 | 5.761069 | 5.640705 |
| 9232_at  | 2.257878 | 1.997387 | 2.808985 | 2.161283 | 4.511978 | 2.339551 | 2.349021 | 2.204418 |
| 92335_at | 3.822185 | 4.707264 | 5.0321   | 5.093037 | 3.199902 | 3.310027 | 4.593267 | 3.658754 |
| 92340_at | 3.685668 | 3.25389  | 4.414897 | 3.636211 | 2.810453 | 3.718612 | 4.160718 | 3.506308 |
| 92342_at | 5.588217 | 6.756903 | 6.284476 | 6.087293 | 7.443129 | 6.140993 | 6.328828 | 6.530484 |
| 92344_at | 4.183744 | 3.770954 | 3.868906 | 3.237662 | 3.139304 | 4.614905 | 3.555874 | 3.624903 |
| 92345_at | 6.271904 | 6.057987 | 5.797106 | 4.879232 | 5.645335 | 6.374528 | 5.736968 | 5.407558 |
| 92346_at | 2.43198  | 2.170999 | 2.15181  | 1.673207 | 2.414794 | 1.598635 | 2.030562 | 2.220769 |
| 92359_at | 2.898618 | 3.143769 | 3.29478  | 3.087162 | 3.923074 | 3.337    | 4.032396 | 4.300663 |
| 9235_at  | 5.353459 | 4.646018 | 5.169631 | 5.20944  | 4.951491 | 5.556197 | 5.336273 | 4.50868  |
| 92369_at | 2.519911 | 3.496621 | 3.547458 | 2.470655 | 1.65856  | 3.515764 | 2.237204 | 2.468542 |
| 9236_at  | 5.07929  | 5.722526 | 5.789946 | 6.009854 | 5.803987 | 5.486331 | 6.698034 | 5.842311 |
| 92370_at | 2.740655 | 3.54126  | 4.190202 | 2.908233 | 3.188567 | 3.054981 | 2.605235 | 2.845592 |
| 9238_at  | 6.199446 | 4.32785  | 5.478965 | 4.703004 | 5.855501 | 5.352114 | 4.334991 | 5.098193 |
| 92399_at | 2.553367 | 1.564579 | 3.530126 | 1.699777 | 2.927643 | 2.967574 | 3.351173 | 2.06394  |
| 923_at   | 2.273533 | 3.525673 | 2.764821 | 3.007352 | 2.676986 | 2.034971 | 2.185359 | 2.299399 |
| 92400_at | 6.587685 | 6.807873 | 6.262919 | 6.258279 | 6.732305 | 6.28471  | 6.784136 | 6.27143  |
| 9240_at  | 6.336917 | 7.077444 | 6.537929 | 7.081984 | 5.002242 | 6.310038 | 6.266096 | 6.66697  |
| 9241_at  | 2.158467 | 2.201013 | 2.401627 | 2.028845 | 3.116948 | 2.279539 | 2.183765 | 1.88251  |
| 92421_at | 6.299847 | 7.286235 | 5.995927 | 5.60603  | 6.683511 | 6.117214 | 6.524303 | 7.278932 |
| 9242_at  | 3.896243 | 2.895908 | 3.486516 | 3.403297 | 2.41538  | 3.139441 | 3.658425 | 3.549223 |
| 9244_at  | 3.256813 | 1.998635 | 2.071232 | 1.855107 | 1.673006 | 2.040517 | 2.528807 | 2.197642 |
| 9245_at  | 2.379929 | 2.205306 | 2.762408 | 2.66993  | 3.968716 | 3.974472 | 2.47063  | 2.836112 |
| 9246_at  | 8.457063 | 7.939336 | 8.267518 | 8.486069 | 7.203071 | 8.158599 | 7.735051 | 7.350758 |
| 9247_at  | 1.611546 | 1.465137 | 1.882353 | 1.594646 | 1.837433 | 2.247302 | 1.831459 | 2.269296 |
| 92482_at | 4.606874 | 4.099823 | 3.982966 | 3.632988 | 4.898939 | 4.279863 | 4.13275  | 4.391027 |
| 92483_at | 1.759808 | 1.116095 | 1.890217 | 2.313462 | 2.022171 | 3.454936 | 2.410997 | 2.825666 |
| 9248_at  | 2.084761 | 2.12539  | 2.544365 | 1.694167 | 1.415543 | 4.605197 | 2.622145 | 2.912519 |
| 9249_at  | 9.315404 | 8.893086 | 9.233078 | 8.752818 | 8.666402 | 9.123025 | 8.99524  | 8.907256 |
| 924_at   | 3.656859 | 3.502157 | 3.326543 | 3.253812 | 3.542523 | 4.170029 | 2.55721  | 3.541291 |
| 92521_at | 5.233901 | 4.84707  | 5.387736 | 5.930996 | 5.150659 | 5.818283 | 4.996464 | 4.447456 |
| 9252_at  | 3.513452 | 2.845802 | 2.429693 | 3.769967 | 2.577986 | 3.124468 | 2.90208  | 3.588866 |
| 9253_at  | 4.043949 | 3.590329 | 3.988786 | 4.402479 | 3.847758 | 3.857071 | 3.8615   | 3.552768 |
| 9254_at  | 2.276684 | 2.205708 | 2.183142 | 3.326749 | 1.998578 | 2.939605 | 2.68437  | 2.075598 |
| 92552_at | 1.322988 | 1.890236 | 1.030994 | 1.825761 | 1.182253 | 1.65387  | 1.601556 | 1.383504 |
| 92558_at | 3.314014 | 3.709853 | 3.773819 | 2.828506 | 3.527149 | 3.187869 | 2.753505 | 4.135248 |
| 9255_at  | 6.827099 | 6.636394 | 6.552536 | 6.369701 | 6.728416 | 6.514337 | 6.889009 | 7.149364 |
| 92565_at | 4.450979 | 4.652302 | 4.23029  | 4.349105 | 4.327647 | 4.529639 | 4.495092 | 5.052444 |
| 9256_at  | 3.242392 | 2.058949 | 3.634633 | 2.482824 | 2.721381 | 2.868068 | 3.282872 | 2.167221 |
| 92579_at | 7.180264 | 6.571007 | 7.068342 | 7.126118 | 7.055067 | 7.002479 | 7.459603 | 6.69489  |
| 9258_at  | 5.14348  | 4.807871 | 4.424157 | 5.079129 | 5.053535 | 5.327906 | 4.621832 | 4.577825 |
| 92591_at | 3.886518 | 4.213488 | 4.845562 | 3.845679 | 3.304418 | 3.99211  | 4.34707  | 3.589097 |
| 92595_at | 3.98827  | 3.659247 | 3.354739 | 3.60108  | 3.449304 | 3.803443 | 4.636668 | 3.593623 |
| 92597_at | 5.646584 | 5.925722 | 6.019434 | 5.34396  | 6.190753 | 6.255353 | 6.066346 | 6.397543 |
| 925_at   | 2.050689 | 2.623663 | 2.969351 | 2.385417 | 2.437875 | 2.31682  | 4.048753 | 3.337032 |
| 92609_at | 6.363083 | 5.840922 | 6.145408 | 5.572883 | 6.422706 | 6.187167 | 5.451576 | 6.796359 |
| 9260_at  | 6.192178 | 5.378468 | 5.702966 | 5.201932 | 5.087282 | 5.700006 | 4.552661 | 5.244532 |

|          |          |          |          |          |          |          |          |          |
|----------|----------|----------|----------|----------|----------|----------|----------|----------|
| 92610_at | 4.388151 | 4.042068 | 3.623417 | 3.247648 | 3.320068 | 4.264376 | 4.414518 | 4.856654 |
| 9261_at  | 7.914464 | 7.849506 | 7.516755 | 7.995117 | 7.699056 | 8.067212 | 7.855072 | 7.921727 |
| 9262_at  | 6.956731 | 7.274095 | 6.492779 | 7.120233 | 7.15335  | 6.536037 | 6.259214 | 7.163203 |
| 9263_at  | 2.931848 | 3.278436 | 4.720017 | 3.792517 | 4.097083 | 3.294544 | 3.394456 | 4.258615 |
| 92659_at | 2.287445 | 2.270417 | 2.008431 | 2.243437 | 2.735924 | 1.755942 | 2.194136 | 1.771012 |
| 9265_at  | 4.709316 | 4.969516 | 4.62505  | 5.637032 | 4.245761 | 5.018955 | 4.552263 | 5.311377 |
| 92667_at | 4.737639 | 5.131722 | 5.404008 | 6.119604 | 6.001525 | 5.385457 | 5.354974 | 6.360008 |
| 9266_at  | 2.799603 | 1.903124 | 2.266638 | 1.807462 | 1.70256  | 3.158074 | 2.897265 | 1.857451 |
| 92675_at | 6.521259 | 6.62363  | 6.067223 | 6.670652 | 5.72952  | 6.00233  | 6.448416 | 6.185101 |
| 9267_at  | 5.084018 | 5.330215 | 5.495875 | 5.659431 | 5.562546 | 5.506292 | 5.159489 | 5.0995   |
| 92689_at | 7.66846  | 7.737721 | 7.550205 | 7.639516 | 7.473193 | 7.278365 | 8.02149  | 7.512254 |
| 92691_at | 1.329485 | 1.220686 | 1.38409  | 1.368748 | 1.398948 | 0.947882 | 2.271901 | 1.297106 |
| 926_at   | 1.791595 | 1.188701 | 1.646211 | 1.859822 | 1.48293  | 2.610549 | 1.335262 | 1.516439 |
| 92703_at | 3.305481 | 4.558483 | 2.725634 | 3.294871 | 3.874998 | 3.62011  | 3.320749 | 4.366042 |
| 9270_at  | 6.762266 | 6.430191 | 6.564606 | 6.74465  | 6.366627 | 5.967368 | 6.453951 | 6.743312 |
| 92714_at | 5.630366 | 5.159862 | 4.687805 | 5.319869 | 4.623652 | 5.562293 | 5.076525 | 3.915729 |
| 92715_at | 3.09327  | 2.527054 | 3.551699 | 2.847144 | 3.16277  | 3.332425 | 3.215762 | 2.732444 |
| 9271_at  | 0.849536 | 1.532263 | 1.358454 | 1.067224 | 1.020133 | 1.258688 | 1.377256 | 1.223312 |
| 92736_at | 2.37322  | 2.674216 | 2.148544 | 2.394131 | 2.492241 | 2.661617 | 3.535401 | 2.949076 |
| 92737_at | 3.034107 | 2.030187 | 2.02694  | 1.835669 | 3.917601 | 2.026502 | 1.485686 | 1.609918 |
| 92745_at | 2.545714 | 2.110861 | 2.538311 | 1.804975 | 2.517343 | 2.400643 | 1.958551 | 2.152182 |
| 92747_at | 1.945443 | 1.546531 | 2.577669 | 1.601345 | 1.373357 | 1.707203 | 1.639408 | 2.095065 |
| 92749_at | 1.254704 | 1.302409 | 1.387633 | 1.934671 | 2.009764 | 1.496039 | 1.647889 | 1.819758 |
| 9274_at  | 4.866851 | 4.188874 | 4.062998 | 4.296635 | 4.242559 | 3.951125 | 4.156918 | 3.443215 |
| 9275_at  | 7.006799 | 6.427786 | 6.276587 | 6.390034 | 4.722226 | 6.561054 | 6.33901  | 5.695798 |
| 9276_at  | 8.094744 | 8.683061 | 8.549351 | 8.3517   | 8.773761 | 8.254471 | 8.377371 | 8.826555 |
| 9277_at  | 4.241974 | 4.486947 | 4.797944 | 4.247083 | 4.175471 | 4.826628 | 4.436514 | 5.235537 |
| 9278_at  | 5.137709 | 5.458122 | 5.193934 | 5.015723 | 4.444063 | 5.283149 | 5.136253 | 4.571983 |
| 92797_at | 2.87864  | 1.847466 | 3.289326 | 2.564773 | 4.154783 | 3.347552 | 2.748278 | 3.231749 |
| 92799_at | 5.464091 | 5.099459 | 5.452589 | 5.57338  | 4.971257 | 6.432742 | 5.656176 | 4.726587 |
| 92806_at | 4.75153  | 4.730212 | 5.290322 | 5.338735 | 4.10036  | 4.23792  | 4.874583 | 4.923058 |
| 92815_at | 1.396363 | 1.706784 | 1.881444 | 1.344114 | 1.223779 | 1.276607 | 1.607383 | 2.166409 |
| 92822_at | 3.769284 | 3.109737 | 3.94788  | 4.116716 | 2.974649 | 3.963744 | 3.45859  | 2.871563 |
| 9282_at  | 6.476879 | 6.888258 | 6.696333 | 6.840528 | 6.839895 | 6.48131  | 6.035352 | 6.538018 |
| 9283_at  | 2.180295 | 2.704759 | 2.179281 | 2.588579 | 2.527406 | 2.673206 | 2.7328   | 3.252023 |
| 92840_at | 5.482128 | 3.962294 | 3.587113 | 3.255563 | 4.269237 | 5.469564 | 2.966946 | 4.893222 |
| 92856_at | 7.016019 | 6.37233  | 6.681489 | 6.730239 | 6.061485 | 6.941165 | 6.929222 | 7.120661 |
| 9287_at  | 1.672631 | 2.26068  | 1.694282 | 1.617431 | 2.198846 | 1.693153 | 1.575455 | 2.373225 |
| 9288_at  | 2.661391 | 1.577989 | 1.8217   | 1.778949 | 1.933887 | 1.573812 | 1.691338 | 3.246202 |
| 9289_at  | 6.613745 | 6.1859   | 6.342939 | 7.08     | 7.054048 | 7.176002 | 6.264964 | 5.210636 |
| 928_at   | 9.195928 | 9.208514 | 9.293302 | 9.568789 | 8.929485 | 9.043419 | 9.455581 | 8.75818  |
| 92906_at | 5.114922 | 5.11038  | 4.102572 | 5.561801 | 6.188909 | 5.636509 | 5.211682 | 5.915799 |
| 9290_at  | 2.12482  | 1.143275 | 2.314863 | 2.318626 | 1.565586 | 1.577877 | 1.656111 | 1.470493 |
| 92912_at | 6.112584 | 6.132138 | 6.362929 | 5.878496 | 6.575157 | 6.42654  | 6.278703 | 6.889395 |
| 92922_at | 3.735119 | 3.90198  | 3.349953 | 2.929203 | 2.253458 | 3.333527 | 2.844582 | 3.016962 |
| 92935_at | 3.565284 | 3.355358 | 2.697234 | 3.108976 | 3.538962 | 2.312817 | 2.991381 | 3.572858 |
| 9293_at  | 1.014533 | 1.459131 | 1.654888 | 1.054034 | 1.753893 | 1.273624 | 1.680097 | 2.082229 |
| 92949_at | 1.660757 | 1.897562 | 1.638789 | 1.74011  | 2.495083 | 1.722492 | 1.914609 | 2.64636  |
| 9294_at  | 3.951964 | 4.279661 | 4.147181 | 3.94033  | 4.016488 | 3.892474 | 3.826669 | 3.871989 |
| 9295_at  | 6.444924 | 6.573347 | 7.244175 | 6.54688  | 6.252037 | 6.78241  | 6.764454 | 6.971183 |
| 92960_at | 3.695989 | 4.19976  | 4.066098 | 3.832636 | 3.60688  | 3.79001  | 3.374611 | 3.695163 |

|          |          |          |          |          |          |          |          |          |
|----------|----------|----------|----------|----------|----------|----------|----------|----------|
| 9296_at  | 6.416122 | 6.188877 | 6.348251 | 6.608923 | 6.289553 | 6.685224 | 6.677215 | 6.208    |
| 92973_at | 2.162458 | 2.947954 | 2.45286  | 2.031948 | 2.020197 | 2.105258 | 1.893492 | 2.078496 |
| 92979_at | 5.241097 | 4.429707 | 4.084265 | 4.721899 | 4.434145 | 4.904658 | 4.193698 | 4.954122 |
| 9297_at  | 4.806    | 1.246356 | 4.355373 | 2.891463 | 1.577515 | 2.595447 | 2.723848 | 1.701508 |
| 9298_at  | 1.326204 | 1.021842 | 1.095036 | 0.940381 | 1.323854 | 1.598723 | 1.025857 | 0.994996 |
| 92999_at | 4.466199 | 4.242732 | 4.144108 | 4.617576 | 3.853771 | 4.756938 | 3.347577 | 2.492096 |
| 9299_at  | 3.041454 | 2.399988 | 1.799315 | 5.076092 | 1.323278 | 1.470319 | 2.731442 | 1.425063 |
| 929_at   | 4.019725 | 2.869806 | 3.277688 | 3.197402 | 2.732338 | 4.244154 | 3.382261 | 3.000387 |
| 92_at    | 4.880953 | 5.340246 | 5.746277 | 6.097137 | 6.095    | 5.519901 | 6.014212 | 6.531188 |
| 9300_at  | 4.083149 | 2.249448 | 4.377983 | 1.004888 | 3.847856 | 1.483163 | 0.857285 | 1.198758 |
| 93010_at | 3.254368 | 3.618022 | 4.156777 | 3.365194 | 4.011848 | 3.232244 | 4.404004 | 3.50696  |
| 9301_at  | 1.150316 | 0.989002 | 0.846376 | 1.119029 | 1.577275 | 1.136334 | 1.243658 | 1.32221  |
| 9302_at  | 1.699674 | 1.650563 | 1.389334 | 2.350067 | 2.135573 | 1.279391 | 1.897547 | 1.351234 |
| 93034_at | 0.65322  | 1.506159 | 0.901516 | 0.600548 | 2.383195 | 1.21356  | 2.407878 | 1.029123 |
| 93035_at | 1.801722 | 2.068303 | 2.824697 | 1.919272 | 2.064359 | 3.724672 | 2.343384 | 1.778525 |
| 9304_at  | 1.842222 | 1.895794 | 2.379439 | 2.07648  | 2.961677 | 2.171267 | 2.553089 | 2.069852 |
| 93058_at | 3.526787 | 3.680715 | 4.885244 | 4.610572 | 3.942505 | 3.812718 | 3.220984 | 3.710937 |
| 9306_at  | 4.721141 | 5.720663 | 5.253305 | 5.331842 | 5.988217 | 5.739375 | 4.929519 | 6.115454 |
| 93081_at | 2.605116 | 2.946387 | 2.997859 | 2.198849 | 3.159238 | 2.303748 | 2.642184 | 1.517085 |
| 93082_at | 2.812435 | 2.603196 | 2.259617 | 2.188721 | 2.019157 | 2.170971 | 2.075775 | 2.361714 |
| 9308_at  | 4.44674  | 4.678592 | 3.713137 | 4.218258 | 3.422497 | 2.414468 | 3.24318  | 4.160128 |
| 93099_at | 4.098535 | 3.31633  | 3.511425 | 4.79901  | 3.498785 | 5.474029 | 4.024323 | 3.983981 |
| 930_at   | 2.436109 | 2.723994 | 2.235592 | 2.521087 | 2.890803 | 1.87989  | 2.977197 | 2.558148 |
| 93100_at | 5.140957 | 4.15379  | 4.788305 | 5.022225 | 4.741663 | 4.812356 | 4.653397 | 4.583456 |
| 93107_at | 1.74756  | 2.907963 | 1.852831 | 1.778463 | 3.224635 | 1.605885 | 1.831694 | 1.699507 |
| 93109_at | 4.344546 | 3.975499 | 4.182654 | 5.145537 | 2.02967  | 3.839393 | 3.58756  | 2.893724 |
| 9310_at  | 3.858909 | 3.74083  | 3.61635  | 3.471932 | 2.733393 | 4.382515 | 2.693784 | 3.420971 |
| 9311_at  | 2.176398 | 2.096785 | 2.049094 | 2.188593 | 2.642754 | 2.061232 | 2.456372 | 3.368263 |
| 93129_at | 3.870299 | 4.317011 | 3.552438 | 3.896683 | 3.856997 | 3.775933 | 3.187906 | 4.136447 |
| 9312_at  | 1.470525 | 1.279817 | 1.557046 | 1.467175 | 1.452314 | 1.793632 | 1.727239 | 2.0625   |
| 93134_at | 4.593518 | 3.890152 | 4.578996 | 4.08813  | 3.945624 | 3.987083 | 2.991835 | 4.254515 |
| 9313_at  | 2.01236  | 1.92521  | 2.68133  | 1.901567 | 2.239055 | 2.093753 | 2.481416 | 2.177698 |
| 93145_at | 2.424581 | 2.403284 | 1.741294 | 3.118871 | 1.967983 | 2.586979 | 1.403104 | 2.414499 |
| 9314_at  | 3.325586 | 3.594919 | 3.768164 | 3.39945  | 3.508704 | 2.973548 | 4.703783 | 3.813616 |
| 9315_at  | 2.914702 | 2.270132 | 2.647577 | 3.619787 | 3.56568  | 3.155364 | 3.000583 | 2.859308 |
| 93164_at | 1.659749 | 1.971014 | 1.742542 | 1.412726 | 3.051039 | 1.653021 | 2.255046 | 1.573449 |
| 93166_at | 2.015656 | 1.814107 | 1.900675 | 1.856186 | 2.570453 | 2.08069  | 2.330314 | 2.11033  |
| 9317_at  | 6.054073 | 6.314918 | 6.097017 | 5.036449 | 5.910005 | 5.090393 | 5.455962 | 5.261807 |
| 93183_at | 5.21602  | 5.103309 | 5.1226   | 5.02987  | 4.633439 | 4.502846 | 5.471544 | 5.359467 |
| 93185_at | 4.277947 | 4.393918 | 4.705782 | 4.148155 | 3.485291 | 5.089542 | 4.968583 | 2.923757 |
| 9318_at  | 7.571566 | 7.151839 | 7.281317 | 7.235746 | 6.875568 | 7.181563 | 7.604983 | 7.696303 |
| 93190_at | 3.234413 | 3.448326 | 1.195099 | 1.193093 | 1.803279 | 1.257868 | 2.127245 | 1.407618 |
| 9319_at  | 2.395279 | 2.35867  | 2.728405 | 2.250946 | 2.962073 | 2.610526 | 2.774929 | 2.615185 |
| 931_at   | 1.10467  | 1.173529 | 2.109717 | 1.667723 | 1.494527 | 1.82734  | 1.345109 | 2.143454 |
| 9320_at  | 7.4405   | 7.659794 | 7.711265 | 7.817974 | 7.965095 | 7.562417 | 7.532282 | 8.092325 |
| 93210_at | 6.384289 | 5.966777 | 6.904319 | 6.403879 | 5.781192 | 6.703781 | 7.04407  | 5.981223 |
| 9321_at  | 6.379213 | 7.019163 | 6.839778 | 6.851043 | 7.035956 | 6.242233 | 6.560225 | 7.37076  |
| 9322_at  | 6.429046 | 6.348772 | 5.433814 | 5.74697  | 6.076146 | 6.195347 | 6.022279 | 5.415465 |
| 93233_at | 1.549992 | 1.692932 | 1.480021 | 1.65953  | 1.938396 | 2.55294  | 2.609877 | 1.680499 |
| 9324_at  | 7.905678 | 7.991581 | 7.686582 | 7.405648 | 7.689572 | 8.10725  | 7.65683  | 7.54658  |
| 9325_at  | 6.061685 | 6.168528 | 5.586555 | 5.433121 | 5.846242 | 5.374689 | 5.963333 | 5.906936 |

|          |          |          |          |          |          |          |          |          |
|----------|----------|----------|----------|----------|----------|----------|----------|----------|
| 9326_at  | 6.408712 | 5.609885 | 6.655762 | 6.380695 | 6.411445 | 5.086302 | 6.187173 | 5.606005 |
| 93273_at | 1.667199 | 1.945827 | 1.244541 | 2.043821 | 1.376848 | 1.985638 | 2.388057 | 1.720102 |
| 9328_at  | 5.633994 | 5.969668 | 5.702642 | 5.979684 | 5.912156 | 6.035681 | 5.146987 | 5.286466 |
| 9329_at  | 6.506664 | 6.304667 | 6.496707 | 6.722773 | 6.478581 | 6.350683 | 6.142098 | 6.445125 |
| 932_at   | 1.580012 | 1.626444 | 2.145601 | 1.946017 | 2.178286 | 2.150253 | 2.666569 | 1.740733 |
| 9330_at  | 6.212816 | 6.78368  | 6.919143 | 5.618621 | 7.096367 | 6.414882 | 6.511851 | 7.105457 |
| 9331_at  | 3.643277 | 4.311267 | 3.862369 | 4.197343 | 4.457727 | 3.538929 | 4.460492 | 2.967114 |
| 93323_at | 4.573634 | 3.79401  | 3.137734 | 4.457451 | 5.057146 | 3.341066 | 4.293793 | 5.033293 |
| 9332_at  | 1.683347 | 1.326981 | 1.558705 | 1.686181 | 2.03842  | 2.31227  | 1.387653 | 1.782579 |
| 9333_at  | 2.313461 | 1.198959 | 1.501364 | 1.489569 | 1.473112 | 0.869134 | 1.4045   | 1.651337 |
| 93343_at | 6.298652 | 5.692281 | 5.007582 | 5.381428 | 4.998131 | 4.836418 | 4.713837 | 3.842198 |
| 93349_at | 4.981159 | 3.57933  | 2.146622 | 3.563387 | 3.144607 | 4.674846 | 4.374442 | 5.085507 |
| 9334_at  | 7.137603 | 7.216028 | 7.306474 | 7.428785 | 7.177862 | 7.341083 | 7.38791  | 7.002441 |
| 93377_at | 2.328512 | 3.199603 | 3.047396 | 2.483973 | 3.254626 | 2.892361 | 3.257647 | 2.973756 |
| 9337_at  | 5.537186 | 6.059518 | 5.331156 | 6.024916 | 5.764955 | 6.016609 | 5.930275 | 6.476535 |
| 93380_at | 6.794598 | 7.189817 | 7.273874 | 7.335018 | 6.987657 | 6.860157 | 7.061853 | 6.432308 |
| 9338_at  | 7.242804 | 7.067612 | 7.549708 | 7.815084 | 6.835116 | 6.878885 | 6.047096 | 8.058653 |
| 933_at   | 1.48818  | 1.599097 | 1.947835 | 1.402831 | 1.807883 | 1.431656 | 1.422928 | 1.452326 |
| 93408_at | 2.843537 | 2.362405 | 2.779423 | 1.712907 | 2.063036 | 1.846487 | 1.956169 | 2.941178 |
| 9340_at  | 1.47179  | 1.743764 | 1.817509 | 1.489133 | 1.379396 | 1.518536 | 1.228618 | 2.210422 |
| 9341_at  | 9.454984 | 9.532046 | 9.86747  | 9.607106 | 9.367804 | 9.634326 | 9.87929  | 9.381937 |
| 93426_at | 2.149416 | 2.042689 | 2.239479 | 2.172189 | 1.701618 | 2.722116 | 2.175546 | 2.531043 |
| 93429_at | 1.219432 | 0.869405 | 1.884641 | 2.698413 | 1.921235 | 1.134072 | 1.061299 | 2.233139 |
| 9342_at  | 7.305766 | 7.326175 | 7.266898 | 7.52317  | 6.930234 | 7.915277 | 7.384789 | 6.505875 |
| 93432_at | 1.499586 | 1.279066 | 1.515614 | 1.39004  | 2.370342 | 1.040438 | 1.805869 | 1.307641 |
| 93436_at | 2.25736  | 2.585126 | 2.806517 | 2.759922 | 2.428077 | 3.257766 | 2.670932 | 2.910057 |
| 9343_at  | 5.794147 | 5.740394 | 6.42331  | 6.421422 | 6.540623 | 6.560347 | 6.294199 | 5.802366 |
| 9344_at  | 6.055873 | 6.321558 | 6.240327 | 6.492472 | 6.000444 | 6.277527 | 5.766335 | 5.383698 |
| 93463_at | 1.249744 | 1.356176 | 1.218148 | 1.576597 | 1.551639 | 1.259699 | 1.148646 | 2.12771  |
| 93474_at | 2.772597 | 3.368318 | 3.365816 | 1.850567 | 0.735108 | 2.63878  | 2.911871 | 5.396177 |
| 93487_at | 9.005671 | 9.207491 | 9.679195 | 9.741628 | 8.844233 | 9.315257 | 9.54921  | 8.213971 |
| 9348_at  | 1.857795 | 1.659226 | 1.760219 | 1.45295  | 2.43569  | 1.376118 | 1.880566 | 1.378745 |
| 93492_at | 3.070145 | 3.402293 | 4.079082 | 3.669976 | 3.509461 | 5.01386  | 2.601531 | 3.746517 |
| 9349_at  | 10.54119 | 10.19337 | 10.21419 | 10.37194 | 10.69127 | 10.37788 | 10.4455  | 10.51939 |
| 9350_at  | 1.34253  | 1.263464 | 1.136103 | 1.482428 | 1.210737 | 1.215584 | 1.048342 | 1.273117 |
| 93517_at | 4.532509 | 6.2775   | 6.683778 | 4.812991 | 5.137659 | 5.399623 | 5.386545 | 4.474761 |
| 9351_at  | 8.841497 | 8.063566 | 8.584847 | 8.901859 | 7.654811 | 8.967981 | 8.763768 | 7.377272 |
| 9352_at  | 7.962123 | 8.074145 | 8.014965 | 7.709832 | 7.7269   | 7.959165 | 7.69352  | 8.443062 |
| 9353_at  | 3.643816 | 3.365828 | 3.695834 | 2.838443 | 4.91107  | 3.901336 | 2.351763 | 3.527951 |
| 9354_at  | 6.966346 | 7.197062 | 7.044785 | 7.109435 | 7.152596 | 6.779738 | 7.005025 | 7.342044 |
| 93550_at | 4.357351 | 4.473457 | 4.71944  | 4.576108 | 4.165433 | 5.091176 | 3.886998 | 4.521082 |
| 93556_at | 1.413698 | 1.846304 | 1.507174 | 1.275626 | 2.01161  | 1.76398  | 1.762251 | 1.508577 |
| 9355_at  | 2.353097 | 2.856581 | 2.399678 | 2.486232 | 2.24333  | 2.216154 | 3.38174  | 2.792366 |
| 9356_at  | 7.362701 | 5.647727 | 5.704125 | 3.705155 | 7.740821 | 6.638825 | 4.382089 | 6.29687  |
| 93587_at | 4.094727 | 3.751423 | 2.76741  | 3.857085 | 2.366851 | 3.589443 | 2.4832   | 5.321898 |
| 93589_at | 2.245827 | 1.26532  | 1.32644  | 1.882247 | 1.611987 | 1.496049 | 2.018523 | 1.129897 |
| 9358_at  | 2.957547 | 4.633574 | 5.784946 | 4.9078   | 3.836138 | 4.770747 | 5.243806 | 4.495219 |
| 93594_at | 5.51677  | 3.503572 | 4.320825 | 4.305229 | 4.213315 | 4.78325  | 4.079301 | 5.370688 |
| 9360_at  | 7.734244 | 8.185594 | 7.730507 | 8.03534  | 8.172303 | 8.027129 | 7.762919 | 8.294414 |
| 93611_at | 3.3785   | 3.428042 | 3.613588 | 3.604964 | 3.440261 | 3.002982 | 3.985177 | 3.046433 |
| 9361_at  | 4.63124  | 4.615567 | 4.458441 | 4.056753 | 4.571679 | 4.808025 | 4.378634 | 4.093458 |

|          |          |          |          |          |          |          |          |          |
|----------|----------|----------|----------|----------|----------|----------|----------|----------|
| 93621_at | 7.296807 | 7.220896 | 7.592543 | 7.498165 | 7.458242 | 8.051796 | 7.685694 | 7.272207 |
| 93622_at | 1.745913 | 2.676367 | 1.904478 | 1.566314 | 2.381743 | 1.849524 | 2.418962 | 2.30601  |
| 93624_at | 3.072053 | 3.775271 | 4.057948 | 4.35056  | 4.530211 | 3.861073 | 4.467671 | 4.785832 |
| 93627_at | 5.933327 | 5.564143 | 6.251409 | 6.285498 | 5.652526 | 5.93716  | 6.028224 | 6.465286 |
| 9362_at  | 2.16816  | 3.287024 | 3.929039 | 3.042868 | 3.022159 | 2.812369 | 2.924408 | 3.422778 |
| 9363_at  | 2.61675  | 3.00776  | 1.835626 | 2.916726 | 2.107598 | 2.281623 | 3.79057  | 2.432727 |
| 93643_at | 4.809708 | 4.668254 | 4.653094 | 4.686958 | 4.50668  | 4.577537 | 3.722267 | 3.761042 |
| 93649_at | 2.980329 | 2.277562 | 2.340098 | 2.909843 | 2.020299 | 2.460053 | 2.082708 | 1.761028 |
| 9364_at  | 3.793626 | 5.099934 | 3.625371 | 3.444632 | 3.02404  | 3.673424 | 3.821233 | 4.323197 |
| 93650_at | 3.291047 | 3.094704 | 2.516901 | 3.225751 | 2.400562 | 3.118192 | 2.836048 | 3.225751 |
| 93653_at | 3.905647 | 2.75214  | 3.635552 | 2.759051 | 2.868188 | 2.828389 | 2.591979 | 3.467546 |
| 93654_at | 1.80977  | 1.829018 | 2.131465 | 1.46457  | 1.867777 | 1.347402 | 2.011093 | 1.530566 |
| 93655_at | 2.80452  | 3.718875 | 4.446373 | 3.084113 | 4.302976 | 3.834667 | 3.429429 | 3.863449 |
| 9365_at  | 7.00202  | 7.373201 | 6.367747 | 7.069925 | 7.332139 | 6.714605 | 5.882616 | 6.671593 |
| 93661_at | 1.516713 | 1.003809 | 0.955076 | 1.168235 | 1.372212 | 1.531503 | 1.815899 | 1.535118 |
| 93663_at | 6.755125 | 6.366118 | 7.278532 | 6.74139  | 6.53863  | 7.232707 | 6.923978 | 7.363415 |
| 93664_at | 5.683358 | 5.756544 | 6.0565   | 5.154373 | 6.258511 | 6.119247 | 5.702892 | 5.66456  |
| 93668_at | 1.368308 | 1.502429 | 1.021484 | 1.358398 | 1.114855 | 0.798598 | 0.987658 | 1.074087 |
| 9366_at  | 1.108089 | 1.313291 | 1.368572 | 1.556048 | 1.4248   | 1.100998 | 1.793602 | 1.798533 |
| 9367_at  | 5.323444 | 5.1848   | 5.538627 | 5.671369 | 4.411646 | 5.037795 | 4.670509 | 5.488937 |
| 9368_at  | 8.171892 | 7.596072 | 7.54517  | 7.247078 | 6.999341 | 7.072398 | 7.700646 | 7.102532 |
| 9369_at  | 1.275869 | 3.020279 | 2.470851 | 2.005169 | 2.822578 | 2.187425 | 2.250076 | 2.597771 |
| 9370_at  | 1.71317  | 0.912067 | 1.304944 | 1.07932  | 1.830919 | 1.387246 | 2.581777 | 2.815207 |
| 9371_at  | 6.648765 | 7.159472 | 7.219554 | 7.039861 | 7.400377 | 6.940558 | 6.964267 | 7.236068 |
| 9372_at  | 6.449923 | 6.608151 | 6.381286 | 6.795877 | 7.031587 | 6.489574 | 6.477861 | 7.089261 |
| 9373_at  | 7.073503 | 7.102265 | 7.182393 | 7.225478 | 7.513569 | 6.299363 | 7.770276 | 7.32288  |
| 9374_at  | 4.940163 | 5.047437 | 5.032241 | 3.725654 | 5.812657 | 4.755092 | 6.776066 | 4.757704 |
| 9375_at  | 8.914757 | 9.249451 | 9.171532 | 9.190029 | 9.40656  | 8.86027  | 9.132178 | 9.29003  |
| 9376_at  | 7.738169 | 7.214101 | 7.349856 | 4.8403   | 8.122651 | 8.081134 | 4.564199 | 7.494037 |
| 9377_at  | 9.688707 | 9.573396 | 9.68006  | 9.487941 | 9.564343 | 9.79354  | 9.157911 | 9.713845 |
| 9378_at  | 1.805235 | 1.666173 | 1.120831 | 1.807826 | 1.798063 | 2.015408 | 1.495142 | 1.63704  |
| 9379_at  | 3.536793 | 2.564205 | 3.588736 | 3.19803  | 3.53045  | 3.257875 | 2.415714 | 2.8661   |
| 9380_at  | 8.537539 | 7.851556 | 8.229752 | 7.70845  | 7.696886 | 8.546019 | 7.921487 | 7.720885 |
| 9381_at  | 2.008022 | 1.595262 | 2.520868 | 1.914359 | 2.264432 | 2.039263 | 2.083725 | 2.096763 |
| 9382_at  | 7.618444 | 6.870098 | 7.494387 | 6.829455 | 6.298912 | 7.200276 | 7.467083 | 6.403031 |
| 9383_at  | 2.606495 | 2.06401  | 1.81819  | 2.329277 | 2.094119 | 2.105642 | 1.831245 | 2.449107 |
| 9388_at  | 2.572997 | 3.126533 | 3.067144 | 2.296634 | 3.519179 | 2.661848 | 1.789759 | 2.091419 |
| 9389_at  | 1.810464 | 1.797913 | 2.84478  | 1.669387 | 1.813741 | 2.115319 | 1.527233 | 2.162222 |
| 9390_at  | 2.125995 | 2.06421  | 3.111499 | 1.799496 | 4.438117 | 2.441962 | 3.147352 | 2.571307 |
| 9391_at  | 5.003739 | 5.165366 | 5.408879 | 6.093044 | 5.201535 | 5.627302 | 5.119031 | 5.195604 |
| 9392_at  | 6.234993 | 6.424612 | 6.046367 | 6.560516 | 6.318068 | 6.011585 | 6.304297 | 6.034864 |
| 9394_at  | 1.817535 | 1.808453 | 1.990015 | 3.079388 | 2.727106 | 0.883865 | 1.774455 | 2.336333 |
| 93953_at | 2.927098 | 1.5865   | 1.798056 | 1.619517 | 1.585318 | 1.711642 | 2.129564 | 1.465207 |
| 93973_at | 5.054147 | 5.389457 | 5.237808 | 5.51516  | 6.056807 | 4.908047 | 5.206337 | 5.224202 |
| 93974_at | 6.964603 | 6.734067 | 6.41877  | 6.568231 | 6.738785 | 6.796254 | 6.216862 | 6.335401 |
| 93978_at | 1.982576 | 1.536884 | 1.891979 | 2.185644 | 1.524897 | 1.273089 | 1.382677 | 1.654203 |
| 93979_at | 1.737519 | 1.681376 | 1.957557 | 1.168067 | 2.454966 | 1.390343 | 1.395261 | 1.489082 |
| 9397_at  | 6.030434 | 6.20311  | 5.918826 | 5.833715 | 5.63789  | 6.108986 | 6.429362 | 6.209665 |
| 93986_at | 2.115754 | 1.581274 | 1.505723 | 1.299344 | 1.996639 | 1.684602 | 1.614156 | 1.886435 |
| 9398_at  | 1.879232 | 1.630546 | 1.637319 | 1.977012 | 1.45771  | 2.041231 | 2.121556 | 1.648005 |
| 9399_at  | 2.417177 | 2.655073 | 2.313026 | 2.272965 | 1.565837 | 2.751624 | 2.116682 | 3.065165 |

|          |          |          |          |          |          |          |          |          |
|----------|----------|----------|----------|----------|----------|----------|----------|----------|
| 939_at   | 2.925184 | 2.53163  | 3.004428 | 2.894054 | 2.341371 | 2.94124  | 2.439212 | 1.806617 |
| 93_at    | 3.710749 | 4.697659 | 3.956963 | 4.491269 | 2.73305  | 3.735372 | 3.344018 | 3.225819 |
| 94005_at | 8.302717 | 7.961667 | 8.698917 | 8.185263 | 8.168734 | 8.016206 | 9.192258 | 7.668329 |
| 94009_at | 2.949821 | 3.01468  | 2.008707 | 2.764625 | 2.323735 | 1.85186  | 2.91119  | 2.922177 |
| 9400_at  | 2.335508 | 2.938073 | 2.970887 | 2.634869 | 3.247301 | 2.599015 | 1.765475 | 2.682798 |
| 94015_at | 2.881599 | 2.958376 | 3.383484 | 3.378979 | 2.356745 | 3.224497 | 2.627559 | 3.072757 |
| 9401_at  | 1.414911 | 2.256172 | 1.383792 | 2.68838  | 2.602832 | 2.303594 | 2.575986 | 2.518708 |
| 94023_at | 2.100802 | 1.892591 | 2.588586 | 4.10655  | 1.652995 | 1.484681 | 2.986139 | 2.282507 |
| 94025_at | 2.435299 | 2.106009 | 2.953126 | 2.735679 | 2.618245 | 2.322048 | 2.873941 | 2.726551 |
| 94026_at | 1.064941 | 1.358946 | 1.679014 | 1.527466 | 1.338546 | 0.84695  | 1.965563 | 0.943216 |
| 94027_at | 1.544551 | 0.921323 | 1.052994 | 1.234292 | 1.257733 | 1.299899 | 1.355623 | 1.023184 |
| 9402_at  | 2.120888 | 2.239382 | 2.691322 | 3.008573 | 2.225808 | 3.186384 | 4.293402 | 4.683291 |
| 94030_at | 3.025205 | 2.054981 | 2.171913 | 1.945794 | 2.641613 | 2.814472 | 2.485458 | 2.439951 |
| 94031_at | 3.439437 | 3.092151 | 3.138571 | 3.467582 | 2.956439 | 4.091908 | 4.378326 | 2.663037 |
| 94032_at | 2.414639 | 2.94175  | 2.529492 | 2.942189 | 2.241203 | 3.682248 | 3.224641 | 2.291075 |
| 94033_at | 1.447053 | 2.028081 | 1.508957 | 2.199622 | 1.587825 | 1.67949  | 1.45588  | 1.641261 |
| 94039_at | 5.266851 | 4.957368 | 4.512642 | 4.817166 | 4.86982  | 5.030259 | 6.165267 | 5.52113  |
| 9403_at  | 9.330416 | 9.520352 | 9.143558 | 9.33734  | 9.586253 | 8.763115 | 9.059399 | 9.79431  |
| 9404_at  | 2.819699 | 2.865784 | 2.493435 | 3.736972 | 4.29444  | 2.099    | 2.850441 | 4.293026 |
| 94056_at | 6.716718 | 6.392173 | 6.484792 | 5.977024 | 6.910737 | 7.279779 | 6.559191 | 6.828607 |
| 94059_at | 5.143265 | 5.358976 | 5.500062 | 5.789814 | 5.030134 | 4.80994  | 4.237935 | 4.918092 |
| 9406_at  | 7.630827 | 7.411174 | 7.566144 | 7.891199 | 7.389562 | 7.117598 | 7.234265 | 7.926932 |
| 9407_at  | 2.907051 | 2.579378 | 2.321795 | 1.886021 | 2.210065 | 2.169898 | 2.13143  | 2.143818 |
| 94081_at | 4.816187 | 4.645529 | 5.236564 | 4.257642 | 4.681853 | 4.547981 | 5.04569  | 5.89486  |
| 94086_at | 1.130655 | 1.881359 | 1.844076 | 2.151668 | 1.490155 | 1.797239 | 1.854715 | 2.823033 |
| 94097_at | 3.874489 | 2.015157 | 3.66114  | 3.839257 | 3.806445 | 3.143368 | 3.173698 | 3.276402 |
| 9409_at  | 5.91516  | 5.649566 | 5.190982 | 5.04865  | 4.873759 | 6.095493 | 5.876175 | 4.933455 |
| 940_at   | 1.778447 | 1.864622 | 2.153802 | 2.088648 | 2.210906 | 1.790332 | 2.046894 | 1.770103 |
| 94101_at | 6.50725  | 6.306918 | 6.180796 | 6.379413 | 6.118195 | 6.750917 | 6.281995 | 6.516461 |
| 94103_at | 7.520511 | 7.19215  | 8.08076  | 7.706015 | 5.937062 | 6.801624 | 6.389322 | 6.527854 |
| 94104_at | 4.478271 | 5.544206 | 3.246118 | 4.552498 | 3.626856 | 5.100526 | 4.450455 | 5.048732 |
| 94107_at | 5.903821 | 5.984353 | 5.342897 | 5.283399 | 5.180963 | 5.604501 | 4.658358 | 5.376459 |
| 9410_at  | 5.687474 | 5.985819 | 4.838629 | 6.041657 | 5.225047 | 6.02056  | 5.215313 | 6.02056  |
| 94115_at | 4.19529  | 2.98941  | 2.331078 | 2.412463 | 2.347861 | 3.63332  | 4.05435  | 2.905344 |
| 9411_at  | 8.414643 | 8.415698 | 8.102249 | 8.367219 | 8.480939 | 8.126211 | 8.752569 | 8.853698 |
| 94120_at | 3.211998 | 2.9844   | 2.933494 | 3.35299  | 3.469864 | 3.260154 | 2.41434  | 3.027945 |
| 94121_at | 5.402392 | 6.203632 | 5.855135 | 5.391275 | 4.633323 | 5.403652 | 4.872837 | 6.262959 |
| 94122_at | 2.382884 | 3.466395 | 3.828753 | 2.653521 | 3.565721 | 2.721426 | 3.675762 | 3.224699 |
| 9412_at  | 8.208968 | 8.186435 | 8.782433 | 8.101954 | 7.875216 | 8.110148 | 8.02784  | 7.959238 |
| 94134_at | 6.451928 | 6.923875 | 6.783449 | 7.436649 | 6.893849 | 6.836394 | 7.027594 | 6.657766 |
| 94137_at | 1.603467 | 1.672509 | 2.437582 | 2.155571 | 2.739306 | 2.216921 | 2.581489 | 1.9227   |
| 9413_at  | 4.340031 | 4.716029 | 4.713323 | 4.173244 | 4.234454 | 5.382601 | 5.654959 | 4.097757 |
| 9414_at  | 5.391505 | 5.533421 | 5.94451  | 5.617386 | 5.233116 | 5.946608 | 5.393763 | 5.429838 |
| 94150_at | 1.110995 | 0.899178 | 1.386057 | 1.158863 | 1.273253 | 1.543154 | 1.563624 | 0.930909 |
| 9415_at  | 6.38196  | 5.511943 | 7.859505 | 6.411386 | 5.098282 | 5.943497 | 6.942257 | 5.55987  |
| 94160_at | 1.147225 | 1.320227 | 1.484258 | 1.006993 | 1.204055 | 1.752104 | 2.244532 | 1.672217 |
| 94161_at | 8.277533 | 8.660906 | 8.946644 | 9.111065 | 8.082663 | 8.300298 | 8.924075 | 10.25128 |
| 94162_at | 1.968661 | 1.368633 | 2.269979 | 1.149566 | 1.310973 | 1.03561  | 1.647298 | 3.473823 |
| 94163_at | 3.247727 | 3.808316 | 1.281231 | 3.375868 | 2.269804 | 2.244773 | 0.857623 | 1.624623 |
| 9416_at  | 5.409294 | 5.835301 | 5.649704 | 5.797333 | 5.670089 | 5.863467 | 5.326437 | 5.516148 |
| 9419_at  | 6.879788 | 6.779127 | 7.104386 | 6.958485 | 7.009431 | 6.420798 | 6.848979 | 7.199185 |

|          |          |          |          |          |          |          |          |          |
|----------|----------|----------|----------|----------|----------|----------|----------|----------|
| 941_at   | 2.821037 | 2.038158 | 1.524142 | 1.609207 | 2.462119 | 2.483767 | 2.287812 | 1.910132 |
| 9420_at  | 4.46564  | 5.167447 | 4.358717 | 4.291707 | 5.391271 | 3.52955  | 3.824453 | 3.831581 |
| 9421_at  | 1.444912 | 1.47397  | 1.776461 | 1.886513 | 1.321484 | 1.796713 | 1.397636 | 3.130329 |
| 9422_at  | 5.254303 | 5.304619 | 5.965492 | 5.182182 | 6.002941 | 4.996006 | 5.31643  | 5.692609 |
| 94233_at | 2.317569 | 2.07639  | 2.059425 | 1.483498 | 2.495601 | 1.723356 | 2.423179 | 1.791021 |
| 94234_at | 2.297083 | 2.374605 | 2.944397 | 1.672024 | 3.094219 | 3.648826 | 2.106013 | 2.63514  |
| 94235_at | 2.832783 | 2.255722 | 2.933408 | 2.517391 | 2.608287 | 3.630688 | 2.233529 | 3.962093 |
| 94236_at | 1.256316 | 1.301741 | 2.206736 | 1.980457 | 1.350286 | 1.605835 | 1.823868 | 1.841329 |
| 94239_at | 7.475028 | 7.833269 | 8.313003 | 8.346181 | 8.182038 | 7.502982 | 8.000591 | 7.860273 |
| 9423_at  | 1.849615 | 2.400043 | 2.392462 | 3.31755  | 3.061599 | 1.641416 | 2.505055 | 2.547156 |
| 94240_at | 5.693601 | 5.69322  | 4.15386  | 5.426146 | 5.215213 | 5.260121 | 5.212173 | 6.147331 |
| 94241_at | 5.980818 | 6.282543 | 6.686748 | 6.211422 | 6.67615  | 6.141082 | 6.311418 | 7.006428 |
| 9424_at  | 4.132781 | 5.223693 | 4.198681 | 4.649179 | 3.236187 | 3.428704 | 5.023929 | 4.320405 |
| 9425_at  | 5.297242 | 4.946238 | 5.014085 | 4.691224 | 5.202071 | 4.87121  | 4.55877  | 5.514722 |
| 94274_at | 6.77002  | 6.311345 | 6.481425 | 6.846078 | 5.830617 | 6.896413 | 5.701107 | 6.714678 |
| 9427_at  | 2.206247 | 2.945382 | 3.036985 | 2.298639 | 3.492415 | 3.448943 | 2.994724 | 2.696953 |
| 9429_at  | 2.249869 | 2.482657 | 4.006389 | 3.346455 | 3.446612 | 2.86908  | 3.852495 | 2.979651 |
| 942_at   | 3.75255  | 3.142055 | 2.602655 | 3.922686 | 2.76437  | 2.481127 | 3.768508 | 3.586411 |
| 9435_at  | 4.655138 | 4.614228 | 4.286963 | 4.152339 | 3.733998 | 3.873716 | 3.805283 | 3.259836 |
| 9436_at  | 3.07574  | 2.97775  | 2.596855 | 3.013677 | 4.021463 | 3.284389 | 3.736884 | 3.531517 |
| 9437_at  | 1.67206  | 2.68675  | 2.146842 | 1.517325 | 2.214187 | 2.37491  | 1.906374 | 1.788373 |
| 9439_at  | 4.984503 | 6.042188 | 5.425669 | 5.566724 | 5.721807 | 5.403737 | 5.211938 | 5.531379 |
| 943_at   | 2.869493 | 3.090561 | 3.288093 | 3.963481 | 2.84669  | 3.99569  | 3.04834  | 2.865588 |
| 9440_at  | 5.695837 | 6.110032 | 5.426444 | 6.196829 | 5.441678 | 5.367006 | 5.674816 | 6.039139 |
| 9441_at  | 2.241716 | 3.017247 | 3.012092 | 3.038418 | 1.860842 | 2.524158 | 2.730579 | 2.647491 |
| 9442_at  | 3.617423 | 1.157373 | 1.550937 | 1.760003 | 1.532144 | 1.99715  | 0.574504 | 2.095388 |
| 9443_at  | 5.990211 | 5.715113 | 5.302959 | 6.168324 | 5.158414 | 5.541382 | 5.906239 | 6.200063 |
| 9444_at  | 8.265953 | 8.04367  | 8.299636 | 8.315181 | 8.172124 | 8.239107 | 8.377769 | 8.321311 |
| 9445_at  | 10.8027  | 10.85502 | 10.94851 | 11.02234 | 10.87636 | 10.85754 | 10.90933 | 10.5279  |
| 9446_at  | 6.525121 | 6.396777 | 6.207995 | 6.449103 | 7.040292 | 5.97106  | 5.901951 | 6.353633 |
| 9447_at  | 2.720968 | 1.626571 | 1.51673  | 1.273858 | 1.783378 | 1.219218 | 3.034778 | 1.779583 |
| 9448_at  | 6.823295 | 7.005734 | 7.028689 | 7.554866 | 7.208947 | 7.067622 | 6.906561 | 6.985095 |
| 944_at   | 1.676469 | 1.855958 | 1.100181 | 1.609066 | 1.553575 | 1.296402 | 1.899083 | 1.883596 |
| 9450_at  | 2.646936 | 3.262129 | 2.589475 | 4.289352 | 2.862931 | 2.531649 | 2.261582 | 3.876293 |
| 9451_at  | 4.092648 | 5.728723 | 4.994287 | 4.534304 | 4.891656 | 4.069402 | 4.186323 | 5.617338 |
| 9452_at  | 7.182379 | 6.993525 | 5.675812 | 7.472005 | 7.371726 | 7.2997   | 7.791157 | 7.205746 |
| 9453_at  | 6.954665 | 6.205929 | 6.906842 | 7.088295 | 7.523559 | 6.318497 | 6.881426 | 7.088251 |
| 9454_at  | 3.819335 | 3.210605 | 3.527319 | 4.06265  | 3.513783 | 3.000333 | 4.116956 | 3.597965 |
| 9455_at  | 4.235856 | 2.789248 | 3.116443 | 2.405197 | 1.695466 | 3.137057 | 3.388719 | 3.13619  |
| 9456_at  | 5.958888 | 5.570191 | 5.18354  | 4.897691 | 6.530119 | 5.36724  | 5.573812 | 4.579966 |
| 9457_at  | 4.49441  | 5.250837 | 4.775995 | 5.084545 | 4.20778  | 3.694885 | 4.793336 | 3.58419  |
| 9459_at  | 6.583416 | 5.976741 | 6.000922 | 6.37154  | 6.380507 | 6.391764 | 6.345036 | 6.772754 |
| 945_at   | 4.629675 | 4.826571 | 3.776591 | 3.594256 | 4.716714 | 3.35884  | 3.445205 | 4.596506 |
| 9462_at  | 6.518299 | 6.087975 | 6.497039 | 6.486612 | 6.559773 | 6.258983 | 6.806087 | 6.157699 |
| 9463_at  | 4.131967 | 4.028909 | 4.525612 | 4.256755 | 3.891996 | 4.033424 | 4.208036 | 3.351715 |
| 9464_at  | 2.332049 | 1.989375 | 2.22042  | 1.815327 | 1.792006 | 2.485011 | 2.634858 | 1.823825 |
| 9465_at  | 3.334681 | 3.979819 | 3.246663 | 3.646196 | 3.351843 | 3.238333 | 3.8811   | 3.163557 |
| 9466_at  | 2.988275 | 3.706846 | 3.742801 | 4.56262  | 2.852713 | 2.956808 | 4.307695 | 2.689228 |
| 9467_at  | 6.72475  | 6.64546  | 7.191658 | 7.662874 | 6.448695 | 7.228332 | 7.01748  | 5.976558 |
| 9468_at  | 3.819558 | 3.211311 | 5.047388 | 3.180571 | 3.433028 | 3.117465 | 3.803884 | 3.686823 |
| 9469_at  | 3.959628 | 3.984175 | 3.704031 | 4.673607 | 3.382947 | 3.891576 | 3.888483 | 2.774884 |



|         |          |          |          |          |          |          |          |          |
|---------|----------|----------|----------|----------|----------|----------|----------|----------|
| 946_at  | 2.325902 | 1.933951 | 1.931058 | 2.430556 | 3.100545 | 3.119058 | 1.932329 | 2.330229 |
| 9470_at | 6.583848 | 6.736046 | 6.169832 | 6.896766 | 6.020224 | 5.939095 | 6.476966 | 7.0943   |
| 9472_at | 3.016103 | 3.557463 | 3.398743 | 2.822698 | 3.527647 | 3.535551 | 3.129741 | 2.659307 |
| 9473_at | 4.331215 | 4.447654 | 3.302003 | 4.804305 | 3.079018 | 4.93015  | 3.063501 | 4.655084 |
| 9474_at | 5.920757 | 5.962291 | 5.719545 | 5.973459 | 5.494869 | 5.77221  | 5.514393 | 5.942413 |
| 9475_at | 7.603591 | 7.91943  | 7.914956 | 8.116722 | 7.851209 | 8.060315 | 7.963925 | 7.866235 |
| 9476_at | 5.494398 | 3.781039 | 4.290994 | 2.859601 | 4.159471 | 6.333823 | 2.783529 | 5.164553 |
| 9477_at | 3.883031 | 5.029934 | 5.00245  | 5.177651 | 4.906673 | 3.946249 | 4.105737 | 5.641289 |
| 9478_at | 1.701516 | 1.327011 | 1.984209 | 2.188417 | 0.950526 | 1.43769  | 1.610971 | 1.545078 |
| 9479_at | 1.385131 | 0.7695   | 1.893013 | 0.921439 | 0.836185 | 0.941787 | 2.039953 | 2.250144 |
| 947_at  | 9.385958 | 9.442195 | 9.242743 | 9.707557 | 9.15163  | 9.131564 | 9.572476 | 9.065451 |
| 9480_at | 2.090747 | 2.369873 | 1.889994 | 2.030534 | 1.629948 | 1.993306 | 1.972309 | 1.324337 |
| 9481_at | 2.758029 | 3.295928 | 1.430312 | 1.847157 | 2.987545 | 2.817716 | 2.443793 | 2.065174 |
| 9482_at | 6.923306 | 6.566091 | 6.073239 | 5.837771 | 5.574465 | 6.677694 | 5.957336 | 6.102014 |
| 9486_at | 3.29595  | 3.738318 | 4.431744 | 4.132244 | 3.239957 | 4.373676 | 3.011192 | 3.830504 |
| 9487_at | 2.745419 | 3.066027 | 2.54232  | 3.26101  | 3.027194 | 2.556902 | 3.119862 | 2.477755 |
| 9488_at | 5.680675 | 5.201517 | 5.588554 | 5.899578 | 7.060924 | 5.141368 | 5.629835 | 6.186106 |
| 9489_at | 4.943424 | 4.197218 | 5.098085 | 5.46443  | 3.927961 | 4.79146  | 4.741401 | 4.713846 |
| 948_at  | 2.266148 | 2.247676 | 1.59503  | 2.36239  | 1.081774 | 1.502463 | 1.407558 | 2.861193 |
| 9491_at | 6.916047 | 6.629333 | 6.531439 | 6.906333 | 6.824523 | 6.626052 | 6.7606   | 6.418676 |
| 9493_at | 2.675945 | 3.457089 | 2.303032 | 3.38275  | 3.741272 | 2.571966 | 2.226075 | 5.136201 |
| 9495_at | 3.400013 | 2.804234 | 2.75346  | 2.973521 | 3.366799 | 3.301103 | 1.790653 | 3.539912 |
| 9496_at | 2.703689 | 2.597305 | 3.151639 | 2.876495 | 2.805779 | 2.42095  | 2.630605 | 2.69899  |
| 9497_at | 3.43652  | 3.823387 | 3.563336 | 3.377072 | 2.957491 | 2.596082 | 3.204685 | 3.617713 |
| 9498_at | 1.365129 | 2.029256 | 1.204398 | 1.330948 | 1.891528 | 2.201617 | 1.483407 | 1.916546 |
| 9499_at | 2.173374 | 1.322228 | 1.476656 | 2.45751  | 2.105575 | 1.576683 | 1.520864 | 1.421433 |
| 949_at  | 4.442814 | 3.835821 | 5.428108 | 4.26049  | 4.970115 | 4.45148  | 4.857742 | 4.290188 |
| 94_at   | 5.563133 | 6.361142 | 5.873977 | 6.429063 | 5.855339 | 6.388799 | 6.041932 | 5.52984  |
| 9500_at | 7.368835 | 7.387666 | 7.696551 | 7.304406 | 6.689382 | 7.679662 | 7.582186 | 7.201271 |
| 9501_at | 4.468341 | 2.940715 | 4.421914 | 4.469499 | 3.183314 | 3.423642 | 3.111685 | 2.157754 |
| 9502_at | 4.57253  | 5.79188  | 5.978948 | 4.375253 | 4.493126 | 3.544983 | 5.330395 | 4.48527  |
| 9506_at | 1.238358 | 1.395735 | 1.55869  | 1.874253 | 1.733893 | 1.084468 | 0.871566 | 1.651529 |
| 9507_at | 2.140676 | 2.027963 | 2.29253  | 2.534864 | 3.37503  | 2.674297 | 2.541013 | 2.619867 |
| 9508_at | 2.16189  | 1.688368 | 1.872431 | 2.432197 | 2.118775 | 2.230999 | 2.333662 | 2.406391 |
| 9509_at | 2.833364 | 2.568613 | 3.256833 | 4.044405 | 2.620346 | 2.21718  | 2.986736 | 2.667755 |
| 950_at  | 8.413566 | 8.785878 | 8.77501  | 8.655855 | 8.894662 | 8.772521 | 8.651205 | 8.886299 |
| 9510_at | 5.867465 | 6.307087 | 5.470259 | 6.073874 | 6.420326 | 5.237948 | 6.606254 | 6.741139 |
| 9512_at | 7.11924  | 6.758307 | 6.972762 | 6.826865 | 6.799159 | 6.503425 | 6.404784 | 7.230781 |
| 9513_at | 5.77569  | 5.815434 | 5.807943 | 5.643398 | 4.959562 | 5.651004 | 5.632867 | 4.714258 |
| 9514_at | 3.794098 | 3.072901 | 3.114629 | 2.929126 | 3.559924 | 3.595237 | 2.146722 | 3.054671 |
| 9515_at | 1.610692 | 1.218959 | 1.665626 | 1.583839 | 1.546007 | 1.730432 | 1.493426 | 1.780968 |
| 9516_at | 7.152252 | 6.75566  | 6.504507 | 7.085752 | 7.015443 | 6.656797 | 7.186595 | 6.723625 |
| 9517_at | 7.537319 | 6.987474 | 7.256951 | 7.523676 | 7.271383 | 7.010647 | 7.618663 | 7.129775 |
| 9518_at | 5.526884 | 4.002653 | 4.951291 | 4.821151 | 4.526705 | 4.960223 | 4.695413 | 4.133678 |
| 9519_at | 6.024116 | 5.792222 | 5.598117 | 6.213062 | 5.400604 | 5.771266 | 5.624808 | 5.610967 |
| 951_at  | 6.17286  | 5.000871 | 5.695924 | 6.544404 | 4.869524 | 5.804065 | 6.679798 | 5.697557 |
| 9520_at | 6.56408  | 7.136115 | 6.894606 | 6.197657 | 6.675718 | 6.261993 | 6.698818 | 7.142308 |
| 9522_at | 7.925477 | 7.710137 | 8.321788 | 7.98884  | 7.502612 | 7.503454 | 7.885371 | 8.24406  |
| 9524_at | 8.196044 | 7.801483 | 8.331332 | 8.006554 | 7.886565 | 8.372853 | 7.888019 | 7.345176 |
| 9525_at | 7.400319 | 7.938596 | 7.490473 | 7.581174 | 7.5753   | 7.119438 | 7.976662 | 8.388495 |
| 9526_at | 7.937718 | 6.729166 | 7.582719 | 7.843068 | 6.901518 | 6.869961 | 8.2056   | 6.722573 |

|          |          |          |          |          |          |          |          |          |
|----------|----------|----------|----------|----------|----------|----------|----------|----------|
| 9527_at  | 6.740069 | 7.103495 | 7.189378 | 7.050079 | 7.667082 | 7.249232 | 6.962056 | 7.0745   |
| 9528_at  | 9.529754 | 9.517257 | 9.564863 | 9.559904 | 9.761689 | 9.548134 | 9.662594 | 9.568331 |
| 9529_at  | 4.203124 | 4.253892 | 4.534481 | 4.811865 | 4.756698 | 4.650562 | 5.100447 | 4.575084 |
| 952_at   | 2.894956 | 2.29487  | 4.549862 | 3.11479  | 3.644249 | 1.846736 | 3.042626 | 2.734663 |
| 9530_at  | 5.187832 | 3.847656 | 5.3712   | 5.016882 | 4.662873 | 5.238983 | 5.731941 | 4.497904 |
| 9531_at  | 6.136277 | 6.21137  | 6.760109 | 6.479179 | 6.40593  | 6.609587 | 6.885449 | 5.882707 |
| 9532_at  | 4.115924 | 4.130396 | 4.294657 | 4.361976 | 4.661479 | 3.612813 | 4.420695 | 4.081819 |
| 9533_at  | 6.112897 | 6.061877 | 5.339768 | 5.543447 | 7.355765 | 5.318582 | 5.242381 | 5.579451 |
| 9534_at  | 5.122543 | 5.286622 | 5.345987 | 5.544699 | 5.608858 | 4.964647 | 5.193223 | 4.780107 |
| 9535_at  | 9.423497 | 8.773575 | 9.218139 | 9.675262 | 9.667907 | 9.523176 | 9.251103 | 8.828286 |
| 9536_at  | 2.842439 | 1.99373  | 2.592229 | 2.962993 | 3.268315 | 2.255071 | 1.874596 | 3.571267 |
| 9537_at  | 6.427859 | 5.67576  | 6.44377  | 6.635975 | 6.276387 | 5.98374  | 6.30725  | 4.978478 |
| 9538_at  | 6.718495 | 7.007902 | 6.970517 | 6.942875 | 7.359361 | 6.262442 | 6.759331 | 7.315025 |
| 953_at   | 2.544094 | 2.732285 | 2.776189 | 3.834315 | 2.992074 | 2.219448 | 3.232167 | 2.266733 |
| 9540_at  | 6.26103  | 5.435934 | 5.259305 | 5.148317 | 4.935799 | 5.074613 | 5.802085 | 4.739219 |
| 9541_at  | 5.974728 | 6.089579 | 5.990334 | 6.441312 | 6.415356 | 6.408104 | 5.955402 | 6.318877 |
| 9542_at  | 2.027992 | 2.460857 | 2.4999   | 2.159523 | 2.152447 | 2.797923 | 2.589815 | 1.764727 |
| 9543_at  | 2.462916 | 2.571873 | 2.203244 | 2.818219 | 2.195258 | 1.939643 | 2.835203 | 2.035364 |
| 9545_at  | 4.868015 | 5.796504 | 5.203796 | 5.123753 | 5.472644 | 5.73195  | 5.255784 | 5.028878 |
| 9546_at  | 2.686793 | 3.554062 | 3.27083  | 2.954821 | 3.224384 | 2.660434 | 2.12839  | 2.881102 |
| 9547_at  | 8.941798 | 7.989164 | 8.88792  | 4.728666 | 8.873116 | 8.710282 | 5.545105 | 8.852747 |
| 954_at   | 2.350337 | 2.305171 | 3.669453 | 2.763482 | 3.58415  | 3.439212 | 2.377566 | 2.354328 |
| 9550_at  | 7.287948 | 6.702689 | 6.858199 | 6.584314 | 6.267675 | 6.420765 | 7.227473 | 6.108989 |
| 9551_at  | 10.66132 | 10.37703 | 10.28937 | 10.60686 | 10.43087 | 10.49102 | 9.887571 | 9.783263 |
| 9552_at  | 6.175711 | 5.976512 | 6.192659 | 6.42683  | 6.333345 | 6.369445 | 6.29386  | 4.649467 |
| 9553_at  | 9.548079 | 9.500955 | 9.206281 | 9.344782 | 9.297001 | 9.07958  | 8.552398 | 9.187341 |
| 9554_at  | 6.542365 | 7.378624 | 7.354752 | 7.515897 | 6.932044 | 6.39146  | 7.265129 | 6.819306 |
| 9555_at  | 7.277954 | 7.400952 | 6.618835 | 6.904628 | 6.77512  | 6.942088 | 6.701709 | 7.347731 |
| 9556_at  | 9.335296 | 8.896435 | 9.170838 | 9.153076 | 9.103698 | 9.226587 | 9.143473 | 9.075563 |
| 9557_at  | 6.060986 | 5.405129 | 5.27162  | 5.21006  | 5.983613 | 5.628414 | 5.463338 | 6.103398 |
| 9559_at  | 7.545601 | 7.957578 | 7.516602 | 7.621881 | 7.777906 | 7.640737 | 7.47504  | 7.895285 |
| 955_at   | 3.582479 | 3.391166 | 3.457632 | 3.548596 | 3.473024 | 3.10858  | 5.201739 | 3.090899 |
| 9560_at  | 3.847292 | 3.672904 | 4.004591 | 5.970481 | 5.133461 | 4.715813 | 4.804731 | 5.382635 |
| 9562_at  | 5.525101 | 4.444667 | 5.470101 | 5.612179 | 5.158674 | 4.981116 | 5.114934 | 5.016426 |
| 9563_at  | 4.319896 | 4.447174 | 4.233593 | 3.842959 | 3.91725  | 5.019791 | 3.880788 | 3.870842 |
| 9564_at  | 4.18583  | 3.984358 | 4.731396 | 4.482368 | 4.384363 | 4.576167 | 4.508874 | 4.016301 |
| 9567_at  | 6.602191 | 6.505369 | 6.05034  | 6.24183  | 5.865499 | 5.728727 | 6.300946 | 5.596881 |
| 95681_at | 4.948363 | 4.229843 | 4.428829 | 4.283395 | 4.317565 | 4.733317 | 5.608192 | 4.690789 |
| 9568_at  | 1.965205 | 2.230876 | 2.46654  | 2.214182 | 2.652298 | 1.768181 | 2.360345 | 2.064205 |
| 9569_at  | 3.589376 | 3.214038 | 2.589089 | 3.990716 | 2.998773 | 4.60559  | 2.621299 | 3.542013 |
| 956_at   | 1.900843 | 2.221195 | 1.937078 | 2.78727  | 1.75934  | 2.761445 | 2.277054 | 1.737548 |
| 9570_at  | 6.114117 | 6.083346 | 6.138102 | 6.175961 | 5.930415 | 5.693903 | 5.68379  | 6.090156 |
| 9572_at  | 5.262287 | 5.046969 | 6.645532 | 8.019187 | 7.285832 | 4.659529 | 6.571704 | 4.125801 |
| 9573_at  | 1.420293 | 1.197778 | 1.391235 | 1.328536 | 2.126096 | 1.9597   | 1.553442 | 1.678719 |
| 9575_at  | 6.427126 | 6.352215 | 6.592808 | 6.364943 | 6.929926 | 6.303026 | 6.576627 | 6.637928 |
| 9576_at  | 1.319974 | 1.016407 | 1.62208  | 0.998524 | 1.510914 | 1.302893 | 1.118023 | 1.510475 |
| 9577_at  | 6.342217 | 6.066092 | 6.515449 | 6.299935 | 6.134937 | 5.978253 | 6.6207   | 6.250018 |
| 9578_at  | 6.980293 | 7.061721 | 7.138052 | 7.029343 | 6.733693 | 7.133875 | 7.365752 | 7.083603 |
| 957_at   | 5.83807  | 4.762013 | 5.726982 | 5.387887 | 5.851455 | 6.013532 | 5.054149 | 6.615024 |
| 9580_at  | 4.928616 | 5.911629 | 5.131703 | 5.406631 | 4.069598 | 5.437024 | 4.859377 | 4.510605 |
| 9581_at  | 7.489891 | 7.694583 | 7.776257 | 7.651248 | 7.902422 | 7.816661 | 7.585519 | 7.869085 |

|         |          |          |          |          |          |          |          |          |
|---------|----------|----------|----------|----------|----------|----------|----------|----------|
| 9583_at | 7.347682 | 7.43714  | 7.558146 | 8.067687 | 7.741336 | 7.082197 | 7.872992 | 7.279046 |
| 9584_at | 8.404369 | 8.469004 | 8.179693 | 8.10162  | 8.601052 | 8.175161 | 8.243176 | 8.611397 |
| 9585_at | 3.624473 | 3.183042 | 3.548643 | 3.697272 | 3.539417 | 4.125876 | 3.685947 | 3.929549 |
| 9586_at | 2.344448 | 2.568338 | 2.736314 | 3.271968 | 2.010815 | 2.794846 | 3.424547 | 2.596605 |
| 9587_at | 6.642273 | 6.113503 | 6.657247 | 6.228971 | 6.352088 | 5.876229 | 5.979168 | 6.507433 |
| 9588_at | 9.648359 | 9.704723 | 9.51768  | 9.293144 | 9.398112 | 9.551092 | 9.225704 | 9.659311 |
| 9589_at | 5.948914 | 6.321674 | 6.011907 | 5.679769 | 6.395686 | 5.596293 | 6.109197 | 6.757526 |
| 958_at  | 5.170505 | 4.396285 | 5.802879 | 6.100852 | 5.076852 | 4.91319  | 5.261301 | 5.818161 |
| 9590_at | 4.905042 | 5.997405 | 5.66341  | 6.368703 | 5.554538 | 5.829304 | 5.556682 | 5.512675 |
| 9592_at | 5.882273 | 6.068432 | 5.860756 | 6.040361 | 6.175663 | 5.894272 | 5.637507 | 5.608277 |
| 9595_at | 3.419798 | 3.865987 | 2.896976 | 3.300758 | 2.350419 | 2.700091 | 3.711153 | 2.982409 |
| 9597_at | 2.881014 | 3.068187 | 4.500442 | 3.016478 | 2.455493 | 3.546298 | 3.821757 | 2.208926 |
| 959_at  | 1.00809  | 1.282759 | 1.014928 | 1.170066 | 0.84264  | 0.981493 | 1.354867 | 1.650078 |
| 9600_at | 4.342708 | 3.841135 | 3.844579 | 4.384407 | 2.881934 | 4.174663 | 3.446838 | 3.172654 |
| 9601_at | 6.390072 | 7.314683 | 7.133376 | 6.691329 | 6.765302 | 7.080634 | 6.658618 | 7.044267 |
| 9603_at | 6.008715 | 5.676038 | 5.792483 | 5.75026  | 5.42982  | 5.032926 | 5.305401 | 5.760036 |
| 9604_at | 6.205282 | 6.014199 | 6.363513 | 6.387205 | 5.340225 | 5.468454 | 6.257123 | 6.398318 |
| 9605_at | 2.834816 | 1.877124 | 2.204001 | 2.31338  | 2.048208 | 2.667022 | 2.581416 | 2.618743 |
| 9607_at | 2.05395  | 1.790956 | 1.769025 | 2.607486 | 1.867622 | 2.009455 | 2.273415 | 2.064151 |
| 9609_at | 3.963045 | 3.026244 | 4.46959  | 3.337176 | 2.833542 | 3.466213 | 3.557097 | 3.287722 |
| 960_at  | 6.187529 | 6.015726 | 6.227893 | 6.811565 | 7.341306 | 6.743687 | 6.254856 | 7.268134 |
| 9610_at | 3.346047 | 3.057707 | 3.474213 | 4.120483 | 4.6118   | 3.434354 | 3.348543 | 3.500159 |
| 9611_at | 6.793592 | 6.962758 | 6.901139 | 6.72043  | 6.689332 | 7.166726 | 7.035927 | 7.358486 |
| 9612_at | 6.111034 | 5.972727 | 6.405879 | 6.457858 | 5.947352 | 6.651176 | 6.98481  | 5.276785 |
| 9615_at | 4.262346 | 4.341708 | 5.144532 | 5.098064 | 6.637752 | 5.335772 | 6.606288 | 5.849505 |
| 9616_at | 7.664114 | 7.385194 | 7.287733 | 7.582934 | 8.042304 | 7.33531  | 7.424657 | 7.256178 |
| 9617_at | 3.703416 | 4.993547 | 3.50502  | 4.402006 | 4.205069 | 3.298328 | 4.026568 | 4.979626 |
| 9618_at | 4.601637 | 4.640445 | 4.048904 | 4.31902  | 4.286189 | 4.39015  | 4.014032 | 3.929115 |
| 9619_at | 4.734229 | 2.937961 | 2.428116 | 4.019267 | 2.963268 | 4.125867 | 3.210482 | 2.918219 |
| 961_at  | 8.126896 | 8.232886 | 8.540758 | 7.80829  | 7.719762 | 7.089039 | 8.042327 | 8.613286 |
| 9620_at | 2.490867 | 2.722663 | 1.564916 | 1.881665 | 3.310883 | 2.89577  | 2.995934 | 1.97454  |
| 9622_at | 1.677861 | 1.952256 | 2.287911 | 1.415219 | 2.043087 | 2.160464 | 1.710073 | 1.707723 |
| 9623_at | 1.395737 | 1.09874  | 1.660788 | 1.344042 | 1.448016 | 1.57875  | 1.972948 | 1.973281 |
| 9625_at | 2.879243 | 2.662004 | 3.120076 | 3.079385 | 2.558222 | 2.539428 | 3.006051 | 3.031358 |
| 9626_at | 1.440457 | 1.440457 | 1.843745 | 1.309729 | 1.490396 | 1.362393 | 1.601751 | 1.835648 |
| 9627_at | 2.467861 | 2.401805 | 2.160465 | 3.086611 | 2.051383 | 2.493177 | 2.289105 | 2.509079 |
| 9628_at | 1.53642  | 2.105681 | 1.312013 | 1.421182 | 2.697019 | 2.076536 | 2.942254 | 2.163743 |
| 9629_at | 2.095908 | 1.433726 | 2.173092 | 1.422869 | 1.941243 | 1.591856 | 1.580926 | 1.646207 |
| 962_at  | 4.323766 | 4.075198 | 4.091381 | 4.515596 | 4.061531 | 4.831069 | 4.339913 | 5.644933 |
| 9630_at | 5.388016 | 5.116865 | 4.811354 | 4.862915 | 5.323246 | 5.199901 | 5.750145 | 3.220621 |
| 9631_at | 5.175619 | 5.947788 | 5.800395 | 6.126378 | 5.82274  | 5.499569 | 5.296165 | 5.77008  |
| 9632_at | 5.724465 | 5.95705  | 5.748373 | 5.663241 | 5.953375 | 5.751556 | 6.082348 | 5.57113  |
| 9633_at | 1.4132   | 1.511352 | 2.13203  | 1.733534 | 2.369892 | 2.106965 | 2.022164 | 2.347816 |
| 9635_at | 1.005795 | 1.132947 | 1.310078 | 1.146575 | 1.452273 | 1.151017 | 1.601117 | 1.749544 |
| 9636_at | 8.90466  | 8.194617 | 8.052173 | 8.425574 | 8.221964 | 8.96382  | 8.441841 | 7.522535 |
| 9637_at | 7.792559 | 6.946458 | 7.618099 | 6.732596 | 7.335362 | 7.02345  | 6.536021 | 7.970054 |
| 9638_at | 5.036563 | 4.903489 | 5.014599 | 5.020805 | 5.407209 | 4.346731 | 5.050796 | 5.208368 |
| 9639_at | 6.11955  | 7.004917 | 6.211065 | 6.193871 | 5.740681 | 6.016841 | 6.102104 | 6.087138 |
| 963_at  | 6.199216 | 5.536375 | 5.164005 | 6.417546 | 5.975514 | 7.098196 | 6.176599 | 4.204081 |
| 9640_at | 6.448243 | 6.59085  | 6.424594 | 6.685259 | 5.37394  | 6.172638 | 6.392945 | 5.325597 |
| 9641_at | 3.561135 | 2.815555 | 2.490425 | 1.457286 | 3.487092 | 3.16159  | 3.452637 | 1.910606 |

|          |          |          |          |          |          |          |          |          |
|----------|----------|----------|----------|----------|----------|----------|----------|----------|
| 9643_at  | 7.672283 | 7.982007 | 7.545782 | 8.17074  | 7.182545 | 7.6948   | 6.899042 | 7.752496 |
| 9644_at  | 3.296341 | 3.295095 | 4.274021 | 3.761472 | 4.332158 | 3.007834 | 3.014201 | 3.59885  |
| 96459_at | 6.153297 | 6.574027 | 6.692705 | 6.542352 | 6.211772 | 5.806042 | 6.072935 | 6.55104  |
| 9645_at  | 6.162925 | 6.318299 | 6.083791 | 6.793472 | 4.943562 | 6.428532 | 5.586917 | 6.322743 |
| 9646_at  | 5.972207 | 6.888087 | 6.726984 | 5.987331 | 6.608177 | 6.608532 | 6.408069 | 7.045632 |
| 9647_at  | 4.812677 | 5.079589 | 4.682638 | 5.759013 | 3.961199 | 5.439559 | 4.286284 | 4.650172 |
| 9648_at  | 6.678936 | 7.367135 | 6.718523 | 7.147412 | 6.654232 | 7.227864 | 6.904486 | 6.937446 |
| 9649_at  | 3.185816 | 2.550709 | 3.869679 | 3.076097 | 2.555522 | 2.848547 | 3.100247 | 3.52457  |
| 9650_at  | 5.046099 | 5.962402 | 4.796471 | 6.025166 | 5.131981 | 5.791846 | 5.546536 | 5.574567 |
| 9651_at  | 3.406804 | 3.338041 | 3.581089 | 3.80811  | 3.856074 | 3.924311 | 3.169662 | 3.459481 |
| 9652_at  | 6.920005 | 7.436464 | 7.084066 | 7.209905 | 7.349555 | 6.93029  | 7.351682 | 7.618147 |
| 9653_at  | 7.414216 | 7.202688 | 7.069264 | 7.446201 | 7.518499 | 7.494442 | 7.718929 | 6.34421  |
| 9654_at  | 5.193701 | 5.159751 | 3.449481 | 4.797821 | 3.972002 | 5.29274  | 3.683941 | 4.409055 |
| 9655_at  | 4.432595 | 4.984218 | 3.779567 | 4.775875 | 5.349146 | 4.644073 | 5.148993 | 4.210422 |
| 9656_at  | 4.299544 | 3.848613 | 4.560032 | 5.010019 | 4.372919 | 5.165764 | 4.455876 | 4.156835 |
| 9657_at  | 3.473214 | 3.959967 | 3.691142 | 3.059379 | 2.556336 | 2.732848 | 3.479238 | 5.101144 |
| 9658_at  | 3.888462 | 4.111298 | 3.562392 | 3.75797  | 2.895783 | 3.631553 | 3.785866 | 3.553287 |
| 96597_at | 2.486578 | 2.624872 | 1.476572 | 3.282309 | 1.971324 | 1.938517 | 3.521184 | 2.855126 |
| 9659_at  | 9.574376 | 9.487804 | 8.613262 | 7.816263 | 8.146254 | 8.524713 | 8.603961 | 9.330752 |
| 965_at   | 5.85098  | 5.244487 | 5.061607 | 5.505735 | 5.133134 | 5.099183 | 4.920686 | 6.247669 |
| 96610_at | 0.752228 | 2.372143 | 2.739345 | 1.985112 | 1.540741 | 2.096749 | 1.389969 | 4.530771 |
| 9662_at  | 4.94557  | 5.039708 | 4.248232 | 5.801077 | 5.745762 | 5.160522 | 4.010707 | 5.542566 |
| 9663_at  | 6.088325 | 5.563334 | 5.757098 | 5.97304  | 6.163069 | 5.934895 | 4.603459 | 5.004972 |
| 9665_at  | 7.063914 | 7.290365 | 7.076627 | 7.097115 | 6.874347 | 6.949705 | 6.746565 | 6.909591 |
| 9666_at  | 5.449358 | 5.436081 | 5.588155 | 5.443089 | 5.95318  | 4.482585 | 5.588995 | 5.753886 |
| 9667_at  | 7.02327  | 6.998569 | 7.140918 | 6.897524 | 7.076343 | 7.412425 | 7.170534 | 7.264906 |
| 9668_at  | 5.279084 | 4.538571 | 6.35229  | 5.516559 | 6.119915 | 4.625682 | 4.790618 | 5.598459 |
| 9669_at  | 6.690374 | 7.511983 | 7.218627 | 6.904216 | 7.703721 | 7.51207  | 7.648811 | 7.735914 |
| 966_at   | 8.531044 | 8.316392 | 8.685792 | 8.639845 | 8.516989 | 8.495496 | 8.65428  | 8.640949 |
| 9670_at  | 6.31579  | 5.881692 | 6.072641 | 6.059784 | 5.852988 | 6.317468 | 5.273928 | 5.141282 |
| 9671_at  | 1.84566  | 2.312633 | 1.687988 | 2.584692 | 2.120081 | 4.355038 | 2.206308 | 2.532977 |
| 9672_at  | 6.827317 | 6.311806 | 7.098944 | 7.445134 | 6.748113 | 7.187783 | 7.282737 | 4.586437 |
| 9673_at  | 5.130301 | 5.075962 | 5.838912 | 4.515865 | 4.843529 | 5.475209 | 5.216833 | 5.397214 |
| 9674_at  | 8.235597 | 8.311056 | 8.792223 | 8.655526 | 8.993485 | 7.990375 | 8.915191 | 6.729627 |
| 9675_at  | 4.798776 | 4.941217 | 4.91865  | 5.155346 | 4.994876 | 4.959178 | 4.640001 | 6.115283 |
| 96764_at | 5.815087 | 5.536637 | 5.646057 | 5.81557  | 6.526945 | 5.855312 | 5.884974 | 6.174184 |
| 9677_at  | 5.312635 | 3.923811 | 5.698856 | 5.761181 | 4.178996 | 5.915857 | 5.967702 | 4.132793 |
| 9678_at  | 6.086238 | 5.866826 | 5.517505 | 4.742794 | 4.847069 | 5.291503 | 5.270347 | 5.234085 |
| 9679_at  | 4.829046 | 4.616519 | 4.74847  | 5.275741 | 4.364925 | 4.95842  | 5.235041 | 3.787117 |
| 967_at   | 9.522381 | 9.871431 | 9.731836 | 9.99288  | 10.1198  | 9.94917  | 9.887017 | 9.869685 |
| 9681_at  | 4.230939 | 4.222142 | 3.821516 | 4.031451 | 4.436908 | 3.801166 | 4.084928 | 3.584081 |
| 9682_at  | 5.524044 | 5.866928 | 5.739803 | 5.205555 | 6.423793 | 5.624502 | 5.54389  | 5.306895 |
| 9683_at  | 5.470876 | 4.566688 | 5.367787 | 5.417327 | 5.684251 | 4.554249 | 5.893305 | 5.798006 |
| 9684_at  | 3.373926 | 3.402344 | 4.486266 | 3.800266 | 3.036546 | 2.63426  | 3.441593 | 2.995774 |
| 9685_at  | 7.737637 | 7.671025 | 7.448817 | 7.903911 | 7.873379 | 7.407354 | 7.515874 | 7.945489 |
| 9686_at  | 6.242725 | 6.812145 | 5.991594 | 6.44309  | 6.421454 | 6.018089 | 6.207308 | 6.451896 |
| 9687_at  | 1.886886 | 2.058447 | 2.838958 | 1.911665 | 2.662363 | 2.080294 | 1.313603 | 1.501504 |
| 9688_at  | 4.913634 | 5.98235  | 5.214543 | 5.607186 | 5.905881 | 5.773811 | 5.428809 | 5.28649  |
| 9689_at  | 5.480845 | 4.380344 | 4.572282 | 3.973764 | 4.658334 | 5.048337 | 4.611822 | 4.235543 |
| 968_at   | 8.094931 | 7.465798 | 7.573652 | 8.600799 | 7.311912 | 7.79166  | 7.811135 | 7.245347 |
| 9690_at  | 6.559644 | 6.592166 | 6.445889 | 6.895026 | 6.249105 | 6.586242 | 6.362894 | 6.487595 |

|         |          |          |          |          |          |          |          |          |
|---------|----------|----------|----------|----------|----------|----------|----------|----------|
| 9692_at | 5.86318  | 6.186269 | 5.746669 | 5.803498 | 5.12744  | 5.642768 | 5.584949 | 6.125639 |
| 9693_at | 6.075495 | 6.474495 | 6.569817 | 6.233465 | 6.516787 | 6.966317 | 6.46911  | 6.174408 |
| 9694_at | 6.705713 | 6.450713 | 6.029543 | 6.01757  | 6.030508 | 5.967551 | 6.089712 | 5.891037 |
| 9695_at | 4.760132 | 4.268544 | 4.168875 | 4.665951 | 5.04614  | 3.644586 | 3.631527 | 3.662796 |
| 9696_at | 3.041703 | 2.237145 | 2.053535 | 2.765562 | 3.209427 | 3.747623 | 3.066122 | 2.126606 |
| 9697_at | 9.008348 | 9.299774 | 9.423142 | 8.994494 | 8.852724 | 8.300447 | 9.405569 | 8.371868 |
| 9698_at | 6.500432 | 6.835228 | 7.038293 | 6.845308 | 6.988183 | 6.971791 | 6.620583 | 6.725262 |
| 9699_at | 1.228212 | 1.383399 | 1.416194 | 1.125358 | 1.309247 | 1.603943 | 1.495071 | 1.442377 |
| 969_at  | 3.985007 | 1.835366 | 4.329428 | 2.155623 | 1.903639 | 4.668567 | 1.820302 | 1.791384 |
| 9700_at | 3.13068  | 2.801134 | 2.16299  | 1.644704 | 2.339953 | 1.65015  | 2.3165   | 1.977145 |
| 9701_at | 3.719739 | 4.813429 | 4.531043 | 5.008847 | 3.623754 | 4.713662 | 5.362617 | 3.783827 |
| 9702_at | 6.794882 | 5.56431  | 5.653365 | 5.962634 | 5.548683 | 5.189334 | 5.871793 | 7.715112 |
| 9703_at | 7.265037 | 7.383817 | 7.592749 | 7.367491 | 7.022627 | 7.264086 | 7.522227 | 7.12697  |
| 9704_at | 2.494755 | 2.298496 | 2.58346  | 2.873742 | 2.423034 | 2.229895 | 2.912961 | 2.902222 |
| 9705_at | 1.868999 | 1.615555 | 1.169363 | 1.3817   | 2.020417 | 1.760414 | 1.037133 | 2.360084 |
| 9706_at | 5.804216 | 5.266671 | 5.7472   | 5.11275  | 5.158686 | 4.95435  | 5.339385 | 6.490567 |
| 9708_at | 2.729544 | 2.669133 | 1.854938 | 2.029747 | 2.421288 | 2.350397 | 1.210387 | 4.239161 |
| 9709_at | 8.023489 | 8.249818 | 7.505629 | 7.565226 | 7.382469 | 7.799634 | 7.524493 | 8.135923 |
| 970_at  | 3.115727 | 3.626802 | 3.600866 | 3.795112 | 3.309503 | 2.31848  | 3.196163 | 3.34893  |
| 9710_at | 6.932678 | 6.646118 | 6.668415 | 7.267972 | 6.989782 | 7.368532 | 7.113123 | 6.521109 |
| 9711_at | 5.208891 | 4.729483 | 4.947343 | 4.797274 | 4.637411 | 5.125296 | 5.088192 | 4.55714  |
| 9712_at | 5.070939 | 5.327565 | 4.832253 | 5.052987 | 4.976902 | 4.930804 | 5.266365 | 5.382275 |
| 9715_at | 1.709203 | 1.776144 | 1.760498 | 2.164557 | 1.813303 | 1.010754 | 2.894544 | 1.479238 |
| 9716_at | 6.323456 | 6.748629 | 6.630012 | 6.065829 | 7.001318 | 6.341843 | 6.748284 | 6.910802 |
| 9717_at | 2.23515  | 2.033227 | 1.959471 | 1.24434  | 1.876915 | 2.469641 | 2.361262 | 1.782966 |
| 9718_at | 2.443901 | 2.046648 | 2.205772 | 2.70952  | 3.195062 | 2.737496 | 2.447182 | 3.523882 |
| 9719_at | 3.157986 | 3.50112  | 3.265783 | 2.730914 | 2.606104 | 3.447503 | 3.568853 | 3.189184 |
| 971_at  | 3.239138 | 2.350238 | 2.887461 | 3.262677 | 2.729422 | 2.746705 | 2.250755 | 2.969998 |
| 9721_at | 2.315737 | 2.371776 | 2.804745 | 2.147679 | 2.444668 | 3.176259 | 1.857883 | 2.85388  |
| 9722_at | 4.489135 | 3.99163  | 5.033601 | 4.74552  | 3.935907 | 5.177088 | 4.680988 | 4.327984 |
| 9723_at | 1.603505 | 1.596479 | 1.264155 | 1.811684 | 1.991001 | 1.211044 | 1.5241   | 1.547064 |
| 9725_at | 6.305885 | 6.108341 | 6.322764 | 6.424162 | 6.084395 | 6.691172 | 6.725012 | 5.646786 |
| 9726_at | 2.638966 | 3.907586 | 2.863746 | 3.007509 | 3.02848  | 3.803518 | 2.785891 | 3.296906 |
| 9727_at | 4.759814 | 4.90893  | 3.226316 | 4.480338 | 4.353022 | 4.95537  | 4.728528 | 6.029207 |
| 9728_at | 7.522169 | 7.261575 | 7.285316 | 7.220648 | 7.619374 | 7.16936  | 7.607716 | 7.746453 |
| 972_at  | 10.56199 | 10.27418 | 10.18195 | 10.63237 | 10.30615 | 10.34552 | 10.38631 | 9.9551   |
| 9730_at | 5.268508 | 5.671832 | 6.021674 | 5.351886 | 6.390599 | 5.843595 | 4.362569 | 6.038148 |
| 9731_at | 6.766466 | 6.862872 | 6.661216 | 7.099127 | 6.557044 | 6.998873 | 6.750349 | 6.575711 |
| 9732_at | 5.689976 | 6.49831  | 6.224797 | 6.396758 | 6.534293 | 6.270613 | 6.411693 | 5.821082 |
| 9733_at | 6.462708 | 6.651404 | 6.549299 | 6.189224 | 6.586914 | 6.222727 | 6.567598 | 7.011148 |
| 9734_at | 3.869186 | 4.07931  | 3.315829 | 3.927256 | 2.796258 | 3.621016 | 3.008597 | 3.520324 |
| 9735_at | 2.936336 | 3.091374 | 2.367074 | 3.161279 | 2.600757 | 2.966903 | 3.976492 | 4.084745 |
| 9736_at | 6.316209 | 6.955987 | 7.014898 | 7.093995 | 6.906247 | 6.333208 | 6.736621 | 7.289657 |
| 9737_at | 3.630563 | 3.894901 | 2.986432 | 5.201242 | 4.363851 | 3.832482 | 4.626657 | 3.130555 |
| 9738_at | 6.084009 | 5.836331 | 5.9941   | 5.425022 | 4.705463 | 5.554757 | 4.756833 | 6.696856 |
| 9739_at | 4.782505 | 4.039713 | 4.811665 | 4.786048 | 4.070689 | 5.045894 | 4.364777 | 3.674725 |
| 973_at  | 3.258696 | 2.874866 | 3.01083  | 2.409929 | 2.289083 | 1.870264 | 2.317484 | 2.344868 |
| 9741_at | 9.923822 | 10.12439 | 10.04236 | 10.21268 | 10.30504 | 10.06683 | 9.898544 | 10.2332  |
| 9742_at | 3.657746 | 4.015313 | 4.431284 | 2.861048 | 3.743657 | 3.130529 | 3.527555 | 3.234381 |
| 9743_at | 2.713014 | 4.144538 | 3.476524 | 3.133159 | 4.475756 | 4.622286 | 3.194102 | 3.848664 |
| 9744_at | 3.366121 | 2.124054 | 1.810156 | 1.536741 | 2.460321 | 2.764217 | 2.656849 | 2.250847 |

|         |          |          |          |          |          |          |          |          |
|---------|----------|----------|----------|----------|----------|----------|----------|----------|
| 9745_at | 1.442601 | 1.672185 | 1.811284 | 1.547277 | 1.808321 | 1.309383 | 1.3715   | 1.286895 |
| 9746_at | 4.76525  | 4.78621  | 5.523636 | 5.846707 | 5.034447 | 6.093391 | 5.475458 | 5.722569 |
| 9747_at | 2.779786 | 3.878135 | 3.18893  | 3.328302 | 3.460488 | 3.753075 | 3.292002 | 3.460309 |
| 9748_at | 9.458716 | 9.6943   | 9.451154 | 9.26178  | 9.689621 | 9.413006 | 9.662543 | 10.03149 |
| 9749_at | 7.640932 | 7.650924 | 8.144232 | 8.09817  | 8.100717 | 7.365234 | 8.07713  | 7.915703 |
| 974_at  | 4.239361 | 3.64404  | 3.819807 | 4.182374 | 3.214214 | 4.012536 | 3.731701 | 3.606847 |
| 9750_at | 4.400341 | 5.060977 | 5.034543 | 4.985464 | 3.390964 | 4.439635 | 5.181226 | 3.946324 |
| 9751_at | 3.432075 | 4.559142 | 4.748679 | 4.342752 | 3.948354 | 3.433309 | 4.155795 | 3.700955 |
| 9752_at | 2.864524 | 1.953511 | 2.255374 | 1.882292 | 3.341662 | 2.094347 | 2.220585 | 1.796891 |
| 9753_at | 2.562352 | 3.42793  | 1.716342 | 2.515097 | 1.983765 | 2.606834 | 2.463993 | 3.195336 |
| 9754_at | 4.779257 | 4.388988 | 4.077528 | 5.196461 | 4.056062 | 4.737921 | 5.043107 | 3.182813 |
| 9755_at | 3.037805 | 2.729203 | 2.796826 | 2.648017 | 2.94512  | 2.304234 | 3.200116 | 2.815346 |
| 9757_at | 3.454646 | 4.017831 | 4.228845 | 4.523609 | 2.50209  | 3.991114 | 3.683779 | 3.695511 |
| 9758_at | 1.698774 | 1.331572 | 1.748922 | 1.463298 | 1.76479  | 1.012901 | 1.2849   | 1.493331 |
| 9759_at | 3.252272 | 3.431277 | 4.205462 | 3.517247 | 3.097086 | 4.233436 | 4.237991 | 3.264414 |
| 975_at  | 11.02179 | 10.80508 | 10.96228 | 10.89358 | 10.95294 | 10.74728 | 11.35106 | 10.56851 |
| 9760_at | 3.975944 | 2.91842  | 3.79524  | 3.494031 | 3.783479 | 3.41685  | 2.821028 | 2.476306 |
| 9761_at | 8.09104  | 8.259138 | 8.64692  | 8.257355 | 8.427091 | 8.106854 | 8.319303 | 8.510845 |
| 9762_at | 2.169488 | 3.233443 | 2.972949 | 2.489572 | 3.171493 | 2.545556 | 2.693098 | 2.529072 |
| 9764_at | 3.782851 | 2.63233  | 3.236759 | 3.971165 | 3.442468 | 3.348126 | 3.802359 | 3.631891 |
| 9765_at | 5.438712 | 5.765047 | 5.52633  | 5.651345 | 5.371576 | 5.262655 | 5.350583 | 5.742031 |
| 9766_at | 5.74593  | 5.8148   | 6.843672 | 6.316236 | 5.648581 | 6.034171 | 6.587494 | 4.487549 |
| 9767_at | 5.403426 | 5.854434 | 5.467094 | 5.876376 | 6.80593  | 5.500255 | 6.151117 | 5.532055 |
| 9768_at | 2.507415 | 3.549377 | 2.595637 | 3.618061 | 2.82919  | 2.18759  | 2.833304 | 3.573064 |
| 976_at  | 7.381172 | 7.632912 | 8.084168 | 8.554814 | 7.716608 | 8.030163 | 8.27507  | 6.741459 |
| 9770_at | 4.029162 | 4.805486 | 3.091306 | 4.702855 | 4.454943 | 4.312987 | 4.307711 | 3.559038 |
| 9771_at | 6.554511 | 6.208825 | 6.142778 | 6.52031  | 5.213282 | 6.125819 | 6.326142 | 5.813896 |
| 9772_at | 5.212622 | 5.411054 | 5.998563 | 5.850523 | 4.984288 | 5.684145 | 6.072049 | 4.133968 |
| 9774_at | 6.63356  | 6.738408 | 6.659354 | 6.328927 | 6.795066 | 6.76436  | 5.524918 | 7.46051  |
| 9775_at | 6.125631 | 6.132609 | 5.684561 | 6.141436 | 5.322294 | 5.879314 | 5.002723 | 5.334894 |
| 9776_at | 6.242645 | 6.269926 | 6.006152 | 6.026742 | 5.451276 | 6.536162 | 6.123215 | 6.016355 |
| 9777_at | 6.399376 | 6.797174 | 6.915378 | 6.649222 | 6.369414 | 7.001013 | 7.253433 | 6.174231 |
| 9778_at | 5.563716 | 5.392222 | 5.51387  | 4.729602 | 4.744277 | 5.473387 | 5.343203 | 5.83986  |
| 9779_at | 6.588525 | 6.153092 | 6.403334 | 6.5004   | 6.218926 | 6.32144  | 6.297648 | 6.148172 |
| 977_at  | 8.241667 | 8.422294 | 8.908637 | 8.879299 | 8.477241 | 8.77763  | 8.890689 | 7.398898 |
| 9780_at | 5.984284 | 5.579706 | 6.192345 | 6.282075 | 5.580497 | 6.252445 | 7.139844 | 4.16369  |
| 9781_at | 5.484106 | 5.552759 | 6.266855 | 6.345733 | 6.41447  | 6.214093 | 6.214094 | 4.756368 |
| 9782_at | 8.592472 | 8.512358 | 8.391536 | 8.347702 | 8.939235 | 8.334112 | 8.534111 | 8.886088 |
| 9783_at | 3.272966 | 2.956322 | 3.26294  | 4.214996 | 3.874201 | 3.577636 | 3.502535 | 2.232348 |
| 9784_at | 5.690122 | 5.486285 | 5.668055 | 5.277104 | 5.863343 | 5.47731  | 5.291883 | 5.770191 |
| 9785_at | 4.77436  | 5.940654 | 5.535755 | 5.594294 | 5.039008 | 5.613273 | 5.138473 | 5.323928 |
| 9786_at | 5.111062 | 5.472076 | 5.268438 | 4.998997 | 4.717722 | 5.183134 | 5.236117 | 5.052405 |
| 9787_at | 1.487724 | 3.341986 | 1.647671 | 2.392631 | 2.010334 | 1.775294 | 1.793624 | 2.354407 |
| 9788_at | 7.8215   | 8.369133 | 8.291377 | 8.358025 | 8.058516 | 8.576696 | 8.570744 | 8.449697 |
| 978_at  | 5.15873  | 5.789003 | 6.327885 | 5.667988 | 4.138074 | 6.436681 | 4.538104 | 3.745154 |
| 9790_at | 5.625583 | 5.751922 | 5.813835 | 5.794135 | 6.619599 | 5.804414 | 5.076373 | 5.840674 |
| 9791_at | 5.828521 | 5.880686 | 6.590392 | 6.580292 | 6.362706 | 6.954212 | 6.018082 | 7.376379 |
| 9792_at | 4.326973 | 4.539036 | 4.415837 | 4.613723 | 3.86184  | 3.887686 | 4.134783 | 4.049961 |
| 9793_at | 5.531538 | 6.419562 | 6.161525 | 6.335413 | 5.566455 | 6.028951 | 6.367322 | 6.780579 |
| 9794_at | 6.02315  | 5.996912 | 5.652259 | 5.492812 | 5.849378 | 5.373793 | 5.991848 | 5.305372 |
| 9796_at | 2.842619 | 3.166542 | 3.141923 | 3.438652 | 2.521154 | 2.904675 | 3.351103 | 2.924027 |

|         |          |          |          |          |          |          |          |          |
|---------|----------|----------|----------|----------|----------|----------|----------|----------|
| 9797_at | 5.168269 | 6.047352 | 5.383804 | 4.644479 | 4.952656 | 6.064538 | 5.66797  | 5.154176 |
| 9798_at | 8.540936 | 7.962499 | 8.191404 | 8.690484 | 8.623724 | 8.711357 | 8.213934 | 8.642528 |
| 97_at   | 3.852753 | 4.632592 | 4.874559 | 3.693411 | 3.880429 | 4.094537 | 3.64814  | 3.707416 |
| 9801_at | 6.005205 | 6.296627 | 6.434127 | 6.264029 | 6.893818 | 6.121419 | 6.297921 | 6.260504 |
| 9802_at | 9.221624 | 8.581073 | 9.106256 | 9.172566 | 8.742935 | 9.020887 | 9.236309 | 8.379092 |
| 9804_at | 9.077238 | 9.570122 | 9.806573 | 9.119708 | 9.454875 | 9.413148 | 9.596789 | 8.969847 |
| 9805_at | 7.029396 | 6.980835 | 7.408744 | 7.269929 | 7.589778 | 7.335576 | 7.567569 | 7.573365 |
| 9806_at | 8.371814 | 8.216067 | 8.983311 | 8.50584  | 8.372371 | 8.23257  | 9.463337 | 8.618958 |
| 9807_at | 5.661752 | 5.960463 | 4.770735 | 5.199377 | 5.388559 | 5.578496 | 5.093616 | 5.407313 |
| 9808_at | 1.50704  | 3.305481 | 1.856079 | 1.694577 | 2.102147 | 2.620849 | 3.45242  | 2.184231 |
| 9810_at | 4.297554 | 5.054385 | 4.376142 | 4.532602 | 4.227362 | 4.819318 | 4.506532 | 4.126419 |
| 9811_at | 4.584662 | 3.889921 | 4.883411 | 4.436755 | 3.897568 | 5.119438 | 5.398561 | 2.525432 |
| 9812_at | 4.727028 | 4.887489 | 4.755085 | 5.182296 | 4.556246 | 5.070109 | 4.442231 | 3.862476 |
| 9813_at | 8.813261 | 8.430728 | 8.685213 | 8.736583 | 8.846774 | 8.980204 | 8.755156 | 8.835225 |
| 9814_at | 3.959257 | 3.512307 | 3.602358 | 3.828471 | 3.09815  | 3.48781  | 2.715757 | 3.279134 |
| 9815_at | 6.318033 | 6.393733 | 6.417779 | 7.270813 | 6.514338 | 6.463362 | 6.634654 | 6.733895 |
| 9816_at | 3.715764 | 2.241663 | 2.717936 | 2.936722 | 4.205665 | 2.000557 | 3.207272 | 4.020966 |
| 9817_at | 5.532525 | 5.486191 | 5.782251 | 5.271865 | 5.189413 | 5.50292  | 5.450685 | 5.193772 |
| 9818_at | 6.541536 | 5.493354 | 6.427449 | 5.808211 | 5.990194 | 5.772748 | 6.268042 | 5.924104 |
| 9819_at | 5.975962 | 6.51105  | 5.925156 | 5.792733 | 5.295513 | 5.887338 | 6.267288 | 5.741491 |
| 9820_at | 4.10496  | 3.692525 | 4.710733 | 3.988544 | 3.829469 | 4.174564 | 3.250157 | 4.444267 |
| 9821_at | 6.933355 | 7.024942 | 6.938967 | 6.936214 | 6.543338 | 6.761892 | 6.866111 | 7.104097 |
| 9823_at | 5.159498 | 5.938867 | 6.126934 | 6.847051 | 6.050112 | 6.057928 | 6.219755 | 6.507927 |
| 9824_at | 2.092859 | 4.398052 | 2.707635 | 4.197637 | 3.23086  | 1.738002 | 3.147461 | 2.993026 |
| 9825_at | 2.191314 | 1.727566 | 2.405868 | 2.119459 | 2.257665 | 1.910444 | 2.49494  | 1.693914 |
| 9826_at | 5.423052 | 5.54118  | 5.936207 | 5.760042 | 5.470333 | 5.797812 | 6.033111 | 5.565256 |
| 9827_at | 4.729708 | 5.41812  | 6.333205 | 5.569777 | 5.108686 | 4.951409 | 5.365265 | 5.572022 |
| 9828_at | 5.87741  | 6.11465  | 6.118795 | 6.221338 | 5.983088 | 5.759245 | 5.463526 | 5.486472 |
| 9829_at | 5.438519 | 5.139149 | 5.351551 | 5.515826 | 4.58537  | 5.594802 | 6.05807  | 5.294549 |
| 9830_at | 4.891087 | 4.550149 | 5.317171 | 4.308597 | 4.748376 | 4.638237 | 4.957801 | 3.745862 |
| 9831_at | 2.787864 | 2.954114 | 4.401853 | 3.756222 | 3.425496 | 3.762539 | 3.259682 | 2.528333 |
| 9832_at | 4.936633 | 5.753819 | 5.057702 | 3.977045 | 5.041768 | 4.614886 | 3.21417  | 5.578724 |
| 9833_at | 2.85663  | 2.216907 | 2.070772 | 3.873191 | 2.15698  | 1.998249 | 1.828581 | 3.406508 |
| 9834_at | 1.73431  | 0.803588 | 1.823077 | 2.201412 | 1.717637 | 1.320476 | 1.265315 | 1.231492 |
| 9836_at | 3.707208 | 4.570291 | 4.058735 | 4.447097 | 4.383674 | 4.012714 | 4.97825  | 5.121841 |
| 9837_at | 2.237034 | 2.325728 | 1.847118 | 3.65724  | 2.739807 | 2.189293 | 1.636276 | 2.03252  |
| 9839_at | 8.210515 | 8.490379 | 8.47093  | 8.178606 | 8.284567 | 8.473584 | 8.339899 | 7.947904 |
| 983_at  | 1.936878 | 2.315301 | 1.419576 | 2.09293  | 3.940335 | 1.570768 | 1.442561 | 2.918702 |
| 9840_at | 2.126379 | 2.501874 | 2.487618 | 2.058509 | 2.288105 | 1.846622 | 2.654255 | 2.182024 |
| 9841_at | 4.338641 | 4.672133 | 3.598826 | 4.282648 | 4.665196 | 4.112119 | 3.513624 | 5.387502 |
| 9842_at | 7.712395 | 7.40532  | 8.341229 | 7.34594  | 7.924615 | 7.722089 | 7.405244 | 7.331592 |
| 9843_at | 3.573761 | 3.946522 | 3.50893  | 2.937577 | 3.855204 | 3.427614 | 2.978481 | 3.919217 |
| 9844_at | 5.478134 | 5.36776  | 5.157582 | 5.162789 | 5.97294  | 5.390316 | 5.149782 | 5.62074  |
| 9846_at | 6.247298 | 6.090289 | 6.450971 | 6.613375 | 5.592033 | 5.858344 | 6.734058 | 5.470942 |
| 9847_at | 6.273029 | 6.124551 | 6.238805 | 6.622582 | 6.452836 | 6.035486 | 6.092968 | 6.868374 |
| 9848_at | 2.963195 | 2.715033 | 2.490522 | 2.480065 | 3.183037 | 2.028675 | 2.545071 | 2.616868 |
| 9849_at | 3.294857 | 3.609518 | 3.941822 | 4.551667 | 2.726203 | 3.438002 | 4.012605 | 2.945032 |
| 9851_at | 4.833098 | 4.509617 | 4.650221 | 4.7831   | 3.958152 | 4.372251 | 4.652018 | 5.71604  |
| 9852_at | 5.18932  | 5.40096  | 5.255344 | 5.397123 | 5.174864 | 5.314316 | 4.488349 | 5.429254 |
| 9853_at | 6.943322 | 7.418268 | 7.145567 | 6.840416 | 7.117714 | 7.089562 | 7.441844 | 6.181851 |
| 9854_at | 4.672651 | 3.340479 | 3.871019 | 3.455423 | 3.887738 | 4.406122 | 4.050951 | 2.666413 |

|         |          |          |          |          |          |          |          |          |
|---------|----------|----------|----------|----------|----------|----------|----------|----------|
| 9855_at | 5.587199 | 5.723144 | 5.678294 | 5.790229 | 5.116047 | 5.954628 | 5.745911 | 5.673864 |
| 9856_at | 2.19808  | 2.307643 | 2.070656 | 2.264523 | 1.916996 | 2.425093 | 2.45242  | 2.160024 |
| 9857_at | 6.586793 | 6.204336 | 6.334085 | 6.262047 | 6.578453 | 6.585387 | 6.012685 | 6.20408  |
| 9858_at | 3.234353 | 3.049864 | 3.013735 | 3.090515 | 2.661559 | 2.831591 | 3.535229 | 2.899884 |
| 9859_at | 5.798502 | 5.987601 | 5.286545 | 4.839036 | 5.359672 | 4.327441 | 5.678462 | 5.214988 |
| 9860_at | 5.026778 | 5.868031 | 5.679014 | 5.838124 | 5.367133 | 5.633266 | 5.866262 | 4.546375 |
| 9861_at | 7.049116 | 6.974367 | 6.552543 | 6.443017 | 6.183324 | 6.865367 | 6.546046 | 7.004875 |
| 9862_at | 5.764197 | 5.153217 | 5.309451 | 5.274199 | 4.830162 | 5.974584 | 6.323194 | 4.916752 |
| 9863_at | 8.177694 | 8.179933 | 8.878108 | 8.087969 | 7.367991 | 8.110723 | 8.000824 | 8.229103 |
| 9865_at | 2.494838 | 1.955473 | 2.514196 | 2.525037 | 3.598985 | 3.208171 | 2.274108 | 2.544545 |
| 9866_at | 2.705066 | 2.432239 | 2.778378 | 3.307409 | 2.500887 | 2.259522 | 2.424284 | 4.467703 |
| 9867_at | 8.465682 | 8.686598 | 8.754268 | 8.884826 | 8.779256 | 8.027278 | 8.57692  | 9.038466 |
| 9868_at | 7.025989 | 6.374026 | 6.447633 | 6.757182 | 6.300184 | 6.627643 | 6.412371 | 6.638783 |
| 9869_at | 5.194526 | 4.536166 | 5.656613 | 5.301116 | 5.191016 | 5.215169 | 4.343377 | 4.845512 |
| 9870_at | 6.331492 | 6.975319 | 6.451036 | 6.690306 | 6.577915 | 6.195161 | 6.744916 | 6.348832 |
| 9871_at | 6.160466 | 6.431294 | 6.647422 | 6.696667 | 6.500777 | 6.048003 | 6.791904 | 6.560425 |
| 9873_at | 7.840212 | 8.340386 | 7.772103 | 8.193552 | 7.550305 | 7.367158 | 8.377938 | 7.567494 |
| 9874_at | 6.777126 | 6.472197 | 6.51982  | 6.400259 | 6.813657 | 6.528684 | 6.006441 | 6.458116 |
| 9875_at | 2.293951 | 3.340256 | 4.174179 | 4.191621 | 3.91941  | 2.938893 | 3.333972 | 3.66381  |
| 9877_at | 6.299501 | 7.349793 | 6.430421 | 6.65983  | 6.862951 | 6.684945 | 6.484586 | 7.018969 |
| 9878_at | 7.625748 | 6.896676 | 7.704813 | 7.21086  | 7.405568 | 7.268274 | 7.467358 | 7.690612 |
| 9879_at | 5.843339 | 6.603931 | 6.389157 | 6.582519 | 6.111713 | 5.974091 | 6.091557 | 6.375049 |
| 987_at  | 6.055237 | 6.364324 | 6.236956 | 6.176173 | 6.898353 | 5.878824 | 6.563783 | 6.502806 |
| 9880_at | 4.580248 | 5.072414 | 4.874381 | 3.927657 | 5.222214 | 3.553679 | 4.537161 | 2.327396 |
| 9881_at | 4.024829 | 4.97309  | 3.893469 | 4.151    | 4.013123 | 4.15849  | 4.920023 | 5.245792 |
| 9882_at | 4.898471 | 5.090845 | 3.940802 | 5.144477 | 5.794017 | 5.358432 | 4.696195 | 5.732537 |
| 9885_at | 6.150099 | 5.390318 | 5.882495 | 6.201253 | 4.151979 | 5.994091 | 6.040343 | 5.786561 |
| 9886_at | 5.401271 | 5.700265 | 5.101466 | 5.103934 | 5.858048 | 6.301776 | 5.624642 | 5.721854 |
| 9887_at | 6.161371 | 6.60174  | 6.374379 | 6.06607  | 6.522443 | 6.358599 | 6.254617 | 6.700944 |
| 9889_at | 3.962548 | 3.939146 | 3.90842  | 3.594773 | 4.05754  | 4.29363  | 3.623453 | 3.366515 |
| 988_at  | 6.694152 | 7.149805 | 6.813257 | 6.954931 | 7.131829 | 7.067062 | 6.683709 | 7.099081 |
| 9890_at | 1.466484 | 1.701266 | 1.763664 | 1.602401 | 2.828092 | 1.885537 | 1.977873 | 1.662379 |
| 9891_at | 3.333184 | 3.334719 | 2.932953 | 2.234609 | 2.052337 | 2.960494 | 3.778692 | 3.75041  |
| 9892_at | 1.161206 | 1.186633 | 1.380449 | 1.161577 | 1.531573 | 1.64053  | 1.992362 | 2.213307 |
| 9894_at | 3.156598 | 2.455442 | 2.402679 | 2.276233 | 2.061249 | 2.675889 | 3.242117 | 2.428122 |
| 9895_at | 4.638411 | 4.943958 | 4.888798 | 4.434197 | 4.896597 | 4.450612 | 4.931348 | 4.480152 |
| 9896_at | 4.899017 | 5.223234 | 5.624588 | 5.030565 | 4.899697 | 3.645996 | 5.711501 | 5.070527 |
| 9897_at | 6.680513 | 6.60006  | 6.744039 | 6.645803 | 6.52532  | 6.208505 | 6.559015 | 6.533444 |
| 9898_at | 7.866644 | 7.508972 | 7.898568 | 7.682367 | 7.216961 | 7.158861 | 7.978439 | 7.226122 |
| 9899_at | 2.931357 | 2.799324 | 2.294722 | 1.849003 | 4.396341 | 2.877668 | 1.737161 | 2.287043 |
| 989_at  | 8.199175 | 8.171013 | 8.429341 | 8.286813 | 8.324028 | 7.874049 | 7.915588 | 9.070417 |
| 98_at   | 6.357382 | 6.169106 | 6.717173 | 6.438017 | 5.379624 | 5.494259 | 6.693134 | 5.602341 |
| 9900_at | 3.170619 | 4.843088 | 4.395443 | 3.679073 | 5.477979 | 4.365748 | 3.700945 | 4.459359 |
| 9901_at | 3.188683 | 2.604637 | 2.774248 | 2.815741 | 2.593479 | 3.324626 | 2.871843 | 2.771921 |
| 9902_at | 3.630296 | 5.682788 | 6.511941 | 6.078332 | 5.68385  | 4.89905  | 6.52378  | 4.127957 |
| 9903_at | 3.070701 | 4.622081 | 3.107296 | 3.217249 | 3.55509  | 3.714899 | 4.621332 | 3.56282  |
| 9904_at | 3.401537 | 3.591399 | 2.583747 | 3.506065 | 2.934022 | 3.226273 | 2.42014  | 3.391371 |
| 9905_at | 3.508386 | 3.60008  | 2.940238 | 2.761586 | 3.115684 | 4.025302 | 3.660119 | 3.059348 |
| 9906_at | 5.063894 | 3.946262 | 4.323561 | 5.243142 | 3.162707 | 4.522394 | 4.872457 | 3.181429 |
| 9907_at | 3.246024 | 4.619145 | 4.12986  | 4.017049 | 2.839872 | 2.969706 | 3.920785 | 3.016402 |
| 9908_at | 7.024279 | 7.012219 | 7.195896 | 7.23769  | 7.387839 | 6.757158 | 7.262828 | 7.255566 |



|         |          |          |          |          |          |          |          |          |
|---------|----------|----------|----------|----------|----------|----------|----------|----------|
| 9909_at | 3.410841 | 3.858714 | 4.23913  | 3.228586 | 3.709973 | 4.359895 | 5.02484  | 3.19515  |
| 990_at  | 2.010894 | 1.126353 | 2.37875  | 1.733258 | 1.627654 | 1.381152 | 1.6827   | 1.192759 |
| 9910_at | 5.377633 | 5.980487 | 5.77063  | 5.708495 | 5.443747 | 5.140519 | 5.551452 | 5.770157 |
| 9911_at | 2.74602  | 3.157692 | 3.685644 | 2.207549 | 2.492718 | 2.99925  | 2.588895 | 2.97236  |
| 9912_at | 3.809899 | 3.519832 | 4.507828 | 2.976236 | 3.405693 | 3.903112 | 3.504725 | 3.726186 |
| 9913_at | 6.022421 | 5.837218 | 6.228726 | 5.482244 | 6.341982 | 6.239677 | 6.207493 | 5.93891  |
| 9914_at | 1.638071 | 1.612271 | 1.608473 | 1.656664 | 1.696827 | 1.873899 | 1.880082 | 1.880533 |
| 9915_at | 4.224678 | 4.733674 | 3.143523 | 3.642739 | 2.789833 | 4.960561 | 3.760143 | 4.272011 |
| 9917_at | 7.198169 | 8.070844 | 8.144203 | 7.708004 | 7.336947 | 7.546077 | 7.727003 | 7.652917 |
| 9918_at | 4.993357 | 5.074512 | 4.018686 | 5.674778 | 5.14011  | 4.673424 | 4.485881 | 4.205895 |
| 9919_at | 5.476067 | 5.879494 | 6.518803 | 6.038754 | 5.836224 | 6.080147 | 6.012823 | 5.124971 |
| 991_at  | 2.049433 | 3.876785 | 3.587624 | 3.719575 | 3.511898 | 1.752972 | 4.112861 | 2.325691 |
| 9920_at | 3.653026 | 5.155464 | 4.152429 | 4.138664 | 4.53333  | 3.997941 | 3.937367 | 4.441328 |
| 9921_at | 6.754788 | 6.441679 | 6.513952 | 6.54415  | 6.706674 | 6.419631 | 6.01853  | 7.075063 |
| 9922_at | 7.217244 | 7.58672  | 7.665204 | 8.065161 | 7.551511 | 7.790194 | 7.984129 | 7.028564 |
| 9923_at | 4.51841  | 4.278048 | 4.804971 | 5.157523 | 4.64918  | 4.421921 | 4.707526 | 5.150128 |
| 9924_at | 4.756941 | 4.975086 | 4.598219 | 4.410056 | 4.582256 | 4.932101 | 3.798722 | 4.972877 |
| 9925_at | 3.896017 | 3.395309 | 3.793207 | 3.308934 | 3.236673 | 4.179489 | 3.979635 | 3.88417  |
| 9926_at | 6.124121 | 6.236571 | 6.16001  | 6.178036 | 6.130055 | 6.165413 | 6.480558 | 6.341682 |
| 9927_at | 7.037593 | 7.184642 | 7.383719 | 7.270039 | 7.206622 | 6.867672 | 7.265335 | 6.791649 |
| 9928_at | 1.816541 | 1.428485 | 1.468728 | 1.833879 | 1.742314 | 1.500169 | 1.827959 | 2.114492 |
| 9929_at | 6.087694 | 6.386715 | 5.504947 | 6.32393  | 5.520697 | 5.987276 | 6.049728 | 5.708965 |
| 9931_at | 5.831875 | 6.616659 | 6.555988 | 6.422223 | 7.271726 | 6.590732 | 6.431429 | 6.4992   |
| 9933_at | 5.374528 | 5.642101 | 6.175856 | 5.127949 | 6.083922 | 5.009272 | 4.492492 | 6.042377 |
| 9934_at | 3.579575 | 2.413927 | 2.568423 | 2.181828 | 2.846468 | 2.57552  | 2.070989 | 2.498598 |
| 9935_at | 8.060816 | 8.176927 | 7.704655 | 7.417624 | 6.618245 | 7.24946  | 6.950194 | 6.745446 |
| 9937_at | 4.906819 | 3.0896   | 3.740512 | 4.310468 | 3.498328 | 4.193856 | 3.877987 | 5.216062 |
| 9938_at | 5.878022 | 5.752258 | 5.232099 | 6.026796 | 4.403145 | 5.388545 | 4.887824 | 4.859879 |
| 9939_at | 6.702895 | 6.756367 | 6.95486  | 6.937618 | 6.667292 | 7.069669 | 6.449094 | 6.986497 |
| 993_at  | 2.365707 | 2.070601 | 2.154237 | 2.740203 | 2.228352 | 1.953034 | 2.532163 | 2.462894 |
| 9940_at | 1.50643  | 1.066935 | 1.321348 | 1.744405 | 1.767529 | 1.751052 | 2.024313 | 1.940735 |
| 9941_at | 5.12305  | 5.026672 | 5.303562 | 3.570745 | 6.445925 | 4.230325 | 4.965216 | 4.731478 |
| 9942_at | 3.831211 | 4.506987 | 4.618955 | 3.407871 | 3.996417 | 3.518388 | 3.250541 | 4.427226 |
| 9943_at | 6.159291 | 6.010532 | 6.265579 | 7.112119 | 5.993588 | 5.978694 | 6.953485 | 6.521025 |
| 9945_at | 2.106991 | 2.36917  | 1.761451 | 1.610355 | 1.299347 | 2.245848 | 2.550321 | 2.079144 |
| 9946_at | 6.39162  | 6.857208 | 6.482035 | 6.045052 | 6.939792 | 6.115976 | 5.901139 | 7.005531 |
| 9947_at | 2.259354 | 1.828944 | 2.155456 | 2.441476 | 1.857666 | 2.627098 | 1.75074  | 2.540239 |
| 9948_at | 7.822393 | 7.556864 | 8.028374 | 7.946867 | 7.700834 | 7.451584 | 7.765079 | 7.278442 |
| 9949_at | 3.731868 | 4.074377 | 4.412954 | 3.620772 | 3.851518 | 4.507306 | 4.037787 | 3.411718 |
| 994_at  | 4.965002 | 5.469617 | 4.861612 | 5.365813 | 4.428475 | 4.971398 | 5.496584 | 5.176214 |
| 9950_at | 7.07691  | 6.784367 | 6.800278 | 7.018879 | 6.187771 | 6.697612 | 7.010686 | 7.281471 |
| 9951_at | 2.266787 | 2.43541  | 2.116308 | 2.28599  | 2.323596 | 2.049915 | 2.224632 | 1.583401 |
| 9953_at | 7.465535 | 7.699813 | 7.879875 | 7.336826 | 7.338682 | 6.848544 | 7.147091 | 7.441897 |
| 9955_at | 4.789588 | 4.859493 | 4.762065 | 4.589876 | 4.107336 | 4.232138 | 3.645705 | 4.389556 |
| 9956_at | 2.410282 | 2.210385 | 1.044039 | 1.757435 | 1.983092 | 1.794751 | 2.151921 | 3.128873 |
| 9957_at | 3.119834 | 2.377956 | 3.321804 | 2.952455 | 2.644486 | 4.139508 | 3.324704 | 3.660805 |
| 9958_at | 5.871748 | 6.163144 | 6.068986 | 6.298029 | 6.548036 | 6.095714 | 5.516965 | 6.385315 |
| 995_at  | 1.385436 | 1.857619 | 1.404387 | 1.49675  | 2.091578 | 2.032863 | 2.064701 | 1.609482 |
| 9960_at | 6.680072 | 6.219975 | 6.626986 | 6.569535 | 6.927542 | 6.996304 | 6.406355 | 7.00049  |
| 9961_at | 5.317528 | 5.590752 | 6.019753 | 5.11245  | 4.941699 | 5.81268  | 5.132899 | 5.522123 |
| 9962_at | 5.606313 | 5.106689 | 5.750426 | 5.76593  | 5.776141 | 5.529056 | 5.669937 | 5.279943 |

|         |          |          |          |          |          |          |          |          |
|---------|----------|----------|----------|----------|----------|----------|----------|----------|
| 9963_at | 5.617812 | 5.090904 | 3.267879 | 3.273982 | 5.77468  | 5.665467 | 3.390166 | 4.351855 |
| 9965_at | 1.757192 | 2.474514 | 2.139359 | 1.708418 | 2.558081 | 2.484411 | 2.030479 | 1.715397 |
| 9966_at | 3.916015 | 2.45464  | 2.944755 | 2.367229 | 4.161877 | 3.117034 | 2.559117 | 4.373277 |
| 9967_at | 7.630147 | 7.740027 | 8.100126 | 7.863336 | 8.10071  | 8.009904 | 8.363356 | 8.209533 |
| 9968_at | 5.780772 | 6.105556 | 6.303838 | 6.413183 | 5.569716 | 6.227045 | 6.047717 | 4.920875 |
| 9969_at | 6.881207 | 7.354986 | 6.904002 | 7.037891 | 7.166345 | 6.923302 | 7.152838 | 6.939556 |
| 996_at  | 7.556389 | 7.681796 | 8.087136 | 7.687907 | 7.495174 | 7.488081 | 7.423027 | 7.683196 |
| 9970_at | 3.039135 | 1.98392  | 2.843908 | 2.541684 | 3.210271 | 1.96016  | 2.608179 | 2.526158 |
| 9971_at | 3.534206 | 1.663409 | 3.517333 | 2.364364 | 3.388682 | 4.001723 | 1.855898 | 2.597231 |
| 9972_at | 6.449203 | 6.337817 | 6.339923 | 6.798104 | 6.19844  | 6.516706 | 6.669745 | 6.975446 |
| 9973_at | 4.572459 | 3.901105 | 4.723284 | 4.631781 | 4.115177 | 4.788986 | 3.796773 | 4.164612 |
| 9975_at | 5.559975 | 6.440458 | 6.080947 | 6.614817 | 6.014408 | 5.097843 | 6.286997 | 6.321233 |
| 9976_at | 7.213516 | 7.099175 | 7.054435 | 6.621429 | 7.348935 | 7.264352 | 6.312361 | 7.262591 |
| 9978_at | 7.962521 | 7.761198 | 7.750246 | 7.760948 | 7.542108 | 7.875768 | 7.375922 | 7.938389 |
| 997_at  | 5.538121 | 5.436191 | 4.752856 | 5.086749 | 4.88342  | 4.64821  | 4.695294 | 5.064764 |
| 9980_at | 4.293222 | 4.477624 | 3.632629 | 4.099146 | 3.923331 | 4.250126 | 2.723669 | 3.937861 |
| 9982_at | 1.400924 | 1.792054 | 1.396088 | 1.797061 | 1.82701  | 1.952312 | 1.761771 | 1.595888 |
| 9984_at | 4.277171 | 4.422746 | 4.037081 | 3.978913 | 4.03078  | 4.27056  | 4.336154 | 5.021763 |
| 9985_at | 3.146864 | 2.638243 | 3.562753 | 2.29879  | 1.915911 | 2.548094 | 2.520548 | 2.375926 |
| 9986_at | 5.616441 | 6.38136  | 5.959101 | 5.864606 | 6.164796 | 5.484958 | 5.981038 | 5.22867  |
| 9987_at | 8.797725 | 8.997328 | 9.154939 | 9.240033 | 9.380808 | 8.876065 | 9.084438 | 9.198279 |
| 9988_at | 6.084672 | 6.804544 | 6.384692 | 6.207054 | 5.611205 | 6.651754 | 6.056277 | 6.722197 |
| 9989_at | 6.029895 | 6.360789 | 6.01635  | 5.900344 | 5.795362 | 6.020561 | 5.575203 | 6.800206 |
| 998_at  | 4.981681 | 4.929866 | 4.553993 | 5.5556   | 4.387518 | 4.973659 | 5.065956 | 4.953497 |
| 9990_at | 5.31995  | 5.530269 | 4.83195  | 5.714997 | 5.782574 | 5.934624 | 4.961483 | 6.214936 |
| 9991_at | 9.400771 | 9.678686 | 9.772009 | 9.656398 | 9.295798 | 9.193588 | 9.754687 | 9.568026 |
| 9992_at | 2.078376 | 2.357006 | 2.288116 | 1.789661 | 2.618597 | 2.015437 | 2.550491 | 1.938508 |
| 9993_at | 5.084335 | 6.299566 | 6.264693 | 5.357475 | 5.456844 | 5.79244  | 5.679942 | 4.268995 |
| 9994_at | 5.434198 | 6.326578 | 4.986169 | 5.535404 | 5.794328 | 5.302895 | 4.903201 | 5.911341 |
| 9997_at | 5.733173 | 4.901288 | 4.917645 | 5.060021 | 5.518175 | 5.178436 | 4.098643 | 4.522741 |
| 999_at  | 6.782276 | 6.137515 | 5.973606 | 7.181252 | 6.835903 | 7.419701 | 5.868497 | 5.750885 |
| 9_at    | 2.359107 | 2.871135 | 2.667618 | 2.842484 | 3.542749 | 2.273892 | 3.936533 | 3.849298 |

!series\_matrix\_table\_end

GSM604458GSM604460GSM604461GSM604461GSM604461GSM604461GSM604462GSM604463GSM604463  
 1. 548422 1. 49726 1. 441816 1. 572466 1. 751793 1. 870682 2. 011748 1. 451999 1. 306762  
 3. 977681 3. 426709 4. 532401 3. 136628 4. 285815 3. 883196 3. 988719 3. 641512 4. 051572  
 8. 44217 8. 471342 8. 562141 8. 7605 8. 217503 8. 346454 8. 28413 8. 297369 8. 225479  
 6. 484308 6. 494431 6. 115008 6. 466832 6. 812477 6. 652116 6. 823692 6. 71194 6. 495686  
 1. 32573 1. 750703 2. 493987 2. 79693 1. 929576 1. 520506 2. 234074 1. 517152 1. 695034  
 0. 662867 3. 042279 2. 25088 0. 835649 0. 780036 1. 999247 0. 842651 3. 77023 4. 570985  
 1. 196706 1. 642634 1. 899267 2. 031678 2. 424145 1. 588889 2. 197395 2. 127704 1. 609789  
 1. 228772 1. 059244 1. 331384 1. 62327 1. 66574 1. 794164 1. 313837 1. 266206 1. 117976  
 1. 100398 2. 158711 1. 725025 1. 460206 2. 211616 2. 892929 2. 173369 2. 19537 2. 581777  
 0. 633131 0. 699169 1. 623351 2. 065711 1. 054816 1. 069914 0. 995988 1. 243272 1. 402972  
 3. 350774 2. 547246 4. 884965 0. 465969 4. 111782 4. 529359 4. 75533 5. 650822 6. 442053  
 6. 261153 5. 458331 6. 856705 4. 672269 6. 225128 7. 025498 6. 191595 7. 357931 8. 449106  
 1. 026439 0. 935252 2. 064156 1. 232468 0. 631773 2. 724272 0. 716889 0. 90708 2. 594423  
 0. 957852 0. 915757 1. 278102 1. 180304 1. 347423 0. 863591 0. 896552 1. 001066 1. 71419  
 3. 787787 3. 259779 4. 0351 2. 607601 2. 639671 3. 788896 4. 232633 4. 18829 5. 63437  
 4. 95692 3. 74764 5. 414497 5. 658892 3. 224248 3. 357742 4. 773617 3. 17017 7. 07697  
 1. 340033 1. 499763 2. 255335 1. 535477 1. 320989 2. 246764 2. 123591 1. 664983 3. 180656  
 1. 118132 0. 692045 3. 618163 0. 446001 0. 59358 2. 055981 2. 227406 1. 134469 4. 07569  
 1. 265053 1. 25878 0. 709973 1. 07821 0. 952735 1. 642887 0. 652551 1. 170448 2. 78632  
 0. 564496 0. 628453 0. 921569 0. 972056 0. 582284 0. 938746 0. 604166 1. 091488 0. 743867  
 1. 022818 1. 781516 1. 70454 1. 283638 1. 417519 2. 02234 1. 168033 1. 489459 2. 747184  
 2. 638317 1. 746086 2. 341799 1. 977814 2. 249979 1. 695166 1. 150374 1. 439222 3. 369214  
 0. 817918 0. 967128 1. 034679 0. 817489 0. 449067 1. 616826 1. 001945 0. 592625 0. 800364  
 0. 996823 0. 949606 1. 239665 1. 361954 0. 685066 0. 668113 0. 863587 0. 855705 0. 742014  
 0. 730732 1. 01674 0. 807421 1. 332966 0. 641277 1. 414712 0. 939322 0. 930846 0. 790806  
 0. 546545 0. 45866 1. 063562 1. 098315 1. 136623 2. 687101 1. 123306 1. 152466 0. 966743  
 0. 687459 0. 757554 0. 862177 0. 773354 0. 530295 1. 072262 0. 619371 1. 081779 0. 688388  
 1. 268625 0. 975796 0. 789319 1. 262688 1. 114665 2. 031084 0. 726738 1. 056155 0. 817834  
 0. 649551 0. 58891 0. 689594 0. 816365 0. 482431 1. 551488 1. 016743 0. 64096 0. 83958  
 1. 0521 0. 678565 1. 148458 1. 209181 0. 995704 0. 972742 0. 964216 1. 148458 0. 959375  
 0. 718378 0. 512061 0. 721704 0. 583401 0. 526442 1. 496189 0. 930576 1. 171313 1. 163294  
 1. 100977 0. 70057 1. 035251 1. 369888 1. 345668 0. 797674 0. 833897 0. 739413 0. 851553  
 0. 923945 1. 520869 1. 291329 2. 362272 1. 95919 1. 257312 1. 136285 1. 74032 1. 721074  
 1. 148994 0. 808401 1. 112615 1. 164 0. 735834 1. 217671 0. 928542 1. 027956 0. 886697  
 1. 678718 0. 687631 0. 728782 1. 005613 0. 62876 0. 88402 0. 910833 0. 730592 0. 855836  
 0. 649415 1. 17704 0. 627471 1. 270745 1. 12498 0. 940097 1. 643523 1. 368381 0. 826691  
 0. 719066 0. 900804 1. 155838 0. 775244 1. 063415 1. 302355 0. 962459 1. 324349 0. 723238  
 0. 738727 0. 552432 1. 23681 1. 091703 0. 729905 1. 546976 1. 341915 1. 021252 1. 446265  
 0. 482821 2. 200845 0. 507378 1. 357867 0. 834371 0. 884173 0. 454356 0. 384013 0. 759673  
 0. 680091 0. 401342 0. 566791 0. 816518 0. 72253 0. 83313 0. 824456 0. 516536 0. 634557  
 0. 827181 0. 939722 0. 913618 1. 057587 0. 55561 1. 394214 0. 931641 0. 742834 0. 770876  
 1. 032445 1. 057417 1. 78312 1. 093608 1. 333312 1. 381227 1. 573861 2. 045994 3. 916152  
 1. 200907 0. 79517 1. 159967 1. 057952 0. 994592 1. 24703 0. 821098 0. 970171 2. 151763  
 1. 076788 1. 029793 0. 706796 1. 73377 0. 803471 1. 36615 0. 841532 0. 937902 1. 066959  
 0. 737927 0. 919947 1. 241175 1. 912849 3. 101116 1. 358686 1. 230347 2. 084313 1. 659668  
 1. 105138 0. 877292 1. 472114 1. 408034 0. 927007 1. 632539 1. 205331 0. 819418 1. 832425  
 1. 046379 0. 78052 0. 791229 0. 845664 0. 516311 0. 721539 0. 529803 0. 969139 0. 807432  
 0. 849778 0. 952227 0. 970933 1. 386956 1. 17068 1. 769207 0. 903737 1. 641837 0. 830827  
 4. 492112 4. 440707 4. 667858 4. 562793 4. 01013 3. 741407 4. 737897 4. 777887 4. 448925  
 2. 582608 3. 089026 1. 863255 1. 679254 1. 888228 2. 812588 1. 786491 1. 897561 2. 416475

3. 524487 1. 702632 2. 629731 2. 134445 1. 663583 2. 472076 2. 421939 1. 605912 4. 040274  
1. 294745 1. 220845 1. 229021 1. 552767 1. 470774 1. 218006 1. 394843 1. 304878 1. 565604  
1. 940157 1. 498573 1. 607588 4. 503355 6. 117743 4. 601516 5. 818151 4. 578228 3. 158668  
3. 502236 3. 914807 3. 661853 2. 51363 3. 464276 3. 957827 2. 979644 2. 873703 2. 589425  
6. 067076 5. 816748 6. 353109 4. 790778 6. 463488 6. 069553 5. 821144 6. 12795 5. 526491  
8. 772425 9. 079884 8. 397892 8. 601688 8. 473124 8. 935846 8. 534726 8. 952972 8. 878389  
1. 031839 1. 147513 1. 018502 1. 415645 1. 973742 1. 315779 0. 996836 1. 016085 0. 783887  
5. 054734 4. 476517 3. 993194 4. 294656 4. 424498 4. 478058 4. 668462 4. 725092 4. 746581  
3. 635892 3. 586628 3. 243854 3. 942585 3. 522325 3. 162673 3. 831836 4. 162224 3. 28239  
8. 599741 8. 4696 8. 370248 8. 799385 8. 13493 6. 964369 8. 640392 9. 13827 9. 370994  
1. 418119 1. 594516 1. 354647 2. 4331 1. 402678 1. 522924 1. 710058 1. 80202 1. 487686  
4. 964455 4. 994414 5. 005077 5. 403065 5. 408177 4. 993358 4. 890784 4. 745777 4. 326881  
5. 670953 5. 943234 6. 644569 6. 977027 6. 254085 5. 233848 6. 420577 5. 803535 5. 88455  
3. 248022 2. 001746 1. 802064 3. 136879 1. 850945 1. 502097 1. 471397 3. 174057 2. 572635  
3. 38689 3. 384506 3. 964215 3. 304089 3. 668575 2. 82548 3. 181822 3. 692153 3. 805512  
3. 16605 3. 353413 3. 550735 2. 588493 3. 229527 3. 048448 3. 501813 3. 226851 4. 23296  
1. 150332 0. 97079 1. 100334 1. 549787 0. 938011 1. 258321 1. 120834 0. 977709 1. 432019  
5. 735658 4. 369181 5. 326002 5. 626614 5. 102156 4. 333896 5. 595522 5. 504896 5. 425916  
1. 098506 0. 816357 1. 079374 1. 272648 0. 872017 0. 77636 1. 012557 0. 758883 3. 590077  
1. 122835 2. 091176 0. 687855 1. 199158 0. 742439 1. 312344 0. 863561 1. 158758 0. 530172  
4. 87542 2. 095257 2. 068464 1. 870623 1. 945555 1. 155689 2. 465737 3. 70582 1. 958144  
2. 702651 3. 471808 1. 562076 3. 126173 2. 87952 1. 722455 3. 468536 3. 242181 4. 713523  
1. 466175 1. 364025 1. 18095 2. 760635 0. 942783 1. 139646 1. 241456 2. 266054 4. 399128  
4. 592573 3. 311412 4. 198923 4. 414073 3. 861925 3. 115477 3. 644071 4. 162207 3. 362999  
1. 021069 1. 023211 1. 120098 1. 207174 1. 160041 1. 230749 1. 134305 1. 117395 0. 932222  
1. 169939 0. 973307 1. 480047 1. 002167 1. 611907 1. 2397 1. 403326 1. 216136 1. 154777  
1. 00137 1. 268455 1. 171986 0. 938076 0. 769533 0. 958615 0. 804359 1. 118843 1. 134937  
0. 991704 0. 942542 1. 27733 1. 412895 0. 794986 0. 899551 0. 68237 1. 088179 1. 064413  
0. 809994 0. 97874 0. 74527 0. 899931 0. 887385 1. 232715 0. 929827 0. 720906 0. 977838  
2. 08669 1. 815116 2. 59603 2. 103546 1. 612831 2. 131662 1. 553017 1. 470823 1. 848284  
0. 928085 1. 016094 1. 50259 0. 967901 0. 910989 0. 717149 0. 760515 1. 017785 0. 733036  
5. 349881 4. 542077 3. 458734 4. 113118 3. 654923 2. 781723 4. 043633 3. 54222 4. 884041  
4. 940274 4. 606833 4. 692433 5. 766798 4. 663285 3. 828917 5. 128439 4. 616088 3. 947272  
4. 580394 3. 318806 2. 853992 3. 217926 2. 492374 4. 056103 2. 617691 2. 98973 2. 921908  
0. 890691 1. 60242 2. 178305 1. 301255 1. 920759 1. 335941 1. 13827 1. 918547 2. 863857  
2. 743219 1. 996525 1. 863516 2. 886818 3. 068394 3. 16789 3. 201024 1. 942224 2. 715899  
3. 018152 2. 279741 2. 517324 0. 994473 1. 803327 1. 389003 0. 737492 1. 622475 3. 464268  
1. 865581 1. 048275 0. 868174 1. 351013 0. 936472 1. 751836 1. 267611 2. 131637 1. 090016  
4. 977065 3. 727336 1. 576987 2. 466864 3. 506138 4. 483658 3. 298791 3. 530602 2. 637002  
1. 735204 1. 890626 2. 227902 2. 158636 1. 590126 1. 992543 1. 734288 2. 611031 2. 806462  
0. 771615 0. 828852 0. 938675 1. 110424 0. 946972 1. 059193 0. 826646 0. 796911 1. 436993  
3. 604513 3. 998187 4. 845415 3. 164434 2. 680772 3. 677256 2. 879946 2. 757769 4. 828676  
1. 407054 1. 294509 1. 784219 1. 064295 0. 874506 2. 117412 1. 338701 1. 170163 1. 662342  
1. 653252 1. 177226 1. 360362 1. 420348 2. 043087 2. 311428 1. 501774 1. 233461 1. 482188  
2. 768362 2. 700547 2. 538986 2. 910304 2. 404979 3. 068884 2. 164214 2. 86408 2. 92824  
1. 085428 1. 628805 2. 273253 1. 97762 2. 301566 0. 985702 1. 265502 1. 428831 1. 819103  
1. 835699 2. 163489 1. 989696 2. 672285 2. 482128 2. 480279 2. 600104 2. 580433 2. 551408  
3. 414911 2. 896186 2. 914397 4. 235862 2. 913949 2. 674462 3. 701841 3. 220396 2. 588473  
0. 87424 1. 109528 1. 572492 1. 976133 0. 994322 1. 637932 0. 864889 0. 84042 1. 075597  
1. 05583 4. 515638 3. 02921 1. 74513 5. 418681 4. 608834 2. 921112 3. 706269 6. 746001  
0. 654671 0. 818781 0. 709073 0. 8091 0. 90446 0. 805883 1. 003441 0. 966844 1. 807306

1. 517463 1. 033691 1. 211284 2. 242505 1. 22261 0. 941478 1. 150489 1. 625784 1. 252204  
0. 838727 0. 920028 0. 771116 1. 627887 0. 54926 1. 251451 1. 256671 1. 027977 0. 890923  
0. 913127 0. 924397 1. 538925 1. 408042 1. 664464 1. 538925 1. 331903 1. 339429 1. 173666  
1. 386288 1. 279587 1. 146645 1. 192308 1. 416925 1. 131175 0. 859942 0. 865359 1. 023246  
2. 546369 2. 973077 3. 265952 3. 282326 2. 438498 3. 367293 2. 704772 2. 899368 3. 758559  
1. 572101 1. 093968 1. 294601 1. 640029 1. 343515 1. 678813 1. 204704 1. 142337 2. 040085  
1. 272821 1. 215914 1. 221352 1. 548404 0. 803756 1. 203297 1. 182607 1. 368199 1. 857474  
2. 118905 2. 195036 1. 750695 1. 962727 1. 849671 3. 6616 1. 793562 2. 402008 2. 075555  
2. 666873 2. 34238 1. 965475 3. 458381 3. 330978 1. 409186 2. 856586 2. 910124 3. 431875  
2. 072395 2. 020363 2. 06693 1. 910199 2. 436461 3. 151625 1. 581592 1. 347726 1. 991726  
1. 125072 0. 773676 1. 114048 0. 929803 0. 979589 1. 90211 1. 202359 0. 731101 1. 46279  
1. 173701 0. 716939 0. 801683 3. 812046 0. 708817 1. 169748 2. 355628 0. 675693 1. 139245  
1. 162872 1. 227935 1. 085626 0. 948103 1. 186486 1. 52861 1. 903255 1. 444754 0. 886875  
1. 523495 1. 612405 1. 288563 1. 861919 1. 369294 2. 485377 1. 633391 1. 497531 1. 819593  
1. 501448 1. 395321 1. 151809 1. 937138 0. 989602 1. 549563 1. 170305 1. 123013 1. 485241  
2. 632286 2. 126519 1. 199822 2. 772392 2. 307436 1. 135971 1. 319188 1. 431209 1. 900522  
1. 113367 1. 216154 1. 396076 0. 995024 0. 759791 1. 372571 0. 941995 0. 985301 0. 747953  
1. 659649 3. 12467 1. 906059 3. 210622 2. 1417 1. 692089 1. 962614 2. 435954 3. 159113  
1. 573537 1. 187799 1. 287548 1. 299215 1. 657397 1. 587273 1. 188377 1. 763903 1. 219949  
3. 778394 3. 2199 4. 038534 4. 138413 3. 648971 2. 416 3. 140556 3. 348448 3. 463182  
1. 4446 1. 02154 1. 088322 1. 611125 1. 218912 1. 058518 1. 465445 1. 066725 1. 783529  
5. 254906 4. 33013 4. 780746 5. 853667 4. 670365 4. 411204 4. 964185 4. 376789 4. 285431  
1. 306534 1. 384128 1. 000291 1. 924858 1. 094566 1. 466673 1. 24963 1. 553715 1. 196256  
2. 328696 1. 88119 3. 34045 2. 336608 1. 592108 1. 634102 2. 179569 1. 536761 2. 420757  
1. 514474 1. 254913 1. 084563 1. 060931 1. 535864 1. 911908 0. 933822 1. 207305 2. 887075  
1. 08634 0. 69112 0. 824237 1. 201379 0. 796908 1. 230937 0. 678069 0. 83525 1. 363858  
0. 971422 0. 972562 2. 328732 1. 943195 1. 446396 1. 390308 1. 351992 3. 619624 4. 219235  
1. 144736 1. 016798 1. 061369 2. 1404 0. 839722 0. 651133 0. 992818 1. 1049 1. 130912  
1. 11964 2. 774199 2. 456512 2. 588208 3. 07602 1. 38769 1. 77383 0. 93329 2. 463305  
1. 206758 1. 442122 0. 603201 0. 963489 0. 445998 1. 134128 2. 59181 1. 699415 1. 524352  
1. 528002 0. 904616 1. 251981 2. 044152 1. 693556 1. 513868 1. 223788 1. 410541 1. 526818  
0. 813351 0. 94894 1. 393174 1. 015912 0. 963076 1. 015912 1. 288093 1. 228864 0. 79317  
1. 696098 2. 146597 2. 163023 1. 261341 1. 092443 1. 61775 1. 409827 1. 005808 0. 847838  
0. 809101 0. 969702 1. 169566 2. 42002 1. 208206 0. 97694 0. 754388 0. 990003 0. 736995  
1. 877633 2. 192577 2. 078954 1. 845059 2. 188174 1. 892669 2. 204131 1. 775602 1. 88637  
1. 387457 1. 235346 1. 155261 2. 603253 0. 875875 1. 523708 1. 850523 1. 002431 2. 080565  
2. 102877 3. 687199 3. 216961 4. 491297 3. 068617 3. 468372 3. 670084 3. 153743 3. 054232  
1. 334693 2. 647211 2. 650041 3. 33544 1. 516734 1. 69127 1. 918021 1. 766715 1. 903435  
3. 293553 1. 8199 1. 231792 2. 604076 2. 111155 2. 445975 4. 059977 2. 135675 2. 096778  
1. 005846 1. 800299 1. 468386 1. 39775 1. 084694 1. 17849 1. 426139 1. 603142 1. 144842  
1. 916214 1. 329214 1. 940059 1. 373586 1. 236894 1. 496285 1. 137457 2. 032039 2. 248172  
4. 448838 3. 750491 3. 714149 4. 136191 2. 793703 4. 169903 3. 764972 3. 063295 6. 159957  
2. 691833 2. 289375 2. 573691 2. 979608 2. 979729 2. 337276 3. 00867 2. 650771 3. 642252  
2. 039854 3. 014839 1. 889855 1. 860071 1. 74612 2. 05992 2. 044091 1. 976705 2. 907182  
3. 0274 2. 263023 2. 23899 1. 745384 2. 223434 2. 490926 3. 07734 3. 175401 3. 676241  
1. 276949 1. 743841 1. 91146 2. 756023 1. 561968 1. 981398 1. 712616 2. 193748 2. 676297  
1. 314126 1. 869665 1. 308633 1. 722214 1. 071481 2. 426097 1. 157747 3. 23043 4. 84408  
2. 455861 2. 055816 2. 564981 1. 703013 1. 600287 1. 636232 1. 998016 1. 565329 2. 09181  
1. 056926 1. 018246 1. 211382 1. 645973 1. 012533 1. 934643 0. 938021 0. 955249 1. 0381  
0. 934696 0. 723794 0. 859949 1. 190887 1. 098253 1. 155105 1. 157731 0. 740865 1. 212932  
1. 251778 2. 035368 1. 65544 1. 492752 1. 945409 1. 567536 2. 00231 1. 307223 2. 04049

5. 365885 4. 504711 4. 788418 3. 160994 4. 613733 3. 940818 4. 530303 4. 264914 4. 289392  
3. 191391 1. 385058 3. 083581 3. 458735 2. 083896 1. 793297 1. 93925 1. 471358 1. 177276  
1. 613305 1. 267504 1. 534424 2. 784038 0. 942885 3. 130975 1. 63515 1. 217663 1. 936602  
1. 541233 1. 785558 1. 624748 1. 855103 1. 405524 1. 159485 1. 010562 1. 844158 1. 542757  
1. 972252 1. 282023 4. 117934 3. 035536 1. 51856 2. 060218 0. 973621 2. 495467 5. 078942  
3. 340782 3. 187352 2. 985791 3. 776257 3. 319942 3. 340139 2. 802842 3. 254838 3. 932156  
3. 724218 3. 572579 3. 768644 4. 785906 4. 595509 3. 770938 3. 170869 3. 314711 4. 208346  
1. 066725 1. 707954 1. 214225 1. 134024 2. 004727 1. 917735 1. 645221 1. 697836 1. 191737  
2. 181893 2. 566665 2. 347177 2. 061014 1. 97803 2. 700281 2. 049052 2. 161332 1. 87583  
1. 816542 1. 30025 1. 309278 1. 974361 1. 477866 1. 417792 1. 604084 1. 522508 1. 66653  
5. 519218 4. 435835 3. 494762 3. 163877 4. 00437 4. 067443 3. 749529 4. 064439 5. 168245  
1. 623346 1. 216694 2. 857439 2. 32797 1. 583031 1. 314796 1. 262156 1. 136703 1. 602126  
2. 306434 3. 25363 2. 524012 2. 389217 1. 523735 1. 736665 2. 110681 1. 318962 2. 223278  
5. 094782 3. 302122 3. 451118 6. 114086 3. 065831 2. 790017 3. 831524 4. 721293 3. 24009  
1. 273491 1. 049618 1. 397699 1. 593989 2. 019338 1. 438591 1. 086168 1. 988245 1. 237256  
1. 316745 1. 337676 1. 329487 1. 230306 0. 982112 1. 215477 1. 299451 0. 855697 1. 101281  
1. 489447 1. 150215 0. 997946 1. 427541 1. 172871 1. 542655 1. 778834 1. 474354 1. 629135  
4. 59398 4. 169258 4. 574549 3. 333171 4. 792624 5. 411188 4. 38624 4. 452218 3. 463913  
1. 460916 1. 647687 1. 504563 2. 047041 1. 196807 1. 167287 1. 644083 1. 20099 1. 441166  
2. 806782 2. 783955 2. 803555 3. 527828 2. 665433 2. 570063 2. 792954 2. 93785 2. 975119  
7. 379208 6. 881958 7. 184052 7. 042013 6. 630519 6. 755555 7. 3493 6. 692 7. 656832  
1. 685072 1. 414652 1. 274908 1. 804231 1. 621567 1. 224451 1. 637677 1. 603155 1. 651921  
3. 523454 4. 744103 4. 242401 4. 318338 4. 204213 3. 503418 3. 923175 4. 055161 4. 959373  
2. 715238 2. 997082 2. 430592 3. 017626 2. 193528 2. 816091 3. 106197 2. 849724 4. 869585  
1. 628969 1. 408983 2. 263128 2. 458259 2. 170111 2. 498814 2. 19709 2. 616036 2. 404672  
0. 900759 1. 149982 1. 002116 1. 755768 1. 061892 1. 182187 1. 163723 1. 146794 1. 449022  
2. 448815 2. 810572 2. 490645 2. 702081 2. 244738 3. 483031 2. 391204 1. 64943 2. 192253  
1. 936944 1. 984975 1. 735329 2. 116996 3. 131796 1. 944364 1. 85073 2. 347155 2. 821907  
4. 901039 4. 441275 4. 502639 3. 943121 3. 396682 4. 386708 4. 455563 4. 68412 4. 073752  
2. 029386 1. 214108 0. 955305 1. 501498 2. 808546 1. 505151 1. 610291 1. 39859 0. 904039  
4. 313459 3. 206851 3. 201345 3. 011658 2. 900121 3. 917487 2. 532609 3. 670849 3. 591535  
2. 277289 2. 773704 3. 116013 3. 943174 3. 746605 3. 025271 1. 746488 3. 565028 3. 01859  
1. 67638 2. 144651 1. 441418 2. 16852 1. 48992 1. 48887 1. 340994 0. 947423 1. 689993  
1. 849086 1. 408939 1. 195765 2. 655744 1. 122201 2. 016843 1. 448953 1. 651621 1. 654564  
5. 452901 3. 54724 3. 919265 5. 187098 5. 46067 4. 575281 3. 77963 1. 979606 5. 449799  
2. 132116 2. 354342 0. 878686 1. 403099 1. 122325 1. 831583 1. 79779 1. 665787 1. 871467  
4. 75976 5. 439099 5. 199968 5. 753643 5. 218724 5. 292254 5. 578109 5. 147233 5. 03396  
1. 406634 1. 202357 1. 294844 1. 573571 0. 86168 1. 093634 1. 129371 1. 461208 1. 116994  
1. 163333 0. 982517 1. 118389 1. 349085 1. 332262 1. 544575 1. 085137 0. 94887 1. 257808  
4. 201258 4. 366109 4. 722699 3. 923728 4. 044256 4. 520379 3. 82164 4. 204488 2. 88725  
2. 957465 2. 931736 3. 876026 3. 6341 2. 620171 3. 187393 3. 374549 2. 877107 2. 710692  
1. 520697 1. 668133 1. 532521 1. 288722 1. 38759 1. 868812 1. 866934 1. 135336 1. 988148  
1. 620829 1. 329354 1. 699514 2. 446094 1. 609066 2. 571187 1. 195701 1. 380265 1. 238395  
3. 035024 3. 226598 3. 665286 4. 483169 3. 909987 4. 180803 3. 377669 3. 236958 3. 256759  
2. 747292 1. 910147 2. 187653 1. 938613 1. 503195 3. 148371 2. 835817 1. 99707 2. 669892  
1. 86264 1. 153934 2. 77154 1. 094923 0. 91106 1. 388269 0. 996062 1. 534395 4. 491061  
1. 820015 1. 214904 1. 357421 2. 783552 2. 128741 2. 474924 1. 569354 1. 261541 1. 550676  
2. 408811 1. 656096 2. 962831 1. 883933 2. 070125 1. 891627 1. 756004 2. 570301 2. 526541  
2. 20411 2. 135246 1. 781161 2. 199596 2. 640123 2. 185935 1. 822357 1. 695608 1. 88043  
1. 607553 1. 534256 1. 431714 2. 236211 2. 193066 2. 422683 1. 769047 2. 418266 1. 69752  
1. 553661 2. 098489 1. 881554 3. 306444 1. 335079 2. 243862 2. 244527 1. 484834 1. 896395

1. 017479 1. 454059 1. 811172 1. 422608 2. 095517 2. 304515 1. 990334 1. 369586 1. 299524  
10. 07207 9. 771425 9. 775265 9. 940465 9. 635293 9. 458584 9. 717702 9. 769954 9. 795153  
3. 892976 3. 218612 3. 390459 2. 984897 3. 640404 3. 936095 3. 425275 3. 249026 5. 023487  
1. 330159 1. 269676 1. 9323 1. 335952 1. 573926 1. 911937 1. 485614 1. 643029 1. 190798  
3. 138545 2. 934311 2. 11314 2. 165374 2. 836172 3. 961052 1. 896284 2. 612734 3. 755103  
1. 717956 1. 497365 1. 362862 1. 2351 2. 011958 2. 399254 1. 995962 1. 708548 2. 395496  
1. 702989 2. 085099 2. 699619 4. 091214 1. 744912 2. 832633 2. 417832 1. 379009 1. 475749  
2. 036548 1. 967526 2. 446242 2. 620045 2. 502294 2. 332677 2. 298271 2. 18033 2. 604461  
3. 100024 2. 677616 2. 573642 3. 196716 2. 90109 3. 465442 2. 5269 2. 657319 2. 47669  
4. 768883 4. 392812 4. 087645 3. 04602 4. 777362 4. 658558 3. 602251 4. 621428 5. 043448  
2. 712896 1. 819874 2. 09449 2. 289972 1. 381416 1. 544745 1. 677048 1. 583128 1. 505922  
3. 083197 3. 467387 2. 112775 3. 416843 1. 843081 2. 154039 3. 068674 1. 8448 3. 197292  
1. 502572 1. 787815 1. 236065 1. 454942 2. 096188 2. 305465 1. 823344 1. 360689 1. 153368  
1. 385544 3. 124768 2. 365009 2. 968209 1. 365639 3. 208801 2. 396402 1. 746523 2. 967987  
1. 380023 2. 120346 1. 664677 2. 32174 1. 804525 1. 752559 1. 949665 1. 194695 1. 432933  
1. 658861 2. 111565 2. 061804 2. 010291 1. 899359 1. 815051 2. 08201 1. 912507 1. 882011  
2. 6178 3. 286224 2. 109239 3. 049964 1. 661526 2. 990551 2. 052639 2. 054279 2. 374041  
1. 907767 1. 845204 1. 738098 3. 035584 1. 666851 1. 491217 2. 44323 1. 986415 2. 495405  
2. 039018 2. 682511 2. 691129 2. 447801 2. 177668 2. 130887 2. 23378 2. 324053 2. 152334  
1. 757661 1. 249057 1. 488028 1. 743205 1. 401276 2. 238868 1. 678618 1. 026063 2. 301659  
1. 098968 0. 987968 0. 977022 1. 503963 1. 210363 0. 951516 1. 29901 1. 018007 0. 975713  
2. 618169 2. 454008 3. 544321 2. 338529 2. 779856 3. 018886 3. 446271 3. 199104 2. 390571  
3. 268549 2. 740327 2. 587637 3. 619508 2. 859791 3. 610717 3. 645576 2. 621324 2. 954282  
3. 303601 3. 439821 3. 540657 4. 246037 3. 871175 4. 008032 3. 151166 3. 745809 3. 28602  
5. 635644 4. 654433 4. 102352 5. 222683 5. 392939 4. 645844 4. 770248 5. 293633 5. 460917  
2. 463874 3. 165208 3. 522014 3. 223322 3. 178793 3. 391249 1. 986675 2. 525795 4. 131097  
1. 422551 0. 92556 0. 82472 1. 432325 0. 899594 1. 751574 1. 368808 1. 639621 1. 985233  
1. 968365 1. 544347 2. 179381 1. 874593 1. 657002 1. 106829 1. 989782 1. 897604 2. 327663  
1. 3044 2. 29284 2. 526562 1. 903656 0. 863468 2. 356549 2. 467063 1. 366113 2. 160478  
2. 150353 4. 19547 4. 503235 3. 03813 4. 500677 1. 765423 2. 61377 1. 844783 2. 981386  
2. 374447 1. 121332 1. 666665 2. 188379 1. 59713 2. 092178 1. 789739 1. 596671 1. 541238  
2. 262093 2. 464058 1. 879133 2. 725846 1. 897849 1. 806918 1. 779773 1. 589669 1. 342766  
3. 646699 2. 755262 2. 601093 3. 63907 3. 699221 2. 752861 2. 974073 2. 694499 3. 527319  
2. 507651 1. 669879 2. 571237 2. 427938 1. 889719 2. 567809 2. 320867 1. 649765 1. 925755  
7. 745618 7. 664151 6. 86794 6. 874846 6. 669532 7. 33101 7. 381276 7. 281587 7. 470996  
1. 034928 1. 249224 1. 411137 2. 080117 1. 34719 1. 85496 1. 359609 1. 513957 1. 042435  
4. 174705 3. 771148 3. 881188 4. 334611 3. 686771 3. 556944 3. 316546 3. 897128 2. 915831  
2. 62496 2. 722041 2. 187472 2. 83983 2. 059678 1. 97643 2. 615985 2. 265647 2. 267744  
3. 469294 1. 452216 1. 619216 1. 809564 1. 574033 1. 884213 1. 980028 2. 081541 2. 325415  
1. 845602 1. 422587 1. 536892 1. 702638 1. 179455 1. 500841 1. 154321 1. 364883 1. 364782  
2. 019596 2. 69449 2. 375973 1. 822206 2. 407695 2. 643785 2. 365273 2. 350709 2. 180943  
1. 315638 1. 22502 1. 341037 1. 810217 1. 234785 1. 097271 1. 289011 1. 820997 1. 558138  
4. 351691 3. 962912 4. 457963 5. 507265 4. 25671 4. 25622 4. 580759 4. 093844 4. 647401  
1. 018122 1. 200681 1. 306391 3. 20761 1. 608804 2. 324369 1. 332813 1. 320598 1. 399297  
1. 76847 2. 384132 2. 076474 1. 791478 2. 058594 1. 68174 1. 484504 1. 614592 3. 109885  
1. 314039 1. 108156 1. 308135 0. 851472 0. 961531 1. 21352 1. 034496 0. 883882 0. 915062  
1. 983854 1. 448821 2. 444786 2. 36765 1. 970334 1. 559933 2. 055013 1. 960973 2. 771707  
0. 850123 1. 317132 1. 156252 0. 777222 0. 493923 0. 846336 0. 775919 1. 067374 1. 491998  
2. 0523 2. 322444 1. 738164 2. 438444 1. 546807 1. 489154 1. 923043 2. 857061 2. 013145  
6. 962463 7. 074074 7. 125143 7. 588515 7. 062684 6. 052281 6. 870697 7. 407641 6. 608417  
0. 982651 1. 189828 1. 050232 1. 457148 0. 96506 1. 653906 1. 677526 1. 272981 1. 253025

4. 422839 4. 918565 4. 453584 6. 734918 4. 034165 3. 257036 3. 850135 3. 234251 4. 867325  
2. 030667 1. 336685 1. 131334 1. 874417 1. 585 2. 739034 2. 401654 1. 640193 3. 547718  
2. 455434 2. 90677 2. 304991 2. 843342 2. 243806 3. 149322 2. 736566 2. 722545 2. 819809  
2. 449017 2. 565232 2. 318281 4. 14252 3. 088181 2. 853084 2. 611735 2. 376823 2. 968636  
1. 786185 2. 565429 1. 318921 2. 6315 2. 560692 1. 676521 2. 503504 3. 100591 2. 041181  
3. 245045 3. 432419 2. 881873 2. 465514 2. 860347 4. 099449 3. 662129 4. 119444 3. 546116  
2. 19219 2. 895945 2. 533506 1. 326092 3. 926114 2. 141342 1. 931102 2. 571192 2. 65966  
2. 784268 1. 206374 1. 26133 1. 050462 1. 141799 2. 007862 0. 984615 3. 916172 0. 84984  
1. 602534 1. 916737 2. 168751 1. 899102 1. 380952 2. 982874 1. 307384 1. 607565 1. 416692  
3. 028999 2. 68597 2. 893014 2. 560316 2. 176666 2. 957797 2. 400389 2. 783566 2. 514455  
1. 594036 1. 17762 1. 434019 1. 67122 1. 990597 1. 287393 1. 543002 1. 022846 2. 121846  
5. 360504 4. 745356 4. 901799 4. 60567 5. 355535 4. 750405 5. 045181 4. 866229 6. 136775  
2. 197616 2. 171925 2. 03888 2. 290419 3. 161629 3. 234282 2. 492276 1. 765173 2. 792539  
1. 881365 2. 520337 2. 3279 3. 061043 3. 831623 3. 521061 2. 660717 3. 301908 2. 378147  
1. 886668 2. 226736 1. 497835 2. 106747 2. 54356 1. 554573 1. 110413 1. 308784 2. 375384  
1. 341012 1. 502367 1. 474174 1. 868113 1. 387286 1. 383983 1. 130935 1. 222793 1. 438876  
2. 168721 2. 641915 2. 463033 3. 152105 2. 499861 2. 145172 2. 86337 3. 007723 2. 097946  
1. 529196 1. 12284 1. 113661 1. 404674 1. 43001 1. 703698 1. 577588 1. 740859 2. 314832  
4. 624573 5. 392401 4. 269562 4. 006635 4. 304405 4. 982034 5. 364871 4. 50531 4. 42964  
4. 443205 3. 54587 3. 399038 3. 389187 2. 845648 4. 155761 3. 547917 2. 670915 4. 305853  
1. 327279 1. 035704 1. 145211 1. 255022 1. 020761 1. 345511 0. 882637 0. 690522 1. 248255  
1. 384819 1. 468613 1. 671677 1. 47647 1. 091802 1. 425404 1. 359013 1. 328842 1. 463614  
1. 737292 2. 492489 3. 249735 1. 405977 1. 888046 2. 591344 3. 150081 2. 406298 2. 703795  
1. 833248 1. 48691 1. 37375 1. 813965 1. 116947 1. 611699 1. 25495 1. 048766 1. 175685  
1. 565108 1. 452418 1. 306187 1. 72591 1. 33596 1. 276539 1. 440748 1. 482422 1. 495962  
3. 658161 2. 789374 2. 892953 3. 264074 2. 661587 2. 452259 2. 0558 3. 367564 2. 759067  
1. 881164 1. 97449 2. 042307 3. 069439 2. 142074 2. 031035 1. 357456 2. 0883 1. 968183  
1. 615596 0. 750168 3. 357495 1. 792688 3. 5728 1. 737522 1. 520012 2. 509386 1. 564167  
1. 297504 1. 358327 1. 568455 1. 202771 1. 109605 1. 678527 1. 435489 0. 959665 1. 023432  
3. 258677 4. 486745 3. 030693 3. 516764 4. 419938 3. 211521 3. 192769 4. 117827 2. 857654  
1. 956323 2. 880856 2. 068256 2. 378029 2. 718949 2. 063283 2. 169652 2. 344283 3. 914198  
2. 636424 2. 857698 3. 512643 2. 1434 2. 887422 2. 428255 2. 445127 2. 299323 3. 052309  
1. 670228 1. 917325 1. 637351 2. 223432 1. 648675 1. 603736 2. 12708 1. 355837 2. 160856  
3. 205314 2. 719291 4. 336229 3. 246196 2. 262035 3. 030738 3. 394342 3. 195628 3. 467917  
2. 551901 2. 4076 2. 235492 3. 051932 1. 925528 2. 860513 2. 247703 2. 297944 2. 690516  
2. 235178 3. 549655 3. 290477 2. 308065 3. 437858 3. 380288 2. 913903 3. 455721 2. 537011  
1. 236789 1. 579896 0. 886368 1. 734712 1. 15477 1. 201521 0. 761359 1. 500765 1. 131674  
2. 735677 1. 647 1. 694524 3. 465244 2. 380827 1. 73855 4. 256949 1. 929414 1. 899196  
2. 279762 1. 439502 1. 520316 2. 274568 2. 396402 1. 317403 1. 538848 1. 881003 1. 953163  
4. 539621 4. 898912 4. 627251 4. 647888 3. 885721 4. 707149 4. 857057 5. 288483 5. 38357  
1. 62599 1. 974211 1. 783423 2. 485564 1. 949213 1. 572213 1. 703469 1. 629757 2. 140513  
3. 1305 2. 572473 3. 157092 2. 38045 1. 538255 1. 783613 2. 764332 2. 123777 3. 124083  
1. 146462 1. 55359 1. 799968 1. 007288 3. 240688 4. 289479 1. 784939 2. 658839 3. 414473  
1. 889071 2. 044726 2. 01062 2. 807986 2. 141719 2. 609651 2. 239137 2. 137514 2. 543396  
3. 268836 2. 941865 2. 667104 3. 75216 2. 848586 3. 501524 2. 711595 2. 950714 3. 022965  
1. 250308 1. 752538 1. 704186 0. 881264 1. 353315 1. 440686 1. 063647 1. 354837 1. 094858  
2. 334339 1. 643969 2. 043804 2. 527934 2. 723044 1. 927505 1. 947023 1. 541695 2. 778321  
4. 617452 3. 552149 5. 171697 3. 539397 4. 073842 5. 241672 4. 634879 5. 071103 4. 888105  
2. 813183 2. 634352 2. 759694 2. 162813 2. 757393 2. 535514 2. 707329 2. 249168 2. 493521  
3. 90529 3. 653512 4. 623603 4. 678502 3. 890793 4. 348098 3. 73303 4. 686912 3. 827461  
1. 294871 1. 11265 0. 93696 1. 495475 1. 594997 1. 770775 0. 975728 0. 907868 1. 357493



2. 329696 1. 751864 1. 724062 2. 795019 1. 766732 1. 996535 1. 709318 2. 774497 2. 092811  
4. 129741 3. 262188 3. 542921 3. 389414 4. 380693 3. 839218 4. 297296 3. 742218 3. 244103  
2. 784525 1. 931282 0. 91332 1. 906738 2. 477697 1. 783202 1. 689205 1. 943752 3. 234811  
2. 050459 0. 884816 2. 362243 1. 716818 1. 474875 1. 825018 2. 076451 1. 320402 1. 175556  
1. 896704 1. 888873 2. 410902 2. 024826 1. 927375 2. 793647 2. 356388 2. 178986 1. 898336  
1. 412003 1. 541613 1. 269654 1. 093239 1. 62191 2. 016011 1. 77594 1. 058171 1. 171239  
1. 305552 1. 301357 1. 29369 1. 682306 1. 296122 1. 212414 2. 282286 1. 225183 1. 216785  
1. 22153 2. 330539 1. 395732 1. 33489 1. 171405 1. 226657 1. 103066 1. 235033 1. 297496  
1. 627764 2. 245008 1. 344002 1. 88285 0. 965469 1. 303283 1. 516911 2. 231813 1. 318919  
1. 690783 2. 777021 1. 240474 2. 050478 1. 222276 1. 246566 1. 381927 1. 450232 1. 067563  
1. 548031 1. 584516 1. 878381 1. 733458 1. 535408 1. 769701 2. 01892 1. 829678 1. 649143  
2. 05505 1. 32706 2. 373206 2. 619077 2. 14399 2. 04387 1. 764309 1. 888367 1. 439964  
1. 802236 0. 782704 2. 829053 1. 759215 2. 339345 1. 439715 1. 198202 1. 13971 2. 933694  
4. 317922 3. 595668 4. 153349 5. 056498 4. 05305 4. 534347 3. 361206 3. 449226 4. 18798  
1. 272142 1. 783429 1. 16927 1. 638845 1. 47221 1. 472109 2. 002854 1. 786332 1. 035388  
1. 379287 0. 965534 1. 200523 2. 092171 1. 185448 1. 554697 0. 868523 1. 28101 1. 650718  
1. 606028 1. 207935 1. 08999 3. 02568 1. 498299 1. 255073 1. 279512 2. 406308 1. 470328  
2. 482452 3. 24366 2. 628408 3. 044844 2. 205318 2. 703137 3. 332097 2. 607171 2. 344742  
1. 841842 1. 664574 1. 725144 1. 967861 1. 727312 1. 99778 1. 736391 1. 789243 1. 738413  
1. 033208 1. 520025 1. 632418 1. 072262 1. 520493 1. 214995 1. 299709 0. 967543 0. 822064  
1. 742766 1. 275759 2. 392899 2. 234219 1. 815738 1. 704223 1. 522017 1. 487526 2. 07349  
1. 289836 1. 07015 1. 023615 2. 242259 2. 291934 1. 522137 1. 050471 1. 603943 2. 502225  
2. 91583 2. 599711 2. 980808 4. 105898 3. 082976 3. 075628 2. 877587 3. 588697 2. 793529  
2. 137148 1. 414634 2. 37113 2. 552519 1. 478523 3. 368812 2. 392991 1. 690878 2. 048353  
1. 675904 1. 61714 1. 099125 1. 095897 1. 324812 1. 353924 1. 374276 2. 403223 1. 57598  
1. 879722 1. 084493 2. 509155 1. 636044 1. 523024 2. 204925 1. 525796 2. 145801 1. 237821  
2. 477233 2. 203506 3. 03559 4. 09775 3. 57613 2. 870068 3. 349159 2. 777385 3. 157169  
1. 580343 2. 119419 1. 648322 2. 127286 1. 339151 1. 148556 1. 096532 1. 632025 1. 632025  
2. 740217 1. 657423 3. 711661 2. 734985 1. 405625 2. 51731 1. 402325 0. 867899 1. 185569  
1. 442466 0. 980306 1. 391001 1. 211159 1. 398424 1. 16563 1. 241384 1. 138803 1. 886288  
0. 85438 2. 08185 1. 304843 0. 814641 2. 028264 2. 168899 1. 075442 0. 922151 1. 350627  
0. 856213 1. 061459 1. 962961 1. 39493 1. 211223 1. 760211 1. 51246 1. 379364 2. 687456  
2. 297161 2. 265853 2. 185711 2. 934872 1. 319632 1. 973832 1. 728313 1. 495075 1. 973832  
2. 19561 2. 117684 1. 945154 2. 294662 1. 765759 1. 96406 2. 287589 1. 627454 2. 716774  
2. 634446 2. 769623 3. 279427 2. 079625 1. 44332 3. 155189 2. 690687 1. 998323 2. 112457  
2. 910491 2. 996629 2. 116119 2. 476012 4. 338685 1. 834876 2. 397722 3. 67388 1. 597883  
4. 887848 5. 552188 4. 592822 2. 731756 4. 766984 3. 14538 4. 298693 4. 062712 4. 057333  
1. 325266 1. 46375 1. 919128 2. 855983 1. 206619 2. 074965 1. 343104 1. 54068 1. 310402  
1. 117998 1. 954919 1. 32155 2. 050396 1. 873116 2. 30755 1. 660612 1. 322758 1. 376743  
2. 885571 2. 998075 3. 134192 2. 489985 2. 168949 3. 776616 2. 741358 2. 308817 3. 161314  
2. 084001 2. 782815 3. 61158 2. 558257 2. 377497 2. 284779 2. 053736 2. 366656 2. 18669  
2. 232286 1. 738402 1. 715106 2. 906497 1. 725284 1. 455049 2. 268601 1. 453446 1. 868614  
1. 342017 1. 773874 1. 283635 2. 326211 1. 44821 2. 05503 1. 539037 1. 721704 1. 551165  
2. 173818 1. 026314 1. 200281 1. 746344 1. 135573 1. 723521 0. 884677 1. 526168 1. 024142  
3. 727161 3. 932019 3. 051873 2. 539184 4. 248425 4. 212906 2. 745693 3. 987637 3. 221555  
1. 822672 1. 67272 0. 832598 1. 451038 2. 050899 2. 084282 1. 80716 1. 570748 1. 447753  
3. 218896 3. 078207 3. 369892 4. 175356 3. 593278 3. 388343 2. 977925 3. 346582 3. 217347  
1. 632577 1. 567159 1. 888635 1. 867104 2. 383015 2. 0351 1. 854424 1. 714108 1. 406657  
2. 405061 2. 82151 2. 451123 2. 348164 1. 94199 2. 068096 2. 019196 2. 285453 2. 606581  
5. 252882 5. 258129 5. 84733 4. 962956 5. 31519 4. 713078 5. 659282 5. 465168 6. 332664  
1. 564703 1. 863439 1. 484138 1. 180871 2. 832529 1. 713891 0. 959455 1. 03889 1. 298355

1. 660788 1. 796676 1. 149403 0. 822201 2. 680755 1. 333322 1. 657284 1. 075686 0. 655272  
3. 423727 4. 191477 3. 689023 4. 799317 3. 979986 3. 526725 3. 449597 3. 77732 2. 365983  
2. 763074 2. 894517 2. 962347 4. 125501 2. 343482 2. 926681 3. 834032 2. 923014 2. 729262  
1. 442858 1. 744358 2. 299478 0. 988233 2. 071244 2. 853351 1. 099211 2. 237997 3. 374975  
1. 411594 2. 03633 1. 559221 0. 910822 0. 995666 1. 154975 1. 282866 2. 536669 2. 369859  
2. 541042 3. 866909 3. 168072 3. 493501 2. 895027 3. 259696 2. 292577 2. 599527 3. 067104  
2. 468369 1. 776111 1. 263256 1. 749215 1. 349862 1. 858895 1. 278686 1. 492708 3. 476818  
2. 505889 1. 818064 3. 280161 1. 605324 2. 368301 1. 617187 4. 500864 3. 891516 1. 337447  
1. 342504 1. 40508 1. 359537 2. 003243 1. 625012 2. 229205 1. 658891 1. 411078 1. 955511  
6. 565907 6. 29299 5. 435167 5. 112952 5. 684976 5. 770266 5. 815773 5. 559052 5. 449382  
3. 284983 2. 997263 3. 560634 2. 84678 3. 183833 4. 122256 2. 760742 3. 484575 4. 372695  
2. 986099 1. 507139 1. 715319 2. 620752 1. 844481 2. 644737 2. 149356 2. 441651 1. 963423  
2. 930756 3. 273953 2. 342671 3. 125711 2. 743911 2. 91896 2. 728979 2. 812206 3. 801448  
1. 817041 0. 856178 1. 03341 1. 106008 1. 028932 1. 078188 0. 947896 0. 986731 1. 220376  
1. 733787 1. 550294 1. 550294 1. 931129 0. 989416 1. 360712 1. 187423 1. 683636 1. 141888  
1. 720718 3. 718898 2. 316337 2. 997908 2. 493625 3. 278411 3. 212482 3. 081552 2. 462288  
3. 522337 2. 481506 2. 102887 3. 150113 3. 328565 2. 047625 2. 404022 2. 641622 2. 337604  
1. 486928 2. 357312 1. 038554 1. 367314 0. 805075 1. 678646 1. 485773 1. 404144 1. 485773  
1. 928966 1. 726591 1. 341185 1. 998406 1. 806935 2. 813032 1. 368529 1. 91071 2. 593614  
1. 141104 1. 125332 1. 505741 1. 506544 0. 908017 1. 476004 1. 953613 1. 905276 1. 331135  
2. 591411 1. 650905 2. 070305 2. 012677 2. 253439 2. 038574 1. 21439 0. 716349 1. 431981  
3. 042037 3. 049476 2. 790783 2. 869011 2. 869011 3. 314083 2. 646259 2. 701931 2. 453263  
1. 675251 1. 176967 1. 350667 1. 561306 1. 295728 1. 76002 1. 559666 2. 000983 1. 614447  
2. 25185 1. 933218 3. 313382 2. 798536 1. 440462 2. 131842 2. 09702 1. 872435 1. 59365  
3. 058955 2. 776986 2. 962945 3. 244619 2. 780583 3. 102528 2. 912948 2. 802136 2. 752508  
1. 597719 1. 381539 1. 582193 1. 685837 1. 387064 1. 385113 1. 424865 1. 810791 1. 366606  
2. 164635 1. 99058 2. 401103 3. 258798 2. 055504 1. 922016 2. 093434 1. 717891 2. 253791  
4. 074625 3. 62193 3. 943163 3. 854182 3. 810691 3. 633369 4. 407691 3. 908749 4. 477933  
1. 404499 2. 48152 2. 742344 1. 377215 1. 688196 1. 509684 1. 777389 1. 213366 2. 52752  
2. 142952 3. 038036 2. 695972 2. 770778 2. 718821 2. 608812 2. 277074 2. 751423 2. 02273  
4. 232055 4. 085278 4. 270639 3. 309415 5. 046222 3. 909002 4. 346332 3. 967267 4. 493157  
1. 990455 1. 818866 1. 932343 2. 700196 1. 347922 3. 261054 1. 673051 3. 031135 2. 322653  
1. 91429 2. 838175 1. 709006 1. 533279 2. 230984 2. 221158 2. 250197 2. 506643 3. 077876  
1. 360053 1. 305667 1. 267026 1. 414164 1. 775031 1. 686937 1. 292295 1. 156246 1. 809932  
1. 474061 1. 082635 0. 904947 2. 212315 1. 66409 1. 733269 1. 350919 1. 565943 1. 660595  
3. 983757 3. 586203 3. 609534 2. 876854 4. 863572 2. 120191 4. 108668 2. 984894 3. 317191  
7. 267019 6. 447317 7. 069672 6. 358424 6. 62446 6. 550065 6. 552346 7. 057574 7. 1671  
2. 967521 1. 777152 2. 298043 2. 150141 2. 71643 2. 782024 2. 102154 2. 451032 2. 79231  
7. 936796 7. 757013 7. 077582 7. 786897 7. 283159 7. 123525 7. 796 7. 999769 8. 125032  
1. 925415 0. 955789 1. 859445 2. 588612 1. 850657 0. 998685 1. 515006 2. 721318 1. 340712  
3. 902904 4. 028355 4. 496519 4. 014891 4. 291144 3. 291248 4. 341473 3. 998145 4. 986136  
2. 18079 1. 946673 2. 32929 2. 426518 2. 304203 2. 490415 2. 361287 2. 061899 2. 341855  
4. 5768 3. 017134 2. 057549 2. 149313 2. 293136 1. 184833 1. 44547 3. 5785 3. 447693  
3. 377329 3. 672934 3. 881132 3. 601269 2. 94767 3. 337282 3. 613975 3. 004585 3. 977099  
1. 441077 1. 585628 0. 977033 1. 706467 1. 463559 1. 992167 1. 614982 2. 14173 1. 79539  
3. 152579 2. 465057 1. 932246 3. 219932 2. 480778 2. 647274 2. 40647 1. 629826 3. 352927  
2. 627449 2. 580881 2. 354862 3. 793445 2. 657584 2. 571112 2. 662405 3. 198855 2. 497154  
4. 039198 2. 631468 2. 271988 3. 273311 2. 985705 2. 390228 2. 927047 3. 200596 2. 762821  
5. 110719 3. 292344 1. 201172 1. 984532 3. 829401 0. 906783 2. 218874 1. 468893 2. 476595  
1. 676916 0. 996691 1. 164506 1. 846345 1. 809611 2. 700324 1. 446952 1. 34963 1. 465045  
1. 394879 1. 165374 1. 108564 1. 051695 1. 149348 0. 836163 1. 098508 1. 029823 1. 077967

2. 335799 1. 749117 2. 234699 2. 663762 1. 943667 1. 934397 2. 209854 1. 853752 2. 020864  
2. 643478 2. 709235 2. 727125 2. 481554 2. 630876 2. 225708 3. 352627 2. 371371 5. 010769  
1. 884367 2. 79693 3. 006405 3. 238682 1. 723982 2. 773606 2. 513809 3. 724714 2. 92489  
1. 616196 1. 346593 2. 438377 1. 7797 2. 063837 1. 373021 2. 719328 1. 53222 1. 717646  
2. 899201 1. 885706 4. 081784 2. 630085 2. 053201 2. 748833 2. 982889 2. 514954 4. 613067  
1. 243821 1. 556691 2. 374124 1. 406555 1. 435099 1. 655318 1. 010306 1. 309282 1. 893097  
1. 571686 1. 850017 1. 699112 1. 430888 1. 305086 1. 40991 1. 383609 1. 172619 1. 770707  
2. 510146 3. 584719 2. 097374 1. 734246 2. 249299 2. 406879 2. 009021 2. 777485 2. 219499  
1. 533645 1. 344393 1. 391487 1. 542933 2. 003943 2. 278711 1. 818988 1. 66563 1. 834551  
1. 833505 2. 1314 2. 066485 1. 975386 1. 672392 2. 732611 2. 311676 1. 2043 1. 871151  
1. 827626 1. 906198 1. 459206 2. 265736 1. 716514 1. 696861 1. 98253 2. 111054 1. 952507  
2. 452745 2. 888178 2. 544889 2. 696786 3. 174406 2. 825685 2. 382943 2. 683598 2. 431519  
1. 935108 2. 068893 2. 522103 3. 752795 1. 636539 2. 147098 1. 909451 1. 9269 1. 810974  
1. 531909 1. 113086 2. 008691 2. 060071 2. 312943 2. 123627 1. 542312 2. 536026 3. 359391  
2. 700819 4. 396774 4. 077264 2. 575088 4. 161726 4. 306426 4. 687145 4. 74244 6. 813963  
1. 397806 1. 217836 1. 271532 1. 768035 2. 20435 1. 627755 0. 9825 0. 995988 1. 304121  
3. 198863 3. 011638 2. 249955 3. 840123 3. 065823 3. 327436 3. 058726 3. 484689 3. 135173  
2. 68305 3. 200091 2. 800682 2. 783699 3. 536595 2. 854017 3. 186058 2. 798828 2. 924374  
2. 560469 2. 154604 2. 410091 2. 152989 2. 351022 1. 989346 2. 648024 2. 724762 3. 277341  
2. 1874 1. 815 1. 720629 2. 727823 2. 154351 1. 896931 2. 343179 1. 63322 2. 881039  
2. 259664 2. 226573 2. 392353 2. 354479 2. 247024 2. 634256 2. 547907 2. 385862 3. 589969  
6. 095815 5. 861453 5. 776948 4. 719436 5. 754915 4. 956667 6. 45639 5. 445412 6. 167417  
4. 581283 4. 990825 4. 674699 5. 091557 4. 230732 3. 368778 3. 954183 4. 309517 3. 717084  
1. 143169 1. 601042 2. 176091 2. 00221 1. 571041 2. 277649 1. 218734 1. 190231 1. 429686  
4. 193732 3. 395629 3. 122863 4. 953858 3. 255228 3. 097271 4. 714386 4. 116832 2. 293043  
3. 590153 3. 985872 5. 800387 3. 710256 4. 524299 5. 303517 4. 71925 4. 595703 5. 760479  
2. 867554 4. 402225 4. 512148 2. 944155 4. 081163 3. 921171 4. 581722 3. 258915 3. 649487  
1. 456457 1. 530229 1. 267972 1. 338085 1. 133211 2. 336441 1. 569303 1. 192202 1. 204957  
0. 620215 0. 52755 0. 391384 3. 980888 0. 392165 1. 207529 2. 070048 2. 820835 0. 467854  
3. 336406 2. 80157 3. 788518 3. 978644 3. 235551 3. 984255 2. 372646 2. 443133 3. 235823  
2. 954572 3. 904704 3. 484585 4. 830179 3. 249722 3. 653902 3. 246074 2. 722617 2. 903713  
1. 332022 0. 889807 2. 085127 1. 531956 1. 238364 1. 029523 1. 574053 1. 760212 1. 238041  
1. 248286 1. 071702 1. 509128 2. 359307 1. 326145 1. 282603 0. 839849 0. 974756 1. 326753  
2. 678689 1. 57298 0. 851844 1. 951176 1. 343568 1. 159986 3. 095419 0. 718611 2. 234489  
2. 691563 1. 716984 1. 951693 2. 323015 3. 100993 2. 31226 2. 915039 2. 86625 4. 142808  
2. 147912 2. 495636 3. 27367 3. 373605 1. 272524 1. 904229 2. 214142 3. 401502 1. 527991  
4. 924555 4. 700842 5. 304604 5. 251607 5. 052531 4. 61042 5. 053427 4. 46868 4. 803511  
3. 621251 4. 468054 4. 21309 4. 468054 4. 907794 4. 581343 4. 266789 4. 806915 4. 92306  
1. 575124 1. 494968 1. 802813 1. 494968 1. 205173 1. 455509 1. 241479 1. 494968 1. 370708  
2. 612359 2. 897933 2. 437701 2. 093699 2. 537266 2. 323506 1. 986898 2. 219538 1. 915712  
2. 456648 0. 916981 1. 87409 1. 332859 0. 739192 1. 817261 0. 848826 1. 724905 1. 316275  
1. 690184 1. 902939 2. 943199 2. 956737 2. 317709 1. 457013 2. 028098 3. 123279 0. 947079  
3. 360122 2. 259211 2. 828593 1. 774251 1. 908893 2. 858635 3. 224833 3. 013718 2. 726571  
2. 02266 2. 66253 3. 047559 2. 931592 3. 114704 2. 992557 2. 567141 3. 376059 2. 825165  
5. 330674 6. 502625 6. 450899 6. 450899 6. 426294 6. 877921 6. 423577 6. 905833 7. 232323  
1. 568374 1. 824952 2. 361892 1. 869933 1. 103852 1. 379191 1. 453417 1. 592794 1. 468306  
2. 226965 3. 227955 3. 101411 3. 345489 2. 12756 2. 607068 2. 412325 2. 366956 3. 416175  
1. 195584 1. 884066 1. 614099 1. 296621 1. 502128 1. 236356 1. 458838 1. 284524 2. 071039  
3. 926818 1. 824046 2. 775082 1. 873465 2. 694248 3. 701904 2. 767491 3. 863325 2. 584064  
1. 428683 2. 970809 1. 085942 1. 577033 1. 64069 2. 175574 1. 842237 1. 351746 2. 646751  
3. 809928 2. 406528 3. 289341 4. 889541 2. 998189 3. 126336 4. 231279 1. 721994 3. 651236

0.903533 1.233975 0.969589 1.054359 1.587612 2.770869 0.935883 1.182717 1.119608  
2.63117 1.703864 2.120354 2.609142 1.714032 2.739348 1.880956 2.094518 1.828645  
1.807874 2.205681 1.616454 2.049814 2.24978 1.293987 1.22531 1.628937 2.110352  
2.678105 2.729497 1.990336 2.544577 2.127578 2.661311 2.730916 3.773651 4.096351  
0.949324 0.61698 1.289454 3.457154 0.834198 1.172663 1.145913 1.02446 0.802429  
1.904485 1.798035 2.712945 2.20821 2.361212 2.651139 2.237891 1.900476 2.93286  
1.315173 0.860687 0.848175 1.083282 1.135451 1.114199 0.892504 1.02097 1.206251  
6.52302 6.47983 6.599228 7.052205 6.672927 6.577728 6.072857 6.765766 5.782644  
1.821228 1.150741 2.484878 1.529582 1.454102 1.250887 2.277366 1.02386 2.521737  
1.111883 1.998049 2.303407 2.388297 0.987926 2.269807 0.922962 1.866661 3.175711  
1.106671 1.722609 1.646985 2.210947 1.534552 2.84533 2.354391 2.645819 2.157104  
1.321408 2.257212 1.266464 1.267112 1.396278 1.056437 1.707869 1.944854 2.649255  
1.583382 2.211506 2.341626 1.955281 2.142733 2.573667 2.43797 2.468788 2.014674  
1.284942 1.713942 1.325208 1.532909 1.295168 1.199177 3.164651 2.16651 3.73572  
2.164309 2.644616 2.367527 2.857448 2.444689 2.538758 2.104607 2.74283 2.420969  
4.829803 3.351582 4.450945 2.966688 4.660818 4.942445 3.970244 3.230248 3.272689  
1.658602 2.034957 1.401978 2.368706 1.722922 1.631718 1.627698 1.722571 1.380744  
4.58649 4.781653 3.713838 4.302821 4.293762 5.039705 5.005456 4.69622 5.250124  
3.603309 2.553252 2.692359 2.527497 3.795363 1.986955 1.8636 2.108979 2.05832  
1.339837 1.773241 1.71298 1.721656 2.333484 2.516463 1.411369 1.450575 2.646786  
1.224339 1.147271 1.320286 1.854023 1.431543 1.651421 1.142623 1.812992 1.835554  
1.191125 3.261101 1.811526 3.317394 3.704329 3.888171 3.625415 2.810058 3.008258  
2.164143 1.757707 1.469068 2.53829 2.53829 2.661799 1.487797 2.052254 1.545933  
1.503394 2.780711 1.339522 1.029724 1.76003 1.807401 1.235496 0.809242 0.848693  
1.802624 1.389328 2.614398 2.505165 1.766209 1.820217 1.704521 2.963076 2.087526  
1.22714 1.784089 1.177715 1.344563 1.142027 1.454115 1.577801 1.12197 1.83867  
4.100291 3.517446 4.288306 3.672021 4.032377 3.171506 4.075954 4.345957 1.668031  
1.005892 1.745235 1.171503 4.228112 0.528357 3.128699 0.955404 1.315919 4.066642  
3.415801 3.424384 6.149658 4.172531 4.518207 6.485553 1.926996 4.444532 5.807706  
2.897593 3.108233 4.070113 2.793533 3.323383 3.560209 3.235308 1.978066 3.124948  
0.757551 2.241946 0.850108 2.38559 1.580927 1.220556 1.859003 1.143222 2.076958  
1.875994 1.616206 1.546288 1.648181 2.185489 0.915741 1.187404 1.411108 2.04181  
1.177674 1.411506 1.012373 0.917224 1.441748 2.000998 1.124979 1.461335 0.955632  
1.582801 2.405694 1.443469 2.048563 1.866092 2.449426 1.390706 2.311783 2.109396  
2.603347 3.696412 1.824862 0.996462 2.552753 2.594219 4.048975 2.544007 3.545496  
6.771701 7.230438 7.512936 8.671847 7.338036 7.245076 6.580661 7.694204 8.262067  
2.686475 3.058144 2.202386 2.311631 3.07526 1.477179 3.454291 2.215714 4.025161  
1.624784 2.011136 1.467131 2.435231 2.277579 1.538294 2.268111 1.394322 1.283538  
3.45261 2.816159 3.186073 2.716469 2.41024 2.557833 2.350877 3.187591 1.818781  
1.784064 1.998566 1.854498 2.211141 2.233327 1.857995 1.952128 1.95521 2.007325  
1.890073 2.930877 1.968963 4.19892 3.365016 2.035617 2.668683 1.293477 2.791026  
2.609808 1.587772 1.939179 1.418982 1.74456 2.289364 2.060636 2.981913 2.242967  
3.377874 3.338007 4.838732 1.984468 3.619164 4.294162 2.970167 3.527461 2.926879  
2.61586 3.572032 2.091773 1.864021 2.167075 2.842473 1.993717 1.83131 1.450688  
2.634714 2.749079 3.205517 2.704621 2.517337 2.475071 3.369245 2.958061 2.814904  
2.953828 2.288059 3.213003 3.742445 2.164876 2.696821 2.343895 2.562597 3.744993  
0.627388 1.213092 0.409231 1.081702 1.864427 1.75137 1.095317 2.709486 1.83672  
2.245451 3.365551 2.029122 2.505437 2.604369 2.341896 2.779541 2.108212 2.890846  
1.569282 4.468442 0.906509 1.397956 1.405621 0.840476 2.992576 3.601174 1.67722  
2.318287 2.630832 2.402331 2.328552 1.26524 1.95779 2.373159 1.924047 1.536862  
1.875795 1.745741 1.088573 2.123007 1.499643 1.343943 2.346981 1.378099 1.743306

2. 533571 2. 939395 3. 22196 3. 175132 2. 471495 2. 695292 3. 189578 2. 391891 3. 358292  
2. 612934 5. 486786 3. 00602 2. 497849 4. 672086 5. 214695 2. 440928 1. 964434 1. 838493  
5. 508171 5. 15893 5. 269826 4. 535291 5. 727588 5. 041335 5. 206451 5. 035961 5. 371574  
3. 014379 1. 903185 2. 297199 3. 198475 2. 60437 2. 786896 2. 536298 1. 719581 2. 540722  
1. 477984 1. 44176 1. 036468 1. 807793 0. 848321 1. 265685 1. 17672 1. 171067 1. 302006  
2. 354555 1. 164808 2. 177404 2. 557775 1. 290347 1. 960299 0. 929525 1. 637243 1. 741722  
1. 561871 1. 709741 1. 611199 2. 151715 1. 531729 1. 327335 1. 687533 1. 778484 1. 81887  
1. 821215 2. 689842 2. 177147 1. 845753 2. 290543 2. 000482 2. 599771 2. 106427 2. 853128  
3. 90759 3. 669585 4. 127856 3. 368157 3. 18427 2. 56337 3. 340918 3. 012366 3. 243118  
1. 927938 1. 247701 1. 210957 1. 121354 1. 451071 1. 425321 1. 789682 1. 408248 1. 081719  
2. 050844 2. 413073 2. 847773 2. 207866 1. 9701 1. 400162 1. 897194 1. 596414 1. 119796  
1. 916284 1. 121148 2. 009256 1. 493918 1. 644655 1. 847613 1. 458233 1. 26817 3. 235609  
6. 29169 6. 405604 6. 75914 5. 568809 6. 585157 6. 638405 5. 718879 5. 697876 4. 782145  
2. 320426 1. 859408 1. 583099 3. 010951 2. 090659 2. 49305 2. 736436 2. 182428 1. 557916  
2. 166123 0. 683741 1. 060338 0. 733175 1. 091932 1. 690658 0. 764335 2. 346796 1. 610582  
1. 565713 4. 752088 5. 692168 0. 644335 1. 750594 0. 88412 4. 843072 2. 180764 6. 283374  
7. 158966 6. 98261 7. 006657 6. 326248 7. 096175 7. 298493 6. 899482 6. 959245 7. 235249  
1. 526698 1. 749381 1. 858113 2. 549685 1. 970509 2. 067921 1. 660283 2. 069481 0. 990334  
1. 355622 1. 885752 0. 997471 1. 556285 1. 471777 1. 981398 1. 514712 1. 47402 1. 266184  
5. 442893 3. 941999 5. 343748 4. 203639 4. 185285 3. 76523 4. 693498 5. 11261 5. 386844  
1. 177939 0. 955649 0. 903816 1. 624191 1. 047682 1. 743416 1. 044228 1. 061757 1. 672542  
7. 943834 7. 801581 7. 790188 7. 087614 7. 720405 7. 050691 8. 173957 7. 713468 8. 092772  
4. 663146 3. 197408 2. 889795 4. 846308 3. 098899 4. 236901 3. 740279 2. 464046 3. 575452  
1. 257078 1. 376852 0. 920687 0. 786871 1. 661079 1. 132959 0. 593518 1. 293193 0. 527907  
3. 626198 2. 489517 2. 237213 2. 782057 2. 96718 3. 268808 2. 390313 1. 956669 2. 782141  
2. 774457 3. 04985 3. 452847 3. 184783 3. 635556 3. 666333 3. 521402 3. 472178 3. 154933  
2. 667113 2. 874879 2. 138446 2. 235985 2. 057606 3. 733429 1. 742678 2. 14752 4. 239919  
1. 96008 2. 049145 2. 86212 1. 613845 1. 990289 1. 416732 1. 580109 2. 005279 1. 97252  
1. 337217 1. 065356 1. 452235 1. 086703 1. 568368 2. 382957 1. 308662 0. 943382 1. 232369  
2. 168051 2. 391363 1. 859187 3. 4347 3. 210882 2. 88637 2. 322455 1. 772356 3. 805625  
8. 629282 8. 796925 8. 554495 7. 924113 8. 802705 8. 142156 8. 232498 8. 688037 8. 459577  
1. 64678 2. 473293 2. 442106 1. 821599 1. 438453 2. 61218 1. 930298 1. 721885 2. 230341  
1. 226076 2. 000269 1. 296333 1. 933053 2. 282496 1. 310828 1. 504196 2. 15771 1. 350537  
1. 530219 3. 026283 1. 936029 1. 436342 2. 140313 2. 710651 1. 653736 2. 710651 1. 736547  
1. 440942 2. 012126 2. 234981 1. 780186 1. 648383 1. 302808 1. 241007 1. 161695 1. 501187  
4. 474387 3. 561609 4. 253717 2. 735507 3. 878531 5. 042598 4. 846423 3. 628359 4. 385339  
0. 923114 1. 135594 1. 289754 1. 678253 1. 388371 1. 840985 1. 798321 1. 150072 1. 960987  
2. 676468 2. 661051 2. 676818 3. 114451 2. 934568 3. 082101 3. 8743 3. 438368 3. 118323  
4. 172632 3. 82234 4. 352546 2. 831126 4. 607483 3. 467222 2. 997467 3. 754987 3. 30047  
5. 614466 5. 108785 6. 342961 4. 282649 5. 50365 5. 148352 4. 618675 5. 273956 6. 43481  
2. 642038 1. 988192 2. 420013 1. 655716 1. 877649 0. 718834 1. 252313 1. 333124 1. 376899  
1. 536084 1. 242717 1. 582813 2. 44651 2. 250478 1. 980088 1. 453719 2. 271833 1. 816478  
2. 351058 2. 874831 2. 784136 2. 468429 1. 995536 2. 236781 2. 558389 2. 821579 2. 472509  
2. 686213 3. 02625 3. 519249 3. 252184 3. 05218 2. 908007 2. 857122 2. 521303 2. 913807  
1. 22907 3. 012704 1. 38081 1. 879355 1. 250658 1. 494549 1. 300794 0. 837311 0. 968321  
1. 07479 1. 47543 1. 128938 2. 771381 1. 528281 0. 817855 1. 109692 0. 95896 1. 47312  
2. 438686 2. 658379 2. 486685 2. 465934 2. 100759 2. 170012 1. 988543 1. 750978 2. 429806  
1. 326382 1. 773674 1. 603901 2. 59107 1. 413067 1. 123304 1. 823313 1. 695789 1. 79298  
2. 601809 2. 774594 2. 580267 2. 892515 2. 898733 2. 736564 2. 547433 2. 339952 3. 073061  
4. 693926 5. 1541 5. 633157 4. 502568 5. 160234 5. 111995 4. 688067 4. 979407 4. 235017  
2. 326303 1. 947251 3. 261831 2. 344877 2. 193363 2. 13702 2. 935325 1. 843812 2. 1913

4. 404353 5. 061897 5. 245218 4. 557936 5. 578178 5. 141733 4. 848919 5. 204719 4. 817805  
1. 627881 1. 628988 1. 263204 1. 838788 3. 029319 1. 711543 2. 510223 1. 448044 2. 383288  
1. 494601 1. 871703 1. 529876 4. 581927 1. 843777 1. 98722 1. 80581 1. 413522 2. 711415  
3. 76001 3. 089481 4. 432704 2. 210125 3. 611054 3. 920134 4. 191254 3. 642121 3. 890996  
1. 977434 3. 101898 3. 208073 3. 509295 3. 185615 3. 289846 2. 706011 3. 047636 5. 322224  
3. 098693 3. 350613 3. 813316 3. 416027 2. 716405 3. 08119 3. 137807 3. 507996 3. 450451  
1. 49636 1. 255739 1. 823826 1. 116381 1. 323941 1. 036082 1. 106574 0. 923968 1. 361749  
1. 182927 2. 126173 1. 143678 2. 049301 1. 806386 2. 15322 1. 355079 3. 598822 3. 975096  
3. 744928 4. 077708 3. 985078 4. 511609 3. 598961 3. 706407 3. 82946 3. 431245 3. 363814  
0. 879531 1. 915165 1. 325997 1. 722469 1. 103233 2. 879462 2. 241465 0. 860833 2. 531043  
5. 076138 3. 994232 4. 808985 5. 790763 3. 395453 3. 666354 3. 75332 4. 201217 1. 577864  
6. 897417 6. 289849 5. 493143 4. 89021 5. 898844 4. 101236 5. 756447 4. 53618 6. 755831  
2. 104739 2. 061848 1. 983257 2. 551788 2. 592385 1. 754344 2. 364557 2. 180494 2. 004963  
4. 984296 5. 502991 5. 721511 5. 19906 5. 789168 4. 895099 5. 179212 5. 881235 4. 690542  
1. 692518 1. 841405 4. 001849 1. 778229 2. 161685 1. 824659 2. 140345 1. 331126 2. 330245  
7. 771463 7. 717494 7. 759546 7. 105239 7. 386315 7. 991087 7. 937322 8. 06805 7. 943893  
1. 900218 1. 615271 2. 008646 3. 1719 2. 11967 2. 228367 2. 335097 2. 142566 1. 73632  
2. 182223 2. 134432 1. 425519 1. 534242 2. 175659 3. 045672 2. 425092 1. 967424 1. 626038  
3. 164491 3. 205302 3. 996838 4. 560627 2. 454301 3. 712949 3. 561578 3. 097346 3. 769073  
3. 496958 2. 24574 2. 673701 3. 165781 2. 083807 2. 933798 3. 190588 2. 541823 3. 737786  
1. 555004 1. 77362 1. 673802 1. 996539 1. 577746 1. 680572 2. 24148 1. 583257 1. 705537  
2. 601132 2. 423734 2. 715856 1. 935225 2. 252525 2. 417242 1. 934341 2. 601575 2. 381028  
2. 05071 1. 37088 2. 48839 4. 623751 2. 6614 3. 049487 2. 409961 2. 517352 2. 785783  
2. 022374 1. 320583 1. 731576 1. 226898 2. 053962 1. 594154 1. 723472 1. 576707 1. 508611  
2. 214747 2. 257954 4. 326625 0. 978987 4. 168699 3. 602827 4. 434749 3. 501115 2. 581762  
1. 703083 1. 638258 1. 474048 1. 807495 2. 060886 1. 711988 2. 067131 1. 471592 1. 751768  
4. 828972 3. 588422 4. 483512 1. 893744 3. 216352 5. 204898 2. 09419 4. 432637 3. 282794  
7. 816984 7. 737548 7. 486149 7. 581472 7. 986841 6. 879446 7. 362566 7. 809353 7. 467582  
1. 073061 0. 889016 1. 548369 1. 580064 1. 68736 0. 989681 1. 644845 1. 00498 1. 733985  
2. 153982 1. 88851 2. 171038 2. 330614 1. 969729 2. 239078 2. 352427 2. 0619 4. 510426  
3. 192356 2. 46222 2. 24279 4. 817124 2. 528671 2. 684989 2. 354097 2. 848013 3. 61871  
2. 123612 1. 640354 1. 77012 2. 307986 1. 996717 1. 768339 2. 301632 1. 444105 1. 495778  
2. 982306 2. 61902 3. 490827 2. 8112 2. 527185 1. 985896 2. 955331 2. 446256 2. 980529  
1. 206189 1. 835249 1. 721701 3. 102258 1. 524644 1. 489998 1. 79993 1. 803521 1. 231481  
0. 884244 1. 764841 1. 202908 1. 151305 1. 954548 1. 270944 1. 111295 1. 291027 1. 149776  
4. 354025 4. 149218 3. 635024 4. 072137 3. 19748 4. 297042 3. 635015 4. 362046 3. 786264  
3. 206032 2. 1407 2. 07684 2. 307309 1. 846976 3. 476221 1. 038736 2. 582023 1. 533292  
1. 888109 1. 838392 2. 891197 1. 682392 2. 72418 2. 254236 3. 208717 1. 851496 1. 703987  
3. 024836 2. 920959 3. 009688 4. 763786 4. 338118 3. 975061 2. 648351 3. 613925 3. 505483  
1. 326529 1. 619082 1. 394538 1. 684196 0. 813607 1. 554181 1. 347116 1. 218144 1. 078141  
1. 268657 1. 775445 1. 010837 2. 374497 1. 255005 1. 495712 1. 225896 1. 065997 1. 26832  
3. 376102 3. 656668 4. 573966 3. 579868 3. 907979 3. 279373 3. 677755 4. 440557 4. 018051  
1. 70805 2. 317215 2. 007181 1. 368398 1. 48006 1. 252495 1. 892121 1. 419886 2. 267199  
1. 994921 2. 627472 3. 381793 2. 881245 2. 608257 3. 550295 3. 059985 1. 966316 3. 768842  
4. 812036 3. 498226 3. 015778 3. 191473 3. 178043 3. 09625 2. 559921 3. 420557 3. 205548  
5. 947263 6. 174824 6. 690523 6. 719247 5. 695572 5. 519806 7. 089886 6. 383055 5. 398111  
1. 89819 1. 986719 1. 76581 1. 905559 1. 8958 1. 982479 1. 892265 1. 734053 1. 509537  
2. 061329 2. 423251 2. 253258 1. 852428 2. 197803 2. 611002 1. 979409 1. 965535 1. 728115  
1. 865935 2. 078313 2. 308994 2. 376569 2. 501881 2. 124265 1. 893983 1. 592157 2. 03477  
1. 375487 1. 68343 1. 050747 1. 16522 1. 085482 1. 803919 1. 17255 1. 447097 1. 367629  
1. 258798 0. 694105 0. 793503 1. 384305 1. 195855 0. 846571 0. 748322 1. 104199 1. 050989

1. 482801 1. 72052 1. 409102 1. 398689 1. 055609 1. 364607 2. 028813 1. 693276 1. 297509  
3. 266836 4. 156697 4. 091522 3. 400324 3. 939389 3. 559374 3. 588103 3. 395647 3. 126806  
2. 39156 2. 73502 1. 396435 1. 992885 2. 423707 2. 110734 2. 137364 2. 248217 1. 954819  
2. 246591 2. 198583 2. 085508 1. 999638 2. 183123 1. 693238 2. 388777 2. 30572 2. 501616  
1. 575756 0. 953674 2. 03119 2. 217612 2. 079886 1. 777386 2. 203557 2. 045602 1. 724454  
2. 758467 2. 810173 2. 149026 2. 998721 2. 511396 2. 372379 2. 37944 3. 083672 2. 205431  
1. 273044 2. 045507 2. 136903 1. 744944 1. 843941 2. 484786 2. 734784 1. 950925 1. 113581  
1. 74849 1. 759004 1. 613848 2. 141976 1. 83367 1. 405712 2. 455048 1. 174302 1. 734971  
2. 411744 1. 421875 2. 966694 3. 212146 2. 490417 2. 619256 2. 746152 1. 908659 1. 767788  
1. 762589 2. 211187 2. 237559 2. 070971 1. 503908 2. 85411 1. 731553 2. 020021 3. 103983  
1. 829676 1. 380672 1. 409468 2. 219341 1. 393464 1. 281534 1. 708845 1. 091525 1. 417171  
1. 878443 2. 316916 2. 409168 2. 107576 1. 972804 2. 635194 1. 859387 2. 248527 3. 84883  
1. 876885 2. 225442 2. 606791 2. 869375 1. 328955 1. 896861 1. 862695 1. 61167 2. 271194  
3. 249543 3. 541854 3. 856513 3. 282861 3. 202957 3. 99536 3. 627173 3. 563176 3. 050423  
1. 500876 0. 710047 0. 956057 0. 808473 2. 007253 1. 478912 0. 779752 0. 719156 1. 482292  
1. 33434 1. 333596 1. 285902 1. 586134 1. 352728 1. 513658 1. 399447 1. 732513 1. 57994  
1. 011479 1. 08763 1. 125943 1. 284405 1. 036222 1. 49742 1. 034953 1. 302751 1. 027681  
1. 277987 1. 289597 1. 954927 1. 979767 0. 988718 1. 306752 1. 334881 1. 523781 1. 383797  
1. 743066 1. 959781 1. 898571 2. 142023 1. 505979 2. 324282 1. 650783 1. 642848 2. 259117  
3. 011054 2. 869122 3. 11862 3. 909129 3. 440627 3. 288258 3. 137754 3. 149345 3. 886217  
1. 652149 1. 820812 1. 93339 1. 364694 1. 644506 1. 438573 1. 819335 1. 528052 1. 25742  
2. 104067 2. 371648 2. 409048 1. 772728 2. 166252 2. 370438 1. 835601 1. 728989 2. 106192  
1. 797067 2. 461715 1. 605654 3. 000457 1. 278875 1. 676338 1. 935679 2. 121412 2. 099875  
1. 264003 1. 430926 1. 294954 1. 505599 2. 042324 3. 420648 1. 199132 1. 706399 2. 744607  
4. 484837 3. 671889 4. 618742 4. 059051 4. 146753 3. 937387 4. 420521 3. 897338 3. 379565  
1. 48438 2. 683034 3. 079024 1. 37887 1. 441326 1. 183673 2. 835264 2. 91903 3. 455288  
1. 594102 1. 584377 2. 059685 1. 801537 2. 238171 2. 334217 1. 693017 1. 654379 2. 011924  
5. 229531 4. 33429 4. 833194 5. 520122 4. 73115 5. 417153 5. 167643 5. 173811 5. 028914  
3. 39709 1. 974693 2. 918696 3. 928956 2. 412587 2. 934059 2. 939141 1. 737351 1. 802968  
3. 40446 3. 770846 3. 372096 4. 010761 4. 084872 4. 827868 3. 760408 2. 620485 3. 987753  
7. 866872 7. 616973 7. 16466 7. 583207 7. 723296 7. 336124 7. 888002 7. 989173 7. 934066  
3. 734673 2. 902172 3. 603299 3. 573654 2. 53204 2. 880827 1. 898082 4. 023369 4. 339532  
1. 350092 1. 663241 1. 494595 1. 883696 1. 24219 1. 04146 1. 27522 1. 637993 1. 554948  
2. 065941 1. 33084 2. 243616 2. 156559 1. 624458 1. 659703 1. 303844 1. 400084 1. 865234  
1. 424627 1. 898417 2. 327386 1. 537702 3. 311036 2. 748871 1. 290937 1. 304105 2. 613723  
4. 006388 2. 490651 4. 360631 2. 929669 2. 308687 4. 066902 2. 709342 2. 56818 4. 08398  
1. 493361 0. 749672 0. 988734 0. 886375 0. 86218 1. 319169 0. 963191 0. 965384 1. 384908  
2. 823181 5. 486642 4. 510016 4. 596061 4. 820187 2. 960096 0. 103289 4. 430629 5. 232474  
2. 670921 1. 976061 2. 444994 2. 802983 1. 809953 2. 818366 2. 50094 2. 463193 2. 437198  
3. 258559 2. 82944 2. 729116 4. 37573 2. 683997 3. 249223 3. 071799 3. 229338 2. 237537  
2. 462486 2. 228856 2. 311869 3. 62428 3. 218711 2. 496163 2. 453272 3. 023451 3. 609418  
2. 691821 2. 798194 2. 403249 2. 203716 3. 327237 1. 906773 2. 487759 2. 389314 1. 960705  
1. 913869 1. 685275 2. 155755 2. 381623 1. 563284 2. 131292 1. 807743 2. 493047 2. 356163  
4. 09022 3. 948728 3. 820384 2. 419634 2. 987924 3. 248574 3. 529076 3. 099399 3. 958543  
1. 402596 1. 093898 1. 209417 1. 294935 1. 306514 1. 219376 1. 462671 1. 483424 1. 21989  
1. 006871 1. 480373 1. 105074 1. 696239 1. 358636 1. 052628 1. 122605 1. 15529 0. 917365  
2. 268081 2. 342398 2. 710612 2. 721425 2. 311522 2. 570025 1. 372758 1. 864518 2. 563164  
3. 72889 4. 796052 4. 879544 5. 083938 3. 770026 3. 645365 3. 266538 4. 526692 4. 765799  
2. 871083 2. 804529 2. 531563 1. 381475 1. 991969 1. 737631 2. 122512 1. 643441 2. 521477  
4. 299723 4. 465913 4. 097569 5. 8568 3. 842733 3. 917252 5. 537467 3. 225065 2. 944796  
1. 754093 1. 662643 1. 503864 1. 766956 1. 161412 2. 149428 1. 24647 1. 13746 1. 620394

2.64725 1.24103 4.32728 3.59176 1.738761 2.406911 1.25302 3.241999 3.033377  
3.936032 3.298869 4.119162 4.163815 3.148497 4.711647 3.671658 3.557588 3.638066  
0.946158 1.01134 1.53405 1.873938 2.350741 1.401946 1.481867 2.663006 2.017933  
1.394105 1.351258 0.765325 1.233318 1.235467 3.004206 1.668228 0.77214 1.091277  
3.692307 3.721995 3.712955 3.053833 2.938581 3.885042 3.469212 3.420528 3.921778  
1.143395 1.391287 1.223821 1.344115 1.431282 1.701042 1.093197 1.490013 1.521755  
5.305101 6.837216 1.778966 5.595569 6.51998 1.999907 6.423862 3.238193 2.951055  
3.213167 3.011451 2.919719 3.862879 3.120387 3.390063 3.7046 2.230958 2.898993  
1.50523 2.026321 2.74055 2.321924 1.975751 2.862871 1.509288 2.680058 4.296023  
1.486202 1.998107 1.650922 2.33546 1.89823 1.284704 1.560278 2.262347 2.694024  
1.47716 2.165783 2.0542 3.805518 1.937901 2.752378 1.436201 1.792354 1.740108  
1.411675 1.503908 1.368849 1.995031 1.835259 1.439288 2.255295 2.558136 1.534605  
2.442676 2.708942 2.180813 2.675541 1.210009 3.855814 1.63344 2.762982 1.484344  
1.861495 2.176696 2.091992 3.136711 1.554298 2.234548 2.097435 2.169098 2.988008  
1.754422 2.756642 2.26022 1.523204 1.950563 1.774066 1.790022 1.45554 2.174538  
7.074501 5.874395 7.461713 6.219007 6.322267 5.969968 7.20081 6.724596 6.627492  
0.561436 0.85864 1.486308 1.506633 0.732732 0.655247 0.75899 1.065136 0.996943  
1.433365 0.990938 0.878044 1.478922 0.832323 0.758479 1.067042 1.147351 1.183791  
2.155134 2.024776 2.572259 2.466427 2.738026 3.093963 2.409944 2.474996 2.869263  
2.219931 3.334559 2.405017 2.015029 2.596034 1.69617 1.618114 2.721742 2.242149  
3.812311 3.010502 3.002868 3.181846 3.418861 2.135875 2.777238 3.561125 3.420529  
4.623109 5.559138 5.723621 5.803126 5.264469 3.236477 3.221132 3.217021 3.456254  
3.836712 2.884417 2.896149 2.66494 3.188221 2.768907 4.295127 3.25151 3.204389  
1.77749 2.50128 2.162983 2.444093 2.40662 1.821613 2.046394 1.944998 2.366745  
1.444196 0.78995 1.307035 1.248004 1.171991 1.307527 1.38554 1.184851 1.784083  
1.613317 2.724425 3.492018 3.022263 2.738617 2.443017 2.888715 2.985912 4.064328  
1.452552 1.875024 1.913382 2.202173 1.897407 1.561476 1.447289 2.219579 1.806595  
4.371144 2.810989 4.426453 3.045916 3.775108 3.69257 3.186343 3.460083 4.120059  
6.199295 5.664234 3.437643 4.779072 6.05632 5.182616 4.565173 4.36145 3.657212  
2.779777 2.799284 3.059089 2.360497 2.892345 2.841649 3.370704 3.388328 3.437267  
4.459301 4.513703 4.041167 4.359894 4.15214 3.619042 3.817728 3.717886 5.063432  
2.182372 1.167911 1.326408 1.78938 1.568864 2.785488 1.852722 1.732066 2.194005  
2.895325 4.962403 1.204795 1.27094 3.112565 3.175644 2.081993 2.239372 3.690377  
2.600019 2.030857 2.335657 2.728424 1.934806 2.097878 2.499781 2.379257 2.503904  
2.020576 3.429911 2.81114 2.167415 1.506105 2.146424 2.45926 1.470109 1.807197  
0.784355 2.015224 1.986313 3.463879 1.840836 3.141214 1.781198 2.382665 2.535997  
1.508256 1.328038 2.307441 1.811093 1.733494 2.377257 1.269867 1.46393 2.513792  
2.049712 3.050576 3.356862 3.191513 2.644825 3.120127 2.399873 2.499387 3.546815  
2.120911 1.654183 2.59737 2.226074 1.821705 2.005762 1.492996 2.181167 2.0332  
3.33465 3.276883 3.336926 3.107738 3.044263 3.212219 3.174546 3.313917 4.099554  
2.694794 2.84056 2.558851 3.712493 2.560436 2.887949 3.559635 3.009118 2.406805  
4.686482 3.918703 4.589994 4.697126 3.059101 4.964315 5.632353 2.121953 3.904202  
1.311547 0.942258 1.310175 2.543254 1.264997 1.466546 2.606016 0.822428 1.251501  
1.493519 2.156107 1.461616 1.787308 1.489293 1.722563 1.089773 1.319366 1.539179  
1.485672 1.530191 1.155595 2.280857 1.458257 1.332389 1.640671 1.329659 1.664928  
1.908143 2.568065 1.952222 2.320396 1.817994 2.324491 2.48186 2.741786 1.885333  
1.627113 2.872708 2.579874 3.307652 3.926305 3.177334 2.399712 4.025287 2.443208  
3.934739 3.400364 3.229467 4.28946 4.032358 3.403477 5.277138 3.159152 3.474035  
2.250843 1.163118 1.505894 1.421564 1.131444 1.531105 1.036464 1.298271 1.31171  
3.633652 2.9731 2.191951 4.851587 3.60516 3.324166 2.852578 3.817223 2.911245  
5.496917 4.927217 4.512217 3.048593 5.245896 4.604471 4.464242 4.578818 3.661415



2. 519436 2. 732666 1. 822792 2. 424236 1. 842085 1. 533706 2. 693052 2. 641863 2. 241547  
1. 563234 1. 812881 1. 999695 2. 424673 2. 146067 3. 118752 2. 057679 1. 891028 2. 004222  
1. 82304 2. 515694 2. 199416 2. 645966 1. 934985 2. 016211 2. 085047 2. 198303 1. 75709  
1. 470792 0. 914362 0. 882402 1. 579451 0. 865275 0. 97738 1. 036224 0. 959255 1. 158109  
2. 280502 1. 614047 1. 237856 1. 811738 1. 318476 2. 655441 3. 004607 2. 527674 1. 670459  
0. 907829 1. 063878 1. 258666 1. 147828 1. 926503 0. 963773 0. 853496 1. 256802 1. 293235  
2. 10328 1. 434571 1. 511277 2. 225138 1. 650152 1. 951251 1. 877165 1. 804901 1. 940229  
1. 030583 1. 030085 0. 642794 0. 892309 1. 175832 1. 596711 1. 353747 1. 187856 1. 466417  
1. 308119 2. 374064 1. 821535 1. 662392 0. 91901 2. 206821 1. 584353 1. 387358 0. 80754  
1. 361719 2. 142171 1. 834869 2. 3068 1. 783822 1. 389404 1. 630651 1. 453516 2. 490481  
5. 327567 5. 190181 5. 147811 6. 362176 5. 652587 5. 164948 4. 905365 6. 390133 4. 977978  
1. 954664 1. 183103 1. 219254 1. 583003 1. 14345 2. 230858 2. 002527 1. 083885 1. 515243  
1. 091408 1. 038475 2. 326741 1. 860888 1. 046356 1. 134175 1. 107468 1. 290885 1. 218092  
0. 907324 0. 793148 1. 031077 0. 609961 0. 837078 1. 126296 0. 628306 0. 899957 1. 050855  
1. 179215 1. 553161 1. 542279 0. 866163 1. 62631 1. 338316 1. 14084 0. 843152 1. 186157  
0. 944093 1. 104665 1. 165548 1. 499158 1. 195611 1. 103017 1. 241824 1. 465383 1. 225321  
0. 934722 1. 166626 1. 021237 3. 503764 0. 673599 1. 249659 1. 296113 0. 986055 1. 325848  
0. 877653 1. 739363 1. 070047 2. 200699 1. 563477 1. 001518 1. 003653 1. 591665 1. 35658  
1. 098781 0. 694647 0. 663555 2. 404911 1. 054913 1. 850986 1. 045471 0. 947734 0. 560673  
0. 75761 0. 791528 0. 737766 0. 990318 0. 74956 1. 962158 0. 692922 0. 743642 1. 235774  
0. 907009 1. 725715 0. 80938 0. 789639 1. 186657 1. 384037 0. 913106 0. 634653 0. 976997  
3. 477324 3. 163597 3. 837729 3. 242797 2. 067883 2. 338541 2. 672906 1. 693061 4. 491996  
1. 1049 1. 437107 1. 19307 1. 342119 1. 165938 1. 158322 1. 00407 0. 968418 1. 452278  
1. 017168 1. 460754 1. 527196 1. 191505 1. 347552 1. 337338 1. 148421 1. 084549 1. 061566  
1. 429372 1. 24112 2. 843119 1. 879336 2. 189545 1. 61327 1. 584148 2. 108407 2. 303439  
1. 033168 1. 388091 1. 296416 0. 823492 0. 896265 1. 880014 1. 036143 0. 794115 1. 515197  
2. 111075 2. 507162 2. 111381 2. 457948 1. 931663 3. 746181 1. 751354 1. 616194 1. 900524  
4. 93592 3. 88397 4. 040257 2. 683665 2. 107335 3. 107981 3. 727099 3. 265159 3. 758508  
1. 114084 2. 273917 1. 835306 3. 022776 0. 956066 3. 18365 1. 664604 1. 790491 1. 736682  
1. 353142 1. 439772 1. 206124 2. 215422 1. 290042 1. 790982 1. 881132 1. 546469 2. 046936  
2. 700982 4. 903488 4. 408666 5. 10276 2. 60092 2. 966559 3. 463992 3. 301621 4. 978682  
0. 810362 0. 511125 1. 239092 1. 03343 0. 775273 1. 187263 0. 987238 0. 782612 1. 042293  
1. 207066 1. 153588 2. 570578 0. 930299 0. 590905 0. 926588 1. 409146 1. 343405 1. 634507  
1. 049176 1. 678975 1. 608918 1. 826937 0. 80995 1. 26136 1. 932616 0. 686301 1. 412678  
1. 750854 2. 248481 2. 640939 2. 601848 2. 670726 1. 730775 1. 656696 2. 230503 2. 495002  
2. 502664 2. 258908 1. 256245 2. 917497 2. 251748 2. 476961 3. 225753 1. 768457 3. 028526  
1. 489178 2. 105914 1. 302276 1. 414863 1. 366747 1. 927924 1. 463916 1. 226836 1. 333706  
1. 024967 0. 771541 0. 879783 2. 805863 1. 139056 1. 124651 1. 259795 2. 119946 1. 665733  
3. 921057 4. 162419 3. 600533 4. 0248 4. 416975 5. 577045 3. 809095 3. 981423 3. 582158  
0. 867822 1. 116218 1. 166359 2. 193392 0. 522232 1. 276025 0. 865614 1. 040751 1. 205749  
3. 907196 1. 962993 3. 911643 4. 493543 2. 422334 3. 263768 4. 08263 3. 284743 4. 177325  
1. 21059 1. 950484 0. 894832 0. 568764 0. 915131 1. 325397 0. 698945 1. 156189 1. 011257  
3. 465655 2. 579987 3. 762659 4. 389371 2. 193281 2. 755052 3. 090445 3. 43986 3. 20857  
1. 41949 1. 402354 1. 513108 1. 620793 1. 469547 1. 626132 1. 587372 1. 6608 1. 600592  
3. 556516 3. 38728 3. 209585 3. 297125 2. 834041 3. 191997 3. 357896 2. 956762 4. 668728  
0. 622962 1. 370651 0. 77063 2. 245403 0. 735908 1. 060643 1. 152026 1. 426629 0. 914445  
1. 211784 1. 022821 0. 735819 2. 278102 0. 715899 0. 801449 0. 79863 1. 188141 0. 999598  
0. 861213 0. 943902 0. 667489 1. 078827 0. 78097 0. 85538 1. 088147 1. 104722 1. 041293  
1. 37163 1. 208369 1. 679146 1. 94399 1. 22943 1. 532075 1. 980974 1. 485199 2. 066884  
0. 93133 1. 217304 1. 67184 1. 080884 1. 315783 0. 785421 1. 134151 0. 667356 1. 191628  
1. 273529 1. 499342 1. 155008 1. 398403 1. 294657 1. 79999 1. 263885 1. 125109 1. 393601

2.300402 2.4113 2.250261 3.008064 2.439418 2.833025 1.617269 2.822599 4.383009  
1.777459 1.947658 1.043227 2.204829 1.083117 2.741831 1.431302 1.435972 1.684828  
1.372815 1.050814 1.031932 2.586203 1.144672 1.103872 1.570525 1.069229 1.836249  
1.902439 2.370485 1.908852 2.410779 1.820004 1.731648 1.930362 2.043712 2.097587  
0.979995 0.567846 0.886727 1.961299 1.224856 1.127806 1.033726 0.633208 0.475734  
1.371934 1.589774 1.341328 1.891705 1.031813 1.274895 1.183332 1.115918 1.790517  
1.183368 0.850684 1.023959 1.24073 0.743124 1.440623 1.402017 1.022547 1.818445  
1.533035 1.1698 1.199649 1.622082 0.95879 1.215122 1.23595 1.896418 1.337392  
0.723693 0.93393 0.76077 0.902555 0.71098 1.182392 0.5567 0.540051 0.82521  
1.728881 1.752313 2.123641 1.092609 1.044138 2.063285 1.66938 1.722372 1.713003  
5.493148 5.037187 5.551729 5.969065 5.157091 5.759254 5.218559 4.216779 6.070662  
0.908357 1.298149 1.016568 0.778259 1.250012 1.086898 1.057118 1.021664 1.354436  
0.904326 0.836011 0.948973 1.256201 1.115216 1.032259 0.845492 1.087011 0.790293  
1.6158 1.266273 1.405177 1.24474 1.167865 0.821734 1.355675 2.790121 1.496472  
0.995106 1.467139 1.418444 1.94491 0.758959 1.393951 0.936361 1.245009 1.25046  
1.139142 1.352803 1.021812 0.878328 1.324201 1.538295 1.869145 1.015132 1.844025  
0.939708 1.244066 1.69102 2.247232 1.225089 1.02094 1.078223 0.972855 0.939584  
1.522207 3.741962 2.759172 6.207612 2.760934 5.885979 2.46134 2.9496 1.165512  
1.637572 1.691588 0.90434 1.010591 1.030288 1.89609 1.520621 0.990233 1.631434  
1.777471 1.830205 1.438925 1.755303 1.269279 1.134546 1.210517 1.566546 1.043037  
0.644394 0.991122 0.807529 1.247688 0.741759 1.169618 1.002942 1.403647 1.854534  
1.554202 1.02907 1.217901 1.708338 0.805439 1.601721 1.130166 0.998494 1.031885  
0.925732 1.56713 1.092386 0.879531 1.442307 2.857159 0.827415 0.510455 1.778721  
1.281084 1.438194 1.402227 0.548374 0.997326 1.970165 1.259679 1.241387 1.948266  
0.872387 0.684552 0.925173 1.133181 0.581649 1.671923 0.911311 0.7591 0.780835  
1.261617 1.26072 1.259867 2.001766 1.731423 1.399156 1.489253 1.474391 1.917765  
2.414144 2.596479 2.536919 2.595956 1.557622 2.69191 2.614253 2.156999 2.836359  
0.703947 1.375009 1.693572 0.919936 1.084298 1.028345 0.616714 0.875568 0.806857  
0.720454 1.096738 1.136372 0.679343 1.071085 0.980944 1.234237 0.725603 0.733615  
4.511203 4.328872 4.358691 5.856608 5.101085 4.430636 4.526538 4.777475 4.392732  
1.003181 1.07728 0.469206 0.745972 1.921544 2.268109 1.348713 0.686509 1.116203  
0.729297 2.800119 0.724943 1.94985 0.39293 1.407494 1.096161 1.545096 0.660536  
2.817887 4.332009 3.883614 3.726451 3.024321 3.510644 3.391417 3.086675 4.741201  
2.095531 3.516269 2.811363 2.909375 1.642631 2.947636 2.200537 2.308477 2.448823  
1.182915 1.321011 1.129465 1.362016 1.29575 0.923658 1.196459 0.997075 1.555524  
1.070583 1.152475 1.913241 1.306538 1.645246 1.867481 1.527264 1.371423 2.033246  
1.246639 1.351894 1.654343 2.387476 0.98514 1.655023 2.183091 1.496792 1.798906  
2.891366 2.503277 3.365005 3.070615 2.402813 3.031706 1.375016 3.085126 4.478651  
1.304041 1.591696 1.541225 2.272514 1.605874 1.95328 1.756982 1.599033 1.874806  
3.419634 3.260498 2.817024 4.550038 2.99924 3.324612 2.829278 3.162709 3.275433  
1.391334 2.038877 2.596524 2.645359 1.41315 1.146279 1.298368 1.111454 1.620982  
1.555031 0.852843 0.791218 1.137268 0.882879 3.73976 0.57093 1.16968 0.905135  
9.329948 9.141683 9.208794 8.287784 9.131298 9.166096 8.973993 9.153502 9.259183  
1.34563 0.910461 1.405293 1.249823 0.915657 0.953356 0.736485 1.321414 1.098481  
1.625415 1.94344 2.01271 2.372286 2.374379 2.189425 2.589223 1.731445 1.635019  
2.215884 1.715948 1.7674 1.911577 1.754099 1.865951 1.693839 1.240916 1.349098  
2.864008 2.310514 2.667384 3.771712 2.519255 3.189842 3.458296 2.693372 3.526122  
6.203488 6.590074 6.160694 6.47045 5.990731 3.898682 6.417818 6.172675 6.56989  
4.119596 4.23249 4.258893 5.1849 3.190405 2.935303 3.929459 3.337026 4.659669  
0.982671 1.542133 0.710501 1.146737 1.122078 1.103384 0.880524 0.500635 0.729646  
0.708992 1.238654 1.321534 2.106389 1.180054 1.557604 0.88519 2.8262 1.822878

4. 165828 5. 733376 5. 564658 4. 749304 3. 315792 4. 239854 5. 064886 4. 293027 6. 007931  
2. 79505 2. 307549 1. 517971 2. 13525 1. 716303 3. 12225 1. 76023 2. 079665 1. 49824  
1. 065165 1. 268865 0. 854256 0. 992507 0. 711196 0. 855104 1. 695024 1. 926028 1. 191816  
2. 017048 1. 023811 2. 434352 1. 805696 0. 907745 1. 073323 3. 46605 1. 273794 3. 027831  
2. 523807 3. 705994 3. 482624 1. 770037 3. 089691 2. 654968 1. 776296 1. 916093 4. 358767  
0. 787001 1. 410234 0. 732961 0. 601115 0. 954024 0. 900546 1. 21657 1. 121433 0. 893004  
3. 130775 2. 302466 2. 921394 3. 381855 3. 025974 4. 391123 1. 957035 3. 211082 2. 228026  
1. 990502 1. 153345 1. 676082 2. 421017 1. 842022 1. 341771 1. 886697 1. 692245 1. 328479  
5. 175081 5. 043954 3. 409924 4. 535098 3. 985712 1. 535039 5. 334292 5. 547421 4. 982065  
3. 517304 2. 866347 3. 174766 3. 617867 3. 517061 3. 630567 3. 826358 4. 083613 4. 11836  
0. 900665 1. 741565 3. 112568 1. 133076 0. 998281 1. 347687 2. 313436 0. 583468 2. 407606  
1. 365185 2. 300251 1. 54168 1. 476122 2. 48477 2. 070213 1. 868096 1. 499232 2. 282595  
2. 934941 2. 052724 2. 662728 2. 71308 1. 420428 2. 30256 2. 647619 2. 135167 1. 448162  
1. 932766 4. 304768 1. 452849 4. 762555 3. 537537 2. 155633 2. 470785 3. 904932 2. 718885  
2. 024036 2. 350067 2. 399188 2. 3322 2. 158139 1. 878819 2. 522321 1. 66795 4. 537063  
1. 219454 1. 462885 1. 81322 1. 892175 1. 750202 1. 452516 1. 26595 1. 27142 1. 61246  
4. 694298 4. 894767 4. 962661 3. 77822 4. 994276 4. 98295 4. 457405 4. 76629 6. 790806  
5. 092119 5. 374603 5. 366463 2. 72382 5. 332735 4. 951431 5. 914957 5. 295459 4. 781552  
1. 218149 2. 20035 1. 504683 3. 107499 1. 145501 1. 790586 1. 932191 1. 140179 1. 34778  
3. 978912 4. 205219 4. 405151 4. 544188 2. 664815 3. 958523 4. 188779 2. 85086 3. 271497  
6. 414407 6. 162663 5. 97458 5. 126828 5. 918237 5. 948152 6. 412417 6. 436861 6. 364073  
1. 907513 2. 324129 2. 491728 2. 890405 1. 939688 2. 214652 2. 038318 1. 758378 3. 035241  
2. 40613 3. 117361 2. 359719 1. 615458 3. 776986 2. 404678 3. 49005 1. 831848 4. 968317  
4. 993617 5. 997495 4. 384814 7. 323601 5. 085516 4. 913044 5. 213042 4. 767633 3. 753412  
5. 873459 5. 960003 6. 432152 5. 633946 5. 706469 5. 142817 5. 909119 5. 977901 5. 936013  
0. 622822 0. 954161 0. 730323 0. 854531 0. 90923 1. 18483 0. 858357 1. 285409 0. 979164  
1. 543635 1. 374772 1. 583398 1. 372122 2. 986059 1. 108861 1. 182633 0. 784625 0. 68886  
1. 862858 2. 928998 1. 692271 2. 242 1. 198796 1. 642769 2. 373386 1. 773313 1. 879701  
0. 664589 0. 906331 0. 919663 0. 94817 1. 054629 1. 631797 0. 315763 1. 183292 1. 078496  
1. 705434 1. 024976 0. 698194 0. 889364 0. 929271 0. 879353 0. 765913 1. 542782 5. 158666  
1. 044745 0. 849076 1. 008735 1. 014849 1. 53031 2. 688669 0. 535176 1. 925827 4. 176965  
1. 299626 0. 918405 0. 942669 2. 721227 1. 75819 2. 64974 1. 79536 1. 587373 1. 229608  
0. 858284 0. 987028 1. 129284 1. 582655 1. 132331 1. 454191 1. 015837 1. 021059 0. 737377  
1. 271245 1. 969653 0. 982902 1. 122584 1. 177998 1. 031391 0. 850582 1. 149334 1. 125365  
0. 973088 0. 772725 0. 964988 0. 843367 1. 192823 1. 479425 1. 077252 0. 837102 0. 678958  
2. 723943 1. 599521 2. 153465 2. 974898 1. 694113 1. 767028 1. 52846 1. 503367 1. 85368  
2. 271512 2. 447153 1. 723211 3. 326653 2. 944542 2. 133297 2. 213978 2. 647924 2. 408076  
0. 948478 0. 938101 1. 208763 1. 448049 0. 628657 1. 638591 0. 813428 0. 682209 3. 384374  
4. 288142 2. 967378 4. 319673 4. 325991 3. 539857 5. 365795 4. 208898 4. 001069 4. 442929  
0. 67987 1. 045596 1. 277659 0. 886519 1. 658885 1. 489041 0. 934664 1. 093081 1. 418321  
1. 500804 3. 144204 0. 664839 0. 485069 1. 204054 0. 515903 1. 031903 2. 407701 4. 661924  
1. 17925 0. 952496 1. 400643 2. 305601 1. 218989 1. 187714 1. 756149 1. 474605 1. 307432  
1. 374531 1. 730091 1. 294268 2. 220807 0. 806413 1. 31699 1. 990823 0. 675388 1. 120939  
0. 885322 0. 90532 1. 266579 1. 296767 0. 835395 1. 071072 1. 400435 0. 942424 1. 239743  
0. 799939 1. 414668 1. 247707 1. 786138 1. 460754 2. 753788 0. 880703 0. 487214 1. 267019  
1. 668739 2. 252507 2. 290567 2. 766995 2. 642325 5. 048533 1. 991273 1. 529927 2. 422202  
2. 199275 2. 305639 2. 318417 3. 275109 1. 514564 2. 676774 2. 986384 2. 504316 3. 518683  
1. 646045 1. 347596 1. 946789 1. 730444 1. 284908 2. 261711 1. 316371 2. 383374 1. 488896  
1. 184521 0. 960084 1. 412362 1. 403075 1. 811985 1. 706407 1. 220816 1. 517142 1. 171521  
1. 647665 1. 527483 2. 199284 2. 129622 2. 036348 2. 296263 2. 457398 2. 357927 1. 046637  
1. 109969 0. 991647 0. 931552 0. 991163 0. 91461 1. 532705 1. 027936 0. 864255 1. 050352

0. 778624 1. 060735 1. 269558 1. 639574 0. 864752 1. 791416 1. 231246 1. 055911 1. 042679  
2. 004607 2. 075729 2. 266566 3. 306792 2. 261407 1. 570629 1. 801817 1. 598441 1. 926259  
0. 989826 0. 551545 1. 00425 1. 265883 0. 937622 1. 575598 0. 759183 1. 210618 0. 834808  
1. 640786 1. 300958 1. 311129 1. 468535 1. 288325 1. 183113 1. 696146 1. 200797 1. 33287  
3. 686401 3. 512707 2. 698968 3. 094917 3. 79746 3. 306152 3. 265939 3. 710993 4. 184883  
5. 136273 5. 336685 4. 799158 5. 586297 4. 735768 3. 876884 5. 132369 5. 23807 4. 906669  
1. 182307 1. 012369 0. 826946 1. 491466 0. 639829 1. 134143 1. 031678 1. 117899 1. 174364  
1. 367969 1. 788376 1. 444703 1. 797237 2. 428862 1. 442661 1. 521985 1. 393711 1. 261185  
1. 088747 1. 170703 1. 232459 1. 227042 1. 013926 0. 730506 1. 767289 1. 836735 1. 408637  
0. 888843 1. 219458 1. 185101 1. 11836 1. 314679 0. 970639 1. 027207 1. 424246 1. 01808  
1. 318137 1. 736748 1. 338681 1. 180441 1. 554519 1. 815089 1. 642395 1. 915169 1. 738237  
2. 65566 4. 492112 3. 31443 3. 178603 3. 600615 3. 270836 3. 011219 2. 478674 4. 088958  
4. 295236 6. 409667 5. 093484 3. 064781 5. 190652 4. 324111 4. 765236 5. 532909 5. 797057  
2. 267663 1. 469973 1. 946518 2. 21485 2. 625556 1. 34665 1. 70826 1. 383818 1. 496698  
1. 35428 0. 942903 1. 520162 1. 779981 1. 199314 3. 072335 1. 508137 1. 478326 1. 581922  
1. 377248 0. 896267 1. 202079 1. 175715 0. 854233 1. 302078 1. 008231 1. 1274 1. 174996  
3. 408465 2. 669903 2. 44266 2. 322494 2. 975693 3. 263872 2. 206915 2. 215082 2. 792603  
2. 943764 3. 167379 3. 010596 2. 718129 3. 940537 3. 21554 3. 371077 2. 688802 1. 901057  
1. 235115 1. 430674 1. 35186 3. 464603 1. 407407 3. 061642 1. 144787 2. 392782 1. 978583  
2. 01257 1. 072549 1. 632057 2. 223881 1. 393549 2. 488468 1. 641297 2. 05522 2. 573172  
1. 470512 1. 395181 1. 973585 2. 243352 2. 765878 1. 404186 2. 881916 1. 994184 3. 291848  
7. 101005 6. 379838 6. 583304 5. 210032 6. 455933 6. 731732 7. 053699 6. 621827 5. 987246  
1. 695841 2. 600902 1. 930291 2. 549258 1. 338447 1. 164607 1. 862554 2. 509104 2. 30188  
6. 865334 6. 974963 6. 266696 6. 43789 6. 239718 7. 116944 6. 870902 6. 731145 7. 197748  
6. 220838 6. 195772 6. 412057 7. 0854 6. 389333 5. 839229 7. 06906 6. 038252 6. 352721  
5. 100959 5. 612622 4. 74407 5. 59342 5. 152808 5. 826497 4. 406228 6. 124547 4. 261264  
7. 278622 7. 266484 7. 282981 7. 170456 7. 778787 7. 653627 7. 184563 7. 248794 5. 513133  
7. 457494 7. 087024 6. 922729 6. 746749 7. 017211 7. 200032 7. 231928 7. 309865 7. 711424  
4. 779077 3. 633134 2. 161129 2. 731312 3. 236284 3. 505876 3. 761773 5. 116031 4. 915323  
1. 092199 0. 965868 1. 118637 1. 319753 0. 952665 1. 558799 2. 362514 0. 765177 1. 400474  
1. 844013 2. 168516 1. 802104 2. 433508 2. 372586 2. 522521 1. 748514 2. 59739 2. 018473  
1. 787665 1. 525994 2. 645274 2. 343494 1. 472893 3. 191388 1. 71221 1. 886441 1. 148467  
2. 62394 1. 47888 2. 401555 2. 110716 1. 449883 2. 149944 1. 188772 1. 879797 1. 152268  
1. 004348 1. 211516 1. 080949 1. 785682 1. 053065 1. 269609 0. 830718 0. 93814 1. 182278  
1. 34433 0. 931323 1. 903955 2. 662828 1. 366313 1. 429667 1. 488566 1. 294218 3. 934552  
2. 068458 2. 205682 2. 227884 1. 225415 2. 566383 2. 460718 3. 701465 2. 324419 2. 599923  
0. 52224 1. 672065 1. 122958 2. 120669 1. 262438 1. 620249 1. 846255 1. 315996 0. 899507  
1. 309726 1. 560769 1. 341988 2. 169021 1. 573503 1. 459558 1. 404227 1. 282782 1. 311724  
0. 80695 1. 016157 0. 686043 1. 281848 1. 038841 1. 0505 1. 478389 0. 835984 0. 899032  
0. 703844 1. 156195 1. 037832 1. 156386 0. 816608 1. 764721 1. 14382 1. 618341 0. 906533  
0. 626474 0. 773173 1. 711054 1. 007864 0. 793365 0. 627329 0. 898395 1. 13001 0. 838567  
1. 332055 1. 269165 1. 573865 4. 650139 1. 087485 2. 183137 1. 629941 1. 534974 1. 157885  
2. 716904 2. 067123 0. 902591 1. 386759 0. 902555 1. 051844 2. 021654 1. 44356 1. 202438  
3. 024683 3. 018709 2. 927605 3. 352869 3. 548489 3. 058815 2. 626937 3. 060104 2. 995811  
1. 444025 1. 197844 0. 885302 2. 399663 0. 870966 1. 525046 1. 195133 1. 318853 2. 104733  
1. 234613 1. 660714 1. 551905 1. 684569 1. 174941 1. 826759 1. 077278 3. 829683 1. 119273  
0. 866177 1. 65842 1. 620057 0. 806295 1. 217794 0. 996901 1. 189305 0. 596405 1. 450174  
1. 054017 2. 384919 1. 19558 3. 278623 2. 144485 0. 952426 2. 450276 2. 671221 3. 777698  
3. 287612 4. 414907 3. 581831 5. 142265 3. 8489 4. 594509 3. 955442 3. 912095 3. 799789  
2. 05264 3. 141845 2. 822988 3. 039805 1. 893924 2. 440349 1. 998288 2. 178423 3. 136732  
1. 75201 2. 31186 1. 791924 2. 948563 2. 028593 1. 880452 2. 114354 0. 705412 2. 090365

|          |          |          |          |          |          |          |          |          |
|----------|----------|----------|----------|----------|----------|----------|----------|----------|
| 1.363895 | 1.708556 | 1.087799 | 1.692621 | 0.71864  | 0.901176 | 0.900341 | 0.805586 | 1.712647 |
| 1.556442 | 1.181212 | 1.387115 | 1.971879 | 1.408032 | 1.409911 | 1.574008 | 1.387037 | 1.066557 |
| 0.805843 | 1.222421 | 0.935183 | 1.117347 | 0.830769 | 0.944593 | 0.790531 | 0.814004 | 0.683241 |
| 1.001409 | 1.089429 | 1.526356 | 2.450288 | 0.80095  | 1.628592 | 1.443719 | 1.305447 | 1.486405 |
| 1.360133 | 2.183134 | 1.380794 | 2.672034 | 1.005514 | 1.472614 | 0.57973  | 2.118992 | 2.634241 |
| 2.535246 | 2.172477 | 1.981335 | 1.654145 | 1.513425 | 2.487543 | 2.497291 | 2.240668 | 2.036036 |
| 0.878362 | 0.959387 | 1.073174 | 1.166523 | 1.028773 | 0.866981 | 0.80064  | 0.768117 | 0.808696 |
| 1.270994 | 1.951423 | 1.167319 | 2.854869 | 1.060393 | 1.317694 | 1.047941 | 1.048086 | 1.088043 |
| 1.229516 | 1.342165 | 0.796799 | 2.104475 | 0.976058 | 0.925523 | 0.812163 | 0.635406 | 0.971803 |
| 0.739707 | 0.817698 | 0.904487 | 1.677762 | 0.850443 | 1.856987 | 2.716914 | 0.817698 | 2.22297  |
| 0.960223 | 1.099454 | 1.262066 | 1.31495  | 1.226228 | 1.08175  | 1.07329  | 1.164119 | 1.073123 |
| 1.492839 | 0.768849 | 1.045943 | 1.27592  | 1.2384   | 1.790577 | 1.194451 | 0.84784  | 0.928475 |
| 1.519963 | 1.620095 | 2.843645 | 4.22831  | 1.344455 | 1.48924  | 1.705937 | 1.603273 | 3.019877 |
| 1.120687 | 1.066326 | 0.973473 | 0.983498 | 0.951778 | 1.6474   | 0.94248  | 1.14696  | 0.82171  |
| 0.975265 | 1.035022 | 1.000989 | 0.725583 | 0.827978 | 1.064216 | 0.795671 | 0.800805 | 0.983758 |
| 2.43833  | 2.815693 | 2.715213 | 2.467301 | 2.377036 | 2.918465 | 2.299783 | 1.661506 | 3.945251 |
| 3.480932 | 2.331242 | 3.10032  | 3.892112 | 1.615014 | 3.025111 | 2.558617 | 1.92168  | 2.775462 |
| 1.848594 | 1.863737 | 2.559949 | 2.139447 | 2.725378 | 2.117602 | 2.389492 | 2.537825 | 2.519669 |
| 1.633805 | 1.458204 | 1.273381 | 1.74683  | 1.361587 | 0.963043 | 1.288297 | 1.697465 | 1.842623 |
| 1.009205 | 0.822302 | 0.949553 | 1.177206 | 0.974499 | 1.482861 | 0.892198 | 1.585888 | 1.495891 |
| 2.23753  | 2.536294 | 2.353745 | 2.240526 | 2.257463 | 1.916396 | 2.303057 | 1.782107 | 1.195842 |
| 1.534615 | 0.91964  | 1.689794 | 1.232765 | 2.209599 | 1.079207 | 1.005467 | 0.997266 | 1.492178 |
| 2.260235 | 1.623485 | 1.497249 | 2.709961 | 0.891334 | 1.39999  | 1.675811 | 1.357824 | 2.210781 |
| 1.251036 | 2.035461 | 1.716735 | 1.202633 | 1.328462 | 1.243012 | 1.260246 | 1.270006 | 2.105482 |
| 3.720109 | 3.794416 | 4.368062 | 1.548845 | 3.359161 | 2.872943 | 3.165517 | 3.585169 | 4.020337 |
| 1.583549 | 1.243149 | 1.220463 | 2.223263 | 1.333205 | 1.173166 | 1.340948 | 1.260037 | 1.527704 |
| 0.615153 | 0.974792 | 0.945766 | 1.397087 | 0.928076 | 1.22365  | 0.92846  | 1.092152 | 1.163231 |
| 1.526532 | 0.499225 | 1.112917 | 1.528059 | 0.689344 | 0.763957 | 1.255385 | 0.946802 | 1.70292  |
| 1.351356 | 2.112354 | 1.897319 | 1.495179 | 2.314911 | 3.156426 | 1.133917 | 2.07116  | 3.247344 |
| 0.901274 | 0.845888 | 0.976847 | 1.259821 | 0.852019 | 0.717595 | 1.284573 | 0.854914 | 0.773536 |
| 2.303484 | 1.270033 | 1.309437 | 1.656109 | 1.29267  | 1.147199 | 1.004475 | 0.967008 | 1.519144 |
| 2.935589 | 1.911249 | 2.108843 | 3.036012 | 1.872759 | 1.988157 | 2.071194 | 2.019924 | 3.144944 |
| 3.078655 | 2.045323 | 2.194667 | 4.089557 | 2.390562 | 2.140878 | 2.267695 | 2.485005 | 3.078655 |
| 1.203024 | 1.437738 | 0.957972 | 0.967057 | 0.912455 | 1.857873 | 1.632894 | 1.121097 | 1.553497 |
| 0.892268 | 0.674188 | 0.902493 | 1.040276 | 0.510548 | 1.756704 | 0.740715 | 0.721121 | 0.79095  |
| 1.744568 | 1.229736 | 2.055679 | 2.515774 | 1.133082 | 1.198269 | 1.957057 | 1.499401 | 1.430321 |
| 2.027856 | 2.447014 | 2.403809 | 2.795327 | 2.142237 | 2.267228 | 2.221828 | 2.492602 | 3.211399 |
| 0.733597 | 0.779837 | 1.610072 | 0.889755 | 0.665094 | 0.652523 | 1.483285 | 0.640366 | 0.59604  |
| 3.510654 | 1.653447 | 1.252888 | 1.700138 | 1.249107 | 1.590014 | 3.940608 | 1.434222 | 1.247282 |
| 1.269878 | 1.497663 | 1.506856 | 2.202233 | 1.358555 | 1.549701 | 1.050281 | 2.155448 | 1.176764 |
| 3.258015 | 3.500969 | 2.821694 | 4.079052 | 3.055645 | 2.739339 | 3.549815 | 3.335292 | 3.144504 |
| 1.784663 | 2.150426 | 3.164558 | 3.389055 | 1.614692 | 3.114089 | 1.944411 | 1.846897 | 1.440041 |
| 1.185257 | 1.256537 | 2.031676 | 2.797628 | 2.358035 | 2.360285 | 1.334232 | 1.217898 | 1.488454 |
| 1.627299 | 1.372247 | 0.845542 | 1.475422 | 1.222562 | 1.737149 | 1.190925 | 1.296893 | 1.31828  |
| 1.616084 | 1.47028  | 3.067604 | 1.178874 | 3.225339 | 1.210796 | 1.382831 | 2.26817  | 6.725502 |
| 2.414703 | 1.064133 | 1.581357 | 1.80242  | 1.876792 | 2.163593 | 1.72361  | 2.708431 | 1.605248 |
| 2.049888 | 2.426747 | 1.997599 | 2.83409  | 2.922461 | 1.476218 | 1.426605 | 2.49445  | 1.810246 |
| 0.926091 | 0.938099 | 0.878058 | 1.285797 | 1.645898 | 1.562202 | 1.134864 | 1.545209 | 1.538135 |
| 1.112802 | 1.519367 | 1.861412 | 1.850767 | 1.177011 | 2.611398 | 0.748333 | 1.36718  | 1.950692 |
| 1.591788 | 1.175492 | 1.487488 | 1.872043 | 1.662314 | 1.270769 | 1.124605 | 1.55527  | 1.547759 |
| 1.848533 | 2.129137 | 2.853371 | 4.204578 | 2.086895 | 2.459489 | 2.494768 | 1.732126 | 3.078264 |

1.140859 0.719384 0.850904 0.748761 0.739672 1.510508 0.714407 0.899231 1.255827  
0.796297 0.637946 1.056667 0.749673 0.856845 0.913647 0.99156 0.790516 0.783794  
1.072547 0.499178 1.390181 1.901942 0.740665 1.801861 0.900368 0.759846 0.479642  
1.128506 1.120813 1.383472 2.01548 0.482236 1.821913 1.023327 1.031775 1.699611  
1.292024 1.448521 1.51297 1.354721 1.928999 1.396341 1.57062 1.06715 2.825134  
2.588494 4.102543 5.240965 1.811049 2.642419 3.215835 3.215835 2.330016 3.402907  
1.893294 1.957158 2.789173 2.302066 1.670798 1.980589 0.887461 0.649811 2.443556  
1.223063 1.830758 0.993953 2.182613 0.983035 1.808348 0.971717 0.594036 0.943325  
2.350484 1.752283 1.725936 1.757482 1.299378 2.550539 2.767997 2.817116 2.740555  
5.208195 3.834362 5.098788 5.151905 3.66816 3.549919 5.222926 4.665363 4.503822  
1.145109 2.104672 1.79544 2.312035 1.434358 2.738911 1.201193 0.880515 0.926874  
2.203384 2.146656 2.609213 1.813619 3.793685 2.334263 3.388087 3.41072 2.879777  
3.604226 4.815097 3.227741 3.945044 4.490234 3.786071 3.269506 3.894571 5.870584  
1.045147 1.051169 1.13403 1.22099 1.049739 0.901576 1.071978 2.419055 1.053675  
0.649121 1.274589 0.677015 0.91108 1.696319 1.164853 0.723897 0.942328 0.843769  
1.101971 1.790105 1.245226 1.581224 1.76458 1.98395 0.878196 1.541766 1.73036  
1.731102 1.606476 1.457359 1.938411 2.31879 1.597956 2.052088 1.561263 2.016447  
1.762879 1.086337 1.778798 1.235967 1.44626 1.377557 2.446862 2.620118 2.116058  
1.693991 2.06979 1.825634 1.667752 1.507899 2.505417 1.999154 1.84156 2.363825  
1.326889 1.276716 0.791156 2.36481 1.381095 1.88022 1.465866 2.222857 1.545466  
0.91275 1.331723 0.80494 2.713109 0.549509 2.101672 1.24673 1.263831 1.206019  
1.650852 1.740514 1.480616 1.572484 1.746891 1.33014 2.646996 1.59319 1.721622  
1.032238 1.101618 1.772184 2.265221 1.142416 2.616845 1.457352 1.483849 1.335403  
5.049678 5.395159 4.721194 4.592206 3.755919 4.019568 3.35056 3.894582 4.661518  
2.958386 2.580623 3.567943 3.555933 1.639448 2.309811 2.824485 1.996762 2.973073  
2.506297 3.409634 3.148597 3.233465 2.895583 1.892085 2.098326 2.798348 2.557306  
1.736319 2.609657 2.598618 3.145856 2.321453 2.24833 2.609657 2.818496 3.403634  
1.2991 1.660434 2.757753 1.090365 2.696548 1.128871 2.896169 1.691251 2.99283  
1.389061 1.673111 0.865113 2.437193 1.712378 1.31236 1.361629 2.229748 1.134412  
0.73189 0.59691 0.786572 1.080427 0.773604 0.864288 0.917691 0.735019 0.626224  
0.945031 2.062738 1.428786 0.922405 1.13209 2.256207 1.100969 2.45057 0.825987  
2.712184 2.123336 3.197556 1.591948 2.096347 1.684183 2.420217 2.746117 1.793944  
2.010375 1.206731 2.967409 2.1511 1.531821 3.589933 2.101118 1.914094 2.979936  
1.023243 0.993633 1.154161 0.997316 1.013072 0.995368 0.691603 0.912983 1.077068  
4.218017 3.649911 3.264311 4.727622 4.452893 3.022764 3.929914 4.007088 4.067235  
1.393573 3.719446 3.800898 2.292033 2.389572 1.315789 1.307789 1.568527 4.235417  
2.15086 3.891593 2.619005 2.464657 2.132706 4.187069 5.428058 2.111579 5.264968  
4.577676 3.292763 2.547176 2.213732 5.286783 5.065292 4.82929 4.893945 2.454909  
1.353422 2.376939 1.833404 0.858017 0.911972 1.264609 1.486546 1.05974 1.785124  
0.920452 1.18972 1.031744 2.155003 1.040217 1.490321 0.821518 0.856542 1.068662  
3.484681 2.170365 3.101511 2.978563 2.435067 2.413603 3.151567 3.216377 2.976022  
0.525727 1.570769 1.075474 1.060913 2.206771 1.040042 0.424303 0.492535 1.414216  
3.922503 4.218589 3.409175 2.899328 3.412786 4.287985 3.73165 2.519905 3.604729  
0.70412 0.823707 0.630722 1.329271 0.667641 1.124246 0.901058 0.885716 1.232275  
0.636408 0.68159 1.293238 1.28314 0.697838 0.676675 0.455522 0.61358 0.611885  
3.690289 3.849942 4.558694 4.007536 3.498594 3.08557 4.1929 3.796452 2.871083  
1.250698 0.951874 0.564751 1.114736 0.904851 2.500269 1.425929 2.043526 2.500478  
3.544523 3.85395 2.69528 1.860945 3.265058 3.430089 4.648843 2.911282 4.169702  
3.360287 3.782509 4.229862 3.5018 4.286532 4.208754 4.871771 4.518728 6.093973  
1.410631 1.530394 2.456055 3.055375 1.749284 2.821333 1.552393 1.69154 1.414532  
2.38939 1.684652 3.033033 4.699753 2.248468 2.769585 3.520114 3.293182 3.870494

3. 591914 1. 872969 2. 875605 1. 306491 1. 543025 1. 08465 3. 544441 1. 567713 2. 262177  
1. 592983 2. 432887 1. 938041 3. 265268 2. 097744 2. 463026 2. 04124 2. 15355 1. 794921  
0. 873282 0. 822876 1. 046926 1. 166218 1. 043486 1. 939423 0. 843635 0. 944415 1. 302056  
0. 965328 1. 722143 1. 020244 1. 365292 1. 143776 1. 704873 1. 490987 0. 914182 1. 080568  
3. 064655 2. 396533 2. 056489 3. 84463 2. 720057 2. 273918 2. 915947 3. 454471 4. 850662  
0. 540655 0. 942909 1. 211105 2. 458963 1. 015939 1. 108953 1. 200734 1. 500992 0. 994731  
2. 068741 3. 067913 3. 317747 2. 936866 1. 882098 2. 835768 1. 634646 2. 407098 1. 807345  
1. 886515 0. 890268 1. 514557 0. 920138 0. 937944 1. 268082 1. 211784 0. 708159 1. 178344  
0. 852777 0. 823039 0. 914362 1. 02717 0. 907299 1. 492927 0. 869503 1. 011884 0. 722744  
1. 221242 0. 878136 0. 889793 1. 371364 0. 9162 1. 866744 1. 156436 0. 737541 1. 153409  
2. 131917 1. 583691 0. 833051 2. 039345 1. 533986 2. 458955 1. 880714 2. 220573 1. 489335  
1. 172686 1. 796507 1. 934952 1. 41883 0. 925272 1. 135627 1. 472972 1. 353539 1. 132284  
1. 209043 1. 758108 1. 519602 3. 451037 1. 674126 0. 795417 1. 164317 1. 079678 2. 482156  
3. 802045 1. 506887 2. 916002 3. 429676 2. 667747 3. 238006 3. 905619 2. 788279 3. 122427  
3. 704498 3. 260042 3. 960553 2. 088761 4. 064898 3. 579394 1. 913008 2. 066514 3. 759467  
1. 752129 0. 714909 0. 88778 1. 213458 1. 04232 1. 333619 1. 051459 1. 059178 1. 197673  
1. 98894 1. 198093 1. 258874 1. 5787 2. 439268 1. 745886 0. 699584 0. 779005 1. 296204  
2. 042603 3. 228046 1. 11087 3. 394251 1. 969432 3. 084765 1. 592561 1. 686628 2. 250858  
4. 379322 3. 394127 3. 668291 3. 912444 3. 636656 2. 661818 4. 384561 3. 362249 2. 149855  
2. 063152 2. 073214 1. 660092 2. 980309 1. 662278 1. 598912 1. 31663 1. 892309 1. 542874  
2. 345794 0. 786683 1. 570649 1. 730664 2. 363171 1. 387408 1. 158579 0. 749308 1. 63962  
2. 416844 3. 311984 3. 103996 2. 686246 2. 521308 2. 259869 3. 358038 2. 876914 3. 414182  
3. 931352 3. 196818 3. 40124 4. 072594 3. 058017 2. 536422 2. 887273 2. 12176 3. 214556  
2. 225659 1. 655245 1. 074095 2. 097177 1. 201371 2. 129233 1. 514687 1. 322233 1. 439983  
1. 140589 1. 160645 1. 022419 1. 84444 1. 28418 1. 314833 1. 135009 0. 908675 0. 971697  
1. 142514 1. 045508 0. 877925 1. 255732 1. 033026 1. 278293 0. 757015 1. 23547 1. 101116  
1. 021577 1. 025728 1. 463308 1. 160445 1. 387343 1. 13941 0. 992357 0. 971228 2. 025603  
1. 241368 1. 275502 1. 529935 1. 531852 1. 195724 1. 437137 2. 256422 1. 720797 4. 029107  
2. 27248 2. 369856 2. 789981 3. 452439 1. 086195 2. 421699 3. 227418 1. 473332 2. 433204  
1. 187447 2. 042299 1. 065756 1. 932567 1. 599774 1. 764544 1. 467901 1. 560888 1. 889574  
2. 365884 3. 70783 2. 740546 3. 436145 2. 251875 3. 384635 1. 891615 1. 900342 3. 637609  
0. 669407 0. 936262 0. 590024 1. 170873 0. 909569 1. 597615 0. 980169 1. 143584 0. 990011  
0. 930582 2. 44795 2. 33268 2. 101873 1. 234964 1. 372932 1. 582986 1. 637243 2. 027457  
2. 541187 3. 407413 3. 260697 2. 96316 1. 416731 2. 093826 3. 040166 2. 156317 2. 389616  
6. 093143 5. 81842 6. 030925 5. 796605 5. 935848 6. 530709 6. 28229 5. 456845 6. 224239  
0. 795678 1. 038412 0. 850921 0. 87098 1. 171597 1. 262125 1. 037584 0. 856379 1. 296676  
6. 047094 5. 873994 6. 384525 4. 773314 5. 772416 5. 77516 5. 770016 5. 794464 5. 00818  
4. 935031 4. 665606 4. 904786 5. 346432 4. 713218 4. 883136 4. 306025 5. 161654 3. 696937  
2. 564304 2. 733506 3. 254912 2. 853015 3. 273712 3. 418633 2. 668605 2. 976356 2. 571431  
3. 175018 1. 908681 2. 707852 3. 356192 1. 962409 1. 856269 3. 692956 2. 624771 4. 984124  
1. 586726 1. 020434 2. 765705 1. 173656 1. 455713 0. 6372 0. 915304 0. 99658 1. 716111  
1. 22674 2. 107269 1. 477697 1. 7287 2. 946858 2. 036797 1. 673712 1. 361007 2. 470807  
1. 570229 1. 836933 2. 894152 2. 343383 2. 389998 3. 232337 1. 690229 2. 132805 2. 68127  
2. 216273 1. 730083 1. 190948 1. 799581 1. 016695 1. 507573 1. 615785 1. 780926 1. 755369  
1. 536538 0. 60534 1. 192371 1. 555656 1. 648548 1. 084595 1. 56075 1. 019457 0. 923438  
2. 424229 1. 542786 1. 669927 3. 359231 2. 27898 2. 435462 1. 863839 0. 85777 2. 867538  
3. 622158 3. 652024 3. 36369 5. 55853 2. 739185 4. 361072 3. 389576 4. 019007 2. 552393  
1. 157368 1. 60981 1. 009793 1. 230231 1. 784688 1. 696768 1. 55518 1. 249137 1. 071914  
1. 665766 0. 940964 0. 509713 1. 497243 1. 533484 2. 367942 1. 475067 2. 776319 1. 432947  
2. 28763 3. 574114 3. 246646 3. 195321 4. 244314 3. 152669 3. 458034 4. 733107 4. 221161  
1. 45203 1. 608927 1. 825826 1. 684999 1. 979689 2. 299388 1. 245037 1. 431876 2. 137316

|          |          |          |          |          |          |          |          |          |
|----------|----------|----------|----------|----------|----------|----------|----------|----------|
| 7.41072  | 7.052674 | 7.099341 | 7.345778 | 7.46102  | 7.032343 | 7.236549 | 7.397616 | 7.344673 |
| 1.107357 | 1.401791 | 0.816744 | 1.604985 | 0.987791 | 1.196097 | 2.146897 | 2.024319 | 1.236114 |
| 1.392195 | 1.180086 | 1.189543 | 2.519797 | 1.183659 | 1.914687 | 1.368364 | 0.886845 | 1.610784 |
| 3.03019  | 1.732878 | 3.066462 | 2.263427 | 3.88869  | 3.490287 | 3.898965 | 2.784898 | 3.990834 |
| 2.335752 | 1.875106 | 1.8303   | 1.751511 | 1.635878 | 2.519255 | 2.752087 | 1.889383 | 1.641546 |
| 2.129544 | 1.49462  | 1.763223 | 2.381668 | 1.497652 | 1.189083 | 1.370979 | 1.000817 | 2.231259 |
| 3.440982 | 2.94425  | 4.054218 | 4.022324 | 3.306208 | 2.607919 | 3.503551 | 4.285529 | 3.902413 |
| 3.853325 | 3.590341 | 5.216865 | 3.788602 | 3.937306 | 3.570771 | 4.276421 | 3.416943 | 3.207219 |
| 5.638295 | 5.624181 | 5.690374 | 5.969185 | 5.670203 | 6.002435 | 5.903788 | 5.705347 | 5.95998  |
| 3.279606 | 2.986765 | 3.057907 | 2.560204 | 2.372726 | 1.841094 | 2.103466 | 2.020509 | 2.998777 |
| 2.200665 | 3.704311 | 1.486171 | 3.342339 | 3.276523 | 1.699904 | 2.939761 | 3.404078 | 4.450518 |
| 4.226778 | 3.926141 | 4.808393 | 4.093871 | 3.742011 | 3.687111 | 3.35656  | 4.486187 | 3.244693 |
| 6.466403 | 6.131056 | 6.622444 | 6.130769 | 6.564228 | 5.978671 | 6.076421 | 6.078526 | 6.186766 |
| 6.255978 | 6.601379 | 4.848004 | 5.138561 | 7.321918 | 4.99448  | 7.98296  | 6.398382 | 5.896288 |
| 1.267854 | 1.780473 | 2.222447 | 2.990123 | 1.357783 | 1.401015 | 1.840574 | 0.61515  | 1.265796 |
| 1.315208 | 1.384611 | 1.308962 | 1.732624 | 1.738605 | 1.283988 | 1.255879 | 1.173171 | 0.974978 |
| 1.957765 | 3.035878 | 2.139787 | 3.00738  | 2.636147 | 1.560736 | 2.195494 | 3.325085 | 2.695968 |
| 0.914456 | 1.010784 | 1.438322 | 1.388198 | 1.064878 | 2.352105 | 0.795098 | 1.307019 | 1.049683 |
| 1.428399 | 1.223643 | 1.628595 | 1.123079 | 1.863501 | 2.134889 | 1.856145 | 1.520848 | 2.565516 |
| 0.675516 | 0.237589 | 1.766086 | 1.12762  | 1.12762  | 1.371589 | 1.426894 | 0.784834 | 0.981821 |
| 1.133922 | 1.645098 | 1.077203 | 1.818101 | 1.43984  | 1.667943 | 1.36235  | 1.838521 | 1.389043 |
| 3.266588 | 3.385091 | 3.941194 | 3.922452 | 4.384324 | 3.978736 | 3.347214 | 2.918706 | 3.749134 |
| 3.310213 | 3.795127 | 4.097859 | 3.075691 | 2.716647 | 4.197332 | 3.10442  | 3.969601 | 4.007303 |
| 2.565169 | 1.433392 | 1.581379 | 1.475563 | 1.75687  | 1.835803 | 2.143969 | 2.650872 | 2.206454 |
| 0.990093 | 0.718165 | 0.755927 | 0.866538 | 0.846523 | 2.449959 | 0.988935 | 1.213766 | 1.01333  |
| 1.089729 | 0.934906 | 1.307559 | 1.602918 | 1.366504 | 1.601851 | 1.210774 | 1.140719 | 1.690285 |
| 0.95303  | 1.873489 | 0.602848 | 2.007337 | 1.517175 | 1.101077 | 1.050832 | 0.855614 | 0.767768 |
| 0.929378 | 0.987515 | 1.308948 | 1.457561 | 1.163447 | 0.924857 | 1.250896 | 1.172635 | 0.920785 |
| 0.957893 | 0.836207 | 1.070145 | 1.753106 | 1.029423 | 1.081608 | 0.96073  | 1.089573 | 1.007808 |
| 1.113096 | 0.848746 | 0.692291 | 1.098635 | 0.981593 | 1.48624  | 1.432671 | 0.879547 | 1.558151 |
| 1.392782 | 0.893995 | 1.294759 | 1.26766  | 0.924501 | 1.506404 | 1.083381 | 0.729668 | 1.006078 |
| 1.631277 | 2.544993 | 1.664222 | 1.71158  | 1.510403 | 2.03847  | 1.727549 | 1.567057 | 1.689637 |
| 1.32439  | 0.989497 | 0.724352 | 1.203917 | 0.724521 | 1.132434 | 0.77751  | 1.102934 | 0.820397 |
| 4.511685 | 4.573127 | 4.43964  | 3.917048 | 4.797856 | 5.194156 | 4.784824 | 2.984014 | 5.048411 |
| 0.933262 | 0.843068 | 0.879452 | 1.217968 | 0.913378 | 0.903065 | 1.033064 | 0.855677 | 1.392686 |
| 1.221813 | 1.134336 | 1.257606 | 2.265619 | 1.590999 | 1.908216 | 1.348162 | 1.044813 | 1.54653  |
| 4.130778 | 3.131165 | 4.315193 | 5.188762 | 4.39576  | 4.317466 | 4.002144 | 4.500394 | 3.897427 |
| 0.681235 | 0.84893  | 0.890514 | 0.968029 | 1.072103 | 0.875642 | 0.969463 | 1.649429 | 0.768768 |
| 1.293005 | 1.751628 | 1.21361  | 1.424411 | 0.98929  | 0.972817 | 1.400387 | 1.573913 | 0.760729 |
| 1.279151 | 0.868856 | 0.955725 | 1.296842 | 1.0924   | 1.290745 | 0.944192 | 0.78309  | 0.829483 |
| 0.885843 | 0.654497 | 0.912246 | 2.404362 | 0.830007 | 1.022946 | 0.644629 | 0.87022  | 1.163479 |
| 5.528221 | 4.086287 | 6.35546  | 6.607442 | 5.864483 | 5.620234 | 5.317122 | 6.122411 | 6.063758 |
| 0.905908 | 1.039117 | 0.693292 | 0.900113 | 1.684839 | 1.246426 | 1.310887 | 0.773217 | 1.094116 |
| 1.545305 | 1.166992 | 1.808365 | 3.042669 | 1.23313  | 1.695124 | 1.29193  | 1.035838 | 1.703071 |
| 1.394751 | 1.134182 | 1.165075 | 1.405785 | 1.036052 | 1.486848 | 1.184562 | 1.76469  | 1.445134 |
| 1.516667 | 2.326047 | 1.403903 | 1.191897 | 1.115573 | 1.947668 | 2.169725 | 2.102714 | 1.634987 |
| 2.546909 | 1.875877 | 1.16664  | 1.404008 | 2.954632 | 1.384989 | 1.877171 | 1.784246 | 2.333822 |
| 0.985601 | 0.947081 | 0.592305 | 1.139254 | 1.265694 | 1.68352  | 0.607163 | 1.32571  | 1.306264 |
| 2.073648 | 2.72789  | 1.979587 | 2.285462 | 1.225983 | 3.00701  | 1.040147 | 1.87718  | 2.203966 |
| 3.650728 | 3.116543 | 4.446923 | 3.304143 | 4.347908 | 5.052817 | 4.426255 | 5.154628 | 5.125309 |
| 1.949265 | 1.074242 | 0.891361 | 4.89525  | 1.533311 | 0.503952 | 0.799503 | 1.331335 | 1.501856 |



2.697047 2.57693 2.736601 4.085536 3.731175 4.284017 2.152424 3.537797 3.357946  
1.482442 1.849925 1.972086 3.262182 1.997822 2.783304 1.45971 1.463055 1.552353  
2.496082 2.294933 4.026313 1.879089 1.5594 1.872934 2.787281 3.395268 3.739116  
0.452447 0.789505 0.943359 0.961734 1.087577 0.751577 0.723975 0.518983 0.690837  
2.228261 2.925451 2.171716 2.63026 2.229863 2.334786 2.418449 1.755239 2.000501  
3.438712 3.86702 3.908374 4.815315 3.649019 3.778144 3.778144 2.685463 2.560239  
0.782128 0.836222 0.951087 1.474796 0.742594 0.877165 0.872423 1.212678 0.945708  
2.439744 2.711096 2.483423 3.531144 2.393569 3.925641 1.903062 1.436463 2.368024  
2.524367 1.858001 2.168281 7.160513 1.708123 2.816352 2.471956 2.086547 1.856419  
1.090679 0.975583 1.037091 1.090629 1.39315 0.98811 1.088226 1.094878 3.868614  
1.054996 0.91818 0.903077 1.068945 0.869 1.164472 1.141992 0.917895 1.187663  
0.878056 0.982867 0.87199 1.042368 1.583684 1.027343 1.391638 0.5412 1.068143  
0.843055 1.213701 1.008943 1.03531 1.317219 1.364472 0.998896 0.838547 0.838547  
2.044796 1.601947 2.83426 3.072374 2.03901 1.710344 2.021228 1.859563 1.57023  
4.582565 3.679561 4.301069 4.788278 3.710556 3.967116 3.752176 4.117184 3.990288  
2.947506 2.248378 2.601829 2.63242 1.824777 1.73254 1.555359 1.380349 3.663159  
2.349568 2.011691 2.011688 1.634829 0.940037 1.749984 1.737974 1.973899 2.629306  
1.022243 1.133506 0.898742 1.166961 1.506203 0.913731 1.156786 1.131229 0.731034  
1.388303 1.566323 0.755053 1.433602 1.043491 0.763008 1.249505 1.067407 3.755509  
1.070359 1.000349 0.952766 1.039058 0.967944 3.010454 0.792843 0.932362 1.400753  
0.926755 1.080944 1.067544 0.952459 0.688437 1.335511 0.768382 0.744975 0.79024  
1.186397 0.893418 1.139445 1.091373 0.901187 1.869131 0.998626 0.830369 3.258931  
0.88151 0.755768 0.795538 0.930166 1.439637 0.838442 1.136876 1.019422 0.864815  
3.122303 3.739128 2.833144 4.955679 3.136756 4.105109 3.670864 2.70987 3.136756  
2.289417 3.167699 0.950269 1.158139 2.048689 4.473437 0.850635 0.908839 4.01328  
1.663023 1.521271 1.322839 3.231237 2.195045 1.648812 1.141739 2.337962 1.188554  
1.926074 0.879347 1.824367 3.42981 2.25898 2.360902 1.833727 3.070563 2.600746  
1.12649 1.332362 1.313073 2.572598 1.146274 1.547694 1.378551 0.705232 0.892439  
1.461619 1.319075 1.445056 2.275908 1.306049 1.22284 2.354821 1.122286 1.429516  
5.188023 4.726823 3.818904 3.545318 4.11659 4.933207 3.395215 3.999453 4.293935  
2.108524 2.028805 2.460774 2.467842 2.224759 1.889378 2.04759 2.501608 3.747479  
4.697013 4.554894 5.503005 5.686359 4.888216 5.109206 4.58681 5.214332 4.645154  
1.714103 1.398058 1.442798 1.532462 1.376397 1.752304 1.29912 1.494845 1.097948  
1.690301 1.669034 2.24737 2.311777 1.672385 1.757569 2.183264 1.424362 2.487051  
0.993323 0.808988 0.982978 0.868132 1.050963 1.107565 1.378034 0.872024 0.952376  
1.727359 1.212511 1.35016 2.156459 1.840343 1.403522 1.719675 1.535323 2.074664  
1.264836 1.506992 1.176294 1.561017 1.446839 4.978401 1.589083 1.60431 1.881625  
3.005117 2.683305 3.113426 3.50528 2.30585 1.924038 1.9584 2.890629 2.234269  
2.941944 1.877704 2.406186 3.119253 2.61227 2.820974 2.564027 2.031735 2.768556  
0.65506 0.938922 0.725701 0.657736 0.562415 1.272647 1.271455 1.418526 0.640156  
1.838617 2.009384 1.028955 2.228693 1.135315 1.976288 1.298966 1.74339 1.786333  
1.690472 1.108982 1.168335 1.096145 1.196558 2.471839 0.876825 0.768846 2.815781  
8.036904 7.563634 7.406325 5.693355 7.846526 8.148444 8.292981 7.36451 7.273981  
0.83438 1.292191 0.734093 1.329318 1.021248 1.180039 0.653862 1.071305 1.35603  
3.086867 2.746067 3.266356 3.751833 2.843194 3.236652 3.555388 2.284893 3.340933  
0.873619 0.744835 1.743947 0.561723 1.046814 2.315059 1.347911 2.041567 5.824174  
1.533141 1.642164 0.977711 1.797932 0.953002 1.074042 1.414421 1.071677 0.962701  
1.590181 1.408853 1.470394 2.00035 1.682806 3.510012 2.045121 0.903609 1.568592  
0.783198 0.87293 1.078185 0.934758 0.878166 0.923742 1.114592 0.974411 0.836687  
2.47222 1.535222 2.16346 3.152791 1.196532 1.069121 1.105958 1.611872 2.662029  
1.069976 1.161044 1.084229 1.186224 0.895896 1.399873 0.993742 0.902956 1.041043

2.895785 3.2414 2.766568 3.537858 3.015942 1.700627 2.829328 2.751542 2.790024  
2.910605 1.773447 1.607357 2.142547 1.592683 1.463945 1.66139 1.495345 2.291611  
4.112238 4.629974 4.278688 4.559719 4.963583 3.979006 4.471426 3.87631 3.656422  
3.212652 3.01143 4.300031 3.727399 4.163842 2.766093 3.284122 4.091775 4.157586  
2.83598 2.333465 2.208707 1.771039 2.297529 2.302614 1.935205 1.582389 2.00523  
0.730358 0.65233 0.529729 2.13278 0.292858 0.67835 0.281836 0.480648 1.477437  
1.291086 2.027599 2.328515 2.338265 1.589559 1.833774 1.757611 1.262628 1.571875  
1.852096 1.751651 1.531082 1.315002 1.044262 2.07716 1.774036 1.523364 2.074532  
1.617212 1.128877 1.318751 1.852037 1.684986 1.48443 1.05483 1.487782 1.707098  
2.362195 2.447101 1.83628 1.99519 1.88153 2.216595 1.526524 2.025207 1.2598  
1.488744 1.104521 1.869182 2.465595 1.113991 1.340545 1.406053 1.969352 3.150873  
1.256069 1.31736 2.129188 1.453704 1.392578 1.221223 2.633945 0.948914 1.803558  
2.404226 2.001287 2.007365 2.820694 2.596059 2.584828 2.129082 1.843339 3.124488  
1.832026 2.121066 2.67862 2.623126 2.561726 2.828414 2.963813 3.207169 3.484521  
0.982039 2.361594 1.272986 2.820742 1.432978 1.560251 1.779031 1.555607 1.589736  
1.311883 1.809632 1.436341 1.984867 1.361398 2.20523 1.581195 1.334691 1.850818  
1.803128 2.038151 1.763649 3.543761 1.2989 1.402847 1.453507 0.969432 1.18697  
3.452052 2.17685 2.968276 2.684395 2.433816 2.003605 2.240266 2.459495 2.242905  
2.807326 3.133681 3.23057 4.326378 3.679677 3.064347 2.997893 3.592117 3.61075  
1.362628 1.96198 1.436481 1.578498 1.349988 1.512121 1.160314 1.13158 1.265937  
3.122262 3.73113 3.172902 3.348135 3.118854 3.660026 2.812557 2.643276 3.831391  
1.00604 1.247831 0.731694 1.550088 1.602274 1.760456 1.341799 1.333103 1.63028  
3.680506 2.997168 3.971332 3.704214 3.743686 4.007523 3.635768 2.648667 5.052853  
7.111562 7.075613 7.355789 7.322208 7.282549 6.978666 7.174141 7.660244 5.877808  
3.977076 2.743786 3.750037 2.22723 3.969664 3.61407 4.087002 3.966363 3.768259  
2.094706 1.933151 1.96974 2.71114 1.571211 1.961787 1.735305 2.0242 1.83257  
1.264499 2.282786 3.938349 3.579109 2.76364 2.185004 1.579084 1.783049 1.717048  
2.860776 1.615927 2.136283 2.52287 2.53271 2.349548 1.731461 3.919796 2.534724  
3.240412 2.952271 2.105413 2.958621 3.060509 3.529322 3.785006 3.901445 2.762673  
1.056583 0.986536 1.257867 1.42402 1.041157 1.189932 1.046302 1.142868 1.390044  
1.222462 1.561415 1.204095 4.753694 2.02961 1.633028 1.766463 2.062425 1.85157  
0.734644 0.516126 0.650602 1.19598 0.621154 0.794142 0.605163 0.865319 0.829882  
4.180181 2.689851 4.961655 6.070668 4.374233 3.013451 4.218422 4.322967 4.513606  
1.494408 1.096498 1.419343 1.378784 1.082758 1.458319 1.970788 1.471202 1.463744  
2.098384 2.041607 2.495817 2.17315 1.896891 1.850634 2.24361 2.257081 2.390845  
4.095767 5.039834 4.545451 4.238442 5.206558 5.06783 4.539263 5.463714 5.350444  
0.919608 1.519435 2.636682 1.896179 1.165715 1.645347 1.041618 0.903005 2.19064  
1.780134 1.299027 1.614151 2.045082 1.629025 1.513012 1.106349 1.445158 1.74406  
3.656683 3.390025 2.17951 4.080284 2.666324 3.079874 2.379428 2.61917 2.91541  
2.214171 2.642164 1.82938 2.208324 1.947814 2.187825 2.872292 2.313287 1.661529  
7.788642 7.669111 7.820021 7.575639 7.718834 7.607527 7.703076 7.733247 7.141433  
2.603641 4.142704 3.206687 3.988814 3.463031 2.794439 2.426814 3.510045 4.033507  
5.451451 3.519239 1.204654 6.264363 5.658015 3.846843 4.986377 4.202949 5.301499  
1.782964 1.239283 0.942143 1.681725 1.144989 1.341573 1.086526 0.937108 2.68676  
1.900363 0.707794 1.060933 1.691811 1.438865 2.122109 1.057878 1.281079 1.810622  
0.917721 1.216607 1.288114 1.20212 1.555105 1.40249 0.945911 1.137697 1.089835  
6.870139 8.20386 7.593495 6.871863 7.931325 6.800536 7.939533 5.127947 7.838479  
2.138304 3.09664 2.620821 2.452211 1.829233 2.111597 1.608801 1.690476 2.054258  
1.450705 1.645608 1.380109 1.635058 1.2249 1.361989 1.650771 1.418927 2.370156  
3.291396 2.445728 3.941152 2.80783 2.90838 3.006169 3.623348 2.638279 3.759954  
4.661494 4.186571 3.996733 3.814114 4.397546 3.79652 4.163771 4.015579 3.665293

3. 5905 1. 812933 3. 141983 2. 803296 1. 701044 3. 726128 1. 924866 3. 270659 2. 866032  
0. 784355 1. 419738 1. 366731 2. 130342 2. 046524 0. 800936 1. 805034 1. 152099 1. 42157  
4. 205554 3. 369324 4. 142887 3. 853886 3. 649929 3. 564275 4. 351969 4. 172872 3. 965859  
1. 188004 2. 510909 1. 686553 1. 846203 1. 596368 1. 479715 0. 954782 1. 032753 2. 260309  
3. 236966 3. 020857 3. 419827 3. 74615 3. 297854 2. 379349 2. 834103 3. 569492 4. 381772  
1. 47348 1. 131459 1. 284052 1. 4499 1. 150398 1. 737869 1. 602153 1. 06381 1. 638862  
1. 945283 1. 716872 1. 731533 1. 779848 1. 939947 2. 009062 2. 995352 3. 0135 2. 084331  
1. 648085 1. 50011 2. 442939 1. 729104 2. 475854 3. 036242 1. 450401 1. 129053 2. 42028  
1. 352879 1. 205404 0. 688011 2. 166461 1. 801631 2. 598687 0. 931921 0. 925991 1. 919025  
2. 993453 2. 104557 2. 264248 2. 252774 2. 260901 2. 716458 2. 35386 2. 174493 3. 440366  
1. 4752 1. 204744 1. 148189 2. 042647 1. 438936 1. 852742 1. 330169 0. 595406 1. 88959  
1. 452958 1. 883081 2. 416474 1. 699051 1. 961526 1. 733593 1. 658757 1. 593895 2. 239077  
1. 522844 2. 032712 1. 532992 1. 373847 2. 163134 1. 640745 2. 569868 2. 412745 4. 083424  
5. 236692 4. 371146 5. 237517 3. 500108 3. 367069 5. 138677 4. 972446 2. 996613 5. 139952  
1. 948933 2. 296604 1. 586014 1. 583819 1. 147716 1. 905196 1. 280908 1. 75261 1. 035669  
1. 109378 1. 15369 1. 323669 1. 643457 1. 242968 1. 142473 1. 292762 2. 118912 2. 290327  
1. 887284 1. 639077 2. 707556 2. 808262 2. 378384 2. 335098 2. 21607 2. 071687 2. 751868  
2. 350101 2. 310404 1. 746636 3. 665442 2. 579889 2. 30412 2. 2497 2. 077814 2. 680451  
5. 15109 4. 3207 5. 090738 5. 891586 4. 674543 4. 428066 5. 29666 5. 777156 4. 150219  
3. 474943 3. 883799 3. 667058 1. 871036 2. 902898 4. 578707 2. 150024 4. 360149 1. 501463  
1. 13962 1. 726312 1. 044398 1. 531234 0. 840265 1. 075149 1. 121996 1. 55682 1. 398723  
4. 067641 4. 345998 4. 215852 4. 85276 4. 380585 4. 156332 4. 170755 3. 989334 3. 708368  
1. 286191 0. 745558 1. 56032 1. 379198 1. 122913 0. 789424 1. 646588 1. 497487 3. 885181  
1. 521283 1. 379589 1. 11827 1. 342361 1. 440692 1. 779155 1. 534877 1. 653595 1. 940136  
3. 574684 2. 369323 3. 064003 2. 38985 2. 154399 2. 672002 2. 489214 1. 913 2. 38391  
3. 96412 3. 673772 3. 973945 3. 255333 4. 028793 4. 37531 3. 995905 3. 876881 4. 08558  
1. 034204 0. 936616 1. 048229 1. 300901 0. 714879 3. 579966 1. 170994 0. 618409 1. 407719  
1. 945111 1. 426149 1. 788133 2. 177821 1. 742401 2. 124607 1. 44243 1. 772646 1. 767755  
0. 961862 0. 674727 1. 809077 1. 931939 3. 00977 0. 856006 3. 53757 2. 467095 2. 804599  
2. 847767 1. 832516 2. 620907 4. 202931 1. 674585 3. 885006 2. 737637 2. 61202 1. 586268  
6. 17357 6. 082871 6. 544912 7. 18034 6. 179429 5. 907248 6. 023795 6. 176937 6. 742881  
1. 799293 1. 553116 1. 273436 0. 619785 1. 179248 2. 301131 1. 322369 1. 200283 0. 82745  
2. 457357 3. 061597 2. 413264 1. 924281 3. 407745 1. 963077 2. 421755 2. 753515 2. 179832  
1. 411031 1. 742406 1. 521901 1. 539713 1. 495034 1. 111402 1. 108547 1. 470642 1. 354089  
1. 990081 2. 304892 2. 079889 3. 386594 2. 143322 1. 811694 2. 761018 2. 728432 2. 486415  
1. 32869 1. 279053 1. 85274 2. 159384 1. 846053 1. 903318 1. 752391 2. 176044 2. 025084  
0. 990058 0. 883818 0. 796604 0. 888756 0. 876856 1. 125655 0. 879123 0. 930863 1. 317459  
1. 484513 2. 236695 1. 229304 1. 237735 1. 198267 2. 000194 0. 794991 1. 141679 2. 88562  
1. 862256 1. 600067 1. 728085 1. 308492 1. 748437 2. 316365 1. 767628 1. 520989 1. 844263  
1. 122826 0. 974663 0. 950823 1. 692972 1. 1946 1. 169281 1. 022172 1. 443997 1. 890014  
1. 735868 1. 446739 1. 717082 2. 283174 1. 800701 2. 224403 1. 228102 2. 027006 1. 375245  
0. 947745 1. 84471 1. 135715 2. 55681 2. 32732 1. 009051 0. 996438 1. 011648 0. 947745  
1. 200075 1. 877281 1. 122415 2. 26486 1. 866656 1. 603376 1. 892404 1. 371328 1. 781701  
5. 750983 4. 523455 5. 478917 3. 35836 6. 238931 5. 058443 5. 170835 5. 359694 5. 612965  
3. 645826 3. 901917 3. 322396 4. 323292 4. 064616 2. 609653 3. 378291 4. 074557 2. 481649  
2. 332813 1. 506405 2. 047169 2. 170896 1. 843191 2. 626262 3. 106069 2. 0638 2. 530656  
2. 485741 3. 187925 3. 606622 4. 196099 2. 729469 2. 752003 2. 392321 2. 385301 3. 618665  
7. 415796 6. 958999 7. 371959 7. 057153 7. 257835 7. 709399 7. 063945 7. 277019 7. 39407  
1. 261267 1. 106451 2. 217827 1. 181511 1. 383708 1. 683501 1. 442255 1. 808743 2. 301183  
1. 309036 2. 147378 1. 830703 1. 627862 1. 759452 1. 074042 1. 685782 0. 761791 1. 226725  
1. 396803 0. 70023 1. 3162 1. 163184 1. 265154 0. 881103 0. 970217 1. 41466 1. 243893

8.990446 8.541359 8.266414 8.182174 8.385044 8.426363 8.140512 8.415447 8.755357  
2.074877 1.813783 1.21445 2.312072 1.187891 1.799157 1.843294 2.147876 1.314698  
2.070668 1.172374 2.272938 1.757374 1.915119 1.904033 2.257017 1.533399 2.063908  
2.267526 1.626623 1.769807 1.621448 1.809735 1.49934 1.713909 1.905985 1.818131  
4.7628 4.597434 4.447866 3.078617 3.516702 2.610497 3.894438 4.084507 4.859827  
1.667411 1.666656 2.123834 1.758029 1.238224 1.549161 1.863861 1.206101 1.964542  
1.394542 1.84675 1.714336 1.368144 1.576468 2.285453 1.508317 1.70829 1.816749  
1.968072 1.779501 1.599468 1.970682 1.825923 1.694711 1.417578 1.442079 1.416611  
2.67303 1.673443 1.918329 2.741383 1.493738 2.456311 1.760859 1.384857 1.995576  
3.66866 3.01376 3.966167 3.780147 3.39932 3.077531 3.844455 2.759213 3.38192  
1.066754 0.723905 1.420648 1.833663 1.979717 1.482645 1.117242 1.044505 1.092678  
4.1315 3.714756 3.600145 2.940911 3.039362 4.565015 3.389153 3.894465 3.408565  
2.500868 5.045687 2.738261 3.306135 3.716555 4.329723 3.885379 4.597916 3.352565  
3.217394 3.105141 3.769911 2.712734 5.567152 1.555487 2.245353 1.657163 5.284204  
3.014491 2.836721 3.353843 3.59308 2.991828 2.51063 2.964406 3.255652 3.88229  
0.843216 1.581435 2.151547 1.219506 1.513465 1.381875 1.349794 1.136727 2.634072  
1.539976 1.817179 1.865003 2.095585 1.773773 1.30483 1.794772 1.037436 2.255014  
1.248733 1.49836 1.796674 1.391487 1.138068 1.625201 2.564197 1.753909 1.332914  
1.49169 1.562424 1.987444 3.324246 2.440527 3.409681 1.522794 1.2309 1.761532  
4.799844 0.72263 2.38497 2.510517 2.602355 4.419281 1.43949 3.168051 3.61517  
1.144434 2.196653 1.026284 2.058795 1.120094 1.214508 1.501693 1.149559 1.332293  
1.769676 2.206307 2.484062 1.864527 2.664977 1.892094 2.313358 1.487621 1.598196  
1.093948 1.453809 0.806258 3.148521 0.931651 0.774465 2.136555 1.451307 3.754742  
0.923277 1.550054 2.533804 1.471504 1.210079 1.90964 1.787845 1.430204 1.366469  
4.447618 1.409657 3.216178 2.227179 1.652848 2.549352 4.205251 2.574446 4.098553  
1.959627 3.130771 2.178695 3.020354 1.935042 1.966215 1.341592 2.053237 1.440527  
1.58484 1.445634 1.342318 1.491272 1.536928 2.139874 1.144535 2.112154 2.351314  
4.478471 4.018435 3.064373 4.621237 3.833294 3.445745 4.188606 4.019508 4.190064  
1.552173 2.143295 1.382638 2.059923 1.491111 1.400274 1.699719 1.608193 2.080798  
2.999294 3.229516 2.645736 2.79353 3.259906 2.45286 3.407182 2.54768 2.895701  
3.126892 2.134098 4.016953 3.228958 1.927505 2.135436 2.294969 3.149206 3.030089  
1.273906 1.287985 1.552878 1.769321 1.711327 1.265815 1.60306 1.189329 2.25773  
5.094756 5.44378 4.781859 5.933535 5.304752 5.568644 5.559113 5.762241 5.017954  
2.324856 2.194625 1.508771 1.663205 1.79996 1.47845 1.518833 1.282301 1.438792  
2.843673 1.671558 1.270616 1.891008 1.52318 2.839619 2.629419 0.915049 3.679755  
4.62241 4.666857 4.873628 0.534358 4.825772 3.302809 2.855511 3.606311 3.953533  
2.131597 2.55037 3.30926 2.958315 2.812087 5.298128 2.027876 2.707082 3.089523  
0.962886 1.507774 1.426731 1.502481 1.362855 1.537185 1.198605 0.891765 1.162521  
2.582293 2.955209 3.025904 3.316986 2.487193 2.519556 2.871054 3.478703 0.962549  
4.258366 2.964301 3.449776 4.461838 3.157183 3.316556 3.001628 3.818748 2.840953  
1.846553 1.580982 1.156323 1.433802 1.085112 2.717087 1.129045 1.236356 3.326062  
1.742745 1.506872 1.901919 2.17346 1.761995 1.588328 1.961596 2.270909 2.257342  
1.297985 1.650589 1.292762 1.17202 1.437176 2.631492 1.327904 1.517771 1.274366  
1.635607 1.552518 1.67698 1.626945 1.452694 1.875361 1.35476 1.26305 2.113081  
4.537555 1.185877 1.206816 1.314345 0.68033 1.31055 1.902554 0.924489 1.18629  
3.320687 2.977787 3.615705 2.825884 2.935726 2.903802 2.405354 3.48919 2.336139  
2.553152 1.42914 2.07723 1.94229 1.6355 1.443042 2.923068 1.485332 1.818928  
1.399291 2.745538 2.451728 2.117483 2.255946 1.276855 3.153563 2.240282 5.094241  
4.107682 5.52195 3.21202 2.615457 4.51142 2.597857 3.901592 4.370266 4.08922  
1.130077 1.229353 1.157865 1.429264 1.436033 1.783026 1.740803 1.55293 1.112271  
2.152562 2.023271 2.675035 1.903788 2.410228 2.725315 2.450212 2.452668 2.093429

1. 654952 1. 207335 1. 79672 1. 641123 1. 404613 1. 092394 2. 251898 0. 99229 3. 987526  
1. 898105 2. 326313 3. 18163 3. 259934 1. 788947 1. 885082 1. 824186 2. 261344 2. 192507  
5. 025247 5. 264259 4. 744605 5. 146492 6. 077832 4. 656487 4. 577997 4. 817311 3. 862604  
2. 475336 1. 836904 2. 456863 4. 273737 2. 456459 2. 706383 2. 583812 2. 111603 2. 226354  
1. 045983 0. 777246 0. 755488 1. 080805 1. 297297 1. 354531 1. 221953 0. 894516 1. 104643  
1. 556278 1. 176113 1. 416556 1. 88622 1. 727096 1. 996367 1. 367729 2. 16266 1. 689789  
1. 581992 1. 242086 1. 107657 0. 925553 2. 094443 1. 698909 2. 610335 0. 844729 1. 563378  
1. 50947 1. 235124 1. 302688 2. 080031 2. 179158 1. 611357 1. 783356 1. 5274 2. 060011  
2. 776494 3. 529949 3. 486086 3. 345579 4. 259588 3. 433224 3. 034416 3. 486086 3. 730434  
1. 586917 1. 165159 1. 507452 1. 591119 2. 005117 1. 939849 1. 581344 2. 018423 2. 001658  
1. 546424 1. 564644 1. 551838 1. 772492 1. 392577 1. 740666 1. 546347 1. 5535 3. 168605  
2. 381243 4. 440019 4. 291789 3. 147355 2. 7283 2. 975957 1. 917266 2. 552741 4. 974764  
7. 837561 7. 830759 8. 113174 7. 431911 7. 693347 7. 480614 7. 639926 7. 641616 7. 60264  
3. 47842 1. 615985 0. 686771 1. 737846 1. 853307 2. 712747 3. 186418 1. 67968 1. 93789  
1. 696109 1. 569971 1. 560503 1. 116487 1. 777867 1. 408521 1. 549984 2. 180816 0. 799139  
2. 351462 4. 081617 3. 703828 2. 824129 1. 929662 3. 374897 3. 889568 3. 711581 2. 055399  
1. 408685 1. 739539 1. 554632 1. 175227 1. 267036 1. 841307 1. 725039 1. 024651 1. 510755  
1. 821934 2. 628259 1. 765252 2. 31186 1. 794961 2. 893858 1. 854089 3. 692626 2. 31088  
1. 232091 1. 018755 1. 230116 0. 842053 1. 475401 1. 643302 1. 362385 1. 467635 1. 57891  
0. 912861 1. 339608 1. 478186 0. 78608 1. 578285 1. 552192 1. 055719 0. 862278 0. 640051  
4. 740607 4. 968365 4. 43788 3. 685977 4. 33506 4. 078316 5. 17125 4. 672695 4. 178276  
1. 093906 1. 832345 0. 971419 1. 272868 1. 505087 1. 296872 1. 53508 1. 585034 3. 659621  
2. 297892 3. 873246 2. 529812 1. 964126 2. 375204 2. 65081 2. 472637 1. 769428 3. 146312  
1. 864705 2. 405502 2. 180563 2. 963704 2. 46633 2. 470875 1. 831923 2. 561046 3. 198507  
2. 141351 1. 904867 1. 479826 1. 209855 1. 519642 2. 812811 1. 948173 1. 963506 3. 146857  
1. 782014 1. 470895 1. 656058 2. 319461 1. 399017 2. 607453 2. 008 1. 748664 2. 397458  
7. 648108 6. 356139 6. 299483 6. 40283 7. 420565 6. 883374 7. 133213 6. 13603 8. 032685  
1. 99468 3. 310966 3. 198515 1. 75905 2. 243003 2. 287324 2. 493625 3. 531669 2. 275417  
1. 454143 1. 666816 1. 14476 1. 480879 1. 249787 1. 325774 1. 463816 0. 8352 1. 254238  
1. 258553 0. 961946 1. 512106 1. 269832 1. 247588 2. 025018 0. 888979 1. 039425 0. 995405  
1. 231891 1. 652537 1. 342742 2. 346467 1. 664948 0. 892143 1. 138007 1. 107529 2. 276256  
4. 19382 3. 111264 2. 663866 1. 844592 3. 255118 2. 933202 3. 987075 2. 5944 3. 332082  
1. 193878 4. 606279 3. 187151 2. 344446 4. 123974 2. 446323 1. 347728 3. 652349 1. 343818  
1. 876413 1. 205319 1. 146638 2. 025092 1. 180268 1. 230832 2. 088403 0. 640925 1. 455576  
1. 907769 1. 653595 1. 870405 2. 554904 1. 8343 2. 479463 1. 817746 1. 796067 1. 905531  
1. 36706 2. 027267 1. 24052 1. 435062 1. 463276 1. 813771 1. 54181 1. 28897 1. 626758  
1. 434243 1. 821819 1. 328731 2. 419649 1. 385582 1. 406391 0. 963834 1. 362317 1. 250613  
3. 556101 3. 588633 3. 778707 4. 1737 3. 290207 4. 290729 3. 347643 3. 428805 3. 724167  
5. 200406 2. 987601 4. 203744 1. 046181 3. 126555 4. 249504 3. 634731 3. 925603 5. 649958  
1. 689046 1. 596982 1. 47667 1. 866818 1. 938616 1. 81496 1. 131377 1. 372667 1. 825423  
1. 673285 1. 364345 1. 468463 1. 933442 1. 4525 1. 779552 1. 655909 1. 460071 1. 529828  
1. 933383 1. 961524 1. 128904 1. 601823 2. 120639 1. 002372 2. 715489 2. 743183 2. 49622  
4. 6644 4. 807279 5. 126143 3. 394837 4. 718484 4. 290055 3. 647721 3. 984472 5. 296844  
4. 06702 3. 631398 2. 963802 4. 1567 1. 939402 3. 294232 3. 988014 4. 302971 4. 409801  
3. 617578 3. 039853 3. 576904 3. 964723 3. 573103 3. 800503 3. 33169 3. 303021 4. 91614  
0. 991672 2. 44356 2. 767583 2. 74226 2. 442434 3. 448801 2. 802538 2. 065792 2. 817438  
1. 212048 1. 726093 1. 710978 1. 896051 2. 038386 2. 636216 2. 446757 1. 566366 2. 214296  
1. 40068 2. 072899 1. 202516 2. 747746 2. 126694 2. 327037 1. 799543 1. 80435 2. 592004  
2. 77253 2. 166798 2. 520783 1. 598188 2. 638035 1. 813505 2. 387131 2. 230788 2. 077947  
1. 705289 2. 010077 1. 717647 2. 302999 1. 577967 1. 905839 1. 658902 1. 822102 1. 602332  
1. 565214 1. 720448 1. 85854 1. 776866 2. 178151 1. 591846 1. 393386 1. 846983 1. 600474

1. 421496 1. 110744 1. 167902 1. 014112 1. 848372 1. 87087 1. 653159 1. 519434 1. 519434  
3. 415209 4. 203606 4. 070134 2. 770713 4. 570848 3. 327767 4. 280763 4. 342591 2. 970118  
2. 983783 2. 969863 3. 659873 3. 450723 3. 373115 3. 314674 3. 163634 2. 964674 3. 406452  
1. 535649 1. 594308 1. 204228 1. 179641 1. 32748 1. 255147 2. 290193 1. 118988 2. 145903  
3. 679133 3. 409946 2. 994664 3. 685226 3. 145278 3. 774156 3. 460572 2. 904551 3. 695951  
7. 485013 7. 592823 7. 783132 7. 98819 7. 532053 7. 65923 7. 620574 7. 923308 8. 138905  
2. 805057 2. 1376 2. 901853 3. 469083 3. 030596 3. 150554 1. 79583 3. 531101 3. 39619  
2. 621192 2. 037125 2. 467126 2. 409796 2. 086578 2. 403839 1. 993515 2. 052461 3. 089383  
2. 037312 2. 433912 2. 21173 2. 05251 2. 425493 1. 773426 2. 041644 1. 967111 1. 375916  
1. 662781 2. 652888 2. 253916 2. 60802 2. 026651 2. 629475 1. 458002 1. 75538 1. 343543  
1. 862222 1. 341681 2. 768151 3. 481836 1. 425964 3. 308829 1. 723745 1. 23001 2. 120407  
3. 927406 3. 789671 3. 92732 4. 660664 3. 816614 4. 084077 3. 83515 4. 700625 4. 457053  
1. 20535 1. 884432 1. 627339 2. 120341 1. 284445 2. 251957 1. 678353 1. 174443 2. 376962  
3. 502424 2. 059807 1. 944626 2. 048035 1. 912104 1. 496442 2. 482045 1. 71429 2. 155872  
5. 176816 5. 392881 5. 305069 5. 459243 4. 936096 5. 548194 4. 916284 6. 159324 5. 073458  
2. 107907 2. 824368 2. 686187 2. 628144 3. 471519 2. 487058 3. 26503 1. 97311 2. 716624  
1. 605112 1. 493987 2. 141566 1. 456134 2. 272762 3. 002607 2. 019907 1. 891253 2. 8699  
1. 755721 3. 273636 2. 638797 4. 556398 2. 092661 2. 906197 2. 86764 3. 690393 3. 046263  
1. 398775 1. 370293 1. 763923 1. 990622 1. 852741 1. 535895 1. 560798 1. 448043 1. 353655  
1. 602703 1. 745074 1. 816399 1. 656572 1. 601816 1. 836373 1. 868162 1. 464051 1. 896527  
1. 248885 1. 032545 1. 612025 1. 120839 1. 015984 1. 021728 0. 938654 0. 778985 1. 88708  
1. 402862 1. 051869 0. 902223 1. 518145 0. 983475 1. 496499 1. 366856 1. 210313 1. 243681  
2. 354626 3. 843322 2. 597779 2. 259914 2. 425134 3. 147174 2. 100438 2. 856932 2. 62832  
1. 283346 0. 938752 0. 940315 1. 071701 0. 686052 1. 084661 1. 477742 1. 24411 0. 912112  
1. 202621 1. 473739 1. 454898 1. 859435 1. 159126 1. 172736 1. 246617 1. 601671 4. 536233  
2. 655224 3. 357528 3. 335899 3. 109519 2. 966302 3. 195796 2. 094843 2. 307233 4. 580328  
1. 889717 1. 063475 1. 66672 1. 541193 1. 072704 1. 770794 1. 310717 1. 411191 1. 496537  
3. 409469 3. 387382 3. 946705 4. 349615 2. 936546 2. 783793 3. 832318 2. 382751 1. 892902  
1. 101817 1. 328397 1. 214206 1. 520552 1. 110928 1. 166493 1. 311211 1. 328814 1. 155485  
1. 575112 2. 68992 3. 024163 2. 829465 2. 01571 3. 914009 1. 43895 1. 625424 3. 428852  
2. 40056 2. 339532 2. 527052 2. 645709 3. 297934 3. 405826 2. 687654 2. 440335 2. 736218  
1. 316956 1. 438212 1. 509782 2. 057941 1. 501756 2. 332691 1. 286023 1. 346974 1. 578791  
1. 515295 1. 424236 1. 744387 1. 966347 1. 330251 1. 439283 1. 463969 1. 366752 1. 771155  
5. 130392 5. 525911 6. 497841 4. 850145 4. 911594 6. 801467 5. 397853 6. 260267 5. 426818  
4. 781698 4. 218468 5. 186509 5. 270686 4. 410547 5. 010578 4. 861055 4. 828775 5. 087639  
1. 601136 1. 902041 1. 623168 1. 625874 1. 829129 1. 167648 1. 547573 1. 58629 2. 305332  
1. 67381 1. 210497 2. 523089 2. 218577 1. 82146 1. 822135 2. 1242 1. 229745 1. 474392  
2. 690126 2. 995472 2. 350572 2. 29523 2. 205205 2. 507526 2. 368152 2. 10694 2. 927407  
3. 598646 3. 409567 2. 434432 2. 979282 2. 785138 2. 537634 2. 921885 3. 294216 2. 658356  
1. 350231 2. 037416 1. 553571 2. 21023 1. 716019 0. 747506 1. 366526 1. 22294 1. 647089  
1. 301357 1. 976744 1. 084015 1. 758961 2. 33493 1. 037953 1. 197011 1. 315007 1. 150326  
1. 370736 1. 941348 2. 97654 3. 036944 1. 852729 1. 982126 1. 848728 1. 895036 2. 330387  
3. 22484 2. 752237 2. 971828 1. 941843 2. 469157 3. 475459 3. 640025 3. 442918 2. 248572  
1. 183534 0. 998788 1. 070497 1. 12229 1. 56708 2. 535632 1. 131166 1. 339274 0. 84349  
3. 037294 2. 937503 3. 771748 2. 096177 2. 872568 1. 838274 3. 3251 2. 848093 2. 163832  
1. 001087 0. 762973 1. 531834 1. 184475 0. 800466 1. 125269 0. 963411 1. 532797 1. 146874  
1. 968597 1. 483478 2. 014536 2. 723919 2. 083103 1. 631161 1. 539663 2. 06225 2. 13765  
1. 900248 1. 773923 1. 597863 1. 554111 1. 444427 1. 271607 1. 664523 1. 453167 2. 5896  
1. 045404 0. 96472 1. 246977 1. 583416 1. 538551 1. 515357 1. 015103 0. 910897 1. 710272  
1. 178156 2. 099215 1. 608003 1. 491996 1. 3758 3. 230139 2. 108167 2. 429379 4. 143886  
2. 487932 1. 676641 2. 372509 1. 301941 2. 107086 1. 093767 1. 283156 2. 20205 1. 123629

4. 658194 3. 250893 4. 12814 2. 764458 2. 99849 3. 781957 2. 977066 4. 03549 3. 151395  
1. 207533 1. 021738 2. 291666 3. 550409 2. 267666 2. 162746 1. 971795 2. 962954 2. 413525  
5. 077571 6. 407252 5. 097632 4. 213242 5. 745574 5. 256119 5. 57692 5. 902681 6. 538153  
1. 123867 1. 938536 1. 467483 1. 34411 0. 855747 1. 344134 1. 777058 1. 679113 1. 069571  
1. 631453 1. 454703 1. 693138 1. 240871 1. 62019 2. 143455 1. 985165 1. 775275 2. 384674  
1. 116478 0. 957098 1. 813016 2. 076795 0. 765467 1. 74002 1. 045154 1. 076771 1. 242001  
2. 434358 0. 893479 1. 250926 1. 101638 1. 807834 1. 483776 1. 649419 0. 968779 2. 122416  
1. 63844 1. 321712 2. 273597 2. 054557 1. 848963 1. 374556 1. 467751 2. 224082 3. 171657  
2. 700657 2. 694836 2. 767055 2. 109885 2. 688706 2. 694834 2. 172136 2. 69061 3. 282646  
3. 013821 3. 052137 2. 582737 3. 026164 2. 606853 4. 066981 2. 62463 3. 161663 2. 41552  
5. 809083 6. 091804 5. 723117 6. 173741 4. 789297 5. 752053 6. 297225 5. 826247 5. 991278  
1. 709181 1. 658479 2. 658643 2. 261181 1. 680664 2. 20217 1. 846778 2. 270763 2. 143821  
1. 495631 1. 111521 1. 382199 3. 663322 0. 792591 1. 817782 1. 472183 1. 629831 1. 578085  
2. 068441 2. 637446 2. 262745 3. 133571 2. 52419 1. 99119 1. 691753 2. 502175 2. 621038  
1. 821831 1. 775671 2. 016758 2. 207514 1. 534299 2. 186868 2. 068105 1. 650298 2. 285126  
0. 770753 0. 899272 0. 873651 0. 683201 0. 995371 2. 591983 1. 148153 0. 63309 1. 281359  
2. 850155 1. 349626 1. 94245 1. 952498 1. 272641 1. 869617 1. 544789 1. 978221 1. 734773  
1. 458902 1. 822342 2. 366237 3. 016858 2. 316818 2. 412943 2. 75848 1. 848672 2. 208145  
3. 159561 3. 872166 4. 042376 4. 478025 3. 622757 3. 092669 3. 586121 4. 012022 3. 523718  
1. 274193 2. 501538 1. 677302 1. 127723 1. 095112 1. 399921 1. 85293 1. 017014 1. 18251  
2. 717231 2. 022175 1. 922774 3. 501757 1. 797282 2. 529043 2. 709013 2. 438878 3. 301351  
3. 584099 3. 191301 3. 616019 3. 848748 3. 532472 3. 973661 3. 714524 3. 127656 3. 022907  
1. 305122 1. 031944 1. 602366 1. 273839 2. 365353 1. 560415 1. 268625 1. 206479 3. 664528  
1. 48805 1. 108028 1. 231038 2. 824206 0. 849172 1. 057057 1. 054601 1. 504896 1. 490439  
1. 992302 1. 938841 2. 004153 2. 302585 1. 046671 1. 433401 1. 673547 2. 065707 1. 988068  
3. 652799 3. 186228 3. 60033 4. 453175 3. 264092 3. 431022 4. 418925 3. 857863 3. 635235  
1. 273539 0. 681033 2. 787085 1. 611468 0. 897775 2. 669891 1. 08219 1. 380393 1. 521358  
3. 226035 2. 873563 3. 108038 3. 877677 3. 538141 3. 427249 3. 39649 3. 582192 3. 615075  
3. 706137 2. 89859 4. 248921 2. 411016 5. 135358 4. 300975 2. 959322 4. 429144 3. 281463  
1. 098078 0. 945852 1. 002185 1. 500472 0. 892029 1. 579396 0. 997196 0. 807633 0. 896158  
2. 045509 2. 465154 2. 10067 2. 71224 1. 979959 1. 864115 1. 658962 2. 393284 2. 188106  
4. 427068 3. 427594 2. 871892 3. 162814 4. 422992 4. 225614 3. 690486 1. 914917 3. 679541  
1. 802559 2. 023393 2. 076293 2. 924202 2. 485817 2. 166912 2. 625934 1. 936866 2. 485817  
5. 062741 3. 190477 2. 431263 2. 111768 1. 00158 0. 97445 1. 58162 2. 435841 3. 705566  
4. 996305 4. 310869 5. 059249 4. 665441 4. 339713 5. 426254 4. 663305 4. 211642 4. 908185  
5. 404298 3. 638191 4. 897812 4. 90828 4. 595974 5. 447441 4. 348377 4. 46026 4. 840401  
1. 107994 1. 619137 1. 119549 1. 281336 0. 687012 1. 106877 1. 326134 1. 217578 1. 81771  
1. 20481 1. 34562 1. 357687 1. 78505 1. 218343 2. 171885 1. 395401 1. 494251 1. 45934  
2. 447039 2. 358043 2. 384011 2. 220142 2. 427649 2. 230117 2. 268111 2. 631565 2. 086081  
2. 521757 2. 017487 1. 848542 2. 268354 1. 630846 1. 864405 2. 549317 1. 891971 1. 95657  
1. 509775 1. 583701 1. 546184 1. 877754 1. 433214 2. 182805 1. 41022 1. 78027 1. 902293  
1. 424828 1. 48198 1. 118127 2. 322132 1. 781023 1. 712317 1. 050487 1. 275259 1. 593822  
3. 313933 3. 256771 2. 943652 3. 842534 2. 851123 3. 147506 2. 553915 2. 80647 3. 171032  
6. 138239 4. 979279 6. 310786 5. 506 4. 560724 5. 445333 5. 626756 4. 331278 6. 513787  
3. 459425 4. 211656 3. 434712 4. 578548 3. 916614 4. 372467 4. 731117 4. 566181 3. 637379  
4. 294431 3. 801991 5. 238591 6. 163653 3. 437356 3. 974758 4. 826603 4. 525885 3. 923569  
1. 356056 0. 922009 1. 678236 1. 948868 1. 956663 1. 61447 1. 742055 0. 867868 1. 572593  
1. 216583 0. 721903 1. 54262 1. 087669 1. 576456 1. 719579 0. 970627 1. 446774 0. 873156  
6. 398517 6. 278806 6. 723448 5. 630732 6. 022296 6. 134169 6. 350351 6. 278992 6. 748753  
3. 238427 3. 583787 2. 782916 2. 439631 2. 512431 2. 884274 3. 730884 2. 330494 2. 031581  
2. 310208 2. 653158 2. 536671 2. 96065 2. 61637 3. 910802 3. 38499 3. 465241 3. 717685

1. 742944 0. 948517 2. 324369 1. 698985 1. 019066 1. 04424 0. 546853 1. 539777 2. 122011  
4. 077921 3. 8863 4. 595533 2. 844664 2. 812632 1. 468879 2. 886869 3. 092663 4. 827976  
4. 840228 3. 903509 3. 117706 3. 342805 2. 68409 3. 782821 4. 832945 3. 612659 4. 105133  
1. 396303 1. 471655 1. 463154 2. 160206 1. 719772 1. 663052 1. 477145 1. 237155 1. 333038  
1. 593322 1. 3117 1. 255449 1. 862866 1. 560648 1. 640016 1. 805763 1. 080941 0. 933324  
4. 332821 1. 189236 3. 214907 2. 305312 3. 017548 1. 409885 3. 335674 3. 64248 1. 45086  
2. 086423 1. 294657 1. 596039 2. 747037 1. 593473 2. 309589 1. 514011 1. 23277 2. 13752  
3. 018718 1. 389658 1. 34909 1. 799669 1. 180248 2. 606089 1. 715171 1. 302384 1. 266465  
4. 650264 4. 336504 4. 230371 5. 696241 4. 928997 5. 172236 4. 203056 4. 862282 4. 101694  
1. 190336 1. 231549 1. 503189 1. 516324 1. 589732 1. 45229 1. 251118 1. 191996 1. 45645  
0. 893448 0. 907335 1. 283993 1. 144453 2. 536045 1. 076633 1. 422675 0. 867811 1. 633303  
2. 828825 3. 612829 3. 38535 2. 542731 2. 897692 2. 354334 2. 755404 2. 893926 3. 462231  
6. 905185 6. 740087 6. 688949 6. 98843 6. 899282 5. 361147 6. 890088 6. 761696 6. 606252  
1. 312431 1. 222151 1. 174171 1. 325589 1. 220874 1. 190188 1. 622027 1. 985576 1. 201891  
1. 504788 1. 764679 1. 35835 1. 267897 1. 638744 1. 153002 1. 167882 1. 380584 1. 16773  
1. 579981 1. 869073 1. 82049 1. 809579 1. 036524 1. 394521 1. 298616 1. 322662 1. 418761  
2. 458992 2. 273086 1. 612256 2. 696151 2. 491044 2. 075261 1. 718126 2. 047872 1. 975942  
1. 016424 1. 140857 1. 082482 1. 636697 1. 03631 2. 118551 1. 625134 1. 879758 2. 296342  
2. 801101 3. 466942 2. 893095 1. 972061 2. 819954 1. 956172 3. 384625 2. 281205 1. 669334  
3. 738328 4. 100238 4. 285405 3. 646525 4. 809406 3. 90564 3. 575254 4. 762413 3. 616972  
0. 988338 0. 874369 1. 249429 2. 540683 0. 931592 2. 784734 1. 067673 1. 075703 2. 706051  
0. 638231 1. 142969 1. 153917 1. 447108 0. 486681 0. 918077 0. 963443 2. 678554 3. 549748  
1. 27969 1. 341747 1. 482854 2. 09228 1. 598867 2. 222579 1. 262394 1. 499149 2. 52894  
1. 239858 1. 103664 1. 216574 1. 102342 1. 51696 1. 956545 1. 559324 1. 444708 1. 032269  
2. 126655 0. 986377 1. 950153 2. 294051 1. 324551 1. 745842 1. 828938 1. 73249 2. 100865  
2. 671384 2. 109492 2. 314744 2. 819224 2. 087399 2. 696115 2. 693806 2. 267504 2. 279788  
1. 602476 2. 117618 1. 5633 2. 492316 2. 317751 1. 887972 1. 330997 1. 910909 2. 015084  
1. 119874 1. 025809 0. 881272 1. 338265 1. 158043 1. 475792 1. 188627 1. 249115 1. 425101  
3. 380034 4. 640166 4. 52235 4. 524788 4. 322961 4. 548189 4. 548034 4. 459073 4. 718393  
1. 539811 2. 076603 1. 612689 1. 686578 1. 544322 1. 60002 1. 767676 1. 153011 1. 556318  
2. 214015 1. 548496 1. 842955 1. 553923 1. 49417 2. 053413 2. 059228 2. 2841 2. 19024  
1. 453222 1. 541336 1. 710055 2. 09331 1. 632796 1. 015183 1. 954075 1. 464165 1. 464165  
1. 661527 1. 537203 1. 559528 2. 239212 1. 82888 2. 581419 1. 432611 1. 849176 1. 674666  
6. 415058 6. 555771 6. 561599 6. 189911 6. 050687 5. 944748 6. 720474 6. 376317 6. 96263  
2. 165827 2. 135961 1. 495091 5. 321234 2. 692737 2. 231902 2. 188508 3. 608314 4. 140872  
1. 676005 1. 426709 1. 393603 1. 580837 1. 897697 1. 696447 1. 715036 1. 074983 1. 389662  
2. 498329 2. 025657 2. 637602 2. 597429 1. 831227 2. 348121 2. 419508 2. 319788 2. 309154  
1. 23933 3. 296521 2. 432726 2. 927936 1. 52588 3. 639244 3. 260891 3. 476086 5. 541135  
2. 160981 2. 633002 2. 815455 2. 462841 2. 416222 3. 369472 2. 514912 3. 353708 3. 136834  
1. 565572 1. 101231 1. 768154 1. 695615 1. 618739 1. 686004 1. 163708 1. 103407 1. 210437  
1. 834659 1. 930922 2. 3978 4. 030799 3. 060015 2. 049487 1. 541501 1. 416367 1. 157297  
1. 300876 1. 772869 1. 720721 3. 047884 1. 270062 1. 719771 1. 306284 1. 660792 2. 424721  
1. 837032 2. 473235 2. 254747 2. 026377 2. 602136 2. 306533 1. 184683 2. 666027 1. 52929  
1. 627091 1. 262045 1. 182288 1. 624327 1. 125514 1. 983626 1. 381114 1. 106901 1. 845386  
1. 637789 1. 424545 1. 893824 0. 946266 0. 978358 2. 327175 1. 589665 1. 398048 2. 530612  
1. 593331 2. 06933 3. 098542 3. 069055 2. 889505 2. 421226 2. 076826 1. 854776 2. 867554  
1. 338265 1. 455342 1. 268872 1. 775656 1. 359205 1. 619071 1. 420853 1. 115401 1. 420853  
4. 556346 3. 813371 3. 930836 3. 5505 4. 349373 4. 744029 3. 753223 3. 824532 4. 764817  
3. 724155 4. 593189 2. 893952 2. 168002 2. 932472 2. 048892 3. 90617 2. 799079 4. 717632  
1. 502294 1. 864727 1. 461664 2. 185895 1. 44688 1. 270016 1. 222538 1. 711229 1. 450762  
1. 804992 2. 170415 2. 262651 4. 313474 1. 916112 1. 988819 1. 785605 1. 792034 3. 103681



4. 912356 5. 007655 5. 927782 4. 54394 5. 400094 4. 894065 3. 959185 4. 095505 5. 513187  
2. 629202 4. 707074 2. 214421 3. 059042 2. 424994 3. 369959 4. 54585 4. 354455 4. 873397  
1. 387394 1. 571137 1. 281939 1. 508398 1. 527887 2. 215603 1. 239209 0. 910705 1. 86755  
4. 217915 3. 736683 3. 773771 4. 051859 3. 240231 4. 10987 3. 246614 4. 349831 3. 999511  
1. 178497 1. 284534 1. 184596 1. 453315 1. 078548 1. 415642 1. 361876 1. 356249 1. 334929  
1. 605136 1. 414523 1. 507024 2. 269465 1. 351563 2. 308655 0. 972117 0. 964352 1. 209149  
1. 39146 1. 10481 1. 693948 2. 253013 1. 677554 1. 791899 1. 043075 0. 972398 1. 543226  
4. 549873 3. 759424 3. 739791 4. 198603 3. 903082 3. 904669 4. 215963 4. 486139 4. 222615  
2. 409179 2. 387896 3. 167379 2. 022709 2. 565935 0. 966912 2. 027048 1. 618111 3. 329378  
3. 234852 3. 637807 3. 042053 3. 650852 3. 332185 3. 391157 4. 110537 3. 174018 3. 461013  
1. 397494 1. 564783 1. 474351 1. 133946 1. 551938 1. 106607 1. 759878 1. 946979 1. 742437  
3. 193925 2. 867778 2. 43115 3. 589843 2. 276135 2. 576982 2. 469971 2. 773633 3. 402107  
4. 591752 3. 425176 3. 167399 2. 293874 4. 187524 2. 608951 4. 605494 2. 96493 3. 424518  
1. 539821 1. 58001 1. 740071 2. 820981 1. 861547 2. 183987 1. 750868 1. 543284 1. 680662  
1. 466964 1. 816856 1. 481356 2. 229532 2. 660763 2. 871766 1. 625522 2. 379633 1. 631765  
1. 511231 1. 198399 2. 150364 1. 30756 1. 439109 0. 476463 0. 696208 0. 774114 1. 108825  
1. 334135 1. 052107 0. 907199 2. 579326 1. 45891 1. 80608 0. 993795 1. 220822 1. 520031  
4. 488867 1. 673269 2. 357547 2. 319897 2. 198959 3. 552278 1. 975387 5. 750244 4. 120659  
5. 015378 3. 327345 3. 172629 2. 908085 2. 748928 1. 635162 0. 977416 1. 977184 2. 631258  
1. 401542 1. 625825 1. 209667 2. 574916 2. 00862 1. 898986 1. 726649 2. 08936 2. 293288  
1. 669953 2. 320409 2. 414579 2. 870928 1. 224014 2. 481406 2. 287068 1. 016089 2. 91618  
1. 974016 1. 730807 1. 825409 1. 88722 1. 882749 2. 036167 1. 645301 2. 138053 1. 585708  
2. 875894 3. 013098 2. 479478 2. 876467 2. 595499 2. 365291 2. 503146 2. 019772 3. 022367  
1. 615707 1. 713557 1. 56299 1. 689113 1. 570343 1. 542945 1. 842964 2. 169853 2. 086473  
1. 811977 1. 573416 3. 036695 2. 802309 3. 622608 3. 467636 2. 724082 3. 831085 1. 914315  
2. 724237 2. 602325 2. 180972 2. 01602 2. 260668 1. 851947 2. 723056 2. 262168 2. 545265  
1. 503369 2. 026426 2. 00849 2. 133975 2. 089101 2. 297114 1. 780452 1. 506931 3. 408567  
3. 017817 3. 21608 3. 254964 4. 385926 3. 468752 2. 635105 3. 759504 3. 273847 2. 579158  
0. 640432 0. 893915 1. 437075 1. 38895 1. 171991 1. 589251 1. 11523 1. 127314 1. 521058  
1. 050132 1. 888212 1. 446706 1. 748545 1. 044332 1. 245315 1. 119876 1. 714383 1. 783672  
2. 859863 2. 644678 3. 741221 4. 111701 4. 194154 2. 47841 3. 642462 2. 92838 6. 54965  
1. 007886 1. 250913 1. 307481 1. 42262 1. 526123 0. 998524 1. 413701 1. 38398 1. 559256  
3. 429114 2. 141877 2. 479213 3. 633759 2. 968773 3. 082571 3. 113882 1. 985713 3. 178114  
1. 897794 1. 815094 2. 045297 1. 858564 2. 122073 2. 202603 2. 006092 1. 964569 2. 096447  
1. 864179 1. 665404 1. 299771 1. 420086 1. 217126 1. 877637 1. 740642 1. 337138 1. 24339  
1. 597829 1. 431122 2. 28309 2. 29261 0. 931615 2. 371786 2. 267634 2. 189363 1. 307536  
2. 016964 2. 045921 2. 384907 2. 148158 2. 310678 1. 9483 2. 037903 1. 702727 1. 994759  
1. 353814 2. 263333 1. 515773 2. 789156 1. 84153 2. 701899 2. 106829 2. 570034 2. 439673  
1. 538422 1. 492051 1. 438319 1. 509256 1. 703852 1. 842908 1. 500949 1. 355355 2. 35749  
5. 601238 5. 980262 5. 354483 4. 574009 4. 736349 6. 503253 6. 112455 5. 918895 7. 366475  
4. 60959 4. 063424 4. 471754 3. 964449 3. 468493 4. 431231 3. 770415 4. 153852 4. 6639  
1. 850345 1. 482136 1. 467449 1. 393489 1. 133818 1. 863428 2. 047546 1. 760259 1. 800145  
2. 279052 2. 149442 2. 695799 1. 879252 2. 168385 4. 051903 4. 03653 4. 450782 5. 056338  
1. 869709 1. 257243 1. 795646 1. 568367 1. 218812 1. 561943 1. 315681 1. 015938 1. 807768  
1. 711537 1. 703235 1. 197389 2. 056269 1. 246912 1. 779339 1. 659127 2. 430733 2. 244067  
2. 1206 1. 752908 2. 407828 2. 573699 2. 054858 1. 714235 2. 210158 2. 210201 2. 022058  
2. 26763 4. 905722 2. 399637 4. 304302 4. 131428 3. 906748 3. 477387 3. 489763 2. 785311  
2. 965448 3. 248379 2. 881455 1. 800827 2. 768965 3. 250815 3. 098408 2. 609897 3. 441217  
1. 247443 1. 404118 2. 018515 1. 55202 2. 112554 1. 082205 1. 709734 1. 236959 2. 582849  
1. 776839 1. 528186 2. 109952 2. 561401 1. 778182 1. 731078 1. 662386 1. 553306 2. 845979  
1. 177343 1. 220108 1. 356205 1. 962236 1. 369953 1. 102178 1. 094052 1. 167704 1. 67425

2. 85932 3. 323971 2. 82477 3. 351539 2. 016602 2. 153425 2. 175114 3. 06871 3. 310219  
2. 832564 2. 368946 2. 750634 2. 817377 2. 809479 3. 465317 3. 572418 3. 452459 3. 8529  
0. 913959 1. 268618 1. 291502 1. 627785 1. 263453 1. 394924 1. 036885 0. 96486 1. 12307  
2. 319719 1. 925765 2. 196266 3. 616855 1. 509785 2. 734581 3. 749026 2. 075158 1. 071906  
5. 120412 5. 279426 4. 266129 2. 839357 3. 890162 4. 096438 3. 589963 4. 49786 3. 55813  
1. 047974 1. 633068 1. 840987 1. 383738 1. 265635 2. 449035 1. 488634 1. 618123 1. 532652  
2. 048696 1. 406487 2. 359734 1. 224504 1. 252922 1. 309742 1. 546701 0. 867861 2. 243028  
1. 871588 2. 24147 2. 877909 1. 995698 2. 585297 2. 191303 2. 266542 2. 191467 1. 51731  
1. 600215 1. 031225 2. 919666 2. 862597 1. 587356 2. 333721 2. 856388 3. 031666 2. 354926  
1. 603574 1. 778723 1. 479852 0. 909781 1. 836509 1. 567498 1. 237534 1. 693425 2. 12215  
3. 536824 4. 506873 1. 338766 3. 672286 4. 255415 1. 813155 2. 525792 2. 843978 3. 996908  
1. 759589 1. 112603 1. 56085 1. 509851 1. 58277 1. 635192 1. 218172 1. 292417 1. 296736  
2. 934148 2. 170089 2. 602621 2. 411299 1. 853926 3. 993737 2. 292496 2. 905427 3. 277731  
1. 163749 0. 939033 1. 576628 0. 876517 1. 091371 2. 035199 1. 353028 0. 649584 0. 90775  
1. 325238 1. 609121 1. 497233 0. 784763 1. 176049 2. 073739 1. 198018 1. 410257 1. 07383  
1. 20645 1. 205141 1. 670533 1. 669009 1. 340395 1. 049837 1. 39437 1. 143591 1. 075417  
1. 893372 1. 33237 1. 32145 2. 061324 2. 314438 3. 456389 2. 252308 1. 21147 1. 393922  
6. 217603 5. 6278 6. 086234 6. 046503 5. 51289 5. 366899 5. 606867 5. 766402 6. 695288  
2. 622112 1. 876143 2. 113322 1. 735842 2. 144767 2. 506297 2. 447215 1. 826856 2. 392263  
0. 644218 0. 933265 0. 859113 1. 428095 0. 644716 1. 404279 0. 870888 0. 873923 0. 524192  
1. 187953 1. 283524 1. 499174 1. 709735 0. 979592 1. 120311 1. 686264 1. 010476 1. 292681  
1. 721169 2. 024051 1. 862137 3. 38847 0. 986274 1. 940934 1. 412466 1. 161564 3. 767509  
1. 659028 1. 37011 1. 176977 2. 065782 1. 364321 1. 509826 1. 325723 1. 41062 1. 885093  
7. 458656 7. 013552 6. 755808 5. 40939 7. 167122 7. 719984 6. 931699 7. 38835 7. 812903  
1. 572192 1. 270899 2. 286339 1. 833116 1. 878218 2. 417785 1. 713861 1. 54556 2. 886211  
0. 906078 1. 859552 1. 601728 2. 179906 1. 885951 2. 332466 1. 600749 1. 459923 1. 117123  
1. 699246 1. 634866 2. 179109 1. 633426 1. 127555 1. 599557 1. 505607 1. 470543 1. 601891  
2. 312185 2. 163697 1. 785814 2. 730144 3. 479501 3. 070073 3. 312292 2. 990486 1. 583743  
1. 394328 1. 260528 1. 834342 1. 469501 1. 54633 1. 114854 1. 063585 1. 099874 1. 568963  
3. 78272 4. 426111 2. 843976 3. 365408 3. 580435 3. 236666 3. 461752 4. 16538 4. 018917  
1. 560158 1. 86386 1. 334418 2. 164975 1. 373286 2. 28887 1. 538227 1. 588308 2. 012655  
0. 643096 0. 888265 1. 662046 1. 461891 0. 983907 1. 15352 1. 194493 1. 112817 1. 496042  
1. 762954 1. 519767 1. 567837 2. 032082 1. 577386 1. 437153 1. 38873 1. 496479 1. 242621  
4. 948371 3. 807674 3. 452931 4. 636836 4. 494063 4. 832586 4. 249346 4. 221918 4. 543523  
2. 763724 2. 993302 3. 0157 3. 005317 2. 790367 2. 790522 2. 580991 2. 925442 2. 966457  
5. 764311 5. 362957 5. 362957 5. 790954 6. 352083 4. 930446 4. 33599 6. 446082 5. 464081  
3. 81075 3. 835704 3. 118654 5. 209396 2. 367711 3. 575926 3. 087216 3. 569351 4. 629187  
3. 373269 2. 755209 3. 540221 3. 037292 3. 393283 2. 521939 2. 766415 3. 188808 5. 425485  
1. 162499 1. 390195 1. 5712 1. 486106 1. 723593 1. 202386 0. 995312 1. 177441 2. 040973  
7. 104163 7. 004532 8. 364947 6. 562527 6. 043675 6. 911822 8. 324935 7. 829267 7. 43337  
4. 857227 4. 798539 4. 697091 3. 750587 4. 194413 5. 220652 4. 704985 4. 915195 7. 387158  
4. 742648 4. 271956 3. 803279 5. 058512 4. 239407 3. 037626 4. 670531 5. 147834 4. 938459  
1. 761389 2. 001571 2. 937449 2. 045981 2. 080691 2. 961636 2. 609034 2. 700048 4. 138609  
5. 303221 5. 38443 6. 010201 5. 428849 5. 877862 5. 548912 5. 055728 5. 41794 5. 195239  
1. 019337 1. 404047 1. 077677 3. 437794 1. 400878 2. 820496 1. 925243 1. 108957 2. 285106  
1. 241918 1. 791244 1. 516929 1. 470512 1. 280211 2. 044938 1. 368772 1. 858334 1. 115332  
1. 360786 1. 371839 1. 334451 1. 954796 1. 852618 1. 437659 1. 68752 1. 297229 1. 176522  
3. 608385 3. 606471 3. 661987 3. 603035 2. 862949 4. 061109 3. 777123 3. 885541 3. 335586  
4. 084374 4. 37188 4. 756693 4. 569271 4. 409163 4. 261219 4. 132267 4. 366395 3. 751903  
1. 637566 3. 304678 3. 227412 1. 350865 3. 095078 1. 38702 2. 294308 1. 610788 2. 665785  
0. 993966 1. 000927 0. 90781 1. 436029 1. 007075 1. 430698 1. 158096 1. 520597 1. 01696

1. 381702 2. 317064 1. 526792 1. 542606 1. 358297 1. 643203 1. 493951 1. 483848 1. 504879  
4. 976984 4. 553708 3. 3476 3. 594227 4. 889196 4. 657935 3. 140403 3. 886688 6. 426454  
4. 154389 4. 706741 4. 979153 3. 327053 4. 758353 5. 193827 4. 057667 5. 099771 3. 730472  
1. 793262 1. 162622 1. 182226 2. 264412 1. 565554 1. 723174 1. 321647 1. 008853 1. 58393  
1. 37394 1. 685143 1. 845693 1. 781164 1. 342131 1. 468159 1. 339991 0. 959588 2. 999568  
1. 199506 1. 151709 1. 073199 1. 166438 1. 183066 1. 295417 1. 336676 0. 984087 1. 192724  
2. 564673 5. 188589 1. 341138 4. 096099 5. 599017 5. 296763 1. 044329 1. 585945 4. 997083  
2. 212205 1. 734542 1. 909247 1. 858941 1. 716495 1. 95496 1. 857209 1. 536176 1. 810011  
2. 084768 1. 857315 1. 787059 2. 964972 1. 905365 2. 62541 1. 810523 2. 416993 2. 388353  
1. 561665 1. 037542 1. 360114 1. 309836 0. 999954 1. 372462 1. 327908 1. 391614 1. 291795  
3. 145134 2. 76358 2. 152975 2. 098553 3. 389938 2. 804587 2. 284346 2. 887629 2. 499557  
1. 851471 4. 644264 3. 234931 1. 369976 1. 611691 3. 282585 3. 881525 3. 31502 3. 924371  
1. 659599 2. 429722 3. 525881 2. 315663 1. 850977 1. 748894 1. 009197 3. 42904 2. 098836  
2. 611342 1. 88019 3. 454606 1. 994805 2. 048925 1. 85294 1. 643807 1. 885666 1. 505706  
1. 469799 1. 474724 1. 173355 1. 726405 1. 271364 1. 59333 1. 950534 1. 337636 1. 620488  
3. 641882 1. 957127 2. 102856 2. 654167 2. 337277 2. 292111 3. 013795 2. 302893 2. 112485  
2. 392545 2. 465146 1. 910785 2. 176236 2. 87451 2. 390435 1. 685835 1. 959851 2. 027212  
2. 446597 4. 246942 2. 665066 3. 674803 3. 75126 3. 15099 3. 443074 2. 756278 2. 70755  
1. 726317 1. 196425 1. 864914 1. 704319 1. 643197 1. 17017 1. 458425 1. 459077 2. 49795  
2. 138993 3. 394832 2. 118681 2. 986269 2. 359007 3. 075887 4. 58419 3. 407915 2. 73989  
1. 314433 1. 04108 0. 991217 1. 829867 1. 809754 1. 201717 1. 124334 0. 55466 0. 812818  
2. 298475 2. 204126 2. 230269 2. 563011 1. 999611 2. 26968 1. 796163 2. 279806 2. 353539  
1. 802152 1. 545772 1. 97615 1. 662678 1. 623098 1. 130867 1. 576448 1. 267123 1. 859056  
2. 442294 1. 915869 1. 472452 3. 068084 1. 658364 2. 124653 2. 572624 1. 302153 2. 331285  
4. 654707 5. 60049 5. 671563 5. 851832 5. 587172 5. 061219 5. 350557 5. 621748 3. 84275  
3. 288139 3. 086249 3. 74893 2. 865318 3. 65622 2. 728362 2. 421674 3. 201754 2. 770714  
1. 941246 1. 918077 1. 799464 2. 05469 1. 832182 1. 336771 1. 722151 1. 951783 2. 240358  
2. 579564 3. 661412 4. 2334 3. 218002 2. 703537 3. 832086 3. 867906 3. 467388 3. 283718  
4. 093981 3. 385024 4. 270972 2. 253685 5. 28711 5. 331203 4. 338472 4. 376584 3. 685008  
2. 02499 1. 140534 1. 670585 1. 888363 1. 380646 3. 106806 1. 375723 1. 854033 1. 49462  
1. 110404 0. 700831 0. 935399 0. 915981 1. 051756 1. 381933 0. 866279 1. 093021 0. 930552  
2. 756256 3. 358049 2. 336079 2. 093281 2. 93066 1. 395338 2. 977753 3. 097902 4. 354514  
5. 095121 5. 239161 4. 963842 5. 18697 6. 081722 4. 712593 5. 061802 5. 184594 4. 111375  
1. 108755 1. 090463 1. 214031 1. 187696 1. 329999 1. 072319 1. 089355 1. 038408 1. 334872  
1. 258177 1. 60205 2. 713871 2. 967271 1. 318654 1. 425138 2. 655404 1. 287741 1. 180781  
1. 677342 1. 418609 2. 218694 3. 041318 2. 54998 1. 871618 2. 24152 2. 358106 1. 642644  
1. 919323 1. 503486 1. 735865 2. 350932 1. 237913 2. 029799 1. 737708 1. 322072 2. 523181  
2. 30474 2. 350188 1. 138069 2. 549392 1. 347351 2. 503568 2. 01005 2. 330039 2. 590413  
4. 099319 3. 602817 3. 658754 1. 496635 3. 993791 4. 007294 1. 357559 2. 184456 2. 13499  
0. 995519 0. 899934 1. 179838 1. 266223 1. 024258 0. 859087 0. 691256 0. 857384 0. 963547  
0. 757224 1. 270083 1. 101203 1. 488021 1. 347238 2. 070544 1. 392618 1. 169191 1. 124529  
1. 339675 1. 871698 1. 354365 1. 304452 2. 405073 1. 953012 1. 371207 2. 147173 2. 802376  
1. 196903 1. 569332 1. 697583 1. 92817 1. 565842 2. 851993 1. 495796 1. 753709 1. 78818  
3. 236975 2. 819208 2. 856619 2. 460882 3. 126149 3. 497377 3. 253546 2. 811674 4. 530331  
1. 781861 1. 608792 1. 730256 0. 764973 1. 111467 1. 821909 1. 371162 1. 364956 0. 981083  
2. 353711 2. 882586 2. 598626 1. 681462 2. 241065 2. 249739 2. 038572 2. 376006 2. 791371  
1. 215786 1. 474853 1. 426797 1. 208353 1. 111924 1. 363329 1. 334733 0. 887575 1. 082381  
4. 074423 2. 93164 2. 269684 3. 545935 3. 422409 2. 734078 3. 437799 2. 817951 2. 936015  
1. 259695 1. 12368 1. 534872 2. 604358 1. 071899 1. 081319 1. 450629 1. 21683 2. 662697  
2. 96607 3. 50911 3. 563761 2. 014594 2. 328713 2. 603236 2. 35641 2. 487312 4. 14705  
1. 786144 1. 748014 2. 023642 2. 013859 1. 916951 1. 765886 2. 627197 1. 698348 2. 002235

3.259533 3.129957 2.504021 6.931548 4.010567 3.787821 4.462001 3.65057 4.897163  
0.976336 0.946799 1.12954 2.341058 1.242672 1.171191 1.044572 1.257369 0.940237  
0.694373 1.446718 1.369114 0.988939 1.417877 0.988109 0.903701 0.728593 1.043584  
2.270773 2.040391 2.858331 1.585083 2.271669 1.73332 3.144345 1.674512 2.479236  
1.95779 1.60079 1.90831 2.706007 1.953862 2.199103 1.872402 2.368788 1.923588  
1.483937 2.406601 1.487929 2.28485 1.37303 1.781499 1.643629 1.316462 1.342999  
2.902675 1.979165 1.472026 2.877914 2.172446 1.503578 1.766596 3.208872 3.598669  
2.743701 1.453392 1.323345 2.942696 3.901455 0.707845 3.35805 3.182294 1.942155  
4.117263 3.213324 3.832241 3.727574 3.639945 4.669667 3.31922 3.695886 3.367934  
2.905372 1.438585 2.382949 1.681631 2.632765 1.927559 2.196053 2.236753 4.251054  
1.161048 2.48962 2.454534 1.935528 2.411525 2.193945 2.071888 2.450657 2.470864  
3.51076 3.847643 3.074779 3.127067 2.806312 3.390929 2.909843 3.489812 3.813948  
1.86117 1.991435 1.048402 2.750706 2.27131 1.35876 2.800813 0.749805 1.092195  
1.685493 0.862532 2.812173 2.170739 1.633772 1.118946 1.075552 1.272397 2.553328  
3.951739 5.255509 3.659837 4.451321 4.15792 3.397735 2.866112 4.638604 4.152153  
4.860833 4.460628 5.23805 4.028711 4.88736 4.322082 5.456224 5.728208 4.087058  
4.490766 5.38102 5.117232 5.195983 5.030699 4.907827 5.9414 5.242727 6.063387  
1.539074 1.698939 1.6539 1.327757 2.516399 1.170743 1.158175 1.434892 1.334211  
1.500185 1.52112 2.942293 2.692023 1.976506 2.943679 1.856337 1.744622 2.417791  
3.371088 3.285451 3.302429 3.230095 2.267267 3.038944 2.805142 3.493968 3.624168  
1.207196 1.076051 1.449054 1.509459 1.490737 1.919276 1.146979 1.295395 1.046306  
3.410408 3.586618 3.618194 1.70501 2.150159 2.775012 4.739067 3.596881 3.613567  
1.167289 1.290543 1.154543 1.37315 1.055905 1.781932 1.309872 1.348421 1.946218  
5.208173 6.189863 4.401346 6.585722 5.194287 6.232359 5.279277 5.284985 4.718353  
1.682991 1.777434 1.734619 2.370473 1.842565 2.055228 1.926261 1.699115 1.678661  
2.452531 2.237123 3.307472 3.334992 2.349803 2.09716 2.243654 2.37146 3.766152  
2.168514 2.064266 2.106569 2.100538 2.138373 2.138935 1.915763 1.58499 2.244069  
1.772458 2.130124 0.955674 1.977256 1.388389 1.784188 1.12977 1.15977 0.887739  
3.684069 2.888986 3.611657 3.958053 3.294046 3.759945 2.587066 3.237696 3.76036  
2.751365 2.706738 2.967014 2.869767 3.126716 3.965681 2.579219 3.248291 4.006541  
2.672309 2.998448 1.702123 1.23653 3.511541 3.071004 3.648076 2.189505 4.72842  
2.574146 1.262954 3.511849 2.305711 1.657053 1.766819 1.71512 2.938505 1.895552  
2.431989 1.898306 2.547402 2.281568 1.688174 3.432843 2.229306 2.454092 3.588623  
1.822932 1.861277 1.468763 1.094305 1.23263 1.814582 1.365555 1.676891 2.609194  
1.713838 1.717966 1.898061 1.907262 1.58213 2.325208 1.743662 1.654786 1.546956  
1.340089 1.050144 1.182813 1.351797 1.809239 2.05565 1.113138 0.885276 1.263541  
0.950371 1.662606 0.835528 1.101167 1.327296 1.52073 0.923208 0.969598 1.971615  
4.291363 3.339533 3.023341 3.300036 3.736357 2.444846 3.735149 3.676267 3.527334  
1.714687 0.882501 2.002145 1.824304 1.784046 1.6991 1.409996 1.545947 1.298419  
2.440451 2.107181 2.191173 2.861845 2.008808 2.812174 2.328633 2.615816 2.240653  
3.770917 1.992117 2.863871 3.1923 2.34959 1.439209 2.641464 4.247187 4.494862  
1.267039 1.76481 1.561348 1.683635 2.171361 2.231301 1.325363 1.331016 0.775471  
4.095058 3.351554 3.062489 2.424339 2.721461 3.688336 3.800198 3.537707 4.297048  
1.415476 1.026704 1.144903 2.049709 1.934468 1.348909 1.704529 1.777451 1.708548  
1.606701 1.329079 1.167299 2.963753 1.322451 1.464158 1.718833 1.580206 1.344758  
1.267382 1.683334 3.197187 1.315076 2.310908 1.937085 1.35512 1.492044 1.541983  
1.315461 1.772277 1.590327 1.891073 1.272574 1.746793 1.99776 2.792899 2.198169  
5.702144 6.353226 5.993167 5.836455 6.693273 6.20806 6.789717 6.339335 5.556367  
3.494495 2.932285 3.500423 4.839368 2.046312 3.478984 3.69628 2.656365 3.189146  
4.349367 2.567792 3.950575 5.812829 3.227461 3.805006 3.611719 4.484822 5.203035  
2.150796 2.851426 4.347955 2.524709 1.309326 1.921918 2.263177 3.524313 4.222729

2.083322 2.124458 1.939203 1.532895 3.545977 2.677553 1.140141 1.955003 1.993336  
2.151562 1.603537 2.568881 3.471302 1.426417 3.311885 2.963493 4.315593 3.794495  
3.017181 2.984644 3.258835 4.009561 3.972004 3.467799 3.893668 3.466175 2.46197  
1.430497 3.289759 1.83737 2.896569 2.538523 4.213478 1.105766 1.691917 3.710366  
1.726437 1.720882 2.049527 1.924193 2.094386 2.269444 2.035879 2.519554 2.226981  
1.605114 1.482187 1.136753 1.449921 1.091876 1.233084 1.744882 1.054098 1.178614  
2.887786 2.705074 3.231871 3.758408 1.756394 2.095547 3.426416 2.971188 2.792272  
1.519938 0.525927 2.267052 0.453822 1.066527 2.309081 0.784313 1.722761 2.364144  
2.638138 3.027452 2.170964 2.073658 3.341744 3.013481 1.887031 2.350691 4.894493  
3.071434 2.834081 3.458925 2.535839 2.883673 3.507961 3.687876 3.062033 3.073567  
7.055434 7.384943 7.429036 6.100829 7.079874 7.214998 6.776022 7.26713 6.865244  
1.2897 2.716152 1.453745 1.89977 1.842848 1.459621 1.19883 1.685963 1.272386  
3.404035 2.635842 2.590488 2.804985 2.879148 2.408046 3.211993 2.805938 2.623552  
6.665197 6.434169 6.124303 5.11591 6.568725 5.961947 6.620248 6.740275 6.541992  
3.241683 3.870585 3.317216 3.200577 2.572086 2.694733 2.960027 2.901074 3.363989  
3.762813 2.632592 3.623852 3.599485 3.746056 3.060619 2.919558 4.097119 2.36085  
6.787021 6.868158 6.937249 6.700942 6.179683 6.277535 7.274096 6.651393 7.160196  
1.559179 1.617558 1.58204 1.875078 1.461487 1.594525 1.373288 1.672772 1.723125  
1.981546 1.274486 2.061094 4.083558 2.009988 1.42792 2.243402 4.063172 2.195953  
0.954201 0.891302 1.100751 1.713075 0.793067 1.093409 1.08279 0.828856 1.09722  
1.611569 1.898564 2.228883 1.933285 1.838639 2.187849 2.038573 2.171406 1.656433  
2.342293 1.878549 1.694458 2.869895 1.745253 1.496911 2.531096 3.030134 2.05531  
0.808452 0.769527 0.884274 0.744751 0.762408 0.916391 1.105895 0.86624 0.7466  
1.765971 1.950341 1.17276 1.579851 1.723986 2.294647 1.61312 0.810536 2.473283  
1.35899 0.989034 0.979383 1.991401 0.965837 1.714965 4.971982 1.149057 0.727789  
1.893795 1.331655 1.828966 1.719203 1.614849 1.224925 1.606047 1.210256 2.733039  
2.118441 2.182964 2.975294 2.946623 2.052751 1.035548 2.429516 2.381924 2.470164  
1.823923 1.868947 2.566776 3.373668 2.136639 1.815346 1.848929 3.030254 2.880123  
2.979505 3.085094 2.193558 2.796768 3.338449 2.596963 2.718934 2.075865 2.667368  
0.617814 1.019529 0.815792 1.63448 1.479706 1.581112 0.799244 0.325481 0.551223  
3.340463 2.42308 4.334295 2.694341 2.951455 2.112523 1.553576 2.810243 2.800237  
3.695905 4.678267 3.587201 5.022698 3.817372 3.841458 3.854845 3.702184 4.360737  
0.687829 1.124325 0.710371 0.911974 0.81094 0.86073 1.873456 0.651282 1.081981  
0.911292 1.166672 1.937088 1.955533 0.774564 1.118151 1.122681 1.11124 0.989868  
4.623378 4.238094 4.567345 4.908496 4.219522 4.209109 4.58341 4.507476 4.420935  
1.095075 0.811015 1.341616 1.331703 0.933384 0.891787 1.136832 0.679106 0.937915  
1.737444 1.925044 1.721657 3.51872 0.699421 1.92221 1.075967 1.202318 2.766209  
3.534021 3.954956 4.078775 4.765562 3.332011 3.412791 3.584092 3.987477 2.301643  
1.219647 0.735521 1.4036 0.910002 0.706818 1.323931 0.817505 0.746439 0.955787  
1.040297 0.804319 0.842913 0.981421 1.120082 1.379942 2.299406 1.022624 0.925424  
0.91123 1.724026 1.557265 1.086352 1.228518 1.5179 0.619764 1.210623 1.017721  
1.215187 1.261954 1.953516 0.951023 1.07956 2.014588 1.868346 1.229042 1.481925  
0.836993 0.857205 0.647048 1.429572 0.717121 1.37636 1.217195 1.139971 0.884378  
2.171413 2.362101 1.971817 2.531321 1.23032 2.934509 1.377484 1.462993 2.324558  
1.342204 1.356045 0.810511 1.950155 1.356244 1.223954 1.939899 1.628002 1.228104  
1.770224 1.874703 1.873957 2.090575 1.746561 1.588337 1.989429 2.262495 1.728799  
1.696153 1.350223 2.569257 1.612643 1.758471 1.413773 1.388041 1.419012 1.795837  
1.805258 3.414831 3.552787 2.38523 2.287716 1.976106 3.347906 3.110723 3.141808  
1.069156 1.473786 0.802956 1.094828 1.3139 1.164014 1.408907 0.757323 0.73041  
2.148332 2.19747 3.526584 2.836991 2.459238 3.61832 3.022781 2.805379 1.233613  
1.024926 1.097959 1.204163 2.04714 1.388375 1.304675 0.843145 0.862911 0.941359

0.728658 1.537919 1.578601 0.94903 0.768934 0.92322 0.923618 1.057972 2.704026  
4.399269 4.096649 3.892128 6.348109 3.553697 2.409636 4.548554 4.564916 4.662628  
1.567051 2.082027 2.078644 2.594617 1.634771 2.120631 2.415307 1.515142 2.361661  
2.15732 2.22169 1.579117 4.234022 2.22738 1.54287 2.547773 1.706335 1.783823  
0.569571 2.147535 1.796398 0.620512 0.663319 1.506142 0.677282 1.885499 0.719118  
1.091881 0.727555 0.883147 0.970518 0.652031 0.928341 1.483117 0.827847 1.146599  
0.917306 0.863346 0.857036 0.971268 1.122042 1.10137 0.671312 0.66632 0.902471  
0.798896 0.805647 0.870144 0.984354 0.912011 1.638339 0.523771 0.43984 0.871218  
2.372031 2.075346 1.668608 2.479584 2.182258 2.311672 1.138616 1.382412 2.339061  
1.672008 1.713002 1.316515 1.663208 1.764084 1.707178 1.784965 1.899107 1.672345  
5.831569 6.300293 6.002065 7.581736 5.878349 5.980914 6.114439 5.801278 5.635445  
1.832995 2.131793 0.831685 0.942747 0.930677 1.635826 1.088568 1.575122 2.051083  
0.939363 0.86899 0.515044 0.96412 0.823425 0.885941 0.96412 0.826171 0.802957  
2.001932 1.678422 2.805186 3.02806 1.819467 2.293407 1.541184 2.201612 2.514454  
0.928281 0.941494 1.084576 1.52941 1.623526 2.186795 0.986698 1.340883 1.354966  
1.685314 2.089462 1.371758 1.818313 1.361774 1.578271 1.199218 1.599151 1.669091  
1.818589 2.839762 1.646266 1.785438 3.211682 3.441364 1.866134 1.278405 1.745268  
0.753194 0.956251 1.068614 0.943989 0.515013 0.989266 0.858731 0.920727 0.9126  
2.792083 2.124071 3.938257 2.371728 0.89168 1.448969 2.990296 1.746679 1.949057  
2.88444 2.509886 1.702301 2.940538 2.305441 2.339579 1.581951 2.034414 2.985823  
2.179102 2.258075 0.703768 0.688791 0.524712 1.167723 0.674015 0.687217 1.170262  
2.020524 2.679162 2.161209 2.584236 1.840167 2.808516 2.267741 1.426343 3.37433  
1.122877 1.12039 1.584264 3.370939 1.906445 0.954053 1.47041 1.417493 0.845613  
2.189807 1.384818 1.411649 0.994172 0.704965 2.768763 0.935904 0.874773 0.660282  
1.485566 1.41552 1.923945 2.51615 1.370658 2.03676 1.430392 1.461164 3.576306  
5.766161 4.992933 5.442311 5.818161 6.176056 4.971257 5.71549 5.437179 7.498735  
0.57969 0.660034 0.453785 1.472231 1.006766 0.690373 1.472231 0.983691 0.844015  
1.185674 1.178014 1.364882 2.59891 1.44742 1.001287 1.5821 0.806347 1.127178  
1.765518 1.481965 1.895835 1.138557 0.902353 1.844784 1.275825 1.303406 1.168465  
0.56206 1.797762 0.8074 0.542904 0.530953 1.054388 1.065733 1.538984 1.059359  
1.286068 1.168766 0.807736 1.094674 1.175963 1.04863 1.035666 1.162723 1.339027  
9.541648 8.577039 9.504301 8.81264 8.024223 8.850001 9.680916 8.624649 9.713844  
2.75119 2.150833 2.980032 5.298325 2.642582 2.689536 3.286748 3.310902 4.193824  
2.465243 2.929843 1.542344 1.909273 1.918544 1.166015 2.274197 1.310728 2.017039  
2.97127 2.326829 0.712605 2.603007 0.946773 1.50239 2.372061 1.89664 1.197126  
1.229385 1.703698 3.884749 2.705103 0.424073 0.593542 2.443316 3.431406 1.800263  
0.574956 0.651337 0.78346 1.040056 0.507373 1.602099 1.007687 1.52996 0.658605  
3.666329 3.058271 3.085515 1.489126 1.670341 3.088383 3.268303 1.480659 3.547738  
1.567085 1.221288 0.919896 2.431671 1.089333 1.061673 1.283933 1.675046 1.15611  
0.440585 0.842287 0.848551 1.447501 0.949856 1.025923 0.800046 0.62496 0.699936  
0.958232 0.627136 0.610666 1.588391 1.102693 1.020894 1.593087 1.058682 0.709375  
4.821087 3.7964 5.033423 5.288439 4.102772 3.986263 4.397581 3.812791 4.146275  
2.014282 3.190598 2.081108 1.804881 0.839767 1.189442 1.837655 1.149236 2.635476  
3.794865 1.576663 2.313683 2.072187 2.150369 1.806226 2.432588 1.750123 2.503728  
1.292273 1.223518 1.408298 1.664054 1.157135 1.641682 1.471508 1.146065 1.246432  
1.616366 2.095536 2.061173 2.298542 1.80589 2.985487 2.298542 1.564641 2.417383  
6.84491 5.652452 6.825726 7.528444 5.349342 5.928659 6.477513 5.573386 7.118537  
0.825901 1.439925 0.801622 1.528525 0.876457 2.931737 0.837345 0.817199 1.139752  
2.250872 1.667727 2.249136 1.931091 2.283001 1.960627 3.121923 2.266831 2.500836  
1.352989 1.796493 1.69655 1.973172 1.186682 1.747691 1.213088 1.24736 1.083805  
1.201178 0.943254 1.021217 1.808373 0.971848 1.637592 1.123196 1.066655 0.817455

0.51816 0.533132 1.02604 0.766104 0.50085 0.523762 0.78673 0.667315 2.125631  
1.848638 1.253582 2.111379 3.145205 1.381063 0.815328 1.586763 1.392171 2.342399  
4.193833 2.963871 4.579691 5.144937 4.823425 2.854125 3.175171 4.479242 3.177715  
0.740705 1.581063 1.256128 1.224938 0.684538 2.354895 2.175812 0.990908 1.609372  
1.081096 1.076716 1.091261 0.93713 0.978176 1.110347 0.841173 1.484098 0.796647  
0.789811 2.029386 1.555231 1.420425 1.234263 2.105972 1.171289 1.395543 1.377471  
2.14586 1.720773 1.193594 3.197281 2.124692 1.626178 1.739422 1.591683 2.499165  
2.807165 4.302548 4.072073 3.554059 3.319482 4.424295 3.250514 3.910556 3.865513  
0.879943 1.26511 1.063444 1.459886 0.960443 1.25596 1.235118 0.938845 1.126329  
1.78206 2.756315 1.121991 2.015303 1.727892 1.807735 2.672053 1.490879 2.455408  
0.8178 1.064646 0.967233 0.936227 0.869702 0.832888 0.745527 0.798878 1.059429  
1.292044 0.707427 0.663553 0.557181 0.881297 0.860558 1.026359 0.884033 1.633578  
1.373644 1.081788 1.026694 1.084709 0.8683 1.593224 1.023947 1.422306 4.392721  
2.505117 3.409266 5.322155 4.65753 2.437536 3.688774 3.418956 3.827961 5.252921  
3.574974 1.896848 3.637206 3.515728 3.700802 3.075215 3.725658 2.324249 3.169673  
1.188938 0.781737 1.17556 1.480375 0.910305 0.93358 0.88776 0.754631 1.373565  
1.30948 1.195323 0.956566 1.291279 0.997722 1.062232 0.824155 1.214106 0.991706  
0.831797 0.868399 0.995032 0.953942 0.908308 1.225077 1.395498 1.151348 0.816555  
2.276102 1.788688 2.155413 1.693578 2.802066 2.283522 1.906115 2.866684 2.000478  
1.415017 1.12794 1.224895 1.259313 1.167237 1.689365 1.201531 2.094161 1.295857  
0.984029 2.200228 1.249898 1.375083 0.964377 1.591404 1.279811 1.20878 1.077611  
0.984621 0.569013 0.617297 1.476151 0.775785 1.566955 1.37166 0.555843 1.2287  
2.886375 2.817883 3.121222 3.055195 2.617151 3.100431 2.778251 2.64981 2.912218  
1.013377 1.399421 1.455909 1.187556 1.444501 2.088089 1.23226 1.24178 1.313152  
0.953761 0.612733 0.902949 0.947449 0.821878 0.986165 0.946803 1.034231 0.906819  
4.535253 3.400079 3.448168 4.703217 2.874903 1.414946 4.258367 3.462007 3.414146  
1.607303 1.459483 2.013087 1.997498 0.869264 1.166667 0.984346 2.022187 2.034762  
1.442163 1.168766 1.578789 2.348046 0.936207 1.389579 0.802428 1.901865 1.311353  
1.426076 1.074935 1.05944 1.082414 0.722029 2.130824 0.793182 1.688748 2.01667  
1.607703 1.594056 2.470006 2.993551 1.730455 1.677823 1.60677 1.938392 2.228635  
0.829448 0.90351 0.863966 0.61678 1.286827 1.069647 0.564094 0.677584 0.697972  
1.003834 0.952195 0.625134 1.317474 0.662303 1.232818 0.9696 2.666061 1.225944  
4.33495 3.706656 5.219855 5.759266 3.817463 3.7418 4.80364 4.209789 4.562632  
0.700419 1.50548 1.033282 2.046107 0.876549 2.326946 1.27081 0.651102 0.651505  
0.96913 0.603141 1.092043 1.404974 0.994933 1.300919 0.864226 0.872562 2.038447  
0.727202 0.727202 0.609485 0.668859 0.672516 0.808565 0.550848 1.868092 0.968325  
0.945512 0.907615 0.785151 1.346802 0.500062 0.867041 0.77474 1.250399 1.114551  
0.510936 0.941124 1.113502 1.23058 0.755296 1.458121 1.201631 1.204185 1.116659  
1.089948 1.606828 1.397381 2.129777 1.185161 0.892729 2.100716 1.061347 0.867224  
0.932299 1.083981 0.821924 1.016298 0.892107 1.254999 0.781255 1.237087 1.027726  
1.19974 1.037069 0.992584 1.860907 2.422425 1.332261 1.631686 3.009217 0.967944  
0.990284 1.376252 1.270706 1.42569 1.379082 1.535546 1.012328 0.99403 1.166362  
2.009421 0.970359 1.226986 0.930697 0.919715 0.81935 1.083203 1.161159 0.627164  
2.695449 3.910436 4.280321 4.024825 2.490256 1.627726 3.697943 3.424429 4.330295  
3.870581 3.444825 3.484254 4.432943 4.175516 3.67154 3.812729 2.562338 3.338459  
1.109557 1.231931 0.957537 0.850361 1.24975 0.97313 0.821038 0.813157 1.253026  
0.599624 0.639527 0.673887 1.506428 0.881079 0.842165 0.967201 1.176776 1.683381  
0.602334 0.728233 0.821204 0.741792 0.830779 2.157579 0.71237 1.014798 1.024334  
3.149979 4.247506 1.990691 1.68769 2.94129 2.398293 3.811979 1.22467 0.744822  
2.037799 1.694004 1.33782 2.082698 0.913837 1.277401 1.604423 1.579619 1.150639  
0.98253 1.834909 1.459241 2.007175 1.309236 1.888212 1.236574 0.971404 1.690793

1. 416949 1. 186292 1. 03132 3. 073584 1. 345925 1. 447747 1. 779408 1. 413969 1. 062239  
0. 963456 0. 884623 0. 990316 1. 611431 0. 902431 1. 13363 1. 292667 1. 185183 1. 262102  
0. 645722 1. 668736 1. 331294 2. 595655 0. 977809 1. 265832 2. 549742 1. 265832 1. 136059  
1. 256509 0. 833757 1. 234084 1. 32315 1. 535017 1. 652247 0. 797835 1. 556098 0. 839276  
0. 648549 1. 164914 1. 002325 0. 881757 0. 540797 1. 445785 1. 050045 0. 882825 1. 656081  
0. 814208 0. 777796 0. 716406 1. 028594 1. 088253 0. 550144 0. 984044 0. 758454 0. 6278  
1. 371221 1. 014587 1. 528704 1. 886853 0. 922869 1. 111478 1. 376379 1. 477674 1. 775133  
0. 710682 0. 874181 0. 902403 1. 164441 1. 136616 0. 900694 5. 337608 1. 190029 1. 23501  
2. 252152 2. 216322 2. 581786 2. 706785 1. 977295 2. 173467 1. 990484 2. 240625 3. 046817  
3. 802353 1. 558101 1. 553283 1. 921439 1. 231872 1. 973672 1. 552172 4. 058268 1. 832678  
0. 763393 1. 07727 0. 829025 1. 355671 1. 047454 0. 667067 0. 821927 1. 054771 1. 104434  
1. 023174 0. 84947 1. 065014 1. 828138 1. 159704 1. 111202 1. 056343 1. 287862 3. 103092  
0. 705978 1. 004315 1. 11531 1. 503097 1. 047494 1. 222581 1. 019319 0. 955177 1. 937324  
0. 750517 0. 649724 1. 203705 1. 157712 1. 076991 1. 141079 0. 883622 0. 892189 0. 862454  
1. 351821 1. 295711 1. 267511 1. 25971 1. 960103 1. 484562 1. 105059 1. 083259 1. 631768  
0. 641581 0. 916646 0. 61865 0. 561964 0. 683022 0. 720543 0. 598523 0. 533395 0. 778223  
0. 874803 1. 052874 1. 357767 1. 064063 0. 940146 1. 073709 0. 967838 1. 611912 1. 07908  
1. 382384 2. 659687 2. 968965 3. 12372 2. 125935 2. 475174 1. 968715 1. 9515 1. 868127  
1. 299701 1. 545202 1. 218366 1. 836227 1. 283012 0. 951575 1. 509568 0. 530981 1. 318148  
0. 952344 0. 718905 0. 777825 0. 629025 0. 621355 0. 984477 0. 840455 1. 401077 0. 97944  
4. 547841 3. 63711 4. 566373 4. 973132 4. 414181 4. 521446 3. 806385 3. 668396 3. 724136  
1. 80126 3. 138642 1. 996021 6. 074598 2. 083813 4. 471459 2. 128667 1. 459215 4. 395202  
1. 479255 1. 892713 2. 018429 1. 628183 1. 022921 2. 100121 1. 788315 1. 565274 2. 474401  
3. 831088 2. 74648 2. 995192 3. 683644 1. 315054 3. 005372 2. 727808 2. 225678 4. 129358  
0. 92376 2. 377035 1. 423906 0. 948258 2. 061447 1. 617783 0. 935329 3. 051513 0. 750404  
1. 155243 2. 726179 3. 553146 1. 331137 1. 846749 1. 316053 0. 800564 1. 222718 2. 393395  
1. 785577 2. 387851 1. 952203 2. 903046 1. 584524 1. 461896 1. 325262 1. 924465 2. 74994  
1. 169148 1. 868387 1. 572046 1. 314559 0. 715199 1. 563132 1. 383761 0. 899251 2. 043738  
4. 552721 4. 054979 4. 547547 4. 858543 3. 834148 3. 819018 4. 590859 3. 994133 3. 9975  
1. 73023 1. 866555 1. 070888 2. 310221 1. 692723 1. 281624 0. 653465 3. 553698 2. 580207  
1. 739206 2. 09357 1. 781776 3. 784391 1. 853782 2. 69662 2. 172479 2. 551555 4. 706092  
1. 797271 1. 497091 1. 4871 1. 064346 2. 898954 1. 726747 1. 132634 1. 284489 2. 47457  
1. 191814 0. 974286 1. 532067 0. 909025 1. 202092 1. 450986 0. 935755 1. 220104 0. 799048  
2. 425229 2. 210803 2. 88194 3. 381671 2. 109268 1. 863084 2. 741559 2. 542869 3. 381671  
4. 084422 3. 428158 4. 326426 4. 62503 3. 235084 3. 948274 3. 671561 3. 236375 4. 63026  
4. 362406 3. 69677 4. 465107 4. 945862 3. 748213 3. 696249 3. 530752 3. 412624 4. 820069  
0. 989393 1. 16242 1. 001539 1. 023991 1. 127534 1. 526201 0. 595975 1. 030953 0. 640709  
1. 506668 1. 235457 1. 448985 1. 659993 0. 93615 2. 064786 1. 503894 1. 192076 1. 326096  
4. 462622 2. 688537 4. 768131 4. 120286 3. 811111 2. 305042 4. 597035 2. 44652 3. 336319  
4. 849003 5. 044219 5. 29296 4. 775603 3. 151805 5. 544068 5. 177662 3. 656795 5. 403496  
1. 833643 1. 212667 1. 334603 1. 122265 1. 605728 1. 392646 1. 016199 1. 04658 0. 901812  
0. 962874 2. 238353 3. 064632 3. 352623 2. 671213 2. 401439 1. 436102 3. 139963 2. 332971  
0. 832456 0. 751044 1. 039881 1. 412879 0. 979617 0. 834037 0. 573569 0. 926887 2. 042465  
1. 309644 1. 103632 0. 545259 0. 844616 1. 195664 2. 602318 1. 197108 0. 751471 0. 694678  
1. 160704 0. 936426 1. 085994 1. 027521 1. 352802 0. 918752 0. 458334 0. 825834 0. 78738  
3. 146397 4. 479141 3. 72346 2. 888969 3. 81877 4. 130765 3. 135249 2. 794215 2. 433066  
2. 017598 2. 134139 1. 172262 1. 626262 1. 329637 2. 483393 1. 768588 2. 483393 1. 453532  
4. 322193 3. 633886 5. 86927 6. 040199 4. 96408 4. 288553 4. 899418 4. 307548 4. 942947  
1. 00309 0. 601042 0. 880514 1. 412697 1. 092425 1. 529228 0. 910576 0. 841742 0. 883031  
0. 7606 0. 881689 0. 745272 0. 993299 0. 714671 0. 866825 1. 293061 0. 880835 1. 219722  
1. 962205 2. 78581 1. 451543 2. 893535 1. 766976 2. 810054 2. 4137 2. 167171 2. 086275



7.069998 6.724539 7.049123 7.287411 7.179694 6.453965 7.056137 6.563459 6.663225  
2.271165 2.133801 2.795292 3.177389 2.259866 2.135109 1.710045 1.910296 2.839502  
0.725969 1.226605 0.741909 0.904791 0.775604 1.663486 0.849367 1.100714 0.910451  
0.710466 0.740359 1.280133 1.062874 0.758075 0.598439 1.020981 1.012585 1.096549  
1.378117 1.50919 1.054543 2.253903 1.165884 1.383258 1.148443 1.502566 1.236291  
2.048553 1.369193 0.867789 1.551473 1.008926 0.896721 0.857985 1.167567 1.200173  
1.131477 1.559733 0.969727 2.700386 0.841913 1.174923 1.299451 1.563234 2.872634  
0.936785 0.521385 0.612021 0.70749 0.678977 1.836863 0.777363 0.786841 0.726319  
1.792267 2.222611 1.407074 2.110638 1.051821 1.314729 0.845479 3.040488 3.999341  
1.581665 1.421315 1.203809 1.06291 0.979188 1.201813 1.18054 1.555641 1.483701  
1.197883 0.889808 1.208733 1.335694 0.953651 1.421522 0.601826 0.970139 1.071874  
0.917398 0.936578 0.940463 1.901846 0.889466 2.290577 0.682014 1.228366 2.076631  
3.97449 3.895722 4.365582 3.476228 3.298228 2.073147 2.493224 3.633223 2.595917  
4.128107 3.396531 4.789837 4.525017 3.450131 3.676797 3.374786 3.890123 3.438861  
1.391052 0.864332 1.534168 1.328696 0.845237 0.959751 1.73074 2.232194 2.014487  
5.804009 5.89831 5.955027 7.324807 5.538386 6.132225 5.655697 4.685751 9.060931  
1.496295 1.065138 1.608528 2.099597 1.049899 1.11396 1.911158 0.803127 2.025871  
2.75654 2.304231 2.163647 2.147145 1.853899 2.077912 2.10201 2.326402 2.380389  
3.907268 2.04202 1.770545 4.019803 1.846702 1.413699 2.150839 1.770545 1.57648  
0.968763 2.265106 2.384877 0.892765 1.487754 2.908196 1.170089 2.624271 1.595689  
1.466257 2.141906 2.976297 1.142817 1.313167 1.821952 1.884988 0.886016 1.725796  
0.923886 0.644644 1.117161 0.959828 0.80756 2.173938 1.156121 0.576635 1.264841  
3.343435 4.011952 3.389462 3.669879 3.519832 3.37292 3.569891 3.411736 4.142422  
1.025654 1.206172 1.992825 2.227067 1.121531 1.960431 1.666548 1.593979 1.314818  
0.939657 1.127208 1.236877 1.229221 0.917235 1.128449 0.999719 1.302484 1.20485  
4.103439 3.901442 3.798343 4.269279 2.957021 2.661468 4.54042 3.731743 3.090014  
1.472109 1.120425 1.519837 1.234344 0.825293 1.356593 1.191894 1.15971 1.026276  
3.630054 5.324235 5.397767 4.355154 3.504014 3.95887 3.292692 5.214104 4.748732  
0.98407 0.780171 0.900933 1.481556 1.219885 0.709093 0.754039 0.745792 1.412813  
0.387432 0.874122 1.022001 3.019836 0.488069 0.688064 0.722568 1.186812 1.58022  
1.068298 0.996934 0.830287 1.324298 1.205787 2.419313 0.563644 1.99544 1.12023  
1.914392 2.789998 0.816831 3.161256 3.263298 2.142764 0.316097 2.528191 2.010833  
0.723243 0.905934 0.788505 1.932968 0.755291 1.250588 1.035878 0.802941 0.865948  
0.738004 1.111744 1.011962 0.946771 1.217954 0.916641 1.119725 1.36809 3.079318  
1.853541 2.266862 1.551392 2.810694 1.043363 1.036088 2.500195 1.258289 1.816463  
1.163178 0.612107 2.099654 1.363902 1.02649 1.509357 0.949738 1.156808 1.622653  
2.032176 2.909862 1.933179 3.415257 1.646034 2.644736 2.18904 1.678121 1.809351  
2.203448 1.718296 1.719397 1.072288 1.45275 1.350315 1.982842 1.186884 1.223667  
2.594167 2.281742 2.401506 3.159317 2.232542 2.895649 2.405572 2.194223 2.860719  
3.470862 3.014856 3.304456 3.663781 3.717295 4.618033 3.26353 2.429044 2.565731  
1.924071 2.20384 1.694321 3.217523 2.447088 2.908325 2.293788 2.74997 1.784573  
1.610516 0.78612 1.068204 1.776065 1.033766 1.711913 0.917304 0.702256 0.839889  
1.530986 1.694952 1.487673 2.366067 1.156354 0.867987 1.762287 1.381699 1.226256  
3.131421 2.969865 2.123805 2.550908 3.027721 2.034191 3.208947 2.692791 1.21762  
1.856107 2.944779 2.536018 3.012105 2.827891 2.779262 2.517365 1.683879 3.412044  
0.813982 0.935093 0.83259 0.809423 0.756972 0.865866 0.73762 0.803406 0.910053  
0.794412 0.999056 0.989965 1.08104 1.083485 0.940448 1.098726 1.038782 1.479968  
3.344128 1.818585 3.262961 2.448396 2.081229 1.797105 2.14249 1.543389 2.443066  
1.351867 0.599993 1.304699 2.165582 0.25409 1.351075 0.677145 0.619287 1.196622  
2.646894 3.555719 2.790159 3.719311 2.651752 3.927445 2.910037 2.749762 3.535272  
1.4898 1.48305 1.484371 1.598036 1.867071 1.919639 2.065198 2.124044 2.497076

1. 304605 1. 616537 1. 807702 0. 677378 2. 180857 1. 8586 0. 999344 2. 057688 1. 310142  
1. 335639 1. 592319 1. 217008 1. 915236 1. 492224 1. 683242 2. 231256 2. 051071 0. 904564  
1. 121918 1. 437472 0. 813126 1. 370675 1. 259575 1. 556698 1. 566973 1. 519572 1. 096235  
1. 388443 2. 80585 1. 1887 1. 638718 1. 033322 2. 809364 1. 138877 1. 595478 1. 622669  
1. 505519 1. 378644 1. 280766 1. 303485 1. 013653 1. 812892 1. 193314 1. 125512 0. 879002  
1. 605387 1. 56547 1. 579903 2. 20098 1. 70408 1. 723273 1. 330483 2. 057495 1. 964811  
7. 078501 6. 792224 7. 335363 7. 823441 5. 686199 7. 049723 6. 622397 6. 541683 7. 819632  
1. 123336 1. 617006 1. 53663 1. 692479 1. 896354 1. 28894 1. 096441 1. 325037 1. 498447  
2. 533523 1. 844745 4. 079828 2. 312612 2. 537478 2. 426584 1. 788573 2. 826908 2. 768094  
0. 937561 1. 443111 1. 117303 0. 975044 1. 241319 1. 129914 0. 759984 0. 739156 1. 113733  
2. 515534 2. 688911 3. 471377 3. 708712 2. 658731 2. 599341 2. 583707 3. 103889 4. 002736  
1. 299259 1. 620455 1. 948333 3. 05912 1. 715384 1. 828212 1. 069343 1. 197292 0. 851004  
0. 870717 1. 558597 1. 042169 0. 876472 0. 883238 0. 859602 0. 786962 1. 082722 1. 143909  
3. 958985 2. 677718 2. 234154 2. 2972 2. 73213 2. 054238 2. 63394 2. 448018 2. 782247  
0. 842962 0. 685282 0. 774906 1. 825184 0. 767482 1. 44924 0. 872019 0. 963285 2. 248652  
2. 270269 0. 790244 0. 49361 0. 672178 0. 544162 2. 263062 2. 321833 0. 423624 0. 638057  
2. 970715 3. 211525 3. 449234 3. 084658 3. 582443 3. 377848 2. 517181 2. 711868 1. 957034  
1. 320887 1. 417191 1. 246056 1. 364822 0. 822472 1. 098914 1. 292813 1. 424337 1. 335139  
1. 903442 2. 703692 2. 248817 2. 651124 2. 732171 2. 812631 2. 764805 3. 17489 3. 04514  
1. 091256 1. 420269 1. 154282 2. 105791 1. 456403 2. 0344 0. 783283 1. 386844 1. 322914  
1. 55766 2. 477475 1. 051475 2. 206268 0. 944399 2. 361071 2. 014499 0. 969523 4. 523678  
3. 907089 3. 205735 3. 354639 2. 536258 3. 28242 3. 569935 2. 127874 1. 642617 3. 12314  
1. 7855 1. 856852 3. 301594 3. 620266 2. 352964 2. 36031 1. 968392 0. 82164 4. 084523  
1. 809254 1. 095847 1. 391562 1. 409928 1. 303511 1. 804175 1. 27819 1. 093111 2. 181776  
1. 000787 1. 382147 2. 308306 3. 312748 1. 981975 3. 661682 0. 909188 1. 472066 4. 150695  
5. 082565 5. 434945 5. 692096 4. 281968 5. 677188 4. 981022 5. 990662 5. 351374 5. 528789  
1. 371094 1. 354533 0. 954197 1. 747425 1. 39286 1. 984782 1. 661219 1. 306449 1. 304996  
3. 286703 3. 928169 4. 344954 3. 92948 4. 358411 3. 020232 3. 655939 4. 525726 5. 932529  
4. 279584 3. 196556 2. 990551 2. 995026 2. 968662 2. 583353 4. 16654 3. 428141 3. 116778  
3. 6096 3. 289908 2. 372227 2. 52547 3. 139432 3. 699868 3. 717992 2. 478455 2. 077576  
1. 225878 1. 514385 1. 302457 1. 113528 1. 447513 2. 141555 1. 155753 1. 624614 1. 151036  
10. 15925 9. 434015 9. 730978 9. 758253 9. 58548 9. 552659 9. 858531 9. 678879 9. 982  
2. 245903 1. 542024 2. 620963 1. 993567 2. 130428 2. 160087 2. 069941 1. 733605 1. 457101  
1. 746272 1. 562791 2. 129887 2. 598947 1. 535402 2. 249309 1. 965903 1. 992407 3. 001147  
1. 593487 2. 127139 1. 635942 3. 005961 2. 006766 2. 964894 1. 62211 1. 971897 1. 807368  
2. 058869 2. 334627 1. 645116 2. 009065 2. 454603 3. 163237 1. 85264 2. 760277 1. 39406  
5. 537872 5. 370698 4. 667466 1. 450238 1. 809857 3. 079589 4. 599447 1. 485984 4. 827078  
1. 180492 2. 056454 1. 583557 1. 072493 1. 135496 2. 273957 1. 446208 1. 370195 1. 322224  
1. 831262 2. 063225 2. 736072 1. 995852 3. 255013 2. 373625 2. 070891 2. 278638 0. 993368  
4. 126719 4. 405293 3. 709187 3. 91131 3. 774247 3. 818492 3. 583442 3. 255809 4. 599951  
4. 46447 4. 740879 4. 482122 4. 477011 5. 022663 4. 146389 3. 789759 4. 353263 3. 709225  
2. 463657 2. 572762 2. 13451 3. 995584 2. 757202 2. 827525 2. 861324 2. 239419 2. 776582  
6. 30976 4. 58505 6. 185681 7. 329275 6. 392544 5. 607339 5. 050996 5. 986117 4. 245606  
0. 911739 1. 427997 1. 023638 2. 790401 1. 463091 1. 435798 1. 271311 0. 961089 2. 020019  
1. 952008 1. 419394 1. 177077 2. 589478 1. 429787 1. 930932 1. 140461 0. 855143 1. 536693  
1. 681612 2. 229181 2. 974756 2. 937191 2. 262107 2. 496223 2. 526937 1. 480811 1. 49501  
1. 921704 2. 550288 1. 303605 1. 351136 1. 661358 2. 705199 1. 451675 2. 328016 1. 690438  
1. 85646 1. 562937 1. 974284 3. 079727 2. 090593 1. 807125 1. 942682 2. 114043 1. 894226  
5. 27897 3. 839784 4. 424535 4. 308715 3. 428702 2. 92602 4. 412846 4. 732528 4. 317954  
1. 252486 1. 137704 1. 127351 2. 661428 1. 369023 1. 434714 1. 232863 1. 080114 1. 293009  
1. 357316 0. 849817 1. 172888 3. 380521 1. 079859 1. 463606 1. 214896 1. 174472 1. 170081

2. 057975 2. 036924 1. 815075 2. 661254 1. 768107 2. 447912 2. 045702 1. 902668 2. 407174  
4. 163099 4. 482788 4. 295874 4. 366796 4. 234497 3. 873387 3. 81444 3. 328875 4. 884653  
1. 290107 3. 234369 3. 11191 3. 242027 1. 963909 0. 901604 1. 596018 1. 035295 2. 460061  
0. 803434 0. 884859 0. 657458 1. 610468 0. 867738 1. 90792 0. 896217 0. 940946 0. 884647  
2. 292261 2. 055485 1. 183013 2. 980766 1. 891555 2. 032951 1. 75896 2. 761899 1. 605445  
1. 659432 2. 505204 1. 382997 1. 446025 2. 098389 1. 910709 1. 833638 1. 564317 2. 532271  
1. 58974 2. 312797 1. 74925 2. 356191 2. 14976 1. 658025 2. 569069 1. 72399 1. 72611  
1. 439532 2. 645495 1. 205557 2. 080944 1. 554467 1. 490958 2. 412653 1. 180624 1. 552356  
0. 650422 1. 075983 1. 071993 0. 606268 4. 124923 1. 176043 1. 202861 0. 432753 3. 122504  
1. 561644 2. 097691 0. 958581 0. 756951 1. 222191 1. 639543 1. 761497 2. 328541 2. 723146  
6. 854481 6. 898797 6. 467266 6. 444559 6. 937209 6. 749184 7. 135692 6. 840961 6. 910045  
1. 34569 1. 856848 2. 336349 3. 064506 1. 302865 2. 786295 1. 864469 1. 56674 1. 557884  
2. 070155 2. 717299 2. 447299 2. 474253 2. 520229 2. 069483 2. 062054 2. 298799 3. 061188  
2. 019495 1. 640332 2. 290172 2. 4547 2. 064731 2. 516268 2. 568851 2. 141315 3. 105675  
8. 218438 8. 381415 8. 542499 8. 437762 8. 394605 7. 841419 8. 063503 8. 156508 7. 504515  
7. 098357 6. 983516 7. 113296 6. 698368 7. 002651 6. 750557 6. 459198 6. 903893 6. 591417  
1. 462642 1. 310072 1. 253682 0. 833696 1. 527007 1. 420446 1. 548539 1. 578838 1. 82429  
4. 189079 4. 249708 4. 395413 5. 237261 4. 959549 3. 799206 4. 309928 4. 443374 4. 027274  
6. 46095 5. 484309 5. 712141 5. 991706 5. 285161 5. 142882 6. 33453 6. 050971 5. 801011  
1. 913789 1. 370464 1. 400562 2. 31735 2. 053739 1. 08013 1. 365636 1. 262967 1. 304849  
1. 046325 1. 687041 1. 874297 1. 792272 1. 984936 1. 317157 1. 288777 1. 325985 2. 239059  
3. 169109 2. 733131 2. 406836 2. 041209 3. 508152 2. 792497 3. 075753 3. 048207 2. 122246  
6. 532678 5. 784625 5. 969919 6. 433944 5. 924891 5. 956396 6. 325387 6. 478796 5. 348295  
2. 506966 1. 243597 1. 243107 1. 735653 1. 514962 4. 042572 2. 54325 1. 680955 0. 815712  
2. 779887 2. 261063 2. 663151 3. 173086 2. 399475 2. 626965 2. 853489 2. 766156 3. 097179  
6. 58076 6. 748796 6. 71338 6. 3724 6. 849867 6. 016216 6. 916112 7. 168013 7. 272051  
2. 028068 2. 190618 2. 130999 2. 154587 1. 505811 2. 444976 2. 054134 2. 346615 1. 449552  
2. 785014 2. 27133 2. 294859 4. 501426 2. 375058 2. 809962 2. 546107 2. 996936 2. 682205  
7. 765406 7. 926053 7. 918689 7. 996238 7. 437456 7. 864732 7. 979992 7. 821806 7. 646192  
3. 159182 2. 479487 3. 146049 3. 44307 2. 533128 3. 010373 2. 684942 3. 307968 2. 927608  
1. 304569 0. 937836 1. 283143 1. 894512 2. 957424 2. 96116 1. 684061 1. 357855 1. 349528  
4. 346579 4. 300225 4. 730093 3. 013083 4. 154983 3. 997565 4. 16876 4. 594831 7. 068091  
3. 237575 3. 199996 3. 283174 3. 328879 3. 857096 2. 229416 2. 732254 3. 537607 2. 758148  
3. 99124 4. 186557 3. 678711 3. 513445 4. 461185 4. 148482 4. 03278 4. 683668 3. 923966  
6. 221005 6. 475087 6. 677434 4. 693526 5. 717813 6. 696547 6. 734009 6. 560353 6. 411308  
2. 846138 1. 687514 2. 387221 2. 018659 1. 768631 3. 745801 2. 313895 1. 635875 3. 683155  
3. 342827 3. 770525 3. 605671 5. 513476 3. 27059 3. 43207 3. 969316 3. 462794 4. 064081  
0. 966678 1. 160182 1. 135606 1. 423625 1. 084093 1. 219072 0. 855595 1. 018285 1. 127634  
6. 451379 7. 584108 6. 260142 6. 916105 7. 294974 8. 324608 6. 746459 7. 931987 5. 972501  
3. 587288 2. 177623 3. 250337 3. 020797 3. 221397 4. 864868 2. 367964 3. 069681 3. 937641  
1. 197848 2. 085212 1. 639364 1. 780182 1. 685287 1. 80318 1. 164142 1. 937229 1. 521245  
6. 77093 6. 529696 7. 109962 7. 077702 6. 986607 6. 374917 6. 956201 7. 177883 6. 910374  
1. 174464 1. 369745 1. 026769 1. 818147 1. 043451 1. 10198 1. 283586 1. 00124 1. 021457  
1. 797418 0. 887665 1. 114572 1. 471579 1. 011263 1. 929913 0. 855408 1. 23524 1. 936145  
1. 570552 1. 586756 1. 445006 1. 865559 1. 560454 2. 166184 2. 804233 1. 441885 2. 692797  
2. 070594 1. 460961 1. 531564 1. 695008 1. 321038 1. 776324 0. 98793 1. 135119 1. 605233  
1. 829598 2. 369217 1. 841731 1. 889646 1. 627194 2. 714153 1. 723072 2. 455714 2. 043977  
7. 424295 7. 595917 7. 47814 5. 6781 6. 950562 6. 240273 7. 197034 6. 972386 6. 533873  
6. 338547 6. 708796 5. 361386 7. 879778 6. 069451 5. 882656 6. 126269 6. 45827 6. 432036  
7. 918573 7. 7975 7. 653215 7. 458229 7. 496323 7. 575827 7. 740594 7. 384149 7. 67946  
1. 674046 1. 173832 1. 736324 1. 133079 1. 45669 1. 69099 1. 772529 1. 351425 1. 809052

|           |           |           |           |           |           |           |           |           |
|-----------|-----------|-----------|-----------|-----------|-----------|-----------|-----------|-----------|
| 1. 237644 | 1. 2001   | 1. 429115 | 1. 688199 | 1. 860861 | 2. 257802 | 1. 657358 | 2. 438164 | 1. 482778 |
| 2. 568003 | 2. 474082 | 2. 161672 | 2. 798886 | 2. 485178 | 1. 971432 | 2. 307151 | 2. 404853 | 2. 84979  |
| 2. 33965  | 2. 299761 | 1. 864463 | 1. 680742 | 1. 379447 | 1. 910424 | 1. 98815  | 2. 057492 | 1. 886408 |
| 0. 917993 | 1. 614696 | 1. 159715 | 1. 115659 | 1. 572406 | 1. 308616 | 1. 192644 | 1. 292483 | 1. 325872 |
| 2. 320096 | 1. 755672 | 1. 914403 | 2. 045406 | 1. 682682 | 1. 807211 | 1. 847926 | 1. 200165 | 2. 251871 |
| 1. 63594  | 1. 9105   | 2. 163651 | 2. 05502  | 1. 521502 | 1. 882376 | 1. 861382 | 1. 569178 | 1. 564434 |
| 1. 937481 | 1. 525516 | 1. 717772 | 2. 37621  | 1. 962213 | 3. 106716 | 1. 458586 | 2. 836359 | 2. 531474 |
| 5. 200655 | 5. 560603 | 6. 576257 | 5. 373304 | 5. 265109 | 5. 121418 | 5. 555248 | 5. 847781 | 5. 49487  |
| 2. 25361  | 1. 634219 | 1. 601094 | 1. 6353   | 1. 579528 | 1. 749715 | 1. 958866 | 1. 585772 | 1. 736629 |
| 1. 785985 | 1. 586856 | 1. 958665 | 2. 86682  | 2. 122198 | 1. 882285 | 2. 254649 | 2. 709047 | 2. 373742 |
| 1. 237674 | 1. 470448 | 2. 297435 | 1. 923867 | 1. 349995 | 1. 741375 | 1. 24077  | 1. 528442 | 2. 064932 |
| 1. 810034 | 2. 007551 | 1. 768682 | 2. 22352  | 2. 294031 | 2. 172295 | 1. 850522 | 2. 118136 | 1. 850273 |
| 1. 043833 | 1. 744195 | 1. 331624 | 1. 65605  | 1. 560489 | 2. 045959 | 1. 114883 | 1. 206592 | 1. 326696 |
| 1. 601995 | 1. 619839 | 1. 920743 | 2. 236981 | 1. 411752 | 2. 115685 | 1. 803352 | 1. 178508 | 1. 338522 |
| 1. 562485 | 1. 91395  | 1. 126234 | 0. 96512  | 2. 059689 | 1. 493012 | 1. 261686 | 1. 280451 | 1. 374972 |
| 1. 479262 | 1. 998132 | 1. 502555 | 1. 249718 | 1. 183942 | 1. 821371 | 1. 587676 | 1. 93472  | 2. 667167 |
| 1. 699032 | 1. 841277 | 1. 614947 | 2. 45586  | 2. 073722 | 1. 912875 | 3. 255607 | 1. 834119 | 1. 330801 |
| 1. 130402 | 1. 562536 | 1. 333302 | 2. 124145 | 1. 122269 | 1. 281639 | 1. 524112 | 1. 065727 | 1. 155494 |
| 3. 983368 | 1. 474486 | 1. 775326 | 1. 035567 | 1. 557523 | 1. 45394  | 1. 531524 | 2. 209647 | 2. 259126 |
| 1. 256759 | 1. 239116 | 0. 907622 | 0. 985224 | 1. 235323 | 1. 096475 | 1. 150447 | 1. 180263 | 0. 813752 |
| 2. 479901 | 1. 05049  | 1. 132468 | 3. 027963 | 1. 818073 | 1. 311345 | 1. 873117 | 1. 720635 | 2. 357508 |
| 1. 173676 | 1. 476569 | 1. 967678 | 2. 024657 | 1. 076774 | 1. 975017 | 1. 529151 | 2. 018368 | 2. 006514 |
| 0. 985686 | 1. 065343 | 1. 309206 | 1. 369886 | 1. 189654 | 2. 022355 | 1. 359148 | 0. 587324 | 4. 194594 |
| 0. 852245 | 1. 233945 | 1. 122039 | 1. 094623 | 1. 363172 | 1. 097404 | 0. 910893 | 1. 186603 | 0. 865529 |
| 1. 324027 | 2. 68711  | 1. 258165 | 1. 141808 | 1. 250578 | 2. 995906 | 0. 975324 | 0. 919732 | 1. 527207 |
| 2. 325104 | 1. 659591 | 2. 11341  | 1. 889683 | 1. 01978  | 1. 7886   | 1. 65054  | 1. 641819 | 2. 11857  |
| 1. 429663 | 1. 533438 | 1. 084731 | 2. 361606 | 1. 251636 | 1. 702712 | 1. 595687 | 2. 295354 | 2. 127448 |
| 1. 044483 | 0. 904902 | 1. 684449 | 1. 065934 | 1. 200206 | 2. 2433   | 1. 062494 | 1. 288894 | 2. 697304 |
| 0. 733239 | 0. 696929 | 1. 223103 | 0. 947655 | 0. 958293 | 0. 842198 | 0. 915435 | 0. 551097 | 1. 11544  |
| 0. 723014 | 0. 765564 | 1. 759176 | 1. 563789 | 0. 513802 | 1. 036502 | 1. 092576 | 1. 11776  | 0. 920296 |
| 0. 787172 | 1. 87503  | 0. 893132 | 0. 60088  | 0. 880046 | 1. 214323 | 0. 641836 | 1. 083891 | 0. 567354 |
| 1. 136166 | 2. 264007 | 2. 71402  | 0. 947948 | 1. 111215 | 2. 020646 | 1. 330785 | 1. 270669 | 2. 532293 |
| 2. 249209 | 3. 68957  | 2. 386064 | 3. 417699 | 1. 368065 | 2. 221381 | 0. 971639 | 2. 824555 | 2. 878433 |
| 0. 892505 | 0. 846157 | 1. 371241 | 2. 553498 | 0. 672812 | 0. 951518 | 0. 726747 | 0. 790044 | 0. 833573 |
| 1. 207979 | 1. 223695 | 1. 215276 | 2. 521462 | 1. 128311 | 1. 199494 | 1. 538679 | 1. 905261 | 1. 284083 |
| 2. 191665 | 2. 029178 | 1. 505848 | 1. 744188 | 0. 950036 | 1. 574324 | 0. 916695 | 1. 014216 | 1. 610666 |
| 4. 471886 | 4. 146332 | 2. 211534 | 1. 845603 | 2. 048067 | 2. 175793 | 2. 617006 | 3. 156931 | 5. 269946 |
| 1. 633741 | 1. 751579 | 1. 939345 | 1. 589932 | 1. 276724 | 2. 199819 | 1. 425212 | 1. 235381 | 2. 754711 |
| 1. 502256 | 0. 993564 | 1. 523005 | 1. 170253 | 1. 586574 | 2. 266334 | 1. 635588 | 1. 786631 | 4. 020562 |
| 3. 543108 | 2. 383341 | 2. 669745 | 3. 030317 | 1. 706322 | 2. 63458  | 1. 331841 | 2. 699404 | 1. 818966 |
| 2. 712062 | 1. 208022 | 2. 228023 | 1. 901006 | 1. 195809 | 1. 294367 | 1. 447027 | 2. 061482 | 2. 09976  |
| 1. 832337 | 2. 095677 | 1. 081452 | 2. 118554 | 1. 58275  | 1. 143097 | 2. 757207 | 2. 098999 | 2. 37701  |
| 2. 7872   | 3. 159592 | 2. 467897 | 2. 421154 | 2. 464407 | 4. 386603 | 2. 970681 | 3. 050985 | 2. 547529 |
| 0. 897407 | 0. 986419 | 1. 002682 | 1. 310971 | 0. 900387 | 0. 772746 | 0. 885846 | 0. 869184 | 1. 095256 |
| 1. 236381 | 1. 734088 | 2. 120973 | 1. 847573 | 1. 590835 | 2. 106191 | 1. 331463 | 1. 632687 | 1. 745652 |
| 1. 981839 | 2. 168079 | 2. 884722 | 3. 123865 | 2. 507107 | 2. 574737 | 2. 549207 | 1. 883346 | 2. 737824 |
| 1. 461778 | 1. 885669 | 1. 630795 | 1. 116046 | 1. 587846 | 1. 465463 | 1. 621948 | 1. 60833  | 2. 575954 |
| 0. 991342 | 1. 38075  | 1. 501739 | 2. 354295 | 1. 970857 | 1. 684726 | 1. 611937 | 2. 321118 | 1. 638387 |
| 1. 406515 | 1. 21151  | 1. 502675 | 1. 603973 | 1. 862027 | 1. 967409 | 1. 743732 | 1. 329932 | 0. 888876 |
| 1. 562669 | 2. 492253 | 1. 511107 | 2. 969221 | 1. 900828 | 1. 620262 | 2. 39447  | 1. 765922 | 2. 502824 |
| 1. 288275 | 1. 02762  | 0. 881192 | 1. 626955 | 1. 043873 | 1. 183966 | 1. 600752 | 1. 343067 | 1. 560953 |

1. 490272 1. 718268 1. 427223 2. 497578 1. 393384 1. 927485 1. 727135 1. 814938 2. 357324  
3. 575168 4. 048701 4. 183768 4. 500504 4. 407139 3. 912997 3. 92841 3. 737944 4. 297901  
1. 307688 1. 286836 1. 003403 1. 201157 1. 070263 1. 413825 1. 120702 1. 20852 1. 123879  
0. 979742 1. 351309 1. 447184 1. 770708 1. 115262 1. 135241 0. 956518 1. 399114 2. 259499  
4. 807429 4. 446722 4. 411082 3. 720241 3. 299125 3. 921924 3. 769701 3. 276881 3. 064173  
7. 460002 7. 369936 7. 860034 6. 633451 7. 148244 7. 52855 7. 713541 7. 561415 6. 277536  
2. 405364 3. 209429 2. 320354 3. 540704 0. 890059 1. 97019 2. 223833 1. 918719 1. 765681  
3. 275416 3. 906419 3. 73262 1. 617723 4. 020299 3. 223632 2. 132025 0. 943767 1. 387858  
6. 580143 6. 70154 6. 874988 6. 721778 7. 09826 6. 560147 7. 302035 7. 34917 6. 838419  
0. 845608 1. 00248 0. 974085 1. 361244 1. 34241 0. 998832 1. 265398 1. 243096 1. 2798  
1. 036298 1. 188845 0. 783052 0. 962121 0. 924381 1. 663884 0. 864765 1. 276626 1. 421746  
1. 065712 1. 185973 0. 979788 1. 285445 1. 572315 1. 46561 1. 288206 1. 46561 1. 946653  
2. 377747 3. 146498 1. 817949 2. 288493 2. 198416 2. 255082 1. 605315 2. 185557 2. 254462  
1. 220365 1. 389578 2. 632182 1. 204732 1. 592574 1. 315481 1. 099887 1. 605689 2. 315763  
1. 684276 1. 653062 2. 232498 2. 768839 1. 442231 1. 752265 1. 826806 1. 46086 1. 894928  
3. 591694 4. 430529 4. 452982 3. 48438 2. 471373 2. 785172 4. 742458 3. 760659 3. 750034  
2. 119568 1. 639435 4. 335599 3. 041675 2. 554645 2. 921696 2. 231108 2. 792572 4. 863922  
1. 260343 1. 626047 1. 913267 2. 379918 1. 266577 1. 089087 0. 987134 1. 726709 1. 203068  
1. 425808 1. 712889 1. 439734 1. 987113 2. 072279 2. 740136 1. 289542 1. 290379 2. 755193  
1. 861046 2. 447597 1. 604366 1. 663455 1. 907641 2. 80128 1. 832504 1. 353329 2. 87105  
1. 35843 2. 470226 1. 029516 1. 289469 1. 270316 1. 562691 1. 262041 1. 567351 1. 738705  
1. 202036 0. 860893 1. 559887 1. 202036 1. 604305 1. 377503 1. 708772 1. 373874 0. 92605  
5. 362052 2. 859894 2. 721332 3. 152395 2. 906292 3. 337946 2. 413593 4. 068512 5. 465209  
2. 00311 1. 684762 2. 615463 1. 992568 2. 165911 2. 717582 2. 134506 2. 073815 3. 734292  
2. 050729 1. 520306 1. 990419 2. 004485 1. 927258 1. 903942 2. 112827 1. 950502 1. 410202  
1. 585301 1. 228357 1. 628997 1. 279095 1. 224994 1. 04284 1. 013251 1. 174292 1. 120976  
1. 58579 1. 767115 2. 556117 1. 299234 1. 041423 1. 504674 1. 762053 1. 095193 2. 838596  
1. 177838 1. 283071 1. 08654 1. 192014 1. 295445 1. 345465 1. 03204 1. 777761 0. 90682  
1. 50084 1. 464573 3. 098547 1. 185414 1. 753086 2. 127792 1. 556388 1. 93616 3. 18174  
1. 815854 1. 662154 3. 545107 1. 261364 1. 184342 2. 308684 1. 230972 1. 535548 4. 246403  
1. 858996 1. 455606 2. 037982 2. 421053 1. 875195 1. 452281 1. 686806 2. 123234 1. 637833  
2. 61679 2. 6423 1. 954259 3. 654383 3. 447038 2. 01726 2. 05824 2. 828832 2. 29051  
2. 539456 2. 4646 1. 836104 2. 059808 1. 850219 2. 325224 2. 058483 2. 031647 2. 025504  
1. 300744 1. 13714 1. 964581 1. 735608 1. 261515 1. 661185 1. 9898 1. 345699 2. 338471  
2. 925541 2. 747112 2. 841266 1. 900394 2. 640108 2. 36872 3. 0573 2. 946611 4. 279652  
1. 984185 1. 590791 1. 564327 1. 413389 1. 322021 1. 675013 1. 709873 1. 692918 1. 252406  
1. 811964 1. 416765 1. 773989 2. 193755 1. 909854 1. 553376 1. 601921 1. 517429 1. 868363  
1. 222218 0. 758832 1. 201263 0. 952195 0. 958367 1. 650108 0. 832661 0. 847183 1. 001015  
0. 958524 1. 715139 0. 914808 1. 156907 1. 109574 1. 419934 1. 628917 1. 829097 1. 466369  
1. 086907 1. 86184 1. 749031 2. 202545 1. 416586 1. 052393 1. 107215 1. 108498 1. 220719  
3. 770297 2. 972265 2. 614998 1. 421828 1. 486936 3. 971454 1. 802985 1. 746725 4. 506371  
1. 710408 2. 50456 3. 062866 1. 601802 2. 871747 1. 94599 2. 232051 2. 512613 3. 018308  
1. 784694 1. 269113 0. 870058 2. 009932 1. 349392 1. 641482 1. 377337 1. 192573 1. 266957  
2. 570499 2. 250914 1. 8491 1. 689199 1. 984046 1. 422179 1. 616304 1. 841713 2. 71919  
1. 4083 1. 708772 1. 320813 1. 757822 2. 424168 2. 072646 1. 501056 1. 670693 1. 698026  
1. 279803 1. 898734 1. 418065 1. 938999 2. 600316 1. 806388 1. 583576 1. 424069 1. 586955  
1. 446002 1. 101364 1. 728811 1. 228063 1. 650299 2. 12858 1. 400745 0. 938242 1. 375002  
1. 637079 2. 801354 1. 610021 2. 315923 2. 098856 1. 554185 1. 687727 1. 877224 2. 719679  
1. 037587 0. 950072 2. 269114 1. 733316 1. 346103 0. 931518 1. 554166 1. 147154 1. 34039  
2. 23861 1. 83529 2. 762323 2. 106804 1. 890914 2. 466162 1. 512378 1. 282268 2. 221506  
4. 728207 3. 37273 5. 299579 3. 057284 3. 880492 5. 092542 4. 756411 4. 355881 5. 117883

|          |          |          |          |          |          |          |          |          |
|----------|----------|----------|----------|----------|----------|----------|----------|----------|
| 1.154672 | 1.200167 | 1.279834 | 1.601144 | 1.558606 | 2.35862  | 1.090797 | 1.388444 | 1.815478 |
| 0.942625 | 1.528326 | 1.33614  | 1.849684 | 1.002944 | 1.723142 | 1.590011 | 1.179986 | 1.378011 |
| 1.829752 | 2.477324 | 1.76123  | 1.534424 | 1.518885 | 2.028172 | 2.052403 | 1.273828 | 1.424306 |
| 1.205216 | 0.871453 | 1.272839 | 1.078353 | 1.073156 | 1.151326 | 1.070224 | 0.960847 | 0.749222 |
| 2.137052 | 2.757388 | 2.325117 | 2.400712 | 2.378156 | 2.370498 | 2.967448 | 2.3799   | 2.434514 |
| 1.407745 | 1.441302 | 2.00877  | 1.057833 | 1.286436 | 1.755742 | 1.88058  | 1.440894 | 1.300433 |
| 1.995752 | 1.377021 | 1.178978 | 1.476212 | 1.667775 | 1.788599 | 1.245757 | 1.599736 | 1.228966 |
| 1.240953 | 1.258626 | 1.584668 | 1.834671 | 1.090772 | 1.343215 | 1.26945  | 1.525878 | 1.418523 |
| 0.940651 | 1.264773 | 1.042953 | 1.293805 | 0.89022  | 1.041629 | 0.835    | 0.8145   | 0.890515 |
| 0.63486  | 0.913895 | 1.137251 | 1.740249 | 0.844512 | 0.774715 | 1.280838 | 1.041504 | 1.738475 |
| 0.833391 | 1.952562 | 1.17028  | 1.666891 | 0.882806 | 2.247079 | 1.400463 | 1.029805 | 1.299601 |
| 1.26921  | 0.984825 | 2.242909 | 2.227466 | 1.781421 | 1.922203 | 1.504987 | 1.51614  | 1.381975 |
| 1.739383 | 1.388936 | 0.841977 | 0.956904 | 1.486471 | 1.588839 | 2.251457 | 0.85272  | 1.19638  |
| 1.133122 | 1.417217 | 1.105267 | 1.093015 | 1.12842  | 1.295635 | 0.879275 | 1.354903 | 1.651074 |
| 1.194403 | 1.479758 | 0.673556 | 1.174964 | 0.996348 | 1.257259 | 1.119816 | 1.25585  | 3.841893 |
| 0.989793 | 0.896545 | 1.198273 | 1.395821 | 0.813302 | 1.300848 | 1.291795 | 1.035224 | 1.213543 |
| 1.823827 | 1.567014 | 1.685375 | 2.366416 | 2.288553 | 1.905291 | 1.646989 | 2.19139  | 2.033825 |
| 1.559629 | 1.143535 | 2.10367  | 1.814821 | 1.359829 | 1.291766 | 2.068222 | 1.418302 | 1.631806 |
| 2.09722  | 1.979758 | 1.769932 | 2.503352 | 2.117808 | 1.862398 | 1.993794 | 2.384667 | 2.496376 |
| 1.975976 | 1.544475 | 1.644854 | 2.549106 | 1.509015 | 1.978606 | 1.432087 | 0.818811 | 2.293053 |
| 1.523419 | 2.309783 | 2.088028 | 2.0484   | 1.790019 | 1.993446 | 1.568031 | 2.310502 | 3.862459 |
| 1.351029 | 1.907315 | 1.812418 | 1.852382 | 1.257644 | 1.060208 | 1.026727 | 1.232043 | 1.937217 |
| 0.980453 | 1.167131 | 0.864403 | 1.359921 | 0.896827 | 1.544747 | 1.124042 | 0.823067 | 1.037842 |
| 0.888836 | 0.992968 | 1.246297 | 2.131312 | 1.286236 | 1.484355 | 1.507921 | 0.977427 | 0.748887 |
| 1.120765 | 1.554281 | 1.051511 | 1.201821 | 1.229518 | 2.899724 | 1.248054 | 2.314445 | 1.105718 |
| 0.782376 | 0.88491  | 1.984546 | 1.390376 | 1.098548 | 1.059633 | 1.284675 | 2.369919 | 1.340398 |
| 1.012114 | 2.135944 | 1.22645  | 1.58057  | 0.865977 | 0.749199 | 0.932986 | 1.015493 | 1.066978 |
| 1.82749  | 1.541727 | 1.383387 | 1.619879 | 1.583467 | 2.701202 | 1.88339  | 1.696127 | 2.070689 |
| 1.124328 | 0.930766 | 1.143563 | 0.829965 | 0.832381 | 1.067951 | 0.978559 | 0.691305 | 0.699587 |
| 1.756073 | 0.815727 | 1.492733 | 0.946569 | 1.621537 | 0.9824   | 0.974754 | 1.442245 | 4.62129  |
| 1.200886 | 1.530292 | 1.265181 | 1.675247 | 1.315464 | 1.107034 | 1.321667 | 1.683206 | 1.63176  |
| 0.765053 | 0.991542 | 0.799876 | 2.074748 | 1.027324 | 1.560262 | 1.853409 | 1.279907 | 1.389886 |
| 2.147017 | 2.340039 | 2.587285 | 3.378526 | 2.531954 | 2.15481  | 1.613243 | 2.075395 | 2.367083 |
| 1.478008 | 1.983373 | 1.143189 | 1.457634 | 1.52874  | 1.363744 | 1.941493 | 1.765062 | 2.43227  |
| 1.251687 | 1.040177 | 1.624838 | 1.517944 | 1.687547 | 0.94618  | 1.186577 | 1.577911 | 1.112388 |
| 3.822807 | 3.051618 | 2.500689 | 2.925303 | 2.840673 | 3.09227  | 1.377333 | 2.923083 | 2.352713 |
| 0.858695 | 1.896155 | 0.799598 | 1.320608 | 0.810388 | 1.034473 | 1.740025 | 0.828525 | 1.479911 |
| 2.277755 | 1.423823 | 2.004893 | 1.695534 | 1.726521 | 1.479265 | 2.683565 | 1.256674 | 1.848669 |
| 1.306995 | 1.888795 | 1.449686 | 2.177449 | 1.151086 | 1.49252  | 2.009928 | 2.311489 | 1.789839 |
| 2.30292  | 2.151877 | 1.647086 | 2.81979  | 4.316442 | 1.237845 | 1.565662 | 1.361355 | 2.717839 |
| 1.697149 | 1.90678  | 1.432332 | 2.390525 | 1.11282  | 1.878391 | 1.115098 | 1.352529 | 2.001634 |
| 1.160282 | 1.126582 | 1.121362 | 1.81272  | 1.028517 | 1.043418 | 1.031567 | 1.259773 | 1.074807 |
| 0.62796  | 1.465178 | 1.158679 | 0.935585 | 0.721938 | 1.497621 | 1.072062 | 1.641572 | 0.607638 |
| 1.044862 | 1.282592 | 1.028268 | 1.268693 | 1.088266 | 0.958638 | 0.999333 | 1.415748 | 1.028268 |
| 1.712173 | 1.110247 | 1.400497 | 1.439683 | 1.25079  | 1.419078 | 2.714015 | 1.015803 | 2.352484 |
| 1.809931 | 2.52366  | 3.118807 | 2.174368 | 2.809214 | 1.909721 | 1.802564 | 1.733072 | 1.511405 |
| 1.270476 | 1.34888  | 1.718545 | 2.434466 | 1.976832 | 1.962342 | 1.668289 | 1.71679  | 1.595747 |
| 2.204893 | 1.539658 | 1.833206 | 2.010227 | 1.800696 | 1.882381 | 2.468462 | 1.497956 | 1.945561 |
| 1.970892 | 2.593712 | 2.325108 | 2.767377 | 2.275007 | 2.355361 | 1.757664 | 1.621028 | 2.198049 |
| 1.488999 | 1.206344 | 1.145453 | 2.296602 | 1.255657 | 1.46519  | 1.223953 | 1.895784 | 1.809675 |
| 2.208662 | 1.367167 | 1.441311 | 1.869875 | 2.179578 | 1.102346 | 1.748315 | 2.232646 | 0.952339 |

2. 237474 2. 641513 2. 81586 2. 233366 1. 888761 1. 535883 2. 144367 2. 189406 3. 173363  
2. 2208 1. 980026 2. 925664 2. 173206 1. 631217 1. 373631 1. 777765 1. 982944 1. 956656  
2. 296853 1. 785872 1. 396959 2. 784118 1. 22278 2. 764517 1. 934001 2. 257037 3. 267885  
3. 297804 3. 078621 1. 580299 2. 61365 2. 474681 2. 889144 3. 603069 1. 990506 2. 599875  
1. 147191 1. 42825 1. 539572 1. 850578 1. 117242 1. 271861 0. 891954 1. 279826 1. 033537  
1. 816199 1. 976968 1. 993431 1. 586379 1. 733141 1. 723775 2. 115287 2. 106538 2. 553745  
3. 901621 3. 311238 4. 289458 4. 206516 3. 575649 4. 085997 3. 306183 3. 626735 2. 928126  
1. 186081 1. 34807 1. 482438 1. 55294 1. 186622 1. 683292 1. 218801 1. 482438 1. 830932  
1. 237021 2. 2025 2. 608382 2. 222235 2. 211214 2. 990006 1. 375531 3. 383055 4. 337778  
1. 970877 1. 959882 1. 753653 3. 260729 1. 7775 1. 513198 1. 522848 1. 076734 4. 161065  
1. 995821 1. 927692 2. 143762 2. 586971 1. 728736 2. 2517 1. 985372 1. 760784 1. 97088  
2. 282508 2. 174076 1. 962574 2. 744024 2. 190139 2. 528441 2. 272357 2. 448478 1. 830119  
1. 347265 1. 801253 1. 601185 2. 630272 1. 491756 1. 604505 1. 486981 2. 04968 2. 373115  
4. 774624 2. 640689 2. 905093 1. 170594 2. 784575 2. 75041 2. 106383 3. 543213 6. 685898  
1. 147295 1. 41992 1. 531279 1. 866038 1. 219956 1. 570937 1. 369438 1. 083709 1. 23072  
1. 996398 2. 366494 1. 073132 1. 616928 2. 180085 1. 211408 1. 988604 1. 57263 3. 79067  
3. 450507 2. 047739 1. 483529 1. 412374 1. 145128 1. 39635 1. 376357 1. 934042 1. 128476  
1. 059312 1. 790531 2. 082487 1. 668515 1. 456009 1. 576419 1. 50659 2. 192973 1. 572295  
3. 894969 5. 822992 1. 954979 3. 513699 4. 702605 5. 305795 3. 834341 5. 331904 6. 085832  
1. 689411 2. 064964 1. 698836 1. 676107 1. 108778 2. 210987 1. 046257 1. 924664 1. 137574  
4. 354961 4. 006815 2. 641021 4. 835642 4. 079163 7. 17954 4. 241773 5. 56626 4. 91301  
0. 937009 1. 229117 1. 618573 2. 480487 1. 395765 1. 397903 1. 234929 1. 340707 1. 319185  
2. 021262 1. 082575 2. 289167 1. 834102 1. 876673 2. 538293 2. 111317 2. 919387 1. 923897  
1. 118107 1. 33958 1. 895362 1. 568683 1. 170855 1. 326694 1. 053886 1. 220384 1. 277747  
1. 248614 1. 591055 1. 387957 1. 920095 1. 075249 1. 584815 0. 988057 1. 036314 2. 075198  
2. 125887 0. 896546 2. 436705 1. 388704 1. 016135 1. 508898 1. 159804 1. 195794 1. 914846  
2. 752907 2. 239393 1. 673313 3. 06441 2. 244648 1. 597839 3. 089657 1. 696034 2. 239393  
1. 131289 0. 899156 1. 3654 1. 118689 0. 951441 1. 919039 0. 955665 0. 956415 1. 295602  
1. 083315 1. 124417 1. 021774 1. 274355 1. 62488 1. 139851 1. 243505 0. 867846 0. 785796  
2. 001209 1. 772035 2. 574265 2. 553226 1. 313949 1. 349929 1. 718967 2. 039864 2. 706618  
2. 318124 1. 756248 2. 672397 3. 056376 2. 25793 3. 235945 2. 404047 2. 846869 3. 009524  
1. 193197 1. 309406 1. 376692 1. 275191 0. 949671 1. 156553 1. 132752 1. 167218 1. 444945  
1. 731497 1. 519547 1. 647133 2. 372438 1. 635558 1. 651845 2. 154508 1. 821056 1. 732668  
1. 93961 2. 57175 1. 353229 2. 066154 1. 161516 2. 270149 1. 651599 1. 865147 2. 232621  
1. 371505 1. 059532 1. 194347 2. 114047 1. 258597 1. 459955 1. 080922 1. 638576 1. 53357  
5. 529671 5. 635021 5. 568447 5. 943716 5. 740416 5. 835603 5. 556648 6. 055491 5. 680836  
1. 772056 1. 018246 1. 352572 1. 469565 1. 474699 1. 553846 1. 700927 1. 853185 1. 895452  
2. 911053 2. 298069 3. 408715 3. 063889 2. 499626 2. 838091 3. 746888 3. 332721 3. 706333  
2. 006259 2. 101115 2. 206857 2. 610745 2. 005679 2. 281341 1. 928687 2. 452027 2. 854804  
1. 673512 1. 149854 1. 180797 1. 314146 1. 573688 1. 636274 1. 739962 1. 330623 1. 847025  
1. 886061 1. 839751 2. 33561 2. 451484 1. 933385 2. 026949 1. 845334 2. 00436 1. 769357  
1. 399741 1. 24082 0. 995426 1. 882246 1. 042374 1. 244576 1. 206412 1. 213003 1. 028678  
3. 526846 3. 809865 5. 138676 4. 201702 4. 828632 3. 992318 4. 308417 4. 465622 2. 586838  
4. 313426 4. 965689 4. 689098 2. 214154 3. 403937 4. 358611 5. 221169 4. 255473 4. 21569  
3. 611029 3. 77787 3. 497836 2. 985918 3. 899588 4. 380323 2. 800826 4. 110868 2. 719063  
1. 487284 1. 837028 1. 730189 1. 961785 1. 711633 2. 206745 2. 336621 1. 245324 1. 607512  
2. 6108 2. 502094 3. 228158 2. 57852 2. 451506 2. 595349 2. 312984 2. 570918 2. 881158  
1. 022646 1. 445151 2. 034805 1. 214198 1. 087864 0. 634273 1. 60377 2. 380703 3. 115605  
1. 271498 1. 434903 1. 696383 1. 568038 1. 992677 1. 594345 1. 314332 2. 148421 2. 098619  
2. 000661 1. 483714 1. 516375 1. 449666 1. 19022 1. 380789 1. 696514 1. 709226 0. 787909  
1. 069952 2. 366622 1. 655375 2. 534246 1. 015386 1. 706928 1. 511731 1. 445697 1. 477691

2.173328 2.1388 2.096908 2.458559 1.481928 2.362408 2.482773 2.411343 1.782953  
1.710235 1.249885 1.378311 1.53289 1.355164 1.298965 1.345567 1.543718 1.484051  
4.288255 4.010204 4.777497 4.506149 4.866553 3.79107 4.24165 4.240597 4.062844  
0.897597 1.207879 0.891425 1.457197 1.214808 1.356094 1.11384 1.39405 0.776029  
6.41301 6.099847 6.119819 5.396335 6.171732 5.882711 6.587616 6.458745 6.227941  
1.315909 3.160952 1.016839 1.715417 1.384128 1.385633 0.793461 1.336543 1.243904  
2.969857 4.449274 3.318142 3.049091 3.032657 2.606298 2.978007 3.184903 2.651167  
2.233118 2.702646 2.636948 2.451061 2.754458 2.833003 1.97152 2.33012 3.115621  
1.53447 1.381304 1.910477 2.025105 1.159977 1.550805 1.216039 1.34984 1.523616  
1.499969 1.159692 1.063316 1.129974 1.641044 1.983924 1.124626 0.896194 1.383295  
1.483466 1.43244 1.540726 1.711073 1.531669 1.763432 1.471844 1.64276 1.336866  
2.101779 1.448154 0.899221 0.86972 1.315772 0.937767 0.790902 1.114481 0.998025  
1.055429 1.203518 1.2824 1.2824 1.298922 1.604503 1.362523 0.870136 1.342859  
1.05642 1.119029 1.356537 1.936131 1.174073 1.674719 1.21542 1.576243 1.21509  
1.407089 2.023443 1.857237 2.906322 1.963804 3.075657 1.644465 2.006371 1.474552  
2.363331 1.934645 0.996836 1.965475 1.42251 1.720008 1.222063 2.108027 2.039177  
1.999326 1.479033 1.963388 1.936974 1.139863 1.520947 1.060108 1.108407 1.25354  
2.687937 2.154343 2.968832 3.114589 2.375454 2.688948 2.66488 2.737056 2.997759  
1.592389 2.124595 1.509734 1.809569 1.463486 1.30103 1.892382 1.172949 1.044046  
1.637587 1.589495 1.58441 1.877096 1.772418 1.819527 1.405897 1.606774 1.428987  
3.545329 2.825138 2.705722 3.3792 2.669072 2.607701 3.366747 3.080483 2.838918  
5.335533 3.972866 3.926765 2.053018 4.850023 4.459255 3.344854 2.841511 4.456468  
2.717718 3.247555 3.264147 3.025786 2.541348 3.614457 2.492932 3.109345 2.622782  
8.950968 9.00495 8.924717 8.712209 9.11047 8.715162 9.469934 8.821749 9.031174  
9.017998 8.621233 8.886348 7.676663 8.614442 8.280094 9.01422 8.738807 8.654051  
9.347307 9.338189 9.269807 9.393927 9.885454 9.232391 9.080078 9.51659 9.642296  
6.244005 6.837685 6.348286 6.888379 7.242303 5.562037 6.628073 6.585181 5.488046  
8.76713 8.942302 8.971416 8.267274 8.883388 8.801749 8.946823 8.727823 9.026888  
9.614684 9.374826 9.356419 9.106 9.199552 9.56503 9.89401 9.504367 9.301076  
6.276959 5.468097 4.998755 5.453784 6.580239 6.62106 6.205037 6.153206 5.536173  
1.824655 2.187799 2.037007 3.044852 2.134179 1.591628 2.327049 3.66526 2.177955  
0.808362 0.842914 1.016799 1.769927 0.780465 0.849546 1.006541 0.922215 0.803811  
1.85008 1.858606 2.110214 3.78383 2.22866 2.290614 2.255426 2.576421 2.549863  
4.822405 4.807624 5.651351 5.93211 4.087712 5.149665 4.804776 4.307434 6.77826  
3.518481 0.693341 2.104879 1.775758 0.712741 2.293556 3.313342 2.764336 4.735323  
2.418059 2.273855 2.707489 2.993963 2.537075 2.353237 2.335622 2.331119 3.268793  
1.854796 1.905437 1.716988 2.825961 1.328469 2.005848 1.706199 1.485125 1.592087  
0.780601 1.298652 0.922423 1.815491 1.800467 3.015761 0.816951 0.782752 1.190763  
1.396346 2.533293 2.853853 1.561298 1.684215 2.182237 1.763292 1.646869 1.604986  
1.240492 1.561114 1.018514 1.997113 1.208305 1.28194 1.346884 1.356441 1.086103  
1.992738 2.259962 2.762208 2.519603 2.052954 1.937947 2.135694 2.492151 2.285392  
1.398275 1.49037 1.353381 1.909199 1.337774 1.309746 1.533302 2.123315 2.005949  
1.548273 1.88867 1.905892 1.801017 1.854976 1.805322 2.842466 2.725372 1.541188  
3.927577 4.158481 3.795719 3.555251 4.000992 4.064383 4.031198 4.246752 4.639973  
0.860037 1.049995 0.540175 3.350919 1.411163 1.592531 0.936644 1.821774 1.131528  
2.28544 1.561992 2.5675 3.296102 1.854883 2.127006 1.817124 2.536775 1.927239  
1.444364 2.990699 1.792473 2.706875 1.275264 3.272693 1.58711 0.889066 1.698681  
1.578095 1.358432 1.362904 2.206267 0.854517 1.464028 0.922487 1.421674 1.277406  
1.81798 1.912316 2.091577 2.577661 1.890862 2.053865 1.979583 2.032351 1.567432  
1.761882 1.967429 1.217731 1.77893 2.463162 2.1796 2.399128 1.354514 1.513726  
3.238755 3.414256 2.575977 3.002843 2.984176 2.709552 3.75977 2.920916 2.068525



1. 216263 1. 828436 2. 258711 1. 26608 2. 21094 2. 437721 1. 266307 1. 893582 2. 32735  
3. 898777 3. 286714 3. 523881 4. 896718 3. 476151 2. 610086 3. 424773 4. 499916 3. 394364  
4. 013226 4. 893237 3. 797037 3. 78771 3. 726792 3. 785062 3. 651724 3. 611619 3. 60129  
1. 916056 2. 132352 1. 526606 1. 798491 1. 121547 1. 403547 2. 064792 1. 571673 1. 165844  
4. 647858 3. 119034 4. 5088 4. 068836 3. 27255 3. 854873 3. 814875 3. 594682 3. 936702  
1. 1561 1. 494345 0. 875036 0. 812829 1. 157645 0. 837997 0. 872268 1. 041405 0. 898467  
2. 838018 2. 475473 4. 273527 4. 100552 2. 466787 2. 546882 2. 830187 2. 170221 3. 015718  
1. 591224 1. 290854 1. 649628 1. 762827 1. 448284 1. 647388 1. 826988 1. 491737 1. 700895  
1. 537307 2. 208837 1. 442653 2. 864405 1. 699344 2. 557182 2. 330575 2. 377322 1. 458218  
3. 953706 3. 076893 3. 343428 2. 485572 3. 020611 2. 784946 1. 973939 3. 077593 3. 016297  
1. 328824 2. 244878 1. 598032 1. 832972 2. 563617 1. 122718 1. 839686 2. 346692 2. 005911  
2. 787923 3. 254527 3. 615127 2. 207681 3. 157954 2. 252809 2. 808149 3. 358522 3. 086764  
1. 319116 1. 106332 1. 368727 0. 762877 1. 341991 1. 464478 1. 316971 1. 369205 1. 298193  
2. 303085 1. 788569 2. 273808 2. 056292 2. 305129 1. 617454 3. 370052 1. 639583 1. 918977  
1. 796813 2. 117639 2. 189966 2. 312386 1. 822119 2. 139282 1. 857312 2. 344666 4. 829657  
0. 804332 1. 409511 1. 970715 3. 862752 1. 028451 2. 647629 1. 316935 1. 720991 2. 02279  
1. 578506 1. 542684 1. 53491 2. 083616 2. 152077 2. 631314 1. 51042 1. 772042 2. 129752  
3. 346224 2. 948411 2. 631778 4. 327939 3. 581018 2. 580281 2. 826594 3. 624634 2. 96428  
1. 649685 1. 288411 1. 338552 1. 224503 1. 357186 1. 318134 1. 398195 1. 599775 1. 286989  
1. 49084 1. 582462 1. 695018 1. 97313 1. 447999 1. 576709 1. 506878 1. 495119 1. 594312  
2. 085559 1. 470437 0. 887267 1. 041724 1. 028012 2. 044203 1. 692439 1. 167975 1. 203557  
1. 575413 2. 258273 2. 181146 1. 91656 2. 240411 2. 762048 1. 409705 1. 666121 1. 232857  
1. 738351 1. 424767 2. 378144 2. 165667 1. 359476 1. 85332 2. 338046 1. 559299 1. 322838  
1. 715035 2. 013974 1. 47599 1. 781512 1. 544771 1. 984613 1. 304627 1. 988543 1. 128585  
1. 329022 1. 383569 1. 565263 2. 173634 1. 327773 1. 958769 1. 465301 1. 766739 1. 787473  
2. 114612 2. 428429 1. 720712 2. 472264 2. 706604 1. 707082 1. 97418 2. 162467 2. 068024  
1. 336292 1. 143511 1. 639844 1. 405338 1. 398596 1. 413697 1. 561472 1. 217435 1. 581256  
1. 625384 0. 946717 1. 929187 1. 432177 1. 485813 2. 210093 0. 898726 1. 389803 1. 702761  
2. 058125 2. 367377 1. 98624 2. 726089 1. 801855 1. 765678 1. 737034 1. 65276 1. 817813  
1. 023485 0. 954461 2. 011754 2. 532038 1. 022548 2. 183995 1. 756766 1. 119814 1. 267383  
1. 143725 2. 039402 1. 754701 1. 932305 1. 528053 1. 206291 2. 617023 1. 256302 3. 260662  
0. 922409 0. 84951 1. 060322 2. 127648 1. 946763 1. 193787 0. 979279 0. 779326 0. 778056  
1. 169205 1. 451143 2. 128504 2. 102537 1. 686791 1. 284295 1. 322513 0. 809521 2. 28612  
1. 310176 1. 435755 0. 817819 1. 674057 1. 376715 0. 802347 1. 142034 1. 318661 0. 843572  
1. 729401 1. 846153 1. 363498 1. 605146 1. 605617 1. 885346 1. 335502 1. 579472 1. 975113  
2. 049763 2. 053187 2. 826246 3. 028296 2. 601302 3. 145758 1. 446537 1. 630286 2. 429185  
4. 826977 4. 400533 2. 871342 2. 625119 4. 149749 3. 276276 4. 53949 4. 225526 4. 037732  
2. 996149 2. 707661 3. 133344 2. 533408 2. 339716 2. 114245 3. 054812 2. 009572 2. 10436  
2. 253377 1. 610073 2. 096735 2. 166836 1. 834943 1. 530024 2. 347945 2. 137584 1. 752699  
2. 345484 1. 666662 1. 414898 1. 656368 1. 6113 2. 197287 1. 918522 2. 583603 1. 745597  
1. 388878 1. 684452 1. 806596 2. 248886 1. 630017 1. 681291 2. 35709 1. 418734 1. 286302  
1. 233048 1. 732177 1. 964066 2. 153353 1. 846457 1. 829487 1. 583591 1. 715891 1. 749694  
1. 893737 1. 570573 2. 165337 2. 448201 1. 944381 2. 375698 2. 280642 2. 597157 1. 864273  
2. 762693 2. 757253 2. 397266 1. 484009 2. 432641 3. 376709 1. 281253 2. 393197 1. 9625  
1. 386236 1. 894019 1. 387906 2. 112114 1. 873825 1. 870977 1. 359462 1. 24168 1. 701727  
1. 048117 1. 034945 0. 935365 0. 754033 1. 237803 2. 243263 0. 905155 0. 994452 1. 600119  
2. 494892 3. 040345 2. 266882 2. 03046 2. 361694 2. 512108 3. 376811 1. 850093 2. 038624  
3. 020415 3. 151492 3. 133194 2. 087383 2. 813003 -0. 08382 2. 02163 3. 354867 2. 423742  
1. 295451 2. 039767 2. 584674 2. 995658 0. 698681 0. 693642 1. 385398 1. 809394 1. 690699  
1. 675101 1. 478426 1. 277736 1. 7143 1. 404767 1. 567148 1. 570151 1. 563596 1. 842511  
1. 705175 2. 175934 1. 316314 2. 466942 1. 4681 1. 885258 2. 200627 1. 759045 1. 580192

1. 910095 1. 897956 2. 137681 2. 424707 1. 906175 1. 687588 2. 002367 1. 754534 2. 632843  
5. 399924 3. 390607 6. 383676 1. 082524 4. 877169 3. 682001 5. 851553 4. 753655 4. 091572  
1. 158651 1. 204245 1. 002954 1. 328312 1. 026208 1. 909463 1. 294718 1. 129514 1. 060956  
7. 637088 7. 366027 7. 784411 7. 18703 7. 209169 7. 63366 7. 466297 7. 610805 7. 442661  
4. 923754 5. 119731 5. 814391 5. 948771 5. 289168 4. 876458 6. 228268 4. 536646 3. 553084  
4. 03415 3. 718638 3. 752313 4. 535282 4. 941941 4. 576271 3. 997382 4. 390577 5. 117868  
8. 62132 8. 572167 9. 015404 8. 478498 8. 686551 8. 370151 9. 207864 8. 218901 8. 008386  
4. 627653 3. 427788 4. 555531 4. 590691 4. 15326 3. 272701 4. 966893 3. 986506 3. 862576  
4. 477195 4. 941409 4. 640821 5. 502013 5. 242795 4. 013158 4. 785352 4. 911869 4. 41212  
7. 087729 7. 273861 6. 141954 6. 119066 6. 79597 6. 522199 6. 997195 6. 818258 8. 075493  
5. 236291 3. 05646 3. 121669 3. 203935 4. 198959 3. 161789 3. 509193 2. 240109 2. 572161  
1. 814299 2. 01856 1. 852249 3. 516498 2. 116909 2. 271279 2. 517895 1. 831797 1. 559967  
4. 112588 3. 886586 3. 505917 4. 502833 3. 462596 4. 942342 4. 029481 5. 296305 5. 084178  
1. 441196 0. 679202 1. 310973 1. 060381 0. 72473 1. 332896 1. 919843 1. 389026 1. 021354  
1. 509024 1. 294162 0. 741069 2. 020414 1. 740654 2. 633603 0. 717703 0. 746627 3. 265789  
1. 786177 1. 745339 1. 500469 1. 736476 1. 765414 2. 031144 1. 61049 1. 344389 1. 626379  
4. 546259 5. 203852 4. 452419 4. 756736 4. 721774 3. 347569 3. 449546 4. 595066 3. 547605  
1. 169673 1. 902779 1. 779015 2. 110063 1. 660319 1. 513437 1. 691113 1. 413781 0. 812644  
1. 032394 1. 691252 1. 411867 2. 37982 1. 612264 1. 345669 1. 600117 0. 753769 1. 351967  
1. 691821 1. 207943 1. 27823 1. 354613 1. 914012 0. 998498 1. 158129 0. 959366 0. 889151  
0. 972853 1. 217241 2. 179087 1. 24809 2. 0662 3. 205813 1. 96897 1. 495919 1. 76793  
1. 868993 1. 504012 1. 949823 1. 836317 1. 752675 2. 197598 1. 324702 1. 508161 1. 638251  
1. 372087 0. 73686 1. 64831 1. 617122 1. 078359 1. 361234 1. 083123 2. 008931 2. 202756  
1. 565767 1. 751463 1. 300184 2. 880009 1. 85411 2. 022056 1. 876439 1. 096638 1. 9628  
3. 196714 3. 436781 2. 459243 4. 010124 2. 508724 3. 163285 2. 622869 2. 839688 3. 256989  
2. 437615 3. 596236 2. 818928 2. 250425 2. 242094 2. 057056 2. 704229 2. 426212 3. 023605  
2. 685756 2. 254105 3. 353187 2. 431194 3. 05361 2. 689277 2. 545938 3. 919239 2. 533348  
1. 617408 1. 760206 2. 090918 1. 938024 1. 794108 1. 833086 1. 922901 1. 993099 2. 096957  
2. 339675 2. 52349 3. 956369 3. 295502 2. 972004 2. 847267 2. 169408 2. 968112 2. 946675  
2. 420783 3. 073811 1. 824684 2. 591348 5. 286474 3. 1672 3. 411714 2. 085655 2. 120954  
1. 547003 1. 521348 1. 469627 1. 783753 1. 178058 1. 45693 1. 094004 1. 158743 1. 331826  
2. 276678 1. 417577 1. 770859 2. 974008 1. 837294 1. 897365 1. 677561 1. 715445 1. 899587  
2. 295184 2. 825101 2. 770322 2. 109376 2. 111536 2. 494962 2. 33318 1. 788875 2. 710304  
1. 185711 1. 270948 1. 190127 1. 538895 1. 945087 0. 895045 1. 702879 1. 592967 1. 496912  
3. 587543 3. 243235 5. 379517 2. 364258 4. 312819 3. 523669 3. 668629 3. 335953 5. 063668  
7. 450787 7. 904917 7. 442009 6. 988353 7. 193192 8. 053378 7. 452944 7. 269321 6. 64563  
2. 046487 2. 015196 1. 867125 2. 462582 1. 825211 2. 684037 1. 812468 1. 953836 2. 400226  
9. 837084 9. 957278 9. 741645 9. 728076 9. 961663 9. 548299 9. 963014 9. 794334 9. 877078  
3. 227944 3. 875331 2. 12529 2. 660565 4. 802808 6. 022079 2. 795189 6. 764851 2. 659725  
1. 683325 1. 411508 1. 478652 2. 506245 2. 182671 1. 792237 1. 489572 1. 148493 1. 646704  
1. 279879 1. 456485 1. 306681 1. 431223 1. 711146 1. 712802 1. 41217 1. 54375 1. 35231  
3. 931868 2. 752326 2. 829293 2. 254673 3. 004037 4. 188626 3. 349496 2. 915529 4. 332798  
7. 332568 7. 555012 7. 236884 7. 95356 7. 249665 7. 437523 7. 364338 7. 500889 7. 681659  
2. 542869 2. 210794 2. 017574 2. 545956 3. 988817 2. 307965 3. 749224 1. 460457 2. 383459  
6. 365057 6. 148594 6. 097517 5. 581454 6. 618913 6. 089561 5. 612272 6. 086592 5. 575759  
8. 585648 8. 542763 8. 491963 8. 201399 8. 097259 8. 572401 8. 837547 8. 44162 8. 437874  
3. 691684 3. 427832 3. 155837 2. 489071 2. 130626 3. 162525 2. 148772 1. 736842 2. 353822  
6. 13903 6. 06726 6. 057735 6. 139581 6. 117276 5. 942593 5. 604871 6. 094997 5. 578796  
2. 941707 3. 141053 2. 61606 2. 963912 2. 963504 2. 77463 2. 453303 2. 263571 1. 569749  
5. 66824 5. 556871 5. 886744 5. 195163 5. 256322 4. 981949 5. 604891 5. 498138 4. 615043  
6. 479705 7. 303758 7. 196581 5. 927674 6. 970494 7. 165018 6. 960817 7. 017021 6. 236286

4. 749147 4. 612427 3. 671117 3. 957786 5. 92558 5. 018925 5. 374757 4. 29027 2. 764214  
1. 548217 2. 090567 2. 12696 2. 501643 1. 4965 2. 263598 1. 454523 1. 621909 1. 566931  
2. 16922 2. 518784 2. 098805 3. 118302 3. 419736 2. 766632 2. 181124 2. 449346 3. 85353  
3. 318054 3. 134466 3. 147478 2. 719309 3. 299343 2. 870118 3. 183205 2. 825138 3. 647337  
3. 328154 4. 997754 5. 097043 3. 145257 4. 738038 4. 861815 4. 704797 4. 979156 4. 774821  
2. 979798 2. 715403 3. 266788 3. 457818 2. 266187 2. 775327 2. 548742 2. 918807 2. 414219  
7. 101362 6. 853687 6. 101643 6. 476789 6. 471307 6. 505949 6. 974078 6. 50738 7. 323552  
8. 402552 8. 441259 8. 306342 7. 016683 7. 998805 8. 241164 8. 158138 7. 644235 8. 510891  
5. 668919 7. 13436 7. 100227 6. 732646 6. 147597 7. 151618 6. 532629 6. 463582 5. 810911  
6. 217544 5. 736041 5. 80304 5. 830866 6. 187047 5. 925909 5. 798619 5. 82492 5. 223117  
4. 602573 5. 798347 6. 160481 5. 762399 5. 290277 6. 226362 5. 980032 5. 330006 5. 266443  
8. 380229 8. 639919 8. 515933 9. 018926 8. 664837 8. 111801 8. 642069 8. 503027 8. 342754  
1. 079292 1. 431823 0. 791183 1. 272549 1. 015403 4. 900172 1. 318831 0. 913712 1. 62982  
5. 618336 6. 08248 6. 175241 5. 531654 6. 135481 5. 249175 6. 279017 6. 075949 5. 302814  
6. 159363 6. 330541 6. 044075 6. 364799 6. 717025 6. 438234 6. 690476 6. 546339 7. 341675  
1. 061933 1. 418591 1. 59318 2. 485044 1. 679114 2. 107304 0. 706028 1. 372146 1. 233359  
6. 242609 6. 364223 6. 644105 6. 217285 6. 204661 6. 186731 6. 115711 6. 365688 6. 459647  
3. 391792 4. 172545 3. 533089 4. 019313 3. 79492 3. 896645 3. 724821 3. 711789 4. 258696  
3. 539105 4. 16733 3. 780773 4. 085525 3. 486114 3. 136798 4. 319399 3. 066887 2. 794232  
1. 892395 1. 765201 2. 032957 1. 239395 2. 010956 1. 743124 2. 213573 1. 857457 1. 801446  
0. 977952 1. 147515 1. 272115 1. 467565 1. 011709 1. 31011 1. 046375 1. 289935 1. 058168  
1. 641762 1. 438404 1. 549374 2. 21808 1. 768053 1. 630531 1. 818589 1. 55462 1. 795225  
1. 646462 1. 888736 1. 841484 1. 978419 1. 506536 2. 275385 2. 552889 1. 209689 2. 127915  
2. 700214 3. 539617 3. 57029 3. 097868 4. 468799 4. 083482 3. 287301 4. 20699 5. 369979  
3. 406062 3. 48902 3. 606192 3. 273754 3. 8801 3. 26549 3. 323303 3. 271725 3. 048769  
6. 529066 6. 371191 6. 376056 5. 671373 6. 581462 5. 645903 6. 79016 6. 726159 6. 685484  
3. 8965 3. 278978 2. 172615 1. 813107 2. 132517 3. 716943 3. 288818 2. 876158 2. 671269  
2. 330086 1. 300766 1. 753892 1. 794183 1. 422518 1. 770883 1. 325102 1. 470532 1. 521263  
7. 13031 7. 05062 7. 836153 7. 89153 6. 769976 7. 337734 7. 183058 7. 266431 6. 654115  
2. 12664 2. 70844 2. 086746 2. 497087 2. 112456 2. 632506 2. 411049 2. 250969 1. 236974  
1. 41418 1. 475957 1. 51579 1. 494823 1. 356074 2. 190611 1. 584469 1. 178823 1. 477101  
0. 956366 1. 379568 1. 063298 0. 900197 1. 329875 1. 315868 2. 969463 1. 593775 1. 150875  
2. 312437 1. 165054 1. 404015 1. 448801 1. 241986 2. 237727 1. 375077 1. 924357 1. 268794  
1. 148643 1. 422207 1. 09054 1. 815205 1. 373115 1. 814051 1. 339102 1. 472638 1. 333239  
1. 160231 1. 284508 1. 03882 2. 02542 0. 954518 1. 5821 1. 089832 1. 47408 1. 217989  
2. 089741 2. 495874 1. 82956 2. 299356 1. 481843 0. 903094 1. 33648 1. 215762 2. 188674  
6. 337799 6. 691447 6. 363242 6. 555232 6. 525101 6. 135151 6. 465102 6. 246094 6. 937404  
1. 311797 1. 704323 1. 555979 1. 607275 1. 51377 1. 641537 1. 686434 1. 08887 1. 657653  
5. 054217 5. 523879 5. 489325 5. 651332 5. 540594 5. 717433 5. 393683 5. 519538 5. 916074  
7. 683967 7. 603847 6. 862195 6. 712834 7. 53724 7. 260232 7. 77806 6. 858352 7. 129668  
4. 893718 4. 898213 5. 252776 5. 68091 4. 728505 4. 742783 4. 424148 4. 877166 5. 233209  
1. 992897 2. 080829 1. 939499 2. 032931 2. 176551 2. 520084 2. 280561 1. 804214 1. 713604  
1. 921781 2. 187832 1. 076154 2. 33176 1. 59469 1. 322779 1. 376458 1. 509056 1. 761331  
4. 479019 3. 756144 4. 371987 2. 502791 4. 150152 5. 102581 3. 801686 4. 349388 5. 071561  
8. 591084 8. 761014 8. 646806 8. 718449 8. 095156 8. 549832 8. 688912 8. 565896 9. 083324  
2. 004326 2. 518894 2. 034848 2. 466826 2. 372451 1. 870199 2. 486569 2. 636168 1. 616646  
1. 530171 1. 298916 1. 506526 1. 279767 1. 058826 3. 43909 1. 64004 0. 890591 1. 033578  
8. 084378 8. 137148 7. 738105 8. 480096 8. 142736 7. 432449 8. 079849 7. 944602 7. 90632  
7. 129025 7. 140613 7. 05198 6. 647691 6. 735733 6. 971755 7. 343709 6. 804074 7. 416564  
5. 215828 4. 59835 5. 329278 5. 682406 4. 52982 4. 14758 5. 275442 4. 731421 4. 544701  
1. 418961 2. 291356 1. 417778 1. 623334 1. 707117 3. 581575 2. 550516 1. 361734 3. 844819

5.836741 5.724804 5.903973 5.212858 6.049169 6.011811 5.597381 5.782378 4.606719  
6.000885 6.076619 5.684649 5.028833 5.998391 6.245645 5.943546 5.862885 7.577141  
8.963205 8.489891 9.274981 9.269402 8.895369 8.583477 9.244605 9.512455 10.01323  
8.269632 7.443892 7.810761 8.863787 7.586749 8.084467 7.815873 8.059724 7.884142  
2.752028 1.872452 1.905896 2.035533 2.02881 2.096048 2.05348 2.058877 2.067748  
5.924214 6.449899 6.41437 5.41279 6.297973 6.4315 6.423844 6.373128 6.068037  
7.44776 5.993747 6.667076 7.15174 6.918946 6.389799 7.375289 6.58691 5.565231  
8.386628 8.26598 8.317419 7.523912 8.121539 8.391847 8.449888 8.111725 7.917452  
9.549322 9.489082 9.547689 9.857961 9.476225 9.554887 9.194862 9.600314 8.73664  
1.989696 1.537639 1.899324 2.548059 1.588721 1.824031 1.636433 1.581345 1.719433  
5.27984 5.627484 5.578178 4.981841 5.465402 5.556648 5.572421 5.507991 5.536698  
0.763666 2.241432 1.226059 1.100571 0.491354 1.39566 0.958307 0.545794 1.334784  
3.490953 3.361367 3.280245 2.376777 2.565897 3.494698 1.942213 1.944094 2.828577  
1.361458 0.946663 0.814003 0.924213 1.750708 1.079854 0.655616 1.251004 0.939085  
2.718144 3.883192 2.704054 4.673109 4.164595 4.087279 3.380808 3.538086 3.007163  
4.623804 4.873326 5.295967 4.668866 5.307553 4.915113 4.847862 5.28491 5.237344  
6.839576 6.132686 6.721549 7.13422 5.924059 5.736071 6.365146 6.237941 6.410212  
1.54497 1.610759 1.330606 2.113907 1.281867 1.674658 1.323659 1.282203 1.014764  
1.334978 1.007202 0.95113 2.286152 0.996755 1.382145 1.178641 0.979049 1.246335  
5.167386 5.465025 5.475501 4.685403 5.929536 5.252393 4.959098 4.858357 5.570341  
5.101498 4.980273 4.702998 4.936821 4.990892 5.326706 5.109186 4.796191 5.31307  
5.091198 5.129859 5.160247 5.298032 5.925252 5.381704 4.834852 5.511329 4.024043  
2.885923 4.476483 4.788664 4.844175 4.616575 3.270603 4.066299 6.092302 5.302203  
6.549197 6.994776 7.219631 6.080118 6.997382 6.913628 6.99463 7.108784 6.618914  
2.275849 1.864118 2.380755 1.844997 1.715924 1.987423 2.262003 3.002154 2.694172  
5.502095 5.526236 5.155793 7.226897 5.626193 4.579468 6.111374 5.209037 4.808235  
6.651708 7.23464 7.591967 6.566258 7.107629 7.280654 6.957531 7.065247 6.333551  
1.2249 1.098784 2.05153 1.715174 1.656753 1.976732 1.539031 1.619478 1.829198  
1.166062 2.772851 0.884418 1.295858 1.600081 1.249039 1.496585 0.992514 2.053852  
5.237736 6.559034 5.763756 6.657643 5.778239 5.020805 5.676775 5.663257 6.950535  
6.398434 6.036772 6.845606 6.713294 6.768402 5.706007 6.691375 6.273301 6.929213  
2.920572 3.184304 2.828739 4.363227 3.725801 3.068002 3.946755 2.806015 2.824108  
6.127802 5.846022 6.251131 6.587671 5.603525 6.335244 6.602416 5.846255 5.679785  
2.637413 3.873133 4.036827 3.597695 3.013959 3.435348 2.883192 3.434806 3.507522  
4.962277 4.93399 4.936591 4.973482 5.595658 5.74093 4.747481 4.644042 4.661304  
5.25841 5.675812 4.617887 4.939873 5.792728 5.143982 5.556167 6.122363 5.818602  
2.332234 2.332234 2.294625 2.493335 3.933812 1.947456 2.675631 2.105788 2.543268  
3.959432 2.854521 3.253033 2.7322 3.508368 3.250264 3.476538 2.869308 2.012896  
1.19547 1.539263 1.514007 1.143898 1.553114 1.551322 1.63461 1.42925 2.198691  
1.5147 0.975102 1.1598 2.196729 1.682642 1.082017 0.838384 0.930305 1.319869  
2.246535 1.593812 2.117707 4.116615 4.17855 0.983984 2.723358 1.940949 1.130173  
2.591928 2.482585 3.003843 2.993409 2.663204 2.934254 3.08314 2.558091 2.743605  
1.789337 1.890665 2.773803 1.287292 1.367356 1.265846 1.533734 1.30603 1.420932  
2.462189 2.108107 2.298005 2.837961 2.159033 2.096192 2.317754 2.362045 2.813671  
1.980558 1.933135 2.323901 2.004626 2.447126 2.785419 1.684729 1.720776 1.545098  
1.396044 1.131529 1.34826 1.632209 1.27039 1.624045 2.143791 2.113617 0.997341  
1.194911 1.070888 1.104155 1.7706 1.196642 1.797452 1.413114 1.37133 0.986989  
3.277623 2.868678 2.739621 1.850384 3.03317 2.215816 4.169236 3.55387 4.481499  
1.422684 1.304924 1.134013 1.561069 1.417662 1.709492 0.90655 1.185874 1.25372  
1.829518 1.489555 1.443737 2.129996 1.115657 1.923106 1.717904 2.519966 1.946859  
1.180989 0.94274 0.738776 1.703161 1.163351 1.139291 1.234991 1.518872 1.72854

3. 225399 3. 214783 1. 947628 3. 626689 2. 357161 1. 826609 1. 692373 2. 490725 2. 961436  
1. 660198 1. 738221 1. 44039 1. 593596 1. 814794 1. 582035 1. 335068 1. 669036 1. 727897  
1. 391022 1. 709292 1. 899295 2. 305617 2. 02883 1. 461019 2. 433132 1. 320556 1. 195125  
2. 013815 1. 26547 1. 914193 1. 031024 2. 371078 1. 91789 1. 859033 1. 157261 0. 906819  
1. 255095 1. 785066 1. 346004 1. 647417 1. 069591 2. 032283 1. 367563 2. 469967 1. 02095  
3. 645422 1. 900236 1. 180166 4. 301406 1. 995844 1. 867769 3. 552631 1. 226709 3. 154062  
2. 101026 1. 443084 2. 404441 3. 143 2. 253802 1. 92524 2. 574394 3. 213919 2. 492318  
1. 044019 1. 222495 1. 518785 1. 534062 0. 965966 1. 984136 1. 011384 1. 207262 1. 512193  
3. 911615 3. 547259 3. 041452 4. 283555 2. 717505 4. 183783 3. 251806 3. 514806 3. 419723  
3. 389993 1. 863189 2. 405559 2. 143257 2. 375993 2. 600792 1. 586272 4. 246601 2. 047615  
2. 590877 2. 427886 3. 59768 2. 050927 2. 262967 2. 074455 3. 201856 3. 383121 2. 549166  
1. 021212 1. 187598 1. 424908 1. 886332 1. 612034 1. 916256 0. 851566 1. 299828 1. 319414  
4. 261129 4. 142786 3. 935222 4. 157627 3. 963062 3. 867965 4. 601317 4. 028964 3. 978042  
1. 123515 0. 951649 1. 183567 0. 888442 0. 997756 1. 877017 0. 953367 1. 344039 2. 157918  
1. 61773 1. 508797 1. 454462 1. 810947 1. 770953 1. 337309 1. 583145 1. 503814 2. 285509  
2. 118269 2. 19923 3. 189137 2. 743569 2. 096346 1. 784732 1. 786578 2. 033935 1. 825904  
1. 179799 2. 288688 1. 432007 1. 536754 0. 483985 3. 147372 3. 110444 2. 164652 3. 263972  
1. 385196 1. 25135 1. 955745 2. 075341 1. 057113 1. 944121 1. 563449 0. 604463 1. 475819  
0. 480185 1. 291795 1. 030664 1. 687836 0. 454558 1. 01 0. 659882 0. 614498 0. 89026  
1. 346417 1. 702762 2. 741404 1. 275039 2. 453177 2. 457602 1. 452607 2. 482041 2. 235827  
3. 301324 3. 235202 2. 764439 3. 412411 2. 98188 3. 235506 3. 473788 2. 930639 4. 178171  
1. 490348 1. 572972 1. 334085 1. 399238 1. 736339 2. 23632 1. 374514 1. 155973 1. 994944  
0. 852095 0. 874059 1. 374251 2. 050545 1. 119731 1. 59431 0. 948606 1. 63788 1. 539067  
1. 223117 1. 449766 1. 198864 1. 119689 2. 402487 1. 097322 1. 875709 2. 109183 1. 538997  
1. 652811 2. 290051 1. 983042 2. 4686 1. 348132 2. 300746 2. 787936 3. 547254 5. 359977  
2. 476 2. 84143 2. 877962 1. 961077 2. 389058 3. 312474 2. 205598 2. 827326 2. 512678  
1. 086272 0. 900471 0. 984506 1. 049071 1. 22269 1. 276719 1. 305103 0. 773155 1. 32908  
1. 850454 2. 381331 2. 55671 2. 232366 1. 887825 2. 342829 2. 522194 2. 033202 2. 239269  
0. 989876 0. 391871 1. 593408 0. 590133 0. 666554 1. 865159 0. 733609 0. 991871 2. 934222  
1. 082096 1. 103277 1. 26019 1. 533007 1. 093401 1. 590275 1. 074079 0. 985748 1. 20019  
2. 828176 1. 8607 2. 572428 1. 968885 1. 316086 2. 271085 2. 117908 1. 926398 3. 079242  
0. 978485 2. 015801 0. 933652 0. 84806 1. 435134 1. 730938 0. 689618 0. 930635 1. 288059  
1. 099102 1. 168881 1. 22781 1. 280656 1. 463722 2. 065332 1. 114827 1. 233264 1. 113588  
2. 432429 0. 915929 1. 691704 1. 064826 1. 469874 2. 120158 1. 111072 1. 708534 1. 613491  
2. 602402 2. 988762 4. 50588 1. 752987 1. 860155 2. 134885 2. 187208 2. 392643 2. 015083  
3. 320532 1. 148815 2. 896473 3. 177689 2. 265018 2. 987906 0. 737566 2. 049589 2. 016997  
4. 309518 1. 487476 2. 96056 2. 788209 3. 38637 2. 306251 2. 112543 2. 535288 3. 378629  
3. 024223 3. 711692 1. 997955 3. 589335 2. 56688 3. 382428 1. 904131 2. 254851 3. 680044  
1. 134721 2. 79051 0. 77461 2. 986834 1. 240458 1. 019878 0. 680582 1. 270664 0. 979467  
1. 419029 1. 264368 1. 703251 2. 818833 0. 985822 1. 641632 1. 695004 1. 349515 1. 708959  
3. 262759 2. 058275 2. 086636 3. 077023 2. 062287 2. 136492 3. 509947 2. 572677 4. 362343  
3. 31052 1. 52353 1. 524611 2. 104833 3. 221731 2. 483053 3. 213274 2. 563302 3. 229967  
1. 812981 1. 796672 2. 132922 3. 12184 2. 379535 0. 929605 2. 536227 1. 432944 3. 012942  
1. 320829 0. 825756 1. 484049 2. 204948 0. 562355 0. 60937 1. 123233 1. 33059 1. 226686  
4. 450058 2. 0622 3. 600874 3. 217558 3. 147283 2. 257289 2. 874363 3. 604292 3. 117611  
0. 876459 2. 20337 1. 206753 1. 185934 1. 607881 1. 245291 0. 928359 1. 049138 2. 244018  
2. 064218 1. 337691 1. 047313 1. 560411 1. 818305 1. 08299 1. 308208 1. 239659 1. 0259  
1. 626933 1. 256754 1. 436687 1. 649301 1. 496577 1. 574115 1. 450749 1. 486523 1. 765469  
2. 667868 2. 23518 5. 025752 4. 582151 4. 50565 2. 476328 4. 468278 3. 852172 2. 678792  
5. 519932 5. 578739 5. 712941 6. 135848 6. 298142 5. 605244 5. 579722 5. 674752 4. 468413  
1. 950949 1. 692639 1. 838096 2. 492795 1. 650385 1. 394804 1. 608189 1. 810929 1. 535306

1. 117954 0. 731792 1. 024914 1. 24855 0. 642922 1. 972396 0. 689555 0. 80543 1. 893218  
1. 317214 1. 4055 0. 940498 1. 846818 1. 050672 1. 745642 1. 509592 1. 019557 2. 204361  
2. 296603 2. 365817 2. 328806 3. 255343 2. 473488 2. 762199 2. 674299 3. 57582 2. 187125  
0. 930144 0. 876991 1. 104466 1. 022234 1. 075629 0. 959895 1. 019039 0. 912821 1. 553563  
0. 81237 0. 783391 0. 830293 3. 859026 0. 775056 0. 892401 1. 617258 3. 291021 2. 872741  
1. 536014 2. 922612 2. 136893 2. 539673 2. 06464 1. 731069 1. 732201 1. 767726 2. 849043  
0. 826269 1. 000986 0. 976224 1. 908944 1. 200566 0. 7643 1. 097978 1. 059791 0. 844464  
1. 289113 0. 499635 2. 295622 1. 991794 0. 642107 1. 437195 1. 852568 2. 04971 0. 891654  
1. 904537 2. 085074 2. 756912 3. 695732 1. 669054 2. 719095 2. 227391 2. 576608 2. 268256  
4. 91238 4. 346456 6. 603133 3. 708753 5. 289962 4. 016178 5. 809461 5. 037761 5. 851276  
1. 925958 1. 870051 1. 115005 1. 905638 1. 198535 1. 796593 1. 248447 1. 682461 1. 610389  
2. 648801 2. 99643 2. 836542 0. 821126 2. 625469 2. 870748 3. 4834 2. 288124 4. 801597  
1. 541633 1. 874821 1. 116518 1. 975956 1. 674494 1. 707003 1. 653028 1. 707577 1. 281074  
2. 184502 2. 280249 1. 919604 2. 522479 2. 227424 2. 393052 1. 412158 1. 807345 1. 459027  
0. 86519 0. 920428 1. 046401 1. 743352 0. 995076 1. 361159 2. 248479 1. 235065 1. 97432  
2. 503339 2. 255707 2. 937993 3. 066436 2. 841725 2. 600026 2. 243191 2. 691924 2. 307278  
0. 994036 1. 870128 0. 801339 1. 828435 1. 331231 2. 479342 2. 530382 1. 914123 3. 158859  
0. 994977 1. 259927 1. 096729 1. 73932 1. 26099 1. 637594 1. 524814 0. 920138 1. 332438  
0. 929566 1. 109075 0. 985862 1. 314135 1. 73041 1. 513863 1. 451817 0. 794586 1. 485194  
5. 470846 3. 994817 5. 230731 7. 31229 4. 402636 1. 920037 5. 937197 3. 65089 4. 229929  
3. 289005 1. 673584 2. 296203 1. 410118 1. 190578 2. 042911 2. 394394 2. 323738 4. 470128  
1. 502389 1. 679013 1. 565485 1. 995058 1. 341368 1. 719865 1. 500217 1. 841893 2. 018459  
1. 411488 1. 729196 2. 296254 2. 141297 1. 396896 1. 524674 4. 0568 2. 221676 1. 350999  
1. 29164 1. 607399 0. 995477 2. 160965 1. 010863 1. 080329 2. 184856 1. 583171 2. 129882  
0. 884635 1. 527237 1. 057559 1. 915551 1. 132675 0. 779229 1. 053972 1. 050074 0. 860811  
0. 922092 1. 894623 1. 468954 1. 872864 1. 846636 0. 872891 1. 320903 2. 046052 1. 192363  
0. 746481 1. 113719 1. 545981 1. 175445 1. 182208 1. 154715 1. 163023 1. 058056 1. 296292  
1. 06282 0. 964175 1. 483326 1. 613982 1. 251151 2. 100707 0. 801132 0. 439478 1. 093532  
1. 656733 1. 231918 1. 591185 1. 099736 1. 176393 1. 742204 1. 435481 1. 13582 0. 941245  
0. 816683 1. 321115 1. 049672 1. 501383 1. 34167 1. 659191 0. 680975 1. 244222 0. 863059  
2. 61544 1. 47869 2. 308996 1. 464874 1. 505256 2. 134881 2. 192972 1. 832672 2. 621328  
1. 47927 1. 432027 2. 395775 1. 230782 1. 432272 1. 701996 1. 304634 1. 764483 1. 383692  
1. 665487 2. 030441 2. 352925 1. 341041 1. 388966 2. 159947 1. 677494 2. 382115 1. 529052  
2. 217726 2. 132009 2. 240701 2. 162939 1. 285239 3. 300641 2. 079121 1. 804686 1. 889594  
3. 136685 3. 14668 2. 83082 2. 676611 2. 910648 2. 721398 2. 592958 1. 915788 3. 680237  
1. 924592 1. 743931 1. 768907 2. 151142 2. 181823 2. 113449 1. 341819 1. 255798 1. 616719  
1. 545379 2. 489151 1. 428287 1. 263325 2. 271462 2. 066861 2. 309642 2. 865079 3. 090875  
1. 480863 0. 825776 0. 924744 1. 050426 1. 407235 0. 982057 1. 536442 1. 150272 1. 691273  
4. 157526 3. 221011 4. 129041 3. 820901 2. 905908 3. 729539 2. 219041 3. 616283 2. 628011  
3. 809505 4. 572346 2. 76544 4. 612017 4. 132527 3. 096871 4. 846089 2. 673588 2. 559261  
0. 933964 0. 976369 1. 416005 1. 879436 1. 498885 0. 9552 0. 904389 1. 04809 1. 417953  
4. 308097 4. 136247 2. 414352 2. 613451 2. 32236 2. 710129 3. 563934 3. 942992 3. 316068  
2. 728537 3. 369186 2. 080782 2. 274134 2. 176176 2. 05639 2. 93989 3. 049934 2. 836208  
1. 413294 1. 323097 1. 441149 0. 647918 1. 328512 1. 601945 1. 293963 1. 035629 1. 094575  
0. 374334 0. 753466 1. 028811 0. 859713 3. 665625 0. 648403 0. 63642 0. 757108 1. 582479  
1. 826096 3. 397918 3. 833724 2. 172265 2. 836033 0. 760186 1. 192009 3. 723571 2. 758775  
2. 998146 2. 953147 2. 88832 2. 351092 3. 094277 2. 881434 2. 360899 2. 682901 3. 104365  
0. 879116 1. 873215 1. 389034 0. 961047 1. 055321 1. 365715 0. 953795 0. 995724 1. 154843  
1. 290906 0. 917102 1. 772992 1. 084877 1. 22609 0. 945171 1. 037095 0. 909727 1. 314813  
1. 675991 1. 126404 1. 160862 1. 589538 1. 115244 1. 588548 1. 595441 1. 448092 1. 503465  
1. 368118 0. 583294 1. 290706 2. 133647 1. 454978 1. 254277 0. 899368 1. 21428 1. 387883

1. 965871 1. 529038 1. 36048 2. 273477 1. 419628 1. 252547 2. 637225 3. 22025 3. 20172  
2. 525478 2. 524076 2. 90796 3. 149572 3. 076096 2. 002329 2. 287299 2. 339131 2. 310099  
2. 082887 1. 496615 1. 677654 2. 628603 3. 399935 2. 982995 1. 861372 1. 894393 3. 666756  
1. 814381 1. 78596 1. 43463 2. 070208 1. 406392 2. 153803 1. 831444 2. 379847 1. 764041  
1. 93711 1. 310679 1. 682757 3. 358517 2. 810384 1. 204275 1. 965352 2. 085165 1. 464599  
1. 080881 0. 844136 1. 190566 1. 791234 1. 511899 1. 878838 1. 687254 1. 715778 1. 612106  
1. 990108 1. 30846 2. 204099 1. 946621 3. 195221 3. 485815 1. 551502 1. 87178 2. 502383  
1. 182072 1. 384053 1. 624982 1. 610683 1. 045618 1. 025416 1. 339903 1. 2657 1. 377594  
1. 344269 1. 904895 1. 333427 1. 32112 1. 766919 1. 234291 1. 252781 1. 244553 1. 745789  
1. 064867 1. 024052 1. 318714 1. 682893 1. 113066 0. 924125 0. 892222 1. 085698 0. 998128  
1. 621859 1. 977251 1. 672832 2. 048221 1. 359219 1. 640421 1. 586363 1. 687736 2. 305497  
1. 855904 1. 012848 1. 561703 1. 101832 1. 271204 0. 719476 0. 72058 1. 557054 1. 787744  
3. 603055 2. 844543 2. 748594 3. 349871 3. 284741 2. 534967 2. 630053 3. 91328 2. 76584  
1. 067137 0. 933136 0. 691861 1. 203184 0. 558465 2. 109282 1. 137725 1. 488441 0. 983728  
2. 11386 1. 854205 2. 195241 2. 559105 2. 13492 2. 673767 2. 293136 2. 327778 2. 917295  
3. 039729 2. 528991 3. 223271 3. 187067 2. 24899 2. 295256 3. 572437 2. 566416 1. 916623  
2. 496568 1. 730326 1. 880584 2. 199596 2. 107015 2. 287398 1. 972173 2. 50477 2. 256215  
0. 596008 0. 550333 0. 814705 1. 842025 0. 855672 1. 100151 0. 857808 0. 88363 1. 629342  
1. 783363 2. 866077 2. 109595 2. 298351 1. 265903 1. 683418 1. 566208 2. 025959 1. 625313  
2. 208004 1. 961489 1. 575215 1. 506611 2. 225596 3. 632857 1. 66994 1. 635119 2. 641778  
1. 968028 2. 793566 2. 2045 2. 401378 1. 82275 1. 973505 2. 00761 1. 484328 1. 948259  
2. 467712 2. 132007 2. 366912 2. 429934 1. 50285 1. 77829 2. 047774 2. 485803 2. 255446  
1. 574142 2. 140669 1. 264442 1. 246863 1. 441726 1. 440982 1. 266472 1. 920236 1. 557298  
2. 225209 2. 60435 3. 681744 3. 854474 2. 679051 3. 03665 3. 358674 2. 844791 2. 851359  
4. 167138 5. 280363 5. 226704 4. 242719 4. 423453 4. 451418 4. 685916 4. 284473 4. 262317  
2. 48034 1. 967742 1. 908166 2. 250827 2. 884723 0. 798808 1. 921843 2. 002579 3. 100133  
1. 358692 1. 126094 1. 425224 1. 286927 1. 739984 0. 980945 1. 66658 1. 375274 1. 176579  
1. 847802 1. 811158 1. 443177 1. 734599 2. 139815 1. 247453 1. 587382 1. 425637 1. 305883  
1. 122139 0. 8178 0. 888756 0. 821796 1. 066813 1. 229156 0. 97958 1. 107447 0. 95435  
1. 764884 0. 826801 1. 101207 1. 199149 1. 347043 1. 110411 2. 191398 0. 804641 1. 47255  
4. 186629 4. 378943 4. 412991 4. 2425 3. 084035 5. 026549 4. 641683 4. 268934 4. 425043  
2. 541217 2. 427193 2. 352649 1. 690087 1. 677295 2. 43904 1. 321889 1. 661866 1. 955867  
1. 981561 1. 539896 1. 994448 1. 755292 1. 808501 2. 170856 1. 986735 1. 426837 1. 877696  
1. 824649 1. 773925 1. 373488 2. 26882 1. 327924 1. 608498 1. 86734 2. 242302 2. 283884  
0. 976569 1. 482923 1. 074193 1. 448612 1. 767199 0. 861442 0. 804063 0. 839297 1. 201723  
5. 620823 5. 708265 4. 858003 5. 134389 4. 392728 6. 035631 5. 44664 5. 21647 4. 996502  
2. 078164 2. 773566 2. 108105 2. 904796 2. 0942 2. 278424 3. 303299 3. 82366 2. 932763  
2. 757133 1. 680562 2. 777581 1. 718973 1. 857135 2. 49211 1. 896293 3. 003476 2. 317307  
0. 915913 1. 766632 1. 522342 1. 671646 1. 207033 1. 149524 1. 42438 2. 053792 1. 748633  
1. 596108 1. 417531 1. 594953 1. 52772 2. 063119 1. 757346 1. 46603 2. 082231 2. 737212  
1. 37383 1. 473201 1. 082246 1. 334679 1. 113846 1. 265655 1. 769367 1. 156771 1. 14124  
1. 882373 2. 537866 2. 063171 1. 72964 1. 60645 1. 672672 2. 376557 1. 822063 1. 895431  
1. 181275 0. 981645 1. 58102 1. 556529 2. 108935 1. 230137 1. 687782 1. 076915 2. 746093  
4. 508312 4. 100938 3. 628051 5. 281707 5. 333265 5. 02964 4. 692622 4. 099379 3. 97773  
0. 799752 2. 581312 2. 209754 2. 775163 3. 062717 2. 883389 0. 963141 1. 793496 1. 332859  
1. 764852 1. 530055 1. 749807 3. 429704 1. 298046 1. 501369 1. 145532 1. 75194 1. 990896  
1. 380571 1. 835369 2. 157311 1. 991432 1. 688079 2. 396998 1. 851036 2. 024842 1. 375453  
1. 316644 1. 042885 1. 426033 1. 359514 1. 981052 1. 626272 1. 390909 2. 286524 2. 973772  
0. 916142 0. 693777 1. 411916 2. 015279 0. 862827 1. 099164 0. 911714 1. 185184 1. 727542  
0. 952405 1. 664931 2. 027469 1. 229928 1. 082749 2. 060952 0. 71107 1. 247845 1. 268366  
1. 485986 2. 00474 1. 54032 5. 308638 2. 558854 1. 342287 2. 044621 2. 233356 3. 224137

1. 854012 1. 854613 2. 314952 1. 740724 1. 544434 4. 287174 2. 306302 2. 554701 1. 759266  
1. 510716 1. 150766 0. 904926 2. 537811 2. 001366 1. 500538 1. 68865 1. 69094 1. 489354  
1. 417965 1. 16404 1. 552339 1. 31216 1. 130589 1. 192899 1. 409839 0. 923925 1. 837021  
4. 310314 3. 295814 5. 251046 3. 268579 2. 577599 1. 846693 3. 389015 3. 321778 3. 100943  
2. 593279 2. 049317 2. 10527 2. 329487 3. 041367 2. 90982 2. 765742 2. 424254 2. 219141  
1. 710474 1. 953516 2. 139526 1. 874179 1. 727982 2. 81837 2. 426038 2. 437488 2. 109986  
2. 471216 4. 343654 3. 764451 2. 997833 1. 716872 2. 451203 4. 041659 2. 810381 3. 813146  
1. 217451 0. 997808 1. 351627 2. 10109 1. 305114 1. 956615 2. 003063 1. 75471 1. 43996  
1. 210323 0. 805781 1. 395958 2. 674225 1. 347402 2. 149034 0. 988769 1. 913679 1. 668612  
1. 373235 1. 546695 1. 625593 1. 435752 1. 222104 1. 356705 1. 315707 1. 053979 1. 418421  
1. 204171 1. 637938 1. 111779 2. 607619 0. 893645 0. 942768 1. 100667 1. 34803 1. 683135  
1. 18882 1. 311821 1. 225946 1. 596698 1. 049228 1. 501367 1. 228559 0. 823451 1. 563938  
1. 466812 1. 587898 0. 982824 1. 234099 1. 0808 1. 256346 0. 835112 1. 970844 1. 298018  
2. 3757 2. 065444 2. 498369 2. 948424 2. 321595 2. 687553 2. 189097 2. 030854 2. 213957  
1. 773512 2. 198109 1. 404182 1. 619464 1. 865354 3. 779134 0. 841558 1. 016409 1. 31447  
2. 065313 2. 105703 3. 011016 3. 07502 2. 570787 2. 605011 2. 348279 2. 435128 3. 661813  
2. 029881 1. 88408 2. 017991 3. 068942 1. 874189 2. 689401 2. 104263 1. 511889 1. 890691  
1. 256045 1. 839941 1. 661319 2. 990105 1. 72022 1. 622059 1. 385086 1. 47536 2. 900279  
1. 700321 1. 600105 1. 387438 2. 448784 1. 698901 1. 6603 1. 668462 1. 718142 1. 734803  
1. 62525 1. 855915 1. 651662 2. 10795 1. 531513 1. 975677 1. 798212 1. 709575 3. 48685  
2. 64326 1. 502099 1. 351113 2. 107107 1. 346581 1. 564968 2. 368927 2. 152749 1. 627073  
1. 768068 3. 100358 2. 272329 2. 270955 1. 103131 1. 419991 2. 677877 1. 43297 2. 029491  
1. 139254 3. 779427 1. 399366 2. 21358 2. 733059 3. 7808 1. 494051 0. 572026 4. 599709  
1. 534846 1. 320596 2. 115099 2. 610229 1. 342488 2. 689181 2. 288484 1. 479958 1. 471072  
1. 185105 0. 714569 0. 835028 1. 307347 1. 025336 1. 240251 0. 990494 0. 796523 0. 947676  
2. 536348 1. 920919 1. 87263 3. 696624 1. 761526 2. 131371 2. 342348 2. 443583 1. 874354  
1. 117848 1. 529276 1. 186121 1. 443719 1. 506403 2. 238662 0. 943592 1. 251603 1. 976998  
1. 447777 1. 180211 1. 12773 1. 935792 0. 592137 1. 119588 1. 946665 1. 439953 1. 168117  
3. 570745 2. 64637 4. 122922 3. 266987 2. 869162 2. 685562 2. 25869 0. 423606 3. 90944  
0. 968707 1. 056692 1. 002907 1. 331156 1. 049784 1. 096213 1. 699836 1. 692026 0. 98742  
1. 649478 2. 130614 1. 319192 1. 732663 1. 402269 1. 795187 2. 016665 1. 231177 1. 301842  
1. 253943 0. 969014 2. 090903 3. 091195 1. 935842 2. 297025 1. 120014 0. 952 2. 194992  
1. 530354 1. 042259 1. 361981 2. 232446 1. 713243 0. 849102 0. 818962 1. 158371 0. 938909  
1. 409097 1. 720812 1. 67273 1. 538787 1. 175963 2. 008352 1. 276854 0. 911073 1. 61804  
2. 763647 4. 005816 2. 927421 4. 275822 2. 515753 2. 785955 2. 888191 2. 357056 4. 639595  
1. 610941 1. 119871 2. 316902 1. 423251 1. 638594 1. 783835 1. 525132 1. 354842 1. 472636  
1. 389969 1. 279437 1. 579415 0. 787825 1. 071074 0. 965168 1. 251671 1. 954319 0. 969989  
1. 332968 1. 872857 1. 008655 0. 893327 1. 939317 1. 234906 1. 713981 1. 317234 1. 459455  
2. 764307 1. 917955 2. 567126 2. 958927 2. 521927 3. 831142 2. 722456 2. 80782 2. 545774  
1. 116729 1. 058669 0. 994359 0. 954433 1. 013532 1. 021278 1. 228664 1. 541529 0. 875446  
1. 083553 0. 748329 0. 511817 1. 960618 0. 690719 1. 241189 0. 928578 1. 263179 0. 461381  
1. 789613 1. 108374 1. 285952 1. 05563 1. 12187 1. 120123 0. 949726 1. 183079 1. 042724  
1. 574045 1. 41043 0. 932607 1. 696273 0. 940298 1. 473048 1. 259122 0. 91197 1. 371436  
0. 966342 1. 145589 1. 0441 1. 344445 1. 270368 0. 845702 1. 04882 0. 961779 1. 584802  
1. 330169 2. 354205 1. 55499 2. 666001 2. 495302 1. 767438 1. 774533 1. 610502 4. 313089  
1. 164703 1. 191369 1. 37028 1. 426043 1. 079876 1. 489537 1. 429538 1. 372283 1. 365976  
1. 528921 1. 218936 1. 952232 1. 921408 1. 532026 1. 255136 1. 680355 1. 290079 2. 482894  
3. 633967 2. 524322 2. 705799 3. 387001 1. 638703 3. 099975 2. 76077 3. 168052 3. 566385  
1. 955336 1. 371986 1. 354245 1. 045164 1. 120163 1. 309323 1. 282402 1. 967663 1. 034103  
1. 101125 1. 060229 0. 831563 1. 912934 1. 086906 1. 764524 1. 176947 1. 266911 1. 234892  
1. 740032 1. 011726 1. 474175 1. 30407 1. 790817 0. 986427 1. 626236 1. 011414 1. 506585



1. 513007 1. 27485 1. 285455 2. 239717 0. 843991 1. 430784 1. 041526 1. 139777 1. 116023  
5. 119994 4. 453324 4. 621964 5. 582656 6. 175389 2. 71725 3. 883082 5. 253438 3. 647449  
1. 147368 1. 281123 1. 005754 2. 445571 1. 832287 1. 432536 1. 213286 1. 739088 1. 669523  
0. 88893 1. 261442 1. 096896 0. 830259 1. 249967 1. 652812 0. 862675 1. 152942 0. 898426  
2. 95969 2. 335377 3. 039858 3. 109424 1. 540589 3. 71082 2. 890129 2. 374951 3. 32205  
4. 477837 4. 219902 5. 400113 2. 775286 4. 276267 5. 185653 3. 362404 5. 930759 6. 717902  
2. 3826 1. 724388 1. 648377 2. 502945 1. 289911 2. 228187 1. 867602 2. 010482 1. 01878  
0. 955906 0. 886705 1. 126652 1. 124101 0. 72265 1. 37045 0. 947445 1. 51857 0. 987408  
1. 109532 0. 888275 1. 428622 1. 363222 1. 618776 1. 490659 1. 013848 1. 095026 1. 27172  
0. 977557 1. 074412 1. 02192 1. 273853 0. 897214 1. 690523 0. 768991 1. 02192 1. 392415  
0. 856625 1. 642108 0. 905506 0. 816788 0. 663018 1. 188122 2. 101954 0. 915408 2. 277445  
1. 843208 1. 624205 1. 426066 1. 600026 0. 983478 1. 599597 1. 331837 1. 450679 1. 005123  
2. 259098 2. 418055 2. 383625 2. 781902 2. 485481 2. 418038 1. 655185 2. 793114 4. 185599  
1. 259725 1. 772801 1. 853895 2. 055978 1. 503027 1. 552362 1. 775817 1. 469256 1. 400185  
2. 008036 1. 256901 2. 049113 1. 880588 2. 091633 1. 687536 1. 795102 1. 485025 1. 397993  
1. 167322 0. 977289 0. 842771 1. 836782 1. 241234 0. 980332 1. 015254 1. 591374 1. 423848  
1. 363621 2. 945671 2. 036118 1. 392301 1. 575384 1. 303656 1. 990568 1. 035051 1. 719552  
1. 461976 1. 112936 1. 298095 0. 861933 1. 05597 0. 776433 0. 836099 0. 869167 1. 445481  
1. 095754 0. 943 1. 4416 1. 899839 1. 191353 1. 89768 1. 629261 1. 353492 1. 117501  
1. 80538 1. 711227 2. 103671 2. 423113 1. 973871 2. 061253 1. 679412 1. 991345 1. 574517  
0. 733725 0. 856134 1. 085004 1. 221668 0. 963555 1. 27785 0. 730708 0. 859925 0. 757947  
1. 815167 1. 362866 2. 226558 1. 66264 1. 66684 2. 08082 1. 07647 1. 232236 3. 622486  
3. 213096 3. 928637 2. 891946 3. 336652 2. 713286 3. 160547 3. 133772 2. 965089 4. 692181  
1. 599197 1. 856495 1. 569721 2. 12335 2. 191945 1. 541873 1. 724404 1. 894861 1. 808349  
0. 50503 1. 318497 0. 578256 3. 202595 1. 094173 0. 845961 0. 688954 1. 183518 2. 10965  
1. 278473 1. 234015 1. 279123 2. 307054 2. 150915 1. 576303 1. 423217 1. 607595 2. 300551  
3. 878474 2. 828919 2. 030989 2. 631199 2. 107854 2. 029416 2. 751032 2. 786367 5. 289206  
0. 841564 0. 909709 1. 199645 2. 579303 1. 158311 2. 051663 0. 799845 0. 845201 1. 557723  
1. 623728 1. 109591 1. 652118 1. 454995 1. 73943 1. 480319 1. 698755 1. 112903 1. 751982  
1. 468798 1. 497708 2. 607535 2. 376179 1. 240795 1. 356903 1. 652339 1. 601136 1. 32189  
2. 085542 1. 563015 3. 830464 1. 539937 1. 704691 2. 041251 1. 668991 1. 71925 1. 837671  
1. 007333 2. 369542 1. 57843 0. 654311 1. 420324 1. 482435 0. 829023 0. 883133 1. 945879  
0. 82805 1. 323795 1. 11751 1. 681758 1. 013754 1. 17592 1. 133185 1. 163816 1. 654987  
1. 441533 1. 238676 1. 681217 1. 076293 1. 113367 2. 226046 1. 172229 0. 970762 1. 791603  
2. 324437 1. 633845 1. 414784 1. 941402 1. 242886 2. 218562 1. 701857 1. 652559 2. 064292  
1. 132491 1. 280029 1. 075782 0. 907342 1. 249131 2. 325662 0. 789902 0. 815998 1. 020091  
1. 396714 1. 189726 2. 058911 1. 867232 2. 543851 3. 002893 1. 920402 2. 706832 1. 653027  
1. 376392 1. 31223 1. 142333 1. 665625 1. 248589 0. 716161 1. 132603 1. 412627 1. 936842  
1. 814604 1. 771293 2. 180684 2. 156455 1. 861374 2. 048287 2. 049451 1. 465995 2. 420506  
0. 760227 0. 74979 1. 008976 1. 05861 0. 959273 1. 163601 0. 911862 0. 872059 0. 996153  
1. 18423 1. 630799 0. 898343 2. 537962 1. 070755 2. 903596 1. 815379 1. 250288 1. 603915  
2. 792913 3. 219128 2. 576283 4. 389903 2. 418014 2. 627402 2. 694672 1. 857456 5. 466076  
0. 960421 0. 598588 1. 662925 0. 660958 1. 161701 0. 782316 3. 414785 4. 990974 0. 621712  
2. 124379 1. 452478 1. 696552 3. 116701 2. 006053 1. 942479 1. 685926 2. 001861 4. 777703  
2. 626872 2. 147506 1. 909082 1. 379554 1. 048836 1. 099007 2. 660579 0. 760819 2. 993024  
1. 883391 2. 108533 1. 557362 2. 732136 2. 186091 2. 223567 1. 925095 1. 902781 1. 855038  
1. 106087 1. 127792 0. 9128 1. 591629 1. 24713 0. 668501 1. 509399 1. 13102 1. 47267  
1. 608314 1. 602603 1. 862206 1. 568872 1. 819694 1. 645862 2. 502604 2. 209729 1. 200767  
1. 743228 1. 827244 1. 754154 1. 715185 1. 302749 1. 901103 1. 771001 1. 631188 1. 998697  
2. 951065 2. 999515 4. 499656 2. 461486 2. 23096 1. 923412 4. 556617 3. 855835 2. 937128  
1. 049336 1. 297998 1. 207862 1. 918532 0. 765258 0. 988899 1. 215282 1. 247042 1. 643447

1.113867 1.38761 1.15033 1.575858 1.370101 1.917647 1.419339 1.54408 2.039177  
2.093272 1.333849 1.612972 1.542021 1.217648 1.543231 0.908775 1.629653 1.555274  
1.564564 1.243592 2.125445 2.181052 1.967395 1.868703 1.681748 2.811091 2.161928  
1.283338 1.251781 1.277068 1.943947 1.857299 1.629983 1.514833 1.274459 1.554988  
1.476664 1.407571 1.505109 1.506327 1.680278 1.237927 1.201528 1.309634 1.418602  
1.016618 0.90053 1.790286 1.420846 1.01433 2.097443 1.290605 1.531118 1.83252  
1.120409 1.446912 1.662333 1.065887 1.584622 2.389432 1.198325 1.283547 1.606692  
3.7961 0.474188 1.991244 3.525552 1.304341 1.502048 1.721439 0.581181 1.835535  
1.619256 2.336785 1.990416 1.690997 0.998469 1.200928 1.530923 2.189636 1.171685  
1.593359 1.137396 1.041563 1.886946 1.948961 1.156381 1.117043 1.191013 1.423462  
1.66845 1.384903 1.761813 1.624166 1.28019 2.103342 1.091356 1.878915 1.645398  
1.140969 1.422846 1.020466 1.127373 0.973474 1.794699 1.350735 1.221829 1.44159  
1.372919 1.404044 1.544264 1.44506 1.230336 1.509282 1.175561 1.041011 1.380659  
1.896957 2.28227 2.783341 2.828099 2.093675 2.180908 1.21754 2.167639 1.599809  
1.130487 1.162274 1.369896 1.5301 1.794535 1.153986 1.291173 1.160061 1.297075  
1.439577 1.659857 0.749939 2.331085 1.423236 1.15836 1.392845 1.422029 1.974067  
1.601719 1.182152 1.504735 2.141871 2.715587 2.12255 1.626438 1.541412 1.993782  
0.967592 1.191894 1.095367 1.314159 1.037904 1.924505 1.019803 1.168902 0.902928  
1.737142 1.336681 0.729629 2.283276 2.387119 1.404197 3.420221 1.631743 2.619904  
3.240241 1.470343 2.048399 2.23003 2.240795 3.250077 3.721148 3.13767 2.396689  
1.708374 2.856326 1.701699 2.901774 2.203244 1.986879 1.853092 1.784036 3.06511  
1.504088 0.7285 3.770243 4.970005 1.19971 0.895673 1.343259 0.808514 1.430536  
2.842056 2.838797 2.273725 4.341904 2.804277 3.555407 2.087307 2.917859 1.771873  
3.374203 3.583137 4.207561 1.943611 3.351801 3.365476 4.563568 2.891636 3.90278  
0.889016 1.77016 1.579899 1.019705 1.738182 1.366403 1.531685 1.255883 1.783513  
2.401602 2.151581 2.168388 3.339009 2.364311 2.771374 2.150472 2.548908 1.693604  
1.043487 1.048672 1.075924 1.143127 0.924024 0.831223 0.922871 1.670723 1.180254  
1.813246 3.253523 1.982403 2.691846 1.637878 1.454283 2.396106 2.272884 1.515856  
1.181541 2.697714 3.704725 1.911817 1.909151 1.420678 2.325635 1.285617 1.728385  
1.081884 0.840597 1.464812 1.92232 0.78887 1.987314 1.810555 1.490656 0.977925  
1.059948 1.578475 1.037335 0.982746 1.129204 0.996787 1.308161 1.255441 1.538611  
2.422992 1.141838 2.024333 1.996895 1.284789 0.982355 1.352765 1.08138 0.917632  
0.983977 1.53977 1.103349 1.673365 1.478254 1.245632 1.656903 0.939804 1.181042  
1.09542 1.304812 0.868976 2.20073 1.172673 2.319969 1.119814 1.618342 2.292937  
2.690402 2.769335 2.731222 4.06309 3.028329 2.45291 2.746817 2.501889 2.546922  
1.618754 0.652539 0.755121 1.515781 1.849012 2.285886 1.908847 1.039641 0.729267  
1.192217 1.27531 1.510957 1.378619 0.950493 1.16655 1.102482 1.245384 0.932029  
2.198443 1.860723 1.48499 2.461529 1.449561 2.40842 1.740408 2.236342 2.671651  
3.676458 3.762633 3.096452 4.407187 3.575439 3.24837 3.435991 4.070456 2.389993  
1.055115 1.188475 1.762161 2.198721 1.165798 0.921388 1.230476 1.290416 0.8217  
1.389173 1.461485 1.595447 1.728128 1.4691 2.128329 0.864556 1.232576 1.460793  
0.983447 1.10259 1.02539 1.285251 0.739597 1.023405 1.227708 1.013147 0.858454  
2.51202 3.052938 1.824537 2.868318 2.071433 2.783701 2.392189 2.358648 2.046819  
2.334236 2.374904 2.771051 3.850642 1.856274 3.06828 1.813702 3.03571 2.569512  
1.797237 2.352461 1.109745 0.739481 0.972932 1.913616 1.315483 1.576421 1.153039  
2.2384 2.590579 2.280656 1.786304 2.701333 1.794653 2.013303 2.243713 2.592363  
1.96413 1.319142 1.72161 1.452441 0.982468 1.613083 1.340187 2.49022 2.678627  
1.552578 1.728499 1.436475 2.401844 1.704919 2.224161 1.390247 1.788513 2.413969  
0.780792 1.159779 2.244877 1.846691 0.803807 1.018173 0.930664 0.88988 1.177215  
1.480345 2.347933 1.625637 2.501612 1.740348 2.482423 1.386333 1.823648 1.535413  
0.993938 1.143572 1.738393 1.381582 1.051149 1.484612 1.267406 1.234538 0.967728

1.245047 0.933221 1.31271 1.747815 1.024144 1.52193 0.94544 0.813209 1.357192  
1.124962 2.000547 0.902107 0.89694 1.100809 1.595184 3.508962 2.820612 1.893805  
1.446904 1.569868 1.564512 1.903201 2.274826 1.263514 2.230929 2.420079 1.766434  
0.938481 2.183577 0.313463 0.870437 0.975337 0.899134 1.12828 1.152562 0.826748  
0.920838 1.270596 0.802539 2.411296 0.910224 1.968309 1.672166 1.913904 1.582074  
2.435297 2.373079 2.316416 3.245388 2.725756 2.75569 2.454694 2.314282 2.407916  
0.96705 0.866166 0.899646 0.769497 0.707491 1.378833 0.851924 0.933717 0.729155  
1.877363 1.659307 2.093948 2.556439 1.948397 1.758064 1.748179 1.633309 2.473617  
1.784015 2.589731 2.260567 2.174128 2.130129 1.628807 3.07817 1.575317 2.190212  
0.849534 0.527023 0.51518 1.112842 1.046246 0.622111 0.987378 1.75417 1.072356  
1.547956 2.597988 2.430693 2.317122 2.26015 3.095418 2.39347 2.359577 2.451404  
1.180478 1.297591 1.332041 2.071233 1.297462 1.568336 1.097445 2.270475 3.397225  
1.015399 1.27868 1.964879 1.759046 1.260895 2.45147 1.228254 1.035525 1.258211  
3.281264 2.607328 2.200579 0.558774 3.121704 3.119685 2.06002 2.181309 3.833643  
1.91892 1.826563 2.86905 2.079851 1.813553 2.08254 1.714445 1.532908 2.364935  
4.417881 2.823047 1.595819 4.405546 2.437355 2.606015 4.165921 1.852076 2.92817  
1.157308 1.528394 1.735035 1.786773 1.584979 1.952025 1.243096 1.919659 2.270728  
1.640406 1.127283 2.00947 2.646991 1.546772 1.752027 1.302756 1.814623 1.931111  
1.656126 2.039859 1.538162 2.118065 1.949619 2.405965 2.087346 2.294354 2.211565  
3.190105 1.243678 2.924104 0.83862 2.69062 2.051479 1.636781 1.313901 3.979639  
1.17611 1.372565 1.059032 1.372679 1.51415 1.488348 1.393952 1.473296 1.349567  
1.494902 1.344761 1.700041 1.769473 1.179004 1.517363 2.391742 1.072371 1.09756  
1.630921 1.117252 0.644434 2.145658 1.219265 3.234013 1.781335 2.284667 1.88948  
1.571194 1.485769 1.84705 2.088043 1.903176 1.326729 1.179749 1.309045 1.384932  
2.049192 1.22486 1.115117 1.132255 1.793737 1.132255 1.062378 1.250954 1.32937  
1.4303 0.888053 1.163458 0.767318 1.1636 1.116577 1.88763 1.127419 0.954958  
2.007482 1.922177 2.303517 2.879397 1.947345 1.832913 2.103348 1.90316 2.599917  
2.240924 1.193514 1.000505 1.174749 1.98169 1.658869 0.970802 1.134202 1.658869  
1.679838 1.890595 1.793848 2.897481 1.960504 1.87934 1.655858 1.628437 1.926958  
1.173314 1.347673 1.370132 1.454556 1.401113 1.170246 1.246549 1.292689 1.550636  
0.853762 1.303987 1.792517 1.784315 1.221616 1.354392 1.496095 0.944461 1.316029  
2.141957 1.870515 1.316327 1.657402 1.63308 1.375637 1.334493 1.952858 1.741417  
2.949754 3.511691 3.75201 3.740652 3.146645 3.233387 3.345074 2.796299 3.011922  
1.792495 1.278464 1.374204 1.382152 1.453163 1.163341 1.057974 1.18379 1.06227  
4.830505 3.636668 4.396772 2.721765 3.567608 4.148224 3.528715 3.875566 3.439122  
2.34806 1.675493 1.70468 3.49489 2.174392 2.731184 2.219484 2.093484 1.851435  
1.447411 1.306929 1.931824 2.683314 1.218352 1.071932 1.436887 1.24992 1.163124  
1.216046 1.59865 1.417738 2.347508 2.156111 3.165869 1.215391 1.47358 2.169963  
2.447023 3.405439 3.714338 -0.04762 2.241916 2.124605 1.991838 1.472128 3.93953  
1.399203 1.556386 1.653661 1.903722 1.354288 1.2813 1.426163 1.447728 1.594945  
1.415082 2.328579 2.599321 2.243169 1.673752 1.929673 2.135861 3.503012 2.062215  
1.091926 1.356927 0.980264 2.154236 0.971872 2.258039 1.150023 1.120611 1.114679  
1.812121 1.561095 1.356692 2.262019 1.679655 1.094724 1.340186 1.688105 1.809349  
3.916323 3.959474 3.924263 3.185927 0.739987 1.165341 0.707558 2.87091 3.102172  
1.952689 1.796704 1.472884 1.813577 1.07211 1.399091 1.201663 1.073621 1.582075  
1.342948 1.090316 1.014416 1.682768 1.329703 1.86736 2.61892 1.154858 1.03677  
2.306839 2.895035 1.942416 1.947901 2.274638 2.251765 2.636817 2.68988 3.76488  
1.503752 1.028663 1.440032 1.306068 0.934144 0.840699 1.000563 0.776613 1.235459  
1.806303 2.587243 1.361851 3.087705 1.962543 2.702115 2.314405 2.225975 1.328704  
1.204655 1.732595 1.490841 1.427958 1.422438 0.795652 1.512964 1.501529 2.202694  
4.173928 4.698426 3.945715 4.360198 3.560364 4.868616 4.747236 4.329342 5.130872

0.678985 1.848469 1.638996 0.833541 1.306412 2.247222 0.833541 0.927067 2.87181  
1.357552 1.818412 2.531224 1.110693 1.267063 0.816595 1.025294 1.908874 1.996794  
1.072663 0.876607 2.719998 0.801553 1.92841 1.152501 0.97407 2.79293 2.206266  
2.131361 2.119395 1.004256 1.886395 0.935048 1.782154 1.427516 1.198097 1.748484  
0.875254 1.011792 1.074303 1.395746 1.266974 1.497488 0.778523 0.822392 1.278399  
1.342496 1.36971 1.540961 1.84772 1.359988 1.514962 1.689738 1.609867 1.585407  
2.319691 2.255083 1.780989 2.549959 2.277627 2.76965 1.560425 2.608557 3.20018  
1.668772 1.100952 1.146989 1.636999 1.280724 2.750974 2.271282 1.856243 1.766147  
2.9576 2.999226 3.000525 2.62144 2.37519 2.081733 3.055556 2.159276 1.971129  
0.963475 0.798179 3.083922 1.527022 0.714328 0.911951 0.725671 1.122193 1.839588  
0.955928 2.153503 1.212879 2.165906 0.974634 1.343689 1.901935 1.215598 1.134436  
1.594941 1.159233 1.577378 1.79842 1.26387 1.815706 1.462938 1.392998 2.15656  
2.533013 1.662955 2.053659 2.728377 2.981683 2.167447 2.505007 2.178719 3.532573  
2.318336 1.943679 2.561564 2.630958 2.162595 2.145368 2.2549 2.339454 2.169203  
2.13031 1.039879 1.090892 1.765875 1.229038 1.528841 1.51838 1.609443 1.160085  
1.638812 1.096552 1.782769 1.630299 1.418038 2.349959 1.622817 1.739439 2.006965  
2.662221 2.261277 2.402359 4.357866 2.261028 2.918577 2.602709 2.807369 2.693168  
3.198391 1.963427 1.326232 1.341054 1.646934 1.99889 1.343952 3.061717 1.575995  
1.623264 1.963114 1.878081 1.653552 2.162085 2.750225 2.440674 2.167546 2.474938  
0.514243 1.930816 0.618447 1.909324 0.755945 1.546667 0.477655 1.234751 1.525645  
3.299081 2.056857 1.782445 0.936378 0.794603 1.103951 1.113428 2.438117 1.629912  
1.230505 1.197483 0.838717 1.161362 0.985068 1.801473 0.968158 0.935097 0.878956  
2.21933 2.097578 2.015553 3.548658 1.49926 3.25433 2.549276 3.022222 2.232426  
2.189782 1.76405 2.357819 1.680731 1.415702 2.478604 1.657307 1.359064 1.363383  
2.301678 4.001845 0.999778 0.90086 2.478078 3.526864 0.539297 2.837984 1.405321  
1.783266 1.259643 1.120934 1.241821 1.606452 1.775961 1.840853 1.062465 1.358735  
1.841308 1.503023 1.328289 3.242236 1.758953 2.227176 1.203441 1.248659 1.381548  
1.587836 1.715158 1.441122 1.436844 1.537804 1.428421 1.475392 1.184624 1.759384  
1.809915 1.546894 2.382022 2.234538 1.868288 1.823902 1.784555 2.163908 2.101095  
1.897836 1.800642 1.457043 1.766208 2.574391 2.869578 1.528259 1.843906 2.126105  
1.999495 1.640832 1.598001 1.400075 1.752914 2.175546 1.788811 1.086339 1.891078  
1.382585 2.673277 1.445464 1.551304 3.262112 1.087948 3.573828 2.273366 0.431613  
0.359259 1.152498 1.238493 1.359329 0.781686 1.206896 1.874729 1.12735 1.381717  
0.993899 1.451328 1.315298 1.516596 0.652096 1.51338 1.097179 1.118869 1.242529  
1.706473 1.56372 1.345348 1.585304 1.454681 2.247399 1.660716 1.282565 1.350159  
8.063029 8.563624 8.236885 7.289183 8.269664 7.94935 7.679402 7.965705 7.510435  
0.925983 2.229075 1.829781 3.030519 1.430009 2.771455 1.581617 1.173925 1.70025  
4.416748 2.676639 2.673504 2.127927 2.956879 3.045471 3.156278 3.044947 2.956802  
1.12114 1.536691 1.526582 2.092916 1.602441 1.903464 1.02183 1.008671 1.549251  
1.572678 2.069762 1.701711 1.675639 2.168254 1.783457 1.229446 1.689551 1.867169  
2.045065 1.518381 1.09034 2.70915 0.944654 1.234128 1.466556 1.223635 1.620773  
2.235803 2.192837 2.355883 3.09217 1.982712 2.809841 2.992585 2.194621 3.940975  
1.351058 1.19919 1.550261 1.69991 1.222199 2.24806 1.162923 3.141762 1.88972  
0.84544 0.780329 1.763109 1.702364 1.134374 0.982736 1.009984 1.225415 1.097045  
2.202181 2.8725 2.808559 3.651956 4.074327 2.838738 3.574717 3.739402 3.825878  
1.518632 1.468383 1.434087 2.042252 2.367239 1.840713 1.263828 1.614695 0.853663  
2.863094 3.132692 3.165386 2.970833 2.997814 3.768448 3.039509 2.806561 3.191971  
1.483833 1.781785 1.980731 1.569415 1.484528 2.518127 1.355735 1.511948 0.787325  
1.231031 1.266 1.535563 2.150881 1.194203 1.693415 1.78769 1.231508 1.659886  
1.775768 1.391639 1.785975 2.25799 3.533628 1.552345 2.518697 1.498068 1.457279  
3.163446 1.801987 1.707202 1.526437 1.499864 2.697611 1.277954 2.166129 1.537287

1. 823992 1. 971515 2. 097353 2. 577461 2. 40173 2. 212553 2. 194756 2. 160805 1. 87066  
1. 287722 1. 658305 1. 474861 1. 300268 1. 38809 1. 560563 1. 134961 1. 393174 1. 188211  
1. 508276 1. 27537 2. 793195 1. 155522 1. 575856 1. 341806 2. 083051 1. 527041 1. 354085  
1. 52475 1. 939328 2. 523569 3. 081434 2. 009928 2. 000738 1. 965546 1. 502923 2. 4243  
2. 08758 3. 519055 2. 179219 2. 216485 2. 809483 1. 890365 1. 555926 1. 720061 2. 175407  
1. 866785 1. 182053 1. 989671 1. 506528 1. 904486 2. 194358 1. 900158 0. 486389 1. 240979  
7. 141373 6. 909957 6. 989502 7. 661772 6. 222265 6. 606765 6. 64688 7. 175513 5. 490643  
4. 763421 3. 491112 3. 954618 3. 392522 2. 97529 3. 689269 4. 334834 4. 2349 4. 368379  
1. 404266 1. 194087 1. 395284 0. 76637 0. 805206 0. 798645 0. 69079 2. 337996 1. 155464  
3. 453919 2. 826221 3. 765911 2. 675642 3. 76264 3. 768744 2. 845313 4. 332423 3. 440698  
2. 484708 3. 020989 3. 878805 3. 487144 2. 835816 1. 632481 3. 096376 3. 438357 2. 331679  
4. 200893 3. 573665 3. 12854 6. 508543 3. 205199 3. 548332 3. 180099 3. 223936 3. 372115  
1. 446071 1. 221498 2. 658889 1. 835043 1. 279095 1. 607161 1. 260801 1. 305369 1. 144842  
3. 945676 2. 373584 3. 912297 2. 123034 2. 301451 2. 413884 3. 102028 3. 568973 2. 924711  
1. 20926 1. 502909 1. 212311 2. 201077 1. 16402 0. 976469 1. 958859 2. 083729 1. 247137  
2. 189187 2. 002826 2. 014411 3. 672664 2. 629902 2. 319919 3. 343626 0. 981854 1. 908488  
3. 68428 1. 904727 2. 286309 1. 245418 1. 152564 1. 608164 1. 80434 1. 846257 2. 912694  
0. 960904 0. 897435 1. 956313 2. 095268 1. 378395 1. 368618 1. 358561 1. 169737 2. 052366  
2. 786486 2. 683306 2. 068409 1. 811499 2. 05835 1. 745521 1. 889018 3. 808454 1. 868213  
1. 983596 2. 05386 2. 534014 2. 090805 1. 620344 1. 924185 2. 475021 1. 152693 1. 704293  
1. 278438 1. 230574 0. 794488 0. 886204 1. 604501 1. 033966 1. 454339 1. 279303 1. 934892  
1. 388646 1. 64823 2. 562012 2. 43679 1. 704425 2. 275021 2. 128826 2. 141095 4. 404722  
0. 557202 0. 797007 0. 561958 1. 380354 0. 67064 1. 620433 0. 890395 1. 11804 1. 204918  
2. 310226 1. 790323 1. 35944 2. 900637 2. 13232 2. 55751 1. 063298 1. 427459 2. 57861  
1. 390204 2. 086037 2. 17068 1. 577608 1. 261076 1. 70661 1. 52455 1. 693932 3. 048352  
1. 011505 0. 790482 3. 445487 1. 2258 1. 217177 1. 741574 1. 247328 0. 950543 2. 791106  
2. 970163 2. 964909 2. 186917 2. 56707 2. 00856 3. 263422 2. 181679 2. 47406 3. 280248  
3. 240145 3. 864609 1. 971418 2. 579987 3. 554932 2. 591369 2. 956444 3. 883501 3. 659781  
0. 907459 1. 285663 0. 855452 1. 34713 1. 621637 1. 623212 0. 729282 0. 902182 1. 749091  
1. 549698 2. 445969 1. 743299 2. 312812 2. 180369 0. 796589 2. 327817 3. 01166 2. 576597  
1. 451544 1. 302291 1. 362922 1. 78288 1. 304657 1. 503333 1. 409092 1. 636229 1. 351795  
1. 089185 1. 227617 1. 421762 0. 962396 1. 053489 1. 263176 1. 004729 1. 654436 1. 250661  
1. 939851 1. 188921 3. 3674 2. 420013 1. 031665 1. 036994 1. 291686 1. 061605 1. 63596  
1. 234665 1. 377951 1. 43028 1. 577543 1. 451469 1. 10545 1. 612818 1. 871969 1. 494692  
1. 42012 1. 949755 1. 416895 1. 734992 1. 096823 2. 96954 1. 626673 1. 39654 1. 681405  
1. 224655 2. 527644 1. 009466 1. 314534 2. 41976 2. 447596 1. 787714 0. 883812 1. 835334  
1. 241203 1. 286789 1. 718476 2. 223716 1. 054629 1. 954509 1. 531058 1. 979544 1. 797468  
1. 735842 1. 75421 1. 84923 2. 006898 1. 594125 1. 45585 1. 63941 1. 808599 1. 760826  
1. 240342 1. 587187 1. 36412 2. 458842 1. 420611 1. 716049 0. 955518 1. 606059 1. 768272  
1. 009344 0. 757404 0. 8856 1. 563713 0. 809779 0. 948215 0. 604885 1. 463318 1. 075901  
1. 322152 1. 816434 1. 557887 1. 758308 1. 642814 1. 442551 1. 786562 1. 445997 1. 624211  
4. 023985 1. 68865 2. 418747 1. 678589 2. 917509 1. 779938 4. 264564 2. 854002 3. 388825  
4. 556961 4. 989543 4. 754495 3. 722179 4. 219766 3. 656322 4. 132733 4. 253496 5. 410852  
1. 378933 1. 738632 1. 085482 1. 644153 0. 86156 1. 655278 0. 997944 1. 065877 0. 991201  
1. 488854 1. 360922 1. 877102 1. 773642 1. 530441 1. 453479 1. 64109 1. 323646 1. 636651  
1. 70714 1. 415258 1. 716539 2. 252258 1. 562144 1. 279652 1. 89584 1. 118907 3. 305884  
2. 241186 1. 242196 2. 353491 3. 862295 2. 30322 0. 282005 2. 010957 1. 285958 2. 579655  
2. 068227 2. 925119 3. 267194 3. 227604 3. 226213 3. 200436 3. 143408 2. 494013 3. 033012  
1. 055405 1. 017992 1. 113017 1. 685026 0. 851005 1. 686589 0. 926548 1. 078055 1. 101869  
1. 502191 1. 640956 2. 167138 2. 189825 1. 246801 2. 201237 2. 145909 1. 653263 1. 996496  
1. 705779 2. 248097 1. 973012 1. 269603 1. 052652 0. 933104 1. 55391 0. 922155 0. 973929

2. 430304 1. 967753 2. 500107 3. 145362 2. 313152 2. 305202 1. 958308 2. 782475 2. 008192  
0. 808731 1. 121777 0. 855095 1. 413283 1. 068165 2. 077277 0. 953907 1. 495823 0. 874784  
2. 374304 1. 425961 2. 133267 1. 459129 1. 93712 1. 946867 1. 309981 1. 749359 1. 482409  
2. 01856 1. 101852 0. 800644 1. 534256 1. 60407 1. 954514 1. 459595 1. 145336 1. 433082  
3. 2468 2. 245412 1. 981582 3. 132125 1. 330664 1. 714903 3. 051521 1. 279891 4. 621134  
1. 128102 1. 460503 0. 653243 1. 125532 1. 147894 2. 447739 1. 010508 1. 247138 0. 967586  
1. 609875 1. 931836 2. 716178 1. 794345 1. 046714 2. 829705 1. 523006 1. 927104 3. 115029  
2. 182467 1. 834937 1. 262745 1. 393467 1. 790359 3. 704749 2. 646636 2. 510566 1. 364443  
1. 684797 1. 150286 0. 751883 0. 648077 1. 400998 2. 452183 1. 095682 1. 079437 2. 0431  
1. 526026 2. 024654 2. 14841 2. 991606 1. 956867 1. 744193 1. 679575 2. 497675 2. 354603  
1. 159824 0. 715522 1. 287444 2. 840407 1. 112662 1. 340079 2. 269743 2. 970961 2. 317234  
1. 879061 1. 596461 1. 501458 1. 243162 1. 214012 1. 939697 1. 363628 1. 247949 1. 310829  
1. 189771 1. 737066 1. 432403 1. 839892 1. 578444 1. 89413 1. 046942 1. 51749 1. 409071  
1. 072774 0. 845357 1. 08537 2. 851884 1. 879948 1. 874867 1. 262058 1. 548817 1. 649062  
1. 070586 1. 352985 1. 619994 1. 728558 0. 825495 1. 170464 1. 435163 1. 0813 1. 911455  
1. 340872 1. 153205 1. 468276 1. 41537 1. 338557 1. 000217 1. 298411 1. 18266 1. 69778  
1. 303183 1. 254304 1. 383649 1. 627751 1. 497513 1. 661664 1. 345589 1. 471304 1. 646539  
3. 823252 1. 725599 1. 949702 2. 282208 2. 576016 2. 263332 2. 387309 2. 868703 3. 588986  
1. 529772 1. 345438 1. 736091 1. 394376 1. 13638 2. 390643 1. 455197 1. 540212 3. 717468  
1. 721981 1. 29995 1. 99378 2. 592165 1. 376012 1. 966548 1. 824749 1. 783843 2. 28827  
1. 394758 1. 419425 1. 108786 2. 777989 1. 942424 1. 906763 2. 057131 1. 718239 2. 962765  
2. 269564 2. 077849 1. 71956 1. 965109 2. 564868 1. 778398 2. 110827 2. 807707 2. 710532  
1. 525631 1. 875667 1. 398734 2. 124591 2. 039357 1. 417851 2. 83572 0. 982526 1. 465184  
0. 762102 1. 066973 1. 152216 2. 47541 1. 267085 0. 940286 1. 028674 0. 969636 1. 510592  
0. 896506 0. 559819 0. 834149 2. 266085 1. 36505 0. 869922 2. 576443 1. 706379 0. 91505  
1. 181636 1. 425239 1. 353888 1. 159487 1. 637512 1. 509432 1. 370109 1. 200974 0. 975446  
1. 614664 1. 091781 1. 390944 0. 996996 1. 838226 2. 158568 0. 870942 1. 287099 1. 614516  
0. 595665 0. 583902 1. 166364 0. 872044 1. 065254 1. 899373 0. 580542 1. 372699 0. 842359  
1. 98051 2. 034262 2. 78772 2. 148446 1. 847216 1. 815085 1. 258702 1. 710196 1. 344103  
1. 350872 1. 158168 1. 650234 1. 752941 1. 506541 1. 451651 2. 082995 0. 907711 2. 20396  
0. 884681 0. 891071 2. 36828 2. 078678 0. 967187 1. 681134 1. 108746 0. 988807 0. 756891  
1. 023456 1. 953687 1. 739346 1. 512257 1. 318536 1. 091708 1. 673823 1. 660572 1. 350545  
1. 104936 2. 126729 0. 900104 1. 360204 1. 678966 2. 512177 0. 950148 1. 712409 1. 36934  
1. 544871 2. 622951 1. 382674 3. 073835 1. 89779 1. 398638 1. 655069 1. 533864 1. 928497  
0. 874434 1. 156218 0. 907005 0. 795015 1. 027536 1. 211869 0. 905877 1. 009172 1. 290251  
2. 3377 2. 053212 2. 426186 2. 695105 2. 315769 1. 989948 2. 180121 1. 932657 2. 926251  
1. 019171 1. 085035 1. 177816 1. 343092 0. 887449 1. 82999 1. 342721 1. 4471 1. 590552  
3. 756419 4. 497765 2. 715067 3. 287531 4. 20489 4. 123571 2. 927044 2. 637015 3. 837466  
2. 814011 1. 896145 1. 608556 1. 307341 2. 598929 2. 602277 2. 027945 2. 053897 3. 711388  
1. 402526 1. 273476 1. 242523 1. 31676 0. 807417 1. 508433 1. 451499 1. 721488 1. 372918  
1. 688999 2. 271296 1. 456888 3. 185686 2. 142415 1. 830231 1. 288838 1. 911746 1. 927021  
2. 40457 3. 40511 3. 676117 3. 207044 3. 975591 3. 840741 4. 040506 3. 681779 3. 036578  
2. 72373 2. 372313 3. 067047 0. 631466 1. 550102 3. 633096 2. 352927 1. 510971 2. 04788  
1. 293752 1. 352295 1. 20853 2. 301847 1. 228238 1. 683045 1. 316089 1. 188125 1. 116815  
1. 766357 1. 441587 1. 047838 1. 686527 1. 363585 1. 320634 1. 341692 1. 229899 1. 514186  
1. 815216 1. 9199 2. 620158 1. 843686 1. 51532 1. 838015 2. 252836 1. 205336 1. 313482  
2. 311391 2. 113148 2. 679849 3. 840672 1. 902195 3. 345373 2. 021967 3. 257374 2. 630584  
1. 708512 1. 400016 1. 590694 2. 287541 1. 992821 2. 300562 1. 043313 1. 175495 3. 056774  
1. 409316 1. 779782 1. 01208 1. 698765 1. 038867 1. 349579 1. 059237 0. 282927 1. 343243  
1. 21437 1. 325649 0. 979492 1. 319323 1. 109275 1. 092071 0. 979912 0. 768786 1. 364973  
1. 159109 1. 21378 1. 527786 2. 218281 1. 50128 1. 942499 1. 072779 0. 921859 2. 211066

4. 7489 3. 444886 3. 039707 1. 965578 4. 998183 2. 424936 3. 994877 4. 960824 6. 665493  
1. 399159 1. 742257 1. 65388 1. 772652 1. 403669 1. 833487 1. 289786 1. 365725 1. 435106  
1. 512406 1. 074138 1. 600977 2. 259447 1. 057443 2. 046796 1. 499584 1. 135 1. 627834  
1. 341182 1. 525012 2. 420272 1. 836527 1. 550356 1. 356268 1. 958131 1. 738155 1. 735821  
1. 40895 1. 186736 1. 463824 1. 659682 1. 491315 2. 007658 1. 73269 1. 307586 1. 590055  
1. 325562 1. 735261 1. 535092 2. 233969 1. 704907 2. 278266 1. 917161 1. 639527 0. 899131  
1. 026051 0. 996263 1. 251934 1. 253303 1. 174021 2. 008624 1. 411672 1. 039127 1. 031309  
3. 241933 0. 736922 1. 320524 0. 631584 0. 985136 1. 968303 1. 786175 1. 593123 0. 829449  
2. 157943 1. 738384 1. 358035 2. 131849 1. 11001 1. 628156 1. 859242 1. 424143 1. 289356  
1. 326829 1. 183893 1. 030646 1. 799434 1. 357838 1. 639028 1. 265822 2. 396276 1. 599049  
3. 599733 2. 593033 2. 949977 2. 969195 3. 953441 2. 752865 2. 830355 3. 846539 2. 340092  
1. 477603 4. 752697 3. 701336 1. 275457 5. 171605 1. 966453 0. 882259 2. 48087 4. 142282  
1. 66271 1. 513621 1. 753627 1. 481511 1. 794902 1. 524128 1. 478407 1. 554081 1. 537089  
0. 821301 1. 042819 0. 843078 0. 84679 0. 841805 0. 913519 2. 62636 0. 650823 0. 990785  
1. 589703 1. 600764 1. 24773 2. 136086 1. 514914 2. 025607 1. 857463 2. 059442 1. 114346  
1. 613805 1. 253009 1. 608035 0. 451518 1. 213955 2. 702898 1. 162155 1. 179563 0. 860651  
1. 199996 1. 325826 0. 820441 1. 260003 1. 43227 1. 307426 0. 951568 1. 032462 0. 855242  
1. 737341 2. 895549 0. 893891 2. 553306 1. 785317 1. 236413 2. 298213 1. 764906 1. 330122  
3. 929709 4. 390044 3. 696454 3. 638884 3. 35741 4. 343161 4. 466894 3. 740053 4. 104066  
1. 275194 1. 621554 1. 301361 1. 629186 1. 124797 2. 314524 0. 680879 1. 304428 1. 32988  
1. 470905 1. 59575 1. 743393 1. 709788 1. 181228 2. 075007 1. 726588 1. 638697 1. 93137  
1. 440439 1. 798899 3. 45732 2. 597187 2. 15134 1. 783719 2. 01786 2. 315059 2. 185  
1. 964191 2. 116243 1. 873535 3. 105765 1. 593534 2. 274611 2. 298015 2. 353259 1. 708186  
2. 65454 2. 671922 2. 930468 3. 55571 2. 783912 2. 766842 2. 88674 2. 460948 3. 502249  
2. 068735 1. 961512 2. 031574 2. 14394 1. 65781 1. 636942 1. 963445 1. 669388 1. 109595  
2. 431608 1. 932704 0. 981737 2. 626271 2. 431758 1. 393894 3. 224605 1. 586093 0. 991092  
4. 114096 4. 031937 3. 579129 1. 426414 3. 415123 3. 748855 2. 325091 3. 454414 3. 679598  
5. 33332 4. 388695 2. 856265 2. 153501 4. 946736 5. 517565 6. 804355 5. 160086 6. 922153  
3. 090201 3. 484532 3. 996298 3. 52303 2. 692672 3. 479017 2. 787614 3. 887975 2. 47245  
1. 439303 2. 088762 1. 604422 1. 489705 1. 493495 1. 225669 1. 322565 1. 537986 1. 637707  
1. 536395 0. 701362 0. 931325 1. 253265 1. 022162 0. 921185 0. 824972 0. 837831 1. 015407  
0. 966227 1. 011774 1. 410309 1. 068514 1. 154904 1. 057236 0. 888192 1. 706707 1. 033442  
1. 555027 1. 276008 1. 842345 1. 344238 1. 706014 2. 048525 1. 534697 1. 349641 2. 007795  
0. 859159 0. 523097 0. 44111 2. 914522 1. 227271 3. 138671 0. 326325 1. 588048 0. 501281  
3. 239335 3. 182205 4. 069533 3. 400342 2. 972037 3. 535775 2. 38511 3. 896306 3. 201027  
2. 40618 2. 520576 2. 501296 2. 747757 2. 340879 3. 021365 2. 313103 3. 477355 2. 626511  
2. 71779 3. 003416 3. 20424 2. 465114 2. 93781 1. 568195 3. 055946 3. 055291 3. 908246  
1. 615 1. 277652 1. 792562 2. 375131 1. 791178 2. 087799 1. 516474 1. 547443 2. 034322  
0. 959991 1. 228795 1. 546931 2. 088467 1. 074629 1. 411743 1. 081004 0. 964117 1. 04335  
1. 609795 1. 711901 2. 446211 2. 582849 1. 397751 0. 969697 1. 353781 2. 225597 1. 841395  
1. 325383 1. 434725 1. 383938 1. 888677 1. 290998 1. 712211 0. 921141 1. 243787 1. 279737  
4. 134431 4. 852762 1. 774589 2. 628165 2. 673912 4. 562688 1. 515378 3. 155952 4. 452745  
1. 200693 1. 752532 1. 145382 1. 400681 1. 399395 1. 876903 1. 420058 1. 887261 2. 81984  
1. 974201 2. 919936 2. 764739 3. 300143 3. 335345 3. 123213 2. 757267 2. 883999 2. 109379  
1. 322067 1. 180385 0. 911814 1. 060783 1. 157589 0. 84712 0. 849194 0. 852458 1. 007991  
3. 008516 3. 608378 4. 094453 5. 464791 4. 046753 2. 929937 4. 541113 4. 716349 4. 888895  
6. 291843 4. 569861 7. 524112 4. 7033 5. 670009 6. 872727 5. 612173 6. 02081 6. 747327  
2. 941488 2. 720955 3. 073896 2. 070719 4. 145745 3. 890341 4. 319556 4. 599371 4. 864347  
1. 329889 1. 481086 1. 329889 1. 807069 1. 937415 1. 750659 0. 961164 2. 09463 0. 891791  
4. 938649 2. 760661 4. 026209 4. 050396 4. 1417 2. 220452 4. 317559 4. 058909 4. 887709  
3. 156258 1. 011213 1. 690137 1. 486754 1. 138606 3. 586576 3. 799279 1. 86566 0. 970365

1. 025495 0. 861509 0. 772785 0. 954459 1. 090964 1. 113486 0. 880911 1. 430847 0. 925589  
1. 52888 2. 014964 1. 450572 1. 489977 1. 661216 2. 294331 1. 14713 1. 577868 1. 391614  
1. 191936 0. 668987 1. 309018 2. 074519 1. 215785 1. 160211 1. 597579 2. 177329 2. 075328  
1. 180944 1. 403611 1. 294538 1. 297034 1. 255805 1. 259158 1. 449007 1. 798808 1. 255805  
1. 534923 1. 373854 2. 39469 3. 709543 1. 904339 2. 364769 1. 785031 1. 87328 1. 940805  
2. 034944 1. 859102 2. 003091 2. 372845 1. 583718 1. 669537 1. 481788 1. 818461 2. 027633  
2. 178311 2. 361711 2. 447469 2. 412571 2. 263153 3. 355684 2. 107052 2. 433908 2. 901741  
2. 008007 2. 455468 2. 197515 1. 692719 2. 489428 2. 333507 2. 820312 3. 327495 3. 685282  
1. 331086 0. 707962 1. 189152 1. 17088 0. 917793 1. 277586 0. 785371 1. 619886 1. 160293  
1. 459955 2. 010501 1. 147324 1. 633107 1. 06736 1. 119461 1. 510894 1. 309098 1. 59367  
0. 862324 0. 882335 0. 995951 1. 982183 1. 088784 1. 370623 1. 599722 1. 022142 1. 701495  
4. 984919 4. 687808 5. 423729 2. 249276 2. 902418 6. 129509 5. 565185 5. 278397 4. 018834  
1. 194459 1. 814447 1. 348553 2. 67906 1. 858113 1. 032712 1. 21895 1. 526955 1. 972558  
1. 110056 0. 842074 1. 343911 1. 333127 1. 188643 0. 690907 1. 179283 1. 150294 0. 827372  
1. 064944 1. 645233 1. 42289 1. 039537 1. 096394 1. 750242 1. 393151 1. 460874 1. 690523  
2. 702852 3. 198414 2. 852845 2. 711433 2. 913466 2. 380156 2. 61779 2. 139305 2. 743665  
1. 149993 1. 09207 1. 14335 1. 392543 1. 075996 1. 718829 1. 011848 1. 054142 1. 329188  
2. 14448 2. 840806 3. 448349 2. 759562 4. 265442 2. 245226 2. 447703 2. 198224 3. 289382  
2. 679895 1. 469984 1. 52376 2. 519102 1. 701098 2. 173363 2. 17368 1. 5734 1. 896994  
1. 403373 0. 831654 1. 616064 1. 131865 0. 980746 1. 552289 0. 867011 2. 230063 1. 965233  
2. 313328 1. 481273 1. 69796 1. 75361 1. 934878 1. 372373 1. 364959 0. 666238 1. 427996  
2. 092999 3. 330822 2. 491428 2. 04727 2. 769475 2. 779345 2. 385231 2. 594836 2. 773226  
1. 099243 1. 003781 1. 150069 1. 683909 1. 593466 0. 781075 0. 940654 1. 10077 1. 290817  
2. 170068 1. 863955 1. 984135 1. 56388 2. 042167 3. 499707 1. 217735 1. 69182 2. 012515  
2. 172743 1. 007233 2. 549653 2. 214398 0. 425417 2. 108985 1. 759309 0. 848369 1. 394702  
0. 915702 1. 068899 2. 198669 0. 81113 1. 468675 1. 614679 1. 175101 1. 050148 6. 20552  
3. 44995 1. 235647 3. 207856 1. 426971 2. 400813 1. 188472 1. 153938 1. 505882 1. 443259  
1. 209756 1. 536474 1. 462115 2. 944716 1. 04712 1. 781041 1. 527335 1. 233488 1. 200105  
1. 988886 1. 574094 2. 315147 1. 444241 2. 171158 2. 201986 1. 169811 1. 102808 2. 490436  
2. 878935 3. 033679 1. 939658 2. 402338 2. 42751 1. 759287 2. 345071 2. 694067 3. 715721  
4. 702411 1. 635326 0. 907218 3. 799815 0. 600598 1. 278933 2. 555292 3. 057431 1. 352286  
1. 63341 1. 106733 3. 660926 0. 786783 1. 003525 3. 243001 0. 856369 1. 178928 3. 269935  
5. 568343 5. 735019 4. 620655 2. 763106 4. 654385 5. 63261 4. 684356 4. 823414 4. 212784  
1. 180924 1. 847642 1. 111704 1. 666977 1. 083237 1. 388787 0. 963448 1. 390636 3. 737016  
3. 876965 3. 37449 3. 083067 3. 421852 3. 564617 4. 559716 3. 95089 3. 695463 2. 947029  
1. 817914 1. 467932 1. 518125 1. 74338 1. 655005 1. 449666 0. 860266 2. 569115 1. 588776  
4. 170511 4. 863945 4. 872789 4. 396132 4. 609095 4. 042585 3. 699228 4. 734775 4. 06921  
1. 687057 0. 845499 1. 439737 0. 993523 0. 696018 1. 365231 1. 901983 0. 920188 1. 015256  
3. 693378 3. 38973 1. 805568 2. 842314 3. 124869 2. 595482 2. 442712 2. 942849 2. 559476  
0. 737798 0. 989469 1. 712687 1. 292858 1. 616801 0. 641621 1. 818564 0. 698598 3. 606705  
2. 936086 2. 000274 2. 465106 2. 120613 2. 26156 2. 148616 2. 023002 2. 308941 2. 70574  
1. 298348 1. 511581 2. 622757 1. 323932 1. 42373 1. 951249 1. 267547 1. 322731 1. 506338  
1. 306052 2. 541321 1. 461786 1. 217372 0. 994862 1. 971916 1. 730743 1. 148238 2. 314554  
2. 165479 3. 851254 1. 758118 5. 298963 3. 983652 2. 225865 5. 102433 2. 609285 4. 517113  
1. 43253 1. 508401 1. 766319 1. 403797 0. 896361 1. 223806 1. 273388 1. 397656 1. 436425  
1. 119142 1. 453236 1. 321999 2. 164492 0. 890933 2. 041775 1. 924793 1. 642823 1. 876741  
1. 293696 1. 104366 1. 050002 2. 350605 0. 95312 1. 217602 1. 750778 0. 863979 2. 72124  
0. 775966 1. 145018 0. 834854 3. 596993 2. 110444 2. 180952 0. 461003 0. 768858 2. 180952  
1. 334137 1. 800088 1. 632815 2. 048838 1. 985819 1. 699816 1. 951474 1. 663215 2. 488688  
1. 950497 1. 707061 3. 066648 1. 699292 2. 167271 1. 443547 1. 770627 2. 071827 1. 587221  
3. 931347 2. 909499 2. 724274 2. 173097 4. 325743 3. 882241 3. 145338 3. 244565 3. 099122



1. 723866 2. 02541 1. 892034 2. 267991 2. 132537 1. 988229 1. 498201 1. 479343 1. 295969  
3. 708213 3. 487446 3. 182901 3. 80908 5. 061667 4. 546145 4. 330391 3. 878528 3. 800514  
1. 390176 1. 21762 1. 23529 1. 148049 1. 597178 1. 477964 1. 365269 1. 315777 1. 074154  
1. 396589 1. 06144 1. 120361 1. 996676 0. 898044 1. 790077 1. 141975 1. 262857 1. 299653  
1. 313223 0. 954444 1. 332004 1. 544788 1. 540199 1. 51076 1. 776777 1. 595128 0. 862375  
1. 473172 1. 578009 1. 949376 1. 938318 1. 284063 2. 205315 1. 55486 1. 234644 1. 704241  
1. 912195 2. 352294 2. 758636 1. 747477 2. 245042 3. 187544 2. 298533 2. 57508 2. 143504  
2. 520218 2. 141592 2. 478053 2. 116979 1. 939933 2. 382813 2. 282065 1. 778582 1. 588629  
3. 991456 4. 288201 4. 248836 2. 414419 4. 376989 4. 667069 5. 607537 5. 499656 4. 217715  
3. 305687 1. 908327 2. 096937 3. 760467 1. 965821 1. 796576 2. 263263 1. 92614 1. 534319  
2. 421433 2. 141426 0. 696287 2. 087568 0. 97399 2. 880247 0. 907481 1. 572836 1. 558551  
1. 61505 1. 685732 1. 622218 1. 664768 1. 859094 1. 830919 1. 583835 2. 127769 1. 505  
1. 326589 0. 74106 1. 071536 1. 599532 0. 83268 1. 411066 0. 871443 0. 871913 0. 93922  
2. 381588 2. 34282 1. 38224 3. 300912 1. 639238 2. 534666 1. 907862 2. 24192 2. 656932  
2. 552811 2. 387032 1. 905193 2. 883836 3. 006136 1. 192006 2. 308761 3. 174117 2. 183591  
0. 926217 1. 212411 1. 469962 1. 306296 1. 268687 1. 206427 0. 849492 1. 117412 1. 353502  
3. 760548 2. 984027 3. 596547 2. 587058 2. 852128 3. 060499 3. 616572 3. 253263 2. 376705  
1. 035557 1. 048685 1. 334978 1. 986754 0. 890751 1. 379195 1. 133193 1. 24194 1. 044041  
1. 091234 1. 061462 1. 298975 1. 255592 1. 075623 1. 572806 1. 032384 0. 961844 1. 415729  
3. 226746 4. 514382 4. 222203 4. 041884 2. 982846 5. 537235 5. 708911 3. 714841 4. 324829  
2. 17853 1. 432473 1. 018128 0. 849321 0. 839427 1. 107364 1. 099206 1. 353718 1. 551249  
0. 753195 1. 079101 0. 860336 2. 910759 1. 469857 0. 723439 3. 113574 1. 104599 1. 6162  
0. 994809 1. 254625 0. 887845 1. 375598 1. 139456 1. 841724 1. 363618 1. 002032 1. 347623  
1. 198849 1. 021381 1. 642649 1. 286314 1. 34058 1. 530204 1. 296909 1. 281541 0. 718237  
2. 786996 1. 773084 2. 476228 2. 81516 2. 043749 2. 309175 1. 150768 1. 022412 3. 146491  
2. 869425 1. 607682 3. 473472 4. 22912 1. 853594 3. 379148 1. 159401 1. 312726 3. 53747  
1. 17925 1. 81255 1. 211414 1. 373221 0. 916254 1. 017246 1. 315821 1. 048751 1. 424658  
1. 025628 1. 346054 1. 864337 1. 360702 0. 924406 1. 944342 1. 336509 1. 457337 1. 201795  
3. 034413 1. 533361 2. 575797 2. 616533 2. 744017 2. 81645 2. 507053 2. 047371 4. 22087  
2. 17405 2. 218507 2. 900573 3. 525993 2. 376878 3. 610722 2. 510366 2. 690178 2. 63351  
1. 144451 1. 156833 0. 710465 1. 265732 0. 884492 1. 745205 1. 218422 1. 76795 1. 582152  
1. 560895 1. 067957 0. 950717 1. 631372 1. 183052 1. 157648 1. 155258 1. 476817 1. 317315  
1. 807603 0. 671639 0. 753065 1. 703561 1. 459469 3. 52596 1. 395622 1. 568487 1. 037176  
1. 107165 0. 903056 1. 316319 1. 305764 1. 036708 1. 623821 1. 099182 0. 846955 1. 245509  
2. 229836 1. 007499 3. 607551 2. 671903 2. 383795 2. 364168 2. 91855 2. 936442 2. 794959  
0. 659534 1. 188024 3. 047756 2. 040239 0. 964462 1. 742069 0. 335294 0. 748879 0. 641059  
3. 218357 3. 581559 3. 776608 3. 415685 3. 566082 3. 120276 3. 654585 3. 657343 3. 127309  
1. 45974 2. 036349 1. 652051 3. 403573 2. 537818 2. 9383 3. 942174 2. 110799 1. 494718  
2. 682409 1. 107248 2. 446454 4. 935092 0. 906522 2. 22537 1. 161607 2. 160469 0. 985352  
1. 627684 1. 718221 1. 584476 1. 651183 1. 733648 1. 722942 1. 71525 1. 252359 2. 081825  
1. 160927 0. 588751 1. 391407 1. 216264 1. 102877 0. 872288 1. 045116 0. 724996 1. 32512  
1. 156382 1. 62793 1. 025244 0. 981064 1. 090705 1. 082706 1. 209019 0. 950705 0. 868345  
1. 123053 1. 24813 1. 036187 1. 611979 1. 316781 1. 442433 1. 213471 1. 104101 1. 534756  
7. 496063 7. 862102 7. 291956 7. 916912 7. 922014 7. 420009 7. 474324 7. 855886 8. 175926  
1. 511617 2. 149673 1. 471708 2. 610665 3. 502542 3. 98509 1. 590485 2. 714323 4. 401736  
0. 87163 1. 305972 1. 096558 1. 971917 1. 463387 1. 192272 1. 435843 0. 866408 1. 781131  
3. 501601 2. 599242 3. 535488 2. 729135 2. 712904 2. 592021 2. 961158 2. 552072 3. 053369  
1. 472801 3. 23731 2. 809297 1. 574943 1. 909052 1. 199683 1. 364514 1. 616732 1. 271091  
0. 881702 2. 572546 1. 006503 2. 099029 1. 887117 2. 722453 2. 33662 3. 018694 2. 618292  
1. 49895 1. 606726 1. 53893 1. 791258 1. 784556 1. 168451 1. 538502 2. 155896 1. 630348  
0. 940999 0. 812283 1. 104962 2. 806093 0. 789404 1. 562681 0. 98005 1. 43599 2. 114921

0.792181 1.212685 1.680347 1.871061 1.17518 0.937697 1.034944 1.609973 2.526419  
3.031939 4.284855 3.375744 0.905787 2.854084 4.655921 4.002673 3.56615 3.626464  
0.724184 0.864919 1.133376 1.398523 0.990436 1.089441 0.996646 1.147411 0.912375  
2.427264 2.021136 1.966425 1.553478 2.465356 1.820975 1.509492 2.253603 1.541523  
2.910525 2.664945 2.671563 2.57392 2.512101 2.352248 2.827224 2.418682 2.228568  
1.000735 0.954535 0.782411 0.904645 0.880079 1.092816 1.730057 1.218984 1.97497  
0.758552 1.401172 1.11268 0.926697 3.362651 0.681036 1.021161 1.548865 2.452227  
1.354388 1.653246 1.937501 1.610221 1.717341 1.876859 1.480526 1.666744 1.790924  
1.066677 0.801954 1.344902 1.459669 1.45053 1.354058 1.294811 1.190121 1.64526  
0.895826 1.815847 0.845201 1.303186 0.497252 1.310366 1.1301 0.734861 0.940136  
2.489396 0.856246 2.952339 6.691057 4.259496 1.355176 1.526169 1.099142 2.307625  
2.176489 1.063872 1.419787 1.871292 1.265054 1.757419 1.390072 1.542293 2.385233  
0.85945 2.496282 3.371163 2.392893 1.300759 1.256582 1.729127 1.092738 2.430421  
2.395097 2.341914 3.072805 3.381138 2.440565 2.663277 2.225596 2.27438 2.112296  
0.839277 1.491495 4.821109 0.971671 1.154258 1.158263 0.928676 0.808326 2.241593  
1.397943 1.602078 2.687131 1.579872 1.413428 2.312783 2.475904 2.247569 2.243595  
1.317523 2.145793 0.577936 1.330991 1.57974 1.114205 0.945299 1.564904 2.795755  
1.619162 2.132476 1.73324 1.737944 1.353799 2.321579 1.730456 1.45486 1.817563  
1.2359 1.432311 0.947906 1.535097 1.448468 2.254057 1.745374 1.37625 2.018266  
1.494657 1.12937 0.983418 0.528702 1.379373 3.402538 0.615671 0.993348 0.903642  
1.528465 0.954914 1.099043 0.952836 1.62619 1.06208 0.494 1.338722 2.246059  
1.648922 1.011512 1.495469 1.926705 1.886281 2.007508 1.574065 1.298322 1.34717  
2.117535 1.722532 2.402378 2.225886 2.425278 2.173979 1.950767 2.242545 2.577755  
2.902607 1.917927 3.052146 3.105238 2.359836 3.332527 2.786792 3.186573 2.581178  
1.948102 1.942148 1.648498 1.788066 1.874585 1.754298 1.286395 1.28734 2.082374  
0.715033 0.589443 1.611003 2.135359 0.898509 1.533446 0.572841 1.441937 0.820369  
4.75914 3.943679 4.543408 4.040801 4.050238 5.102629 4.270871 4.91697 4.776199  
1.683302 3.222465 2.458699 3.105278 2.422008 2.181385 1.655229 2.226841 2.337222  
1.199861 1.18266 1.454359 1.871344 1.48907 1.51086 1.644019 1.119706 1.257679  
1.715459 1.420511 4.479423 2.357173 1.662358 2.137088 2.258694 1.928691 1.723153  
1.935121 1.666559 1.817715 1.991913 1.767793 2.688116 1.822987 1.566971 2.574687  
0.912393 0.884599 1.060518 1.294874 0.786713 1.100812 1.716764 1.265787 2.666082  
2.031043 1.725321 1.873365 2.948139 2.002448 2.020934 2.594138 3.056456 3.90447  
2.532636 2.407052 2.682626 4.542238 1.325571 3.005648 3.6407 2.243009 3.952138  
2.557977 3.149269 2.612803 4.428145 3.024419 4.218489 2.132064 3.605598 3.49342  
1.251911 0.892757 1.117146 2.07791 1.142361 0.857472 0.567844 1.825164 1.962975  
1.215235 1.536121 1.113967 1.336894 1.768269 0.860154 1.166897 0.923945 1.219575  
1.169043 1.204646 1.47578 1.289631 1.420667 1.274598 1.276559 1.26365 1.461831  
1.437847 1.688764 1.949289 2.739647 2.148402 2.035495 1.588033 1.283074 1.650427  
0.779435 1.840976 2.178024 3.334871 0.790706 1.211903 0.704976 0.799968 1.388109  
0.819237 1.882739 1.925846 2.347258 1.426344 2.078126 1.710555 1.681025 1.312053  
1.180136 0.804472 1.199652 1.259272 0.792784 1.096637 1.129494 1.159076 1.207821  
0.944168 1.341318 0.742826 0.902841 0.916718 0.974675 1.32851 0.87709 0.809857  
0.919946 1.025392 1.185883 1.440487 2.975441 1.366221 0.837242 1.139741 2.544862  
0.164342 1.858912 0.734815 0.826359 0.599027 0.903128 0.669541 1.518342 0.79403  
1.221298 0.895252 1.162594 1.702999 0.992712 1.908603 1.108014 1.257913 1.185823  
1.252105 1.497377 1.102658 1.394412 1.119369 1.319239 1.105639 1.024484 0.974862  
1.269237 1.62906 1.608261 1.714401 1.26925 1.640923 1.206561 1.41538 1.653764  
2.654225 2.847123 2.56251 2.78427 2.647621 3.383717 2.698403 2.192059 3.21283  
1.611791 1.146742 1.769227 1.129826 0.9578 2.338753 1.459727 0.727208 2.801972  
0.882864 1.229086 1.396744 1.294035 1.181244 1.872989 1.231365 1.077777 1.649736

1.666898 1.423645 1.93031 2.135518 1.835192 1.274831 1.459165 1.8197 1.48428  
1.350759 2.080927 1.354341 1.233358 1.526135 2.157605 1.50993 1.155757 1.317727  
1.143083 0.752738 1.683399 0.931044 0.99762 1.162294 1.035086 1.383405 1.059888  
2.855498 1.405761 2.298135 3.079333 2.179999 2.193731 1.90621 2.153034 2.524163  
2.018538 2.255129 1.97717 2.086483 1.749922 2.156372 1.875521 1.482788 1.469708  
1.517142 1.165636 1.665695 1.843465 1.390623 1.872683 1.06764 1.490464 1.353572  
2.744412 4.128362 2.86149 2.875068 3.535137 3.167418 2.505528 2.379318 2.438823  
4.44619 4.447091 2.524507 4.726966 3.949784 1.707731 3.371901 4.044431 5.128709  
1.738959 1.476807 2.012184 2.154686 1.653789 1.637335 1.577433 1.242026 1.944042  
0.98142 1.599747 1.435186 1.050439 1.225618 1.380325 1.116442 1.085441 1.107424  
2.370409 2.4768 2.390274 2.747879 2.490663 2.580223 2.224415 2.361963 3.234992  
3.046072 1.496064 3.054212 3.181588 3.703337 3.400207 1.384567 1.698322 2.685794  
4.255847 3.588856 4.452798 4.411677 4.021069 3.489614 3.425474 3.175251 3.616526  
1.204535 1.180894 0.991518 1.185721 1.274438 1.262652 1.599257 1.847462 0.772255  
1.329645 0.918007 1.241737 1.663466 0.946803 0.920748 1.473791 1.559288 1.475151  
0.735702 0.862122 1.167209 1.262153 0.85154 1.057991 1.033723 0.842466 1.169663  
1.359113 0.967462 2.048645 2.024196 0.779831 0.999067 2.24535 1.896099 1.091886  
3.254881 1.014651 0.855591 1.034573 2.493046 2.382453 4.240491 1.631131 1.529596  
3.68308 3.533518 3.658047 3.84996 3.480409 3.584392 3.038389 2.839645 4.852969  
2.579731 2.41227 2.619827 2.422077 1.845463 2.399902 1.360043 2.747563 3.690091  
2.374021 2.103793 1.919619 2.140153 1.402084 2.196937 2.812792 3.022945 1.406858  
1.243546 1.47486 1.034176 1.417906 1.417906 1.434514 1.591556 1.463606 1.434514  
1.170637 1.244923 1.104154 2.125653 1.558965 1.27849 0.924765 1.134288 1.107525  
3.858587 1.358694 2.013304 1.955956 1.907998 1.279844 2.249668 1.704547 1.736273  
1.697078 1.352171 2.341999 1.817666 1.481762 1.77695 1.506313 1.550825 1.952881  
0.935056 1.075503 0.87332 2.024669 0.752469 1.025164 0.798668 1.181395 0.953008  
1.577356 1.665403 2.177104 1.893766 1.610675 1.890478 1.655479 1.508159 2.443646  
2.407651 0.906056 1.227483 1.725967 1.232671 1.823725 2.029975 1.310288 2.0706  
1.338799 1.000939 1.314796 2.898795 1.511519 1.450787 1.678303 2.515744 1.133739  
0.967869 0.739575 0.828848 1.774651 1.404086 1.622115 1.019183 1.981607 1.215656  
2.079138 1.873067 1.912588 2.54771 2.657506 2.140054 2.926087 2.759461 1.601288  
1.355834 1.694116 1.326324 2.252035 1.658055 1.569891 1.505294 1.66811 2.148851  
2.206069 2.092149 1.51487 2.474077 2.359495 1.464971 1.762832 2.109522 1.050426  
3.011973 1.760062 1.692646 2.262699 2.039143 1.126818 1.253915 1.311547 2.13799  
0.946415 0.952156 0.796483 0.972264 0.877125 1.371456 4.93537 1.809275 0.678186  
1.574889 1.771277 2.008739 1.888669 2.095826 1.813507 1.580906 2.337755 1.981877  
1.566534 0.932341 1.187037 1.231407 1.095369 1.134856 1.075532 0.921379 1.231407  
1.54774 1.790237 1.40732 2.659331 1.714579 1.600102 1.453397 1.497625 2.026737  
2.297697 3.504329 3.636956 3.80403 2.895228 2.946826 2.708502 3.044014 2.764328  
1.459692 2.262614 1.611468 1.864424 1.627107 1.612507 1.814146 2.687292 3.139157  
1.528775 1.307368 1.609301 1.234133 1.637495 1.219427 1.156815 1.405541 1.871203  
3.607983 2.680868 4.288056 3.411901 2.476757 2.789311 3.2278 1.789193 3.639452  
2.402956 1.548322 1.548955 1.674799 1.990004 2.000852 1.422966 1.301982 1.616691  
2.201815 1.84797 1.763531 2.048012 1.893696 1.904876 2.513274 2.373135 1.824026  
1.588033 1.793859 1.264872 2.727697 1.411838 1.260262 1.269304 1.186097 1.033931  
2.284723 1.933484 2.308571 1.420697 1.568349 3.162693 1.779613 1.0254 1.601992  
1.150352 1.07666 1.177573 1.687939 0.881624 1.350687 0.804132 0.727078 0.948361  
1.14121 1.298616 1.093243 1.659537 1.410222 1.08022 1.09896 1.277014 1.606525  
2.002563 2.620099 1.783326 1.746403 1.907183 2.066939 2.011607 1.991831 2.553502  
4.663776 3.590324 4.718909 1.434215 3.952027 2.254045 2.257238 3.229111 2.744004  
0.990978 0.89558 1.421497 2.10204 1.640707 2.226026 1.353012 1.04472 1.180419

1. 233997 1. 199418 1. 722784 2. 055919 1. 554735 0. 960987 1. 676751 2. 037381 1. 36105  
1. 567435 1. 352971 0. 981021 1. 311413 1. 301769 0. 990602 0. 955331 0. 644522 0. 491031  
1. 135808 0. 865847 0. 695818 1. 458414 1. 318569 0. 97336 0. 767607 0. 893961 1. 063844  
1. 741161 2. 510616 1. 286233 1. 535033 2. 213415 1. 384956 1. 26265 1. 206187 1. 690483  
2. 364855 2. 524983 2. 611113 2. 916167 2. 183877 2. 253124 2. 258753 1. 758292 1. 713427  
0. 695225 1. 462644 0. 8911 1. 747173 0. 727639 1. 789942 1. 635607 1. 467604 1. 820346  
3. 251014 3. 830389 4. 050812 3. 791322 1. 553 4. 3722 3. 865429 1. 355949 4. 130185  
3. 260139 3. 563313 3. 315392 4. 699408 2. 754074 3. 624638 3. 447724 2. 67339 3. 586891  
1. 815679 1. 34683 1. 480631 2. 712421 1. 186813 1. 067791 1. 45381 1. 389265 1. 982938  
0. 969067 0. 964404 1. 296429 1. 033902 0. 91562 1. 073105 1. 128101 1. 154103 1. 246932  
1. 661867 2. 022503 1. 894177 3. 030662 1. 829957 2. 59099 1. 555891 1. 960209 2. 753752  
0. 845542 1. 146755 0. 946505 1. 870002 3. 663554 1. 330816 1. 124163 1. 151802 3. 644325  
1. 165272 2. 278179 1. 001284 1. 187434 1. 486434 1. 790496 0. 776077 1. 287619 1. 42766  
1. 701375 2. 654899 1. 372499 1. 310766 1. 167188 2. 119578 1. 362795 2. 514368 1. 38004  
2. 387496 2. 342567 2. 092339 2. 217007 2. 329643 2. 541874 1. 744645 1. 90742 2. 209235  
1. 234327 1. 782003 0. 99893 1. 319662 1. 333491 1. 514259 1. 469005 2. 030697 1. 056435  
1. 733192 2. 193303 1. 577153 1. 943138 1. 776763 1. 855573 2. 082605 1. 635617 1. 66812  
1. 079045 0. 965207 1. 007313 1. 114661 0. 884314 1. 193714 0. 803018 0. 947271 0. 908478  
2. 03036 1. 400857 1. 62896 2. 02725 3. 437087 2. 161983 1. 843609 1. 325757 1. 835046  
1. 588492 1. 656622 2. 099255 2. 833674 1. 437171 1. 421779 1. 974436 2. 16907 2. 187547  
1. 534574 1. 487592 1. 496838 2. 625139 1. 216172 1. 206752 2. 047858 1. 593845 1. 576719  
1. 45999 1. 135306 3. 010013 1. 693914 0. 91236 0. 899901 0. 914763 1. 504223 4. 562426  
1. 317137 1. 047677 1. 768172 2. 393099 1. 476047 1. 756642 1. 29593 1. 27152 0. 718717  
1. 304733 1. 854236 1. 789362 1. 918075 1. 633074 1. 323986 2. 920281 1. 961175 2. 758488  
1. 100923 1. 183911 1. 438123 1. 126035 1. 126035 0. 85669 0. 910332 1. 084322 0. 895319  
1. 306006 1. 058952 1. 33489 1. 722499 1. 054962 1. 277248 1. 0565 1. 203493 1. 304542  
1. 372123 0. 950169 1. 170011 1. 479434 0. 978605 1. 069078 0. 98214 1. 387801 0. 915274  
1. 386213 1. 556204 1. 253334 1. 609891 1. 095857 1. 984018 1. 342933 1. 362279 1. 492344  
1. 640987 1. 451856 2. 125894 1. 747353 1. 862104 1. 843034 2. 385165 1. 974734 2. 152026  
1. 487943 1. 16555 1. 516766 1. 899074 1. 469193 1. 545699 1. 49063 0. 939401 1. 437558  
1. 335193 1. 033124 1. 442439 1. 252969 1. 717577 1. 234755 1. 670714 0. 977832 1. 339931  
1. 743109 2. 251948 1. 551969 2. 345955 1. 720534 1. 88888 1. 77575 1. 703525 1. 524703  
2. 196651 2. 918077 2. 631523 3. 329251 2. 374714 1. 917966 2. 874865 3. 522873 2. 467956  
1. 725477 1. 836603 2. 181901 1. 82832 1. 358487 1. 787754 1. 700893 2. 478432 1. 75144  
1. 38544 1. 549539 1. 325883 2. 248966 1. 880873 1. 540033 1. 503763 1. 160572 1. 601129  
1. 317856 1. 853916 1. 342765 1. 679349 1. 264723 1. 129523 1. 178689 1. 120299 1. 234628  
5. 781409 5. 004794 4. 676749 5. 963754 5. 531945 4. 462698 5. 42101 5. 485842 4. 705928  
5. 734966 6. 409603 6. 309859 7. 196422 6. 914723 6. 106279 6. 817116 6. 843195 8. 001507  
2. 087588 2. 004219 1. 432305 3. 740996 1. 368518 1. 862924 2. 756003 1. 977668 2. 494133  
1. 292484 0. 753114 0. 811419 1. 974439 0. 666044 1. 584105 1. 737705 2. 992218 1. 577797  
1. 339203 2. 019122 1. 496209 2. 097128 1. 301658 1. 617815 1. 48642 1. 590297 1. 36153  
2. 298464 1. 740788 1. 440047 1. 700051 2. 279339 1. 912034 1. 928436 1. 30127 1. 963787  
2. 662519 2. 006164 3. 444822 2. 512159 2. 735542 2. 986384 2. 534445 3. 578573 2. 308269  
1. 333497 1. 035892 2. 716947 2. 926989 0. 93333 2. 524987 1. 427709 1. 241755 1. 164633  
4. 890482 1. 873292 4. 272542 3. 468972 3. 224178 2. 930708 4. 043046 3. 682241 4. 005092  
1. 289563 1. 616004 1. 026703 2. 004088 2. 370149 1. 705913 2. 155683 1. 328815 2. 857916  
2. 527005 2. 798862 4. 89763 2. 54495 3. 323298 2. 415445 2. 789408 4. 169231 5. 732498  
1. 069077 1. 773937 1. 369568 1. 679749 1. 444792 2. 049445 1. 18805 1. 272931 1. 427761  
1. 308518 1. 022205 1. 299678 1. 168387 1. 034929 1. 123459 0. 73463 1. 107479 1. 187953  
1. 217466 1. 061245 1. 110516 2. 088334 1. 30469 2. 263844 1. 637201 1. 170536 1. 267284  
0. 881588 0. 705329 1. 035274 1. 904296 1. 146551 1. 637958 0. 944509 1. 205966 0. 948606

1. 893732 2. 119634 1. 9238 2. 844775 2. 02993 2. 248332 2. 201926 2. 397753 1. 682929  
0. 896216 1. 096597 0. 96208 1. 261224 1. 196256 1. 309721 1. 529469 1. 34643 1. 682  
2. 761874 2. 903711 2. 939482 2. 932796 2. 502693 3. 06183 3. 746163 2. 268157 2. 526034  
1. 344556 0. 876615 1. 254538 1. 533374 1. 320889 1. 550388 1. 151951 1. 090757 1. 521652  
1. 24616 1. 458199 0. 995733 1. 033434 1. 071959 2. 03952 1. 470822 1. 717694 0. 695205  
1. 145214 1. 183077 1. 214152 1. 124025 1. 097471 1. 169824 1. 082262 0. 838623 1. 115209  
1. 392352 0. 909579 1. 553153 1. 157738 1. 181663 1. 585615 1. 534666 2. 042586 2. 434946  
3. 07015 2. 284563 2. 390114 1. 701846 1. 721614 2. 960311 2. 030253 2. 118345 3. 159865  
1. 516467 2. 223094 2. 684956 2. 128298 1. 532783 1. 451312 1. 571844 1. 462326 1. 336911  
1. 666127 1. 465925 2. 12226 1. 813564 1. 922518 1. 577348 1. 403085 1. 952536 1. 49017  
1. 172357 1. 126613 1. 10191 1. 145774 1. 003224 1. 14087 1. 170932 1. 389568 1. 387287  
4. 484224 3. 785656 4. 008601 4. 173611 4. 060887 3. 697728 3. 789844 4. 168806 2. 974826  
1. 230953 1. 451694 1. 259977 1. 588622 1. 173437 1. 761592 1. 154829 1. 667684 1. 631315  
1. 114179 1. 107057 0. 920658 1. 725467 1. 297028 1. 138023 0. 951889 0. 956736 1. 020494  
2. 494692 2. 447106 2. 57732 3. 012758 2. 104042 1. 944756 2. 407676 2. 718379 2. 26635  
1. 504093 1. 965448 2. 238299 2. 505806 1. 577791 4. 012044 1. 032204 2. 570392 2. 491646  
2. 415448 2. 980753 3. 012358 2. 338589 3. 684019 3. 170346 3. 840318 1. 572096 5. 015309  
6. 344362 6. 689632 6. 628854 7. 177896 6. 767532 6. 167124 6. 671492 6. 51941 6. 705628  
6. 222057 6. 302276 5. 169928 6. 448635 5. 819276 6. 23652 6. 140841 5. 589952 5. 891748  
1. 130127 0. 863532 1. 73271 1. 759345 1. 166441 1. 574208 1. 469217 1. 069988 1. 181197  
1. 696706 1. 752767 1. 925837 1. 862752 2. 158151 2. 044736 1. 93903 1. 840729 1. 563654  
1. 450869 2. 011644 2. 215785 2. 115508 1. 181261 1. 282617 1. 022352 1. 535916 1. 341368  
0. 94192 1. 016191 1. 065757 2. 68898 0. 980297 1. 263 1. 340496 1. 111029 0. 878551  
1. 592827 1. 505219 1. 788057 1. 287783 1. 196164 1. 482956 1. 194966 1. 109462 1. 885639  
0. 839693 0. 648533 1. 051308 1. 150385 0. 926822 0. 940856 1. 318785 1. 729936 0. 940206  
1. 211808 1. 070522 1. 135022 1. 2671 1. 154829 1. 670035 1. 35807 1. 055768 0. 928507  
3. 722268 2. 896791 2. 092529 3. 105346 1. 906838 3. 798128 3. 023914 2. 749966 2. 776814  
3. 449984 2. 506082 3. 268281 2. 105355 1. 106371 3. 908691 1. 273586 1. 140139 0. 570217  
1. 865314 0. 903209 0. 755362 1. 409194 1. 123469 0. 851573 1. 804753 1. 277475 1. 387087  
1. 18856 1. 603131 1. 716629 0. 997016 2. 207297 2. 548624 1. 185756 1. 951491 1. 59293  
0. 868875 1. 415099 1. 363798 1. 76342 1. 877211 0. 925065 1. 165133 0. 91276 1. 314476  
1. 160117 1. 145682 2. 324917 1. 16231 1. 360469 1. 068056 1. 493571 1. 320383 3. 407195  
1. 665862 2. 012639 1. 646133 2. 248386 1. 907458 2. 171918 1. 908185 1. 827974 1. 610323  
2. 822638 2. 102347 2. 922675 1. 901885 1. 950853 2. 551337 1. 916089 2. 487152 2. 113823  
1. 362295 1. 423433 1. 137388 1. 658699 1. 288661 1. 438811 1. 479868 1. 7738 1. 033228  
1. 66401 1. 014641 1. 447207 1. 72258 2. 158177 1. 566922 1. 783666 1. 669186 1. 398551  
1. 159799 1. 181639 0. 748629 1. 035301 0. 918987 1. 240659 0. 886427 0. 745928 1. 181131  
4. 234737 2. 590143 3. 486459 3. 320649 3. 487647 2. 785015 3. 450756 3. 478955 3. 286777  
0. 851719 0. 816689 0. 934282 1. 251186 0. 822068 1. 213761 1. 112526 0. 910729 1. 055022  
2. 323696 2. 254952 2. 37119 2. 11518 2. 645861 2. 956857 2. 89246 2. 381549 2. 666709  
4. 860071 5. 840018 5. 352683 5. 647764 4. 840404 4. 553738 3. 738812 5. 058632 3. 29457  
4. 6984 4. 976206 4. 892944 5. 237985 3. 422171 4. 832675 4. 953383 5. 214031 5. 265534  
2. 640769 2. 363117 2. 681106 2. 934295 2. 539085 3. 100745 2. 708888 2. 744311 3. 579721  
1. 498844 1. 933193 2. 423964 2. 269677 1. 395463 1. 717843 1. 953188 1. 590789 2. 602013  
1. 558051 1. 16373 1. 267983 1. 317118 1. 099285 2. 256852 1. 388681 1. 041591 1. 467931  
1. 419524 1. 531124 1. 714721 2. 100231 3. 08594 1. 98723 1. 698214 2. 589983 1. 767514  
2. 239296 2. 877277 0. 588573 0. 625689 2. 999918 1. 508712 0. 303981 1. 388633 2. 201221  
0. 870217 1. 241138 0. 987123 1. 295479 0. 927219 1. 454773 1. 072331 1. 062067 1. 182237  
1. 062686 0. 681079 2. 681518 1. 114337 1. 268835 1. 270945 1. 20897 1. 195494 1. 227351  
2. 78099 2. 338684 3. 311009 2. 550781 2. 429085 2. 786711 2. 215953 2. 055602 2. 815243  
1. 224504 0. 973447 1. 305553 1. 875239 2. 199806 1. 171613 1. 565259 1. 333018 3. 995286

1. 598204 1. 102281 1. 492912 1. 801975 1. 127519 1. 878929 1. 284824 0. 745968 1. 549898  
1. 274463 1. 970891 0. 690583 1. 194181 2. 076886 1. 142093 2. 398341 1. 94728 2. 08069  
1. 307971 1. 090731 1. 053445 1. 841904 1. 145511 1. 277327 1. 796253 0. 78972 0. 925524  
2. 229741 1. 48584 1. 273123 1. 712383 2. 588261 1. 356044 1. 39303 2. 613198 3. 513424  
1. 11783 1. 344884 1. 119729 1. 066929 1. 0557 1. 76977 1. 465339 1. 269071 1. 238937  
1. 880575 2. 629104 2. 318058 1. 526885 2. 673595 3. 12829 2. 624461 2. 48596 2. 702319  
1. 675528 1. 100224 1. 16562 3. 705515 0. 637945 0. 820335 1. 578607 2. 000303 0. 942997  
1. 478967 1. 655933 1. 640082 1. 813774 1. 354343 1. 159586 1. 472935 1. 480666 2. 531765  
4. 743989 4. 932912 4. 368447 4. 74199 5. 75159 3. 545216 4. 03751 5. 173669 3. 535791  
1. 485453 1. 142744 0. 782689 1. 434513 0. 842965 0. 938191 1. 108579 0. 657893 1. 091311  
1. 19266 1. 534205 2. 434528 2. 200056 1. 708064 1. 938861 1. 317939 1. 370772 1. 82461  
3. 542975 3. 204312 4. 731192 3. 460417 3. 728314 2. 665037 3. 595411 5. 970894 2. 720865  
1. 264045 1. 352224 0. 973396 1. 036417 1. 878548 1. 83377 1. 932315 1. 040953 1. 452662  
1. 059966 1. 013037 1. 038885 0. 818295 1. 300579 1. 476127 1. 209548 1. 035498 1. 222433  
1. 030081 1. 145347 1. 218696 1. 156442 1. 419096 0. 85717 0. 859212 1. 218696 1. 408942  
1. 025043 0. 786946 1. 445677 2. 48672 0. 768067 0. 765742 1. 048331 1. 191544 1. 289274  
1. 43571 1. 894133 1. 1725 1. 821219 1. 415105 1. 599055 1. 559411 1. 484601 1. 321264  
0. 890729 1. 634275 1. 373687 3. 164367 1. 054517 1. 512554 1. 418232 0. 955945 1. 675716  
1. 105109 1. 283053 1. 335181 1. 451265 1. 158575 1. 307014 1. 300016 1. 278925 1. 326689  
3. 181824 1. 881107 1. 845088 2. 050777 2. 181071 3. 403736 2. 341028 1. 176055 1. 598185  
0. 386185 1. 156419 0. 709779 3. 60395 3. 59691 1. 338234 0. 739516 2. 957352 2. 217648  
2. 648091 3. 089875 3. 421937 3. 844637 2. 668169 2. 586683 3. 085871 2. 664571 2. 851342  
0. 958647 1. 001452 1. 021467 1. 024148 1. 053894 1. 055402 1. 059362 0. 5677 1. 429537  
4. 23597 4. 152082 4. 04825 4. 582743 4. 019793 3. 200079 4. 618338 4. 423738 4. 183007  
1. 995821 1. 311971 1. 968786 1. 633865 1. 677973 1. 182983 1. 243151 1. 246068 1. 212609  
1. 591707 1. 562809 0. 74353 1. 619583 1. 351052 1. 976993 2. 290056 1. 535925 1. 583277  
0. 94185 1. 804992 0. 670476 1. 195997 0. 844081 1. 460027 1. 892173 1. 59741 1. 109125  
8. 556909 9. 00605 8. 311143 7. 472465 8. 829647 8. 40899 7. 87965 8. 187413 9. 162326  
3. 0488 3. 879412 4. 921401 5. 013047 2. 530397 2. 943325 4. 755885 4. 248538 4. 113713  
2. 416385 1. 594278 2. 312243 2. 231082 1. 396162 2. 592487 1. 622064 1. 720888 1. 811951  
0. 805572 1. 066292 1. 095646 1. 279834 0. 922945 0. 866063 1. 663512 0. 571028 0. 805572  
0. 663424 1. 363017 1. 114032 1. 285547 0. 649977 1. 598981 0. 942091 0. 992138 1. 407042  
1. 283545 1. 327434 1. 340342 1. 68731 1. 158972 1. 557185 1. 456431 1. 189102 1. 11447  
2. 213533 2. 081295 1. 673654 1. 090933 2. 187584 1. 523489 1. 447533 1. 897227 1. 552642  
2. 091968 1. 411844 1. 814144 2. 410692 1. 44081 1. 616214 1. 789317 1. 629179 1. 493623  
1. 045324 2. 281312 2. 239739 1. 948082 1. 178005 2. 6042 2. 45605 1. 535886 3. 058035  
1. 564082 2. 252898 2. 39735 1. 37715 1. 101573 3. 052974 1. 495789 1. 928245 1. 620922  
0. 964562 1. 068186 1. 175328 1. 711726 0. 978434 1. 396302 1. 622909 1. 273692 1. 407031  
1. 308946 2. 023243 1. 125558 2. 336683 1. 248481 1. 506572 1. 643763 1. 489958 1. 383217  
1. 610421 1. 536906 1. 543375 2. 404031 2. 161531 1. 744276 2. 68423 1. 57303 1. 90152  
1. 097988 1. 525028 1. 528792 2. 055489 1. 4716 1. 180428 1. 352001 1. 404112 1. 152209  
1. 776148 1. 721882 1. 209111 1. 368502 2. 063384 1. 300626 1. 609332 2. 236866 3. 587308  
0. 914812 1. 503359 1. 935082 0. 800072 1. 143035 1. 691781 1. 169779 1. 281931 1. 937521  
2. 32616 1. 539872 1. 444722 1. 358708 2. 031693 1. 442369 1. 251964 1. 069312 2. 670717  
0. 530852 0. 648655 1. 519015 0. 986597 0. 760057 1. 39601 1. 423128 1. 000665 1. 60019  
0. 668468 2. 129121 1. 135837 1. 465093 1. 006557 1. 635735 1. 86976 1. 169524 1. 500463  
1. 223607 1. 325659 1. 363264 1. 878115 1. 317181 1. 361538 1. 238199 2. 144905 1. 359318  
1. 925134 2. 409194 1. 462356 2. 668728 1. 654468 2. 282541 2. 015835 1. 418983 1. 369828  
1. 701359 2. 562283 1. 769171 1. 691845 1. 242144 2. 102038 1. 355274 2. 133653 2. 281331  
2. 415616 1. 798479 1. 434673 1. 857116 0. 836662 0. 981383 2. 208683 1. 378282 1. 973287  
4. 384374 2. 493489 2. 373598 3. 396688 4. 075242 2. 371866 3. 468553 4. 551155 3. 237076

1. 793043 2. 110229 1. 12445 1. 698371 1. 745479 2. 149693 1. 981893 0. 709128 2. 450647  
1. 322981 2. 438523 2. 174002 2. 249452 2. 243075 3. 264159 1. 919805 2. 253777 2. 089282  
0. 692112 1. 342671 1. 293868 2. 110881 1. 012021 2. 245867 0. 13463 1. 104826 1. 524184  
1. 967227 0. 954444 3. 350558 2. 380167 3. 294187 1. 382054 0. 920605 0. 672084 0. 630179  
2. 941537 1. 202117 1. 581556 2. 650445 2. 777615 3. 995878 1. 538891 2. 351248 3. 462253  
1. 478605 1. 579158 1. 677601 1. 800614 1. 150323 1. 375804 1. 734588 1. 806939 1. 60701  
2. 21926 2. 123466 1. 619702 2. 765481 2. 269113 2. 174695 1. 808315 2. 391453 4. 284484  
1. 766816 1. 598312 2. 335028 2. 76876 1. 776487 2. 307512 2. 111394 1. 918045 2. 416423  
2. 140874 1. 612544 1. 873506 2. 531798 1. 806527 2. 426656 1. 607501 1. 573926 2. 89032  
0. 939716 0. 897664 1. 067167 1. 087368 0. 92389 1. 955952 0. 850071 1. 300487 0. 993394  
4. 113862 3. 443193 2. 879511 4. 571366 3. 171661 1. 125415 4. 213324 2. 076519 3. 888031  
2. 054969 2. 2022 1. 57651 2. 211986 2. 41447 2. 158871 1. 654386 1. 95748 2. 324878  
1. 838789 1. 670995 2. 248542 1. 513083 1. 72123 1. 815513 1. 181627 1. 217711 1. 024248  
1. 300403 1. 132779 1. 522881 1. 677014 1. 178128 1. 394849 1. 354589 2. 029648 1. 228468  
1. 366004 1. 740665 1. 441907 1. 397893 1. 351983 1. 411167 1. 454985 1. 43746 2. 310046  
1. 540454 1. 192652 2. 170978 3. 066961 1. 435323 2. 226228 1. 533122 0. 952272 0. 858723  
1. 258046 1. 056796 1. 525414 1. 365488 1. 342066 1. 448311 1. 624026 1. 494526 1. 510303  
3. 562611 1. 932483 2. 490915 2. 76157 1. 923955 4. 550509 3. 154986 3. 917018 2. 081814  
2. 864025 2. 547558 3. 594864 2. 706277 3. 081713 2. 891255 3. 583779 2. 906357 3. 286229  
1. 339344 1. 619017 1. 301194 1. 292119 1. 411692 0. 996531 1. 124054 1. 100871 0. 873454  
0. 948903 1. 118517 1. 28482 1. 143701 1. 049949 0. 834934 1. 051382 1. 129461 0. 947146  
2. 510195 2. 28573 2. 587372 2. 299217 1. 866237 3. 980135 2. 636423 3. 270489 2. 768165  
1. 313166 1. 088161 1. 918623 1. 407697 1. 496453 1. 870628 1. 116145 1. 02665 1. 187189  
1. 082981 1. 232199 1. 5279 2. 72586 1. 27311 2. 154554 1. 218253 1. 027685 1. 280746  
0. 954033 0. 917108 1. 525088 1. 480121 1. 432346 1. 311325 0. 773328 1. 311042 1. 279425  
1. 642598 1. 876406 1. 942356 1. 935206 1. 554067 1. 707299 2. 161339 1. 919162 1. 771396  
1. 534202 1. 578525 1. 463996 2. 066425 1. 719263 1. 648894 1. 381848 1. 495649 1. 571902  
1. 613392 1. 627997 1. 887588 1. 933869 1. 797475 2. 073458 1. 896465 2. 100337 2. 062059  
1. 653554 1. 631985 1. 729943 1. 116195 1. 15685 1. 090578 1. 51214 2. 026202 1. 497416  
1. 812473 1. 494299 0. 744216 2. 139427 0. 763544 0. 988713 1. 262449 1. 989538 1. 153278  
1. 777657 2. 157182 2. 301631 2. 5518 1. 810259 1. 88973 1. 745382 1. 82523 1. 943678  
1. 528667 2. 584112 2. 361057 2. 927663 2. 949848 0. 697482 3. 926834 4. 295456 1. 292462  
0. 945323 1. 044663 1. 089547 1. 405308 1. 335136 1. 535034 1. 090347 1. 110719 1. 232479  
1. 163397 1. 49639 0. 681007 1. 048253 1. 108735 0. 791817 0. 826858 0. 95936 1. 063377  
0. 873189 0. 828292 0. 856038 2. 182682 1. 190862 1. 41222 0. 792839 1. 728425 1. 005989  
1. 442593 1. 629517 1. 424202 1. 511244 1. 648034 1. 853472 1. 365451 1. 404426 2. 040528  
1. 426711 0. 311092 0. 75793 1. 070813 0. 708205 1. 699766 0. 525006 0. 753516 1. 733526  
1. 179812 1. 07374 1. 299051 1. 470604 1. 060506 1. 085939 1. 201725 1. 796204 1. 478855  
1. 395049 1. 320731 1. 832612 1. 931022 1. 027677 1. 221539 2. 035707 1. 010771 1. 691983  
1. 271293 1. 528548 1. 068367 2. 489972 0. 579566 0. 578994 1. 318065 2. 137932 1. 552354  
2. 631176 2. 574123 2. 829391 2. 191689 2. 052188 2. 738056 2. 752302 2. 490113 2. 205107  
1. 694706 1. 420217 2. 396775 1. 392577 2. 22773 1. 416565 1. 812574 1. 944712 1. 305639  
1. 691433 2. 04238 2. 172905 2. 720264 1. 369697 1. 317462 1. 387939 1. 303419 1. 590176  
1. 967942 1. 852875 1. 734542 2. 933429 2. 117456 1. 684558 2. 257821 1. 642597 2. 046642  
2. 028632 1. 847874 4. 098336 1. 589547 1. 915829 2. 397876 2. 571337 2. 659883 4. 825981  
1. 738937 1. 92449 1. 931368 2. 561286 2. 294253 1. 51011 2. 213991 2. 012263 2. 967994  
1. 678996 1. 198678 1. 154756 2. 182821 1. 465935 2. 138217 1. 157293 1. 275578 1. 246922  
1. 518328 2. 652131 2. 104073 2. 22505 1. 515875 3. 199127 2. 281138 1. 49362 2. 508938  
1. 486307 1. 448641 0. 980591 1. 299203 1. 737853 1. 057768 1. 282743 1. 268558 1. 258991  
1. 034369 0. 899334 0. 989714 1. 826514 0. 849737 1. 121146 1. 103594 1. 107929 1. 236514  
2. 292424 1. 214901 4. 254481 2. 936896 2. 501942 3. 605149 1. 597752 2. 489419 2. 620507

1. 851353 1. 60701 3. 483584 2. 263993 2. 339898 1. 573666 2. 291274 1. 419737 2. 242897  
0. 890864 1. 180262 1. 277527 1. 34498 0. 940567 1. 5018 0. 993164 1. 122865 0. 990824  
2. 818923 2. 777719 2. 832071 2. 665316 2. 690101 1. 578965 2. 500249 2. 28921 1. 858696  
1. 224893 1. 063015 1. 306972 1. 556234 1. 937528 1. 239666 1. 310276 1. 227546 1. 653411  
3. 113724 1. 059755 1. 534727 2. 300544 0. 57021 2. 841358 1. 232001 0. 542228 1. 931884  
5. 406855 3. 959778 4. 508219 3. 615557 3. 73806 2. 820179 4. 797933 4. 621999 3. 852699  
1. 670823 1. 066797 1. 815422 1. 122783 1. 48164 1. 296345 1. 736831 1. 87942 2. 371338  
1. 316356 1. 323554 1. 477953 1. 469311 1. 65568 1. 271885 1. 430231 1. 246524 1. 272234  
1. 608016 1. 575672 1. 64545 2. 171521 1. 497281 1. 793228 1. 698207 1. 698079 2. 516484  
3. 895406 2. 894981 2. 424418 1. 137461 3. 411957 4. 306941 3. 06012 3. 852868 3. 249481  
1. 548279 1. 299988 1. 445778 1. 562767 2. 525071 2. 599301 1. 245199 2. 714499 1. 24086  
1. 715687 3. 521875 2. 099993 1. 886506 2. 5505 2. 493535 2. 428774 2. 28337 2. 234916  
1. 074018 1. 871964 2. 184715 2. 055049 1. 459359 1. 886738 1. 517761 1. 238701 1. 66805  
2. 24895 1. 944129 1. 660245 2. 177317 1. 757443 3. 133193 1. 416228 2. 12106 3. 035883  
1. 085725 1. 174434 1. 257848 0. 688043 1. 276559 1. 407549 1. 406628 1. 661804 1. 069818  
0. 847836 2. 420963 1. 436255 2. 273128 1. 289955 0. 850212 1. 551246 1. 987223 1. 647413  
1. 437592 1. 068216 1. 760201 2. 029459 2. 923733 2. 351661 2. 223087 3. 310913 0. 791027  
1. 637303 1. 24133 1. 194202 1. 752737 1. 270776 1. 179679 1. 552658 1. 089108 1. 051913  
3. 982968 2. 595764 3. 653816 3. 178512 2. 530735 2. 902077 3. 27291 3. 170474 4. 831469  
3. 587565 1. 317889 1. 092722 1. 146969 1. 466921 1. 108882 1. 103487 1. 666255 3. 370612  
1. 212813 1. 383508 1. 21363 1. 142046 1. 406599 1. 779821 1. 882752 1. 652798 1. 425533  
1. 740142 1. 680523 1. 634881 1. 779483 0. 725462 1. 209508 1. 330685 1. 375612 1. 383514  
1. 265126 1. 414523 0. 992801 1. 721667 1. 637771 1. 042163 1. 317941 2. 480144 2. 513194  
1. 915911 0. 977682 1. 462644 1. 315729 0. 835493 1. 342597 1. 163301 1. 374387 1. 16047  
2. 51298 2. 722815 2. 992947 3. 155786 3. 952284 3. 094304 2. 292807 2. 643422 2. 301114  
2. 720616 2. 977504 2. 513894 2. 300384 1. 837163 2. 084194 3. 724072 2. 275893 2. 123066  
3. 413479 3. 447216 3. 233478 3. 369705 4. 374845 3. 59889 3. 086942 3. 130751 3. 598306  
1. 467484 1. 411982 1. 577122 3. 040073 1. 675821 2. 187377 1. 57617 1. 986373 2. 031018  
3. 061941 3. 162217 2. 767289 3. 517874 2. 313928 2. 175726 2. 719791 2. 802059 3. 212035  
1. 593269 1. 110052 1. 521847 1. 466858 1. 571113 2. 136732 1. 761132 1. 868423 1. 888914  
2. 235215 3. 26606 3. 260124 2. 6084 2. 002039 3. 364942 2. 976761 2. 037328 1. 719171  
1. 475489 1. 811858 1. 645162 2. 351007 1. 330028 1. 986564 1. 643643 2. 095667 1. 712912  
1. 894367 1. 832054 2. 336703 2. 442121 1. 959521 2. 113258 2. 183425 2. 508203 1. 996735  
1. 708948 0. 5307 1. 637768 5. 472635 0. 824032 3. 718045 0. 756212 1. 808524 2. 780544  
1. 890074 1. 267826 1. 616432 2. 43695 1. 39157 3. 925639 1. 978958 2. 863492 4. 056341  
1. 647446 2. 080338 2. 335215 1. 15011 2. 001126 1. 180579 1. 209444 0. 982959 1. 097145  
2. 393347 1. 87436 2. 201176 2. 546365 2. 056545 2. 086462 2. 202351 2. 017945 2. 779798  
1. 628155 1. 664717 1. 513024 2. 063004 1. 668939 1. 858013 1. 80189 1. 83849 1. 685805  
0. 898942 2. 21787 0. 806966 1. 547711 1. 09047 1. 47456 1. 126304 1. 095878 1. 487375  
2. 543201 3. 233122 2. 212367 4. 667948 3. 108137 2. 174466 3. 212129 2. 916822 2. 052492  
1. 971952 1. 880313 1. 677432 1. 284469 1. 639388 1. 911454 1. 633382 1. 369816 1. 733721  
1. 171804 0. 866093 0. 911862 1. 258264 1. 177469 1. 057385 1. 222229 1. 398152 1. 392104  
1. 393979 1. 189596 1. 594676 1. 355824 1. 997131 2. 286734 1. 531627 1. 02583 1. 843794  
1. 76391 1. 851581 2. 573749 2. 410287 1. 582944 1. 931775 1. 517286 1. 76827 1. 602666  
4. 496796 5. 524194 5. 325853 5. 869986 6. 152908 5. 068476 5. 450086 5. 841023 3. 776515  
0. 905953 1. 584131 0. 42936 1. 71148 0. 510474 1. 904226 0. 649331 0. 598594 2. 706904  
1. 249462 0. 939275 1. 31174 1. 52984 1. 222084 1. 302558 1. 2206 1. 379011 1. 526914  
1. 360456 0. 99836 1. 041531 1. 279134 1. 402303 2. 673414 1. 275008 1. 136956 0. 842787  
2. 610942 2. 926738 2. 602017 4. 216121 2. 669457 2. 070685 2. 884682 1. 660748 2. 799627  
1. 823225 1. 760558 2. 057059 2. 18001 1. 337067 1. 558281 1. 46395 1. 765258 1. 498699  
1. 773338 1. 62921 1. 133407 1. 471533 0. 948603 1. 342324 0. 840405 1. 785927 2. 218087



2.130366 1.986677 2.902326 2.74144 2.756585 2.036151 2.548568 1.789791 2.797003  
0.835414 1.570069 1.034778 0.955665 1.031257 1.400709 0.903365 1.404476 0.865726  
3.167714 2.805645 2.004662 1.708996 3.007281 2.457474 2.1208 2.789733 2.812994  
2.27146 2.783833 2.047885 2.752721 2.585993 2.817464 2.28223 1.481513 3.051843  
0.729597 1.023625 0.916195 1.347316 1.016074 1.232946 0.959855 1.612441 2.944229  
1.207835 0.862144 1.117868 1.221375 0.979986 1.601706 1.079625 1.546824 1.044665  
1.545194 3.541046 1.688068 1.019336 2.554877 2.50854 2.864812 1.355374 2.389899  
1.733929 1.887409 1.965754 1.521929 1.525313 2.605875 1.637512 1.927028 1.514883  
1.524377 1.423416 1.138654 1.921472 1.407954 1.280404 1.268518 1.179865 1.057101  
3.873425 3.424527 3.981305 1.790623 2.657544 2.653564 4.45051 1.152708 4.458618  
3.183722 4.76973 2.544281 4.40199 1.153781 4.782359 1.968098 1.485657 3.743027  
1.25212 1.179629 1.531095 1.316578 0.811013 0.617092 0.975794 1.195736 3.086068  
1.786175 1.302947 1.79057 3.054126 1.485932 1.34995 2.204782 2.023576 2.023576  
3.780459 1.070824 1.07624 1.115382 1.00513 1.710154 0.985756 1.054774 1.69398  
3.700472 4.217376 4.02019 3.727957 4.282546 4.314345 3.817464 4.17006 3.945209  
1.964935 1.347707 1.580874 2.807835 2.815057 1.512826 1.962013 1.132749 1.229786  
2.468078 2.997814 2.452998 2.641859 2.870499 2.306064 3.123016 2.931559 4.010592  
0.469634 1.127838 0.625753 1.259844 0.81073 2.457599 0.624385 1.157709 2.218167  
1.101516 1.360018 1.020386 0.888488 0.991657 2.452452 1.049163 0.762712 0.969639  
6.794284 7.454809 7.891228 4.313943 6.867814 6.492016 6.819947 6.054634 6.372944  
1.344214 2.964281 1.386971 4.552215 1.713653 2.618037 1.323302 1.324608 1.224704  
0.926029 0.739459 1.155562 1.015167 1.008538 1.891699 0.938009 2.036317 2.489939  
1.012367 1.152296 1.255868 1.043728 1.26376 2.113264 1.391615 0.988082 1.231448  
0.808973 0.866687 0.814772 1.024538 0.995727 1.087773 0.859409 0.857435 1.357807  
1.285276 1.406473 2.159114 1.500495 0.90602 1.602283 1.214012 0.84447 1.03072  
2.343158 2.611273 2.785029 2.236778 1.781892 1.167805 2.10328 1.54403 1.708114  
1.408995 1.16964 1.161692 1.227123 0.946825 1.60904 1.448678 1.061881 0.748012  
1.224725 1.037177 1.040388 1.19501 0.822973 1.058703 1.66776 1.579261 1.295282  
1.160782 2.987451 1.30716 2.336135 2.391447 0.78951 1.78088 1.54359 3.40176  
2.781655 2.659933 1.517031 2.017907 3.834272 3.268422 1.50625 3.898429 3.153619  
1.530173 1.210017 1.940884 1.425503 1.465372 1.520387 1.034784 1.179454 1.615611  
2.988014 3.741387 3.599928 3.761259 3.140982 3.687983 4.654379 3.851742 3.968514  
0.395637 1.957559 1.404604 1.394013 1.037974 1.998549 0.920075 0.971045 0.69973  
2.182777 2.145243 2.341321 1.408473 1.782361 2.594491 1.159056 1.898045 2.290458  
2.268227 2.042039 1.602708 0.91234 1.475627 0.950287 1.79342 1.593194 1.886395  
2.811054 2.384089 2.742995 2.53922 2.523899 2.643961 1.983862 2.267974 3.341756  
0.833681 1.189863 0.917109 1.417688 1.05041 1.111591 0.694716 0.843367 0.589063  
0.9702 1.48606 0.987101 1.436107 0.961713 1.830259 1.323016 0.992098 1.110225  
1.947281 2.062663 1.726066 1.967464 1.582352 2.277158 1.957036 2.476843 2.400841  
1.889556 1.720561 1.503766 2.465249 2.182186 1.915799 2.453486 2.033663 2.516559  
0.984627 0.917034 1.581354 1.363101 1.194945 1.812932 0.837642 0.774171 1.351666  
1.101343 0.831216 1.900528 1.976763 1.574581 1.357489 1.171002 1.235746 1.621061  
1.405115 1.567999 1.637226 2.044292 1.102937 1.85739 1.822501 1.696047 2.628883  
1.164542 1.486739 1.220726 1.763257 0.999803 2.228407 1.789567 1.314504 1.583276  
1.712955 1.753652 2.170591 1.738378 1.815892 1.924698 2.057404 1.548692 1.768379  
1.003371 1.042172 1.383682 1.916053 0.993641 1.336911 0.946288 1.505515 0.858406  
1.612817 1.485302 1.363009 2.105887 1.185952 1.27824 1.598331 1.607689 1.159707  
1.292274 1.618242 1.47075 2.058719 1.807724 1.762752 1.622554 1.262274 1.242724  
2.629323 2.239277 1.998038 2.161635 1.924166 1.687711 1.717848 2.204945 1.355731  
1.027066 0.992463 0.865231 2.519774 0.988099 1.692792 0.887052 1.554465 1.2858  
0.372884 1.297199 1.064623 3.633899 3.648321 3.724988 1.984472 3.45809 3.362955

1. 862084 2. 057229 1. 226733 2. 558451 1. 810174 2. 721228 2. 058843 1. 30518 1. 30518  
1. 626988 2. 116859 2. 214395 2. 226377 2. 849835 2. 160679 1. 676333 2. 326465 3. 063599  
2. 776316 1. 847003 2. 750572 1. 990512 2. 200294 2. 370529 2. 921135 1. 977484 2. 628399  
0. 960967 0. 653059 0. 832961 1. 314927 0. 841626 0. 886382 1. 1071 1. 278446 1. 116939  
3. 454895 1. 135408 1. 213124 1. 276952 1. 090722 1. 164972 1. 480281 0. 924809 1. 27689  
3. 749826 3. 954677 3. 502186 3. 876357 4. 377551 3. 85549 3. 574497 3. 128198 4. 049691  
0. 987552 1. 384619 1. 207704 1. 279823 1. 129442 1. 308242 1. 279823 1. 207704 1. 081134  
1. 422003 1. 151514 2. 417748 2. 025711 1. 4024 2. 359487 1. 185199 1. 169731 1. 07891  
1. 026651 1. 188881 1. 717775 1. 616832 1. 208284 1. 849293 1. 750833 1. 338011 2. 24889  
1. 174403 1. 343213 1. 059836 1. 78799 1. 319126 0. 916337 1. 323234 2. 197959 1. 122575  
2. 838076 2. 085548 3. 298005 3. 316336 2. 60477 2. 721266 2. 687013 2. 723924 2. 253804  
1. 420601 1. 91995 1. 160277 2. 302878 1. 293035 1. 729789 1. 613564 1. 162538 0. 909044  
2. 266729 1. 281673 2. 190023 3. 025048 2. 187667 1. 82723 2. 785 2. 865486 2. 561949  
0. 789774 0. 989076 1. 157056 1. 519881 0. 969683 1. 53372 0. 60799 0. 829816 0. 752018  
2. 085294 1. 514654 1. 782918 1. 873373 1. 783261 2. 234656 2. 003801 1. 911909 2. 324862  
1. 450476 1. 471034 1. 770816 2. 365771 1. 180258 1. 337254 3. 211978 1. 896864 1. 730926  
0. 717156 0. 939004 1. 104929 0. 838249 0. 925581 0. 940904 0. 954218 1. 447947 0. 90592  
5. 148396 4. 403405 4. 262248 4. 832601 5. 365942 4. 723655 4. 396159 4. 149507 4. 031005  
1. 839742 1. 264042 1. 591099 1. 864888 1. 588792 2. 48006 1. 448474 1. 144036 1. 695756  
0. 683693 1. 688078 1. 015973 0. 6549 0. 973285 1. 546961 1. 533271 0. 646487 0. 836886  
1. 081261 1. 416229 1. 361825 1. 318182 1. 68679 0. 890354 1. 357302 1. 252762 1. 292996  
1. 06084 1. 016985 1. 187699 1. 8709 1. 382946 1. 44257 0. 847121 1. 418924 1. 867027  
1. 467483 1. 533893 0. 885966 2. 142482 1. 122891 1. 290597 1. 304394 1. 406493 1. 188932  
1. 098674 1. 292366 1. 321783 1. 75019 1. 429386 1. 62921 1. 146004 1. 228825 1. 661022  
1. 841678 2. 020144 2. 325399 2. 218108 2. 570312 3. 019372 2. 05381 1. 466421 2. 473619  
4. 040911 0. 730423 2. 590706 5. 387984 2. 447342 2. 411746 3. 665352 4. 244043 4. 576787  
2. 262993 1. 258131 1. 926215 2. 936807 1. 078371 1. 146082 1. 054298 1. 624262 1. 977351  
2. 593104 1. 291172 1. 63705 1. 89383 1. 789787 0. 743315 1. 390618 1. 369296 0. 828418  
4. 185511 3. 859861 3. 469287 2. 076343 2. 24504 2. 80323 1. 391195 4. 542618 3. 119716  
1. 738841 1. 340844 1. 717633 2. 4306 1. 494443 2. 378131 1. 488237 1. 60409 2. 096434  
2. 167831 1. 572735 2. 158133 2. 505323 1. 960519 2. 19497 1. 559431 2. 20526 1. 820757  
2. 323585 1. 586348 2. 085691 2. 878011 2. 082959 2. 438881 1. 879253 2. 466532 2. 133986  
2. 951903 2. 575069 1. 879978 3. 785005 2. 43428 2. 263992 2. 523206 1. 703299 2. 24265  
1. 259349 1. 693232 1. 335431 1. 431059 1. 603395 1. 848046 1. 603395 1. 550833 1. 278971  
1. 943076 2. 129808 1. 943076 2. 653545 1. 731419 2. 253218 1. 969004 2. 131527 2. 336401  
1. 805886 1. 939369 2. 32687 2. 367832 2. 336683 2. 169996 1. 807864 2. 314159 2. 439499  
2. 509896 1. 620489 1. 813143 2. 375636 1. 553017 1. 730125 1. 993667 1. 732829 1. 41965  
2. 675114 1. 762448 3. 056612 2. 300576 1. 09726 4. 376061 2. 165674 1. 396771 5. 695152  
3. 094903 3. 046281 2. 941493 3. 853997 2. 685502 3. 137925 2. 940639 2. 985114 3. 354317  
1. 230545 1. 244107 1. 825472 1. 09487 1. 121632 2. 867315 1. 525595 0. 947235 1. 312628  
2. 174229 1. 2856 1. 796906 2. 165275 2. 834001 1. 713444 2. 086563 2. 123384 2. 262284  
2. 002381 1. 170837 1. 728696 1. 57055 1. 150347 0. 910863 1. 626814 1. 308062 1. 311674  
1. 536007 1. 871907 1. 716701 2. 093016 1. 655573 1. 936755 1. 833986 1. 500314 1. 679054  
1. 26646 1. 197359 1. 30032 1. 94068 1. 177135 1. 578134 1. 008794 1. 067355 1. 56577  
1. 959745 2. 187155 2. 001366 2. 100676 1. 806679 2. 418585 2. 226114 3. 098469 2. 680342  
3. 859062 2. 085315 2. 951107 0. 927148 5. 243024 3. 064838 4. 708604 3. 647641 0. 43217  
2. 860209 4. 012029 2. 590909 2. 800463 2. 445496 1. 630381 2. 470207 2. 440309 2. 297762  
3. 336741 3. 190832 2. 911985 3. 405138 2. 847302 2. 851342 2. 810066 2. 749019 3. 282638  
1. 966452 1. 529334 1. 709495 1. 781801 2. 217245 3. 259737 1. 841877 1. 626738 2. 268787  
1. 517294 1. 928351 1. 592602 1. 939083 1. 725276 2. 198727 2. 042573 2. 695068 1. 747989  
1. 545717 1. 133815 1. 575945 1. 463813 0. 995515 1. 210465 1. 421423 1. 188881 0. 971679

1.727408 0.854373 2.012777 2.564693 1.202114 1.864397 2.007601 1.309462 1.812897  
1.132535 1.656211 2.151236 1.565357 1.198995 2.082874 1.682224 1.321985 2.287982  
2.288043 2.054506 1.580795 1.583094 2.882792 2.631437 1.729562 2.140346 2.470049  
0.681266 1.666542 1.140548 2.241636 3.034078 1.244981 1.270194 2.321909 0.868299  
1.241675 1.241459 1.700706 0.783578 1.531487 1.07524 1.477846 0.91483 0.892554  
3.92537 3.957131 3.834286 5.46196 3.326345 5.299882 3.362149 4.276975 4.18384  
1.696943 3.79 3.817559 1.243717 1.503628 2.77505 4.032607 3.485078 4.110262  
1.007488 1.098131 0.961405 1.128773 2.148418 1.371067 0.993161 1.635491 0.966645  
1.751953 1.344395 1.718132 1.749634 1.40348 1.61576 1.517454 1.660406 2.363711  
2.144848 2.65857 1.44965 3.128323 1.292708 2.95445 2.134355 2.279567 2.467383  
1.152805 1.525371 1.097745 1.414948 1.229818 1.008222 1.050065 1.237015 1.059151  
1.225698 2.063591 1.540614 1.875927 1.168286 1.494129 1.12141 2.071937 1.894852  
1.689378 1.615148 1.538829 1.79951 1.838183 2.091494 1.649691 1.375043 2.113459  
1.847795 2.566156 3.026334 2.458847 1.956138 1.720055 1.794783 0.856137 2.132054  
2.366333 1.630329 2.01605 2.522154 2.816695 2.929687 2.043454 1.7691 3.704161  
0.909971 1.497488 0.945128 1.488568 0.918942 0.434931 1.295479 0.999631 1.68978  
1.146026 1.112331 1.302129 1.66401 1.457638 1.963797 1.083236 1.425612 1.340397  
1.292124 0.846183 1.962341 1.924565 1.084275 2.038028 1.118198 1.367664 1.286195  
2.548199 1.79318 1.201989 1.835874 1.552401 1.409862 1.611804 1.709002 2.139593  
1.945054 1.938462 2.305037 2.579378 1.959652 2.148314 2.320973 2.243171 2.99893  
2.226954 1.642682 1.61622 2.653054 1.934641 2.104966 1.44056 2.128859 1.335397  
6.145402 5.52647 4.606655 4.107915 5.196714 5.849148 5.018182 3.831612 5.976522  
1.2849 1.498618 0.834933 2.504286 0.918193 0.970066 1.290875 2.487382 1.037872  
2.27474 1.855497 2.069452 2.840795 2.489827 3.858289 2.055088 3.243726 2.010463  
2.737996 1.768073 1.99811 3.60848 2.12218 1.813771 1.677269 1.948809 3.046838  
1.090895 1.03278 0.987791 0.884176 0.80565 1.053483 1.228969 1.173017 0.932916  
2.669828 1.972489 1.392401 2.920899 1.56548 1.303432 1.748527 1.402376 1.668324  
3.457334 2.483167 0.844725 3.545779 2.153745 2.336325 3.009513 2.957987 1.718817  
1.271222 1.08899 1.255832 2.223897 1.198035 1.656006 1.149375 0.995882 1.369833  
1.692254 1.180407 1.074314 2.828294 1.562608 1.999514 1.887538 1.485976 2.051572  
4.89562 5.949869 5.705211 6.817314 4.971239 5.993109 5.700875 6.355061 6.433642  
2.877524 3.009296 3.211029 4.227259 2.861868 3.39578 3.015454 2.783811 2.962808  
0.993223 1.417231 1.151485 1.697665 1.240889 1.139549 1.476271 1.165095 0.802555  
3.855534 2.066426 3.220674 1.671507 2.406008 2.449792 3.872898 3.608886 3.20721  
1.659236 1.50105 2.325376 1.730728 2.691105 1.213289 1.867388 1.607239 1.234717  
1.871641 1.383991 1.843071 2.907036 1.323687 1.594609 1.73946 1.60874 1.843636  
1.255236 1.208261 1.543809 1.962996 2.458441 1.128708 2.565759 1.300323 2.261047  
1.913921 2.362267 1.89462 2.030642 2.219977 2.645095 0.811715 1.118353 1.04645  
1.207535 0.773601 1.568896 1.529994 1.111458 1.262259 1.41587 1.353053 2.237549  
2.036687 1.966109 1.731554 1.732343 2.421926 1.267445 1.362378 1.305379 3.797013  
2.111919 3.324447 1.834383 1.172005 1.894109 3.23949 1.959816 2.424443 3.228053  
2.680256 1.842111 1.456372 1.819106 2.025894 1.722178 2.555855 2.714373 2.02523  
1.163984 1.672179 1.408759 2.011716 2.574138 1.931441 1.419054 1.381111 1.369393  
2.185096 2.034756 2.211 3.081249 1.687818 2.090762 1.939673 1.898912 1.993233  
1.965304 2.594772 2.569797 2.503275 1.905302 1.947194 1.630646 1.965304 2.516915  
2.328624 2.254343 1.649616 2.90933 2.007015 2.203871 3.692317 3.567539 1.275966  
1.14073 0.868981 1.553326 2.13428 1.437952 1.307508 0.837008 0.74424 0.558035  
2.436356 2.18092 2.295769 3.398493 1.993379 2.837647 2.470029 2.087808 3.026229  
1.294396 1.80677 1.52899 2.651213 1.517897 2.280789 1.452966 1.517991 1.539199  
1.193655 1.527259 1.366048 1.43119 1.018864 1.181469 1.090482 1.439046 0.807699  
1.207323 1.400516 2.572061 2.324842 2.139077 1.850664 1.642141 1.518859 1.868496

|          |          |          |          |          |          |          |          |          |
|----------|----------|----------|----------|----------|----------|----------|----------|----------|
| 6.219841 | 6.274663 | 6.228641 | 6.159438 | 5.587562 | 6.590681 | 6.00201  | 6.030566 | 6.260858 |
| 1.642228 | 0.917274 | 1.512433 | 1.473251 | 1.630864 | 1.732779 | 0.834548 | 1.407121 | 0.812528 |
| 0.979749 | 0.914494 | 1.31427  | 1.034872 | 0.827347 | 1.477961 | 1.208621 | 1.141168 | 1.313987 |
| 3.695205 | 2.817673 | 2.289013 | 1.527981 | 2.970711 | 1.156273 | 1.720282 | 1.409617 | 1.571137 |
| 1.983351 | 0.970258 | 1.960718 | 2.314219 | 3.577777 | 1.529365 | 2.378663 | 1.538788 | 1.782848 |
| 1.43806  | 1.915121 | 1.952844 | 1.687407 | 2.369984 | 2.126256 | 1.755273 | 1.580019 | 1.598674 |
| 1.210115 | 1.926022 | 1.199121 | 1.660123 | 1.118989 | 0.89239  | 1.22204  | 1.301982 | 1.4014   |
| 1.240375 | 1.35362  | 1.570676 | 1.966875 | 2.294458 | 1.791645 | 2.082358 | 2.166193 | 1.264181 |
| 1.639657 | 1.517551 | 1.963266 | 1.539305 | 1.415747 | 1.897503 | 1.766993 | 1.650876 | 1.755366 |
| 1.890205 | 1.138117 | 1.338341 | 1.199662 | 1.028682 | 1.952292 | 1.458438 | 1.545908 | 1.493708 |
| 1.627526 | 3.075135 | 2.12078  | 2.229194 | 2.160802 | 2.43552  | 3.216539 | 2.55635  | 2.037071 |
| 1.796068 | 2.654753 | 1.722685 | 2.037177 | 1.595317 | 2.197171 | 2.039532 | 1.555437 | 1.294253 |
| 5.236677 | 3.637649 | 2.476636 | 6.333737 | 3.123354 | 3.286214 | 3.787755 | 4.521245 | 3.507862 |
| 1.748451 | 1.990085 | 1.591839 | 2.206708 | 1.861104 | 1.529847 | 1.353959 | 1.689832 | 2.125661 |
| 0.991917 | 1.457283 | 1.243332 | 2.262437 | 1.49034  | 0.999582 | 1.377578 | 1.592799 | 1.198802 |
| 2.180924 | 1.52932  | 1.377505 | 1.938441 | 1.721236 | 1.702751 | 1.449812 | 1.193323 | 1.335235 |
| 4.336939 | 4.752375 | 2.920286 | 5.0062   | 3.379917 | 4.838752 | 4.108357 | 0.962877 | 4.936535 |
| 3.039241 | 2.099804 | 1.784975 | 2.360295 | 2.42901  | 2.575992 | 2.199693 | 1.756806 | 2.093803 |
| 1.050987 | 1.429985 | 1.222957 | 0.875808 | 1.010554 | 1.820697 | 0.590864 | 0.949418 | 1.246554 |
| 3.385125 | 3.455958 | 3.56555  | 2.559425 | 1.600638 | 2.551666 | 2.212126 | 1.993921 | 3.090964 |
| 1.707246 | 1.859138 | 1.362568 | 1.489345 | 1.686466 | 1.301805 | 2.61777  | 2.299755 | 3.441811 |
| 1.277411 | 1.96274  | 1.715916 | 2.837197 | 1.481452 | 2.290911 | 1.766525 | 2.078161 | 1.39961  |
| 2.397227 | 2.932498 | 1.443547 | 1.679105 | 2.426919 | 2.683826 | 1.686146 | 1.913974 | 1.09769  |
| 1.799987 | 1.78401  | 2.165887 | 2.464667 | 1.627517 | 0.776088 | 2.01941  | 0.964174 | 1.242446 |
| 1.619269 | 1.44968  | 2.141889 | 2.467896 | 1.639589 | 1.892229 | 2.421806 | 1.312426 | 2.003048 |
| 1.714964 | 1.08016  | 1.571648 | 1.022512 | 1.007134 | 1.11939  | 0.93919  | 1.083519 | 1.72397  |
| 1.131162 | 1.035883 | 0.822452 | 1.194502 | 1.449412 | 0.977691 | 1.027377 | 0.849844 | 1.256732 |
| 1.324698 | 0.832771 | 1.223081 | 2.220237 | 0.994679 | 1.823598 | 1.566939 | 2.338689 | 1.089939 |
| 1.230136 | 0.826101 | 1.402216 | 1.662644 | 0.776573 | 1.427939 | 1.101118 | 0.992079 | 1.008448 |
| 1.39566  | 1.201546 | 0.825444 | 1.09994  | 0.955115 | 1.453401 | 1.065293 | 1.192902 | 1.432087 |
| 0.970442 | 1.520309 | 0.983203 | 1.783699 | 1.445377 | 1.775746 | 1.218159 | 1.030471 | 1.95328  |
| 1.3836   | 1.32138  | 1.966626 | 1.328993 | 1.325988 | 2.094811 | 1.126385 | 1.37499  | 1.576498 |
| 2.575035 | 2.334258 | 2.200793 | 3.031391 | 2.089084 | 2.820321 | 2.821685 | 2.451769 | 2.379016 |
| 1.470832 | 1.927017 | 1.661169 | 2.763668 | 1.39476  | 1.481744 | 1.488884 | 1.630985 | 2.283629 |
| 4.48001  | 4.291716 | 5.327573 | 2.637543 | 4.34221  | 5.081123 | 4.460011 | 4.915498 | 3.084533 |
| 8.572495 | 8.243939 | 7.305735 | 8.630065 | 7.876769 | 8.281307 | 8.004482 | 8.041414 | 8.853935 |
| 1.25987  | 1.866832 | 1.463079 | 2.470676 | 1.702473 | 1.611039 | 2.350359 | 1.738366 | 2.399    |
| 1.435343 | 2.374835 | 2.054704 | 1.179532 | 1.647643 | 1.23807  | 0.848292 | 1.153997 | 2.339925 |
| 1.813858 | 3.222498 | 3.092622 | 3.112731 | 2.317386 | 1.919238 | 3.11924  | 2.563757 | 2.837591 |
| 1.701622 | 1.582847 | 1.838188 | 2.048402 | 1.733292 | 1.753274 | 1.834659 | 1.283329 | 1.659324 |
| 0.896344 | 0.775231 | 0.450544 | 3.064858 | 1.286141 | 1.770396 | 1.01705  | 4.092493 | 1.07816  |
| 0.427743 | 0.308307 | 0.289096 | 0.106383 | 0.764532 | 0.376337 | 0.546319 | 0.596814 | 0.635167 |
| 0.907147 | 1.259582 | 0.96645  | 1.863781 | 0.809293 | 1.364506 | 1.013138 | 0.827703 | 0.780138 |
| 1.58796  | 1.353286 | 1.421689 | 1.854238 | 1.372246 | 1.336235 | 1.334029 | 1.407826 | 1.36739  |
| 0.876225 | 1.277115 | 1.735345 | 1.643488 | 1.221387 | 0.914263 | 0.915136 | 1.146423 | 1.705415 |
| 1.809    | 0.823495 | 1.911116 | 1.865345 | 0.582479 | 1.377208 | 0.729256 | 1.09472  | 1.115496 |
| 1.556531 | 1.394689 | 1.243466 | 1.94335  | 1.316981 | 1.905292 | 2.102179 | 1.266635 | 2.212389 |
| 1.195656 | 1.533339 | 1.692239 | 2.061811 | 1.40886  | 1.991345 | 1.680957 | 1.003045 | 1.46647  |
| 2.73918  | 2.470195 | 2.435991 | 2.556911 | 2.621575 | 2.472579 | 2.01853  | 2.414424 | 2.442581 |
| 0.965986 | 1.179544 | 1.154828 | 1.256165 | 1.044731 | 1.435939 | 1.156779 | 1.774631 | 1.227185 |
| 1.998872 | 0.702061 | 1.750724 | 2.205867 | 2.387795 | 1.336973 | 1.294791 | 1.86999  | 1.812987 |

4. 467267 3. 995483 4. 302344 3. 648622 3. 13719 3. 581712 4. 376271 4. 768878 4. 744738  
2. 422857 1. 530506 2. 467364 2. 299491 1. 801554 1. 885383 1. 572016 2. 40109 1. 988422  
2. 737747 2. 902869 2. 859183 2. 490232 2. 320217 2. 947897 2. 570462 3. 757809 4. 545333  
1. 441513 1. 126286 1. 127934 1. 299929 0. 872371 1. 094765 1. 565277 1. 320409 1. 496926  
1. 552088 1. 976637 1. 66722 2. 135595 1. 572391 1. 556337 2. 773181 0. 856122 1. 433801  
2. 303695 1. 109045 0. 887169 1. 689238 0. 987691 1. 046109 1. 582801 1. 698272 1. 454423  
2. 368699 1. 595301 2. 379311 2. 396842 1. 634039 1. 55877 2. 349559 1. 96907 2. 475443  
1. 841128 0. 886737 1. 891348 1. 63918 1. 265074 1. 681898 1. 450239 1. 489179 0. 897142  
3. 107684 2. 147253 1. 88119 1. 919034 0. 89284 2. 803212 2. 472224 2. 004129 1. 394469  
1. 515009 1. 469595 1. 529209 1. 808986 1. 445387 1. 129839 1. 438861 1. 169236 1. 367547  
4. 569073 5. 584944 5. 615427 2. 305717 3. 9823 6. 071299 3. 591449 2. 976519 3. 574104  
1. 180496 2. 565001 1. 333672 1. 892661 0. 976002 2. 027842 1. 165598 1. 154268 1. 353244  
1. 068835 1. 277785 1. 084921 1. 997839 1. 268884 1. 516556 1. 417756 1. 252563 1. 386464  
0. 964066 0. 627742 1. 582427 1. 302812 1. 580986 0. 357525 1. 084776 1. 199674 1. 454573  
1. 519496 1. 873648 1. 429007 1. 259185 1. 20486 1. 589323 1. 111739 1. 566788 0. 935093  
0. 867645 1. 141003 1. 828878 3. 07141 0. 602396 2. 151017 1. 278923 1. 40631 1. 695137  
1. 983891 2. 201333 2. 490849 2. 548759 1. 908902 2. 465026 2. 137082 2. 400391 1. 700457  
1. 673959 2. 376359 1. 656824 1. 817907 2. 055031 2. 129737 2. 108018 1. 726714 1. 843678  
2. 121321 1. 859524 2. 328896 3. 242686 1. 984812 2. 059454 2. 4733 2. 58837 2. 303302  
1. 926822 2. 739238 2. 336485 2. 880124 2. 309507 2. 050435 2. 373388 2. 88009 3. 317644  
2. 476213 0. 781914 1. 124259 2. 032488 1. 792228 1. 913561 1. 472381 1. 400035 0. 701264  
1. 733777 1. 344885 0. 962172 1. 420996 1. 450029 1. 619892 1. 291124 1. 338568 1. 595494  
1. 032079 1. 302616 1. 241787 1. 439748 1. 472814 1. 535982 1. 119157 1. 368029 1. 757323  
1. 622158 2. 245846 1. 518473 2. 087393 2. 098135 3. 299141 1. 323353 1. 820348 1. 798591  
1. 68792 0. 515441 2. 210719 1. 123006 2. 106576 2. 858961 0. 96358 1. 266491 0. 518193  
1. 284047 0. 90012 2. 100018 1. 357481 1. 157365 1. 01246 0. 901187 0. 82674 1. 309731  
1. 882911 1. 53702 1. 942333 3. 148873 1. 882911 1. 99203 1. 470957 2. 171832 1. 78495  
4. 801405 5. 918007 5. 719842 5. 001167 5. 421495 5. 37728 5. 403166 6. 095372 5. 976966  
1. 151922 1. 37285 2. 057911 1. 958448 1. 430361 1. 838682 1. 011327 1. 315687 1. 679535  
1. 96938 2. 200731 2. 361221 2. 054692 1. 643651 2. 404788 1. 523589 1. 642403 2. 211738  
1. 459034 1. 020722 1. 499486 1. 76556 1. 45582 2. 171705 1. 618149 2. 742689 1. 414469  
2. 063971 1. 012853 1. 614092 1. 300154 2. 091134 1. 946047 1. 401134 2. 331101 2. 313617  
1. 384664 1. 665767 1. 536192 2. 280296 1. 483711 2. 904617 2. 087446 1. 541325 0. 982983  
1. 152633 0. 786498 1. 23409 2. 595202 0. 755633 1. 122237 0. 571157 0. 892073 0. 95076  
0. 866072 1. 052467 0. 936036 1. 111361 0. 787448 0. 979057 1. 560109 0. 710277 0. 850705  
0. 942965 1. 020006 0. 82035 1. 039351 1. 235634 1. 146137 1. 309426 1. 128812 2. 713231  
1. 637522 1. 685557 3. 013139 1. 951472 1. 666156 3. 039972 1. 86614 1. 812497 2. 000123  
2. 258589 0. 998676 2. 380449 2. 138805 1. 341049 3. 390038 1. 112546 1. 055291 1. 652105  
3. 770865 5. 002656 5. 568484 3. 353476 4. 131413 4. 476878 5. 094437 4. 430436 5. 449179  
1. 041623 1. 14508 0. 976417 1. 403648 1. 298254 1. 580985 1. 049317 1. 191223 1. 290883  
1. 298293 1. 501558 1. 292378 1. 516747 0. 885394 1. 76223 1. 720704 1. 354062 1. 694238  
1. 786491 2. 01918 2. 472659 2. 571858 2. 069717 2. 662089 1. 83903 1. 737215 2. 245278  
1. 805916 1. 13616 2. 371717 2. 581074 1. 51561 1. 494936 1. 979745 1. 492103 2. 324466  
1. 508412 1. 582893 0. 545023 2. 294393 1. 388714 0. 802987 0. 463875 2. 184383 2. 03656  
0. 67275 1. 851724 0. 766682 0. 875599 2. 207301 2. 28995 1. 47129 2. 705373 0. 965991  
1. 166298 0. 756442 0. 963028 1. 169911 0. 94742 0. 758452 0. 953235 1. 207234 0. 570781  
0. 964727 1. 164337 1. 35748 1. 31581 1. 010465 1. 226462 1. 236433 0. 950099 0. 949147  
2. 190469 2. 297863 2. 352594 3. 136734 2. 512426 2. 148541 2. 401865 2. 571139 2. 358089  
1. 371374 1. 311089 0. 983139 1. 574289 1. 084377 1. 218568 1. 684386 2. 512414 1. 626774  
1. 260675 1. 510111 0. 984625 2. 128846 1. 328222 1. 287448 2. 046637 1. 541277 1. 399628  
0. 957428 1. 529279 1. 291912 2. 097838 1. 401494 1. 44102 1. 228422 1. 285393 1. 258764

2.969621 2.320277 2.071202 2.362207 1.897171 1.873864 2.184195 2.568396 0.922462  
1.393746 1.215805 1.063807 1.141366 1.244772 1.694823 3.795892 1.417225 1.637522  
0.928119 1.530163 1.481581 1.34004 1.509967 1.213845 1.060695 1.671715 1.336052  
1.334929 1.411561 1.251591 1.400627 1.204629 2.420336 1.009896 1.373115 0.758681  
1.3505 0.601065 1.157386 1.38368 0.855729 1.0445 1.198201 0.661851 0.932775  
1.675239 1.385704 1.765114 1.666153 1.631028 2.05112 1.929465 1.30012 1.362473  
1.454614 1.704238 1.72117 1.882831 1.678537 1.633935 1.783403 1.737334 1.773232  
1.180714 1.264023 1.251844 1.575633 1.336813 1.900441 1.166518 1.341242 3.2383  
1.18801 1.273467 1.109353 1.327008 0.980622 2.06065 1.06917 1.102604 1.077635  
6.345296 6.883 6.912604 7.293362 6.874045 6.656067 5.427111 6.311204 5.828847  
0.956927 1.576381 1.791687 1.171841 0.400473 1.141909 2.955708 3.822046 0.969055  
0.693489 1.061215 0.937159 1.293025 0.811112 0.97908 1.430931 1.921779 0.88469  
6.06754 4.395371 4.376563 4.711205 4.230533 3.274601 4.73621 3.303738 7.715221  
1.812283 1.523008 1.50473 2.829017 2.182592 2.408012 1.713864 2.044853 1.690741  
1.206949 1.647696 1.667112 1.754466 1.76965 1.661107 1.63103 1.834721 1.207351  
1.668333 1.737527 2.380355 1.350632 1.262607 1.335963 1.264935 1.456855 1.791501  
1.586127 0.96626 2.980706 1.484145 1.247499 2.543518 1.279717 1.914613 1.617052  
0.863789 1.136545 1.063637 0.972862 1.010757 1.816204 1.054207 0.797145 0.596563  
1.511903 1.84376 2.336768 1.991375 2.13695 2.028265 1.412103 1.807835 2.100542  
1.290459 1.329012 1.86095 1.470523 1.781603 1.176574 1.692328 1.382914 1.766512  
0.840254 0.873518 1.256696 1.146185 1.234278 1.328166 1.27973 0.89205 1.197199  
3.04989 2.238661 3.134847 2.01859 2.349666 2.468627 3.011092 3.246839 2.271  
2.829512 1.786497 2.974831 3.669187 2.453514 2.496217 2.419954 2.270104 3.52971  
1.296367 1.394363 1.689525 3.157892 1.731478 1.690033 1.943616 2.117653 2.962817  
1.188259 1.345725 1.57444 1.273793 1.745468 1.447002 1.2703 1.019069 1.812106  
1.197273 1.595663 1.068936 0.942681 2.571071 2.068492 2.919081 1.064107 5.736042  
1.468265 1.636741 1.127173 2.355606 0.933275 1.643614 1.862217 1.90942 1.219251  
4.499951 2.212739 3.850209 3.572077 3.336739 1.491557 1.937497 4.057445 2.305716  
0.957448 1.502329 1.052127 1.413065 1.445805 1.57129 1.157895 0.91597 1.244372  
2.742998 1.677637 1.858083 2.58492 3.778027 1.846029 2.286095 2.551659 2.286095  
1.523019 1.215831 1.059382 1.910763 1.190784 1.242512 1.371036 1.818214 1.945083  
2.015291 1.989654 2.083763 2.345035 2.380542 2.825345 2.251772 2.436573 1.827164  
2.825443 2.277127 2.311429 2.351377 2.042637 2.524405 2.524823 2.010933 2.3301  
5.543935 6.834584 7.279976 6.04419 6.702326 6.892584 6.350081 7.196525 7.343997  
2.184948 3.021262 1.606386 2.676115 1.44495 2.473002 1.721557 3.946316 2.671422  
1.180039 1.080146 1.689779 1.165867 1.298048 1.358638 1.455386 1.649847 1.733745  
0.802254 1.404251 0.955049 2.044556 1.112251 1.696873 1.434135 0.804411 1.380614  
1.241649 0.834902 1.249201 2.26077 1.375474 2.028329 1.764164 1.082923 1.304067  
2.196184 2.320935 2.061631 2.796844 1.704671 2.68645 2.138493 3.117747 2.107136  
2.55391 2.369479 2.155027 4.134463 1.939199 2.818188 1.721532 2.503914 2.788494  
1.098019 1.138525 0.891192 1.498079 1.232267 1.147601 1.257204 1.366787 1.562382  
2.927789 1.28682 1.115714 1.102509 1.458994 4.372408 1.267377 1.508867 1.991452  
1.166784 1.116198 1.337283 2.632507 1.354323 2.597709 1.176538 1.091809 2.536439  
1.655161 1.376252 1.32035 0.938728 1.212519 2.082511 1.220465 0.840937 1.685003  
6.029918 6.249764 5.039838 6.051537 5.941054 7.059537 6.286581 4.743566 8.181121  
1.942923 0.785692 2.19898 1.032834 1.165085 1.710984 1.046204 2.088153 0.883568  
1.479017 1.754187 1.274036 2.101126 1.247672 1.420761 3.208398 2.315743 1.999273  
1.134541 1.282605 1.168812 0.928424 0.821104 1.387466 1.019527 1.401378 1.139955  
1.438466 1.457436 1.070207 1.04644 0.913875 2.003569 0.916053 1.010345 0.893852  
2.967761 2.090157 3.421854 3.293623 2.072214 1.538001 1.775747 2.112922 1.496998  
2.591079 2.328411 2.44476 2.809771 2.020383 2.947846 2.130335 2.183759 1.775141

1. 6897 1. 446132 1. 836333 1. 718904 1. 157103 2. 000129 1. 496382 1. 233981 1. 345783  
2. 258444 2. 364721 1. 959046 1. 979141 1. 823775 2. 343247 1. 814887 2. 860226 2. 260809  
1. 230593 0. 954359 1. 125947 1. 51232 1. 246338 1. 395932 1. 020922 1. 648407 1. 755207  
1. 288851 1. 593621 0. 899627 1. 952469 1. 133305 1. 087577 0. 909417 1. 569768 1. 022688  
1. 686686 1. 126653 1. 010467 1. 404169 1. 310131 1. 124848 0. 93902 1. 143283 1. 383284  
2. 180353 3. 00224 2. 18253 2. 198416 1. 865066 2. 137425 2. 420422 1. 609918 1. 916394  
2. 655007 2. 258377 1. 948735 1. 985935 2. 564362 2. 23838 2. 125423 2. 374868 2. 0281  
1. 082575 1. 657949 1. 284521 1. 918963 0. 779037 2. 503701 1. 510901 0. 881485 1. 197721  
2. 250855 1. 901323 1. 516635 1. 553708 2. 062976 3. 213419 2. 927388 3. 725081 2. 554341  
0. 763646 1. 155993 1. 31576 1. 553484 2. 115976 1. 689536 1. 601096 0. 921628 1. 544606  
1. 692384 1. 522279 1. 718261 1. 110375 1. 45555 1. 835858 2. 287547 1. 260259 2. 10266  
1. 852369 1. 519504 1. 469874 1. 439429 1. 169264 1. 325503 0. 936202 1. 501778 1. 775866  
1. 414149 0. 646176 0. 861511 0. 821062 0. 778127 0. 465794 0. 846481 0. 913433 2. 00842  
2. 929982 3. 800601 2. 035914 3. 880335 1. 594262 2. 709198 2. 063547 2. 042853 2. 574655  
2. 471677 1. 54684 1. 949006 1. 956927 2. 234033 1. 92652 1. 484825 1. 558722 1. 476564  
2. 478136 2. 421589 2. 985385 2. 674034 2. 345445 2. 802257 1. 348881 2. 598984 2. 448134  
1. 421618 1. 064672 2. 683716 1. 677531 2. 311131 2. 077181 1. 165326 1. 73022 2. 554731  
1. 47279 1. 557894 1. 620393 1. 236263 1. 476897 1. 265592 1. 208504 1. 123029 1. 608436  
1. 566138 0. 947093 1. 424416 3. 556232 1. 597896 1. 653923 1. 022909 1. 199205 0. 995511  
1. 081033 1. 623842 1. 003875 1. 509898 1. 500204 1. 42962 1. 42408 1. 477257 1. 442416  
1. 428079 3. 089426 1. 166622 2. 274289 2. 216486 2. 011317 1. 312037 2. 806771 3. 063067  
1. 909981 1. 912519 1. 368736 2. 03293 1. 385294 1. 887811 1. 785811 1. 989329 1. 674927  
1. 920659 1. 300462 0. 983138 1. 796844 1. 827461 1. 111262 1. 761882 1. 553932 1. 497591  
1. 49315 1. 404741 1. 472296 2. 160356 1. 632879 1. 436073 1. 371449 1. 425619 1. 252565  
1. 089549 1. 132163 1. 162207 1. 759467 1. 284827 2. 006648 1. 218676 1. 787779 1. 072917  
1. 05429 1. 035779 1. 512463 1. 55252 1. 788866 1. 185456 1. 505478 1. 589143 1. 391715  
2. 782721 2. 329517 1. 649883 1. 059533 0. 15615 1. 407157 0. 747818 2. 637969 1. 445789  
1. 204383 1. 028047 1. 479318 1. 167409 1. 345122 1. 684895 1. 054049 1. 003547 0. 999664  
1. 735021 3. 065617 3. 08299 2. 043849 3. 736947 4. 217853 4. 842496 3. 603322 6. 349432  
3. 945299 3. 051832 3. 021134 3. 311471 2. 980211 4. 137656 2. 201052 2. 820613 3. 207643  
3. 056982 2. 507632 3. 030316 3. 035802 2. 935168 2. 897466 2. 977529 2. 884477 2. 708673  
1. 028479 1. 431047 1. 265194 2. 093301 1. 256796 1. 205771 2. 057346 0. 677654 0. 839774  
3. 791452 3. 435982 2. 548227 3. 465082 4. 063922 3. 424101 2. 949651 2. 105872 2. 463544  
0. 964585 1. 325088 0. 684951 1. 897317 2. 796292 1. 598114 1. 032533 2. 538906 0. 743803  
1. 539977 1. 282373 1. 481891 1. 19319 2. 050085 1. 596556 1. 241498 1. 336392 0. 866252  
1. 545797 1. 133354 1. 5522 1. 774712 1. 301817 1. 582083 1. 092299 1. 532334 1. 390876  
1. 779392 2. 237125 2. 015358 1. 652869 2. 682288 3. 112836 1. 663876 1. 827722 2. 256368  
1. 791141 1. 503476 2. 40008 1. 95541 1. 192102 1. 052369 1. 289558 1. 634067 1. 381648  
1. 617884 0. 879215 1. 74998 1. 465416 1. 361865 1. 630062 1. 466015 1. 153582 1. 955622  
0. 734966 1. 380564 0. 997649 0. 934734 1. 312222 0. 753584 1. 065039 1. 067812 0. 296793  
1. 814276 1. 399302 1. 323571 1. 414647 1. 24744 1. 26233 1. 410992 1. 1849 1. 510789  
1. 614998 1. 248995 1. 54511 2. 23685 1. 403652 2. 425929 1. 643832 1. 32484 1. 630227  
1. 125953 1. 250435 1. 422678 2. 434033 0. 868747 0. 932414 1. 300166 1. 016934 1. 540102  
1. 427484 1. 401664 1. 548612 1. 092786 1. 061454 1. 658229 0. 51735 0. 372146 1. 128959  
2. 51589 2. 338705 1. 555609 3. 118312 1. 25561 2. 320675 2. 036457 2. 022575 1. 832849  
1. 168228 3. 416178 2. 014178 3. 052192 2. 644837 2. 346148 2. 461157 2. 595311 5. 072869  
4. 73402 5. 501247 4. 430701 3. 223851 3. 605995 4. 360779 4. 19713 4. 835862 5. 648413  
4. 580463 1. 601206 1. 332587 4. 108703 1. 485033 5. 161511 2. 267118 2. 499285 1. 46672  
1. 223517 1. 733257 1. 305914 1. 851207 1. 957891 2. 337199 1. 342589 1. 458879 1. 453116  
1. 785252 1. 61648 1. 213052 1. 349288 1. 453667 1. 914835 1. 977882 1. 429606 1. 617071  
2. 176855 1. 596332 2. 771205 2. 915849 2. 125847 3. 820412 2. 828338 2. 487405 2. 638857

1. 239362 1. 559338 1. 569871 3. 189936 0. 777772 1. 640446 1. 177143 1. 498748 1. 226817  
1. 54621 1. 833688 0. 932849 2. 549925 1. 121341 1. 042277 1. 444825 1. 156538 1. 863388  
1. 029669 1. 445984 1. 871166 1. 435885 1. 302524 2. 432948 1. 994341 1. 279632 0. 738603  
1. 654774 1. 432785 1. 682698 2. 381001 1. 675005 2. 157475 1. 59143 1. 612371 1. 485728  
2. 161383 1. 199465 1. 493738 1. 967219 1. 691741 1. 501006 1. 512522 1. 865673 2. 084031  
1. 548693 1. 635628 1. 550335 2. 15555 1. 282795 1. 626174 1. 328594 1. 244913 1. 749285  
0. 79942 0. 917651 0. 810517 1. 314313 0. 548511 1. 229233 1. 251116 1. 296517 1. 043578  
1. 103922 0. 669705 0. 986349 1. 969076 1. 046014 2. 058062 1. 328787 1. 060209 1. 068095  
0. 440708 1. 095262 1. 449914 1. 565802 0. 928019 2. 233842 1. 887496 1. 323424 1. 811528  
1. 348014 0. 84388 1. 355185 1. 930067 0. 618583 0. 661444 1. 080171 1. 049956 1. 169556  
1. 228816 1. 208727 1. 973839 1. 579019 1. 115436 1. 390281 1. 402718 1. 503901 1. 694116  
3. 374852 4. 976309 3. 34992 6. 413757 3. 077893 4. 348673 2. 885941 4. 956434 2. 99557  
1. 147005 1. 867227 1. 540501 1. 486139 2. 288045 2. 113286 1. 447014 1. 325437 1. 207245  
2. 745627 3. 292088 2. 322421 1. 626738 1. 730436 3. 264681 3. 238282 3. 382052 3. 194898  
1. 654092 1. 56044 1. 37624 3. 070253 0. 657729 3. 547328 1. 788317 2. 78617 1. 786408  
2. 128186 0. 850325 0. 948926 1. 588026 0. 694872 1. 400686 0. 848417 3. 248665 1. 948576  
1. 703311 2. 20871 2. 319348 2. 815239 1. 84643 2. 554582 1. 354607 1. 948167 1. 920045  
1. 312667 1. 108814 1. 002863 1. 531374 0. 927302 2. 020732 1. 359217 0. 905996 1. 466066  
1. 535004 2. 110616 1. 497681 1. 58515 1. 670709 2. 320873 1. 617831 2. 259368 2. 119472  
3. 929563 4. 304845 4. 059216 4. 634972 4. 974247 4. 190209 4. 347167 4. 417933 4. 291082  
1. 654982 2. 359094 3. 060505 4. 877004 2. 1741 2. 394677 1. 88745 3. 037037 2. 186999  
1. 083518 1. 130765 1. 25279 1. 478693 1. 500908 1. 306216 1. 620623 1. 074059 1. 282172  
3. 118304 1. 444694 2. 379918 2. 080596 1. 987483 2. 070526 2. 055281 1. 827806 2. 401415  
0. 585816 0. 538809 1. 284871 0. 843502 1. 767232 1. 267248 0. 720716 2. 734637 0. 903319  
2. 524817 2. 286444 1. 843248 2. 487501 2. 438454 2. 676437 1. 795157 2. 281067 2. 564656  
1. 494084 1. 11385 1. 013001 1. 536023 1. 546795 0. 99742 1. 502572 0. 909177 2. 489995  
2. 808077 1. 727067 1. 916511 2. 097365 1. 206618 1. 64296 2. 105822 1. 647913 3. 811596  
1. 135807 0. 859831 1. 751222 2. 027266 0. 83962 1. 50408 1. 297596 1. 343409 1. 531735  
3. 100334 1. 684901 2. 849828 4. 374287 1. 782555 1. 108695 1. 307673 2. 836018 1. 732192  
1. 41989 1. 671061 1. 291371 2. 430172 1. 264105 1. 550209 1. 228958 1. 523913 1. 349502  
0. 86436 0. 958873 1. 093013 1. 223768 0. 851833 1. 124493 1. 524252 0. 652203 1. 368455  
0. 932645 2. 206022 1. 601741 1. 210869 1. 408928 0. 981386 1. 098875 2. 40266 3. 816047  
1. 162454 1. 271714 1. 268075 1. 808184 1. 58372 1. 452683 1. 00972 1. 414525 1. 592657  
5. 20993 4. 714553 4. 714553 1. 733978 4. 766865 4. 780483 4. 889036 5. 068438 5. 314361  
2. 056327 3. 227484 2. 130457 2. 743765 2. 105372 2. 341379 1. 971139 1. 65787 1. 990248  
2. 955751 2. 224737 2. 652615 2. 298772 3. 099207 4. 195659 3. 576948 2. 335836 4. 131368  
3. 431116 4. 630173 5. 28151 1. 758639 4. 495391 4. 453301 3. 558185 4. 790767 3. 847762  
3. 723605 3. 369425 2. 382311 3. 122179 2. 79061 2. 135847 2. 216672 4. 479789 5. 253034  
1. 076935 0. 809221 1. 240305 0. 918514 0. 787284 0. 996045 1. 095293 1. 248449 1. 41938  
2. 103974 1. 882518 2. 180562 2. 788477 2. 47618 1. 971697 2. 628645 1. 875414 2. 593327  
2. 706688 3. 376259 4. 589423 4. 571382 3. 226947 2. 444389 4. 766458 4. 767984 3. 630197  
0. 987159 2. 151384 2. 53471 0. 363994 1. 920186 1. 791905 1. 47168 1. 405059 0. 682758  
1. 646167 4. 113397 2. 326065 3. 027438 2. 76367 2. 366672 3. 570772 1. 934734 2. 18636  
1. 588878 1. 635429 1. 933445 1. 948613 1. 813455 1. 574586 1. 678157 1. 155201 1. 329554  
1. 498726 2. 086512 2. 038546 2. 221303 1. 711748 1. 468108 1. 049655 1. 486861 1. 470952  
1. 420586 1. 1943 1. 820338 2. 065904 1. 621945 1. 176591 1. 547588 1. 372342 1. 928873  
1. 080773 1. 379573 1. 249446 1. 457601 1. 724038 1. 378049 1. 513989 1. 237984 1. 629507  
2. 114757 1. 299937 2. 646789 1. 674929 1. 174061 1. 769006 1. 94334 1. 320181 2. 959465  
1. 246757 0. 836395 0. 948307 1. 125576 0. 796458 1. 645529 0. 892404 0. 897516 0. 965656  
1. 99956 2. 487562 3. 259102 3. 878464 2. 326688 2. 828594 2. 269093 3. 429578 2. 76573  
3. 255432 2. 860578 2. 696199 2. 890391 2. 298544 1. 843514 1. 832047 1. 805506 3. 13178



1. 321992 3. 101785 1. 907124 -0. 02924 3. 321009 3. 031632 2. 730406 1. 239339 3. 163339  
1. 597295 2. 400063 3. 578458 1. 429188 1. 572259 1. 763986 2. 249417 2. 25491 2. 076245  
2. 186873 1. 689518 2. 479967 3. 740426 2. 577232 1. 941345 2. 059456 3. 245427 2. 072888  
2. 810477 3. 400715 2. 4019 1. 15496 0. 923029 0. 782844 2. 095251 4. 315782 2. 175384  
1. 995909 2. 479031 2. 605524 1. 682791 2. 052992 2. 679722 1. 931817 2. 008446 3. 017096  
1. 319586 0. 396013 0. 834805 0. 691837 0. 634263 1. 29972 1. 636494 0. 929317 0. 655446  
2. 052074 2. 182942 1. 960951 2. 417382 1. 659197 2. 054243 1. 530254 1. 504083 1. 185111  
1. 456662 1. 764837 3. 416867 2. 126339 1. 745017 1. 874478 2. 209616 1. 426121 1. 710432  
3. 434315 3. 718162 3. 381107 3. 884371 3. 919583 3. 93755 3. 537454 3. 422731 3. 259412  
1. 432363 1. 832824 1. 628259 1. 406451 1. 762589 1. 428182 1. 887548 1. 84843 1. 284781  
2. 436448 1. 675243 0. 783294 1. 046841 1. 271322 0. 92847 0. 793848 1. 060869 0. 663559  
1. 659882 1. 448645 1. 869301 1. 461884 1. 377465 1. 08694 1. 535564 2. 022523 1. 427942  
6. 954217 5. 508504 5. 017295 3. 268659 5. 002495 6. 13548 5. 992667 4. 760499 6. 351593  
1. 608217 1. 561173 1. 211917 1. 35545 0. 973282 1. 961729 0. 72027 1. 083997 1. 371317  
0. 990809 1. 039183 1. 041304 1. 028579 0. 899377 1. 017596 1. 00973 1. 240024 1. 659995  
0. 987038 2. 281875 1. 509127 2. 112528 1. 169195 2. 070813 1. 145494 1. 120999 1. 8034  
3. 566897 3. 38507 3. 845346 4. 85287 4. 097268 4. 418499 3. 474743 3. 39387 3. 3877  
4. 089168 3. 866534 5. 067807 4. 227031 3. 876889 3. 552233 3. 806803 3. 924591 4. 808807  
3. 518963 3. 326679 4. 484837 3. 92457 3. 993288 4. 976697 4. 671525 3. 854922 3. 689601  
1. 592309 3. 469649 4. 113515 3. 816285 2. 192962 1. 690691 3. 772192 1. 440982 3. 32628  
1. 915712 2. 651627 3. 487858 0. 699381 1. 375111 2. 599547 1. 656062 2. 706294 1. 735909  
0. 77088 1. 438406 1. 23406 2. 365053 0. 893535 0. 776066 0. 671369 0. 465551 1. 666117  
1. 919895 2. 30227 2. 2707 2. 232493 2. 212739 1. 803031 2. 096796 2. 800027 2. 004025  
1. 702415 1. 655439 1. 597127 3. 228643 1. 636353 1. 45097 1. 479604 1. 427101 1. 342587  
1. 929117 1. 309104 1. 5959 1. 586178 1. 198748 2. 376169 1. 373128 1. 458338 1. 571184  
0. 947771 1. 856713 2. 342335 1. 509024 0. 947493 1. 645882 1. 640105 1. 290075 1. 415126  
3. 576093 2. 924342 2. 555713 2. 254004 2. 54548 2. 36732 2. 145357 3. 272119 2. 188319  
0. 66081 3. 142945 0. 996052 3. 693362 0. 55155 1. 805298 1. 490335 1. 063898 2. 47373  
0. 970113 1. 147376 1. 706339 1. 487484 1. 447708 1. 182204 1. 178291 1. 117195 1. 186108  
1. 162303 0. 792569 1. 426256 1. 730686 1. 273223 2. 115362 0. 999481 1. 103355 1. 278888  
2. 048939 1. 773173 1. 440195 2. 222033 2. 751211 2. 504098 1. 27492 2. 092258 2. 489785  
1. 998873 1. 433045 2. 1894 2. 120139 1. 639655 1. 254445 1. 290712 1. 811384 2. 219559  
4. 886378 5. 27201 5. 742777 4. 99622 5. 165782 5. 148193 5. 964142 5. 417678 5. 555949  
8. 040689 7. 411833 7. 531804 7. 352702 7. 234476 7. 590799 7. 418604 7. 113444 7. 71285  
1. 053439 1. 046494 1. 930794 1. 401391 1. 115501 1. 729665 1. 470733 1. 371356 1. 663186  
1. 379606 1. 524259 1. 2986 1. 982691 1. 98989 0. 922207 1. 340922 0. 974493 1. 235866  
1. 336955 1. 56971 1. 01608 1. 762351 1. 289498 1. 614743 1. 304955 1. 667804 3. 18411  
1. 735113 1. 361606 1. 186694 1. 615633 1. 936834 2. 035435 1. 232167 1. 238328 2. 141252  
0. 892942 0. 825912 0. 737387 0. 787475 1. 00349 0. 645403 0. 792903 0. 706476 1. 0224  
1. 587071 1. 048706 1. 055957 1. 424815 1. 026275 1. 310037 1. 783967 4. 935673 2. 810882  
1. 220098 1. 862961 1. 027892 1. 533772 1. 004286 2. 434165 1. 037828 1. 45429 0. 951218  
1. 160921 0. 758849 1. 44358 0. 938998 1. 729899 1. 217235 1. 779555 1. 041223 0. 74384  
5. 160987 5. 478307 5. 420097 5. 9788 5. 872857 5. 762286 5. 006172 5. 523558 4. 585201  
4. 972426 4. 391632 4. 146242 4. 48399 4. 618051 4. 598567 5. 11861 4. 359527 4. 095554  
2. 254064 1. 816365 1. 967691 2. 000829 1. 791874 1. 529423 1. 880776 1. 633031 2. 56324  
1. 934742 0. 723047 0. 499324 2. 434404 2. 151894 1. 707679 1. 335665 1. 394485 1. 428091  
6. 559609 6. 279725 6. 707953 5. 82364 6. 5899 5. 48931 6. 604409 6. 69542 6. 773624  
3. 906522 3. 746123 3. 876788 3. 77019 3. 905567 4. 06849 4. 478485 3. 89631 4. 745851  
6. 17696 6. 513063 6. 383726 6. 500229 6. 523729 5. 855284 6. 384302 6. 565151 6. 882367  
7. 234073 6. 883563 7. 371978 7. 412682 7. 553259 7. 067156 7. 375025 6. 978148 7. 21111  
2. 587817 2. 485265 1. 987945 2. 663468 2. 397723 2. 628565 2. 624041 2. 100874 2. 734119

6.08377 5.523229 5.797003 4.999837 5.560315 5.378004 5.835901 5.439108 5.658747  
2.982775 3.715087 4.345482 2.904276 3.744189 3.501691 2.770404 3.188632 3.51231  
3.569428 2.142241 1.900261 6.14211 3.104136 3.006591 1.692706 3.709199 3.37399  
2.235945 2.877683 2.068852 1.679736 2.361342 2.033401 2.254984 1.91033 2.647672  
7.176622 6.921004 7.391409 7.375837 7.178753 7.336034 7.262071 7.551722 7.43076  
4.588396 4.874495 5.318565 5.227744 5.89899 5.043976 5.366325 5.458614 5.239634  
4.208096 4.900918 4.553589 3.89994 4.537679 4.908914 4.917999 4.957187 3.637624  
1.616232 2.133535 1.671789 2.183602 2.159095 1.945121 1.495651 1.847802 2.23597  
5.008591 4.98923 5.3186 4.285909 5.311596 4.44307 4.663206 4.774937 4.569048  
6.505737 6.158238 5.992411 6.200762 5.832721 6.401066 6.269149 6.272203 6.811216  
5.555671 5.360663 4.742551 5.091138 5.094884 5.075061 4.836427 4.850611 6.118021  
10.18424 10.46846 10.16724 10.43821 10.2831 10.16205 10.19502 10.44042 10.22519  
5.602295 5.498606 6.318355 5.793075 5.165243 4.832171 6.548846 5.469384 4.629236  
6.48729 5.88848 6.368602 5.824675 6.14955 6.054625 5.928949 5.910498 6.49603  
7.442004 7.394933 7.397938 8.03869 7.751147 7.455014 7.521305 7.645412 7.285955  
6.144948 5.982179 6.150483 5.346827 6.892261 5.148472 6.252757 5.839507 5.565634  
7.90805 7.606204 7.180819 7.823907 7.687267 7.463961 8.062462 7.471287 7.651318  
0.779166 0.813353 0.634015 0.957027 0.634797 1.451147 0.465905 0.71465 0.779166  
1.02387 1.600308 1.655698 1.769494 1.089633 0.95979 1.331251 1.48447 1.335379  
8.537165 8.50335 7.319538 7.657454 8.139153 7.671305 8.695749 8.811009 8.297626  
1.303575 1.75867 1.643101 2.805644 1.358272 1.882769 1.519522 1.574636 2.516227  
2.097864 3.907467 2.552182 5.267538 3.332149 2.063784 5.898902 1.519664 2.458981  
9.047089 8.767254 8.945848 8.754395 8.609185 8.916761 8.806338 9.105355 9.096883  
1.687388 2.356329 1.953668 2.069551 1.422619 1.849074 1.690458 1.528161 1.633183  
2.253106 1.938494 1.678146 1.736537 1.94592 1.637702 2.415391 2.259752 2.365206  
5.700992 6.694465 6.372192 5.945617 5.75758 6.325957 6.51844 6.194963 6.148  
4.854243 4.639735 4.58292 4.306694 4.649798 4.423962 4.972928 5.053511 4.649281  
1.664898 2.24333 3.551586 1.434718 2.631329 4.09165 1.459288 1.587975 1.713686  
1.400365 1.181403 1.364398 1.014936 1.544117 2.121724 1.390129 1.643249 1.479825  
2.748061 2.965362 2.30498 2.906923 3.224288 3.61106 3.434665 3.464081 3.010874  
0.999453 1.346346 1.643275 1.45206 2.075305 1.959395 1.496646 1.848154 2.165009  
1.940483 2.699385 1.557876 2.53111 1.275157 1.803959 2.417699 2.075035 1.783145  
2.328705 2.229987 2.322381 2.171489 2.777046 3.02044 1.965862 2.768748 1.61281  
1.846485 2.311557 1.543545 2.596748 2.39289 2.420509 2.901546 2.226949 1.870041  
4.49467 4.474792 4.101615 2.589205 3.480339 4.535837 4.673721 4.914365 3.53858  
4.890976 5.529863 5.340988 5.627102 6.013635 4.73383 4.570817 5.313168 4.710474  
5.894566 4.507501 5.128832 5.552238 5.093311 5.44552 5.383831 5.050665 4.600546  
6.212394 6.051008 5.803406 5.111187 6.020315 6.016959 6.174482 5.931362 5.759211  
6.480918 5.95631 6.62261 6.428293 6.352705 6.217872 6.414712 6.537673 6.249701  
4.323244 4.185622 5.617304 5.751942 3.918662 4.768304 2.481726 5.159653 4.241156  
6.705301 5.104836 6.09819 6.425553 6.201168 5.992366 6.830202 6.450607 5.752322  
5.207634 5.122935 5.098342 4.856143 3.995403 5.831926 4.201745 6.04859 5.489867  
3.780948 4.326488 3.177883 1.286316 3.307417 4.090155 3.290973 3.669601 4.093244  
2.222621 1.767156 2.118186 2.272006 1.742008 2.236365 2.003621 2.477695 1.922679  
3.133513 3.101546 3.280177 3.857134 2.715744 2.495682 2.456969 3.049725 2.974998  
7.458529 7.186095 6.820236 7.326755 7.206322 7.305176 7.431604 7.087798 7.446961  
7.86734 8.018284 8.194821 7.116406 8.181733 7.511853 7.762162 7.974741 7.561923  
6.881869 6.824506 6.819059 7.257217 6.773061 6.879363 7.288925 6.750817 6.974796  
7.140744 6.496681 6.694872 6.679327 6.286295 6.81254 6.557321 6.151932 7.210711  
7.67235 8.131755 7.860484 8.216199 8.213957 7.634432 7.90883 8.112594 7.787759  
4.949463 3.609928 5.660422 3.99938 3.691291 5.258632 5.219833 3.723866 5.346768

7. 311537 6. 934879 7. 0484 7. 026919 6. 52475 7. 200463 7. 635536 6. 847407 7. 093216  
4. 233322 4. 426148 3. 686348 3. 43019 3. 925616 3. 853191 4. 42563 3. 18673 3. 414795  
4. 657162 3. 378908 4. 680692 2. 724883 4. 901094 3. 991934 3. 662291 3. 916567 3. 990456  
2. 317079 1. 314252 1. 544986 3. 413461 1. 321512 2. 307508 4. 435292 2. 838759 2. 740496  
1. 143777 0. 75468 1. 661511 1. 235067 0. 894401 0. 760154 1. 117839 1. 205684 0. 810939  
1. 020006 2. 415577 1. 55053 0. 92519 1. 40694 2. 498055 1. 273647 0. 92079 2. 0528  
1. 352962 2. 066714 0. 981053 2. 335756 1. 245615 2. 363524 0. 836363 1. 085951 1. 617345  
2. 198021 2. 300837 2. 609526 2. 971301 2. 852871 2. 410285 1. 724778 1. 732953 2. 19354  
1. 305075 1. 116349 1. 430702 1. 360866 0. 935492 0. 765813 2. 985872 0. 931912 0. 985796  
0. 807079 0. 615937 0. 978161 1. 130951 0. 535725 1. 71251 0. 957589 0. 444992 1. 639743  
1. 897068 0. 824631 1. 547256 1. 70781 1. 609035 0. 82198 1. 037204 1. 223942 1. 38342  
0. 99458 1. 27332 0. 873805 1. 792759 1. 292588 0. 808466 0. 870377 1. 190469 1. 144174  
2. 006503 2. 846502 1. 455521 1. 734364 1. 858216 2. 28323 3. 786521 1. 2994 2. 4981  
2. 52739 2. 183456 1. 00631 2. 514028 1. 158133 1. 081618 1. 229064 0. 799092 1. 330079  
2. 189913 1. 957232 2. 08716 2. 180443 2. 029658 2. 374165 1. 953975 2. 032379 3. 26513  
1. 133982 1. 33352 1. 218805 2. 309847 1. 228907 2. 142134 1. 323851 1. 755172 1. 870181  
0. 825919 0. 919485 1. 308267 1. 69627 1. 02141 1. 376656 1. 295876 1. 417053 1. 485907  
3. 06191 2. 444331 2. 506978 2. 797715 2. 145315 1. 66649 2. 823355 2. 247164 2. 923965  
1. 677647 0. 663537 1. 508725 1. 221424 2. 232084 1. 03147 1. 498156 2. 432287 1. 038753  
1. 283564 1. 683474 1. 833774 2. 516256 1. 270291 1. 558865 1. 075913 1. 616723 1. 642097  
2. 076092 2. 375719 1. 358706 2. 189429 1. 230522 0. 910693 1. 670177 2. 042388 1. 384621  
0. 663886 1. 320619 1. 090125 1. 599767 0. 887214 1. 191563 0. 814955 1. 046357 1. 158037  
1. 058085 0. 906647 1. 154431 1. 113603 0. 721701 1. 488703 1. 001395 0. 89064 0. 714397  
0. 610628 1. 14632 0. 834018 0. 746205 1. 102435 1. 54127 0. 774655 0. 703517 0. 808753  
1. 704645 2. 524518 1. 722931 2. 162284 1. 3283 1. 233874 1. 5038 2. 129776 2. 212331  
1. 585216 1. 71203 1. 700834 1. 816938 1. 559718 2. 338633 2. 249821 1. 718653 1. 685595  
5. 599435 5. 133546 5. 491222 6. 791328 5. 29498 6. 469217 5. 711882 5. 716339 7. 265465  
5. 703261 6. 004138 6. 265623 6. 257045 6. 266695 6. 256719 6. 024129 6. 560266 5. 508883  
6. 891834 4. 82963 6. 666401 7. 146857 5. 838721 7. 721938 6. 2848 6. 785105 7. 433542  
5. 534521 5. 624827 5. 422677 4. 454193 5. 31522 4. 813692 5. 594263 5. 109815 6. 054741  
0. 90062 0. 681325 1. 043089 1. 368366 0. 748534 0. 814712 1. 050466 0. 986095 0. 882471  
1. 35345 1. 381757 1. 058614 1. 293873 1. 147668 2. 573053 1. 305185 1. 427626 1. 152514  
8. 998797 9. 361084 9. 083713 9. 198677 8. 78761 9. 161206 8. 708017 9. 087478 9. 396996  
4. 562212 4. 145109 4. 871405 4. 046576 4. 177294 4. 010395 4. 262148 3. 954527 4. 320812  
0. 759241 1. 494213 0. 788038 1. 296169 0. 969503 0. 914836 0. 693639 1. 164131 0. 697498  
6. 566121 6. 940548 7. 465446 6. 365674 7. 598149 6. 182214 6. 872906 7. 778955 6. 387316  
6. 434108 5. 928511 5. 870193 4. 881651 5. 718785 5. 843689 6. 222183 7. 174554 5. 987006  
1. 347992 1. 199319 1. 067252 1. 419377 0. 803448 1. 107138 1. 134783 1. 222527 1. 444719  
1. 080998 1. 038756 0. 673808 1. 13817 1. 132678 1. 81718 0. 746697 0. 735999 1. 050276  
1. 169409 0. 808499 0. 862617 1. 472227 1. 404729 1. 112187 1. 31558 1. 688981 1. 154236  
1. 371483 1. 607724 0. 948253 2. 061618 1. 130384 2. 196188 1. 313917 1. 407567 1. 588369  
1. 007248 0. 640517 1. 182509 1. 071895 0. 602247 1. 536681 0. 979895 0. 936993 0. 830921  
1. 527355 1. 846708 0. 832646 1. 377636 1. 162829 1. 435583 2. 024078 1. 752698 1. 755359  
1. 31847 2. 008288 1. 541752 1. 84034 1. 647547 2. 160942 2. 09299 1. 672289 2. 10075  
8. 18447 8. 178805 7. 479893 7. 520299 7. 869661 7. 752062 7. 296079 7. 86989 8. 349876  
1. 130405 1. 960436 0. 78706 1. 707712 1. 47334 1. 123525 1. 308652 1. 330993 1. 700566  
2. 906068 2. 591709 3. 215028 3. 333997 3. 089408 3. 217327 2. 408991 2. 938933 2. 811334  
2. 337073 1. 809098 1. 864567 2. 8188 1. 7402 1. 03884 1. 36147 2. 521675 1. 937785  
2. 827519 2. 456316 1. 77381 2. 47501 1. 971764 2. 117419 2. 048335 2. 258029 2. 476713  
1. 765226 1. 57425 1. 77051 2. 709534 1. 385213 1. 678652 1. 765906 1. 532468 1. 995122  
4. 644396 4. 132652 4. 162758 3. 315209 4. 917314 4. 586676 4. 999316 4. 505968 4. 700515

6.499387 6.459308 6.153468 3.710479 6.503219 6.430708 5.907178 6.447283 5.79438  
0.89182 1.068016 0.947829 0.936363 0.96255 1.64565 1.008812 0.864804 1.509466  
3.769217 2.864238 2.333206 3.615923 3.394239 4.746351 2.061999 2.730488 1.541481  
1.723286 1.245237 2.047681 2.979747 1.156183 2.972268 1.714737 1.732492 1.712463  
6.078852 6.136391 6.577684 5.646589 5.890511 6.360977 6.229971 5.925725 6.097434  
5.2782 4.918165 3.146423 4.725981 5.76558 3.730734 3.930658 4.921957 3.752858  
7.253848 7.493987 8.005651 6.286724 7.805591 8.047924 7.437823 7.533644 7.236926  
3.446396 4.319297 4.384532 4.126388 4.439676 4.067162 3.629249 4.144919 2.050301  
1.297971 1.324143 1.039219 1.667744 0.982625 0.998907 1.103961 1.831709 1.429262  
1.212673 1.584529 1.366531 1.194795 2.280185 1.641151 1.880289 3.146549 0.878818  
10.11877 9.871433 10.42114 10.33487 10.04849 10.00842 9.746293 9.949325 8.530233  
4.666134 4.102049 2.694586 3.217329 4.036025 3.450718 3.382354 5.037988 3.982375  
7.348435 7.365012 6.671135 6.180286 7.164037 7.886605 5.840479 8.899568 6.145382  
7.126232 7.171657 6.767467 6.843689 6.95136 7.135808 7.429904 7.169594 7.101531  
4.243216 5.385156 5.166064 5.171488 5.193557 4.101916 4.788913 5.28783 5.188721  
5.051881 5.584569 5.777157 5.601275 5.406662 4.647902 5.947794 5.575606 5.493652  
1.383356 4.356833 1.101625 0.921207 2.237299 1.503299 3.84712 2.47501 1.154461  
1.290433 1.000792 2.373732 1.412541 2.448149 2.949263 2.092005 2.246212 1.389263  
1.379192 1.552905 1.84342 1.777516 1.886753 1.897238 1.459152 1.350411 1.710058  
1.155668 1.115326 1.036299 1.397399 1.616397 0.987516 1.082891 1.200074 1.453529  
0.828198 2.838049 1.848623 1.855378 0.639272 1.06746 2.371171 1.198868 1.154031  
1.471667 2.007513 1.604037 3.058498 2.003049 1.344244 2.398214 2.134804 1.5647  
1.143687 1.050774 2.077298 1.400189 1.7389 2.207749 1.649785 1.581012 1.233814  
1.436986 1.526029 1.40363 1.390997 1.166275 1.790181 1.872771 1.442305 1.531961  
1.271575 2.166747 1.988645 1.887672 1.168017 2.223124 1.603518 1.589401 1.244496  
2.070268 1.426807 1.615555 2.566322 2.106424 1.836734 2.178652 2.120791 1.194675  
2.251984 2.904519 3.827179 4.342594 2.902367 2.23463 1.795115 3.657284 5.07682  
1.064736 1.286088 1.113054 1.320593 1.14804 2.025741 0.874208 0.947315 0.816774  
2.806947 1.988931 2.153582 1.560628 1.844783 2.045404 1.783394 1.697556 2.000323  
3.3083 3.409757 3.079519 3.951616 3.348486 2.992949 2.804014 3.40698 3.202353  
1.008282 1.012036 1.82758 1.194276 0.980929 1.184449 1.242709 1.098125 0.902604  
1.472773 1.132045 0.933513 0.720054 0.656132 0.737664 0.853584 0.86085 1.007552  
0.649286 2.24601 2.033453 0.490906 1.106689 0.754074 0.488338 0.096946 0.751643  
1.333333 1.43097 2.844953 1.652041 1.012126 1.285124 1.37756 1.265682 3.017523  
1.536322 2.415151 2.628181 2.576895 2.842283 2.352498 2.880045 1.49969 1.667649  
2.822433 2.909809 3.192525 3.210688 2.567026 2.070956 1.257744 2.775955 2.240231  
1.6938 1.540147 1.254195 2.990164 2.164547 2.270413 3.23376 3.381803 1.753668  
3.896859 2.820505 2.819678 5.018337 2.881549 1.422994 4.805859 4.493902 4.759804  
1.505767 0.993466 2.463941 1.812648 4.257388 2.56005 1.013566 2.408117 1.424885  
0.669526 1.551665 0.559171 0.808448 0.952602 0.989186 0.606716 0.881501 1.102744  
2.713075 1.808961 1.442787 1.761645 2.121739 1.898412 1.351418 2.230648 3.774039  
1.399705 3.530969 3.610081 1.846681 1.397302 1.274218 1.557762 1.71579 0.288697  
0.77497 0.659883 3.609689 1.845568 0.726082 0.918205 1.320801 1.151499 1.424278  
0.826743 1.365746 0.999817 1.026908 1.244584 1.544655 1.494256 1.637466 3.444645  
4.493446 4.554019 4.0253 4.858427 4.042837 4.021877 4.840644 3.559514 3.145485  
1.733159 2.406201 2.185437 1.765875 1.594535 1.799843 1.573915 2.025386 2.081103  
1.632891 1.46827 1.371047 1.230215 1.465432 1.369299 1.377696 1.531586 1.442647  
1.404664 1.068393 1.233725 2.080089 1.279437 2.273466 1.725876 2.080503 1.248703  
2.570514 1.060254 2.324162 1.730537 1.532216 1.422624 1.791053 1.629768 2.019041  
1.158637 1.466992 1.788197 2.507618 1.655799 1.514703 1.514703 1.156391 1.436595  
1.135727 2.290915 0.763899 1.544336 0.973491 1.227041 1.101057 1.234912 0.61732

1. 666432 1. 220316 1. 477328 1. 310236 1. 146795 1. 279804 1. 584063 1. 119595 3. 667735  
3. 434773 4. 234297 3. 031912 4. 307784 2. 67364 2. 892113 4. 103623 1. 730028 4. 061378  
3. 785928 1. 357973 0. 217014 5. 359808 2. 773821 2. 708372 0. 601228 1. 483928 5. 17582  
1. 975183 1. 244346 2. 147349 1. 539433 1. 309108 0. 849552 1. 859301 2. 747571 3. 106836  
1. 226359 1. 823616 1. 426786 1. 525026 1. 153081 1. 163749 1. 04097 1. 120022 1. 924398  
2. 04368 1. 558324 1. 277867 2. 201093 1. 401161 2. 034896 1. 636352 1. 732759 1. 403294  
1. 354802 1. 389104 1. 514509 2. 266473 1. 043704 1. 268373 1. 037934 1. 195622 1. 11559  
2. 511685 1. 837245 2. 710461 2. 23227 2. 676601 2. 023953 1. 773175 1. 615295 1. 864851  
1. 07318 1. 500562 0. 967162 1. 380229 1. 403499 1. 062857 0. 860757 1. 160161 1. 084309  
2. 901542 3. 428213 2. 908529 2. 82012 2. 428401 2. 130896 3. 492241 2. 495086 2. 973697  
0. 908229 0. 688138 2. 612912 2. 039468 0. 653985 1. 316889 1. 390633 0. 796221 1. 09111  
1. 358745 0. 784617 0. 981612 1. 218255 0. 676434 1. 822788 1. 248476 1. 525452 0. 923185  
1. 986008 0. 347374 1. 124628 2. 690393 2. 190512 2. 493187 0. 539427 2. 61366 2. 600768  
1. 306917 0. 993986 2. 294026 1. 529114 2. 099961 2. 000691 1. 666043 1. 168793 1. 086897  
2. 180331 2. 555005 2. 087452 1. 757089 2. 506498 2. 911575 2. 964331 2. 872101 1. 543463  
3. 138519 3. 34745 4. 398367 4. 977945 4. 970107 5. 545957 3. 157679 3. 125952 3. 412908  
1. 345052 1. 38238 2. 810607 1. 282411 1. 977024 1. 133678 1. 59322 1. 869163 1. 35643  
1. 859752 1. 483885 1. 734413 1. 866205 1. 874181 2. 116174 1. 77561 1. 961028 1. 922841  
1. 613692 3. 150627 2. 073127 4. 131023 2. 977687 3. 001392 2. 328567 1. 821828 4. 146245  
1. 688831 1. 966914 1. 28363 2. 38933 2. 206701 1. 540085 3. 247385 1. 908874 3. 798475  
2. 827501 2. 569657 2. 862578 2. 24397 2. 422222 2. 667158 2. 294757 2. 007475 2. 38396  
1. 434646 0. 939718 2. 046431 1. 5389 1. 12229 0. 961112 1. 044387 0. 879502 1. 36411  
1. 091931 1. 998227 1. 221755 4. 245286 1. 641751 1. 554189 1. 086042 1. 074517 1. 681279  
0. 875991 0. 982112 1. 349996 2. 061599 1. 717215 0. 454269 1. 035203 1. 511888 1. 853293  
2. 247239 2. 991039 2. 915696 3. 291183 4. 331915 3. 102602 1. 920042 2. 803815 3. 363713  
2. 724955 3. 332064 1. 808314 4. 406342 3. 51065 4. 605108 3. 666395 3. 057542 4. 56566  
2. 110817 3. 471908 2. 108177 2. 4827 2. 305106 2. 933821 4. 195555 2. 835413 2. 683105  
1. 076017 1. 112944 0. 837647 1. 621485 0. 739918 1. 119163 0. 875567 0. 403816 0. 923389  
2. 11472 2. 557374 2. 276239 1. 753058 1. 57484 2. 393705 1. 859259 1. 886042 2. 64004  
0. 979004 1. 087401 2. 45797 1. 434459 0. 696055 1. 44729 1. 026702 0. 935649 1. 49622  
1. 001262 0. 974038 1. 82404 2. 376736 1. 050976 1. 597373 1. 725109 1. 283394 2. 21564  
2. 950528 2. 503373 1. 986895 2. 316226 1. 683546 1. 241293 2. 744254 2. 518707 1. 495139  
1. 731334 2. 021122 1. 838807 0. 650431 1. 151396 0. 568986 1. 306812 1. 295771 1. 359172  
0. 941519 1. 831973 1. 312081 1. 771752 1. 303847 1. 49132 1. 488136 1. 024417 1. 19752  
7. 668547 7. 565472 7. 296977 7. 425627 6. 517573 8. 110299 7. 563659 7. 739523 6. 818739  
1. 229447 0. 792631 1. 049772 2. 160966 1. 290508 1. 057083 1. 168981 1. 812443 2. 273713  
1. 769325 1. 435818 2. 183636 3. 160607 1. 501998 2. 861339 1. 886647 1. 627022 1. 297624  
1. 82255 1. 374242 1. 16234 0. 99606 2. 200968 3. 128507 1. 641746 1. 112513 1. 076088  
3. 15409 3. 215302 1. 909184 2. 750394 2. 496617 2. 400163 2. 06607 1. 416774 0. 628735  
2. 460797 2. 143509 3. 547814 3. 214635 3. 123597 2. 784479 3. 856103 3. 550303 4. 388296  
1. 240128 1. 149581 2. 186019 0. 715691 1. 133951 1. 034518 1. 381803 0. 645238 1. 838184  
2. 444853 2. 568692 3. 069481 2. 240016 2. 003662 2. 595476 2. 89067 2. 865318 2. 193921  
2. 398905 2. 970028 1. 890787 4. 300123 3. 262787 4. 351898 4. 042662 3. 02588 3. 310065  
3. 808715 2. 902321 1. 970975 1. 94304 2. 415506 2. 250792 2. 225643 1. 258274 2. 558661  
1. 680514 1. 030274 2. 29863 1. 805794 1. 016688 1. 658744 2. 761032 1. 805763 3. 10908  
0. 594074 1. 083148 1. 567861 1. 086358 1. 181898 1. 330883 2. 791535 1. 024128 1. 690662  
1. 081475 3. 315199 3. 921163 2. 856183 4. 474838 4. 34455 4. 347641 3. 650847 6. 301646  
0. 808608 1. 407371 1. 418226 1. 4155 1. 165086 1. 219631 1. 136677 1. 350196 1. 381691  
2. 07818 1. 617796 2. 440022 3. 110121 2. 516477 2. 252037 2. 427676 2. 198104 1. 77432  
1. 597088 1. 560743 2. 182551 2. 179649 1. 51881 1. 510276 1. 574936 1. 753737 2. 154343  
2. 109854 2. 63421 1. 861346 2. 073347 1. 733232 2. 578113 1. 449035 1. 244668 2. 237002

1.736375 2.45791 0.538729 1.436686 1.647688 1.387399 1.01801 1.229025 1.995772  
1.146247 1.577922 1.794632 1.365242 0.770813 1.43501 1.234099 1.17682 1.589989  
0.693154 0.870554 1.071134 0.940547 0.477584 0.964026 0.730092 0.852026 1.183903  
3.692235 4.079044 3.41234 0.620849 3.767129 0.503176 3.792511 5.637834 1.468078  
1.332911 2.062871 1.696788 1.514457 1.870139 1.699666 2.190545 2.100835 1.547744  
2.046336 1.312969 2.380221 2.814493 1.148913 1.945105 2.162405 2.53128 2.358339  
2.614434 3.181424 1.975862 2.343387 1.553099 2.008867 1.391548 1.286524 2.305498  
1.962205 2.502853 2.232891 2.861821 1.682944 1.613669 1.541299 2.21915 3.967655  
1.136336 1.582414 2.379685 1.74063 1.447809 1.851987 1.286108 1.296067 2.243152  
0.843798 1.473826 0.650414 1.148277 0.959347 1.254071 1.403431 2.0446 0.8022  
1.218002 1.186775 1.799258 1.480881 1.594208 1.127009 1.480881 2.087123 1.927198  
2.271596 1.755619 2.335628 2.425284 1.903394 1.341241 1.872155 2.590281 1.612163  
1.05786 1.739839 1.030093 1.735512 0.8575 2.140122 1.804579 1.138833 0.863758  
2.75115 1.86025 1.925528 2.666713 1.294288 2.615303 0.93151 1.286251 1.845026  
2.406561 2.388223 2.203362 2.787599 2.482451 2.359847 2.304723 2.190906 2.525839  
1.674314 1.145569 1.995197 1.85657 1.16523 1.166847 1.071424 1.894907 1.48038  
4.336846 4.500124 3.961795 5.673796 2.251274 4.085447 3.6413 3.566433 1.102941  
1.464943 1.84929 2.523928 1.966604 1.734877 1.912505 1.491299 2.082132 2.93852  
2.571488 2.828152 4.476898 3.503481 2.332024 4.276699 2.887786 2.358515 2.442123  
2.058479 1.242844 1.54294 1.33568 0.735184 2.0408 0.608165 1.696109 1.269758  
2.401895 3.107285 2.333039 2.968961 3.165523 2.417629 2.290288 3.040952 3.061798  
2.181736 1.245766 2.442889 1.202262 3.72397 1.251862 1.25436 2.478638 2.48246  
1.60425 1.967375 1.203142 2.323532 1.663494 1.690681 1.454181 1.246933 1.043261  
4.740354 3.835524 6.288224 5.124924 5.468209 2.065499 5.696175 6.534001 1.916019  
3.237184 2.863228 4.197321 1.896341 1.913369 3.691508 3.230394 3.688849 2.710828  
1.2524 1.404665 1.277318 1.272402 1.428528 1.09027 1.037922 1.196004 1.639863  
1.181429 1.131657 0.530308 0.620256 3.552951 1.101059 2.38889 0.875938 0.562805  
1.274798 1.042806 1.657495 2.436579 2.781198 0.830223 1.277197 1.164116 1.166249  
1.007874 1.176245 1.923711 2.2127 1.962941 1.713633 1.104764 1.400639 2.106485  
1.291214 1.26511 1.627278 2.301826 0.748541 1.430166 0.735747 2.048902 1.344586  
1.497533 0.875948 1.89539 2.112146 0.896215 1.34194 1.392573 0.942109 0.773886  
4.348828 4.227382 4.883253 1.817541 3.947396 4.323199 3.599204 4.332432 2.203549  
2.2991 3.316325 1.406152 2.774261 2.80767 2.655166 3.542139 3.648551 3.803739  
2.336747 2.251533 2.114069 2.231836 2.149711 4.212912 2.83153 0.974152 2.226689  
0.387474 0.339706 1.02933 1.806767 1.581432 1.363838 0.613891 1.281682 1.544393  
1.660858 2.522921 1.522946 2.076261 1.57534 1.603745 1.48876 1.526128 1.642777  
2.534463 2.24309 0.629542 0.721221 1.51159 1.488656 2.86722 1.533545 4.396916  
2.247633 2.318951 2.265547 3.123834 2.554374 2.465293 2.715354 2.813569 2.426751  
3.510285 3.741255 2.209231 2.871561 2.492279 2.733904 4.983282 1.933013 1.644414  
0.870441 1.095421 1.201971 0.979412 0.969549 1.114139 0.971828 1.436064 4.312795  
0.876085 0.726445 0.834306 0.978651 0.810853 1.062869 0.761702 0.794927 1.999503  
1.307699 2.586587 1.33544 1.674409 1.482165 1.218431 3.168461 1.515181 1.05666  
3.668133 5.142014 2.510453 5.306792 5.026117 3.039166 3.751106 3.841125 3.327388  
1.041266 1.327104 1.212018 1.389458 0.989663 1.143296 1.182969 1.16591 1.216923  
1.654665 1.39809 1.758251 2.626762 1.30951 1.766196 1.600545 1.937884 2.831995  
0.593377 1.699455 0.550126 1.692528 2.921657 0.350009 1.002033 0.521298 0.822624  
2.018858 2.757353 4.670788 2.010599 1.339496 2.409184 2.183896 2.128082 2.337344  
2.029598 1.581577 2.535373 2.051347 1.644524 1.372324 1.540174 1.858473 1.46885  
0.734929 1.57706 1.344753 0.66666 0.750387 1.410643 0.790834 1.140434 1.067052  
1.035851 1.997141 2.138301 1.73527 2.794564 2.771511 0.698806 1.857817 2.075539  
3.250503 1.994425 2.933581 3.446138 2.47226 1.893644 3.019719 2.283139 2.402427

|          |          |          |          |          |          |          |          |          |
|----------|----------|----------|----------|----------|----------|----------|----------|----------|
| 0.986666 | 0.915033 | 1.2698   | 0.97897  | 1.179601 | 1.136803 | 1.675191 | 1.204219 | 3.664529 |
| 1.380099 | 1.762915 | 1.202127 | 2.092839 | 1.26775  | 1.095117 | 1.88233  | 1.596151 | 1.549131 |
| 2.094058 | 2.084965 | 1.238513 | 1.200983 | 1.592689 | 3.338528 | 1.646006 | 1.303173 | 0.748892 |
| 2.528912 | 1.935358 | 1.342172 | 3.194688 | 2.660084 | 2.111364 | 2.578324 | 1.847423 | 2.146148 |
| 2.436128 | 3.099051 | 1.871869 | 1.67938  | 3.628956 | 3.279673 | 2.507985 | 1.747467 | 1.544277 |
| 2.037475 | 0.631079 | 1.062775 | 1.274945 | 0.724611 | 1.456696 | 0.727054 | 0.596168 | 1.388712 |
| 1.838595 | 1.24535  | 2.240919 | 2.567736 | 1.508578 | 1.646694 | 1.156674 | 1.510216 | 1.832572 |
| 0.507534 | 1.094848 | 1.537391 | 2.259566 | 1.407831 | 2.025944 | 1.461532 | 1.132826 | 2.730744 |
| 1.586242 | 1.290252 | 1.476809 | 1.39379  | 1.423097 | 1.38068  | 1.586737 | 2.72937  | 1.230621 |
| 1.53496  | 1.448146 | 0.989331 | 1.456648 | 1.15157  | 1.512784 | 1.405792 | 1.564173 | 0.983744 |
| 2.802448 | 2.894088 | 3.304215 | 3.059524 | 3.047398 | 2.630437 | 2.94036  | 2.978589 | 3.374422 |
| 1.60747  | 1.22391  | 1.603204 | 1.805325 | 2.154924 | 1.740269 | 1.453008 | 0.991149 | 1.299129 |
| 2.669196 | 4.438143 | 3.929734 | 4.959106 | 4.551726 | 3.858348 | 5.257745 | 4.580761 | 3.737423 |
| 1.770253 | 1.362417 | 1.639866 | 3.390962 | 2.681409 | 3.792944 | 0.657952 | 1.537903 | 1.103536 |
| 2.696201 | 2.784694 | 3.404607 | 3.156967 | 1.74164  | 2.957413 | 2.667287 | 2.509628 | 2.939361 |
| 1.527475 | 1.666525 | 2.517698 | 2.712416 | 2.408713 | 2.186281 | 1.242658 | 2.01836  | 1.634176 |
| 2.03158  | 1.783068 | 1.724499 | 1.823816 | 0.746548 | 1.353153 | 0.600442 | 0.828793 | 1.090714 |
| 1.553669 | 0.953008 | 0.524544 | 1.552341 | 1.526553 | 1.163419 | 0.971337 | 1.644668 | 1.122223 |
| 0.615544 | 1.418793 | 1.946765 | 3.222976 | 1.549601 | 1.114895 | 2.914048 | 1.692669 | 2.912709 |
| 2.790926 | 0.818684 | 2.666044 | 0.577306 | 2.505642 | 3.02799  | 2.314611 | 3.456096 | 2.519001 |
| 0.960663 | 1.833777 | 2.501078 | 2.557956 | 2.19215  | 1.4773   | 2.609031 | 2.124513 | 2.014333 |
| 2.536612 | 4.177546 | 3.955682 | 4.318685 | 3.383847 | 3.376894 | 4.038679 | 3.52052  | 4.913097 |
| 3.798324 | 3.012189 | 2.149892 | 3.98003  | 3.335828 | 1.801596 | 2.182156 | 3.29915  | 3.817531 |
| 3.00143  | 2.607499 | 2.648991 | 1.87707  | 4.060297 | 1.978789 | 3.911384 | 2.807643 | 5.804932 |
| 2.833891 | 3.353444 | 3.243042 | 4.468452 | 3.053061 | 3.623816 | 3.43057  | 3.200854 | 3.602315 |
| 1.31729  | 1.634271 | 1.654242 | 1.992179 | 1.272469 | 1.618629 | 2.037458 | 1.156222 | 1.784034 |
| 2.404329 | 1.857112 | 4.118046 | 3.198822 | 2.785729 | 3.831177 | 2.184534 | 3.05746  | 2.909711 |
| 1.62781  | 1.296301 | 2.041453 | 1.599942 | 3.736093 | 1.769181 | 1.891879 | 0.841307 | 3.508844 |
| 0.879984 | 0.839532 | 0.827769 | 1.812754 | 0.896139 | 1.520598 | 0.896799 | 0.891809 | 0.684607 |
| 1.828222 | 1.508564 | 1.349107 | 1.502204 | 1.520573 | 1.871118 | 1.035168 | 1.32414  | 1.737765 |
| 1.286822 | 1.71145  | 0.800877 | 1.712607 | 1.003605 | 1.830599 | 1.064526 | 1.550348 | 1.53545  |
| 1.229456 | 0.806026 | 1.410493 | 1.03136  | 2.389694 | 0.754957 | 0.807988 | 1.337799 | 3.336527 |
| 1.676879 | 2.155753 | 2.714367 | 2.564618 | 2.198815 | 2.266237 | 2.022734 | 2.445266 | 1.907256 |
| 3.692764 | 2.902596 | 2.50568  | 2.777615 | 2.756774 | 2.724094 | 2.683873 | 3.116497 | 3.17104  |
| 1.357426 | 0.673962 | 1.023589 | 1.36158  | 0.867984 | 0.990298 | 1.143665 | 1.069411 | 0.997147 |
| 1.518285 | 2.557566 | 1.055432 | 0.932381 | 1.935878 | 0.980563 | 2.694979 | 0.252032 | 0.887302 |
| 1.568515 | 0.99677  | 1.249841 | 1.324847 | 1.374515 | 1.207067 | 0.9787   | 1.05553  | 1.265194 |
| 0.886452 | 2.032265 | 1.161411 | 1.242297 | 1.636188 | 0.972591 | 2.990798 | 1.186892 | 1.00338  |
| 2.009375 | 1.463048 | 1.285248 | 2.64606  | 1.766621 | 1.409148 | 1.676829 | 1.353423 | 1.460612 |
| 1.212629 | 1.455347 | 0.88043  | 2.013303 | 0.927468 | 1.358357 | 1.92621  | 1.006979 | 0.876769 |
| 3.400601 | 2.674756 | 3.115875 | 4.184928 | 2.137614 | 4.259749 | 3.27567  | 3.794746 | 3.633582 |
| 1.9624   | 0.574278 | 0.889678 | 0.752815 | 1.228078 | 1.390043 | 0.80765  | 1.064313 | 1.166456 |
| 1.069926 | 1.000766 | 1.69356  | 6.521816 | 1.396959 | 1.130282 | 2.629868 | 2.698414 | 1.290834 |
| 1.214579 | 0.912793 | 0.896856 | 1.37077  | 1.326887 | 1.658038 | 1.105618 | 1.051859 | 0.617249 |
| 1.23404  | 1.571908 | 1.117483 | 2.109577 | 1.677684 | 1.350713 | 1.720948 | 1.266377 | 1.047116 |
| 3.273177 | 3.312564 | 4.316442 | 2.00614  | 2.212201 | 2.672038 | 4.889924 | 2.194774 | 3.969668 |
| 1.061217 | 1.310994 | 1.511906 | 1.253301 | 0.897081 | 1.118796 | 1.241624 | 1.239736 | 1.01045  |
| 1.051443 | 0.938991 | 1.817448 | 1.8208   | 1.669963 | 0.826976 | 1.174207 | 0.818328 | 1.184801 |
| 1.73507  | 1.792403 | 1.997488 | 2.15648  | 1.928619 | 1.75868  | 1.824417 | 1.681198 | 1.462332 |
| 2.25933  | 1.801256 | 2.055784 | 1.763794 | 1.309025 | 2.750582 | 2.02251  | 0.879404 | 3.655699 |
| 1.38669  | 1.765242 | 1.245026 | 1.299391 | 1.341505 | 2.919813 | 1.189644 | 1.535203 | 1.263977 |

3.017348 2.769357 2.896682 3.185721 3.074614 2.647269 3.204619 3.065394 3.298298  
2.980177 2.322964 3.075132 2.379295 3.318685 1.968632 2.105387 1.841178 2.015385  
1.143567 1.963834 1.498485 2.251765 1.487692 1.657899 0.918504 2.179268 0.842609  
1.341784 1.246853 1.373142 1.653992 1.324917 1.193424 1.7729 0.98401 1.080147  
4.210765 1.628991 1.776216 2.985604 1.370679 1.848752 2.714455 1.989554 2.262706  
2.441906 1.138703 3.324757 2.464539 1.736973 2.355582 1.43104 0.66317 2.565951  
1.745289 1.410111 1.624951 1.73471 1.44284 1.511917 1.660646 1.462745 1.468669  
3.738998 3.990425 3.013614 2.868397 5.014705 2.919177 4.091225 5.264706 3.19534  
1.258171 1.444712 1.832448 2.100343 1.790392 1.583377 1.672901 1.306459 1.21883  
3.866045 2.092459 2.358414 3.097614 2.649399 3.043341 2.563168 1.454467 3.277736  
1.392039 1.3276 1.195916 1.543006 0.992415 2.106757 1.426281 1.278378 1.45777  
6.683007 6.292921 6.216105 6.050262 6.139353 6.883122 6.509299 5.981879 6.92457  
1.119966 0.84961 1.217199 1.505835 0.815286 1.267754 0.898588 0.948648 1.106331  
0.923808 1.020698 1.040234 1.329104 2.026542 1.135341 0.926078 0.71818 1.453883  
1.097181 1.93159 0.900553 2.026292 2.086245 2.140977 1.115905 1.166025 1.130808  
2.668499 1.587798 1.631495 1.673729 1.693682 3.329998 1.736199 2.62496 1.522985  
5.348183 5.572171 4.960206 3.243386 5.187013 5.567246 5.129394 5.226223 6.802155  
1.909042 1.690493 1.587208 2.68852 1.500514 3.344037 2.126349 1.841925 2.16428  
4.946996 4.839457 4.073879 2.324203 5.282951 3.8842 4.369713 3.367655 4.986815  
1.899805 1.896717 1.884307 2.969445 2.347634 2.59961 2.313535 1.430326 1.843352  
1.211962 1.229375 1.141824 2.029653 1.294577 1.165597 1.529799 1.750734 1.430428  
2.970079 2.201566 2.046904 2.559437 4.301491 1.532412 2.275115 1.909025 1.712192  
3.26265 1.626363 2.680548 2.567113 2.117814 1.413935 3.521379 1.200903 3.529639  
1.333823 1.145035 1.423967 1.824568 1.349701 1.632324 1.548524 1.843617 1.781517  
1.412014 2.40268 2.668637 4.068812 3.368081 3.307002 1.500085 3.848188 0.872643  
1.788518 1.799766 1.593828 3.003715 1.095096 3.321057 1.375648 1.980157 1.965284  
2.058686 3.442389 3.948587 2.779343 1.801617 2.084457 2.561187 3.535336 3.544106  
2.441326 1.95065 2.097963 2.45994 2.019852 2.433158 2.134196 2.572033 1.960411  
1.484475 1.913097 1.886481 2.385401 1.395849 1.401618 1.060841 1.693441 1.419357  
2.927793 1.311071 1.31532 1.148271 1.116338 3.70916 1.095964 1.580934 0.840129  
1.839103 3.435919 3.332936 1.302083 2.531558 0.837795 2.667916 2.571279 3.523143  
1.344645 1.089337 1.356487 1.248465 1.136188 1.224839 1.320647 1.327456 1.269103  
2.531483 2.259516 3.791952 2.151092 1.593051 3.194019 1.87809 2.222935 2.372666  
5.482273 4.714548 4.559574 5.253315 3.410505 3.005166 5.490875 3.187684 5.453172  
6.942032 7.168921 6.679253 7.582948 6.781971 5.677812 6.841404 6.516142 6.978685  
2.436989 1.602413 1.356274 2.056243 1.925301 0.74903 2.837081 2.093889 1.695266  
1.529185 1.078524 1.527902 2.07339 2.499172 2.090537 1.741707 1.109211 0.942023  
4.070312 4.719763 4.245668 4.570952 5.16321 4.145647 5.486111 4.957559 5.031647  
4.350269 5.660871 4.422321 4.75541 4.326714 3.766219 6.135567 5.526514 6.176586  
2.020134 2.052212 2.15587 2.300953 1.73824 2.143346 2.963985 1.987003 1.434613  
0.803555 0.845587 2.519714 1.061571 0.563363 1.206001 1.146335 1.12469 0.981571  
4.497202 4.818742 4.59214 2.625145 3.842203 4.538756 4.297613 4.578878 5.596171  
2.134113 1.414184 1.581191 1.622742 1.783569 2.754729 1.082382 1.808064 1.27266  
1.910388 2.159257 2.181799 2.672862 1.885496 2.746926 2.174733 2.071446 2.540255  
4.718765 4.339601 4.013491 5.377211 3.794613 4.838662 4.113779 4.568424 5.683691  
0.991911 0.982797 1.170478 2.131058 1.542436 2.132561 0.826229 1.449125 1.335238  
2.628341 3.259861 3.098685 1.516051 1.398236 3.460233 1.819053 1.982753 2.725113  
1.634323 1.754429 1.623387 5.160685 2.988374 1.216301 2.353237 3.810561 3.514065  
1.355847 3.100224 1.982165 3.185876 1.85828 2.214695 1.727248 1.824826 1.406105  
1.437461 2.22098 1.251208 1.065763 1.387095 2.175745 5.059235 1.003426 2.852044  
0.846848 1.826547 1.71117 2.487267 1.838817 1.113999 1.651611 1.686488 0.904891



1. 451881 3. 357985 2. 094689 2. 313234 3. 095639 3. 80734 2. 100942 1. 579432 1. 41229  
1. 065358 0. 719776 1. 134584 1. 620184 0. 709811 2. 089728 1. 000635 1. 096968 1. 28503  
1. 129923 1. 506497 1. 564928 3. 034501 1. 666259 0. 992013 1. 614365 1. 423244 2. 033878  
1. 65196 1. 301669 1. 922493 1. 348834 1. 624369 1. 562954 1. 58708 0. 960655 1. 145517  
0. 436 0. 808059 0. 560383 1. 138833 0. 751472 2. 678668 1. 327911 1. 873479 1. 777732  
1. 515094 1. 333356 1. 210848 1. 259252 1. 380796 1. 632044 1. 386183 1. 575742 2. 50083  
4. 802433 3. 327221 5. 160183 3. 739674 4. 124055 3. 234328 4. 299294 4. 71751 4. 765501  
0. 994451 0. 906462 1. 053124 1. 302954 1. 868185 1. 01294 1. 274319 0. 90141 1. 706366  
4. 779319 1. 303584 1. 925014 1. 988435 5. 112745 2. 590421 2. 995546 4. 216069 1. 960055  
1. 086661 0. 766705 1. 0951 1. 334738 1. 094374 1. 144186 1. 431326 1. 289396 1. 631104  
1. 188032 0. 950706 1. 361676 1. 716368 0. 423534 2. 268017 2. 310027 1. 194122 0. 159612  
1. 157534 1. 199041 0. 983881 1. 171211 1. 080944 1. 219274 0. 686979 0. 899549 0. 744624  
1. 055985 0. 637408 0. 950804 1. 689639 1. 008746 1. 160247 3. 120815 0. 738217 0. 781774  
5. 289226 4. 613014 3. 418103 3. 974785 3. 7125 4. 833081 3. 064563 4. 037136 5. 493625  
1. 170036 1. 115911 1. 112641 1. 299137 1. 204872 1. 089877 1. 394011 1. 346359 1. 45675  
1. 906986 2. 989933 3. 582388 1. 832356 2. 063361 3. 521272 2. 456421 3. 313833 3. 438192  
1. 895336 0. 991136 1. 359494 1. 494285 0. 808804 1. 014393 0. 82574 0. 979196 0. 893106  
3. 376637 2. 12576 2. 541726 1. 840085 2. 6249 1. 317352 3. 405201 2. 53476 3. 092898  
1. 124131 1. 197355 0. 861678 0. 961473 1. 481633 1. 239412 1. 077307 0. 72275 1. 110995  
1. 136109 0. 81918 1. 575805 1. 175651 1. 034845 1. 38642 1. 146963 1. 425814 0. 784482  
1. 923517 2. 518008 1. 557274 1. 880332 1. 288425 1. 038312 1. 3932 1. 317905 1. 345694  
4. 260292 4. 818254 4. 886509 4. 891157 5. 580984 3. 472811 2. 754054 5. 170946 3. 039301  
1. 315691 1. 084846 1. 197378 1. 846281 1. 572633 1. 791023 1. 522061 1. 903134 1. 318428  
1. 961566 2. 834401 2. 12391 1. 717682 1. 959405 1. 53594 1. 887186 2. 238224 2. 301429  
1. 471266 2. 884121 2. 567382 1. 495578 1. 525807 1. 605571 1. 930242 1. 292955 1. 749643  
3. 416434 1. 461106 1. 034273 0. 949617 1. 274175 1. 560663 1. 286655 0. 65568 1. 054696  
3. 216168 5. 033809 3. 638803 3. 817148 4. 029833 4. 301262 3. 060953 4. 157512 5. 44762  
1. 704516 1. 784224 1. 045763 3. 158971 3. 185763 1. 759357 1. 693202 2. 791142 1. 671955  
1. 430099 1. 844438 2. 804413 1. 294656 1. 289723 1. 479115 1. 125585 1. 983992 1. 73531  
2. 177494 2. 157936 1. 258524 2. 57106 1. 810238 2. 747504 1. 203253 2. 684095 2. 423372  
5. 456107 5. 319368 5. 086938 5. 876176 5. 034784 5. 335371 4. 897608 3. 108152 4. 754155  
2. 432328 2. 306426 1. 969587 1. 858153 1. 415034 1. 969587 1. 649683 2. 69491 3. 427052  
2. 496625 2. 083534 3. 375045 2. 351136 2. 809096 2. 135817 2. 268622 1. 91741 2. 216173  
0. 955678 0. 961346 3. 039358 0. 998987 0. 823348 1. 592659 1. 233474 1. 259682 0. 702691  
3. 031866 1. 348397 1. 556337 1. 553406 1. 394043 1. 982296 2. 863693 1. 770545 1. 56354  
1. 511122 2. 448973 2. 756435 2. 23787 1. 799313 2. 383335 1. 30046 1. 57443 1. 709384  
10. 1138 9. 781905 10. 31215 10. 05741 9. 967588 9. 958828 10. 41977 10. 05669 9. 703364  
3. 537689 4. 548939 4. 34123 3. 61541 4. 136663 3. 889418 4. 000117 4. 239428 3. 675937  
7. 478625 7. 416131 6. 877416 7. 486339 7. 80373 6. 703916 6. 959737 7. 428066 7. 60019  
3. 276238 2. 600039 2. 790731 1. 536841 4. 480404 5. 686821 3. 200691 1. 944219 4. 566206  
1. 710142 2. 146892 1. 72671 1. 641388 2. 04948 1. 343824 1. 75733 1. 219712 1. 506492  
1. 237917 1. 469743 1. 330874 1. 409398 1. 438399 1. 500787 1. 027574 1. 134029 0. 840044  
2. 180462 2. 77573 2. 821184 2. 778609 2. 809229 2. 661075 2. 42641 2. 264747 2. 491741  
3. 516664 3. 581356 3. 859272 3. 585815 3. 794739 3. 023301 4. 700256 4. 245125 3. 149284  
1. 043321 2. 866542 1. 693629 3. 009708 1. 736159 2. 133369 0. 674972 1. 704232 1. 147307  
1. 036778 1. 345285 1. 530207 1. 112026 1. 322518 1. 464835 1. 433555 1. 60192 1. 016117  
1. 408183 1. 886202 1. 881 1. 376271 1. 154521 1. 540284 1. 485763 1. 419587 1. 39093  
2. 857761 3. 941433 2. 913178 2. 769421 2. 719414 2. 566228 2. 413944 1. 78134 1. 908184  
2. 639478 2. 368807 2. 896917 3. 346543 2. 833207 2. 90595 2. 509644 2. 66871 2. 808039  
1. 92185 1. 864051 1. 477594 1. 308339 0. 699559 1. 810756 1. 822768 1. 333395 0. 964767  
5. 862919 5. 360733 5. 233795 5. 199216 5. 638632 4. 761301 4. 889752 5. 57288 3. 63115

1.666114 1.985492 1.014558 1.953601 0.777197 1.410583 1.741609 0.807644 1.411846  
1.189904 1.271893 1.549238 2.024282 1.131703 1.407825 1.031324 0.861962 0.941707  
1.344391 1.654123 1.431429 2.449755 1.636528 1.642573 1.538976 1.74818 1.796279  
1.210282 1.271746 1.448383 1.236448 0.935587 1.392139 0.887657 0.976224 0.975538  
0.717935 2.437332 1.039679 1.520523 1.850794 1.02434 1.339156 1.162517 1.29071  
1.060429 0.723245 1.187656 1.949263 2.900178 0.803019 1.350975 2.358492 1.07519  
1.676234 1.241758 2.268631 1.375896 2.74713 2.20142 2.708301 1.118842 1.359465  
2.002233 2.135636 0.955115 2.806169 1.75665 1.670422 1.432179 2.59595 1.618113  
1.304299 0.696478 1.083151 1.499726 0.806057 1.675484 1.502906 0.822463 1.455109  
1.932392 1.41694 0.43538 2.190337 1.081348 1.469431 1.747333 2.028703 2.185121  
1.24033 1.581456 0.896052 0.901371 1.505334 1.08703 1.331555 1.33109 2.079023  
1.581775 1.320093 1.206877 1.877047 1.696287 1.078832 1.559952 1.35668 1.652962  
0.790862 1.049695 1.004568 0.922939 1.007864 2.07132 0.587878 0.725649 0.948345  
2.704341 1.465413 2.105441 1.54716 2.20111 2.251067 4.015198 2.165394 2.444228  
2.619176 2.595328 3.323783 2.105633 3.059538 2.2393 2.300199 4.150269 2.264269  
0.729389 0.78917 0.929649 1.542589 0.662699 1.358695 0.865878 1.242573 1.206655  
0.956066 1.063714 0.85024 1.68346 1.407838 1.085432 0.818104 1.077989 1.353607  
1.529285 2.148294 2.912986 3.392437 3.574887 2.912674 1.911521 2.855958 1.46128  
2.977559 1.889137 0.707347 3.166747 1.038554 0.968987 0.604867 1.538808 0.849399  
4.688895 4.182791 4.404999 4.366838 4.680327 4.06348 5.271489 5.559968 4.335514  
3.15458 2.827454 2.707014 3.600104 3.067882 3.180528 3.229322 3.099821 2.359414  
0.632633 3.45708 0.777566 5.786142 4.24312 2.17585 1.769153 0.898095 1.458923  
1.475758 1.985776 1.920366 1.81371 1.028099 2.299467 1.452839 1.187368 2.261227  
1.155362 1.930871 2.261545 1.867274 1.315007 1.284775 0.950099 1.609436 1.278703  
1.246437 1.328884 0.962189 1.708608 1.286013 1.268962 1.076489 1.568641 1.719463  
1.265202 0.945241 1.721655 2.434456 1.493813 1.392818 2.003701 1.022558 1.830663  
0.952442 1.533322 1.998149 1.329859 4.017839 2.493914 2.438446 0.742363 2.023198  
1.106073 3.58369 0.787335 0.75421 1.285654 0.647888 1.408631 2.658619 1.253983  
0.969595 0.981937 1.487251 2.339272 0.938653 1.00605 1.360022 1.423528 1.769077  
3.064891 3.585032 2.865993 3.468275 2.173492 3.963882 2.858721 4.048193 3.975587  
1.911933 1.61491 1.765957 1.824173 3.075933 2.587589 1.025504 1.376375 1.257104  
2.314602 0.638321 1.040569 1.710996 2.195859 0.747808 0.931934 1.022167 1.288103  
2.032563 1.18456 2.455628 3.317248 0.801421 2.221183 0.763495 0.834294 3.635436  
1.197108 1.705351 3.086488 2.052287 1.137725 2.70184 1.598406 1.00875 1.844679  
1.092474 1.473363 1.420596 1.534097 2.655405 1.25307 1.381494 1.243749 1.598795  
0.539185 1.117019 2.703079 1.516458 2.668288 1.334598 0.974757 1.825843 1.730262  
0.811035 1.027126 1.565294 1.097209 0.883555 1.183033 1.318396 1.18604 0.767756  
1.394555 1.316204 1.296683 1.442956 1.354258 1.016244 1.068776 2.270729 0.896056  
1.342004 1.600439 2.081774 1.621067 2.082042 2.156225 1.649993 1.694824 1.730602  
3.445069 3.864675 4.147386 3.285015 3.818239 3.121119 4.153732 4.789675 3.531782  
1.257077 1.157196 1.166383 1.501871 1.272031 1.207841 0.97222 1.200436 1.142127  
3.939332 4.094277 2.994678 3.31145 3.949288 3.989186 3.911031 2.852825 3.888929  
6.818907 6.278574 6.097222 6.997721 6.210309 6.936838 5.753037 6.386144 6.406045  
0.982192 1.401649 0.945875 1.522896 1.878278 1.479859 0.921527 0.853252 1.465266  
1.548444 1.818176 1.103823 1.819562 1.209971 1.525999 1.715321 1.507477 1.802711  
0.970373 0.855188 0.665204 1.041481 1.739556 2.226725 1.387782 1.517466 1.320632  
3.511797 3.579462 4.617681 3.401223 4.014008 4.278183 3.738247 2.389939 3.656519  
1.476784 2.113018 1.31467 1.965391 1.640074 1.955723 1.330601 1.949675 1.684862  
1.630108 1.846029 2.749108 2.494853 0.86019 1.500751 1.432275 1.895893 1.504601  
2.354332 2.360758 2.526713 2.751241 2.373021 3.440653 1.944793 2.180341 2.351671  
2.42741 2.029055 3.081663 2.913264 2.640177 1.175824 2.439466 1.298671 3.390314

2.00333 2.816795 3.890619 2.924311 0.490753 2.019126 1.32605 2.749241 5.286201  
0.811861 1.627739 1.882903 3.186452 1.301259 3.038228 1.353693 1.74749 2.399332  
0.511344 0.658798 1.526643 2.152937 0.560235 2.133628 4.709868 0.56306 2.395386  
1.178657 1.703047 1.290699 1.37205 1.533225 1.949251 1.37864 1.38137 1.507721  
1.102437 0.961943 0.956603 1.321346 1.338953 0.851296 0.960673 1.358412 1.602777  
3.615202 3.426205 4.180405 5.017455 3.318923 4.122062 5.510015 2.556525 3.00555  
2.334478 2.183756 1.935807 1.940752 3.316754 2.403382 2.373111 1.73136 2.731247  
1.097485 1.416507 2.517707 1.094101 1.219793 1.67381 0.990718 1.054819 0.819937  
0.910545 1.011005 0.92585 0.956342 1.42463 2.755409 0.726589 0.834308 1.009784  
2.033985 1.48601 1.298623 1.529022 0.763984 1.360582 1.268988 1.014032 1.892504  
2.333991 1.589242 1.404585 3.108094 1.987076 2.992431 1.381734 2.040531 3.020464  
3.362304 2.042041 1.929157 3.176033 2.460312 3.309092 3.691593 4.039268 3.054473  
2.548153 1.032796 1.544159 2.603682 2.168403 0.979832 0.494339 0.416236 1.397771  
2.500179 3.358678 3.461726 3.145017 2.709635 2.356917 2.636777 2.597724 2.548147  
1.264965 1.397037 1.139116 2.165393 0.712579 0.627319 1.362435 1.240722 2.043999  
0.975376 1.55645 1.791747 1.500014 2.117967 1.232121 1.21695 1.943619 1.102008  
2.138568 1.49861 1.63898 2.285089 1.932286 4.416007 1.440035 0.985437 2.118184  
3.970185 5.128503 4.921923 2.124222 5.013881 4.62176 5.136881 6.757218 6.869812  
1.290271 1.704998 1.130273 2.703806 1.315657 1.40977 1.598693 2.077188 1.534306  
1.527381 1.537725 1.983909 1.977914 1.134737 2.908912 1.434115 1.407818 1.274497  
1.185667 1.863645 3.305137 1.07431 2.707424 1.777657 1.873249 2.612538 2.122881  
2.360635 0.798155 0.886147 1.353571 1.180761 0.913442 0.953451 0.827277 3.354728  
2.159182 2.169945 3.035296 4.137034 1.557497 1.939999 1.913351 2.358457 2.549778  
2.953566 3.014585 2.894343 3.464802 3.430329 1.735524 2.906682 2.434053 3.317204  
1.359233 2.330595 1.257905 2.128751 1.930083 2.928446 1.536306 2.481723 2.107965  
1.962902 1.119577 1.042273 1.626945 1.164957 1.250072 1.320209 1.411238 1.118937  
2.196723 2.403895 2.368922 3.958625 3.728551 3.657317 3.706174 3.043566 3.442931  
0.617453 0.986861 0.575035 1.297217 1.694684 0.649452 1.319765 1.553475 0.973392  
1.760784 2.503298 2.629716 1.562223 3.732758 2.593196 2.766137 1.887175 2.176795  
1.062322 1.274163 1.236648 1.535131 1.139785 1.680162 1.181262 1.010196 1.536312  
4.877553 5.067013 3.717681 4.67066 4.162095 4.372695 5.728929 4.509462 4.189054  
1.019636 2.399796 2.168796 2.48625 2.16421 1.842352 2.126205 2.209672 2.121681  
1.951788 2.471599 1.511407 1.484608 1.483522 2.416118 1.366932 1.556797 2.118766  
0.964404 1.062773 1.115076 0.976581 1.092155 1.639417 3.07753 1.257502 1.531814  
4.033233 3.947466 5.728708 4.360594 4.616414 4.781014 4.684493 4.530069 4.789367  
1.04985 0.983006 1.300762 1.501908 1.272331 1.265246 1.089971 1.756992 1.499552  
1.858498 2.429684 3.487515 2.321407 2.761997 1.464273 2.019647 2.954624 2.262395  
2.486563 1.732122 1.558445 2.849222 1.230505 2.654886 1.481228 5.231611 1.279487  
0.957424 1.45736 1.086241 1.654119 1.117337 1.128041 1.345744 1.019641 3.104807  
2.005721 2.485869 2.770356 3.210346 3.111369 1.970188 2.905369 2.181672 2.005721  
1.532212 0.846654 0.730549 0.961181 0.862559 0.935475 0.640282 0.995473 0.845867  
2.252841 1.953569 2.378809 2.690639 2.270096 2.349545 2.202982 1.839055 1.798652  
1.827194 1.731671 1.926453 2.529583 2.184478 2.264959 1.93235 1.685787 2.827477  
1.508699 1.286593 1.226925 2.117542 1.474062 2.2639 2.924971 1.282247 1.584937  
1.69848 2.933283 2.635376 1.662443 2.046128 1.33182 1.26896 2.45208 1.436225  
1.955224 1.118848 1.489035 2.280476 1.359978 1.292378 1.296774 1.865225 1.342315  
3.059265 0.658841 1.851532 0.338896 1.270129 1.420998 1.273761 0.884076 2.396731  
2.109665 2.553071 2.118719 3.140305 2.254458 2.995992 2.449187 1.900285 2.061681  
2.458633 2.875621 1.903079 6.640643 2.386804 2.56181 3.569155 3.149838 5.590282  
2.286357 1.37703 1.531474 1.347309 1.197334 1.962877 1.652641 2.275285 3.305107  
0.790765 2.789649 1.826975 1.041593 3.669973 0.886902 1.030893 2.016664 0.943894

2. 224595 1. 383676 2. 694661 2. 428908 2. 051029 0. 40729 -0. 02838 3. 858066 1. 376109  
1. 222041 1. 619141 0. 84 1. 219854 0. 978611 1. 740608 1. 806365 0. 782109 1. 354605  
3. 503398 2. 492364 3. 410165 5. 702085 1. 120099 4. 338514 4. 104791 4. 903642 4. 298108  
0. 869803 1. 07631 1. 312031 0. 83175 1. 01351 1. 692824 0. 857549 1. 345368 1. 045823  
1. 721123 2. 419443 1. 933922 1. 635124 1. 503286 1. 766856 2. 753246 2. 50606 3. 176387  
1. 451831 1. 124525 1. 154837 1. 615131 1. 184398 1. 066158 1. 555283 1. 477934 0. 98071  
1. 409184 0. 820357 1. 625514 1. 41817 1. 336455 1. 717472 1. 401931 1. 425989 2. 12837  
2. 909305 1. 324079 0. 701668 1. 968523 4. 48187 3. 533553 1. 336783 1. 351363 6. 814803  
1. 111502 1. 921107 1. 727323 1. 527031 0. 9119 1. 58656 1. 687788 1. 202248 1. 109137  
5. 476802 6. 16665 6. 603906 6. 213952 5. 003964 5. 322272 4. 920064 6. 30441 5. 975993  
1. 382167 2. 177649 0. 959515 0. 861834 1. 762352 2. 653786 1. 215504 1. 736479 2. 586206  
1. 756836 2. 355736 2. 580588 2. 304941 1. 727469 1. 580376 2. 616168 1. 739544 3. 158342  
5. 048098 3. 921403 3. 783308 3. 747364 3. 696207 4. 48239 3. 309458 5. 048877 4. 81768  
1. 818187 1. 754729 1. 785443 3. 568161 2. 389845 1. 442825 1. 951748 1. 792941 1. 971843  
2. 029971 3. 979542 3. 281889 2. 088173 1. 973564 3. 339077 1. 94155 1. 955837 2. 669584  
1. 917268 1. 925414 1. 283833 1. 545562 1. 510983 1. 458877 1. 648795 1. 219598 1. 966372  
0. 995372 1. 086171 0. 905027 0. 942168 1. 122604 1. 249979 1. 222191 1. 098911 1. 171746  
1. 112987 0. 816423 1. 174257 0. 892779 0. 88373 1. 000942 1. 169381 1. 294182 1. 390171  
1. 200094 1. 210125 1. 682762 0. 699804 1. 234082 2. 337454 1. 060773 0. 9816 1. 819623  
1. 773818 2. 94151 1. 994957 2. 724431 3. 343455 3. 669432 2. 375064 2. 004086 3. 798541  
2. 556022 2. 174705 4. 473605 2. 310828 3. 783905 1. 445857 1. 636146 2. 648206 2. 535644  
1. 964775 1. 361354 2. 560976 2. 837449 2. 236861 2. 245492 2. 086824 2. 118588 2. 415247  
4. 097462 1. 298244 2. 956986 3. 050742 1. 827311 2. 49601 2. 684868 2. 837212 3. 350408  
2. 134238 2. 088814 3. 13406 6. 703814 3. 118747 2. 597884 2. 040245 1. 43529 1. 94923  
1. 692327 2. 073363 1. 967709 2. 03208 1. 155354 1. 342229 1. 957453 1. 102681 1. 62741  
0. 824137 0. 939905 2. 090971 2. 007011 1. 684963 0. 809492 1. 784052 0. 707428 1. 255062  
0. 807665 0. 882496 1. 369716 1. 931 1. 228172 0. 974046 1. 115742 1. 716494 1. 963048  
1. 160712 1. 607943 0. 621845 1. 860549 0. 697534 2. 316642 1. 363858 1. 772808 1. 12006  
1. 435462 0. 89189 0. 872465 1. 627945 2. 276566 1. 129596 1. 323712 1. 929597 1. 904763  
0. 28824 0. 748423 1. 005058 0. 395736 0. 551044 1. 494902 0. 995618 1. 005058 0. 626849  
0. 872853 1. 083129 0. 792016 1. 756275 0. 91638 1. 17905 1. 974782 1. 593781 1. 826957  
1. 280538 1. 972488 1. 281957 1. 700221 1. 4853 1. 45044 1. 136645 1. 536142 1. 101936  
1. 416846 2. 01068 2. 683328 1. 271514 1. 348183 1. 521182 0. 926383 2. 144267 1. 314317  
1. 003777 1. 40069 1. 019005 1. 594 1. 056297 1. 806557 0. 898746 1. 133426 1. 072112  
2. 307149 1. 642593 2. 218895 2. 321978 2. 360199 1. 735224 1. 431994 1. 586751 1. 249972  
1. 16365 1. 729121 2. 410435 1. 993103 1. 703667 0. 923262 0. 739528 2. 045684 2. 172269  
3. 821136 2. 092523 3. 351169 2. 907994 2. 11413 4. 441401 2. 800541 2. 923982 3. 280845  
4. 380672 3. 622393 2. 378189 3. 169799 3. 414918 3. 069718 2. 920038 4. 879229 5. 335572  
2. 397921 2. 067373 1. 031117 1. 20258 1. 464458 1. 054307 1. 297485 2. 11887 0. 892603  
0. 634276 0. 695581 0. 530283 0. 97909 0. 986065 1. 878207 0. 785566 0. 75844 0. 72448  
2. 108214 3. 626226 1. 759438 1. 443773 1. 707868 1. 913063 1. 991072 2. 761281 1. 881553  
2. 084869 2. 270328 3. 577845 3. 309226 1. 892218 2. 785116 3. 152472 2. 623277 1. 832488  
5. 353677 5. 868292 4. 221911 5. 330888 5. 383854 3. 836984 4. 505799 5. 80805 5. 265882  
1. 751443 2. 604122 0. 94659 1. 808366 2. 538866 3. 332573 2. 183726 3. 065553 3. 275036  
1. 348873 1. 600422 1. 381331 1. 880503 1. 30672 1. 04275 1. 312409 1. 514525 1. 327224  
0. 31063 2. 082825 3. 336012 1. 145496 1. 246311 1. 645603 1. 473351 2. 517523 1. 0036  
1. 261575 1. 985138 1. 401138 2. 586722 1. 553063 1. 628382 1. 595429 1. 564599 1. 114132  
0. 860058 1. 296122 1. 446287 1. 335033 1. 333199 1. 786008 2. 630403 1. 025037 1. 114275  
0. 886437 2. 29385 1. 593454 1. 018018 1. 272905 2. 017774 1. 729103 0. 931388 2. 213558  
1. 348166 0. 934392 1. 62615 2. 387426 3. 425553 0. 614368 1. 337804 3. 137528 2. 7222  
1. 63763 0. 974498 1. 371472 1. 333357 1. 070126 1. 304796 0. 918752 1. 186868 1. 362427

0.789314 0.49144 0.300498 1.730895 0.808477 0.914781 0.695006 0.626866 1.039453  
1.811994 2.812167 2.153378 2.407556 1.303476 1.764056 1.380651 1.999483 1.458372  
1.769901 1.97606 1.501433 2.14117 1.291702 2.403914 1.749056 1.599481 2.024161  
2.650373 2.229322 2.644009 2.710345 2.413129 2.664372 2.220672 2.165314 3.008293  
1.126407 0.918089 0.733843 1.226225 1.755944 0.859332 0.851671 1.239872 1.2326  
2.007952 1.650829 2.44674 2.8154 1.787994 1.845432 1.800743 1.776311 1.579519  
4.200854 2.188858 4.274124 4.721456 2.380182 3.174231 4.406963 3.489411 3.898197  
1.289528 1.901104 1.436098 1.976436 1.289354 1.894689 1.596841 1.800894 1.191405  
0.887234 1.996093 1.278654 2.615475 0.702002 1.505004 0.582939 0.704642 1.377944  
1.393448 1.116936 1.30555 4.086746 1.8506 2.848372 0.806841 3.619112 0.624347  
1.704143 1.048833 1.005788 1.011694 0.969058 1.652011 0.778328 0.986165 0.882745  
1.020427 2.167405 0.609485 1.226082 1.147667 1.18113 1.022459 1.395325 2.206146  
4.618985 2.980654 2.332855 1.240013 2.446105 1.326599 1.229637 3.201953 1.651574  
1.1467 2.179474 0.927212 1.170455 0.902521 1.302518 1.922052 1.495799 1.256225  
2.379992 2.294845 3.354937 1.757525 4.444893 2.321305 2.839383 2.301148 3.588086  
3.631367 2.267968 3.532785 3.290525 2.163814 4.146277 3.63314 2.471476 4.027126  
1.815333 1.938735 2.357011 2.637632 1.969765 2.349288 1.942464 2.357011 2.27783  
3.610458 3.587952 3.704836 3.744364 3.765755 3.178653 3.541753 3.7316 3.610037  
4.194853 2.690353 0.984001 1.280163 1.467793 2.872964 0.973024 0.965577 2.347807  
1.288303 1.145442 0.860866 1.255773 1.03118 1.148656 0.914852 1.298282 1.196138  
1.098754 1.041518 1.635579 1.437501 1.583543 1.42282 1.554947 1.543107 1.690664  
1.752701 0.667692 1.380831 2.008158 1.249882 1.726105 2.691703 1.127967 4.127393  
2.828051 2.102113 2.54534 4.036414 2.287611 2.565981 3.073806 2.071921 2.430679  
0.999275 1.634628 0.664147 1.306861 0.700323 1.232366 0.413935 1.102811 0.679676  
1.097855 0.739432 0.782078 1.583419 2.267392 1.089619 1.014476 2.742774 1.294689  
2.326375 2.40432 2.73514 2.851759 2.544671 2.589512 2.852232 2.23966 2.731583  
1.810459 1.095199 1.521599 2.061592 2.475537 0.955459 1.365509 2.164617 3.649045  
1.470675 1.778829 1.233693 2.536623 1.484025 1.127164 1.44829 1.780486 1.223676  
3.570056 3.432572 4.523126 3.910549 4.349802 3.100554 3.725997 3.458782 3.095522  
0.961533 2.273536 1.223285 2.019844 0.513506 1.209307 2.019844 1.742954 1.295869  
1.418484 1.746741 1.824283 3.708228 1.543354 1.282853 1.58412 2.189901 1.898348  
0.961441 1.087908 0.974473 1.115579 0.890469 3.164317 1.051407 1.191051 1.562944  
0.830671 0.756529 1.227846 1.336017 0.951621 1.204387 1.05283 1.123989 1.099875  
4.587941 4.164655 4.161515 2.284096 4.030347 2.997832 4.435913 2.899875 3.588409  
0.710849 1.537788 1.958107 1.180615 0.97449 0.618297 0.987954 0.731218 0.987135  
1.673016 1.257306 2.030676 1.247668 2.315105 2.085677 0.965654 0.889063 3.689077  
0.662615 1.610266 1.628399 2.126772 2.107062 2.437206 1.109425 2.895172 2.545081  
1.741819 1.886865 1.691265 1.649745 1.39198 2.495784 1.595961 1.841356 1.52473  
1.008294 1.520483 2.093255 0.946215 1.685782 2.328061 1.822246 1.874127 1.297425  
1.427842 1.641426 1.699531 1.976458 1.71835 3.197046 1.34161 1.304648 1.385448  
1.672447 0.826099 1.058649 1.123809 1.307566 1.05105 1.714393 1.195798 1.448246  
0.702818 1.307145 0.875912 1.833573 0.747631 2.042475 1.182327 0.770898 1.050186  
2.425506 3.650949 3.916645 3.218872 4.413874 3.915505 1.838886 3.659216 1.962076  
1.690161 2.836343 1.054069 1.702904 1.345804 1.203886 2.047202 1.878451 3.870961  
0.805858 1.233192 2.14162 1.246525 1.33884 1.845058 0.851301 1.123619 1.353149  
1.168112 1.366766 1.174041 1.937044 1.237864 1.814359 1.194048 1.529817 1.667094  
1.59633 2.098689 1.125126 2.131691 1.990663 1.210097 1.542723 2.444712 3.179136  
1.103596 0.820842 1.530221 2.811773 0.955536 0.923751 1.288498 1.250125 1.193526  
1.1646 1.430639 2.210847 1.774753 1.116206 1.264422 1.434964 2.545035 0.55832  
2.350433 3.07005 1.005189 2.150971 1.154129 1.440803 0.979966 1.509812 2.041903  
3.828592 2.515351 3.418149 3.042338 2.419578 2.405922 3.368259 2.44871 3.323364

2. 305625 1. 91517 1. 752637 2. 329702 2. 536747 3. 456225 2. 062664 1. 607985 2. 469359  
1. 66003 2. 330058 3. 22473 1. 602456 1. 631337 3. 804345 2. 368115 1. 249802 2. 176961  
1. 205019 1. 361721 0. 584538 1. 659065 1. 15913 1. 134733 1. 700251 0. 912101 0. 645196  
1. 490177 1. 563457 1. 945057 2. 403799 1. 202448 1. 817653 1. 994082 1. 654099 1. 267592  
1. 037032 1. 406667 1. 905539 1. 549428 1. 546239 2. 02759 1. 30895 2. 357147 0. 885279  
2. 254352 2. 059872 1. 741177 1. 89481 1. 642714 2. 66011 1. 661342 1. 685012 1. 343799  
1. 358858 1. 367111 1. 236036 1. 822224 1. 515391 1. 413329 1. 643439 1. 270961 1. 515048  
1. 297491 0. 748889 1. 021245 2. 267003 0. 885264 1. 883268 1. 166397 2. 476157 1. 923317  
1. 227312 1. 369033 1. 405099 1. 240311 1. 20977 1. 194547 1. 461061 1. 446261 3. 569758  
2. 327188 3. 203264 3. 204447 2. 629865 2. 550458 3. 044031 2. 727549 3. 836195 2. 669294  
3. 191414 2. 424655 3. 258044 2. 562782 4. 621981 4. 737093 4. 244091 4. 128592 4. 563017  
1. 096623 1. 003777 1. 023891 2. 743104 0. 692692 2. 055396 1. 023278 0. 822023 1. 105832  
0. 608611 1. 024658 1. 081728 1. 313555 2. 515176 2. 852892 2. 302112 1. 216667 1. 873124  
1. 218434 2. 935916 3. 653905 3. 629773 1. 551526 1. 700632 2. 383418 1. 829725 4. 839438  
1. 594189 1. 460968 1. 79221 2. 047994 1. 44522 1. 633889 1. 591168 1. 923684 3. 644626  
3. 379069 3. 383262 1. 490185 2. 707493 1. 07405 1. 723229 2. 103342 3. 695071 3. 547651  
1. 339996 0. 660383 1. 040507 1. 273016 1. 321617 1. 078459 1. 545443 0. 942984 0. 598053  
0. 730964 0. 679853 0. 776719 2. 24636 2. 18712 3. 046418 1. 18398 1. 206443 1. 801905  
2. 024245 3. 655103 1. 997995 2. 403131 4. 554034 2. 623554 2. 603902 2. 111122 1. 810636  
1. 436968 0. 705388 0. 855014 1. 177494 1. 260379 0. 971579 0. 614934 0. 791548 1. 794967  
1. 355116 1. 725244 1. 005858 1. 85939 0. 961272 1. 348274 1. 483385 0. 976367 0. 780648  
0. 623014 1. 466793 0. 958925 1. 68455 0. 979418 1. 00528 0. 925868 1. 125924 1. 204139  
0. 671806 1. 342658 1. 687944 1. 786127 0. 723897 1. 458104 1. 199858 1. 105674 1. 039629  
2. 357884 1. 399822 1. 6041 2. 36816 1. 866031 1. 93083 2. 488318 1. 670826 2. 992511  
2. 607732 0. 770246 1. 545005 1. 533585 2. 156285 2. 544709 1. 840733 1. 567726 1. 280401  
2. 570789 2. 938214 3. 231594 3. 447556 2. 65415 2. 616077 2. 102589 2. 672413 3. 191346  
5. 445535 3. 661816 2. 835403 5. 075917 2. 231619 4. 484771 5. 63697 4. 938717 4. 84132  
0. 671424 1. 535033 1. 8366 1. 28948 0. 854159 3. 05805 1. 44559 0. 851435 1. 58119  
1. 454473 2. 76169 1. 791194 1. 356848 2. 56193 3. 420189 1. 400251 1. 484245 1. 612859  
3. 37992 2. 562917 2. 495971 2. 644888 1. 534057 2. 068178 1. 93574 3. 987145 2. 212314  
2. 93175 3. 550183 4. 437488 2. 232428 3. 923178 3. 026877 2. 586731 2. 334 4. 299727  
1. 984744 1. 247092 1. 590837 2. 194027 1. 939007 1. 071956 1. 410938 2. 112448 1. 953956  
5. 739088 6. 168856 6. 423667 7. 432901 4. 762293 4. 550484 6. 81218 5. 07144 4. 650519  
0. 781336 1. 104089 1. 341726 1. 146103 0. 996247 0. 825031 1. 026059 1. 082127 0. 67273  
1. 448691 1. 382455 1. 807833 1. 205437 2. 107111 0. 674503 2. 800865 1. 174825 1. 117549  
0. 670197 1. 784743 0. 520518 1. 650133 1. 59744 1. 591566 2. 091964 1. 219548 1. 174404  
1. 077005 0. 847424 1. 117043 1. 736262 0. 933146 1. 315434 1. 068208 1. 373581 1. 019177  
2. 74411 1. 727729 2. 240198 2. 348192 1. 167969 1. 312344 2. 213322 2. 035799 1. 450745  
3. 486071 4. 427211 2. 66722 1. 639771 3. 543668 2. 471026 2. 161565 1. 716571 1. 352329  
2. 271516 1. 287508 0. 822081 2. 076355 1. 063451 2. 215108 1. 190794 1. 037442 1. 327585  
2. 943221 3. 446884 1. 171169 3. 396501 1. 623735 0. 492141 0. 760705 1. 038941 2. 37768  
1. 273153 1. 473791 1. 593018 1. 390981 1. 421049 1. 966057 1. 462885 1. 124534 1. 524341  
3. 934887 2. 930909 0. 641223 1. 615507 4. 100346 3. 115189 1. 688037 2. 819133 1. 874179  
1. 696831 2. 069077 1. 709557 2. 188462 1. 449405 2. 796711 1. 64975 1. 824924 1. 559417  
1. 599454 1. 704174 1. 916677 2. 181123 1. 880157 1. 930763 1. 307044 1. 961465 1. 743362  
0. 863115 1. 026325 1. 562048 0. 985549 1. 325858 0. 514172 1. 558692 1. 126862 1. 48236  
1. 873377 2. 1555 2. 261303 2. 597137 2. 246463 2. 492065 2. 350893 1. 842612 2. 352869  
1. 313997 1. 217728 1. 078194 1. 794227 1. 809088 1. 288177 1. 109868 0. 947286 1. 346166  
1. 996782 3. 1431 1. 255898 3. 769283 2. 989379 1. 959161 3. 428055 0. 449576 2. 523675  
0. 903039 2. 00311 0. 781668 2. 76953 1. 550947 1. 663439 1. 271645 1. 87839 0. 882333  
0. 998604 1. 390638 0. 938782 1. 656108 0. 928295 1. 331464 1. 039624 0. 997044 1. 491527

1. 85973 1. 083621 1. 570275 1. 587756 1. 447524 1. 188008 1. 350218 0. 885479 1. 370583  
1. 668219 2. 309112 1. 865404 1. 641837 0. 858677 1. 473658 1. 507488 1. 716007 2. 117965  
2. 347965 2. 262166 1. 616674 1. 570357 2. 131554 0. 852446 1. 959384 1. 565547 2. 092069  
1. 035886 1. 486001 1. 605043 1. 598465 2. 633029 2. 242125 0. 926211 2. 030887 1. 93733  
1. 950963 1. 082855 1. 059777 1. 169245 1. 268452 1. 664149 1. 93864 1. 521011 1. 872188  
1. 818138 1. 844713 0. 294713 1. 014337 1. 291138 4. 119759 0. 971406 0. 630993 1. 038623  
2. 252122 2. 571903 1. 383675 2. 369313 1. 787906 1. 466179 2. 094114 1. 5465 2. 140291  
2. 13209 2. 144303 2. 185961 2. 564194 1. 069532 1. 546959 1. 053814 1. 283747 1. 607499  
3. 889688 4. 710052 4. 475562 3. 90973 4. 166803 4. 912112 5. 093731 5. 499967 3. 740341  
1. 599138 2. 653433 1. 963613 3. 007208 2. 01774 2. 72876 2. 446351 2. 176917 1. 836049  
2. 304733 1. 243049 2. 295569 2. 368982 1. 777948 2. 473939 1. 657329 1. 960718 2. 379331  
1. 555306 1. 564432 1. 08042 1. 81132 1. 465184 1. 226024 1. 472465 1. 475989 2. 158477  
3. 368259 3. 859247 3. 477247 4. 718362 5. 279826 3. 935056 4. 124135 4. 250478 4. 06948  
6. 847594 7. 091293 7. 244968 7. 021124 7. 28438 7. 179046 6. 911832 7. 2382 6. 461743  
5. 63279 5. 592895 5. 451695 4. 89862 5. 055182 5. 279058 5. 816772 4. 96438 5. 591564  
7. 53297 7. 230744 7. 537657 7. 375882 7. 144055 6. 99693 7. 546969 7. 249013 6. 814248  
6. 938009 6. 843004 6. 868911 7. 834182 6. 754825 6. 991996 7. 198488 6. 891803 6. 689756  
3. 16294 2. 921828 3. 328704 3. 73657 2. 66979 2. 452969 2. 737177 3. 060299 3. 182692  
2. 218726 1. 721391 1. 585568 1. 725755 1. 531507 1. 942238 1. 40973 2. 123051 1. 945955  
9. 302558 9. 07457 9. 22254 9. 113192 9. 127861 9. 114656 9. 393111 9. 13685 8. 956381  
5. 755626 6. 016122 6. 067906 5. 730069 5. 800463 5. 145686 5. 526833 5. 774014 5. 443801  
2. 539359 2. 093071 1. 783783 3. 464667 1. 217927 2. 65605 2. 162596 2. 61132 2. 767696  
2. 258886 1. 596463 2. 691366 1. 361501 1. 963972 1. 474606 1. 51238 1. 739117 2. 952353  
6. 701783 6. 516893 6. 167909 6. 649446 6. 51264 6. 325996 6. 690108 6. 553673 6. 721079  
9. 503587 9. 648091 9. 468358 9. 55865 9. 594537 9. 162488 9. 432523 9. 671176 9. 909608  
5. 893208 6. 535191 6. 742008 6. 436083 6. 277872 5. 641884 6. 651596 6. 184333 6. 595523  
7. 145124 7. 229173 7. 732814 7. 068218 7. 52065 7. 833789 7. 001414 7. 431678 7. 509769  
3. 642192 3. 650361 2. 638474 3. 538289 3. 557698 2. 593515 2. 971216 3. 000223 2. 953249  
4. 514836 4. 29272 4. 455895 3. 814261 6. 025239 4. 804155 3. 763632 5. 28448 3. 467435  
7. 721615 8. 079495 8. 003795 8. 676921 8. 389408 7. 858493 7. 835781 8. 539861 8. 181532  
8. 271344 8. 361943 7. 914086 7. 894942 7. 990273 8. 347883 7. 55411 9. 146576 7. 050652  
1. 627368 1. 295251 1. 530959 1. 861012 1. 386321 1. 535767 1. 921364 1. 511366 1. 521806  
6. 911339 6. 957678 7. 093716 7. 172908 7. 005746 7. 171476 6. 885255 7. 146474 6. 437878  
2. 094622 2. 860261 2. 137308 2. 681385 2. 27888 2. 353721 2. 224938 2. 500622 1. 859002  
7. 563767 7. 399437 7. 398578 7. 809391 7. 708077 7. 384109 7. 761258 7. 460149 7. 247301  
5. 985834 5. 722855 6. 023045 4. 482632 5. 986355 5. 820925 5. 743848 6. 132227 5. 50621  
5. 366995 6. 348574 5. 897821 5. 554748 6. 253298 6. 30593 5. 504588 6. 250677 5. 561419  
3. 127911 2. 117812 1. 473102 3. 071518 2. 027734 1. 656866 1. 672496 2. 544261 1. 61562  
3. 614438 2. 840296 2. 958428 3. 202269 3. 488022 3. 677953 2. 547318 2. 708202 2. 726598  
8. 03241 7. 906369 7. 780424 7. 452427 7. 629969 8. 081016 8. 176569 7. 828162 8. 185845  
1. 321365 1. 513768 1. 512942 1. 653658 1. 144568 1. 435932 1. 398699 1. 42583 1. 246935  
7. 69968 7. 99981 7. 522522 7. 666553 7. 99118 7. 62156 8. 239023 7. 967952 8. 02352  
4. 51515 5. 358991 4. 562509 4. 283867 4. 875621 4. 826192 4. 369535 5. 077684 4. 334657  
1. 090486 1. 9783 1. 836549 1. 598065 1. 009088 2. 441408 3. 088736 1. 870105 1. 558842  
5. 750826 5. 773896 5. 174842 4. 892234 5. 375775 5. 102873 5. 618099 5. 27586 5. 453958  
2. 694606 3. 179966 2. 971676 3. 553666 2. 334466 2. 64438 2. 153419 2. 820707 3. 179082  
4. 920148 5. 412393 4. 408838 5. 849258 4. 902593 4. 170001 5. 129863 5. 036233 6. 09904  
1. 995698 1. 573429 1. 989966 2. 451434 1. 82426 2. 366965 2. 785725 2. 572076 1. 852838  
1. 798701 2. 713941 1. 595102 2. 324686 1. 67731 1. 837649 2. 08577 1. 548269 1. 738665  
6. 87961 7. 321993 7. 66642 7. 188756 7. 185421 7. 182077 6. 644506 7. 392463 7. 174766  
5. 350283 5. 435171 6. 030797 4. 988053 5. 936456 5. 274334 5. 792815 4. 933609 4. 487948

6.993592 6.973383 6.929656 7.229258 6.74386 6.982073 7.115177 6.880658 6.954005  
6.811691 6.333838 6.70439 5.402207 5.641907 6.547596 6.802987 6.410713 5.835475  
3.03688 3.407372 3.98036 4.080546 2.418268 2.842446 3.868125 2.889725 2.972226  
1.659617 1.694645 1.669223 2.887562 1.965825 2.429113 2.129531 1.585469 1.426989  
6.655477 6.405708 6.679237 6.377117 6.521667 6.668467 6.618506 6.79124 6.128822  
2.767395 2.163297 2.909592 1.839357 1.976968 2.586868 1.978744 2.079514 2.396889  
4.936006 4.152382 3.750984 5.32101 4.949991 4.732161 4.138647 4.730687 3.379331  
3.811803 4.051708 3.10775 5.621763 4.507906 3.431715 3.689578 4.213815 2.500036  
1.403008 2.081513 1.479819 1.67549 1.485909 1.334674 1.38077 2.315553 1.621409  
3.12959 3.949994 3.530708 4.113087 3.207824 3.53722 2.996715 3.199201 3.343617  
1.317764 1.525788 1.450205 2.425286 1.519541 1.521619 1.845756 1.573588 2.621152  
5.650177 4.964102 5.244488 5.058993 5.132024 5.594483 5.940136 5.150998 5.668939  
3.961008 2.209608 2.958874 2.933172 2.639741 2.831792 2.600953 3.537887 2.37932  
6.996705 6.628993 6.876736 6.693199 6.9488 6.58085 7.092633 7.070369 7.277312  
5.409382 6.180865 6.242905 6.548638 6.450327 5.596921 5.57204 6.373368 5.084915  
5.115196 4.701657 4.799521 5.204787 5.256569 5.011022 5.333103 4.961448 4.738745  
4.241721 3.607957 3.751675 4.278669 3.846282 3.470054 4.09287 4.063935 2.731979  
9.403224 9.244683 9.269104 9.305708 9.330675 8.541672 9.382319 9.378559 9.608395  
1.27039 1.558395 1.896781 1.869411 1.337574 1.544014 1.397691 1.170084 1.226714  
1.650747 1.056811 2.131218 1.96996 2.649192 1.224521 2.396948 1.515973 1.631981  
2.83503 2.819472 1.556356 2.114616 2.350168 1.661918 2.01518 1.946691 1.211905  
5.588347 6.467543 6.024351 6.445724 5.93535 6.371167 6.524477 6.467631 4.566051  
4.462511 4.482869 5.064324 3.862911 4.019659 4.08696 4.66552 5.316622 4.306626  
2.724699 3.771933 1.194132 2.061904 5.674528 4.067417 4.205722 3.829255 1.854598  
7.902546 8.020128 7.852551 7.679901 7.954638 7.697391 7.717334 7.880802 7.87586  
1.621086 1.649101 1.677164 1.940922 1.616945 1.988937 1.69166 1.885028 1.811526  
2.234731 2.314461 2.001257 2.358574 2.018064 2.469887 2.009983 2.083328 2.634745  
1.294976 1.711859 1.551422 1.245857 1.544981 1.824053 1.412972 1.43622 1.169866  
5.379789 5.64201 4.56919 5.51254 7.148319 5.819375 5.516627 5.584539 5.742332  
2.529798 3.050421 3.002303 2.529655 2.789483 2.548298 2.304688 2.98765 2.580116  
1.239335 1.03388 1.499814 1.686928 1.182802 1.379383 1.303997 1.210264 2.990932  
1.739316 1.201811 1.012958 1.48625 1.64425 1.430505 1.401809 1.730264 2.149983  
1.467336 1.395685 1.416467 2.514486 1.293359 2.295707 1.719842 2.45152 3.524329  
5.251683 5.27547 4.635891 4.466331 5.445727 4.942104 4.648314 5.301507 4.857234  
2.440434 2.947522 2.778255 3.713241 2.764999 2.930611 2.377097 2.745837 2.463308  
2.630927 3.020598 2.523568 4.512843 2.614018 3.256419 2.713281 3.175566 2.419819  
5.183105 5.571382 5.148298 4.148699 5.670034 5.227255 4.887549 5.26623 3.359237  
6.492121 5.810346 6.008989 5.392139 6.092817 6.103771 6.627205 6.253809 6.266275  
6.519918 6.80331 7.556737 6.067644 7.401155 6.736265 5.084292 7.239322 4.722429  
6.519433 5.830935 6.225914 5.088366 6.454479 6.182772 6.32813 6.019493 6.400072  
2.266008 2.375938 2.516775 2.172789 1.901634 2.953303 1.73365 2.628818 2.044781  
0.947975 0.995041 1.096809 1.337729 0.920062 1.304402 1.361671 0.953021 1.753691  
3.372845 3.107128 4.739885 3.852711 3.486495 3.56638 4.013602 4.089636 3.652382  
8.213465 8.842636 9.037048 7.853947 8.755697 8.434235 8.36037 8.399554 8.662364  
2.098536 3.79926 2.974011 2.262019 4.349033 1.565648 3.990006 1.707285 2.734831  
8.845323 8.371192 8.578139 8.610316 8.715594 7.98735 9.367965 7.812034 8.601382  
6.718152 7.28399 7.230008 7.003215 8.329497 7.030169 7.156158 7.33854 7.487591  
5.459394 4.786909 4.50599 4.821633 5.276172 5.377222 5.777193 5.589631 5.17655  
4.162254 4.969919 3.163782 4.631232 4.900383 5.104057 6.119751 4.183274 4.88632  
11.30205 10.66234 11.21462 11.18182 10.99823 10.92942 11.3327 10.76202 11.21616  
5.088781 5.405726 5.124484 4.039868 4.862891 3.794045 5.254693 4.39999 4.547652



2. 14705 2. 64866 1. 469212 2. 222624 1. 797955 2. 500795 2. 744221 2. 979017 4. 428741  
2. 414785 2. 311847 1. 958727 2. 050631 2. 241644 2. 611948 2. 411295 2. 410371 1. 541408  
6. 875579 6. 147647 6. 818647 7. 910469 7. 128456 7. 377505 7. 450251 7. 739175 7. 267571  
6. 196986 5. 964216 5. 783565 5. 251034 6. 156495 5. 881787 6. 22715 5. 722608 5. 963862  
3. 632465 3. 980163 3. 582602 3. 363007 3. 738248 3. 252849 3. 840265 3. 104689 2. 677954  
6. 364603 7. 236117 6. 378297 6. 602815 7. 0565 7. 218001 6. 534854 7. 130767 5. 640301  
4. 974003 4. 400169 4. 402811 2. 97169 4. 612419 4. 706716 3. 923525 4. 399489 4. 834706  
3. 134313 2. 931026 3. 72361 2. 513205 3. 291887 2. 832339 2. 820373 2. 56394 2. 925039  
1. 95142 2. 785862 1. 607742 1. 85752 1. 087076 2. 394031 1. 835546 1. 395458 1. 341347  
4. 928591 4. 930509 4. 83915 4. 661796 4. 802464 4. 778569 4. 739258 5. 448031 4. 339546  
4. 474285 3. 988056 3. 831425 3. 158618 4. 003173 3. 781775 4. 647913 3. 670932 4. 880009  
9. 657931 9. 745281 9. 767018 9. 490326 9. 199645 10. 00047 9. 665656 9. 534126 9. 739636  
10. 78038 10. 78127 11. 11311 10. 94687 10. 93607 10. 90078 11. 03616 10. 89113 10. 57183  
10. 42433 10. 36235 10. 14019 10. 21647 10. 37183 10. 16364 10. 46354 10. 51075 10. 34939  
7. 246929 7. 16578 7. 113229 6. 890761 6. 64508 7. 043959 7. 044329 7. 08767 6. 824993  
6. 80024 6. 951281 6. 653004 6. 853636 7. 968176 7. 137581 6. 686619 7. 067001 6. 940125  
5. 561088 4. 892666 5. 528843 5. 169588 5. 295816 4. 673933 4. 645012 5. 099789 4. 929845  
6. 338381 6. 428642 6. 048349 6. 16142 6. 478404 6. 357165 6. 101619 6. 426375 5. 265927  
6. 170971 5. 860386 5. 853631 5. 100691 6. 210061 6. 16922 6. 201524 5. 295104 6. 272563  
2. 897649 2. 491397 2. 261169 2. 159339 3. 728351 2. 210692 4. 404462 2. 915159 2. 87097  
7. 136067 7. 421316 7. 552233 6. 849939 7. 161701 7. 585781 7. 363403 7. 771488 7. 896538  
6. 733647 9. 136091 7. 168523 6. 019735 8. 38705 6. 063755 6. 494992 7. 81011 6. 859878  
1. 763292 1. 227691 1. 668069 1. 161961 1. 518582 1. 435941 1. 094762 1. 180842 1. 328162  
1. 354917 1. 29054 1. 024673 1. 63608 1. 009363 1. 29054 1. 23683 0. 891678 1. 431151  
3. 987094 6. 077996 5. 8405 3. 021107 7. 000011 7. 744056 5. 557591 7. 494414 4. 911436  
4. 632202 6. 228124 5. 199202 4. 795556 5. 429528 5. 964666 5. 901582 5. 542552 5. 466812  
12. 10179 11. 59397 11. 8515 11. 85576 11. 31883 11. 43086 11. 9349 11. 76273 12. 03163  
5. 298108 5. 087549 5. 244766 5. 223768 4. 653304 5. 228924 4. 993394 4. 886652 4. 834083  
7. 936 7. 257653 7. 593913 7. 973912 7. 897726 7. 199805 7. 783685 7. 900664 7. 625472  
7. 98674 7. 724112 7. 894682 7. 773839 7. 58388 7. 823385 8. 133161 7. 89944 7. 261218  
4. 282759 4. 144042 4. 951911 5. 516953 6. 235051 4. 188778 4. 626509 4. 726132 3. 53299  
1. 979907 1. 874847 2. 116754 4. 387708 2. 10647 2. 121624 1. 981382 2. 198517 1. 987608  
5. 274734 4. 960682 5. 697673 4. 864401 5. 374506 5. 635349 5. 601564 5. 571753 5. 298905  
2. 069478 2. 148999 2. 441731 2. 821637 2. 405869 2. 00097 1. 866176 1. 906133 2. 596635  
3. 290822 2. 809955 2. 79276 1. 349533 2. 875308 3. 600957 3. 203672 3. 071495 3. 177686  
5. 643986 5. 907458 5. 99487 6. 110005 6. 043446 6. 197382 6. 285157 5. 945979 5. 256528  
5. 900891 5. 790019 5. 814146 5. 164011 5. 502967 5. 273479 5. 878889 5. 882977 4. 859864  
7. 536697 6. 970532 7. 599018 6. 849147 7. 434808 6. 933803 7. 220646 7. 242119 6. 630754  
6. 814428 6. 497709 6. 92925 7. 040853 6. 600174 6. 407508 6. 866396 6. 447969 6. 337369  
5. 992431 5. 801059 6. 169532 5. 345324 5. 779531 6. 308106 6. 083961 5. 446407 6. 623803  
4. 433795 4. 687257 4. 733851 4. 173619 5. 045447 4. 643333 4. 770854 4. 828603 5. 300035  
8. 066762 8. 111801 8. 056025 8. 22687 7. 905046 7. 999956 7. 952985 7. 828599 8. 509396  
7. 133647 6. 787491 7. 159593 7. 815731 7. 050563 6. 856015 7. 280846 6. 833164 7. 282173  
7. 561472 7. 662865 7. 31153 7. 891337 7. 79551 7. 213202 7. 477973 7. 482541 7. 686682  
5. 166663 4. 959613 4. 939759 4. 853876 4. 572604 5. 613235 3. 97242 4. 687446 4. 073847  
6. 441216 6. 460786 6. 006519 5. 579971 6. 528119 5. 71179 6. 376009 6. 589017 6. 09736  
6. 47835 7. 33145 6. 955383 6. 220348 6. 958547 6. 270395 6. 402252 7. 148294 6. 101185  
6. 309953 5. 475098 5. 995853 6. 096726 5. 712776 5. 384838 6. 014741 6. 268269 6. 779373  
8. 145832 7. 961787 7. 145527 8. 160477 8. 924149 6. 726477 7. 61496 7. 924602 6. 354276  
3. 286998 3. 458359 3. 742823 3. 075444 2. 807769 3. 283605 2. 111301 3. 956861 2. 549332  
8. 585299 8. 368138 7. 759669 7. 519109 7. 56737 7. 153481 7. 050241 7. 610237 5. 501561

6. 707688 7. 246577 6. 663043 5. 929483 6. 828291 7. 204741 6. 749722 7. 139663 7. 229584  
6. 379963 6. 265084 6. 44885 6. 213478 6. 161333 5. 852372 6. 588314 6. 445778 7. 473723  
5. 562611 5. 805534 5. 697973 4. 435621 5. 570275 5. 583402 5. 592713 5. 748524 4. 755173  
5. 182764 5. 390653 5. 00482 5. 333454 5. 388243 5. 071503 5. 338125 4. 985955 4. 637777  
5. 005247 5. 559434 4. 856558 5. 474056 5. 141533 4. 213322 5. 173159 4. 673814 4. 268522  
9. 67243 8. 737776 9. 842389 9. 768378 9. 525084 9. 333292 9. 659378 9. 481817 9. 941536  
7. 286412 7. 106245 7. 012024 6. 629108 6. 809246 7. 373629 6. 956763 7. 288573 7. 860664  
2. 238843 3. 149681 2. 587614 3. 217374 1. 631302 2. 721157 2. 376961 2. 477863 2. 444681  
6. 368128 5. 691114 6. 722031 5. 600049 6. 600902 4. 863376 6. 345226 5. 861297 5. 867959  
5. 326142 4. 585993 4. 017453 3. 773058 4. 625541 4. 075656 4. 711488 4. 972823 4. 504617  
4. 62384 4. 572017 4. 818805 5. 248046 5. 086569 5. 143472 5. 552258 3. 56483 4. 652585  
4. 370615 4. 631407 5. 018476 3. 606262 5. 044849 4. 544145 4. 934693 4. 440015 3. 647443  
8. 251131 7. 77021 7. 362915 7. 83877 7. 749565 7. 782949 7. 926791 7. 906579 7. 995185  
7. 300452 7. 463804 7. 542823 8. 07941 7. 621937 6. 994024 7. 219058 7. 50169 7. 700148  
7. 798277 7. 704934 8. 490422 9. 005605 6. 264603 7. 46111 8. 624109 7. 209303 7. 894978  
5. 54484 5. 913756 6. 667341 5. 945913 6. 004327 5. 869925 5. 712685 6. 072147 5. 277787  
5. 039976 5. 797627 6. 08222 4. 870734 6. 386437 3. 924765 5. 507566 6. 134694 5. 486089  
2. 272735 1. 871042 2. 50742 3. 483835 2. 432508 3. 239098 2. 449653 2. 466809 1. 749781  
3. 049808 3. 828491 3. 073016 3. 361654 4. 372788 3. 786177 4. 162773 3. 196429 4. 357221  
5. 540217 4. 695891 5. 082349 2. 21276 4. 821933 4. 973008 3. 781923 4. 536395 4. 554307  
2. 233749 1. 894951 3. 208158 2. 600867 1. 908471 1. 609129 1. 488357 2. 858926 1. 967704  
7. 101137 7. 097157 6. 932167 6. 814816 7. 192172 7. 389553 6. 843006 7. 489606 7. 041871  
5. 866851 6. 133402 5. 751959 5. 965762 5. 491031 5. 367694 5. 669768 6. 037733 6. 740391  
6. 408231 6. 356042 5. 777132 6. 43041 6. 125012 5. 423421 5. 744467 6. 055585 6. 083759  
6. 5693 6. 325937 5. 631851 5. 945398 6. 31389 5. 630427 6. 221525 5. 997589 6. 717926  
6. 686838 6. 655922 6. 799374 7. 586113 6. 868415 6. 286414 6. 569297 6. 587417 5. 779591  
1. 960148 1. 699835 2. 826083 2. 491881 2. 37183 2. 595315 2. 465436 2. 21167 1. 86801  
3. 805964 3. 759571 3. 469492 3. 31244 4. 85425 4. 160397 4. 011932 4. 366522 3. 465619  
1. 016817 2. 36609 1. 617961 1. 663666 1. 247208 1. 610772 1. 008738 0. 82973 1. 422725  
6. 565486 5. 773978 6. 050906 6. 259217 6. 137918 6. 900188 7. 103395 6. 353894 5. 731329  
4. 229524 4. 417765 3. 852465 3. 597345 4. 060056 4. 764204 4. 153437 4. 10817 4. 496053  
6. 067968 6. 169362 6. 351296 6. 414419 6. 557579 6. 338407 6. 450485 6. 44487 6. 626282  
5. 028772 5. 631922 5. 397245 4. 478541 5. 196002 4. 621036 5. 525271 5. 612197 4. 807641  
6. 049109 5. 948353 6. 426529 5. 386211 6. 98025 5. 630331 6. 296447 5. 52861 5. 395756  
6. 856247 7. 366085 7. 105023 6. 973137 7. 470425 6. 885814 7. 275769 6. 921405 6. 904177  
4. 262949 4. 698441 4. 360096 3. 249757 3. 610896 3. 394214 4. 461648 3. 939184 5. 017657  
6. 054432 5. 811679 5. 062928 5. 125862 5. 601574 5. 590146 4. 823007 5. 556275 5. 933836  
5. 47657 5. 827677 5. 416126 2. 707149 5. 647868 5. 918626 5. 724856 5. 71449 5. 013726  
2. 020372 1. 614106 2. 373744 1. 424968 2. 405863 1. 433518 3. 869157 1. 768951 3. 256588  
9. 499728 9. 350028 9. 37325 8. 814624 9. 363656 8. 962408 9. 598041 9. 250365 9. 647068  
1. 908086 2. 148346 1. 64486 2. 309301 1. 733006 2. 792906 1. 829876 1. 393605 1. 484114  
5. 554345 6. 134665 5. 785196 5. 514369 6. 225823 6. 416378 5. 951403 6. 351367 7. 010077  
6. 934113 6. 895316 6. 277448 6. 205954 6. 691577 6. 335193 6. 27119 6. 550776 5. 826677  
5. 857671 6. 247215 5. 884322 5. 900305 6. 310758 6. 521907 6. 259019 6. 311945 5. 384305  
2. 016053 1. 227118 1. 793831 1. 777255 1. 184675 1. 409352 1. 625169 1. 64284 2. 484711  
6. 444256 6. 361606 7. 504618 7. 696956 6. 752988 6. 357313 6. 603093 6. 064927 6. 584594  
8. 79941 8. 921551 8. 938125 8. 637345 8. 942343 8. 81571 9. 014001 8. 996122 8. 702067  
6. 41935 6. 381755 7. 013009 6. 133101 6. 661288 6. 248435 6. 650567 6. 661088 6. 050121  
7. 273532 7. 316448 7. 065671 6. 263437 7. 090445 7. 086776 7. 178681 7. 279291 6. 670818  
2. 213283 1. 321838 2. 17138 1. 216007 1. 848033 1. 993226 1. 57829 2. 766293 1. 498871  
8. 578192 8. 215053 8. 302153 8. 364185 8. 233472 7. 768667 8. 610853 8. 351921 8. 529039

7. 408626 7. 297428 7. 523968 7. 89631 7. 045596 7. 390096 7. 007098 7. 700346 6. 662426  
8. 093136 8. 038853 7. 997672 8. 025212 7. 580857 7. 668114 8. 17381 7. 745933 8. 139082  
4. 910694 4. 891431 5. 956964 5. 379269 5. 348295 4. 909764 4. 940182 4. 938006 3. 682486  
6. 103069 5. 933635 6. 772228 5. 998069 6. 673288 6. 276579 5. 688683 5. 955939 5. 531975  
5. 397428 4. 530369 4. 75808 5. 27589 4. 556663 5. 539997 5. 208511 5. 09722 5. 295703  
6. 026281 6. 348826 6. 592044 6. 753875 6. 462012 6. 416591 6. 240275 6. 735508 5. 977334  
5. 47088 5. 577506 5. 796905 5. 437431 5. 876328 5. 668173 5. 456017 5. 556902 5. 362605  
7. 159375 6. 87187 7. 171926 6. 302137 6. 95524 7. 38706 6. 898963 6. 985814 7. 4642  
5. 282752 4. 210214 4. 851536 5. 69874 5. 209703 4. 45644 5. 213312 4. 586452 4. 608686  
2. 099674 3. 253339 2. 7309 3. 171651 2. 903171 2. 795795 2. 489795 2. 745821 2. 07429  
2. 281888 2. 280832 2. 183533 3. 555112 2. 662495 2. 992249 2. 691494 2. 706354 2. 221846  
2. 996991 2. 713842 3. 300035 2. 089833 2. 58744 1. 705322 2. 636329 3. 001787 2. 618437  
4. 221802 4. 139835 4. 901678 3. 786197 4. 32326 4. 015434 4. 822083 3. 689343 4. 5784  
3. 829719 4. 077197 4. 525586 3. 786308 3. 790438 4. 011179 3. 922096 4. 033637 3. 710549  
2. 531617 3. 25396 3. 77278 3. 019598 2. 977006 3. 039616 2. 382286 2. 050172 2. 077477  
6. 028527 5. 116978 5. 256454 4. 461794 5. 828451 6. 827275 5. 696919 5. 403965 7. 202337  
7. 399185 7. 513234 7. 098833 6. 639795 7. 008996 6. 961488 7. 146029 7. 091174 7. 609397  
4. 730467 4. 669126 4. 170034 3. 123162 4. 728189 5. 008766 4. 961632 4. 684187 4. 523342  
4. 474096 4. 496017 5. 318179 6. 775827 5. 13943 5. 522455 4. 831235 5. 359235 7. 195514  
0. 815775 1. 539064 1. 640747 1. 504832 1. 402025 1. 802023 1. 086302 1. 571061 1. 060983  
3. 679537 4. 127398 2. 756225 3. 81726 4. 090808 4. 296461 3. 925101 3. 419334 4. 017383  
6. 783454 6. 659058 6. 530186 6. 518358 6. 409888 6. 150108 6. 607209 6. 657022 6. 841155  
3. 599779 4. 338581 3. 765234 3. 651132 4. 36825 3. 493339 3. 587675 4. 067206 4. 024956  
2. 414435 3. 454215 3. 519456 4. 287504 2. 463401 3. 039136 3. 914658 3. 973908 3. 711423  
8. 495577 8. 67356 8. 979871 7. 963786 8. 48341 8. 45056 8. 886642 8. 637613 9. 659108  
4. 869655 5. 683883 5. 403087 5. 184624 4. 806529 5. 177073 5. 60168 5. 349176 4. 536255  
5. 384059 5. 76592 5. 739846 5. 839231 6. 190873 5. 80742 5. 626185 5. 89425 5. 121233  
7. 17452 6. 737937 7. 330846 6. 5493 6. 817493 6. 123241 6. 201659 7. 095378 6. 88711  
7. 014244 6. 92576 7. 154125 6. 627049 7. 303639 7. 255951 7. 094595 7. 127242 6. 122301  
6. 673094 6. 392129 6. 37786 5. 916774 6. 475011 6. 367458 6. 686571 6. 398914 6. 278794  
7. 760995 7. 646335 7. 56785 7. 242397 7. 630765 7. 979719 7. 725247 7. 923825 7. 714873  
5. 929548 7. 008464 6. 291243 5. 061531 6. 582409 6. 450779 6. 548701 6. 591232 6. 64916  
5. 163467 5. 089496 5. 596803 4. 639816 4. 790287 5. 141982 4. 660937 4. 892647 6. 707982  
5. 56243 5. 925333 5. 541612 6. 076746 5. 822171 5. 577744 5. 558717 5. 997064 6. 970421  
6. 469432 6. 545675 6. 404755 6. 386919 6. 683832 6. 516601 6. 698311 6. 438156 6. 649271  
4. 644287 4. 561078 4. 519936 4. 335067 5. 13291 4. 477455 4. 221554 4. 054873 4. 775335  
5. 704372 5. 986329 5. 992738 6. 153295 6. 145792 5. 977104 5. 69305 5. 90156 5. 968585  
4. 172315 5. 080494 4. 734681 4. 618618 5. 353808 4. 924331 4. 750606 4. 399648 5. 031063  
2. 927617 3. 088941 2. 866878 1. 862789 3. 248747 3. 33512 2. 951669 3. 306576 2. 208677  
5. 487161 4. 742805 3. 72892 5. 702166 4. 244204 4. 362515 4. 802653 3. 875092 4. 639467  
3. 132958 2. 802672 3. 517788 3. 13228 2. 634849 4. 099323 2. 9575 2. 580736 2. 682394  
6. 025279 6. 082738 5. 941151 6. 502175 6. 684367 5. 731044 6. 25443 5. 655104 5. 70958  
1. 365328 1. 76844 1. 187042 2. 209857 1. 257362 1. 538437 1. 786757 1. 863059 1. 475009  
7. 859376 7. 848972 7. 368102 7. 314966 7. 864254 8. 151425 8. 162478 7. 789872 7. 569865  
6. 396224 6. 390963 6. 656433 6. 566533 6. 766287 6. 131914 7. 201994 6. 284924 6. 233857  
9. 163791 9. 032136 8. 610348 8. 731339 8. 980281 8. 79629 9. 177101 9. 040427 9. 258905  
4. 350807 4. 986384 4. 113726 5. 755672 5. 66937 5. 150312 5. 662322 4. 922595 4. 075301  
6. 982053 7. 112282 7. 210367 7. 036251 7. 159333 6. 911107 6. 890379 6. 814679 6. 802391  
6. 406404 6. 381544 6. 669585 6. 556435 6. 996848 6. 682485 6. 729396 7. 294727 6. 058345  
4. 930061 5. 118669 5. 317683 5. 118034 5. 380545 4. 72115 4. 808165 4. 79228 4. 630644  
8. 98793 8. 797479 9. 075051 10. 12699 8. 886324 8. 946068 8. 583738 9. 187001 8. 745398

4. 654537 4. 902588 5. 241791 3. 126479 3. 715766 3. 322811 1. 939439 4. 44506 3. 615307  
8. 401571 8. 554026 8. 628902 8. 496345 8. 40761 8. 520732 8. 481007 8. 478452 8. 111668  
5. 075451 5. 996405 5. 42785 5. 349015 5. 724384 5. 575804 5. 859722 5. 211945 4. 833956  
6. 804931 6. 713919 7. 147285 7. 558603 6. 41561 6. 690318 6. 65087 6. 865595 6. 026145  
4. 413465 4. 270074 4. 093142 4. 162306 4. 707818 3. 500245 4. 289069 4. 442167 4. 057973  
6. 061779 5. 941359 6. 034393 6. 619645 6. 353651 5. 975445 6. 110144 6. 110013 5. 941416  
5. 164412 5. 214779 5. 282534 5. 477382 5. 389096 4. 47811 5. 212641 5. 472186 5. 089185  
6. 723247 7. 231026 7. 092788 5. 757883 6. 976432 6. 654569 6. 96059 6. 834601 6. 904626  
4. 84807 4. 902314 4. 780945 5. 507609 5. 396614 4. 440654 5. 528608 5. 095921 5. 074593  
4. 718357 3. 899887 4. 528112 3. 566613 3. 78418 4. 422338 4. 123307 3. 09783 6. 12722  
5. 757141 5. 829701 5. 212748 6. 117109 8. 002146 5. 698462 6. 074397 6. 05991 8. 358979  
1. 396814 2. 057603 2. 635257 2. 115332 2. 06445 1. 753291 1. 539243 1. 58699 1. 37802  
1. 634571 1. 245377 1. 41293 2. 20162 1. 433964 1. 780022 1. 359728 1. 335986 2. 095991  
6. 025503 6. 226232 5. 670594 5. 471794 6. 198393 6. 368226 6. 360301 5. 985664 6. 484254  
6. 543993 6. 835545 6. 478263 5. 778917 6. 720457 6. 576709 6. 271749 6. 542779 6. 636059  
2. 157506 2. 186076 3. 119109 2. 939217 1. 601737 1. 970733 2. 031733 2. 657839 2. 261337  
9. 160767 9. 409109 9. 462898 9. 101067 9. 631323 8. 949595 9. 036421 9. 530812 8. 387686  
2. 185615 3. 211921 1. 755947 2. 318047 2. 329382 2. 569614 2. 392085 2. 768238 2. 998912  
6. 869667 6. 166631 6. 861893 6. 294825 6. 522183 6. 450306 6. 698131 6. 558746 6. 454495  
2. 580215 2. 242051 2. 430729 2. 622427 1. 984791 2. 748978 1. 357253 1. 999234 4. 126589  
2. 245574 2. 0301 2. 417917 2. 841477 2. 145068 2. 53892 2. 530866 2. 512215 2. 014298  
7. 751943 7. 401411 7. 800903 6. 928782 7. 529999 5. 889466 6. 780685 7. 669353 7. 024398  
6. 004576 5. 995998 6. 426869 4. 32555 6. 525847 5. 18767 5. 923651 6. 098661 5. 534714  
7. 336039 7. 488445 7. 518002 7. 349074 7. 7801 7. 170951 7. 827341 7. 456181 7. 810971  
6. 480179 6. 529757 6. 338723 7. 041553 6. 907235 6. 302222 6. 441963 6. 297946 6. 448139  
7. 950809 8. 157038 7. 52539 7. 65654 8. 143494 8. 00398 8. 386723 7. 777579 8. 284631  
10. 02372 9. 96326 9. 547438 10. 35692 10. 4345 10. 08955 10. 17176 10. 26991 10. 10608  
6. 28308 4. 363486 2. 225985 3. 768744 4. 324237 6. 08723 4. 598751 5. 99637 4. 217429  
7. 219103 7. 433102 7. 625193 7. 007573 7. 308352 7. 07228 7. 291684 6. 765285 7. 29564  
1. 311118 1. 128187 1. 339705 2. 562673 1. 657689 1. 045067 1. 460229 1. 548294 2. 354133  
5. 154059 5. 580474 5. 83221 5. 924606 6. 002427 5. 244592 5. 054256 5. 741985 4. 683063  
9. 886563 9. 594193 10. 05327 9. 736166 9. 751274 9. 838548 9. 941817 9. 910168 9. 773171  
2. 918949 1. 605887 1. 523444 1. 521646 1. 909461 1. 432603 1. 445461 1. 238536 1. 305253  
4. 412877 4. 579239 4. 713761 5. 247547 4. 341795 5. 522678 4. 989533 4. 747386 4. 508164  
1. 66588 1. 956682 1. 255833 2. 820848 1. 561681 2. 263122 1. 742173 1. 613227 1. 506296  
4. 04153 4. 215722 4. 233778 3. 881432 4. 561967 3. 276831 4. 21099 4. 68707 4. 239795  
5. 052833 5. 40883 3. 980577 5. 00638 4. 203394 5. 412198 4. 957591 4. 930491 5. 520462  
5. 588099 6. 135921 5. 489161 4. 215765 6. 460441 5. 526464 6. 246579 5. 882751 4. 411164  
3. 510206 2. 796069 3. 022485 3. 33388 3. 134203 2. 064485 2. 895493 3. 116227 3. 652441  
2. 959129 1. 792042 1. 555144 1. 579742 1. 681463 1. 944683 1. 857802 1. 916507 2. 651018  
5. 762285 5. 451194 5. 514616 6. 410041 4. 971793 5. 346806 5. 515196 5. 648544 6. 016152  
6. 491984 6. 008103 6. 070396 5. 307816 5. 984031 5. 801629 6. 840637 5. 964703 6. 488306  
8. 022366 8. 106522 8. 148731 8. 244634 8. 032068 8. 092451 8. 039478 8. 122474 8. 015321  
2. 977428 2. 603844 2. 836986 2. 74106 2. 494705 3. 30537 2. 937474 2. 800286 2. 814547  
8. 625136 8. 454047 7. 951929 8. 923198 8. 882342 7. 967479 8. 399719 8. 776997 8. 637494  
7. 835733 7. 889327 7. 598577 7. 354667 8. 126476 7. 267321 7. 701455 7. 52173 8. 15685  
1. 629712 1. 540749 0. 879625 2. 008351 2. 313676 1. 516959 0. 949202 1. 44497 1. 362047  
5. 807215 6. 063599 6. 090887 5. 793342 6. 012077 6. 08597 5. 671025 5. 799333 4. 882285  
1. 51767 2. 378697 2. 229158 2. 469272 2. 510822 2. 245487 1. 76364 1. 513694 1. 421426  
6. 826193 6. 550318 6. 779883 6. 814754 6. 621391 6. 389997 6. 905732 6. 612078 7. 260709  
8. 417041 8. 108076 8. 497902 8. 320599 8. 456671 8. 570492 8. 295784 8. 591078 7. 41157

2. 280878 3. 58832 3. 731614 3. 633142 4. 083186 4. 620695 3. 198063 3. 136596 2. 200259  
4. 474605 4. 76631 4. 069512 5. 215368 4. 90519 4. 361249 4. 489853 4. 909719 5. 31935  
3. 106291 2. 626233 2. 328108 3. 28946 2. 844832 2. 632931 2. 712741 2. 152342 2. 819615  
3. 876391 4. 142588 5. 061135 3. 727311 4. 545709 4. 180756 3. 96192 4. 549087 4. 121008  
6. 328612 6. 983141 7. 259157 5. 705718 6. 48515 6. 684448 6. 183486 6. 817356 5. 48911  
4. 795451 4. 29546 4. 518929 4. 317186 4. 313695 4. 331987 4. 002876 4. 547884 3. 635755  
6. 732223 6. 195598 6. 76769 6. 626219 5. 841706 6. 534491 6. 394572 6. 674477 7. 290452  
6. 513302 5. 19517 5. 452832 5. 876052 4. 880946 6. 973406 5. 127107 3. 877529 4. 389303  
8. 018691 8. 014467 7. 826147 7. 068749 7. 949969 7. 75241 7. 926496 7. 775223 8. 05748  
2. 510642 3. 357127 2. 796695 3. 185978 2. 993956 2. 724895 3. 295381 2. 368562 2. 251047  
7. 007281 7. 144887 6. 825863 6. 372886 7. 341777 7. 11284 7. 43248 6. 985251 6. 871101  
7. 462136 7. 448034 7. 318177 7. 165983 7. 561996 7. 631951 7. 470657 7. 595015 7. 098423  
3. 825883 3. 634404 2. 71107 3. 026852 3. 48992 2. 764404 2. 836136 2. 2639 3. 037644  
5. 131287 5. 479649 5. 710762 5. 230663 6. 283373 5. 69461 5. 131278 5. 405543 5. 592562  
5. 243496 5. 422751 5. 35017 4. 577681 5. 543849 5. 054894 5. 292161 5. 423894 5. 368145  
8. 240252 8. 135764 8. 302953 8. 127138 8. 243233 8. 703864 8. 183888 8. 477446 7. 851348  
3. 621096 5. 216951 2. 521536 3. 728436 4. 432255 2. 777982 3. 446142 3. 892154 3. 17043  
5. 106661 5. 215762 4. 727015 5. 105785 4. 822792 4. 725183 4. 719787 5. 066994 4. 614306  
3. 915055 3. 271198 2. 289412 4. 048019 3. 815326 2. 135144 4. 344898 3. 775609 4. 13845  
6. 025432 6. 372313 6. 294136 7. 412791 6. 384417 5. 422165 5. 746332 6. 076219 6. 306715  
6. 827123 6. 353779 6. 949158 5. 949702 6. 791928 6. 767944 7. 02013 6. 692781 7. 733605  
4. 574056 4. 831884 4. 863073 4. 268213 4. 781652 4. 526847 5. 246994 4. 419549 4. 612375  
10. 46593 10. 38545 10. 35791 9. 868053 9. 927324 10. 33522 10. 48709 9. 988893 10. 4295  
2. 596856 3. 646733 3. 906391 3. 463662 2. 724986 1. 394811 3. 444259 3. 123038 3. 314568  
3. 192672 2. 416978 1. 814099 2. 899087 3. 391188 3. 235924 2. 883141 2. 823793 2. 315883  
6. 085581 6. 047961 6. 171891 6. 184542 5. 623569 6. 115095 6. 644805 4. 770372 4. 882315  
8. 927559 8. 902474 8. 600637 8. 955127 9. 200963 8. 300418 9. 625022 9. 475627 8. 580494  
4. 6868 3. 778013 4. 140023 4. 308691 4. 39399 3. 857962 4. 158694 4. 552476 4. 812112  
1. 378041 2. 116774 2. 059179 3. 044097 1. 533527 2. 448049 1. 520888 1. 963013 1. 630282  
4. 184841 4. 437302 3. 584259 4. 529145 4. 034549 3. 696334 3. 470916 4. 062728 2. 515326  
2. 221401 3. 106571 1. 813039 2. 344897 1. 905557 3. 152035 2. 037268 2. 517183 2. 207299  
3. 549332 2. 950891 3. 508929 3. 406437 2. 37491 2. 961365 3. 457824 3. 068552 2. 532129  
3. 246413 2. 941371 3. 964403 3. 601434 2. 411583 2. 464125 3. 545863 3. 302225 3. 594204  
2. 003131 1. 684491 1. 968588 1. 799238 3. 438378 1. 148299 3. 838164 1. 173953 1. 671208  
7. 788618 7. 493072 7. 015276 7. 204757 7. 174828 7. 626738 7. 425129 7. 484581 7. 355819  
5. 36394 5. 13727 5. 72935 5. 564955 5. 233995 5. 227585 4. 346305 5. 36728 5. 416601  
2. 081271 2. 227624 2. 152667 2. 374375 2. 626739 2. 508099 2. 272577 2. 351671 2. 39891  
3. 107803 3. 227521 1. 983686 3. 267065 4. 031812 2. 679666 2. 6804 2. 988416 2. 807524  
4. 549788 4. 575164 5. 028742 4. 667515 4. 471664 4. 276284 4. 285748 4. 549788 3. 650666  
6. 465328 6. 096972 6. 226676 4. 204297 6. 581281 5. 861451 6. 081874 6. 595143 5. 78865  
2. 03354 3. 29162 2. 712064 3. 703394 1. 597535 2. 537334 2. 388351 2. 700686 2. 297957  
1. 073313 0. 993423 0. 956318 1. 288012 1. 071866 1. 549534 0. 995452 0. 991801 0. 667898  
1. 886897 2. 585573 3. 334484 2. 086181 2. 004186 2. 321924 2. 048131 3. 088551 1. 782393  
6. 172937 6. 016741 5. 868622 4. 830867 6. 352103 5. 998531 6. 080039 6. 39882 6. 182013  
5. 839866 5. 859178 5. 954221 4. 756823 5. 911369 5. 223997 5. 251014 6. 094131 5. 713781  
8. 281017 8. 069765 8. 393757 7. 68635 7. 551228 8. 498831 8. 208839 8. 49422 7. 811626  
4. 626477 5. 792887 5. 645745 4. 757264 5. 164912 4. 855293 5. 03179 4. 873766 4. 743617  
1. 480372 1. 748841 1. 850404 2. 269962 2. 967165 1. 677147 1. 632923 1. 797413 2. 851675  
5. 902298 6. 138495 5. 485297 5. 759623 5. 944238 4. 376 5. 10917 5. 092518 4. 795394  
7. 405395 7. 319017 7. 356102 7. 186094 7. 366367 7. 298371 7. 397781 7. 422346 6. 688021  
5. 294779 5. 557164 5. 588142 4. 454582 5. 335964 5. 464651 5. 4495 5. 394914 5. 55812

3. 926189 4. 178597 3. 394869 4. 294639 4. 477117 3. 740591 4. 506935 4. 522677 4. 139706  
1. 078916 1. 03961 1. 470005 0. 944323 1. 694614 1. 834449 1. 473042 1. 160826 1. 281477  
2. 504996 2. 071212 1. 990272 3. 085517 2. 411755 2. 53846 1. 822303 2. 801012 1. 550413  
1. 75968 1. 744309 2. 147351 2. 765733 1. 996421 2. 161301 2. 263096 2. 466853 2. 686433  
7. 033516 7. 154582 7. 278045 7. 618622 7. 125901 7. 38002 7. 364427 7. 169887 6. 428873  
1. 505412 1. 277316 1. 195752 1. 348727 1. 154474 1. 052164 1. 187717 1. 299656 2. 160678  
1. 672673 2. 753769 3. 210518 2. 56505 2. 603037 2. 426945 1. 554136 3. 732055 3. 525144  
4. 544493 4. 886295 4. 613915 4. 006455 4. 596248 3. 834035 4. 111966 4. 665888 4. 431616  
6. 373045 5. 822528 5. 413463 4. 771691 5. 889545 6. 037924 6. 079441 5. 430193 6. 631873  
1. 960191 2. 234851 2. 03691 2. 501161 1. 992986 2. 006237 2. 640809 2. 162127 2. 579315  
4. 862869 3. 483549 3. 380084 3. 783335 1. 898765 2. 915357 3. 385229 2. 698473 3. 810647  
8. 231117 8. 06139 8. 316271 7. 933061 8. 022133 7. 738137 8. 020085 7. 78215 7. 936507  
8. 628141 8. 432205 8. 581055 7. 697826 8. 681334 8. 45706 8. 707687 8. 668507 9. 292337  
6. 332906 6. 498955 6. 224835 6. 114623 6. 590026 6. 06564 6. 988031 6. 283067 6. 001579  
3. 451672 4. 007555 2. 930226 4. 068969 6. 104348 2. 695936 3. 242625 3. 920626 3. 369744  
2. 88491 2. 827608 1. 957133 2. 660163 1. 757232 2. 047046 1. 98019 3. 275875 2. 191525  
3. 462994 2. 584834 2. 950934 3. 216148 3. 355729 2. 368424 2. 509115 2. 491073 3. 719944  
6. 588851 6. 544865 6. 355261 5. 445328 6. 623752 6. 220188 6. 495424 6. 313966 5. 580902  
5. 216445 5. 677416 5. 154271 5. 374652 5. 1491 5. 45093 4. 618604 4. 982908 4. 559435  
8. 07671 7. 331523 7. 785008 7. 775143 8. 160625 7. 597763 8. 2196 7. 544357 8. 397871  
2. 09284 1. 254347 1. 817745 1. 94266 2. 018797 1. 350987 1. 641825 1. 729018 1. 776039  
4. 957258 2. 346584 5. 005818 4. 110823 3. 366898 4. 690066 3. 471705 2. 389226 3. 416101  
6. 322053 6. 651046 5. 946688 5. 847093 6. 064012 7. 225693 5. 847873 7. 375861 5. 921441  
2. 013882 2. 647574 2. 377928 3. 484148 1. 953742 1. 842522 2. 467656 2. 196374 2. 711432  
1. 659115 2. 306798 1. 770657 2. 200923 1. 814093 2. 792594 2. 627732 1. 34292 1. 770016  
5. 867053 5. 472529 5. 354708 4. 327525 6. 004755 5. 79825 5. 472717 5. 800567 5. 504274  
1. 525298 1. 56222 1. 207762 1. 575043 1. 128713 1. 672112 1. 210461 1. 782754 1. 965839  
1. 595133 1. 136734 2. 731807 2. 197563 2. 853663 1. 762347 1. 491619 2. 516711 1. 86618  
7. 158122 7. 324537 6. 796752 6. 195754 7. 370944 7. 667215 7. 438343 7. 017857 7. 127684  
6. 410761 6. 161968 6. 200008 6. 86445 6. 473119 6. 212415 6. 216751 6. 223908 5. 73942  
2. 234999 2. 11056 2. 0471 2. 296934 1. 865258 2. 195172 2. 240334 1. 964211 2. 362338  
8. 163459 7. 680464 7. 389442 7. 66592 7. 708615 7. 517467 8. 366177 8. 01171 8. 560731  
6. 648965 5. 959263 6. 196471 4. 690393 5. 832126 6. 211568 6. 211774 6. 173847 6. 59503  
5. 649191 5. 594292 5. 981723 5. 249252 6. 160616 6. 079973 5. 622076 5. 733054 4. 72214  
5. 347909 5. 055151 4. 879994 3. 565632 5. 193225 5. 399393 5. 272113 5. 345092 4. 857769  
6. 665247 6. 075076 7. 17847 7. 911087 6. 513601 6. 845323 7. 130247 6. 397032 7. 966348  
0. 98671 1. 209038 1. 140936 1. 537664 1. 235314 1. 739217 1. 407138 1. 521876 1. 417957  
4. 662455 4. 11423 3. 762867 2. 258326 4. 457018 4. 043525 3. 791928 3. 704038 5. 05015  
3. 65459 2. 996723 4. 391797 3. 798656 3. 547855 3. 938713 3. 604604 2. 968294 3. 06009  
5. 989484 6. 363382 5. 519933 5. 832302 5. 740303 5. 428269 5. 033353 6. 410929 4. 694709  
1. 244568 1. 432647 1. 584001 1. 874037 1. 2414 1. 492689 1. 780928 2. 056584 1. 206611  
3. 339557 4. 753816 3. 321585 3. 847111 3. 684599 4. 039225 3. 740031 3. 691982 2. 836004  
7. 287567 6. 627174 6. 427542 6. 565417 6. 56952 7. 256645 7. 322904 7. 288971 7. 458876  
6. 830647 6. 581395 6. 761571 6. 69644 6. 879232 6. 576332 6. 940524 6. 754399 7. 16586  
7. 077767 7. 196273 7. 496855 7. 504155 7. 316717 6. 862088 7. 729248 7. 411779 6. 976539  
7. 735078 7. 960327 7. 459815 7. 092044 7. 255003 8. 007706 7. 475512 7. 969736 8. 318634  
8. 842866 8. 788719 8. 719709 8. 729813 8. 993913 8. 421519 8. 938051 8. 689091 8. 375682  
8. 680044 8. 770886 8. 826155 8. 732328 8. 815488 8. 750807 8. 918084 8. 659909 8. 073368  
4. 575359 5. 074479 3. 788206 3. 950432 4. 470564 3. 908856 3. 733281 4. 729643 3. 5631  
2. 440623 2. 390716 1. 63645 1. 969287 2. 234866 1. 394372 2. 69246 1. 684134 1. 738213  
1. 962255 2. 246803 2. 50913 3. 290619 2. 251298 3. 104982 2. 774288 2. 725518 3. 369154

5.738749 5.817651 5.761809 6.319964 5.706487 5.846349 6.05829 5.714042 6.117297  
4.385551 4.569078 4.773161 4.86283 3.680858 3.679654 3.553046 3.130276 3.199774  
1.073445 1.850891 1.583582 1.605954 1.657129 2.284448 0.812719 2.169739 1.453896  
0.590278 0.271368 1.006036 0.919897 0.93477 1.035556 0.502467 0.711491 0.761298  
2.324924 2.136327 2.670182 2.807073 2.108602 2.140395 3.679301 2.329719 2.228289  
7.427578 7.032657 7.05328 6.026486 7.131236 7.341142 6.876096 7.220774 7.332227  
1.732388 1.151401 1.803791 1.069752 1.02525 0.998308 0.789652 1.580382 1.204545  
6.28252 5.214274 5.691597 6.433728 5.667177 5.66198 5.535801 5.671603 5.626306  
5.90915 5.975688 6.035839 4.760528 5.620467 5.026559 5.640475 5.878205 4.949825  
4.940666 5.067558 5.397812 5.638911 5.343746 4.86049 5.227771 5.290154 4.242082  
1.760067 2.650025 1.459217 2.382969 2.170616 1.974951 2.870852 1.572724 2.890858  
6.550191 6.582949 6.417508 6.170719 6.532941 6.129932 6.959639 6.088328 5.942497  
5.722282 5.645104 5.22124 4.242468 5.253004 5.86638 5.525234 5.247822 5.820032  
2.592846 1.876365 2.285809 2.80879 2.064297 1.337235 2.035312 2.140936 2.414893  
2.289158 2.271932 1.60484 2.129001 1.588777 1.702255 2.072492 1.995254 3.027191  
6.510828 6.549051 7.077803 6.223479 6.280669 6.562599 6.498128 6.36096 5.482219  
3.557905 4.016357 3.35935 4.227011 4.085351 3.585506 3.317858 3.670836 2.81721  
2.743873 2.956485 3.494898 2.173709 2.734506 2.565143 2.086934 2.881787 3.25889  
2.350367 1.103711 1.907143 1.557294 1.790821 2.099609 2.449003 2.530006 1.681613  
3.930418 3.871237 3.566157 5.117433 4.042183 3.971053 4.108569 4.149815 3.578087  
4.527718 4.494536 4.638952 4.093818 4.625417 4.230443 4.53504 4.804911 5.332131  
7.205385 7.203917 5.637761 7.278133 7.629159 5.894703 7.85596 7.305501 7.459218  
1.318046 1.926302 1.586738 2.005821 1.721912 1.649417 1.036307 1.885157 2.637783  
5.96428 5.978946 6.253494 6.180008 6.052413 6.002597 5.985682 5.252007 6.461512  
9.4423 9.76698 9.480356 9.49204 9.423826 9.627306 9.038791 9.627206 8.564884  
7.004757 6.574185 6.582259 6.323049 6.446524 6.572219 6.900678 6.388829 6.275247  
4.903571 5.273796 5.23512 4.345545 5.318765 4.382699 5.082961 4.698036 4.588437  
6.840525 6.567864 6.865666 6.329194 6.301182 6.107199 6.545458 6.330922 6.706471  
7.762949 7.314541 7.721477 7.833809 7.406187 7.631577 7.807988 7.708137 7.333471  
6.405173 6.845424 6.371195 7.082037 7.388685 6.469945 6.962828 7.59801 6.852843  
7.623567 7.316447 7.171897 6.94263 6.832695 7.188954 7.42587 7.008244 7.318624  
5.714234 5.736778 6.256918 5.269594 5.579004 6.266616 5.64373 5.665176 6.288677  
5.789675 6.255749 5.958329 5.533195 5.22363 5.654916 6.039654 5.047045 5.179784  
6.317873 6.959886 6.067348 6.734517 6.867391 5.53944 6.060493 6.254596 6.348309  
8.381541 7.615625 8.057556 6.978889 7.905961 8.105242 8.4243 8.046734 7.330536  
1.690095 1.606237 1.780334 2.08048 1.942341 1.863556 1.702311 1.696927 2.05399  
5.594388 5.297902 4.664923 5.092356 5.545871 4.983518 5.315844 5.221539 4.849354  
4.940117 4.93048 4.57694 3.543927 4.877476 4.358444 4.845675 5.02884 4.860715  
3.771995 4.327956 4.044386 3.101354 4.721609 3.853317 4.366725 4.972238 5.606871  
3.61832 3.195657 3.486152 3.931021 4.117934 3.851462 3.623766 3.610342 3.177726  
2.981912 3.496991 3.368985 3.480266 3.377597 3.038915 3.869964 3.040502 2.771594  
2.256325 2.008724 2.041516 2.477373 2.8898 2.411151 1.990961 2.218182 1.235313  
5.067359 3.028004 2.076771 2.001917 5.764904 5.635937 3.929521 5.784574 5.477077  
8.834542 8.93385 8.776352 8.798656 8.820468 8.827583 8.950565 8.858999 8.630119  
9.136957 9.048727 8.944329 8.825877 8.445565 8.808421 9.258175 9.210539 8.919595  
9.97234 9.475046 9.822963 9.554134 9.751148 9.212555 9.734696 9.746763 9.735051  
2.697374 1.724568 1.596328 2.053493 1.668298 2.167544 1.390975 2.22212 1.815916  
5.436393 5.234805 5.631867 4.155271 5.211551 5.762508 5.622805 5.293831 5.411141  
3.674428 4.484537 3.445389 3.288645 3.529009 3.113833 4.286277 3.870567 4.43121  
6.097921 6.424055 7.174635 6.132635 6.193725 6.491807 6.451323 6.153061 6.279113  
1.282686 1.413159 0.91645 1.193277 1.122764 1.135396 1.050984 1.692037 0.665084

3. 593295 3. 142686 2. 564582 2. 583517 2. 734399 1. 635569 1. 94383 2. 680494 1. 74062  
2. 759874 4. 249022 4. 832923 1. 638979 4. 493921 4. 145914 2. 962914 3. 80517 3. 838445  
5. 110787 3. 294267 4. 443847 4. 958053 4. 883142 4. 09251 5. 107721 4. 011704 4. 050505  
6. 644561 6. 55525 6. 311259 6. 650393 6. 784664 6. 615589 6. 534132 6. 746889 5. 839796  
6. 422907 6. 484215 6. 171893 7. 047332 6. 672104 6. 264788 6. 763492 6. 622695 6. 393237  
1. 537305 1. 459526 2. 210017 2. 057763 1. 858323 1. 698135 1. 806668 1. 430754 2. 0243  
2. 112572 2. 300993 2. 104029 2. 193022 2. 054267 1. 825788 2. 055422 1. 800508 3. 027296  
5. 857352 6. 025761 5. 683358 5. 477739 6. 079707 5. 804701 6. 030241 6. 124861 5. 945485  
4. 0612 3. 920277 3. 39676 4. 547855 4. 191088 3. 92125 4. 2138 4. 357689 2. 906701  
7. 137274 6. 807037 6. 568517 7. 626187 7. 145625 6. 510944 6. 948413 7. 228085 9. 57771  
5. 224038 5. 013253 5. 006921 6. 096333 4. 250904 4. 443201 3. 884225 4. 636375 5. 062129  
1. 227483 1. 189802 1. 149795 1. 653038 1. 354084 1. 494263 0. 994954 1. 684492 1. 688281  
6. 408655 5. 96775 6. 40224 6. 421878 5. 062497 6. 551343 6. 509144 6. 568952 6. 031538  
3. 722962 3. 267105 3. 229523 3. 885658 3. 217642 3. 237603 3. 052456 3. 537742 4. 089371  
3. 429122 2. 851748 3. 882742 4. 511361 3. 615484 3. 491923 4. 43485 4. 764164 2. 642247  
2. 295903 2. 848699 2. 783321 2. 43723 2. 401635 2. 76376 2. 794428 2. 501169 2. 849253  
2. 967698 2. 910531 2. 920642 3. 041678 2. 894428 3. 59041 3. 549133 2. 566957 2. 877204  
0. 927392 1. 188836 1. 073132 1. 363837 0. 794262 1. 151468 1. 2294 0. 765365 1. 469775  
4. 115629 3. 44882 4. 262568 3. 292643 2. 671068 4. 019718 4. 023063 3. 295658 4. 116112  
7. 220673 7. 016144 6. 944766 6. 063737 6. 761173 7. 010763 6. 787865 6. 441619 7. 505003  
2. 592473 2. 778488 3. 617529 1. 248187 2. 102902 3. 008768 3. 208048 3. 518223 2. 987848  
3. 170042 1. 206702 1. 861361 2. 108367 3. 06673 1. 915847 1. 918636 7. 993269 4. 681983  
2. 210455 1. 826337 2. 845604 1. 886523 1. 714736 2. 263494 1. 865654 1. 038619 1. 841288  
2. 886626 2. 723428 2. 245701 2. 349568 3. 370182 2. 85971 2. 63812 2. 198937 2. 763275  
8. 012575 7. 665132 7. 887446 8. 302715 7. 251884 7. 940068 8. 149026 7. 983938 7. 964999  
5. 53445 5. 681248 5. 643639 5. 695085 5. 462859 5. 467998 5. 420955 5. 571476 5. 6246  
2. 090973 2. 039287 1. 300434 1. 598081 4. 290458 6. 004098 1. 984602 3. 388925 2. 551042  
4. 862723 4. 722162 4. 375789 4. 502489 4. 377398 5. 134012 4. 604583 4. 452588 4. 214336  
5. 288533 3. 088627 3. 500367 2. 450065 3. 426045 4. 722489 3. 872332 4. 668726 2. 945682  
4. 548729 3. 343147 4. 612239 4. 012596 2. 298802 3. 983222 3. 183577 4. 36407 4. 70769  
1. 706183 1. 440721 2. 417064 1. 87811 1. 330239 1. 481897 1. 648816 1. 420791 1. 633063  
6. 813143 6. 562218 6. 630233 6. 7237 6. 770568 6. 744709 6. 683373 6. 869967 6. 130925  
6. 701698 6. 485517 6. 528599 6. 317258 7. 039079 6. 695962 7. 307584 6. 526772 7. 259151  
4. 574331 4. 734336 3. 953671 4. 370713 4. 802297 4. 336126 5. 440192 4. 981811 5. 653478  
6. 422477 6. 211039 6. 059729 5. 895429 6. 51281 6. 210016 6. 139076 6. 343792 5. 454917  
3. 44935 3. 478651 3. 432559 3. 631536 3. 103916 3. 114578 3. 427082 2. 987594 3. 212492  
3. 320236 3. 499784 3. 472559 3. 397937 3. 515427 3. 270606 3. 713301 3. 629827 3. 073186  
1. 383664 2. 515143 1. 879623 1. 905012 1. 488293 2. 592898 1. 728601 1. 127869 2. 245612  
1. 70072 4. 414727 2. 738246 3. 55915 2. 68715 2. 585689 4. 241863 2. 187669 2. 672457  
1. 889512 1. 812082 1. 609747 1. 373824 2. 24293 2. 300721 2. 20748 3. 041895 1. 378553  
7. 128982 6. 211755 6. 907028 7. 338021 7. 2399 6. 424229 6. 927127 7. 173825 6. 397508  
6. 542981 6. 491406 6. 321935 6. 49983 5. 985222 6. 540518 6. 748069 6. 451266 6. 425238  
3. 083372 2. 577007 3. 645276 3. 225354 2. 832703 2. 798803 2. 674344 2. 975716 3. 499056  
2. 496985 3. 196128 2. 337298 2. 90214 4. 453141 1. 241065 2. 41419 3. 43029 1. 002844  
2. 390213 2. 233177 1. 174 1. 333805 1. 221183 2. 063565 1. 535454 1. 724406 1. 557536  
4. 457923 4. 147843 4. 181557 3. 261111 2. 983827 3. 569866 2. 873018 3. 571858 4. 775398  
1. 87167 2. 858473 2. 340838 2. 601516 2. 018442 3. 789754 2. 005484 2. 412698 2. 358526  
2. 685596 3. 135454 2. 736459 4. 065764 3. 408023 3. 538481 2. 833018 3. 351494 2. 384312  
5. 758827 6. 00017 5. 507714 5. 871673 5. 829469 5. 527965 5. 880862 5. 199745 4. 509821  
5. 833313 6. 21097 6. 144188 4. 527279 5. 295961 4. 871921 5. 474104 5. 672227 5. 570604  
3. 77274 3. 571781 4. 885163 3. 451047 3. 68449 2. 710015 3. 209419 4. 38075 1. 942372



3. 633806 4. 751463 4. 77183 3. 169245 4. 145021 3. 65613 4. 383021 3. 959628 3. 362327  
5. 792462 5. 560432 6. 219519 4. 488465 6. 301249 5. 435065 5. 127407 6. 59098 4. 18164  
3. 183985 4. 35775 3. 128662 4. 188146 4. 353975 3. 515843 3. 513885 3. 465279 3. 231565  
3. 669593 3. 693518 3. 780077 3. 957888 4. 407916 1. 99809 3. 016162 2. 958302 4. 674486  
2. 406036 2. 224067 2. 28626 6. 071076 5. 607873 2. 57271 5. 883994 2. 697928 2. 450145  
7. 817252 8. 409986 6. 976836 7. 010084 8. 721078 7. 903301 7. 782122 7. 291465 7. 378018  
1. 387954 0. 6644 0. 949411 2. 01087 0. 69186 1. 195432 1. 121951 1. 487691 1. 338076  
1. 34384 1. 096728 1. 135448 2. 295805 1. 840443 1. 230457 1. 494026 0. 8202 1. 006222  
1. 133555 1. 339911 1. 284496 4. 644652 0. 764027 0. 927142 1. 054073 1. 0799 0. 739137  
0. 777189 2. 210948 1. 417105 2. 579661 2. 18532 1. 226191 1. 241646 1. 033572 1. 343777  
1. 422899 2. 010196 1. 486532 1. 618088 1. 359837 1. 557036 0. 982974 1. 346904 0. 992291  
2. 269635 1. 933511 1. 928022 1. 754366 1. 458199 1. 594911 1. 141407 2. 036216 1. 793486  
1. 629199 1. 090958 1. 547635 2. 445406 1. 414854 1. 647865 1. 61236 1. 484807 1. 410799  
4. 226222 5. 397049 5. 643223 5. 272927 4. 774315 4. 073978 5. 01991 5. 785752 3. 4884  
7. 693328 7. 793331 7. 701179 7. 65454 7. 43505 7. 259115 7. 263836 7. 706458 7. 490376  
4. 257215 3. 307772 3. 497372 4. 191613 5. 063754 4. 443496 5. 078115 4. 405529 3. 596921  
0. 883059 0. 967045 1. 838552 1. 135188 0. 951336 0. 744683 0. 786014 1. 359422 1. 181086  
2. 735699 3. 188617 2. 318042 4. 317394 3. 561831 3. 133496 2. 536395 3. 517914 2. 526188  
2. 006714 2. 044346 2. 044019 1. 617989 1. 647822 1. 387538 1. 545658 1. 324675 1. 249968  
1. 19778 1. 573484 1. 686952 1. 534223 1. 984977 1. 435948 1. 153393 4. 515723 1. 778933  
8. 331074 8. 150456 8. 276508 8. 789997 8. 328152 8. 018643 8. 195625 8. 168586 8. 437973  
4. 838828 4. 514882 4. 960348 4. 869405 5. 257833 4. 701983 5. 754405 5. 050789 7. 038057  
5. 064749 4. 866657 4. 198271 5. 390461 5. 266939 4. 851426 4. 812034 5. 11663 5. 26753  
2. 9827 2. 671003 3. 887346 3. 146858 3. 560068 2. 055048 3. 414439 3. 530029 4. 698763  
4. 698988 5. 597084 3. 381908 5. 632356 6. 157787 4. 640613 3. 409175 5. 482003 5. 498481  
1. 06636 1. 328487 1. 328331 1. 62962 1. 373065 2. 325812 1. 349719 1. 415109 1. 228924  
1. 094291 1. 917205 2. 631339 2. 113113 1. 918848 1. 612161 1. 420961 2. 017362 1. 013469  
6. 556088 6. 796325 6. 757675 6. 402007 6. 803061 6. 895803 6. 674301 7. 043429 6. 435324  
4. 650598 4. 205329 4. 799366 2. 285822 3. 810492 3. 397799 2. 660232 4. 01672 3. 893332  
6. 300044 6. 215436 6. 302845 6. 233864 6. 23222 6. 125401 6. 305818 6. 647788 6. 147775  
1. 271493 1. 507342 2. 102908 1. 234797 2. 903424 2. 323304 1. 22997 1. 343461 1. 383907  
1. 022234 1. 14705 1. 034835 2. 691914 2. 093973 2. 416544 1. 275947 1. 239214 2. 602416  
2. 464926 2. 220944 3. 062022 3. 003715 2. 328547 1. 921216 1. 743088 2. 341662 2. 622172  
4. 21978 4. 263298 4. 805821 3. 612879 4. 074741 4. 413821 4. 595919 4. 602077 4. 868513  
5. 280213 4. 912936 5. 399945 5. 76846 5. 136679 4. 713341 4. 950157 4. 831481 5. 269392  
4. 163068 3. 322171 4. 907208 3. 39119 4. 186928 3. 742739 3. 771867 3. 720087 4. 04773  
3. 131285 3. 353673 3. 355465 3. 092344 3. 339812 3. 13943 3. 377297 3. 166643 2. 896652  
7. 975217 7. 772863 7. 937851 7. 585002 7. 562554 7. 772508 8. 181367 7. 687847 8. 01808  
5. 7119 6. 090618 5. 834276 6. 912721 6. 837985 5. 377118 6. 102611 6. 061348 6. 275085  
7. 848516 8. 047322 8. 100965 8. 038826 7. 854073 6. 968125 7. 20185 7. 870229 7. 417805  
4. 869124 4. 418525 4. 868551 5. 326575 4. 780673 4. 325223 4. 437697 4. 561786 4. 031084  
7. 266159 6. 933092 6. 957613 6. 253131 7. 097927 6. 464733 7. 536916 6. 953437 6. 8551  
1. 279651 3. 296132 0. 986626 1. 322402 1. 20524 0. 912686 1. 763994 1. 681649 0. 9812  
3. 774641 2. 429652 3. 64678 3. 167293 3. 830054 3. 426406 2. 191822 3. 288776 3. 759997  
1. 60939 1. 687618 1. 747409 1. 695773 1. 690157 1. 877636 1. 59137 1. 810025 2. 102746  
6. 953597 6. 793742 6. 891423 6. 907964 6. 682389 6. 277439 7. 209715 6. 831773 7. 08326  
5. 850397 6. 252067 5. 90014 5. 7161 6. 143787 6. 012538 6. 10265 6. 027472 6. 698745  
8. 03087 7. 796752 7. 621193 7. 298329 7. 858384 7. 672487 7. 748048 7. 871169 7. 385866  
1. 079881 1. 561144 1. 775645 2. 218057 1. 03451 1. 447625 1. 423546 1. 477672 1. 295859  
4. 569727 4. 647883 4. 488269 4. 823896 4. 553104 4. 834755 4. 95225 4. 207504 3. 767363  
7. 842403 7. 21721 6. 766863 6. 921878 7. 221075 6. 325225 6. 9123 7. 179803 6. 692075

7. 077802 7. 246352 7. 353712 7. 207994 7. 540851 7. 268801 7. 113522 7. 421389 6. 655858  
4. 058587 4. 511087 5. 36493 4. 414038 4. 680091 4. 276335 4. 599807 4. 978374 3. 816117  
9. 33827 8. 320424 8. 962761 8. 538864 8. 984809 8. 856146 9. 126184 8. 37704 9. 593257  
5. 286041 5. 274533 5. 452413 5. 872584 5. 311299 5. 062132 5. 049372 5. 288675 4. 822228  
1. 573595 1. 543611 1. 706392 1. 699521 2. 37358 2. 165522 1. 660663 1. 74397 1. 422605  
7. 442634 6. 99071 7. 500124 6. 095857 6. 564441 7. 155388 7. 452686 7. 20715 7. 260485  
7. 352892 7. 370922 7. 057594 7. 708145 7. 26957 7. 37554 7. 478894 7. 229143 7. 111993  
6. 683584 6. 941014 7. 384836 5. 888209 6. 749414 6. 989467 6. 505748 7. 031741 5. 856788  
1. 56416 1. 500212 2. 37604 1. 72813 1. 397285 2. 073302 2. 935287 1. 862899 3. 161185  
5. 144031 4. 683324 4. 824812 4. 576767 4. 417102 4. 147749 5. 485709 4. 560752 4. 93244  
8. 804597 8. 561419 8. 440199 8. 904327 8. 820423 8. 911352 8. 49698 8. 627456 9. 029356  
2. 490833 1. 839196 2. 132593 3. 022555 1. 781799 1. 663903 2. 5016 2. 301314 4. 02393  
2. 778565 2. 644893 2. 82141 2. 846531 3. 212468 3. 281037 2. 283466 3. 47994 2. 736748  
5. 819479 5. 930307 5. 401191 5. 846261 5. 927179 6. 259074 6. 243597 5. 846619 6. 040754  
2. 330588 2. 478785 2. 14778 2. 292946 3. 158607 2. 064859 3. 059954 2. 545853 1. 582775  
0. 91464 1. 319468 1. 036925 2. 250618 1. 629576 2. 577953 1. 389822 2. 223099 1. 006808  
1. 797641 1. 687335 1. 612202 2. 007821 2. 029862 2. 679627 2. 297474 1. 999005 1. 730365  
3. 732034 3. 151129 3. 73443 3. 897159 3. 246646 4. 123528 3. 429616 3. 050393 3. 345366  
8. 126548 7. 86665 7. 759019 7. 64175 7. 439825 7. 44657 8. 142345 7. 914559 8. 01529  
8. 274143 8. 668469 8. 559072 8. 311931 8. 383473 8. 575908 8. 322687 8. 61178 7. 590313  
7. 54504 7. 597624 7. 197741 6. 465706 7. 161041 7. 859673 7. 572924 7. 055369 7. 631287  
5. 9552 5. 01457 5. 947215 6. 146835 5. 178599 5. 208776 5. 971484 5. 830729 5. 443735  
5. 135838 4. 280461 5. 284143 5. 620168 4. 993447 4. 368031 5. 166782 4. 916487 4. 720164  
6. 195235 6. 224203 5. 973557 4. 837783 5. 360259 6. 394709 6. 197652 5. 488095 5. 476388  
7. 072432 7. 508657 7. 110538 5. 998516 7. 230996 6. 701706 6. 829281 7. 061276 7. 09993  
6. 747213 6. 005076 6. 54505 6. 495585 6. 544794 6. 77209 6. 520309 6. 208123 6. 370812  
8. 7356 9. 159673 8. 855156 7. 97367 9. 232506 8. 403168 8. 667987 8. 978102 8. 642248  
5. 835219 6. 132654 5. 685496 6. 721302 5. 682977 5. 04592 5. 242875 5. 580635 5. 862949  
6. 748667 6. 717931 6. 911664 6. 697424 6. 142067 6. 327857 7. 286336 7. 062636 6. 157835  
9. 909754 9. 952267 10. 14217 9. 741572 9. 940812 10. 01097 9. 945951 9. 959515 9. 768727  
8. 453383 8. 27346 8. 742126 8. 630281 8. 271721 8. 769532 8. 546056 8. 441829 8. 135451  
8. 583158 8. 784394 9. 188053 8. 494278 8. 321498 9. 071996 8. 649312 8. 85241 8. 088788  
9. 871572 9. 9409 9. 548479 9. 328494 9. 637939 9. 736921 9. 587055 9. 878247 9. 339146  
8. 014492 8. 301805 8. 28205 8. 045174 8. 816056 8. 255463 8. 033366 8. 503293 7. 571254  
6. 930679 6. 682798 8. 290163 6. 807596 7. 851837 7. 15207 7. 317779 7. 264782 7. 244666  
4. 173197 5. 144103 3. 659775 4. 234398 5. 3823 4. 296915 5. 41253 5. 224149 4. 387995  
7. 048638 7. 184588 7. 384518 7. 223925 7. 667941 7. 266214 7. 06373 6. 815597 7. 459981  
4. 197197 5. 262017 5. 011002 5. 328276 8. 736483 4. 618052 6. 127182 6. 867054 7. 721596  
4. 956766 5. 458878 5. 100533 3. 747432 5. 682251 4. 71747 5. 071307 5. 052521 4. 162638  
4. 226007 3. 407815 4. 060834 4. 465417 3. 15691 4. 421173 4. 08239 2. 408196 4. 238845  
6. 843281 6. 217763 6. 585692 7. 312182 6. 271002 6. 036166 6. 558791 6. 334846 7. 005141  
6. 055157 5. 359759 5. 305919 5. 959017 5. 961847 5. 357552 5. 937674 5. 919255 5. 324507  
9. 272405 8. 8794 9. 389372 9. 476906 9. 185424 9. 221231 9. 024153 9. 173681 9. 299238  
8. 916972 8. 677898 9. 141508 8. 045783 8. 670213 8. 614462 8. 091692 8. 960141 8. 006326  
5. 979708 6. 266685 5. 476062 5. 970982 6. 451232 6. 01697 6. 327319 5. 840069 6. 454124  
8. 89478 8. 582468 8. 563087 8. 435975 9. 282925 8. 225305 8. 404345 9. 575738 7. 937542  
9. 014955 9. 001586 9. 007772 8. 331084 9. 13386 8. 649816 8. 76035 9. 104267 8. 948563  
4. 208573 5. 603681 4. 533901 4. 935159 5. 292867 3. 961267 5. 300111 4. 685648 6. 085461  
9. 265384 9. 27806 9. 304125 8. 777967 8. 99256 9. 330303 8. 955222 8. 740446 9. 073337  
8. 008048 7. 57574 8. 09495 8. 505774 7. 873245 7. 343476 7. 936058 7. 921438 7. 707251  
5. 508243 4. 956699 4. 613052 5. 056169 5. 560373 5. 173755 5. 012642 5. 270582 4. 390721

7. 409432 7. 964766 7. 655499 7. 282863 7. 212979 7. 435396 7. 511327 7. 366718 7. 381735  
9. 947581 9. 628571 9. 895777 9. 80685 9. 483349 9. 666976 9. 864208 9. 719016 9. 730036  
3. 131794 4. 180747 3. 226973 3. 75152 3. 007219 3. 099438 3. 144782 3. 628543 5. 49244  
5. 686406 5. 624027 5. 451979 4. 431464 5. 72075 5. 387489 5. 499632 5. 65933 5. 143232  
6. 453497 6. 765313 5. 667222 7. 121418 6. 70753 6. 34992 6. 096104 6. 409672 6. 367599  
8. 165335 7. 810292 7. 839635 7. 878269 7. 822104 7. 386177 8. 486224 7. 707073 8. 581494  
7. 446082 7. 616975 7. 567602 7. 539447 7. 553981 8. 286608 7. 719644 7. 248432 7. 544794  
1. 653126 2. 299958 2. 344408 2. 596078 2. 04841 1. 996359 2. 616525 1. 527612 2. 515209  
2. 63768 2. 565853 3. 010326 3. 218442 3. 03808 2. 978846 2. 249877 2. 474239 2. 852552  
8. 246148 8. 045239 8. 26123 8. 271982 8. 173896 7. 912886 8. 554617 8. 046667 7. 83555  
1. 264664 2. 10971 2. 104281 2. 446504 3. 307619 0. 875403 1. 860421 1. 604004 0. 912538  
5. 854397 5. 253843 4. 981404 5. 87894 4. 930325 4. 680814 5. 557205 5. 264347 4. 702757  
3. 062552 3. 116761 3. 476772 1. 999588 3. 839891 3. 503567 2. 792698 3. 359703 3. 30972  
4. 248133 4. 203335 3. 417307 4. 068223 4. 328142 4. 194922 3. 850662 4. 029837 3. 566312  
4. 368677 4. 584774 4. 287998 4. 606549 4. 71252 4. 632629 4. 909581 4. 982623 3. 786008  
1. 444929 1. 315536 1. 51148 1. 78662 1. 245973 1. 298466 0. 770931 1. 546887 0. 681321  
4. 549859 4. 499274 4. 373805 5. 244632 5. 010421 4. 267181 4. 731881 4. 937433 4. 053593  
5. 504775 4. 785763 4. 500839 4. 27223 4. 49296 6. 324323 5. 121459 5. 695262 6. 924879  
1. 697027 1. 341679 1. 314742 1. 658959 1. 472474 1. 568206 1. 709567 2. 093746 1. 513287  
1. 355671 1. 643822 1. 643335 1. 302647 1. 693086 2. 790575 1. 850446 1. 480846 1. 650763  
2. 036734 3. 731444 2. 078846 3. 769437 3. 374356 0. 747062 3. 039742 3. 774964 2. 12123  
3. 64456 3. 838278 4. 468171 4. 138191 3. 984593 3. 22722 3. 033824 3. 602194 2. 849389  
1. 370135 1. 371353 1. 884874 2. 215507 1. 315455 2. 023765 1. 231162 1. 530147 2. 596545  
5. 113582 5. 621984 5. 310288 5. 595464 6. 271609 5. 397845 5. 43879 5. 882068 5. 600863  
6. 713792 7. 09677 6. 418252 5. 085441 6. 43525 5. 881862 6. 473752 6. 384052 5. 984377  
3. 053076 2. 537361 3. 029311 3. 472716 3. 025134 2. 810811 2. 310694 3. 128829 2. 786969  
8. 461507 7. 151539 6. 962887 7. 235047 8. 941673 4. 370952 7. 390266 6. 209561 6. 272799  
9. 333944 9. 192177 9. 471604 9. 212162 9. 434965 9. 496227 9. 250625 9. 325528 8. 937212  
5. 638358 7. 44051 5. 786405 6. 586955 6. 887393 6. 953964 7. 309628 6. 872197 5. 138373  
5. 969102 6. 131065 6. 443598 5. 690026 6. 51848 5. 853311 6. 411358 6. 284775 5. 952714  
6. 656342 6. 81948 6. 547562 7. 000291 6. 788759 6. 036083 6. 968816 6. 78261 6. 806933  
3. 687802 2. 967633 3. 714465 3. 97687 4. 294727 3. 029661 3. 943591 3. 643262 3. 471798  
5. 02208 4. 899298 5. 172533 5. 435906 4. 888428 4. 711831 5. 479412 5. 323289 4. 852396  
1. 331774 2. 40945 2. 389447 2. 202352 1. 60612 3. 059986 1. 865888 2. 431285 2. 276781  
4. 484831 4. 254118 3. 730835 5. 014395 4. 332539 4. 241912 4. 283294 4. 773411 4. 200614  
5. 984333 6. 28564 6. 564459 4. 109016 6. 518144 6. 238926 6. 114309 6. 152535 5. 530065  
4. 84266 3. 752461 4. 00104 2. 990681 3. 673138 3. 939446 4. 034332 3. 470091 3. 556578  
1. 203459 2. 272262 2. 569453 1. 774611 1. 579733 1. 739775 1. 815339 1. 534518 1. 899269  
2. 703876 2. 609609 3. 699449 2. 726276 4. 12065 2. 317086 2. 834479 3. 086751 1. 937384  
2. 327872 2. 336324 2. 321721 2. 291035 2. 659887 2. 370548 1. 777771 3. 494946 1. 921236  
2. 113302 2. 122159 2. 635402 3. 472706 3. 193246 2. 232683 1. 853216 3. 383204 2. 883555  
5. 484183 5. 178931 5. 224736 4. 600619 5. 135177 5. 419575 5. 954325 5. 167558 5. 14453  
8. 912673 8. 789057 8. 923271 8. 883964 8. 680184 8. 664316 8. 596959 8. 838052 8. 685793  
7. 073227 7. 205398 7. 349484 7. 373574 7. 199455 6. 966212 7. 473232 7. 293957 6. 619707  
3. 423498 1. 695952 1. 699876 1. 392592 2. 020928 2. 663877 1. 398653 1. 573638 2. 868752  
7. 066367 7. 902962 7. 453429 6. 979152 7. 15981 7. 754561 6. 882087 7. 273685 6. 341378  
1. 680471 1. 686342 2. 617048 2. 548458 2. 09406 1. 521003 1. 260238 0. 995259 0. 803521  
7. 848675 7. 463291 7. 828606 7. 083462 6. 8129 7. 525043 7. 532256 7. 371509 7. 165758  
2. 331791 1. 802639 1. 793461 2. 300379 1. 186581 2. 051524 2. 209801 1. 662673 2. 006431  
3. 045827 2. 495443 3. 016161 3. 665268 3. 295722 3. 497586 3. 16443 3. 671981 2. 425967  
6. 282952 5. 733547 5. 893869 5. 946439 5. 943205 6. 207157 5. 871342 6. 232722 5. 582862

6. 248421 6. 240059 6. 485302 5. 898357 5. 928481 5. 566037 6. 070666 5. 719723 6. 572425  
5. 437156 5. 444207 5. 667995 5. 273809 5. 845503 5. 035644 5. 624231 5. 41205 4. 892818  
4. 535163 2. 365683 4. 557667 3. 539716 3. 091953 2. 636973 2. 4683 3. 544757 3. 359273  
6. 258228 5. 875361 5. 289975 5. 507439 5. 898356 6. 204195 5. 926518 5. 480873 4. 968344  
6. 935696 7. 127554 6. 860136 7. 479988 7. 294646 6. 975845 6. 69867 7. 136924 6. 613775  
2. 257751 2. 422624 1. 959556 2. 405539 3. 553577 3. 781132 4. 192385 2. 833131 2. 449151  
8. 395537 8. 303683 8. 104914 7. 467067 8. 454134 8. 141012 8. 514901 8. 041675 8. 556104  
6. 68336 6. 638234 6. 76234 6. 76742 6. 649097 6. 549732 6. 741617 6. 390674 7. 112142  
5. 047781 4. 568446 4. 802112 4. 555019 5. 666697 3. 379013 4. 672326 4. 460646 3. 830713  
1. 765267 1. 976277 1. 732858 1. 977363 1. 465689 2. 336107 2. 327802 1. 221132 2. 006321  
6. 761337 6. 703593 6. 768961 5. 311894 7. 401766 6. 308116 6. 974113 6. 491276 6. 92841  
5. 044109 5. 535929 4. 888089 4. 972787 5. 307318 5. 606575 5. 896088 4. 838348 5. 622535  
8. 264767 8. 214118 7. 98898 7. 198908 6. 9713 8. 110731 7. 967393 7. 675154 8. 124995  
6. 145805 6. 287618 5. 820152 5. 927805 6. 638001 6. 27245 6. 011858 5. 807659 6. 621915  
5. 787202 5. 918999 6. 253481 5. 547883 6. 189617 5. 964958 6. 106049 5. 480429 5. 922443  
1. 555387 1. 491108 1. 188336 2. 218229 1. 295683 1. 171543 1. 723939 1. 351523 2. 546542  
3. 502435 3. 284134 3. 598039 2. 443723 3. 401976 2. 915403 2. 866804 4. 534074 4. 086898  
3. 1288 1. 840431 1. 821531 1. 447403 1. 565194 2. 30851 1. 612961 1. 461763 1. 791036  
4. 948747 4. 747638 4. 841315 4. 876412 4. 938683 4. 872839 4. 782016 5. 028116 5. 534184  
3. 492531 4. 600789 2. 992944 2. 591733 5. 844974 3. 630166 4. 469638 3. 504684 3. 091663  
5. 067605 5. 259028 5. 956 5. 775536 5. 071603 4. 990279 5. 335818 5. 437332 5. 250528  
3. 692263 5. 099942 4. 828092 6. 494803 3. 363131 4. 598248 4. 392208 5. 680696 5. 001996  
4. 320266 4. 138166 5. 922478 3. 392921 4. 703858 3. 41797 4. 028999 3. 674928 2. 595272  
6. 630914 6. 245693 6. 77863 6. 178125 6. 333797 5. 96037 6. 591704 6. 254386 6. 68518  
7. 239635 7. 297778 7. 160992 6. 799135 7. 469093 6. 817245 7. 399057 7. 082415 7. 757454  
5. 28397 5. 130398 5. 196579 5. 670472 5. 41474 4. 85891 4. 543935 5. 603265 4. 423886  
5. 52824 5. 933842 6. 904074 5. 014854 5. 885603 5. 355094 5. 514302 5. 632368 5. 46444  
5. 36505 6. 004932 4. 78205 5. 044616 6. 195613 5. 657894 5. 99832 5. 344346 5. 996775  
1. 357379 1. 581127 1. 561663 1. 804343 1. 560783 1. 650005 1. 455753 1. 811986 1. 30086  
2. 620339 1. 811683 1. 785116 1. 809908 2. 182448 2. 190274 1. 369435 1. 773507 2. 60634  
3. 048072 3. 321494 3. 445068 3. 890386 3. 201134 3. 240825 3. 350568 3. 723123 2. 635206  
1. 771182 1. 480938 1. 368939 1. 713924 1. 784292 1. 754152 2. 113607 2. 107907 1. 379712  
3. 619788 4. 176255 4. 425296 4. 775962 3. 836597 4. 081346 4. 119609 4. 260416 3. 375696  
7. 973463 7. 516702 8. 005952 8. 371316 8. 040015 7. 594685 7. 724689 7. 555529 7. 343444  
7. 861537 7. 844081 7. 619692 8. 189535 7. 550371 7. 924399 7. 902221 8. 036801 7. 16093  
5. 678515 5. 572079 5. 720734 5. 743894 5. 27764 5. 750364 5. 850816 5. 294391 6. 799371  
1. 21041 1. 556935 1. 583716 1. 521963 0. 831134 1. 055096 1. 405609 1. 272202 1. 053235  
4. 227721 7. 617635 5. 309567 4. 455519 3. 672813 6. 907214 5. 89093 6. 830184 7. 728978  
6. 009585 6. 247804 6. 173945 6. 168587 5. 879042 5. 992261 6. 300071 6. 176531 6. 390009  
1. 434171 1. 369296 1. 23877 1. 750943 2. 164642 1. 857669 1. 919742 1. 62586 1. 092725  
1. 249885 2. 09424 1. 407086 1. 076272 1. 7601 1. 809238 1. 182648 1. 374126 1. 122166  
7. 950807 7. 858702 7. 491903 7. 49961 7. 98634 7. 566913 8. 063174 7. 785444 7. 354127  
4. 426247 4. 063408 4. 863337 5. 023633 3. 583117 4. 875016 5. 398658 5. 098338 4. 725092  
6. 201735 6. 119388 6. 581221 4. 943165 6. 186831 6. 403066 6. 471622 6. 907821 5. 885063  
2. 462289 3. 023689 2. 881829 2. 825312 2. 707702 2. 99813 2. 616352 2. 800229 2. 904978  
3. 516263 1. 574196 2. 614825 2. 185987 1. 925356 1. 517151 2. 570866 1. 553106 1. 991539  
2. 168316 2. 919324 2. 752334 3. 724573 3. 236539 2. 185201 3. 325804 3. 321185 2. 743484  
6. 28006 5. 461451 7. 009984 4. 504512 6. 234868 4. 542196 5. 868887 4. 91467 3. 750525  
5. 227805 5. 482569 5. 128748 5. 166118 5. 267927 5. 086879 5. 090981 5. 173009 5. 274584  
6. 520096 7. 625661 6. 203872 5. 724325 8. 46597 6. 425778 7. 704493 7. 11735 6. 602205  
7. 292384 7. 232185 7. 078604 7. 146812 6. 737251 7. 039079 6. 891748 6. 446975 6. 636872

0. 851293 0. 862043 1. 402349 1. 062014 0. 633188 1. 358676 1. 302091 1. 525182 1. 504379  
7. 695018 7. 67923 7. 709149 7. 347387 7. 787043 7. 672972 8. 046596 7. 815578 7. 097556  
5. 189001 5. 274151 5. 106329 4. 40638 5. 094908 5. 272289 5. 305271 5. 379625 4. 750513  
4. 607252 4. 590585 5. 046476 3. 491313 4. 474925 4. 439696 5. 066154 4. 734704 4. 19626  
6. 796931 6. 557378 6. 354168 7. 117137 7. 178018 6. 816879 6. 846368 6. 830617 6. 763735  
5. 963035 5. 666161 5. 606979 5. 780103 5. 731536 5. 491261 6. 107564 6. 291361 6. 119599  
1. 456463 0. 858233 1. 834316 1. 89913 1. 756363 1. 935157 0. 94846 1. 170428 1. 730448  
6. 596919 5. 990369 5. 648563 5. 269732 5. 47795 6. 245698 5. 642257 5. 309255 6. 849937  
6. 584127 7. 047153 6. 919056 6. 817487 6. 995292 7. 238092 6. 885378 6. 904525 7. 5709  
6. 729966 6. 320305 6. 700204 6. 037456 6. 537556 6. 508689 7. 079204 6. 675446 7. 272914  
1. 776057 2. 00915 2. 660357 1. 725144 2. 565566 2. 003267 2. 808976 2. 082736 1. 995682  
5. 079529 4. 647512 5. 192659 3. 483164 5. 136448 3. 775069 4. 775666 3. 870529 4. 676993  
2. 95453 2. 459271 3. 595982 3. 299386 2. 437383 3. 303202 2. 96221 3. 296463 2. 535861  
4. 524059 4. 840634 4. 909023 4. 026297 5. 384159 4. 113864 4. 85448 5. 07303 5. 028611  
6. 089249 6. 218083 6. 138623 5. 517936 6. 095845 5. 898442 5. 946288 5. 131142 6. 407275  
2. 703534 3. 144346 2. 727616 3. 542758 3. 34761 2. 243995 4. 025881 3. 268694 3. 018139  
5. 428172 4. 772188 5. 652642 5. 851247 5. 924434 4. 971427 5. 200628 5. 54873 4. 97125  
1. 972376 2. 340561 1. 204435 2. 221452 1. 858968 2. 090761 1. 892832 1. 235578 1. 492491  
5. 97244 6. 003391 5. 430432 5. 799262 5. 729722 5. 906616 5. 977199 5. 37953 5. 248393  
5. 54285 5. 989848 5. 605537 5. 516409 6. 18748 6. 294786 5. 973325 5. 530248 5. 730897  
1. 426568 2. 525597 2. 055161 1. 592151 1. 655991 2. 160028 2. 76467 2. 361748 3. 421706  
5. 711615 5. 521314 5. 221556 5. 928992 4. 949994 5. 563883 5. 865979 5. 56339 5. 43699  
4. 239444 5. 051161 5. 000409 3. 75439 4. 88085 4. 054466 4. 557045 5. 019373 5. 671627  
3. 785996 3. 564654 4. 536992 4. 584335 3. 139867 3. 762561 3. 893066 4. 326083 2. 980026  
6. 659974 6. 164914 6. 46039 7. 850022 6. 232965 6. 590577 6. 653318 6. 577859 5. 410065  
1. 766262 1. 93747 2. 125298 2. 44845 2. 987493 2. 077445 2. 350732 1. 382141 0. 917309  
1. 089222 0. 983199 1. 257341 2. 460855 1. 271216 2. 12727 1. 215139 2. 710431 1. 750606  
2. 37956 1. 958254 2. 24055 3. 400074 2. 519363 2. 603026 2. 32354 2. 444007 1. 300017  
2. 541886 3. 570096 2. 411127 2. 679854 2. 905927 2. 277167 2. 321714 2. 658888 1. 829715  
5. 474301 5. 339846 5. 606696 4. 875731 5. 965153 5. 472544 5. 402179 5. 956334 4. 402479  
4. 762073 2. 763787 4. 370345 2. 609766 3. 378034 5. 920477 4. 217849 4. 342615 5. 7598  
7. 241454 7. 065857 7. 142712 6. 948945 7. 212159 7. 141888 7. 519985 7. 230393 7. 292419  
4. 478893 5. 611832 5. 708059 5. 799751 5. 026931 4. 680335 4. 898167 5. 797067 4. 485533  
1. 251601 1. 929384 7. 509138 5. 144007 2. 748437 3. 588608 4. 120601 4. 598827 1. 68144  
8. 161484 8. 567036 8. 516682 7. 733487 8. 441399 8. 325439 8. 567585 8. 812647 7. 795738  
0. 973647 1. 43944 2. 31478 1. 535555 1. 111664 1. 797097 1. 389806 1. 569797 1. 340184  
6. 278571 6. 185855 6. 44211 6. 28384 6. 396763 6. 379456 6. 068358 6. 388489 6. 365874  
6. 368588 6. 740941 5. 361431 4. 802297 5. 725386 6. 336603 5. 72497 6. 561336 6. 90559  
1. 712368 1. 290174 1. 247312 1. 358961 1. 495298 1. 688583 1. 297586 1. 282896 1. 341306  
7. 551197 7. 675324 7. 74454 7. 401618 7. 575038 6. 702428 7. 906266 7. 320837 7. 224044  
2. 361729 2. 672401 2. 767253 2. 422639 2. 916358 2. 864246 4. 243716 2. 885781 4. 787582  
4. 801723 4. 594991 5. 25648 3. 323391 4. 714882 4. 748003 5. 302903 6. 07054 4. 673964  
1. 471178 0. 995743 1. 250992 1. 981854 1. 445819 1. 591201 1. 765479 1. 396232 2. 053209  
1. 959382 1. 318005 1. 370961 3. 136712 2. 133092 1. 507277 1. 721726 1. 452664 1. 40932  
1. 768781 2. 523603 1. 071149 1. 411584 3. 939736 1. 811946 2. 464452 1. 843224 2. 619196  
4. 132977 4. 103037 3. 555196 5. 763364 6. 155538 4. 251167 3. 558002 4. 550907 3. 800284  
4. 483177 5. 761893 5. 348327 6. 609497 5. 766969 3. 99528 4. 892432 5. 301144 5. 283506  
5. 364565 5. 152814 5. 105701 5. 357751 4. 641826 4. 576835 4. 892916 5. 604104 4. 12932  
3. 39793 2. 618239 3. 125637 1. 738861 3. 304872 2. 46685 2. 303196 3. 066466 2. 927894  
1. 694547 2. 55215 2. 504205 2. 248789 2. 048684 2. 054082 1. 712008 1. 783321 1. 734413  
6. 27464 6. 400644 6. 671079 6. 604158 7. 188495 5. 709248 5. 848775 6. 541161 4. 709716

6.910496 6.632417 6.802036 6.907145 7.073989 5.976903 7.063207 6.88976 7.149635  
5.664231 5.235148 5.058555 3.538847 5.620776 5.256079 2.394286 4.709656 5.776425  
6.047534 4.729131 4.994857 5.225531 4.084994 5.408211 5.052154 2.93652 5.001853  
5.968534 6.048984 5.723571 6.066481 5.740251 5.681628 6.104701 5.81902 5.859216  
8.501968 8.459725 9.002017 8.535115 8.376367 8.646452 8.48657 8.325042 8.748102  
5.183349 4.162668 4.79227 3.968512 4.582202 5.244705 4.608542 4.637667 4.66433  
2.252196 1.48425 1.824313 1.740876 2.33272 1.686536 1.247798 0.994825 2.508237  
6.670353 7.004722 6.70375 6.486797 7.655053 6.55632 7.14999 7.043169 6.837285  
2.292953 2.582911 2.471077 3.060916 2.47491 2.377814 2.152752 2.351229 2.697323  
9.001354 8.769007 9.383911 8.807993 8.884338 8.778145 9.141361 8.82505 8.430228  
7.683065 7.108213 7.353918 7.972834 7.363116 7.228757 7.619832 7.307025 7.71378  
3.385591 4.589118 3.255572 4.411746 3.402241 4.489521 4.692316 3.781819 3.780444  
8.022926 9.167779 8.884333 7.862166 8.119197 8.601229 6.433943 7.18567 7.316715  
3.11355 3.402267 3.858491 3.921308 3.195887 3.082991 2.955598 2.786915 3.841128  
7.62935 7.727154 7.040197 7.139046 7.450631 7.031943 7.805122 7.668125 6.937103  
0.746913 0.878549 1.106356 2.005181 1.665463 0.918033 0.793755 0.592467 1.265438  
1.308031 1.624152 3.115448 3.606682 2.042096 1.755951 3.196502 2.102517 2.099365  
2.45715 2.49045 3.1356 2.715878 3.403873 3.038255 3.179363 2.677093 3.142595  
5.777388 5.787596 5.967161 5.543485 5.837273 5.733771 5.947303 6.105638 5.559481  
5.091334 5.807963 4.627153 5.623692 6.574194 4.02424 5.517113 4.875424 4.843754  
3.675118 3.790967 4.119077 3.178973 4.094854 2.928328 4.086776 3.986782 3.19637  
6.184928 6.266789 6.058555 5.971672 6.561415 6.637528 6.344152 6.410097 6.133967  
2.62053 1.824264 1.220582 1.005589 2.078901 0.741686 1.27242 1.609049 1.898573  
3.751476 4.423732 4.248302 5.640927 5.080645 4.344981 3.651476 4.750923 4.108548  
2.053891 2.489818 2.844623 3.088201 2.96067 3.345837 3.021177 2.414858 1.915993  
3.316485 3.577467 3.295897 3.851362 3.607211 3.399267 3.225005 3.25493 3.098925  
7.079532 6.985244 7.060649 6.604426 7.148047 6.979581 6.805102 7.174366 6.989172  
1.702606 1.657753 1.453859 1.66486 1.793175 2.66516 1.373987 1.945848 1.498559  
6.685323 6.451872 7.14348 6.252084 7.438247 6.06538 6.820212 7.740931 4.091265  
3.281425 3.280807 3.803594 3.564025 4.004726 3.529334 3.886934 4.067835 2.870975  
2.99534 2.630515 2.076322 2.964231 2.201748 3.17004 1.856988 2.151862 2.20897  
6.033918 5.90242 5.966832 5.799066 5.499126 5.853558 5.754526 6.002106 5.005761  
1.841895 2.195639 1.747659 2.145133 2.123598 2.919014 2.302259 1.682339 2.846967  
1.847486 1.725995 1.23742 0.817978 1.573048 1.093316 1.27624 0.889541 1.233723  
3.18478 2.552965 2.134164 3.2605 2.185889 1.853 3.88002 2.978603 2.425009  
1.377907 0.896689 2.253267 2.559609 1.159129 2.021823 1.692723 1.593657 1.192687  
5.813924 5.851452 5.759927 4.966882 5.984145 4.75709 5.962647 5.759199 5.905721  
2.381153 3.744408 2.811479 3.050216 2.422561 1.127567 2.911074 1.602844 1.817841  
5.80064 6.19315 5.293716 5.191515 5.97678 6.261014 6.111934 5.757824 5.771384  
1.026803 2.012112 1.59471 1.690626 1.295258 1.369653 1.493742 1.19811 1.295774  
7.515399 7.119368 7.405585 6.400375 7.294012 7.350693 7.582683 7.558502 7.585732  
1.332194 1.061947 1.054628 2.760068 1.400689 1.633137 1.510617 1.674959 2.482177  
4.508419 3.88642 2.443413 4.276738 4.126919 4.001443 3.277184 3.780141 3.011325  
2.84974 4.41772 3.227552 2.598511 2.88142 3.15038 2.74199 3.083669 2.365837  
4.410608 2.604389 2.694894 1.176496 2.404782 2.165901 2.361657 3.54101 3.074314  
6.720285 6.763105 7.098654 5.505408 6.003405 7.053232 6.689324 6.475754 7.061227  
3.066158 5.034903 4.675066 4.038342 5.103587 4.68304 4.085921 3.506663 4.164601  
3.454221 3.348204 4.505817 4.397431 3.272339 3.895194 3.421424 2.784434 3.911839  
2.380148 2.693821 2.555727 2.602208 2.496017 1.707626 3.203316 2.45049 2.489879  
6.688677 6.42364 7.056767 4.239025 6.573775 6.392106 6.442497 6.70915 6.179726  
5.947888 5.795262 5.783277 3.325028 5.820236 5.050399 4.9846 5.338776 6.512573

6. 350124 6. 113893 6. 038626 6. 329554 6. 624716 6. 535859 6. 37804 6. 384104 7. 02837  
6. 04103 6. 142154 5. 993781 5. 066267 5. 620723 5. 974119 5. 734921 6. 269154 6. 274944  
5. 349993 5. 216765 6. 336592 6. 389576 6. 000049 5. 990189 5. 752262 5. 600658 5. 721674  
3. 39673 3. 099513 3. 9086 2. 923989 3. 769422 3. 385547 2. 742004 3. 363471 3. 532017  
2. 297831 1. 973894 1. 695292 3. 099743 1. 693068 1. 87453 1. 868027 1. 989724 1. 447596  
5. 735827 5. 513962 5. 464282 6. 263137 5. 961808 5. 719195 5. 497273 5. 876292 5. 724085  
5. 65147 5. 920525 4. 78696 4. 193168 6. 318599 6. 259396 5. 853033 5. 64108 4. 095783  
7. 334072 6. 636227 7. 090966 6. 174103 6. 754991 6. 655809 6. 982791 6. 782344 7. 265331  
3. 16601 3. 311334 2. 464843 3. 056627 1. 818574 2. 280105 3. 223404 3. 005662 4. 064323  
11. 39836 11. 16207 11. 34094 11. 11809 11. 39894 11. 30906 11. 54885 11. 02567 11. 62694  
3. 387571 3. 311891 3. 242715 3. 921405 3. 498308 3. 429901 3. 921908 3. 59931 3. 062332  
2. 894431 2. 305089 1. 910472 2. 639923 2. 563372 3. 335729 1. 948615 2. 516096 1. 856203  
7. 742473 7. 38479 7. 743271 6. 960253 7. 306625 8. 118298 7. 420679 7. 817342 7. 53851  
5. 027652 4. 761234 5. 13089 4. 113827 5. 06232 5. 251798 4. 958097 4. 251915 5. 321822  
6. 620457 6. 774189 7. 174577 7. 754649 6. 857244 6. 469204 6. 565958 6. 5903 5. 257238  
8. 248156 7. 947551 7. 933006 8. 337458 8. 112126 8. 54747 8. 301472 8. 324087 8. 077307  
3. 84268 2. 294716 3. 208191 2. 426331 3. 579165 2. 365113 3. 282715 3. 461576 2. 931169  
6. 841705 6. 036718 6. 778857 6. 189288 5. 891784 6. 489463 6. 428527 6. 025545 6. 832551  
5. 914953 6. 058821 5. 716068 6. 10959 5. 93903 5. 727165 6. 222699 5. 628287 6. 184224  
6. 329427 6. 344691 6. 706726 6. 005036 6. 324439 6. 586871 6. 604412 5. 870409 6. 510096  
5. 518797 4. 874197 5. 391014 5. 078525 5. 855999 5. 577877 4. 919014 5. 001996 4. 348252  
5. 633615 5. 723278 5. 287676 6. 060271 4. 832576 4. 751574 4. 86269 5. 907471 4. 895208  
2. 929972 2. 8225 2. 827872 1. 223776 3. 864963 2. 283463 2. 757027 3. 258759 1. 536348  
4. 355325 4. 711995 3. 9491 3. 560664 3. 70529 4. 161711 4. 28391 5. 111054 4. 848915  
2. 182412 2. 341805 1. 902912 2. 156329 1. 285488 1. 551618 2. 443589 1. 974256 2. 457293  
2. 71544 1. 860414 2. 180268 2. 827917 1. 753809 2. 512807 2. 283318 2. 670942 2. 282333  
6. 614409 6. 544516 6. 389735 6. 639387 6. 395104 5. 712678 6. 57079 6. 115022 6. 392672  
2. 935459 2. 641481 3. 564053 3. 056783 2. 86821 2. 531329 3. 423643 2. 391712 3. 50289  
4. 875465 5. 089067 5. 363792 4. 324772 5. 173916 4. 242375 5. 101654 5. 110026 3. 868975  
1. 458141 1. 618672 2. 676372 1. 933221 1. 881364 2. 065276 2. 572431 3. 028171 0. 834135  
4. 158735 3. 555189 3. 900728 3. 578491 4. 356871 3. 295498 4. 16037 4. 42835 5. 079619  
1. 212946 0. 999608 1. 543229 2. 322614 2. 789961 3. 06776 1. 853493 2. 418945 2. 110995  
6. 905506 6. 546713 6. 929777 6. 664623 6. 918459 6. 41 6. 959283 6. 868179 7. 065211  
5. 349644 5. 864755 5. 014821 4. 555989 5. 602524 5. 349726 5. 858048 5. 358757 4. 77748  
3. 269034 2. 679106 2. 95176 3. 114163 3. 434877 2. 827016 2. 552857 2. 598491 3. 240489  
6. 412183 5. 923514 6. 424933 6. 551007 6. 353281 5. 280082 6. 686486 6. 088913 6. 491436  
4. 898009 3. 898109 5. 523966 3. 372445 2. 835122 3. 97246 3. 420632 2. 636977 3. 954708  
4. 352863 3. 120418 3. 658501 4. 428179 4. 579085 4. 636827 4. 316325 4. 519159 4. 723436  
2. 223368 1. 940104 1. 947075 2. 372111 1. 964688 1. 738345 1. 817157 1. 794307 1. 770863  
4. 274589 4. 35512 3. 879214 4. 941355 4. 065243 4. 624097 3. 818765 4. 77998 4. 374322  
6. 061994 5. 734502 6. 145922 5. 432287 5. 901397 5. 711832 5. 844923 6. 355656 6. 119049  
4. 69861 5. 145878 5. 764715 5. 889501 5. 183341 5. 558307 5. 622633 5. 511861 4. 40871  
1. 633046 1. 804518 1. 9543 2. 011584 1. 452767 1. 649132 1. 747001 1. 836782 1. 699669  
2. 245498 2. 322739 2. 797968 3. 105143 2. 368598 2. 301703 2. 430055 2. 753851 2. 431396  
4. 566855 4. 542695 4. 221842 5. 654206 4. 120027 4. 184351 3. 986524 3. 678438 4. 083745  
6. 167666 6. 32851 5. 732377 6. 457223 6. 420864 5. 605171 5. 987907 6. 458907 6. 517006  
6. 81595 6. 794295 7. 003238 6. 604017 7. 041753 6. 420901 7. 380377 7. 107159 6. 922378  
4. 016402 3. 60355 3. 489363 4. 601948 4. 185379 3. 665247 4. 591955 3. 810113 4. 194409  
1. 764985 1. 88527 2. 040082 2. 308751 2. 350219 2. 513269 1. 737399 2. 477988 2. 134254  
7. 742885 7. 240389 6. 342833 7. 332213 6. 545071 6. 489141 7. 239391 7. 118332 5. 811322  
3. 199501 3. 407885 2. 747859 3. 094378 2. 951449 3. 279232 3. 846672 3. 144827 4. 022687

5. 977948 6. 26881 5. 853465 6. 518463 5. 891872 5. 525776 6. 417659 5. 670799 5. 778369  
8. 318572 8. 30587 8. 068684 8. 50727 8. 277939 8. 479312 8. 088324 8. 134012 7. 966023  
2. 033093 2. 296709 1. 186002 1. 40713 3. 097485 1. 806312 1. 224232 1. 073964 1. 309685  
5. 438061 5. 475155 5. 69037 4. 544093 5. 02383 5. 548501 5. 053171 5. 032303 4. 520721  
5. 717001 5. 570122 5. 643169 5. 49798 5. 402562 4. 967468 5. 448032 5. 320188 5. 967798  
8. 204997 8. 245294 8. 518632 7. 166552 8. 604147 8. 127775 8. 104245 8. 119775 7. 811155  
6. 013586 6. 119441 5. 89596 5. 385358 5. 315762 6. 752137 5. 835868 5. 928075 6. 627916  
2. 004038 3. 559409 3. 922202 3. 931065 2. 848796 2. 717389 3. 30994 3. 409714 2. 88905  
4. 509798 4. 521066 4. 556096 4. 843348 4. 811311 4. 329749 4. 144105 4. 673838 3. 897822  
1. 331347 1. 311408 2. 009143 2. 491575 1. 73925 2. 086455 2. 722115 2. 272431 2. 257906  
2. 057777 3. 339125 3. 639885 4. 033085 2. 387701 3. 515651 3. 060603 3. 28292 2. 993586  
3. 340325 1. 423178 3. 036751 2. 358288 0. 929844 1. 80837 1. 577128 2. 299325 1. 870434  
6. 971949 7. 016868 6. 695191 7. 527197 7. 015543 6. 936428 6. 5204 6. 957101 5. 950562  
2. 708532 1. 602587 2. 013353 2. 11403 2. 348432 2. 111707 2. 500119 1. 797329 1. 845019  
4. 056455 4. 608127 2. 44854 3. 428781 6. 946284 3. 646081 4. 046746 4. 599376 5. 361557  
5. 826981 5. 770127 5. 595935 4. 948808 5. 969802 4. 813219 5. 940332 5. 620142 5. 666345  
2. 70074 2. 070408 2. 10755 2. 191757 1. 695444 2. 900857 1. 885347 2. 135334 1. 936203  
5. 743985 5. 646026 5. 222774 5. 65075 5. 423172 5. 437929 6. 366391 5. 644581 5. 543686  
6. 490875 6. 636134 6. 420655 6. 70405 6. 447375 6. 431895 6. 711588 6. 520129 6. 699218  
7. 017366 7. 046528 7. 501496 7. 245376 7. 359799 6. 909258 7. 478105 7. 300379 6. 674983  
3. 868447 3. 672403 4. 280359 4. 016029 5. 773296 4. 284258 3. 936925 4. 349264 3. 649183  
4. 902195 5. 470725 5. 926525 6. 056497 5. 195036 6. 083366 6. 02817 5. 761151 5. 704698  
3. 671179 3. 699239 3. 417107 2. 863747 3. 645437 3. 366282 3. 095614 3. 674518 4. 23937  
2. 24588 1. 359354 1. 0353 2. 409537 1. 519153 1. 546428 1. 371499 1. 670188 2. 097906  
1. 537217 1. 763757 1. 877271 1. 536779 2. 237502 1. 853249 2. 08936 1. 373318 1. 123139  
5. 892615 6. 353341 7. 103142 6. 843473 6. 655637 5. 100143 6. 199646 6. 722367 5. 455191  
4. 222214 4. 167605 5. 137316 3. 949609 3. 169155 5. 220907 3. 618788 4. 842461 4. 17869  
4. 889776 2. 69797 2. 397646 3. 74301 2. 215016 2. 318287 2. 68947 3. 057223 2. 975828  
7. 287657 7. 7012 7. 675203 6. 910411 7. 619915 7. 65676 7. 564419 7. 176785 6. 416124  
2. 140323 3. 459177 1. 80108 1. 946277 1. 817035 3. 220731 2. 342354 2. 066417 1. 498598  
4. 577993 3. 496741 4. 323753 3. 303923 4. 761578 3. 780942 3. 772984 3. 853734 3. 593802  
4. 158598 3. 14208 3. 841015 4. 492026 3. 941358 3. 155968 4. 449267 4. 447614 4. 701724  
3. 715326 4. 754886 4. 56613 4. 178145 4. 714323 4. 863805 4. 475961 4. 624664 4. 126976  
3. 445235 4. 452562 3. 247462 3. 578292 4. 516871 3. 561527 3. 620434 3. 258504 3. 295045  
4. 792535 4. 727442 5. 152248 3. 981582 5. 060534 4. 572162 4. 223409 4. 718051 4. 52869  
4. 860432 4. 231757 5. 221645 3. 836645 4. 300115 3. 812872 4. 718899 4. 668459 4. 244268  
2. 301833 3. 304134 3. 594734 3. 766574 3. 408207 3. 455224 3. 03848 3. 296703 3. 082908  
3. 21535 4. 297211 4. 015303 4. 521926 3. 041881 3. 391436 3. 378533 3. 765636 3. 082456  
5. 92563 5. 829302 6. 602687 5. 539376 6. 109597 6. 279428 6. 608777 6. 10589 6. 135433  
1. 850996 1. 57075 2. 093438 1. 402745 1. 509193 1. 782881 2. 062693 1. 070265 1. 490781  
4. 953886 5. 262695 5. 589282 5. 634315 5. 270823 5. 348451 5. 439574 5. 559259 5. 373394  
6. 947857 6. 585084 6. 293961 6. 858218 6. 879391 6. 746055 6. 874431 7. 041048 7. 559013  
4. 726401 4. 50678 4. 695974 4. 287515 5. 28829 4. 152492 4. 947459 4. 982486 5. 101335  
1. 850421 1. 401658 1. 681751 1. 390702 1. 590224 1. 342073 1. 824922 1. 683684 1. 832753  
4. 737291 4. 40376 5. 055598 2. 79196 4. 855334 4. 83864 4. 290471 5. 045598 2. 556717  
2. 339975 1. 706681 2. 252741 2. 098381 2. 093384 2. 652013 2. 610615 1. 869903 2. 60826  
6. 674632 6. 657024 6. 882866 6. 753916 6. 253614 6. 301589 6. 44705 6. 656012 5. 263292  
3. 22723 2. 29035 3. 025283 2. 966473 2. 548001 2. 973085 2. 686478 2. 476476 2. 755122  
2. 180215 2. 711865 1. 952564 1. 782006 2. 482226 2. 647392 2. 580856 2. 731453 3. 252554  
4. 678468 4. 541721 4. 47714 4. 409922 4. 858745 4. 134472 4. 471052 4. 72529 4. 74505  
1. 334083 1. 558156 1. 333504 1. 723547 1. 417394 1. 928392 1. 049857 1. 068988 1. 574372



6. 437249 6. 278615 6. 597236 5. 701012 6. 433711 6. 243978 6. 557061 6. 438275 6. 582622  
3. 366417 3. 368692 2. 521129 3. 594759 3. 089803 2. 473437 2. 467505 2. 986489 3. 202519  
1. 859252 2. 000297 1. 728465 4. 197288 4. 038078 1. 548165 2. 761899 2. 77341 1. 280967  
3. 207197 3. 555915 3. 187732 4. 66701 4. 968556 2. 352362 3. 190994 3. 483681 2. 152223  
1. 739056 1. 299978 1. 953982 2. 079269 1. 611263 1. 650821 2. 182204 1. 850362 1. 497073  
9. 857652 9. 568981 9. 642335 9. 144571 9. 584567 9. 515889 9. 96699 9. 517458 10. 0117  
5. 207903 5. 663766 5. 197447 5. 248844 5. 35742 5. 247622 5. 204356 5. 754699 4. 668896  
4. 832447 3. 890755 4. 279645 5. 440293 3. 179341 3. 228321 4. 766873 3. 095538 3. 439452  
2. 664692 2. 771518 2. 338159 3. 385898 2. 664329 3. 003914 2. 522951 3. 386075 1. 66254  
5. 317645 6. 054095 4. 801907 4. 653551 4. 837566 4. 651603 5. 189526 4. 794743 3. 162693  
2. 055652 2. 628354 2. 575469 2. 366158 3. 066627 3. 308057 2. 489078 1. 73581 2. 194549  
4. 88509 4. 749585 4. 854371 4. 894697 4. 843568 4. 803339 5. 031929 4. 955936 3. 24811  
2. 00666 2. 872632 4. 403199 3. 933797 1. 924598 2. 645506 3. 072454 2. 802224 3. 047471  
6. 708354 6. 809564 6. 356517 7. 319578 6. 740933 6. 319475 6. 663298 6. 513367 6. 416013  
4. 498064 3. 581343 3. 650094 4. 394348 3. 931615 4. 144977 3. 386502 3. 874804 3. 660019  
8. 604564 8. 27634 8. 195981 8. 119703 8. 472142 8. 392192 8. 501969 8. 389358 8. 189485  
6. 431499 6. 184089 5. 249558 6. 217734 6. 338277 5. 021456 6. 518214 5. 667902 6. 836904  
6. 384395 6. 731187 6. 379691 5. 993554 6. 47462 6. 423651 6. 784457 6. 445223 6. 02392  
2. 58106 3. 474777 4. 07576 4. 289935 3. 220883 3. 445098 4. 155501 4. 074113 3. 668347  
3. 23488 2. 997517 2. 997923 3. 672579 3. 145425 3. 309476 2. 729836 3. 388818 2. 256724  
3. 652455 3. 164226 3. 062481 4. 00623 3. 451476 2. 517904 4. 295762 2. 73172 2. 791907  
4. 371009 3. 240593 4. 266525 2. 87268 3. 794248 4. 07406 4. 171676 3. 988852 3. 869905  
9. 075841 9. 299108 9. 686249 8. 983171 9. 217684 8. 988073 9. 104952 9. 4806 8. 96309  
6. 785197 6. 354836 6. 219615 5. 783031 6. 323208 6. 49885 6. 285376 6. 49885 6. 707158  
7. 276477 7. 126847 7. 097676 7. 112822 6. 707925 7. 357368 7. 484575 7. 251917 7. 249976  
5. 347021 5. 283134 5. 848624 4. 906461 4. 86165 5. 681049 4. 514845 5. 216783 5. 85923  
2. 550184 4. 031666 2. 182118 2. 713487 3. 277665 2. 22988 3. 982815 4. 058995 3. 532407  
6. 648592 5. 566882 6. 483174 6. 37655 6. 152596 6. 88053 5. 367321 6. 05768 6. 342002  
2. 960496 2. 927083 2. 556425 2. 496516 2. 891685 2. 533835 3. 690167 2. 987339 2. 396875  
7. 433249 7. 296618 7. 068253 7. 415134 6. 677458 7. 509065 6. 824522 7. 533571 5. 910649  
7. 031655 6. 834723 6. 988592 7. 160914 6. 97096 6. 254388 7. 184261 6. 83562 6. 52338  
2. 120097 1. 510253 2. 042217 1. 437827 1. 697202 2. 268263 2. 002661 2. 363619 1. 917103  
2. 695481 3. 079275 2. 458495 2. 305313 1. 881588 2. 57745 2. 127934 2. 019612 0. 90174  
7. 540162 7. 574252 7. 824287 8. 498381 8. 003735 7. 621283 7. 585428 7. 965822 7. 141129  
3. 938988 3. 649786 4. 129446 4. 247314 4. 472093 3. 692674 4. 291961 3. 479618 3. 947035  
4. 595623 5. 524938 3. 833564 4. 913554 4. 829412 4. 969945 5. 131669 4. 784772 3. 983954  
4. 787389 5. 4097 5. 00465 4. 252038 5. 401284 4. 984274 5. 201827 5. 39244 4. 228195  
7. 03189 7. 472099 6. 895586 5. 448476 7. 39569 6. 801404 7. 942465 7. 542206 7. 473003  
6. 246443 5. 691909 5. 903403 5. 450678 6. 040025 5. 713919 6. 093862 5. 94135 6. 17145  
10. 49842 10. 63649 10. 40922 10. 24288 10. 39245 10. 24984 10. 51635 10. 69709 10. 14529  
5. 268648 6. 359051 5. 961902 4. 198343 5. 556764 5. 971539 5. 347691 5. 940831 4. 516415  
1. 640534 1. 469947 1. 149831 1. 675125 1. 231439 1. 621133 1. 126255 1. 883357 1. 438955  
1. 390757 1. 47674 0. 980277 1. 504532 1. 025852 1. 620145 1. 823075 1. 075305 1. 157087  
7. 199018 6. 783562 6. 577492 6. 004623 7. 231149 5. 929791 7. 42761 6. 81537 6. 846082  
5. 109099 5. 539968 5. 560442 6. 427264 5. 444325 4. 570268 5. 889358 5. 293392 5. 703094  
7. 240385 6. 694408 7. 322866 7. 164405 7. 664897 7. 19373 6. 952794 6. 980333 6. 084995  
1. 288787 1. 383071 1. 82408 2. 02956 2. 14984 1. 446688 1. 565066 2. 210551 1. 589346  
7. 864566 8. 312111 7. 873473 7. 558964 7. 841259 7. 77996 7. 853555 7. 955396 8. 104129  
6. 902987 6. 551097 7. 440207 6. 280064 7. 040077 7. 139862 6. 624297 6. 884762 6. 651761  
3. 869703 4. 151635 3. 743408 3. 933823 3. 975844 3. 48617 4. 392144 4. 007782 3. 567416  
5. 219546 5. 131827 5. 33678 5. 431238 5. 509156 5. 371557 4. 74289 5. 568491 4. 197374

2. 318615 3. 360873 3. 797434 2. 472538 3. 077208 3. 420328 4. 559412 3. 478661 2. 584848  
6. 380067 5. 692272 5. 578181 6. 149458 6. 898742 6. 023346 5. 952468 5. 389223 5. 090961  
3. 351535 3. 19471 2. 215685 2. 448275 3. 957397 2. 268707 4. 426065 2. 632223 2. 905492  
8. 584577 8. 400453 8. 457454 8. 355126 8. 365637 8. 348505 8. 6461 8. 664841 7. 772962  
7. 56539 7. 885947 7. 514921 7. 241675 7. 617743 8. 117774 7. 308159 7. 724627 6. 800896  
1. 860761 1. 954023 2. 766332 2. 437293 1. 545377 1. 948221 2. 912859 1. 91469 2. 10135  
4. 207198 4. 509533 4. 242977 3. 538441 3. 636612 4. 154598 4. 351985 4. 190838 4. 282778  
3. 767352 3. 791373 4. 358153 4. 663441 4. 137349 2. 63433 2. 960934 3. 810635 3. 980187  
2. 144767 2. 085482 1. 94117 2. 297971 1. 81938 2. 27443 1. 979518 2. 46417 1. 547462  
6. 556022 6. 330386 5. 813501 5. 906796 6. 055635 6. 17278 5. 596428 6. 34417 4. 964359  
3. 184213 3. 342596 2. 997583 3. 547114 2. 965803 1. 996704 2. 624847 2. 445586 2. 840721  
4. 325955 4. 257634 4. 531496 4. 896696 4. 262961 4. 638157 3. 781788 4. 658263 3. 512292  
2. 94084 4. 096662 3. 526417 3. 869521 3. 799027 3. 23355 3. 435505 3. 807489 3. 290759  
2. 349376 1. 878706 2. 684976 2. 534937 2. 637441 3. 066717 2. 184374 2. 218631 1. 614942  
1. 629137 1. 677316 1. 657846 1. 155047 1. 494716 1. 689988 1. 362373 1. 713681 2. 052565  
2. 398149 1. 280485 1. 670991 1. 868325 2. 75478 1. 668271 2. 157831 2. 250436 1. 726298  
1. 515423 1. 514273 1. 582534 2. 32865 2. 050346 1. 474254 1. 643588 1. 753452 1. 688334  
2. 46974 2. 691485 3. 256961 2. 86769 2. 993601 2. 99202 2. 978458 2. 33039 2. 227183  
4. 437361 4. 41743 4. 523049 4. 434978 3. 510015 4. 456127 4. 661412 4. 504012 4. 138665  
1. 280574 1. 211569 1. 215705 2. 540026 0. 662046 2. 369991 1. 133976 0. 981906 1. 236766  
2. 133961 1. 883974 2. 009014 2. 885282 1. 362898 1. 887099 2. 879998 1. 879668 1. 839396  
3. 081753 2. 166351 1. 844453 2. 439536 1. 765634 1. 842697 1. 729033 2. 15203 2. 344126  
7. 211201 7. 194338 7. 371892 6. 42943 7. 341914 7. 209572 7. 433063 7. 046621 6. 39849  
2. 107666 2. 471831 2. 095455 2. 975571 2. 408994 2. 965974 2. 585977 2. 940013 3. 780521  
4. 629298 4. 572159 4. 642324 1. 736396 2. 738478 2. 715817 4. 243575 2. 565257 4. 157601  
2. 23702 1. 754305 0. 899067 1. 522343 1. 456451 2. 755874 1. 553663 1. 440809 1. 545757  
2. 379822 1. 755262 2. 473298 1. 29787 2. 547394 1. 121523 1. 003879 1. 820243 2. 241895  
3. 249007 2. 696555 2. 506082 4. 096066 4. 010405 2. 416948 3. 078174 2. 844091 2. 820801  
0. 775443 1. 135418 1. 154463 1. 068926 1. 02026 1. 135291 0. 970008 1. 447304 1. 336283  
4. 138665 4. 078808 3. 745354 4. 894099 3. 907832 3. 910524 3. 503571 3. 704555 4. 003361  
1. 383413 1. 029434 2. 704856 1. 142155 1. 505187 2. 290746 1. 115701 1. 181239 3. 123982  
1. 971391 1. 321288 1. 857791 2. 328112 1. 109809 1. 193998 2. 133508 2. 66845 1. 420569  
1. 760634 1. 467775 1. 428678 1. 947844 1. 157393 1. 929934 2. 005924 1. 405138 1. 834013  
5. 560297 5. 476374 5. 988383 6. 455588 5. 710723 5. 113643 5. 286071 5. 539143 6. 733459  
5. 284925 6. 175389 6. 119524 4. 939306 5. 905165 4. 881853 5. 695507 6. 631488 5. 970868  
2. 048663 1. 949405 2. 814157 2. 094144 1. 743555 1. 7865 2. 200998 2. 246013 1. 681999  
4. 193764 5. 073536 4. 760081 4. 350766 4. 833385 5. 319543 4. 992177 4. 793961 4. 330939  
3. 755204 3. 661461 4. 087418 2. 338134 2. 892202 4. 300375 4. 299105 4. 301489 3. 573327  
1. 834753 1. 777788 1. 779172 1. 95704 2. 256745 2. 481176 1. 881433 1. 932699 1. 751469  
1. 686986 2. 319952 2. 031983 2. 52155 1. 404503 1. 489572 1. 610326 1. 833636 1. 609054  
7. 335153 6. 52957 5. 561132 5. 742019 5. 452961 6. 633628 5. 81529 6. 444638 6. 944243  
1. 914457 1. 529884 1. 781151 3. 122231 2. 37506 2. 345714 1. 863296 1. 966415 2. 6368  
4. 617325 4. 910453 5. 705044 3. 394173 5. 233572 4. 885026 6. 29505 5. 147299 5. 062967  
3. 854321 1. 669594 4. 52824 4. 337815 1. 281543 3. 982826 5. 070235 3. 977317 2. 816384  
1. 308279 2. 355094 2. 257049 2. 117724 1. 383092 2. 06029 1. 674605 2. 030139 2. 039939  
4. 325359 4. 456497 4. 597117 2. 114936 4. 465851 3. 657322 4. 670461 4. 47079 5. 158969  
3. 725997 2. 275059 0. 732926 3. 457914 2. 111778 3. 261606 1. 354533 2. 738396 2. 400916  
0. 917407 2. 266348 0. 418926 1. 769718 2. 332724 1. 021891 1. 114298 2. 298992 1. 45109  
3. 640108 2. 810716 3. 332466 3. 705349 2. 971852 3. 520394 3. 588608 3. 248041 4. 222805  
1. 70393 1. 903052 2. 275915 1. 713359 1. 722894 2. 582196 2. 278337 1. 868495 2. 140703  
3. 019916 2. 39355 2. 100312 2. 785061 3. 984413 3. 180148 2. 138953 1. 492411 2. 444166

10. 30875 9. 733716 9. 937205 10. 03086 9. 613271 10. 1458 9. 980666 9. 2503 9. 730453  
2. 40807 1. 751962 2. 12872 3. 090582 2. 103419 1. 62313 2. 715885 2. 372295 2. 324751  
2. 510662 3. 848458 2. 714012 2. 22494 2. 987652 2. 970376 2. 387301 3. 049522 1. 946988  
3. 212388 2. 374813 3. 427449 2. 323991 2. 503357 2. 526594 3. 185632 2. 924934 2. 966654  
4. 038168 4. 753062 5. 473575 4. 123848 4. 466963 5. 54991 3. 617478 4. 29986 3. 958006  
1. 281481 2. 17751 1. 535986 2. 991724 2. 220282 3. 226031 1. 741253 1. 725825 3. 819583  
4. 695129 3. 811327 4. 288082 3. 800923 4. 000712 4. 485024 4. 569434 4. 106197 4. 42443  
3. 722693 3. 119553 4. 459319 3. 881801 1. 997745 1. 365421 2. 788178 3. 63565 3. 890874  
1. 95292 2. 578093 1. 71582 2. 374391 1. 648972 1. 788162 1. 801319 2. 041944 2. 141668  
2. 920332 4. 091017 4. 525395 5. 568269 4. 947139 3. 623423 4. 158936 4. 695084 4. 193316  
4. 658925 4. 225656 4. 206756 5. 386631 5. 582464 4. 374208 4. 848428 4. 417762 3. 716151  
1. 152684 1. 935125 1. 915622 2. 31553 1. 133795 1. 710442 1. 441976 1. 727452 1. 076872  
1. 351186 1. 679917 1. 542697 2. 305184 1. 649399 2. 645655 1. 302469 1. 448246 1. 12922  
2. 376152 1. 997582 1. 872719 2. 129602 1. 760218 1. 756325 1. 935792 1. 406877 2. 04741  
5. 086343 5. 113295 4. 816233 4. 542609 4. 737553 4. 804994 5. 040048 4. 609857 5. 120336  
2. 897864 2. 727784 2. 378069 3. 253358 2. 785513 2. 671231 2. 927552 2. 452266 2. 130279  
2. 078165 1. 976912 2. 210018 2. 812181 2. 453304 2. 355974 1. 852994 1. 89731 1. 854836  
4. 626654 4. 928483 5. 016797 5. 416266 5. 277862 4. 970824 4. 671258 5. 509612 3. 790412  
4. 212101 3. 717256 3. 700928 5. 315837 3. 851031 4. 504403 3. 58726 2. 665158 3. 540239  
1. 994319 1. 981834 2. 022554 1. 679789 2. 009925 1. 519102 2. 095192 2. 114969 1. 475101  
1. 427351 1. 661786 1. 49928 1. 663886 1. 300682 1. 377658 1. 530161 1. 170229 1. 769896  
2. 340393 2. 311215 2. 645022 2. 509752 3. 292279 2. 641739 3. 010554 2. 309076 2. 968761  
2. 835883 3. 663565 2. 466267 2. 6343 3. 297184 3. 098206 2. 286845 2. 916479 2. 071838  
5. 082154 4. 841207 3. 841295 5. 199672 4. 344615 5. 204825 4. 211722 5. 34365 4. 571961  
1. 775003 1. 598429 1. 978795 1. 981227 1. 737808 2. 255163 2. 063378 2. 181465 3. 114516  
6. 67198 6. 898891 6. 686915 7. 44545 7. 21605 7. 616362 7. 333251 7. 04543 6. 28333  
2. 51533 2. 542172 2. 812821 3. 669082 3. 799 2. 544365 2. 75044 3. 284912 2. 961853  
2. 046778 1. 939564 1. 767142 1. 83068 1. 789586 1. 975094 1. 758043 1. 577296 2. 056279  
3. 414594 2. 770577 3. 516017 2. 353789 2. 483436 5. 030818 2. 811238 3. 096704 2. 834602  
1. 772124 1. 955 2. 185795 1. 869607 1. 538123 2. 586275 1. 445655 2. 299049 1. 531653  
6. 350916 5. 25654 5. 869136 5. 102612 6. 195793 4. 857588 6. 102176 5. 745653 6. 795901  
5. 570886 5. 391326 5. 41024 3. 497569 5. 249271 5. 272306 5. 414502 5. 334555 5. 170289  
2. 489936 2. 702747 3. 044136 3. 248825 2. 369549 2. 588835 2. 880332 2. 72509 2. 284215  
4. 541166 4. 208732 4. 854795 4. 07462 4. 330833 3. 876263 5. 253629 3. 806604 3. 307447  
5. 1996 5. 200861 5. 213492 4. 948708 5. 451274 4. 940956 5. 536968 5. 508438 6. 76322  
3. 865677 3. 571368 3. 848325 3. 258441 3. 836179 3. 681304 4. 44068 4. 56021 4. 035891  
1. 728014 1. 291894 0. 853196 1. 479841 2. 173704 1. 285088 2. 31338 1. 145355 2. 054426  
4. 423758 4. 430339 5. 190382 4. 771651 4. 672962 3. 938537 5. 034671 4. 624595 4. 778444  
1. 612615 1. 63645 1. 505363 2. 224439 1. 49399 2. 870087 1. 60955 1. 902482 3. 427172  
4. 392809 5. 715733 5. 382848 4. 656697 5. 770364 5. 416272 4. 812978 5. 315383 5. 348345  
2. 227704 2. 322929 2. 642494 2. 50173 1. 613527 2. 743657 1. 68833 2. 258282 2. 568437  
1. 801148 1. 993128 2. 133087 1. 80995 2. 282604 1. 875197 3. 592485 2. 524299 1. 664966  
2. 260899 1. 829582 2. 695802 1. 97665 1. 889086 2. 251775 2. 387248 2. 305409 1. 908946  
4. 888671 6. 350989 6. 429529 6. 058015 6. 232434 6. 509794 5. 24206 6. 685293 7. 135374  
2. 726922 2. 451053 3. 408755 2. 982995 2. 547582 3. 695083 2. 398134 2. 711557 2. 512786  
5. 233352 4. 405661 5. 223332 5. 798391 5. 174693 5. 692763 4. 767075 4. 536501 5. 778718  
3. 866603 4. 017421 3. 817351 2. 248963 3. 889872 3. 801938 3. 60504 3. 768551 3. 217644  
2. 027891 2. 24278 2. 151207 2. 421681 1. 546806 2. 546326 2. 276941 2. 341014 2. 15505  
1. 738771 1. 34058 1. 478264 2. 383096 1. 916258 2. 236629 1. 750754 2. 991744 1. 846395  
5. 659871 5. 373192 5. 052583 4. 631823 4. 806541 4. 864233 5. 795209 5. 46676 5. 594807  
3. 534209 4. 25182 3. 992845 3. 988514 3. 848562 4. 361421 3. 669581 3. 670837 2. 275982

2. 375259 2. 253254 2. 90889 2. 257506 2. 867969 2. 538938 2. 443222 2. 126256 3. 041533  
2. 09125 1. 474917 2. 226986 1. 52322 2. 279866 1. 680517 1. 641275 2. 275427 1. 631107  
7. 3625 7. 212411 6. 852166 7. 192857 7. 119137 7. 092114 7. 339169 7. 356637 7. 070535  
7. 127106 6. 933215 7. 365923 6. 145371 6. 565241 6. 102147 6. 994038 6. 983348 7. 306748  
5. 241495 5. 751161 4. 648716 4. 21687 5. 299901 4. 733597 4. 842513 5. 52201 5. 963039  
4. 492513 5. 141841 4. 40155 4. 939223 5. 119894 4. 525929 4. 502425 5. 299262 5. 190733  
3. 466859 3. 70723 4. 008224 4. 196299 4. 017801 3. 812028 4. 731176 4. 763335 2. 801413  
1. 973115 3. 030465 2. 106343 3. 06485 2. 284087 1. 750062 1. 77402 2. 050206 1. 681531  
3. 591102 0. 458619 5. 490146 3. 915475 3. 38013 5. 128995 4. 114544 4. 478955 3. 212553  
2. 049201 1. 848587 2. 759178 2. 987949 2. 688457 2. 559166 2. 32625 1. 697112 2. 237786  
3. 994828 3. 646763 3. 718224 4. 808134 4. 904052 2. 902142 4. 30354 3. 274168 2. 675855  
2. 643153 1. 461548 2. 381472 2. 944229 1. 995717 2. 066646 2. 878719 2. 635964 2. 900366  
5. 010638 4. 965105 3. 975308 5. 463128 3. 122588 4. 121785 4. 402333 5. 068547 4. 378536  
8. 24729 8. 431242 8. 453216 8. 800855 8. 671693 8. 05424 8. 601562 9. 016334 8. 078616  
6. 514666 6. 598525 6. 420217 6. 433905 6. 315097 6. 052734 6. 942603 6. 789596 6. 670136  
6. 738711 6. 826295 6. 876756 6. 436257 6. 544677 6. 24179 6. 850085 6. 741636 7. 169602  
6. 743172 6. 215598 6. 329189 6. 278836 6. 526223 6. 152912 6. 816581 6. 874075 7. 09878  
0. 915566 1. 45271 1. 13747 1. 047458 1. 124005 1. 859244 1. 812522 1. 584156 1. 68258  
6. 876653 6. 638592 6. 791068 6. 458609 6. 946487 5. 935233 6. 528082 6. 902932 6. 728131  
6. 067128 6. 267915 6. 044475 6. 923648 6. 476072 5. 585952 5. 281171 6. 006653 5. 744063  
4. 365546 4. 440299 3. 888563 3. 465874 4. 401177 4. 465769 3. 98612 4. 388441 3. 834006  
7. 033598 7. 491922 7. 980646 6. 638644 6. 737451 6. 700668 6. 540965 7. 208772 5. 52723  
4. 566435 4. 947799 4. 665889 3. 437954 4. 743704 4. 972067 3. 767488 4. 887095 3. 773593  
1. 181195 1. 972237 1. 895433 1. 607292 1. 152971 1. 780124 1. 441364 1. 386732 1. 878139  
1. 285422 1. 210868 1. 412206 1. 529931 1. 260777 1. 756269 1. 390454 1. 724454 2. 053913  
4. 014134 3. 503197 3. 846967 3. 75089 4. 11195 3. 218184 4. 42431 3. 074655 2. 753134  
1. 109315 1. 430745 1. 062842 1. 799314 1. 168704 2. 342256 1. 26617 0. 778366 1. 650447  
5. 59797 5. 751123 6. 422998 7. 159009 6. 143128 6. 305892 6. 291967 6. 348001 5. 743793  
4. 972423 5. 642829 5. 883114 5. 622551 5. 713103 4. 556658 5. 575116 5. 779591 4. 043057  
5. 678925 5. 558684 5. 944266 4. 490154 6. 063687 5. 194929 6. 23618 5. 62189 5. 562383  
1. 118125 1. 652446 0. 87351 1. 036018 1. 031835 1. 868481 1. 482717 0. 904138 1. 793141  
1. 749569 3. 131338 2. 548793 2. 069016 2. 971538 2. 531475 2. 441928 3. 098571 2. 402469  
3. 1129 2. 15901 2. 039348 3. 082416 2. 264403 2. 088897 2. 424396 2. 530018 3. 35495  
5. 432715 4. 956871 5. 308025 3. 863414 5. 550942 5. 090688 5. 031963 5. 242987 5. 504749  
6. 926416 6. 701934 6. 612294 7. 462544 6. 461224 7. 935532 7. 228282 7. 429821 6. 378369  
4. 567242 4. 310313 5. 209421 4. 968629 4. 289025 4. 354486 4. 523824 4. 101943 5. 824066  
6. 031062 5. 471501 4. 439579 3. 48283 5. 207304 6. 415953 4. 64134 5. 290995 4. 413619  
2. 885913 1. 614837 1. 289465 1. 580561 0. 940966 1. 054748 1. 459809 1. 669353 0. 98019  
6. 132458 6. 236066 5. 904981 5. 515428 5. 752445 6. 057146 6. 048519 5. 927297 5. 981111  
6. 408165 6. 74218 6. 215859 6. 336123 6. 275271 6. 533622 6. 579203 6. 171237 5. 484606  
7. 487068 7. 539541 7. 415877 7. 259624 6. 817737 7. 4369 7. 639284 6. 632166 7. 911877  
4. 770269 6. 43495 5. 692653 5. 727766 5. 803829 5. 741807 4. 756269 5. 612726 5. 623104  
3. 215326 3. 215326 3. 547322 3. 012115 3. 093502 2. 314166 3. 649217 3. 001903 2. 209544  
1. 182537 1. 303753 2. 515119 1. 731499 1. 691824 1. 393462 1. 56475 1. 711792 1. 472054  
1. 576235 2. 013933 1. 552584 3. 29268 2. 173069 1. 483295 1. 903753 2. 483602 1. 514522  
5. 898099 5. 579206 5. 743229 5. 963755 5. 920902 5. 398324 5. 76974 5. 333721 5. 765743  
7. 644916 7. 320667 7. 180289 7. 122171 7. 767971 6. 978432 7. 512406 6. 9062 6. 855136  
3. 858084 3. 937658 3. 720902 2. 774724 5. 675609 2. 689413 2. 479967 5. 287945 3. 558706  
2. 662902 2. 95517 3. 324737 3. 589517 3. 177663 2. 711827 2. 626361 2. 48092 2. 864008  
8. 655281 8. 251039 8. 516972 8. 09196 7. 901103 8. 477341 8. 440118 8. 539342 8. 17361  
8. 509552 8. 275516 8. 395627 8. 045219 8. 026006 7. 576586 8. 616856 8. 092748 8. 459364

5.015003 5.141938 5.128777 4.602682 5.167919 4.186563 4.787706 4.575891 5.260431  
3.639809 3.574717 2.81709 3.011426 2.600119 3.30759 2.97966 3.213243 4.020891  
2.712716 3.336201 1.872837 1.325877 2.597002 2.610161 2.712846 3.426447 2.32811  
5.3499 6.052187 5.606465 5.43135 5.569363 5.258577 5.97811 5.54985 6.010782  
4.288883 3.927809 4.599249 3.916723 4.186268 4.774867 4.332318 4.206663 3.940321  
3.629684 3.653545 4.025015 2.936321 2.36374 3.469928 3.134098 3.389461 2.759328  
2.685902 2.234845 3.206736 2.998666 2.973481 2.992645 2.778059 1.985824 2.562224  
2.177424 1.851061 1.852815 2.840463 1.572719 2.089388 1.831887 2.046093 2.076135  
8.202503 8.507134 8.088776 7.988051 8.526578 8.069609 8.27675 8.448196 7.843749  
2.912612 2.433085 1.720002 2.301942 1.643607 2.186646 1.905428 1.525401 2.918634  
3.142418 3.142914 1.375588 4.500869 3.732417 3.4685 2.965945 3.04508 2.149455  
8.014948 8.111907 7.960154 8.47793 8.37001 7.217431 7.938247 8.438633 8.457215  
3.548233 3.22248 2.478129 3.577405 3.406056 3.365201 3.588663 4.249045 4.239772  
1.329346 2.622245 2.007545 2.436684 2.44388 2.885649 1.469272 1.711078 1.845333  
3.33641 3.346663 3.615446 4.33936 3.524126 3.634459 3.161808 3.388015 2.431148  
1.512564 1.913116 1.679861 3.099915 1.804925 2.601566 1.982065 2.353262 1.748495  
2.578981 2.12149 2.763225 2.511835 2.390767 2.901029 2.347705 2.645662 3.033525  
3.648092 2.744382 3.0188 2.507836 2.529513 2.605681 2.07519 3.042487 3.337755  
4.240171 4.358502 4.930233 3.865209 4.277627 4.679347 4.424158 4.474369 5.154066  
1.772158 1.951976 1.648689 2.322832 1.438086 1.678944 1.403897 1.913829 1.847334  
3.07635 2.055676 1.206493 1.253978 1.71102 1.200354 0.961454 2.508189 1.611116  
2.383924 4.087836 2.512412 2.599076 2.62033 3.537612 2.699028 3.477326 2.733229  
5.295972 5.42257 5.848205 4.909903 5.955855 4.154784 5.822475 5.290494 4.179801  
4.132618 4.195122 4.608262 2.578934 4.880604 3.680882 4.17091 3.775476 4.443126  
2.01492 1.978075 2.206923 1.476717 1.635831 1.835869 1.296129 1.452711 2.290038  
2.544756 2.538094 2.301124 3.37722 1.94486 1.828929 2.701492 2.244539 3.112595  
2.958475 2.316496 2.043544 3.570604 1.953646 3.161538 1.785268 2.216608 2.393145  
2.67944 2.324784 2.500845 3.011958 2.938417 2.736059 3.072353 3.465639 2.702342  
6.109325 6.106425 6.023494 6.070231 6.102433 5.757215 6.025925 5.92061 5.655127  
1.992594 1.84822 2.03679 2.599715 1.757899 1.732141 1.658686 2.199015 1.830835  
2.836855 2.476139 3.451435 2.602048 2.861586 3.760099 2.999835 2.538607 2.433587  
4.835004 4.829126 4.96906 3.365172 5.217027 5.276953 4.422517 4.754346 4.942402  
4.915573 5.125266 4.571049 4.40964 5.094499 5.176317 4.764195 5.114026 4.515702  
4.329657 3.29773 3.920974 3.370846 4.67773 3.882268 4.166145 3.874881 3.429851  
1.234387 1.501292 2.308206 2.351169 1.394297 1.872205 1.440333 2.294924 1.582412  
6.155674 5.792733 5.788745 5.696237 5.785414 5.914858 5.921485 5.871013 5.362895  
6.587089 6.303508 6.185923 6.569823 6.382864 6.56849 6.332115 6.049615 6.259119  
5.008471 5.58993 5.259416 5.450027 6.693636 5.402789 4.082216 5.652305 4.019654  
3.86184 2.333407 3.499811 3.113275 3.595666 4.764916 2.495467 3.566021 4.579004  
5.643699 5.691669 5.679648 5.69223 6.090762 4.879211 6.156017 6.139368 5.134691  
1.163051 0.787838 1.067997 1.187259 1.11062 0.955452 0.730959 0.70938 0.896065  
2.938132 3.466196 3.177021 3.065009 2.94228 2.90944 2.810424 3.495888 4.383296  
5.09484 5.654354 5.365742 5.464695 4.662276 4.862824 4.981818 5.239815 3.771987  
4.675342 5.289131 4.470041 6.489595 5.126677 4.646338 4.620051 4.369122 3.701778  
0.865873 1.040815 0.843354 1.860603 1.229863 1.083178 0.855261 0.905091 0.865856  
1.60562 1.254907 1.992464 2.083991 1.214464 1.927519 1.380582 1.258291 2.033773  
5.558439 5.6149 5.348963 5.261625 5.504975 5.727042 5.739519 5.528118 5.044729  
4.712503 4.154566 5.217813 4.685576 4.565106 4.269952 5.506837 4.858344 4.871184  
5.92949 6.788392 6.448054 6.738815 7.032016 6.260456 7.060599 6.562918 7.200199  
6.980097 6.746779 6.941245 6.753961 7.002108 6.520202 6.909501 7.137417 6.181704  
2.661927 3.598804 3.023417 3.11177 3.498 2.878024 3.154038 2.784997 5.130896

7. 264269 7. 446129 7. 670852 5. 18072 7. 622057 7. 236299 6. 993808 7. 276348 5. 611921  
2. 259309 2. 572196 2. 513548 2. 297881 1. 776468 1. 805913 1. 829731 3. 600104 1. 64145  
1. 886983 1. 442557 1. 551496 2. 496071 1. 98764 1. 897894 1. 503074 1. 578306 2. 531394  
4. 804088 5. 316188 4. 970172 6. 077212 4. 004669 3. 441769 4. 405174 4. 434139 4. 53603  
5. 269586 5. 146188 5. 403635 5. 185919 5. 012302 5. 104165 5. 882006 5. 435805 5. 425377  
4. 617642 5. 110462 4. 945049 4. 966708 4. 430132 4. 055857 4. 333088 4. 189937 4. 385847  
8. 31828 8. 241107 8. 29076 7. 888442 8. 077934 8. 552041 7. 792238 7. 909657 8. 027355  
4. 492734 4. 915579 4. 138816 3. 804442 4. 709588 5. 568691 5. 04938 4. 392739 4. 809678  
3. 173266 2. 98654 3. 857205 4. 719531 3. 735512 4. 22592 4. 311294 3. 29681 3. 732395  
8. 658226 8. 789629 8. 560189 8. 201463 8. 591247 8. 737245 8. 770616 9. 159119 8. 133647  
1. 529813 1. 229783 1. 862932 1. 29172 1. 334491 1. 245151 1. 030087 1. 355607 1. 014597  
1. 40149 2. 271227 1. 699138 2. 283379 1. 405974 1. 976319 1. 810638 2. 203194 1. 80383  
1. 557912 2. 086722 1. 640727 1. 902909 1. 506888 1. 313814 1. 158032 1. 984818 1. 43831  
2. 301703 1. 784953 1. 586857 1. 587424 1. 14828 1. 542582 1. 436592 2. 177139 2. 329444  
2. 752689 2. 445235 3. 469964 3. 861635 1. 985444 3. 659849 3. 295884 3. 001933 2. 876574  
7. 812148 8. 554044 7. 2602 7. 315934 7. 523408 5. 897851 8. 15922 6. 38771 7. 552041  
1. 603582 1. 890404 1. 374945 1. 344424 1. 506956 1. 742239 1. 689296 1. 06612 1. 382524  
3. 135346 3. 40387 3. 314075 3. 303396 4. 66208 1. 97431 4. 201194 2. 577161 3. 794219  
1. 668454 1. 835861 1. 900338 1. 487728 1. 698715 1. 988976 1. 046022 1. 098146 1. 155496  
4. 841474 4. 822217 0. 99937 1. 253065 3. 318667 3. 877061 1. 967871 1. 227223 1. 078978  
2. 261735 3. 005729 2. 798202 3. 038715 2. 281894 2. 708687 2. 157089 2. 178777 2. 98844  
1. 157463 1. 764643 1. 020083 1. 016017 1. 252963 0. 625269 1. 934585 0. 711578 0. 841671  
6. 690067 6. 842354 6. 617305 7. 043617 7. 04014 6. 716542 7. 123881 6. 712118 7. 155991  
3. 637197 4. 256818 2. 996512 2. 610572 3. 07635 2. 811837 2. 996512 3. 429538 4. 050805  
2. 697394 1. 728616 2. 580932 2. 565161 2. 565611 0. 932279 2. 615149 2. 672204 2. 268716  
2. 701295 2. 323438 2. 92693 2. 940808 2. 262354 2. 741981 2. 451688 2. 784865 2. 168814  
2. 437303 1. 750036 3. 024999 3. 116042 3. 148281 2. 169652 3. 352361 3. 310823 2. 790959  
1. 852798 2. 247122 2. 97883 2. 638131 2. 508536 2. 804203 3. 518322 2. 347065 2. 228862  
1. 862914 1. 557053 2. 228201 1. 827897 1. 734483 2. 284348 1. 736766 2. 113141 3. 197409  
6. 003184 5. 939665 6. 125155 6. 178954 6. 034076 6. 150517 5. 555359 5. 674252 5. 727612  
5. 033354 5. 679024 4. 80623 4. 625304 5. 175362 4. 317944 5. 721272 3. 971483 4. 343985  
6. 311141 5. 172853 4. 29551 6. 913889 6. 158851 3. 486064 5. 573333 5. 190945 4. 582486  
0. 95066 0. 741623 1. 341927 1. 751362 2. 070883 1. 086259 1. 319248 0. 895208 0. 935539  
2. 671357 2. 848549 2. 920252 3. 906202 2. 803031 2. 353045 2. 719479 2. 711087 3. 653577  
3. 050017 3. 235039 3. 011576 3. 842257 3. 145264 2. 733265 3. 231167 2. 577673 3. 765742  
2. 835967 2. 894366 2. 819164 2. 926464 3. 219933 3. 118094 3. 39837 2. 650835 3. 62023  
7. 314873 7. 993011 7. 966839 6. 475077 7. 912638 7. 770752 7. 211851 7. 348316 5. 731819  
7. 17907 7. 692699 7. 433728 7. 491045 7. 743198 6. 936745 7. 696485 7. 24886 7. 460405  
6. 628621 7. 21158 7. 334374 7. 047589 7. 227898 6. 234125 7. 065122 7. 112342 6. 806173  
2. 144162 1. 503073 1. 943048 1. 808259 1. 818592 1. 521655 1. 702684 1. 755299 1. 512586  
2. 056724 4. 281898 2. 559532 2. 570946 3. 050145 3. 539804 2. 763714 3. 969277 6. 819388  
4. 747778 6. 082105 5. 190907 2. 940194 6. 438286 4. 367924 5. 290217 5. 681745 5. 744562  
3. 47867 3. 748754 4. 759091 4. 498793 4. 638457 4. 201027 4. 045249 3. 423863 3. 344328  
5. 128297 5. 468366 4. 290172 4. 349168 5. 555331 5. 116185 5. 182513 5. 139949 5. 357279  
3. 937639 4. 231815 4. 964484 4. 30472 4. 786527 4. 344186 4. 35198 4. 113172 3. 653521  
2. 961982 2. 079018 3. 782163 1. 744916 2. 273448 4. 3431 2. 241811 3. 520135 5. 308819  
4. 80045 4. 657586 4. 453847 4. 75903 5. 035135 4. 501061 5. 178871 4. 026175 4. 389321  
3. 516601 3. 664501 3. 331451 3. 253433 3. 093901 2. 670981 3. 604062 3. 466574 3. 302929  
1. 540526 1. 802771 1. 556872 2. 305463 2. 060057 1. 51529 1. 659128 1. 714688 2. 230215  
1. 627467 1. 128054 1. 498236 1. 2448 1. 372895 1. 975347 1. 485975 1. 283035 1. 499333  
1. 141847 1. 43511 2. 095877 1. 528149 1. 682926 1. 617949 1. 136284 2. 186902 2. 255775

4. 301759 5. 116097 2. 278507 3. 942224 2. 992441 2. 635211 3. 788552 3. 432957 6. 110669  
3. 338594 3. 857309 2. 584442 2. 532049 2. 712051 3. 786372 3. 836798 2. 743669 3. 682825  
1. 41134 1. 491509 2. 353143 2. 572547 2. 039922 1. 722231 1. 326181 1. 497097 1. 029278  
2. 3022 2. 646822 2. 55823 2. 904737 2. 520219 2. 161684 3. 427124 2. 443859 2. 032703  
4. 58223 4. 707932 4. 213282 4. 401015 4. 823558 4. 550598 4. 916425 4. 549383 5. 910495  
3. 980512 4. 081504 4. 171083 4. 585616 4. 298984 4. 089685 3. 885376 3. 607022 3. 523799  
2. 872669 2. 639147 2. 533315 2. 853604 1. 993655 2. 097531 2. 370367 2. 237887 2. 383674  
3. 421178 3. 717181 4. 129982 4. 279474 3. 81868 3. 802891 3. 89252 3. 78628 2. 255532  
4. 152889 4. 324332 5. 347808 4. 207049 4. 272189 4. 41511 3. 782275 4. 424209 3. 468248  
3. 243363 1. 94272 3. 112714 2. 757442 2. 957777 1. 980933 3. 321107 2. 468295 2. 621748  
4. 506429 4. 557839 4. 699403 3. 740564 4. 275757 5. 089177 4. 649408 4. 252316 4. 621851  
2. 341778 1. 925954 1. 247174 1. 734897 1. 59803 1. 546373 1. 867192 2. 103884 1. 142919  
2. 771724 3. 034655 2. 907475 1. 529297 3. 317387 3. 524387 1. 826034 2. 523706 3. 526216  
4. 068109 2. 383096 2. 346785 3. 736356 3. 550286 4. 309581 2. 966065 3. 009877 4. 291518  
4. 81761 4. 51704 3. 286446 3. 728033 4. 226491 4. 445723 3. 641688 3. 484153 4. 073966  
1. 819075 2. 071583 1. 512121 1. 547778 3. 479698 1. 23752 3. 14165 2. 927776 1. 796381  
1. 327768 1. 55627 1. 420016 4. 705186 2. 087745 1. 535873 2. 044239 1. 663857 1. 928755  
1. 858817 3. 216814 1. 215432 5. 031507 1. 865053 2. 360575 1. 978098 1. 309451 3. 303294  
1. 105106 0. 918468 1. 432179 1. 83836 1. 539646 0. 997289 0. 962798 0. 908911 1. 081306  
3. 391343 3. 643887 3. 354331 3. 257753 4. 406794 5. 631158 2. 934806 3. 265488 3. 041067  
6. 266098 5. 929342 5. 87556 5. 584767 5. 871667 5. 566101 5. 95316 4. 443498 5. 927931  
3. 740701 3. 047225 4. 269931 3. 326986 4. 151626 3. 186107 4. 001603 3. 229559 2. 948339  
2. 55862 1. 542074 2. 055845 2. 110337 1. 770689 2. 015422 1. 529585 2. 035108 1. 937048  
1. 315499 1. 643627 1. 745179 1. 934311 1. 315499 2. 186082 1. 406644 0. 922316 1. 050593  
1. 192033 2. 358507 1. 144812 1. 4687 1. 418248 2. 005134 1. 264227 1. 449127 1. 030386  
1. 693821 2. 075509 1. 988675 2. 546728 1. 829741 2. 554178 2. 346879 1. 321857 1. 693821  
5. 824764 5. 576727 5. 554046 5. 672823 5. 626742 5. 333152 6. 126142 5. 458161 4. 775268  
6. 184358 5. 476205 6. 14492 5. 19935 5. 975879 6. 737795 5. 709566 6. 04179 6. 009587  
3. 465699 5. 004006 4. 484919 5. 300469 3. 233768 4. 136527 2. 466829 4. 738709 3. 637885  
4. 009747 4. 113809 1. 815067 2. 887731 2. 331466 4. 56363 2. 934224 4. 718127 6. 312808  
2. 473197 1. 747229 1. 900365 1. 540199 1. 163221 2. 401519 1. 598149 1. 306291 1. 641516  
1. 710402 1. 926363 1. 776769 2. 168946 1. 422413 1. 878981 1. 558497 1. 740291 2. 384664  
2. 712776 3. 010826 1. 729611 2. 77207 3. 338772 2. 441684 2. 201539 3. 153839 3. 297581  
7. 93893 8. 039896 8. 015909 7. 711164 8. 10964 8. 281643 8. 359293 8. 152194 7. 868467  
6. 220145 4. 457374 4. 430844 2. 458635 5. 300683 4. 48605 5. 865468 4. 835453 5. 308152  
2. 954706 2. 792773 3. 227053 2. 879045 2. 055334 3. 284279 3. 634564 2. 635647 3. 215358  
1. 817572 1. 839982 1. 980211 2. 40142 1. 78294 2. 254304 1. 928584 1. 789458 1. 973612  
1. 967353 2. 302485 2. 605634 2. 470072 1. 999729 2. 470072 2. 123442 2. 062443 1. 947706  
1. 587885 1. 548531 1. 236308 1. 323732 1. 361165 0. 844088 1. 680064 2. 39424 1. 347579  
7. 087978 7. 095128 7. 445682 6. 568862 6. 817619 7. 295984 7. 365653 7. 028469 7. 826633  
2. 642261 3. 936407 3. 369309 1. 612145 3. 309929 3. 479786 3. 383548 3. 213941 2. 219844  
7. 943766 7. 838542 7. 668418 8. 472728 8. 001881 7. 63885 7. 986055 7. 859404 7. 190075  
2. 036087 3. 395056 4. 056164 2. 105607 2. 023054 2. 595152 1. 677056 1. 72651 4. 210357  
4. 874652 4. 638907 3. 982955 3. 534478 4. 273957 4. 149497 4. 382293 4. 198377 4. 670184  
5. 75394 5. 185257 5. 530751 5. 47517 4. 754022 4. 858392 4. 805849 5. 041846 6. 074018  
3. 146235 3. 062934 2. 814558 1. 362406 3. 578972 1. 355588 1. 900488 2. 795499 1. 397026  
1. 843358 1. 939037 1. 329098 1. 65978 1. 346626 1. 639842 1. 418341 1. 182899 1. 456899  
2. 02953 1. 665196 2. 992622 2. 485081 1. 76957 2. 690001 2. 234485 1. 872454 1. 938819  
1. 341636 1. 789529 2. 373725 1. 650065 1. 174819 1. 397231 1. 861372 1. 434222 1. 128274  
2. 933517 2. 331753 2. 230608 3. 104558 2. 477903 3. 105452 2. 303905 2. 446488 2. 434745  
6. 244742 6. 127193 5. 905384 5. 969145 6. 052414 5. 973153 6. 751293 6. 310885 5. 814447

3. 432297 3. 603274 3. 841356 2. 529844 2. 102462 2. 641605 3. 688422 3. 445727 2. 989945  
1. 911677 0. 887942 1. 520065 1. 732631 1. 122471 1. 090267 1. 095629 1. 377444 1. 732633  
4. 309437 4. 610782 4. 911488 5. 202568 4. 825345 3. 942892 4. 448293 4. 083035 3. 821537  
1. 096085 1. 406801 1. 520384 2. 322351 1. 066873 1. 538728 1. 567365 0. 913171 1. 355138  
4. 703007 4. 271128 4. 6561 3. 693972 5. 209062 4. 899253 5. 106981 5. 299641 3. 978775  
1. 972323 2. 017012 1. 838217 3. 247043 1. 774964 2. 652428 1. 693564 1. 990427 1. 77861  
7. 710191 7. 339644 7. 094483 7. 130073 7. 429084 7. 555544 7. 600436 7. 412751 6. 530583  
2. 388135 1. 762616 2. 335896 1. 665758 1. 568926 1. 157452 1. 920963 2. 126118 2. 133754  
5. 679356 5. 359588 5. 27411 4. 875787 4. 735437 5. 707101 5. 531039 5. 66153 6. 038217  
1. 450121 1. 722627 1. 767836 1. 379986 2. 10726 1. 881105 3. 217064 2. 108401 4. 963697  
2. 600883 1. 847185 2. 165579 2. 800849 2. 150041 2. 039102 1. 836646 2. 32841 2. 425251  
4. 291226 4. 58707 4. 562021 4. 317665 4. 335511 4. 479668 4. 209873 4. 008238 4. 22792  
1. 929159 1. 716191 1. 513926 2. 084222 1. 595374 1. 553623 1. 770591 1. 494576 2. 087108  
6. 468728 5. 070153 6. 251196 6. 454425 5. 072157 6. 311628 5. 286601 5. 474553 7. 502764  
5. 425159 5. 615575 5. 092538 4. 873527 5. 405121 4. 817964 4. 39063 4. 666341 4. 671882  
6. 253309 5. 632057 5. 913542 3. 336659 5. 930303 5. 039275 6. 16922 5. 755283 5. 952757  
1. 915376 2. 748433 3. 224333 2. 309004 2. 1027 2. 923897 2. 261824 1. 776298 1. 625228  
1. 673932 1. 504819 1. 628981 1. 854277 1. 706148 2. 483834 2. 205857 1. 65592 3. 481008  
4. 151299 2. 750326 3. 671656 4. 081188 3. 128731 4. 231958 3. 981155 3. 752415 3. 899514  
4. 918313 4. 524484 4. 805012 4. 948015 4. 903409 5. 217325 4. 825581 4. 062209 4. 766268  
1. 854666 1. 717982 1. 79166 1. 780805 1. 319036 2. 231402 1. 849665 2. 149776 1. 614727  
1. 940428 1. 632988 1. 367993 2. 060536 2. 181174 2. 483048 1. 847548 2. 665385 1. 817512  
2. 077658 1. 775631 1. 325477 2. 182855 1. 061415 1. 215306 1. 423662 2. 185085 1. 758842  
4. 099885 3. 671298 3. 180969 2. 488229 3. 685205 3. 144851 3. 60476 3. 07215 4. 41172  
4. 471429 4. 728697 5. 180797 4. 080407 5. 570077 4. 331767 5. 078683 5. 047721 4. 342346  
1. 521449 2. 017444 3. 420559 1. 88626 3. 32298 2. 44475 2. 275957 2. 265023 2. 455407  
5. 073734 4. 998119 4. 465358 4. 124507 6. 398078 4. 861421 5. 747106 5. 359627 5. 67459  
1. 814159 1. 391647 1. 953651 4. 413526 2. 496172 4. 136218 1. 544537 1. 709363 2. 450098  
4. 315692 3. 08587 3. 731846 3. 448244 2. 432989 3. 189478 4. 970099 3. 764618 3. 517438  
4. 773115 4. 52425 5. 085674 4. 73897 4. 470684 4. 362787 4. 801234 4. 044844 3. 823343  
1. 46367 2. 564419 2. 538473 1. 56241 1. 378157 1. 371694 1. 57056 1. 612191 2. 078188  
5. 002097 5. 857775 5. 656793 5. 291794 4. 803082 4. 423653 4. 583475 5. 018884 4. 178676  
4. 312541 3. 78076 3. 8497 2. 261603 1. 984888 4. 417065 1. 738806 2. 784473 5. 766808  
6. 772328 6. 635705 6. 607672 6. 310486 6. 519629 6. 052107 6. 755423 6. 813952 7. 040732  
1. 363518 0. 922594 1. 035755 0. 826996 3. 249322 1. 137067 0. 934326 1. 316046 1. 078609  
4. 875476 3. 976424 5. 469046 3. 990523 3. 651186 6. 188181 5. 67584 3. 944023 5. 391075  
5. 554327 6. 111106 5. 752568 6. 01189 5. 519904 5. 671593 5. 830696 5. 776979 5. 987291  
6. 842733 7. 124829 6. 974481 6. 794755 6. 842346 6. 848925 6. 938725 7. 001855 6. 241063  
7. 924071 7. 464879 7. 587766 8. 18522 7. 496298 7. 111564 7. 692007 7. 579078 7. 445825  
7. 589487 6. 967654 6. 229285 6. 900644 7. 255172 7. 156634 7. 214515 8. 112406 7. 365202  
8. 271103 8. 444172 8. 516282 8. 166303 8. 678656 8. 180133 8. 515855 8. 446299 8. 032945  
1. 523682 1. 07814 1. 796317 1. 497504 1. 712273 1. 189912 1. 62758 1. 462459 1. 276462  
2. 203099 2. 137946 2. 514106 3. 657374 2. 181976 1. 89153 1. 458968 3. 005615 2. 141302  
4. 735151 3. 658315 3. 84989 4. 021173 2. 698109 3. 800924 4. 265763 3. 425725 4. 914198  
4. 694225 4. 178022 3. 96977 2. 369816 4. 273884 3. 414017 4. 148102 4. 34436 3. 550618  
1. 520226 1. 619582 1. 564333 1. 637839 1. 696391 1. 867262 1. 865522 1. 267296 2. 235095  
6. 291718 5. 799706 6. 294086 6. 896843 5. 840846 5. 709694 6. 359235 6. 074943 6. 119384  
1. 225704 0. 857537 1. 410976 1. 187118 0. 9976 1. 498214 1. 122654 1. 125228 0. 982157  
3. 292857 2. 540449 1. 994703 2. 507873 3. 194406 4. 394871 4. 796858 5. 013823 4. 831852  
7. 971146 8. 088217 8. 080544 7. 560699 7. 899359 7. 907387 7. 779415 8. 066487 8. 025321  
1. 103492 1. 891502 1. 061747 1. 440055 1. 123619 0. 855125 1. 123722 1. 357649 0. 923144



4. 07892 3. 501297 3. 638732 5. 157451 2. 652451 3. 566935 3. 313716 3. 517245 4. 067533  
3. 009602 2. 446351 2. 430268 2. 49268 2. 82868 3. 820023 3. 216818 2. 114726 3. 690493  
5. 85684 6. 133848 6. 589244 6. 290275 6. 263078 6. 076592 6. 373849 6. 273139 8. 520954  
2. 807422 1. 404037 1. 226723 1. 840991 1. 409704 1. 834853 2. 447608 1. 182293 1. 133937  
1. 237807 0. 994923 1. 841697 2. 385152 1. 23867 1. 808612 1. 921663 1. 201891 1. 619273  
0. 9311 1. 611676 1. 333512 1. 787586 1. 079939 1. 730887 1. 616009 1. 204449 1. 518746  
1. 05979 1. 266224 1. 128207 1. 691171 1. 220346 1. 312362 1. 391245 1. 280327 1. 467418  
2. 324307 2. 038958 2. 264502 1. 88831 1. 759125 2. 065832 2. 049636 2. 893691 2. 86618  
2. 695242 2. 776466 2. 579032 3. 08576 2. 02688 1. 613925 2. 078692 3. 104149 2. 657988  
2. 416107 1. 957027 2. 2012 2. 310742 1. 922703 3. 126574 2. 072358 2. 234216 2. 12534  
4. 890037 3. 409198 4. 586518 4. 126382 3. 428079 3. 082926 3. 980162 4. 511464 4. 465475  
4. 891333 4. 578156 4. 682036 5. 025169 4. 565154 4. 141258 4. 960485 4. 554294 4. 626756  
1. 385986 1. 25864 1. 217891 2. 001873 1. 477671 3. 214874 1. 2799 2. 268792 2. 552998  
2. 490038 2. 310934 2. 941979 2. 841679 2. 102058 1. 866459 3. 370831 2. 283496 2. 506573  
1. 997251 1. 566896 1. 259452 1. 377739 1. 423737 1. 518469 0. 82572 1. 638862 1. 496076  
1. 534924 1. 395121 1. 609829 2. 220526 1. 024157 1. 140949 1. 284599 1. 421546 1. 331489  
1. 358117 1. 385788 1. 014388 1. 463389 2. 022414 1. 967069 0. 864617 1. 048199 0. 946496  
3. 462666 2. 037338 2. 663862 3. 942707 3. 466144 2. 823239 2. 788243 3. 258669 3. 878695  
5. 574554 5. 6831 5. 513727 5. 071007 5. 771297 5. 665045 5. 299705 5. 268197 4. 964905  
1. 304946 2. 021754 1. 538607 1. 841253 1. 588424 1. 379691 2. 250034 1. 533811 1. 989522  
2. 685264 1. 475517 1. 086197 2. 369302 1. 041202 1. 391224 2. 934908 2. 751456 3. 592651  
1. 114567 1. 406382 1. 414003 1. 545457 0. 96215 0. 984972 1. 503807 1. 260962 1. 074142  
3. 234682 2. 546996 3. 037129 3. 139795 2. 750281 3. 786549 2. 47838 3. 337041 3. 660674  
7. 862837 8. 33189 8. 120498 8. 593754 8. 730154 8. 335238 8. 278173 8. 511729 7. 757763  
3. 263906 4. 83505 2. 918007 2. 846386 4. 017589 3. 92794 4. 262198 3. 872404 3. 830008  
1. 680328 1. 720015 1. 505556 2. 377914 1. 621214 1. 822494 1. 891329 1. 569632 2. 217018  
0. 994124 0. 491327 1. 103182 0. 72361 1. 036011 1. 271567 1. 058296 0. 738114 0. 848047  
6. 442719 6. 324301 6. 073061 3. 690588 6. 919569 6. 344912 6. 148579 6. 090982 5. 976719  
4. 047631 3. 641798 5. 318098 3. 840931 2. 579753 3. 928684 3. 95143 2. 892554 4. 326478  
2. 673643 3. 316592 2. 662997 3. 191695 2. 291466 2. 283335 3. 511031 3. 621309 3. 618049  
1. 65827 1. 511683 1. 470928 2. 622156 2. 888341 2. 697502 1. 439448 1. 819357 1. 844392  
3. 361359 3. 15216 2. 500921 1. 955186 2. 476507 2. 922036 2. 323597 2. 89268 3. 340213  
3. 605912 2. 876273 2. 456763 2. 20675 3. 454308 2. 782387 3. 727654 3. 41599 4. 077436  
6. 841928 7. 409219 6. 725342 6. 577294 7. 066834 7. 349354 7. 074369 7. 167532 6. 585969  
1. 344677 0. 834146 0. 998128 2. 363042 0. 909426 1. 305588 1. 118492 1. 493769 1. 570242  
0. 927199 1. 483822 1. 207828 1. 21185 1. 156832 1. 022055 1. 075214 1. 174207 1. 174207  
2. 651359 2. 573659 2. 705563 2. 863842 3. 12153 2. 102862 2. 645425 2. 898935 2. 771887  
6. 532219 6. 45144 5. 923734 3. 472956 5. 954177 6. 245562 6. 514986 5. 745819 5. 910013  
7. 414596 7. 003924 7. 014085 5. 074499 7. 186208 6. 894679 7. 31187 6. 488632 8. 042672  
1. 360331 1. 869459 1. 210066 1. 384226 1. 633052 2. 037279 1. 620122 1. 217448 1. 63787  
1. 284432 1. 062675 0. 837933 1. 145046 0. 940356 0. 946358 1. 481977 1. 421279 1. 937289  
0. 81975 0. 852425 1. 379189 2. 50616 0. 862476 1. 631823 0. 98722 1. 373045 0. 957297  
2. 141211 2. 306668 1. 793746 2. 556554 1. 497154 1. 935154 1. 865982 1. 57765 2. 677903  
1. 633212 2. 39609 3. 287161 3. 573204 2. 532002 1. 965012 1. 658206 1. 378286 2. 225568  
1. 555383 1. 403918 1. 675643 1. 728089 1. 38052 1. 171405 1. 124166 1. 152468 1. 506017  
6. 984606 6. 139048 6. 0104 6. 840307 5. 82207 5. 978905 5. 357004 6. 694231 6. 919613  
1. 164246 1. 371622 1. 342769 1. 25738 1. 119232 1. 297739 1. 259482 1. 307874 1. 128853  
4. 816971 4. 671923 4. 223734 3. 258889 4. 90321 4. 705242 4. 887543 4. 533907 5. 154153  
2. 021756 1. 850029 1. 473346 2. 351018 1. 657869 2. 275895 1. 835546 2. 061125 2. 439063  
1. 400356 1. 35342 1. 758523 2. 020553 1. 20817 2. 089538 1. 630642 1. 387252 1. 544933  
5. 964338 2. 946366 5. 090796 3. 971131 3. 160312 5. 452422 3. 883518 3. 668765 7. 600658

|          |          |          |          |          |          |          |          |          |
|----------|----------|----------|----------|----------|----------|----------|----------|----------|
| 8.385061 | 8.813236 | 8.57869  | 8.341898 | 8.826562 | 8.623885 | 8.221399 | 8.843237 | 8.038027 |
| 8.116735 | 7.96339  | 7.711607 | 7.27915  | 7.907431 | 7.793634 | 7.636677 | 7.635365 | 7.972393 |
| 1.25437  | 1.145366 | 1.109675 | 1.676165 | 1.512641 | 1.707167 | 1.401037 | 1.575849 | 1.009594 |
| 5.850078 | 5.517733 | 4.470118 | 4.568962 | 5.591313 | 4.53994  | 6.275584 | 5.67449  | 6.511418 |
| 1.1082   | 1.308978 | 0.865854 | 2.152429 | 1.135139 | 1.920192 | 1.060421 | 1.261713 | 0.930459 |
| 1.613277 | 2.574344 | 2.352418 | 1.67197  | 1.379294 | 1.887403 | 2.336715 | 1.263558 | 1.71595  |
| 7.659474 | 7.472771 | 7.797646 | 7.78647  | 7.992674 | 7.591686 | 7.813498 | 7.964601 | 7.212359 |
| 2.058021 | 2.293488 | 1.978694 | 1.713768 | 2.51564  | 2.225036 | 2.313508 | 1.612374 | 2.086743 |
| 4.392721 | 4.580984 | 5.202791 | 5.304374 | 4.785025 | 4.609294 | 4.63727  | 4.788111 | 5.113665 |
| 1.446671 | 1.369392 | 1.643699 | 1.536036 | 1.57859  | 1.223082 | 1.873894 | 1.803273 | 1.038132 |
| 7.042852 | 6.901153 | 6.631633 | 6.272631 | 7.283177 | 6.668063 | 7.172975 | 6.94576  | 6.788956 |
| 1.36659  | 2.388461 | 1.420832 | 1.48469  | 1.748085 | 1.88884  | 1.300215 | 1.571104 | 1.858603 |
| 1.529343 | 2.293823 | 1.985355 | 0.841736 | 1.244781 | 3.484683 | 1.140875 | 2.770858 | 1.738054 |
| 3.617062 | 4.063568 | 4.075321 | 4.602903 | 4.097738 | 4.005947 | 4.237651 | 3.83821  | 3.60691  |
| 1.822835 | 2.537349 | 2.546078 | 1.954962 | 1.415204 | 2.738311 | 1.531316 | 1.857264 | 2.721669 |
| 1.466425 | 1.457794 | 1.641732 | 0.843523 | 1.480416 | 1.656347 | 1.142283 | 1.330411 | 1.293903 |
| 6.877339 | 7.149123 | 7.380068 | 6.896741 | 7.45125  | 6.926792 | 7.062569 | 7.116507 | 6.385383 |
| 1.487944 | 1.429101 | 2.149785 | 2.759929 | 2.426657 | 1.914096 | 1.861313 | 1.720066 | 1.855153 |
| 1.598546 | 2.116095 | 1.71247  | 2.216253 | 3.190201 | 1.471468 | 1.023408 | 1.34313  | 1.347696 |
| 1.140094 | 1.143961 | 0.87339  | 1.193455 | 1.420747 | 1.755798 | 1.508881 | 1.568036 | 1.150378 |
| 1.787781 | 1.02081  | 1.1286   | 3.033067 | 1.628765 | 2.9114   | 2.175421 | 1.544164 | 1.944262 |
| 8.887071 | 8.962391 | 8.821891 | 8.387528 | 8.925323 | 9.059398 | 9.18051  | 8.822733 | 8.773633 |
| 5.574767 | 5.897788 | 5.492759 | 4.822795 | 5.912064 | 5.712915 | 5.663999 | 5.506883 | 5.92575  |
| 5.021764 | 4.385903 | 4.418112 | 3.114535 | 4.322211 | 5.39772  | 5.044329 | 4.591342 | 1.779651 |
| 5.858152 | 5.754011 | 5.936253 | 5.462663 | 6.109323 | 5.858152 | 6.044797 | 6.032786 | 5.108125 |
| 6.914559 | 7.396487 | 8.1795   | 0.465772 | 6.300927 | 7.738002 | 6.800755 | 6.77111  | 6.62498  |
| 5.358695 | 5.117961 | 5.355897 | 6.142587 | 5.355192 | 5.501285 | 7.801463 | 5.205408 | 6.056383 |
| 5.357322 | 5.560365 | 5.921279 | 5.988407 | 5.887784 | 5.864606 | 5.015739 | 5.272009 | 5.791462 |
| 6.460983 | 6.484428 | 6.537488 | 6.321657 | 6.539783 | 7.025883 | 6.646672 | 6.431365 | 6.189506 |
| 2.21065  | 1.870947 | 1.929459 | 1.666577 | 1.237717 | 1.544    | 1.421359 | 1.469524 | 1.067356 |
| 1.563494 | 1.944756 | 2.178142 | 1.822901 | 1.69323  | 3.165453 | 2.88687  | 2.300269 | 1.933555 |
| 1.476139 | 1.084274 | 1.27542  | 1.918327 | 0.864551 | 1.125901 | 2.281566 | 1.180248 | 0.643686 |
| 1.673965 | 2.119335 | 1.967552 | 3.073322 | 2.255529 | 1.903486 | 2.289023 | 2.731553 | 2.197924 |
| 1.800268 | 1.123136 | 0.945465 | 1.257267 | 1.070513 | 1.431842 | 1.505796 | 1.401848 | 1.04707  |
| 3.749371 | 3.749209 | 4.690922 | 5.671759 | 3.909268 | 3.252967 | 4.629713 | 3.881889 | 3.700117 |
| 3.325033 | 3.757896 | 3.389391 | 3.945899 | 2.986565 | 3.451557 | 3.194058 | 3.099733 | 3.664357 |
| 6.947542 | 7.103535 | 7.526813 | 5.158825 | 7.314688 | 7.597981 | 6.621712 | 7.434079 | 5.992223 |
| 2.094233 | 1.782076 | 2.345627 | 2.260065 | 1.869874 | 2.503195 | 1.893797 | 1.581038 | 3.491118 |
| 1.356919 | 0.873087 | 1.130209 | 2.261978 | 1.634242 | 1.315407 | 1.402527 | 1.754054 | 1.488187 |
| 0.777392 | 1.687699 | 2.241378 | 1.335206 | 1.534245 | 2.875352 | 3.12747  | 3.113305 | 2.453548 |
| 2.156034 | 2.952476 | 3.228634 | 3.459432 | 2.814127 | 3.640847 | 2.60545  | 2.99019  | 3.081909 |
| 0.943131 | 1.05348  | 1.336312 | 1.662159 | 1.13081  | 1.10516  | 0.830605 | 1.463558 | 1.270303 |
| 0.962308 | 0.916174 | 2.121223 | 1.801261 | 0.869388 | 1.346504 | 1.223057 | 0.789724 | 0.960827 |
| 3.589001 | 3.326008 | 2.830281 | 2.644164 | 3.159389 | 3.088569 | 3.638192 | 3.451667 | 3.426595 |
| 1.404637 | 1.403987 | 1.837741 | 1.613616 | 1.622493 | 1.863608 | 1.574327 | 1.30374  | 1.985256 |
| 2.023708 | 3.616456 | 2.089033 | 2.001086 | 1.796647 | 2.690202 | 2.953245 | 2.77703  | 2.99149  |
| 2.141014 | 2.469679 | 2.633198 | 3.010461 | 1.924773 | 2.215233 | 1.869211 | 1.808727 | 1.984044 |
| 2.972284 | 2.408839 | 2.270224 | 2.763645 | 2.003573 | 1.925439 | 2.317226 | 2.625265 | 1.925801 |
| 5.427169 | 6.078979 | 6.710229 | 6.092646 | 6.477397 | 5.288644 | 6.029567 | 6.422708 | 5.320146 |
| 4.228165 | 3.324157 | 3.195038 | 2.959113 | 3.079688 | 2.899539 | 3.463617 | 3.462407 | 3.221616 |
| 7.238784 | 6.798028 | 6.93236  | 5.362904 | 6.888337 | 6.481482 | 7.184866 | 6.760548 | 7.069069 |

2. 938793 2. 933559 3. 33048 2. 51859 2. 969795 2. 651333 2. 128371 3. 817887 3. 509966  
1. 525532 1. 950464 1. 948371 1. 745661 1. 528973 1. 976932 2. 227423 2. 569106 1. 579622  
3. 5796 3. 755829 3. 486205 3. 399161 3. 954415 3. 718624 3. 879876 3. 995809 4. 713787  
1. 619606 0. 993684 1. 659139 1. 558849 1. 005139 1. 911324 1. 96556 1. 216925 1. 168256  
3. 192742 4. 183459 3. 133131 2. 713383 3. 275694 4. 782232 2. 92337 3. 427252 4. 858062  
1. 785137 2. 581258 1. 718847 2. 657446 2. 051476 3. 311897 1. 127136 1. 661113 2. 631069  
6. 00856 6. 181624 5. 845303 5. 776661 6. 253692 5. 187471 6. 07548 6. 272233 5. 66402  
1. 381564 1. 561089 1. 651125 1. 764902 0. 969778 1. 973437 1. 423509 1. 057179 1. 571265  
1. 354955 1. 919477 1. 342201 2. 068132 1. 307163 1. 257657 1. 469264 1. 774133 2. 221634  
1. 298114 1. 645823 1. 191495 1. 951413 1. 551144 1. 048853 1. 191133 1. 02671 1. 056969  
1. 278015 1. 095981 1. 96555 4. 103725 1. 556779 2. 660509 1. 176385 0. 640189 1. 275916  
3. 198424 3. 19743 3. 189399 4. 226582 3. 768673 4. 294798 4. 186931 3. 245868 3. 54927  
5. 201657 5. 199037 5. 239602 5. 33706 4. 591922 5. 214025 5. 067864 5. 054716 6. 105835  
4. 881429 4. 443672 4. 979456 3. 144657 4. 640533 4. 537493 5. 057896 4. 875658 4. 760626  
6. 948904 6. 954041 6. 546679 7. 591516 6. 61639 6. 931994 6. 988414 6. 725388 6. 587311  
6. 396893 6. 128355 5. 501551 4. 794328 6. 156836 5. 991362 6. 209526 5. 840728 6. 248079  
0. 948571 1. 336828 0. 996916 2. 286682 0. 721371 1. 005277 0. 800057 1. 410643 1. 309856  
1. 525989 2. 585762 2. 139709 2. 020636 1. 635734 2. 093603 2. 370632 2. 679523 3. 409361  
3. 889323 4. 117793 4. 442396 3. 936987 3. 566965 3. 886028 3. 475682 3. 058005 4. 315995  
5. 189714 6. 021273 5. 452783 4. 799453 5. 806252 5. 817328 5. 745077 5. 522253 5. 073544  
1. 944323 1. 751111 2. 431364 1. 458922 0. 998752 2. 552388 0. 70887 1. 742516 1. 130561  
3. 488413 3. 467419 3. 525099 2. 866904 4. 048852 3. 715192 4. 352607 4. 37294 3. 251721  
4. 115615 3. 887433 3. 375509 3. 761711 1. 698767 4. 390745 3. 975755 4. 220324 4. 372793  
2. 075832 2. 147838 1. 876213 1. 55907 3. 225697 2. 875349 2. 701259 2. 014851 2. 908498  
3. 680968 3. 175982 4. 077615 3. 499461 3. 331756 4. 210641 3. 375784 3. 794232 3. 804335  
2. 963874 3. 916797 3. 908015 2. 428041 2. 130319 4. 186952 2. 536993 3. 551261 3. 254635  
4. 130862 2. 403263 3. 451256 2. 890943 4. 952347 3. 166138 3. 221706 4. 256174 2. 776485  
1. 64397 1. 980578 2. 290835 3. 236042 2. 105797 2. 984927 2. 57711 2. 201046 2. 290682  
6. 974965 6. 484661 6. 721906 7. 355632 6. 541422 6. 428952 6. 629507 6. 870024 6. 635937  
5. 123329 5. 3598 5. 933408 3. 33852 5. 410787 5. 81533 5. 73818 5. 376551 4. 891239  
2. 459409 3. 027883 2. 712153 4. 409977 2. 768883 2. 928821 2. 50264 3. 206441 3. 532454  
5. 73366 5. 516608 5. 19055 4. 904503 5. 659449 5. 741971 5. 860037 5. 991922 5. 19408  
3. 74303 1. 702988 3. 906392 3. 303883 2. 15315 4. 049259 3. 66211 2. 694018 4. 641489  
4. 743104 5. 335392 5. 207666 5. 433515 4. 126374 4. 789785 5. 512072 4. 983901 5. 311984  
0. 927132 1. 386908 1. 034805 1. 990662 1. 022557 1. 210699 0. 992761 1. 52386 1. 081313  
1. 486647 1. 149518 1. 344844 1. 075651 0. 999725 1. 572712 1. 090128 1. 127939 1. 464963  
3. 901091 4. 894058 4. 610131 4. 033834 4. 574436 4. 853485 4. 562273 3. 996568 4. 404332  
1. 545274 1. 902967 1. 514118 1. 225435 1. 198708 2. 674829 1. 605939 2. 864063 0. 587352  
1. 938231 1. 676946 1. 46085 2. 137931 1. 710975 2. 151764 1. 695656 2. 256796 1. 773906  
5. 773229 5. 736864 5. 613126 3. 467299 5. 458177 5. 470086 5. 346131 5. 123736 5. 220538  
2. 51792 1. 872612 2. 061141 2. 057654 1. 937625 2. 463813 1. 699923 1. 957793 2. 68513  
4. 975547 5. 450737 5. 572494 5. 489914 4. 698304 4. 499818 5. 233468 4. 643835 4. 064759  
1. 450198 1. 330754 1. 798224 2. 300835 1. 677155 1. 831496 1. 740579 1. 946685 1. 894033  
4. 006274 3. 067614 4. 028708 2. 84971 4. 247657 4. 424481 4. 581924 4. 104687 3. 865719  
3. 06934 3. 366598 3. 24959 3. 663413 2. 911185 3. 611837 3. 280327 3. 430388 3. 157897  
3. 921932 4. 108944 3. 067206 4. 035487 4. 251955 4. 029081 4. 923992 4. 689535 2. 876498  
2. 376856 1. 970806 1. 594784 1. 879148 2. 313396 1. 685196 2. 090167 2. 473376 2. 130349  
1. 563265 1. 707274 1. 825247 2. 951151 1. 663244 1. 607359 1. 952356 1. 401069 1. 345047  
2. 758979 2. 648141 2. 080669 2. 752553 3. 367467 2. 208394 2. 714619 2. 050695 2. 372844  
1. 500371 1. 522782 1. 679326 1. 982983 1. 408069 1. 597854 1. 528552 1. 841308 2. 118046  
6. 471461 7. 065309 6. 731812 6. 267095 7. 039256 6. 219108 7. 305266 6. 645012 6. 640039

7. 515126 7. 591342 7. 254584 6. 988788 7. 479764 7. 452965 7. 315038 7. 327162 7. 235525  
2. 168672 1. 541062 1. 30986 2. 102173 1. 311636 1. 520897 1. 764436 1. 367393 1. 61601  
6. 190773 4. 621523 4. 176437 6. 353727 5. 030239 6. 377844 6. 530026 5. 673853 7. 06862  
2. 951566 4. 026898 3. 726201 6. 012373 4. 497702 3. 76796 4. 754595 3. 785128 4. 613904  
1. 829052 2. 971 3. 071583 1. 896048 2. 129756 2. 335855 2. 214014 2. 447102 2. 706368  
2. 404325 3. 053446 1. 971723 3. 174727 2. 945146 2. 074147 2. 052259 2. 339435 2. 022848  
5. 000569 6. 289091 5. 157396 4. 813638 5. 948847 5. 745841 5. 129091 5. 439886 5. 196291  
1. 367079 1. 903018 1. 246412 2. 508372 1. 44629 1. 952241 1. 624991 2. 221983 1. 517615  
7. 38648 7. 569198 7. 74542 7. 235724 7. 487022 7. 625317 7. 893546 6. 713723 7. 915208  
4. 209451 4. 004847 4. 111929 3. 697604 4. 054301 3. 234126 3. 94012 3. 908773 3. 155644  
4. 085299 3. 237813 3. 456004 2. 742762 2. 428862 2. 293505 2. 008024 3. 181532 3. 049994  
2. 098146 1. 567168 2. 024491 2. 528945 1. 584984 2. 134707 1. 735542 1. 673748 2. 349469  
1. 64497 2. 11361 1. 993868 2. 902285 2. 071171 1. 739209 2. 538418 2. 09268 2. 956627  
4. 847837 3. 630601 4. 766545 4. 712988 4. 860867 4. 893732 5. 253763 3. 678857 4. 138351  
0. 746222 1. 092337 1. 427411 1. 279933 0. 987587 1. 54305 1. 080934 1. 111298 1. 271734  
4. 766783 5. 779326 4. 811738 3. 815689 4. 716751 4. 902125 5. 647665 5. 041019 4. 467469  
1. 318543 0. 907302 1. 419428 3. 07173 1. 482876 1. 867844 1. 98429 1. 927566 2. 163667  
5. 090069 4. 871165 5. 056574 3. 988539 5. 102722 5. 544046 4. 360714 5. 520052 3. 608971  
3. 162843 2. 201393 2. 389258 1. 409435 1. 696377 2. 403398 1. 427021 2. 557386 1. 876424  
4. 142639 3. 66076 3. 771107 3. 514264 3. 104299 3. 763091 4. 129818 3. 514043 3. 352964  
4. 850141 5. 448133 5. 524148 5. 44261 5. 399439 5. 476567 5. 561931 5. 442022 5. 299039  
2. 155435 1. 629329 2. 542755 2. 597414 1. 869323 2. 718397 2. 488164 1. 900312 1. 997877  
2. 99611 2. 786318 3. 285816 3. 020312 4. 168353 2. 896374 3. 323404 3. 15456 2. 892381  
3. 762351 3. 195989 3. 41634 3. 696704 3. 70794 3. 344021 3. 270227 3. 184838 3. 609326  
6. 13537 5. 153472 6. 378347 4. 932812 5. 565483 5. 292662 4. 735601 5. 388969 5. 348852  
2. 479734 2. 972647 2. 533043 3. 525241 2. 575622 2. 476616 2. 250493 2. 602813 2. 273065  
9. 660238 9. 586084 9. 671449 9. 620539 9. 797005 9. 451057 9. 839757 9. 599055 9. 781994  
3. 513174 3. 525017 3. 748269 4. 061807 3. 70114 3. 562357 3. 869831 4. 631866 3. 782451  
1. 722489 1. 91834 1. 69375 2. 275781 2. 267973 1. 204639 1. 535937 1. 726423 1. 531093  
5. 447839 5. 721745 6. 576289 6. 147587 6. 634358 6. 189078 5. 352863 5. 77585 4. 822864  
3. 490671 2. 079021 3. 349072 2. 357295 2. 480212 4. 014081 2. 011205 3. 136284 3. 615122  
4. 612251 4. 492478 4. 715767 5. 293556 5. 328018 3. 901654 4. 483855 4. 733714 4. 957132  
1. 691738 1. 666253 1. 998806 2. 518133 1. 634045 1. 607845 1. 666253 1. 180776 1. 973362  
1. 606104 0. 940184 1. 095864 1. 846988 1. 025644 0. 900376 1. 052436 1. 209169 0. 967768  
7. 463243 8. 036562 7. 524513 6. 68413 7. 708685 7. 585324 7. 379099 7. 873293 7. 597488  
5. 689908 6. 026767 5. 391549 5. 160953 4. 959412 5. 629787 5. 588526 5. 635756 4. 842902  
4. 7844 4. 628962 5. 032901 3. 57817 5. 130725 3. 800908 4. 672908 4. 672209 4. 605047  
2. 583588 2. 794818 3. 042754 2. 777558 2. 452235 2. 777843 2. 198363 2. 646031 2. 454255  
2. 389319 1. 762512 1. 34597 2. 494501 1. 968357 1. 626759 1. 53105 1. 72442 1. 686871  
2. 085758 2. 55941 2. 587662 3. 880013 2. 574977 2. 723015 2. 98317 2. 416278 2. 416278  
1. 531366 1. 14332 1. 319767 1. 554284 1. 270441 1. 415824 1. 103947 1. 21964 1. 436602  
4. 20621 5. 046404 5. 529008 3. 719211 4. 291421 4. 384649 4. 786481 5. 381192 3. 959524  
1. 259321 2. 600978 2. 074509 1. 777675 1. 621006 3. 758556 1. 232384 2. 190231 0. 915392  
2. 219462 1. 638722 1. 787798 2. 971176 1. 643657 2. 913196 1. 978395 2. 773063 2. 397839  
4. 16704 4. 132708 3. 841682 4. 207947 4. 04325 4. 142359 4. 824826 4. 399058 3. 717066  
1. 691992 1. 623812 2. 363509 2. 69324 1. 951503 1. 793028 2. 491653 2. 169851 1. 728243  
1. 537345 1. 77801 2. 145876 1. 804812 1. 938232 1. 479608 2. 159779 1. 828459 1. 938366  
4. 085887 3. 429137 3. 697803 4. 371777 3. 278259 3. 733609 3. 518845 3. 722132 3. 564619  
2. 247485 2. 780214 2. 77941 2. 569788 1. 894302 2. 762281 2. 334723 2. 843804 2. 104819  
6. 127492 6. 252452 6. 591977 5. 244743 6. 82464 5. 731301 6. 546271 6. 444699 5. 079177  
1. 458101 1. 673562 2. 112365 1. 604263 1. 252139 2. 024382 1. 998216 2. 064851 1. 920877

2. 134161 1. 900802 2. 332794 2. 752442 3. 119212 2. 716643 2. 395801 2. 429092 1. 771825  
1. 858334 1. 366597 2. 216264 2. 374954 1. 845814 2. 855134 1. 881476 2. 016976 1. 999392  
1. 169156 1. 382803 1. 515633 1. 635676 1. 637762 2. 581672 1. 737056 1. 265052 1. 746885  
1. 669025 2. 233189 2. 410734 2. 05174 1. 421118 1. 916018 1. 691963 1. 748874 2. 073538  
1. 985005 2. 069145 2. 350335 3. 64813 1. 590373 2. 475989 1. 884743 1. 896911 2. 019134  
2. 129794 1. 252687 1. 648761 1. 746919 1. 749461 1. 684489 1. 405535 2. 782109 2. 034657  
1. 396286 1. 608375 1. 6286 1. 757608 1. 502525 1. 241539 1. 304307 1. 66937 1. 162762  
3. 328504 2. 630683 2. 885501 2. 817284 2. 637548 3. 480123 3. 065965 2. 545131 2. 939106  
5. 35461 5. 785314 5. 072861 4. 713844 5. 09538 5. 397879 5. 371811 5. 063831 4. 804204  
5. 784002 5. 944049 6. 398581 5. 504183 5. 385857 5. 222299 5. 699356 6. 20236 5. 673148  
5. 67959 4. 519488 5. 239421 4. 120254 5. 294732 4. 886461 5. 730499 4. 757992 5. 310667  
3. 975784 3. 269882 3. 392524 2. 60988 2. 929985 4. 662954 3. 061012 3. 920129 4. 137279  
3. 455638 4. 137852 3. 956989 3. 141848 4. 615217 4. 775713 3. 642266 4. 061708 3. 889433  
5. 965522 6. 13383 5. 293791 5. 364104 6. 218428 6. 149913 6. 374493 6. 632885 7. 300996  
4. 652802 5. 260881 5. 124707 4. 413026 5. 154892 5. 047009 4. 518036 4. 742271 4. 189702  
2. 668235 2. 739157 3. 219036 3. 290645 2. 478946 2. 972361 2. 317489 3. 318176 3. 490987  
1. 36084 1. 431929 1. 013491 1. 480072 1. 470925 0. 753271 1. 246395 0. 862108 1. 279611  
3. 814252 3. 686642 2. 582294 2. 841965 2. 33607 4. 2168 3. 606206 3. 236799 2. 98653  
3. 604328 3. 38485 3. 584346 4. 057657 4. 280076 4. 049506 3. 484802 3. 437068 4. 120341  
4. 510418 4. 730687 4. 761193 5. 709046 5. 413589 4. 201382 4. 106124 4. 498741 2. 658163  
1. 892312 2. 397189 2. 006887 1. 180472 2. 003768 2. 944953 4. 09802 2. 002024 2. 178396  
0. 985564 1. 210711 1. 437941 2. 216576 1. 333083 1. 270003 1. 206149 1. 376516 1. 727726  
5. 010982 4. 901368 4. 998893 4. 911959 4. 607859 4. 901142 5. 61153 5. 19553 5. 703898  
6. 554479 6. 977782 6. 482614 5. 980556 6. 808538 6. 100583 5. 331044 6. 810661 6. 475807  
2. 745859 2. 746698 3. 225075 3. 181774 2. 490472 3. 287124 3. 097831 2. 471209 3. 044871  
4. 573239 3. 317115 4. 000181 4. 025008 3. 833762 4. 539059 3. 434622 4. 296568 4. 292649  
4. 888948 4. 396597 4. 565129 3. 611646 5. 035939 4. 633685 4. 66312 4. 37849 4. 050109  
1. 453828 1. 639474 1. 677973 2. 017742 1. 365977 1. 692707 1. 360661 1. 060799 1. 925058  
5. 154222 5. 323786 5. 938773 5. 395138 5. 833838 4. 44214 4. 779735 5. 318006 5. 540536  
2. 586524 2. 509423 2. 979456 3. 291 2. 820532 2. 712695 3. 5022 2. 738232 2. 933538  
1. 660466 1. 650643 1. 783613 3. 119889 1. 887649 1. 900002 2. 204181 1. 907809 1. 891378  
5. 183688 5. 010771 4. 708655 6. 467281 5. 010771 4. 369235 5. 487892 5. 001161 5. 355601  
3. 317632 1. 918901 3. 372741 4. 250812 3. 311258 2. 785908 2. 747389 1. 920243 4. 746473  
2. 400436 1. 938298 1. 577231 2. 502863 2. 324453 1. 761443 1. 990735 2. 520607 2. 667709  
4. 595574 4. 200168 4. 595574 5. 006338 4. 06877 4. 595574 5. 181496 4. 43033 4. 467837  
1. 155494 1. 810701 1. 912451 2. 028804 1. 384134 2. 573997 1. 596784 1. 540487 1. 956513  
4. 805338 5. 273883 5. 218241 5. 329075 5. 128122 4. 923675 3. 965669 5. 068681 4. 173458  
1. 523264 1. 911189 2. 041281 2. 120688 1. 600017 2. 405538 1. 959189 2. 935141 2. 645967  
1. 917609 1. 361101 1. 931198 2. 33004 1. 48169 1. 951513 1. 666665 1. 7361 1. 587013  
1. 677944 2. 011499 2. 380555 1. 944485 1. 434818 0. 844009 1. 695607 0. 972182 1. 787109  
1. 641626 1. 975792 1. 975792 2. 220018 1. 852216 2. 613119 2. 060788 1. 694198 1. 462907  
1. 174851 1. 406968 1. 190622 1. 665257 1. 390276 1. 217609 1. 679522 1. 3243 1. 244108  
1. 391026 1. 981497 1. 407674 2. 380647 1. 87318 1. 777167 1. 548298 2. 111993 2. 666885  
7. 159777 7. 761367 7. 014623 7. 316197 7. 552567 7. 295798 7. 099488 7. 490381 7. 257411  
3. 422957 1. 237414 2. 857514 2. 169187 1. 389306 4. 933789 2. 361145 2. 425713 3. 713214  
4. 348137 2. 204693 2. 005098 3. 988116 3. 815121 4. 039113 4. 31063 2. 989536 3. 265076  
0. 729049 1. 336537 0. 830531 2. 261422 1. 314596 2. 359585 2. 701368 1. 094475 2. 076549  
7. 712663 7. 767876 7. 95864 7. 69236 8. 247467 7. 60756 7. 536182 8. 204485 7. 773168  
1. 720119 1. 539651 1. 715792 2. 310676 2. 488479 1. 934131 2. 242782 2. 671237 1. 603691  
2. 405101 2. 702931 2. 154461 2. 755742 2. 215404 2. 399408 1. 742551 2. 052749 2. 400517  
3. 014186 3. 557178 3. 933073 3. 421161 3. 682591 3. 588138 4. 239915 2. 927521 3. 99479

2. 664199 1. 548036 3. 478263 1. 466485 1. 920694 3. 283988 1. 471989 1. 843182 1. 016078  
4. 542988 4. 198045 4. 398502 2. 978798 5. 378211 4. 541383 3. 831276 4. 540541 2. 646027  
3. 882652 4. 388833 4. 22492 3. 612012 3. 859974 3. 567177 3. 780768 3. 921035 2. 67683  
3. 06785 3. 587257 3. 20171 2. 815255 3. 089879 2. 591822 2. 895255 3. 753313 1. 636993  
1. 342927 1. 38771 1. 570446 2. 669444 1. 088697 1. 685902 1. 839308 1. 46128 1. 718038  
4. 268396 4. 866739 4. 534813 4. 216092 5. 046575 4. 711405 5. 128947 4. 938384 3. 771838  
1. 586193 1. 084911 1. 12683 1. 818896 1. 535108 1. 993868 1. 176924 1. 324064 1. 115901  
2. 725316 2. 895773 3. 424188 2. 880737 2. 864877 3. 83658 3. 461925 3. 281403 2. 481876  
2. 306479 1. 883206 3. 10595 3. 248949 2. 153656 2. 29874 2. 160651 2. 229079 2. 03764  
1. 540518 2. 257099 1. 558699 1. 528057 1. 528616 1. 40393 1. 861413 2. 084753 1. 516931  
2. 250737 2. 052771 2. 190881 1. 844564 1. 619317 2. 785699 1. 903216 1. 422349 1. 597716  
1. 715921 1. 989103 1. 650393 1. 763746 1. 626377 2. 259255 1. 530865 1. 683327 1. 468039  
1. 893986 1. 384311 1. 289242 1. 657296 1. 168839 2. 306755 1. 630307 1. 526689 1. 488224  
1. 332969 1. 602152 1. 736987 1. 754209 1. 634898 1. 470198 1. 467507 1. 291139 1. 761845  
3. 538422 5. 250226 4. 767845 4. 941785 5. 490111 4. 155153 4. 289114 5. 085046 3. 548169  
2. 808488 2. 42752 3. 024416 2. 454617 2. 65739 1. 982866 3. 073629 3. 130919 3. 184651  
1. 214313 1. 337566 1. 779533 2. 199311 1. 307198 1. 23525 1. 392248 1. 943001 1. 615095  
1. 854141 2. 281542 2. 310343 2. 190252 1. 627742 2. 029991 3. 132736 1. 864527 2. 232013  
1. 946773 1. 889294 1. 454627 2. 808802 1. 779957 1. 39271 1. 619466 1. 812708 2. 992525  
3. 078736 3. 182188 3. 939916 3. 144407 2. 94395 2. 722221 3. 489552 2. 759403 2. 427997  
5. 45049 3. 53813 4. 266248 4. 792673 4. 272213 4. 230191 3. 989148 3. 717235 5. 034409  
3. 365181 2. 895285 3. 509474 3. 902012 2. 560481 3. 484377 2. 735251 2. 36801 3. 032598  
4. 441449 4. 3535 4. 60687 4. 068005 4. 840363 4. 155904 4. 644823 4. 881545 4. 732447  
1. 695778 1. 665596 1. 714586 1. 833156 1. 057944 1. 771761 1. 181405 1. 900946 1. 744963  
3. 746776 3. 360701 3. 654822 4. 334486 3. 570252 3. 507649 3. 585587 3. 41626 3. 921968  
6. 596432 6. 87995 6. 496748 6. 107322 7. 09607 6. 688131 6. 12259 6. 690796 5. 079726  
4. 655192 4. 780322 5. 216611 5. 678928 5. 236613 5. 212171 4. 719441 4. 956146 4. 304921  
4. 845329 3. 451227 3. 692123 5. 293607 3. 865542 2. 944081 3. 850237 4. 952176 2. 690145  
8. 238507 8. 459991 8. 421215 8. 033992 8. 544629 7. 930879 8. 160055 8. 498173 8. 237182  
2. 454654 3. 291297 3. 174425 1. 794747 3. 555346 3. 613674 2. 390609 3. 779947 2. 165891  
3. 060477 2. 846524 2. 986746 2. 431343 3. 925892 1. 927216 2. 554186 2. 815163 1. 522432  
0. 89364 2. 094224 3. 109647 3. 454604 1. 170104 1. 456174 1. 053953 2. 921792 1. 474049  
4. 630247 6. 216647 5. 748548 3. 849273 4. 923856 5. 969377 4. 480642 4. 893156 4. 312209  
3. 056193 3. 852336 4. 380668 5. 186215 4. 365538 4. 258521 4. 145975 4. 024447 3. 709554  
5. 372749 5. 79485 5. 172819 5. 570871 5. 705385 5. 599838 4. 763543 5. 224649 4. 410793  
4. 027087 4. 451084 3. 920432 3. 594943 3. 967344 4. 515779 3. 664695 3. 331713 3. 009424  
3. 419842 3. 581328 3. 214008 3. 009365 3. 911809 4. 051375 2. 794905 4. 195711 3. 321727  
1. 452228 1. 554209 1. 920543 2. 276179 1. 393033 1. 337231 1. 105523 1. 47982 1. 134815  
1. 706071 1. 770428 1. 525519 1. 370724 2. 639331 1. 956796 1. 911767 1. 657328 1. 966902  
3. 477961 2. 584721 2. 869916 2. 46618 2. 816339 1. 962803 2. 985007 3. 122712 2. 414228  
5. 574335 4. 94924 5. 30772 4. 098586 4. 605778 4. 487607 4. 852662 5. 042797 4. 878017  
2. 624513 2. 782358 2. 093093 2. 537129 1. 838255 2. 59861 2. 923389 2. 52673 2. 56973  
1. 207547 0. 896103 1. 473731 2. 35254 0. 872256 1. 738676 1. 364257 1. 487751 1. 708641  
3. 600027 3. 404913 4. 719378 3. 164149 3. 185276 3. 007289 3. 854183 3. 430637 3. 508631  
2. 592463 1. 617942 1. 831982 3. 094694 3. 353393 1. 705306 1. 582365 2. 288238 1. 620035  
2. 59119 2. 054192 2. 344662 2. 501251 2. 178906 2. 446764 1. 945072 0. 981676 3. 639736  
3. 053325 2. 708538 3. 042418 3. 186713 3. 19953 3. 487685 3. 208649 2. 853953 3. 012873  
2. 785507 2. 655429 2. 417632 2. 63428 2. 329145 2. 566932 2. 323427 2. 383087 3. 167706  
8. 595249 8. 805159 8. 673509 8. 094893 8. 540195 7. 976617 8. 284033 8. 827943 7. 970872  
6. 533643 5. 780285 6. 916735 6. 548787 6. 089837 6. 244213 6. 04098 6. 178695 6. 157772  
1. 462265 1. 579874 1. 895787 2. 178797 1. 297313 1. 890967 2. 072381 1. 757174 1. 715696

1.152226 1.482513 2.153537 2.781611 1.934475 2.652618 1.810418 1.514949 1.713277  
2.420773 2.266335 2.196109 2.714451 2.10349 2.122626 1.566409 2.312302 1.332213  
2.002387 2.733917 2.390012 2.171661 1.662268 2.085766 1.489619 1.715182 2.363797  
4.8327 5.592359 5.132073 4.504002 4.57054 5.04307 5.798417 5.202934 3.661668  
3.783027 2.609519 2.289807 2.46311 2.380122 2.532172 2.419746 2.72093 2.689807  
7.972909 8.284193 8.459137 8.067847 8.154604 7.941671 8.159982 8.14732 7.874822  
4.642319 5.181936 5.00589 2.806145 4.631785 5.278237 4.1932 5.063683 3.834611  
2.270518 2.322561 1.371763 2.49845 1.963332 1.314543 2.067847 1.875185 1.891728  
1.430952 1.088815 1.757798 1.616009 1.345106 2.239265 1.338651 1.89018 1.124674  
4.478106 4.802912 4.398731 5.263137 4.583098 4.304277 3.872554 4.241772 3.809127  
5.412535 5.336444 5.307674 5.810262 5.698132 5.791884 5.265573 5.535276 5.338244  
4.067942 4.21254 4.476558 3.463113 5.939284 4.825856 4.501979 4.061666 3.968867  
1.713878 1.835649 2.209988 2.423771 1.571636 1.865217 1.792082 3.6481 2.473968  
4.152548 3.387325 3.276568 2.793066 3.311186 3.338275 3.53921 3.261513 3.4874  
1.609461 1.60287 2.038516 1.625093 1.528093 1.998188 1.772921 1.717736 2.221629  
1.373733 1.432169 1.840062 1.436973 1.035379 1.357819 1.625485 1.697008 1.385505  
2.037166 1.285815 1.31631 1.362706 1.404494 1.35459 1.105826 1.421115 1.812912  
5.038689 5.061991 4.289537 5.914694 5.268989 4.942085 4.739324 5.597521 5.148545  
3.552115 4.702175 5.475745 4.971105 4.829226 4.392436 4.988832 4.478626 5.113965  
1.503407 1.215669 1.413193 1.366359 1.111603 1.304753 1.479665 1.447794 1.485464  
3.66353 1.958859 2.093848 3.636167 2.466518 3.975216 2.081348 2.252128 1.588275  
2.7985 3.306929 3.411639 4.35075 3.328933 3.430075 3.387603 3.550717 2.999202  
2.35399 2.805769 1.590169 2.110075 3.001484 2.106048 2.311673 2.081824 2.548873  
5.603987 5.563803 5.586781 5.543452 5.427495 5.770592 5.710932 5.200796 6.126261  
1.348011 1.033057 1.401051 1.693116 1.144849 1.927712 1.864192 0.881447 1.823424  
2.794956 3.080758 4.523742 3.873615 3.767646 2.188173 3.615129 3.162666 3.886901  
1.486806 2.15817 1.93455 2.201044 1.348759 1.706788 1.427681 1.846231 1.748056  
4.474066 3.684429 3.692002 5.105974 2.397085 3.716502 4.643364 3.63342 4.646516  
1.044853 1.295684 0.795127 2.848469 0.968785 1.574155 0.995232 1.889196 1.957317  
3.520126 1.665778 1.914724 1.678265 1.759398 1.460278 1.761703 2.567989 2.164595  
1.475924 1.778079 1.246425 1.439291 2.596075 2.912516 2.515984 2.126884 4.937758  
4.345294 3.188166 3.221922 3.204602 2.677425 3.645163 2.738645 5.006771 2.639296  
0.797716 1.272003 0.95448 1.332054 1.138745 1.01156 0.791648 1.090277 1.403243  
7.239925 6.502732 6.596673 6.910382 6.809357 6.975065 7.278103 6.970814 7.707173  
0.922887 1.126536 1.378432 1.080889 0.833142 1.707208 1.050608 0.845986 1.131865  
1.365314 1.258399 1.177433 0.924366 1.747469 1.3757 1.412584 1.404867 1.689799  
7.262526 6.830356 7.366024 6.306314 6.559119 6.407293 7.065427 7.173133 5.646446  
3.988826 3.448464 3.742986 4.954286 3.690499 2.752023 3.798655 3.185968 3.769619  
3.609971 2.876955 2.619547 3.415526 2.928551 3.970869 1.993991 3.312422 2.954369  
6.738007 6.040128 4.202064 5.704347 6.004454 7.775457 5.611514 6.086955 5.350087  
1.871269 2.735599 2.34318 2.627271 2.201913 2.663075 2.103299 1.819183 2.750746  
1.244934 1.406412 1.686425 1.151526 0.810778 2.968957 1.106304 1.27413 1.347336  
1.275578 1.217346 1.034395 1.308199 1.299193 0.898506 1.024246 0.960314 0.953347  
4.342884 4.729458 4.859942 3.919519 4.981648 4.795923 4.80594 4.394832 5.491016  
5.066602 4.725879 4.108424 4.956239 3.990623 4.690447 4.624978 4.51926 3.956595  
1.762732 2.404827 2.661676 2.633346 2.070166 2.236763 1.948612 2.57482 2.181102  
1.100935 1.362034 1.79039 2.203369 1.607185 1.868821 1.895087 1.796452 2.409359  
1.595265 1.039921 1.669227 1.3432 1.247796 1.780861 1.830042 1.41063 1.354699  
2.123127 1.992856 1.690851 2.082746 1.786011 2.053825 1.847646 1.600722 2.08088  
6.180859 6.144205 5.882616 6.13018 6.878949 5.845607 5.977723 6.018919 5.061855  
2.710917 2.85715 2.277352 3.346364 2.530152 2.605637 2.309602 1.87917 1.841783

1. 710103 1. 681937 1. 938089 1. 776457 1. 611047 2. 062001 1. 611801 1. 730109 2. 273162  
1. 905973 2. 420574 1. 58679 1. 684835 1. 062097 2. 642646 2. 068313 1. 299742 1. 843131  
2. 008441 1. 63673 1. 665475 2. 310166 1. 376595 2. 511618 1. 605467 1. 514856 1. 794547  
2. 378652 1. 982561 1. 345426 2. 229926 1. 468564 1. 549517 1. 013367 1. 418631 2. 475734  
5. 867615 5. 983766 5. 475287 5. 527732 5. 828049 5. 929215 5. 157707 6. 072462 4. 9368  
4. 258228 5. 160986 4. 483992 4. 586631 4. 429073 4. 185135 4. 48259 4. 165542 5. 315542  
3. 398195 3. 82559 4. 582424 2. 813867 3. 080249 3. 152675 3. 140718 3. 747774 3. 030861  
2. 874505 2. 286687 3. 379922 2. 174402 2. 853265 3. 222576 2. 790128 3. 22728 3. 612885  
1. 919611 1. 397357 2. 26574 2. 430555 1. 797656 2. 402243 1. 907003 1. 506278 1. 732838  
2. 768458 2. 730482 2. 584257 2. 361392 2. 788537 2. 724829 2. 612917 2. 977286 2. 988919  
1. 791918 1. 755213 2. 127608 1. 819996 1. 610068 1. 857186 1. 848524 1. 980255 1. 479032  
3. 86067 3. 682071 3. 166766 4. 3322 4. 290489 3. 74051 4. 334398 3. 972303 2. 900796  
6. 755553 7. 697323 7. 902482 5. 23637 7. 477064 7. 911016 6. 875536 7. 683252 7. 136318  
2. 030899 2. 158685 1. 751677 1. 975518 1. 653873 1. 651623 3. 60107 1. 88077 2. 409955  
1. 816678 1. 92089 1. 755242 2. 597917 1. 397073 1. 607459 1. 751764 1. 728206 1. 746996  
2. 669523 1. 853948 2. 115898 2. 127496 3. 084669 3. 115912 2. 613449 3. 053961 3. 657677  
4. 907934 4. 239637 4. 604575 4. 986764 4. 736421 4. 071343 5. 104982 4. 424667 3. 193575  
7. 826753 7. 585913 7. 408781 6. 960766 7. 70828 7. 821765 7. 695269 7. 711815 7. 623338  
2. 578976 3. 266239 2. 789234 2. 869197 2. 699494 3. 153223 2. 928792 2. 157844 2. 120307  
1. 499459 1. 450312 1. 667276 1. 775149 1. 840811 1. 708067 1. 470724 1. 265694 1. 708067  
1. 163845 1. 57346 1. 413742 1. 776806 1. 058619 1. 62472 1. 240399 1. 660269 1. 30007  
5. 610239 5. 367706 5. 331646 4. 582607 5. 926947 4. 816218 5. 281823 5. 296495 5. 783425  
4. 964061 5. 085019 5. 464067 5. 914392 5. 441119 5. 497884 5. 211837 5. 252675 4. 729444  
2. 011256 1. 93572 1. 803318 2. 838848 1. 658408 2. 333775 1. 769863 1. 652639 1. 392061  
2. 778699 1. 808322 1. 786863 2. 915283 2. 868405 1. 618449 2. 04642 1. 982792 2. 956292  
3. 203273 2. 456529 1. 620353 1. 602225 1. 858684 2. 45038 3. 682828 3. 981987 3. 141662  
2. 933316 3. 307084 2. 940459 2. 600968 3. 924021 1. 961869 2. 771065 2. 326685 2. 229819  
5. 645673 4. 430174 4. 919725 5. 03949 4. 73551 4. 925893 5. 303562 3. 871449 4. 36309  
1. 258595 1. 671787 1. 857155 1. 877076 1. 431818 1. 479229 1. 668684 1. 571761 1. 74045  
4. 519963 3. 977235 3. 585639 4. 905289 3. 071286 3. 290673 4. 299982 3. 561415 4. 093486  
1. 600182 1. 481757 1. 390578 2. 315182 1. 609611 1. 318565 1. 367231 1. 346568 1. 490439  
1. 528923 2. 293911 1. 630701 2. 710184 1. 885091 3. 30926 1. 937557 1. 86292 2. 3059  
7. 67659 8. 139905 7. 808977 7. 28155 8. 086474 7. 096068 7. 843433 8. 365138 7. 768292  
2. 580477 2. 251461 2. 330085 3. 683437 2. 678686 3. 520303 2. 975657 3. 089634 2. 671535  
6. 174021 6. 524684 6. 139233 6. 773812 7. 577619 5. 699526 6. 887908 6. 759379 5. 089844  
4. 722374 5. 267186 5. 082996 4. 125088 5. 360351 4. 627633 4. 654728 5. 12901 4. 990471  
3. 328827 2. 372854 3. 724536 3. 245599 1. 865828 3. 555943 1. 89115 1. 717533 2. 155156  
6. 417942 6. 268424 6. 096656 5. 862012 6. 208615 5. 941662 5. 935388 6. 252213 6. 040709  
3. 765645 4. 458715 4. 025287 3. 53569 4. 738167 3. 122364 4. 662772 3. 087717 4. 775017  
6. 514178 5. 804322 5. 071377 5. 035177 6. 785987 4. 866563 4. 356891 6. 033908 4. 697784  
1. 246741 1. 475348 1. 596794 1. 489963 1. 371221 1. 374876 1. 425618 1. 035632 1. 20053  
1. 782293 1. 651788 1. 202741 3. 221864 1. 264447 2. 430245 1. 80547 1. 447287 2. 197357  
1. 227212 1. 500035 1. 23878 1. 843428 1. 489867 2. 346654 1. 617236 1. 484588 1. 504104  
1. 843911 0. 985744 1. 348491 1. 637633 1. 713158 1. 123672 1. 867522 1. 635995 2. 045462  
1. 080744 2. 143118 2. 09567 1. 725256 0. 703952 0. 619018 0. 490513 0. 822631 0. 968259  
1. 378377 1. 939901 1. 069221 1. 879192 0. 991596 2. 089888 1. 059362 1. 043315 1. 019406  
5. 092813 5. 401697 4. 886741 4. 920274 5. 268119 4. 650244 4. 752492 4. 985989 5. 001132  
1. 435589 1. 390119 0. 821979 2. 463192 1. 834758 2. 133476 1. 796814 1. 938607 1. 646528  
2. 614446 2. 880122 3. 228905 2. 17504 2. 184751 2. 508375 2. 102535 2. 497722 2. 242655  
2. 710972 2. 859985 3. 912557 4. 496405 2. 656664 2. 274842 2. 928847 2. 417349 2. 968125  
3. 860317 4. 367153 4. 135 4. 486758 3. 889878 3. 398521 4. 008268 3. 22255 4. 387524



5.992518 5.758109 7.180568 5.486467 6.271556 5.529376 6.204615 6.066927 5.1033  
2.294666 1.816286 2.537783 2.294666 2.197439 2.318111 1.890627 2.104618 2.461357  
2.932221 4.144603 3.197256 3.645658 2.98583 2.840707 2.515759 2.797303 3.007061  
5.979021 6.183606 5.879801 6.40048 6.966323 5.88264 6.839504 6.212992 4.647502  
1.407179 1.623797 2.103772 2.706295 1.900666 1.727892 1.951408 1.523867 2.326054  
3.885823 3.80108 3.529337 4.021807 3.834476 4.82191 3.911396 4.034221 3.579274  
7.176322 7.236201 7.592619 6.54096 7.216599 7.112724 7.154868 7.559277 7.565689  
2.072248 1.418169 2.061874 3.34481 1.656937 2.393124 2.254049 1.226711 2.335665  
1.936537 1.966519 2.168995 2.432318 2.049624 2.561848 2.264193 1.908266 2.151315  
6.695303 7.16223 7.132998 6.804498 6.481859 6.558765 6.565594 6.619561 5.727594  
1.928806 1.736946 2.434934 2.540012 1.913852 1.488586 1.769941 1.831043 2.017782  
3.026143 2.760043 3.298749 3.764392 1.934113 2.943197 2.739865 3.303496 3.170468  
1.786119 2.470415 1.823774 2.285056 1.097894 2.492631 2.132084 1.868625 1.513869  
4.008457 4.910331 4.502367 3.473605 4.783594 4.42703 4.173667 4.96274 4.843633  
4.625087 4.381531 4.684841 2.20997 3.576559 4.577235 3.960057 3.909355 3.502797  
4.636812 3.937083 4.32655 2.945045 4.216758 3.61545 4.309641 4.226941 4.408696  
1.135617 1.238269 1.317505 2.275659 1.322221 1.097086 1.288981 1.084075 1.293236  
2.248849 1.928308 1.939588 2.013042 1.31423 2.189497 2.494158 1.892181 1.614237  
1.646618 1.239774 1.585998 2.00525 1.972619 1.390668 1.223648 1.456515 1.366286  
3.27914 2.993876 2.533653 4.010822 3.382855 3.031906 2.908077 3.358183 3.098375  
5.421606 4.38482 4.580479 3.610023 4.416702 4.579072 4.362122 4.606279 4.352634  
2.806177 3.164073 3.291821 3.167041 3.210386 2.684589 3.580747 4.187886 2.883597  
1.621385 2.251295 2.158799 2.881715 2.305165 1.786545 1.954175 1.509621 1.458979  
2.089551 2.601613 1.846877 1.975482 1.761302 2.191767 1.690422 1.524583 1.672147  
2.677411 2.202061 2.56454 3.018609 2.278094 3.417615 2.58286 2.169769 2.202525  
8.810663 8.503132 8.655097 8.807187 8.800783 8.814992 9.282842 8.60887 8.529927  
6.330798 6.038166 6.41827 7.265821 6.68006 5.73915 6.192933 6.310278 6.397492  
1.856773 1.574166 2.773148 1.728318 1.511614 1.134715 2.021418 1.462189 1.87206  
1.905533 1.658388 1.634622 2.057591 1.753558 1.996299 2.092778 1.401499 2.100527  
2.315022 2.600951 2.069335 2.16739 2.222665 2.330751 2.546499 2.685503 2.194609  
2.04336 2.817002 2.050116 3.624904 1.788869 2.012549 1.911448 2.030152 2.155869  
4.816373 3.950408 4.886649 4.321424 5.058596 4.102583 4.633649 4.507226 4.274643  
4.040245 3.575123 4.444374 3.720817 3.794371 3.398415 3.594584 3.495503 3.629504  
2.266818 2.245888 2.787585 2.697918 2.274805 2.959968 2.587594 2.448753 1.6721  
8.697442 8.737651 8.578803 8.351236 8.596212 8.778194 8.775607 8.555897 8.996018  
1.463507 1.702551 1.374081 2.064579 1.316022 1.53445 1.232462 1.453538 1.524877  
2.414007 2.130719 2.273732 3.050061 2.115383 2.460174 3.110495 1.757346 1.460134  
4.490837 4.428942 4.91786 2.957647 4.363353 4.230656 3.745241 4.338539 3.651867  
2.463633 2.172379 2.24304 2.476668 2.316082 1.890398 2.434237 4.207963 1.810929  
3.378434 2.829752 3.819785 4.439465 3.769816 3.02654 3.565192 4.57123 4.074353  
5.829927 5.977949 6.327427 6.01592 6.811286 5.381942 5.732506 6.227152 4.53784  
6.326386 5.772792 6.190728 5.205325 6.126739 6.269948 6.51126 6.483298 5.974461  
2.488055 3.386387 2.749925 3.389609 2.630504 3.471064 2.710923 2.879485 2.611412  
5.664727 5.662409 5.039495 4.982531 6.085774 3.512748 6.423189 5.20148 3.940037  
5.111348 5.482218 4.948874 5.531063 4.535318 4.967566 4.8305 5.25382 4.950428  
3.603671 2.593655 2.726468 3.599659 4.416672 2.622392 3.863611 3.839237 2.970787  
4.290002 4.371549 4.194832 4.691298 4.313302 4.737364 4.483275 4.250297 4.773453  
1.933762 1.757759 1.599316 2.350849 1.568897 1.937647 1.299168 2.323241 1.518115  
4.638018 5.412604 6.243312 4.287466 5.911889 4.601266 5.926397 4.161789 4.60682  
2.364935 2.549888 2.110418 1.913189 1.878714 1.839038 2.226448 2.149909 2.00337  
1.811204 2.000937 1.506396 2.420564 1.410134 1.628531 1.593521 1.564801 2.02118

3.482983 3.412946 3.899587 4.758657 4.256097 2.556809 2.820872 3.488548 3.679764  
6.202198 6.050272 6.481608 5.372734 6.667479 5.313839 6.449881 6.124716 7.064278  
4.986718 4.944013 4.566997 5.353917 5.217696 4.568024 4.584959 4.789274 4.400947  
5.156277 6.043942 5.71243 5.681126 6.695569 5.211411 6.308048 4.742629 4.422327  
4.57733 4.678431 4.826499 5.123229 7.513145 3.902026 4.635182 4.667632 4.466033  
6.773873 7.134193 6.999092 5.962942 6.860898 6.989536 6.647741 6.929772 7.007211  
1.165641 1.082002 1.027932 2.350337 1.441175 1.355221 1.137986 1.245055 1.545583  
5.181166 6.113871 6.116137 5.835601 5.503405 5.873529 6.209436 5.933915 5.67628  
1.540517 1.789963 2.432726 2.537041 1.61744 2.019969 2.573491 1.821762 2.204916  
7.323451 6.896518 7.05665 7.642079 6.619363 6.142088 6.987702 6.331178 6.173744  
3.728185 1.957393 1.973863 2.30807 2.401191 2.590744 2.412466 2.099654 4.113463  
2.190833 1.70098 2.065849 2.55728 2.616335 1.97108 1.777969 2.35487 1.738844  
2.868951 2.673206 3.07094 2.802689 2.106345 2.459652 2.073186 1.419331 1.193124  
1.763521 2.300568 1.89688 2.775665 1.613028 2.648219 2.108884 1.602588 1.86368  
3.946626 3.574371 4.020455 2.196805 3.918513 3.748804 3.637964 2.166576 4.302624  
3.314524 2.850687 1.489382 2.097007 1.204012 1.177992 1.197605 2.290231 3.104788  
1.031607 2.071365 1.730323 0.92842 1.307984 1.224453 0.937215 1.89415 1.291636  
4.835744 4.986877 5.049567 2.357169 4.839881 4.708382 4.360245 4.3571 4.206663  
1.774585 1.205025 1.841522 2.058028 1.438667 1.603669 1.202852 1.42567 3.088325  
2.322017 2.744221 2.608989 2.527815 2.149081 2.297519 2.706786 3.116816 1.73416  
1.775542 2.951244 1.923039 2.376436 1.839373 1.95609 2.675673 3.066213 1.812079  
1.756989 2.8361 2.755471 2.936364 4.029805 2.44804 2.165407 2.011348 1.738718  
5.704952 3.660565 3.850173 2.423185 4.175567 5.017632 4.87396 5.122039 6.131945  
3.309881 4.022022 3.598272 3.074606 3.806453 3.582509 4.39824 4.020694 4.094792  
7.344668 7.597007 7.593618 7.377327 7.128827 7.803416 7.277339 7.516649 6.873996  
0.570625 1.998159 0.742191 0.854555 1.057052 1.486245 0.957533 1.117807 1.648938  
1.51821 2.188606 1.540355 2.348007 2.714653 2.189867 2.171132 2.596696 3.940677  
1.937789 1.472744 2.348294 3.246767 1.44671 1.839324 1.944925 1.215877 1.711237  
2.04332 1.4391 2.340149 2.856396 2.654776 2.018208 2.226123 1.542448 1.307333  
5.410819 5.019595 5.678717 5.781199 4.776522 5.223385 5.56813 5.538368 6.250436  
1.651282 2.257948 2.870053 1.259935 1.341744 1.489338 2.703794 2.060712 3.823424  
2.316431 2.340363 2.788386 2.685087 2.3722 1.821892 2.706699 2.735243 2.816755  
5.966429 5.178681 5.138849 5.98411 4.851482 5.387442 4.863408 5.189293 6.363424  
3.124845 2.790737 2.76059 3.099191 3.182905 3.272448 2.951059 2.591863 2.925573  
5.961068 4.858238 3.803582 3.887453 3.870144 5.109396 4.332452 3.583547 5.55036  
4.968247 5.471937 5.043726 5.271845 4.702026 4.249068 4.512669 4.759276 5.30121  
3.039297 3.483742 3.657011 4.179875 3.554027 3.866387 5.227916 3.267063 3.560035  
1.213069 2.102701 1.186289 1.712648 2.366691 2.08973 1.416372 1.679541 1.492172  
5.277221 6.23814 6.229471 6.937708 5.967803 6.010249 6.92007 6.693966 5.814957  
4.296914 3.516036 3.208185 2.891787 2.837369 2.798112 4.019538 3.49418 4.034797  
2.746599 3.948331 4.422917 4.046534 3.641433 2.975686 3.619972 3.257021 4.592048  
6.792477 6.373443 6.505314 6.486245 6.205037 6.531973 6.589616 6.54015 6.871388  
5.429322 4.833116 5.50059 4.406991 4.598164 4.950573 4.749793 3.912085 4.553072  
2.635893 2.246439 2.352662 3.59601 1.846291 2.038775 2.179606 2.939689 3.311165  
3.568077 3.908185 4.17246 4.453388 3.578086 3.382878 3.149513 3.409957 4.194162  
1.199273 1.860084 1.761342 2.449859 1.258398 1.437867 1.897742 1.04397 1.17858  
1.553915 1.849115 1.902313 2.227529 2.028165 1.902929 1.963833 3.126618 2.719056  
2.244413 2.898399 1.482639 3.293627 1.498923 2.72869 2.093325 1.423897 1.438503  
4.069052 3.372152 3.920947 2.526633 4.328925 5.24836 3.995975 5.111725 4.757094  
1.616462 1.968805 2.487815 1.89421 2.209738 3.182921 2.568233 1.710019 1.967789  
1.968313 2.890646 2.038875 2.956104 1.994874 2.78484 1.701496 2.361568 2.210858

5.86535 6.066489 6.52626 6.338975 6.151345 6.078642 5.582385 6.600182 5.689523  
2.414154 2.936675 2.724767 4.436432 3.680669 2.641299 3.921426 3.207793 3.247848  
7.69627 6.473448 8.319922 6.056891 6.430102 6.075194 6.555624 5.531559 6.542888  
1.54897 2.27435 1.743135 1.804454 1.740909 1.479513 1.511602 1.602554 1.457674  
1.535631 2.474967 1.630664 1.259037 1.261973 1.577276 1.216707 3.057389 3.323651  
2.773178 3.039773 2.663472 3.042054 2.718198 2.323878 2.167912 3.280844 3.331685  
2.037263 2.833581 2.330723 2.021333 1.836257 2.28243 2.021619 1.605169 1.693585  
6.631267 6.622911 6.413666 5.404703 6.639068 6.459468 6.277743 6.384832 6.164176  
2.005537 2.597971 2.337682 1.500326 2.025977 2.693149 2.410268 2.842799 2.35385  
4.070054 3.574606 4.55224 3.578211 3.055007 4.088327 3.7487 3.905869 6.599621  
4.545957 4.779155 4.114076 6.297241 5.166705 4.282766 5.197071 4.958853 4.609097  
1.74328 2.105025 2.171292 2.295702 2.19747 1.789436 2.157552 1.891084 2.394613  
4.085799 4.236248 4.542165 3.340114 4.483262 4.205497 3.994569 4.556292 4.716296  
5.40918 4.827009 5.368985 3.772815 3.661825 4.464721 4.802969 4.521588 6.102122  
1.379982 0.979604 1.537159 1.335273 1.249037 1.771648 1.264854 0.96986 1.79171  
3.013872 2.821725 1.450284 1.167781 2.470518 3.88549 1.350711 2.239177 2.432768  
4.096018 4.882165 3.140321 4.974193 3.654073 5.047913 2.154494 3.515376 4.569497  
6.937 7.607838 7.08295 7.390618 7.839303 7.413008 7.332326 7.262066 7.855301  
1.416871 1.030166 1.119008 1.59242 1.335725 1.355327 1.191281 0.940712 1.094551  
1.906712 1.99079 2.109835 2.376993 2.050658 1.593879 2.246677 1.870593 2.426318  
7.977464 7.655087 7.860161 7.759655 7.194492 7.674235 7.884084 7.338136 8.306553  
1.349803 1.484223 1.305237 1.022214 1.35167 1.391396 1.208771 1.513663 2.454275  
2.24777 2.473565 2.190642 2.300504 2.012547 2.322865 2.056591 2.940342 2.815948  
2.010685 2.422843 2.411134 2.905937 1.828006 1.783289 1.89745 3.397513 1.391438  
5.36778 6.243241 5.984133 5.759705 6.453878 5.170176 5.964751 6.318193 5.540984  
1.575644 1.737949 1.522359 1.344537 1.746765 1.714025 1.35659 1.909279 1.471132  
1.130994 1.165374 1.674762 1.16467 1.404906 0.857821 1.021647 0.857535 1.011537  
2.277644 1.755527 1.922244 2.602225 1.688465 1.695998 1.738179 1.497208 2.217055  
1.760841 3.232768 2.13941 3.593768 2.926133 1.559001 2.61674 2.222388 2.510957  
2.95609 2.996135 2.956652 3.129021 3.662019 3.077188 3.826924 3.141925 4.200913  
1.492601 1.103957 1.180114 1.089856 0.955091 1.902763 1.279028 1.230814 1.400483  
3.997246 2.951425 4.497235 1.758627 3.541715 2.12437 2.918973 2.637081 3.106771  
7.279894 7.178903 7.276243 6.053861 7.214727 7.031468 7.698762 7.131769 7.363065  
3.42736 2.864194 3.354087 3.871375 3.051714 2.989731 3.364655 3.830246 2.898713  
5.032931 4.818504 4.857033 4.752138 4.668457 4.359773 5.270941 4.95148 5.610316  
8.122113 8.382744 7.934214 7.759986 8.261538 8.003755 8.196093 7.925326 8.361016  
1.78389 1.789334 1.731191 2.662818 1.495379 2.045952 1.608743 1.355869 2.601276  
6.124924 5.932367 6.893072 5.71701 5.492743 5.888757 5.864461 5.351343 7.076155  
7.967363 8.269197 7.86913 7.86729 8.299318 7.977065 7.9019 8.182671 8.038105  
4.593064 4.842848 4.582934 4.14783 4.564906 3.759842 4.040978 4.263339 4.540895  
5.590505 5.875716 6.169815 6.719135 5.474113 5.054519 5.007183 5.69845 6.239007  
1.804836 1.452546 1.965237 2.801895 1.668074 2.304692 1.830426 1.843081 1.719767  
6.619842 6.660803 6.654082 7.374739 7.290088 6.177762 6.515784 6.509304 6.814644  
6.256954 7.320824 5.726377 5.380204 7.305382 6.66119 6.600788 6.855428 6.452763  
1.172367 1.108215 1.180332 1.828238 1.104906 1.196883 1.296105 1.206309 1.322081  
4.872939 4.62496 4.614858 4.529731 5.208593 4.830849 4.253458 4.771827 5.006739  
1.588811 2.015362 1.845898 2.39919 2.322561 2.252501 1.73599 1.79431 2.0849  
1.57251 2.081891 1.921663 2.480002 3.12892 1.701679 1.301207 2.042336 2.320786  
7.242656 6.682006 6.067359 5.065363 6.392817 5.035827 6.060536 6.52468 6.603007  
1.215552 0.749487 1.599052 1.943965 2.139123 1.02145 1.496057 1.267832 1.663083  
3.216716 1.708439 2.852812 1.929226 1.446855 2.352692 2.646546 1.020324 1.205189

4. 899432 4. 729187 4. 842361 4. 348518 4. 506913 4. 766966 5. 080223 4. 080756 4. 285868  
1. 008378 0. 899257 0. 996927 1. 855009 1. 097126 0. 995268 1. 266469 1. 112556 1. 062646  
4. 207748 4. 721507 4. 14504 4. 059564 4. 949851 4. 947475 3. 655398 4. 786514 5. 274444  
5. 35498 4. 718626 5. 096191 4. 498406 4. 295932 4. 604177 5. 322206 4. 419896 4. 457876  
1. 241099 0. 98385 1. 589611 1. 282061 1. 247897 1. 314524 1. 809475 1. 215013 1. 446549  
0. 931003 0. 858629 1. 167592 1. 046495 1. 705595 1. 975017 1. 128762 1. 992581 1. 520645  
2. 697823 2. 602752 2. 862634 2. 668004 2. 505602 2. 669978 3. 393326 2. 663056 2. 850295  
5. 381462 4. 989121 5. 097971 4. 287646 4. 807952 4. 317049 5. 014293 5. 329308 4. 083751  
1. 857558 2. 791182 2. 266211 2. 08634 2. 042759 3. 885999 2. 375221 2. 770305 2. 362446  
1. 087951 1. 605689 1. 501467 1. 275924 1. 487391 1. 115031 1. 930671 1. 55847 1. 242477  
1. 221053 1. 327298 0. 896106 1. 490916 1. 310821 1. 318821 1. 03423 0. 573272 0. 899248  
2. 033125 2. 070119 1. 778897 3. 23568 2. 176357 2. 055042 2. 120493 1. 731398 2. 256371  
3. 708284 2. 238117 2. 545516 3. 164593 2. 796345 2. 843434 3. 284672 3. 152611 3. 378652  
2. 180179 2. 307674 2. 748586 2. 7889 2. 635091 1. 978805 2. 577558 2. 366638 2. 137381  
8. 031263 7. 772009 7. 635675 6. 874906 7. 975249 7. 485359 7. 746916 7. 792378 8. 222828  
5. 312693 5. 28918 5. 595617 5. 181621 5. 885422 5. 120914 5. 876344 5. 38024 5. 471621  
4. 369612 4. 789727 4. 535648 3. 713717 4. 153103 4. 435387 4. 611666 3. 705245 4. 30893  
1. 175313 1. 161548 1. 348219 1. 821368 1. 108049 1. 286697 1. 613918 1. 51953 1. 291289  
1. 124714 1. 198485 2. 006905 1. 329416 2. 786333 1. 663561 3. 36024 3. 095923 1. 842762  
3. 114564 1. 620829 3. 595911 1. 06292 1. 567252 0. 502495 0. 699605 1. 773012 0. 667543  
1. 501914 1. 604949 1. 389004 2. 079981 1. 345889 1. 724761 1. 157711 1. 671421 1. 775629  
1. 390073 1. 577012 1. 535934 1. 418196 1. 52527 1. 385995 1. 375755 1. 241622 1. 349165  
5. 824971 5. 222417 5. 357276 5. 044034 5. 241255 5. 036749 5. 366222 5. 186509 5. 189094  
6. 905527 6. 175025 6. 047187 3. 440775 4. 629151 6. 641796 6. 149373 4. 890549 6. 357339  
3. 48809 3. 575051 4. 36083 3. 628171 4. 630917 4. 05509 4. 33621 4. 141952 4. 568515  
6. 995419 6. 891099 7. 36442 6. 875339 6. 900706 7. 018826 7. 203871 6. 840388 6. 089612  
1. 416878 1. 389844 1. 017887 2. 613563 1. 538396 1. 327101 1. 357858 0. 915014 1. 632153  
5. 248236 4. 793089 4. 802372 3. 97187 3. 97311 4. 86199 4. 976899 4. 724901 4. 691503  
9. 994842 9. 963748 9. 731684 10. 23084 9. 859121 9. 575795 10. 15812 9. 937572 10. 14854  
1. 399581 1. 244892 1. 359483 2. 255621 1. 275883 1. 23673 1. 536455 1. 750653 1. 055255  
6. 143554 5. 968374 5. 436609 6. 21962 5. 861863 5. 934663 5. 282096 5. 763323 5. 743643  
2. 145302 2. 925208 2. 286817 2. 43732 2. 080211 3. 026329 3. 043867 1. 500759 3. 75475  
0. 793176 0. 960802 1. 341846 1. 061317 1. 316236 1. 51628 1. 296437 0. 896477 1. 122006  
6. 2446 5. 563448 5. 516866 5. 061759 5. 484167 5. 530341 5. 077577 5. 186313 5. 733127  
0. 942992 1. 046918 1. 092505 1. 297931 1. 428774 1. 172869 1. 074389 1. 597729 1. 071992  
2. 222856 1. 977369 1. 810979 1. 554863 1. 608908 1. 863081 1. 800424 1. 90659 1. 883106  
9. 531901 9. 204189 9. 324466 8. 877148 9. 170533 8. 669424 9. 428051 9. 056959 9. 621561  
6. 556325 5. 634202 5. 75389 5. 652527 6. 143954 6. 137296 5. 950156 5. 955931 6. 220504  
3. 347597 3. 432163 3. 328337 2. 406309 3. 736576 3. 344807 3. 367765 4. 117217 4. 941313  
5. 283419 4. 475023 5. 225392 4. 28215 4. 965125 4. 732818 4. 754754 4. 668285 5. 206102  
1. 714806 1. 554314 1. 58626 2. 221415 1. 830034 2. 202426 1. 858221 1. 491893 1. 48853  
2. 614031 1. 52951 2. 521308 4. 108108 1. 881775 3. 045961 2. 482651 2. 357683 3. 264496  
4. 660534 4. 599755 4. 674163 5. 812855 3. 931287 4. 050642 4. 813093 4. 189589 4. 773097  
2. 870181 3. 481772 3. 504828 4. 511822 3. 650478 3. 82944 3. 247504 2. 727873 3. 630063  
1. 702035 1. 277131 1. 575721 1. 865841 1. 88138 2. 511087 1. 285639 1. 490825 1. 551167  
5. 429857 5. 278561 5. 918849 6. 095845 5. 358693 4. 501755 2. 596585 3. 59359 4. 939239  
1. 139803 0. 890525 1. 308652 1. 17835 0. 862278 0. 981819 1. 289612 1. 154587 1. 135892  
1. 53704 1. 879827 1. 95482 1. 708898 1. 314992 1. 838069 1. 293652 1. 624228 1. 522883  
3. 714509 3. 59643 3. 552328 2. 2428 3. 163068 4. 284989 3. 598411 4. 078217 2. 550022  
1. 38515 1. 159498 1. 135779 1. 397567 1. 145606 1. 286766 1. 283677 1. 325349 1. 112571  
2. 527296 2. 844321 1. 601198 2. 828285 2. 859555 4. 76636 1. 479182 3. 400056 1. 671643

7. 393211 7. 536779 7. 453746 7. 469833 7. 259954 7. 641289 7. 550696 7. 179665 7. 174698  
6. 909686 6. 730347 6. 806115 7. 040869 6. 354217 6. 729362 7. 007867 5. 945642 7. 190582  
2. 525052 1. 67958 1. 375464 2. 040956 2. 197381 2. 151427 1. 647581 1. 677623 2. 235356  
1. 598915 1. 055989 1. 188053 1. 769479 1. 546451 1. 367621 1. 367632 1. 342147 1. 887321  
6. 894416 6. 4281 6. 192402 6. 976917 6. 626236 6. 696565 6. 529696 6. 635388 6. 310289  
0. 621194 0. 703789 1. 036613 0. 501585 0. 716306 1. 544927 0. 683908 0. 887119 1. 697772  
2. 188943 1. 534383 1. 054534 1. 786198 1. 5321 2. 304432 1. 768623 1. 636297 3. 069499  
6. 34662 6. 786196 6. 623998 5. 978105 6. 572378 5. 655035 6. 667361 6. 338435 5. 815733  
3. 912002 1. 492325 2. 531883 2. 651277 2. 633221 3. 658679 1. 925534 2. 458167 3. 272638  
4. 425654 6. 709802 5. 816088 6. 023993 6. 46141 6. 721474 6. 053904 6. 542472 4. 187265  
1. 261082 1. 210307 3. 201858 2. 126522 1. 457778 0. 663467 2. 233333 1. 137153 1. 13268  
9. 623531 9. 82658 9. 595685 9. 539254 9. 811351 9. 298734 9. 764619 9. 850542 9. 751813  
1. 979157 2. 177141 1. 762408 1. 739178 1. 881997 2. 049798 1. 664969 1. 280034 2. 297891  
2. 71727 2. 885928 2. 435092 2. 384636 2. 207875 2. 855031 2. 73315 2. 884581 3. 512254  
4. 842848 5. 150442 4. 283523 4. 683333 4. 768406 5. 039658 4. 676952 4. 651771 5. 292069  
6. 962847 5. 708918 6. 718315 5. 413013 6. 232702 7. 939356 5. 997342 6. 594801 6. 340498  
1. 563074 1. 810042 2. 439189 1. 832412 1. 420534 1. 811441 1. 593195 1. 293168 2. 052866  
7. 418004 7. 308994 7. 24742 7. 569573 7. 27672 7. 311992 7. 617775 7. 319296 7. 235031  
3. 946487 4. 190207 3. 945235 4. 51174 4. 610359 4. 259394 4. 455801 4. 752638 3. 117343  
4. 698717 5. 290938 5. 154801 4. 009527 4. 723636 5. 338212 5. 536597 5. 182622 4. 972511  
4. 203201 5. 028447 2. 80054 5. 276246 3. 180822 4. 070708 4. 903781 5. 077925 3. 933536  
5. 763274 3. 14448 4. 038202 3. 866521 3. 396503 5. 632929 4. 473931 5. 564815 5. 854048  
1. 957365 1. 694772 1. 632098 2. 462998 2. 104779 2. 50705 2. 137246 2. 546231 1. 467371  
4. 983834 3. 507937 4. 328841 4. 793037 4. 732065 3. 816467 4. 701276 4. 495055 4. 143755  
1. 107445 1. 149613 1. 391249 1. 653535 1. 88137 1. 513478 0. 892572 2. 213774 1. 223494  
5. 760376 5. 016334 5. 141736 5. 574609 5. 405239 4. 845473 4. 813739 4. 704235 5. 391717  
5. 880328 5. 654394 5. 694636 6. 097972 6. 201437 5. 158981 5. 967109 5. 778333 5. 505358  
2. 872629 1. 210345 2. 098773 2. 993742 0. 962814 2. 653877 0. 679731 3. 051653 3. 189796  
6. 424728 6. 193178 6. 735328 6. 97197 6. 573442 6. 594501 6. 719296 6. 201481 6. 826624  
7. 240714 7. 04663 6. 778345 7. 471344 6. 850516 7. 333582 7. 026657 6. 925489 6. 484266  
1. 137067 1. 354476 0. 946092 1. 723634 1. 198554 1. 640754 1. 701212 1. 128618 2. 675171  
2. 185432 2. 551228 2. 144899 2. 471919 2. 531725 1. 928769 2. 45716 1. 701046 2. 2964  
4. 408928 4. 521622 2. 716555 2. 157492 2. 879442 3. 399563 4. 415149 4. 257711 3. 349782  
5. 247212 5. 599581 5. 41598 5. 656967 5. 762306 5. 495127 4. 786485 5. 095183 4. 436031  
7. 905265 7. 213869 7. 489312 6. 861353 7. 065336 7. 068155 7. 668404 7. 16859 7. 336232  
3. 538333 1. 737585 2. 377324 2. 560081 2. 330765 2. 46881 2. 939292 3. 382229 4. 241611  
9. 521195 9. 929925 9. 93614 9. 870886 9. 652087 9. 816366 9. 988976 10. 02203 10. 07456  
2. 024814 2. 352491 2. 406223 2. 030476 2. 206191 2. 636456 2. 002191 2. 16446 2. 124056  
4. 49784 4. 96222 3. 771263 3. 377817 5. 538859 4. 048797 4. 320619 5. 070786 6. 151776  
7. 246983 6. 935327 7. 140248 7. 21471 6. 63638 7. 006828 7. 557924 6. 958241 7. 766557  
1. 138866 1. 100805 1. 153704 1. 454271 1. 295878 1. 506886 1. 153704 0. 853076 0. 91457  
1. 728914 2. 091257 1. 075593 1. 741499 1. 576405 1. 200476 0. 853391 1. 559179 0. 747446  
1. 270483 1. 362235 1. 44277 2. 657407 1. 179612 1. 17159 1. 569321 1. 007123 1. 291583  
4. 96227 4. 590305 3. 945645 3. 68159 4. 055465 3. 842865 3. 761504 4. 179783 5. 039189  
10. 41158 10. 54103 10. 21098 10. 39847 10. 54999 10. 18763 10. 2654 10. 44899 10. 74419  
5. 659541 5. 940784 5. 345157 5. 556766 5. 872886 5. 642927 5. 663858 5. 873039 5. 227128  
10. 6471 10. 06361 10. 41374 9. 976433 10. 17803 9. 919093 10. 24142 10. 1667 10. 65494  
6. 112238 6. 286795 5. 534905 5. 186143 6. 5347 6. 144307 6. 321527 6. 528543 6. 417917  
5. 787437 5. 578075 5. 615209 4. 009374 5. 983498 5. 679483 6. 196492 5. 875088 5. 563518  
3. 106401 4. 132912 3. 561404 3. 777337 3. 844303 3. 991503 3. 914378 3. 499103 4. 472049  
3. 713485 4. 443022 3. 711877 4. 178979 3. 999366 2. 887792 3. 452504 3. 062768 2. 991901

5.971156 5.916791 5.883239 4.559204 5.073361 6.115399 5.505162 5.465359 4.851812  
10.05009 9.788447 9.825223 9.278561 9.895078 9.489114 9.868398 9.831865 9.811072  
4.846601 5.313783 5.274852 5.343584 5.059244 5.602702 5.992321 5.202251 5.01955  
7.341427 7.678844 6.566851 5.443983 6.994089 6.848 7.467936 5.634991 5.203714  
5.273294 5.373271 4.457797 4.706781 4.975235 5.119417 4.252093 4.954531 4.395476  
2.694198 1.991818 1.952104 0.876617 1.742753 2.4526 1.91353 2.152919 3.07802  
5.062882 5.43178 4.835658 4.948814 5.112698 4.973097 5.339026 4.823928 4.745752  
1.723426 1.203394 1.641091 1.508698 1.284053 1.512061 1.17922 1.534471 1.770698  
5.164544 5.08586 5.43828 4.633696 5.625426 5.36675 5.682947 5.480649 5.748873  
1.356002 1.369814 0.880936 1.611597 1.235276 1.701435 1.160223 0.740611 1.246279  
6.032187 5.850747 5.687158 4.719407 5.517634 6.043113 6.16006 6.004799 5.486914  
2.626722 2.598529 2.601662 3.015829 2.289982 2.48746 2.48221 2.424124 2.646179  
2.480061 2.343526 2.774097 2.683005 2.518788 2.436967 2.515618 2.496861 3.004212  
2.778693 2.013037 3.774203 2.664887 2.08223 2.584627 3.423792 2.692221 2.811653  
2.278994 1.776812 2.13124 1.707665 1.791457 1.691038 1.74372 2.895206 1.427514  
1.608545 1.453447 1.887099 1.895212 1.901579 1.956985 1.692905 1.580372 1.44652  
1.426983 1.92576 1.71819 2.14248 2.528646 2.412209 1.705431 1.593388 1.867178  
1.630882 1.75344 1.24096 1.634393 1.335108 1.126166 1.432449 1.604499 1.720486  
1.556918 2.01622 1.988555 1.423382 2.277975 2.254148 1.554785 1.197006 2.814922  
2.534354 2.250781 1.919744 2.983402 1.680684 2.425681 2.025828 1.259784 2.024426  
4.774615 4.6469 5.306982 5.580982 3.607498 4.574907 5.012374 4.876038 4.319453  
1.383426 1.639007 1.4353 2.531324 1.696803 1.783329 1.229444 1.751665 1.77594  
1.452749 0.914305 0.565124 1.316988 1.32807 0.78628 1.321779 0.873534 1.901179  
1.465953 3.057529 2.354326 2.528816 1.624942 2.573401 1.369955 1.955151 1.470009  
2.085423 1.510512 2.827631 2.214252 2.185889 3.749361 2.157175 1.48755 3.691519  
1.154992 1.042349 1.81756 1.104998 1.022195 1.491035 0.895925 1.324209 1.534139  
1.595031 2.343154 1.16124 2.187414 2.462614 1.157731 1.845052 1.297826 2.929055  
1.37537 2.303775 1.486394 1.699308 1.357838 1.816462 1.687954 1.435363 1.380379  
1.424555 1.274482 1.37203 1.4127 2.479104 2.023635 1.316349 1.189096 1.022326  
1.17093 1.883372 1.709505 1.536703 1.372142 1.630795 1.379391 1.188039 1.880852  
3.764225 3.551502 4.135935 4.22164 3.266203 3.181405 3.789028 3.633186 3.518109  
1.602865 1.639303 1.560493 1.873553 1.380235 2.341692 1.764902 1.964783 1.578071  
2.37506 0.949709 1.333894 1.443767 1.637499 2.134687 1.583732 1.425011 1.066865  
1.182024 1.274053 1.163198 1.273238 1.317454 1.558267 1.028416 1.046154 0.861425  
1.6089 1.273329 1.700608 2.036317 1.69018 1.827202 1.691442 1.28628 1.412775  
7.299314 7.693255 7.428969 7.188797 7.451753 7.189899 7.63898 7.64489 7.110279  
1.766276 1.344905 1.243054 2.319815 1.26005 1.525718 1.39207 1.025431 1.403718  
1.961326 3.182676 1.956467 1.859364 2.452682 1.917787 2.163397 1.793031 2.209412  
2.140054 1.902529 1.810531 2.770549 2.377586 2.185148 2.456016 2.399858 2.125345  
4.743345 4.685914 4.73565 6.572843 4.012227 4.77662 4.353104 5.258598 5.500364  
4.107518 1.946716 4.963498 4.065538 3.2605 3.338626 3.194718 2.410399 1.494824  
0.756031 1.193445 1.293029 1.197333 0.925766 1.004711 1.115502 0.60035 1.2395  
5.255605 6.081212 6.501083 6.616858 6.223981 5.864972 6.709928 6.435497 5.730139  
6.224854 6.312267 5.811387 6.127028 6.316912 6.048246 6.346394 6.38773 6.765753  
4.17491 4.669728 4.010227 4.122311 5.023084 5.074387 4.449232 3.966056 4.811077  
1.884489 1.975736 2.224659 2.327787 2.035563 2.143619 1.915891 2.302628 1.515079  
4.108577 4.02303 4.17819 4.224681 4.1978 4.737038 3.74171 4.100559 3.034528  
6.070956 7.109377 6.370833 6.387183 6.315133 6.808579 6.458047 6.890578 7.35208  
0.93301 0.924241 1.117752 1.090484 0.946232 0.965181 1.065196 0.743004 1.050003  
1.937941 1.226932 1.355274 1.374999 1.312808 2.269421 1.825867 1.120668 1.301578  
3.525297 3.662608 3.474295 3.138388 3.209425 4.203562 2.92458 3.388517 3.419008

2. 921495 2. 749747 2. 673575 4. 156291 3. 147563 3. 062132 3. 603642 2. 910449 2. 931103  
2. 999685 3. 381868 4. 141439 3. 231763 3. 213948 4. 324883 3. 849946 3. 580189 3. 966173  
3. 473119 4. 746861 4. 841502 4. 210973 3. 897589 3. 663357 5. 083822 3. 63815 3. 175912  
1. 998687 2. 077821 2. 45607 1. 124547 2. 225412 2. 447435 2. 39324 2. 060775 2. 196858  
1. 642146 1. 136753 1. 008195 1. 558648 1. 48675 1. 088751 1. 216294 1. 242796 1. 191894  
3. 937587 3. 48669 2. 244259 2. 692972 2. 846348 2. 38404 2. 232558 2. 439505 3. 035478  
7. 19772 7. 209217 6. 974402 7. 894566 7. 320768 7. 640794 6. 327649 7. 320697 7. 027537  
6. 834644 6. 872253 6. 340972 6. 179162 6. 914709 6. 012601 6. 296541 6. 649271 5. 951486  
2. 487989 3. 170329 2. 801679 3. 863525 3. 95237 3. 991078 4. 356979 4. 429422 3. 558613  
5. 928569 5. 15387 4. 08646 3. 069462 5. 006467 4. 811177 5. 166342 5. 409381 4. 595858  
4. 958981 4. 524591 4. 685661 4. 508732 5. 128952 4. 892564 5. 133306 4. 932303 4. 411713  
1. 749166 1. 495749 2. 020398 1. 941078 1. 825569 0. 913995 1. 67303 1. 740604 1. 327338  
2. 206494 3. 021139 3. 095366 3. 205912 3. 705756 3. 744427 1. 820036 3. 143355 2. 137169  
1. 595871 1. 408292 1. 793734 2. 218294 1. 752119 1. 812617 1. 857757 2. 395921 1. 247617  
1. 030957 1. 376516 1. 240046 1. 651925 2. 318716 1. 100165 0. 969131 1. 724348 2. 715227  
1. 275366 1. 323711 1. 444973 1. 501045 1. 114261 1. 584309 1. 394436 1. 238785 1. 392663  
5. 609433 4. 289063 4. 548027 3. 135481 3. 669922 5. 219198 5. 01563 5. 051446 6. 171804  
4. 785075 4. 489806 3. 757987 4. 06582 4. 35695 4. 349311 4. 353008 4. 482064 4. 846762  
7. 687836 7. 315922 7. 539516 6. 109168 7. 114435 6. 306716 6. 942979 6. 325294 7. 874048  
1. 23302 1. 989462 1. 785675 1. 812931 1. 477531 2. 508893 1. 987738 2. 031595 1. 703226  
5. 534343 6. 272856 7. 119285 5. 688738 5. 987856 5. 610241 6. 558333 5. 622123 5. 361203  
4. 114717 2. 886231 2. 017656 1. 623173 1. 746332 3. 719863 1. 268975 3. 582569 2. 698517  
2. 373795 2. 610754 3. 124655 2. 656479 2. 765587 2. 364466 3. 490125 2. 700026 3. 435957  
1. 390682 1. 825029 1. 485981 1. 308614 1. 382298 1. 372162 1. 533903 2. 11539 1. 603803  
1. 186718 1. 516503 2. 027496 2. 171394 1. 453942 1. 952229 1. 84312 1. 554515 1. 85766  
2. 405785 2. 032802 1. 858351 1. 968235 1. 772792 2. 578244 1. 615791 1. 922403 1. 980829  
6. 671555 6. 510185 6. 659486 5. 772865 6. 402768 6. 176873 6. 837516 5. 987705 6. 105242  
4. 245998 3. 066864 2. 926116 2. 758201 2. 495382 1. 93107 2. 581999 3. 494372 3. 536598  
3. 950094 1. 923782 2. 457619 3. 14625 2. 211888 1. 970371 2. 279932 2. 53554 3. 110319  
5. 096581 5. 080295 4. 812207 5. 842282 5. 384282 6. 512231 5. 144208 5. 331121 3. 986507  
4. 322923 4. 267977 3. 972102 3. 577678 4. 567595 3. 841428 3. 460787 4. 560138 4. 631218  
5. 7049 5. 684256 5. 544435 4. 62665 5. 586652 5. 014664 5. 424327 4. 12311 5. 659778  
2. 395485 1. 971807 2. 093532 1. 87719 1. 631007 3. 625298 2. 196006 2. 535345 2. 879988  
1. 335216 1. 408047 1. 15172 2. 729938 1. 381934 1. 70184 1. 313569 0. 919302 1. 153508  
6. 238576 5. 333518 5. 867186 5. 051598 5. 737911 6. 548198 6. 085063 5. 724069 5. 716536  
1. 555455 1. 245714 1. 396696 1. 435731 1. 623078 1. 902851 1. 736006 1. 160427 1. 209425  
1. 591751 1. 779417 1. 810522 2. 290975 1. 439364 1. 323718 1. 671819 1. 410384 2. 169695  
1. 517891 1. 850071 1. 681115 2. 482282 1. 453676 1. 934881 1. 839251 1. 772502 1. 332959  
3. 117721 1. 750382 3. 907189 2. 786855 3. 120364 3. 28948 3. 294257 2. 913884 2. 786141  
5. 330572 6. 17261 5. 979888 5. 739184 6. 609148 4. 55617 5. 821417 5. 770234 5. 886491  
1. 814955 1. 527567 1. 829921 2. 030297 1. 478506 1. 773981 1. 6055 1. 747283 2. 356462  
1. 571723 2. 027519 2. 207164 3. 436988 1. 85574 1. 779219 2. 303047 1. 623061 1. 760838  
5. 479318 4. 701565 5. 496884 6. 016468 5. 299997 5. 726774 5. 094472 5. 506618 5. 731923  
8. 640401 8. 103733 8. 162606 8. 087801 8. 29896 8. 4524 8. 220223 8. 209597 8. 578383  
4. 437139 4. 576663 4. 30898 3. 749048 3. 928241 4. 503677 4. 032649 4. 635223 5. 085157  
5. 498312 5. 590599 5. 283242 4. 968698 5. 380037 5. 709506 5. 915996 5. 519753 5. 753683  
7. 692318 7. 779032 7. 697469 8. 126627 7. 811176 7. 922632 7. 918677 7. 696303 8. 120143  
0. 673857 1. 563644 1. 425914 1. 603382 1. 08783 1. 260691 1. 452729 1. 863561 1. 416011  
5. 204626 4. 722528 5. 484877 5. 237378 5. 279855 4. 870486 4. 772693 5. 25288 6. 25786  
1. 550443 1. 801371 1. 851451 1. 947543 1. 296566 1. 884509 1. 669941 2. 055465 2. 52438  
7. 973294 8. 197747 8. 112496 8. 21585 8. 114383 8. 138034 7. 880052 7. 967871 7. 502093

1. 173446 2. 431749 1. 875931 1. 701255 1. 370712 2. 24452 1. 234087 1. 333873 1. 406944  
1. 742914 1. 152711 1. 254247 1. 433565 3. 175462 1. 464862 2. 698284 0. 957052 3. 984598  
1. 084774 0. 821317 1. 490195 1. 394195 1. 563885 0. 78748 0. 802482 1. 02069 1. 029326  
1. 184392 1. 396474 1. 151259 1. 372673 0. 621529 1. 66465 0. 93146 1. 05407 1. 226238  
1. 702488 0. 897894 3. 495584 1. 731484 3. 206879 2. 664771 0. 697765 1. 255645 2. 645137  
1. 389222 1. 800672 1. 740933 2. 026634 3. 020606 2. 616235 1. 540372 1. 682451 1. 560304  
2. 580542 2. 098489 1. 804733 1. 948807 2. 1296 2. 652347 2. 042775 1. 913022 2. 652122  
6. 911695 7. 141912 7. 680191 6. 424387 7. 298312 6. 971268 6. 659884 7. 313335 6. 272961  
1. 544267 1. 284994 1. 470356 2. 028077 1. 532916 2. 095139 1. 335664 1. 422704 1. 287853  
7. 074028 7. 555446 7. 0212 6. 960627 7. 227517 7. 54949 6. 843213 7. 080339 7. 01139  
2. 082237 2. 309427 1. 709731 2. 150802 2. 555827 1. 640695 3. 549056 2. 095395 2. 768086  
1. 386721 1. 142452 1. 079774 2. 233622 1. 442897 1. 251741 1. 734299 0. 852614 0. 609235  
2. 060346 3. 015573 1. 749043 1. 313515 2. 060755 1. 508588 1. 744908 1. 550094 2. 102566  
4. 488109 4. 29962 4. 235067 3. 476966 4. 539529 4. 038336 4. 392902 4. 145122 4. 706435  
1. 788409 1. 473078 1. 550291 1. 725506 2. 150717 1. 549463 1. 542624 1. 853654 2. 022182  
1. 317665 1. 151871 1. 200015 1. 614516 1. 538178 1. 346293 1. 461463 1. 559613 1. 318568  
2. 36035 1. 855365 2. 472065 2. 168914 2. 386532 2. 070215 1. 748073 2. 300173 2. 007552  
1. 999895 2. 034537 2. 216731 2. 259581 2. 237384 1. 932942 2. 580536 2. 372483 2. 407124  
1. 549333 1. 523061 1. 074384 1. 137725 1. 715875 1. 202307 1. 51538 1. 264988 1. 52971  
1. 231366 1. 458155 1. 714202 2. 011709 1. 603888 1. 168832 1. 42054 1. 475773 1. 601479  
1. 486553 1. 562442 1. 687214 2. 779739 1. 55845 2. 097625 2. 327165 2. 059559 2. 811301  
6. 330824 6. 071943 5. 99954 5. 918714 6. 168734 6. 514267 6. 706446 6. 332944 6. 67586  
3. 119065 3. 532551 4. 037599 3. 173363 3. 408486 2. 631629 2. 557665 3. 262258 4. 006959  
1. 381538 1. 250279 1. 54854 1. 846392 1. 12013 1. 290486 1. 612748 1. 265547 1. 352883  
8. 257626 7. 957301 8. 29872 8. 417391 7. 915763 8. 370856 8. 014497 8. 260982 8. 222198  
3. 561108 2. 762035 3. 635095 3. 352894 4. 152262 3. 009333 4. 050012 3. 838299 4. 369383  
6. 818947 5. 893861 6. 306376 6. 254021 6. 154624 5. 28987 6. 18539 6. 280486 6. 545148  
1. 482905 1. 315724 1. 440327 2. 147803 1. 546061 1. 482197 1. 385643 1. 1897 1. 428365  
10. 14585 9. 709706 9. 867308 10. 27183 9. 914127 10. 14994 9. 713305 9. 668854 9. 359852  
3. 041423 1. 513832 1. 810559 2. 245401 1. 978853 1. 919628 4. 262494 2. 031405 1. 180973  
1. 460836 1. 148118 1. 676165 2. 438264 1. 330241 1. 455375 1. 665921 1. 3485 1. 335508  
1. 554467 1. 28463 1. 168033 2. 306409 1. 126198 2. 14005 1. 305925 1. 129298 1. 39607  
1. 051011 1. 590757 1. 655151 1. 149178 1. 14618 1. 373616 1. 234345 1. 372194 1. 067469  
1. 550349 1. 866392 2. 214121 3. 310479 2. 249344 1. 330985 1. 91573 1. 394921 2. 504941  
0. 811931 1. 273782 1. 026461 0. 89765 0. 884499 1. 073581 0. 760023 0. 936033 1. 166209  
1. 567289 1. 451647 1. 461607 2. 239162 1. 758154 2. 806137 1. 722936 1. 777537 1. 613279  
5. 646371 4. 826997 5. 16605 5. 460678 4. 862389 5. 4142 4. 546784 4. 236411 4. 859518  
1. 62943 1. 315442 1. 515883 2. 691846 1. 609101 1. 884248 1. 557474 1. 778209 1. 827522  
2. 16101 2. 25887 2. 06519 2. 03279 2. 322987 1. 791992 2. 341855 2. 109139 2. 034498  
1. 952734 2. 006565 2. 374701 1. 985741 1. 980797 1. 534775 1. 703902 1. 528029 2. 153028  
1. 830522 1. 726163 1. 675581 1. 841451 1. 063004 2. 321257 1. 732406 1. 316558 1. 361995  
2. 788366 1. 599352 2. 487173 2. 212049 1. 774935 1. 958309 1. 77228 2. 228008 1. 417446  
9. 099389 8. 786203 8. 299534 8. 969987 9. 502053 8. 437502 9. 13727 9. 867964 7. 566669  
3. 801798 3. 306704 3. 49497 1. 697805 2. 481188 2. 322861 2. 533192 3. 294635 3. 591317  
2. 026701 2. 149125 1. 560133 3. 116903 1. 70032 1. 735589 2. 360465 1. 95621 2. 870189  
2. 249776 1. 95693 1. 363232 2. 53855 1. 599558 1. 640775 1. 528274 1. 715905 1. 360269  
1. 080068 1. 165526 1. 663578 1. 178857 1. 21036 1. 801835 1. 316284 1. 321001 1. 264179  
1. 298685 1. 589521 1. 364541 0. 781045 1. 451223 1. 858076 1. 201111 1. 34908 1. 218993  
1. 239785 1. 13061 1. 382382 2. 538307 1. 230097 1. 498985 1. 139104 1. 282423 1. 486468  
5. 256706 5. 805306 6. 477464 5. 258614 6. 22263 5. 274702 5. 521006 5. 701965 5. 237503  
2. 54041 1. 719878 1. 626823 1. 970156 2. 378518 2. 927773 1. 557305 2. 00221 2. 578781



5.064144 4.874667 3.703872 4.370906 5.002961 4.772999 5.117556 5.229625 5.128472  
4.097477 4.155946 3.675239 5.635591 3.648093 3.904327 4.733989 3.530426 4.084823  
6.621983 6.540522 6.853671 6.411602 6.951909 6.734857 6.88279 6.517605 5.989942  
6.920035 7.023481 6.955674 6.621874 6.988275 6.371518 6.41683 6.684492 5.814397  
0.771431 1.20073 1.132083 1.304556 1.140745 1.001888 0.90824 1.229877 1.505835  
1.450211 1.538805 0.696351 0.924685 1.213447 0.588012 0.852925 0.533669 0.750278  
1.499609 2.136849 1.788527 2.157667 1.508407 1.570924 2.040221 1.592855 1.677641  
2.092782 2.118687 2.280592 2.82588 2.021668 1.939295 1.777338 2.489777 1.776697  
1.549463 1.627579 1.886156 1.812352 1.948589 1.492245 1.729612 1.617195 2.206839  
1.402165 1.919631 1.60183 2.71726 1.742816 2.5489 2.287242 1.833282 2.311421  
2.294114 2.015369 3.897326 3.321041 2.41203 2.315512 2.220237 1.962009 2.420304  
2.574248 1.568208 2.444287 2.097697 1.702799 2.214527 1.527561 1.377043 1.095976  
1.411833 1.638541 1.434503 1.747073 1.348936 1.286748 1.910683 1.228839 1.610984  
1.04272 1.235483 1.263074 1.274164 0.963616 1.564282 0.837263 1.239461 1.342886  
4.297317 4.771079 4.205203 4.811619 5.085513 3.956166 3.996482 3.846151 3.916444  
4.878687 5.017549 5.269963 5.862532 4.911642 5.571559 5.152685 4.69279 4.081311  
6.391914 6.993188 6.967626 6.287921 6.41081 6.17218 6.547995 7.223018 6.973332  
3.70941 3.559013 3.216726 3.505173 2.831932 2.172251 2.986214 2.668424 3.148526  
1.473609 1.882736 1.394638 1.412204 1.57751 1.213895 1.247884 1.224715 1.679538  
6.176073 6.067582 6.198751 6.902429 5.941695 5.47124 6.543844 5.671881 5.856438  
7.362975 7.568762 7.358605 7.29406 7.556718 7.569523 7.083898 7.861189 6.976092  
1.518847 1.615246 1.285208 1.774425 1.33024 1.411106 1.473583 1.642034 1.601184  
0.472314 1.732967 1.452545 1.21369 0.970631 1.664234 1.112597 1.060046 0.651596  
3.000015 2.948704 3.469647 2.46064 2.576666 2.440678 2.943014 2.198489 3.467489  
6.034629 4.832862 4.659146 6.222358 5.170176 3.300936 6.187123 4.338284 4.589935  
6.389703 7.612429 6.634207 6.243571 7.698904 6.538028 6.904568 7.149991 6.202468  
4.867742 3.655187 2.945186 2.980477 3.117158 4.482273 5.073241 3.223653 1.923384  
9.273541 9.070667 8.718168 8.42449 9.035854 8.249863 9.645951 8.846735 9.058017  
6.87045 6.87717 7.150258 5.610801 6.468074 6.852058 6.34822 7.309515 5.650409  
7.52899 7.712762 7.429584 6.636495 7.184729 7.774809 7.453969 7.683698 7.561431  
4.771043 4.312956 4.615079 5.283754 4.377424 4.589575 4.474711 3.684191 4.415936  
1.573357 2.210927 1.225277 2.794731 1.253636 2.112706 1.436513 1.375829 1.398273  
5.082429 4.61166 5.487913 4.999252 5.421087 4.374891 4.904501 4.727578 3.754601  
1.522214 1.753029 1.860286 1.193453 1.316182 1.844756 1.422347 1.666438 1.839098  
3.514721 2.090017 2.325467 3.194172 1.933212 3.02858 2.30366 1.619509 2.144934  
3.602345 2.524559 2.913577 2.148222 2.936671 4.104654 2.939922 3.312411 3.568616  
2.565794 1.751805 1.83246 2.434592 1.945386 2.078771 2.519047 1.905108 2.020459  
4.189463 4.552819 4.965303 4.12216 4.325392 3.567836 4.822938 4.588228 4.390286  
2.028961 1.987901 2.490925 2.336627 1.892588 2.880986 2.824081 1.870282 2.427456  
1.512223 1.147368 1.02744 1.097702 1.766301 1.000967 1.687375 1.249938 1.507061  
3.50977 3.944055 4.035911 4.116161 3.787396 3.969045 3.446014 3.801873 3.310006  
1.447609 1.969987 1.113704 2.170025 1.275482 2.386085 1.254068 1.534831 1.440001  
1.447508 1.704399 1.548276 1.752568 1.856464 1.389606 2.027797 1.842384 1.946731  
2.205504 2.504542 2.493454 2.2988 3.994205 2.162837 2.249169 2.531084 2.205797  
3.252808 2.363345 3.199699 2.583941 3.037733 3.622452 2.847728 4.118691 3.025139  
2.749236 1.415577 1.598506 1.758538 1.545563 2.400931 2.19249 1.916306 1.661755  
2.773833 3.782157 2.579819 2.998041 2.919388 2.666239 1.926843 3.322918 2.845434  
3.204363 2.981471 3.883994 1.870422 3.619943 3.735783 3.030489 3.604694 2.954718  
3.093431 3.480158 3.918568 3.709229 4.098356 3.447312 3.737011 3.594263 1.91084  
4.766443 4.445271 5.124409 3.894316 4.513284 5.221837 5.371068 4.775342 4.191349  
4.424061 3.760567 3.769355 3.562701 4.230929 4.539902 4.275087 4.197454 3.49309

1. 349708 1. 084349 1. 434585 2. 131907 1. 95443 1. 501296 1. 588368 1. 497241 1. 90069  
1. 659737 2. 454977 1. 94463 2. 527573 1. 639711 1. 944638 1. 732868 1. 592314 1. 517922  
2. 248948 1. 305554 0. 876315 1. 833318 1. 004078 0. 778486 0. 975116 1. 248443 0. 796489  
1. 499049 1. 36121 1. 943329 1. 463393 1. 755949 1. 651939 1. 099119 1. 056914 1. 579629  
4. 547968 5. 078352 6. 016636 5. 145484 4. 700818 3. 752373 3. 753014 4. 284459 5. 18757  
7. 829839 7. 806953 7. 551815 6. 169836 7. 59655 7. 725343 7. 321182 7. 680605 6. 638784  
6. 090762 5. 527038 6. 325829 4. 341717 4. 147597 6. 225718 5. 574962 5. 112989 5. 114808  
1. 20874 1. 215759 1. 327839 1. 995677 2. 181319 2. 369435 0. 903857 1. 151153 1. 141146  
2. 039349 2. 488617 2. 283982 3. 15462 2. 594119 3. 121874 2. 814057 2. 059111 2. 776942  
1. 019677 2. 1287 1. 385447 2. 082379 1. 893509 2. 59254 1. 639886 1. 527815 2. 232821  
1. 646845 1. 892374 1. 45092 2. 940282 1. 488099 1. 112546 2. 213331 1. 171576 2. 925117  
5. 23034 5. 703518 5. 121116 6. 286234 5. 657219 5. 167324 5. 288847 4. 989218 5. 178697  
1. 999374 3. 111777 3. 381383 4. 094212 2. 448416 2. 466046 2. 391455 2. 279719 3. 16844  
5. 435043 5. 65456 5. 757169 4. 228907 5. 516302 5. 519071 5. 592489 4. 873571 4. 390905  
1. 195222 1. 073087 1. 34746 1. 612578 1. 680973 1. 5131 0. 908771 1. 128483 1. 115113  
2. 167021 1. 35519 1. 314802 1. 94421 1. 725542 2. 710421 1. 82192 1. 638259 3. 29742  
1. 447886 1. 018033 0. 603678 1. 812394 2. 188991 1. 596802 1. 516122 1. 114335 1. 066137  
5. 359543 4. 989768 4. 844572 5. 563502 5. 420511 5. 143075 4. 96298 4. 815564 4. 292363  
9. 569654 9. 617109 9. 411518 8. 808818 9. 640335 9. 308556 9. 584075 9. 702855 9. 749533  
2. 999601 2. 700175 2. 741754 2. 80412 3. 312981 3. 15864 2. 058022 3. 595102 4. 363602  
0. 896965 1. 550194 1. 217508 1. 493779 0. 848663 1. 674069 1. 533503 1. 195882 0. 811119  
1. 983511 2. 595957 3. 197458 2. 819547 2. 726573 3. 073803 2. 659127 1. 931241 2. 228828  
1. 900524 1. 855079 1. 891209 1. 450235 1. 466991 1. 493042 1. 449155 2. 045129 1. 84696  
0. 727514 1. 413813 1. 878675 1. 874615 1. 244933 1. 052737 1. 611822 1. 157301 1. 482098  
1. 931623 1. 591674 1. 776851 1. 326209 1. 578868 1. 125061 0. 914241 1. 573292 2. 864732  
3. 447562 3. 496357 2. 581285 3. 293771 2. 695145 3. 589497 3. 747618 3. 551199 4. 342085  
4. 158481 2. 494373 2. 704618 2. 060694 1. 746906 1. 688724 1. 495143 1. 953203 2. 541585  
1. 038377 1. 252123 1. 442976 1. 408939 1. 380786 2. 005333 1. 295459 1. 040989 1. 315369  
1. 14989 1. 522489 1. 106365 1. 06701 0. 715255 1. 016193 1. 154079 2. 134631 1. 009009  
1. 287711 1. 105516 1. 048128 1. 354793 0. 950968 1. 282312 1. 889447 1. 199241 1. 450881  
4. 67816 3. 947723 2. 440143 3. 342657 4. 933417 2. 742139 4. 090378 2. 715951 4. 410487  
0. 958197 1. 112465 0. 860979 1. 333509 1. 197497 0. 911233 0. 963974 1. 709606 0. 614258  
1. 26865 1. 249108 1. 686664 1. 769829 1. 375847 2. 146757 1. 401234 1. 786563 1. 65548  
2. 084448 2. 049096 2. 488838 3. 17069 2. 402875 2. 126835 1. 558081 1. 464399 2. 136844  
2. 024466 1. 937525 1. 585494 1. 760289 1. 712159 2. 178182 1. 398955 2. 551059 2. 507183  
1. 033667 0. 983994 1. 47324 1. 67566 1. 302616 1. 299218 0. 942225 1. 021716 1. 078295  
1. 120698 1. 236251 0. 804803 1. 090791 0. 840159 1. 031426 0. 969078 1. 527848 1. 279887  
2. 721968 2. 248472 2. 306875 3. 175794 3. 410158 2. 091889 2. 585677 3. 094808 2. 117926  
8. 133987 8. 370661 8. 336715 7. 895721 8. 385729 8. 071385 8. 077734 7. 73783 7. 987878  
2. 759986 3. 417978 2. 801003 1. 761258 2. 765156 2. 962319 2. 943873 3. 240282 2. 601748  
6. 308964 5. 844147 5. 76979 6. 311951 6. 072397 6. 188652 6. 517746 6. 067365 7. 074454  
2. 505684 2. 334449 2. 021561 2. 670899 2. 649907 2. 1985 1. 785711 2. 000436 2. 088517  
2. 396328 1. 21223 1. 27665 1. 544349 2. 15135 1. 66817 1. 235881 1. 995757 1. 617135  
4. 036938 4. 744173 3. 872302 2. 623198 4. 214804 4. 790621 4. 18334 4. 029334 3. 94354  
5. 098088 4. 506477 4. 492901 4. 432589 4. 387614 4. 359645 3. 86561 3. 754137 2. 85686  
1. 377646 1. 770462 1. 463785 2. 183764 2. 097424 2. 457289 1. 483794 1. 509958 1. 956039  
1. 909964 2. 108388 2. 025439 1. 786979 1. 794676 2. 439569 1. 964035 1. 840343 1. 609027  
1. 827287 1. 797053 1. 917484 2. 561491 2. 037808 2. 009779 1. 842569 1. 682027 2. 327525  
10. 12829 10. 34173 10. 08649 10. 17018 10. 30059 10. 03957 10. 48197 10. 47132 10. 8263  
1. 547152 1. 628715 1. 85883 1. 898745 1. 82013 1. 635148 0. 98432 1. 329293 1. 773756  
1. 461976 2. 022026 2. 399424 2. 204667 1. 761999 2. 138832 2. 237536 1. 594385 1. 714868

2. 058177 2. 232044 2. 026223 3. 272969 2. 805887 2. 794299 2. 145816 1. 778731 2. 452125  
1. 681839 1. 555349 1. 563206 1. 424147 1. 767731 1. 353203 1. 243817 1. 20143 1. 141575  
3. 503726 3. 374098 3. 295336 4. 640145 2. 85868 3. 131046 3. 2684 2. 787029 2. 781946  
4. 4138 4. 704227 4. 827777 5. 048881 5. 202709 4. 066007 4. 689401 4. 01397 5. 309812  
3. 506084 3. 47109 3. 84121 3. 521108 2. 521891 3. 711954 3. 388513 3. 126594 3. 46773  
2. 106518 2. 347972 2. 022634 2. 501642 1. 648908 2. 233154 2. 377874 2. 115584 2. 05831  
1. 068279 1. 669027 2. 148839 1. 113922 1. 665305 2. 135207 2. 003096 1. 536158 1. 193084  
5. 512677 4. 807868 5. 229546 4. 55476 5. 603537 5. 436825 5. 12059 4. 295525 3. 959219  
2. 430444 2. 576841 2. 764931 2. 82899 2. 454938 2. 67374 2. 183379 1. 887495 1. 305088  
2. 013775 2. 983266 3. 070295 2. 519815 2. 093623 1. 660522 2. 433483 2. 378684 1. 960531  
3. 828519 3. 560333 3. 222353 3. 911269 3. 274802 2. 435373 3. 032566 3. 262123 2. 830625  
4. 605135 4. 767289 4. 125954 2. 835496 3. 511112 3. 646268 4. 534552 3. 87887 2. 119045  
1. 934615 1. 531077 2. 131458 1. 642515 2. 154702 2. 831514 1. 619314 2. 045976 1. 846675  
1. 274463 1. 825252 1. 169413 1. 138174 2. 574014 1. 018917 2. 089145 2. 729834 1. 452924  
1. 041301 1. 421123 1. 788381 1. 014223 1. 358548 2. 067967 1. 154144 1. 476013 1. 706311  
1. 502568 1. 011164 1. 506878 1. 856626 1. 810509 3. 511451 1. 82866 1. 898764 3. 664521  
1. 500927 2. 138758 1. 631081 1. 763294 1. 920015 1. 387493 2. 655269 2. 171387 2. 598099  
1. 641675 1. 596791 1. 71404 2. 430919 1. 818312 1. 609805 1. 670698 1. 245921 2. 087277  
3. 322999 3. 200712 2. 562462 2. 773127 2. 667463 2. 630129 2. 091051 1. 37426 4. 63197  
1. 63617 1. 366474 1. 029331 1. 767278 1. 230356 1. 411389 1. 078404 1. 47497 1. 531983  
5. 726418 5. 667353 5. 769982 5. 11179 5. 752438 6. 46729 6. 37524 5. 756892 5. 857024  
4. 252041 3. 37778 2. 908119 3. 168683 3. 025693 3. 681461 2. 777271 3. 621265 4. 321981  
0. 724162 1. 25899 0. 85198 1. 310206 0. 751207 1. 597025 1. 236499 0. 69214 0. 704393  
2. 61014 2. 391773 2. 365695 2. 444699 2. 921157 2. 698705 2. 165423 2. 765493 1. 829145  
5. 231187 4. 875291 4. 622637 4. 464496 5. 226908 5. 417967 5. 403221 5. 69559 5. 209077  
6. 859218 6. 921764 6. 360658 7. 236218 6. 649731 7. 424457 7. 06998 7. 112044 7. 281176  
6. 667706 6. 512944 6. 531319 6. 89206 6. 500397 6. 269665 6. 583927 6. 210658 6. 421336  
3. 104901 3. 204761 4. 097306 3. 499706 3. 508973 2. 460983 4. 597404 3. 346258 2. 714103  
1. 487868 1. 847003 2. 274314 2. 157968 1. 800619 1. 645352 1. 583304 1. 428888 2. 096694  
6. 541412 7. 205802 6. 617561 6. 899479 6. 462691 6. 919327 6. 532814 7. 421989 6. 901418  
7. 121038 6. 82738 6. 888825 6. 732023 7. 450464 7. 276526 7. 551692 7. 063927 7. 370527  
1. 276657 1. 30172 1. 319611 2. 12256 1. 238404 1. 689693 1. 365746 1. 743934 1. 304983  
2. 74651 3. 007475 1. 224906 3. 344231 2. 161991 1. 800312 2. 502644 2. 97405 2. 543273  
4. 33552 4. 716164 4. 410067 4. 220504 4. 750425 4. 427172 4. 817143 4. 285542 5. 070843  
2. 466223 2. 292186 2. 83509 2. 067931 2. 052822 2. 972565 1. 950633 2. 358709 2. 094851  
6. 090881 6. 594722 5. 397306 5. 446931 5. 968427 6. 173572 5. 677701 6. 058965 5. 961975  
2. 836246 4. 934417 5. 903754 4. 287724 4. 106816 5. 086849 5. 495514 3. 81485 3. 453224  
6. 3864 7. 130587 6. 2152 5. 702616 6. 784779 6. 442738 6. 64876 6. 708864 6. 182222  
4. 062151 3. 844624 4. 805438 4. 590536 5. 126866 4. 617573 4. 902784 4. 165724 4. 232483  
2. 530639 3. 176302 2. 944852 3. 406278 3. 804796 2. 058173 3. 758048 3. 649699 2. 84968  
1. 276771 1. 115137 1. 209779 1. 590844 1. 723114 0. 816234 1. 449657 1. 079806 1. 187962  
1. 192619 0. 948039 0. 867343 1. 097933 1. 008949 1. 150722 0. 875518 1. 177332 1. 179753  
7. 947311 8. 087707 7. 589594 7. 886755 7. 868692 8. 046936 7. 797167 7. 772244 8. 036062  
2. 132827 2. 430376 2. 760688 2. 701872 2. 242136 2. 359711 2. 209919 2. 662898 2. 242697  
0. 912606 1. 393776 1. 157999 1. 686399 0. 931699 2. 016966 0. 882187 1. 347957 1. 059495  
1. 44971 3. 978196 6. 601182 4. 580846 5. 786008 5. 7236 2. 233274 10. 22675 1. 489786  
4. 101918 4. 683537 4. 077584 2. 959418 4. 57372 3. 089664 3. 622512 3. 999163 4. 207391  
5. 322653 4. 861227 4. 997636 4. 450691 5. 504961 5. 533755 4. 89091 4. 703728 3. 590595  
2. 00068 0. 979231 1. 074949 2. 413009 3. 458062 1. 670185 1. 222022 1. 895609 2. 208741  
5. 634181 3. 243842 2. 357346 1. 924331 3. 062765 3. 533081 1. 417516 2. 090138 3. 702956  
3. 693072 2. 987905 3. 605989 3. 15733 2. 715268 2. 753355 3. 057292 2. 212359 3. 95134

2. 10728 1. 814075 2. 064118 3. 005735 2. 300367 2. 333804 2. 267571 2. 08061 2. 177488  
3. 169269 4. 156537 2. 991838 3. 294112 4. 787345 3. 921945 3. 159061 3. 711744 4. 208631  
5. 631833 4. 828149 5. 424564 5. 970605 4. 60261 5. 840579 5. 261914 5. 645561 6. 299716  
1. 722761 1. 241367 1. 014926 1. 120767 1. 581118 1. 354301 1. 647214 1. 962339 1. 742088  
5. 522869 5. 147602 5. 070348 4. 905688 5. 45449 4. 702675 4. 777413 5. 107691 4. 392198  
1. 313846 1. 330475 1. 021469 2. 212884 1. 231381 1. 221104 0. 872678 0. 86477 1. 380061  
4. 845057 4. 981019 4. 407396 4. 345156 5. 166744 5. 629279 4. 504372 5. 786547 5. 193336  
4. 216647 3. 777222 4. 734719 3. 232483 4. 131621 3. 943971 4. 616721 4. 809736 5. 247266  
6. 140378 5. 76248 5. 76464 5. 213169 5. 988824 5. 749156 5. 838969 5. 711995 6. 350349  
7. 034604 7. 134485 6. 594389 6. 234564 7. 576476 7. 68925 7. 125461 6. 484533 5. 480832  
2. 578074 2. 135874 1. 804429 2. 930718 2. 524052 1. 594608 2. 074838 2. 274979 1. 643971  
3. 330576 3. 86557 2. 938537 3. 793049 4. 145968 4. 174365 4. 430311 4. 211116 2. 979127  
2. 838026 3. 050999 1. 753786 2. 816113 1. 712841 2. 934485 1. 273456 2. 230373 3. 533643  
3. 950994 4. 384128 6. 348262 5. 140318 4. 653932 5. 195665 3. 603191 5. 328115 3. 598011  
7. 154958 7. 521413 7. 500349 7. 091535 7. 62106 7. 199052 7. 610037 7. 268571 7. 61165  
3. 012065 3. 198023 3. 696964 3. 284412 3. 274311 3. 599322 3. 962236 3. 840963 3. 218863  
1. 82225 2. 443214 1. 581895 2. 153547 2. 188865 1. 743498 2. 004906 2. 088941 2. 015795  
3. 865888 3. 690215 3. 612771 4. 572798 3. 084917 3. 304096 3. 63449 4. 102768 3. 579004  
5. 899778 5. 518355 5. 773731 5. 965755 6. 366769 5. 642371 5. 603262 5. 518167 5. 809982  
3. 831345 5. 709206 5. 311173 5. 134696 4. 799046 1. 403982 5. 67082 5. 123059 4. 521248  
3. 154777 1. 030676 2. 061211 2. 60755 1. 191174 2. 347842 1. 607382 0. 883977 1. 663076  
0. 727321 1. 221086 1. 323954 1. 687431 1. 66313 1. 215772 1. 750114 1. 333464 1. 141552  
1. 928336 2. 197897 1. 781002 2. 194037 2. 265679 1. 875281 2. 33624 2. 142177 2. 722404  
7. 019853 7. 077285 6. 990507 6. 42051 6. 810107 6. 855616 6. 992818 6. 531742 6. 063579  
2. 024721 1. 371893 1. 631429 2. 922021 1. 815013 2. 261081 2. 145492 1. 909125 2. 375395  
1. 744077 0. 797011 1. 725602 1. 263079 0. 878352 1. 618969 1. 162779 0. 774378 2. 683917  
2. 04797 1. 949943 2. 702669 3. 058698 2. 716918 1. 803484 2. 987638 2. 648621 2. 435084  
2. 955784 3. 268342 3. 476407 4. 405275 3. 334938 3. 477176 2. 961657 3. 691945 4. 752102  
3. 708101 4. 35957 4. 709911 3. 155295 3. 357323 3. 128384 3. 033365 5. 526443 5. 154578  
3. 424938 3. 873934 3. 566694 1. 567303 2. 091318 5. 049206 4. 413157 3. 281459 3. 685236  
0. 812005 1. 23616 1. 019463 1. 082162 0. 673453 0. 998552 0. 764755 1. 131064 0. 514015  
3. 180279 4. 30321 4. 269668 3. 325168 3. 564188 3. 975283 3. 730004 3. 88002 3. 034983  
1. 074115 1. 636827 2. 587716 3. 241737 2. 820413 2. 877236 3. 438349 2. 029216 4. 241844  
7. 628059 7. 771827 7. 281149 7. 974326 7. 709923 7. 918954 7. 054417 8. 001822 7. 838696  
3. 750635 3. 870752 2. 21241 2. 820828 2. 662619 3. 324699 4. 096038 3. 365389 3. 856974  
4. 814895 4. 720362 3. 414156 2. 574184 3. 686344 3. 843916 3. 980605 4. 272671 4. 208941  
1. 298577 2. 659742 3. 401233 1. 876613 2. 077703 1. 148363 1. 508185 1. 173116 1. 446252  
1. 098093 1. 163184 1. 366024 1. 808326 1. 580729 1. 478371 1. 507046 1. 190073 1. 635524  
1. 704477 1. 319425 1. 450084 1. 85612 1. 625225 1. 521345 1. 591921 1. 386579 1. 682887  
1. 871915 2. 276674 1. 779473 2. 180179 1. 980585 2. 347823 2. 173893 1. 922907 1. 784359  
2. 501126 1. 669441 2. 109323 4. 473822 3. 014622 1. 588454 2. 931604 2. 475952 2. 429383  
1. 787718 1. 51781 1. 535787 1. 2335 1. 665827 1. 271006 0. 953779 1. 227305 1. 177311  
2. 49585 0. 819042 1. 669671 2. 044307 1. 616913 1. 59182 0. 80388 2. 574852 2. 655904  
2. 258075 1. 736589 1. 3009 2. 160054 1. 084141 1. 238752 2. 499183 2. 27989 2. 642169  
1. 074018 1. 135664 1. 238879 1. 452589 1. 419394 1. 825988 1. 633448 1. 452918 1. 792574  
1. 325711 1. 204373 1. 593596 1. 973117 1. 329 2. 143405 1. 571307 1. 453182 1. 284525  
5. 055849 4. 281106 5. 190255 3. 269437 3. 500126 4. 321109 4. 167283 4. 183325 5. 731097  
3. 310129 3. 390652 3. 089765 1. 991378 1. 971932 1. 331235 3. 340894 2. 961164 2. 524019  
4. 833987 3. 252086 3. 085852 4. 301207 5. 155687 3. 551437 3. 817208 5. 132823 2. 513944  
2. 184469 2. 990079 3. 368004 3. 461019 2. 343447 2. 861981 2. 971775 2. 664321 3. 445998  
4. 167403 4. 125424 4. 409249 4. 938467 4. 703116 4. 51827 3. 709678 3. 690672 4. 500224

1. 609959 1. 827291 0. 841798 2. 117422 1. 23647 1. 777005 1. 276329 1. 04294 1. 112012  
1. 271609 1. 478946 1. 596307 2. 745134 1. 279157 2. 013898 2. 336189 1. 299061 1. 322483  
2. 085426 2. 063503 3. 222655 3. 829541 3. 223554 3. 254031 3. 238694 2. 492124 3. 266169  
1. 406418 0. 862747 1. 137634 1. 821414 1. 445793 0. 869047 1. 113319 1. 34524 1. 188772  
1. 172822 1. 209601 1. 012692 0. 893917 1. 13924 0. 942499 1. 071799 0. 681708 1. 356092  
1. 325674 1. 655896 0. 516346 1. 833593 1. 012484 1. 470245 1. 342131 1. 421613 0. 874742  
1. 311988 2. 002862 1. 367859 1. 475667 1. 663051 2. 323431 1. 54623 1. 588629 1. 706827  
3. 131074 2. 776618 3. 66713 2. 425634 2. 954956 4. 152326 2. 998614 3. 141628 3. 314078  
1. 393676 1. 805137 1. 658513 1. 312327 1. 434849 1. 392405 1. 237222 0. 887523 2. 022893  
1. 566549 2. 127052 2. 056532 2. 061434 1. 054908 2. 583594 2. 083353 1. 582511 1. 539229  
0. 981728 2. 02427 1. 456374 1. 030074 1. 146837 1. 802086 1. 339355 0. 760024 1. 120586  
3. 901034 2. 627109 3. 157198 1. 656098 2. 935525 3. 700424 1. 831451 3. 348585 2. 537985  
1. 349125 1. 899441 2. 206986 1. 812678 2. 751052 0. 866063 1. 095737 1. 521951 2. 02509  
4. 159187 4. 180243 3. 9651 3. 239879 3. 899152 2. 949215 4. 332039 3. 038001 3. 914966  
0. 961802 0. 989554 1. 425535 1. 73228 0. 906412 1. 405353 1. 401673 1. 094114 1. 151274  
2. 274071 2. 815498 2. 511601 2. 517797 3. 122757 2. 606672 2. 318591 2. 373882 2. 830209  
1. 990184 2. 121292 1. 465608 2. 652378 1. 486609 1. 82123 2. 136554 2. 617556 1. 586038  
0. 972173 0. 92673 1. 49887 2. 88457 0. 736764 1. 183854 0. 87865 0. 767012 1. 182987  
2. 30764 2. 246572 2. 34773 2. 078855 1. 884409 2. 13572 2. 489646 1. 667093 2. 238124  
1. 727033 1. 817856 0. 953831 2. 256457 1. 30638 1. 38652 1. 348034 1. 496334 1. 457813  
2. 02686 1. 703322 2. 41173 2. 666303 1. 403499 2. 319964 2. 142053 1. 863541 2. 736479  
3. 519988 4. 142435 3. 916059 2. 892925 4. 387067 3. 838581 2. 951704 4. 431372 5. 090377  
6. 48931 6. 807719 6. 577153 6. 341627 6. 642445 6. 735549 6. 159444 6. 65132 6. 44604  
0. 866705 1. 072499 1. 33097 2. 073947 2. 413258 2. 102635 1. 373805 1. 417622 2. 014919  
4. 808125 4. 753837 4. 693959 5. 217363 4. 848083 4. 979222 5. 146364 4. 603478 5. 876891  
6. 902557 7. 297058 7. 592365 6. 490795 7. 115102 7. 644477 7. 056964 7. 266904 7. 144197  
9. 904807 9. 970145 9. 714487 9. 692823 9. 045442 9. 863145 9. 878995 9. 848943 9. 396754  
2. 936566 2. 016971 2. 51541 2. 150979 2. 317597 1. 967185 2. 01617 1. 613229 2. 834939  
5. 30388 4. 715225 5. 723295 4. 604877 5. 136287 3. 981606 4. 906341 5. 087276 2. 112828  
2. 483287 1. 522495 1. 224766 1. 155218 1. 33509 1. 748697 1. 716992 1. 439545 2. 494286  
5. 789831 5. 594397 6. 199018 6. 91672 4. 850251 6. 205123 5. 206898 5. 68581 5. 863395  
4. 533052 3. 982283 3. 458585 3. 593423 3. 692962 3. 769545 3. 748658 4. 215821 2. 524058  
1. 600186 2. 05916 1. 981647 1. 946434 1. 713106 1. 465416 1. 888415 1. 712605 1. 867042  
6. 903768 7. 257212 7. 202228 6. 378562 7. 274912 6. 40846 7. 014548 7. 285977 6. 200596  
2. 576792 2. 567909 3. 095567 3. 965534 2. 813713 3. 541938 2. 575992 2. 495256 2. 429741  
4. 305849 3. 950906 4. 606869 3. 807069 4. 18252 3. 790924 4. 45666 3. 780986 3. 947844  
3. 347166 3. 786725 3. 799082 4. 508463 4. 070712 3. 69313 4. 087489 3. 634068 3. 564204  
5. 339866 5. 191728 5. 506558 4. 964321 5. 296052 5. 555346 5. 575971 5. 340802 4. 548002  
3. 159998 3. 642628 1. 864286 3. 834824 2. 802998 3. 009511 4. 116299 2. 71414 4. 246051  
5. 617302 5. 755943 5. 33611 5. 458796 5. 932414 5. 999986 5. 34381 5. 657414 4. 417917  
1. 896845 1. 65418 1. 370119 2. 299057 1. 532262 1. 159609 1. 360782 1. 454389 2. 94795  
0. 902899 2. 181314 1. 147425 1. 826227 1. 117702 1. 445144 1. 327762 1. 717624 1. 388231  
1. 625934 1. 408693 1. 630737 1. 767413 1. 994253 2. 217938 1. 206032 1. 119785 1. 125751  
7. 236989 6. 809632 6. 655533 6. 446996 7. 100027 6. 778477 6. 826804 6. 808177 6. 984765  
3. 212097 3. 159491 3. 184276 4. 523078 2. 807606 2. 934106 2. 875293 3. 163453 3. 051117  
1. 967633 2. 297397 2. 197847 1. 755919 1. 619883 1. 57151 1. 862995 1. 62338 2. 212044  
2. 304902 2. 098894 1. 848482 3. 048708 2. 434219 2. 508367 2. 366232 2. 351511 3. 112417  
6. 62906 4. 870822 5. 96368 5. 091204 5. 788359 6. 18757 5. 850224 6. 697147 5. 923057  
1. 053515 0. 861867 2. 240515 1. 649467 1. 266468 2. 633761 0. 700363 1. 266468 1. 057999  
5. 331265 5. 077305 4. 057279 4. 751743 5. 230588 4. 437276 4. 509594 4. 94277 5. 068865  
5. 098381 5. 290228 5. 916109 5. 550541 6. 631431 6. 099696 4. 522276 5. 101426 3. 756405

5.075357 4.981313 4.343337 3.701048 4.902295 4.741615 4.69169 5.577911 4.413409  
1.471748 1.225052 1.426198 1.573161 1.40395 1.841361 1.699547 1.331141 1.787367  
2.611921 2.774518 2.330423 3.333016 2.393442 2.492493 4.479985 4.113838 4.406654  
3.018445 1.45912 3.091741 1.573401 1.837608 4.447134 1.913252 2.539126 2.693404  
2.093592 1.145422 2.029966 1.3381 1.884634 1.689149 1.490311 1.405738 1.449513  
6.469046 5.964275 6.500905 6.672831 6.199116 5.912236 5.707206 5.967232 5.666397  
1.591276 1.775653 1.713879 1.72039 1.587641 1.934382 1.990288 1.272361 1.283709  
2.176472 2.443602 3.245672 2.065978 2.201799 1.136157 2.039778 1.854262 2.003947  
1.589542 1.472804 1.893556 2.961801 2.278744 2.405922 1.866486 1.332209 2.538978  
1.399905 1.905045 1.423169 1.587859 1.016609 1.391435 1.225168 1.519192 1.305157  
1.545577 1.838794 1.702452 2.790989 1.253211 1.336478 2.131323 1.44043 2.198822  
4.644762 5.09693 4.599283 4.432298 3.12573 3.917201 3.550215 3.385672 3.53247  
5.589576 3.154181 7.256974 5.680523 2.905695 5.43302 5.818399 2.271617 5.233672  
7.780152 7.584425 7.541978 8.027497 7.773739 7.27146 7.956053 7.286478 7.219686  
4.965572 4.343853 3.962943 5.315832 4.970032 4.536372 5.211646 4.671223 3.871675  
4.634244 5.544277 4.026506 4.815114 4.904906 5.412608 4.617596 4.621026 4.624637  
2.753153 2.281822 3.097584 3.287511 3.343656 2.963419 3.427356 2.16388 3.42363  
9.406566 9.400593 9.232262 9.541061 9.484727 8.665391 9.27877 9.193184 9.325498  
2.800169 1.947257 2.753587 3.394107 2.373043 2.424693 2.271434 2.64316 2.326764  
1.825637 1.286113 1.828582 2.902004 3.071917 1.534446 1.969772 2.048946 2.370242  
1.200014 1.158123 0.998459 1.001291 2.034819 1.220704 0.887897 1.025598 0.916529  
4.874096 5.303253 4.953115 5.66346 4.795004 5.14998 5.041276 5.016536 4.898173  
2.278416 1.788859 2.005285 2.784589 2.332759 2.462319 2.272375 1.924037 1.738077  
2.296053 2.15405 1.954508 2.125716 1.928362 2.060672 1.68519 1.695268 1.493319  
6.194864 5.55839 5.936747 4.388823 4.857244 6.33919 5.525904 5.734845 5.459076  
2.116885 2.653855 2.855187 3.704413 2.185291 1.741701 2.037974 2.312588 3.42442  
3.248125 2.389958 2.489759 4.98114 3.667661 4.615193 3.557038 2.816797 3.288114  
1.239287 1.046627 2.22037 1.973155 1.136009 1.584255 1.073286 1.124597 1.183173  
5.263129 5.370341 3.862256 5.711475 6.121057 3.132799 6.308553 4.690722 3.35587  
2.46709 1.95335 2.465353 2.059492 2.591855 3.219696 2.073 1.918043 1.673642  
2.631746 3.327689 2.856885 2.700941 2.962738 3.136844 2.847192 1.643726 3.066779  
1.86848 1.665998 1.251947 1.885852 2.039443 2.240113 2.043506 1.781388 1.512232  
1.71676 1.597949 1.746698 2.63612 2.279937 1.766438 1.625459 1.63931 1.233581  
1.655464 2.190545 1.851679 2.409442 1.44428 1.700965 1.339847 1.711868 1.779558  
1.977374 2.227526 2.391844 3.723489 2.641289 3.70071 2.103302 2.031696 1.755351  
1.216603 1.673431 1.394963 1.812923 1.653589 1.932724 2.508135 1.341606 1.736022  
2.531048 2.188214 2.021761 2.458214 1.925044 2.473471 1.893219 2.110772 2.191371  
4.015485 2.798884 3.384003 5.331669 3.212387 3.181991 3.750461 3.711555 3.915647  
4.482761 5.180654 5.046267 4.382178 4.757997 4.371361 5.631542 5.043434 4.538625  
2.944489 3.063442 2.430135 3.326532 2.604755 2.255335 2.782007 2.97097 2.207633  
4.39384 2.024241 2.760687 3.567016 2.618968 2.719586 4.529552 3.305084 3.066605  
1.729938 1.742471 1.410648 1.341082 0.952793 0.899079 1.225106 1.06519 1.622354  
3.049079 3.462375 3.640632 4.069102 2.894383 3.458004 3.002116 3.918928 3.373468  
2.513997 2.801613 1.933737 2.608125 2.238089 2.515391 2.614411 2.014606 1.273537  
1.985693 2.265289 2.29355 2.58147 1.955482 2.49069 2.162685 2.534604 2.123882  
3.247761 3.065296 4.311088 3.662544 3.694822 3.963536 4.024051 3.757941 2.837063  
4.385651 4.152076 4.681775 4.570985 4.51632 4.385651 4.693873 4.934121 4.175007  
1.630074 1.763428 1.808158 2.569864 2.790668 1.740288 1.979644 1.890312 1.922585  
3.139315 2.807425 2.371174 2.482852 2.261152 2.917236 2.568816 2.371001 3.832222  
2.030421 2.188102 2.368037 1.907533 1.887011 2.244896 2.058904 1.883321 2.387223  
7.837529 8.40735 8.335991 8.496568 7.947993 8.234612 8.389318 8.252156 7.930291

2.247816 2.119867 1.368515 2.913888 1.982893 1.905732 1.650696 1.92724 1.856637  
7.550993 7.541699 8.152175 6.824945 7.421191 7.537652 7.900851 7.712813 6.882646  
3.245882 4.34871 3.971374 3.811632 3.320918 4.157891 4.271742 4.198977 3.059471  
3.361596 3.282514 2.804021 3.402265 3.369853 3.214742 2.91645 3.513547 2.902846  
2.567866 3.073096 3.009945 3.376554 2.725041 2.901272 2.864255 2.906282 2.886154  
2.24963 2.43245 1.906245 2.698291 2.293085 2.403134 1.792937 2.412919 2.162976  
2.509134 3.138933 2.431571 1.671049 3.706851 2.364002 2.11627 3.32538 2.43444  
1.720787 1.736964 1.594222 2.725112 1.686738 2.239662 2.058148 1.584031 1.871049  
1.516989 1.874882 1.855749 1.832736 1.713278 1.812196 1.629502 1.862401 1.833457  
2.721254 3.495433 3.910783 2.121897 2.237668 2.666216 3.115033 3.70184 2.435455  
1.894953 1.746028 1.713777 1.425709 1.312765 1.516875 1.528717 1.851592 1.552744  
1.210248 1.152765 0.75263 2.071099 1.152437 0.952864 1.659896 1.078563 1.189131  
4.508135 4.646515 4.024593 4.564332 4.898457 5.663409 4.040291 5.486067 3.07842  
1.431217 1.772128 1.374169 1.262906 1.914528 1.793243 1.619335 1.810178 1.893872  
1.250317 1.453287 1.418974 2.096198 1.463953 2.086691 1.090605 1.711316 1.69624  
1.724264 1.675784 2.127484 2.03442 1.799465 1.826829 2.635431 1.637741 1.589274  
1.689471 1.593737 2.014559 2.002703 2.295841 1.649927 1.280906 1.239026 1.487366  
2.912494 3.354064 3.330645 4.048764 3.199945 3.06828 2.479383 3.219419 2.592719  
0.949419 1.442279 2.31728 1.85137 2.577244 2.264251 2.13117 1.844564 1.716622  
0.980894 1.52766 2.00965 0.857582 1.998312 1.683845 1.708146 1.060933 1.242041  
1.023776 1.293781 1.281229 1.645062 1.101466 1.568494 1.366893 1.53493 1.363988  
2.284356 1.26978 1.940413 1.899448 1.716342 3.465209 1.844439 2.335912 1.834351  
2.781261 2.42893 1.999358 3.61988 2.152866 1.919635 4.295536 2.779657 2.591275  
4.094123 3.425609 4.251925 5.278843 3.130897 4.10256 4.206814 3.754915 3.272761  
2.221999 3.33024 2.732219 4.23356 2.010829 3.076017 2.458294 2.299677 2.473627  
4.692168 4.977652 5.082516 4.203929 4.934036 4.751348 4.568017 5.257094 4.95087  
2.524097 2.739137 2.233363 2.931802 2.607814 3.499505 2.174574 2.049679 2.295052  
1.954965 1.971217 3.508509 2.050985 1.948199 2.021277 1.490091 1.989012 1.614111  
3.285869 2.83629 3.462166 3.344847 2.679127 2.257369 3.435559 2.158437 2.310965  
6.155125 6.014529 6.069882 4.682866 6.703369 6.384604 5.598915 5.878474 6.222822  
1.742702 1.678995 1.667751 2.534963 2.217186 2.526905 1.796823 2.124625 1.665798  
2.093937 2.211595 1.962772 2.215605 2.733207 2.466293 3.269027 2.204638 2.299848  
4.974373 4.869027 5.301564 4.522645 4.664338 4.582903 4.741903 4.166448 4.375539  
3.115285 2.391834 3.080328 3.563921 2.491794 3.355851 2.33799 2.614885 4.189688  
1.967777 1.574934 1.521967 2.564926 1.336123 1.389827 1.095532 1.855434 1.544793  
2.505033 1.514726 1.573351 4.016726 5.946632 2.747042 3.631354 1.54972 2.031266  
2.042481 1.651866 2.691295 3.751764 1.192752 1.640312 2.619073 2.043811 1.977118  
2.731753 1.618854 2.719189 2.774116 1.85492 2.421399 1.887878 2.327128 2.671114  
1.806825 2.4508 3.338247 1.876547 3.650721 3.546645 2.739422 3.021449 3.18885  
4.854433 4.03499 4.628092 4.285794 5.123143 4.425354 4.612382 5.601063 4.738701  
5.918732 5.895461 6.478054 6.043173 6.080772 5.89641 6.113787 6.104145 4.794802  
1.207575 0.98165 0.746026 1.403582 1.737476 1.67742 0.850268 0.981335 1.350263  
4.129953 4.316735 3.749265 3.618584 4.033335 4.053642 3.799724 4.001789 3.153223  
7.835968 8.164035 8.100805 7.584847 8.328061 7.811142 7.735844 8.382544 7.61884  
2.860077 1.823926 2.766502 2.542646 2.338088 3.30723 2.681901 1.920459 3.39997  
1.043053 1.717863 0.956969 2.650597 1.336587 2.097762 1.293799 1.567928 1.14384  
5.069309 4.931955 4.741423 4.988391 5.158422 4.551441 5.677229 4.934228 4.848092  
5.987032 6.327618 6.406115 5.432356 5.943681 6.249142 6.621216 5.962325 5.83209  
2.560697 2.50862 2.876077 3.653366 2.841923 2.833911 2.880669 2.314234 2.705792  
1.654078 1.320841 1.701302 2.667281 1.755988 1.770905 2.884368 1.369374 1.561627  
2.80828 1.629283 1.67678 1.284166 1.606157 1.267836 2.527828 1.037411 1.289435

1. 286096 1. 109659 1. 977503 2. 09065 1. 084908 1. 534003 1. 07043 1. 931001 1. 725509  
1. 012889 1. 943286 0. 83139 1. 600607 1. 754995 1. 865094 0. 820066 1. 007718 1. 885433  
2. 305807 2. 04139 1. 433806 2. 43495 1. 819326 2. 440965 1. 69127 1. 976739 2. 047901  
2. 446031 2. 384539 2. 322185 2. 800565 2. 755046 2. 117883 3. 007255 3. 576382 2. 413003  
2. 576204 4. 474338 5. 217133 5. 178696 5. 667891 3. 707905 4. 299174 4. 637608 4. 169103  
2. 798576 3. 059421 2. 08104 3. 007977 2. 459975 3. 184801 1. 397635 2. 542601 2. 72086  
6. 013621 5. 269396 5. 121248 4. 118976 6. 409055 4. 513548 4. 751279 5. 988624 3. 904396  
3. 265154 3. 066537 2. 931591 3. 480726 2. 716555 2. 069093 3. 245132 2. 51663 2. 49825  
1. 243274 1. 127219 1. 646545 0. 994552 1. 60422 1. 511446 0. 848394 0. 908317 0. 7599  
3. 222455 4. 824876 4. 946963 3. 946757 5. 20712 4. 816315 5. 274248 5. 041809 4. 24081  
5. 749213 5. 393188 5. 102255 4. 956754 5. 519757 4. 433799 5. 347314 5. 683749 6. 363032  
4. 079945 4. 059229 3. 999424 3. 196353 3. 949537 4. 086218 3. 449081 3. 313311 4. 173403  
3. 946563 5. 123428 4. 297437 1. 539571 4. 479093 4. 440605 3. 490412 3. 122117 4. 222394  
1. 609607 1. 342841 1. 317693 1. 860182 0. 985065 1. 970166 1. 420837 1. 337506 1. 359553  
2. 881775 2. 310505 2. 435081 2. 578399 2. 279331 2. 176352 2. 901271 3. 64154 2. 224628  
3. 042032 2. 466891 2. 623673 2. 734175 2. 514037 2. 863246 3. 248519 3. 333886 3. 630422  
3. 010051 3. 260514 3. 720038 2. 216825 2. 790066 2. 392105 2. 631834 3. 408044 3. 321645  
6. 097509 5. 400858 5. 781903 6. 121757 5. 571231 5. 979524 5. 641805 4. 415431 5. 902282  
4. 928975 5. 232471 5. 904333 5. 745347 4. 827002 4. 717943 6. 092783 5. 435954 5. 551073  
1. 658345 2. 090175 2. 358397 4. 690376 2. 000272 3. 289369 2. 311241 1. 942942 2. 293219  
10. 16976 10. 18355 10. 20444 10. 06382 10. 25972 10. 1346 9. 916909 10. 3452 9. 709782  
1. 795665 2. 118789 3. 259071 3. 868719 3. 093466 2. 428593 2. 039393 2. 80397 2. 34889  
2. 35972 2. 002982 2. 398584 2. 318139 2. 80508 2. 185754 2. 283942 2. 035878 3. 30155  
2. 132987 1. 235825 2. 324447 1. 763072 1. 356124 2. 244562 1. 548174 1. 432296 1. 39834  
4. 229692 3. 750037 4. 667743 4. 696976 3. 483884 3. 325596 4. 190615 4. 421891 3. 131065  
2. 181395 1. 251332 1. 675895 1. 796482 1. 712473 1. 479166 1. 363844 0. 925404 1. 060719  
2. 270479 2. 005898 2. 270843 2. 4575 2. 38471 2. 127227 2. 157841 1. 685606 2. 131486  
2. 003582 2. 448849 1. 853689 2. 429298 1. 497937 1. 673263 2. 025361 1. 639127 1. 721313  
3. 374653 2. 933096 2. 631365 3. 479 2. 306934 2. 711149 2. 803627 2. 713815 3. 594549  
5. 096887 5. 097235 5. 18251 4. 792394 5. 467453 5. 435231 4. 940694 4. 776906 5. 30362  
5. 531829 4. 950457 5. 057707 5. 020657 5. 156031 4. 348386 5. 091722 5. 176792 3. 566633  
4. 074877 3. 93358 3. 933983 4. 846669 3. 885818 4. 032374 3. 771999 4. 228533 3. 544832  
3. 695658 3. 041581 2. 52925 1. 759915 1. 346425 1. 664395 2. 573419 3. 479914 2. 216867  
2. 168321 1. 947494 2. 259088 2. 732863 1. 612577 2. 291576 2. 592672 1. 626179 1. 696727  
2. 421711 2. 229974 1. 980697 2. 346301 1. 92899 2. 023846 2. 014741 1. 932916 1. 582226  
4. 370303 3. 444294 4. 4709 3. 880981 4. 28455 4. 589771 4. 504732 4. 492631 5. 054502  
3. 558308 3. 561262 2. 351141 4. 034438 3. 532621 2. 829591 2. 58549 3. 155589 2. 727792  
3. 102196 3. 281156 2. 78534 3. 002838 2. 302532 2. 718705 2. 678928 3. 331789 2. 386313  
2. 306206 1. 703918 1. 861606 2. 288362 1. 559464 1. 91749 1. 740614 2. 127442 2. 366503  
5. 177189 4. 910175 5. 228189 5. 468298 4. 835373 3. 727474 4. 569081 4. 396789 5. 396999  
2. 907907 1. 734871 2. 271488 0. 836224 2. 789107 3. 46431 2. 570057 3. 686944 1. 763626  
1. 034734 1. 02695 1. 783837 1. 306351 1. 221469 1. 905748 1. 292165 0. 963224 1. 333599  
3. 025781 3. 095383 2. 879019 2. 7205 3. 219039 2. 050263 2. 164936 3. 374676 2. 863522  
1. 98802 3. 079866 2. 448118 2. 037349 2. 849043 2. 675972 2. 949993 3. 211928 2. 575275  
5. 703628 5. 01912 5. 346897 4. 433409 5. 02109 5. 538654 5. 677948 4. 924408 4. 650249  
5. 113935 4. 911135 4. 764284 4. 555444 4. 435605 4. 017983 4. 07951 4. 438492 5. 230344  
2. 308467 2. 274067 2. 321673 3. 002663 1. 839448 2. 132004 2. 618149 2. 003101 2. 270058  
5. 500696 6. 123302 5. 062333 2. 8026 6. 029454 6. 126318 5. 446969 6. 083152 6. 592097  
6. 032254 6. 008349 5. 97601 5. 729134 6. 34257 5. 366102 6. 234171 5. 792847 6. 949258  
3. 956902 2. 735057 2. 71293 3. 289374 3. 187455 3. 507762 3. 185606 2. 191507 3. 306147  
2. 081925 1. 174717 1. 544419 1. 8669 1. 249828 2. 926897 1. 486572 1. 51539 1. 897538



1. 518482 1. 401467 1. 538632 2. 815999 1. 0715 1. 282568 1. 799423 1. 744307 1. 181633  
4. 373969 4. 515309 4. 345734 4. 219571 4. 637313 3. 996571 3. 546927 3. 560809 3. 594726  
1. 36161 1. 585563 2. 159665 1. 524697 1. 384115 2. 319128 1. 473467 2. 900618 2. 153627  
2. 048393 2. 654783 2. 252272 3. 182915 2. 537554 2. 793662 1. 659081 2. 702851 2. 148458  
2. 865314 1. 614399 3. 312777 3. 009883 2. 053648 1. 907225 2. 559757 1. 841542 1. 266234  
1. 805928 1. 733861 2. 140293 2. 504636 1. 878125 2. 589932 1. 616997 1. 772246 2. 312447  
2. 251409 2. 385668 2. 422415 2. 82003 2. 621643 2. 708185 2. 898552 2. 67061 1. 787362  
5. 292223 3. 823053 5. 429233 3. 963387 5. 403824 3. 56721 4. 845635 5. 251111 4. 462384  
1. 285728 1. 187867 0. 838199 1. 388041 1. 424305 1. 445436 1. 72251 0. 896668 1. 182342  
3. 218592 3. 442718 2. 957207 4. 044474 3. 406795 3. 226594 3. 590709 3. 299349 2. 654464  
4. 865201 4. 968545 5. 004257 5. 041646 4. 944919 3. 583432 4. 526466 5. 499882 3. 632124  
3. 75839 3. 692994 3. 990248 2. 132124 3. 539563 3. 098683 3. 887878 3. 484262 4. 615332  
3. 517256 2. 581845 4. 071707 4. 074346 3. 192366 3. 604901 4. 268846 3. 533551 3. 492981  
4. 100565 4. 796871 3. 957849 3. 449132 2. 237526 3. 160915 4. 070932 2. 847293 3. 983108  
1. 50755 1. 658857 1. 112615 1. 627716 1. 792555 1. 199183 2. 225022 1. 211899 2. 433384  
0. 819072 3. 085146 2. 706889 3. 401743 2. 475531 2. 577748 3. 291365 3. 374033 3. 351485  
4. 256041 4. 52083 4. 148091 3. 712543 4. 362829 3. 559627 3. 394197 3. 78445 3. 865385  
1. 936868 2. 376084 2. 827553 2. 585597 2. 170317 1. 884798 2. 017964 1. 869577 1. 489898  
1. 846354 1. 79825 2. 114233 2. 04726 1. 710722 2. 615757 2. 244157 2. 201775 1. 867918  
3. 577532 2. 757284 2. 493143 4. 210966 4. 036316 3. 179591 3. 574722 2. 479321 2. 219629  
4. 126898 5. 238832 4. 264597 2. 642191 4. 93642 5. 187881 4. 153778 4. 590736 4. 748792  
3. 641603 3. 201188 4. 066167 3. 252338 3. 744902 2. 81795 3. 631322 2. 451995 3. 055438  
3. 827009 3. 703375 4. 919097 3. 584666 3. 890678 4. 142062 4. 018105 3. 607983 4. 838557  
1. 588865 1. 845195 1. 276707 1. 650171 1. 721899 1. 517148 1. 817719 1. 684274 1. 276309  
1. 63691 1. 871946 1. 953507 3. 025273 1. 583629 1. 545919 1. 898613 1. 751141 2. 292318  
1. 845125 2. 028783 3. 174511 1. 657783 1. 831963 1. 66795 2. 050606 2. 156401 2. 429113  
3. 612753 2. 436815 2. 729149 3. 424218 3. 25297 3. 628253 3. 246276 4. 105592 2. 945658  
1. 311276 1. 35531 1. 527572 1. 813973 1. 258442 1. 533264 1. 70169 0. 860591 1. 227947  
7. 650877 7. 566459 7. 536145 6. 615794 7. 740186 7. 544292 7. 770408 7. 674152 7. 42447  
2. 707916 3. 206536 2. 863209 2. 442991 2. 98393 3. 46013 2. 818295 2. 283288 3. 215102  
3. 566687 3. 575336 3. 412524 3. 918477 3. 370333 2. 645303 3. 353264 3. 241945 4. 049812  
2. 59993 2. 661109 1. 746658 3. 765095 1. 140091 1. 199097 2. 309579 1. 334768 2. 929669  
5. 597103 6. 430715 5. 939032 7. 308961 6. 029356 5. 502825 5. 783643 6. 363398 5. 788735  
3. 894815 4. 030496 4. 455476 2. 778896 4. 409919 4. 221571 3. 410153 4. 143237 4. 197934  
3. 742487 3. 33168 3. 794037 3. 366499 3. 045274 3. 063809 2. 419205 3. 371079 5. 425185  
4. 970228 4. 614446 3. 935193 3. 014122 5. 043486 4. 851402 5. 316042 5. 850543 4. 61044  
1. 564041 1. 835742 2. 037626 2. 332225 1. 626405 2. 527526 1. 056558 2. 971267 1. 355525  
1. 369196 0. 949352 1. 344455 1. 136668 1. 386872 1. 49096 1. 30528 0. 827841 1. 060488  
2. 740556 2. 842305 2. 48612 2. 779734 2. 635461 2. 362088 2. 265325 2. 658394 2. 466634  
1. 513538 1. 604253 1. 655607 1. 946141 2. 247003 1. 856056 1. 726852 1. 651045 1. 507664  
1. 513097 2. 167186 2. 099766 1. 762178 1. 809367 2. 492223 1. 984081 2. 149065 3. 417506  
6. 855031 6. 823715 6. 881586 6. 583043 7. 313145 6. 584425 7. 043927 7. 452304 6. 985125  
1. 379149 1. 018133 1. 389365 2. 578793 1. 297526 1. 97907 1. 40373 1. 237827 1. 35515  
1. 653797 1. 93055 2. 131684 2. 678931 2. 077294 1. 92567 1. 930792 2. 299279 2. 007962  
2. 335456 1. 365005 1. 676988 1. 439222 1. 568163 2. 404605 2. 324661 1. 528041 1. 681105  
1. 601476 1. 739228 2. 066177 2. 131217 1. 520114 1. 721998 1. 754853 1. 360153 2. 031184  
1. 7026 1. 972226 1. 822119 2. 213235 1. 217757 1. 919178 2. 125951 1. 844765 1. 669099  
5. 332866 6. 068791 5. 212845 6. 973985 5. 512091 6. 215346 5. 255232 5. 881614 4. 693966  
5. 593755 6. 293908 6. 131382 4. 786508 5. 862543 6. 0023 4. 913945 5. 869035 5. 037279  
3. 028677 3. 112571 3. 510371 2. 997558 2. 716041 2. 490371 2. 948352 3. 020262 3. 706383  
3. 356324 2. 791532 2. 52773 1. 624163 2. 280479 3. 572297 2. 622489 3. 060903 2. 451756

1. 009355 0. 947609 1. 044841 1. 628619 1. 199163 2. 16034 1. 351417 1. 196289 1. 010017  
1. 820283 2. 843258 2. 735041 4. 34067 2. 052172 2. 653901 2. 070698 1. 515149 2. 31617  
4. 885631 5. 56252 5. 362088 4. 904786 5. 590726 5. 276319 5. 403323 5. 384061 5. 21059  
1. 448574 1. 79059 2. 530616 2. 249149 1. 688507 1. 835841 1. 628323 2. 127549 1. 90563  
3. 233974 2. 791108 2. 630507 2. 7314 3. 153926 2. 92223 2. 663933 3. 496206 3. 946748  
4. 008136 5. 290321 4. 292267 3. 072947 3. 294335 3. 428206 2. 877586 4. 171862 4. 330813  
2. 146139 1. 805712 1. 68483 2. 46638 1. 919097 2. 176383 2. 991333 2. 310198 1. 796171  
2. 382824 3. 418649 2. 923999 3. 29133 3. 048263 2. 491528 2. 685683 3. 473436 2. 190357  
2. 815781 3. 017965 3. 17974 2. 519111 2. 843185 2. 537077 3. 23262 2. 540143 3. 222155  
4. 724938 5. 754761 5. 719965 3. 348341 5. 174609 5. 381941 5. 192467 5. 234661 4. 199522  
1. 054988 1. 584739 1. 902278 1. 942101 0. 837072 1. 535258 1. 243437 1. 300243 1. 370407  
5. 198939 4. 237299 4. 65622 4. 729072 3. 857182 5. 230717 5. 046079 5. 363344 4. 991599  
2. 164768 2. 113505 1. 454189 2. 177627 2. 100624 1. 664741 1. 571548 1. 669337 2. 501936  
6. 634855 6. 581243 6. 746718 6. 897912 6. 723982 6. 741787 6. 537564 7. 002464 6. 417357  
1. 332695 1. 253884 2. 357464 1. 717336 1. 199951 1. 549981 1. 442102 1. 876495 2. 204488  
2. 68937 2. 106425 2. 677581 1. 421469 1. 699247 1. 93307 3. 207357 1. 779428 2. 985916  
6. 656934 6. 51688 6. 97587 6. 619224 5. 967787 6. 59882 6. 648518 6. 708898 5. 653337  
2. 48784 2. 143621 2. 373718 2. 62988 2. 940688 2. 121294 2. 522852 2. 297457 2. 654735  
2. 207562 2. 574989 2. 34275 2. 663293 2. 127169 2. 769365 2. 284725 2. 288101 1. 745682  
10. 91602 10. 70307 10. 56862 10. 94635 10. 37654 10. 77822 10. 42578 11. 18622 10. 54874  
2. 378541 2. 387887 2. 695607 3. 015281 2. 045708 3. 637424 2. 88565 2. 307855 2. 923378  
1. 361446 2. 094574 2. 418908 1. 103528 1. 924101 1. 82711 0. 856088 1. 08141 1. 683815  
3. 546914 2. 322119 2. 608891 2. 162389 2. 868288 2. 601133 3. 554972 3. 572134 2. 892311  
2. 604132 1. 952387 2. 470108 2. 855951 2. 666111 3. 285829 1. 785049 1. 689804 3. 674383  
1. 046931 0. 994427 0. 999983 0. 991069 0. 890133 1. 153145 1. 15036 1. 307884 1. 183436  
1. 241034 1. 280702 2. 479302 1. 760945 1. 230556 1. 996996 1. 200264 1. 185657 1. 497699  
2. 947135 2. 247148 2. 146181 1. 780978 2. 186874 2. 189433 1. 638874 2. 103216 3. 640231  
4. 737323 5. 284073 5. 276405 6. 206621 5. 11848 4. 807292 4. 880362 5. 19554 3. 840606  
1. 654562 2. 243515 1. 247581 2. 44995 2. 744118 2. 03232 1. 449981 1. 390703 1. 343465  
6. 00076 6. 022547 5. 581233 6. 256713 6. 48135 5. 993576 6. 296793 6. 04024 5. 055467  
2. 258848 2. 208751 1. 799044 2. 305663 2. 338264 1. 711875 2. 152319 1. 649104 3. 253465  
1. 785654 1. 615952 1. 633128 1. 817405 1. 293643 1. 667019 1. 304582 1. 217583 1. 505778  
3. 539657 3. 206407 3. 516097 3. 06048 3. 463643 3. 371659 3. 211234 2. 808578 2. 779787  
1. 977782 2. 761032 1. 87403 2. 592629 2. 273795 2. 365856 2. 454497 2. 135746 3. 158565  
3. 153322 3. 440886 3. 145556 3. 669808 3. 312083 4. 380554 3. 405873 3. 533499 3. 944107  
1. 750442 2. 12842 2. 045914 2. 905347 2. 413629 2. 077186 1. 617316 2. 162989 1. 90701  
1. 630682 1. 737884 2. 330392 1. 626386 1. 7748 2. 58066 1. 733839 1. 509343 2. 138074  
2. 699478 1. 964544 1. 835847 1. 69773 2. 567373 1. 855876 1. 871705 2. 701984 2. 46351  
3. 45435 3. 087037 3. 445998 2. 439938 3. 403902 3. 530164 3. 092146 3. 137261 3. 739031  
1. 594042 1. 571131 2. 519045 2. 206222 1. 689857 1. 891293 1. 712885 1. 554219 2. 848584  
2. 020205 1. 659224 2. 068848 2. 889696 2. 100413 1. 931565 1. 59175 2. 210961 2. 252058  
1. 631464 2. 361732 1. 189824 1. 157825 1. 714069 2. 327401 0. 799352 0. 885319 1. 737408  
8. 767682 8. 862505 9. 016728 8. 556823 8. 880371 8. 949244 9. 007611 8. 880024 8. 465689  
6. 437251 6. 302173 6. 038639 5. 428815 6. 371466 6. 801155 6. 441891 6. 532835 5. 898419  
1. 318121 1. 158773 1. 133667 1. 463056 1. 633421 1. 249723 1. 556649 1. 219362 1. 31712  
2. 293069 1. 812674 1. 671126 2. 161378 1. 813346 2. 572716 1. 985102 1. 800864 1. 314464  
3. 105537 1. 131523 1. 151429 1. 22889 1. 230317 1. 314982 1. 655619 1. 123042 1. 642038  
2. 000081 2. 067963 1. 733627 2. 26958 1. 508912 1. 811338 2. 085246 2. 004357 1. 925067  
3. 204118 2. 859012 2. 520948 4. 04667 2. 700744 3. 05689 2. 837326 2. 138991 2. 667316  
1. 539944 1. 347882 1. 443801 1. 465287 1. 494228 1. 922344 1. 211579 1. 615519 1. 931066  
2. 069727 1. 749105 1. 54083 2. 491202 1. 668183 1. 423708 1. 218792 1. 133541 2. 240056

1. 99349 1. 556173 2. 152651 2. 082305 1. 380393 2. 037864 1. 548827 1. 847001 2. 198803  
0. 900318 1. 754211 1. 707262 1. 048434 1. 50532 2. 000154 1. 622748 1. 628905 1. 547563  
1. 929129 2. 392796 2. 437323 2. 6017 2. 531134 2. 065992 2. 345822 1. 588758 1. 768076  
4. 026323 4. 780229 4. 400554 4. 533606 4. 006177 4. 30048 4. 546154 4. 14615 3. 994417  
1. 434449 1. 099266 0. 993311 2. 029676 1. 273733 1. 296513 1. 401214 1. 338625 1. 756277  
3. 643316 3. 395385 2. 74357 2. 908239 2. 440559 4. 65204 4. 15923 3. 692336 2. 963731  
4. 730513 3. 512185 4. 499422 5. 140666 4. 410873 4. 752692 5. 674428 4. 446153 3. 940879  
0. 579896 0. 809794 0. 814257 0. 757072 0. 802313 0. 812274 1. 043452 0. 771866 0. 769022  
1. 499849 1. 445865 1. 942702 1. 613179 2. 256527 1. 940215 1. 575018 1. 610228 2. 024294  
7. 897293 8. 042183 7. 867416 7. 498543 8. 201358 7. 463745 7. 650791 7. 911037 7. 880734  
1. 958083 1. 707944 1. 981592 1. 982168 1. 52667 1. 797285 1. 599111 1. 866207 1. 797751  
4. 521027 5. 208249 4. 345162 5. 00629 4. 397992 4. 370653 5. 31956 4. 865895 4. 529604  
0. 976349 1. 162333 1. 73272 1. 750937 1. 152538 1. 201873 1. 130343 0. 977964 1. 392984  
8. 685989 8. 701079 8. 41266 8. 181705 8. 348705 8. 835245 8. 783187 8. 574757 8. 451735  
4. 904181 4. 708623 5. 478843 4. 037917 5. 177606 4. 495735 4. 567979 4. 942881 3. 968463  
2. 041474 2. 638395 2. 478054 2. 364678 1. 967025 1. 669629 1. 973495 1. 476892 1. 483426  
1. 923031 1. 850282 1. 806471 1. 924199 1. 51517 2. 205169 1. 665345 1. 778063 1. 507444  
2. 776358 2. 403157 2. 381088 1. 991255 2. 000456 2. 618386 2. 030056 3. 238797 3. 130763  
1. 194194 1. 124009 1. 455167 1. 696504 1. 967342 1. 905317 1. 580924 1. 472436 1. 75872  
5. 961954 5. 879366 4. 345359 5. 293809 5. 459172 6. 317901 6. 19695 5. 49524 6. 641578  
1. 576753 1. 6853 1. 676616 2. 924169 1. 649931 1. 786821 1. 378663 1. 73116 1. 795952  
1. 18679 1. 63576 1. 570059 2. 134054 1. 291718 1. 596008 1. 182271 1. 218183 1. 544042  
2. 625632 2. 891233 2. 443409 3. 090363 2. 735415 1. 714013 2. 225904 1. 714013 2. 209212  
1. 814474 1. 100709 1. 475845 1. 809511 1. 193237 1. 423927 1. 262387 1. 464213 1. 202775  
2. 165378 2. 121739 1. 996253 1. 274484 0. 957874 1. 185174 2. 140506 1. 366193 1. 414522  
1. 260324 1. 526398 1. 518092 2. 001502 1. 178387 1. 856961 1. 727023 1. 705793 1. 644875  
2. 393794 2. 391731 2. 087567 3. 021312 1. 70746 2. 505149 1. 70856 1. 677189 2. 087567  
2. 481537 2. 233965 2. 524218 2. 637005 2. 379268 3. 33606 1. 799751 1. 997937 1. 80134  
2. 19689 1. 579219 2. 481912 2. 721574 1. 976285 2. 439692 1. 62196 2. 298201 2. 589694  
2. 140002 1. 686144 1. 6765 2. 140677 1. 293043 1. 757474 1. 319005 1. 751466 1. 776495  
4. 120337 4. 238361 4. 273107 5. 235204 3. 030795 3. 076983 4. 130106 3. 157918 3. 896975  
2. 152038 1. 708385 2. 166577 2. 167747 1. 660549 2. 129185 1. 987637 1. 638568 2. 045627  
1. 966672 2. 475465 1. 473717 1. 978574 2. 428021 3. 103454 2. 679408 2. 614579 2. 313151  
4. 111964 4. 492781 4. 795506 4. 35536 4. 788496 4. 201445 4. 629949 4. 979267 5. 391139  
6. 353286 6. 584085 6. 568327 5. 643326 6. 682749 6. 581853 7. 518713 6. 452552 6. 889551  
0. 90664 1. 406044 1. 153469 1. 305899 1. 186736 1. 371647 1. 129238 1. 490826 0. 99525  
5. 377689 5. 013102 5. 202048 5. 328604 5. 172698 4. 008659 5. 270282 5. 499825 4. 658291  
3. 869227 3. 682094 3. 714486 3. 373579 3. 399204 3. 380904 3. 647631 3. 476256 3. 177165  
1. 866558 1. 979391 2. 562875 2. 039764 1. 94132 1. 923675 2. 346232 2. 360054 2. 156329  
0. 806525 1. 628441 0. 802277 1. 323961 0. 922166 1. 273106 1. 143825 1. 081354 1. 41353  
3. 066608 3. 451798 2. 829231 2. 262607 2. 752783 1. 903667 2. 134811 2. 431383 2. 91994  
3. 537549 3. 374653 4. 349267 4. 663567 3. 511324 2. 638121 3. 490365 3. 179045 3. 263343  
1. 612633 1. 880101 1. 994636 2. 428851 1. 816921 2. 045163 2. 462894 1. 731934 1. 464171  
2. 620062 2. 749559 3. 413686 3. 069978 2. 416663 2. 750059 3. 080711 2. 089106 2. 501778  
3. 267172 3. 335653 3. 636478 2. 58684 3. 847787 3. 529128 3. 523867 2. 890008 2. 482533  
1. 546264 1. 997439 1. 528395 2. 547102 1. 480042 1. 302333 1. 649814 1. 641175 1. 582433  
3. 313507 3. 409101 3. 174061 3. 281392 2. 164984 2. 521334 2. 795896 3. 772419 3. 668096  
3. 875515 2. 234431 3. 338712 3. 153417 4. 183722 3. 311333 3. 78634 3. 688533 3. 044351  
1. 78355 1. 324105 1. 890782 2. 109603 1. 748122 2. 341372 1. 507955 1. 097855 1. 611928  
5. 040683 4. 167586 4. 520692 3. 821303 4. 358134 3. 62182 3. 744897 4. 290267 5. 13951  
5. 291426 4. 741035 5. 079395 5. 599466 5. 110095 5. 087719 5. 808115 4. 898694 5. 212849

2. 25664 2. 500776 1. 437333 1. 791655 4. 142272 1. 470061 3. 041433 1. 994851 2. 299368  
1. 692737 2. 296496 2. 394507 2. 999743 2. 464878 2. 147994 1. 775767 2. 925572 1. 912409  
2. 200863 2. 882045 2. 144879 2. 780541 2. 233876 3. 172925 1. 474133 1. 953653 2. 513424  
1. 225549 1. 45301 0. 465067 2. 129557 0. 814853 1. 245417 1. 270299 0. 697799 0. 933347  
1. 686916 1. 087305 1. 55041 1. 755669 1. 322851 1. 28635 1. 035207 1. 539408 2. 192511  
1. 364631 1. 453468 1. 465486 2. 375885 1. 929075 1. 732956 1. 281122 1. 407849 1. 422031  
1. 985087 1. 794771 2. 152586 1. 352252 1. 820431 2. 156412 2. 425216 1. 870949 1. 599894  
2. 408113 2. 947933 3. 82346 1. 629947 2. 197631 3. 43428 2. 942769 3. 360663 3. 311197  
1. 928507 1. 345938 1. 3178 1. 716562 1. 14362 2. 037877 1. 348274 1. 1178 1. 249454  
1. 896332 2. 740371 1. 876263 1. 646171 2. 20079 1. 461609 2. 061224 1. 842633 2. 165845  
6. 726818 6. 931311 6. 421229 6. 440765 6. 771471 6. 24362 6. 350546 7. 144243 6. 687939  
0. 705963 1. 253459 0. 876786 1. 081677 1. 073676 1. 809424 1. 364432 1. 089361 1. 660319  
8. 836222 9. 037845 8. 548921 8. 069149 8. 975828 8. 599338 8. 70229 8. 826573 8. 897795  
3. 335943 1. 896054 2. 600374 2. 477568 2. 658596 3. 743901 2. 332878 2. 786971 2. 919761  
2. 593114 2. 142468 2. 292379 3. 1502 3. 028491 2. 538943 2. 321235 2. 96279 3. 087163  
3. 785497 3. 220269 3. 997849 1. 228472 3. 035738 2. 708353 2. 872189 3. 761088 4. 727736  
2. 596734 2. 445653 2. 604219 2. 739023 2. 281474 2. 489219 2. 615273 2. 258787 2. 5836  
4. 15277 4. 316644 3. 882218 5. 381407 3. 913206 3. 483203 3. 889156 4. 046302 3. 024628  
3. 136722 3. 289873 2. 024905 3. 15435 2. 286765 2. 258932 4. 090076 3. 370742 2. 398994  
1. 797609 1. 783993 1. 691044 2. 517437 2. 168606 2. 094811 2. 113553 2. 350294 2. 359261  
3. 906482 3. 327034 4. 201697 4. 297946 3. 368599 4. 107935 3. 528728 4. 020863 4. 822207  
0. 691191 0. 466389 0. 797594 1. 78473 0. 838135 1. 805246 0. 988405 1. 406672 1. 101384  
6. 40455 5. 430227 6. 57748 7. 479222 5. 936343 6. 42249 5. 467379 5. 487764 5. 76885  
8. 541122 9. 014291 8. 523852 8. 10853 8. 894233 9. 277148 8. 786045 9. 120187 8. 804384  
2. 297228 1. 55472 2. 403569 3. 081983 3. 526264 2. 099626 1. 198668 1. 999613 1. 877175  
1. 606586 1. 328135 1. 675919 1. 632012 1. 677135 1. 412971 1. 766564 1. 675919 1. 501604  
2. 14019 1. 565591 2. 268734 3. 001671 1. 906709 2. 306312 1. 584835 2. 262712 2. 475837  
2. 994093 2. 816421 2. 863714 3. 047643 2. 857324 2. 493782 2. 745533 3. 245879 4. 378731  
5. 355704 5. 511673 5. 69276 5. 776333 4. 050051 5. 823802 5. 111012 4. 869393 4. 957961  
1. 469223 1. 781808 1. 004078 1. 393669 1. 021197 1. 114675 1. 593282 1. 433242 0. 955798  
9. 017576 9. 263939 9. 437012 8. 422454 8. 967286 9. 513869 8. 909246 9. 485544 8. 182416  
1. 157852 1. 675003 1. 9952 1. 884452 1. 228727 1. 840766 1. 980608 1. 754345 1. 428652  
7. 329485 7. 129089 6. 745853 6. 317445 7. 147183 7. 763363 7. 051124 6. 837469 6. 782446  
5. 911593 6. 138824 5. 745391 5. 177843 5. 843352 5. 719304 5. 50399 5. 645342 6. 407694  
2. 049639 1. 790203 2. 207164 2. 84629 2. 281783 2. 19592 2. 225753 2. 041746 2. 262819  
1. 673682 1. 779592 1. 527185 2. 159879 1. 447409 2. 49419 1. 631174 2. 381113 2. 28862  
1. 314478 0. 744897 0. 976571 1. 137754 1. 339057 1. 989073 0. 734225 1. 442145 1. 328953  
1. 589805 1. 539457 1. 774217 2. 271409 1. 792557 1. 843786 1. 89335 1. 829779 1. 919051  
2. 956451 2. 333319 2. 700967 1. 540091 2. 818014 3. 502082 4. 302242 2. 640474 3. 225352  
2. 176846 1. 982249 1. 594985 2. 522785 1. 767059 1. 96014 1. 831239 1. 889049 1. 5062  
2. 215659 2. 147496 1. 916614 2. 098579 2. 385121 3. 837159 1. 894562 1. 643574 2. 060587  
1. 939769 1. 869408 2. 510126 1. 820244 3. 103346 1. 759893 1. 640257 2. 17624 2. 014871  
4. 464942 3. 533054 4. 529941 3. 363586 4. 060838 3. 467737 3. 35513 3. 933292 3. 990836  
3. 571758 3. 797879 2. 509942 2. 703569 3. 680917 3. 373405 3. 242028 2. 862049 3. 171015  
6. 926057 6. 956717 6. 584422 6. 038312 7. 324199 7. 126459 7. 893504 7. 008033 6. 119879  
2. 233804 2. 683242 1. 624738 2. 184401 2. 329705 1. 568412 2. 325774 4. 323745 1. 784082  
1. 62007 1. 248291 1. 548147 1. 451876 0. 993992 1. 043314 1. 50372 1. 229201 1. 573903  
1. 765523 2. 118305 1. 703204 2. 427626 1. 951092 3. 065374 2. 089175 2. 714924 2. 474108  
3. 472843 3. 285989 2. 794632 3. 121475 3. 671216 3. 069961 2. 787483 3. 855739 3. 607013  
1. 452727 1. 601281 1. 188685 1. 849344 1. 84262 1. 484836 1. 748598 1. 384432 1. 339677  
0. 886542 1. 592793 1. 482612 1. 368381 1. 469483 2. 236441 1. 403346 1. 803515 2. 667098

2. 906507 1. 179148 2. 123029 1. 563417 2. 528166 2. 189849 1. 70319 1. 596548 1. 794765  
2. 005253 2. 267854 2. 692186 3. 981954 2. 390462 4. 991979 2. 389043 2. 767514 4. 118958  
5. 728524 5. 45661 3. 840786 5. 681163 5. 715383 5. 050208 5. 462491 5. 639877 5. 616136  
1. 218305 1. 086281 1. 369527 1. 906493 1. 204149 1. 894248 1. 197876 1. 484943 1. 20478  
4. 356352 3. 877622 4. 06001 3. 907451 5. 349274 3. 868917 3. 915814 4. 876976 3. 559081  
2. 002567 1. 999939 2. 038655 1. 579872 1. 420146 2. 056127 1. 700009 1. 374569 1. 961779  
3. 571979 2. 39363 2. 402132 2. 198922 2. 471125 2. 085209 2. 480278 2. 954482 3. 248358  
3. 872911 4. 127245 4. 511911 3. 881765 4. 379019 4. 032192 5. 049532 3. 81239 4. 357544  
3. 783826 3. 349482 3. 953007 5. 701808 3. 722252 4. 107849 3. 612956 3. 902164 3. 976988  
3. 099683 2. 624584 3. 538587 3. 275891 1. 748833 2. 88583 2. 8895 1. 943253 2. 101795  
1. 444327 1. 784118 2. 305422 1. 281835 1. 053234 3. 101677 1. 537035 2. 890295 1. 504435  
1. 224158 0. 739922 1. 72233 1. 060201 1. 324684 1. 57493 1. 212608 1. 658923 1. 20898  
2. 260674 2. 579919 1. 387286 2. 427323 2. 201911 1. 712335 2. 458758 1. 735729 1. 804813  
2. 205021 2. 248437 2. 289606 1. 90665 2. 514324 1. 994455 2. 636695 2. 217108 2. 223557  
8. 090624 7. 733318 8. 078398 7. 908527 7. 964387 7. 748905 8. 363295 7. 614908 7. 923223  
2. 378514 3. 189481 2. 200018 2. 29034 1. 851076 1. 855613 3. 017592 2. 890377 3. 001635  
1. 741066 0. 892065 3. 367532 2. 644945 2. 06444 2. 279239 3. 379584 3. 281158 2. 217761  
5. 263134 5. 52481 5. 799197 4. 657555 5. 075332 5. 437603 4. 614116 5. 129312 5. 694429  
2. 242535 2. 254424 2. 136453 3. 509239 2. 7016 3. 73102 2. 205998 3. 196434 3. 860232  
2. 049352 2. 958444 2. 003079 3. 048329 2. 674564 2. 400062 2. 387889 3. 049674 1. 92319  
4. 59043 4. 65308 3. 98032 4. 538961 4. 530091 5. 365071 3. 653365 4. 477976 4. 940758  
6. 18405 4. 694003 6. 67459 5. 598282 4. 480901 5. 094237 5. 736797 4. 047727 5. 840158  
5. 636401 5. 212254 5. 932029 5. 951674 5. 762537 5. 782143 5. 753843 5. 844102 7. 643744  
7. 043484 7. 720673 6. 66379 6. 815448 8. 892927 7. 263662 7. 136785 7. 474234 6. 817516  
1. 942582 1. 489302 1. 544089 2. 067579 1. 637296 1. 633217 1. 548009 1. 883431 1. 284571  
1. 666601 1. 780311 1. 191946 1. 610989 2. 530367 1. 281061 1. 707014 1. 613222 1. 843776  
1. 325044 1. 619135 1. 188859 1. 584749 1. 154987 1. 408895 0. 81215 1. 106714 1. 676072  
3. 985172 1. 918476 1. 363297 1. 70224 1. 880743 1. 788402 0. 850605 1. 531548 1. 10108  
1. 283961 2. 697114 1. 311222 1. 612783 1. 732827 1. 843738 1. 599614 1. 566724 1. 390089  
4. 100665 3. 635236 3. 31762 3. 303147 2. 760506 2. 806109 3. 780946 3. 53755 2. 952374  
1. 674229 2. 116428 2. 035843 2. 670159 2. 204074 2. 314915 2. 093038 1. 774199 1. 690153  
5. 585222 5. 559909 4. 966554 4. 431528 4. 276728 5. 522718 5. 592827 4. 413618 6. 661904  
4. 218959 4. 981395 3. 185224 6. 353798 3. 844502 5. 554808 5. 296126 4. 695147 4. 985603  
3. 722098 4. 701067 3. 929169 4. 616107 3. 083031 3. 943996 3. 487457 3. 849188 4. 030153  
2. 474972 1. 582457 1. 471409 2. 105896 1. 83837 1. 142639 1. 384008 1. 920035 1. 784818  
1. 531395 1. 620063 2. 041777 2. 056865 2. 233241 2. 297632 1. 907312 1. 796326 2. 588563  
1. 156878 1. 530128 1. 41051 2. 572744 1. 707015 2. 728202 2. 239239 1. 835999 3. 083678  
6. 98885 6. 629318 7. 486175 7. 258437 6. 823242 6. 874587 7. 813989 7. 02002 6. 057168  
2. 140034 1. 476735 1. 346023 1. 772648 1. 083126 1. 793711 1. 512738 2. 063699 1. 350755  
0. 59972 1. 176395 1. 616556 1. 660547 0. 783363 1. 167633 0. 427035 0. 436403 0. 848897  
6. 305542 6. 596794 6. 677489 6. 283117 6. 591521 5. 939098 6. 705194 6. 481567 6. 678304  
4. 722093 4. 200633 4. 981 3. 656882 4. 134069 4. 443994 3. 547228 3. 792359 3. 809905  
5. 460727 4. 969017 4. 846948 6. 063808 4. 311536 5. 841988 6. 246366 5. 14582 5. 3235  
6. 459834 6. 604269 6. 103471 5. 908436 6. 331081 6. 302155 6. 673269 6. 230302 6. 354033  
3. 552723 5. 456288 5. 203045 3. 15452 3. 484026 5. 76228 5. 075729 4. 886753 4. 127796  
2. 793056 3. 153152 2. 39872 2. 682706 2. 576806 3. 202277 2. 568043 2. 515409 1. 558993  
8. 148075 8. 058602 8. 11591 7. 961232 7. 854447 8. 481805 7. 932775 8. 312765 7. 930198  
5. 343329 4. 708712 4. 937711 4. 955875 6. 864665 4. 741786 5. 167257 5. 880674 3. 977683  
1. 21744 1. 298971 1. 84442 1. 231139 1. 247693 1. 816085 1. 207053 0. 799324 1. 760139  
1. 690026 3. 011263 2. 442055 2. 041859 2. 229143 2. 007566 2. 11399 2. 083601 2. 372969  
1. 546253 1. 932534 1. 93757 2. 348228 1. 721035 1. 803346 1. 895401 1. 955057 2. 352473

1. 231936 1. 742761 1. 704196 1. 075561 1. 042087 1. 120155 1. 18492 1. 031414 1. 531133  
4. 346083 3. 561319 3. 042195 2. 159962 2. 796375 2. 955964 3. 373045 3. 395618 5. 004977  
7. 519182 7. 407809 6. 385383 6. 070418 8. 03012 6. 647699 6. 677489 7. 383591 5. 107699  
4. 551696 5. 184387 4. 683731 5. 600819 4. 867565 5. 387027 4. 877328 5. 438453 5. 662243  
1. 279013 1. 088658 1. 457284 1. 722341 1. 233861 1. 742712 1. 524726 1. 194343 1. 617736  
2. 063718 2. 86891 1. 731503 1. 7578 1. 504671 1. 624086 1. 722061 2. 529756 3. 752642  
6. 692159 7. 534222 6. 928583 6. 265265 7. 706832 7. 133767 7. 12986 7. 482548 7. 460946  
1. 622373 2. 118875 1. 308148 2. 057486 1. 586576 1. 613777 1. 934246 1. 846343 1. 399799  
4. 584243 4. 508134 4. 650514 4. 407322 4. 341872 4. 954063 5. 051423 4. 014991 6. 147385  
5. 963845 7. 490454 6. 700876 7. 234532 6. 793058 6. 75379 6. 840286 7. 025986 6. 175805  
4. 089492 3. 29886 4. 10071 3. 860348 3. 414871 3. 549123 3. 794559 3. 790298 3. 622823  
3. 898792 4. 186825 3. 388918 4. 066405 3. 614043 3. 970935 3. 667952 4. 671705 2. 911174  
2. 446419 2. 39697 2. 474305 2. 874434 2. 30029 2. 733084 3. 133331 2. 681999 3. 483433  
5. 155527 4. 790931 4. 894219 4. 185613 5. 178203 4. 510038 4. 755208 5. 207763 4. 957826  
0. 890418 1. 392705 0. 738012 1. 644073 1. 30012 0. 999973 0. 859182 0. 653118 1. 036625  
5. 737061 5. 237667 6. 454042 6. 808414 5. 940353 5. 967738 5. 664627 6. 032491 4. 006099  
6. 264744 6. 812758 6. 68353 6. 472655 6. 073464 6. 037299 6. 754876 6. 57165 5. 538322  
5. 303458 6. 643436 6. 777654 6. 236001 5. 921883 4. 181199 5. 884408 7. 02079 5. 673234  
4. 946731 3. 359511 5. 588249 3. 401729 5. 106436 3. 060363 4. 589301 1. 847573 4. 959939  
6. 610261 6. 909143 7. 250863 7. 375128 6. 802651 6. 813909 6. 657181 7. 179201 6. 263376  
4. 080123 2. 883064 2. 826275 2. 695361 2. 680241 2. 890882 3. 310899 2. 699198 3. 42114  
2. 491043 1. 604811 1. 89583 2. 162696 1. 964693 1. 891398 1. 818148 2. 379312 1. 720744  
5. 599008 4. 809354 5. 612213 5. 84682 5. 123952 5. 18188 5. 308557 5. 060375 5. 010899  
3. 783815 2. 967318 2. 452266 3. 187911 4. 374687 3. 146073 3. 167638 3. 03775 1. 997937  
5. 976652 5. 672602 5. 597968 6. 283361 5. 656331 5. 929694 6. 276718 5. 940006 5. 414892  
4. 680695 4. 537892 4. 273141 3. 519044 4. 081887 3. 661318 4. 562982 5. 148087 5. 033356  
1. 52418 2. 104232 1. 69456 2. 398634 2. 029583 1. 842047 1. 506679 1. 408665 1. 121425  
4. 04467 3. 513259 3. 20587 4. 653365 3. 989009 4. 923881 4. 738837 3. 971209 4. 718379  
6. 438669 6. 446392 5. 914152 5. 833911 4. 54205 6. 705677 5. 542363 5. 536855 5. 006548  
0. 998925 0. 848664 1. 063679 1. 25696 1. 079908 1. 180562 0. 778388 1. 044238 1. 341316  
5. 127192 4. 998682 5. 23037 5. 927504 5. 087577 5. 400982 5. 295275 5. 498098 5. 213546  
1. 571659 1. 658001 1. 040104 0. 992393 1. 396769 1. 346463 1. 051053 1. 237182 0. 912004  
2. 817569 3. 186873 3. 232188 2. 458927 3. 151799 3. 062591 2. 481932 2. 718995 3. 342494  
2. 272491 1. 729511 2. 682251 2. 004694 1. 670042 2. 042949 2. 023114 2. 24256 1. 968283  
6. 041401 5. 267779 5. 600061 6. 795781 5. 123169 5. 173794 6. 0032 4. 93633 6. 355742  
1. 407813 1. 32007 0. 960522 1. 686682 1. 505509 2. 670639 1. 342115 1. 708695 2. 439211  
3. 498588 2. 034268 2. 625217 3. 091394 2. 357662 3. 395614 2. 47606 2. 507548 2. 575801  
1. 748756 2. 256562 1. 298431 3. 088344 1. 405064 1. 330407 1. 655509 1. 9313 1. 793303  
4. 828607 4. 310963 4. 369212 5. 29735 4. 33083 5. 318447 4. 292073 4. 493211 4. 62134  
4. 92378 5. 748809 5. 467552 4. 362581 5. 109618 5. 859154 5. 488099 5. 813098 5. 679283  
1. 724249 1. 410208 1. 269819 1. 828542 1. 391006 1. 438062 1. 159904 1. 488196 1. 659726  
1. 451255 1. 22356 1. 123959 1. 443639 1. 588224 1. 147023 1. 32693 1. 422021 1. 713102  
1. 972927 2. 676526 1. 673781 2. 848967 2. 044003 2. 396164 2. 270156 1. 841261 2. 18982  
10. 21258 9. 581341 10. 07544 9. 550955 9. 435647 9. 906484 9. 583208 9. 623345 10. 37976  
4. 229755 2. 896025 4. 484646 4. 691239 5. 583896 5. 424503 4. 331522 5. 407404 4. 633338  
0. 96236 0. 910403 1. 052356 0. 872163 1. 172631 1. 747438 1. 153308 1. 211166 1. 126896  
3. 787211 2. 977226 3. 61322 2. 340363 4. 076411 3. 012743 3. 818138 3. 54829 2. 747934  
2. 51857 1. 755625 2. 414702 3. 106553 1. 82093 3. 019953 2. 431328 2. 112889 2. 185475  
6. 941249 7. 015091 7. 186992 5. 698087 7. 540904 7. 094941 8. 022278 7. 140543 7. 003631  
5. 2008 5. 569714 5. 294906 5. 883858 6. 158323 4. 956101 5. 617034 5. 822193 5. 18245  
4. 415919 4. 148489 4. 753281 3. 531796 4. 415218 3. 797707 3. 894482 4. 728219 4. 655882

1. 043853 0. 695838 0. 686027 0. 824203 1. 096538 1. 092893 1. 208802 1. 080532 0. 71633  
6. 356102 4. 487782 5. 632276 1. 964521 2. 193988 6. 752525 5. 810661 5. 664355 5. 987699  
1. 222086 1. 014011 1. 649474 1. 655232 0. 616459 1. 804058 1. 455853 1. 068669 1. 464126  
5. 74925 5. 862959 5. 763586 5. 672699 5. 717829 5. 841889 5. 593355 5. 884859 6. 475144  
5. 666996 6. 023635 6. 608656 4. 989018 5. 731859 5. 864013 5. 911663 6. 095039 5. 864601  
1. 825274 1. 611458 2. 192229 3. 45321 2. 196778 2. 772311 2. 260662 2. 322529 2. 809659  
5. 634838 5. 661435 5. 352637 5. 631687 5. 613254 5. 486355 5. 398811 4. 873042 5. 606308  
4. 483631 4. 252204 4. 802609 4. 206527 3. 588581 4. 109947 4. 156397 4. 534673 3. 920164  
4. 90823 3. 81857 3. 969975 4. 418793 4. 649937 5. 213146 4. 583192 3. 739188 6. 310315  
6. 526436 6. 005466 6. 372824 6. 058581 6. 336202 6. 078074 6. 586467 5. 924203 6. 400626  
2. 797716 3. 465072 3. 137691 2. 925418 2. 423994 3. 226754 2. 390988 2. 111523 2. 506826  
2. 012557 2. 198545 2. 229659 2. 47121 2. 52906 2. 386336 2. 174394 2. 618083 2. 200149  
4. 227766 3. 873126 4. 354993 3. 900224 2. 900777 2. 993922 3. 645021 3. 512889 3. 349576  
7. 581941 6. 89122 7. 133098 6. 693936 7. 256719 7. 440784 7. 790225 7. 136628 6. 814134  
5. 120569 4. 246319 4. 610391 3. 510149 4. 746784 3. 464948 4. 718533 4. 766776 4. 228364  
1. 562929 2. 701528 3. 247962 2. 209358 2. 189563 2. 039592 1. 269182 1. 514843 1. 588967  
2. 970212 3. 086584 3. 269045 2. 519649 2. 732152 2. 793655 2. 391665 2. 336786 2. 286157  
4. 401872 4. 77624 5. 111318 4. 721496 5. 153157 3. 274754 4. 417814 3. 890075 3. 677757  
6. 036196 6. 159945 6. 167759 5. 682884 6. 534611 6. 06293 5. 433962 6. 768699 5. 195493  
5. 26352 5. 615457 4. 834233 4. 949362 4. 632224 4. 811526 5. 260523 5. 579397 4. 849479  
1. 987532 2. 298383 2. 133712 2. 563429 2. 307818 2. 279393 2. 466178 2. 378063 3. 79174  
1. 493868 1. 14672 1. 090556 1. 541921 1. 629139 1. 36517 1. 560985 1. 093027 1. 134481  
1. 065864 2. 152892 2. 639576 0. 829903 1. 755019 3. 481411 2. 745106 1. 362113 2. 136256  
6. 846598 6. 990788 6. 313651 5. 776962 7. 320806 6. 06219 6. 120602 6. 489011 2. 981645  
4. 335445 4. 022528 3. 988965 4. 832016 4. 567277 3. 743014 4. 054309 3. 710418 3. 877696  
2. 812197 0. 974653 1. 727725 1. 763345 1. 229625 1. 79614 1. 709693 1. 098787 1. 67839  
1. 192408 1. 639897 1. 876776 2. 349313 1. 32433 2. 03619 2. 028296 1. 971652 1. 291379  
3. 507062 2. 724239 4. 164869 3. 032004 3. 548005 0. 575572 4. 393702 3. 094395 2. 791387  
3. 565737 3. 224118 3. 960358 3. 174055 3. 992022 4. 13365 3. 068405 3. 383224 3. 491584  
1. 205704 1. 664785 1. 482922 2. 243591 1. 323396 1. 506827 1. 363889 1. 488296 1. 819951  
7. 41597 7. 204041 7. 625867 7. 575069 8. 160876 7. 758271 7. 612744 7. 986977 7. 87366  
6. 185774 6. 158707 5. 992732 5. 504654 6. 036415 5. 906296 6. 308045 5. 175071 5. 624578  
0. 897951 1. 209882 1. 015619 1. 338579 0. 880796 2. 192384 1. 65012 0. 954377 1. 714626  
1. 453805 1. 809661 1. 861023 2. 304821 1. 951989 1. 509951 2. 745726 1. 796867 1. 683585  
0. 975889 1. 790402 2. 108794 1. 653271 1. 165096 2. 034694 1. 376502 1. 342576 1. 660794  
1. 090232 1. 594411 1. 15836 1. 84279 1. 206213 1. 189927 1. 559505 1. 021579 1. 223673  
3. 231049 3. 665728 2. 835952 2. 967834 4. 336069 3. 000633 2. 966648 3. 301122 3. 46209  
5. 144319 4. 725976 4. 597705 3. 490058 4. 993866 4. 516403 4. 216324 5. 120005 5. 384853  
6. 287472 6. 692322 7. 235804 7. 37186 6. 34639 6. 169763 6. 58421 6. 901379 6. 431629  
1. 712813 1. 449159 3. 195039 1. 077871 1. 34164 1. 158208 2. 862663 1. 755308 1. 113773  
2. 068474 2. 655094 2. 80546 2. 03365 2. 743189 2. 199162 2. 438572 2. 603715 2. 50524  
2. 770755 2. 355878 1. 957138 2. 082923 2. 319268 2. 545194 2. 023537 2. 257636 3. 417988  
6. 842536 6. 813183 6. 866525 7. 477227 5. 772999 7. 399183 6. 561349 7. 040739 6. 74032  
2. 214854 1. 622466 1. 918974 1. 975454 1. 767356 1. 714792 1. 74679 1. 670898 1. 864329  
7. 149197 6. 795613 6. 488602 6. 130042 6. 712743 6. 66321 6. 62381 6. 64151 6. 81551  
5. 307051 5. 362945 5. 705873 6. 643297 6. 09505 4. 963318 4. 990645 5. 464004 5. 484985  
2. 033602 2. 086726 2. 644439 2. 683209 2. 461057 1. 522173 1. 823011 1. 70495 2. 148325  
2. 038256 1. 138766 1. 330941 1. 764176 1. 31009 1. 138105 1. 749795 1. 440355 1. 674217  
3. 239856 3. 63357 3. 534958 4. 050912 3. 630502 3. 568561 3. 795565 3. 132084 3. 344764  
2. 271441 0. 898074 1. 182327 1. 697221 1. 588884 1. 441359 0. 97573 1. 907185 1. 611549  
1. 904261 1. 678182 2. 125863 2. 228664 1. 914429 1. 935297 1. 812174 2. 187881 2. 609232

1. 67618 2. 102747 1. 896954 1. 765896 2. 8343 1. 382771 3. 274076 1. 820686 3. 309964  
1. 447252 2. 258347 1. 874313 2. 949553 1. 787072 1. 597158 2. 080907 2. 075515 2. 364899  
1. 096526 1. 375727 2. 059993 1. 387445 1. 366629 2. 127887 1. 184371 1. 590318 1. 396622  
1. 421186 1. 51548 2. 015069 1. 909864 1. 51548 1. 610254 1. 51548 1. 510107 1. 388659  
2. 469796 2. 736735 2. 647105 2. 872648 2. 08833 3. 043796 2. 319267 1. 879057 2. 640858  
6. 105043 5. 445454 5. 282959 5. 696506 5. 940521 5. 824432 5. 309184 5. 862826 4. 126309  
1. 941097 1. 409251 1. 683816 2. 16656 1. 851709 1. 38281 1. 426666 2. 002881 1. 429525  
6. 296313 7. 051587 6. 95249 6. 796713 6. 117381 6. 351628 7. 095978 7. 389028 6. 332507  
1. 446797 1. 286959 1. 947591 2. 553184 1. 350668 2. 071102 1. 376654 2. 711838 1. 822097  
1. 460437 1. 171697 1. 263263 1. 592586 1. 26543 1. 386295 1. 06671 1. 561992 1. 560695  
5. 802018 5. 154392 5. 843898 5. 791907 5. 917114 5. 82964 6. 106326 5. 432418 5. 79647  
2. 236454 4. 471408 5. 707727 3. 435131 1. 498038 1. 86333 3. 757783 5. 122002 3. 613564  
1. 789979 1. 4211 1. 775599 1. 986344 1. 166049 1. 81231 2. 002294 1. 382642 2. 355013  
7. 312447 6. 838269 7. 076334 6. 556761 7. 024422 7. 091289 6. 735998 7. 226396 7. 549198  
7. 357851 7. 285528 8. 508121 7. 406783 5. 859685 5. 915123 7. 467972 6. 711863 5. 931951  
7. 658953 7. 637486 7. 449009 7. 468787 7. 620893 7. 350952 7. 990417 7. 936164 6. 673368  
6. 912214 6. 933057 6. 785379 7. 342734 7. 207754 6. 535439 6. 598615 6. 819349 6. 267883  
1. 765654 2. 329371 2. 02412 1. 135943 1. 875905 3. 204195 1. 273561 1. 699802 2. 043867  
1. 551674 1. 585054 1. 472662 1. 931874 1. 117316 0. 937161 1. 448294 1. 534666 1. 764123  
2. 475728 2. 341286 1. 789285 1. 907069 2. 181892 3. 292923 2. 456702 2. 406549 3. 608305  
0. 902823 0. 791696 1. 332256 1. 389792 1. 629679 1. 372514 1. 026383 1. 082717 1. 282192  
4. 85515 4. 723881 4. 117386 4. 227663 4. 338911 4. 54005 4. 434703 4. 643585 4. 810873  
2. 011064 1. 390009 1. 153941 1. 829831 2. 226247 1. 570741 1. 55931 1. 346362 1. 821065  
1. 015487 1. 182655 1. 727121 1. 708464 1. 049961 0. 626472 1. 097266 0. 966882 1. 231263  
2. 900411 2. 856315 3. 477156 4. 245807 2. 382119 3. 738008 3. 224852 4. 412086 3. 05442  
3. 815841 1. 369668 2. 688438 2. 960299 2. 848195 2. 289054 2. 495017 3. 174281 1. 967704  
2. 978891 2. 865924 3. 336075 2. 741241 3. 273855 3. 773882 2. 18709 1. 663477 3. 811406  
7. 298321 7. 348148 7. 648302 7. 551714 7. 193993 7. 183892 7. 611976 7. 396713 6. 084365  
2. 025346 2. 332875 2. 716073 2. 228274 2. 762735 3. 061936 2. 236414 1. 889201 2. 544476  
4. 490507 4. 409558 4. 313168 5. 227271 3. 466858 4. 446889 4. 521712 3. 811144 4. 964688  
2. 224551 2. 020214 2. 081128 1. 847156 2. 204211 2. 123596 1. 872503 2. 136251 2. 577216  
5. 155205 5. 143137 5. 075817 4. 437915 4. 873174 4. 987096 5. 134512 5. 2901 3. 764236  
5. 124755 4. 63784 4. 559608 5. 146719 4. 193852 4. 884188 4. 796314 5. 219788 4. 123765  
2. 13338 2. 145386 2. 438577 2. 311017 1. 719004 1. 547288 2. 145386 2. 282413 2. 034068  
2. 643599 2. 019237 3. 098132 2. 923519 2. 710016 2. 692775 2. 317985 2. 579574 2. 275933  
3. 349049 4. 03768 4. 621926 3. 788558 4. 732152 4. 448762 4. 102762 3. 474388 2. 794558  
3. 679885 2. 883727 3. 408516 3. 493144 2. 712338 3. 993912 3. 864999 2. 918515 3. 846078  
3. 188197 2. 049293 2. 105155 2. 818791 2. 311291 3. 868609 2. 765175 1. 703542 2. 516389  
1. 786645 0. 861388 0. 802169 1. 118868 1. 356396 1. 80017 1. 778261 1. 114945 1. 874837  
3. 323156 2. 828562 4. 992405 2. 500535 3. 384564 3. 419605 3. 537864 4. 96737 4. 502708  
4. 603219 5. 200594 5. 81652 4. 765777 5. 341185 4. 688751 5. 996548 5. 145497 5. 397244  
1. 3046 1. 402394 1. 231391 1. 895487 0. 655503 0. 703791 0. 960916 1. 020238 1. 018404  
5. 436909 0. 741742 1. 780647 0. 718515 1. 943193 5. 57106 4. 194965 1. 047155 2. 94771  
1. 522027 0. 984558 1. 791945 1. 53049 1. 315658 1. 491395 1. 697422 1. 813682 0. 774558  
0. 747834 0. 518224 2. 961461 2. 83682 0. 670924 0. 951411 0. 644988 1. 040643 0. 842891  
0. 739023 1. 385657 1. 65932 1. 423092 1. 41534 2. 246135 1. 120066 1. 034914 2. 156686  
2. 42138 2. 543197 2. 410863 1. 888324 1. 597198 1. 706467 2. 657223 2. 566381 2. 317716  
1. 022532 2. 178305 0. 978224 1. 014545 1. 054822 1. 966333 1. 493419 1. 170051 1. 630581  
3. 032745 1. 739004 2. 365735 3. 455926 2. 236959 2. 838738 2. 284463 2. 02326 2. 634965  
3. 099439 3. 375249 3. 653547 4. 396407 2. 479422 1. 632431 3. 640468 2. 681454 3. 181495  
5. 010176 5. 113073 5. 358175 3. 754122 5. 06026 4. 654886 5. 066977 4. 711426 3. 99703



2. 89384 1. 948795 1. 691365 2. 141639 2. 261936 1. 406136 2. 003365 3. 064495 1. 860697  
5. 408995 6. 287549 5. 237314 5. 881509 5. 245902 5. 113039 5. 037432 5. 039017 4. 331653  
1. 673099 1. 992983 1. 439255 3. 044621 1. 596806 2. 114448 2. 411267 1. 622132 1. 964384  
3. 977922 3. 420439 3. 884527 4. 424378 4. 281656 4. 026081 3. 416991 3. 490969 3. 183176  
1. 740606 2. 365646 1. 963282 2. 256389 1. 566812 1. 059888 1. 257411 1. 559471 2. 221614  
4. 981801 4. 92316 4. 330875 7. 626581 4. 513581 4. 6272 4. 605448 6. 154482 4. 93443  
1. 427854 1. 675423 2. 60764 2. 115224 3. 281624 2. 334222 1. 987964 1. 76483 1. 516867  
1. 013921 1. 329266 0. 984697 1. 679605 0. 882254 1. 204834 1. 78793 1. 302057 1. 244417  
4. 909891 5. 102987 5. 274653 5. 300749 5. 448841 6. 377339 5. 10119 5. 32274 3. 714582  
1. 114219 2. 215012 1. 645163 1. 220735 1. 479567 2. 355772 1. 472738 0. 96687 2. 831801  
2. 144826 2. 314281 1. 395678 3. 097615 3. 677176 2. 129399 2. 213421 1. 81661 2. 702117  
5. 542854 4. 980172 4. 437055 5. 88755 5. 232365 6. 442076 5. 413184 5. 231281 6. 092596  
1. 601113 1. 321243 1. 455575 1. 368841 1. 437724 2. 053828 1. 217234 0. 715074 1. 217088  
4. 452152 4. 004966 4. 183626 3. 326758 3. 98535 3. 959697 4. 635558 4. 44074 4. 257587  
1. 527412 1. 005661 1. 078414 1. 403997 1. 821072 1. 488179 1. 214598 1. 233415 1. 233415  
2. 791721 4. 148958 4. 0298 5. 526767 4. 734298 2. 490456 4. 26334 4. 647934 4. 471798  
1. 145479 0. 952062 1. 550457 1. 541853 1. 361268 1. 317123 1. 464712 0. 994691 1. 431556  
2. 866776 2. 714316 3. 864656 3. 411992 2. 943304 3. 128615 3. 844964 3. 827489 3. 59337  
3. 07676 2. 819072 3. 797412 3. 345689 3. 095997 3. 509212 2. 313628 2. 032576 1. 899153  
5. 655816 5. 641846 5. 668657 5. 745277 5. 090704 5. 455924 5. 817599 5. 821005 6. 550842  
1. 822535 1. 257044 1. 541924 2. 129795 1. 777423 1. 600849 1. 361433 2. 33734 1. 802428  
4. 914114 3. 959015 4. 768012 4. 069392 4. 370693 4. 208934 4. 971567 4. 513571 4. 422236  
6. 193229 6. 614351 6. 312873 6. 941448 6. 683432 6. 087731 6. 259693 6. 615892 6. 278547  
1. 156644 1. 635746 1. 439422 1. 046402 1. 712326 2. 156408 1. 701613 1. 514297 1. 33764  
4. 150194 1. 014545 2. 827379 1. 779178 1. 923072 2. 559714 1. 198164 2. 514844 1. 222161  
1. 214679 1. 030901 1. 123552 1. 753859 0. 887967 1. 174944 1. 660082 1. 256052 1. 186266  
1. 493872 1. 266783 1. 824331 2. 110682 1. 321946 0. 984761 2. 558435 0. 955725 1. 003703  
6. 510375 5. 960312 6. 083515 5. 252466 6. 076044 6. 740528 6. 551546 5. 669693 6. 755733  
2. 156507 4. 436932 3. 320906 1. 994376 3. 524634 3. 212414 3. 621608 2. 362197 2. 308797  
1. 428954 1. 111569 1. 38847 1. 81159 1. 294684 1. 419336 1. 326916 1. 325798 1. 575039  
4. 868044 2. 112269 3. 046176 2. 841844 2. 514047 3. 837775 2. 787606 4. 333076 4. 652401  
1. 778491 1. 737272 2. 209136 2. 235742 1. 976118 2. 801353 1. 317241 1. 931715 1. 813197  
1. 270358 2. 477308 1. 789799 3. 455093 1. 98962 1. 42608 1. 955828 2. 122911 1. 594856  
1. 213297 1. 36999 1. 244493 1. 860551 0. 999951 1. 783158 1. 442327 1. 604319 1. 338917  
8. 397776 7. 942834 8. 410242 8. 252076 9. 016424 8. 241677 6. 997959 8. 48338 8. 448837  
5. 36181 5. 574128 5. 285611 6. 085402 5. 423121 5. 08101 5. 696891 5. 66065 5. 183432  
2. 148871 2. 676507 1. 757717 2. 173883 2. 960246 1. 545266 1. 676351 2. 284098 2. 559253  
4. 200661 3. 84334 3. 807664 3. 440396 3. 947221 4. 923594 3. 019951 4. 147232 3. 673839  
6. 585106 5. 296177 7. 188936 3. 622548 5. 704893 7. 612999 5. 322513 6. 312017 8. 274707  
7. 047786 6. 932111 5. 76167 5. 034293 6. 636153 7. 364608 5. 2645 5. 779356 5. 802803  
1. 014498 1. 789661 1. 423894 1. 604118 1. 482609 1. 929681 1. 502503 1. 623861 2. 109001  
1. 716053 2. 142384 1. 501373 1. 29911 1. 20933 2. 768418 1. 83347 1. 986512 2. 21823  
1. 12664 1. 296003 1. 495312 1. 786033 1. 600603 2. 073273 1. 853821 1. 390329 1. 756788  
2. 201147 2. 417725 2. 595891 2. 447619 2. 368827 2. 107758 2. 056379 2. 416389 1. 906795  
2. 498701 2. 202288 2. 603528 2. 811327 2. 342901 2. 175311 2. 14845 1. 97009 2. 059707  
2. 276673 2. 71304 3. 324886 2. 959294 3. 086591 2. 313812 2. 713445 2. 412326 2. 383793  
3. 134877 3. 380692 2. 556536 3. 054989 3. 112891 3. 574238 2. 274877 3. 146412 3. 756663  
5. 602224 3. 306462 4. 863258 2. 660993 5. 07551 1. 986025 3. 113669 4. 895477 3. 488629  
1. 002554 2. 763938 0. 431525 0. 93569 1. 481693 0. 935775 0. 790823 0. 824188 0. 889942  
3. 481153 3. 528187 3. 898794 3. 597216 3. 971361 4. 057179 2. 711129 2. 949908 3. 301192  
3. 426945 3. 606116 3. 301358 2. 283269 3. 743683 2. 523303 3. 689965 3. 141248 2. 742961

2.698281 3.417015 3.471807 3.121315 3.146985 2.591293 2.851861 2.960779 3.840974  
1.385132 2.205174 1.741927 1.658579 1.282373 1.059408 1.319148 1.186754 1.083215  
5.036837 4.863172 4.896543 4.880099 5.477048 5.090486 5.805577 4.766141 6.152754  
3.848774 3.575964 4.422624 3.482523 3.142008 3.446413 3.84578 3.764846 4.79391  
4.433029 3.978284 5.51291 5.632422 4.013008 4.841959 4.731493 4.771917 4.62882  
2.550783 2.617425 2.393273 3.378868 3.128978 3.384635 2.623639 2.59706 2.326987  
1.951891 3.471071 3.456527 1.61303 2.093608 3.412717 3.401236 2.528079 4.373851  
6.575513 6.575158 6.351367 6.932175 6.55443 6.558027 6.251781 6.632208 6.184775  
2.122923 1.539568 2.257172 2.439517 1.590506 1.573998 1.242385 1.349807 1.720065  
1.590938 1.431808 2.68741 2.893801 1.87028 2.60004 1.894959 1.592833 2.11366  
0.783861 0.90785 0.212848 2.400776 2.125327 0.90138 0.514068 0.385336 2.711659  
2.941716 3.164709 3.247369 3.231704 3.354182 2.414288 3.453878 3.099877 3.793458  
6.622068 6.575578 5.792303 7.043873 6.861336 6.36914 6.429712 6.346211 6.839211  
5.972642 6.528113 6.822939 6.570482 5.408284 5.732661 6.130551 5.782236 6.086295  
2.106054 1.674519 1.824 1.998981 1.430408 1.862748 1.669396 1.849195 1.788737  
4.825228 4.437295 4.188643 2.607114 3.469889 4.489392 4.400083 4.107473 4.990472  
1.611708 1.694907 0.716809 1.647302 1.269298 1.749176 1.789324 1.7366 1.424556  
1.347344 1.491678 1.570618 2.213568 2.464112 1.849545 1.908493 1.431484 3.060464  
3.370295 4.074585 4.459376 2.998471 4.101785 3.247059 3.465562 2.699213 3.226107  
4.145454 4.649846 4.708146 4.630723 4.847728 4.453708 4.763548 4.291867 4.93038  
2.562086 2.957183 2.144212 2.967858 1.826954 1.960549 2.589318 1.955106 3.921714  
2.319982 2.03682 1.800262 1.891308 1.84604 2.173801 1.920267 2.152998 2.265895  
4.722619 4.944698 3.807254 4.613671 3.837372 5.203415 4.690923 4.035753 5.354575  
2.360199 2.728961 3.525416 3.166791 2.449504 3.516499 3.524424 2.951649 3.670446  
1.151015 1.1223 0.732493 1.933499 1.21099 1.299986 1.352241 1.148195 1.531557  
2.43658 2.457309 2.305346 3.256383 2.931217 2.098876 2.112127 1.783962 2.815372  
1.982324 1.550913 1.631045 2.431614 2.180714 1.439949 1.876957 1.726522 2.244435  
1.250164 1.676465 1.389746 1.321424 2.165841 1.728466 2.40217 1.472461 1.329767  
2.714363 2.166321 1.443732 2.18049 2.302346 2.205937 2.945225 1.807473 3.426589  
6.083436 5.811037 5.62864 5.644528 6.32564 6.305976 6.697982 5.705269 6.16871  
2.468875 1.356158 2.370613 3.577565 2.272725 1.847916 1.837429 1.659201 2.314173  
2.828321 0.974875 0.840585 2.043447 1.176108 1.123761 1.17406 2.376491 0.966977  
3.679413 3.081223 5.584412 5.098742 4.22178 7.163452 2.658528 4.25806 4.938906  
2.386441 1.646426 2.36218 2.817513 2.744266 1.480759 1.36938 1.885631 1.05461  
5.509636 5.75113 5.581064 5.573718 5.748145 5.724181 5.729582 5.728305 5.285295  
1.706846 1.609093 1.732671 2.133977 1.813328 1.616174 1.805379 2.370431 1.903181  
2.003433 3.436963 2.097432 1.772376 1.75962 1.593884 1.810673 2.369086 2.127918  
0.984357 1.615293 1.211865 1.19784 1.096672 2.263282 1.369269 1.092497 1.356342  
1.181875 1.412735 1.522495 1.464264 0.917247 1.159628 1.269953 1.341209 1.406472  
1.27557 1.86782 1.736126 1.179628 1.17522 1.769589 1.167855 2.52357 1.243541  
3.584937 1.996397 1.997809 1.029359 1.310371 3.326881 2.208248 1.36989 2.003145  
1.718316 1.391705 1.240859 1.925783 1.921082 2.483781 1.925783 2.12614 2.249367  
1.772439 1.662112 1.213578 3.01668 1.988125 2.006855 2.098603 2.070417 2.039471  
1.252569 1.394974 1.660407 1.160273 1.372152 2.052303 1.472643 1.328814 1.242579  
1.718198 2.058666 1.757911 2.204266 1.544164 1.927527 1.510759 1.203807 1.548261  
4.531419 4.591483 4.071479 3.620744 4.031032 3.101098 3.748794 3.550088 4.169192  
4.50143 4.588229 3.563757 5.615629 3.418179 3.638145 4.248675 3.631176 4.517156  
1.933582 2.614323 1.833381 2.798454 1.637692 2.237138 2.044606 1.783686 1.770785  
4.67724 3.580629 2.915039 1.478578 2.149897 1.915482 1.82861 2.177183 3.14834  
2.002175 2.566333 1.61197 2.027119 1.49062 1.953846 1.614741 1.820334 1.563161  
2.920126 1.831749 2.263445 2.747533 3.237819 0.517917 2.253419 1.849123 2.98241

5.103643 5.398167 5.68633 5.902771 5.9432 7.416665 5.196583 4.737592 5.27472  
4.825548 4.763017 4.133062 5.906696 4.120331 3.268329 4.291702 4.391227 4.10503  
5.519447 6.166075 5.885701 5.465566 5.801828 5.928214 6.244049 6.009591 4.861733  
2.572811 3.541498 2.544071 2.908794 3.045208 3.458995 3.385459 3.314264 1.963067  
2.908564 2.17813 2.783539 3.051909 3.86307 3.426269 2.771674 2.870794 2.54246  
1.543982 1.799193 2.397221 1.932305 1.587894 1.829826 1.58675 1.562219 1.643813  
1.18351 1.377469 1.175533 3.158719 0.58101 1.311906 1.032455 1.450306 1.273706  
4.210907 4.652032 3.54129 4.060188 4.15587 4.767109 4.468686 4.132969 5.011208  
4.173134 2.921916 2.114344 3.025934 3.588912 5.796277 2.564164 2.222449 2.15702  
1.36487 1.235973 1.405555 1.683653 1.354939 1.124748 1.217316 0.884938 1.216596  
1.590949 1.540545 2.329069 2.230245 1.522254 2.242659 1.864295 1.470852 1.307145  
2.166477 2.187592 3.265014 1.874689 2.563712 2.01531 3.619758 3.111766 2.774316  
5.408285 5.184194 5.541588 5.114204 4.924621 4.721321 5.445957 4.103361 4.3667  
3.016658 1.971886 2.536898 2.40675 2.670857 2.730037 2.782554 2.754827 4.032574  
6.350531 6.233773 6.199242 5.719367 7.110619 5.798769 7.126752 6.322439 6.468619  
2.010358 1.237321 1.674594 2.179582 1.722668 1.271084 1.694884 1.469497 2.078029  
7.036799 4.688448 5.798231 5.99557 6.037794 7.502212 6.149686 6.803841 7.636951  
0.936059 1.637115 1.104656 2.687331 0.999391 1.346392 0.888233 1.277098 1.141391  
6.371286 6.713513 5.97279 5.90505 6.285495 5.561205 6.857253 6.411171 6.715996  
1.866051 2.035866 2.060794 2.776216 2.086027 1.655441 2.007445 1.6294 2.440215  
1.503421 1.573249 1.710141 2.443611 1.61428 1.930051 1.741411 1.534995 2.031867  
1.454802 1.967901 1.423263 2.980168 2.784471 2.517155 1.597847 1.562719 1.76478  
1.492399 1.414555 1.464733 1.603408 2.303981 1.177296 1.554618 1.635665 2.042826  
8.973802 8.666873 8.747552 8.442421 9.015529 8.872034 8.762967 8.771638 9.189379  
1.718864 2.847977 2.284492 1.575157 2.308794 1.346014 1.342196 1.097111 2.393522  
1.024387 1.343133 1.211992 2.409001 1.729871 1.523098 1.161464 1.429712 1.564021  
8.732606 8.58076 8.858694 8.010784 8.308599 8.287243 8.498787 8.490673 8.572069  
1.600508 4.318981 1.690733 2.172037 2.206599 1.504116 1.186657 1.57419 1.615841  
3.423887 2.390041 2.922571 3.194503 4.117594 4.468926 4.466956 3.150993 3.885666  
2.202366 1.889868 2.0552 3.337517 4.375263 1.483705 2.769841 2.899362 1.924199  
0.95564 1.924288 1.510843 1.552333 1.86829 1.316278 0.922558 0.7405 1.485491  
10.30563 10.37444 10.1267 10.24953 10.1716 10.2476 10.253 10.35045 10.12087  
6.967605 7.075444 6.919079 6.564858 7.001735 6.732304 7.107456 6.724761 6.948179  
1.261938 0.919907 1.225789 1.915653 1.019851 1.415899 0.950672 1.273402 0.956592  
2.199692 1.569559 1.431549 1.321546 2.175871 1.643059 1.332446 1.617259 1.718033  
1.552852 1.980054 1.287891 1.165761 1.742396 0.99579 1.058753 1.711646 1.662987  
8.667091 9.180127 9.227888 9.468422 9.330899 9.219603 9.152655 9.029791 8.707412  
4.909051 5.717821 5.898627 3.585852 5.540908 6.502876 5.401249 6.183383 5.292112  
5.760468 6.333843 6.703111 6.228942 6.210084 5.890291 6.471465 6.105039 4.517901  
3.013907 3.346258 2.957464 2.259044 2.984555 2.887265 2.275255 2.613578 3.028838  
3.259001 4.192834 4.228414 4.256368 3.368258 3.401187 3.503905 3.286362 3.181553  
1.40904 1.548159 1.664547 2.184532 1.430965 1.233334 1.455511 1.779354 1.551751  
5.107658 5.038096 4.862266 5.821745 5.449183 5.594576 5.825432 4.98359 6.555909  
1.516895 2.032941 1.675029 1.817634 1.707691 1.400461 1.499489 1.509974 1.469576  
1.898556 1.22076 1.82002 2.076667 2.09828 2.09828 2.573234 2.054118 2.013493  
1.083924 0.905007 1.675451 1.689892 1.495821 1.116562 1.791394 1.018946 1.42025  
3.73069 4.122688 3.958204 3.635645 4.059677 3.878292 4.614245 3.995655 4.299728  
4.697528 5.26762 5.097163 3.783171 4.443039 4.886416 4.864003 4.433617 5.391689  
3.215794 3.619332 3.263165 3.89208 3.477403 2.947319 4.687241 3.242706 3.853798  
2.913961 3.323802 2.341121 2.498539 3.313531 3.079372 2.774682 3.204386 2.541886  
2.587997 2.855335 2.973212 3.460873 2.685893 3.258997 3.038941 2.680766 2.699872

6. 216125 6. 136611 6. 50827 5. 598421 6. 210202 5. 896762 6. 041327 6. 143575 5. 408356  
1. 435601 1. 156542 1. 59825 1. 738788 1. 292267 1. 763737 1. 046872 1. 141591 1. 416765  
6. 366423 3. 629949 5. 202 3. 829321 3. 781018 5. 824366 4. 997537 4. 948619 5. 432097  
1. 57536 2. 257599 1. 541857 2. 35752 1. 390881 1. 635213 1. 738841 1. 315385 2. 378817  
2. 556353 2. 81769 2. 517965 3. 452354 3. 691463 2. 220006 2. 62157 2. 89232 1. 88062  
1. 300111 1. 588383 2. 793971 2. 051838 1. 72084 2. 492674 1. 52732 1. 365137 1. 611128  
3. 203198 3. 257066 3. 152102 2. 906104 3. 001965 2. 089856 2. 397496 3. 484788 2. 489396  
5. 411191 5. 215043 5. 465377 5. 498455 5. 247996 5. 07458 5. 361431 5. 121861 4. 522773  
7. 775797 7. 870151 7. 677674 7. 416406 7. 690127 7. 463547 7. 528491 8. 083442 7. 170942  
2. 09987 2. 547521 1. 83192 4. 218692 2. 654288 1. 385086 2. 224788 2. 450719 2. 756483  
2. 749432 2. 18249 1. 520895 2. 5799 2. 018711 2. 866679 2. 760354 2. 08998 2. 320971  
2. 563014 2. 910905 2. 193085 3. 336449 1. 923269 3. 134688 2. 278925 2. 020923 2. 432879  
7. 72948 7. 208733 7. 034069 7. 146733 7. 044433 7. 125509 6. 954317 6. 666828 8. 057284  
1. 353172 1. 934156 1. 437142 1. 35935 1. 377429 1. 370455 1. 681012 1. 427401 1. 730967  
3. 144342 2. 166331 2. 872547 2. 009256 2. 723343 3. 289846 2. 647666 2. 248745 2. 213814  
3. 451777 3. 505045 3. 933725 3. 730846 3. 687152 3. 533793 3. 99144 3. 420676 3. 185582  
4. 192002 4. 255092 4. 140459 2. 316886 3. 238849 3. 141603 3. 733335 3. 617856 3. 546762  
1. 801238 1. 424576 1. 580963 1. 570801 1. 399078 1. 746645 2. 310227 1. 78559 2. 888431  
2. 114583 1. 876355 3. 423779 3. 739325 2. 097623 1. 832063 2. 387342 2. 414244 3. 453603  
1. 948582 1. 833204 1. 519789 1. 528291 1. 60141 1. 281218 1. 482606 1. 920906 1. 330657  
1. 890686 1. 134182 1. 335121 1. 689366 1. 631141 1. 426552 1. 452622 1. 493878 1. 423924  
4. 401947 5. 334429 4. 275692 4. 998707 4. 959133 3. 775819 4. 752431 4. 269543 4. 882837  
7. 786213 7. 776032 7. 337109 6. 836338 7. 356312 6. 885436 7. 633623 7. 627949 7. 958891  
2. 030177 1. 773466 2. 10729 2. 054204 2. 390861 2. 63089 3. 149726 4. 299886 2. 773032  
5. 648459 5. 412029 5. 732894 5. 399184 5. 705026 4. 561822 5. 295032 5. 472371 5. 138239  
1. 678655 1. 782261 1. 564923 2. 567525 1. 23445 1. 413936 1. 554692 1. 63881 1. 145124  
7. 254575 7. 012529 7. 07263 7. 919135 7. 414708 6. 846869 7. 703197 7. 481964 6. 389189  
2. 743695 2. 819352 2. 6412 3. 101108 2. 526109 2. 294247 2. 237381 2. 485302 2. 259293  
2. 378706 2. 276688 3. 060544 1. 801473 2. 20468 3. 153663 3. 003778 2. 574715 2. 732795  
5. 440132 4. 651234 4. 066043 4. 42827 4. 079718 5. 019775 5. 083982 3. 821447 4. 536567  
1. 420883 1. 834445 1. 423125 1. 403817 1. 291074 1. 66261 1. 402611 1. 687779 1. 708088  
1. 795441 2. 689327 3. 002561 1. 538165 2. 661106 2. 367525 3. 08941 2. 709168 2. 95682  
3. 366774 3. 736109 4. 02711 4. 063555 3. 854691 3. 447619 3. 894204 3. 689651 3. 522557  
1. 836401 1. 21196 2. 352521 1. 779456 1. 75022 2. 319918 2. 145818 1. 831692 2. 140113  
3. 044264 3. 223507 2. 415569 3. 285297 2. 62079 2. 413139 2. 637214 2. 548664 2. 18528  
6. 7373 6. 540392 6. 444981 6. 39272 6. 849937 6. 436654 6. 384113 6. 642983 5. 770535  
4. 955127 4. 583589 5. 027581 4. 852261 4. 729541 4. 566347 4. 60819 4. 604245 4. 390176  
1. 643321 1. 784023 1. 483469 1. 711967 1. 96504 1. 657829 1. 955357 1. 664971 1. 314295  
1. 6641 1. 689815 1. 279864 1. 62436 1. 540898 2. 095407 1. 93386 1. 914285 2. 47383  
1. 868425 2. 164895 3. 009431 2. 134393 1. 94664 1. 787932 1. 447465 2. 059939 2. 682796  
5. 603935 5. 473172 5. 037404 5. 050332 5. 189979 4. 489079 4. 889664 5. 150293 5. 562643  
1. 064197 1. 017077 0. 98523 1. 439552 1. 013513 1. 252211 1. 263646 1. 156842 1. 361126  
6. 989947 6. 813792 7. 015396 6. 844274 7. 323638 6. 456357 6. 853412 7. 292177 7. 108456  
1. 592395 1. 922249 1. 840215 1. 655002 1. 619696 1. 326253 2. 024668 2. 016583 1. 590175  
2. 782955 2. 469692 2. 517114 2. 324045 1. 793977 3. 763785 3. 393874 2. 929593 3. 53049  
7. 882636 7. 211326 7. 533625 8. 055219 8. 053569 7. 36667 7. 760503 7. 448561 7. 20171  
2. 677733 3. 201688 4. 122079 4. 057802 3. 371464 2. 983868 2. 503851 3. 070541 3. 825329  
5. 866088 5. 613194 5. 491562 6. 040007 5. 942219 6. 13533 5. 600679 5. 449567 4. 917497  
3. 046362 3. 263997 2. 938987 3. 169162 3. 046977 2. 402089 2. 93511 2. 826168 2. 134064  
3. 158008 2. 53122 1. 963204 2. 823531 2. 913045 2. 814357 3. 428369 3. 560283 2. 734988  
2. 673315 2. 917308 2. 098567 4. 109533 2. 894213 2. 945521 2. 103405 2. 875464 2. 738529

2.069884 1.939319 2.01998 2.279748 1.859557 1.593573 1.927107 1.927006 1.964442  
2.305547 2.298255 2.597484 3.570983 2.115056 2.1917 2.757719 3.267281 2.095527  
2.145156 1.827938 2.505981 1.782976 1.701714 2.241442 2.117885 2.241128 2.753508  
2.260293 2.445287 2.242539 2.427649 2.069385 2.439034 2.326383 1.974723 2.025848  
1.333887 1.266603 1.943168 2.221832 1.918093 1.3852 1.881676 1.672474 1.241942  
1.689112 1.485632 2.059876 2.713554 1.329363 1.648734 1.275464 2.320232 1.777124  
4.474996 4.958644 4.115332 3.998669 5.337308 4.289702 5.440647 4.111713 3.790273  
5.746862 6.181476 6.46857 6.032481 6.226397 5.69921 6.457297 6.696262 5.757486  
4.48737 4.520982 4.745848 4.937891 3.458486 4.447217 4.207947 4.535807 4.608672  
4.103454 4.208503 4.004443 4.419116 4.697972 3.195321 4.858109 4.197474 3.554721  
4.729655 2.875639 2.97981 2.845666 3.679647 5.073141 4.094286 3.351191 4.39252  
3.302735 1.887408 2.078479 2.431753 2.706203 2.150052 2.896229 1.377323 3.245697  
4.221133 4.926085 4.157219 2.58315 4.504046 5.318433 3.881433 4.432602 4.207256  
2.867528 1.937515 2.803559 2.419213 2.645942 3.410731 2.716146 2.941628 2.204437  
2.723815 2.638365 2.349996 3.518798 2.75881 3.134549 2.932648 3.039776 2.773527  
2.369736 3.297886 3.955389 3.72571 3.54471 3.088302 3.367736 2.884136 3.721578  
3.017088 3.739774 3.294843 3.489551 3.955441 3.306556 3.891835 2.757871 3.843643  
4.205648 3.957435 4.08055 3.306002 3.085312 4.608873 3.838664 4.186166 3.696025  
1.750304 2.071256 1.06128 0.981789 1.443397 1.61193 1.207965 1.185428 1.484917  
5.855937 5.527795 5.589826 5.467826 5.744429 5.974765 5.887567 5.652139 5.624196  
6.225175 6.815755 6.81621 6.881258 6.605255 6.54899 6.641543 6.619881 6.01352  
4.549352 4.222221 4.146846 4.330027 4.017939 3.893941 4.214218 4.505697 3.076466  
5.539613 5.481976 6.355577 5.357195 5.900079 5.45755 6.324899 5.54517 5.789988  
5.597031 5.884012 5.152744 4.978369 5.315236 5.77352 6.188876 5.518746 6.003152  
3.166877 3.780801 2.597641 2.703899 3.114849 5.068294 3.412912 4.449668 4.341461  
2.725154 1.985047 3.444499 3.452161 2.863998 3.018779 3.015033 2.371045 3.170078  
3.889225 3.113302 3.372005 4.644734 3.268784 3.142784 2.777694 2.982705 2.33657  
3.92558 3.64124 4.432961 3.726531 4.261665 3.685455 3.650116 4.609801 5.240461  
4.724028 3.597209 4.040051 4.44607 4.44607 3.89285 4.89542 4.7057 5.890541  
2.660964 1.911448 3.393024 3.630645 2.838967 3.118888 2.801369 2.747249 2.135403  
3.494579 2.438584 2.862825 4.78154 2.611228 1.556684 2.310127 1.841157 2.343707  
3.602198 4.593266 4.925031 4.672614 4.958353 4.039528 3.828872 4.020594 3.676828  
4.704224 5.090966 5.131766 4.709394 4.916381 4.618788 5.486766 6.040431 4.985726  
2.263552 2.105466 3.382283 2.336169 1.475964 2.036765 1.785936 1.794086 2.005703  
3.459535 3.62942 3.187666 3.101361 3.785289 4.288631 2.975855 2.922013 4.348176  
3.797484 2.445681 2.413751 2.886392 2.422944 1.963846 2.15129 2.158936 2.961639  
2.715065 1.564884 1.547601 2.293729 1.850726 2.404206 1.598637 2.222254 3.142944  
3.119782 4.231208 4.238343 3.453521 4.646415 1.546057 4.312188 4.141892 3.572503  
3.696142 4.102234 4.32384 1.933943 2.208119 3.209372 3.061153 2.485126 3.081579  
3.637214 2.733351 4.827134 4.518921 3.57401 3.390633 4.420495 3.265271 2.991102  
5.96349 6.09772 5.890767 5.985101 6.141094 4.743475 5.326473 5.950504 4.852755  
1.230181 1.414137 1.382816 1.631533 1.081951 2.194309 1.739482 1.206327 1.815311  
6.130603 5.872404 5.810829 6.98628 6.270254 6.168083 6.315351 6.355198 5.420979  
1.208419 1.012402 1.158665 2.907228 1.216211 2.242196 1.091317 1.269774 1.22702  
1.537698 1.49481 1.337341 2.015487 1.022016 1.668076 1.417077 1.758391 2.331537  
4.504565 3.873604 3.594677 3.664374 3.613447 4.433777 4.10285 3.848059 4.344132  
10.8084 10.54378 9.261728 9.546891 10.26393 10.6909 9.639944 10.39623 10.61244  
3.605416 3.525072 3.84894 3.196867 3.40432 3.25834 2.714255 2.70543 3.789639  
6.787233 6.957191 6.294049 6.849884 6.970888 6.727866 6.969064 6.943245 6.157372  
7.196029 7.180947 6.927232 6.190167 6.802442 6.681555 6.700536 6.821066 6.134624  
1.951792 2.303715 2.333784 1.842385 2.687895 2.861613 2.548351 1.849651 1.683836

2. 357295 2. 207742 3. 083659 2. 409618 2. 143776 2. 943745 2. 138582 3. 128605 3. 399181  
2. 93319 2. 08294 3. 325076 2. 962419 2. 436069 2. 794903 3. 276164 2. 591713 3. 369347  
3. 180817 3. 430895 2. 950278 4. 18441 3. 61012 2. 976979 3. 397126 3. 140219 2. 92678  
2. 119185 1. 20372 1. 183888 1. 731963 1. 666644 1. 213731 1. 264118 1. 271707 0. 755727  
1. 169426 1. 933678 1. 27153 2. 068078 1. 824375 1. 67232 1. 360958 1. 572272 1. 871385  
3. 115268 2. 897173 3. 020538 3. 245134 3. 250316 3. 15975 2. 503854 2. 798151 2. 970559  
2. 409008 2. 257461 2. 282693 2. 242754 1. 489153 1. 72515 3. 414262 1. 442349 1. 754781  
4. 08027 3. 770606 3. 969043 4. 150314 3. 58203 4. 876452 3. 437032 3. 418498 4. 411724  
6. 116095 6. 105354 6. 454587 5. 386563 6. 449097 5. 740373 6. 748862 5. 953572 6. 313938  
4. 877961 5. 23421 4. 517511 4. 998631 5. 026168 4. 964962 5. 216685 4. 198852 5. 998716  
2. 962249 1. 544792 1. 865412 2. 6198 1. 605082 1. 439933 1. 410072 1. 818055 2. 638406  
1. 449964 1. 850911 2. 206019 2. 439418 1. 621712 2. 221642 1. 598694 2. 456163 2. 001558  
7. 061277 7. 111912 7. 254662 6. 912611 6. 951983 6. 900065 6. 945585 7. 27041 6. 593434  
8. 538382 8. 756301 8. 610171 8. 39708 8. 651271 8. 588855 8. 656138 8. 642111 8. 36127  
2. 034769 2. 370049 2. 268446 1. 836626 1. 988839 3. 124382 2. 258315 3. 073487 3. 793867  
7. 700682 8. 543362 8. 092356 7. 811758 8. 655879 8. 351204 7. 475221 8. 175511 7. 496608  
2. 710775 2. 25503 2. 38015 3. 384152 2. 354739 2. 757973 2. 452826 1. 966906 2. 291092  
1. 179525 1. 133056 1. 361444 2. 1234 1. 70858 1. 35387 2. 369005 1. 110741 1. 200641  
2. 662903 3. 2505 3. 347135 3. 579056 3. 170112 2. 984948 3. 086948 3. 598724 2. 878447  
1. 842826 1. 840832 1. 458331 2. 513933 1. 330648 1. 785364 1. 197563 1. 375429 1. 568821  
2. 737471 2. 525528 2. 631579 2. 799872 2. 853833 2. 946452 2. 338611 3. 181932 3. 390458  
2. 828571 3. 182816 2. 175374 3. 121486 2. 847199 2. 829531 2. 741666 2. 655624 2. 832936  
7. 097954 6. 985611 7. 08919 6. 125516 6. 708968 7. 143498 7. 159755 7. 050313 6. 791279  
3. 663882 5. 217658 3. 172598 3. 494046 5. 255072 4. 226681 3. 719468 3. 584108 3. 841305  
2. 480076 1. 977697 1. 822554 2. 391388 1. 885769 1. 646667 1. 736398 1. 868064 1. 525144  
1. 056422 1. 312461 1. 744632 1. 44307 1. 474384 1. 423886 1. 908354 2. 288577 2. 414134  
4. 156409 5. 553451 5. 176423 6. 272366 4. 534815 4. 931158 5. 152253 5. 244747 5. 040457  
5. 464236 4. 028371 4. 290419 4. 900636 4. 797565 6. 251827 4. 744133 5. 827351 6. 430471  
2. 435978 2. 159023 2. 3684 2. 083833 1. 906694 2. 45856 2. 42681 1. 592628 2. 276963  
1. 839551 2. 937544 2. 046317 3. 016309 1. 822996 3. 742354 1. 946686 2. 213537 2. 115167  
1. 93162 1. 516858 2. 145781 2. 677484 2. 013082 1. 885536 1. 792169 1. 827903 0. 981448  
1. 711898 2. 476325 1. 510129 1. 78866 1. 539989 3. 587041 1. 259458 1. 729611 1. 840921  
2. 7407 1. 637972 1. 967599 2. 515003 2. 248876 2. 729482 1. 130024 1. 699758 3. 958593  
2. 023295 1. 529513 1. 735724 2. 041009 1. 083757 1. 76926 1. 554211 1. 810715 1. 911046  
2. 087565 2. 233791 2. 441817 2. 222204 2. 11306 2. 081212 2. 131739 2. 423007 2. 28588  
1. 586308 1. 483265 1. 456888 2. 025257 1. 216523 1. 300207 2. 012419 1. 483659 1. 214384  
8. 870933 9. 623026 8. 508762 8. 105705 9. 739572 8. 88023 8. 222405 9. 053251 7. 692509  
2. 853553 2. 454483 2. 055114 3. 559894 1. 940474 2. 278129 3. 124227 2. 940675 3. 692931  
2. 790928 3. 239362 3. 846484 3. 773439 3. 230092 2. 27068 3. 064614 3. 492 3. 983468  
7. 848344 8. 208026 7. 888764 7. 780649 8. 27027 8. 279798 8. 020793 8. 041946 8. 01325  
1. 56551 2. 724385 1. 613693 1. 858537 1. 886312 2. 783151 1. 438753 1. 63541 1. 893543  
2. 219924 2. 090353 1. 702783 2. 79246 1. 632663 1. 72022 1. 713503 1. 520025 2. 06694  
8. 183235 7. 956583 8. 113441 7. 298439 8. 041023 8. 119006 8. 156088 8. 172544 7. 27142  
1. 333957 1. 537472 1. 656969 1. 870516 1. 611295 1. 404944 1. 686049 2. 291088 1. 61586  
4. 10352 2. 524639 5. 090912 6. 369525 3. 150869 4. 808363 3. 417915 4. 98359 4. 000575  
2. 982192 2. 479913 2. 968619 3. 108517 2. 203379 2. 865882 2. 579139 2. 116862 2. 350453  
5. 133347 5. 075617 4. 789533 5. 406043 5. 622269 5. 792274 5. 589622 6. 154736 3. 60182  
1. 301634 1. 683783 1. 376125 1. 864544 1. 179967 2. 252734 1. 02167 1. 742553 1. 529288  
9. 756807 9. 794511 9. 692913 9. 04375 10. 02714 9. 398665 9. 700851 9. 767175 9. 917431  
5. 960406 5. 749844 6. 03773 4. 833844 5. 971128 4. 461459 6. 072292 5. 484537 4. 555376  
8. 016352 7. 811346 7. 401433 7. 186344 7. 741117 7. 624526 8. 066991 7. 781562 7. 942568

7.82244 8.18038 7.621799 7.640003 7.910223 7.760459 7.870555 8.521602 8.547413  
1.622774 1.542075 1.749119 2.431404 2.370343 1.738476 2.203008 1.873583 2.000853  
2.039013 1.535391 2.010943 2.837181 1.591323 1.978036 1.892504 1.571385 1.952593  
7.053479 7.298913 7.52289 6.617524 7.390023 7.288387 7.318574 7.230739 8.542798  
1.169299 1.642105 1.201307 0.965417 1.008867 1.429053 1.281376 1.59943 1.096024  
3.606383 1.129417 1.988232 2.554758 1.747621 3.432256 0.662013 6.482639 2.266145  
8.271052 8.117637 7.915829 7.669416 7.466374 7.915314 8.478533 8.09656 8.038448  
2.225472 1.827738 1.993154 2.946249 1.72316 1.705553 2.187875 2.378785 3.088334  
6.444171 6.367471 6.245957 5.460047 6.001618 6.534954 6.408288 6.079378 6.722135  
1.088769 1.509922 1.295847 1.661006 1.314496 1.596822 1.931979 1.110057 1.291203  
1.788082 2.126714 2.261027 2.601159 1.788378 1.898821 1.723882 2.51881 2.248261  
6.882232 6.899353 6.854363 7.377031 7.077367 7.421399 7.161732 6.861187 6.906275  
5.228049 6.288409 5.415441 5.157631 5.596298 6.120966 5.638615 5.927131 5.004927  
5.361014 5.739897 5.145734 6.326691 6.562705 5.214598 6.363945 6.10291 5.307141  
2.179256 1.760281 1.900231 2.307772 1.925687 2.011689 1.117762 1.573306 1.510441  
7.295285 7.206108 6.976229 6.642569 7.550433 6.663214 7.264358 7.129917 7.784044  
3.523663 4.412155 4.592274 3.421238 4.21812 4.769994 5.718804 5.083454 4.77608  
4.957846 4.176341 4.664462 3.997086 4.423554 4.865544 4.97162 4.139318 4.767116  
1.047619 1.151815 1.426975 1.213319 1.088643 1.461113 1.04558 1.130885 1.008242  
5.241707 4.706374 4.586136 2.962605 4.524891 4.75093 5.078523 4.127251 5.891304  
3.681585 3.081824 3.460223 3.447652 4.406717 2.711879 3.916122 3.186147 3.523558  
2.264919 4.365133 1.702616 1.051732 3.636309 3.189827 3.323678 1.855294 2.317093  
7.252364 7.142233 6.992519 7.074924 7.561996 7.187988 7.689339 7.066472 7.649509  
4.158077 3.950643 3.405281 3.540752 4.390913 3.38139 3.538484 4.018324 3.567548  
5.340902 5.747533 5.329733 3.495909 5.520002 6.004027 5.030673 5.506174 5.625835  
0.935095 1.278728 1.772931 1.397015 1.405069 1.932632 1.205216 1.081669 1.291422  
8.320918 7.98904 7.952953 6.783715 8.333657 7.762809 8.196699 7.949863 8.187997  
1.448169 1.439294 1.495285 1.903606 1.870092 1.552987 1.771629 1.286429 1.426205  
5.605188 5.687001 4.292933 4.634291 4.802501 4.203122 5.5986 4.75792 5.90184  
2.987196 2.878728 2.594016 2.249636 3.542631 2.802805 3.297506 3.284556 3.706823  
3.604039 2.444697 2.170195 3.718189 3.071781 2.952545 3.993814 2.928833 2.272492  
1.439219 1.06321 1.484386 1.135755 0.985316 0.916415 1.556383 1.475603 1.872927  
1.525637 0.952015 1.117184 0.940994 2.266151 1.188962 1.488277 0.629866 0.99497  
1.063466 3.658532 0.743965 1.824355 1.326985 0.716468 1.204063 7.486975 1.696538  
4.757531 4.345669 4.358184 4.752766 5.590222 4.683389 5.227779 4.798115 4.865845  
5.361316 5.606087 5.724949 4.119821 5.53955 5.746349 5.195223 5.06322 6.168649  
1.526704 1.309178 1.655966 2.099446 0.901976 1.761524 1.732764 1.608074 1.580575  
1.477948 4.360053 1.50246 2.11789 1.716446 1.799428 1.529556 7.495259 1.607751  
7.621142 7.914356 8.005249 7.559423 7.829037 7.877249 7.279872 7.966034 6.701501  
1.094635 1.581522 1.517105 1.454186 1.404694 1.701078 1.523534 1.17654 1.735329  
2.157168 2.760158 0.99632 2.051216 1.66892 1.480156 1.426639 2.353487 1.571701  
7.074531 6.909107 6.620371 7.692831 7.302621 7.130412 7.158154 6.973644 7.301793  
1.00547 2.072351 1.109847 1.406407 1.001663 1.625757 1.148695 1.277613 1.376316  
6.635269 6.167875 6.334502 5.611138 6.312652 6.582131 6.094642 6.618202 5.740824  
9.252338 8.193029 9.548269 6.03245 7.110764 9.003286 6.795813 7.767753 10.39733  
1.709277 2.051757 2.060848 1.768778 1.609079 2.230612 1.824473 1.541337 3.014573  
0.647688 1.042805 3.500774 1.713983 2.330246 2.838356 3.087256 0.996077 1.358391  
3.495992 3.557167 3.23121 5.356847 3.209669 2.672597 5.237531 4.474308 4.612036  
5.994608 6.872424 5.247326 5.829923 6.426024 5.201013 5.891147 6.420484 4.139585  
1.805877 1.907093 2.988854 3.049805 2.03703 1.944479 2.246939 1.919844 2.444457  
4.819218 4.321036 2.987318 4.023669 4.278415 3.57243 2.091427 3.948408 3.481076

4. 291814 4. 315118 3. 914739 3. 961907 4. 842198 3. 460182 3. 706885 3. 276609 3. 782383  
1. 118184 1. 216929 1. 618124 2. 67388 1. 540962 1. 604443 1. 32321 1. 396656 0. 890799  
5. 992387 5. 935083 5. 688504 6. 685203 5. 87377 5. 96556 5. 397972 5. 723592 5. 974152  
5. 141573 5. 131693 4. 861116 5. 03704 5. 173665 5. 062559 5. 3088 3. 979406 3. 67664  
3. 258508 3. 290855 4. 37223 3. 911779 2. 906008 2. 571574 3. 727059 3. 009764 3. 497594  
1. 656657 2. 042526 1. 36418 1. 755863 1. 297554 2. 166482 1. 357139 1. 907626 1. 852443  
1. 986796 2. 184894 1. 622444 3. 138343 2. 166419 2. 385928 2. 009061 2. 707211 2. 172393  
4. 599669 3. 957034 2. 883344 2. 283378 4. 958491 4. 149637 4. 330307 4. 510365 3. 125031  
1. 481363 1. 478168 1. 052583 0. 957109 1. 252683 0. 887019 1. 550849 1. 295262 1. 215638  
1. 720163 2. 4487 1. 756262 1. 404534 2. 141003 1. 904379 2. 040236 2. 148613 1. 604727  
1. 277677 1. 086852 0. 910579 1. 503894 1. 234186 0. 942262 1. 125865 1. 004843 1. 289797  
5. 389287 4. 816925 2. 904232 4. 89225 4. 657861 4. 281684 3. 847122 4. 03109 3. 822428  
1. 292432 1. 531241 1. 273204 1. 318716 1. 006683 1. 244814 1. 341046 1. 390725 1. 322333  
0. 981732 1. 009525 1. 054562 0. 930035 1. 098309 1. 596804 1. 29543 1. 390967 0. 916346  
1. 938627 1. 029195 1. 291003 1. 355106 1. 207576 1. 628285 1. 145172 1. 237024 1. 895757  
1. 362064 1. 022369 1. 362608 1. 517706 0. 966773 1. 191786 0. 759573 1. 152934 2. 240202  
1. 68833 1. 41076 1. 568256 1. 871117 0. 946177 1. 472464 1. 747036 1. 417048 1. 407169  
6. 73918 6. 323367 6. 58596 5. 489188 6. 243046 6. 490909 6. 454319 6. 839278 6. 474478  
4. 280055 4. 783899 4. 632547 4. 635326 4. 75794 4. 280459 4. 913165 4. 875754 4. 705571  
1. 40883 1. 394793 2. 070291 1. 836039 1. 363438 1. 755717 1. 405775 1. 500638 1. 908389  
7. 305024 7. 34459 7. 551065 7. 089259 7. 284066 7. 069294 6. 318868 7. 352669 6. 058551  
4. 845733 5. 07411 3. 927994 4. 5413 5. 275944 3. 716366 3. 338215 4. 972607 4. 149625  
2. 036277 2. 520388 2. 485935 2. 594947 2. 33325 2. 020612 2. 487193 2. 152111 2. 110915  
3. 074327 2. 871002 3. 14416 4. 054863 3. 064074 2. 534053 4. 034658 2. 848663 2. 935126  
1. 078798 0. 932029 1. 343599 1. 217902 1. 134715 0. 87174 1. 479002 0. 985432 1. 876127  
2. 990257 2. 312236 2. 630828 2. 790058 2. 214764 2. 382052 3. 337966 2. 406166 3. 513804  
5. 585445 6. 370026 5. 716137 5. 937288 6. 126321 6. 00027 5. 622795 6. 187553 5. 412726  
1. 13913 1. 35373 1. 308395 1. 875912 1. 230864 1. 539867 1. 644939 1. 550323 0. 881672  
1. 412386 1. 161712 1. 308474 1. 644629 1. 262913 1. 450157 1. 377863 1. 151363 2. 063211  
1. 790521 1. 389183 1. 476892 2. 188829 1. 788258 2. 390831 1. 588527 1. 557276 1. 522637  
1. 821159 1. 94735 2. 068097 2. 508303 1. 599149 2. 49213 2. 232646 2. 742524 2. 763607  
1. 021196 1. 0379 1. 090983 1. 236141 1. 475594 1. 33264 1. 085126 0. 716928 1. 802168  
7. 426737 7. 575031 7. 118619 6. 438936 7. 897171 7. 888918 7. 751369 7. 615924 8. 136283  
4. 678383 4. 61211 4. 695337 2. 010364 3. 951867 4. 756305 3. 630766 4. 704312 5. 692236  
0. 984172 1. 276547 0. 942947 1. 433511 1. 052041 1. 467221 1. 091226 0. 762706 1. 266259  
2. 12548 1. 615678 2. 665435 2. 409283 1. 424032 2. 797165 2. 185611 2. 797902 1. 557354  
1. 781726 2. 477156 2. 009452 2. 084121 1. 409353 1. 444904 1. 947046 1. 485445 2. 260555  
5. 892371 6. 951399 5. 345288 6. 804718 7. 890247 7. 583793 5. 316682 7. 23499 4. 898351  
2. 775344 2. 743587 1. 903336 2. 537603 2. 23616 3. 497537 1. 722399 2. 154085 3. 143187  
3. 506765 3. 559493 3. 748904 3. 223943 4. 297569 3. 980225 4. 779242 4. 165239 3. 07796  
3. 009417 4. 713491 4. 336828 2. 603253 4. 690093 3. 913831 4. 760983 4. 934453 5. 520471  
3. 899233 2. 758509 2. 271897 3. 658977 4. 142478 2. 416847 4. 078354 2. 328872 2. 573068  
1. 849888 1. 661433 2. 101307 1. 855752 1. 597162 2. 720882 2. 243017 1. 349494 1. 732465  
0. 859357 1. 304697 0. 916456 1. 036327 1. 316141 0. 986763 0. 827486 0. 858303 1. 066808  
2. 680006 3. 84973 2. 103989 2. 717335 3. 271495 2. 869589 3. 655192 3. 339823 3. 579575  
6. 912229 7. 028224 7. 222981 7. 389037 7. 141248 6. 868259 7. 332489 7. 075473 6. 961397  
1. 775349 1. 963493 1. 877449 1. 969128 2. 202206 2. 006916 1. 148363 1. 385739 2. 58088  
1. 080546 1. 26923 1. 344192 1. 507283 1. 459314 1. 405157 1. 550073 1. 849806 1. 740275  
1. 338244 1. 55848 1. 18428 1. 230538 1. 432349 1. 128387 1. 26728 1. 607442 1. 348795  
2. 753986 2. 863186 3. 472779 2. 361916 3. 447554 3. 555288 2. 979838 2. 495035 2. 807037  
1. 07158 1. 520667 1. 348103 1. 544145 1. 784147 1. 122358 0. 975154 0. 88207 1. 562898



2.425469 2.731357 2.451241 2.601653 3.316117 2.998437 3.259162 3.096876 2.713313  
2.217167 1.918445 1.819499 1.742893 1.976859 2.174611 1.988363 1.596178 1.983195  
3.048501 2.721241 1.768213 3.332757 2.380817 2.438885 2.185045 2.571288 2.524834  
5.537348 5.881647 5.483196 5.046265 5.867925 5.300257 5.618927 5.815477 4.604605  
1.814628 2.074894 1.47908 1.469404 1.606915 1.522771 1.619698 1.306969 2.173998  
1.364046 0.965807 0.731585 1.362291 1.034607 1.838826 0.875386 1.172739 1.172739  
2.859053 3.668773 2.780714 2.69693 3.820989 3.037974 2.567413 3.360304 2.066228  
1.581439 1.459307 1.129235 1.388134 1.204709 0.987229 0.927402 1.219248 2.443927  
3.790538 4.557974 4.430379 4.218034 4.632517 4.30168 3.410497 4.691181 3.371467  
1.474993 1.26227 1.094952 1.010981 1.344285 1.53419 1.147629 1.347642 1.74853  
1.858429 1.505146 2.009307 1.821713 1.76842 2.233039 1.571675 2.20274 1.552365  
7.46256 7.388763 7.28062 7.071431 7.211947 6.952692 7.465921 7.092587 7.70501  
1.833717 1.521482 2.150934 2.406427 1.766882 2.401401 1.609724 2.00261 1.47421  
6.287231 6.182942 6.420498 5.119592 6.189934 6.495037 5.710908 5.982657 5.070508  
1.937003 2.385706 2.883208 3.956155 2.651284 2.090875 2.274864 2.528328 2.277222  
3.116271 2.231605 2.722158 3.481945 3.30107 3.400104 2.647562 2.968971 2.585845  
5.586895 5.914613 5.429889 5.447576 6.262212 5.302796 5.726405 6.071668 5.773791  
1.478638 2.840994 1.202504 1.706631 0.947772 2.6071 2.101741 1.815696 1.830218  
0.78053 1.269838 1.351275 0.941351 0.78053 1.151768 1.643588 1.389661 1.59916  
1.959674 2.848394 2.547396 3.010293 3.619205 2.398768 2.294444 2.922404 2.879683  
2.810406 1.939625 2.257788 3.221844 2.458073 2.155089 2.134307 2.061494 2.554216  
5.539973 4.223213 3.815635 4.777171 4.014517 3.865844 4.966065 4.194658 4.4665  
2.440056 2.407001 2.494394 3.013279 2.933707 3.005194 3.050589 3.582538 2.744091  
2.865378 2.776246 2.224689 2.186541 3.317324 3.333746 4.195267 4.339644 3.79341  
1.589851 1.862016 1.345238 2.734154 1.598247 1.697224 1.545517 1.197227 2.761429  
2.273183 1.966778 1.282044 2.120619 1.87573 1.738414 1.882606 1.606041 1.769443  
1.384863 1.621256 1.903398 1.365103 1.483776 1.038779 1.203651 1.351268 0.984995  
3.508759 3.639411 2.982257 3.736826 2.679514 2.190628 3.351147 2.764895 2.802589  
1.375329 1.750073 1.956205 1.877913 1.571517 1.807183 1.521911 1.518804 2.098372  
5.849207 6.341866 6.137488 6.658355 6.521914 6.289281 5.936636 6.429474 5.200349  
3.118025 3.92193 2.790525 5.122245 3.033746 3.952031 2.70839 2.093521 4.213603  
3.217361 3.887914 3.286681 4.277061 4.343542 3.829676 3.118768 4.42717 3.460243  
5.196453 5.570102 4.652789 4.522355 5.664064 4.098731 3.05894 5.702752 6.148487  
1.460558 0.936973 2.501686 2.069607 1.619024 2.193366 1.167855 2.230289 1.914723  
7.050237 7.160009 7.1325 6.582654 6.619426 7.219971 6.446979 6.683641 6.454628  
5.525925 6.109361 4.784292 6.05082 5.718117 6.189644 4.581161 5.593157 6.332394  
1.844847 3.165113 2.431899 2.797654 1.858046 2.584898 1.81675 2.563996 1.497418  
4.79259 4.300966 4.947449 3.828775 4.304537 3.959905 4.166747 4.339247 4.287123  
4.335325 4.459675 4.849698 4.743817 4.015297 3.985269 4.315002 4.738916 2.780634  
1.907693 1.66043 1.925006 2.502452 2.321533 1.836785 2.142175 1.862872 2.06979  
1.638258 1.269782 2.256918 1.861505 1.359498 1.97881 1.103374 1.739074 2.198671  
4.562795 3.880192 4.428768 2.406287 4.9093 4.965731 4.710687 4.68268 3.796494  
1.196893 2.212412 1.514675 3.4279 1.575997 2.123061 1.518087 3.665799 2.818682  
2.19885 1.810789 2.701494 2.625204 2.308242 2.961624 4.280198 2.539188 2.772781  
3.580475 3.595291 2.947086 2.531547 3.8564 3.403581 4.019081 3.39022 3.499804  
6.45852 5.755874 5.784842 5.953789 5.869484 5.458432 5.755384 5.414261 6.457758  
5.06632 4.429071 3.967827 4.619509 4.507446 4.329102 4.072588 4.122757 4.240388  
1.170739 1.534313 1.623595 2.485521 0.72507 1.010978 1.324284 1.861905 1.305465  
1.113614 1.537461 0.97973 2.227145 1.181811 1.104092 1.087733 1.486593 1.342065  
2.385941 4.409924 3.315352 3.026821 3.151245 2.245632 2.946058 2.829388 2.730753  
6.813176 6.643709 7.216139 5.078845 6.562584 5.86673 7.217492 6.482077 6.058032

4. 052811 4. 239163 4. 013368 3. 828173 3. 459739 2. 652428 3. 187978 4. 219802 3. 892454  
4. 870894 5. 122931 4. 771426 4. 606974 5. 307386 4. 585732 5. 525016 5. 009274 4. 654232  
5. 071922 5. 035691 6. 009803 4. 417731 5. 481141 4. 556154 5. 106087 5. 160585 4. 841021  
6. 65498 6. 717209 6. 826807 6. 50898 6. 497286 6. 597233 6. 438155 6. 961712 7. 047642  
5. 909087 6. 190531 6. 022808 5. 09986 6. 51173 6. 206221 6. 066009 5. 847353 5. 96972  
6. 286991 6. 417228 5. 517834 6. 939745 7. 764499 5. 320927 6. 863785 4. 728006 5. 272229  
4. 618652 2. 925864 4. 250264 2. 379573 3. 48811 3. 369112 3. 387134 3. 346381 2. 704318  
0. 867526 1. 622308 1. 799669 1. 357838 1. 137866 2. 686205 1. 355674 1. 996569 0. 791651  
3. 03502 3. 563958 2. 736381 3. 748298 3. 735094 2. 773226 3. 500566 2. 689849 3. 933735  
6. 260118 6. 600286 6. 589461 6. 7709 6. 885765 5. 229306 6. 145706 6. 400597 5. 830528  
8. 676047 8. 970328 9. 067331 9. 08711 8. 896028 8. 952278 8. 658664 9. 162281 8. 079363  
8. 137292 7. 824439 7. 927487 7. 736713 7. 055807 8. 032175 8. 265537 7. 68786 8. 583602  
6. 821618 6. 820867 6. 589 5. 611397 6. 89304 6. 718084 6. 861363 6. 981058 6. 360039  
3. 662907 2. 964221 3. 407159 3. 624445 3. 733917 4. 070304 3. 804024 2. 689645 3. 457379  
6. 053235 6. 392399 5. 087405 5. 071246 6. 570046 5. 907827 5. 730848 5. 989292 6. 235045  
4. 521388 4. 206073 4. 015878 5. 164013 3. 500788 3. 906462 3. 38477 3. 262842 2. 78318  
5. 377687 3. 462885 4. 642985 4. 427106 3. 123458 4. 421794 3. 664385 4. 322464 4. 241857  
1. 734026 0. 821697 1. 286518 1. 213909 0. 998878 0. 845037 0. 959188 0. 975918 2. 215083  
1. 597784 1. 748492 2. 224851 3. 068564 2. 19103 2. 323669 1. 621024 1. 771067 2. 015147  
5. 244216 4. 953834 5. 379433 5. 537762 4. 931208 5. 036572 4. 831176 5. 098828 4. 796639  
6. 629659 6. 942355 6. 522862 6. 738426 6. 575357 6. 64959 6. 418099 6. 455609 7. 093575  
7. 828014 7. 037396 7. 194765 5. 735838 7. 093022 7. 125882 7. 636394 6. 80387 7. 703637  
6. 110911 6. 600561 6. 150963 5. 886906 5. 947786 6. 752 6. 787483 6. 097692 6. 312927  
5. 049771 2. 38029 4. 996858 3. 38294 3. 287855 6. 530972 4. 554239 5. 368227 5. 688113  
6. 165353 4. 694217 4. 855787 5. 211447 4. 868991 5. 081021 5. 218455 5. 085716 6. 450261  
4. 149899 4. 27737 4. 210141 4. 652337 3. 784093 3. 880849 3. 83446 3. 743789 4. 091814  
4. 567027 4. 240331 4. 258799 4. 482178 4. 074025 3. 686863 4. 813223 4. 480744 3. 753413  
6. 238414 5. 911354 5. 94311 4. 326678 6. 010274 5. 795232 5. 445086 5. 4421 4. 428803  
2. 947958 2. 822222 3. 591592 3. 303334 2. 759399 2. 197461 2. 403433 2. 408706 2. 886274  
2. 829164 2. 651128 2. 732257 2. 278383 1. 881898 2. 518416 2. 07039 2. 054475 2. 391733  
2. 195083 1. 847039 2. 275 2. 692303 2. 41019 2. 529786 1. 603108 2. 33143 1. 586681  
2. 52393 2. 226566 1. 869625 3. 146102 3. 305247 2. 65408 2. 673662 2. 190659 1. 77803  
2. 205479 2. 935002 2. 74402 2. 21208 2. 161341 1. 982989 2. 368296 2. 130227 1. 78412  
1. 790957 1. 721074 2. 333822 1. 864006 1. 56741 3. 622271 2. 065532 1. 962742 2. 091771  
2. 249648 2. 722783 3. 708106 4. 18726 2. 882818 2. 861424 2. 322245 3. 534786 2. 092951  
1. 176045 2. 291716 1. 988514 2. 773254 1. 861229 2. 9331 1. 503217 1. 096955 1. 921035  
2. 780232 3. 129039 2. 550893 2. 56177 2. 083383 3. 100688 2. 720461 2. 96476 3. 655056  
2. 236548 1. 758625 3. 134826 3. 104073 2. 277518 2. 537084 2. 934808 2. 934808 2. 983181  
0. 642581 0. 806502 1. 361992 1. 237635 0. 840607 0. 687948 0. 763762 1. 103018 1. 646006  
3. 533457 4. 292068 3. 483477 4. 071235 3. 423295 4. 151448 5. 017257 5. 100173 4. 224411  
5. 88091 5. 871562 6. 004242 5. 541918 5. 72963 5. 863464 6. 3783 6. 504524 6. 174547  
2. 897583 3. 544648 3. 422563 4. 027828 3. 634401 3. 556197 3. 809843 3. 382232 3. 70219  
2. 173214 1. 9768 1. 87453 2. 112249 1. 908029 2. 316323 2. 268491 1. 876511 2. 682847  
5. 513415 5. 476759 5. 63914 5. 278698 5. 398853 5. 576016 5. 398664 5. 284247 4. 668688  
2. 336197 1. 611672 2. 006814 2. 072458 1. 373979 2. 164725 1. 621978 2. 650756 2. 683535  
1. 850008 1. 953108 1. 597991 2. 230985 1. 723954 1. 921462 2. 109308 2. 390401 2. 046037  
1. 381509 1. 35812 1. 646732 1. 91767 1. 539215 1. 878533 1. 58999 1. 681011 2. 68047  
1. 218982 1. 046555 1. 282302 1. 716426 1. 278039 1. 385576 1. 336564 1. 257123 1. 107639  
2. 019544 1. 587421 1. 407678 1. 229429 2. 06192 1. 202676 1. 54825 1. 33962 1. 552759  
3. 03529 2. 391091 2. 392862 2. 228303 1. 825651 2. 834734 2. 17977 2. 990029 3. 314194  
3. 006969 2. 469581 2. 360251 3. 466046 2. 753284 2. 840959 2. 260928 2. 724392 2. 824217

4. 734088 5. 311764 5. 281714 5. 417263 4. 838755 5. 036931 4. 901955 5. 57099 4. 799061  
2. 976512 3. 295995 3. 067182 3. 472677 2. 320509 3. 392819 2. 869434 2. 884735 2. 924673  
4. 174064 4. 927332 5. 551816 4. 608792 4. 227276 4. 239205 5. 316172 5. 952046 4. 928802  
6. 258643 6. 075343 6. 197965 5. 58888 5. 513532 5. 156766 6. 304878 6. 234978 5. 373254  
7. 41195 7. 720903 7. 39671 7. 150278 7. 689586 7. 368539 7. 548061 7. 626997 7. 284682  
2. 854747 2. 621589 2. 692888 2. 669804 2. 923735 1. 75787 3. 076101 2. 415655 3. 261719  
6. 040384 5. 78208 4. 662726 5. 048487 3. 981097 6. 28091 4. 449251 5. 940702 4. 316313  
6. 253486 6. 552678 6. 070048 6. 201044 6. 599026 6. 477624 6. 494563 6. 071377 6. 346771  
7. 982987 7. 80555 7. 761032 7. 473688 7. 672438 7. 832959 7. 899705 7. 923488 7. 808485  
6. 560504 6. 581735 6. 771408 5. 337283 6. 781153 7. 105316 6. 673171 6. 959793 5. 746394  
5. 080579 5. 533581 4. 838443 4. 716793 5. 405087 4. 83577 5. 636929 5. 289482 4. 631508  
3. 987234 3. 591411 3. 449834 3. 60583 3. 162313 2. 641669 2. 862641 3. 236184 3. 791982  
3. 092048 3. 511699 3. 29858 2. 875131 3. 61943 3. 00684 3. 773682 3. 609536 3. 028877  
2. 418194 2. 829137 2. 640302 2. 502226 2. 685469 2. 348545 2. 636009 2. 825483 2. 820704  
4. 937094 4. 79567 4. 796239 4. 205016 4. 811937 5. 548329 4. 833353 5. 0376 4. 722264  
1. 583829 1. 84643 1. 490455 2. 0627 1. 757565 1. 907848 1. 714003 1. 741254 1. 710972  
7. 390964 7. 439928 7. 442998 7. 065678 7. 07113 7. 060617 7. 424589 7. 061853 6. 812799  
3. 707351 3. 951332 2. 033961 3. 470232 4. 036305 1. 776199 2. 594135 3. 341961 2. 740444  
2. 498278 2. 233339 2. 688209 2. 603408 2. 557365 2. 348641 3. 007902 2. 740691 2. 17132  
4. 342935 3. 6568 2. 963067 1. 911025 3. 520366 3. 007945 3. 166208 3. 009282 2. 518629  
4. 307605 3. 984842 3. 949654 4. 915225 3. 706009 3. 003862 3. 581698 3. 245498 4. 822897  
7. 080665 7. 183409 6. 926725 6. 55536 7. 487297 6. 935242 7. 01008 7. 051597 6. 73218  
3. 87942 2. 711331 4. 725753 3. 883539 3. 300517 5. 68032 3. 962534 4. 608024 4. 481683  
4. 57785 4. 321936 5. 539856 3. 517799 4. 745218 4. 932593 4. 65174 4. 502298 4. 967414  
2. 974391 2. 346878 2. 575464 3. 87748 3. 423417 2. 777794 3. 10407 2. 747823 2. 493564  
6. 173926 6. 085376 7. 274077 8. 11097 7. 158078 6. 447618 8. 139277 6. 240547 6. 553873  
8. 353907 7. 779957 7. 836618 7. 631027 7. 325353 8. 371277 7. 993664 8. 0849 7. 73346  
1. 617939 2. 408345 1. 11432 1. 749193 1. 26829 1. 635381 1. 336983 1. 697662 1. 412501  
6. 140575 6. 024576 5. 995182 5. 291552 6. 448984 6. 117264 6. 195294 5. 939011 6. 090402  
5. 770566 3. 270938 4. 390065 5. 526046 4. 746793 7. 082652 5. 587902 5. 823009 6. 832331  
8. 106856 8. 211304 8. 119489 8. 293719 7. 878164 8. 307477 8. 283578 7. 872172 7. 796838  
5. 982631 6. 222747 6. 221293 5. 981476 6. 318889 5. 568202 6. 389817 6. 294843 5. 202219  
7. 62233 7. 641048 7. 938441 6. 088646 7. 352843 7. 495235 7. 48778 7. 736365 7. 135471  
1. 150333 1. 376769 1. 299388 1. 792995 1. 236127 1. 374747 1. 544216 0. 579221 1. 145708  
1. 160878 1. 594051 1. 117273 1. 581898 1. 322701 1. 289812 1. 312604 1. 351287 1. 251858  
1. 948951 2. 828119 2. 511871 2. 647486 2. 673574 1. 858342 3. 282119 2. 246722 2. 815055  
1. 921247 1. 67718 2. 665074 2. 718692 2. 012725 2. 389884 1. 756345 1. 530124 2. 006513  
5. 313423 4. 055613 2. 65467 3. 62663 5. 200574 4. 385962 1. 856886 3. 769516 4. 109063  
3. 045175 3. 113678 2. 77482 3. 602667 2. 883925 2. 920067 3. 129069 2. 775836 3. 081502  
5. 461821 5. 618306 6. 20337 5. 64283 5. 848432 5. 752945 5. 03791 6. 256089 4. 768828  
1. 675212 1. 022699 2. 153828 1. 827925 1. 559161 1. 729693 1. 693723 1. 109034 1. 443069  
4. 189207 3. 820453 4. 339682 3. 859298 4. 077208 4. 11236 4. 657299 4. 087604 3. 425997  
1. 534591 1. 444897 1. 611251 1. 54129 1. 385525 1. 701157 1. 358162 1. 52477 1. 413754  
6. 799014 6. 579451 6. 434278 6. 899627 7. 033152 6. 72208 6. 449895 6. 775383 6. 14735  
2. 195006 1. 901109 1. 893287 2. 013704 1. 694138 1. 901279 1. 553762 1. 612974 2. 69627  
6. 846938 7. 353148 7. 178816 7. 000342 7. 404736 6. 743117 7. 544815 7. 044073 7. 112678  
1. 717997 1. 316419 1. 391451 1. 290478 1. 070758 1. 735121 1. 44743 1. 541688 1. 297827  
1. 585978 2. 205872 1. 607084 1. 814751 1. 424659 1. 777581 1. 395331 1. 493928 1. 570518  
3. 460702 4. 786729 4. 763061 4. 126791 4. 219954 3. 966747 3. 688622 4. 236333 4. 26207  
0. 768563 0. 987607 1. 041832 1. 789003 1. 115564 1. 621779 0. 986961 1. 425643 0. 888901  
6. 713032 6. 579174 6. 648586 6. 850595 6. 864577 6. 840391 7. 230679 6. 766517 6. 47834

5. 159771 5. 511585 5. 041247 5. 786773 5. 132063 5. 108391 6. 155491 5. 300548 5. 12626  
1. 207603 1. 265947 1. 563389 1. 427541 1. 247025 1. 568128 1. 089344 1. 176722 1. 817773  
5. 465402 6. 398083 5. 947301 6. 06892 6. 013335 6. 137388 5. 410109 6. 281663 6. 826317  
5. 199533 5. 476286 5. 286888 4. 987985 6. 971284 4. 608577 6. 612495 6. 164274 5. 495478  
1. 551253 1. 989481 1. 328488 2. 077498 1. 738812 1. 24631 1. 294472 1. 168477 1. 642078  
1. 368392 1. 452657 1. 729326 1. 635342 1. 452448 1. 10105 1. 169478 2. 074511 1. 894647  
5. 668289 5. 599945 5. 085752 6. 308972 5. 43385 5. 92836 5. 411134 5. 281501 5. 527829  
4. 573096 4. 931765 4. 189492 4. 569467 5. 195758 5. 633591 4. 665451 4. 848895 5. 224315  
4. 244526 4. 562653 4. 357525 3. 11872 4. 658164 4. 9328 5. 067079 4. 681824 5. 001758  
5. 951918 6. 311621 5. 794504 6. 995463 6. 305776 5. 238065 6. 665549 6. 135414 5. 782074  
4. 927015 3. 661186 4. 721428 4. 023193 4. 76964 4. 195765 4. 532576 4. 055889 5. 891697  
3. 606205 3. 486564 3. 657933 3. 182559 4. 453941 3. 62773 3. 458013 3. 834921 3. 258349  
4. 355969 5. 064532 5. 498958 4. 667584 5. 531574 5. 208517 5. 30121 5. 087095 4. 70643  
7. 570159 6. 039878 5. 508514 6. 13407 5. 587179 7. 155363 6. 071131 7. 180952 7. 459  
5. 456361 6. 638237 6. 635889 5. 694929 6. 752641 5. 392155 6. 278603 6. 603088 7. 805477  
3. 254398 4. 417137 4. 116912 3. 715589 4. 12318 3. 70797 4. 144535 3. 995392 4. 633165  
8. 143343 8. 432364 8. 260852 6. 586202 8. 277876 8. 311191 7. 454792 7. 918549 7. 219231  
2. 219498 1. 846621 2. 311989 3. 45353 2. 406073 2. 14168 2. 521293 2. 149945 1. 873256  
3. 045749 2. 877248 2. 747067 3. 205946 3. 895366 2. 966137 3. 126589 2. 569156 3. 17815  
5. 381642 5. 774734 5. 648433 6. 147312 6. 295289 5. 53322 6. 297924 6. 512511 5. 743383  
7. 71438 8. 473504 8. 019713 8. 78372 8. 30167 7. 857825 7. 553705 8. 066481 6. 631749  
2. 731952 3. 107336 3. 784565 3. 563835 4. 248914 3. 572754 3. 749198 3. 175073 3. 078009  
3. 010041 3. 027545 3. 531818 2. 914283 3. 440467 3. 736792 3. 82243 3. 262138 3. 39376  
2. 279294 2. 530362 1. 395029 2. 764398 2. 623499 2. 498787 1. 55304 2. 833357 2. 704124  
4. 492679 4. 167082 4. 39957 5. 31618 4. 479139 4. 748435 4. 284348 3. 981682 3. 284636  
3. 227735 3. 62382 4. 258996 2. 100494 3. 272754 3. 666897 3. 098271 4. 127559 2. 713977  
6. 462084 6. 569295 7. 25038 6. 546945 6. 577728 6. 151187 6. 384664 6. 921077 6. 056512  
6. 38374 6. 388845 6. 328193 6. 296271 6. 336313 6. 230033 6. 295816 6. 596261 6. 489984  
7. 453858 7. 76422 8. 043153 7. 638641 7. 302485 7. 459317 8. 060585 7. 23086 7. 295028  
7. 070429 7. 629753 7. 014042 5. 506593 7. 410064 7. 893213 7. 429606 7. 687249 6. 86475  
2. 427553 1. 830532 1. 824323 2. 172272 1. 550553 1. 761817 2. 880482 2. 148148 2. 15454  
1. 28948 1. 077915 1. 269912 2. 209563 1. 355533 1. 136398 1. 112979 1. 219957 1. 528765  
2. 058553 2. 036396 2. 027057 2. 975594 3. 022266 2. 556193 1. 909014 2. 283178 2. 437248  
3. 807157 4. 282954 4. 452551 3. 176483 3. 851236 3. 430177 3. 64345 4. 44804 4. 077809  
4. 945723 6. 037909 5. 739258 4. 977366 5. 485597 5. 168656 5. 907196 5. 418064 4. 486054  
4. 197499 4. 764634 3. 776678 3. 439957 4. 86872 3. 885552 3. 975302 4. 311895 4. 542737  
3. 298996 2. 525967 3. 564051 2. 712588 4. 006262 4. 355987 3. 316403 2. 922345 4. 146216  
2. 636328 2. 583154 3. 283352 3. 044639 2. 338362 2. 821991 3. 520632 3. 174064 2. 676492  
6. 583088 6. 502257 6. 955846 7. 200822 6. 997305 6. 335696 7. 420769 6. 718289 5. 949179  
8. 645777 7. 912191 8. 707117 8. 102292 7. 998638 8. 077906 8. 501045 7. 800604 5. 966356  
3. 088379 3. 712856 3. 051758 1. 751008 2. 951385 2. 600167 3. 294266 2. 91497 3. 329979  
7. 103965 7. 232105 6. 99418 6. 570648 7. 449679 7. 327277 6. 973836 7. 628433 5. 668221  
4. 244709 4. 579155 4. 622604 4. 456246 6. 024416 4. 340509 3. 922634 4. 816281 4. 923858  
7. 86338 8. 045272 7. 786077 7. 084251 8. 324828 7. 655751 8. 058695 8. 052262 8. 126314  
7. 223898 6. 936424 6. 761544 7. 318257 7. 481955 6. 989974 7. 142869 7. 839656 7. 20473  
7. 888529 10. 42848 9. 867206 10. 93114 10. 55775 10. 72073 9. 901165 11. 06893 7. 416469  
3. 583105 4. 216532 3. 392112 2. 058035 5. 01938 3. 319803 5. 58092 3. 730577 4. 205717  
2. 810732 2. 449094 2. 510259 3. 43755 2. 301568 3. 377842 2. 635973 2. 288091 2. 291491  
2. 587113 2. 689429 3. 079733 2. 804802 2. 954772 3. 12463 1. 743183 2. 510626 3. 432774  
5. 677485 4. 872989 4. 631429 5. 880649 5. 115174 6. 467916 5. 394523 5. 906343 5. 467188  
7. 066294 7. 328091 7. 090007 7. 370071 6. 993034 6. 984187 6. 969237 7. 00155 6. 284709

3.088759 2.652032 2.541927 4.502591 3.003455 2.96633 3.390926 2.957526 3.968842  
6.317153 6.814142 6.032163 3.310607 6.838196 4.857834 6.698335 7.799393 5.171952  
2.81594 3.29376 3.434656 5.41503 3.084628 3.305209 4.153847 3.286875 4.312768  
2.526933 2.478342 2.043016 2.298604 2.389871 2.471984 1.595769 1.865838 2.381419  
3.134894 3.826801 2.921632 3.785076 2.995973 3.048085 3.440618 2.942601 3.867797  
5.383761 4.376056 5.861805 4.426786 4.967845 4.240101 5.554242 5.188722 4.537271  
1.542543 2.049233 1.549122 1.883762 2.103342 1.650416 1.592912 1.524749 1.421676  
4.802335 7.343322 5.653365 4.966748 6.243503 6.435831 5.918267 7.003279 6.184978  
6.471208 6.287322 6.264368 6.425823 6.820075 6.092564 6.89478 6.571393 6.950702  
4.016827 3.767105 3.862256 3.041522 3.385384 4.44956 3.177306 3.69441 3.320367  
1.493194 1.871107 0.937474 1.864102 1.48439 1.960037 1.367232 1.008453 2.721098  
2.753309 3.44612 2.872337 2.603576 2.519871 2.786311 2.631893 3.163142 3.408567  
5.637555 4.990973 5.948946 5.369944 5.380054 6.164658 5.572793 5.489575 5.462707  
4.198291 3.750268 5.318219 3.103373 4.409903 4.419007 3.416605 4.116593 4.313985  
2.252606 2.358775 3.392871 3.559048 1.932728 2.645175 2.768839 1.997645 2.962931  
8.700775 8.983892 8.665571 8.718759 9.280035 8.692385 8.158428 8.991202 8.399221  
1.566021 0.766573 1.0857 1.865451 0.849654 2.36718 1.54519 1.063488 1.094118  
5.175266 5.318379 5.433703 3.699488 3.854653 4.642399 4.52647 4.465272 4.089366  
5.339264 5.830312 4.773314 4.093888 4.744256 5.090836 5.747247 5.295053 5.410976  
4.756939 4.707307 4.768439 4.20562 4.71533 4.189882 4.840074 4.272733 4.854393  
3.252352 3.451383 3.705538 4.771183 4.422088 4.372755 4.23249 3.607992 4.178472  
6.568726 5.883641 6.028701 6.324651 5.391733 5.392402 5.711327 6.228264 6.441629  
1.22437 1.676508 1.333111 1.643574 1.716127 1.934074 2.092334 0.960632 1.480439  
2.267342 2.971927 2.60215 2.851233 2.828288 2.224452 2.899722 1.979062 2.383394  
9.795574 10.00492 9.833409 9.715456 9.976963 9.819506 10.27599 10.31804 9.951546  
9.203855 9.153116 9.290288 8.806432 8.990299 9.214664 9.321971 9.378913 8.847422  
6.291506 5.696522 6.296603 6.354106 6.263463 5.295192 5.939855 6.673273 6.04789  
5.842196 6.072392 6.463576 5.875805 5.15579 6.202863 5.848923 6.539236 5.955387  
2.658144 2.26656 2.252169 1.897889 1.755917 1.9971 2.451091 1.767146 2.163251  
2.081246 2.141275 1.810682 1.473202 1.517812 2.035104 1.656868 1.582316 1.256355  
2.686851 3.427215 3.809844 3.625723 2.643831 2.245905 2.456151 2.336282 2.965672  
5.05488 5.140692 4.607495 5.04559 5.613895 3.946387 6.197035 4.932934 5.64997  
8.078037 8.173561 7.763132 8.205756 8.288425 7.583117 8.001339 8.511875 6.488282  
7.881151 7.759846 7.928547 7.678323 7.44415 7.920154 7.974685 7.848803 6.458033  
3.490891 3.079372 3.425549 3.079672 3.469661 3.335108 4.037661 4.186891 2.460862  
3.003359 2.367531 4.458366 1.761356 2.063785 4.739686 3.076922 2.651806 5.608806  
2.83004 1.861537 2.699544 2.678783 1.94598 2.335635 1.787247 2.881528 2.534792  
5.225656 5.705899 5.791076 5.98172 5.968223 5.478779 4.714424 5.532088 4.753611  
2.268359 2.610671 2.753447 2.185776 2.25265 2.110595 2.809499 1.715772 1.643782  
3.890179 4.180395 4.051281 3.963187 4.049721 4.300336 3.326278 3.76556 3.461523  
7.931581 8.524998 7.880806 7.380004 7.739279 8.579018 7.969418 8.106456 7.399621  
6.172328 6.61021 6.300852 5.982399 6.375206 6.109494 5.845722 6.514666 6.622093  
1.494207 1.722291 1.520897 2.179621 2.220448 1.46431 2.634532 2.125796 1.789906  
4.840034 5.086925 5.002384 3.358055 5.246408 5.619418 4.887576 4.546718 3.616585  
2.380004 3.409689 2.923668 2.333443 2.767054 2.587096 3.48331 3.700965 2.621338  
6.099794 7.045227 6.962537 7.877361 8.150317 5.921075 7.191484 7.084705 10.09179  
1.734815 1.920007 1.91626 2.950274 2.041293 2.480084 2.193955 2.367738 1.688177  
5.561685 4.397527 3.773135 6.081645 4.553699 3.301378 3.929309 3.475322 5.763822  
3.900686 3.956681 4.190379 4.47236 4.524153 4.29844 4.584261 4.211926 4.629492  
2.60448 2.640395 3.197671 3.227774 3.610713 3.610799 3.464489 3.056918 3.706859  
2.754782 3.772507 3.245289 3.112984 2.722106 2.421143 3.640913 2.952536 3.926319

3. 65863 4. 088637 3. 841065 4. 0398 5. 192855 2. 593297 5. 492407 2. 684289 3. 54002  
1. 858459 1. 961821 2. 081333 2. 400609 1. 799696 1. 920009 2. 120139 2. 24893 2. 671206  
2. 770847 2. 659306 3. 241804 3. 767081 3. 798272 2. 62131 2. 515537 3. 043775 2. 612615  
2. 026773 2. 145429 2. 34764 2. 911088 1. 84625 2. 27391 1. 958174 2. 688238 3. 085129  
5. 520917 5. 224275 5. 000796 3. 7689 4. 991089 6. 63034 5. 467559 5. 212597 5. 228864  
0. 836857 1. 309209 1. 171528 1. 436666 2. 260193 1. 671557 1. 196121 1. 626552 2. 556794  
1. 862798 1. 742023 2. 036448 2. 374121 1. 680322 1. 999089 2. 956623 2. 097255 1. 916804  
7. 092513 6. 929145 6. 909132 7. 318193 6. 545973 5. 999876 7. 249959 6. 917341 6. 145257  
2. 206343 1. 800449 1. 880471 2. 669878 1. 780554 1. 96767 2. 283918 2. 213113 1. 717409  
5. 853536 6. 210082 5. 630057 5. 211833 5. 476865 5. 269737 5. 460385 5. 312446 5. 737444  
4. 727228 4. 652862 4. 634141 2. 710336 4. 953951 4. 609235 4. 774622 5. 173471 5. 594867  
4. 937744 4. 4898 4. 32238 5. 966171 5. 036859 6. 398466 4. 837671 5. 368441 4. 794667  
1. 295468 1. 891855 1. 481012 1. 731679 1. 375066 1. 53821 1. 893987 1. 278317 1. 758044  
5. 781781 5. 742475 5. 898811 6. 380024 5. 398865 6. 384505 5. 811548 5. 628788 6. 570602  
1. 501726 1. 427082 1. 745911 1. 958656 1. 419137 1. 509063 1. 892889 1. 420061 2. 304442  
6. 170093 6. 350059 6. 733719 6. 765684 6. 181162 6. 058235 6. 240741 6. 593297 5. 003325  
0. 72271 0. 747841 0. 868661 1. 808062 0. 890831 1. 418602 1. 313566 0. 738832 1. 648067  
4. 799275 3. 127471 3. 855912 2. 803413 3. 572978 3. 729175 5. 052936 4. 20356 5. 955895  
0. 961488 1. 386153 1. 356564 1. 379807 0. 873428 1. 063654 1. 070701 1. 192259 1. 581405  
4. 546527 4. 526896 3. 780286 5. 812478 4. 817268 4. 185707 4. 708212 4. 385352 3. 64973  
8. 301241 7. 467033 7. 503811 7. 769563 7. 919277 6. 288119 7. 337911 8. 172405 8. 173688  
2. 661163 2. 769256 2. 372461 3. 232387 1. 959787 3. 589227 1. 462244 1. 787538 2. 044841  
6. 160198 6. 094012 6. 131778 6. 190749 6. 174646 6. 088462 5. 818665 5. 884545 6. 093504  
8. 15601 8. 102587 7. 869835 7. 915739 7. 925109 8. 047134 7. 929495 7. 834669 7. 714687  
6. 836164 6. 171982 6. 626863 6. 930006 6. 671978 6. 029387 6. 643598 6. 395435 6. 75053  
1. 106175 1. 462212 1. 04629 1. 742309 1. 285665 1. 363782 1. 572498 1. 000111 1. 943043  
5. 708161 5. 676271 6. 254935 4. 68642 4. 236403 4. 857822 6. 20635 4. 870777 7. 460589  
7. 144719 7. 071739 6. 915153 7. 499958 7. 19465 6. 941644 7. 861859 7. 251002 7. 107224  
5. 248597 3. 852254 5. 17146 3. 252239 5. 444885 5. 327566 3. 74742 5. 078482 4. 069154  
3. 093421 3. 317855 3. 156596 3. 70548 3. 110329 3. 298992 3. 202857 3. 172575 2. 944758  
2. 792269 3. 342281 0. 711477 4. 789539 3. 10728 1. 498236 4. 096903 2. 031208 4. 010969  
6. 448288 6. 163082 6. 636997 5. 575043 6. 422828 6. 002114 6. 294577 6. 526977 6. 110702  
1. 925835 1. 931637 1. 725249 2. 155 1. 810838 2. 297739 2. 011324 2. 036842 1. 153946  
4. 092726 4. 175156 3. 809204 5. 224948 4. 390031 4. 013826 4. 060929 3. 816671 3. 894173  
9. 946792 9. 02758 9. 005873 9. 672526 9. 023843 9. 107289 9. 873236 9. 526989 9. 397598  
2. 419917 2. 671082 3. 129106 2. 767055 2. 979461 2. 564411 2. 56152 2. 502796 4. 057389  
3. 135223 3. 953216 3. 133325 2. 746752 2. 711168 3. 526335 3. 273089 3. 116954 3. 735804  
1. 352432 2. 763461 1. 720134 2. 432822 1. 236159 2. 49704 1. 146881 1. 28096 2. 520019  
2. 202688 1. 990739 2. 198464 1. 93045 1. 578667 2. 094337 1. 839243 2. 134622 1. 763997  
2. 066373 2. 756081 2. 793488 3. 237456 2. 460254 3. 152721 2. 567491 2. 391292 3. 463116  
3. 79818 3. 710156 3. 542457 2. 896348 4. 150611 3. 498738 4. 113877 3. 930314 2. 883379  
8. 031746 7. 722062 7. 652026 7. 931063 7. 459139 7. 603289 8. 035529 7. 62625 6. 8005  
1. 454438 1. 624311 1. 894481 1. 711582 1. 626632 1. 804914 1. 71614 1. 947552 1. 625724  
1. 090318 1. 674799 1. 517424 1. 296825 1. 134987 1. 674558 1. 451887 1. 261631 1. 266209  
5. 936121 6. 026269 5. 690456 5. 813606 6. 340924 6. 054801 6. 317585 6. 117321 6. 15751  
1. 511639 1. 718 1. 541555 2. 163471 1. 52389 1. 05482 1. 318976 1. 382298 1. 666365  
2. 72507 3. 182062 3. 04147 3. 494621 3. 091552 3. 997453 3. 208443 3. 584162 3. 848046  
1. 238314 1. 157207 1. 125261 1. 187992 0. 964638 0. 849642 0. 908726 1. 391935 1. 113812  
3. 159684 3. 414792 3. 532165 2. 565248 3. 386349 2. 256485 2. 255679 2. 568595 2. 871523  
3. 57712 2. 525546 2. 673352 3. 214476 3. 703445 3. 244005 2. 558013 2. 756979 2. 272954  
4. 38429 4. 516873 4. 290859 4. 986933 5. 932959 4. 818652 5. 179507 4. 685687 3. 577583

1. 606222 3. 112015 1. 504681 1. 347236 1. 676975 2. 17915 2. 917119 1. 865104 2. 55064  
3. 639518 4. 071023 3. 501828 3. 981004 3. 912584 4. 108267 3. 432743 4. 06737 4. 071588  
3. 021186 3. 181976 4. 046718 2. 959035 2. 63778 3. 366427 2. 926159 3. 362311 3. 484495  
3. 050874 3. 881539 3. 532293 3. 271049 3. 134001 2. 660087 3. 228539 4. 051899 3. 676497  
3. 138715 2. 45365 3. 280287 3. 338775 2. 485447 2. 261584 2. 259259 2. 530648 2. 679665  
2. 804247 2. 604771 3. 094216 1. 850074 1. 777781 2. 870231 2. 338433 1. 560579 1. 563745  
7. 355883 7. 630976 7. 575018 7. 729252 7. 335939 7. 117512 7. 499239 7. 82095 7. 58031  
2. 853924 2. 412998 2. 600437 2. 632834 3. 062199 2. 904543 3. 407448 2. 441181 2. 17744  
9. 670762 9. 285092 9. 458438 9. 115935 9. 204083 9. 20527 9. 799029 9. 353227 9. 862456  
7. 31104 6. 721352 7. 46822 7. 375271 7. 247586 7. 292554 7. 992497 7. 647561 6. 443639  
3. 846578 2. 987763 3. 807559 3. 291227 3. 242496 4. 375666 3. 527199 3. 461169 3. 907145  
3. 747533 6. 060041 5. 1164 5. 135355 6. 218435 4. 171929 4. 088142 5. 770135 4. 461568  
9. 145614 9. 44317 9. 64584 9. 242838 9. 534477 9. 58768 8. 969135 9. 363945 9. 013  
2. 425554 2. 795883 2. 095665 2. 286844 2. 687425 1. 991901 2. 366999 2. 682104 2. 480974  
6. 469462 6. 864077 6. 739471 7. 106601 7. 070299 6. 530629 6. 740238 6. 892503 6. 220842  
9. 545982 9. 355748 9. 274115 9. 550041 9. 39967 9. 148059 9. 601827 9. 497295 9. 228415  
7. 912021 7. 817839 7. 774543 7. 555003 7. 941939 7. 610062 7. 860588 7. 878252 7. 887857  
1. 980812 2. 101642 2. 340947 2. 534978 1. 665885 2. 07088 2. 124921 2. 284931 1. 474603  
3. 123612 4. 457581 4. 193419 3. 720329 3. 689251 3. 802278 3. 243736 3. 488228 2. 898694  
1. 592174 1. 159608 1. 70194 2. 113162 1. 395574 1. 620668 1. 935393 1. 71763 2. 155399  
2. 734073 2. 854173 2. 455005 2. 607176 2. 059366 2. 523137 2. 64434 4. 985039 2. 604867  
2. 278222 3. 245176 2. 734353 3. 600872 2. 377737 2. 303522 3. 375907 2. 404909 3. 378341  
1. 692337 1. 933933 2. 414267 2. 099701 2. 223591 2. 213533 1. 878989 2. 05319 3. 386278  
6. 753336 7. 111604 6. 67727 6. 27289 6. 813669 6. 615488 6. 679706 6. 933332 7. 356393  
1. 521015 1. 126185 0. 712061 1. 864836 0. 883332 1. 003968 1. 27142 1. 458539 1. 826322  
5. 777763 6. 484256 6. 418886 5. 47606 7. 144941 6. 526063 7. 058178 7. 024514 6. 157722  
1. 621215 2. 209694 2. 3551 2. 432398 1. 299995 1. 498574 1. 895907 1. 642667 1. 232044  
1. 124254 1. 912767 1. 701333 1. 663573 1. 5231 1. 894211 1. 280644 2. 087681 1. 59846  
4. 072693 3. 917646 4. 406192 3. 408515 3. 632467 4. 207836 3. 428191 4. 25294 3. 622938  
1. 49839 2. 422622 2. 704302 3. 006814 2. 447298 2. 386001 2. 207495 2. 043324 2. 837935  
1. 270153 1. 67156 1. 611906 2. 218476 1. 447411 1. 412503 1. 721756 1. 80734 1. 880106  
5. 163095 5. 42885 5. 773858 4. 931015 5. 777839 4. 744998 5. 62936 5. 073143 5. 61756  
2. 034863 1. 356959 1. 724776 1. 845388 1. 162917 2. 02708 1. 534947 1. 117725 1. 180573  
2. 002811 2. 054607 1. 942455 2. 177811 2. 235623 2. 446901 2. 458305 1. 619148 1. 694418  
4. 88774 4. 712401 5. 512637 4. 901014 5. 202996 5. 138726 4. 063464 5. 070311 4. 353042  
3. 667151 3. 898946 4. 209891 3. 77157 4. 159646 4. 06757 3. 908671 4. 136781 3. 851353  
4. 77047 4. 876623 4. 934094 4. 157888 4. 856835 4. 245033 4. 923349 4. 863278 5. 169761  
5. 742091 4. 808957 5. 632704 4. 948146 4. 645196 5. 141078 4. 552741 4. 878638 4. 689106  
1. 664447 1. 694085 2. 231298 2. 27836 1. 990345 2. 228237 1. 655687 1. 961233 2. 173582  
7. 613443 8. 140192 7. 760046 7. 557116 8. 09066 7. 476681 7. 865766 7. 949094 8. 005895  
3. 018602 2. 074736 2. 887479 2. 887455 3. 060139 2. 849204 2. 743891 2. 50939 2. 879507  
3. 497284 2. 176867 3. 943773 2. 119861 2. 444635 3. 441793 2. 243767 3. 147269 4. 185103  
6. 574448 6. 853904 6. 821943 5. 537645 7. 092563 6. 394086 6. 294475 6. 274132 6. 257891  
2. 621787 3. 951688 3. 264984 1. 727994 3. 861595 3. 501469 2. 126812 2. 75994 3. 380891  
1. 162538 1. 423853 2. 41232 1. 876789 0. 972775 1. 78526 1. 262343 0. 959965 1. 100095  
5. 788805 5. 901415 6. 0623 4. 470051 6. 114629 5. 577113 5. 893208 6. 225213 6. 284346  
1. 980132 2. 017816 1. 738039 1. 278858 1. 161243 1. 274711 1. 461104 1. 499626 3. 158033  
2. 307657 2. 004927 3. 074548 2. 587345 3. 157966 3. 554144 1. 916695 3. 431508 2. 648951  
2. 859397 2. 453139 3. 181382 2. 917426 2. 865677 2. 878321 2. 573571 1. 968854 2. 680709  
1. 552203 1. 105356 2. 421927 1. 46664 0. 759224 1. 099719 3. 284021 1. 730193 4. 272734  
4. 777508 5. 227508 5. 236304 4. 322462 5. 312424 4. 790053 4. 939036 4. 73724 3. 50938

2.868915 4.012121 2.726057 3.177581 2.454604 2.696837 3.51716 3.140001 3.024392  
9.140135 9.143279 9.166133 8.543441 8.808101 8.92397 9.26128 9.102322 9.435174  
4.297106 4.594347 4.678352 4.355625 4.571046 3.489463 4.536482 5.519435 3.701221  
3.371499 3.18183 3.632637 3.007032 2.429371 3.580164 3.03131 3.104145 3.017699  
1.558536 2.038149 1.317127 2.756207 1.55156 1.649774 1.762796 1.663202 1.192201  
1.658368 1.716129 2.061297 2.671416 3.046547 2.530086 2.615039 2.525719 2.515082  
4.993164 4.530244 5.28368 4.498244 4.651312 4.886759 4.801641 4.887113 4.337175  
2.317964 3.018005 3.593743 3.075094 3.681352 2.179912 3.663094 3.494324 4.373978  
4.603843 1.975616 3.227939 4.142861 3.06828 2.312993 3.906854 3.973241 2.551169  
6.54891 7.04891 6.904299 6.657582 6.535028 6.600829 7.030781 6.768508 6.231318  
4.962916 5.172079 5.59407 4.583595 5.821955 5.32816 4.995855 5.166679 4.356708  
0.620073 1.329161 0.55038 0.847847 2.43886 2.691878 1.352382 0.893832 1.797277  
1.576221 1.407792 2.069765 2.077513 1.76966 1.6997 2.006272 2.315026 2.259726  
1.599432 2.205319 1.508502 1.812988 1.101153 1.750776 1.692307 1.659368 1.768687  
2.035447 1.155287 1.497576 1.343568 1.231505 2.474627 1.985497 1.942982 2.236572  
2.542737 1.836894 2.30717 3.317638 2.432695 2.490155 2.17462 1.900283 2.020335  
9.707528 9.775484 9.506512 9.445882 9.856371 9.399681 9.327502 9.431365 9.537421  
6.750103 6.688719 7.036234 7.327819 7.07618 6.713728 6.815423 6.950295 5.662971  
2.816277 1.505904 1.717343 2.599533 1.227052 1.607354 2.229011 2.190455 2.081363  
1.154853 1.677376 1.206197 2.251488 1.665618 2.23414 1.622627 1.347733 1.543614  
2.189628 3.108043 3.417123 3.10095 3.343114 2.477261 2.314813 2.644058 2.483052  
1.713085 2.739403 1.147891 1.255133 1.664836 1.397326 0.745719 0.919146 1.724199  
1.621082 1.898969 1.770299 1.920189 1.651172 1.995899 1.555846 1.59432 1.698534  
1.408478 1.136447 1.873478 2.372819 2.586593 2.03485 2.368182 1.51115 2.149799  
6.180238 4.389506 4.716352 2.793051 5.166596 3.79401 4.445767 4.637097 3.835562  
3.211785 2.929916 2.229672 2.864369 3.270031 3.07653 2.287307 2.44967 2.043353  
3.115095 0.829064 1.529999 3.510066 3.860083 3.276912 2.159139 3.058826 1.993366  
6.294949 5.472252 3.959476 6.708056 5.927537 1.889736 5.939378 4.250529 4.35505  
1.737546 1.692175 2.485945 3.218229 1.772653 1.852197 1.796464 2.086002 2.318003  
3.205564 2.814189 3.242763 3.632683 2.904962 3.930293 3.402223 3.843067 3.29863  
1.328996 1.767616 1.108769 1.661768 1.702008 1.427425 1.331595 1.133569 1.599396  
1.555192 1.570133 1.838661 2.883275 1.86971 2.081209 2.215843 1.976136 1.828555  
2.661981 3.643049 3.080088 3.323409 2.623606 2.7027 2.563176 2.270096 3.818591  
2.60872 2.002938 2.830457 2.753566 3.022406 2.317264 2.636213 2.684557 2.514975  
7.132369 7.380573 7.519459 7.067646 7.510501 7.056716 7.511744 7.172673 5.993103  
1.180426 1.570304 0.936492 1.28272 1.122705 1.345089 0.86427 1.048117 1.501643  
1.352634 1.299576 1.774314 2.443325 1.131932 1.601583 1.532681 1.23008 2.075755  
3.767054 2.080745 2.506214 3.401027 2.734246 2.359272 3.131782 2.765821 2.176269  
5.117112 5.305277 5.64948 4.657987 4.876862 3.87866 5.781073 5.571765 5.423338  
6.217343 6.297493 6.138443 6.120549 6.557385 6.545416 6.389043 6.180125 6.326549  
4.657098 4.764741 4.49856 5.055689 4.654711 4.970125 4.851763 4.533841 4.382061  
3.506169 2.79579 3.104119 2.852215 3.822083 3.571694 3.190074 2.433713 3.00436  
2.052516 2.070038 2.244183 2.066261 2.068299 2.494147 2.129851 2.046444 2.031637  
1.565543 1.126302 1.087845 1.1609 1.235298 1.44816 1.346191 1.487353 1.282247  
4.496612 4.998447 4.032926 3.730765 3.52908 4.097507 4.51613 4.835965 4.855875  
6.220952 7.648505 6.942472 8.041183 7.066825 7.245054 6.902367 7.443069 6.13937  
2.946791 2.318186 3.056614 1.34419 2.776404 2.453044 2.445347 2.867592 1.872926  
1.512636 1.362264 2.050174 2.161501 1.613705 1.698495 1.883674 2.418676 1.275175  
2.147017 1.146772 2.192927 2.362996 1.279067 1.786257 1.666407 2.017631 1.639544  
1.357766 2.20236 2.290439 3.180175 2.199141 2.232422 1.792138 1.740116 1.781718  
2.570208 2.543608 2.64705 2.049594 2.350731 2.695069 1.829224 2.575826 2.461733



1. 451927 1. 814307 2. 144987 2. 036355 1. 745628 2. 120781 1. 600453 2. 230112 1. 719734  
6. 336413 6. 423544 6. 437509 6. 309865 6. 486699 5. 847887 6. 844671 6. 200193 7. 132721  
4. 696494 4. 362127 4. 474752 4. 022923 4. 228252 5. 442216 4. 48259 4. 774211 2. 680282  
1. 421902 2. 671023 1. 311792 2. 299014 0. 984631 1. 113011 1. 592891 0. 979233 2. 024627  
4. 827987 5. 815996 5. 472792 4. 483432 5. 878088 4. 705411 4. 746505 5. 5841 5. 165091  
1. 764334 3. 707335 3. 072885 2. 377729 2. 422055 3. 396419 1. 887915 1. 82502 3. 184946  
3. 579754 2. 704662 2. 409516 3. 682666 3. 802782 3. 270305 2. 087075 2. 275101 2. 157264  
3. 696484 3. 61009 3. 164195 3. 466032 3. 534281 3. 754966 3. 581044 3. 500319 3. 330759  
5. 155499 4. 954061 4. 635044 4. 563388 5. 424402 5. 868013 4. 631664 5. 965206 6. 457876  
1. 235359 0. 983676 1. 005519 2. 19724 1. 08164 0. 979237 1. 131388 0. 913618 1. 502326  
6. 600654 6. 507423 7. 211588 7. 100229 6. 314759 7. 176406 7. 089473 6. 827529 5. 779463  
6. 538841 6. 985509 6. 555752 5. 426987 6. 560988 6. 61237 5. 86107 7. 032799 5. 624506  
5. 478668 5. 402591 5. 664099 5. 783201 5. 156338 5. 121417 5. 994629 5. 69206 6. 599702  
1. 778155 1. 858867 2. 20674 2. 56594 1. 540272 1. 874482 1. 860161 1. 716443 1. 96021  
3. 126507 3. 117651 2. 860486 1. 690007 3. 595249 2. 770282 2. 79402 2. 867135 2. 989128  
4. 554228 4. 072816 5. 370142 4. 324826 3. 877881 3. 810994 4. 394443 4. 0517 5. 165493  
3. 687395 3. 688981 4. 598382 3. 679089 3. 98881 4. 209514 4. 382287 4. 073569 3. 526589  
3. 45291 3. 918557 2. 509958 2. 612515 2. 692572 3. 397607 2. 739516 2. 534494 4. 569287  
3. 605608 2. 615822 3. 08687 2. 933711 2. 964715 3. 574024 3. 224222 3. 082577 3. 418054  
2. 842841 2. 804828 2. 894117 3. 00126 3. 169983 3. 126341 2. 638067 3. 467111 2. 950645  
4. 427268 3. 990321 4. 405951 4. 72139 4. 180972 4. 511256 3. 95899 3. 724688 3. 376239  
4. 734218 4. 81553 4. 856565 5. 39469 4. 798489 4. 882668 4. 997891 5. 181194 2. 87684  
2. 563328 2. 598947 2. 270009 2. 071881 1. 643798 3. 171868 2. 817515 2. 516152 3. 69605  
4. 582228 3. 023743 3. 820748 4. 749145 4. 571072 4. 720272 4. 196292 4. 209318 3. 784269  
1. 26982 1. 531794 1. 010096 1. 930171 1. 447379 1. 423146 1. 761334 1. 353507 1. 597991  
5. 389835 5. 113007 5. 979678 5. 048359 5. 637411 5. 214293 5. 000653 5. 560063 4. 9599  
2. 868868 3. 012968 2. 757185 3. 271767 3. 574882 2. 941629 2. 545966 3. 205567 2. 374887  
4. 859616 4. 701044 4. 750591 5. 292079 4. 924882 4. 795433 5. 345394 4. 700856 3. 213164  
2. 815444 2. 515833 1. 152986 0. 786001 1. 635646 3. 793305 1. 02813 3. 757698 2. 048516  
3. 841088 3. 697087 4. 021613 4. 302705 3. 888602 4. 114004 2. 673296 3. 946734 3. 415233  
3. 722966 4. 010266 3. 321623 3. 84298 3. 648369 2. 310894 2. 803779 3. 321623 3. 278734  
1. 871343 1. 774832 1. 530496 4. 425207 1. 218208 0. 911243 1. 242642 1. 345137 1. 148178  
6. 850505 6. 462472 6. 402049 6. 735427 7. 599034 6. 11143 7. 511623 7. 221056 6. 010151  
2. 319466 2. 229074 3. 169405 2. 434088 2. 201332 1. 988884 2. 177669 2. 203997 2. 342759  
8. 515757 9. 191429 8. 847723 9. 080572 8. 792196 8. 627308 8. 40517 8. 259244 7. 60028  
1. 379648 2. 864324 2. 699099 1. 897524 1. 47813 1. 799502 2. 251244 1. 472184 2. 917595  
7. 414956 7. 621477 7. 247139 7. 211172 7. 108831 6. 962269 7. 495599 7. 037074 7. 096136  
1. 565953 2. 020782 1. 191233 1. 681926 1. 629504 1. 30514 1. 155221 1. 719046 1. 134207  
9. 052871 9. 231758 9. 209934 8. 615053 9. 824706 8. 588881 9. 252631 9. 090169 8. 508193  
4. 19955 4. 993343 4. 587823 2. 981722 4. 076556 3. 703601 4. 413581 4. 272278 2. 917209  
3. 663955 3. 732757 4. 338286 3. 62509 3. 897952 2. 990051 3. 600652 3. 474131 3. 818429  
1. 444092 2. 139296 1. 743029 1. 286249 1. 845204 1. 213271 1. 028876 1. 681894 1. 445515  
7. 541763 7. 455648 6. 927714 5. 942072 7. 356065 7. 715965 6. 950261 6. 719186 6. 29621  
7. 506341 7. 453388 7. 045803 6. 281358 7. 079253 7. 259322 7. 416633 7. 161739 7. 148677  
2. 68234 2. 248943 1. 501847 2. 280543 3. 346855 2. 251773 2. 454261 1. 559751 1. 32685  
1. 490086 1. 493421 1. 505306 1. 983363 1. 412267 1. 688528 1. 356207 1. 239166 1. 662965  
1. 149207 1. 149207 0. 970135 1. 439106 1. 235214 1. 545032 1. 240726 0. 887076 1. 31426  
4. 86416 4. 554094 4. 933803 4. 01018 4. 867531 4. 936184 5. 180846 4. 954084 4. 593761  
6. 532487 6. 753469 6. 397821 6. 313933 6. 259661 6. 398003 6. 756718 6. 735864 6. 469251  
1. 339776 2. 158839 1. 261617 1. 735016 1. 638236 1. 964624 1. 407871 0. 865759 2. 033712  
1. 435189 0. 985919 0. 951685 1. 415554 1. 073832 2. 112073 2. 013637 0. 816839 1. 347849

2. 811929 2. 657287 4. 155286 3. 883912 3. 086098 3. 96944 3. 118871 3. 556921 3. 112887  
4. 45394 3. 647614 4. 000304 3. 443426 3. 681311 3. 377216 4. 762982 4. 14279 4. 466731  
1. 229346 1. 508161 2. 135085 2. 131355 1. 340838 1. 215893 1. 54831 0. 955614 1. 508161  
1. 215593 1. 677967 1. 408428 1. 605523 1. 829582 1. 099561 0. 973716 1. 703428 1. 22423  
3. 26455 3. 765792 2. 958464 3. 513558 3. 607929 3. 840467 2. 53664 3. 368493 3. 143622  
8. 772747 8. 601607 8. 761407 8. 218967 8. 650818 8. 236459 8. 904205 8. 300759 8. 017307  
7. 356079 7. 680349 7. 774065 7. 556481 8. 006766 7. 67536 7. 759915 7. 59878 6. 675522  
5. 053481 4. 725391 4. 809111 5. 021603 5. 575932 5. 311042 5. 119394 5. 306507 5. 366449  
6. 308725 5. 418524 5. 589535 6. 049169 5. 774454 6. 405714 5. 965156 5. 66819 5. 828841  
2. 685714 3. 116426 3. 64046 4. 206245 3. 475068 4. 187163 3. 921796 3. 90262 4. 346596  
4. 244061 4. 519528 3. 929036 3. 250085 3. 627255 3. 544462 4. 669286 3. 927955 5. 230438  
1. 947847 2. 074211 1. 216991 1. 821269 1. 830138 1. 670644 1. 706045 2. 206124 1. 679586  
5. 67785 5. 601015 5. 479402 5. 044815 5. 622247 5. 991731 5. 386956 5. 649747 5. 469799  
4. 873085 3. 847462 4. 179523 4. 481446 4. 045703 3. 923759 4. 645471 4. 552308 5. 442058  
3. 496919 2. 085219 1. 976171 2. 625913 3. 826081 2. 91817 3. 521932 2. 544395 1. 668008  
4. 019179 3. 660495 3. 340386 3. 566582 3. 881981 4. 403305 3. 629564 4. 073556 3. 165453  
1. 590027 1. 260715 2. 173356 1. 981397 1. 279531 1. 756473 1. 570789 1. 54999 1. 497329  
3. 332841 2. 554059 2. 495557 4. 539535 2. 477897 3. 340241 3. 248489 2. 578386 4. 755944  
5. 81849 5. 082857 3. 433611 2. 71961 5. 13664 3. 625732 4. 082331 4. 492548 5. 5342  
6. 253282 6. 540648 5. 720447 6. 730725 6. 092776 5. 70317 6. 410841 6. 538304 6. 094525  
5. 711611 4. 666762 5. 022806 5. 760727 4. 462193 5. 846065 5. 583343 4. 816029 5. 601502  
1. 888604 1. 708868 1. 366958 1. 402842 1. 097136 2. 22054 1. 411936 1. 16244 3. 526723  
8. 969424 9. 141674 9. 327198 9. 03802 9. 281425 9. 206847 9. 353796 9. 12549 7. 173088  
2. 00026 2. 486626 3. 558859 2. 622068 3. 303814 3. 59253 2. 652594 1. 904141 1. 732075  
5. 484057 5. 901055 5. 250535 5. 114755 7. 116124 5. 443254 5. 592992 5. 138384 6. 872079  
3. 856588 1. 739595 2. 210602 2. 771962 2. 457092 1. 638275 2. 319197 1. 933151 1. 748281  
6. 295015 5. 91933 5. 987886 6. 379289 6. 872726 6. 082596 7. 130757 6. 30153 6. 143145  
2. 327908 2. 447167 1. 569876 1. 500057 0. 963414 1. 640538 1. 639354 1. 609701 0. 796568  
1. 373429 1. 368256 0. 946111 1. 904097 1. 411887 0. 888757 1. 319697 1. 68248 1. 755006  
1. 533978 1. 508519 1. 750537 2. 145938 1. 56789 2. 49288 1. 293986 2. 799974 1. 451612  
3. 394818 4. 159791 2. 990295 2. 042524 4. 563957 1. 888592 3. 870193 3. 955774 1. 705745  
3. 193671 3. 425789 3. 776974 3. 13761 3. 46445 3. 389145 3. 299928 3. 086043 3. 195555  
2. 836095 4. 50278 3. 304297 4. 589489 4. 789222 3. 285888 3. 797681 3. 512966 3. 42061  
1. 488629 1. 664985 0. 888899 2. 47822 1. 081978 1. 320932 1. 445461 1. 112855 1. 268375  
9. 624859 9. 832452 9. 263828 8. 573207 9. 653483 9. 724395 9. 378419 9. 426342 9. 900559  
3. 354458 2. 33683 2. 560713 2. 287099 2. 443166 3. 359394 2. 884569 2. 439182 3. 258401  
7. 118166 6. 611857 6. 740147 6. 959857 6. 757185 6. 179954 6. 961296 6. 874543 7. 011417  
4. 747599 4. 819528 3. 991056 5. 156327 4. 896156 4. 602106 4. 793389 4. 271588 4. 592307  
2. 774088 2. 82226 3. 07012 2. 352824 2. 315637 3. 12474 3. 070915 2. 282064 2. 85959  
1. 762629 1. 984522 3. 098412 2. 657929 2. 479562 3. 025837 2. 583936 3. 045931 2. 784768  
9. 629783 9. 399448 9. 391032 9. 828559 9. 757447 9. 248983 9. 470991 9. 412293 9. 233704  
5. 35457 5. 393774 5. 317897 6. 440356 5. 420043 5. 596153 5. 394265 5. 504323 4. 053574  
1. 878801 1. 695725 2. 797108 2. 650851 1. 908906 2. 014988 2. 187238 2. 383279 2. 014774  
3. 121189 4. 256124 3. 819081 3. 430816 3. 084102 1. 723956 3. 433405 2. 692218 3. 906154  
6. 20253 6. 324002 6. 416561 6. 272717 6. 032672 6. 387265 6. 342361 6. 656997 5. 75753  
1. 981147 1. 738299 2. 574569 1. 913391 1. 721396 1. 892259 2. 123063 1. 862459 2. 069021  
3. 061763 2. 6937 2. 842382 2. 868467 2. 165523 2. 990964 2. 793286 2. 947637 2. 335224  
3. 088729 2. 798276 3. 670541 4. 836176 2. 865372 2. 786868 5. 301461 3. 2162 3. 357135  
2. 983787 2. 324337 3. 345614 3. 04802 2. 814906 2. 859577 2. 146078 2. 546113 3. 230458  
3. 907252 3. 544128 3. 61488 2. 978973 3. 801214 3. 409715 3. 34468 2. 56916 2. 170971  
3. 603406 4. 413061 3. 976125 3. 185934 5. 146232 4. 146624 5. 083205 4. 145263 4. 77345

1. 995366 2. 523221 2. 678858 2. 805072 2. 136817 2. 842513 2. 906863 3. 109455 4. 026646  
3. 718865 3. 601931 4. 197996 1. 974413 3. 306767 3. 792868 3. 623655 3. 881789 2. 832826  
6. 615055 6. 73399 7. 135411 6. 853024 6. 44418 6. 159924 6. 318409 6. 192322 5. 041537  
6. 08527 5. 719001 5. 827351 6. 521961 5. 864693 5. 247551 6. 32455 5. 885828 5. 669378  
3. 840851 3. 887213 3. 742206 3. 170893 4. 450195 4. 179382 3. 587521 4. 307922 4. 585002  
3. 486203 3. 012257 3. 108359 4. 794929 3. 298308 3. 028511 3. 404318 3. 539698 4. 409449  
7. 764401 7. 685317 7. 452933 7. 767166 7. 972127 7. 998449 7. 810586 7. 53929 7. 561322  
3. 62409 1. 915007 2. 564125 2. 869651 2. 415413 2. 527954 2. 266226 3. 314486 3. 29558  
5. 197415 5. 046893 3. 899066 3. 480707 5. 12529 5. 02032 4. 589139 4. 201227 3. 626714  
1. 973726 2. 156434 2. 25265 2. 148141 1. 715728 2. 625147 2. 417436 2. 354212 2. 331299  
2. 422624 1. 834464 1. 440092 2. 000908 2. 212955 3. 064296 1. 637574 1. 564182 1. 631456  
10. 20788 10. 57505 10. 55319 10. 78186 10. 04111 10. 50219 10. 26932 10. 72694 9. 542375  
2. 258898 2. 244093 2. 180337 1. 988889 2. 893461 2. 42474 2. 709471 3. 543588 4. 2484  
4. 824017 4. 823411 4. 368086 6. 071302 5. 48986 3. 860046 5. 344911 4. 708659 4. 489472  
4. 703957 3. 640297 3. 405473 3. 617527 4. 737301 4. 180247 4. 008023 3. 896662 3. 831943  
2. 319675 2. 677158 2. 718706 2. 491611 4. 454217 2. 343639 2. 6879 3. 142715 2. 110146  
1. 460087 1. 612454 0. 494276 1. 660043 0. 839717 1. 031672 0. 700423 1. 80255 1. 535665  
5. 585619 5. 553251 5. 600811 5. 992008 5. 657928 5. 602212 5. 578106 6. 371329 5. 291217  
4. 363827 3. 836635 3. 946005 3. 887192 4. 273915 3. 22999 3. 656017 3. 67586 3. 78436  
6. 093318 5. 179218 5. 321786 6. 243969 5. 191061 5. 595929 5. 410496 5. 625376 5. 355912  
6. 962771 7. 00881 7. 130807 6. 580239 6. 363686 6. 979181 7. 357332 7. 264307 6. 476796  
4. 386617 4. 476255 3. 899812 2. 33377 3. 485706 3. 668124 3. 95633 4. 258227 4. 560259  
2. 616748 1. 969704 1. 872777 2. 794651 2. 038947 2. 26288 2. 018372 2. 601187 2. 767339  
5. 006996 4. 696268 5. 272068 5. 346378 4. 756471 5. 484147 4. 224743 4. 856822 4. 276826  
5. 898256 6. 318764 6. 429971 6. 609382 6. 409573 6. 643111 6. 57994 7. 080466 5. 505964  
2. 834175 2. 543008 2. 264551 1. 729749 1. 654604 1. 699032 1. 267089 1. 463828 4. 748814  
7. 761275 7. 223152 7. 690028 7. 330304 7. 95874 7. 476952 8. 180751 7. 554049 7. 132966  
2. 277692 2. 430295 2. 548177 2. 37018 2. 004843 3. 041813 2. 466206 2. 004075 2. 214054  
1. 337868 1. 576356 1. 516988 1. 738042 1. 587687 1. 437514 1. 49045 1. 970386 1. 676564  
3. 414896 2. 299645 2. 151177 1. 933801 3. 257987 2. 839439 3. 257541 3. 079184 2. 925236  
5. 985614 5. 691046 6. 596243 5. 926915 5. 581447 4. 897518 6. 547512 5. 964606 5. 161943  
1. 5076 1. 641904 1. 425674 1. 982789 1. 57668 1. 072489 1. 343688 1. 560375 1. 398707  
1. 665794 1. 664015 1. 38839 1. 788283 1. 149671 1. 243124 1. 275316 1. 624601 1. 770821  
4. 498097 3. 805862 4. 189017 3. 6948 4. 016485 5. 299573 4. 309148 4. 065908 5. 582556  
1. 463377 1. 697006 2. 353275 3. 242207 1. 312257 1. 505698 1. 525726 1. 715126 2. 020778  
2. 258943 1. 784588 1. 839587 2. 416449 2. 062217 2. 175571 1. 690952 2. 385884 2. 291571  
1. 386309 1. 900499 1. 398462 2. 678146 1. 190042 2. 08207 1. 760529 1. 456031 1. 3414  
7. 937614 7. 595276 7. 43873 7. 32727 7. 133251 7. 478406 7. 174066 7. 59974 7. 424321  
1. 884757 3. 18162 1. 720639 2. 795561 3. 86055 1. 607384 3. 945333 2. 945707 2. 104087  
2. 048849 1. 952082 1. 757229 2. 121675 2. 158193 2. 375829 3. 638536 1. 883474 2. 035916  
2. 541202 1. 648608 1. 319029 1. 951811 2. 486657 1. 565569 2. 394182 1. 717743 1. 740799  
6. 409895 6. 093089 6. 174022 6. 692648 6. 234315 6. 207486 6. 075685 6. 154781 6. 643883  
5. 774387 5. 185822 5. 468758 4. 867153 5. 742518 5. 330843 5. 693013 5. 244769 4. 126691  
1. 633867 2. 530779 1. 509544 1. 986069 1. 647968 1. 492262 1. 780773 1. 992466 1. 587345  
2. 333733 3. 554297 2. 02317 3. 553568 3. 061945 2. 663703 2. 582951 3. 568396 2. 846851  
1. 742464 1. 653032 1. 649901 0. 980979 2. 175625 2. 624366 1. 171258 1. 821201 1. 720771  
8. 008576 7. 189102 7. 666792 6. 314105 7. 318468 8. 018511 8. 00478 7. 604035 6. 717135  
3. 281005 3. 307459 3. 61459 3. 083299 3. 250767 3. 533353 3. 355968 3. 233316 3. 801531  
5. 625608 4. 72141 5. 904019 4. 963208 4. 47144 5. 511023 5. 377578 5. 084181 5. 488507  
5. 932677 6. 276861 5. 135325 7. 236745 6. 079299 5. 568787 5. 825607 6. 016308 5. 953009  
6. 755389 6. 452301 6. 082089 6. 584812 5. 767587 5. 598262 6. 336494 6. 382161 5. 926731

5.915119 5.753171 5.58964 4.515496 6.139573 5.629087 5.633934 5.847226 5.864121  
4.167739 4.467732 3.98177 3.686598 4.728319 4.147262 3.890321 4.377081 3.465616  
1.755555 2.569935 1.972239 2.525954 2.648976 2.091125 2.162103 2.57786 2.000278  
5.777477 5.856219 5.56097 6.615365 6.02791 5.473931 5.529061 5.335783 5.344111  
3.054016 2.748522 3.429002 3.892113 2.891495 4.037438 3.367566 3.351263 2.258766  
1.83616 1.622697 1.504898 1.924447 1.415226 1.409472 1.909391 1.538562 1.086192  
7.411058 7.706253 7.152067 7.233228 7.619514 6.854363 7.61002 7.636733 7.342662  
5.355362 6.460241 5.803571 6.701306 6.121029 6.554001 5.635687 6.431358 6.502576  
4.804874 4.545105 4.53376 5.03038 3.829806 5.571305 4.29867 4.637367 4.664236  
7.083026 7.427114 7.132749 7.093871 7.362659 7.321772 7.213486 7.220237 7.244127  
1.815729 1.867824 1.829122 1.701457 1.654819 1.963829 1.287172 1.689822 1.661714  
5.075332 5.227505 5.152103 3.753016 4.774166 5.025974 5.420431 4.864853 4.509468  
4.376953 3.43135 4.301948 4.615718 4.417152 4.027442 4.370096 4.735509 3.861825  
1.028815 1.683761 1.143532 1.385008 1.403201 1.42288 1.385008 1.792939 3.056626  
1.476647 1.419106 1.77485 1.317012 1.567829 1.452392 1.177385 1.297281 1.512434  
5.148563 5.319987 5.302919 4.908808 5.393722 5.872718 5.353641 5.592781 5.303145  
4.856675 5.144101 5.961651 5.165754 5.209241 4.991121 5.184487 5.658262 3.848555  
5.937393 6.342879 4.648396 3.168316 5.489354 6.589024 4.711527 5.729134 6.412265  
5.947156 6.566588 6.288072 5.424519 6.662943 6.029249 6.214633 6.561533 5.860135  
4.69673 5.404582 5.552211 5.604946 5.323812 5.342086 5.182431 5.295815 4.680228  
1.678306 1.298135 1.139427 1.635027 1.96554 1.919867 1.581285 2.114914 1.804505  
6.685968 6.345594 6.806961 6.153048 6.369318 6.210879 5.928479 6.118314 5.387162  
3.163331 3.929158 2.869174 2.220908 3.971051 3.537141 3.702409 3.349135 5.465016  
0.72542 1.215072 1.028269 1.17103 1.376065 2.121826 1.482134 1.041239 0.928289  
1.582731 1.171792 1.733673 1.880777 1.309067 1.494119 1.337807 1.402286 1.989503  
5.896179 6.085712 6.113884 5.886396 6.313665 6.281549 5.771194 6.407741 5.565609  
3.943248 4.560794 4.101133 3.206554 4.882216 4.086492 4.973979 4.714773 4.299002  
4.382914 5.296078 5.233746 5.029007 5.410839 4.741913 4.67026 5.10342 5.688676  
6.104558 6.946353 6.865282 7.177172 7.050857 6.594305 6.766103 6.241236 5.773473  
6.549139 6.651876 7.007408 7.769402 6.429373 6.962144 6.574302 6.696243 6.186023  
9.134543 8.422184 8.662011 6.895859 8.241278 8.089416 8.522125 8.198245 8.507874  
5.913134 5.969758 5.577611 6.258997 5.415307 4.928093 5.219562 5.713622 4.363381  
4.014968 4.208866 3.306087 4.597506 3.487482 4.234288 3.771598 4.62853 2.892165  
4.229256 4.965528 5.250989 5.188002 5.183803 3.856378 3.37966 5.491664 6.744147  
6.422428 6.715778 6.142375 6.228969 6.525837 6.049022 5.803168 6.310338 6.410185  
8.018893 7.715548 7.9454 8.303199 8.116144 7.298715 8.331273 7.990192 8.025906  
9.03724 8.949635 8.922974 8.733484 9.118178 9.327381 8.217473 9.228378 9.313324  
1.444433 1.114892 1.8345 1.831878 1.129592 1.301483 1.338269 1.838374 1.583763  
4.107752 4.301174 4.208378 4.141014 4.553154 4.925485 4.239231 4.45361 3.352512  
1.362087 1.377976 1.538463 2.434924 1.832559 2.324172 2.28859 1.718412 1.989138  
2.68696 2.442481 2.114836 2.34768 2.164724 1.496354 1.981495 2.32996 1.778603  
2.412263 2.596832 2.936519 2.856841 2.707412 3.950655 2.734738 2.347438 2.849874  
2.750355 2.450315 3.642845 2.372212 2.879844 3.951437 3.214983 2.393337 4.746897  
7.011393 6.466563 6.834885 5.79304 6.732838 6.427433 7.184324 7.118394 6.575843  
8.145498 7.843001 7.537074 7.969422 8.181996 7.52157 7.452813 8.030304 8.295294  
7.172362 6.80434 6.836307 7.002912 7.042963 6.893528 6.934005 7.139839 7.074976  
5.94836 4.820141 5.357801 5.593556 5.560962 5.437641 5.430072 5.520297 4.673648  
5.971883 6.000821 6.073437 5.47058 5.829553 5.880217 6.404106 6.088104 6.646757  
8.059758 7.94099 7.95617 7.991069 8.142005 7.724505 8.074 8.288695 6.989583  
8.845949 8.659638 9.143851 8.503532 8.71885 9.004086 8.929633 8.792331 8.471866  
2.27535 3.050417 2.495871 2.051794 3.588359 2.554429 2.483944 3.861522 2.60149

2. 177282 2. 770937 3. 065659 3. 038942 2. 828515 2. 119337 2. 269544 3. 044436 2. 224268  
6. 205401 6. 540457 6. 389247 6. 730018 6. 305779 6. 13709 6. 726234 6. 488361 5. 952477  
2. 049617 3. 501935 3. 243912 2. 605166 3. 153646 2. 683936 2. 087424 3. 392496 2. 597226  
4. 054181 4. 568663 4. 685944 4. 429273 5. 371951 5. 756972 4. 299279 6. 250265 3. 945056  
6. 478922 6. 616746 6. 489741 6. 135091 6. 596858 6. 201694 6. 629011 6. 473312 6. 195574  
6. 04766 6. 108553 5. 368383 6. 443075 6. 170935 5. 42021 6. 042945 5. 462842 5. 676986  
5. 182522 4. 521731 4. 611012 5. 77732 4. 398968 3. 869315 4. 814133 4. 87886 4. 307942  
5. 906928 5. 609155 5. 744839 5. 99976 5. 729066 5. 47801 6. 448951 6. 029343 5. 777642  
2. 554468 2. 528551 2. 392398 3. 711153 3. 368626 2. 433163 2. 484358 3. 172328 3. 147264  
4. 114888 4. 618012 3. 499281 3. 087234 4. 879128 3. 987993 3. 793004 4. 477034 4. 252723  
3. 86821 3. 786866 3. 657257 3. 806077 3. 515174 3. 572548 3. 070699 3. 390853 2. 839201  
1. 855924 2. 8032 1. 668756 2. 1888 1. 824444 2. 15261 1. 484713 2. 220223 2. 102935  
2. 863734 2. 313776 1. 975812 2. 079741 1. 459799 2. 858301 2. 682048 3. 703637 1. 189752  
7. 975233 7. 976904 7. 96607 7. 941803 8. 074882 7. 754542 7. 851711 7. 72565 8. 360484  
6. 674728 6. 692795 6. 266145 7. 269092 7. 043076 6. 809179 6. 817675 6. 756957 5. 760958  
7. 983124 7. 334668 7. 297181 7. 494075 7. 530703 7. 91941 7. 359273 7. 755002 7. 067174  
1. 887372 1. 586413 2. 611932 2. 363273 2. 28395 2. 49898 2. 401411 3. 452538 2. 049676  
4. 697722 5. 376818 3. 710769 4. 793071 5. 04069 4. 209414 4. 850362 4. 436902 4. 913275  
5. 407904 5. 693651 5. 222987 5. 018441 5. 115713 5. 710217 5. 130264 5. 325745 4. 627166  
2. 960509 1. 95537 1. 969195 2. 327809 1. 547367 1. 61942 2. 018941 1. 916561 2. 027435  
5. 12977 5. 248229 4. 529572 3. 15618 3. 81825 4. 683585 3. 942018 4. 582285 4. 715688  
5. 654466 2. 85249 5. 066551 3. 035291 4. 821818 8. 370015 3. 172417 6. 017652 7. 996889  
6. 381968 6. 24963 5. 959675 6. 745088 6. 477422 5. 903605 6. 349052 6. 204855 6. 623245  
6. 834008 6. 769082 7. 009748 5. 58131 6. 326249 7. 126705 6. 798149 6. 835143 7. 245294  
1. 593847 2. 470362 2. 749294 3. 780179 3. 815512 2. 238629 3. 133568 3. 53671 2. 661745  
1. 77701 2. 457298 1. 903657 2. 208789 1. 929835 2. 112908 2. 080996 2. 085619 1. 704764  
9. 531687 9. 638455 9. 324654 9. 969661 9. 648018 10. 32951 8. 888268 9. 665466 9. 069795  
5. 865114 5. 817864 5. 711736 5. 817375 6. 118816 5. 706281 5. 908313 5. 559971 5. 575925  
2. 802457 1. 701237 2. 4599 2. 643365 2. 646368 2. 998225 3. 17161 2. 201684 3. 275539  
3. 698101 3. 43675 4. 832129 3. 984966 4. 264336 0. 857612 5. 626627 4. 718937 4. 999124  
8. 202328 8. 129377 8. 405395 6. 88317 7. 640005 7. 8647 7. 736537 8. 079637 7. 306244  
7. 040826 6. 973327 7. 097033 7. 06478 7. 255875 7. 932911 7. 504464 7. 186676 8. 332216  
1. 450763 1. 410426 1. 557694 2. 415689 1. 88317 1. 573856 1. 857401 1. 98324 2. 6809  
7. 645841 7. 269241 6. 934617 7. 433786 7. 203153 7. 053163 7. 336872 7. 33321 6. 874189  
1. 129532 0. 980159 0. 913984 1. 4715 0. 868096 1. 452183 1. 406206 1. 02947 1. 123323  
1. 632564 2. 05676 1. 613675 2. 436322 2. 503642 2. 868398 2. 163242 2. 058922 2. 08233  
2. 271895 2. 618523 2. 273097 2. 55137 3. 979011 1. 9058 3. 134135 2. 257039 2. 694105  
2. 501688 1. 958511 2. 377093 2. 236403 2. 954231 3. 574097 2. 010972 2. 363852 3. 026588  
2. 823852 1. 963121 1. 348956 1. 735436 2. 536646 2. 322009 1. 854552 2. 189657 1. 795221  
2. 602084 2. 611301 3. 951558 3. 050526 2. 732258 4. 052196 3. 201332 5. 05082 3. 191255  
0. 591317 0. 883215 1. 387088 1. 518136 1. 182954 1. 237817 0. 996207 0. 885721 1. 050313  
3. 552217 4. 27738 3. 969351 4. 255009 3. 712997 3. 854794 3. 648743 4. 133915 3. 699031  
7. 533271 6. 201833 6. 961077 6. 665003 8. 038424 5. 996964 6. 965203 6. 903027 7. 613958  
8. 117989 6. 383361 7. 417631 7. 646881 7. 486775 8. 547533 6. 836251 7. 551641 9. 221104  
0. 76048 0. 862578 0. 852348 1. 634087 1. 176763 1. 769802 1. 312035 0. 836982 2. 517604  
7. 378989 6. 753333 6. 677033 6. 92602 6. 06237 6. 721855 7. 272177 6. 602667 7. 065024  
5. 752633 7. 166753 6. 06943 7. 725758 6. 935178 7. 165341 6. 76101 6. 2276 6. 954946  
1. 858106 1. 848662 1. 951778 2. 177579 1. 633509 1. 336239 1. 673524 1. 74145 1. 385873  
0. 942817 1. 140469 1. 401396 1. 748672 1. 030084 1. 343505 1. 452059 0. 829076 0. 941541  
2. 116601 2. 585614 1. 759414 2. 613347 3. 331746 2. 608699 2. 197006 2. 478342 2. 762256  
2. 439433 3. 813579 4. 3549 2. 98727 3. 59631 2. 998828 4. 025977 4. 722431 4. 046682

2. 316714 3. 347254 2. 656976 2. 575951 2. 758597 1. 991301 3. 386707 2. 707558 1. 701111  
1. 722764 1. 995452 1. 548061 2. 531449 1. 498742 2. 090682 1. 502285 1. 492783 2. 212096  
7. 098663 6. 542113 6. 398598 6. 143976 5. 834362 7. 151731 6. 247342 6. 512982 7. 024419  
5. 433464 5. 998295 5. 849932 4. 817897 5. 800953 5. 728436 5. 979268 6. 072496 6. 086717  
7. 609713 7. 484708 7. 526944 7. 452281 7. 142957 7. 302817 7. 553387 7. 72721 7. 303444  
7. 087733 7. 372804 7. 250004 6. 011093 7. 369121 7. 042756 7. 306203 6. 988314 7. 45268  
5. 984769 5. 824083 5. 977399 6. 304235 6. 008168 6. 324894 6. 228701 6. 656134 6. 185484  
4. 994097 4. 773156 4. 089033 4. 557294 4. 704929 5. 394649 4. 886658 4. 466093 4. 243386  
7. 881336 7. 787167 7. 786483 8. 29506 7. 843406 7. 969294 7. 907297 7. 87879 7. 590816  
1. 705089 2. 979804 2. 628511 2. 092158 1. 25009 1. 881009 1. 86407 2. 007288 1. 302146  
4. 119489 4. 592627 4. 817028 4. 244083 4. 774935 3. 619522 4. 376726 4. 542499 4. 044257  
3. 850339 2. 77762 3. 16172 4. 351722 3. 573343 3. 135503 3. 197717 3. 667235 2. 573062  
1. 751038 2. 17001 1. 64378 2. 524833 1. 724581 1. 688824 1. 803875 1. 181247 2. 536426  
1. 702383 1. 591425 1. 801565 1. 772693 2. 019075 1. 549338 2. 188689 0. 952036 2. 145068  
5. 533108 5. 920096 5. 352895 5. 60357 7. 666655 4. 763229 5. 536549 5. 682128 6. 181935  
1. 785922 1. 979373 2. 543856 1. 998011 1. 543005 1. 647235 1. 593365 1. 818123 2. 153418  
2. 151243 0. 679417 1. 164567 1. 48536 2. 122096 1. 487776 1. 485323 1. 381306 1. 025014  
3. 329279 2. 964289 3. 418419 3. 220132 3. 160371 3. 237106 4. 075983 3. 269609 2. 998447  
6. 337479 6. 609723 5. 64677 6. 147938 5. 371264 6. 15967 5. 79197 6. 566284 6. 179547  
1. 166808 1. 194068 1. 732524 1. 814296 1. 765613 1. 346803 2. 017573 1. 401195 1. 043283  
6. 85241 6. 966561 7. 12783 7. 208185 7. 373412 5. 813041 6. 155341 7. 306115 5. 083652  
6. 733012 6. 39788 6. 462551 4. 684975 6. 760241 6. 649133 6. 234387 6. 548793 6. 066994  
5. 835193 5. 701878 5. 347936 5. 487341 5. 709478 5. 284897 5. 779465 6. 043145 5. 845896  
2. 728363 2. 939826 2. 244568 1. 979962 2. 469072 2. 958956 2. 263751 2. 066773 2. 545758  
0. 962781 1. 750817 1. 306445 2. 347797 2. 167724 1. 156396 2. 056571 2. 466882 0. 844538  
1. 412097 0. 724321 1. 324192 1. 308112 1. 289422 1. 940143 1. 308112 1. 269766 1. 430565  
1. 147336 1. 256514 1. 327044 1. 831219 0. 872063 1. 157029 0. 866856 1. 116683 1. 23522  
0. 629559 0. 96651 2. 146691 1. 334368 1. 203452 2. 725853 1. 222002 1. 878688 1. 382079  
2. 381408 2. 554905 1. 095556 2. 986061 1. 95843 4. 823611 1. 449599 2. 849568 2. 393252  
0. 757848 0. 881669 1. 005537 2. 742831 0. 974508 1. 335941 0. 995702 1. 521022 1. 212084  
0. 990931 1. 226928 1. 250248 1. 235562 0. 879318 1. 34845 0. 925374 1. 160863 1. 15702  
2. 729331 3. 286528 4. 732252 3. 350291 3. 843451 3. 86501 4. 046887 2. 617625 2. 897637  
1. 395432 1. 047462 1. 864224 1. 896885 1. 404358 1. 540562 1. 185068 1. 619079 1. 595791  
1. 358754 1. 458875 0. 935384 1. 376604 1. 316009 0. 871558 1. 356208 1. 344484 1. 469673  
0. 883491 1. 141814 2. 559216 2. 025287 1. 098649 0. 841832 0. 909099 1. 436483 1. 303446  
1. 740238 2. 281743 2. 828291 3. 527488 3. 276593 1. 573042 3. 077 1. 210646 1. 028756  
1. 125925 1. 359318 1. 503189 2. 231081 1. 585385 2. 245387 1. 230816 1. 320397 1. 316699  
1. 101548 0. 842792 0. 695629 1. 27518 0. 864557 1. 107832 1. 444118 0. 937857 0. 622361  
1. 610246 1. 801207 1. 268034 1. 466295 1. 501 1. 747498 1. 352727 1. 618599 1. 495045  
0. 723171 1. 022103 0. 933137 1. 214223 1. 186907 0. 899059 0. 500597 2. 293703 0. 940211  
2. 183308 2. 306261 2. 57637 1. 75868 1. 877738 2. 711045 1. 465975 1. 220664 1. 877998  
1. 710599 1. 418519 1. 824935 1. 224285 1. 528655 2. 852869 1. 782038 2. 147836 2. 27067  
1. 69553 1. 614228 2. 177894 2. 219955 2. 467103 2. 246839 1. 980568 1. 066496 0. 895967  
3. 611206 4. 0608 3. 375731 4. 151142 4. 339797 3. 139343 4. 063858 3. 275626 2. 783093  
1. 639976 2. 090529 1. 885939 2. 25991 4. 417855 2. 164318 2. 447389 2. 617207 1. 467216  
5. 163764 6. 577618 4. 851023 3. 952449 6. 246925 6. 232916 4. 393116 4. 889915 2. 30001  
2. 109892 2. 178252 2. 178252 2. 022045 2. 63207 1. 638977 1. 595041 2. 954842 3. 428827  
2. 079722 1. 471764 2. 118474 2. 545453 1. 325107 2. 17465 2. 247542 1. 764182 3. 016024  
4. 903402 4. 584767 4. 927676 4. 429594 5. 481423 4. 514284 4. 458885 5. 396926 4. 888722  
0. 660152 1. 471217 1. 102835 1. 00617 1. 111112 1. 519843 0. 911371 0. 895149 1. 250266  
2. 000725 1. 803184 2. 082787 2. 040118 1. 744294 1. 946767 2. 760642 1. 726214 2. 215069

3. 640486 1. 564595 1. 988461 1. 635499 1. 602674 2. 55226 1. 560551 1. 128443 2. 072029  
8. 868631 9. 158826 9. 366874 8. 988375 8. 813535 9. 090133 9. 090374 9. 20711 9. 334877  
4. 038314 4. 090125 4. 408677 2. 973039 3. 695167 3. 866312 5. 422065 5. 967933 4. 174094  
5. 258349 5. 123537 4. 496052 4. 422868 4. 92633 4. 472648 4. 9863 4. 236296 3. 432486  
4. 380779 4. 179487 4. 840506 3. 641165 4. 007922 4. 4235 4. 100738 4. 30304 3. 297617  
1. 14142 1. 209082 1. 026966 1. 559011 1. 670646 1. 212157 1. 759285 1. 352925 1. 065059  
1. 744405 0. 828923 1. 339973 1. 368045 1. 480496 1. 283181 1. 8459 1. 050287 1. 221413  
5. 804352 6. 818163 6. 851206 7. 12379 5. 9038 6. 617358 6. 191358 6. 39849 3. 547122  
2. 281949 1. 507349 2. 372543 2. 254141 1. 814121 2. 359662 1. 637685 1. 954198 1. 398526  
1. 998015 2. 270742 1. 832315 2. 464231 1. 365492 2. 285204 1. 185266 1. 497355 1. 961682  
1. 35582 1. 064812 1. 512855 1. 503344 1. 225175 0. 948726 1. 627711 1. 19956 0. 908355  
3. 695651 3. 014135 3. 327051 3. 277402 3. 162608 2. 381818 3. 280143 3. 289389 3. 718329  
3. 744049 4. 530121 4. 041756 3. 994302 3. 779826 4. 256938 3. 920672 4. 246101 3. 703643  
6. 719464 6. 81567 7. 172129 6. 218626 6. 280663 7. 035106 6. 349266 6. 800569 7. 303549  
1. 361023 0. 996555 1. 594706 1. 503806 1. 690793 2. 133236 1. 270929 1. 399502 1. 901184  
6. 369191 6. 570957 6. 260819 5. 997086 6. 415657 6. 726528 6. 382111 6. 740706 6. 479511  
1. 087902 2. 56822 1. 386853 1. 560501 1. 697772 1. 426559 1. 429569 1. 320068 1. 580778  
1. 724428 1. 617795 1. 874344 2. 366584 1. 394685 2. 050392 1. 77996 2. 166495 1. 279189  
1. 816501 2. 23919 2. 070041 2. 292464 2. 23245 2. 479246 2. 007578 2. 190536 1. 445223  
4. 045944 3. 388498 4. 310997 4. 576548 4. 09769 4. 411501 3. 72994 3. 888711 3. 269741  
3. 974084 3. 679029 4. 292616 4. 156887 3. 767176 4. 147557 4. 625533 4. 33457 5. 548423  
1. 747446 2. 737904 3. 258134 1. 755235 2. 718022 2. 154876 2. 406495 1. 961975 1. 915294  
2. 44756 1. 815527 2. 481651 2. 534329 1. 592728 3. 207283 1. 495854 1. 358115 1. 87687  
1. 702065 1. 057475 1. 543595 1. 192227 0. 9637 1. 106744 1. 599225 1. 426948 1. 167065  
3. 329231 1. 06866 2. 962194 3. 434255 1. 548385 2. 353083 1. 821329 2. 36014 1. 873064  
1. 669921 1. 720607 1. 774914 3. 082725 1. 776387 2. 611351 3. 120312 2. 563297 1. 90066  
3. 307423 2. 043185 3. 446406 3. 055914 3. 202618 3. 891644 3. 276624 2. 161083 3. 119553  
1. 315639 1. 792495 1. 170883 2. 081659 0. 698573 2. 669348 1. 191276 1. 544509 2. 973347  
2. 699231 2. 044308 3. 106613 4. 865398 1. 691606 1. 922109 2. 621924 2. 939395 3. 851474  
6. 595978 6. 372359 6. 793412 4. 987363 5. 984688 6. 400743 6. 593282 6. 212037 6. 149071  
4. 229954 4. 781961 4. 135885 5. 62036 4. 539992 3. 132382 3. 407182 5. 051737 4. 368853  
7. 53507 7. 740878 7. 599888 7. 758264 7. 581892 7. 648711 7. 704647 7. 860229 8. 334493  
3. 90664 3. 628257 3. 821482 3. 805345 3. 987355 3. 295961 3. 341568 2. 888781 3. 95147  
1. 501726 1. 690381 1. 802913 2. 427323 1. 974276 1. 717232 1. 822642 1. 975344 2. 562686  
1. 478684 2. 10942 1. 760638 2. 873547 1. 805315 1. 725616 1. 55968 1. 381016 2. 087944  
2. 019372 1. 784054 2. 244599 2. 416104 2. 009874 2. 356447 2. 096632 2. 213295 2. 560806  
1. 053087 1. 071135 1. 391811 1. 499358 1. 065786 1. 091502 1. 352504 1. 238418 1. 526923  
1. 40099 1. 480597 2. 170131 1. 205936 1. 201535 1. 23505 1. 584693 1. 192515 1. 40099  
2. 365233 2. 251774 2. 443194 2. 301216 2. 123789 2. 119595 2. 620459 2. 358343 2. 268231  
0. 914926 0. 837665 1. 600399 1. 100652 1. 327931 2. 666533 1. 14512 1. 140703 1. 511586  
1. 568043 1. 758392 1. 541525 2. 559772 1. 667565 2. 380161 1. 635424 2. 081666 2. 034138  
1. 271895 2. 766563 1. 480595 1. 527423 0. 830105 1. 614986 1. 187944 1. 931788 1. 455585  
1. 3984 1. 631952 2. 157235 1. 291468 1. 378466 0. 687349 1. 305503 1. 07369 1. 722072  
1. 124578 0. 954659 0. 970967 2. 484069 1. 875534 1. 403603 1. 076209 1. 030575 1. 30204  
4. 445913 4. 252097 3. 473696 3. 892241 5. 374934 3. 38898 4. 175346 4. 849545 2. 253881  
1. 165155 1. 121731 2. 274151 2. 038834 1. 30323 1. 542007 1. 964263 0. 913745 1. 480909  
1. 427371 2. 221531 1. 16706 1. 970056 1. 40865 3. 321413 1. 905854 1. 294434 3. 19099  
2. 713961 2. 910846 2. 580933 2. 022685 2. 433901 3. 009821 1. 931387 1. 351751 3. 094375  
1. 112497 1. 170457 1. 171087 2. 304214 1. 363967 0. 969138 1. 112379 0. 911094 3. 20401  
7. 081079 7. 309839 7. 660946 6. 552755 7. 711332 7. 603133 7. 696021 7. 234308 7. 495863  
1. 124254 1. 230262 1. 451679 1. 302361 1. 188307 1. 410205 1. 497087 1. 061906 1. 044486

2. 142768 3. 057367 2. 446183 2. 13215 1. 812079 1. 995707 2. 080501 2. 164206 1. 92938  
2. 202235 2. 109471 2. 351318 2. 783733 2. 391707 1. 446678 1. 559815 1. 413675 1. 464347  
4. 559734 4. 556995 5. 00595 4. 096078 5. 858097 5. 318419 5. 896751 3. 507509 3. 570107  
5. 01867 5. 446035 5. 136036 5. 42239 5. 486187 5. 520152 4. 754634 5. 208184 3. 81111  
3. 059011 2. 558448 2. 790863 3. 206259 2. 210271 3. 27507 2. 049585 2. 785679 3. 214518  
4. 061248 4. 335138 3. 350667 4. 275506 3. 564021 4. 156924 3. 838121 4. 262118 3. 352821  
2. 924323 2. 930818 2. 364588 2. 508407 3. 209715 2. 069116 2. 370997 3. 469337 2. 335386  
1. 367941 1. 402909 1. 645538 1. 744928 1. 137053 1. 281781 1. 353827 1. 215457 1. 501525  
2. 658598 1. 86003 1. 997085 1. 217745 2. 132325 1. 69758 1. 704843 2. 076687 1. 400463  
1. 463049 1. 29397 1. 214654 1. 626346 1. 443636 2. 17154 1. 166735 1. 030989 1. 116865  
4. 202453 4. 262246 4. 477193 4. 715428 4. 710546 4. 336981 4. 918774 4. 585241 4. 842293  
1. 959658 1. 968628 2. 574933 2. 077749 3. 045895 2. 277293 1. 94339 2. 315843 2. 273036  
3. 67848 2. 988652 3. 240187 3. 922232 3. 171639 3. 632922 3. 479681 3. 637818 3. 457371  
1. 379286 1. 420156 0. 743772 1. 372984 1. 166761 1. 21727 1. 661226 0. 931053 1. 249438  
0. 973409 1. 031539 0. 829246 1. 034531 1. 289385 1. 908864 0. 886369 0. 744414 0. 980245  
5. 142106 4. 932402 4. 886177 5. 129809 5. 656339 4. 193393 5. 716109 5. 01843 4. 711299  
1. 268339 0. 813837 1. 392687 1. 257787 1. 560917 2. 888878 1. 696331 1. 977958 2. 395318  
2. 504205 2. 425828 2. 163187 3. 552325 2. 685588 3. 164676 1. 742881 2. 594696 3. 606245  
1. 223059 0. 783767 0. 983283 1. 274213 1. 267799 0. 946887 1. 558027 0. 983283 1. 205118  
1. 506019 1. 536243 2. 559115 1. 576422 3. 06482 1. 873018 1. 90471 1. 008218 1. 187222  
2. 440929 2. 540512 2. 914057 1. 877637 2. 488413 2. 883924 2. 784878 3. 666522 2. 025454  
0. 992815 1. 235705 1. 105628 1. 321411 1. 283931 1. 370595 0. 856838 1. 155216 0. 996154  
2. 538805 3. 082294 3. 099471 2. 434325 2. 309691 2. 282473 3. 543558 2. 910196 3. 168162  
2. 168944 1. 823705 1. 530848 1. 870651 2. 087822 1. 980896 1. 899651 1. 775278 1. 920366  
1. 071477 1. 650259 1. 571341 1. 517107 1. 361946 1. 000756 1. 592951 1. 092331 1. 297233  
5. 468741 5. 054831 4. 808351 5. 057093 4. 929136 4. 90689 5. 149302 4. 044022 4. 805887  
2. 250966 1. 852125 1. 405339 2. 183588 2. 406942 2. 256374 1. 602696 2. 163085 1. 908634  
9. 365672 9. 149814 10. 40087 9. 864407 8. 657821 9. 099144 9. 848565 9. 321008 9. 10863  
4. 580288 3. 185589 3. 285638 3. 818422 5. 555822 3. 295895 4. 085254 3. 930793 3. 830595  
1. 937961 1. 735679 1. 932315 2. 479901 1. 900717 2. 343042 1. 562429 2. 278471 2. 288236  
2. 267491 2. 665696 2. 363938 2. 498226 2. 298617 2. 872229 2. 295546 1. 547267 2. 21709  
4. 435775 3. 761869 4. 183412 3. 815891 2. 730231 3. 704806 3. 796419 3. 263904 3. 900452  
7. 091361 4. 511745 5. 655041 5. 24839 5. 062407 7. 511552 5. 477417 6. 42255 7. 010598  
1. 50321 0. 823537 1. 10516 1. 391194 1. 110164 1. 591271 1. 371134 1. 424712 1. 361858  
0. 861881 0. 666169 1. 662418 0. 682257 0. 770408 1. 006815 1. 033693 1. 381587 1. 015316  
4. 765792 4. 525667 4. 780562 5. 631586 2. 659321 5. 85863 4. 005193 4. 57854 5. 41967  
1. 883162 1. 613698 1. 581489 1. 704661 1. 426965 1. 546328 1. 54082 1. 760697 1. 782511  
1. 936378 3. 000026 2. 408102 3. 281539 2. 179042 2. 028674 2. 214272 2. 307937 1. 254825  
2. 817971 2. 636714 2. 460155 1. 570016 2. 493446 3. 40509 1. 690835 2. 875017 1. 666591  
1. 810092 1. 241315 0. 895527 2. 163577 1. 352481 1. 170337 1. 207879 1. 174407 1. 197732  
4. 939877 4. 585568 4. 764127 3. 922628 3. 722727 4. 927508 4. 344733 2. 984065 5. 546332  
8. 06458 8. 245868 6. 928015 7. 245651 9. 128112 7. 299028 7. 06163 8. 61998 5. 545618  
1. 636414 1. 818542 1. 91195 2. 210395 1. 513974 2. 123611 1. 786935 1. 598077 1. 795077  
1. 834918 2. 095743 2. 265859 2. 269585 1. 565719 1. 934127 1. 455681 2. 382711 1. 211217  
3. 714372 4. 782205 4. 260236 3. 548741 4. 435265 3. 719612 4. 628863 4. 740505 4. 201672  
4. 319796 4. 878565 5. 21406 5. 627472 4. 669284 4. 360721 4. 691003 4. 877771 4. 756382  
5. 679135 4. 955706 5. 342884 5. 296296 5. 544084 3. 934917 4. 696221 4. 690998 4. 417012  
6. 721872 4. 614658 5. 289225 5. 026308 5. 54994 7. 008893 6. 246238 5. 364091 7. 078818  
2. 346187 2. 563193 3. 071645 2. 706069 2. 107692 2. 455951 3. 169907 2. 355523 1. 954368  
5. 105377 5. 537991 5. 70981 5. 65561 5. 211722 4. 446793 5. 392856 5. 081029 4. 793435  
5. 613755 4. 901434 5. 320909 4. 589606 4. 35996 5. 426201 5. 113362 4. 993583 5. 096832



1. 558599 1. 828779 1. 83098 1. 958785 1. 464511 1. 528615 1. 611291 1. 305217 2. 445425  
7. 411913 6. 842672 6. 70137 8. 443384 6. 815435 7. 164819 6. 4616 6. 978754 6. 162155  
2. 049907 2. 080382 1. 316739 2. 275682 1. 73049 1. 704717 1. 95164 1. 552709 1. 508833  
1. 858586 2. 671913 1. 807261 1. 877511 2. 363015 1. 567087 2. 242204 1. 879569 1. 526425  
2. 839496 3. 126763 2. 877864 4. 070369 3. 319765 2. 52403 2. 449219 2. 25628 2. 955508  
7. 682216 8. 159112 7. 366132 7. 865498 7. 813907 7. 931605 7. 834602 8. 053916 6. 630684  
6. 060927 6. 319243 5. 960343 6. 522527 6. 144267 6. 19091 6. 866148 6. 177036 6. 959382  
1. 652499 1. 829485 2. 049069 1. 926756 1. 459817 1. 755231 1. 592905 1. 829857 1. 616289  
1. 434622 1. 119069 1. 397181 1. 230572 1. 344291 2. 02892 1. 326151 1. 705904 1. 948446  
3. 817126 4. 303229 3. 204853 4. 522433 3. 656043 2. 251143 3. 45519 4. 079109 3. 787543  
1. 399195 1. 469805 1. 616819 1. 510496 1. 148941 1. 751992 1. 573219 1. 458027 1. 640244  
4. 122802 3. 962762 3. 373586 4. 649585 3. 816306 3. 183371 3. 645812 3. 93987 4. 831157  
5. 573803 6. 150867 5. 872986 3. 973532 5. 981629 5. 534541 6. 176267 5. 777121 5. 708801  
2. 948041 2. 799574 3. 43567 2. 704291 3. 002352 3. 033049 3. 127666 2. 936463 2. 322947  
1. 164412 0. 463484 1. 475404 0. 468657 1. 957288 0. 057049 2. 417119 2. 085087 0. 691433  
4. 84528 5. 092102 4. 991302 5. 31384 5. 11577 4. 298008 5. 387017 5. 286618 5. 663453  
1. 745654 1. 420378 1. 043588 1. 868673 1. 345515 2. 23791 1. 51458 1. 852413 2. 076634  
6. 16063 6. 009911 6. 562045 5. 869903 6. 524919 6. 24416 6. 137448 6. 270769 6. 789499  
1. 249422 2. 823436 2. 833012 1. 608588 2. 914885 1. 675631 3. 389906 1. 375418 1. 694249  
5. 434183 5. 474263 5. 115566 3. 917999 5. 878337 4. 769435 5. 69194 5. 19115 5. 748206  
5. 007605 5. 88318 5. 801517 5. 610294 5. 650361 5. 421613 5. 514768 5. 195603 5. 662558  
7. 361255 6. 855321 7. 397376 7. 553296 7. 319043 7. 322614 6. 679037 6. 790089 5. 966254  
2. 275133 1. 893949 3. 079077 2. 266567 2. 237961 2. 253253 2. 033777 2. 26636 1. 828417  
2. 518948 1. 674165 1. 882555 1. 721128 2. 011704 2. 275599 2. 108665 2. 91186 2. 425143  
1. 284188 1. 309055 1. 33207 3. 206142 1. 508738 1. 759494 1. 350876 1. 107878 1. 500758  
1. 586603 1. 256093 1. 566946 1. 462146 1. 174602 2. 333465 0. 854174 1. 295806 0. 771377  
1. 546288 1. 01976 1. 475035 1. 899164 1. 225464 1. 978033 1. 538632 1. 933854 1. 185674  
3. 521222 3. 763046 3. 111348 3. 378175 3. 378175 3. 558237 4. 245565 3. 285402 3. 392137  
6. 267405 6. 559484 5. 497772 5. 218567 6. 04482 6. 54693 5. 590781 6. 39576 6. 513175  
2. 997131 2. 808646 3. 250149 4. 286269 4. 43498 2. 45207 2. 613244 4. 14909 3. 902032  
2. 962621 5. 641759 3. 280088 3. 377406 4. 539166 3. 838271 4. 27231 4. 635934 3. 078027  
4. 199661 3. 474525 3. 784766 4. 326996 4. 528176 3. 827332 4. 095974 3. 86433 4. 3208  
4. 667178 5. 380126 5. 239824 5. 763841 5. 59764 3. 987402 5. 648564 5. 433479 5. 109051  
2. 187654 2. 435411 2. 423741 2. 253693 2. 633984 2. 461292 2. 512126 2. 09541 2. 321678  
3. 221168 3. 414739 3. 031546 2. 474993 3. 355816 3. 285617 3. 456077 2. 740242 3. 043728  
4. 412208 4. 027228 3. 46956 4. 72641 2. 872414 4. 682096 3. 028653 3. 980833 4. 18516  
1. 591271 1. 69374 1. 712301 2. 109337 1. 688255 2. 271431 1. 489776 1. 406215 1. 737035  
1. 264238 1. 449454 1. 112703 1. 37479 1. 650335 2. 355441 1. 102099 1. 157283 1. 741239  
8. 937607 9. 102281 8. 848919 8. 868318 8. 878152 8. 858678 8. 836328 9. 088478 8. 946324  
1. 182244 2. 294028 7. 137192 1. 166033 3. 58801 0. 359642 3. 690218 2. 970615 2. 363776  
1. 187317 1. 886793 1. 617149 1. 830949 1. 58627 2. 190155 2. 7126 1. 935618 1. 762993  
1. 597751 1. 792952 1. 685572 1. 396025 2. 112895 1. 871106 1. 357042 2. 10941 1. 188623  
2. 407863 3. 013529 2. 605268 2. 036626 1. 623802 2. 619899 2. 025967 2. 390777 2. 582271  
4. 756858 4. 755813 3. 374255 1. 972547 4. 625119 3. 247851 3. 324694 3. 454383 2. 334033  
2. 387255 3. 510221 2. 486216 2. 867985 2. 940114 3. 187951 2. 695994 3. 032228 2. 618145  
1. 276908 1. 985574 1. 969836 1. 460822 1. 073858 2. 128013 2. 109181 1. 816771 1. 566329  
2. 18512 2. 046847 2. 161574 2. 068139 1. 70209 1. 727707 2. 149644 2. 174805 2. 993802  
7. 674414 6. 941296 7. 36307 6. 519497 7. 19038 7. 192205 6. 817215 7. 322916 7. 713872  
2. 211587 1. 294029 1. 17092 1. 61838 1. 648748 1. 828615 1. 486661 2. 158734 2. 809196  
1. 560289 1. 495146 1. 362524 1. 686815 2. 4611 1. 794076 1. 711534 1. 594076 1. 781681  
3. 071063 2. 286587 2. 603014 2. 189402 3. 318856 2. 696955 2. 587579 2. 390757 2. 66031

3.918206 2.84516 3.314644 4.050001 5.194674 3.707549 3.463042 3.719396 4.329293  
6.293893 6.569189 6.165245 5.575585 5.783764 6.601507 6.227891 6.154115 6.08716  
1.895737 0.988149 2.070343 2.928582 1.353269 1.767848 1.658149 2.525285 2.328133  
4.294846 4.329228 4.685526 5.068625 4.492921 3.665943 3.787684 4.215672 4.155281  
4.763266 4.65086 4.400195 4.683157 4.883819 3.9668 3.979131 4.213235 3.863087  
1.679549 2.674538 1.672473 1.568286 1.764621 1.534805 1.813702 1.755173 1.304216  
3.705891 3.430013 3.503553 3.331739 3.467215 2.824224 3.596253 3.540066 3.368396  
1.540564 2.401758 1.554524 1.470235 1.572271 1.914284 1.893266 1.836192 1.724329  
5.527865 5.405602 5.649356 5.759078 5.009756 5.385177 5.546086 5.298768 3.797783  
3.158831 3.177135 2.818061 3.886716 2.874858 3.364958 3.517702 3.67676 2.860713  
1.163596 2.633611 3.183469 4.04152 3.588756 1.466831 2.29234 2.674129 3.905846  
1.368324 1.794874 1.19517 1.356948 1.432373 1.253352 1.345871 2.139834 2.012401  
4.639751 4.343455 4.207917 4.557021 4.889375 4.080049 4.748381 4.362976 3.952618  
0.846871 1.929534 0.994281 1.347754 1.134215 1.312686 2.343684 1.174049 1.795064  
2.008617 1.651646 2.782225 2.009056 1.547177 1.84049 1.682055 1.665809 1.943359  
1.614212 3.041944 1.429123 1.95573 2.124453 2.118337 3.381929 2.89566 1.919609  
5.073505 5.737918 5.028802 4.677693 4.779843 5.430906 4.755602 4.712322 4.789655  
3.012953 2.939023 2.85506 1.947128 2.045622 3.319768 2.44579 2.155153 3.257234  
1.793447 1.942644 1.582051 1.961919 1.712235 1.29978 2.121495 1.355497 2.058304  
6.327325 6.642391 6.765936 5.892316 6.865657 6.540599 6.864435 6.702531 6.141163  
4.520275 2.75649 2.202106 2.306531 3.252534 2.081067 1.83022 3.675127 3.511774  
3.231894 3.346663 4.153915 2.810122 3.485471 3.596143 3.987897 3.371506 4.390759  
2.978479 4.423014 3.26095 3.466074 3.58581 3.018641 3.658366 3.536743 3.141335  
6.233689 5.841137 5.498388 5.368522 5.781522 5.623262 5.816589 6.115144 5.133772  
2.077498 2.44126 2.311444 2.399134 2.48491 2.34376 2.302834 1.845955 3.085465  
1.519802 0.977689 1.684414 1.579268 1.214394 1.713264 1.216973 1.180735 1.853051  
5.805782 5.863198 5.868487 6.625697 6.227772 6.038219 6.077625 6.261475 5.696339  
0.905895 1.063156 1.044219 1.596276 1.491269 1.892112 1.062523 1.059333 1.180159  
2.58521 4.088847 3.141939 3.100204 2.60533 2.972693 3.206858 2.417929 2.563285  
6.138276 6.531878 7.096537 6.238921 6.229164 5.901556 5.905342 7.034836 5.615573  
5.523247 5.623513 4.996136 4.707866 5.01368 5.255688 5.445401 5.124764 4.647862  
6.085317 5.787209 6.937186 6.078882 6.283444 6.204782 5.78893 5.796908 6.111007  
2.145884 2.326537 2.250671 2.226892 2.299581 1.737331 1.956706 2.423895 2.589006  
3.541771 3.351707 4.023308 3.651454 3.009898 3.404096 3.217172 3.410578 3.900961  
2.23084 3.179928 2.27363 2.424448 2.539768 2.227248 2.154382 3.025174 2.619522  
5.770213 6.279412 6.092056 6.060056 6.134099 6.287411 5.816611 6.557878 4.921607  
1.96496 2.128099 1.702493 1.296483 2.030884 1.561154 1.513517 1.295846 1.388029  
3.672883 4.782524 2.960754 2.263953 3.995428 4.116361 4.244091 3.782691 2.29488  
8.159529 7.960744 8.343663 7.806872 8.393381 8.391326 7.839628 8.226328 8.304033  
4.666681 5.052207 4.829226 6.026192 6.692901 4.08713 3.789498 5.127863 2.571616  
5.338049 5.921435 5.120047 5.761199 5.119942 5.006175 5.179994 5.638451 5.018238  
1.243984 1.4191 1.241407 2.600758 1.346894 1.653207 1.519308 1.496307 1.710508  
1.694149 1.718776 2.005562 1.843288 1.718966 2.093803 2.092501 1.966093 2.74069  
8.110413 8.596537 8.826809 7.247917 8.447874 8.486631 7.890602 8.78567 7.959627  
2.724503 0.947044 2.056864 1.259096 1.064349 1.063636 0.739844 2.87212 1.549764  
5.83858 6.116708 5.467991 4.439502 5.426745 5.792425 5.6985 5.922059 6.705003  
5.299064 6.159322 5.956492 5.491229 4.318891 5.931389 5.97724 5.460225 5.219511  
2.368446 1.58138 1.912344 2.512357 2.377854 2.663945 2.095207 2.014974 2.396004  
2.392341 2.472477 2.783564 2.57363 1.965567 2.771606 1.927928 2.019048 2.324032  
6.199164 6.154152 6.685111 6.420106 6.334937 5.714286 6.138992 6.37789 6.311063  
4.855146 5.636064 4.673796 4.644108 4.99993 5.725295 4.878273 5.168671 4.767914

4. 306405 4. 100001 4. 378803 3. 169114 3. 92747 4. 20914 3. 221642 3. 903423 2. 455613  
4. 143483 4. 664913 3. 67577 4. 459233 4. 339381 4. 309933 4. 29407 4. 757794 3. 66105  
2. 301045 1. 460664 1. 472653 2. 416878 2. 343027 2. 485458 1. 465084 1. 87756 2. 591344  
6. 806447 6. 531366 6. 062292 5. 442072 5. 826269 6. 954915 6. 091209 6. 673393 6. 699577  
4. 308172 4. 380362 4. 16968 4. 388939 4. 985511 3. 572843 4. 423139 4. 589149 4. 622153  
1. 654613 1. 768621 1. 85401 1. 624655 2. 148287 1. 865074 1. 983587 1. 737783 1. 987498  
5. 48983 5. 448494 5. 339389 4. 886964 5. 499684 5. 192952 5. 138586 5. 12104 5. 363955  
5. 19814 4. 361951 4. 859009 3. 937547 4. 950487 5. 469899 4. 650492 4. 548948 4. 844893  
5. 836208 6. 368266 5. 832844 4. 963427 5. 464589 5. 375584 6. 098553 6. 072657 6. 673899  
2. 309158 2. 163578 2. 525581 2. 173926 1. 646021 1. 850788 2. 532199 2. 82275 2. 0708  
4. 449919 4. 422241 4. 220506 4. 952936 5. 131315 4. 075075 4. 335611 4. 679326 4. 451095  
1. 038842 1. 761421 1. 250064 1. 423616 1. 35711 1. 219306 1. 418416 1. 203459 1. 234469  
1. 347538 0. 994736 0. 932932 1. 819792 1. 062519 1. 177159 1. 50578 0. 938604 1. 693212  
1. 444099 1. 666839 1. 240328 1. 850074 1. 507146 1. 569214 1. 248804 1. 212486 1. 004113  
1. 602737 1. 814041 1. 501313 2. 224823 1. 685003 2. 495578 1. 649811 2. 280584 2. 015591  
2. 035428 1. 873168 1. 769534 2. 369302 2. 530348 1. 598922 3. 703373 2. 028409 2. 554354  
1. 114385 2. 338639 1. 358408 1. 582966 1. 399644 1. 570233 1. 056637 1. 408031 1. 993358  
1. 442576 1. 193929 2. 493585 3. 196208 1. 708693 1. 551237 1. 482573 2. 342577 1. 591092  
2. 931318 2. 28693 2. 440723 3. 521187 3. 02601 4. 209888 2. 760724 2. 991725 3. 817508  
5. 322063 5. 564414 5. 188319 5. 47002 5. 266227 5. 038954 6. 162035 5. 17554 5. 288166  
2. 225804 0. 875277 1. 199469 1. 483239 1. 559345 2. 0713 1. 402311 1. 141725 1. 170058  
1. 023295 3. 04827 1. 956031 3. 397762 1. 605982 2. 554142 1. 997981 1. 23942 2. 805712  
2. 832601 3. 270996 2. 780344 2. 617876 3. 353604 2. 166759 2. 833797 3. 99607 4. 197234  
4. 208287 3. 035686 2. 961886 1. 990069 2. 62352 2. 071302 3. 158146 3. 258807 5. 067902  
3. 30288 2. 675753 3. 240562 3. 879169 2. 589456 3. 368107 3. 964787 3. 201058 3. 939826  
3. 599563 4. 270139 4. 871285 4. 171717 3. 889343 5. 727398 4. 720949 4. 899078 2. 567691  
1. 259924 0. 962718 0. 893528 1. 525138 1. 065636 0. 703382 1. 085384 1. 116458 1. 014425  
6. 721193 4. 755803 5. 351868 8. 324981 3. 483505 5. 208132 6. 985519 5. 247243 5. 268547  
1. 581889 2. 51577 2. 621498 4. 1545 2. 665462 2. 457778 2. 70496 2. 220285 2. 378597  
1. 842709 1. 40921 1. 462362 1. 412562 1. 568669 1. 664255 1. 792776 1. 817513 1. 386845  
3. 018866 2. 540121 2. 183703 2. 322945 2. 243893 2. 747089 2. 180479 2. 980456 1. 86011  
2. 027348 3. 176528 2. 094734 2. 967773 3. 055508 1. 840084 3. 056178 2. 434865 2. 417033  
2. 746715 0. 843169 0. 812147 2. 48419 0. 923534 0. 604253 1. 376913 1. 17103 1. 17103  
2. 188941 2. 518786 2. 355591 2. 676894 2. 866812 3. 131833 2. 555058 2. 510997 3. 04467  
2. 388491 2. 556763 1. 906968 2. 003794 2. 159506 2. 409697 2. 598303 2. 628954 2. 732839  
5. 15426 5. 462182 4. 923757 5. 681953 5. 357535 5. 454121 4. 259776 5. 442458 5. 279879  
5. 731504 5. 664791 6. 256711 5. 162669 5. 580994 5. 953728 6. 089089 5. 243218 6. 083384  
2. 515805 1. 468804 1. 821917 2. 154004 1. 481605 1. 619604 1. 361801 3. 27239 2. 107531  
3. 032763 2. 662118 2. 812007 3. 562534 2. 479909 1. 99405 3. 147227 2. 506404 3. 371624  
5. 161877 4. 963146 5. 281376 3. 16625 4. 966275 4. 953035 4. 603962 4. 55014 5. 347875  
4. 515282 3. 636062 4. 513391 4. 026761 3. 888272 3. 271334 3. 890914 3. 315879 3. 795475  
7. 622648 7. 704298 6. 101741 6. 124839 7. 076336 7. 517621 7. 734821 7. 375678 7. 028194  
7. 212013 7. 266487 7. 391651 6. 446483 7. 413481 7. 515599 7. 367313 7. 478634 7. 521901  
6. 71517 6. 62529 6. 523265 6. 04131 6. 538061 6. 501169 6. 317037 6. 766388 7. 063258  
3. 977476 4. 249385 3. 632071 3. 750744 3. 653066 2. 926852 3. 326417 3. 657908 3. 458357  
3. 748105 2. 978141 1. 883999 2. 847801 2. 406617 2. 152333 2. 089028 3. 279016 5. 09299  
2. 425693 2. 660867 3. 451973 2. 536234 3. 155861 1. 818793 2. 285994 5. 077016 2. 744879  
4. 635047 4. 135967 3. 917407 4. 836066 5. 061077 3. 847275 4. 127839 4. 199199 3. 476953  
7. 965544 7. 962512 8. 090361 8. 023417 8. 038747 8. 061256 7. 706782 7. 952637 7. 853292  
5. 618774 5. 399676 4. 64083 6. 54382 5. 681776 5. 075019 5. 350066 4. 561259 5. 173131  
2. 055131 1. 562032 1. 753677 2. 76357 1. 930276 1. 792352 1. 707318 2. 750123 1. 624008

1. 826583 1. 543609 1. 550615 2. 652636 2. 413348 1. 851163 1. 653014 1. 634438 1. 748307  
6. 030604 5. 488422 6. 366088 6. 03542 5. 936555 6. 225118 6. 213448 5. 987342 5. 946022  
2. 28724 1. 68425 2. 097307 2. 315483 1. 561191 1. 949942 2. 955272 2. 527855 2. 158301  
0. 754158 1. 083371 1. 326294 0. 992693 1. 344909 1. 478199 1. 272381 0. 900031 0. 919659  
2. 431625 2. 683787 0. 692116 3. 321843 2. 224244 2. 420336 0. 920189 2. 355084 3. 780757  
1. 731228 2. 523886 1. 345073 1. 347659 1. 174048 1. 886292 1. 917125 0. 988907 1. 780224  
6. 062703 4. 158932 6. 067623 4. 789783 4. 50009 5. 382988 5. 741856 3. 647348 4. 923914  
1. 649491 1. 793964 1. 356188 1. 586072 1. 540951 1. 413879 0. 93049 1. 330626 1. 135594  
2. 861208 2. 742251 2. 451069 3. 696931 3. 645009 2. 573462 2. 827474 2. 399275 3. 133264  
2. 050485 2. 656472 2. 12624 1. 8371 2. 372935 1. 722086 1. 9322 1. 744128 1. 78533  
3. 140947 2. 945907 2. 238215 2. 66495 4. 259102 2. 152873 3. 539124 3. 510928 2. 186313  
4. 10745 4. 483677 3. 954061 4. 3098 4. 004346 4. 650748 4. 484951 4. 418198 3. 732707  
1. 101906 1. 517993 1. 183673 1. 256136 1. 364932 1. 36071 1. 352684 1. 735401 1. 473066  
0. 710702 0. 72174 0. 995462 1. 033567 0. 92837 1. 715432 1. 226853 1. 344845 1. 179593  
6. 488099 6. 449851 6. 956341 6. 379438 6. 647649 6. 27297 6. 551896 6. 748076 5. 646361  
3. 155868 2. 789817 3. 578414 3. 043843 3. 456004 3. 561255 2. 967127 2. 372321 2. 48797  
1. 8008 1. 658487 1. 800001 1. 526939 2. 480306 1. 966871 1. 609322 1. 507096 2. 050956  
4. 553719 5. 117652 4. 943255 4. 382747 4. 89859 4. 549846 5. 78805 4. 284963 4. 42159  
5. 688175 5. 369788 5. 530609 3. 157892 5. 123749 4. 850808 4. 533688 4. 987952 5. 02121  
1. 156849 1. 64913 1. 25797 1. 478455 1. 165352 1. 725682 1. 752837 3. 44127 2. 200164  
1. 220665 1. 159722 0. 847962 1. 104507 1. 306179 0. 95499 1. 550185 1. 606013 1. 724755  
4. 468935 3. 6815 3. 671611 4. 563876 4. 911134 3. 131669 3. 991216 4. 281256 3. 093034  
8. 262773 8. 086582 8. 735721 7. 601809 8. 382127 8. 252409 8. 250069 8. 575112 7. 574087  
6. 522071 6. 137593 6. 116616 7. 277572 6. 470485 6. 346676 6. 659271 6. 226232 6. 401971  
4. 372321 4. 042637 4. 213747 5. 506688 2. 515455 3. 424155 4. 08054 3. 602752 4. 849474  
1. 987851 2. 733159 3. 045574 3. 211588 2. 07395 1. 941564 2. 903872 1. 69694 2. 624118  
5. 031054 5. 829396 5. 355677 6. 282892 5. 812578 5. 480622 6. 137528 5. 659227 6. 104039  
4. 842414 5. 356216 5. 466378 5. 645069 5. 915887 5. 437629 5. 143305 5. 760625 3. 46414  
7. 964931 7. 883203 8. 088398 8. 050143 7. 834677 7. 735352 7. 861619 7. 910868 7. 237064  
5. 144137 5. 408676 5. 286092 6. 440726 6. 020298 5. 103818 6. 263871 5. 739611 5. 347303  
6. 17116 5. 374549 5. 990013 4. 475865 6. 195061 5. 710947 5. 927029 5. 713135 5. 53505  
2. 353409 2. 189164 2. 406913 2. 241888 2. 604466 3. 123888 3. 77591 2. 815774 1. 872398  
1. 238072 1. 511297 1. 550814 1. 467323 1. 583738 1. 635434 1. 432207 1. 177717 2. 439356  
2. 195447 3. 275916 3. 071235 2. 343233 2. 43748 1. 857907 3. 193411 3. 054327 3. 521074  
5. 017971 4. 921397 4. 930924 4. 39781 5. 168782 4. 794568 5. 893945 6. 543556 3. 228854  
1. 262974 1. 047877 1. 074295 1. 742352 1. 681859 1. 678508 1. 212778 1. 228351 1. 22147  
6. 495695 6. 687347 6. 427118 5. 911524 6. 604454 6. 033582 6. 782661 6. 638315 6. 69249  
2. 555709 2. 975567 2. 249494 2. 042325 2. 139314 2. 922802 2. 671631 2. 359786 2. 661026  
4. 330451 4. 509205 4. 558912 3. 438493 4. 567134 4. 842896 4. 414928 3. 70976 3. 927237  
3. 323818 2. 945708 1. 995689 4. 01076 3. 400449 3. 555582 2. 919771 3. 344921 2. 66098  
4. 928017 5. 48222 5. 068225 5. 457786 5. 617642 5. 226062 5. 794503 5. 617553 4. 831105  
7. 608382 7. 712346 6. 924783 7. 538668 8. 026179 7. 542726 7. 639672 7. 643008 7. 134056  
4. 733493 4. 686122 5. 318073 5. 720947 6. 29697 4. 292239 5. 787442 5. 057548 5. 715297  
7. 574555 7. 879586 7. 925659 8. 109916 7. 833455 7. 760977 7. 996942 8. 359689 7. 698616  
4. 658143 4. 798722 5. 085291 3. 589071 4. 347097 4. 608918 4. 513231 5. 48739 2. 983998  
5. 942267 6. 212562 6. 302488 6. 130214 7. 303508 6. 058772 6. 346997 7. 066508 5. 803332  
5. 606193 5. 671927 4. 804441 4. 052526 5. 508416 4. 491999 5. 510332 5. 192435 6. 402064  
4. 594696 3. 642999 4. 469012 5. 597294 4. 600527 5. 27616 3. 71171 4. 409815 6. 560927  
5. 929983 6. 419979 6. 105128 6. 340707 5. 893796 5. 9633 5. 603128 6. 28927 5. 9633  
6. 701631 7. 101609 6. 263608 7. 902077 7. 693909 7. 566118 6. 970412 7. 423371 6. 837291  
7. 454482 7. 477807 7. 706858 6. 508599 6. 972248 7. 283291 7. 492386 7. 255866 7. 473901

1. 934017 3. 211578 2. 027511 1. 855948 3. 181843 3. 532475 3. 293055 0. 925607 1. 479385  
2. 598117 2. 472782 2. 092586 2. 108667 2. 116051 1. 667155 1. 763867 3. 19342 3. 104846  
3. 77181 3. 948312 3. 911428 2. 684389 4. 09834 4. 196857 3. 925228 3. 716931 4. 520937  
6. 839315 6. 808963 6. 028277 6. 403822 6. 207516 6. 248422 6. 785172 6. 355198 5. 924639  
4. 965548 5. 010296 4. 773857 4. 347607 4. 704451 5. 046915 4. 924908 4. 073126 5. 168206  
6. 899166 6. 429654 6. 666098 5. 848319 6. 438815 5. 80967 6. 768074 6. 071932 7. 335642  
6. 781719 4. 924463 6. 047355 6. 982663 6. 345277 5. 820822 5. 739732 6. 617649 6. 822348  
4. 845638 6. 227636 6. 009423 5. 292626 5. 622853 5. 980874 5. 160923 5. 895661 4. 242015  
6. 89045 7. 373803 7. 461378 7. 809534 7. 308353 7. 219013 6. 693912 7. 470412 6. 375265  
7. 099875 7. 096823 6. 67506 6. 789472 7. 025817 6. 89797 7. 332088 7. 145327 6. 776706  
1. 265749 1. 537967 1. 39087 2. 05512 1. 285079 1. 579651 1. 698264 1. 251327 1. 81294  
1. 209376 1. 46607 1. 59861 1. 746841 1. 152715 2. 449377 0. 971805 1. 345871 1. 982116  
5. 066445 5. 333538 5. 066445 5. 606508 5. 323341 4. 640019 4. 814702 4. 634335 4. 480156  
4. 245722 4. 248535 3. 714328 4. 482916 3. 827915 4. 082658 4. 156334 4. 978069 3. 665142  
5. 600745 5. 602921 5. 768883 6. 562446 5. 97754 5. 645087 5. 953098 5. 396604 5. 665802  
5. 175834 5. 905198 5. 260885 6. 414915 5. 673038 5. 612008 5. 90611 5. 824189 5. 811589  
2. 193052 2. 639701 3. 191794 3. 523175 3. 075979 2. 176416 3. 654916 3. 001084 3. 236142  
4. 479048 4. 669334 4. 154541 3. 382729 4. 557972 4. 710824 4. 33916 3. 926371 3. 965744  
5. 579262 4. 545239 4. 873935 4. 626097 4. 796837 4. 813573 5. 3368 4. 784419 6. 072599  
5. 251832 5. 377551 4. 927339 4. 744712 5. 38882 5. 228662 5. 502075 5. 430788 4. 98915  
8. 921675 9. 160205 8. 528012 8. 473719 8. 438995 9. 28085 8. 462315 9. 314853 9. 276522  
6. 079302 5. 234553 5. 918526 6. 105442 5. 874871 5. 934852 6. 363435 5. 797959 5. 473345  
5. 274437 5. 369687 5. 510491 4. 308526 5. 438465 4. 812314 5. 639055 5. 193721 4. 732958  
5. 176395 5. 558896 5. 607913 4. 926044 5. 506347 5. 880885 5. 415194 5. 564852 4. 457561  
3. 109097 4. 119243 2. 928292 3. 293147 4. 249971 3. 814113 3. 667058 4. 009418 3. 198495  
7. 756059 7. 691757 7. 755023 7. 733192 8. 099399 7. 624504 7. 755581 8. 133313 8. 152757  
5. 272645 5. 631502 5. 378881 5. 598149 5. 365269 5. 143146 6. 0422 5. 236901 4. 97271  
7. 10218 7. 104459 7. 234958 7. 22016 7. 167374 7. 304679 7. 090768 7. 517217 7. 015927  
2. 329295 1. 207963 1. 769879 2. 509373 2. 971129 1. 825523 1. 91981 1. 407884 1. 51133  
1. 790735 2. 364698 1. 994394 3. 203102 2. 102385 2. 830514 2. 5722 1. 845901 2. 244184  
5. 019684 5. 231669 4. 466642 5. 277007 4. 641064 4. 083006 4. 949645 4. 285757 4. 978163  
5. 160433 4. 85142 5. 502438 5. 504782 5. 497173 5. 311191 5. 179854 5. 357499 5. 307765  
10. 06575 9. 838365 9. 989678 9. 847074 9. 856356 9. 726744 10. 01224 9. 976236 9. 483513  
6. 031748 6. 15688 6. 31504 5. 448526 6. 000987 6. 059727 5. 4672 5. 643563 5. 004802  
1. 554769 2. 566031 2. 333521 2. 53731 2. 140811 2. 075135 2. 466421 2. 995213 2. 420826  
8. 627945 8. 34306 8. 581278 8. 085092 8. 438633 8. 690239 8. 721501 8. 56008 8. 584447  
4. 955174 4. 710609 5. 143339 6. 208016 4. 878954 4. 522053 5. 456545 5. 904343 5. 178877  
4. 699963 3. 593698 4. 905102 5. 13995 4. 230511 4. 199153 4. 700018 3. 88503 3. 224146  
6. 347878 6. 953728 6. 739326 6. 539108 6. 175749 7. 253043 6. 782395 7. 141078 6. 736072  
5. 787385 6. 050695 5. 215771 6. 261291 6. 104323 6. 077675 6. 112657 5. 992121 6. 011599  
6. 550696 7. 190892 6. 998936 6. 89574 7. 676481 6. 910216 7. 304814 7. 048935 5. 851713  
5. 92306 6. 251139 4. 69905 5. 245367 5. 984677 6. 22381 6. 092221 5. 955535 5. 899484  
3. 352633 3. 980952 4. 500115 2. 697346 3. 958712 4. 415972 4. 497264 4. 531293 3. 851472  
7. 406482 6. 931894 7. 131251 7. 068193 7. 501119 6. 830495 7. 249852 7. 426665 7. 614889  
6. 064679 5. 788759 5. 876583 5. 112897 5. 939222 5. 724639 5. 889023 5. 880586 5. 139692  
3. 331615 3. 427192 2. 50567 2. 253057 3. 042049 2. 661962 4. 648235 2. 980927 3. 629352  
4. 477352 4. 781316 4. 913748 5. 013259 4. 202441 4. 654999 4. 710492 4. 697991 4. 348655  
7. 568225 7. 705353 7. 546806 7. 513082 7. 588497 7. 472502 7. 634882 7. 787526 7. 06175  
5. 126961 5. 248838 4. 937943 4. 428965 4. 368898 4. 707801 5. 56114 4. 682861 4. 789979  
4. 705835 5. 054167 4. 42572 4. 623416 4. 64959 5. 382871 4. 679854 5. 532443 3. 502928  
7. 0322 7. 246618 6. 971761 7. 538668 7. 217192 7. 196384 7. 006039 6. 987182 7. 375924

3. 889589 3. 689488 4. 216467 3. 306506 3. 236709 3. 987783 3. 937071 4. 219622 3. 490669  
6. 51946 4. 763863 5. 55626 4. 937627 6. 154486 5. 447091 6. 06107 5. 980613 6. 409079  
6. 661674 6. 201648 7. 202816 6. 603955 7. 337351 6. 750882 6. 487589 6. 873754 6. 894235  
5. 165954 4. 663139 5. 428246 4. 317686 4. 633947 4. 824938 4. 998531 4. 862189 6. 01942  
1. 520442 0. 836858 1. 369017 2. 886122 1. 264913 1. 287632 1. 77858 1. 564411 1. 272009  
4. 776331 5. 12969 5. 273291 4. 148532 4. 822645 4. 790861 4. 137843 3. 47333 3. 135951  
6. 875033 7. 043764 6. 654809 6. 87085 6. 829767 6. 667193 7. 1082 6. 763408 7. 254662  
2. 220145 2. 396532 2. 378585 2. 386086 1. 730635 2. 325448 1. 989796 2. 282574 2. 270345  
3. 356237 3. 879495 4. 458674 3. 743773 5. 034029 4. 513912 5. 02893 4. 195817 4. 355088  
3. 970455 4. 712244 3. 897995 3. 964794 4. 501712 3. 362833 4. 313873 4. 494336 3. 194895  
6. 148686 6. 249762 7. 083074 6. 864797 6. 725768 6. 591652 6. 399753 6. 555579 3. 280355  
7. 007746 7. 834073 6. 439551 7. 462132 7. 492951 7. 696822 6. 915612 7. 673536 8. 987221  
4. 771978 4. 994474 4. 836897 4. 224291 4. 983838 4. 397418 4. 503617 4. 881867 4. 248964  
2. 972648 2. 844109 2. 379156 2. 080132 3. 46915 2. 927581 2. 677356 4. 02978 4. 02066  
5. 953411 5. 244298 5. 588959 3. 927634 5. 62487 5. 638649 5. 277383 6. 213744 6. 411938  
6. 618629 6. 992021 6. 931223 6. 057182 5. 678206 6. 707143 6. 738398 7. 05876 6. 470084  
2. 371191 2. 906827 2. 054362 3. 928555 3. 229633 2. 528883 2. 183509 2. 712941 1. 944604  
6. 229951 6. 405459 6. 45711 6. 336932 6. 50813 5. 993066 6. 176054 6. 565243 5. 425784  
4. 979195 5. 187417 5. 272403 5. 735034 5. 509681 5. 94165 5. 147488 5. 511696 4. 62893  
5. 030673 5. 301095 5. 426233 4. 730252 6. 009563 5. 064916 5. 063468 5. 561244 4. 765393  
6. 94415 6. 903901 6. 361498 5. 461089 6. 560566 7. 073069 6. 841221 6. 55801 6. 716292  
4. 563981 3. 55761 4. 67676 3. 233874 3. 67608 3. 937858 3. 634845 3. 985162 4. 63562  
2. 153162 2. 280309 2. 626341 3. 205176 2. 129603 2. 558972 2. 324101 2. 046428 2. 541121  
4. 995754 4. 576425 4. 976423 3. 893724 4. 70876 5. 276933 4. 627887 4. 941293 3. 693773  
6. 854301 7. 160034 7. 234865 6. 625592 7. 215324 6. 891647 6. 76043 7. 213541 6. 443158  
0. 937489 1. 496303 1. 702585 1. 740249 1. 781822 1. 095077 1. 556307 2. 416503 1. 515703  
6. 039707 5. 432761 5. 545416 5. 200724 5. 874459 5. 567528 5. 785071 6. 006656 5. 640689  
1. 349284 1. 91565 1. 843491 1. 804651 1. 958633 1. 895986 1. 736303 1. 745869 1. 063298  
5. 329498 4. 879247 5. 020257 7. 159042 5. 626768 5. 637622 6. 097373 5. 362828 5. 110845  
8. 147842 8. 200948 7. 990107 7. 5404 7. 981307 7. 894471 8. 221541 7. 864318 7. 96068  
7. 07915 6. 962433 6. 769747 6. 689875 6. 924115 7. 066308 7. 067446 6. 922206 7. 100614  
7. 054045 6. 560979 6. 515019 7. 986193 6. 722207 6. 100271 6. 890401 6. 767769 6. 950145  
5. 763853 5. 945774 5. 647582 5. 032399 5. 384164 5. 494755 5. 06512 5. 5773 5. 625489  
9. 528906 9. 467006 9. 271501 9. 340286 9. 136098 9. 417779 9. 750061 9. 58687 9. 415731  
7. 693395 7. 922572 7. 86782 7. 540901 7. 805408 7. 619378 8. 012959 7. 827358 8. 068626  
7. 341058 7. 218113 7. 037201 7. 240813 6. 941117 6. 418852 7. 300539 7. 35147 6. 431778  
5. 497625 5. 207018 5. 359829 6. 368516 5. 564038 5. 324 5. 295933 5. 434306 5. 68048  
7. 212132 7. 072369 7. 033609 7. 744489 7. 308535 7. 043826 7. 247598 6. 656689 6. 766652  
7. 179239 7. 422319 7. 228197 7. 184662 7. 196112 7. 431185 7. 297005 7. 131557 6. 905303  
7. 882039 7. 770852 7. 111245 6. 656773 8. 083262 7. 722455 7. 75018 7. 732044 7. 91908  
4. 807138 5. 585994 5. 635469 5. 920936 5. 900155 5. 001852 5. 565877 5. 785572 4. 893254  
5. 16362 5. 232742 6. 237574 5. 817567 5. 981782 5. 998318 5. 46167 5. 636703 5. 376631  
3. 830156 4. 051672 3. 571337 3. 573352 3. 925665 3. 637548 4. 50549 3. 46315 3. 154273  
8. 079911 8. 370397 8. 348563 8. 14832 8. 162359 7. 997674 8. 192946 8. 218253 8. 938071  
6. 27073 6. 17463 6. 125853 5. 890831 6. 23417 6. 202379 5. 695321 6. 243312 5. 583027  
6. 430705 6. 03664 6. 262233 6. 273442 6. 473059 5. 997008 6. 045047 5. 94685 6. 039405  
3. 158152 4. 199232 2. 611106 3. 132035 3. 054662 3. 368811 2. 904851 3. 479586 3. 68862  
1. 310484 1. 344306 1. 827451 2. 648559 1. 777161 2. 365461 1. 322039 1. 609729 1. 162372  
4. 606275 4. 54533 4. 636079 5. 663277 5. 100955 4. 583012 4. 916412 4. 404253 5. 096277  
7. 260441 7. 77795 7. 119104 7. 13595 8. 201788 7. 719066 7. 755991 7. 872785 8. 209223  
8. 020274 7. 454649 7. 305112 7. 192605 7. 683789 7. 608287 8. 18438 8. 040208 8. 041543

4. 312334 4. 52681 3. 079118 4. 019072 3. 450919 2. 955798 3. 854106 4. 261814 3. 101579  
5. 347641 5. 960063 5. 753714 5. 980106 5. 220698 5. 536566 5. 854555 5. 513218 5. 948573  
1. 277814 1. 297125 2. 18497 1. 712367 1. 712367 2. 362724 1. 770409 1. 387079 1. 413206  
2. 231327 2. 265295 2. 480858 2. 984303 2. 149036 1. 889391 2. 196639 2. 240205 2. 249437  
4. 790738 3. 893488 4. 363863 4. 708932 4. 930337 4. 65976 5. 136796 4. 319864 4. 189505  
6. 36941 6. 460756 6. 544395 5. 756682 6. 327978 5. 663273 6. 325624 6. 391039 6. 246201  
1. 221728 1. 748919 1. 870474 2. 257683 1. 472048 2. 488262 1. 85923 1. 499712 1. 662203  
9. 587388 9. 90303 9. 567661 9. 572691 9. 66651 9. 774008 9. 060692 9. 689721 8. 992042  
2. 585544 3. 747809 2. 02132 2. 048546 1. 986762 2. 363961 3. 718194 2. 373607 2. 764701  
2. 061626 3. 207905 1. 731854 1. 656948 4. 177921 2. 102286 3. 628036 1. 389041 1. 663517  
4. 423718 5. 015092 5. 080176 4. 849794 4. 804832 4. 010702 4. 833801 4. 861061 4. 808515  
5. 486514 2. 20872 5. 149262 6. 075552 4. 493413 5. 347598 3. 790474 6. 151061 5. 406898  
6. 958049 6. 131068 6. 551995 7. 014322 6. 27704 6. 22111 6. 980083 6. 732201 6. 890577  
3. 403043 2. 678568 2. 620394 2. 086866 2. 861509 3. 158266 3. 485841 2. 551396 2. 356941  
5. 034687 5. 402063 5. 346515 5. 534692 5. 880317 4. 989275 4. 72275 5. 014476 3. 792049  
6. 880093 6. 943173 7. 47185 7. 191657 7. 233366 6. 889033 7. 260395 6. 87956 6. 644879  
3. 207092 2. 455482 3. 484909 4. 699187 2. 965807 3. 298054 3. 366655 3. 718254 2. 903305  
4. 962616 5. 028509 5. 136768 5. 072955 5. 233402 5. 685409 4. 68451 5. 268843 4. 697085  
0. 877961 1. 788121 2. 074431 3. 081339 1. 059703 1. 691662 1. 569052 1. 917169 1. 911705  
5. 333621 4. 781423 5. 025344 4. 89257 3. 82904 4. 940847 4. 589528 4. 455774 4. 406723  
5. 365147 5. 678719 5. 728011 5. 181276 5. 936357 5. 835932 5. 711345 5. 941535 5. 039504  
1. 606045 1. 932878 1. 150608 2. 366884 0. 973293 1. 140576 1. 302317 1. 946389 1. 513636  
1. 093127 1. 0862 1. 231286 2. 074037 1. 388535 1. 83638 1. 217905 1. 024366 1. 339378  
1. 518316 1. 124217 1. 501254 1. 767579 1. 07404 1. 641615 1. 394333 1. 184818 1. 530038  
3. 434592 4. 855894 5. 413453 6. 177486 4. 382215 5. 063169 2. 866452 3. 337492 3. 80001  
6. 391427 6. 673017 6. 076654 7. 069249 6. 618939 6. 691441 6. 781377 6. 254762 6. 211547  
6. 845416 6. 409077 6. 630609 7. 10593 6. 758154 6. 824812 6. 507241 6. 693377 6. 926951  
4. 944629 4. 685585 4. 644686 3. 866509 4. 306908 5. 040261 4. 231209 4. 488011 4. 238035  
3. 089394 2. 947639 3. 945632 4. 185578 3. 76615 3. 256523 3. 563344 3. 923879 3. 822239  
2. 54486 1. 820399 1. 822439 3. 175793 1. 974922 2. 022706 2. 665358 2. 351873 2. 83054  
3. 288658 2. 425793 2. 9172 2. 705948 3. 253379 3. 241825 1. 733926 3. 941517 2. 142919  
2. 758424 2. 574627 3. 034481 3. 013264 1. 930642 2. 31696 2. 636008 3. 009915 2. 736519  
6. 812503 6. 75752 7. 160062 6. 691416 6. 262454 6. 60876 7. 07193 6. 529941 6. 608022  
1. 334299 1. 475246 1. 408898 1. 745294 1. 384043 1. 486347 1. 855191 1. 644855 1. 820313  
2. 390771 1. 546321 2. 775464 3. 381253 2. 274604 2. 15641 2. 239148 1. 37867 3. 294965  
9. 575762 6. 96399 9. 055117 8. 713183 8. 149964 9. 892909 9. 014655 9. 410464 10. 11404  
5. 793402 5. 0503 5. 089388 5. 663215 5. 352872 5. 170702 5. 745284 5. 24119 5. 616101  
6. 43117 6. 358115 5. 962998 5. 147525 6. 301952 6. 554907 6. 387788 6. 456483 6. 622231  
5. 524782 5. 058225 4. 635726 3. 988481 4. 699352 5. 150607 5. 46186 5. 598524 5. 260013  
3. 79984 3. 602825 2. 926016 2. 899496 3. 755262 3. 247371 4. 12588 4. 765737 2. 50112  
1. 908773 1. 456072 1. 388803 1. 341899 1. 94177 2. 219658 1. 753488 1. 807036 2. 622423  
7. 47479 7. 510698 7. 142066 7. 811902 7. 148848 6. 935989 7. 778154 7. 29009 7. 136349  
3. 802986 3. 397413 2. 956851 4. 14149 3. 210918 3. 549204 2. 155978 3. 024696 2. 718309  
7. 85017 7. 651861 7. 760084 7. 752189 7. 589585 7. 816524 7. 759138 7. 772004 7. 314003  
6. 153525 6. 083396 6. 06409 5. 369777 6. 27218 6. 104337 6. 477341 5. 822762 5. 706474  
6. 708763 6. 101444 6. 46998 6. 389569 6. 705293 6. 61674 6. 542107 6. 601098 6. 235934  
7. 233937 7. 480034 7. 182437 7. 008662 6. 49947 7. 612999 7. 191005 7. 191467 8. 064092  
3. 813269 4. 06839 5. 691316 6. 551072 2. 241932 4. 120619 2. 969408 5. 701103 6. 948953  
6. 604992 6. 326182 6. 384205 6. 607694 6. 196897 5. 58315 6. 832159 6. 560699 6. 931195  
1. 728555 2. 011869 3. 17514 3. 02698 2. 021717 1. 671066 2. 045545 1. 58399 2. 200148  
7. 994145 7. 72633 7. 744974 7. 581969 7. 898286 8. 095256 8. 087382 7. 908135 8. 186404

2. 901582 3. 83041 3. 467572 3. 068408 4. 303952 3. 119544 2. 683075 2. 216486 2. 623405  
7. 473155 7. 359099 7. 435788 7. 051402 7. 334911 7. 360592 7. 333082 7. 316982 7. 234575  
7. 318604 7. 460069 7. 522819 7. 07161 7. 352675 7. 620292 7. 458008 7. 304657 7. 111975  
4. 848696 5. 441349 4. 946557 5. 773383 4. 853085 4. 382129 5. 616147 5. 509511 4. 906503  
2. 260096 1. 631286 2. 262302 2. 959652 2. 404291 2. 289967 1. 89818 1. 853408 2. 961161  
2. 500816 2. 396657 2. 539821 3. 207768 2. 483702 3. 099304 2. 253709 3. 575247 2. 32045  
1. 480503 1. 399433 1. 411733 1. 580335 1. 316188 1. 832122 1. 305697 0. 924993 1. 360761  
7. 114271 6. 982624 6. 770399 6. 893766 7. 058899 6. 973675 7. 044594 6. 830619 7. 141382  
8. 087882 7. 670304 7. 541457 8. 32816 7. 556712 7. 671768 7. 505279 7. 748131 7. 854276  
1. 931198 2. 784836 2. 022575 2. 95454 2. 181281 2. 292552 2. 650436 1. 441177 1. 856593  
3. 679117 5. 102728 4. 617934 3. 238923 4. 886051 4. 487508 3. 907766 4. 258663 3. 861607  
4. 253516 4. 798483 4. 506854 3. 876381 4. 803491 4. 280085 3. 893215 4. 776942 3. 599446  
6. 309046 6. 742663 6. 531548 5. 722053 6. 584177 6. 486263 6. 495231 6. 473684 7. 047217  
4. 255536 4. 890779 4. 635316 3. 326379 4. 848104 3. 454682 4. 800723 4. 52712 5. 608534  
5. 607746 5. 392537 5. 497706 5. 194763 5. 431792 5. 290262 5. 841124 5. 365731 4. 469519  
5. 242365 4. 225515 4. 004618 3. 614863 4. 831961 3. 875813 3. 47015 3. 769964 3. 813496  
5. 998277 5. 924861 6. 06684 5. 92087 5. 635425 5. 69491 6. 305121 5. 615379 6. 5921  
4. 901349 4. 572681 3. 679546 4. 334346 4. 754135 4. 270217 4. 658569 5. 047405 4. 161929  
5. 819618 6. 131169 6. 20084 5. 039897 5. 722522 6. 02511 5. 545171 5. 708048 6. 022789  
7. 37117 7. 195632 7. 117613 6. 319705 6. 857447 7. 165263 7. 062549 6. 897307 6. 893381  
5. 575926 5. 411587 5. 17306 5. 051982 5. 439723 5. 208066 4. 676214 6. 189691 3. 344453  
1. 894888 1. 934733 2. 142938 2. 601908 2. 476669 1. 695057 1. 819382 2. 135694 2. 135261  
5. 348236 5. 95473 5. 610164 5. 087215 5. 654563 5. 886299 5. 802745 5. 793084 6. 601988  
6. 233608 5. 938023 5. 197314 5. 544904 5. 938963 6. 823555 6. 408312 5. 914747 5. 319249  
4. 685718 3. 86056 4. 806939 4. 155033 4. 090922 5. 14891 4. 904851 4. 795861 4. 632538  
2. 237088 1. 76929 2. 254205 2. 49003 1. 840583 1. 931224 2. 36306 1. 970925 1. 894183  
6. 904606 6. 832455 6. 87056 7. 229529 6. 890629 7. 103606 7. 233695 7. 138643 7. 741265  
8. 837934 8. 814291 8. 538235 8. 4655 8. 38473 9. 011037 8. 41307 8. 867874 7. 941867  
5. 855791 5. 335615 5. 483308 5. 513827 5. 928501 5. 600325 5. 313085 5. 876738 5. 776532  
2. 62711 1. 880991 2. 567875 2. 716901 2. 435359 2. 250022 2. 37934 2. 775295 2. 574789  
4. 460296 4. 47794 3. 850845 3. 95185 4. 407013 4. 755272 4. 355757 4. 748034 4. 388114  
6. 228698 6. 318291 6. 228061 5. 639239 6. 378988 6. 127399 6. 374683 6. 221381 5. 069341  
5. 348003 5. 608371 6. 094303 6. 011152 5. 927147 5. 472459 5. 401499 5. 83583 5. 184405  
5. 330607 6. 044918 5. 087203 6. 093814 6. 326788 5. 178646 5. 630806 5. 235612 5. 695486  
2. 052494 2. 178234 2. 407469 1. 36814 1. 808099 2. 490377 1. 71957 3. 276819 1. 676279  
7. 397769 6. 836771 7. 504213 5. 465607 7. 447043 7. 343499 7. 079888 7. 139775 7. 273243  
1. 985078 2. 603629 2. 947066 3. 396233 2. 773888 1. 960965 3. 37049 2. 722278 2. 116123  
7. 29722 6. 861731 7. 026298 6. 909927 7. 176822 7. 35685 6. 999881 7. 267578 6. 736021  
6. 094765 6. 168417 5. 504932 5. 288542 5. 959516 5. 584422 5. 51525 5. 771591 5. 169255  
5. 46395 5. 80721 5. 990748 6. 269282 5. 764564 5. 888144 5. 574581 5. 550966 5. 930924  
7. 429182 7. 363728 7. 276672 6. 904779 7. 178279 7. 423795 7. 673015 7. 551544 6. 935934  
7. 137572 7. 440191 6. 825172 6. 999824 7. 358212 7. 428337 7. 594551 7. 247445 7. 24342  
5. 632946 5. 931718 6. 143113 5. 385091 6. 008395 5. 417121 6. 358675 5. 988943 4. 93571  
5. 191392 5. 574961 5. 343907 3. 553274 5. 771973 5. 0809 4. 788291 5. 18063 3. 990409  
5. 324533 5. 095645 5. 870013 5. 054717 5. 809592 5. 063849 5. 726817 5. 161295 4. 077843  
4. 995185 5. 203046 5. 349996 5. 087087 5. 011818 5. 152105 5. 106951 4. 600565 4. 49009  
5. 495276 5. 371965 5. 280361 4. 16369 5. 980448 4. 253705 5. 485877 4. 551195 5. 599493  
7. 833538 7. 834033 7. 699758 7. 614616 7. 883196 7. 711767 7. 896573 8. 04767 7. 839434  
3. 124638 2. 159248 2. 101756 2. 088141 2. 639463 3. 367725 1. 714077 2. 943237 3. 211467  
6. 055204 5. 573311 5. 970902 5. 942983 6. 027594 5. 616795 6. 218759 5. 801645 5. 71851  
7. 749069 7. 931744 7. 446319 7. 567885 7. 958794 7. 69486 7. 710731 7. 878179 7. 045398



4. 750466 4. 662086 4. 760027 4. 241748 5. 059816 4. 793665 5. 102409 5. 098124 4. 022821  
6. 693081 6. 691304 6. 225665 6. 596797 6. 276334 6. 547301 6. 555743 6. 529353 6. 787289  
5. 756601 5. 116758 5. 475 4. 737346 5. 0734 5. 204943 5. 115631 5. 063931 5. 45671  
4. 593971 4. 634257 5. 338676 5. 557772 5. 045043 3. 831658 5. 105074 5. 60472 3. 821768  
5. 418766 4. 945324 5. 137493 3. 75125 5. 028973 5. 703551 5. 149784 4. 696426 4. 189275  
4. 658126 5. 218299 4. 687294 4. 351758 4. 847103 5. 161055 4. 976531 4. 722913 5. 374526  
5. 208792 5. 775833 4. 821577 5. 322739 6. 040405 4. 990342 5. 212974 5. 26558 4. 499068  
7. 976496 7. 66192 7. 66075 7. 598456 7. 527331 7. 943004 7. 891366 7. 6313 8. 308274  
7. 381007 6. 807263 6. 768178 7. 005145 6. 251249 6. 917003 7. 079166 5. 854508 7. 780581  
4. 260709 3. 733048 4. 465677 3. 272201 4. 433217 3. 844849 3. 648297 3. 975404 4. 799298  
4. 997766 5. 332032 4. 945288 6. 107554 6. 59425 5. 166718 5. 742074 5. 14251 5. 757832  
5. 297498 5. 561335 5. 764108 5. 010659 5. 341825 5. 141185 5. 613272 5. 264622 5. 34512  
4. 955152 4. 591528 5. 611104 5. 423386 4. 399321 4. 704287 5. 242825 4. 317011 4. 219453  
7. 588983 7. 370827 7. 181448 7. 775042 7. 19926 7. 309888 7. 456565 7. 426535 7. 538825  
5. 328137 4. 502724 4. 926759 5. 819205 4. 927285 5. 53823 4. 113518 5. 534184 5. 636658  
5. 87468 6. 18243 5. 525731 5. 746861 5. 33254 6. 053979 5. 675776 5. 761525 6. 152076  
5. 023004 5. 822728 5. 754025 5. 38559 6. 167148 4. 786999 5. 395837 5. 626054 5. 860234  
7. 066005 6. 993466 6. 56309 6. 630362 6. 647389 7. 180887 6. 814166 7. 090405 6. 881374  
4. 673287 4. 795172 4. 259447 3. 522849 5. 18124 4. 937714 4. 076355 5. 040284 3. 943111  
6. 06047 6. 031464 6. 349525 5. 726717 5. 723861 5. 604833 6. 174293 5. 835686 5. 178412  
2. 804702 2. 530577 2. 450325 2. 779092 2. 094499 1. 717861 1. 810997 2. 167101 2. 114421  
3. 344616 3. 792168 3. 444697 4. 12172 4. 05021 3. 078488 3. 859016 4. 393854 3. 731348  
3. 262086 2. 058535 2. 931664 2. 371139 1. 653239 3. 066561 1. 05516 1. 619351 2. 231896  
5. 824018 4. 306801 6. 067189 5. 073152 4. 850513 6. 10076 5. 52613 5. 14526 5. 103885  
1. 605478 1. 766885 2. 40082 2. 874849 1. 960142 2. 31893 2. 508901 1. 744043 2. 24743  
5. 819789 5. 599667 5. 628706 6. 581687 5. 806815 5. 480823 6. 073252 6. 219159 5. 137752  
1. 999194 2. 00001 1. 43009 2. 062357 1. 742071 1. 661474 1. 406082 1. 516762 2. 135842  
6. 038927 5. 960993 5. 999211 5. 464286 5. 649536 5. 524503 5. 751245 6. 408239 6. 179448  
1. 935817 2. 327408 2. 023864 2. 702517 3. 094026 2. 821269 1. 679596 2. 561393 2. 123196  
5. 863177 6. 288986 5. 909021 5. 48205 6. 145605 6. 331365 6. 203319 5. 648424 4. 641806  
5. 985252 5. 687099 5. 814381 5. 809852 5. 862 5. 853465 6. 512634 6. 03125 5. 75498  
5. 89743 6. 2525 5. 580831 5. 762466 5. 921332 5. 598061 5. 946166 6. 150625 5. 914359  
2. 885927 2. 704433 3. 957588 4. 03085 3. 513713 3. 337154 3. 017678 3. 509579 3. 505309  
8. 596565 8. 36829 8. 709867 8. 226737 8. 147072 8. 271234 8. 615199 8. 596007 8. 519511  
5. 190748 5. 245042 4. 97611 5. 249018 5. 238231 5. 738483 5. 600253 5. 648389 5. 165317  
7. 556576 7. 448645 7. 462933 7. 147762 7. 711803 7. 773241 7. 427595 7. 746712 7. 159997  
4. 071671 2. 599383 3. 477018 2. 972961 3. 682259 3. 520335 2. 422722 2. 721779 1. 804398  
1. 664369 1. 625057 0. 990201 1. 482666 1. 037349 1. 944246 1. 171281 1. 901424 1. 601069  
5. 972929 6. 114531 6. 198524 5. 774122 6. 048018 6. 211992 5. 863667 5. 995901 5. 979139  
5. 613118 6. 307084 6. 709374 5. 850218 6. 146802 6. 152418 6. 010554 5. 904066 4. 901639  
6. 543546 6. 433083 6. 459861 7. 09256 6. 770725 6. 646864 6. 456282 6. 844736 7. 123231  
5. 48509 5. 614953 5. 267453 6. 510243 4. 860576 5. 265098 5. 120181 5. 049933 4. 996111  
6. 612574 6. 635903 6. 884851 6. 608991 6. 720666 7. 462331 6. 256162 6. 960849 5. 415828  
3. 192022 1. 344496 1. 802252 2. 167484 3. 22833 1. 716889 1. 303364 3. 263164 2. 702039  
3. 285843 3. 358794 3. 885548 3. 669684 4. 132936 4. 676665 3. 754526 4. 291512 2. 957942  
6. 11595 6. 565648 7. 010881 7. 298602 6. 038097 6. 197598 5. 999466 6. 172118 6. 56503  
6. 12122 5. 54493 5. 564085 5. 134358 6. 005795 6. 050055 5. 60444 5. 671665 5. 042068  
4. 853413 5. 148374 5. 024449 4. 665072 5. 449769 5. 2115 5. 202581 5. 429146 5. 441685  
4. 690183 5. 102748 4. 942149 5. 3833 5. 007446 4. 825223 4. 71153 5. 31129 3. 387072  
4. 657837 4. 154184 3. 959218 4. 469996 4. 557615 4. 370434 3. 787213 5. 319374 4. 058755  
6. 951837 6. 403837 6. 108193 6. 079796 6. 887189 6. 36723 6. 849989 6. 787727 7. 342409

2. 038778 1. 978809 1. 947593 2. 933548 2. 199065 2. 39316 1. 565348 2. 353818 1. 446771  
4. 516489 5. 211593 4. 648478 4. 282921 4. 899488 4. 714694 4. 006215 5. 052162 4. 506363  
5. 930736 5. 193915 5. 661704 6. 654892 6. 104769 5. 260463 5. 776204 5. 805045 4. 515295  
5. 434823 5. 739055 5. 530459 5. 40678 5. 688328 5. 438831 5. 809676 5. 599458 5. 723152  
6. 395196 5. 996539 6. 112629 5. 128822 5. 908701 6. 21679 5. 741314 5. 856294 5. 820379  
6. 297831 6. 306829 6. 267185 5. 207004 6. 002516 6. 267757 5. 967173 6. 316602 6. 661794  
6. 630415 6. 639276 6. 722204 5. 839087 6. 357013 7. 07701 6. 877288 6. 662536 6. 484742  
4. 395391 4. 425947 4. 957149 4. 760192 4. 947932 4. 591931 4. 385296 4. 517546 4. 308529  
2. 082868 1. 815774 2. 13162 2. 602634 2. 427237 2. 369737 2. 059076 2. 112573 2. 83514  
4. 451913 5. 062606 4. 706273 4. 647254 5. 84632 3. 943941 4. 972707 4. 901138 3. 918666  
2. 562994 3. 273229 3. 412407 2. 524609 2. 833437 3. 364311 2. 679296 2. 004585 1. 810597  
6. 996612 7. 242833 7. 096019 6. 068268 7. 605894 6. 865864 6. 91196 7. 236413 6. 370774  
4. 697969 4. 354866 4. 036197 3. 615751 4. 166342 4. 35667 4. 807294 4. 582389 5. 213122  
3. 411099 3. 277901 3. 797852 2. 293309 3. 647895 3. 136148 3. 78911 2. 927037 2. 906399  
4. 022606 3. 9858 4. 537432 4. 493206 4. 197305 4. 593737 4. 015882 4. 541648 3. 346137  
4. 171402 4. 984444 4. 933777 4. 635782 5. 306909 5. 145375 4. 141222 4. 688818 2. 974129  
5. 970446 6. 196235 5. 93416 6. 193363 5. 95872 5. 759506 6. 089296 6. 292944 5. 71497  
5. 096028 3. 892077 4. 99229 5. 033412 3. 842533 4. 176533 3. 917419 4. 840594 4. 989197  
6. 283576 5. 922694 6. 744992 6. 150926 6. 461685 6. 177298 6. 526353 5. 701233 6. 072493  
3. 892573 2. 689097 1. 331919 2. 646729 1. 999406 2. 694692 1. 679748 2. 89811 3. 909566  
6. 239282 6. 505419 6. 466974 6. 143146 6. 263846 5. 093757 6. 334781 6. 23452 5. 828524  
6. 561608 6. 526038 6. 799053 5. 660887 6. 47696 6. 496546 6. 189104 6. 752067 6. 949726  
2. 581469 2. 273938 2. 941935 2. 7401 2. 852613 2. 903807 2. 16989 2. 989463 2. 81663  
4. 360863 4. 584076 4. 35178 4. 866294 4. 990037 5. 051591 4. 754155 4. 661077 4. 622684  
6. 767648 6. 630317 6. 232292 5. 870389 6. 645348 6. 810317 6. 656669 7. 379146 6. 039714  
5. 284723 5. 551774 5. 478678 4. 095125 5. 486216 4. 451215 5. 900134 5. 763744 5. 322566  
3. 439968 3. 53457 3. 136659 3. 651994 3. 831724 3. 126275 3. 54607 3. 136084 2. 514577  
7. 460683 7. 633926 7. 33786 6. 608273 7. 276069 7. 664502 7. 690747 7. 012169 7. 33047  
7. 224457 7. 011472 6. 91931 5. 583365 7. 035007 6. 900083 7. 157007 7. 23099 6. 369161  
4. 316996 4. 930965 3. 334149 4. 347008 4. 705794 5. 185925 4. 527296 4. 449658 4. 718365  
7. 346838 7. 755495 7. 530774 6. 772217 7. 869121 7. 713011 7. 418588 7. 816947 6. 484155  
5. 119564 4. 821318 5. 24004 6. 206952 5. 07902 4. 671573 4. 840315 4. 979589 4. 425437  
6. 287331 6. 237297 6. 352079 5. 15821 5. 166479 6. 28703 6. 751088 6. 096898 6. 385137  
6. 579233 6. 678537 6. 585004 6. 174676 6. 820875 6. 533942 6. 612321 6. 300171 6. 385788  
7. 132359 7. 239396 7. 036643 6. 877927 6. 986277 7. 485291 7. 166129 7. 109138 7. 212931  
6. 054447 5. 877512 5. 912912 6. 066513 5. 92786 6. 002295 5. 613105 6. 010221 5. 295409  
4. 548464 4. 794688 5. 19843 3. 769125 4. 05106 3. 278044 3. 742044 4. 511512 4. 982621  
5. 734625 5. 805104 5. 952234 6. 593691 6. 018194 6. 116815 6. 381532 5. 899069 5. 080232  
5. 038234 4. 770559 4. 496445 4. 275169 5. 016521 5. 109003 5. 294556 5. 343708 4. 242577  
2. 321124 2. 215505 2. 213512 2. 243335 1. 584422 2. 546064 2. 29257 2. 703903 1. 776514  
7. 500274 7. 695205 7. 635309 7. 6552 7. 727435 7. 729748 7. 350611 8. 384482 7. 129512  
4. 975189 5. 836304 5. 388766 5. 227692 5. 572779 4. 672101 5. 80011 5. 442342 5. 593326  
6. 122047 6. 536942 6. 255012 5. 524752 6. 170803 6. 194583 6. 891666 6. 30636 5. 678374  
4. 50178 4. 613397 4. 305443 3. 915286 4. 694005 4. 376309 4. 528985 4. 443897 4. 586272  
7. 796049 7. 666942 8. 017318 7. 937128 8. 282328 7. 833224 7. 861566 7. 817502 7. 034737  
5. 372626 5. 84173 5. 853264 5. 897883 5. 996607 5. 982474 5. 889713 5. 958681 5. 64784  
5. 725822 5. 268303 4. 994168 6. 150228 5. 712014 4. 725264 5. 976505 5. 600242 4. 72534  
4. 299765 3. 969372 4. 582037 3. 580365 4. 564462 4. 009513 3. 312568 3. 467796 2. 791289  
7. 400701 6. 903394 7. 332412 6. 838544 6. 432353 6. 456865 6. 581607 6. 761656 7. 640771  
3. 850463 5. 036927 4. 831817 5. 182359 4. 554447 4. 223564 4. 221606 4. 57253 4. 104818  
7. 572191 7. 792152 7. 298653 7. 346475 7. 588971 7. 877443 7. 649839 7. 459948 7. 768226

6.685229 6.336107 6.609021 6.797092 6.88263 6.735019 6.926875 6.543257 6.211504  
3.521526 3.963162 3.309665 3.195126 3.585734 2.767533 3.964862 4.037638 3.360357  
7.28358 7.237485 7.330402 6.469991 7.199308 7.250543 7.253419 7.169049 6.675254  
5.276793 4.98378 4.93691 4.972554 5.388486 5.20753 5.490899 5.085164 4.791738  
3.73729 4.018302 4.060431 4.011372 3.646046 3.868588 4.291466 4.271013 4.819142  
6.586721 7.12262 6.800029 6.321624 6.850745 7.132363 6.576275 6.823989 6.602207  
6.377938 6.478026 7.208796 7.276236 6.481744 6.576305 6.377398 6.377046 6.40345  
5.011426 5.703806 5.084094 3.958256 6.024412 4.792424 5.628786 5.281726 5.835271  
3.081995 3.364691 3.796832 4.18889 3.234359 3.084494 3.406742 3.361007 2.801235  
5.428098 5.399017 5.617397 6.288782 5.439452 5.205612 6.464572 5.607076 4.69829  
5.887822 6.601667 6.96214 6.982038 6.965349 6.374187 6.640654 6.131716 6.296469  
7.006126 7.275396 6.903191 6.915756 7.137422 6.85426 7.089267 6.846874 7.091623  
7.142852 7.354516 7.218548 7.791652 7.214488 7.530324 7.359477 7.393336 6.195165  
4.327144 4.982341 4.640924 4.271137 4.550001 3.924905 4.687953 4.823233 4.077148  
8.635922 8.718474 8.873149 9.073784 8.826035 8.841576 9.147888 8.896654 9.285125  
2.036095 1.482499 1.408742 1.23371 2.48491 1.683954 1.407529 1.542116 1.834303  
5.858409 5.698943 6.192385 5.920196 5.766917 6.003179 5.580569 6.046625 4.720561  
6.005611 5.677958 6.429823 5.367493 6.502655 6.695459 6.427945 6.502611 5.237603  
1.934742 2.711492 2.56998 2.834978 2.029536 2.143121 2.561227 2.260899 2.56081  
3.761241 4.317329 4.095394 4.99552 5.079032 4.893605 4.787175 4.776496 4.663868  
6.130543 5.894574 5.932643 5.80625 5.552599 5.20855 5.631792 5.622796 5.270204  
2.593413 3.713445 2.976358 2.279902 2.603435 2.681508 2.052503 2.26127 3.009478  
9.017782 9.210659 9.152741 9.443401 9.128726 9.441593 9.455819 9.155424 8.845878  
7.141393 7.031059 6.826792 7.790009 7.209823 7.039817 7.17211 7.060571 7.070346  
8.496028 8.665068 8.206335 9.195294 8.753813 8.455403 8.364235 8.436339 8.623129  
7.217394 7.119086 7.102441 7.181193 7.006413 7.12006 7.273829 6.989254 7.107599  
2.00395 1.749009 2.197435 2.23877 1.924306 2.212324 1.816614 1.938022 1.676941  
3.460629 3.874996 3.267666 3.80459 4.503133 3.791017 3.271184 3.980728 3.017462  
6.333616 6.777496 6.539354 6.577262 7.094722 6.711459 6.829276 7.186779 6.548986  
7.847824 8.20825 8.067872 8.040936 7.6304 7.895534 8.172203 8.271045 7.110598  
6.589138 6.7395 6.535521 6.474469 6.298888 6.389604 6.75319 5.705003 5.317813  
5.78331 6.729839 6.319883 5.417561 5.817761 6.522266 5.364688 6.29364 6.227331  
3.22969 2.983615 3.700563 3.894604 4.016135 2.700344 3.441893 3.111256 2.85117  
7.562714 7.703561 7.535359 7.430112 7.55514 7.644427 7.5505 7.402605 8.489826  
2.430442 4.086386 2.632504 3.189469 4.320635 3.328587 2.816466 4.523306 3.539013  
4.482003 4.122255 4.128727 4.966284 4.379714 4.103023 5.232932 4.61228 3.778434  
6.001038 5.65011 5.765403 6.071565 5.311201 5.180802 5.567735 5.418573 5.136255  
3.895381 2.12674 1.921624 1.525675 2.438137 1.582194 1.868598 2.675444 1.90762  
5.734883 5.745817 5.46473 4.682158 5.619066 5.871581 5.78418 5.705159 6.780059  
4.041013 3.245057 2.554321 2.454609 4.634607 3.192206 3.258599 4.381844 3.232958  
4.259541 4.04747 3.809546 4.22335 3.246912 3.437717 4.720064 3.880332 4.049572  
5.803966 5.739035 5.313184 4.287041 6.429991 5.62364 5.380619 5.777881 6.143145  
2.449719 1.582502 2.040896 4.112302 2.274643 4.120883 3.969341 1.848789 3.443718  
5.958336 6.859803 6.171632 6.014335 6.206412 6.613704 6.20606 6.512833 7.305552  
4.661757 4.814216 3.722659 3.715338 4.444498 4.598453 4.784264 4.659281 3.682298  
1.897054 2.868741 3.026358 2.36624 3.058992 2.693549 1.677547 2.433814 2.049529  
5.691756 6.50173 6.738695 6.517098 5.453148 6.507774 6.17561 6.175384 5.750705  
5.290359 5.273723 4.529822 4.886688 5.111901 5.074749 4.111809 4.919768 4.496588  
5.184291 5.235694 4.836396 5.533905 5.220888 4.73276 5.318152 4.600011 3.616885  
5.368108 5.377209 5.651535 5.600417 5.325955 5.546466 5.126104 5.267546 4.40303  
4.200013 4.334973 4.49428 5.776166 4.290279 4.446442 4.157826 4.573268 3.826461

5. 772258 6. 0294 5. 551025 5. 102531 5. 61521 6. 309599 5. 75078 5. 765738 6. 205468  
6. 487859 6. 152657 6. 145721 6. 564399 6. 595664 6. 35774 6. 513556 6. 101787 6. 421449  
2. 067179 2. 96413 2. 373932 2. 893425 2. 563355 2. 662315 2. 600085 2. 92167 2. 69336  
3. 866648 3. 886882 3. 677263 4. 359711 3. 804906 4. 489619 3. 840039 4. 235356 3. 565317  
5. 037961 5. 362994 5. 157767 4. 19141 5. 149595 4. 047202 5. 134612 4. 806837 4. 270778  
7. 351523 7. 343149 7. 445484 7. 856665 7. 416931 7. 415736 7. 085747 7. 570946 7. 384742  
5. 665333 6. 118527 5. 792943 5. 269189 6. 205125 5. 263043 5. 349147 6. 411551 4. 265651  
5. 931131 6. 515481 6. 126165 6. 645948 6. 835477 5. 774116 6. 338883 6. 045115 5. 22295  
2. 541741 3. 118542 1. 917501 2. 599719 1. 964287 3. 665958 2. 955652 1. 557319 2. 054416  
4. 560787 3. 652995 4. 095171 4. 037973 3. 502004 4. 014907 4. 140224 4. 210799 4. 286904  
7. 587635 7. 183944 7. 325278 7. 832603 7. 263118 7. 131187 7. 522748 7. 410596 8. 16853  
1. 99235 2. 08939 2. 800255 2. 301331 2. 315631 1. 966931 2. 121549 2. 484242 1. 793592  
2. 686943 2. 684319 3. 034896 3. 431156 3. 63639 2. 73552 2. 315927 2. 30529 2. 671125  
6. 936022 7. 312821 6. 916941 6. 933344 7. 136599 7. 138689 7. 154788 7. 347486 7. 062598  
6. 538747 6. 590433 6. 480981 6. 600615 6. 868038 6. 553496 6. 659553 6. 372538 5. 875541  
6. 048497 5. 538672 6. 003578 5. 60788 5. 72093 6. 478347 6. 5813 5. 847457 6. 273579  
5. 572595 5. 382223 5. 422561 5. 556805 5. 245776 5. 288205 5. 742723 5. 572426 5. 666576  
6. 109844 6. 073967 6. 217873 5. 034509 6. 114783 6. 437485 5. 954151 5. 973229 6. 834386  
3. 384253 3. 261335 3. 255413 3. 314984 3. 423404 2. 886697 3. 349906 3. 214591 3. 622521  
6. 863319 6. 695066 7. 294978 6. 120974 6. 92102 6. 902329 6. 342877 6. 878112 6. 21153  
7. 082166 7. 066269 6. 823407 6. 724686 7. 068102 6. 98468 6. 721205 7. 01992 6. 56598  
6. 236514 6. 454435 6. 577136 6. 62829 6. 663413 6. 813231 6. 669485 6. 910534 6. 604197  
4. 94637 4. 577709 5. 077332 5. 153943 5. 625456 4. 712393 5. 545633 4. 98626 4. 60847  
6. 637526 6. 702759 6. 754605 6. 897479 6. 858601 6. 661181 6. 869972 6. 66823 6. 825533  
6. 565568 4. 058462 4. 606223 4. 874326 5. 140558 6. 61454 5. 658693 5. 804486 5. 934588  
5. 519983 4. 745496 5. 274913 4. 456065 4. 736757 5. 371918 5. 266612 5. 028079 5. 156147  
8. 18028 8. 024359 7. 731533 7. 92225 7. 758796 8. 082038 8. 127334 7. 784559 7. 912696  
6. 332993 6. 501207 6. 136562 5. 97597 6. 365001 6. 397201 6. 55582 6. 328066 6. 281294  
5. 761867 6. 728613 6. 034503 5. 961991 6. 417905 5. 984293 5. 700231 5. 82468 6. 099866  
3. 480482 3. 54039 4. 446839 3. 094652 3. 578724 3. 316451 3. 621559 4. 044195 3. 223069  
3. 693282 3. 194956 2. 947485 3. 001991 4. 17525 3. 565497 2. 903442 3. 827725 3. 358127  
4. 038565 4. 616783 5. 089625 3. 677346 4. 616783 4. 217381 4. 134573 4. 646615 3. 382065  
4. 997814 5. 406739 5. 280428 3. 5232 5. 662777 5. 451455 5. 451455 5. 28488 5. 428507  
5. 306473 6. 214238 5. 721944 2. 138889 3. 891218 5. 410503 6. 594021 5. 088669 5. 965807  
1. 605802 2. 041953 1. 472049 1. 765761 1. 872666 1. 848775 1. 738983 1. 635242 1. 821143  
5. 130786 4. 737473 5. 554216 4. 355807 4. 605583 5. 520654 4. 417687 5. 288778 5. 6693  
1. 437988 1. 728346 1. 552795 2. 210454 1. 301911 1. 009329 2. 233389 1. 73684 1. 816165  
4. 169864 3. 05571 3. 921457 3. 876565 4. 492664 2. 856744 3. 721507 4. 360974 3. 771836  
3. 722646 4. 024711 2. 034507 4. 883797 4. 335493 3. 706225 4. 505642 4. 20272 4. 435261  
5. 476495 5. 995557 5. 902827 4. 354192 5. 217743 5. 674847 5. 726 5. 37896 5. 794697  
4. 772061 4. 963538 4. 064911 6. 70077 5. 272092 4. 569678 5. 266895 4. 51896 4. 02207  
3. 523241 2. 436198 3. 165919 1. 899123 2. 72889 2. 725013 3. 069448 1. 846721 1. 495146  
5. 868707 6. 070449 6. 15357 5. 603505 6. 293815 5. 961839 6. 141982 6. 144367 5. 89673  
4. 891727 5. 195141 4. 607162 3. 934082 4. 628397 4. 745937 5. 211768 4. 754827 4. 218592  
6. 369407 6. 699534 6. 668807 7. 571229 6. 178956 6. 843985 5. 765558 6. 668197 7. 023817  
5. 896054 5. 862089 6. 33914 6. 202607 6. 066155 6. 834179 5. 778941 6. 11647 5. 734191  
4. 569761 5. 343494 5. 013161 5. 208547 4. 480974 5. 08552 4. 768341 5. 142015 3. 704933  
6. 572221 5. 297212 4. 655381 3. 96245 4. 655091 5. 893412 5. 178575 5. 884138 5. 332299  
5. 925192 6. 12687 6. 015766 6. 443642 6. 132741 5. 895801 5. 610879 6. 416706 5. 874068  
6. 594926 6. 289022 6. 229876 6. 009853 5. 939125 6. 119415 6. 017375 6. 349937 6. 896211  
2. 693432 2. 325727 2. 651417 2. 966223 1. 767447 2. 620079 3. 215328 2. 534527 1. 859

5. 78273 5. 792017 5. 248172 5. 732021 5. 516759 5. 465368 5. 947953 5. 339707 5. 832419  
6. 868946 6. 685897 6. 602281 6. 657358 6. 758957 6. 704044 6. 568112 6. 709264 7. 044239  
1. 689642 1. 817186 1. 910799 2. 771982 1. 799689 1. 340301 2. 017695 1. 83596 2. 218239  
4. 016405 4. 024156 4. 29518 6. 154549 4. 498689 5. 322555 4. 543989 4. 650173 4. 324121  
6. 334224 6. 967897 6. 670041 7. 218485 7. 003856 6. 272986 6. 396127 6. 611611 6. 343781  
4. 277173 4. 318287 4. 734563 3. 523713 4. 611451 4. 589347 4. 306501 4. 77653 3. 888247  
4. 181207 3. 710699 3. 432696 3. 535758 3. 819674 4. 054926 4. 559539 4. 034747 4. 100171  
4. 254998 4. 781054 4. 409159 3. 484063 4. 576432 4. 700892 5. 498493 4. 817183 4. 802021  
5. 786371 6. 057242 5. 26645 5. 260447 5. 250851 5. 971081 5. 59785 5. 670582 6. 087729  
5. 358078 6. 028835 5. 148373 5. 06167 5. 623548 4. 696072 4. 713497 4. 580375 5. 505251  
2. 965604 3. 769934 4. 032836 3. 188234 3. 414979 3. 750962 2. 575729 3. 181126 3. 821107  
5. 829222 5. 511302 6. 179565 4. 766583 5. 753221 5. 674226 5. 740096 5. 271921 5. 328138  
1. 793023 1. 476202 1. 62907 2. 356571 2. 397361 2. 080312 2. 166351 1. 816541 2. 372007  
6. 238244 6. 20643 5. 948809 5. 746535 6. 049378 6. 211158 6. 542582 6. 205445 6. 217362  
6. 467418 6. 289185 6. 215472 5. 801667 6. 196845 6. 041759 6. 275961 6. 083381 7. 23558  
2. 833468 4. 222897 3. 312155 4. 499029 3. 120466 3. 668951 3. 397589 5. 044588 3. 641  
5. 674303 4. 852666 4. 832938 4. 436459 5. 008667 4. 735185 5. 181362 5. 405285 5. 029035  
3. 756849 3. 263263 3. 781427 4. 236066 3. 699332 2. 90292 4. 096706 4. 170085 3. 913856  
6. 2564 6. 137486 6. 867207 5. 305398 6. 551014 6. 425673 5. 754513 6. 839682 5. 787174  
7. 052429 6. 884499 6. 79425 6. 429618 7. 064526 6. 841963 6. 808773 6. 997453 7. 284011  
7. 785914 8. 290581 7. 893931 7. 886816 8. 10154 8. 009042 8. 000462 8. 152507 7. 524039  
5. 944513 6. 333256 5. 775268 5. 561843 6. 147169 6. 670912 5. 983728 5. 428226 6. 581755  
7. 650763 7. 714581 7. 915094 7. 705228 7. 512655 8. 039445 7. 377099 7. 780422 7. 99072  
2. 876304 2. 267161 3. 627181 2. 42772 3. 371128 2. 331205 3. 094602 2. 992282 2. 622935  
6. 305526 6. 503854 6. 182114 6. 587622 6. 817542 6. 245609 6. 756904 6. 479632 6. 755611  
5. 144495 5. 348423 5. 214034 5. 728647 5. 028622 5. 793087 4. 901296 5. 536452 4. 528687  
6. 21889 6. 793834 6. 398666 6. 007245 6. 46322 6. 815933 6. 49143 6. 571488 7. 07181  
1. 63299 3. 524149 2. 47212 0. 89527 3. 655492 2. 415866 3. 935949 2. 56166 2. 703529  
3. 776951 3. 662724 3. 32197 2. 932908 3. 833967 3. 71979 3. 302452 3. 802422 3. 421936  
6. 543983 6. 452286 6. 297669 5. 94 6. 235403 6. 328172 6. 406979 6. 628782 6. 299053  
3. 946669 4. 456228 4. 780631 5. 500672 3. 639368 4. 570944 5. 178023 4. 044077 3. 549925  
4. 128585 4. 263578 3. 861787 4. 342697 3. 895424 4. 191084 3. 718702 4. 226199 4. 562058  
7. 050483 7. 035636 6. 648105 6. 466663 7. 306232 6. 836431 7. 270578 7. 140527 6. 987681  
6. 050834 5. 325433 5. 440643 5. 703339 5. 744257 6. 398693 5. 767971 5. 775864 5. 162878  
7. 285598 7. 36809 6. 988208 6. 905587 7. 312916 7. 407603 7. 468186 7. 373616 6. 59062  
7. 933324 7. 971283 7. 878184 7. 995447 7. 270729 7. 840652 7. 881062 7. 8661 8. 6361  
6. 966806 6. 608446 6. 492068 6. 557614 7. 422673 5. 88558 6. 623893 6. 699321 7. 199816  
6. 105811 6. 279401 6. 237796 6. 854967 6. 093714 6. 325608 6. 277018 6. 246496 6. 830009  
1. 963774 2. 259861 2. 375898 1. 548505 1. 651657 2. 157834 2. 175511 2. 524349 1. 883072  
2. 240817 2. 250348 2. 723702 2. 102918 2. 037531 1. 839869 1. 983257 2. 550567 2. 339509  
7. 267928 7. 197411 6. 966968 6. 751584 7. 100884 6. 720919 7. 17504 6. 977104 7. 896418  
4. 070532 4. 112719 3. 783288 3. 830431 3. 868266 4. 329012 3. 782089 4. 05747 3. 130456  
6. 523305 6. 647516 6. 570934 6. 289812 6. 988569 6. 884422 6. 42981 6. 754049 7. 125077  
6. 631648 6. 740665 6. 941942 6. 602492 7. 303914 7. 041012 7. 073352 6. 96362 7. 123476  
2. 400436 3. 090279 2. 892402 2. 728492 1. 929183 2. 303034 2. 907294 2. 182853 2. 662473  
5. 035291 4. 949275 4. 18871 5. 68006 4. 797389 4. 774899 5. 05369 4. 731819 5. 352114  
2. 877252 2. 942469 3. 379574 2. 83859 2. 897451 4. 218714 2. 99766 3. 072776 2. 799776  
5. 550047 5. 609245 5. 595871 5. 785329 5. 727662 5. 345186 6. 154954 5. 499194 6. 351027  
2. 828948 3. 182977 2. 583026 3. 097502 3. 103665 2. 084651 3. 323097 3. 151603 3. 201068  
7. 373758 8. 202412 6. 367369 8. 091415 8. 948734 7. 560134 8. 866362 8. 651216 6. 496683  
5. 326834 5. 13629 5. 958474 4. 819011 5. 562763 5. 471285 5. 506474 5. 456824 6. 822539

4. 374743 5. 565569 4. 979835 2. 797121 4. 961488 4. 551742 4. 067798 5. 152808 3. 230528  
5. 685204 6. 153386 6. 361953 4. 888167 5. 496702 5. 750843 5. 740737 5. 39038 6. 056968  
2. 939328 2. 688293 2. 940062 2. 699531 2. 41922 2. 210974 2. 904972 2. 852805 2. 635783  
10. 12451 10. 23275 9. 937575 9. 896827 10. 08117 10. 22351 10. 04306 10. 13749 10. 07571  
3. 715467 4. 160241 3. 816625 3. 782558 4. 011717 3. 166405 3. 756228 3. 794393 4. 188721  
8. 108556 8. 259362 7. 842617 8. 651586 8. 222362 8. 314728 8. 115149 8. 058736 7. 756125  
5. 630481 5. 653312 5. 370477 6. 747118 6. 29379 5. 988379 6. 060406 6. 147717 4. 739732  
6. 798604 6. 697354 6. 526308 6. 421412 6. 727663 6. 53297 6. 78614 6. 806502 7. 135378  
3. 207936 3. 23524 3. 530743 3. 351397 3. 485662 3. 469991 3. 272041 3. 029783 3. 119678  
8. 700387 9. 054607 9. 306602 8. 854526 8. 89838 9. 338115 8. 430764 9. 082254 8. 02376  
4. 59905 4. 51068 4. 96815 4. 828663 4. 925106 4. 474914 3. 853777 4. 936346 3. 280213  
6. 663523 6. 428182 6. 514536 6. 209699 6. 228837 6. 639476 6. 5323 6. 326015 6. 928803  
4. 214136 4. 594865 4. 734892 4. 123289 5. 211491 3. 863662 5. 389729 4. 779407 4. 322347  
5. 495159 5. 992581 5. 145295 6. 422678 6. 071329 5. 7814 5. 765573 5. 978174 5. 513059  
8. 287806 8. 694176 8. 455371 8. 709011 8. 299915 8. 506247 8. 175019 8. 387076 8. 804318  
5. 660045 5. 466762 6. 277813 5. 07369 5. 86993 5. 902995 6. 1982 5. 997166 5. 247705  
5. 98565 5. 410849 5. 700846 5. 975795 5. 644826 6. 58291 6. 028527 5. 723982 6. 711741  
5. 410201 5. 089576 5. 758849 3. 901479 5. 836481 5. 458284 4. 979119 5. 456616 4. 385239  
2. 42236 3. 973654 2. 474113 2. 919925 2. 479479 2. 551955 2. 643757 2. 594293 2. 551955  
8. 846181 8. 801321 8. 814006 8. 421268 8. 778252 9. 061606 8. 655027 8. 931323 8. 469744  
3. 805936 4. 062263 4. 246087 2. 584742 3. 378242 3. 556002 3. 779202 3. 627805 3. 495994  
7. 11683 7. 256487 6. 831817 5. 829268 7. 009881 7. 318514 6. 510452 6. 518096 7. 04307  
6. 681939 6. 721728 6. 454566 6. 292997 6. 546242 6. 515746 6. 53045 6. 557078 6. 760517  
5. 674035 5. 774912 6. 314559 4. 05878 6. 096689 6. 03474 6. 420498 5. 246408 6. 980796  
6. 715465 6. 456682 6. 114396 5. 570247 6. 405548 6. 106241 6. 395962 6. 04616 6. 144724  
6. 94058 6. 774667 7. 457966 6. 369358 7. 357914 7. 308465 7. 035682 6. 912963 7. 393157  
3. 770943 3. 968587 3. 937496 2. 463595 4. 529602 3. 694895 4. 237478 4. 236958 4. 631125  
3. 354123 5. 003202 3. 879597 4. 367054 4. 751179 4. 88723 3. 781905 4. 560822 2. 950898  
1. 437374 2. 331575 1. 298741 1. 881413 3. 585722 1. 730657 1. 632945 1. 861362 1. 566566  
6. 668578 6. 62814 7. 068674 6. 69922 6. 414192 6. 764549 6. 816187 6. 787238 7. 769095  
6. 575377 7. 03363 6. 670072 6. 060243 6. 661152 6. 758231 6. 796472 6. 913204 5. 785663  
7. 099023 7. 125319 7. 340866 6. 750127 7. 117878 6. 714328 7. 481048 7. 031127 6. 956939  
5. 734653 5. 709485 6. 21063 6. 04616 6. 06299 5. 541214 5. 10546 5. 889283 4. 617477  
4. 743379 3. 685154 4. 475136 3. 822245 4. 357049 3. 252897 4. 035232 4. 585228 3. 786008  
4. 91065 4. 954859 5. 209852 4. 73095 4. 97287 5. 164118 4. 812834 4. 834566 4. 26501  
5. 669939 4. 712605 6. 11801 6. 082674 5. 43949 4. 376177 5. 219072 4. 7516 5. 808365  
7. 466427 7. 791089 7. 075592 7. 150726 7. 711418 7. 593128 7. 53178 7. 49246 7. 58475  
6. 485429 6. 882572 6. 306569 7. 453122 7. 421019 7. 292017 6. 576332 6. 864802 5. 447288  
4. 955585 5. 185755 4. 827183 4. 458309 4. 867084 5. 172405 4. 519005 4. 79956 5. 385381  
2. 856924 1. 412158 3. 261004 2. 195164 2. 027407 2. 101664 2. 451609 1. 890807 2. 355865  
3. 077299 3. 187198 3. 865425 3. 731615 3. 345528 2. 962697 3. 02057 3. 376195 3. 460351  
5. 850184 6. 010953 5. 636879 6. 464653 6. 015948 5. 971758 6. 033296 5. 911837 5. 781566  
7. 928355 7. 77017 7. 84842 8. 344828 8. 482854 7. 426467 7. 28639 7. 975527 8. 199899  
4. 421477 4. 143867 4. 229937 3. 675534 4. 683676 4. 802057 5. 301382 3. 446817 5. 032413  
4. 843147 4. 293387 4. 83231 3. 454449 4. 637279 3. 903934 4. 291743 4. 33053 6. 006733  
1. 419713 2. 002574 2. 266565 1. 752763 1. 792437 1. 627552 2. 305574 2. 309211 1. 803737  
2. 503427 2. 023782 2. 00531 2. 054243 2. 933324 2. 875052 2. 436632 2. 096595 3. 216654  
3. 904469 4. 924494 4. 412551 4. 192923 4. 308956 4. 064698 4. 55945 3. 897392 4. 7373  
1. 299423 1. 611289 1. 119496 2. 216236 1. 201973 1. 485497 1. 665215 1. 644828 1. 091145  
8. 118474 7. 539676 7. 681399 8. 094246 7. 448734 6. 727644 8. 32688 8. 027777 7. 911656  
5. 231705 5. 553177 5. 108542 6. 183276 5. 174604 5. 253022 5. 186268 5. 603471 5. 325963

5. 850708 5. 732237 6. 135788 6. 167883 4. 999896 5. 682886 5. 654528 6. 289366 5. 986644  
6. 261669 6. 5971 6. 367606 7. 321217 7. 509062 6. 617302 6. 193719 6. 557596 6. 93308  
2. 483158 2. 400531 1. 98987 2. 523192 2. 275492 2. 194563 1. 936993 1. 97882 2. 29861  
7. 543567 8. 050061 7. 670397 6. 441965 7. 558763 8. 21029 7. 43575 7. 84826 8. 392102  
7. 694578 8. 235823 7. 380764 8. 05628 8. 170568 7. 986232 7. 152309 8. 018571 7. 284689  
2. 658662 1. 370235 2. 831104 2. 916008 2. 800139 1. 277451 1. 601311 1. 816324 2. 124018  
4. 712948 5. 467911 4. 877366 4. 571824 5. 315971 5. 465088 4. 86917 5. 058103 4. 473239  
2. 747346 2. 457831 2. 418339 3. 489388 2. 831335 2. 433993 2. 692973 2. 980879 3. 28955  
1. 367601 1. 903928 1. 753141 2. 315999 1. 47907 2. 035045 2. 105157 1. 603863 1. 330823  
7. 166834 7. 105146 6. 406133 6. 06571 6. 684726 6. 463902 7. 396617 6. 659639 7. 931157  
5. 600691 5. 355223 5. 542159 5. 614801 5. 46442 5. 110832 5. 273504 5. 023078 5. 063471  
1. 834507 1. 826112 1. 989742 1. 90815 1. 763219 1. 823902 1. 435245 1. 805742 2. 50985  
3. 586679 3. 533922 3. 549471 2. 855122 3. 623076 3. 862727 3. 533946 3. 139747 3. 116344  
4. 921505 4. 965426 3. 828145 5. 056718 3. 455494 4. 299838 4. 348816 3. 54881 3. 385633  
7. 641028 7. 576001 7. 478336 6. 836196 7. 675107 7. 665153 7. 484786 7. 498629 6. 335563  
6. 884505 6. 721174 7. 025588 7. 047502 7. 157884 7. 302228 7. 038796 6. 826485 7. 178985  
8. 221629 8. 112614 8. 13744 8. 432328 8. 304918 8. 362091 8. 368779 8. 074752 9. 142567  
4. 301543 4. 611216 4. 803858 4. 70877 4. 55572 4. 880083 5. 203045 4. 208889 3. 981135  
5. 177449 5. 115949 5. 065623 4. 305473 5. 68353 4. 14778 4. 957979 4. 41862 3. 996606  
3. 274069 2. 33729 1. 989382 2. 656531 2. 596564 2. 443688 2. 410293 2. 405152 2. 54503  
1. 049212 1. 108416 1. 198834 1. 98017 1. 780709 1. 399416 1. 243493 0. 99557 2. 750852  
4. 460414 4. 233205 4. 50652 2. 755272 3. 879097 4. 21018 4. 122536 3. 820395 4. 308497  
4. 696071 4. 452914 4. 105798 5. 63436 3. 749281 2. 227662 4. 876111 4. 168734 3. 834699  
6. 230318 6. 640051 5. 893207 6. 93745 6. 07511 6. 214338 6. 201815 6. 175091 5. 204998  
2. 733345 3. 18447 2. 792872 2. 538794 3. 174164 3. 372068 2. 720256 4. 551597 3. 845921  
5. 663475 6. 070732 6. 219976 4. 431983 5. 670792 5. 852816 6. 172497 5. 824235 2. 816248  
1. 751507 2. 38173 3. 159215 3. 970597 2. 329904 2. 089465 1. 846707 2. 38606 2. 159349  
7. 679763 7. 623823 7. 285694 7. 061276 7. 221013 7. 53061 7. 835194 7. 319688 7. 193287  
7. 236647 7. 779275 7. 479943 7. 406767 7. 71259 7. 683148 7. 313744 7. 822647 8. 035151  
4. 285424 4. 021382 3. 982602 2. 216268 3. 959139 5. 059862 4. 123504 4. 354327 5. 443275  
9. 09908 8. 942685 8. 460858 8. 600179 8. 813721 8. 533225 9. 212859 8. 850578 8. 802169  
6. 111478 6. 071093 5. 915555 5. 931208 5. 899221 5. 976388 6. 253797 6. 150222 7. 038819  
7. 809674 7. 781544 8. 020802 7. 905391 8. 485114 7. 74521 7. 498309 7. 76501 7. 04853  
7. 299362 6. 722702 6. 964811 7. 336614 7. 272965 7. 978248 6. 950309 8. 126196 7. 05567  
6. 225647 6. 090389 5. 988513 6. 517549 6. 29249 6. 384332 5. 877304 6. 405969 5. 053004  
7. 257322 7. 117426 6. 576444 6. 246168 6. 708661 6. 27268 6. 958741 7. 001829 6. 251028  
3. 984191 3. 135687 3. 882545 3. 287684 3. 245421 3. 340883 3. 965601 4. 294813 3. 854646  
9. 80386 9. 238877 9. 320813 9. 42986 9. 370626 9. 105359 9. 891555 9. 336028 9. 90947  
4. 755094 5. 399165 5. 156864 4. 49484 4. 973289 3. 998687 5. 537652 4. 818453 4. 293483  
5. 193799 4. 322459 4. 913282 5. 740344 4. 833026 6. 011711 5. 336231 4. 852291 4. 890796  
6. 243251 6. 773323 6. 188554 5. 956418 6. 822725 7. 111094 6. 712549 6. 858736 5. 971983  
6. 73915 6. 588263 6. 764223 6. 630172 6. 00755 8. 032234 6. 501323 7. 776254 7. 291493  
2. 728262 2. 175964 3. 143412 2. 104247 2. 61171 4. 418123 2. 404369 2. 425407 2. 255137  
5. 243797 5. 230128 5. 618711 4. 402283 3. 953525 4. 666175 5. 305696 4. 830442 4. 73971  
4. 544314 3. 405061 2. 577244 3. 427525 3. 671835 3. 273085 4. 627449 3. 368973 2. 238401  
3. 030361 2. 669666 3. 480603 4. 371186 2. 565269 3. 086051 2. 978745 2. 638949 4. 35514  
4. 166668 3. 941948 5. 552423 3. 447374 3. 708182 5. 356168 4. 75206 4. 676577 2. 38966  
7. 2862 7. 323593 7. 202505 7. 2926 7. 122308 7. 275134 7. 269335 7. 42812 7. 682506  
6. 377369 6. 567828 6. 711414 5. 484854 6. 165992 6. 361341 6. 42386 6. 863519 5. 515162  
4. 401467 4. 402863 4. 345484 4. 304891 5. 094964 5. 030342 3. 77042 4. 727143 4. 891033  
2. 016656 2. 015823 2. 29531 2. 968879 1. 725411 2. 333682 2. 313813 1. 734373 1. 222794

7. 520828 7. 663975 7. 344536 7. 383903 7. 655448 7. 695956 7. 394451 7. 657514 7. 431355  
5. 220082 5. 428866 5. 591123 4. 27421 5. 786445 5. 94541 4. 521357 5. 288555 5. 054861  
4. 290566 4. 007175 4. 476175 3. 499447 4. 564189 3. 795651 4. 286413 4. 254746 4. 272218  
2. 83465 3. 55995 3. 785115 3. 059617 4. 001408 2. 018182 3. 783293 3. 008501 2. 773029  
5. 464593 5. 700703 5. 994363 4. 725315 5. 200068 4. 886861 5. 009904 5. 417799 4. 289009  
1. 268224 1. 585295 1. 939236 2. 750839 2. 681033 1. 543094 2. 493217 2. 104734 3. 141555  
6. 078972 6. 375742 5. 83114 5. 659406 5. 650578 5. 877322 5. 315517 5. 78876 5. 682636  
5. 156158 5. 568269 5. 165161 6. 021453 5. 75116 5. 679163 5. 788374 5. 091309 5. 101508  
6. 801943 6. 505088 6. 449813 6. 213825 6. 681565 7. 220594 6. 549511 6. 57767 6. 876175  
3. 629191 3. 494613 3. 171126 4. 229925 4. 330847 4. 180017 3. 037175 3. 666915 3. 260386  
5. 78998 5. 197466 5. 39845 3. 944034 4. 987969 5. 274228 5. 361587 5. 187673 5. 851387  
5. 688946 4. 910572 5. 258685 4. 063991 5. 14287 4. 840895 5. 704558 5. 374181 4. 846831  
4. 789582 4. 869407 4. 409222 4. 370838 4. 947798 4. 784459 4. 992817 5. 447847 5. 173453  
6. 591608 6. 769495 6. 972407 5. 878841 6. 667298 6. 681466 6. 670537 6. 327811 6. 798818  
6. 291204 6. 36525 5. 861837 5. 812706 6. 5779 6. 264642 6. 424776 6. 346216 6. 588451  
2. 701697 1. 720565 1. 397056 0. 760085 0. 923845 1. 0592 0. 82262 1. 06966 0. 937389  
1. 073877 1. 729335 0. 971803 1. 403759 1. 246094 1. 208601 0. 952492 0. 9932 0. 924616  
2. 688927 2. 636296 2. 651028 3. 131126 2. 482385 3. 8397 2. 81037 4. 068516 2. 519065  
6. 752208 6. 249537 6. 267668 5. 450623 5. 933979 6. 589038 6. 465078 6. 029057 6. 390658  
4. 99197 5. 122848 4. 991013 4. 24569 5. 383884 5. 191195 4. 753802 5. 023208 4. 20495  
7. 998883 8. 342614 8. 2663 8. 424326 8. 494849 8. 623861 7. 842876 8. 391411 8. 158461  
3. 468854 3. 317644 3. 911644 3. 540081 3. 882566 3. 595213 3. 453178 3. 386321 2. 944768  
6. 576462 6. 583656 6. 504082 5. 140258 6. 350574 6. 863825 6. 617323 6. 308945 6. 324825  
4. 168385 4. 58453 4. 48789 4. 481919 4. 960285 4. 490534 4. 579728 4. 738711 4. 142933  
4. 942553 4. 428334 4. 92291 4. 310947 5. 520712 4. 279748 4. 41759 5. 005748 5. 248174  
2. 745934 1. 825456 1. 856335 2. 65002 2. 030756 1. 539283 2. 677332 2. 464479 2. 736274  
6. 584551 6. 628657 5. 870289 5. 386798 6. 873038 5. 939728 6. 645085 6. 198947 6. 937261  
4. 518314 4. 463656 3. 37612 5. 028327 3. 42336 3. 98402 3. 606405 2. 883748 2. 897821  
1. 821423 2. 289739 1. 576005 2. 715023 2. 591903 2. 086226 2. 063615 2. 087022 1. 551729  
1. 947237 3. 023745 2. 364311 2. 330116 2. 98844 2. 76025 2. 692225 2. 87189 1. 687854  
7. 206575 6. 958058 6. 912279 7. 204317 6. 630638 6. 73859 6. 76503 6. 839016 7. 180882  
4. 691935 4. 979674 3. 568613 4. 212174 4. 312869 4. 560385 4. 197346 4. 662988 3. 846752  
1. 552012 1. 894417 1. 743068 1. 601863 1. 024946 2. 39627 1. 880302 1. 524707 1. 540999  
2. 015578 2. 987578 2. 911571 3. 782784 2. 460479 2. 84439 1. 446944 2. 007832 2. 149433  
4. 866761 6. 543014 6. 779134 3. 827304 6. 870628 3. 457338 6. 695402 4. 721504 9. 42988  
1. 896338 1. 662184 1. 687018 1. 343093 1. 994106 2. 013452 2. 939792 1. 634103 1. 621939  
2. 039208 1. 973501 2. 78773 2. 999723 1. 930209 2. 084348 2. 246217 2. 123661 2. 347762  
7. 09995 6. 566086 6. 614062 6. 229722 6. 245767 6. 532894 6. 73016 6. 494773 6. 196999  
1. 869077 1. 662868 1. 928214 1. 778286 2. 000656 1. 786157 1. 47794 2. 158983 2. 513465  
4. 947138 4. 84277 4. 209015 4. 093886 4. 642178 4. 517021 5. 690557 4. 257805 3. 166866  
2. 544121 2. 121721 2. 587942 3. 134275 2. 110001 1. 622532 2. 337759 1. 955038 2. 794028  
1. 380312 1. 959876 0. 929821 2. 835894 1. 535003 1. 617082 1. 929186 2. 657525 2. 314794  
5. 130413 5. 618348 4. 851437 6. 660688 5. 238981 4. 430014 5. 039354 4. 822572 5. 355606  
6. 051852 5. 852112 5. 483621 5. 546913 5. 873775 5. 888693 6. 13581 5. 735603 5. 07373  
2. 871717 3. 012627 3. 350811 2. 94167 2. 95537 2. 64032 2. 969229 2. 894057 4. 854405  
3. 166067 2. 224476 3. 31235 3. 33124 2. 549608 2. 65726 2. 325817 3. 805864 2. 58999  
1. 958972 2. 24335 2. 479606 3. 062549 2. 969252 1. 97262 2. 288115 2. 387267 2. 700949  
3. 803263 4. 689011 4. 164681 2. 212795 4. 03588 3. 986661 3. 821532 4. 235351 4. 223932  
1. 502203 1. 491615 1. 386572 1. 580241 1. 708945 1. 333264 1. 091267 1. 510162 0. 899437  
6. 671023 6. 679015 6. 879666 6. 347432 6. 503445 6. 764954 7. 406488 6. 847368 7. 873948  
6. 575957 6. 461137 5. 984499 4. 959066 6. 150776 6. 525539 6. 109763 5. 832269 6. 115422



4. 940957 4. 849849 4. 657903 3. 478391 4. 696389 4. 90933 5. 033424 4. 589239 4. 375098  
7. 222433 7. 627863 7. 547117 5. 695443 7. 888507 6. 791294 7. 437 7. 489711 7. 302221  
7. 336379 7. 756417 7. 592545 6. 915491 7. 224832 7. 86183 7. 536592 7. 980772 7. 162065  
4. 515554 5. 154644 5. 142898 4. 43312 5. 307686 4. 938086 4. 933024 5. 229869 5. 33162  
6. 415111 6. 138825 6. 087684 6. 120007 6. 665384 6. 212222 6. 439861 6. 399888 5. 727097  
2. 514691 2. 405785 2. 149245 2. 192098 2. 747603 2. 250923 2. 491868 1. 993455 1. 61417  
1. 037671 1. 557206 1. 588961 1. 956137 1. 379363 1. 645657 1. 729272 2. 455134 2. 140232  
6. 846747 6. 776709 6. 484758 6. 794089 7. 31192 6. 535577 6. 500205 6. 924981 5. 707386  
2. 231558 2. 213081 2. 766083 1. 7337 1. 65548 1. 558394 2. 849982 1. 801922 1. 641663  
4. 960011 4. 677689 4. 768597 4. 939552 5. 226645 4. 257258 4. 630855 5. 231063 4. 44276  
7. 071153 7. 065062 6. 947751 5. 580233 7. 11 7. 093843 6. 809766 6. 730408 6. 200475  
1. 75875 1. 995228 1. 681076 1. 704483 2. 225642 1. 715993 2. 242601 1. 465509 1. 853787  
3. 591681 4. 403655 3. 868359 3. 060153 3. 835277 4. 670951 3. 284836 3. 269528 3. 096934  
1. 499679 1. 698971 1. 797601 1. 926837 1. 161994 1. 067094 1. 283207 1. 344064 2. 005838  
7. 004609 5. 442257 6. 112681 6. 198237 6. 610166 7. 521252 6. 666213 6. 245247 7. 275197  
5. 586866 5. 920182 5. 689358 6. 30219 6. 25275 4. 07114 4. 994584 5. 556088 5. 179199  
5. 331983 5. 369954 5. 491213 4. 442701 5. 77433 5. 669097 4. 89489 5. 378967 5. 126822  
1. 153575 1. 466539 1. 609749 1. 621917 1. 607215 2. 447534 1. 411375 1. 79868 1. 827213  
7. 202535 7. 178422 7. 042137 6. 539197 6. 991031 7. 036479 6. 744723 7. 408408 7. 044359  
4. 194723 4. 565517 4. 26433 3. 213192 4. 246792 3. 569246 4. 068071 4. 70961 4. 181227  
4. 259967 4. 11984 3. 928601 4. 544834 3. 856602 4. 475283 3. 935591 4. 378281 3. 312718  
8. 767144 8. 553403 8. 602376 8. 395095 8. 707057 8. 522878 8. 828155 8. 536758 8. 622698  
6. 10728 6. 870453 6. 323109 7. 770461 9. 435941 6. 87755 6. 845018 6. 781559 7. 418004  
5. 572605 5. 167447 5. 735014 5. 067536 5. 554932 5. 483375 5. 918061 5. 170176 5. 332226  
7. 674839 7. 629021 7. 419531 7. 715929 7. 190859 7. 152921 7. 889295 7. 618342 7. 845701  
5. 984684 6. 220582 6. 951225 5. 643572 7. 194666 6. 012758 6. 333074 6. 415989 5. 479614  
1. 544254 1. 424257 1. 408237 2. 229836 3. 830306 1. 928989 2. 495456 2. 103968 2. 401897  
1. 695076 2. 145108 2. 52851 3. 333462 2. 654422 2. 173812 2. 978156 2. 093238 3. 031945  
2. 427122 3. 062487 2. 561335 2. 612344 3. 081888 3. 036717 1. 365683 1. 364633 1. 805756  
6. 854542 6. 779376 6. 689574 6. 266419 6. 360889 6. 094722 6. 858254 6. 273199 6. 328853  
7. 059579 7. 278195 7. 176191 6. 967322 7. 434438 6. 62982 7. 182204 7. 580369 7. 54786  
3. 901721 4. 348607 4. 141111 3. 914008 3. 190739 3. 521121 4. 010756 4. 158859 4. 667659  
5. 700485 6. 201423 6. 301234 6. 279307 6. 177219 5. 582355 6. 20564 5. 883647 6. 282058  
6. 144767 6. 462999 6. 316324 3. 899059 5. 585545 5. 955047 5. 817213 5. 483514 5. 513014  
5. 719981 5. 527871 5. 15225 5. 392693 5. 808564 4. 900878 5. 606311 5. 658869 4. 927461  
5. 163327 4. 364987 4. 737812 5. 064704 4. 502127 4. 718356 5. 061393 4. 876441 3. 641006  
2. 235855 2. 770829 3. 196422 2. 213599 3. 6442 2. 901209 2. 641264 4. 166524 2. 358609  
1. 097744 0. 747956 2. 062726 1. 560951 2. 129943 1. 809064 1. 183418 1. 47695 1. 341747  
6. 957034 6. 639822 6. 167025 6. 128529 6. 976114 6. 449021 7. 486664 7. 018451 5. 926893  
3. 547006 3. 679782 3. 190556 3. 570579 2. 657493 3. 052614 4. 878756 4. 070561 3. 198142  
9. 01301 9. 275612 8. 533798 8. 965003 9. 126884 8. 963372 9. 018922 9. 036034 8. 695134  
5. 766797 4. 948387 4. 826115 5. 364988 4. 910067 5. 70876 5. 736792 4. 891906 5. 487208  
6. 009763 5. 915081 6. 421559 6. 22638 5. 821535 6. 350657 6. 015811 6. 126984 5. 401502  
4. 405278 4. 248911 4. 020955 3. 876746 4. 248911 3. 82895 3. 933049 4. 024053 3. 509301  
5. 193578 6. 092322 5. 170119 5. 850985 6. 191025 5. 700007 4. 967451 6. 107836 6. 344526  
1. 096701 1. 129594 1. 465877 1. 715416 1. 624689 1. 308233 1. 628839 1. 61874 2. 369098  
3. 528235 2. 95216 3. 362233 3. 615706 2. 804118 3. 004443 1. 955134 2. 530788 3. 464534  
2. 8313 3. 447349 3. 166558 3. 612735 3. 575367 2. 770647 3. 00019 2. 816907 2. 699097  
1. 092323 2. 337651 4. 124793 1. 957739 1. 649285 1. 482522 1. 282178 3. 37768 1. 274453  
1. 971779 0. 925878 3. 087603 1. 768685 1. 292383 1. 233794 1. 226496 2. 782475 1. 325021  
1. 674432 2. 616794 1. 934717 1. 66808 1. 452766 2. 498906 1. 426219 1. 271369 2. 123886

7. 77419 7. 827692 7. 92708 7. 482387 7. 455149 7. 612431 7. 554842 7. 855927 7. 002768  
3. 782972 4. 511549 4. 018495 4. 175512 4. 571123 3. 484357 3. 518815 3. 970193 3. 593965  
1. 622281 1. 744699 2. 719128 3. 114437 2. 530808 1. 8435 2. 343892 1. 498271 1. 942389  
6. 129604 6. 839813 6. 550794 5. 918551 6. 873893 6. 022737 5. 707321 6. 848366 5. 063202  
1. 094012 1. 287214 1. 245038 1. 760227 1. 188501 1. 024074 1. 06789 0. 953201 1. 100685  
2. 076816 1. 923594 1. 589502 2. 262222 1. 816451 2. 607731 1. 699332 1. 82141 1. 386972  
0. 773494 1. 700638 1. 615871 1. 001449 1. 025191 1. 088496 0. 922938 1. 468219 2. 786589  
2. 855582 1. 56849 2. 625233 2. 811759 2. 190607 2. 099842 2. 181873 2. 668816 2. 548431  
2. 572352 1. 805846 2. 579771 3. 536138 1. 847504 2. 544187 2. 990247 1. 706207 1. 46624  
6. 504242 6. 770426 6. 150359 6. 328555 6. 81944 7. 101402 6. 834172 6. 663541 6. 681981  
6. 277069 6. 319867 6. 445635 7. 675577 6. 346587 6. 706635 6. 510766 6. 496622 7. 42347  
5. 263384 5. 555715 6. 038226 5. 665237 5. 683962 5. 184488 5. 588769 5. 702311 4. 913744  
6. 931427 7. 343425 6. 926441 7. 145554 7. 23631 7. 233713 7. 52945 7. 032454 7. 221671  
5. 926298 5. 702383 4. 973582 4. 907363 5. 80473 5. 023068 5. 567017 5. 725294 6. 933072  
4. 757157 4. 338761 4. 672181 4. 676427 4. 66918 3. 836321 4. 498488 4. 645389 4. 195084  
5. 921813 6. 017781 6. 261762 5. 883803 6. 292565 5. 847244 6. 229121 5. 446218 5. 329473  
4. 190069 4. 656273 4. 237181 5. 298108 5. 258596 3. 899248 4. 657366 4. 989869 5. 038127  
4. 234449 4. 538242 3. 77575 4. 799926 4. 412546 4. 89304 4. 112717 4. 723769 3. 844466  
5. 566 5. 923545 6. 018587 5. 443936 5. 730501 4. 722602 6. 304741 5. 61253 6. 158482  
8. 024666 8. 584554 8. 528891 7. 930003 7. 879334 9. 060848 8. 24783 9. 027489 6. 994823  
4. 859264 5. 084129 4. 21321 4. 7648 4. 184871 5. 251868 5. 24436 5. 2433 4. 683047  
7. 25531 7. 200756 8. 167797 7. 476584 6. 839952 6. 561691 7. 345085 6. 973156 6. 250739  
5. 00165 5. 460341 5. 71927 3. 36894 4. 667936 4. 083519 4. 813509 4. 746 5. 173751  
1. 72221 2. 184771 1. 34582 1. 336554 2. 021593 1. 735244 1. 44875 1. 077478 2. 47479  
7. 063614 7. 528346 7. 395065 7. 197042 7. 490597 7. 551035 7. 173362 7. 663939 5. 784286  
1. 413725 1. 578322 1. 251285 2. 524275 1. 666747 1. 627538 1. 479146 1. 662352 1. 653957  
4. 453425 4. 616452 3. 450192 4. 229504 3. 675851 4. 044921 3. 581044 4. 280671 3. 063903  
5. 846405 6. 594839 6. 525922 6. 329612 6. 751128 6. 381738 6. 221933 6. 020662 5. 975327  
3. 815215 4. 370402 4. 254749 3. 72362 4. 332521 3. 604416 3. 73954 3. 526296 4. 3976  
6. 540297 6. 57013 5. 806932 5. 406411 6. 386908 6. 557698 6. 217152 5. 899065 6. 771743  
1. 376838 4. 244698 2. 082261 3. 812316 1. 578569 1. 230914 3. 249878 1. 142114 1. 909826  
7. 520207 7. 980689 7. 894205 8. 386921 7. 836994 7. 805125 7. 732186 8. 011121 8. 076152  
1. 354909 1. 02654 1. 134339 1. 867314 1. 331801 2. 086736 0. 911566 1. 030586 0. 973093  
5. 110442 4. 727222 6. 304657 5. 393297 5. 014147 4. 42381 4. 967508 4. 904179 5. 170445  
2. 5816 2. 69228 3. 221446 2. 249567 2. 547383 2. 192469 3. 627254 2. 435239 3. 081443  
5. 960799 5. 998727 5. 754344 5. 044888 5. 826729 5. 595468 6. 595253 5. 924091 6. 483652  
3. 876216 3. 443533 3. 563672 4. 569746 4. 280797 2. 930982 4. 442514 3. 783624 3. 101794  
5. 668855 6. 354506 5. 318599 7. 617816 6. 771074 6. 6081 6. 3261 6. 256966 7. 015126  
4. 909549 4. 83783 4. 555803 5. 154427 4. 323463 4. 183582 4. 594986 4. 564467 4. 076795  
2. 251284 3. 191354 2. 036142 1. 800514 2. 121605 2. 191215 2. 750577 1. 629786 2. 173882  
4. 69311 3. 647089 4. 284493 3. 760047 4. 545881 3. 605172 3. 175179 4. 45374 3. 355197  
8. 247584 8. 254834 8. 487823 8. 044077 7. 818239 8. 381434 8. 168418 7. 893138 8. 019646  
1. 874295 1. 431674 2. 147988 2. 84347 1. 129879 1. 532727 2. 244052 1. 47235 1. 869644  
8. 702662 8. 49859 8. 661804 8. 818889 8. 399743 8. 544916 8. 861181 8. 639109 8. 941561  
1. 960781 2. 387684 2. 106639 2. 71282 1. 865645 2. 132624 2. 060125 1. 508062 2. 210742  
7. 214368 4. 782977 6. 464293 6. 285451 5. 831817 7. 970764 7. 292588 7. 034757 8. 233802  
2. 156162 1. 505342 2. 74983 2. 500192 1. 579884 1. 521408 2. 777531 2. 680356 2. 09833  
5. 788859 5. 378297 5. 923641 6. 408846 5. 767727 5. 53356 5. 73088 5. 527408 5. 353746  
5. 015502 6. 098551 5. 975271 3. 79832 6. 169744 5. 983705 6. 000793 5. 629794 5. 609877  
8. 57853 8. 372972 8. 312771 8. 506768 8. 548888 8. 22737 8. 723281 8. 432772 8. 811967  
3. 483748 3. 880216 3. 56774 2. 966399 4. 163327 4. 147275 3. 566706 4. 011652 3. 282799

3.136596 2.582857 3.264545 3.961599 2.788335 2.167128 3.172932 3.130993 2.45123  
3.011101 2.829596 2.33322 3.901063 2.899641 2.93895 2.483787 3.13932 2.625139  
5.827084 6.036437 6.512889 7.216205 6.833502 6.67505 6.246367 6.356449 5.01161  
1.252874 2.678812 1.501675 1.295268 2.247005 1.497418 1.214278 1.48697 1.974721  
8.122145 8.51258 8.02639 8.618044 8.119014 8.218861 7.770567 8.404207 8.964866  
5.082 5.842478 5.148954 5.174187 5.079252 5.273972 4.699615 4.27444 5.193109  
2.7948 3.314834 2.275634 2.458002 2.987208 2.95633 2.762255 3.127012 2.099214  
5.793799 5.514192 6.019101 4.242697 5.455486 5.836974 5.001996 5.476026 5.135403  
4.813247 4.125011 4.488432 4.754428 4.192918 4.724273 4.988624 4.554871 4.081452  
4.875016 3.361237 2.979651 3.319187 3.780344 3.68957 3.774216 3.207731 4.31745  
3.581309 3.755312 3.125487 3.320499 3.340671 2.919871 3.600348 3.504712 3.164689  
0.678975 0.665203 1.280237 0.966343 1.042368 1.675295 1.293703 1.193028 0.881267  
3.12969 2.296277 1.848164 2.774332 2.967797 1.843915 1.597246 1.970863 3.050515  
5.647696 5.288259 5.682247 3.371324 5.315774 4.679311 5.67977 4.884962 5.395454  
7.216395 7.455386 7.710816 6.337365 7.191908 6.882047 7.598716 7.134354 6.920219  
8.20236 8.551915 8.044335 7.012366 8.331996 8.245502 8.470156 8.169346 8.105882  
2.115158 2.337814 2.200305 2.830194 2.010858 2.459751 2.503491 2.623683 2.399369  
3.949123 4.55484 4.096687 3.686233 4.067083 3.03149 4.174255 4.461466 3.045788  
1.418739 1.875922 2.48521 1.490212 1.923872 2.109085 1.659709 1.6156 2.323432  
6.848615 6.721024 6.818563 7.207386 7.100174 6.928563 6.868901 6.720103 6.405232  
3.411154 3.999198 3.155336 2.396166 4.830016 1.743031 3.549812 4.516453 2.837149  
2.663247 2.875489 2.218761 1.949703 3.917405 3.260162 3.587034 2.538684 2.512323  
6.000597 6.014083 5.666713 5.64499 7.691688 5.805668 6.02939 6.279043 6.731915  
4.12429 3.161596 3.857291 3.667966 3.581782 4.619646 4.180257 3.911587 3.166074  
4.80873 5.342668 5.126929 5.123711 5.936874 5.217986 5.339016 4.861833 4.674187  
3.343137 2.914803 2.427129 3.379959 2.57469 1.967251 4.274959 3.617296 3.980706  
4.42297 4.641812 4.742542 5.876566 4.52204 4.532726 4.04684 4.053108 4.388534  
5.773739 5.897171 5.316353 5.748555 5.72648 5.28104 5.770895 5.727515 5.237731  
4.90113 5.196433 5.232102 4.549554 5.386462 5.087138 4.078054 5.314603 5.017918  
3.001603 3.538366 4.065783 4.151221 4.123514 3.045048 3.474477 3.446218 3.358801  
3.343349 4.035641 3.16288 3.789674 4.236223 3.136962 3.865982 4.392752 2.963079  
6.244242 6.439842 6.445122 6.394142 6.021915 6.540216 6.13533 6.378411 5.683926  
5.449088 5.581672 5.690552 5.419519 5.73428 4.821609 5.994895 5.7436 5.908159  
4.569203 3.781222 4.256216 4.525325 4.209268 2.430471 4.229561 5.667092 5.980469  
1.441811 1.88433 1.728631 1.621568 1.844582 1.624132 1.821137 1.302521 1.851798  
5.30251 4.138231 3.641648 5.249238 5.078519 5.225433 5.376746 3.850173 4.845849  
1.99396 2.150582 1.74295 1.939762 1.958094 2.123221 1.710335 1.728675 2.979811  
1.448499 1.865813 1.097756 2.176106 1.135433 1.527354 1.826511 1.095889 1.166414  
2.569011 2.673134 2.973384 3.128727 3.157357 3.175897 3.077207 3.036325 3.163081  
6.163217 5.270761 5.796895 4.469744 5.255521 5.193705 5.734824 5.689175 5.333673  
5.703167 4.300556 6.30313 5.837954 4.85902 5.204578 4.82779 4.454594 4.644516  
1.087425 0.892278 0.993575 1.758923 1.153783 0.924583 1.086916 1.303124 1.247819  
1.167863 1.130118 0.916169 1.577926 1.211747 1.38964 1.901543 1.246836 1.36645  
2.211283 1.811642 1.867151 4.050882 2.061581 2.11228 2.122382 1.552342 2.023962  
1.047607 1.032018 1.132342 1.818594 1.133126 1.061695 1.104146 0.836209 1.119972  
2.390206 1.887957 1.815397 2.525041 1.680693 2.305738 1.822558 1.868426 1.971117  
1.524886 1.913108 1.971299 2.717907 1.468481 2.971683 1.594188 1.613341 2.435897  
1.366671 1.586446 1.508493 2.348891 2.102103 1.118735 1.431866 1.616384 1.523318  
1.227578 1.713852 1.601351 2.028241 1.962591 1.755892 1.182432 1.415632 1.727541  
1.512367 0.958644 1.566661 1.865173 1.419316 1.838105 1.55715 1.539864 1.864002  
2.278183 2.075124 2.285478 2.272546 1.426149 1.903083 2.067876 1.859037 1.316495

2. 741248 3. 386178 3. 334574 4. 717541 2. 34026 2. 037359 3. 692369 2. 895394 3. 752077  
1. 493529 1. 290116 1. 09369 2. 44581 1. 026972 1. 284027 1. 116562 1. 708478 1. 186823  
0. 745581 0. 811031 0. 843628 1. 184386 1. 301638 1. 251311 0. 982819 1. 155647 1. 879338  
5. 152394 2. 003618 3. 626501 3. 203207 4. 255156 5. 385346 4. 111307 2. 650187 6. 809307  
1. 874583 1. 76726 2. 41123 2. 15854 2. 858198 3. 359776 2. 549985 2. 290039 2. 635331  
1. 418781 1. 727469 1. 433963 1. 695342 1. 688924 2. 257189 1. 428499 1. 495796 1. 998819  
3. 871934 2. 809168 4. 250276 1. 934244 1. 958943 2. 760548 2. 917653 1. 304622 1. 475971  
4. 203678 4. 220343 4. 743136 2. 204086 4. 719221 4. 456427 4. 788312 2. 085956 1. 653795  
6. 790781 6. 575424 6. 380648 5. 88529 6. 343349 6. 907003 6. 746564 6. 583367 6. 462954  
1. 92305 1. 797351 1. 286668 2. 059662 2. 41561 2. 355073 2. 474954 1. 885306 2. 119002  
1. 670195 1. 711824 3. 016209 2. 494217 1. 496843 2. 098007 2. 157717 2. 199417 3. 467422  
2. 398479 1. 924318 2. 430099 3. 261544 1. 88286 2. 124133 1. 731197 1. 487938 2. 431107  
5. 734393 5. 382799 5. 683472 5. 362133 5. 39305 5. 417453 6. 017677 5. 59202 5. 7218  
1. 192444 1. 641265 1. 777214 1. 93352 2. 165664 1. 648373 1. 463837 1. 498272 1. 401623  
6. 152093 5. 793827 5. 908621 5. 225188 5. 956246 5. 497394 6. 685059 6. 072442 5. 73536  
3. 829529 3. 657356 3. 528787 2. 331889 3. 85359 3. 934979 2. 460926 3. 575777 3. 925629  
0. 875925 1. 378191 1. 053146 0. 884228 1. 539779 1. 229949 1. 329518 1. 873147 1. 060211  
1. 436653 2. 008054 2. 165318 1. 541387 2. 971022 1. 474833 2. 356563 1. 487541 2. 001982  
2. 871037 2. 885617 3. 580902 3. 508675 3. 578552 2. 688647 3. 830701 2. 92126 3. 104946  
1. 381191 0. 982333 1. 160468 1. 61327 1. 249266 2. 367065 1. 406544 1. 073239 1. 687966  
1. 715548 1. 816996 2. 01399 2. 091366 2. 084518 1. 807756 1. 623238 1. 549002 1. 846816  
1. 899933 1. 478655 2. 40934 1. 63604 1. 304257 1. 73218 2. 068979 2. 482338 2. 068979  
4. 639326 4. 802322 4. 486469 5. 650575 3. 790854 3. 770161 4. 863203 5. 185289 2. 134785  
2. 620539 2. 931013 2. 479995 3. 020208 2. 288594 2. 090424 2. 348048 2. 695721 2. 882309  
1. 942309 1. 519787 1. 933679 2. 332256 1. 844863 2. 262327 1. 580574 2. 550044 1. 9368  
6. 298308 6. 587592 6. 375125 6. 298308 6. 444892 6. 298308 6. 186074 6. 625752 6. 062159  
1. 342215 1. 650886 2. 033515 2. 472934 1. 40907 1. 659316 1. 270995 1. 391357 1. 819091  
7. 401629 7. 910732 8. 117751 8. 28845 5. 011128 8. 911421 7. 063586 5. 436308 8. 364392  
8. 198162 8. 041188 8. 120764 7. 697147 7. 358641 7. 791401 8. 362415 7. 728761 7. 703173  
1. 659836 1. 509161 1. 970809 2. 113809 2. 161114 1. 566939 1. 960291 1. 889775 1. 821837  
2. 181059 2. 232338 2. 249117 1. 676018 1. 211389 2. 254751 2. 714391 1. 524909 2. 250971  
2. 746546 1. 889296 1. 767375 2. 858611 2. 338313 1. 353603 2. 380231 1. 352412 1. 265053  
2. 180756 1. 675185 1. 586185 1. 437548 1. 660841 2. 656715 1. 470252 1. 109481 1. 510546  
3. 171441 3. 609127 2. 366341 3. 059304 2. 663832 2. 477243 2. 598386 2. 50264 3. 330618  
5. 457589 5. 344227 6. 165932 5. 111032 5. 373609 5. 361598 5. 356348 4. 732322 4. 667778  
4. 046736 3. 052393 3. 335688 4. 320074 4. 464716 3. 248497 4. 176396 4. 254518 4. 987872  
4. 089571 2. 346501 5. 112571 2. 480903 3. 920456 4. 455755 3. 27378 3. 666219 3. 793992  
1. 660882 1. 719201 1. 488789 1. 705141 1. 55035 1. 421356 1. 884103 1. 497668 1. 590451  
2. 037209 1. 73797 3. 06272 2. 876956 1. 423557 1. 519593 1. 589136 1. 888604 1. 950758  
11. 06567 10. 70688 11. 21393 10. 86335 11. 11148 11. 01324 10. 89873 10. 88621 11. 27464  
1. 495439 1. 248486 1. 190469 1. 041281 0. 852465 2. 670865 1. 28781 1. 206521 1. 268902  
2. 528305 2. 335226 1. 684702 1. 832107 2. 03448 1. 320127 1. 154308 1. 414291 1. 644371  
7. 286882 6. 606089 7. 113437 5. 902482 6. 508396 6. 921064 6. 912705 6. 943732 7. 051188  
7. 074469 7. 307191 7. 121355 7. 027099 6. 968978 7. 011034 7. 485109 7. 313662 7. 24817  
2. 145231 1. 265351 2. 633226 2. 698589 1. 71562 2. 371468 2. 254105 2. 51254 1. 964575  
2. 382069 2. 456583 2. 32661 2. 164088 2. 036454 2. 379982 2. 12106 1. 697232 2. 758546  
7. 509093 7. 077554 7. 359985 7. 412248 7. 301865 7. 393466 7. 575319 7. 05222 7. 416265  
2. 936766 3. 337988 3. 254247 3. 217869 3. 431536 2. 591592 2. 181885 2. 748773 2. 340205  
1. 928356 1. 572329 2. 380576 3. 411737 2. 145902 1. 766241 2. 180471 1. 324045 1. 753536  
1. 506607 1. 976248 1. 462126 1. 711681 1. 597657 1. 310211 1. 309753 1. 832923 1. 651835  
3. 018245 2. 366876 3. 212539 3. 08447 3. 04182 2. 686306 2. 18607 3. 028777 2. 85199

2. 522187 1. 311356 2. 284602 2. 706369 2. 138036 2. 500212 2. 03346 1. 675456 2. 38707  
3. 761135 4. 630148 3. 868668 3. 498824 4. 626667 4. 224286 4. 334475 4. 268511 4. 584423  
2. 767734 2. 678599 2. 472746 3. 449856 2. 019273 2. 431535 2. 694975 3. 251616 2. 146627  
4. 328251 4. 115218 3. 159692 2. 547333 3. 352383 4. 282329 4. 36891 4. 69964 3. 178881  
1. 688015 1. 644599 1. 302692 2. 010271 1. 708916 2. 038711 1. 220644 1. 125752 2. 191038  
0. 863201 1. 992761 1. 162147 0. 791618 1. 743596 1. 172264 1. 879764 1. 73672 1. 35755  
1. 66555 1. 843522 2. 067275 3. 838217 1. 944433 2. 984786 2. 471668 2. 245321 2. 040358  
1. 280772 1. 190971 1. 079567 1. 883695 1. 13383 1. 616508 1. 080054 1. 5229 0. 907852  
1. 968145 1. 844684 2. 082259 3. 673052 1. 229831 1. 405955 2. 217815 1. 88194 1. 049521  
3. 263752 3. 143072 3. 447845 2. 499292 2. 827645 3. 355558 3. 528097 4. 003751 2. 997957  
4. 338686 4. 76153 4. 434474 2. 072048 4. 336361 4. 475493 4. 361375 4. 023167 5. 175971  
2. 867052 2. 839352 3. 298559 3. 740915 1. 780405 2. 43214 2. 225518 1. 900618 2. 205827  
1. 573885 1. 847024 2. 299336 2. 25253 2. 231341 1. 629801 2. 012367 1. 518158 1. 370301  
1. 307393 1. 862808 1. 040732 1. 124692 1. 231797 1. 590013 1. 438131 1. 458383 1. 424677  
1. 270726 1. 708299 1. 511323 1. 25929 1. 68153 1. 329861 1. 337552 0. 855289 1. 146662  
1. 741434 2. 686446 2. 599455 4. 609183 1. 950346 3. 33013 2. 121353 1. 845893 3. 005663  
4. 9546 1. 72866 3. 627221 3. 317965 3. 410465 3. 119324 2. 121342 3. 457514 3. 537603  
1. 039136 1. 462402 1. 974392 2. 412531 1. 38697 1. 643851 1. 26768 1. 143229 1. 618938  
6. 837761 6. 423049 6. 188394 6. 691602 6. 35633 6. 493935 6. 871903 6. 164262 5. 829834  
1. 985867 1. 451289 1. 259726 1. 167841 1. 690405 1. 85573 1. 702102 1. 060877 2. 18315  
5. 207627 5. 393924 4. 791412 3. 489101 5. 416494 4. 754181 5. 162661 4. 649899 5. 131503  
1. 07958 0. 979403 1. 223216 1. 403323 0. 937944 1. 146388 1. 20107 1. 524808 1. 850245  
1. 226542 1. 730886 1. 888652 1. 250781 3. 008517 2. 22553 3. 000558 0. 845082 0. 98643  
6. 183179 6. 674623 6. 042161 5. 2721 6. 281339 5. 720182 6. 326433 5. 737106 5. 415334  
5. 745491 5. 03964 5. 464458 4. 985048 5. 683685 5. 499174 5. 23222 5. 437949 6. 461855  
4. 823512 4. 069158 4. 984175 4. 689567 5. 1254 4. 27216 4. 682361 4. 620248 4. 111551  
2. 458951 2. 867459 2. 824572 3. 534339 3. 195898 2. 403434 2. 907749 2. 299845 3. 696169  
2. 997846 2. 285599 2. 879439 2. 957872 2. 527033 3. 314143 2. 9417 3. 09966 2. 68799  
5. 036796 5. 069451 4. 172042 3. 740426 6. 435153 3. 734543 5. 029662 5. 667119 3. 958057  
5. 215677 5. 454588 5. 652345 5. 722045 5. 352132 5. 455491 5. 500772 5. 937724 4. 535319  
4. 902294 4. 535631 5. 233102 4. 88392 5. 261988 5. 206966 4. 644425 5. 507762 6. 111668  
7. 701522 7. 676161 7. 84982 7. 304196 7. 049285 7. 416348 7. 620685 7. 864798 7. 795428  
7. 716894 6. 925174 7. 572791 7. 251619 6. 841483 6. 978419 7. 636968 7. 269758 7. 48924  
5. 090971 5. 546201 5. 78801 5. 149555 5. 580924 4. 96932 5. 101029 5. 051719 4. 728307  
1. 480293 1. 740969 1. 656497 1. 503433 2. 156628 2. 557418 1. 727384 1. 015415 2. 749893  
1. 579311 1. 254991 1. 493518 2. 17958 2. 270259 1. 634092 1. 523585 1. 457793 1. 540971  
3. 811399 3. 78781 6. 195192 1. 585152 3. 61972 4. 189429 1. 784233 1. 351726 5. 089256  
5. 376058 4. 634452 5. 786555 4. 969385 4. 552964 4. 948688 5. 046513 4. 572834 5. 109801  
5. 913527 5. 607175 4. 874683 3. 975027 4. 326629 5. 953237 5. 407716 5. 482204 5. 678009  
3. 944262 3. 336143 3. 470551 3. 886713 4. 389996 3. 553464 4. 12488 2. 503671 2. 436935  
2. 664832 2. 424715 1. 637105 2. 287183 1. 989844 2. 630928 1. 505944 3. 26357 1. 377767  
2. 48949 3. 510883 3. 456981 1. 946851 2. 855648 2. 800085 2. 97126 1. 768438 3. 57457  
1. 345628 1. 450276 1. 430102 1. 251762 1. 296855 1. 435914 1. 228879 1. 928117 1. 424235  
7. 122067 7. 177971 6. 56002 6. 744245 7. 021053 6. 371385 7. 378305 6. 376981 6. 638373  
1. 884141 1. 999526 1. 16164 1. 574731 1. 52575 1. 415375 1. 379413 1. 58741 0. 942148  
2. 703316 1. 97704 3. 419486 2. 539054 2. 444966 2. 588612 2. 278032 2. 181016 2. 871168  
9. 356028 9. 287185 9. 246642 9. 232615 8. 970235 9. 3923 9. 061645 9. 213249 8. 891725  
6. 875051 6. 817642 6. 971672 6. 942932 10. 20808 6. 196309 7. 318863 8. 211372 8. 740554  
6. 937988 6. 818426 7. 017858 5. 695734 6. 315568 7. 092572 6. 560205 6. 881968 6. 682659  
5. 924965 6. 044986 5. 302514 5. 590715 6. 428785 5. 778503 6. 193746 6. 322823 5. 383091  
2. 500682 2. 406704 2. 814679 3. 203146 3. 26748 2. 928412 3. 125906 2. 948613 2. 625168

6. 362169 5. 045222 5. 482849 3. 453877 4. 311864 7. 949789 4. 525427 6. 820801 6. 578414  
1. 211891 1. 089564 0. 918903 1. 313052 0. 839091 1. 258202 1. 075092 0. 994742 1. 176825  
6. 091407 6. 21858 5. 9397 6. 02768 6. 092388 5. 856039 6. 400392 6. 358364 6. 22604  
5. 836148 6. 148061 5. 548905 6. 449972 6. 132035 5. 757337 5. 833513 5. 535258 5. 864323  
3. 698994 2. 872681 3. 21425 3. 017597 2. 433013 2. 62758 3. 012939 3. 236295 3. 168542  
1. 072168 1. 120811 1. 229338 1. 46971 1. 337465 0. 815923 1. 247365 1. 602455 0. 830728  
4. 998342 5. 385984 6. 299549 5. 318337 5. 533452 6. 115769 5. 326683 5. 6031 4. 20214  
4. 815228 4. 788122 3. 983044 3. 687114 5. 27717 4. 882909 5. 118352 5. 052135 4. 594266  
5. 090519 5. 238553 5. 034894 4. 117758 4. 659867 5. 355284 5. 308431 5. 177276 3. 792739  
3. 085431 3. 453015 2. 897176 3. 062399 2. 781534 3. 444567 2. 926614 3. 43282 2. 722618  
0. 88429 0. 686271 0. 815679 1. 793205 0. 974421 1. 611584 1. 297469 0. 894392 1. 801239  
1. 855873 2. 562362 2. 09512 1. 984335 2. 420058 2. 200164 1. 94128 2. 225088 1. 777933  
5. 151544 5. 415439 5. 750504 5. 831161 5. 264305 5. 564337 5. 49818 5. 601722 5. 209658  
1. 577629 2. 031651 2. 225002 1. 974331 2. 823329 1. 833456 1. 955902 1. 224658 3. 034258  
4. 74097 4. 658897 4. 8249 5. 511475 4. 211445 4. 31687 4. 630303 5. 023081 4. 301765  
2. 464607 2. 175921 2. 393028 2. 19434 1. 572134 3. 218999 2. 056039 2. 506169 2. 15034  
3. 421442 2. 263046 1. 649601 3. 470062 3. 62054 4. 066836 3. 112947 2. 692536 2. 520168  
2. 626991 2. 591648 2. 537581 2. 119758 3. 086515 1. 730978 3. 374989 2. 678157 1. 811551  
2. 021756 1. 768199 1. 613302 2. 436725 1. 722797 1. 131515 1. 756011 2. 196819 2. 301481  
4. 987359 4. 445792 5. 223557 4. 647443 4. 307884 4. 398149 4. 507445 3. 939643 4. 921535  
1. 68752 0. 956662 1. 170046 2. 293364 1. 120622 1. 225419 1. 130182 1. 090963 1. 304743  
5. 255215 5. 239887 4. 225828 4. 751853 5. 306561 4. 554143 5. 297818 5. 176129 4. 650089  
1. 933393 2. 581753 2. 661219 2. 423653 2. 113004 2. 37715 2. 100031 2. 964805 2. 518034  
2. 554699 2. 749667 2. 512711 3. 035672 2. 575251 2. 660269 3. 031644 2. 806718 2. 638768  
5. 641137 5. 200505 5. 658239 5. 403124 5. 600489 5. 339629 5. 907224 5. 63405 5. 397978  
8. 529866 8. 418111 8. 558476 8. 558041 8. 446084 8. 800356 8. 195611 8. 706519 7. 236738  
1. 69435 1. 545321 1. 621173 1. 535091 1. 497365 2. 092054 1. 742626 1. 700673 2. 223447  
4. 769594 4. 300294 4. 760152 5. 195601 4. 567103 4. 516356 4. 321402 4. 536842 3. 75085  
1. 858423 2. 152031 1. 829985 2. 803418 1. 885406 1. 829948 1. 784659 1. 576993 2. 348739  
2. 239566 1. 334422 0. 95715 1. 18724 1. 50416 1. 130211 1. 173171 1. 316482 1. 495212  
3. 245449 4. 056856 4. 07242 4. 155826 3. 690694 3. 971018 3. 62496 4. 272662 4. 695965  
4. 67806 4. 8807 4. 433225 4. 92815 4. 74511 4. 316529 4. 019511 5. 328028 5. 207325  
1. 227996 1. 388097 1. 826093 1. 384844 1. 215058 1. 175709 1. 14192 1. 18687 1. 048722  
4. 253531 4. 303966 4. 192648 3. 840441 3. 75746 3. 22296 4. 15874 4. 10774 3. 707102  
4. 312994 4. 523061 4. 244637 5. 34829 4. 248048 4. 00482 4. 613807 4. 415255 4. 549177  
1. 33737 0. 675733 1. 164348 0. 882891 1. 072971 2. 809001 1. 80584 0. 951285 0. 68988  
3. 724085 2. 316093 3. 144674 3. 552549 3. 753291 4. 187672 3. 589445 3. 506906 3. 310861  
5. 643887 5. 824443 5. 5272 5. 516615 5. 642277 6. 086233 5. 5272 6. 397006 5. 215975  
1. 650256 1. 430962 1. 758945 2. 207014 1. 950199 1. 647918 1. 660898 1. 767382 1. 144918  
1. 388708 1. 140156 1. 607329 2. 332646 1. 096051 1. 427829 1. 35813 1. 514598 1. 224187  
5. 061817 5. 11984 5. 889313 5. 835555 4. 446925 4. 785619 4. 930683 5. 203469 4. 133403  
4. 475662 4. 87789 4. 626726 4. 460389 4. 431453 3. 467461 4. 418915 5. 194961 4. 211448  
2. 075866 2. 268706 1. 822064 2. 424392 1. 635033 1. 664273 2. 504094 2. 609969 1. 397967  
1. 996962 1. 671137 2. 323072 2. 028269 1. 337042 1. 670296 2. 317329 1. 542706 2. 678945  
0. 978044 1. 651716 1. 649675 2. 060528 1. 218248 1. 076317 1. 813994 3. 543833 1. 714749  
2. 203542 1. 179372 1. 550438 1. 532599 1. 93992 1. 099644 1. 290811 1. 248637 1. 371467  
1. 127018 1. 720676 1. 560331 1. 916973 1. 435427 1. 575979 1. 236706 1. 792539 1. 981773  
5. 909642 5. 439206 6. 432046 5. 682259 5. 801553 5. 215741 5. 766031 5. 639075 6. 166159  
5. 158413 4. 973442 4. 148924 2. 312998 3. 81851 4. 864309 3. 710417 4. 458075 4. 592864  
3. 003338 2. 275505 2. 616153 2. 467276 2. 826604 3. 81589 3. 59519 2. 509295 4. 239864  
2. 039654 1. 790956 1. 857881 2. 37415 1. 808647 2. 442391 3. 223229 2. 349776 2. 72539

3. 542888 2. 384004 2. 773294 2. 805354 3. 327599 2. 152735 2. 183127 2. 416547 2. 362117  
5. 665798 5. 657856 5. 957621 5. 413772 5. 263639 4. 966327 4. 984298 5. 918135 4. 823118  
1. 256844 1. 095355 1. 259056 1. 178122 1. 448989 1. 292597 1. 245506 1. 393413 0. 959366  
1. 183571 1. 37236 1. 605293 1. 438742 1. 045223 1. 405219 1. 371645 1. 355632 1. 480863  
1. 555976 1. 457439 2. 421511 1. 334722 1. 112981 1. 228905 1. 960779 1. 423202 1. 523047  
1. 558668 1. 326994 1. 329079 3. 13144 1. 276417 2. 409591 1. 085858 1. 131269 1. 254787  
1. 273728 1. 076834 2. 113393 2. 559324 0. 897358 1. 212246 1. 409174 1. 245211 1. 10764  
6. 437539 5. 753265 6. 282025 5. 962416 5. 685267 5. 939489 6. 127546 6. 99292 6. 253721  
2. 305571 1. 647882 2. 132196 2. 95221 2. 086563 2. 523426 1. 764282 2. 131811 2. 073018  
0. 987316 1. 185596 1. 050372 0. 860691 1. 038057 1. 250406 1. 026705 1. 335306 1. 006259  
3. 174866 4. 1852 4. 102921 3. 082056 3. 650657 4. 750452 3. 517744 3. 282709 3. 126494  
2. 754953 3. 116715 3. 186246 3. 564482 2. 978109 2. 971869 2. 270308 2. 957218 5. 089674  
2. 272866 2. 55594 3. 822974 3. 231847 2. 717827 3. 185408 3. 505437 3. 327806 2. 696231  
2. 409645 2. 673377 2. 413194 2. 853965 2. 8115 2. 656632 2. 44933 1. 931658 2. 101518  
2. 341538 2. 168915 2. 64356 3. 632512 2. 284014 3. 965823 2. 9186 3. 216077 3. 2805  
3. 155642 2. 98805 2. 212874 3. 412093 3. 023775 3. 095236 3. 59114 2. 30515 2. 842903  
2. 69257 3. 751518 3. 749634 4. 070206 3. 681481 3. 606478 3. 197195 3. 399299 4. 125426  
2. 540504 1. 633157 1. 881314 2. 227773 2. 032785 2. 242769 2. 339782 1. 864947 2. 134975  
1. 926293 3. 499266 2. 79379 1. 997158 2. 517411 1. 756981 2. 38555 1. 719266 2. 765166  
1. 326049 2. 043116 0. 839471 1. 281051 1. 275949 1. 978295 2. 158721 1. 239317 0. 992832  
2. 315495 2. 372858 2. 231425 2. 726169 2. 108527 2. 90928 3. 288198 2. 362888 2. 7773  
1. 39693 1. 553574 1. 9536 1. 470815 1. 479291 2. 172379 1. 324061 1. 907773 1. 750372  
1. 064574 1. 059143 0. 919031 1. 090934 0. 914244 0. 806491 1. 102096 1. 292911 1. 019061  
3. 083734 2. 39778 1. 926293 2. 176401 2. 202 2. 623102 2. 212336 3. 123648 1. 870565  
1. 154896 1. 264543 1. 424311 1. 651397 1. 274202 1. 315611 1. 276618 1. 393447 2. 028354  
1. 401993 1. 977034 1. 756485 1. 364941 1. 703265 2. 057488 3. 061182 2. 112727 2. 666134  
2. 050743 2. 673155 2. 285013 2. 225524 2. 000929 1. 907784 2. 393937 1. 96668 2. 562166  
6. 352288 6. 264107 5. 828193 6. 332099 5. 704659 6. 048327 5. 755296 5. 894171 5. 46739  
1. 643266 1. 568311 1. 356924 2. 434707 1. 278386 1. 385872 1. 414029 1. 47515 1. 687944  
1. 718469 1. 775469 1. 741003 1. 522917 1. 815015 1. 984696 1. 303315 1. 772327 1. 486237  
2. 12117 2. 40963 2. 661997 3. 075473 1. 737135 1. 902285 2. 358887 2. 177034 2. 781011  
5. 912864 6. 593228 5. 982686 5. 728757 6. 305386 6. 576839 6. 129264 6. 273748 5. 673532  
1. 562684 2. 277203 2. 277972 1. 959819 2. 039279 2. 816581 2. 012178 1. 752915 2. 631582  
1. 584436 1. 669499 1. 83423 1. 480624 1. 416918 1. 485391 1. 610401 2. 254756 1. 29636  
1. 679067 1. 429496 1. 07634 1. 271068 1. 478862 1. 12236 1. 066672 0. 92209 1. 604526  
1. 927349 1. 299609 2. 665679 1. 685431 2. 395301 1. 804131 1. 80899 1. 965749 1. 907243  
2. 687008 2. 377721 2. 759006 2. 737868 2. 595869 1. 957642 2. 066171 1. 995149 2. 684815  
5. 796023 5. 149811 6. 084502 5. 684806 5. 619464 5. 851358 5. 762536 5. 889705 5. 069545  
4. 841263 5. 137451 4. 578822 4. 654606 5. 815492 5. 206773 5. 145392 4. 770579 5. 215875  
5. 188033 5. 789663 4. 639613 5. 429098 4. 481734 4. 785002 4. 065563 5. 293462 3. 338999  
1. 34647 1. 325185 1. 23661 1. 704178 1. 047777 1. 59916 1. 269384 1. 224885 1. 113634  
2. 297065 2. 119684 2. 59139 2. 69553 2. 427226 2. 476028 2. 309333 2. 115778 2. 458458  
2. 07374 1. 199834 1. 307544 1. 35378 1. 259281 1. 319563 1. 261365 0. 965431 1. 584001  
6. 629598 6. 410458 5. 764901 5. 488514 5. 835906 6. 348334 6. 444354 5. 987757 5. 79  
1. 215431 1. 37402 0. 957733 1. 467196 1. 45063 1. 197556 0. 899871 1. 339035 1. 311888  
5. 091142 3. 928198 4. 120034 6. 052589 3. 362489 4. 890832 4. 574516 3. 557434 5. 691787  
5. 472446 5. 631719 5. 143703 4. 779182 5. 313985 4. 628361 5. 699738 5. 249524 5. 677489  
4. 415586 3. 638442 3. 50551 4. 910678 2. 137647 4. 494632 4. 552888 5. 020202 2. 416636  
1. 104377 1. 186207 0. 983868 0. 989302 1. 023427 1. 416963 1. 300809 1. 165462 0. 939477  
1. 819035 1. 882989 2. 406532 1. 585462 1. 788867 2. 072709 1. 39551 1. 444635 2. 122072  
1. 601017 1. 520396 1. 250372 1. 303679 0. 982809 1. 395683 1. 157647 1. 180263 1. 193724

2.014844 3.063279 2.217435 2.789375 1.9515 2.636714 2.19774 2.096554 2.049452  
1.36481 1.328869 1.145888 3.148191 1.556033 1.377744 1.476546 1.411432 1.514988  
1.829432 1.783576 2.364881 3.103498 3.261722 3.084384 1.998683 2.117908 2.457364  
1.474512 1.323658 2.236819 2.577071 1.236069 1.639788 2.095153 1.949346 1.562932  
10.11295 9.76954 9.082674 9.27453 9.664204 10.01711 9.500342 10.14452 10.17422  
7.363866 5.965329 6.172674 7.555978 6.191095 6.562941 6.306049 6.654909 7.465385  
1.795425 1.745364 1.637956 3.293957 1.655788 1.815807 1.54675 1.889175 2.557917  
2.988884 3.401178 3.025746 2.44676 3.035313 3.277789 2.34379 3.453962 2.944785  
1.867322 1.921962 1.637528 2.09939 1.79855 1.724758 1.636198 1.484015 1.56443  
1.088447 1.581928 1.693388 1.593684 1.371887 1.78796 1.194567 1.353562 1.148754  
4.282738 3.305764 3.218126 2.085163 4.777158 3.180494 2.21394 3.443531 1.773782  
5.625806 6.606363 6.009522 6.069636 6.856224 6.282328 5.875465 6.968357 4.561531  
1.968755 2.315506 2.38472 2.770344 2.061688 2.214698 2.486929 2.280855 2.254178  
5.971316 5.680126 5.409189 3.452479 5.617589 5.217907 5.713003 5.424859 5.245385  
0.996995 1.218324 1.17137 1.303623 1.213334 1.081227 1.00858 1.567523 1.118053  
1.488059 1.431514 1.114634 1.431514 1.415574 1.16106 1.45137 2.259481 1.380421  
6.192532 6.283454 6.085003 5.379396 5.708673 5.603633 5.971347 5.941484 6.949838  
0.997506 0.907596 1.748209 0.983365 0.99788 1.716376 0.810561 0.948519 1.344679  
1.297576 1.129775 0.993614 1.574606 0.912092 1.407354 1.261422 1.50227 0.996882  
1.185528 1.202799 1.445818 1.258273 1.258386 1.195865 1.908944 1.837326 1.432018  
4.139577 3.138054 3.862611 3.846644 3.997918 3.355965 3.763443 3.201215 1.959153  
1.398156 1.043677 1.356068 1.627161 1.105889 1.55481 1.293878 1.436531 1.509463  
1.694524 1.215018 1.729222 1.275901 1.06216 1.403635 1.9028 1.253447 1.926169  
1.344305 1.566991 2.63465 2.416609 2.122148 1.816857 2.128687 2.705676 2.397646  
1.819757 1.527228 1.429762 2.914456 1.818134 1.530667 1.535617 1.710214 1.914815  
0.771531 0.609516 2.821875 0.61498 0.554822 0.854634 1.416618 2.058159 0.887652  
0.990466 0.970312 0.741254 1.725653 0.939436 3.174228 1.031302 2.15142 1.238124  
2.115027 1.74287 2.439102 2.420198 2.001116 2.156026 1.790934 1.59784 2.095472  
1.468148 1.723974 2.483309 1.534797 1.608075 1.959385 2.931075 2.132545 1.808618  
1.007975 0.681705 1.291023 2.836467 1.028547 2.107244 1.270937 0.731628 1.392978  
2.303159 2.361204 1.998765 2.794222 2.59871 3.670483 1.849973 2.403618 3.49547  
4.847421 3.396904 4.35445 6.310727 5.792641 3.520948 4.346649 5.10279 3.994992  
3.34916 2.697892 3.473606 3.542337 3.738037 3.116382 3.046489 4.169978 2.707904  
1.364179 1.256891 1.626424 1.604763 2.062461 1.352756 1.926453 2.155989 1.599084  
1.378904 1.872377 2.485316 2.109911 2.033461 1.219071 2.439909 1.831616 1.705067  
4.410459 5.304388 4.398144 4.89782 5.128339 4.092198 3.404167 5.107118 4.29741  
2.357242 2.408171 2.440046 2.283952 3.246588 2.048691 1.668405 3.261319 2.982312  
2.42251 2.400208 3.05249 2.562186 2.85884 2.316326 2.783745 2.965229 3.409366  
4.226768 3.575005 4.505527 5.311953 3.664955 4.609175 3.880138 2.872027 2.567899  
3.93198 4.081536 3.232893 3.7047 3.803317 3.477842 3.469371 3.914479 4.421094  
4.841037 4.436081 4.830803 4.401897 4.774621 4.55769 4.327006 4.689207 3.734854  
1.588165 1.238225 1.64427 1.525236 1.492186 1.669977 1.194364 1.411548 1.426085  
1.50726 1.113577 1.624438 1.762952 1.26099 1.498321 1.250216 0.924807 2.017529  
1.236162 1.982493 2.088914 2.306876 2.388737 1.719764 2.190345 1.579383 1.819641  
2.746288 3.167659 2.059197 2.887756 2.580187 2.23662 2.283838 2.324832 2.376728  
7.798267 7.535247 7.820974 7.584056 7.535754 8.049789 8.13803 8.228365 8.193353  
3.78527 4.003794 4.230053 3.782997 3.741978 4.483738 3.682397 3.553626 4.804277  
1.629175 1.668737 1.608666 2.058647 2.396967 2.393408 1.538084 1.916237 1.706895  
2.453198 1.833022 1.365352 2.639084 2.155584 2.189451 1.676856 1.379607 2.033034  
2.106757 1.405128 1.394686 1.524117 1.113236 1.907449 1.397706 1.737007 1.099597  
4.194295 4.495278 4.253849 4.099078 5.009856 4.25838 4.921906 4.636975 2.906488



1. 457183 1. 091169 1. 084138 1. 72399 1. 650193 2. 288961 1. 424639 1. 357688 0. 921849  
5. 463461 5. 11684 4. 877136 4. 419715 4. 885373 5. 645075 4. 896109 5. 538041 4. 994756  
1. 510232 1. 234951 1. 706045 2. 515303 1. 469206 1. 540167 1. 306508 1. 603591 1. 578038  
2. 686835 3. 757791 3. 561681 3. 562615 3. 346433 4. 311111 4. 715439 2. 738749 3. 559906  
1. 674533 1. 253746 1. 580194 1. 205311 1. 618521 1. 052293 1. 569226 1. 035311 0. 877745  
2. 086597 2. 164466 2. 103712 2. 481558 1. 600426 2. 186437 2. 731846 2. 501483 3. 33428  
2. 138731 2. 058604 2. 035843 2. 71275 2. 961643 3. 010671 2. 676474 2. 743693 1. 861938  
5. 228437 4. 282903 4. 555906 3. 147656 4. 743481 6. 289756 5. 572646 4. 865349 6. 551876  
1. 252296 1. 194803 1. 419426 1. 568158 1. 281193 1. 129044 1. 153298 1. 25832 1. 387426  
2. 220632 2. 14133 2. 995468 1. 662074 2. 351145 1. 595243 2. 589247 1. 659519 2. 134753  
2. 409291 0. 997093 3. 111935 1. 038133 0. 986919 1. 51412 1. 722188 1. 070802 1. 552232  
2. 038786 1. 495978 1. 69389 1. 819746 1. 517323 1. 717408 1. 958618 2. 365156 1. 837081  
1. 516508 1. 805233 1. 731226 2. 72894 1. 909576 2. 182398 1. 370991 1. 158565 1. 913116  
3. 055768 3. 255496 1. 953223 1. 2317 2. 122 3. 097587 3. 201245 1. 734766 1. 836884  
6. 031696 6. 218165 6. 153969 6. 3834 6. 313737 5. 578872 5. 829012 6. 240701 4. 951131  
1. 189389 1. 422822 1. 563242 1. 727741 1. 307872 1. 656909 1. 129865 1. 763803 2. 059272  
1. 422626 1. 123759 0. 980756 1. 772887 1. 567195 1. 085081 1. 142248 0. 909434 1. 721332  
7. 650916 7. 324767 7. 151348 7. 399422 6. 638966 6. 573835 7. 124772 6. 861178 7. 387503  
2. 273482 2. 263809 2. 047669 1. 664761 2. 507296 1. 589013 1. 699538 2. 415358 1. 288862  
2. 773696 1. 209883 1. 369802 1. 94713 2. 038591 1. 989455 1. 64738 2. 594938 2. 057847  
7. 306125 7. 015241 7. 297127 6. 627232 6. 903166 7. 095873 7. 173657 7. 015103 7. 425294  
2. 207558 2. 208309 2. 671999 2. 165889 2. 264095 1. 91911 2. 325883 2. 112321 2. 998511  
1. 902593 2. 058425 1. 648674 2. 727158 1. 526108 1. 685016 1. 687178 2. 314478 1. 13637  
1. 953464 2. 365019 2. 603814 0. 898115 2. 653853 2. 870534 2. 204425 3. 480363 2. 632355  
3. 219424 3. 974316 4. 359115 3. 118896 3. 402575 3. 635227 3. 438208 3. 17779 4. 164916  
1. 762037 2. 394106 2. 097106 2. 388208 2. 218174 3. 083651 2. 036118 1. 366196 1. 690112  
2. 592545 3. 602614 2. 594719 3. 113887 2. 863454 2. 569735 2. 942967 3. 029291 2. 176737  
2. 815005 1. 957605 2. 868311 2. 740805 2. 098758 2. 365853 2. 078135 1. 783503 3. 224484  
6. 356222 6. 362241 6. 093295 5. 769798 6. 452095 6. 196181 6. 340422 6. 208448 6. 318515  
1. 414422 1. 627386 1. 819132 1. 997577 1. 558979 1. 300712 1. 223868 1. 638319 1. 187509  
5. 84449 6. 038919 6. 359113 4. 870139 5. 567619 5. 401299 5. 972038 5. 648893 5. 963308  
1. 80644 2. 178197 1. 705533 1. 995717 1. 547748 2. 105934 1. 459664 2. 854543 2. 217201  
1. 666387 1. 198823 1. 623727 2. 404628 1. 494335 2. 230641 1. 051144 1. 763992 1. 68847  
2. 219782 2. 124172 2. 508008 2. 245502 2. 087654 1. 801282 1. 823552 1. 543146 1. 925075  
1. 824389 1. 582878 1. 52491 2. 320437 1. 830221 1. 852869 1. 514217 1. 808584 3. 429162  
5. 566197 5. 572096 5. 374201 4. 898265 5. 231426 5. 542398 5. 435006 5. 015588 6. 662995  
2. 518026 2. 527097 2. 051303 2. 650636 2. 935253 2. 171583 2. 574791 2. 546185 3. 109973  
1. 560699 2. 482702 2. 099408 1. 737579 1. 961393 1. 4751 2. 052277 1. 661719 1. 45787  
1. 783953 1. 631199 1. 950363 3. 099114 1. 621076 1. 973348 2. 362742 1. 477971 1. 376652  
1. 708282 1. 107032 1. 257375 0. 961054 1. 784701 1. 153931 0. 927659 1. 935669 1. 555798  
2. 160656 2. 817221 4. 007519 2. 555097 1. 964239 2. 109486 1. 868269 2. 218596 2. 498214  
1. 169098 0. 761746 1. 629726 1. 721741 1. 186864 1. 126979 0. 77945 1. 287578 0. 971155  
4. 461519 4. 857918 6. 081141 3. 583654 4. 754526 4. 605902 4. 619887 4. 955458 4. 682853  
3. 303608 3. 695078 3. 39875 2. 711731 3. 330441 3. 170893 2. 986128 3. 155389 3. 096026  
5. 354861 5. 696335 5. 264088 6. 027161 5. 594177 5. 640613 5. 740873 5. 114708 5. 46495  
3. 484243 2. 406843 2. 922143 2. 557289 2. 791735 2. 902199 2. 695699 2. 470968 2. 466376  
3. 310632 3. 840876 3. 726968 3. 647761 4. 226376 3. 328364 4. 224097 2. 37698 4. 106137  
1. 871657 1. 38217 1. 852386 2. 418638 1. 432785 1. 934313 1. 497864 2. 260378 1. 98532  
3. 652106 3. 641618 4. 565954 3. 273771 2. 610215 2. 72492 3. 323398 3. 904363 2. 136853  
3. 102613 1. 998434 1. 968375 1. 957258 1. 705054 2. 614055 1. 869088 2. 394635 4. 354169  
1. 474445 1. 785857 1. 939341 1. 519247 1. 621741 1. 244887 1. 891846 1. 33738 1. 394884

4. 8022 4. 864987 4. 602456 6. 12341 4. 482032 4. 274678 4. 905174 4. 73712 4. 336846  
0. 860089 1. 623366 1. 372205 1. 392438 0. 993206 1. 666613 0. 753344 1. 218915 1. 565298  
1. 586049 1. 542125 1. 889231 1. 836483 1. 608447 1. 344929 1. 59686 1. 486122 1. 782807  
6. 130959 6. 59704 6. 466415 5. 064892 6. 443341 5. 865147 6. 533483 6. 826275 5. 967997  
1. 537391 2. 317421 1. 912417 2. 577354 1. 836701 2. 44841 2. 489362 1. 881042 2. 232254  
6. 803252 6. 532328 7. 220872 5. 834104 6. 767946 5. 664049 7. 789191 6. 72728 7. 06516  
5. 575721 5. 709178 5. 791611 3. 260572 5. 098399 6. 162652 5. 534867 5. 868617 4. 417191  
5. 438262 5. 314339 5. 501936 5. 005041 5. 12219 5. 220452 5. 52353 5. 011073 4. 866558  
7. 679806 7. 160943 7. 425047 6. 626532 7. 234194 7. 09507 7. 488829 7. 374156 7. 044768  
6. 651376 6. 9925 6. 486436 6. 768085 7. 047242 6. 691646 7. 348002 6. 556385 6. 68309  
3. 838677 4. 055648 2. 976983 3. 185553 3. 258394 3. 008453 3. 693741 3. 562743 3. 207912  
1. 935484 1. 726807 2. 455422 2. 751015 1. 197837 2. 588474 1. 512085 1. 643176 1. 619292  
3. 956063 3. 895698 2. 770367 1. 910952 3. 366427 1. 426324 3. 060909 3. 551857 2. 924873  
2. 327084 2. 650791 2. 417367 2. 826984 2. 560985 2. 319076 2. 744946 2. 745077 2. 039092  
3. 25127 2. 749689 3. 139941 2. 964942 1. 829791 2. 935365 3. 421708 2. 901776 3. 826826  
3. 1798 2. 689241 2. 748367 3. 367481 3. 380629 3. 459254 2. 191425 2. 518714 3. 659648  
7. 14487 7. 321004 7. 284054 7. 216411 7. 291993 7. 067249 7. 005051 7. 192559 6. 355752  
8. 200365 8. 166237 8. 239019 8. 188264 7. 989273 8. 174401 7. 904234 8. 182365 8. 251342  
3. 281378 2. 627613 2. 447029 3. 331386 2. 276051 2. 895453 1. 956316 3. 255027 1. 847803  
7. 072962 7. 457736 7. 36961 6. 645591 7. 784109 6. 614222 6. 696904 7. 385438 5. 926959  
6. 049881 5. 578491 5. 132217 6. 449473 6. 646058 5. 221721 6. 466525 6. 021069 5. 441106  
4. 713017 5. 254896 4. 72813 4. 694631 4. 856889 4. 414034 4. 802419 4. 559468 4. 127881  
2. 331715 2. 931235 2. 449064 2. 432859 1. 860795 2. 413952 2. 57943 3. 320946 2. 448785  
1. 092078 1. 713987 2. 123632 2. 690639 1. 924147 0. 718244 1. 72994 2. 005139 2. 618987  
8. 153418 7. 851022 7. 625644 7. 727736 8. 151234 8. 193222 8. 273017 8. 599506 8. 291503  
6. 213568 6. 873023 6. 608025 5. 07758 7. 019546 7. 167132 5. 830595 6. 958274 5. 197015  
5. 061917 4. 599498 4. 56253 3. 912617 5. 258728 4. 300676 4. 718804 5. 110328 5. 297331  
4. 154594 4. 027924 3. 992995 3. 937232 3. 160885 4. 391451 4. 252385 5. 441132 4. 140216  
2. 446589 2. 383082 2. 041341 3. 478618 1. 865304 3. 116139 2. 123008 2. 085571 3. 286263  
5. 196542 5. 920357 5. 655743 4. 914038 5. 8785 5. 524274 5. 129715 5. 908763 5. 530163  
7. 845926 8. 351248 8. 228748 7. 689564 7. 945804 8. 933711 7. 706418 9. 065054 7. 50019  
2. 998147 3. 065525 3. 81365 3. 2356 2. 826773 3. 732235 3. 160121 3. 201268 2. 909083  
3. 482845 3. 784918 4. 764113 4. 613833 3. 906878 3. 348283 4. 465224 3. 924193 4. 084897  
4. 130255 4. 157683 3. 891476 4. 380124 4. 42511 4. 717503 4. 832843 4. 478984 4. 244384  
5. 612989 5. 444844 5. 938873 5. 549216 5. 677121 5. 340198 5. 545148 5. 424743 4. 189684  
2. 895377 3. 261607 2. 536916 3. 674673 2. 672984 1. 753558 2. 847931 3. 205045 2. 775942  
6. 121188 6. 417835 5. 887805 5. 833442 5. 762204 5. 303261 6. 747413 5. 948904 5. 874139  
8. 331883 8. 363244 8. 169763 7. 890878 8. 160924 7. 958625 8. 33462 8. 213606 8. 244022  
2. 234028 2. 049221 1. 727198 1. 986984 2. 450976 1. 888687 2. 472162 2. 069397 2. 409887  
1. 652908 2. 267969 1. 642674 1. 96622 2. 406823 1. 715188 1. 775986 2. 127868 2. 021756  
4. 473772 5. 478046 3. 126775 5. 551143 3. 412097 5. 286122 4. 366192 5. 069128 5. 293339  
3. 623264 4. 276588 3. 84798 3. 124003 3. 05349 4. 26152 3. 456645 4. 489228 3. 893885  
7. 226636 7. 044578 7. 28054 6. 566005 6. 748191 7. 06639 7. 566779 7. 077339 7. 128245  
7. 457588 7. 095854 6. 58475 6. 246064 6. 921814 7. 033287 6. 736434 7. 092798 7. 043502  
5. 678417 5. 617213 6. 354577 5. 029792 4. 905941 4. 949558 5. 735061 5. 262143 5. 926153  
4. 026091 3. 390029 4. 110737 5. 129667 4. 496696 4. 254538 3. 846676 4. 36677 3. 87091  
2. 865478 2. 915293 2. 872584 2. 582196 2. 625711 2. 071905 2. 355876 2. 410619 2. 338829  
9. 673166 9. 277103 9. 605899 9. 453971 9. 361559 9. 15895 9. 623074 9. 350516 9. 805311  
5. 171083 4. 441684 4. 010033 5. 009115 5. 779629 4. 295841 5. 658758 5. 048041 4. 733752  
3. 546188 0. 911069 0. 861815 1. 589679 1. 320681 1. 22275 1. 185827 1. 456848 5. 124766  
6. 480327 6. 764175 6. 283192 7. 087642 6. 324286 6. 043862 5. 757986 6. 375129 6. 047991

5. 495773 5. 699192 5. 584755 6. 026334 5. 771936 5. 446925 5. 377544 5. 662008 5. 226416  
8. 010456 8. 044699 8. 087364 7. 83765 8. 301436 8. 162224 8. 258075 8. 09167 7. 319253  
3. 11794 2. 277429 2. 076129 1. 990514 2. 831656 2. 177594 3. 241408 3. 476625 3. 331921  
1. 342667 1. 817615 1. 413113 1. 784871 0. 999691 1. 332374 1. 751485 1. 854952 2. 229726  
7. 492055 7. 456322 6. 952475 6. 692957 7. 205308 7. 29441 7. 417913 6. 973625 7. 413239  
1. 530311 1. 637328 1. 577341 2. 38903 1. 617365 1. 813702 1. 525702 2. 025217 1. 47989  
1. 392407 1. 685372 1. 035079 1. 833147 2. 847537 1. 169845 2. 205533 1. 089722 1. 121009  
7. 590876 7. 420686 7. 259529 7. 446703 7. 380052 7. 104913 7. 692788 7. 453715 7. 80103  
3. 076117 2. 827676 3. 024646 3. 661895 2. 460847 2. 06751 2. 577073 2. 646869 2. 582566  
5. 53668 6. 113836 6. 312925 6. 121593 5. 690652 5. 953113 5. 964674 6. 325369 5. 835764  
3. 650038 3. 036143 2. 378474 2. 932538 2. 532004 2. 217915 3. 071321 2. 1886 1. 87053  
6. 251891 5. 206656 5. 728856 4. 674639 5. 04028 5. 366051 6. 054823 5. 997031 6. 31086  
2. 195275 2. 07421 2. 475827 3. 853053 2. 522216 2. 128601 3. 090817 3. 010305 3. 4093  
7. 645958 7. 511826 7. 33842 7. 359252 7. 362584 6. 958506 7. 9077 7. 046038 7. 275234  
6. 92693 7. 4932 7. 47775 7. 23197 7. 406837 6. 564612 7. 538606 7. 391114 7. 022276  
8. 046153 7. 023313 7. 363699 7. 831541 7. 051858 8. 715969 7. 312397 7. 214489 8. 021746  
7. 531422 7. 09666 7. 15957 7. 640776 7. 377159 7. 320005 7. 48115 7. 533771 7. 306579  
6. 415073 7. 438427 6. 948539 5. 576552 6. 511434 7. 433033 7. 410497 7. 305732 6. 493595  
5. 250908 4. 901786 4. 963738 5. 548657 5. 028406 5. 530987 4. 020195 4. 946393 4. 628075  
2. 751185 2. 060863 2. 324625 2. 350316 1. 855489 2. 715261 2. 698618 1. 596786 3. 91615  
3. 40655 3. 873695 3. 45466 3. 44322 3. 551793 2. 449797 2. 663449 2. 674405 2. 775744  
6. 007001 5. 752221 5. 780167 4. 201424 5. 951142 6. 091874 6. 111439 5. 825303 5. 815796  
6. 10466 5. 724714 5. 45055 6. 462572 5. 856735 5. 565886 6. 310549 6. 441797 4. 648047  
4. 530146 4. 341386 4. 586224 5. 286346 4. 375061 4. 540735 5. 243123 4. 3463 3. 940974  
5. 668042 4. 893653 4. 958824 4. 562475 5. 572502 4. 987709 5. 107815 4. 839738 4. 562999  
2. 137215 1. 413629 1. 653039 2. 024207 2. 090997 1. 778309 2. 029758 2. 161374 1. 322924  
2. 062422 1. 789163 2. 205312 2. 740051 1. 836878 1. 556863 2. 022282 1. 422863 2. 174472  
4. 720068 4. 928586 5. 212025 5. 288499 4. 418347 4. 176921 4. 86947 4. 469948 5. 170582  
2. 52273 2. 365495 2. 252603 2. 961237 2. 077016 2. 521615 1. 990814 2. 087451 2. 120266  
2. 040148 1. 861394 2. 440919 2. 565821 2. 344983 1. 706156 2. 232333 2. 028494 1. 863865  
6. 838789 6. 971345 7. 339354 6. 978333 6. 877048 7. 514773 5. 801194 7. 378774 6. 841916  
6. 126728 6. 387004 6. 434782 6. 75729 6. 809258 6. 064127 6. 33817 6. 309893 5. 54071  
6. 436088 6. 823545 6. 829023 7. 100846 6. 608344 6. 670126 6. 570812 7. 090266 5. 760365  
7. 112744 6. 761164 7. 106636 7. 039616 6. 929809 6. 935601 6. 783724 6. 716213 7. 021397  
4. 813018 5. 804302 4. 910814 5. 571064 5. 102755 4. 850754 5. 362512 5. 269602 5. 28752  
8. 071011 7. 30348 7. 174687 8. 069676 7. 295099 7. 53783 7. 564211 7. 412752 7. 738391  
6. 322153 5. 049885 6. 006846 5. 024034 5. 351418 5. 67717 5. 508126 5. 85986 6. 102149  
1. 52011 1. 784538 1. 325735 1. 428487 1. 201529 1. 874647 1. 40681 1. 80972 1. 444194  
3. 011932 3. 742033 2. 949389 3. 742033 4. 34622 3. 518594 5. 865787 3. 020053 3. 091026  
4. 022467 3. 838872 4. 257944 3. 139387 4. 167293 3. 895499 3. 577969 4. 043156 3. 408881  
1. 286924 1. 070274 1. 653588 1. 769151 0. 880815 1. 783665 1. 139437 0. 969691 1. 007236  
3. 945097 4. 053362 4. 399371 4. 513884 4. 057038 3. 140357 4. 920204 3. 335858 4. 755904  
2. 651448 3. 099056 3. 398211 2. 865478 2. 399272 2. 878884 3. 252753 2. 464388 2. 921393  
4. 163522 5. 080424 3. 903771 4. 039338 3. 887736 4. 692672 4. 825804 3. 964137 4. 22113  
2. 562899 2. 653419 2. 46485 2. 986918 2. 585059 2. 168689 3. 539422 2. 306849 3. 090949  
3. 223004 3. 409058 2. 570204 2. 254369 2. 953766 3. 096671 3. 653855 2. 644998 2. 725471  
4. 197832 5. 261741 4. 738579 4. 729204 5. 134511 5. 14212 4. 422021 5. 054819 3. 87802  
4. 405931 4. 67657 4. 231018 6. 612129 5. 289798 4. 915648 5. 822823 5. 727789 6. 240682  
4. 704099 3. 481751 4. 535601 4. 3245 4. 974839 4. 785975 3. 210331 4. 269118 4. 014665  
3. 528838 4. 004771 4. 27216 2. 757942 4. 173064 3. 859385 3. 706022 4. 118508 2. 940994  
1. 414669 2. 218837 1. 346479 1. 832931 2. 692753 2. 796568 1. 735741 1. 478657 2. 135669

4. 186242 3. 775883 4. 146552 3. 170131 3. 912337 4. 274144 4. 608492 3. 714219 4. 154371  
4. 60855 4. 121168 4. 292967 3. 550248 4. 988525 4. 5103 4. 860503 3. 629705 4. 57759  
7. 104791 6. 870878 6. 914092 5. 824248 6. 823803 7. 143116 7. 427554 7. 071618 7. 589711  
5. 510244 5. 031689 5. 421114 2. 400723 5. 219593 4. 210716 5. 307923 5. 391881 4. 93723  
6. 367565 6. 49645 5. 699143 6. 53244 6. 62491 6. 378132 6. 767992 6. 216968 5. 887953  
1. 155279 1. 445917 1. 687073 1. 914626 1. 221711 1. 272055 1. 73543 1. 415856 1. 674417  
2. 792708 2. 945552 3. 904751 2. 858315 2. 970168 3. 674665 2. 620722 2. 326155 3. 265978  
5. 973201 5. 607002 5. 667836 5. 995833 6. 149114 5. 98622 6. 334349 6. 129445 6. 085815  
3. 940807 4. 695855 3. 161766 5. 18262 4. 542132 3. 282627 3. 855127 4. 512726 3. 310147  
3. 90571 4. 05292 2. 773109 5. 302554 4. 551238 2. 24311 5. 359677 4. 768038 3. 579053  
5. 068083 5. 300525 5. 248986 5. 38178 5. 474679 5. 168309 4. 905372 5. 276576 5. 30093  
5. 251383 4. 846509 4. 926857 5. 953249 5. 13409 4. 601268 5. 678597 5. 253076 4. 999555  
2. 03108 1. 861224 3. 089911 3. 137575 2. 8145 2. 563779 2. 977067 2. 208745 2. 210202  
5. 519185 6. 064816 5. 857265 5. 299896 5. 362966 6. 016488 5. 376011 5. 759644 6. 265771  
5. 717213 5. 767665 6. 240604 5. 659462 5. 808898 6. 378557 6. 054421 5. 663098 4. 733131  
6. 528983 6. 167127 6. 026267 6. 32167 6. 682008 6. 361112 7. 198431 6. 585775 6. 836546  
9. 852573 9. 664877 9. 616699 8. 676266 9. 542643 9. 58545 9. 717391 9. 731619 9. 554862  
5. 701109 5. 646228 6. 065343 5. 683672 5. 919425 5. 762394 5. 430655 5. 275146 5. 734687  
3. 791212 3. 639304 3. 855944 3. 143738 4. 108934 4. 454774 4. 259454 4. 238108 4. 973216  
6. 735075 7. 073717 6. 925423 6. 943734 7. 395539 6. 501192 6. 770192 7. 253893 6. 465624  
4. 55653 5. 227442 5. 724968 5. 307318 4. 579707 5. 192165 4. 93599 4. 7748 4. 967296  
6. 542066 6. 597808 6. 212487 6. 328323 6. 692488 6. 394764 6. 504525 5. 931959 6. 891482  
2. 429768 2. 838806 1. 964098 3. 145269 2. 659843 2. 119986 2. 38268 2. 610008 1. 680948  
1. 177671 2. 004981 1. 105883 1. 635305 1. 865711 1. 793755 1. 96853 2. 236145 2. 478332  
4. 761353 5. 062665 4. 426695 5. 457179 4. 682836 4. 389615 4. 377413 5. 015055 4. 653272  
2. 22978 2. 595181 2. 593859 3. 568843 2. 629822 1. 979426 2. 811588 3. 115169 2. 493273  
5. 88511 6. 27559 6. 314315 4. 578967 5. 924394 6. 253881 5. 926854 5. 916003 6. 438227  
6. 845752 7. 176049 7. 268419 6. 016025 7. 111584 6. 878071 6. 918966 7. 019908 5. 988182  
6. 63257 6. 870678 7. 078876 6. 447198 6. 959196 6. 739459 7. 033533 6. 990327 7. 330521  
3. 67376 4. 241332 3. 85349 3. 464199 3. 512168 3. 728677 4. 575317 4. 130623 3. 347231  
1. 447197 1. 786897 1. 666854 2. 336897 1. 391846 2. 020688 1. 551053 1. 237593 1. 669565  
4. 20014 4. 814602 4. 415546 3. 367069 5. 726087 5. 36963 3. 450505 3. 678196 3. 356291  
1. 543329 1. 968407 1. 098772 1. 226576 1. 72406 1. 592637 1. 24861 1. 939555 1. 157484  
6. 968698 6. 845147 6. 223726 6. 360605 6. 812656 7. 003863 7. 157308 6. 811496 6. 254785  
1. 036105 1. 195884 1. 389402 1. 909413 1. 481376 0. 870846 1. 381838 0. 903104 1. 566222  
2. 934453 2. 652802 3. 122811 3. 34774 3. 096829 2. 291285 2. 953497 3. 266869 3. 209445  
2. 708554 2. 921378 2. 326042 3. 052107 2. 275092 2. 344381 2. 5984 3. 01122 3. 826741  
4. 348624 4. 511739 5. 361387 4. 869672 4. 1502 4. 605615 5. 038505 4. 596612 4. 859835  
2. 322583 1. 978781 1. 806907 2. 357144 4. 28181 2. 208561 3. 496532 2. 467553 2. 012939  
5. 675368 5. 915578 6. 308613 5. 06178 5. 943208 5. 772232 5. 893102 5. 742162 5. 67279  
4. 687754 4. 649513 4. 781432 3. 897455 4. 877615 3. 740021 4. 399996 5. 109011 3. 639541  
6. 71979 6. 75326 6. 504927 7. 314858 6. 704569 6. 264312 6. 795374 6. 604007 7. 184793  
2. 004546 2. 635108 2. 657925 2. 940973 2. 285916 1. 57265 2. 03208 2. 257496 2. 932949  
1. 673028 1. 17067 1. 195657 1. 252222 1. 281787 1. 398482 1. 299918 1. 413618 2. 914038  
1. 12793 1. 260003 1. 719251 2. 722469 1. 489501 1. 285983 1. 167582 1. 21512 1. 162455  
1. 763463 1. 185897 1. 957555 2. 234744 1. 456614 2. 028772 1. 559691 1. 308139 1. 902135  
1. 442337 0. 756521 0. 433092 1. 446348 0. 661735 0. 943086 0. 410263 1. 122505 0. 864672  
6. 408657 6. 563267 7. 075962 7. 242132 5. 973894 4. 300729 7. 161917 7. 689689 5. 476898  
1. 054988 1. 601032 1. 73684 1. 120479 0. 784531 1. 126167 2. 949638 0. 851527 3. 476539  
1. 027256 0. 833772 1. 241688 1. 347904 1. 396719 2. 424015 1. 934513 1. 673257 2. 238241  
0. 906111 3. 165524 1. 361649 1. 23055 1. 290872 1. 928289 2. 18369 2. 327604 3. 025001

1. 083219 1. 261043 0. 805784 1. 118093 1. 450665 0. 998398 1. 040823 1. 175434 2. 718824  
2. 052559 1. 57143 1. 700954 1. 945874 1. 052685 1. 091157 1. 09655 1. 101821 3. 200888  
5. 353463 4. 475572 4. 182773 4. 326586 4. 844163 4. 434308 4. 857529 4. 926814 4. 25361  
5. 756007 6. 236928 6. 709115 5. 738048 6. 622661 6. 205316 6. 028045 6. 54137 6. 400961  
2. 926644 2. 678649 2. 741578 2. 362599 3. 187092 2. 27539 2. 20364 1. 836447 2. 785783  
1. 63291 1. 923236 2. 366352 2. 997348 2. 009606 2. 391601 1. 56258 1. 461782 1. 183232  
5. 496804 5. 398533 5. 274155 5. 09289 5. 913272 5. 606594 5. 719696 5. 718924 3. 115101  
8. 755507 8. 838302 8. 806705 8. 454674 8. 751396 8. 881117 8. 72596 8. 874378 7. 984792  
6. 976127 7. 144375 5. 743339 5. 778072 6. 481841 5. 702092 6. 371343 6. 179689 6. 823955  
5. 916196 6. 153802 6. 328011 5. 322759 6. 435518 6. 404083 6. 030609 6. 696426 6. 346878  
8. 125858 8. 514486 8. 643155 8. 666347 8. 019052 8. 604717 8. 375577 8. 236807 8. 201823  
5. 473721 4. 688647 5. 053655 5. 335421 5. 185403 5. 041037 5. 474649 5. 187533 5. 122737  
7. 611615 7. 49423 6. 739864 8. 196846 9. 073993 7. 012313 7. 235186 7. 618384 6. 691439  
5. 382363 4. 640755 5. 428978 4. 743779 4. 539199 5. 528274 4. 994069 5. 132411 4. 353716  
7. 410199 6. 930617 6. 897573 7. 191044 7. 071641 7. 548833 7. 552526 7. 309657 7. 280215  
8. 184183 7. 732829 8. 292075 8. 65637 8. 200384 7. 893823 8. 135892 7. 989164 7. 666621  
6. 859618 6. 759885 6. 580097 6. 366115 6. 710198 6. 524252 6. 826349 6. 549953 6. 387801  
6. 907989 6. 91411 6. 483522 6. 840471 6. 653519 6. 718139 6. 7581 6. 674067 6. 104212  
6. 332463 6. 472882 6. 634489 6. 074847 6. 754005 6. 638095 6. 713347 6. 335073 7. 123975  
4. 48556 3. 871763 4. 037871 3. 152027 4. 628536 3. 989989 3. 679735 3. 94142 3. 005984  
5. 748524 5. 889867 5. 974086 4. 972013 5. 772318 6. 130943 5. 756152 5. 775881 6. 103644  
8. 819012 8. 07211 8. 414009 8. 604178 8. 266526 8. 265529 8. 840316 8. 5027 8. 700691  
4. 92396 4. 449312 4. 282159 4. 258521 4. 366203 4. 100404 4. 623845 5. 21778 5. 09025  
4. 849171 5. 150708 5. 229626 5. 180023 5. 663473 4. 549966 5. 061572 5. 042894 4. 77663  
2. 404989 2. 974959 3. 673718 2. 972931 3. 051724 2. 629853 2. 885786 2. 528894 3. 630102  
7. 850002 7. 537612 7. 836915 7. 601478 7. 669712 7. 419106 7. 662627 8. 00765 9. 420152  
6. 217559 6. 870749 6. 488552 6. 349252 6. 846628 7. 550635 5. 976153 7. 3709 6. 492312  
4. 485988 4. 697496 4. 898212 4. 047591 4. 312044 4. 859104 3. 835853 4. 285057 4. 776862  
4. 536834 4. 954837 4. 91018 3. 928606 5. 330482 5. 512051 5. 068883 4. 627132 3. 118488  
3. 227342 3. 14056 2. 881424 2. 278849 3. 646242 2. 606491 3. 348997 3. 632473 3. 753961  
6. 031819 6. 389251 5. 49794 5. 946165 5. 641426 5. 506693 5. 919276 5. 987058 5. 771862  
6. 958539 7. 139373 6. 913847 7. 033955 7. 1965 7. 232103 7. 177908 6. 696867 6. 82265  
5. 330839 5. 813005 5. 214779 5. 637569 5. 300735 4. 716437 5. 740337 5. 550562 4. 331488  
1. 95676 2. 102567 2. 079722 1. 857072 1. 565365 2. 176144 1. 703136 1. 900296 1. 766488  
3. 646253 3. 716205 4. 028583 3. 063777 3. 391925 3. 8924 3. 449479 3. 746625 3. 108401  
8. 472077 8. 270803 8. 436741 8. 368626 8. 041026 8. 160728 8. 671826 7. 983962 8. 785052  
3. 110604 3. 862213 3. 683163 3. 306827 3. 976737 2. 90021 4. 207026 2. 926558 3. 382969  
2. 107041 2. 406268 2. 081057 2. 667893 2. 487796 2. 003256 2. 82307 3. 62577 2. 324899  
2. 197115 1. 787988 1. 3913 2. 543684 1. 177967 1. 783895 2. 145894 0. 981016 2. 387729  
7. 17815 7. 22525 7. 245924 6. 305309 7. 340531 6. 503943 7. 034972 7. 165005 8. 117358  
7. 232527 7. 395429 7. 320556 6. 650821 7. 255451 6. 864612 6. 691904 6. 890539 7. 425241  
5. 656981 6. 249274 5. 725523 5. 976154 6. 171706 5. 810164 6. 446904 6. 195837 6. 441986  
5. 139791 5. 609732 5. 151199 6. 134305 5. 627596 5. 816341 5. 136713 5. 132898 5. 561738  
10. 11748 10. 05668 10. 22002 10. 35175 9. 820594 9. 928344 10. 17462 9. 666899 9. 928316  
5. 689454 6. 602344 6. 658142 5. 658558 6. 214293 5. 964986 5. 923739 6. 221323 5. 354638  
2. 031623 2. 053314 2. 485988 2. 723712 1. 877525 2. 243379 2. 100701 2. 51594 2. 310206  
5. 728532 5. 30634 5. 044735 5. 997914 5. 990417 5. 361981 5. 595744 5. 651713 5. 962369  
2. 748053 2. 563777 1. 562516 3. 38094 2. 679206 2. 42185 3. 642154 2. 557801 3. 765908  
5. 745101 5. 217325 5. 438079 5. 778007 5. 560747 6. 098314 5. 429757 5. 396242 5. 065974  
4. 638123 5. 315791 5. 287573 4. 675486 4. 665881 3. 773755 5. 503644 5. 934046 5. 070729  
1. 951382 2. 855258 2. 080766 2. 070056 3. 078146 3. 46563 2. 093219 2. 569148 2. 435492

4. 526705 5. 325383 5. 109858 5. 014839 3. 977137 5. 160705 4. 469074 4. 782299 3. 949076  
8. 506307 8. 349887 8. 222377 8. 538575 8. 319771 8. 175816 9. 040579 8. 367381 8. 611488  
7. 054826 7. 284441 6. 875621 7. 540285 7. 512413 6. 657751 7. 677951 7. 10094 7. 51201  
6. 267008 6. 223231 6. 103277 6. 239552 6. 020495 5. 993226 6. 48818 5. 92997 6. 947447  
7. 222368 6. 922896 7. 090405 7. 128687 7. 489805 7. 909647 6. 713263 7. 123265 6. 610574  
2. 276366 1. 671686 1. 351503 3. 520224 1. 874766 3. 72062 1. 951823 2. 941034 2. 13398  
5. 567876 5. 127742 5. 270581 5. 340777 6. 03083 6. 302243 5. 269268 6. 150996 4. 423086  
3. 376524 3. 16275 3. 400522 3. 805979 3. 368238 2. 556448 3. 345534 3. 462154 3. 305889  
6. 887339 6. 78916 7. 155136 7. 435827 6. 793913 7. 051189 6. 461504 6. 904236 5. 940462  
3. 246868 3. 164867 2. 862909 5. 572128 5. 212159 2. 612254 5. 599402 3. 05383 3. 736225  
7. 238936 7. 331404 7. 597092 7. 430475 7. 495462 7. 609134 7. 28989 7. 63922 7. 435209  
5. 327145 5. 070128 5. 70538 4. 845569 5. 321041 5. 215691 5. 531871 5. 280963 5. 625537  
3. 895883 3. 738489 3. 758406 4. 58665 3. 554468 3. 913928 4. 168904 4. 376306 4. 160432  
6. 76765 6. 694917 6. 325235 5. 826801 6. 564343 6. 533301 6. 839544 6. 351368 6. 987425  
6. 123731 5. 364902 6. 029617 5. 231208 6. 461725 5. 474074 5. 703845 5. 423488 6. 348179  
1. 893367 1. 867279 1. 936569 2. 988738 2. 403448 2. 10714 2. 042252 2. 354577 1. 73231  
5. 026059 4. 972056 4. 853848 4. 823781 5. 219438 5. 311964 5. 385096 5. 106011 4. 980161  
2. 701384 2. 724008 2. 982224 3. 190771 3. 028141 2. 777919 3. 166643 3. 449105 3. 617082  
4. 663907 5. 417558 5. 175449 4. 555287 4. 666962 4. 67284 5. 043658 4. 995744 4. 103048  
7. 974252 7. 668207 7. 832788 5. 609677 8. 02524 7. 855374 7. 822862 7. 844391 7. 421428  
5. 036668 5. 547282 5. 885592 6. 225598 5. 180314 6. 09089 5. 163268 5. 43352 4. 711144  
5. 757043 5. 358493 5. 42733 6. 123 5. 619917 6. 03097 5. 8166 5. 796176 5. 741406  
7. 620542 8. 295664 8. 485323 7. 772602 8. 05452 8. 324393 7. 982571 8. 165047 6. 591454  
6. 651337 6. 008618 5. 987477 5. 058476 6. 454931 7. 015291 5. 552177 5. 92021 5. 323127  
2. 133277 4. 239029 4. 740077 3. 531712 4. 099817 4. 3554 3. 402224 4. 578863 3. 777574  
3. 448232 2. 817519 3. 145769 3. 046688 2. 271209 3. 331997 3. 046349 4. 391846 4. 128711  
4. 007168 3. 923449 3. 624998 4. 646221 3. 203627 3. 850347 4. 188513 3. 963959 2. 818519  
4. 247663 1. 74821 4. 356339 2. 602153 2. 61942 1. 834205 1. 607599 2. 781061 3. 263668  
4. 88061 5. 02699 4. 617309 5. 066349 5. 304824 4. 564024 4. 854999 5. 232154 5. 555399  
3. 652186 3. 719324 4. 424182 4. 469525 4. 349818 3. 672813 4. 905754 4. 29951 4. 291629  
1. 786816 1. 609039 1. 843863 1. 66622 2. 09593 2. 240118 1. 554913 1. 857292 2. 059058  
5. 250059 4. 039769 3. 981571 4. 225724 3. 9993 6. 125539 4. 400483 5. 01557 4. 21411  
1. 670492 1. 297795 1. 584648 2. 548037 1. 451688 1. 623562 1. 775906 1. 616991 2. 194509  
1. 558185 2. 350679 2. 532959 2. 236182 2. 071502 2. 26198 2. 434477 2. 637868 3. 153673  
5. 665716 4. 851804 5. 641849 4. 904678 5. 259004 5. 0297 5. 682506 4. 583138 5. 671613  
5. 169427 5. 273201 4. 818681 5. 097715 5. 403696 5. 354613 5. 245877 5. 73704 5. 776066  
5. 534274 5. 866232 5. 827948 6. 381947 5. 647172 5. 381827 5. 26133 5. 321951 5. 674745  
1. 576216 1. 864185 1. 685365 1. 93242 1. 380309 2. 435448 1. 535915 2. 027616 1. 561177  
3. 515475 3. 163857 3. 562059 3. 782005 3. 792956 3. 378605 3. 084894 3. 487571 3. 415569  
3. 365463 3. 579784 3. 422828 3. 693621 4. 106847 3. 342587 4. 165699 4. 490992 4. 075208  
4. 712542 5. 036259 3. 351466 5. 707315 4. 206534 4. 72705 4. 188288 4. 346298 4. 83421  
2. 394428 2. 327954 2. 190906 2. 339122 2. 021656 2. 632473 2. 364799 1. 492131 2. 214964  
1. 607063 2. 281923 2. 051544 2. 9433 1. 745151 1. 793543 1. 665366 2. 046708 2. 602115  
1. 77549 1. 588573 1. 186538 0. 552502 1. 224206 1. 935804 0. 888347 0. 578931 1. 15029  
6. 360576 5. 661798 6. 041987 4. 219035 6. 057797 5. 762092 6. 613225 5. 654382 5. 74297  
1. 928078 1. 306748 1. 327257 2. 537623 1. 992747 1. 444222 1. 451408 1. 478071 3. 722473  
5. 991225 5. 7822 5. 823734 4. 3588 6. 12945 5. 598438 5. 637251 5. 796697 5. 888397  
2. 362598 2. 801265 1. 95224 2. 523795 2. 225579 1. 810852 2. 129877 1. 702004 2. 075373  
2. 398238 3. 395325 2. 738878 3. 237068 3. 214302 2. 782054 2. 485938 3. 010323 3. 534754  
4. 019372 4. 373293 4. 12241 2. 55697 4. 308465 3. 516536 3. 696917 3. 723031 3. 978634  
1. 852633 2. 674085 1. 947141 2. 00403 1. 408177 2. 144212 1. 892043 1. 651 2. 196942

4. 255851 2. 461673 3. 824177 4. 481766 3. 250848 4. 156472 3. 634833 3. 051154 3. 293959  
4. 071096 3. 716179 4. 371245 5. 174621 3. 641076 3. 315596 4. 91771 4. 265155 5. 216182  
3. 831533 2. 747876 3. 373235 3. 140863 3. 542757 3. 033092 3. 573007 3. 369865 2. 805803  
7. 32456 7. 21498 7. 123411 6. 542417 7. 027128 6. 711501 7. 040363 7. 151785 7. 184701  
3. 47713 4. 558915 4. 725291 3. 953677 4. 556088 4. 783189 4. 049471 4. 629508 4. 449503  
7. 458608 7. 226543 6. 998657 7. 226834 7. 457774 7. 254631 7. 238859 7. 361657 7. 306622  
6. 536282 6. 318394 6. 638319 6. 252066 6. 565523 6. 408921 6. 967744 6. 201395 6. 658604  
2. 68955 2. 121939 2. 909888 3. 147856 2. 754807 2. 802371 2. 973049 2. 655808 3. 165894  
7. 509121 7. 728069 7. 409495 7. 565746 7. 732249 7. 377438 7. 293124 7. 526282 7. 127794  
5. 01906 4. 712856 4. 343468 4. 864196 4. 733078 4. 076377 5. 39557 4. 685809 5. 295775  
0. 699366 0. 971107 0. 746931 1. 72092 0. 875061 1. 180456 1. 000301 1. 108827 1. 897495  
4. 738712 5. 117679 5. 820571 5. 513347 5. 009263 4. 353336 5. 02281 5. 466014 4. 95426  
7. 398022 7. 124847 6. 84355 6. 618371 7. 042912 7. 149045 7. 047158 7. 23798 7. 349474  
8. 732873 8. 394255 8. 578067 8. 25561 8. 393306 8. 552146 8. 477115 8. 529546 8. 335207  
1. 777156 1. 57927 1. 201977 2. 991736 1. 483353 1. 276311 1. 492284 1. 345694 1. 733862  
6. 124654 5. 388527 5. 909228 5. 196048 5. 552532 5. 526707 6. 211049 5. 272391 4. 49298  
6. 823053 7. 03039 7. 270919 6. 814884 7. 634769 7. 02161 7. 441226 7. 513417 6. 571024  
2. 380161 1. 842862 1. 699326 2. 480803 1. 542445 1. 953423 1. 517808 1. 438787 2. 081971  
0. 980454 1. 646923 1. 525276 1. 889794 2. 003601 1. 352438 1. 797388 1. 23559 1. 701111  
0. 641824 1. 15339 2. 032336 1. 549485 2. 131465 0. 607779 1. 261813 1. 555488 1. 044585  
1. 550111 1. 203734 2. 858151 1. 970899 3. 085244 0. 708743 1. 988933 2. 179465 1. 22273  
1. 119697 1. 575511 1. 840594 0. 882818 1. 322032 3. 584803 2. 069438 2. 44878 1. 689792  
6. 694477 6. 714615 6. 510983 6. 87123 6. 426756 6. 66526 6. 533873 6. 466242 7. 131554  
1. 853568 1. 896736 1. 279013 1. 834247 1. 290096 1. 534209 1. 720514 1. 864265 1. 723081  
3. 800959 4. 713227 3. 714005 3. 876882 4. 185472 3. 620033 3. 541511 4. 048339 3. 835678  
3. 080849 3. 5598 3. 050169 3. 437145 3. 052896 3. 056584 3. 139275 3. 638453 3. 322497  
5. 564074 5. 669677 5. 983693 4. 451237 5. 429125 5. 579628 5. 494964 5. 366452 4. 757146  
5. 65031 5. 842195 5. 887829 4. 137116 5. 436908 5. 36798 5. 565872 5. 880365 6. 199265  
7. 659686 7. 975686 7. 701552 8. 245702 7. 881791 7. 957144 7. 298617 8. 09774 7. 531945  
3. 486091 3. 586018 2. 946171 2. 850778 3. 634942 3. 573657 2. 587804 3. 350272 3. 353762  
2. 600712 2. 897569 2. 466889 1. 958745 1. 902958 1. 714937 2. 431569 1. 784247 2. 516285  
5. 53568 5. 833003 5. 654811 5. 634294 6. 334528 5. 540325 5. 942633 5. 903619 5. 91016  
4. 81413 4. 371436 4. 521361 3. 436701 4. 427862 4. 336784 4. 657141 4. 051638 4. 994966  
6. 878968 7. 089659 7. 322237 7. 001015 7. 392864 7. 125337 7. 193953 7. 235459 6. 65353  
7. 082404 7. 010503 6. 615359 7. 328922 6. 747998 6. 679426 6. 662855 6. 845859 7. 319572  
2. 76196 2. 088557 2. 020449 2. 871163 2. 081376 2. 139352 2. 156177 1. 978023 2. 443979  
1. 847467 1. 540117 2. 150826 2. 654837 2. 070057 1. 853408 1. 560785 1. 314399 1. 88433  
3. 900587 3. 954172 3. 497422 3. 011012 3. 558325 3. 845324 3. 232857 4. 077556 3. 672741  
5. 033148 5. 099935 4. 976134 5. 332587 5. 401917 4. 971279 5. 251379 5. 221372 4. 743667  
4. 511882 3. 377644 3. 379384 4. 805348 4. 813471 3. 92765 3. 499726 3. 974222 4. 388502  
7. 019146 6. 663269 6. 972176 4. 860757 6. 89459 6. 879134 7. 121163 6. 913633 8. 643575  
4. 110339 4. 650044 4. 370764 5. 02161 3. 676945 3. 77602 4. 80927 4. 347677 4. 899482  
5. 036642 5. 201442 4. 872321 5. 213364 5. 207481 5. 303077 5. 439682 5. 13537 4. 950188  
7. 340422 7. 52619 7. 342359 7. 57259 7. 029754 7. 573906 7. 020004 7. 110437 7. 244379  
7. 339791 7. 916198 7. 151393 7. 181582 7. 859896 7. 699133 7. 21584 7. 725179 6. 946763  
5. 995867 5. 421662 6. 05205 5. 18546 5. 945755 4. 105639 5. 793303 6. 108625 5. 822651  
6. 389816 6. 106967 6. 261004 6. 395265 6. 361801 5. 887019 6. 256331 6. 303059 6. 459383  
5. 548256 6. 06846 5. 523998 5. 659067 5. 991553 6. 331977 6. 361304 5. 848105 6. 108675  
6. 162149 6. 111637 6. 454681 6. 061573 6. 094138 5. 963051 6. 319971 6. 217697 5. 921496  
8. 981248 8. 698839 8. 016653 8. 512561 8. 673039 8. 438409 8. 330888 7. 955207 8. 321262  
5. 439737 6. 232291 6. 108087 5. 573119 6. 443659 4. 887207 6. 361158 5. 665183 5. 019128

6. 754453 7. 026335 6. 541403 6. 931034 6. 712089 7. 002272 6. 810559 7. 030509 7. 824727  
1. 123526 1. 444487 1. 229383 1. 628107 0. 99699 2. 7184 1. 371358 1. 106907 1. 286527  
3. 365485 4. 805665 4. 106798 3. 271181 4. 078328 3. 7408 3. 524927 3. 963821 5. 248438  
5. 006876 4. 752297 4. 262395 5. 391922 4. 445081 4. 421808 4. 802528 5. 109011 3. 654309  
6. 153992 5. 271585 6. 26054 6. 626238 5. 691655 6. 558911 6. 351274 5. 674045 6. 044009  
4. 222674 4. 22086 4. 017587 3. 660533 5. 298796 3. 809001 4. 590957 5. 02789 3. 779882  
4. 092003 4. 747569 4. 073498 5. 147322 4. 597725 3. 834804 4. 442341 4. 709292 4. 353283  
1. 463958 1. 584456 1. 773327 1. 497799 2. 577493 1. 981607 1. 398305 1. 171104 1. 308015  
3. 678234 3. 617969 4. 132426 2. 187673 3. 52409 2. 481407 4. 370306 3. 269495 2. 916308  
4. 836255 4. 551792 4. 9751 5. 239166 5. 031049 4. 05962 4. 776684 4. 693483 5. 20347  
2. 530041 2. 592064 2. 911827 3. 975661 2. 105201 2. 996979 3. 008782 3. 458408 2. 671077  
1. 514197 1. 532103 1. 636945 1. 284533 1. 249884 1. 607468 1. 445946 1. 238998 1. 574713  
1. 417928 1. 849528 2. 072839 1. 813829 1. 574861 1. 415305 1. 375365 0. 914321 2. 406672  
7. 056785 7. 40021 7. 060368 7. 069658 7. 318524 7. 277341 7. 446106 7. 636519 7. 117534  
6. 391132 5. 577197 6. 010266 6. 975122 5. 946259 5. 611196 6. 317181 6. 086125 6. 43392  
7. 328439 7. 496189 7. 602738 7. 710319 7. 864683 7. 871665 7. 651625 7. 319595 5. 79689  
4. 494202 3. 528274 4. 126432 4. 1802 4. 495952 3. 806814 4. 556681 4. 404177 4. 341495  
4. 209961 3. 765495 3. 653495 3. 32015 4. 220556 4. 501233 4. 524755 4. 050839 4. 515657  
1. 26674 1. 743964 1. 34798 1. 749095 0. 837863 1. 143113 1. 672597 2. 136459 0. 990236  
5. 67176 4. 488081 5. 395722 5. 264703 4. 319886 5. 123758 5. 470582 5. 823978 2. 974641  
6. 975219 6. 895063 6. 573257 6. 888295 7. 345388 6. 309947 7. 013602 7. 208334 6. 690678  
2. 435895 2. 578091 2. 290546 3. 139438 2. 227242 2. 781141 2. 668105 2. 087219 2. 806172  
3. 657594 3. 214844 3. 580864 3. 050097 2. 948146 3. 29357 2. 717914 3. 180198 3. 402453  
4. 905574 5. 185321 5. 027741 4. 602794 4. 770119 5. 110769 4. 214393 5. 08155 3. 668765  
5. 083673 4. 910451 4. 162245 4. 604237 4. 775098 4. 061069 5. 293673 4. 634159 5. 01745  
6. 365886 6. 394129 5. 961565 5. 717964 6. 248274 5. 784238 6. 338668 6. 066036 6. 027684  
1. 511376 1. 668797 1. 275888 1. 810352 0. 999841 1. 529781 1. 503018 1. 191362 1. 349239  
1. 201565 0. 982634 0. 9635 2. 044011 1. 677023 1. 31942 1. 49007 1. 700482 2. 498111  
1. 991936 1. 985407 3. 135582 2. 801636 2. 090886 2. 359477 2. 425172 1. 991969 2. 478158  
5. 187682 5. 324844 5. 807547 4. 518094 5. 944157 5. 596971 6. 058287 5. 487005 4. 966721  
6. 070517 5. 199408 5. 789593 4. 326316 4. 561449 5. 407093 6. 020498 5. 811044 6. 453003  
1. 400009 1. 421628 1. 65626 1. 494149 1. 349025 2. 496067 1. 924577 2. 060763 1. 671207  
4. 733725 5. 529965 5. 089801 3. 921827 4. 688723 5. 015336 4. 582446 5. 467223 4. 178112  
3. 576605 5. 59274 4. 343583 5. 062255 4. 608695 4. 158764 4. 813721 4. 446233 3. 897329  
2. 376598 3. 262411 1. 887298 2. 546983 1. 816831 1. 759051 1. 633723 2. 633358 3. 124545  
6. 678964 6. 050913 6. 578525 6. 620992 6. 364161 6. 735783 6. 51526 6. 752311 6. 01616  
6. 740406 6. 106808 6. 255056 5. 136569 5. 327158 5. 851053 5. 772577 5. 363025 4. 733603  
1. 537969 0. 911337 1. 066703 0. 94864 0. 712045 0. 673341 1. 038637 0. 874849 1. 166159  
1. 030014 0. 91849 1. 221484 1. 646795 0. 863216 1. 804948 0. 953635 1. 694828 1. 209612  
1. 117652 1. 228405 1. 295275 1. 413996 1. 36432 1. 060082 1. 239861 0. 975549 1. 487132  
4. 909859 5. 547811 5. 206875 5. 123732 5. 175985 5. 809203 5. 019218 5. 31052 4. 305199  
1. 928715 1. 650066 1. 907439 2. 592957 1. 818942 1. 935659 2. 14036 1. 793853 1. 558109  
1. 578913 1. 399189 1. 336911 2. 443842 1. 885572 1. 521802 1. 297289 1. 612217 1. 535663  
0. 897798 1. 554838 1. 570436 1. 733274 1. 06849 1. 45986 1. 349969 1. 505849 1. 543035  
7. 624462 7. 896683 8. 135607 6. 001583 7. 485641 7. 515355 7. 659965 7. 480591 8. 036902  
4. 734662 5. 068042 4. 201672 4. 237991 4. 292004 5. 054394 4. 479704 5. 118041 4. 440554  
2. 034681 1. 892929 1. 926965 1. 863677 1. 756543 2. 395958 2. 377438 2. 253528 1. 805205  
4. 573707 3. 376436 3. 168279 2. 771443 3. 774584 4. 383094 4. 205816 3. 322024 3. 961939  
1. 077504 1. 398463 1. 12096 2. 327184 1. 160126 1. 639188 1. 30401 0. 965008 2. 774141  
4. 033912 3. 947204 3. 804119 4. 055387 3. 619099 2. 450309 3. 923883 3. 83205 2. 469652  
3. 85656 4. 424737 4. 527506 3. 572832 4. 066011 3. 846182 4. 152865 3. 363679 4. 177924



3. 069127 2. 471654 2. 534865 2. 551682 2. 200868 2. 413562 2. 432599 2. 269281 2. 676485  
3. 77566 3. 72961 4. 165231 4. 283021 3. 418669 3. 178735 4. 150686 3. 794241 3. 491283  
5. 197196 5. 085782 6. 033765 5. 854421 4. 125898 6. 14106 5. 536682 6. 5635 5. 396652  
2. 016219 3. 671164 3. 904892 3. 624054 2. 497675 3. 571027 3. 229724 2. 752045 2. 713244  
7. 749153 7. 592592 7. 431511 6. 365993 7. 142353 7. 651559 7. 370872 7. 479418 7. 753512  
6. 207868 5. 827927 5. 900237 5. 574742 5. 489658 5. 527523 5. 501044 6. 066255 5. 246353  
1. 875545 3. 227663 1. 833963 2. 792773 1. 673897 1. 453919 1. 021683 1. 220153 2. 979246  
1. 516661 1. 065963 1. 497846 1. 700941 1. 265468 3. 373945 1. 149432 0. 819109 0. 621248  
3. 635088 3. 764765 3. 674859 4. 248426 2. 999754 3. 605762 3. 240917 3. 946819 3. 818725  
3. 667105 3. 512702 3. 676912 4. 224275 3. 502832 2. 408508 3. 841692 4. 026796 4. 046167  
1. 293895 1. 562805 1. 862092 1. 543602 1. 425242 1. 595518 1. 658729 1. 705426 2. 376975  
2. 807899 2. 632642 1. 481104 2. 682549 1. 559515 2. 624263 1. 040407 0. 624477 1. 274303  
4. 995162 4. 995484 4. 776047 5. 382047 4. 42458 5. 06508 4. 906914 5. 420226 4. 785865  
2. 444218 2. 182996 1. 820645 2. 159258 1. 835254 2. 0957 1. 7548 2. 138407 1. 906905  
3. 101869 3. 22518 3. 047407 2. 576664 2. 757913 3. 26493 2. 338173 3. 017276 3. 192737  
4. 662227 4. 197917 4. 793522 3. 342778 4. 720218 3. 89538 3. 822061 4. 210795 3. 073404  
3. 199061 2. 129938 3. 120828 3. 289556 1. 911097 2. 808566 2. 661024 2. 34938 2. 821113  
2. 434779 3. 61539 2. 424082 1. 736641 2. 858971 1. 741433 1. 897896 4. 186676 3. 680099  
2. 151606 2. 455416 2. 497484 2. 922347 2. 546806 2. 040577 2. 300904 2. 299539 2. 658307  
2. 014774 3. 12259 3. 099675 2. 077357 3. 010898 3. 367441 1. 666384 3. 184671 1. 906239  
3. 703215 3. 92361 3. 87167 2. 753909 4. 541465 3. 081854 3. 83179 3. 770516 4. 268102  
1. 687664 1. 883401 1. 433215 2. 171479 1. 863297 1. 173868 1. 756705 2. 01729 1. 887689  
6. 538916 6. 551653 6. 318881 5. 779043 6. 56479 6. 618498 6. 756847 6. 365757 6. 182291  
4. 345069 4. 427681 5. 036294 4. 340627 4. 750321 5. 65488 4. 630529 4. 98704 4. 454181  
7. 354051 7. 129911 7. 681901 7. 598578 7. 290931 7. 268456 7. 58742 7. 435575 5. 009879  
6. 411036 6. 079641 6. 252935 4. 747036 6. 163116 6. 607377 6. 432124 6. 572731 6. 414094  
1. 803691 1. 630989 2. 369069 2. 623948 1. 889451 1. 590249 2. 098545 1. 767379 2. 032407  
5. 696718 4. 887953 5. 182134 4. 277032 5. 435136 4. 966923 4. 813295 4. 546939 4. 285996  
4. 441311 4. 010638 4. 415969 5. 698862 4. 751635 4. 263522 4. 953062 4. 741638 5. 724535  
2. 367312 1. 828616 2. 051185 2. 842845 1. 643804 2. 845686 1. 964837 2. 121828 2. 679142  
4. 933019 4. 565709 5. 532915 5. 908321 4. 603896 3. 719852 5. 288786 4. 445121 4. 778605  
7. 791288 7. 4906 7. 70336 7. 061771 7. 557769 7. 369813 7. 826974 7. 46132 7. 422983  
6. 46686 6. 566891 6. 33467 4. 13241 6. 459861 6. 671659 6. 201623 6. 069089 6. 7916  
1. 6672 1. 821239 2. 449369 2. 541869 2. 041298 1. 919733 1. 538286 1. 439629 1. 712604  
3. 538852 4. 47995 3. 674071 4. 614993 5. 254777 3. 371029 3. 353475 3. 75557 3. 296408  
4. 351331 4. 574355 4. 45158 4. 149628 5. 246038 4. 845759 4. 663232 4. 086206 5. 317757  
3. 621185 5. 050777 3. 755102 4. 102679 4. 443969 3. 887398 4. 354437 4. 234949 4. 598458  
6. 635433 6. 255044 6. 145796 3. 817991 5. 841327 5. 798745 6. 595573 6. 10027 6. 528273  
5. 98938 6. 499985 5. 98133 7. 393794 6. 682991 7. 877162 6. 634231 6. 650849 7. 739319  
4. 857667 4. 176338 5. 479334 3. 56177 4. 216261 4. 896452 4. 055231 5. 581197 5. 400523  
7. 302339 7. 157987 6. 852434 6. 979563 6. 923616 6. 854494 6. 445724 6. 78142 6. 271191  
3. 596791 3. 563204 2. 853706 1. 979131 4. 640948 2. 839902 4. 485078 2. 864921 4. 134249  
1. 509027 2. 194026 1. 138084 1. 717698 1. 752062 1. 252358 1. 62082 2. 079591 1. 717736  
3. 939645 2. 588261 2. 521523 2. 945853 2. 887443 2. 268501 2. 742112 3. 363852 2. 728341  
1. 462417 1. 024088 1. 267902 1. 627706 1. 411181 1. 356388 1. 198292 1. 496613 1. 400133  
1. 463528 1. 410688 1. 278403 1. 460397 1. 514654 1. 396466 1. 73053 1. 432183 1. 508633  
5. 239697 5. 459232 5. 176546 5. 183964 5. 779845 5. 470189 6. 068292 5. 139674 3. 33552  
1. 016592 0. 796969 0. 990879 1. 934379 1. 100552 1. 416848 1. 456968 1. 399697 1. 250105  
6. 199017 6. 276888 5. 926031 6. 178998 6. 187792 6. 426727 6. 185491 6. 2154 6. 429977  
2. 709738 3. 352218 3. 166838 2. 879704 2. 947278 1. 84207 2. 917479 2. 899482 2. 811393  
4. 597705 4. 505269 4. 884749 5. 762181 4. 672097 3. 984783 5. 318751 4. 556138 4. 575494

8. 295791 6. 366179 7. 72001 7. 43977 6. 512428 9. 017779 7. 239521 7. 420229 8. 510903  
2. 483027 1. 934314 2. 277122 2. 894508 2. 139784 2. 417083 2. 460092 1. 635894 2. 76574  
1. 224659 2. 083389 2. 035767 1. 801568 2. 177421 1. 603067 2. 119213 1. 396537 1. 551494  
5. 961495 5. 620583 5. 816206 6. 378678 5. 513564 6. 963244 5. 885913 5. 5003 5. 026961  
1. 850361 2. 088996 2. 683296 2. 546628 2. 48212 3. 810613 1. 97919 3. 057193 2. 906238  
6. 621801 7. 051039 7. 044684 7. 506967 7. 159827 7. 878366 7. 044875 7. 704385 7. 181451  
5. 898698 6. 239381 5. 41568 5. 973525 5. 587427 6. 088307 5. 997898 6. 239854 6. 331465  
3. 201108 3. 180547 2. 876824 3. 138297 3. 481225 4. 15881 2. 867062 2. 702269 3. 052118  
3. 490722 2. 770168 4. 186508 3. 70444 2. 623073 3. 81186 2. 136466 4. 709979 3. 03275  
6. 423691 6. 873839 6. 315498 6. 850188 6. 889977 7. 105364 6. 187678 6. 777928 6. 958072  
7. 042517 7. 018882 7. 080095 5. 932869 7. 015989 6. 875067 7. 274348 6. 464552 6. 83061  
2. 552949 2. 326265 3. 042513 2. 557179 2. 7094 2. 509942 2. 172427 3. 117844 2. 607387  
0. 386528 1. 268674 3. 561192 0. 904391 1. 048103 1. 20633 0. 374168 0. 811055 0. 58284  
2. 508067 1. 04013 2. 197442 2. 471578 1. 820547 1. 41215 1. 519874 1. 205986 2. 403367  
5. 364456 6. 862687 4. 750621 7. 149151 8. 481448 5. 17658 6. 539693 5. 821229 5. 803782  
1. 289599 0. 88638 0. 794549 0. 927933 0. 930329 1. 615636 1. 458165 1. 477072 0. 873823  
1. 64349 1. 790024 2. 44342 1. 757345 1. 516752 1. 619485 1. 446225 1. 276601 1. 787322  
5. 563713 5. 580791 5. 370655 5. 23023 6. 17346 4. 734404 5. 513043 5. 355432 5. 377186  
6. 753827 7. 338501 6. 763032 6. 184377 6. 882482 6. 05835 6. 97066 6. 657157 6. 869673  
6. 427891 7. 031991 5. 885771 6. 883635 6. 643091 5. 914143 7. 200571 6. 713407 6. 96827  
7. 58371 7. 26474 7. 546356 5. 886371 6. 975529 7. 062849 7. 113425 7. 919102 7. 431479  
5. 336964 5. 822165 5. 660318 6. 572241 7. 02835 5. 912848 5. 63288 6. 011203 4. 893879  
1. 109538 1. 110095 1. 902472 2. 108943 0. 948428 1. 944258 1. 019369 1. 010178 1. 488727  
2. 434157 2. 970549 2. 834666 3. 405708 2. 606304 1. 558914 1. 785856 1. 918169 2. 530506  
1. 713366 1. 276799 3. 176493 1. 677135 1. 415125 1. 60379 1. 242714 3. 392482 1. 458455  
3. 519364 4. 117098 3. 6768 4. 054783 4. 08461 3. 56839 3. 562489 3. 577252 3. 431842  
0. 901452 1. 207678 1. 329557 1. 46773 1. 554328 2. 01004 1. 233491 1. 025278 1. 110317  
3. 496574 2. 617827 2. 756334 3. 246087 3. 006747 3. 725044 3. 01392 2. 819741 3. 212601  
4. 97105 5. 039574 5. 057654 3. 89728 5. 826706 4. 480311 4. 778212 4. 694718 3. 741759  
5. 861831 5. 95498 5. 193772 4. 763677 5. 61896 6. 342582 5. 736179 5. 660784 6. 115221  
2. 049741 2. 449368 2. 283276 2. 146841 2. 026319 1. 957778 2. 177458 1. 638721 1. 799143  
2. 514335 2. 870192 1. 879518 2. 579634 2. 035822 2. 41666 2. 036898 2. 434988 2. 003885  
5. 157891 4. 511037 5. 289383 5. 02811 5. 177554 4. 812848 4. 504575 4. 875559 4. 153792  
1. 525673 1. 498699 1. 562055 2. 703781 1. 645211 2. 040866 1. 675015 1. 246482 1. 657371  
5. 182983 5. 84359 5. 248075 5. 984601 5. 745414 5. 622959 5. 472734 5. 71446 4. 589876  
7. 793929 7. 626351 8. 244273 7. 773686 7. 055359 7. 125828 7. 995718 7. 64803 8. 010904  
1. 675194 1. 430495 1. 539866 1. 383069 1. 742124 1. 027988 1. 601198 1. 287218 1. 518458  
4. 662087 5. 018994 5. 289945 4. 716602 4. 895169 4. 606125 4. 784609 5. 157756 4. 834796  
3. 522013 3. 425683 3. 087758 4. 454706 4. 47422 4. 240978 3. 636268 4. 272949 5. 056076  
0. 994808 1. 245321 1. 776968 2. 022092 1. 597447 1. 261688 1. 510498 1. 073312 1. 425968  
1. 649983 2. 255149 2. 334405 2. 381381 2. 069278 1. 903741 1. 442778 2. 529308 1. 283381  
1. 317861 1. 631246 2. 037735 3. 00756 1. 113487 1. 558584 1. 818393 1. 094516 1. 273549  
2. 157074 3. 433733 1. 337725 2. 329032 1. 691167 2. 245272 2. 180444 1. 145689 1. 689219  
4. 462287 1. 328293 2. 831477 2. 53038 3. 740931 2. 822116 4. 741752 2. 649965 3. 180259  
1. 228375 2. 702322 1. 684481 1. 259723 1. 817081 1. 17096 1. 598151 1. 667398 1. 789988  
6. 196814 5. 70421 6. 326853 6. 086353 5. 628588 6. 027595 6. 117957 6. 030082 5. 48083  
8. 67017 8. 110192 8. 075833 7. 514803 7. 754567 7. 861538 8. 077197 7. 733319 7. 996943  
4. 668123 4. 125557 4. 397882 6. 204239 4. 757817 3. 683959 3. 938473 2. 860993 4. 814415  
5. 860988 5. 580058 5. 666012 4. 600391 5. 430239 5. 582001 5. 434825 4. 962834 4. 46082  
1. 711085 1. 642733 1. 640173 1. 953892 1. 922643 1. 884671 1. 622051 1. 589836 2. 593335  
4. 796418 5. 10691 5. 591506 2. 986755 5. 259706 5. 305974 4. 174484 5. 377246 3. 024653

7. 226518 8. 052346 7. 330815 7. 465969 8. 185463 7. 250073 8. 277126 7. 803789 7. 224303  
4. 452123 3. 471308 3. 099305 3. 360114 4. 455227 3. 623708 3. 3753 3. 365523 3. 205137  
6. 502403 6. 960528 6. 746658 6. 535967 7. 060426 6. 632008 6. 59411 6. 797443 6. 981482  
4. 252596 4. 68714 4. 350908 4. 019293 4. 146245 4. 502336 4. 51814 4. 271302 4. 505873  
6. 619787 6. 858462 6. 72794 5. 812473 6. 501664 6. 830321 6. 340394 7. 105683 5. 905224  
7. 832015 7. 979236 8. 078958 6. 538358 8. 333178 6. 630777 7. 897276 8. 1019 7. 892048  
6. 941808 7. 602354 6. 691156 6. 795732 6. 514694 6. 467079 7. 480423 7. 129537 7. 327005  
2. 653436 2. 909256 2. 849973 3. 705339 3. 153645 3. 691991 3. 777074 2. 97733 2. 985554  
5. 800924 6. 528404 6. 313113 7. 037339 6. 562076 6. 016566 7. 001748 6. 629298 7. 004776  
6. 557302 6. 441937 6. 370576 6. 697668 6. 648579 5. 95008 6. 315724 6. 6569 6. 058349  
5. 387152 5. 0464 4. 691304 4. 455395 4. 992478 4. 251311 5. 001795 4. 835579 3. 809295  
6. 197123 6. 439273 6. 335619 5. 318893 6. 00846 6. 006788 6. 250131 5. 925114 5. 934499  
1. 84387 1. 000353 1. 611212 1. 586366 1. 720358 1. 100029 1. 183171 1. 597408 1. 377428  
1. 135639 1. 538978 1. 998475 2. 462294 1. 341915 1. 776369 1. 733753 1. 510898 1. 636605  
4. 771762 4. 749057 5. 17473 3. 141465 4. 632702 4. 652484 4. 75015 4. 720187 4. 272175  
0. 964919 0. 943968 0. 896968 1. 250913 0. 857522 1. 419522 1. 257663 1. 43928 0. 903559  
1. 258245 1. 736237 1. 073432 2. 274125 1. 217373 1. 443905 1. 007894 0. 883833 1. 529857  
1. 176366 1. 621187 1. 331851 2. 390005 1. 351657 1. 493837 1. 742936 2. 020784 1. 698862  
1. 215372 1. 19325 1. 278413 1. 569224 1. 325894 1. 418443 1. 086452 1. 202208 1. 171923  
5. 075768 3. 722415 4. 952011 2. 526013 3. 41154 3. 935479 3. 202195 4. 420279 3. 309263  
1. 721729 1. 525441 1. 733297 1. 735056 1. 519691 0. 938967 1. 814879 2. 019141 2. 712588  
1. 311414 1. 679361 1. 498717 1. 803311 1. 429245 1. 825336 1. 102283 1. 132988 1. 966059  
3. 360189 1. 65348 2. 515522 2. 804034 2. 580956 2. 641622 2. 834062 2. 382872 2. 04239  
1. 783524 1. 579059 2. 019049 2. 636859 1. 891381 2. 083877 2. 093644 2. 000952 1. 710791  
6. 951879 6. 80657 6. 625961 6. 791978 6. 908216 6. 544075 7. 092824 6. 504227 6. 057953  
2. 05267 2. 519303 2. 021802 2. 690882 2. 57721 2. 893795 2. 20738 2. 468762 2. 678594  
2. 243384 1. 894094 2. 559341 1. 465984 1. 416247 1. 652573 1. 835935 1. 280412 1. 920283  
10. 48564 10. 08106 10. 02844 9. 645958 9. 608366 10. 00863 10. 19138 9. 700414 10. 36728  
7. 401494 7. 412545 7. 293902 6. 429676 7. 477654 7. 336911 6. 858089 7. 32186 6. 819697  
2. 051064 1. 518583 1. 73761 1. 089427 1. 326842 1. 853508 1. 226199 1. 731819 1. 73761  
2. 038052 2. 123215 1. 768188 1. 773675 2. 490319 4. 036272 0. 98107 3. 731067 2. 022411  
1. 415156 1. 859493 2. 155335 2. 242049 2. 217595 2. 250681 2. 748794 1. 581393 1. 676731  
5. 45295 5. 354048 5. 401971 5. 422455 6. 030621 5. 225397 6. 020253 5. 526703 4. 625253  
6. 399599 6. 18804 6. 15354 5. 708514 6. 483275 5. 594563 6. 495269 6. 650672 6. 951488  
1. 996344 2. 487118 1. 926523 2. 223885 1. 412446 2. 44662 2. 221914 2. 304991 1. 774197  
1. 616754 1. 191978 1. 531677 1. 37636 1. 37104 1. 289049 0. 672845 1. 209033 1. 671091  
1. 443434 1. 728736 1. 260951 1. 220818 0. 78125 1. 366231 0. 677236 0. 891642 2. 027303  
3. 333665 3. 464602 3. 419965 3. 821102 3. 384442 3. 875063 3. 211114 2. 995993 2. 305564  
0. 611317 0. 681876 1. 121308 1. 087536 0. 778511 0. 724808 1. 02654 1. 564782 2. 700688  
2. 103012 1. 173826 2. 006737 1. 764759 1. 670345 2. 333157 1. 596324 0. 922636 1. 459719  
6. 171187 6. 344778 5. 489568 5. 962333 5. 890396 6. 194425 5. 850592 6. 010006 5. 932363  
1. 749964 0. 969368 1. 095204 1. 196621 1. 591344 1. 440615 1. 433846 1. 237215 2. 202747  
2. 237166 2. 509624 1. 886757 2. 492793 2. 642589 2. 711167 2. 603411 2. 398829 1. 88539  
7. 912449 8. 072814 8. 058829 7. 466653 8. 032142 7. 566213 7. 827496 8. 149554 7. 434719  
1. 058677 1. 244162 1. 218731 1. 486269 1. 192698 1. 23855 0. 943837 1. 243845 1. 006753  
1. 91881 1. 815635 1. 654735 2. 700264 1. 925308 2. 49659 1. 732425 2. 129897 2. 066242  
0. 817776 0. 684871 1. 117485 1. 719008 1. 314702 1. 105635 1. 776548 1. 235187 1. 412502  
8. 48143 8. 314351 8. 182751 8. 247951 8. 363023 7. 735398 8. 680531 8. 316037 8. 291009  
1. 765806 1. 792358 1. 891706 1. 645595 1. 458424 1. 714302 1. 405576 1. 600504 2. 049025  
0. 977776 2. 636243 0. 684276 0. 793699 1. 913171 2. 302342 0. 973296 2. 18432 1. 428464  
5. 380858 4. 772563 5. 253071 5. 921371 4. 986365 4. 821997 5. 437799 4. 768055 4. 684267

1. 550164 1. 58564 1. 562832 2. 492611 1. 497089 1. 60063 1. 949829 0. 993677 1. 669762  
2. 092053 1. 481759 1. 277038 1. 166066 3. 109656 1. 300013 0. 987937 1. 15227 1. 740804  
1. 405233 1. 740032 1. 763367 3. 18978 1. 427709 1. 853943 2. 369201 1. 448037 1. 832213  
1. 156208 2. 280291 1. 855833 3. 237952 1. 878601 2. 246986 2. 358967 1. 58759 2. 433027  
1. 542408 1. 160852 1. 2944 1. 639462 1. 455976 1. 602119 1. 314895 1. 234082 1. 49282  
2. 743723 2. 852064 1. 905642 4. 801305 1. 753704 1. 840959 1. 847892 2. 686179 2. 137784  
6. 880406 6. 370734 7. 704207 6. 927582 7. 028197 6. 59395 6. 471397 7. 124074 6. 609795  
1. 639318 1. 679481 1. 287033 2. 536312 1. 786772 1. 654997 1. 567297 1. 705251 1. 45886  
1. 077889 0. 701967 1. 260267 2. 350999 1. 310428 2. 102569 1. 250552 1. 396631 2. 141717  
2. 62225 2. 183475 1. 767066 2. 654832 1. 701903 2. 233811 1. 823561 1. 677989 2. 201618  
1. 113847 1. 207934 1. 344522 1. 777438 1. 157098 1. 273839 1. 226328 1. 30491 1. 402258  
1. 126484 1. 467324 1. 339606 1. 32958 1. 060019 1. 527979 1. 646109 1. 447826 1. 692752  
1. 913497 1. 347791 1. 950725 1. 953183 1. 48317 1. 615908 1. 676585 1. 357091 1. 449732  
1. 825456 1. 388182 1. 586341 1. 408209 4. 185544 1. 764783 1. 418664 0. 940548 1. 379607  
1. 399971 1. 43547 0. 880739 2. 253813 0. 887488 1. 493162 1. 459499 1. 270636 2. 873178  
0. 862959 1. 492967 1. 063835 0. 983355 0. 725438 1. 196922 0. 937344 1. 175595 1. 022862  
2. 878181 2. 537523 2. 085471 2. 287893 4. 099457 1. 673989 3. 306021 2. 573565 3. 480637  
4. 222457 4. 810359 5. 602984 4. 787472 5. 100231 4. 30965 4. 601328 4. 11598 3. 151325  
1. 584104 3. 290001 2. 051581 2. 170601 1. 174339 2. 809089 1. 605396 1. 802666 2. 299557  
2. 591014 2. 399546 2. 932328 2. 487315 2. 629241 3. 257922 2. 675525 2. 541298 2. 043261  
4. 858244 2. 744753 4. 286769 3. 695436 2. 997167 4. 993941 3. 683565 3. 139179 6. 753142  
1. 503046 1. 513734 1. 617718 1. 703238 1. 183293 1. 706026 1. 395322 1. 323296 1. 51447  
1. 742366 1. 929761 1. 445587 2. 516147 1. 324906 1. 701963 1. 676534 1. 473645 2. 042724  
1. 799628 1. 004319 1. 149181 1. 059407 1. 254964 1. 203994 1. 259772 0. 988103 1. 019561  
2. 056272 2. 698324 1. 581901 2. 162312 2. 283173 2. 929104 1. 936931 1. 930883 2. 1047  
1. 613502 1. 635634 2. 279147 1. 831089 1. 370475 1. 598115 1. 152559 1. 49302 1. 640361  
4. 609545 4. 511119 4. 396367 4. 615923 4. 264209 4. 466905 4. 757005 4. 400634 4. 122799  
1. 31768 2. 024068 1. 747076 2. 484961 1. 854771 2. 234053 2. 211843 2. 196217 1. 799646  
0. 624456 1. 353528 2. 440322 1. 226501 0. 656726 0. 729601 0. 957571 0. 82677 2. 514836  
1. 334416 1. 242175 2. 493433 2. 927552 1. 750073 1. 860518 1. 917498 2. 141971 2. 232904  
7. 392599 7. 25258 6. 721452 7. 413106 7. 065268 7. 406564 7. 684385 7. 396702 7. 018429  
0. 917649 1. 166686 0. 882435 1. 430926 1. 417456 1. 887873 1. 619451 0. 835661 1. 328572  
4. 200277 4. 869726 3. 882479 4. 02122 4. 026725 4. 362431 4. 731442 3. 815499 2. 839412  
2. 31341 3. 27023 2. 619656 3. 693952 3. 341323 3. 352508 4. 062684 2. 881348 3. 536424  
5. 446968 4. 943478 5. 571613 5. 781281 5. 207482 5. 297103 5. 421815 4. 974331 5. 5871  
4. 273289 3. 996895 3. 877476 4. 258099 3. 712557 4. 662074 4. 079715 4. 095325 5. 070517  
1. 662545 3. 132693 1. 473227 2. 076097 2. 725507 1. 988091 1. 699841 1. 478482 1. 749075  
2. 31714 3. 35051 3. 88576 2. 410516 1. 69407 2. 024247 2. 17518 3. 09729 2. 195896  
2. 19602 1. 104196 0. 3408 0. 904998 0. 998786 0. 854461 1. 350672 0. 731365 1. 807215  
1. 66334 1. 499728 1. 544835 1. 661585 1. 498143 1. 488199 1. 338296 0. 965218 0. 913657  
3. 110606 2. 829661 2. 232204 3. 633058 3. 68811 2. 330513 1. 845531 2. 819019 4. 6358  
7. 114841 6. 33533 6. 462974 4. 166296 7. 503222 7. 050823 5. 89813 7. 587535 7. 392627  
1. 854906 1. 083717 1. 237971 3. 122556 1. 580286 1. 625831 2. 375863 1. 395921 1. 567562  
3. 703664 1. 796959 1. 821016 0. 885719 3. 792107 1. 55316 2. 281256 3. 059814 5. 237554  
5. 143933 2. 080622 3. 593835 2. 266488 4. 65835 2. 035544 2. 156411 4. 789536 6. 697732  
1. 69171 2. 734898 2. 819252 1. 536578 3. 745611 1. 032083 2. 874932 2. 061113 5. 830335  
0. 970419 1. 423033 1. 141609 2. 254839 4. 184856 1. 312018 3. 055778 1. 123314 1. 848571  
2. 067244 2. 814936 3. 949075 1. 065216 4. 273776 2. 748868 3. 154789 3. 506463 5. 611852  
1. 590355 1. 200657 1. 504511 1. 362612 2. 667721 1. 325819 1. 225266 0. 764114 4. 390544  
3. 447259 1. 716135 1. 767925 1. 107399 0. 95544 1. 514258 2. 46462 3. 043132 1. 557893  
4. 279319 4. 237531 5. 195322 3. 343164 3. 978678 4. 734521 4. 193455 4. 146138 4. 713497

2.599969 2.098221 1.517233 3.83252 2.881663 1.153708 1.783976 1.485757 3.290815  
0.749804 0.711017 0.827022 0.964657 1.106208 1.294911 0.949528 0.713074 0.882446  
6.580826 6.811034 7.001115 5.50528 6.762237 7.277347 6.900773 7.356289 6.016956  
0.802551 3.561743 5.012117 0.738339 2.626521 3.467727 4.256473 4.157194 6.701617  
2.950076 2.895309 1.60543 1.630918 1.140132 3.2887 1.65965 1.015558 2.061405  
2.061597 2.208567 3.364168 4.222043 2.061166 3.996702 2.732996 3.068702 3.640289  
4.812084 3.698516 5.785431 2.163336 5.167914 4.076399 3.36432 1.706895 4.241775  
1.883931 1.772943 2.117059 2.432943 1.946101 1.986341 1.850272 1.427112 3.717783  
3.191591 4.280304 2.388846 0.35985 3.897488 2.976923 5.924598 3.488642 6.719109  
1.636184 2.878372 1.280954 1.060023 2.653864 1.494951 1.329986 1.592967 2.900733  
0.822852 0.764256 1.031263 0.943499 0.586978 1.311418 1.100117 1.454969 1.070639  
1.143104 1.162083 1.707546 0.825857 1.290328 4.826341 5.833641 0.795216 6.259278  
0.566365 1.052729 0.961827 1.637765 0.627614 1.964026 1.265986 0.910601 2.480389  
5.065388 4.47932 5.253872 2.252073 3.974034 5.49738 4.941343 5.173051 6.240747  
0.824749 1.031474 0.93698 1.180772 2.330539 1.505085 4.374762 0.938705 1.814059  
2.838668 1.356542 1.2643 1.096036 0.833093 1.84585 1.312209 1.212306 4.811972  
4.914085 4.073141 5.029826 5.109272 4.881346 4.380054 4.185295 3.762001 5.71629  
1.97089 4.14081 3.590158 1.701811 2.157965 1.384252 1.84145 3.152137 5.965717  
1.570633 1.437577 2.128352 2.1952 1.389833 1.479604 2.621851 2.880216 1.616446  
5.180137 3.926313 5.03511 4.94383 4.063249 5.433112 6.17969 5.217736 5.904258  
7.440761 7.640688 7.751276 6.724252 7.4092 7.532775 7.735872 7.508871 7.499251  
1.757784 2.336778 2.254991 1.15818 1.710767 2.27703 1.158913 4.232116 4.560976  
8.347385 7.702421 7.555883 4.923207 6.510507 8.657964 8.227028 7.296275 9.017385  
4.676054 4.487736 4.354246 1.423628 3.817057 1.778661 2.896957 4.686267 4.993065  
0.986641 1.638038 1.00343 1.214626 1.481388 1.401648 1.199213 1.014821 2.345827  
0.906203 0.665417 2.384326 0.82681 1.790692 1.010255 2.668504 0.779349 1.122664  
1.020503 1.982779 1.639863 2.009711 1.034229 0.937049 0.92868 1.448326 1.354559  
3.945002 2.450186 2.895012 2.998313 2.810844 2.400323 3.164942 2.727311 4.120424  
2.47491 1.306593 3.541518 2.091272 2.297562 1.313723 2.327634 2.567385 3.892814  
2.276534 2.506367 1.8688 1.261998 1.66248 1.532378 1.68533 1.472013 4.893109  
0.921782 0.703408 5.266056 1.119324 1.066869 1.17747 2.801063 0.470014 1.635504  
1.195831 3.209388 1.889851 1.885532 1.874385 2.861244 1.807732 2.351025 4.170597  
1.606706 1.306177 2.039447 1.94813 1.608239 1.425979 1.813383 2.290265 1.62803  
1.303352 0.994502 1.221075 1.169233 1.252623 2.166271 0.930694 2.284363 3.992821  
0.816807 1.03363 1.163004 3.056507 0.88173 2.947047 0.903176 1.741997 1.394782  
3.473079 0.925256 1.263409 1.682475 1.375852 2.207497 1.765025 2.958717 3.829876  
3.815841 0.963 2.855142 1.252442 1.503168 1.155831 2.899609 1.77584 2.163656  
2.164602 4.316198 0.94104 1.21416 1.99337 1.648965 4.221917 1.149045 5.941093  
5.917589 5.13778 6.138518 2.687618 4.771572 5.722853 4.436919 4.047985 5.408112  
5.327723 4.466337 5.006883 1.747897 3.508424 3.749386 3.316712 3.122657 3.958494  
1.549453 1.450582 1.094258 1.133541 1.495376 1.491052 1.044753 2.300976 1.21483  
2.307721 1.88043 2.09705 2.402092 2.043234 2.058013 2.067185 2.73582 2.881819  
1.30027 2.225363 1.141028 1.644073 1.388892 1.279316 1.512764 2.909357 3.05773  
2.171979 2.137393 2.033756 2.420214 1.630563 1.505862 1.852394 2.383231 2.931082  
5.263581 4.613724 4.490463 3.865713 3.900649 4.091503 4.883996 4.490231 7.590016  
1.298076 1.014198 1.253233 1.598391 1.330308 1.698535 1.029952 1.954706 1.183537  
3.338882 2.850815 3.487357 3.013124 3.280959 4.054619 3.30117 3.439169 7.310192  
3.030195 3.057981 4.582463 0.821843 3.353126 4.577263 3.268484 3.844767 6.32131  
7.504015 7.702332 7.16977 7.290821 7.443308 7.704574 7.642081 7.593087 7.218026  
3.817397 3.579164 3.894334 3.526503 3.393845 4.567207 3.837388 3.958655 4.493795  
0.966135 1.026965 1.365658 0.805693 0.867574 1.215882 3.481602 1.140629 3.101686

2. 140105 2. 388065 2. 593449 2. 616375 2. 170605 1. 812159 1. 782259 2. 035752 1. 669474  
4. 114483 3. 8126 3. 28983 3. 532957 3. 196197 3. 633646 3. 444808 4. 023308 3. 533926  
1. 770352 2. 561178 2. 746861 2. 580036 2. 676 2. 186447 1. 958383 2. 859996 2. 134593  
1. 756343 1. 167702 2. 178135 3. 247092 1. 818378 1. 777839 1. 14232 1. 221356 1. 503323  
2. 427797 2. 824613 2. 769211 2. 93723 2. 667831 2. 649968 2. 594058 2. 902186 2. 425448  
3. 477669 3. 848038 4. 01244 3. 346613 3. 263049 4. 053632 3. 728198 3. 774618 3. 751089  
2. 514843 1. 941663 1. 916621 3. 47663 2. 518621 2. 676168 1. 853819 1. 995015 2. 315051  
2. 535908 3. 034397 2. 741938 3. 456133 3. 710997 2. 756792 2. 40811 1. 960696 3. 364984  
1. 621046 2. 146688 1. 112841 1. 943425 1. 119974 1. 479136 1. 421429 1. 561902 2. 771615  
0. 901259 1. 359263 1. 041062 1. 207541 0. 886561 1. 919623 1. 203846 1. 231465 0. 982367  
0. 849897 1. 069644 2. 866583 1. 193078 2. 383045 1. 875352 3. 660074 1. 570756 1. 486243  
5. 648538 5. 484593 5. 268789 3. 638246 5. 621089 5. 344771 5. 407622 5. 739995 5. 727522  
5. 980576 5. 222887 5. 469557 5. 710216 5. 299368 5. 349807 5. 504392 5. 3528 4. 652407  
5. 27759 4. 91928 5. 36533 4. 866275 5. 120717 5. 058829 5. 610756 4. 992754 5. 561692  
2. 07507 1. 829296 1. 950566 2. 39326 1. 740106 1. 939532 2. 118982 2. 274918 2. 173862  
5. 327226 5. 059423 4. 296686 3. 461577 4. 88301 5. 761083 5. 259713 5. 06101 4. 958329  
1. 848022 2. 756547 2. 240457 1. 92376 1. 966418 2. 146759 1. 927956 2. 318111 1. 982177  
4. 468202 3. 470585 4. 899665 1. 810256 3. 825303 3. 754797 3. 377614 3. 856281 6. 146051  
3. 726577 3. 860527 2. 851781 2. 759604 3. 421856 1. 724554 3. 450632 2. 642146 3. 036095  
8. 251783 8. 825563 8. 428483 7. 830783 8. 437309 7. 531493 8. 135595 8. 503752 8. 131247  
4. 745367 4. 681285 4. 250934 4. 887135 4. 803259 4. 077119 4. 28765 4. 530809 4. 115223  
7. 706428 7. 501242 6. 957133 7. 655082 7. 75347 7. 374767 7. 415884 7. 548853 7. 13645  
5. 592362 6. 065969 5. 844366 6. 328338 6. 358312 6. 489114 6. 136622 6. 523606 6. 390307  
8. 560514 8. 608893 8. 793723 8. 309589 8. 273798 8. 220098 8. 761116 8. 372932 8. 097095  
5. 327538 5. 135496 5. 800341 6. 193957 5. 113973 4. 025696 5. 403078 5. 164631 5. 912323  
4. 041644 3. 860439 4. 06087 3. 777063 3. 717334 5. 06572 3. 60378 3. 712679 4. 041644  
0. 862282 0. 994132 1. 02814 1. 089922 1. 163994 1. 117179 0. 789492 1. 187448 1. 078816  
6. 20178 6. 010134 5. 98721 6. 338755 5. 909944 6. 86865 6. 450949 6. 707653 6. 572725  
1. 535944 1. 923054 1. 308139 1. 906543 1. 535832 1. 560577 1. 244408 1. 43034 1. 268153  
5. 024496 2. 376766 4. 513276 5. 208442 3. 555979 3. 645846 4. 612405 3. 725438 3. 975666  
6. 158569 5. 398968 6. 224501 6. 809433 6. 310372 5. 781783 6. 397054 5. 764697 6. 701038  
2. 478508 2. 923739 3. 564819 2. 458887 2. 621185 3. 482281 3. 268193 2. 632198 2. 733092  
5. 212381 4. 805 5. 190257 4. 613733 5. 22951 4. 613987 5. 15683 5. 190456 4. 600673  
2. 586816 0. 929864 1. 875167 2. 107206 1. 737803 1. 375294 1. 435055 1. 058722 1. 221044  
5. 25038 5. 458108 5. 216838 3. 259404 5. 351993 4. 899334 4. 972665 4. 974254 3. 822245  
4. 555296 4. 810846 5. 558912 3. 197048 4. 863615 5. 347843 3. 417123 5. 065205 4. 742453  
1. 393868 1. 269846 1. 490741 2. 248212 1. 231839 1. 387346 1. 818859 1. 510087 1. 315476  
4. 474028 4. 596844 5. 38528 3. 599963 4. 632757 4. 37546 4. 592938 4. 822471 3. 703999  
4. 461228 4. 364555 4. 32743 4. 166348 4. 383806 3. 913296 4. 664114 4. 411543 4. 885152  
1. 262406 1. 783437 1. 733447 2. 512748 1. 696836 1. 690322 2. 452939 1. 676726 1. 625768  
4. 611297 4. 571672 5. 200602 4. 500217 4. 272514 4. 558985 5. 18996 4. 613763 2. 719488  
8. 496271 8. 679261 8. 883202 8. 246922 8. 4047 8. 777411 8. 447646 8. 652247 8. 357954  
1. 258092 2. 201096 1. 028555 1. 861882 1. 374033 1. 448676 1. 438174 1. 247531 1. 736668  
1. 231146 1. 620385 1. 014981 1. 407693 0. 805157 2. 128075 1. 769988 1. 16346 0. 842488  
7. 487671 7. 494931 7. 7379 7. 679332 7. 637375 7. 349011 7. 955212 7. 233256 6. 663554  
3. 565408 4. 295592 3. 2345 3. 311369 4. 180119 4. 214361 4. 481155 4. 206788 4. 237636  
6. 720477 6. 380256 6. 046658 6. 482165 6. 352619 6. 35344 6. 526119 6. 429321 6. 318072  
1. 967276 2. 032648 1. 371892 1. 86973 1. 344801 1. 972127 2. 401122 1. 868497 1. 442906  
3. 841186 3. 855015 3. 392513 3. 462347 3. 770527 3. 233971 4. 164945 3. 954215 4. 470844  
1. 294184 1. 341888 1. 85424 1. 925032 1. 013076 1. 240347 1. 188247 1. 619977 1. 284605  
3. 561618 2. 583912 2. 765648 3. 122936 3. 188985 2. 138772 3. 532219 2. 910719 2. 758532

2. 222781 3. 369598 4. 12975 3. 408799 3. 57959 3. 757123 3. 07744 2. 943521 1. 973159  
1. 041919 1. 349054 1. 055639 1. 629694 1. 356522 1. 359905 1. 370769 1. 397427 1. 27871  
0. 81714 1. 65005 1. 34966 1. 82432 0. 851216 1. 620108 1. 359241 1. 072609 0. 832629  
3. 259749 2. 993163 4. 673006 3. 543331 3. 279925 3. 210673 4. 297628 5. 386647 4. 290964  
4. 336817 4. 521493 4. 842187 3. 372205 5. 00828 4. 620614 4. 702123 4. 749782 4. 433574  
4. 378597 4. 357678 3. 924936 4. 417991 4. 38973 3. 59798 3. 890118 4. 066012 3. 451615  
6. 972362 7. 183014 6. 951839 6. 225324 7. 165368 6. 822324 7. 317102 7. 083694 6. 909515  
3. 234593 2. 956146 3. 842087 2. 370297 3. 516006 4. 636794 2. 873572 2. 660324 3. 28715  
1. 940708 1. 879299 1. 817914 2. 819145 4. 776331 1. 639753 2. 650493 3. 98948 4. 524014  
3. 061679 3. 747489 4. 350569 3. 223531 3. 10448 3. 804295 4. 606202 2. 945997 3. 890654  
6. 147473 6. 131358 5. 671674 6. 964985 5. 970399 5. 563554 6. 106769 6. 306206 6. 414262  
6. 571958 6. 042967 6. 046536 7. 462178 6. 10632 6. 528405 5. 970013 6. 1837 6. 605668  
8. 331964 8. 305284 7. 959538 7. 265674 8. 331597 8. 281804 8. 261589 8. 444346 8. 106202  
4. 850354 4. 565197 4. 471886 4. 29695 4. 119376 4. 386742 4. 930439 3. 842652 3. 9926  
2. 540676 2. 142452 2. 743852 2. 056521 3. 599621 1. 611985 1. 719904 3. 564553 1. 800115  
7. 513535 7. 424225 7. 164425 7. 742355 7. 287989 7. 738173 7. 220326 7. 243483 7. 371385  
3. 542875 2. 211855 2. 160606 1. 620507 3. 177553 2. 676126 2. 131146 2. 292619 2. 520623  
3. 915777 6. 03583 5. 400445 4. 966612 4. 39092 5. 177563 5. 995419 6. 297305 4. 303725  
4. 025311 3. 029907 3. 082537 3. 533082 2. 62361 3. 820177 3. 946656 3. 791809 2. 756525  
5. 810776 5. 991945 5. 989496 4. 999331 5. 746298 5. 893686 5. 131867 5. 354079 5. 506597  
4. 9071 4. 056929 4. 591726 3. 918988 4. 455422 4. 114444 4. 006457 4. 486355 2. 663499  
1. 84346 1. 60214 2. 671406 2. 650851 2. 13365 2. 561183 1. 849585 1. 976006 1. 87765  
3. 32234 3. 091421 3. 070596 2. 878583 1. 562206 2. 297561 2. 671165 2. 256882 2. 438141  
4. 040703 4. 270272 4. 658294 4. 169595 4. 383101 4. 401704 4. 389686 4. 552252 4. 397436  
2. 374875 2. 312563 2. 088076 3. 150356 1. 871566 1. 669188 2. 360375 1. 592019 1. 779603  
8. 267407 8. 563889 8. 082593 8. 38176 8. 343078 8. 098178 8. 408352 8. 255989 8. 584761  
5. 257309 5. 78735 5. 71491 4. 321524 5. 445374 5. 003285 5. 352767 5. 437744 4. 181554  
2. 184066 1. 862375 1. 789801 1. 556059 3. 093474 1. 932431 1. 520225 1. 408443 2. 178335  
2. 14741 2. 212946 2. 056781 2. 095154 1. 446507 1. 881066 2. 128576 1. 212009 2. 12752  
2. 815963 2. 824652 2. 335118 2. 765538 2. 974933 2. 255361 2. 777402 2. 941938 3. 864532  
8. 104947 8. 029033 7. 960539 6. 131872 7. 722176 7. 080492 7. 620105 7. 575556 7. 943376  
4. 995774 5. 010646 4. 752384 4. 046451 5. 133119 4. 813172 5. 172052 5. 492979 3. 810356  
2. 944193 3. 06166 2. 506596 3. 204105 2. 013389 3. 235604 2. 098661 3. 568366 2. 367837  
1. 440278 1. 786548 1. 316506 1. 430297 1. 973659 1. 314702 1. 904326 1. 940492 4. 366811  
2. 224739 2. 822495 2. 511529 2. 387389 2. 396778 1. 502187 2. 357673 1. 974479 2. 385349  
1. 481203 1. 393646 1. 599425 2. 144837 1. 661562 2. 043363 1. 592197 1. 934408 1. 16515  
6. 715985 6. 643783 6. 955817 6. 796698 6. 911072 5. 90991 6. 574891 6. 174154 7. 577272  
7. 102072 6. 810094 6. 887448 6. 263323 6. 726716 7. 169733 6. 848485 6. 828955 6. 951857  
3. 470896 3. 950308 4. 224458 4. 042127 3. 090308 3. 556589 2. 858859 3. 413601 4. 947409  
5. 595112 5. 723659 5. 396057 4. 921353 5. 872668 5. 500284 6. 019205 5. 73854 5. 311371  
3. 814894 3. 109426 3. 006395 3. 002822 3. 462706 3. 99652 3. 523831 3. 648805 4. 068707  
2. 32524 1. 880541 2. 04468 2. 407911 1. 940343 2. 913748 2. 607296 1. 990726 2. 107989  
1. 838927 2. 29879 2. 074179 2. 550783 2. 473224 2. 418411 2. 177313 1. 800822 2. 403153  
8. 824017 8. 824796 7. 729068 7. 856971 8. 449562 9. 210399 8. 078627 9. 292689 9. 213317  
1. 779605 1. 982647 1. 743014 2. 339189 1. 819112 2. 697206 2. 084802 2. 741988 1. 582209  
1. 218672 1. 001144 1. 515569 1. 488959 1. 199581 1. 124943 1. 376164 1. 035905 2. 518178  
3. 324976 3. 520345 3. 66459 4. 337185 4. 412711 4. 93555 3. 880342 4. 138249 3. 276107  
2. 046164 2. 204741 2. 023583 2. 34452 2. 482621 1. 559798 3. 062622 2. 259685 2. 239491  
2. 410452 2. 38245 2. 7191 2. 115373 3. 127415 3. 063685 2. 322364 2. 657383 1. 64341  
8. 300772 8. 337799 8. 017754 8. 04211 8. 462129 8. 285891 8. 23756 8. 57101 8. 497697  
1. 224654 1. 172599 1. 235595 1. 443913 1. 086086 1. 386005 0. 870579 1. 202249 1. 284296

3. 73447 2. 976489 3. 438687 5. 236968 3. 959669 2. 659519 3. 429162 4. 399194 2. 6828  
2. 663327 2. 931696 3. 604001 2. 688479 2. 931758 2. 419937 3. 310393 3. 991515 3. 722676  
1. 316361 1. 226935 0. 995948 1. 539039 1. 210257 2. 014858 1. 261205 1. 711581 1. 079298  
5. 061318 4. 414978 4. 330722 3. 167789 4. 680351 4. 443211 4. 705733 4. 35979 4. 779573  
7. 22551 6. 971485 7. 10667 7. 413641 6. 844825 7. 384154 6. 954355 6. 920255 7. 163443  
1. 999667 1. 766702 1. 997145 2. 884279 1. 633368 2. 386759 1. 610836 2. 313169 2. 502067  
2. 078229 1. 207032 1. 347163 1. 264994 1. 142439 1. 378846 1. 425002 1. 421333 1. 39929  
3. 287095 2. 945855 2. 457126 3. 601197 2. 802587 2. 921265 3. 115256 2. 71048 2. 752723  
1. 98981 1. 609686 1. 809048 1. 96026 0. 864226 1. 424835 1. 833579 1. 809502 1. 513731  
1. 899669 1. 750155 3. 74585 1. 900731 1. 531395 2. 35617 2. 53824 3. 057049 0. 955689  
6. 029969 5. 07726 5. 363489 5. 747539 5. 82505 5. 806565 5. 840234 6. 010625 5. 259194  
2. 203761 2. 883242 2. 149403 3. 128813 2. 453098 2. 89053 2. 247665 2. 190448 2. 270602  
4. 650348 5. 142514 4. 639719 3. 409787 3. 845278 5. 484369 5. 221376 4. 256468 5. 250965  
4. 108747 5. 456437 4. 306369 4. 391139 4. 540465 4. 230741 5. 374211 3. 738711 4. 047587  
1. 80964 2. 160699 1. 932653 1. 900462 2. 504182 1. 992031 1. 648259 2. 759895 1. 812451  
3. 870568 4. 334718 4. 003701 3. 102612 4. 668414 3. 29614 3. 717333 3. 22913 3. 870238  
3. 2443 3. 963472 2. 700708 3. 504765 2. 221686 3. 910843 3. 107443 2. 956845 2. 078141  
4. 356397 4. 179845 3. 60093 3. 02275 4. 234979 3. 949279 4. 4845 4. 117163 5. 067394  
3. 685033 3. 928034 4. 369873 4. 476903 4. 048912 5. 072265 3. 747717 4. 164369 3. 818877  
4. 914355 5. 054238 4. 941207 5. 179535 5. 434895 5. 152778 5. 791356 5. 373237 4. 582094  
2. 135927 2. 378607 1. 663495 1. 984743 2. 110037 2. 632918 1. 707264 2. 53117 1. 842329  
4. 087226 3. 787034 4. 545769 4. 141931 4. 437994 4. 034634 3. 105802 3. 60791 2. 931988  
1. 278572 0. 768486 1. 033287 2. 820314 1. 257704 1. 361896 1. 398257 1. 321847 1. 818007  
2. 011933 1. 520508 3. 005664 1. 669244 1. 299828 3. 055725 1. 889246 2. 199732 1. 909232  
6. 606478 6. 637591 6. 154713 5. 507805 6. 457323 6. 338713 6. 321506 6. 657824 5. 460829  
5. 704065 6. 565657 6. 254437 6. 63201 6. 614471 6. 798046 5. 560059 5. 471899 4. 316088  
1. 608865 1. 342167 1. 311371 2. 300713 1. 261817 1. 73694 1. 94795 1. 475703 1. 16947  
2. 670504 3. 052824 1. 859906 2. 135548 2. 294844 2. 361573 2. 857838 1. 779118 2. 473345  
8. 71907 8. 279851 8. 327636 9. 478012 8. 95941 7. 7804 8. 461986 8. 854294 8. 437595  
2. 077812 3. 057523 2. 881445 2. 182813 2. 724927 2. 957174 2. 829328 3. 153298 2. 417014  
7. 179643 6. 954142 7. 619164 4. 756586 6. 731852 5. 840934 7. 335385 7. 693879 6. 954318  
1. 260968 1. 426263 1. 270296 0. 950407 1. 325403 1. 305889 1. 684173 1. 513167 1. 404076  
1. 455914 1. 271219 1. 000597 1. 480945 1. 236569 1. 475107 0. 990124 0. 915181 1. 894479  
2. 143274 1. 429218 1. 885712 2. 48937 1. 987595 1. 96318 2. 135979 1. 795723 1. 754404  
5. 013327 5. 524326 5. 132022 5. 86566 5. 780275 6. 161179 5. 303968 5. 260713 5. 288562  
3. 322854 3. 761978 4. 192017 3. 216121 3. 076107 3. 199917 1. 86488 3. 804771 2. 448704  
1. 507768 1. 980987 1. 973767 2. 00084 1. 997004 2. 163466 1. 748315 1. 502338 1. 965724  
6. 183911 6. 644288 6. 566462 6. 506405 6. 308553 5. 764651 6. 086105 6. 184964 5. 368272  
2. 279642 1. 979164 2. 72552 2. 15465 2. 686352 2. 146221 2. 595655 1. 741874 2. 442965  
2. 23335 1. 409654 1. 862337 2. 134118 1. 724404 1. 207599 2. 284842 1. 231512 0. 931815  
2. 061797 2. 61192 2. 056481 2. 292113 1. 88962 1. 881548 1. 65025 2. 156188 2. 08068  
1. 975862 2. 021339 2. 355697 2. 142434 2. 220054 2. 308313 2. 453727 2. 57934 2. 385858  
0. 998078 1. 026809 1. 984437 1. 083775 1. 367082 2. 172114 1. 202873 1. 913207 1. 192217  
3. 248677 3. 243007 4. 724997 2. 434863 3. 137333 2. 939488 4. 76415 4. 225507 2. 192953  
1. 614744 1. 187969 1. 138199 2. 478074 1. 101841 1. 909223 1. 737772 1. 297764 1. 301003  
7. 054098 4. 677222 3. 675103 6. 080326 5. 101426 5. 617286 4. 714218 8. 737266 5. 240783  
4. 188898 4. 659985 3. 818442 4. 772558 4. 207248 4. 567172 4. 110091 4. 201558 4. 099399  
2. 151576 2. 307271 1. 787657 3. 404479 2. 307271 2. 535819 2. 818196 2. 174869 2. 656413  
1. 560531 1. 899018 2. 234568 2. 637371 2. 119685 1. 746293 1. 822569 1. 902555 1. 724587  
6. 791423 6. 192548 5. 737025 6. 907122 6. 783152 6. 644152 6. 604378 6. 408436 6. 275079  
5. 475991 5. 1193 5. 248826 4. 643258 5. 656505 5. 104952 5. 228308 5. 249772 4. 04512



8. 306029 8. 084772 8. 084675 8. 082574 7. 972103 7. 776205 7. 978373 8. 006866 7. 418737  
2. 110444 2. 403252 2. 036843 2. 642858 1. 995695 2. 224771 1. 72489 1. 98508 1. 902195  
1. 663954 2. 059127 1. 670954 2. 406405 1. 2648 2. 676585 1. 562982 2. 254473 2. 595628  
5. 218947 5. 639076 4. 836877 6. 267311 6. 521665 5. 285566 5. 608024 5. 550956 5. 723548  
3. 967514 2. 929635 3. 679959 3. 715337 3. 952906 3. 009371 4. 20978 2. 793214 3. 518865  
6. 845621 6. 73177 6. 937802 6. 545422 6. 739605 6. 860951 6. 564689 6. 905178 6. 981415  
2. 997984 3. 978078 3. 157073 3. 38716 3. 212504 3. 11152 2. 708355 3. 118775 3. 516972  
5. 604975 5. 939495 6. 125073 5. 78037 5. 603389 5. 585959 5. 821456 5. 763793 4. 81753  
2. 547691 1. 669062 2. 079625 2. 969813 2. 133196 1. 788865 2. 081954 2. 480987 1. 800695  
3. 8045 1. 911349 1. 767581 2. 997442 1. 994353 1. 521327 1. 825231 1. 687138 2. 229092  
5. 892976 5. 565646 5. 665382 4. 884662 5. 226528 5. 675132 5. 811229 5. 492746 6. 235819  
6. 079572 6. 86803 8. 57725 8. 70597 6. 591777 6. 997907 8. 237095 7. 886321 5. 84446  
7. 889335 7. 560587 7. 839752 7. 527003 7. 991931 7. 487252 8. 076623 7. 877005 7. 620059  
5. 550565 5. 786674 5. 212342 6. 237656 5. 437043 5. 768688 5. 269851 5. 593815 5. 703532  
4. 709818 5. 804277 5. 368456 5. 105701 5. 006517 5. 141128 4. 524026 4. 596855 4. 331493  
6. 519283 7. 392332 6. 514754 5. 760175 6. 752111 7. 127962 6. 891542 6. 611163 6. 605408  
6. 250149 6. 159728 6. 251387 5. 315774 6. 357643 5. 690925 6. 130528 6. 43398 6. 409101  
7. 814104 7. 671565 7. 965768 7. 792519 7. 47197 7. 943352 7. 655905 7. 899379 7. 024487  
7. 286123 6. 932207 7. 328706 7. 031237 6. 823982 6. 504284 7. 322219 7. 116264 7. 215862  
7. 737969 7. 230527 7. 387072 7. 329926 7. 068778 7. 27092 7. 800632 7. 124723 7. 496405  
5. 595217 5. 367602 5. 358881 5. 900621 5. 357846 5. 101629 5. 760298 5. 265771 5. 101629  
5. 528461 5. 39922 4. 756813 5. 500542 6. 640657 6. 082195 5. 7369 7. 204252 3. 717169  
5. 46011 6. 570226 6. 430773 3. 983896 6. 709077 5. 797183 5. 467942 6. 139216 5. 244019  
1. 095537 1. 387921 1. 78111 2. 00261 1. 316485 1. 358112 1. 323809 1. 463723 1. 258348  
6. 183827 6. 327335 5. 613117 6. 955596 6. 038736 5. 321258 6. 282034 5. 561328 6. 351113  
5. 448443 5. 770293 4. 973359 4. 684826 4. 610007 4. 880634 4. 910211 5. 115362 4. 753686  
5. 587044 4. 163587 4. 18478 2. 428064 4. 41589 5. 1139 4. 61316 5. 322969 5. 337251  
1. 553449 1. 091929 0. 969153 1. 470425 2. 754184 1. 703551 1. 083977 1. 166542 1. 051076  
1. 582741 2. 400766 2. 530128 2. 366607 2. 15092 1. 67718 1. 330284 1. 433023 2. 710795  
2. 894666 2. 735554 3. 079746 3. 082782 3. 268013 3. 176786 3. 264846 5. 264236 3. 469472  
1. 608306 2. 291376 2. 296005 2. 22916 1. 318549 2. 419955 1. 138211 1. 564729 2. 452421  
1. 439555 1. 458976 1. 555812 1. 500551 1. 008352 1. 810112 1. 258659 0. 758598 0. 972426  
3. 095909 4. 019718 2. 697583 2. 412418 2. 901897 2. 66078 2. 662094 3. 27641 2. 1446  
3. 425794 2. 185483 2. 725613 3. 232212 1. 838194 1. 898651 3. 216929 2. 006729 3. 382233  
4. 36429 4. 302731 4. 143251 3. 80952 4. 473436 3. 724885 4. 48012 3. 983066 4. 645452  
5. 593738 5. 394736 5. 090299 5. 026915 5. 353801 4. 646037 5. 234921 5. 477126 5. 658448  
1. 678925 2. 479059 0. 881648 3. 276045 2. 940341 1. 316908 1. 471446 2. 083188 1. 421531  
3. 043088 2. 373788 2. 86041 3. 13044 2. 817744 3. 067886 2. 765373 3. 353924 3. 690224  
4. 593817 4. 744492 5. 451044 6. 204396 4. 659402 5. 22256 4. 5923 4. 595152 3. 853079  
1. 894662 1. 721285 0. 951334 3. 800989 1. 910445 1. 189156 1. 461922 0. 996331 1. 867003  
6. 837447 6. 472877 6. 580477 6. 108486 5. 9049 5. 507737 6. 162856 5. 8393 5. 52953  
1. 526781 1. 501607 2. 438338 2. 117802 1. 723791 1. 700462 1. 337885 1. 614063 1. 556702  
4. 933253 5. 159906 4. 706839 5. 770882 4. 558278 4. 827974 4. 82028 5. 205327 5. 3179  
3. 80807 4. 020988 2. 514886 3. 05095 2. 121946 3. 553869 2. 856478 3. 489974 4. 118752  
4. 313089 4. 842402 4. 589168 3. 767776 4. 839659 4. 079747 3. 994521 4. 096959 4. 451139  
3. 494668 3. 080342 3. 323582 2. 631867 3. 561429 4. 199369 2. 922141 2. 977772 3. 37926  
1. 226057 1. 346825 1. 606678 1. 801816 1. 580666 1. 911298 1. 489449 1. 249421 1. 801507  
7. 107567 7. 112509 7. 021828 6. 625797 6. 544878 6. 801734 7. 003684 7. 024721 7. 37727  
5. 051629 4. 170466 4. 471073 5. 131576 3. 870818 4. 105586 4. 143079 4. 313011 3. 915623  
1. 229017 1. 44199 1. 282777 1. 998141 1. 725156 2. 437274 1. 339844 1. 1852 1. 061574  
6. 622888 6. 482841 5. 692925 4. 700324 6. 213643 6. 597584 6. 068072 5. 999617 6. 369239

5. 314656 4. 851267 5. 257246 4. 225736 5. 269637 3. 642953 4. 848516 4. 544837 4. 49079  
5. 494509 4. 518901 5. 275958 4. 303653 4. 676198 5. 369508 5. 097486 4. 740376 5. 409641  
3. 958203 4. 704212 4. 117063 4. 775717 4. 503281 4. 779099 4. 244756 4. 776336 4. 388925  
4. 812411 4. 748427 4. 604575 5. 909613 4. 902995 4. 40741 5. 20984 4. 677503 5. 204973  
1. 672019 1. 139234 0. 970314 1. 894369 1. 573389 1. 439925 1. 13555 1. 038462 1. 095267  
3. 513671 2. 698982 2. 95956 3. 73658 2. 683817 4. 558141 2. 814487 3. 992287 4. 932503  
2. 415356 2. 125389 2. 032111 2. 731961 2. 89741 2. 897737 2. 724117 2. 50094 3. 274351  
6. 185428 5. 975295 6. 47767 6. 092893 6. 358525 6. 426784 5. 441785 6. 062633 6. 772908  
1. 150631 0. 874621 2. 206121 1. 22851 1. 354298 2. 192053 1. 320736 3. 057744 1. 928458  
4. 713554 2. 13073 4. 213419 4. 860833 3. 382073 5. 132945 2. 93448 3. 623649 4. 674724  
5. 550069 5. 066665 4. 600458 3. 243672 5. 760073 5. 215212 4. 510253 4. 751471 6. 085993  
7. 490991 7. 401553 7. 725392 7. 83692 7. 581199 7. 557703 7. 710412 7. 8155 8. 364107  
9. 576194 9. 609021 9. 269454 9. 529209 9. 556895 9. 363019 9. 658718 9. 521085 9. 503874  
1. 421897 1. 198603 1. 549934 1. 44801 1. 240095 1. 96113 1. 238077 1. 353749 1. 697666  
9. 511608 9. 788636 9. 600716 9. 18181 9. 582054 8. 686301 9. 633635 9. 670184 9. 751572  
7. 546778 7. 297761 7. 438226 7. 770642 7. 223628 7. 098737 7. 566296 7. 356408 7. 463007  
0. 99055 2. 765931 2. 47827 2. 844547 2. 834665 0. 976502 1. 873605 0. 986719 1. 41965  
6. 194544 6. 398248 6. 386164 5. 169421 6. 276022 6. 505073 6. 547549 6. 292876 6. 192021  
5. 082545 5. 455063 5. 220216 3. 311059 4. 739592 5. 72909 5. 202189 4. 752102 4. 918232  
5. 0768 4. 78275 4. 774108 4. 270227 5. 149762 5. 05939 5. 07999 5. 123816 4. 844791  
5. 010556 4. 671555 5. 185654 3. 193442 4. 996783 5. 061079 5. 050841 5. 810076 4. 277523  
5. 59903 5. 207963 5. 175963 4. 170738 4. 749707 5. 239795 5. 014068 5. 13977 5. 020495  
3. 054569 3. 674446 3. 390936 2. 798087 3. 134734 2. 565556 3. 176135 3. 490117 3. 855531  
7. 279835 5. 866313 6. 385198 6. 570848 5. 613215 7. 569286 6. 117591 6. 772199 7. 952045  
4. 124708 4. 004236 4. 554486 4. 704407 3. 897351 4. 258901 5. 052159 4. 010349 3. 93544  
5. 468043 4. 960604 5. 53413 3. 15178 4. 936385 5. 262435 4. 660237 4. 251067 5. 260991  
5. 613811 5. 102732 5. 122159 3. 907398 5. 542723 4. 781766 5. 366178 5. 289764 4. 56619  
5. 890902 6. 079352 6. 598488 5. 848097 6. 68388 5. 782017 6. 100519 6. 212103 4. 957466  
4. 27484 4. 49146 5. 813124 3. 573455 5. 581447 4. 69733 5. 107161 4. 708636 3. 974267  
7. 952298 7. 704392 7. 709371 7. 685766 7. 895395 8. 227845 8. 049658 7. 849058 7. 478016  
6. 928169 6. 555657 6. 886934 6. 186069 6. 736821 5. 53685 6. 964788 6. 130094 6. 53878  
5. 652368 5. 200489 5. 592253 5. 391755 6. 140844 5. 466871 5. 687461 5. 721631 4. 834626  
2. 906378 3. 442208 4. 463978 3. 494471 3. 762586 2. 351359 3. 726315 3. 632729 3. 534433  
2. 298914 1. 619164 1. 706913 3. 787418 2. 618538 1. 743418 2. 637402 1. 930202 1. 89209  
3. 186488 3. 078511 3. 534678 2. 891275 2. 914762 3. 127373 3. 081941 3. 410557 3. 437186  
5. 236823 5. 045987 5. 057779 4. 861024 5. 46105 4. 765386 3. 784526 5. 310754 4. 761081  
2. 919895 3. 008463 3. 880751 4. 425528 2. 692859 2. 370169 2. 098183 4. 127436 2. 924151  
8. 041658 7. 912163 7. 492344 6. 18206 7. 299788 7. 709228 7. 490606 7. 557056 8. 001723  
2. 074851 2. 084706 3. 144409 3. 547254 2. 950301 2. 348051 2. 215163 3. 325931 2. 477331  
1. 238142 1. 399565 1. 934853 1. 45692 1. 098132 1. 871688 1. 195 1. 853183 1. 822674  
2. 077995 1. 663432 1. 711566 1. 473069 1. 138647 1. 518056 1. 541974 1. 54559 1. 719731  
5. 730625 5. 787655 5. 893908 6. 193421 6. 005962 5. 552 5. 642633 5. 820146 5. 620109  
1. 826536 1. 668953 1. 487771 2. 607467 1. 605916 2. 10875 1. 389194 1. 495799 1. 640741  
8. 249037 7. 496755 7. 931444 7. 629273 7. 668825 7. 502672 7. 83336 7. 639633 7. 951336  
4. 023914 3. 239624 2. 833172 3. 698978 3. 855182 3. 055605 3. 086269 3. 471608 3. 007465  
3. 195592 3. 391201 3. 224109 2. 805095 2. 848039 3. 596719 2. 479685 2. 378789 3. 627057  
7. 449121 7. 06629 7. 006952 6. 874159 6. 128497 6. 98381 7. 153685 6. 146636 7. 325459  
1. 481879 0. 960068 1. 379808 1. 4857 1. 099055 1. 307737 1. 432441 1. 918308 0. 878811  
3. 532571 2. 943951 2. 94764 4. 106118 3. 093147 2. 881329 3. 519894 2. 709539 3. 276145  
1. 952459 2. 084958 1. 629026 2. 238309 1. 984943 1. 834588 2. 399167 2. 004985 1. 387147  
3. 737084 3. 304315 2. 499642 3. 854421 2. 857332 2. 482276 3. 826455 2. 853084 3. 218459

1. 043864 1. 208336 1. 358508 1. 766878 1. 173546 1. 537799 0. 983357 1. 961973 0. 943065  
3. 147791 2. 662585 4. 161479 3. 812089 4. 194276 4. 088261 2. 871402 3. 877737 3. 851985  
2. 590992 3. 278476 2. 674598 2. 623371 3. 56294 3. 57822 3. 144765 2. 406602 2. 968001  
7. 746164 7. 537084 6. 901413 6. 978995 7. 539696 8. 328055 7. 429585 7. 637241 8. 079059  
2. 792634 2. 895251 3. 567193 4. 371523 3. 770486 3. 093137 2. 478586 3. 57734 2. 628267  
3. 232584 2. 297034 1. 858584 2. 537582 2. 115366 1. 937373 2. 922265 1. 822458 2. 373889  
5. 693618 4. 912564 5. 47673 5. 835219 5. 86368 5. 21287 5. 599523 5. 824885 6. 268148  
5. 411586 5. 234353 5. 374736 5. 982756 5. 67927 5. 094851 5. 589651 4. 960941 6. 269041  
4. 359796 3. 811225 5. 44572 3. 900252 3. 454203 4. 713911 4. 130674 4. 159795 5. 156769  
7. 62045 7. 37269 7. 94723 7. 720885 7. 370104 7. 025819 7. 677134 7. 681476 6. 900895  
6. 544 6. 537083 6. 43207 4. 129955 6. 640095 6. 525189 6. 546159 6. 437208 5. 590377  
8. 976483 8. 59612 8. 43702 7. 642947 8. 652883 8. 698475 9. 064074 8. 014131 8. 86289  
1. 004436 1. 514035 1. 172123 1. 212961 1. 073518 0. 992435 1. 039701 1. 221135 1. 299011  
4. 5588 3. 236215 3. 945263 3. 417846 5. 630288 2. 647235 3. 48011 2. 942446 3. 809201  
6. 712935 6. 657385 7. 1707 6. 394664 7. 040053 6. 874164 7. 331611 6. 998475 5. 601072  
3. 698707 3. 912735 2. 95302 2. 986134 3. 104802 2. 527316 2. 943515 3. 754706 2. 825139  
1. 868567 1. 996091 2. 413463 2. 307429 3. 257231 1. 857369 1. 709384 1. 99329 1. 990986  
6. 47451 5. 865187 5. 884807 6. 664195 5. 832273 6. 133015 6. 33222 6. 218068 6. 282281  
7. 656427 7. 79987 7. 836773 7. 77568 7. 794236 7. 469543 7. 883108 7. 983568 6. 874429  
7. 710889 7. 234017 7. 077544 7. 040935 7. 098079 6. 701767 7. 631279 7. 245067 7. 422684  
3. 009821 2. 957795 2. 366118 2. 896464 3. 056382 2. 587136 3. 190276 3. 002814 1. 961682  
4. 421157 6. 25771 4. 406583 5. 147906 5. 311235 6. 67187 5. 398187 6. 291278 4. 22222  
7. 688452 7. 65574 7. 657865 7. 7692 7. 691486 7. 619876 7. 751358 8. 310485 7. 799961  
8. 889357 8. 613621 9. 056509 8. 765518 8. 634064 8. 853713 9. 052138 8. 746474 8. 638871  
2. 395683 1. 820676 2. 320809 2. 803838 1. 843309 1. 58618 1. 778145 2. 833043 1. 596364  
2. 453671 2. 871728 2. 41809 2. 264405 1. 988328 2. 17334 2. 9933 2. 34159 3. 167729  
4. 224888 4. 522611 3. 859636 4. 869634 4. 579162 3. 922035 4. 248107 4. 555805 4. 506197  
10. 5478 10. 66569 10. 48038 10. 52387 10. 76166 10. 73588 10. 30243 10. 7236 10. 32553  
6. 612158 6. 740358 7. 006577 6. 042555 7. 092451 5. 801441 6. 139728 6. 374592 5. 617015  
2. 118315 2. 647876 2. 094849 2. 584525 1. 913891 2. 254737 2. 015771 1. 643325 1. 573442  
2. 298956 2. 680191 2. 552023 2. 979775 2. 44662 2. 739659 2. 066908 2. 241239 2. 241239  
2. 338672 2. 967501 2. 410947 2. 732119 2. 968927 2. 44479 2. 496584 3. 264713 2. 186204  
2. 001686 3. 903119 3. 384056 4. 916267 5. 22696 1. 819918 1. 884572 3. 950091 2. 137818  
7. 137899 6. 878311 6. 687565 4. 921511 6. 384741 7. 384077 7. 220245 7. 021316 5. 705729  
8. 720587 9. 035312 8. 775047 8. 55823 9. 03857 8. 318448 8. 733902 9. 177381 8. 435489  
3. 338617 1. 514657 1. 339756 1. 687928 1. 187561 1. 305395 1. 176324 2. 249463 2. 588341  
2. 642237 1. 810215 2. 030626 1. 672733 2. 282363 1. 694699 1. 863107 3. 126092 1. 228554  
4. 33767 4. 674017 4. 409627 4. 031963 4. 548346 4. 31409 4. 838969 4. 599581 4. 434159  
2. 267244 2. 592693 2. 063904 1. 928659 2. 511094 2. 314712 3. 175207 2. 323216 4. 887707  
3. 61874 3. 095327 3. 095327 3. 625512 3. 232342 3. 238395 3. 479885 3. 734123 3. 456056  
1. 146996 1. 573646 1. 54373 2. 298087 1. 566231 1. 930204 1. 180055 1. 908752 2. 933795  
8. 231211 8. 19378 7. 811899 7. 746907 8. 128293 8. 669349 8. 20411 8. 384357 7. 560761  
3. 01132 0. 864024 2. 095497 2. 457569 2. 194136 2. 435895 0. 766374 1. 54846 1. 426422  
4. 566127 4. 191221 4. 480021 5. 275535 4. 033954 3. 690501 4. 540107 3. 603699 4. 175012  
4. 776705 4. 774427 4. 498683 4. 711765 5. 464299 5. 101267 4. 74899 5. 14782 5. 030393  
6. 661922 7. 24306 6. 976134 7. 397802 7. 122637 7. 180912 6. 852605 7. 125974 6. 113761  
5. 216907 5. 434575 5. 219557 5. 601712 4. 833937 5. 831319 5. 592141 5. 726243 4. 767907  
6. 787177 6. 855555 6. 574283 7. 091528 6. 750588 6. 732495 6. 774449 7. 023084 7. 031764  
7. 712779 7. 256362 7. 408691 7. 720281 6. 94294 7. 497177 7. 407114 7. 642466 7. 980797  
6. 311557 6. 204806 5. 905467 6. 494041 6. 183496 6. 336932 6. 36046 6. 432262 6. 632915  
6. 815421 6. 570168 6. 635272 7. 173421 7. 049116 6. 228394 6. 505268 6. 851171 6. 646211

0.892839 1.134426 0.811375 1.195375 2.98529 2.158267 2.006097 0.90035 1.55943  
1.376334 1.800613 0.921705 2.83835 1.988461 1.463558 2.103295 2.308587 1.324226  
3.476899 3.624588 3.891673 3.95437 1.805506 3.740598 1.888578 2.453659 2.311395  
1.267039 1.026469 1.217155 1.633856 1.522053 1.940261 1.412276 1.215631 2.144516  
1.917885 1.945014 1.622295 2.791952 1.627791 2.100607 2.011254 1.475142 1.674544  
6.262833 6.210158 6.15984 5.927474 6.161571 6.498111 6.298629 5.846887 6.544014  
2.091037 2.073848 2.19102 3.407562 1.553992 2.129392 2.168584 1.684857 2.055716  
2.091999 2.428038 3.589633 2.57624 2.306753 2.71358 1.941685 5.646134 2.26651  
1.931419 2.01941 2.138653 2.319055 1.757048 1.986207 2.527362 2.020187 2.207363  
2.028779 2.360167 1.540308 2.972462 1.368656 2.029732 1.674372 2.432634 1.996002  
2.517299 1.656242 2.785084 2.006232 1.994706 2.762773 1.861878 4.252772 1.696819  
3.99133 4.995794 5.012401 5.148302 4.532007 4.50909 4.419062 5.468274 4.503266  
4.256618 4.418412 4.052321 3.103346 5.17653 5.180393 4.675403 3.981452 3.995705  
5.780115 5.065161 5.647696 5.131181 5.849865 3.463073 5.34753 5.079253 5.581357  
7.128768 7.151901 7.239526 7.212552 7.385437 7.373712 7.264048 7.293227 7.238984  
3.133142 2.411327 2.162945 3.119724 2.785943 2.590799 1.878407 1.99389 2.442872  
2.954065 2.936216 2.354067 2.211661 2.152547 2.401158 3.040213 2.481465 2.762988  
2.585505 3.239221 1.824542 3.241051 4.588491 2.66108 2.767906 3.268428 2.628531  
5.662949 5.869749 6.019266 5.838916 6.247187 6.0097 6.183957 5.829969 5.014452  
0.869303 1.033313 1.289399 1.227431 0.998958 1.658751 1.089831 0.939317 1.240459  
1.273937 2.284544 2.055616 2.930467 1.733339 2.176635 1.859656 1.352516 1.740293  
4.684545 5.545735 4.486461 3.881626 4.316332 4.727413 4.770371 5.990376 3.618214  
4.952639 4.297141 2.03367 3.938498 3.087527 3.636013 2.737197 4.031133 5.300086  
2.032473 1.825183 2.331871 2.39547 1.489203 1.55492 2.087183 2.220689 1.385082  
4.469432 5.085522 4.499516 4.052698 3.997716 4.488216 4.727115 4.97216 4.645486  
3.714532 2.946434 3.394824 4.796197 3.702261 2.694015 3.482063 2.899127 2.875236  
1.330652 1.393214 1.534444 1.675202 1.392157 1.855328 1.147324 1.473793 1.811475  
4.393798 4.287562 3.868132 4.838267 3.918912 3.930331 3.06861 4.627428 3.080116  
2.451769 1.858676 2.734244 1.909124 1.984127 2.51146 1.919597 2.898017 1.82203  
1.492767 1.372856 1.20867 1.315717 1.313828 1.385858 1.17303 1.118104 1.972643  
1.066258 1.003017 1.266373 1.141921 1.047938 1.744825 0.921225 1.50385 1.592468  
0.744132 2.297218 1.617806 1.422608 0.897804 2.842269 1.232684 0.981518 1.612654  
1.222617 0.79445 1.701701 1.366943 1.086873 0.894328 0.938453 0.745848 0.78006  
2.766902 4.754697 2.882244 2.010411 2.812098 2.99762 2.80042 2.906585 3.474548  
1.174486 0.977528 1.504992 1.736495 0.703339 0.829877 0.730236 1.106588 1.019806  
2.721722 4.612579 4.196413 5.494018 4.289765 4.192349 4.627519 4.975139 5.206915  
3.580825 3.672159 3.246514 3.971171 3.184315 2.629611 3.665297 3.131887 3.79418  
6.238216 6.1652 6.401078 6.100412 6.915921 6.029947 5.936711 5.838497 3.790404  
1.558136 1.169806 1.603529 1.611817 1.461344 2.159649 0.897499 1.280573 1.673023  
7.263437 7.056945 6.907114 6.945135 7.407147 7.146594 6.829285 7.111161 7.003811  
1.186125 1.609533 1.480515 3.28705 1.724147 1.646039 1.181459 1.921171 1.745305  
3.554885 3.066065 3.144595 3.783826 3.072892 3.905785 3.199945 3.673485 3.560703  
2.133932 3.469299 2.447527 3.265839 2.497759 2.421569 2.518459 2.654468 2.126027  
6.322539 6.354899 5.749401 5.159372 6.124148 5.831712 6.16913 6.113159 6.058975  
1.747473 1.474485 1.989704 2.279248 1.646138 2.033526 2.166956 1.217362 1.458335  
3.370924 3.02736 2.072428 3.04787 2.956383 1.980499 2.546475 3.099607 3.201747  
0.606487 0.962111 0.988402 1.514004 1.074253 3.144184 1.448404 1.448322 7.61702  
2.541815 1.80877 2.903332 4.163534 2.61878 3.18135 2.441972 2.24002 3.145413  
2.400973 3.603423 1.884525 2.556905 2.515649 3.578285 2.466115 1.549677 1.979241  
0.970415 1.644333 0.829837 1.141017 1.833709 1.0553 1.062093 1.204614 0.939189  
1.767379 2.231598 2.232262 2.5986 1.408389 1.350572 1.847527 2.066011 1.652222

1. 50102 2. 240903 1. 383376 1. 97758 1. 852052 1. 276839 2. 642981 1. 235163 1. 387313  
1. 469187 1. 09372 1. 223905 1. 7027 1. 144906 1. 442575 1. 44118 1. 674879 2. 117313  
2. 034343 2. 18129 1. 627513 3. 419703 2. 609339 1. 79566 2. 222174 2. 885158 1. 655397  
1. 578178 1. 224426 1. 631281 1. 314814 1. 489141 1. 745068 1. 058971 0. 990127 1. 562277  
1. 689479 1. 178644 1. 568614 1. 315212 1. 038058 1. 753994 1. 302305 1. 013636 1. 631264  
1. 28719 1. 09165 1. 367018 1. 909345 1. 639392 1. 449907 1. 082529 1. 088276 1. 281917  
0. 875633 0. 4855 0. 662452 0. 607558 0. 906365 2. 463603 1. 375617 0. 53921 0. 985009  
2. 148065 1. 794014 2. 173726 2. 237164 1. 443404 2. 135905 2. 566594 1. 638817 1. 996042  
2. 871497 2. 663681 3. 533095 3. 462593 2. 157156 2. 833894 3. 109378 2. 324717 2. 805888  
1. 559539 2. 672211 1. 724228 1. 791013 2. 507178 2. 732495 1. 866469 2. 553261 1. 838364  
4. 732148 4. 325393 4. 993166 4. 986492 4. 56814 4. 516618 5. 09102 3. 7028 5. 860839  
3. 725588 3. 071025 3. 255904 4. 445701 3. 607492 2. 621434 3. 680358 3. 532797 3. 590235  
0. 970455 1. 510684 1. 772062 1. 606309 1. 599369 1. 857456 1. 316351 2. 323592 2. 07262  
1. 997079 0. 996192 1. 329353 0. 643662 0. 777699 0. 90462 0. 843778 0. 840722 1. 638053  
8. 342151 8. 622669 7. 869842 7. 513035 7. 8221 8. 650946 8. 175962 7. 259749 7. 422442  
1. 685323 1. 940943 1. 399509 2. 069755 1. 813266 2. 57737 2. 028875 1. 541683 2. 039846  
3. 057052 2. 609776 2. 883939 2. 628563 3. 192495 4. 029458 2. 715546 2. 854435 2. 119935  
8. 994876 8. 747488 8. 834605 8. 876003 8. 491585 8. 935809 9. 41214 9. 144465 10. 65031  
1. 998155 2. 009403 1. 822304 2. 250504 2. 485551 2. 046462 3. 365191 2. 323156 2. 827643  
5. 476653 5. 671813 5. 794085 5. 909445 5. 47785 5. 605626 5. 524238 5. 623908 4. 033685  
1. 848152 2. 072632 2. 00825 2. 827864 1. 905968 1. 642388 1. 721562 1. 845041 1. 799408  
3. 218068 2. 66326 3. 385688 3. 8314 3. 409168 3. 499451 3. 009102 3. 192359 3. 572688  
2. 438331 2. 028582 3. 419568 3. 562908 2. 328548 2. 178495 2. 090237 1. 645268 2. 592786  
1. 515456 1. 685503 1. 374985 1. 67036 1. 235337 1. 70013 2. 199107 1. 408801 1. 613905  
0. 987362 1. 284685 0. 879201 2. 771889 1. 762905 1. 177403 1. 624897 1. 349714 1. 765306  
2. 079198 2. 001936 2. 108327 2. 068914 1. 834218 2. 172664 2. 281105 1. 633773 1. 904444  
1. 672319 1. 67163 1. 556768 2. 197496 1. 681754 1. 547747 1. 61746 1. 785859 1. 916966  
1. 436733 1. 495794 1. 561094 1. 823519 1. 371021 1. 899888 1. 311168 1. 085027 1. 369055  
1. 725287 2. 155685 1. 761521 3. 161492 2. 000053 2. 676995 3. 091691 3. 025744 1. 474421  
1. 440123 1. 695725 1. 264724 2. 570412 1. 183608 3. 108834 2. 948975 2. 536826 2. 344501  
1. 905447 1. 078503 1. 245914 2. 080383 1. 999152 1. 934019 1. 672504 1. 254005 1. 609106  
1. 652393 1. 069231 0. 904475 1. 326093 1. 716449 1. 608928 0. 714789 0. 584622 1. 331451  
1. 23291 0. 841472 1. 200458 1. 558347 0. 860582 2. 69337 1. 126849 1. 313922 1. 298997  
2. 328092 1. 017362 1. 444182 2. 484797 1. 530726 2. 806749 1. 517097 1. 375379 1. 361981  
1. 50386 1. 446601 1. 794195 1. 202446 1. 035572 1. 854797 1. 247456 2. 234464 1. 087623  
4. 697627 5. 131159 4. 287252 4. 289984 4. 571556 3. 779926 5. 157438 5. 056613 4. 466647  
1. 932428 1. 569317 1. 889258 1. 27346 1. 526971 2. 165834 2. 159815 2. 428186 1. 527232  
1. 318843 2. 229196 1. 632591 1. 766179 0. 757723 1. 237394 1. 574816 1. 25574 0. 910218  
4. 91888 4. 891585 4. 570035 4. 992574 4. 631752 4. 682226 4. 961491 4. 853092 4. 290666  
2. 298943 2. 45292 3. 040078 3. 080081 2. 556689 2. 65338 2. 146817 1. 997213 1. 724189  
4. 902085 4. 485363 5. 117396 5. 354952 4. 727616 4. 532575 4. 114156 4. 369379 4. 109481  
1. 373302 1. 991782 1. 885116 1. 446915 1. 731501 2. 243087 1. 586288 2. 358892 1. 82289  
5. 762721 6. 20051 6. 28725 6. 870057 6. 453997 5. 886181 5. 512935 6. 394104 5. 920517  
1. 654596 1. 406296 2. 165691 2. 008805 1. 445881 1. 741218 2. 157559 1. 629102 1. 868369  
3. 83754 3. 410935 3. 038108 3. 403779 2. 524158 4. 109131 3. 052003 3. 459752 2. 836497  
2. 763721 2. 399261 3. 128681 2. 991031 3. 115375 3. 986666 3. 014352 3. 270238 2. 177545  
6. 216725 5. 859172 7. 094239 4. 344436 5. 644844 6. 113063 6. 355468 6. 619996 5. 907135  
1. 473905 1. 93389 2. 019881 1. 406972 2. 398596 1. 928875 1. 633643 1. 407236 1. 889528  
1. 315795 1. 901104 1. 736772 2. 277989 1. 475106 1. 582815 2. 040561 1. 405196 2. 882677  
5. 328278 5. 5025 4. 719364 4. 334171 5. 116952 5. 791545 4. 906309 5. 624991 4. 319737  
0. 996461 2. 072234 1. 939373 1. 722183 1. 444978 1. 395296 1. 62972 1. 560049 1. 079925

2. 295688 1. 95192 3. 070027 1. 8067 2. 188457 3. 525977 2. 150414 2. 369799 2. 307992  
1. 911999 2. 15715 1. 766406 2. 324402 1. 686894 1. 93728 1. 868175 1. 589613 2. 029916  
1. 329978 1. 311828 1. 476966 1. 539781 1. 207273 2. 212259 1. 202563 1. 506333 1. 544439  
1. 569959 1. 780889 1. 746638 2. 50308 2. 745594 3. 589654 2. 004779 2. 585176 2. 101503  
1. 842998 1. 799878 1. 776826 1. 707368 2. 097339 1. 826975 2. 077016 1. 756699 1. 559476  
1. 334021 1. 037987 1. 794785 1. 781427 1. 452576 1. 064374 1. 575141 1. 280309 1. 429505  
5. 737623 5. 182561 6. 321557 6. 422292 5. 83592 6. 427756 5. 553118 4. 79374 6. 402459  
5. 53312 4. 946569 4. 938556 4. 317692 4. 818113 5. 566595 4. 972956 5. 108863 4. 882505  
5. 141289 4. 477243 4. 310248 4. 071444 4. 47276 4. 527423 4. 23485 4. 835709 5. 099998  
6. 418121 5. 964703 6. 184727 5. 249156 6. 065987 5. 804884 5. 787135 5. 944173 5. 335693  
1. 122552 1. 213217 2. 073276 2. 036986 1. 176005 1. 729355 1. 532749 1. 409746 1. 085362  
1. 808329 1. 441471 2. 189071 2. 67949 2. 452043 1. 693849 2. 091142 2. 484643 2. 56371  
1. 68505 1. 112983 1. 008183 1. 452078 2. 181858 1. 304134 1. 501577 1. 836627 0. 791112  
5. 306656 5. 688056 5. 684694 5. 626255 5. 497395 4. 849305 5. 381658 5. 308163 3. 946692  
4. 582064 2. 965102 4. 068053 4. 130696 2. 672813 4. 734793 2. 997701 4. 26315 4. 792296  
4. 369162 4. 538222 4. 489311 3. 793281 4. 60884 4. 426912 4. 121591 4. 384005 4. 339789  
5. 347396 5. 584824 4. 556036 4. 394403 4. 177324 4. 318106 3. 636095 4. 254363 3. 680117  
2. 571293 2. 309272 2. 051415 2. 312432 2. 163033 2. 636282 2. 21887 2. 053523 2. 282748  
1. 298902 1. 031214 1. 413278 1. 210901 1. 883793 1. 101178 2. 015014 0. 96817 1. 139795  
2. 238637 2. 940416 2. 502673 2. 003901 2. 48165 2. 801289 2. 528722 2. 750777 3. 099278  
1. 968601 1. 979928 1. 789126 1. 85427 1. 409014 1. 802223 1. 761183 2. 073517 1. 81194  
1. 900081 1. 904071 2. 299149 2. 467296 1. 79268 2. 591045 2. 193772 2. 382695 2. 093657  
0. 88705 1. 135823 1. 461495 2. 252679 2. 076959 1. 593163 1. 215713 2. 225715 1. 371493  
1. 825686 1. 916981 1. 983499 1. 915403 2. 732762 2. 008041 1. 58696 2. 42374 2. 006023  
2. 71147 2. 545038 2. 171845 3. 901546 4. 126093 4. 456054 3. 356908 3. 903081 4. 0746  
1. 353147 1. 077723 1. 402004 1. 334106 0. 881207 1. 152781 1. 569135 3. 054496 2. 406937  
3. 169057 3. 740481 2. 029172 2. 386867 3. 212749 1. 728947 1. 427166 2. 798243 3. 037668  
1. 639875 3. 010543 3. 1453 2. 997044 3. 685762 1. 606886 4. 255147 2. 540105 2. 497197  
2. 489208 2. 03075 2. 154961 1. 331877 2. 25688 1. 502108 1. 638136 1. 592279 2. 160856  
1. 014998 1. 292053 1. 734166 1. 505096 1. 675043 1. 068177 0. 997021 1. 986895 1. 498037  
1. 60564 1. 14022 1. 217848 1. 169747 1. 379445 1. 261215 1. 870959 1. 353503 1. 345397  
5. 49822 5. 83374 5. 290227 4. 830591 5. 668359 5. 773912 5. 495509 5. 466265 5. 907092  
1. 57753 1. 453439 1. 730137 2. 702352 1. 403528 1. 552177 1. 722129 2. 008217 1. 357597  
5. 617051 5. 747877 6. 22759 5. 852787 6. 368162 6. 179693 5. 857158 5. 688592 5. 895951  
3. 100978 3. 57121 3. 087988 3. 667399 3. 407483 5. 18314 4. 131718 4. 478565 2. 247761  
1. 248405 1. 251111 1. 543586 1. 274572 1. 517098 1. 413749 1. 172346 0. 96003 0. 985405  
1. 404015 1. 301675 1. 532425 1. 477935 1. 336844 1. 565262 1. 412777 1. 3893 1. 435463  
5. 787753 5. 87481 5. 731493 5. 198519 5. 464236 5. 522936 5. 234711 5. 533012 5. 23449  
1. 096905 0. 810748 1. 123365 1. 195752 1. 242732 1. 052804 0. 871825 1. 348423 0. 996812  
2. 266099 1. 94824 2. 145895 2. 966886 1. 699506 2. 250446 1. 665845 1. 471126 2. 708044  
6. 03367 5. 425979 5. 036559 5. 424311 5. 511583 4. 605297 5. 515982 4. 538199 4. 72588  
1. 490395 1. 420351 2. 277266 2. 68352 1. 379095 2. 12386 1. 608322 2. 518188 2. 0646  
2. 625254 1. 676292 1. 627252 1. 957594 2. 056328 2. 10115 2. 350425 1. 866163 2. 112331  
4. 557969 4. 165251 5. 218578 4. 473744 4. 381725 4. 112543 4. 195198 4. 271336 4. 637025  
1. 228038 1. 043169 1. 513773 1. 226334 1. 089633 0. 712884 1. 740486 0. 89647 0. 71684  
1. 533244 2. 073516 2. 180824 2. 276542 1. 73748 1. 952237 1. 869379 1. 636906 2. 54138  
3. 853829 3. 503707 0. 972415 0. 505769 3. 092283 0. 910732 2. 649556 4. 343689 1. 341897  
1. 719323 2. 084258 2. 306507 2. 267745 1. 373653 1. 93394 2. 659871 1. 527636 1. 818538  
4. 085621 4. 257969 3. 187666 5. 218778 3. 406733 2. 214295 3. 428971 3. 500628 4. 660149  
2. 815577 2. 038459 2. 422747 2. 998712 1. 835667 2. 643628 1. 957787 1. 868672 2. 659187  
6. 879544 6. 615171 6. 20162 6. 624621 6. 378152 7. 124017 6. 510447 6. 804795 6. 120189

1.760069 1.680842 1.898189 1.918515 1.740458 1.808426 1.883573 1.753287 1.89563  
2.134165 3.441634 2.523023 2.152983 2.049421 3.068868 3.045956 1.7364 2.868152  
1.358012 1.309938 1.14327 2.052016 1.683815 1.834861 1.461011 0.971168 2.705867  
2.367869 1.433098 1.755073 1.447725 2.408689 2.028123 2.392066 1.615165 1.290212  
2.220927 1.784226 2.263604 1.479059 2.470678 3.001709 2.437368 1.719803 2.270478  
1.419508 1.799949 1.38167 2.572132 1.285503 1.757894 2.277519 1.994923 1.2728  
1.638012 1.271291 1.546948 1.473132 1.309703 1.082047 1.558541 1.429565 0.911339  
4.04678 3.474807 2.373338 2.837411 2.021251 3.686644 3.634444 3.549816 3.84139  
0.946242 1.288274 0.61128 2.011649 2.244272 0.97804 0.798999 1.323218 1.067586  
0.933697 1.261576 0.732456 0.906691 0.83903 1.259991 1.913247 1.183776 1.084808  
2.448751 1.280581 1.796813 3.378719 2.076227 1.602773 3.008128 2.199914 1.82761  
3.321673 3.615742 3.689409 3.516783 2.89272 2.964835 2.940097 2.864991 4.121888  
1.801709 1.826318 1.274809 2.032808 1.678575 1.514934 1.393716 0.922584 1.753284  
1.803957 2.083876 1.765519 1.881646 1.700653 1.737576 1.478847 1.367765 2.169028  
2.983393 2.612067 2.971334 3.200094 2.9318 2.802564 2.651828 3.064252 3.179473  
2.860004 2.241915 1.507441 1.149982 1.490876 2.005665 1.7609 1.585588 2.026445  
4.446715 4.929247 4.136096 3.70229 3.199234 4.05389 5.032303 4.684938 6.178517  
4.346909 2.947539 3.01652 2.940207 2.70258 3.397962 3.445844 3.04553 3.68704  
6.553747 6.160183 5.25316 5.589556 6.297178 5.466868 6.121199 6.626532 5.437157  
4.742478 5.181434 4.579197 3.941916 5.099969 4.309533 4.593034 5.236998 3.813523  
2.119329 2.513605 3.387839 2.587268 2.325652 1.830531 1.951591 2.264997 2.594642  
2.795157 2.772136 1.92156 3.126255 2.804392 2.474405 2.177265 3.077073 3.761192  
3.358825 2.723319 2.933809 4.08269 3.298681 2.940759 3.259815 3.588987 3.596339  
3.682475 3.008768 2.024391 3.76617 2.404962 3.299782 3.0833 2.771147 2.826134  
1.788527 1.232505 3.591895 0.751968 1.798965 2.659451 1.933668 1.329092 2.200403  
1.726643 1.923309 1.755894 1.436028 1.341067 1.620331 1.646645 1.265577 1.626485  
0.787569 1.294084 1.461886 1.552116 1.089775 1.334925 1.51089 1.122005 1.657838  
1.433206 2.221278 0.964399 1.092059 0.712844 0.781969 0.954436 0.853729 0.952257  
4.1661 4.132858 4.380397 6.820005 3.895735 3.600806 3.353554 4.716372 4.925281  
2.862966 2.040631 2.459845 2.436381 3.010644 3.46776 2.07671 1.575734 2.811555  
3.477006 3.860922 4.016255 2.779453 3.091172 2.8891 3.427707 3.699272 2.722636  
1.135418 1.006622 1.90154 1.982592 1.464898 1.767981 1.429218 1.071205 1.043777  
1.155006 2.278935 1.946234 1.136786 0.747446 1.430879 1.748743 1.448638 1.275454  
2.22283 1.700775 2.810144 2.401432 1.975109 1.878932 2.529833 2.70245 3.533412  
1.117158 2.054662 1.847456 1.282627 2.029681 1.597744 1.334908 1.998451 1.690875  
2.621769 0.938095 1.433331 1.461807 1.62893 2.175954 1.727233 1.140133 1.423215  
1.952779 2.427878 1.712079 1.945795 1.706394 2.041912 1.991265 1.912867 1.423748  
1.434306 1.273045 1.552684 1.536485 1.575028 2.231856 2.12968 1.471202 1.59744  
6.303622 5.978547 5.897047 4.708863 5.349329 5.8337 5.388809 6.324316 6.317833  
2.188884 2.115213 1.557619 2.206128 2.090185 3.085064 1.740936 1.908828 2.271283  
6.04037 5.733427 4.669842 5.41555 4.85463 4.498196 5.277736 6.003738 6.366277  
2.242271 2.699298 1.901196 3.276451 2.430528 2.187605 2.568061 2.245284 2.675105  
1.340707 1.183087 1.101321 1.149288 1.536619 1.199844 1.134487 1.50412 1.46092  
1.433302 1.620368 1.503641 1.968216 2.318144 2.249032 1.79253 1.760057 2.821919  
2.665108 1.920348 2.149251 2.26739 1.576811 2.11289 1.619336 1.61108 2.069796  
1.228358 1.585204 1.571978 2.191765 1.617203 1.574397 1.611103 1.796236 1.26985  
1.04183 1.217652 1.282016 1.23026 0.895291 1.493134 1.356063 0.932853 1.069155  
1.190588 1.276749 1.736302 2.004119 2.611145 2.855241 1.485754 1.96168 1.389013  
3.665716 3.887893 3.981009 4.733422 4.122828 3.801349 3.758886 4.154193 2.610929  
0.977567 1.639697 1.707535 1.250502 1.15856 2.651918 1.135105 1.22319 1.499657  
1.752749 2.863258 1.809805 3.172786 2.115708 2.356912 2.655432 3.217232 1.700438

1. 78877 1. 530453 0. 807797 2. 219738 1. 327832 2. 598708 0. 810312 1. 367502 2. 429938  
1. 789814 1. 362979 1. 879383 2. 257581 2. 609306 1. 642561 1. 443799 1. 99282 1. 955583  
1. 390153 0. 890553 1. 097591 1. 214851 1. 262388 1. 825923 1. 531935 0. 856025 1. 764652  
4. 352163 3. 507198 4. 409889 5. 496317 4. 071037 4. 90409 4. 694801 4. 393556 3. 681189  
4. 053855 4. 722154 4. 325227 4. 581069 4. 324261 3. 989143 4. 380494 4. 032091 4. 793339  
5. 063472 5. 90314 6. 014192 6. 498211 5. 641931 5. 513114 5. 053129 5. 674712 4. 540082  
2. 010948 1. 775565 2. 056657 2. 55669 2. 075245 2. 008801 2. 120424 1. 759008 1. 778552  
2. 725441 3. 484673 3. 432462 2. 993037 2. 2927 2. 979129 3. 437859 2. 501621 3. 55845  
3. 05924 1. 945147 2. 492113 3. 315008 1. 671023 2. 993537 1. 607593 2. 323119 3. 236947  
1. 940136 2. 048434 2. 372425 3. 188487 2. 654386 1. 357809 2. 306557 2. 17896 2. 452069  
0. 833698 3. 638595 1. 398578 0. 538582 2. 759589 0. 737104 1. 11838 1. 086941 0. 424864  
4. 000875 2. 795531 4. 12722 3. 511121 2. 9785 2. 917938 3. 871407 3. 192008 3. 578089  
3. 966102 4. 80076 4. 936012 4. 247798 4. 077553 4. 970825 4. 732505 4. 498888 4. 107064  
1. 243932 1. 150994 1. 906857 1. 097175 1. 251803 1. 534262 1. 495953 1. 207161 0. 966266  
2. 707374 2. 113509 2. 295549 3. 180331 2. 257207 2. 74221 2. 290253 2. 47395 2. 127572  
1. 270865 1. 878055 2. 087215 1. 959778 1. 398749 1. 465722 1. 877208 2. 223252 1. 896748  
2. 78618 1. 996523 3. 454166 4. 774076 2. 319494 1. 365864 2. 018065 2. 460172 1. 724898  
3. 883431 3. 623072 3. 867395 3. 87766 3. 339933 3. 570899 3. 797144 3. 624808 3. 589926  
2. 741637 3. 647735 3. 405698 2. 431132 3. 537247 4. 211825 3. 386828 3. 666462 4. 073664  
2. 417256 1. 854414 2. 217147 2. 135049 1. 824386 2. 630105 1. 141347 2. 217654 1. 983185  
3. 149314 2. 478868 2. 534133 2. 241992 2. 045486 2. 332508 2. 829888 3. 147776 2. 917473  
4. 137791 5. 538907 4. 57173 6. 501778 4. 622278 6. 085571 4. 707125 4. 587766 4. 869709  
6. 396394 5. 982867 6. 188273 6. 448134 6. 279136 5. 092962 6. 512844 5. 98833 5. 980363  
1. 728128 1. 731458 1. 78235 1. 809747 1. 666298 2. 261763 2. 091362 2. 361985 1. 31206  
2. 259038 3. 323534 3. 012724 2. 766519 1. 948312 3. 362061 1. 541829 1. 569004 3. 187513  
1. 403856 1. 678384 2. 967249 1. 365935 2. 78135 2. 03256 1. 801139 2. 035386 3. 606613  
2. 804739 2. 192769 1. 313786 1. 838049 2. 349006 3. 175192 1. 489328 3. 078662 2. 616072  
1. 499462 1. 327152 2. 879591 1. 958163 1. 271568 2. 536881 2. 168681 1. 352439 2. 103396  
1. 038211 0. 985654 1. 174762 1. 992895 1. 343325 1. 809953 0. 941563 1. 554142 2. 457756  
1. 497188 2. 338977 2. 310444 3. 218357 2. 488967 2. 62804 2. 474822 2. 274477 2. 152181  
6. 243736 6. 491273 7. 204404 7. 960901 6. 204031 6. 637612 5. 606894 6. 731453 5. 368197  
3. 225897 3. 892719 3. 20514 3. 134499 3. 622729 4. 06557 2. 964687 3. 632478 3. 31231  
7. 457878 7. 483062 7. 413265 5. 41181 7. 504427 6. 63647 7. 066622 7. 249531 5. 345502  
2. 5013 1. 891129 2. 624495 3. 034404 2. 415392 1. 645174 2. 496932 2. 131428 2. 656865  
6. 31651 6. 463902 6. 693518 7. 112798 6. 163413 6. 90369 6. 49195 6. 611407 6. 174773  
2. 967273 3. 158765 3. 104328 4. 517237 3. 75699 2. 559383 3. 491194 3. 547157 3. 643367  
2. 984546 2. 855132 3. 490572 3. 410297 3. 31144 2. 494419 3. 213726 2. 934151 3. 225865  
1. 962369 1. 63859 1. 88904 1. 710228 1. 706007 1. 506454 1. 369401 1. 663712 1. 67067  
1. 733125 1. 386359 1. 231673 1. 223621 1. 135818 1. 176308 1. 855771 1. 176308 1. 192064  
3. 400738 3. 289668 3. 62154 3. 809585 3. 558089 3. 758453 4. 056021 3. 772529 3. 057106  
3. 141827 2. 835728 3. 821734 3. 972055 3. 17822 2. 87358 2. 982702 2. 746324 2. 581689  
2. 387771 2. 854277 1. 804755 2. 058406 2. 428919 2. 231789 1. 460741 3. 836777 1. 540026  
3. 787452 4. 252355 4. 259359 3. 179606 3. 828891 3. 681006 3. 522842 4. 039154 3. 267573  
3. 271069 2. 811023 2. 469275 1. 729849 1. 998291 2. 931976 3. 147029 2. 518621 3. 26126  
2. 187798 2. 466411 1. 392175 2. 506889 2. 168771 1. 201972 1. 680328 2. 210886 1. 534795  
0. 989496 2. 550291 3. 244471 2. 599648 3. 501203 3. 109521 2. 599648 3. 555382 2. 347173  
6. 169662 6. 075097 5. 746383 5. 143396 5. 80843 5. 365743 5. 884183 6. 194692 5. 092983  
1. 569345 1. 592958 1. 334284 2. 168091 1. 388734 1. 422038 1. 600542 1. 157936 1. 90892  
2. 475952 2. 007889 2. 638479 2. 009092 1. 440308 2. 405195 2. 296508 2. 592265 3. 045487  
1. 753442 2. 021075 1. 137244 2. 014213 1. 944016 2. 188111 1. 462409 1. 602158 1. 970334  
1. 988178 1. 685086 1. 670316 2. 566018 2. 680878 2. 121655 1. 445333 1. 833787 2. 349657



4. 394943 4. 58434 3. 559598 3. 67386 3. 162166 2. 890726 4. 122231 5. 026526 3. 601552  
1. 27034 1. 34266 1. 303541 1. 586946 1. 298505 1. 422072 1. 050152 1. 090033 1. 300428  
1. 78561 2. 736104 2. 208006 1. 550738 2. 699426 1. 670657 1. 708589 1. 756468 1. 759986  
3. 165275 2. 764483 2. 920934 2. 78504 3. 271997 2. 97057 3. 926325 3. 380939 3. 957838  
2. 395854 2. 858513 2. 949421 2. 86711 2. 747481 2. 837052 2. 937299 2. 555021 3. 169149  
1. 548825 1. 245096 1. 453748 1. 614284 1. 930144 1. 902903 1. 652851 1. 844797 2. 167265  
1. 338302 2. 779638 1. 512204 3. 153016 1. 254523 2. 462207 1. 932538 0. 958027 2. 863037  
2. 262596 2. 135788 1. 750471 1. 627372 1. 767753 2. 351622 3. 175187 2. 391708 1. 773787  
1. 087559 1. 284311 2. 639492 1. 726211 1. 174984 1. 9134 1. 274073 2. 053232 1. 578751  
6. 6744 6. 814495 6. 602438 6. 75998 7. 153067 6. 183053 6. 427365 6. 965888 6. 304834  
1. 46703 1. 119932 1. 246698 0. 906211 1. 612191 1. 112937 1. 975875 1. 038281 2. 160335  
4. 158886 3. 695649 3. 605944 3. 003089 3. 14758 2. 66554 3. 481655 3. 213336 4. 026436  
2. 125876 2. 581043 1. 407159 2. 83132 1. 636691 2. 707428 1. 817337 1. 637525 1. 4902  
1. 650653 1. 557702 2. 049222 1. 847874 1. 263789 1. 839646 1. 637496 2. 179081 1. 712745  
1. 637264 2. 110107 2. 100879 3. 305641 1. 432446 1. 769736 2. 615928 1. 714528 1. 64094  
6. 473221 6. 339136 7. 007414 5. 897517 6. 551556 6. 334304 6. 802621 6. 703827 5. 387138  
2. 535868 1. 855739 2. 707087 2. 981432 2. 330117 3. 560569 2. 648396 2. 199125 2. 898181  
1. 227618 1. 535246 1. 271763 1. 708971 1. 566952 1. 597859 1. 147694 1. 271737 1. 770922  
4. 011607 3. 864634 4. 205829 3. 73616 3. 996981 3. 94522 3. 755343 4. 240446 3. 426801  
2. 131219 2. 967306 2. 280014 4. 03265 1. 733529 2. 115011 2. 616021 1. 986969 1. 576943  
2. 572991 2. 43956 1. 129599 1. 643695 2. 968485 3. 038018 2. 917256 2. 814882 4. 218627  
8. 458382 8. 409268 8. 404883 7. 93733 7. 578951 8. 323639 8. 656555 8. 536855 8. 591399  
2. 949452 2. 742306 3. 130103 3. 344845 2. 097288 2. 562418 2. 520747 2. 958336 2. 706403  
2. 464543 2. 500419 2. 795665 2. 666354 2. 490183 2. 552006 2. 500419 2. 568428 2. 843184  
3. 032844 3. 377878 3. 509601 4. 342783 3. 436903 3. 585961 3. 058255 3. 354785 3. 092817  
2. 681869 3. 104825 1. 533456 1. 649402 2. 390778 2. 563061 2. 321864 2. 111194 2. 083701  
4. 205701 3. 870025 4. 619055 4. 351157 4. 772996 3. 718203 4. 108456 4. 044881 3. 745327  
1. 250386 2. 070963 1. 373308 2. 19252 1. 185578 1. 744918 1. 240534 1. 443063 1. 766022  
1. 968293 2. 149283 1. 752341 2. 523408 2. 643343 2. 298222 2. 743526 1. 699849 2. 301674  
1. 393362 1. 507707 0. 903133 0. 911076 1. 347491 1. 48237 1. 08622 1. 408843 1. 15495  
1. 034694 1. 14581 1. 259004 1. 987318 0. 914854 1. 525038 1. 342716 2. 070246 1. 049009  
0. 518425 1. 64714 0. 978661 0. 817756 0. 556721 1. 325493 1. 034507 1. 523027 0. 949722  
1. 802882 1. 58586 3. 839105 2. 487477 1. 218595 1. 642744 2. 422243 1. 744434 1. 377942  
1. 677344 1. 902872 1. 722945 2. 383776 1. 914981 2. 184774 2. 05017 1. 677107 1. 980128  
3. 544609 2. 820442 2. 325783 3. 021441 2. 989044 3. 203639 3. 515312 2. 894684 3. 134015  
1. 229429 1. 261317 1. 133654 1. 442503 0. 743801 1. 230028 1. 332053 1. 629384 1. 440193  
2. 233983 1. 496708 1. 516561 1. 778759 1. 780766 2. 015598 1. 37879 1. 420956 1. 399726  
2. 342409 2. 259725 2. 301551 2. 261124 2. 312754 1. 78702 2. 374183 1. 806697 2. 006004  
1. 515436 0. 74052 0. 87665 1. 243506 1. 029396 1. 574554 1. 095103 0. 799917 1. 199603  
6. 481416 6. 392805 6. 383336 5. 785361 5. 971263 6. 579195 6. 335593 5. 572045 6. 754315  
1. 214806 0. 998708 1. 432111 2. 575051 1. 12338 1. 315435 1. 108085 1. 024793 0. 950291  
1. 819447 2. 964407 2. 145656 1. 492895 2. 603542 2. 575589 1. 633067 2. 04697 1. 402206  
1. 542812 1. 582948 1. 669379 1. 454281 1. 139957 0. 649659 1. 241452 0. 722113 0. 753995  
0. 806875 0. 654252 1. 099895 1. 374737 1. 450781 1. 157007 0. 736029 0. 680667 1. 109952  
4. 787095 4. 869088 4. 152704 4. 809296 4. 490293 5. 670081 3. 70374 6. 391367 3. 991768  
1. 2581 2. 561253 1. 501336 2. 514813 1. 62258 1. 582241 2. 468427 1. 239162 1. 610014  
1. 586994 1. 445552 1. 547173 2. 502287 1. 606215 1. 963781 2. 255232 1. 66083 1. 924875  
2. 259191 3. 378343 3. 650375 4. 399402 2. 729283 3. 660687 4. 553024 3. 584846 5. 265478  
3. 72005 4. 115088 3. 813664 4. 094903 3. 773209 3. 21484 4. 777859 4. 595491 4. 636058  
4. 26684 4. 665939 4. 568776 4. 368809 4. 382619 4. 105418 4. 803469 4. 567152 3. 989692  
3. 148317 3. 03176 2. 765263 2. 801438 2. 419291 2. 661862 2. 895752 2. 907642 3. 828164

4. 415743 4. 383628 4. 240931 5. 355277 4. 357787 4. 677291 5. 198946 3. 988915 5. 012589  
3. 436499 3. 244121 3. 037597 2. 00706 3. 138267 1. 838309 3. 059475 3. 523492 2. 27015  
2. 438914 1. 876076 0. 967659 2. 880237 1. 237792 0. 785948 1. 264185 1. 918818 0. 998858  
1. 789903 1. 983612 2. 212874 1. 964326 1. 701699 2. 473128 1. 523441 1. 928411 1. 57764  
3. 369656 2. 094978 2. 472934 2. 818878 1. 978972 2. 11282 2. 636331 2. 481698 2. 473475  
2. 180338 2. 796533 1. 946796 2. 729168 2. 071215 2. 028717 2. 125018 2. 933107 1. 891669  
1. 684 1. 524255 1. 804358 1. 983258 1. 269434 1. 215636 1. 390533 2. 270001 1. 954584  
2. 862006 2. 524087 3. 736819 4. 105115 3. 641906 2. 92168 3. 139939 2. 463444 2. 112835  
3. 05999 3. 490786 4. 241206 4. 242113 4. 183944 3. 098526 3. 323134 4. 128241 3. 018661  
5. 583752 5. 171016 5. 057556 3. 031168 4. 495752 3. 864632 5. 317514 3. 501535 4. 483812  
3. 180154 3. 954361 3. 154706 3. 727383 1. 456821 0. 32085 4. 113672 0. 70279 3. 611549  
3. 347642 4. 559817 4. 303744 3. 20558 4. 882967 5. 165634 4. 10347 4. 380764 3. 809563  
2. 048517 1. 801733 2. 536005 3. 342257 2. 199449 1. 887014 1. 875771 1. 923955 2. 085119  
2. 468708 2. 613861 2. 758415 2. 443923 2. 930666 2. 431815 2. 023582 1. 682223 2. 823466  
2. 437173 2. 728347 3. 336162 2. 214878 2. 24009 3. 44346 2. 394105 1. 80297 2. 554684  
1. 481981 1. 223366 1. 387473 2. 006552 1. 200388 1. 638456 1. 079419 2. 026064 1. 420985  
5. 630453 5. 3939 5. 91154 4. 98333 5. 408392 4. 569704 5. 739445 5. 358786 4. 746202  
3. 007068 2. 790374 3. 61851 4. 408519 2. 943413 4. 358552 3. 03617 3. 613355 3. 524281  
2. 374555 1. 587024 2. 022431 2. 531413 2. 355391 2. 065078 2. 18595 2. 732748 2. 566166  
2. 729642 0. 689129 1. 300198 1. 805635 1. 293588 2. 084917 1. 808107 1. 084958 0. 572443  
1. 433654 1. 663503 1. 22793 3. 130775 1. 587713 1. 627992 2. 167928 1. 276997 1. 370089  
3. 065153 4. 188395 3. 794875 3. 292233 3. 27575 3. 223898 3. 331202 3. 066957 2. 668597  
5. 941887 6. 351718 5. 7709 5. 592056 5. 66673 5. 450327 5. 621448 4. 728101 5. 567856  
1. 997596 1. 678464 1. 155946 2. 29114 1. 662136 1. 901439 1. 377171 1. 16083 2. 666588  
1. 601784 2. 109418 1. 624118 1. 88183 1. 600846 2. 125783 1. 997063 1. 17001 2. 632072  
2. 122718 1. 457582 1. 992177 2. 029861 2. 015639 1. 688639 1. 94166 1. 631486 1. 734013  
4. 463762 3. 133977 3. 047383 2. 779857 4. 517272 2. 232876 4. 254089 4. 309013 2. 449866  
1. 998579 3. 044999 3. 075881 1. 778587 1. 897888 2. 989415 2. 199203 2. 846412 2. 712879  
5. 19895 4. 513241 4. 733364 5. 063716 4. 831646 4. 306366 5. 215609 4. 685081 4. 385839  
1. 281215 1. 749699 1. 877768 1. 827292 1. 421572 1. 820161 1. 412463 1. 519741 1. 855183  
0. 871378 1. 386787 1. 363111 0. 898064 0. 689811 1. 292188 0. 795658 1. 332309 1. 642488  
2. 090843 2. 78623 2. 470168 2. 671546 2. 424676 2. 684672 2. 116113 2. 220284 2. 608787  
1. 607413 1. 761597 2. 235819 2. 783482 1. 93596 2. 349969 1. 912536 1. 780251 1. 879929  
2. 744616 3. 505892 3. 02768 3. 482554 3. 301624 3. 080529 3. 081026 3. 351491 2. 544815  
3. 642459 4. 179343 4. 343147 4. 192019 4. 13857 3. 638923 3. 165456 3. 399165 2. 940398  
3. 385228 3. 698648 4. 856582 3. 37504 3. 448111 2. 571945 4. 459583 3. 591175 4. 989797  
1. 421559 2. 493331 1. 11213 2. 04141 0. 833159 1. 87837 1. 78951 1. 541604 1. 688645  
2. 127211 1. 117045 2. 193551 1. 7442 1. 287507 1. 635054 1. 475101 2. 996398 1. 297143  
2. 288172 2. 135551 2. 082054 1. 798266 2. 002306 2. 188226 2. 160264 1. 521248 1. 966825  
1. 71308 1. 491649 1. 845346 1. 880846 1. 541653 2. 373329 1. 88598 2. 026718 2. 212872  
8. 164817 6. 346223 6. 775277 6. 391243 6. 58296 8. 351916 7. 482977 7. 702314 8. 650207  
1. 661292 1. 844836 2. 047464 2. 559728 1. 584558 1. 619482 1. 571697 1. 722786 1. 913349  
1. 509224 1. 657178 1. 856458 2. 14498 1. 520314 1. 609265 1. 862763 1. 555903 1. 360916  
1. 9069 1. 69441 1. 417477 1. 430936 1. 720912 2. 023913 1. 668421 1. 134351 1. 563282  
1. 141976 1. 703911 1. 173825 3. 214278 2. 125318 1. 502439 1. 541853 1. 732903 1. 281768  
1. 169448 1. 86637 1. 811979 2. 030094 1. 545756 2. 231829 1. 216203 1. 310798 1. 166827  
4. 328041 3. 503058 5. 239798 2. 996529 3. 828443 3. 755982 3. 739599 3. 887237 3. 667656  
2. 381027 2. 667152 2. 996581 2. 058391 1. 985881 2. 718031 2. 157361 2. 184242 2. 993321  
4. 345166 2. 847674 2. 824565 5. 119863 3. 820889 2. 167254 3. 522638 4. 391094 4. 505238  
2. 737395 2. 340964 2. 308809 4. 105501 2. 949591 3. 303428 2. 231204 2. 669282 2. 442343  
2. 432073 2. 941263 4. 479777 4. 283969 3. 121567 2. 977351 3. 51212 2. 985691 3. 266152

3.519577 3.606006 3.601063 3.538406 4.014782 3.340487 3.861639 3.728346 3.93218  
1.754057 1.08459 0.833885 1.047162 1.937359 1.793529 0.943286 1.650309 0.917931  
1.423919 1.641793 1.286105 1.955528 1.247024 1.950366 1.06793 1.086133 1.030531  
4.293596 2.61154 3.9669 4.70579 4.332299 4.313341 3.605491 2.974415 4.677839  
1.392776 3.449528 3.090483 1.149969 4.850081 4.631708 1.927042 2.431123 3.039883  
1.915339 2.099686 1.699992 2.258315 2.246987 1.938711 1.822744 1.876174 2.055828  
2.330322 2.263314 2.812621 2.681316 3.219185 2.151846 3.250149 2.587123 3.805667  
2.717865 2.826734 2.393253 2.764102 2.51248 2.519868 2.222836 1.724666 1.835863  
1.646882 1.308169 1.543238 1.823809 1.437596 3.498564 0.933162 1.64915 1.702856  
3.529374 3.481159 3.106176 2.963709 1.874596 2.127989 1.836715 2.726631 4.420762  
1.283012 1.348069 1.543462 1.978849 1.78826 1.71133 1.75895 2.300953 1.542431  
1.379973 2.466788 1.104268 1.396369 1.352006 1.099578 1.396369 1.383328 1.693331  
0.561956 0.752568 1.129882 2.187573 0.918848 1.267279 1.8142 1.095163 1.418015  
2.212033 1.283128 1.189527 2.515076 1.588874 1.992879 1.809121 0.958294 1.421266  
3.139978 1.485118 1.632556 2.981879 2.157417 2.761921 1.578679 1.760768 3.821616  
1.751233 1.066641 1.585409 1.442898 2.561491 1.508265 1.484875 1.241136 1.296222  
2.261288 1.38061 1.804021 2.117304 1.92912 1.561282 1.64816 1.910806 1.58865  
0.851809 0.968661 2.186495 1.028219 3.203561 2.365682 1.21863 0.666367 0.7427  
1.388562 1.320422 1.213945 1.1878 1.645346 1.311744 1.616059 1.160522 0.914782  
5.504897 5.733623 5.489689 4.938635 5.021141 3.646608 5.290234 5.305231 6.344368  
2.385437 1.429508 1.77766 1.38404 1.478739 2.68729 1.635289 2.208658 1.679224  
1.633712 1.15825 1.464763 1.870742 1.470496 1.746623 1.560216 2.033146 1.791133  
2.018942 1.563059 2.535347 1.95097 2.025483 1.463713 1.558619 1.498426 1.310128  
2.269489 1.639062 2.337002 1.756318 1.52745 2.967984 1.45079 1.573489 3.617311  
1.016122 0.906801 1.300031 1.424551 2.397052 1.379771 1.002725 0.997543 1.00127  
1.819741 1.211865 1.552737 1.958698 1.780568 2.447668 1.659116 1.251648 2.313123  
2.425678 2.187223 3.071504 3.235806 2.3744 2.848525 2.369567 2.561098 1.814294  
5.134776 3.09571 4.407031 2.750209 4.810259 2.799982 5.173244 3.820814 2.555697  
3.603339 3.081105 4.126027 3.526688 3.741831 2.945958 3.186744 4.456424 3.305849  
4.072159 3.350143 3.795927 4.834248 4.261677 4.553092 3.730657 2.909668 3.124633  
2.312068 2.614876 2.800207 3.131348 2.457154 2.25081 2.746884 2.501642 1.519535  
2.948521 3.163186 2.285212 2.805144 3.284462 2.615695 2.847091 3.195757 3.043498  
2.231912 2.901933 1.717149 3.065254 1.735823 2.707088 1.534117 2.104044 1.824233  
1.853106 1.598136 2.2404 2.165054 2.470456 1.226961 2.563487 2.426846 2.207595  
1.308987 1.606462 1.071193 1.649354 1.270681 2.999103 1.467701 1.656184 1.146934  
1.017388 2.355502 2.54238 2.479213 1.732031 1.253966 1.744616 2.697406 2.038823  
2.689666 2.318415 2.493304 3.107319 2.17067 2.192465 3.248552 2.663812 2.342479  
1.104477 1.704273 1.787069 1.689754 1.491697 2.293566 1.364742 1.256549 1.458183  
3.142791 2.815816 2.876718 2.748242 1.55259 4.160038 2.683007 2.377845 2.285497  
1.269567 1.675641 1.030532 1.09209 1.499106 1.205258 0.890449 0.85295 1.06789  
0.834879 1.489716 1.403863 0.982022 1.036768 1.747467 1.634737 0.724671 1.660544  
5.197775 4.95037 5.006452 4.185247 4.762955 6.805922 4.720811 5.114119 6.812574  
3.470907 2.416915 2.429084 1.698275 1.979464 3.784172 2.489219 3.084768 2.62347  
2.805976 1.66746 2.203775 2.748855 2.394619 2.782243 3.029567 2.657506 3.285662  
1.169994 1.269923 1.568729 1.675221 1.096496 1.056968 1.168151 1.715148 1.355047  
0.669574 1.345688 1.362128 1.411113 0.954818 1.813065 1.434085 0.850911 0.781045  
5.80531 5.996482 5.74028 4.884107 5.496686 6.127184 5.492107 5.590576 5.888665  
2.307445 2.857798 1.882947 2.455509 1.860715 1.856826 0.760921 1.231648 3.032475  
1.835843 1.338277 1.394981 2.109952 1.591597 0.97829 2.555345 1.190226 1.371009  
2.588136 2.309815 4.435572 6.315466 4.325568 2.810222 3.531175 3.740517 5.912017  
2.151111 2.017244 2.42464 2.057784 2.331319 1.319437 1.664666 2.204167 1.405297

1. 626462 1. 789657 2. 406149 3. 035693 2. 148457 3. 264076 2. 042028 2. 261194 2. 18743  
2. 234028 3. 096407 3. 572845 3. 39096 3. 627674 4. 258534 3. 407744 2. 398955 3. 034495  
1. 819664 1. 503432 2. 317769 2. 811772 2. 158675 2. 545158 1. 718203 2. 247053 2. 851992  
3. 794098 0. 93264 1. 035137 3. 370583 1. 153652 2. 096044 1. 944851 3. 35889 1. 362287  
1. 633148 2. 521816 2. 836875 1. 316121 1. 34086 1. 53952 1. 339813 1. 319809 0. 906241  
2. 500364 3. 609327 3. 040405 4. 541398 4. 301366 1. 151991 2. 320948 2. 800108 1. 442277  
2. 673326 1. 684056 2. 30479 2. 822116 2. 630816 2. 959547 2. 090682 2. 811743 3. 119155  
3. 067128 2. 75181 3. 285766 3. 709444 3. 191689 3. 105773 2. 832521 3. 26307 2. 62549  
1. 291066 3. 587928 1. 309574 1. 220325 1. 184211 1. 145405 1. 366013 1. 897209 0. 961174  
2. 202742 1. 608148 2. 307049 2. 858429 1. 640376 2. 355086 1. 828746 2. 289324 2. 328006  
1. 774505 0. 877538 0. 649989 1. 600296 0. 812363 1. 051403 1. 228396 2. 424136 2. 201953  
1. 165416 0. 974174 1. 450161 1. 523717 0. 932835 1. 421964 0. 772388 1. 794647 1. 03685  
1. 477546 2. 343677 1. 625077 2. 413707 1. 692321 2. 442326 1. 550128 1. 312514 1. 980599  
2. 961142 1. 992632 2. 138893 1. 920194 2. 062746 2. 922331 1. 52501 5. 870684 1. 698466  
2. 258993 2. 871043 2. 648062 3. 321874 2. 607979 1. 8885 2. 047394 2. 525337 2. 844138  
2. 182839 2. 941741 1. 51851 0. 689677 2. 556818 2. 462182 1. 837994 1. 926564 2. 295022  
2. 337804 1. 229654 1. 367567 2. 337167 2. 4406 3. 816697 1. 079335 1. 886557 1. 365018  
1. 737596 1. 747132 1. 749668 2. 716515 1. 507408 1. 870212 2. 169093 1. 156666 2. 077527  
3. 637066 2. 782122 3. 08044 4. 497069 2. 686875 4. 093824 3. 1666 3. 1589 2. 59043  
5. 304833 3. 759401 4. 332865 5. 103338 5. 104107 5. 070191 5. 937474 5. 381136 4. 75676  
0. 618859 1. 231129 1. 198962 1. 464622 1. 089998 3. 045178 1. 560905 1. 775974 1. 017731  
0. 785651 1. 130997 0. 961416 2. 913871 1. 520754 1. 671956 0. 741673 0. 84336 1. 608393  
1. 482125 1. 908794 1. 404164 1. 94335 2. 059447 3. 483983 1. 73996 1. 200399 2. 483847  
4. 236295 4. 418686 5. 136696 5. 269403 4. 39682 3. 215628 4. 194883 5. 114948 4. 816257  
1. 821282 1. 968156 2. 137088 3. 367434 1. 594256 2. 241186 1. 807555 1. 544683 1. 76069  
2. 23273 2. 459053 2. 544794 2. 294399 2. 429681 3. 249684 2. 489037 1. 389242 2. 449417  
1. 051013 1. 00154 1. 441083 1. 640524 1. 655251 1. 330642 0. 960712 1. 255903 1. 772436  
1. 81905 2. 255343 1. 817203 2. 83238 1. 201503 2. 532404 1. 856141 2. 770554 1. 918225  
4. 205881 3. 512894 3. 237079 2. 598574 3. 406477 3. 225672 3. 222494 3. 187928 3. 946449  
2. 175226 1. 606931 2. 8281 2. 402233 2. 085092 1. 853909 2. 021317 1. 800939 2. 395611  
1. 370483 1. 542825 1. 417459 1. 553396 1. 763373 1. 923219 1. 606838 1. 609073 1. 291393  
2. 447744 2. 635723 2. 960751 2. 737777 2. 357677 2. 530661 2. 343729 1. 94182 3. 05594  
5. 128444 4. 947491 5. 559271 4. 532372 4. 968585 5. 504182 4. 39809 4. 999601 5. 325879  
2. 476451 1. 993225 2. 848763 3. 304337 1. 962143 2. 193454 2. 401958 2. 12905 3. 11497  
1. 647909 1. 818429 2. 157329 2. 040245 2. 049683 1. 725831 1. 228631 2. 623565 2. 000641  
1. 51317 1. 293083 2. 652687 1. 650684 1. 239723 1. 470388 2. 079035 1. 244675 1. 497799  
4. 531577 4. 046864 3. 778266 4. 636461 4. 161025 2. 886795 4. 110618 4. 027702 3. 830266  
0. 841277 1. 065099 1. 460217 2. 70212 1. 054746 0. 765848 1. 368127 1. 611477 1. 13191  
1. 709234 2. 272336 2. 168557 2. 145419 1. 150443 1. 895267 1. 59704 2. 453591 1. 751829  
5. 052028 5. 115613 4. 894758 4. 93634 5. 105638 5. 099693 5. 554822 4. 702192 5. 313957  
1. 861787 1. 063302 2. 240561 2. 122543 1. 955224 2. 611888 1. 835995 1. 748245 1. 611199  
0. 710442 0. 838978 0. 725487 0. 868418 0. 531835 2. 852816 0. 952277 1. 913171 0. 873932  
3. 544153 4. 128305 3. 601612 4. 222798 3. 984876 4. 152543 3. 099927 3. 872711 3. 769838  
1. 17826 1. 789962 2. 154243 1. 398914 1. 762379 1. 317701 1. 466133 1. 393328 1. 656775  
5. 306228 3. 651973 5. 199773 5. 475999 3. 834592 4. 463432 5. 20325 3. 78548 4. 523497  
2. 33849 3. 749522 4. 279473 3. 030716 4. 084953 3. 906464 3. 116583 3. 924125 2. 313261  
3. 038278 2. 81679 2. 705142 4. 511103 2. 73928 2. 480024 2. 487348 2. 375183 2. 373608  
2. 913202 2. 055597 2. 405738 3. 010221 1. 735807 1. 652343 2. 357739 1. 564103 2. 287839  
0. 751185 1. 07923 1. 165844 1. 213977 0. 757215 0. 885933 1. 638817 1. 076526 0. 933942  
1. 271338 0. 779788 1. 260374 0. 91398 0. 654619 1. 323513 0. 745354 1. 951991 0. 948844  
2. 253339 2. 084538 1. 882363 2. 201611 2. 425343 2. 331373 1. 495985 3. 235789 3. 284212

4. 144194 5. 357226 4. 47362 4. 740671 4. 665367 3. 785647 4. 273295 3. 911834 4. 983636  
1. 118083 1. 22746 1. 178421 1. 757716 1. 620723 1. 41576 1. 082333 1. 258942 0. 950314  
3. 902385 2. 57003 4. 260988 4. 428679 2. 980367 3. 489507 3. 597386 5. 033915 4. 844317  
1. 296587 1. 174032 1. 604478 0. 80627 1. 741246 1. 520603 1. 801368 2. 502309 2. 072306  
1. 214655 1. 096734 0. 625312 1. 195459 1. 551626 1. 19715 1. 757482 1. 594992 0. 945381  
4. 558546 4. 290315 4. 644425 4. 653918 3. 337003 4. 651239 4. 142741 4. 334976 4. 223709  
3. 282104 2. 297084 3. 399489 3. 735446 3. 196991 1. 847419 2. 187264 2. 372366 2. 080905  
4. 467796 4. 870862 4. 623373 3. 426295 4. 615101 4. 281497 4. 411968 4. 463652 3. 998538  
1. 360759 1. 240346 1. 53079 1. 528937 1. 18348 1. 393046 1. 147711 1. 494616 1. 649854  
5. 177727 5. 070208 4. 880866 4. 168747 4. 730879 4. 788122 5. 346222 4. 721706 4. 820245  
1. 193657 1. 292903 1. 429438 1. 065227 1. 142612 1. 42441 1. 566081 1. 294175 0. 893249  
1. 82625 2. 035749 1. 658595 1. 782512 1. 669522 2. 514124 2. 476636 2. 259006 1. 757471  
4. 638531 5. 149595 5. 290894 4. 935429 5. 269668 5. 360956 5. 123461 4. 888411 5. 348618  
2. 499019 3. 271057 3. 563225 3. 173749 3. 65247 2. 211552 2. 997869 3. 501841 1. 912507  
2. 025525 1. 396645 1. 187422 2. 701554 2. 186167 1. 028315 1. 093126 0. 938631 1. 125805  
1. 118566 0. 921757 1. 192522 3. 07703 0. 933661 1. 344748 1. 791709 1. 018508 1. 372363  
0. 622975 1. 866532 1. 034172 1. 256954 1. 349243 1. 61297 1. 467335 1. 739756 0. 58909  
5. 986096 5. 455927 5. 124245 4. 833335 5. 570531 5. 866793 5. 752947 5. 494429 6. 208536  
2. 0838 2. 212544 1. 918317 2. 306508 1. 593706 1. 623286 2. 333522 1. 662485 2. 097095  
1. 414096 1. 281304 1. 42479 1. 15057 1. 15966 1. 674135 1. 324075 1. 360737 2. 013035  
1. 350128 1. 619727 1. 777573 1. 583599 0. 886389 2. 622017 1. 568483 1. 439568 1. 612129  
3. 892752 3. 230426 3. 00257 2. 785985 3. 074973 4. 198431 2. 866367 3. 722543 3. 48726  
1. 34215 2. 396455 1. 137878 1. 32135 2. 253992 0. 742088 1. 862778 3. 47308 1. 476581  
2. 08612 1. 662143 1. 670138 2. 228672 2. 21902 1. 74265 2. 457127 1. 812095 3. 088892  
1. 094317 1. 844126 1. 890498 1. 800816 1. 272924 1. 217172 1. 530422 1. 358795 2. 087329  
4. 44773 3. 86374 4. 165798 3. 709329 3. 679912 4. 557847 3. 362728 4. 170905 3. 874181  
1. 166571 1. 511749 0. 989161 1. 317291 0. 988284 1. 57477 1. 072878 1. 00032 0. 691893  
5. 471387 5. 615477 4. 256431 5. 788131 5. 337543 5. 211046 5. 485119 5. 451524 5. 705332  
0. 512615 0. 771648 1. 31184 0. 868032 1. 174277 0. 993111 1. 298325 1. 284355 2. 046798  
6. 07668 5. 843735 4. 807963 5. 634431 5. 730344 6. 108969 5. 434919 6. 342665 5. 347622  
1. 8653 1. 648889 2. 360692 2. 528121 1. 661335 2. 799623 2. 806486 1. 755813 1. 971549  
1. 631856 2. 196557 2. 915739 1. 973705 2. 278406 3. 061809 1. 776785 1. 940678 1. 851228  
4. 306476 3. 516308 0. 784481 1. 597001 1. 249373 1. 757982 1. 690743 3. 370923 1. 270247  
1. 772441 1. 576877 1. 538211 1. 731758 1. 915611 2. 53286 1. 598571 1. 879477 1. 931329  
1. 797158 2. 262334 2. 386258 2. 225018 2. 898397 2. 450517 2. 082751 2. 358905 1. 568549  
4. 499056 4. 677524 2. 789691 2. 722443 2. 070345 3. 636177 2. 511013 4. 25931 2. 571378  
1. 298059 1. 056206 1. 29649 1. 684058 1. 438692 1. 549904 1. 516644 1. 440958 1. 257553  
6. 247435 6. 487404 6. 576181 6. 119822 6. 738589 6. 63359 6. 531907 6. 555126 6. 140359  
1. 22824 1. 807993 1. 535093 1. 421072 0. 940519 1. 519706 1. 572511 1. 393698 1. 660137  
2. 808948 3. 138014 2. 97242 2. 974052 3. 162628 3. 04835 3. 123248 2. 930867 4. 12398  
2. 802718 2. 755893 3. 323255 2. 327342 3. 149056 2. 540835 2. 526764 3. 203657 2. 090351  
5. 180574 5. 435982 4. 969994 4. 230959 5. 016719 5. 469997 5. 16017 5. 711365 5. 117293  
3. 686753 4. 131521 1. 842394 4. 711827 2. 623493 4. 055589 3. 800528 3. 609739 1. 20651  
6. 07379 6. 093137 6. 344938 5. 229867 6. 606205 5. 989739 6. 7839 6. 328449 6. 128622  
1. 400375 1. 184232 1. 321644 1. 511989 1. 269355 1. 442222 1. 148002 1. 174893 1. 439817  
4. 878102 4. 687792 6. 276731 6. 489421 5. 665963 4. 591928 5. 677887 4. 713857 4. 512961  
1. 568121 1. 691299 1. 301082 2. 01572 1. 578908 1. 565217 1. 278897 1. 732423 1. 867331  
1. 832135 2. 55972 2. 473701 2. 696796 1. 515658 2. 194101 2. 224449 2. 02017 2. 55972  
4. 087043 3. 631487 2. 875738 4. 552548 3. 030882 3. 166727 2. 871077 2. 684582 2. 444316  
0. 909495 0. 708332 1. 057294 1. 572067 1. 591973 1. 053058 1. 012858 1. 172243 1. 371959  
4. 514474 3. 751681 4. 263422 4. 293813 3. 793863 4. 526794 4. 316298 4. 237417 4. 853014

1. 02667 0. 914378 1. 313774 1. 07556 1. 272602 1. 19828 1. 014895 1. 574811 1. 489937  
6. 437561 6. 11888 6. 039024 6. 563258 6. 416326 6. 365921 6. 031772 6. 165613 6. 327211  
4. 212686 3. 450406 4. 65171 1. 937446 3. 49416 3. 325801 2. 317223 3. 294078 1. 655617  
4. 685014 4. 686531 4. 587578 4. 749508 3. 580277 4. 10689 4. 789663 4. 287315 3. 691499  
1. 475166 2. 727834 1. 533902 1. 839708 2. 16531 2. 332229 1. 429887 2. 840284 1. 717781  
6. 396047 6. 385568 6. 299513 5. 028509 5. 785062 6. 066725 6. 3625 6. 625506 6. 347905  
5. 170533 4. 099117 5. 527985 4. 307687 5. 568787 5. 688667 4. 720235 5. 527775 5. 527834  
4. 372721 3. 511941 4. 275081 5. 608616 5. 023253 4. 621559 4. 482222 4. 406302 4. 330085  
1. 969522 1. 842875 2. 281862 2. 555234 1. 896341 2. 524247 2. 171142 1. 595114 1. 851333  
2. 304416 1. 2027 1. 844406 2. 000708 2. 274419 1. 774332 1. 549698 2. 586084 2. 328041  
7. 034711 7. 469186 7. 556292 8. 16712 7. 08931 6. 913804 8. 168028 7. 245454 7. 828067  
6. 597184 6. 465169 6. 952898 4. 209908 6. 719548 6. 613953 6. 654492 6. 817671 3. 261442  
2. 214407 2. 086376 1. 982459 2. 589034 2. 17126 2. 315751 2. 038367 2. 145909 2. 295506  
1. 345043 1. 668413 1. 423094 1. 89717 1. 563901 1. 502848 1. 352323 1. 501056 1. 395967  
2. 23606 1. 893564 2. 162237 2. 194018 2. 03146 1. 610995 2. 258091 2. 074985 1. 821077  
0. 648041 0. 925774 1. 692419 0. 994951 0. 830108 0. 896709 1. 874483 1. 556026 0. 755659  
4. 52513 3. 452903 3. 392118 2. 389538 3. 801697 2. 786 3. 135999 4. 212361 3. 297726  
0. 829375 0. 808531 1. 376548 1. 142206 1. 034737 0. 85899 1. 66668 1. 868748 1. 036012  
1. 429703 1. 33404 1. 194587 1. 304893 1. 231975 1. 514845 1. 26098 1. 146338 1. 50177  
1. 126848 1. 323668 1. 289867 2. 213869 1. 453979 1. 31765 1. 279703 1. 06772 1. 680025  
6. 069098 6. 760221 6. 727438 5. 384894 5. 785337 6. 655119 6. 424889 6. 458988 5. 908929  
2. 301195 1. 65197 1. 500131 2. 593736 1. 505008 2. 115868 1. 942311 1. 098218 2. 08463  
2. 524455 1. 501116 2. 61707 2. 990207 1. 55144 2. 443 2. 048517 1. 665549 2. 200735  
3. 175184 3. 310498 3. 330302 3. 18543 3. 660114 3. 566807 3. 087626 3. 273073 2. 545811  
6. 748947 6. 11514 5. 757258 4. 351668 6. 143171 6. 06427 5. 563132 6. 126506 5. 57101  
1. 703352 1. 92511 2. 010483 2. 665663 2. 077479 2. 209303 1. 891041 1. 482976 1. 325353  
3. 026849 3. 240606 3. 170286 3. 351087 3. 091417 2. 292372 2. 207689 1. 9693 2. 035119  
1. 437583 1. 835855 2. 085006 3. 59173 1. 316378 1. 752 2. 132719 1. 74617 2. 024518  
2. 379471 1. 819414 2. 438241 2. 748004 2. 384631 2. 632811 1. 791716 3. 009494 3. 159339  
1. 662423 2. 027471 1. 538499 2. 583847 2. 133463 2. 273749 2. 600919 1. 662601 1. 630749  
1. 181031 1. 407956 1. 082909 1. 345113 0. 838923 1. 299438 1. 124091 1. 134003 1. 737737  
3. 158271 3. 033853 2. 171299 2. 812099 3. 422096 2. 905628 2. 602575 2. 956238 4. 637637  
4. 116568 3. 521142 3. 470896 4. 663696 4. 045921 4. 098799 3. 989762 3. 863374 3. 470603  
4. 342855 4. 895357 3. 269218 1. 682178 3. 578548 4. 598413 4. 127956 4. 047858 3. 964633  
2. 836543 1. 978588 2. 144166 2. 457914 1. 999623 2. 167964 2. 153994 1. 661958 2. 256984  
6. 169778 6. 371758 5. 766708 5. 722762 6. 124194 6. 052248 6. 349202 6. 213884 6. 611402  
1. 897989 1. 356748 1. 522143 2. 422148 1. 722904 1. 85969 1. 54446 1. 724755 2. 490337  
2. 844964 2. 845928 4. 486917 0. 627452 2. 939743 3. 591391 2. 88181 2. 196975 2. 867949  
2. 230012 2. 275906 2. 339094 2. 701457 2. 016265 2. 427992 1. 82907 2. 221768 2. 212258  
1. 97349 1. 732795 1. 353937 1. 264078 2. 021158 1. 597377 2. 453044 2. 147705 1. 312827  
6. 061769 5. 868814 6. 585257 6. 405707 5. 485235 6. 045416 5. 718793 5. 68298 6. 899402  
2. 764583 1. 893981 1. 547064 2. 066003 1. 585325 2. 304854 1. 707954 1. 668651 2. 505777  
1. 652735 1. 713725 1. 196557 2. 855895 2. 173254 1. 729798 1. 676042 1. 59685 1. 683602  
2. 502314 2. 203159 1. 69996 1. 924657 1. 715025 2. 298028 1. 989478 1. 910903 2. 269956  
1. 766654 1. 29652 1. 382405 2. 889048 1. 96747 1. 118808 2. 350544 1. 983403 1. 304946  
1. 079538 1. 118227 0. 792858 1. 227341 1. 371096 1. 163094 0. 819973 1. 218546 0. 915179  
1. 155267 1. 95142 0. 681214 2. 709493 1. 55103 2. 857394 3. 116793 1. 709424 1. 597962  
3. 173723 3. 394437 2. 486223 3. 422982 4. 05749 3. 248827 3. 595594 2. 800337 2. 557722  
0. 826131 1. 302602 1. 295948 1. 744258 1. 201819 1. 156828 1. 107164 1. 423925 1. 171458  
1. 999956 2. 001639 2. 090328 1. 769202 1. 972841 2. 051214 2. 429322 1. 312314 1. 36133  
2. 330292 1. 557139 1. 055295 1. 734342 1. 213942 1. 02207 0. 916519 0. 359998 1. 204717

4. 397767 3. 560903 3. 820857 3. 098227 4. 089796 3. 107097 3. 350886 4. 095877 4. 743857  
2. 720483 1. 834773 1. 891894 2. 503674 1. 623743 1. 955173 2. 604154 1. 988642 1. 654622  
5. 430216 4. 647551 4. 833573 6. 213199 5. 234086 5. 958138 4. 33075 4. 811866 4. 704796  
2. 260271 1. 685929 1. 969275 4. 20272 1. 366006 1. 933368 1. 992009 1. 180344 3. 039659  
3. 078112 3. 426064 4. 130912 2. 647762 2. 99589 2. 429799 2. 448124 3. 454582 2. 378332  
0. 538778 1. 005087 1. 195858 1. 926669 0. 679633 1. 192219 0. 787828 1. 109081 1. 005087  
1. 251304 1. 04751 1. 487857 1. 765191 1. 465233 1. 027812 1. 577334 1. 156985 1. 685079  
1. 748376 1. 201071 1. 115682 2. 098994 1. 069853 1. 48124 1. 302955 1. 240337 1. 057163  
1. 880174 1. 906969 2. 513123 3. 397286 2. 137659 1. 822683 2. 664086 2. 040747 1. 730289  
1. 088705 1. 350784 1. 182539 1. 103066 1. 27983 1. 217425 0. 934864 0. 898607 1. 357716  
5. 889726 5. 897205 5. 768657 5. 94618 5. 224528 6. 306514 5. 693362 5. 69044 6. 01349  
2. 329707 1. 890665 1. 624541 2. 085817 2. 226705 1. 419612 1. 581385 1. 983236 2. 225225  
1. 439348 0. 692244 1. 52475 2. 081383 1. 66356 2. 455388 1. 024811 1. 387177 1. 116988  
1. 257709 1. 389167 1. 733561 1. 730204 1. 630288 1. 254763 1. 383813 2. 259263 1. 386962  
4. 602725 3. 816302 3. 91789 4. 297615 4. 292846 4. 874793 3. 91536 4. 497527 4. 521294  
1. 031878 1. 378946 1. 092151 1. 963351 1. 823407 1. 454295 1. 187178 1. 151789 1. 373542  
1. 59176 1. 056978 1. 768327 2. 576497 0. 99767 2. 199006 1. 234353 1. 287057 1. 317585  
4. 624887 5. 187786 4. 847626 4. 2286 4. 663881 5. 301863 4. 902018 4. 534372 5. 619051  
6. 36032 5. 914901 5. 239365 6. 086236 5. 433242 4. 935496 5. 688652 5. 684748 5. 820719  
2. 10386 2. 187373 2. 442399 2. 107223 2. 329111 1. 886595 2. 426884 1. 98494 2. 351047  
0. 899752 1. 118796 1. 127215 0. 800855 1. 080371 1. 560725 0. 974394 0. 622682 2. 069114  
2. 224615 3. 116749 4. 166327 1. 612211 3. 890717 2. 882877 2. 321638 1. 51658 2. 339293  
3. 066328 2. 072794 2. 082151 2. 29608 2. 325424 2. 162041 2. 028049 1. 745283 2. 712378  
1. 339545 1. 690685 1. 406141 1. 894503 1. 551116 1. 366224 1. 30983 1. 305874 1. 305874  
1. 527947 1. 893157 1. 351621 2. 06648 1. 546335 2. 899771 1. 231932 1. 456192 1. 579392  
1. 017801 1. 215233 1. 536742 1. 089234 1. 262709 2. 116956 1. 406604 1. 80387 1. 23811  
3. 947599 3. 600843 4. 605582 3. 672009 4. 236915 3. 363058 3. 983959 3. 584711 3. 152056  
1. 332601 1. 503379 1. 058637 2. 027668 1. 076703 1. 322814 1. 687731 1. 043519 0. 894383  
1. 25392 1. 469557 1. 422222 1. 170342 1. 044215 0. 960385 1. 028394 1. 044852 0. 783337  
0. 873447 1. 137895 1. 659631 1. 48753 0. 984733 0. 833969 1. 123803 1. 06033 1. 257878  
3. 131427 4. 135827 3. 537628 5. 04022 5. 097977 2. 961136 4. 16501 3. 677757 4. 77719  
3. 296072 2. 965532 3. 462157 2. 387994 2. 921132 4. 057655 4. 229436 3. 208917 4. 5637  
1. 220869 1. 134565 0. 937677 0. 912677 2. 176364 0. 934201 1. 933579 1. 009821 1. 64239  
1. 183251 1. 593308 1. 02987 1. 319044 1. 453637 1. 996071 1. 4039 1. 864927 1. 423295  
5. 165924 4. 527813 4. 293378 4. 145064 4. 535568 3. 946252 4. 792154 4. 47217 3. 94222  
1. 072261 0. 785782 1. 04358 1. 47585 1. 024464 1. 50453 0. 865678 1. 667081 2. 095325  
1. 342186 1. 640691 1. 512106 2. 118431 2. 589576 2. 147879 1. 723729 1. 417448 2. 317545  
1. 664632 2. 093441 1. 90209 2. 036976 1. 996083 2. 358881 2. 110175 2. 279835 2. 132523  
1. 04408 1. 055259 1. 260218 1. 554193 1. 131786 1. 201784 2. 195281 1. 250633 1. 171665  
1. 591958 1. 938849 1. 569662 2. 366812 1. 555331 1. 620727 1. 083307 1. 57793 1. 343435  
1. 636403 2. 852444 1. 712158 4. 008987 1. 757845 1. 543439 2. 253205 3. 29754 3. 473803  
2. 683441 2. 123948 2. 315149 3. 359079 1. 802922 2. 054255 1. 943303 2. 354136 2. 135024  
1. 689526 1. 133822 2. 866106 3. 212178 1. 954152 1. 44432 1. 309482 1. 867647 2. 133066  
2. 032516 1. 450524 2. 025936 2. 377122 1. 329554 1. 686673 1. 470924 1. 986633 0. 609537  
4. 193009 3. 746108 3. 967059 5. 123557 3. 337146 3. 766817 4. 198906 2. 94115 4. 762363  
4. 291602 4. 53952 3. 369244 4. 162582 4. 027614 4. 762541 4. 078719 3. 960961 4. 640528  
1. 704381 1. 480009 1. 861735 2. 33094 1. 65017 1. 751986 2. 957924 2. 300063 2. 193268  
1. 492237 1. 440801 1. 863672 1. 673286 0. 982714 1. 879288 1. 246243 1. 734972 1. 670066  
2. 555333 1. 974403 2. 583003 2. 65488 1. 788318 2. 305967 2. 282544 1. 915526 2. 329653  
1. 74754 1. 244591 1. 35122 2. 747826 1. 251666 1. 622458 1. 607505 1. 621618 2. 111791  
1. 068044 2. 710943 3. 33224 1. 156296 2. 508065 2. 443398 1. 379561 1. 46313 1. 674539

5. 714731 5. 268223 5. 156144 4. 154258 5. 473289 5. 875072 5. 764673 5. 958305 4. 889364  
0. 436183 1. 064568 1. 327371 0. 60988 1. 424969 1. 158346 1. 143915 0. 731469 1. 58744  
0. 870327 1. 116873 1. 118367 1. 070052 1. 227997 0. 939313 0. 872557 2. 142292 1. 882688  
1. 729282 2. 133499 1. 86441 1. 995938 2. 106351 2. 90359 1. 763136 1. 750698 1. 549228  
1. 497531 2. 503435 1. 390035 2. 562807 1. 530914 1. 307881 1. 379853 1. 657413 1. 482264  
1. 292955 1. 023521 1. 424911 2. 219421 1. 214432 1. 487194 1. 110302 1. 1944 1. 228889  
2. 489884 2. 537696 1. 793702 3. 262152 2. 573304 3. 403083 2. 162723 2. 956321 2. 711944  
1. 38364 2. 020172 0. 545165 0. 868214 1. 723101 1. 919711 1. 582412 1. 460377 2. 035168  
1. 180296 1. 289943 2. 050879 1. 982533 1. 61899 1. 262576 1. 303503 0. 969925 2. 422974  
2. 165763 2. 293221 2. 87754 2. 551904 3. 511013 3. 198665 2. 332167 2. 774695 2. 956202  
0. 978936 2. 060651 1. 664407 1. 590418 0. 869597 1. 211853 1. 040072 2. 305605 0. 941809  
1. 874389 0. 910415 1. 829749 1. 634892 1. 021705 3. 127109 1. 071971 0. 508192 0. 419971  
1. 692735 1. 579048 1. 517289 1. 316763 1. 596707 1. 677962 1. 413333 1. 682356 1. 49274  
4. 047415 2. 787754 2. 996707 3. 095996 3. 551998 3. 408975 4. 412059 4. 529986 3. 563541  
1. 706588 1. 27676 2. 172418 1. 434307 0. 902491 1. 314552 1. 138044 1. 289224 3. 127402  
1. 518389 1. 636463 1. 636481 2. 590539 1. 315823 1. 689292 1. 599646 1. 585637 1. 591749  
3. 050212 3. 524414 3. 805717 2. 026802 2. 980676 3. 394266 2. 894348 3. 045963 4. 115071  
4. 716312 5. 41254 4. 94112 3. 944048 5. 264117 5. 368724 4. 529046 4. 767276 4. 850806  
2. 55523 1. 287637 1. 658398 2. 63545 0. 61537 1. 746088 1. 730214 1. 871605 1. 747123  
1. 513819 1. 819731 1. 357373 1. 66261 1. 098416 1. 445708 2. 236556 1. 676445 2. 751127  
1. 124719 1. 348668 1. 200507 1. 918473 1. 861413 1. 69294 1. 253796 1. 340708 2. 072007  
1. 558917 3. 179042 3. 583372 2. 623135 4. 094432 1. 682196 4. 377217 3. 608046 2. 189175  
4. 053073 3. 573191 3. 521302 4. 137295 3. 444999 2. 914299 3. 983664 4. 217035 2. 614399  
1. 601657 1. 859507 2. 045657 1. 479203 1. 948783 2. 151873 2. 118212 1. 404209 1. 18967  
2. 600144 1. 620476 2. 391658 3. 088086 2. 299368 1. 505286 1. 754399 1. 897415 1. 167252  
0. 640724 1. 827731 1. 423624 1. 602559 1. 546389 1. 083809 1. 163617 1. 375126 1. 249824  
2. 852292 3. 141202 2. 947413 3. 362115 2. 598547 2. 51047 3. 756148 3. 789089 3. 162222  
0. 709684 0. 695925 0. 784745 0. 839433 1. 357512 1. 226159 0. 66816 1. 683251 1. 497741  
2. 007086 2. 729305 2. 632229 2. 635176 2. 685249 2. 136009 2. 525791 2. 289862 2. 494835  
2. 933719 4. 327214 3. 442547 3. 10743 3. 3668 2. 667941 2. 436941 4. 187267 4. 104903  
1. 894875 1. 102337 1. 073408 1. 949475 2. 398967 1. 281099 1. 768331 1. 059244 1. 748378  
1. 562798 1. 585354 3. 562353 1. 59338 1. 822338 2. 860797 1. 503662 2. 74317 4. 279378  
2. 928951 2. 807672 1. 937776 2. 59311 3. 860697 3. 341758 2. 659309 3. 033596 2. 231572  
1. 820886 1. 545482 1. 301789 2. 382804 1. 309492 1. 676725 1. 296623 0. 855039 2. 173091  
1. 039457 1. 043633 1. 468245 1. 911095 1. 335754 2. 238975 1. 393698 1. 938147 1. 75518  
5. 269771 4. 616517 4. 433261 4. 857944 2. 941811 5. 300701 4. 564176 4. 045687 5. 252471  
0. 997086 1. 348486 1. 533186 1. 393651 1. 477521 1. 656126 1. 647045 1. 679892 1. 489354  
3. 590217 3. 368079 3. 783782 4. 162025 3. 091665 3. 592935 3. 486647 3. 547504 4. 092178  
3. 012055 4. 082677 2. 164874 2. 907734 1. 678907 2. 58442 3. 160971 2. 493432 3. 670379  
6. 309404 6. 048825 6. 120315 6. 043883 6. 272055 5. 564908 6. 428564 6. 368953 6. 11519  
1. 892069 1. 958635 2. 03726 2. 114102 1. 832188 2. 149807 2. 501001 2. 620837 1. 847796  
1. 103748 0. 837084 1. 325592 1. 980914 0. 732202 0. 696719 0. 272296 0. 962842 1. 157544  
1. 888145 1. 696359 1. 154782 1. 897686 1. 366553 1. 494339 2. 146936 1. 658818 1. 09995  
2. 23493 3. 102019 2. 230445 2. 685797 2. 574159 2. 037957 2. 327437 2. 200509 1. 940986  
3. 991998 3. 795614 3. 803294 4. 519967 4. 473448 4. 287848 4. 158492 4. 159158 3. 095474  
1. 561692 2. 131022 2. 403363 2. 338181 1. 807609 2. 028207 1. 452909 1. 632693 1. 728942  
1. 432075 1. 835015 1. 486332 1. 007816 2. 359951 2. 883763 2. 34736 1. 566591 2. 175465  
0. 865713 1. 372957 1. 116401 1. 547036 1. 153344 1. 578475 1. 088942 1. 018458 1. 039644  
4. 33306 3. 989956 4. 352609 4. 738289 3. 403247 3. 681342 3. 560026 4. 03027 4. 177764  
1. 883654 2. 01391 1. 271832 3. 230334 0. 802454 2. 311623 2. 103935 1. 610719 1. 395128  
5. 344253 5. 224489 5. 059462 6. 057316 4. 927355 5. 686429 5. 05255 4. 610167 5. 590705



3.080311 1.802205 3.108639 2.098567 3.424324 3.257886 3.507891 2.364238 2.069284  
2.125753 2.590562 2.331657 2.165066 1.748712 2.322554 2.092881 1.914856 1.910882  
2.701422 2.373844 2.70801 3.465176 2.357897 1.99873 1.741082 1.707245 1.757973  
1.622462 1.144627 1.283879 1.863331 1.202234 1.516729 1.605784 1.528274 0.966785  
2.317158 2.850389 2.549695 2.169982 2.671579 1.927017 2.068895 1.719824 2.655225  
2.810093 2.890816 2.928119 3.258182 3.325773 2.264947 2.581084 3.632283 2.869471  
2.117414 1.738248 1.640421 1.389534 1.760516 1.750331 1.484448 2.240818 1.606251  
2.207038 2.231291 1.575709 2.843113 1.507008 2.654719 2.134471 2.270678 2.010405  
4.089665 3.621065 2.725071 2.811729 3.321487 1.760555 2.179894 2.772654 2.133044  
5.915653 6.881861 5.988672 5.900329 6.013039 7.197704 5.700084 6.306099 6.350937  
6.372127 6.437114 6.372997 5.790797 6.242531 5.892983 6.096527 5.460807 6.26507  
1.26481 1.491613 1.121237 1.977379 1.182529 1.889859 1.266909 1.90817 1.433263  
1.233032 1.86326 1.314417 1.492621 1.451199 1.157541 1.969002 1.299826 1.599959  
1.376979 1.411976 2.485496 2.307104 1.130025 0.685652 1.298085 1.086358 1.173159  
1.975086 2.321692 1.855231 1.945799 1.757295 1.737059 2.112867 1.729232 1.821892  
1.210241 4.072847 0.964637 2.388207 2.003191 2.252215 1.406882 1.326697 0.936165  
1.899692 2.218583 1.870972 2.758072 2.11472 1.869006 2.411364 2.219077 1.886074  
1.631437 1.455209 1.395147 1.665935 1.128584 1.26176 1.214654 1.253602 1.631044  
2.258754 2.421165 2.082762 2.783573 2.139406 2.344389 2.179685 2.340355 2.063128  
1.257753 1.247159 1.399859 0.849508 1.264402 1.580673 1.135446 1.27349 1.455904  
1.432781 1.543516 0.955584 1.364676 1.348244 1.773629 1.332107 1.138852 1.865913  
1.845245 1.913131 1.779596 1.514442 1.546186 1.46141 1.004377 1.456101 0.957029  
1.392517 1.384243 0.887274 1.686201 1.389423 1.51119 1.305898 4.535091 1.503958  
1.886722 2.656008 1.384832 2.355608 4.166577 1.418919 3.764992 1.702032 1.636449  
5.283224 6.114204 5.90154 5.227413 5.860626 5.782487 5.560019 5.793133 4.782887  
4.650788 4.258287 4.289289 4.144533 3.835591 4.330417 3.48824 4.591815 3.293613  
1.490091 1.931962 2.407515 1.834727 2.402322 2.291721 1.485559 1.024824 2.131824  
1.131856 1.456495 1.243704 1.597531 0.76665 1.418441 1.418704 1.661805 1.076067  
2.129734 2.439667 3.224346 3.734839 2.837311 2.587274 2.442747 2.811012 2.821903  
2.65867 2.70683 5.100599 3.702726 2.129142 1.8323 1.987159 1.284175 3.526443  
2.100269 1.537448 2.193552 2.694553 2.185576 2.241312 1.921695 2.193179 2.800096  
1.908867 1.632875 1.990932 3.891166 2.36331 2.564886 1.51416 1.479264 1.785779  
2.045854 2.961082 2.173834 3.698552 2.252055 2.15922 1.422506 2.527074 2.023705  
1.751738 0.929544 3.45171 2.465532 2.796114 1.404047 1.360666 2.265813 2.041875  
3.307143 3.219823 2.503341 2.411219 2.837418 3.532326 2.275365 2.335981 2.723496  
7.369239 7.417792 7.677901 7.070312 7.83521 6.973762 7.120745 7.582938 7.002457  
1.42556 0.750612 1.723851 1.180883 1.051259 1.969752 0.653999 1.06824 1.410778  
2.848952 2.274858 2.264056 3.522125 2.90297 2.467022 3.440494 3.042336 2.240372  
5.220642 5.010606 5.497459 5.997417 4.943287 5.202034 4.850767 5.330359 5.089013  
3.439781 1.568094 1.825315 2.083483 2.745312 1.72723 2.31924 4.990446 1.247161  
4.227442 5.262437 5.032767 5.416955 4.121676 4.263839 4.305842 4.47512 3.135891  
1.872409 2.019623 2.362013 1.750673 1.778361 2.166112 2.258268 2.766941 2.009309  
4.424375 4.265189 3.835987 4.958992 3.806893 4.169213 3.975923 3.219203 3.386567  
2.112885 3.017685 1.984236 2.623808 1.366104 2.037844 1.048427 2.437054 2.032766  
2.768791 3.920224 3.890375 4.140508 4.042947 3.875405 4.007294 4.10022 3.265991  
2.802237 1.97635 3.269334 2.566878 2.504873 2.704622 2.27726 2.597016 2.966517  
1.712281 1.423433 1.744862 2.224545 1.199613 1.706782 2.040707 2.168576 1.833107  
0.638568 0.756369 0.836821 1.231964 0.611163 1.953763 1.304597 0.927959 1.018671  
1.137454 1.044258 1.486313 1.378265 1.63219 1.486313 0.877119 2.765163 1.495479  
1.346441 1.948285 2.085381 2.122712 1.680684 1.992447 1.914942 2.112622 2.391369  
6.165475 3.817482 6.216952 5.49766 5.576024 6.209376 5.205626 4.499789 5.563229

7.922669 5.256262 6.280253 1.910281 6.808148 5.56797 6.349997 7.323987 7.265367  
3.083456 3.238051 2.427193 4.395936 3.459227 2.843764 3.699303 2.965115 3.126629  
1.192672 1.387624 1.12498 4.009926 1.517574 1.312269 1.02801 1.994868 1.605741  
6.814208 6.867237 6.807849 6.390675 6.635665 6.851081 6.81289 6.733381 6.625288  
1.596341 1.303976 1.129669 1.328084 1.177404 1.107936 0.954679 1.476772 1.449627  
1.242321 1.552228 0.990967 2.62283 1.445689 1.230984 1.053031 1.107956 1.618028  
2.774266 4.292366 6.20986 2.652998 4.780768 5.014209 4.119987 4.209434 3.517569  
1.660953 2.077857 0.836803 1.676257 1.723311 1.350801 0.978487 1.053186 1.379426  
5.335174 5.328852 4.643881 5.871878 4.74315 4.540357 5.675822 5.362469 4.607464  
3.810322 4.809169 5.019961 6.023086 3.602135 3.497007 3.523382 4.055619 4.431922  
1.519929 1.355958 1.482971 2.6187 1.377792 2.325532 1.562819 1.21637 1.685013  
3.003686 2.915608 2.775751 4.584888 2.49651 2.619448 2.741926 2.689131 3.431067  
7.475311 7.717658 6.357025 6.764045 7.658647 7.568398 7.582449 7.625025 7.719612  
1.227045 1.622917 1.090214 1.060232 0.841737 1.149775 1.155915 1.06863 1.083848  
1.444844 1.477924 1.652964 1.933169 1.452269 1.751816 1.77611 1.699211 1.406312  
1.392491 1.365109 0.997215 1.910011 0.841169 1.025147 0.876771 1.911726 1.18752  
1.155608 0.955098 1.071601 1.223565 1.502836 0.879372 1.062169 1.145788 1.046582  
0.981467 1.018931 0.958562 1.354679 1.067314 1.725546 1.24374 0.883735 0.807725  
2.685867 3.883857 3.704193 3.61463 3.864125 2.820407 4.592212 2.965736 3.803068  
1.721394 1.299601 1.617576 2.614368 1.308661 1.370636 2.013958 1.864141 1.387295  
2.688583 2.984072 2.400731 3.47983 1.788925 2.922866 2.371304 1.896403 2.357068  
1.411881 0.99496 1.170179 1.45063 1.133398 1.811903 1.560194 1.334348 1.406744  
1.780137 2.232283 1.902944 1.781969 1.703373 2.573856 2.156246 1.860138 2.033111  
1.941886 3.273734 2.242799 2.818463 2.607544 2.769403 2.424293 3.334286 1.822569  
1.331581 1.799244 0.844149 1.356583 1.917614 1.240784 0.799945 1.922845 0.759961  
1.665761 1.400916 1.329294 1.756731 1.623917 1.505822 1.570684 1.879184 1.760534  
1.393551 1.070567 1.223423 1.508984 1.116968 1.323221 1.002483 0.823401 1.595124  
1.250267 1.884725 1.317418 1.266842 0.925755 1.374496 1.503721 1.831255 1.305015  
1.23343 0.862183 0.732284 1.266214 0.908743 0.7795 0.91114 0.874239 0.866518  
1.638249 1.01631 1.628279 1.570103 1.281954 1.32931 1.724959 2.313964 1.348561  
1.285581 0.971593 1.157388 1.621121 0.777014 1.666362 1.190611 1.148762 1.190611  
0.642039 0.775683 1.013243 0.872462 1.326075 1.09596 0.887577 1.074735 1.331006  
3.149512 2.962526 2.676656 3.079847 3.097484 2.407268 3.909291 3.431754 0.909863  
0.752569 0.561143 0.77898 1.538587 0.542448 0.994475 1.400744 0.873103 0.729352  
2.283338 1.804228 1.020303 1.852583 1.300595 2.161573 1.617574 2.167837 1.218405  
1.350116 1.600567 1.365495 1.618293 2.067473 1.254795 1.491897 2.200157 1.598926  
1.092126 1.067998 1.134839 1.270277 0.886502 1.030981 1.163763 1.811103 1.585603  
2.428035 2.672719 2.678505 1.994433 2.334868 2.217324 1.845212 1.377113 1.431631  
1.721145 1.741213 1.284883 1.698865 1.587915 1.031388 1.258586 0.735082 1.643461  
1.808874 1.472554 1.401726 1.612193 1.602763 1.764794 2.015203 1.730744 1.758315  
2.353731 2.693774 2.203205 3.355808 2.718662 2.559749 2.567678 2.940841 2.971096  
1.142002 0.929413 1.108135 1.547584 1.104741 1.855886 1.181342 1.258079 1.181373  
1.524126 1.497656 1.016791 1.480561 1.561956 2.95335 1.135403 1.586971 1.746436  
2.724212 1.743332 1.656003 1.992133 1.505718 2.665075 1.716263 2.762955 3.135901  
1.722153 2.254451 4.15546 1.83223 1.608804 2.028692 1.418715 2.063622 1.46609  
1.381658 1.52971 1.945621 2.199749 1.753349 1.959386 1.444708 2.705464 1.358658  
2.165064 1.377438 1.93047 2.229977 2.235168 1.928747 2.444624 2.042003 2.001044  
0.769211 1.961841 0.465103 0.928292 0.959464 1.958809 1.494569 0.604798 2.691758  
2.350527 1.260387 1.820858 3.413629 1.685581 1.582406 2.13025 1.822948 2.554383  
1.918528 2.158512 2.004539 2.557379 2.37117 2.139867 2.566556 2.243379 3.149749  
1.418366 1.167744 1.988593 1.24539 1.756945 1.208087 1.428623 1.181158 0.930898

1. 001385 1. 203238 1. 537478 0. 901651 0. 830466 1. 184632 1. 681751 1. 042527 1. 100316  
1. 804911 1. 470747 1. 50014 1. 3696 1. 418906 1. 935412 1. 50014 1. 50014 1. 172203  
2. 992473 2. 57253 2. 589789 3. 870728 1. 528059 1. 747947 2. 630653 2. 137871 3. 380993  
1. 505892 1. 213145 1. 398602 2. 74535 3. 231651 1. 064223 1. 958431 1. 183837 1. 659086  
1. 319271 2. 889129 2. 090811 1. 85244 3. 193773 3. 677757 1. 232057 1. 517854 1. 399796  
3. 461503 3. 919285 3. 110624 2. 883868 2. 988023 2. 845343 4. 157293 2. 732797 2. 662967  
3. 603374 3. 547392 3. 194668 4. 069309 4. 651869 3. 219802 3. 718827 4. 2862 3. 952401  
1. 148524 1. 029355 1. 851444 0. 874381 0. 820865 1. 094678 0. 859873 1. 130803 1. 40202  
1. 89456 1. 354328 2. 421168 1. 38595 2. 221845 1. 324649 1. 977871 3. 330248 2. 111507  
0. 416094 1. 484632 1. 501616 2. 192917 1. 491312 3. 699805 1. 251048 3. 167792 3. 1753  
1. 283716 1. 234835 2. 163671 1. 155119 1. 212511 3. 357509 0. 795024 1. 118601 1. 82537  
1. 018632 1. 279674 0. 707147 0. 742589 1. 474007 1. 443357 1. 113659 0. 618987 0. 86696  
0. 926705 0. 789152 1. 631151 2. 690229 0. 868913 1. 594553 0. 808467 0. 890235 2. 972864  
0. 863527 1. 149032 1. 22122 1. 559827 1. 069118 1. 356921 1. 41608 1. 351498 1. 432582  
3. 661479 3. 068292 2. 465704 3. 761203 2. 03065 2. 829126 2. 363583 2. 824901 3. 535721  
3. 099305 2. 134593 1. 991491 2. 46788 2. 071692 2. 233907 2. 231372 2. 379914 2. 540638  
1. 375408 1. 251762 1. 736617 2. 427424 1. 168078 2. 062029 2. 057237 1. 593362 1. 955424  
2. 100081 1. 349369 2. 431153 3. 379523 1. 832449 1. 920502 1. 900439 2. 032338 1. 927951  
1. 30788 2. 343044 1. 692106 2. 516464 2. 624725 2. 465023 2. 066266 1. 63623 2. 620328  
1. 321587 2. 473576 1. 821661 3. 285009 3. 4012 2. 015506 1. 813865 2. 253537 3. 077406  
1. 434296 1. 285282 1. 246173 2. 61171 0. 943652 2. 805597 1. 385773 0. 742073 2. 017051  
4. 275866 3. 155275 1. 119775 1. 090709 1. 592503 2. 443147 1. 831773 1. 511689 1. 595301  
2. 668735 1. 929642 1. 113206 1. 192338 1. 12967 1. 123143 1. 04004 1. 865576 1. 469741  
0. 843099 0. 937572 1. 818519 1. 721344 1. 002991 2. 151005 1. 758325 1. 364863 2. 282772  
1. 114317 0. 881483 0. 876016 1. 109421 1. 006941 1. 652982 1. 371922 0. 924548 0. 85897  
6. 659614 6. 354744 6. 055011 5. 497039 6. 27612 6. 174657 5. 890129 6. 14624 5. 744191  
3. 051189 3. 696642 3. 953883 3. 619764 3. 210724 3. 147442 3. 601404 4. 047893 3. 173935  
1. 338096 1. 421724 0. 934435 2. 317777 1. 283517 1. 141825 1. 761868 1. 47897 1. 406152  
2. 316595 2. 596028 2. 45838 3. 895049 2. 770329 2. 125547 2. 144368 2. 118546 2. 587811  
0. 657821 1. 654605 1. 004772 1. 980671 0. 821794 1. 728377 0. 801642 0. 94703 1. 112727  
0. 917426 0. 787176 0. 997102 0. 783023 0. 765712 1. 773619 0. 726132 0. 987999 1. 088713  
0. 746492 0. 96731 1. 127171 1. 156676 1. 037815 1. 268494 1. 001692 1. 165056 1. 138488  
3. 148395 1. 729195 1. 529099 1. 4772 1. 057063 1. 438477 2. 428619 4. 24448 1. 114513  
3. 010766 2. 135635 3. 176306 2. 63024 2. 082012 2. 259421 2. 382261 2. 697947 1. 801513  
1. 366376 1. 280607 1. 64744 1. 368463 1. 33254 1. 59657 1. 092077 1. 306936 0. 57805  
1. 724599 1. 96171 1. 636647 2. 141378 1. 912522 1. 414617 0. 950708 2. 234352 1. 929414  
3. 609151 3. 776261 3. 886253 2. 118448 4. 36582 2. 661655 2. 982444 4. 852659 1. 320774  
1. 762653 4. 804435 1. 067281 1. 863825 1. 739118 1. 535073 1. 625143 1. 398258 1. 598769  
2. 234664 1. 11329 1. 246266 2. 782951 1. 04658 1. 922042 1. 642784 0. 711759 1. 816357  
1. 552037 3. 428261 1. 698052 3. 398689 2. 252378 2. 043677 2. 218467 1. 22023 2. 163653  
0. 759986 1. 399424 1. 021859 1. 011733 1. 0922 0. 85119 1. 095477 4. 119653 1. 316482  
2. 122285 2. 063548 2. 26874 2. 623695 2. 035045 2. 144344 2. 553842 2. 157384 3. 927794  
1. 390102 1. 699563 0. 834564 1. 120678 1. 196442 2. 353887 1. 376728 2. 772986 0. 558887  
1. 900758 1. 559105 3. 162725 3. 546109 2. 657413 1. 538764 2. 526698 1. 969578 4. 329544  
0. 946371 1. 232403 0. 713671 1. 112844 2. 059129 1. 710611 0. 85912 1. 905568 1. 196491  
2. 617201 3. 348359 1. 64939 2. 435111 2. 082847 3. 033542 3. 00925 2. 586146 2. 829909  
2. 628725 2. 53794 2. 680177 2. 127245 2. 067008 3. 250942 2. 101516 2. 043734 2. 676148  
4. 740914 6. 874251 8. 53639 4. 893791 4. 816427 6. 342627 7. 969098 3. 686409 2. 514445  
0. 919208 0. 936347 2. 509282 0. 614692 1. 749405 2. 804368 2. 977844 1. 346197 0. 83269  
3. 403829 0. 960165 2. 561951 6. 727054 0. 492 1. 23461 2. 024539 0. 652141 1. 163566  
3. 894683 2. 349708 5. 440586 3. 083754 1. 734865 2. 577537 4. 566146 1. 857431 2. 158854

0.931203 1.094814 0.997384 1.062928 1.209133 3.246504 2.500412 1.031275 0.999902  
1.237375 2.048396 2.51056 1.416531 0.757531 0.975532 1.707448 2.214507 1.294255  
0.595138 1.011163 0.906194 2.11355 0.816596 0.947514 0.848365 0.769459 0.803048  
2.780942 2.031985 1.639078 1.383367 2.150009 2.073003 1.627582 1.869563 1.502163  
4.017016 4.098232 4.136115 1.803943 1.513836 1.637832 4.188857 1.800976 1.937946  
1.153756 1.527837 2.36338 1.72603 1.55353 1.515831 2.643744 1.192193 3.433305  
5.933724 6.35327 6.485918 6.276095 6.483309 5.758627 6.18339 6.273924 5.864944  
1.264828 1.963051 1.09803 1.153828 0.999258 0.915106 1.090631 1.658874 1.488929  
3.370566 2.772509 3.387667 4.726985 2.547812 2.14646 3.245704 2.639055 4.491701  
3.294787 0.643272 4.020694 1.058857 1.502421 0.915228 3.534068 0.941875 0.57829  
1.165554 0.87355 4.392696 1.350638 1.06579 1.103021 2.515327 1.007 1.595619  
0.702214 4.452036 1.912299 1.603089 1.117015 1.861214 1.063892 1.740497 1.234564  
1.678087 2.70212 3.817209 1.705943 2.236592 2.077343 2.096578 2.375017 1.42736  
0.778135 1.276308 1.522277 1.364876 0.918249 1.774885 1.310516 0.838935 0.993919  
1.78225 1.64824 1.449062 2.146462 1.517074 1.456829 1.623897 1.209779 1.468285  
0.956436 1.367585 1.089972 0.878747 0.865013 1.059262 1.080847 1.646978 0.986044  
1.28237 1.430957 3.301692 1.312377 1.422494 0.796478 1.39573 0.741762 1.891045  
6.846383 7.01734 7.578984 6.612425 7.165631 6.181775 6.542153 6.890349 6.849662  
3.135746 1.032833 1.352763 0.977485 0.738101 1.243527 1.090153 0.743681 0.793027  
1.365643 2.153 1.996787 1.104268 1.534844 1.49254 1.513571 1.437787 1.517036  
1.042536 0.8228 2.546802 1.089656 0.868232 1.001067 2.113277 0.897493 0.947554  
2.324756 2.958598 2.803621 2.995096 2.922293 2.851835 2.712666 3.197165 3.199871  
1.310997 1.712225 1.750091 1.311181 2.746066 2.00811 3.863175 1.091708 2.187673  
2.079271 1.03617 1.883026 1.534095 1.351405 1.449618 1.690666 2.765666 2.143271  
4.764825 4.859818 5.329924 4.751413 4.177393 5.164536 5.312024 5.060074 5.132775  
1.258631 0.820218 1.943904 1.982225 1.197673 1.113706 1.106562 1.157142 4.691736  
1.063224 1.290704 0.978687 1.215114 0.86124 1.515932 0.96041 2.335117 0.665771  
7.57167 7.893219 7.838375 7.699319 8.050398 7.843432 7.594159 8.075367 7.345591  
1.501977 1.340732 3.760888 1.535737 1.487007 1.929276 1.194281 2.236653 1.825063  
1.106035 1.24084 2.665131 1.247185 1.307579 1.861088 2.334409 0.878115 1.587212  
1.006225 1.123885 0.937203 0.844997 1.039092 1.72035 1.084378 1.853409 1.425309  
0.853655 0.720872 0.936647 1.028713 1.867871 1.127638 0.817792 0.787803 1.746193  
1.238479 1.949206 0.813386 1.474597 1.607052 2.356611 1.429869 3.390768 0.988144  
6.328869 7.390587 9.211431 6.835585 6.205092 6.641762 8.816397 6.270716 3.8715  
2.881238 1.991966 3.115647 3.300703 2.208868 2.367474 1.992638 2.136613 3.077177  
5.095702 5.189326 5.14812 5.184657 4.924369 4.627347 4.760515 5.063772 4.794166  
0.980786 1.184644 0.991247 1.935859 1.518681 1.851321 1.258899 1.215197 1.261292  
3.105484 3.490789 3.369036 3.535981 3.076769 3.496333 3.369036 3.402805 2.671781  
2.045814 0.957517 1.208252 1.534895 1.203931 1.372109 1.033878 1.380048 0.731979  
1.87896 1.579185 1.750206 3.206613 0.834153 2.091172 1.465782 5.315815 1.024986  
1.181561 1.512805 0.773333 2.956573 1.858719 1.397649 1.340602 1.667338 1.64564  
2.308151 2.61473 2.457966 1.877573 1.697775 2.122466 1.877573 2.773904 3.503102  
0.623397 1.104439 1.20383 1.94094 0.823723 1.393033 0.947196 0.781742 1.827738  
1.789615 2.164691 1.763843 2.309758 2.025079 1.33883 1.819486 2.007139 2.754279  
1.592206 1.846501 0.904797 1.550594 0.604005 1.814521 1.199627 0.870434 1.12381  
0.811108 1.055683 1.227264 1.495147 0.989981 1.093636 1.329986 1.137815 1.062907  
3.463851 2.635091 2.802833 3.912194 2.77673 3.000356 2.914046 2.458595 2.497125  
1.71938 1.73596 2.626855 2.129787 2.081468 1.524214 1.743386 1.812514 1.426539  
1.151845 1.231804 2.6891 2.2747 1.639121 1.378078 1.40405 2.188561 3.060743  
1.101983 1.767842 1.99495 2.035057 2.856978 1.199128 1.301209 2.014721 1.535525  
10.40654 10.25674 10.20088 10.28693 9.842841 10.73733 10.24292 10.417 10.69946

2. 290834 3. 119971 2. 329859 2. 781178 1. 811346 3. 601684 2. 067856 2. 198077 2. 564464  
2. 851 3. 510817 2. 706488 5. 010479 5. 193927 2. 611421 2. 427884 2. 414764 2. 713597  
1. 802576 2. 07591 1. 377145 1. 481571 1. 742687 2. 988035 1. 829591 2. 201701 2. 493074  
3. 515854 2. 65373 4. 20499 4. 077873 2. 660698 3. 652652 2. 732239 2. 699571 2. 770368  
2. 011971 2. 790672 2. 386879 2. 956855 1. 351022 2. 191747 1. 642672 0. 9394 2. 067847  
1. 949946 1. 545588 1. 258973 3. 485547 2. 349186 2. 658424 2. 109933 2. 120571 3. 12039  
7. 195785 7. 187267 7. 416053 6. 527498 7. 50865 6. 905966 7. 166605 7. 533904 6. 796217  
4. 845306 4. 559979 4. 536036 4. 443451 4. 316746 5. 598272 5. 156399 5. 272689 5. 598074  
1. 176205 2. 618276 1. 182754 2. 459583 2. 094302 2. 140605 1. 416959 1. 720623 2. 255642  
2. 460422 2. 965077 2. 061194 3. 32414 2. 961527 2. 980962 2. 277801 2. 567705 2. 82113  
3. 753176 3. 642854 2. 267188 4. 164975 2. 821873 3. 323961 3. 51234 3. 19268 4. 390955  
3. 845915 4. 26581 3. 554685 2. 883691 4. 066713 4. 312846 1. 828977 1. 330098 4. 802392  
1. 958427 2. 719511 1. 888348 1. 61584 1. 676438 1. 782658 1. 780289 1. 482438 2. 040826  
1. 175769 0. 624674 1. 418428 1. 388913 1. 016623 1. 259729 0. 864348 0. 658547 1. 422235  
3. 714944 3. 308443 1. 446761 2. 636239 4. 35896 1. 485427 2. 894673 4. 844883 2. 89509  
9. 240957 9. 320887 9. 588289 9. 638916 8. 966625 9. 012421 9. 459228 9. 315702 9. 235537  
1. 004289 2. 113161 1. 064342 6. 220956 1. 514558 1. 135538 1. 442276 0. 899043 1. 915994  
2. 410534 1. 314045 0. 45495 1. 521563 0. 673381 1. 187224 1. 374027 1. 084382 0. 723665  
2. 455071 1. 402276 1. 153207 2. 4288 0. 392229 0. 722168 0. 713048 0. 919404 2. 857576  
4. 250929 4. 335757 3. 234938 5. 054019 3. 37766 3. 186451 3. 496608 3. 933686 3. 174884  
4. 113157 3. 927283 4. 593619 5. 624264 4. 236555 4. 030014 4. 07001 3. 941491 5. 077425  
5. 256916 5. 086261 4. 380271 6. 558762 5. 707907 5. 76917 4. 977493 5. 257904 6. 033157  
5. 668978 6. 234752 5. 923516 5. 475695 6. 077435 5. 049003 5. 978441 5. 372152 4. 702442  
2. 745058 1. 343611 1. 674848 2. 863636 2. 72663 1. 501463 2. 810312 2. 380017 1. 929579  
1. 522087 1. 765644 2. 174558 2. 194644 4. 896882 1. 915205 3. 16611 4. 127615 1. 502001  
7. 697453 7. 57545 7. 786054 6. 536384 7. 603229 7. 568666 7. 304267 7. 674923 6. 776182  
1. 209005 2. 254557 0. 91351 1. 7287 1. 20991 1. 945019 1. 100311 1. 437379 0. 82022  
3. 125978 2. 6935 3. 432922 2. 570751 3. 409127 3. 9175 3. 323391 2. 160125 2. 615067  
5. 064148 5. 159147 5. 052518 4. 872552 4. 64563 5. 377 4. 951055 5. 57086 4. 704803  
0. 606155 0. 735886 0. 915031 0. 885622 0. 880352 4. 211706 0. 976794 0. 843767 1. 158263  
1. 540685 1. 953738 0. 857041 2. 516143 1. 261123 3. 178915 1. 449714 2. 647169 1. 53446  
1. 586871 1. 08394 0. 637551 3. 177949 1. 542179 1. 416481 1. 329732 0. 678913 1. 379533  
3. 243461 3. 42439 3. 143743 2. 442525 3. 42005 4. 632777 4. 185629 3. 104023 4. 820907  
1. 282451 0. 556939 0. 996107 2. 470115 1. 015525 1. 020208 2. 219355 1. 205193 1. 09193  
0. 726765 0. 527207 0. 972403 0. 538719 0. 714921 1. 171636 0. 588581 1. 124009 0. 598105  
6. 331602 6. 848563 6. 445979 5. 919387 6. 489924 6. 579321 6. 000408 6. 622112 5. 322589  
5. 990798 5. 185115 5. 556298 6. 012452 5. 148079 5. 581083 5. 318644 5. 667342 6. 699643  
4. 607183 5. 068536 4. 071002 4. 737209 2. 617795 5. 027871 3. 93522 4. 051073 4. 80579  
0. 829462 1. 2816 1. 576209 0. 741699 0. 864417 2. 333045 2. 116778 1. 227969 1. 047866  
1. 382064 2. 704764 1. 195054 2. 716625 1. 338627 1. 260462 1. 195867 1. 54632 2. 609002  
1. 413529 3. 332803 2. 060964 4. 262347 0. 780389 2. 697606 2. 006949 2. 487894 1. 74652  
1. 713788 2. 924613 2. 861743 2. 94684 2. 497961 3. 212473 2. 58323 2. 741441 4. 598707  
1. 152021 2. 70984 1. 683014 1. 88333 1. 002596 0. 872106 1. 610336 2. 26722 2. 153209  
1. 248908 1. 565067 0. 872591 2. 651454 1. 018161 2. 140716 1. 408017 2. 030492 1. 212456  
3. 430395 3. 933009 3. 225609 4. 550294 4. 314975 4. 17093 5. 135194 4. 774625 8. 013902  
4. 049907 3. 792528 3. 283177 3. 716717 2. 656036 2. 689433 3. 192854 3. 366654 3. 572654  
3. 497841 1. 473491 1. 066977 3. 260929 1. 036386 3. 862868 1. 48124 2. 485166 4. 454924  
3. 508854 4. 329958 3. 755483 5. 411499 4. 437457 3. 254615 5. 027116 3. 745336 4. 793812  
1. 222426 2. 140766 1. 363479 1. 360725 0. 908268 1. 529903 0. 880376 1. 273273 1. 180345  
1. 40624 2. 632758 2. 01573 3. 554436 1. 179999 1. 438941 1. 095672 1. 556119 0. 932965  
1. 968117 1. 067877 1. 537129 1. 885673 1. 233664 1. 704538 1. 018461 1. 317001 1. 185396

1. 06995 3. 271826 2. 611549 3. 407354 2. 674897 1. 935308 2. 63245 0. 646626 1. 4482  
2. 046133 3. 826441 2. 018433 2. 654672 1. 748306 1. 543703 2. 158231 3. 468966 2. 74644  
6. 242055 3. 82382 2. 528444 3. 229525 3. 747929 4. 914165 3. 621045 3. 513316 6. 482483  
1. 584216 1. 063995 2. 35698 2. 192764 1. 699317 1. 111659 1. 634548 1. 042206 1. 367265  
1. 188278 0. 51981 0. 593265 0. 856373 0. 971663 1. 332665 0. 650087 0. 995414 0. 657429  
1. 574623 3. 19144 1. 196574 2. 348556 1. 378656 2. 078177 1. 653844 1. 23353 1. 267336  
2. 282934 8. 018914 1. 769883 2. 67096 2. 663358 1. 624695 1. 984082 3. 658943 2. 380459  
2. 572125 3. 246703 1. 78609 3. 571633 1. 267929 1. 104472 1. 311316 7. 936889 2. 02149  
1. 476815 1. 671398 1. 63828 2. 800582 1. 509984 1. 791501 1. 897556 1. 397801 1. 772617  
8. 529046 8. 396691 8. 715828 8. 009043 8. 440543 8. 643241 8. 520062 8. 737171 7. 211533  
5. 329579 5. 386813 5. 112767 5. 250382 5. 179209 4. 595132 4. 996807 5. 107188 4. 440139  
2. 436654 1. 991784 2. 409975 3. 145766 3. 018917 2. 30082 1. 93654 2. 683254 2. 521705  
7. 095388 7. 152104 7. 286676 7. 610422 6. 784936 6. 972605 7. 128765 6. 47346 6. 52174  
7. 492503 7. 57445 7. 096901 6. 681923 7. 40434 6. 903787 7. 162291 7. 130841 7. 123721  
7. 655563 6. 741957 7. 51151 6. 849266 7. 403966 6. 833016 7. 605756 6. 984563 8. 299147  
8. 535515 8. 152848 7. 689989 8. 140925 8. 416339 8. 388528 8. 351664 8. 036728 8. 67954  
5. 300264 6. 057487 4. 935676 6. 573143 6. 478771 5. 714396 5. 53216 5. 615404 5. 923572  
0. 812093 1. 625275 1. 70602 0. 8036 0. 738624 1. 336622 1. 439021 0. 68157 1. 396339  
5. 670332 5. 395581 5. 556648 5. 696657 5. 74143 4. 874603 5. 459138 5. 625676 4. 959781  
7. 639653 7. 711768 7. 45203 7. 978197 7. 93486 7. 726608 7. 536526 7. 748661 7. 124963  
5. 848143 5. 643469 5. 629295 5. 506163 6. 304534 5. 669022 5. 632925 5. 728502 4. 053063  
0. 940843 1. 095507 1. 473218 1. 231814 1. 764855 1. 581785 0. 956254 1. 064443 1. 035639  
4. 584861 4. 851703 4. 983539 3. 861864 4. 943511 4. 149935 4. 779089 4. 61352 4. 872031  
3. 927298 4. 398168 3. 868373 4. 900987 3. 403096 4. 625582 3. 639047 3. 976328 5. 170849  
4. 945405 4. 037347 4. 918387 2. 4604 4. 780273 4. 154647 5. 039898 5. 051189 4. 165693  
8. 23254 8. 30363 8. 618983 8. 458942 8. 65818 8. 218031 8. 10733 8. 80698 7. 436337  
7. 880979 7. 117786 7. 590609 7. 263998 6. 929112 8. 30754 7. 524196 7. 594183 8. 50401  
7. 202148 6. 039914 6. 818733 7. 603065 6. 608897 7. 017896 7. 390705 6. 593624 7. 078201  
9. 879614 10. 06458 9. 862064 9. 619837 9. 903024 9. 767354 9. 811558 10. 10112 9. 821051  
8. 093067 8. 170397 8. 096111 7. 777832 8. 161884 8. 137254 8. 267698 7. 913749 7. 939438  
9. 158916 9. 114989 9. 303071 8. 783035 9. 654997 9. 305872 9. 316364 9. 69077 9. 306981  
5. 807458 5. 839718 6. 115084 4. 98711 5. 957802 4. 986983 5. 607674 5. 353824 5. 287159  
7. 009593 6. 668563 6. 24877 6. 762351 6. 59681 6. 67704 6. 9645 6. 666788 6. 94349  
7. 88554 7. 601528 7. 655418 7. 841524 7. 846683 7. 726976 8. 168493 7. 920161 7. 894722  
1. 962126 2. 521412 2. 882842 2. 412009 2. 081389 1. 705664 1. 768942 1. 608557 3. 38602  
5. 37041 5. 453169 4. 447085 5. 746311 4. 706718 5. 254829 5. 733201 5. 333323 5. 803471  
4. 462971 4. 84753 4. 275262 2. 655713 5. 417576 4. 360216 4. 604467 4. 986578 4. 850384  
1. 397144 1. 217821 1. 007304 1. 328389 1. 371195 1. 527891 1. 216932 1. 536065 1. 479714  
3. 718164 4. 49314 2. 871322 4. 682875 3. 389751 3. 757124 5. 274847 7. 120904 3. 462286  
4. 198204 4. 817722 4. 134352 4. 041751 4. 515566 5. 237919 5. 030876 5. 105023 3. 997794  
6. 982075 6. 929422 7. 106525 6. 655346 7. 126076 6. 462294 7. 069815 6. 68782 6. 819704  
6. 740363 6. 510947 6. 642462 7. 091828 6. 912179 6. 555333 6. 278823 6. 367324 6. 458089  
4. 614766 5. 444055 5. 325016 4. 278279 5. 645813 5. 141464 4. 963845 5. 203628 5. 126896  
5. 227729 4. 922167 4. 972329 6. 151247 5. 603401 4. 991161 5. 646859 5. 648555 4. 714585  
5. 378577 5. 862835 5. 108531 5. 232159 6. 159926 6. 189766 5. 4085 6. 658856 6. 268039  
3. 424218 4. 069663 4. 15413 3. 419766 3. 715144 2. 793882 3. 775709 3. 478459 3. 816865  
3. 492671 3. 01071 3. 521641 2. 914508 3. 42787 3. 385024 3. 490466 3. 256392 3. 501981  
4. 081931 3. 50806 4. 294248 4. 214134 3. 041588 4. 202435 3. 159601 3. 38793 3. 315241  
9. 878145 10. 04953 9. 959132 10. 20843 9. 448409 10. 37103 9. 622108 10. 22428 9. 063964  
6. 630216 7. 068518 6. 741946 6. 460895 7. 335411 6. 127198 6. 974922 6. 838199 7. 037057  
1. 726623 1. 795822 2. 664891 2. 136956 1. 922753 2. 630045 1. 536805 1. 39831 3. 171207

1. 970557 1. 730069 1. 835356 2. 100616 1. 723221 2. 314804 2. 22209 1. 481419 1. 929088  
2. 241612 2. 49498 2. 86818 3. 280867 1. 699168 2. 070097 2. 633183 2. 087397 2. 690894  
2. 944429 2. 479128 2. 299073 2. 879401 2. 463233 2. 192756 2. 376197 2. 66539 2. 411927  
6. 303337 6. 040585 6. 154218 5. 283362 6. 835307 6. 781025 6. 423226 6. 60816 4. 923707  
1. 632508 1. 337093 1. 352511 1. 950929 1. 260961 1. 660066 1. 442932 2. 293726 1. 418539  
4. 609537 4. 623924 4. 433989 4. 412191 5. 014604 4. 606915 4. 080468 5. 073881 4. 406736  
5. 235929 4. 383177 4. 671256 3. 123585 4. 451945 3. 999301 4. 737949 3. 919343 3. 059284  
2. 064129 1. 704004 2. 15818 2. 567602 2. 205836 1. 531152 1. 764103 1. 541418 1. 334019  
1. 953491 1. 522656 1. 480083 1. 236227 1. 606708 1. 31467 1. 000798 0. 98097 1. 348582  
7. 648182 7. 595343 7. 852575 8. 274745 7. 571567 7. 388188 7. 802802 7. 639295 7. 483769  
2. 539744 2. 218694 2. 941686 2. 870591 1. 586705 2. 146379 2. 582421 2. 218435 2. 340131  
2. 483806 1. 623086 1. 576559 2. 111883 2. 061441 0. 991757 2. 433343 2. 260926 1. 447527  
2. 634787 1. 035751 2. 071769 1. 315829 1. 24274 2. 955118 1. 552797 0. 968613 3. 351006  
6. 793363 6. 545996 6. 757281 6. 196633 6. 823574 5. 898044 5. 951337 6. 452808 5. 747136  
1. 629638 2. 206709 2. 244218 2. 153785 1. 910206 2. 103053 2. 134636 2. 188739 2. 814429  
4. 572397 4. 80138 4. 733336 4. 195194 4. 455904 3. 920695 4. 746683 5. 427897 5. 171057  
3. 161844 3. 438729 3. 149294 2. 657809 3. 147952 3. 379286 3. 2817 2. 839303 3. 117571  
1. 187814 1. 294166 1. 117245 3. 834792 1. 76129 1. 758763 1. 831929 1. 661755 3. 032153  
6. 528094 6. 588147 6. 622401 6. 551487 6. 686535 6. 832148 7. 046598 6. 828222 6. 546825  
7. 61396 7. 125385 7. 195337 6. 821426 6. 818897 6. 99701 7. 533692 7. 126524 7. 463352  
2. 479865 2. 930462 2. 659532 2. 903494 2. 226197 2. 538486 2. 591541 1. 967402 2. 770005  
4. 514909 4. 244293 3. 875879 3. 30858 4. 023736 4. 722888 4. 514498 4. 988177 2. 690289  
5. 65885 5. 484219 5. 560007 5. 428724 5. 712808 5. 652236 6. 03025 5. 87534 5. 301025  
7. 460944 7. 428923 7. 317989 6. 809737 7. 56547 7. 315273 7. 82227 7. 68385 7. 149325  
6. 872747 6. 662096 6. 965321 6. 843949 7. 019179 6. 27336 7. 055153 6. 943691 7. 263425  
1. 33588 1. 626659 1. 333975 2. 018505 1. 942942 1. 842289 1. 826524 1. 763763 2. 910076  
5. 834453 6. 535637 5. 265079 7. 786881 5. 405404 4. 898567 5. 085505 5. 514524 4. 131392  
7. 599968 7. 250135 7. 357805 7. 094578 7. 391119 6. 956283 7. 829262 7. 340106 7. 725865  
6. 579208 6. 293024 6. 741056 5. 839271 6. 632525 6. 749143 6. 241168 6. 715257 5. 832665  
7. 516192 7. 158396 7. 150314 7. 310204 7. 244204 6. 912607 6. 641412 7. 489041 8. 228416  
7. 783362 7. 093197 6. 845426 6. 91199 6. 960209 7. 3194 7. 07859 7. 095915 7. 715638  
7. 095144 7. 15964 7. 020203 6. 958854 7. 148156 6. 021745 6. 918717 6. 95855 7. 186264  
6. 160689 6. 41773 5. 405741 4. 920399 6. 281941 5. 305919 6. 168288 5. 699225 5. 627466  
5. 570984 5. 757367 5. 723556 4. 823016 6. 307124 5. 307665 5. 631122 5. 806857 5. 591976  
6. 495953 6. 229755 6. 706267 6. 963994 6. 783733 6. 201641 6. 736856 6. 311624 6. 415652  
5. 63019 6. 306154 5. 633145 6. 279154 5. 711138 5. 3889 6. 033418 5. 823949 6. 137706  
5. 492812 5. 906136 5. 477873 6. 184153 6. 410752 6. 381517 5. 934519 5. 954541 5. 929005  
5. 00175 3. 258442 4. 009162 0. 483511 4. 667203 2. 056554 4. 924882 4. 515649 4. 358033  
7. 101853 7. 355463 7. 226696 7. 173612 7. 052937 7. 214844 7. 233924 7. 027686 6. 702581  
6. 569987 6. 358579 6. 935788 7. 179511 5. 985445 6. 049196 6. 132862 6. 338054 6. 478316  
2. 686816 2. 200635 2. 644199 3. 366035 2. 49409 2. 244459 3. 226029 2. 361236 3. 040402  
4. 464774 4. 162689 3. 172285 4. 726674 3. 792347 3. 595072 5. 0947 4. 430974 4. 331248  
6. 272652 6. 193358 6. 033608 6. 683951 6. 552168 6. 304228 6. 271498 6. 195048 6. 845649  
6. 812276 6. 515517 6. 765687 6. 173268 6. 604346 6. 46005 6. 957362 7. 414132 6. 815726  
8. 403435 8. 423872 8. 011021 8. 990314 8. 881858 7. 903991 8. 430313 8. 100683 8. 037095  
7. 29319 7. 439947 6. 95223 6. 905748 7. 303908 7. 129662 7. 458659 6. 975105 7. 341522  
5. 623273 5. 165442 5. 482273 5. 123213 5. 82307 5. 174511 5. 527781 5. 860965 5. 658847  
6. 555138 6. 449133 6. 158883 6. 70021 6. 549294 6. 377328 6. 00793 6. 566539 6. 121915  
7. 65202 7. 792889 7. 496274 8. 144211 7. 490475 7. 815627 7. 290747 7. 714676 6. 823474  
8. 042365 7. 135574 7. 947516 7. 671355 7. 664411 8. 654712 7. 41085 7. 639901 8. 179689  
6. 492741 6. 835966 6. 688654 7. 432725 7. 165285 6. 470238 6. 833445 6. 904432 6. 877272

7. 193378 7. 398969 6. 998924 6. 568665 7. 60271 6. 943382 7. 214014 7. 056734 6. 664342  
6. 202254 6. 060572 6. 270631 6. 529626 5. 959596 6. 334881 6. 468482 6. 071562 6. 059995  
9. 312386 9. 126862 9. 127715 8. 797695 9. 400783 9. 394822 9. 124739 9. 4968 8. 816766  
4. 135078 4. 317406 4. 232068 4. 155773 4. 142231 4. 436381 3. 015498 3. 720539 4. 638265  
7. 343959 7. 606894 7. 506592 6. 792878 7. 771859 6. 89329 7. 336722 7. 194984 7. 183751  
1. 214517 1. 484198 1. 66977 3. 380234 1. 837681 2. 017805 1. 257042 1. 392848 1. 246209  
3. 990295 3. 904402 3. 904448 4. 693763 4. 390571 3. 700267 4. 177414 3. 769186 3. 532742  
6. 288617 7. 218706 6. 249151 7. 072486 7. 604327 6. 246556 6. 627024 7. 505205 4. 479172  
3. 205887 3. 691337 3. 129135 3. 84845 3. 926361 3. 174144 3. 516632 3. 562261 2. 912113  
6. 299172 6. 256954 6. 035486 5. 696253 5. 94041 5. 817202 5. 895823 5. 794165 6. 348362  
3. 457103 3. 022705 3. 603874 3. 686624 3. 242652 2. 98236 3. 185542 3. 064986 3. 067115  
2. 602858 2. 519352 2. 087811 2. 795372 3. 06576 2. 461199 3. 336438 2. 478589 2. 965586  
6. 579469 6. 404262 6. 154437 7. 155647 6. 72047 6. 163124 7. 009521 6. 278858 6. 561018  
8. 576473 8. 372821 9. 03464 7. 524187 7. 732019 8. 576119 8. 759995 8. 511873 7. 797146  
7. 691141 7. 213621 7. 567763 7. 260631 7. 217275 7. 610391 7. 168695 7. 802219 6. 657939  
1. 48341 1. 834824 1. 348459 2. 185676 1. 289417 1. 697354 1. 708466 1. 411469 1. 703292  
3. 828912 2. 360866 2. 149172 3. 690452 1. 922896 1. 382391 2. 491987 2. 324165 2. 279159  
1. 735712 1. 565108 1. 979563 2. 950225 1. 058933 2. 13284 1. 474255 1. 58869 2. 028497  
2. 610805 2. 570227 2. 612269 2. 194627 2. 001048 3. 303999 2. 842435 2. 603236 3. 562556  
3. 300259 4. 208588 3. 495429 2. 749319 4. 244669 3. 982269 2. 960417 4. 195571 3. 557311  
6. 447516 6. 488403 6. 490974 7. 582097 6. 042818 6. 493877 6. 124827 6. 667363 6. 392696  
1. 407336 1. 041062 1. 071857 1. 032726 1. 326214 1. 721536 1. 081492 0. 843536 0. 57856  
2. 644772 2. 371133 2. 421669 3. 913955 2. 164315 2. 409426 2. 317879 2. 409426 1. 965155  
4. 276801 5. 254506 2. 299285 1. 622655 6. 063155 5. 352687 3. 145497 5. 33229 4. 829294  
2. 042909 1. 584179 2. 454458 2. 589775 1. 90557 2. 085692 3. 358036 2. 040372 1. 583303  
1. 936791 1. 868962 2. 186774 2. 895973 2. 609794 1. 555015 1. 752278 1. 091316 1. 519693  
1. 440476 1. 882223 2. 360121 1. 988778 1. 406275 2. 031916 1. 218946 2. 292506 1. 464056  
2. 316185 1. 907509 2. 850917 3. 819108 1. 36119 2. 707011 1. 679658 1. 967712 2. 307627  
2. 439181 2. 93218 2. 987235 3. 119551 2. 68445 2. 976121 2. 860649 2. 215342 3. 235896  
1. 742837 1. 42896 3. 042412 1. 983244 2. 605043 1. 504005 1. 822477 2. 761144 3. 170978  
1. 749555 2. 746103 2. 952473 2. 105855 1. 875337 2. 341899 3. 08094 2. 340563 2. 488808  
1. 690768 2. 132116 1. 223195 2. 010808 1. 128058 1. 753137 2. 343511 1. 913855 1. 572868  
1. 628182 1. 695503 1. 00435 1. 692869 1. 605518 1. 685785 1. 361938 1. 722277 2. 368924  
3. 033239 4. 807907 3. 762025 3. 161031 5. 16473 1. 225347 5. 73352 2. 435917 5. 202457  
6. 250242 6. 784416 6. 553568 6. 51895 6. 718081 6. 681088 6. 565685 6. 748901 6. 494251  
2. 552451 1. 543684 2. 491066 1. 677904 2. 825858 2. 162892 1. 780143 2. 866122 3. 84085  
2. 730713 3. 2084 2. 366048 3. 449276 1. 271732 1. 934171 3. 274845 2. 880195 1. 179283  
2. 683645 2. 157724 2. 37984 2. 343944 2. 078417 1. 772143 2. 420067 2. 503734 2. 630487  
2. 17259 2. 269452 1. 533359 2. 390532 1. 611034 1. 861329 1. 651409 2. 256491 2. 30493  
7. 150079 7. 07815 6. 544263 6. 70362 6. 664804 6. 683674 7. 509097 6. 811481 7. 45442  
1. 76929 1. 443436 2. 016842 1. 610039 1. 282729 1. 605907 1. 70264 1. 063742 1. 789856  
7. 230922 6. 824995 6. 383221 7. 089407 6. 762144 6. 449568 6. 867466 7. 57453 6. 844644  
6. 695827 7. 016128 6. 998121 7. 500602 7. 272738 7. 333277 6. 483413 6. 777021 5. 677785  
7. 365645 7. 6015 7. 506364 7. 898443 7. 638574 7. 689662 7. 622568 7. 795663 7. 218355  
6. 314459 6. 697151 7. 040609 6. 421469 6. 604331 6. 669853 6. 612229 6. 961792 5. 649473  
5. 60297 5. 665249 5. 235241 5. 173488 5. 919398 5. 464747 6. 037745 4. 836815 5. 579164  
7. 194163 7. 024927 6. 977916 6. 102635 7. 377387 6. 698416 7. 27819 7. 380243 6. 753647  
6. 630839 6. 200038 6. 114947 6. 233092 6. 458071 6. 483289 6. 416596 6. 131987 6. 272333  
8. 606084 6. 009266 7. 155211 8. 641506 6. 088094 9. 13049 8. 455873 8. 442563 9. 553777  
6. 913093 1. 467126 3. 800503 1. 175923 4. 002025 7. 262677 4. 60737 6. 589032 7. 096281  
9. 526674 9. 891721 9. 942748 9. 788685 9. 815502 9. 555323 9. 578511 9. 806554 9. 034598



1. 198056 1. 868959 1. 16877 2. 406386 2. 548383 2. 204922 0. 908364 0. 994819 1. 524888  
6. 902744 6. 878418 6. 709478 5. 736973 6. 599775 7. 055147 6. 358991 6. 806293 6. 886611  
3. 274441 3. 247588 3. 702768 1. 690594 4. 42073 3. 017739 3. 850697 3. 906284 4. 262897  
7. 433783 7. 836615 7. 619079 7. 438535 7. 595655 7. 077746 7. 303157 7. 687459 7. 147605  
7. 107643 5. 683993 6. 312394 6. 966448 5. 302112 6. 238537 5. 800477 6. 553482 5. 902313  
5. 065319 4. 433956 5. 467187 3. 769855 4. 530621 2. 439083 5. 652882 1. 954698 4. 673308  
9. 516818 9. 815255 9. 565898 9. 016643 9. 920858 9. 326806 9. 730624 9. 715311 9. 555003  
3. 50057 3. 736176 3. 084901 3. 749305 3. 621988 3. 428167 3. 166803 2. 995415 3. 480711  
6. 835482 7. 078637 6. 13718 7. 021486 7. 003626 6. 921357 7. 099086 6. 816084 7. 10287  
8. 33005 8. 462626 8. 525941 8. 509897 8. 270776 8. 224587 8. 462138 8. 39292 8. 149102  
5. 490401 5. 273803 5. 798472 5. 062567 5. 230133 4. 624261 5. 486357 5. 341818 5. 481379  
6. 9344 7. 297321 7. 098329 6. 439291 7. 468023 6. 789986 7. 626659 7. 247363 7. 394368  
4. 7942 4. 752713 5. 008932 3. 399197 4. 610235 4. 850077 5. 030216 4. 748856 4. 894586  
6. 117586 5. 680494 5. 882362 5. 680786 6. 102021 6. 168721 5. 796411 5. 900876 6. 371311  
6. 562505 6. 626506 6. 768074 6. 483503 6. 763466 6. 499853 6. 864175 6. 848742 5. 932619  
6. 437641 6. 501114 5. 299931 7. 388941 6. 736011 6. 828294 6. 79754 6. 39355 6. 573352  
6. 488647 5. 5685 5. 666111 6. 041464 5. 705361 5. 44595 6. 196828 5. 992325 6. 390099  
4. 831244 5. 381844 4. 950368 4. 802976 5. 235005 5. 238483 5. 166581 4. 647082 4. 70045  
3. 929661 3. 931336 4. 022332 4. 483693 4. 609099 4. 362064 4. 163077 3. 074668 4. 07225  
7. 547283 7. 06489 7. 680122 6. 737618 7. 012625 6. 331805 7. 351025 7. 236092 6. 833356  
7. 28378 7. 541483 7. 48904 7. 971587 7. 699477 7. 22204 7. 282086 7. 635758 7. 439209  
4. 411224 3. 932238 3. 666221 4. 086846 4. 005281 3. 504082 4. 037026 3. 730878 3. 958853  
1. 621063 1. 288864 2. 361618 1. 632566 1. 422313 1. 925203 1. 637109 1. 3676 1. 404804  
5. 404982 5. 913634 5. 913065 5. 48977 6. 11444 5. 561385 5. 776765 5. 956464 5. 527851  
3. 492611 3. 647266 3. 386025 4. 144763 4. 025384 3. 935576 3. 900036 4. 054782 3. 606696  
6. 851751 6. 477593 6. 768599 6. 712337 6. 631167 6. 622181 6. 717492 6. 651994 7. 151783  
4. 026496 3. 51525 4. 292791 2. 955236 3. 293964 3. 30661 3. 216937 3. 498332 4. 160369  
3. 087223 1. 733793 1. 788421 2. 902164 2. 523852 1. 67141 1. 162137 2. 129215 1. 863257  
9. 167173 8. 896335 8. 993587 9. 170035 8. 895906 9. 308797 9. 064032 9. 234161 8. 872919  
6. 524102 6. 525302 5. 725725 6. 41636 5. 870854 7. 115643 5. 706849 6. 252713 5. 658451  
5. 843787 5. 757126 5. 751495 5. 743451 6. 581292 5. 483373 5. 701444 5. 668885 6. 516871  
1. 657496 1. 237476 1. 366701 2. 075716 0. 752593 1. 27044 1. 963602 1. 139193 1. 215631  
4. 898849 4. 3295 4. 134568 3. 938154 3. 60608 4. 728211 3. 421009 3. 608907 3. 733617  
3. 654972 3. 876945 4. 158266 4. 070908 4. 207092 3. 152304 4. 477228 4. 457259 4. 196218  
3. 384992 3. 072872 3. 67912 2. 961186 2. 042914 4. 398474 3. 705804 3. 078825 3. 079803  
3. 143606 5. 005724 2. 899272 3. 351149 3. 52304 3. 908401 4. 054574 4. 003057 1. 940098  
3. 094545 2. 704934 3. 733787 4. 625617 2. 418779 3. 190561 3. 460134 3. 431038 3. 053111  
2. 169686 2. 976367 2. 9893 3. 102182 2. 762333 1. 955764 2. 913039 2. 994395 2. 468146  
5. 820834 5. 829344 5. 624572 4. 607091 5. 880361 5. 981711 6. 193907 5. 768454 5. 796505  
1. 865715 2. 251611 1. 327038 2. 054463 1. 467543 2. 017455 1. 815907 1. 566832 1. 430124  
9. 982995 10. 42407 9. 984832 9. 744393 10. 07842 9. 714864 9. 851073 10. 10153 10. 09387  
5. 36028 4. 879651 5. 340895 4. 927445 3. 298669 4. 873677 5. 452456 4. 655247 5. 386704  
3. 393114 2. 516809 3. 332946 2. 360754 2. 429229 1. 455081 1. 940863 3. 914585 3. 552786  
1. 401316 1. 855633 1. 833073 2. 023198 2. 100341 3. 17682 1. 909831 1. 993632 1. 932778  
5. 0941 5. 890783 5. 207208 4. 985544 5. 325696 5. 774687 4. 985698 5. 140303 4. 761133  
4. 851602 5. 084609 4. 721807 3. 58389 3. 561686 4. 56969 4. 69684 4. 67254 4. 084853  
1. 19813 1. 462773 1. 642454 2. 990255 2. 263878 1. 342857 2. 293483 2. 024314 1. 815196  
4. 638069 4. 525241 4. 5717 4. 67759 4. 63825 4. 375973 4. 666105 4. 53 4. 068591  
3. 123735 2. 778738 3. 432717 3. 118075 3. 024489 2. 945685 3. 216259 2. 315926 3. 446681  
2. 034308 2. 017945 1. 616836 2. 194306 2. 144471 2. 451735 2. 156308 1. 917443 2. 110243  
6. 447091 5. 902086 5. 763099 6. 240137 5. 659429 5. 555998 6. 075975 5. 630272 5. 39543

7. 262847 7. 052439 7. 124454 6. 19133 7. 282841 7. 764376 7. 464673 7. 134884 6. 748447  
3. 259953 2. 715618 1. 797903 4. 259913 3. 879366 3. 582392 2. 517096 3. 300101 2. 169833  
4. 262076 5. 370681 3. 961816 3. 962721 3. 36026 4. 548259 3. 521956 4. 319922 6. 278112  
5. 824894 5. 745092 5. 782462 5. 923734 5. 922692 5. 886213 6. 674024 5. 56934 6. 355327  
5. 573459 5. 956622 5. 539078 5. 423159 6. 38721 4. 836682 5. 65941 5. 607742 4. 653575  
0. 878886 1. 586029 1. 83305 1. 276733 1. 356944 1. 558481 1. 39096 1. 685469 2. 318384  
3. 085704 1. 984482 1. 848948 3. 269908 2. 166077 1. 814577 2. 006338 2. 870797 2. 772082  
0. 955088 1. 165398 1. 098396 1. 282138 1. 154375 1. 790604 1. 23318 1. 224075 0. 916897  
4. 505715 4. 981626 4. 23589 5. 172566 4. 911346 4. 851719 4. 545113 5. 046765 4. 099359  
1. 629253 2. 01189 1. 360655 1. 531167 1. 094128 1. 14511 1. 400567 1. 362652 1. 131202  
8. 114002 7. 927001 8. 167662 8. 59012 8. 205573 7. 657887 7. 840317 8. 287698 7. 546043  
6. 802378 6. 814381 6. 529523 6. 757385 6. 901577 6. 099486 7. 083664 6. 346199 6. 954771  
1. 494605 1. 062685 1. 49974 2. 775838 1. 47168 1. 879541 2. 197254 1. 891237 1. 934984  
3. 316422 2. 902211 3. 066738 3. 812645 2. 683631 2. 691508 2. 603541 4. 036919 2. 964437  
5. 342443 5. 060212 5. 385557 4. 634123 5. 220853 4. 718559 5. 432261 5. 373961 4. 972193  
4. 713661 5. 037394 4. 975408 4. 555333 4. 921766 4. 46081 3. 842525 4. 824402 4. 611263  
3. 954136 5. 078993 4. 23531 4. 717227 4. 679722 4. 870365 3. 952182 4. 644891 4. 129054  
4. 496995 4. 648365 4. 327735 5. 328804 4. 685945 4. 595149 4. 583735 4. 798036 3. 314102  
5. 873311 6. 266812 6. 559674 5. 888438 6. 485234 5. 877513 6. 393896 6. 227032 6. 295236  
4. 357432 5. 058187 4. 552025 3. 850807 4. 330953 4. 047666 4. 580844 4. 200381 3. 528083  
4. 498262 4. 707273 4. 973828 4. 716973 4. 521738 4. 364881 4. 733389 4. 201313 4. 227618  
3. 953855 4. 632322 4. 405281 3. 967316 4. 907697 4. 624123 4. 090594 4. 552168 3. 809741  
4. 629722 4. 147676 3. 58179 4. 548658 3. 452848 4. 137321 3. 547333 3. 172037 4. 074625  
7. 466275 7. 36365 7. 356218 6. 992995 7. 295531 7. 374745 6. 839107 7. 254077 7. 941463  
1. 89902 2. 408581 1. 779891 2. 395675 2. 011202 1. 90492 2. 120065 2. 00729 1. 802003  
2. 771846 1. 914894 2. 190986 1. 923504 2. 205153 3. 251604 2. 764554 2. 658377 1. 952905  
4. 801251 5. 249812 5. 328582 3. 706302 3. 959445 4. 034464 3. 706302 4. 119382 4. 448039  
2. 627585 2. 995312 2. 867162 2. 75959 2. 837221 2. 006205 2. 584457 3. 321078 3. 584739  
4. 165943 4. 024979 3. 989795 4. 176858 4. 446749 3. 447074 4. 048705 3. 990464 3. 433338  
1. 987838 2. 231035 1. 88897 2. 449931 2. 422853 1. 51294 1. 627876 1. 932952 2. 249519  
2. 336448 3. 052453 1. 340018 3. 028045 1. 592138 1. 761485 2. 638697 2. 708921 2. 374846  
5. 776348 6. 259773 6. 136117 6. 457001 6. 338009 5. 801615 6. 391117 6. 683068 5. 646879  
2. 909463 2. 410437 2. 798743 3. 207013 2. 948655 3. 06824 2. 856605 2. 969462 2. 820461  
4. 408047 4. 886226 5. 21117 4. 929126 5. 538943 5. 288038 4. 440786 4. 931758 4. 617081  
6. 44535 6. 368828 6. 228496 6. 138764 6. 162498 5. 961584 6. 04104 6. 120194 6. 344327  
5. 272429 5. 114975 4. 939443 4. 674843 4. 838293 4. 717684 5. 841399 4. 316614 4. 53037  
5. 781939 5. 595409 5. 719418 6. 300546 6. 007629 6. 042244 5. 793247 5. 877813 5. 345926  
5. 137903 5. 465178 5. 45932 5. 265587 5. 407554 5. 248723 4. 751267 5. 177034 4. 664501  
6. 100853 5. 80245 6. 001408 5. 966981 6. 451589 5. 671198 6. 432159 5. 893259 6. 742383  
5. 135923 4. 688813 4. 906164 2. 760559 5. 142083 4. 513179 3. 617217 3. 403642 4. 864626  
4. 79688 5. 0594 4. 998265 4. 709427 4. 789738 5. 625965 4. 36887 5. 295775 4. 941749  
3. 779237 3. 863566 2. 728405 4. 712712 3. 60473 3. 290994 3. 113516 2. 592834 2. 969972  
4. 647026 5. 593853 5. 178565 6. 006446 5. 833088 5. 087753 6. 189396 5. 953546 4. 691469  
8. 749082 8. 99736 8. 709249 7. 976625 8. 628395 8. 627497 8. 702608 8. 624227 8. 335335  
6. 141437 5. 692313 5. 528046 5. 783556 5. 967843 4. 612457 4. 696305 5. 92421 5. 370327  
5. 227036 4. 963972 5. 22135 5. 472726 4. 714868 4. 751821 5. 463756 4. 725329 5. 637626  
5. 92485 6. 048461 5. 779693 5. 494394 6. 008924 5. 660188 5. 786006 5. 611034 5. 539785  
1. 544608 0. 933507 1. 589161 2. 305266 0. 935213 1. 164111 1. 146302 1. 605321 0. 889299  
1. 65398 1. 402805 2. 690667 2. 22899 1. 994962 1. 860286 2. 159088 1. 605434 3. 01992  
1. 801477 1. 261995 1. 807839 0. 941638 1. 040016 1. 31687 1. 132448 1. 757941 1. 530665  
7. 422616 7. 556891 7. 15618 6. 25576 7. 056631 6. 886997 7. 268041 7. 222328 7. 12602

1. 499322 1. 372752 1. 489889 1. 287655 1. 434155 1. 158573 1. 361149 1. 234676 1. 087714  
8. 988599 8. 728918 9. 051403 8. 658042 8. 816005 8. 457247 8. 857238 8. 82456 8. 665768  
1. 202746 1. 820589 1. 682953 1. 095337 1. 16052 1. 873758 1. 038113 1. 163436 1. 460183  
6. 300464 6. 526558 7. 056316 5. 83316 5. 990479 6. 348929 6. 476845 6. 626153 5. 709209  
2. 830276 3. 723998 2. 829419 3. 889473 4. 141084 3. 000542 3. 414599 2. 993459 2. 876732  
2. 673801 2. 362509 2. 273146 3. 347895 3. 052197 2. 721498 2. 600054 2. 419047 2. 96526  
1. 721564 1. 353244 2. 215755 1. 656767 1. 481583 2. 170869 1. 719649 1. 839021 1. 524391  
3. 106327 3. 008401 3. 44783 2. 478212 3. 080462 2. 145985 2. 476394 3. 06355 3. 189565  
3. 753254 4. 104411 4. 351348 4. 35208 3. 958401 4. 026616 4. 0025 3. 452052 5. 218496  
3. 947265 4. 330562 4. 489628 5. 097944 4. 595801 4. 292831 4. 642302 4. 375664 4. 243269  
1. 531328 1. 448027 1. 271375 2. 442717 3. 121072 1. 696311 1. 527426 1. 133874 1. 284366  
3. 850701 4. 083249 3. 750222 4. 642361 4. 505705 4. 646936 3. 796804 4. 563611 4. 224785  
1. 943215 1. 980209 2. 037778 2. 433243 1. 892492 1. 653887 1. 450544 1. 906944 2. 547243  
1. 582545 2. 329181 2. 4297 1. 661512 2. 148679 2. 218468 2. 073545 1. 829634 1. 346293  
3. 960831 4. 771212 5. 053518 5. 115827 5. 365752 3. 730311 4. 510321 4. 988077 4. 764888  
0. 86284 0. 646543 0. 889188 1. 117796 0. 844371 1. 154839 1. 546282 0. 770011 0. 92303  
5. 474144 5. 394286 6. 260655 5. 670632 5. 678652 5. 75347 5. 821883 6. 13741 4. 804465  
3. 296159 4. 164205 3. 2324 1. 481673 3. 448181 2. 632682 4. 176765 2. 589073 3. 503905  
5. 660322 5. 710032 5. 851134 5. 131405 5. 876345 5. 53518 5. 917904 5. 496947 5. 099936  
8. 01823 8. 169141 8. 271568 7. 505458 8. 316998 8. 589537 8. 17636 8. 158737 7. 773136  
5. 822107 6. 037641 5. 97326 5. 407931 5. 860799 5. 240985 5. 975448 5. 562429 5. 543268  
3. 635107 1. 737472 3. 219926 3. 24834 2. 463127 5. 21911 4. 477552 2. 996814 5. 017946  
7. 632884 7. 538192 7. 721325 7. 171135 7. 833277 7. 403437 8. 169529 7. 533544 7. 632588  
5. 803874 6. 136732 6. 445584 5. 723949 6. 469041 5. 858388 5. 864057 6. 339732 5. 189414  
6. 187023 5. 799343 5. 88022 5. 951081 5. 488138 5. 19746 6. 201594 5. 902269 5. 319746  
1. 490096 2. 150958 1. 677097 2. 242022 2. 108372 0. 830267 1. 640259 1. 784765 1. 66406  
4. 563388 4. 39447 4. 705734 4. 142537 3. 99711 3. 826568 4. 628149 4. 079582 3. 119674  
7. 50185 6. 821895 6. 9287 7. 220133 7. 025816 6. 999681 7. 009844 6. 987223 7. 079338  
5. 096962 4. 920741 4. 588486 1. 71497 5. 298849 5. 503771 5. 228736 5. 18444 4. 544115  
5. 579548 3. 06886 6. 336198 3. 322259 5. 296757 7. 195626 6. 017066 5. 655125 6. 114566  
4. 916512 5. 338773 4. 547606 3. 636131 4. 39894 5. 073247 4. 629366 4. 135367 4. 674167  
2. 354435 3. 11305 3. 630358 3. 375589 2. 174557 1. 72279 2. 764547 2. 236753 2. 088042  
3. 425997 3. 953499 3. 274753 3. 261851 2. 722447 3. 396045 3. 509165 4. 571404 4. 787545  
4. 939215 2. 512971 3. 496765 3. 130711 3. 79014 3. 882646 4. 263156 3. 234531 4. 609936  
6. 206825 6. 141284 6. 840109 6. 139669 6. 592242 6. 469594 5. 934187 6. 531702 5. 42828  
8. 693678 8. 603815 8. 426186 8. 319847 8. 782573 8. 7084 8. 445365 8. 755671 8. 432239  
3. 569441 4. 057138 3. 87301 3. 601956 3. 775545 4. 276071 3. 454646 4. 026438 2. 799306  
3. 047958 4. 483687 2. 381475 3. 183334 3. 878233 2. 799332 3. 630737 3. 09365 4. 492049  
5. 107147 6. 005152 6. 095448 5. 773181 6. 380774 5. 630745 5. 454331 5. 77241 6. 438678  
4. 122884 4. 441744 3. 623676 4. 526295 4. 829 3. 921857 4. 483002 4. 356096 3. 363489  
2. 721205 4. 941878 4. 425204 3. 591106 4. 122726 2. 313145 3. 709838 4. 647302 2. 410517  
2. 255133 2. 008502 2. 113053 2. 072319 2. 822333 2. 078695 1. 976925 1. 801711 1. 674654  
3. 663278 3. 679638 3. 87799 4. 858711 4. 332421 3. 57615 4. 574062 4. 182516 4. 093816  
1. 369096 2. 237413 1. 242005 1. 118998 1. 84911 2. 396123 2. 933319 1. 011927 1. 384542  
2. 30914 1. 460765 1. 644389 2. 247505 1. 423504 1. 915585 1. 865201 1. 728398 1. 439445  
2. 502217 2. 502217 3. 134635 2. 665596 2. 07659 3. 364619 2. 924937 2. 493531 2. 38061  
5. 471602 4. 83981 5. 023575 5. 985277 6. 647277 5. 109147 4. 498158 5. 709825 4. 07174  
2. 007663 2. 403937 1. 920116 2. 377968 2. 600693 2. 626018 2. 701314 2. 471836 1. 820078  
6. 481782 6. 373228 6. 199518 6. 241015 6. 275586 6. 466878 6. 683428 6. 527266 7. 557804  
5. 332498 5. 822607 6. 005436 5. 45179 6. 088343 5. 953348 5. 382221 6. 488778 5. 48515  
8. 392697 8. 623276 8. 916442 8. 652827 8. 216442 8. 156321 8. 406872 8. 658715 7. 823956

3. 425245 3. 96728 4. 668117 3. 762005 3. 779099 3. 150109 4. 016643 3. 181074 2. 388747  
1. 69793 1. 660421 1. 911319 2. 611521 1. 90135 1. 81161 2. 096523 1. 916516 1. 49801  
4. 600278 4. 49454 2. 136792 3. 496288 4. 493663 4. 728983 3. 678452 3. 90404 2. 809835  
5. 859538 5. 891669 5. 604813 5. 962155 5. 92908 6. 169223 5. 543311 5. 937285 4. 947922  
10. 2891 10. 25919 10. 29195 10. 36851 10. 12256 10. 20566 10. 67468 10. 12563 10. 35895  
6. 72754 6. 872312 6. 804522 6. 532967 6. 727093 6. 667283 6. 486674 6. 752415 6. 294615  
7. 151536 7. 146593 7. 054123 7. 385588 7. 370137 7. 390826 7. 747671 7. 479639 6. 230457  
7. 466961 7. 647929 8. 157989 7. 194228 7. 919706 7. 14262 7. 693315 8. 121557 6. 794978  
2. 728031 2. 420029 2. 76903 1. 995682 2. 404568 3. 607013 2. 054071 2. 283763 2. 876942  
2. 015617 2. 30868 2. 321859 2. 611796 2. 338597 2. 057862 1. 869852 2. 234147 2. 170117  
2. 486793 2. 221601 3. 093348 3. 690471 2. 548833 2. 405237 2. 494965 2. 155564 2. 488601  
7. 198817 7. 246994 7. 673372 7. 477744 7. 499955 7. 331689 7. 258027 7. 591431 6. 671315  
1. 994966 2. 50932 3. 050968 2. 615155 2. 296058 3. 490931 2. 089519 3. 252458 2. 431159  
6. 24844 5. 320901 4. 6746 5. 054168 5. 042212 5. 473426 4. 637678 5. 680898 4. 013502  
4. 276837 5. 02172 3. 356266 4. 858878 3. 983754 5. 12641 3. 552214 5. 510852 3. 686215  
2. 286648 2. 39942 1. 263645 4. 960482 3. 092792 1. 196847 1. 665877 2. 529518 1. 516826  
4. 558491 3. 879792 3. 858371 3. 343319 3. 896085 3. 908382 3. 979634 4. 521909 3. 054811  
8. 50679 9. 086087 9. 267985 9. 16645 9. 18307 8. 854583 8. 926361 9. 005486 7. 566386  
7. 529233 6. 938799 6. 626079 6. 929777 6. 818925 7. 338097 7. 194473 6. 425835 6. 503705  
2. 712813 1. 686852 1. 665829 1. 710643 1. 421455 2. 361627 1. 648929 2. 327613 1. 581848  
8. 698017 8. 616487 8. 614324 8. 343369 8. 484219 8. 418383 9. 259063 8. 75293 8. 251457  
3. 599456 5. 858665 4. 259348 1. 90043 4. 657308 4. 040202 4. 915539 4. 806258 3. 882888  
8. 905741 9. 070193 9. 434814 7. 432335 8. 814608 9. 313147 8. 363427 9. 108286 7. 702293  
0. 881945 1. 361358 1. 301094 1. 152588 3. 209457 0. 911053 2. 082472 1. 486701 2. 325424  
1. 198752 1. 275398 1. 039283 1. 739629 1. 340897 1. 012197 0. 813794 1. 430971 1. 082679  
6. 424287 5. 056836 5. 289179 5. 45194 5. 232412 4. 955961 5. 973364 5. 730177 5. 28579  
1. 865121 1. 032315 1. 457671 1. 293598 0. 804645 0. 895833 1. 7073 0. 897988 0. 973044  
5. 22733 5. 287503 5. 447135 4. 742353 5. 829816 4. 869602 4. 636837 4. 909614 4. 701744  
8. 72123 8. 337081 8. 631702 7. 677637 8. 501849 8. 119092 9. 158648 8. 064915 8. 956971  
8. 082136 7. 862305 7. 666591 7. 512008 8. 485196 7. 198818 8. 853251 8. 43826 7. 589798  
3. 322661 3. 468367 3. 349009 2. 919 2. 897946 4. 094716 3. 654402 3. 70936 3. 424315  
8. 848037 9. 342522 8. 213348 9. 022268 9. 146733 8. 408496 9. 404145 9. 399556 8. 503146  
9. 549985 9. 447963 9. 516513 8. 370202 9. 380918 9. 456671 9. 51 9. 384933 9. 581398  
2. 378542 3. 03964 3. 286033 4. 304532 3. 208915 2. 066486 3. 493594 2. 698085 2. 094768  
2. 607845 3. 383127 3. 430308 2. 838975 4. 317582 2. 970608 4. 735434 4. 221175 3. 209487  
6. 64184 6. 604792 6. 859897 7. 00153 7. 033823 6. 083476 6. 17038 6. 7512 6. 222169  
7. 142965 7. 473894 7. 707016 7. 819416 7. 455999 6. 801199 7. 4846 7. 418119 7. 229834  
7. 139331 6. 695329 7. 051697 6. 936356 7. 251162 5. 996196 5. 722893 6. 246654 5. 871364  
9. 210654 8. 961321 8. 969418 8. 658901 8. 974544 8. 964767 9. 409988 9. 084533 9. 196734  
8. 244958 8. 226487 7. 608945 7. 650139 8. 132233 7. 990566 7. 786528 7. 72871 7. 887761  
6. 463757 6. 048661 6. 048284 5. 835991 5. 873052 6. 8612 6. 580057 6. 339602 6. 500047  
0. 955045 0. 997586 1. 227899 2. 055821 1. 724685 1. 40033 2. 084019 1. 20733 1. 485501  
4. 826729 4. 965402 4. 350642 4. 872817 5. 431202 3. 55746 5. 461093 4. 984667 5. 324886  
1. 422154 1. 257928 2. 05304 2. 835459 1. 850566 1. 652324 2. 312753 1. 302914 2. 369885  
1. 900069 1. 636968 1. 793416 2. 135678 1. 7802 1. 355381 1. 903379 2. 060919 1. 917901  
2. 87389 3. 219224 3. 065615 3. 154572 3. 210948 3. 51353 2. 797113 2. 827079 2. 391867  
11. 68433 10. 56504 11. 12784 10. 17697 9. 647944 11. 1146 10. 82651 11. 4184 8. 484408  
2. 068521 2. 373525 2. 714934 3. 152744 2. 591703 2. 494285 1. 877614 2. 000371 2. 135008  
11. 75496 11. 49442 11. 78544 11. 33033 11. 01474 11. 63837 11. 63271 11. 73556 10. 31596  
3. 993706 2. 990563 3. 717236 4. 786599 2. 813681 3. 219623 3. 113966 5. 145314 3. 307477  
10. 96406 10. 36137 10. 15589 9. 607773 9. 395453 10. 33155 10. 35656 10. 55488 8. 854822

1. 466638 1. 1091 1. 238535 1. 382407 1. 413956 1. 084771 1. 383762 1. 161979 1. 510325  
2. 287968 2. 048857 1. 858279 1. 78434 0. 956641 1. 630177 1. 854697 5. 772493 1. 265437  
2. 408101 2. 735244 2. 303476 3. 451548 3. 825496 3. 231067 2. 361163 2. 568873 2. 611287  
3. 522684 2. 484581 2. 705736 3. 804217 2. 48373 3. 098314 2. 724006 4. 264104 2. 441267  
9. 101532 8. 972744 8. 810285 8. 624574 8. 869093 8. 527951 9. 105095 9. 144604 8. 943048  
1. 996949 2. 17744 2. 792367 2. 828212 1. 765658 2. 307511 2. 233629 1. 861095 3. 358268  
5. 983717 5. 305503 5. 218998 5. 738942 5. 988391 4. 900016 5. 778714 5. 288806 5. 365276  
2. 290823 3. 892347 2. 211763 2. 383433 4. 695184 5. 194049 3. 807069 3. 326219 3. 73048  
6. 073209 6. 533258 6. 392732 6. 286057 7. 082018 6. 164217 6. 395584 6. 617707 5. 763662  
3. 933465 4. 283897 3. 370885 3. 145203 5. 42741 4. 158286 3. 791222 4. 191538 2. 661242  
6. 968504 6. 391632 5. 6446 6. 550569 6. 054676 5. 449176 6. 09404 5. 978627 4. 632249  
2. 599553 1. 575307 1. 427441 2. 38764 2. 444713 2. 41289 2. 672666 1. 954201 1. 923576  
3. 171111 3. 021975 3. 203471 3. 28345 3. 098482 3. 422593 3. 161734 2. 639304 3. 246683  
1. 258381 1. 729211 2. 295969 2. 936034 1. 221629 2. 867834 2. 073285 1. 999918 1. 7925  
1. 666192 2. 126703 2. 368834 2. 923668 1. 842384 1. 700113 1. 952915 1. 934476 2. 165869  
6. 047766 6. 575673 6. 127366 5. 453343 6. 298568 6. 081945 6. 345972 6. 058162 5. 756803  
6. 752436 7. 05263 6. 630398 7. 506544 7. 18636 7. 12112 7. 29185 6. 787798 6. 883436  
7. 966553 7. 649067 7. 545541 7. 802294 7. 683964 7. 399521 8. 006746 7. 723985 7. 60705  
1. 7828 1. 467527 2. 489235 2. 647107 1. 564782 1. 78552 1. 590842 1. 485503 1. 903891  
5. 459432 5. 405196 6. 057496 4. 5174 5. 549197 5. 530218 5. 480822 5. 284323 5. 008771  
8. 431936 8. 350558 8. 392776 8. 378423 8. 262007 8. 524567 8. 18616 8. 351298 8. 156822  
3. 923476 4. 580782 3. 77607 4. 741549 5. 738235 4. 159611 5. 496389 5. 04098 5. 146447  
2. 837531 2. 622614 1. 915521 2. 134732 2. 667357 1. 827252 2. 326402 2. 25456 1. 089165  
5. 26392 5. 145576 2. 783579 3. 776459 5. 545109 3. 892016 4. 321718 4. 824109 2. 488758  
8. 423197 8. 156216 8. 498785 7. 517322 8. 096909 8. 514097 8. 504531 8. 673609 8. 28062  
8. 164758 8. 301767 8. 053185 8. 158238 8. 514392 8. 311145 8. 322935 8. 243616 7. 972115  
8. 122772 7. 453139 5. 346814 7. 188696 7. 144042 7. 173218 8. 098921 8. 506859 8. 037578  
3. 487706 4. 14051 4. 19959 2. 540943 3. 239333 2. 338073 3. 596759 4. 058997 3. 607371  
6. 892683 7. 124366 6. 456443 7. 405134 7. 271326 6. 972276 7. 260089 7. 038129 7. 698061  
0. 972511 0. 732719 0. 908099 0. 801962 0. 734719 1. 184759 1. 136743 1. 971701 0. 999743  
2. 066518 1. 841468 3. 272298 2. 243223 2. 058508 2. 608004 3. 437885 2. 033157 3. 822722  
2. 200017 1. 993449 3. 0071 3. 238361 2. 193211 1. 755179 2. 584745 2. 835902 3. 265019  
1. 055382 1. 229818 0. 933841 1. 055989 0. 677894 1. 3316 1. 226393 1. 207922 1. 034674  
1. 658613 1. 965503 2. 080331 2. 039888 2. 059592 1. 387621 1. 778463 2. 534028 1. 819613  
6. 442068 6. 594576 6. 890227 6. 137355 6. 252486 6. 723311 6. 274816 6. 767947 6. 165952  
1. 059069 1. 566938 1. 748219 2. 252738 1. 517672 3. 1394 1. 738868 1. 702505 2. 064393  
2. 452821 3. 753142 1. 678124 4. 145771 4. 441576 2. 709129 1. 956052 4. 346722 3. 161347  
4. 293857 4. 337151 3. 39539 5. 119129 4. 106364 4. 383629 4. 419508 3. 686284 4. 224455  
2. 420278 2. 405846 2. 199491 2. 283701 1. 923229 2. 775377 1. 341156 1. 65383 2. 176223  
5. 30446 4. 170284 4. 757464 5. 456191 4. 501461 6. 124296 5. 00405 5. 138238 6. 671793  
2. 061179 3. 681615 4. 901847 2. 266309 2. 32561 3. 29205 4. 68474 3. 356644 3. 800416  
4. 465472 4. 429414 4. 629491 4. 988589 4. 402442 4. 245536 4. 230374 5. 164109 3. 685525  
1. 905556 1. 045491 1. 327149 2. 191795 2. 28294 2. 465859 1. 895265 1. 828876 1. 919025  
3. 084525 3. 936107 4. 709063 4. 762637 4. 529877 3. 006246 4. 88036 4. 591573 3. 487676  
4. 558287 4. 682944 5. 386613 5. 653804 4. 586515 4. 101486 4. 166312 4. 741302 4. 474416  
5. 745967 5. 691007 6. 049866 6. 262151 6. 265292 4. 854134 6. 192736 6. 647968 5. 250292  
2. 493642 1. 356131 1. 195089 2. 842464 1. 142063 1. 590882 1. 408732 1. 83896 2. 130295  
6. 845413 6. 759247 6. 811842 6. 541177 6. 73043 6. 532427 7. 289857 6. 945201 7. 4405  
6. 587357 6. 019061 6. 293018 6. 552688 5. 639633 6. 647305 6. 251959 5. 708678 6. 890467  
1. 796847 2. 651851 2. 492998 2. 072422 1. 769896 3. 010193 1. 681443 1. 819972 1. 563598  
6. 192577 6. 941803 7. 348727 3. 685623 7. 282358 6. 554798 6. 320744 6. 109677 5. 747008

7. 815477 7. 632118 7. 694071 7. 562435 7. 7299 8. 057012 7. 290639 7. 811963 6. 446479  
6. 50896 7. 390127 6. 989095 6. 988722 7. 382474 6. 553371 6. 317205 7. 869737 5. 549722  
4. 618214 4. 643241 4. 120629 4. 071461 3. 891156 4. 289527 4. 08077 4. 593564 4. 118995  
6. 60557 6. 226219 6. 125993 5. 742739 5. 514303 6. 103473 6. 247378 5. 661336 5. 711475  
1. 975075 2. 836055 2. 968172 2. 725528 2. 280734 2. 786693 2. 754761 2. 746064 2. 518524  
3. 593184 3. 99277 3. 472939 4. 018677 3. 84906 3. 257847 3. 517334 3. 462757 1. 923489  
5. 960842 6. 246159 6. 154125 6. 3091 6. 093251 5. 579865 6. 08883 5. 910542 5. 225041  
9. 926529 10. 02856 9. 685011 9. 492779 10. 01327 9. 899732 10. 04776 9. 938154 9. 711859  
1. 559585 1. 705728 2. 261579 2. 772061 2. 353532 1. 464018 2. 013097 2. 76509 1. 545606  
7. 767638 8. 094652 7. 625929 8. 075538 8. 34202 7. 653264 8. 181976 8. 458367 8. 33637  
6. 19798 5. 535087 6. 621861 6. 131764 5. 881845 5. 88286 6. 156874 6. 245629 5. 112557  
8. 622879 8. 632463 8. 075284 8. 407338 8. 522453 8. 17576 8. 508427 8. 727865 8. 412581  
9. 506146 9. 871771 9. 413674 9. 364772 9. 243787 9. 61617 9. 430003 9. 540379 9. 553371  
6. 663658 6. 689465 6. 725782 7. 022011 6. 95362 7. 13074 6. 465901 7. 227201 7. 015976  
6. 565568 6. 641815 6. 095423 7. 308817 7. 253384 6. 430549 7. 212515 6. 829001 6. 383174  
6. 726295 6. 944094 6. 992173 6. 899304 6. 88538 7. 39372 6. 852952 7. 218038 6. 805042  
5. 918395 6. 099262 5. 950464 6. 001621 6. 3466 6. 259204 6. 591904 6. 769616 5. 558199  
5. 283048 5. 327595 3. 845851 4. 174648 5. 065314 3. 469531 5. 547637 5. 195847 3. 888726  
6. 998179 6. 954849 6. 880677 6. 984326 6. 894965 6. 837149 6. 873244 6. 691881 5. 583808  
5. 414399 4. 310829 4. 277132 5. 326246 4. 496895 4. 380851 4. 258702 4. 543549 4. 764446  
2. 137998 1. 389981 1. 733082 1. 589781 2. 028225 2. 31027 2. 189988 1. 341781 1. 339032  
3. 14947 4. 127053 3. 917368 4. 548906 4. 45365 3. 128298 4. 059509 4. 039354 3. 543701  
8. 128732 7. 839364 6. 985623 7. 913875 7. 709639 7. 911945 7. 822519 7. 789799 7. 235986  
7. 777537 7. 796919 7. 8501 7. 729907 7. 93106 7. 940447 7. 833262 7. 776548 7. 855605  
8. 712046 9. 201953 9. 230084 9. 02983 9. 707995 8. 853231 8. 597759 8. 419953 7. 75213  
8. 045327 8. 036013 8. 047514 7. 66096 7. 824377 7. 714543 7. 697677 8. 020737 7. 215079  
6. 482884 7. 015779 6. 866747 6. 842541 6. 996083 6. 190693 6. 676595 6. 779052 5. 809619  
9. 072239 8. 641592 8. 575473 8. 728417 8. 550095 8. 518126 9. 040198 8. 689929 9. 126196  
2. 949388 2. 895415 2. 636981 4. 078687 2. 46672 2. 826229 2. 39525 2. 506932 2. 73046  
6. 074702 5. 918411 6. 196749 5. 923685 5. 581158 5. 005134 5. 204964 6. 38032 4. 64896  
1. 890501 1. 695525 2. 953743 2. 540606 1. 801479 2. 367978 2. 205111 1. 869887 1. 781659  
9. 031797 9. 531549 9. 403568 9. 259073 9. 473791 9. 084761 8. 995385 9. 597641 8. 425761  
6. 579783 6. 044776 6. 935215 6. 987461 6. 944637 6. 80811 6. 513816 6. 086413 6. 69016  
2. 406267 2. 969945 2. 680128 2. 829773 3. 066375 2. 262199 2. 692929 3. 114814 2. 094183  
7. 759703 8. 571254 8. 9066 8. 927797 7. 029797 8. 021329 8. 209759 8. 134286 6. 809239  
3. 244548 4. 46213 4. 240653 4. 499075 3. 340049 3. 708252 3. 82534 4. 220466 3. 159297  
5. 72625 4. 706211 4. 959626 6. 67417 6. 608964 4. 510808 6. 266195 6. 692416 3. 746358  
5. 792274 5. 793897 6. 078336 5. 864169 5. 932998 5. 289973 5. 731213 6. 136513 5. 503073  
3. 152696 3. 143751 3. 152747 3. 449937 3. 138096 2. 685649 3. 051786 2. 978797 2. 66866  
9. 387195 9. 573975 9. 597723 9. 52846 9. 465276 9. 114298 9. 591049 9. 766335 9. 188774  
6. 035378 6. 366899 5. 98969 6. 000203 7. 233934 5. 531228 6. 653316 6. 072786 5. 234034  
1. 110819 2. 127464 1. 979269 1. 464488 9. 118115 2. 09499 8. 34211 1. 684736 1. 905837  
2. 393328 3. 10997 3. 103488 2. 738913 2. 554788 2. 346533 2. 539647 3. 381796 2. 721228  
2. 587516 1. 78132 2. 178085 1. 806424 2. 120304 3. 716859 2. 19019 1. 479046 3. 626213  
4. 721765 3. 699773 4. 216648 5. 758342 3. 84187 5. 401904 3. 584861 5. 000367 5. 761641  
8. 956843 9. 045227 9. 139824 8. 882271 8. 887473 8. 973269 8. 898366 9. 143358 8. 28326  
6. 828303 6. 738563 6. 775665 6. 661802 7. 007436 7. 064024 7. 104844 6. 971891 6. 889535  
3. 513989 2. 908851 3. 099135 3. 882329 3. 108006 3. 221366 3. 220433 3. 178964 3. 074531  
4. 467581 3. 545263 3. 842962 3. 702529 3. 753376 4. 72577 3. 493529 3. 368339 4. 895151  
2. 207282 1. 827224 1. 509883 1. 637872 1. 369382 1. 941605 1. 289302 2. 296512 1. 607133  
3. 167767 2. 849022 2. 805062 3. 416921 3. 272731 2. 519176 2. 607551 2. 927802 2. 879316

4. 465468 3. 761965 2. 28595 3. 201316 4. 301116 3. 334208 3. 188191 3. 080368 1. 895756  
4. 917203 5. 862146 5. 392824 6. 632028 5. 735894 5. 257773 6. 283547 5. 885655 5. 291295  
4. 625587 4. 297363 3. 733124 4. 055732 3. 593347 4. 147842 4. 635439 3. 924667 3. 965946  
4. 879834 5. 437771 4. 760023 5. 807355 6. 097896 5. 295431 5. 075563 5. 374585 1. 911393  
2. 806306 2. 284924 1. 725809 2. 952854 3. 349316 2. 081486 3. 064496 3. 405564 3. 471351  
4. 95831 4. 289642 5. 063453 4. 256711 4. 036566 4. 637176 4. 711656 4. 961808 5. 314577  
6. 684774 6. 266233 5. 840265 5. 875847 6. 516569 5. 127581 6. 705199 6. 689519 6. 039818  
3. 546635 2. 705978 3. 15342 4. 000741 3. 240493 3. 467524 3. 770158 3. 694085 2. 771841  
1. 423763 1. 291614 1. 80294 2. 935837 1. 80785 1. 537342 2. 051752 1. 873276 1. 482269  
2. 733303 3. 869198 3. 286892 1. 126364 2. 85723 2. 162906 3. 385496 2. 090347 3. 886782  
5. 15579 4. 98515 5. 078967 4. 903145 5. 467946 5. 953943 5. 158179 5. 262918 5. 12288  
5. 452239 5. 545144 5. 3935 4. 977783 6. 301433 5. 977301 6. 423875 5. 401187 6. 214138  
6. 703819 6. 464785 6. 003231 4. 801238 6. 959602 5. 805932 6. 867327 5. 115176 6. 621788  
2. 75588 2. 009304 1. 935746 2. 024531 2. 40609 3. 667971 3. 26693 2. 348737 3. 433968  
4. 422195 4. 516194 5. 326751 4. 778234 3. 584942 3. 763673 4. 017494 4. 602072 3. 761256  
2. 024079 2. 700206 2. 143276 3. 001298 4. 749328 2. 512252 3. 338916 2. 675065 1. 791065  
7. 073118 6. 650762 5. 799159 6. 132859 6. 915323 6. 679038 6. 38023 6. 740414 5. 750555  
5. 151751 6. 42797 5. 819339 6. 421174 6. 157779 6. 053583 5. 485978 5. 789259 5. 473961  
3. 396428 4. 932871 5. 062586 4. 303901 5. 319104 3. 868782 3. 949447 4. 551334 6. 112476  
2. 763876 2. 355478 3. 061274 3. 623897 2. 35267 2. 916477 2. 442687 2. 699529 2. 281671  
1. 631756 1. 754206 1. 433048 2. 162593 1. 44036 1. 773074 1. 838576 1. 719657 1. 454533  
1. 452517 2. 891578 2. 315091 3. 080236 1. 950704 1. 877928 3. 021589 1. 099549 2. 301956  
5. 019045 4. 310052 4. 065613 3. 462618 4. 558702 5. 06231 3. 947921 4. 467514 5. 591327  
2. 497931 2. 881572 2. 677136 3. 170342 2. 917995 2. 278729 2. 245631 2. 163951 2. 517256  
2. 545077 2. 213188 2. 66434 3. 234762 1. 731706 3. 617679 2. 743428 2. 417316 2. 378732  
3. 886952 3. 737127 4. 331523 3. 715822 4. 188525 5. 187646 4. 236885 3. 682288 4. 881855  
3. 022852 2. 849524 3. 361083 1. 277699 1. 897862 2. 417016 3. 183259 3. 594996 4. 528969  
1. 422092 1. 30897 1. 572615 1. 314764 2. 077164 1. 691889 1. 140168 2. 276225 1. 372238  
3. 498616 4. 527968 4. 139891 3. 323797 4. 811402 4. 691234 3. 750865 4. 407832 2. 936093  
5. 456166 5. 245753 4. 843646 5. 132711 5. 230056 5. 013265 4. 548044 5. 390533 4. 18424  
6. 375312 5. 89156 5. 396671 5. 644337 5. 815552 5. 141797 5. 762774 6. 199153 5. 947022  
1. 45345 1. 174673 1. 077792 1. 998222 1. 409139 1. 856932 1. 804486 1. 725515 1. 729085  
6. 70411 6. 372504 6. 772135 5. 064947 6. 45861 6. 594066 6. 016504 6. 38818 6. 348174  
1. 780274 1. 700262 1. 076067 2. 079159 1. 473965 1. 081881 1. 612528 1. 485858 1. 447323  
0. 766527 0. 808772 1. 823057 2. 340219 1. 706412 1. 099665 1. 813665 1. 557486 1. 512615  
1. 370923 1. 895286 1. 3575 1. 215331 1. 026957 1. 318325 1. 208417 1. 491694 0. 854058  
1. 502078 1. 374243 1. 951979 1. 75111 1. 629215 1. 619684 1. 250918 2. 137283 1. 410178  
1. 473173 1. 7632 1. 99906 2. 37665 1. 666093 1. 62886 1. 977614 2. 396444 1. 711302  
2. 034701 1. 740994 2. 246386 2. 150001 1. 655946 1. 665314 1. 598407 2. 266338 2. 628878  
1. 280021 2. 375327 3. 122738 3. 798196 2. 314318 1. 959785 2. 70867 1. 798887 2. 583317  
2. 204917 2. 201879 1. 33066 1. 567103 1. 434733 2. 282404 1. 775526 2. 082323 2. 552349  
1. 114388 0. 977279 1. 054849 1. 001409 1. 035432 1. 427728 0. 94943 1. 018878 0. 952565  
4. 750949 6. 267878 5. 270093 5. 701547 5. 413403 4. 852549 4. 261401 5. 561824 3. 990965  
8. 460007 8. 969769 8. 772116 4. 981528 7. 949428 8. 827327 8. 285327 8. 747205 7. 489297  
3. 526761 3. 519442 3. 219514 3. 684134 2. 990025 2. 564977 2. 820739 3. 356765 3. 024977  
2. 451357 3. 32696 3. 482088 3. 355032 1. 974182 3. 569035 2. 734011 2. 114156 3. 595255  
8. 641003 6. 851488 6. 839687 9. 264137 7. 154902 7. 503824 8. 007836 8. 079684 9. 409588  
4. 92739 4. 81185 4. 522503 4. 511316 4. 824669 4. 976297 4. 94156 4. 683539 3. 995609  
9. 297931 9. 198485 9. 158421 9. 048656 9. 118837 8. 966068 9. 378038 9. 343525 9. 759852  
8. 103182 8. 0707 7. 905121 7. 533181 8. 11177 7. 704795 8. 595291 7. 905029 7. 567309  
7. 303077 6. 50177 7. 191481 5. 071911 6. 541223 7. 156006 6. 829075 7. 693834 8. 151005

9. 079773 9. 127937 8. 970895 9. 230214 8. 935147 9. 121815 9. 349491 9. 264372 9. 253718  
6. 185035 6. 405229 6. 350095 6. 61008 6. 644964 6. 462482 6. 822154 6. 262085 6. 316763  
9. 007779 8. 223834 8. 663796 8. 515626 8. 687442 8. 69576 8. 944204 7. 863673 9. 095089  
10. 0032 9. 467956 9. 771609 9. 834119 9. 399705 9. 46926 10. 00254 9. 594994 9. 903854  
4. 323106 4. 457398 4. 689109 4. 492613 4. 266797 3. 541698 4. 667239 4. 418208 4. 321186  
1. 590283 1. 719639 1. 719639 1. 532396 1. 52513 1. 663919 1. 343441 1. 972213 1. 302818  
1. 48703 1. 219561 1. 783582 1. 856477 1. 445143 1. 539981 1. 082078 1. 371915 1. 294291  
10. 60148 10. 27289 10. 16073 10. 21003 10. 10924 10. 29388 10. 50231 10. 18001 10. 30427  
1. 108952 0. 942009 1. 01693 1. 968096 1. 324027 1. 349883 1. 312305 1. 028743 1. 093331  
1. 508487 1. 886939 1. 378059 2. 111459 1. 787131 1. 840651 1. 55564 1. 596624 1. 944872  
2. 036065 1. 044513 3. 222954 2. 139482 0. 996703 1. 418279 2. 597331 4. 631569 3. 87748  
1. 251007 3. 003827 1. 878356 2. 337202 1. 490429 1. 200656 1. 985982 3. 459803 3. 984951  
7. 65893 7. 697676 7. 254473 7. 055841 7. 69394 7. 276333 7. 803475 7. 587988 6. 821734  
9. 214506 8. 752096 8. 589779 8. 069045 8. 849406 8. 895289 9. 155014 8. 777056 9. 149898  
0. 895198 1. 841461 1. 706117 2. 532516 1. 841461 1. 726415 2. 92724 2. 456419 1. 582777  
1. 717484 1. 944239 1. 878452 3. 26892 1. 629571 2. 411774 1. 912184 1. 347546 2. 291738  
3. 818812 4. 220216 5. 179344 2. 553867 4. 98763 4. 408459 3. 730813 3. 982121 4. 618439  
2. 719033 2. 794577 3. 351205 3. 056481 3. 429164 3. 615426 2. 380294 3. 314584 4. 690841  
1. 965502 2. 107291 1. 975016 3. 340038 2. 347005 1. 910519 1. 976242 1. 5242 1. 831718  
5. 322721 5. 245572 5. 42353 5. 214872 5. 183487 4. 749678 5. 731955 4. 872888 4. 683323  
2. 147288 3. 034529 2. 669731 2. 277468 2. 292868 2. 57283 3. 013721 2. 33276 2. 138786  
5. 549621 4. 872631 5. 556118 3. 834132 5. 592154 5. 394814 5. 123611 5. 399684 5. 091744  
5. 467979 6. 041097 5. 885645 7. 207768 5. 603173 6. 531816 5. 669486 6. 425459 5. 961275  
2. 711609 2. 76114 3. 411745 2. 322196 3. 281268 3. 792362 3. 549987 3. 23112 3. 305102  
5. 730633 7. 454943 7. 075832 6. 581016 6. 662481 6. 899063 7. 114113 6. 762469 5. 311523  
2. 728537 4. 214668 4. 61845 3. 685414 4. 522523 3. 581029 3. 669262 4. 854264 3. 825942  
6. 178993 5. 960049 6. 164261 6. 226335 5. 996163 5. 437742 6. 235597 5. 932954 5. 922638  
2. 309711 3. 109088 4. 388766 2. 895483 3. 768153 2. 575912 4. 17395 3. 661424 2. 125971  
2. 065992 2. 304107 0. 89307 3. 323711 1. 573657 2. 175905 0. 87122 2. 313379 0. 946837  
2. 239938 3. 258959 3. 246535 2. 063507 1. 587414 3. 02315 1. 481223 2. 656126 1. 97917  
6. 235416 6. 06705 5. 789144 6. 010473 5. 805325 6. 511925 5. 391388 6. 208202 5. 650907  
1. 726242 1. 639199 2. 679929 2. 417376 2. 044583 2. 385072 2. 16753 2. 023611 1. 595484  
7. 491298 7. 34064 7. 845631 7. 77541 7. 832221 6. 921943 6. 904602 7. 216595 6. 662082  
3. 330961 4. 074146 4. 413853 3. 423029 3. 599125 3. 681207 3. 165493 3. 926307 3. 830572  
3. 372699 2. 679755 3. 512516 2. 895429 2. 939762 2. 14506 2. 428419 2. 536087 2. 523371  
3. 81592 4. 459228 3. 628216 2. 860315 3. 540639 3. 632554 3. 246453 4. 068365 2. 436057  
4. 15907 3. 936029 3. 968708 2. 841886 3. 670199 3. 754097 4. 274404 3. 994708 3. 327005  
7. 051906 6. 899249 6. 460457 6. 408006 6. 729093 6. 41228 6. 490249 6. 710926 5. 4012  
3. 244348 3. 481198 4. 491924 3. 191792 3. 879405 3. 143292 3. 925143 3. 539061 2. 390351  
2. 752837 2. 907343 3. 965745 2. 655629 3. 015338 2. 667626 3. 305913 3. 658636 3. 072966  
1. 541988 1. 843461 1. 50232 1. 711316 1. 36 1. 196592 2. 012948 1. 22103 1. 554763  
5. 795543 5. 572842 6. 311776 5. 793044 5. 242673 5. 43744 6. 117538 5. 612133 3. 929094  
2. 425335 3. 90934 2. 989153 2. 309871 3. 527826 3. 805598 3. 349426 3. 411161 2. 721615  
7. 126302 7. 502474 7. 365173 8. 07855 7. 382561 6. 184559 7. 067838 7. 187481 5. 815388  
2. 270856 4. 242256 2. 612452 1. 84874 2. 780174 2. 807638 2. 508763 4. 220916 3. 60937  
4. 565754 4. 331423 3. 860198 3. 459998 4. 539304 3. 641326 4. 836041 4. 431719 4. 788214  
4. 13262 4. 707452 4. 466601 3. 088387 5. 002709 4. 464974 4. 294534 5. 101182 2. 698682  
1. 868773 1. 923657 3. 033893 2. 143636 1. 889329 1. 795553 2. 029554 2. 89794 2. 9621  
1. 944074 1. 822916 1. 215663 2. 382534 1. 692215 3. 697913 1. 122462 1. 189189 2. 685251  
2. 559874 2. 037962 1. 702916 2. 305227 2. 451409 3. 010765 1. 96489 2. 04512 2. 880666  
4. 477352 4. 539903 4. 394921 4. 257565 3. 991417 4. 257453 3. 976638 4. 126268 4. 256334



3. 927525 4. 231535 3. 862364 1. 657161 3. 948365 4. 483431 3. 577655 3. 431728 3. 335863  
3. 268549 3. 353768 3. 562517 2. 774541 3. 890032 3. 310421 2. 340356 3. 622653 4. 194997  
3. 406193 4. 022082 2. 953441 3. 181022 2. 902913 3. 991356 2. 407454 3. 420836 2. 685428  
3. 997664 3. 401877 3. 514599 3. 843968 2. 99783 3. 489795 3. 002649 3. 380558 4. 135382  
3. 985466 2. 722785 3. 407679 3. 516827 3. 073481 3. 822868 3. 926674 3. 277338 4. 370886  
5. 012081 4. 591306 4. 172622 3. 618862 3. 580313 4. 602137 4. 067104 3. 13017 3. 634705  
3. 815704 3. 555723 2. 769702 3. 946501 2. 793677 3. 56058 3. 167371 2. 48872 2. 661374  
2. 0909 2. 769895 2. 632743 2. 392487 2. 94688 1. 239079 1. 824943 2. 715174 1. 029037  
1. 140297 1. 389808 1. 061485 1. 627377 1. 49226 1. 554747 1. 037326 1. 141088 1. 639126  
8. 211182 8. 392713 8. 098671 8. 518746 7. 741783 8. 024385 7. 754938 8. 21658 8. 339569  
0. 541501 0. 990252 1. 938096 1. 199143 1. 332853 1. 459098 1. 013218 2. 979813 1. 476038  
4. 138971 4. 280238 4. 270755 4. 487303 3. 714689 3. 70256 4. 060096 4. 168376 3. 480441  
6. 970221 4. 109843 6. 401036 6. 123605 5. 414216 8. 034015 5. 832119 6. 777526 7. 570218  
8. 804398 8. 947544 7. 22294 7. 674626 7. 974214 8. 039743 7. 292315 6. 708377 7. 508785  
4. 082939 3. 854008 4. 058282 3. 607235 3. 981451 4. 251217 3. 165469 3. 652425 3. 647954  
4. 954683 5. 438477 5. 4535 5. 588196 5. 418596 5. 741215 5. 146241 4. 91492 5. 572624  
1. 102786 0. 717659 0. 859199 1. 032644 1. 276191 0. 645792 1. 340992 0. 950205 1. 745161  
6. 363125 6. 033734 5. 858868 6. 228253 6. 099623 5. 200292 5. 995086 6. 300558 6. 11296  
4. 697676 5. 316492 4. 529766 4. 275189 4. 400553 4. 158949 3. 951094 4. 399208 3. 96125  
1. 668468 1. 761439 1. 448323 2. 45129 1. 25175 1. 826896 1. 454104 1. 622803 2. 063944  
1. 265457 1. 607859 1. 147769 1. 577786 1. 237299 1. 55549 1. 397555 1. 179736 2. 487638  
2. 17841 1. 483243 2. 250131 1. 184462 1. 211116 1. 621214 1. 906054 1. 463025 2. 380547  
1. 276019 1. 20607 1. 469269 1. 78304 1. 196203 1. 937011 1. 496659 1. 638367 1. 728398  
4. 79018 3. 196438 3. 736993 3. 1164 2. 936028 3. 476926 2. 90834 3. 898795 4. 396125  
2. 128444 1. 920727 2. 011459 2. 397193 1. 6912 1. 842076 1. 682242 1. 87184 1. 84498  
6. 3238 6. 923621 6. 41489 6. 37353 6. 795864 5. 923294 6. 289116 6. 891514 5. 142765  
2. 052033 2. 641578 2. 320603 2. 897992 2. 806958 2. 617249 1. 997956 2. 728726 2. 316124  
6. 023797 6. 046613 5. 426354 5. 81021 5. 690799 5. 946114 5. 72027 5. 950475 6. 660195  
2. 331214 1. 598295 1. 723694 3. 724327 1. 310186 3. 164866 2. 30853 2. 403786 2. 234685  
7. 316294 7. 465461 7. 271139 6. 710516 7. 662458 7. 455556 7. 43357 7. 300828 7. 439358  
5. 156702 5. 083471 5. 308481 4. 594218 4. 793357 4. 806746 4. 798527 5. 709219 4. 130975  
2. 517794 2. 359206 2. 389407 4. 160776 2. 020068 2. 769332 4. 063824 2. 444252 2. 801706  
2. 488535 2. 579412 2. 835229 2. 723285 2. 221857 2. 697744 1. 965812 2. 765558 2. 566393  
4. 26552 4. 321628 5. 420611 3. 665658 2. 821949 3. 685478 3. 801224 4. 415995 4. 242817  
3. 557017 1. 137532 1. 502203 1. 251311 1. 195479 4. 431501 0. 895779 1. 157455 4. 359459  
2. 441895 2. 647972 2. 493131 2. 772762 2. 508833 2. 475052 2. 111551 2. 382654 2. 758922  
7. 407913 6. 881286 6. 843544 7. 130295 7. 219046 6. 981109 7. 288183 7. 089817 7. 169408  
1. 195764 1. 543347 1. 442468 1. 629563 1. 639079 2. 108078 1. 309582 1. 161537 1. 482782  
5. 745698 6. 03269 5. 935134 6. 133737 6. 310294 5. 774395 5. 703462 6. 386582 5. 625682  
6. 842913 6. 788785 6. 736291 6. 761529 7. 08168 6. 443182 6. 624511 6. 346863 5. 864386  
7. 527738 7. 300472 7. 412068 7. 605961 7. 512902 7. 462857 7. 464089 7. 50905 7. 027861  
9. 724331 9. 599139 9. 537797 9. 17398 9. 722854 9. 302059 9. 823652 9. 705625 9. 904101  
0. 865249 0. 466799 0. 783428 2. 187055 0. 841295 3. 50658 1. 451112 1. 152716 1. 292672  
2. 747438 0. 774855 1. 627396 3. 084317 0. 643988 2. 524631 1. 617397 2. 355952 2. 578663  
6. 767909 6. 467913 6. 602061 7. 402307 7. 035928 6. 641209 7. 107185 6. 979848 6. 510897  
2. 819991 2. 126396 3. 238027 1. 770376 3. 007255 3. 202276 2. 894522 2. 911263 3. 746754  
3. 92526 4. 507609 4. 93045 4. 557589 3. 560491 6. 184577 4. 147068 2. 843674 6. 155506  
4. 286573 3. 525024 3. 431049 3. 902136 3. 728285 3. 342985 3. 497232 4. 221512 4. 125299  
1. 728484 1. 785942 1. 202904 1. 910105 1. 602173 2. 252688 1. 558732 1. 337421 1. 545868  
3. 625582 1. 652696 4. 870373 1. 960985 1. 551562 2. 114754 3. 615037 1. 909565 1. 395927  
8. 361294 8. 378384 8. 130651 7. 949208 7. 846378 7. 936966 8. 383322 7. 72683 8. 060049

5. 514915 5. 980822 5. 615926 5. 100139 5. 701216 5. 659 5. 32027 5. 748986 5. 260605  
5. 164088 5. 011451 5. 177384 4. 958825 5. 353489 5. 12032 5. 253131 5. 125079 5. 284494  
2. 9332 3. 02937 3. 05089 2. 465671 2. 302849 3. 162828 2. 488879 2. 105528 2. 537912  
6. 242356 5. 8698 6. 079421 5. 943824 6. 226165 5. 538438 6. 094207 6. 408946 6. 764805  
3. 929262 4. 568214 4. 856879 5. 113192 4. 188268 4. 649391 4. 499165 4. 3747 5. 219723  
4. 027446 4. 439425 4. 901979 4. 442414 3. 769377 3. 887782 3. 289787 4. 216707 4. 441057  
8. 940951 9. 145614 8. 62091 8. 834123 9. 267381 8. 849658 8. 793929 8. 72158 9. 308435  
9. 241298 9. 083504 9. 212737 8. 92604 9. 225941 9. 092751 9. 420321 8. 895741 10. 23364  
9. 803974 9. 264696 9. 528097 9. 218052 9. 243377 9. 413757 10. 0341 9. 174111 10. 88348  
3. 431813 3. 407853 4. 056163 3. 19873 3. 330952 3. 085398 3. 094812 3. 277393 4. 512  
5. 276701 6. 06517 6. 473897 5. 026471 5. 878487 5. 140206 6. 084717 6. 816679 6. 563638  
7. 52513 7. 662915 7. 075793 7. 311854 7. 507072 7. 13647 7. 637707 7. 699018 7. 264041  
9. 731324 9. 742089 9. 803117 9. 556527 9. 954618 9. 663904 9. 966966 9. 841191 9. 286437  
5. 052569 5. 529678 4. 265039 5. 383785 5. 957176 5. 264874 5. 210208 4. 555613 5. 974929  
3. 323241 4. 16598 2. 768649 4. 408514 2. 85621 3. 138404 3. 032452 3. 817379 5. 725756  
1. 764598 2. 488959 1. 510621 2. 411109 1. 804797 2. 696219 1. 273376 1. 949914 2. 003355  
10. 76769 10. 71752 10. 54745 10. 41414 10. 52317 10. 61238 10. 78212 10. 68319 11. 0277  
8. 746359 8. 95042 8. 807366 8. 335801 9. 044996 9. 03794 8. 873026 8. 943128 9. 065661  
8. 63671 8. 830065 8. 711234 9. 055648 9. 412974 8. 377867 8. 501235 8. 555621 9. 246628  
6. 559511 6. 404217 6. 154013 5. 31863 6. 047817 4. 346035 6. 071641 6. 513782 5. 638679  
4. 811784 5. 005316 3. 705478 4. 493978 4. 967312 4. 669546 5. 140816 4. 279146 4. 149643  
6. 047558 5. 877098 6. 385081 6. 11106 6. 068903 5. 851601 6. 316141 6. 076869 7. 014149  
3. 196966 3. 015651 3. 738866 4. 23407 3. 66873 3. 781679 3. 815375 4. 151866 3. 102719  
10. 67703 10. 434 10. 48905 10. 20144 10. 58249 10. 43729 10. 73432 10. 45671 11. 11952  
8. 17397 7. 656417 7. 544564 7. 845963 7. 727368 7. 769767 8. 216956 7. 620768 9. 111644  
2. 879718 2. 75616 2. 485097 2. 375634 3. 37403 2. 177791 2. 237819 1. 651556 2. 303353  
5. 329655 5. 094558 5. 058348 5. 109609 5. 142403 5. 0239 5. 068669 5. 426682 7. 93169  
7. 042864 6. 897437 7. 221746 7. 28366 7. 262376 6. 805404 6. 730362 7. 459804 6. 404181  
2. 274155 2. 348536 2. 330832 2. 357299 2. 584253 2. 446833 2. 416715 1. 882977 1. 387423  
3. 330318 3. 275317 3. 383287 3. 133473 3. 718508 3. 261657 2. 628579 2. 625453 3. 330738  
4. 395964 5. 397836 5. 435245 5. 302711 5. 253172 5. 656115 5. 461258 5. 586442 3. 693113  
4. 041025 4. 873294 4. 871412 4. 40465 4. 734514 4. 721258 4. 605422 5. 468286 3. 625335  
5. 69108 5. 698211 5. 629582 4. 801547 6. 071208 5. 841539 5. 60381 5. 735333 4. 656634  
6. 680482 6. 607696 6. 427725 6. 165006 6. 771608 5. 857312 6. 885158 6. 701548 6. 81544  
0. 376401 0. 793404 0. 510291 0. 919351 1. 025733 1. 037799 0. 510863 0. 93348 1. 312176  
0. 81309 1. 182085 1. 219027 2. 854503 1. 430829 0. 934427 1. 455631 1. 276959 1. 319111  
10. 03563 9. 987845 10. 12021 9. 506666 9. 885755 9. 955301 10. 16834 9. 915062 10. 07497  
1. 244652 2. 01282 1. 434961 2. 474579 1. 8447 1. 445109 1. 747458 1. 32809 1. 416729  
1. 343663 1. 999279 2. 207594 1. 952729 1. 650687 1. 378367 1. 885422 1. 208561 1. 067914  
1. 048197 1. 379834 1. 175034 1. 241245 0. 835882 1. 444886 1. 341688 1. 225914 1. 495099  
2. 021554 1. 223485 1. 227321 2. 078722 1. 289938 1. 698269 1. 335679 1. 38372 1. 171334  
1. 806809 1. 772653 1. 504664 1. 836428 1. 568181 1. 257499 1. 102699 0. 872962 0. 891861  
1. 016749 1. 245524 1. 564291 1. 894556 1. 354827 1. 302736 1. 264058 1. 040396 2. 12653  
5. 441184 4. 792104 5. 022166 5. 161314 5. 097786 3. 56623 5. 601836 4. 598919 4. 548764  
1. 198114 1. 119284 1. 734454 1. 680008 1. 507061 2. 795448 1. 240915 1. 311421 1. 076982  
1. 803781 0. 847218 1. 829248 1. 643888 1. 26205 2. 488644 1. 5361 1. 941862 1. 752561  
1. 489704 1. 118361 3. 311097 2. 724354 1. 905705 2. 366714 2. 399563 3. 358147 3. 337258  
1. 471666 1. 684583 1. 421233 2. 225515 1. 593258 1. 961751 1. 737868 1. 688241 1. 357603  
1. 531633 1. 096337 1. 671869 1. 854303 1. 950885 1. 847591 1. 733647 1. 321682 1. 371938  
1. 995957 1. 604046 1. 991285 2. 218488 1. 456006 1. 779 2. 268428 1. 695789 0. 998839  
2. 91832 1. 563478 2. 376728 3. 274785 1. 393832 2. 227928 2. 393752 1. 657802 2. 777735

6. 097121 6. 458962 6. 060957 6. 458973 6. 776584 6. 020382 6. 259561 6. 3258 6. 295243  
3. 093108 3. 982072 2. 758185 3. 265845 2. 707476 3. 737226 2. 206206 4. 705931 2. 690706  
7. 056121 6. 608373 6. 458957 6. 433288 7. 134802 6. 344668 7. 397089 7. 242078 6. 391266  
3. 489301 4. 139472 5. 282796 4. 183074 5. 271755 3. 623924 3. 63334 4. 559547 3. 713039  
1. 666078 1. 054131 1. 762674 1. 854028 1. 562574 1. 448826 1. 612731 1. 369005 1. 064882  
7. 628297 7. 58824 7. 561719 7. 138302 7. 711087 7. 619834 7. 676053 7. 665918 7. 943378  
4. 88146 5. 542489 5. 942401 4. 988736 5. 217791 5. 098222 5. 459407 4. 923731 5. 272347  
4. 25737 4. 335757 3. 791253 2. 186907 3. 358946 3. 885519 3. 225599 3. 563618 3. 946167  
6. 876601 6. 410968 6. 651443 5. 763586 6. 020647 5. 928887 6. 371239 7. 134313 5. 308268  
2. 135794 1. 734926 1. 975489 2. 465902 1. 670955 1. 832879 2. 427014 2. 138886 1. 973243  
1. 534206 1. 494898 1. 216143 1. 915071 1. 149166 1. 97779 1. 396219 1. 056464 1. 512921  
1. 234405 1. 296802 0. 98376 1. 628208 1. 372011 1. 377443 1. 348256 1. 204092 1. 533622  
1. 943038 2. 037754 1. 79066 2. 745679 1. 484372 1. 813155 2. 412383 2. 101276 1. 902202  
0. 619398 0. 475535 1. 843936 1. 768376 0. 728299 1. 123713 0. 896973 0. 737788 1. 608962  
1. 429881 2. 06606 1. 950763 2. 871228 1. 964232 2. 532351 1. 907526 1. 229462 2. 039058  
2. 017175 2. 004007 1. 780059 2. 4374 1. 476791 1. 413987 1. 889399 2. 000386 1. 714677  
2. 374443 3. 484108 2. 372664 3. 655167 2. 697475 2. 875472 3. 614619 2. 709595 3. 258124  
0. 97736 2. 030043 1. 276571 1. 711213 1. 389805 1. 802716 1. 023443 1. 205891 1. 205891  
0. 702924 1. 036157 1. 168824 1. 245028 0. 689611 1. 505607 1. 695098 1. 130908 1. 292685  
1. 188676 0. 7525 0. 957605 0. 839195 0. 971021 1. 183155 1. 262452 1. 627914 0. 978062  
1. 289281 1. 831152 0. 877952 0. 97649 1. 283426 2. 045113 1. 291237 1. 26114 1. 205651  
2. 980542 2. 233535 2. 508565 3. 800112 1. 214853 1. 805224 3. 045671 1. 645481 1. 033833  
0. 974762 1. 033506 0. 817193 0. 946975 0. 711786 0. 994151 0. 814035 1. 372542 0. 871336  
1. 197938 1. 444309 2. 006401 0. 965712 1. 365279 1. 375542 3. 106149 1. 983878 1. 265087  
3. 003801 3. 961427 2. 962829 2. 314491 2. 698101 1. 873255 1. 406157 2. 007026 3. 88545  
1. 728943 1. 613026 1. 564182 5. 271647 2. 654077 1. 95161 3. 604089 1. 991984 1. 76856  
0. 902738 2. 622556 2. 853907 1. 353096 0. 972694 3. 232589 0. 583104 1. 185491 1. 151587  
1. 286977 0. 977302 0. 720659 1. 465872 0. 518268 1. 031511 1. 374673 1. 099357 1. 019601  
1. 648336 1. 277309 1. 974112 2. 014582 1. 144356 1. 630643 1. 341676 1. 842265 1. 15241  
1. 76616 1. 478265 1. 540644 2. 139499 1. 542952 1. 441866 1. 963965 1. 350476 1. 600067  
3. 003477 3. 16008 2. 533713 2. 833331 3. 272449 2. 815101 1. 834502 3. 03567 2. 573306  
1. 349924 1. 622945 1. 537519 2. 884075 2. 826472 1. 978234 1. 163266 1. 389289 3. 16204  
1. 72298 1. 708757 2. 353862 2. 289116 1. 875982 3. 730526 2. 501349 1. 971662 2. 996312  
6. 613195 2. 182561 5. 309718 4. 448733 3. 213232 6. 853216 4. 52848 5. 973814 6. 629748  
1. 142706 1. 573307 1. 104662 1. 075197 1. 143177 1. 058359 1. 088375 0. 818274 1. 322931  
4. 996754 4. 980474 5. 340078 4. 779007 4. 658181 6. 050688 4. 738996 5. 001604 4. 942413  
1. 209763 1. 257956 1. 620305 1. 376238 1. 345251 1. 536963 1. 599354 1. 435233 2. 03497  
1. 756274 2. 274396 0. 943157 1. 910949 2. 855861 0. 981361 1. 033313 1. 290672 1. 722546  
1. 06805 1. 34127 1. 019703 2. 033176 0. 916204 1. 229379 1. 027814 1. 145226 1. 179787  
1. 239883 1. 849144 1. 520249 0. 701436 2. 128964 2. 529268 0. 534562 1. 08854 2. 759424  
3. 863982 4. 518232 4. 659795 3. 811893 2. 119706 3. 021456 3. 819393 3. 813821 2. 937993  
1. 290573 1. 226359 2. 379176 1. 615172 1. 210322 1. 32269 1. 067629 1. 670906 1. 442056  
1. 127914 0. 827242 0. 864833 2. 103626 1. 162691 1. 115346 1. 045704 1. 508433 1. 182845  
2. 137776 2. 519885 1. 66721 3. 206734 2. 47724 2. 415947 2. 811676 2. 663957 1. 938239  
1. 494113 1. 794604 2. 081973 1. 63559 1. 393182 2. 903585 2. 015017 1. 454018 1. 977977  
6. 052711 5. 283772 4. 924797 5. 93139 6. 087593 4. 646494 5. 260552 5. 475002 4. 291484  
1. 798228 1. 909196 1. 727903 1. 85598 2. 084054 1. 688251 1. 963642 2. 272514 2. 19957  
2. 174246 2. 039128 2. 360827 1. 69291 1. 811247 1. 934542 1. 531226 1. 381919 2. 048142  
0. 933862 1. 45218 0. 985302 1. 164357 0. 533779 0. 925928 1. 982029 1. 101335 2. 45475  
7. 532987 7. 731846 7. 20128 7. 226262 8. 089022 7. 134213 7. 223219 7. 423618 6. 338958  
1. 60899 1. 542763 1. 862981 3. 415269 1. 925571 1. 846172 1. 410978 1. 268046 1. 682205

1. 974184 1. 936014 1. 822767 2. 623953 1. 692646 1. 366749 1. 835182 1. 7673 2. 12277  
0. 970435 1. 560962 1. 09102 2. 139727 1. 539734 0. 971831 1. 204361 1. 795417 1. 257783  
2. 615507 2. 0624 2. 262165 2. 704509 1. 483405 1. 739804 1. 992104 2. 121664 1. 311451  
1. 710094 2. 76933 3. 440535 3. 429097 2. 334375 1. 559762 1. 75708 2. 154909 2. 301504  
2. 170988 2. 010623 2. 178375 1. 910532 1. 368732 2. 336916 1. 694245 1. 771613 2. 183893  
3. 192681 3. 515295 3. 520215 3. 26848 3. 634101 3. 497856 3. 52305 3. 751418 3. 795754  
0. 923908 1. 577093 1. 279836 1. 930918 1. 776995 1. 576683 1. 214597 1. 42776 1. 59713  
1. 477325 2. 156673 2. 025822 1. 244059 1. 555107 3. 595045 2. 073274 1. 989892 3. 787308  
4. 243508 5. 145849 5. 07001 4. 927546 5. 277693 3. 77601 4. 395951 5. 545461 5. 320118  
1. 154106 1. 149309 1. 170801 1. 64793 1. 097605 1. 21411 1. 121269 1. 416141 1. 434463  
1. 087617 0. 572441 0. 814536 0. 858174 1. 172549 1. 221623 1. 386982 1. 692467 1. 410143  
1. 822242 1. 81114 1. 687736 2. 937489 1. 797616 2. 456899 1. 180737 1. 655186 2. 222065  
1. 212227 1. 198159 1. 607602 1. 597803 1. 259222 1. 35353 0. 803256 1. 280922 0. 972318  
0. 898863 1. 588725 1. 349848 1. 560259 1. 523602 2. 485389 0. 922245 0. 890505 1. 106107  
4. 652256 4. 301863 4. 197107 4. 822936 4. 61526 3. 918953 3. 668329 3. 561422 5. 022045  
4. 739271 5. 170788 4. 146427 3. 335913 4. 901581 4. 777414 3. 513626 5. 693676 4. 476584  
3. 348401 3. 222085 2. 737749 2. 645385 3. 714246 3. 61507 2. 977207 2. 395231 1. 556179  
2. 573778 2. 0688 2. 361877 2. 175364 2. 202512 2. 942144 2. 312836 1. 83107 2. 871627  
1. 011411 1. 650493 0. 915741 1. 632161 0. 932194 1. 721011 1. 324623 1. 051522 1. 319995  
1. 158927 1. 151151 1. 477513 1. 339316 1. 257209 1. 339316 1. 863261 1. 584805 1. 592876  
1. 648025 1. 019962 1. 904039 2. 34134 0. 949199 1. 324567 1. 655845 1. 498333 0. 967999  
4. 514416 3. 95992 4. 451757 5. 327785 3. 912424 4. 035914 3. 512358 3. 692555 3. 462327  
2. 53332 1. 549641 1. 577942 2. 108341 2. 017997 1. 529253 1. 504654 2. 715397 3. 839482  
1. 57067 1. 841723 2. 057042 2. 489228 1. 764551 2. 206537 2. 133728 1. 511326 2. 370657  
0. 878443 0. 908218 2. 128279 1. 86963 1. 375173 2. 138101 1. 507343 1. 438331 1. 112626  
2. 332425 2. 522502 2. 155586 2. 256902 2. 429765 1. 926036 2. 149598 2. 059248 2. 269787  
2. 792935 4. 202858 3. 963176 3. 461485 3. 019937 4. 108082 3. 256223 3. 910291 4. 76819  
1. 363751 1. 869563 1. 331065 2. 634611 1. 690962 1. 077561 1. 805679 1. 443173 1. 396031  
1. 3601 1. 0964 2. 490968 1. 06425 2. 085026 1. 65386 1. 644233 1. 68893 1. 472075  
3. 549901 3. 026039 3. 242882 2. 922167 2. 357993 2. 479502 2. 956123 2. 428163 3. 780463  
1. 121308 0. 689316 1. 226244 1. 336533 0. 769216 1. 024444 0. 640151 1. 076735 0. 997315  
1. 411209 1. 416683 1. 061111 0. 969175 1. 016166 1. 241968 0. 868842 1. 066828 1. 364635  
1. 173333 0. 849082 0. 977675 2. 348689 1. 196631 0. 95625 0. 761641 0. 905281 1. 331666  
2. 608451 3. 138721 0. 699312 1. 001244 3. 998727 1. 949283 3. 510379 2. 630447 1. 215768  
1. 553345 1. 305863 1. 46408 1. 422149 1. 806584 2. 059127 1. 584963 1. 191174 1. 19686  
1. 867422 1. 667605 1. 64077 2. 887464 1. 883661 1. 148849 1. 781423 2. 276739 1. 94716  
1. 476506 1. 37367 1. 160245 1. 887495 1. 510561 1. 56213 1. 550291 1. 423664 0. 909071  
2. 159312 1. 620105 2. 729109 1. 57275 1. 675901 2. 052202 2. 325795 1. 45624 1. 573353  
2. 530852 2. 12801 2. 77232 3. 59435 1. 966155 2. 347593 2. 185796 2. 434333 3. 046457  
2. 728137 2. 78515 3. 234156 2. 047051 2. 278022 2. 334098 2. 370989 2. 92293 2. 175743  
2. 211695 2. 69687 2. 704364 2. 887468 2. 553075 2. 552187 2. 455962 2. 345656 3. 117706  
2. 779338 3. 100669 2. 236363 3. 203729 2. 786149 2. 196951 1. 9964 2. 333344 2. 856994  
7. 15861 7. 200509 7. 707313 6. 550398 7. 268279 7. 80443 6. 55027 7. 423489 6. 622635  
1. 987401 1. 519221 2. 317149 2. 200048 1. 838324 2. 393685 2. 358523 1. 757801 1. 70921  
2. 492703 2. 149771 2. 046291 2. 257396 2. 005879 2. 109056 2. 052316 1. 81453 1. 99789  
1. 703447 1. 533453 1. 55312 2. 256611 1. 225845 1. 702141 1. 80319 1. 467765 1. 842555  
5. 151585 4. 736792 4. 739103 5. 271487 5. 663558 5. 142631 5. 847951 4. 990537 6. 326497  
1. 750727 2. 247044 1. 67361 1. 621538 2. 545931 2. 391463 2. 183397 1. 726392 1. 779321  
4. 906922 5. 328422 4. 957218 3. 807742 4. 812031 5. 442947 4. 545415 5. 656211 4. 434209  
2. 457131 1. 706422 2. 195176 3. 907863 2. 086738 2. 523251 2. 883986 2. 313326 2. 833379  
1. 752937 1. 854115 2. 033545 2. 48457 2. 138001 2. 785089 1. 755811 1. 776039 1. 800602

5. 984901 5. 619043 5. 894305 5. 226888 5. 836485 5. 491312 6. 083351 6. 111938 5. 165972  
4. 195004 3. 898892 3. 544852 4. 778329 4. 287512 4. 193164 4. 460784 3. 716426 3. 559371  
4. 33384 4. 173305 5. 028649 4. 091083 4. 433206 4. 488785 4. 158647 4. 905699 4. 07846  
1. 547057 0. 990868 2. 216274 1. 05089 1. 181576 2. 072446 1. 246908 1. 345193 1. 740874  
3. 834551 1. 655899 1. 685047 2. 707952 1. 110533 2. 307753 1. 675284 2. 035661 2. 572844  
4. 285643 4. 607681 4. 478937 2. 583266 3. 839013 4. 403676 3. 687755 4. 584351 4. 125553  
5. 449966 5. 83886 5. 212787 5. 420357 5. 984063 5. 678046 5. 397966 5. 455478 5. 713842  
4. 712243 4. 796307 4. 890915 3. 364335 4. 049333 4. 716645 4. 961785 4. 552487 4. 105079  
2. 21425 3. 104149 2. 671381 3. 159799 1. 839184 3. 745259 2. 992213 2. 151438 2. 387436  
1. 645777 1. 471329 1. 048135 1. 347761 0. 958357 1. 726467 1. 2928 1. 087314 1. 085942  
0. 843419 0. 811324 1. 202227 1. 421018 0. 988831 1. 210441 0. 951156 0. 742615 1. 071982  
3. 851151 3. 456702 4. 011111 2. 421593 3. 558963 3. 230191 3. 819957 3. 874138 4. 130114  
6. 026499 6. 559163 6. 761264 6. 406208 6. 590557 6. 463288 6. 933504 7. 09405 6. 081122  
3. 19982 2. 145744 3. 040414 2. 630657 3. 029025 2. 68953 1. 431627 4. 147343 3. 542387  
3. 744634 3. 858817 3. 623707 3. 868552 3. 1429 4. 088143 3. 487968 3. 354663 2. 712784  
1. 63248 2. 558511 1. 843551 2. 412119 2. 06281 2. 067932 1. 537776 1. 942868 2. 2152  
2. 127984 2. 669029 2. 019038 2. 459776 2. 48553 2. 27039 2. 702543 2. 878134 2. 237771  
1. 691961 1. 608631 2. 029281 2. 853258 2. 828504 2. 372915 2. 347822 2. 215273 1. 645997  
2. 275425 2. 419913 1. 858212 2. 516034 1. 893376 1. 635397 1. 968238 2. 276643 1. 912896  
2. 938133 1. 219683 1. 920413 1. 828159 3. 131078 1. 574423 2. 160462 2. 301911 1. 903232  
3. 901977 2. 257132 3. 724419 4. 056314 3. 047993 1. 686415 2. 924297 2. 745715 2. 579247  
3. 206225 2. 291405 1. 746378 2. 72087 1. 915108 2. 584384 3. 551837 3. 130511 3. 293793  
1. 307009 1. 706337 0. 887902 1. 320053 1. 542855 1. 335786 0. 977239 1. 238936 0. 885542  
5. 300547 4. 922242 6. 204294 3. 918708 5. 485963 3. 778698 4. 562477 4. 890181 5. 675236  
3. 574362 3. 030398 3. 625237 3. 255404 2. 721571 3. 390342 2. 864834 3. 214249 3. 332627  
1. 875854 1. 805659 1. 332088 3. 469719 1. 877293 2. 253938 2. 477818 1. 863187 1. 796141  
1. 99802 1. 818737 3. 14386 2. 553168 2. 678627 2. 664802 2. 586201 2. 703536 3. 16889  
0. 92612 1. 226236 1. 138489 1. 289455 0. 743238 1. 383937 0. 955554 1. 048957 1. 596437  
1. 380608 1. 779152 1. 863264 1. 839345 2. 152056 1. 681001 1. 626667 1. 643111 1. 352066  
1. 373254 2. 019151 2. 304153 3. 124106 2. 395946 2. 794241 2. 954352 3. 493033 3. 0614  
3. 884831 3. 354308 3. 726809 4. 359981 3. 899529 3. 943543 4. 364445 3. 439479 4. 178602  
2. 660452 2. 680677 2. 794986 3. 563681 2. 513271 2. 86231 2. 643753 2. 803408 2. 625068  
2. 218673 2. 728525 2. 908064 2. 598063 2. 963224 1. 903208 2. 822719 2. 414293 3. 183059  
5. 134255 5. 406282 5. 263714 2. 625221 4. 907741 5. 047979 4. 339415 3. 345122 5. 283241  
2. 274022 2. 082086 1. 654275 2. 143674 1. 998223 1. 787417 1. 728245 1. 178994 2. 006526  
1. 711721 1. 618086 1. 895663 1. 861944 1. 32393 1. 377252 1. 769894 1. 593961 1. 521601  
1. 718176 1. 426367 1. 534749 2. 102236 0. 996685 1. 691744 1. 881155 1. 112398 1. 202064  
0. 973517 1. 500423 1. 66504 0. 756211 1. 893369 1. 705092 1. 394657 1. 914886 0. 998348  
1. 144159 1. 532136 1. 457294 1. 457328 1. 463675 1. 23963 1. 506592 1. 364847 1. 728092  
6. 872101 6. 748543 5. 179668 3. 897375 4. 735282 5. 211671 5. 231966 4. 984164 5. 540423  
2. 700168 2. 414647 2. 447009 2. 346892 2. 523039 2. 330439 2. 217094 2. 464847 2. 711726  
1. 601732 1. 198373 1. 771782 2. 125537 2. 277537 1. 76803 2. 139392 3. 45735 1. 778032  
2. 562639 2. 769537 3. 295122 3. 044185 3. 960613 3. 168876 3. 621875 3. 783005 2. 851837  
1. 180459 1. 205108 1. 584623 1. 558517 1. 559405 1. 548421 1. 259553 1. 288818 1. 153736  
1. 043285 0. 655736 1. 030019 1. 29862 1. 185063 0. 924287 1. 057569 1. 312381 1. 026783  
0. 91316 1. 300207 0. 996216 2. 044412 0. 994624 1. 905618 1. 550272 1. 14376 1. 110341  
2. 698855 1. 2501 1. 389457 3. 1167 3. 34518 3. 126446 2. 908703 2. 02278 2. 546023  
1. 309798 1. 604683 2. 149345 2. 077002 1. 874443 2. 311105 1. 514122 1. 645588 1. 900652  
2. 881115 1. 954389 2. 13219 2. 900155 1. 74658 2. 503697 1. 99011 1. 705446 1. 933779  
1. 717334 1. 597781 2. 151714 2. 496563 2. 237984 2. 501124 2. 376744 1. 468636 3. 117344  
7. 763089 8. 032247 7. 644433 8. 094037 7. 882244 7. 334916 7. 695472 7. 622182 7. 126491

|          |          |          |          |          |          |          |          |          |
|----------|----------|----------|----------|----------|----------|----------|----------|----------|
| 6.320768 | 6.32864  | 5.960017 | 6.600337 | 6.259678 | 6.046256 | 6.581341 | 6.290742 | 6.109    |
| 2.051407 | 1.984168 | 1.91968  | 1.634251 | 1.349157 | 2.023403 | 1.950997 | 1.256198 | 1.616006 |
| 2.38216  | 2.392343 | 1.684682 | 2.646063 | 1.529891 | 2.863089 | 1.761782 | 1.761004 | 2.071002 |
| 1.64259  | 2.140054 | 1.802708 | 2.092288 | 1.788482 | 2.066035 | 1.693118 | 1.816889 | 1.861253 |
| 2.004914 | 1.880609 | 1.239258 | 1.599832 | 1.430344 | 2.358927 | 1.63324  | 2.061853 | 1.470202 |
| 1.626525 | 3.254576 | 1.77084  | 3.076035 | 1.695937 | 2.980391 | 2.377707 | 1.685289 | 1.78509  |
| 1.749052 | 1.958064 | 1.816472 | 2.571691 | 1.757835 | 1.858163 | 1.690206 | 1.657578 | 1.709706 |
| 1.153559 | 0.805022 | 0.821996 | 0.429009 | 0.939463 | 1.006102 | 1.005432 | 0.746341 | 1.024366 |
| 1.898192 | 1.49606  | 1.630387 | 1.695545 | 1.206726 | 1.328278 | 1.124993 | 1.658749 | 1.077538 |
| 7.662952 | 8.533413 | 8.287057 | 8.046033 | 8.911881 | 7.814924 | 7.691935 | 8.387015 | 6.332172 |
| 5.771971 | 6.453939 | 5.784149 | 3.846095 | 5.990499 | 6.48588  | 6.015399 | 6.289384 | 5.819956 |
| 7.471755 | 5.804674 | 7.047274 | 6.639472 | 6.396866 | 6.224076 | 7.105128 | 6.518588 | 6.725708 |
| 2.099556 | 1.573549 | 2.004633 | 1.616548 | 2.024791 | 1.419024 | 1.606857 | 1.797547 | 1.350426 |
| 1.692598 | 1.445287 | 2.570948 | 1.949771 | 1.176307 | 1.684196 | 1.961136 | 1.237254 | 2.219905 |
| 1.775083 | 2.795338 | 1.874179 | 1.807521 | 2.018703 | 1.447309 | 1.343902 | 1.354535 | 1.75894  |
| 1.991587 | 2.70423  | 1.851059 | 2.070555 | 2.194779 | 2.26988  | 1.825081 | 1.903912 | 2.423235 |
| 2.691399 | 2.684681 | 2.803243 | 2.920929 | 2.829388 | 2.890037 | 2.355928 | 2.212042 | 3.077894 |
| 1.549629 | 1.662105 | 1.292214 | 1.609259 | 1.379994 | 1.812677 | 1.358263 | 1.883904 | 2.776489 |
| 1.724418 | 1.557422 | 1.253323 | 1.355535 | 1.733664 | 1.484077 | 1.309245 | 1.81497  | 3.607159 |
| 0.935675 | 1.293409 | 1.685178 | 0.930081 | 1.179712 | 1.684491 | 1.595296 | 1.58157  | 1.292438 |
| 2.25287  | 2.131552 | 2.8565   | 2.389588 | 2.583798 | 2.283176 | 2.300344 | 2.53415  | 2.448778 |
| 2.313036 | 1.712916 | 2.332993 | 3.304861 | 1.886446 | 2.014203 | 2.35415  | 2.628569 | 2.695132 |
| 1.886308 | 1.481136 | 1.825162 | 1.786849 | 1.815235 | 2.016227 | 1.837784 | 2.203947 | 1.655276 |
| 5.107035 | 4.625511 | 4.790778 | 3.383423 | 4.664351 | 4.543738 | 5.396141 | 5.223034 | 5.028001 |
| 2.416941 | 2.332115 | 2.448339 | 3.377538 | 2.499538 | 3.449871 | 4.439523 | 3.060969 | 3.318114 |
| 1.933219 | 2.035888 | 1.824488 | 2.047211 | 1.670724 | 2.756585 | 1.610517 | 1.209739 | 1.854027 |
| 1.398981 | 1.203435 | 1.206794 | 1.161555 | 1.389499 | 2.06954  | 1.205262 | 1.199709 | 1.111833 |
| 1.597685 | 1.533176 | 1.1761   | 1.976094 | 1.718143 | 1.481123 | 1.733262 | 0.994301 | 2.019906 |
| 2.425336 | 1.80412  | 1.48226  | 1.623994 | 1.798711 | 1.51632  | 1.741931 | 1.807743 | 1.590244 |
| 1.590213 | 2.042623 | 1.515916 | 2.193157 | 1.961318 | 1.974653 | 1.893696 | 1.682056 | 3.748927 |
| 2.19756  | 1.987711 | 2.314703 | 2.697814 | 2.870888 | 3.028107 | 2.406098 | 2.251069 | 1.947147 |
| 2.314922 | 1.675753 | 2.157411 | 2.962566 | 1.981197 | 2.067474 | 1.952507 | 1.811286 | 1.90243  |
| 2.101935 | 2.39174  | 1.420773 | 2.055576 | 1.883674 | 1.926657 | 1.810236 | 1.997664 | 1.797229 |
| 6.917764 | 6.747502 | 7.232004 | 6.459222 | 6.63995  | 6.566392 | 6.753386 | 6.869769 | 6.223999 |
| 1.103834 | 1.169325 | 2.155056 | 0.881794 | 1.22863  | 1.66022  | 1.115637 | 1.283814 | 1.678121 |
| 1.39178  | 1.535123 | 1.846397 | 1.869281 | 1.486394 | 1.243232 | 1.653826 | 1.588255 | 1.209522 |
| 1.071482 | 1.061469 | 1.192909 | 1.424381 | 0.799652 | 0.95477  | 1.489805 | 1.583169 | 1.620721 |
| 5.359277 | 2.427189 | 3.541867 | 1.752522 | 4.434729 | 5.996889 | 3.62278  | 4.902158 | 5.100567 |
| 2.402942 | 1.655797 | 2.816275 | 3.033277 | 1.900014 | 1.832913 | 2.318244 | 2.183505 | 2.819051 |
| 6.361328 | 6.522104 | 6.320745 | 6.765334 | 6.507501 | 5.614756 | 6.011254 | 6.084621 | 5.856833 |
| 1.975654 | 2.569231 | 1.497465 | 2.385149 | 1.830499 | 1.75848  | 1.665673 | 2.207424 | 2.3716   |
| 1.660171 | 1.957498 | 1.93427  | 2.008902 | 1.356742 | 1.297139 | 1.551364 | 1.477511 | 2.493561 |
| 1.265212 | 1.040385 | 1.299905 | 2.977926 | 1.052329 | 1.596766 | 1.547993 | 1.501999 | 1.734885 |
| 2.373294 | 2.8791   | 2.11871  | 1.683533 | 4.041268 | 2.874365 | 2.761495 | 2.690797 | 2.000042 |
| 1.702709 | 1.184092 | 1.928097 | 1.955209 | 1.746638 | 2.915433 | 2.185645 | 2.436221 | 2.705462 |
| 5.037244 | 5.494932 | 4.859148 | 3.77954  | 4.703254 | 5.510962 | 4.912726 | 5.116566 | 5.129702 |
| 0.980019 | 1.83954  | 1.120615 | 0.995143 | 0.816247 | 1.436579 | 0.897123 | 1.131592 | 0.885351 |
| 1.721733 | 2.066297 | 1.394053 | 1.618816 | 1.5102   | 1.491628 | 2.135953 | 2.003518 | 3.048339 |
| 1.597629 | 1.457864 | 1.210639 | 1.674623 | 1.497866 | 1.202668 | 1.377449 | 1.457864 | 1.591028 |
| 2.159322 | 2.89324  | 2.460824 | 2.664181 | 2.400141 | 2.03269  | 2.296879 | 2.430564 | 3.004677 |
| 1.254101 | 1.724685 | 1.876115 | 1.736095 | 1.463178 | 2.927811 | 1.344114 | 2.212751 | 1.5669   |

2. 538781 2. 072594 2. 301676 2. 901072 1. 716329 3. 202934 2. 583976 1. 960842 2. 821662  
1. 711252 2. 461543 1. 66867 2. 094013 1. 743478 1. 849999 1. 575524 1. 736102 2. 299566  
4. 157491 3. 607629 3. 792364 4. 541002 3. 469313 3. 359323 4. 044093 3. 578628 3. 98612  
1. 756524 1. 732457 2. 255249 2. 102619 1. 778318 1. 416904 2. 279902 2. 115315 1. 395905  
3. 21296 2. 591396 1. 886377 1. 808194 1. 844698 1. 914907 2. 492086 4. 201398 1. 792596  
3. 979769 3. 587102 3. 739765 4. 499185 3. 80175 4. 395255 4. 382307 3. 623434 4. 49396  
3. 198296 2. 306252 2. 986062 0. 404388 3. 140045 2. 899949 1. 404231 2. 492986 2. 828313  
1. 793868 2. 995641 2. 670646 1. 859095 2. 888206 2. 070634 1. 902307 2. 518798 2. 764374  
1. 351264 1. 596013 1. 198202 2. 260033 1. 283466 1. 891503 2. 289807 1. 413074 1. 392102  
1. 98139 1. 931857 1. 764716 3. 349283 2. 048445 1. 664015 3. 575789 2. 327747 2. 120465  
3. 134233 1. 954775 3. 099509 4. 110585 3. 123448 1. 797164 2. 754617 2. 63332 3. 535776  
1. 203835 1. 889518 1. 734003 1. 567859 1. 532051 1. 204541 1. 731586 1. 400701 3. 093718  
5. 770529 5. 760155 6. 413244 7. 254218 6. 241228 6. 525446 6. 763071 5. 917095 5. 331066  
1. 57626 1. 584069 1. 513346 1. 778228 1. 625685 2. 069797 2. 486168 2. 089668 2. 72657  
1. 356546 1. 352374 1. 796678 1. 855197 1. 304528 1. 731388 1. 274009 1. 324912 2. 492949  
1. 418462 1. 148981 2. 942243 1. 191872 1. 180443 1. 486311 1. 729919 1. 343589 0. 940465  
3. 101214 3. 017312 3. 758868 2. 325953 4. 07968 3. 972201 2. 514445 3. 743925 3. 146884  
2. 517917 3. 000842 2. 44364 2. 16701 2. 763873 3. 587981 2. 562686 2. 937739 3. 02664  
1. 95329 2. 458996 1. 720133 2. 262077 2. 216049 3. 173734 2. 643626 2. 39561 1. 832917  
2. 615219 2. 767016 2. 841438 1. 868346 2. 21276 2. 257355 2. 400472 1. 843339 3. 05544  
1. 090154 1. 486716 1. 465132 2. 014707 2. 140923 2. 29375 1. 028489 1. 430986 2. 93248  
0. 580458 0. 723848 0. 717624 0. 915626 0. 602936 1. 148992 1. 031137 0. 775735 0. 605269  
5. 284763 5. 369665 4. 988322 3. 462852 4. 835286 4. 560439 5. 599965 4. 825953 5. 685395  
4. 364846 4. 377152 4. 096828 4. 560126 3. 969012 4. 851304 4. 016739 4. 406897 4. 319302  
0. 996998 0. 916106 1. 74837 1. 546919 1. 280183 1. 448697 1. 503535 1. 492918 1. 31402  
0. 859003 1. 68947 1. 280059 1. 242298 1. 003115 1. 296244 0. 796458 1. 170217 0. 924258  
1. 322695 1. 751601 1. 008204 1. 571556 1. 563682 1. 407893 2. 295734 1. 889376 1. 398086  
4. 159052 3. 686442 3. 52322 3. 902329 4. 043773 2. 96384 3. 553039 3. 856517 2. 136283  
4. 451592 5. 136377 4. 5769 4. 777789 3. 825008 5. 092827 4. 502545 4. 792624 3. 056788  
0. 810901 2. 171061 0. 965382 0. 86878 1. 511924 1. 636758 1. 165287 0. 806528 1. 559229  
2. 858701 2. 316768 1. 669846 4. 266639 2. 043385 3. 234135 3. 416415 3. 569682 4. 50503  
8. 483976 8. 355039 7. 609767 7. 820484 8. 119457 7. 378234 8. 614957 7. 541443 7. 68241  
2. 156056 1. 424478 1. 810295 1. 918651 2. 787776 1. 362037 2. 24189 1. 329641 1. 399038  
1. 562336 2. 122051 2. 285687 1. 102164 2. 039983 1. 707518 2. 292257 2. 552599 2. 278053  
1. 259956 1. 332608 1. 166195 1. 838295 1. 403979 1. 507873 1. 49113 1. 277419 1. 503098  
3. 606552 3. 492058 3. 664153 1. 955001 2. 895119 3. 964321 2. 883942 2. 629249 2. 618006  
3. 032218 3. 211891 2. 599341 4. 102467 2. 915831 2. 955451 3. 340891 3. 169393 2. 802965  
2. 833468 2. 076727 1. 928495 1. 962767 2. 094532 2. 784845 1. 936043 1. 476915 1. 968698  
1. 008813 1. 031018 0. 945955 1. 369243 1. 333307 1. 692562 1. 443551 1. 883014 1. 059743  
3. 79082 4. 924001 3. 196833 5. 275453 3. 770959 4. 525907 3. 709662 4. 419516 4. 414953  
2. 137489 1. 508131 2. 818916 1. 262587 1. 65414 1. 687906 2. 098444 1. 866367 2. 085744  
2. 061767 1. 457456 1. 971009 2. 74089 2. 031882 1. 780404 2. 354597 2. 472245 1. 775679  
2. 756397 1. 041392 2. 296667 3. 781843 2. 566351 1. 323145 1. 441842 1. 500962 2. 657694  
1. 547599 1. 657884 1. 828847 1. 685196 1. 812501 1. 483685 1. 695661 1. 309755 1. 730516  
1. 431319 1. 209266 1. 400886 2. 423747 1. 099679 1. 283925 1. 594611 1. 353546 1. 255046  
1. 542363 2. 216972 2. 098416 2. 196112 1. 888844 2. 203262 2. 308165 2. 334743 1. 968754  
3. 970521 3. 45468 3. 048128 4. 000784 3. 344081 3. 841016 3. 753046 3. 011259 4. 368457  
1. 462962 1. 111296 1. 737586 1. 997171 1. 555249 1. 649428 1. 262682 1. 260593 1. 349067  
2. 436906 3. 366407 3. 451993 4. 003109 3. 206708 3. 069557 3. 831437 3. 074397 3. 789929  
1. 298771 1. 54268 1. 284505 1. 084148 1. 514404 1. 303358 1. 062372 1. 345408 1. 544346  
1. 178801 1. 229841 1. 358737 1. 71073 1. 343163 1. 636402 1. 242574 1. 339546 1. 408812

1.132279 1.843855 1.331851 1.298846 1.192693 1.902494 1.328565 1.246128 1.662509  
1.748425 1.435268 1.852402 2.202859 1.438098 1.458084 1.589062 2.025743 3.145602  
1.961351 1.905811 2.130751 2.655046 1.97764 2.581705 1.989504 1.875789 2.147679  
1.154636 1.67258 0.86873 1.069957 1.048353 0.912616 1.004669 1.485751 2.205033  
1.338337 1.350405 2.908053 1.955945 1.321329 1.414326 1.283383 1.154888 1.670502  
2.149182 1.690806 1.455371 1.499585 0.772044 1.952921 1.246089 2.097264 2.460334  
1.783964 2.146787 1.911976 2.09236 1.842115 1.585507 1.899937 1.728206 1.752499  
1.29082 1.233258 0.921132 1.038189 1.527448 1.454649 1.770108 2.00479 2.302977  
1.421197 1.567229 1.736499 1.647916 1.867274 2.461325 1.678873 1.632142 1.607259  
3.24141 1.726819 2.02635 1.491515 2.247587 2.06799 2.136839 1.020672 1.622201  
1.051514 1.694723 0.871903 2.209875 1.313574 2.059199 1.123024 1.152061 1.490965  
1.128665 1.775842 1.444683 1.291698 1.178495 1.339969 1.156569 1.060518 1.013492  
1.419183 1.24427 0.988091 2.093439 1.568903 0.986299 1.100799 1.99874 1.682814  
2.60146 2.327141 2.232917 2.645956 2.516986 2.123789 2.249412 1.904425 2.359119  
1.888535 2.255853 2.947886 2.45879 1.776355 3.112637 2.096698 2.166492 2.486863  
1.726615 1.602581 2.413444 1.541553 1.198214 1.194902 1.277752 2.391727 2.280088  
1.103972 1.721308 1.041979 0.966259 0.884141 2.414845 0.835403 1.143951 1.218111  
1.87317 1.395317 1.82268 2.807186 1.711807 1.533744 1.963799 1.311773 1.789323  
1.633923 1.569871 1.652765 1.824257 1.671265 1.688104 1.697415 1.557715 1.940793  
2.792384 2.534001 2.499161 3.974616 2.808696 2.961275 2.960861 2.894474 3.823995  
4.427131 2.661068 2.988641 3.113617 3.391228 4.54954 2.803259 3.782841 4.358749  
2.123477 2.011465 1.553772 2.351293 2.071408 1.97553 1.51933 1.866428 1.637105  
6.290927 6.41001 6.202858 4.825977 6.384196 6.237038 6.484207 5.909431 6.288967  
1.484079 1.38588 1.520465 2.350899 1.142801 1.647761 1.290726 1.664559 1.381574  
6.541146 5.055529 5.916078 4.89918 5.936693 5.784844 6.630223 6.075752 5.882537  
2.152451 2.387853 3.181557 2.844536 2.420161 2.455978 3.306505 3.658874 3.853599  
0.956221 1.06841 0.994048 1.216008 1.111584 0.98526 0.964986 1.544894 1.15485  
5.737064 5.833361 6.16554 5.94236 6.302903 6.126649 6.521575 6.215431 5.486388  
1.603532 1.574028 1.702263 1.858077 1.243982 1.655035 1.503226 1.644376 1.108963  
6.543833 6.755594 6.597943 4.616566 6.500546 6.26991 6.524893 6.264162 6.830262  
4.933602 6.543395 4.169133 5.120396 7.150807 1.741598 5.391088 5.045794 4.793916  
2.214392 1.956196 1.717637 2.718388 2.243291 2.065193 2.095842 2.729312 2.59251  
2.6534 2.189927 3.477713 3.410186 1.992743 1.836047 2.158187 2.64752 2.232276  
6.883371 6.39909 6.523383 6.45083 6.457396 5.864374 6.909393 6.524909 6.818068  
2.917274 1.786973 2.014648 1.716954 1.942969 2.142513 1.766119 1.309053 1.708321  
2.361757 2.908334 2.391194 2.777796 2.031587 2.568259 2.362879 3.106198 3.702598  
1.786665 1.895195 2.675373 2.695291 2.357375 2.102461 1.859936 1.776111 2.892489  
7.07454 7.2953 6.978305 6.220349 7.453309 7.115136 7.279478 7.064868 6.902035  
3.731334 4.152259 3.408308 3.415357 3.831988 3.100527 3.228387 3.580167 4.3138  
1.328282 1.60931 1.583732 1.699412 1.214849 1.247692 1.542774 1.801502 1.173299  
3.69406 3.404694 3.488282 3.459451 4.051988 4.026192 3.808309 3.126011 4.050521  
6.147932 5.730699 5.555872 5.539609 5.857097 5.608646 5.544701 5.744754 4.927556  
1.507492 1.490581 1.748533 1.523252 1.585323 2.04659 1.991138 1.774136 1.052126  
7.722197 7.603891 7.612894 7.78531 7.67231 7.934268 7.848922 8.10622 7.515954  
1.89297 2.203554 2.120793 1.367867 3.300025 1.685408 1.573672 2.095256 1.575164  
2.450689 3.161277 3.028486 2.887524 2.640341 2.986718 2.884866 3.028486 2.583768  
3.234902 3.639741 4.349829 3.054604 2.746337 3.323099 2.694927 2.519905 3.129804  
1.883379 1.502043 1.917191 3.059987 2.120047 2.278069 1.630211 1.249744 2.120262  
2.905357 4.25749 4.514971 4.896793 3.302581 3.795785 3.480486 3.816645 3.309068  
2.822984 1.328866 1.651991 1.816887 1.238878 1.285342 1.796942 1.789381 1.729816  
1.735893 1.654487 1.866245 2.446829 2.478755 1.864299 1.905347 1.589992 1.348203



2.735724 2.599584 3.123431 2.92106 3.130289 2.665585 2.561164 2.896567 2.270974  
6.155467 5.594398 5.935045 6.646752 5.957375 5.775044 6.614354 6.058284 7.178968  
0.85282 1.043195 1.249521 1.420227 0.681283 1.070691 0.694555 1.06227 1.45124  
1.695745 1.427942 1.075059 2.728216 1.540091 1.273215 1.733513 1.965858 2.186253  
2.756943 1.941601 2.775769 3.722243 2.607494 2.69388 2.353992 1.538816 2.138203  
3.188952 3.430799 3.434019 3.415456 3.463545 3.54379 3.863945 2.610389 3.249198  
1.913559 1.421357 0.954091 0.660002 1.616615 1.873831 1.612094 1.630073 2.270801  
7.489057 7.641084 7.48179 8.439218 8.806301 7.307008 7.735084 7.898352 8.43532  
1.781318 2.247417 1.851686 2.375367 2.032296 1.717587 2.247417 2.567816 2.240536  
3.99513 4.582455 2.582963 1.548231 3.950316 1.872222 2.959443 2.488094 4.139693  
3.550051 2.817546 3.086883 2.49978 2.97064 1.912392 1.61959 1.399036 2.1503  
2.763911 2.954557 2.656817 3.848845 2.467452 2.715165 2.369421 3.666134 2.426074  
4.217837 4.373593 4.498477 4.308292 4.694498 3.777391 3.442595 4.33845 4.691889  
1.075381 0.914278 0.821983 2.412562 1.086793 1.096113 1.339569 1.053235 0.828293  
2.802381 2.5885 3.54133 3.737389 2.539804 2.594853 2.813151 2.433772 2.382339  
3.451819 3.603639 2.631265 3.716322 2.835144 3.845679 3.745959 3.265971 4.259138  
2.26193 2.281734 1.843225 2.391132 2.036458 2.083999 1.581081 1.711544 2.222796  
9.103658 9.46871 9.218402 9.114382 9.980385 8.679285 9.154089 9.340097 9.476719  
2.163068 2.476231 1.554245 4.160127 1.893269 1.986824 2.049428 1.620867 1.620867  
1.626143 1.175583 1.498348 1.445587 1.500117 1.525775 1.482051 1.809486 1.137513  
2.125056 2.040784 3.83856 1.364731 1.87298 1.640408 1.613787 1.861888 2.936517  
1.833027 1.950976 0.985379 0.896704 0.869 2.494465 0.779467 0.517345 1.526103  
3.26997 3.655668 3.785082 4.237497 3.693275 2.391894 3.95515 2.165678 1.758216  
2.094368 2.231621 3.448201 2.968163 3.347421 2.226491 2.319684 2.795303 3.812509  
6.168779 6.598923 6.548894 6.607737 8.937234 6.373179 6.569644 6.817157 6.366797  
1.712514 0.907292 1.885562 1.499475 1.251761 2.404861 1.344492 1.378327 1.101389  
2.989645 3.554982 3.482694 3.985534 2.522354 2.933549 2.402964 2.520675 3.249562  
0.708541 0.558422 0.71234 0.670022 1.018271 1.212497 0.749601 1.188638 0.824054  
3.72172 3.284375 4.099194 3.888627 3.627927 2.555859 3.339451 1.829186 2.800989  
5.898216 5.886154 5.670429 6.251635 7.853723 5.381827 5.944657 5.53263 6.365773  
1.920402 1.757701 1.835794 1.759636 1.936557 1.831269 2.348256 1.462072 1.605084  
4.40202 4.535765 4.216561 3.921371 6.994434 4.229824 4.707251 4.272218 4.203389  
1.11803 1.497555 1.824952 2.1601 1.499684 1.859886 1.767731 1.076009 1.591704  
1.293989 1.985327 1.334523 3.945366 1.807339 2.425518 1.414348 1.710856 2.162514  
4.059982 2.892233 1.79879 3.699367 3.550608 2.626753 3.543896 3.466598 5.136771  
1.875399 1.54543 1.821288 2.21071 2.009728 2.566135 2.091371 2.348136 2.43934  
6.498827 6.536986 6.666491 7.14532 9.477829 6.309834 6.873136 6.81545 7.535627  
0.692855 0.514641 1.009427 2.288334 1.106545 1.108885 0.888428 1.806302 0.853761  
2.742337 3.915154 2.676387 3.086848 3.355263 3.720542 2.856353 3.264912 2.806188  
1.013361 0.985485 1.017394 1.319833 0.955988 1.517773 1.498731 1.467238 0.822354  
1.793783 1.7794 2.180646 2.636828 1.892216 2.303791 2.321879 2.375434 1.638345  
1.965376 2.687218 1.806329 3.119049 2.436521 2.757586 2.163116 2.20906 2.724778  
1.665716 1.853298 2.433956 1.915561 1.423583 1.813616 2.352351 1.896089 2.184571  
1.103817 1.812975 2.040321 1.816624 1.255912 0.925815 1.141921 1.402263 1.295829  
6.560753 6.671811 6.313004 6.377394 8.930127 5.692818 6.752 6.713493 6.531242  
2.038766 1.802676 2.294186 2.615454 1.720039 2.260341 1.869321 1.642131 1.432072  
2.350181 2.218336 3.091129 3.063697 3.136027 2.375923 2.726736 2.14923 3.276048  
1.843939 2.000453 2.589424 3.304762 1.781714 1.994842 1.744635 2.130892 1.734648  
1.074959 1.501127 1.653449 1.624306 1.01563 0.611941 1.39437 1.067693 0.817836  
2.152005 2.381161 2.064736 2.183773 1.127941 2.08803 1.463735 1.737813 2.396786  
2.185667 1.298434 0.916694 2.028084 0.953818 1.188047 1.878919 1.092734 1.330747

4. 037312 4. 133813 4. 056065 5. 948509 3. 88816 4. 117745 3. 713361 3. 724511 4. 946694  
1. 370768 1. 965602 1. 747206 1. 143206 1. 87602 1. 496864 1. 425267 1. 528335 1. 653365  
3. 187785 2. 766056 2. 290984 3. 242894 2. 376546 2. 7802 2. 740818 2. 699109 2. 835502  
0. 871574 0. 718581 0. 810227 0. 73633 2. 170331 2. 255916 0. 714459 1. 46372 0. 70297  
2. 382699 1. 524135 1. 130371 2. 975078 2. 471524 2. 637415 1. 125721 2. 412484 0. 990984  
1. 18938 0. 897139 1. 07776 1. 192954 0. 936018 1. 880876 1. 06023 0. 970763 1. 407867  
2. 922746 1. 98713 4. 192863 3. 851197 2. 182914 2. 161539 2. 779446 2. 672851 3. 482059  
1. 585407 1. 460546 1. 727662 1. 988735 1. 583998 1. 558908 1. 457821 1. 528761 1. 5328  
1. 727756 0. 693643 0. 747346 1. 339273 0. 850713 1. 504867 1. 169743 0. 936315 0. 948549  
2. 45144 2. 868819 3. 0192 2. 369311 3. 757762 3. 326285 3. 187951 3. 096317 2. 052989  
1. 059348 1. 712518 1. 146864 1. 592423 2. 194289 2. 007937 1. 825944 1. 16525 1. 659463  
3. 297582 3. 537504 3. 480046 3. 541372 2. 889678 3. 401497 3. 560609 2. 791974 3. 631489  
3. 149552 1. 253639 1. 211646 0. 853618 1. 022738 1. 327619 1. 321293 1. 994796 1. 162158  
1. 30214 1. 077934 1. 439713 2. 13924 1. 151051 1. 132356 1. 456853 1. 309089 1. 440818  
1. 211431 1. 297651 1. 273435 1. 308972 1. 438686 1. 866018 0. 982138 1. 396125 1. 195374  
0. 772483 2. 308357 0. 48799 1. 243764 1. 04736 0. 951676 0. 881984 0. 613121 0. 792519  
1. 56028 1. 56546 1. 364339 1. 469187 1. 611011 1. 771681 1. 760068 2. 234129 1. 590888  
1. 401289 1. 430759 1. 518513 1. 392047 1. 074737 1. 341481 1. 308579 1. 619974 2. 400269  
3. 912327 3. 792233 4. 35169 4. 327299 2. 837934 3. 103635 4. 126757 4. 694259 3. 436254  
1. 366403 0. 962097 1. 641019 1. 11157 2. 324392 2. 833801 1. 859198 1. 613932 1. 413188  
1. 619992 2. 248635 1. 271196 2. 170619 1. 383751 2. 07537 1. 643177 1. 809505 1. 86417  
1. 343201 1. 078269 1. 006119 1. 335866 0. 974535 0. 98549 1. 160456 1. 531044 1. 42792  
1. 323965 1. 556704 1. 055402 2. 51035 1. 518184 1. 56979 1. 045481 0. 876715 0. 928749  
1. 204478 2. 232733 1. 420385 1. 41707 1. 154003 2. 987558 1. 130449 1. 630578 1. 626978  
1. 621202 1. 572449 1. 766509 1. 922146 1. 588616 1. 862957 1. 134406 0. 749916 1. 512779  
2. 027293 1. 28283 1. 732793 1. 629201 1. 933715 1. 455605 1. 775105 1. 732793 2. 811635  
3. 668091 3. 43348 3. 611027 4. 238317 3. 555237 4. 431566 3. 930938 3. 731592 4. 458477  
0. 980378 0. 937075 0. 745032 2. 526501 0. 77915 1. 345274 1. 274409 0. 701194 1. 517539  
1. 30084 2. 066032 1. 810896 1. 632147 1. 722677 2. 547019 1. 109242 1. 583364 2. 184025  
1. 631114 1. 947718 1. 612933 1. 394129 1. 410246 2. 060458 1. 442791 0. 913918 1. 575768  
0. 891356 0. 56818 1. 783718 2. 977547 1. 357824 2. 12263 3. 031309 2. 257566 1. 587374  
1. 598853 1. 566536 1. 738311 2. 093069 1. 638545 1. 801986 1. 278371 1. 743022 2. 157402  
3. 314973 2. 159624 2. 644854 3. 218459 2. 400706 2. 517817 2. 028763 2. 589326 2. 238379  
1. 802215 1. 954733 2. 071624 2. 395641 1. 689318 2. 809187 2. 337494 2. 53937 2. 367447  
1. 360585 1. 266811 1. 626158 1. 882389 1. 324116 1. 782911 1. 102455 1. 812648 1. 431952  
1. 764207 1. 087119 1. 09825 1. 099551 1. 208563 1. 096476 0. 755444 0. 753461 1. 444317  
1. 396594 2. 014706 1. 082945 3. 195311 1. 259127 2. 213062 1. 450649 1. 487241 1. 35722  
0. 888627 2. 498115 1. 036172 1. 181999 1. 570698 1. 388036 0. 96695 1. 385348 2. 600061  
1. 108825 1. 515844 1. 25659 1. 093673 1. 448533 1. 402595 1. 117982 1. 058647 1. 085486  
0. 925398 0. 920128 0. 693504 1. 697775 0. 74906 0. 648354 0. 969012 1. 097951 0. 998118  
1. 453618 0. 917498 1. 58956 1. 41098 1. 367379 1. 963874 1. 057891 0. 894844 3. 359096  
2. 398441 2. 891597 2. 413595 2. 279883 2. 273708 3. 307925 1. 841713 2. 800389 2. 357006  
3. 18047 2. 850697 3. 866996 3. 597263 3. 815675 3. 670721 3. 760622 2. 957202 3. 561992  
8. 102805 7. 950833 7. 742982 8. 019524 7. 82871 8. 173165 8. 162423 8. 153501 7. 650339  
3. 482295 2. 891408 2. 808902 4. 246813 2. 788732 2. 732462 2. 757912 2. 956893 3. 333368  
5. 933132 6. 008857 6. 209739 4. 27388 6. 473107 5. 780658 5. 983197 5. 91507 4. 589655  
0. 973057 1. 033863 0. 997404 0. 989738 1. 127137 1. 3809 1. 571928 1. 133018 1. 662322  
2. 385405 1. 9081 2. 925277 2. 676604 1. 610396 1. 872123 2. 170634 1. 842122 2. 673668  
1. 527229 0. 772472 2. 238194 2. 1534 1. 599796 1. 831147 1. 568359 1. 505229 1. 799627  
1. 233097 1. 351003 0. 990487 2. 183492 1. 148825 1. 406131 1. 8513 1. 069648 1. 144379  
1. 319365 1. 479551 0. 887251 1. 31626 1. 298989 1. 107972 0. 833072 0. 824462 1. 049707

5. 30595 5. 947618 5. 579424 5. 062044 5. 993195 5. 369589 5. 62097 6. 11745 5. 653592  
7. 08156 6. 176544 6. 372092 4. 777205 6. 335244 6. 80582 6. 462916 6. 296102 6. 502015  
2. 434641 1. 782969 2. 154993 2. 267867 1. 716826 2. 857747 2. 559393 2. 852079 2. 247378  
2. 093502 0. 983647 1. 675584 1. 620041 1. 537357 2. 127426 1. 202361 0. 910898 1. 519131  
1. 65405 1. 265419 1. 264689 1. 220511 1. 387134 1. 797367 1. 817539 1. 787459 2. 288424  
7. 022953 7. 022593 6. 983257 7. 235931 6. 777743 7. 139041 7. 48662 6. 948638 7. 687028  
5. 468315 2. 514835 4. 72546 7. 150525 3. 733861 4. 386882 2. 410804 4. 049886 6. 978959  
1. 237602 1. 216846 1. 132089 1. 473042 1. 467983 1. 369254 1. 157993 1. 168451 1. 523259  
6. 484505 6. 606779 6. 474363 4. 100625 7. 092651 6. 367132 6. 357885 6. 623229 6. 157413  
3. 592947 2. 842237 4. 294809 4. 610923 4. 233301 3. 088453 3. 851399 2. 431361 2. 051138  
1. 678152 1. 877253 1. 59766 2. 317305 1. 658474 1. 799878 1. 576493 1. 84726 1. 54317  
1. 781897 1. 16445 0. 957504 1. 960153 1. 089665 1. 139434 0. 868777 1. 01839 1. 239635  
3. 396347 2. 836408 2. 499296 2. 667785 3. 979108 3. 380214 4. 273907 3. 530548 5. 17519  
1. 405787 1. 533997 2. 427918 2. 52288 1. 797201 2. 675489 1. 449572 1. 993043 2. 753708  
2. 811984 1. 048972 0. 731743 2. 632039 0. 747303 1. 452366 1. 19654 1. 339263 0. 951286  
3. 285284 4. 038046 3. 559215 5. 598694 1. 461449 2. 782963 2. 465593 1. 438557 3. 070906  
2. 078017 2. 285082 0. 933854 2. 707652 1. 339332 3. 243345 1. 381331 1. 49221 1. 155381  
1. 964896 1. 952444 2. 344577 2. 683533 1. 891993 2. 29894 1. 98047 2. 669603 2. 540788  
1. 195522 1. 847085 1. 215827 2. 522576 1. 196488 1. 443501 1. 283624 1. 827597 1. 215367  
1. 225243 1. 29441 1. 364473 1. 296338 1. 353545 1. 34575 1. 653649 1. 562538 1. 720181  
1. 975819 2. 713276 2. 311233 3. 473448 1. 947513 2. 341233 2. 973145 2. 043264 2. 221876  
0. 88566 1. 234547 0. 707627 1. 292617 0. 812705 1. 030424 1. 203779 1. 290713 1. 092363  
1. 980944 4. 009906 2. 545088 3. 080088 1. 208025 2. 444439 3. 214791 3. 2645 4. 542574  
2. 013138 1. 973928 2. 042021 2. 192781 2. 03911 2. 875874 2. 119008 1. 549693 2. 725822  
1. 829844 1. 800524 1. 456164 2. 619449 1. 30327 1. 168201 1. 590466 1. 516265 1. 581264  
2. 51135 2. 802944 2. 358846 2. 765276 2. 798785 2. 506399 2. 887349 2. 736932 2. 905479  
1. 515808 1. 970503 0. 815186 1. 568022 1. 602173 1. 260247 1. 237051 1. 62876 1. 395726  
0. 841031 1. 119502 1. 132944 0. 927864 1. 160905 0. 870549 1. 399428 2. 622165 2. 204207  
1. 850307 2. 509903 2. 038348 1. 510227 1. 830888 2. 230701 2. 375834 2. 725846 2. 683242  
1. 776091 1. 956768 2. 396674 1. 869062 1. 688656 1. 038576 1. 473255 1. 954497 1. 640044  
1. 581172 1. 98289 1. 315574 1. 489085 2. 15783 1. 946739 1. 801315 1. 835004 1. 557501  
4. 029414 3. 748292 3. 706787 3. 574601 4. 14797 3. 060938 4. 553899 3. 440812 4. 659145  
1. 727308 1. 66737 1. 332958 2. 5599 1. 687211 1. 362638 1. 771836 1. 463421 1. 197704  
1. 616104 1. 228044 1. 164267 1. 953815 1. 259143 1. 645507 1. 721261 1. 876158 1. 563327  
1. 564444 2. 284249 1. 764191 2. 437558 1. 218904 2. 143305 1. 380262 1. 768984 2. 075232  
2. 397202 2. 391585 2. 429998 3. 675059 1. 928726 2. 103922 2. 008273 2. 636933 1. 929269  
1. 86024 1. 892181 1. 997218 2. 401081 1. 852894 1. 701853 1. 587984 1. 785079 1. 669136  
1. 576519 2. 183823 1. 855951 2. 285643 1. 760137 1. 912152 1. 214188 2. 069413 0. 694477  
2. 330404 2. 342522 2. 771372 2. 853711 2. 662392 3. 113647 3. 633648 3. 177033 4. 194144  
1. 320388 0. 785246 1. 285644 0. 927156 1. 250814 1. 280597 0. 832877 1. 044285 1. 472017  
1. 858693 1. 406213 1. 724015 1. 565962 1. 520864 1. 579168 1. 46757 1. 517557 1. 535022  
1. 495792 2. 1314 1. 98982 4. 031269 1. 933253 1. 957485 1. 136532 2. 041235 1. 983553  
1. 249616 1. 451224 1. 2429 1. 841135 1. 25905 1. 972788 1. 228582 1. 181506 1. 701385  
2. 133482 1. 567794 1. 660657 2. 315569 1. 369362 2. 147813 2. 040786 2. 155371 1. 950888  
4. 79655 4. 488644 4. 910114 5. 263933 5. 562965 4. 865082 5. 172924 4. 563062 5. 591864  
3. 430902 2. 847515 2. 730121 1. 4425 1. 522392 2. 90348 1. 553669 2. 857171 2. 260664  
0. 82222 1. 342977 1. 145875 1. 414989 1. 355553 1. 345936 1. 58886 1. 531456 2. 017778  
4. 539883 5. 054444 5. 468825 3. 964549 4. 9123 5. 220215 4. 996369 5. 163303 4. 635979  
1. 396057 1. 472798 2. 327183 1. 530719 1. 71553 1. 348546 1. 817271 1. 077318 1. 492058  
2. 055673 1. 88922 1. 678696 2. 753945 2. 825694 1. 134799 1. 648637 2. 638258 2. 875933  
2. 136702 3. 066455 2. 29631 2. 793265 2. 493483 2. 788024 2. 004815 1. 713983 2. 233529

5. 63015 3. 965956 3. 742151 5. 354268 4. 115237 3. 815554 5. 572869 5. 020892 4. 439852  
5. 78219 5. 476162 5. 856549 5. 28178 5. 576805 5. 459186 4. 799547 5. 760308 5. 703693  
4. 759041 5. 053695 4. 648174 4. 568267 5. 031599 5. 598455 3. 749653 4. 663458 4. 687235  
2. 019028 1. 416532 2. 040411 1. 275466 1. 500506 1. 807374 2. 388232 2. 16014 2. 28339  
2. 375331 1. 976067 1. 767643 2. 527562 1. 739355 2. 34764 1. 657079 1. 667313 1. 422675  
2. 416071 1. 30894 1. 327585 1. 923051 1. 840342 1. 824899 3. 034423 2. 530489 1. 567826  
1. 758702 1. 252758 1. 329733 2. 06085 0. 976413 1. 233174 1. 308787 1. 168039 1. 269128  
4. 201927 5. 374583 4. 641856 6. 351129 4. 128128 4. 269574 5. 145125 4. 540378 5. 945801  
2. 865921 1. 733955 2. 845517 3. 245553 2. 386697 1. 471187 2. 494097 2. 281558 2. 562779  
5. 439125 4. 849943 5. 157721 4. 830532 5. 146897 5. 402304 5. 026812 5. 331971 3. 874088  
7. 511519 7. 472304 7. 110271 6. 924394 6. 940752 7. 21259 6. 674199 7. 987424 6. 395558  
2. 600549 3. 670674 3. 408935 2. 641394 2. 315619 3. 195208 1. 96984 2. 492822 3. 304093  
7. 258273 5. 63796 6. 327535 5. 39607 2. 988658 5. 7952 5. 560958 5. 501843 8. 067533  
10. 75482 10. 09743 9. 452292 10. 42974 9. 350644 10. 45737 10. 0343 9. 096448 10. 52278  
4. 624614 5. 111957 5. 222821 3. 336841 4. 132149 4. 09406 4. 712458 4. 497611 3. 660606  
0. 72265 2. 405559 1. 940446 2. 430531 1. 586398 0. 711564 1. 276283 1. 984729 1. 091493  
5. 707185 5. 865461 6. 170929 6. 133336 5. 778648 5. 902781 5. 864763 5. 791522 4. 463621  
3. 45038 3. 84761 3. 412156 2. 987064 3. 410358 3. 373961 3. 205935 3. 374991 3. 752417  
7. 655152 7. 381855 7. 344996 7. 495381 7. 098759 7. 602869 7. 206552 7. 248349 7. 262946  
7. 178702 6. 915037 6. 936929 6. 602595 6. 748711 6. 788596 6. 739355 6. 709478 6. 603537  
1. 901566 0. 882061 1. 404447 1. 207716 1. 758849 2. 637994 1. 002026 0. 955036 0. 979371  
6. 469466 5. 36716 6. 435848 4. 713279 4. 547706 6. 606495 5. 666496 4. 726942 6. 367416  
3. 018195 1. 286751 1. 124428 1. 938094 2. 714282 2. 432087 2. 002592 2. 803476 1. 463829  
3. 872442 2. 322373 3. 714111 3. 079515 3. 740544 2. 971568 3. 225037 2. 717143 2. 962298  
2. 485637 2. 969083 1. 316464 2. 556895 1. 221342 2. 155764 1. 461915 2. 020778 1. 802095  
6. 249114 5. 806156 5. 514308 7. 279895 5. 630185 5. 781499 5. 946828 5. 326207 6. 118612  
1. 698325 3. 171616 2. 199373 2. 155933 2. 896948 2. 051935 2. 249808 3. 359451 3. 766895  
5. 840614 5. 249844 5. 623667 4. 932497 6. 133741 5. 163899 5. 942428 5. 979897 4. 822659  
6. 464612 6. 567794 6. 487779 6. 840403 6. 586255 6. 485293 6. 749334 6. 522738 6. 516395  
1. 334517 1. 867998 2. 166827 2. 203785 1. 841066 1. 633859 1. 528302 2. 028588 1. 97883  
4. 45321 2. 675471 4. 135944 2. 81868 2. 387825 3. 230183 3. 045766 3. 291242 3. 714414  
3. 627879 2. 565259 2. 661654 3. 870688 2. 822476 3. 320436 3. 987931 2. 571513 2. 692787  
2. 198463 2. 786543 2. 917374 2. 526512 2. 622111 2. 681142 3. 385699 1. 887267 2. 598724  
2. 762958 3. 088186 1. 393342 2. 703443 2. 457276 4. 047616 2. 386681 2. 499071 3. 176659  
3. 260095 5. 288616 3. 870332 3. 639768 7. 799593 3. 162862 5. 449606 4. 811103 2. 911795  
9. 10516 9. 281911 9. 81588 9. 162689 9. 07141 9. 592756 8. 773709 10. 00698 7. 926392  
2. 58682 3. 218951 3. 431352 4. 328095 2. 377348 2. 162116 2. 560161 2. 1929 2. 013523  
2. 77222 4. 393093 3. 210194 4. 212178 2. 886833 2. 190208 3. 758016 3. 140394 4. 498276  
5. 808457 6. 873574 3. 71595 6. 203138 7. 525059 5. 602519 7. 882842 6. 033734 6. 07539  
2. 014172 1. 971747 2. 81264 2. 873879 2. 540405 2. 460318 2. 604437 1. 888537 2. 073905  
3. 200653 3. 360058 4. 520068 2. 808357 3. 511182 3. 246458 2. 609817 3. 427658 4. 955813  
1. 310793 1. 553928 1. 977871 2. 697128 1. 189415 1. 766146 1. 394476 1. 727504 2. 106605  
4. 589963 2. 519396 4. 45173 3. 630413 4. 575696 4. 070137 3. 720033 4. 579916 4. 791103  
8. 398585 8. 295626 8. 979149 8. 756502 8. 922849 8. 894843 8. 539266 8. 562543 7. 010486  
3. 456517 3. 59405 3. 105506 5. 590406 3. 511085 3. 973075 3. 928323 4. 556871 3. 955051  
3. 329683 2. 668271 2. 51635 2. 71209 1. 76694 1. 934045 1. 885091 2. 057035 1. 611453  
1. 250301 1. 263822 1. 499446 1. 314065 1. 081521 1. 484453 1. 277428 1. 000835 1. 024984  
2. 89758 1. 379825 2. 321 2. 532968 2. 571071 1. 781294 1. 674749 3. 099882 2. 062288  
1. 492048 1. 256108 1. 288172 1. 71161 1. 00344 1. 517312 1. 170702 1. 234793 1. 386975  
11. 41629 11. 16053 11. 53975 11. 51664 11. 45403 11. 51939 11. 3722 11. 58484 10. 1148  
3. 353494 2. 731505 2. 838801 2. 442144 2. 768119 2. 383441 2. 368523 2. 024121 3. 860183

2. 288414 3. 711148 3. 995076 3. 693733 2. 073724 3. 523352 1. 745832 2. 580243 2. 805823  
1. 019647 1. 380902 2. 309661 1. 882971 1. 204161 1. 948077 2. 040646 1. 344521 2. 749762  
1. 897406 1. 757754 1. 609904 1. 762946 1. 552262 1. 543633 1. 262472 1. 45448 1. 517849  
5. 057088 5. 264168 4. 442887 5. 114837 5. 359089 5. 919829 5. 657704 5. 038901 5. 20603  
6. 446255 6. 734147 5. 246375 7. 23691 7. 62996 5. 827209 6. 564782 6. 826104 4. 723159  
6. 454456 5. 185804 6. 396432 5. 560891 6. 407594 7. 356406 6. 02414 7. 273458 5. 985633  
3. 903453 3. 633725 3. 697315 5. 459237 2. 307953 4. 407862 4. 485647 3. 804247 3. 612833  
10. 91368 10. 98243 11. 00564 10. 92222 10. 9556 11. 0556 11. 09351 11. 22477 11. 15261  
4. 30364 3. 484341 4. 978246 4. 655264 4. 610122 5. 321688 4. 026138 4. 89025 4. 152472  
3. 217326 2. 93213 3. 125301 3. 282974 3. 205959 3. 291326 3. 283164 3. 589365 2. 316593  
3. 956608 2. 028634 1. 800294 1. 693745 1. 930385 1. 965765 1. 904022 4. 133207 2. 013219  
2. 180142 2. 592655 2. 152757 3. 470385 2. 444147 3. 982106 2. 021112 3. 082839 2. 594741  
0. 656927 1. 312146 1. 044388 0. 928254 1. 841823 1. 329699 0. 849404 1. 366166 1. 202983  
5. 474489 5. 957773 7. 122465 7. 008636 6. 398701 5. 229395 6. 548623 5. 97394 7. 609806  
5. 758228 4. 589647 4. 301808 4. 499153 3. 829069 3. 174323 5. 128841 3. 744227 7. 634416  
1. 202071 0. 894203 0. 766149 2. 198935 1. 189691 1. 832213 1. 282025 1. 10768 1. 840297  
4. 358615 3. 98884 3. 924485 5. 170299 4. 133667 2. 711285 4. 608759 4. 2411 4. 238843  
3. 403453 2. 978063 3. 598642 2. 63203 2. 521676 3. 036545 3. 255375 3. 149534 4. 299288  
2. 453514 2. 412732 3. 22181 3. 664316 4. 303569 1. 652197 2. 321482 2. 265997 2. 16562  
1. 432207 1. 110781 1. 875665 1. 860508 1. 132909 1. 641871 1. 342873 1. 288321 2. 137874  
3. 158785 2. 240721 2. 645189 4. 132358 2. 072789 3. 113187 2. 356152 2. 062487 1. 815683  
2. 809397 3. 337922 2. 660674 4. 812422 3. 409892 3. 241476 3. 850149 3. 701924 2. 9866  
7. 930392 7. 996525 7. 130537 7. 73386 8. 018465 8. 238131 7. 999669 7. 947674 8. 205792  
7. 491268 7. 612832 5. 952466 3. 316949 7. 538245 5. 420835 5. 204702 8. 577281 8. 783964  
2. 786491 5. 98093 3. 29116 4. 531422 3. 378722 3. 075683 3. 391011 4. 004125 4. 46825  
2. 066161 1. 638247 1. 762292 2. 567816 2. 379806 2. 129965 2. 349328 2. 118154 2. 187815  
3. 26879 3. 895229 3. 703666 3. 753124 3. 946094 2. 621947 2. 546559 3. 649127 4. 07536  
4. 203778 3. 193811 4. 015841 4. 757132 4. 641776 3. 22584 3. 456632 3. 292294 3. 109827  
2. 667932 3. 271841 3. 061743 3. 357017 2. 79774 2. 265488 2. 17346 2. 985666 2. 708401  
4. 256616 2. 490329 3. 246743 3. 816517 1. 573782 5. 111996 3. 602987 2. 552218 4. 262311  
5. 013736 4. 400491 2. 689547 4. 226424 5. 900934 3. 205867 3. 528927 5. 47637 6. 38582  
6. 77334 8. 462888 4. 340619 5. 31753 7. 363649 3. 736348 3. 770375 6. 869431 9. 642452  
7. 698581 7. 221244 6. 879861 6. 977383 7. 233599 7. 051681 7. 383503 6. 908922 7. 710017  
10. 08554 10. 1956 10. 30671 9. 990221 10. 23833 10. 12439 10. 46382 10. 1872 9. 957158  
0. 950143 1. 561853 1. 320872 1. 166312 1. 190482 1. 115251 1. 802676 0. 714555 0. 807274  
2. 761332 2. 829132 2. 693968 2. 486442 2. 23242 2. 641275 2. 010766 2. 154702 2. 246502  
3. 724561 4. 5316 6. 014107 4. 757982 4. 425068 2. 646228 4. 690457 4. 681401 4. 159891  
2. 961976 3. 201695 2. 841535 3. 682279 3. 044362 2. 921415 3. 915242 2. 418568 2. 420264  
2. 052261 0. 819581 1. 915535 1. 815097 1. 339716 1. 257412 1. 125814 1. 716911 1. 820025  
3. 968028 4. 755212 6. 05193 5. 060689 3. 809547 3. 941482 4. 880651 3. 902289 5. 041506  
3. 064951 3. 786465 3. 081164 1. 325417 2. 505059 3. 944931 2. 352009 3. 01812 2. 803377  
4. 993632 4. 776077 5. 307629 6. 042355 5. 730658 5. 117258 5. 712261 5. 171852 5. 281473  
1. 528624 2. 244132 1. 499972 2. 821649 1. 764389 3. 205721 1. 432764 1. 691112 2. 353199  
1. 148344 1. 194165 1. 299707 2. 365818 1. 495628 1. 375834 1. 143763 1. 382312 2. 182049  
1. 685133 1. 410307 1. 344974 1. 537997 2. 224604 2. 661359 1. 907879 1. 326722 1. 212952  
0. 901786 2. 55039 1. 198546 1. 796063 2. 046262 2. 009128 1. 022082 1. 050929 3. 671037  
1. 473348 1. 165463 1. 08099 1. 332797 1. 227833 1. 751012 1. 485567 1. 504676 1. 406939  
3. 759543 3. 519001 3. 570212 3. 742695 2. 941593 3. 893897 3. 396276 2. 634016 4. 203172  
1. 270067 1. 15102 1. 240472 2. 265284 1. 034028 0. 991547 0. 932874 1. 291384 1. 721663  
1. 140477 0. 680269 0. 930421 1. 222353 0. 964071 1. 096729 0. 576291 0. 482812 0. 493698  
3. 518573 2. 898956 3. 872833 4. 000577 3. 242348 2. 233875 3. 282381 2. 698105 3. 517496

3.46881 3.394691 3.905528 3.355572 3.463659 3.775592 3.506559 2.937303 2.685317  
1.566107 1.935448 2.057008 1.877302 1.837105 2.6237 2.359101 1.777421 1.789386  
0.708056 0.701684 0.723767 1.045824 1.359825 0.847786 0.87646 1.010977 0.519901  
1.612953 2.29667 1.866986 1.700463 1.126928 1.974749 1.29176 1.179639 1.030026  
0.961958 0.876284 0.988888 1.010989 1.231098 1.401259 1.05401 0.985048 1.737097  
5.373127 4.795596 4.669364 5.752356 5.00243 4.060619 4.625913 4.581518 3.663789  
4.904741 2.441022 3.519879 4.479745 4.290837 4.800798 3.277529 4.339956 5.813415  
5.198713 5.669534 5.324977 5.541254 5.873471 4.285613 6.086891 4.817529 5.258516  
1.518525 1.650597 1.484232 2.232235 1.373093 1.57071 1.816756 1.466678 1.775719  
5.028188 4.117443 5.086834 4.394848 4.529656 5.130168 5.262668 4.413135 4.962823  
0.83076 0.666771 1.908285 0.82219 0.755089 1.095113 1.3579 0.766751 0.948968  
1.227583 1.183956 1.312702 0.942476 1.168395 1.122147 1.337389 1.061737 0.704516  
5.625033 7.003437 5.612317 7.58187 6.829052 5.906616 6.520925 7.227604 5.84494  
1.695438 1.76473 2.627647 2.023681 1.392226 1.652291 1.708564 1.951225 2.013758  
1.891803 1.732538 2.330432 2.273927 1.841181 1.56777 1.538471 2.216842 2.381631  
1.086155 1.430699 1.192203 1.748581 0.868923 1.601245 1.170269 1.184081 1.057048  
2.764781 2.734881 2.95824 3.230067 3.233798 3.10376 3.202219 2.416272 2.749134  
2.466855 2.5206 2.018948 1.864765 2.014087 1.579674 1.967104 2.266431 1.78272  
3.537261 2.956081 2.053015 2.438881 2.164532 2.171451 3.502614 3.31755 1.878893  
2.457466 1.652137 2.570265 2.042089 2.179091 2.443566 1.799883 1.54766 1.792746  
5.398369 5.094438 5.589047 4.990395 4.78225 4.146673 5.029088 4.162871 5.071291  
2.846193 2.629946 2.460236 1.91007 5.076331 3.230398 2.710435 2.348336 2.025387  
5.267337 2.9671 4.761064 5.223699 6.368094 4.479806 4.582138 6.007516 4.644915  
6.766943 7.074458 7.143744 6.488486 7.471613 6.915392 7.042219 7.001909 6.914626  
1.751381 2.026096 1.896462 1.831517 1.25945 1.46625 1.455011 1.636282 2.030567  
1.562985 1.778347 1.444754 1.612626 1.820497 1.575976 1.801332 2.528877 2.142193  
1.690178 2.177811 1.388415 1.694953 1.422259 2.088649 1.129509 1.686083 1.578817  
1.877119 2.711395 2.830959 2.292746 1.845505 1.921887 2.156306 2.95227 3.126023  
8.223939 7.650786 8.19202 8.554479 7.926169 7.780601 8.132159 8.006068 8.298151  
4.737553 4.566225 5.51695 2.665628 5.205512 4.767204 5.312486 5.070837 3.799777  
1.004374 1.320194 1.285044 1.861843 0.938293 1.333014 1.734943 1.434559 1.498936  
1.715464 2.812154 2.262108 2.546665 3.754484 1.206757 1.469785 2.354345 1.502186  
6.619908 6.970676 6.797791 7.136199 6.901482 6.603571 6.846418 6.50369 6.315996  
4.741637 5.501581 4.805509 5.258745 5.219779 4.876707 6.442351 5.504733 4.966348  
2.62349 2.562971 2.607739 1.470951 4.405791 2.842637 2.290743 3.049112 1.935037  
1.238518 0.555606 0.599127 0.665079 0.659792 1.510109 0.988437 1.187404 1.301416  
2.320894 2.08704 2.400979 3.526325 2.40645 3.097323 2.80439 2.205954 2.787799  
3.435963 3.923701 4.277587 2.925135 4.441178 4.417592 4.112653 4.34654 4.597571  
3.550874 4.112506 4.090855 3.490698 3.293892 4.046672 5.108932 4.128471 3.521733  
4.833776 4.9033 3.523576 4.929917 5.019274 4.884707 3.301606 5.332786 3.689875  
1.130997 0.870099 1.523536 2.317364 2.036893 1.660352 1.123218 1.205694 0.92076  
5.775433 4.441245 4.872205 4.82324 4.921403 4.202782 5.361339 4.203268 4.402557  
2.176868 1.311862 1.292405 1.747985 1.032367 1.386029 1.436397 1.34332 1.339791  
5.554183 6.12092 5.85062 5.442079 6.341669 6.677088 5.529397 6.52126 5.63574  
2.983163 1.637856 1.48453 1.462717 1.04415 3.243252 1.265345 1.906008 3.51431  
3.751774 2.118375 3.177793 2.801155 3.321462 3.248699 3.282338 2.679224 1.993135  
1.532088 1.282498 2.007594 1.762193 2.025629 2.278493 1.39023 2.401127 2.600522  
1.740747 1.008683 1.151033 3.786976 1.05545 1.301107 1.154445 1.548593 1.645687  
4.587662 5.306817 3.966762 4.210922 5.50876 4.701788 3.96184 5.062701 5.069657  
9.406845 9.01521 9.108889 9.246288 9.02374 9.344178 9.477318 9.341427 9.640675  
2.309682 3.4623 3.674377 2.916778 3.390518 2.889811 3.488087 3.285232 3.310423

2. 713761 3. 704234 3. 356114 3. 092525 2. 692184 2. 296856 2. 172035 1. 983042 3. 95828  
1. 518512 1. 671655 1. 927721 2. 052374 3. 006416 1. 404379 2. 301437 3. 087655 3. 401322  
1. 086709 2. 25926 2. 604346 1. 649482 2. 712523 1. 727239 2. 191612 2. 754731 3. 067857  
1. 541429 1. 42152 1. 561133 1. 902458 1. 411873 1. 98168 1. 603102 1. 420657 1. 86441  
1. 810702 1. 354532 1. 581518 1. 774046 1. 911843 1. 637141 1. 391524 1. 722521 1. 560192  
2. 712599 3. 954035 4. 156249 3. 298235 3. 305904 3. 773691 4. 11918 3. 125849 2. 538776  
1. 221879 2. 365476 1. 435104 1. 473588 4. 610744 2. 395386 1. 998 4. 534419 2. 300437  
2. 290672 2. 187875 1. 927764 2. 30747 1. 887705 2. 302079 2. 751514 2. 069328 2. 259012  
1. 411901 1. 622717 2. 122781 2. 43713 1. 840925 2. 296999 2. 484806 1. 716483 2. 304387  
4. 368083 5. 10078 3. 862805 4. 467115 5. 52023 3. 652598 3. 813493 4. 444659 3. 251392  
6. 913155 7. 054487 7. 335067 7. 10169 7. 623104 6. 637537 6. 042531 7. 434932 6. 119268  
1. 97225 1. 774415 2. 009278 1. 773909 1. 790448 2. 897848 1. 685121 1. 360218 2. 108777  
7. 752241 7. 58062 8. 845595 8. 246042 8. 179044 8. 442682 8. 663138 8. 429756 7. 429863  
5. 113773 3. 944419 4. 082 4. 215278 4. 007699 4. 416964 4. 093842 4. 341261 4. 563673  
1. 764416 1. 654943 2. 020714 1. 436263 3. 35503 2. 029859 1. 603707 1. 866909 1. 844426  
1. 10921 1. 850387 1. 747629 2. 766564 1. 406875 1. 272066 1. 454266 1. 042614 1. 482969  
2. 067016 2. 404639 1. 589489 1. 895354 1. 932519 2. 730258 2. 166941 2. 041665 1. 858531  
0. 907907 1. 103721 1. 396759 2. 511273 1. 09212 1. 05738 1. 16368 1. 161464 1. 411981  
1. 892396 1. 656624 1. 791942 2. 200958 1. 751239 1. 457669 1. 238674 1. 372227 1. 641317  
2. 237795 2. 247736 2. 238295 1. 957636 1. 629993 2. 687299 2. 099715 0. 977984 2. 470522  
8. 336305 8. 210719 8. 156631 8. 646467 8. 021435 8. 295474 8. 387983 8. 518625 7. 78018  
0. 725871 0. 749957 0. 631354 1. 011094 0. 953901 1. 266021 1. 018088 1. 135211 0. 849875  
1. 642864 1. 447365 2. 61444 1. 718755 1. 256116 1. 408168 1. 439306 1. 841946 2. 446416  
1. 157486 2. 347276 2. 286386 1. 849929 1. 447803 1. 175545 1. 198479 1. 192497 1. 225203  
6. 590076 7. 501175 7. 793427 7. 318996 6. 415629 6. 984937 7. 292223 7. 070364 5. 360925  
7. 86529 6. 892307 7. 220698 8. 18088 6. 806475 6. 761524 8. 010245 7. 253041 8. 241882  
6. 440373 6. 30345 5. 792416 6. 937082 6. 461101 5. 936377 6. 264863 7. 101206 6. 861094  
2. 517274 3. 890657 3. 080676 2. 167888 2. 634773 5. 055468 2. 362636 2. 602552 3. 644769  
3. 161289 3. 96244 3. 280259 2. 425979 4. 454579 3. 037977 1. 996421 3. 453525 2. 725433  
5. 517137 4. 615008 5. 564592 6. 555084 5. 109812 5. 259911 5. 255037 5. 289889 5. 720134  
0. 776035 1. 116555 1. 333097 1. 384386 0. 954599 1. 037048 0. 561029 0. 895787 1. 358745  
1. 386878 2. 324517 1. 379492 1. 639053 2. 598727 2. 59306 2. 421847 2. 993039 3. 365704  
1. 389237 1. 960836 2. 2819 2. 574898 1. 450916 1. 064967 2. 150516 1. 87295 2. 320847  
1. 668715 1. 118067 1. 25244 1. 787373 1. 547682 0. 886635 1. 401163 1. 921228 1. 616046  
6. 147456 6. 693511 5. 880974 6. 054329 7. 610899 6. 648108 5. 442376 6. 673064 5. 085669  
2. 247194 2. 843622 2. 556878 3. 06941 2. 292733 2. 126544 2. 438306 1. 635553 2. 088628  
2. 159811 1. 619776 2. 057115 1. 723291 1. 554761 1. 574172 1. 591665 1. 418311 1. 62535  
1. 805273 1. 835667 1. 023396 3. 0516 1. 030486 1. 679063 1. 081866 1. 360763 1. 659136  
1. 865395 2. 129872 1. 345027 2. 603527 1. 880834 1. 934756 1. 393461 1. 130608 1. 094552  
3. 226348 4. 013715 2. 682356 3. 933175 2. 983619 3. 100301 3. 119001 3. 418614 2. 871938  
2. 801689 2. 037153 2. 059485 1. 880889 2. 599223 1. 828474 2. 512362 1. 925709 1. 749596  
1. 088454 1. 300764 1. 485405 1. 825114 1. 471293 1. 759014 1. 719182 1. 512862 1. 820651  
3. 125837 4. 126064 1. 972862 2. 17849 4. 438239 4. 11651 4. 682903 4. 814393 3. 547095  
6. 50076 6. 73686 6. 4717 6. 567877 6. 804471 6. 680704 6. 390051 6. 866895 5. 586942  
8. 343286 8. 26554 8. 406357 7. 561017 8. 501606 7. 96944 8. 57719 8. 729409 8. 506628  
7. 006069 7. 353097 7. 381173 7. 035844 6. 891066 7. 252343 6. 934168 6. 743481 6. 524692  
6. 949628 7. 138811 7. 023986 6. 855752 7. 353155 7. 507834 6. 101784 7. 415764 5. 100846  
8. 719178 8. 664961 9. 244801 8. 275929 8. 806881 8. 665836 8. 797762 8. 827838 8. 229562  
4. 940944 4. 512684 4. 242309 3. 53132 4. 382663 4. 988061 4. 574341 4. 718951 4. 640274  
6. 11626 5. 866088 5. 582554 6. 278377 6. 380481 5. 345164 6. 276639 5. 145866 6. 557191  
5. 810827 5. 272356 5. 110725 5. 032528 5. 477465 5. 047331 5. 488823 4. 916219 4. 926849

6. 564452 5. 926977 6. 312968 5. 085161 7. 002217 6. 204796 7. 118181 6. 366034 6. 370181  
1. 836722 1. 998761 1. 321367 1. 550416 1. 1789 1. 343653 1. 638255 1. 646728 1. 216553  
3. 595682 3. 653869 3. 929361 2. 661592 3. 970122 4. 015374 3. 715415 3. 794155 3. 234718  
1. 483542 0. 891357 1. 245364 2. 02342 1. 068549 1. 516798 0. 784529 1. 114523 1. 02038  
3. 620916 3. 964291 4. 478805 5. 486295 5. 449829 4. 889404 4. 314782 4. 130344 2. 388069  
1. 482402 1. 974803 1. 8755 2. 852705 2. 43035 2. 943051 1. 597503 2. 364085 1. 700899  
5. 496649 5. 199365 5. 539728 4. 771561 5. 346532 4. 73959 5. 575989 4. 979088 5. 445719  
2. 167125 1. 822142 1. 954088 2. 633842 1. 649406 2. 487905 1. 873117 1. 912372 2. 713372  
2. 908861 2. 030001 1. 72248 4. 225502 1. 851821 1. 851079 2. 453044 2. 734821 1. 550272  
2. 299893 2. 587709 1. 736435 3. 208109 2. 73392 2. 705074 2. 247984 1. 994932 2. 147767  
1. 203965 1. 002647 1. 411605 1. 698915 1. 8263 1. 386264 1. 562717 1. 140357 1. 376975  
6. 11949 7. 859426 1. 361255 4. 56168 7. 969197 7. 055363 5. 955179 4. 954305 6. 043626  
4. 73911 4. 997532 4. 994525 4. 872398 5. 399991 4. 635825 5. 008441 4. 848088 5. 337834  
3. 224635 2. 110247 2. 358677 2. 923613 1. 704598 1. 614381 2. 141799 2. 577043 1. 985847  
0. 963343 1. 383919 1. 631477 4. 05589 1. 842229 1. 194285 1. 679409 1. 009171 1. 683003  
5. 01518 4. 301111 5. 161833 4. 159601 5. 339324 5. 026555 5. 238528 5. 086787 5. 427773  
6. 264971 6. 097211 6. 066581 3. 813505 5. 637527 5. 481385 5. 833277 5. 793128 4. 705755  
4. 995075 4. 816853 4. 063082 3. 968004 4. 336883 4. 689294 5. 561686 4. 715324 4. 26458  
4. 220539 4. 453442 3. 099211 5. 48146 4. 766656 4. 027968 4. 678026 4. 787724 1. 827717  
6. 545436 6. 697147 6. 484673 5. 679656 6. 74592 6. 779 6. 17002 6. 348167 5. 228584  
4. 956611 4. 710263 5. 410231 5. 718299 6. 009465 5. 243349 5. 8885 4. 583109 5. 336677  
1. 721977 1. 592494 1. 50704 2. 786034 2. 155893 1. 7111 1. 726193 1. 052119 1. 90084  
3. 389089 2. 580982 2. 964628 3. 671145 3. 160977 2. 920545 2. 948923 3. 116105 2. 841296  
5. 789883 4. 936653 4. 118424 6. 344885 5. 47171 5. 921619 6. 896272 3. 678832 2. 926892  
2. 74685 2. 562385 2. 070528 2. 695567 2. 236759 2. 341883 2. 294512 2. 19201 2. 44237  
5. 760046 6. 1847 6. 245549 4. 166422 4. 88398 6. 286246 6. 215417 6. 137427 6. 151107  
2. 232375 2. 140218 2. 582051 2. 927308 1. 924845 1. 834914 1. 998202 2. 389609 2. 131209  
9. 017356 8. 646948 8. 679941 8. 578422 8. 635892 8. 365636 8. 893387 8. 748957 9. 062609  
2. 594033 1. 190167 0. 488036 0. 493485 3. 101458 1. 562056 2. 714674 2. 746773 1. 811067  
1. 662528 2. 130656 2. 00746 2. 607575 2. 250892 3. 039067 1. 975437 2. 61238 2. 341641  
5. 459587 5. 46581 5. 190291 4. 753758 5. 156532 5. 519066 4. 778251 5. 102162 5. 529856  
3. 386713 4. 006202 3. 76577 3. 224357 3. 291892 4. 156347 4. 279037 4. 341065 5. 851818  
3. 404143 3. 517889 3. 61688 4. 009344 4. 081734 3. 307928 3. 225276 3. 133175 3. 075707  
7. 202295 7. 235756 7. 191882 7. 19316 7. 808516 7. 281525 7. 448588 7. 142374 7. 186224  
4. 284762 3. 615782 3. 464207 3. 807282 3. 877291 4. 274035 3. 234896 3. 724531 2. 926431  
6. 248772 5. 890517 5. 781296 4. 160849 6. 147874 6. 307793 6. 326193 5. 880037 6. 123922  
5. 90845 7. 076836 5. 997676 6. 147228 7. 806067 6. 664161 6. 308454 6. 492978 5. 107995  
6. 989131 7. 075425 6. 574478 7. 174126 7. 773142 6. 99864 6. 505172 6. 849414 6. 786412  
4. 946105 4. 851712 4. 791092 5. 00312 4. 883868 4. 402745 4. 696753 4. 672873 4. 290041  
1. 951343 2. 044066 2. 178422 2. 771303 1. 458033 1. 347667 2. 973817 2. 14499 1. 525766  
2. 929709 2. 440325 2. 659742 2. 582966 3. 470986 2. 596242 2. 518359 2. 439649 2. 504508  
4. 760946 4. 166166 3. 261996 4. 140806 4. 639925 5. 051647 4. 294556 3. 861849 5. 364722  
3. 433936 2. 896998 3. 225613 3. 768303 5. 243205 3. 219751 2. 896873 3. 070819 3. 143434  
3. 478024 4. 293489 4. 757737 4. 394888 4. 338774 4. 881232 3. 900637 2. 553368 4. 360171  
3. 16463 3. 411089 2. 983474 4. 523289 6. 21427 3. 443144 3. 24727 3. 645622 3. 724568  
1. 877152 1. 906186 1. 76324 1. 978682 4. 468382 2. 892676 1. 801234 3. 355381 3. 507577  
1. 789603 1. 607449 1. 529575 1. 264994 1. 249296 1. 740224 1. 534372 1. 809991 1. 525456  
1. 452133 2. 16897 1. 946957 3. 985292 2. 066234 3. 468144 2. 01428 1. 746748 1. 184445  
8. 10138 8. 416364 8. 411125 8. 410305 7. 900581 8. 055828 8. 426676 8. 541111 8. 094673  
3. 937843 4. 753444 3. 887798 4. 270055 4. 482223 4. 713592 4. 095621 4. 106528 4. 073922  
1. 789353 1. 439932 1. 250991 1. 977518 1. 818877 1. 43584 1. 613628 3. 336688 1. 485444



10.10814 10.34259 10.67227 10.55162 10.41821 10.55388 10.11463 10.54595 9.285971  
4.932026 5.151986 3.670645 4.465139 5.584454 3.146702 3.604577 5.435444 3.471327  
5.395959 5.724434 5.219117 5.901756 5.524397 5.351157 5.750669 5.692554 3.074771  
2.860187 2.311747 2.69579 2.954428 2.804884 2.801336 2.146276 3.348399 2.495126  
4.364694 5.40882 5.164367 5.032013 4.696845 5.389557 4.142858 4.308813 3.484115  
5.288439 4.533054 4.769465 5.210004 4.718768 5.294906 5.060417 4.820648 5.042317  
1.505113 1.752024 1.405626 2.745137 1.106848 1.99387 1.954749 1.258759 1.808842  
2.261954 2.444575 1.907164 1.757339 1.442008 1.380636 1.585077 2.090273 2.202798  
3.746668 3.82738 3.141579 3.186344 4.52341 3.228024 3.354432 3.865599 2.523261  
2.173014 2.042442 1.946166 2.641593 1.711781 1.478504 1.891413 2.538605 2.021327  
9.497387 9.601757 9.975631 9.208948 9.748962 9.708095 9.667116 9.570771 9.686417  
3.473764 3.573606 1.716924 1.536932 3.258617 1.663016 2.047244 3.490286 1.591279  
9.295998 9.220961 9.230449 8.703174 9.1312 9.240518 9.168906 9.293555 9.031254  
4.378984 4.731724 4.463937 3.711942 4.760542 4.734797 4.041018 4.909042 2.61203  
3.829391 3.207374 3.170043 3.151691 2.979482 4.425955 2.944438 3.386726 3.924478  
8.203169 8.603196 7.67429 7.691072 8.953634 8.841851 8.540581 8.937701 8.503774  
2.377621 2.338746 1.787347 2.444718 2.069382 2.19622 1.907791 2.61163 2.676379  
5.733273 5.915976 5.848613 6.031016 5.953668 5.595124 5.868764 5.671178 5.840924  
7.319789 7.178856 7.616288 7.054937 7.081358 7.650879 7.515888 6.985273 6.815537  
3.109404 4.659825 1.823632 1.785243 3.930006 1.808386 3.989454 3.264823 3.509232  
2.698626 3.085455 2.600169 1.392534 2.541279 2.625165 2.165427 2.548287 2.857659  
9.569117 9.70201 9.313783 9.6559 9.206917 9.583877 9.609958 9.644289 9.30432  
1.635452 0.958204 1.398939 2.02039 1.572797 1.139525 1.640996 1.664343 1.575642  
4.011316 5.167715 2.463012 4.757243 4.071602 2.618401 3.236729 4.052933 3.085253  
2.369216 2.622635 3.043249 3.883206 3.723462 2.456628 2.080717 3.010916 2.75957  
6.593686 6.631188 6.902524 6.243409 7.122635 6.92961 6.25652 6.957984 6.048199  
6.519512 5.462012 5.810495 5.663207 5.204805 6.489276 5.809576 5.772781 7.38797  
1.463899 1.681248 2.508314 2.621945 2.311287 1.367833 1.926513 2.023052 2.332164  
1.515215 1.777465 1.229127 2.556077 1.223911 1.856589 1.308124 2.499015 2.695782  
8.308731 8.017007 8.062281 8.182119 8.141395 8.141378 8.56743 7.95721 8.170706  
6.60265 6.136341 5.931847 6.456583 6.985282 5.473488 6.267553 6.417453 4.919533  
5.005327 4.93293 5.215886 5.058522 5.079588 4.706999 5.186448 4.95014 4.286347  
2.824839 3.092252 2.218099 2.630005 2.352482 3.407283 2.188331 2.080749 2.942818  
5.033776 4.936816 4.96104 5.07088 4.043128 4.257573 4.635419 4.875729 3.419988  
5.469319 5.355219 5.911837 5.712345 4.760806 5.337998 5.761192 5.272919 5.932197  
5.077065 5.460467 4.467198 4.602892 4.741855 4.878166 5.019707 5.249622 5.700453  
3.592543 4.132071 3.940425 4.297402 4.289933 3.639554 4.080802 3.926626 3.919074  
5.854264 5.707089 5.023934 5.023642 5.696091 6.118394 5.563727 5.697277 5.093042  
1.577532 1.814772 2.310635 1.939013 1.501278 2.299832 1.422202 1.713432 1.570612  
3.184243 2.977329 2.80426 3.978222 3.704626 2.387926 3.756559 3.678343 2.756755  
8.470044 8.552652 8.246871 8.352236 8.509401 8.632021 8.673866 8.383068 7.822861  
6.227136 6.044829 4.857105 4.718442 5.901087 5.517918 4.895129 5.336429 6.607028  
3.461409 3.937427 3.749873 3.171888 4.246128 4.355653 3.21462 3.825648 2.637055  
5.452561 6.377309 5.300584 4.972123 5.942859 5.13309 5.874431 6.241075 6.31386  
5.676449 6.053909 6.39533 6.098923 6.341843 5.880197 5.918689 6.330352 7.951607  
6.291488 6.892972 7.111244 6.175253 7.356362 6.558122 6.097483 6.798317 7.314716  
7.477807 7.108185 7.380457 6.892542 6.975217 7.226727 7.315372 6.94296 7.552729  
7.388569 7.981129 7.981297 7.080304 7.970275 7.900385 7.728975 8.27281 6.685526  
8.426407 8.249659 8.436537 8.416741 8.226503 8.377472 8.780623 8.287869 8.340782  
2.720217 2.990958 3.635684 4.024264 3.106132 4.164357 2.760444 3.289755 2.372522  
7.922097 8.26596 7.790552 7.884805 8.330621 7.603269 7.265452 8.316184 7.846481

2. 713392 4. 078541 2. 869713 2. 601726 2. 774467 2. 802524 3. 043309 2. 234774 2. 168582  
1. 513241 1. 428024 1. 737292 1. 829951 1. 790893 2. 30796 2. 146288 1. 680269 2. 075025  
7. 704976 7. 577838 7. 138061 7. 370203 7. 694597 7. 600961 7. 826802 7. 583425 7. 488411  
1. 758798 2. 350708 3. 500486 3. 369849 1. 82355 2. 656924 3. 85803 2. 073095 2. 195038  
1. 278528 1. 099171 1. 122289 2. 118555 1. 676778 1. 355944 1. 367272 1. 029613 1. 860948  
1. 673912 1. 44322 2. 0764 2. 421063 2. 019755 2. 200231 2. 302074 3. 057816 1. 656096  
3. 440154 3. 580303 3. 004841 3. 716242 2. 874919 2. 3733 3. 571054 3. 651456 3. 203977  
3. 265006 3. 141339 2. 896662 2. 46952 3. 79352 3. 795507 3. 323581 2. 817014 2. 325945  
2. 227041 3. 373603 5. 296651 4. 842214 2. 08431 2. 279627 5. 782141 5. 392162 3. 064396  
5. 547108 5. 48436 5. 650956 5. 247419 5. 656898 5. 675453 6. 069835 5. 229592 6. 331694  
3. 041131 2. 853121 3. 904562 3. 681494 2. 428812 2. 029685 3. 679884 2. 887117 2. 444335  
5. 850809 5. 679868 6. 009212 6. 025621 6. 176837 5. 561526 5. 475056 5. 616986 5. 447284  
1. 178953 1. 451961 2. 12596 2. 526276 2. 012155 2. 519338 2. 125098 1. 742167 1. 338142  
1. 151879 1. 21735 1. 124358 1. 881143 0. 87601 1. 553124 0. 870058 1. 242093 1. 283654  
6. 78558 6. 823662 6. 43913 7. 389841 6. 704393 6. 767336 7. 07469 6. 742046 6. 965973  
1. 047819 1. 248577 1. 451102 1. 886306 1. 10486 1. 441211 1. 345033 1. 2623 1. 663832  
3. 375418 3. 715123 3. 650157 4. 478591 2. 353243 3. 314272 3. 712785 4. 153328 4. 174151  
4. 26326 3. 392653 2. 85938 3. 523817 2. 642657 3. 185283 2. 988329 3. 068677 2. 867764  
2. 991354 2. 731569 4. 391007 2. 926484 3. 170714 2. 837179 3. 643896 3. 51921 2. 914446  
1. 71407 1. 75363 1. 414449 2. 534759 2. 339187 1. 874984 1. 694805 2. 342538 1. 737533  
7. 833837 8. 087352 8. 139642 7. 025454 8. 129397 7. 952117 7. 79658 7. 671224 7. 249925  
1. 564926 0. 911397 1. 248016 1. 07359 1. 172917 1. 452306 0. 876963 0. 764836 1. 751478  
2. 916443 2. 419868 2. 356274 2. 82975 2. 118324 3. 212317 2. 821312 3. 009398 2. 831065  
2. 525632 1. 686926 1. 690687 1. 750397 1. 517611 1. 966578 1. 841738 1. 880715 2. 159357  
3. 580303 2. 392499 3. 994181 1. 854232 3. 624552 2. 824827 4. 590992 3. 033177 3. 539612  
2. 217346 2. 044748 2. 392558 1. 630498 1. 019773 1. 804468 1. 390273 1. 392873 1. 510957  
7. 085259 7. 738691 6. 393286 6. 63186 6. 972636 7. 974524 6. 493233 8. 189221 8. 551201  
1. 654208 1. 850693 1. 998297 2. 545831 1. 521708 2. 070015 1. 885596 1. 521157 1. 558362  
1. 116967 0. 864081 1. 214883 1. 226021 1. 309131 1. 275207 2. 036516 1. 078974 1. 327884  
2. 029785 1. 927881 3. 004963 2. 483719 2. 212397 2. 268558 2. 337251 2. 112203 2. 055757  
3. 306585 2. 454241 3. 741387 3. 656532 1. 816027 3. 494667 3. 506032 2. 837707 3. 061946  
2. 076091 2. 097562 2. 828291 1. 928128 2. 89905 1. 64796 2. 884463 2. 277005 2. 374204  
5. 279745 5. 214959 4. 815569 3. 993925 4. 740653 5. 191028 5. 316406 5. 232591 5. 850893  
2. 066242 2. 505052 2. 67968 2. 52787 2. 544841 2. 439132 2. 45612 2. 390132 2. 46975  
3. 052387 3. 137498 3. 127063 3. 581995 3. 206273 2. 611139 3. 709863 3. 301817 2. 207867  
4. 217505 4. 295165 4. 506925 4. 357598 3. 619044 3. 532634 3. 819754 4. 653353 3. 821796  
3. 969468 3. 192972 3. 389025 3. 624879 2. 84338 2. 759405 3. 449003 2. 445638 3. 184391  
1. 7407 1. 460089 2. 111522 2. 117729 1. 641375 1. 904281 1. 593504 1. 525756 2. 593211  
2. 876156 2. 352103 2. 619058 2. 539864 2. 379305 3. 045633 2. 58165 2. 829152 1. 876018  
1. 518981 1. 483378 1. 917122 1. 668205 2. 32698 1. 480607 1. 738053 1. 757488 1. 455782  
0. 963053 1. 13218 1. 331053 1. 517644 1. 346712 1. 461864 1. 224792 1. 14163 1. 440321  
1. 241629 1. 096353 1. 199336 2. 219371 1. 265149 1. 146023 1. 329819 1. 258914 1. 339307  
3. 065604 1. 849462 3. 970565 4. 396759 4. 598412 2. 648933 3. 760903 4. 498481 2. 710947  
1. 874733 3. 34096 0. 872264 1. 000314 2. 789188 0. 754112 1. 151941 1. 447288 1. 929624  
0. 993777 1. 389067 1. 133531 1. 774573 1. 875432 1. 291499 1. 119953 0. 974876 2. 070334  
4. 982585 4. 466731 4. 609433 3. 802362 4. 389364 4. 749479 4. 971379 4. 475552 3. 970173  
3. 134385 3. 926536 4. 116691 3. 712002 3. 27702 3. 174337 2. 46472 3. 375699 2. 627881  
3. 552757 3. 550586 4. 099538 3. 530313 3. 371654 3. 052931 3. 654307 3. 376668 3. 190715  
1. 379965 1. 368544 1. 242973 1. 604573 1. 353896 3. 069274 1. 821306 1. 62289 0. 938265  
3. 739021 3. 851269 3. 012039 4. 435659 3. 790738 3. 921539 4. 724186 3. 863094 3. 331877  
7. 789882 7. 941105 7. 68214 7. 691076 7. 689886 7. 670719 7. 501848 7. 845474 7. 391397

3. 446656 4. 364162 4. 065026 3. 616575 3. 971059 2. 973285 3. 498389 4. 254688 3. 366397  
1. 634317 1. 243598 1. 962971 1. 139563 1. 27875 1. 787922 1. 636551 1. 324804 0. 847028  
2. 556744 2. 512324 2. 297965 3. 219328 2. 640308 3. 389332 2. 761451 2. 51772 3. 13652  
3. 307174 4. 780863 4. 379571 3. 163488 3. 82793 3. 524708 4. 544503 2. 757007 2. 75942  
4. 41393 4. 074434 3. 928945 5. 842103 4. 236989 4. 973584 4. 799874 4. 980648 4. 361888  
3. 823994 4. 51483 3. 794007 3. 943151 3. 26582 3. 495582 3. 718455 4. 86746 4. 710747  
3. 196739 2. 822943 1. 985857 3. 008853 1. 42564 2. 853551 2. 467626 2. 481864 1. 671846  
4. 177883 3. 119085 1. 937412 1. 484225 4. 968433 4. 046548 2. 10938 3. 570128 3. 812345  
4. 505983 3. 908542 4. 285828 4. 722305 4. 330178 4. 443114 4. 224458 4. 087958 4. 293936  
3. 732398 3. 597411 3. 657078 3. 829166 3. 48642 3. 228442 3. 695238 2. 840808 3. 988289  
1. 679281 1. 693068 1. 620245 2. 076519 2. 241097 2. 415307 2. 433624 1. 568921 2. 887332  
3. 16836 2. 294146 2. 117503 3. 042252 2. 68506 3. 330864 2. 545608 2. 377108 2. 147148  
5. 642757 4. 772618 5. 392706 4. 217477 5. 269284 4. 672169 6. 150139 5. 685085 5. 36159  
2. 315114 1. 916734 2. 123686 3. 494376 1. 74892 2. 551466 1. 980987 2. 883538 2. 566764  
6. 095179 6. 274132 6. 234531 4. 630137 5. 40174 5. 916457 6. 261954 6. 000014 6. 181689  
1. 203614 1. 707509 1. 50427 1. 375947 1. 787701 1. 652256 1. 724787 1. 319175 2. 397724  
5. 431869 5. 702776 4. 713284 4. 744632 5. 276181 5. 123984 4. 68345 4. 811427 4. 611746  
2. 779471 4. 638481 2. 721985 4. 684554 4. 363782 1. 808849 3. 704534 2. 381895 3. 577822  
2. 561774 3. 979176 3. 808538 2. 382621 2. 775812 3. 146759 2. 401996 2. 652445 1. 934676  
7. 40528 7. 031278 6. 771178 7. 369578 7. 549058 7. 29634 7. 532842 6. 690047 7. 880475  
7. 05568 7. 11483 6. 607107 7. 094844 7. 318661 6. 728629 6. 963629 7. 176881 7. 199791  
3. 286026 3. 137663 2. 989323 3. 61371 3. 593063 2. 633976 2. 841531 3. 166192 3. 72231  
6. 006693 6. 209774 5. 8913 5. 476743 5. 817627 5. 643865 5. 931129 5. 704729 5. 695408  
3. 119614 2. 411123 2. 723774 2. 925515 3. 229324 2. 015739 4. 183945 2. 708678 2. 48817  
2. 16604 2. 404046 2. 733671 2. 183422 3. 893392 2. 894833 2. 311403 2. 899447 2. 97075  
4. 467682 3. 595875 3. 956587 3. 02166 3. 890854 3. 580034 4. 647622 4. 601283 4. 336609  
2. 843766 2. 87628 2. 109133 2. 400997 2. 015424 3. 173193 2. 648862 2. 550819 2. 462829  
1. 083304 1. 102738 1. 415981 1. 760564 1. 939697 2. 40444 1. 215607 1. 753004 1. 269634  
5. 151741 4. 239289 5. 166076 5. 008111 5. 060988 4. 915563 5. 650349 5. 276509 4. 618495  
4. 931785 6. 043965 6. 407251 5. 173283 6. 178973 5. 148046 5. 652646 5. 904089 5. 436595  
3. 793442 3. 764531 2. 965305 3. 018568 3. 235631 3. 879646 4. 831066 2. 703334 2. 662435  
1. 297483 1. 720646 1. 274618 1. 421508 1. 329896 2. 290073 1. 784093 1. 859396 2. 826925  
6. 389046 6. 761727 5. 004347 6. 002369 6. 830247 5. 954075 6. 302969 5. 642463 4. 840324  
3. 164796 3. 047446 3. 626974 3. 385488 2. 858254 3. 5822 3. 630798 3. 744018 3. 103521  
1. 655035 1. 662372 2. 370925 1. 540866 2. 000146 3. 181015 1. 93273 1. 889927 2. 773086  
3. 014624 3. 003241 3. 460966 4. 356228 3. 431554 2. 710356 1. 978099 1. 518243 3. 334506  
2. 653159 2. 436823 1. 968058 2. 835091 2. 352566 1. 899701 2. 759294 2. 516398 3. 098509  
1. 162246 0. 873331 1. 302344 1. 200533 1. 0595 1. 482938 1. 073807 1. 023605 1. 15572  
2. 49411 3. 35432 2. 681682 2. 742592 3. 518914 2. 713461 3. 59426 3. 886586 3. 234049  
5. 381817 4. 465369 5. 458901 2. 293462 5. 478452 4. 664016 5. 036164 5. 544663 2. 46885  
2. 90005 3. 2867 1. 461805 1. 402972 3. 725032 1. 014241 1. 269342 3. 708078 1. 94839  
1. 070537 1. 439281 1. 231238 1. 98833 1. 300719 1. 892638 1. 807 1. 700696 2. 231351  
5. 148623 4. 820688 4. 447335 4. 569027 4. 672801 4. 673448 4. 348878 4. 719646 4. 690655  
5. 048854 5. 650199 4. 591097 5. 37408 5. 887148 5. 105827 4. 586367 4. 401169 5. 022098  
3. 172384 3. 278823 3. 252677 4. 038018 3. 047859 3. 157187 3. 203724 3. 293065 3. 397281  
1. 050746 1. 521914 1. 638482 1. 036922 1. 358751 1. 040046 1. 393075 2. 16341 3. 046756  
1. 469663 1. 238587 1. 582808 1. 578245 0. 801538 2. 000081 1. 307906 1. 394469 1. 342184  
1. 588797 1. 530263 2. 38439 1. 769141 1. 996747 2. 199115 1. 146498 1. 566458 1. 465837  
1. 450617 1. 366293 1. 288135 1. 42795 1. 847262 1. 439017 1. 565559 0. 94389 1. 437975  
1. 03347 1. 017194 1. 648757 1. 562495 1. 011227 1. 62241 1. 070556 0. 98898 1. 165169  
1. 210624 1. 533309 1. 824463 2. 100442 1. 911144 1. 865035 1. 707212 1. 675228 1. 789553

2.682871 2.075956 2.951891 3.17109 2.629472 3.260334 2.29772 2.763494 2.037254  
3.187686 2.743596 2.40154 2.39691 2.377383 3.199062 2.179973 2.23174 2.26401  
1.491336 1.274147 2.3832 2.220859 1.732064 1.867453 1.423511 1.458271 1.360703  
3.051591 2.637998 2.75802 2.232963 2.281712 2.382538 2.523118 1.929551 1.844658  
3.729327 2.83284 2.374169 5.144156 3.142665 2.800369 3.864558 2.532454 4.261054  
5.407018 6.219377 5.792332 5.512985 5.854948 6.271506 6.240257 5.47878 5.675119  
5.085474 5.533606 4.804045 4.327907 4.992555 5.077293 5.109706 5.30861 5.38368  
5.728945 5.480767 5.725081 6.378189 5.649747 4.855679 5.660629 6.165051 5.311861  
2.43745 2.129508 2.383713 2.670299 1.992088 2.055287 2.092017 2.227316 2.235542  
1.751266 2.720195 2.008445 2.740325 2.145038 2.525552 2.438371 3.014641 2.336194  
5.432245 5.982195 6.04568 5.634532 5.965263 5.381348 6.007238 5.389223 4.659861  
3.149998 2.515425 3.229907 3.647411 3.229907 3.088388 3.15453 2.759654 3.373518  
3.440891 3.661907 4.246096 3.65128 4.366486 3.905587 3.261523 4.694826 3.65128  
2.820251 2.658414 3.782525 1.706394 2.428857 3.236968 2.056316 1.811024 2.518254  
1.636453 1.806583 2.3275 2.466822 1.864854 2.099672 1.553075 2.055487 1.728009  
2.58121 3.159743 3.014446 3.298901 3.107973 2.751236 3.198333 2.893685 3.1216  
10.41948 10.61425 10.8068 10.31851 10.7767 10.41451 10.48478 10.7606 10.3742  
4.456104 4.082658 2.887702 3.159109 2.36187 4.280454 2.490727 2.285378 2.943587  
2.039731 2.497766 1.832122 1.644055 1.972715 1.756723 1.986768 1.341216 1.943918  
3.464865 3.723283 3.372041 3.730492 3.015784 3.092842 2.838008 3.344057 3.166476  
2.787396 2.70907 1.704288 4.247246 3.33443 3.331888 1.850187 3.165271 2.423723  
2.680383 2.469889 2.167716 3.055873 4.688625 2.761788 2.141202 2.627468 2.511016  
2.146666 1.537925 1.599874 1.486398 1.457767 1.537259 1.597704 1.705449 1.524675  
2.163749 1.211064 0.994523 2.194997 1.49566 2.518272 1.485849 2.00208 2.459351  
4.038884 3.882227 4.114332 3.969636 3.860911 4.289575 3.818078 4.288202 3.990526  
1.865749 1.551728 2.110234 1.660658 1.638349 2.21234 1.758025 2.911225 1.662835  
2.117829 2.196245 2.72283 3.289068 2.644101 1.872853 2.41865 2.107208 2.669719  
5.756424 2.465889 5.030933 5.025058 5.650495 5.473246 4.750196 5.198378 3.69131  
2.917155 1.68507 2.039613 1.485573 1.53955 3.381765 2.30638 1.596863 4.800278  
1.672081 2.000706 2.122614 2.602403 2.192771 1.90115 1.277579 2.718617 1.341822  
1.454027 1.352326 1.36318 1.89363 1.471161 1.811142 1.366921 1.670075 2.446416  
3.18269 2.934993 3.431512 3.428408 3.134144 2.538962 2.985398 2.722194 3.620862  
6.323449 6.109186 6.093392 5.891085 5.617217 6.401578 6.109186 6.460351 6.95014  
2.510751 2.38222 2.841344 2.932322 1.998646 2.315771 3.084109 2.787392 3.896223  
2.201006 2.406437 2.013541 2.246453 1.723618 2.452104 2.355944 1.655013 1.798403  
3.624461 1.416177 1.52886 1.331603 0.698538 0.936173 1.412858 3.242502 1.865246  
1.677619 2.027975 2.182597 2.62657 2.008945 1.800833 1.920522 2.383844 1.417973  
7.08706 4.887936 5.88511 7.157777 6.112577 8.030068 6.466882 6.730857 7.197961  
5.810196 5.770422 5.544113 4.902118 5.586775 6.719158 6.793362 5.946471 7.309071  
3.214332 3.905743 3.46465 3.65536 3.843129 3.131874 4.399857 4.372242 3.856154  
3.253496 2.12249 3.048233 2.603516 2.981887 3.721917 2.521567 3.37929 1.57714  
2.628958 2.066199 2.275507 2.834413 2.169294 2.586337 2.128427 2.067494 2.146453  
2.382018 3.203466 3.103654 4.094446 3.386551 1.358962 3.227247 3.051723 1.677744  
2.857058 2.479823 2.642102 2.52756 2.267016 2.79269 1.900322 2.106545 2.790346  
2.715516 2.807732 2.30879 2.830235 2.154744 1.997133 2.355346 2.238364 2.317128  
4.010778 4.486906 4.115523 4.567338 4.261939 3.160128 2.906268 3.843232 3.468671  
7.218818 7.186394 7.115149 7.440976 6.715783 7.304912 7.033901 7.115568 6.731161  
1.723585 1.144992 1.884527 1.937608 0.887924 1.51144 1.109827 1.124061 1.731975  
3.685845 3.026445 6.058468 4.228553 1.869282 2.365304 2.153714 2.656984 3.942503  
1.997811 1.422903 2.77334 2.1461 2.131306 2.1461 1.356716 3.00091 0.917319  
2.797066 2.452144 3.865741 5.114447 3.427229 3.345009 3.388208 3.759719 2.864362

1. 212401 2. 212063 2. 199743 2. 916898 1. 630101 1. 688072 2. 278737 1. 829273 2. 285942  
4. 430029 4. 798779 4. 315566 4. 100075 4. 401677 4. 993683 3. 832051 4. 253711 3. 35362  
1. 606006 1. 399835 1. 696403 2. 311516 1. 969983 1. 795171 1. 54467 1. 472993 1. 413524  
1. 283894 1. 475477 1. 826643 1. 525721 1. 500393 1. 826715 1. 657896 1. 509859 1. 70903  
2. 474782 1. 978114 2. 71108 1. 566953 1. 734738 2. 17271 2. 398834 1. 521192 1. 573725  
3. 805245 3. 712575 3. 560418 3. 766433 3. 595138 3. 888588 2. 872184 3. 43181 4. 743287  
1. 75351 1. 436595 2. 004777 2. 071092 1. 579567 2. 122671 1. 930784 2. 400254 1. 496551  
2. 23689 1. 346871 2. 931489 1. 798509 1. 794055 2. 099766 2. 024055 1. 481066 1. 932407  
1. 417843 1. 495294 1. 722302 1. 809124 1. 148622 1. 17485 1. 207149 1. 295156 1. 567291  
2. 10458 2. 004633 2. 041719 2. 489001 2. 331314 2. 431907 2. 041082 1. 498004 2. 361112  
1. 846984 1. 447989 2. 002909 2. 028878 1. 696684 1. 611795 1. 764127 1. 770587 2. 373959  
3. 553154 3. 296412 3. 21484 1. 593659 3. 125941 2. 350426 4. 094123 3. 071097 3. 568511  
1. 999987 1. 76713 1. 542904 0. 903849 1. 475529 1. 266243 1. 73471 1. 90479 2. 444707  
1. 176717 1. 304662 1. 244928 1. 300846 1. 212033 1. 832863 1. 550569 1. 013234 2. 381075  
10. 25482 10. 42166 10. 48309 9. 981483 10. 19018 10. 34623 10. 61894 10. 47097 11. 39512  
7. 892309 7. 82805 8. 07673 7. 60695 8. 122314 7. 701257 7. 9977 7. 955139 7. 481985  
1. 548478 1. 282899 2. 698647 1. 490102 2. 144624 1. 20138 1. 459248 1. 961387 3. 626408  
5. 699436 4. 696766 5. 470826 4. 331931 5. 327658 5. 347531 5. 58742 5. 423464 5. 769617  
1. 002692 0. 669678 1. 187365 1. 578275 1. 18487 2. 091966 1. 315843 1. 172858 1. 174323  
2. 702635 2. 466733 3. 04391 2. 491472 2. 629626 3. 079844 2. 324096 2. 572419 2. 260302  
8. 834118 8. 761655 8. 882642 8. 603604 8. 419514 8. 656312 8. 870462 8. 772068 7. 820667  
1. 650178 2. 140964 2. 414325 2. 689892 3. 233534 3. 264408 2. 710359 2. 425264 3. 872448  
5. 152062 3. 912952 4. 372147 4. 244824 3. 049641 5. 050059 3. 455846 3. 868468 4. 613455  
7. 495351 7. 530593 7. 512684 7. 66381 7. 482107 7. 406961 7. 453173 7. 976511 7. 160687  
3. 831347 3. 810811 4. 150895 3. 989601 4. 360707 3. 9289 5. 086844 3. 966601 3. 703792  
2. 267695 1. 814936 2. 750573 2. 481496 2. 199761 2. 187735 1. 898446 1. 367194 1. 189184  
9. 122372 8. 991139 8. 983966 8. 799954 8. 972487 9. 064735 9. 15873 9. 030893 8. 875441  
4. 653346 4. 396455 5. 077926 4. 221609 4. 150379 3. 574979 4. 003824 4. 371986 3. 418414  
7. 263168 7. 64486 7. 379698 7. 795143 7. 473571 7. 234757 7. 365884 7. 536868 6. 958657  
1. 526247 1. 239697 1. 976154 1. 672241 1. 364808 1. 47809 1. 564216 2. 106902 1. 361521  
3. 262301 2. 917067 2. 565528 2. 490991 3. 446082 3. 612368 2. 215761 3. 993016 2. 119304  
1. 532335 1. 434849 1. 747843 2. 424915 2. 022838 1. 740388 2. 012656 1. 617628 1. 747517  
3. 915328 2. 468094 3. 648121 3. 722201 3. 408679 1. 872198 2. 183533 3. 666533 3. 872606  
2. 666414 2. 629159 2. 391084 2. 157813 2. 196313 2. 260065 2. 373595 2. 475872 2. 132447  
2. 348428 1. 887171 2. 149459 2. 418596 1. 962691 2. 721312 2. 208823 2. 464654 2. 044278  
1. 873497 2. 493808 2. 675708 1. 620332 2. 10984 1. 729386 2. 908399 2. 281206 1. 639066  
2. 615313 2. 128745 2. 305731 2. 486498 1. 802854 1. 785346 2. 415303 1. 489937 2. 538202  
2. 858309 2. 305376 2. 513633 2. 571706 2. 587956 2. 834047 3. 096898 2. 863195 2. 532722  
3. 737706 1. 980143 2. 578349 1. 862827 2. 269919 2. 396554 3. 528482 3. 218255 3. 886864  
3. 561715 2. 889332 2. 625833 3. 731838 3. 339959 4. 118319 3. 033862 3. 360451 6. 052817  
2. 410808 2. 40939 2. 682854 3. 68638 2. 244175 2. 110314 2. 43297 2. 835316 2. 351478  
1. 835684 1. 438879 1. 757156 2. 448361 1. 573682 2. 153376 2. 901248 1. 89706 2. 6528  
5. 059632 4. 655958 4. 924739 3. 207594 5. 450925 5. 415349 3. 753019 4. 576326 4. 568507  
4. 744847 5. 651492 2. 644982 4. 026989 4. 508458 3. 80944 5. 012932 4. 591716 4. 78094  
0. 742363 1. 16746 1. 39786 0. 919088 1. 813844 1. 710856 0. 755418 1. 213243 1. 09114  
0. 644521 2. 296583 1. 335815 4. 274909 0. 709175 1. 581786 1. 116565 2. 343993 0. 676844  
1. 167726 1. 072722 1. 143917 0. 890774 1. 19592 1. 931651 0. 908876 2. 123192 2. 199639  
1. 935602 3. 305622 2. 465455 2. 230119 2. 88215 2. 929996 3. 52354 3. 253719 2. 286757  
6. 582183 4. 888429 6. 946772 1. 408851 3. 813551 7. 471916 3. 748815 3. 993184 8. 404901  
8. 951182 8. 305809 8. 625263 8. 082295 8. 489886 8. 527839 8. 508065 8. 556245 8. 534877  
7. 866069 7. 967568 8. 343689 7. 547138 8. 268231 7. 565168 8. 178401 7. 718214 7. 717468

3.051759 3.453339 1.74406 2.690654 3.131724 2.825255 4.148207 2.558627 1.598194  
2.490703 2.911609 2.765652 3.129121 2.770211 2.906202 2.770211 2.562626 2.454186  
1.728409 2.20095 1.45846 1.171376 1.520745 1.860055 1.611625 2.307765 1.501425  
4.940197 4.443772 5.153266 5.259876 3.788721 4.422786 4.712559 4.701483 4.517101  
5.744719 5.151875 5.729912 5.011362 5.566393 5.507967 4.956429 5.232097 5.932111  
8.02064 7.923159 7.592998 7.163654 8.214634 7.991517 7.789075 8.003273 7.044583  
5.981684 6.394807 6.470422 7.533555 7.332629 6.522285 6.988222 6.657001 6.239996  
6.591718 6.517675 6.746771 6.484224 6.52227 6.322333 6.215904 6.275026 6.274896  
1.605409 2.592244 1.58583 2.758127 1.959597 2.238309 2.165178 1.994668 3.079416  
6.972817 7.066477 7.216587 7.210946 7.156315 6.973778 7.21349 7.000779 6.727997  
5.476015 5.910507 5.867246 4.49236 5.879672 5.802719 5.936062 5.383214 6.247152  
7.78319 8.162467 7.579706 7.888227 7.866879 8.025692 8.06038 7.99807 8.251691  
6.625241 6.74496 6.602652 6.356091 7.049919 6.670941 6.556497 6.863764 6.821995  
6.492523 6.699553 6.174647 5.490027 6.550167 6.519286 6.71165 6.479687 6.689067  
0.942072 1.032514 2.014718 2.02416 1.178978 2.339952 1.384418 2.505185 1.766095  
2.153295 2.160513 2.165467 2.323187 2.447528 1.813306 1.685524 2.320328 1.587679  
1.684775 1.946756 1.555883 2.153571 1.704139 1.881709 2.953765 1.939609 2.318765  
5.158113 4.40193 4.646297 4.510189 3.191111 4.637471 4.971212 4.766442 5.567323  
1.775226 2.362362 2.668565 2.132132 2.036308 2.181196 1.94044 1.616649 1.542754  
1.363608 2.053412 1.782711 2.803344 1.317714 1.770519 2.030003 1.45152 1.829248  
1.211409 1.159324 2.201788 2.756072 1.462055 1.605466 2.004979 1.711054 2.094247  
1.591508 1.299745 2.701634 1.256072 3.372093 1.424043 0.86559 2.000923 1.696203  
1.711613 0.875672 2.043129 2.291838 1.03061 1.521432 1.680831 1.306187 1.320854  
3.210942 5.459005 5.03117 4.629189 5.476589 3.581842 5.970331 4.827387 4.41859  
3.5352 2.880669 4.05442 3.288955 4.33732 4.438706 4.4403 3.863276 1.338806  
1.065195 1.457318 2.050219 0.911245 1.325348 1.207642 1.482586 1.111963 2.066194  
4.168904 2.518276 3.220951 5.002951 3.026 3.177041 3.158437 3.035487 2.588994  
1.055359 1.976292 1.023175 1.62285 1.553178 1.44773 1.367255 1.44773 1.440303  
1.665924 3.152226 1.834776 2.930378 2.006972 2.178353 2.308726 2.874211 1.891906  
0.608362 0.866914 2.776924 1.367325 2.084832 1.353155 1.978089 2.101258 1.851808  
2.962159 2.034525 1.494298 2.387962 2.596002 1.489709 1.482688 2.433807 2.126893  
2.685399 2.022767 2.302027 2.510281 1.675638 1.965069 1.81486 1.83835 2.061042  
1.176245 1.435963 1.139961 2.536119 1.436392 2.238306 1.207517 1.454506 1.295115  
3.004871 3.774498 2.429226 4.220045 3.043216 3.637285 2.65419 3.357992 4.024287  
1.346849 1.650396 1.878703 1.981434 1.388321 1.396229 1.752129 1.175622 0.989595  
0.993705 1.933001 1.181793 1.714352 1.212867 2.204706 1.484733 1.289059 1.502689  
3.369409 2.654956 2.946261 4.003556 2.647671 2.865446 2.875136 2.521509 2.998178  
2.343877 1.688568 1.90042 1.477174 1.066413 2.277275 1.437018 0.879547 2.058281  
3.989584 4.434405 4.40221 4.459649 1.905018 4.040324 4.234856 3.456212 3.99477  
2.005414 2.315542 1.719923 3.053039 1.537965 2.914858 1.536623 1.886893 0.704198  
2.070738 2.778903 2.266217 2.982291 2.317073 1.798465 3.070543 2.005332 2.202183  
2.612218 1.775179 2.238639 2.535919 1.642095 2.950969 2.186776 1.80949 2.226264  
2.353294 1.108456 1.020278 1.207105 1.528736 2.295632 2.090375 1.034222 1.586099  
1.493207 1.707225 1.488933 1.904061 1.296416 1.165047 1.584074 1.522964 1.420757  
2.75561 2.25215 2.345988 3.507414 2.758858 2.390057 2.274451 2.606739 3.386982  
3.294109 2.541816 3.045104 3.00799 2.550065 3.218287 2.57764 2.35311 2.669398  
3.133228 3.473272 4.642354 4.549379 3.576848 3.78969 3.756984 3.572637 4.01031  
1.667852 2.175852 1.433351 2.24962 1.624104 1.899626 1.845296 1.754829 1.588102  
2.088866 2.510301 3.118751 2.243779 2.222533 2.401632 2.174962 2.269805 2.517674  
2.849613 2.541772 2.135965 2.380603 2.117505 2.339385 2.519927 2.122943 2.250346  
3.637593 3.251341 3.305823 3.736128 3.792501 3.623761 4.027037 4.212806 3.813386

3. 406629 3. 195517 3. 314606 3. 56871 2. 390918 3. 691965 2. 876246 2. 535791 2. 976944  
2. 083572 1. 730588 2. 688141 0. 054378 2. 833599 2. 582601 1. 911821 2. 068952 1. 640689  
4. 509642 4. 315131 4. 456585 3. 637747 4. 24993 3. 709945 4. 909628 4. 956306 4. 527087  
2. 083341 2. 319382 1. 579793 2. 55294 2. 037105 2. 301739 1. 542392 2. 10999 4. 044099  
2. 117386 1. 947044 2. 783989 2. 121626 1. 421521 2. 122702 2. 180651 2. 065128 2. 285687  
6. 551267 7. 280837 7. 092686 7. 236568 5. 933969 6. 477235 7. 474258 6. 682723 7. 374242  
2. 85391 2. 695981 2. 117926 2. 949828 2. 2062 2. 566714 2. 637073 2. 900985 4. 075415  
1. 55779 1. 857791 2. 336678 4. 389935 3. 101049 1. 896039 2. 208889 2. 884173 2. 41866  
2. 292873 3. 406551 2. 573555 4. 073836 4. 420754 2. 418943 3. 098942 3. 445161 2. 629119  
2. 187536 2. 013034 3. 108871 3. 546329 3. 170859 1. 658953 1. 498514 2. 00114 4. 309983  
1. 380227 1. 303147 1. 298758 1. 333449 1. 300678 1. 548549 1. 570164 1. 370507 2. 50289  
2. 215993 1. 756325 2. 636091 1. 856292 1. 635814 1. 881837 2. 486468 1. 894069 2. 538744  
1. 611119 1. 198046 2. 212437 2. 34775 1. 166988 1. 532228 1. 878269 1. 387082 0. 975681  
2. 301536 1. 623795 3. 134433 3. 631315 1. 849605 2. 642228 1. 997849 2. 850884 3. 597796  
5. 727453 6. 267915 5. 423789 5. 826314 6. 236868 5. 573989 5. 977277 5. 902953 5. 61144  
5. 305732 4. 885101 5. 048902 5. 98821 5. 231559 5. 306364 5. 039308 4. 655116 5. 042199  
1. 576002 1. 180165 1. 498125 1. 821436 1. 515369 1. 337118 1. 012345 2. 050574 0. 828672  
0. 971888 0. 710257 1. 222715 1. 907452 1. 424077 2. 112352 0. 663232 0. 800393 1. 107864  
1. 823786 2. 186128 2. 334711 1. 578302 1. 811477 3. 197357 2. 220239 1. 614161 2. 016767  
2. 130172 2. 949161 1. 877058 2. 573337 3. 240843 4. 797285 3. 615275 4. 590665 3. 246421  
0. 916651 1. 578345 1. 144433 1. 160314 0. 937884 1. 014954 0. 944765 1. 055795 1. 00614  
3. 078498 1. 37632 1. 920752 1. 749631 1. 661164 2. 695656 1. 669074 3. 744434 3. 363275  
1. 241029 1. 15932 1. 290566 1. 583586 1. 165461 2. 015513 1. 041452 1. 548227 1. 367719  
4. 844742 5. 492496 4. 105901 4. 695807 4. 978355 5. 217141 4. 863153 4. 792937 5. 059755  
1. 374557 1. 865792 1. 520702 1. 724453 1. 556005 2. 599398 1. 329911 2. 652144 1. 421493  
1. 85407 1. 476389 1. 487092 2. 044739 1. 678333 1. 781657 1. 790341 1. 099434 1. 357466  
6. 426788 6. 520295 6. 847048 5. 147628 6. 221864 6. 931577 5. 841949 5. 633563 5. 574016  
3. 166443 4. 432727 3. 070729 3. 575405 4. 487377 3. 306366 3. 42771 2. 836236 2. 677783  
2. 517399 4. 241231 4. 458538 4. 41691 4. 253776 4. 101399 4. 267235 3. 896913 3. 908655  
5. 669338 6. 258671 5. 960309 6. 531334 6. 140872 6. 052143 6. 0521 5. 482604 5. 242588  
6. 315933 6. 185071 5. 989176 6. 584668 6. 579652 6. 336757 6. 891797 6. 698455 6. 344224  
1. 319465 2. 405131 0. 965382 2. 334016 2. 073923 1. 333259 1. 057406 1. 53985 1. 959816  
0. 951979 0. 738626 1. 835764 0. 637785 0. 550837 0. 921423 1. 644287 1. 2987 1. 277996  
2. 106139 2. 59829 2. 352252 3. 148478 2. 843879 2. 379584 2. 174534 2. 426795 2. 126425  
1. 63473 1. 55537 1. 914116 1. 582214 1. 999456 1. 666527 2. 189545 2. 288737 0. 987446  
2. 445969 3. 569576 3. 169337 2. 328539 3. 1455 2. 883119 2. 56146 3. 378586 3. 150794  
2. 587831 3. 345318 2. 335342 3. 107842 3. 877739 3. 016887 3. 661348 2. 017776 2. 670277  
7. 158551 7. 379936 6. 467942 7. 230128 7. 575131 6. 731561 7. 462836 7. 29719 7. 300371  
6. 617453 7. 070706 5. 839759 6. 198126 6. 66177 6. 630399 7. 149365 6. 354014 6. 595241  
1. 579675 1. 618397 1. 841591 2. 322556 1. 121185 1. 510945 1. 70743 1. 440953 2. 420575  
2. 895122 2. 259902 2. 916423 3. 322762 3. 092602 2. 277478 2. 366545 2. 566052 2. 622296  
4. 341232 3. 947598 4. 137711 1. 480166 3. 317641 5. 054881 3. 237454 4. 631011 5. 326546  
1. 3599 1. 468219 1. 392738 2. 010768 1. 050904 1. 24522 1. 213824 1. 160897 1. 289166  
1. 770898 1. 55352 1. 951262 1. 622022 1. 920355 2. 004089 2. 23992 2. 267115 3. 106613  
2. 261422 1. 674637 1. 653282 3. 278833 2. 145573 2. 327547 1. 625233 3. 257824 3. 564826  
1. 189566 1. 714489 1. 33356 1. 790605 1. 135548 1. 814752 1. 013924 1. 378008 1. 519756  
1. 466316 0. 944018 1. 487199 2. 359237 1. 570777 1. 611586 1. 478567 1. 219185 1. 267189  
2. 471865 2. 137008 2. 407619 2. 607752 2. 538635 3. 183784 2. 217218 2. 48923 2. 986973  
2. 351501 1. 642329 1. 927895 2. 394092 1. 512609 1. 833252 1. 696425 1. 622136 2. 11342  
2. 031116 2. 697769 2. 150133 2. 375859 2. 45054 3. 503217 2. 879507 2. 074957 2. 98167  
1. 792304 1. 475814 1. 414418 1. 932934 1. 040196 1. 719807 1. 11465 0. 848162 1. 712249

3. 708364 4. 623047 4. 057974 4. 720475 4. 956532 3. 722066 4. 917556 4. 981248 4. 408182  
2. 324004 1. 85104 2. 098234 2. 269461 1. 993449 1. 751562 1. 732046 2. 200492 2. 526983  
3. 674392 3. 045846 5. 82429 3. 820063 2. 515702 3. 352603 5. 247488 3. 480969 2. 816192  
3. 371424 3. 794693 4. 920326 3. 107539 4. 224868 3. 774957 4. 124797 4. 109148 2. 91038  
1. 080127 1. 455119 1. 564991 1. 785413 1. 114697 1. 079545 0. 984969 1. 120992 0. 874448  
2. 510933 2. 867888 2. 36251 3. 007542 2. 092164 2. 781847 2. 683274 2. 457566 2. 320453  
3. 468843 4. 328193 3. 755307 3. 625377 2. 733402 2. 892634 3. 01791 3. 265269 3. 588009  
3. 171464 4. 03245 3. 177442 2. 230394 1. 496084 3. 073627 2. 952106 1. 648609 2. 624259  
1. 452929 1. 792338 1. 760231 2. 276285 2. 261852 2. 782662 1. 900653 1. 640992 1. 848044  
0. 900822 1. 268089 1. 199663 1. 189237 1. 318359 1. 689249 1. 676754 1. 290405 1. 560874  
1. 090977 1. 051516 0. 907097 1. 720681 0. 767882 1. 172628 1. 140339 1. 021962 1. 304392  
6. 958263 6. 414546 7. 207481 7. 291765 6. 227554 6. 012193 7. 401933 7. 038665 7. 632266  
1. 895039 2. 843084 1. 471811 2. 12979 2. 821095 1. 579809 3. 390243 2. 044199 1. 281028  
3. 156496 3. 112242 3. 284498 3. 226489 3. 662509 3. 295925 2. 802139 3. 744945 2. 267217  
6. 464475 7. 500409 5. 700932 8. 165535 8. 508099 6. 767456 6. 974829 6. 810802 6. 6563  
1. 715469 1. 598513 1. 28576 2. 097195 1. 628085 1. 575705 2. 254618 2. 041617 1. 615591  
2. 24037 3. 229651 2. 19816 2. 454473 3. 28539 2. 227137 3. 023767 3. 731068 3. 238892  
6. 201877 6. 681607 6. 450021 4. 61816 6. 939788 5. 408324 6. 82959 7. 04541 4. 135863  
3. 079122 1. 948256 1. 412578 3. 534611 3. 446453 1. 869949 1. 957483 2. 615795 2. 041353  
0. 690813 0. 500305 1. 293245 0. 650238 0. 544733 1. 043519 0. 796709 1. 223663 0. 807387  
4. 540511 5. 168142 4. 619267 3. 536374 5. 583446 5. 516711 4. 391617 4. 54288 3. 502322  
6. 589021 6. 336304 6. 263836 5. 47377 6. 091611 6. 700801 6. 627338 6. 188142 6. 768725  
2. 007772 3. 061365 2. 706066 1. 865904 1. 831801 1. 903139 1. 979919 2. 707832 1. 997093  
1. 254411 1. 309482 1. 454229 1. 516045 1. 360552 1. 638697 1. 500012 1. 35818 1. 349745  
2. 092018 2. 077869 2. 899413 2. 737391 1. 982412 2. 01531 2. 354913 2. 82044 2. 573721  
10. 72423 10. 56656 10. 65374 10. 73776 10. 72054 10. 72184 10. 79871 10. 54829 10. 7374  
1. 736872 1. 845139 1. 810729 2. 485043 1. 483562 1. 770651 1. 670989 1. 665596 2. 742017  
4. 388949 4. 103633 2. 812005 0. 979571 2. 571623 4. 355046 2. 766281 3. 681038 4. 311966  
2. 174159 2. 440201 2. 312073 3. 086072 1. 748378 2. 404804 2. 085582 2. 291003 2. 14708  
2. 203256 1. 817738 2. 052993 2. 253298 1. 903234 2. 551873 2. 309195 1. 917686 2. 387228  
6. 383011 7. 545239 6. 305948 6. 900925 8. 522505 5. 281137 8. 139565 6. 366251 6. 096865  
3. 92592 3. 928893 4. 200495 3. 187634 3. 04014 4. 635497 4. 308718 3. 664722 2. 819621  
1. 640321 1. 502467 1. 561472 1. 177538 1. 834046 1. 38977 1. 740655 1. 906165 1. 970728  
1. 817318 2. 261589 1. 629832 2. 116856 1. 926347 3. 268189 2. 195833 2. 139673 3. 928129  
7. 449454 7. 209066 7. 611275 6. 883864 6. 262445 6. 92368 6. 682781 6. 598845 6. 951479  
2. 196713 0. 929569 0. 888265 1. 860279 1. 431425 1. 291295 1. 638149 1. 370011 1. 345681  
1. 999143 2. 360799 2. 134068 1. 706378 0. 9877 1. 819272 1. 761054 2. 595907 2. 540497  
2. 918719 3. 711757 3. 862865 3. 797389 2. 74708 3. 07844 2. 802344 3. 343834 3. 439847  
1. 199147 2. 065254 1. 545168 2. 896612 1. 92065 2. 067607 1. 520737 1. 263428 1. 593916  
2. 91721 2. 402216 2. 666398 3. 371008 2. 445965 2. 897148 2. 561344 2. 670588 2. 753685  
2. 351415 2. 904041 2. 50211 3. 147416 2. 329522 2. 618021 2. 646376 2. 883924 2. 353908  
2. 620383 2. 519967 3. 013602 1. 665523 1. 683147 2. 877558 1. 5658 4. 183878 2. 19264  
4. 913027 5. 056885 5. 738391 5. 279375 5. 095033 4. 764838 5. 306554 5. 292699 4. 829411  
1. 123083 1. 799835 1. 513411 1. 402047 1. 402296 1. 119952 1. 308462 1. 368405 1. 706336  
1. 876085 2. 216354 1. 750485 2. 081239 1. 790235 1. 897603 2. 214891 1. 263547 2. 327429  
2. 004215 2. 221633 3. 853763 1. 441712 2. 978694 4. 257139 3. 482012 3. 636504 1. 935435  
2. 394568 2. 383465 1. 946276 1. 910216 2. 304671 1. 431692 1. 664499 1. 917268 1. 620573  
1. 205902 0. 952418 1. 613149 1. 232594 0. 854739 1. 318526 1. 175896 0. 779091 0. 879624  
2. 84892 2. 123014 2. 024021 2. 617062 1. 866227 3. 523868 2. 210088 1. 875795 2. 571371  
3. 174541 3. 513517 2. 827605 3. 906523 3. 297774 2. 796876 3. 403893 3. 595398 2. 223155  
5. 308219 5. 416171 4. 302328 4. 262262 6. 692752 3. 489213 3. 692784 5. 280407 4. 008043



3. 907528 3. 230239 3. 93194 3. 763834 2. 624581 2. 327336 3. 003706 3. 546335 2. 702461  
1. 701307 1. 191553 0. 803707 2. 139211 1. 29434 1. 335155 1. 913922 0. 806305 1. 669447  
2. 944967 4. 690941 5. 15365 2. 990634 4. 285007 5. 858612 4. 745602 4. 370796 4. 112833  
3. 681406 3. 403643 2. 775535 4. 050537 2. 326031 3. 694686 2. 907024 4. 785039 2. 98417  
2. 323103 1. 885833 2. 996406 3. 722695 3. 137548 2. 814793 2. 561186 3. 95761 1. 311714  
1. 515675 1. 399037 1. 059915 1. 333079 1. 116136 1. 304292 1. 587387 2. 143802 1. 399131  
1. 321331 1. 70768 1. 764052 1. 696109 0. 869071 1. 363005 1. 320782 1. 494512 1. 446916  
4. 309226 2. 19759 5. 156058 3. 881898 2. 59375 4. 891114 2. 940632 4. 352659 4. 556469  
1. 883464 2. 078077 2. 108138 2. 296778 3. 141067 2. 461257 1. 45933 1. 896258 1. 912573  
2. 488004 1. 703781 1. 975627 5. 287962 1. 738845 3. 018284 3. 100747 2. 870973 3. 083582  
1. 344771 1. 481755 1. 43941 1. 74869 1. 641668 0. 945668 1. 984207 0. 715763 1. 446983  
5. 735938 5. 982687 6. 288716 5. 824787 5. 582897 5. 647084 5. 817902 6. 454558 5. 26951  
3. 052689 3. 710453 2. 362053 3. 922673 2. 415861 3. 3968 2. 941735 2. 867131 2. 469929  
2. 312224 1. 910976 2. 356376 2. 266599 1. 745608 3. 195099 1. 653732 1. 655645 1. 763602  
2. 451049 1. 79105 1. 824455 2. 417867 1. 909254 2. 784132 2. 123972 2. 645628 1. 842457  
2. 095428 1. 649237 1. 212018 2. 283218 0. 890111 0. 821548 1. 867118 1. 535333 1. 374073  
2. 549264 1. 75292 2. 774133 3. 232114 1. 634192 2. 189078 2. 012574 2. 599853 3. 055623  
1. 961886 2. 601191 1. 870144 2. 409541 2. 238031 2. 296444 2. 190014 2. 225161 2. 023205  
3. 480708 3. 974824 3. 749877 2. 77976 4. 558245 4. 146067 4. 679426 3. 66844 3. 856374  
1. 563887 1. 690592 2. 002234 2. 39724 1. 553078 2. 256246 1. 84495 1. 189844 1. 217575  
1. 264302 0. 811234 1. 018796 1. 967968 1. 236382 2. 244534 2. 283165 1. 57819 1. 874658  
1. 944487 2. 804882 1. 714478 1. 871099 1. 782549 1. 976587 2. 173735 2. 01904 1. 350269  
2. 36998 2. 90464 2. 186613 1. 162462 2. 208353 1. 751279 2. 546039 1. 94834 2. 660883  
1. 573897 1. 522801 2. 100708 1. 803122 1. 783199 1. 816382 1. 228748 1. 6086 1. 824275  
2. 364649 2. 904733 2. 451621 2. 610632 2. 151701 2. 834798 2. 666474 2. 047845 2. 962723  
4. 862197 4. 42081 4. 542128 4. 303842 4. 018254 5. 026212 4. 419457 4. 377208 4. 264714  
1. 72079 1. 393768 1. 778791 2. 541101 1. 675228 1. 526262 1. 771625 1. 615417 1. 744343  
2. 04616 2. 369816 1. 897592 1. 917691 1. 118791 1. 964956 2. 181397 1. 661837 2. 456653  
3. 364768 3. 689595 3. 935042 2. 264779 3. 679195 3. 160848 3. 880497 2. 983478 2. 355078  
1. 704188 1. 851534 1. 592657 1. 059551 1. 638117 1. 829028 1. 72388 1. 874156 1. 212986  
1. 503628 1. 279843 1. 826121 1. 310088 1. 523759 1. 574102 1. 190839 1. 142694 1. 564722  
6. 290752 5. 230113 4. 222834 5. 770548 5. 429652 4. 799237 5. 08728 4. 963912 4. 846193  
3. 303924 4. 569408 1. 336161 1. 623045 3. 083229 3. 382278 4. 450882 3. 488688 3. 982829  
3. 424767 3. 807439 3. 650351 3. 159487 3. 719579 3. 671486 3. 354189 4. 642511 3. 274041  
3. 38238 4. 37121 4. 124809 4. 146716 3. 310071 2. 722591 3. 26031 3. 593433 3. 977954  
2. 154124 0. 861782 1. 581444 2. 333887 1. 080968 1. 599516 1. 818537 2. 074727 2. 086373  
3. 737867 3. 09901 4. 083581 3. 948999 3. 316624 2. 63689 3. 692794 3. 44723 4. 252034  
3. 702242 4. 920932 3. 552266 4. 369241 4. 888473 3. 965496 3. 753362 4. 537445 4. 174488  
1. 531841 1. 426169 2. 175006 2. 50482 1. 411283 1. 94824 1. 068544 2. 25551 1. 125827  
3. 204395 3. 321022 2. 44228 3. 662939 3. 44788 2. 942884 1. 723788 2. 383769 4. 187866  
3. 13338 3. 148659 3. 725157 3. 996623 3. 724374 4. 228058 4. 004905 2. 543198 2. 703044  
2. 153497 1. 93058 2. 791857 2. 417962 1. 832905 1. 827773 1. 944822 2. 478971 2. 58812  
0. 814245 2. 559965 1. 082863 0. 993218 1. 578043 0. 856263 1. 327966 0. 958272 1. 055425  
3. 536669 3. 70444 3. 664791 4. 375772 3. 621141 3. 720759 4. 118736 3. 214681 3. 082703  
2. 406343 1. 604725 2. 406343 1. 465543 2. 020157 2. 101531 2. 907317 2. 54257 1. 738122  
3. 52331 4. 533374 3. 706117 3. 98232 3. 766378 3. 68857 3. 655346 3. 939432 3. 781263  
3. 021738 3. 11868 2. 832599 3. 541274 3. 328965 3. 50778 3. 341703 3. 072265 3. 346468  
1. 759828 1. 349505 1. 385132 2. 220932 2. 079732 1. 126036 1. 291651 1. 658214 1. 381592  
0. 918416 1. 143108 1. 119897 1. 146664 0. 929175 1. 616293 0. 825604 0. 775543 1. 996673  
2. 695425 3. 481048 3. 117959 2. 824891 2. 685605 2. 942356 3. 745582 3. 385579 2. 477152  
1. 834243 2. 120948 2. 557094 2. 507318 1. 784893 2. 193346 2. 295489 3. 048853 1. 909453

1. 574555 1. 133105 1. 598108 1. 306135 0. 700573 2. 105488 1. 151712 1. 27546 1. 452705  
5. 653352 5. 605253 6. 455023 5. 147657 4. 843556 3. 40222 5. 194634 5. 361188 4. 41918  
4. 351488 3. 156976 3. 427912 2. 889137 3. 596261 3. 164115 3. 371414 3. 539971 3. 649872  
1. 385083 1. 763173 1. 571986 1. 074981 1. 263954 1. 36618 0. 955324 2. 120236 2. 035164  
1. 386939 1. 618101 1. 42485 1. 292255 0. 811742 1. 716725 1. 132043 0. 981796 1. 03046  
1. 015455 1. 291624 1. 826051 1. 657733 1. 472792 0. 460358 1. 323381 2. 471924 1. 373143  
1. 40871 1. 344727 1. 336309 2. 337388 1. 311958 1. 507741 1. 059291 1. 920251 2. 402696  
1. 622855 1. 720113 2. 093113 1. 100379 2. 007512 2. 540005 1. 190383 0. 922352 2. 635282  
1. 056412 1. 170131 0. 988365 1. 856083 1. 176845 1. 542399 1. 357195 0. 956075 1. 275905  
1. 985002 3. 681632 3. 096009 2. 791207 3. 864325 2. 172632 3. 545753 3. 131718 3. 03402  
4. 493084 2. 778395 2. 540049 2. 976051 3. 791617 3. 503052 4. 54885 2. 593888 1. 833565  
3. 593089 3. 126905 3. 399571 3. 156193 3. 249797 3. 170565 3. 360574 3. 046984 2. 259441  
5. 727919 5. 543891 4. 897829 5. 056192 5. 774896 4. 453454 5. 717395 5. 139862 5. 617599  
3. 061186 3. 145816 3. 265421 1. 990021 2. 593148 2. 891452 3. 066789 2. 90717 2. 425319  
2. 152118 2. 249016 2. 649268 2. 659213 2. 325646 3. 115619 2. 133033 2. 358819 1. 587843  
2. 756046 3. 274665 3. 627761 3. 075033 4. 266498 1. 973659 4. 337428 3. 222647 3. 111168  
8. 487307 8. 707646 8. 617622 8. 174001 8. 89576 8. 085242 8. 496442 9. 036234 8. 82606  
2. 147677 3. 174536 3. 74254 3. 469885 1. 264756 1. 630681 1. 209153 2. 155049 2. 566435  
4. 210593 3. 641045 4. 359504 4. 977405 4. 784841 4. 460269 3. 712481 3. 997804 4. 778296  
1. 864236 2. 412143 2. 602877 1. 765875 1. 488092 1. 326 2. 595621 1. 983921 2. 141166  
2. 168065 2. 323184 2. 760138 2. 606979 1. 815007 3. 024788 2. 529629 2. 271111 1. 380853  
1. 917741 1. 679985 1. 844877 1. 844819 1. 527244 2. 313141 1. 487446 1. 613744 2. 290516  
2. 645328 2. 256218 1. 849822 3. 040295 1. 243753 1. 659048 1. 959337 2. 590899 2. 46124  
1. 461542 1. 288133 1. 366489 1. 481167 1. 483699 2. 10162 1. 336783 1. 236785 1. 103825  
3. 009694 2. 696699 2. 534417 2. 735683 2. 656502 2. 235701 2. 074417 2. 994854 2. 81261  
2. 629732 2. 983031 3. 13712 3. 984221 2. 914824 1. 313555 1. 991403 3. 293811 2. 511669  
1. 535481 1. 565278 1. 535481 1. 823545 1. 222012 1. 765676 2. 974878 1. 455619 1. 091971  
3. 571513 2. 977313 3. 58483 3. 669913 3. 004111 2. 90011 2. 215168 3. 088422 3. 834825  
2. 216937 1. 510941 1. 994707 2. 050071 1. 672165 1. 8519 1. 919131 2. 686135 1. 727712  
2. 297748 1. 662756 1. 786715 1. 898449 1. 652172 2. 296193 2. 25622 1. 625789 2. 674536  
1. 398899 1. 503077 1. 167906 2. 654663 1. 097804 1. 26484 1. 410688 1. 637975 1. 246503  
1. 258211 1. 544844 1. 665001 1. 907713 1. 431485 1. 691257 1. 808972 2. 414649 1. 497379  
3. 326952 4. 119323 3. 729164 3. 458908 2. 850986 3. 181083 3. 561157 3. 234519 2. 828863  
1. 681103 1. 246062 1. 967889 2. 347361 1. 805692 1. 725691 1. 701631 1. 334625 1. 047471  
1. 485515 1. 541933 1. 108894 2. 15568 1. 499646 2. 294973 1. 91855 1. 68531 2. 201658  
1. 953834 2. 349438 2. 269705 2. 965471 1. 767802 1. 578812 2. 521003 1. 462622 2. 253429  
1. 859477 2. 408134 1. 91135 2. 330212 1. 817679 1. 937037 1. 979843 1. 967215 1. 791934  
2. 734278 1. 790498 2. 181808 2. 036128 2. 309736 2. 439734 1. 907998 1. 824574 1. 929853  
6. 770567 6. 833889 6. 557141 6. 842027 6. 300932 5. 308957 6. 699373 6. 303573 5. 823645  
3. 463212 3. 540308 3. 790475 4. 283891 4. 738656 3. 215951 4. 217688 2. 908899 4. 279194  
1. 090301 1. 015196 1. 203956 1. 416881 0. 983962 1. 455271 1. 02245 1. 02773 1. 356487  
5. 048039 5. 407029 6. 060642 4. 340672 4. 972411 5. 055428 4. 620022 4. 872597 5. 44087  
2. 780832 1. 784141 1. 08883 2. 126179 2. 828374 2. 138699 1. 840751 1. 080716 1. 496375  
7. 108035 6. 829335 7. 34064 7. 212491 6. 76593 6. 481044 7. 343095 7. 272132 7. 200461  
1. 232764 1. 354834 0. 961739 1. 438147 1. 380903 1. 725229 1. 286951 1. 171357 1. 859586  
0. 752372 1. 734015 1. 91704 1. 673312 1. 356212 2. 412025 1. 287871 1. 83449 2. 085829  
0. 898308 1. 897557 1. 848599 3. 573267 1. 99139 1. 033559 1. 611017 1. 121217 1. 077823  
1. 14278 1. 734411 1. 50574 2. 472792 1. 111226 1. 732457 1. 274445 1. 025856 1. 205979  
2. 631174 2. 194011 2. 917877 2. 238274 2. 041104 3. 089481 2. 860845 2. 860929 2. 459009  
3. 516621 3. 968093 3. 581492 3. 229371 3. 230101 3. 952676 3. 437822 3. 672019 3. 20845  
1. 462614 1. 882631 0. 959519 1. 913139 1. 44751 1. 274302 1. 744881 1. 409075 1. 242624

1. 464604 0. 759897 1. 710289 2. 246651 1. 211972 1. 254718 2. 235074 1. 329319 1. 817384  
2. 54226 2. 385659 2. 365425 2. 825121 2. 355905 1. 863918 2. 756912 3. 06124 2. 759231  
1. 348275 2. 054893 1. 674579 2. 011965 1. 044792 1. 842856 1. 68545 1. 296526 1. 346532  
1. 115373 1. 290316 1. 233877 2. 266708 0. 894913 2. 095132 1. 586538 1. 199263 1. 587  
1. 852145 1. 690824 2. 008516 2. 996627 1. 680153 1. 214905 1. 851229 1. 898024 1. 093378  
3. 211681 3. 102117 3. 030821 3. 248707 2. 467413 2. 445159 3. 332379 2. 986625 3. 446587  
0. 985721 1. 193304 1. 443692 1. 683992 1. 445259 1. 334801 1. 429269 1. 277814 1. 581046  
2. 20142 2. 055863 2. 225734 4. 110925 2. 847575 2. 376531 2. 18127 2. 412725 1. 836443  
1. 415656 2. 006347 1. 19994 2. 913412 1. 123031 1. 013273 1. 956629 2. 378521 1. 007247  
0. 71838 1. 936612 1. 568745 1. 027851 1. 101528 1. 388202 1. 194583 1. 186565 1. 413199  
3. 045053 3. 090839 3. 944187 3. 512734 2. 996758 1. 956789 1. 999994 4. 865387 3. 50941  
2. 44146 2. 771949 2. 725213 3. 567674 2. 545578 2. 268284 2. 066476 2. 642521 2. 250241  
1. 565336 0. 764941 1. 003085 1. 317478 1. 198558 1. 044859 0. 986001 0. 85463 1. 377912  
0. 962398 1. 013438 1. 337946 1. 570158 0. 978707 2. 394449 1. 242926 1. 298956 1. 542668  
0. 733242 1. 610814 1. 043799 1. 024232 1. 3401 1. 836824 0. 980868 1. 268079 1. 34839  
0. 963159 0. 965148 1. 253275 1. 231016 0. 718574 1. 338313 1. 100103 0. 76616 1. 20588  
1. 590857 1. 848529 1. 421719 1. 383927 1. 261279 1. 396453 1. 449891 1. 660168 2. 395721  
1. 579827 1. 266837 2. 429336 2. 579536 1. 051728 1. 476749 2. 066288 1. 927431 2. 304547  
1. 893814 1. 852054 2. 123936 2. 97415 1. 56862 2. 011624 1. 400372 1. 806849 1. 882077  
2. 132575 2. 706389 2. 381672 1. 911013 2. 574499 2. 627034 1. 798557 2. 189935 1. 750941  
3. 15837 2. 632592 2. 978683 4. 185171 2. 294815 2. 728728 2. 190097 2. 907784 2. 614053  
5. 455868 5. 98406 5. 856189 5. 863675 5. 802229 5. 172715 6. 049321 6. 028725 5. 67428  
1. 533005 2. 350266 2. 317176 1. 849275 2. 013829 3. 081169 2. 520058 1. 703903 1. 445862  
0. 925966 1. 515167 1. 092511 1. 407676 1. 170941 1. 081543 1. 589007 1. 256474 1. 34215  
1. 305922 1. 394024 1. 230702 1. 235341 1. 118794 1. 194192 1. 145599 0. 929306 1. 051736  
0. 827418 1. 382326 1. 370531 1. 795425 1. 635556 1. 946055 1. 508666 1. 167894 1. 763936  
1. 681976 2. 373757 2. 919419 2. 584138 2. 053118 3. 563324 2. 240253 1. 782551 2. 096386  
1. 635582 1. 701917 2. 448007 2. 250703 1. 859732 3. 212873 1. 767194 2. 10613 1. 896737  
3. 122365 4. 087716 3. 904938 2. 248454 3. 429153 3. 591172 3. 114152 3. 08316 1. 960276  
2. 798785 3. 126408 2. 356156 2. 783982 1. 718695 1. 260734 2. 651505 1. 545913 2. 596132  
1. 042875 1. 009993 1. 669057 1. 262903 1. 122253 2. 698967 1. 282321 1. 312055 1. 00669  
3. 815749 3. 00322 3. 723012 3. 384765 3. 239481 3. 257816 2. 939484 3. 5639 3. 292589  
2. 172562 2. 136537 1. 99155 1. 582328 1. 217532 2. 326825 1. 829764 2. 390504 2. 445773  
3. 274071 2. 511698 3. 103994 2. 725035 2. 785263 2. 844975 2. 520891 2. 958055 2. 607557  
4. 890843 5. 63354 5. 535577 5. 806152 5. 02002 5. 957616 4. 419489 5. 340461 5. 865881  
6. 64603 6. 732865 7. 204782 6. 438274 7. 028943 6. 37089 6. 534379 6. 7867 6. 265886  
2. 447522 3. 003268 2. 220069 2. 991687 2. 868592 2. 104912 2. 688787 2. 340543 3. 507071  
2. 227474 1. 965088 1. 305187 1. 882044 1. 552415 1. 681576 1. 640217 2. 061474 1. 104121  
1. 137459 1. 214351 0. 83025 1. 594252 1. 544729 1. 142495 1. 030577 1. 699838 0. 747578  
1. 185798 1. 186136 1. 206688 1. 138002 1. 586293 1. 498812 1. 195384 1. 365349 2. 011397  
0. 946538 0. 959784 1. 204123 0. 991958 1. 173026 0. 976195 1. 304486 0. 921547 1. 386024  
0. 832121 1. 056944 1. 028219 1. 392952 1. 366306 1. 533416 1. 248409 0. 74492 1. 06989  
2. 848267 2. 230626 2. 398067 3. 191731 3. 480324 3. 458441 3. 418994 3. 34004 2. 759564  
3. 038189 1. 897577 2. 165816 2. 157595 2. 579501 2. 506016 2. 238851 3. 015592 3. 657024  
4. 644691 1. 501801 3. 134214 4. 369851 2. 887067 4. 099373 3. 325686 2. 704992 3. 164093  
5. 908768 5. 259275 6. 497288 5. 945907 6. 125066 4. 739516 5. 046457 5. 632877 4. 831803  
8. 368686 8. 933569 8. 845373 8. 199591 9. 172363 8. 39093 8. 323997 9. 088407 8. 538947  
2. 258167 1. 827614 1. 4858 3. 214404 1. 886809 1. 918934 2. 070185 2. 126111 2. 104271  
5. 449558 7. 132663 5. 755058 4. 181465 4. 332304 6. 69081 5. 200794 4. 737063 7. 081683  
8. 789533 8. 869572 8. 701881 8. 926828 8. 681912 8. 687023 8. 865001 8. 6542 9. 181139  
0. 920546 1. 419486 1. 540974 1. 85042 2. 085391 2. 090712 1. 542829 0. 97041 1. 852792

3. 312629 2. 882041 3. 819297 3. 260295 3. 041395 3. 566787 2. 954972 3. 443748 3. 652118  
1. 943252 1. 219659 1. 883087 1. 483762 1. 869293 2. 230255 1. 781213 2. 068199 1. 552553  
1. 397517 0. 522109 1. 94885 0. 527402 1. 396044 1. 607861 1. 655824 2. 557625 2. 083392  
2. 370243 0. 649288 0. 485192 1. 858607 1. 416662 1. 537598 2. 194556 2. 021176 1. 122466  
2. 754727 2. 442431 2. 318909 2. 690928 3. 224798 2. 311152 2. 765632 2. 488836 2. 027554  
1. 939241 1. 928582 1. 714958 1. 775125 1. 552121 3. 339256 1. 724853 1. 753264 2. 259635  
1. 199024 1. 420839 1. 97802 2. 193818 1. 256585 1. 335593 1. 472113 2. 248004 1. 524868  
1. 109483 1. 416131 1. 061209 1. 561383 1. 579488 1. 667063 1. 117629 1. 051725 1. 379774  
1. 62427 1. 195307 1. 917445 1. 795519 1. 107223 1. 696543 1. 722997 1. 826139 2. 114452  
1. 943225 1. 861611 1. 931993 2. 791771 2. 243233 2. 101355 1. 709031 2. 072079 2. 79587  
4. 295288 4. 053762 4. 629407 4. 286209 3. 726208 4. 104684 4. 327893 4. 599872 4. 635678  
2. 103334 2. 356818 2. 020913 2. 751429 2. 498013 1. 519444 2. 210749 2. 151016 3. 164816  
3. 568861 4. 050062 3. 949198 4. 208224 3. 418919 3. 273841 3. 636875 3. 259359 2. 850112  
0. 919109 1. 411551 3. 642366 1. 875245 1. 049687 2. 538818 1. 474487 0. 62148 2. 364824  
1. 799138 1. 282321 2. 218471 1. 592861 0. 931831 1. 422438 0. 981761 1. 082253 1. 857602  
0. 884312 1. 345829 1. 462823 1. 773711 1. 629411 1. 522883 1. 103053 1. 270246 0. 770931  
4. 930771 3. 730595 4. 631575 4. 143466 3. 515422 3. 920746 4. 178631 4. 035574 4. 844779  
1. 856723 1. 730339 2. 223975 2. 221296 0. 937918 2. 596307 1. 433471 1. 026464 1. 183572  
1. 09134 1. 845055 0. 85457 1. 240072 1. 382258 1. 366021 1. 913333 0. 820583 2. 648613  
5. 064569 6. 629318 6. 411316 5. 402262 5. 022379 6. 19739 4. 918932 5. 998175 5. 623252  
1. 94646 1. 93128 1. 415532 2. 295505 1. 506171 1. 102926 1. 478785 1. 683597 0. 887264  
2. 106501 2. 062541 2. 169839 2. 496954 1. 684844 1. 73125 2. 069462 1. 765357 2. 375212  
3. 571013 2. 907674 3. 712673 3. 964917 4. 095484 3. 541896 3. 569656 3. 83509 3. 402043  
1. 921341 2. 046704 1. 748169 1. 860129 2. 113211 1. 929977 1. 990084 2. 595388 1. 884959  
2. 159931 2. 88198 2. 543361 3. 180597 3. 956516 3. 940102 3. 404109 4. 011689 1. 92178  
1. 992831 2. 142906 2. 066891 2. 384085 2. 00529 1. 994483 1. 896058 1. 55237 1. 989632  
2. 725912 3. 719216 3. 109122 3. 411391 2. 337104 4. 184259 3. 665115 3. 152812 2. 076017  
1. 931027 2. 53827 1. 847196 1. 649688 1. 464727 3. 776264 2. 003942 2. 23257 1. 369792  
2. 705516 2. 349986 2. 616847 2. 509813 1. 842532 1. 923174 1. 754588 1. 367866 1. 62523  
1. 789452 1. 867657 1. 682931 2. 094778 1. 982863 2. 358124 2. 224994 1. 837723 2. 240975  
3. 774438 3. 495489 2. 868483 3. 541573 3. 263831 3. 295546 3. 240802 2. 578452 2. 488094  
2. 072767 1. 883539 1. 952208 2. 091775 1. 522184 1. 748668 2. 489384 2. 811476 2. 441104  
1. 399958 1. 592229 1. 237192 1. 655801 1. 222058 1. 200138 1. 159362 1. 113122 1. 155649  
2. 862945 2. 482678 2. 320345 2. 081087 2. 407095 2. 270443 2. 44227 1. 88322 2. 01164  
3. 960886 3. 756616 4. 246814 4. 026377 4. 297146 4. 07111 4. 837541 4. 396989 3. 877057  
2. 495861 4. 28909 4. 112785 3. 255103 3. 665231 3. 209631 2. 190748 4. 334715 3. 858452  
1. 922605 1. 80107 1. 332163 1. 709575 1. 322099 2. 114497 1. 931215 1. 469692 1. 191124  
2. 542679 3. 985552 2. 583965 2. 545656 4. 274548 2. 922068 3. 181944 3. 674428 4. 755661  
3. 614497 2. 858029 2. 298261 3. 31907 3. 405611 2. 508373 4. 154837 3. 366578 3. 009528  
8. 70307 8. 588504 8. 797979 9. 199887 8. 85886 8. 754287 8. 580892 9. 338206 8. 340772  
6. 097603 5. 642433 6. 175722 5. 116596 5. 638585 6. 680649 6. 208647 6. 130677 6. 807292  
1. 230073 1. 363247 1. 396226 1. 402539 1. 371441 1. 380402 1. 209297 1. 146303 1. 283481  
2. 873515 1. 954304 3. 392691 3. 010756 2. 571202 2. 929262 3. 986544 1. 262567 3. 143564  
1. 490532 1. 070526 1. 829921 2. 235518 2. 123418 1. 959225 1. 552231 2. 131549 1. 260729  
1. 621844 2. 073409 1. 551187 1. 359771 1. 219894 2. 857729 1. 838092 2. 268119 1. 113845  
1. 041045 1. 188382 1. 978504 2. 545495 0. 661925 1. 542871 0. 994008 1. 541427 1. 849426  
1. 374348 1. 170042 1. 119257 1. 869943 1. 01978 1. 320799 1. 844971 1. 658417 2. 133701  
1. 212271 0. 893188 1. 567463 2. 631043 1. 29226 1. 944389 1. 109965 1. 510519 1. 878579  
1. 505052 1. 961883 2. 556475 2. 515759 1. 203978 1. 685573 1. 00916 1. 48071 1. 244944  
1. 038134 1. 185651 1. 332818 0. 896744 1. 195121 1. 266976 0. 799082 1. 483321 1. 063069  
1. 822375 1. 874556 2. 10244 2. 652732 2. 066249 2. 151565 2. 182491 1. 980531 3. 028826

1. 373903 1. 475259 1. 200074 1. 227535 1. 411438 1. 209549 0. 927966 0. 924924 1. 041581  
1. 027653 1. 087765 1. 148106 1. 293564 1. 200108 2. 085592 0. 871718 1. 109302 1. 142349  
2. 352732 1. 638985 1. 820598 1. 514903 2. 004618 2. 11418 2. 037066 1. 677154 3. 08089  
1. 10436 2. 020725 1. 779173 1. 289176 1. 494851 1. 568952 1. 297886 1. 658166 1. 622719  
1. 097377 1. 646558 0. 859466 2. 276086 0. 931301 1. 54372 2. 028826 1. 746931 2. 445812  
1. 157787 1. 019467 1. 209822 0. 98004 1. 00499 1. 515576 2. 117048 1. 913447 1. 341748  
1. 035944 0. 978455 1. 180347 1. 200785 1. 086238 0. 993231 0. 912302 1. 153453 1. 832764  
1. 180971 2. 189397 1. 867716 1. 433574 1. 255587 2. 236609 1. 74704 2. 337576 1. 371136  
1. 214393 1. 589259 1. 372566 1. 98512 1. 457294 1. 376792 1. 506453 1. 240375 2. 023978  
1. 272672 0. 622398 1. 609898 1. 39054 1. 185474 2. 136972 1. 433758 1. 870878 1. 436974  
2. 050947 1. 428704 1. 024196 1. 320401 1. 058606 1. 399736 1. 284498 1. 162572 1. 275588  
1. 866687 1. 315913 1. 875068 0. 967248 1. 901352 1. 876386 1. 31931 1. 526142 1. 988931  
1. 679634 1. 253438 2. 010321 2. 181263 1. 390655 2. 105898 1. 652251 1. 254638 1. 858479  
1. 590884 1. 741185 1. 832609 2. 698846 1. 432501 1. 781445 1. 930995 1. 700015 1. 79572  
0. 82145 1. 178729 0. 947155 1. 128389 0. 938541 1. 085785 0. 629252 0. 921002 0. 959985  
1. 587466 1. 837949 1. 815806 2. 317847 1. 219278 1. 85807 1. 193642 1. 094846 1. 813091  
1. 404184 1. 464251 1. 889785 1. 275845 1. 243325 1. 41965 1. 303999 1. 250273 1. 750572  
0. 706248 1. 497421 1. 35638 0. 666134 0. 810547 1. 113424 1. 035648 0. 770993 2. 248207  
2. 067938 1. 841317 1. 138884 2. 736704 2. 254537 1. 752833 1. 263417 1. 410639 1. 895395  
1. 726114 1. 23966 1. 053071 1. 763163 1. 512429 1. 15176 0. 925821 1. 2479 0. 781845  
1. 451811 1. 31823 0. 617989 0. 796874 1. 640573 1. 305335 0. 602339 1. 66519 1. 141705  
2. 39193 1. 454896 1. 012781 2. 172008 1. 738999 1. 851376 3. 180082 3. 781379 1. 260891  
1. 78666 1. 11945 0. 995472 1. 875024 1. 252652 1. 582769 0. 839827 1. 13169 1. 923542  
0. 701717 0. 665166 1. 50906 3. 05728 2. 236161 1. 465925 3. 400363 1. 154841 1. 334397  
2. 467758 2. 150201 1. 179422 4. 216104 1. 923664 2. 481391 1. 357982 1. 289404 1. 981077  
1. 679569 1. 612958 1. 660525 1. 364139 1. 65816 2. 076756 1. 330406 2. 158034 1. 65147  
4. 380237 1. 259952 1. 452585 1. 418336 4. 32891 2. 505003 2. 354365 1. 135003 1. 348313  
1. 026885 1. 645629 1. 686907 1. 699695 1. 135012 1. 980205 1. 639317 0. 950322 2. 793661  
1. 471421 1. 760773 1. 126832 1. 545701 1. 991976 1. 889045 1. 609118 1. 928817 1. 169225  
1. 258897 0. 523227 1. 998447 2. 325571 1. 943728 1. 066497 2. 32758 0. 855918 1. 120116  
2. 89779 1. 023335 1. 551675 2. 456195 1. 91463 2. 168868 1. 419369 1. 742721 1. 696917  
1. 138388 1. 764187 1. 23929 1. 566281 1. 380138 1. 819964 1. 786893 1. 088341 1. 766308  
1. 153783 0. 578585 0. 62386 3. 126035 1. 174558 1. 791163 1. 224557 1. 569712 3. 354198  
2. 523432 2. 283647 2. 32987 2. 648507 2. 104602 2. 110264 1. 894376 2. 229524 2. 401275  
1. 79658 1. 660801 1. 569959 2. 640804 1. 84995 2. 522511 1. 400583 1. 832198 2. 145357  
2. 53271 1. 807095 2. 470926 2. 575443 2. 254913 2. 147845 2. 610911 1. 846686 2. 280314  
2. 392953 1. 98273 2. 514644 3. 551963 2. 846995 2. 297559 2. 384624 2. 900399 3. 021876  
1. 008111 1. 137872 1. 088529 0. 982781 0. 773004 1. 176299 1. 072865 1. 179671 1. 047472  
1. 834463 1. 563711 1. 556586 2. 16897 1. 705606 2. 08734 1. 360401 1. 837423 1. 926585  
1. 968136 1. 762999 1. 404392 1. 381895 1. 901447 1. 830638 1. 257117 1. 908488 2. 012128  
2. 661898 1. 922149 1. 821828 3. 435034 2. 136796 1. 592888 2. 115549 2. 054283 1. 938493  
1. 515012 2. 179803 1. 292592 1. 796504 2. 202331 1. 669693 2. 97316 1. 723588 1. 551331  
1. 133549 1. 3183 1. 225327 1. 320298 1. 776372 1. 850534 1. 203838 0. 92213 1. 522029  
1. 160743 0. 831281 0. 841966 0. 796989 0. 992658 1. 828626 1. 483844 1. 164613 0. 842065  
1. 248141 1. 065511 2. 146357 2. 529535 1. 965201 1. 326975 1. 321924 1. 562841 1. 023383  
1. 242609 1. 184108 1. 422315 2. 575079 0. 908647 1. 143239 1. 183318 1. 473548 1. 662388  
2. 706752 1. 534675 0. 917223 3. 690333 1. 120646 2. 388337 1. 723651 1. 503986 1. 94281  
3. 447152 2. 48651 3. 388728 2. 515716 2. 969898 2. 931732 2. 916876 2. 880622 2. 925257  
0. 64792 0. 718528 1. 412469 2. 021455 0. 881645 0. 915258 0. 789703 0. 898169 0. 812986  
0. 74891 1. 28199 1. 965779 1. 271596 1. 482317 1. 88124 0. 926267 1. 691778 1. 643277  
1. 047351 0. 995089 1. 497059 1. 970899 0. 923834 1. 800841 1. 243742 1. 195967 0. 71746

0.934432 0.683808 0.590915 1.301287 0.877622 0.785127 1.146428 0.658068 1.555305  
1.17845 1.557152 1.833918 2.946164 3.644109 1.136034 1.552254 0.693932 0.878324  
0.614682 0.972645 1.534867 1.771998 1.553242 2.916442 1.240534 1.393125 0.828298  
0.86085 1.067775 0.978571 1.21698 1.740396 1.876668 1.419289 0.812516 0.989549  
1.905452 2.312751 1.476429 2.29763 2.250782 2.385951 1.938714 2.094154 1.547011  
1.880226 1.785353 2.565134 2.532433 1.553296 1.374145 1.398963 1.943834 1.232132  
1.03704 1.108443 1.478997 2.902858 1.267464 1.394209 1.481156 1.488125 1.013788  
0.849858 1.235345 1.165054 2.066453 0.662822 0.736251 0.775311 0.827613 1.121334  
1.487794 1.407919 1.782332 2.173513 3.394966 1.072923 1.850235 2.789688 2.069979  
0.947117 1.392581 1.40413 1.395056 1.232144 1.118225 1.195243 1.285259 1.225601  
2.748124 2.05675 2.819403 2.389418 3.429443 2.25038 2.608524 2.642859 2.642859  
2.491962 1.435237 1.222291 1.830811 0.901594 2.112675 1.978606 2.90303 4.899367  
1.150637 1.730686 1.040274 1.893055 1.206641 0.899492 0.939552 1.241297 1.906634  
1.530508 1.704929 1.980155 2.361305 1.469689 1.922829 1.813421 1.416812 1.343616  
1.864404 2.02503 2.443892 2.64464 1.593596 2.73908 2.038647 2.085882 1.622897  
1.274831 1.658828 2.348736 1.584548 1.304073 1.051007 1.4924 1.13423 0.984083  
1.353929 1.282982 1.755773 2.402556 1.9302 1.602457 1.71581 1.761527 1.919563  
4.829689 4.881875 4.619079 2.59162 3.679957 4.700425 4.215559 4.700012 3.486091  
1.046276 1.045856 1.3192 1.936928 1.00723 2.388441 1.122771 1.064007 1.20253  
1.859318 0.982797 1.092584 1.410745 0.796792 1.257162 0.84218 1.500233 1.711884  
0.875666 1.151341 1.276931 1.530944 0.920744 1.456068 0.99102 1.789183 1.300273  
2.624368 2.341289 1.881793 4.093654 2.601993 2.359404 3.128839 3.159001 3.866322  
2.622388 1.69191 2.517003 1.953732 2.038995 2.022679 1.822944 2.338375 2.549683  
1.839627 2.232761 2.052847 2.575806 2.494737 2.90241 2.168699 2.001542 2.276756  
1.750487 1.824376 1.227077 1.292003 2.177956 1.822614 1.869511 1.573952 1.93787  
1.173018 1.830504 1.701876 2.492286 0.800322 2.82931 1.467691 0.557966 1.280332  
1.856494 1.993792 2.013592 1.935546 2.12679 2.224048 2.174075 1.557513 1.874511  
1.630778 1.267394 1.129215 2.461158 1.729812 0.997136 1.492771 1.442965 1.221301  
1.808648 2.111197 2.666906 2.642974 1.799693 1.383725 2.583483 1.741789 1.7795  
1.948837 2.733113 2.014775 2.067132 1.819482 1.565357 2.254082 1.549037 1.394707  
1.602474 1.828552 1.840603 1.98953 1.763947 1.637857 1.802094 1.599509 1.401571  
1.255873 1.086174 0.890982 2.166657 1.187908 1.309436 1.676373 1.089235 1.583757  
2.183611 1.864421 2.911786 1.991025 1.992719 3.242231 0.986591 2.633667 4.0509  
1.794928 1.435042 1.124178 1.898253 1.422292 1.683388 1.659812 1.889248 2.260762  
1.72833 1.541286 1.392229 1.220551 1.481984 1.320587 1.398576 1.736849 1.837107  
1.965751 1.698725 1.616434 1.69731 1.617147 2.273934 1.405165 1.306201 1.442064  
1.938325 1.349665 2.039054 1.317906 1.301125 1.095185 1.148329 2.272671 1.914541  
4.332409 4.290368 4.063413 4.074833 3.636974 3.669593 4.818751 3.840518 4.178603  
6.355144 6.438988 6.494662 6.321624 6.368843 6.679532 6.314977 6.833124 5.949398  
2.878276 1.762433 3.356695 2.791704 2.520145 2.625304 3.337706 2.23302 3.834228  
1.832761 1.832761 1.80301 2.324867 1.6284 2.456536 1.864545 1.556861 1.881497  
2.762045 1.493583 1.106426 1.929698 1.38241 2.19371 1.344502 1.539282 2.248579  
3.705893 3.536502 3.921387 2.233796 3.415912 3.667878 3.526841 2.99921 3.893053  
1.001328 2.250018 2.216116 2.131755 1.160873 0.629271 2.101411 1.459495 1.78939  
3.102152 3.672852 3.294923 3.597085 3.353063 3.674887 3.318453 3.476445 3.120366  
4.500733 4.703512 5.05482 4.480626 5.19367 4.186697 5.085277 5.143388 4.365107  
2.018078 2.450544 2.196495 1.889599 2.098689 1.521845 1.606572 1.49487 2.173904  
1.787735 1.202107 1.597915 1.422609 1.630181 1.587631 1.499479 1.288353 1.447894  
3.736904 3.845137 4.293881 4.113134 3.641381 4.212967 4.001145 2.242082 4.626364  
6.299265 6.212278 4.992255 5.967614 6.575364 5.221012 6.351167 5.558026 7.266366  
1.723884 1.774142 1.194663 2.408929 1.291879 1.52409 2.504663 2.375397 1.464656

1.680442 1.411325 1.498455 1.39076 0.966731 2.246114 1.232546 1.061238 2.335428  
1.935468 1.969756 2.089134 1.631987 2.11486 1.728 2.026348 2.165618 2.926162  
1.090351 1.180355 1.377181 1.09013 0.95412 1.516833 1.414619 1.297798 1.723692  
0.915929 0.984018 1.087919 2.01162 0.715433 1.18014 1.219497 1.087919 1.733936  
3.810812 2.525481 1.540301 2.087191 3.73296 3.287569 3.453577 3.091128 4.183623  
3.772199 4.26402 3.734603 3.774652 4.043228 3.044078 4.485305 4.105996 3.749742  
2.250183 2.255141 2.230627 1.974976 1.19193 1.840447 1.353094 1.744837 2.017099  
1.589654 1.071761 1.542406 1.825004 1.204081 1.666016 1.071187 1.678412 1.007119  
1.335994 1.656554 2.522331 3.120078 1.785384 1.341509 1.249398 1.930759 1.685604  
1.942845 1.559519 2.004855 2.100297 1.237652 2.666499 1.432406 2.033686 1.356457  
1.640883 1.682253 1.368172 1.743037 1.207463 1.639966 1.529289 1.051517 1.137433  
5.766287 5.093736 5.374825 5.190691 4.008402 5.270552 5.598161 4.755725 5.524566  
2.186335 1.901705 2.796202 1.677275 1.409194 1.880226 1.615921 1.599316 2.251325  
2.281076 2.588264 2.814542 2.181624 2.711822 3.654256 2.32216 3.132438 2.896774  
2.929424 2.822577 1.924432 4.312713 1.954292 2.440742 1.942998 2.505191 2.13274  
4.134662 4.208119 4.277144 4.90383 4.150977 5.474774 4.417321 4.701319 4.941656  
1.760908 0.508308 1.052812 1.186709 0.543283 0.858236 1.966099 0.780166 0.662008  
1.502001 1.111012 1.061437 2.527683 0.706446 1.299383 0.781178 1.430849 1.430849  
4.908121 5.006448 5.719379 5.027224 5.54061 5.257836 4.883121 5.449898 4.122683  
1.821356 2.456193 0.801147 0.918497 2.028037 1.169056 1.565986 1.358399 1.099392  
1.23412 1.027015 1.026238 2.107733 0.752419 2.014276 1.173327 1.02644 1.075597  
0.808666 0.525394 0.907378 1.660496 0.803831 2.126975 0.539245 0.755677 1.523286  
1.511963 1.155273 1.891207 2.007944 0.959543 1.900111 1.014023 1.482267 2.015896  
5.63483 5.17093 5.366401 5.911987 5.817429 4.96749 6.582395 5.53364 5.915156  
9.570863 9.161606 9.206965 9.280372 9.45698 8.603308 9.112383 9.183653 9.551288  
0.807527 0.772518 0.733697 1.054333 1.020622 0.818119 0.791087 0.647372 0.753872  
7.754441 8.167501 8.046645 7.695776 8.211176 8.151839 7.859218 8.030645 7.245114  
0.880104 1.248845 1.282939 2.177755 1.321035 1.09972 1.162575 1.369611 1.149891  
3.199441 2.302134 3.229672 3.140434 2.410929 2.514678 2.349008 2.935777 2.572121  
1.669439 1.355645 1.76044 1.854751 1.576125 1.288737 1.543844 1.184611 1.684034  
7.576625 7.20714 7.695723 7.595146 7.597013 7.132228 7.855889 7.655337 6.991507  
1.941278 1.02602 1.11427 1.674095 1.305718 1.351685 1.047387 1.238058 0.922734  
8.641953 8.800919 8.919224 7.445765 8.780007 8.636487 8.837161 9.134356 7.681419  
1.934271 1.462377 0.814582 1.222957 1.022991 1.183261 0.970001 0.846167 1.4869  
1.421478 1.639314 1.292022 1.608793 1.248991 1.649839 1.077806 1.177138 1.577417  
2.262272 1.971813 2.048279 2.715082 2.60553 2.014794 1.825673 1.484929 2.679099  
2.078513 1.971554 2.017155 2.361199 3.422992 2.130045 2.247599 1.642985 2.188672  
5.220523 5.477189 5.68014 5.648403 5.523697 5.215496 4.610279 5.209242 4.429841  
8.06756 8.13995 8.038586 8.086432 8.108521 8.130794 8.048728 8.040305 7.575919  
1.858078 1.569044 1.47159 1.786699 1.084889 1.30147 1.608313 2.543437 1.848295  
0.796682 0.73619 0.715154 1.289434 0.953645 1.28772 0.935403 1.151147 1.803364  
1.375752 2.221075 1.606771 2.623661 1.809163 1.844834 2.066626 1.813493 1.227116  
2.125959 1.945642 2.33328 2.379174 1.73362 1.88828 2.362895 2.591417 2.199817  
1.55063 0.8468 1.541464 1.365355 1.001747 1.23455 1.081089 1.236666 1.086514  
1.80623 1.470571 1.198296 2.086734 1.25625 1.892083 2.241094 1.263656 2.271861  
2.913513 2.4363 1.936874 2.052637 1.739975 4.517381 2.568799 1.069869 3.974726  
1.581455 1.798294 2.050337 1.400069 1.483535 1.313668 1.501823 1.858617 3.594954  
3.033501 4.528072 5.519948 3.22826 4.373415 2.673902 2.29007 2.730191 2.826538  
1.117814 1.475155 1.326957 1.363171 0.973005 1.153355 0.883187 1.090534 1.084614  
2.957948 2.68751 3.401541 3.719437 3.29779 2.712532 3.466771 3.397968 3.107209  
2.692446 2.494231 1.851134 1.917947 1.467436 1.218044 2.237729 2.474392 2.028813

1. 152572 1. 711571 1. 826684 1. 173853 1. 311168 1. 668484 1. 151077 1. 141839 2. 018244  
1. 580231 1. 259234 1. 58297 1. 701459 1. 747956 1. 532608 1. 253274 1. 568351 2. 521907  
1. 730554 0. 752955 1. 666787 1. 007541 1. 729377 1. 789136 2. 49605 1. 868261 3. 435559  
1. 630384 2. 853151 2. 251062 2. 989183 0. 906508 2. 597514 2. 245548 2. 856566 2. 70174  
1. 900466 2. 174779 1. 890842 2. 489276 2. 038169 1. 945921 1. 78054 1. 581813 2. 509603  
5. 545482 5. 096559 4. 560662 4. 629974 5. 437131 4. 515438 5. 621687 5. 327708 5. 657492  
2. 677439 3. 113325 3. 159098 3. 071612 3. 451243 2. 572606 2. 386753 3. 3414 2. 769804  
3. 042993 1. 773677 1. 98166 2. 273572 2. 648621 3. 402086 3. 167665 3. 833593 3. 192507  
8. 564105 8. 512901 8. 531116 8. 643705 8. 406561 8. 425723 8. 021465 8. 53337 7. 956359  
2. 541391 1. 396161 1. 349361 2. 277702 1. 65867 1. 581383 1. 629274 1. 885461 2. 034642  
1. 267883 1. 671997 1. 534538 1. 350357 1. 635434 1. 393357 2. 089684 1. 438847 0. 946987  
2. 049748 1. 381193 2. 275332 2. 538778 2. 120025 2. 112468 1. 858464 1. 756249 1. 734352  
8. 305633 8. 511668 8. 780846 7. 826185 8. 378565 8. 859595 8. 338902 8. 367026 7. 229936  
0. 864599 1. 282112 1. 47619 1. 824354 0. 965124 1. 945639 1. 216019 1. 451693 1. 607615  
5. 772813 5. 601712 4. 697761 6. 053465 5. 741632 5. 199007 6. 484129 5. 340172 5. 988808  
2. 201981 4. 034968 3. 72616 3. 511578 3. 683398 0. 845089 3. 833441 3. 481765 1. 940766  
1. 723003 2. 387232 1. 299909 1. 629267 1. 552287 1. 350113 1. 488689 2. 301651 1. 501874  
1. 86683 1. 6855 1. 990993 1. 937551 1. 479424 1. 679483 0. 926436 2. 057542 1. 061357  
2. 825263 2. 368606 3. 069874 3. 168079 3. 216062 2. 935581 2. 432092 5. 128056 2. 045639  
7. 482666 7. 632309 6. 171155 5. 478607 7. 929641 7. 307834 6. 817192 7. 603994 6. 903294  
5. 806571 6. 674227 6. 667314 6. 678122 7. 077135 6. 071425 5. 754393 6. 400653 4. 728547  
1. 562527 1. 229163 1. 545559 2. 115603 1. 922543 1. 567365 2. 384587 1. 334584 1. 491244  
4. 767144 4. 922148 4. 648786 3. 594577 4. 947231 5. 381337 4. 928067 4. 491228 4. 755875  
2. 930367 3. 654188 3. 653748 3. 521043 3. 445536 2. 928499 3. 30301 3. 291853 3. 004556  
2. 497311 2. 188682 2. 758206 2. 550818 2. 364838 2. 069799 2. 325515 2. 430684 2. 526691  
9. 415309 8. 986322 9. 018773 9. 201787 8. 714031 9. 444669 9. 386404 9. 26869 9. 841289  
1. 277373 1. 469043 1. 250237 1. 532715 1. 267547 0. 713453 1. 032381 0. 769399 3. 123425  
4. 709401 3. 958261 4. 606135 4. 157447 5. 775862 4. 406006 5. 355283 4. 48799 4. 559005  
7. 939233 7. 77895 7. 347791 7. 150816 7. 519343 7. 77002 7. 619768 7. 852529 7. 495112  
1. 371806 1. 762479 1. 290369 2. 645762 1. 872805 1. 201473 1. 361728 0. 956484 1. 057797  
1. 128329 1. 136113 1. 309469 1. 755507 2. 045211 1. 675837 1. 288902 0. 878888 1. 177307  
5. 522806 5. 985851 6. 267247 5. 530022 5. 267496 5. 000018 6. 409768 5. 935411 5. 834061  
5. 200962 5. 714347 5. 861921 5. 498061 5. 148964 6. 257311 5. 55221 5. 920628 5. 186185  
2. 159258 1. 900479 1. 743175 2. 656632 2. 497812 1. 547561 2. 447252 2. 223886 0. 929973  
10. 60172 11. 00207 10. 77642 10. 52458 11. 14872 10. 86379 10. 93162 11. 09233 10. 31985  
7. 71166 6. 334434 6. 48169 6. 996701 7. 413202 6. 428034 6. 409811 7. 499634 8. 219907  
5. 737907 6. 590245 5. 869242 6. 793934 6. 782046 6. 788592 6. 18505 6. 42129 6. 803582  
6. 885838 6. 943522 7. 262848 6. 520878 7. 518616 7. 160747 6. 792977 6. 841304 6. 543549  
2. 726658 2. 292675 3. 068882 3. 573294 2. 706948 3. 111465 3. 073486 4. 040751 3. 247296  
2. 365925 2. 710889 2. 618437 2. 437002 2. 427299 1. 958247 1. 886146 2. 070415 3. 485014  
2. 118101 2. 246907 1. 34299 3. 512214 2. 613716 3. 657021 1. 421197 2. 987754 2. 41197  
8. 861261 8. 945782 8. 282414 9. 044755 8. 761315 8. 885467 8. 612783 8. 667098 8. 818375  
7. 524459 7. 56235 7. 725592 6. 899097 7. 731239 7. 354714 7. 397625 7. 675345 6. 329187  
1. 550155 2. 18102 1. 433479 1. 736931 1. 591023 1. 724122 2. 299423 1. 645937 2. 653448  
2. 181532 3. 009058 2. 543076 3. 801547 2. 161431 2. 727907 2. 927957 2. 73841 2. 424717  
2. 340842 3. 247415 1. 936613 1. 94752 3. 150923 3. 097004 2. 600303 2. 620371 2. 400683  
8. 557066 8. 181716 8. 401756 8. 654203 7. 880049 8. 347537 8. 190854 8. 147732 8. 695828  
3. 969459 4. 465619 3. 957358 3. 832416 3. 968793 4. 082873 4. 079134 3. 60454 4. 115959  
9. 027433 8. 869489 9. 389768 9. 270448 8. 572794 8. 934559 9. 228582 8. 937343 9. 043564  
4. 179113 4. 787367 4. 355677 3. 434325 4. 671456 3. 590101 4. 665707 4. 653442 3. 812699  
6. 577116 6. 363614 6. 034966 6. 130109 6. 070316 5. 880808 6. 418063 5. 873625 6. 574078



1. 984324 1. 716053 1. 68367 2. 1763 1. 821071 1. 841919 2. 21803 1. 961923 1. 694104  
4. 816251 5. 28017 4. 790946 5. 685243 5. 213905 5. 727517 5. 938956 5. 947738 5. 898204  
3. 285763 3. 174794 4. 375886 3. 344025 4. 048257 2. 570922 3. 930616 4. 412224 2. 267422  
4. 900833 5. 26066 5. 269217 5. 208092 5. 047772 4. 591296 5. 339828 4. 936174 3. 615483  
3. 296158 3. 457409 2. 979467 3. 273467 3. 852725 3. 650088 3. 100264 3. 976992 2. 454575  
6. 879861 6. 879807 6. 06801 5. 777769 6. 724489 6. 523427 6. 44809 6. 786995 5. 46162  
2. 39505 2. 229108 3. 224204 3. 17789 2. 070036 2. 403288 2. 439935 3. 280653 3. 084772  
2. 621167 2. 47757 2. 963512 4. 734421 4. 257823 2. 623346 3. 155736 4. 25001 4. 424279  
4. 161818 3. 788855 3. 752734 2. 897792 3. 263452 3. 655049 2. 674969 3. 352905 2. 557714  
7. 433862 7. 096087 7. 080459 7. 723296 8. 015949 7. 245931 7. 347901 7. 405088 5. 676315  
3. 95516 2. 079268 3. 599437 2. 344758 4. 070683 3. 456474 3. 619114 3. 326787 3. 128273  
1. 391893 1. 253424 1. 266123 1. 873731 1. 536848 1. 572308 1. 273058 1. 457722 1. 410606  
2. 890947 2. 561065 3. 153119 3. 806769 2. 775759 2. 612598 3. 04035 2. 902225 2. 742989  
5. 056829 5. 358399 4. 808872 5. 238348 5. 849275 4. 845257 5. 460147 5. 501863 4. 920267  
5. 443975 6. 111878 6. 144207 5. 28429 5. 573494 5. 312341 5. 55117 6. 1683 5. 235834  
4. 666077 4. 813527 4. 125036 4. 106425 4. 732697 3. 771758 4. 461644 4. 388101 2. 741628  
6. 060073 5. 645447 5. 094982 5. 462692 5. 819479 5. 034433 6. 322084 5. 553332 4. 708993  
5. 074887 4. 208813 2. 488296 2. 724542 3. 015382 3. 248804 2. 499725 2. 675329 3. 810214  
1. 652883 1. 722194 1. 867577 1. 938946 1. 418404 2. 061927 1. 363711 0. 961603 2. 827981  
1. 34723 1. 380706 1. 553098 1. 884678 1. 765296 1. 807711 1. 363047 1. 326448 1. 593589  
5. 852785 5. 805313 5. 546037 5. 7895 5. 680506 5. 446701 6. 048256 5. 615711 4. 821401  
1. 798261 1. 744839 2. 214862 1. 558352 2. 233017 3. 176107 1. 961196 1. 648608 2. 629495  
1. 360604 2. 471173 2. 414041 3. 835013 1. 415044 2. 463223 2. 912461 2. 955941 1. 785009  
2. 23594 1. 651525 1. 418859 1. 631285 1. 966588 1. 360993 1. 778491 3. 228319 1. 63638  
3. 236176 3. 33285 2. 816658 2. 144667 2. 769829 3. 478885 3. 163931 3. 678959 2. 89487  
2. 439567 1. 773033 2. 51243 2. 964565 2. 038547 2. 744615 2. 51771 2. 398236 2. 832101  
1. 578522 2. 054564 2. 274507 2. 918748 1. 434448 1. 116615 0. 939467 2. 416779 2. 023013  
1. 952666 1. 765791 2. 177823 2. 664189 1. 576345 2. 797304 1. 441743 2. 091055 1. 870168  
1. 342477 1. 496772 1. 256099 1. 298827 1. 307639 1. 103335 1. 633412 1. 412361 1. 935951  
3. 751963 4. 477866 4. 628736 4. 489554 4. 063553 4. 223661 3. 958741 4. 158933 3. 191279  
4. 230349 2. 97434 4. 528372 3. 234464 3. 984224 4. 087021 3. 09428 3. 26319 2. 520909  
0. 427566 1. 656872 0. 758004 1. 920766 1. 963597 0. 811601 1. 07354 1. 188795 0. 707476  
4. 16155 3. 698559 5. 473763 5. 361577 3. 009205 4. 097019 3. 507494 2. 594365 4. 627438  
1. 396101 1. 520346 1. 299015 1. 609568 1. 322877 2. 237025 1. 520346 1. 05864 1. 168729  
1. 637065 1. 397275 1. 597723 1. 931434 1. 501064 1. 682763 1. 724539 2. 221297 1. 956303  
1. 620096 1. 585436 1. 65433 1. 673526 1. 43684 1. 571303 1. 563036 1. 186378 2. 816176  
6. 007646 5. 896885 5. 909019 5. 247189 6. 07574 5. 296773 6. 056606 6. 402061 5. 350607  
4. 270669 2. 40307 2. 24314 1. 762939 2. 350471 1. 99088 2. 851427 2. 186239 1. 382314  
1. 924182 1. 990172 1. 884099 2. 8411 1. 845696 2. 655615 2. 759725 1. 876463 1. 990172  
2. 386094 2. 625649 3. 02807 2. 36798 2. 480864 2. 332378 2. 524727 1. 953432 2. 492662  
1. 223108 1. 704027 1. 620152 2. 063989 1. 838496 1. 858586 1. 767468 1. 853352 1. 330954  
2. 110878 2. 638626 3. 023985 4. 113961 2. 260712 0. 92952 0. 772069 1. 394593 0. 726559  
1. 511059 1. 793704 1. 962587 1. 594932 1. 389637 1. 411085 1. 88523 2. 035167 1. 015414  
2. 666169 1. 682395 2. 237721 2. 975436 2. 731552 1. 789995 2. 071533 1. 758011 2. 244302  
2. 438765 2. 037946 2. 395494 3. 254807 2. 907928 1. 962226 1. 78684 1. 98306 2. 713331  
1. 683093 1. 875955 2. 134038 3. 021995 2. 054942 2. 444941 1. 514608 1. 562221 1. 971002  
8. 533026 8. 146479 8. 382965 8. 300582 8. 371513 8. 320258 8. 736325 8. 549574 8. 39328  
2. 138495 1. 69076 1. 216173 2. 165207 2. 420069 1. 717801 1. 920515 1. 040591 1. 311712  
5. 554771 6. 143197 5. 412061 5. 686781 5. 952972 5. 642028 5. 525734 5. 654157 4. 318611  
2. 355084 2. 280018 2. 014938 2. 734249 1. 447058 2. 411831 2. 097878 1. 887645 1. 865744  
2. 857151 1. 629413 2. 052479 2. 773992 1. 862004 1. 788092 2. 26011 2. 018239 2. 186329

1. 546639 2. 071389 1. 551803 1. 698317 1. 334442 1. 900454 1. 580983 1. 205972 1. 798735  
0. 930267 1. 314174 1. 640088 1. 386597 1. 791139 0. 785823 1. 203332 1. 337592 1. 161732  
4. 694151 5. 012039 5. 228349 4. 981468 5. 003618 3. 956346 5. 246525 5. 38215 5. 469691  
1. 3849 1. 783856 1. 164547 2. 213366 1. 080583 1. 301689 1. 268105 1. 174519 1. 463913  
1. 418766 1. 354703 1. 203754 1. 288421 1. 370145 1. 472174 1. 109863 1. 298302 0. 780139  
2. 539108 3. 968101 3. 731345 4. 894081 3. 687497 3. 674712 4. 309898 3. 409476 4. 138586  
6. 340301 6. 887793 6. 45389 6. 240547 6. 349745 6. 297536 6. 075943 6. 929483 6. 939463  
1. 845421 2. 318565 1. 721953 2. 275476 1. 576815 2. 351084 1. 80175 1. 989865 2. 031074  
4. 83932 3. 924353 4. 790047 5. 235043 5. 122669 3. 99153 4. 689012 4. 695789 4. 863572  
1. 279137 1. 326284 2. 022538 1. 281835 1. 315082 1. 415783 1. 446608 1. 100865 1. 297181  
0. 722727 1. 46673 0. 860361 0. 97548 1. 148215 1. 577301 1. 108337 1. 159907 1. 225663  
5. 783919 5. 319402 6. 143669 6. 175331 5. 255697 4. 979352 5. 87461 5. 343839 6. 617987  
4. 072216 3. 727952 4. 031725 4. 249731 4. 349195 3. 41982 3. 886749 3. 606768 2. 756514  
1. 519718 1. 364499 1. 718512 2. 052031 2. 213257 1. 896487 2. 100992 1. 492512 2. 917509  
1. 118548 1. 417795 0. 803354 1. 443774 0. 806801 1. 141719 0. 912723 1. 349034 0. 99898  
3. 607922 2. 604992 2. 979904 3. 658135 3. 372866 4. 324598 3. 326712 3. 72322 2. 729305  
1. 264027 1. 636748 2. 471528 1. 696044 1. 224163 1. 414193 1. 367592 1. 450799 1. 006908  
1. 437043 2. 432173 1. 215406 1. 722988 1. 371877 2. 752726 1. 5137 1. 573435 2. 223018  
5. 901898 5. 957316 6. 147344 6. 279453 6. 666387 6. 326688 6. 256455 5. 815676 5. 533828  
1. 859682 2. 458597 3. 31241 2. 87705 1. 715128 1. 962154 1. 214133 2. 981021 3. 236578  
2. 340939 1. 907454 1. 663392 2. 573735 1. 861922 1. 961382 1. 176469 2. 057567 1. 913768  
1. 134928 0. 794933 1. 408578 1. 177353 1. 393159 2. 017265 1. 072074 0. 905009 1. 041961  
1. 8008 1. 019543 0. 922374 2. 57184 1. 15998 1. 468783 1. 581797 1. 401295 1. 268438  
1. 982124 1. 883565 2. 973733 3. 527692 1. 549696 1. 220478 2. 403892 1. 995129 1. 995129  
1. 642756 1. 499588 1. 577509 2. 086776 1. 563343 1. 842465 1. 467993 2. 195622 1. 968697  
2. 339513 3. 565304 1. 086055 2. 554247 5. 614435 3. 656361 5. 066129 5. 15225 1. 91561  
3. 304397 1. 973071 1. 734443 2. 805268 3. 212626 2. 008356 1. 82911 2. 619211 1. 634801  
1. 291586 1. 331175 1. 16059 2. 599699 1. 913189 1. 965816 1. 510033 1. 024197 0. 975331  
1. 90873 1. 459411 1. 799085 1. 694234 2. 381483 1. 209976 1. 564581 1. 279004 1. 684346  
0. 744089 1. 085371 1. 38488 2. 416729 1. 17678 1. 254066 1. 106102 0. 786384 1. 21024  
3. 931545 3. 923007 4. 317878 3. 657862 3. 829701 4. 13572 3. 637624 3. 749348 5. 391315  
2. 333942 2. 612128 2. 385783 2. 872364 2. 219034 2. 603894 2. 244489 2. 738492 2. 314898  
4. 973664 4. 900193 4. 705291 4. 741597 4. 996065 4. 526525 5. 047943 4. 614389 5. 09442  
1. 593194 1. 714253 1. 622637 1. 781359 2. 044702 1. 766869 1. 720325 2. 513478 2. 906943  
1. 203904 0. 924909 1. 404581 0. 965414 1. 468622 0. 967917 2. 663222 1. 107184 2. 034378  
3. 124039 2. 981771 2. 524352 2. 648256 2. 630601 2. 514932 2. 675674 2. 989979 3. 660626  
6. 308307 5. 940468 6. 459452 5. 913356 6. 378051 5. 282315 5. 111623 6. 81865 4. 444688  
1. 558531 1. 320899 1. 218031 1. 13985 1. 012724 2. 374139 0. 958347 1. 719635 1. 11035  
3. 583401 2. 345152 4. 200133 4. 267494 2. 287924 3. 40743 3. 821455 3. 016307 3. 626343  
1. 225116 1. 176521 1. 988386 2. 706815 1. 444107 1. 143977 1. 169551 1. 30043 1. 564397  
1. 382108 1. 765524 1. 337611 1. 827798 1. 345411 1. 734565 1. 363287 1. 194817 2. 10834  
1. 180798 1. 504534 1. 608474 1. 663146 1. 120761 1. 549185 1. 636668 1. 169456 1. 543272  
6. 63875 5. 7091 6. 496595 8. 060043 6. 445712 5. 950134 6. 641106 6. 228618 5. 979108  
0. 88648 1. 068764 0. 80979 1. 66307 1. 492475 0. 954051 1. 082052 1. 006941 0. 802781  
1. 470168 1. 277309 1. 664985 2. 102085 0. 913519 1. 545114 0. 945007 1. 627948 1. 263447  
3. 187494 3. 196689 3. 340032 4. 267622 3. 940873 3. 981064 3. 647657 3. 550151 3. 308929  
2. 439564 2. 411152 1. 849993 2. 42771 1. 406383 3. 172265 1. 864248 2. 475328 2. 300658  
2. 18426 1. 586621 2. 078697 2. 324299 1. 953298 2. 148699 2. 424583 2. 806243 1. 933896  
2. 097961 1. 901191 2. 45527 1. 973218 2. 010464 2. 401397 1. 66078 1. 34706 1. 643952  
2. 564386 2. 490583 2. 881209 3. 719862 2. 926686 2. 679652 2. 438853 2. 117415 2. 688634  
2. 161799 2. 373569 2. 53584 2. 967552 1. 987196 1. 557361 2. 033901 1. 367112 2. 375874

6. 363443 4. 699181 6. 074878 5. 338536 5. 447735 5. 44325 4. 735454 5. 974161 6. 067554  
5. 503639 5. 842144 5. 976573 5. 106993 6. 211762 4. 793728 6. 013519 5. 459382 4. 765983  
3. 877912 4. 737768 4. 700457 4. 952662 3. 957206 4. 412955 4. 498311 4. 312404 4. 590766  
1. 572163 1. 13569 0. 891746 1. 935295 1. 305234 1. 835235 1. 458165 1. 553979 1. 774464  
4. 94907 4. 186817 4. 932887 5. 411993 4. 778483 5. 25624 4. 66083 4. 786102 4. 127479  
2. 759442 3. 050096 3. 570494 2. 90231 3. 456781 3. 450422 3. 340462 2. 875521 3. 846383  
1. 463759 1. 872107 1. 596779 2. 028564 1. 214571 2. 037583 2. 110762 1. 872107 1. 848068  
2. 174826 2. 267708 2. 466598 1. 97895 1. 608261 1. 692058 2. 089846 1. 58089 3. 042622  
1. 768063 2. 465348 1. 89394 1. 091305 2. 257733 1. 926596 1. 73213 3. 027272 3. 172402  
1. 455111 1. 296236 1. 155878 1. 629337 1. 52545 1. 690075 1. 705872 1. 747327 1. 629825  
2. 239508 1. 77185 1. 591916 2. 204808 2. 580562 1. 561285 2. 105471 1. 942255 2. 038228  
1. 516735 1. 255359 1. 702891 1. 07434 1. 086385 1. 206421 1. 629613 1. 047767 1. 452379  
1. 347131 2. 203411 1. 541113 2. 114678 1. 566297 2. 170046 1. 493838 1. 739566 1. 749317  
1. 141545 1. 538731 1. 214941 2. 67096 0. 94066 1. 148579 0. 985433 0. 984949 0. 988821  
2. 728413 2. 632817 2. 727581 2. 722397 2. 372282 2. 474947 2. 57315 2. 941052 2. 467846  
2. 040431 1. 900803 2. 261949 1. 92148 2. 171556 1. 530085 1. 846747 1. 543513 2. 292455  
1. 512809 1. 119953 1. 319033 1. 714227 1. 53846 1. 070801 1. 584378 0. 977463 1. 617119  
1. 465377 1. 475441 1. 463017 1. 541866 1. 058457 2. 467868 2. 41075 2. 115804 1. 837465  
3. 545916 3. 125053 2. 47887 2. 646008 3. 727643 3. 233186 2. 818457 3. 488031 2. 73436  
2. 782535 2. 707498 3. 085184 3. 204272 2. 788618 3. 553154 3. 43619 2. 903472 2. 697905  
3. 829371 3. 451078 3. 647718 3. 28097 2. 904461 2. 844708 3. 112196 4. 124698 3. 343615  
2. 694123 2. 980873 2. 611716 2. 284569 3. 044823 2. 752923 2. 663277 2. 347521 2. 274392  
1. 406454 1. 743751 1. 504958 1. 593264 1. 141014 1. 451113 1. 504958 1. 645588 1. 400994  
3. 446752 3. 291783 2. 676998 4. 060149 2. 371424 1. 987548 2. 660224 2. 669266 3. 324861  
2. 46126 2. 560403 2. 891485 2. 999505 2. 853446 2. 825227 2. 88345 3. 824634 2. 893483  
2. 389637 2. 154161 0. 920159 1. 575016 2. 67577 1. 93362 0. 838069 0. 600852 0. 947001  
1. 391338 0. 927173 1. 35149 1. 179467 1. 747449 1. 792701 2. 406394 1. 224125 2. 497035  
1. 188401 1. 890429 1. 601658 1. 609865 1. 544062 1. 992324 1. 451998 1. 64862 1. 547754  
3. 656995 3. 579199 3. 779797 3. 400283 0. 606424 3. 02479 4. 576463 4. 476264 2. 630405  
4. 85439 4. 568564 4. 308857 3. 558931 4. 223478 5. 271967 4. 768499 4. 107503 3. 584497  
3. 714527 3. 437852 3. 182497 3. 62093 1. 925651 3. 152768 2. 896591 2. 91507 3. 911492  
1. 511959 1. 103768 1. 158005 2. 360569 1. 278143 1. 679917 1. 434881 1. 066571 2. 072051  
2. 21122 1. 538347 2. 315875 2. 970505 2. 036686 3. 039473 2. 303957 1. 651797 2. 704226  
2. 322413 2. 370538 1. 96556 2. 470464 2. 043811 3. 107088 2. 322413 2. 319882 2. 587219  
1. 833912 2. 25025 2. 794871 3. 046175 1. 827295 2. 104042 2. 825344 2. 507126 2. 550102  
1. 717055 1. 634071 1. 736541 2. 903266 1. 057736 2. 625366 1. 492849 1. 523857 2. 182368  
1. 886198 1. 701839 2. 686687 1. 598986 1. 449103 2. 050527 2. 758033 2. 015743 3. 275165  
1. 705018 1. 931368 2. 138796 2. 917958 1. 817955 2. 135046 2. 115664 2. 026459 1. 992953  
0. 931189 1. 368765 1. 153223 0. 966854 0. 798147 1. 873494 1. 505002 1. 308537 1. 340074  
2. 75497 3. 021262 2. 721006 2. 521091 3. 977631 2. 305645 2. 337938 1. 926885 2. 678428  
3. 400115 2. 865726 2. 878174 3. 327298 3. 513032 3. 96866 4. 652606 3. 285212 2. 67682  
1. 32282 1. 165038 1. 2448 2. 818547 1. 915882 1. 103035 1. 198595 1. 077256 1. 858444  
3. 776765 3. 724656 4. 347848 4. 002419 4. 20796 4. 611162 4. 235978 4. 257842 3. 49903  
1. 611842 1. 256444 1. 615847 2. 227935 1. 826089 1. 535084 1. 322701 1. 2042 1. 307688  
2. 372024 2. 43423 2. 880706 2. 587449 2. 814892 2. 352541 2. 185763 2. 898827 2. 77587  
1. 768884 0. 903749 1. 494566 1. 420416 1. 182685 2. 135337 1. 046626 1. 716223 1. 01832  
1. 137836 1. 617153 1. 256695 1. 908423 1. 162136 1. 503678 1. 372482 1. 034159 1. 351328  
4. 667453 3. 651955 4. 518866 5. 140148 3. 718231 4. 522334 4. 096764 4. 671501 3. 659307  
1. 966837 1. 310968 1. 493155 1. 324484 1. 024503 1. 728077 1. 533652 1. 456282 1. 784901  
2. 066009 1. 476876 2. 488318 2. 058245 1. 639374 1. 755698 1. 663152 1. 62391 2. 079937  
1. 699802 1. 247148 1. 280221 1. 580748 2. 400297 1. 496727 1. 765398 1. 633147 1. 875783

1. 258085 2. 158488 1. 52598 1. 369069 1. 805085 1. 682251 1. 374891 1. 420258 1. 518192  
3. 031407 3. 265081 3. 696111 3. 888515 3. 235606 3. 023972 3. 889109 4. 156895 2. 568509  
1. 990539 1. 342414 1. 347108 2. 094515 1. 337582 2. 67391 2. 564036 1. 720398 1. 938512  
1. 94916 1. 805423 1. 736419 1. 823973 2. 296581 1. 821393 1. 990018 2. 226756 2. 211308  
1. 949173 2. 074435 1. 679017 3. 129666 1. 65295 1. 501698 2. 316687 2. 138898 2. 221494  
2. 034526 1. 320641 1. 165071 1. 855219 1. 160704 2. 205369 1. 551474 0. 916877 1. 784886  
2. 571711 2. 484244 2. 442774 1. 887764 2. 140096 2. 595926 2. 327025 2. 512821 1. 747837  
1. 784961 1. 934211 1. 35568 2. 727105 1. 927243 1. 95547 1. 37033 1. 83196 1. 221653  
1. 274691 1. 300587 2. 250537 0. 998442 1. 29472 1. 594112 1. 348011 1. 03307 1. 404792  
1. 756747 1. 368137 1. 726339 4. 036092 2. 012866 2. 518539 1. 986089 2. 470663 3. 061638  
7. 544895 7. 490536 7. 60848 7. 129231 6. 758746 6. 957745 7. 746166 6. 519279 7. 254324  
3. 417724 4. 163202 4. 360601 4. 796259 3. 656733 4. 289499 4. 265952 4. 667809 3. 683913  
3. 738581 4. 175821 3. 215621 5. 81952 3. 007217 3. 360675 4. 602934 4. 808601 3. 683405  
1. 923681 2. 306013 2. 864373 3. 216334 2. 348788 2. 340439 2. 043873 2. 780179 2. 55418  
2. 240511 1. 992485 1. 84515 2. 586878 1. 678175 2. 190407 2. 042517 2. 822539 1. 607177  
1. 883565 1. 992415 1. 986431 2. 320944 1. 854384 2. 487194 1. 964871 1. 751298 2. 287032  
1. 616735 1. 090293 1. 48259 1. 541395 1. 403394 1. 615933 1. 844235 1. 156824 1. 671987  
1. 095116 2. 439586 0. 964073 1. 294074 2. 663022 1. 226699 1. 218281 2. 404403 1. 622137  
3. 229386 0. 424718 2. 43191 2. 179407 3. 352036 5. 21966 1. 342173 4. 279052 1. 933716  
3. 42902 1. 926451 1. 886981 2. 505825 1. 769877 2. 23602 1. 347139 2. 422061 2. 257177  
1. 478056 2. 351039 1. 682598 2. 930626 1. 87584 1. 658051 1. 60849 1. 361817 2. 613759  
1. 380301 2. 116864 2. 277985 2. 234958 1. 809207 2. 852383 1. 173695 2. 149859 3. 036399  
1. 548945 1. 860656 2. 077705 2. 436252 2. 288409 2. 432196 2. 395692 1. 949283 2. 273593  
1. 07874 1. 386352 1. 275708 1. 205895 1. 20125 1. 166598 1. 219559 1. 30134 2. 259379  
1. 820307 1. 973828 1. 418217 2. 142502 1. 957526 2. 208546 1. 602658 1. 507446 2. 808217  
0. 928659 1. 118683 0. 907354 1. 971736 0. 776866 1. 166217 1. 136526 1. 076213 1. 456029  
5. 309009 5. 35854 5. 256421 3. 948177 4. 986724 6. 235407 5. 495715 4. 595693 4. 647428  
5. 483258 4. 535554 4. 454246 4. 477661 4. 140602 3. 767792 5. 61991 4. 633469 4. 78296  
1. 824658 1. 014581 0. 399915 1. 434429 2. 081096 3. 997446 0. 884324 1. 759631 2. 586377  
1. 270587 0. 646201 1. 265409 2. 112557 1. 015979 1. 741727 1. 915885 1. 169781 1. 217024  
1. 207954 0. 934518 1. 686291 1. 905687 1. 410169 0. 928359 1. 142719 1. 405195 1. 503404  
1. 627541 1. 739205 2. 455193 2. 674586 1. 839835 1. 632206 1. 556633 1. 608321 1. 634598  
8. 555202 8. 605691 8. 72484 8. 17125 8. 639576 8. 708709 8. 841633 8. 344116 8. 759618  
3. 477472 3. 090511 3. 416886 3. 879302 2. 756576 3. 200998 3. 868881 3. 209133 3. 711896  
1. 948625 1. 216243 1. 30553 1. 4384 1. 396792 1. 774755 1. 254604 1. 409698 1. 351392  
3. 591063 4. 041019 3. 231161 4. 192994 3. 788852 4. 418185 2. 764642 3. 986042 3. 53804  
1. 656596 1. 559013 1. 532821 2. 031833 1. 488503 1. 242297 1. 27921 1. 580285 3. 458293  
1. 757532 1. 747986 1. 367099 1. 72552 1. 460783 1. 396928 1. 83932 1. 477201 1. 788435  
1. 882457 2. 299876 1. 124496 1. 476983 1. 712001 1. 447377 1. 525519 1. 407813 1. 018209  
2. 057539 1. 417513 1. 500891 1. 833469 1. 38104 1. 768841 1. 605756 1. 346583 2. 40008  
1. 11777 0. 825368 1. 148658 2. 048564 1. 473518 2. 01212 1. 256589 1. 022135 1. 2542  
2. 301933 2. 046828 2. 370116 3. 841722 2. 255404 2. 386449 2. 212357 2. 106338 2. 986179  
1. 35272 1. 52012 1. 503495 1. 440239 1. 297395 2. 076384 1. 745258 1. 059623 1. 343014  
2. 139067 2. 99063 2. 83098 2. 570751 3. 439776 3. 792796 3. 693384 3. 131642 3. 381411  
2. 054444 1. 106248 2. 134309 2. 320274 1. 582531 3. 806757 3. 114693 2. 347174 2. 646142  
1. 004748 1. 399146 1. 322587 0. 964678 0. 751735 1. 285696 1. 203236 1. 410548 1. 033945  
1. 527606 2. 159183 1. 218018 2. 488318 1. 698824 1. 904567 2. 19038 2. 026575 1. 642458  
3. 003015 2. 925856 3. 287291 3. 166215 3. 331416 3. 473155 2. 974321 2. 711097 3. 427066  
1. 56042 2. 009902 2. 06873 2. 341887 1. 785397 1. 530282 2. 512046 1. 667941 1. 207887  
6. 05445 6. 969163 6. 418567 6. 938177 6. 728778 6. 848278 5. 820511 6. 658011 5. 290307  
1. 250592 1. 208169 1. 156143 2. 146133 1. 770322 0. 947556 1. 589023 1. 133813 1. 526044

1. 533387 1. 642968 2. 041564 2. 053895 1. 889092 1. 939482 2. 058596 1. 88424 2. 827501  
3. 446661 2. 737807 3. 337142 3. 009711 2. 97616 3. 120332 3. 266975 2. 691223 2. 953728  
1. 038362 0. 888912 1. 946392 1. 609167 0. 985361 2. 581125 1. 482435 1. 023284 0. 979109  
4. 828821 5. 5838 4. 922574 5. 528456 6. 006989 5. 127247 4. 847022 5. 799939 4. 174926  
1. 175131 1. 119678 0. 96865 1. 175955 1. 165845 1. 437407 1. 03616 1. 334782 1. 178193  
2. 143418 2. 612162 2. 273303 3. 364162 3. 031173 2. 447785 2. 832508 2. 040593 2. 937348  
1. 964816 1. 253861 1. 870989 3. 207143 1. 23698 0. 879303 1. 535048 1. 609668 1. 08626  
1. 098391 1. 295585 1. 197258 1. 618788 1. 6769 1. 710201 1. 335673 0. 960938 1. 238082  
1. 040024 1. 176295 1. 526724 1. 681912 1. 238924 1. 162339 1. 022367 1. 114272 1. 335327  
1. 703697 0. 82117 1. 877128 1. 828687 1. 384454 1. 807475 1. 988929 1. 828453 2. 208555  
1. 23581 1. 201171 0. 879155 1. 02289 0. 998467 1. 360593 0. 874198 1. 019913 0. 962179  
1. 968251 1. 951516 2. 002465 1. 551231 1. 649819 1. 799962 1. 734997 1. 665759 2. 625542  
3. 508657 3. 783976 5. 152388 6. 255694 3. 81261 3. 758551 4. 367329 4. 77586 4. 056661  
3. 772102 3. 691613 3. 701251 3. 652731 3. 647828 3. 330636 3. 720234 3. 513754 3. 624405  
1. 206791 1. 437707 1. 936189 0. 970778 1. 6997 2. 569375 2. 044262 4. 086853 2. 017004  
2. 25677 1. 933631 1. 82043 2. 316009 2. 679639 2. 447414 2. 023725 1. 632786 2. 794275  
1. 79515 2. 996668 1. 857819 2. 799998 1. 809103 2. 213117 1. 74803 2. 039374 2. 036393  
1. 566879 1. 774648 2. 470364 1. 712144 1. 923985 2. 052279 2. 009042 1. 303283 1. 640105  
2. 712813 4. 055771 3. 147622 2. 226805 3. 903457 2. 555542 3. 485406 3. 21623 2. 699821  
1. 84359 2. 194303 1. 68988 2. 217123 2. 088031 1. 683341 1. 710534 1. 393308 1. 63236  
1. 483842 2. 384331 1. 848469 1. 447448 1. 021947 1. 513783 1. 417235 2. 214549 1. 961522  
1. 936729 2. 069352 1. 983834 2. 099366 2. 005196 1. 980825 2. 02192 3. 050653 2. 618856  
1. 961462 2. 158049 2. 32951 2. 733458 2. 128574 1. 55913 2. 520048 2. 337211 2. 807707  
2. 345628 2. 441806 2. 02369 2. 652656 2. 174114 1. 886036 2. 407388 1. 980622 1. 818424  
4. 374516 3. 033411 4. 531724 3. 352287 2. 660843 3. 697101 3. 684313 3. 47752 4. 486416  
1. 958014 1. 941671 1. 962193 2. 567502 1. 644529 1. 614972 1. 774941 1. 796559 2. 00517  
1. 733301 1. 715379 1. 600782 2. 112584 1. 818835 1. 909975 1. 589204 1. 846107 1. 702733  
1. 195191 1. 638046 1. 521186 1. 737919 1. 193912 1. 667892 1. 548982 1. 677081 2. 724227  
2. 24858 1. 847084 1. 748247 1. 890571 2. 984342 2. 323304 3. 56623 3. 285702 3. 682157  
3. 4476 3. 275504 3. 499986 3. 70798 3. 249951 4. 456422 3. 004862 3. 838623 3. 305492  
5. 843788 5. 373331 5. 824509 4. 963311 5. 385235 5. 693726 5. 402123 5. 209733 5. 228575  
1. 408196 1. 365184 1. 102349 1. 160974 1. 786554 1. 548248 1. 628419 1. 488475 1. 566272  
1. 758916 1. 126902 3. 16159 2. 906334 1. 582927 2. 764564 1. 461675 1. 476088 1. 805854  
1. 814397 1. 535196 2. 165282 2. 336894 1. 406302 1. 726452 1. 223753 1. 135346 1. 123144  
1. 964514 2. 15164 1. 679762 2. 061271 1. 819129 2. 061157 1. 936014 1. 957584 1. 633171  
4. 30052 5. 235633 4. 131826 2. 510942 4. 716523 2. 835415 4. 873133 4. 218281 4. 902139  
1. 452621 1. 346668 1. 250083 1. 727078 1. 617696 1. 407909 1. 463022 1. 278515 1. 436366  
1. 614828 1. 968054 1. 143502 1. 572558 1. 523742 2. 468081 1. 200335 1. 599129 1. 02935  
2. 02689 1. 812622 2. 706533 2. 194911 1. 890592 2. 175197 1. 779655 2. 600472 2. 630722  
6. 80022 6. 995377 7. 32619 6. 392632 6. 807577 6. 992597 6. 988398 6. 817585 6. 870203  
2. 981535 2. 87331 2. 8424 5. 022699 2. 673585 2. 837501 3. 522154 3. 15968 2. 711337  
1. 34204 1. 216146 1. 294791 2. 283431 1. 160627 1. 522537 1. 62227 1. 327493 1. 684304  
4. 544987 3. 348481 3. 268921 4. 893766 3. 920891 3. 868024 3. 756192 5. 255411 5. 714134  
5. 820214 5. 372545 4. 722757 6. 007665 5. 53822 5. 027025 5. 890538 5. 160561 4. 82192  
1. 043742 1. 331627 1. 215095 1. 997459 1. 140655 1. 222267 1. 509011 1. 034302 1. 226691  
3. 988832 3. 230624 4. 103524 5. 461937 4. 014264 2. 682729 4. 404508 3. 804226 3. 685992  
2. 963539 2. 651717 2. 834881 3. 594423 2. 441409 2. 527384 2. 635643 2. 407582 3. 216156  
1. 546259 1. 487563 1. 979694 1. 708823 1. 596533 2. 592548 1. 950957 3. 190704 1. 702359  
3. 561943 2. 908275 3. 456387 2. 523445 2. 984275 3. 433891 3. 386405 2. 797248 3. 608912  
1. 139854 1. 681637 1. 605461 2. 117379 0. 827024 1. 348439 1. 032248 1. 206609 1. 215705  
1. 671414 1. 013795 1. 290944 2. 050685 1. 170549 2. 797118 1. 925178 1. 370645 1. 459589

4. 759972 5. 365773 4. 889195 4. 29929 4. 967958 4. 657266 4. 863447 5. 10546 5. 786973  
1. 843405 1. 540352 1. 896196 3. 16579 1. 47407 1. 801342 0. 996186 1. 537195 1. 604303  
5. 493803 4. 773784 5. 572773 6. 000364 4. 928307 4. 709024 5. 14268 5. 196509 5. 340308  
4. 185032 3. 428534 2. 501616 2. 690483 3. 302732 2. 868238 2. 267276 3. 185016 1. 954388  
1. 786526 2. 203682 2. 399987 1. 86946 1. 752926 2. 289411 1. 885037 2. 144731 1. 699085  
1. 807249 2. 098096 1. 940393 2. 122549 1. 303726 2. 347082 2. 45352 1. 995736 1. 89913  
1. 259299 1. 344171 1. 82378 1. 462672 1. 311996 1. 382761 2. 042964 1. 067187 1. 201268  
6. 990464 7. 475168 7. 280489 6. 841215 7. 740032 7. 017112 7. 005795 7. 56642 7. 754762  
4. 07592 3. 953557 3. 668674 3. 064047 3. 233274 3. 88096 3. 399024 3. 99603 4. 248968  
1. 140305 1. 13326 1. 301459 2. 110178 0. 819088 1. 505016 1. 293864 1. 377308 1. 288114  
2. 113116 3. 279707 3. 355912 3. 278412 3. 121314 3. 750042 2. 85924 3. 393532 2. 679238  
1. 414659 1. 291067 1. 566644 1. 564134 1. 329943 1. 851333 1. 594548 1. 660045 1. 600121  
2. 750913 2. 062585 2. 33469 2. 631338 2. 138667 2. 129015 2. 902046 2. 259531 2. 595277  
6. 068083 4. 65348 4. 904709 4. 801289 5. 370153 4. 583404 5. 002419 5. 484609 5. 386665  
2. 002981 2. 397608 2. 152588 2. 807002 2. 400649 2. 404239 2. 137873 2. 848766 2. 346848  
2. 236127 2. 69727 2. 683305 2. 90212 2. 143017 2. 216128 2. 007953 2. 460135 2. 859579  
5. 969909 5. 967535 5. 350806 6. 290684 6. 271173 5. 61228 6. 066135 6. 272865 5. 503605  
1. 833558 2. 147394 1. 527286 1. 831259 1. 534791 1. 667442 1. 911801 1. 740451 1. 822258  
4. 528271 4. 277123 3. 057632 3. 524091 3. 991424 5. 629854 3. 740947 4. 574572 4. 106542  
0. 926818 1. 029721 0. 860925 1. 85724 0. 930059 1. 330552 1. 030583 1. 589142 2. 033887  
5. 834808 5. 111367 5. 090874 4. 434318 5. 33108 6. 753176 5. 38641 5. 537146 5. 889831  
2. 715122 1. 868138 2. 49924 2. 641463 2. 370891 1. 689352 2. 780214 2. 518275 2. 496563  
2. 300879 1. 915403 2. 038677 2. 966175 1. 762115 2. 212472 2. 451869 1. 964009 2. 04872  
3. 490463 2. 482968 2. 528275 3. 193505 1. 067868 3. 811609 2. 334523 2. 00901 3. 248298  
2. 619846 1. 993806 1. 661621 2. 155416 2. 190753 2. 451456 2. 160761 2. 366941 2. 755098  
2. 666341 2. 387374 2. 306156 2. 653092 2. 468351 2. 529558 3. 101478 2. 691729 2. 2999  
2. 203818 2. 622598 2. 777615 2. 552587 2. 882286 2. 411711 2. 427339 2. 557822 2. 715922  
4. 779869 4. 651928 4. 449293 5. 213684 4. 926695 4. 443636 4. 520008 4. 716944 3. 838661  
3. 244654 3. 035321 2. 445366 3. 911881 3. 219941 3. 110752 3. 229059 2. 435531 2. 834308  
3. 889012 1. 91473 2. 173393 3. 856179 2. 981054 3. 595005 1. 399003 3. 026682 3. 382673  
7. 965205 7. 077866 6. 695645 6. 33984 7. 128688 6. 778916 6. 566393 6. 469009 7. 321684  
2. 585914 2. 6617 2. 290215 3. 673179 3. 031497 2. 562936 2. 448375 1. 35906 2. 571569  
1. 562208 1. 03515 3. 009803 2. 334223 0. 945778 1. 714794 1. 102889 1. 313647 1. 126281  
1. 217993 1. 986538 1. 451419 1. 672432 1. 743532 2. 635981 1. 78004 1. 990307 1. 608259  
1. 881627 1. 283915 1. 423675 2. 562229 1. 661184 1. 822263 1. 591154 1. 746989 2. 203771  
1. 672709 1. 99076 0. 979121 0. 961875 1. 280967 1. 566488 2. 462681 1. 335603 2. 680787  
1. 607242 1. 277982 1. 316775 2. 175079 2. 254431 1. 708585 1. 990512 0. 965363 1. 952736  
7. 569225 7. 274223 7. 749228 7. 716586 7. 147761 7. 321912 7. 096634 7. 852888 7. 421554  
1. 174193 1. 652056 1. 801621 1. 212287 1. 334777 2. 656235 1. 715859 1. 478002 1. 300458  
4. 409031 4. 287212 4. 982672 4. 068874 5. 340486 3. 783662 5. 758138 5. 043135 3. 558957  
5. 639579 5. 696031 5. 680769 4. 26166 5. 446593 5. 403291 5. 40663 5. 0186 4. 943838  
2. 148873 2. 801801 1. 887529 2. 06109 1. 637115 1. 509511 1. 559042 1. 052176 2. 137417  
1. 610601 1. 286737 1. 355477 2. 241048 0. 956415 2. 411007 1. 373932 1. 347468 2. 185991  
3. 040987 2. 718267 1. 971677 2. 941311 2. 681979 2. 359712 1. 751126 2. 362595 2. 441777  
2. 453713 2. 527951 3. 016203 3. 594876 2. 821196 2. 648823 2. 750189 2. 683471 2. 715465  
0. 733908 1. 589995 0. 493647 1. 146459 1. 344021 1. 770589 1. 091416 2. 117752 1. 834695  
1. 29775 0. 971732 1. 972274 1. 874859 1. 491838 1. 61589 1. 245645 1. 187465 1. 284872  
1. 995338 2. 368099 1. 729615 2. 496534 1. 907692 2. 854875 1. 982193 2. 090701 2. 536  
4. 800479 3. 599864 4. 764408 3. 442844 5. 265282 3. 965304 4. 6802 4. 210172 4. 918874  
1. 538437 1. 306356 1. 090607 1. 402818 1. 33403 1. 664221 1. 521896 0. 992408 1. 333495  
1. 758577 1. 962354 2. 529261 1. 509105 2. 067898 3. 19476 2. 737465 1. 495896 4. 5009

2.022788 2.495784 2.711779 2.635146 1.967788 1.676701 2.1057 2.166997 3.06875  
2.227428 1.909658 1.200623 2.047348 0.957561 1.642101 1.359051 1.775677 1.562593  
1.472366 2.355917 2.410082 3.657736 2.08519 2.519197 1.52968 1.118999 3.637884  
2.066075 1.536861 2.240063 1.98199 1.723016 1.626323 2.127597 1.654319 1.671031  
4.960947 3.876714 5.404334 5.489215 3.33936 6.816918 4.715422 3.294375 7.287381  
1.417385 1.30358 1.837371 2.359882 1.387366 1.589704 1.607591 1.718718 1.499034  
5.064375 4.730622 4.362765 4.173857 5.267892 4.917587 3.335986 4.271422 5.240685  
1.570937 1.413994 1.964296 1.782691 1.297006 1.522508 1.181266 1.383086 1.870244  
2.026897 1.94566 2.292211 2.191135 2.09412 2.497861 2.212162 2.830127 2.527407  
1.556878 1.680469 1.703302 2.32217 1.70964 1.010022 1.653164 1.816295 1.666771  
2.226415 2.26264 2.03295 3.481103 2.246405 3.524088 2.117751 2.016661 1.93734  
3.193212 2.63303 3.558603 3.973448 3.766844 3.562557 3.580931 3.042451 2.598448  
5.861012 5.949908 6.06918 5.813037 5.953492 5.910652 5.953236 6.121471 5.773493  
4.292202 4.243995 3.294484 4.797329 3.830431 3.642031 3.097454 3.535167 2.848218  
2.041129 1.225811 0.76872 1.811595 0.646463 1.062049 1.286638 1.296176 1.903852  
10.24383 10.36641 10.78922 10.04289 9.994983 10.05087 10.21008 10.37575 9.984632  
2.052065 1.703601 1.658894 2.706319 1.486256 1.673441 2.400442 1.379975 2.880832  
2.479221 1.889456 2.453906 3.585572 2.192429 1.691922 1.503541 2.077419 2.725492  
1.541174 0.964694 1.163455 1.274808 1.871091 1.919737 1.67307 2.09441 1.434383  
0.885617 2.40758 1.557238 3.810124 1.098058 1.783228 1.483326 0.882036 1.58706  
1.099387 0.933796 0.740859 2.137854 0.596775 1.180591 0.836218 1.479707 0.556937  
0.515038 1.689028 0.6894 1.390316 1.43015 0.826953 0.701188 1.053541 2.097679  
0.941451 1.050855 1.248843 0.653589 0.939899 1.331454 0.825291 0.829547 0.920732  
1.420569 0.987214 1.280055 2.105499 2.664021 1.141299 0.976566 1.061224 1.581687  
0.922119 1.075623 1.250794 1.031118 1.207564 1.445088 0.97847 1.061688 1.129164  
1.349479 0.927687 0.888544 0.931575 0.741449 1.57128 0.506483 0.857852 1.294467  
0.772426 1.143673 1.099446 1.540163 0.625225 1.184727 1.315834 0.79275 1.04401  
1.588813 1.910776 2.331404 2.498358 2.556608 3.39755 2.184761 2.726127 1.916916  
4.116839 4.546392 4.507243 4.26474 4.325449 4.338362 4.393885 3.730855 4.189653  
1.126398 1.032645 1.556563 1.195504 1.45225 1.057013 1.431304 1.292441 1.389407  
1.99554 1.217728 1.57599 0.973639 1.418841 1.538988 1.184023 0.975648 1.040276  
1.888436 2.619561 1.031579 2.847119 1.643543 2.499972 1.474799 2.098475 1.733083  
1.555026 1.28751 1.541676 1.775467 1.24732 1.602276 1.381719 1.126482 1.346065  
5.713241 4.614776 5.978497 5.177583 5.166346 4.403873 5.429198 4.783366 4.828583  
5.411322 4.610243 4.640973 4.163394 4.628924 5.040083 4.225032 4.985386 3.284779  
4.466488 4.194172 4.226633 4.301533 4.894526 4.847771 4.639889 5.015572 4.627116  
5.070499 4.840393 5.709619 5.146616 4.889976 5.513409 5.220498 6.129086 3.948848  
6.933078 6.020466 6.249452 6.301177 6.719881 7.02762 7.174725 7.061287 8.20304  
2.198733 2.871953 3.275335 2.617953 3.307086 2.728944 2.148798 2.862981 3.178682  
3.179677 2.915139 3.045444 3.339988 2.559153 2.695109 2.656045 2.663139 2.695689  
8.534552 8.488084 8.311086 8.224405 8.107174 8.266662 8.619384 8.270387 8.790242  
1.518361 1.929826 2.050809 2.173795 1.190996 1.887245 1.836181 1.603951 1.464123  
3.750813 3.997027 4.535549 4.002728 4.767524 3.689587 3.910145 3.917608 3.688438  
5.919826 6.133639 5.963786 6.259268 5.71755 5.938987 6.575886 5.684632 6.031678  
3.059893 3.398574 4.636465 4.071968 3.324863 3.251732 3.74772 3.724922 2.760704  
5.744092 4.467608 5.482167 2.917779 4.648689 5.476123 5.001678 4.924454 4.363237  
1.407932 0.835791 1.406514 1.658697 0.987406 1.833022 1.250577 1.19277 1.223373  
1.800572 2.522547 2.301988 2.979669 3.081824 2.168378 2.124093 2.400129 2.641025  
4.079417 3.828282 4.265462 3.897509 3.206823 3.176738 3.921855 4.067219 3.607372  
1.153743 1.313948 1.230991 2.668841 1.556609 1.886582 0.999175 1.790215 1.780556  
4.142809 3.630139 4.281142 3.615673 3.76176 3.661697 3.992714 3.965039 4.01723

1. 718849 2. 766211 2. 095446 2. 729915 1. 797082 1. 854463 1. 107034 1. 43087 2. 574466  
7. 414056 7. 645487 8. 011535 7. 10533 7. 760701 7. 629873 7. 236302 8. 059451 6. 32284  
3. 843736 3. 427898 4. 084675 4. 52776 4. 058683 3. 341376 4. 077858 4. 135085 3. 599065  
1. 617935 1. 529984 2. 754569 1. 576681 1. 420213 1. 930542 1. 934408 1. 242657 1. 594147  
1. 712392 2. 642586 2. 412009 2. 054146 2. 777144 2. 754141 4. 196094 1. 606114 1. 763496  
1. 44706 1. 553344 2. 717289 2. 165286 2. 573935 2. 316275 1. 083773 1. 131097 1. 608254  
2. 700988 4. 000287 3. 686716 3. 741811 3. 488329 4. 422183 3. 848845 3. 042844 3. 308246  
6. 299877 6. 769627 5. 968669 6. 699305 6. 253173 5. 714406 6. 234656 6. 394645 5. 763907  
4. 302008 3. 449673 3. 237677 4. 766915 4. 892861 4. 041895 3. 442863 5. 331846 3. 345336  
1. 531273 1. 92055 0. 979472 2. 261024 1. 9427 1. 758277 1. 73371 1. 745988 2. 331833  
1. 157343 1. 460591 1. 594328 1. 546996 1. 347213 2. 159653 2. 222652 1. 258184 0. 827012  
4. 496642 3. 734042 4. 663896 4. 200793 3. 906748 4. 553667 4. 157219 4. 229522 4. 173124  
6. 695294 6. 27276 6. 651378 6. 981994 6. 657579 6. 581217 6. 830404 6. 95988 6. 807159  
3. 346029 3. 287227 3. 405309 3. 323289 3. 026298 2. 950117 2. 921326 3. 25275 3. 323289  
4. 70994 5. 01937 4. 970133 5. 8627 4. 867805 3. 548332 4. 453998 4. 693947 4. 612753  
1. 569223 1. 855973 2. 241536 1. 531208 1. 518114 4. 453623 2. 313097 2. 061118 1. 29917  
5. 684004 5. 774406 5. 86036 7. 51374 5. 9011 5. 879364 6. 594949 6. 305637 4. 900562  
3. 847887 3. 759134 3. 068339 3. 328401 3. 219342 4. 19826 3. 098227 3. 509102 3. 343179  
5. 278304 4. 9674 5. 499628 4. 194587 4. 848892 5. 856672 5. 195554 5. 240477 4. 175768  
6. 297677 6. 821947 7. 098211 7. 129148 7. 266637 6. 897728 6. 52014 6. 580466 6. 560438  
5. 079054 4. 401779 6. 239631 5. 214848 5. 496199 5. 322892 5. 014627 5. 018549 3. 95925  
1. 29566 1. 208303 1. 473747 1. 842296 1. 596232 1. 46376 1. 602691 1. 556894 1. 454077  
5. 838658 4. 472562 6. 260445 5. 499446 5. 649966 5. 825064 6. 471896 6. 611556 5. 120271  
1. 320541 2. 244902 2. 189678 2. 872459 2. 406866 1. 94785 1. 963595 3. 405347 2. 634236  
2. 413352 2. 464366 2. 418112 2. 788208 2. 569374 2. 67703 1. 456031 2. 131973 2. 44727  
8. 316769 8. 922366 9. 333005 8. 263923 8. 646087 9. 148519 8. 399541 8. 555601 7. 776242  
8. 493404 8. 188841 8. 793212 7. 621476 8. 213665 8. 647621 8. 011876 8. 032741 8. 24435  
4. 97935 6. 285605 5. 403697 5. 502674 5. 649508 4. 270397 3. 914762 4. 510499 7. 108886  
7. 551867 8. 00429 7. 61799 7. 235756 9. 201609 7. 10913 7. 713733 7. 845418 7. 466681  
2. 616654 3. 05504 2. 427853 2. 275554 1. 775238 2. 652358 2. 270537 2. 234379 2. 323902  
2. 078432 2. 093732 2. 958454 2. 940179 1. 783527 1. 904916 2. 279678 3. 115337 1. 924288  
4. 135714 4. 594877 2. 664366 1. 905926 4. 72666 4. 341503 4. 216361 4. 98935 2. 470779  
4. 159089 3. 96885 4. 422502 4. 316712 4. 920872 4. 067004 3. 991293 5. 183307 3. 798361  
5. 602915 5. 625898 4. 977685 5. 185111 6. 424869 4. 584901 5. 697775 5. 391069 3. 475076  
1. 41659 3. 043889 2. 047395 1. 927174 2. 02903 2. 652151 4. 630029 2. 595047 3. 994423  
0. 833617 0. 92509 1. 059792 0. 824383 0. 916572 1. 273726 1. 082055 1. 046423 0. 799966  
1. 333395 1. 192785 0. 866558 1. 621584 0. 983337 1. 163257 1. 224484 0. 760527 1. 039733  
1. 687484 1. 430289 2. 528794 2. 257212 1. 565462 1. 396743 2. 625202 1. 453928 1. 982069  
2. 551462 2. 587415 2. 45348 4. 260342 3. 065352 3. 065286 2. 829793 3. 207832 2. 727719  
0. 900754 0. 802131 0. 762136 0. 848618 0. 844473 1. 254856 2. 039689 1. 092278 0. 814707  
1. 471106 0. 682795 0. 841628 1. 833661 0. 979648 1. 695356 1. 305961 0. 948512 0. 708387  
2. 818793 2. 573399 3. 041747 2. 395667 3. 211827 3. 329923 3. 282484 2. 596507 3. 697828  
1. 257963 1. 044305 1. 747162 2. 02123 1. 281591 1. 744057 1. 827495 1. 219678 2. 76523  
1. 089992 1. 094447 0. 990268 0. 846774 1. 086499 0. 973377 1. 071904 1. 150172 1. 071531  
1. 933269 1. 306235 1. 130694 1. 185784 0. 848948 2. 18052 1. 331325 0. 975565 0. 959539  
1. 294459 0. 864415 0. 913582 1. 151483 0. 945486 1. 885021 0. 927163 0. 874975 1. 020926  
1. 055347 1. 601595 0. 993912 1. 633295 0. 844846 1. 84353 0. 81858 1. 003155 1. 011935  
4. 973835 5. 180655 2. 140603 4. 645997 4. 86641 2. 448379 5. 08038 4. 228823 4. 063858  
3. 00915 2. 441435 2. 831208 4. 028969 2. 71449 3. 22751 2. 685617 2. 707501 2. 961202  
2. 837064 2. 357257 2. 98888 3. 925374 2. 715278 3. 516009 2. 43625 2. 035132 2. 903134  
1. 035153 0. 84726 0. 726656 1. 081691 0. 938621 1. 046171 0. 849523 0. 899868 0. 894703



1. 856991 1. 708597 1. 794926 2. 54469 2. 312134 1. 575245 1. 630807 1. 488377 1. 755647  
2. 962576 2. 962535 3. 743071 4. 138223 2. 807366 3. 875197 2. 908158 3. 233591 2. 93232  
1. 47665 1. 815854 2. 565415 1. 382624 0. 819566 0. 283577 2. 544692 1. 59618 2. 290624  
0. 926188 2. 256289 0. 914483 1. 103151 1. 133906 2. 449742 1. 146515 1. 351015 1. 138632  
0. 928696 1. 136032 1. 276037 1. 964864 2. 033738 1. 672729 0. 933896 1. 101572 1. 181404  
0. 633511 0. 824256 0. 735398 1. 261538 1. 461097 1. 096929 0. 999085 1. 008669 2. 058098  
1. 013577 1. 758231 1. 391203 1. 340352 1. 44553 1. 716998 0. 879323 1. 611282 1. 166962  
1. 016032 0. 591184 0. 870318 1. 742348 1. 14563 1. 490717 1. 372588 0. 710415 0. 824966  
3. 038979 2. 320291 2. 977072 3. 31365 3. 246691 2. 33739 2. 633083 2. 635338 2. 154827  
1. 040671 1. 64912 0. 892413 1. 207159 1. 485599 0. 792073 0. 92307 0. 760584 0. 849264  
1. 740648 1. 972575 1. 462833 1. 578352 1. 411771 1. 201984 1. 871775 1. 318571 1. 377317  
0. 937378 1. 200734 0. 951513 2. 165402 1. 323148 1. 327354 1. 17439 1. 327807 1. 264799  
1. 292671 1. 381794 1. 349062 2. 384012 1. 299662 1. 317852 1. 809789 2. 244871 1. 392302  
1. 015371 1. 129507 0. 992928 2. 567706 1. 697298 3. 521001 1. 199505 1. 118211 0. 978059  
2. 591661 2. 444161 2. 939369 3. 143547 3. 319647 2. 947888 2. 510304 2. 651983 4. 292797  
1. 053749 0. 523365 0. 611376 1. 12181 1. 221025 0. 891133 1. 036756 0. 995019 2. 178306  
1. 351917 1. 000562 1. 397061 1. 092919 0. 933381 1. 485731 1. 178312 0. 809748 0. 846464  
1. 99004 2. 812524 2. 772481 2. 484283 2. 436878 1. 849589 2. 207014 2. 541185 1. 615033  
1. 208482 1. 37341 1. 663018 1. 896025 1. 026586 1. 386107 1. 795881 1. 247479 1. 47448  
1. 584401 1. 486038 1. 939513 1. 999365 1. 116057 1. 413254 1. 36236 1. 276003 0. 995685  
1. 716173 1. 457838 1. 683368 1. 895924 1. 709622 2. 369533 1. 504965 1. 364358 1. 276576  
1. 112881 0. 998688 1. 104413 1. 642665 1. 060617 1. 069909 1. 672549 0. 992755 1. 345979  
1. 043508 1. 477898 2. 019101 1. 362794 1. 046436 1. 196681 1. 371516 1. 411653 2. 303924  
1. 456948 1. 212746 0. 567604 2. 242305 1. 479037 1. 164279 1. 033125 1. 687918 1. 632918  
1. 793135 1. 84378 2. 646034 2. 543118 1. 537042 3. 901864 2. 762231 2. 42497 2. 114136  
0. 856573 0. 829153 0. 825654 1. 414819 1. 736148 1. 331282 1. 11807 0. 923989 0. 803565  
1. 016941 0. 968446 1. 081318 2. 019679 0. 916281 1. 04461 0. 879266 0. 748941 1. 124596  
0. 810375 1. 264596 0. 98805 1. 526701 1. 238379 1. 669705 1. 0859 0. 822549 1. 145123  
2. 168722 1. 781503 1. 730889 1. 488503 1. 902179 2. 19101 1. 781503 2. 040177 2. 201328  
2. 554643 3. 021665 3. 250279 2. 574074 2. 368233 2. 752701 1. 919927 2. 358762 1. 906355  
2. 130426 2. 031381 2. 80695 2. 539977 2. 164475 2. 938626 2. 194373 2. 197131 2. 497192  
1. 125953 1. 576155 2. 462774 1. 548435 1. 41036 1. 361788 1. 620969 1. 025652 1. 446446  
1. 391911 1. 946433 1. 908139 2. 136562 1. 292664 1. 511149 1. 613666 1. 513534 1. 584328  
1. 195005 1. 197151 1. 616008 1. 784897 2. 497751 1. 220278 1. 319573 1. 366468 1. 349803  
0. 994939 1. 079982 0. 837099 1. 237862 1. 03305 2. 054571 0. 893447 1. 092499 1. 334409  
0. 948426 0. 654183 0. 867787 1. 127345 0. 579957 1. 09345 0. 582426 2. 081688 0. 665851  
1. 326509 0. 632863 1. 221385 0. 611026 0. 282906 2. 332874 1. 211929 1. 056146 1. 516594  
1. 821325 2. 407025 3. 017113 3. 521444 2. 309296 3. 274546 3. 638239 1. 701807 4. 050205  
0. 945302 1. 381129 0. 904201 1. 260544 1. 099079 2. 250953 1. 618473 0. 745191 1. 194465  
1. 981513 2. 75187 3. 428223 3. 140276 2. 792233 3. 574214 2. 373302 2. 28409 1. 619784  
1. 758988 0. 967413 1. 790024 2. 24733 1. 807451 2. 133276 1. 053395 1. 85939 3. 138172  
2. 834363 1. 262046 2. 433718 2. 320395 2. 775492 3. 239924 2. 650536 1. 780159 2. 185522  
1. 408186 1. 15266 1. 39411 1. 767864 1. 134271 1. 225702 0. 832218 1. 040111 1. 535784  
1. 64136 0. 821071 1. 613691 1. 106286 0. 858673 1. 478927 1. 426461 1. 359684 0. 926816  
0. 867592 0. 975011 0. 712845 1. 15096 0. 846585 1. 304095 1. 378599 0. 659077 1. 042704  
2. 61217 4. 2167 1. 950537 1. 937369 1. 43954 0. 989742 1. 832386 2. 407142 3. 27487  
1. 227416 1. 097152 1. 669716 1. 177543 1. 190161 1. 120006 1. 857134 0. 892257 1. 467639  
1. 806613 1. 336996 1. 450653 2. 496 1. 130155 1. 279696 0. 975765 0. 77034 1. 277278  
1. 725726 1. 568413 2. 608854 1. 113684 1. 118023 1. 147413 3. 607112 1. 678003 1. 04233  
2. 05366 1. 667006 1. 389685 1. 43649 2. 501223 2. 266567 1. 217071 1. 715985 2. 94025  
2. 414661 1. 503639 1. 857526 2. 301881 1. 654869 2. 159909 1. 570296 3. 157015 1. 367872

1. 10889 1. 553487 2. 8677 2. 971594 1. 453029 3. 067772 1. 019098 1. 733479 1. 493082  
2. 038294 2. 502403 2. 973098 3. 105048 2. 300444 2. 252614 2. 380839 2. 216507 3. 117551  
1. 228928 1. 031847 1. 053346 1. 154511 1. 234357 1. 190014 1. 231015 1. 090358 1. 279918  
1. 04014 1. 165679 1. 119463 1. 206512 0. 794784 1. 19673 1. 155161 1. 054014 1. 454664  
2. 420535 1. 807902 1. 603568 2. 677266 1. 560157 2. 284374 2. 117017 1. 720935 2. 161096  
4. 846796 5. 281786 5. 204912 5. 281786 5. 593749 5. 169669 4. 95805 4. 972706 5. 601885  
3. 02513 2. 967047 3. 715002 3. 867849 3. 562234 3. 025662 3. 646196 3. 583264 3. 501001  
1. 506978 2. 834295 2. 631847 1. 336975 1. 923005 2. 177039 1. 038297 1. 009011 1. 643129  
1. 133622 0. 87132 1. 446526 2. 282723 0. 940176 1. 548404 2. 752321 1. 668736 0. 832513  
2. 883025 3. 234814 2. 611228 2. 838274 3. 919474 3. 846359 2. 763423 3. 020086 2. 527195  
1. 509915 1. 326357 2. 534941 2. 446711 2. 554191 2. 192397 1. 390495 1. 56344 2. 381871  
1. 540891 2. 071666 1. 676249 2. 497143 2. 144075 1. 668099 1. 592352 1. 426757 1. 373149  
0. 856297 1. 185426 0. 926008 1. 747509 1. 106236 1. 689929 0. 966071 1. 236581 3. 829533  
4. 699642 4. 416432 5. 05938 2. 739566 3. 864797 2. 680539 3. 78262 4. 1732 4. 182882  
1. 560378 1. 359022 1. 624722 2. 012949 1. 476128 1. 133283 1. 412256 1. 209863 1. 315637  
1. 104817 2. 205162 1. 347857 1. 482895 1. 356629 1. 287029 1. 413134 0. 913881 1. 124616  
3. 970967 1. 939385 2. 356367 3. 056967 2. 025356 3. 187441 2. 014431 2. 357057 3. 219478  
2. 344094 1. 738152 0. 810928 1. 671944 1. 192321 0. 853863 1. 303306 1. 432922 1. 383313  
1. 296338 1. 917443 1. 501657 1. 785113 1. 307385 1. 62989 1. 190399 1. 788463 1. 472837  
0. 842413 0. 684697 0. 955921 1. 29502 0. 862899 0. 976538 0. 586628 0. 53654 1. 225897  
1. 46472 1. 834331 2. 5313 1. 787632 1. 612244 1. 794627 2. 099766 1. 188327 1. 673113  
1. 034176 2. 292477 1. 484601 2. 155187 1. 465594 1. 364591 1. 909862 2. 079497 1. 544576  
0. 67077 1. 114851 1. 278567 0. 908536 0. 720154 1. 388685 1. 356816 1. 047381 1. 41586  
1. 379599 0. 603862 0. 796639 1. 367203 0. 701863 1. 196042 0. 919218 0. 92973 0. 883075  
0. 942871 1. 155411 1. 331554 1. 188692 1. 285234 1. 281101 1. 254942 1. 499841 3. 419462  
2. 071314 3. 283138 2. 670857 3. 091524 1. 69946 2. 706245 2. 549929 2. 232183 3. 359716  
1. 919086 1. 937316 2. 441609 2. 574858 1. 032431 1. 826967 1. 409382 2. 022387 1. 535561  
1. 324718 0. 930498 1. 154711 1. 005799 0. 976068 1. 071937 1. 2705 0. 954134 1. 196612  
4. 236785 5. 159719 4. 769671 3. 903968 4. 348764 2. 974236 5. 633202 4. 163671 7. 69886  
5. 005356 4. 309864 4. 784924 5. 252509 3. 019704 4. 583867 3. 613902 2. 410748 4. 018623  
2. 925853 2. 521356 3. 503949 3. 575967 2. 694526 3. 057403 2. 861058 2. 821926 3. 383991  
3. 16854 3. 087475 2. 541453 4. 381391 2. 518324 3. 80788 2. 906316 3. 379385 3. 185339  
1. 563059 1. 278641 1. 061575 1. 333853 1. 091435 1. 985243 1. 29628 1. 462252 0. 79504  
1. 192118 0. 776993 0. 76797 0. 844762 1. 297532 1. 807833 1. 033325 2. 117477 2. 15676  
1. 110349 1. 043469 1. 235681 2. 317634 1. 120794 0. 58637 1. 022654 0. 89734 1. 281334  
0. 996122 1. 040804 0. 986566 1. 379058 1. 019425 1. 028961 1. 018166 1. 372322 1. 754192  
9. 525066 8. 680913 7. 908192 7. 23999 9. 32578 6. 650419 7. 570032 9. 486495 5. 755767  
4. 391464 3. 948913 4. 634921 2. 847349 4. 687936 3. 31426 3. 682249 3. 412413 4. 205434  
1. 514331 3. 018978 1. 234585 1. 953375 1. 271069 1. 444257 1. 431712 1. 414877 1. 74147  
1. 480099 1. 358205 2. 40609 1. 256009 2. 121581 1. 286961 1. 150079 1. 463655 1. 013767  
1. 007506 1. 271744 1. 45519 1. 488769 1. 194942 1. 312091 1. 339601 1. 23351 0. 879362  
1. 611463 2. 053771 1. 339114 2. 272704 1. 872894 2. 094853 1. 534612 1. 628279 1. 41642  
1. 247074 1. 159347 1. 007027 4. 865166 0. 947002 1. 692122 1. 397153 1. 259034 3. 461181  
1. 635694 1. 064506 0. 991383 2. 35728 1. 272588 1. 517899 1. 001337 1. 1394 1. 464207  
1. 366447 1. 652742 1. 542884 1. 164904 1. 366447 0. 600808 1. 015744 1. 081633 1. 671651  
1. 326703 1. 281607 1. 6603 1. 350837 1. 259818 1. 77359 1. 041124 1. 065722 1. 331634  
1. 897008 1. 268642 1. 871347 2. 089056 2. 386561 1. 789672 2. 052262 2. 307435 2. 646304  
2. 536544 2. 67931 2. 21001 2. 810557 3. 427775 2. 387322 2. 389388 2. 197389 2. 506617  
1. 777574 1. 30163 1. 407431 1. 880183 2. 498732 2. 234014 1. 431466 1. 189849 2. 199869  
1. 447616 1. 192138 0. 69632 1. 20324 0. 991837 1. 851633 0. 922312 0. 805321 0. 934693  
2. 433178 2. 602221 2. 30598 4. 122776 1. 240295 1. 451109 1. 362267 1. 846347 2. 278351

1. 179993 2. 45971 1. 275416 1. 948505 1. 61651 1. 44812 1. 148807 1. 122354 1. 866571  
0. 811207 1. 894951 0. 904509 1. 372868 1. 323203 0. 846239 1. 125501 1. 113701 2. 062895  
2. 743906 2. 210763 2. 913695 2. 99245 2. 45938 2. 327206 2. 231161 1. 905255 2. 255443  
1. 339471 1. 241342 2. 831573 2. 151634 1. 549193 2. 5198 1. 592248 1. 765718 1. 338125  
5. 026176 5. 067511 4. 907293 1. 825079 4. 483635 4. 128476 3. 423562 4. 235229 6. 476334  
3. 045361 2. 451013 2. 169513 2. 690528 2. 620972 3. 319411 2. 4454 2. 469489 2. 298196  
0. 891038 0. 923007 0. 945971 1. 047013 0. 908696 0. 988718 1. 018595 1. 39239 1. 339035  
1. 098833 1. 478157 1. 165934 1. 74501 0. 847772 1. 952704 1. 255105 0. 725399 1. 646667  
1. 421758 1. 675943 1. 22436 1. 682316 1. 164159 2. 842808 1. 292228 2. 3326 1. 301057  
0. 881974 0. 644022 1. 055415 0. 947298 1. 109121 1. 011778 0. 792461 2. 344602 1. 307424  
1. 397001 1. 196809 1. 316458 1. 31855 2. 038744 1. 134956 2. 092004 2. 246103 1. 759299  
2. 580719 6. 281077 4. 279133 4. 541323 5. 460622 3. 622813 3. 375355 4. 268057 5. 327139  
0. 593667 1. 020794 0. 702453 0. 948702 0. 654771 0. 901803 0. 940797 0. 772944 1. 996059  
1. 425046 0. 94554 1. 347217 1. 791493 1. 152133 3. 39184 1. 233536 0. 976006 1. 467355  
0. 890637 1. 057011 1. 77649 1. 062101 1. 616358 2. 224723 1. 880857 3. 211045 2. 177768  
0. 84006 0. 920351 0. 912416 0. 96437 0. 844018 2. 49268 0. 824407 0. 768407 0. 987008  
1. 746264 1. 23321 1. 776276 1. 539112 0. 870319 1. 062077 0. 9412 1. 059335 0. 985471  
2. 527372 3. 727938 4. 324602 4. 71403 1. 440412 2. 700717 0. 448791 3. 616931 5. 282838  
0. 655772 0. 88689 0. 509833 1. 320744 1. 615885 0. 980786 0. 979433 0. 674736 0. 655772  
2. 363911 1. 471552 3. 860976 2. 429133 2. 597998 4. 446968 1. 355945 1. 663779 1. 643695  
1. 365087 1. 833089 1. 416526 2. 422438 1. 111818 1. 477761 1. 618185 2. 26552 1. 901835  
1. 226048 1. 007693 1. 6194 2. 170836 1. 092522 1. 42586 2. 002377 1. 803713 4. 025433  
1. 621938 1. 326302 1. 662089 1. 508199 1. 030445 1. 656003 1. 404471 1. 37171 2. 018628  
0. 985142 1. 375624 1. 327887 1. 015079 1. 126765 1. 555507 1. 350368 0. 872483 1. 432569  
1. 30448 1. 730867 0. 981175 2. 299133 1. 024399 1. 317143 1. 090709 0. 942243 1. 290141  
1. 214914 0. 729376 1. 143294 1. 2103 1. 065519 1. 575905 0. 870269 1. 121299 1. 210255  
2. 466763 2. 359038 2. 592327 2. 161827 2. 117 4. 051987 3. 392688 2. 572814 4. 277131  
1. 702555 1. 312913 2. 252504 1. 548914 2. 343765 2. 948939 1. 098826 1. 758217 1. 477071  
1. 929095 2. 248827 1. 998144 2. 011556 1. 751177 1. 76288 1. 781997 2. 663702 1. 249587  
2. 24256 2. 032643 2. 075071 3. 034455 2. 130397 2. 232019 2. 362457 2. 640486 2. 107707  
0. 8156 1. 038345 0. 922591 0. 840132 1. 335422 1. 167755 0. 671116 1. 599073 2. 158225  
2. 270503 1. 733673 2. 74769 1. 959735 2. 950791 2. 348189 2. 075742 2. 327226 2. 318462  
1. 373993 2. 381603 1. 890188 1. 728013 1. 906464 1. 520847 1. 542771 2. 042587 1. 685059  
1. 363331 0. 980196 2. 39105 0. 953014 0. 982585 1. 919704 0. 822041 1. 349244 1. 535178  
1. 322573 1. 03305 1. 091737 2. 334601 1. 409102 1. 463332 1. 267558 1. 473696 1. 321469  
2. 754829 1. 95476 2. 822959 2. 573663 2. 129296 1. 717156 3. 146405 2. 757179 3. 075247  
2. 264596 3. 684356 3. 869826 2. 982793 1. 783209 1. 726634 1. 549742 3. 328 1. 691127  
4. 192671 4. 391449 3. 622991 5. 238757 2. 618011 3. 199506 4. 108896 2. 936252 4. 029037  
3. 90418 3. 567774 3. 402791 4. 943752 4. 141647 3. 448087 4. 016489 2. 921541 3. 949265  
8. 835932 8. 361461 8. 953195 9. 056166 8. 608497 8. 617592 9. 149628 8. 56054 8. 115897  
5. 654629 5. 483833 5. 450354 4. 76823 5. 40202 5. 804008 6. 176075 5. 666892 6. 746504  
7. 611316 7. 796827 7. 341278 6. 564039 7. 632029 7. 377124 7. 239161 7. 132835 7. 166742  
8. 810622 8. 963312 8. 702106 8. 907571 8. 902077 8. 77077 8. 945141 9. 12097 8. 75282  
1. 403729 2. 266492 2. 913614 2. 477795 1. 626462 1. 860204 2. 048384 2. 727605 1. 964677  
8. 044745 7. 693064 8. 049783 7. 68517 7. 788674 7. 773979 7. 681593 7. 772926 7. 588988  
3. 249527 3. 701514 3. 887763 4. 365465 3. 552425 2. 716869 3. 529993 3. 357872 3. 538071  
0. 602508 1. 668504 1. 310285 1. 314365 0. 683388 1. 366221 0. 976226 0. 82047 1. 392877  
1. 671576 1. 67793 2. 31521 1. 696222 1. 986897 1. 834256 1. 340605 1. 379405 1. 423856  
0. 985642 1. 346663 1. 018253 1. 039114 1. 078122 0. 790633 0. 763359 0. 941617 0. 775042  
1. 305573 1. 120242 1. 472232 1. 310712 1. 690448 1. 184087 1. 996164 1. 692681 1. 316327  
1. 696804 2. 539416 2. 084035 2. 078528 1. 777745 1. 523141 1. 860993 1. 736694 1. 794249

5. 558627 5. 197858 5. 202565 5. 181473 5. 314708 5. 08687 5. 933639 5. 186486 5. 42907  
5. 642783 5. 582611 5. 228208 4. 174358 5. 869641 5. 227186 5. 573988 5. 72367 5. 225584  
2. 438227 2. 426668 2. 966842 4. 440088 2. 833232 2. 084428 3. 920211 2. 08044 1. 750822  
3. 957565 4. 471826 4. 609502 4. 286248 4. 509091 4. 62029 4. 461723 4. 762104 5. 179749  
7. 689112 7. 84994 7. 720832 7. 182782 7. 365406 7. 464571 7. 48499 7. 6181 7. 65072  
6. 020171 5. 970254 6. 06165 5. 937018 5. 579069 6. 086352 5. 940295 5. 85898 4. 986706  
7. 872744 7. 427951 7. 495441 7. 409313 7. 472651 7. 715189 7. 631247 7. 564467 7. 666065  
8. 499748 8. 15079 8. 510064 7. 409243 8. 381544 8. 773477 8. 370506 8. 446154 7. 669796  
5. 460296 5. 1218 5. 634433 5. 025088 5. 209998 5. 90743 6. 01747 5. 276837 5. 958023  
7. 789195 7. 461434 7. 739852 7. 552838 7. 199117 7. 259144 7. 636857 7. 550232 6. 455981  
4. 08162 4. 349828 4. 337727 3. 370048 3. 860504 4. 739314 3. 992654 3. 315112 3. 915665  
4. 546522 4. 333961 5. 185701 5. 181554 4. 678976 5. 081465 5. 240142 4. 632622 3. 610633  
6. 858803 7. 002394 6. 862223 6. 768542 6. 683065 6. 334341 6. 896584 6. 843348 7. 339252  
3. 166793 3. 101334 3. 485532 2. 984397 3. 364059 3. 006993 2. 991164 3. 992727 2. 768554  
1. 44097 1. 562156 1. 722533 4. 003292 1. 33941 2. 037793 2. 244335 1. 908505 1. 719606  
4. 820488 4. 874952 4. 809793 5. 98036 5. 422659 5. 093648 4. 542081 5. 135339 3. 119114  
1. 311663 1. 817723 1. 657493 2. 216772 1. 534157 2. 329641 1. 686887 1. 310037 2. 865583  
1. 993856 1. 910671 1. 626603 1. 704591 2. 113281 1. 579291 1. 318018 1. 781446 1. 505936  
1. 208621 1. 197412 1. 782122 2. 88728 1. 083798 2. 942541 1. 251071 1. 90796 1. 282308  
1. 466788 2. 268448 1. 339991 1. 813816 1. 203747 1. 343947 1. 353355 1. 140685 1. 140685  
1. 985274 1. 22915 1. 735987 1. 903718 2. 193509 2. 786711 2. 053223 2. 302502 1. 673543  
1. 341868 1. 195884 1. 911355 1. 581443 1. 622707 2. 811799 1. 966843 2. 030509 1. 237893  
5. 629086 5. 423204 5. 585729 4. 913966 5. 840617 5. 800717 4. 968897 5. 154033 4. 250539  
1. 297692 1. 523065 1. 691717 1. 441011 1. 48225 1. 172698 1. 818051 1. 458332 1. 263609  
0. 754607 0. 795461 1. 0525 1. 248406 1. 964167 1. 876977 1. 530764 1. 365906 1. 769981  
1. 767469 1. 522963 1. 764706 2. 177923 1. 429216 1. 324363 1. 772441 1. 188049 2. 127945  
1. 169529 1. 473134 1. 233496 1. 562208 0. 957776 1. 378456 0. 971735 1. 853235 1. 518686  
1. 457803 1. 355731 1. 808098 1. 109836 1. 215796 0. 784732 0. 977474 1. 173924 1. 16012  
1. 029666 1. 986717 1. 138758 1. 448556 0. 581627 2. 37173 0. 797754 0. 952347 1. 165924  
4. 510516 5. 188407 5. 199043 5. 06517 5. 485538 4. 313167 5. 440086 4. 783678 4. 871672  
2. 242993 2. 263141 2. 029704 2. 244819 3. 235405 1. 55786 2. 759143 2. 931772 3. 217711  
7. 806056 7. 315687 7. 206232 7. 260017 7. 788746 7. 504945 7. 808847 7. 081927 8. 813671  
4. 192541 4. 832114 3. 899723 4. 139526 4. 179372 4. 206203 4. 699703 4. 389211 3. 968407  
6. 830261 6. 914297 7. 026022 5. 431668 6. 732297 7. 630149 7. 36431 6. 896714 6. 896981  
5. 643835 6. 093614 6. 305889 5. 799839 6. 140478 6. 073468 5. 919054 6. 356544 5. 400774  
4. 100929 5. 304169 4. 891533 3. 050049 4. 231861 3. 708055 3. 72322 4. 758368 4. 705304  
6. 338895 6. 545033 5. 963528 4. 777369 6. 319212 6. 274764 6. 030355 6. 328679 5. 508844  
5. 734931 5. 16282 4. 868707 4. 586294 5. 509734 5. 190912 5. 697802 5. 186087 3. 983604  
7. 033585 6. 852342 6. 437985 6. 134648 6. 098063 6. 12281 7. 150629 6. 119458 5. 56083  
5. 232312 5. 777422 5. 156859 4. 462689 4. 935003 6. 332514 5. 531112 5. 957876 7. 092762  
4. 640185 4. 157152 4. 613649 5. 307351 4. 132613 4. 61208 5. 593245 5. 165598 5. 394459  
5. 68404 6. 296341 5. 767606 7. 443137 6. 149652 6. 613479 5. 633077 6. 64474 6. 398743  
4. 218666 4. 457528 4. 003513 4. 379191 4. 323658 4. 555773 4. 270494 4. 403885 3. 728949  
8. 529594 8. 86938 8. 3234 9. 199482 8. 791969 9. 366113 8. 528805 8. 819699 8. 425121  
6. 175363 5. 558591 6. 24792 6. 946426 6. 027352 5. 395713 6. 973388 5. 65324 5. 272817  
6. 437193 6. 537644 6. 31242 5. 836514 6. 292771 6. 547246 6. 227959 6. 395063 6. 242785  
6. 876499 7. 557455 7. 841589 7. 654431 6. 722786 7. 341854 7. 681087 7. 465186 6. 525463  
4. 396459 4. 592004 3. 740267 4. 629589 5. 181553 5. 418955 3. 843456 5. 592533 4. 458463  
5. 103237 5. 590977 4. 227033 2. 904353 5. 293665 3. 897227 4. 602173 4. 538545 3. 902588  
1. 345433 2. 196375 2. 62769 3. 093937 3. 309622 2. 630376 2. 889665 1. 372278 2. 521047  
1. 335063 1. 10697 1. 298255 1. 941627 1. 652008 1. 107901 1. 481031 0. 75162 3. 53734

1. 531988 1. 710342 1. 907381 2. 836175 2. 832455 2. 771314 1. 946866 2. 469347 2. 492714  
7. 48397 7. 749333 7. 313373 7. 625518 7. 687107 7. 562396 7. 42745 7. 439263 7. 670762  
3. 913976 3. 121581 3. 447348 3. 084607 2. 762735 2. 75666 3. 497751 3. 229716 3. 369811  
2. 300226 1. 472612 1. 733597 2. 183808 1. 846752 1. 557218 1. 948361 1. 228456 3. 591856  
2. 091333 2. 189666 1. 862386 2. 504914 1. 974878 1. 553706 2. 161281 1. 992342 2. 604484  
3. 575183 2. 708804 3. 999087 2. 24361 4. 615236 3. 870817 4. 073828 3. 811422 4. 672436  
3. 516607 4. 901684 2. 342123 3. 756148 1. 265592 3. 149171 3. 153849 4. 663248 3. 955836  
1. 410972 2. 118482 1. 77355 2. 066733 2. 366201 2. 164809 1. 469165 1. 74151 1. 782548  
4. 111815 4. 431228 4. 518533 4. 209306 4. 2336 3. 439423 4. 103797 4. 175132 3. 842109  
6. 86653 6. 516964 6. 172417 6. 456638 7. 107702 6. 294667 6. 871725 6. 584678 6. 859807  
1. 669731 0. 885327 2. 591235 2. 130322 1. 860079 1. 153599 1. 413276 1. 021502 2. 301063  
2. 399598 2. 81459 2. 702854 2. 797446 2. 235638 2. 242223 2. 303261 2. 462592 2. 436875  
6. 395707 6. 379097 6. 317558 7. 200804 6. 030433 7. 841454 6. 544931 5. 66197 5. 978722  
2. 138049 1. 92798 1. 953387 2. 672228 1. 904823 2. 55814 1. 747628 2. 562798 2. 907962  
2. 831862 1. 942733 2. 373758 2. 654814 3. 13165 1. 932817 2. 958894 2. 763156 1. 604042  
1. 317192 1. 375802 1. 843986 1. 511806 1. 090487 2. 492627 2. 684335 1. 108534 1. 127924  
1. 482641 1. 996107 2. 272289 2. 015141 2. 245304 2. 14703 2. 757356 1. 449093 3. 158323  
1. 645717 1. 206043 1. 884826 2. 129046 1. 401386 1. 761208 1. 226396 1. 261116 1. 64442  
1. 81585 1. 970561 1. 600179 1. 994551 1. 43885 1. 406619 1. 887844 1. 443591 1. 415  
1. 304223 1. 897504 1. 065165 1. 6054 1. 304223 1. 461943 1. 375921 1. 775696 1. 40358  
4. 277531 4. 108014 5. 272384 5. 235409 4. 202537 3. 493613 4. 851768 4. 556629 4. 651832  
1. 473537 1. 3456 1. 424064 1. 86861 1. 415886 1. 534158 1. 185212 1. 7302 1. 246785  
3. 90857 3. 834343 3. 541063 2. 477676 2. 990247 4. 213191 4. 153576 3. 53219 3. 411009  
1. 467337 1. 702257 2. 302396 2. 499205 0. 661858 1. 389475 1. 746655 1. 227886 1. 788219  
1. 60076 1. 619296 1. 232099 2. 054823 1. 840329 1. 338715 1. 788087 1. 235558 1. 38817  
2. 24948 2. 413115 2. 222252 2. 953944 2. 007592 2. 677716 2. 073456 2. 288368 2. 095925  
7. 73271 7. 881645 7. 975489 6. 580855 8. 096271 7. 859878 7. 815457 8. 015567 8. 539172  
3. 103902 3. 563024 2. 963193 2. 845805 2. 943327 3. 073535 3. 086326 3. 113586 2. 598186  
1. 664976 1. 503098 1. 667026 2. 288815 1. 055765 1. 157841 1. 610892 1. 15569 1. 394406  
2. 631734 2. 780981 1. 808675 2. 808692 2. 58354 2. 92217 2. 406799 2. 442436 3. 908778  
3. 437929 3. 541013 3. 431278 3. 88888 2. 615271 2. 601644 3. 685747 3. 196342 3. 86076  
6. 083371 6. 316312 6. 778451 6. 396343 6. 085692 6. 389333 6. 149602 5. 860366 6. 124864  
1. 909218 2. 991313 2. 936904 2. 893268 2. 236452 2. 446951 2. 658546 2. 003718 1. 997797  
4. 085571 4. 381903 4. 436639 3. 49923 4. 254423 4. 193088 4. 278772 3. 996387 4. 480751  
2. 052298 1. 374541 1. 583422 2. 397862 2. 003866 1. 6011 1. 663799 1. 817934 2. 103614  
6. 161973 5. 889688 5. 520232 7. 525274 6. 533827 6. 362629 6. 722433 7. 256894 5. 977776  
1. 527471 1. 354882 1. 214248 1. 35611 1. 092839 1. 619392 1. 711355 1. 505997 1. 239733  
6. 456761 5. 604728 6. 533864 6. 098365 5. 47374 4. 670302 5. 955142 4. 711414 5. 019403  
4. 561965 4. 591544 4. 378605 4. 112274 4. 547871 4. 783138 4. 230932 4. 659077 4. 653674  
2. 993842 2. 430787 3. 249795 2. 647063 2. 735185 3. 919494 2. 602975 3. 159432 2. 634331  
1. 809432 1. 21975 1. 817595 2. 724047 1. 959871 1. 581709 1. 796311 1. 98153 2. 011429  
9. 723059 9. 009606 9. 441276 9. 106841 9. 475113 9. 085288 9. 436582 9. 319199 8. 950989  
4. 391195 4. 784199 5. 112097 4. 209682 4. 365031 4. 796703 5. 066956 5. 491655 4. 954072  
2. 505659 3. 768021 2. 157421 4. 027926 1. 074947 2. 824239 3. 050805 2. 447575 4. 237071  
4. 804195 5. 481135 5. 481301 4. 957171 5. 335282 5. 583578 5. 126754 5. 366931 4. 677807  
4. 735927 4. 373065 4. 241793 4. 233161 3. 790327 4. 531467 3. 828589 3. 962926 3. 577792  
1. 259877 2. 667273 1. 859225 1. 468841 1. 812444 2. 316264 2. 075533 1. 943742 2. 192879  
2. 858757 2. 538462 2. 373847 3. 138047 1. 950046 2. 1436 2. 608236 2. 629285 2. 712561  
5. 008071 4. 900136 5. 619811 5. 410522 5. 300157 5. 031236 5. 40144 5. 21142 4. 744449  
1. 613483 1. 361069 1. 235692 1. 393938 1. 538273 2. 433342 1. 566803 0. 909091 1. 632134  
7. 355077 7. 831263 7. 51968 7. 734182 7. 950278 7. 857394 7. 727313 7. 812375 8. 128516

3. 257307 3. 840103 2. 783801 3. 634063 2. 576739 2. 82424 2. 138507 1. 951161 3. 121996  
2. 007609 2. 561959 2. 022547 3. 414942 2. 797359 2. 635365 3. 029397 2. 16006 2. 288767  
1. 505614 1. 632166 1. 552053 2. 511028 1. 457937 2. 270832 1. 863767 2. 16109 1. 72801  
0. 895071 1. 378405 1. 491268 1. 045616 0. 962749 0. 769764 1. 028463 1. 563019 1. 757828  
1. 899148 2. 61395 3. 235047 4. 195689 2. 059032 2. 927869 3. 54111 3. 966859 3. 356778  
1. 312131 0. 914022 1. 303418 1. 734478 0. 730012 1. 532749 1. 033691 0. 753205 1. 005989  
1. 409779 1. 213228 1. 714637 1. 411691 1. 334725 1. 67696 1. 214621 1. 577289 1. 802857  
3. 57167 3. 869024 4. 135074 4. 217873 4. 795098 3. 020055 4. 402418 4. 176082 3. 484004  
5. 83459 6. 011407 5. 894919 6. 392482 5. 573957 5. 841987 5. 423914 6. 13338 4. 934346  
2. 761694 1. 938478 1. 774953 2. 578082 2. 1824 2. 215814 1. 9347 2. 512174 1. 881697  
1. 831147 1. 788392 2. 174865 1. 396199 1. 898685 2. 226812 2. 39556 1. 780421 1. 802808  
1. 549403 1. 291166 1. 329195 1. 133734 1. 982325 2. 105953 1. 572647 1. 104536 1. 286712  
6. 763829 6. 920834 6. 811801 6. 812191 7. 137879 7. 089233 6. 577629 7. 111489 6. 785619  
2. 552206 2. 885485 3. 972233 3. 709075 3. 215583 2. 204143 3. 540656 3. 00692 2. 686872  
5. 766925 5. 575906 5. 794059 5. 675545 5. 645788 5. 517464 5. 877589 5. 860815 5. 971442  
4. 346583 5. 76966 4. 25216 4. 105654 5. 73675 4. 281732 6. 062936 4. 982313 4. 944934  
4. 47066 4. 606136 4. 962255 4. 775251 4. 784683 4. 082157 3. 708369 3. 484661 3. 951484  
7. 869258 7. 718884 7. 754276 7. 841375 7. 39711 7. 228012 7. 97551 7. 152393 7. 929918  
4. 507849 4. 387337 4. 919896 4. 243628 4. 550653 4. 195902 5. 903913 5. 039729 4. 519111  
9. 820928 9. 480027 9. 777453 9. 245169 9. 253803 9. 249331 9. 8581 9. 62103 9. 784754  
1. 709237 1. 782774 1. 859387 1. 751212 1. 941629 1. 461962 1. 601612 2. 713568 2. 650274  
1. 304947 1. 115221 1. 72278 1. 851749 0. 727652 1. 221901 1. 247451 1. 353368 1. 214142  
2. 190147 2. 415484 2. 31107 2. 837881 1. 828958 1. 743938 2. 359115 1. 737548 1. 829936  
2. 191094 2. 089954 2. 818245 2. 763055 2. 743048 2. 306053 2. 61819 1. 970753 3. 071522  
8. 344378 8. 344464 8. 374666 8. 070536 7. 855934 8. 008597 8. 588293 8. 309596 7. 947188  
6. 402637 6. 252459 5. 986489 6. 595731 6. 127074 6. 358089 6. 429624 6. 085364 6. 700939  
7. 961601 8. 157602 8. 148317 8. 841657 8. 310008 7. 898465 8. 273967 8. 202022 8. 01521  
4. 732299 4. 717937 5. 202365 5. 490632 6. 114102 4. 841291 5. 523797 5. 229313 4. 862001  
6. 879552 6. 799062 6. 171639 6. 563759 6. 928668 6. 418187 7. 097658 6. 852355 6. 331127  
4. 042264 4. 267412 4. 350004 3. 784771 3. 698027 3. 6668 4. 175212 4. 24866 4. 223024  
5. 30357 5. 802082 5. 308258 5. 333058 5. 649678 5. 142389 5. 802696 5. 80149 5. 469168  
2. 276605 1. 233126 1. 483639 1. 93053 1. 849039 1. 9506 1. 297609 1. 654757 1. 160391  
1. 414756 2. 23442 1. 940346 2. 347069 1. 873651 2. 564888 1. 902088 2. 026105 1. 789505  
5. 892417 6. 138938 5. 117603 5. 193443 6. 316484 5. 342332 6. 197655 5. 400248 5. 573885  
7. 902044 7. 676173 7. 850558 8. 423845 8. 187904 7. 411797 8. 02847 7. 971903 8. 444066  
5. 890879 5. 718421 6. 095519 4. 757579 5. 959144 6. 124488 6. 249523 6. 35862 5. 540469  
6. 772558 6. 86862 7. 384847 6. 606051 7. 146342 6. 805101 7. 392427 7. 05637 6. 402549  
6. 18429 6. 240408 6. 599666 5. 408762 6. 328394 6. 106419 6. 758797 6. 777069 5. 132529  
6. 69628 7. 536921 6. 996366 6. 970361 7. 346195 7. 631497 6. 917049 7. 55243 5. 508698  
4. 878165 5. 286224 5. 135174 4. 49528 2. 536864 5. 876946 5. 079523 2. 829831 5. 769301  
1. 934663 3. 067062 2. 321692 1. 663314 4. 07937 2. 365095 2. 096022 2. 115739 2. 500669  
5. 81548 5. 593604 6. 291396 5. 510824 5. 579459 5. 194039 6. 022194 6. 022204 6. 687561  
6. 978089 6. 939907 7. 827375 7. 602848 7. 152005 6. 575322 7. 033004 7. 45663 6. 715657  
4. 452863 6. 318416 5. 934022 3. 519265 4. 082646 4. 236195 5. 773613 5. 723028 3. 91437  
5. 997654 5. 495861 5. 438206 5. 592373 6. 417116 5. 456415 5. 979486 6. 065376 5. 675047  
5. 924972 6. 224429 5. 805778 6. 323768 5. 662555 6. 097115 5. 897737 5. 67935 4. 959386  
5. 433748 5. 430829 5. 4964 5. 603796 5. 75111 5. 271504 5. 48628 4. 99514 5. 817592  
4. 928537 5. 185997 5. 689226 5. 386317 5. 049541 4. 708523 5. 343877 5. 067265 5. 014732  
6. 894473 7. 1675 6. 676155 6. 028675 7. 026411 6. 578437 7. 378316 6. 724048 6. 367531  
3. 305073 3. 075301 2. 969997 3. 041155 3. 504299 2. 916614 3. 049867 3. 006073 2. 847944  
4. 147559 5. 044223 4. 615799 4. 260642 5. 445906 4. 8216 4. 917916 4. 721174 4. 173243

2. 478339 1. 184901 1. 573521 2. 919783 2. 088673 2. 886817 1. 604639 1. 472243 3. 063851  
2. 068 1. 548213 1. 698825 2. 253216 1. 807963 2. 150683 1. 662136 2. 327455 1. 79083  
1. 13356 1. 34276 0. 848643 0. 958213 1. 357629 1. 04886 1. 040993 0. 975397 2. 251044  
1. 071978 1. 041308 0. 832847 1. 641057 0. 846307 1. 486848 1. 570367 1. 138365 2. 225803  
4. 035388 4. 112382 3. 559118 3. 623622 3. 48228 2. 903725 4. 447331 3. 559886 4. 136485  
5. 371997 5. 534662 2. 757662 5. 351569 6. 356274 5. 391782 6. 795738 5. 200641 5. 214169  
3. 649201 3. 279056 2. 588756 2. 62992 2. 51217 4. 288841 3. 322744 4. 361709 4. 578366  
8. 036684 7. 888851 7. 945656 7. 555721 7. 986275 8. 189884 8. 340627 8. 045428 7. 958703  
2. 421076 3. 135087 3. 286277 2. 556535 3. 149963 2. 908054 5. 066942 3. 418055 3. 437052  
6. 6533 6. 43476 6. 484349 6. 452113 6. 549163 7. 025231 6. 92921 6. 780342 6. 706103  
4. 749737 4. 32328 3. 434154 5. 353639 4. 207823 4. 958957 3. 819789 5. 933966 4. 961341  
6. 720934 6. 900736 7. 154067 6. 860235 7. 416175 6. 618439 7. 288903 7. 323676 5. 479173  
2. 554051 1. 413325 3. 693042 2. 717006 1. 945867 2. 552135 2. 429592 1. 985201 2. 398736  
4. 248369 4. 537856 4. 9752 4. 632937 4. 960505 4. 739896 3. 973636 4. 937168 3. 380812  
4. 017425 3. 586168 4. 042245 3. 947026 3. 678705 4. 060037 3. 606103 4. 044805 3. 539809  
1. 005523 1. 343475 1. 179301 1. 671165 1. 094995 1. 394484 0. 851647 0. 761761 1. 865154  
3. 22052 3. 345468 2. 470261 3. 100655 3. 366886 2. 647655 3. 323505 3. 073598 2. 442766  
2. 708494 1. 875714 2. 783343 3. 581326 2. 041959 2. 520887 3. 056885 4. 055645 1. 792035  
8. 580148 8. 825253 8. 416683 8. 418675 8. 488936 8. 565543 8. 646109 8. 8493 8. 31155  
2. 241041 1. 418478 1. 655772 2. 137757 1. 219262 1. 646394 1. 250837 1. 125932 3. 181896  
0. 880966 1. 622191 1. 014442 1. 169036 1. 618535 0. 923275 1. 018636 1. 197228 0. 86163  
3. 362328 2. 312211 2. 478133 1. 996021 1. 59563 3. 217659 1. 56483 2. 09391 4. 143126  
3. 264465 3. 510951 4. 044884 4. 643169 4. 411313 4. 425461 3. 88113 4. 576245 4. 757976  
5. 208889 4. 876219 5. 858795 5. 674148 5. 151044 5. 235696 5. 267179 5. 519957 5. 793201  
9. 648854 8. 911203 10. 11135 10. 00284 8. 849291 9. 255963 10. 08997 9. 684303 9. 752565  
3. 564831 3. 257646 2. 900292 3. 434812 3. 088902 3. 823734 3. 245976 3. 132282 3. 627747  
8. 770398 8. 54285 8. 365192 8. 214148 8. 586837 7. 83419 8. 222784 8. 321302 8. 207924  
9. 041041 9. 215461 9. 270254 8. 838282 9. 150816 8. 769843 8. 913085 8. 982375 8. 910908  
3. 980457 4. 007292 4. 345831 4. 436281 4. 19154 2. 337636 4. 216243 4. 545914 2. 693618  
9. 194597 9. 450496 9. 390094 8. 784508 9. 451394 9. 324874 9. 288403 9. 236219 8. 006246  
3. 365746 3. 934001 3. 195555 3. 744227 3. 718606 3. 02719 3. 018817 3. 395186 3. 12784  
8. 477723 8. 586732 8. 106948 8. 347288 8. 576954 8. 439963 8. 366235 8. 694134 8. 598134  
2. 330121 2. 692667 2. 65629 2. 555378 2. 406029 2. 221765 2. 833073 2. 513912 2. 449934  
10. 3325 10. 53225 10. 69949 10. 33868 10. 69475 10. 27994 10. 29497 10. 69703 10. 44075  
9. 070397 8. 013267 5. 982594 7. 807286 6. 587314 8. 286789 7. 515074 5. 637097 6. 654533  
2. 032358 3. 077641 2. 22517 2. 75534 2. 505719 2. 20394 2. 619212 2. 725294 2. 087966  
3. 680744 4. 267515 3. 837343 3. 642197 4. 768749 3. 031592 4. 158 4. 464191 4. 387921  
2. 781396 3. 110275 3. 12401 3. 822517 3. 338463 3. 145602 3. 868561 2. 971995 3. 623585  
5. 843355 5. 914981 5. 565096 5. 354772 6. 01099 5. 743612 6. 15606 5. 866823 5. 740019  
1. 412204 3. 472382 2. 155604 2. 271525 4. 727205 2. 095164 3. 23514 2. 57578 1. 710389  
7. 291786 7. 195734 7. 164673 6. 538951 7. 141024 7. 101776 7. 251255 7. 218097 7. 752521  
4. 393198 4. 174462 3. 506087 3. 927486 4. 087695 3. 978797 3. 429376 4. 933467 4. 396447  
5. 770343 6. 11059 6. 039665 5. 94742 5. 844658 5. 734958 5. 961871 6. 127319 5. 954495  
2. 491939 2. 791754 2. 32021 2. 569246 2. 373754 2. 46117 2. 604752 2. 716865 2. 206539  
2. 30007 2. 769022 2. 370598 2. 340383 2. 719987 2. 701718 3. 125217 2. 774696 2. 371692  
1. 137484 1. 123865 2. 332525 2. 661005 2. 015033 1. 611381 2. 351141 1. 392214 1. 529458  
4. 501531 5. 304197 4. 711768 2. 928936 4. 211677 4. 577895 4. 987893 4. 35895 3. 118875  
7. 385006 7. 340263 7. 331058 7. 484129 7. 303712 7. 540726 7. 141725 7. 369413 7. 494209  
6. 391613 6. 340831 6. 473011 7. 140439 5. 925899 6. 55422 5. 618735 6. 570537 5. 085764  
7. 788586 8. 179762 7. 890611 8. 334514 8. 238897 8. 177136 7. 614285 8. 143065 7. 716849  
1. 627408 2. 164941 1. 417311 2. 100524 1. 529794 2. 78137 1. 848682 1. 986935 1. 64987

6. 264487 5. 824475 6. 372189 7. 187632 5. 77211 5. 992236 6. 181877 6. 249116 6. 502022  
7. 392612 7. 356016 7. 453142 7. 550224 7. 716852 7. 651596 7. 457466 7. 306852 7. 783314  
5. 063477 5. 05688 5. 310842 4. 597182 4. 693211 5. 413369 4. 71585 4. 362369 4. 505227  
5. 749626 6. 016009 6. 233549 4. 985852 6. 242508 5. 732508 6. 069012 5. 451483 4. 982799  
5. 228682 4. 659715 6. 190452 5. 035594 4. 896291 5. 669579 5. 056835 4. 643998 5. 681829  
2. 114789 1. 709723 2. 127955 2. 214179 1. 868142 1. 847849 2. 074919 1. 547831 1. 843383  
2. 802149 1. 792129 1. 632723 2. 021987 3. 273385 1. 573665 1. 336913 2. 469489 2. 300653  
10. 76443 10. 7788 10. 60867 10. 2788 10. 48839 10. 82016 10. 78846 10. 60937 10. 81911  
1. 085747 0. 994799 1. 481581 1. 996425 1. 447567 2. 026066 1. 138658 1. 828121 1. 222579  
5. 273476 4. 252416 5. 187988 4. 989699 4. 675088 3. 788482 5. 13062 5. 446711 3. 566099  
1. 879553 2. 644609 2. 138081 2. 232053 1. 713542 2. 532544 2. 091485 1. 791193 2. 265206  
6. 407701 6. 724943 4. 454634 7. 150578 7. 174455 5. 653902 8. 440657 7. 089853 6. 649723  
1. 174166 1. 398618 1. 105936 1. 658344 1. 042122 1. 457214 1. 355297 0. 834358 1. 957438  
1. 403068 1. 494496 1. 279579 2. 240798 1. 543086 1. 782998 2. 211462 2. 004256 1. 949329  
2. 167027 2. 012037 2. 519741 2. 16144 1. 845355 1. 866685 1. 87936 1. 704413 1. 734829  
1. 016315 1. 339164 1. 391342 1. 220995 1. 297763 2. 328507 1. 522973 2. 046936 1. 409015  
2. 623181 2. 111524 1. 92731 2. 074581 1. 830955 1. 912342 2. 194732 2. 082959 1. 868914  
1. 910343 1. 23107 1. 571027 1. 635215 1. 678937 1. 789288 2. 092152 1. 614544 1. 300402  
2. 652636 2. 566624 2. 775563 3. 838006 2. 692329 3. 198794 2. 658716 3. 284153 2. 901166  
1. 245602 1. 158471 2. 792524 1. 397028 2. 646838 1. 407861 2. 164664 1. 976166 3. 394337  
0. 930037 0. 871959 2. 409995 1. 139717 0. 757858 1. 578862 0. 841438 1. 03651 2. 137657  
1. 979129 2. 378633 2. 952653 2. 805267 2. 417836 1. 973584 2. 806075 1. 789 2. 377317  
6. 30574 7. 234363 7. 085479 6. 14268 7. 533814 5. 984174 7. 672929 6. 75079 5. 115045  
4. 173706 4. 684504 4. 90805 4. 195808 4. 98415 4. 742522 4. 007873 3. 997924 2. 813637  
3. 368255 2. 455076 4. 200172 2. 477328 4. 944539 5. 530691 4. 078655 5. 130484 2. 331539  
2. 088706 2. 235159 2. 885371 3. 011076 1. 826768 2. 670239 2. 367364 2. 564919 2. 037662  
2. 966189 2. 732311 2. 455526 2. 25381 3. 1376 3. 108846 3. 296046 2. 477287 2. 600943  
6. 939978 5. 01451 6. 333349 5. 257329 5. 62273 7. 075341 6. 428301 6. 504922 7. 040703  
2. 897467 3. 185369 3. 262189 3. 688299 3. 228943 2. 772314 2. 907364 3. 07844 2. 507706  
5. 399709 5. 482245 5. 818695 6. 41315 5. 762968 5. 312252 5. 442147 5. 329195 3. 355265  
6. 182172 5. 499452 5. 975241 4. 539084 6. 305806 5. 703711 6. 155172 5. 960107 6. 166717  
5. 292827 5. 677605 4. 591264 3. 432869 6. 666917 4. 569808 4. 036754 4. 970344 5. 311592  
5. 104231 5. 146603 5. 307255 4. 53414 5. 312364 4. 561796 5. 46279 5. 567471 4. 43242  
1. 170018 1. 000229 1. 55036 0. 857796 1. 019283 1. 485646 1. 041148 1. 446993 1. 347396  
4. 065767 3. 735363 3. 521025 2. 47123 4. 240986 3. 514475 3. 779533 4. 297494 3. 059223  
7. 346379 7. 214767 6. 813275 7. 443484 6. 68341 7. 370319 7. 337722 7. 149248 7. 656426  
3. 508267 2. 407215 3. 035268 3. 982491 2. 859667 2. 976786 2. 746121 3. 009863 2. 802034  
1. 790806 1. 470295 1. 209161 1. 535019 1. 586232 1. 643372 1. 274875 1. 124548 1. 826242  
2. 500735 1. 523583 1. 743893 2. 063269 1. 598861 2. 315587 1. 721374 1. 87963 1. 79931  
4. 673578 5. 070324 5. 091899 5. 25197 6. 235527 4. 758721 4. 073976 4. 999174 4. 354033  
7. 251747 7. 196815 7. 574593 6. 933616 6. 877671 7. 252362 6. 817334 7. 277223 7. 129409  
1. 999588 1. 915977 1. 680918 1. 901068 1. 973227 1. 834662 1. 90736 2. 219224 2. 065794  
5. 085707 5. 482037 5. 836645 5. 671144 5. 924871 5. 129947 5. 440791 5. 238702 5. 006112  
5. 933767 6. 180301 6. 53169 5. 173563 5. 60111 7. 072222 6. 634978 5. 955409 5. 623979  
2. 215516 1. 742533 1. 890778 2. 805606 1. 76257 2. 060979 1. 963621 1. 343372 1. 908455  
1. 604851 1. 912519 2. 262579 2. 230318 1. 622077 2. 177171 1. 618788 2. 056269 1. 935541  
6. 231128 5. 614542 6. 102383 6. 458487 5. 633675 5. 673841 5. 591831 6. 028243 5. 295776  
1. 710402 1. 711823 1. 390036 1. 666437 1. 435398 1. 619145 1. 567938 1. 4336 1. 540668  
3. 051255 3. 177305 3. 335143 3. 359341 2. 585311 2. 63727 2. 738575 3. 05585 3. 962779  
3. 412762 3. 583294 3. 418847 3. 096009 4. 262343 4. 155635 2. 976124 3. 494233 3. 942001  
7. 014842 6. 66026 6. 568673 6. 932478 7. 151008 6. 13643 7. 212245 6. 982159 6. 95198



1. 53203 1. 400307 1. 535602 1. 535602 1. 322011 2. 374497 1. 503633 1. 437044 1. 311209  
3. 874831 4. 330319 4. 816829 4. 482226 4. 850623 4. 69602 5. 106385 4. 216956 4. 69602  
2. 357272 4. 343213 2. 219788 3. 920405 3. 175597 2. 84166 4. 180699 4. 525843 3. 469216  
5. 718434 4. 724447 5. 373949 5. 54955 5. 634509 5. 900256 6. 196587 5. 535532 5. 839739  
6. 14598 6. 245911 6. 574915 4. 610608 6. 150335 6. 382049 5. 818931 6. 129987 5. 417951  
1. 473397 1. 301254 2. 296926 2. 850477 1. 586815 1. 894411 1. 634486 1. 434432 1. 876573  
1. 038486 1. 336978 1. 630395 2. 625051 1. 522507 1. 303734 1. 308047 1. 484254 2. 291416  
1. 199148 1. 619582 1. 649772 1. 818701 1. 964531 1. 67513 2. 172881 1. 575349 1. 668147  
1. 762094 1. 709626 2. 479342 3. 629242 2. 093849 3. 656077 2. 047266 2. 28317 3. 040429  
1. 38584 1. 624186 1. 242458 1. 468943 1. 52229 1. 048684 1. 200529 1. 494225 1. 197598  
7. 579921 6. 9729 6. 817599 6. 463394 6. 523133 6. 491001 7. 162158 7. 981583 5. 994381  
2. 077218 1. 240742 2. 006676 1. 931672 1. 538961 1. 818446 1. 526981 1. 383989 1. 04214  
3. 18502 3. 435121 3. 499229 3. 557009 3. 561655 3. 23601 2. 850325 3. 607686 2. 862198  
1. 246404 0. 8613 1. 228231 1. 2506 1. 131649 1. 082212 1. 56674 1. 507954 1. 358958  
1. 260406 1. 063699 1. 201994 1. 895902 0. 541845 1. 91074 0. 890956 1. 353093 1. 534818  
1. 302701 1. 655576 1. 302261 1. 535047 1. 276247 1. 635815 1. 993426 1. 565213 1. 353343  
2. 226679 2. 059446 2. 542425 2. 203411 1. 982699 2. 147373 1. 651586 1. 58299 2. 405682  
1. 26576 1. 128439 0. 898571 1. 415882 1. 667413 2. 370972 1. 173882 1. 240648 1. 105844  
0. 615466 1. 121885 1. 689287 1. 611748 1. 689103 3. 562479 0. 728316 1. 590907 2. 486195  
1. 063447 1. 315361 1. 337443 1. 534554 1. 296107 1. 210033 1. 459694 1. 264038 1. 272197  
2. 01543 3. 798469 1. 794415 2. 946816 3. 00635 4. 303307 3. 958245 2. 30949 2. 971998  
1. 75501 1. 633627 1. 744861 1. 357061 1. 532655 1. 444289 0. 907208 1. 909139 2. 721863  
6. 235718 5. 977764 5. 896411 2. 797008 6. 294821 5. 795545 6. 520571 6. 707343 6. 154806  
1. 880265 1. 064943 2. 67003 4. 016466 1. 626936 1. 529706 1. 955909 2. 00495 1. 972258  
3. 217042 1. 686023 1. 598613 2. 840059 1. 520458 1. 468988 2. 130203 2. 149808 2. 593529  
2. 447709 3. 154515 2. 577651 3. 575192 2. 246875 2. 695525 2. 708803 2. 535465 3. 302743  
5. 391947 4. 895864 4. 978579 4. 996752 5. 316331 4. 578973 6. 166019 5. 550578 5. 267721  
1. 302519 2. 459059 1. 578297 2. 74284 1. 379774 1. 358813 1. 057893 1. 550511 1. 842494  
1. 615115 1. 292953 1. 448246 2. 731469 1. 668325 1. 745178 1. 805514 2. 513646 2. 007737  
1. 684839 2. 472961 1. 539879 2. 25998 1. 206993 1. 763009 1. 529573 1. 359803 1. 829664  
1. 423342 2. 207511 1. 778033 1. 624084 0. 981336 1. 633575 1. 856626 1. 417442 1. 020524  
1. 291736 2. 411045 1. 843717 2. 65767 2. 099494 2. 124443 2. 175271 1. 993768 2. 137451  
7. 700998 6. 889368 8. 123317 8. 236139 7. 158701 6. 131328 7. 882715 6. 922697 7. 523402  
1. 622877 1. 39375 1. 812509 1. 531368 1. 474459 1. 213659 1. 507113 2. 185222 1. 396772  
1. 520409 1. 478656 1. 772989 1. 707997 1. 464894 1. 459455 2. 323732 1. 938158 2. 277163  
3. 106974 4. 054927 2. 621092 4. 860372 4. 177998 5. 202835 3. 571162 4. 719734 3. 35947  
1. 512535 2. 809185 2. 497119 2. 303115 0. 983943 0. 591619 2. 265207 1. 497226 2. 53639  
3. 287799 3. 131605 2. 979091 2. 065893 2. 912057 3. 208893 2. 806788 2. 640259 2. 91306  
3. 768029 4. 134152 4. 052141 4. 097804 4. 285408 3. 380491 3. 566371 3. 725941 4. 401629  
5. 516847 5. 330596 5. 364671 5. 527165 4. 765333 5. 165429 5. 165429 4. 186106 6. 135817  
1. 851223 1. 135168 2. 112789 1. 934854 1. 128394 1. 674764 1. 438696 1. 284379 1. 888938  
1. 959631 2. 040818 1. 697379 2. 415381 1. 930838 2. 470202 1. 748517 2. 144562 2. 210379  
1. 874942 2. 553919 3. 058484 1. 550726 1. 587573 2. 255931 2. 330355 1. 171754 1. 464389  
4. 030731 3. 809031 4. 625696 4. 453053 4. 675141 3. 740605 3. 341928 4. 417568 3. 537643  
1. 263163 0. 990697 1. 078148 1. 929209 0. 998465 1. 70111 1. 047621 0. 761581 0. 982242  
1. 801318 1. 317096 1. 425594 2. 576997 1. 330066 1. 624688 1. 61742 1. 319106 1. 967998  
1. 201538 1. 388492 0. 6292 1. 910346 1. 816383 1. 725395 1. 017006 0. 850792 2. 756007  
3. 242899 2. 827373 2. 830727 3. 184915 2. 406747 2. 161408 2. 654167 2. 464502 3. 23338  
1. 608722 2. 650699 2. 369061 1. 163665 1. 352416 1. 556746 2. 5192 2. 136879 3. 116691  
7. 225433 6. 528118 7. 615019 5. 840687 7. 029827 6. 557059 7. 495462 6. 913695 7. 663188  
4. 412949 4. 073855 3. 71925 3. 435665 4. 099337 3. 861184 4. 082681 4. 146229 3. 368499

1. 047802 0. 852412 0. 927041 1. 128905 1. 697336 1. 383801 0. 899721 0. 64698 2. 019155  
1. 47113 1. 240578 2. 018113 2. 278741 1. 227636 1. 876741 1. 937783 1. 119973 0. 75089  
5. 154791 4. 756303 5. 103051 2. 159125 4. 892759 2. 86928 4. 438065 4. 073679 4. 559939  
1. 274615 1. 770169 0. 836222 1. 194676 1. 019145 2. 992763 1. 35627 0. 949604 2. 669434  
4. 118046 3. 54698 3. 991057 4. 204471 4. 020635 2. 869103 3. 706222 3. 908283 3. 674896  
4. 65335 3. 680977 3. 654239 4. 290583 3. 442611 4. 755929 4. 416179 4. 802723 4. 791168  
1. 698555 4. 526392 5. 62683 3. 754397 5. 219031 4. 863714 2. 868455 5. 721731 6. 270855  
6. 019602 5. 904754 5. 911145 6. 372313 5. 909151 5. 698678 6. 178411 6. 100087 5. 911161  
5. 826756 3. 914862 2. 521785 2. 66963 4. 30084 4. 702814 4. 372039 3. 12344 2. 339424  
1. 247079 1. 182439 1. 380035 2. 23972 1. 326982 1. 374623 1. 862461 1. 598478 1. 118789  
4. 378044 2. 023637 3. 602422 1. 963826 2. 444258 3. 316787 3. 643738 1. 889761 2. 092335  
1. 771705 1. 688872 2. 035672 1. 909477 1. 653087 1. 885524 1. 399156 1. 223679 1. 859547  
2. 981955 3. 170726 2. 493419 2. 7038 2. 570772 2. 890412 2. 906955 3. 292761 2. 885286  
2. 384831 1. 798881 1. 662354 2. 237482 2. 207923 3. 158105 1. 622459 1. 521477 1. 524255  
0. 763658 0. 891885 2. 286107 1. 944976 1. 383239 1. 719728 1. 60702 1. 924938 1. 867609  
4. 994389 3. 056568 3. 578949 2. 85057 3. 530721 5. 472929 4. 641449 4. 63783 4. 75941  
3. 444664 1. 717592 2. 590413 1. 99074 1. 588034 1. 959944 1. 471061 1. 991592 0. 999622  
4. 174957 4. 285461 3. 662896 4. 888691 4. 32578 3. 238254 4. 486609 4. 460873 3. 600287  
1. 855625 2. 130045 2. 024418 2. 580898 1. 384229 1. 943543 1. 448336 1. 624227 1. 2163  
1. 014042 1. 160214 1. 088059 1. 696414 1. 322844 1. 839497 0. 964042 0. 941623 1. 703132  
2. 509741 0. 965803 2. 933632 2. 714852 1. 232575 1. 540067 1. 128694 1. 398366 1. 077656  
2. 914914 2. 495564 2. 486343 3. 545165 2. 250677 2. 593517 2. 214586 2. 606325 2. 16158  
1. 801101 2. 18191 1. 866156 2. 86561 2. 322892 1. 900198 2. 292232 2. 236843 2. 272648  
1. 154219 1. 711691 1. 221918 1. 075926 2. 0749 2. 17732 1. 618139 1. 422295 2. 216182  
4. 108199 3. 831943 4. 578222 4. 537059 4. 243168 4. 237888 1. 160522 3. 226254 3. 644759  
1. 447911 1. 568433 1. 458923 1. 263218 2. 111886 1. 641474 1. 822144 1. 718239 0. 780341  
2. 967045 2. 584373 2. 480959 2. 708436 2. 547961 3. 026106 3. 051064 2. 361459 2. 340464  
1. 012158 1. 311467 1. 204848 1. 508411 2. 094883 0. 733758 1. 270844 0. 890909 2. 998197  
6. 524804 6. 559149 7. 112363 6. 29155 6. 35741 6. 370608 5. 863584 6. 716423 7. 002866  
3. 289548 3. 170223 3. 275884 3. 877715 2. 924223 4. 409229 3. 436617 2. 450866 3. 323926  
1. 157995 1. 665483 1. 036455 1. 962803 0. 610747 2. 267687 2. 218522 1. 985098 1. 283933  
6. 450982 4. 851728 6. 673371 4. 853918 6. 176964 6. 246012 6. 165908 6. 068152 6. 238885  
1. 345195 1. 107646 1. 80555 1. 2104 1. 459212 0. 730296 1. 363445 1. 642403 0. 981579  
3. 027955 2. 961095 2. 930139 2. 931109 2. 583973 2. 822567 2. 257176 2. 869156 3. 388853  
0. 756478 1. 964814 2. 116028 2. 93253 1. 279031 1. 011699 0. 864858 0. 575113 0. 983436  
7. 465016 6. 467606 6. 836104 7. 602779 6. 52855 6. 568778 7. 737262 6. 581969 7. 608997  
2. 555699 3. 698803 2. 596095 3. 264916 3. 079881 2. 345805 3. 826387 3. 420654 2. 708524  
1. 727872 1. 677422 2. 717725 2. 601314 1. 869921 2. 560517 1. 909584 2. 847718 2. 05409  
4. 01938 4. 379866 4. 268873 2. 303189 3. 101975 2. 030184 3. 263379 3. 683624 3. 339415  
2. 124219 1. 912083 2. 423363 2. 518756 1. 938665 2. 727644 1. 808057 1. 598639 2. 208171  
1. 770873 3. 269429 2. 215916 1. 383381 1. 142699 1. 614316 2. 005376 1. 17676 1. 359627  
1. 673135 1. 501295 1. 194245 1. 507526 1. 58037 1. 803757 1. 624407 1. 958285 1. 693164  
2. 000534 1. 37757 1. 554596 2. 000242 1. 469469 1. 41678 1. 647783 2. 267907 1. 802601  
1. 74858 1. 204747 1. 236236 1. 329982 1. 247927 2. 900445 1. 721879 1. 131115 2. 436117  
1. 837081 1. 436119 1. 260597 1. 928275 1. 639928 1. 371695 1. 571078 1. 358959 1. 443063  
1. 260885 1. 320235 2. 149018 2. 046275 1. 216002 2. 831223 1. 963489 2. 259338 1. 433892  
2. 124549 2. 386656 1. 99286 3. 290996 2. 013576 2. 035154 2. 42048 2. 211575 2. 091343  
1. 163944 1. 270891 1. 180397 1. 631 1. 158389 1. 465463 1. 457562 1. 150702 1. 18843  
2. 479282 4. 720871 2. 634928 5. 66824 4. 521435 3. 944372 4. 585369 3. 37147 5. 833397  
2. 054883 1. 958892 1. 906161 2. 563487 2. 419427 2. 338677 2. 081738 1. 759608 2. 39279  
3. 07641 1. 80302 1. 911664 2. 910376 1. 887826 2. 422882 3. 878419 1. 841216 2. 275493

1.067601 1.540077 1.241809 2.06205 1.411222 0.763766 0.578409 0.804716 0.665603  
1.303551 1.997075 1.540481 1.396617 1.623982 1.619782 2.041647 1.556348 1.793646  
0.793045 1.298431 2.01779 1.555511 1.327754 1.700118 1.039469 2.085627 2.130054  
1.71633 1.836359 1.521983 2.875817 1.64493 1.195499 1.394773 1.600263 2.046492  
2.245219 1.700172 1.398861 1.933219 1.507023 1.710461 1.388956 1.187286 1.632727  
3.1568 3.027925 3.235721 3.6318 2.527106 2.761637 2.627782 2.867404 2.978299  
4.543026 4.978828 5.152999 5.832981 6.161838 4.171265 4.219795 5.229661 4.718598  
1.4505 1.699286 1.979304 1.162417 1.869395 1.770285 1.232234 1.424786 1.33783  
0.864705 1.689524 1.112083 2.333556 0.97126 1.044228 0.627764 1.169431 0.898371  
1.402953 2.296767 2.377763 2.707798 2.010833 1.582253 2.054845 1.701622 3.200278  
1.652156 2.56236 1.792631 1.796643 1.742209 1.59235 1.645544 1.329903 1.352961  
2.879869 2.874121 1.964064 3.198951 3.140105 1.957985 3.150821 2.898811 1.668326  
1.743624 2.333269 1.761881 2.415491 2.07979 1.77969 2.191971 1.901852 1.626682  
3.294538 2.181088 3.174134 2.437514 2.25841 2.723678 3.574315 2.386348 1.931228  
4.323187 2.954538 3.264546 3.765187 5.139025 4.751719 4.834389 4.427415 6.042589  
1.96871 2.197104 1.341839 2.786523 1.718902 3.36725 1.847129 1.947861 2.30487  
4.350074 4.116766 4.911745 5.692502 4.176456 5.493766 4.625769 4.214211 5.091647  
1.514668 1.408152 1.626063 2.308569 1.133709 2.017045 1.457371 1.918651 1.663461  
8.577799 8.330668 8.337645 7.593298 8.691501 7.39283 8.183296 8.421282 8.479923  
1.393489 1.326119 1.244846 1.684122 1.631722 1.724588 1.564488 1.200168 1.368011  
1.686746 1.642046 1.596182 1.613385 1.398139 1.36736 0.984284 1.499134 1.092683  
2.251965 2.058339 2.259854 2.475565 2.866609 3.583523 2.492127 2.155915 2.765183  
4.60008 4.417464 4.929464 5.81244 4.531187 3.873637 4.682215 4.350178 4.936645  
0.702183 0.785621 0.830584 0.970593 1.343901 1.201559 0.975497 1.203115 1.056808  
1.778146 2.370189 3.552666 4.545043 2.024958 2.668512 1.991649 2.533486 2.81459  
1.558367 1.292174 1.388601 2.738878 1.336804 1.634308 1.530491 1.099798 1.999667  
8.593321 8.283685 7.694477 8.096739 7.554236 8.737872 7.589159 8.071428 8.415739  
1.801505 1.484157 3.244995 2.695307 1.966539 2.974752 2.444639 2.193537 2.558806  
2.18203 2.330807 2.014115 2.292467 2.393468 2.819533 2.06015 3.492155 2.221471  
1.674874 3.252088 1.661655 2.579532 1.312074 1.200492 1.524064 1.850919 1.632398  
1.8082 1.633827 2.58335 1.952121 1.707808 2.413676 1.758726 1.718617 1.611362  
0.7288 0.908318 1.349939 1.491811 1.546376 0.937558 1.191921 1.341873 2.41452  
2.364572 2.807897 2.377003 3.758279 2.225552 1.997935 2.604077 2.25865 2.724267  
6.637084 6.722052 7.026389 6.69871 7.111618 5.960048 6.079136 6.412553 6.630523  
1.055819 0.959879 1.424015 1.207117 1.169287 1.289521 1.20542 1.366737 1.302052  
6.023309 6.538875 6.056008 5.580301 6.298371 6.019306 5.571439 6.54688 6.136209  
1.108677 1.839518 1.145318 1.770676 1.177212 2.747104 1.684684 0.952846 1.568151  
1.711997 1.682126 1.206013 2.417023 1.500668 1.960022 1.808405 1.792816 2.546085  
3.672863 3.265439 3.536272 3.279171 5.105667 4.007129 3.730229 5.269301 3.916473  
2.648294 2.341846 3.113696 1.857065 2.644397 3.761201 2.285581 1.965548 2.981385  
1.97531 2.526851 2.431823 1.228724 3.47671 3.193988 1.870819 2.917009 2.982802  
1.141798 1.392691 2.533512 3.489995 1.217917 1.293956 1.644561 0.917816 1.855903  
1.283375 2.816373 2.363514 0.871445 1.914813 1.852152 1.15528 0.863794 1.198785  
3.342454 2.799816 3.99992 3.28788 3.337718 1.55957 3.369034 3.344094 2.876868  
3.720719 4.433403 4.696239 3.871715 4.414533 5.030901 4.672642 5.580811 4.444719  
2.369287 2.409924 2.545394 2.457152 3.497547 3.544866 3.040191 3.438688 3.744031  
4.575695 4.510168 3.639267 5.883735 3.421343 4.222138 3.899477 4.823078 2.843331  
1.247656 1.989822 2.136457 1.813359 1.382379 1.188419 1.283576 1.573837 1.669986  
1.947376 1.675112 1.52253 1.681369 1.757173 1.558951 1.611416 1.417978 2.042939  
1.943322 2.144347 2.71429 3.945639 2.643941 3.541153 2.492927 2.974028 2.266791  
4.603413 5.302548 4.558111 3.662252 5.466499 5.013189 2.361081 4.365542 2.443328

1. 204909 1. 517514 1. 058787 2. 799797 1. 15923 1. 992589 1. 902047 1. 401198 1. 915146  
1. 947556 1. 737102 1. 421014 2. 982265 1. 335357 1. 933325 1. 464129 2. 074008 1. 770885  
3. 232164 2. 973674 2. 952945 4. 511794 3. 34464 3. 133576 3. 154041 3. 471142 3. 488323  
4. 921522 5. 186941 5. 234364 5. 189212 5. 279854 5. 932251 4. 671403 4. 709287 3. 89051  
1. 12118 1. 949328 1. 476743 1. 419279 0. 808121 1. 282709 1. 084725 1. 537525 1. 065485  
1. 866499 1. 389686 1. 400195 2. 534407 1. 692302 1. 632388 1. 494152 1. 498546 1. 703352  
1. 340475 1. 583506 2. 175888 2. 482119 1. 771321 1. 644244 1. 439446 2. 290368 2. 046092  
1. 19448 1. 497148 1. 435191 1. 072882 1. 067938 0. 819764 1. 366567 0. 893744 1. 412862  
3. 872891 2. 642742 3. 751956 2. 429142 3. 213567 3. 498173 4. 344719 3. 702336 2. 709101  
1. 517217 1. 635803 1. 139024 1. 522096 1. 594578 1. 599797 1. 382358 1. 517217 1. 164334  
3. 635576 3. 288635 3. 514549 3. 238021 2. 74778 3. 867105 3. 674206 3. 226642 4. 007008  
1. 487653 3. 011584 1. 325256 2. 158 3. 403443 2. 839716 1. 921551 2. 10637 3. 168757  
2. 512526 2. 778561 3. 723824 3. 903096 2. 394969 4. 907622 3. 143995 2. 386183 4. 306578  
0. 698214 0. 734822 0. 854395 0. 98812 0. 97263 1. 675649 1. 11736 1. 069978 1. 126634  
1. 463415 3. 609859 2. 502054 3. 724061 1. 821709 2. 204006 2. 48561 2. 514823 2. 645373  
1. 31873 2. 533848 0. 969219 1. 716493 0. 990945 1. 930461 1. 949542 0. 978751 3. 253304  
2. 331256 2. 171612 2. 169132 2. 501503 2. 1217 1. 924622 2. 098421 2. 642257 1. 796084  
4. 345987 4. 378076 3. 814633 4. 058434 4. 371848 4. 02154 4. 362934 4. 078667 2. 91237  
1. 273779 1. 495857 1. 615297 1. 553265 1. 883559 1. 869598 1. 565869 1. 10664 1. 706755  
3. 042161 2. 189352 2. 780368 1. 8728 1. 958748 2. 75791 1. 933144 1. 864552 2. 079787  
1. 90764 1. 003973 1. 400344 1. 762112 2. 464872 1. 094853 1. 141654 1. 59496 1. 275579  
3. 314486 2. 307404 3. 724853 3. 294335 2. 921982 3. 139162 2. 593902 3. 025356 2. 495288  
1. 624178 1. 611597 1. 799419 2. 101652 0. 967189 2. 960828 0. 900628 2. 470176 1. 948319  
5. 050984 4. 372624 4. 11693 4. 506457 4. 544496 4. 026929 4. 623497 4. 924822 3. 41954  
2. 770769 2. 447224 2. 37109 2. 895494 2. 271429 3. 617775 3. 428403 2. 832974 3. 383633  
0. 759262 2. 154458 1. 40678 1. 297721 1. 23813 1. 90044 1. 08462 1. 343839 1. 539241  
1. 272494 1. 283762 0. 944102 1. 641679 0. 64699 1. 211477 1. 13679 1. 222621 0. 809806  
3. 79812 1. 799771 5. 640118 4. 250387 2. 707115 2. 474404 3. 467197 3. 163395 1. 773412  
1. 06002 2. 175519 1. 283279 2. 151069 1. 061463 1. 97162 1. 266716 1. 201559 1. 799117  
4. 683096 0. 720182 0. 733139 1. 452005 1. 327198 1. 135448 0. 969077 1. 082184 0. 885208  
1. 512188 1. 472013 0. 879711 1. 290361 1. 418288 1. 104534 1. 393233 1. 267214 1. 106252  
1. 103213 0. 92853 1. 637956 1. 450545 0. 989989 1. 603009 1. 179977 0. 921876 1. 174753  
2. 249026 2. 469913 2. 731369 4. 157852 3. 31973 1. 970763 3. 018886 1. 927329 1. 328715  
2. 470492 1. 884908 2. 227209 3. 324633 2. 236062 1. 979755 2. 046721 1. 94275 2. 151331  
2. 338442 1. 252715 2. 115747 2. 101218 1. 571365 1. 600642 1. 372315 1. 20993 1. 341827  
1. 929403 2. 312187 1. 994142 1. 555494 1. 753679 2. 019099 2. 348321 2. 052345 2. 439814  
4. 744074 5. 619696 4. 975578 6. 952221 4. 711935 4. 847007 5. 189784 5. 093033 6. 54567  
1. 736729 1. 459479 1. 149189 2. 107928 1. 640882 2. 446768 1. 524937 1. 708152 1. 353458  
2. 356588 1. 397766 2. 201065 3. 213384 1. 882368 3. 212511 1. 92692 1. 691637 0. 863488  
2. 113765 1. 734638 1. 88988 2. 17118 1. 523402 1. 141701 1. 525758 1. 763011 2. 260904  
1. 080466 1. 081814 0. 822217 1. 395174 2. 002379 1. 419792 0. 767704 1. 123809 1. 516371  
1. 318411 2. 236369 2. 121429 2. 52774 1. 787069 1. 457423 1. 694196 1. 560465 2. 175345  
7. 948712 7. 885036 8. 210314 8. 465427 7. 612931 7. 7793 8. 541446 8. 11468 8. 6394  
1. 592466 1. 235286 2. 103945 1. 434594 1. 161648 1. 687812 1. 718303 1. 161341 1. 852213  
1. 376976 1. 729883 0. 962136 2. 004107 1. 409295 1. 063835 1. 653715 1. 856178 1. 85663  
1. 664341 2. 890488 2. 156523 2. 801279 2. 13676 2. 987744 1. 935161 2. 620456 3. 261758  
1. 306216 1. 413009 1. 542493 1. 287531 1. 54572 2. 090152 1. 59378 1. 603378 1. 508269  
2. 180174 1. 104329 1. 874262 2. 714726 2. 286945 1. 468513 2. 039248 1. 393857 1. 08494  
0. 87481 0. 943197 1. 340471 1. 628194 0. 945416 0. 967032 1. 187096 1. 221412 0. 896138  
0. 934109 0. 954352 1. 106502 1. 670321 1. 331541 1. 311055 0. 871697 1. 192858 1. 11278  
1. 070852 0. 948374 1. 115591 1. 960947 1. 507377 0. 549775 1. 178454 0. 852357 1. 56729

2. 512216 1. 57759 1. 535318 2. 395671 1. 743821 1. 785024 1. 493976 1. 724416 1. 770024  
4. 299931 3. 477147 3. 368129 5. 2281 3. 741479 3. 426241 2. 586149 3. 092998 3. 460952  
2. 314944 1. 873042 2. 671312 2. 059497 2. 330238 2. 15288 1. 79424 2. 408775 2. 448103  
1. 508909 1. 447336 1. 439418 1. 86882 1. 521891 2. 108905 1. 592553 1. 219326 2. 058302  
4. 014841 3. 815131 4. 383793 4. 517666 5. 325935 3. 997259 4. 188977 4. 671395 4. 671389  
0. 924758 1. 808471 1. 815153 1. 514074 1. 697799 1. 094869 1. 223258 1. 332832 1. 021485  
4. 218311 4. 119037 3. 145167 4. 58433 3. 830923 4. 632207 3. 861826 4. 334889 4. 414583  
1. 186814 1. 612817 1. 70008 1. 829991 1. 092856 2. 110118 1. 200899 2. 706369 1. 599659  
1. 736603 0. 853287 1. 571168 1. 618692 1. 71359 2. 152569 1. 248954 1. 285148 1. 353607  
2. 240009 2. 024283 2. 303312 2. 108626 2. 274875 2. 220919 2. 724145 2. 142591 2. 252453  
1. 517656 1. 738437 2. 13522 2. 718716 2. 395489 2. 169096 2. 267595 1. 43003 1. 91193  
1. 964825 1. 060936 2. 740981 2. 508705 1. 379719 1. 603218 1. 883134 1. 338781 2. 199483  
3. 781842 3. 29249 3. 264202 2. 804607 2. 681798 2. 598776 3. 012787 3. 399766 3. 047271  
1. 797941 1. 638865 1. 264559 1. 524838 1. 693551 1. 030188 1. 937776 1. 474594 1. 256383  
1. 33538 2. 222914 1. 105666 1. 325905 2. 002134 1. 06634 1. 87948 1. 889076 1. 104863  
1. 51138 2. 235352 1. 276746 1. 935169 1. 532715 1. 276473 1. 607564 1. 370565 1. 562411  
0. 854569 3. 581806 4. 000056 2. 94262 0. 497865 2. 53762 2. 289049 1. 274694 2. 958548  
2. 967759 4. 09013 5. 059283 3. 25571 1. 885029 1. 531952 3. 496205 4. 262967 3. 307253  
1. 486957 1. 747692 1. 563611 1. 419245 1. 317929 1. 031801 2. 602689 1. 100431 1. 707361  
1. 418921 1. 624533 1. 45802 2. 061863 1. 768308 1. 433373 1. 677621 1. 666844 3. 42338  
2. 916524 2. 230708 2. 636416 2. 871972 2. 12092 2. 984311 3. 193778 2. 606986 2. 267454  
2. 260161 1. 7189 2. 354389 2. 597998 2. 264466 2. 695665 2. 146833 2. 229779 2. 325107  
0. 990867 1. 051316 0. 921168 1. 250384 0. 932301 1. 025918 1. 091827 1. 197953 0. 995253  
0. 939123 0. 575432 1. 829346 1. 434297 0. 896413 0. 92133 1. 655567 1. 236237 1. 245132  
0. 847311 1. 147285 1. 285491 0. 889385 0. 8784 1. 420774 1. 029938 0. 989386 1. 098815  
1. 066926 1. 042131 2. 041778 2. 271192 1. 930199 1. 836168 1. 110129 1. 128241 0. 8699  
1. 72962 2. 83292 3. 994438 3. 326203 1. 669439 4. 017906 1. 214044 1. 873387 1. 658222  
1. 023716 1. 032678 1. 000804 1. 265934 1. 72075 1. 132764 1. 420764 0. 806339 1. 075397  
4. 509179 3. 900744 5. 195684 3. 48881 2. 239082 3. 429407 2. 906107 4. 430005 3. 792924  
1. 84156 1. 948743 1. 383181 2. 61056 1. 885924 2. 83641 1. 808619 1. 787395 1. 942619  
3. 798712 4. 533236 3. 841523 3. 489708 2. 045296 1. 921141 3. 533208 1. 721767 3. 984445  
3. 861254 3. 301444 3. 347445 2. 18676 2. 798296 3. 922854 3. 035517 3. 954931 3. 492098  
2. 766143 2. 142821 3. 118036 3. 217082 3. 302608 3. 122978 2. 917652 3. 839286 3. 334626  
3. 813316 1. 28874 1. 581763 2. 315348 2. 940454 1. 364271 1. 162231 2. 357875 1. 765076  
2. 169192 1. 938943 2. 196197 2. 394213 2. 458615 2. 927321 2. 157291 2. 12212 2. 211939  
1. 773263 1. 020873 1. 306896 1. 472804 1. 00122 1. 190689 2. 058824 0. 902592 1. 720374  
3. 005768 2. 648997 2. 959809 3. 441426 2. 96606 2. 534872 2. 349745 2. 630813 2. 40497  
5. 112952 4. 74964 4. 177156 5. 344707 3. 950077 3. 577901 2. 54981 4. 955193 4. 128361  
1. 076782 1. 058208 1. 216305 1. 312034 1. 269885 1. 248207 1. 345966 1. 526095 1. 288584  
3. 538329 3. 959741 3. 896139 3. 59933 3. 224304 3. 232445 3. 360489 3. 961934 3. 557756  
1. 173733 1. 489567 2. 376162 2. 976353 0. 720794 1. 625361 1. 864866 1. 995942 1. 091606  
5. 563989 4. 849365 5. 387376 5. 773692 4. 355294 4. 843957 4. 758164 5. 13191 5. 539542  
0. 561918 0. 573173 0. 581904 0. 949946 0. 687394 1. 226325 0. 620962 0. 820067 0. 669375  
0. 698831 0. 824623 0. 610702 0. 995011 0. 658136 1. 065483 0. 778437 0. 614896 0. 827461  
0. 89825 0. 591735 1. 123852 0. 962422 1. 46166 1. 118358 0. 848666 1. 163391 0. 997013  
0. 816685 1. 392053 0. 927747 1. 684416 1. 30264 1. 261787 1. 887833 1. 180918 1. 59836  
1. 434333 1. 436031 1. 83737 2. 25542 1. 614459 1. 256713 1. 591813 1. 561038 1. 946084  
0. 701138 1. 42907 1. 342831 1. 371683 0. 913904 1. 140996 0. 889618 1. 575765 0. 985247  
0. 989595 1. 230738 0. 957873 1. 436863 1. 266144 2. 21133 0. 959622 0. 862883 0. 978976  
1. 274142 1. 195895 1. 002925 1. 874436 1. 438252 1. 192957 0. 756494 1. 000666 1. 009697  
4. 741735 2. 811582 4. 40801 3. 00628 4. 845596 4. 97762 4. 216135 5. 685712 3. 753382

9.030796 9.211913 8.34189 8.973138 8.730006 9.113957 8.866289 9.537622 9.3492  
1.659488 2.583516 2.260215 1.56603 2.037208 2.165104 2.064575 2.473004 2.036217  
5.920113 5.331627 5.705812 4.788444 5.569681 4.862989 5.480185 5.432433 3.70483  
5.764153 5.411344 5.39597 4.852709 5.121343 5.512643 5.062512 5.755676 5.529974  
1.087498 1.338984 1.349991 1.322551 1.375654 1.181321 1.28375 1.239946 2.431885  
3.826984 4.906471 3.690573 3.561461 4.614925 6.466136 5.578465 4.671192 2.737754  
5.270421 5.130888 4.894455 5.43136 4.586222 5.495123 5.146172 4.851222 5.752502  
2.670433 2.240753 2.652119 2.636239 4.609323 2.515462 2.245665 2.388713 2.276338  
1.949442 1.312791 1.915186 2.1418 1.356908 1.830575 1.414535 1.214529 1.680021  
5.212957 4.871964 4.811992 4.971015 4.827327 4.79198 5.393336 5.342067 5.414658  
1.609863 1.757678 1.596671 2.452133 1.390117 1.495853 1.335715 1.170737 1.979057  
8.53032 7.423247 8.809021 7.909902 8.121992 8.577595 8.254517 8.847807 8.556567  
1.004233 0.606686 1.31991 2.879852 0.701693 1.082633 1.068252 1.260975 0.958513  
8.553413 8.872911 8.984831 8.935547 8.853439 8.875591 8.890356 8.97004 8.445356  
2.523682 3.837446 1.857998 2.266838 3.897122 1.848464 3.244233 4.377143 2.262532  
5.912739 5.70185 5.870633 6.04559 5.634556 6.483466 5.351657 5.975708 5.237986  
1.19293 1.263435 2.154022 2.968042 1.379801 1.941457 1.214998 1.948239 2.248434  
3.111029 3.39357 3.976607 4.370565 3.981665 3.837173 3.518832 3.641031 3.181521  
1.556289 1.795703 1.522059 2.419668 1.809049 1.872649 1.300567 1.893515 1.58632  
1.907225 1.221772 2.194611 1.681186 2.082776 1.896891 1.332841 1.801134 1.970073  
2.541832 3.44936 3.540939 4.4716 3.7963 3.943521 3.619215 4.735297 1.206131  
2.642111 4.294115 0.726435 4.296 4.909641 2.274323 2.428834 3.138125 5.956105  
1.128811 1.171388 1.675731 0.961419 1.080713 3.77189 1.444378 1.278426 1.053316  
3.174516 2.871204 2.515908 3.464336 3.239006 2.268333 2.741216 3.52807 5.657906  
1.206081 1.00829 1.383311 1.555844 0.865516 1.709383 1.147353 0.996686 1.279805  
9.728219 9.814895 9.272546 9.518493 9.527271 9.099891 9.461537 9.712487 10.37388  
1.483355 1.767217 1.671518 3.030627 1.928413 1.714911 1.726163 1.63868 1.603979  
8.540719 8.858543 7.774822 8.693426 8.79597 9.09742 8.602476 9.355421 10.0886  
9.211623 9.895471 8.370405 7.470367 9.721306 8.608586 8.370692 9.753389 10.47872  
1.948683 2.676805 1.89326 2.965516 2.225897 1.782217 3.026755 3.050739 3.057343  
6.036665 6.751209 5.60802 6.264169 6.657501 5.976553 5.671806 6.200452 7.220914  
6.120267 5.995281 4.487761 5.160314 6.27285 4.948001 5.701142 6.232182 5.89183  
8.780229 8.951199 8.226071 7.918835 8.720247 9.032978 8.687296 8.990804 10.37009  
11.68615 11.60841 11.60649 11.75025 11.13949 7.091355 11.30358 11.11086 11.50437  
2.154893 2.75147 1.812291 1.957456 1.412129 2.040105 2.166004 1.512795 2.610517  
3.385379 4.463749 4.229377 3.232377 3.739138 3.332469 4.79849 4.181958 4.935226  
2.511426 2.276025 2.246232 2.525904 2.276025 2.035812 3.692142 2.115587 3.563678  
6.594592 6.33067 6.596327 7.112858 7.448075 6.369677 7.026021 6.951268 5.74179  
6.759384 6.372165 7.420951 6.903315 6.895056 6.317476 6.77429 7.696966 6.364203  
5.489028 5.869675 6.025213 5.844455 6.134179 5.690425 6.022218 6.280781 6.734624  
3.372802 3.199332 3.956628 4.110985 4.171453 3.628931 3.079569 3.645745 3.522802  
6.175068 6.095721 6.063601 7.049495 5.293745 5.787688 6.127345 6.014079 6.225058  
5.420418 5.955054 5.67958 4.320052 5.629031 5.70625 5.666258 5.554184 5.919534  
3.477494 3.79146 4.101617 3.203979 3.978797 3.674597 3.467681 3.537893 3.505619  
1.951284 1.385839 1.479738 1.770995 1.843637 2.329372 1.38265 2.299614 2.501479  
2.072073 2.562251 1.546974 1.449781 1.231829 2.394313 1.757399 2.639305 1.860817  
2.166316 2.543757 3.078153 2.668322 2.925973 3.298722 1.698276 1.856286 3.69788  
6.435465 6.006114 6.44713 6.517858 6.429845 5.766325 6.627294 6.286035 6.516695  
5.786226 6.051132 5.338321 6.384988 6.700516 6.378133 6.408685 6.307618 6.140602  
1.302279 2.002164 1.338584 1.726727 1.250402 2.770468 1.521813 0.865729 1.012977  
6.374855 6.774503 6.383291 4.708588 5.977709 6.902949 4.613392 6.045973 6.515502

2.062376 1.89764 1.977846 2.127553 1.866064 1.896788 1.78515 2.36861 2.314858  
2.595438 2.364279 1.648826 2.50399 3.2616 2.507512 1.881559 2.862078 2.484192  
1.94141 1.847074 1.800447 2.149093 1.317606 2.52038 1.940943 1.765398 2.60834  
2.324264 2.464485 2.333604 3.57138 2.287674 1.916516 2.43785 2.30411 2.052316  
2.170311 2.008351 2.252024 2.668012 2.171935 1.911498 2.068011 1.761615 1.392786  
2.270833 1.30296 1.406421 1.698472 1.391265 2.125722 1.66199 1.41213 2.224017  
5.800988 6.457402 5.222025 6.134892 6.050611 5.786576 6.721515 5.94387 4.83506  
1.698486 1.397215 1.47053 1.86178 1.931329 1.611742 1.719999 1.686633 1.149266  
7.428933 6.671623 6.531755 5.828936 6.562606 6.85274 6.701199 6.81815 6.579915  
2.664517 2.50686 3.180826 2.862778 2.55863 2.554322 2.859982 2.132961 2.141946  
4.534456 4.844543 4.381134 4.504421 4.73061 4.774764 5.124583 5.173277 4.292237  
2.977353 2.340702 2.323472 3.328283 2.350789 3.582482 3.017059 3.444215 2.727127  
5.884322 6.146568 6.128326 6 9.939508 5.8998 5.717815 6.997287 7.296007  
4.892555 5.79472 5.141565 3.302708 8.590893 4.792639 5.697686 5.581233 5.675962  
4.780294 3.931808 4.103804 4.535227 4.011206 4.036319 4.155741 4.444213 5.06819  
1.992266 1.83719 1.924167 2.458981 1.896044 2.05674 1.579921 1.744121 2.618795  
1.719343 2.169773 1.875376 1.588455 3.654009 3.343234 2.970525 2.466643 2.470438  
1.265026 0.915799 0.830672 1.748162 1.181471 2.240804 0.803238 1.037545 0.905886  
2.29249 2.2098 2.995229 2.723162 2.521227 2.016276 2.454273 2.407941 2.343689  
2.236784 2.193432 1.425705 1.640522 2.069625 2.017758 1.67078 2.181614 0.99008  
1.555946 1.773031 1.906032 2.90512 1.549517 2.739462 1.668994 1.799023 2.301176  
4.428559 6.806929 6.121629 4.834745 7.235363 5.516498 3.862572 5.90183 2.530603  
4.029657 5.28956 4.932499 3.985041 5.319724 4.592567 5.29984 3.608397 5.183246  
2.491464 2.628846 3.124231 2.743649 2.351602 2.073262 2.288781 1.853938 2.407645  
2.638314 2.291728 2.732046 3.240657 2.317836 2.506653 3.028459 2.809129 2.815946  
3.741664 3.797033 3.585168 3.504309 2.72936 3.108295 2.949511 3.680033 3.000074  
5.136222 4.922589 4.454022 5.609569 6.638133 4.974129 4.559854 5.446964 3.490273  
6.702683 7.564928 7.870993 7.237951 7.667406 6.670205 7.440909 7.019318 8.172901  
2.576601 1.672587 1.668577 2.726552 2.346562 2.301462 1.543891 1.402748 1.542634  
1.572879 1.619146 1.482338 1.033964 1.205052 1.716489 1.829206 1.217017 1.722495  
1.668221 1.737467 1.775124 2.703281 1.81796 1.886809 1.379093 1.517073 1.047714  
2.022959 2.052898 1.25239 2.104193 2.082585 0.854144 1.241918 1.463857 1.118386  
2.356323 1.677336 1.634402 2.320261 1.498075 1.395681 1.866296 1.597332 1.301397  
1.151817 1.752597 1.560755 1.693546 1.290483 1.753764 2.003504 1.324238 0.485563  
1.318684 0.758932 1.240574 1.865258 1.221742 2.006747 1.72557 1.616041 1.135538  
1.781647 1.866569 2.078307 3.25578 1.36625 1.925597 1.58278 1.836674 1.657232  
1.733916 1.420471 1.455503 1.352698 1.908829 1.116942 1.123295 1.117867 1.716314  
8.860913 9.226044 9.118494 8.584699 8.647194 9.035164 9.203451 9.160111 8.484498  
6.153377 5.615638 5.940326 6.660296 5.463622 5.366921 6.47924 6.558552 5.809372  
3.844033 4.731577 3.492484 4.809608 3.580915 4.104387 4.512143 3.633538 3.097595  
2.316087 2.005928 1.945275 2.702942 2.094492 2.293866 2.730419 2.233532 2.203128  
2.294393 2.222887 2.485734 2.762403 2.598745 1.573672 2.219432 1.664172 1.382022  
1.934061 2.165663 2.195459 4.08343 2.412417 2.732156 2.821844 2.155273 2.480684  
4.929279 4.967258 5.250876 4.509289 5.623501 5.303554 4.364337 5.719969 5.126668  
2.986057 3.05908 3.282284 3.865006 4.25927 3.17962 3.452341 3.643906 2.829791  
3.779346 4.428387 3.793932 4.268459 3.965825 4.218312 4.477338 4.553089 5.020808  
10.86743 10.8498 10.86483 10.8877 10.70288 10.53498 11.05104 10.69962 10.96326  
8.720556 8.469481 8.382749 8.736473 8.430723 8.465761 8.917597 8.627223 8.614002  
6.055572 5.987378 5.850479 5.666972 5.82587 6.323738 5.445487 6.227397 5.328575  
1.873012 1.971827 1.277139 1.550266 1.744234 2.00404 1.116264 1.129027 1.852356  
8.013257 8.402764 8.417158 7.873477 8.132816 7.961465 7.940152 8.034647 6.915657

8. 39735 8. 373273 7. 994512 7. 683287 7. 792777 8. 840536 7. 950206 8. 023276 7. 572319  
9. 081032 9. 099405 9. 085007 9. 219671 9. 0598 9. 114326 9. 449374 9. 293773 8. 831494  
5. 361959 5. 578951 5. 097943 5. 734639 5. 518513 5. 913416 5. 571824 5. 719629 5. 227412  
4. 900982 4. 555752 5. 237447 5. 089307 5. 486817 4. 820249 4. 954601 4. 738338 5. 456648  
6. 861251 7. 347205 6. 874926 6. 965269 7. 138255 7. 041799 7. 272546 7. 251715 7. 340789  
2. 914598 2. 419272 2. 256734 3. 384527 2. 758946 2. 423844 2. 362429 2. 937035 2. 512385  
2. 33542 2. 763356 3. 367929 2. 851175 3. 098671 3. 4337 2. 756653 3. 647043 2. 523485  
6. 156106 6. 04062 5. 694905 6. 349457 5. 904988 5. 808161 5. 948161 5. 826736 6. 577368  
4. 810841 5. 248126 5. 088931 4. 927069 5. 376348 5. 203118 4. 749808 5. 021895 3. 818523  
5. 182928 5. 006598 5. 115604 4. 570976 4. 806868 4. 582766 5. 730562 5. 607982 4. 299158  
1. 449772 1. 441999 1. 237234 2. 496441 1. 86254 1. 268846 1. 52606 1. 535148 1. 058255  
1. 340568 1. 904604 1. 926668 2. 197335 1. 945004 1. 518609 2. 490582 1. 531613 1. 968752  
2. 743045 2. 778566 3. 116808 3. 608627 3. 069504 2. 299088 3. 196273 2. 500933 2. 790023  
6. 596089 6. 70295 6. 579231 6. 6369 6. 724251 6. 57598 6. 948551 6. 983969 7. 557031  
4. 269043 4. 448169 4. 774695 5. 013859 4. 0496 4. 461876 4. 692426 4. 313494 4. 855106  
2. 344187 2. 753615 2. 924339 3. 938598 2. 464793 3. 352864 2. 170671 2. 234084 2. 690426  
5. 846635 5. 827895 6. 21628 5. 741334 5. 729831 5. 853335 6. 300998 6. 159697 6. 280706  
4. 438502 4. 926371 3. 850837 3. 665824 4. 530934 5. 110265 4. 417828 4. 726808 3. 410119  
3. 773202 3. 3134 2. 50114 3. 369908 4. 037441 3. 945478 3. 773202 4. 004687 4. 391322  
6. 294132 6. 93505 6. 264228 5. 723988 6. 442508 6. 66381 6. 713875 6. 384125 5. 937846  
4. 720809 5. 131049 5. 40841 5. 541444 4. 486222 5. 698646 5. 059838 5. 884769 3. 960118  
7. 058309 7. 37378 6. 906614 7. 320987 6. 794004 6. 959136 7. 441661 7. 419081 7. 477004  
9. 038267 8. 740971 8. 82658 8. 664245 8. 706699 8. 71627 9. 253375 8. 799722 8. 643083  
0. 630689 1. 664879 1. 321401 1. 882532 0. 741615 1. 587759 1. 611497 0. 349462 1. 993018  
7. 720454 7. 623743 7. 000141 7. 899276 7. 226212 7. 682391 8. 231931 7. 20328 7. 68782  
5. 701929 5. 322631 5. 71556 6. 246003 4. 965406 5. 310238 5. 243521 5. 803071 5. 526914  
2. 183617 2. 416637 1. 963786 2. 855055 2. 8205 2. 248242 1. 819152 3. 640845 2. 511118  
7. 061961 7. 300021 7. 364162 6. 511969 7. 118816 6. 98207 7. 108556 7. 343537 7. 123962  
8. 452947 8. 23217 8. 24325 8. 130669 8. 291254 8. 133921 8. 472565 8. 067678 8. 721656  
7. 325367 6. 479056 6. 437557 7. 457664 6. 655449 7. 1203 7. 28082 6. 911217 7. 214639  
2. 899793 3. 423257 3. 340112 3. 028695 4. 752171 3. 705401 4. 396594 3. 589839 5. 728144  
0. 851527 1. 304484 1. 085579 1. 685973 0. 937819 0. 94306 1. 032393 1. 998575 0. 91154  
2. 184243 2. 709828 1. 744131 2. 488698 1. 945146 1. 95681 2. 103295 1. 859299 2. 143229  
5. 758988 5. 516809 5. 649592 6. 148867 5. 915591 5. 610323 5. 588046 5. 351358 5. 639307  
5. 784091 6. 080958 5. 598329 5. 603355 6. 066513 5. 82155 6. 377982 6. 121723 6. 230605  
3. 462862 4. 293374 6. 459977 6. 007432 4. 626606 4. 352215 5. 726291 4. 417653 3. 284022  
1. 703766 1. 099486 1. 883243 2. 369419 1. 940103 1. 452054 2. 394943 1. 563936 0. 580611  
7. 045371 7. 469576 7. 081742 5. 852291 7. 0863 6. 582172 7. 108216 6. 780707 7. 666336  
4. 469354 4. 479802 3. 747656 2. 602961 5. 421388 3. 472071 3. 937511 4. 383404 3. 147486  
2. 547815 2. 649217 2. 119525 2. 156319 2. 360517 1. 580203 2. 896062 2. 756158 2. 106608  
8. 967175 8. 876213 8. 863443 7. 614999 8. 751424 8. 626849 8. 527457 8. 753396 9. 235419  
5. 957664 5. 825434 5. 415259 4. 917266 5. 707258 6. 555325 6. 027655 5. 964733 5. 98089  
10. 35994 9. 875641 10. 10734 10. 50885 10. 17247 10. 28348 10. 51568 10. 10709 10. 41482  
3. 576367 2. 843622 3. 18403 3. 229088 2. 984053 2. 743493 3. 629188 2. 70483 3. 130533  
1. 686102 1. 865947 1. 894024 1. 713467 2. 035907 2. 083453 1. 47163 1. 717411 1. 825282  
10. 59605 10. 30644 10. 37382 10. 38629 10. 18349 10. 11999 10. 42418 10. 40439 10. 56636  
9. 01919 8. 911776 9. 100337 9. 348848 9. 029457 8. 726592 9. 022497 9. 123959 9. 211776  
10. 20855 10. 32835 9. 898777 10. 22282 10. 06184 9. 889836 9. 659911 9. 994551 10. 02187  
6. 749648 5. 690852 5. 886139 5. 730927 5. 648952 5. 196443 5. 502577 5. 357193 5. 918138  
4. 66548 3. 450966 3. 901319 3. 350639 3. 755234 3. 812079 3. 930629 4. 049709 4. 856097  
8. 371159 8. 339887 8. 31411 7. 352801 8. 816028 8. 060079 8. 652421 8. 243962 8. 544865



8. 596453 8. 700476 8. 449655 7. 959599 8. 633212 8. 042555 8. 178858 8. 772108 8. 199661  
7. 605515 7. 214616 7. 667344 7. 689634 7. 147292 6. 972395 7. 733843 7. 263195 7. 716604  
1. 25548 1. 643001 1. 317504 1. 933812 1. 36278 1. 506344 1. 651876 1. 618484 1. 868636  
7. 166545 7. 782915 7. 352311 6. 815903 8. 18444 7. 27909 7. 592148 7. 511965 7. 665956  
7. 273992 7. 245876 7. 317731 7. 283205 7. 597482 7. 069988 7. 538215 7. 289981 7. 673078  
9. 406285 9. 537825 9. 278556 9. 34655 9. 691158 8. 998496 9. 071829 9. 575458 9. 395577  
10. 12151 10. 07273 9. 779133 9. 428409 9. 743468 9. 653619 9. 736276 9. 854329 10. 29366  
10. 86876 10. 71954 10. 82683 10. 49613 10. 81841 10. 48954 10. 89656 10. 71015 10. 78875  
6. 317028 5. 040357 5. 792911 6. 357962 5. 675336 6. 003228 5. 901456 5. 928903 6. 320786  
4. 44986 4. 549079 4. 672913 4. 065397 4. 905435 4. 439805 4. 292185 4. 426394 4. 507031  
7. 487031 8. 130037 7. 233572 7. 39637 8. 153274 7. 63052 7. 531014 7. 966328 7. 52978  
7. 976342 7. 578123 7. 57117 5. 969833 7. 662908 7. 345094 8. 189902 7. 780668 8. 097571  
9. 122715 8. 928511 9. 20166 8. 403434 9. 079778 8. 832916 8. 756003 9. 281377 8. 925482  
7. 326111 6. 986481 7. 21433 7. 593465 7. 029376 7. 533874 7. 645784 7. 255445 7. 58251  
8. 013884 8. 106411 7. 893824 8. 087097 7. 8726 7. 879228 8. 24869 8. 141268 8. 534427  
8. 586444 8. 551071 8. 975238 8. 225469 8. 718762 8. 233484 8. 408199 8. 897427 8. 573728  
4. 815361 4. 742752 4. 792551 4. 742994 5. 197532 4. 815169 5. 02982 5. 044598 4. 900549  
6. 580201 6. 328445 6. 274009 6. 754205 6. 58718 6. 401546 6. 699072 6. 525539 6. 432733  
7. 80436 7. 890307 7. 603207 6. 795974 8. 103113 7. 58697 8. 099776 7. 771154 8. 131432  
7. 060724 7. 116331 6. 548388 6. 759768 7. 114489 6. 767338 7. 105038 7. 260234 7. 298333  
8. 191118 8. 183884 7. 982019 7. 392072 8. 431072 8. 020641 8. 388525 8. 238528 8. 100547  
6. 979646 6. 435485 7. 183264 7. 709934 6. 843665 6. 720336 7. 120219 6. 871083 6. 925156  
8. 036435 8. 355273 8. 053666 8. 197118 8. 412419 7. 57614 8. 177985 8. 391717 8. 735895  
8. 668197 8. 855833 8. 141365 9. 539777 8. 843161 8. 148426 8. 729341 8. 379693 8. 738759  
9. 265014 8. 844203 9. 177865 8. 753518 9. 163539 8. 589607 9. 08277 8. 980811 8. 965491  
6. 215653 6. 598909 6. 654952 6. 214662 6. 706246 6. 001589 6. 191896 6. 780393 6. 039609  
6. 933525 6. 797529 6. 59809 6. 638976 6. 65243 6. 936347 6. 329475 7. 143544 6. 542395  
6. 123131 5. 884525 5. 453333 5. 815475 5. 317105 5. 863679 5. 728178 5. 797812 6. 591405  
7. 812407 7. 601748 7. 545284 7. 610945 7. 658097 8. 327534 7. 449734 7. 84626 7. 24261  
8. 098051 7. 886818 8. 362778 7. 25972 7. 988503 8. 179566 7. 761344 8. 069143 8. 241164  
6. 702496 6. 141457 6. 301932 6. 610732 6. 149596 6. 161582 6. 686439 6. 415083 6. 284834  
7. 843293 7. 914646 7. 572524 6. 992664 7. 901169 7. 964174 8. 111848 7. 744025 7. 577971  
10. 30044 9. 768217 9. 907018 10. 20712 9. 562758 9. 561633 10. 2517 9. 849124 10. 35866  
4. 497361 5. 147794 4. 587555 4. 173123 4. 659885 4. 372136 4. 881447 5. 120545 6. 08833  
7. 002343 7. 572701 7. 305195 7. 423919 6. 69677 7. 572328 6. 58902 7. 295597 6. 771723  
1. 528113 1. 359276 1. 717398 2. 378538 1. 893226 1. 687526 3. 259209 3. 313133 2. 905749  
2. 653361 2. 332 2. 17112 2. 794461 1. 761653 2. 410866 2. 495769 2. 279317 4. 370134  
3. 658266 5. 665911 7. 321881 1. 878933 6. 342111 6. 871975 5. 782631 4. 594547 5. 02324  
6. 20661 6. 535757 6. 555477 5. 983485 6. 882363 6. 112452 6. 124009 6. 663394 5. 596892  
1. 328045 1. 809607 1. 481946 1. 204917 1. 4868 2. 447353 1. 526469 1. 161278 1. 253177  
2. 078711 1. 252362 3. 266603 3. 798656 4. 016627 3. 476861 3. 221447 1. 019975 0. 521257  
2. 471603 1. 911478 1. 831813 1. 862604 2. 505359 2. 510831 1. 929236 1. 939666 2. 156856  
4. 881968 6. 143292 6. 877408 7. 094696 3. 835384 5. 984604 7. 787334 5. 360503 6. 361826  
1. 760745 2. 366649 1. 885781 3. 44528 2. 956755 2. 130856 2. 888331 3. 925546 1. 699518  
1. 556192 2. 592458 2. 797603 3. 124345 1. 47084 1. 154125 1. 834569 2. 629454 1. 585865  
6. 197172 6. 075304 6. 277928 5. 896894 5. 872532 5. 596188 5. 731074 6. 003754 6. 15673  
1. 364216 2. 286431 1. 855443 2. 175552 2. 003659 2. 087095 2. 160614 3. 570266 2. 607566  
4. 357312 4. 562276 4. 504892 3. 576282 3. 859201 4. 009913 4. 063207 4. 425743 5. 180921  
1. 690875 1. 744008 1. 433038 1. 813012 1. 6371 2. 434404 2. 011043 1. 264864 2. 061245  
7. 249203 7. 431154 7. 524105 7. 033685 6. 717081 6. 9773 7. 551165 6. 989809 6. 755921  
6. 423043 6. 488219 6. 387305 7. 439855 6. 685903 6. 66831 6. 65019 6. 49134 6. 251082

2. 222527 2. 096838 2. 424201 2. 168638 2. 144816 2. 351582 2. 148134 2. 389879 2. 761832  
10. 90053 10. 77221 10. 46364 10. 9293 10. 86207 10. 57081 10. 66669 10. 7566 10. 70553  
1. 160481 1. 471977 2. 634934 2. 536611 2. 260403 1. 971915 1. 491306 1. 440459 1. 843559  
1. 54482 1. 210717 1. 871205 1. 84358 1. 298153 1. 126687 1. 309529 1. 466979 1. 155877  
1. 753957 2. 106407 1. 751553 2. 134403 1. 775886 1. 877441 1. 503521 1. 874358 2. 13962  
7. 098184 7. 235708 6. 958398 7. 044384 7. 268687 7. 559379 7. 434522 7. 349378 7. 409191  
9. 587691 10. 07616 10. 11359 9. 421815 10. 02357 10. 12078 9. 938848 9. 816657 9. 822502  
5. 430644 5. 308678 4. 980856 5. 00424 5. 076052 4. 851092 5. 437301 5. 378367 4. 687114  
3. 781745 4. 927908 6. 132181 4. 849631 4. 972728 4. 53748 4. 431414 4. 550776 3. 058362  
3. 871042 3. 882535 3. 741021 3. 844392 4. 50582 4. 197034 4. 177427 4. 880622 2. 930086  
5. 563268 5. 576896 5. 366724 7. 128681 5. 423107 5. 722974 6. 164816 6. 049532 5. 855542  
6. 596884 6. 887505 6. 346781 7. 051168 6. 601997 6. 480807 6. 351037 6. 497223 7. 323945  
3. 372311 2. 833183 3. 288928 3. 385296 4. 057446 2. 625276 3. 141495 3. 370548 2. 631967  
2. 233711 2. 045415 2. 597936 1. 866955 2. 424793 1. 896222 1. 623225 3. 064844 1. 270024  
9. 447954 9. 712585 9. 713433 8. 77935 9. 586747 9. 44877 9. 791287 9. 449235 9. 174682  
4. 324032 4. 119203 4. 259565 3. 255756 4. 422541 3. 847197 3. 612805 3. 517892 2. 069424  
7. 924003 8. 343636 8. 111382 8. 296739 7. 915949 7. 98688 8. 033602 8. 043296 8. 164135  
6. 258286 5. 595485 5. 293309 6. 085181 5. 899125 6. 039747 5. 981167 6. 418568 6. 161251  
7. 639238 8. 282185 8. 245455 8. 661731 8. 171802 8. 415552 7. 677526 8. 429741 6. 803852  
4. 96294 4. 348714 5. 380097 3. 722317 5. 498009 4. 125036 5. 132191 4. 963972 6. 398202  
7. 509238 7. 646038 7. 209585 8. 163597 7. 601697 7. 556919 7. 591098 7. 343856 5. 920146  
2. 283788 2. 398809 2. 244448 2. 387469 2. 383957 2. 200378 1. 754929 2. 049601 1. 437767  
6. 238333 6. 329904 5. 859027 5. 426812 6. 379919 6. 425112 6. 101207 5. 658045 6. 253949  
4. 325134 4. 703099 4. 861073 4. 084621 5. 364919 4. 60382 4. 397271 4. 318448 4. 167722  
9. 026383 9. 323785 9. 406405 8. 981947 9. 349817 9. 289587 8. 729468 9. 481304 9. 532542  
3. 548435 3. 674628 3. 37457 4. 03264 3. 75448 3. 387033 3. 636268 3. 14243 3. 056579  
4. 080745 4. 553633 3. 500064 3. 465903 4. 705869 2. 360843 4. 172006 4. 013369 4. 090124  
2. 669866 2. 548078 2. 879169 2. 447467 2. 832436 2. 893981 3. 082583 2. 561362 2. 681419  
2. 423654 2. 95986 3. 17471 2. 636781 2. 150352 3. 193665 2. 772586 2. 452673 2. 243937  
4. 956374 5. 086319 4. 83566 4. 340896 4. 488867 5. 147537 4. 837608 4. 772356 4. 571184  
5. 031263 4. 984776 5. 609803 5. 03477 5. 467741 5. 108266 5. 565729 5. 884715 5. 365984  
1. 716435 1. 460748 1. 726846 1. 814279 1. 558819 1. 7315 1. 435808 1. 536443 1. 884229  
6. 926041 7. 148319 7. 043005 6. 42557 7. 539365 7. 175003 7. 068926 6. 996511 6. 332085  
6. 506622 5. 772887 5. 438323 5. 346102 5. 580484 5. 626911 6. 239983 5. 709572 5. 399425  
6. 523673 6. 261739 6. 098491 4. 680217 5. 77567 5. 426996 6. 190074 6. 062087 6. 171321  
4. 12299 3. 566389 3. 459819 3. 535379 3. 343176 4. 875389 3. 176076 3. 704245 3. 901836  
5. 722466 4. 331548 3. 971804 1. 830152 3. 712764 3. 777417 1. 600015 5. 504715 5. 061895  
1. 795228 1. 908356 2. 34707 2. 136562 2. 962678 2. 341707 2. 452735 2. 187907 2. 643332  
1. 549189 2. 108741 2. 133974 1. 583809 1. 580319 2. 726308 1. 701879 1. 914497 1. 530992  
1. 376331 1. 39302 1. 269806 1. 681008 1. 183812 1. 047842 1. 666509 0. 99989 1. 245099  
7. 606285 7. 49068 8. 09009 7. 831912 8. 138567 7. 604525 8. 033163 7. 993541 7. 876442  
1. 120093 1. 102809 2. 550865 3. 383946 1. 355388 1. 671054 1. 580229 1. 284715 1. 120093  
3. 957609 4. 282226 4. 085411 5. 503357 4. 420236 4. 725796 4. 542214 4. 467527 4. 584248  
5. 884725 6. 243854 4. 944005 5. 500567 6. 917905 5. 591547 5. 839765 5. 670024 4. 483428  
6. 752908 7. 14985 7. 452405 6. 149209 6. 63988 6. 771522 6. 556141 7. 123434 6. 222955  
4. 036064 2. 679809 2. 772757 4. 552407 2. 473929 2. 302667 2. 827408 3. 584556 3. 262391  
5. 581789 5. 994457 6. 220537 3. 996338 6. 376726 6. 21533 6. 39464 5. 974679 5. 295159  
6. 99803 6. 999861 5. 118553 6. 140557 6. 874251 6. 783753 6. 700657 7. 367469 5. 496454  
9. 654581 9. 55548 9. 810963 9. 929112 9. 367207 10. 01872 10. 67108 9. 386643 10. 32711  
5. 476269 4. 996743 4. 817068 5. 199169 5. 275168 5. 022602 5. 36499 4. 639373 7. 44851  
1. 484841 1. 960871 1. 799019 2. 139869 1. 976845 2. 380273 1. 8487 1. 923696 1. 660396

4. 062562 2. 21159 4. 291125 3. 647586 3. 379603 2. 816067 3. 376609 3. 150577 2. 852012  
1. 862889 2. 075489 1. 621108 2. 514015 1. 096037 2. 376523 0. 967617 1. 514778 1. 784712  
1. 528587 1. 546155 2. 807911 2. 39407 2. 477121 2. 998871 1. 64994 1. 91939 1. 791197  
5. 285381 3. 378322 4. 244041 3. 154378 4. 157473 3. 901559 4. 694967 4. 583783 3. 463248  
2. 89093 2. 003918 1. 772832 1. 672298 2. 60663 1. 484692 2. 352871 3. 31463 2. 247976  
6. 899363 6. 502471 7. 736874 7. 951351 6. 900069 7. 734114 7. 778643 7. 751925 5. 77188  
8. 570127 8. 521366 7. 76763 6. 899652 8. 638463 7. 331713 8. 712734 8. 79505 8. 530002  
2. 057273 2. 412969 3. 586614 1. 652263 0. 869328 1. 561568 4. 222379 3. 539057 1. 18865  
4. 941039 4. 879727 4. 848351 5. 24684 5. 346039 4. 233567 4. 318849 5. 186253 4. 373602  
2. 471811 3. 220025 3. 648553 3. 099182 2. 770602 2. 720881 2. 661874 2. 899121 2. 911071  
7. 513665 6. 009706 7. 249901 7. 065588 7. 151793 6. 947859 6. 071417 7. 133427 6. 612678  
7. 805397 7. 89093 7. 944091 8. 081922 8. 014174 8. 050158 7. 975429 7. 714597 7. 640689  
4. 589089 5. 240649 5. 026424 5. 54344 4. 534055 2. 676922 5. 647793 5. 729569 6. 129481  
1. 900377 2. 019859 1. 863344 2. 319766 1. 200983 1. 731594 1. 657644 2. 143188 1. 831076  
3. 479802 2. 740714 2. 822907 4. 134216 4. 486028 4. 173318 3. 322874 4. 261852 2. 92274  
6. 671881 7. 2332 7. 30907 7. 316946 7. 347146 6. 843714 7. 223734 7. 145681 7. 133474  
6. 223717 6. 091617 6. 568234 6. 345082 6. 619679 6. 813652 7. 168067 6. 398405 6. 909962  
1. 755017 2. 4714 1. 430561 2. 678421 1. 532107 2. 542295 2. 543597 3. 052082 1. 932784  
2. 203217 1. 829075 1. 448676 2. 202308 2. 264056 2. 270817 1. 950753 2. 882093 1. 774935  
3. 867518 3. 802182 4. 079035 3. 804431 4. 527657 3. 566559 4. 03396 4. 327737 3. 408907  
5. 58982 5. 559451 5. 386979 5. 881741 5. 396727 4. 878665 5. 734786 6. 026311 6. 092877  
6. 481416 6. 408846 6. 415334 5. 929756 6. 398303 6. 170041 6. 622083 6. 588244 5. 465579  
6. 71759 6. 776478 6. 708307 6. 90887 6. 822298 6. 928425 6. 48754 7. 210396 7. 144579  
5. 013158 4. 569021 5. 681469 5. 121807 5. 205735 5. 098839 5. 097366 5. 465257 3. 75991  
1. 819977 1. 347234 2. 669169 2. 302351 2. 078032 1. 517716 1. 702823 2. 855261 2. 307878  
7. 507744 7. 623018 7. 485369 7. 066762 7. 268618 7. 577937 7. 306513 6. 955524 7. 447975  
4. 409343 4. 854909 4. 176522 3. 044398 4. 163457 4. 767731 4. 489476 4. 242102 3. 078099  
4. 704393 4. 623353 4. 580711 4. 738485 5. 060173 4. 240556 4. 541607 4. 78706 3. 365661  
5. 79476 3. 425753 2. 672081 4. 39329 3. 370675 3. 928488 3. 265976 3. 068682 2. 91128  
3. 958657 4. 169595 3. 139652 4. 017767 4. 722503 5. 080859 4. 232028 4. 549832 5. 366456  
3. 854214 4. 235929 3. 598974 3. 621384 4. 589961 3. 527676 2. 639818 3. 620231 2. 469368  
5. 03704 4. 730437 4. 682481 5. 920194 4. 719552 5. 577472 5. 102188 5. 348458 5. 51747  
2. 220754 2. 613617 2. 10353 2. 917025 3. 171943 2. 878387 2. 095926 2. 526043 2. 436058  
3. 333241 3. 321353 4. 564013 6. 609159 4. 873918 3. 325893 3. 53057 3. 578398 3. 327806  
6. 151759 6. 581656 5. 896729 5. 41591 6. 679325 6. 571789 6. 072821 6. 22714 6. 391213  
5. 24932 5. 674967 5. 326414 5. 091439 5. 496569 5. 068827 5. 743232 5. 24932 5. 011613  
4. 120126 4. 327694 4. 938227 3. 582781 2. 858387 3. 843142 3. 749029 4. 593697 4. 278008  
8. 073599 8. 416757 8. 657209 7. 751371 8. 258533 8. 706947 7. 314033 8. 417076 7. 742013  
5. 602049 5. 014468 5. 273021 5. 614907 5. 392387 5. 145884 6. 208245 5. 39674 6. 210493  
2. 442572 1. 367149 1. 547607 2. 52118 1. 424611 1. 935056 2. 082988 1. 972221 1. 344737  
2. 242033 2. 268057 2. 327187 1. 880345 1. 95133 2. 429282 1. 854101 1. 734472 1. 588172  
2. 510183 2. 681796 2. 165574 3. 326207 3. 070846 2. 402561 2. 569808 2. 402697 2. 204645  
1. 505831 1. 220118 1. 418521 2. 211187 2. 435239 2. 367446 1. 707559 1. 882403 2. 863981  
7. 041932 7. 071748 7. 516639 6. 589388 7. 039608 7. 175073 7. 294386 6. 978114 6. 36404  
5. 414897 5. 32848 5. 327688 5. 180706 4. 821655 5. 635179 5. 044582 4. 934334 4. 346797  
8. 250509 8. 732309 8. 788273 8. 315691 9. 000397 9. 460263 8. 651085 9. 204763 8. 817523  
2. 252931 2. 520032 2. 036484 2. 817201 2. 740689 2. 251342 2. 605913 2. 407624 2. 034786  
2. 45001 3. 58649 2. 77532 2. 542812 2. 430338 3. 663759 2. 014048 2. 069079 1. 697065  
6. 180718 6. 163725 6. 273417 5. 869984 5. 797464 6. 173776 6. 875941 6. 029448 5. 866541  
1. 703108 1. 185777 1. 514122 1. 92459 1. 527304 1. 208281 2. 032842 1. 814407 1. 59604  
3. 763774 2. 372972 4. 715311 4. 281603 2. 43347 3. 404024 3. 755731 4. 378148 4. 236753

2.916799 3.341063 3.871944 2.207258 3.409487 3.036014 3.69627 3.324848 1.594525  
8.824177 9.317257 8.953077 9.175536 9.31352 8.885853 9.299986 9.282807 8.620865  
4.639241 4.22812 4.650056 3.457533 3.896463 4.643149 4.893887 3.857235 4.461162  
1.366663 1.599128 1.47852 1.932843 1.197343 1.917049 1.327915 1.413604 1.55216  
6.873174 7.349413 7.137529 6.803186 7.634388 6.743752 7.417145 7.086126 6.837161  
1.960892 3.361467 4.041497 1.628398 1.855805 2.614177 1.99677 1.819439 1.993543  
8.043557 7.68168 7.408275 7.412274 7.946307 7.420178 7.931334 7.768194 8.07659  
5.472709 4.509624 4.346542 3.647191 4.366774 4.091031 4.766621 4.608668 4.898472  
4.453486 4.233651 4.957773 4.257537 4.969011 4.619721 4.898528 4.955941 3.168352  
7.634409 6.958862 7.455108 6.950959 5.790132 8.027812 7.497179 7.054149 7.541189  
7.476703 7.187506 8.339851 7.179246 6.72432 6.941009 7.37583 7.547288 4.037667  
2.57306 2.821508 2.778737 3.300239 3.274079 3.587128 2.953278 2.289809 2.56587  
3.735504 3.111188 1.999062 1.988612 3.329776 2.440439 2.984616 2.713546 2.869917  
2.642409 2.791692 2.316308 2.123806 2.345814 1.912804 2.569172 2.451914 2.362092  
6.368733 5.983013 6.119776 4.952831 6.109037 5.848408 6.466 6.45769 6.462527  
5.358511 7.305539 6.215057 7.591173 7.011022 7.984564 6.702263 8.146768 6.315379  
1.406376 2.475655 1.892176 1.881331 1.334349 2.152821 1.391738 1.445149 2.129434  
2.614273 2.050061 2.616915 4.210205 3.679433 2.947405 2.472098 2.7785 2.977896  
7.609073 7.054409 7.512635 7.126687 7.04293 6.646379 7.475799 6.781036 7.460878  
5.310288 5.79636 5.237296 6.050404 5.780258 4.523555 4.413638 5.848098 5.191056  
1.662085 1.935828 1.393535 1.437902 1.494633 1.366163 1.821178 1.549325 2.437303  
4.578121 5.718902 6.092684 6.271327 6.097159 5.713369 6.58807 5.291312 5.529272  
1.954744 3.692852 4.428098 4.690335 3.227698 3.634391 3.62464 4.000397 3.122159  
2.088906 2.042213 2.797531 3.248988 3.067467 2.770114 2.233272 2.260709 2.619168  
3.970306 4.32725 4.17265 4.184394 4.861148 3.174203 4.609426 4.341398 4.086027  
1.725039 1.687039 1.924329 2.888327 1.239849 1.761304 2.13069 1.516223 1.536395  
2.861807 3.128389 1.77134 1.772971 1.495188 1.68414 2.015028 2.926518 1.852814  
5.021349 4.734721 5.112158 3.800731 4.909071 4.21502 5.276881 5.328341 3.92162  
1.581162 2.515579 1.895383 1.601843 2.08367 1.810323 1.671197 1.732672 2.137589  
2.738315 2.145491 2.219003 1.94715 1.710096 1.415837 2.088595 1.417816 1.380313  
1.58257 1.227456 1.088086 0.957659 1.138817 1.357795 1.426857 0.840813 1.330402  
7.199039 7.414781 7.070192 7.336074 7.031652 6.643042 7.174222 7.350866 7.153417  
2.19383 1.812301 1.946724 2.470892 1.680968 1.708186 1.983349 2.832148 1.661264  
7.588592 8.094009 8.564667 8.048951 8.295992 8.463717 7.672244 8.501715 6.797852  
6.27797 5.90833 6.258325 6.351338 5.879975 6.040496 6.511246 6.464116 5.817833  
6.483368 6.584944 6.751087 6.918846 6.50439 6.886989 6.436738 6.629497 6.578166  
5.352012 4.934002 4.426479 4.505056 4.520515 4.565151 4.662768 4.687742 4.72854  
6.587069 7.193305 6.68117 6.613211 6.650103 6.782167 6.699613 6.701068 6.448918  
4.139806 3.419238 1.640851 2.663456 3.470739 2.665406 3.632313 4.460725 4.206822  
1.039247 1.076272 1.274721 1.574897 1.477075 2.612435 1.658631 0.93046 2.063716  
5.026166 4.908726 3.906056 5.799679 5.156562 3.436622 5.352474 4.174814 5.407093  
3.558829 2.601797 2.768176 3.56112 3.621494 3.313086 2.92245 2.637391 3.174141  
6.083748 5.539971 5.759326 6.323401 5.857788 5.862034 5.778169 5.731245 5.700678  
4.224467 4.629498 5.538682 5.520366 5.304585 4.868766 6.133852 5.337921 5.504321  
5.28701 5.574829 5.692072 5.370944 5.152205 6.16481 6.876423 5.928949 4.712468  
1.297006 2.178557 1.696769 2.066112 1.66745 2.122143 2.169572 1.914022 1.917533  
6.545694 6.10651 5.946332 5.35162 6.174332 5.970083 6.917871 6.258672 6.080233  
0.88794 1.641357 1.690978 1.162272 1.319468 1.061418 0.97079 1.26793 1.1884  
4.209757 3.443411 2.661739 3.49846 3.574954 3.50227 3.699605 2.473706 4.319798  
7.178901 6.484685 6.033439 6.259505 7.227401 6.730538 6.499948 6.965824 5.755953  
7.766152 8.985107 6.642398 9.160882 10.60208 8.331128 8.064939 8.993815 8.501803

3. 353419 2. 583112 2. 106391 3. 75562 3. 140111 2. 84544 3. 910299 3. 490116 3. 836947  
0. 547521 1. 281003 1. 409967 0. 996874 0. 792959 2. 634024 0. 77185 1. 298753 1. 377312  
1. 91758 2. 759419 5. 613106 1. 217508 2. 998171 1. 578636 1. 714539 1. 053774 4. 058723  
6. 04016 5. 820986 5. 133617 6. 281103 4. 90997 7. 216089 4. 362362 6. 600171 6. 951659  
4. 90995 5. 384281 4. 868849 5. 755526 8. 328132 4. 979326 5. 629858 5. 776319 5. 613739  
7. 653695 7. 260574 7. 266956 7. 552324 7. 478701 7. 430394 7. 367924 7. 337113 7. 028163  
4. 85687 5. 612473 4. 889984 5. 433739 9. 140791 4. 420197 5. 274306 5. 876793 5. 275895  
5. 675236 5. 415931 5. 444139 5. 690261 5. 285415 4. 295757 5. 047823 5. 868589 6. 066579  
1. 286459 1. 166109 1. 182651 1. 849906 0. 531216 1. 13336 0. 901609 0. 467713 0. 63516  
1. 626882 0. 85024 1. 294556 1. 248153 1. 169668 1. 412317 1. 13487 0. 984998 1. 312134  
1. 355523 1. 706599 1. 713676 1. 531612 1. 539035 1. 496183 1. 517107 1. 691575 1. 287671  
1. 335025 0. 982698 0. 85538 1. 062574 1. 585263 1. 717998 1. 131609 0. 455049 0. 949759  
2. 117532 3. 011844 2. 73712 1. 835482 1. 848617 1. 774822 2. 033448 2. 696435 2. 298769  
1. 003488 1. 211073 1. 527898 0. 928921 0. 99206 1. 625809 0. 994036 0. 716149 1. 098141  
0. 940337 2. 194005 1. 030112 1. 419947 1. 897766 1. 512086 0. 875956 1. 223799 1. 23899  
6. 6147 6. 308687 6. 243961 6. 218588 5. 729432 6. 530916 5. 922155 6. 226831 6. 064407  
0. 582204 1. 017984 1. 06328 1. 123366 1. 783274 1. 77969 1. 063325 1. 014891 0. 822808  
5. 192262 4. 020285 4. 205089 5. 898642 4. 422322 4. 118242 4. 442984 3. 464855 4. 848498  
0. 782701 1. 903415 0. 7978 1. 25681 0. 559355 0. 950027 1. 207407 1. 184005 0. 600071  
1. 03328 2. 149244 1. 958466 2. 106012 2. 424655 1. 388379 1. 430644 1. 029525 1. 186135  
1. 257516 0. 961227 1. 231346 1. 095827 1. 508799 1. 534606 1. 089215 1. 271087 1. 31813  
1. 115423 1. 069371 0. 959036 1. 249584 1. 136597 1. 594735 1. 112156 1. 04897 1. 482377  
0. 855623 0. 884061 0. 928666 1. 332428 0. 807677 1. 798166 1. 014206 1. 065999 0. 905156  
0. 842313 1. 610653 1. 352662 0. 961994 1. 289918 1. 220463 1. 184814 1. 148003 1. 30347  
1. 450452 1. 335948 1. 293121 2. 170925 1. 94207 1. 933692 1. 25613 1. 616396 1. 452669  
2. 035084 2. 47132 2. 343787 2. 667386 2. 009794 1. 769567 1. 844851 2. 062272 1. 517137  
0. 926902 0. 990618 0. 926538 1. 364478 0. 9557 1. 130251 0. 984628 0. 74217 0. 671029  
2. 140295 2. 653379 2. 299714 3. 981026 2. 024697 2. 607304 2. 928711 2. 679285 2. 186058  
3. 459739 2. 973355 2. 820191 2. 234967 1. 949578 2. 927002 1. 163267 1. 647769 2. 313274  
1. 037134 0. 813412 1. 147045 1. 14129 0. 829359 1. 137335 1. 064513 0. 869224 0. 887958  
2. 959566 3. 018675 3. 355092 2. 803141 2. 516951 3. 21818 2. 71679 2. 790621 3. 286369  
4. 020688 5. 337973 4. 086115 2. 655286 4. 174974 4. 555988 3. 268763 4. 81223 5. 127557  
2. 342753 2. 170384 2. 356483 3. 294984 2. 272916 2. 949247 1. 956265 2. 827507 2. 577222  
2. 859186 2. 962401 3. 476108 1. 396642 1. 695928 2. 506989 2. 137773 1. 814475 4. 01824  
3. 45086 3. 425236 3. 816729 3. 170236 3. 408306 3. 242789 3. 371318 2. 78629 3. 531148  
1. 975196 1. 658706 1. 372907 1. 906921 0. 836301 1. 703474 1. 944046 1. 304758 2. 329036  
1. 744165 1. 432758 1. 1355 1. 236043 1. 680674 1. 556239 1. 416474 1. 375672 1. 430895  
9. 358821 9. 705572 9. 496923 8. 260392 10. 03465 9. 195719 9. 536191 9. 774325 9. 170735  
7. 552456 7. 734496 7. 483158 6. 519145 7. 369892 7. 513737 7. 736292 7. 622563 6. 424402  
1. 428983 1. 684411 1. 896044 2. 30435 1. 914647 2. 017424 2. 794449 1. 402671 2. 007089  
6. 449089 6. 493089 6. 387532 5. 756402 6. 372025 6. 936839 6. 644496 6. 48063 5. 92783  
8. 768529 8. 349841 8. 280063 8. 051091 8. 027621 8. 389428 8. 597011 7. 95843 8. 577885  
1. 728187 1. 685501 1. 177238 1. 535048 1. 201085 2. 024056 1. 626721 1. 494605 1. 156719  
4. 727541 4. 606459 5. 015094 4. 952584 5. 064043 3. 808387 4. 403895 4. 415289 4. 114138  
3. 921996 3. 982414 4. 002908 4. 157012 2. 362003 5. 074937 4. 073142 5. 976236 5. 121157  
1. 848391 1. 28041 1. 562858 2. 413251 1. 889495 2. 106555 1. 79443 1. 261391 1. 611368  
6. 435386 7. 026046 6. 747541 5. 430952 6. 477961 6. 933787 6. 993197 6. 544475 6. 373518  
4. 666769 4. 245328 4. 749604 5. 279231 4. 416392 4. 44634 4. 079578 4. 767841 4. 374767  
2. 753271 1. 446226 1. 771403 2. 188718 2. 181272 1. 841384 1. 349001 4. 602146 3. 518794  
1. 618194 0. 898081 0. 674209 2. 264242 1. 822921 2. 212769 1. 143206 1. 920795 1. 473235  
1. 924464 1. 8102 1. 284653 1. 531481 1. 882438 0. 821619 1. 191549 0. 898759 1. 431245

1. 894399 2. 223783 2. 080339 2. 964504 1. 909418 2. 573028 1. 803437 2. 7866 2. 521565  
3. 690885 2. 573719 3. 100094 5. 122323 3. 770155 3. 01331 4. 672691 2. 144015 4. 568542  
3. 328933 3. 327585 3. 692635 2. 697357 2. 384176 3. 758188 4. 075953 3. 825783 4. 323665  
0. 888441 0. 833963 0. 739267 1. 066907 1. 156641 1. 46979 0. 915712 0. 815412 1. 168407  
1. 994422 1. 621726 1. 02737 1. 916802 1. 488683 1. 75706 1. 682691 2. 290499 2. 284615  
1. 194354 1. 538323 1. 197774 2. 162748 1. 658374 2. 083653 1. 287048 1. 687429 2. 717668  
2. 384034 2. 044053 2. 313353 2. 222915 2. 170429 2. 270547 2. 0101 2. 561341 2. 079679  
1. 129446 1. 126807 1. 224764 2. 185707 1. 872105 1. 778263 1. 021487 1. 565527 1. 452198  
2. 353176 3. 272739 3. 075197 2. 608048 1. 986642 1. 832652 1. 919086 1. 571474 2. 385142  
7. 020032 7. 10715 6. 532032 5. 787297 6. 728811 6. 528426 6. 877533 6. 555278 7. 147662  
2. 90317 2. 389099 3. 391766 3. 302243 2. 059519 2. 069999 2. 521503 2. 205524 2. 542994  
7. 228432 6. 96557 5. 987072 6. 940415 7. 78656 7. 001334 7. 167224 6. 80373 6. 537072  
4. 084583 4. 165743 3. 604631 5. 206344 4. 042669 4. 451425 3. 724253 4. 15427 4. 735229  
4. 65762 6. 093649 4. 870533 5. 378461 5. 409826 4. 729525 4. 555858 5. 729082 6. 13731  
6. 399222 6. 3168 6. 452422 5. 604343 5. 742926 6. 428055 6. 643604 6. 665533 7. 203264  
3. 157651 3. 511728 3. 849817 3. 090789 3. 205456 3. 50357 2. 786725 3. 410053 2. 705911  
2. 069992 1. 95795 2. 562746 2. 83373 2. 534468 1. 933798 2. 403212 1. 736381 2. 510643  
1. 875505 2. 189672 1. 707704 1. 908051 2. 631378 2. 267073 1. 396659 1. 636688 2. 113567  
2. 891275 3. 072582 4. 244002 3. 197712 2. 915057 2. 457484 3. 017415 2. 318145 2. 368652  
2. 041418 1. 194901 1. 35881 1. 768237 1. 3143 1. 331985 1. 484476 1. 433385 1. 854504  
2. 006017 1. 791957 2. 710614 2. 485142 1. 682838 2. 206954 1. 691177 2. 281709 2. 185758  
1. 427713 1. 725586 1. 74962 1. 880686 1. 514668 1. 410059 1. 710464 1. 189809 1. 893546  
9. 110279 9. 143364 9. 002434 8. 597117 8. 963414 9. 020827 9. 099101 8. 874893 9. 376562  
2. 112317 1. 991535 2. 075224 2. 923993 2. 541589 2. 183288 2. 912886 2. 188059 2. 34363  
2. 287672 1. 567789 2. 551726 1. 894092 1. 339381 1. 621772 2. 611215 1. 463408 1. 41929  
0. 953407 0. 850342 0. 879795 1. 88299 0. 841793 1. 122053 2. 027325 1. 69505 1. 749773  
1. 080839 1. 399417 1. 190565 1. 563363 1. 061995 1. 689303 1. 916799 2. 549777 1. 199581  
1. 78003 1. 420023 1. 585015 2. 797573 2. 815452 1. 468794 1. 794558 2. 272905 1. 654221  
0. 979243 0. 862298 1. 185087 2. 268989 2. 931528 1. 69707 1. 174558 0. 756645 1. 237637  
2. 635939 1. 849654 2. 323859 2. 628603 2. 137359 2. 218063 1. 9377 2. 304484 1. 774387  
5. 189818 5. 044424 5. 806389 5. 331286 5. 578222 5. 561508 5. 816882 5. 656213 5. 589522  
1. 445314 2. 358696 1. 694199 2. 131313 1. 224367 2. 579567 3. 683763 3. 062109 1. 753068  
5. 606452 6. 012405 5. 398341 4. 788986 5. 564671 5. 754802 6. 102481 5. 657813 5. 926924  
4. 737045 4. 604212 5. 114334 3. 542381 4. 993764 5. 103401 4. 746136 4. 636548 5. 080446  
5. 039644 4. 760511 4. 443436 5. 386278 4. 285173 5. 246398 4. 702997 5. 53485 5. 024529  
2. 159434 1. 273586 1. 983031 2. 039793 2. 761769 3. 252708 1. 891934 1. 683005 1. 714195  
1. 378028 1. 854595 1. 959099 2. 626145 1. 470279 2. 385957 2. 885658 1. 870323 2. 731562  
1. 805571 1. 503959 2. 075274 1. 381935 1. 766518 1. 087809 2. 147088 1. 31175 1. 697005  
6. 928232 7. 035435 6. 887605 6. 769053 7. 144515 7. 122207 7. 020165 6. 841994 6. 451195  
2. 226534 1. 412332 1. 386786 1. 592334 1. 890945 1. 781069 1. 307333 1. 445299 2. 270766  
1. 282927 1. 364107 1. 285063 1. 060238 1. 177256 1. 372802 1. 354356 0. 986226 1. 007989  
9. 353309 8. 665731 8. 213093 7. 810209 9. 385822 10. 46359 4. 311877 10. 07227 7. 662249  
1. 868641 1. 730976 1. 814988 2. 677266 1. 664907 1. 838785 1. 499862 2. 387549 2. 299878  
1. 583504 1. 838876 1. 704741 2. 420052 1. 872464 2. 220685 1. 622699 1. 850614 2. 100337  
2. 002316 2. 063537 2. 071981 2. 907109 2. 385384 2. 99346 2. 190633 2. 331789 2. 570797  
1. 617898 3. 506984 3. 129997 2. 847064 2. 264543 2. 850339 2. 663327 2. 838303 3. 547315  
7. 605584 8. 063668 8. 137677 7. 553875 8. 020876 7. 287064 7. 833641 8. 19249 7. 909604  
4. 526949 5. 504617 5. 429756 4. 036937 5. 0542 5. 311241 6. 304981 5. 67011 4. 372612  
6. 936446 6. 58462 5. 345545 7. 470987 6. 242185 6. 669248 6. 921311 7. 371624 6. 698598  
3. 929991 5. 290358 4. 38716 7. 691266 4. 873027 4. 704094 3. 771758 3. 781283 3. 335113  
2. 344467 2. 464023 2. 498187 3. 797147 2. 252184 2. 501018 3. 717725 2. 477629 3. 219789

2. 543786 2. 189361 2. 328551 2. 391926 2. 826019 1. 856621 1. 955043 1. 944857 1. 864809  
1. 837859 1. 947109 1. 454657 1. 974975 1. 360682 2. 256849 1. 53663 1. 808292 2. 992004  
5. 81734 6. 593602 6. 007527 3. 602346 6. 397741 5. 81462 5. 991543 5. 772742 4. 861477  
2. 707083 3. 706781 2. 580756 1. 97779 3. 653081 2. 337082 3. 417823 3. 581135 2. 767132  
3. 840939 2. 989479 3. 130569 3. 065916 2. 982303 3. 739524 3. 069103 3. 697308 2. 188491  
3. 042236 2. 782279 2. 508826 3. 601115 3. 397008 2. 773469 2. 281907 2. 857149 2. 078962  
1. 766301 1. 817998 1. 939269 2. 430703 1. 904628 1. 906878 1. 837102 1. 696108 2. 115211  
2. 6416 1. 782359 1. 949013 2. 995343 2. 084635 2. 813804 1. 92547 3. 022825 1. 748872  
6. 094408 6. 018321 6. 188897 5. 294429 6. 356257 6. 299674 6. 409101 6. 681897 6. 623646  
1. 00342 0. 806951 0. 865017 0. 884489 1. 086821 0. 81217 0. 807493 0. 840894 0. 871831  
7. 949887 8. 132703 8. 194667 7. 377645 7. 977587 8. 32493 8. 103976 8. 467748 7. 221812  
2. 005228 1. 411191 1. 669811 1. 99842 0. 929371 0. 99749 1. 03699 2. 016511 1. 458445  
2. 622832 2. 260508 2. 599612 2. 025641 2. 938039 3. 076912 2. 552326 4. 415082 2. 425454  
3. 270073 3. 924892 3. 698145 3. 830371 3. 134838 3. 418504 4. 465704 2. 52505 3. 908396  
1. 377352 1. 325988 1. 358835 1. 322851 1. 489605 1. 820785 1. 615209 1. 087739 1. 416627  
1. 473326 3. 169644 1. 49433 1. 919153 1. 62778 1. 140768 1. 529401 1. 820434 0. 948812  
2. 079338 1. 695796 1. 288996 1. 39079 1. 346901 1. 151358 1. 037949 1. 306421 1. 177511  
1. 409744 2. 244883 2. 497464 3. 03126 1. 264714 1. 471658 1. 104826 2. 661158 1. 165108  
2. 810816 3. 405881 2. 979281 2. 230172 2. 507573 2. 324164 2. 364222 3. 263345 3. 712086  
3. 2918 3. 216586 3. 915497 4. 361454 3. 213 3. 443237 3. 215629 3. 369223 4. 157974  
9. 559462 9. 510703 9. 427812 8. 907282 9. 355161 9. 41306 9. 306513 9. 928125 9. 448603  
1. 118924 1. 150169 1. 310979 1. 759031 1. 174459 1. 455201 1. 269123 0. 859582 1. 005053  
2. 290599 0. 895131 0. 884599 2. 801468 1. 225906 2. 170186 0. 669841 1. 077339 1. 244329  
1. 532267 0. 820042 0. 734701 1. 186673 0. 925081 0. 94399 1. 323922 1. 899535 0. 797333  
5. 160851 5. 428245 5. 56786 5. 607116 5. 606125 5. 097664 5. 045032 5. 382287 3. 930158  
3. 284448 2. 973337 4. 192296 3. 419541 3. 929891 3. 453801 4. 174758 3. 461423 4. 532475  
2. 092293 1. 176208 1. 740728 3. 929302 1. 510748 2. 293477 2. 006525 1. 843899 1. 954632  
4. 58195 4. 743826 4. 387571 4. 030287 4. 572958 5. 272907 4. 443312 5. 143638 4. 056076  
5. 745487 4. 900872 5. 05121 3. 800896 5. 453171 5. 514226 4. 508081 4. 948851 4. 755002  
6. 437734 6. 451272 5. 572062 4. 710247 6. 328832 7. 193684 5. 326961 5. 770383 6. 244926  
2. 170392 1. 661826 2. 378979 1. 509253 1. 854047 1. 785196 2. 0653 1. 514698 1. 610134  
5. 704957 5. 686947 5. 700435 5. 011258 5. 540298 5. 708256 5. 264899 6. 015068 4. 790911  
2. 043374 1. 72319 1. 590246 1. 899867 1. 65681 2. 308984 2. 155904 1. 343436 3. 295866  
8. 031305 8. 221399 7. 795473 7. 753607 8. 011084 8. 099643 8. 203143 8. 078128 7. 833291  
6. 200345 6. 260956 6. 224255 5. 458918 6. 379773 6. 409063 6. 173953 6. 568461 6. 166518  
2. 01348 3. 438264 1. 926948 1. 909032 2. 762171 1. 770299 2. 306957 2. 086879 1. 773089  
6. 538741 5. 057419 5. 7986 4. 566523 5. 519541 6. 797671 5. 402223 6. 180578 7. 050833  
1. 137831 1. 096484 3. 53746 2. 107875 1. 629423 1. 606464 2. 463798 1. 197545 1. 429802  
2. 329998 1. 972418 2. 487693 2. 762049 1. 96449 2. 507884 2. 437208 2. 403413 2. 313344  
4. 80308 4. 396237 5. 258135 4. 900485 4. 913484 4. 21682 4. 353883 3. 836651 4. 160589  
1. 769844 2. 204144 3. 345619 2. 687407 2. 028733 2. 100558 2. 898655 2. 455516 2. 79125  
3. 34505 1. 884544 3. 65836 3. 567916 3. 61984 4. 160903 2. 543273 3. 487578 3. 465755  
1. 908166 1. 372201 1. 797707 1. 50222 1. 128275 2. 167536 1. 379397 1. 505136 1. 249448  
5. 055537 4. 390705 5. 37152 5. 410388 5. 546098 4. 534684 4. 029846 4. 553023 4. 176777  
3. 866004 4. 793411 4. 601673 4. 215995 4. 25527 3. 993637 4. 001325 4. 395599 3. 618949  
8. 686052 8. 746313 8. 643341 8. 277557 8. 375681 8. 6465 9. 131641 8. 438739 8. 970764  
6. 612424 4. 689999 6. 057179 4. 292989 4. 881907 7. 984444 6. 195251 7. 155007 7. 7858  
4. 833406 6. 861618 2. 78669 5. 449936 6. 071662 5. 368722 5. 627537 5. 281886 6. 453814  
1. 841347 2. 044284 1. 712256 2. 337575 1. 603693 2. 547719 1. 619856 1. 953397 2. 43245  
8. 204056 7. 650147 9. 371713 7. 988206 9. 061516 9. 274729 8. 917652 8. 435279 9. 33572  
1. 154473 0. 763299 1. 138296 2. 53664 1. 149272 1. 042606 1. 14217 1. 509322 1. 252189

2. 072073 2. 542249 3. 208275 2. 530832 2. 014397 1. 965374 1. 911288 1. 904527 2. 484793  
2. 236217 2. 033531 2. 658813 3. 295332 2. 430617 2. 114826 2. 724833 3. 182126 1. 658185  
3. 274079 3. 468205 2. 942762 2. 547799 2. 829315 3. 612742 3. 151396 2. 736781 2. 319247  
1. 205933 1. 244331 1. 333735 1. 636129 0. 891619 0. 987507 0. 816966 1. 300126 1. 250843  
3. 64957 3. 481026 4. 666507 3. 577818 3. 415788 5. 368727 2. 455642 2. 399644 5. 769345  
6. 398322 6. 560426 6. 131188 6. 4645 6. 598258 6. 420436 6. 657839 6. 560092 5. 971077  
1. 970684 1. 932007 1. 837638 2. 174676 1. 344063 1. 622011 2. 338201 1. 787363 2. 031061  
4. 400002 4. 753414 4. 659688 4. 21509 4. 38461 3. 34044 3. 750159 4. 360064 4. 53557  
3. 754008 3. 480887 3. 599345 3. 632827 3. 58336 4. 789762 3. 559999 3. 494339 3. 455868  
6. 802074 6. 979434 6. 575015 6. 3073 7. 078799 6. 914063 6. 701414 6. 382974 6. 243542  
2. 491555 3. 083292 3. 025376 2. 51535 1. 94392 2. 421837 2. 700898 1. 957384 2. 144504  
2. 309397 2. 44104 2. 833494 2. 723546 2. 506622 2. 100363 2. 292997 1. 79183 2. 444073  
1. 742809 1. 479747 1. 694638 2. 60331 1. 888996 1. 293577 1. 819552 2. 256365 1. 941142  
5. 952448 6. 434942 5. 649145 5. 638542 6. 069977 6. 260629 6. 176006 5. 916583 6. 20014  
1. 436943 1. 759067 2. 240231 2. 013854 1. 462494 1. 330855 1. 839994 1. 955377 1. 637064  
4. 031346 3. 794391 3. 928745 2. 987423 3. 403553 3. 477659 3. 03349 4. 171558 3. 369942  
7. 839471 8. 549028 8. 268947 7. 8319 8. 622053 8. 163277 7. 750189 8. 492964 8. 266001  
6. 446822 7. 355507 7. 053021 7. 012486 7. 120376 7. 588343 7. 127116 7. 585957 5. 998806  
3. 840173 1. 532342 1. 860689 4. 208661 1. 38728 2. 28774 1. 912872 1. 481798 4. 210666  
8. 710622 9. 000795 8. 960587 8. 506922 8. 912833 9. 198717 8. 91847 9. 507687 8. 380717  
1. 770645 1. 453915 2. 347258 2. 15666 1. 798888 2. 743202 3. 040253 2. 722559 2. 274098  
4. 879111 4. 830782 4. 5709 5. 407267 4. 094374 4. 955141 5. 175206 5. 14609 4. 673884  
0. 965531 0. 769052 1. 113206 1. 766579 3. 61817 1. 13907 1. 377451 1. 310333 1. 376493  
5. 193483 5. 369612 4. 295541 5. 248977 4. 052057 6. 290603 2. 82821 5. 798082 5. 527826  
9. 719881 9. 506922 9. 82169 9. 539648 9. 710683 9. 60903 9. 926799 9. 672182 10. 18632  
1. 799385 2. 065593 2. 767836 2. 217148 1. 847147 2. 805972 1. 8424 1. 735254 2. 303393  
5. 568716 5. 788452 5. 866684 5. 650916 5. 472666 5. 686492 5. 611667 6. 039371 5. 709002  
3. 449362 3. 808398 3. 518886 3. 304333 3. 560033 3. 33477 3. 485735 4. 488346 3. 350805  
6. 619207 6. 210862 6. 369642 6. 13754 6. 000419 6. 378643 6. 537379 6. 088714 6. 47459  
5. 159785 5. 316689 4. 751109 4. 862587 5. 377859 5. 156925 5. 07913 5. 641525 5. 624451  
1. 387718 2. 213296 2. 077026 1. 708715 1. 739629 1. 727968 1. 628271 1. 422074 1. 870321  
3. 558855 4. 645773 4. 897235 5. 440474 3. 905755 4. 817407 4. 125677 4. 621726 4. 2228  
1. 341736 1. 680841 1. 622068 2. 323353 1. 10887 1. 402443 1. 365767 1. 149393 1. 496237  
2. 328675 2. 67564 2. 156487 2. 345187 2. 47346 1. 994153 1. 671501 2. 139343 1. 770119  
1. 960933 2. 331958 2. 397751 3. 07638 2. 255218 2. 187359 1. 697332 2. 292501 1. 983194  
3. 459512 3. 13203 3. 152928 2. 914415 3. 174375 3. 53473 3. 207794 3. 282168 3. 373169  
6. 336296 5. 892497 5. 211764 5. 853315 6. 321282 5. 876366 5. 865648 4. 968167 6. 581513  
2. 480487 2. 420556 1. 985581 2. 464365 2. 187089 2. 058097 1. 988237 1. 507999 2. 342402  
7. 091862 7. 522584 7. 209978 7. 559365 7. 670294 7. 308193 7. 181307 7. 613278 6. 50521  
6. 718596 7. 269077 6. 843539 6. 223142 6. 93282 7. 440809 6. 500791 6. 786055 6. 890014  
7. 847424 7. 95754 7. 848669 8. 012474 7. 762279 7. 916681 7. 991599 7. 907998 7. 473451  
1. 635565 1. 655629 1. 492023 1. 529778 1. 79319 1. 811622 1. 784892 2. 284247 1. 195343  
6. 770018 7. 03353 6. 703083 6. 208542 6. 909507 7. 050919 6. 921795 7. 069169 6. 142281  
7. 050586 6. 831713 7. 391162 6. 717064 6. 737541 6. 732727 6. 804416 6. 9815 5. 868501  
5. 646606 5. 744024 5. 038573 5. 309561 5. 896379 5. 681153 6. 072122 5. 243698 5. 055331  
2. 776976 1. 607244 2. 515236 2. 140016 2. 16753 2. 701615 1. 893646 1. 792485 2. 993747  
5. 699353 5. 166761 5. 718033 4. 748246 5. 605582 5. 2883 5. 591648 5. 281782 4. 616551  
2. 206157 1. 746583 2. 486204 2. 190784 1. 718223 2. 219281 1. 404951 1. 52836 4. 152702  
0. 765161 1. 597283 2. 138842 1. 558764 1. 377119 2. 592167 1. 502309 0. 710313 3. 415506  
1. 231199 0. 991642 1. 466543 1. 604546 1. 304245 1. 185306 1. 170812 1. 312495 1. 374339  
1. 359426 1. 763623 1. 412964 2. 482013 1. 42017 1. 563049 1. 020922 1. 395563 1. 66474



1.742418 1.390064 1.865572 1.54892 1.47612 0.86192 1.00449 2.005325 1.044594  
0.907713 0.798519 0.64477 1.288495 0.744268 1.367155 1.041448 1.285499 3.149419  
0.990229 1.147602 0.978662 0.933422 1.290727 1.310881 0.873486 0.922069 1.320293  
1.29736 1.858602 1.529712 1.878929 1.254983 1.349068 1.123856 0.975154 2.189817  
1.081234 1.549159 1.212942 1.770973 1.491285 1.326864 0.893587 1.220438 3.422445  
3.259177 3.806653 3.004404 4.172482 2.35728 3.269672 2.743018 2.636955 2.8476  
2.959468 2.649353 1.741944 0.801484 1.488093 1.659316 0.868865 1.794262 5.426575  
1.894375 1.879343 1.466224 2.028088 2.159595 2.008058 1.779492 2.055998 1.868131  
6.919486 6.638461 6.673172 6.456625 6.970977 6.870838 7.466856 7.021565 6.604815  
1.932703 1.01472 1.358377 1.176344 0.907522 1.326987 1.161178 1.383952 1.864296  
2.561476 3.405076 3.393482 3.201599 2.804356 3.35323 2.841125 4.020569 2.95981  
9.749046 9.713205 9.777228 9.627167 9.411334 9.178413 10.011 9.597 10.29755  
2.485015 2.439411 3.149052 3.342643 3.110412 2.59733 2.939534 3.017281 2.565073  
2.945782 3.256385 3.292832 1.851409 3.939712 2.452103 1.84309 3.557891 2.960071  
1.43396 1.437491 2.650516 2.003624 2.098559 2.032876 1.659545 1.616724 1.779483  
3.964655 4.096849 3.932766 4.495741 4.389837 2.675949 4.056336 4.335517 3.916481  
7.761113 7.493158 7.651923 6.323728 7.178206 7.580379 7.682645 7.939292 7.589596  
1.716482 2.935607 2.205511 3.078968 2.372615 2.118138 1.939076 1.774767 2.355331  
8.292758 8.277903 8.366103 6.935715 8.117653 7.87065 8.092182 8.416582 7.670289  
8.60553 8.635144 8.681886 8.807426 8.586722 8.84474 8.839806 8.885397 7.409955  
6.734743 7.618639 7.490795 6.588761 7.162029 7.119039 7.559146 7.321242 6.754553  
4.389125 5.672682 5.259786 5.664465 5.041006 4.660364 4.37735 5.42778 4.689004  
5.162595 5.322276 5.771212 4.717778 4.952848 5.538765 5.11996 5.441607 4.601356  
7.920047 7.711588 7.791747 7.17067 7.890833 7.72827 7.082931 7.581822 7.704702  
5.130526 5.344762 4.822815 4.475544 6.559136 5.71331 5.044431 5.385892 4.228132  
2.815908 2.254296 2.351804 2.186408 2.515174 2.379381 2.521019 2.570173 3.381967  
8.203825 8.181667 8.339367 8.51486 8.219955 8.22749 7.8482 8.427392 7.370897  
1.523823 1.74843 1.63757 1.800975 1.423328 1.576553 1.458886 1.057691 1.600507  
2.165678 2.186656 1.959483 2.660142 2.514065 1.991154 1.992 1.918171 2.780136  
1.696246 1.483563 1.345903 1.864286 1.649917 1.427146 1.559743 1.607007 1.673359  
1.873139 1.171564 1.482311 1.35686 1.064077 3.269002 1.424894 0.88035 1.242908  
9.614398 9.385233 9.740002 8.980883 9.370484 9.362998 9.727826 9.428654 9.377654  
5.274985 5.439591 5.080511 5.096892 5.4997 5.39977 5.847076 5.103194 6.82991  
8.932842 8.682689 9.024063 8.584639 7.913737 9.320167 8.561806 8.847453 7.181492  
5.761725 6.144265 5.860985 5.825227 6.161718 5.523919 6.66918 5.782995 6.33283  
5.17912 5.83368 6.062809 6.293978 5.431798 5.73046 5.572358 5.142914 4.919512  
4.179693 3.970571 3.386883 2.827148 4.255373 3.496631 4.192851 3.916935 3.036765  
8.010586 7.978975 8.110279 7.386977 8.342902 8.067267 7.963277 8.124967 7.723876  
2.445552 1.813671 2.576698 4.001172 1.047439 3.451856 2.241834 3.760086 2.69748  
8.759272 8.818296 8.514046 8.776467 8.778206 8.512901 8.657411 8.879774 8.907802  
6.419413 6.513188 6.911032 6.523131 6.872107 6.688754 6.864031 6.593746 6.870191  
6.495652 5.779904 6.028498 5.629052 5.905869 5.627878 6.072276 5.511229 5.886577  
4.908828 5.36626 4.698471 5.006417 4.969804 4.468636 5.050798 4.972281 4.999775  
6.472956 7.558976 6.353138 7.428431 6.956679 7.162346 6.317229 7.317676 7.503718  
6.913439 6.306895 6.031971 5.987193 6.22324 5.287469 6.673975 6.704608 6.904602  
5.594584 4.795536 5.218011 6.1076 5.457195 5.317583 4.766124 5.195666 5.998253  
2.531167 2.574872 3.891264 3.891333 2.898656 3.070835 3.644652 3.440861 2.259342  
5.982716 6.201969 6.225235 5.456846 6.463795 6.27791 5.795416 6.542657 5.771839  
6.847108 6.212967 6.076466 6.189766 6.303465 6.343202 6.554778 5.709217 6.223615  
7.665244 7.717313 7.377091 7.047142 7.722781 7.166363 7.430912 7.778911 7.357592  
1.288279 2.094359 1.74618 2.984137 1.689146 2.355706 1.333752 1.690396 1.775575

6. 59793 5. 352942 6. 333938 3. 926152 5. 605756 5. 867659 6. 724297 6. 147776 5. 935642  
1. 907403 2. 030548 3. 934446 3. 215353 2. 476442 3. 455991 2. 865468 2. 940516 3. 767881  
5. 710139 5. 871325 5. 629542 6. 794499 6. 602942 5. 097382 6. 238642 6. 412808 6. 150635  
8. 693967 8. 48269 8. 375937 8. 564646 8. 548803 8. 234653 9. 115707 8. 833274 8. 71182  
6. 308951 6. 097727 5. 187847 3. 587904 6. 084651 5. 374545 5. 860127 5. 708377 6. 068007  
5. 373402 5. 504841 5. 327118 5. 593063 5. 697183 4. 638086 5. 334226 5. 319341 4. 955547  
6. 803124 6. 436697 5. 74485 6. 048536 6. 197781 6. 359708 6. 67619 6. 456654 6. 242701  
7. 487553 7. 420347 7. 205739 8. 080682 7. 454127 7. 108445 7. 371407 6. 88783 7. 120486  
5. 191653 4. 453429 5. 072397 4. 649779 4. 810284 5. 192929 5. 022917 5. 338715 5. 561213  
7. 627615 7. 493938 7. 811492 7. 796109 7. 180109 6. 971176 7. 532663 7. 679964 7. 729388  
6. 954505 7. 453142 6. 870304 7. 017382 7. 607613 6. 600611 7. 25251 7. 8012 7. 029116  
5. 293541 5. 196649 4. 978817 4. 566063 5. 658695 5. 092625 4. 847132 5. 11763 4. 914287  
5. 689091 5. 031293 4. 954712 5. 279127 5. 53575 4. 529417 5. 212556 5. 546609 5. 653453  
9. 122217 9. 258714 9. 301485 8. 680103 9. 420222 8. 838498 8. 928845 9. 263755 9. 390545  
6. 747493 7. 258786 6. 725131 5. 61008 7. 118144 6. 398593 6. 436806 6. 967768 6. 323246  
3. 762314 3. 997166 4. 079267 3. 696004 3. 599496 3. 577205 3. 580502 4. 516591 4. 128535  
7. 238698 7. 375154 7. 523674 7. 20363 7. 307476 7. 129568 7. 608443 7. 128492 7. 584734  
6. 366065 6. 986143 7. 115314 5. 784687 6. 134645 6. 426752 6. 974204 6. 67208 5. 651031  
7. 089413 7. 090389 6. 860402 7. 224949 7. 181016 6. 982315 7. 513864 7. 413913 7. 211256  
1. 278638 2. 20776 2. 137621 2. 884538 1. 015914 1. 718223 1. 795121 0. 91699 1. 57638  
7. 263615 7. 544535 7. 870032 8. 019206 7. 753176 7. 271411 7. 589672 7. 979206 7. 332983  
6. 741678 6. 690058 5. 554582 7. 352958 7. 202747 5. 776939 5. 99059 6. 975062 6. 571139  
4. 044076 4. 458858 3. 96802 3. 766082 4. 164022 4. 31116 3. 510723 4. 171696 3. 348811  
2. 065421 1. 543822 1. 530747 1. 927901 1. 148514 1. 543822 1. 660625 1. 477351 1. 379147  
5. 303098 2. 390636 4. 828894 2. 274761 3. 712245 4. 533805 4. 553969 2. 720176 5. 119578  
1. 743203 1. 179827 1. 945202 2. 43794 1. 82189 1. 359612 1. 495669 1. 655633 2. 048508  
2. 131243 2. 308598 2. 621227 3. 42749 2. 422381 2. 059632 2. 341154 1. 778982 1. 635862  
4. 816381 5. 484486 5. 580874 4. 231466 5. 598943 5. 295112 5. 079046 5. 586384 5. 5439  
3. 122287 2. 459764 2. 928137 5. 417321 4. 417462 2. 269496 5. 556302 1. 681794 1. 459429  
7. 718183 8. 351786 7. 585921 8. 09718 9. 724899 7. 359486 7. 72562 8. 146105 8. 05777  
3. 585215 3. 503476 3. 331408 3. 331408 3. 28695 2. 464694 4. 800078 3. 361611 3. 887767  
2. 953368 3. 266653 3. 545829 3. 396053 3. 637999 3. 084075 3. 846308 3. 631754 3. 051048  
1. 45084 1. 218045 1. 398778 2. 382533 1. 539627 1. 45288 1. 79342 2. 196237 1. 718569  
5. 288294 4. 36182 3. 676959 3. 155367 3. 916711 6. 015642 3. 351145 5. 433718 7. 301752  
5. 042519 5. 218638 4. 722103 5. 835022 4. 989665 5. 059235 5. 252728 4. 86729 5. 077261  
6. 70719 6. 77641 6. 908333 7. 250942 6. 808171 6. 909376 6. 268802 6. 604039 5. 928976  
5. 10416 5. 478516 5. 134019 5. 534427 5. 442367 5. 381972 5. 07333 4. 781607 5. 077555  
4. 707147 4. 392004 4. 796115 4. 397855 5. 043547 4. 503062 4. 274971 4. 689686 3. 476643  
8. 389604 8. 664377 8. 222999 8. 702133 8. 588802 8. 135008 8. 524559 8. 495101 8. 627177  
2. 001932 1. 761441 1. 796009 2. 283769 1. 964608 2. 534232 1. 96738 2. 184027 1. 629757  
4. 457802 4. 461607 4. 287321 5. 304443 4. 37473 4. 644114 4. 51134 4. 794633 3. 561236  
7. 243164 6. 36779 7. 31345 6. 989289 6. 385936 7. 288429 6. 849373 6. 890808 7. 416402  
5. 683759 5. 683283 6. 182108 5. 582759 5. 775844 5. 41232 5. 714454 5. 965779 5. 527989  
5. 019197 4. 310373 4. 603521 4. 021108 4. 292009 5. 177476 4. 482044 4. 996123 5. 705375  
6. 79448 6. 768294 7. 042052 6. 913243 7. 18794 5. 790532 6. 806126 6. 975285 6. 520519  
5. 883965 6. 264216 6. 388455 6. 304622 6. 287993 6. 543577 6. 092858 6. 276338 6. 425879  
4. 921793 4. 88564 5. 142602 4. 653248 5. 328986 6. 002335 5. 001478 5. 207702 4. 246858  
4. 944695 4. 512467 4. 841313 4. 414303 5. 21078 4. 821861 4. 92873 4. 977277 4. 234058  
4. 665889 5. 84118 5. 122761 4. 044774 5. 53468 4. 676341 4. 213236 4. 666281 4. 321191  
7. 779969 8. 10103 7. 413351 7. 956 7. 935614 7. 126352 8. 033114 7. 632127 7. 77168  
6. 618326 6. 298094 6. 295784 6. 42374 6. 425837 5. 932411 6. 615122 6. 432458 6. 850661

4. 949434 4. 374112 4. 333655 4. 693809 4. 370526 4. 445445 4. 848831 4. 124118 3. 471952  
4. 670907 5. 168497 5. 041507 5. 498057 5. 394399 4. 875016 4. 490155 4. 944173 4. 991531  
9. 058769 9. 313162 9. 336838 8. 816769 9. 067987 9. 059003 9. 386443 9. 21638 9. 121504  
6. 580174 7. 224304 6. 96474 7. 27615 7. 164207 6. 246895 7. 073803 6. 58894 6. 977911  
7. 337755 7. 262929 7. 373049 7. 645412 7. 3253 6. 877249 7. 412525 7. 71876 7. 281312  
3. 531944 2. 271007 3. 043387 3. 20675 3. 008328 1. 889138 1. 903775 2. 881682 2. 859105  
6. 603573 6. 35433 5. 95116 6. 575222 6. 078606 6. 796451 6. 325885 6. 892597 7. 240362  
3. 297664 2. 216239 3. 107027 3. 406903 2. 738584 3. 015183 3. 854089 2. 771998 2. 246694  
2. 477414 3. 084347 2. 905496 2. 095275 2. 876453 3. 542872 2. 079092 2. 860968 2. 237995  
5. 746611 5. 458674 6. 435267 6. 358968 5. 783328 6. 364758 6. 398479 6. 33734 5. 999273  
8. 191759 8. 16911 8. 242724 8. 146611 7. 765284 8. 002396 8. 211607 7. 967698 8. 572585  
3. 949268 4. 080181 5. 345264 5. 154878 3. 515874 5. 623334 3. 390767 4. 253212 3. 170177  
5. 305845 5. 077438 4. 66754 5. 271047 4. 822995 5. 081686 5. 167242 5. 322035 5. 258071  
6. 801421 7. 579315 7. 290639 7. 176604 7. 64974 7. 559109 7. 019204 7. 07683 6. 094772  
4. 367154 3. 894262 4. 387581 3. 26868 4. 468745 2. 95254 3. 680381 3. 779418 3. 339069  
8. 14817 8. 246633 8. 346898 8. 644723 8. 027041 8. 297349 8. 169095 8. 422176 7. 848425  
5. 537028 5. 251709 4. 838057 4. 592718 5. 279759 4. 822271 5. 24775 5. 251169 6. 245782  
4. 071386 4. 501123 4. 187887 5. 543333 5. 072472 3. 221918 4. 993408 4. 456156 4. 647894  
6. 848712 6. 888769 6. 733663 6. 930454 6. 965557 6. 851104 7. 02861 6. 686876 7. 010139  
5. 408682 5. 808208 4. 846218 4. 874733 5. 10476 4. 700278 5. 130709 5. 637516 5. 136418  
5. 900318 4. 789978 5. 925129 5. 922844 6. 287966 5. 71251 6. 101252 5. 781661 6. 236709  
8. 492045 8. 591086 8. 258443 8. 460457 8. 580342 8. 323742 8. 46509 8. 567556 8. 062341  
6. 096204 6. 117601 6. 109659 5. 169334 5. 393335 5. 612605 4. 971661 5. 753188 6. 079432  
4. 4162 4. 027676 4. 402388 3. 548457 4. 418262 4. 310081 4. 534017 4. 113902 3. 449429  
3. 132518 3. 13702 2. 417893 3. 70536 2. 910214 2. 526728 3. 295426 2. 795424 2. 914507  
4. 368141 4. 608196 4. 029624 2. 417951 4. 375721 3. 83373 5. 064181 4. 74291 4. 653665  
6. 191606 6. 543322 6. 175154 5. 859571 6. 634537 6. 459148 6. 233142 6. 051727 6. 724651  
4. 468571 5. 109971 3. 842516 4. 464928 4. 394678 4. 463891 4. 193068 4. 665774 5. 108317  
6. 290605 5. 914856 6. 155445 5. 676502 5. 560162 6. 417516 6. 09992 5. 771964 5. 020249  
6. 851436 6. 647019 6. 173984 6. 100004 6. 689538 6. 316449 6. 704501 6. 645017 6. 661932  
6. 351635 6. 479859 6. 640769 6. 918753 6. 831415 6. 904979 6. 977949 6. 775855 6. 451733  
7. 889489 8. 021441 7. 898266 6. 616055 7. 952125 7. 68123 7. 965038 7. 673039 7. 368159  
5. 490338 5. 009992 5. 295263 5. 404201 5. 462394 5. 023667 5. 819706 4. 686623 5. 957178  
7. 701066 7. 41533 7. 894772 7. 963538 7. 729863 7. 348071 7. 621859 7. 417057 8. 056992  
5. 922887 5. 757072 6. 233821 6. 021786 6. 315633 5. 829185 5. 516708 5. 875765 6. 281621  
7. 829381 7. 486083 7. 232159 7. 494234 7. 456692 7. 57431 7. 494428 7. 63177 7. 035175  
6. 761767 7. 014818 6. 385054 5. 7181 6. 543273 6. 900466 6. 658101 6. 493719 6. 495442  
3. 624364 3. 441484 3. 787268 3. 294722 3. 752371 3. 044178 3. 223966 3. 11028 3. 479954  
6. 17746 6. 425785 6. 496293 5. 732503 6. 593577 6. 286274 5. 660311 6. 466889 5. 573024  
6. 880369 6. 570094 6. 78414 6. 932937 7. 109525 6. 613561 6. 925898 7. 236645 6. 599931  
10. 38833 10. 01608 10. 2172 9. 894022 9. 66568 9. 806787 10. 52564 10. 0024 10. 56542  
6. 254383 6. 326853 6. 200157 5. 828359 6. 601337 5. 749827 6. 640355 6. 361266 6. 292451  
4. 522013 4. 551597 4. 5345 5. 307292 4. 943215 4. 872396 4. 438827 4. 479118 3. 194748  
7. 485457 7. 292151 7. 435064 7. 254178 7. 410071 6. 617905 7. 597152 7. 106779 6. 90269  
4. 898512 5. 317144 4. 225947 3. 418217 4. 790704 4. 978404 5. 022088 4. 418799 4. 51459  
7. 769815 8. 12315 7. 5772 5. 595377 7. 879488 7. 401036 7. 581191 7. 721404 6. 997542  
8. 891312 9. 23493 8. 847633 8. 832448 9. 085876 9. 170988 8. 998218 9. 048642 8. 927513  
7. 453734 8. 125955 7. 449648 6. 953507 7. 87862 7. 283774 7. 708101 7. 757723 7. 558722  
2. 076117 2. 43449 3. 718944 3. 41931 2. 993222 3. 942183 2. 795101 2. 929705 2. 814215  
7. 200054 7. 048762 6. 63077 6. 759501 7. 267283 7. 125494 7. 082566 7. 140137 6. 99431  
4. 584596 5. 853356 3. 776177 3. 409805 4. 566211 3. 895967 1. 772602 4. 587563 4. 05346

5. 373974 5. 43667 5. 7159 5. 882314 5. 877542 5. 100855 5. 4148 5. 508297 5. 708447  
6. 500894 6. 631224 6. 262719 4. 045437 6. 568935 6. 122604 6. 262572 6. 451596 6. 92255  
6. 47622 6. 919199 6. 885418 5. 362902 6. 663656 6. 64746 6. 981518 6. 580065 7. 65148  
3. 497324 3. 151587 3. 490435 3. 79696 3. 671458 3. 658072 3. 638295 3. 13113 4. 13251  
4. 347527 5. 4392 4. 926384 4. 614352 4. 564214 4. 532351 4. 360083 4. 940529 4. 622894  
5. 399096 5. 989671 3. 789019 4. 898843 4. 950802 4. 66956 5. 292484 4. 80494 5. 243347  
7. 602964 7. 454745 7. 784689 7. 660504 7. 511484 7. 420756 7. 284814 7. 612983 7. 621081  
6. 005042 6. 619675 6. 091392 5. 90056 6. 214839 6. 313713 6. 578035 6. 3834 6. 756745  
9. 265696 9. 635068 9. 24076 9. 60106 9. 608859 9. 071824 9. 34301 9. 529808 9. 42528  
7. 282631 7. 228181 6. 966275 6. 749011 7. 568779 6. 66854 7. 379141 7. 406508 6. 856547  
8. 789987 8. 758802 8. 715243 8. 669546 8. 648551 8. 803439 8. 940126 8. 774321 8. 639911  
1. 801652 2. 38412 2. 48565 2. 90216 2. 083707 3. 727309 2. 041046 1. 967887 2. 043605  
1. 387066 1. 644202 1. 179261 3. 387491 1. 229854 1. 564302 1. 214553 1. 160595 3. 030999  
6. 278573 6. 367452 6. 790869 4. 762109 6. 44089 5. 837791 6. 059205 6. 028412 6. 381275  
3. 391142 3. 807851 3. 527605 4. 140004 3. 279778 3. 902845 3. 415005 3. 082883 3. 271518  
4. 313345 5. 053168 4. 792776 4. 820043 4. 370966 4. 579368 5. 425096 5. 564415 5. 376962  
7. 106199 6. 889232 7. 369738 7. 468513 7. 21472 7. 114485 6. 896148 7. 746526 6. 319379  
1. 610141 1. 405681 1. 863251 2. 48513 1. 771274 2. 755067 1. 306066 1. 663956 1. 670233  
4. 837847 4. 716309 4. 893552 3. 41126 4. 714438 5. 336936 5. 076293 5. 060163 4. 255312  
4. 440182 5. 142556 4. 848133 4. 77016 5. 545723 4. 144665 4. 663103 5. 319017 3. 419839  
1. 973736 1. 577793 2. 238782 2. 169313 2. 005037 2. 336791 1. 821566 1. 469525 1. 852783  
4. 460213 4. 062886 3. 998083 3. 366655 4. 077447 3. 704592 3. 338138 3. 762611 3. 355468  
7. 347079 7. 762773 8. 077753 8. 016776 8. 112245 7. 198074 7. 443269 8. 024554 7. 124271  
3. 668231 3. 42008 2. 711925 3. 142866 3. 228045 2. 715578 3. 605932 3. 337115 1. 563424  
3. 960965 4. 319457 5. 303312 3. 804493 4. 933562 4. 318688 3. 755817 4. 751333 3. 527088  
5. 748159 4. 94547 5. 558192 5. 687831 5. 57853 4. 729509 5. 18541 5. 010474 5. 542274  
6. 198685 6. 153102 5. 844002 6. 330961 6. 242528 6. 260944 5. 914907 6. 442437 6. 240024  
3. 552927 3. 679398 3. 893585 3. 380103 2. 994266 4. 15981 3. 245495 3. 262099 4. 712316  
4. 332698 4. 575795 4. 194351 4. 355282 4. 522715 4. 648701 4. 454814 4. 12832 3. 499673  
2. 092228 2. 301431 2. 030909 2. 044867 2. 021048 2. 478351 2. 328698 2. 222904 2. 114671  
4. 528831 4. 265939 4. 194648 4. 900969 4. 049337 3. 887213 3. 761917 4. 340672 3. 569752  
6. 563065 7. 157272 6. 362288 7. 11354 7. 254785 7. 087511 6. 7371 7. 339724 7. 114382  
4. 875471 4. 568131 3. 720599 3. 029226 4. 045666 4. 313084 4. 575929 4. 415504 5. 577774  
2. 988414 2. 615631 3. 126504 3. 510239 2. 922385 3. 418258 3. 128324 3. 536141 1. 938326  
4. 584891 4. 316199 4. 094846 4. 254456 3. 691014 4. 72187 4. 001979 4. 297955 3. 898497  
5. 281074 5. 961445 5. 315017 4. 098718 5. 697563 5. 49721 5. 576861 5. 176449 6. 025042  
3. 391052 3. 192357 1. 518033 3. 525841 3. 147775 2. 274061 1. 784108 2. 04046 3. 961304  
7. 195318 7. 050213 7. 210677 6. 509698 7. 209564 6. 850308 7. 331698 6. 902286 6. 343549  
6. 096599 3. 237373 4. 599473 4. 996656 3. 910106 6. 333027 4. 766398 5. 568045 6. 418315  
8. 098658 7. 001922 7. 896966 7. 518494 8. 092042 8. 107085 7. 125141 8. 318572 8. 522405  
4. 74235 4. 51792 3. 65487 4. 054667 5. 146615 4. 969243 4. 607223 4. 518824 4. 730713  
5. 17136 5. 105838 4. 214171 5. 027638 4. 834896 4. 659302 5. 498982 4. 841702 4. 711108  
7. 692193 7. 360079 7. 633445 7. 596468 7. 509545 7. 476507 7. 645686 7. 55427 8. 341451  
9. 386163 9. 48357 9. 248136 9. 485836 9. 55193 8. 927078 9. 466577 9. 204599 9. 260168  
7. 376178 7. 583128 7. 049545 6. 073312 7. 162613 7. 414714 7. 191931 7. 161238 7. 944478  
6. 006366 5. 030825 5. 017954 5. 0201 5. 713055 6. 063699 5. 035139 5. 094424 5. 962585  
4. 137417 4. 204231 4. 476039 5. 254643 4. 843573 3. 512168 5. 014453 4. 534629 3. 316936  
4. 986239 4. 66638 3. 206952 2. 995594 7. 08642 4. 245243 4. 698817 4. 491192 5. 462746  
6. 214941 4. 602442 4. 710176 4. 494298 4. 703384 3. 883611 4. 800648 5. 249106 5. 741039  
5. 365705 5. 285926 5. 471702 6. 220236 5. 223151 4. 977664 4. 952683 5. 091828 4. 867792  
5. 439491 4. 874254 5. 376745 5. 109435 5. 075349 4. 920365 5. 771553 4. 698617 5. 250411

1. 176068 1. 834372 1. 567305 1. 429018 1. 341321 1. 261805 1. 430544 1. 568911 1. 404491  
9. 034093 9. 092137 9. 072114 8. 385355 8. 644976 8. 897539 8. 77408 9. 161715 9. 508446  
1. 843611 1. 81831 1. 621214 1. 533385 1. 549338 1. 050509 2. 241805 1. 669363 2. 055199  
7. 079411 6. 993819 6. 427288 7. 305028 6. 998111 6. 911815 7. 13357 6. 829855 6. 66119  
5. 583539 5. 432003 4. 992657 3. 860589 5. 292888 4. 54723 5. 133483 5. 094208 4. 437935  
2. 362703 4. 108027 2. 470009 3. 521291 4. 960922 2. 09006 4. 302891 4. 676279 2. 860415  
5. 637733 5. 98246 5. 531952 5. 474173 5. 927368 5. 720665 6. 193849 6. 259397 6. 501875  
6. 949122 7. 136543 6. 830663 6. 416955 7. 055191 6. 489961 7. 434046 7. 008025 7. 156794  
3. 101632 4. 199533 2. 748038 2. 475139 4. 428957 3. 090097 3. 585052 3. 299473 2. 234188  
5. 934695 5. 754114 6. 020695 5. 897148 6. 180821 6. 14594 6. 23797 5. 821215 6. 118472  
4. 582684 4. 213974 4. 826809 3. 745464 4. 257925 4. 440901 4. 221742 4. 299261 4. 309284  
3. 005535 1. 847846 2. 088839 1. 944086 1. 78706 2. 250188 1. 72127 2. 955748 1. 768382  
2. 376359 2. 100837 1. 696184 2. 730155 2. 657198 2. 305781 1. 706928 1. 732031 2. 771041  
1. 979711 1. 655062 2. 626957 2. 962525 1. 699769 1. 948016 2. 346586 1. 794891 2. 80482  
2. 217465 2. 753925 2. 050533 2. 553563 2. 496421 2. 185596 3. 166305 2. 546067 2. 284517  
1. 149545 1. 364673 1. 109379 1. 006965 0. 990326 1. 170198 1. 034791 1. 024615 1. 32275  
2. 474418 2. 083897 2. 426424 2. 607595 2. 115361 2. 331788 2. 506306 2. 483699 1. 939935  
7. 17187 6. 923416 6. 695877 6. 676724 6. 74014 6. 617258 6. 852042 7. 128207 6. 665086  
7. 260407 6. 149383 6. 221619 6. 796858 5. 358131 5. 298629 7. 108917 5. 377615 6. 937028  
2. 855468 2. 172197 3. 092003 2. 516021 2. 963412 2. 490117 2. 410538 3. 622281 2. 507616  
1. 101969 1. 428452 1. 873158 2. 905428 1. 091258 1. 501226 1. 796546 1. 33046 1. 372593  
4. 4936 4. 998574 4. 348231 4. 551368 5. 488692 5. 113986 4. 256077 4. 953565 3. 881878  
6. 737282 6. 348151 6. 589881 7. 50375 6. 658913 6. 014787 7. 018001 6. 674562 6. 424453  
5. 298692 6. 034627 5. 405091 6. 390009 5. 760944 6. 607012 6. 508325 6. 387587 6. 304619  
5. 784212 5. 493587 5. 739322 5. 416567 5. 432033 4. 944311 5. 04594 5. 776845 5. 021777  
1. 738643 2. 264653 2. 024506 2. 122213 1. 984196 1. 377771 1. 697009 2. 038539 2. 064925  
5. 674449 5. 59432 5. 360509 6. 24973 5. 178508 5. 172384 5. 509081 5. 02975 5. 302527  
4. 941523 5. 183477 4. 991663 4. 158604 4. 880766 5. 153284 4. 753669 5. 722228 4. 913381  
10. 0793 9. 727352 10. 00747 9. 947885 9. 326363 10. 04953 10. 26909 10. 0873 10. 01941  
1. 56198 1. 878547 2. 055541 2. 023353 1. 582044 2. 989831 1. 870282 2. 147348 2. 170072  
7. 720197 8. 074893 8. 172805 7. 932581 7. 851752 7. 648523 8. 069146 7. 897548 8. 04526  
2. 230673 2. 088685 2. 00348 1. 817664 2. 099519 2. 701379 2. 086977 2. 550945 2. 218055  
2. 320328 2. 91616 2. 458461 2. 704654 2. 519059 2. 321507 1. 841051 2. 905644 2. 712929  
4. 322991 4. 294421 3. 781034 3. 981375 4. 975704 4. 124593 3. 798791 4. 916159 4. 279385  
8. 664599 7. 99951 8. 279953 6. 88153 8. 540196 7. 616704 8. 923655 7. 548315 9. 048811  
6. 490619 6. 28342 6. 622634 6. 700163 6. 111144 6. 039764 6. 235015 6. 253286 5. 604395  
5. 073849 5. 149652 5. 085806 4. 906819 5. 472173 5. 058686 5. 173202 4. 940803 4. 342207  
9. 308296 9. 364869 9. 293463 8. 88662 9. 107284 9. 044807 9. 396772 9. 304739 9. 437702  
5. 279198 5. 884447 4. 96983 5. 04474 5. 449301 5. 221156 6. 044532 5. 624996 5. 403347  
6. 544712 6. 978325 6. 374142 7. 179832 6. 789433 6. 713154 6. 881629 6. 821264 7. 10788  
6. 178235 5. 774266 6. 043207 5. 711068 5. 454208 5. 974501 6. 157304 5. 627514 6. 48808  
3. 475113 2. 461176 3. 512026 3. 386894 5. 518786 3. 155383 2. 223881 4. 020783 3. 445484  
3. 02853 2. 279628 3. 074171 2. 865357 2. 053675 2. 647613 2. 188172 2. 109959 2. 004935  
8. 266521 8. 30885 8. 447157 7. 45205 8. 48558 8. 093781 8. 078872 8. 408192 8. 152707  
7. 871466 7. 937974 7. 864645 8. 026118 7. 561696 7. 483448 7. 740801 8. 218785 7. 87117  
5. 030682 4. 441709 5. 341354 5. 969432 5. 297935 5. 667507 4. 648884 4. 974206 4. 58777  
4. 870303 5. 301976 5. 946465 5. 039433 5. 400422 4. 290898 5. 39816 5. 903513 4. 503473  
9. 674149 9. 149596 9. 392896 9. 429682 9. 409543 8. 92052 9. 884708 9. 4246 9. 743025  
4. 811029 4. 268734 4. 718355 3. 954331 4. 815565 5. 227145 4. 883214 4. 162443 4. 655773  
2. 158511 2. 982267 4. 547607 3. 518323 2. 573001 2. 644991 3. 620516 3. 236947 2. 842203  
6. 171987 6. 488717 6. 699181 7. 152941 6. 339736 6. 01748 6. 439178 5. 987603 5. 805611

6. 603585 6. 227901 6. 588581 6. 364861 6. 324028 6. 440261 6. 147719 6. 282061 6. 813289  
7. 617671 7. 970938 7. 628369 7. 737985 8. 636546 7. 041025 8. 186011 8. 023783 7. 4288  
2. 174659 1. 939269 2. 435953 1. 392358 1. 845669 2. 123901 2. 021914 1. 977787 3. 225136  
0. 950512 1. 368417 1. 37384 1. 317497 1. 955892 1. 582092 1. 667469 4. 383019 1. 145945  
2. 939113 3. 772242 1. 631921 4. 117993 2. 714543 2. 601277 1. 83815 3. 392193 3. 290987  
5. 808245 2. 701677 5. 688917 5. 253075 4. 17451 5. 958318 4. 333237 5. 392343 6. 255936  
2. 52728 2. 537511 2. 153958 3. 004553 2. 67963 2. 735983 2. 414532 3. 323914 2. 575391  
1. 591684 1. 466209 1. 401323 1. 297306 1. 015736 1. 928777 1. 112625 1. 540572 1. 214051  
5. 747527 6. 017339 5. 869365 4. 467623 6. 074534 6. 061586 5. 988396 5. 146096 5. 477795  
4. 780402 3. 657121 5. 27083 4. 722923 4. 346989 4. 823609 3. 683145 4. 375353 3. 58185  
7. 486443 7. 734239 7. 671898 7. 345707 7. 525445 7. 489904 7. 067133 7. 181438 7. 132386  
4. 140869 3. 851684 4. 639333 5. 546963 4. 334406 3. 450884 4. 317658 3. 266298 4. 757411  
2. 639931 2. 390903 3. 875736 2. 859786 1. 598263 2. 891368 2. 196792 2. 477505 2. 041371  
4. 306502 3. 608452 3. 897183 3. 74253 4. 301215 4. 234221 4. 225235 4. 732545 4. 522579  
4. 871177 4. 549296 4. 05928 3. 856951 4. 025776 3. 827742 3. 339491 4. 812739 4. 037954  
4. 473196 3. 456402 5. 181682 4. 866806 3. 759916 4. 528461 3. 884762 4. 449065 4. 279234  
6. 389608 6. 755901 6. 656132 7. 313717 7. 238793 6. 783489 6. 63453 6. 821743 6. 212598  
4. 713346 5. 070084 4. 76326 5. 954805 6. 099218 4. 731026 5. 710336 5. 023824 5. 914201  
2. 447211 2. 979193 2. 269955 3. 02783 2. 729019 3. 101603 2. 598186 2. 389362 2. 567462  
4. 643206 4. 690284 4. 725876 2. 986532 4. 412991 4. 109546 4. 251312 4. 479356 3. 777986  
6. 367381 6. 686549 5. 897163 4. 716812 6. 855386 6. 458355 6. 635096 6. 242987 6. 302699  
3. 18704 3. 939335 1. 839741 2. 624259 4. 342816 1. 740053 1. 638786 2. 597086 1. 512883  
2. 106506 3. 521804 2. 930169 0. 88932 1. 94311 1. 923344 1. 64467 2. 275692 2. 198914  
3. 432538 2. 658628 2. 733921 2. 685953 2. 830533 3. 054615 3. 173764 2. 740545 2. 025258  
7. 793967 8. 146814 7. 788122 8. 438497 8. 664436 8. 098927 7. 844373 7. 98511 7. 885704  
1. 784155 1. 841375 2. 242777 2. 320183 1. 703091 2. 320256 1. 739866 1. 785998 1. 293541  
5. 959663 6. 303542 5. 665336 5. 641153 6. 652969 6. 146025 6. 779863 5. 898525 5. 424823  
6. 672986 6. 953855 6. 349581 6. 66822 6. 645351 6. 298495 6. 581825 6. 703064 7. 03246  
2. 777287 2. 012884 2. 431354 2. 884727 3. 360696 3. 004366 2. 791836 2. 673005 2. 661796  
6. 350589 5. 907103 6. 565485 6. 595635 6. 368457 6. 531641 6. 202809 6. 446683 7. 006122  
4. 343906 5. 369318 5. 253969 5. 994966 4. 886921 5. 637896 4. 724556 5. 805003 4. 834954  
4. 960099 5. 385914 4. 420694 5. 68987 4. 88362 4. 783346 4. 793831 5. 076353 3. 650223  
4. 115681 4. 278918 4. 744166 3. 862943 5. 164742 4. 576641 3. 590131 4. 59363 4. 149156  
6. 396362 6. 642651 6. 248348 6. 897438 8. 221722 5. 880335 5. 87797 6. 978726 5. 474114  
1. 628482 1. 962759 2. 191774 2. 680056 2. 327267 1. 49623 2. 067593 1. 748644 1. 739056  
1. 423929 1. 747585 1. 38403 1. 296076 1. 601203 2. 283999 1. 622109 1. 673206 1. 200048  
6. 8067 6. 447886 7. 525613 6. 166103 5. 163272 5. 798203 7. 187767 6. 581 5. 289706  
4. 031942 4. 551405 4. 154194 4. 475946 3. 977698 4. 095216 4. 700805 4. 52546 4. 771715  
6. 972739 7. 101202 7. 12197 7. 136748 7. 175372 6. 901546 7. 262876 6. 883751 6. 858543  
4. 03471 2. 865132 4. 753462 4. 106944 2. 966322 4. 513495 4. 468282 2. 822471 3. 371206  
3. 322244 2. 37199 1. 874702 2. 537038 3. 170886 2. 634087 2. 604907 2. 25726 3. 253723  
5. 364314 6. 073158 5. 637547 5. 439749 6. 053395 5. 227459 5. 356068 5. 738589 4. 455771  
3. 860092 4. 359989 4. 229225 3. 134414 4. 248696 3. 68864 4. 049356 3. 915993 3. 892491  
1. 861748 1. 520186 1. 759795 1. 388841 1. 633088 1. 384837 1. 23427 1. 26675 1. 274109  
6. 594321 6. 679269 6. 175694 5. 829119 6. 518354 6. 802267 6. 576896 6. 305091 6. 190344  
4. 83988 5. 006765 5. 699925 5. 223396 5. 305311 4. 963372 4. 742843 5. 010357 3. 369148  
2. 750314 3. 43518 3. 478931 2. 425402 3. 474542 3. 164513 2. 751862 3. 291353 2. 817359  
6. 227459 5. 943003 5. 764259 4. 825969 6. 068353 5. 117773 5. 924713 5. 41949 5. 079765  
7. 00276 6. 836011 6. 399665 6. 13353 6. 774587 6. 833563 6. 502392 6. 438973 6. 262322  
4. 574961 4. 844364 4. 802135 5. 104993 4. 730976 4. 849519 4. 838087 5. 344174 4. 312742  
3. 08613 3. 357446 3. 532337 3. 01543 4. 422494 2. 471646 1. 969474 2. 885787 2. 448093

6.613536 6.603667 6.641197 4.479897 6.39091 6.718474 6.533225 6.623313 6.496449  
5.601148 5.37485 5.586887 5.64489 3.650077 4.631033 5.133143 5.048246 4.818554  
1.355821 0.84707 1.071013 1.68803 0.9807 1.146742 0.941476 1.289693 1.415821  
6.30728 6.637519 6.324017 5.964468 6.414527 6.418241 6.902237 6.409811 7.047607  
4.96126 5.093549 3.75265 2.943245 7.141866 4.907035 4.922452 5.522043 3.601885  
6.504214 6.071021 6.815651 6.888009 6.632934 6.182972 5.918105 6.60195 6.320694  
7.926183 7.753789 7.940956 7.269602 7.937289 7.788336 8.156602 8.086913 7.631498  
4.958835 5.437724 3.963097 3.826522 4.566105 4.265183 4.743965 4.820702 4.28837  
7.438161 7.656448 6.680063 7.11896 7.543662 7.407685 7.43271 7.062747 6.999969  
4.805882 4.846421 4.89996 4.987786 5.109504 4.889252 4.878432 4.96185 5.130925  
7.833029 8.163962 8.00037 8.60769 8.198338 8.055284 8.030117 8.026747 8.155864  
6.439548 6.104047 6.103005 6.404337 6.612363 6.662852 6.471183 6.059586 6.16251  
2.71942 1.715594 1.51476 1.797985 1.889634 1.581942 2.01799 4.551571 1.827201  
6.919331 7.052507 7.048171 6.867497 7.031626 6.94665 7.412633 7.284695 6.439055  
1.098651 1.127836 1.239084 1.253726 1.465558 3.425269 1.187311 2.333768 4.052222  
6.592731 7.725 6.400359 5.11323 8.6942 6.682847 7.289104 7.416597 5.648277  
2.991039 2.96323 2.93895 2.661893 2.962766 3.00862 2.746241 2.912032 2.657615  
2.751896 2.544355 2.590914 3.272198 2.629623 2.692673 2.380617 2.605908 3.327978  
2.42069 3.076926 3.460607 2.393576 2.403982 2.418785 3.220335 2.855141 2.810168  
7.053123 6.8672 7.132673 6.610303 7.007838 6.712939 7.591963 6.962498 7.213824  
3.525189 4.68478 4.481934 4.568651 4.991484 4.048408 4.336834 3.903899 3.36602  
2.255553 2.955829 1.786882 4.51293 4.465248 2.119512 2.332586 3.338191 2.531958  
1.972838 1.879822 1.78742 1.758763 1.725568 1.698012 2.940193 1.186622 2.295769  
2.446381 2.704496 2.774843 3.427475 3.104725 2.825839 2.373284 2.695811 2.233338  
6.8428 6.759952 6.948132 6.502735 6.592938 6.589384 6.869233 6.447879 7.000512  
5.138037 5.15049 5.792838 5.802403 4.89773 4.814373 4.931844 5.072666 3.588418  
5.480523 5.441247 6.160534 5.14775 5.894698 5.330703 4.679381 5.671371 5.105093  
6.590901 6.786739 6.208437 5.984156 6.49121 6.540755 6.652324 6.416636 6.155304  
1.840807 1.062166 1.152961 0.969701 1.068407 2.714611 2.753496 3.304977 0.881992  
5.274878 5.200401 5.168565 5.203227 5.27121 3.245166 5.357146 4.990847 4.719434  
1.086204 1.382556 0.878217 2.334078 1.70995 0.944247 1.317767 2.082188 2.163905  
3.514824 3.754738 2.850728 2.054214 3.104972 4.191954 3.115196 3.832164 5.063656  
5.312082 5.435088 5.510343 3.750082 5.562128 5.212924 4.526015 5.051993 4.84808  
5.652906 5.64495 6.03284 4.284977 5.712797 5.628005 5.125065 5.143991 5.892179  
4.423846 4.463437 3.621545 2.963344 4.737522 4.401367 4.156468 4.786907 4.552594  
6.689748 6.424698 6.731562 6.160143 6.833406 5.871771 6.407687 6.615481 6.938671  
4.065913 4.796039 3.338854 3.459959 4.715421 4.328795 4.715728 4.291634 3.605043  
2.328715 2.486081 3.002477 2.678605 3.224825 3.884498 2.560387 2.913237 1.800854  
6.544296 6.394407 6.035596 7.334508 7.80136 6.22386 5.753814 4.997054 5.857105  
6.129029 6.396489 6.233508 5.43228 6.109738 6.018139 6.295633 6.207157 6.602303  
7.473241 6.345614 7.016023 6.466891 6.79215 6.57994 6.490622 6.962616 5.683717  
3.592377 3.578603 3.629237 3.708098 3.696749 3.787295 3.129537 3.395871 3.473453  
4.794228 4.556593 4.349928 5.569909 4.920893 4.001896 6.026244 5.062598 6.077416  
10.1158 9.733123 9.883066 9.619915 9.685207 9.523767 10.20513 9.767474 10.24655  
6.7259 6.629952 6.438564 6.349061 7.051818 5.351496 7.497875 6.260669 6.844475  
8.514042 8.7066 8.430228 8.5655 8.520023 8.474122 8.338593 8.963776 8.633419  
6.21419 5.998462 5.668727 5.780287 6.07388 5.453999 6.403218 5.782445 5.834448  
4.889861 4.428764 4.390944 4.689649 4.52056 4.52746 5.060322 4.783627 5.080387  
1.954466 2.042881 2.611834 2.091735 2.344993 1.558698 1.74579 2.351604 1.944342  
5.888887 5.604993 5.903431 4.672164 5.824946 5.17388 5.740386 5.201273 5.70125  
2.270951 2.018274 2.732559 2.396627 2.228837 1.756533 1.894514 2.518845 2.614441

2. 967963 4. 578242 3. 672685 2. 539285 3. 52335 4. 632551 2. 147744 3. 866568 3. 748069  
7. 668109 7. 726264 7. 240993 7. 927588 7. 833943 7. 251501 7. 477185 7. 888454 7. 76645  
1. 793882 2. 319468 1. 880276 2. 185582 1. 954055 2. 162492 1. 858545 1. 608125 1. 745506  
4. 593719 3. 434014 3. 720663 3. 711189 3. 862362 5. 09492 4. 44404 4. 172335 3. 308127  
8. 177924 7. 943358 8. 067885 8. 001384 7. 743797 7. 905762 8. 623724 8. 303186 8. 616987  
5. 496917 5. 266962 5. 05366 5. 422454 6. 173649 5. 159352 5. 915976 5. 320984 5. 599779  
7. 596994 6. 686079 7. 171731 7. 448471 7. 246418 7. 251767 6. 988328 7. 439713 7. 34015  
4. 803351 4. 646631 4. 7027 5. 180266 4. 366834 4. 558377 4. 234921 4. 925336 3. 788694  
6. 113267 5. 855225 5. 198439 5. 723901 5. 634032 6. 137958 5. 945182 6. 57058 6. 369277  
4. 675472 5. 336213 4. 848741 4. 940284 6. 093916 4. 00599 4. 935076 5. 0748 3. 073278  
4. 083169 5. 63005 4. 460333 2. 823127 5. 25568 4. 108117 4. 426702 5. 179608 5. 379811  
8. 199302 8. 364367 8. 211648 8. 002306 8. 477641 8. 168337 8. 264933 8. 404007 8. 372732  
7. 253714 7. 362891 6. 732091 8. 025525 7. 606094 6. 973338 7. 62912 7. 422772 7. 730046  
6. 248767 6. 200027 6. 562989 6. 990418 6. 485458 6. 764046 6. 670441 7. 428646 6. 473449  
8. 542909 8. 763006 8. 726143 8. 527945 9. 076979 8. 396887 8. 372056 9. 040142 8. 330311  
6. 010413 6. 197241 6. 22925 5. 389247 5. 922301 5. 854934 6. 356438 6. 289483 6. 740838  
7. 994252 7. 788138 7. 786296 8. 08249 7. 930888 6. 944734 8. 188049 7. 926605 8. 05285  
4. 014094 4. 235288 4. 29431 4. 715958 4. 491431 3. 710991 3. 798501 4. 612636 3. 3939  
2. 458855 3. 192597 2. 226186 2. 702337 2. 325452 2. 028784 2. 756904 2. 970108 3. 160519  
4. 398591 4. 441285 2. 495551 2. 836391 4. 776234 3. 540234 2. 656927 4. 333752 1. 889719  
1. 449786 1. 410271 1. 175147 2. 17634 1. 302686 1. 982973 1. 607546 1. 207829 1. 582188  
5. 123707 4. 989781 4. 594423 4. 054781 5. 289676 5. 708159 4. 28779 5. 45881 2. 804045  
4. 46445 4. 984303 5. 21711 3. 805776 4. 560356 4. 784665 4. 168762 4. 906938 4. 614357  
3. 290288 3. 238304 3. 147283 2. 815926 3. 900067 3. 712629 3. 324503 3. 076084 3. 304731  
5. 468447 5. 710978 4. 441176 5. 827873 5. 676378 4. 712488 5. 295195 5. 557512 5. 941048  
3. 698589 3. 306919 4. 072638 3. 032257 3. 71207 4. 319432 3. 620309 3. 297863 3. 447482  
6. 31145 6. 397099 6. 290925 6. 281809 6. 173092 5. 514723 6. 473824 6. 634559 5. 692893  
5. 750857 5. 694779 5. 415246 5. 202088 5. 760898 5. 693262 5. 795412 5. 618574 5. 195735  
3. 533062 3. 892507 3. 528309 4. 024232 4. 036316 3. 862925 4. 218235 3. 708406 3. 682805  
6. 993714 6. 994718 6. 916858 6. 421227 7. 003399 6. 625936 6. 720644 7. 009696 6. 923746  
6. 947751 6. 923639 6. 958609 6. 740881 6. 791147 6. 549434 7. 133001 6. 965843 7. 741614  
5. 986841 6. 256415 5. 98737 5. 112597 6. 234236 6. 108734 6. 214243 6. 021734 5. 700254  
2. 309505 2. 30189 2. 716057 1. 769682 2. 706958 2. 251451 2. 266614 1. 980468 2. 172726  
2. 000303 2. 247892 1. 588897 2. 027616 2. 928387 1. 679067 2. 095585 2. 118098 1. 827947  
6. 463987 6. 370477 6. 013661 5. 869273 6. 204853 6. 126922 6. 45685 6. 427204 6. 043128  
2. 311822 2. 872902 3. 248644 2. 542848 3. 173021 2. 480859 2. 307772 3. 57901 2. 199758  
2. 785435 2. 237424 2. 201343 2. 338489 2. 000221 2. 627057 2. 166365 2. 151174 2. 098085  
5. 435655 5. 849708 5. 724132 5. 34863 5. 989579 5. 276132 5. 742659 5. 206969 5. 268516  
2. 048805 1. 247821 1. 823512 2. 923596 1. 860329 2. 850094 2. 222353 2. 208678 1. 798231  
5. 097322 5. 245697 4. 904141 4. 667165 4. 959003 4. 809685 4. 641378 4. 363654 4. 692291  
6. 502031 6. 778853 6. 960903 6. 019406 6. 192935 5. 890154 6. 984215 6. 308614 7. 553464  
8. 955523 8. 862396 9. 093014 8. 979023 8. 30547 9. 015925 9. 100169 9. 022422 8. 827318  
4. 311902 4. 078914 3. 184529 4. 188267 3. 962201 4. 846738 4. 465877 4. 86013 5. 787777  
3. 748487 3. 396213 3. 841195 4. 315595 3. 819789 3. 179385 4. 289219 3. 793449 2. 874178  
5. 661737 6. 472549 5. 728787 6. 277086 6. 650295 6. 51416 6. 304565 6. 320916 5. 854228  
8. 142054 8. 001692 7. 734101 7. 712289 7. 736819 8. 249712 8. 262199 7. 763761 8. 331172  
5. 876525 5. 703582 5. 910216 5. 072545 5. 550342 5. 486163 5. 544145 5. 713126 6. 522222  
2. 646108 1. 698907 2. 003277 2. 817252 1. 99667 2. 661378 2. 435813 1. 838885 5. 023693  
1. 053403 1. 652937 0. 980509 2. 053564 1. 550243 1. 36487 1. 494535 1. 184291 1. 382859  
5. 002005 5. 171308 4. 397961 4. 71848 4. 670305 4. 075329 4. 747205 4. 071815 4. 344717  
7. 737789 7. 872085 7. 780555 8. 296995 7. 807518 7. 549036 7. 720398 7. 542872 7. 527711



6. 395512 6. 61407 6. 323843 6. 489948 6. 239545 6. 355419 5. 379644 6. 906939 6. 099365  
1. 447065 2. 227977 1. 956317 1. 506663 1. 442129 2. 069813 1. 508029 1. 253571 1. 934404  
5. 446478 4. 697381 5. 713533 7. 009413 3. 822884 5. 404605 5. 629916 4. 027271 5. 707318  
7. 397174 7. 213919 6. 673719 7. 521885 7. 519442 6. 589024 8. 373928 7. 006282 7. 819579  
7. 770549 6. 367845 7. 534667 8. 450631 7. 760419 7. 392136 7. 937036 7. 411538 7. 980974  
2. 105771 1. 798745 1. 952951 2. 772426 1. 768474 1. 414958 1. 518858 1. 924264 1. 91975  
4. 838048 5. 246976 5. 460257 4. 787631 5. 103335 4. 75977 5. 102625 5. 617682 4. 343662  
5. 468149 6. 008999 5. 746169 4. 646285 6. 842807 5. 898706 6. 097337 6. 13825 5. 615412  
6. 59319 7. 177901 7. 622452 7. 740952 6. 637234 6. 393668 7. 433197 6. 49845 6. 860353  
3. 538397 3. 270661 3. 62817 3. 91151 3. 447758 3. 700422 3. 382315 3. 735359 4. 005792  
3. 551018 2. 122314 3. 919419 3. 605203 3. 110966 3. 756366 3. 529441 3. 117174 3. 359042  
4. 631129 3. 993488 4. 687754 4. 260237 4. 437662 3. 712326 3. 434391 4. 47716 4. 246762  
4. 056514 4. 473863 5. 945847 4. 453923 5. 518919 5. 078522 5. 816192 4. 874501 4. 924768  
7. 383673 7. 415679 7. 2586 7. 048147 7. 292842 6. 690752 7. 390398 7. 121617 6. 561638  
8. 307517 8. 047142 8. 170698 8. 658068 7. 992691 8. 399957 8. 404597 8. 177026 8. 21729  
6. 054771 6. 730274 6. 431946 6. 269157 6. 615865 6. 200877 6. 064269 6. 568825 6. 644634  
7. 014443 6. 684282 6. 753825 6. 788723 6. 891314 6. 747171 6. 880326 6. 825014 6. 484123  
4. 317834 4. 796873 4. 572457 3. 565483 3. 930315 3. 983556 4. 584042 5. 008061 4. 60104  
1. 079013 1. 156146 1. 333126 1. 847611 0. 965067 1. 208133 1. 251021 1. 206871 1. 669081  
3. 882004 3. 484605 3. 132541 2. 779898 3. 958936 3. 64295 3. 843054 3. 852834 4. 250993  
7. 472622 7. 544042 7. 436319 8. 065438 7. 652617 6. 759002 7. 587442 7. 821546 7. 600003  
5. 563607 5. 658798 5. 661695 5. 466236 5. 293745 4. 812303 6. 095393 5. 093618 6. 383577  
8. 432114 8. 139539 8. 189264 8. 20716 8. 041169 8. 197369 8. 315257 8. 099226 8. 347129  
6. 820621 6. 147251 7. 018578 6. 673753 6. 949857 6. 430759 6. 898961 6. 974206 6. 654652  
4. 543056 4. 019609 2. 974245 3. 050694 3. 636445 3. 297985 4. 347086 4. 316393 5. 255579  
8. 040985 8. 091532 7. 879508 8. 242503 8. 511439 7. 72822 8. 150592 8. 008511 8. 334308  
1. 862732 2. 351704 1. 824165 1. 730345 3. 066196 1. 911279 2. 103499 1. 658469 2. 255374  
2. 546293 2. 225773 2. 236448 3. 777325 4. 560559 1. 174766 2. 230611 1. 786361 2. 275321  
2. 911331 4. 044177 1. 710231 1. 73316 2. 759463 3. 751743 3. 890132 2. 623559 3. 002939  
4. 644945 5. 146717 5. 153032 4. 000323 4. 829602 5. 271469 5. 266534 6. 033551 3. 787733  
4. 992123 5. 337222 4. 961277 4. 483715 5. 742844 5. 253192 5. 223869 5. 667343 5. 559  
7. 24768 7. 207444 7. 219907 7. 082666 7. 09147 6. 507442 7. 637589 7. 320128 7. 622984  
8. 444531 8. 60294 8. 607089 8. 499662 8. 484087 7. 976114 8. 362736 8. 739774 8. 711464  
8. 382664 8. 417743 8. 302107 8. 040756 8. 341529 8. 327816 8. 514085 8. 677904 7. 338122  
4. 755432 4. 608788 3. 944492 3. 221255 4. 636428 5. 358849 4. 617458 4. 868766 4. 72853  
6. 405754 5. 925896 5. 662401 5. 62901 6. 201819 5. 425842 5. 910556 6. 111538 6. 36727  
4. 294109 4. 494932 3. 549963 3. 076773 4. 634237 4. 338447 4. 782856 3. 84142 4. 043501  
7. 4013 7. 337229 7. 533781 7. 062084 7. 293993 7. 620412 7. 350566 7. 087396 7. 614657  
7. 345463 7. 069823 7. 29333 6. 415892 7. 419616 6. 577898 7. 169782 6. 820649 7. 328447  
5. 183845 4. 664531 4. 471107 3. 590412 5. 494904 4. 467673 4. 660602 5. 371493 4. 839493  
4. 133271 3. 332484 4. 186481 1. 835464 4. 450315 3. 540197 4. 568104 3. 483913 3. 808377  
4. 551431 4. 776435 4. 411328 4. 928326 5. 067723 5. 122768 4. 857189 5. 048281 5. 322459  
2. 783576 2. 958929 2. 615069 2. 963462 3. 08896 3. 058531 2. 871952 3. 317224 3. 223872  
7. 084916 6. 902077 6. 801173 6. 508364 6. 988442 6. 39946 7. 105603 6. 75103 7. 063368  
7. 278527 7. 109443 7. 036928 7. 346491 7. 346104 7. 020689 7. 785603 7. 683428 7. 945047  
2. 673773 2. 589285 2. 692811 4. 092801 3. 623031 2. 797902 3. 114396 2. 965539 2. 498463  
5. 614888 5. 473979 5. 579977 6. 356948 5. 290761 5. 369128 5. 359591 5. 341851 5. 145302  
2. 379015 2. 248246 3. 027144 1. 90294 3. 263124 2. 645721 3. 179057 3. 15369 2. 004447  
6. 399551 6. 69014 6. 076157 5. 987941 6. 079061 6. 622509 6. 301612 6. 269633 6. 301796  
4. 873647 3. 750396 5. 630904 4. 47455 5. 414221 4. 17325 4. 261111 4. 973528 4. 305931  
3. 535539 3. 694939 3. 932224 4. 907479 3. 074811 3. 286377 4. 256837 4. 185652 4. 069193

2. 445584 3. 117623 3. 334466 3. 962135 2. 735571 2. 639124 2. 619107 3. 385211 2. 835427  
6. 357565 6. 516875 6. 7423 6. 271651 6. 990069 6. 180614 6. 366326 6. 695707 5. 787443  
4. 01788 6. 277844 6. 192701 3. 856895 6. 553034 5. 627974 5. 970372 6. 130544 5. 342066  
7. 406678 7. 37204 7. 44501 7. 835007 7. 280701 7. 847028 7. 492615 7. 534358 7. 338811  
1. 274412 2. 039328 2. 303799 2. 039767 2. 244956 2. 456446 2. 902361 1. 791904 3. 343957  
2. 984846 3. 956304 3. 231013 4. 624305 3. 944704 2. 901756 3. 259732 3. 696163 3. 580162  
1. 22829 1. 045294 1. 037512 1. 635307 1. 265591 1. 575347 1. 452341 1. 137907 2. 136886  
2. 832074 2. 125268 1. 500601 2. 368226 2. 318153 1. 484359 2. 096533 2. 056513 1. 504664  
4. 653777 3. 442757 5. 185933 5. 854307 5. 082017 5. 166572 4. 545057 4. 829482 3. 245643  
4. 084663 3. 729127 5. 222604 4. 488512 4. 105213 3. 936245 4. 115417 4. 061419 3. 460468  
1. 731029 1. 557109 3. 62171 2. 634838 2. 397051 1. 427084 1. 509592 1. 487243 2. 286328  
5. 668106 5. 790645 6. 087782 6. 027616 5. 733945 5. 811641 5. 69058 6. 103045 5. 685123  
5. 347689 5. 557293 5. 660991 5. 645289 5. 63804 5. 968023 5. 21746 5. 387587 4. 372158  
7. 084986 6. 750129 6. 661603 5. 917329 6. 995875 6. 855493 7. 279658 7. 219498 6. 946718  
7. 33188 7. 171094 6. 847171 6. 86917 7. 238375 7. 636303 7. 450368 7. 906546 7. 446758  
6. 314242 6. 961501 6. 51052 6. 8195 6. 980621 6. 532179 6. 642261 6. 97166 6. 974035  
6. 520318 6. 20172 6. 901904 6. 42047 6. 087302 5. 610657 6. 621358 6. 376661 6. 678474  
5. 21696 5. 525458 5. 025038 4. 614702 5. 556973 5. 101637 5. 317994 5. 625493 4. 901516  
7. 59712 7. 931334 7. 471919 7. 475118 7. 966982 7. 443529 7. 8086 7. 905656 7. 453105  
7. 421205 6. 983867 7. 142741 7. 294827 7. 596641 7. 260626 7. 567123 7. 15989 8. 177672  
6. 997481 6. 695478 6. 716995 7. 461951 7. 201055 6. 887134 7. 593315 6. 701859 7. 172993  
1. 681156 1. 584027 1. 43255 3. 781039 2. 664987 2. 748714 3. 019709 1. 05474 3. 676882  
6. 892212 6. 512731 6. 355322 6. 042831 6. 929168 6. 849072 6. 760473 6. 744666 6. 934832  
5. 316923 5. 315347 5. 591612 5. 443932 5. 525856 5. 308704 5. 859351 5. 302755 6. 482867  
7. 658433 7. 430313 7. 61428 6. 379936 7. 748832 6. 953879 7. 09296 7. 669015 6. 724457  
5. 160563 5. 621066 6. 159131 4. 930052 5. 865796 5. 142928 5. 388906 5. 732584 3. 689731  
2. 546573 1. 888651 3. 06452 2. 399331 2. 788167 1. 645481 2. 864252 1. 723313 3. 086497  
6. 822201 6. 92089 6. 817607 7. 4937 6. 73207 6. 531299 7. 110172 6. 848116 7. 328292  
4. 83214 4. 899758 5. 182582 5. 130055 5. 941241 5. 298588 4. 617421 4. 929206 5. 009996  
6. 33652 6. 102179 6. 370056 6. 048232 5. 926542 5. 886132 6. 33713 6. 191235 6. 196467  
8. 711738 8. 595754 8. 646658 8. 396232 9. 053625 8. 467918 8. 648917 8. 672631 8. 669334  
4. 648203 4. 73435 4. 917797 5. 118472 5. 226495 5. 069479 5. 05052 5. 313399 4. 827013  
7. 51255 7. 246543 7. 29004 6. 710946 7. 828266 7. 500097 7. 230398 8. 316425 6. 547579  
9. 390113 9. 36987 9. 257865 9. 19066 9. 338238 9. 218355 9. 086975 9. 193566 9. 36647  
1. 811885 2. 828723 2. 370834 2. 75547 1. 725762 1. 828869 2. 555276 2. 19296 2. 599727  
6. 524385 6. 576581 6. 375665 6. 65742 6. 522946 5. 268067 6. 388423 6. 097726 7. 103131  
5. 200357 4. 999845 4. 591257 4. 659207 4. 975276 4. 21234 5. 165097 4. 38752 4. 325845  
9. 285837 9. 336601 9. 433952 9. 906939 9. 228385 9. 832348 9. 33975 9. 844159 8. 853295  
4. 898658 5. 665753 4. 898157 5. 087663 5. 663921 5. 405953 5. 709729 5. 244172 5. 349514  
6. 617914 6. 536829 6. 603266 5. 715849 6. 539161 6. 72492 6. 787935 6. 737954 6. 707925  
3. 742834 3. 275377 3. 76149 4. 039958 3. 903861 3. 562015 4. 237319 3. 139947 4. 68212  
6. 337232 6. 286485 6. 039416 5. 279859 6. 20832 6. 321113 6. 301143 6. 151812 6. 55828  
4. 873999 4. 709265 3. 343543 5. 969113 5. 227919 4. 17053 4. 111181 5. 181571 4. 189649  
7. 96914 7. 93755 8. 214898 7. 745336 7. 945113 7. 724911 8. 49044 8. 078908 7. 714381  
8. 581519 8. 505001 8. 559158 7. 460103 8. 59604 8. 515444 8. 229505 8. 113862 8. 481789  
2. 270108 2. 251134 2. 902097 4. 221522 2. 697419 2. 760002 2. 936402 2. 53933 2. 389606  
5. 34315 5. 123 5. 152851 3. 062673 5. 36425 5. 31446 4. 572352 5. 285897 4. 863655  
1. 736914 1. 619817 1. 539226 2. 29766 1. 359068 1. 547707 1. 683939 1. 415805 1. 281643  
5. 466968 5. 480248 5. 480248 6. 314804 5. 818296 4. 663074 5. 628557 5. 267256 4. 512443  
4. 906252 5. 138034 4. 72784 5. 256618 5. 666666 4. 95562 5. 48056 5. 816234 5. 840143  
6. 999696 7. 004124 6. 997679 6. 734589 6. 569256 6. 998967 6. 494502 6. 869997 6. 478915

8. 588793 8. 271106 8. 484941 7. 598454 8. 523971 8. 182221 9. 142498 8. 211426 8. 654255  
5. 840468 6. 695441 7. 524844 6. 843374 6. 284872 5. 479086 6. 9597 7. 179608 8. 775136  
5. 077753 4. 914928 5. 139597 5. 001288 5. 154225 5. 330092 5. 508414 4. 724537 5. 817293  
6. 561224 6. 099433 6. 487518 5. 424526 6. 400233 5. 849819 7. 157139 6. 302575 6. 421143  
8. 022636 8. 109123 8. 008987 8. 105444 8. 39052 7. 876318 8. 635822 8. 230771 8. 49483  
7. 818589 8. 066096 7. 511384 8. 196313 8. 012178 7. 710616 7. 923234 7. 892728 7. 597106  
7. 990285 7. 566959 8. 10985 8. 51334 8. 708516 7. 596568 8. 355192 8. 455932 8. 451338  
5. 254413 4. 919292 5. 721939 3. 58846 3. 923527 4. 389033 4. 709687 4. 932827 4. 069073  
6. 407241 6. 258557 6. 269236 7. 073089 6. 155871 6. 551908 6. 52004 6. 243611 6. 741743  
9. 711861 9. 63163 9. 772887 9. 441211 9. 460969 9. 610384 9. 600848 9. 39466 9. 509904  
5. 414407 6. 133659 6. 076462 5. 183068 6. 144397 4. 678506 5. 99537 5. 881044 5. 685011  
6. 155976 6. 256184 5. 980622 5. 47642 6. 265068 5. 481124 5. 806411 5. 991207 5. 750242  
7. 441202 7. 272998 7. 265957 6. 328513 7. 844928 7. 127347 7. 22974 7. 47983 7. 40528  
6. 750804 7. 050232 6. 830616 7. 20161 7. 098654 6. 65947 7. 127453 6. 808678 6. 917128  
6. 182372 5. 536765 6. 08779 4. 328478 5. 493069 5. 992591 5. 738196 6. 009067 5. 791527  
6. 625162 6. 564653 6. 880456 5. 948105 6. 399483 6. 546686 6. 065438 6. 616546 6. 536438  
4. 398389 4. 945704 4. 96372 5. 038705 4. 340886 4. 161172 4. 484813 4. 594851 5. 002779  
4. 265544 3. 56545 3. 509445 5. 723427 4. 319291 4. 002437 3. 582062 3. 740815 4. 10731  
2. 743343 4. 377484 2. 320665 3. 324111 3. 490627 3. 846281 3. 688042 3. 721699 5. 81668  
4. 957946 5. 592914 5. 330615 4. 196288 5. 993945 5. 067832 5. 520177 5. 795605 6. 000672  
4. 060824 2. 519956 1. 71182 2. 171986 2. 636931 1. 593568 1. 431776 3. 155745 1. 895491  
5. 593312 4. 337359 4. 286862 3. 092559 4. 085234 5. 31592 4. 258293 4. 832754 4. 808126  
6. 043509 5. 563973 5. 541981 5. 277362 5. 551003 5. 784633 5. 660499 5. 561877 6. 201472  
5. 0531 4. 792447 5. 613245 4. 347251 5. 446685 5. 886277 5. 286294 5. 219199 5. 488798  
8. 272882 8. 14354 8. 353897 7. 967208 7. 94543 7. 684613 8. 224457 7. 794108 8. 130515  
5. 263956 5. 403409 5. 076152 5. 046217 4. 514218 4. 800533 4. 876955 5. 29595 4. 483049  
1. 064301 1. 326246 1. 594367 2. 268736 1. 157342 1. 534025 1. 407222 1. 50396 1. 387841  
7. 869171 7. 915041 7. 553737 7. 830427 8. 270263 7. 468075 8. 062969 7. 826172 8. 093906  
7. 732507 8. 047241 7. 313475 8. 045342 7. 896186 7. 503359 7. 042588 7. 784148 8. 447969  
9. 042716 9. 150779 9. 13027 8. 729457 9. 019274 8. 960054 9. 245164 9. 4071 8. 669261  
8. 64348 9. 451114 8. 35386 8. 263429 8. 327547 8. 180358 7. 532803 8. 45733 9. 979565  
7. 621699 7. 821066 7. 526163 7. 524474 7. 459127 7. 329646 7. 672176 7. 292152 6. 862291  
2. 503548 1. 932154 2. 655244 2. 295355 1. 931632 2. 031721 2. 10152 1. 956431 2. 624996  
5. 741057 4. 519592 5. 323693 3. 54381 5. 121059 5. 287956 5. 386195 5. 172116 5. 162071  
4. 268196 5. 044651 3. 43891 5. 192562 5. 539573 4. 448265 5. 038062 4. 770128 4. 711316  
2. 147886 3. 266641 3. 639647 2. 930723 2. 652307 2. 847118 2. 957246 3. 237181 2. 600102  
4. 059992 3. 651061 3. 357236 3. 516643 5. 471581 3. 666177 4. 140765 4. 541391 3. 585321  
6. 442711 5. 997965 5. 377161 8. 332779 6. 635017 7. 08164 7. 346799 5. 348989 7. 208837  
6. 920394 7. 170396 7. 194891 6. 518764 7. 591662 6. 483785 7. 185865 7. 165234 6. 332383  
6. 786681 6. 721737 6. 588751 6. 365209 6. 731252 5. 598863 6. 628971 6. 937466 7. 092697  
5. 6128 5. 927048 5. 579435 6. 758431 6. 249044 5. 816057 5. 791636 5. 288764 5. 841491  
7. 994499 8. 227176 8. 389986 7. 615598 8. 585979 7. 68611 8. 726242 8. 702967 8. 25841  
3. 556256 4. 383089 4. 161303 2. 930814 4. 158184 4. 408733 4. 614084 3. 795772 2. 886407  
7. 870007 7. 695489 7. 696968 7. 015477 7. 591839 7. 139726 8. 311701 7. 550827 8. 40703  
3. 529079 3. 069079 2. 84692 2. 595361 2. 286424 4. 547513 2. 467095 3. 503281 4. 643811  
7. 148798 6. 594883 6. 928096 6. 784244 6. 504113 5. 567011 6. 591141 6. 452389 6. 606692  
5. 1566 4. 102888 5. 135717 5. 006949 5. 151214 4. 915097 4. 352099 4. 628815 5. 662478  
8. 606733 8. 394145 8. 164093 7. 683739 8. 201182 8. 530418 7. 940722 8. 15753 8. 734045  
2. 56055 1. 629738 1. 561904 3. 405553 1. 582056 1. 765529 1. 753581 1. 831937 1. 889069  
6. 169023 5. 988824 5. 927 6. 663054 6. 361783 6. 129224 6. 155962 5. 772903 6. 201667  
5. 798822 5. 792616 5. 696603 6. 013281 5. 645097 6. 24413 5. 768803 6. 177569 4. 221997

10. 30631 10. 31111 10. 18969 10. 22679 10. 05494 10. 25445 10. 22446 10. 42258 10. 25519  
6. 442694 6. 657444 6. 952524 6. 056167 6. 937007 6. 548773 6. 792328 6. 825733 5. 423977  
5. 379257 6. 11325 5. 721131 4. 877362 6. 077089 4. 532623 4. 718245 4. 799594 4. 002051  
5. 790456 6. 296499 5. 413278 5. 876101 5. 636156 4. 502209 6. 038215 4. 964486 6. 41939  
9. 395775 9. 456179 9. 156207 8. 284716 9. 294516 9. 174443 9. 317936 9. 327325 9. 451183  
4. 945334 4. 979065 5. 376588 5. 098706 4. 959848 5. 14093 6. 055347 5. 176859 5. 110022  
1. 813419 3. 807322 2. 407479 2. 35953 1. 643732 1. 656031 2. 004477 1. 236045 1. 678741  
6. 619555 6. 862943 6. 4351 5. 269296 6. 63349 6. 484256 6. 618034 6. 695865 6. 55154  
3. 952819 4. 452093 3. 865336 3. 887177 3. 947755 2. 6364 4. 609905 4. 44301 4. 213978  
1. 380669 1. 297592 1. 590317 1. 751034 1. 49219 1. 434369 1. 376922 1. 5344 1. 146323  
8. 340071 8. 200815 8. 5066 8. 843314 8. 308456 7. 948432 8. 701046 7. 841038 8. 02409  
7. 723869 7. 443044 7. 59793 8. 414816 7. 27934 7. 237177 7. 962146 7. 637847 7. 250286  
7. 698709 7. 000897 7. 664223 8. 011221 7. 825639 7. 052562 7. 588383 7. 998461 6. 979118  
8. 710096 8. 953363 8. 452968 8. 667779 8. 814105 8. 79277 9. 086562 8. 862174 8. 089168  
3. 299327 3. 493694 4. 005551 3. 600581 3. 079019 3. 109863 3. 776018 3. 770337 3. 351237  
3. 929984 1. 592533 3. 101598 3. 214777 0. 912707 4. 425408 1. 912455 2. 248351 2. 665202  
5. 950733 4. 83153 5. 344536 4. 890142 5. 395146 3. 785895 4. 71101 4. 654577 4. 648923  
5. 647767 5. 809437 5. 409776 5. 335435 5. 834863 4. 861912 4. 777742 5. 902625 6. 310602  
2. 109377 2. 865294 1. 644514 2. 275751 1. 390823 2. 471842 1. 22077 2. 42188 2. 20687  
1. 436853 1. 018435 1. 353631 1. 600322 1. 166768 1. 89998 1. 520794 0. 800945 1. 25222  
3. 790877 4. 215363 4. 173644 3. 232931 3. 441894 4. 017135 4. 042812 3. 59336 4. 162466  
7. 416657 7. 165673 7. 808054 7. 43538 7. 072525 7. 225627 7. 409441 7. 086381 7. 752024  
2. 796408 1. 500756 0. 899017 1. 543585 2. 270558 2. 300881 1. 632725 2. 290099 1. 474823  
7. 052168 6. 602605 7. 52623 7. 230157 7. 149343 7. 051392 7. 604989 7. 581146 9. 209566  
5. 233828 3. 895498 3. 992184 6. 122787 3. 989668 5. 796936 5. 142596 5. 251309 7. 101851  
2. 41925 3. 354149 3. 14268 5. 527074 2. 959054 2. 69022 2. 756387 2. 931253 2. 779654  
7. 232494 7. 160895 6. 529116 6. 952984 7. 318868 7. 20865 6. 625821 6. 865043 7. 273862  
4. 964258 5. 552676 4. 411536 5. 250518 4. 757506 4. 363355 4. 693149 4. 80926 3. 868904  
4. 526092 4. 731585 4. 586598 4. 386381 5. 064001 4. 280398 4. 720961 5. 132722 5. 184092  
7. 53217 7. 370126 7. 332858 7. 701622 7. 093707 6. 945796 7. 581516 7. 870628 6. 752997  
7. 425251 7. 380467 7. 54446 7. 875985 7. 970011 7. 289556 7. 906404 8. 100814 7. 230686  
2. 726969 3. 680406 4. 005651 3. 734581 3. 593958 2. 637578 3. 127826 3. 122181 2. 621884  
2. 751988 2. 638105 2. 875245 3. 685551 2. 503471 2. 982178 2. 317814 3. 380008 3. 182328  
7. 539197 7. 626398 7. 32604 7. 225991 7. 61012 7. 566554 7. 453789 7. 70819 7. 295166  
6. 190758 6. 282197 6. 781637 6. 016551 6. 312433 6. 317491 6. 320756 6. 445803 5. 65585  
3. 404136 2. 484812 3. 217077 3. 468997 2. 928186 3. 415122 2. 694303 3. 037537 2. 755172  
3. 130538 3. 695161 4. 065016 5. 640246 3. 451264 3. 465536 4. 92447 4. 691966 2. 365395  
7. 819664 7. 302616 7. 249596 6. 013833 7. 370652 7. 947891 7. 212279 7. 204602 7. 163046  
5. 635924 2. 533217 3. 275803 4. 299854 5. 103777 3. 107549 3. 652338 3. 281642 4. 336598  
7. 066568 7. 105963 7. 107712 7. 329262 7. 009089 7. 006943 7. 119471 7. 252487 7. 490993  
5. 839657 5. 370973 6. 159482 3. 639374 5. 009588 4. 875793 5. 527473 5. 025477 5. 688157  
5. 456681 6. 758879 4. 854869 7. 139505 6. 839687 6. 004639 5. 686793 6. 541989 3. 987136  
7. 198128 7. 083823 7. 247899 7. 491368 7. 014017 7. 218923 7. 085561 6. 844729 6. 831762  
3. 506216 3. 776727 3. 42279 3. 306522 3. 240372 3. 802148 3. 476188 4. 381187 2. 87398  
1. 866692 1. 675034 2. 023821 1. 929212 2. 94969 2. 723012 2. 710825 2. 189843 2. 710645  
8. 37947 7. 718853 8. 166247 7. 77434 7. 89505 8. 059645 8. 221004 7. 751349 8. 108578  
1. 081458 0. 963218 1. 078866 1. 680124 1. 188757 1. 425857 1. 317446 0. 78489 1. 373074  
1. 57615 2. 473446 2. 02742 1. 909867 1. 646062 1. 903662 1. 734865 1. 979832 2. 408413  
2. 310718 3. 253925 3. 291902 2. 995981 3. 167676 2. 58642 3. 936605 2. 37322 2. 387423  
1. 654477 1. 287075 1. 155919 1. 329545 1. 35363 1. 426591 2. 078547 1. 796117 1. 695265  
3. 116241 2. 348919 2. 341788 2. 513605 1. 712972 1. 698049 2. 413284 2. 650346 1. 874455

7. 078968 6. 912289 6. 881404 6. 374935 7. 051761 7. 104956 7. 508428 7. 147915 7. 071904  
5. 066977 4. 636685 3. 48317 4. 117471 3. 859932 3. 860392 4. 939274 3. 704907 4. 896237  
4. 38576 5. 000945 4. 184035 4. 176075 5. 702402 3. 455392 4. 116307 5. 291133 4. 513277  
7. 30811 7. 274977 7. 524484 7. 33861 7. 461294 7. 324051 7. 038411 7. 592628 7. 404615  
4. 880962 6. 121306 4. 918446 5. 329047 5. 698557 5. 682569 5. 275961 6. 201833 6. 02538  
5. 033122 5. 475565 5. 14145 3. 596031 5. 107576 4. 609824 5. 314823 4. 238288 4. 679282  
4. 908831 4. 192257 5. 14464 4. 894175 4. 358546 4. 846378 5. 010829 4. 230201 5. 576243  
9. 582749 9. 55744 9. 328573 9. 566883 9. 828226 9. 034955 9. 576375 9. 437745 9. 685981  
3. 517415 3. 689826 4. 24436 3. 89187 3. 696684 2. 501109 3. 110768 3. 64644 3. 63907  
5. 653539 5. 426273 4. 917783 5. 308352 5. 082541 5. 169936 5. 383928 5. 375867 5. 384873  
2. 851794 3. 811651 3. 898989 3. 876045 3. 030205 3. 488455 3. 931892 3. 617394 2. 929324  
5. 455382 5. 605806 5. 312903 6. 404193 5. 142279 5. 062057 5. 456798 5. 063157 5. 609733  
6. 134243 5. 870351 5. 39117 5. 346001 5. 795571 5. 390408 6. 138986 6. 054732 5. 219041  
6. 020986 6. 198139 6. 767594 6. 785044 6. 827144 6. 130613 6. 331764 6. 370276 6. 847709  
2. 954892 2. 496878 2. 695432 4. 524612 1. 688251 2. 473186 1. 955347 6. 086696 2. 378869  
2. 192192 4. 106909 0. 957134 2. 28297 2. 161139 2. 499905 1. 850957 3. 237575 2. 224774  
3. 551802 4. 299885 3. 816373 3. 449257 3. 798269 2. 878187 3. 301778 4. 154641 3. 353792  
3. 758902 4. 024633 3. 335298 3. 333802 4. 782757 2. 211484 3. 770221 3. 910003 2. 497759  
6. 357232 6. 069589 5. 820561 5. 665534 6. 267545 6. 265727 5. 489143 6. 246382 5. 6995  
5. 698491 6. 43497 6. 065067 5. 789381 6. 124434 5. 80695 5. 51139 6. 17183 5. 898088  
8. 024615 7. 96856 7. 425142 7. 921364 8. 031648 7. 572889 8. 186725 7. 894844 7. 907763  
5. 665375 6. 330158 5. 634826 6. 311275 6. 206369 4. 946169 6. 109072 6. 226071 5. 514369  
9. 603042 9. 588803 9. 3559 9. 761643 9. 492461 8. 922907 9. 481353 9. 978574 9. 739341  
7. 629201 8. 257629 8. 121529 7. 329433 8. 463535 8. 137452 7. 701742 8. 54114 6. 477306  
1. 801021 2. 540974 2. 747479 1. 967235 2. 152927 2. 760475 2. 668546 2. 636955 2. 274811  
4. 479084 4. 642202 4. 733149 5. 626603 4. 92498 4. 648436 5. 053178 4. 723656 5. 916912  
3. 27628 3. 622533 3. 850594 3. 030987 3. 917369 3. 929103 3. 262823 4. 188578 3. 151775  
2. 266552 2. 335207 2. 867829 2. 55494 3. 487127 2. 460455 2. 424209 1. 927372 2. 03945  
5. 968707 5. 874812 6. 035385 5. 476097 5. 349093 5. 720884 5. 451733 5. 638114 4. 990899  
1. 802595 1. 967642 1. 845579 1. 932749 2. 047018 2. 480089 1. 62626 1. 949818 1. 904058  
4. 55364 4. 183701 4. 562666 5. 033068 4. 839319 5. 10861 5. 053931 4. 77292 4. 723245  
4. 56566 4. 455944 4. 027996 4. 982345 4. 939285 3. 221089 4. 300824 4. 276683 5. 07409  
3. 275793 3. 279234 3. 710171 3. 151642 3. 382376 3. 687671 3. 586806 3. 150683 2. 530236  
8. 843255 8. 508698 8. 668381 8. 401622 8. 303014 8. 503961 8. 68536 8. 354607 8. 486102  
5. 822319 5. 90117 5. 38105 5. 905017 5. 451046 6. 19286 6. 225863 5. 833153 5. 972887  
10. 63218 10. 571 10. 48241 10. 3796 10. 49928 10. 3017 10. 59583 10. 51502 10. 61843  
4. 411501 4. 291489 4. 706207 2. 452284 4. 001892 4. 459334 3. 309628 4. 847937 5. 557961  
1. 444619 1. 993854 1. 760332 2. 776288 1. 47982 1. 215117 1. 485537 2. 098582 1. 824038  
6. 130144 6. 1549 5. 971597 5. 910227 6. 075461 5. 2649 6. 247653 6. 214788 6. 383553  
4. 90432 3. 823319 4. 076041 3. 5081 3. 990199 3. 898116 4. 421165 5. 110726 3. 026465  
6. 528149 7. 062888 6. 065653 5. 682307 7. 093943 7. 170909 6. 506876 6. 873767 5. 750887  
5. 58471 4. 984946 5. 234219 5. 241943 4. 991233 4. 871179 5. 476362 5. 125851 5. 642275  
8. 668998 8. 7235 8. 622817 7. 253541 8. 643066 8. 747892 8. 343831 8. 287086 8. 004558  
2. 254649 1. 245639 1. 06555 1. 892891 1. 264605 1. 609927 1. 285569 1. 313547 1. 851144  
4. 680987 4. 604767 4. 867945 4. 019096 4. 926349 5. 24257 5. 175547 4. 350424 5. 027774  
4. 819224 4. 688136 4. 721735 4. 639196 5. 469146 4. 830034 6. 295091 4. 925781 5. 749345  
1. 219104 1. 846103 1. 515834 1. 851165 3. 789304 2. 093242 1. 619754 4. 319154 1. 359591  
6. 57483 6. 594819 6. 633157 6. 543715 6. 372749 6. 66068 6. 603386 6. 450544 6. 832939  
5. 344697 5. 404614 5. 209603 2. 996473 5. 030941 4. 742669 5. 13011 4. 938364 3. 888584  
4. 941287 5. 251829 3. 924672 4. 633452 5. 264932 5. 221114 6. 504613 4. 940833 5. 822043  
1. 941679 1. 519696 1. 899599 1. 759923 1. 939019 2. 152011 1. 935882 1. 65527 2. 008851

7. 058049 6. 906128 7. 258625 7. 312604 7. 412883 6. 896524 6. 969225 7. 563853 7. 666943  
8. 799107 8. 970378 8. 827647 8. 817728 8. 680664 8. 675799 9. 286871 8. 797958 8. 851186  
1. 29087 1. 232706 1. 627491 1. 172536 1. 659959 2. 002994 2. 235141 1. 364895 1. 042659  
6. 241616 6. 197847 6. 645134 5. 796418 5. 957354 5. 538261 6. 166843 6. 192545 5. 774206  
6. 782608 6. 164964 6. 284936 6. 39914 6. 534672 6. 832244 6. 255445 6. 699501 5. 236805  
3. 60701 3. 834923 3. 149221 2. 181134 3. 231039 2. 896126 4. 305113 3. 382114 3. 307044  
5. 264134 5. 069888 5. 302222 3. 550144 4. 673751 5. 114549 5. 214585 4. 312509 5. 100689  
6. 474636 6. 988003 7. 004912 6. 899013 6. 670677 7. 150069 7. 370005 7. 164628 7. 073895  
3. 960375 3. 558127 3. 306415 2. 341999 2. 657124 5. 033139 2. 251466 3. 819696 6. 063067  
1. 456374 0. 994656 1. 378306 2. 413146 1. 134323 1. 634952 1. 294291 1. 201506 1. 149134  
4. 405473 4. 384045 4. 450639 2. 744471 4. 069129 2. 749547 2. 475193 4. 748387 3. 483472  
6. 768454 6. 036809 6. 496726 6. 776028 6. 264419 6. 540798 6. 311931 6. 705016 6. 736979  
8. 325268 6. 515437 6. 534897 7. 942713 8. 043741 8. 108423 6. 52032 7. 150142 7. 401374  
3. 257982 2. 785681 1. 852879 1. 839142 2. 456259 3. 133249 2. 985311 5. 41962 3. 598077  
2. 481705 1. 716404 2. 272454 2. 204092 2. 193873 2. 818974 2. 4532 1. 654763 2. 59104  
0. 932261 1. 554771 1. 184307 1. 74614 1. 653709 1. 50448 0. 766285 1. 533394 1. 425228  
7. 481286 7. 846027 7. 62744 8. 042972 7. 649727 7. 506104 7. 897901 7. 889033 7. 581876  
7. 013121 6. 988888 7. 304456 6. 985966 6. 649541 7. 574506 7. 182962 6. 758142 7. 550059  
3. 9097 4. 411301 3. 919176 5. 807605 4. 397261 4. 453164 4. 390308 5. 146037 5. 085687  
2. 044134 3. 232154 3. 03438 2. 27745 2. 701727 2. 55787 3. 301839 3. 487508 2. 270867  
5. 822305 4. 583972 5. 10051 5. 05089 4. 783736 5. 943879 4. 65167 4. 934448 4. 522659  
1. 44159 2. 152248 1. 296535 1. 336409 2. 285645 1. 58968 1. 475583 0. 8591 1. 420479  
5. 801315 5. 581762 4. 761378 5. 129918 5. 279064 5. 558221 5. 828207 5. 781624 5. 673745  
1. 165654 1. 407366 1. 450444 1. 924686 1. 228772 1. 225542 1. 67472 1. 083818 1. 028118  
2. 536044 1. 258098 1. 223384 0. 918005 1. 692379 1. 150323 1. 219982 1. 200733 3. 915418  
3. 883498 3. 936298 3. 95794 3. 635224 4. 509051 3. 517298 4. 873817 4. 566576 4. 522769  
6. 172534 5. 240319 6. 472938 5. 996818 6. 101617 5. 291533 6. 105548 5. 985333 5. 729922  
8. 418986 8. 507276 8. 82507 7. 926534 8. 678656 8. 892406 8. 701203 8. 71547 7. 8045  
3. 989979 3. 621472 3. 945034 3. 571404 3. 651693 3. 760689 3. 743875 3. 402276 4. 105571  
6. 599911 6. 843428 6. 940811 5. 856751 7. 043011 6. 809812 6. 951817 7. 264963 7. 139856  
4. 955844 5. 93722 5. 123403 5. 022645 5. 846162 4. 881157 5. 930145 6. 726641 6. 143218  
7. 595337 7. 632459 7. 466106 7. 832961 7. 513569 7. 843959 7. 752237 7. 819609 7. 927717  
6. 015121 5. 675538 5. 296743 6. 354915 5. 663477 5. 974936 6. 410866 5. 818359 3. 945785  
1. 381878 0. 88422 1. 789799 1. 93359 1. 468573 3. 030029 1. 336725 1. 212093 2. 243045  
7. 568676 7. 544191 7. 46136 7. 426452 7. 137026 7. 353863 7. 668679 7. 418935 8. 246172  
7. 648436 7. 407165 7. 20924 7. 157502 7. 253934 7. 436213 7. 460031 7. 162085 7. 786948  
6. 49917 6. 420244 6. 632282 6. 374599 6. 292066 6. 265572 6. 90321 6. 579096 6. 787899  
5. 328662 5. 62012 5. 560886 5. 708761 5. 392461 5. 974254 5. 468973 6. 225428 6. 031604  
3. 482852 3. 906426 3. 951578 2. 791704 3. 829955 4. 037348 3. 898824 4. 588224 2. 532366  
3. 018876 3. 738944 3. 399267 2. 587606 3. 354031 2. 834747 3. 792025 3. 3457 2. 460452  
3. 882009 3. 711496 2. 954726 4. 23467 4. 220595 2. 748958 2. 451843 3. 230165 2. 532835  
7. 17556 7. 329862 6. 631681 7. 403514 6. 748487 7. 02783 7. 376849 7. 065677 7. 437121  
3. 619499 3. 902641 3. 992055 3. 818678 4. 341705 4. 516303 3. 447878 4. 036956 3. 701948  
6. 753065 7. 312092 6. 891086 6. 298462 7. 346562 7. 509528 6. 921737 6. 995654 6. 730053  
5. 507907 5. 703048 5. 605726 4. 212603 5. 806188 5. 808404 5. 315797 5. 415416 5. 739164  
9. 776127 9. 89955 9. 752742 9. 674592 10. 13978 9. 679085 9. 997201 9. 900907 9. 891897  
8. 427946 8. 290748 8. 391156 7. 991577 8. 262282 8. 155015 8. 162072 8. 194757 8. 522734  
7. 826011 7. 472124 7. 585995 7. 463717 7. 292809 7. 316588 7. 242434 7. 63859 7. 121454  
2. 818963 2. 546702 1. 521336 2. 786571 1. 183148 1. 153247 1. 471858 1. 652759 2. 989968  
1. 6546 1. 83701 2. 984795 3. 284239 2. 194549 2. 17207 1. 999405 4. 539882 3. 181765  
1. 703003 1. 913724 1. 216622 2. 27785 1. 915316 1. 636588 2. 143359 1. 414623 0. 903027

7. 500466 7. 360668 7. 436543 7. 171115 7. 212265 7. 005338 7. 53927 7. 315006 6. 72643  
7. 423359 7. 956633 7. 289124 7. 108213 7. 809036 7. 205544 7. 689846 7. 511823 6. 317831  
1. 778011 2. 169904 2. 151862 1. 933984 2. 697115 2. 590767 2. 558487 2. 254785 2. 299995  
1. 971618 2. 641063 2. 237077 2. 629723 1. 992025 2. 683031 2. 276518 2. 023316 2. 13201  
2. 002289 2. 764845 2. 192525 2. 263675 2. 430739 2. 349351 2. 98184 1. 943223 2. 143025  
2. 977548 3. 710381 3. 164657 3. 366512 3. 272593 3. 580565 2. 508504 3. 769256 2. 413802  
6. 139395 5. 811111 5. 837588 5. 438787 5. 957207 5. 150476 6. 486781 5. 988271 5. 263113  
2. 169565 1. 61274 2. 51639 2. 745819 2. 302909 2. 894591 2. 865304 2. 464669 2. 811111  
3. 414614 2. 777401 2. 365385 1. 953379 3. 149812 4. 322932 4. 054891 4. 123842 5. 510309  
7. 307498 7. 394983 7. 410263 6. 595863 7. 47099 6. 896421 7. 557445 7. 395445 6. 998678  
5. 984858 6. 013174 5. 565495 5. 818 5. 788981 5. 75925 5. 946746 5. 558899 5. 627006  
3. 419038 3. 772428 3. 814863 3. 593792 2. 663149 3. 834844 3. 397511 3. 194017 2. 322294  
4. 438733 4. 420781 3. 859398 4. 69696 4. 108794 4. 574384 4. 46129 4. 038028 5. 575003  
3. 056597 3. 624872 2. 85979 3. 541456 2. 866135 3. 161424 2. 67378 2. 719918 4. 095467  
1. 547957 1. 582617 1. 766982 1. 490282 1. 444571 1. 68152 1. 946349 2. 07636 1. 111949  
4. 098197 4. 304172 3. 247282 1. 907503 3. 356804 3. 770202 4. 766033 3. 188495 3. 608621  
2. 212546 2. 039967 2. 183795 3. 014624 1. 774332 2. 036986 2. 73304 2. 096042 2. 457672  
3. 936064 3. 740243 3. 665922 3. 93583 1. 721753 3. 407907 3. 29062 2. 945576 3. 55663  
4. 77009 4. 668135 3. 638315 4. 994825 4. 117832 3. 903532 4. 753311 4. 879034 5. 809751  
4. 28381 5. 057949 4. 62179 3. 349029 4. 824256 4. 912656 4. 057777 4. 680158 4. 133521  
9. 838764 10. 21089 9. 922378 9. 762902 10. 05166 9. 955388 9. 663575 10. 10546 8. 691282  
4. 785962 4. 17214 4. 843009 4. 743394 4. 866345 4. 439531 5. 10807 5. 100046 3. 534401  
4. 528919 4. 790607 5. 064937 4. 339464 6. 252288 3. 901695 4. 276925 5. 315409 3. 608345  
2. 528949 1. 956345 2. 437062 2. 6025 3. 036689 1. 779251 1. 989548 2. 563554 1. 69662  
5. 014394 4. 683706 5. 167453 4. 076143 4. 763017 4. 57624 4. 535142 5. 19018 4. 068709  
2. 749435 3. 026845 2. 132401 4. 503623 3. 115642 2. 903679 3. 665612 2. 998852 3. 168895  
1. 991723 1. 925246 2. 25982 3. 175722 2. 821106 2. 96108 2. 32621 1. 500446 2. 704842  
1. 292377 1. 266743 1. 465274 1. 454802 1. 013455 1. 786508 1. 365749 1. 178562 1. 748226  
8. 064799 7. 804834 7. 64121 7. 406432 7. 276511 7. 826536 7. 892272 7. 701351 7. 472353  
5. 159011 4. 458209 5. 01639 4. 975835 4. 813475 4. 84921 4. 778345 4. 875204 3. 286709  
4. 75525 6. 033206 6. 311558 6. 068287 5. 531416 5. 009172 5. 717889 5. 85914 5. 299524  
2. 498488 2. 180018 3. 819559 2. 785899 2. 527682 2. 115265 2. 38907 2. 151755 2. 135015  
5. 358344 5. 792684 5. 567406 6. 062078 5. 940887 5. 948178 5. 87609 5. 231653 5. 714909  
3. 955222 4. 161249 4. 052633 3. 27571 3. 820169 4. 398643 4. 428227 3. 7987 4. 580205  
3. 18386 2. 966556 3. 395534 2. 729321 2. 058108 2. 565423 3. 709505 2. 916756 3. 147359  
2. 95914 1. 923776 2. 446384 4. 842835 3. 205826 2. 126615 2. 386518 3. 073018 3. 069682  
1. 809158 1. 619794 1. 60835 2. 658148 1. 548567 1. 574587 1. 788433 1. 481836 1. 979082  
4. 552505 4. 401884 5. 252352 4. 962549 5. 280745 4. 486557 5. 236003 4. 738056 4. 489714  
5. 236211 4. 890906 5. 099389 6. 217348 4. 947439 5. 030358 5. 632985 4. 994551 5. 0387  
1. 302536 1. 389234 1. 39893 1. 499889 1. 324379 1. 619976 1. 527645 1. 768919 1. 713015  
3. 387366 3. 405504 3. 578221 3. 403511 1. 97196 2. 558588 3. 17968 2. 835514 3. 629922  
2. 515939 2. 549524 2. 677078 2. 639039 2. 283633 2. 311075 2. 524664 2. 256454 3. 218071  
5. 375515 5. 45858 5. 227762 5. 556824 5. 956133 5. 442019 5. 637306 5. 787741 4. 397001  
5. 735812 7. 040475 6. 712756 6. 867775 6. 80363 7. 482948 4. 374608 6. 343227 7. 891747  
3. 870108 5. 063569 4. 254141 4. 315629 4. 639405 4. 306396 4. 685797 4. 50195 4. 976608  
7. 022828 7. 299341 7. 165949 7. 198714 6. 991216 7. 152963 6. 84987 7. 395413 6. 192641  
4. 657343 4. 837054 5. 140014 4. 683954 4. 83045 4. 708171 4. 709804 4. 667799 4. 896284  
3. 572586 3. 735118 5. 302096 3. 56369 3. 878219 3. 016104 4. 387747 4. 169925 3. 191442  
4. 653671 4. 931414 4. 820586 4. 580573 5. 051836 4. 789169 4. 787475 4. 545257 3. 392874  
5. 890277 6. 153845 6. 068357 5. 571194 6. 378292 5. 798 5. 502309 6. 189802 5. 450166  
8. 967071 8. 746027 8. 614304 8. 394719 8. 378375 8. 545612 8. 555249 8. 523973 8. 755843

7. 808443 7. 526693 7. 419303 7. 534699 8. 049043 7. 293916 8. 295219 7. 629263 7. 660979  
6. 772563 4. 996868 5. 220723 4. 627223 5. 561331 6. 963204 5. 672875 6. 75591 7. 655652  
4. 207523 3. 577782 2. 277285 1. 798429 4. 285227 4. 220568 3. 409671 5. 397866 3. 371461  
3. 826347 3. 410336 4. 71376 2. 859944 3. 75867 4. 522271 4. 066299 3. 600082 4. 248313  
1. 551693 2. 516151 1. 916624 2. 130691 1. 996958 1. 982246 2. 235336 2. 225729 2. 270071  
2. 234505 3. 437841 3. 235622 2. 501429 4. 148344 2. 86415 4. 425424 2. 309428 2. 983722  
6. 880675 7. 963371 7. 105638 6. 316294 7. 066979 7. 191469 6. 944283 7. 546174 6. 591769  
2. 432499 3. 189711 2. 603347 3. 368507 2. 061413 2. 769124 2. 014301 2. 472574 2. 955184  
3. 732627 4. 419155 3. 7512 4. 361531 3. 95757 3. 394211 4. 71746 4. 389445 3. 785655  
4. 533203 6. 408088 5. 32911 5. 655303 2. 940976 5. 987315 5. 419456 6. 290471 5. 689038  
8. 842771 8. 451326 8. 40422 8. 205873 8. 620277 8. 15828 8. 4307 8. 739953 7. 707858  
7. 55584 7. 912383 7. 239853 7. 05203 7. 919459 7. 522049 8. 028393 7. 838153 7. 840777  
2. 933493 1. 538149 2. 162518 3. 043319 2. 180568 1. 203415 2. 10778 1. 788368 2. 862955  
10. 00179 10. 26615 10. 20871 10. 20576 10. 42114 10. 32153 9. 57717 10. 04407 9. 291863  
7. 049203 7. 313305 6. 367977 7. 022178 7. 225708 6. 931769 6. 88709 7. 131245 7. 191418  
4. 117135 3. 841395 4. 370098 2. 2398 3. 677644 4. 249349 4. 208726 3. 85814 4. 011918  
9. 04491 9. 200243 8. 61569 8. 280939 8. 957238 8. 811514 9. 03941 9. 007024 8. 792972  
7. 27672 7. 440086 6. 786373 6. 73035 9. 759365 6. 965258 7. 824396 7. 902375 8. 349351  
6. 68426 6. 587166 6. 310943 6. 549414 6. 300797 6. 737487 7. 051293 6. 786368 6. 513242  
8. 096461 8. 497288 6. 877571 7. 057185 8. 228033 8. 591227 7. 098678 8. 183206 7. 16048  
3. 618236 3. 917238 4. 196117 2. 822244 4. 239037 3. 588178 3. 220267 3. 557538 3. 32515  
2. 00178 1. 194162 1. 183207 2. 326779 2. 284993 1. 426386 2. 918498 1. 442207 2. 05139  
4. 279429 4. 383447 4. 785738 4. 949165 4. 527864 4. 294976 4. 530085 4. 431345 3. 789779  
3. 74686 4. 694045 4. 041941 3. 895594 5. 2204 4. 360881 4. 681003 5. 307024 3. 962157  
2. 025363 1. 740387 2. 189533 2. 340895 2. 542668 2. 756381 2. 303249 2. 828957 2. 55727  
2. 061927 1. 766743 2. 306004 2. 067205 2. 493062 2. 155101 2. 097639 1. 61219 1. 857286  
7. 074767 7. 331887 6. 983183 7. 314796 7. 476773 6. 834946 7. 002472 6. 961688 6. 123379  
1. 925108 1. 866477 2. 312808 2. 654022 2. 06711 2. 768882 2. 433963 1. 966648 1. 717464  
5. 564062 5. 693235 5. 491627 6. 194026 5. 753095 5. 395136 5. 758592 5. 32553 4. 471683  
2. 161903 1. 996892 2. 398524 2. 661409 1. 938455 2. 279958 2. 459166 2. 748862 2. 134992  
1. 615475 1. 68946 1. 183033 1. 603546 2. 990933 1. 649382 1. 826113 1. 579933 1. 810897  
2. 477065 2. 492611 1. 840831 1. 657852 2. 608698 1. 648279 2. 617059 1. 738175 1. 683203  
3. 546113 2. 771282 2. 744478 3. 310402 2. 86098 3. 17084 2. 474873 2. 482746 2. 617271  
2. 607535 3. 126541 3. 072282 5. 515308 3. 827284 2. 991765 3. 620902 3. 734284 1. 723314  
4. 326842 4. 267753 4. 390573 5. 311216 5. 566078 4. 81744 4. 811934 4. 566911 3. 235428  
5. 623477 5. 174702 5. 857222 5. 18479 6. 287014 6. 231269 5. 753661 5. 886391 6. 257569  
4. 24394 4. 278789 4. 228798 3. 562208 4. 833467 4. 367198 4. 951323 4. 737242 5. 159646  
1. 978142 1. 433317 1. 607734 1. 682086 1. 863944 2. 825986 1. 4942 1. 462739 2. 084095  
8. 004322 7. 97097 9. 164184 8. 343479 8. 61611 7. 892537 8. 358253 7. 911348 7. 723426  
3. 957418 4. 202502 4. 471068 4. 731867 3. 691886 3. 887674 4. 888047 4. 906981 5. 110616  
5. 026768 4. 65763 4. 734283 3. 254102 5. 244206 3. 717988 5. 238212 4. 911327 4. 969139  
8. 387253 8. 712833 8. 608617 7. 765197 8. 62248 8. 808477 8. 462162 9. 095422 7. 535856  
2. 660468 1. 841612 2. 236523 3. 666334 2. 595179 2. 589819 2. 404684 2. 13403 1. 763589  
2. 31147 2. 616896 2. 398027 2. 346933 2. 26434 3. 209079 2. 087783 2. 063671 2. 463916  
7. 850843 7. 196307 7. 738783 8. 155012 7. 602879 6. 938605 7. 703912 7. 44417 6. 555874  
8. 430447 8. 889696 9. 136557 8. 87738 9. 180625 9. 026373 8. 593418 8. 982502 7. 44048  
3. 971714 4. 769678 4. 981843 4. 000066 2. 492064 4. 824391 3. 134316 3. 261527 6. 509511  
4. 59241 4. 149757 4. 50084 4. 39948 5. 28969 3. 898011 4. 073005 4. 640285 2. 556746  
5. 915745 6. 057483 6. 701073 6. 541151 5. 434089 6. 857407 6. 226589 6. 045155 7. 092319  
1. 998128 1. 122186 1. 210317 2. 047045 1. 012494 1. 318892 1. 300261 1. 786025 1. 853443  
1. 657118 1. 152664 2. 061206 1. 281385 2. 182824 2. 593167 1. 632207 2. 135515 1. 451965



1. 527535 1. 710184 1. 769806 2. 5332 1. 307199 1. 286124 1. 145467 2. 356767 1. 499026  
4. 78613 4. 543568 4. 015933 5. 045359 4. 791377 5. 350924 4. 420344 5. 037836 4. 182703  
0. 829828 0. 809868 0. 971847 1. 833996 0. 815155 1. 629109 1. 340606 0. 802756 1. 041784  
5. 319843 6. 372157 5. 84474 6. 162706 6. 605252 5. 881612 5. 518419 6. 373517 4. 562405  
2. 419017 1. 687996 2. 714229 2. 764416 3. 219478 2. 551935 2. 239777 2. 184325 3. 350198  
5. 116933 3. 494593 4. 619434 4. 219918 5. 439907 3. 179473 4. 34728 4. 421705 4. 158074  
4. 895938 2. 89258 4. 52936 4. 217411 3. 26812 5. 269935 3. 632019 4. 589532 4. 614711  
3. 023386 1. 719268 2. 138595 2. 192064 2. 03395 2. 349435 2. 911237 2. 10328 3. 458713  
1. 705453 2. 837341 1. 332215 2. 655344 1. 331092 2. 382729 2. 4026 2. 914671 3. 062865  
4. 139424 3. 060569 3. 632301 3. 115494 2. 809226 3. 180262 3. 738809 2. 798062 4. 121245  
5. 298622 5. 734892 5. 361455 4. 217266 5. 501227 5. 058044 5. 441133 5. 227147 5. 443384  
1. 08958 1. 166329 1. 384884 2. 458172 1. 374178 2. 672291 1. 296926 1. 289953 1. 479554  
2. 127903 2. 255103 2. 288788 2. 350248 1. 764732 2. 30211 2. 170938 2. 762585 1. 908689  
4. 803743 3. 273945 4. 570539 5. 064249 4. 653467 4. 31606 4. 4402 4. 320457 3. 646934  
6. 45787 6. 932828 7. 26239 5. 640801 6. 033836 5. 530604 6. 952847 6. 446375 6. 811397  
1. 133644 1. 094816 1. 025682 3. 004715 0. 966592 1. 607057 1. 044195 2. 132493 1. 4096  
4. 576972 5. 216981 5. 484837 5. 451144 3. 20906 4. 14066 5. 812143 4. 99476 5. 454336  
5. 505934 5. 064603 5. 052414 6. 032712 5. 417261 5. 335705 5. 434482 5. 644703 4. 998887  
1. 824459 2. 37954 1. 50465 2. 918544 1. 625846 1. 69837 2. 068521 1. 417991 1. 802102  
3. 270452 2. 262019 2. 524347 2. 067214 2. 028131 2. 433257 1. 859285 2. 157375 2. 490106  
4. 74414 5. 123297 4. 85374 5. 231325 5. 298706 4. 68331 5. 587528 4. 531677 4. 039758  
4. 13649 4. 598991 3. 941963 3. 973647 4. 387621 4. 475115 3. 835013 3. 393087 3. 803764  
6. 824475 6. 631008 6. 553952 7. 414151 6. 978274 6. 901724 6. 667247 6. 789476 6. 476519  
4. 263438 5. 51976 3. 45042 5. 903179 4. 826473 3. 8849 4. 528451 4. 071262 4. 480016  
2. 448872 3. 487865 3. 532171 4. 667045 3. 351686 2. 476924 2. 069801 3. 852365 4. 520903  
6. 285752 6. 465337 6. 110627 5. 902269 6. 427732 6. 654356 6. 502016 6. 204738 6. 135557  
10. 05194 10. 15144 9. 728335 9. 591594 9. 924856 9. 6149 9. 893651 10. 09435 10. 09989  
5. 442634 5. 323775 6. 126369 5. 341657 5. 954455 5. 792593 4. 983459 5. 643568 5. 058319  
5. 508742 5. 404072 5. 362234 5. 243199 5. 043913 5. 424066 5. 485887 5. 354159 6. 266772  
2. 849656 3. 860561 2. 845753 2. 66417 4. 163075 3. 688659 3. 533598 3. 700909 2. 810974  
2. 510801 3. 848261 3. 518291 2. 736283 4. 073392 2. 571431 3. 310466 3. 008573 4. 292189  
3. 089947 4. 277844 4. 008108 3. 473725 3. 194822 2. 789943 2. 783515 2. 935718 2. 912381  
1. 409034 2. 024304 2. 350917 2. 584539 2. 087403 1. 527164 1. 89588 2. 85139 1. 798298  
4. 930457 4. 963859 3. 707399 3. 317231 5. 349155 4. 12097 4. 611256 5. 301298 4. 584903  
1. 281997 1. 198543 1. 196811 1. 331606 1. 280725 1. 364058 1. 219309 1. 010678 1. 348775  
1. 058432 1. 163537 3. 677333 1. 17283 2. 080642 2. 139648 2. 334143 1. 425294 2. 43411  
4. 795637 5. 479515 4. 391355 1. 622375 5. 043629 4. 95026 5. 719638 5. 395216 6. 042561  
1. 21961 1. 144206 1. 603073 1. 627155 1. 594949 1. 372728 1. 353697 1. 436685 1. 106896  
1. 030492 1. 067359 1. 420948 1. 095734 1. 196398 1. 362203 1. 227156 1. 302566 1. 637062  
1. 236774 1. 090045 1. 135677 2. 3169 1. 044233 1. 113619 1. 321156 1. 150719 1. 847078  
1. 289015 2. 445552 1. 789268 1. 844614 1. 331997 1. 620059 1. 489928 1. 565935 2. 022416  
2. 457049 2. 000745 1. 742179 3. 222919 2. 683108 2. 289176 2. 114616 1. 950452 2. 219601  
1. 60587 2. 141497 1. 593405 3. 081081 2. 387222 1. 645447 2. 444694 2. 134604 2. 230456  
2. 833965 2. 426141 2. 319379 2. 181202 2. 827783 2. 558226 1. 718579 2. 20484 2. 475199  
1. 124672 0. 808359 1. 072452 1. 122236 1. 241233 1. 286834 1. 2003 0. 99783 1. 254838  
1. 188092 1. 187118 1. 638418 2. 064424 1. 031026 2. 690606 1. 370981 0. 794727 1. 507897  
1. 637806 1. 918326 1. 462523 2. 244508 1. 140521 1. 891801 1. 848378 1. 348302 2. 064469  
1. 829343 2. 194642 2. 446183 3. 033273 1. 27784 1. 791186 2. 140251 1. 24207 2. 182284  
2. 217171 2. 859184 2. 689031 2. 969546 2. 404585 2. 646897 2. 473861 2. 730916 2. 770362  
4. 099103 4. 154942 3. 615652 3. 766072 3. 582022 3. 33859 4. 099089 4. 139559 3. 954936  
2. 551383 2. 797879 2. 32248 2. 017311 1. 799502 2. 771543 1. 577108 2. 023189 3. 644993

1. 054865 2. 052874 2. 165726 2. 97608 1. 941118 1. 827205 2. 260737 1. 706145 2. 213699  
3. 691302 2. 199369 2. 505059 2. 316378 2. 0348 2. 186668 1. 695025 2. 974861 2. 845666  
3. 391119 2. 416022 2. 87265 3. 486688 3. 048963 3. 963133 3. 587121 2. 353243 3. 204208  
1. 789271 1. 103152 1. 344998 1. 44491 1. 765332 1. 953568 1. 453237 1. 349371 1. 960866  
3. 86145 4. 111896 4. 402214 3. 806806 3. 916487 4. 409971 4. 088309 4. 380635 4. 964242  
2. 38863 2. 113148 2. 645032 2. 875041 2. 918313 1. 959616 1. 852204 2. 16525 2. 928198  
5. 10261 4. 554376 5. 364 5. 165251 5. 120248 4. 916853 4. 579538 5. 234119 4. 235487  
5. 408814 4. 633875 4. 368451 3. 864159 4. 917054 4. 773872 4. 376517 4. 084229 4. 500204  
2. 482845 2. 037491 2. 11105 3. 080075 1. 681342 1. 872333 2. 42048 2. 117558 2. 037491  
7. 127485 6. 614632 7. 017069 7. 333763 6. 979144 7. 175831 7. 117951 7. 319195 7. 86017  
6. 991344 6. 874921 7. 020804 7. 708161 7. 118475 7. 014214 7. 334599 6. 984178 7. 016246  
1. 039975 1. 116903 1. 556183 1. 153998 1. 535567 1. 709937 1. 233267 0. 763173 1. 274335  
6. 887328 6. 640656 7. 172581 8. 464931 6. 922308 6. 489482 7. 157723 6. 305299 6. 273247  
2. 932597 2. 927473 3. 038514 3. 07896 2. 220295 2. 732317 2. 632507 2. 386926 2. 44538  
6. 156338 6. 915336 6. 026957 6. 929437 6. 717835 5. 860138 6. 693606 6. 122317 6. 564342  
6. 947393 6. 857102 7. 346075 7. 04743 6. 912854 6. 362547 7. 148613 7. 040969 7. 666461  
6. 396287 5. 661135 6. 544333 6. 653275 6. 39538 6. 155487 6. 599803 5. 915898 6. 421731  
5. 02246 4. 808961 5. 056135 4. 898034 4. 962656 4. 516956 4. 815944 5. 250894 4. 064917  
4. 102834 4. 370176 5. 324283 3. 970795 3. 541686 5. 010563 3. 205197 4. 788028 2. 816421  
3. 03006 2. 594656 2. 049308 2. 053566 2. 744633 2. 205599 2. 626504 2. 636638 4. 077565  
6. 641997 6. 033339 7. 282537 5. 557933 6. 359337 6. 431445 7. 031494 6. 799264 7. 489326  
5. 873326 5. 959873 5. 581724 6. 685035 6. 495855 5. 491304 6. 187124 5. 736228 6. 393022  
6. 253765 7. 959242 6. 032981 6. 640155 7. 474829 7. 343464 6. 36198 7. 948772 9. 27176  
1. 578966 2. 526705 1. 703978 1. 561631 1. 741744 1. 773393 1. 550996 1. 422889 1. 71177  
2. 340486 2. 631471 2. 379215 4. 448489 2. 684367 2. 574235 1. 556617 1. 997783 2. 14799  
11. 23244 11. 33696 11. 16075 11. 02137 11. 15018 11. 42171 11. 23513 11. 32089 10. 82782  
3. 407417 2. 251215 2. 759185 1. 948725 2. 905882 2. 237629 1. 975425 2. 329452 2. 717083  
1. 677785 1. 718596 1. 55293 1. 615894 2. 378115 1. 891764 2. 210014 1. 676292 2. 238404  
2. 069682 1. 998077 1. 686269 1. 381924 1. 646107 1. 288204 2. 036583 1. 769652 2. 601402  
5. 276456 4. 779747 4. 634056 3. 872144 5. 38577 4. 866022 5. 163906 4. 581186 5. 465821  
5. 424274 6. 253341 5. 475887 5. 797045 5. 458974 5. 38142 5. 581658 5. 988623 5. 406837  
3. 762243 3. 243435 3. 47997 3. 304219 3. 383613 2. 47652 2. 753231 4. 001969 3. 428044  
6. 54607 6. 83488 6. 137343 5. 969539 6. 41751 5. 638306 6. 957411 6. 154204 5. 580814  
2. 081612 2. 795194 2. 896923 2. 871201 2. 62601 3. 003387 2. 543391 2. 727907 3. 406161  
2. 143721 2. 220477 1. 832075 0. 925356 1. 803204 0. 894123 3. 316774 1. 110197 1. 012015  
1. 005716 1. 489547 1. 069304 1. 462327 1. 216239 1. 969363 1. 896075 1. 269897 2. 374213  
4. 860357 5. 291972 5. 761651 5. 133077 5. 218993 5. 415681 5. 313679 5. 069214 4. 471583  
4. 663365 4. 703209 3. 627694 4. 275882 4. 079758 4. 502646 5. 47344 5. 232425 4. 545385  
7. 885518 8. 203486 8. 073309 8. 266593 8. 11834 8. 355624 8. 096037 8. 578803 7. 162138  
7. 472299 7. 152809 7. 370099 7. 184771 7. 027229 6. 871742 7. 454996 7. 050675 7. 78836  
2. 152607 2. 933372 2. 100923 2. 178599 3. 030984 2. 731744 2. 962777 3. 176301 3. 323289  
1. 646822 1. 789098 1. 456472 1. 685664 1. 538931 1. 555839 1. 356721 1. 308575 1. 455693  
6. 269997 5. 949764 6. 126769 5. 522885 5. 808265 5. 739907 6. 086455 6. 328731 5. 780569  
7. 651601 7. 453425 7. 789624 6. 239401 7. 734218 8. 328057 7. 150822 7. 787534 6. 409623  
3. 68448 4. 530736 4. 402696 1. 433378 4. 051031 4. 587248 5. 218541 3. 887425 4. 192041  
4. 391941 5. 073804 4. 210733 2. 80924 4. 885967 4. 935091 4. 367309 4. 598669 5. 069385  
2. 989239 2. 919747 3. 405251 1. 657619 3. 380169 3. 074911 2. 841056 3. 282706 2. 551023  
5. 568227 5. 738405 5. 271793 6. 174267 5. 893096 5. 328474 4. 811364 5. 946768 2. 157742  
1. 930382 2. 706428 1. 661726 1. 836105 2. 320675 2. 653461 1. 776244 1. 791231 1. 440222  
5. 295448 4. 869459 5. 087197 2. 480161 4. 795634 4. 801937 4. 744021 4. 320332 3. 603657  
3. 536422 2. 661322 3. 417864 3. 53561 3. 120331 2. 920142 3. 605849 2. 820176 2. 901771

2. 815808 3. 219143 4. 398978 3. 421278 3. 19648 3. 03678 2. 830769 3. 261745 2. 849857  
2. 254819 3. 384663 2. 235533 2. 427642 1. 73861 3. 354423 1. 6102 1. 809984 3. 152562  
1. 528628 0. 698129 1. 206546 1. 793607 0. 991812 0. 880134 1. 216236 1. 138362 1. 641846  
8. 061391 8. 071339 7. 822006 7. 438639 8. 235067 7. 40098 8. 139756 7. 975426 7. 941023  
5. 666588 4. 697342 5. 491715 5. 78197 5. 544873 4. 344359 5. 818322 5. 353348 5. 883961  
7. 113253 7. 194291 7. 0491 7. 635748 6. 604799 6. 493091 7. 050874 7. 015975 6. 400253  
8. 764408 8. 932063 8. 666391 9. 178414 8. 705829 7. 617262 8. 416118 8. 88167 8. 564027  
5. 990519 5. 950196 6. 377884 5. 482709 5. 826963 5. 850763 5. 916103 4. 829714 4. 735388  
8. 903894 8. 795318 9. 017673 8. 303288 8. 831448 8. 873082 9. 199556 8. 369096 9. 740772  
7. 331312 7. 59641 7. 478503 6. 995487 7. 739096 7. 177808 7. 278519 7. 585574 7. 862668  
4. 061199 4. 10266 4. 223538 5. 273437 4. 125657 4. 384222 4. 906996 4. 840608 3. 75173  
5. 898672 6. 238044 6. 303087 5. 404576 6. 368097 6. 603284 6. 421705 7. 091165 5. 930187  
9. 802518 9. 675387 9. 815173 9. 955422 9. 936233 9. 137724 9. 592516 9. 585146 9. 573898  
1. 602348 1. 120583 3. 013124 3. 484338 3. 481251 1. 244835 1. 854446 2. 6731 3. 956627  
4. 578284 4. 143282 3. 241988 4. 718649 3. 935906 4. 033219 4. 141449 4. 290782 3. 531943  
8. 122193 8. 028857 7. 674487 7. 946923 7. 839309 8. 195386 8. 356783 7. 896687 8. 112993  
6. 066766 6. 069724 5. 749471 5. 507157 6. 356974 5. 025625 5. 368805 6. 113247 5. 728611  
4. 055422 4. 48984 4. 581392 4. 109134 4. 103321 3. 899098 4. 414431 4. 422175 3. 86834  
4. 315311 4. 070979 3. 926118 5. 651651 3. 764148 4. 36579 4. 225626 4. 900495 4. 076012  
3. 351342 2. 227035 3. 550252 2. 75397 1. 842842 2. 064533 2. 80762 1. 721498 2. 335738  
2. 348671 2. 754538 3. 185659 2. 628555 2. 303541 2. 588818 2. 483743 2. 648521 2. 049403  
4. 788387 3. 941199 4. 989432 4. 881001 3. 854598 4. 690114 4. 59357 3. 986956 3. 378515  
2. 155088 1. 684314 2. 005414 2. 71418 1. 382254 2. 253259 1. 621263 2. 539251 2. 152599  
6. 719444 6. 901634 7. 119735 6. 830892 6. 788329 6. 803772 7. 105638 6. 778607 7. 098344  
1. 871997 1. 495579 2. 15415 2. 636096 2. 610003 2. 220031 1. 568742 1. 65244 1. 119282  
3. 357069 2. 537979 2. 545013 4. 460018 3. 75499 2. 751072 3. 331655 3. 393081 2. 245096  
4. 450015 4. 385176 4. 276814 4. 978966 3. 722884 3. 375958 3. 668037 4. 065574 3. 537171  
2. 596171 4. 132557 2. 331916 2. 390533 4. 807533 2. 328619 4. 703373 1. 453826 2. 387148  
4. 337058 2. 059561 0. 992441 1. 554204 1. 451015 1. 38399 4. 056534 1. 863641 3. 358415  
7. 463721 7. 265766 7. 535809 7. 256396 7. 273971 7. 424203 7. 15016 7. 98163 6. 213813  
4. 514667 4. 149426 4. 434728 3. 634865 4. 298994 3. 681477 3. 970885 4. 623154 4. 998245  
4. 754481 5. 089613 4. 284006 4. 516881 4. 712692 4. 351628 4. 772983 3. 718381 4. 684389  
1. 825139 1. 949954 1. 77569 2. 385779 1. 715258 1. 879155 1. 698354 2. 271561 2. 228421  
2. 358717 2. 361548 2. 242292 3. 172963 2. 704251 2. 359912 3. 029333 1. 884707 2. 743167  
5. 452895 5. 952642 6. 969719 6. 630974 6. 133583 6. 160333 6. 125187 6. 460074 6. 36117  
7. 960678 8. 11666 8. 155889 7. 458007 7. 720881 7. 746273 8. 081641 8. 052515 7. 714128  
8. 510028 8. 58871 8. 443427 8. 318556 8. 567272 7. 981572 8. 181809 8. 58964 8. 765779  
5. 178692 5. 749941 5. 818994 4. 226059 5. 866034 6. 101911 5. 264304 6. 038963 4. 672104  
7. 494967 7. 486274 7. 692289 7. 669373 7. 63299 7. 516654 7. 686476 7. 556427 7. 68913  
7. 967 8. 097062 7. 693322 6. 450899 7. 767075 7. 877258 8. 000788 7. 494311 8. 100892  
7. 142587 7. 190461 6. 826263 6. 610819 7. 478977 7. 383216 7. 034779 7. 099715 7. 498814  
5. 267569 4. 927301 4. 653444 4. 351123 5. 38997 4. 607964 5. 225537 5. 477726 5. 914429  
1. 741665 1. 323412 2. 122321 4. 001606 1. 277174 2. 720512 1. 57586 1. 272819 1. 870214  
6. 479501 6. 262096 6. 273623 6. 38116 6. 745252 6. 770386 6. 664441 6. 30052 6. 918222  
5. 930439 5. 578581 5. 37 5. 036053 5. 737957 6. 000109 6. 062946 5. 954977 5. 366291  
2. 600071 2. 920454 2. 56615 2. 363855 2. 044416 3. 07531 3. 148638 2. 92077 4. 238867  
2. 260056 1. 785571 1. 335267 1. 555206 1. 294806 2. 287674 2. 415176 1. 906595 1. 312842  
5. 9838 6. 714823 5. 611453 4. 262323 6. 353915 6. 059577 5. 813178 5. 944318 5. 30149  
4. 896967 5. 118171 4. 911848 5. 636187 5. 061717 5. 431543 5. 13268 5. 145695 5. 121376  
5. 377616 4. 900098 5. 891315 5. 409387 5. 129889 4. 598699 4. 535166 5. 217437 3. 928252  
1. 267438 1. 455552 1. 303289 1. 653096 1. 45513 0. 954647 1. 370515 1. 275003 1. 279703

2. 327774 3. 151174 3. 766833 3. 199557 3. 238649 3. 456389 2. 282789 2. 792319 3. 034186  
6. 078038 6. 393155 6. 350422 5. 152444 6. 713579 6. 392664 6. 27334 6. 373869 6. 429302  
5. 204817 4. 940395 5. 368817 5. 045299 4. 903705 5. 597645 5. 313429 5. 093891 6. 086903  
1. 077647 1. 315387 1. 641432 2. 467597 1. 812789 2. 048203 1. 785486 0. 965634 1. 696951  
5. 687909 5. 535207 5. 829623 5. 957222 6. 017308 4. 798889 5. 230659 5. 870167 5. 628726  
5. 175866 5. 069672 5. 148298 4. 983183 5. 561617 6. 038297 5. 638205 5. 254398 4. 006411  
4. 604385 5. 218869 5. 367318 5. 159647 4. 979143 4. 561269 5. 263791 4. 684183 5. 667966  
5. 123667 5. 075926 4. 770958 4. 949761 4. 905018 4. 199295 5. 378873 4. 943485 5. 335388  
1. 10379 1. 091037 1. 879975 2. 787105 1. 99775 1. 527062 2. 053656 2. 268908 0. 970603  
2. 985933 1. 592529 1. 799769 2. 595381 1. 451724 1. 8011 2. 167082 1. 562208 1. 603019  
2. 372272 3. 071035 2. 543937 3. 081295 2. 187688 2. 848812 2. 52423 2. 299116 2. 686423  
4. 50625 4. 843688 4. 835749 5. 227728 4. 178921 4. 408898 4. 637074 4. 694896 5. 522997  
6. 361479 6. 398338 6. 333485 5. 994396 6. 509606 6. 109058 6. 868792 6. 284729 6. 046488  
2. 52215 2. 515013 3. 214432 2. 677431 2. 868809 2. 473363 2. 796939 3. 071437 3. 110964  
5. 9351 5. 883841 6. 077924 5. 788002 5. 165091 5. 431717 5. 916606 5. 615482 6. 125183  
4. 164565 5. 044305 3. 651133 3. 764785 4. 239444 3. 658372 3. 417239 4. 926147 2. 394991  
7. 012589 7. 252668 7. 25311 6. 81121 7. 357089 7. 04091 7. 231487 7. 153374 7. 102826  
1. 758506 1. 413981 1. 167006 1. 691366 1. 371822 1. 964874 1. 897543 1. 316907 1. 918048  
4. 430505 4. 177062 3. 723677 4. 800197 4. 708192 4. 863004 4. 726141 4. 676725 4. 592844  
4. 336597 4. 972309 4. 336071 3. 383404 5. 081403 5. 256679 4. 948645 4. 658541 4. 968312  
4. 302491 3. 825849 3. 992352 3. 830708 4. 268477 2. 372219 4. 232394 4. 016008 3. 67312  
6. 713844 6. 085172 6. 647735 6. 787198 6. 320195 6. 787475 6. 597148 6. 519803 6. 7509  
3. 233186 2. 69766 2. 469753 3. 31726 3. 253352 3. 862375 2. 114163 3. 249483 2. 839172  
2. 960033 2. 97899 3. 756144 4. 241517 3. 260621 2. 988238 2. 609747 3. 385947 3. 03272  
3. 807163 3. 961426 3. 64147 3. 250231 4. 825282 3. 217615 4. 375603 3. 573621 2. 605548  
1. 932262 2. 359686 1. 749107 2. 976452 1. 217851 2. 431915 1. 879014 2. 824787 2. 069166  
5. 379528 3. 637877 4. 903484 3. 789835 5. 470352 4. 625452 5. 080043 4. 483882 2. 924043  
2. 353095 1. 446717 1. 364268 1. 924587 1. 575426 1. 930506 1. 230796 1. 800034 2. 01859  
5. 98044 6. 844787 6. 569378 5. 177647 6. 43843 6. 195074 6. 018202 6. 474769 5. 55157  
1. 245956 1. 157681 1. 724423 1. 345182 1. 256844 1. 233858 0. 879497 0. 846452 0. 978871  
2. 037248 2. 461687 2. 193163 3. 341725 2. 456047 1. 853123 2. 103057 2. 24938 2. 427275  
4. 037478 3. 103012 2. 152968 3. 279536 3. 518873 2. 825199 3. 836195 4. 074942 2. 239442  
4. 011937 3. 731989 2. 508297 3. 595935 4. 873899 2. 291676 3. 584879 4. 443331 2. 851527  
6. 657781 6. 660152 6. 829293 6. 05416 6. 930038 6. 213864 6. 252786 6. 604948 6. 433773  
6. 385656 6. 322783 6. 053731 5. 002353 6. 245058 6. 075935 5. 77995 6. 159314 6. 601748  
5. 991712 6. 149063 6. 074013 6. 354459 6. 058274 5. 919996 6. 004299 6. 038515 6. 12002  
4. 177745 4. 063754 5. 122445 4. 047981 4. 892497 3. 472615 3. 802396 3. 007913 3. 585105  
6. 526907 6. 4222 6. 65592 6. 593606 5. 75702 6. 825487 6. 280928 6. 105476 6. 360375  
3. 289966 2. 647647 2. 800051 2. 099242 3. 256308 2. 241815 2. 178026 3. 69351 1. 573232  
3. 637388 4. 485645 4. 100198 2. 488867 3. 180779 3. 517461 3. 89173 3. 255701 2. 824234  
7. 830311 7. 6301 7. 744804 6. 673804 7. 302747 8. 036006 7. 757477 7. 300966 8. 109834  
5. 646474 5. 663612 6. 01244 5. 864124 5. 953106 6. 607374 5. 300935 5. 841661 6. 490951  
2. 963425 3. 180039 2. 583816 3. 46258 2. 823906 2. 690048 3. 574211 2. 52363 2. 733743  
6. 166796 5. 552474 5. 273128 5. 422555 5. 253743 5. 158002 5. 752536 5. 013017 5. 955731  
4. 030252 4. 398689 0. 887842 4. 177573 3. 904712 3. 787051 4. 308581 4. 244412 2. 509952  
5. 923132 5. 824522 6. 457818 6. 008271 5. 543747 5. 818937 5. 740737 6. 417619 4. 658989  
8. 11514 8. 39218 8. 240356 8. 389437 8. 416488 8. 28861 8. 019382 8. 428365 8. 111699  
1. 481079 1. 74072 2. 3884 2. 685887 1. 893805 2. 318519 2. 398824 2. 185885 2. 931498  
3. 407737 2. 682032 3. 551537 2. 825628 3. 261315 3. 249382 3. 370054 3. 497134 2. 971169  
4. 064514 4. 64278 4. 638335 3. 700219 3. 82784 3. 258105 4. 049358 5. 431499 5. 08901  
7. 018198 7. 459838 6. 735673 6. 237275 7. 457357 7. 202247 7. 046879 7. 091701 6. 774343

10. 85762 10. 67399 10. 41032 10. 55362 10. 6301 10. 33698 10. 77174 10. 77363 11. 00535  
1. 188939 1. 248318 1. 32501 1. 283919 1. 447702 1. 763793 1. 36485 1. 199224 1. 319922  
6. 890895 6. 742086 6. 802771 6. 310002 6. 605438 6. 885449 6. 881448 6. 750152 6. 600427  
3. 059938 3. 810513 4. 207537 3. 459202 4. 449327 3. 364732 3. 348467 4. 031327 4. 91288  
2. 76704 3. 064076 2. 890706 3. 099793 2. 186492 2. 749248 2. 019855 1. 992312 2. 234477  
1. 829959 1. 79586 2. 102755 3. 193357 2. 671343 2. 001929 2. 203129 2. 286074 2. 063658  
2. 607787 1. 714445 2. 890512 1. 879543 1. 960411 1. 850292 2. 346026 2. 17155 2. 325865  
3. 900443 3. 216323 3. 642619 1. 943651 2. 302141 3. 034669 3. 003654 3. 290408 2. 906345  
4. 504648 3. 659033 4. 670748 2. 299301 4. 146501 4. 957252 4. 25925 4. 327249 3. 479713  
1. 941176 2. 806765 1. 349941 1. 532285 2. 158104 1. 557623 2. 597322 1. 665159 1. 877216  
4. 73135 3. 89722 3. 84691 2. 852603 4. 007038 4. 540039 4. 870787 4. 461683 4. 721973  
3. 976426 5. 008038 4. 799294 5. 216301 4. 843721 5. 159106 4. 302291 4. 733719 3. 772738  
5. 299535 6. 390139 6. 963898 6. 673162 6. 810138 6. 252392 6. 80847 6. 252038 7. 058555  
6. 352437 6. 285191 6. 056329 5. 70052 6. 140924 6. 254437 6. 110752 6. 013148 5. 516749  
4. 410981 4. 197005 4. 222691 3. 732882 3. 546796 3. 706993 4. 427681 3. 931704 4. 833934  
2. 810646 2. 855865 2. 786221 2. 241722 3. 598369 2. 237685 2. 520059 2. 528877 2. 079735  
1. 693887 2. 060622 2. 442631 1. 964359 1. 952893 2. 604652 1. 849508 1. 831253 2. 066878  
5. 204876 5. 991962 5. 675018 4. 922183 5. 70024 5. 786017 5. 49868 6. 355985 4. 191138  
1. 025114 0. 946019 1. 318123 1. 027204 1. 230738 1. 286289 0. 982569 1. 489357 1. 565603  
3. 503473 2. 788858 2. 465643 4. 992834 2. 60777 1. 976034 2. 657489 2. 591771 3. 457846  
0. 569663 1. 06249 0. 602921 0. 637407 1. 329643 1. 335298 2. 732214 3. 400261 0. 853437  
1. 657632 3. 079973 1. 022599 3. 166278 2. 97621 1. 185126 0. 790825 1. 266611 1. 356658  
4. 200008 1. 48441 2. 965901 3. 872171 3. 819445 4. 401719 1. 856599 3. 961618 4. 719541  
1. 336984 0. 932358 1. 048186 0. 863242 1. 609843 1. 566457 1. 026176 0. 548997 0. 32837  
2. 392202 2. 050716 2. 48624 2. 763933 2. 255308 1. 985772 2. 138877 2. 276461 2. 007041  
3. 222872 4. 885613 3. 690186 2. 330441 3. 851959 2. 742341 3. 664603 4. 298367 4. 203868  
6. 983123 6. 924983 6. 385726 6. 188045 6. 757093 6. 884367 6. 936892 6. 815054 6. 564173  
2. 613507 2. 619708 3. 032136 3. 028375 2. 255745 3. 556444 3. 354853 2. 066486 2. 687351  
6. 295581 6. 692868 6. 938698 6. 736173 6. 765251 6. 767945 6. 717931 6. 967729 7. 039836  
1. 402868 1. 092263 1. 061135 1. 515061 0. 852029 1. 911246 0. 888719 1. 011841 1. 31165  
8. 298114 8. 986921 8. 858802 7. 967787 8. 538451 8. 660276 8. 370303 8. 097324 7. 119545  
2. 102098 1. 989143 1. 414711 1. 966359 1. 586958 1. 690213 2. 130461 1. 483181 1. 400466  
2. 288333 1. 804553 1. 796456 2. 671067 2. 683912 2. 932797 3. 021576 1. 823257 2. 228131  
3. 638865 3. 896892 3. 767056 3. 66899 3. 787425 3. 789904 3. 680764 3. 526889 4. 278234  
4. 646635 4. 739977 4. 67087 3. 915924 4. 880179 4. 29273 4. 992391 4. 145511 5. 306047  
6. 462163 6. 380358 6. 338341 5. 090421 7. 026528 7. 901735 6. 646397 6. 945832 8. 290357  
6. 365532 6. 171353 6. 283802 5. 317989 5. 890894 6. 200163 6. 234312 6. 374293 6. 063869  
5. 621745 5. 908731 6. 197821 4. 812532 6. 379236 6. 348635 5. 614997 5. 80147 5. 533691  
2. 371057 1. 892804 2. 421774 2. 061637 2. 748393 2. 541039 2. 604688 2. 251155 4. 153192  
5. 064751 4. 780675 5. 157119 4. 300507 5. 041497 5. 507047 4. 973849 5. 02936 5. 220549  
3. 749607 4. 739301 4. 052697 3. 255593 4. 12202 3. 787099 4. 254003 3. 89484 4. 380475  
2. 894439 3. 199222 3. 45762 4. 050617 2. 736437 3. 259743 3. 312582 3. 095766 2. 707655  
2. 627761 2. 10426 4. 197347 2. 102861 4. 093455 1. 061682 3. 904641 3. 866175 4. 996387  
6. 500825 6. 216141 6. 671735 6. 561737 6. 152059 6. 791272 6. 952539 6. 708511 6. 895632  
6. 747959 6. 872933 6. 748251 6. 680073 6. 474898 6. 757641 6. 594134 6. 851126 6. 228978  
6. 681416 6. 853343 5. 726482 6. 741435 8. 07186 6. 413271 6. 681417 6. 625604 6. 509171  
2. 657039 1. 784505 2. 859109 2. 304796 1. 978956 1. 78795 1. 836871 2. 60525 2. 173867  
2. 210529 1. 74028 1. 849529 1. 885647 1. 23688 1. 994216 1. 637439 1. 173302 1. 482674  
5. 193387 6. 083188 5. 741627 5. 903543 5. 14453 5. 548153 6. 010002 5. 762519 5. 075929  
1. 041052 1. 272243 0. 358674 1. 521303 1. 841331 3. 157104 1. 563205 1. 849178 1. 147255  
3. 098575 3. 289777 3. 793787 3. 957788 3. 993873 3. 514774 3. 072374 3. 46274 2. 865364

8. 379847 8. 295941 8. 207601 8. 352996 8. 548015 7. 906385 8. 668296 8. 352612 8. 735118  
3. 336582 2. 2077 3. 185969 2. 770748 2. 341923 2. 941681 2. 507983 3. 454664 4. 153279  
0. 980017 2. 918746 3. 673506 3. 054913 1. 450012 2. 693085 1. 719335 2. 333215 2. 063736  
4. 873939 3. 926309 4. 873881 3. 803669 4. 359813 4. 108779 5. 408267 4. 731358 4. 346598  
2. 655308 2. 362458 1. 738527 1. 724049 2. 208976 2. 018781 2. 465556 1. 897479 2. 873911  
2. 159098 1. 537344 1. 384502 1. 983217 1. 346205 3. 273486 1. 454888 2. 273192 2. 202664  
5. 811124 5. 535694 5. 046262 4. 146599 5. 615938 5. 425217 4. 92338 4. 777293 5. 657488  
4. 636965 4. 661796 5. 329192 5. 857991 5. 487132 4. 277785 5. 016493 4. 868098 5. 802814  
8. 003572 8. 235899 7. 978811 7. 849554 8. 151297 8. 574346 7. 780457 8. 534604 7. 857132  
6. 251691 6. 201427 6. 298464 5. 873695 6. 072067 6. 757114 5. 931394 6. 215243 6. 427487  
2. 164853 1. 732991 1. 953202 2. 097889 1. 599752 2. 761088 2. 104931 2. 113556 1. 579911  
6. 006315 5. 388066 5. 421589 4. 88399 5. 779184 5. 531425 6. 309477 5. 94682 6. 347143  
5. 115069 4. 583081 4. 87487 4. 79091 5. 839047 3. 797779 4. 60491 4. 796741 4. 555545  
3. 603933 3. 641283 3. 443938 3. 465864 3. 326651 4. 000731 4. 177099 3. 697175 3. 630326  
4. 791478 4. 600637 4. 950152 5. 230402 4. 244487 5. 029218 4. 509087 4. 798425 3. 695325  
5. 847758 5. 43536 5. 893852 5. 948049 4. 845975 5. 783452 5. 888737 5. 52173 5. 909887  
4. 979975 5. 012141 4. 820003 5. 411883 5. 409192 5. 387259 5. 300181 5. 632376 4. 65602  
7. 155106 7. 314562 7. 510601 6. 780331 7. 512434 7. 476622 6. 975064 7. 259693 6. 640383  
6. 053479 6. 633635 7. 056635 6. 281474 6. 609206 6. 034851 6. 363514 6. 249806 5. 810731  
5. 723414 5. 757785 5. 611012 5. 648462 6. 176422 5. 506491 5. 86802 5. 729197 5. 684812  
7. 515382 7. 713487 7. 308579 7. 63705 7. 281889 7. 589479 7. 676263 7. 52109 7. 678197  
5. 73064 4. 530942 4. 724812 2. 370972 4. 953624 4. 827193 5. 776982 4. 717989 4. 99252  
4. 951394 5. 493954 4. 911856 5. 018711 5. 238397 4. 891898 5. 103458 4. 965848 5. 592977  
4. 550874 5. 341596 5. 468003 6. 207795 5. 234944 5. 306091 5. 636721 5. 739114 4. 933692  
6. 157132 5. 765033 6. 10636 5. 987878 6. 275131 5. 618549 5. 78986 5. 779398 6. 063355  
1. 1264 1. 145216 1. 358048 2. 030623 1. 567323 1. 563695 1. 0171 1. 342984 1. 180847  
1. 413532 3. 592708 4. 867618 3. 536506 1. 605038 4. 27647 1. 620207 1. 480276 5. 136164  
2. 178133 2. 285151 2. 800615 2. 315419 1. 891012 2. 756957 2. 088308 3. 705511 2. 708746  
2. 886744 2. 612135 2. 311064 3. 56916 3. 297332 2. 512757 2. 881773 2. 628924 2. 634349  
1. 481896 1. 477434 3. 116724 1. 901018 1. 065453 3. 551279 2. 422714 2. 825814 2. 579784  
5. 649679 4. 808617 5. 106138 3. 452975 4. 821125 4. 753598 4. 853345 5. 579392 4. 858879  
5. 764223 6. 380265 5. 529886 6. 536766 6. 121409 5. 407641 5. 910051 5. 231634 6. 657883  
6. 517594 6. 035417 6. 741743 5. 622634 6. 217814 6. 872249 7. 198489 6. 552332 4. 995773  
3. 029229 2. 551591 2. 023464 2. 36196 2. 114534 2. 700171 2. 458792 2. 126603 2. 208869  
2. 205878 3. 642073 1. 629292 2. 017348 1. 546731 1. 959092 1. 07672 1. 441359 1. 382542  
5. 888352 6. 215339 5. 991907 5. 501472 5. 772499 6. 252103 6. 227121 6. 093964 6. 083136  
1. 381486 1. 724734 1. 298698 1. 998688 1. 953119 1. 585371 1. 731161 1. 50074 1. 328059  
4. 296979 4. 683534 4. 875018 4. 919747 7. 803459 4. 418809 5. 027705 5. 839117 7. 121359  
5. 27891 5. 283782 4. 534088 3. 980231 5. 812366 4. 962314 4. 163364 7. 997546 4. 671924  
5. 209085 5. 042385 5. 020649 4. 200006 4. 95524 4. 985364 5. 039469 4. 796999 4. 928573  
2. 970507 2. 898778 3. 628637 2. 929697 2. 953109 3. 083099 3. 088511 4. 321705 2. 550909  
5. 073897 4. 565938 4. 653002 4. 617204 4. 082128 5. 353798 4. 699569 4. 264711 3. 880903  
2. 608378 2. 607143 2. 875655 3. 074712 2. 549845 2. 428557 2. 88467 2. 1967 1. 909073  
2. 265188 2. 740664 1. 701208 2. 428612 1. 442477 1. 282492 2. 429034 1. 956698 2. 076637  
3. 08857 3. 868434 3. 769981 2. 817352 3. 513772 2. 858933 2. 962096 3. 044922 2. 781517  
3. 986202 4. 068709 3. 106036 3. 352864 3. 250473 4. 458131 3. 069291 3. 172467 2. 654029  
6. 49866 6. 685979 6. 655516 5. 672712 6. 176445 7. 011492 6. 405336 6. 180962 5. 96033  
2. 203667 2. 372413 2. 434569 2. 597606 2. 989794 2. 328613 2. 74838 2. 287077 2. 323268  
3. 444043 3. 829608 2. 840205 3. 114044 4. 299721 4. 037554 4. 014191 4. 382809 3. 6979  
0. 920257 0. 959662 1. 019763 2. 108314 1. 675016 1. 531828 1. 366362 1. 477332 0. 998753  
2. 877093 2. 620105 2. 898895 3. 056536 2. 798945 2. 920528 3. 066128 2. 166898 2. 757547

3. 587232 3. 114549 4. 018429 3. 052739 2. 719161 3. 873977 4. 166062 2. 839196 4. 113111  
7. 375086 7. 27422 6. 848984 6. 665308 6. 756064 7. 01919 7. 014835 7. 070918 7. 024718  
8. 206175 7. 773808 7. 610127 7. 815331 7. 507561 7. 886816 7. 65114 7. 615438 7. 20732  
1. 082729 1. 517993 0. 901634 2. 108858 1. 578506 1. 661267 1. 127067 1. 519188 0. 885814  
2. 291567 3. 103251 2. 450502 2. 712615 2. 535315 3. 399406 2. 350127 2. 275695 3. 039277  
1. 921023 1. 7359 1. 943823 2. 516643 1. 941983 2. 870312 2. 161789 2. 083873 1. 991198  
9. 708069 9. 644282 9. 875357 10. 14066 9. 943232 9. 671423 9. 759288 10. 13343 9. 054867  
4. 73298 5. 201599 5. 077344 4. 112277 4. 672428 5. 569748 4. 42035 4. 992951 4. 379773  
2. 229917 1. 77772 1. 351184 2. 013303 1. 941454 1. 941454 1. 954169 1. 888613 1. 822916  
6. 313292 6. 47916 6. 156215 6. 632674 6. 658702 6. 270534 6. 288345 6. 208879 5. 542309  
4. 991145 5. 950429 4. 987702 5. 369623 5. 705652 5. 453642 5. 511726 5. 273832 5. 690225  
2. 949516 2. 859389 3. 213014 3. 114458 2. 625399 2. 713872 3. 278693 2. 981789 2. 909233  
3. 806568 3. 72097 3. 880175 4. 449395 4. 077666 3. 279593 3. 479068 3. 614403 2. 921441  
7. 212985 7. 965285 7. 277745 6. 100144 7. 55835 6. 598127 7. 445416 7. 482584 7. 075412  
5. 292508 5. 424008 4. 199749 5. 78793 5. 114568 5. 144271 5. 586522 5. 011008 5. 031838  
5. 797664 5. 570495 5. 901044 5. 497154 5. 596172 5. 823994 5. 59798 5. 516683 7. 730614  
6. 625001 5. 922452 7. 060249 6. 338174 6. 958753 6. 521261 6. 705636 6. 655107 7. 815447  
3. 960656 4. 524042 4. 159973 4. 694506 3. 963922 4. 771918 2. 76856 3. 673703 3. 417313  
3. 499154 2. 502963 3. 340028 2. 743955 3. 442303 3. 212075 3. 8729 2. 868416 3. 36305  
2. 29364 2. 600306 2. 19789 2. 122477 2. 727179 2. 825304 2. 489821 2. 470162 2. 537388  
1. 474826 1. 58079 1. 419671 1. 599584 1. 461509 1. 504451 1. 661388 1. 690425 1. 858583  
4. 600825 3. 957514 4. 055492 4. 505236 4. 569623 4. 585511 4. 012305 4. 234704 4. 854583  
9. 335262 9. 633435 9. 595261 9. 658958 9. 726292 9. 010588 9. 564323 9. 673669 8. 926578  
2. 994394 3. 237744 3. 88577 4. 068577 2. 87864 3. 996368 3. 455177 4. 02416 3. 253751  
6. 084266 5. 741794 5. 877217 5. 178107 5. 567739 5. 828451 6. 112657 5. 901602 5. 144696  
4. 524556 5. 079726 5. 103254 3. 823525 5. 219719 4. 746772 5. 49836 5. 129177 5. 194264  
4. 8412 4. 213479 5. 051416 5. 648053 4. 87902 4. 768818 5. 577276 4. 858464 5. 821492  
3. 475655 4. 130648 5. 269597 4. 876788 4. 000077 4. 858395 4. 13029 4. 589 4. 673338  
4. 99353 5. 862317 5. 422309 5. 023907 5. 295658 5. 442171 5. 348286 5. 443565 6. 155694  
4. 741933 4. 80558 4. 613344 4. 198219 4. 389602 4. 453804 4. 325769 4. 131558 5. 00793  
6. 552373 6. 879869 6. 386635 6. 598368 6. 806374 6. 495481 6. 60243 6. 843119 6. 79283  
6. 325185 5. 939608 5. 327 6. 830065 8. 072319 5. 959711 6. 232307 6. 325754 6. 537263  
6. 804945 6. 499508 6. 611146 7. 421211 7. 038402 6. 832123 7. 570752 6. 804267 6. 533188  
5. 041675 2. 990795 2. 537452 3. 495366 3. 673632 5. 948698 4. 576929 4. 385427 5. 24397  
6. 219368 6. 067908 6. 016285 4. 785288 5. 901155 5. 073913 6. 081804 5. 81151 5. 208805  
7. 590366 7. 052814 7. 54826 7. 629249 7. 077964 7. 377508 7. 321352 7. 333761 7. 802049  
5. 931737 5. 360817 5. 170834 3. 372088 4. 997591 4. 720368 5. 616836 4. 559609 5. 867956  
4. 179066 4. 507546 4. 673093 3. 704579 3. 634349 3. 990128 3. 806359 4. 157029 3. 944684  
5. 93594 6. 087141 6. 236821 5. 457519 6. 062903 6. 053545 6. 564824 6. 564869 5. 406892  
5. 391676 5. 824416 5. 791199 5. 739127 5. 921776 5. 651233 5. 857492 5. 477223 6. 193408  
5. 942662 6. 798655 5. 551011 5. 165058 6. 380555 6. 887864 6. 138909 6. 651586 5. 878681  
7. 113211 6. 89412 6. 885138 6. 813844 7. 099158 6. 963435 7. 29157 6. 995879 7. 216614  
4. 073422 3. 780674 5. 054497 5. 823844 4. 705333 4. 719359 4. 784223 4. 660401 3. 735432  
1. 757556 2. 708188 1. 14842 2. 116809 1. 052662 2. 232842 2. 231496 1. 413485 1. 623168  
6. 154991 6. 083209 6. 055397 5. 535599 6. 096117 6. 727164 6. 259555 5. 732788 6. 680874  
4. 344267 3. 802167 4. 206141 3. 253372 3. 068978 3. 432814 3. 70222 3. 859131 3. 094321  
3. 765045 2. 555789 2. 342579 3. 597426 3. 13476 2. 675795 2. 791149 3. 166062 3. 859673  
4. 793146 3. 920816 4. 036954 2. 767358 4. 243236 4. 230116 3. 923487 4. 520628 4. 362706  
1. 577689 1. 262451 0. 917284 1. 880499 1. 36549 1. 468656 1. 356835 1. 356835 0. 961838  
6. 265586 6. 301385 5. 715658 5. 747574 5. 949257 5. 889752 6. 106943 6. 494252 6. 270353  
4. 684244 3. 562823 3. 143546 5. 046491 3. 341492 3. 49223 4. 225139 4. 121028 5. 044103

2. 415681 1. 309799 1. 449867 1. 835971 2. 692545 2. 366456 1. 465163 1. 864572 2. 592556  
2. 513915 0. 740453 1. 705922 2. 411202 1. 297492 1. 451501 1. 403235 1. 180188 0. 790595  
6. 748725 7. 039422 6. 697128 6. 484124 6. 426595 6. 901718 6. 893637 6. 870265 7. 52096  
5. 306746 5. 05491 5. 20377 4. 138265 5. 256728 5. 246364 5. 843736 5. 693742 5. 487762  
2. 557551 2. 215229 2. 347396 3. 102803 2. 626684 3. 121813 2. 711595 2. 282619 2. 173175  
8. 004322 7. 589567 8. 243613 7. 982285 7. 617045 8. 160218 7. 86361 8. 013557 7. 542634  
4. 640194 4. 759335 5. 051384 2. 806051 4. 70097 4. 879418 4. 207442 4. 010955 4. 918225  
5. 137531 5. 232072 5. 179881 4. 326791 5. 213344 4. 733632 5. 996208 5. 447266 5. 391188  
6. 081875 5. 238322 5. 060802 6. 271471 6. 008986 4. 72545 6. 109729 5. 39098 5. 937527  
8. 803498 9. 157749 8. 416474 8. 592859 8. 697762 9. 499951 9. 105174 9. 197733 8. 63343  
5. 245941 4. 455816 4. 300181 5. 865436 5. 038085 5. 458132 6. 500213 4. 818357 5. 253741  
2. 212029 1. 796929 2. 144981 2. 288946 2. 138935 2. 610596 1. 840116 1. 56674 3. 004245  
2. 072594 3. 282243 1. 674326 1. 98324 2. 780147 2. 469358 1. 674882 2. 302198 2. 482626  
1. 444299 1. 386218 1. 5582 1. 510897 1. 146977 1. 622603 1. 44833 1. 231609 1. 773135  
4. 533992 4. 464935 4. 684844 4. 322819 4. 30225 4. 094847 3. 843611 3. 995194 4. 728586  
4. 733752 4. 492061 5. 33841 3. 913991 4. 972842 4. 858126 4. 76283 4. 610778 4. 414124  
5. 002964 3. 942523 3. 583645 4. 174531 4. 647848 3. 916958 4. 732446 4. 57792 5. 260922  
5. 242753 4. 471002 4. 952469 4. 119291 5. 250648 6. 287658 5. 021096 5. 244431 4. 871096  
3. 614952 3. 387644 2. 575201 3. 058197 2. 905353 2. 650916 3. 592955 2. 234839 2. 522729  
1. 960528 1. 792638 1. 999229 3. 466596 2. 835015 2. 622887 2. 154102 2. 113341 1. 725515  
5. 466872 3. 437559 4. 255418 4. 805297 3. 068482 5. 188338 4. 52045 5. 782369 5. 353698  
5. 344578 4. 761787 5. 330481 5. 735536 4. 730547 4. 79307 5. 067022 5. 50042 5. 600298  
1. 735279 1. 816684 1. 641728 1. 801794 1. 60381 1. 880039 1. 956151 1. 431154 1. 881501  
5. 364878 5. 344079 5. 384953 6. 895324 5. 240058 6. 208302 5. 292322 5. 6365 4. 933653  
3. 805825 3. 396618 3. 589431 4. 155833 3. 596828 3. 876347 3. 852672 2. 957508 3. 556913  
2. 31458 1. 460095 1. 892088 3. 338965 2. 411071 1. 784879 2. 230492 2. 898679 1. 776116  
7. 362945 7. 420907 7. 672097 7. 332564 7. 329753 7. 431421 7. 453532 7. 550477 6. 801284  
4. 360703 3. 192286 4. 43103 2. 63938 4. 154987 3. 22763 3. 719716 3. 567298 2. 805585  
4. 791609 4. 242344 4. 373544 4. 034861 4. 847673 5. 024206 4. 607941 4. 812612 3. 681273  
4. 346766 3. 970986 4. 694726 5. 152737 4. 612658 4. 096745 4. 725537 5. 338838 4. 702396  
4. 964976 5. 71351 4. 829919 5. 613816 5. 202477 5. 084782 4. 839002 5. 071481 4. 804234  
2. 342916 1. 848796 1. 843449 2. 134882 2. 62067 2. 11882 1. 947601 2. 411469 4. 424718  
6. 800628 7. 006975 7. 379677 6. 399224 7. 020571 7. 074736 7. 259411 7. 337087 6. 048467  
4. 87145 4. 888885 3. 840914 3. 929907 4. 386142 3. 326151 4. 880362 4. 264251 3. 440411  
1. 855661 2. 04725 1. 862975 1. 585374 1. 921092 1. 805697 1. 651007 2. 086148 2. 529464  
7. 833218 7. 924072 7. 674973 7. 061283 8. 100211 8. 095621 7. 698259 8. 001082 7. 648432  
4. 591338 4. 707025 5. 020509 3. 963364 4. 990992 4. 408271 4. 812495 4. 841286 4. 225713  
5. 787924 5. 720343 6. 769299 7. 082314 5. 548003 6. 155694 6. 089123 6. 470244 6. 111224  
8. 75534 8. 676183 8. 361495 9. 172714 8. 465118 8. 645685 8. 680324 8. 618705 9. 045945  
4. 95605 3. 469773 3. 924259 3. 542391 3. 292424 3. 681314 3. 816929 4. 300288 4. 923033  
7. 391681 7. 6117 7. 043604 6. 895341 7. 02391 7. 195484 7. 255382 6. 896262 7. 091782  
5. 286345 6. 462094 6. 140789 5. 670225 7. 113913 6. 168512 6. 229273 6. 23342 5. 363754  
6. 553674 6. 452661 5. 928674 6. 018566 6. 151277 6. 454975 6. 603543 5. 894891 6. 243791  
4. 618786 4. 694734 4. 044972 4. 48558 5. 174905 4. 547238 5. 086469 4. 108891 4. 618786  
5. 676911 5. 735891 5. 533482 5. 823662 6. 382621 6. 039709 5. 743066 6. 137951 5. 382728  
5. 258874 5. 273322 5. 165163 4. 516105 5. 169481 6. 232965 5. 342548 4. 71389 5. 531764  
7. 07819 6. 837866 6. 440723 6. 443557 6. 697909 7. 615858 6. 384474 6. 577827 7. 313246  
5. 065422 5. 005663 4. 655019 4. 622656 5. 181786 5. 007632 5. 056253 4. 380555 5. 385762  
5. 762435 6. 240695 6. 421937 5. 414474 6. 26684 6. 940278 6. 328786 7. 135401 5. 61791  
3. 409478 3. 124567 3. 633441 3. 648471 3. 330678 2. 836413 3. 835993 2. 930568 3. 766241  
4. 168006 2. 863199 3. 872453 1. 619912 2. 375952 4. 488679 3. 08312 3. 165263 4. 41321



5. 22063 5. 196003 5. 630656 4. 221862 5. 371715 4. 270301 5. 438348 4. 542776 4. 630054  
5. 395381 5. 472498 4. 796889 4. 934608 5. 257133 3. 602431 5. 020108 4. 71341 5. 356167  
5. 376322 5. 499197 5. 483256 4. 236942 5. 290976 5. 169762 5. 087445 5. 526694 4. 588668  
6. 26525 6. 058272 5. 96504 5. 786727 5. 966555 5. 021511 5. 530364 5. 686155 6. 237981  
2. 563103 2. 887074 2. 334433 2. 84638 1. 941581 2. 672746 2. 558248 2. 126788 2. 431837  
7. 153311 6. 938567 7. 22575 6. 680111 6. 608525 6. 777686 6. 708246 7. 203406 7. 243666  
2. 117922 1. 43212 2. 067403 2. 016487 1. 904798 3. 680259 2. 162032 2. 069259 2. 290251  
3. 030821 3. 420132 2. 936861 3. 05064 3. 658199 2. 592296 3. 467858 4. 06597 3. 739374  
4. 630183 5. 508489 4. 776221 3. 337131 5. 517411 4. 060579 3. 990624 5. 339281 4. 624493  
1. 313952 1. 544784 1. 813881 2. 516464 1. 429745 2. 040959 1. 587823 1. 554706 2. 996851  
6. 138945 6. 385178 5. 87576 6. 50365 6. 048146 5. 850302 6. 346451 6. 412369 6. 102792  
1. 737243 1. 527598 1. 60689 1. 796615 1. 259393 1. 853176 2. 137272 1. 43244 2. 581344  
5. 275593 5. 238999 4. 622183 3. 787702 5. 096331 4. 685495 5. 738842 5. 311613 5. 8888  
6. 785177 6. 656359 6. 560444 6. 402333 6. 156668 6. 327383 6. 508472 6. 387808 6. 929364  
2. 527421 2. 741697 3. 509432 1. 960573 3. 434594 3. 10328 2. 255081 2. 296304 3. 018692  
6. 816258 6. 506008 6. 642221 7. 271713 6. 82927 6. 997351 6. 738024 6. 665035 7. 296516  
2. 403775 1. 998896 1. 861945 2. 240294 2. 424137 1. 912193 1. 977547 2. 136584 2. 073656  
5. 217889 5. 520725 4. 928107 5. 743714 5. 244747 5. 521948 5. 30433 5. 165134 5. 627985  
4. 021076 4. 067925 5. 259074 3. 340523 3. 79602 4. 239398 4. 517093 4. 311548 4. 109003  
5. 424952 5. 138355 5. 2923 6. 010213 5. 420046 5. 351055 5. 436297 5. 114511 2. 435472  
4. 215224 2. 625331 3. 433486 2. 716076 3. 207594 2. 29364 2. 868114 3. 523423 3. 405987  
5. 68378 5. 540403 4. 784803 5. 935338 5. 262833 5. 27837 5. 664914 5. 349607 5. 77246  
6. 918923 7. 145024 6. 634209 4. 748967 7. 074218 6. 786753 6. 417351 7. 046973 6. 151752  
5. 165008 4. 558048 4. 754228 5. 510262 4. 766114 4. 705504 4. 027151 3. 938532 5. 272597  
7. 316923 7. 24611 7. 095059 6. 795898 7. 672316 7. 077684 7. 214959 7. 035756 6. 912712  
4. 342408 4. 590378 4. 832786 3. 605498 4. 781804 4. 04802 4. 787037 4. 561314 4. 08559  
3. 358063 3. 741242 3. 377527 2. 086598 2. 46113 3. 068824 3. 541733 3. 563922 2. 67497  
7. 556329 7. 749375 7. 742173 6. 938769 7. 554144 7. 864934 7. 307908 7. 154367 7. 372849  
5. 025022 5. 276134 4. 879236 4. 383051 5. 161662 5. 277932 4. 25351 5. 245475 2. 847266  
3. 835445 3. 106587 3. 638012 3. 344133 3. 599716 3. 780461 3. 712006 3. 542597 3. 354898  
4. 577968 4. 656628 4. 218516 3. 876073 4. 560284 4. 729761 4. 498804 4. 662102 4. 566636  
7. 410064 7. 360391 7. 099521 7. 271158 7. 454595 6. 90097 7. 443827 7. 459604 6. 594894  
7. 184352 7. 038434 7. 133007 6. 787394 7. 757252 6. 868712 7. 141887 7. 696347 6. 983709  
6. 761343 6. 934264 7. 085991 6. 875415 7. 056781 7. 059298 7. 580123 7. 411583 6. 419312  
6. 157411 5. 607303 6. 394321 5. 655002 5. 417964 6. 172762 5. 533686 5. 996739 3. 818132  
6. 348523 6. 006265 6. 190784 5. 545874 5. 840994 6. 030296 6. 088128 5. 661813 5. 210511  
5. 692828 5. 912322 5. 981532 5. 776386 5. 968313 5. 570093 6. 321739 6. 197062 6. 330176  
2. 595442 2. 861404 3. 010505 3. 164489 2. 584726 2. 554439 2. 648523 2. 736665 2. 715783  
2. 356159 2. 9638 2. 049728 2. 81686 3. 318154 1. 955177 3. 642393 3. 178636 2. 577942  
5. 296956 5. 039237 5. 204809 4. 019251 5. 233082 5. 357134 5. 255212 5. 326971 5. 530202  
8. 305054 8. 694812 8. 722275 7. 87094 8. 77008 7. 825963 8. 225286 7. 86885 8. 109265  
2. 544998 2. 634895 4. 526927 3. 500067 4. 031117 2. 606713 3. 511733 2. 924672 3. 55013  
3. 997444 4. 755047 4. 023236 4. 45825 4. 379008 3. 83167 4. 27395 4. 161221 4. 684256  
6. 743649 6. 930486 7. 034168 7. 461717 6. 964693 6. 784926 6. 999787 7. 027025 6. 841749  
2. 192114 2. 775868 2. 333117 3. 085276 2. 735464 3. 035759 2. 266379 2. 133818 3. 285334  
7. 377846 7. 499049 7. 633939 7. 45186 7. 503814 7. 509366 8. 089715 8. 262366 7. 940327  
4. 379975 3. 830105 3. 055676 4. 956928 4. 146712 3. 94453 4. 87571 4. 395669 2. 188917  
5. 450667 6. 450424 4. 668125 1. 868063 5. 379925 6. 017864 6. 230099 5. 457425 5. 560381  
3. 258706 3. 437242 3. 439784 3. 600251 3. 865215 4. 101913 3. 555728 3. 773744 2. 929298  
2. 637823 2. 228324 2. 587138 2. 383666 2. 182498 2. 230738 2. 548033 2. 287465 2. 705372  
4. 465177 4. 19375 4. 717422 4. 714866 4. 456318 4. 283443 4. 055901 4. 026059 4. 11238

7. 89072 7. 814773 7. 61734 7. 590063 6. 750135 8. 277105 7. 444829 7. 471283 7. 318449  
7. 923386 7. 846185 8. 258557 6. 374677 8. 308186 7. 932796 7. 789271 7. 831846 7. 77351  
6. 632713 6. 58588 6. 286124 6. 469894 6. 506683 6. 216051 6. 764193 6. 700008 6. 406883  
5. 345434 5. 241615 5. 195184 5. 12458 5. 356386 5. 393835 5. 632986 5. 247238 5. 633943  
6. 488382 6. 324171 6. 277169 4. 956597 5. 597146 5. 769647 5. 701174 5. 585901 5. 616167  
5. 0075 5. 236185 5. 525185 5. 768783 5. 604172 5. 12208 5. 492149 5. 26357 5. 182663  
6. 577365 5. 792248 5. 511284 6. 926211 6. 127936 5. 618519 6. 05376 6. 050825 6. 39343  
3. 801445 4. 306852 3. 925038 3. 268822 3. 998943 3. 523409 3. 436763 4. 197607 3. 801445  
3. 901254 3. 853213 4. 364387 3. 372937 3. 88738 3. 977219 3. 546103 3. 218713 3. 574033  
3. 743504 3. 963642 4. 521161 3. 351181 3. 500916 3. 040707 3. 174169 4. 2676 4. 302542  
4. 684521 4. 119017 5. 537877 6. 270219 4. 614177 4. 613588 5. 392935 4. 876675 5. 489831  
5. 66977 5. 442808 6. 161443 3. 706239 5. 797911 5. 808826 5. 904907 5. 135702 5. 320183  
0. 839664 1. 416969 1. 138235 1. 582371 1. 185582 1. 403599 1. 503349 1. 078786 1. 33611  
6. 091392 5. 835102 5. 875581 5. 78232 5. 925181 6. 026691 6. 175568 5. 700664 5. 726419  
3. 793429 4. 512957 3. 285667 4. 418974 4. 478656 4. 63226 4. 092897 4. 535775 4. 441865  
3. 561336 3. 634908 3. 307378 3. 833481 4. 298609 4. 304534 3. 820034 3. 79427 3. 287397  
4. 722726 4. 317813 4. 489403 2. 974486 3. 347329 4. 402935 4. 501139 2. 978137 3. 750172  
4. 679972 5. 022336 4. 355813 5. 082969 4. 702317 4. 172482 4. 894632 5. 127867 4. 417703  
3. 601461 4. 98725 5. 071906 4. 917151 4. 422922 4. 614461 4. 616888 4. 177177 4. 593599  
3. 614383 4. 69207 4. 565389 4. 023352 4. 831972 5. 376272 5. 084924 4. 324286 4. 683895  
1. 295987 1. 280226 1. 664371 1. 608005 1. 569781 1. 44024 1. 441284 1. 472587 2. 057642  
2. 963448 4. 661527 4. 542346 5. 363334 4. 768876 4. 425664 4. 010737 4. 317815 5. 153444  
6. 706178 6. 65704 6. 614902 7. 117236 6. 734097 6. 026338 6. 801229 5. 999825 6. 679986  
7. 456663 7. 580253 7. 321863 6. 371938 7. 738293 7. 263531 7. 116425 7. 187017 6. 564782  
4. 40756 3. 41749 3. 696955 4. 808704 4. 106745 3. 203561 3. 833739 4. 23776 4. 872068  
2. 912704 4. 019474 3. 430891 4. 417705 4. 697883 4. 409131 2. 894564 4. 440208 2. 592956  
2. 835154 3. 718747 3. 250368 3. 232896 3. 06381 2. 909793 3. 39288 3. 339976 2. 208317  
5. 146835 4. 966418 5. 057402 5. 389483 5. 448709 4. 886305 4. 638782 5. 361334 4. 565807  
6. 235108 5. 592132 5. 655116 6. 704113 5. 18346 4. 637132 5. 464088 4. 90836 5. 373656  
3. 217587 2. 91944 3. 043641 3. 286812 2. 982463 2. 893271 2. 418626 2. 419398 2. 006648  
6. 948344 7. 21091 7. 552804 5. 534377 6. 875012 7. 679722 6. 923895 6. 574919 6. 295967  
5. 804025 6. 413374 6. 171181 5. 692291 6. 767058 6. 063437 5. 855731 6. 369711 4. 598021  
2. 547256 1. 911243 1. 544907 1. 640693 3. 172167 1. 290013 1. 986841 1. 529973 2. 036014  
4. 623139 4. 67752 4. 31441 4. 785063 4. 018383 4. 215332 4. 135068 4. 212644 4. 150377  
5. 123825 4. 663786 4. 448364 4. 872059 5. 152427 4. 455864 4. 944554 4. 95596 4. 625811  
4. 594014 5. 711043 5. 288583 6. 326133 5. 262518 5. 161913 5. 058789 4. 606548 4. 38705  
4. 762037 4. 836447 3. 878737 6. 222882 4. 795315 4. 035338 4. 538001 3. 975606 4. 551042  
7. 382773 7. 318403 7. 738689 6. 589879 7. 222931 7. 422491 6. 85224 7. 380134 6. 174571  
4. 331618 3. 859488 4. 890801 4. 636227 4. 356072 4. 850843 4. 940095 4. 773301 5. 076022  
7. 514278 7. 749415 7. 852487 7. 653144 7. 678159 7. 673379 7. 727103 7. 705266 7. 95873  
2. 942186 2. 784462 2. 523448 3. 119987 2. 643848 4. 712019 2. 824386 3. 691766 4. 513411  
5. 919632 5. 451292 6. 092304 5. 440483 4. 997447 6. 181672 5. 457202 5. 368697 5. 028561  
4. 236448 3. 951618 4. 192858 4. 034626 3. 515901 4. 316364 4. 513821 4. 840979 3. 856395  
4. 040392 3. 623872 3. 994036 3. 794458 3. 94373 3. 871321 3. 451784 4. 101616 3. 842995  
4. 673607 4. 522239 4. 295041 4. 553113 2. 943713 3. 888315 4. 786151 2. 894586 3. 485201  
7. 477291 7. 012152 7. 139637 5. 669011 6. 888862 6. 999637 7. 100274 7. 17505 6. 731018  
2. 0306 2. 413388 2. 764302 3. 129463 2. 920653 2. 46905 2. 730284 2. 516431 3. 174321  
6. 947899 6. 592503 6. 902812 6. 433992 6. 197445 6. 332493 7. 090242 6. 243746 6. 904807  
3. 269713 3. 89297 3. 037688 4. 128465 3. 691068 2. 989764 3. 075672 3. 864284 3. 673879  
8. 661206 9. 002229 9. 024313 8. 537869 9. 056595 8. 708459 8. 700312 9. 141702 8. 887857  
8. 379519 8. 726062 8. 684475 8. 351783 8. 816831 8. 510095 8. 581454 8. 623238 7. 812789

5.666106 4.871578 5.117993 4.787207 4.922594 5.412115 5.268004 4.939576 5.955163  
4.426879 3.00822 3.977077 3.460042 3.69807 4.522702 3.839581 3.824402 4.544489  
8.859141 8.278036 8.434833 8.669218 8.604931 8.107043 8.897367 8.313722 8.804077  
2.00002 1.201634 1.568921 2.433855 1.420866 1.250426 2.247487 1.333504 1.649591  
7.369852 7.355654 7.523875 7.3239 7.563424 7.857404 7.607217 7.538818 6.607992  
5.530445 5.527968 5.385723 4.135088 6.01036 4.761381 5.76209 5.610707 6.042306  
6.544655 7.356629 7.842787 5.909168 7.219969 7.013917 6.902119 7.725104 6.097021  
5.175347 5.050907 5.326835 6.244575 5.716311 5.789866 5.346384 5.844547 6.393524  
4.705677 4.015923 4.004223 3.733621 4.032246 2.583014 4.690273 3.680507 4.290169  
3.731083 4.131672 3.298045 3.180362 3.295496 3.511883 4.003994 3.731104 3.691549  
4.574872 4.988912 5.169942 4.793738 7.930266 3.706942 4.651388 5.491332 5.889544  
5.889966 6.221894 5.830037 5.390053 6.684699 5.811762 5.807488 5.749608 5.967677  
8.296056 8.420229 8.437201 7.991358 8.257467 8.525945 8.597467 8.433166 8.837257  
2.147657 2.090209 1.643798 3.453807 2.433632 1.927915 2.716913 1.593937 1.99428  
4.917988 6.011993 5.358712 3.028173 4.961976 4.097044 5.970066 5.622014 5.173941  
6.938975 7.136177 7.151482 6.709542 7.08956 6.412611 6.237244 6.996763 6.971094  
5.361827 5.726307 5.086827 5.539319 6.033478 5.454796 5.489878 5.798841 5.329947  
5.801392 5.604148 5.194106 4.005371 6.109485 5.746268 5.702494 4.940012 6.2383  
5.75538 5.863639 5.809844 1.721912 6.263828 6.267021 6.014889 5.968862 5.489122  
4.688399 4.634415 5.119107 4.905199 4.376327 4.278981 4.925811 3.996099 5.563937  
3.23625 3.352749 2.487219 2.968989 3.510636 3.03163 2.229481 3.153268 2.566268  
6.465927 6.295958 6.612005 6.42138 6.372021 6.014708 6.605863 6.130835 6.272114  
1.738673 1.278663 1.561796 2.981065 1.934804 1.210894 1.522893 2.079974 1.437505  
8.659871 8.528494 8.458756 8.020924 8.343124 8.816733 8.643549 8.352292 8.908872  
5.152719 4.252249 4.240269 2.301074 5.032801 5.614369 4.919268 4.459022 4.87112  
4.162813 3.423537 3.226035 4.767975 3.423309 3.704435 2.413077 3.700985 3.252332  
6.802978 7.176683 6.778586 6.909773 6.738961 6.886613 6.870266 7.131938 7.560329  
3.762258 4.22054 3.679979 2.466734 2.647735 4.26019 3.938973 2.656866 3.821309  
1.712774 1.771565 1.532981 2.018855 1.198782 2.293572 1.506921 1.806753 1.618303  
2.254501 1.987476 2.092955 2.521582 3.609774 1.730653 3.971542 1.804178 2.656516  
5.187579 5.078211 4.933871 4.216424 5.459545 5.12965 5.90583 5.109911 4.811694  
4.822511 4.204572 4.634491 4.317216 4.309144 4.762618 3.931308 4.531399 4.994129  
5.618992 5.919872 5.27798 7.070411 6.86305 4.91428 5.033379 5.546515 6.218637  
5.634131 5.586733 5.550288 5.258974 5.221085 6.115416 5.710904 5.66624 5.544656  
6.820702 6.98029 6.612623 7.11817 6.876603 6.909781 6.969807 6.98089 7.28775  
7.144358 5.82108 6.197836 4.680325 5.883405 6.849568 6.632439 6.191683 6.585285  
5.102771 5.11362 5.321307 4.471712 4.950279 5.370276 5.384844 5.283586 4.652988  
2.70922 2.215645 2.085195 3.186532 2.308368 2.163323 2.176569 3.025921 1.928251  
5.149363 4.971092 4.784482 5.516879 5.427667 6.118277 5.187257 5.306255 5.969409  
2.934635 2.606041 2.524621 3.01098 3.054212 2.701088 2.698438 2.729534 2.734295  
6.273005 6.084363 6.416192 7.166612 6.029949 5.963028 6.471009 6.155894 6.605061  
4.719248 3.80982 4.583092 4.426427 4.342531 3.349489 4.885094 3.890868 3.212807  
4.357374 4.555784 3.235254 2.42567 4.102461 3.800365 3.541581 4.318035 4.221438  
3.066092 2.976944 3.737585 2.791165 3.015311 2.562894 2.892277 3.11178 3.425607  
6.877696 6.529518 6.61641 6.645378 7.359033 7.278899 7.577716 6.645328 7.161668  
4.894279 4.446083 5.115071 5.295499 4.252616 4.391579 5.480523 4.855026 4.241813  
7.535067 7.808297 7.955525 7.64141 7.347474 7.300676 7.509069 8.149063 7.483574  
2.000902 2.840133 1.4804 0.940721 3.439681 1.384632 3.079405 2.912292 4.268064  
4.337803 4.259553 4.273155 4.092676 4.269278 4.310763 4.339177 4.020898 4.139836  
8.598196 8.16343 7.954946 7.347361 8.015981 7.454591 8.307441 8.111649 8.097906  
2.956246 3.546775 3.960557 4.70419 4.067991 3.945084 3.691183 3.87563 4.082092

2. 953627 2. 44181 3. 391729 2. 128403 2. 701096 2. 632695 4. 27656 1. 845019 2. 350626  
5. 085797 5. 206969 5. 240384 5. 016649 4. 589398 4. 833036 5. 396411 5. 064125 5. 257274  
2. 224761 2. 187723 2. 48925 2. 918113 1. 296427 1. 900497 2. 018124 2. 203307 2. 43089  
2. 82871 2. 880368 2. 441172 2. 40395 2. 79513 4. 782727 2. 763104 2. 845981 2. 893519  
6. 915092 6. 728747 7. 234012 7. 333125 7. 208904 6. 854475 7. 364615 7. 405423 6. 871012  
2. 080468 2. 235148 2. 457553 3. 733967 2. 172668 3. 814616 2. 848005 2. 689333 2. 307995  
3. 727813 2. 526084 2. 228477 2. 734946 2. 044103 2. 760515 2. 794174 1. 947987 2. 601985  
8. 660722 8. 926798 8. 579985 8. 262616 9. 095401 7. 838864 8. 719831 8. 905494 8. 453946  
3. 012252 3. 359637 1. 820684 2. 298857 2. 756607 1. 729682 2. 454472 1. 898247 2. 778565  
1. 521936 1. 334885 1. 654544 2. 635145 1. 788351 2. 228336 1. 67925 0. 943125 1. 516943  
5. 752385 5. 141573 5. 410397 4. 620054 5. 005578 5. 504 5. 344225 4. 412581 4. 323524  
1. 80444 1. 908392 2. 533024 2. 519317 2. 498707 2. 944837 3. 460837 2. 385245 2. 202304  
8. 331628 8. 208451 8. 276008 7. 836772 8. 059668 8. 316501 7. 827084 8. 175417 7. 644363  
0. 837714 1. 700814 0. 776352 1. 429561 1. 307287 1. 41666 0. 872422 0. 774017 1. 210464  
4. 289637 5. 520604 4. 399411 3. 732752 4. 792853 4. 899077 4. 898128 4. 541249 4. 770256  
1. 88539 1. 740662 2. 116642 2. 241669 1. 31744 1. 571419 1. 966798 1. 599921 1. 538259  
4. 723908 4. 84915 4. 959083 4. 462129 5. 232354 4. 496753 4. 856708 5. 089803 4. 922179  
1. 959958 2. 990889 2. 803473 2. 225838 2. 745806 1. 193254 1. 84384 2. 727001 1. 94794  
4. 763505 4. 148448 4. 53394 2. 909668 4. 538701 4. 665614 5. 120399 4. 417978 4. 672066  
10. 20492 9. 36888 8. 816712 9. 635999 8. 886261 9. 727198 9. 662473 9. 626928 10. 32221  
4. 488378 4. 867666 3. 79683 5. 596725 4. 757423 5. 286562 4. 866992 4. 9767 3. 979584  
1. 724038 1. 85914 2. 377968 2. 436147 1. 957664 2. 34687 1. 343314 1. 596942 1. 617069  
7. 320374 6. 958089 7. 079433 7. 597598 7. 038327 8. 730143 6. 965763 7. 24759 6. 562323  
5. 152337 5. 057303 4. 671635 5. 93909 4. 534083 5. 203065 4. 865754 5. 102699 4. 572466  
7. 081068 7. 696567 7. 181468 7. 011258 7. 5965 6. 81322 7. 238173 7. 471055 7. 382301  
5. 77373 5. 7079 6. 31633 6. 333053 6. 272799 6. 012045 5. 966045 6. 242554 7. 391907  
2. 791548 3. 601568 3. 077206 2. 657726 2. 87722 2. 932217 3. 547843 2. 839857 2. 624051  
4. 788985 4. 97174 5. 117433 5. 390109 4. 596738 4. 873138 4. 393303 4. 296159 3. 901113  
1. 410665 1. 629321 1. 90815 1. 337962 1. 689494 1. 640773 1. 987138 1. 115836 1. 860006  
7. 00793 6. 781088 6. 864213 7. 245236 6. 617776 6. 876284 6. 74758 6. 879478 7. 41304  
2. 881779 1. 630374 1. 850994 1. 856396 2. 606742 1. 421741 2. 179028 1. 960249 4. 074892  
5. 519734 4. 568572 5. 003826 4. 275396 5. 545494 4. 728347 4. 510171 4. 401572 4. 045036  
3. 334041 4. 224843 2. 670316 4. 424916 3. 922796 4. 594957 3. 720072 4. 173164 2. 877121  
3. 910261 3. 205967 3. 654482 1. 947934 3. 342297 4. 09567 3. 200239 3. 839405 3. 605381  
4. 254196 4. 495909 3. 716458 3. 559064 4. 749045 3. 912789 4. 368943 4. 624048 4. 462116  
5. 500015 5. 650601 5. 348443 5. 527984 5. 972516 5. 497619 5. 285002 5. 277588 4. 876264  
2. 006006 1. 5382 3. 123782 1. 602232 2. 555038 2. 312492 1. 989185 1. 457133 3. 15192  
4. 353068 4. 772999 4. 044781 4. 063481 4. 575148 3. 747602 3. 889393 3. 324262 3. 405726  
7. 450518 7. 876853 7. 550424 6. 669352 8. 275891 7. 465597 7. 305034 7. 335808 7. 246164  
5. 889215 5. 74852 5. 345764 5. 293034 5. 541501 5. 806783 5. 51114 5. 987582 6. 433881  
4. 529066 4. 657542 4. 03168 3. 710092 5. 034089 3. 933 5. 410981 4. 537466 3. 632703  
5. 837553 5. 854658 5. 44615 5. 111317 5. 867086 5. 929824 5. 642611 5. 456551 6. 320798  
4. 951402 4. 115145 4. 87006 3. 662087 4. 825877 4. 163634 4. 205623 3. 369121 4. 486263  
4. 816265 4. 746421 4. 58708 4. 43289 4. 653441 4. 45331 5. 348234 4. 918585 5. 566437  
6. 070205 5. 315827 5. 348279 5. 869707 6. 211252 5. 568942 5. 892293 4. 500954 5. 575241  
3. 068287 3. 930075 4. 374836 2. 64057 3. 285801 3. 67586 3. 762931 4. 040369 2. 418854  
4. 673268 4. 196186 5. 358902 4. 647464 4. 628413 4. 309166 4. 866799 4. 591842 4. 896699  
7. 025236 7. 178086 7. 029613 7. 238981 7. 210627 6. 894452 6. 975886 7. 151771 7. 0101  
7. 261194 7. 539914 7. 524417 7. 935974 7. 473859 7. 315998 7. 472906 7. 658165 7. 445043  
3. 139875 3. 044685 1. 784539 3. 294581 4. 298362 2. 035813 2. 453027 2. 834379 3. 814558  
5. 64123 5. 087699 5. 445659 5. 959067 6. 42626 5. 014173 6. 217779 5. 96593 4. 980578

5.929165 5.716577 5.666621 6.61865 6.262078 6.366068 6.393964 6.496137 6.72026  
3.8245 3.819712 3.928649 4.328758 4.121604 3.747163 3.803878 3.143593 3.136734  
5.808687 5.925419 5.857412 5.686101 5.914525 5.604038 6.047406 5.431082 5.143806  
5.277781 5.305386 5.353235 4.744048 5.299725 5.118051 5.334709 4.700207 4.335075  
1.874036 1.674787 1.485829 1.962198 1.929123 1.010052 1.344745 1.770119 1.290002  
3.814082 3.662286 3.622513 3.714118 3.406999 3.081377 4.064541 3.747409 3.552723  
5.766341 5.351525 5.477207 5.926005 5.982947 6.046379 5.576701 5.628946 5.424485  
4.212219 4.522541 4.064107 4.942798 4.364408 4.701739 4.504439 3.945242 3.531972  
6.047588 5.773977 5.94453 2.553886 5.441397 5.369378 5.989865 5.691921 6.485945  
7.80534 7.616914 7.398198 7.291075 7.248992 7.431972 7.531602 7.415924 6.704106  
1.051078 1.472021 2.12717 1.763566 1.566542 1.195737 1.028535 1.247254 1.035653  
5.290769 5.544361 5.143243 4.439524 5.193858 5.14327 5.234159 4.952688 5.605457  
5.651065 5.883777 5.536669 5.740848 5.589628 5.628955 5.539554 5.332558 6.087068  
5.482965 4.14194 5.184622 3.529755 5.08981 4.942007 6.012759 4.910357 4.774446  
5.164818 5.11805 4.911575 4.11609 5.259674 5.097722 4.978599 5.212176 4.536586  
1.224985 1.937111 1.080765 1.629591 1.818671 1.618111 1.633603 1.341633 1.596273  
5.561202 4.679929 4.623622 5.386132 5.710857 4.729707 5.758109 4.98007 5.312169  
5.037392 5.385089 5.061739 5.475182 4.914377 5.259029 5.178704 5.172389 5.547998  
4.941941 5.172157 5.851194 5.187389 4.35959 4.46692 4.203463 4.716753 5.144155  
3.313466 2.737665 3.487777 3.357575 3.651298 3.000522 2.838321 3.722338 1.915638  
6.278626 6.642659 6.774238 7.515524 7.000038 6.404586 6.268084 6.168973 6.391894  
1.363911 1.597423 1.05443 0.817495 3.216767 1.463137 1.0833 1.76802 1.161128  
4.114229 1.987412 4.072131 2.93006 3.985019 3.964523 2.478619 2.56596 4.50835  
7.418581 7.24941 6.903364 6.645685 7.194668 7.377575 7.668294 6.648915 6.766829  
5.16042 5.145955 4.825331 5.360962 5.78613 5.527893 5.1641 5.227948 4.417507  
1.865761 3.403616 3.146589 3.682072 3.225811 1.83513 4.249343 2.466024 2.319755  
4.35137 4.261267 4.563255 4.226706 4.00395 4.134221 4.070821 3.967512 3.874869  
6.597508 6.247123 6.924524 5.299948 7.296272 6.178514 6.568529 6.749634 6.764477  
6.345942 6.306641 6.377119 6.447122 6.292981 5.695778 6.044976 6.185537 6.251503  
6.699219 6.210878 6.582729 6.167337 6.927269 6.222121 6.320579 6.467127 6.570012  
4.800629 5.308771 3.888495 4.515795 4.508648 3.852486 4.904871 4.744683 3.83692  
7.511268 7.52357 7.435592 7.675233 6.880505 7.200188 7.105288 7.175647 7.723989  
5.413388 5.683091 5.970829 5.902408 5.566987 5.691888 5.722609 5.823327 6.617853  
4.803637 4.346671 4.085627 6.281006 4.049102 3.959122 3.570146 4.34841 3.583241  
5.302694 4.472161 5.057809 4.037849 5.278628 4.7506 5.030367 5.192219 5.351014  
5.017553 4.847003 5.067573 4.909615 5.248539 4.488972 5.133566 5.109037 5.024273  
6.603376 7.116026 6.976496 6.073839 6.912243 6.534986 6.589239 6.843221 7.128374  
6.144791 6.39066 5.87059 6.234127 5.629101 6.15317 5.92083 6.344775 6.142421  
5.10726 4.797669 4.683652 3.647317 5.171049 4.361156 5.031394 4.394188 4.459242  
4.12337 4.768846 3.948563 3.4279 4.962764 4.590128 4.678657 4.748557 4.603894  
8.173969 7.801014 7.838464 7.469736 8.150294 7.964422 8.106595 7.936553 8.058388  
2.53835 2.899646 3.869422 3.679674 3.360981 2.374828 3.581601 3.638287 3.076703  
7.530208 7.491563 7.365309 6.54843 7.707299 7.666349 7.721697 7.413083 6.717569  
5.849298 4.992909 5.468308 3.128441 3.751863 4.515673 5.57454 4.966398 4.403301  
6.102693 5.998243 6.0498 3.726594 5.537494 5.32573 5.382626 4.711088 6.01156  
2.837558 3.557309 2.490665 2.526331 4.389093 2.595659 3.057952 2.91535 2.053228  
4.636974 4.19111 3.847156 3.480039 4.03809 4.048502 4.417369 3.982951 4.035165  
6.782906 6.931189 6.90913 6.781147 7.120291 7.294599 6.639092 6.77284 6.672574  
8.776151 8.662702 8.581507 9.257211 8.737991 8.468586 8.409318 8.181527 8.60981  
9.132953 9.008881 8.762699 8.548403 8.585987 8.596744 9.074231 8.655592 9.350716  
5.898324 6.567205 5.962448 7.06011 6.771444 6.616527 5.177095 5.746216 4.389943

4. 412619 4. 264213 5. 100328 4. 535275 4. 838808 4. 806315 5. 815282 4. 549798 4. 780454  
4. 170643 3. 343732 3. 835644 3. 15087 3. 0617 3. 397051 3. 211236 3. 157107 3. 078944  
6. 67555 6. 703501 6. 646684 6. 211576 6. 302114 6. 75457 6. 804305 6. 314399 6. 643305  
6. 351594 6. 210331 5. 411594 6. 346097 5. 830916 6. 277264 6. 377718 6. 275122 6. 724792  
5. 588005 5. 32595 5. 697751 4. 486208 4. 903773 5. 210339 5. 212635 5. 446833 5. 085627  
2. 309007 2. 147569 2. 938384 2. 284398 2. 604769 2. 589833 3. 078275 2. 968747 3. 525821  
5. 586593 5. 8384 5. 590428 5. 617432 5. 418166 5. 281393 5. 563716 6. 22283 4. 772468  
4. 327542 3. 376429 4. 028501 3. 672553 4. 187015 2. 862923 3. 708274 3. 5677 3. 890749  
4. 713361 4. 297653 3. 935504 5. 795297 4. 149451 4. 240475 4. 414214 5. 361971 5. 377343  
4. 56582 4. 323367 3. 39054 4. 255332 4. 611629 4. 524547 4. 933532 4. 298862 4. 586574  
5. 339423 5. 177162 4. 522139 5. 1373 5. 681989 4. 507348 5. 253417 4. 836614 4. 569743  
6. 11497 6. 027459 5. 000848 5. 844707 5. 65678 5. 805095 5. 894733 5. 586904 5. 922671  
6. 004824 6. 065093 5. 367942 5. 00795 6. 04941 6. 061194 6. 020945 5. 911418 5. 958276  
4. 065683 3. 765811 3. 850209 4. 343667 2. 996192 3. 158395 3. 469397 3. 52995 2. 993069  
6. 260069 6. 299108 6. 068746 6. 167098 5. 970647 5. 844512 6. 030976 5. 760334 6. 72845  
5. 762141 6. 079673 5. 306561 4. 816061 5. 401593 5. 60667 5. 803951 5. 396987 5. 861697  
4. 327251 4. 609546 4. 523807 4. 329588 4. 577949 4. 683538 4. 843114 4. 874441 5. 189254  
8. 216539 8. 237306 8. 319746 8. 164073 8. 432801 8. 111186 8. 193525 8. 478708 7. 909258  
2. 71407 3. 264029 3. 676845 1. 497311 4. 146923 1. 799076 4. 260144 3. 215315 2. 672855  
6. 159995 5. 531581 5. 325457 5. 056601 5. 839963 4. 954938 5. 211507 5. 20183 5. 352031  
5. 416114 5. 488979 4. 23871 6. 162427 5. 269229 3. 61952 5. 191683 5. 389316 4. 646826  
6. 217372 6. 519426 5. 551725 5. 899451 6. 592595 6. 19681 6. 2854 6. 303813 6. 31855  
6. 1159 6. 486103 6. 77942 6. 19112 6. 650358 6. 118184 6. 308466 7. 2637 5. 625732  
4. 426756 4. 502423 2. 736904 4. 625654 4. 556656 4. 763673 5. 14709 5. 541162 5. 565195  
6. 978864 7. 306178 6. 575103 7. 426323 7. 1263 6. 904105 7. 225074 7. 108228 7. 306406  
6. 197089 6. 739889 6. 595932 4. 520023 6. 169143 6. 298754 6. 582322 6. 358177 6. 267879  
5. 816747 5. 782255 5. 608058 4. 095562 5. 21175 5. 648443 5. 610615 6. 157808 5. 716216  
4. 307612 3. 596751 1. 411548 0. 428826 3. 746313 1. 9295 2. 515833 2. 918007 3. 888853  
5. 565229 5. 158075 5. 610204 5. 449214 5. 71824 5. 321651 5. 589458 5. 797649 5. 965633  
1. 938119 2. 333466 2. 099603 2. 220271 2. 354418 2. 727062 2. 089171 2. 241092 2. 95864  
2. 562152 2. 104261 2. 424682 2. 778636 1. 903861 1. 452859 1. 874682 1. 785076 1. 917239  
5. 688861 6. 563966 6. 314885 6. 03755 6. 319956 6. 632224 5. 858351 6. 089226 5. 087288  
3. 376029 2. 530522 3. 061446 2. 284395 3. 619953 2. 492919 1. 637293 3. 053457 4. 181617  
7. 149697 7. 373897 7. 065081 7. 756335 7. 298358 7. 247756 7. 19263 7. 365604 7. 273504  
7. 37254 6. 974754 7. 325892 7. 079575 6. 824817 6. 858418 6. 969197 7. 104493 6. 907982  
7. 260304 5. 852606 6. 513355 6. 884325 6. 476114 6. 566375 6. 302616 6. 284477 6. 481242  
7. 718647 7. 566091 7. 917746 8. 142307 7. 659832 7. 549293 7. 888992 7. 913962 7. 904499  
4. 334103 4. 252578 4. 282699 2. 978094 4. 543164 2. 83817 4. 352605 3. 729315 4. 609218  
6. 718746 6. 481263 6. 58275 7. 482166 6. 776363 6. 63871 6. 566353 6. 673847 6. 735212  
5. 790481 5. 726325 5. 756092 5. 58127 5. 828657 5. 91965 5. 645182 5. 384024 5. 725456  
4. 369208 4. 631417 3. 770989 4. 801015 4. 322609 5. 366028 4. 08279 4. 502782 2. 416537  
2. 292437 1. 927678 2. 010042 2. 730053 2. 003346 2. 267194 2. 170884 1. 245527 1. 483347  
5. 864068 6. 30475 5. 753 5. 584044 6. 198048 5. 736664 6. 42767 6. 123419 5. 621754  
5. 245972 4. 970415 6. 294689 6. 019531 5. 251981 5. 724778 4. 887775 5. 436807 4. 654448  
8. 529079 8. 936819 8. 868744 8. 95881 8. 804868 8. 74754 9. 342617 8. 1809 8. 60254  
2. 757511 2. 442357 3. 02841 2. 52916 2. 719902 2. 076791 2. 879264 2. 367304 2. 238464  
5. 371335 5. 864693 5. 301623 5. 512151 6. 330673 6. 088138 6. 091468 5. 955687 6. 284153  
6. 132546 6. 260583 5. 95145 5. 514221 5. 909798 6. 095313 6. 039834 6. 122489 7. 027802  
3. 847621 3. 994461 3. 948779 4. 016218 4. 278993 4. 89365 4. 24027 4. 487858 4. 179256  
7. 374239 7. 192338 7. 280327 6. 816987 7. 163236 7. 444338 7. 082063 7. 29789 6. 795478  
5. 342108 4. 806009 5. 334992 5. 179261 4. 364097 4. 49647 5. 231235 4. 902728 4. 455185

1. 283535 1. 125649 1. 814645 1. 87193 1. 121571 1. 412551 1. 386706 1. 471053 2. 265447  
3. 056196 2. 760074 3. 091967 4. 047511 3. 243565 3. 272638 3. 329 2. 631189 3. 082731  
4. 243717 2. 991031 3. 65807 3. 079123 3. 173758 2. 959386 2. 51646 2. 76026 1. 944888  
4. 784157 4. 177648 5. 767233 4. 586998 5. 025149 6. 203135 5. 052751 5. 426668 6. 552104  
4. 531 4. 004277 3. 688152 4. 406302 4. 77586 3. 967305 4. 447243 4. 428492 5. 36717  
4. 899621 4. 899537 5. 298593 2. 698524 5. 638297 5. 349766 4. 955039 5. 010347 3. 986972  
5. 66361 5. 865492 6. 052357 5. 541259 5. 445901 5. 065222 5. 473683 5. 750155 6. 474135  
3. 611395 2. 81534 3. 206732 4. 254881 2. 023623 2. 355723 3. 328346 3. 680289 2. 636843  
4. 264681 4. 42322 3. 986215 3. 66665 4. 195432 3. 767075 4. 666931 4. 27941 3. 278018  
1. 891612 1. 321965 1. 502976 3. 244791 2. 064655 2. 352735 1. 311441 1. 962436 1. 453285  
5. 121982 4. 996134 4. 6684 5. 34722 4. 546762 4. 512322 5. 024869 4. 711736 5. 682227  
3. 88289 2. 818139 3. 397977 2. 306914 3. 62768 2. 785909 3. 400675 3. 63711 2. 909227  
8. 609442 8. 779446 8. 405421 7. 834883 8. 699857 8. 462227 8. 251654 8. 663012 8. 394474  
6. 613298 5. 936043 6. 349901 3. 697565 6. 189342 6. 136618 6. 891623 5. 979747 6. 3709  
6. 079249 6. 445167 5. 427282 5. 726491 6. 440288 6. 173621 6. 092347 6. 028038 6. 108929  
1. 242245 2. 195911 1. 433726 1. 861886 1. 727457 1. 662721 1. 067616 1. 153299 1. 431758  
2. 698874 3. 746088 3. 08048 3. 422334 3. 723184 2. 811081 3. 981917 2. 888389 2. 493624  
6. 598789 6. 847235 6. 331076 6. 562899 6. 932441 6. 573574 6. 714792 6. 789952 5. 903402  
4. 615321 4. 28533 4. 042756 4. 736507 4. 906212 4. 690621 5. 015624 4. 382024 5. 977998  
5. 032574 5. 52024 4. 626912 5. 221101 5. 786121 6. 164892 3. 939578 5. 691423 4. 836344  
7. 992164 8. 251569 8. 170343 7. 330905 8. 286484 7. 870906 7. 785008 8. 147106 6. 83662  
5. 584459 4. 175581 3. 811975 4. 44009 4. 119704 5. 388954 5. 491283 4. 960999 5. 6219  
3. 843421 4. 795144 4. 816851 5. 079739 4. 157068 4. 653301 4. 236162 5. 287282 5. 205684  
6. 770343 6. 5516 7. 233943 4. 771046 6. 72387 7. 187139 7. 108309 6. 887092 7. 003453  
2. 296868 1. 928615 1. 577934 2. 140812 1. 8819 1. 861868 2. 370403 1. 826798 2. 129444  
4. 08757 4. 661205 3. 691097 5. 211907 4. 690404 4. 479405 4. 526491 4. 606423 4. 335023  
3. 85232 2. 813965 4. 375969 4. 724751 4. 242617 4. 094538 4. 20138 4. 596602 4. 716742  
5. 263214 4. 973707 5. 070396 3. 627713 5. 387114 4. 692297 4. 631866 5. 109642 4. 48492  
6. 493803 6. 58102 6. 043418 5. 982998 5. 566001 5. 76062 6. 252893 5. 788709 6. 744178  
7. 837953 7. 689977 7. 927054 6. 569826 7. 068719 7. 871767 7. 678965 7. 375322 8. 16059  
5. 282439 5. 513872 4. 96347 5. 412485 5. 308289 4. 726132 5. 466424 5. 486348 5. 119747  
5. 723209 5. 712994 5. 760737 3. 928119 5. 377251 5. 473329 5. 548175 5. 655591 6. 012426  
6. 475085 7. 122641 6. 603337 6. 734621 6. 60965 6. 464788 7. 069636 7. 187333 7. 063967  
7. 549557 6. 526292 6. 748428 6. 17809 6. 50183 6. 416653 6. 506526 6. 769886 7. 017796  
5. 311027 5. 120241 4. 001958 4. 739995 5. 381922 3. 57986 4. 844925 3. 556309 3. 585849  
5. 475208 5. 694962 5. 198586 3. 232308 4. 155187 5. 565037 5. 024503 4. 424612 5. 901711  
2. 5322 2. 554138 1. 877906 1. 499898 2. 228818 1. 473342 2. 754589 1. 897912 2. 282042  
5. 465298 5. 905136 5. 336405 5. 221415 6. 046177 5. 7532 5. 548203 5. 580156 5. 333484  
2. 478143 3. 046334 2. 340353 2. 747445 3. 079402 2. 813799 2. 703658 2. 582051 3. 040452  
4. 900479 5. 049614 5. 177281 3. 650336 4. 869135 5. 2563 3. 682604 4. 563142 4. 585503  
6. 995324 6. 586376 6. 427893 6. 770359 6. 766749 7. 183314 7. 123165 6. 281911 6. 793233  
2. 104687 2. 060697 4. 735987 2. 174408 1. 619 2. 572992 3. 309781 3. 203189 3. 304562  
6. 020243 6. 101722 5. 261275 5. 337782 5. 483098 5. 064564 5. 56116 5. 577716 6. 029181  
5. 516803 5. 321903 5. 996983 5. 568051 5. 628204 5. 26711 5. 362127 5. 383142 6. 162234  
3. 065587 4. 500336 3. 894376 3. 611333 3. 636076 2. 562675 4. 258649 3. 973466 2. 259957  
4. 589665 5. 321658 4. 623493 4. 126396 4. 864776 4. 641488 4. 57362 3. 66145 4. 542237  
4. 774701 4. 310272 4. 673319 4. 967126 4. 5891 4. 3204 4. 215829 4. 642613 4. 418345  
1. 993705 1. 784201 2. 923831 1. 625504 1. 819729 2. 550244 1. 697535 1. 941756 2. 201031  
7. 496238 7. 716493 6. 846917 6. 894203 7. 510242 7. 057909 7. 31506 7. 640318 7. 459508  
7. 16692 7. 163818 6. 647287 6. 609877 6. 932379 6. 944292 6. 992738 7. 269932 6. 443456  
6. 052487 6. 090342 6. 550193 5. 429236 6. 0931 6. 217033 6. 173015 6. 35252 5. 476926

4. 438039 3. 165406 3. 349962 2. 377046 3. 746755 3. 862709 3. 266698 3. 584133 5. 011975  
6. 043602 5. 051458 5. 504717 4. 848849 5. 723694 4. 816224 5. 432573 5. 680082 6. 167088  
5. 325593 4. 901438 5. 021037 4. 851216 5. 624334 4. 942172 5. 171998 5. 057974 5. 515849  
6. 872002 6. 91881 6. 577971 6. 705016 6. 932822 6. 81953 7. 289797 6. 589746 7. 137064  
3. 835811 3. 501886 3. 355913 1. 984206 2. 881248 4. 515726 3. 644264 3. 087879 3. 31758  
4. 924265 5. 66058 5. 080992 5. 491064 6. 252612 4. 958081 5. 47801 5. 611879 4. 377026  
1. 372362 1. 56055 1. 242433 1. 351634 1. 449483 1. 144556 1. 133887 1. 50105 1. 115902  
2. 901288 2. 600096 2. 874665 2. 931035 2. 936391 3. 185477 3. 77898 2. 782915 3. 423119  
5. 367501 5. 135667 4. 972022 5. 296902 5. 254883 4. 377635 5. 179718 5. 290398 4. 640442  
1. 738567 1. 876159 2. 265746 2. 155022 1. 839528 1. 858011 1. 543185 1. 871775 2. 136641  
4. 454451 4. 282283 4. 095464 3. 955648 4. 495983 3. 547608 4. 635477 4. 216367 5. 024288  
1. 392994 1. 510628 1. 730316 4. 214577 1. 83101 1. 210823 1. 316134 1. 716342 1. 538103  
2. 092619 1. 412334 1. 77972 1. 990198 1. 593877 3. 211015 1. 890897 2. 41597 2. 885932  
3. 451115 2. 989178 4. 084033 3. 447213 3. 046388 2. 665501 2. 434659 5. 854158 2. 882086  
8. 119463 8. 011059 8. 388398 7. 145556 7. 907065 8. 065671 8. 075876 7. 945133 7. 838955  
6. 043998 6. 245327 5. 717859 5. 220512 5. 933022 5. 615183 5. 774948 5. 566889 5. 952573  
1. 284257 2. 324402 2. 101601 1. 889949 1. 431421 1. 550421 1. 570689 1. 278863 1. 327426  
6. 099361 5. 892396 5. 803938 3. 524846 5. 643778 4. 861617 5. 5519 5. 997554 4. 89997  
5. 076183 4. 036817 4. 741971 3. 969381 4. 791778 4. 680999 4. 602336 4. 59125 3. 112368  
7. 108854 6. 872217 6. 451604 6. 805496 6. 706873 6. 926778 6. 886903 6. 690298 7. 170935  
5. 226073 5. 748683 4. 61845 3. 904836 5. 252708 4. 884952 5. 480959 5. 044194 4. 274737  
4. 767786 4. 587403 4. 875863 4. 815605 4. 746263 3. 974168 5. 562469 4. 983055 6. 060425  
3. 765329 4. 220333 4. 099322 3. 794968 3. 191819 3. 652062 2. 916081 3. 674247 3. 054111  
5. 160374 4. 7873 4. 292756 4. 802317 4. 759399 4. 579598 4. 635996 3. 930553 5. 104111  
7. 587191 7. 300482 7. 831 6. 692036 6. 954328 7. 37804 7. 510988 7. 065988 8. 678291  
5. 441709 5. 192007 4. 815122 4. 78308 5. 414839 5. 531786 6. 022393 5. 084732 5. 390361  
6. 63519 6. 593672 6. 619657 5. 750651 6. 351996 6. 162021 6. 079608 6. 396813 6. 401907  
6. 502005 6. 069628 5. 980686 6. 078926 5. 988046 5. 568179 6. 332489 6. 230313 5. 634648  
2. 612941 2. 537325 2. 208572 1. 705052 2. 651269 3. 366915 1. 654032 1. 476675 2. 136424  
4. 143776 4. 400571 5. 173915 5. 336596 5. 856829 4. 042941 5. 246237 4. 330303 4. 819813  
3. 496255 3. 441494 4. 034722 2. 003949 3. 428437 2. 299789 2. 980795 3. 02902 4. 626362  
8. 721546 8. 14051 8. 702049 9. 039252 8. 923115 7. 977664 8. 619033 8. 500749 7. 951728  
5. 75669 6. 134602 4. 357988 5. 740144 6. 300191 5. 57408 6. 617966 5. 558765 5. 748405  
6. 52984 5. 377257 6. 66771 6. 143138 6. 303598 5. 074929 6. 391356 6. 015 6. 217083  
6. 190573 6. 577667 5. 981777 6. 170373 5. 914353 6. 229482 6. 504965 6. 321453 6. 089347  
2. 840448 2. 102222 1. 601495 3. 004494 1. 85265 1. 985399 2. 796114 2. 463458 3. 014833  
4. 351524 5. 39554 4. 91894 6. 293273 5. 625417 4. 419346 5. 010691 5. 388658 3. 664146  
2. 691223 2. 452742 2. 507325 2. 725144 2. 626719 3. 54294 2. 773687 2. 823569 2. 294471  
5. 934832 6. 300456 6. 676077 5. 556407 6. 782735 6. 991484 6. 132025 5. 865377 5. 756871  
5. 205177 5. 044262 4. 199576 5. 907421 5. 840594 5. 182828 4. 524547 5. 044262 3. 474959  
1. 865403 2. 501277 3. 719557 2. 999664 2. 016763 2. 024782 3. 097555 2. 249414 2. 810023  
4. 653512 5. 386274 2. 875017 3. 965986 4. 710836 3. 977245 4. 348188 3. 537522 3. 096729  
4. 262602 4. 130066 4. 295333 3. 848394 4. 081322 3. 682028 3. 07596 3. 086247 4. 352372  
3. 331888 3. 449479 3. 356034 3. 790851 3. 06011 3. 36784 3. 567944 3. 628498 2. 601607  
6. 794534 7. 022455 6. 675192 7. 091216 6. 500401 6. 85349 7. 109141 6. 219209 6. 994369  
6. 483038 6. 547743 6. 895278 6. 654228 6. 653552 6. 390035 7. 322123 6. 911311 6. 374242  
5. 276042 5. 797251 4. 900686 5. 613783 5. 92271 5. 230929 5. 734222 5. 959189 5. 994264  
1. 896382 1. 739011 1. 990079 4. 279711 1. 594277 2. 144443 2. 466001 2. 475439 1. 683006  
5. 943125 6. 545035 5. 514342 6. 107485 6. 374796 6. 174482 6. 226746 6. 219544 7. 212155  
4. 787353 3. 743339 3. 663426 2. 885393 4. 165679 3. 879846 4. 018292 3. 494861 4. 197849  
6. 828194 6. 353743 6. 593022 5. 3939 6. 400074 5. 926488 6. 140833 6. 117737 5. 13733



6. 387314 6. 327651 6. 244648 6. 03422 6. 062053 6. 154041 6. 286469 6. 547882 6. 944938  
4. 809297 5. 219955 5. 829357 4. 227599 5. 735133 5. 168863 6. 130275 5. 712188 5. 056991  
8. 902356 8. 379598 8. 38116 8. 204831 8. 501321 8. 397818 9. 295467 8. 682194 8. 829454  
3. 071366 3. 859538 3. 499725 1. 660091 3. 584077 3. 179929 3. 278969 3. 297795 3. 645734  
5. 431428 3. 736733 3. 700967 5. 929627 4. 383482 4. 503422 4. 4819 4. 511993 5. 180447  
6. 433757 6. 381381 6. 240488 6. 003206 6. 048046 5. 892649 6. 675877 6. 397124 5. 966721  
4. 591075 3. 689016 4. 117437 3. 123334 4. 299119 3. 492084 4. 087329 4. 27481 2. 978122  
3. 338805 4. 423686 3. 941629 3. 659717 4. 480752 4. 496625 4. 778996 4. 089237 4. 451483  
5. 659414 5. 279037 4. 894372 6. 49941 5. 214593 4. 183808 6. 113391 4. 714041 2. 222043  
8. 556185 8. 111331 8. 800543 9. 070447 8. 613916 9. 361883 8. 707106 9. 023782 8. 100003  
7. 04553 7. 361683 6. 452186 6. 794564 7. 042172 6. 928956 7. 073983 7. 028472 6. 330439  
3. 120633 3. 042461 2. 914979 4. 292144 3. 669031 3. 748881 3. 555241 4. 452055 4. 571206  
3. 635923 3. 743618 4. 637822 3. 263636 3. 529037 4. 15041 3. 771383 3. 183726 3. 288733  
5. 324131 5. 21672 5. 422835 4. 012318 6. 439096 4. 754076 5. 26855 5. 834469 4. 409135  
6. 441487 6. 60987 6. 68095 7. 155238 6. 594432 6. 316157 7. 035411 6. 714553 7. 005099  
6. 025651 6. 067759 6. 038732 4. 762103 6. 364486 5. 112183 5. 880072 6. 093372 6. 814795  
5. 887722 5. 637747 5. 322621 5. 163905 5. 576908 6. 19481 5. 55938 3. 975394 5. 310752  
5. 406787 4. 821771 5. 517398 5. 961056 4. 914494 5. 212329 4. 935557 5. 173605 5. 685578  
4. 757841 4. 984284 4. 713905 5. 011079 5. 201291 4. 55054 4. 903065 4. 926473 3. 347768  
2. 594883 2. 385815 2. 985954 2. 320122 3. 066646 2. 132892 1. 594629 2. 240597 2. 635618  
2. 408394 2. 354242 2. 362313 2. 723126 2. 867591 2. 38959 2. 464987 2. 569814 2. 739501  
5. 447133 5. 873837 5. 875981 5. 143398 5. 61909 5. 862932 5. 65039 5. 597821 5. 819486  
5. 396417 5. 335887 5. 537617 5. 080693 5. 0055 5. 75674 5. 386616 5. 215241 5. 533805  
3. 761152 2. 887396 2. 260858 3. 292717 2. 367352 3. 515889 2. 017103 1. 943869 3. 434011  
7. 316514 6. 841541 6. 301113 6. 675068 7. 043067 6. 454118 7. 201265 7. 086325 6. 032225  
1. 34488 1. 008373 2. 149422 1. 386539 1. 611082 1. 283041 1. 43561 1. 559986 3. 28669  
1. 843018 1. 269299 1. 753686 1. 500644 1. 671433 3. 729838 1. 50307 1. 567639 2. 38616  
6. 047382 5. 533161 6. 390334 6. 368294 5. 957072 5. 546851 5. 817054 5. 942603 5. 876458  
7. 822331 7. 692108 7. 250998 7. 591734 7. 575705 7. 627205 7. 590048 7. 596827 7. 61794  
2. 354762 2. 808208 3. 190993 3. 086486 3. 789624 1. 938128 2. 669524 2. 832107 2. 326698  
2. 13302 1. 747924 2. 785562 1. 559949 1. 691587 1. 756392 2. 03313 2. 301108 1. 749071  
3. 065879 3. 67105 2. 277488 2. 445541 4. 020061 2. 160035 2. 992342 2. 917123 2. 699174  
1. 426319 1. 00792 1. 024635 1. 88111 1. 641871 1. 13765 1. 334439 1. 177738 1. 526849  
2. 328444 2. 55338 2. 595187 2. 6629 1. 894703 2. 802002 1. 961483 2. 391429 2. 8127  
5. 573646 5. 163406 4. 915908 4. 436407 5. 036455 5. 795162 5. 330637 4. 748593 4. 002865  
5. 182388 5. 412932 5. 433971 4. 857321 5. 285637 4. 660263 5. 614154 5. 182627 4. 533494  
2. 775038 1. 548762 1. 558827 2. 308722 1. 95759 2. 254145 1. 520594 2. 824281 1. 725441  
7. 468467 7. 316065 7. 045616 7. 527234 6. 835829 7. 483371 7. 523516 7. 306025 7. 504557  
7. 419438 7. 934168 6. 959237 7. 401837 7. 303001 7. 476477 6. 910836 7. 428097 8. 152554  
7. 714029 7. 741556 8. 051468 7. 250758 7. 69637 8. 045659 7. 983372 7. 793754 7. 968568  
2. 720146 2. 160251 2. 540095 2. 964399 2. 275274 3. 033609 2. 593608 2. 274085 1. 680096  
6. 703074 6. 858287 7. 220146 5. 511929 7. 343475 7. 051775 6. 561592 7. 49692 6. 023052  
2. 681694 3. 462294 3. 669897 3. 131816 3. 435905 2. 369441 4. 139302 4. 155259 3. 237187  
4. 365028 3. 895892 3. 850251 5. 159446 4. 188648 4. 283527 4. 289756 3. 012899 3. 158685  
6. 587668 6. 395698 5. 381899 4. 672633 6. 675492 6. 450099 6. 736261 6. 480297 5. 060886  
7. 63846 7. 226026 7. 55614 7. 415644 7. 327788 7. 528352 7. 193701 7. 169973 7. 097994  
2. 402509 1. 663001 1. 65503 2. 323921 2. 341039 2. 436308 1. 605671 1. 504803 2. 032803  
1. 747778 2. 364659 2. 822432 2. 987637 2. 342672 2. 792196 2. 112137 2. 45177 2. 033839  
7. 08744 6. 785214 6. 547078 7. 036473 6. 698195 7. 020409 7. 352514 7. 37076 6. 658213  
1. 79224 1. 732258 1. 216811 1. 523704 1. 253713 0. 985976 2. 243644 1. 523704 2. 101172  
1. 657846 1. 594073 2. 765431 2. 420631 1. 843243 1. 874637 1. 949116 2. 021803 1. 95602

2. 502499 2. 404703 2. 99697 0. 922494 1. 82809 3. 222565 2. 24269 1. 096259 1. 073061  
1. 721581 1. 532445 1. 315334 1. 368224 1. 0288 1. 518584 1. 155257 1. 053608 2. 482818  
1. 768538 1. 343425 1. 094244 1. 816749 1. 345667 1. 271048 1. 44984 1. 028909 1. 831785  
5. 848266 6. 533938 5. 884366 7. 756338 6. 258522 5. 348285 6. 376078 6. 671079 6. 854776  
3. 252154 2. 987454 2. 488742 4. 937298 3. 258411 3. 392437 2. 697219 2. 706596 2. 247586  
1. 634648 0. 924609 1. 307031 1. 486267 1. 25821 1. 184055 1. 242201 1. 218322 1. 308279  
1. 030465 1. 025751 1. 657442 2. 281306 1. 570457 2. 176279 1. 414346 1. 509986 1. 585822  
1. 472819 1. 403071 1. 294141 2. 475994 0. 993085 1. 116726 1. 089146 1. 599451 2. 134837  
1. 369156 0. 629035 1. 243998 0. 844305 0. 588947 1. 721106 0. 877426 0. 743332 1. 785102  
6. 350443 5. 896574 5. 831527 5. 774152 5. 800892 5. 944789 6. 221001 5. 772522 5. 845564  
2. 90219 2. 695591 2. 97557 3. 49294 2. 247704 3. 035074 3. 037856 2. 713145 2. 962067  
4. 421533 4. 316227 4. 299655 3. 91158 4. 52228 4. 537524 4. 376011 4. 893712 5. 534277  
2. 83563 2. 352953 3. 008488 3. 203896 2. 732494 3. 213619 2. 900468 3. 460454 3. 26699  
2. 144498 1. 633901 1. 764746 2. 549662 1. 53273 2. 462122 3. 08047 1. 397236 3. 518276  
4. 078379 4. 003976 4. 522467 3. 542097 4. 359562 4. 376808 3. 545159 3. 347988 3. 399265  
5. 044389 5. 848776 5. 780031 5. 537236 5. 433094 5. 264803 5. 857017 5. 621961 5. 708308  
1. 449382 1. 173297 1. 157738 1. 794695 1. 159273 1. 055576 1. 458499 0. 929248 1. 625666  
0. 424606 0. 690572 1. 371608 0. 499801 0. 540403 1. 662453 2. 464351 3. 73792 1. 261475  
2. 515822 4. 335349 2. 280451 3. 354444 3. 718294 3. 562268 2. 901215 4. 074953 3. 939371  
2. 798873 3. 757173 3. 288458 2. 819524 2. 8411 3. 263141 3. 495849 3. 074478 2. 662867  
4. 771638 4. 879492 5. 401412 4. 561947 5. 149428 5. 157109 4. 828902 5. 110137 4. 862253  
6. 061795 6. 031575 5. 949742 5. 504644 5. 767133 5. 968557 5. 072443 5. 322226 5. 011689  
4. 463854 4. 743062 4. 912812 4. 455855 4. 72444 4. 771364 4. 656663 4. 953066 3. 84125  
1. 222046 1. 272524 1. 209152 2. 038322 1. 125746 1. 231464 1. 8412 1. 130192 0. 954919  
7. 347999 6. 70296 7. 377542 8. 144572 7. 241388 6. 78151 7. 692905 6. 963016 7. 908926  
6. 256957 6. 120623 5. 793092 5. 197793 5. 828637 5. 088643 5. 966168 5. 923322 4. 869084  
1. 904232 0. 833678 0. 71389 2. 182975 1. 229585 1. 842252 0. 924288 0. 900438 1. 272989  
4. 765879 4. 515196 4. 165349 4. 56729 5. 442504 4. 271456 5. 745456 5. 489798 6. 308436  
4. 802249 5. 546135 5. 445235 5. 890296 5. 758923 4. 70261 5. 389028 5. 778153 5. 392108  
3. 62487 3. 705553 4. 397553 4. 139777 3. 717073 3. 532535 4. 824514 3. 597166 4. 466268  
2. 794247 3. 723029 4. 648733 2. 214735 2. 905127 3. 79347 2. 500542 3. 119203 3. 341946  
7. 793302 7. 577507 7. 63712 7. 011817 7. 822536 7. 435857 8. 068574 7. 691992 7. 359201  
6. 28441 6. 186606 6. 8611 6. 542697 5. 587278 6. 082351 6. 057698 5. 893486 6. 434679  
5. 875448 5. 632882 5. 401499 5. 81521 5. 231129 6. 164123 5. 042629 6. 883087 4. 868621  
1. 389443 2. 471112 3. 035658 2. 306848 1. 951892 1. 360196 2. 501963 2. 433561 2. 248403  
5. 622172 5. 677767 5. 671569 5. 424279 5. 83269 6. 094836 5. 177388 5. 372118 5. 85606  
5. 171406 5. 481253 5. 063589 5. 136797 4. 994982 4. 795002 4. 806634 5. 381655 3. 876726  
2. 585756 3. 038827 2. 876242 3. 658238 3. 362728 3. 412324 2. 62767 3. 508464 2. 726102  
1. 18599 0. 78905 1. 095592 1. 212975 1. 380732 1. 507778 1. 982247 1. 912099 0. 641425  
2. 60818 2. 815501 3. 499304 2. 91911 3. 920005 3. 291816 3. 767042 3. 505021 2. 43894  
9. 790417 9. 817983 9. 454093 9. 942774 10. 24048 9. 268656 9. 612836 9. 810846 9. 444308  
4. 130952 4. 496975 4. 19463 4. 48764 4. 573532 3. 517611 4. 108183 3. 745662 2. 68093  
1. 203141 1. 850339 1. 378375 1. 613842 2. 050453 2. 209722 1. 908008 1. 231393 1. 657971  
5. 264153 5. 178626 4. 696313 3. 631556 4. 533781 5. 044979 5. 262371 5. 649954 3. 879971  
4. 032793 4. 205286 2. 497448 4. 455969 5. 772584 3. 084935 2. 855878 5. 389957 3. 090831  
5. 252649 5. 279674 4. 990465 4. 212284 5. 253125 5. 039704 5. 704955 4. 967693 5. 102152  
1. 385272 1. 484352 1. 534979 2. 384014 1. 423356 1. 645602 1. 238356 2. 066172 1. 280615  
0. 79425 1. 568576 2. 075781 1. 329556 1. 801833 1. 438748 1. 089128 1. 399201 1. 283977  
2. 084548 2. 207514 2. 906929 3. 011964 1. 843141 1. 860543 2. 02291 1. 97711 2. 602169  
1. 102066 1. 630125 1. 451993 2. 013489 1. 072963 2. 289929 1. 610755 1. 445302 1. 307843  
3. 502955 3. 086296 2. 298369 3. 458583 2. 780838 4. 124785 3. 616274 3. 970876 2. 506375

4. 59625 4. 562399 4. 271012 3. 658181 3. 908052 4. 665932 4. 588397 4. 51017 5. 330617  
1. 99521 1. 755322 1. 95811 2. 173527 1. 704895 2. 35241 1. 737518 2. 02769 1. 884906  
5. 953605 5. 451309 5. 901201 4. 847306 5. 749292 5. 966407 5. 841807 5. 406949 5. 799552  
4. 937519 5. 170549 4. 284035 5. 288848 4. 816031 5. 53419 4. 917268 4. 874588 4. 757995  
6. 907251 6. 805873 7. 430841 4. 93606 7. 131462 7. 382445 6. 846306 7. 242498 6. 345772  
7. 754214 8. 110542 7. 378358 8. 010412 8. 382076 7. 147797 8. 031883 8. 428224 8. 200583  
1. 966608 1. 991933 1. 312378 2. 083974 1. 751858 1. 54905 1. 913874 1. 231837 1. 581287  
2. 028717 1. 716376 2. 043891 1. 90472 1. 514316 1. 66491 1. 345959 1. 636708 2. 006049  
1. 14903 0. 979061 1. 722711 2. 372487 2. 55593 1. 755948 1. 066809 2. 026126 1. 320261  
5. 704451 5. 639341 5. 22093 5. 757422 5. 825342 5. 929549 5. 154061 6. 446676 5. 891873  
3. 48281 4. 458099 2. 023313 2. 849098 3. 169584 2. 857851 3. 848252 2. 552977 2. 583354  
3. 049681 2. 437557 3. 547098 3. 833227 2. 716979 3. 20943 2. 973425 2. 658614 3. 171654  
1. 377374 1. 886323 1. 63832 2. 201206 1. 629887 1. 257439 1. 964471 1. 033823 1. 87008  
4. 148512 2. 631721 2. 98277 3. 353804 4. 145945 3. 616113 2. 972042 4. 062758 3. 830914  
4. 503265 4. 644116 4. 764214 5. 420477 4. 425261 4. 672415 4. 464981 4. 173595 4. 053662  
1. 53361 1. 392766 3. 580359 1. 800454 2. 097161 2. 57613 1. 599137 1. 000388 0. 84768  
4. 449585 4. 810207 3. 406468 5. 820574 3. 775811 4. 235045 4. 020223 4. 242488 4. 379662  
5. 413488 4. 565152 5. 18496 5. 659003 5. 320688 5. 341744 5. 058165 4. 565772 5. 986356  
2. 02233 1. 957593 2. 10581 2. 69584 2. 736079 3. 478905 1. 859325 1. 425229 1. 552778  
5. 100614 5. 370866 5. 435192 4. 759235 4. 672679 5. 65413 4. 791858 4. 99932 5. 160651  
4. 050056 4. 714005 4. 226513 4. 454572 4. 834579 4. 350844 4. 52219 4. 920816 3. 302084  
2. 647226 2. 593834 3. 062229 2. 937564 2. 732461 2. 964034 2. 734748 2. 863221 2. 609998  
1. 073015 2. 156156 1. 194438 1. 451944 2. 022489 1. 652633 1. 672403 1. 752466 3. 065078  
1. 721908 1. 452302 1. 629972 2. 534406 1. 851741 2. 242245 1. 731514 1. 804335 1. 782177  
3. 294019 2. 199138 2. 24881 3. 181088 1. 765725 2. 432554 2. 691303 2. 182354 2. 071075  
1. 140192 1. 575957 0. 986148 1. 470622 1. 128483 1. 540261 1. 334722 1. 458647 1. 508086  
5. 749782 5. 448729 4. 266027 4. 929348 4. 959429 4. 863528 5. 257558 5. 05413 4. 683757  
7. 057767 6. 810142 7. 270561 7. 643858 7. 149655 6. 952018 7. 116493 7. 095602 6. 824328  
2. 922964 2. 591431 2. 507104 2. 642777 3. 081763 2. 604733 2. 823856 2. 854135 4. 118724  
5. 973747 6. 219118 6. 071686 5. 484583 5. 799913 6. 144486 6. 161871 6. 257125 5. 763634  
1. 509752 1. 818765 1. 706345 2. 425871 1. 609327 2. 24911 1. 650789 1. 783025 1. 960047  
7. 019514 6. 494207 6. 879578 6. 072873 7. 394534 6. 067324 6. 462024 6. 649863 6. 013336  
6. 127617 7. 036072 6. 676434 7. 068107 6. 915045 5. 749665 6. 729521 6. 614645 6. 84213  
5. 149192 5. 021264 5. 031072 4. 339097 5. 697858 5. 710174 5. 311833 4. 661488 5. 875238  
4. 40875 4. 655311 5. 270924 4. 797236 4. 532073 3. 76048 3. 69808 4. 236752 4. 136651  
2. 261426 1. 876982 1. 890394 2. 689829 2. 060849 2. 128036 2. 400592 2. 187858 2. 06806  
7. 36035 7. 129494 7. 198198 7. 485751 7. 12483 7. 270186 7. 194015 7. 124799 7. 067866  
7. 642686 5. 207026 7. 728305 7. 869142 6. 940677 9. 427847 7. 036244 7. 871107 8. 270769  
6. 614505 6. 610654 6. 953043 5. 917769 6. 658878 7. 033473 6. 112394 6. 825341 5. 858731  
6. 043682 6. 635368 5. 850534 6. 38127 6. 252186 6. 214099 6. 512346 5. 793754 5. 985992  
4. 094747 2. 940768 3. 024076 4. 116884 3. 541625 3. 118567 3. 431004 3. 621025 3. 552367  
7. 252549 7. 206823 7. 151673 5. 542996 7. 244045 7. 147059 7. 204211 6. 718788 7. 445208  
2. 087363 1. 047854 2. 541682 1. 370201 1. 9894 1. 043427 1. 469861 1. 841237 2. 140998  
6. 687721 7. 197464 6. 841024 7. 269991 7. 144571 7. 438125 6. 802264 6. 981887 6. 588868  
5. 453969 4. 471966 4. 403613 4. 072394 5. 444207 4. 07588 5. 22754 5. 441545 5. 153226  
5. 601673 5. 408927 6. 032569 5. 641774 5. 37437 6. 363935 5. 273848 5. 445942 7. 623774  
1. 687325 2. 35622 2. 02858 1. 952243 2. 408204 1. 961692 1. 450438 2. 414669 2. 590852  
6. 190964 6. 154374 5. 556268 5. 771639 7. 608669 5. 839049 6. 607774 5. 823383 7. 296218  
5. 612326 5. 713929 5. 724327 5. 979732 5. 049218 5. 153999 5. 777527 5. 512864 5. 730354  
4. 397252 4. 751633 4. 359995 5. 507678 5. 737099 4. 730588 4. 620485 6. 059217 5. 728733  
5. 329914 5. 60717 5. 021736 5. 100489 5. 322158 5. 033364 5. 419834 5. 312822 5. 479139

5. 292343 5. 548827 5. 005763 6. 137346 5. 602347 5. 700405 5. 359457 5. 622406 5. 947048  
4. 814241 4. 561943 5. 587875 4. 895384 5. 520696 4. 954359 5. 26053 5. 160877 5. 569564  
5. 55666 5. 464294 5. 087971 5. 594999 5. 534099 5. 454146 5. 051873 5. 551012 6. 483426  
5. 391555 5. 374913 4. 756009 5. 424372 5. 556599 5. 551647 4. 941072 5. 050621 5. 104358  
5. 401379 5. 929779 5. 746653 5. 496826 5. 513131 5. 687319 5. 682401 6. 117102 5. 458868  
6. 222651 6. 19585 6. 055879 6. 3659 6. 452278 5. 633725 5. 971602 6. 422679 5. 745714  
3. 267519 3. 876374 3. 169055 3. 129631 2. 992941 3. 46286 3. 165067 2. 845789 3. 397631  
1. 773125 1. 902656 2. 105088 1. 597878 1. 750664 2. 015499 1. 726221 1. 478613 3. 143429  
5. 706604 5. 366787 5. 544322 5. 538758 4. 597299 4. 533362 5. 93613 5. 721284 6. 071906  
1. 739932 1. 503348 2. 151027 1. 896556 2. 702704 3. 403779 2. 613935 2. 281714 2. 013271  
2. 553303 2. 424217 2. 720634 3. 598889 3. 158904 3. 220582 2. 711294 3. 203429 2. 640592  
4. 48031 4. 709051 4. 733028 4. 803113 5. 085632 5. 356692 4. 923394 5. 228562 5. 518442  
4. 54441 4. 983531 5. 561291 2. 44056 4. 79455 4. 148735 4. 974066 4. 933705 4. 936206  
4. 263871 4. 686555 4. 013169 3. 371801 5. 545029 4. 389238 4. 336474 4. 854504 4. 167661  
3. 351605 3. 263715 3. 17037 3. 158993 3. 587024 2. 820475 2. 946776 3. 489567 3. 351605  
5. 171396 5. 649938 5. 849546 5. 788926 5. 521392 5. 735094 5. 130282 5. 315966 6. 201848  
5. 139023 5. 544634 5. 420199 5. 472514 5. 130689 5. 042182 5. 823755 4. 987146 5. 720821  
6. 523457 6. 525674 6. 061287 5. 118685 6. 526437 6. 092942 6. 149742 6. 522568 5. 555412  
5. 934537 6. 008123 5. 953235 4. 381441 5. 350869 5. 960828 6. 448689 6. 007497 5. 801188  
4. 033733 4. 687517 4. 191333 4. 276847 4. 772825 4. 389081 4. 735803 4. 689477 4. 586083  
4. 690401 4. 737227 4. 704193 4. 19503 5. 48356 4. 61068 5. 089339 5. 073729 5. 860329  
7. 165789 8. 190177 7. 830582 7. 519013 8. 054004 5. 810634 6. 198524 6. 760988 6. 484585  
6. 821141 6. 851465 6. 62657 6. 638258 6. 354748 6. 644737 6. 758326 6. 730664 7. 405575  
2. 625335 2. 641094 2. 776113 3. 949312 3. 063746 2. 842502 2. 607972 2. 278879 2. 534593  
5. 241158 5. 331727 5. 378599 5. 235202 5. 551659 5. 759236 5. 669334 5. 306289 5. 48593  
5. 419004 5. 379092 5. 532087 4. 767146 4. 873546 5. 722298 5. 440847 5. 649861 6. 444937  
4. 491537 5. 381819 4. 077767 5. 996311 4. 041024 4. 231473 4. 755203 4. 706014 4. 103168  
5. 655986 6. 033844 5. 326808 5. 652496 5. 283287 6. 000944 5. 85982 6. 115704 6. 26648  
1. 665043 2. 275362 1. 530891 3. 621203 4. 11949 1. 833692 1. 912738 1. 40012 1. 646161  
5. 948857 5. 314392 5. 620878 5. 403277 5. 78103 5. 541443 5. 215223 5. 333282 6. 05044  
2. 287369 2. 191882 3. 709112 1. 883824 2. 706633 3. 748787 3. 19676 2. 556138 2. 88186  
6. 077711 5. 735204 6. 033887 7. 144708 5. 984254 5. 743269 6. 137816 5. 783637 5. 793957  
2. 575986 2. 42685 2. 106706 2. 465573 3. 380082 2. 508645 2. 71007 3. 135981 2. 744698  
6. 563761 6. 717931 6. 428737 6. 155971 6. 438773 6. 926337 6. 250413 6. 831783 5. 583161  
3. 969788 5. 473426 5. 142578 5. 068426 5. 38472 5. 367471 5. 465215 4. 940995 3. 546501  
4. 003117 4. 404884 3. 243418 4. 724875 3. 596931 3. 820864 4. 202828 3. 606883 3. 840187  
3. 99503 4. 007687 4. 543405 3. 966933 4. 74865 3. 479455 4. 17843 4. 217767 4. 055478  
6. 440742 7. 314032 7. 276407 8. 389111 7. 284462 7. 234892 6. 852175 7. 04618 7. 479137  
4. 981303 4. 367291 4. 094957 3. 731833 4. 748906 4. 619102 3. 95183 4. 119538 4. 277479  
8. 444958 8. 576078 8. 728934 8. 233009 8. 883069 8. 115396 8. 82236 8. 760526 8. 670917  
8. 36125 8. 260874 8. 523932 8. 108803 8. 3543 8. 402456 8. 07848 7. 992658 7. 268523  
2. 651071 1. 674968 2. 147028 3. 732039 2. 521743 1. 776288 2. 51366 2. 51366 3. 387935  
6. 748581 7. 638502 7. 567101 7. 262971 7. 684202 7. 101956 7. 149126 7. 040597 5. 493871  
1. 6426 1. 758662 1. 55736 1. 491351 1. 596599 2. 778381 1. 692979 1. 382459 1. 656758  
4. 057781 4. 80806 4. 004312 4. 426108 4. 691553 3. 743926 4. 1403 4. 417701 4. 259785  
1. 909762 2. 311857 3. 229366 2. 362427 3. 490327 2. 726308 1. 904958 2. 574849 2. 720263  
3. 848974 4. 455787 5. 122639 4. 970935 4. 659126 3. 326133 4. 764535 4. 265077 2. 883252  
4. 58183 3. 702137 4. 092476 2. 388982 3. 718476 4. 13018 4. 19593 3. 689068 3. 32363  
6. 036819 5. 327407 5. 723855 3. 051698 5. 474501 5. 726365 5. 527385 6. 0819 5. 754736  
7. 852745 7. 839291 7. 598311 8. 06761 8. 108876 7. 586025 8. 176796 7. 827424 8. 164339  
5. 462727 4. 800303 5. 653916 5. 727556 5. 592571 5. 530537 5. 419501 5. 546079 5. 637708

5. 039818 5. 474819 5. 654001 4. 606777 4. 949248 5. 360328 5. 446392 5. 15563 5. 04194  
3. 329648 3. 019927 3. 098804 2. 696982 3. 391159 3. 100109 3. 246658 2. 69162 2. 891708  
6. 341997 6. 166774 6. 568671 5. 524924 6. 431944 6. 171304 6. 666435 5. 910406 6. 112566  
4. 810249 5. 020582 5. 394384 5. 439746 5. 404449 4. 846313 5. 220857 5. 158615 5. 462152  
5. 855084 6. 010072 5. 89045 6. 039477 6. 264639 6. 0981 5. 708366 5. 982713 5. 16669  
6. 459275 6. 482478 6. 043726 5. 541032 6. 547565 6. 434946 6. 407359 6. 390942 6. 730365  
6. 293859 5. 106753 5. 280084 5. 097926 5. 159889 5. 07654 5. 46291 5. 366434 4. 946011  
5. 77934 6. 311238 5. 745533 6. 289236 6. 144756 5. 497245 6. 60032 6. 308539 5. 894223  
7. 943932 8. 323033 7. 942505 7. 755936 7. 93112 8. 236559 7. 936518 8. 179034 6. 427402  
5. 768009 6. 102603 5. 548466 5. 549594 5. 383832 5. 93081 5. 158702 5. 953357 4. 947917  
7. 090379 6. 973478 6. 618579 6. 130717 7. 152889 6. 756937 6. 877803 6. 660386 6. 766543  
4. 288889 5. 444458 6. 09516 4. 297038 5. 393044 6. 044877 4. 888439 6. 145484 5. 282545  
5. 572498 5. 148072 5. 845154 5. 95205 5. 388724 5. 098289 5. 51031 4. 959708 5. 375481  
7. 134017 6. 991259 6. 723102 6. 794967 7. 465515 8. 020237 6. 962794 7. 334418 7. 234459  
6. 044368 6. 228312 7. 535361 5. 738656 6. 19274 7. 066708 6. 204287 6. 275427 5. 747125  
6. 479454 6. 215683 5. 819087 5. 923971 6. 053241 6. 125138 5. 831746 6. 648437 5. 674492  
6. 050559 5. 911256 6. 290258 5. 378958 6. 269957 6. 269957 6. 198434 6. 109669 6. 751397  
5. 75628 6. 071897 5. 69936 6. 001214 5. 942769 5. 714883 5. 605224 6. 543092 6. 087691  
5. 46521 5. 806106 5. 77614 5. 205531 5. 393182 5. 506416 5. 176561 5. 240471 5. 670947  
5. 161926 4. 902871 5. 161926 5. 779631 5. 540102 6. 422985 5. 487745 5. 035011 3. 632201  
3. 156546 2. 888752 2. 411501 2. 915444 2. 761132 3. 092461 3. 423779 2. 591129 3. 391892  
5. 326075 4. 895413 4. 093168 5. 604373 4. 628426 4. 857768 5. 178558 4. 877503 5. 123418  
6. 434863 6. 205844 6. 394763 5. 947141 6. 917323 5. 443689 6. 09544 6. 304221 5. 701184  
1. 385439 0. 861818 2. 126998 2. 526954 0. 791528 1. 084865 1. 397645 1. 481322 0. 878323  
6. 504717 6. 883463 6. 466723 5. 87457 6. 527914 6. 605956 6. 656324 6. 47314 5. 577141  
4. 797579 5. 091843 5. 518383 5. 450024 4. 806074 4. 655452 4. 974924 5. 17894 4. 648677  
4. 0507 4. 027985 5. 379572 3. 553427 5. 344771 4. 001081 4. 59638 4. 828592 5. 261697  
2. 341357 2. 609819 3. 417955 3. 818497 2. 590773 3. 020655 2. 406574 3. 086122 2. 300547  
3. 752227 4. 045061 5. 508184 5. 260268 4. 471518 3. 8812 4. 720217 4. 94433 3. 843574  
5. 959941 6. 274842 6. 310621 6. 682885 6. 037478 5. 787296 5. 764064 6. 236485 5. 828814  
5. 588312 5. 547756 6. 120884 4. 361165 5. 783758 5. 529891 5. 920542 5. 799242 5. 022792  
0. 75665 1. 84316 1. 567184 2. 354439 2. 112541 3. 182829 2. 342436 1. 368236 1. 260456  
6. 738964 6. 876621 6. 748996 5. 989819 7. 106226 6. 832978 7. 315572 6. 402755 6. 756399  
2. 980571 2. 140831 2. 698933 2. 876861 3. 937106 3. 832885 2. 429055 2. 243432 2. 267371  
5. 717111 5. 776007 5. 549954 4. 578065 5. 882392 5. 798592 5. 8298 5. 955906 5. 073656  
4. 637504 4. 808875 4. 352221 4. 803481 5. 086358 5. 659605 5. 157992 5. 168575 3. 967699  
5. 654899 5. 436787 5. 162441 4. 921957 5. 410995 4. 981652 4. 971207 5. 653811 4. 664395  
5. 096702 5. 012878 5. 319499 4. 279457 5. 374044 4. 515291 4. 483032 5. 259159 4. 910433  
5. 864418 5. 671288 5. 160567 5. 543753 6. 141858 5. 64281 5. 94451 6. 08741 6. 287687  
6. 522766 6. 400759 6. 458272 6. 464592 6. 176517 6. 48827 6. 328147 6. 118621 6. 445123  
5. 415239 5. 530097 5. 258996 5. 308209 5. 868029 5. 858209 6. 098759 5. 909147 5. 614281  
7. 05205 7. 333912 6. 955297 7. 292282 7. 009972 6. 535982 7. 135112 6. 384129 6. 325759  
5. 44893 5. 272108 5. 467312 4. 632385 5. 326146 5. 376939 5. 410266 5. 56003 4. 750893  
0. 788214 2. 527684 1. 322206 2. 955626 1. 96211 2. 400355 1. 285551 2. 33064 0. 836097  
4. 689614 4. 327391 4. 054743 4. 556582 4. 585284 4. 338718 4. 431215 4. 594559 4. 446613  
4. 103778 3. 092756 2. 698705 4. 931239 3. 74555 3. 089858 3. 501818 4. 277086 4. 407908  
5. 92995 5. 495997 5. 718112 4. 554436 4. 363082 5. 505809 5. 630999 5. 464086 5. 359316  
5. 106407 4. 919369 4. 124156 4. 089202 5. 140977 3. 841202 4. 730583 4. 734099 4. 728551  
4. 008849 4. 031487 4. 548384 3. 886744 4. 443581 4. 170039 4. 193812 4. 284946 4. 811119  
5. 51233 6. 348847 6. 11163 4. 683311 6. 016615 5. 777289 6. 374895 5. 552346 5. 87886  
4. 347152 4. 138279 3. 759313 4. 653764 4. 804502 4. 145181 3. 599924 4. 363201 4. 158764

4. 687882 4. 823222 4. 927812 4. 711302 4. 50698 4. 963292 5. 084225 4. 688471 5. 608597  
8. 245185 8. 354134 8. 244241 8. 84577 8. 086262 8. 299013 8. 06018 8. 204394 8. 183159  
5. 953197 5. 40116 5. 448824 5. 114633 5. 924489 6. 145618 5. 780089 5. 363421 5. 574004  
3. 018899 3. 352613 3. 839906 4. 215695 2. 889849 2. 365269 4. 186447 2. 926557 3. 503337  
3. 046168 2. 779673 2. 806505 2. 958359 2. 41922 3. 106392 2. 96616 3. 106672 3. 526363  
2. 185879 2. 315884 1. 719656 2. 097028 3. 145407 1. 826673 1. 994583 1. 903664 2. 093024  
5. 150001 5. 089392 4. 809884 4. 900758 5. 500361 4. 978359 4. 849967 5. 481875 4. 906599  
5. 848208 5. 801995 5. 261513 5. 782705 5. 358477 5. 375947 5. 754308 5. 299877 4. 840077  
5. 036785 4. 884522 4. 49302 4. 104165 4. 738568 4. 865324 5. 075871 4. 58796 4. 742961  
7. 84138 7. 624711 7. 776762 7. 550882 7. 74279 7. 51737 7. 520869 7. 323241 7. 843498  
6. 612026 6. 573422 6. 109176 4. 98205 6. 928194 6. 493158 6. 139725 6. 625099 6. 251748  
2. 064632 3. 075168 2. 458584 4. 209087 2. 780908 2. 299991 2. 888508 3. 228495 3. 570428  
3. 927247 3. 245358 2. 426105 2. 771034 2. 959767 3. 405094 4. 067542 3. 129133 2. 821662  
4. 61842 4. 899398 5. 627672 4. 157819 4. 698687 4. 025225 4. 656231 4. 904672 4. 362127  
6. 421542 6. 301988 6. 314968 6. 550455 6. 673016 6. 377615 6. 558719 6. 546759 6. 676926  
7. 559951 7. 449291 7. 328379 6. 86622 7. 424628 7. 512466 7. 266708 7. 457672 7. 117067  
4. 916173 4. 411016 5. 598658 4. 702459 4. 897971 4. 135961 4. 595511 5. 58537 2. 944567  
4. 125079 4. 330217 4. 559025 4. 048752 4. 439251 4. 586952 4. 182776 4. 542321 5. 03078  
10. 39401 10. 29053 10. 14092 9. 976657 10. 25268 10. 32135 10. 57236 10. 38519 10. 12653  
4. 957211 5. 702948 5. 336558 5. 092021 5. 542616 5. 806621 6. 090412 5. 597743 4. 13334  
4. 203653 5. 24717 5. 179711 4. 009073 4. 649514 4. 275607 4. 41382 4. 765571 4. 659813  
9. 430376 9. 256307 9. 199687 8. 99791 8. 910557 8. 997926 9. 496153 9. 487607 8. 839553  
5. 192999 4. 589693 5. 084571 4. 340825 4. 355432 3. 141349 4. 543653 4. 458401 5. 089599  
5. 785233 6. 049535 5. 435554 4. 868976 5. 95418 5. 296833 6. 218125 6. 080321 6. 385748  
5. 272571 5. 398883 5. 107049 5. 542206 5. 334766 5. 879284 5. 199565 5. 783697 5. 531627  
5. 438505 5. 901394 4. 928584 3. 702911 5. 195323 5. 722647 5. 593972 5. 413492 5. 728443  
7. 467609 7. 294806 7. 117871 5. 573024 7. 247833 7. 126103 6. 921759 6. 88742 7. 494771  
7. 576871 7. 355236 7. 146306 7. 564434 7. 657659 7. 401031 7. 620823 7. 578027 7. 991213  
6. 076477 6. 385075 7. 006623 5. 332045 6. 274313 6. 356595 6. 478809 6. 074862 6. 757989  
6. 475494 6. 15747 6. 175155 6. 101458 6. 366089 6. 164622 6. 143669 6. 084866 6. 285362  
9. 234092 9. 083912 8. 684789 8. 755327 8. 936963 8. 841363 8. 958827 8. 694875 9. 157491  
5. 133238 4. 099358 4. 644149 4. 555567 3. 628223 5. 238008 4. 514815 3. 978421 5. 640394  
8. 849121 8. 494075 8. 218301 7. 430564 8. 167358 8. 636557 8. 70484 8. 220624 7. 912818  
5. 849484 6. 10909 6. 143373 6. 027902 5. 567216 5. 852717 5. 850732 5. 532745 5. 967314  
4. 35851 4. 982435 5. 392849 3. 832491 4. 662032 4. 951412 3. 741913 5. 047658 3. 660497  
6. 681961 6. 830364 6. 599981 5. 668148 6. 47165 6. 967117 6. 512768 6. 614176 6. 489933  
5. 940538 5. 685005 5. 558397 5. 564087 5. 513529 5. 75477 5. 333309 5. 672126 6. 198454  
6. 102171 5. 765824 5. 408522 5. 817533 5. 440717 5. 930969 5. 834499 6. 072792 5. 979686  
4. 079881 4. 189195 4. 641157 2. 916693 5. 102245 3. 787273 4. 087944 5. 357455 4. 687212  
6. 197355 6. 086458 5. 566414 5. 346647 6. 222494 6. 158838 6. 27981 5. 855683 6. 335699  
6. 958782 7. 081373 7. 024912 6. 844166 7. 250567 7. 296435 7. 199507 7. 015159 7. 695303  
1. 993807 2. 720853 2. 534864 3. 338299 2. 602157 4. 250795 2. 420368 3. 018375 4. 323631  
7. 175318 7. 386267 7. 385079 6. 798521 7. 170783 7. 055842 8. 072695 7. 331248 7. 305196  
4. 774285 4. 962148 4. 90283 4. 891879 5. 073098 5. 16551 5. 535793 5. 04529 5. 888531  
3. 816995 2. 522139 3. 933179 3. 79857 3. 571895 3. 79108 4. 214756 3. 816995 3. 816995  
4. 86498 5. 129716 5. 464576 4. 251932 5. 025397 4. 29097 5. 31763 4. 629139 4. 618834  
5. 652723 5. 083443 5. 619839 5. 280445 5. 698788 6. 138161 5. 21655 5. 562562 5. 031092  
4. 959482 4. 484295 5. 05344 4. 7554 4. 715519 4. 587249 4. 648407 5. 093752 6. 406791  
6. 380647 6. 390725 6. 112369 6. 359725 6. 514201 6. 203801 6. 388082 6. 433704 5. 861286  
6. 503308 6. 460022 6. 13798 5. 113778 6. 434624 6. 232602 6. 425607 6. 212356 6. 162573  
4. 66843 5. 09974 3. 763432 5. 533447 5. 201735 4. 08926 4. 869845 4. 952946 2. 576002

6.686351 6.476165 6.258572 6.906257 6.843266 6.419679 6.599322 6.325557 6.959771  
4.954147 4.658216 3.728359 3.508101 4.292941 4.220802 4.213225 3.483917 4.250276  
4.967878 4.437766 4.607801 4.201192 4.989414 4.215374 4.469858 4.132753 4.611491  
5.705368 5.755432 5.370175 4.752009 5.877155 5.923348 6.020369 5.200978 6.934879  
3.934458 3.911199 4.773838 4.540847 4.540964 3.147198 3.627853 4.012222 3.52709  
2.944158 1.884346 2.093242 2.396458 2.473256 2.134423 2.304842 2.561812 4.086281  
8.57087 7.435468 7.938305 6.14421 7.187681 7.726893 7.733874 7.505688 8.546337  
6.108076 6.317806 5.860489 5.95213 6.030398 5.63965 6.043705 6.230504 7.292301  
5.355473 5.022608 4.885286 5.437151 4.731358 4.958573 5.161891 5.217473 4.976025  
3.457754 3.851731 3.909231 4.13385 4.025956 3.994048 3.792137 3.580109 3.794467  
4.036151 4.200422 3.758074 4.234431 3.677924 4.130851 4.607843 4.803351 4.278361  
5.58844 5.691201 5.52508 5.813167 5.622586 5.972124 6.080563 5.458249 3.716794  
4.452572 3.221345 3.654766 2.869266 3.390787 3.010937 3.910862 3.475917 3.328109  
5.135081 5.22184 4.886028 5.28291 4.983855 4.583691 5.302092 6.158318 4.548932  
8.336865 8.264495 8.265993 8.009016 8.009511 8.299007 8.238998 8.227669 8.235184  
2.311125 2.286629 1.798085 2.311307 1.396251 2.703398 1.868239 1.792202 2.311999  
6.35052 6.700179 6.33205 6.270975 5.593762 6.807542 6.436238 6.194964 6.081431  
2.314502 1.909621 2.018089 1.980077 2.082375 2.788504 2.796797 2.342239 2.144305  
5.882158 5.352909 5.895742 6.183328 5.808623 5.84467 5.095849 5.974053 6.554222  
5.494068 5.144378 4.687008 4.388086 5.107154 5.202999 5.041457 5.531254 3.946812  
3.475104 4.37113 4.23313 2.213203 3.69233 2.820415 4.147393 2.998899 3.059101  
5.530803 5.33613 5.065834 5.390134 5.433609 4.773062 5.818747 5.329819 5.998884  
6.280558 5.966519 6.305243 5.422286 5.762767 6.077817 6.211793 5.971321 6.376288  
1.940841 1.773786 1.521303 2.146992 1.719448 2.185302 1.516291 1.728626 1.624678  
4.097516 4.344997 4.624696 1.915176 4.913539 3.879131 3.352153 4.702871 3.097428  
1.989608 2.974884 2.339762 3.194371 2.764086 3.152263 2.635247 2.924542 3.21489  
0.828037 0.863202 1.093174 1.246441 1.276591 1.736055 0.942881 0.667497 1.122151  
5.037778 5.562217 5.62703 5.464066 5.858905 5.050871 5.72226 5.927894 5.714767  
3.669622 3.566936 2.834086 4.078519 4.324583 4.000793 4.25652 3.43569 4.139812  
3.14302 3.680996 4.703099 3.040156 4.156074 3.365207 3.796626 4.011571 5.837582  
3.468041 2.608577 3.496831 3.197274 2.658679 3.356652 2.630942 2.918014 2.391537  
2.008704 1.226559 1.958465 2.235271 1.790348 1.946997 1.474919 1.427552 1.305103  
4.01776 4.084521 4.030902 4.426245 4.138056 3.152404 4.326695 4.016736 3.591538  
5.222572 4.673118 5.385064 3.892034 4.901845 4.451955 5.112162 4.776336 4.817846  
6.775385 6.92537 6.788756 6.728212 7.022254 6.786311 6.540692 6.846932 5.995514  
1.129596 1.238928 1.369662 1.537723 1.557085 1.409908 1.577162 1.241717 1.622094  
6.316343 6.135364 5.88766 5.043102 5.864961 6.019774 5.991219 5.781573 6.207543  
5.30203 5.484025 5.375868 5.461662 5.829537 4.946481 5.285036 5.300076 6.041045  
6.128772 6.130138 6.117418 6.998136 6.898773 6.344262 6.414996 6.381049 7.056325  
1.479004 1.80489 1.505197 1.546729 1.940084 1.86887 1.739481 1.563885 1.533779  
1.442025 2.051618 1.467541 1.768451 2.679041 1.555414 3.120874 1.85333 1.959864  
5.992137 5.978728 6.167516 6.720282 5.396799 5.882698 6.273062 5.918597 6.333108  
7.247835 7.279508 7.344691 7.50923 7.383607 7.239993 7.006445 7.176675 6.950168  
4.315931 4.399102 4.211534 4.586924 5.035341 4.214878 4.357758 5.010663 4.196798  
1.574552 1.484123 1.313529 1.998409 1.57468 2.571091 1.938887 2.098867 1.820983  
6.592477 6.601552 6.719277 6.046172 6.772638 6.403163 6.883221 6.995889 6.66921  
3.95184 4.116379 3.802388 3.177862 4.650119 2.847442 4.827992 4.015591 3.902138  
5.250617 4.954981 4.43712 4.383221 3.85893 4.724505 5.338845 4.077601 5.482365  
7.714375 7.619681 7.46853 7.695531 7.015799 7.349456 7.646338 7.527074 7.142329  
7.4796 8.0761 7.736449 7.664687 7.788998 7.290641 7.829804 7.685286 6.896036  
2.22207 2.080837 1.562024 1.883562 1.878483 1.740692 1.754806 1.580758 1.40001

7. 781043 7. 750468 7. 984952 6. 853122 7. 6831 7. 603211 7. 783753 7. 899367 7. 289611  
6. 617278 7. 410229 6. 966732 7. 157543 7. 42681 6. 432438 7. 018365 7. 236372 6. 499845  
7. 28767 7. 0866 6. 979417 6. 793715 6. 805579 6. 802289 7. 217341 6. 400837 7. 019737  
7. 893898 7. 787089 7. 890344 7. 209666 7. 549014 7. 477295 7. 487329 7. 719261 8. 065778  
2. 284311 3. 117256 2. 962622 2. 210535 3. 213671 2. 247026 2. 845766 3. 191466 2. 684609  
7. 030308 7. 085983 6. 91298 6. 473781 7. 253676 6. 074034 7. 121055 7. 283679 7. 265864  
3. 249227 3. 462112 2. 848735 2. 386065 4. 523641 3. 373789 4. 314184 3. 552241 2. 385721  
7. 145933 6. 846715 6. 932547 7. 51962 6. 814353 6. 307818 7. 157364 7. 142753 6. 231071  
3. 293723 2. 954807 3. 518975 4. 220302 3. 610282 4. 593125 4. 117553 3. 297818 4. 402439  
5. 239058 5. 375274 5. 449652 4. 780912 4. 920748 5. 779452 5. 160461 4. 810671 3. 875977  
4. 972346 4. 300683 4. 50187 3. 457857 3. 286946 1. 984544 4. 052493 3. 982767 3. 685774  
5. 960657 5. 193288 5. 562296 5. 614653 5. 424005 5. 665759 5. 688677 5. 215899 5. 791358  
8. 841389 8. 730763 8. 785203 8. 477857 8. 810938 8. 549327 8. 728565 8. 86172 9. 027743  
6. 388869 6. 165897 6. 672649 5. 94741 6. 089467 5. 913818 6. 114025 5. 669186 6. 368764  
5. 02134 4. 816111 4. 597127 4. 365287 5. 064305 4. 985304 5. 131174 4. 958035 5. 109959  
5. 461094 5. 292553 4. 715926 4. 579688 5. 171107 5. 204031 5. 287144 5. 087254 5. 411137  
7. 479025 7. 247528 8. 078755 6. 857071 7. 543001 6. 855324 7. 782287 7. 283534 7. 6954  
6. 321523 6. 553792 6. 040637 6. 509364 6. 495878 5. 365639 6. 399865 6. 293829 6. 500022  
4. 489213 7. 00388 5. 062092 5. 077434 5. 818415 4. 96899 4. 606987 4. 436648 3. 871595  
5. 628615 4. 61556 5. 7587 3. 722919 5. 23074 5. 436989 5. 608606 5. 502735 4. 943339  
1. 415418 1. 534132 1. 790473 1. 642902 1. 199586 2. 669458 1. 773863 1. 789845 1. 640852  
7. 813806 7. 684251 7. 842332 7. 929237 8. 001315 7. 846589 7. 872928 7. 796996 7. 868023  
1. 779486 2. 127035 2. 437694 1. 9236 2. 230641 2. 172791 2. 138106 2. 156058 1. 849845  
6. 527757 6. 126539 6. 337398 6. 880242 6. 610896 5. 714729 6. 262605 6. 640997 6. 002621  
6. 032672 5. 39843 5. 452675 6. 675199 5. 289511 4. 938966 5. 453269 5. 848691 6. 198559  
6. 962385 7. 103476 6. 740945 6. 411175 7. 015389 6. 800964 7. 092031 7. 360108 6. 961019  
7. 507129 7. 258818 8. 029166 7. 815807 6. 251104 6. 829702 7. 982547 7. 170112 7. 953399  
6. 736502 6. 155159 6. 790294 6. 509278 6. 286929 6. 914448 6. 233187 6. 278996 5. 242845  
6. 547947 6. 765935 6. 861343 5. 826603 6. 577841 6. 638856 6. 610877 6. 789216 6. 284346  
2. 947984 2. 4257 2. 444558 4. 041859 2. 905897 2. 978459 2. 406554 2. 0235 1. 88384  
6. 063117 5. 954174 5. 397593 5. 197965 5. 902087 6. 259382 6. 02181 6. 118116 6. 440286  
7. 230214 6. 874146 6. 945032 7. 465642 6. 752443 6. 925846 6. 793345 6. 926101 7. 28737  
4. 875532 3. 377931 4. 485639 5. 049967 3. 779418 5. 223409 4. 157844 4. 963715 5. 141619  
4. 761313 4. 869278 4. 735569 5. 163045 4. 539664 4. 414916 4. 400881 4. 615801 5. 506843  
7. 221707 7. 209002 7. 013754 7. 184089 7. 036408 7. 374319 6. 85837 6. 949613 7. 63877  
6. 984218 6. 900978 6. 757314 7. 209925 6. 777346 6. 846437 7. 171251 6. 927607 7. 272721  
1. 934732 2. 575026 1. 685172 1. 662758 3. 620134 3. 00619 3. 429423 1. 833484 1. 689108  
1. 736795 2. 556593 1. 74622 1. 681439 1. 303452 1. 761786 1. 750902 1. 622091 3. 071049  
1. 469124 1. 536703 1. 636853 1. 885133 1. 093244 1. 477376 1. 474181 1. 617529 2. 004517  
6. 182955 6. 505775 6. 162328 5. 369017 6. 096985 6. 750597 6. 13893 6. 32709 6. 726585  
7. 787224 7. 935886 7. 710384 7. 040223 7. 961712 7. 736823 7. 94528 7. 638949 7. 139117  
2. 568053 3. 974995 3. 851986 4. 718193 2. 570917 4. 425981 2. 372257 3. 730485 4. 610616  
4. 08372 3. 11723 2. 638149 2. 336485 2. 610196 3. 828542 3. 005717 3. 59451 3. 442898  
0. 3391 1. 16355 0. 523172 0. 691255 0. 929932 3. 665318 0. 82076 1. 952545 1. 462286  
1. 824371 2. 171437 1. 660332 1. 937607 1. 842557 2. 546478 2. 15813 2. 42386 1. 758999  
4. 234232 3. 458632 3. 938078 3. 680382 4. 614661 3. 404228 3. 339778 4. 324293 4. 236354  
1. 118093 1. 541901 1. 532306 1. 627721 1. 265145 1. 775593 2. 465176 2. 512357 1. 601494  
5. 729663 5. 603109 5. 558741 5. 157966 5. 355893 5. 254266 5. 378482 5. 481575 6. 258295  
5. 465394 5. 217813 4. 815999 5. 197675 5. 074034 4. 969953 4. 999944 4. 988186 5. 045203  
4. 368878 3. 851696 4. 102829 5. 349551 2. 739149 3. 779629 4. 624175 3. 588321 3. 931046  
4. 423112 3. 79534 4. 199287 3. 771645 4. 05797 4. 508362 4. 433487 4. 643544 3. 956056



6. 889433 6. 934387 6. 696677 6. 428586 7. 02504 7. 084349 6. 803659 7. 121499 5. 979588  
5. 923716 7. 456893 6. 677422 6. 705895 7. 701301 7. 326193 6. 222116 7. 387282 5. 082565  
3. 747294 4. 222946 4. 728116 4. 652444 4. 814737 4. 209465 4. 474811 4. 02089 4. 717338  
3. 991174 2. 730947 3. 476139 2. 398679 4. 105347 3. 610973 3. 653912 3. 040511 2. 842022  
5. 424153 5. 409455 5. 268447 5. 689293 5. 552206 5. 496582 5. 423735 4. 795078 5. 342762  
7. 910798 7. 867091 7. 807429 7. 675951 7. 781498 7. 653032 7. 611844 7. 771278 8. 031965  
7. 659693 7. 838329 8. 030947 6. 296886 8. 237566 7. 559972 7. 480414 7. 596641 7. 667146  
4. 952094 3. 806198 4. 642373 6. 350235 4. 051584 4. 295254 4. 427552 5. 059961 4. 310284  
7. 483152 6. 963887 6. 889384 6. 669252 6. 856777 7. 109554 7. 279318 7. 056783 7. 405614  
2. 530977 3. 687127 2. 113419 2. 739422 2. 802283 4. 045399 2. 361589 3. 268217 2. 391355  
3. 361276 4. 280593 3. 475336 2. 730901 3. 689791 2. 953125 3. 621534 3. 63931 2. 719346  
3. 698136 3. 775543 4. 038797 3. 082275 3. 758837 3. 224482 3. 489515 3. 333607 3. 9353  
3. 388041 3. 180182 2. 506691 2. 468083 3. 065497 2. 592533 2. 191723 2. 323856 1. 581002  
8. 088545 7. 728977 7. 456194 7. 479881 7. 625751 7. 945685 7. 905858 7. 99624 8. 34246  
5. 173429 5. 16951 5. 951635 5. 216201 5. 754636 4. 852607 5. 585548 5. 261647 5. 808478  
4. 730631 3. 754716 3. 569228 4. 924856 3. 848048 3. 853551 4. 354286 3. 802528 3. 846752  
7. 348058 7. 391628 6. 848325 7. 674323 7. 428493 7. 054599 7. 575349 7. 173593 7. 611705  
6. 228044 6. 32447 5. 8654 5. 501588 6. 216806 6. 067331 6. 262244 6. 254343 6. 578796  
5. 745381 6. 53011 6. 45096 6. 736359 6. 99241 5. 69805 6. 423921 5. 742846 5. 562848  
4. 463283 3. 961753 3. 973312 3. 864688 3. 66724 3. 350152 4. 155895 4. 041152 4. 67764  
2. 679998 3. 060403 2. 634893 3. 145846 3. 315657 2. 745751 3. 341923 3. 308078 2. 09154  
4. 973507 4. 682263 5. 493928 5. 287407 4. 910827 4. 766756 4. 758664 4. 647615 4. 436975  
5. 669073 5. 240492 5. 846338 5. 553246 5. 090918 5. 367329 5. 81165 4. 845169 6. 404309  
5. 406712 5. 197678 4. 768883 4. 4864 5. 289674 5. 258764 5. 186276 5. 025461 5. 992065  
6. 45905 5. 021857 5. 572728 6. 195176 5. 193909 7. 081708 5. 859118 6. 58112 8. 274281  
3. 555904 3. 315839 4. 626147 3. 695589 2. 950048 3. 579548 5. 018576 3. 709435 2. 04748  
8. 30212 8. 407995 8. 484269 7. 246236 8. 595979 8. 232919 7. 863048 8. 339464 7. 7203  
5. 038478 4. 375077 4. 82495 4. 80464 5. 428338 4. 566893 5. 095781 5. 082918 3. 365873  
5. 162481 5. 952652 5. 934176 4. 746148 5. 934794 5. 548993 5. 348825 5. 990135 5. 940069  
6. 349156 6. 639835 6. 8307 6. 830133 6. 503628 6. 513695 6. 391731 6. 087877 6. 346733  
8. 479275 8. 930449 8. 530259 8. 79829 9. 600395 8. 425507 9. 046441 9. 320725 8. 689496  
7. 840769 7. 808139 8. 165964 8. 076009 7. 631556 7. 980008 7. 486845 7. 77992 7. 179278  
1. 900553 1. 936624 2. 288983 2. 283721 1. 800071 2. 356607 1. 770916 2. 226175 1. 682978  
5. 421677 6. 070399 4. 494003 5. 948258 5. 215162 5. 328779 5. 116607 6. 133755 4. 526251  
9. 306287 9. 087879 9. 338573 9. 53374 9. 557035 8. 866326 9. 248641 9. 221709 9. 386505  
7. 272428 6. 839589 7. 233433 5. 721475 6. 650441 6. 835409 6. 806739 7. 189643 6. 923046  
3. 135037 2. 691063 2. 196587 2. 235457 2. 260786 2. 314681 1. 923256 2. 724455 1. 360565  
1. 79335 2. 376904 2. 955151 2. 410569 2. 205574 2. 140632 1. 982084 2. 165096 2. 701029  
8. 231175 8. 098075 7. 844612 7. 863552 8. 100011 7. 900805 8. 704773 7. 926558 8. 076195  
5. 520042 5. 120416 5. 84723 4. 967636 5. 492696 4. 534486 5. 102275 5. 096999 4. 052308  
6. 800754 6. 003802 6. 648383 5. 977205 5. 494502 6. 088154 5. 705199 5. 841004 6. 500987  
6. 553005 6. 389478 5. 98999 6. 194409 6. 618233 6. 415042 6. 657092 5. 983975 6. 178774  
6. 697192 6. 790359 6. 708722 6. 413439 6. 901578 6. 62379 6. 925623 6. 927943 6. 595493  
5. 428704 4. 94802 5. 247629 3. 340396 4. 81169 4. 068677 5. 046775 4. 954143 4. 882446  
4. 007525 3. 373134 3. 23958 4. 041927 4. 143066 3. 727696 4. 030796 4. 126805 4. 434326  
4. 955963 5. 664612 5. 070132 4. 153683 5. 902356 5. 377778 5. 136853 5. 869831 4. 835122  
1. 589312 1. 528406 2. 009344 2. 010735 2. 043591 2. 215769 1. 700916 1. 375328 1. 386831  
1. 606865 1. 629467 1. 344928 1. 954924 0. 914762 1. 138367 1. 368481 1. 162956 1. 429378  
5. 048156 5. 454884 5. 118887 3. 943194 5. 260347 4. 496571 5. 690337 4. 708215 5. 796705  
3. 166505 3. 081284 4. 680768 3. 111359 2. 388682 3. 602487 1. 67909 3. 373933 2. 899521  
3. 967325 4. 598701 2. 935516 4. 593922 4. 247875 4. 495552 4. 294959 2. 823817 3. 571468

6. 231552 6. 062334 6. 191205 6. 038048 6. 714196 6. 104176 6. 242403 5. 883442 4. 7283  
6. 485086 5. 965063 5. 795229 4. 970428 5. 820711 5. 585108 5. 631317 5. 67127 4. 771317  
2. 311897 2. 619291 2. 966798 2. 535363 3. 145788 1. 77341 2. 066897 3. 004286 1. 33012  
5. 943356 6. 257009 5. 349282 6. 035801 5. 593912 5. 986266 5. 69878 5. 881846 5. 981866  
4. 046307 4. 275072 4. 181645 4. 105602 3. 720369 3. 761518 3. 881828 4. 156142 4. 791969  
1. 740301 1. 228054 1. 877805 2. 038821 1. 543012 1. 754233 1. 620583 1. 581455 1. 950559  
6. 461178 5. 978854 6. 125325 6. 84947 6. 233747 6. 256893 7. 040133 6. 176267 6. 771341  
2. 899869 1. 83516 2. 557254 2. 306457 3. 131276 2. 190026 2. 250261 1. 682223 2. 750582  
5. 379992 5. 209291 5. 623247 5. 147334 5. 230549 4. 848762 4. 99774 4. 773063 4. 838266  
3. 723933 5. 010503 3. 136879 2. 528057 4. 362866 4. 402482 3. 955115 4. 182909 3. 75095  
4. 822395 5. 300562 5. 316057 3. 292499 6. 103769 5. 358369 5. 65066 5. 192748 4. 910561  
1. 37059 2. 365347 1. 623105 1. 983317 2. 287392 1. 528065 1. 5838 1. 85386 1. 125097  
4. 68076 5. 137757 4. 505187 3. 340248 4. 490796 4. 500844 4. 655051 5. 36199 5. 161803  
3. 694683 3. 458549 3. 97398 1. 325079 4. 747244 3. 718377 3. 672306 5. 358121 3. 576156  
5. 256348 5. 230173 5. 108234 4. 760447 5. 06206 4. 670519 5. 518345 5. 885965 5. 291106  
3. 63102 1. 934082 2. 990476 1. 406291 2. 801084 4. 072786 4. 56274 1. 95342 3. 556403  
0. 887159 1. 561669 1. 452932 2. 637926 1. 238768 1. 042724 1. 21042 1. 151399 2. 451841  
1. 362165 1. 250183 0. 949626 1. 621594 1. 612735 0. 844022 1. 734566 1. 231636 2. 03454  
5. 722709 4. 597244 5. 416174 5. 61823 5. 205767 5. 403996 5. 557508 5. 768371 5. 088813  
5. 183169 4. 707784 5. 285928 5. 859465 4. 910722 4. 773927 4. 52409 5. 581345 4. 436274  
3. 887602 5. 089212 3. 545833 3. 496564 3. 774736 2. 64109 4. 456448 3. 426543 3. 500019  
5. 964807 5. 947029 6. 282726 5. 706488 5. 676199 6. 44981 6. 049671 6. 269823 4. 914535  
2. 826922 3. 926778 2. 734002 4. 512606 3. 364045 4. 405075 2. 935586 2. 856608 3. 063613  
2. 86073 4. 348429 4. 304585 2. 099801 2. 998913 3. 573341 3. 970158 4. 16174 4. 273305  
5. 853161 5. 046599 5. 525589 5. 103805 4. 92303 5. 392038 4. 885764 4. 808813 5. 253568  
2. 834048 4. 365546 3. 81407 3. 115109 3. 031887 3. 465986 4. 015401 4. 251827 3. 651936  
5. 138454 5. 01091 5. 17276 4. 346678 4. 851532 4. 78925 4. 558455 4. 91808 4. 478718  
4. 917947 5. 398653 4. 631354 4. 177792 4. 727819 4. 513062 4. 324244 4. 434812 3. 728337  
4. 888459 5. 258556 5. 699858 3. 755813 4. 615099 4. 6821 4. 829658 5. 2344 4. 676466  
3. 062935 4. 930267 4. 056816 4. 060084 5. 063008 5. 029398 3. 960493 5. 67681 2. 941053  
6. 498889 6. 508142 6. 183587 6. 048882 8. 155807 6. 179674 6. 841376 6. 87511 6. 873494  
3. 820677 4. 951646 2. 471508 2. 995842 3. 441026 3. 405119 3. 061998 2. 030153 3. 591529  
3. 617196 3. 290364 3. 024738 2. 490993 3. 120759 4. 110894 4. 37574 3. 883022 3. 498656  
4. 924783 3. 767684 3. 966908 1. 461993 2. 094148 3. 938314 2. 061659 4. 374967 4. 195516  
3. 760692 4. 128541 3. 077134 2. 901431 2. 76027 3. 634481 2. 688208 2. 604467 3. 740487  
1. 953742 2. 630049 1. 410042 3. 139879 1. 245861 2. 108852 2. 037736 1. 701 0. 770627  
8. 193643 8. 29748 7. 928841 7. 788392 8. 40505 8. 137893 8. 268362 8. 384752 7. 782194  
2. 068849 2. 164822 0. 893301 1. 507168 1. 750657 1. 69644 1. 448909 1. 739846 2. 645132  
4. 616203 3. 299524 4. 092677 3. 679982 3. 973799 3. 959952 3. 680744 3. 023715 3. 740916  
3. 764976 3. 696773 1. 63285 2. 976838 3. 541903 3. 076464 5. 154802 2. 708569 2. 866423  
4. 957365 4. 76572 3. 104575 5. 703036 5. 37304 5. 041455 5. 026467 4. 692322 4. 152441  
3. 675098 4. 680679 4. 497388 2. 968512 5. 599678 5. 869062 3. 545127 5. 072973 4. 713421  
4. 175547 3. 308234 4. 129057 2. 429096 3. 490346 2. 003701 2. 219197 3. 259215 1. 113924  
5. 620523 4. 882245 4. 321185 4. 141077 3. 73073 5. 20246 5. 407945 4. 591714 4. 19777  
5. 258976 4. 36659 5. 178771 3. 787163 3. 334845 4. 973966 2. 694849 4. 744193 4. 12422  
1. 276766 1. 738477 0. 780893 0. 885644 1. 145604 1. 354911 1. 557405 0. 992308 2. 838293  
3. 531622 2. 801469 2. 153553 1. 70142 3. 104042 2. 992277 2. 483563 2. 346233 2. 344508  
3. 583101 3. 194692 2. 146241 4. 776361 1. 904834 2. 409867 1. 68044 3. 900098 2. 348928  
4. 414383 4. 499203 3. 725157 2. 457724 4. 241898 3. 780181 3. 937517 3. 502361 2. 734197  
4. 117773 4. 290999 3. 285461 2. 867383 3. 026913 3. 369279 3. 697141 3. 842015 2. 472803  
4. 29922 4. 196881 3. 743521 4. 340812 4. 3012 3. 616777 5. 403422 3. 604416 3. 633251

2. 947394 2. 725826 2. 739814 3. 44515 2. 047621 2. 68079 3. 941854 2. 738788 1. 209452  
1. 910143 2. 690567 2. 72065 1. 628482 2. 150529 3. 621022 2. 421507 2. 281248 1. 523218  
1. 520068 2. 967588 1. 293033 1. 738374 1. 399243 1. 291373 0. 877308 0. 922311 2. 627954  
4. 47883 4. 712504 4. 227655 4. 276605 4. 330278 4. 235416 3. 855885 4. 169276 2. 926522  
2. 374415 3. 021173 2. 343494 1. 799442 1. 339584 3. 847079 3. 091293 1. 511889 2. 34621  
3. 798051 2. 964783 2. 772366 2. 300753 1. 572418 2. 136435 4. 603051 2. 520932 1. 991215  
3. 855815 4. 386258 2. 762718 3. 154579 3. 720114 0. 946254 4. 166914 3. 958453 3. 231203  
2. 416002 2. 383715 2. 427766 3. 12143 1. 9876 2. 359867 1. 936644 2. 62698 2. 092172  
1. 791074 1. 038551 1. 517449 1. 47145 1. 91069 1. 575859 1. 407185 0. 659743 1. 513887  
1. 443288 1. 32073 1. 296413 2. 766721 1. 271515 2. 250372 0. 959714 2. 044877 0. 990326  
1. 769376 1. 876446 1. 373653 2. 43007 1. 633133 1. 273067 1. 797635 1. 627257 1. 208672  
1. 774722 1. 430345 2. 769518 2. 712318 1. 604005 1. 630425 2. 656389 3. 15567 1. 874225  
2. 129119 2. 188357 2. 715118 2. 159053 1. 907571 2. 647829 3. 010315 3. 220529 1. 950611  
1. 561949 1. 610149 1. 870522 2. 583996 1. 325575 1. 660144 2. 584759 1. 658597 1. 810697  
1. 745468 2. 081624 1. 97323 1. 894187 2. 10645 2. 386277 1. 322302 1. 433555 1. 92097  
1. 063949 1. 003523 1. 037806 1. 222894 1. 854269 0. 956267 1. 264675 0. 972935 1. 609247  
1. 892088 1. 887968 1. 97095 2. 184409 1. 826105 1. 998637 1. 674864 2. 082579 1. 873263  
1. 436397 1. 518069 1. 496047 1. 321759 1. 373333 1. 538638 1. 402523 1. 597867 1. 435923  
1. 477624 1. 527748 1. 858773 1. 706438 1. 999825 1. 480862 1. 326608 1. 497557 1. 399124  
1. 00154 0. 988793 1. 236345 1. 448241 1. 064153 1. 215696 1. 078879 1. 103498 1. 298402  
1. 013672 1. 070565 2. 415293 1. 283161 0. 897107 1. 68201 1. 118372 1. 439495 1. 283009  
5. 282951 5. 175238 5. 240107 4. 987908 5. 076889 4. 637968 5. 453863 4. 369087 4. 94373  
0. 966166 0. 994007 1. 297498 1. 263709 1. 385964 1. 621985 1. 283922 1. 640282 1. 181219  
1. 160728 1. 335519 0. 964447 1. 172048 1. 338661 0. 864469 1. 049015 1. 035022 1. 573167  
1. 422771 1. 154675 1. 05769 1. 92505 2. 005099 1. 264337 1. 190217 1. 093272 1. 409848  
1. 098414 1. 412161 1. 196606 1. 440341 1. 451628 1. 37392 1. 28385 1. 097924 1. 160231  
4. 202999 2. 890872 2. 248802 2. 189662 3. 359463 3. 020002 3. 937646 2. 405768 1. 97567  
2. 275282 2. 450821 2. 142432 2. 589825 1. 909656 1. 833428 1. 726737 2. 11479 3. 893977  
7. 074614 7. 109141 6. 836362 7. 387659 7. 056939 8. 063397 7. 065595 7. 936123 7. 403165  
1. 078888 1. 255126 0. 948169 1. 214279 1. 160383 1. 686417 1. 038523 1. 223682 1. 40596  
4. 319944 4. 25205 4. 173017 4. 988543 4. 550337 3. 198227 5. 090733 4. 432976 4. 6415  
7. 51627 6. 901713 7. 227295 5. 835779 7. 349591 7. 375276 6. 867583 7. 086989 7. 034571  
1. 501723 1. 765339 2. 858099 1. 860145 2. 289634 3. 323987 2. 053706 3. 048364 3. 265579  
1. 664568 2. 235258 1. 966825 2. 090106 1. 577331 1. 844526 1. 754539 1. 582378 1. 225454  
1. 519926 1. 4367 1. 324937 1. 940085 1. 612045 2. 058592 1. 73708 1. 188158 1. 752379  
5. 360975 6. 247645 5. 816879 6. 304147 5. 796496 5. 978525 6. 177456 6. 386723 6. 572926  
1. 882759 1. 914473 2. 152388 2. 106962 2. 638006 2. 742368 2. 381491 2. 132482 1. 656979  
5. 517334 5. 664323 5. 696693 5. 199916 5. 893575 5. 400688 5. 242409 5. 509224 5. 460861  
3. 077067 1. 868456 1. 585724 3. 294917 2. 640043 1. 423577 1. 418795 2. 474343 1. 454173  
4. 250296 3. 754309 4. 643994 3. 331185 2. 992492 5. 550817 3. 544445 4. 324221 4. 03967  
4. 940346 4. 878659 5. 839239 5. 097598 5. 024398 4. 780468 4. 808733 4. 813035 4. 012876  
5. 794124 5. 903085 5. 765759 6. 198517 5. 852367 5. 542957 5. 708313 6. 041911 5. 348498  
1. 79745 1. 551739 2. 034108 2. 207051 2. 051216 2. 037171 2. 031388 2. 172225 2. 017134  
5. 369827 3. 575921 4. 23326 5. 323174 3. 671129 4. 884346 5. 259732 4. 564601 4. 959346  
2. 115571 1. 492637 1. 636809 2. 23953 1. 777498 1. 801371 1. 503299 1. 370457 2. 266511  
4. 323092 3. 571074 3. 78549 3. 408649 2. 784747 4. 756936 2. 815296 3. 19852 3. 668298  
7. 74641 7. 731944 7. 454406 8. 153206 7. 74768 7. 557321 7. 980586 7. 584744 6. 973964  
1. 575731 1. 768596 1. 045853 1. 136162 1. 733295 1. 425256 1. 372859 1. 165708 1. 349736  
6. 759611 6. 796649 6. 527124 6. 224407 5. 887835 6. 500562 6. 50547 6. 481351 6. 10006  
7. 09525 7. 104316 6. 783539 5. 963536 6. 447544 6. 991872 6. 589559 6. 852628 5. 526779  
1. 604314 2. 768987 2. 084069 1. 984188 2. 407635 2. 176732 2. 932971 2. 158293 1. 330758

6.052993 6.410869 6.031856 6.394068 5.485532 6.374294 5.679178 6.209855 5.305725  
5.511427 5.844797 5.169062 5.97758 5.970554 4.844163 5.382735 5.254988 5.216635  
1.261401 1.481125 1.642781 3.016191 1.15103 2.352077 1.69662 1.546659 2.021107  
2.33497 4.288458 2.927918 1.391999 2.890595 3.046696 3.845495 3.951786 4.515906  
5.331651 5.187039 5.650512 2.708751 4.919502 5.290815 5.012682 4.56356 5.689131  
5.006663 5.67452 4.469252 4.284367 5.05666 5.56969 4.667966 5.140936 4.147489  
5.64415 5.018859 5.44164 4.479278 5.70066 4.862752 5.83612 5.038161 4.846709  
6.55465 6.418929 6.070497 5.985129 6.512393 6.415231 5.849055 6.455972 6.38033  
1.759369 1.895399 1.773122 1.709854 2.271808 1.126663 1.762327 1.470026 1.258936  
2.226499 1.924858 2.592254 2.647161 2.244878 2.945256 2.690509 1.336854 2.446461  
6.697876 6.20535 6.834956 6.119821 6.42579 6.423243 6.771702 6.504248 5.726223  
8.557645 8.520814 8.651214 8.45131 8.366575 8.076459 9.048412 8.441283 8.564403  
6.757504 6.629955 6.922317 5.976314 6.831954 6.651079 7.188471 6.996485 6.719379  
1.501687 1.91769 1.272982 1.985121 1.415782 2.025098 1.050144 1.415462 1.225676  
7.542798 8.31409 7.978567 7.994888 7.919983 7.917657 8.144524 8.15433 8.170451  
2.087414 2.171832 2.785983 3.137767 2.905381 3.282264 2.245822 3.795126 4.285218  
1.353854 1.546603 1.668994 1.772513 1.300827 1.433823 1.77272 0.90487 2.029853  
3.662438 3.91262 3.422533 4.474996 3.469832 3.124161 4.358535 3.574165 2.52724  
1.08558 1.130818 1.831997 1.740266 1.447537 1.567863 1.824486 0.99463 1.761894  
1.871369 0.973567 2.301993 2.524416 1.615322 2.399524 1.267935 1.378403 1.718666  
0.865916 1.144288 1.040169 1.205481 1.105243 1.296638 1.225299 0.884217 1.010765  
5.991166 5.681515 6.189586 4.987411 5.975629 6.053221 6.825827 5.744478 5.957883  
6.837836 6.076935 6.413458 5.676513 6.293078 5.934938 6.463923 6.679882 6.897294  
1.745687 2.172849 1.954461 1.783976 1.31592 2.214693 1.390155 2.04932 1.756572  
2.094832 1.229782 1.494456 1.982056 1.145386 2.32403 2.656769 1.421231 1.486447  
5.84564 6.148561 5.714027 4.607022 5.361055 6.357608 5.663261 5.598159 6.106966  
5.156437 4.951113 4.722897 5.495455 4.29295 4.224498 5.13532 4.905042 4.52931  
5.019719 4.820042 5.08083 4.906816 5.170251 4.791146 4.727074 4.545825 5.432188  
4.511961 4.080599 4.830318 4.830485 4.592864 4.710479 5.002082 5.567411 4.64649  
1.944448 2.472841 1.987239 2.406327 2.380332 2.735917 2.846305 1.979366 2.846454  
6.264419 4.673718 6.095677 6.257955 5.231884 6.314794 5.993327 6.208047 6.598052  
3.841318 3.002667 2.925038 4.578065 2.848829 3.822943 3.892654 2.491029 3.1625  
8.22606 7.538845 7.822049 7.454422 8.085235 8.200611 7.655265 8.199425 8.07489  
1.460626 1.418271 2.644244 1.538454 1.908706 2.336294 1.913146 1.396734 1.53863  
4.630276 3.952493 3.733641 4.778829 4.851099 4.655673 5.031619 4.289133 4.977779  
1.557026 1.627845 2.072909 1.515147 1.893388 2.669882 1.936781 1.226458 1.525034  
2.605572 4.508672 3.313856 2.945285 3.146367 2.584238 4.387041 3.192535 2.648571  
6.776152 6.048783 6.251546 6.171161 6.346858 6.040784 6.714833 6.623178 6.130065  
2.04399 2.227191 3.779213 2.909242 2.20626 2.701352 2.155168 2.112392 1.719599  
1.319466 1.556172 1.788615 2.754242 1.60846 2.411544 2.248033 1.923562 2.122318  
3.614441 3.330759 2.076933 3.279565 4.506043 3.733938 4.430095 3.433428 3.215781  
9.141942 9.190122 9.079122 9.895468 8.84528 9.544661 9.185762 8.692816 9.317305  
1.226356 1.247232 1.553211 2.021169 1.197637 1.649238 1.562665 1.690909 1.143591  
4.317297 3.081386 3.297266 3.345163 3.934869 2.837261 4.410626 3.252956 3.304289  
5.27603 4.216859 4.405521 4.4627 4.167479 4.912336 4.526911 4.589232 4.820017  
9.160718 9.793912 9.6011 9.786685 9.85966 10.07908 9.324853 9.040573 8.640489  
1.418399 1.190973 1.163249 2.137308 1.475842 1.53491 1.085375 1.002706 1.295327  
2.936739 2.558512 3.425322 4.394211 3.274536 2.711762 2.451243 3.615193 3.510541  
10.62788 10.59817 10.62416 10.44304 10.35738 10.68021 10.60408 10.68462 10.70292  
1.831538 2.341617 2.137524 2.35123 1.839901 2.55231 2.018403 1.779538 2.323232  
2.45914 1.461988 1.846297 1.624841 1.649653 1.565265 1.397439 4.926446 1.89156

4. 757833 4. 396184 4. 514241 3. 568955 3. 815688 4. 117933 3. 078663 2. 685615 2. 096274  
6. 13326 6. 409899 5. 702446 5. 295334 6. 269568 6. 440657 6. 209386 5. 993978 5. 540103  
2. 724647 3. 278405 3. 352145 2. 300138 2. 838722 2. 996577 3. 883826 2. 700904 4. 367873  
10. 54378 10. 31067 10. 39454 10. 03813 10. 1217 10. 42002 10. 39812 10. 39109 10. 34161  
6. 32538 5. 797979 6. 551335 5. 68114 5. 731696 6. 499046 5. 752556 5. 73864 6. 220255  
3. 334722 3. 645736 3. 556158 3. 164116 3. 958066 2. 886731 3. 128908 3. 304718 2. 662154  
1. 790764 1. 203194 1. 650608 2. 153893 0. 888242 1. 087513 1. 371336 2. 220672 2. 04243  
3. 424038 3. 259957 2. 502906 2. 795255 2. 721252 2. 285791 2. 624771 2. 517756 3. 185657  
6. 659728 7. 059053 6. 502553 6. 45012 6. 978479 6. 453176 6. 84268 6. 971654 6. 418066  
6. 789854 5. 948978 6. 166598 6. 397361 5. 942508 5. 286184 6. 265715 5. 806912 6. 82369  
6. 445324 7. 246127 6. 078634 5. 993857 7. 123825 7. 239729 5. 291484 7. 756786 5. 397666  
1. 987336 1. 844369 1. 80532 2. 451729 2. 176648 2. 654647 1. 529392 2. 110293 2. 467169  
5. 845364 5. 555048 6. 087068 5. 228034 5. 224053 5. 8889 6. 274924 5. 71409 5. 119035  
7. 086276 7. 152943 7. 56738 7. 321295 6. 908901 6. 213893 7. 489596 7. 062115 7. 267938  
1. 436894 1. 143033 1. 481118 1. 151079 1. 243858 1. 651351 1. 424944 0. 896224 2. 291268  
2. 914015 2. 905222 1. 603327 2. 162928 3. 280273 1. 775391 2. 024966 2. 363144 3. 132398  
6. 085272 6. 696124 6. 895906 7. 010302 6. 775432 6. 157616 6. 399576 6. 982795 5. 271614  
8. 059914 7. 50664 7. 213431 6. 422287 8. 074915 7. 112446 7. 382809 7. 251659 7. 009913  
1. 664345 1. 123913 1. 925228 3. 071497 1. 322898 1. 243786 1. 832542 1. 907629 2. 787083  
3. 131219 3. 218383 3. 041616 3. 108033 2. 863159 2. 489541 3. 384302 2. 047418 4. 342984  
2. 319974 1. 955562 2. 542536 2. 128826 1. 933789 2. 570175 2. 109173 2. 019808 2. 871278  
1. 042029 3. 75918 3. 031615 4. 350004 2. 332637 1. 707498 2. 991678 2. 97071 2. 823745  
5. 797878 6. 528309 6. 650622 1. 99212 6. 469792 6. 472629 4. 331319 5. 813755 8. 80535  
2. 577106 1. 633306 3. 290375 1. 644007 1. 760429 2. 30411 1. 419356 2. 090298 1. 928735  
0. 771151 1. 077855 0. 866053 0. 907341 1. 537134 1. 041493 0. 893851 1. 058943 3. 50992  
2. 046302 1. 897719 2. 508926 3. 419809 2. 424013 2. 442619 1. 74066 2. 506386 2. 378169  
1. 511701 2. 046251 3. 222208 3. 4393 1. 20395 6. 944639 4. 315941 2. 306517 3. 065983  
5. 412917 4. 557901 4. 865809 2. 452646 4. 413708 4. 944486 5. 072537 3. 796264 3. 487822  
5. 004544 5. 255436 5. 144583 4. 15395 5. 008938 4. 610929 4. 406294 4. 855054 4. 34889  
2. 151619 2. 385155 1. 901855 1. 602952 1. 844139 1. 474509 1. 737952 2. 199907 1. 686997  
8. 648888 8. 939642 8. 537736 8. 597944 8. 817911 8. 921954 8. 487345 8. 749788 8. 243888  
1. 189786 1. 907481 2. 270234 1. 416969 1. 127118 1. 466087 1. 644213 2. 159097 1. 784106  
1. 633216 1. 640803 1. 733645 2. 772781 1. 091142 1. 740373 1. 768144 2. 183709 1. 965085  
8. 456427 8. 788773 8. 666945 8. 721805 8. 683164 8. 410161 8. 748462 8. 537685 8. 629332  
7. 341294 7. 021428 7. 161556 6. 242734 7. 144725 6. 837891 7. 398856 7. 083768 7. 476779  
1. 005695 1. 312233 1. 542998 1. 989605 1. 174255 1. 07451 1. 651552 1. 106377 1. 126697  
3. 179803 3. 244584 3. 637663 2. 721594 1. 958479 2. 9172 2. 248024 2. 994387 2. 740712  
4. 399178 4. 266579 4. 416204 5. 408023 4. 17238 4. 052507 3. 903777 4. 243304 5. 478128  
1. 766889 1. 544007 1. 583858 2. 005571 1. 384563 1. 287401 1. 665665 0. 895222 1. 239679  
2. 061642 1. 350316 1. 992556 1. 339585 1. 202251 2. 723187 4. 657619 1. 152613 1. 157752  
2. 384299 2. 249594 2. 382113 2. 927816 1. 963724 2. 065956 2. 872177 2. 637696 2. 147243  
2. 165218 2. 495438 1. 572326 3. 355378 3. 757345 1. 09583 1. 819168 1. 383151 2. 917069  
6. 189751 5. 872133 6. 45441 6. 360765 5. 407012 7. 496116 5. 948746 5. 937296 5. 733181  
1. 792966 1. 310617 2. 330401 2. 429488 2. 027155 2. 090209 2. 960342 2. 959287 1. 586027  
1. 205397 0. 705739 1. 045937 0. 657571 0. 984008 1. 518848 0. 78997 1. 277925 0. 998742  
6. 622936 6. 384657 6. 172786 5. 794736 6. 023515 6. 255905 5. 845352 6. 437145 6. 656223  
0. 748392 0. 952411 0. 99121 1. 588372 1. 253264 1. 254542 0. 962334 1. 605465 1. 355333  
11. 52309 10. 96778 11. 17204 10. 9098 11. 05527 11. 13475 11. 4766 10. 73783 11. 41273  
1. 472471 1. 003394 1. 144019 1. 154275 0. 950096 2. 839392 0. 871685 0. 858261 1. 177676  
5. 221403 5. 201589 4. 854494 5. 161178 4. 966811 3. 889871 4. 045725 5. 191907 4. 778789  
6. 261357 6. 894502 6. 461292 5. 603469 7. 420582 6. 488717 6. 912828 6. 867121 6. 379821

6. 288102 6. 529527 5. 942997 6. 091914 6. 362285 5. 821033 6. 704619 5. 993131 6. 538412  
1. 464816 1. 158018 1. 005713 1. 663802 1. 321885 1. 821711 1. 628309 1. 175095 2. 281275  
4. 80822 6. 559158 5. 659867 6. 490772 5. 471352 5. 34143 3. 95421 5. 139457 6. 413864  
4. 248426 4. 932846 4. 825785 4. 612228 5. 338813 5. 477432 5. 858833 4. 617672 4. 659415  
7. 450946 7. 345164 6. 87741 6. 804663 7. 404021 6. 773394 7. 988831 7. 491515 7. 687  
2. 988028 2. 76585 3. 031531 2. 394474 3. 800143 3. 885895 3. 35234 2. 891567 2. 921789  
6. 364335 5. 47319 6. 224287 6. 627939 5. 874025 5. 775769 6. 692412 5. 346998 6. 448213  
8. 831542 8. 615528 8. 371563 8. 366058 8. 610545 8. 291512 9. 099492 8. 492748 8. 960675  
5. 380231 5. 575314 5. 367086 4. 549484 5. 763108 5. 721642 5. 421086 5. 624906 4. 397003  
8. 989283 9. 112189 9. 232718 8. 832001 9. 356032 9. 265898 9. 488542 9. 045588 9. 116045  
3. 948492 4. 894605 5. 570254 3. 747434 4. 802116 4. 610662 4. 638256 4. 842225 4. 698843  
1. 810504 1. 228321 2. 210726 1. 834599 1. 79577 1. 497965 1. 57827 1. 0474 1. 896191  
7. 911049 7. 817991 7. 031554 7. 687526 8. 181628 7. 325683 8. 098728 7. 823501 7. 977316  
7. 739633 7. 856267 7. 440346 7. 569871 8. 332496 7. 132815 8. 269353 7. 789505 8. 55796  
7. 74885 7. 579082 7. 333508 6. 417219 7. 897662 7. 029635 7. 626741 7. 480101 7. 479882  
6. 903817 7. 332646 6. 919278 7. 110084 7. 500514 6. 461296 6. 983045 7. 00264 6. 560684  
0. 966483 1. 512859 1. 55674 1. 644191 1. 308591 1. 194209 1. 151103 1. 023923 1. 345064  
6. 444029 6. 630968 6. 14461 5. 832414 6. 521196 6. 686192 6. 183706 6. 469281 5. 628384  
7. 227751 7. 215228 6. 916923 6. 729129 6. 884671 6. 799952 7. 21679 6. 958223 6. 757533  
8. 626864 8. 504396 8. 495399 7. 703594 8. 192057 8. 711586 8. 803992 8. 334372 8. 161359  
9. 610433 9. 585666 9. 611358 9. 517177 9. 827854 9. 402864 9. 802326 9. 711396 9. 833483  
4. 438118 3. 411007 4. 723322 3. 389116 4. 142914 3. 938228 4. 351314 4. 420742 5. 575096  
1. 03876 1. 51363 1. 262825 0. 779644 1. 254002 2. 033017 0. 704297 0. 728805 0. 806788  
8. 088169 7. 453576 8. 104552 7. 953337 8. 336257 7. 539434 7. 920843 7. 608812 6. 055251  
3. 823889 3. 666581 5. 352916 3. 497765 4. 51604 2. 249064 4. 494239 4. 896438 3. 135347  
5. 800719 6. 173789 6. 045248 5. 20121 6. 208331 6. 457731 6. 072009 5. 791127 5. 779122  
4. 390157 4. 264705 4. 821369 2. 860006 4. 156971 3. 425023 3. 785636 4. 026904 3. 41507  
1. 527894 1. 800572 2. 328516 2. 608392 1. 705141 2. 519026 1. 537729 2. 19662 1. 477366  
6. 019738 5. 562897 5. 733004 5. 944528 5. 987222 5. 558043 5. 835694 5. 770463 5. 05045  
6. 053263 5. 41197 5. 865695 5. 413711 6. 038518 6. 030323 5. 652449 6. 619059 6. 239713  
2. 778611 3. 022946 2. 007229 1. 787073 2. 917315 2. 984894 2. 204524 2. 485302 3. 961142  
9. 029385 9. 185154 9. 100666 8. 615545 9. 054417 8. 676262 8. 788046 9. 242448 9. 146379  
8. 448049 8. 522256 8. 493318 7. 778943 8. 315762 8. 322828 7. 887314 8. 544822 7. 640361  
5. 703747 6. 63034 6. 473846 5. 039647 4. 934248 6. 219155 4. 828226 6. 480363 3. 934594  
4. 771678 4. 806485 4. 053483 5. 273442 4. 235668 4. 169679 4. 107531 3. 645446 4. 961155  
1. 266252 0. 738308 0. 69625 1. 295464 1. 013569 0. 923452 1. 779284 0. 857821 1. 216402  
5. 395087 5. 854316 6. 172436 4. 68168 5. 526604 5. 787678 5. 375295 5. 25943 5. 160767  
4. 09556 4. 332077 4. 628421 4. 283307 5. 536558 4. 22621 3. 735813 4. 395403 3. 555445  
3. 49496 3. 456324 3. 634524 1. 867637 3. 49198 4. 117206 3. 058785 3. 203539 2. 876207  
7. 38479 7. 201356 6. 889671 6. 872007 7. 263933 7. 071325 7. 34772 7. 246472 7. 141024  
8. 295903 8. 465792 8. 31363 8. 420173 8. 714662 8. 142256 8. 186661 8. 425128 8. 10731  
8. 841515 8. 571287 8. 565447 8. 702402 8. 492119 8. 57092 8. 838238 8. 311956 8. 390882  
1. 784404 2. 060365 2. 203467 1. 659045 2. 15255 2. 158383 2. 327841 2. 168461 1. 964242  
5. 943067 6. 011772 6. 090392 7. 502453 5. 917728 5. 871611 5. 695034 5. 58397 5. 789405  
6. 638012 6. 362763 5. 997366 5. 337718 5. 925458 6. 527128 6. 183242 6. 019696 6. 462019  
0. 925478 1. 214034 0. 484275 2. 34335 1. 179094 1. 351637 1. 005502 1. 186825 2. 236293  
4. 790725 2. 569316 3. 311782 2. 159764 2. 710883 3. 9555 2. 360152 3. 404404 2. 51661  
6. 629493 6. 325 6. 475426 6. 317388 6. 74761 6. 531714 6. 731828 6. 520094 7. 137278  
2. 157014 1. 800623 1. 671394 1. 863035 1. 605401 1. 358311 1. 929974 2. 164301 1. 813955  
4. 825571 5. 194849 5. 117506 5. 066379 5. 365852 5. 58344 5. 69627 4. 756321 4. 485922  
7. 978004 8. 416363 8. 209332 8. 380961 8. 807799 8. 152681 8. 220314 8. 441235 7. 997346

5. 776857 6. 643168 6. 670137 5. 025764 6. 334272 7. 17797 5. 616889 6. 890571 6. 23575  
5. 883086 5. 05849 5. 445774 6. 183531 5. 79397 6. 04208 5. 322964 5. 987456 6. 309515  
1. 495938 1. 21814 1. 945557 1. 83018 1. 587066 1. 610344 1. 273047 1. 468975 1. 812736  
2. 663891 2. 417801 3. 096641 3. 349939 2. 304021 1. 74028 2. 291524 2. 35574 2. 504984  
5. 878088 5. 997452 5. 650425 5. 578316 5. 990301 5. 558025 6. 317397 5. 737789 6. 066732  
4. 159201 5. 137803 4. 746569 4. 320066 4. 739351 4. 34233 3. 896768 4. 822007 2. 761679  
6. 868712 7. 360502 7. 458862 6. 754476 6. 973694 6. 864698 7. 173122 7. 295794 6. 539247  
4. 118928 4. 709435 4. 085456 3. 82309 3. 987843 3. 937985 4. 443877 4. 452048 3. 704371  
5. 304495 5. 388423 4. 745928 3. 47003 5. 32332 4. 617048 5. 206897 4. 624711 5. 457823  
9. 865972 9. 633537 9. 830012 9. 722196 9. 695404 9. 616999 10. 12778 9. 830757 10. 24448  
3. 703906 3. 532294 3. 841113 4. 280177 3. 912399 3. 67638 2. 975366 3. 173929 3. 319641  
7. 2853 7. 384859 6. 427619 5. 572475 6. 791144 7. 679674 6. 926119 5. 767759 6. 537041  
2. 750459 3. 251088 3. 081332 3. 237376 4. 093085 3. 726057 3. 931181 2. 761315 3. 320457  
0. 790379 1. 815001 1. 037858 1. 315878 1. 145901 1. 360079 1. 281775 0. 956529 1. 689787  
5. 680498 5. 473452 6. 453119 4. 413129 5. 084623 5. 116492 5. 141394 5. 678617 4. 895815  
1. 960212 1. 650427 1. 812317 1. 821947 3. 258122 2. 314309 3. 43897 1. 971837 2. 073927  
7. 534853 7. 369796 7. 345117 7. 795699 7. 780447 6. 73517 7. 585971 7. 458629 7. 726435  
6. 291044 6. 750494 6. 180857 5. 262252 6. 412314 5. 276356 6. 275985 6. 025993 5. 523586  
6. 885737 6. 809623 6. 785822 4. 88847 6. 160514 6. 378251 6. 911953 6. 770214 6. 897397  
7. 219481 7. 957523 7. 525789 7. 505553 8. 320097 7. 860351 8. 092304 7. 697094 7. 289195  
9. 063098 8. 705082 8. 833724 8. 843201 8. 175534 8. 477348 9. 057488 8. 438985 9. 191228  
2. 362534 1. 367209 2. 352262 1. 997213 1. 731013 1. 490698 1. 586422 1. 575273 1. 972852  
7. 647495 7. 366605 7. 773919 7. 428426 7. 641718 6. 712316 7. 463328 7. 094367 7. 925075  
5. 16965 4. 867708 4. 536728 5. 425185 5. 547289 5. 406114 5. 74376 5. 097428 5. 503666  
6. 805131 7. 059117 6. 644222 6. 443414 6. 505258 7. 136132 6. 562669 7. 082088 6. 83172  
4. 45208 4. 422148 4. 421906 4. 957792 5. 188668 4. 433619 4. 833922 5. 032196 3. 772934  
5. 76552 5. 975634 5. 661201 5. 053969 5. 637893 5. 422087 5. 772271 5. 741721 4. 366809  
8. 990586 8. 854489 8. 984192 8. 984608 8. 89873 8. 482583 9. 252824 8. 851713 8. 872638  
6. 397755 6. 110433 6. 075446 7. 745407 6. 444087 6. 275871 6. 278977 6. 465949 6. 653887  
7. 887607 8. 063536 7. 907487 7. 660699 8. 090774 8. 120102 8. 131258 8. 084883 8. 124288  
1. 729395 2. 334701 1. 630284 6. 129373 3. 201884 1. 45287 1. 69401 2. 977969 3. 817713  
1. 556538 1. 62249 2. 340295 1. 749881 1. 469951 1. 485703 1. 494032 1. 398106 2. 823675  
7. 057696 6. 244073 6. 218689 6. 555898 6. 5208 6. 483846 6. 52239 6. 438706 7. 445991  
1. 406839 2. 183976 1. 276289 1. 404091 1. 463838 1. 382683 0. 847592 1. 36273 0. 910207  
1. 325266 1. 484011 1. 126288 1. 61946 0. 931378 1. 345958 1. 010648 0. 873745 1. 313665  
5. 093904 4. 837603 4. 141931 5. 392743 4. 769734 4. 876634 4. 795571 5. 216122 4. 714492  
8. 733246 8. 529003 8. 529769 9. 199073 9. 126171 8. 356434 9. 320054 8. 69595 9. 176536  
2. 378434 1. 954388 1. 69169 2. 763859 2. 016375 2. 023711 2. 22322 2. 249401 2. 652202  
3. 308843 2. 935009 2. 655282 2. 745424 2. 435261 2. 642924 2. 306052 2. 599612 2. 495522  
1. 390143 0. 902564 1. 935861 1. 81868 1. 813807 1. 323665 1. 468691 1. 789343 0. 98396  
6. 017983 6. 117389 6. 263622 4. 601898 6. 627698 5. 16128 6. 395638 6. 140294 7. 082944  
3. 353779 3. 40365 4. 050698 5. 053051 2. 894669 4. 167476 4. 153243 3. 424308 3. 839022  
4. 671216 3. 486024 5. 264477 2. 548173 4. 066902 4. 655316 4. 379978 5. 025486 7. 081464  
6. 557257 7. 065691 6. 182189 6. 908685 7. 678048 5. 499232 6. 570212 6. 439079 6. 58657  
4. 400598 5. 343979 4. 933828 5. 433378 4. 803755 4. 925676 4. 711486 5. 047705 4. 374626  
3. 952987 4. 786268 5. 458985 4. 965876 5. 525372 4. 91685 4. 554853 3. 987621 5. 02888  
6. 622573 6. 523673 6. 523673 6. 689467 7. 030427 7. 278769 6. 528753 6. 859366 5. 463044  
3. 819771 4. 407565 3. 698066 4. 696439 4. 085605 3. 934905 3. 840609 4. 247997 2. 949989  
1. 583227 2. 098089 2. 33779 2. 7047 1. 569128 2. 000775 1. 454991 1. 81197 1. 526204  
1. 835616 2. 403405 3. 132354 1. 837767 1. 047078 2. 361134 1. 617283 2. 290782 1. 662764  
2. 765199 2. 778414 2. 743188 4. 111641 2. 757146 3. 990137 2. 763569 3. 376835 3. 460761

3. 521303 3. 561623 2. 675409 2. 552568 3. 291178 2. 966572 3. 201965 2. 553388 3. 542521  
3. 192729 3. 032194 3. 843216 4. 190604 3. 721361 2. 852213 3. 191462 3. 07518 2. 211225  
5. 654262 5. 973401 5. 472503 6. 520247 5. 89488 5. 828842 5. 469716 5. 397543 4. 914259  
7. 53459 7. 19485 6. 950696 7. 589813 7. 363153 6. 693162 6. 871738 7. 035593 6. 765947  
4. 044918 4. 23451 4. 696891 2. 961608 4. 235028 4. 337209 3. 516802 4. 073725 4. 656665  
6. 380706 5. 563059 5. 44617 6. 627987 5. 132827 5. 574145 5. 525164 5. 334607 5. 918635  
6. 64145 6. 773951 6. 449386 6. 926616 6. 794945 6. 791446 6. 638459 6. 984567 6. 881698  
9. 361941 9. 352651 8. 927106 9. 087083 9. 621363 8. 113974 9. 17781 8. 676797 9. 247024  
7. 450791 7. 258633 7. 229337 6. 550601 7. 345806 7. 12933 7. 490277 7. 06211 7. 42557  
2. 289114 1. 66684 2. 038509 2. 112337 2. 564865 1. 808892 1. 59609 2. 078905 1. 279216  
7. 016561 6. 921838 7. 012168 6. 688421 6. 784291 6. 023881 6. 767923 6. 975513 6. 33416  
8. 082788 8. 230542 8. 231758 7. 626534 7. 955707 8. 261623 8. 085779 7. 826455 7. 997615  
8. 091981 7. 869177 7. 867175 6. 676256 7. 332847 8. 313397 7. 420372 7. 439363 7. 577505  
3. 257926 3. 325784 2. 833885 3. 250081 3. 601596 3. 569576 3. 078702 3. 514784 3. 407554  
4. 089218 3. 347672 4. 577608 4. 767094 3. 574784 3. 689985 3. 254792 3. 653042 3. 79776  
5. 448743 6. 561751 7. 017048 5. 190225 5. 509156 6. 381575 6. 195499 5. 537609 5. 227339  
6. 833175 6. 719462 6. 844929 6. 359053 6. 648531 6. 784075 6. 712775 6. 348235 7. 501828  
6. 74379 7. 381687 6. 928582 6. 829363 7. 643178 6. 510544 6. 588297 6. 881966 6. 264113  
1. 420794 1. 662301 1. 513164 1. 913769 1. 435139 1. 809086 2. 184846 1. 633393 1. 496921  
3. 548009 3. 863773 3. 224798 3. 176688 2. 347729 3. 602125 2. 663721 3. 273818 3. 955509  
5. 590861 5. 112111 5. 989159 6. 866089 5. 798423 5. 361048 5. 652784 5. 452789 5. 752765  
4. 972696 5. 744727 5. 160605 5. 689749 5. 352787 4. 5158 4. 784888 4. 979915 5. 572398  
8. 264218 8. 199637 8. 261497 8. 251289 8. 140095 8. 480684 8. 70061 8. 156508 8. 478483  
5. 779088 3. 043581 6. 397109 4. 975624 3. 624442 3. 703304 4. 985567 3. 16538 3. 42448  
2. 425846 1. 649888 2. 691875 3. 564361 1. 757306 2. 556129 2. 710734 3. 26586 2. 562228  
1. 569306 1. 215216 1. 21155 2. 050685 1. 806708 2. 469482 1. 372664 1. 512612 1. 871109  
5. 359183 5. 579086 5. 942432 5. 654315 5. 529022 5. 531775 5. 486491 5. 251512 4. 87545  
5. 160895 4. 968319 5. 059883 4. 394376 5. 810057 5. 684276 5. 924801 5. 861657 7. 288119  
4. 870884 4. 970657 4. 347243 3. 108283 5. 185772 4. 340809 4. 806227 5. 288968 4. 721798  
8. 035057 7. 835076 7. 471008 7. 215683 7. 7718 7. 889652 8. 2482 7. 932349 8. 026971  
7. 617471 6. 947185 7. 091511 6. 32856 7. 442867 6. 989278 7. 488193 7. 290494 7. 506193  
5. 505776 4. 937028 4. 846063 4. 683606 5. 13923 5. 477472 4. 773413 4. 592898 4. 705497  
7. 578249 7. 666968 7. 461258 7. 267767 7. 804003 7. 168193 7. 514286 7. 798038 7. 368058  
1. 793481 2. 130882 1. 925305 1. 989524 1. 489088 2. 481051 1. 300173 1. 538246 1. 018399  
5. 414469 4. 614804 6. 249507 5. 317644 5. 900223 5. 134634 5. 306353 5. 968498 7. 188817  
6. 114535 5. 688836 5. 840687 6. 159593 5. 537467 5. 961658 5. 551269 5. 771671 5. 729491  
6. 951688 7. 180813 6. 510086 6. 636624 6. 687382 6. 645401 6. 951757 6. 924203 7. 171403  
7. 175083 7. 23394 7. 345501 7. 164909 7. 340827 7. 501031 7. 582708 7. 411008 7. 525169  
1. 257293 1. 655251 1. 093362 0. 809919 1. 436442 1. 517249 0. 918179 1. 575311 1. 740407  
7. 002039 7. 256899 7. 202635 7. 10225 7. 592661 6. 933969 7. 149629 7. 324711 7. 257505  
7. 024127 6. 596294 6. 301575 6. 017371 6. 786687 6. 715158 6. 224074 6. 63756 6. 382099  
3. 319216 2. 179911 3. 080858 2. 756128 2. 396284 3. 427449 2. 997172 2. 857303 2. 635098  
2. 53918 2. 824216 3. 009292 2. 991437 2. 276652 2. 288683 1. 764475 1. 703854 2. 302517  
8. 078987 7. 979648 7. 692195 7. 575598 8. 084864 7. 877841 8. 36739 7. 891718 7. 918409  
3. 412522 3. 969617 3. 742873 3. 847318 3. 386055 4. 743311 2. 930443 4. 187897 3. 531162  
2. 320538 2. 230093 2. 144108 1. 66905 2. 444222 1. 977163 2. 111222 2. 012149 2. 24259  
7. 390493 7. 854166 7. 700449 7. 552634 7. 530674 7. 630689 7. 758508 8. 136384 7. 794778  
6. 802629 7. 766626 6. 968529 6. 510688 6. 751884 6. 953082 7. 083846 6. 831754 7. 00429  
8. 321146 8. 389135 8. 38813 8. 534278 8. 429915 8. 260091 8. 502884 7. 985434 8. 410219  
1. 534844 1. 698368 3. 275947 1. 862413 3. 880527 2. 650022 2. 226029 2. 583902 2. 191827  
1. 181753 1. 726842 1. 576504 1. 297093 0. 744362 1. 194935 1. 581575 1. 503988 1. 039791



5.784417 6.391626 6.65792 6.285512 6.110776 5.938583 5.903683 5.526939 6.093922  
7.202405 6.653788 7.083899 6.681686 6.128206 7.056831 6.703995 6.351567 6.921507  
3.901483 5.623077 3.185787 3.352233 4.37272 3.854986 4.198964 3.883443 4.07606  
7.933073 7.760255 7.466659 7.344529 7.854295 7.565502 8.304462 7.507983 6.369312  
2.388991 2.219653 2.47501 2.286722 2.253184 1.933832 1.956305 2.397698 2.982822  
9.280234 9.137518 9.40634 8.373407 8.948089 8.68669 9.206327 8.859627 8.940741  
1.544426 0.967166 0.899462 1.018831 0.579986 2.157785 0.902903 0.96864 1.228146  
1.272813 1.190475 1.08065 1.71682 1.393369 1.658493 1.168843 1.247104 1.532137  
5.020459 5.865607 5.383038 5.316556 5.454646 4.991507 5.730894 5.954304 5.817295  
1.608064 2.093027 1.438257 2.151931 1.826285 2.412507 1.371082 1.828092 2.557729  
5.859405 6.191818 5.505962 5.559641 6.058328 5.6197 5.651426 5.143977 5.039867  
4.386081 5.499619 4.224403 5.800097 4.570548 3.719475 4.772019 4.074474 4.630987  
7.0971 7.068776 6.680583 6.704561 7.358471 6.977993 6.629538 7.279508 7.157313  
2.506886 1.956431 2.561781 2.772808 1.841231 2.007727 2.347395 1.972964 3.064455  
1.537093 1.693868 1.502488 1.985882 1.243326 2.346881 1.147153 1.553828 1.325932  
4.862724 4.407822 3.46572 3.518459 5.636769 3.955536 5.479991 5.091572 5.064536  
4.6796 4.430669 3.289239 4.16686 3.624344 4.602603 3.356775 4.099813 1.691392  
6.158637 6.646452 6.947429 6.405442 5.928261 6.217111 5.867747 6.82418 5.473862  
2.091167 1.285401 2.101361 1.417656 2.068184 2.200558 2.091571 1.826743 1.785934  
3.810358 3.550735 3.861524 4.575653 4.051983 3.491464 4.395455 3.425717 4.212026  
4.016699 3.825103 3.52128 4.339184 4.184424 3.670621 3.854192 4.006581 4.296538  
4.735951 3.907846 5.371685 3.264657 5.011702 4.26006 4.383349 4.625398 3.089356  
1.922652 1.847963 1.390601 0.965596 1.745459 1.173022 1.335364 2.010206 1.396634  
3.092723 4.409597 3.758098 2.656528 2.376972 3.661127 2.544747 2.552353 3.739098  
1.486732 1.679617 1.250638 1.949575 1.460977 1.789023 1.740605 1.723226 1.19326  
1.528098 1.273482 1.759047 2.226324 1.530616 1.210994 1.202675 1.319622 1.016289  
2.290964 1.083704 1.122255 1.90012 2.050622 1.412035 1.113617 1.279822 1.086054  
5.706244 5.945052 5.366943 5.568715 5.618254 6.028742 6.000445 6.198623 6.536276  
4.214346 4.698392 4.716503 5.924301 4.151659 3.816972 4.165833 4.63355 3.344148  
5.555217 3.889466 4.528562 4.316915 5.212948 4.933252 5.109021 4.442026 4.598266  
7.072356 6.832105 6.581989 6.265032 6.503385 6.864987 6.550437 6.736619 7.50212  
1.832709 1.554999 2.872311 1.895209 1.987985 1.446513 1.915213 3.032038 2.183455  
5.327855 5.205185 4.820528 5.55165 4.932244 5.311417 5.41858 4.56998 5.622252  
7.451401 7.809077 7.662794 8.091778 8.242968 6.969967 7.875894 8.756004 5.566142  
2.37511 2.49829 2.811442 3.498182 2.067644 3.14561 2.788164 2.423939 2.680601  
1.473228 1.770738 1.689936 2.278894 2.380311 1.619446 1.86521 2.322742 2.404098  
3.002128 2.611206 3.096276 3.432402 2.758452 2.495385 3.209159 2.601043 4.083482  
2.78346 3.464773 3.285574 2.625761 3.048125 2.857926 2.610121 2.803392 2.417189  
7.719839 8.11713 7.472442 7.801918 8.540326 7.498692 7.838646 7.767268 7.852907  
4.651806 5.318207 5.365109 4.264604 4.952835 4.593619 5.450422 5.125826 4.09424  
7.423365 7.611396 7.654325 7.105042 7.533038 7.394908 7.794958 7.607579 7.319205  
3.044686 2.756323 2.057361 2.925208 2.483786 1.594378 3.342179 3.02992 2.780186  
7.148341 6.609926 7.448931 6.777357 6.981407 6.423912 7.234618 6.69532 6.645115  
4.043599 5.254962 3.973302 3.18963 4.683366 3.907156 4.173722 4.454964 3.131697  
7.817708 7.814757 7.583593 7.78376 7.941932 7.501033 8.175507 7.50269 7.808816  
6.516263 6.803359 6.099569 5.402608 6.928125 6.70463 6.366195 6.798538 4.420584  
6.556356 6.60576 6.664703 6.335126 6.37606 6.350178 6.824885 6.155005 6.612546  
2.264914 2.980285 2.856638 3.632027 2.912476 3.523079 3.177915 2.808079 2.403496  
1.296758 1.614511 1.482673 2.543305 1.705641 1.928112 1.64396 1.267054 1.527956  
4.738605 5.08045 5.326722 5.739425 4.682202 3.857129 4.618365 4.980761 4.600558  
4.788436 4.548585 5.398097 3.989521 4.461156 5.222067 3.851552 5.124429 5.150463

6. 897089 6. 922969 6. 668779 7. 257738 6. 698965 7. 293386 7. 008834 6. 589675 7. 138117  
5. 364773 6. 176527 5. 790863 5. 738941 5. 491142 5. 907315 6. 54028 5. 957351 6. 087883  
9. 260729 9. 357974 9. 31 9. 233819 9. 552343 9. 258891 9. 048819 9. 496616 8. 603774  
4. 661607 5. 490792 5. 058575 6. 051546 4. 331936 3. 163965 4. 815016 5. 184057 5. 540167  
1. 860783 1. 594158 1. 588356 1. 766101 1. 365672 1. 695276 1. 660865 1. 049716 1. 381418  
1. 546484 2. 697117 1. 969486 2. 568537 1. 574195 2. 640604 1. 805934 2. 034128 1. 858905  
9. 79692 9. 862607 9. 360743 9. 072464 9. 617796 9. 853361 9. 522087 9. 599399 9. 365446  
5. 952777 5. 960701 6. 088211 4. 391131 5. 911616 5. 526157 5. 796017 5. 587262 5. 230364  
3. 553061 3. 280869 2. 736411 2. 959719 2. 330581 3. 004949 4. 542972 3. 46264 2. 81922  
5. 385318 5. 166073 5. 756704 4. 375374 5. 016886 5. 38374 5. 557624 5. 480298 5. 345671  
1. 796428 2. 315448 2. 399995 3. 696432 2. 46529 2. 117128 2. 011951 1. 93717 1. 968722  
5. 115304 5. 872139 5. 565042 4. 586848 6. 032776 5. 030438 5. 382024 4. 667927 4. 255237  
4. 871808 5. 305156 5. 287622 6. 263668 5. 90538 5. 601068 5. 642351 5. 967157 5. 474211  
4. 894216 5. 291974 6. 110044 4. 071148 4. 625831 6. 001673 5. 324223 5. 729509 5. 780748  
4. 806177 5. 563491 4. 896631 5. 93324 5. 857021 4. 385937 4. 888317 5. 206427 5. 189787  
2. 289075 1. 825523 2. 202115 2. 369503 2. 090593 1. 963989 2. 735903 2. 093709 2. 697614  
2. 263456 2. 245439 2. 085185 2. 339059 2. 100828 2. 849581 2. 34683 2. 326797 2. 038958  
1. 793297 1. 611269 1. 893055 1. 995855 3. 274946 3. 334459 1. 824389 1. 927563 1. 850451  
6. 997176 7. 015847 7. 265187 7. 34366 7. 86002 6. 642862 7. 217063 6. 732808 6. 085356  
6. 664688 6. 290665 6. 351871 6. 312712 6. 59722 5. 597113 6. 840303 6. 946923 6. 896111  
5. 620576 5. 326898 6. 196157 3. 497605 5. 789972 6. 276861 5. 878174 5. 702349 3. 938786  
4. 905008 5. 073829 4. 563514 5. 506106 4. 668056 5. 211482 5. 540806 5. 431879 4. 90457  
4. 503354 3. 719945 3. 888205 4. 237484 4. 110958 3. 681994 4. 327861 4. 487871 3. 185162  
3. 173562 2. 655769 3. 729824 3. 696423 2. 704524 3. 249913 2. 586106 3. 177481 3. 290288  
6. 861604 7. 491472 7. 328887 7. 687134 7. 281381 6. 83854 6. 579913 7. 480471 5. 964398  
8. 925418 8. 963048 8. 753993 9. 207274 8. 876132 9. 338048 8. 664985 9. 179564 9. 003812  
7. 217736 6. 938749 7. 200299 7. 204553 7. 354227 7. 054006 7. 079065 7. 097587 6. 7893  
4. 100676 3. 191233 4. 234078 4. 261719 1. 790197 4. 088985 4. 849611 4. 404904 4. 777991  
6. 95018 6. 63323 6. 516902 6. 179614 6. 40934 6. 171841 6. 105254 6. 580657 6. 322611  
6. 318579 6. 23772 5. 726821 6. 800574 6. 344226 6. 34673 6. 758584 6. 251601 5. 654276  
2. 751782 2. 754092 2. 277825 1. 773446 2. 330462 2. 872942 2. 552035 2. 495313 2. 846052  
5. 997569 6. 228591 6. 052748 5. 529203 5. 779159 5. 844494 6. 516832 6. 574984 5. 989846  
5. 780771 5. 56046 4. 922454 5. 283472 5. 272898 5. 690614 5. 409021 4. 896945 5. 612442  
6. 758682 6. 543233 5. 947804 6. 420306 6. 409835 6. 015194 6. 512963 6. 431927 7. 019253  
2. 111999 2. 282557 2. 150965 2. 283491 2. 070802 1. 623506 2. 230784 2. 585141 2. 46734  
4. 205005 4. 095767 3. 710602 4. 451249 3. 546399 5. 212772 4. 819355 4. 291899 4. 96306  
8. 141119 7. 941828 7. 878556 7. 13407 7. 673549 7. 573419 8. 328972 7. 553847 7. 952633  
7. 54415 7. 68102 7. 484762 7. 703629 7. 810658 7. 550934 7. 555277 7. 354094 5. 612323  
2. 935151 2. 295376 2. 861169 2. 764562 2. 295376 2. 813878 2. 658731 1. 921137 2. 437875  
5. 705923 5. 932333 6. 318599 6. 726742 5. 860698 5. 707717 5. 34367 5. 939041 4. 88362  
7. 677095 8. 19326 8. 085752 8. 329937 7. 959918 7. 968664 8. 054765 8. 096608 7. 511204  
4. 404029 4. 519692 4. 866083 4. 203707 5. 404562 5. 136275 4. 724536 4. 978546 4. 128268  
7. 125582 7. 717978 7. 399011 7. 415963 7. 305916 7. 415602 7. 332882 6. 800986 6. 947132  
3. 545184 3. 685718 3. 068985 2. 446215 3. 219345 3. 790386 3. 772652 3. 356183 3. 031895  
6. 584537 7. 140386 6. 7748 5. 998737 6. 922531 7. 053181 7. 241528 6. 734701 7. 303326  
2. 861031 2. 443901 2. 85135 2. 985993 2. 615218 2. 9249 3. 003423 2. 714778 2. 613175  
9. 254857 9. 20568 9. 304541 9. 172545 9. 627023 8. 779108 9. 358981 9. 44863 9. 342459  
2. 887498 4. 181511 3. 307274 2. 028131 3. 718353 4. 436974 3. 019039 4. 29073 3. 11687  
5. 809391 5. 695329 4. 101225 5. 385395 6. 006882 4. 668473 6. 246171 5. 199539 6. 743525  
3. 859623 3. 579091 3. 982257 3. 312002 3. 55832 3. 870515 3. 95088 3. 388553 3. 475651  
6. 078517 5. 719063 5. 700824 5. 420381 5. 685616 5. 625254 5. 965656 5. 725654 6. 278665

1. 997053 2. 068907 2. 762647 2. 418865 2. 306052 1. 56487 2. 299619 2. 502486 2. 35553  
4. 515094 4. 255709 4. 897303 3. 907663 4. 183544 4. 723256 4. 031408 4. 744888 3. 034778  
3. 236758 2. 905097 3. 232423 3. 572614 3. 385818 2. 904559 2. 826203 2. 669803 2. 549853  
2. 882831 2. 821647 3. 29364 3. 443306 3. 368241 3. 452205 2. 925497 3. 444419 2. 547182  
5. 036596 5. 217221 4. 755524 5. 282177 5. 845996 4. 161884 5. 395927 4. 972014 5. 645231  
2. 491674 3. 482947 3. 74281 3. 014402 2. 634804 3. 184813 3. 043492 2. 734337 2. 623979  
5. 716173 5. 288937 5. 165348 4. 52607 5. 676068 5. 695621 5. 503722 5. 814715 5. 292277  
6. 437285 6. 010629 5. 951574 5. 929564 6. 266229 6. 466116 6. 351429 6. 271487 6. 281289  
4. 072893 4. 572832 4. 200855 3. 480631 3. 922588 4. 262713 3. 866855 3. 962057 2. 900742  
5. 315021 5. 846226 5. 10399 5. 973361 4. 82817 5. 095111 5. 887431 5. 285715 4. 978843  
5. 565306 6. 546696 5. 508732 5. 973948 6. 179966 5. 932793 5. 891096 5. 317375 5. 670809  
6. 289579 6. 508272 6. 10478 6. 025921 6. 629106 6. 221467 6. 709602 6. 615716 6. 895608  
3. 012957 2. 86415 3. 099592 3. 476396 2. 963134 3. 386359 2. 380505 2. 639023 2. 910715  
4. 680797 4. 419117 4. 254182 3. 694285 4. 779405 4. 553652 4. 185523 4. 06822 3. 452495  
3. 437303 3. 410352 2. 889978 4. 253534 2. 213667 2. 221201 2. 425837 4. 136924 2. 332229  
4. 939962 4. 616809 4. 29925 3. 76081 5. 564713 3. 659778 4. 166593 5. 676727 4. 092416  
7. 926358 8. 150419 8. 176364 7. 201864 8. 374085 8. 215174 8. 122061 8. 310059 7. 131335  
1. 369535 0. 755433 0. 761523 0. 982117 0. 750486 1. 082797 0. 774004 0. 709697 1. 310162  
5. 662895 5. 671768 5. 823204 5. 491052 5. 131126 5. 199247 5. 751934 5. 616864 5. 370567  
0. 902113 0. 968321 0. 938482 1. 257392 1. 572247 1. 360831 1. 118491 0. 977422 1. 620434  
6. 76587 6. 529264 6. 640299 6. 475484 6. 821544 7. 600169 6. 22764 6. 900932 6. 087444  
7. 297232 8. 130971 7. 979426 6. 126855 7. 3805 7. 564875 6. 575839 7. 734955 8. 165653  
1. 711688 1. 520231 1. 45638 3. 038437 2. 208043 2. 260735 1. 634463 1. 614054 1. 270936  
6. 410721 6. 025678 6. 466603 6. 12282 6. 953144 5. 429176 5. 568444 6. 308771 5. 9487  
11. 2302 11. 21568 11. 27418 10. 91622 10. 66861 11. 45584 10. 75406 11. 38351 11. 25399  
1. 658784 2. 823213 3. 838424 3. 838848 3. 120414 2. 468257 2. 273762 3. 63685 2. 46104  
5. 394242 4. 873563 5. 070423 5. 707357 4. 886559 4. 997915 5. 2733 4. 451977 5. 032574  
3. 462778 5. 499385 4. 631541 3. 502473 4. 471102 4. 377772 5. 199875 5. 101337 4. 013677  
3. 975654 3. 391569 3. 559471 4. 319019 3. 768065 3. 535627 3. 893996 4. 145085 1. 945099  
3. 28195 2. 912266 2. 671421 2. 743298 3. 333611 3. 533173 2. 752121 3. 93824 3. 60606  
3. 16086 2. 631334 2. 928863 4. 640846 2. 49132 3. 061829 3. 49632 3. 243728 2. 415819  
5. 247593 5. 37588 5. 408129 3. 596189 5. 355127 5. 438289 5. 150017 4. 954299 4. 91944  
4. 094682 4. 57743 3. 823552 4. 57561 3. 939871 4. 862538 4. 491065 4. 247959 4. 242781  
6. 165564 5. 635061 6. 347321 6. 59004 5. 937159 6. 367917 5. 680093 6. 038816 6. 829561  
1. 61691 1. 682482 1. 910875 1. 827961 1. 985746 1. 687858 2. 133585 1. 771183 1. 396744  
2. 234578 2. 755189 2. 832435 1. 823962 2. 517589 3. 303433 2. 891152 2. 709514 3. 605026  
3. 112089 3. 126199 4. 704803 3. 665837 3. 081303 3. 760588 3. 958626 3. 625729 2. 805906  
1. 767966 3. 302334 2. 677821 2. 985961 1. 316431 2. 975912 1. 237375 2. 26206 2. 262947  
7. 337472 7. 698473 8. 06773 6. 580679 7. 4403 7. 401957 7. 051692 7. 500357 7. 484763  
4. 52322 3. 977805 4. 222955 5. 756964 4. 346355 2. 906643 4. 267083 4. 364532 4. 797478  
1. 512615 1. 132031 1. 42525 1. 868172 1. 142051 1. 27898 1. 267015 1. 042235 1. 00745  
1. 602278 1. 858105 1. 697255 2. 193492 1. 61166 1. 779141 1. 952584 1. 369989 2. 815582  
6. 384016 6. 683484 6. 373144 5. 353151 6. 353192 6. 262024 6. 497795 6. 207901 6. 649153  
5. 305549 4. 992022 4. 989024 5. 579372 5. 452989 5. 149359 5. 256402 5. 171241 4. 541759  
2. 95516 3. 990466 3. 785196 2. 71345 3. 93647 3. 182052 4. 686704 3. 304793 2. 558873  
6. 195735 5. 18411 5. 098163 5. 162248 5. 437123 6. 727806 5. 225091 6. 55606 7. 043156  
4. 705375 4. 732053 5. 165936 6. 666748 4. 757882 4. 022406 5. 305973 5. 557946 6. 74752  
2. 731514 3. 190987 2. 508247 2. 277848 3. 525186 3. 802971 2. 555346 3. 214941 1. 575775  
8. 599253 8. 738121 8. 738595 8. 412736 8. 672775 8. 250923 8. 72966 8. 487387 8. 862044  
2. 633938 1. 702728 2. 282929 1. 456503 1. 809124 2. 027655 2. 03369 1. 539192 2. 456887  
1. 296326 1. 364711 1. 615713 1. 828102 1. 807261 1. 566893 1. 637785 1. 208695 1. 203767

2. 43982 1. 965613 2. 25092 2. 247337 2. 170917 2. 825186 1. 926015 1. 878502 2. 217786  
2. 468008 2. 124407 2. 072945 2. 158525 2. 966982 3. 664707 1. 375793 1. 951886 3. 142317  
2. 101333 1. 86598 2. 043307 2. 615095 2. 107012 1. 596129 2. 280027 2. 136126 1. 825824  
0. 991688 0. 866785 0. 853655 1. 070508 1. 020866 1. 009079 1. 058826 1. 253241 1. 902995  
0. 610581 0. 774199 0. 801937 1. 433758 0. 928269 1. 07682 0. 871457 0. 984137 1. 03869  
1. 003063 0. 592786 0. 761937 1. 09563 1. 084023 2. 180784 0. 894565 0. 684183 0. 759174  
0. 932331 0. 737988 0. 708126 1. 986024 0. 944381 1. 160034 1. 497765 1. 028943 2. 118393  
3. 656734 2. 651235 3. 369956 4. 042352 2. 874523 2. 603682 3. 584925 2. 983727 2. 633626  
1. 665698 1. 720975 1. 909163 2. 402165 1. 416772 2. 510443 1. 210948 1. 381853 2. 196406  
8. 55252 8. 96225 8. 477044 8. 296148 8. 137327 8. 804425 8. 970987 8. 465057 7. 952359  
1. 556857 1. 527178 1. 241878 1. 968619 1. 197935 2. 85545 2. 070045 1. 295298 2. 159339  
7. 05199 6. 636681 6. 785968 6. 199089 6. 55803 6. 191323 6. 833537 6. 785311 6. 662186  
1. 727013 2. 645962 1. 790221 2. 501709 1. 672641 1. 787474 5. 270225 1. 755917 3. 438699  
4. 602649 4. 637235 4. 070551 3. 685488 4. 780589 4. 280319 5. 196014 4. 762687 3. 655203  
4. 580304 4. 94197 5. 300235 5. 414158 4. 653196 4. 889513 4. 778994 5. 18603 4. 824385  
3. 069467 2. 270451 2. 52741 2. 614313 2. 301691 1. 865837 2. 029487 2. 930734 2. 680742  
4. 168156 3. 991209 4. 95391 4. 415444 3. 165755 3. 35375 3. 816562 4. 665979 3. 715132  
3. 847647 6. 539359 5. 36714 6. 122327 3. 675552 6. 528208 4. 616251 4. 240731 3. 469252  
6. 144805 6. 241411 6. 616116 5. 92508 6. 55574 6. 327443 6. 44012 6. 269489 4. 832902  
8. 024393 8. 177132 8. 189315 7. 286465 8. 421664 8. 417773 7. 844478 8. 608883 7. 596947  
5. 721635 5. 326883 5. 212997 4. 463339 5. 405057 4. 216266 5. 447123 4. 877039 5. 008084  
4. 707497 4. 618648 4. 276633 4. 223232 4. 583485 4. 357737 4. 507621 4. 456881 4. 227111  
2. 491404 1. 999068 3. 588723 3. 002687 2. 619669 1. 788497 1. 480576 2. 048656 4. 627444  
0. 773235 1. 325285 1. 154762 0. 986492 0. 8083 1. 130694 0. 858643 1. 314979 1. 208375  
3. 849937 3. 434029 5. 281709 6. 256614 3. 545111 4. 420125 3. 405611 4. 915897 3. 965421  
4. 016026 4. 378664 3. 813916 2. 30598 3. 630218 3. 699101 3. 423867 3. 978227 3. 035242  
1. 770078 2. 401778 1. 488791 1. 999422 1. 69472 2. 093591 2. 259589 1. 733564 2. 345755  
1. 978272 2. 209283 2. 761595 2. 418555 2. 569635 2. 127612 2. 474294 1. 949153 3. 353197  
1. 92279 1. 619863 2. 323288 2. 173823 3. 988911 2. 786302 1. 572343 1. 445482 1. 029752  
1. 291448 1. 424427 1. 105444 1. 235468 1. 304819 1. 256098 1. 520654 1. 042068 0. 823559  
1. 263 0. 822755 1. 149824 1. 206818 1. 112201 1. 152559 1. 205826 1. 123001 1. 268256  
1. 150135 1. 140009 1. 690987 1. 677919 0. 992328 1. 066884 1. 469954 0. 884524 1. 351288  
1. 355608 1. 440304 1. 28568 1. 280003 1. 265862 1. 449424 1. 237199 1. 434547 0. 743186  
1. 648029 1. 826499 2. 037979 1. 637024 1. 769626 1. 377153 1. 301304 1. 636264 1. 907765  
2. 720229 2. 684881 4. 626157 2. 575947 3. 502613 2. 185235 3. 835632 3. 366736 3. 334278  
3. 515177 3. 051483 3. 275601 4. 52381 2. 724244 3. 341763 2. 967777 2. 622345 2. 026054  
0. 947006 0. 516229 1. 004978 1. 154267 1. 188155 0. 881612 0. 828905 0. 918743 1. 122525  
0. 956251 0. 994712 1. 764307 1. 222253 2. 109726 1. 093674 0. 964845 0. 699557 0. 974753  
1. 020524 2. 95148 1. 034735 1. 273518 0. 96239 1. 50673 1. 314411 1. 1742 0. 902887  
1. 402201 1. 63527 0. 902352 0. 85648 1. 228385 1. 220187 1. 288765 1. 259058 1. 397891  
1. 264315 1. 140317 1. 547097 1. 573792 1. 525557 1. 919517 1. 099635 1. 325036 1. 142245  
1. 565041 2. 140843 1. 373317 2. 302657 1. 256699 1. 278933 1. 425789 1. 143385 1. 057392  
1. 382564 1. 50814 1. 002464 2. 709311 1. 512566 1. 340186 1. 026583 1. 317377 1. 223136  
1. 380636 1. 395002 1. 36903 2. 004394 1. 268438 1. 471815 1. 665134 1. 482357 1. 747364  
1. 15452 1. 042564 1. 195982 1. 339251 0. 758341 1. 231228 1. 380544 0. 834492 1. 804648  
1. 00396 0. 695109 1. 095891 1. 057901 0. 840226 0. 996986 1. 084462 0. 936284 1. 319565  
1. 673435 1. 276318 1. 017104 0. 891433 1. 359072 2. 411162 0. 678646 0. 891497 1. 176198  
2. 338804 2. 174914 2. 624391 3. 159279 2. 337571 2. 504319 2. 48472 2. 438578 3. 897189  
1. 710459 0. 92618 1. 379729 1. 526215 1. 112382 1. 300141 1. 781769 1. 011195 1. 473929  
1. 13486 1. 231714 1. 66096 0. 975351 0. 808326 2. 348402 0. 995199 1. 247226 0. 7682  
3. 073492 3. 664957 3. 374705 2. 499798 2. 664472 3. 348015 2. 318368 2. 852166 2. 676839

1. 429796 1. 843995 1. 310108 2. 456558 1. 514616 2. 206038 1. 30222 2. 053844 1. 490659  
2. 920378 2. 838594 3. 645968 3. 903067 3. 716254 2. 134962 3. 209724 3. 118696 4. 125188  
1. 033859 1. 155511 1. 066076 1. 039177 1. 624176 1. 412919 1. 226191 0. 827905 1. 984279  
1. 633531 1. 632951 1. 370801 1. 504116 1. 913127 2. 096921 1. 92068 1. 660675 1. 473868  
0. 754219 0. 93574 0. 761297 1. 036547 1. 14667 1. 152299 1. 012578 0. 679889 1. 126741  
4. 299054 3. 946215 3. 720126 3. 492306 4. 216027 3. 99998 4. 607787 4. 027794 3. 350811  
1. 035178 0. 592831 0. 961747 1. 323653 0. 674872 0. 811873 1. 197691 1. 592562 0. 483097  
0. 549574 1. 370716 1. 247568 1. 370716 1. 236715 1. 602129 1. 291241 0. 887234 1. 144623  
0. 884966 0. 817479 1. 205114 1. 574672 1. 654822 0. 646822 0. 759216 0. 815176 0. 868561  
1. 000881 1. 045988 0. 68994 1. 104784 0. 497221 1. 058731 0. 940983 0. 929021 1. 074686  
6. 469279 6. 226601 6. 358642 6. 179653 6. 231668 6. 123188 6. 003746 6. 210464 5. 707172  
0. 976046 1. 067252 0. 978715 0. 930316 1. 729891 2. 916752 0. 677705 1. 122392 1. 035231  
0. 733543 0. 88166 1. 232333 1. 764755 1. 237646 2. 984014 1. 102296 1. 178991 1. 465217  
0. 712932 0. 846206 0. 696833 0. 851351 0. 962726 1. 514502 1. 224189 0. 591502 1. 517112  
2. 085545 2. 634096 1. 434239 1. 55556 1. 969096 2. 811688 1. 619822 1. 855476 2. 228145  
1. 229741 0. 543506 0. 929866 0. 968091 0. 734715 1. 052915 0. 887381 0. 542861 1. 149325  
0. 567957 1. 420952 1. 051119 1. 004241 1. 201662 1. 420847 1. 012303 1. 725263 0. 762278  
1. 034298 1. 027206 1. 447538 2. 239849 0. 95592 1. 346043 1. 174087 1. 222001 1. 190592  
1. 102461 1. 337047 1. 392699 2. 21091 1. 664183 1. 040352 1. 109354 1. 39709 1. 085113  
1. 083738 2. 356415 2. 552139 1. 582528 1. 844906 1. 073792 1. 072274 1. 716765 2. 691174  
9. 355455 9. 797868 9. 504161 9. 421079 9. 852182 10. 56578 9. 627286 10. 13848 9. 458746  
2. 122389 2. 720059 1. 925584 2. 351919 2. 36171 2. 226752 2. 02803 2. 003457 1. 948359  
1. 126926 0. 939576 1. 736049 1. 006462 0. 915198 1. 00486 0. 909451 1. 190414 0. 88053  
0. 291291 0. 230001 2. 904836 0. 637293 1. 850646 1. 0371 0. 813013 1. 618987 1. 263776  
1. 707237 1. 236904 1. 159486 1. 733152 1. 082391 1. 128629 1. 157036 0. 702113 0. 997192  
1. 672239 1. 472457 1. 753454 1. 555812 1. 823849 3. 586904 1. 432222 1. 323715 1. 786528  
0. 750455 0. 450486 0. 822388 1. 686914 1. 237634 1. 524395 1. 095183 0. 817183 1. 214045  
1. 496067 2. 032484 1. 461652 1. 189962 2. 305986 1. 714265 1. 228437 2. 004616 2. 147956  
6. 232967 6. 522509 6. 027764 5. 39694 6. 427479 6. 190915 6. 169762 6. 478933 7. 034973  
0. 734603 1. 073641 1. 111969 1. 133723 0. 928365 1. 153595 0. 841477 1. 061916 1. 597532  
1. 645665 2. 312941 2. 257741 3. 520032 1. 227486 1. 632697 1. 18991 2. 035168 1. 499057  
0. 720417 0. 962022 0. 821026 0. 988269 0. 92768 1. 759396 1. 175047 0. 924223 0. 520714  
1. 052894 0. 66952 0. 697903 0. 904696 1. 493972 1. 006211 1. 030604 0. 721776 0. 44835  
1. 773906 3. 007939 1. 748356 4. 647937 2. 19398 2. 908516 1. 652528 2. 289285 3. 082462  
1. 711426 1. 231405 1. 296962 1. 699893 1. 040989 1. 255162 0. 947281 0. 821112 1. 149731  
0. 929759 0. 868483 0. 819766 1. 563549 1. 35604 0. 707164 0. 872218 0. 980511 0. 965677  
0. 838618 1. 020693 0. 650893 1. 043109 2. 878979 1. 214372 2. 917602 0. 6428 1. 563264  
0. 480168 1. 885702 3. 203035 1. 137299 1. 682218 1. 886315 2. 070514 1. 385026 1. 454203  
0. 546809 1. 004319 0. 858638 0. 639096 0. 985765 2. 590454 1. 642007 1. 787677 1. 445746  
1. 570394 2. 09173 2. 724794 2. 29042 1. 757061 2. 585457 2. 29042 1. 854135 1. 553473  
3. 226604 3. 768954 2. 311365 4. 036369 2. 98325 2. 676534 3. 032746 2. 703367 4. 14849  
1. 676679 2. 37545 2. 926579 2. 912234 1. 860569 2. 545148 1. 801469 1. 998268 1. 974132  
2. 713124 2. 041927 1. 22307 1. 254709 0. 942072 1. 896217 2. 693392 1. 514927 2. 010518  
1. 303405 1. 661714 1. 250705 1. 749066 1. 628382 0. 940681 1. 218905 1. 275214 1. 952186  
2. 234493 2. 766807 2. 107208 4. 24981 1. 749458 2. 159474 2. 172404 2. 090466 2. 430857  
0. 838722 1. 224843 0. 825987 2. 387495 0. 498863 1. 110293 1. 529233 1. 634997 2. 126481  
1. 714272 1. 712279 1. 757588 2. 258649 2. 216538 4. 169114 1. 999856 3. 284868 2. 620833  
1. 381008 1. 825341 1. 941275 1. 534366 2. 120117 2. 285015 2. 032073 1. 186212 2. 447303  
1. 876955 0. 989598 1. 681701 1. 345433 1. 080526 2. 014952 1. 470546 1. 430159 1. 717464  
3. 451918 2. 540569 3. 657781 3. 325077 3. 353228 3. 395625 3. 385834 1. 827838 3. 847411  
1. 295269 0. 859493 1. 454594 1. 229463 1. 001893 1. 215824 1. 202652 1. 040583 2. 055753

1. 056561 0. 549171 0. 585386 1. 068616 0. 885987 1. 16429 0. 807352 0. 797006 4. 575608  
2. 106355 1. 731442 0. 951313 1. 754664 1. 20154 1. 506365 1. 093032 1. 157358 0. 789775  
1. 529888 1. 818362 0. 754936 1. 469343 1. 08558 1. 160913 3. 393102 0. 903695 0. 831743  
5. 654548 5. 518716 5. 802326 5. 915803 5. 704671 5. 068877 6. 08576 5. 208126 5. 247832  
1. 357829 1. 488354 1. 614851 1. 543088 1. 468197 1. 398951 1. 258784 1. 316979 1. 321814  
1. 338368 1. 794597 1. 057249 0. 883917 1. 046879 1. 732177 1. 02454 1. 260968 3. 260297  
2. 187021 2. 354549 2. 253725 3. 388212 2. 491411 2. 636256 2. 165836 2. 839467 2. 972058  
4. 226209 4. 014866 4. 137058 4. 174681 3. 756217 4. 672974 3. 629309 4. 014264 3. 363583  
6. 930721 7. 038931 6. 886776 6. 902699 6. 977726 7. 126088 6. 755117 7. 258547 6. 040472  
6. 982608 6. 998206 7. 457403 5. 575105 6. 583276 6. 67693 6. 714963 6. 331791 6. 135557  
7. 99765 7. 985917 7. 833542 8. 497434 8. 060998 7. 400834 7. 824385 7. 91523 7. 374868  
8. 580745 8. 436147 8. 926682 7. 702273 8. 31501 9. 168867 8. 457833 8. 80425 8. 363039  
5. 334032 5. 14166 4. 03148 5. 444569 5. 65308 5. 1924 5. 370488 5. 120077 4. 781785  
4. 000249 4. 534727 4. 971263 4. 250582 4. 82712 4. 310343 4. 46478 4. 898845 4. 58725  
5. 313504 5. 042153 5. 635071 5. 930411 5. 440739 5. 225613 5. 818698 4. 763898 5. 394814  
2. 269315 2. 674006 1. 984589 3. 171301 2. 445232 2. 726311 3. 393196 3. 091575 1. 791379  
3. 100026 3. 335442 3. 113156 4. 56522 3. 051916 3. 100805 2. 838964 3. 230115 2. 299132  
7. 256432 7. 682122 7. 579058 7. 267788 7. 628797 7. 492161 7. 028204 7. 288718 7. 124711  
3. 266893 3. 503899 3. 24548 2. 802196 3. 961332 2. 624601 3. 209207 3. 621382 3. 283433  
1. 079186 1. 178636 1. 1751 2. 694971 1. 07879 2. 149991 1. 387641 1. 364636 1. 584802  
2. 953935 2. 42075 2. 237262 2. 467815 2. 09526 2. 775648 1. 516885 1. 543876 2. 63677  
1. 726218 1. 510458 1. 709201 1. 893955 1. 614937 1. 751413 2. 377647 1. 400725 2. 079856  
5. 782854 6. 260728 6. 658996 4. 528961 6. 208061 6. 154805 5. 725072 6. 017487 6. 246889  
1. 137727 1. 212416 1. 908289 1. 946906 0. 960312 1. 304862 1. 299126 1. 655622 1. 013328  
5. 77829 5. 895629 4. 53318 5. 046568 5. 035019 5. 551906 5. 516129 5. 485589 5. 086879  
4. 407699 4. 832658 4. 92618 4. 746575 5. 137785 4. 500265 4. 420019 5. 036843 4. 607887  
4. 108402 5. 065425 4. 664744 4. 989534 5. 348133 4. 497318 4. 542594 5. 455992 3. 48849  
2. 100346 1. 814456 2. 083589 2. 453499 2. 272261 1. 590536 1. 774789 2. 152826 2. 552089  
2. 580983 2. 420059 2. 608983 3. 029116 3. 161292 2. 92265 3. 16317 2. 877773 3. 117067  
5. 107205 5. 000225 5. 27817 5. 787485 4. 972399 5. 205781 4. 954817 5. 086843 5. 126385  
5. 339741 5. 561446 5. 702631 5. 551745 5. 387863 5. 467325 5. 708549 6. 036842 5. 075736  
5. 717063 5. 806385 5. 756693 5. 496693 6. 06451 6. 056455 5. 781253 5. 945363 4. 178337  
7. 74241 7. 463037 7. 157597 6. 529097 7. 463195 7. 228809 7. 430863 7. 28524 7. 536842  
5. 748368 6. 057923 6. 059739 6. 438647 6. 47707 5. 267321 5. 785293 5. 886629 5. 297568  
1. 134879 1. 549557 1. 469099 2. 25471 1. 936794 2. 358304 1. 855245 1. 236247 1. 230865  
4. 363372 4. 605964 3. 78195 3. 093785 4. 086414 4. 961836 3. 562605 4. 134107 3. 18327  
4. 587967 4. 785227 4. 463928 4. 029947 4. 581606 4. 359237 4. 329053 4. 099188 5. 128084  
6. 035738 5. 681153 5. 131747 3. 655099 4. 986286 5. 035194 5. 04261 4. 988876 5. 366771  
8. 469245 8. 426817 8. 071549 8. 045254 8. 510423 8. 69743 8. 433533 8. 275769 8. 134559  
5. 421142 5. 593569 5. 385459 6. 640496 5. 677668 5. 270352 4. 866217 5. 813231 6. 039727  
3. 01862 1. 762368 2. 390415 2. 846699 1. 716995 2. 053937 1. 788243 2. 78569 1. 547726  
6. 303125 7. 380665 7. 173908 6. 96589 6. 989683 7. 354602 6. 440071 6. 964408 5. 9092  
8. 937339 8. 634594 8. 848017 8. 068142 9. 227639 9. 236987 9. 151865 8. 947898 7. 938223  
5. 540491 5. 297764 5. 727245 4. 696577 5. 349065 5. 393194 5. 727445 5. 380619 7. 032079  
2. 415435 2. 21696 1. 397563 1. 348297 1. 396143 1. 635697 2. 074052 2. 269856 1. 154898  
5. 63084 5. 180107 5. 828507 5. 684501 5. 761304 5. 391801 5. 700155 5. 765911 5. 686642  
1. 128846 1. 172403 1. 359637 1. 754036 1. 352732 2. 779072 2. 107552 1. 13731 1. 326009  
7. 146429 7. 136605 7. 287057 6. 749394 7. 140562 7. 189943 7. 126879 7. 074596 6. 964121  
1. 886865 2. 524469 1. 986981 2. 555621 2. 56138 2. 081445 2. 244685 1. 051018 3. 872224  
1. 885887 2. 20672 1. 821024 1. 49573 2. 079099 2. 170749 1. 981807 1. 597005 1. 362986  
3. 499097 3. 761847 3. 895356 3. 613652 3. 521367 3. 81982 3. 664763 3. 665541 4. 084349

2. 354449 2. 064794 2. 146981 2. 856008 2. 429688 3. 184144 2. 067058 2. 688303 2. 103939  
5. 94444 5. 49175 5. 607514 5. 266433 5. 887586 5. 596273 5. 791527 6. 087021 4. 839445  
5. 971902 5. 404 5. 77117 5. 462414 5. 736098 5. 997767 6. 21182 5. 359586 5. 62964  
4. 901226 4. 27278 3. 891396 5. 096018 5. 051669 5. 439346 4. 898748 4. 824298 4. 55457  
5. 383378 5. 445863 5. 19683 6. 322504 5. 797133 5. 068662 5. 46693 5. 331543 6. 167732  
6. 307264 6. 298346 6. 054104 5. 026544 6. 838595 6. 047603 6. 608438 6. 576239 6. 040702  
5. 299503 5. 535971 5. 585661 3. 541678 5. 521877 5. 71294 5. 538626 5. 551533 5. 353357  
1. 503642 1. 756833 2. 55164 1. 561906 1. 246146 1. 384279 1. 921778 1. 838478 1. 16548  
5. 865595 6. 160633 5. 969001 5. 729165 6. 303622 6. 134407 5. 908711 6. 270231 4. 384296  
6. 721039 6. 902729 6. 496503 7. 539481 7. 124064 6. 88489 6. 950578 6. 633489 6. 239646  
9. 533212 9. 289131 9. 405254 8. 91364 9. 118189 9. 150912 9. 79251 9. 335758 9. 379791  
3. 366844 3. 586121 3. 84223 3. 594556 3. 459624 3. 617722 4. 09413 4. 048221 4. 653156  
6. 929751 7. 557482 7. 619357 7. 420979 7. 314754 7. 414572 6. 715992 7. 148816 6. 903487  
4. 23696 4. 723612 4. 523164 3. 729664 4. 506112 3. 93667 4. 287413 4. 674577 3. 929423  
7. 086605 7. 940836 7. 377768 6. 603664 7. 588071 8. 016886 6. 982274 7. 796227 7. 625754  
3. 568913 3. 498963 2. 838345 2. 317051 2. 248427 3. 490578 2. 906959 2. 570144 2. 035337  
2. 473824 1. 478012 2. 164467 1. 824887 2. 031837 2. 373324 2. 051822 1. 71279 1. 55054  
1. 515131 1. 66093 1. 715336 2. 599586 2. 648855 2. 147203 2. 814469 1. 765746 1. 85436  
2. 208738 1. 557919 1. 762127 1. 783279 1. 595601 2. 320252 1. 648012 2. 050769 2. 892536  
2. 226998 2. 090141 2. 043657 1. 798965 1. 510828 3. 711769 1. 762001 1. 840365 2. 488461  
1. 770928 1. 826783 2. 741358 2. 756096 2. 716157 1. 792825 2. 215149 1. 60442 2. 681087  
5. 549807 4. 931694 5. 379695 4. 499891 4. 702415 5. 508856 5. 218048 4. 979978 5. 877041  
7. 530048 7. 707234 6. 828566 7. 203924 7. 764271 7. 389074 7. 545075 7. 550992 7. 626503  
5. 981275 5. 55138 6. 173111 6. 330088 5. 592264 5. 793774 5. 547806 5. 825967 6. 176014  
8. 462689 7. 959462 7. 719372 7. 148352 7. 416953 8. 4167 8. 165223 7. 745937 8. 285776  
1. 807095 2. 455023 1. 993066 3. 242077 1. 816952 2. 517817 2. 172498 1. 759917 2. 140881  
5. 124448 5. 176886 5. 272355 6. 226383 5. 220561 4. 250244 4. 727928 5. 220218 5. 800641  
2. 158333 1. 347432 2. 090571 2. 981631 1. 860497 2. 848862 1. 948912 1. 839482 2. 00378  
3. 491364 3. 610217 3. 903696 4. 226411 3. 577609 3. 377407 3. 820511 3. 591323 3. 494727  
5. 704703 5. 461613 5. 07338 5. 30838 5. 426767 5. 454172 5. 783621 5. 434944 6. 081866  
2. 589892 2. 827092 2. 16356 2. 957214 2. 357028 3. 352411 2. 296178 2. 288578 3. 061882  
1. 184487 1. 42966 1. 199741 2. 037547 1. 50081 2. 248477 1. 019848 1. 784871 1. 858584  
5. 589203 5. 816871 6. 160693 5. 265924 5. 644758 5. 624398 5. 544959 6. 088123 4. 814314  
8. 025074 8. 384655 7. 662168 6. 726675 8. 370343 8. 002497 7. 645194 7. 732874 7. 737167  
3. 975144 4. 281591 4. 13279 4. 103142 4. 407124 4. 208729 4. 357661 4. 355693 4. 558762  
5. 073445 5. 038171 5. 289744 5. 231488 5. 431637 5. 2472 5. 239977 4. 94163 5. 967382  
4. 935487 4. 565137 5. 000679 5. 244248 4. 8616 4. 98479 5. 25061 5. 225114 4. 067602  
3. 797675 3. 396967 4. 807322 5. 054964 4. 339145 4. 296492 3. 516265 4. 254967 3. 598083  
2. 42245 2. 034746 3. 370931 2. 646234 2. 38632 2. 53698 2. 127174 3. 101031 2. 306394  
4. 648286 4. 790129 4. 806228 4. 072528 4. 193656 4. 070393 4. 16809 3. 964842 3. 555052  
7. 052587 7. 000074 6. 719044 7. 444067 7. 040669 7. 250703 7. 121691 7. 217934 6. 941202  
4. 278684 4. 635906 3. 858029 5. 75422 4. 818253 4. 466848 4. 749701 4. 520901 4. 696954  
4. 26264 4. 675622 4. 315886 3. 043327 4. 308084 3. 743557 4. 58036 3. 996749 3. 802762  
1. 695965 1. 831385 1. 498646 2. 124563 1. 679892 1. 795829 1. 437869 0. 792394 1. 217223  
4. 33259 3. 687583 3. 960655 3. 6613 4. 09123 3. 362911 4. 273345 4. 527803 3. 464105  
6. 810634 7. 125637 7. 507821 7. 02306 7. 11769 6. 977996 7. 499789 6. 992783 5. 875123  
3. 092195 2. 794472 2. 985723 2. 822748 2. 536488 2. 705501 2. 486237 2. 871655 3. 189673  
3. 549586 2. 523499 2. 004281 2. 61823 3. 590828 2. 789821 2. 899825 3. 295015 4. 629855  
4. 778654 4. 803325 5. 292299 4. 621193 4. 936095 5. 390565 5. 606996 5. 580348 5. 5751  
7. 132841 7. 378751 6. 934373 7. 120921 7. 239285 7. 370312 7. 383453 7. 539872 7. 016912  
5. 193817 5. 150365 5. 519415 5. 566871 4. 828571 4. 169614 5. 606892 5. 330955 5. 525889

6.05042 5.38073 4.958496 2.672017 5.700973 5.530019 6.000154 5.432428 6.108868  
3.223062 4.063508 3.823282 2.28806 3.553763 2.306755 3.594225 3.049352 2.654481  
3.123221 4.673427 4.876407 2.427734 4.852455 4.49403 4.135392 3.943512 3.193605  
5.076109 5.196692 5.343955 5.634768 5.17991 5.386925 6.09889 5.343156 5.439708  
3.793681 3.696128 3.558322 2.163758 3.6048 3.27741 2.765759 3.578488 2.569902  
5.19749 5.714606 5.753345 5.523247 6.274151 6.102584 5.856614 5.863829 5.876091  
6.055529 5.356241 5.913018 5.491863 5.222982 5.513814 5.285215 5.619378 5.565607  
3.709025 3.130123 2.333103 3.556462 3.51729 3.178848 3.401064 3.622167 2.931316  
5.362125 5.507253 5.310137 5.325363 5.464559 5.574289 5.462894 6.071642 3.441519  
4.032274 3.212233 1.901404 3.212233 1.51592 2.810601 2.921961 2.087484 3.875299  
3.05559 2.233158 2.58276 3.263292 3.388619 3.459105 2.572762 2.329177 2.276187  
2.066397 3.911245 4.223604 3.848593 2.69788 4.455774 3.769533 1.942895 4.145857  
3.265219 2.890267 3.055515 2.977794 2.80606 2.543161 2.577389 3.020227 2.367692  
4.629059 3.544472 3.943713 3.837088 3.860608 3.948286 4.332559 4.436386 4.92682  
1.770525 2.013297 1.390387 2.229808 1.678256 1.64812 1.958883 2.312765 1.932568  
5.768022 5.734767 4.709621 5.472431 5.375792 5.463578 6.008896 5.158495 5.920075  
4.620381 4.850477 4.754895 5.218242 4.642551 4.433183 4.726309 4.636557 2.510726  
2.469473 2.362943 2.079172 2.375048 2.309304 2.341577 2.042034 2.278396 2.028511  
5.929263 6.148091 6.296518 4.800812 5.935906 6.383707 6.093338 5.452884 5.440595  
6.390938 5.919787 5.501644 5.917938 5.91311 6.040243 5.946759 5.620732 6.72526  
4.442549 4.746554 3.705384 4.184027 5.206679 4.31924 4.210119 4.901867 3.569171  
1.959494 2.085645 2.043658 2.201071 2.552391 2.476438 2.736959 2.508906 2.963016  
5.908397 5.481771 5.41571 5.552436 5.738479 5.926609 5.737858 5.802386 6.18111  
5.176814 5.162395 4.425757 5.103706 5.065555 4.709245 5.507501 5.061428 5.356024  
6.071513 5.915465 5.987299 5.83434 6.279989 5.456074 5.875449 5.759983 5.856038  
5.201925 5.122377 5.852694 4.724467 5.419243 5.195097 5.128873 4.836966 5.451385  
4.772798 5.007849 4.745677 5.09853 5.016626 4.874374 5.183889 4.861527 3.933534  
4.894581 4.463844 3.911656 3.524221 4.367946 3.788773 4.865554 4.892955 3.933061  
4.050318 4.606052 4.879575 3.991937 5.245046 4.403746 3.689719 4.431956 4.004088  
2.232213 2.212626 2.160467 2.814442 2.856548 1.686391 2.360678 2.195351 2.390083  
3.644243 1.57198 2.454502 1.06897 2.38724 2.000123 2.869622 1.808013 2.235582  
3.665323 3.41981 3.074719 2.962007 3.390393 2.833296 2.069468 4.177952 2.939344  
7.073379 6.69603 6.459015 6.839888 6.745336 6.54896 6.852137 6.460457 6.693059  
2.07996 2.415028 2.438476 2.919863 1.958749 2.110195 1.83283 2.019441 2.038003  
5.27502 5.366773 6.083285 6.271909 5.417845 5.340941 5.474621 4.820615 5.125894  
5.765875 6.474449 6.718514 6.513586 6.623558 6.683242 6.033605 6.527581 6.042473  
1.615262 2.08777 2.710325 2.721709 1.771644 2.009995 2.800502 1.541425 2.454858  
3.704821 3.69343 3.526522 3.115029 3.856955 3.749193 3.976806 4.275563 2.651133  
8.96404 8.748317 8.714284 9.086573 8.827203 8.840183 8.560234 9.043836 8.616167  
6.828069 7.340942 6.999453 7.601314 6.56153 7.041342 7.400883 7.433764 4.983465  
4.950118 4.680368 4.629917 3.923837 5.345878 4.749473 4.651461 4.969228 4.547962  
5.244113 5.468771 5.626982 6.307804 5.923522 5.767682 4.724884 5.611723 4.627301  
1.626057 1.539688 1.729135 1.971082 1.343971 2.281034 1.841711 1.728869 1.277388  
4.428503 3.737625 3.790745 2.018731 3.330025 3.060221 3.740816 3.190598 3.097847  
6.86284 6.615363 6.381843 6.265654 6.317913 6.493293 6.729567 6.206698 6.851102  
2.568314 2.277114 3.630826 1.82219 1.35447 1.125976 2.130143 2.015251 2.385673  
7.063206 6.462366 6.265432 6.672039 6.301311 6.803206 6.304838 6.523899 5.556983  
4.743762 5.477398 5.076773 5.285087 5.471074 5.384295 4.245456 5.325574 4.166575  
4.909186 5.188245 5.495318 4.087327 5.291214 5.074503 5.760416 4.825222 5.949417  
6.59392 6.309163 6.713266 7.437642 6.775054 6.694022 6.915893 6.702456 6.067306  
5.048501 5.531279 4.903079 4.330967 5.409867 5.280075 5.223728 4.828506 3.985559



2. 212427 2. 603772 3. 060698 3. 812491 2. 824519 3. 282602 2. 470467 2. 63974 3. 260821  
3. 469376 4. 526815 3. 883042 4. 947404 4. 133842 3. 916063 4. 035914 4. 441534 2. 703629  
1. 616307 1. 252614 1. 578402 1. 713193 1. 610818 1. 297244 1. 479671 1. 948742 1. 301452  
1. 934522 1. 213679 1. 263482 1. 322741 2. 05139 1. 435502 1. 400951 1. 735891 2. 117681  
1. 163056 1. 298566 1. 044029 1. 992064 0. 893622 1. 004397 1. 303329 1. 190005 1. 129823  
7. 026877 7. 356113 6. 935513 6. 017914 6. 997715 7. 623532 6. 441402 6. 580075 6. 953787  
4. 549986 4. 492877 4. 40007 5. 006047 5. 253816 4. 36763 4. 461096 4. 417726 3. 990156  
1. 933014 1. 19489 2. 108592 2. 564366 2. 055662 1. 767207 2. 511837 2. 143487 2. 63605  
5. 488327 5. 310539 5. 381992 5. 194534 5. 866604 5. 487886 5. 086768 5. 941622 4. 901477  
6. 330503 6. 737234 6. 532468 6. 503228 7. 007839 6. 325781 6. 028652 6. 675134 5. 067652  
4. 264373 4. 046144 4. 190778 4. 044262 4. 43635 3. 926032 5. 158295 4. 471865 5. 454619  
9. 898077 9. 531025 9. 837474 9. 699934 9. 912645 9. 457369 10. 01359 9. 807113 9. 62902  
2. 700149 2. 034827 2. 648367 2. 975629 1. 885008 2. 871707 2. 58631 2. 061594 3. 12183  
4. 426959 4. 317904 3. 53905 3. 233343 5. 106765 4. 916511 4. 283876 4. 462798 5. 358451  
2. 416622 2. 039063 1. 416361 2. 174982 1. 660463 1. 513195 1. 673492 1. 509037 1. 528686  
5. 611856 5. 202176 3. 686081 4. 643292 5. 233544 5. 504523 5. 320935 4. 618198 4. 885279  
5. 371305 4. 855919 5. 833648 3. 062127 5. 33298 5. 365015 4. 879522 4. 937189 5. 356812  
2. 294398 2. 42434 3. 222422 2. 908069 3. 094036 2. 479146 2. 88575 2. 395282 2. 402061  
3. 586915 3. 84843 3. 608338 3. 459781 3. 492946 3. 140063 3. 629963 3. 846434 3. 315456  
6. 872029 6. 498766 6. 785743 7. 424059 7. 009711 7. 305833 6. 407419 6. 969436 6. 001728  
5. 007955 5. 190131 7. 754538 8. 208976 5. 919347 6. 035748 6. 760027 6. 311922 6. 149008  
2. 051197 3. 212167 2. 709493 2. 122986 2. 330198 1. 311443 3. 114439 1. 976336 1. 811477  
2. 117713 2. 552185 1. 829535 2. 307031 2. 554912 2. 292933 2. 792275 2. 596122 2. 040474  
4. 873988 4. 713582 5. 089617 3. 990382 5. 49986 4. 569544 4. 746796 5. 034953 3. 893657  
3. 075243 2. 89013 3. 024316 2. 099063 3. 145477 4. 021926 2. 588598 3. 357695 3. 227227  
5. 872967 6. 436324 6. 482802 7. 167951 6. 057741 6. 550607 6. 583321 6. 578197 5. 94041  
7. 909632 7. 456994 8. 436002 6. 490534 7. 468479 7. 495189 7. 026393 7. 224605 6. 343254  
3. 665177 4. 153545 4. 688617 4. 946592 4. 458517 3. 578636 4. 12504 4. 160774 3. 196441  
2. 711442 3. 233575 3. 362462 3. 162386 2. 916646 3. 045338 2. 60775 3. 366608 2. 883463  
1. 294719 1. 768685 1. 09889 2. 143685 0. 752598 1. 570869 1. 560314 0. 846336 1. 28953  
4. 518124 4. 448511 4. 85437 5. 304682 5. 637606 4. 452496 4. 344779 4. 862787 4. 533063  
1. 471768 0. 990615 1. 983286 1. 406077 0. 910042 2. 242144 1. 361871 1. 134574 0. 990178  
3. 230718 2. 957097 3. 353841 3. 66586 3. 537059 2. 965006 3. 540983 3. 310115 3. 247884  
9. 392877 8. 931077 8. 961611 8. 072095 8. 48187 9. 196984 9. 021166 8. 756727 9. 457819  
3. 967924 4. 341332 3. 726908 4. 509144 4. 651475 4. 588455 4. 360717 4. 228713 4. 261439  
1. 994951 2. 632437 2. 479423 2. 404502 1. 923408 2. 457254 2. 14589 1. 919773 2. 441026  
6. 051563 6. 418306 5. 948723 6. 364625 7. 886323 6. 219989 6. 334806 6. 016544 6. 18566  
4. 843422 4. 337609 5. 183642 3. 46303 4. 673519 3. 604224 4. 518474 4. 701332 4. 486086  
3. 693057 4. 184327 3. 223225 3. 56508 3. 755386 4. 550544 4. 849038 3. 98215 4. 530736  
5. 225103 5. 049411 5. 055915 5. 580932 5. 046138 4. 927795 5. 24876 5. 219288 5. 220233  
6. 865075 6. 912834 6. 79444 6. 822426 7. 206138 6. 887463 7. 458584 6. 911045 6. 953246  
6. 035762 6. 060404 5. 653537 4. 794559 5. 110078 5. 246173 4. 720986 6. 230763 5. 917766  
2. 903337 3. 266178 3. 295661 2. 107642 2. 552178 3. 275437 3. 49071 2. 415299 3. 203404  
5. 023278 4. 412905 4. 140054 3. 701758 3. 758995 4. 779723 5. 144759 4. 407323 5. 662835  
3. 212973 3. 286194 3. 929427 2. 169836 3. 619904 3. 559709 3. 606289 3. 415906 3. 886862  
7. 34141 7. 503999 7. 320898 7. 149656 7. 933245 7. 378741 7. 175063 7. 464612 8. 150751  
2. 480008 1. 824733 1. 85193 1. 563482 2. 177262 1. 72644 2. 101515 2. 281305 1. 680592  
5. 518875 5. 978713 6. 341494 6. 418023 5. 771559 6. 170016 5. 872837 6. 388925 5. 140811  
5. 990246 5. 90637 6. 281191 5. 079831 6. 278927 6. 186727 5. 271367 6. 087699 6. 045028  
6. 547811 6. 86405 6. 393576 4. 669245 6. 494109 5. 472331 6. 61964 6. 612223 5. 978362  
4. 001903 3. 870781 4. 606622 3. 720399 4. 767185 3. 698614 4. 168669 4. 068016 3. 762084

4. 582037 4. 734006 5. 392561 4. 757483 4. 833788 4. 605412 3. 951716 4. 443187 4. 969242  
4. 935818 5. 111448 4. 602669 5. 019278 4. 821199 4. 43486 4. 644097 4. 209126 4. 551152  
4. 675066 4. 21404 4. 836555 2. 141768 4. 68604 4. 947979 5. 053442 2. 928655 3. 144954  
2. 423027 2. 711442 1. 882166 1. 89655 2. 82476 1. 726976 2. 689527 2. 235622 3. 414244  
6. 044095 7. 080197 6. 524031 6. 569526 7. 140726 6. 828069 6. 795746 6. 656786 6. 727822  
2. 306181 2. 148903 2. 491007 1. 911832 2. 600588 2. 550216 2. 738933 2. 481071 1. 563694  
2. 870562 2. 742133 2. 763703 3. 726329 3. 523566 3. 85975 3. 709715 3. 403164 2. 416968  
6. 047692 6. 008517 6. 393597 5. 765373 5. 951973 6. 174584 5. 960854 5. 764371 6. 00437  
3. 647412 3. 609652 3. 348612 2. 990202 3. 784257 2. 999132 3. 342444 3. 336219 3. 244737  
5. 889708 5. 512498 5. 742937 5. 564031 5. 816961 5. 475601 5. 880328 5. 768265 6. 505747  
4. 691436 5. 28463 4. 329286 4. 043305 5. 587979 4. 611345 4. 528253 5. 671864 5. 528615  
1. 607447 1. 651355 1. 717726 1. 784212 2. 072657 1. 592117 1. 610572 1. 561799 1. 784212  
5. 059062 4. 694597 5. 146363 4. 401173 4. 393143 4. 194841 4. 356694 4. 861417 4. 698685  
3. 975001 3. 648288 4. 270346 4. 497231 4. 457042 3. 892676 3. 94368 3. 855334 3. 438011  
6. 52188 6. 170544 6. 238687 6. 360935 6. 181253 5. 930596 6. 66509 6. 472695 6. 518978  
3. 77088 3. 484724 2. 240846 1. 956662 2. 753468 4. 683527 2. 852662 4. 413177 2. 959599  
7. 25905 7. 131673 6. 479334 7. 286967 7. 226632 6. 928577 7. 029995 7. 183846 6. 994564  
3. 60978 3. 209136 3. 359459 3. 144725 4. 073965 3. 794808 3. 167353 2. 652428 3. 836626  
3. 861376 3. 234899 4. 532023 4. 969239 3. 701484 3. 214467 4. 320735 3. 022991 3. 092157  
5. 57946 5. 540134 4. 696775 5. 18441 5. 587029 5. 759345 5. 17067 5. 253257 6. 080707  
5. 15649 6. 465945 6. 570508 5. 438944 6. 29831 5. 835696 6. 752582 5. 523163 4. 501681  
4. 350302 4. 770836 4. 534361 4. 146596 4. 20558 4. 56323 4. 329911 4. 699907 3. 60609  
4. 400406 4. 108402 4. 164513 3. 181017 4. 329446 4. 678861 5. 330023 4. 062241 3. 787679  
1. 330852 0. 971317 1. 164623 1. 336112 1. 012405 1. 162874 1. 267967 0. 974724 1. 740524  
3. 672689 4. 300565 3. 71273 3. 716413 3. 897046 4. 960278 4. 836241 4. 53473 3. 390347  
5. 085323 5. 541956 5. 030141 6. 041587 5. 595278 5. 946201 5. 498291 5. 392827 4. 723087  
7. 295839 7. 269566 7. 186306 6. 148548 7. 066233 7. 253459 7. 048176 7. 04008 6. 06503  
6. 598508 6. 574724 6. 630846 5. 85811 6. 417635 6. 585223 6. 424588 6. 744975 6. 70592  
1. 399019 1. 32597 2. 123492 2. 08804 2. 120288 1. 399379 2. 242045 1. 606303 1. 662903  
4. 933276 4. 463569 4. 90056 4. 003705 4. 816754 5. 308205 4. 312066 4. 946858 4. 955683  
5. 530196 5. 77397 5. 070803 4. 805428 5. 621679 4. 879169 5. 763442 5. 059095 5. 265164  
5. 216364 4. 873333 5. 226176 4. 346151 4. 712867 4. 180671 5. 021776 5. 020522 5. 985923  
1. 99382 2. 98229 1. 911906 2. 851535 2. 67504 2. 207784 2. 95679 3. 462147 5. 099456  
2. 287456 1. 55292 2. 057025 2. 533428 1. 761907 2. 00076 1. 892273 1. 630989 2. 168196  
2. 499096 2. 104188 2. 771769 2. 190603 2. 458645 2. 435649 1. 164157 1. 287493 1. 329917  
4. 06311 3. 778848 4. 616417 3. 908816 3. 597663 5. 29802 4. 060246 4. 457366 5. 12226  
5. 736144 5. 952675 6. 036783 5. 139668 5. 585326 6. 256159 6. 071072 6. 129831 6. 23113  
3. 012823 1. 761726 1. 474401 2. 636565 1. 55053 1. 578652 4. 270195 4. 329336 1. 913564  
5. 701741 5. 538373 5. 685379 4. 663891 5. 109928 5. 870466 5. 286892 5. 530759 6. 338085  
2. 353862 2. 82662 3. 03462 2. 263328 3. 396507 2. 902635 2. 565197 2. 363162 2. 07857  
5. 072466 4. 26644 4. 983642 3. 903212 4. 418942 3. 949291 4. 658257 4. 990374 5. 51128  
5. 433493 5. 10997 5. 087445 5. 018964 5. 865409 5. 257849 4. 46143 5. 104856 3. 884677  
5. 192974 5. 250356 5. 569133 6. 051536 5. 796461 5. 748984 5. 755454 5. 618358 5. 715837  
4. 57318 4. 644207 5. 168398 4. 633791 5. 294276 4. 27415 4. 788303 5. 139166 3. 954589  
4. 574622 5. 014531 4. 542345 4. 049065 4. 290809 4. 796778 3. 794602 5. 014693 3. 540617  
4. 741923 4. 716593 5. 123577 5. 094104 4. 321018 4. 217853 5. 308487 4. 489495 3. 04809  
1. 729092 2. 495264 2. 68323 2. 193409 1. 864427 1. 810381 1. 709837 1. 534128 1. 879456  
5. 000781 5. 969886 6. 189685 5. 784128 5. 991012 5. 84774 5. 799307 5. 91069 6. 136176  
3. 088226 3. 123919 3. 100733 2. 63297 3. 212053 3. 529575 2. 987933 3. 698898 2. 474249  
1. 812004 1. 781922 2. 288476 2. 670614 2. 2729 1. 896906 2. 015853 2. 397061 1. 5587  
3. 179711 3. 279615 3. 41641 2. 258724 4. 976373 3. 019105 2. 358134 3. 260412 2. 426226

5. 72165 6. 722544 5. 930868 5. 853409 6. 533503 5. 713952 5. 914003 6. 437082 5. 688856  
6. 075369 6. 070728 5. 665436 5. 758643 5. 723518 5. 809569 5. 550323 5. 618758 5. 265848  
5. 873054 5. 636362 5. 650065 5. 775264 6. 141256 6. 109657 5. 594625 5. 632715 5. 68849  
3. 2013 3. 111479 3. 620204 3. 964026 2. 825729 3. 562134 3. 329227 3. 126677 3. 391541  
1. 106162 1. 605078 1. 054883 1. 994066 1. 505871 1. 367117 1. 137124 1. 165735 1. 300763  
8. 215418 8. 126399 8. 135033 7. 172085 8. 054897 7. 92194 7. 604562 8. 073181 7. 106131  
8. 431508 8. 566211 7. 932985 8. 523581 7. 987168 8. 665365 8. 465064 8. 267594 8. 310043  
5. 876168 5. 745773 5. 433188 5. 124701 5. 18228 5. 64258 5. 700764 5. 90519 6. 35766  
3. 100758 3. 715762 2. 890925 3. 520755 2. 612148 3. 110948 3. 047762 3. 802748 3. 209405  
1. 802896 1. 619795 2. 263645 3. 235735 2. 485533 2. 060831 1. 992885 1. 785094 1. 577892  
4. 445559 4. 58302 2. 956172 2. 751958 5. 423426 3. 997049 2. 365327 5. 390478 2. 479811  
2. 16807 0. 898758 2. 214286 2. 893563 1. 702314 2. 169874 1. 809881 1. 743958 2. 519042  
4. 398395 3. 91679 4. 475202 4. 195001 4. 666012 3. 864391 4. 580514 4. 130613 4. 480746  
3. 772049 4. 346333 3. 314489 3. 607613 3. 40072 3. 110847 3. 915083 3. 401534 2. 81543  
1. 227261 1. 508053 2. 062408 2. 335022 1. 324888 2. 290902 1. 764202 1. 645671 1. 640659  
1. 14037 1. 336169 1. 110374 1. 173809 1. 629556 1. 273775 1. 398993 1. 198052 1. 709428  
7. 714069 7. 938429 7. 490064 8. 352356 7. 836091 7. 86319 7. 884448 8. 324389 7. 732772  
1. 55054 1. 296378 1. 995519 2. 708684 1. 663472 4. 380173 2. 188189 1. 475435 2. 083319  
1. 922339 1. 105277 2. 144808 2. 464619 2. 33595 2. 57908 3. 014508 3. 793358 1. 696332  
1. 814941 1. 429843 1. 979608 2. 530279 1. 715141 2. 592556 2. 182654 2. 214459 3. 875715  
7. 435378 8. 217193 7. 364288 7. 205267 7. 681637 8. 055335 7. 210332 8. 035799 8. 638905  
8. 35461 8. 123492 8. 251729 8. 436596 7. 616644 8. 253242 8. 045184 8. 215178 8. 11625  
6. 073876 6. 284269 6. 080893 5. 185044 6. 105712 5. 560147 6. 104306 5. 897742 6. 767111  
2. 733697 2. 633707 3. 703788 3. 308425 3. 018827 2. 841456 3. 102324 2. 743819 2. 609359  
3. 96756 3. 253597 2. 739997 3. 603458 2. 755583 2. 212573 3. 032307 2. 84082 2. 977701  
7. 376337 7. 445219 7. 300983 7. 019928 7. 481782 7. 253791 7. 354288 7. 464897 6. 992617  
7. 990294 7. 998167 8. 457031 8. 547686 7. 49062 8. 394738 8. 259266 8. 438597 7. 570765  
5. 452848 5. 283973 4. 481283 4. 86672 5. 831662 4. 989683 4. 820162 5. 463435 4. 441204  
7. 364989 7. 430209 7. 53792 7. 050193 7. 146145 7. 295467 6. 570859 6. 892889 7. 633646  
5. 555524 5. 633255 5. 486704 4. 147604 6. 575895 5. 817962 6. 250592 6. 277712 4. 306756  
5. 149492 4. 32213 4. 075859 4. 614575 4. 27419 4. 917408 3. 793904 5. 382046 4. 277666  
4. 483964 3. 719653 3. 717241 3. 955618 4. 445844 2. 902536 4. 144662 5. 199322 4. 034107  
5. 331032 4. 72225 5. 164909 4. 119709 5. 221278 6. 041011 5. 295384 5. 063522 5. 269764  
7. 612404 7. 642883 7. 756941 7. 861802 7. 005495 7. 722969 7. 576281 7. 736845 7. 232814  
1. 200954 1. 910342 1. 270534 2. 526112 2. 214407 1. 603608 1. 751362 2. 023179 2. 362342  
6. 613987 6. 299718 5. 994403 6. 34514 6. 848545 6. 281946 6. 39172 6. 744937 6. 153181  
6. 22229 6. 247776 6. 194014 6. 61128 6. 51778 6. 879052 5. 685058 6. 306534 6. 147771  
7. 925387 8. 016338 8. 14708 8. 760816 7. 98996 8. 197182 8. 311013 8. 23088 7. 942826  
2. 678049 2. 135916 2. 652906 3. 030065 2. 419638 2. 30781 2. 377999 2. 25046 1. 978866  
2. 969558 2. 564433 2. 9669 2. 839386 2. 720679 2. 655919 2. 179615 2. 379006 2. 28737  
1. 815409 1. 736393 1. 838112 1. 969268 1. 487763 2. 114039 2. 412156 1. 920038 1. 902817  
9. 554499 9. 352807 9. 313027 8. 701482 9. 316951 9. 465623 9. 378503 9. 507522 9. 639692  
1. 767426 1. 107447 2. 193735 1. 785942 1. 976468 2. 229563 1. 331585 1. 844928 0. 967923  
4. 648932 4. 420411 4. 620977 4. 918981 4. 898678 4. 550464 4. 503835 4. 896247 4. 421779  
1. 400276 0. 961882 1. 286759 1. 768255 1. 235233 1. 466197 1. 541551 1. 055757 2. 106995  
7. 319125 7. 173757 7. 009812 7. 415786 7. 349663 6. 250325 6. 590487 7. 091311 7. 461907  
3. 620519 2. 509141 2. 125823 2. 147061 2. 489848 3. 723951 2. 104447 1. 99995 2. 185046  
5. 310163 3. 752453 4. 331077 5. 341511 5. 418672 4. 649947 4. 566494 3. 938045 4. 698092  
6. 377261 6. 554948 6. 506016 6. 161939 6. 579831 6. 539985 6. 464718 6. 864671 6. 138435  
8. 099487 8. 204506 7. 778986 8. 361961 7. 771648 8. 462335 8. 067325 8. 035311 7. 754847  
6. 413219 5. 912833 5. 729196 6. 615866 6. 274919 6. 112838 6. 462647 6. 322313 5. 625268

5. 434375 5. 301298 4. 318099 4. 266116 4. 770945 5. 196382 4. 293679 4. 638187 5. 247415  
2. 52294 2. 745604 2. 409522 2. 685584 2. 146966 2. 760725 2. 307715 2. 176568 2. 471963  
1. 709432 1. 785277 1. 630878 2. 075673 0. 803243 1. 941898 1. 174851 1. 00101 2. 010171  
1. 326898 1. 343798 1. 326898 2. 641601 1. 933176 1. 308132 0. 970089 1. 449949 0. 882205  
5. 046988 2. 001237 5. 098741 2. 931976 2. 560862 4. 764286 3. 05105 1. 934535 5. 728925  
5. 107867 6. 073904 5. 991297 5. 860564 6. 57014 5. 191195 5. 342029 5. 392061 5. 112656  
4. 929112 5. 703477 6. 397955 4. 470865 6. 348775 4. 566289 5. 260224 6. 554013 4. 387432  
2. 55483 3. 010056 2. 763241 3. 162708 2. 99029 3. 442944 3. 103722 3. 147954 1. 428107  
5. 989571 6. 604808 6. 368054 6. 422121 6. 195206 5. 801612 5. 952605 6. 521916 4. 143637  
6. 516966 6. 48126 5. 991776 5. 509894 7. 256115 5. 701346 5. 998334 6. 514816 5. 930788  
7. 258716 7. 840519 7. 713314 7. 857952 7. 876935 7. 563309 7. 751638 8. 009549 6. 694838  
5. 132211 4. 025351 4. 616165 5. 717317 5. 049761 3. 674334 4. 894246 4. 712354 4. 662758  
2. 350485 1. 092594 2. 505484 1. 115081 1. 653431 1. 404668 2. 104594 1. 377175 1. 989304  
7. 21044 7. 298028 7. 134418 6. 247164 6. 923866 6. 117812 7. 332758 7. 287112 6. 99757  
6. 309054 6. 264677 6. 126137 6. 263233 6. 147846 6. 799852 6. 147787 6. 108543 6. 720054  
5. 017456 4. 595981 5. 657625 5. 871318 5. 328596 4. 478109 5. 540609 5. 225723 5. 59551  
6. 11859 5. 619747 5. 665635 5. 963285 5. 957336 5. 330551 5. 661216 6. 055796 5. 713209  
3. 94412 4. 044395 3. 924561 2. 932525 3. 727881 4. 010729 3. 977995 4. 19696 4. 070934  
5. 314064 5. 488925 4. 518566 4. 968454 5. 377237 5. 173415 4. 061455 5. 303393 3. 921224  
7. 26861 7. 360058 7. 074163 5. 784135 6. 750259 7. 02389 6. 947479 7. 162288 7. 190341  
4. 415607 4. 742524 5. 021585 5. 109041 4. 69934 5. 169574 5. 513627 4. 544846 4. 10465  
2. 537644 2. 061755 2. 249201 4. 197045 2. 954802 3. 167624 1. 77396 2. 811556 3. 167624  
4. 067245 4. 854849 4. 450684 4. 866206 4. 73104 4. 94754 4. 991281 5. 379662 5. 739358  
4. 265681 4. 207846 3. 172486 3. 010088 3. 436735 4. 078575 4. 36085 4. 395663 3. 227968  
4. 592804 5. 474288 4. 723703 4. 973909 5. 301951 5. 00656 5. 118943 4. 859412 5. 003686  
5. 339465 4. 513138 5. 216575 4. 81528 5. 040284 4. 318331 5. 246109 4. 62649 4. 159382  
2. 44074 2. 885667 2. 484799 1. 92242 1. 457786 2. 229786 2. 490474 2. 292834 1. 956324  
5. 967509 5. 880225 5. 604132 5. 343229 5. 530256 5. 679103 6. 380908 5. 874126 5. 814937  
8. 289183 8. 650194 8. 420654 8. 199223 9. 321421 8. 25555 8. 365339 8. 615247 8. 399545  
4. 157597 4. 517348 5. 443369 4. 470826 4. 562199 5. 234066 4. 16434 5. 991187 4. 352021  
5. 050404 5. 841627 4. 94847 5. 365109 6. 589304 3. 745685 5. 152691 5. 704092 3. 254822  
5. 512394 5. 360278 5. 626514 5. 138065 4. 91101 5. 214621 4. 562247 5. 333187 3. 936671  
6. 22773 5. 816288 5. 310392 5. 257809 6. 82849 5. 905233 6. 179351 6. 050435 5. 750732  
6. 59288 6. 757208 6. 454524 6. 371379 6. 529969 6. 394428 6. 828607 6. 786791 6. 467567  
5. 653905 5. 899648 5. 603294 5. 424336 5. 627621 6. 031269 5. 394587 5. 785271 5. 648298  
1. 552508 1. 259085 1. 987554 1. 399081 1. 207507 1. 132755 1. 363319 0. 956789 1. 289818  
1. 621253 1. 973686 2. 559033 1. 805959 1. 715183 0. 96372 1. 511568 2. 018559 1. 560159  
9. 589773 9. 194318 9. 383533 8. 643987 9. 24474 8. 930586 9. 236349 9. 304157 9. 107967  
7. 382068 6. 909103 7. 203752 6. 030171 6. 879647 6. 929742 6. 795132 6. 817653 7. 191957  
4. 17898 4. 523907 4. 326095 5. 514178 4. 89034 4. 968097 5. 212833 4. 36356 5. 72178  
4. 520147 4. 779792 4. 405485 2. 972419 5. 150445 4. 525403 4. 576114 4. 476239 4. 189479  
5. 823063 6. 982195 6. 721756 5. 709189 6. 375218 7. 555132 5. 603754 6. 479718 5. 498182  
6. 235204 5. 885019 5. 375215 6. 166817 5. 917304 5. 950343 6. 667069 5. 454535 5. 936085  
4. 478391 4. 21551 4. 787452 4. 186011 4. 844865 4. 35416 4. 572266 5. 108487 3. 559438  
3. 401629 3. 260799 4. 197217 3. 361218 3. 136276 3. 644939 2. 885688 1. 839022 3. 707332  
7. 060269 7. 23991 6. 630848 5. 183056 6. 724499 7. 586872 6. 360462 7. 252396 6. 503879  
6. 364672 5. 579951 6. 107247 7. 597209 5. 668077 6. 170522 5. 230113 5. 93605 5. 083352  
1. 979322 1. 719844 2. 856402 2. 64764 2. 176116 2. 718037 2. 033128 2. 178413 2. 672318  
2. 117277 2. 405987 4. 248419 1. 938267 3. 9382 1. 625872 2. 417921 2. 415208 4. 206078  
6. 415653 6. 136241 6. 504913 5. 349057 6. 104338 6. 480288 5. 918738 6. 426062 5. 87266  
1. 679521 1. 552751 1. 556933 1. 634986 1. 827678 1. 458699 1. 901934 1. 857975 1. 674464

7. 507053 7. 521225 7. 560073 6. 61628 7. 309846 7. 58716 7. 098879 7. 486173 7. 483591  
5. 249377 5. 03145 5. 257768 4. 237401 5. 141408 4. 956772 4. 71365 4. 155997 3. 346445  
1. 064285 0. 638266 1. 120606 1. 868078 1. 079752 1. 492155 0. 961654 0. 863139 0. 974747  
2. 181074 1. 945127 2. 817054 2. 326263 2. 997313 3. 543954 2. 414487 1. 93419 2. 610466  
9. 323265 9. 205472 8. 831568 9. 490459 9. 153936 8. 542151 9. 510102 9. 303626 9. 467794  
5. 086975 5. 923517 6. 301961 4. 761885 6. 020352 5. 477132 5. 957126 6. 424747 4. 939069  
7. 111301 7. 255079 7. 040716 7. 027487 7. 342047 7. 200466 6. 89158 7. 270131 7. 463462  
3. 345876 3. 023639 3. 641253 4. 332312 3. 049316 3. 302282 3. 377225 3. 441352 2. 408397  
4. 987358 2. 495611 4. 174936 4. 373889 4. 289284 5. 607555 4. 452866 5. 062111 5. 84998  
1. 62657 1. 475318 1. 275004 1. 623437 1. 729127 1. 930737 1. 320345 1. 418185 1. 322357  
1. 293528 1. 700983 1. 254992 2. 893778 1. 667093 1. 324325 1. 759002 1. 403195 1. 948393  
6. 306984 6. 857752 6. 852168 6. 155847 6. 848989 6. 486189 6. 060417 6. 879398 6. 134754  
8. 341985 8. 102762 8. 351133 7. 322517 8. 890746 8. 036294 8. 321644 8. 499372 8. 790308  
6. 161164 6. 409405 6. 284665 6. 414816 6. 678765 6. 156367 6. 991073 6. 292792 7. 361075  
2. 310352 3. 048458 2. 251196 2. 343602 2. 143404 2. 046196 2. 093511 1. 930251 2. 067062  
5. 117912 4. 406651 4. 842657 4. 982079 4. 992085 4. 504722 3. 732566 4. 535686 4. 147565  
5. 424456 5. 471283 5. 761459 3. 734759 5. 392289 4. 952516 4. 991392 5. 352384 3. 902459  
7. 882006 8. 132521 7. 558191 7. 738266 8. 241113 6. 896147 7. 841213 7. 713661 7. 576042  
6. 652 5. 514787 6. 196365 5. 223956 5. 870528 5. 922156 6. 161381 5. 984988 5. 610432  
4. 503908 5. 390626 4. 711663 4. 366924 4. 129997 4. 866275 4. 334696 4. 238621 4. 163133  
2. 746272 2. 266668 3. 236076 3. 009386 2. 608151 2. 311799 2. 859477 2. 644816 2. 03854  
2. 492429 1. 67384 2. 758884 3. 27281 2. 575948 2. 415753 1. 573979 2. 054214 2. 432528  
7. 975455 7. 580036 7. 640836 7. 585098 7. 893012 7. 456212 7. 511224 7. 532642 7. 515212  
1. 556422 1. 452652 1. 572483 1. 282735 1. 260819 1. 471945 1. 353003 1. 574867 1. 218851  
1. 144449 1. 493232 1. 74097 2. 149044 1. 335129 1. 679318 2. 232887 2. 096305 1. 839405  
5. 595889 5. 75096 6. 044558 5. 864965 6. 219681 5. 954632 6. 260854 6. 394843 5. 932678  
5. 373173 5. 853676 6. 279887 3. 77425 5. 279401 5. 420726 5. 448578 5. 753243 5. 570913  
6. 01992 5. 847426 6. 038851 6. 214879 6. 187005 5. 869972 5. 662153 6. 27831 6. 423775  
9. 408343 9. 121213 9. 205912 9. 024573 9. 032814 8. 912371 9. 551772 9. 260121 9. 451901  
8. 324643 8. 084181 8. 0232 7. 4719 8. 11647 7. 980348 8. 150738 8. 027805 7. 905517  
4. 090886 4. 592163 4. 329255 3. 704563 4. 804646 3. 552543 4. 384444 4. 128259 4. 28479  
4. 292308 3. 19245 3. 141718 4. 598379 3. 187279 3. 783208 3. 301217 4. 47064 2. 634918  
2. 543995 4. 345332 3. 808983 4. 180401 5. 824373 3. 69156 6. 176128 3. 894791 3. 271422  
3. 836811 3. 716091 4. 312065 3. 969296 3. 195216 2. 68406 3. 203218 3. 881935 3. 536216  
6. 465522 6. 961583 6. 431848 6. 628633 6. 582055 6. 958458 7. 082656 7. 16667 6. 675727  
7. 670867 8. 037274 7. 489827 7. 25017 7. 969255 8. 124336 7. 818024 7. 980646 8. 006271  
6. 605303 6. 811294 6. 876997 6. 561692 7. 009381 6. 752364 7. 101635 6. 676989 6. 478893  
2. 232729 2. 671347 1. 64343 2. 249946 4. 006161 2. 24412 2. 328019 3. 503396 2. 380302  
7. 537527 7. 820984 7. 641005 7. 025498 7. 106801 8. 029351 7. 523455 7. 775449 7. 577923  
4. 851387 5. 054165 5. 253089 3. 647154 5. 40588 4. 927316 4. 732996 4. 660755 3. 958804  
6. 301098 6. 39874 6. 25849 6. 691706 6. 37274 6. 283238 6. 606904 6. 578546 6. 280148  
4. 863344 5. 147818 4. 884786 4. 937936 4. 552409 3. 756041 4. 706847 3. 91672 3. 856415  
2. 522345 1. 452272 1. 350358 2. 972219 2. 388117 1. 557266 1. 805369 4. 317547 1. 400581  
4. 757401 5. 437004 5. 724491 5. 650504 5. 382504 5. 119028 5. 12562 5. 455865 4. 70408  
7. 181495 6. 960508 6. 883823 7. 146054 7. 029536 6. 358439 7. 276355 7. 227711 7. 668694  
4. 697603 4. 532538 4. 520195 4. 978756 5. 283569 4. 71889 4. 69508 4. 746623 5. 021115  
8. 706486 9. 031855 9. 178758 9. 329495 9. 182625 8. 529633 8. 551173 8. 980784 8. 192465  
9. 895196 9. 424453 9. 735511 9. 664962 9. 404755 9. 254907 9. 700254 9. 583817 9. 641904  
5. 402767 5. 85439 5. 440752 5. 541404 5. 140313 4. 704725 4. 732512 5. 723996 5. 03065  
5. 550746 5. 414927 4. 951739 5. 846449 5. 685818 5. 152887 4. 723997 5. 527772 4. 295804  
3. 565243 2. 778933 2. 35299 3. 797996 2. 39642 2. 7291 2. 420348 2. 44341 2. 239972

3. 567904 4. 10772 3. 776179 3. 438176 4. 156185 3. 601013 2. 863252 4. 193376 3. 445463  
5. 994257 5. 745622 5. 21926 5. 399526 5. 438187 5. 749242 5. 451414 5. 561957 5. 965743  
9. 472999 8. 754888 9. 201112 9. 226547 8. 840354 9. 096404 9. 347404 9. 037271 9. 229728  
6. 772699 6. 78341 6. 61322 6. 756786 6. 577423 6. 922452 6. 762835 6. 750703 6. 218503  
8. 036117 7. 672618 8. 40415 7. 553819 7. 728956 7. 780743 7. 887667 7. 955896 8. 130437  
1. 391969 1. 290748 1. 496562 1. 548426 1. 585735 1. 51177 1. 237381 1. 121029 1. 540127  
6. 317202 5. 889424 5. 702671 6. 03629 6. 099249 5. 713727 6. 356893 6. 188279 6. 349357  
3. 470982 3. 598515 3. 244361 4. 692929 3. 527639 3. 271011 3. 228546 3. 092363 3. 782002  
2. 658557 2. 964146 3. 314297 2. 813696 3. 428795 3. 346758 3. 617442 3. 956882 3. 770884  
3. 973691 3. 09242 2. 456639 3. 686442 3. 435972 1. 902527 3. 886796 3. 818448 3. 02056  
3. 523001 3. 01132 3. 451509 4. 332938 3. 284495 4. 444591 3. 399796 3. 205099 4. 617257  
6. 881061 6. 684567 6. 636082 6. 512339 6. 790465 6. 949737 6. 936896 6. 892883 6. 752177  
2. 130801 3. 800033 2. 484525 3. 63009 4. 090596 2. 896924 2. 424809 3. 127603 1. 130747  
1. 681218 1. 745666 1. 20094 2. 062436 2. 47138 1. 676613 1. 789448 1. 4307 1. 671283  
2. 291165 2. 655083 2. 659912 2. 15581 1. 87283 1. 908739 2. 040054 2. 120703 3. 026269  
5. 767234 6. 172455 5. 913078 5. 280739 6. 748608 5. 462087 6. 31458 6. 068355 5. 067668  
6. 268487 6. 966345 5. 992556 6. 799763 7. 109137 6. 799515 7. 013564 6. 170803 6. 347775  
6. 134493 6. 443652 6. 127409 5. 246899 6. 208203 5. 4625 6. 257256 5. 931935 5. 595768  
2. 37878 2. 385701 2. 561517 3. 356858 3. 686888 2. 475882 2. 119873 1. 252492 3. 262545  
5. 201116 5. 600414 5. 732424 5. 364142 5. 53038 4. 806266 4. 564216 5. 126428 4. 257611  
9. 069617 9. 19344 9. 036866 8. 285901 9. 203082 8. 650062 9. 328999 8. 977865 9. 270821  
3. 290727 3. 513018 3. 695317 3. 659282 3. 799681 2. 616384 4. 325487 2. 819586 3. 809244  
7. 187322 6. 744899 6. 681591 7. 014981 7. 032024 6. 814423 7. 293559 7. 639125 7. 436088  
5. 776624 5. 974168 5. 977849 4. 779193 5. 585643 5. 284742 5. 544514 5. 412755 5. 06855  
0. 863492 0. 822324 0. 695427 1. 844667 1. 077075 0. 99697 0. 676959 0. 874534 1. 155246  
6. 186476 5. 82012 6. 042059 6. 850248 6. 167979 5. 377053 6. 653684 6. 366214 5. 954493  
1. 168682 1. 46513 1. 718296 1. 929978 1. 512295 2. 119039 1. 969345 1. 621216 1. 799691  
5. 54495 5. 353187 4. 884371 6. 411077 5. 308397 6. 116945 5. 198088 7. 046792 5. 628568  
6. 005928 6. 098445 5. 707153 6. 270763 6. 892211 5. 441592 6. 021347 6. 227959 5. 393362  
3. 784249 4. 01546 4. 334246 4. 100029 4. 341388 2. 648641 4. 24467 4. 008469 4. 784438  
2. 584531 1. 306962 1. 292134 1. 349445 1. 781058 3. 272574 1. 85073 2. 005286 2. 721081  
6. 720156 6. 733406 6. 47267 6. 089163 6. 606393 6. 631789 6. 468456 6. 976891 6. 464041  
7. 554924 7. 794327 7. 770345 7. 219927 8. 088122 7. 889382 8. 115476 7. 710042 7. 334155  
4. 283216 3. 91964 4. 15497 4. 257318 4. 258662 4. 513854 4. 403427 4. 453973 3. 681942  
2. 361302 2. 677065 2. 549859 3. 027294 2. 494434 2. 862113 2. 095949 2. 122976 2. 320107  
5. 647905 5. 411122 5. 268182 5. 352201 5. 480391 5. 746402 5. 218543 5. 249861 3. 414468  
5. 873981 6. 49406 6. 243295 6. 306268 6. 20926 6. 070392 6. 279242 6. 079383 6. 693739  
4. 917574 4. 297399 5. 304538 4. 42048 4. 979838 4. 423134 4. 956918 4. 214458 3. 458035  
7. 634944 7. 098466 7. 042087 7. 605208 7. 025198 7. 1654 7. 234402 7. 299583 7. 524477  
1. 978153 2. 503498 2. 090985 2. 677629 3. 237275 2. 195099 2. 04959 2. 229617 2. 229567  
9. 726198 10. 05336 10. 30749 10. 14362 10. 20046 10. 1645 10. 24524 10. 12008 10. 33937  
8. 742603 8. 932603 8. 885351 9. 1223 9. 223959 8. 044706 8. 95029 8. 735276 8. 589399  
6. 826515 6. 710359 6. 67181 6. 188328 6. 952133 6. 845411 6. 906029 6. 891661 7. 259108  
3. 69934 4. 570249 4. 110238 1. 651731 4. 078051 3. 377869 4. 562777 4. 228297 4. 710047  
2. 438095 1. 676017 1. 512111 2. 823735 2. 120794 2. 064223 1. 952696 2. 045584 1. 609223  
3. 6351 4. 079835 4. 970659 4. 466392 4. 756421 4. 111887 4. 246454 4. 99899 4. 838291  
7. 089638 6. 907252 6. 659837 7. 574523 7. 234175 7. 012507 6. 947244 7. 211083 6. 753665  
3. 214718 4. 612619 3. 926278 3. 877909 3. 462515 4. 386471 3. 700116 3. 967502 3. 480638  
6. 065169 5. 694879 6. 202655 6. 894057 6. 066524 6. 05116 6. 601285 6. 400173 6. 448635  
4. 215032 5. 576143 5. 008102 4. 215297 5. 270772 5. 217688 4. 894966 5. 383059 4. 738517  
4. 189815 4. 233272 4. 092146 3. 914794 4. 135509 5. 446115 4. 589578 4. 566942 5. 91352

6. 210459 6. 319397 6. 264678 6. 044458 6. 608741 6. 169238 5. 418243 6. 182607 4. 553641  
8. 469271 8. 908296 9. 039686 8. 534451 7. 993269 8. 729853 8. 719674 8. 493365 8. 572279  
7. 296619 6. 885455 6. 752573 7. 136042 6. 999069 6. 635529 7. 246939 6. 841911 7. 343004  
1. 120122 1. 252756 1. 62276 1. 670393 0. 881342 1. 987883 1. 689673 0. 866534 1. 381181  
1. 658801 2. 191347 1. 816647 2. 41647 1. 729067 2. 333068 1. 906899 1. 676966 1. 652322  
1. 416558 1. 696708 1. 692112 2. 02237 1. 362447 1. 434996 1. 558604 1. 734493 1. 696708  
7. 850187 7. 739011 7. 788208 7. 181722 7. 858636 7. 544358 7. 504416 8. 110747 7. 787868  
6. 987557 7. 133145 7. 163279 6. 629258 6. 794679 7. 64656 7. 356663 7. 185088 7. 349062  
5. 400721 5. 197114 5. 922341 5. 021764 5. 992689 6. 17326 5. 087055 5. 876252 5. 224223  
4. 040828 4. 260151 4. 642969 4. 260151 4. 332968 5. 029248 4. 149457 3. 892364 3. 794368  
6. 074761 7. 045282 5. 897375 6. 041414 6. 570203 5. 709398 6. 768628 6. 076234 6. 899357  
7. 751289 7. 398379 7. 733174 7. 312149 7. 420261 7. 544098 7. 957978 7. 704604 8. 004832  
6. 060788 6. 455152 6. 301626 6. 792077 6. 680948 6. 221574 6. 601842 6. 333209 7. 218736  
2. 09989 1. 971761 1. 88487 2. 690136 1. 823247 2. 173977 1. 881638 2. 637806 2. 134856  
1. 325167 1. 334168 1. 277922 1. 146262 1. 724135 1. 344188 1. 448617 1. 212084 1. 46107  
6. 236725 6. 431739 6. 436766 6. 196262 6. 489123 6. 543517 6. 693121 6. 361308 6. 847266  
6. 531149 6. 398947 6. 028649 6. 05529 5. 975993 5. 483483 5. 910721 6. 171842 6. 617004  
4. 141894 3. 546093 4. 502088 2. 662886 4. 116339 3. 99095 4. 657866 3. 027323 3. 230299  
1. 576136 0. 993261 1. 036631 1. 398018 1. 089838 1. 17412 0. 94508 1. 09712 1. 045084  
4. 271543 3. 917712 3. 776141 4. 412818 3. 751797 5. 400863 3. 770256 4. 655292 3. 8584  
6. 652879 6. 270452 6. 628506 5. 978202 6. 17171 6. 303202 6. 676852 6. 608112 5. 866408  
6. 979197 6. 595672 6. 36505 6. 003062 6. 259527 7. 29789 6. 28575 6. 48859 6. 528666  
1. 913531 2. 012892 1. 801862 2. 220779 2. 043856 1. 553551 1. 506522 1. 714045 1. 886966  
4. 385786 4. 284223 4. 248325 3. 98281 5. 346079 4. 830262 4. 605535 5. 038189 3. 957044  
4. 567514 5. 35113 5. 220958 5. 230187 4. 873395 3. 966668 5. 278742 4. 459412 5. 483318  
4. 155003 3. 742813 4. 480289 3. 075078 4. 164635 3. 885626 4. 694584 3. 617299 3. 942621  
6. 802712 6. 372381 6. 35901 6. 314972 6. 146281 6. 085705 6. 550586 6. 811055 6. 271129  
7. 358175 6. 57134 7. 108122 6. 382074 7. 344948 7. 463629 6. 340594 6. 617041 6. 553567  
1. 128102 1. 226977 1. 942725 1. 08846 1. 255623 1. 933078 1. 036869 1. 117939 1. 210092  
0. 852215 2. 486271 1. 709223 1. 536491 0. 742493 1. 509399 1. 461274 2. 407763 1. 255293  
1. 739916 1. 521866 1. 668145 1. 95512 1. 614747 1. 548078 1. 309237 1. 641721 1. 757024  
7. 404367 7. 417664 7. 208366 8. 046051 7. 116995 6. 742984 7. 597605 7. 398267 7. 172195  
4. 174861 5. 569865 5. 982853 4. 611349 5. 143565 5. 747508 6. 087406 4. 669201 6. 779472  
8. 034927 8. 013768 7. 999101 7. 68007 7. 793066 7. 699607 7. 715457 7. 926855 8. 12167  
8. 499626 8. 339435 8. 532928 8. 986639 8. 349922 8. 862074 8. 575142 8. 920564 7. 458083  
5. 569594 5. 99565 6. 22722 5. 05308 6. 061671 5. 577057 4. 228536 5. 865053 5. 703444  
7. 4363 7. 115879 6. 994312 7. 273457 7. 122544 6. 64387 7. 772806 7. 364513 7. 075617  
1. 626634 0. 949664 1. 453245 0. 978123 0. 553803 1. 082469 1. 044479 0. 730808 3. 888873  
3. 259133 3. 805916 4. 460913 2. 468718 4. 882226 3. 104404 1. 950348 4. 040926 5. 142054  
3. 78118 4. 00778 4. 974039 3. 370794 3. 737909 5. 595497 4. 170337 2. 860716 4. 437578  
2. 997645 2. 903945 2. 54683 2. 999917 2. 89359 2. 970291 2. 983234 2. 877822 3. 004663  
1. 961455 1. 353658 1. 505004 1. 646916 1. 818525 1. 444883 1. 001245 1. 1946 0. 765662  
1. 302875 1. 191745 1. 868266 1. 702308 1. 439476 3. 494163 1. 070269 1. 884056 2. 730419  
1. 304557 1. 69089 1. 283841 1. 911885 1. 821168 1. 554136 1. 207117 1. 269439 1. 440331  
1. 36712 1. 860899 1. 719191 1. 849258 1. 316629 1. 443163 1. 946326 2. 23546 2. 126638  
0. 980748 2. 060425 1. 566795 1. 309623 1. 472533 1. 414146 1. 367455 1. 276807 1. 390482  
6. 044796 6. 022917 5. 114119 6. 201774 5. 867313 7. 13204 6. 033769 7. 296894 6. 694941  
3. 354096 1. 486079 1. 931274 1. 768855 1. 634068 1. 665778 2. 431978 1. 020674 4. 25576  
0. 737165 0. 774092 1. 302821 1. 597165 1. 228681 1. 878807 1. 29723 1. 861867 1. 12187  
1. 295293 0. 973714 0. 738336 1. 132405 1. 345769 0. 828928 0. 965517 1. 659794 1. 321046  
5. 822024 6. 0348 7. 536099 8. 981424 6. 113121 7. 837428 4. 566038 7. 535036 6. 64715

1. 566901 2. 321258 0. 928039 0. 857225 1. 366721 1. 468602 0. 768468 0. 944324 3. 113059  
8. 336581 8. 340002 8. 268689 8. 398459 8. 934513 8. 204436 8. 073145 8. 497822 7. 933438  
8. 34724 8. 070852 8. 382716 7. 770848 7. 882963 7. 764606 8. 620513 7. 733215 8. 543805  
2. 18048 3. 374673 3. 273412 2. 278755 2. 071035 1. 947374 2. 593048 2. 553177 2. 40716  
1. 798714 2. 157058 1. 901467 1. 777339 1. 645216 1. 870886 2. 45318 1. 31376 1. 715835  
1. 68929 2. 904112 1. 577035 3. 611384 2. 754201 2. 526372 2. 9161 2. 718631 2. 165792  
8. 507292 8. 480222 8. 272558 8. 524019 9. 063485 8. 712048 8. 330158 9. 018469 6. 745134  
2. 190325 2. 176086 1. 712916 3. 48222 2. 741602 2. 468872 3. 064061 2. 711398 3. 419658  
7. 525758 7. 108043 7. 070868 6. 960198 6. 574705 6. 732333 6. 776198 6. 620901 6. 54467  
6. 124979 5. 983795 5. 569146 5. 140745 5. 844966 6. 194957 6. 148255 6. 157379 6. 102789  
5. 644026 4. 909018 5. 226087 5. 86423 5. 493298 4. 983193 5. 489196 5. 126549 5. 884956  
3. 459876 3. 215765 0. 981665 2. 162506 1. 2548 2. 768671 1. 759284 0. 892125 1. 881475  
3. 46413 3. 638758 4. 135942 3. 841233 4. 889336 4. 385929 3. 8415 3. 962846 3. 941429  
1. 350197 1. 54966 1. 516693 1. 437991 1. 168207 1. 729891 1. 458999 1. 485565 1. 538509  
5. 0998 5. 217821 4. 594539 3. 209136 4. 426741 5. 168 5. 758169 4. 433356 5. 116981  
7. 52682 7. 54871 7. 987061 7. 883871 7. 935879 7. 411604 7. 489768 7. 738202 6. 025135  
4. 721874 5. 271664 5. 046233 4. 612356 5. 142721 4. 969413 5. 208679 4. 246384 4. 080776  
8. 03327 8. 126801 6. 565122 8. 603385 7. 522355 7. 472137 3. 3962 10. 00978 7. 950356  
3. 070587 2. 169594 3. 096304 3. 011192 3. 325024 2. 537181 2. 184056 3. 033823 2. 696398  
5. 769565 6. 107228 5. 851404 5. 692422 6. 248009 6. 147049 5. 611874 6. 413055 4. 906372  
6. 794588 7. 258087 6. 808953 5. 731366 6. 885162 6. 994141 6. 86604 7. 221511 5. 984031  
7. 945756 7. 960767 7. 716216 7. 838275 7. 918501 7. 622482 7. 58423 7. 593537 7. 536727  
1. 96419 1. 260111 2. 312222 3. 331589 1. 677594 2. 383277 1. 679116 3. 072929 1. 757676  
4. 104494 4. 272569 3. 163677 5. 200328 5. 158964 3. 39257 3. 109273 3. 850274 3. 712127  
5. 232999 5. 492331 5. 001498 5. 583275 5. 271778 4. 399678 4. 946391 5. 442286 5. 836448  
7. 771125 7. 758974 7. 781919 7. 63567 7. 787803 7. 809763 7. 975428 7. 590715 8. 26743  
4. 70546 4. 006498 4. 618652 3. 850099 4. 488067 4. 489616 5. 014084 4. 270772 4. 837467  
4. 349275 4. 888673 3. 476054 4. 264696 3. 879724 3. 389031 4. 870085 3. 997987 4. 502377  
3. 501585 3. 796776 4. 180334 2. 805041 4. 885038 3. 709241 4. 025118 3. 633856 5. 043956  
5. 933794 4. 863532 4. 235117 3. 84587 5. 302527 5. 000503 4. 739001 5. 374024 4. 041434  
4. 232835 4. 883464 4. 85316 3. 543811 4. 691679 4. 726649 5. 133368 4. 632914 3. 368737  
5. 034304 5. 367466 5. 299865 4. 882587 5. 429959 5. 039606 5. 476962 5. 240903 4. 590825  
1. 498798 1. 664343 1. 426699 2. 177223 1. 537946 1. 712987 2. 50295 1. 231281 1. 691058  
4. 129385 3. 784612 3. 548523 4. 143795 3. 820906 3. 878437 3. 45031 3. 638406 4. 009845  
5. 515801 5. 843092 5. 835332 6. 27851 5. 84012 5. 49024 5. 350535 5. 287496 6. 216054  
2. 766795 2. 715604 3. 277292 2. 64036 3. 223017 2. 622285 2. 909471 3. 449675 3. 337722  
4. 069062 4. 858293 4. 845278 3. 839188 4. 837312 5. 052156 4. 736987 5. 608012 4. 815667  
1. 870999 1. 940412 1. 79201 1. 987627 1. 493498 1. 85853 2. 1959 1. 796049 1. 769902  
4. 796073 5. 211875 5. 170084 4. 933159 5. 220471 4. 120065 5. 271526 4. 982123 4. 894031  
2. 841503 3. 153591 3. 061989 4. 302162 3. 397381 3. 917328 3. 034244 3. 154457 3. 116898  
1. 677342 2. 127779 1. 603186 2. 677073 1. 970511 1. 821831 2. 070096 1. 21685 1. 644595  
1. 660236 1. 455366 1. 232062 1. 228847 1. 324247 2. 408751 1. 627463 1. 948191 3. 48802  
6. 771089 8. 292678 8. 059775 8. 290669 8. 344544 7. 136304 8. 289167 8. 142473 9. 093765  
4. 155879 3. 780058 4. 277659 4. 703627 3. 730404 3. 983301 4. 22833 3. 785808 3. 654515  
2. 892086 3. 240903 2. 84964 3. 837169 3. 946426 2. 379755 4. 728458 3. 523743 2. 345165  
4. 455796 4. 317465 4. 299064 4. 174784 3. 978209 5. 19646 5. 007666 3. 872415 3. 528682  
7. 970682 8. 048945 8. 427576 7. 65662 7. 678708 8. 022803 7. 206578 6. 939516 7. 437861  
3. 125272 2. 484131 2. 675237 1. 470352 1. 81147 2. 418745 1. 248134 1. 089477 1. 510138  
7. 975923 8. 353394 7. 33315 7. 261223 7. 979689 7. 363529 7. 547376 7. 911753 7. 615767  
2. 98304 2. 690403 3. 152899 3. 269926 3. 952617 2. 066631 3. 312249 4. 04386 1. 970323  
1. 008152 0. 964669 1. 722816 1. 766834 0. 874878 1. 555871 1. 036474 0. 821219 1. 028059



5.016201 5.021281 5.833049 4.133057 5.587989 4.315597 5.91213 5.302503 4.536197  
2.010419 0.975291 2.304191 1.715905 1.5553 1.259672 1.63284 2.172566 2.044958  
1.562868 1.171915 1.984779 2.631698 2.529086 3.397371 2.281131 2.755924 1.540623  
5.726711 4.403869 3.914308 4.820026 5.080848 5.340244 5.855817 4.493072 5.566967  
1.672873 2.016257 1.909236 2.957825 1.273979 2.25308 2.47722 1.958321 2.337223  
1.335744 1.518015 1.691701 1.591142 1.34683 1.401466 1.845422 1.654808 1.824287  
1.333258 1.393638 0.890366 1.147986 1.447934 1.782514 0.955564 1.809941 0.887996  
1.875355 1.599 2.32558 1.900614 1.684659 2.401492 1.931845 1.665766 2.319405  
5.949652 6.140333 6.347962 5.094635 6.151476 5.7815 5.756399 6.093195 5.246054  
6.322764 6.496814 6.110934 5.751902 6.562282 6.711875 6.662924 6.531918 6.640269  
1.630145 2.11471 1.726187 2.47252 1.71645 1.541907 1.630776 0.84114 1.064998  
4.529404 4.990657 4.497806 4.179855 5.245174 5.536882 5.243812 4.47609 6.427025  
1.730225 0.894203 0.635734 1.302944 0.926706 2.254403 1.328723 1.081129 1.600456  
10.43205 9.949748 10.48384 7.746145 10.15014 10.46421 10.23113 10.32756 10.87147  
5.882839 5.598788 5.845884 6.164645 6.316394 5.546742 5.128454 5.827838 4.298122  
4.427157 4.874676 4.719339 4.27794 4.594164 4.989039 4.765703 4.82968 4.149272  
7.783777 7.717838 7.94797 6.984479 7.539565 8.143749 7.639776 7.510028 7.994843  
6.088355 6.544675 6.784821 5.747862 6.676275 6.579712 6.968582 6.983209 6.10828  
4.881297 5.132482 5.204805 3.825235 4.748171 4.801235 4.413314 5.39646 3.896714  
8.735465 8.297471 8.839838 8.9525 8.68664 8.68367 8.80389 8.467815 8.220098  
4.455636 4.067285 2.824858 4.178391 5.883364 2.194397 2.931187 4.626421 2.075163  
3.646903 4.671776 3.884618 4.365937 4.468258 3.979138 3.616627 5.071051 5.169167  
1.139703 0.832248 1.434816 2.056952 2.115785 2.852581 1.239589 5.106197 1.283509  
1.535443 1.756238 2.064794 2.792043 2.662817 2.515576 2.24563 1.90536 2.018103  
1.573482 2.160561 1.68937 2.173697 2.14369 3.17647 2.049847 3.169894 1.98394  
7.876966 7.699193 7.708472 6.329856 7.139094 7.579003 7.790292 7.136686 8.008969  
4.94458 5.893706 3.767322 4.262492 5.253384 3.392961 3.600013 5.999262 3.774164  
2.230313 2.658056 1.995794 3.611893 2.331289 1.825909 2.111537 2.155406 2.783656  
6.678653 6.436216 6.409963 5.899579 6.271575 6.835226 6.681975 7.051766 6.724842  
5.15518 4.889538 4.774495 4.575084 5.411678 4.981987 5.324231 4.954507 4.599934  
4.473738 4.84625 4.709068 6.428883 5.058074 4.758687 4.712632 4.233596 2.811269  
1.891554 2.355376 2.205698 2.152315 1.699233 1.816338 2.050383 2.03352 2.451739  
6.602162 6.259009 6.248347 6.019849 6.707853 6.052999 6.284443 5.973145 5.369253  
1.396126 1.157879 1.270419 1.263072 1.565255 1.491936 1.357147 0.897354 2.216097  
3.110571 2.42536 2.043327 3.299325 2.952519 1.948733 3.139197 3.757478 3.475645  
8.273434 7.913367 8.045683 8.572677 8.285854 8.103287 8.268435 8.293634 7.755363  
6.978866 6.670231 6.292092 4.6852 6.891029 6.147477 6.431961 6.715325 7.536418  
7.833396 8.13616 7.837165 7.559129 7.678875 8.088514 8.019683 7.557789 7.465156  
1.753244 1.762281 1.47141 1.590296 2.022881 1.267225 1.995711 2.735561 1.244377  
2.392654 1.92943 2.388318 2.639455 2.096082 1.727268 1.923438 2.082332 2.363264  
7.135938 7.228087 7.40152 7.31544 6.971408 7.09049 7.258241 7.189076 7.120412  
5.123581 4.079412 3.182553 4.41667 3.832843 4.275755 4.967668 3.235887 5.661871  
7.043635 7.175229 6.774863 5.550604 7.070044 7.242561 6.769191 7.28995 6.968695  
6.388255 6.244837 5.975899 5.934623 6.484864 5.318894 5.248314 5.73814 5.932796  
5.108529 4.962983 5.121301 5.021819 4.104601 4.451688 5.010194 4.390598 4.432628  
3.425108 3.876784 3.85114 4.653365 3.14488 2.615883 3.714517 3.699411 3.744416  
6.853505 6.868586 6.740262 6.484885 6.454127 6.973704 6.684389 6.930595 6.933298  
5.271986 5.532487 5.394323 5.785266 5.534146 5.403641 5.078075 5.60494 5.617469  
6.939317 7.152475 7.085613 6.013808 7.272971 6.925475 7.222099 6.567193 6.5162  
1.359105 1.524043 1.440075 1.713823 1.259461 1.822013 1.206811 1.212682 1.942522  
1.48131 1.717856 1.082951 2.242216 1.857529 1.675621 2.106625 2.001245 1.49431

5. 720153 5. 556685 5. 679444 5. 835173 5. 741874 5. 278652 6. 114298 5. 783416 6. 065591  
7. 411786 6. 467535 6. 543582 7. 122029 7. 066533 6. 596351 6. 9721 6. 784664 6. 895512  
5. 147354 5. 383441 5. 768268 5. 236636 5. 399236 4. 397229 5. 163778 4. 771624 5. 18268  
3. 01064 3. 090429 2. 542009 3. 630044 2. 190875 2. 338993 2. 468768 3. 164204 2. 82502  
6. 023672 5. 59999 5. 922859 5. 338221 5. 41526 6. 378604 6. 003791 5. 676244 5. 60846  
6. 293601 6. 709211 6. 316522 6. 157114 6. 717456 6. 00099 5. 915167 6. 917226 6. 098533  
5. 980425 6. 382065 6. 339874 7. 91133 6. 698509 6. 38162 6. 129977 6. 515109 6. 140697  
5. 724845 5. 055432 5. 412918 5. 886605 5. 697268 5. 436485 5. 089998 5. 917303 5. 910802  
5. 428838 5. 899548 6. 182576 4. 37457 6. 18713 6. 07208 6. 306609 6. 064506 5. 149869  
2. 362309 2. 282586 2. 080492 2. 453182 2. 188463 2. 378784 2. 499391 2. 576106 1. 851713  
6. 442988 5. 5953 5. 50247 3. 385287 5. 519003 6. 202242 5. 564293 5. 5521 6. 178872  
8. 037276 7. 919973 7. 780536 6. 918573 7. 702451 7. 858712 8. 040343 7. 506199 7. 322399  
6. 167161 5. 740535 5. 895729 5. 199414 5. 68133 5. 554072 6. 292054 5. 955458 6. 561252  
5. 219322 6. 199105 5. 562346 4. 690784 5. 27333 4. 721591 4. 79669 4. 649928 5. 372059  
7. 00567 6. 959849 7. 09215 6. 305166 6. 317154 6. 672431 7. 363859 6. 4387 7. 212038  
1. 73589 2. 14193 2. 064394 3. 246748 1. 935443 1. 484433 2. 702668 2. 097198 1. 468284  
5. 917023 6. 462555 4. 975929 3. 851552 5. 402427 5. 815921 6. 619551 5. 355943 5. 462943  
4. 481998 5. 084324 5. 144874 6. 265026 4. 990999 5. 789991 4. 862352 4. 836404 4. 150188  
4. 173733 5. 129648 4. 66862 3. 857778 4. 249928 3. 696682 4. 329457 3. 859045 4. 711456  
5. 608877 5. 731974 5. 669045 5. 296245 5. 905067 4. 964967 5. 669062 5. 197361 5. 097162  
0. 950288 1. 83299 1. 812248 1. 959526 1. 455895 2. 966291 1. 565791 1. 622889 2. 635597  
2. 872025 2. 736581 2. 284872 4. 197293 3. 035976 2. 143256 3. 23805 2. 691716 2. 836031  
4. 254669 4. 552245 4. 634698 3. 986651 4. 546675 3. 487956 2. 918435 4. 326542 4. 159536  
3. 666279 3. 724537 3. 718402 4. 21899 4. 966019 4. 320538 3. 91099 3. 794908 3. 504145  
1. 569665 1. 37598 1. 577973 1. 692004 0. 953304 1. 335391 1. 140623 1. 127175 1. 547463  
4. 324103 3. 614913 3. 93222 4. 283527 4. 065605 3. 820451 3. 184572 4. 293711 3. 576685  
5. 388364 5. 179387 5. 22512 4. 149451 5. 405494 4. 55269 5. 151584 4. 668628 4. 790258  
8. 061653 6. 96522 7. 526231 8. 130566 7. 125786 7. 819403 8. 206308 8. 017374 9. 161876  
1. 95815 1. 523418 2. 440974 1. 826991 2. 744098 2. 109843 2. 328227 3. 028778 1. 780857  
2. 105849 3. 302257 2. 475373 2. 125544 2. 357158 1. 948876 1. 797263 2. 628848 2. 397357  
2. 603173 2. 331605 2. 854145 3. 251883 2. 479398 2. 692875 3. 164554 2. 309639 2. 981081  
5. 778972 4. 946732 5. 026362 5. 283528 5. 330734 5. 027574 4. 651622 4. 949755 4. 524076  
3. 163616 2. 289398 3. 113359 3. 395192 2. 648525 2. 662725 3. 338252 2. 372562 3. 584597  
5. 311257 4. 967277 5. 378129 5. 607769 5. 143026 5. 824529 5. 701998 5. 873439 4. 495372  
6. 257499 6. 495142 6. 609086 6. 131461 6. 690688 5. 933926 6. 102441 6. 26514 6. 052837  
6. 544784 6. 337527 6. 458151 6. 10417 6. 206778 6. 6652 6. 294178 6. 449954 6. 795374  
7. 369009 7. 714118 7. 515659 7. 489978 7. 696883 7. 82927 7. 082473 7. 563208 7. 017323  
3. 51348 3. 142586 3. 674094 4. 023808 3. 820136 3. 037333 3. 1539 3. 359637 2. 579598  
1. 031192 1. 299103 1. 50812 2. 17587 0. 765191 3. 106081 1. 425511 1. 626392 0. 885431  
2. 264975 1. 988442 2. 838831 2. 921984 2. 239898 3. 215394 3. 809267 2. 014726 3. 034744  
5. 209802 5. 916137 5. 608636 6. 448034 5. 691789 5. 924451 6. 30747 5. 561406 5. 77125  
1. 155794 1. 119041 1. 210725 0. 980319 1. 016688 1. 28044 1. 263102 1. 094145 1. 756593  
4. 490211 1. 694208 4. 058589 1. 765117 3. 045973 5. 363443 4. 60169 4. 820223 6. 371539  
1. 47426 1. 198547 1. 439442 1. 503065 1. 246903 1. 322584 0. 967568 1. 230009 1. 653186  
7. 224742 7. 207604 7. 003246 6. 912612 7. 192535 7. 336336 7. 305219 7. 342552 7. 394132  
6. 375182 5. 975792 6. 437884 6. 642008 6. 400516 7. 165975 5. 626184 5. 933932 7. 012608  
8. 207555 7. 841979 7. 717245 8. 596512 7. 910391 8. 010715 7. 951966 8. 142578 7. 720332  
2. 301536 2. 865478 3. 42112 2. 978998 3. 077635 2. 061573 2. 783651 1. 481466 2. 61567  
3. 793322 4. 377815 3. 950124 4. 310996 3. 829031 3. 779256 4. 578242 3. 877831 4. 111222  
1. 682202 1. 427266 1. 481553 1. 359236 1. 966178 2. 349608 1. 48363 2. 533735 1. 628944  
4. 032817 4. 458337 5. 54151 2. 788568 2. 769302 5. 125963 3. 813619 3. 592514 4. 548801

1. 468912 1. 355585 1. 361141 1. 706222 1. 332668 2. 482236 1. 308382 1. 411781 1. 395121  
10. 21123 10. 01262 10. 27206 7. 986162 9. 792697 9. 903467 9. 742115 9. 598708 10. 01589  
6. 270004 6. 362872 5. 754575 6. 541062 6. 501221 5. 48884 6. 3269 6. 702649 6. 250097  
1. 556347 1. 111724 1. 222053 2. 237829 0. 892406 2. 133268 1. 370506 1. 612811 1. 825703  
5. 688543 5. 494064 5. 262507 5. 204088 5. 840272 5. 059009 5. 315649 5. 481117 4. 930484  
4. 860662 4. 807909 4. 914848 6. 029428 4. 969297 4. 613914 5. 038688 4. 989396 5. 702482  
1. 453226 0. 892574 1. 0659 1. 705351 0. 880157 2. 548091 1. 080993 1. 198625 1. 034767  
6. 132174 5. 362471 5. 308757 5. 306825 5. 33855 5. 19593 5. 911028 5. 647444 4. 893652  
6. 300683 5. 754649 6. 499934 6. 364101 5. 995159 6. 0444 5. 974496 6. 174353 6. 088231  
7. 009478 6. 583716 6. 875543 6. 742501 7. 228715 6. 550644 6. 506698 7. 035596 7. 517942  
2. 397199 2. 986146 2. 887395 2. 422477 2. 482239 2. 556503 2. 586264 2. 247015 2. 382029  
2. 963024 1. 953893 1. 85876 2. 23915 1. 66542 1. 69539 1. 749025 2. 240163 3. 459559  
1. 616002 1. 347492 1. 632125 1. 22494 1. 554051 1. 254411 1. 093542 1. 183694 1. 383747  
4. 838833 4. 517173 4. 593296 5. 128576 4. 277142 4. 48805 4. 821641 4. 437253 5. 113542  
1. 878447 2. 213995 1. 577564 2. 393467 1. 572823 2. 444643 1. 43375 1. 857465 1. 954919  
10. 20723 10. 45635 10. 12986 9. 573351 10. 04899 9. 982506 10. 21921 10. 79677 10. 15572  
10. 96291 10. 98626 10. 98515 11. 22451 10. 81551 10. 35051 11. 32623 11. 26383 11. 21522  
3. 476229 3. 494469 3. 605049 4. 341808 3. 634808 4. 447871 3. 4995 3. 739977 4. 175845  
1. 176137 2. 323812 2. 371547 1. 411372 3. 205186 2. 500075 2. 941389 2. 487412 2. 405378  
1. 627693 1. 787254 1. 778579 1. 487819 1. 461297 1. 846021 1. 650463 1. 293988 1. 443386  
1. 211517 1. 013636 1. 198597 1. 26977 1. 118428 1. 047176 0. 958456 1. 24118 1. 451033  
3. 364443 1. 890944 2. 344343 2. 016764 1. 950425 1. 967057 3. 569213 2. 293214 1. 762405  
4. 560762 2. 422306 3. 95297 3. 915502 3. 041422 4. 368101 3. 92059 4. 202413 4. 947923  
1. 800712 1. 805132 2. 044616 1. 137567 1. 664735 1. 87343 1. 393719 1. 787981 1. 775112  
10. 45967 10. 53228 10. 51985 10. 40259 10. 7823 10. 21859 10. 82361 10. 79017 10. 77436  
8. 173423 7. 497917 8. 595161 7. 571853 8. 653145 7. 696301 6. 821545 8. 756905 6. 810288  
5. 340287 4. 982168 4. 863844 3. 941101 5. 90276 5. 165291 4. 84169 4. 676861 4. 639056  
10. 80643 10. 66354 10. 71316 10. 66524 10. 60196 10. 17941 10. 77029 10. 91713 10. 91135  
2. 877666 1. 867893 3. 238258 2. 667989 2. 170546 2. 149518 2. 132031 3. 257708 2. 84029  
3. 901859 4. 237596 4. 192187 4. 471419 3. 765181 4. 384227 4. 407418 4. 022361 4. 631215  
5. 892275 6. 034504 6. 262651 5. 174375 6. 223935 5. 934214 6. 028179 5. 338211 6. 779065  
5. 475063 5. 108268 5. 209409 5. 202221 5. 412061 5. 365933 5. 495561 5. 443895 4. 047467  
10. 02727 10. 29771 10. 06448 10. 13773 10. 13474 9. 820758 10. 5815 10. 57419 10. 41261  
3. 819512 4. 016711 3. 251957 4. 093868 3. 641135 3. 092117 3. 647173 3. 913523 3. 525738  
6. 334832 6. 137986 6. 040104 6. 078339 6. 552395 5. 694362 5. 903568 6. 231625 6. 771701  
6. 941725 6. 613726 7. 301455 5. 680749 6. 586042 4. 270049 6. 586592 7. 22948 7. 178265  
5. 370041 5. 802944 5. 921993 5. 42746 6. 114188 5. 512502 5. 032754 6. 086846 5. 303285  
11. 34528 10. 62625 11. 11954 11. 12181 10. 89225 11. 06588 11. 28186 10. 79431 11. 33644  
2. 88733 5. 0594 2. 80702 2. 878605 3. 120314 2. 61352 2. 950326 3. 118516 3. 692566  
11. 65299 11. 39709 11. 5259 11. 18182 11. 51627 11. 18161 11. 70752 11. 45469 11. 70045  
10. 72361 10. 50137 10. 36166 10. 13445 10. 54774 10. 17409 10. 43866 10. 70084 10. 71512  
3. 731972 3. 089857 4. 092512 3. 415899 3. 167085 3. 132223 3. 811532 3. 481295 3. 636911  
2. 99781 3. 085655 2. 947927 2. 926639 3. 03286 2. 322273 3. 205981 2. 805176 3. 746687  
2. 493267 4. 132161 3. 429019 6. 504787 4. 503597 3. 028489 5. 721155 1. 785235 3. 89054  
5. 593779 5. 516325 5. 214807 5. 927481 5. 331772 4. 469853 5. 657932 5. 575235 5. 690968  
3. 206114 3. 314551 2. 846929 3. 226274 4. 319383 1. 431296 2. 374172 2. 029527 2. 04472  
6. 436025 6. 258284 5. 870088 6. 61944 6. 482738 5. 807774 6. 92626 6. 142486 6. 804217  
8. 477507 8. 1292 8. 357567 7. 708293 8. 205631 7. 724931 8. 50636 8. 341268 8. 696357  
9. 027676 8. 890018 8. 621153 9. 010484 8. 977768 8. 839936 8. 904507 8. 850756 8. 777664  
5. 782611 5. 13723 5. 312452 5. 957664 3. 809588 5. 519823 6. 279407 5. 480017 6. 420973  
11. 71951 11. 48936 11. 47942 11. 55702 11. 5531 11. 09421 11. 60333 11. 49061 11. 73396

7. 924753 7. 570661 7. 494803 7. 911099 8. 042385 7. 076457 8. 371829 8. 098845 7. 898271  
2. 540335 1. 772968 1. 797314 1. 918799 1. 085378 3. 644795 3. 739964 0. 87307 2. 530412  
5. 558215 6. 225251 5. 686084 5. 385187 5. 868763 5. 035465 5. 237762 5. 948934 5. 499915  
2. 866762 2. 909857 2. 642914 4. 04848 2. 557498 2. 019877 3. 118616 3. 002094 4. 151251  
6. 065418 6. 109951 6. 727511 6. 335152 6. 66359 5. 410268 5. 149711 6. 206319 4. 206949  
3. 505251 3. 64319 4. 268287 3. 940751 4. 957068 4. 189265 3. 541681 4. 43184 3. 628764  
9. 504232 9. 72454 9. 512906 9. 089818 9. 669043 9. 705194 9. 861041 9. 633562 9. 538808  
9. 190481 9. 329075 9. 305943 9. 516326 9. 358527 9. 136245 9. 372757 9. 663205 8. 898118  
6. 496443 5. 592174 5. 860841 5. 132006 5. 141021 5. 684659 5. 720608 5. 773369 5. 62625  
3. 659924 2. 963056 2. 980487 2. 950716 2. 377135 3. 041894 2. 254265 3. 557896 3. 627266  
4. 046152 3. 421722 3. 988384 4. 2881 4. 001984 3. 360429 3. 968399 3. 770954 3. 822851  
1. 170279 0. 789295 1. 278887 1. 606671 1. 162251 2. 37093 1. 218892 1. 344931 1. 812041  
5. 230521 4. 503391 4. 840903 5. 185164 4. 606952 4. 111412 5. 522574 5. 224981 4. 672309  
1. 228903 1. 503731 1. 817464 3. 138495 1. 870956 1. 895421 1. 136169 1. 615377 1. 346173  
5. 296509 5. 824896 4. 898772 5. 377773 5. 290788 5. 467466 5. 558577 5. 656884 5. 377854  
6. 119265 6. 12526 5. 646707 5. 707248 5. 481176 6. 769015 5. 77106 6. 205403 4. 945444  
7. 566631 7. 679857 7. 459565 2. 213768 7. 728911 7. 667662 7. 94783 1. 447054 1. 561138  
1. 088502 1. 459817 1. 316354 1. 745384 1. 180914 1. 471263 1. 417091 1. 252748 1. 301666  
1. 849749 1. 250361 1. 210347 2. 545372 1. 710918 1. 883784 1. 15841 1. 241081 0. 792235  
1. 674409 1. 949263 1. 771007 1. 458258 1. 009907 3. 092921 1. 988616 1. 489464 2. 716993  
1. 320866 1. 595058 1. 648577 2. 228255 1. 161395 1. 117683 1. 513913 1. 54858 1. 321859  
7. 313184 7. 191462 8. 620345 7. 294047 6. 576795 7. 42231 8. 691868 7. 976025 10. 04651  
10. 38991 10. 32269 10. 39432 10. 44592 10. 63172 10. 02759 10. 52729 10. 74222 10. 70055  
3. 479075 4. 468731 5. 374228 3. 835482 3. 413788 1. 300657 3. 957882 3. 836085 3. 753419  
1. 352186 1. 424445 1. 732408 2. 543121 1. 808474 1. 694107 1. 857855 1. 796186 1. 651259  
0. 96246 1. 276126 0. 915541 1. 414842 0. 725897 1. 594141 1. 019342 3. 496356 1. 416729  
2. 565155 3. 920306 3. 314766 2. 006183 3. 213907 1. 636749 4. 674656 2. 077054 5. 655503  
9. 558034 9. 590539 9. 415264 9. 225297 9. 305281 9. 612718 9. 70002 9. 757023 9. 902093  
6. 052491 1. 824443 2. 820459 2. 187958 1. 622103 3. 337806 3. 871536 3. 281315 6. 315069  
2. 03594 2. 031881 2. 265873 1. 600779 1. 993645 2. 055331 1. 603581 1. 741862 2. 03594  
4. 017857 3. 087458 4. 334803 3. 859453 3. 886642 3. 187292 3. 077845 3. 176433 3. 233085  
4. 546808 3. 360355 4. 131939 5. 134453 3. 649369 3. 174641 4. 801416 3. 579098 3. 725323  
1. 462924 1. 148635 1. 491436 1. 460779 0. 884297 1. 442052 1. 516691 1. 17675 1. 382729  
1. 044686 1. 150165 1. 27156 1. 984524 1. 367984 1. 286209 1. 106499 1. 230794 1. 356931  
1. 496256 3. 090506 3. 087002 1. 662336 2. 142566 1. 737742 2. 857144 2. 092302 5. 982426  
0. 786102 0. 84306 0. 792067 1. 56781 0. 732052 1. 297385 1. 185398 0. 706718 1. 005073  
3. 734648 3. 53848 5. 386335 3. 544826 1. 802593 2. 780712 4. 057632 3. 51415 4. 338871  
1. 335405 0. 70829 2. 443799 0. 58629 0. 500576 2. 064389 1. 02069 2. 4344 3. 789137  
1. 685572 1. 221354 1. 832384 1. 59281 1. 327458 1. 23238 3. 280333 1. 626889 3. 678633  
3. 968106 3. 297175 4. 832637 3. 75666 4. 025671 5. 621214 3. 32752 3. 762953 7. 235892  
2. 513745 1. 327695 1. 745027 1. 924903 0. 763386 1. 852024 1. 350794 2. 455893 2. 0342  
3. 478709 4. 278208 3. 949235 4. 257374 3. 926775 3. 494787 4. 491709 3. 621234 3. 562632  
5. 637445 6. 30601 6. 216844 5. 060587 6. 061623 5. 794892 6. 233143 6. 750144 5. 234164  
6. 073542 6. 238886 6. 278691 6. 234691 6. 514941 6. 458406 6. 626463 6. 671537 5. 620046  
6. 848924 6. 384337 6. 616604 6. 456153 6. 204466 6. 652124 6. 631317 6. 709241 7. 038816  
4. 624738 4. 695078 4. 922826 4. 617568 5. 114885 5. 111571 4. 99201 4. 919054 4. 106137  
5. 336724 5. 231904 5. 891534 5. 574507 5. 609858 4. 341155 5. 605421 4. 940501 5. 65807  
11. 75994 11. 65291 11. 65215 11. 57922 11. 54872 11. 48476 11. 81947 11. 65196 11. 92373  
10. 80102 10. 51261 10. 60001 10. 66522 10. 28243 10. 10738 10. 65372 10. 71353 11. 01691  
3. 736636 3. 647981 3. 813755 4. 033757 3. 835901 3. 313342 3. 912884 3. 996084 3. 649774  
7. 702985 7. 896196 7. 922783 8. 094612 8. 155064 7. 825679 7. 641222 8. 084463 7. 65753

7. 833518 7. 332736 7. 307287 8. 032335 7. 497606 6. 982313 7. 847218 8. 042051 8. 496863  
6. 711172 6. 969977 6. 623937 6. 612072 6. 754165 6. 535304 6. 304984 6. 915556 6. 934658  
10. 41156 10. 45212 10. 16018 10. 04155 10. 48875 9. 753494 10. 46187 10. 58416 10. 47951  
4. 137746 4. 810269 4. 625736 4. 62252 3. 765492 4. 769991 4. 524066 4. 474113 4. 495305  
10. 65372 10. 19119 10. 39517 10. 29231 10. 42542 10. 12185 10. 18851 10. 58789 10. 58074  
5. 397452 6. 278765 6. 298139 6. 274638 5. 316631 5. 653085 6. 463811 6. 387561 6. 895618  
2. 854524 2. 518522 3. 225265 2. 947951 2. 876776 3. 202492 3. 232173 2. 98859 3. 67327  
2. 737999 3. 503963 2. 200375 2. 872902 2. 561247 3. 921474 2. 889162 2. 672472 3. 118179  
4. 317055 4. 946099 3. 740306 5. 414993 4. 328701 3. 718133 4. 150516 4. 604418 2. 257428  
2. 870167 3. 464257 1. 509782 2. 003134 1. 920268 2. 635965 2. 636647 2. 258763 1. 735522  
10. 67886 9. 861959 10. 11188 10. 02153 10. 11537 10. 06071 10. 15127 10. 3016 10. 33205  
2. 360356 2. 591573 2. 767488 3. 030298 2. 82322 1. 958549 3. 266033 2. 499008 2. 897844  
8. 36783 8. 666402 9. 180035 8. 229679 8. 646559 7. 951033 8. 453982 9. 15503 7. 926647  
7. 368547 7. 307672 7. 084643 7. 814205 7. 596549 6. 693179 7. 193615 7. 496233 6. 170503  
6. 234355 6. 7659 6. 44392 6. 141476 6. 6532 6. 331689 6. 748694 6. 73348 6. 612987  
1. 976192 1. 537744 1. 730557 1. 605609 1. 301057 2. 091176 1. 729961 1. 081273 1. 200685  
5. 983133 6. 066902 5. 933583 6. 594155 5. 991476 6. 079945 6. 469385 5. 53792 5. 897746  
2. 998161 3. 972954 2. 037612 2. 438639 4. 417683 2. 986954 4. 237485 2. 80316 2. 401909  
4. 779526 3. 972234 3. 960621 2. 795996 3. 386341 4. 271306 3. 331383 3. 768159 3. 96309  
2. 237747 1. 733414 1. 379354 1. 238947 1. 5061 1. 360347 1. 390674 1. 352755 2. 256796  
7. 807945 7. 830676 7. 232101 8. 347519 7. 957009 8. 062438 7. 775439 7. 916107 7. 634235  
7. 949332 7. 748147 7. 965095 8. 234807 7. 856691 7. 87084 7. 911866 7. 978304 7. 81523  
2. 037083 2. 129457 2. 984648 2. 975858 2. 400255 3. 146884 2. 890836 2. 778535 2. 244726  
9. 028512 9. 225781 9. 015404 9. 193033 9. 074368 8. 678017 9. 276299 9. 113296 8. 922351  
2. 444881 2. 381458 2. 517126 2. 975285 2. 696175 2. 721867 2. 574807 2. 401404 2. 471131  
4. 483079 5. 108367 4. 949809 3. 695781 4. 892072 4. 471375 4. 821183 5. 279951 4. 521323  
5. 988536 6. 51361 6. 735128 5. 517084 6. 396735 5. 56838 5. 96716 6. 407066 5. 157688  
5. 17768 5. 374615 5. 617778 4. 590061 5. 52912 5. 595548 5. 759172 4. 992826 4. 902096  
1. 902011 1. 449128 2. 129678 1. 942014 1. 441049 1. 711439 1. 428872 1. 043456 1. 647609  
6. 783096 7. 053631 7. 001701 6. 832853 6. 373656 6. 944046 6. 921454 6. 693809 6. 729625  
1. 63042 1. 671485 1. 724781 2. 080379 1. 595324 1. 889423 1. 613983 1. 677293 1. 427813  
1. 408375 1. 503341 1. 23848 1. 747168 1. 315049 1. 764353 1. 362494 1. 457821 2. 047043  
2. 772923 2. 561082 2. 940942 1. 927802 3. 209285 3. 295627 1. 629458 3. 114044 4. 919492  
4. 481698 4. 196341 3. 941858 4. 199946 4. 480438 3. 156354 3. 927379 5. 127841 4. 053371  
8. 831483 8. 870897 8. 825715 8. 132383 8. 568121 8. 738794 8. 973829 8. 635357 8. 613285  
4. 732673 6. 544649 6. 608101 6. 045967 6. 712934 5. 90865 5. 271791 5. 71664 6. 086669  
5. 503263 1. 517534 4. 151367 2. 758829 2. 823115 2. 468936 1. 488061 2. 687505 4. 567785  
8. 285784 7. 763554 8. 45536 8. 76449 7. 299273 8. 303376 8. 344905 8. 707759 8. 040578  
1. 981827 1. 379297 2. 098246 1. 603753 1. 727245 1. 305336 2. 600995 1. 528984 2. 265322  
9. 391252 9. 48565 9. 374727 9. 133431 9. 482023 9. 303433 9. 1432 9. 544681 9. 41143  
2. 109683 3. 041523 2. 208906 3. 522256 1. 711292 1. 752713 2. 36633 2. 814482 1. 617176  
7. 048247 6. 764617 7. 063047 6. 2812 8. 797855 5. 986079 5. 728302 8. 300482 8. 511623  
1. 839338 2. 017474 1. 915974 2. 311379 1. 826587 2. 242933 1. 827135 2. 257187 1. 909592  
6. 729475 6. 916367 6. 767804 6. 988531 8. 769221 5. 791141 4. 687408 7. 771394 7. 188272  
9. 387726 10. 00171 8. 941791 10. 11466 10. 07399 9. 327599 9. 318445 9. 810105 9. 187463  
9. 823665 9. 795031 9. 641514 9. 957317 10. 16401 9. 686535 9. 497643 9. 890294 9. 004759  
4. 0606 3. 386989 4. 993825 2. 004996 5. 735382 3. 025248 2. 455152 5. 174843 6. 434547  
4. 642801 4. 886239 4. 544258 4. 673695 4. 603462 4. 750942 4. 674978 4. 819336 4. 278584  
4. 095287 0. 996415 1. 773264 2. 585479 2. 324119 2. 078125 2. 177005 2. 83842 2. 262361  
5. 740602 4. 702986 3. 82631 3. 807829 3. 40697 2. 77006 3. 414206 4. 668531 4. 241457  
3. 373134 2. 295417 1. 622792 1. 874497 2. 945928 1. 730206 4. 002788 1. 417445 2. 47536

0. 903436 0. 77968 2. 431429 1. 064055 1. 001198 1. 892275 2. 556483 1. 179051 1. 080146  
1. 095903 1. 822757 0. 833192 1. 188637 1. 07943 1. 21999 1. 204118 0. 809721 0. 928272  
7. 32581 6. 90352 7. 36163 7. 185431 6. 932545 6. 864658 7. 159491 6. 986708 7. 01949  
7. 15595 7. 031101 6. 775367 6. 957297 7. 026889 6. 576052 7. 352302 7. 281618 7. 088511  
2. 523819 2. 348836 2. 469338 3. 501675 2. 443922 3. 169476 2. 388236 2. 738306 2. 610605  
5. 218989 4. 372024 4. 175406 4. 592311 4. 593631 4. 762374 5. 469724 5. 102953 5. 732119  
4. 278301 3. 956761 3. 612563 3. 580769 3. 942873 3. 476808 4. 298681 3. 946105 3. 73193  
6. 03586 5. 76185 6. 503536 4. 313495 6. 157588 6. 046403 6. 349577 5. 712799 6. 11486  
4. 421555 5. 462416 4. 13779 5. 317611 5. 733215 3. 601925 5. 859906 4. 927034 5. 372381  
3. 130877 3. 726207 2. 900385 3. 507268 2. 049827 2. 401966 3. 555023 3. 005141 2. 592839  
7. 095705 7. 013491 6. 945719 6. 798891 7. 073512 6. 741777 7. 171739 7. 149998 7. 200137  
3. 042741 3. 24517 2. 826034 1. 928794 3. 722404 3. 006333 2. 999053 3. 081893 2. 80815  
7. 666412 7. 945675 7. 774372 7. 400969 7. 671259 7. 894434 7. 516649 7. 662285 6. 810887  
2. 810936 3. 873958 3. 773628 3. 016317 3. 837919 2. 828596 2. 645341 4. 260505 1. 906895  
2. 809483 2. 130533 2. 333255 1. 625125 2. 879984 3. 241529 1. 775472 1. 737686 1. 447179  
8. 160453 8. 110214 7. 881241 8. 368552 8. 409301 8. 065977 8. 49236 8. 748017 9. 008492  
6. 461233 5. 61675 5. 932252 5. 645546 6. 284266 5. 885194 6. 668773 6. 609277 6. 110995  
3. 986271 3. 566207 4. 447989 4. 181208 4. 569554 3. 273599 4. 064141 3. 84199 3. 431343  
6. 748965 6. 90923 6. 430404 6. 495245 7. 414513 6. 894818 7. 067894 6. 659046 6. 225895  
6. 919627 7. 071744 5. 876824 6. 710595 6. 712622 6. 716014 6. 567242 6. 858921 6. 883275  
5. 768639 5. 279561 5. 64144 5. 34399 5. 274196 5. 474001 5. 639436 5. 840238 4. 811908  
7. 756533 7. 913846 7. 732257 7. 754899 7. 736196 7. 635627 7. 663601 7. 921107 7. 863517  
6. 449596 6. 739845 6. 969543 6. 4715 6. 731939 6. 913822 6. 207271 6. 632073 6. 594137  
1. 507235 1. 38435 1. 899258 1. 76107 1. 898725 0. 94825 1. 480121 1. 346372 1. 780571  
0. 963685 0. 785028 1. 301503 1. 99466 0. 603479 1. 256566 1. 082666 1. 412454 3. 467567  
1. 395736 1. 319438 0. 774789 1. 825163 1. 9923 0. 975293 0. 880954 1. 222517 1. 495648  
7. 912791 7. 171595 5. 565566 5. 594239 7. 745076 6. 82111 6. 347589 7. 936691 6. 231692  
3. 675052 3. 201889 3. 725922 3. 72665 2. 947995 3. 399044 3. 773385 4. 006142 3. 379176  
4. 392699 4. 26625 5. 208635 5. 157711 4. 681912 3. 895347 4. 53049 4. 104378 4. 166547  
4. 625471 4. 323515 4. 115717 4. 416556 3. 88649 3. 225109 3. 918699 4. 010005 5. 177155  
0. 801946 0. 83246 1. 124236 0. 950253 1. 316225 1. 78026 1. 209042 0. 959321 1. 296763  
1. 904712 1. 733764 2. 235918 2. 298323 2. 266019 2. 729778 2. 058235 2. 384112 1. 691565  
1. 27321 1. 844854 1. 044534 1. 089939 1. 43927 2. 054678 1. 493506 0. 98985 2. 148988  
3. 997398 2. 246241 4. 56293 2. 845904 1. 348667 2. 104204 3. 381559 3. 985008 3. 503239  
1. 273052 1. 079534 1. 204679 1. 101124 2. 015541 1. 339159 0. 855461 0. 96543 3. 378327  
2. 424835 2. 410962 2. 834622 2. 410962 2. 59226 1. 898218 2. 456756 2. 702467 2. 12552  
3. 365649 2. 356284 3. 497139 3. 204383 3. 947809 3. 562938 3. 050893 4. 203458 3. 012058  
1. 450713 1. 784764 1. 46849 1. 378268 2. 087698 2. 53373 1. 755571 1. 59102 1. 472602  
5. 140159 4. 8143 4. 758084 3. 324282 3. 834207 4. 572511 5. 079368 3. 670048 4. 871767  
1. 376205 1. 444542 1. 534381 1. 729926 1. 419675 1. 451661 1. 617092 1. 535842 1. 309691  
3. 751582 2. 76883 4. 064681 3. 653859 4. 017982 4. 460271 3. 992142 4. 135481 4. 705941  
1. 460483 1. 408228 1. 557726 2. 578234 1. 319158 1. 649403 1. 82399 2. 245828 1. 987408  
5. 153784 4. 596205 5. 168706 3. 197979 4. 543482 3. 877136 3. 283172 2. 862598 4. 241862  
2. 442342 3. 285841 5. 125998 2. 577289 4. 660984 3. 473186 2. 26943 3. 782318 3. 426783  
2. 848078 2. 62506 3. 304748 3. 476474 2. 871671 2. 899009 2. 831802 3. 038546 3. 369106  
10. 61338 10. 91385 10. 61065 10. 84716 10. 75684 11. 34198 10. 53152 11. 32792 9. 654422  
2. 577589 2. 770305 3. 95194 3. 872523 2. 64269 4. 542741 2. 780787 3. 203774 3. 17177  
6. 228593 6. 3026 5. 837585 6. 191219 6. 191226 5. 931801 6. 234403 5. 922635 6. 047105  
8. 123921 7. 669901 7. 629053 7. 601402 7. 60904 7. 552126 8. 249184 7. 656404 8. 173311  
3. 641934 2. 460408 3. 284063 4. 098994 4. 299548 3. 601148 2. 839598 4. 053348 2. 785914  
1. 499782 1. 883041 1. 729975 1. 579212 1. 777165 1. 783618 1. 342736 1. 449449 1. 840735

3.17805 1.88777 2.050299 5.383346 3.791091 1.764516 3.233444 2.19861 1.813531  
1.598322 1.413464 1.310708 1.657212 1.051597 1.493897 1.173436 1.336415 0.925995  
8.412061 8.158111 6.802707 8.819945 8.494906 6.95979 8.074022 7.454019 8.751747  
2.178472 1.917776 1.540904 2.53466 1.824189 1.889751 1.925989 2.353295 1.684531  
8.818762 8.947746 9.377811 9.075521 8.970628 8.831311 8.845566 8.738951 8.100225  
5.911651 4.860876 3.230826 5.102596 4.092292 4.325132 4.9925 5.281287 5.254193  
6.62204 7.707542 5.818773 6.87078 6.603802 7.326136 5.938542 8.401813 5.311287  
1.742639 1.514743 1.262629 2.450246 1.969393 1.975719 0.95009 1.429765 1.648915  
1.642174 1.470804 1.624343 4.88448 4.141629 0.730317 0.960646 0.989315 1.405979  
0.779421 0.874397 1.171822 2.222732 1.953033 2.473975 0.889299 1.979088 0.942244  
5.034709 3.350952 1.98089 4.396533 4.260329 2.604406 3.110461 2.704169 2.621692  
8.8443 6.521056 7.45548 7.409398 7.279128 8.991649 8.395296 7.936112 9.176758  
1.753716 1.465188 2.049235 2.605707 1.360476 1.990837 1.231587 1.456744 1.571229  
2.133688 1.938246 2.129619 2.168152 2.265249 1.846447 3.176182 2.043261 1.824077  
3.490999 5.352517 4.702625 5.574506 6.592025 4.526958 5.174682 5.732805 3.147172  
3.143927 3.602193 3.435685 4.051576 3.310243 2.461012 3.054413 3.004737 3.650059  
3.032301 2.98932 2.622999 3.522571 2.722622 1.713171 2.972045 2.995557 1.725983  
5.307809 3.539442 5.387791 4.410348 4.713855 4.270121 3.363101 4.040181 6.031212  
2.038972 2.194986 2.111721 1.909437 1.489094 2.404474 2.01275 1.952441 1.431539  
2.244246 4.490621 2.618479 1.700568 2.1411 1.962872 2.040607 1.69017 3.538375  
0.57518 2.393381 2.955129 3.590819 0.94592 3.202876 3.015897 0.388107 1.333511  
5.054573 5.359204 5.38526 3.930878 5.361855 4.57905 5.309782 5.565952 5.509936  
2.093882 2.087152 2.233818 2.29033 2.467267 1.738733 1.93593 1.881332 2.26133  
2.363995 1.984608 2.1719 0.851817 1.74324 1.4812 4.465053 3.17116 1.760371  
5.62089 5.853352 2.91537 4.462554 5.26366 4.93037 4.103413 2.583918 4.901258  
1.160566 1.442474 1.43552 2.650208 1.836822 1.379673 1.548308 1.662556 2.212808  
2.377758 0.928329 1.351084 0.917346 0.999502 2.272472 1.235976 1.265023 0.642293  
7.830506 7.972371 6.50712 6.461594 8.012871 7.9138 7.061878 7.50973 6.563731  
4.49996 4.374589 4.483551 4.604462 5.226441 3.526271 4.400708 4.833085 4.129068  
6.157258 5.537555 4.953544 4.707851 5.261506 5.765854 5.607662 4.544142 5.578219  
1.571637 1.698736 2.139908 2.567054 1.434741 1.50183 1.960427 1.694856 1.764248  
4.853279 4.326819 4.569359 5.230859 4.356197 5.803095 4.204972 4.907971 4.555891  
8.892636 8.744182 8.895613 8.914841 8.974801 8.759995 9.106632 9.297536 8.866177  
9.610472 9.923936 9.570229 8.728524 9.759843 10.01176 9.489101 9.951151 9.07461  
7.242847 6.84928 6.435581 5.792508 6.895612 6.312601 7.087171 6.738733 7.150302  
6.264191 6.833096 6.740714 7.374055 6.665322 6.469372 6.560812 5.98031 5.762692  
5.010994 5.66691 5.949815 6.39062 5.586236 4.905556 5.237441 5.170064 5.288624  
4.340708 4.572892 4.053186 3.905628 4.835205 3.295683 4.502933 4.341564 4.002783  
7.049153 7.064682 7.285302 6.757957 7.167133 7.049359 7.215875 7.096708 7.289331  
4.930029 4.64666 5.696022 4.550751 4.666932 6.113302 7.407069 8.232482 6.150691  
6.941373 7.103698 6.939507 6.311784 7.349703 6.654125 6.962381 7.219868 6.26595  
3.755262 4.373853 4.310768 4.380152 4.753742 3.714771 4.528077 4.587443 3.927674  
5.149096 4.965739 4.599232 4.675542 4.869369 4.319149 5.238546 4.750693 5.133137  
4.106614 4.271918 4.208182 4.199079 4.384456 3.924201 4.452221 4.409825 4.133175  
5.976858 5.728413 5.282311 5.028143 6.017853 6.637425 5.811124 6.205768 5.767481  
4.69623 4.830553 4.591558 5.790612 4.7442 4.201937 5.458467 4.924745 3.913086  
6.046664 5.959832 6.085749 4.22443 6.184983 6.339364 5.909339 6.365045 6.200559  
5.192474 5.39682 4.930947 4.808655 5.290587 4.852225 5.133358 4.723709 4.715332  
5.301898 5.694743 5.778667 3.070065 5.729778 5.074826 5.514132 5.311696 5.900775  
2.778516 1.784706 1.815887 2.54925 1.645555 1.830404 1.960328 1.850245 2.238841  
5.745885 5.65282 5.809729 4.638426 6.592145 5.855103 5.948851 5.939316 5.828406

1. 292675 1. 555595 1. 526841 2. 335884 1. 403381 1. 696393 1. 337758 1. 715118 1. 122799  
6. 094039 6. 273374 6. 124283 6. 250593 5. 823683 5. 468772 5. 399908 6. 031891 4. 042008  
4. 520192 4. 110853 4. 730793 4. 739121 4. 415503 3. 244884 4. 648147 4. 293897 3. 46319  
2. 650278 2. 723429 3. 104136 2. 679585 2. 81669 2. 253908 2. 882252 3. 207902 3. 19473  
8. 297746 8. 467945 8. 493793 9. 008494 8. 457824 8. 070015 8. 060914 8. 587266 8. 537632  
2. 241509 2. 044688 2. 457354 3. 164518 2. 07306 1. 74953 1. 980248 2. 049711 2. 544112  
2. 100731 2. 051975 2. 146966 3. 449391 1. 49244 1. 872293 3. 043173 2. 093279 2. 031703  
2. 120153 3. 801196 1. 000293 2. 041671 1. 007152 3. 877174 1. 647471 3. 402322 3. 722582  
6. 703385 6. 651971 6. 537532 6. 230637 6. 819057 6. 382229 6. 434876 6. 364884 6. 17941  
6. 561024 5. 869838 6. 159739 6. 161555 6. 032969 6. 195034 6. 441665 6. 209066 6. 449859  
7. 715535 7. 55791 7. 23209 7. 098306 6. 844428 8. 017663 7. 144065 7. 194817 7. 331085  
4. 311776 3. 721702 3. 970173 3. 501562 4. 284779 3. 146038 3. 959552 3. 861055 4. 489524  
2. 594426 2. 304579 2. 579241 3. 323837 2. 283614 1. 407015 2. 414996 2. 712722 2. 073253  
1. 856033 1. 95269 1. 979993 2. 355666 1. 390292 2. 225003 1. 650915 1. 434692 2. 367771  
1. 541711 1. 355359 1. 637967 1. 470362 2. 275278 1. 718353 3. 075369 1. 571574 0. 995351  
3. 514426 4. 100733 4. 224344 2. 829151 4. 893148 4. 753419 3. 975639 4. 219035 3. 916047  
4. 188831 3. 585583 3. 014636 3. 499241 2. 969748 3. 161692 3. 684769 2. 874973 4. 762979  
1. 515139 1. 041421 1. 260761 1. 947102 1. 648241 1. 180006 1. 51109 1. 915475 1. 908424  
5. 644553 5. 279242 4. 900974 3. 478458 4. 925986 5. 304431 5. 144684 5. 225347 5. 817776  
6. 820862 5. 9704 6. 126993 5. 46357 5. 349926 5. 921751 6. 441061 6. 197483 6. 907054  
2. 043964 3. 104678 2. 01364 2. 172148 1. 779918 2. 633049 1. 515773 1. 978228 2. 227175  
6. 662545 6. 709456 6. 192641 6. 642917 6. 656702 5. 955205 6. 366967 6. 076673 6. 731279  
2. 207144 1. 791805 2. 957105 1. 600847 3. 190573 1. 692052 2. 475809 1. 701647 1. 940039  
7. 004492 6. 664687 6. 485276 7. 016826 6. 992337 6. 946092 6. 437265 6. 711042 6. 094177  
3. 610457 2. 153022 3. 498439 1. 86501 2. 931154 3. 602866 2. 843473 3. 806954 4. 117867  
4. 667512 5. 033596 4. 669397 4. 746487 5. 105467 4. 722211 5. 143485 4. 986949 3. 325513  
4. 925457 5. 155714 5. 208352 3. 39456 4. 84758 4. 750814 4. 997527 4. 911069 4. 154484  
3. 331433 4. 088579 3. 681249 3. 748635 4. 25084 3. 611668 3. 456567 4. 071925 3. 713168  
3. 547398 2. 751945 4. 023533 3. 5342 2. 37407 3. 346256 4. 043305 3. 19399 2. 973396  
2. 930055 2. 535615 2. 465283 2. 189027 3. 137981 3. 268772 3. 515108 2. 703433 2. 387105  
2. 408995 2. 482179 2. 528342 3. 225946 2. 263078 2. 040388 2. 122836 2. 716226 2. 640278  
2. 28538 2. 187761 2. 728335 2. 959315 2. 006933 3. 332735 1. 590081 1. 907553 3. 301131  
1. 259624 1. 287128 1. 321484 1. 697027 1. 33298 2. 770126 1. 500842 1. 675879 1. 704878  
2. 836029 2. 440366 2. 878347 2. 85879 2. 855865 2. 235761 3. 173512 2. 883425 3. 592702  
2. 711601 3. 620272 2. 409556 1. 764874 2. 538592 2. 037737 2. 09574 2. 26365 2. 178542  
7. 246269 7. 420896 7. 394455 7. 589352 7. 450281 7. 340267 7. 510157 7. 560257 7. 409685  
1. 725827 1. 725612 1. 209172 1. 555489 1. 760473 1. 471995 1. 266994 1. 241371 2. 00947  
6. 673736 6. 429959 6. 66551 5. 949487 6. 464011 6. 30231 6. 590517 6. 329638 6. 186006  
1. 758305 1. 470675 1. 960786 1. 67683 1. 911142 1. 866026 1. 946824 1. 802647 1. 469471  
0. 871808 1. 250156 0. 993409 2. 207167 1. 022667 0. 890819 1. 090691 0. 982457 1. 074016  
1. 726994 2. 350402 2. 752151 2. 990241 1. 453759 2. 117349 2. 111893 1. 583282 2. 587809  
2. 575604 2. 502085 2. 557729 2. 66249 2. 830251 2. 686737 2. 574488 2. 763838 2. 502242  
1. 601092 1. 425308 1. 597793 2. 69662 1. 458328 2. 716095 1. 882097 1. 759523 2. 114935  
2. 771427 3. 098823 3. 596 3. 842486 2. 722656 3. 247708 3. 129758 2. 292188 1. 762207  
7. 745915 8. 538047 8. 049084 7. 549061 7. 435319 7. 645851 8. 180311 7. 857451 7. 492923  
2. 951095 3. 029563 4. 803783 1. 914534 2. 964044 3. 889105 4. 265241 2. 436718 3. 398572  
4. 66592 5. 17742 4. 708778 4. 418063 6. 977063 4. 703093 4. 616659 5. 024632 3. 993992  
3. 393887 3. 206773 3. 457951 4. 967696 3. 802503 3. 613795 3. 508865 3. 631828 4. 928101  
4. 140496 4. 414905 4. 886296 5. 336013 4. 297487 3. 80586 5. 26856 4. 748776 3. 823119  
1. 431413 0. 946232 2. 188343 1. 676367 1. 668136 1. 734959 1. 174625 1. 174491 1. 25854  
3. 697672 3. 667043 1. 934395 1. 670434 4. 499646 2. 403894 1. 74687 3. 397953 2. 789512



7. 9894 7. 751506 8. 014431 7. 690337 7. 648629 7. 852677 7. 979566 7. 732094 8. 017233  
3. 741187 2. 937299 1. 703543 3. 047515 2. 535691 2. 147849 3. 695576 2. 111376 3. 129775  
4. 139862 3. 643928 3. 387318 3. 218345 5. 222528 3. 593121 4. 030515 3. 986143 4. 219263  
2. 592958 2. 825153 3. 942807 2. 921924 1. 514839 3. 189474 4. 122977 2. 69453 2. 850994  
4. 488386 4. 399885 3. 428593 4. 51726 5. 087376 3. 749108 3. 857198 4. 089861 3. 376597  
4. 719188 4. 926076 5. 425829 4. 789066 6. 504791 4. 758317 4. 519041 5. 612214 3. 076116  
4. 837529 4. 923893 5. 216432 6. 933925 4. 785433 4. 897375 5. 227677 5. 416903 7. 063616  
6. 448555 6. 235406 6. 20947 5. 790411 6. 516167 5. 477316 6. 411243 6. 608804 6. 820264  
2. 471543 2. 234855 2. 849087 3. 085995 2. 256745 2. 663135 2. 608819 2. 608819 2. 025504  
1. 950312 1. 716979 1. 124306 1. 675304 1. 061325 0. 847168 2. 215552 2. 14563 1. 993146  
6. 453224 6. 342306 6. 731005 6. 422946 5. 773957 5. 044887 6. 331226 6. 20053 5. 227741  
1. 386063 1. 590745 1. 712274 1. 476795 1. 351934 1. 645251 1. 382276 1. 470045 1. 307731  
6. 415957 5. 72442 5. 685983 5. 600995 5. 406046 5. 871804 5. 216728 5. 957162 5. 945827  
1. 594999 1. 02804 2. 353859 1. 409796 1. 138122 2. 188376 1. 249664 1. 14235 1. 12694  
1. 987249 1. 894734 2. 021543 1. 913051 1. 644532 1. 722642 2. 058789 2. 315042 1. 877857  
6. 168735 6. 261233 7. 046456 6. 386691 7. 060096 4. 9096 6. 472698 6. 61929 5. 243683  
5. 927552 5. 372985 5. 84801 5. 925065 5. 41335 5. 401071 5. 754707 5. 690068 4. 995691  
1. 351514 1. 250639 1. 173068 2. 38149 1. 621396 1. 764868 1. 433513 1. 283603 1. 224898  
1. 082875 1. 051476 0. 998192 1. 511109 1. 52162 1. 032395 0. 996347 0. 985149 1. 256824  
4. 470821 3. 944363 4. 557535 5. 306603 4. 487256 4. 039679 4. 638551 4. 539635 4. 58466  
6. 333488 5. 920682 6. 360611 6. 670849 5. 547733 7. 234823 6. 500734 6. 781702 7. 001605  
7. 616937 8. 084926 7. 577767 7. 246928 7. 90627 7. 228368 8. 128214 7. 766181 8. 116416  
4. 230739 3. 853585 4. 342863 4. 539643 4. 286851 3. 766063 4. 647081 3. 789796 4. 877622  
4. 805148 3. 985534 4. 510958 4. 968195 5. 100829 4. 618255 5. 154142 5. 831016 5. 246459  
4. 82953 4. 348966 4. 361893 4. 205105 4. 183881 4. 431433 4. 265399 3. 964583 4. 142751  
5. 266195 5. 169421 6. 573653 4. 320712 5. 22438 4. 103873 3. 888566 5. 688902 5. 23157  
4. 615015 5. 351793 5. 523581 5. 41029 5. 379045 5. 607546 5. 051475 5. 608142 4. 919646  
3. 174463 2. 929984 2. 291842 3. 03338 2. 348319 2. 856561 1. 906964 3. 330776 3. 183736  
2. 155831 1. 573265 2. 726666 2. 328261 2. 155831 1. 561713 1. 730305 2. 280728 1. 849076  
1. 718156 2. 102914 1. 859216 2. 768557 1. 571666 1. 430958 1. 668788 1. 098417 1. 859139  
1. 339522 2. 230347 1. 974133 2. 857545 2. 15871 1. 54625 1. 920796 2. 263939 1. 48785  
5. 917318 5. 836729 5. 603686 6. 64789 6. 046258 6. 635496 6. 235027 6. 835516 6. 734911  
1. 788724 2. 31786 2. 059404 2. 698215 2. 747908 2. 726963 1. 777602 2. 022697 1. 988591  
2. 578979 1. 864375 2. 79042 2. 36643 2. 561401 2. 313548 2. 412495 1. 906576 1. 813337  
1. 215458 1. 084924 1. 61108 1. 468304 1. 460055 1. 815962 1. 586104 1. 633517 1. 175302  
5. 618546 6. 556446 5. 877525 6. 060116 6. 571397 6. 635983 5. 14894 5. 946108 5. 567123  
1. 146374 2. 121786 1. 259613 1. 428069 1. 352087 1. 727788 1. 082903 2. 266727 2. 409899  
1. 397503 1. 626735 2. 120642 1. 61131 3. 246043 1. 775071 2. 097668 2. 424458 2. 007745  
1. 742533 1. 492199 2. 578846 3. 389114 1. 907068 1. 965228 1. 40857 1. 242666 2. 020933  
4. 375582 4. 86098 4. 033037 4. 973657 7. 232161 3. 239908 4. 834365 4. 457394 5. 239694  
1. 648156 1. 372614 2. 080512 2. 266064 1. 543881 1. 946975 1. 589699 1. 419131 1. 682811  
6. 333083 5. 845902 6. 270433 6. 713177 5. 901085 5. 800993 6. 437792 6. 219615 5. 909016  
0. 831767 0. 96114 1. 405635 1. 406075 1. 118855 1. 764938 1. 298705 0. 863517 1. 052177  
5. 130177 4. 667221 5. 19757 3. 681045 4. 83053 5. 133865 5. 361099 4. 964408 5. 17628  
8. 239551 8. 655375 8. 948537 8. 301237 8. 895229 9. 207177 8. 796894 8. 790846 7. 827098  
5. 136365 4. 736034 5. 50839 5. 573677 5. 241506 5. 204617 5. 156948 5. 390911 4. 980888  
3. 862741 3. 83641 4. 430169 3. 8511 3. 996059 3. 293033 4. 110987 3. 665521 3. 548153  
3. 381775 3. 487466 4. 316115 4. 276827 4. 012127 2. 560122 3. 714006 3. 65318 2. 882799  
6. 069337 6. 039825 5. 605615 5. 711853 6. 313575 5. 752903 6. 011529 5. 893256 4. 845242  
6. 893579 5. 310374 5. 704567 6. 518264 5. 761641 6. 571326 6. 354621 6. 107171 3. 550566  
7. 951953 8. 137218 7. 937918 8. 555877 8. 60594 8. 096654 8. 008461 8. 074312 7. 480621

1. 452989 1. 288172 2. 030256 1. 204066 1. 495024 1. 634598 1. 132423 1. 868858 1. 438063  
6. 290801 6. 532284 6. 883203 4. 83386 6. 830363 6. 299566 6. 413824 6. 944229 4. 633831  
4. 745708 5. 130301 5. 227637 5. 467767 5. 745528 5. 22289 5. 809072 5. 02426 4. 42657  
0. 758491 1. 31597 1. 12656 1. 364758 1. 084432 0. 730516 1. 005399 0. 846181 0. 832059  
5. 017987 5. 195884 4. 450872 4. 811835 4. 398103 4. 635187 5. 181845 4. 245054 5. 908443  
4. 528558 3. 68541 3. 616804 4. 319325 3. 633165 3. 411638 4. 255904 4. 441363 3. 364389  
4. 186954 3. 671103 2. 745976 0. 575388 2. 194812 1. 107713 2. 082322 3. 885277 2. 928626  
6. 385213 6. 264882 6. 29418 7. 258603 8. 705263 6. 229001 6. 670181 6. 654401 6. 784991  
1. 151365 2. 21236 1. 374933 1. 445254 1. 537121 1. 814566 1. 045388 1. 036176 1. 991567  
1. 140508 1. 099478 1. 306188 1. 387678 0. 982993 1. 285039 1. 26961 1. 151278 1. 129756  
1. 961131 2. 202416 1. 863879 1. 850807 2. 059842 2. 887957 1. 768025 1. 739303 2. 828024  
3. 391814 0. 974581 2. 879646 3. 375878 3. 447745 1. 647829 1. 384376 1. 322837 1. 279206  
1. 805465 1. 942971 1. 941041 3. 32332 3. 013481 2. 195233 2. 404886 2. 010239 2. 167784  
0. 996123 1. 934344 1. 080323 2. 563395 1. 16993 1. 288056 1. 922357 2. 017969 1. 848228  
1. 951561 2. 141251 2. 069563 2. 655309 1. 355465 2. 051358 2. 063434 2. 625696 2. 035481  
1. 61277 1. 845608 2. 13015 1. 770906 1. 629869 2. 038439 1. 425852 1. 463865 1. 522654  
0. 828757 0. 588614 0. 890699 0. 844185 0. 703454 0. 945991 0. 883413 0. 629428 3. 288704  
4. 797266 4. 388579 4. 227027 3. 766953 4. 172485 4. 210284 4. 51272 4. 110427 4. 636547  
3. 924287 4. 627336 4. 828922 4. 884264 4. 39881 5. 314394 4. 469699 4. 450972 4. 69251  
3. 423996 1. 973313 2. 809497 0. 877487 1. 992163 1. 896823 1. 842262 2. 073427 1. 983965  
1. 843165 1. 713404 2. 082045 2. 335066 2. 525538 1. 519339 2. 078389 2. 478531 1. 736609  
5. 923309 5. 314441 5. 275822 5. 214552 5. 250497 5. 852586 5. 19488 5. 322178 5. 241549  
9. 706611 9. 280173 9. 191966 9. 353589 9. 196993 9. 376121 9. 489321 9. 335581 9. 675491  
1. 815454 1. 653039 1. 744079 1. 961055 1. 372395 1. 080542 1. 725883 1. 754582 2. 502075  
2. 258131 3. 382897 1. 912868 2. 762444 1. 776572 2. 133211 1. 914083 2. 486145 3. 338376  
1. 312485 1. 344539 1. 37549 1. 75679 1. 421033 1. 574591 1. 757927 1. 82921 3. 287707  
1. 728909 1. 150568 1. 515252 1. 450945 1. 406617 1. 434435 1. 332272 1. 68451 1. 875758  
2. 339677 2. 84331 1. 921383 3. 674708 4. 011363 3. 380696 3. 485226 3. 484527 2. 031701  
8. 828106 8. 669027 9. 265227 9. 112543 9. 094541 7. 962234 9. 018342 8. 990085 8. 2714  
9. 428917 9. 27485 9. 460416 8. 830313 8. 956546 8. 846017 9. 282899 9. 323391 10. 03268  
4. 824461 5. 206865 4. 772565 2. 749998 5. 377557 5. 546469 4. 404113 5. 642625 6. 357794  
3. 804933 3. 597339 4. 523674 3. 362561 4. 121624 3. 187379 4. 077876 4. 81299 5. 142958  
4. 043047 2. 137141 4. 393147 2. 188159 2. 409978 2. 019517 2. 41138 2. 352409 2. 997736  
4. 464175 4. 160934 3. 983505 7. 415312 7. 645152 4. 469782 4. 126996 3. 871726 7. 354468  
7. 075428 7. 307538 6. 788011 6. 005894 7. 415236 7. 932844 6. 428615 6. 507858 7. 897332  
3. 797575 2. 917684 3. 702155 3. 010995 4. 897298 4. 959311 3. 149939 3. 989004 2. 939159  
6. 857799 6. 681344 6. 879907 7. 564259 6. 627522 6. 152709 6. 857113 6. 617012 6. 086815  
2. 483792 2. 157581 2. 397272 1. 80949 1. 499877 1. 730303 2. 846801 2. 650464 1. 448792  
3. 753704 4. 031241 3. 615532 2. 676298 3. 990044 3. 496902 3. 994664 3. 456813 4. 804093  
1. 893897 0. 89876 1. 908081 1. 942918 1. 917398 2. 789282 2. 028308 1. 468466 1. 54331  
3. 966569 3. 366096 3. 628959 2. 806389 4. 194557 2. 283425 3. 438504 3. 996075 1. 93878  
5. 997344 6. 366288 6. 791975 7. 004668 6. 729616 5. 924201 6. 384414 6. 542113 5. 47037  
2. 074017 2. 104073 1. 842785 1. 603935 2. 074134 2. 247585 3. 016836 1. 703364 1. 614046  
1. 028875 0. 852729 1. 320571 2. 140044 1. 100629 1. 290406 1. 124938 1. 333273 0. 879249  
5. 568409 5. 33486 5. 409312 4. 480084 5. 623995 5. 658472 5. 424584 5. 681568 4. 828272  
2. 114668 1. 843216 1. 727467 3. 179698 2. 144679 2. 440043 2. 013437 1. 963062 3. 216101  
2. 907669 3. 372094 3. 676956 2. 378516 2. 949821 2. 729012 2. 419759 3. 521799 3. 259352  
1. 886705 1. 724244 1. 85378 1. 638953 1. 66305 1. 66936 1. 151487 1. 47114 1. 600161  
1. 422341 0. 941096 2. 531964 1. 274286 1. 473477 2. 530959 1. 119198 1. 053028 1. 310576  
5. 276409 5. 517927 5. 387512 5. 066099 5. 334401 4. 992969 5. 432564 5. 542363 4. 860141  
1. 954883 1. 581999 1. 766381 2. 64884 2. 03899 1. 727327 2. 195802 2. 075559 1. 973361

5. 203167 5. 281638 5. 104095 4. 131847 5. 086778 4. 926136 5. 248412 4. 866675 5. 078782  
1. 411051 1. 078105 1. 838104 2. 275162 1. 338854 1. 531246 0. 867568 1. 64622 0. 915427  
6. 87935 7. 659446 7. 249766 7. 207176 7. 245797 7. 198457 7. 338473 7. 189247 7. 205484  
4. 402974 4. 242162 3. 856241 5. 413905 4. 18441 4. 478761 4. 680594 4. 433646 5. 479418  
2. 47567 2. 153505 1. 840299 2. 841569 3. 094784 2. 59269 1. 819829 2. 776338 1. 576067  
6. 237382 6. 418569 6. 581701 6. 04293 6. 101125 6. 815303 6. 083459 6. 286524 5. 669714  
6. 138411 6. 364193 6. 042868 5. 917501 5. 875473 5. 510835 6. 162532 6. 042483 7. 247871  
3. 105681 1. 601334 2. 70862 2. 322418 1. 837193 2. 941982 2. 985068 2. 80887 2. 862846  
2. 683463 2. 541373 2. 554585 3. 396786 2. 653053 2. 906099 2. 771272 2. 150279 2. 611523  
3. 475943 5. 088979 4. 705808 4. 037075 4. 46264 4. 763362 4. 528324 3. 949825 4. 185765  
1. 785342 2. 102714 2. 59033 2. 161211 2. 599094 2. 346468 2. 242168 2. 425667 2. 021951  
5. 836207 5. 647311 5. 409001 5. 43435 5. 723942 4. 460614 5. 14173 5. 027852 4. 470439  
7. 429308 7. 58634 7. 427606 7. 792651 7. 674909 7. 24868 7. 551396 7. 645022 6. 945668  
4. 152558 4. 520459 4. 245084 4. 098928 4. 36029 4. 835102 4. 770609 3. 973355 5. 47036  
2. 448701 2. 086763 2. 048716 3. 591497 1. 98613 3. 145198 1. 952599 1. 936976 2. 506614  
1. 756607 3. 290109 2. 201853 4. 357859 3. 217103 2. 652559 3. 489478 3. 702579 2. 831285  
7. 000918 5. 907753 6. 65093 6. 037792 6. 705224 6. 32936 4. 514808 6. 617636 7. 340668  
5. 32038 5. 989123 4. 355147 4. 926896 6. 580357 3. 467077 4. 608458 6. 197363 5. 10418  
1. 282985 1. 058697 1. 51022 2. 038673 1. 166828 1. 5357 1. 289948 1. 354877 1. 267031  
1. 227174 1. 271714 1. 54023 0. 978976 2. 711716 1. 521489 2. 195283 1. 428688 1. 644084  
2. 857022 2. 313343 1. 630618 1. 006612 2. 529109 1. 632346 1. 331225 2. 000585 3. 298788  
1. 502151 1. 756077 1. 256624 1. 350177 1. 361989 1. 551299 1. 366771 1. 566444 1. 207768  
7. 123379 7. 264464 7. 228494 6. 861848 7. 257256 6. 903466 6. 587481 7. 116356 6. 3445  
2. 154592 1. 805588 2. 386503 2. 738189 2. 462057 1. 797709 2. 617255 1. 745726 1. 89999  
3. 097287 5. 006622 1. 835056 7. 51208 5. 201861 3. 739476 7. 616573 4. 529568 2. 33694  
1. 333483 1. 819772 1. 442404 2. 101608 1. 145663 1. 902208 1. 50152 1. 912921 1. 744869  
1. 244785 1. 183234 1. 477744 1. 551928 1. 498403 2. 543019 1. 147963 1. 592577 1. 899114  
0. 882029 0. 826971 1. 419792 1. 079825 2. 441227 1. 672416 1. 146692 1. 07085 1. 045178  
3. 641472 3. 391998 4. 010226 4. 011769 3. 732469 3. 448115 3. 496762 3. 20542 3. 424874  
1. 276725 1. 541535 2. 09181 2. 073497 1. 370837 1. 953295 1. 471745 1. 517521 0. 980629  
1. 963077 3. 304633 2. 633758 3. 250713 2. 454118 2. 765147 2. 368867 1. 636821 2. 670683  
3. 953107 1. 88279 2. 936064 3. 291106 2. 497245 2. 516085 3. 483425 1. 448864 3. 433222  
5. 951521 5. 06254 6. 012959 8. 012896 5. 605702 5. 215417 5. 222779 6. 213935 5. 317525  
1. 110086 1. 288272 1. 963551 1. 874432 1. 662744 1. 708197 0. 903509 1. 070194 1. 718761  
0. 984519 1. 792937 0. 90282 1. 418046 1. 058267 1. 557988 1. 167126 1. 906127 2. 057412  
1. 707897 1. 497186 2. 259014 1. 655983 2. 045096 1. 934938 1. 534471 1. 275282 2. 216143  
0. 620376 2. 068428 1. 05923 2. 028197 1. 597304 1. 369004 1. 310788 1. 090769 1. 48973  
2. 655354 1. 9555 2. 389131 2. 885668 1. 583254 2. 096897 1. 832282 2. 459083 2. 892594  
1. 277399 1. 273512 1. 346541 1. 01027 1. 177577 1. 380203 1. 080664 1. 148085 0. 852122  
3. 912495 4. 083961 3. 27328 3. 526036 3. 101573 3. 520418 3. 602759 3. 672317 2. 596536  
2. 314679 3. 462592 2. 684813 2. 257287 2. 497303 3. 315241 2. 679031 2. 936994 2. 853534  
1. 384697 2. 025886 1. 188332 1. 670624 2. 525227 2. 287523 1. 830155 1. 420331 0. 89221  
6. 497616 6. 251841 6. 461437 5. 600103 6. 344526 5. 778053 6. 681626 6. 283319 6. 523562  
1. 041592 1. 660607 1. 342142 1. 14816 0. 87789 1. 983177 2. 191137 1. 467092 1. 383075  
5. 132773 5. 072916 4. 825978 4. 496461 5. 378296 5. 2254 5. 654537 5. 343104 6. 06819  
3. 240075 1. 622388 1. 455044 1. 553141 3. 339552 3. 651066 4. 342526 1. 4714 2. 235872  
5. 608342 6. 109002 5. 994993 6. 433953 5. 969176 5. 723784 5. 864681 6. 110614 5. 832731  
3. 725566 4. 428164 4. 176221 4. 687867 4. 049317 4. 940233 4. 433868 4. 297221 5. 406267  
2. 964425 2. 21725 2. 06955 2. 630465 2. 339187 2. 147995 1. 909127 2. 21725 2. 367618  
3. 871463 2. 037691 2. 668969 4. 409793 3. 054225 3. 415289 1. 898783 2. 591707 2. 358526  
3. 690117 2. 808507 2. 836042 2. 89445 2. 683204 2. 120518 2. 794555 3. 273005 3. 123229

3. 606661 4. 836482 4. 345686 4. 417555 4. 223789 3. 920274 5. 329485 3. 965777 5. 097382  
3. 177834 3. 866744 3. 182152 3. 681397 3. 182042 3. 404904 3. 141681 2. 815872 1. 916428  
0. 751436 1. 125832 1. 097117 1. 583014 0. 898641 0. 937315 0. 934839 0. 959356 1. 079576  
3. 350858 3. 72175 3. 183044 3. 062374 3. 30325 3. 579487 3. 042852 2. 805314 3. 831323  
8. 513719 8. 064675 8. 555126 7. 909334 8. 363811 8. 458655 8. 548512 8. 080756 8. 943671  
1. 876623 1. 696353 1. 254809 2. 908678 3. 040149 2. 110297 1. 084774 1. 186624 1. 329872  
2. 641863 2. 12356 2. 392304 1. 756922 3. 667735 1. 927759 1. 563669 1. 181836 1. 423894  
1. 89548 2. 259686 1. 575918 2. 814348 2. 012937 1. 957328 1. 787506 1. 85498 2. 193863  
3. 05034 3. 289734 3. 723727 2. 442345 3. 986949 1. 87817 1. 824472 1. 362919 3. 122118  
2. 010123 1. 712927 1. 992434 2. 228218 1. 904655 2. 064309 1. 557704 2. 20284 2. 243504  
2. 258103 3. 059545 3. 051532 2. 691476 3. 582356 2. 724852 2. 9971 1. 899358 5. 45235  
3. 365833 3. 01046 3. 400167 1. 855411 2. 825739 3. 072983 3. 872571 3. 398133 4. 257798  
6. 918559 6. 892173 7. 265199 6. 551159 6. 996819 6. 801881 7. 474896 6. 868613 7. 28273  
5. 976862 6. 591345 6. 206512 5. 789918 6. 721518 6. 256131 6. 987455 6. 127497 5. 768903  
2. 082829 1. 700194 2. 139808 2. 807544 2. 138133 1. 873573 2. 296278 2. 665733 3. 196805  
1. 22449 1. 062238 1. 186492 1. 981902 1. 957828 2. 588827 1. 733106 1. 506647 3. 588028  
1. 406838 1. 019214 1. 151353 1. 535527 1. 153581 1. 032836 0. 970471 1. 433598 1. 539558  
5. 127487 4. 223528 4. 39345 3. 035398 4. 499188 5. 379125 5. 143584 5. 276134 6. 067339  
8. 653384 8. 613333 8. 728383 8. 562968 8. 461934 8. 700409 8. 998339 8. 506436 10. 07528  
7. 551544 7. 410676 7. 848431 7. 264889 7. 038764 6. 586427 7. 366761 7. 327557 7. 117285  
2. 388505 2. 221169 2. 008336 1. 87644 2. 172872 1. 699682 1. 928621 1. 328669 1. 761922  
2. 655885 3. 387552 2. 780287 2. 822401 2. 970736 4. 942538 2. 738129 2. 287305 4. 360447  
2. 749867 2. 274136 2. 301959 2. 749926 2. 53551 2. 921632 2. 540963 2. 40904 2. 272392  
5. 567775 5. 578948 4. 978801 5. 156459 5. 380121 5. 60316 5. 92748 4. 983305 6. 363789  
5. 25724 5. 61212 5. 485315 4. 861012 5. 209625 5. 29568 5. 013395 5. 921565 4. 160254  
6. 105048 5. 866913 6. 138816 5. 901855 6. 456483 5. 671599 5. 824341 6. 368194 6. 860318  
1. 134384 1. 218697 1. 306377 1. 62414 1. 45908 1. 334973 2. 109349 1. 45908 2. 003336  
4. 725096 5. 632608 6. 224353 4. 722142 5. 597958 4. 942815 5. 236776 5. 144359 4. 783274  
2. 206068 2. 433855 2. 209693 1. 855244 2. 030972 1. 34336 1. 909935 1. 967964 2. 019466  
4. 084454 4. 054827 5. 002734 5. 946688 4. 333901 4. 334734 4. 327072 4. 665233 2. 935332  
6. 215797 1. 459184 2. 25993 1. 301726 4. 424332 2. 779122 3. 212427 3. 799321 3. 40102  
1. 795284 1. 527746 1. 720044 2. 365053 1. 226223 1. 543458 1. 51234 1. 607211 1. 091252  
4. 040896 4. 065673 2. 89359 2. 379374 3. 489041 4. 005288 3. 185794 3. 071653 3. 678966  
1. 816971 3. 418406 3. 640791 3. 473125 3. 365676 4. 585997 2. 862379 3. 251988 3. 146405  
6. 305465 6. 36552 6. 193339 6. 495397 6. 253166 6. 337634 6. 596645 6. 258414 6. 448234  
3. 450396 2. 621938 2. 819661 2. 934865 2. 593454 3. 284214 3. 911343 3. 572048 3. 684301  
7. 349665 6. 543588 6. 88424 6. 328464 7. 120825 6. 862037 7. 253129 7. 114923 7. 214018  
5. 466751 5. 111296 5. 615699 4. 905102 5. 286302 4. 853509 5. 550813 5. 413305 4. 968882  
5. 362588 5. 10639 4. 76051 4. 709338 4. 823007 4. 857692 4. 628666 4. 681366 5. 339696  
6. 916536 7. 444825 7. 532432 6. 769749 7. 527092 7. 343108 7. 414899 6. 888495 7. 748893  
3. 43403 2. 263101 3. 471956 2. 276046 1. 822796 2. 325611 2. 38898 2. 728947 2. 74705  
4. 718179 4. 330502 4. 860242 3. 718538 4. 451507 4. 620894 4. 820188 4. 372009 4. 60561  
5. 24919 4. 879583 5. 44452 5. 115654 6. 127856 5. 02612 5. 367098 5. 293981 6. 368858  
3. 418292 1. 848493 1. 502677 0. 917476 1. 611289 2. 547851 1. 964207 1. 199753 1. 673452  
1. 757268 1. 362414 2. 068113 2. 144909 1. 904622 1. 665315 1. 432683 1. 616953 2. 094417  
1. 16336 1. 050946 1. 431603 2. 406037 0. 956094 1. 391627 1. 671291 1. 550071 2. 805191  
2. 782926 1. 936081 2. 14906 3. 592244 2. 497034 2. 974961 1. 930322 2. 473061 3. 179861  
2. 36025 2. 276477 1. 973769 2. 080374 2. 181114 3. 037611 2. 033702 1. 986518 2. 497598  
1. 405036 1. 514254 1. 715828 2. 304726 1. 758811 1. 751423 1. 932436 1. 5389 2. 121294  
1. 338829 1. 586395 1. 219818 1. 662272 1. 371289 1. 891296 1. 245157 1. 29247 2. 477116  
1. 852253 2. 384683 1. 683677 1. 637227 1. 690328 2. 120075 1. 619003 1. 431132 1. 650484

1. 438869 3. 316646 3. 267017 2. 955837 1. 705096 2. 837419 2. 117451 1. 434936 1. 498312  
1. 594834 1. 210686 2. 144872 1. 68623 2. 55727 1. 676551 1. 414483 1. 637233 2. 089503  
5. 79848 5. 813389 6. 059407 6. 453749 5. 207823 5. 496241 5. 936452 5. 575359 5. 628615  
1. 872089 1. 3867 1. 742412 3. 001263 1. 211567 1. 292376 1. 837518 1. 789085 2. 507018  
1. 57594 1. 342497 1. 181433 1. 361154 1. 091693 1. 744514 1. 641966 1. 569434 1. 483473  
1. 691275 1. 940199 1. 281976 1. 570098 1. 066251 1. 290384 1. 545666 1. 107459 1. 3566  
2. 64806 1. 958562 1. 295711 1. 706134 1. 926005 1. 509979 1. 110525 1. 059649 1. 098839  
4. 379813 5. 152131 4. 661826 5. 873731 4. 070913 5. 563847 3. 93308 4. 773567 3. 454449  
1. 522234 2. 162765 1. 688964 1. 446346 1. 445522 2. 345906 1. 594089 1. 397893 3. 076621  
5. 791453 5. 378981 5. 174338 5. 202961 5. 933767 5. 039791 5. 963626 6. 070187 5. 91488  
2. 607676 1. 80511 1. 71817 2. 176793 1. 514728 1. 913084 2. 414194 1. 99186 2. 365802  
2. 569037 2. 746105 2. 985997 4. 690826 4. 397382 2. 92183 2. 864264 3. 898033 3. 465403  
1. 288866 1. 11924 0. 928433 2. 463132 1. 394254 1. 265788 1. 415522 1. 14274 0. 843213  
7. 263944 7. 212418 7. 533254 7. 504832 7. 521147 6. 747178 7. 493883 7. 216481 8. 342186  
1. 465325 1. 041637 1. 608211 1. 25343 1. 398937 1. 34657 1. 905634 1. 058979 1. 324553  
1. 285035 1. 158404 1. 274683 1. 839175 1. 348516 1. 225618 1. 351332 1. 385625 1. 345972  
3. 818646 2. 917448 3. 711097 3. 868806 3. 20281 4. 268386 3. 636943 2. 81996 3. 175639  
3. 751743 4. 151772 4. 339052 2. 788135 3. 764435 4. 592578 3. 616975 4. 252297 3. 140159  
1. 426415 1. 101459 1. 217125 2. 094161 1. 815708 1. 372304 1. 233794 1. 146776 1. 257138  
3. 586171 2. 716636 3. 607932 2. 713534 4. 01213 3. 244485 3. 947655 2. 807353 4. 021057  
0. 81852 1. 126479 0. 832753 1. 360839 1. 151242 1. 61443 0. 773559 1. 860131 0. 814866  
1. 276109 1. 83447 1. 347274 1. 74426 0. 817606 1. 432242 1. 436442 1. 482725 0. 998672  
3. 137571 2. 715124 2. 626118 3. 904534 3. 265195 1. 264874 3. 256735 2. 670985 3. 976049  
1. 025247 0. 713631 1. 066342 1. 721119 0. 881384 1. 103648 1. 206203 1. 526982 1. 434483  
0. 994294 0. 45166 0. 855496 1. 340779 1. 163832 0. 835603 0. 746775 0. 828325 1. 386331  
1. 140931 1. 500269 1. 728903 1. 770952 1. 951776 2. 067958 2. 009254 1. 844908 1. 741616  
3. 456046 2. 803268 3. 923827 3. 659673 3. 704572 3. 24206 3. 775249 3. 79249 3. 109631  
1. 275172 1. 801924 1. 173036 0. 95561 1. 292116 3. 147238 1. 409385 2. 328125 1. 566659  
4. 789203 4. 5006 4. 503027 3. 986206 4. 217304 3. 249682 3. 387886 4. 835423 5. 252394  
4. 335778 3. 343895 3. 641574 3. 775376 3. 650605 3. 406145 4. 24952 3. 949016 4. 147777  
6. 149 6. 352486 6. 235498 5. 161041 6. 369449 5. 525045 6. 069136 6. 497045 5. 122011  
3. 488048 3. 373044 3. 181768 3. 101736 2. 685903 2. 795215 3. 308713 3. 184657 2. 850407  
1. 355934 1. 30469 1. 713318 1. 948843 1. 820387 2. 3007 2. 157125 1. 41413 1. 089483  
6. 053174 5. 8473 6. 483884 5. 210904 5. 979265 5. 668749 6. 252661 5. 557515 6. 509906  
0. 787394 0. 923485 1. 118888 1. 109009 1. 051766 1. 252005 1. 109009 1. 178454 1. 439463  
2. 065675 2. 568274 2. 426302 2. 969415 2. 088755 2. 35233 1. 848141 1. 821247 2. 380584  
5. 417142 5. 052919 5. 058628 6. 25364 5. 879648 4. 575736 4. 2067 5. 410491 5. 343703  
2. 065583 1. 11384 1. 883664 1. 109358 1. 869402 3. 055397 2. 128116 1. 507168 1. 588989  
1. 583466 1. 457357 0. 829152 1. 674247 1. 989352 1. 074631 1. 656312 0. 974583 1. 317578  
1. 575309 1. 049495 1. 015916 1. 413457 1. 139631 1. 348322 1. 332082 1. 43731 1. 320979  
1. 376846 1. 154251 1. 580536 2. 285397 1. 17361 0. 974126 1. 407763 2. 327944 1. 731317  
6. 004788 5. 659149 6. 041773 6. 508851 5. 557029 5. 620942 6. 215175 5. 676803 5. 226816  
5. 861067 6. 225123 5. 284148 3. 06648 5. 248312 4. 319964 6. 494262 6. 13526 5. 416277  
4. 031426 4. 389254 4. 252765 4. 063231 3. 785424 3. 869109 5. 109694 3. 829537 3. 906282  
2. 849203 2. 259778 3. 668315 2. 195315 2. 470144 1. 514354 2. 851376 3. 209465 3. 098749  
4. 057397 3. 168505 3. 047836 4. 388338 3. 9771 4. 148998 1. 393453 2. 885242 4. 531434  
2. 137565 1. 952933 1. 956936 2. 409882 1. 919212 1. 565523 2. 184113 1. 885586 1. 890151  
1. 477789 1. 788392 1. 949159 2. 177845 2. 031424 1. 877129 1. 777736 1. 62836 2. 099034  
2. 040045 2. 650743 1. 837918 3. 334447 1. 96441 2. 116257 1. 888456 2. 416581 2. 452326  
1. 772695 1. 659855 2. 269497 1. 588995 1. 205337 1. 92461 1. 55529 1. 129151 1. 724482  
3. 922192 3. 882164 4. 245244 5. 428469 5. 191762 2. 85849 3. 704573 4. 083228 3. 935713

1. 956943 1. 341597 1. 953183 2. 525177 1. 53171 1. 95834 2. 007698 1. 988533 1. 405517  
4. 855395 5. 270959 5. 051845 4. 583166 5. 015619 5. 113642 5. 373592 5. 760295 5. 267462  
4. 237975 3. 20539 4. 051378 4. 398661 3. 540676 4. 384222 3. 927834 3. 802293 4. 234926  
0. 856616 1. 913271 1. 523335 1. 327349 0. 85876 2. 026012 0. 624304 0. 997191 0. 901516  
4. 40123 5. 709647 4. 861166 5. 551636 5. 287844 4. 525419 5. 821505 5. 9751 3. 887627  
7. 238924 6. 925978 6. 735468 7. 200983 6. 647968 7. 29816 7. 177207 7. 386199 6. 705223  
3. 26357 2. 436671 2. 529065 3. 65118 3. 035523 3. 694741 3. 72223 2. 907421 3. 033683  
9. 328288 9. 236256 8. 732121 8. 077398 8. 864332 9. 146867 9. 006145 8. 757602 9. 124236  
2. 216605 2. 155423 1. 718523 3. 12779 2. 014025 2. 079427 2. 696707 1. 777872 2. 773188  
2. 08701 2. 14317 2. 628523 2. 929406 1. 493921 1. 233862 1. 961043 1. 940415 2. 096254  
1. 452247 1. 20848 1. 757191 1. 161457 2. 143882 1. 938457 1. 584594 1. 150579 1. 902409  
6. 596583 5. 965785 5. 913789 5. 165033 5. 636374 6. 474699 6. 036253 5. 55681 6. 381994  
3. 315647 4. 203996 3. 773035 4. 442405 3. 571822 4. 345879 3. 133728 3. 244706 2. 944664  
0. 820445 0. 788643 1. 542518 1. 055391 1. 048464 1. 841329 0. 912244 0. 726113 1. 494992  
1. 613205 1. 588025 2. 007498 2. 195865 1. 949899 1. 995713 1. 856298 1. 901446 1. 652976  
1. 56808 1. 481707 1. 257095 2. 424611 1. 850408 1. 775764 1. 482464 1. 866925 1. 585993  
1. 978359 1. 918486 2. 252958 1. 900191 2. 448157 2. 445687 1. 450007 2. 08039 1. 442883  
1. 868012 1. 673236 1. 542461 1. 928599 1. 498952 2. 197431 1. 829071 1. 765261 2. 030628  
3. 663057 2. 078101 1. 850547 2. 62063 3. 310596 1. 741853 1. 951447 5. 18426 3. 567042  
1. 300343 1. 923398 2. 118882 1. 743132 1. 773817 1. 792494 2. 163903 1. 344063 2. 36723  
1. 037102 0. 982912 1. 427533 1. 54285 2. 325936 2. 065417 1. 787059 1. 052868 1. 518813  
2. 369544 2. 354306 3. 107196 4. 053095 3. 470005 3. 032463 2. 507765 3. 080216 2. 622519  
1. 313218 1. 961143 1. 398782 0. 988641 1. 177434 1. 574415 1. 270637 1. 862102 1. 877671  
2. 434488 2. 930882 3. 074382 2. 517711 2. 538886 3. 070459 2. 577448 2. 595102 2. 853604  
1. 217772 1. 054078 0. 87934 1. 284076 1. 367665 1. 331838 0. 961972 0. 860001 0. 746192  
2. 547292 2. 774529 3. 019912 3. 088226 2. 490182 2. 898583 2. 691052 2. 339912 3. 182427  
4. 671208 4. 475735 4. 309151 5. 372652 4. 482632 3. 683309 4. 52209 4. 236696 2. 93719  
3. 915481 4. 42652 3. 341137 2. 459675 3. 653971 3. 748427 2. 609861 3. 053353 2. 129124  
3. 586539 3. 770232 3. 613096 4. 384174 3. 647198 3. 440725 2. 973206 3. 030129 3. 879413  
1. 410853 2. 208748 1. 953613 2. 107149 1. 256233 2. 047021 1. 528773 2. 235699 3. 939861  
2. 140263 1. 959866 2. 292891 2. 562943 1. 555108 1. 698978 1. 676539 2. 030084 2. 013382  
0. 925334 0. 705762 0. 809725 1. 060375 0. 833836 0. 835521 0. 781863 0. 789111 1. 21643  
7. 986036 8. 151429 8. 151875 7. 751264 8. 120002 7. 605662 7. 582226 8. 376748 6. 847067  
1. 608116 2. 060141 2. 783208 1. 903619 0. 828219 2. 718887 1. 888121 1. 48856 1. 181221  
1. 66412 1. 32737 1. 492653 2. 35293 1. 095476 2. 508209 1. 810803 1. 184477 1. 568848  
1. 312745 0. 9083 1. 036301 0. 89758 1. 517409 1. 978085 0. 909154 2. 414288 1. 011382  
3. 148058 3. 687885 3. 420374 3. 688482 3. 318699 3. 504084 3. 997067 3. 149573 2. 979393  
3. 428095 2. 144032 1. 493026 2. 979101 2. 911455 1. 637354 2. 811739 2. 792664 2. 088017  
2. 670498 1. 553517 2. 456009 2. 42611 1. 719587 1. 31672 1. 656633 1. 73532 2. 617585  
4. 817883 5. 077328 5. 036128 4. 737121 5. 347194 4. 97635 5. 180971 4. 497691 5. 094417  
3. 794165 4. 207923 2. 962761 2. 038804 3. 768557 2. 214251 2. 68655 2. 768804 4. 021456  
6. 062588 6. 028954 6. 165854 4. 418612 6. 19408 5. 949159 6. 122568 5. 783645 5. 656934  
2. 890335 2. 249944 3. 007391 4. 270749 3. 304872 3. 092077 2. 888745 2. 934468 2. 771393  
6. 459609 6. 127805 6. 066537 5. 527341 6. 405922 6. 091915 6. 512645 5. 863278 5. 668239  
3. 933324 3. 792406 3. 983833 4. 899025 4. 20653 4. 176182 3. 264973 3. 60361 2. 8287  
8. 023924 7. 935605 8. 09038 8. 399577 8. 177133 7. 875831 8. 215007 8. 077858 8. 098904  
6. 119696 6. 041019 6. 312431 5. 699534 6. 324501 6. 056453 5. 646019 6. 330627 4. 449202  
4. 341001 2. 412489 3. 561631 2. 988283 2. 484518 3. 698056 3. 910084 4. 191424 3. 752983  
4. 042264 4. 785436 4. 597446 5. 037974 4. 533523 5. 518504 4. 70157 4. 047876 4. 287433  
1. 383067 1. 259334 1. 703541 2. 070452 1. 134011 1. 757737 1. 250992 1. 415499 1. 095758  
5. 135499 4. 956102 5. 579771 4. 708552 4. 647891 5. 62328 4. 413177 4. 8182 4. 97081

5. 707834 5. 940889 5. 248233 4. 70875 5. 80751 5. 334503 6. 061797 5. 546357 6. 205634  
2. 408507 2. 616375 2. 41492 2. 34981 2. 340683 2. 113382 1. 489137 2. 456474 2. 879961  
3. 30204 3. 558957 4. 578879 4. 01214 3. 709982 4. 164054 4. 282229 3. 233408 3. 786112  
2. 679786 3. 926869 3. 137066 2. 890565 2. 910749 2. 263138 3. 36852 2. 44664 1. 732518  
9. 488309 9. 526293 9. 454588 8. 967346 9. 114143 9. 394876 9. 190127 9. 149055 9. 881502  
2. 49784 2. 784716 2. 718493 3. 133863 2. 713787 2. 820762 2. 306845 3. 28553 3. 684821  
7. 878208 7. 903015 8. 13796 7. 327735 7. 505273 7. 980331 7. 954676 7. 718939 7. 978275  
1. 262885 1. 261373 1. 635819 1. 880957 1. 278756 1. 430832 1. 817735 1. 188866 2. 698122  
5. 185843 5. 223568 4. 503067 5. 38701 5. 104623 5. 192446 5. 682989 4. 995595 5. 760495  
4. 860227 4. 594805 5. 59797 5. 659796 5. 046533 4. 052402 5. 625184 5. 268422 4. 321524  
1. 278 1. 212333 1. 352181 1. 372671 1. 511319 1. 255421 1. 220464 1. 393875 1. 571132  
4. 395531 4. 146232 4. 465919 5. 311546 4. 950378 4. 790718 4. 201095 4. 681241 4. 065074  
3. 131954 2. 898818 2. 375522 2. 626807 2. 067704 1. 714532 2. 229391 1. 646681 1. 730204  
9. 553154 9. 055222 9. 022092 8. 621724 8. 827558 9. 544274 9. 488411 8. 988758 9. 47372  
2. 795929 2. 141429 3. 243221 2. 11652 1. 387532 2. 610165 2. 203347 1. 739134 2. 818191  
1. 239105 1. 019103 0. 850111 1. 262323 1. 477751 1. 228659 1. 015668 1. 164274 2. 388662  
1. 756346 1. 908297 2. 023097 2. 48256 2. 093508 2. 090636 1. 740769 1. 308714 1. 885732  
2. 790615 1. 761618 1. 661336 2. 560677 1. 93616 2. 03811 3. 784204 1. 542761 1. 803003  
1. 045938 0. 924977 2. 017287 2. 593922 0. 9529 2. 571137 2. 507061 2. 094961 2. 965914  
1. 244413 1. 346885 2. 05059 1. 632526 1. 473724 2. 076567 1. 397319 1. 0455 1. 764952  
6. 433949 5. 754878 7. 013376 5. 551732 5. 802613 5. 605058 6. 127806 6. 17871 5. 474535  
1. 346885 1. 208639 1. 683987 2. 936442 1. 880821 3. 163508 2. 301793 1. 44433 2. 765445  
1. 250964 1. 890811 1. 576826 3. 342625 1. 689656 2. 735228 3. 395528 1. 828731 1. 988808  
3. 159083 3. 446441 3. 395712 3. 848397 2. 523506 3. 20939 3. 619023 3. 449139 3. 51754  
1. 239983 1. 224309 1. 45278 1. 781552 1. 447972 1. 371954 2. 021363 1. 199315 1. 734352  
1. 265088 1. 318922 1. 182176 2. 986276 0. 979352 2. 251401 2. 001556 1. 109285 1. 030951  
1. 684814 1. 794391 2. 166341 3. 95557 2. 400312 3. 106203 2. 703019 2. 707829 2. 279887  
2. 859374 1. 899416 2. 091487 2. 199984 2. 396269 2. 294713 2. 62131 2. 128696 2. 45377  
4. 37819 3. 840428 4. 362611 3. 211687 4. 583557 2. 037428 3. 357954 4. 217938 5. 15939  
1. 441435 2. 256628 2. 374137 3. 58791 1. 259107 1. 973198 1. 488882 1. 695622 1. 855864  
2. 570026 1. 96754 1. 727533 2. 031827 2. 929031 2. 552578 2. 65614 2. 34124 1. 80663  
1. 792295 1. 908251 1. 845604 2. 03223 1. 407072 1. 898289 1. 440079 1. 792295 2. 078599  
7. 632785 7. 754106 7. 608123 7. 378546 7. 569021 7. 425201 7. 315928 7. 561509 7. 730695  
3. 877795 3. 900737 4. 26605 3. 897131 4. 681206 2. 865837 3. 696872 2. 952831 2. 721319  
1. 18038 1. 003746 0. 963061 0. 930132 1. 076622 1. 050571 0. 739438 1. 917373 0. 969187  
1. 654353 1. 379475 1. 264897 1. 553845 1. 34261 1. 284936 1. 153102 1. 846561 2. 246171  
1. 595723 2. 173389 1. 661095 2. 441373 2. 102274 1. 669684 1. 548606 1. 587158 1. 932806  
3. 605424 1. 917807 3. 953083 3. 393484 2. 220532 3. 645165 4. 023692 2. 420818 2. 372323  
2. 393721 1. 830884 2. 342931 4. 256802 3. 763282 2. 258626 4. 425435 2. 509412 2. 524078  
3. 395781 2. 811451 2. 305844 3. 379801 2. 440972 2. 089252 2. 117712 2. 058455 1. 714828  
3. 799422 2. 167772 2. 578097 1. 821027 1. 726479 2. 655358 1. 984827 3. 064487 2. 37708  
1. 388091 1. 368235 3. 201037 1. 830603 2. 027885 1. 725054 1. 193154 1. 854937 1. 893287  
1. 541528 1. 176911 2. 593402 1. 788764 2. 072004 1. 338679 1. 00318 1. 289117 1. 342435  
5. 037906 5. 347202 4. 59779 6. 25152 5. 524906 5. 275187 5. 379958 6. 779661 4. 671713  
1. 490609 1. 010342 1. 469865 1. 080091 1. 273999 0. 853877 1. 016665 1. 790427 1. 276831  
5. 831844 5. 901598 5. 799578 6. 560194 5. 696437 5. 643917 5. 427859 6. 101514 4. 824841  
2. 192297 2. 779953 2. 077637 2. 80834 1. 603064 3. 42681 2. 89254 2. 034334 1. 761044  
3. 153606 2. 294193 2. 933569 3. 401177 2. 907531 3. 728786 2. 996696 2. 485445 2. 846515  
1. 326139 1. 10802 0. 871885 1. 553987 1. 505483 1. 441701 1. 704809 0. 784976 1. 171249  
1. 325371 2. 233438 2. 137621 1. 533455 1. 434957 1. 512427 1. 406142 1. 640104 1. 229889  
3. 637137 4. 068723 3. 244522 4. 864857 3. 948237 3. 841279 3. 695481 3. 540802 3. 321937

1. 393289 1. 312102 1. 589277 2. 548845 1. 372228 1. 789847 1. 444536 1. 117737 1. 719824  
2. 006476 0. 444434 2. 871792 1. 541973 1. 712086 1. 940382 2. 076955 1. 020511 3. 690639  
2. 561435 1. 274821 1. 131542 1. 217624 1. 316206 2. 361325 2. 114055 2. 519832 2. 812814  
2. 499169 2. 751669 3. 634378 3. 090738 2. 325934 2. 67311 3. 261519 3. 289918 3. 74134  
1. 904845 1. 389426 1. 851831 2. 103966 2. 114808 1. 807355 1. 49352 1. 951254 2. 195999  
2. 151507 2. 615943 2. 844495 3. 499195 1. 396378 2. 22891 2. 039983 2. 219168 2. 664616  
5. 613625 6. 535761 6. 025791 6. 113006 6. 509333 6. 236706 6. 37758 6. 270077 5. 678634  
8. 106994 7. 852471 7. 763491 7. 64552 8. 166618 7. 66846 7. 91502 7. 97131 7. 889243  
2. 144814 0. 876907 2. 537131 2. 928905 2. 288508 2. 819835 0. 94833 2. 723948 1. 911759  
1. 760932 1. 287277 1. 649941 2. 259194 1. 289308 1. 548582 1. 615786 1. 7283 2. 855945  
3. 472276 3. 654741 3. 270271 2. 928463 3. 712534 5. 161394 2. 868391 4. 293185 4. 998898  
1. 390788 0. 938617 1. 447617 1. 741751 0. 992319 1. 70573 1. 472683 1. 027356 1. 243755  
1. 087842 0. 921863 1. 107219 2. 039229 0. 880989 0. 924476 1. 141524 1. 458154 1. 09435  
3. 301486 3. 550271 3. 024138 2. 423332 3. 269175 4. 053569 4. 372732 4. 056892 4. 162277  
2. 574474 1. 853949 2. 427727 3. 083558 2. 0283 2. 269344 2. 386745 2. 359173 2. 414639  
3. 413568 2. 779089 2. 822017 3. 745289 2. 586773 2. 753095 3. 502369 2. 477346 3. 168  
2. 133751 1. 771932 2. 744759 3. 03478 2. 253349 1. 913903 1. 983538 1. 542962 1. 969855  
1. 216278 0. 674458 0. 750891 0. 785036 0. 775535 0. 768751 0. 695688 1. 418625 1. 362895  
1. 227411 1. 312264 0. 818503 1. 136559 1. 197527 1. 099462 1. 022796 0. 78613 1. 632541  
1. 42575 1. 590222 1. 992942 1. 291999 1. 570403 1. 278489 1. 311396 1. 436485 1. 516518  
2. 083054 3. 255822 2. 370579 2. 492832 2. 640606 2. 762179 1. 898327 2. 573223 1. 993794  
8. 262419 7. 998212 7. 993002 8. 462558 8. 271789 8. 477204 8. 454339 8. 152164 8. 355675  
3. 136307 2. 993464 3. 330409 2. 530764 2. 870099 3. 898715 2. 917526 3. 208359 2. 433327  
5. 652226 5. 33651 6. 047042 5. 028272 5. 499807 6. 437122 5. 531683 5. 509048 5. 928215  
2. 090876 1. 95145 2. 000329 2. 253744 2. 237028 1. 737659 1. 933811 2. 117043 2. 131064  
3. 152881 2. 461076 2. 402191 2. 922938 2. 159734 3. 375155 2. 748504 3. 134178 1. 441024  
2. 584958 1. 676345 2. 422553 2. 641804 2. 075253 2. 22921 1. 884357 1. 996639 2. 885511  
2. 0212 2. 559761 1. 98776 2. 31842 1. 609896 2. 349192 1. 950586 1. 84514 2. 333546  
4. 344811 3. 048602 3. 623713 3. 276316 4. 073425 4. 352898 3. 929767 3. 452898 3. 194574  
1. 953908 1. 509722 1. 491905 1. 989288 1. 537783 2. 625313 1. 825698 1. 898258 1. 531233  
0. 773183 1. 02581 1. 499034 1. 196239 0. 888757 1. 353555 1. 108286 1. 254942 0. 625476  
2. 505513 1. 401136 1. 668348 1. 564921 1. 712899 1. 923311 1. 612701 1. 517905 1. 17851  
4. 380441 3. 635735 4. 27656 2. 404798 3. 628951 3. 612846 3. 455224 3. 82984 4. 010591  
6. 49104 6. 193413 6. 290093 6. 32586 5. 994088 6. 220539 6. 132112 5. 95013 6. 123758  
0. 8128 1. 460435 1. 104563 1. 362339 0. 811064 0. 861003 0. 969827 0. 763937 0. 760759  
0. 73773 1. 443981 0. 776321 2. 505378 1. 235828 2. 249128 1. 10183 1. 299516 1. 282081  
3. 550331 2. 803409 1. 882647 1. 99153 1. 478098 1. 22236 1. 444442 0. 322748 3. 745661  
1. 946414 1. 79917 1. 929553 1. 707269 2. 531429 1. 676545 2. 250811 1. 411704 2. 024871  
1. 837545 1. 221521 0. 971789 1. 468278 1. 101709 2. 015292 1. 296935 1. 43153 1. 526614  
1. 618478 1. 03939 1. 371103 1. 228363 1. 044208 1. 366023 0. 650042 1. 03875 1. 827269  
3. 590697 3. 346981 2. 023085 2. 881924 1. 858603 1. 975241 2. 756014 2. 55394 3. 313033  
3. 032844 3. 951397 4. 812227 5. 166525 3. 145621 2. 059064 4. 048916 3. 277096 5. 409766  
1. 329721 1. 186054 1. 403052 1. 40908 0. 9753 1. 152352 1. 057058 1. 455093 1. 166646  
4. 993063 5. 224791 4. 851881 5. 198415 5. 169441 3. 604621 5. 714985 4. 739276 5. 635799  
1. 274378 1. 363903 1. 035136 2. 364378 2. 47534 1. 248537 1. 238089 2. 39766 0. 799907  
0. 921568 1. 51845 0. 781516 1. 630043 0. 695603 0. 975991 0. 993592 0. 964855 1. 364652  
3. 071518 1. 964306 1. 882589 2. 184675 1. 810439 2. 062082 2. 104655 1. 927518 3. 079019  
4. 275151 4. 395603 4. 440424 3. 894535 4. 548655 4. 078475 3. 693026 4. 473041 3. 119889  
2. 280261 1. 752999 1. 934168 1. 985263 2. 712183 2. 124038 1. 743393 2. 479513 2. 203414  
2. 942184 4. 624576 4. 833163 4. 615265 2. 649094 3. 082887 4. 649563 3. 819975 3. 650793  
2. 572313 2. 434068 3. 149638 3. 40078 2. 246727 1. 933547 2. 421727 2. 139095 1. 653662



5.018142 4.219724 4.893769 4.072806 4.745179 4.992387 5.390559 4.761266 4.082409  
0.942766 1.482893 1.337452 1.229181 1.097505 1.321854 1.326183 1.176894 1.519029  
1.649425 1.343483 2.272123 3.724654 1.98929 1.611257 1.81578 2.041197 1.904475  
1.442653 1.5628 1.956151 1.124372 1.545887 1.86379 1.540806 1.554596 2.104695  
1.41907 0.724983 1.39222 1.838116 1.057331 1.08386 1.482773 0.86768 1.1749  
1.236404 2.45331 2.910587 3.370089 2.275895 1.342525 1.523791 1.269997 2.404333  
2.538601 2.133298 2.22425 2.454722 2.757704 3.230945 2.802216 1.769987 3.53992  
1.402607 1.59853 2.028233 1.721983 2.055826 1.800632 1.743273 1.719143 2.493321  
1.271189 1.186582 1.28004 1.445089 1.649031 1.469038 1.224795 1.285217 1.41412  
2.14705 1.728255 1.914305 2.401737 1.947879 2.427635 2.306468 1.852518 1.855111  
2.011265 1.76373 2.154458 3.160038 1.931237 2.036318 2.16357 2.441565 2.291487  
3.346827 2.665218 2.610576 2.416744 4.051532 2.872415 2.308402 2.442322 2.524915  
3.64821 4.729067 4.016498 2.714582 3.135118 4.204588 2.733214 3.466736 4.922083  
2.937121 2.070433 2.712847 2.809958 2.647683 3.023262 2.63705 2.461707 2.622784  
2.007096 2.674148 3.698756 3.621315 3.35963 4.382142 2.873025 2.809529 4.45825  
1.478289 1.78302 2.214157 1.548737 2.308221 2.107847 1.920563 2.319269 4.498063  
2.242985 1.362221 2.101616 1.151012 1.438396 1.38454 1.449847 1.268621 2.124016  
1.365281 2.148158 1.848681 1.797178 2.228087 1.509098 1.534535 2.464763 2.483964  
2.28515 1.72387 2.278567 1.842371 2.803076 2.585334 2.359929 1.457645 2.304617  
1.848882 1.37454 1.066942 1.926976 1.451346 2.072236 1.300371 0.901515 1.416088  
0.83651 1.255873 1.230476 1.212303 1.275553 1.447315 1.131827 1.036311 0.829141  
1.274474 1.317389 1.041317 2.994118 1.576525 1.062418 1.215976 1.073258 1.182507  
6.085923 5.347036 5.512631 1.45353 5.489839 5.240321 5.232565 1.466234 1.204091  
2.548708 2.70252 2.067968 2.474333 2.163999 2.31803 2.646628 2.099709 2.831952  
1.469145 0.98302 2.007202 2.307216 1.559534 1.378395 1.254813 1.152763 0.856004  
5.697081 5.883239 6.02171 4.706892 6.314231 5.714826 5.747345 5.706302 5.986729  
2.091285 2.067422 2.214071 2.943092 2.044226 1.695586 1.746672 1.790523 2.325085  
3.088625 3.601129 2.847073 2.69363 2.279784 2.528223 2.461937 2.383663 2.882031  
1.732283 2.27887 1.679245 1.739861 3.093016 2.316531 1.849338 1.917666 1.633712  
6.285064 6.445349 6.282053 5.837401 6.269561 5.681816 5.71258 6.192973 5.991818  
1.766901 1.985629 3.982416 3.46993 2.292721 3.63942 3.109629 2.723718 2.408099  
2.164906 1.522832 1.459578 1.979849 1.625675 2.016456 1.56342 1.80878 1.445456  
1.374809 2.089601 1.898345 1.492841 1.706364 2.313869 1.926904 1.345301 2.399887  
5.134415 4.234986 4.388213 4.58418 4.763998 4.504404 5.05219 5.055816 3.968918  
4.406014 4.350194 3.721145 3.52233 3.865028 3.875137 4.439053 4.079466 3.824786  
3.01836 2.494374 3.165633 3.248234 2.978009 2.955851 3.079608 3.694135 2.522573  
0.760491 0.963966 0.936151 1.099264 0.712721 1.393574 1.141538 0.972089 0.942184  
1.438044 1.013081 0.981868 2.215211 1.756208 1.285765 1.292952 1.325684 2.233344  
3.413294 3.490727 5.192455 3.110636 3.413294 3.314231 3.904274 1.711139 3.757552  
1.889335 1.25009 0.66394 1.604576 1.56617 2.073484 1.17185 1.417718 0.450585  
2.904813 2.255853 0.8544 2.658723 1.592645 2.586956 1.739131 1.018801 0.909538  
1.071717 0.72238 1.008544 1.690603 1.221432 1.071717 0.732232 1.071717 1.362008  
2.563936 2.616594 2.599176 3.19668 3.128847 2.70151 3.531114 2.889593 2.90837  
6.07499 5.394628 5.361308 6.020578 5.883769 5.054907 5.714361 5.241047 4.70955  
2.279329 3.044024 3.461289 3.931808 2.238321 2.271943 2.926115 2.87502 4.35097  
1.769012 2.16956 2.633407 2.404969 1.634425 2.448952 1.659876 2.223891 3.775799  
1.684097 1.511766 1.042452 1.319159 0.955992 1.745641 1.310369 1.145907 1.427309  
1.303656 0.891817 1.166844 1.105098 2.176509 1.809388 1.1572 1.140485 1.401158  
2.09065 1.393338 1.438702 2.110321 1.922343 2.42408 2.00636 2.35549 2.421085  
1.878166 1.484264 1.620457 2.135518 2.176101 2.9302 1.2964 1.277906 1.989928  
3.39374 4.998245 2.685779 3.996678 3.433723 3.838792 2.476598 3.793582 4.385833

1. 831878 2. 105431 3. 136376 4. 329333 2. 318112 3. 001101 3. 182238 2. 041838 2. 533053  
2. 328612 2. 583178 3. 613884 2. 009365 2. 377435 2. 150843 2. 419429 2. 643397 2. 085654  
1. 634217 1. 237117 1. 451219 1. 799528 1. 507559 1. 737281 1. 211479 1. 206894 2. 076217  
1. 231141 1. 164208 1. 215925 1. 458226 1. 052591 1. 39554 1. 343813 1. 22447 1. 507159  
2. 260989 2. 486727 2. 016922 1. 838637 2. 014683 2. 204577 1. 676211 1. 922126 3. 232389  
6. 354418 6. 063315 5. 988408 5. 257738 5. 730477 5. 224559 6. 27721 5. 977588 5. 910154  
1. 488323 4. 385149 5. 070333 1. 245459 2. 604832 1. 341614 2. 472878 3. 325356 2. 3442  
1. 286526 1. 61436 1. 594999 1. 908926 1. 78386 1. 480511 1. 322101 1. 460241 1. 175146  
1. 372284 1. 111192 1. 164628 1. 655697 1. 851428 1. 190589 1. 402494 1. 076801 1. 171255  
2. 889014 2. 888022 2. 362606 3. 008113 3. 41854 2. 872537 3. 434645 2. 837041 2. 226968  
1. 559562 1. 717489 2. 009478 2. 693773 1. 862227 2. 186065 1. 942958 2. 02336 2. 803066  
6. 475319 7. 071475 6. 443505 5. 645919 7. 02794 6. 927032 6. 820526 6. 849438 7. 006821  
2. 966964 1. 730627 3. 717452 3. 042162 2. 025252 2. 486373 2. 491323 2. 036597 4. 307498  
1. 201277 1. 95036 0. 871012 2. 101009 0. 820078 2. 211749 1. 022563 1. 451991 1. 739048  
1. 115731 1. 121495 1. 211709 1. 22756 1. 166129 1. 490333 1. 325518 1. 023347 1. 023347  
1. 651321 2. 076948 1. 271965 2. 429155 1. 464271 1. 656646 1. 554791 2. 019618 2. 273775  
7. 502665 8. 031067 7. 418244 7. 447635 7. 928543 8. 060374 7. 364544 8. 436555 6. 986765  
1. 224138 3. 146336 1. 702935 2. 376918 1. 883466 3. 540545 1. 828066 1. 250959 2. 265442  
5. 652323 4. 18785 5. 610847 5. 017343 2. 891037 3. 754218 4. 677609 4. 347209 4. 500014  
3. 534927 3. 701568 3. 843987 3. 08592 4. 528659 3. 080785 3. 907637 3. 262261 4. 803406  
3. 204399 1. 737129 2. 422498 2. 675838 2. 394035 3. 942171 2. 506765 2. 293341 3. 457925  
1. 086276 0. 961176 1. 241727 1. 981319 1. 35925 1. 063042 1. 145334 1. 301761 1. 356091  
1. 860569 0. 825944 1. 041236 1. 245751 1. 303407 0. 697557 0. 812774 1. 353862 1. 385981  
1. 556558 1. 692198 1. 408678 1. 606757 1. 692198 1. 642262 1. 206219 2. 014808 2. 501543  
1. 390641 1. 402271 1. 823259 1. 64587 1. 520347 1. 521681 1. 264109 1. 65266 1. 084783  
2. 09541 3. 62218 2. 29313 1. 91652 1. 939151 2. 455774 2. 391391 1. 642254 1. 092545  
1. 028665 1. 62525 2. 617653 1. 81482 1. 704173 2. 07792 1. 828158 2. 66081 2. 270643  
1. 841991 1. 674493 1. 618985 2. 112237 1. 810497 2. 146372 1. 865389 1. 465904 1. 937541  
2. 272293 1. 7764 2. 095443 2. 516861 1. 853355 1. 493832 2. 197558 2. 105205 1. 381744  
4. 797796 4. 481247 4. 619467 5. 363889 4. 242821 4. 602807 3. 685693 3. 486759 3. 64045  
1. 203057 0. 962892 1. 57803 1. 343363 1. 629092 1. 585372 1. 735171 1. 81499 1. 455456  
1. 618297 1. 374988 1. 04462 1. 331524 1. 303908 1. 633654 1. 526458 1. 482184 1. 893593  
1. 347741 1. 124385 1. 479295 1. 99145 2. 211258 1. 92619 1. 205536 0. 982895 1. 530091  
6. 381766 7. 316132 7. 29498 5. 684124 6. 437022 7. 027119 6. 297004 6. 432654 7. 159125  
1. 879286 1. 939263 1. 474237 2. 58055 1. 891666 1. 899476 1. 664595 1. 791621 1. 957325  
5. 008603 5. 204785 5. 670647 4. 145329 5. 023767 5. 424962 5. 592759 5. 050615 4. 678708  
1. 270228 1. 702244 2. 849157 1. 385113 2. 633059 2. 500134 1. 123328 3. 201603 2. 498683  
2. 63115 2. 62018 2. 69903 3. 237013 1. 86157 2. 540828 3. 360478 2. 288082 3. 805355  
1. 685622 1. 464312 2. 149411 3. 070551 1. 737784 3. 054953 2. 289309 1. 809338 1. 749053  
2. 984722 5. 059358 4. 284168 3. 851389 4. 413363 4. 575591 5. 41827 4. 416216 3. 8211  
6. 319581 5. 136644 6. 084968 6. 90606 6. 382081 6. 375369 6. 288667 5. 636863 5. 105124  
3. 2584 2. 331593 3. 283606 2. 37423 1. 997866 2. 167837 1. 380106 2. 132931 1. 638767  
4. 731179 5. 071106 5. 572791 5. 207215 4. 860719 4. 86797 5. 198649 4. 499362 5. 183703  
1. 392612 0. 999452 1. 759372 2. 023797 1. 420036 1. 362537 0. 94417 0. 95452 1. 659892  
2. 513794 2. 822044 3. 066879 3. 075223 2. 702927 2. 655927 2. 619135 2. 91637 2. 364472  
4. 406292 4. 419675 4. 290649 4. 81986 2. 755708 4. 282347 4. 782253 3. 317718 4. 507708  
1. 134856 1. 323534 1. 464841 2. 1774 0. 708892 1. 723471 1. 735054 1. 449519 1. 335344  
2. 87126 3. 461175 3. 753739 2. 750125 2. 720791 3. 485399 3. 274408 1. 948734 2. 458178  
2. 763926 2. 003791 2. 233338 3. 706924 3. 252036 3. 647408 1. 796766 3. 498127 2. 537133  
1. 275753 1. 341763 1. 539158 1. 318936 1. 583393 1. 225189 1. 44495 1. 326873 1. 62894  
0. 906817 1. 374501 0. 782547 1. 337269 1. 327499 1. 530709 1. 285626 1. 073178 1. 329291

2. 345173 2. 808009 2. 144152 2. 775246 2. 259398 2. 160589 1. 868903 1. 963806 1. 473722  
1. 12839 1. 752813 1. 527299 1. 67396 1. 773444 1. 134119 1. 516944 1. 75393 2. 841524  
1. 496593 2. 314155 1. 400544 2. 027349 2. 619448 2. 716253 1. 635804 1. 934945 1. 627247  
1. 203453 1. 000804 1. 128958 0. 6959 2. 079331 1. 885642 1. 403507 2. 493788 3. 164165  
7. 738899 8. 197553 8. 178077 7. 272684 8. 047814 7. 752817 7. 552572 7. 868196 7. 136955  
5. 473276 5. 832078 5. 734018 5. 149295 6. 025481 4. 77508 5. 480255 5. 517305 5. 950043  
5. 948672 3. 936262 4. 872981 5. 476108 5. 019414 5. 416028 5. 329209 5. 676489 5. 929996  
1. 246217 0. 972653 1. 384646 1. 544188 0. 94626 1. 024441 1. 172628 1. 096447 1. 251807  
9. 140536 8. 838218 8. 699502 8. 55556 8. 569523 8. 799198 9. 074809 9. 019218 9. 062543  
2. 148294 1. 098413 1. 27071 1. 595293 1. 513305 1. 27322 1. 212502 1. 097138 1. 720489  
2. 996966 2. 449754 2. 103778 3. 030333 3. 433446 3. 20331 3. 539752 3. 133057 2. 735199  
2. 337386 1. 820151 2. 682756 2. 24352 2. 098707 2. 724748 1. 801079 1. 599211 2. 393434  
1. 566156 1. 59635 1. 758349 1. 388154 2. 486333 1. 290124 1. 091027 2. 361365 0. 97613  
2. 23055 2. 893132 1. 718397 1. 277169 2. 142015 1. 8442 3. 202509 1. 688163 3. 246648  
2. 88001 2. 60989 3. 370756 3. 427925 2. 558592 2. 677174 2. 293168 2. 865033 3. 022015  
1. 753315 1. 389714 1. 826224 2. 091821 1. 559203 1. 751078 1. 585864 1. 739253 2. 515976  
4. 92962 3. 5877 5. 310999 4. 983297 3. 979741 3. 04149 4. 266401 3. 601866 4. 781122  
1. 469025 1. 957933 1. 547768 1. 553929 1. 506108 1. 540332 1. 258186 1. 455614 1. 83518  
1. 18561 0. 786267 1. 306871 1. 160451 1. 374254 1. 325285 0. 845671 1. 087963 0. 91535  
4. 666346 5. 706095 5. 742978 5. 338604 5. 558343 4. 878083 6. 132347 6. 04879 4. 887564  
1. 851956 1. 702983 1. 355699 1. 251298 1. 342484 3. 973403 1. 964871 3. 361894 2. 572188  
1. 929527 1. 491856 2. 255641 1. 883711 1. 662973 1. 686966 1. 906918 1. 960371 2. 513479  
0. 784143 0. 955671 0. 793921 1. 162797 0. 583746 1. 237204 0. 925077 0. 828873 1. 000198  
1. 549839 0. 79721 0. 574881 1. 346665 1. 137303 1. 565304 0. 841757 0. 751268 1. 196334  
1. 389823 1. 582533 1. 463772 2. 940855 1. 226761 1. 700839 1. 527718 1. 476605 1. 626481  
5. 082132 4. 592766 5. 422541 5. 744493 4. 943633 4. 511153 4. 532359 5. 114315 5. 262628  
5. 278767 5. 455756 5. 236887 6. 247355 5. 564716 6. 177406 4. 975545 5. 439678 4. 988399  
3. 61361 4. 40692 4. 919964 4. 288781 4. 938532 5. 033946 3. 937437 4. 272132 5. 067178  
7. 895949 7. 814458 7. 710662 7. 662431 7. 551651 7. 869114 7. 92906 7. 48397 7. 895292  
7. 192624 7. 481415 7. 047351 7. 655558 7. 022115 7. 784751 8. 257296 7. 515517 7. 584346  
4. 444051 4. 179844 4. 176744 4. 20242 3. 765592 5. 192294 4. 331385 4. 376257 3. 700185  
2. 351123 2. 201122 2. 026514 2. 625556 2. 398284 2. 291354 2. 119793 2. 798187 2. 885142  
6. 707429 6. 609451 6. 745605 6. 123233 6. 137236 6. 189 6. 802573 6. 144531 5. 944721  
3. 378203 2. 556887 2. 242056 2. 73623 1. 965087 2. 071387 1. 594419 2. 300915 3. 810719  
4. 280204 4. 439898 3. 439246 3. 470602 3. 415667 3. 519662 4. 011674 4. 381333 4. 488519  
5. 184485 5. 825085 5. 095593 4. 730495 5. 335626 5. 95963 5. 409642 5. 611864 4. 707418  
6. 407925 6. 684525 6. 741608 5. 971839 6. 42876 6. 357955 6. 475381 6. 636315 6. 372867  
3. 935826 3. 209451 3. 859875 2. 727713 3. 031743 4. 30835 2. 991544 3. 399253 4. 646979  
1. 895359 1. 491278 2. 128189 3. 288329 1. 297187 2. 159137 2. 576519 1. 605537 2. 045115  
7. 739662 7. 690963 8. 151985 6. 89369 7. 326649 7. 994966 8. 012226 7. 531997 7. 139621  
5. 168671 4. 77195 5. 006718 5. 482032 4. 798899 4. 40188 4. 836473 4. 852965 4. 641492  
5. 144926 5. 785005 5. 71344 4. 743279 7. 487889 4. 928266 5. 848908 5. 760091 6. 032458  
5. 31302 5. 315582 5. 2627 5. 487698 5. 641623 5. 806877 5. 436681 5. 108738 5. 682016  
5. 684227 5. 829109 5. 996814 6. 46021 6. 257301 5. 56285 5. 757963 6. 208782 5. 421478  
7. 329807 7. 201253 7. 709872 7. 72395 7. 091113 7. 846788 7. 489694 7. 745923 6. 220122  
5. 250346 5. 617693 4. 069493 5. 714859 5. 328919 4. 221776 5. 567089 5. 091789 5. 679168  
4. 212737 3. 164605 3. 696444 3. 251804 3. 192689 4. 864553 4. 237086 4. 419771 3. 607502  
6. 769658 7. 192639 6. 219287 6. 854564 6. 839066 6. 122943 6. 802726 6. 939496 6. 602172  
1. 325091 0. 923414 1. 199745 1. 257113 0. 976523 1. 209854 1. 207479 1. 172888 1. 069457  
6. 196496 5. 34125 4. 873529 5. 783319 6. 448893 5. 820439 5. 662823 6. 388023 7. 983809  
6. 932088 6. 82394 7. 007811 7. 235197 7. 063208 6. 910544 7. 293606 6. 988386 6. 583329

2. 756289 2. 683995 3. 636092 2. 644446 2. 985845 3. 795426 2. 948839 2. 771599 4. 054831  
5. 614667 5. 25784 5. 999517 5. 812621 5. 740095 5. 3105 5. 55684 5. 560255 4. 806695  
8. 031189 8. 115262 7. 093128 6. 528585 7. 492855 8. 302482 7. 837472 8. 25756 8. 074313  
4. 543748 4. 878708 4. 487211 4. 44569 4. 471309 4. 237892 4. 474883 4. 613858 4. 572088  
8. 398587 8. 340726 8. 959075 8. 411233 8. 100704 8. 157078 8. 636471 8. 267343 8. 786243  
3. 40109 2. 731387 4. 137355 2. 05105 2. 908406 3. 065661 3. 371506 3. 028064 3. 496342  
4. 767884 4. 585403 4. 057927 4. 676184 4. 140558 4. 568783 4. 496131 3. 87783 4. 445967  
3. 756279 4. 503913 3. 807034 3. 707312 4. 869802 3. 284366 3. 929958 4. 172432 4. 375314  
5. 782199 6. 054283 6. 684381 5. 145762 4. 859748 5. 313721 5. 59864 5. 406643 5. 325521  
3. 200957 3. 365772 2. 987708 2. 953469 2. 905793 3. 175866 3. 013204 2. 685371 2. 611093  
4. 367444 5. 111337 4. 577299 4. 673836 5. 776417 4. 530772 4. 867376 5. 243495 5. 221999  
6. 169652 6. 839484 6. 328334 5. 483491 6. 430327 6. 190455 6. 008142 6. 173268 4. 895452  
2. 313718 2. 954189 2. 821237 3. 453271 2. 867479 1. 353115 4. 741973 4. 113398 4. 180427  
2. 605498 3. 696561 4. 148776 3. 391598 2. 892501 4. 014791 4. 086926 3. 226319 3. 06347  
7. 715661 7. 213976 7. 32102 7. 377309 7. 095275 7. 083167 7. 553712 7. 531409 7. 886313  
4. 758401 5. 402748 5. 033334 4. 034604 4. 576965 4. 178156 4. 495182 5. 135226 5. 335104  
3. 990167 3. 918266 4. 809971 3. 483256 4. 008628 4. 211689 4. 106487 4. 81109 3. 218868  
5. 183621 5. 151777 4. 188977 3. 05905 4. 711375 4. 10205 5. 525313 4. 367629 4. 626121  
5. 285007 4. 854435 5. 209473 4. 944154 5. 199416 5. 559376 4. 86133 5. 301377 5. 142678  
5. 553099 5. 324729 4. 866171 2. 964418 5. 888624 5. 724839 5. 628274 5. 538828 5. 43371  
3. 236461 4. 851749 4. 069374 3. 788261 4. 278768 4. 26677 4. 158467 3. 86475 4. 499354  
0. 88363 1. 222213 1. 144611 1. 332779 1. 064507 1. 142827 1. 3274 0. 932593 1. 273609  
3. 078372 4. 423902 4. 520531 3. 73803 4. 225271 4. 09279 4. 186499 4. 632775 4. 278583  
6. 991568 6. 716782 7. 096985 6. 325053 6. 596955 6. 705659 6. 866253 6. 79792 6. 228023  
8. 427769 8. 107656 8. 11567 8. 475655 7. 54414 7. 372693 8. 561623 7. 909313 8. 058447  
5. 827908 6. 36985 6. 548778 4. 614206 6. 174063 6. 134812 5. 798692 5. 411005 5. 877932  
2. 637782 3. 061237 2. 939541 2. 518404 3. 251776 3. 227232 3. 186882 2. 730674 3. 340705  
3. 416902 2. 781286 2. 957349 2. 326285 2. 81745 3. 015913 2. 776341 3. 068637 3. 147122  
7. 380313 7. 075363 6. 886435 6. 356414 6. 636607 7. 05442 7. 284571 6. 977124 7. 616436  
4. 691372 4. 471574 4. 896258 4. 028542 5. 59341 5. 112425 4. 877605 4. 686042 4. 393438  
1. 806577 3. 808945 3. 28444 3. 305333 2. 971184 2. 565504 3. 025177 2. 238574 3. 218689  
1. 682729 2. 18276 1. 154479 1. 54397 1. 949576 1. 495941 1. 592133 2. 108574 1. 538971  
1. 533848 0. 972609 1. 53282 0. 92474 1. 450305 1. 760331 1. 043371 1. 209873 1. 186251  
7. 90562 7. 874389 7. 807803 7. 549716 7. 704557 7. 864388 7. 892442 8. 021199 6. 670581  
1. 980213 1. 791739 2. 645008 1. 476188 1. 429888 1. 772836 1. 399029 1. 624843 1. 844518  
6. 796099 6. 930327 6. 609764 5. 993835 6. 925729 7. 135601 7. 143067 7. 034985 6. 197784  
7. 766149 8. 538023 8. 167501 8. 697364 8. 54219 8. 296313 8. 165257 8. 304157 7. 445586  
3. 825664 3. 986766 4. 563183 4. 479893 4. 103017 4. 709662 4. 258981 4. 668948 3. 076776  
3. 785438 2. 825929 4. 163594 3. 490344 4. 228199 3. 506288 3. 581224 3. 647605 2. 267555  
5. 902207 5. 843135 5. 672872 5. 528192 5. 695231 6. 016496 5. 712784 5. 981005 5. 883326  
4. 244597 4. 767812 4. 534173 4. 649537 4. 737151 4. 299002 5. 354477 4. 982617 3. 155973  
4. 651984 3. 87688 4. 89308 3. 95622 4. 174984 3. 112486 4. 492013 3. 863775 4. 09357  
6. 311237 6. 511257 6. 862326 5. 755152 6. 583472 5. 88045 6. 430166 6. 373088 6. 099799  
3. 238742 2. 996534 3. 053732 3. 908509 3. 148299 3. 200981 2. 793225 2. 948487 3. 407842  
6. 843988 6. 723335 6. 429245 6. 801137 6. 546018 6. 645425 6. 744201 6. 924236 7. 538976  
4. 352746 5. 438539 5. 491929 5. 392025 4. 248788 5. 476565 5. 145991 4. 657129 4. 630795  
5. 953576 5. 447014 5. 438909 5. 449073 5. 568666 5. 247824 5. 793286 5. 19697 7. 008892  
7. 564779 5. 029176 6. 329692 6. 064768 5. 772812 8. 103823 5. 54189 6. 152854 7. 626957  
5. 2242 5. 37782 5. 84405 5. 729273 5. 557359 5. 71847 5. 379079 4. 556264 4. 867462  
1. 350562 1. 590157 1. 485762 1. 711152 1. 612372 2. 41165 1. 713572 2. 187161 1. 658252  
4. 229923 4. 220994 3. 678461 4. 185786 3. 838045 3. 950388 4. 470444 3. 748215 3. 393667

5. 232478 6. 055792 4. 238522 6. 183536 5. 341118 4. 335794 5. 394559 5. 507993 5. 790637  
6. 148259 6. 979022 6. 161813 4. 824392 5. 496934 6. 850763 5. 875659 6. 634031 6. 770533  
5. 680027 5. 41845 5. 938115 4. 38007 5. 773267 5. 42531 6. 015577 5. 795152 3. 845803  
3. 613693 3. 569281 4. 00471 2. 56452 3. 55302 5. 056471 3. 871321 3. 904023 3. 675956  
4. 506868 4. 057944 4. 156214 4. 34718 4. 699106 4. 154798 4. 180116 4. 95126 2. 729789  
6. 097567 5. 442989 5. 218934 6. 006864 6. 191849 5. 791411 5. 679577 6. 293855 6. 03432  
3. 938656 3. 43615 2. 397764 3. 997359 4. 432646 2. 358804 3. 768836 4. 547602 6. 105105  
5. 572059 4. 255691 5. 265515 5. 21654 4. 558858 4. 0358 4. 515893 3. 804801 4. 063208  
3. 938589 4. 336166 4. 20875 3. 310833 4. 983905 4. 11577 4. 26448 5. 099658 4. 054208  
5. 080409 5. 54214 4. 990119 4. 467868 6. 001204 5. 224737 5. 217219 5. 511503 5. 395058  
2. 581321 2. 82713 2. 836419 3. 315485 4. 472537 2. 661193 3. 954707 2. 549789 2. 445917  
2. 627503 2. 118141 1. 862431 3. 144043 1. 74098 1. 272264 2. 470463 1. 388137 0. 844644  
2. 061214 1. 608587 2. 145822 2. 073554 1. 687761 1. 792651 1. 775798 1. 446406 2. 920285  
2. 261339 2. 316439 2. 375847 2. 304372 2. 776512 2. 05842 3. 34523 2. 318241 2. 091452  
3. 761065 3. 316217 3. 983943 1. 855741 3. 340632 3. 660409 3. 921996 3. 621538 3. 069882  
3. 022424 1. 170533 1. 150393 1. 147568 1. 284272 2. 428285 2. 44046 1. 673109 1. 620133  
2. 196916 2. 252532 2. 013157 2. 739631 2. 529486 2. 137815 2. 503249 2. 043326 2. 632036  
6. 194106 5. 572213 5. 937291 5. 925351 5. 956635 5. 756118 6. 188823 6. 13369 6. 136582  
4. 607743 4. 161457 4. 440648 4. 574841 4. 428653 4. 397322 4. 242243 4. 236649 3. 675984  
5. 383036 5. 841762 6. 012692 3. 872371 5. 489385 6. 63627 5. 030603 6. 024784 5. 409823  
1. 352413 2. 405376 3. 123076 2. 758513 2. 759543 3. 722017 2. 011117 2. 346788 2. 964783  
3. 643065 4. 000474 3. 654893 4. 07267 3. 520293 3. 845605 3. 489817 4. 137908 3. 115298  
3. 081577 3. 07361 3. 074779 1. 839543 2. 692271 3. 500416 2. 827435 2. 47058 3. 985617  
5. 895421 4. 477392 4. 806399 4. 177823 5. 221776 6. 760497 5. 666037 5. 965954 6. 115504  
2. 239675 1. 83975 2. 139872 2. 984718 1. 790682 3. 360917 3. 111502 1. 889984 1. 731244  
1. 814692 1. 682067 1. 446072 2. 301128 1. 481027 2. 536481 1. 491397 2. 550485 2. 484106  
2. 077592 1. 607198 2. 48037 1. 902236 2. 0404 2. 505869 1. 367371 1. 834811 1. 535949  
1. 748145 2. 769237 2. 152678 3. 076194 1. 946296 2. 808647 2. 641562 2. 356448 1. 571362  
2. 454854 2. 505655 1. 975093 3. 282729 2. 325114 2. 811943 2. 266118 2. 197677 2. 991341  
2. 180598 2. 924844 3. 247919 1. 23793 4. 069154 1. 968571 2. 120725 1. 484398 1. 554571  
5. 68042 5. 695962 5. 479603 5. 68804 4. 944465 5. 304508 6. 094289 5. 750131 5. 429298  
5. 083545 2. 995897 3. 392935 2. 701088 4. 289169 5. 508453 2. 735677 5. 22501 4. 20176  
5. 727204 5. 542095 5. 642323 5. 823456 5. 630273 5. 096112 5. 697524 4. 76349 4. 679725  
4. 014902 5. 128538 5. 099974 3. 153159 4. 182433 4. 606435 3. 696102 4. 22577 3. 96773  
1. 061794 2. 777198 1. 389244 1. 545856 1. 469073 1. 391496 1. 439571 0. 825204 1. 061794  
3. 575341 3. 228086 4. 22525 4. 244392 4. 656208 3. 605091 3. 552116 3. 223302 2. 526349  
4. 754391 5. 285355 5. 10934 3. 955651 5. 225101 4. 040173 5. 760826 4. 889627 4. 917505  
6. 991572 6. 681436 6. 701148 6. 298156 7. 061228 5. 785605 7. 193463 6. 407801 7. 33405  
2. 071549 2. 227154 2. 251581 2. 51584 1. 666809 3. 927962 2. 322837 1. 966606 2. 467413  
2. 36046 1. 588074 1. 53997 1. 999029 1. 36279 2. 103684 1. 717922 1. 740504 1. 794805  
2. 439346 2. 425775 2. 573706 2. 568302 2. 157614 2. 580513 2. 476721 2. 388144 2. 82067  
4. 347064 3. 990358 4. 665494 4. 655525 5. 285195 2. 858384 5. 968278 4. 604912 5. 195897  
4. 886024 5. 501169 5. 536448 5. 468349 5. 471249 4. 857167 5. 663823 5. 565223 4. 136654  
6. 200038 6. 687869 6. 28747 7. 176834 6. 70835 5. 689782 6. 193363 6. 858301 6. 598679  
2. 59001 2. 277046 2. 002707 2. 988781 1. 76643 1. 637136 3. 449111 3. 394697 1. 538852  
4. 705418 5. 464411 5. 079345 7. 143958 5. 683207 4. 884318 5. 623533 6. 255577 5. 587415  
4. 208726 5. 287494 4. 704968 5. 348104 5. 273375 2. 890173 4. 555867 5. 602984 3. 575476  
3. 419329 4. 499701 3. 427347 3. 658572 3. 755754 4. 083135 3. 823758 3. 761737 4. 422568  
7. 404193 7. 770985 7. 974436 7. 683032 7. 843775 7. 595189 7. 852167 7. 766969 8. 168282  
7. 155909 7. 069396 7. 308289 7. 234536 7. 363161 7. 197851 6. 904826 7. 073495 6. 814769  
6. 566524 6. 37165 6. 478491 7. 458067 6. 87806 6. 38593 5. 927718 6. 694837 6. 591401

6. 934932 7. 030164 6. 943726 7. 202455 6. 689415 6. 4582 6. 786583 7. 48788 7. 302383  
6. 179473 5. 927407 5. 974723 6. 416202 6. 039944 6. 15128 6. 508024 6. 375806 6. 660207  
1. 441809 1. 97092 1. 591443 2. 269361 1. 764868 2. 196455 1. 503445 1. 27805 1. 505642  
9. 292962 9. 446626 9. 416887 8. 356827 9. 64963 9. 496353 8. 855749 9. 539612 9. 142806  
5. 71089 5. 796806 5. 721141 5. 186636 5. 246113 4. 909455 5. 315922 6. 282067 5. 34343  
5. 653274 5. 953515 6. 242515 5. 515325 6. 080214 6. 195524 5. 773983 6. 196561 5. 266641  
6. 952778 7. 357627 7. 11734 7. 276835 7. 56521 6. 921145 6. 949712 7. 601779 7. 865207  
5. 623178 5. 594849 5. 795195 5. 72695 5. 754786 6. 197107 5. 479114 5. 892417 3. 226687  
5. 991171 6. 029852 5. 843383 5. 991796 6. 06678 6. 405622 6. 175167 6. 125435 5. 401707  
4. 260417 4. 313052 4. 179469 4. 43939 4. 620211 3. 979914 4. 492017 4. 037251 4. 114159  
6. 93936 7. 049357 7. 113052 6. 935792 7. 029986 7. 22935 7. 058176 6. 562795 6. 415718  
1. 912206 2. 894089 2. 003955 3. 343356 3. 057126 3. 44865 3. 200844 3. 92587 2. 658169  
4. 656215 4. 603346 4. 660542 4. 433515 4. 608348 5. 229662 4. 479443 4. 86736 4. 685007  
4. 771894 5. 128214 5. 340006 5. 47022 5. 743443 5. 225489 5. 260322 5. 92947 4. 195879  
6. 607612 6. 77008 6. 659596 6. 908445 7. 227409 6. 416606 6. 561673 6. 672387 6. 506997  
7. 361436 7. 772639 7. 453706 7. 209189 7. 347507 6. 784965 7. 594147 7. 257418 6. 913102  
5. 880799 5. 973767 6. 006689 5. 410292 6. 10847 5. 93355 6. 101922 5. 796671 6. 546544  
3. 118848 2. 402426 3. 077653 2. 697802 2. 44364 2. 19045 2. 211707 2. 119848 2. 631082  
1. 844705 2. 788073 1. 825111 1. 921837 2. 759796 1. 583239 1. 093491 1. 956716 1. 446203  
2. 970839 2. 663791 2. 106194 2. 81255 4. 19705 2. 175667 3. 194723 2. 515804 3. 926431  
1. 636064 1. 260688 1. 885322 1. 864409 1. 412846 1. 578134 2. 047353 1. 946349 2. 921583  
1. 990449 1. 000869 1. 960642 1. 783281 0. 922437 0. 75351 1. 346629 0. 84922 1. 030984  
7. 234271 7. 876909 7. 478994 7. 869852 7. 21744 7. 597554 7. 446278 7. 710723 6. 279109  
1. 048761 1. 127734 2. 192297 1. 801 1. 881057 1. 990011 1. 92397 2. 030858 1. 786586  
2. 618036 1. 737944 2. 462495 4. 330632 4. 498685 2. 741166 3. 532186 1. 58285 3. 069699  
6. 307809 6. 057063 5. 811924 5. 027069 5. 72065 5. 982837 6. 341731 4. 992547 5. 243623  
2. 063618 2. 638897 2. 107435 3. 673613 1. 649149 2. 364638 2. 362739 1. 722535 2. 604145  
5. 106104 4. 934539 5. 870863 4. 238583 5. 241297 5. 296358 5. 535521 6. 724336 5. 150514  
2. 196639 1. 827777 2. 462698 2. 204679 2. 362436 3. 231951 3. 007068 1. 940355 3. 679764  
1. 983371 2. 380975 2. 271791 2. 521692 1. 682847 1. 897969 2. 628782 2. 42725 3. 704159  
7. 855256 7. 831989 7. 810258 7. 543006 8. 01405 7. 582981 7. 793312 7. 710062 8. 225761  
5. 400728 5. 472945 5. 282225 5. 306856 5. 538873 5. 630763 5. 377598 5. 264199 4. 948587  
7. 303021 6. 990207 7. 533923 7. 713587 6. 947925 6. 985398 7. 418895 7. 014393 5. 966939  
4. 323404 2. 817803 5. 157078 2. 035893 3. 254396 4. 709224 3. 71642 3. 220475 5. 044821  
1. 761486 1. 806324 0. 681332 1. 70702 1. 257284 1. 39573 0. 959755 0. 857146 1. 829266  
1. 944563 2. 662446 1. 444883 3. 692826 2. 305809 1. 458736 2. 791584 2. 51927 2. 586377  
4. 559345 4. 605567 4. 097594 1. 828927 4. 243737 3. 634421 4. 194441 4. 765137 4. 244027  
1. 063794 1. 497011 1. 302249 1. 409587 1. 09468 1. 268216 1. 027896 1. 440152 1. 341638  
6. 630351 6. 573798 6. 362667 6. 303704 6. 143913 6. 792761 6. 437583 6. 667099 7. 224303  
3. 007495 2. 91372 3. 669796 3. 092461 2. 932385 2. 970038 3. 436512 3. 092191 3. 255322  
2. 162946 2. 438708 1. 870107 1. 805069 1. 695659 2. 059607 1. 974645 1. 819873 1. 91636  
1. 944844 1. 737709 2. 450461 2. 155815 2. 412238 2. 230072 2. 317391 2. 501365 4. 120366  
3. 593439 2. 341503 2. 443569 3. 534412 3. 193845 2. 115344 3. 08973 3. 045587 2. 741353  
1. 634315 1. 808895 1. 40655 1. 646688 1. 739054 1. 999922 1. 970385 1. 6663 2. 041461  
5. 623258 5. 407031 5. 644029 4. 879331 5. 643136 5. 998831 5. 958571 5. 463196 5. 382985  
5. 807282 5. 643859 6. 162848 4. 977817 5. 386079 5. 410698 6. 394272 5. 545487 4. 943716  
3. 623473 4. 377366 4. 106368 3. 08177 4. 166589 3. 887247 4. 195625 4. 237555 3. 119367  
5. 245517 4. 883347 4. 865138 4. 937676 4. 57694 4. 31177 5. 172439 5. 127583 4. 27821  
2. 998469 3. 107033 2. 404396 3. 880125 2. 693782 2. 642695 2. 332372 3. 650501 3. 072594  
3. 7862 4. 159029 4. 23719 3. 535069 4. 271963 4. 207845 3. 686282 4. 053485 2. 425238  
4. 060043 3. 953172 4. 91491 5. 56197 4. 932469 3. 544557 5. 123992 4. 905952 4. 548663

3. 662408 4. 326542 5. 937924 4. 775676 4. 826777 5. 067801 4. 220621 3. 65811 3. 631449  
6. 849073 7. 622547 7. 563674 7. 899204 7. 988694 6. 847843 8. 121264 7. 471417 6. 302855  
6. 312864 6. 336502 5. 755803 6. 824744 6. 593316 6. 499638 6. 739202 6. 531262 5. 769273  
3. 471217 3. 729535 3. 064302 4. 560757 3. 291021 3. 817676 3. 530695 2. 942742 3. 140796  
5. 550701 5. 248819 6. 06135 4. 970437 4. 78064 5. 923528 5. 933802 5. 204709 5. 579655  
6. 171161 6. 217662 5. 801983 3. 450398 5. 952089 5. 687989 6. 179573 5. 669916 6. 244287  
8. 315472 8. 186279 8. 189302 8. 114375 7. 895014 7. 613528 8. 598623 8. 257415 8. 940071  
2. 114445 1. 49844 2. 205822 2. 137823 1. 166112 1. 430215 1. 59934 1. 740127 2. 096308  
1. 284619 1. 928747 2. 165379 1. 458559 1. 337111 4. 282686 1. 777077 1. 36833 1. 486728  
6. 329306 7. 174693 7. 413871 6. 905963 7. 225016 7. 030733 7. 150671 7. 219218 7. 39845  
3. 512584 4. 584142 3. 588632 4. 370304 4. 283119 4. 763492 3. 956498 3. 74011 4. 056192  
8. 776754 8. 87795 8. 738206 8. 731602 8. 780847 8. 971046 8. 580984 8. 955566 8. 829236  
2. 119459 1. 73008 1. 732679 1. 983473 2. 943686 1. 975341 1. 499793 1. 441135 1. 646167  
1. 419408 2. 742502 1. 849442 1. 785201 1. 761408 1. 754886 1. 652508 1. 622194 1. 801864  
4. 557326 4. 381006 4. 796533 4. 464513 3. 697463 3. 361751 4. 1437 5. 53295 3. 987246  
1. 765519 1. 107515 1. 539477 1. 717716 1. 584306 1. 743724 2. 270293 1. 466079 1. 471814  
4. 119838 1. 849861 3. 943632 2. 619341 2. 851948 4. 450174 3. 276556 3. 436582 3. 695621  
5. 611322 5. 137059 5. 654754 5. 413937 5. 961944 5. 96848 5. 625115 6. 064646 4. 861157  
3. 428151 4. 514697 4. 838942 4. 676875 4. 948628 2. 081957 4. 18416 3. 69435 1. 544473  
0. 650042 1. 368558 2. 05309 1. 989368 1. 520483 0. 903008 2. 363957 1. 391232 1. 556984  
2. 35667 2. 516567 2. 330327 2. 386042 2. 640461 2. 492126 3. 929561 2. 567495 2. 838647  
7. 036767 6. 484943 6. 282267 6. 38192 6. 642273 8. 244364 7. 160233 7. 386964 7. 679922  
2. 21721 1. 758597 2. 496248 2. 469836 1. 910944 3. 015351 3. 214516 2. 812544 2. 337324  
6. 728995 7. 088665 6. 767174 5. 665495 7. 014475 7. 099368 6. 953742 7. 128467 6. 594763  
1. 258119 1. 068486 1. 482405 1. 59989 1. 1391 1. 611792 1. 211371 1. 164633 1. 504139  
3. 64645 2. 170656 1. 549503 1. 334281 2. 400817 1. 802342 1. 541948 2. 798985 4. 371775  
4. 128235 4. 483653 4. 867194 3. 336766 4. 15238 3. 578758 3. 943641 3. 016481 3. 539601  
4. 116274 4. 780848 4. 542078 4. 540559 3. 440622 4. 153664 4. 373739 3. 973074 3. 947627  
2. 851206 2. 997687 2. 958702 3. 091956 3. 255228 3. 361234 2. 697198 2. 694483 3. 312661  
1. 66503 1. 906186 2. 780969 2. 047171 1. 991507 2. 777753 1. 424819 2. 084915 2. 647783  
1. 065827 3. 136854 1. 151195 2. 493432 3. 183278 1. 470787 1. 849909 3. 056172 2. 055188  
5. 590874 5. 88094 4. 914084 5. 245773 5. 528951 6. 061499 5. 214673 5. 861685 4. 775716  
1. 948829 2. 894363 1. 775827 2. 220481 2. 710552 1. 744644 2. 129636 2. 216844 1. 313306  
4. 302578 3. 677552 4. 713092 4. 596867 4. 087304 4. 782044 4. 064983 4. 241894 4. 837755  
5. 836878 5. 371235 5. 205165 5. 517025 5. 40128 5. 136516 5. 507214 5. 38541 6. 31222  
4. 352212 4. 720012 4. 970675 5. 226819 4. 051355 3. 902408 4. 232242 4. 024272 4. 330067  
7. 312574 6. 963813 6. 547606 7. 221224 7. 208642 7. 281928 7. 518518 7. 044168 6. 770322  
3. 282444 4. 329913 3. 27136 2. 864079 4. 073255 4. 454997 3. 969651 3. 96585 3. 728575  
3. 776378 3. 138051 3. 238432 3. 457422 4. 022897 2. 788733 4. 165694 3. 280306 2. 799819  
3. 478166 2. 875786 3. 433423 3. 281288 3. 163466 2. 513046 2. 530738 4. 071719 3. 882508  
7. 426854 7. 657087 7. 537452 7. 394845 7. 860556 7. 493641 7. 374076 7. 516246 7. 337723  
6. 638343 7. 089992 7. 07296 5. 461996 6. 901042 6. 599922 6. 68936 7. 041648 5. 595602  
2. 517417 2. 731504 3. 320041 2. 185211 2. 564064 3. 173857 2. 841681 3. 341755 3. 534418  
1. 455773 1. 695296 1. 211802 3. 313213 1. 359278 2. 665913 2. 474213 1. 993821 2. 531025  
2. 067985 1. 946139 1. 960347 2. 856049 1. 843939 2. 177556 2. 303993 2. 218658 2. 265704  
6. 334355 5. 794305 6. 342044 6. 850189 5. 183162 6. 183231 6. 369178 5. 995656 6. 921803  
1. 784716 2. 947018 2. 07771 2. 229873 2. 39749 2. 375638 1. 915698 2. 772602 1. 824604  
1. 580098 1. 983517 2. 056648 2. 303249 1. 904944 1. 800993 1. 747994 1. 704473 2. 085261  
10. 03722 9. 933052 10. 61538 4. 840605 10. 16934 10. 81614 9. 118094 10. 0641 11. 5668  
3. 761508 4. 354884 4. 252233 3. 200454 4. 458477 3. 689085 2. 333257 3. 929583 4. 77718  
4. 145146 5. 364589 5. 047762 6. 032007 5. 210614 5. 36024 4. 88263 6. 045453 4. 798496

0.824924 2.008342 0.855681 1.494325 0.933981 1.349773 0.647487 1.66126 1.685823  
1.600091 1.459383 1.482587 1.482116 1.337605 1.325934 1.143858 1.234199 1.570732  
2.032524 1.649093 2.308708 2.12393 2.334644 2.091128 1.872122 1.780998 1.666405  
1.959457 1.688225 1.958148 2.631527 1.815914 2.438085 1.815468 1.817786 1.793478  
4.572291 3.45656 4.891527 3.875615 3.600569 2.040093 4.49757 3.536852 3.604726  
1.646898 2.063573 1.32067 2.698198 3.94037 2.686361 1.896659 1.32067 4.078077  
0.640365 0.87762 0.985718 1.456796 1.507783 0.255246 2.345023 1.140782 0.832385  
2.52666 1.457454 1.760189 1.814404 3.307545 2.534735 1.875305 2.837315 3.356988  
3.948301 2.411904 2.332333 2.103777 2.250234 3.471964 2.087256 2.320101 2.303624  
3.889954 4.401823 4.318793 3.938303 3.819555 4.223303 3.961142 4.586912 4.670162  
1.554429 1.404242 0.867138 1.786599 0.6529 1.918655 1.748034 2.479953 1.205997  
2.803183 1.88283 1.40589 2.635249 2.149161 1.843945 2.634634 2.512267 3.348721  
3.049136 2.507676 2.048226 4.329633 2.380062 2.048226 2.515558 2.951593 3.120212  
3.015441 3.558594 3.684012 4.164599 3.445757 3.648532 3.710286 3.369028 3.439002  
1.710231 1.804579 1.010462 1.23681 1.192869 1.101927 0.986911 0.889221 1.877577  
1.355258 1.799017 1.95193 2.551815 1.231405 1.665722 1.459681 2.157574 1.832794  
1.469794 1.289038 1.784069 1.999565 0.753635 0.732098 1.260269 0.983724 1.111776  
2.923719 2.112018 2.964656 2.915472 1.970163 2.940604 2.305361 2.409639 1.802575  
1.372801 1.619594 0.820168 1.499568 1.450002 2.003122 1.745904 1.624209 1.440817  
3.700577 3.297552 4.297866 2.581557 3.104014 2.311446 3.655167 3.745889 5.183125  
2.04854 2.638139 2.438726 3.454868 1.596336 3.209323 2.328916 1.775508 1.821836  
2.589503 1.361014 2.805413 2.77179 1.864535 2.639234 2.278554 1.933495 2.841046  
2.876228 1.638665 0.917502 3.050728 2.176024 3.94025 1.901268 1.853416 1.131377  
7.168992 7.395058 7.305927 7.395416 7.78862 7.305704 7.841633 6.846498 7.410631  
2.221094 2.184752 2.847699 4.140542 2.959711 4.12641 4.230132 2.391706 3.324417  
3.449027 1.531805 2.410626 1.284125 1.308769 1.520843 2.005683 1.39395 2.885787  
2.364874 1.957871 2.11461 2.074032 1.711389 2.004869 2.439779 1.294296 2.177056  
3.278499 3.494647 3.785415 2.200601 2.46615 3.354265 3.689988 1.503252 3.199022  
2.52323 2.405813 2.529046 2.314752 2.744741 2.92571 2.554486 3.494663 3.523374  
2.860055 2.206171 1.790788 1.408279 2.15536 2.268558 2.009182 1.896178 2.698791  
3.476864 3.11305 3.446538 4.722822 2.818141 5.09604 3.940575 4.904048 3.521139  
1.559303 1.283501 1.553109 1.190254 1.881867 1.666643 1.600856 1.834541 1.666649  
2.255883 2.418376 1.904881 2.637463 2.107288 1.979724 2.545135 2.102592 2.389298  
3.347907 2.959052 3.489543 4.319704 2.984974 3.723661 3.566022 3.488804 3.935062  
1.445734 1.606517 1.683235 1.554442 1.99505 1.270949 1.383803 1.584796 1.931814  
4.132529 3.714921 2.887335 2.554795 3.695349 2.336943 3.590385 3.470765 5.104581  
2.661952 2.043622 2.917538 3.462699 2.931341 2.617139 2.548711 1.914065 2.770238  
2.550458 2.701051 1.831434 2.583861 1.460652 1.881453 1.759568 1.612824 2.951661  
2.876725 2.553714 3.269511 2.696026 3.139232 2.996608 2.635658 3.33871 2.577141  
5.534775 5.265417 4.880722 7.257429 6.986414 4.765821 5.738027 4.886009 5.73023  
0.183422 0.489519 0.449298 0.776311 1.688689 0.95681 0.42624 1.827581 1.889056  
3.870526 2.615735 2.634555 2.266526 2.312118 1.683118 2.408935 2.73199 3.520187  
2.809401 1.968101 1.956761 3.020188 1.347011 1.811343 1.98581 2.017857 2.278953  
2.978876 3.597006 2.722077 3.983464 3.389256 2.269991 3.904801 3.586102 2.433418  
2.72695 3.387024 3.065992 2.886552 2.66868 3.280874 2.663427 3.07231 2.616633  
3.378323 3.381266 4.157252 3.015121 2.453445 3.750762 3.54133 3.399926 2.512249  
2.319402 1.94698 1.982401 2.147777 2.540305 2.404487 2.207599 1.624987 2.00195  
2.180664 1.67278 1.524641 2.687143 1.754443 3.835049 3.322508 2.044346 2.863565  
1.499183 1.165462 1.890713 1.442781 0.726224 1.168171 1.315175 1.547736 1.643164  
2.232447 2.084165 4.591577 3.814938 3.516745 2.555688 3.548854 3.717944 3.357767  
1.608198 1.395884 1.832681 1.525084 1.451058 1.994873 1.76089 1.17327 1.674663



3. 282243 3. 018754 3. 597662 3. 776131 3. 76972 3. 247267 2. 688581 3. 858195 4. 264195  
2. 055932 2. 450019 2. 299362 1. 949929 1. 720039 2. 719199 1. 912145 2. 053537 3. 327244  
2. 772506 2. 639291 2. 907012 2. 429694 3. 015574 3. 060979 2. 84244 3. 423116 4. 080842  
4. 437538 4. 295377 5. 109716 3. 122062 4. 806182 4. 927287 4. 734842 5. 005568 3. 907629  
0. 985283 1. 47164 1. 05947 1. 608817 1. 550273 1. 275492 1. 208353 1. 05947 1. 345277  
2. 984377 3. 487321 1. 619289 1. 225013 2. 276747 3. 424723 1. 720229 1. 281034 1. 609492  
3. 329211 3. 614187 2. 925429 2. 322736 2. 993076 2. 830394 3. 926881 3. 753572 4. 364638  
5. 870739 5. 139912 6. 228211 1. 629625 5. 279328 5. 833225 5. 747813 5. 457643 8. 492762  
3. 339051 3. 936643 3. 325467 2. 925156 3. 682468 3. 288382 2. 999812 3. 183935 4. 753761  
1. 010146 2. 191564 1. 700184 1. 497424 1. 587155 1. 138917 2. 510833 2. 527764 3. 549913  
2. 757616 1. 219874 1. 356472 1. 625917 1. 022358 1. 528155 1. 834816 1. 253195 3. 336774  
3. 156085 2. 893422 2. 838914 3. 250704 1. 638166 2. 997125 2. 800734 2. 465613 2. 687884  
1. 928165 1. 733872 1. 404118 2. 33331 1. 059113 1. 435575 1. 519526 1. 306373 1. 285986  
2. 553322 1. 864415 1. 878775 2. 271273 1. 724647 2. 047902 2. 000726 1. 629833 1. 849555  
3. 690797 4. 658363 5. 114068 4. 743346 4. 987479 4. 304036 4. 655319 5. 284715 5. 051158  
3. 348525 4. 932109 4. 810019 5. 547446 4. 117805 3. 915961 3. 967159 4. 568427 2. 278912  
2. 411603 1. 620946 1. 589544 2. 27431 1. 881744 2. 431683 2. 028964 1. 527765 2. 510309  
2. 78989 3. 902375 1. 85948 2. 852535 3. 676193 3. 278444 2. 508384 2. 395922 5. 618214  
1. 770589 1. 46544 2. 197147 2. 43175 1. 606603 1. 335814 1. 737121 1. 714421 1. 694348  
2. 463328 1. 937862 2. 369631 2. 465538 2. 510022 1. 810317 2. 555101 1. 805806 3. 884867  
1. 673959 1. 960654 1. 905867 2. 439214 1. 764423 2. 643 1. 991071 1. 948863 2. 063978  
1. 753226 1. 493445 1. 90829 1. 146439 1. 375035 1. 130247 1. 708482 1. 425664 1. 1772  
2. 282341 3. 767052 2. 744463 4. 173474 5. 491011 1. 300985 2. 837457 4. 365072 2. 607809  
0. 736792 0. 845707 3. 037734 3. 01292 0. 876123 1. 323165 2. 121074 1. 251329 1. 202597  
1. 307069 1. 492603 1. 944146 1. 69955 1. 624156 1. 39695 0. 817772 1. 528167 3. 705596  
5. 280705 5. 683661 4. 893293 5. 545578 6. 19647 5. 412724 5. 322875 6. 34961 4. 991503  
1. 801118 1. 74193 1. 663426 1. 633529 1. 946479 2. 06777 1. 82012 2. 230683 1. 559893  
4. 517288 4. 652749 4. 99982 4. 443827 4. 040305 5. 309403 5. 502533 4. 979745 4. 707474  
4. 060695 1. 976998 3. 012431 2. 854251 3. 155379 5. 274027 1. 579107 2. 199991 2. 832843  
1. 587553 1. 659416 1. 858022 2. 783491 1. 86896 1. 328508 2. 294838 2. 684502 1. 693464  
1. 635867 1. 258299 1. 635318 1. 595436 1. 207849 1. 476416 1. 548743 1. 519706 3. 651435  
2. 181747 2. 512802 2. 708632 2. 06077 2. 17147 3. 2127 3. 608318 2. 285634 2. 419271  
3. 128058 2. 970238 2. 665586 3. 908481 4. 746546 3. 116839 2. 714875 3. 966633 2. 5385  
6. 485668 5. 452863 6. 669005 2. 105796 2. 628809 7. 001449 3. 362984 4. 306215 6. 174868  
5. 394574 5. 741949 5. 268246 5. 385435 5. 778093 5. 422832 6. 201691 5. 94286 5. 135892  
4. 522076 2. 840686 4. 150729 3. 988481 3. 745451 6. 652162 4. 365767 3. 088658 7. 778079  
6. 086525 5. 710623 6. 36051 6. 980525 5. 420946 6. 371831 6. 354049 5. 386562 4. 905335  
5. 315664 5. 367443 5. 687369 5. 049207 5. 346451 5. 493587 5. 556941 5. 178366 4. 625277  
6. 201779 4. 867323 4. 684445 4. 925375 5. 103053 5. 687836 4. 819599 5. 760744 6. 8299  
1. 981462 2. 263316 2. 659505 2. 414525 1. 859837 2. 525701 2. 027298 2. 812671 2. 017605  
4. 286416 2. 572084 2. 146543 3. 307192 2. 414359 3. 978684 2. 115311 2. 703344 3. 749767  
1. 097773 2. 508135 1. 043536 1. 886563 1. 488869 2. 359781 1. 433828 1. 442021 2. 306495  
2. 980084 4. 324559 3. 474677 1. 861339 5. 193111 3. 918541 4. 185845 4. 180435 3. 212283  
5. 778339 6. 084981 5. 766937 5. 332093 6. 082351 6. 250285 5. 68581 5. 917696 5. 262518  
5. 092566 4. 083244 3. 956993 4. 943948 4. 979635 5. 378282 4. 722998 5. 416957 6. 594276  
6. 499146 3. 953542 5. 325967 4. 121929 5. 594394 6. 360694 5. 514335 6. 634081 6. 528264  
3. 328011 0. 901946 2. 091303 2. 950628 1. 245414 2. 385185 1. 375746 1. 189325 2. 230055  
1. 204074 1. 279805 1. 385989 1. 558036 1. 254651 2. 043288 1. 418678 1. 290782 1. 460915  
2. 06702 1. 835677 2. 406455 2. 899106 1. 898996 2. 43899 2. 643092 2. 374341 1. 691607  
1. 783168 2. 085015 1. 779696 2. 133744 2. 101486 2. 889031 2. 691782 1. 928998 2. 033014  
2. 44952 3. 511876 3. 061295 3. 570942 2. 153626 2. 903928 2. 253837 1. 833341 2. 874469

5. 385159 5. 121148 3. 717409 4. 532585 5. 507196 5. 099868 5. 641081 5. 192481 5. 181015  
5. 279308 5. 70944 5. 670299 5. 178463 5. 073767 4. 80898 5. 325276 5. 164211 4. 977948  
4. 912402 4. 749302 4. 917466 4. 600353 4. 896854 4. 611023 5. 008428 5. 215673 3. 069852  
9. 211683 9. 896218 9. 952688 10. 13656 9. 922864 9. 784692 9. 6391 8. 988164 8. 436812  
1. 135288 1. 242274 1. 191584 2. 211169 1. 368981 1. 443005 1. 858968 1. 838506 1. 182009  
6. 104795 5. 71751 5. 829833 6. 10108 5. 338512 5. 644189 6. 227985 5. 549199 6. 248014  
1. 67768 1. 864109 1. 40221 2. 040846 1. 981296 2. 294641 2. 304047 1. 87402 2. 406569  
3. 186876 3. 306646 1. 681086 2. 408715 3. 136642 1. 868284 4. 045018 2. 849269 2. 001169  
6. 380003 6. 187996 5. 151854 6. 109633 6. 54233 7. 13187 6. 340951 6. 289129 7. 689434  
2. 253887 2. 536081 1. 536423 2. 981239 1. 95953 1. 566056 2. 483563 2. 55063 2. 232844  
3. 868002 3. 983733 3. 726982 4. 45316 3. 469269 4. 920474 3. 491313 4. 222347 4. 529464  
2. 652472 2. 542698 2. 430034 3. 296303 1. 883902 3. 018629 2. 603595 2. 118387 2. 509185  
5. 949443 5. 881039 8. 51791 7. 238544 5. 932824 6. 069388 7. 18996 6. 412352 4. 886579  
1. 704193 1. 600697 2. 404302 2. 51327 1. 725329 1. 590086 2. 021568 1. 58562 1. 758037  
3. 174519 2. 829798 1. 847721 1. 55894 1. 312404 1. 37531 3. 151433 1. 567885 3. 235905  
7. 029244 6. 389717 6. 599445 8. 908887 6. 204494 3. 934629 5. 201289 6. 175891 7. 974122  
9. 276468 9. 344814 9. 694002 9. 559302 9. 018551 9. 330357 9. 480038 9. 204494 7. 749842  
8. 020023 7. 990032 8. 099434 7. 881102 8. 019287 7. 763318 8. 192071 7. 772826 8. 156795  
7. 561691 7. 405435 7. 499233 7. 22584 7. 225393 7. 211722 7. 444575 7. 294811 7. 389445  
6. 500741 6. 56627 5. 84488 6. 086402 5. 800488 6. 628874 6. 382668 6. 326929 6. 675636  
5. 722311 5. 33221 4. 988521 3. 61637 4. 887676 5. 178545 5. 491163 5. 030401 6. 274981  
6. 385234 6. 598756 6. 472152 6. 84659 6. 17688 5. 568621 6. 525115 6. 433541 6. 309731  
8. 872942 8. 508001 8. 49654 8. 682613 8. 933091 8. 94179 8. 600459 8. 633743 8. 670479  
5. 854962 5. 91136 5. 942212 6. 307367 6. 008884 5. 676252 6. 008259 6. 080281 5. 656145  
4. 344745 4. 700078 4. 770585 3. 435958 4. 262839 4. 974099 4. 808883 4. 444916 3. 320876  
4. 715339 4. 963456 4. 900833 5. 975206 5. 134707 5. 153924 5. 173476 5. 148415 5. 441382  
3. 975101 3. 619516 3. 768212 3. 668377 3. 554474 3. 394613 3. 430539 3. 259919 3. 253665  
5. 541201 6. 15641 5. 805237 5. 482381 5. 910723 6. 000611 5. 287974 5. 61455 5. 874066  
5. 112184 4. 781233 4. 17153 4. 698302 4. 654184 4. 573416 5. 01532 4. 500518 4. 31517  
5. 673144 6. 066548 5. 535709 5. 182612 5. 634704 5. 441635 5. 668208 5. 745687 5. 70511  
3. 998201 3. 552784 4. 787527 4. 044139 3. 586488 3. 108896 4. 55114 3. 74489 3. 90187  
2. 753957 2. 838776 3. 159689 2. 835007 2. 428985 2. 870244 3. 088235 3. 132492 3. 294838  
6. 880787 6. 824664 7. 649629 6. 084913 7. 101948 6. 944906 6. 921846 6. 511096 6. 343422  
6. 396413 6. 447551 6. 164336 6. 3201 6. 31045 5. 200868 6. 127946 5. 99583 5. 167386  
8. 187799 8. 403392 8. 737951 8. 868461 8. 744302 7. 821956 8. 611675 8. 546085 7. 845736  
7. 265587 6. 950053 7. 543501 7. 587902 7. 500595 6. 76887 6. 665678 7. 636375 6. 164006  
5. 62366 6. 025276 5. 452638 5. 005843 5. 887635 5. 810457 6. 201524 5. 934044 5. 334484  
6. 021753 7. 582103 6. 834193 5. 754702 6. 291544 6. 576454 6. 178737 7. 497966 7. 433328  
2. 945832 3. 019999 3. 226816 3. 501922 3. 089288 3. 635329 3. 846988 3. 263192 2. 650849  
2. 696054 2. 767474 3. 153283 1. 760874 3. 061355 3. 019212 2. 470361 2. 475344 2. 040091  
7. 659723 7. 420976 7. 515912 7. 525804 7. 318614 7. 450976 7. 847189 7. 590744 7. 887658  
8. 423676 8. 457402 8. 561706 8. 591375 8. 428188 8. 30131 8. 760566 8. 45231 8. 024784  
0. 857585 1. 982938 2. 029167 1. 215113 1. 23963 1. 167242 1. 797573 1. 170744 1. 804987  
1. 48456 2. 335192 1. 504468 2. 813532 2. 564738 1. 539838 2. 844927 2. 931184 1. 142273  
3. 364235 3. 716131 3. 123733 3. 475121 2. 504643 1. 96297 3. 530773 3. 410446 2. 518209  
7. 08728 7. 339177 7. 273715 7. 107162 7. 518045 7. 098456 7. 259249 7. 784866 6. 651132  
8. 253463 8. 294226 8. 055841 7. 837276 7. 72689 8. 171408 7. 985809 7. 99438 7. 550381  
8. 27268 7. 882378 8. 242644 7. 687119 8. 020692 8. 221366 8. 282875 7. 945943 7. 784344  
5. 877883 6. 549078 5. 899722 6. 219048 6. 736228 7. 176138 6. 622652 6. 394032 5. 629968  
2. 369621 3. 873718 3. 461848 3. 659624 3. 035617 3. 635629 3. 110444 3. 574891 3. 289742  
4. 677375 5. 532541 4. 507743 4. 933565 5. 19268 4. 688063 4. 915145 5. 152061 3. 985931

1. 567728 1. 661702 1. 842829 2. 475734 1. 492488 1. 596288 1. 471932 0. 946629 1. 630226  
4. 473108 4. 300723 4. 826506 3. 357045 4. 533043 4. 419582 4. 513421 4. 824864 3. 536127  
4. 777079 5. 222358 6. 177342 5. 120537 5. 623874 5. 079432 4. 927514 5. 453712 5. 065192  
8. 473204 8. 962397 8. 210722 7. 950064 8. 512434 8. 42014 8. 651758 8. 520851 8. 393189  
5. 164941 3. 646848 4. 10643 4. 36541 3. 15179 4. 62568 4. 597348 3. 852931 4. 02517  
6. 837086 6. 206626 6. 80365 6. 58335 5. 793669 6. 730337 6. 589063 6. 815138 5. 443417  
1. 210059 1. 085594 1. 448259 1. 270051 1. 109495 1. 666039 1. 059052 1. 367175 1. 053818  
2. 08471 2. 826596 3. 104921 3. 580746 2. 109245 2. 956499 3. 591692 2. 976202 3. 164742  
3. 74979 3. 800664 3. 628161 3. 557944 3. 832284 4. 014205 4. 075408 3. 200223 3. 526544  
6. 729173 6. 869284 7. 341551 6. 996248 6. 633161 6. 577018 7. 077691 6. 122375 6. 618978  
2. 039017 3. 139126 2. 459548 1. 880687 3. 349721 2. 303013 2. 076544 2. 251504 2. 184905  
2. 50305 2. 618553 3. 976161 4. 077457 3. 942733 3. 914865 3. 07434 3. 600764 3. 128414  
2. 855411 2. 958894 3. 224433 2. 493438 2. 910937 2. 173353 2. 430543 2. 54644 3. 171479  
5. 031059 4. 958385 5. 35706 4. 526856 4. 494193 3. 194164 4. 659634 4. 899395 5. 615848  
3. 220494 4. 433916 4. 11388 3. 662115 3. 930771 4. 359343 3. 65491 3. 6759 2. 891864  
7. 283861 6. 995169 7. 416016 8. 081644 7. 262153 7. 152433 7. 057752 7. 185205 6. 942707  
4. 771544 5. 119227 5. 392688 3. 273834 5. 049699 4. 720529 4. 876813 5. 226152 4. 787479  
1. 396403 1. 730499 2. 056956 1. 981326 1. 523933 2. 324785 2. 362273 1. 733843 1. 739905  
3. 265415 3. 656559 3. 543406 3. 077046 3. 4772 3. 670026 3. 110601 3. 356281 2. 87941  
8. 189624 7. 912685 7. 80087 7. 892975 8. 049066 7. 622556 8. 078515 8. 364663 8. 069377  
5. 656578 5. 492976 4. 419798 4. 633322 5. 461627 5. 862499 4. 806064 6. 135136 4. 800413  
7. 654729 8. 182222 8. 301979 7. 534703 8. 125178 7. 882431 7. 638721 8. 056301 5. 027467  
6. 660805 6. 623329 6. 798253 5. 224831 6. 83555 6. 536734 6. 342139 6. 443005 7. 169787  
7. 34283 7. 375828 7. 763324 7. 297818 7. 424705 6. 428969 7. 690614 7. 329451 6. 87256  
4. 779957 4. 69427 5. 235962 5. 682938 5. 298548 5. 166265 5. 226595 6. 056251 4. 749081  
6. 487149 6. 625281 6. 39413 6. 987052 7. 192942 6. 232048 6. 108289 6. 450571 6. 305165  
7. 563399 7. 541709 7. 468765 8. 031163 7. 637575 7. 484355 7. 606316 7. 178621 7. 908713  
3. 342478 4. 544275 2. 721438 2. 704853 4. 617771 4. 398202 4. 402772 4. 328393 4. 070824  
6. 657989 6. 621752 6. 300507 5. 948259 6. 620842 6. 37464 6. 144964 6. 369733 6. 612402  
6. 445312 6. 148111 6. 128602 5. 503436 6. 662439 5. 068828 6. 481716 6. 388986 6. 751335  
4. 95149 4. 759941 4. 806842 4. 689718 5. 072319 4. 604173 4. 996844 5. 087542 5. 461143  
8. 51386 8. 224622 8. 358566 8. 338141 8. 47111 8. 161559 8. 746795 8. 295503 8. 333393  
3. 510333 5. 718114 4. 599382 6. 039459 6. 39548 5. 054819 1. 317733 5. 514327 4. 626122  
7. 85235 7. 230981 7. 645914 7. 055061 7. 270081 7. 150038 8. 09796 7. 413467 7. 647834  
1. 67471 1. 521839 1. 689919 1. 510659 1. 645104 1. 000413 1. 348485 1. 318655 1. 799997  
7. 284154 6. 938088 6. 893933 7. 0714 6. 864559 6. 74098 7. 179862 7. 376781 6. 877396  
5. 112765 5. 159862 5. 525488 5. 394228 5. 506373 5. 142332 4. 740938 5. 078633 4. 088503  
5. 546746 5. 778949 5. 828257 5. 976739 5. 456198 5. 451598 5. 982759 5. 615861 5. 192764  
7. 227758 7. 192737 7. 22214 6. 960224 6. 977882 7. 111953 7. 190385 7. 237321 7. 154726  
5. 563448 5. 559406 5. 525949 5. 5921 5. 830224 5. 463949 5. 773885 5. 34574 5. 597247  
5. 430043 5. 81065 5. 349578 5. 533177 5. 509649 4. 992477 5. 190979 5. 771386 4. 999837  
3. 417042 3. 426623 2. 632176 3. 546519 2. 964393 4. 497142 3. 709821 2. 690967 2. 749887  
1. 529688 1. 249193 1. 318797 2. 50953 0. 933808 2. 053184 0. 957523 1. 900908 3. 351055  
1. 233185 1. 5314 1. 152595 1. 54179 1. 865483 1. 569895 1. 423122 1. 079031 1. 484462  
2. 65809 2. 834727 3. 118292 3. 361597 2. 59925 1. 987398 2. 628806 3. 352001 3. 790263  
0. 999363 1. 399109 1. 420126 1. 918648 0. 920555 1. 489458 1. 015475 1. 633928 1. 043819  
0. 8897 1. 118086 1. 019586 1. 115966 1. 088815 0. 942199 0. 95658 1. 145822 1. 38344  
1. 575787 2. 172368 1. 722861 2. 014603 2. 020697 2. 784215 2. 139349 1. 364795 1. 433925  
6. 023437 5. 85852 5. 720341 5. 425726 6. 176085 5. 556112 6. 184536 5. 90665 5. 49028  
5. 235361 5. 483807 4. 783172 3. 698841 2. 862686 5. 008889 5. 470015 4. 722425 6. 069789  
10. 62588 10. 41746 10. 49939 10. 36965 10. 00022 10. 45282 10. 72125 10. 48623 10. 80156

10.05858 10.10408 9.911879 9.838863 9.851766 9.817425 10.17502 9.987976 10.10207  
8.533762 8.727941 8.562467 7.283764 8.875369 7.93287 8.677236 8.649141 8.170538  
4.482105 4.332434 4.76893 3.581182 4.143025 5.382824 4.047137 5.617005 4.687065  
7.312075 7.767642 7.038108 6.931093 7.647302 7.354943 7.336743 7.529913 7.50869  
2.330942 2.282997 2.740194 4.22916 3.189091 2.232935 2.560329 2.895238 2.058982  
7.087268 6.912406 7.130383 6.603678 6.71018 6.946064 7.094801 7.063345 7.424523  
5.918886 4.058286 3.592572 5.557679 4.188572 5.180693 4.086921 3.196977 4.627059  
4.716163 4.705165 4.569178 5.156846 5.280531 5.310592 5.0234 5.616297 5.491652  
6.461426 6.798864 6.541043 6.656161 6.6324 6.916309 6.851248 6.495712 7.095301  
6.686351 7.131105 7.017572 6.461121 6.280467 6.35575 6.621044 5.958493 7.413558  
1.765809 1.022369 1.394179 1.727319 1.177473 1.75887 1.51848 0.944635 1.50148  
2.2872 2.332517 2.786519 2.455429 2.725259 2.68803 2.409097 1.993841 2.157677  
1.975892 1.337727 1.929401 1.741218 1.318601 1.657574 1.743576 1.23155 1.832978  
5.70854 5.104276 5.302541 6.18307 5.572029 4.745297 6.625865 5.668107 4.349008  
9.364066 9.273678 8.971264 9.553982 9.27298 9.423367 9.127838 9.423966 9.160385  
3.760954 2.694421 3.129996 4.267952 3.09883 2.411635 4.884808 3.126203 3.847259  
5.56809 5.181583 4.841704 6.495764 5.905299 5.007871 5.150055 6.019571 4.806037  
2.486931 2.44451 2.683896 2.284257 2.107268 1.898031 1.944987 2.378161 3.314299  
1.889553 2.157921 1.435864 2.178879 2.487502 1.565644 1.441521 1.76403 1.576695  
2.613594 2.917316 1.947287 2.760558 2.475266 2.61035 2.017445 2.505573 2.742276  
4.067111 4.020885 4.90711 4.142661 4.259842 4.710911 4.664345 4.014227 4.164093  
7.060591 6.832442 6.6115 7.082884 6.822813 6.706203 7.04488 6.657849 6.7129  
6.015564 6.261265 6.90384 6.813095 5.779271 6.055725 5.942962 6.215251 5.739606  
5.679287 5.947141 5.35262 5.156024 5.725907 6.033228 5.184065 5.09811 3.848395  
5.046438 5.053918 5.065624 4.852476 4.915353 5.612186 4.867474 4.282913 4.530255  
4.960584 4.607212 5.10928 6.221107 4.815751 4.907143 4.91308 5.188063 4.533737  
7.077324 6.761441 6.680954 7.46608 8.075896 6.70491 6.854006 6.871083 7.116541  
3.46977 3.929815 3.193427 3.260622 4.738007 4.193121 4.078875 5.143879 4.145217  
6.200418 5.192682 5.806572 5.848994 5.252275 5.58329 6.043962 5.516014 6.374778  
1.847609 2.311672 2.512465 2.884174 2.412857 1.91436 2.560089 2.512104 2.907453  
1.173533 1.413341 0.867758 0.985283 1.0951 1.173533 1.185625 0.947798 1.266129  
10.3457 10.10747 10.41085 10.21507 10.11386 10.18205 10.66089 10.21227 10.0543  
8.35116 8.7691 7.894804 8.364174 8.320755 8.490437 8.209983 8.277038 8.92957  
5.857639 6.475052 5.071248 4.590487 5.486726 5.761814 6.050742 5.702437 5.521016  
4.992082 5.059484 4.935408 2.61297 4.828857 4.071621 5.573367 4.99236 4.430996  
4.542764 3.64931 3.253445 3.09311 5.005767 2.943999 3.143301 4.252427 2.731162  
2.522697 2.018216 2.545863 3.083485 2.369204 2.74777 2.756424 3.905935 2.55467  
1.861041 1.296804 1.433868 1.329401 2.114456 1.467762 1.37475 1.621904 1.466451  
1.597959 1.531828 2.074102 2.908386 1.64601 6.450359 4.777554 1.93622 5.682338  
2.350614 2.032593 1.332755 2.378642 1.119162 1.476373 1.42929 1.744096 1.05723  
5.60994 5.612181 5.633492 4.713714 5.955673 6.325903 5.13442 5.213439 4.704479  
4.956814 4.600174 4.054305 4.86137 4.81014 4.187332 4.172649 4.786916 2.061064  
1.069843 0.959762 1.108977 1.095347 1.093977 1.463018 0.968876 0.921108 1.439669  
9.215473 9.278066 9.278647 8.61703 8.889391 9.742203 9.223101 9.543875 8.162278  
8.993334 9.8716 8.551427 8.600087 10.00716 9.573014 9.074048 9.137395 9.942525  
6.103617 6.059516 5.416361 6.632164 5.848366 6.126855 5.461883 5.972616 5.49207  
1.905742 2.777439 2.178449 2.856945 1.687834 2.322877 1.995452 2.101278 1.767875  
1.376829 0.951335 1.557842 2.573633 1.02014 2.645612 1.580496 1.427512 2.006191  
5.596253 5.260771 5.154527 5.945168 5.479672 5.302629 5.437215 5.232822 5.207488  
1.976786 1.189394 2.44 2.216021 1.464061 1.260036 1.75179 1.503989 2.295749  
2.307614 1.599187 1.469499 1.618799 1.68689 2.008743 1.564898 1.37027 1.283243

1.136043 2.112178 0.907384 1.726418 0.799901 0.70199 1.061828 2.056044 1.778392  
1.541743 1.8073 1.501773 2.673029 1.470662 1.145715 3.406178 1.316453 3.201999  
1.392424 1.581495 1.732725 1.933564 1.334943 2.617101 1.283633 1.193255 1.633707  
2.025307 2.44654 2.207117 2.567791 1.210544 2.540654 2.259323 1.585142 2.020475  
1.436921 1.471678 2.237124 2.039763 1.617038 1.964196 1.639977 1.562663 1.451268  
8.708017 8.653488 8.616829 8.490942 8.666771 8.804703 8.706809 8.766777 8.525086  
5.886681 5.087341 5.806034 6.215318 5.23351 6.223532 5.176039 5.863234 7.450269  
5.82968 5.823934 5.500917 5.419297 5.618249 5.755679 5.584244 5.503672 6.070453  
9.681051 9.72471 9.645083 9.936387 9.832623 9.535397 9.887176 9.936216 9.157188  
1.284587 1.558854 2.168224 2.126217 1.912039 1.781539 2.163905 1.947115 1.70767  
7.098755 6.831008 6.89737 6.196591 6.88279 6.501827 7.654594 6.431522 6.188773  
3.206261 2.895567 3.958969 3.2305 2.837399 3.893208 3.955715 3.0992 4.163677  
2.034077 1.345412 1.556413 3.401722 1.913675 1.234558 2.088438 1.923633 1.371213  
1.527955 1.196636 1.548905 1.755094 1.068703 1.528996 1.466654 1.06148 1.729469  
8.837361 8.618213 8.767474 8.754833 8.542045 8.293209 9.086229 8.413538 8.627644  
1.528247 1.445368 1.692673 1.256985 1.150685 1.288025 1.61432 1.069959 0.980462  
0.891263 1.004679 1.033748 1.058451 1.967442 1.872069 0.796067 0.466765 1.582985  
2.037415 1.653362 2.164783 1.711181 1.871961 1.652064 2.075662 2.930453 1.617043  
3.542259 3.956659 4.679061 3.890255 4.045829 4.27025 3.494726 3.754947 3.080142  
6.071217 6.223495 5.885705 5.572561 6.347903 6.069431 5.928568 5.827221 5.409456  
6.937014 7.229082 7.166208 7.112487 7.407718 7.000365 6.885366 6.917171 6.324165  
6.202321 6.211231 7.069174 6.124893 6.779033 6.93912 6.86442 7.092913 5.08378  
2.114098 2.4494 2.795251 1.891114 1.920182 1.964653 1.891114 1.758315 1.707245  
9.891561 9.326589 9.233259 9.448706 9.162925 8.742088 9.72032 9.128601 9.778913  
9.353277 9.133846 9.076975 8.883805 9.058476 8.932952 9.283446 9.253462 9.217186  
4.583332 4.729125 3.953457 3.924261 5.388444 4.608813 4.875907 4.932854 4.758908  
6.224867 6.972908 6.104805 6.335081 6.70103 6.894424 7.223192 6.845186 7.129503  
3.115134 3.448486 2.223783 2.154707 2.900572 2.894695 3.941168 2.773086 1.711867  
7.219624 6.939449 6.703604 7.281708 7.173513 6.549545 6.986212 6.750888 6.760951  
8.072375 8.316726 7.911022 7.637449 8.339108 7.643465 8.208649 8.033176 8.238105  
6.213312 6.144564 6.080358 6.629604 6.464292 5.406876 6.792286 6.298028 5.530575  
5.677894 6.056085 4.897222 4.908848 5.475982 5.937594 6.251106 5.677435 5.860933  
7.404541 7.269568 7.561157 7.128406 7.310757 7.440949 7.336518 7.439499 6.894275  
1.542298 1.674544 1.291657 1.683136 1.832058 2.162321 1.174786 1.301067 0.971054  
5.275616 5.315259 4.564565 5.41684 6.540042 3.840932 5.472825 4.855376 5.1916  
6.937259 7.004071 6.687977 6.863436 6.997143 6.878741 6.938919 7.180738 6.691978  
6.630931 6.804629 7.197423 6.663344 6.993903 6.808532 7.012378 7.087452 7.491206  
9.593007 8.921595 9.438934 9.161715 9.339073 8.895467 9.527603 9.146003 9.556256  
6.544065 6.131204 6.259119 6.287563 6.432038 5.675366 6.49437 6.138293 6.671165  
6.641427 6.402429 6.729884 6.522492 6.657957 6.501524 6.572111 6.582991 6.494873  
8.457351 8.515121 8.345767 8.266948 8.302997 8.353772 8.558306 8.403801 8.349878  
9.65118 9.329613 9.292446 8.789922 9.356643 9.2182 9.371477 9.725156 9.211261  
8.437524 8.466796 8.335382 8.06379 8.557633 8.746569 8.3232 8.568082 8.187886  
9.662752 9.76951 9.704826 9.887146 9.967639 9.894437 9.825513 10.20062 9.709015  
7.271212 7.466595 7.502388 7.401324 7.398437 6.70094 7.274022 7.579376 7.318737  
6.30009 7.589857 7.459931 8.860807 10.82294 8.921738 8.946156 5.615266 7.52099  
1.843347 2.043729 2.263749 3.447782 2.041743 2.420068 2.158987 2.673943 1.68347  
1.976433 1.906525 2.195882 2.874729 2.038543 1.663663 2.54859 2.343023 1.954609  
2.058801 1.731369 2.452814 3.179927 1.53738 1.837221 1.718517 1.470405 2.343543  
2.22652 2.189078 1.799452 2.276756 1.311066 1.827287 3.020921 2.532107 1.600772  
2.5415 2.660889 2.271513 3.401247 2.482151 2.688944 2.612953 2.792652 2.199523

0. 902176 0. 798835 1. 104418 1. 854886 1. 235627 2. 255698 1. 119435 0. 983357 0. 811671  
1. 627217 0. 707094 1. 127206 1. 815989 1. 253384 1. 474544 3. 940677 0. 947465 1. 703147  
1. 902676 2. 094164 2. 139105 1. 919685 2. 788363 2. 272159 1. 86398 1. 785697 1. 699694  
8. 257358 8. 173238 8. 264216 7. 961841 8. 220241 8. 261025 7. 625427 8. 345997 8. 082723  
4. 501638 4. 409233 4. 580086 5. 092023 5. 149962 4. 413664 5. 245224 4. 725116 4. 189381  
6. 003917 6. 137653 6. 149673 6. 28531 6. 320426 6. 471883 6. 606695 5. 540055 6. 683113  
2. 924956 2. 762348 2. 760908 4. 010064 2. 46755 3. 683931 3. 404259 2. 628309 3. 440097  
3. 690599 4. 116843 3. 210532 3. 221441 3. 32041 2. 887172 3. 321294 1. 135339 1. 752295  
1. 186733 1. 247728 1. 114257 1. 074244 1. 107762 1. 632899 1. 234838 1. 033023 1. 354352  
1. 641558 1. 937673 1. 375346 1. 950552 2. 145203 2. 380306 2. 016541 1. 946248 1. 44824  
8. 404434 8. 929836 7. 838091 7. 782179 9. 933772 8. 450488 8. 580701 8. 008611 8. 596546  
5. 167297 6. 1116 5. 067595 4. 309528 7. 452797 5. 803723 5. 93236 5. 811569 5. 734451  
7. 915965 8. 234607 8. 58014 8. 504509 8. 755455 8. 22999 8. 427353 8. 306909 7. 96619  
2. 340228 2. 895172 2. 8266 3. 030039 2. 121354 2. 618741 3. 60834 2. 996523 2. 263481  
4. 539237 3. 380366 5. 155735 1. 499377 1. 024227 3. 850569 4. 05158 5. 2944 3. 840157  
3. 720345 3. 271574 3. 75475 3. 796433 2. 517828 3. 779393 1. 88487 0. 604302 4. 038597  
4. 941833 4. 930485 4. 674102 1. 725464 4. 732561 5. 362083 3. 296547 4. 138928 4. 256402  
2. 559851 3. 259292 4. 775846 2. 484026 2. 772734 2. 173031 2. 307077 3. 088241 4. 21187  
0. 765705 0. 685629 0. 913519 1. 198262 1. 958118 1. 096241 1. 685783 0. 966584 2. 294164  
4. 091865 4. 510959 4. 916511 3. 4547 3. 752361 3. 604865 4. 433524 4. 541521 5. 284512  
4. 883785 4. 753595 7. 071722 2. 302407 4. 835784 4. 77349 6. 422281 5. 611211 7. 487409  
5. 145256 4. 850214 4. 348029 5. 997558 5. 22758 4. 901748 5. 05757 4. 695531 7. 91251  
4. 359325 3. 545363 1. 328738 2. 982694 4. 926572 2. 915554 4. 352765 3. 484985 4. 448978  
3. 699063 3. 603778 4. 853884 2. 00381 2. 792921 4. 375179 5. 444092 4. 569375 6. 128733  
4. 194975 2. 691513 0. 983327 2. 747015 1. 313984 3. 223016 2. 21886 1. 790731 2. 763013  
1. 560967 1. 378359 1. 116907 1. 854719 1. 417241 1. 96175 1. 323652 1. 350542 1. 310323  
1. 748307 1. 865936 1. 375767 1. 710048 2. 532265 1. 687321 1. 353157 1. 43862 2. 683894  
4. 740157 4. 991517 4. 679606 1. 745128 3. 87491 5. 292711 5. 902143 3. 836932 5. 417938  
1. 461154 1. 935772 1. 685746 2. 053903 1. 254894 2. 697992 1. 431926 2. 220551 2. 275957  
5. 690513 4. 629827 6. 594305 1. 196389 4. 959802 5. 865211 6. 45185 5. 425346 6. 66798  
1. 075125 1. 593498 0. 90765 0. 741524 1. 219834 1. 002865 0. 810335 0. 595622 1. 648773  
1. 158825 1. 304764 1. 143678 2. 10301 1. 407134 1. 502149 2. 89364 1. 687178 1. 802118  
1. 839655 2. 115578 1. 918795 1. 438323 4. 141714 2. 569256 1. 485987 1. 952099 2. 664615  
4. 569739 4. 089934 3. 364745 4. 523713 3. 140335 3. 896777 3. 546376 2. 789902 5. 446177  
1. 685272 0. 619945 1. 901213 1. 602103 1. 461859 3. 104787 2. 347438 1. 156486 2. 854943  
1. 181142 0. 796259 1. 101937 1. 478899 1. 029735 0. 994691 2. 409147 0. 847148 1. 065012  
1. 151012 1. 135131 2. 548277 1. 253042 1. 748828 1. 652141 2. 726182 3. 024926 2. 691478  
2. 622962 2. 651331 2. 758141 3. 815627 2. 756984 3. 100683 2. 784388 2. 126167 3. 371564  
3. 790935 3. 696285 3. 436872 4. 334893 2. 568002 3. 783072 3. 631654 3. 508012 4. 203198  
1. 427836 5. 86328 4. 816288 0. 854399 1. 53742 3. 567521 3. 15636 1. 263769 3. 68134  
1. 199669 1. 800472 1. 406004 1. 495609 0. 708954 1. 439763 1. 276564 1. 581846 1. 90504  
5. 05599 4. 019274 5. 154628 6. 912654 3. 84492 5. 047922 4. 017132 5. 712884 7. 848834  
6. 657545 6. 137672 6. 704085 5. 330782 6. 279557 5. 530347 6. 663861 6. 348043 6. 511457  
5. 373305 4. 034358 4. 995188 1. 250773 4. 168316 5. 006936 1. 768478 4. 551299 6. 476831  
4. 952733 4. 65407 5. 031214 0. 866324 3. 760515 2. 072625 3. 68279 4. 187609 6. 164217  
2. 092393 1. 48958 1. 114228 1. 181807 1. 135156 2. 252319 1. 309469 1. 026415 4. 376707  
0. 890249 0. 654005 1. 12167 1. 502711 1. 199281 1. 053289 0. 616347 0. 874524 1. 663014  
1. 826613 5. 361986 6. 534534 0. 612753 3. 801243 5. 773987 2. 759491 5. 326889 6. 56538  
1. 740541 1. 586295 3. 869577 1. 558756 3. 776876 1. 559669 3. 060432 4. 21733 4. 064854  
7. 999351 7. 771161 8. 363132 3. 964481 7. 741627 8. 016729 7. 487685 8. 03243 8. 946567  
3. 440679 5. 163287 1. 859349 1. 513356 2. 098019 4. 924349 3. 444274 1. 822906 6. 086172

6.608805 6.013925 5.778228 1.232387 6.255786 4.493494 5.827446 5.712454 8.660511  
0.347787 2.717393 4.440752 1.051922 0.457143 1.497396 1.528601 1.77545 5.605778  
5.380976 5.199879 5.685462 2.012855 4.371108 5.251707 4.164531 5.129863 6.640904  
1.266545 1.774909 1.112463 1.367484 1.134683 1.798842 1.102728 1.184553 4.164846  
0.895011 2.258376 1.142631 0.962732 1.537845 0.987521 1.377808 1.373723 1.410126  
0.981409 1.895986 1.423921 1.244078 0.888359 1.105789 0.978362 1.673832 4.686704  
1.236075 1.123726 1.29159 1.324051 1.124017 1.286864 1.347225 0.901649 1.320515  
2.091365 1.625352 1.902027 2.597144 1.807697 1.198839 2.616187 1.434009 1.837259  
2.442497 3.08276 1.353207 1.857752 1.14941 2.162772 1.229965 1.16069 4.38661  
1.853281 2.651329 0.822603 1.258939 1.463377 1.610722 1.738262 1.648839 3.28216  
2.249145 1.755932 2.907082 2.734819 3.211627 2.531981 4.854275 3.622058 5.027425  
3.360097 2.822533 3.221196 3.252238 2.907156 2.560249 2.849428 2.614162 3.45419  
4.207173 2.701221 4.587648 3.300909 3.391467 4.209062 4.241889 2.58663 5.593807  
1.273006 1.618406 1.96985 1.934243 1.110885 1.775641 1.074534 1.349713 4.404224  
2.552226 3.138028 4.942331 4.842895 4.480071 4.202254 3.357919 2.881163 6.633761  
2.093118 1.923205 1.964316 1.612393 1.588583 1.465259 1.926641 2.256234 2.894281  
5.240117 5.730939 6.885823 3.211834 5.941937 7.211263 6.004341 5.160152 8.079233  
2.417788 1.482531 3.167827 1.141689 3.398885 3.376061 2.509644 3.055183 5.501461  
5.488561 5.717129 4.811729 2.046386 5.106915 5.98769 5.70088 5.508022 7.343568  
2.996915 1.521534 1.228087 1.478202 2.569715 3.654473 1.506363 1.829367 4.789248  
1.473647 0.824655 2.188207 1.421211 0.772041 1.069222 2.83646 1.283128 2.367167  
2.317636 1.426291 2.649894 3.564386 2.363993 2.962509 2.553887 1.534885 4.721126  
2.299784 1.589646 0.799955 1.309302 1.488678 1.410797 0.716448 1.324494 0.723687  
3.752898 4.563815 3.437857 1.773832 2.81801 2.942308 2.298298 3.696144 6.748504  
2.235646 3.600869 2.692349 1.897414 2.315434 1.97615 2.366214 2.987117 5.084393  
4.929779 3.734471 5.183643 5.439417 3.251692 4.928066 4.275779 3.920012 5.055462  
1.965992 5.982139 1.733979 1.561994 1.849251 2.438248 2.24152 2.910416 3.448454  
1.947747 2.343457 3.698257 2.419001 3.520336 2.813143 2.670476 3.830237 2.412702  
0.991574 0.845661 0.863424 1.581868 0.816585 0.951067 1.192107 0.990845 1.195845  
1.736516 2.2176 1.75711 2.411764 2.66318 1.631567 1.75273 1.934955 1.853344  
5.922144 5.360231 6.394273 1.104552 5.836961 5.798332 5.387575 5.432795 9.498717  
2.48407 1.698492 3.240856 3.787835 3.394305 4.549851 3.987223 2.942003 3.438031  
2.191692 1.056508 0.700756 1.628935 1.194378 1.054906 1.65478 1.129282 5.386828  
1.210768 1.202242 1.045745 1.789706 1.098571 1.34742 1.285619 1.42044 2.094108  
2.439137 0.614686 1.976389 1.907554 2.15709 1.214685 2.074399 0.912272 1.189559  
0.976058 1.027319 0.95761 1.566906 1.425079 1.666627 1.100974 1.594525 3.202833  
6.889014 6.921058 6.936876 6.233798 7.337806 6.457794 7.044689 6.801067 5.600809  
0.775127 1.094857 0.833973 0.746092 1.046809 1.245668 1.269272 0.712052 0.893035  
8.813139 9.399676 9.344562 8.166536 8.995019 8.935484 8.7981 9.307646 8.186534  
7.354354 7.064957 6.982433 7.364022 7.406674 7.192557 7.07379 7.318279 7.125688  
3.146541 4.873563 3.109971 4.455538 3.879341 3.575981 2.830098 3.306748 3.649414  
7.16994 7.508082 7.423014 7.050923 7.20699 7.416985 7.755564 7.419607 7.403255  
1.081609 1.039747 1.217329 1.258027 0.981771 1.277397 1.136509 0.934585 1.426911  
5.668854 5.290662 4.719336 4.720786 4.989097 5.670525 5.132552 5.89595 5.811394  
3.890302 3.838953 3.4559 3.60139 3.458671 3.172046 3.041026 2.770197 3.225273  
5.232909 5.914903 5.971371 5.834514 5.903454 5.758173 6.071027 5.520659 4.487058  
5.578666 5.806366 5.505963 5.369133 5.927183 5.652853 5.429446 6.025681 5.380798  
5.564926 5.478593 5.460239 5.660489 5.532227 5.874389 5.274558 5.906522 5.801423  
6.848935 6.772825 6.220314 6.238681 6.699516 6.720647 6.818767 7.050884 6.469444  
6.529441 6.820587 7.018914 6.267413 6.629045 6.701654 6.984486 6.774277 5.926358  
2.25323 2.441922 1.505013 3.266541 2.33236 1.944011 3.823564 2.191349 1.254099

2.067181 1.48265 0.905743 1.267945 1.794937 1.520275 2.038833 1.622372 2.578713  
5.052487 4.315494 4.399468 6.224822 5.083921 4.656737 5.179356 4.681741 4.244092  
4.707163 5.030601 4.274747 5.801403 5.139471 4.390775 4.310113 4.468894 3.29301  
5.088149 4.039707 4.228772 3.617802 4.131044 4.083185 4.486845 4.255571 3.042333  
2.562028 2.929723 3.084464 2.969981 2.817559 2.200989 1.902365 2.906251 2.629856  
5.00654 4.808914 5.100495 4.998517 4.545389 4.946434 4.768561 5.293021 4.80665  
6.088126 5.944793 5.989032 5.927441 5.655013 5.859431 6.122642 5.93137 5.383668  
2.036348 2.873438 2.894598 2.353059 1.79852 2.438891 2.252068 2.521775 2.415549  
5.399748 4.747192 4.34571 2.292315 5.051581 4.308221 4.567175 5.062965 4.802052  
0.917619 1.866206 1.435369 2.358472 2.041255 1.221289 0.897519 1.329814 1.483357  
6.238661 5.849108 5.648253 6.495645 6.245934 5.352672 5.903408 5.745796 5.307838  
5.796891 5.417917 6.128336 7.005466 5.778688 6.2713 5.911745 6.138831 5.355587  
7.592328 7.443814 7.97093 8.481985 7.663676 7.696655 7.77777 7.741229 6.774406  
6.103888 5.614257 5.425698 4.983985 6.301543 5.024015 5.314946 5.85257 4.731369  
6.778064 6.612581 6.996554 6.820668 6.578501 6.836021 7.214163 6.840716 7.73344  
6.452294 6.775553 6.649294 6.362378 6.664877 6.778856 6.877706 6.742711 6.375732  
0.937439 2.948005 1.835907 2.164393 2.330391 1.681043 1.510251 2.774008 2.980231  
4.488737 3.955902 2.998496 3.889702 4.442424 5.051391 4.894257 4.474563 5.443191  
2.69859 2.569895 3.050448 3.214327 3.119449 3.082415 2.61011 3.136601 2.410535  
6.033081 5.563562 5.982994 5.252649 6.339268 6.341673 5.829544 5.405818 6.222353  
1.700113 1.10692 1.819055 1.735942 2.631339 1.584243 1.662047 1.407739 1.848456  
9.386895 8.581546 9.222724 9.084574 8.786017 9.218795 9.259246 8.81373 8.996288  
5.980596 5.874593 6.387366 6.414084 6.202014 6.210774 6.07987 6.264874 5.802164  
8.521983 8.509254 8.84943 8.478498 8.683987 8.708643 8.582801 8.759966 7.876589  
6.886233 7.046998 6.956464 6.910704 7.094205 7.197721 7.259469 7.184303 6.74896  
4.507323 4.391104 4.729691 3.902858 4.614862 3.6265 4.474411 3.659866 4.551569  
1.681039 1.985513 1.8115 2.619506 2.08922 1.773538 2.240273 1.854848 2.08922  
7.348284 7.623543 7.224224 7.839392 7.111595 6.276174 7.326725 7.547993 7.320241  
6.15559 5.985939 5.415928 6.629734 6.116007 5.806163 6.084586 6.23022 4.178676  
5.475739 5.993206 5.556669 4.498883 5.759156 6.047204 5.772383 5.637547 4.570744  
3.873646 4.137586 4.121635 4.704515 5.455505 4.118522 4.215893 3.303854 3.879231  
4.18851 4.188277 4.075593 2.952094 4.117703 4.339444 4.517182 4.662826 3.829652  
2.320096 2.289159 2.564893 2.03614 3.191271 2.759946 3.045821 1.984181 1.920676  
7.127914 6.869284 7.778631 4.559822 6.5081 6.911298 6.417978 6.310107 6.956297  
6.351898 6.595441 6.154835 7.033983 5.763232 6.74075 6.57712 6.313283 5.530804  
3.762728 4.524972 4.170339 3.024639 3.429248 3.88318 3.993127 4.06928 3.628312  
7.95191 7.983056 8.389013 7.924277 7.927734 7.872811 8.086086 7.958533 7.167297  
6.761902 6.870757 6.596043 6.225643 6.76496 6.72832 6.721063 7.011481 5.806067  
4.535558 1.857774 4.086785 2.904406 2.175162 3.694829 3.30651 3.115144 2.348695  
1.664054 1.168386 1.102633 1.361679 1.39548 1.621575 1.007557 1.896788 1.183384  
2.557409 3.800928 2.73429 3.078608 2.190309 3.189388 2.597133 2.614375 4.86385  
9.29717 9.417487 9.522198 9.471888 10.0092 9.091147 9.555597 9.546365 9.068353  
2.882443 3.092907 1.920891 2.352333 3.677851 1.370674 2.839082 2.761293 2.398754  
2.905434 3.771657 2.751087 2.904313 4.136056 3.542484 2.447829 3.818185 2.318896  
1.841848 1.579333 1.623122 0.918834 0.86568 2.283112 1.235829 1.270457 1.154109  
3.483724 3.468742 2.406004 2.8685 2.749291 4.094251 3.411209 4.343784 1.373594  
9.195628 9.227027 8.971552 8.574442 9.264274 9.285461 8.98055 9.031136 9.099779  
3.938517 3.117921 2.694371 2.469744 1.777869 4.578121 2.760027 4.31605 3.396855  
4.221509 4.058209 4.408604 2.348366 4.408578 4.13396 3.563313 3.458177 4.001153  
0.98851 1.321577 1.22114 1.990868 1.856772 1.852943 1.577421 1.328284 1.495069  
2.959423 3.01394 3.042594 3.318495 2.741176 2.940574 3.018921 3.211362 2.782491



2. 330815 2. 935228 2. 628399 2. 932083 2. 665572 2. 981599 3. 196482 2. 935648 2. 783446  
1. 593928 1. 405806 1. 355355 1. 102608 1. 412068 1. 84463 2. 185151 0. 985983 2. 345405  
2. 541676 2. 200997 3. 03522 2. 473442 1. 754781 2. 37138 2. 432636 2. 355393 2. 205216  
1. 989375 1. 507628 1. 718129 2. 323653 1. 873387 1. 454044 1. 569835 2. 040641 2. 129527  
7. 725525 8. 085657 8. 074282 8. 162767 7. 443179 8. 177438 7. 680649 8. 042365 8. 4514  
6. 491417 6. 819941 6. 464475 6. 722403 6. 869534 6. 569836 6. 860355 6. 618344 6. 309168  
5. 12328 5. 626367 5. 064068 3. 924426 4. 09679 5. 294004 3. 742586 5. 430177 4. 489296  
2. 801049 2. 841822 2. 371868 2. 29966 2. 445366 2. 549795 2. 576765 2. 374255 2. 911403  
4. 718144 5. 380829 4. 398162 4. 366392 3. 770986 5. 529095 3. 069885 4. 772619 5. 289401  
5. 560228 5. 330134 4. 819773 4. 268282 5. 012051 5. 191847 4. 581179 5. 154888 4. 398815  
2. 942587 3. 39643 3. 133867 1. 726124 3. 263572 3. 312466 3. 032106 3. 263588 4. 375921  
5. 460208 5. 445136 5. 241781 5. 608771 5. 999959 5. 372246 5. 97035 5. 19741 6. 33886  
5. 688353 5. 511464 6. 39133 5. 863468 6. 30276 6. 201635 5. 638712 5. 738617 5. 188362  
3. 8936 3. 535816 3. 204082 2. 966615 2. 781715 3. 214178 2. 636767 2. 656253 2. 720375  
6. 455243 7. 191757 7. 199562 6. 712224 7. 208939 6. 57235 6. 676936 7. 650915 5. 677831  
2. 961227 3. 526166 3. 416499 2. 396971 3. 447206 2. 727792 3. 589621 3. 056867 4. 339774  
6. 044661 5. 436249 5. 856472 5. 020121 5. 879101 6. 315414 5. 799618 6. 107733 4. 690414  
8. 277938 7. 943305 7. 812541 7. 820089 8. 005295 7. 812942 8. 072938 7. 912531 8. 2578  
6. 017524 6. 780282 6. 251312 6. 965236 6. 091201 6. 742342 6. 365192 6. 814939 6. 842863  
6. 814343 7. 051633 6. 269367 6. 725259 7. 658152 7. 111055 6. 240725 7. 357094 7. 605598  
8. 857096 9. 167358 8. 879346 8. 969212 9. 269018 8. 752424 8. 666142 9. 252273 8. 364475  
6. 861112 6. 140502 6. 885487 5. 896714 7. 025331 6. 5095 6. 320766 5. 930212 6. 752969  
5. 653352 5. 956589 6. 002351 5. 566917 6. 089517 5. 713671 5. 257607 5. 892624 5. 106838  
7. 871048 7. 016662 6. 993447 7. 205755 7. 399455 6. 818401 8. 097667 7. 213616 7. 698546  
6. 371481 6. 155874 6. 309713 5. 829817 6. 199783 6. 15791 6. 443305 6. 421744 6. 659152  
2. 972138 3. 36599 2. 246557 4. 03713 2. 866265 3. 075222 2. 694363 2. 964416 3. 133168  
2. 299281 2. 577783 1. 374841 2. 710932 2. 492642 1. 680158 1. 089531 1. 456607 1. 273023  
8. 936168 9. 039786 8. 904219 9. 35509 9. 303008 8. 51791 9. 147251 9. 206548 8. 617174  
4. 102268 4. 310968 4. 049119 5. 136369 4. 406476 4. 042075 4. 351832 4. 121395 3. 988804  
7. 022233 7. 558555 6. 449367 7. 422486 8. 416886 6. 67289 7. 034946 6. 899244 6. 277714  
4. 806678 4. 954641 4. 266382 4. 249518 5. 734916 3. 876756 4. 4854 4. 214763 3. 726201  
8. 892133 8. 920734 8. 708764 8. 690161 9. 181158 8. 987544 8. 531618 8. 923302 7. 769581  
4. 751502 4. 328985 3. 93769 5. 507584 3. 701932 3. 57264 4. 254749 4. 463455 4. 723416  
3. 846912 4. 117554 4. 427672 3. 809359 3. 919901 4. 778396 3. 142682 3. 941565 4. 026876  
6. 68746 6. 788747 6. 453481 6. 512632 6. 749 6. 480705 6. 782615 6. 583421 7. 278611  
1. 352919 1. 287094 0. 870642 1. 536367 0. 763007 1. 484708 1. 476041 1. 694405 0. 76612  
2. 100924 2. 253364 1. 848007 2. 16452 2. 747909 1. 667773 1. 381588 2. 679989 1. 973573  
5. 937568 6. 035551 5. 78017 5. 665826 6. 034286 5. 252964 5. 742047 5. 80852 5. 396305  
2. 577641 2. 65593 2. 859139 2. 253063 2. 237484 2. 404769 1. 559364 2. 1654 1. 872588  
3. 526956 3. 524101 3. 926904 3. 145991 3. 420884 3. 024091 3. 616667 2. 632843 2. 18077  
2. 824692 4. 1747 2. 885151 2. 726368 3. 309755 3. 583536 2. 649349 3. 198082 4. 331248  
5. 061773 5. 195804 4. 479896 4. 209157 5. 764929 4. 43378 4. 463599 5. 186238 4. 573862  
4. 755116 4. 639869 5. 343736 4. 60517 5. 500601 4. 641933 5. 304897 5. 038729 4. 935253  
5. 556666 5. 564146 5. 396155 6. 073033 5. 027512 5. 049521 5. 431167 5. 455004 5. 563224  
1. 139874 1. 446272 1. 410122 2. 152938 1. 564754 1. 329328 1. 20134 1. 447555 1. 696848  
5. 090402 5. 043423 5. 236227 3. 74593 3. 848935 4. 430853 5. 564312 4. 791309 5. 249553  
7. 549842 7. 322358 6. 668629 7. 66513 6. 916829 6. 792876 7. 468245 6. 767111 7. 688903  
4. 040789 3. 840466 4. 479456 3. 751546 3. 685473 4. 054812 4. 120606 3. 973729 2. 953736  
1. 214744 1. 001833 1. 426769 2. 552516 1. 214701 0. 770249 0. 998227 1. 420882 1. 847144  
1. 724963 1. 54935 1. 430245 2. 439282 1. 136108 1. 576554 2. 362881 1. 742405 1. 036903  
1. 635063 2. 198993 2. 872473 3. 717019 2. 407866 2. 4164 2. 101863 2. 200961 1. 87211

1. 902504 1. 380369 1. 7638 2. 303126 1. 456848 1. 561078 1. 825484 2. 219593 2. 921851  
6. 126491 6. 169911 6. 408111 6. 695191 6. 640468 6. 182437 6. 188191 5. 834218 4. 792555  
5. 035034 5. 333079 4. 209734 5. 049841 5. 431766 4. 594765 4. 663091 5. 432425 3. 930038  
4. 344381 4. 004849 3. 929068 3. 452157 4. 177485 4. 127412 3. 690731 3. 971637 3. 99429  
3. 914512 3. 759931 3. 576328 4. 546669 3. 798808 3. 953099 3. 928264 3. 992073 2. 769545  
1. 142907 1. 703251 1. 368154 0. 548659 1. 581818 2. 412047 0. 893786 0. 982704 2. 189378  
0. 771759 1. 668217 1. 993121 2. 252514 1. 192482 2. 370317 1. 053897 1. 163929 1. 463244  
2. 366882 2. 173118 1. 327932 2. 161543 1. 479041 2. 84908 2. 195304 3. 076954 2. 732611  
5. 689812 7. 093436 6. 591963 5. 636542 5. 763384 5. 34518 6. 576443 6. 142141 8. 597483  
5. 160101 4. 013587 2. 561734 1. 304683 5. 061406 5. 472704 3. 859539 5. 541804 7. 293946  
1. 830606 2. 116847 2. 922852 1. 822951 1. 418461 1. 267261 2. 46685 2. 123283 2. 077123  
1. 331143 3. 329125 2. 299022 2. 844053 1. 283576 3. 583704 1. 220418 2. 658142 6. 589433  
2. 235198 1. 338075 3. 397457 2. 348285 2. 425928 1. 892779 2. 811757 2. 178036 2. 615751  
9. 677379 9. 477476 9. 93946 2. 709571 9. 999623 10. 81035 8. 514278 8. 968033 10. 83176  
1. 995541 2. 827546 1. 408247 2. 544345 3. 014559 4. 843322 3. 469433 1. 967313 5. 875335  
5. 58291 2. 958477 5. 780211 1. 686157 4. 832916 5. 742458 5. 04742 5. 855892 7. 963549  
1. 571319 0. 970254 1. 274247 1. 313131 1. 240952 2. 650963 0. 941238 0. 890978 2. 343093  
4. 837946 3. 16036 2. 732164 5. 863103 2. 784021 2. 144042 4. 712413 4. 135257 4. 698146  
0. 828311 0. 955106 0. 873833 1. 084914 0. 728784 1. 991317 0. 721333 1. 266815 3. 638768  
0. 839336 0. 807361 2. 830766 1. 927978 2. 158541 0. 89941 1. 293788 1. 864021 4. 990782  
1. 282142 2. 776383 2. 476131 3. 359062 2. 451811 2. 391025 2. 035964 2. 881569 1. 543088  
1. 883599 1. 826508 2. 368364 1. 457523 1. 226528 0. 951904 1. 657274 0. 958263 2. 357535  
6. 298192 5. 821434 4. 62323 5. 654673 6. 371177 6. 287901 5. 873145 5. 990331 5. 620077  
2. 330876 2. 002785 1. 509803 3. 648248 1. 836764 2. 744196 1. 603089 3. 16871 3. 577891  
5. 159952 5. 321168 5. 77518 5. 680851 5. 452478 6. 420971 5. 637766 5. 741337 5. 86456  
1. 837283 3. 0517 1. 151333 1. 34371 3. 208826 2. 779071 1. 490974 3. 476904 1. 627068  
2. 608962 3. 000132 2. 844465 3. 475079 2. 298245 1. 524742 2. 833198 5. 629661 5. 452238  
3. 576889 4. 279863 3. 701343 0. 823253 3. 687571 3. 198134 3. 571222 5. 057437 6. 398754  
2. 924258 2. 74832 3. 641927 4. 266261 4. 034962 3. 664207 4. 358743 4. 881788 4. 784283  
1. 80438 1. 154608 0. 872206 2. 005347 1. 165914 1. 029806 0. 846588 0. 812222 1. 530445  
2. 41797 4. 136699 2. 518774 2. 153716 1. 900667 4. 467691 2. 985201 4. 750355 6. 010036  
6. 423692 5. 856642 6. 931468 1. 763336 5. 826716 5. 89835 5. 625548 6. 877494 7. 524158  
1. 315176 1. 337171 1. 182432 1. 498424 1. 031393 1. 231471 1. 482071 1. 215146 1. 595838  
1. 345308 1. 650577 1. 797825 2. 062917 1. 47719 4. 770376 1. 534009 1. 791657 2. 074725  
3. 170863 1. 714119 1. 481486 1. 260562 1. 706321 2. 0637 1. 362683 2. 270829 3. 22201  
3. 705577 3. 315 2. 18973 1. 206365 3. 89864 3. 300126 4. 765318 3. 638095 4. 844948  
0. 835044 1. 405558 0. 85592 1. 165094 1. 147662 1. 014195 0. 841791 0. 780347 1. 049486  
2. 932186 2. 616322 3. 804838 2. 245757 2. 991055 2. 982323 4. 321091 3. 388127 3. 582292  
2. 75865 2. 632749 2. 718217 2. 348614 3. 072611 2. 001768 2. 65604 2. 414642 3. 607427  
1. 019357 1. 156571 0. 984703 1. 952356 0. 9473 0. 779484 0. 876727 1. 049974 1. 103288  
3. 761769 3. 143503 3. 1024 3. 071424 1. 966668 3. 012826 2. 806468 3. 296292 3. 136806  
3. 784287 2. 766816 3. 2295 4. 250809 3. 139566 2. 808979 2. 764345 3. 870998 3. 58102  
4. 202054 3. 167043 3. 020383 4. 336018 4. 156195 4. 395102 3. 646911 3. 938658 4. 333612  
7. 525193 6. 619439 6. 627069 2. 673459 7. 183085 7. 066802 6. 226018 6. 897586 9. 937933  
1. 047235 1. 125218 1. 152254 1. 018247 0. 772952 1. 275157 1. 375502 0. 989887 1. 442225  
2. 204367 2. 228439 2. 365666 3. 270393 2. 004885 2. 532208 2. 858475 1. 778769 6. 828239  
2. 052001 2. 100263 0. 838759 1. 851679 1. 872765 0. 758487 0. 829855 1. 311504 1. 300354  
1. 142207 1. 410389 1. 384017 1. 641567 1. 296727 1. 382773 1. 630403 1. 613659 2. 242901  
0. 569428 0. 485325 0. 764945 0. 786041 2. 089082 2. 180458 1. 537329 1. 579916 0. 749022  
2. 559902 1. 127836 1. 378613 1. 457461 0. 981417 1. 233827 1. 26144 2. 858569 4. 197565  
0. 780292 0. 628822 1. 196693 1. 254006 1. 044108 1. 899517 1. 254006 0. 616205 0. 926895

3. 272863 2. 477807 4. 440727 1. 577938 3. 395571 3. 031916 2. 323914 3. 862474 5. 774441  
1. 075836 2. 781202 2. 021589 1. 151695 0. 907886 1. 807608 1. 243249 0. 612524 2. 668587  
1. 427205 1. 112561 1. 185834 0. 983342 1. 27021 2. 037612 0. 958965 0. 992354 0. 979764  
1. 828106 1. 737096 3. 169451 1. 887173 3. 756688 3. 097268 1. 370837 3. 277711 5. 296171  
6. 794745 5. 953966 6. 711834 5. 718537 6. 316745 6. 018603 6. 651767 6. 213286 6. 630868  
5. 221461 5. 3053 4. 30654 0. 908209 3. 837822 6. 688712 4. 907827 5. 50802 7. 190138  
1. 216868 1. 557473 1. 826382 1. 744105 1. 126359 1. 271833 1. 54083 0. 697978 1. 970528  
1. 187339 1. 069873 2. 136938 1. 568695 2. 801657 1. 257812 1. 352995 4. 059678 2. 671239  
1. 35663 1. 488261 1. 298689 2. 223799 1. 290571 1. 737554 1. 985194 1. 26336 2. 350412  
3. 880727 1. 923439 1. 436243 1. 288233 1. 728184 1. 661209 2. 076725 3. 462262 2. 34679  
8. 309721 8. 372381 8. 264083 8. 261757 8. 359435 7. 78375 8. 024041 8. 516982 8. 380169  
5. 03733 4. 600002 4. 615556 4. 717881 4. 637166 4. 578449 5. 107491 5. 35213 4. 691699  
5. 830871 5. 663474 5. 705452 5. 915061 6. 208266 6. 026504 6. 139206 6. 236987 5. 868609  
6. 773725 6. 944164 6. 983537 6. 044106 7. 605417 6. 930465 6. 773168 6. 915211 5. 196845  
2. 850024 4. 125267 3. 932869 2. 363547 3. 17703 4. 01024 3. 542718 3. 575592 3. 989429  
5. 931364 5. 825395 4. 612263 5. 941638 5. 578417 5. 377301 5. 992371 5. 711805 5. 311843  
4. 677064 4. 68151 4. 552073 5. 715012 4. 945788 4. 441231 4. 403189 5. 099634 3. 833281  
4. 289027 2. 642314 2. 141224 4. 834285 1. 878599 2. 980788 3. 308817 3. 11624 3. 967702  
1. 053556 0. 784887 1. 235409 1. 246055 0. 746191 1. 020573 0. 628453 0. 894033 0. 661961  
3. 488078 4. 643056 4. 703005 3. 744719 3. 929494 4. 368433 4. 692075 4. 616626 6. 510221  
4. 659765 4. 814915 4. 667472 5. 189509 4. 7143 5. 151101 4. 24832 4. 779565 4. 225055  
0. 677106 0. 380233 0. 654774 1. 180836 0. 757703 0. 835114 0. 645023 0. 909086 1. 579753  
2. 054944 1. 1341 1. 817464 2. 474624 1. 950287 1. 205391 1. 556183 0. 971388 1. 694712  
1. 322454 1. 714258 1. 24178 3. 154402 1. 48563 1. 323706 3. 33582 1. 422558 2. 403242  
1. 360704 0. 820677 1. 040562 1. 144297 0. 737553 1. 439071 0. 925102 1. 341511 1. 615331  
0. 630634 0. 660453 0. 55229 0. 998574 1. 586971 1. 231629 0. 947594 0. 475205 0. 550717  
0. 806952 1. 439867 1. 528424 2. 646868 1. 245513 1. 141975 0. 721444 0. 970411 0. 562119  
1. 044075 0. 870142 0. 837888 1. 477904 1. 452383 1. 703617 1. 114651 1. 174848 2. 022905  
1. 742426 1. 656823 1. 365069 2. 930401 1. 108603 1. 528527 1. 367517 1. 924881 3. 953723  
1. 581176 1. 714545 1. 557423 1. 852838 2. 104591 1. 9552 2. 332197 2. 202487 3. 166344  
2. 639658 2. 576082 1. 971558 3. 17225 2. 452857 2. 617932 1. 972296 1. 809839 2. 560325  
2. 882038 2. 609566 2. 770464 3. 222857 3. 274295 2. 246241 2. 970185 2. 424367 2. 41043  
1. 6803 1. 06813 2. 556903 1. 924679 2. 38326 1. 407108 2. 767403 1. 122769 1. 631487  
1. 398939 1. 063385 1. 394943 1. 483423 1. 082819 3. 223547 1. 306675 1. 391538 2. 366464  
1. 320433 1. 282948 1. 202461 1. 117723 1. 100559 1. 428382 0. 968557 0. 967603 1. 087543  
1. 605148 0. 728647 2. 761974 0. 728647 1. 609512 0. 926043 1. 151616 2. 187689 1. 122332  
0. 840118 0. 579536 0. 699943 0. 81382 0. 882567 2. 413221 1. 098516 1. 096043 2. 180358  
3. 08912 2. 957275 2. 770385 3. 036835 2. 646509 3. 300169 2. 883975 2. 652723 3. 759317  
1. 352605 1. 844289 1. 375993 1. 594534 0. 922915 1. 646672 0. 888206 1. 574601 4. 60004  
1. 102256 1. 276204 0. 938466 1. 229238 0. 861367 1. 60693 0. 87272 0. 829827 1. 205896  
1. 369786 1. 194561 1. 127087 1. 172719 0. 762152 1. 869927 0. 99746 1. 07251 1. 108414  
0. 484857 0. 596559 0. 65399 0. 54984 0. 734247 0. 676117 0. 739194 0. 725687 1. 493085  
2. 734487 2. 852907 2. 930992 3. 634873 2. 670564 3. 227933 2. 921672 2. 947509 3. 731834  
4. 38472 4. 224508 4. 10223 4. 588434 3. 357633 3. 943951 2. 322557 4. 07962 3. 628933  
1. 096561 1. 099403 0. 765644 1. 269234 0. 80595 1. 434905 0. 973246 0. 827693 1. 900752  
0. 847239 0. 735811 0. 836909 1. 163776 1. 199805 1. 642663 0. 865498 0. 618318 1. 216703  
2. 21532 4. 138052 4. 522342 5. 238577 3. 571129 5. 669878 3. 806758 3. 575836 4. 731658  
3. 135842 2. 685536 2. 630466 3. 738058 4. 336285 3. 328358 1. 837412 2. 448632 3. 941208  
3. 025207 3. 532269 1. 556446 1. 09148 0. 916495 1. 294068 1. 91743 1. 730502 2. 906519  
4. 950637 5. 225503 5. 414615 5. 046156 5. 180918 5. 899056 4. 880992 5. 894848 5. 96259  
1. 933111 2. 422759 1. 771248 2. 204814 1. 390152 1. 436998 2. 702033 1. 618434 4. 409137

0.938327 0.980565 0.879375 1.136016 0.807038 1.297679 1.054286 0.78971 0.973136  
1.109733 1.292998 0.630569 1.219077 0.976264 1.37863 1.220815 1.123467 0.676815  
0.899639 0.95206 1.256188 2.11519 1.38417 1.808425 1.160868 1.680509 1.43586  
0.99308 0.623005 1.244275 1.330405 0.95407 1.147435 0.761342 1.128031 1.153488  
1.227424 1.240532 4.070683 1.32759 1.128012 2.56342 0.943462 1.1246 0.917037  
1.099834 1.145245 1.363329 1.127823 1.04609 2.755815 1.02336 2.807576 3.230327  
0.68675 0.995041 0.985722 0.860428 0.918037 1.459214 1.568141 0.819445 0.732778  
1.506781 2.016197 1.084654 1.28828 1.341888 1.518477 0.999195 0.932338 0.885591  
2.132452 2.464369 2.539803 3.803392 1.456675 2.246466 2.176423 2.3653 2.825416  
2.303631 2.167631 2.608766 3.209822 2.119513 2.286017 2.220594 2.020244 2.107917  
1.1946 1.019319 1.11964 1.892438 1.227572 1.580295 1.109407 1.218446 1.509022  
1.977265 2.585067 1.772654 2.774867 3.086687 1.907799 2.049139 3.391667 3.34489  
0.968387 0.849908 0.87992 1.351735 0.862283 1.691628 0.794736 1.044767 1.146594  
2.941741 2.092033 2.288377 3.253773 1.883989 2.909836 2.133782 2.255028 2.570057  
0.898853 0.976106 0.982652 1.05049 0.933053 1.177502 1.211604 1.451532 1.344357  
1.034315 0.755219 1.017327 1.42717 1.101206 1.398909 1.250209 0.733173 1.354903  
1.790382 1.240348 1.946139 1.494937 0.94559 1.525114 0.822509 1.847627 2.314069  
3.592722 3.946123 4.20443 4.081372 3.498548 4.103387 3.530949 3.888391 3.996702  
1.17441 0.990444 0.930465 2.624172 0.913044 1.5149 2.10752 1.173328 1.396877  
2.209801 2.111728 3.177768 4.397778 2.016743 2.53265 1.288404 1.914288 3.577204  
1.835192 1.391932 1.858709 4.33376 1.662501 2.106524 2.275367 1.819305 2.227451  
2.931158 0.921488 1.307594 2.094389 1.115252 1.828276 1.956449 1.112654 1.502666  
1.365648 3.540247 2.202608 1.213663 1.105665 1.936113 1.193365 1.384947 1.383131  
1.163568 1.591927 1.064881 1.296835 0.616492 0.854718 1.070337 0.919905 1.792996  
2.216682 2.096024 1.837759 2.380487 1.477654 1.588488 1.410795 1.167764 2.542263  
2.922615 1.230417 2.357058 2.298636 1.452137 1.60504 2.808196 3.26251 1.792919  
1.268786 4.986057 1.918123 2.429275 2.06768 2.61455 3.569535 4.249497 5.653847  
0.630514 0.981375 0.771237 1.452683 0.648926 1.615935 1.221967 1.195238 1.028509  
2.925998 2.654989 3.462756 3.057159 2.645803 3.08902 3.220005 2.557101 3.358337  
0.929229 1.318661 0.896161 1.562853 0.69511 0.874077 0.883953 1.20714 0.943153  
1.844146 1.705687 1.27447 2.4437 2.202818 1.50415 1.802629 1.821738 1.411626  
1.389671 1.315914 1.418567 2.375484 1.339103 1.398814 1.499495 1.721342 1.896547  
1.219806 1.55064 1.607426 2.222955 1.342411 1.214372 1.344734 1.206365 1.885665  
3.678952 5.002956 5.024124 0.66957 4.162174 3.606632 4.890126 5.301903 7.120654  
1.808176 1.410259 1.2221 3.445224 1.519855 1.777199 1.570815 1.531381 1.43566  
8.25589 8.57859 8.935828 8.698014 8.531752 8.635828 8.922385 7.358241 7.28759  
1.49519 1.727864 1.666688 2.074217 1.725327 1.47121 1.575606 2.454272 1.99127  
1.093594 1.571148 1.255154 1.966859 1.008654 2.075757 0.694391 1.106317 0.838205  
1.415265 1.91882 1.148736 2.086393 1.298513 1.956499 1.118381 0.971818 1.617453  
1.277541 1.462027 1.101563 1.569844 1.00792 1.386314 1.4101 1.204804 2.532878  
2.185651 3.557641 3.653456 3.893198 2.840488 3.010467 4.447143 3.289695 2.556019  
0.806073 0.705931 2.163787 0.831143 1.009507 1.159762 0.928488 0.638407 1.290958  
3.008446 2.884511 1.710003 2.859826 1.763337 1.844899 3.885983 2.825086 1.208349  
1.428936 1.049917 1.016693 1.21665 1.366437 2.080727 1.334704 1.523426 1.52386  
0.832431 1.199667 0.947938 0.93706 0.776679 1.537429 1.107785 1.064529 1.051961  
3.00925 0.916205 0.564882 1.418142 0.7423 0.99969 0.953066 0.803231 0.887675  
1.738196 2.708051 0.67543 1.083459 1.573374 2.359558 1.304454 2.400984 1.606808  
1.018453 1.73908 0.859912 1.204799 0.908543 1.441362 1.184397 1.742826 0.837837  
1.286874 1.406529 1.354957 1.218732 1.228603 1.332706 0.899216 1.204283 2.374529  
1.913047 1.427683 1.545381 1.773407 1.075254 1.963283 1.991894 1.508624 1.44285  
2.568663 2.304159 3.444853 3.277988 2.290979 2.464835 1.93358 2.385753 2.969143

2.198623 0.968288 1.987604 2.166733 2.955054 1.749896 0.963437 1.455394 2.201313  
0.888701 0.843765 0.914188 1.209679 0.750158 2.028144 0.908661 0.668189 0.904093  
3.067073 2.445895 0.750538 1.719727 1.394051 0.603888 1.073257 0.681643 4.914259  
4.055751 2.41902 2.467971 3.081005 3.075283 1.626395 3.880837 3.568644 2.652123  
3.696151 1.433894 3.277572 3.722583 2.788613 2.251007 2.261378 2.602658 3.924483  
1.249399 0.910912 1.214418 2.049656 0.987118 1.189612 1.726733 1.814349 1.380741  
0.930309 0.984853 0.781137 1.782836 0.795987 1.188512 0.920191 0.966392 1.299923  
3.014417 2.489675 2.843172 2.900335 2.895381 2.273439 2.952644 3.628938 3.018501  
1.19108 0.971175 1.49566 1.283968 1.279348 1.462148 1.595296 1.768225 1.033635  
5.068359 3.412762 4.408178 1.628097 2.036109 3.299905 4.303223 3.036585 5.161644  
2.309195 2.2951 2.60347 2.376376 1.548291 1.631711 1.88176 2.04372 3.023884  
2.512239 1.478437 3.239105 2.900711 3.057263 2.85972 2.267978 1.769046 4.047475  
4.656174 4.756644 5.523302 5.521365 3.944921 4.744302 4.900986 4.721108 5.267756  
1.414071 1.894541 1.815118 2.235515 2.119211 2.61905 1.588916 2.007665 2.756111  
1.035801 1.254424 0.832828 0.772822 1.6266 1.058244 1.349496 0.634166 1.130711  
4.660247 3.765132 3.965069 4.986356 3.726195 5.232581 4.105925 4.652069 4.64622  
2.12804 1.680067 3.293981 1.79443 1.81713 3.05468 1.713128 2.98248 2.962054  
6.406758 5.921189 6.238894 6.574046 6.477689 6.391708 6.034954 6.47678 6.797608  
7.572768 6.588636 7.373296 7.444491 6.982497 6.985059 7.30766 7.383921 7.274172  
5.427827 5.391946 5.568915 5.746546 5.061487 5.440062 5.36003 5.415091 5.341853  
6.784301 7.373801 7.045336 7.545416 7.434178 7.177947 7.401903 7.191146 7.480353  
3.829911 3.294495 4.03605 3.012807 3.531057 3.544009 4.021622 2.848214 2.212134  
5.403306 5.849165 5.571373 5.489663 6.458436 6.545421 6.157997 6.040564 5.887775  
3.012462 2.601823 2.522916 2.453755 2.939343 2.826141 2.785344 2.575862 3.092498  
6.26065 6.654483 5.96992 7.623448 6.337449 5.624915 6.387394 6.109264 6.124422  
9.730553 9.659865 9.985879 9.12955 9.442223 9.899626 8.977006 9.626841 9.216439  
5.536751 5.721513 5.616455 4.513649 5.720334 5.589164 5.955091 5.712802 5.35397  
6.473546 6.828524 6.263481 6.514393 6.764213 6.202733 6.296031 7.003918 5.295567  
0.966943 2.122858 1.32667 1.828955 1.234378 1.585016 1.446681 2.02086 1.715896  
6.247865 5.961893 5.784461 5.585698 7.473131 6.138785 5.725841 6.517391 5.770031  
3.800456 4.888879 4.704747 3.88554 4.736301 3.719387 4.251554 4.650223 3.375645  
5.181059 6.031505 6.012591 4.745736 6.321939 5.680131 5.74039 6.155203 6.287311  
8.357125 8.06449 8.118326 8.695523 8.387372 7.986692 8.631107 8.139426 8.189278  
1.542184 1.404212 1.5676 1.60482 1.216289 1.537365 1.441279 1.35273 2.108622  
1.670137 2.291814 0.903915 2.576621 1.157615 1.571059 2.052158 1.584926 1.138738  
2.537219 2.669596 2.899003 2.701966 3.846184 3.316031 3.242382 2.651073 2.480416  
1.074383 1.166224 0.79768 1.5448 1.161778 1.198266 1.253681 1.29576 1.145546  
1.31838 1.331635 1.089882 2.087926 1.339845 1.54798 1.515501 0.723892 1.511952  
0.863446 0.834974 0.928449 0.931717 0.926907 4.680983 0.808914 0.712118 0.616291  
1.377546 1.559064 1.362421 1.300034 1.444456 2.562002 3.388942 2.144324 2.860517  
1.773126 2.163582 2.54482 2.351619 1.482093 2.038782 1.379267 1.634951 1.505477  
2.107132 4.498744 0.860662 1.664579 1.379328 1.877404 3.269349 4.175235 3.53104  
1.841745 3.828474 1.750442 2.775358 0.958091 2.268714 4.494439 4.96151 2.618497  
1.687482 2.692417 1.556746 1.625085 2.732167 2.990639 1.659208 1.602521 1.923026  
3.972357 3.302861 2.149583 3.251322 2.72761 2.144503 2.788865 2.154836 2.814602  
7.653131 7.551204 7.726469 6.247162 7.276819 7.051763 7.094737 7.104543 6.44544  
8.166962 7.858844 8.412299 7.963415 8.003036 7.22771 8.118849 8.105205 7.933018  
0.798911 1.649054 1.256042 1.12088 1.221142 2.361636 1.294041 0.990822 1.067639  
6.678506 6.655839 7.032252 6.429384 6.866202 6.885602 7.147083 6.732302 6.370999  
8.098066 8.016584 8.138938 8.105979 8.719676 7.850471 8.468165 8.079864 8.349322  
5.46224 6.148815 6.081422 2.970808 6.315058 5.522572 5.255864 5.392307 6.624609

1. 249017 1. 091401 1. 599999 1. 810857 1. 807312 1. 59276 1. 588036 1. 09266 1. 566577  
0. 948777 1. 16908 0. 882312 1. 251037 1. 011222 2. 478819 0. 868489 1. 064751 1. 37347  
1. 54979 2. 255644 1. 589167 1. 65813 3. 489608 2. 069671 2. 233736 1. 441584 1. 593101  
9. 190253 9. 146295 9. 27884 8. 693874 9. 296878 9. 201206 8. 830706 9. 394438 8. 850806  
7. 733225 8. 041582 7. 613198 7. 501396 7. 534959 7. 794235 7. 845878 7. 574793 7. 588433  
5. 429411 5. 198836 5. 316898 6. 168076 5. 529212 6. 110652 5. 221856 5. 449992 4. 762582  
4. 686316 4. 968956 5. 766232 6. 642362 5. 523349 5. 101274 4. 372015 5. 770148 5. 345439  
3. 758128 4. 106944 3. 321891 1. 660923 2. 917203 2. 448968 2. 209375 3. 604861 3. 724555  
1. 623899 2. 287831 2. 165545 2. 047308 1. 831044 2. 116781 1. 540313 2. 048156 1. 915951  
5. 186411 4. 742529 5. 315224 4. 821259 5. 114929 4. 583268 4. 938008 5. 018576 5. 527567  
9. 517033 9. 165138 9. 398269 9. 282361 9. 033075 9. 291854 9. 461454 9. 389771 9. 693718  
7. 884714 7. 610473 7. 995509 7. 952804 7. 569232 7. 531197 7. 773794 7. 914001 7. 579126  
2. 968637 3. 601113 3. 55688 2. 846907 4. 012342 3. 356517 3. 738971 3. 694404 2. 686571  
5. 470735 5. 040597 3. 512746 3. 313256 4. 553717 4. 053929 3. 996279 3. 970311 4. 403901  
6. 496464 6. 407216 6. 96726 6. 25801 6. 156938 6. 092844 6. 233337 6. 233337 6. 68768  
6. 139636 5. 998353 6. 080069 6. 266602 5. 857119 6. 146424 6. 058053 6. 617185 5. 57131  
1. 914416 2. 035533 2. 630639 2. 438317 2. 062018 2. 057159 2. 349525 1. 965768 2. 033457  
6. 938682 7. 126799 7. 63162 7. 444171 7. 306497 7. 936401 6. 937462 7. 152663 6. 074255  
2. 078749 2. 408931 2. 229826 3. 15198 1. 426865 1. 937631 2. 153949 2. 340125 1. 602138  
5. 036931 4. 821562 4. 78632 5. 08937 4. 887312 4. 702361 5. 499986 5. 021538 5. 483811  
1. 492008 2. 420706 1. 567264 2. 640266 3. 026955 1. 493597 4. 063165 1. 990464 1. 286908  
3. 152182 3. 138606 3. 000741 3. 48949 2. 81716 4. 150595 3. 224178 3. 866529 4. 597509  
2. 103825 2. 227042 2. 824826 1. 861824 1. 559902 2. 229901 1. 952921 1. 812247 1. 819618  
2. 265239 2. 15088 1. 606787 1. 789329 2. 274437 1. 789356 1. 738319 1. 713839 1. 720985  
3. 005993 2. 689474 5. 085091 2. 731865 3. 846349 3. 358925 4. 113941 2. 373526 2. 183412  
6. 232792 6. 144372 5. 697365 5. 832548 6. 168731 5. 480141 6. 136198 6. 390916 6. 255382  
6. 697913 6. 977303 6. 626778 6. 895944 7. 000314 7. 008298 6. 789408 7. 000616 6. 848906  
6. 334555 5. 855183 6. 861295 5. 946683 6. 22511 5. 978354 6. 446095 5. 812414 5. 456571  
7. 901506 7. 750092 8. 023552 8. 096524 7. 265161 7. 980964 8. 323186 7. 690668 8. 018742  
7. 454775 7. 22189 7. 163446 7. 301716 6. 747597 7. 219145 6. 811111 7. 272255 7. 310993  
5. 625391 5. 94498 5. 997387 5. 350488 5. 841572 5. 371682 5. 328962 5. 264993 4. 519393  
2. 554896 2. 114526 2. 552024 2. 979631 1. 768862 2. 525316 1. 83781 2. 392847 2. 348197  
2. 20514 1. 419922 1. 771565 1. 545225 1. 51352 1. 308661 1. 289693 1. 308661 1. 695528  
4. 674713 4. 45 3. 918134 5. 350714 3. 838853 4. 084141 4. 631966 4. 488737 3. 942314  
7. 744876 8. 107626 7. 318541 7. 106339 7. 653055 8. 447982 7. 298508 8. 408525 8. 051195  
1. 876184 1. 627065 1. 520401 2. 209417 1. 671667 1. 660065 1. 338703 1. 39443 1. 437605  
4. 996089 4. 371599 3. 978637 3. 596617 4. 456339 4. 475248 4. 539856 4. 418625 4. 930173  
2. 325525 2. 355478 2. 332843 2. 831248 2. 558477 2. 229415 2. 509112 1. 945647 2. 295514  
2. 788933 3. 054818 2. 951656 3. 305247 2. 611191 2. 699213 3. 054818 3. 168065 2. 909282  
6. 697809 6. 942852 6. 284298 6. 33003 7. 373128 6. 686649 6. 941442 7. 235629 5. 125684  
6. 17315 6. 568478 6. 086457 5. 467824 6. 238456 6. 214084 6. 406587 6. 093861 3. 771483  
6. 381826 5. 416662 5. 826186 6. 775527 5. 527276 5. 54462 6. 290849 6. 125664 5. 470315  
2. 773591 3. 321044 4. 08856 2. 827376 3. 442047 3. 207628 3. 847551 3. 076882 2. 45  
1. 366407 2. 374486 2. 822342 4. 294914 1. 484192 2. 386442 2. 261312 1. 860955 1. 806971  
4. 724832 4. 731261 5. 459048 5. 949563 5. 216689 4. 171016 6. 752115 5. 348056 4. 168178  
5. 280569 6. 045043 5. 307932 3. 189199 5. 836527 5. 024223 5. 314004 5. 621389 4. 281544  
2. 046532 2. 630783 2. 458297 2. 283269 1. 670575 1. 701111 1. 194475 2. 072572 1. 965316  
9. 388589 9. 399153 9. 377839 9. 165386 9. 651386 9. 522341 9. 414456 9. 385633 8. 512019  
8. 870556 9. 041748 8. 883927 7. 784079 8. 654647 8. 819176 8. 731649 8. 952431 8. 890006  
4. 283918 4. 165373 4. 170134 4. 330157 4. 458182 4. 283632 4. 311309 4. 324553 4. 268288  
2. 2709 2. 437904 2. 791004 2. 731987 1. 992456 2. 368498 2. 243183 2. 571834 2. 609629

6.883472 7.65588 7.287668 6.906168 8.245501 6.380928 6.838878 7.242419 4.986076  
2.147285 2.350234 1.747613 2.550892 2.633426 2.471324 1.665201 1.680387 2.106919  
2.768825 2.971925 2.897069 2.767036 2.370927 2.411932 2.866745 1.990463 2.920127  
3.972432 4.584722 5.099639 5.25772 5.83655 4.336806 3.804516 4.731113 3.302598  
8.874521 8.79758 9.706929 7.334486 8.717234 8.919195 9.119152 8.728531 9.252621  
2.650477 2.956803 3.197955 4.158725 3.214703 2.349006 4.044283 2.981956 3.191871  
3.332171 3.493284 3.336584 4.281752 3.836184 2.786373 3.054416 3.5735 4.022329  
4.241782 3.465453 2.682204 2.125809 3.393504 2.857198 3.919467 3.504858 2.936141  
2.139597 2.362176 2.229424 3.043021 2.353204 3.018701 2.136658 2.382664 2.621068  
1.392512 0.861571 1.1691 2.543249 1.377813 2.236775 1.142144 1.154886 1.676623  
3.899158 3.885374 3.986577 4.168886 4.285181 3.27153 3.740679 4.01728 3.79634  
3.080837 3.78093 3.281751 3.580611 3.291833 2.946082 3.389901 3.111125 4.491888  
6.173695 5.616508 5.86514 5.9149 6.116452 6.420096 5.981932 6.131214 5.720118  
5.257812 4.733953 5.333192 5.740157 4.497437 4.756364 5.537133 4.944002 4.907557  
1.608116 2.229847 2.088286 1.420868 2.162528 1.224794 1.397027 2.08612 2.111592  
6.750157 6.842454 6.705769 6.649113 6.649372 6.417931 6.522 7.076506 6.29942  
8.595985 8.19548 7.619408 9.233918 8.850221 8.091334 8.82056 8.623962 8.04236  
6.910518 7.546691 7.263606 6.488522 7.397506 7.532392 6.512594 7.03814 7.164812  
4.085814 5.336159 4.306434 3.844795 5.710796 4.86577 5.054257 4.422809 7.24935  
7.016284 6.935489 6.606163 6.947941 6.948318 6.862245 6.97774 6.952522 7.270675  
3.521919 4.463645 3.649873 3.040585 3.279247 4.625056 4.034049 3.830167 3.512932  
4.770295 4.266544 4.226473 4.99024 4.290395 4.520245 4.575967 4.617488 2.919229  
9.102195 9.707449 8.838805 9.643928 10.20664 9.611136 8.974016 10.14066 8.511792  
7.649124 7.603141 7.692943 7.650412 7.524337 7.945855 7.718012 7.685636 6.716058  
9.566182 9.547762 10.39213 10.05049 9.410168 9.571558 10.00943 9.760935 9.57769  
2.306317 5.026343 3.073018 2.724479 3.097501 4.485345 2.708758 2.17498 2.648907  
2.165645 1.862001 1.959486 2.828258 1.630755 2.073659 1.559741 1.425591 1.263223  
5.323162 5.277414 5.124114 4.945849 5.145581 5.678084 5.066419 5.176423 5.453393  
3.751073 3.795868 2.851047 3.614579 4.655672 3.951289 3.982558 3.939547 2.770331  
6.018801 5.14821 5.220879 5.470393 4.986738 4.900454 6.213452 5.615974 5.65679  
6.100986 6.781962 5.963483 7.281667 6.864892 6.398003 6.563818 6.802192 6.049472  
2.666298 2.057758 1.75989 1.979742 1.794997 1.788305 1.608103 2.145934 1.804012  
3.51301 4.228255 4.096448 3.769757 5.044352 4.279839 4.297925 4.210586 3.083455  
4.635821 5.331117 5.376783 4.841917 5.277892 5.484536 5.197231 4.548271 3.261543  
7.450852 7.463123 6.923564 7.424902 7.592493 7.2195 7.368345 7.254496 7.164538  
4.971957 5.416732 5.000164 5.461058 5.165312 5.387971 5.14812 5.045965 2.820612  
6.633277 6.526326 7.054751 6.775261 6.805387 6.242553 6.289629 6.118622 6.699767  
2.114835 2.867372 3.617164 1.790472 2.445404 4.150389 1.96751 2.169156 1.662811  
1.137111 0.992514 1.510247 1.102847 2.371513 1.957039 1.058411 1.061364 1.555229  
7.445483 7.851555 7.632578 6.943602 7.655039 7.476323 7.475543 7.570536 6.754313  
8.90222 8.751854 8.727159 8.722123 8.479586 8.545465 9.091973 8.8742 9.178765  
4.103192 3.012967 2.678887 2.671748 4.720542 4.22811 2.741249 3.839378 2.826668  
2.4983 3.020552 2.720463 2.586258 4.084075 2.80071 3.669946 2.799373 4.003549  
6.571782 7.275889 6.866296 7.080952 8.101168 6.981041 7.496357 6.800379 6.765727  
7.813766 7.753495 7.839346 7.978095 8.179077 7.870716 7.92397 7.756557 8.239926  
0.495972 1.101555 1.492014 0.338236 1.128021 0.569007 1.835213 0.931114 0.938528  
2.170014 3.634115 1.802451 1.84827 3.365246 3.208866 3.007876 3.007468 2.395102  
1.262004 1.229144 1.599442 2.112496 0.902848 2.111268 1.351241 1.487749 1.390148  
9.030554 8.925928 9.078213 9.188031 8.210128 9.304632 8.75354 9.088699 8.118258  
6.385159 4.328919 2.485804 4.704463 4.094739 4.850305 4.005249 2.122102 4.224193  
1.515086 2.506087 1.632609 2.009943 2.338913 2.02891 2.630034 2.110679 3.991819

7. 416421 6. 823593 6. 604933 6. 252372 6. 973729 7. 072843 6. 923609 7. 620007 6. 745345  
5. 957012 6. 242883 6. 717875 6. 005418 5. 921984 5. 767906 5. 62312 5. 647857 4. 517412  
7. 350115 6. 341238 6. 081263 5. 362799 6. 249455 6. 996343 6. 625182 6. 414517 6. 726747  
5. 743973 5. 282797 4. 909069 3. 128003 4. 359776 5. 82426 4. 984715 5. 230212 4. 986089  
6. 850209 7. 068115 7. 029811 6. 745656 7. 202059 6. 961295 7. 137758 6. 859817 7. 757019  
9. 528389 9. 556266 9. 187056 9. 613912 9. 897282 9. 188736 9. 472109 9. 353773 9. 433118  
7. 346705 7. 357813 7. 097401 7. 733454 7. 558229 7. 422768 7. 720055 7. 592769 7. 723646  
7. 743037 8. 494624 8. 649764 8. 665221 7. 743402 8. 236284 8. 592273 9. 038078 7. 81533  
5. 416068 5. 712755 6. 018865 4. 44523 6. 149648 5. 566466 5. 500461 5. 811011 4. 970931  
1. 444793 1. 536224 2. 517739 1. 961044 2. 024239 2. 880132 1. 868326 1. 70164 3. 091798  
11. 49845 11. 10582 11. 4033 11. 14944 11. 11442 11. 35223 11. 42605 11. 21821 11. 32519  
1. 287301 1. 17988 1. 641009 1. 597426 1. 59525 2. 044921 1. 339918 1. 246524 1. 172722  
2. 87119 4. 128488 3. 563513 3. 189247 3. 035584 3. 553664 3. 194504 3. 600516 2. 696629  
8. 26583 8. 293667 8. 412412 8. 007772 8. 326707 8. 250957 8. 317775 8. 371107 7. 685567  
4. 800786 4. 346664 3. 387865 5. 516634 5. 194992 3. 982163 3. 968579 5. 012652 2. 830751  
4. 919816 4. 154433 5. 818171 6. 13446 5. 35762 3. 570607 4. 675884 3. 816099 4. 463268  
7. 342406 7. 735228 7. 548115 7. 102901 7. 958442 7. 541223 7. 225403 7. 371752 5. 822873  
4. 17237 3. 986239 4. 290792 3. 317311 4. 905365 3. 871929 4. 096486 5. 181725 3. 82659  
4. 535235 4. 355197 4. 070488 2. 905659 4. 730941 3. 720083 3. 773303 4. 862021 4. 977318  
2. 112292 3. 317799 2. 862477 3. 111269 3. 61291 2. 710409 5. 102933 3. 409583 2. 90237  
0. 962609 2. 207671 1. 236951 1. 515764 1. 638692 1. 138193 1. 17947 1. 582193 2. 185456  
7. 485026 7. 882475 8. 169907 8. 007506 8. 289882 7. 757424 7. 902986 7. 929799 7. 593347  
4. 038547 4. 877263 3. 866476 4. 860472 5. 313574 3. 934444 3. 373422 4. 215503 2. 866711  
8. 070147 6. 94779 9. 13087 8. 45886 5. 246462 5. 726462 8. 109267 6. 546038 8. 200771  
7. 112267 6. 5919 7. 774314 5. 460786 7. 034608 6. 037222 7. 208796 5. 604047 6. 197052  
2. 273198 3. 079081 1. 92346 1. 447295 2. 440362 2. 266505 1. 887589 2. 521519 2. 942786  
1. 482892 1. 477166 1. 596382 1. 988779 1. 532719 1. 584691 1. 423112 2. 616152 2. 204369  
2. 021053 1. 956871 2. 684314 1. 411708 1. 567432 3. 013964 2. 456454 4. 115721 1. 483029  
8. 45029 7. 58261 9. 145075 8. 436746 6. 62631 7. 816118 8. 258877 7. 588279 8. 691594  
4. 213398 5. 07748 3. 619698 3. 081502 5. 350517 3. 203227 4. 272332 5. 945021 3. 928458  
3. 209218 2. 762026 3. 063498 2. 151541 2. 227902 4. 028635 2. 616481 3. 961064 2. 45142  
2. 261784 2. 546153 2. 111314 2. 99865 2. 206548 2. 149128 2. 272432 2. 465473 1. 531096  
1. 407826 2. 068476 1. 340361 1. 107096 0. 929478 1. 980839 1. 227545 1. 572362 1. 162908  
1. 473187 1. 618016 1. 891232 2. 907544 1. 274668 2. 490878 1. 717864 1. 768361 1. 501238  
7. 642072 7. 84087 7. 600869 7. 625621 7. 651517 7. 726217 7. 634487 8. 044243 6. 342816  
3. 196907 2. 54261 3. 357949 1. 445774 2. 42894 3. 001316 2. 50108 2. 771621 0. 546127  
2. 305707 2. 282602 2. 721351 2. 648037 2. 498948 2. 470882 1. 736398 3. 29578 2. 044874  
3. 633196 5. 334207 3. 790822 4. 42825 5. 045703 3. 23887 5. 758693 6. 762005 3. 003818  
7. 119724 7. 064958 6. 401702 7. 472335 7. 513698 6. 749417 7. 02418 7. 285058 7. 140844  
1. 913577 1. 605936 1. 762244 1. 450053 2. 413838 2. 330608 1. 926897 1. 859732 1. 783831  
1. 016212 1. 120433 1. 207474 1. 726991 1. 581596 1. 35409 1. 268319 1. 083146 1. 050418  
2. 130808 4. 701331 3. 765284 3. 242423 5. 792209 2. 677217 5. 91121 3. 029923 2. 401433  
7. 576407 7. 688572 7. 552244 7. 405485 7. 224088 7. 378151 7. 779728 7. 876496 7. 639472  
3. 869089 4. 268832 4. 006309 2. 667503 3. 682669 2. 975111 3. 634361 3. 354401 3. 259493  
6. 043752 6. 028771 6. 357896 5. 5496 6. 156439 5. 723896 6. 064422 5. 66719 3. 834501  
5. 864037 5. 996224 5. 895128 5. 755284 6. 120328 5. 494027 6. 223453 6. 063919 5. 614526  
6. 591389 6. 422168 6. 43952 6. 379557 6. 683069 6. 330253 6. 811556 6. 580473 6. 122465  
8. 085347 8. 438844 7. 997658 7. 348895 8. 340891 8. 350189 7. 751262 8. 513084 7. 498712  
1. 715355 1. 669784 2. 429077 2. 975946 1. 857198 0. 917299 1. 843765 1. 253117 1. 736326  
2. 74004 2. 421153 2. 608635 2. 869332 2. 367848 2. 318117 2. 401096 1. 970611 2. 561678  
6. 774469 6. 710714 6. 755711 6. 585413 6. 765952 6. 873993 6. 857762 7. 007874 6. 995609



3. 212804 4. 542206 3. 960422 3. 674992 4. 064062 3. 794557 4. 150275 4. 766012 2. 507099  
7. 246915 7. 745503 7. 585418 7. 129335 7. 278718 6. 877351 7. 224779 7. 523193 6. 502356  
1. 320907 1. 780747 1. 240591 0. 850384 1. 799068 4. 911417 1. 06562 1. 153828 1. 134514  
3. 162289 2. 949491 3. 338252 3. 515686 4. 53993 3. 403516 3. 057392 4. 200653 3. 144997  
5. 472988 5. 132485 5. 753768 5. 037714 5. 27383 4. 169042 5. 91536 5. 543077 5. 520597  
8. 22192 7. 803499 8. 321754 7. 597014 7. 219078 7. 239393 8. 258594 7. 885435 8. 397857  
6. 657683 6. 563104 5. 485904 6. 622615 6. 035761 6. 440257 6. 712294 6. 106434 5. 780613  
0. 863158 2. 329495 1. 824643 1. 549183 1. 433037 2. 905376 0. 545318 1. 179739 1. 290874  
9. 020363 9. 172726 9. 029829 9. 259851 9. 061852 8. 102948 9. 106234 9. 268372 8. 726529  
6. 339529 6. 005856 5. 721916 3. 47197 6. 0251 5. 834755 6. 548872 6. 014192 6. 103916  
1. 985713 1. 910293 1. 586209 2. 053186 2. 31741 2. 224984 1. 396404 2. 154472 1. 208433  
6. 019946 6. 281302 6. 229986 5. 68242 6. 621092 5. 630128 6. 295336 5. 966245 7. 030914  
8. 018703 8. 071721 7. 66269 8. 251137 7. 775151 7. 890936 8. 086615 8. 103003 8. 080236  
5. 879936 5. 874434 5. 919318 6. 202223 5. 628838 5. 636366 5. 361881 5. 332326 6. 22376  
1. 303204 1. 980688 2. 385209 1. 960084 1. 93534 1. 969021 1. 839775 2. 83835 3. 323903  
3. 551464 4. 162147 3. 151845 4. 234339 4. 509369 3. 292772 4. 521067 4. 372176 3. 420094  
1. 397784 1. 320278 1. 306866 2. 475047 1. 078346 1. 468579 1. 183702 1. 767722 1. 245792  
4. 462226 5. 330436 4. 789259 4. 400266 4. 776757 4. 661819 4. 381573 5. 168915 5. 638985  
6. 680679 7. 074604 6. 595899 6. 006119 6. 768825 7. 115961 6. 349281 6. 360106 7. 022298  
11. 20068 10. 83223 11. 14219 10. 80467 10. 77435 10. 76625 11. 20505 11. 03662 10. 93584  
2. 097751 2. 063776 2. 503725 1. 652811 1. 995967 1. 711563 1. 774661 1. 919661 1. 696938  
2. 778405 3. 914566 3. 181273 3. 209456 3. 632902 3. 184472 2. 970638 2. 828034 3. 567879  
5. 787152 6. 262914 6. 219916 6. 347341 5. 326132 5. 916161 6. 193045 5. 642635 6. 349994  
5. 524747 5. 856574 5. 583996 4. 723861 5. 531636 5. 734669 5. 679072 5. 296917 6. 116701  
6. 317565 5. 967839 6. 437109 7. 439361 5. 949713 5. 771756 6. 099402 5. 899684 6. 799668  
4. 090902 6. 039896 3. 957431 6. 667149 5. 60557 3. 273468 6. 64848 6. 251331 4. 619202  
4. 43537 4. 124991 2. 733145 6. 315417 5. 694303 2. 473019 3. 61219 3. 996079 2. 820188  
9. 902521 9. 665756 9. 997826 9. 416003 9. 702568 9. 811374 9. 87265 9. 595354 9. 680327  
2. 095657 2. 413315 2. 869671 3. 025696 2. 252569 2. 662353 2. 421759 1. 920898 2. 821631  
1. 174286 1. 215836 1. 203979 1. 509391 1. 600768 1. 004397 1. 344118 1. 409819 1. 342908  
7. 890162 8. 011099 7. 898446 7. 178327 7. 922349 7. 948639 8. 117565 7. 84402 7. 899859  
5. 546099 5. 421985 4. 930406 5. 554965 5. 785403 5. 641053 5. 667089 5. 858894 5. 552188  
5. 787679 5. 356666 5. 710378 5. 61523 5. 7561 5. 170878 5. 61523 4. 986407 6. 076726  
2. 640382 2. 695148 2. 940995 3. 279142 3. 385974 1. 986015 3. 377104 2. 855955 3. 327019  
4. 995017 5. 831816 4. 910939 4. 578155 4. 581205 4. 608294 4. 735287 5. 110344 6. 028085  
1. 629691 2. 002348 2. 309361 1. 324541 1. 564373 1. 332638 1. 927284 1. 706852 1. 405762  
1. 521345 1. 939527 1. 02534 1. 599223 2. 389041 1. 316017 1. 76242 1. 508776 1. 504801  
2. 370658 3. 255375 2. 416636 1. 355128 2. 424352 2. 833147 3. 726703 1. 670745 2. 739965  
1. 327211 1. 078915 2. 272697 2. 148769 1. 520137 2. 434301 1. 093709 1. 188823 1. 533629  
6. 849854 6. 953379 2. 702713 5. 957315 7. 171911 6. 557435 5. 880109 6. 940121 5. 607759  
1. 613359 1. 700725 2. 027127 3. 377335 1. 49841 1. 521676 1. 741675 2. 105791 2. 330676  
5. 33138 5. 329949 4. 860293 4. 714993 5. 336543 5. 57874 5. 466424 5. 934849 6. 060333  
1. 934831 1. 28084 1. 236001 1. 622893 1. 040974 1. 087799 1. 772066 1. 498045 1. 746896  
0. 840197 1. 187374 1. 264969 1. 165476 0. 666722 0. 685538 1. 011538 0. 824894 1. 112612  
1. 203436 1. 240199 1. 882995 2. 609953 0. 948487 1. 524251 1. 744867 1. 205106 0. 947065  
3. 57199 2. 752571 3. 349349 3. 672351 3. 656393 3. 060391 2. 936465 3. 839782 4. 088888  
1. 589577 1. 0876 2. 045979 1. 497503 1. 317166 1. 559168 0. 996238 1. 437503 3. 239162  
1. 348526 1. 029837 1. 06924 1. 162395 1. 132128 1. 257476 1. 60587 0. 940117 1. 374368  
0. 85563 1. 57839 1. 018039 0. 82945 1. 283289 1. 060683 0. 934689 1. 168172 0. 859853  
1. 993706 2. 297891 2. 542436 2. 978997 2. 172971 1. 216799 1. 854391 1. 249895 2. 034118  
0. 776999 1. 271297 2. 318266 2. 140754 1. 547711 1. 177677 1. 155382 1. 188809 1. 370696

1. 498675 1. 025762 1. 187338 1. 537842 1. 101286 2. 031353 1. 475848 1. 170085 1. 277718  
4. 066752 3. 800004 3. 698086 4. 836766 3. 385751 3. 663285 2. 804985 3. 552607 4. 702277  
1. 952369 2. 199717 2. 099347 1. 730828 3. 310105 1. 189524 1. 864218 1. 359221 1. 967705  
1. 216782 1. 559442 1. 304393 2. 226948 1. 136691 1. 142698 2. 191651 1. 820842 2. 058173  
3. 303168 2. 558755 4. 112833 4. 784868 2. 119724 2. 552156 3. 969164 2. 339638 4. 262813  
3. 458987 3. 761514 2. 877366 3. 930624 3. 604189 2. 127117 3. 845442 3. 201083 3. 827547  
2. 510729 1. 341343 2. 986988 2. 414872 2. 141581 3. 685338 1. 605616 3. 432433 1. 066514  
0. 876596 1. 96394 0. 801139 1. 633745 1. 687469 1. 168842 1. 225038 1. 496741 1. 514397  
7. 324706 7. 250498 6. 376713 7. 51543 6. 862391 7. 298385 7. 389868 6. 818343 7. 093517  
5. 883244 6. 085298 6. 168001 5. 430563 6. 247582 6. 547857 5. 704471 6. 372802 6. 524503  
5. 99132 6. 080954 5. 894715 5. 761819 5. 696814 6. 284969 5. 636213 6. 056628 5. 180671  
8. 494077 8. 351244 8. 556862 8. 421866 8. 682862 8. 394518 8. 406229 8. 481229 8. 242642  
3. 411213 3. 555746 4. 487679 5. 833492 2. 278506 2. 68332 5. 465107 3. 398734 4. 7867  
1. 41961 1. 317184 1. 380812 1. 771176 2. 346585 1. 870206 1. 471219 2. 045076 1. 40368  
7. 407931 7. 017692 6. 988403 7. 096176 7. 011202 7. 201936 7. 586374 7. 384483 6. 82243  
7. 216605 6. 476702 6. 515921 6. 57691 6. 617957 6. 592324 6. 847168 6. 897403 6. 611906  
1. 481527 2. 102234 2. 323121 1. 916975 1. 835101 1. 508594 1. 693781 1. 51472 1. 540455  
4. 158781 5. 131343 4. 742541 5. 12967 6. 105638 4. 182332 4. 887967 5. 672885 4. 951893  
5. 159815 4. 809098 4. 611129 4. 815931 6. 040149 3. 968001 4. 713903 5. 189754 4. 053005  
7. 741353 7. 512282 7. 426883 6. 443637 7. 625084 8. 008514 6. 812249 7. 897212 7. 823075  
4. 32907 4. 693218 4. 442704 4. 683964 4. 687559 5. 254752 4. 672692 4. 878221 3. 545296  
7. 66543 7. 332729 7. 250098 7. 505562 7. 242658 7. 238107 7. 335892 7. 065565 7. 185265  
7. 601191 7. 798422 7. 67578 7. 833416 7. 933871 7. 430858 7. 856255 7. 920872 8. 034788  
6. 521666 6. 60839 6. 695605 5. 420066 6. 081361 6. 642918 6. 811893 6. 508555 7. 151218  
4. 272898 3. 980976 4. 616962 4. 840372 4. 569186 4. 056163 3. 702451 3. 717263 4. 131918  
4. 029499 4. 045624 4. 44613 3. 760012 3. 705798 3. 231094 4. 574169 4. 719021 3. 069704  
1. 284501 1. 280247 1. 231389 1. 628484 3. 061804 1. 695296 3. 326136 1. 853174 1. 026851  
2. 043593 1. 873072 1. 908856 2. 091753 2. 173988 2. 164384 1. 963251 2. 080326 3. 047769  
2. 543332 0. 982381 1. 971787 1. 775174 1. 243607 2. 176947 1. 445191 1. 163188 1. 780163  
3. 957854 4. 079422 4. 659945 5. 094326 3. 859595 4. 654561 4. 314048 3. 461033 3. 988474  
1. 587796 1. 483472 1. 110811 2. 58395 2. 275655 1. 772949 1. 69117 1. 396725 1. 934539  
1. 201813 2. 010631 1. 605608 1. 539536 1. 150137 1. 598237 1. 407697 1. 980501 1. 712336  
2. 731149 2. 205274 2. 562844 3. 472557 2. 101482 2. 595834 2. 067697 2. 119018 2. 506807  
8. 558059 8. 52635 8. 268534 8. 055954 6. 79235 7. 684161 8. 328747 7. 622103 8. 022197  
2. 9178 2. 724745 2. 76089 3. 569522 2. 956116 2. 442941 2. 835062 2. 649914 2. 534075  
0. 686013 1. 109829 0. 911267 0. 851621 0. 719099 1. 612102 1. 071276 1. 612102 1. 109171  
4. 955947 5. 443495 5. 539888 5. 154672 5. 189919 4. 818924 5. 577368 5. 429989 5. 274325  
1. 887773 2. 008019 1. 792464 3. 037384 1. 709787 2. 118244 1. 817355 1. 538117 1. 27878  
2. 7802 1. 407349 1. 558929 1. 177871 2. 579835 2. 02238 1. 329308 3. 376807 2. 467828  
0. 797812 0. 963041 1. 538913 1. 361612 1. 986649 1. 642466 0. 91159 1. 508753 0. 465215  
6. 428755 6. 974309 5. 241855 6. 968222 7. 188782 6. 188447 6. 281331 6. 009771 7. 747008  
2. 393885 2. 178108 2. 360067 2. 943035 1. 710433 2. 269575 2. 298527 2. 169375 2. 135833  
3. 170859 3. 667994 2. 363037 2. 700594 1. 745566 2. 48677 1. 870358 2. 076304 2. 278974  
2. 93005 4. 2744 3. 104889 3. 622872 2. 727668 3. 368528 2. 842355 3. 143984 3. 277456  
3. 707722 4. 082558 4. 06956 4. 40209 3. 93523 2. 869858 4. 986829 3. 388676 2. 046281  
3. 94716 0. 806566 3. 49452 2. 195798 1. 435988 2. 655555 1. 012844 3. 253812 5. 032735  
3. 846392 4. 160773 4. 480603 4. 019287 4. 218467 4. 385637 4. 222053 4. 150262 3. 627268  
2. 146984 1. 81936 1. 880632 1. 770751 2. 57559 1. 590213 1. 693362 1. 18519 1. 82203  
3. 448778 4. 686102 4. 529384 2. 996216 3. 174974 3. 168595 3. 715258 2. 844046 4. 549757  
4. 284877 4. 378795 3. 232365 2. 85566 3. 701151 3. 134887 3. 940805 4. 200316 4. 661368  
2. 648664 3. 096225 2. 275113 2. 016334 1. 859892 1. 822587 2. 045922 1. 368925 2. 127352

3. 547399 4. 210446 4. 127589 3. 695037 4. 778812 2. 372593 5. 347397 3. 763903 1. 814939  
2. 495853 2. 723699 2. 635171 3. 241354 2. 664149 3. 038795 2. 55569 2. 866066 2. 381829  
1. 868595 0. 528239 0. 923013 0. 83637 0. 574114 4. 117186 3. 563816 2. 58393 2. 654382  
3. 605985 3. 970504 3. 532962 3. 826003 4. 019544 3. 887847 3. 411495 2. 676836 3. 519146  
0. 782987 0. 729144 1. 143193 0. 963516 0. 919773 1. 118589 1. 028884 1. 009618 1. 010019  
1. 156584 1. 692665 1. 133562 1. 408731 1. 351678 1. 952066 1. 113188 1. 190838 1. 421862  
1. 190799 1. 611843 1. 808494 1. 790756 1. 469032 1. 96103 1. 599475 1. 419578 1. 85909  
10. 41271 9. 858282 10. 33172 10. 08545 9. 964781 9. 743605 10. 17499 9. 975125 9. 905067  
1. 130027 1. 268283 1. 482725 2. 047937 1. 138066 2. 232512 1. 359207 1. 076081 1. 282853  
1. 454542 2. 693078 1. 806749 2. 156774 2. 537928 1. 873601 2. 139143 1. 79779 2. 350192  
4. 267532 4. 303772 5. 508152 5. 496093 4. 224709 4. 285777 4. 746177 3. 911373 3. 847855  
1. 538866 1. 255746 1. 665815 2. 252864 1. 533045 1. 869586 2. 018092 1. 501101 1. 523836  
1. 680675 1. 950377 1. 508095 1. 613945 2. 22717 1. 765748 1. 223327 1. 95017 1. 933751  
1. 752399 1. 058751 2. 281131 1. 555275 0. 856781 0. 784743 2. 016732 2. 11438 1. 339616  
1. 476555 1. 641037 1. 948157 2. 652628 2. 208967 1. 852729 2. 866448 2. 204594 2. 227133  
2. 896021 2. 605309 2. 710809 4. 013569 2. 78813 2. 305882 4. 076656 2. 455968 3. 224627  
0. 608616 1. 952238 1. 659456 0. 838922 1. 374273 0. 547112 0. 825844 1. 609949 1. 079487  
3. 534534 2. 039155 2. 036711 3. 17886 1. 971776 2. 065616 2. 160615 1. 586738 1. 847119  
1. 150969 1. 813739 1. 306448 2. 074527 2. 462943 2. 378312 1. 274128 1. 501879 1. 601545  
1. 286355 1. 954432 2. 644963 1. 576981 2. 169183 1. 259681 1. 200192 1. 233433 1. 386968  
2. 282456 3. 151719 2. 417917 1. 977647 2. 546062 2. 114976 2. 972382 3. 966711 2. 800464  
1. 150731 1. 966451 1. 185256 1. 764255 1. 359084 1. 867413 1. 176081 1. 224004 1. 34206  
0. 992402 1. 114037 1. 477768 2. 353407 1. 270576 2. 111408 1. 402118 1. 552661 1. 106285  
2. 174855 1. 556574 1. 009029 1. 545571 2. 078897 2. 711839 1. 421932 2. 678954 3. 458302  
3. 34263 3. 420197 2. 917878 3. 240373 2. 761959 3. 371698 3. 659213 2. 639178 3. 799717  
1. 286727 0. 743924 1. 468237 1. 285507 0. 805932 1. 797376 1. 150344 1. 015795 1. 284841  
1. 973728 1. 185628 1. 480916 1. 033409 1. 014717 1. 134719 0. 638899 0. 85138 1. 297178  
3. 308735 1. 45439 1. 825751 1. 586786 1. 19391 2. 427557 1. 257505 1. 796637 1. 727252  
6. 870329 6. 640936 6. 978762 5. 496685 5. 790578 5. 768857 6. 892837 6. 667724 6. 942016  
4. 736141 3. 803338 4. 081732 3. 436218 3. 921398 4. 551075 3. 906843 3. 672563 5. 064602  
0. 828845 1. 297477 1. 216337 1. 475601 0. 973263 1. 18097 1. 146036 1. 016572 1. 052299  
1. 671954 1. 545535 1. 89362 1. 909452 1. 960985 2. 484866 1. 357964 1. 767086 1. 490619  
1. 704987 0. 293884 0. 37924 1. 243285 1. 114662 0. 779122 0. 157534 0. 777532 0. 612018  
3. 778905 4. 586363 2. 564057 2. 849509 1. 859685 2. 581016 1. 673532 2. 417531 4. 227704  
6. 659243 6. 644437 5. 731467 5. 989392 7. 00107 6. 100057 6. 490147 6. 400607 6. 929464  
6. 332778 6. 633813 6. 298476 5. 987415 7. 615738 7. 10596 6. 377475 7. 037539 6. 767164  
1. 147462 1. 304727 1. 569062 1. 824287 1. 611756 1. 119392 1. 086142 1. 539097 1. 537349  
4. 922976 6. 054643 5. 290133 2. 284302 5. 621386 5. 740491 4. 869002 5. 854033 6. 307321  
1. 15791 1. 709971 1. 351812 2. 004828 1. 138398 1. 032399 1. 754268 1. 70515 2. 017095  
4. 737246 5. 710813 5. 130617 1. 389599 4. 238504 3. 046494 4. 64518 4. 10317 3. 788034  
2. 451576 2. 898493 3. 439756 3. 396577 2. 194733 3. 670498 2. 892879 3. 542702 1. 735272  
4. 584531 2. 196109 2. 787858 2. 874882 2. 688411 2. 808178 2. 304952 3. 991125 3. 5089  
4. 296272 4. 614181 6. 468843 2. 075355 4. 276331 3. 898772 5. 479608 3. 661124 4. 261096  
2. 124884 1. 651774 1. 590053 2. 302872 1. 867397 2. 001289 2. 080391 1. 879309 2. 089174  
1. 408591 1. 256598 0. 892075 2. 265019 1. 630107 1. 188348 0. 936905 1. 283959 1. 555162  
4. 966049 4. 512544 4. 545269 5. 450283 4. 516626 5. 334253 4. 801029 4. 365789 4. 096434  
5. 152124 6. 149808 4. 554685 5. 316575 5. 145512 3. 338175 5. 305805 5. 45397 4. 317414  
1. 879607 1. 893017 3. 473798 2. 993012 2. 3988 1. 709382 2. 352049 2. 239941 2. 010744  
7. 132775 7. 283886 7. 161555 7. 254755 7. 49314 6. 746406 7. 126874 7. 613276 6. 783053  
2. 022639 2. 150659 1. 936186 1. 824373 1. 964595 1. 919685 2. 028797 2. 269566 3. 581651  
4. 798037 3. 849399 4. 524996 4. 882315 3. 702124 5. 288399 3. 486107 4. 486982 4. 496839

2. 408147 1. 712341 2. 054188 2. 543033 1. 509879 2. 456451 1. 872196 2. 105787 1. 54569  
5. 870756 4. 764911 4. 608662 4. 217798 4. 457735 5. 268848 5. 39067 4. 721281 4. 274874  
5. 977468 5. 03184 3. 033806 3. 401394 3. 247625 2. 686448 3. 941452 2. 024968 5. 100273  
1. 369522 2. 065809 1. 558466 1. 968649 1. 501687 2. 251789 1. 46899 1. 390128 1. 810308  
1. 133914 1. 373298 1. 474728 1. 445995 1. 224669 1. 012939 1. 58218 0. 899841 1. 718151  
1. 15459 1. 62775 1. 229531 2. 451716 1. 520729 2. 471356 2. 776075 2. 261687 2. 579398  
1. 330543 1. 431226 1. 521364 1. 703937 1. 845226 1. 558025 1. 507209 1. 586748 1. 753485  
1. 388058 1. 021847 1. 003163 2. 573672 1. 513005 1. 716328 1. 098842 1. 865768 1. 195941  
4. 103722 3. 673791 3. 563605 4. 697516 5. 408879 4. 461005 4. 375701 5. 265973 4. 095605  
3. 585097 4. 464487 4. 264714 3. 298509 5. 188347 5. 084713 4. 648174 5. 560794 4. 713675  
1. 524889 1. 437922 2. 35493 2. 203547 1. 920495 1. 481238 1. 98094 2. 06663 1. 766558  
3. 610828 3. 578423 2. 714585 3. 672524 3. 236388 3. 562998 3. 377505 3. 415382 2. 961888  
1. 909656 1. 089728 1. 88404 2. 130878 1. 422543 1. 246425 1. 49979 1. 458853 1. 401069  
2. 908863 2. 355051 2. 304941 3. 367702 1. 46717 2. 213877 1. 8848 1. 003057 2. 014079  
1. 113281 1. 645512 1. 052971 1. 302275 1. 091464 0. 796837 1. 136023 1. 081245 0. 9276  
2. 425945 1. 844199 1. 777162 2. 426657 2. 034134 2. 198766 2. 513257 2. 257364 3. 422817  
1. 299457 2. 059547 1. 363088 1. 373113 1. 006727 2. 204862 1. 269893 2. 252827 1. 855145  
4. 725987 4. 607381 5. 475805 3. 822116 4. 117776 5. 261654 5. 279994 3. 383409 3. 924149  
1. 752202 3. 054572 3. 300813 2. 053963 1. 63768 2. 573042 1. 958706 1. 674802 1. 49271  
3. 763724 4. 3826 3. 843522 3. 791463 3. 333322 4. 065568 4. 122052 3. 61284 3. 192859  
3. 241834 2. 498529 3. 187369 4. 223303 2. 862614 3. 156316 3. 153794 2. 859104 3. 227751  
4. 059685 3. 392333 4. 781084 2. 968599 2. 672461 3. 051887 3. 392772 3. 883874 6. 235978  
2. 339264 2. 289592 2. 251009 2. 321193 1. 700778 1. 951659 1. 726551 2. 043553 2. 91847  
6. 644898 5. 884495 7. 353805 6. 728285 5. 797173 6. 985943 5. 55893 6. 778501 6. 738802  
5. 735404 5. 795903 5. 692951 5. 320093 5. 582255 6. 312479 5. 762226 6. 19265 6. 198168  
4. 015643 2. 652861 1. 54672 3. 646497 1. 598276 1. 705042 1. 69357 2. 276209 2. 039215  
4. 95862 4. 752002 4. 744618 6. 731947 5. 479905 4. 991167 5. 827227 5. 699584 5. 148906  
3. 677861 3. 421501 3. 582767 4. 220691 3. 9716 3. 027336 3. 875815 3. 72721 3. 593701  
2. 151267 2. 330964 2. 886682 1. 769954 1. 668311 2. 01147 1. 615291 2. 135303 2. 813428  
2. 977858 3. 161859 3. 707575 3. 962025 3. 259968 2. 337014 3. 759506 3. 800999 1. 97316  
2. 025876 0. 909839 1. 000948 1. 01698 1. 02161 1. 61989 1. 614213 1. 281727 1. 361123  
1. 445145 2. 207236 1. 757176 1. 130408 1. 14954 2. 585953 1. 220119 1. 283642 1. 404694  
2. 652176 1. 483807 2. 582218 2. 912171 1. 966727 2. 473636 1. 951121 2. 033162 1. 738904  
3. 885322 2. 628217 3. 166221 3. 299169 3. 072506 2. 477088 2. 897435 2. 683556 3. 121539  
1. 925071 2. 292148 1. 546413 1. 760504 2. 229072 2. 00434 1. 496482 2. 138985 1. 587943  
1. 847692 1. 259889 1. 875552 1. 670351 1. 680865 1. 648761 1. 775869 1. 549727 3. 270192  
2. 710125 2. 456432 2. 485056 2. 333593 1. 858536 2. 267015 1. 860591 1. 55577 2. 443027  
1. 659274 1. 414349 1. 464215 2. 003361 1. 663281 1. 484053 1. 52861 1. 26345 1. 730517  
2. 850813 3. 248471 3. 274504 3. 161894 3. 990961 2. 740295 3. 165842 4. 425314 2. 966541  
3. 510959 1. 712994 2. 973215 6. 441132 3. 913532 4. 1787 3. 383261 3. 769451 5. 414584  
2. 636631 1. 842372 1. 760764 2. 606923 1. 276897 2. 77221 1. 759439 2. 436673 2. 793033  
7. 643919 8. 104098 8. 131076 8. 46346 7. 625939 7. 78109 7. 337506 7. 891016 8. 457647  
1. 90295 1. 908013 2. 066119 1. 754375 1. 580191 1. 446918 2. 006602 1. 433457 3. 324381  
4. 535561 3. 713646 3. 616964 3. 893804 3. 227213 4. 693695 4. 591891 2. 358912 3. 14949  
0. 904412 1. 014063 0. 853037 1. 060748 2. 231394 2. 949244 0. 637325 1. 680356 0. 884129  
1. 709928 3. 080553 1. 877135 2. 133806 1. 680293 1. 932215 1. 324622 3. 196794 2. 197619  
3. 675581 2. 407668 2. 458103 5. 148417 3. 209691 3. 072306 3. 691591 3. 833583 4. 019686  
3. 586062 3. 106711 2. 643037 5. 882623 5. 423419 3. 802129 5. 355365 3. 581271 3. 707802  
3. 265893 3. 823172 2. 286232 3. 294961 4. 222729 2. 339247 1. 685639 3. 155621 3. 172199  
5. 420864 6. 043228 5. 838147 5. 8609 5. 612056 5. 656388 5. 942523 6. 095861 5. 742438  
3. 995725 3. 920781 3. 443189 3. 704203 5. 449205 2. 755006 3. 296363 4. 218904 3. 287279

|          |          |          |          |          |          |          |          |          |
|----------|----------|----------|----------|----------|----------|----------|----------|----------|
| 6.004301 | 5.419898 | 6.518059 | 6.554426 | 6.077568 | 6.686807 | 6.736347 | 5.97239  | 6.659716 |
| 1.210001 | 0.923336 | 1.240701 | 1.007596 | 1.055543 | 1.207348 | 0.923272 | 1.116231 | 1.005855 |
| 1.328811 | 1.066971 | 1.50099  | 1.853584 | 1.266894 | 1.416285 | 1.228469 | 1.183996 | 1.018165 |
| 1.074985 | 2.288668 | 2.634578 | 2.249008 | 1.549896 | 1.596794 | 1.471442 | 1.461876 | 1.29269  |
| 1.908884 | 1.78307  | 2.062777 | 3.325196 | 2.159265 | 1.754088 | 1.873963 | 1.689906 | 1.809556 |
| 1.9506   | 1.735216 | 2.237604 | 2.395928 | 1.773432 | 2.406858 | 1.316568 | 1.351534 | 1.59284  |
| 1.343505 | 1.264787 | 0.47563  | 0.845683 | 0.894783 | 1.102954 | 0.396061 | 0.902358 | 0.562605 |
| 7.992009 | 7.751705 | 8.365237 | 8.42525  | 8.146803 | 7.652861 | 8.146803 | 7.953831 | 7.751146 |
| 1.444727 | 1.354926 | 1.872426 | 2.773992 | 3.438054 | 2.072287 | 2.098885 | 1.265296 | 2.343467 |
| 2.113553 | 1.834005 | 1.823107 | 2.988174 | 1.848362 | 1.880341 | 2.286161 | 2.332656 | 1.593716 |
| 4.130772 | 3.209997 | 4.096767 | 2.530017 | 3.795353 | 3.162252 | 3.20489  | 4.699463 | 4.636996 |
| 1.325423 | 0.795054 | 1.207975 | 0.853804 | 0.862932 | 0.561103 | 1.779885 | 2.885733 | 4.336131 |
| 4.297515 | 3.771557 | 5.153794 | 3.667662 | 5.338777 | 4.988709 | 4.883495 | 4.601581 | 4.074423 |
| 1.225198 | 2.111867 | 1.763501 | 1.334686 | 1.363263 | 1.24602  | 1.468184 | 0.932373 | 1.30627  |
| 5.240036 | 5.913104 | 5.430952 | 5.83633  | 5.319978 | 5.317219 | 5.002877 | 5.067115 | 5.628519 |
| 2.043036 | 1.793441 | 2.923191 | 2.251704 | 1.63294  | 3.014644 | 1.250763 | 0.942032 | 1.975462 |
| 2.645014 | 1.800501 | 2.440052 | 1.305655 | 2.172455 | 1.82427  | 1.830947 | 2.076459 | 2.146635 |
| 1.375302 | 0.788903 | 1.425339 | 1.027025 | 1.693304 | 2.302482 | 0.980191 | 1.081693 | 0.891729 |
| 1.646949 | 1.306415 | 2.369186 | 2.98388  | 1.840462 | 2.586465 | 1.550348 | 1.880249 | 2.089707 |
| 1.300205 | 1.311992 | 1.34274  | 1.695035 | 1.258469 | 2.368346 | 1.442228 | 0.995299 | 1.344782 |
| 1.788673 | 3.22351  | 2.579312 | 1.993911 | 2.290734 | 3.250076 | 4.373249 | 2.388394 | 3.408214 |
| 1.411586 | 1.579885 | 1.008873 | 1.610769 | 1.082992 | 1.376836 | 1.321862 | 1.530327 | 1.436833 |
| 2.995185 | 1.753083 | 3.844151 | 2.99021  | 3.365511 | 2.712763 | 4.34878  | 3.135152 | 2.326493 |
| 4.47929  | 3.503208 | 4.795781 | 3.828548 | 4.164642 | 4.566731 | 5.093032 | 4.093054 | 3.549365 |
| 1.847144 | 2.325802 | 1.715834 | 2.244583 | 2.67893  | 1.95635  | 1.573775 | 1.856988 | 2.578564 |
| 3.811219 | 2.289373 | 3.428327 | 2.643006 | 0.08505  | 2.472258 | 1.434889 | 2.27454  | 3.980605 |
| 1.015273 | 0.831776 | 0.999727 | 0.906737 | 0.578026 | 1.2142   | 1.026611 | 1.157071 | 1.366116 |
| 3.391851 | 2.362865 | 2.093454 | 1.987526 | 3.156496 | 2.634848 | 1.966783 | 2.498469 | 1.769871 |
| 5.139614 | 5.013209 | 4.281059 | 6.161657 | 4.439957 | 4.456555 | 4.097913 | 4.429112 | 4.484598 |
| 0.354771 | 1.775664 | 2.589666 | 1.648315 | 2.829292 | 1.587525 | 1.211874 | 0.540403 | 1.778416 |
| 3.987407 | 4.701811 | 4.715418 | 5.921178 | 4.699313 | 5.278431 | 3.429895 | 3.427337 | 4.705566 |
| 1.298867 | 1.309316 | 1.475025 | 1.557785 | 1.237535 | 1.366268 | 1.421661 | 1.279496 | 1.374616 |
| 2.51137  | 2.260159 | 1.806449 | 2.599179 | 1.95205  | 1.291794 | 3.248782 | 2.298739 | 2.654378 |
| 1.04222  | 0.986513 | 1.223874 | 1.401862 | 0.651357 | 1.071959 | 1.542405 | 0.923665 | 1.176313 |
| 2.455425 | 2.300784 | 2.208532 | 2.025911 | 2.238121 | 1.879722 | 2.496192 | 2.059511 | 2.46786  |
| 1.358269 | 1.49499  | 2.181889 | 1.256976 | 1.274696 | 1.83241  | 3.123004 | 1.318716 | 1.663539 |
| 1.625092 | 2.337126 | 1.511206 | 2.244807 | 1.968427 | 2.433579 | 1.937777 | 1.952951 | 1.868077 |
| 3.085191 | 3.141673 | 3.077287 | 3.518701 | 2.750849 | 3.147296 | 3.138754 | 2.97104  | 3.563736 |
| 0.315404 | 3.315075 | 2.547283 | 2.864753 | 2.46947  | 0.986653 | 1.441325 | 1.246192 | 4.223964 |
| 2.606462 | 1.883904 | 1.898252 | 2.875073 | 2.960288 | 2.058216 | 2.281811 | 2.43509  | 2.4113   |
| 1.452506 | 1.047527 | 1.585951 | 1.02328  | 1.116229 | 1.20523  | 1.120237 | 1.112583 | 1.129739 |
| 4.846605 | 6.03271  | 5.870098 | 4.407083 | 5.386802 | 5.3826   | 5.999386 | 5.321673 | 4.129398 |
| 3.955594 | 3.885583 | 4.021832 | 3.228222 | 3.295455 | 3.244571 | 3.610716 | 3.971067 | 2.810543 |
| 2.469912 | 2.700556 | 2.088756 | 1.982016 | 2.191549 | 2.608293 | 2.065953 | 1.789502 | 2.406991 |
| 1.590192 | 1.674162 | 1.319872 | 2.082766 | 1.470831 | 1.68488  | 1.788414 | 1.244032 | 1.41527  |
| 1.638627 | 2.170338 | 2.766537 | 1.557323 | 0.945836 | 3.087027 | 3.34857  | 2.366431 | 3.904148 |
| 0.977252 | 1.491566 | 0.879812 | 1.355456 | 0.995309 | 1.305095 | 1.109974 | 1.456218 | 0.959354 |
| 1.744335 | 1.337435 | 1.501373 | 2.311228 | 1.487983 | 2.522453 | 1.692811 | 1.461678 | 2.149652 |
| 1.867183 | 1.634754 | 1.953849 | 1.83863  | 1.784408 | 1.890266 | 1.455153 | 2.343028 | 1.708315 |
| 5.607395 | 5.897761 | 5.17713  | 5.883183 | 6.354175 | 5.368128 | 5.903842 | 6.246002 | 6.083623 |
| 0.963767 | 1.668507 | 2.102914 | 2.48759  | 2.118103 | 1.871291 | 1.63379  | 1.563043 | 1.742893 |

2.628639 3.476795 1.665865 1.667141 1.949169 2.977504 1.451235 1.55513 1.768148  
1.477925 1.952284 2.488536 2.373512 2.516294 1.902054 1.645254 2.495269 2.131013  
9.544489 9.517487 9.275268 9.327454 9.587338 9.081035 9.268096 9.478195 9.823864  
1.956286 2.766452 1.663197 4.085424 2.435564 3.601967 2.794499 2.506676 3.54057  
1.332028 0.950835 2.579852 1.682277 1.034034 2.574236 0.889579 1.247733 2.513545  
4.24514 3.104957 3.594113 3.806021 3.860834 3.551029 2.858991 2.923246 3.194258  
1.161993 1.116827 1.448753 1.721717 1.200189 2.022591 1.662372 1.104157 1.950338  
2.044283 2.328059 1.430303 1.817627 1.953708 1.627263 0.986944 1.265656 1.833554  
2.457506 1.975277 2.172916 1.332819 1.559952 3.570507 1.837914 2.37033 1.603837  
1.844095 2.265429 2.140478 2.321811 1.38017 2.423893 1.789601 1.973672 2.696431  
1.781903 1.395542 1.540182 1.129632 1.159632 1.359145 1.258638 1.149943 1.339124  
5.029766 5.138868 5.244685 4.597984 3.77447 4.673669 4.640223 4.745594 4.389935  
6.541809 7.240434 6.739849 6.348696 6.971255 6.458532 6.756396 6.36912 6.617823  
2.341425 1.098118 1.639544 1.217828 1.018471 1.119909 1.682099 1.813396 0.868383  
3.009119 4.212152 3.172136 4.683014 4.143753 4.650663 2.919345 5.076741 4.411888  
2.658206 1.471563 2.035705 2.913721 2.786223 1.266013 3.075596 1.922362 4.127387  
1.38042 1.471247 1.331048 2.560266 1.576035 1.263344 2.325066 2.304962 1.697444  
2.167593 2.108023 3.225984 1.310962 1.979227 0.624192 2.466975 1.610635 1.847401  
1.239856 0.803663 1.056994 1.535258 1.468758 0.960735 0.955454 0.728246 1.190929  
2.786987 2.672205 1.700684 1.758689 1.850833 1.619719 1.991567 1.634505 1.79249  
3.154833 2.959486 2.475898 2.559989 2.040934 1.551161 2.546019 2.284542 2.473115  
4.179081 3.384741 3.903219 3.280358 4.673177 4.463013 4.326066 3.71795 4.493611  
1.279802 1.544767 1.309885 2.110079 1.168523 2.344205 1.620203 1.609234 1.694293  
1.272467 1.613477 1.288702 1.435807 1.658441 2.448084 1.590056 0.846673 1.559006  
3.322169 2.469181 4.079904 3.499717 2.854878 2.881494 3.443513 2.789805 4.005827  
5.67094 6.29077 5.683534 5.900964 6.191452 5.938885 5.823865 5.771249 5.394239  
1.077235 1.144319 1.780248 1.766534 1.155864 1.965797 1.601469 1.849099 2.461791  
1.569932 1.783735 1.414275 2.199773 2.058648 1.175893 1.473746 1.597509 2.303594  
1.765004 2.031621 1.91166 1.763612 2.060265 3.412642 1.968645 1.699887 1.996766  
3.929338 4.686392 4.347881 3.434359 5.240055 3.740265 4.635474 3.408706 4.774164  
1.678327 1.751071 1.444302 1.107073 1.233848 1.451279 1.789259 1.865578 2.163218  
3.704945 4.03845 2.961543 3.48661 4.018137 3.687703 4.14244 4.581083 3.005458  
1.443635 1.993073 2.047239 1.184526 2.015652 1.529879 3.016935 1.368454 1.635992  
2.094059 1.870795 1.628709 2.38106 1.931075 2.765893 2.175632 1.494798 2.278861  
1.693776 2.114699 1.993181 2.67651 1.610142 2.525717 1.673787 1.838587 2.480016  
7.459716 6.792219 6.855416 6.540597 7.26166 7.066815 6.821279 7.262812 7.227653  
5.096139 4.960338 5.155687 5.238923 5.245029 5.314174 5.516289 5.388696 5.983502  
2.119282 2.344893 1.498693 1.525597 2.057784 2.023147 1.54325 2.655822 1.716573  
3.843132 3.378362 3.163068 2.368028 2.506202 3.065105 3.861013 2.57422 2.330717  
1.423706 1.035184 1.761995 1.780759 1.337681 1.526927 1.485786 1.464801 2.022012  
2.973835 3.684786 3.381088 3.318724 4.821622 2.876368 3.386864 3.045764 2.865078  
2.43239 2.622399 1.971223 3.073854 3.237539 2.292923 3.264644 2.375102 2.313585  
1.785097 2.166553 1.720966 1.490411 2.411916 2.165215 1.279814 1.572378 2.538858  
2.144146 1.774452 2.271304 2.29989 1.76256 1.957102 2.554247 1.839143 2.493382  
0.734507 0.855602 0.886615 0.620541 1.395263 1.468934 2.788018 1.04569 1.740818  
2.140429 2.254314 2.04165 2.695403 2.486481 2.526839 2.455849 2.119958 2.387157  
6.371089 3.933179 3.934955 5.749102 4.142017 4.441315 5.454902 4.696656 5.802864  
4.515634 4.510124 5.167051 2.585199 3.317981 4.292668 4.532023 3.499876 4.281398  
2.934446 2.137124 1.922313 2.407062 0.599246 2.070648 0.752712 0.811023 0.818647  
2.418404 3.796178 2.231054 2.067237 2.249655 3.086112 1.779224 2.505612 1.71266  
5.358163 5.353567 5.949073 5.893289 4.683747 5.528721 5.810399 5.506731 4.486378

0. 973114 0. 950344 1. 008895 1. 868843 1. 1429 1. 036284 1. 061967 1. 124007 1. 184783  
5. 45035 6. 89629 5. 576807 5. 417965 7. 184515 7. 735516 5. 68614 7. 765599 4. 592375  
4. 21118 4. 65442 4. 686976 4. 833634 3. 122753 4. 706277 3. 572741 5. 148464 5. 348844  
1. 642588 2. 23148 1. 785495 2. 496708 2. 076513 2. 749188 2. 209342 2. 453786 1. 500474  
3. 139132 3. 139132 3. 332905 2. 818826 3. 118012 3. 381355 2. 924529 2. 637082 3. 252645  
1. 503129 1. 911459 1. 759437 1. 489424 1. 880573 2. 689833 1. 844909 1. 822505 1. 571739  
1. 40465 1. 167637 1. 414204 1. 226132 1. 812611 1. 875217 1. 638179 1. 791963 1. 470226  
1. 07225 1. 007244 0. 732662 2. 938009 0. 854094 0. 917964 1. 369633 1. 214143 0. 72865  
4. 23092 4. 786348 3. 166173 5. 28093 4. 139157 3. 724643 3. 370058 4. 423336 4. 108146  
1. 180455 1. 419033 2. 116854 3. 539073 1. 23104 2. 011736 1. 93394 2. 514126 1. 753461  
7. 226335 7. 928776 7. 298965 6. 787987 6. 990774 7. 780105 6. 898401 7. 760894 6. 146389  
1. 545583 1. 834479 1. 823535 1. 86768 1. 501279 1. 745691 1. 721102 1. 422907 1. 929949  
1. 404753 1. 376635 1. 911843 1. 947904 1. 402067 1. 479259 2. 083949 1. 932952 1. 941754  
1. 184513 2. 238122 1. 136309 0. 78152 1. 42667 1. 600101 1. 55704 1. 677973 1. 647445  
1. 139668 2. 17055 1. 177028 1. 620559 1. 656489 1. 560775 1. 642496 1. 486272 2. 464208  
1. 299645 1. 478064 0. 952292 2. 137297 1. 691951 0. 837311 0. 720911 1. 282874 1. 181852  
7. 957721 8. 301416 7. 459266 5. 763796 9. 338864 7. 352909 7. 203459 8. 395041 6. 750275  
1. 599006 1. 819271 1. 903194 2. 352186 1. 625584 1. 359752 1. 333203 1. 846764 2. 249811  
3. 17273 2. 423547 2. 074857 2. 638679 1. 5237 4. 161122 1. 177455 3. 064993 1. 871235  
1. 410773 1. 370704 1. 466558 3. 462684 4. 137535 1. 595294 1. 768579 1. 095793 1. 279354  
1. 807997 1. 508786 1. 976624 2. 528478 2. 209805 1. 73707 1. 947141 2. 222247 1. 840975  
2. 287226 3. 513702 1. 306847 3. 284253 2. 115288 1. 805555 1. 591685 1. 809763 1. 63255  
6. 579262 6. 114815 6. 059216 6. 586353 6. 809013 5. 820009 7. 361888 7. 94872 7. 185369  
1. 503842 1. 89301 1. 486359 1. 302572 1. 49614 2. 240887 0. 927767 1. 936151 0. 865875  
10. 90608 10. 6056 10. 73902 10. 8539 10. 79128 10. 39653 10. 95913 10. 64941 10. 82364  
2. 059077 1. 917465 2. 077085 2. 601331 2. 354157 2. 039229 2. 007441 2. 119552 2. 531603  
1. 090404 2. 748352 2. 263477 3. 174169 2. 351683 1. 360167 1. 830394 3. 415468 3. 868023  
1. 635914 1. 346981 1. 985618 2. 671419 1. 406358 1. 553292 1. 90003 3. 039961 2. 306663  
1. 577118 2. 102381 1. 785991 1. 859265 1. 969296 1. 677253 1. 301561 1. 572552 2. 127286  
1. 946642 1. 54343 2. 411684 1. 816759 1. 798933 1. 786802 1. 389738 1. 550317 3. 321563  
1. 961032 1. 794808 1. 829104 2. 140767 1. 677753 1. 988911 1. 837684 1. 514842 2. 41024  
1. 518646 3. 159474 2. 118162 2. 303473 2. 783101 2. 040099 3. 367046 2. 279333 3. 945522  
1. 346409 1. 467698 1. 34654 1. 577309 1. 263044 1. 750993 1. 347118 1. 517065 1. 179201  
2. 003638 1. 330525 1. 333813 2. 630465 2. 879397 0. 850743 1. 855449 1. 550413 1. 550547  
8. 186812 8. 163983 8. 472871 8. 06626 8. 175674 8. 063632 8. 354491 8. 144959 7. 852045  
5. 223817 4. 878224 4. 958664 5. 51878 6. 349074 5. 259216 5. 249255 5. 178344 4. 580773  
6. 588359 6. 44234 6. 940613 6. 816135 6. 900781 6. 671687 6. 441157 6. 723622 6. 527338  
2. 054926 2. 05461 1. 985348 2. 760193 2. 334563 2. 808628 1. 898015 1. 392641 1. 753962  
7. 944308 7. 571568 8. 022152 7. 723301 7. 744296 7. 459564 8. 032822 7. 698145 8. 040865  
6. 669452 6. 510517 6. 313831 6. 065496 6. 81243 6. 590058 6. 422193 6. 901534 6. 207951  
1. 421049 1. 710223 0. 963314 1. 402477 1. 60147 2. 489478 2. 328269 2. 461449 1. 535347  
1. 886497 1. 450341 1. 960309 2. 009971 1. 250718 2. 347644 2. 209691 1. 510644 1. 479967  
7. 272151 7. 358275 7. 065818 7. 237985 6. 680202 6. 876306 7. 082976 7. 030019 7. 138334  
6. 076984 6. 474492 6. 02356 6. 399493 6. 122758 5. 892473 6. 459407 6. 263885 6. 479497  
4. 236436 3. 539164 4. 196516 3. 840699 3. 786724 4. 22983 3. 370673 3. 762294 3. 798023  
6. 174616 6. 489845 7. 507067 7. 083968 5. 999519 6. 301821 6. 745336 6. 70899 5. 963405  
6. 436847 6. 802841 7. 022708 6. 914023 7. 416379 7. 413255 7. 287564 7. 151373 6. 287914  
6. 694174 7. 200077 7. 355797 5. 326847 7. 154361 6. 809552 6. 309783 7. 113006 6. 425228  
7. 820068 7. 818944 7. 756272 7. 304995 8. 035043 7. 847854 7. 721785 7. 554953 6. 897331  
6. 084777 6. 097112 6. 120226 5. 621218 6. 226712 5. 971781 5. 791045 6. 009543 5. 280432  
1. 252849 0. 986003 0. 873054 1. 763403 0. 832319 1. 135284 0. 970706 0. 859682 1. 615362

4. 371831 4. 155006 4. 18505 5. 073752 4. 366422 3. 844405 3. 983629 4. 111856 3. 586474  
1. 939304 2. 365728 3. 101933 3. 441613 2. 182971 2. 172972 3. 523794 1. 705971 2. 651691  
6. 195827 5. 934489 6. 174865 5. 277519 5. 99785 5. 426305 6. 239177 5. 919679 6. 392278  
6. 741589 7. 005721 7. 003321 4. 803646 6. 717832 6. 372793 6. 70212 6. 470445 6. 909992  
2. 594445 2. 169365 3. 218077 3. 792294 2. 443651 2. 58994 2. 028682 2. 56033 2. 497886  
6. 726321 6. 57199 6. 5783 7. 273201 6. 506836 6. 302519 6. 681215 7. 002458 7. 935642  
6. 884814 7. 000291 6. 563596 6. 137465 6. 787616 6. 846127 6. 695003 7. 084149 6. 718113  
6. 966031 7. 432009 6. 87839 7. 357826 7. 262017 7. 42466 7. 52165 7. 472553 6. 426959  
7. 546525 8. 361107 9. 646125 9. 362401 7. 897904 8. 415973 9. 261192 8. 058389 7. 70452  
6. 076784 5. 843057 5. 824372 5. 52177 7. 039539 4. 900641 5. 845492 6. 334394 6. 390447  
3. 994226 4. 377427 1. 587485 1. 461313 5. 923601 4. 119611 4. 540697 5. 818382 4. 711749  
2. 434189 1. 956941 3. 253861 2. 61507 3. 526907 3. 645958 2. 751931 2. 25487 1. 462221  
4. 920626 4. 639812 4. 713432 4. 224446 3. 916464 5. 218181 4. 397931 4. 301038 5. 449682  
1. 442245 1. 594518 1. 681609 1. 967578 1. 312004 1. 601639 1. 301254 1. 425529 1. 996701  
5. 835365 6. 141198 5. 109166 5. 149191 5. 896364 4. 799969 5. 262761 6. 108282 2. 527012  
1. 448809 2. 741371 1. 165737 2. 331973 1. 036943 1. 2021 1. 161228 1. 541808 1. 75116  
7. 740158 7. 881888 7. 875898 7. 517351 7. 992647 7. 169171 7. 167937 8. 039304 7. 62321  
7. 117806 7. 345355 7. 33291 6. 822932 7. 555066 7. 198982 7. 39161 7. 374237 7. 651468  
5. 163638 5. 733717 5. 699211 5. 919733 5. 156146 5. 411392 5. 36757 5. 486038 4. 855776  
2. 818881 2. 478276 2. 916763 3. 690808 2. 531546 2. 894789 2. 742395 2. 801462 2. 790104  
7. 515561 6. 821663 7. 040856 6. 504653 7. 361528 6. 865455 7. 728252 6. 908505 7. 195463  
7. 379941 7. 440059 7. 382803 6. 803558 7. 641914 7. 371906 8. 0034 7. 327216 7. 329054  
0. 853574 0. 865047 1. 581038 1. 185315 0. 731863 1. 446344 1. 120435 1. 033524 2. 879239  
7. 468223 7. 027327 7. 29911 6. 863885 7. 078956 6. 818893 7. 38814 7. 195848 7. 262898  
1. 365919 1. 735691 1. 13348 2. 300095 1. 003929 1. 062307 1. 360473 2. 779843 1. 494911  
7. 357678 4. 959326 5. 990909 6. 200443 4. 713283 6. 493684 6. 965045 6. 034052 7. 527207  
2. 231374 1. 176859 1. 90009 2. 460372 1. 330151 1. 991908 1. 939377 1. 541852 2. 523782  
0. 641192 0. 932436 0. 799926 0. 408025 0. 479941 0. 687524 0. 513989 0. 927888 0. 984079  
0. 783529 1. 172888 2. 195023 1. 400776 0. 998627 1. 569493 0. 841825 0. 883819 1. 508398  
7. 436438 5. 685116 3. 714188 4. 04848 5. 332543 4. 573138 4. 675741 6. 601363 4. 918938  
8. 211323 6. 182122 8. 973664 4. 40197 4. 873175 9. 102336 4. 006733 5. 169847 7. 747507  
3. 679714 4. 28261 4. 053572 5. 337977 4. 445236 3. 056968 4. 00268 4. 084263 3. 621859  
5. 805314 5. 040146 5. 187136 6. 104062 5. 517128 4. 820334 4. 925065 4. 838805 5. 759061  
4. 086453 3. 110854 3. 099257 5. 101873 3. 28423 2. 553684 3. 243927 2. 298795 3. 680054  
6. 119542 6. 824422 6. 249271 5. 98863 6. 686867 6. 432601 6. 114664 6. 472733 6. 718047  
6. 862862 7. 005598 6. 90978 6. 779408 6. 956255 6. 856781 7. 124774 7. 023098 6. 703901  
5. 578934 6. 000863 5. 930796 5. 183509 5. 68358 5. 558635 5. 00467 5. 865023 5. 201781  
2. 704881 2. 460565 2. 853171 2. 566974 2. 921084 1. 575991 2. 193276 2. 798914 2. 434078  
2. 12783 1. 818994 2. 392113 1. 287231 1. 050219 2. 371906 2. 820272 1. 645577 1. 459306  
2. 741823 1. 731491 1. 713435 2. 330959 1. 891268 3. 306205 2. 057972 1. 688253 2. 496235  
2. 697008 3. 146518 3. 021401 3. 226399 3. 486596 3. 211276 3. 279137 2. 530144 3. 804088  
7. 082093 7. 054011 7. 216477 5. 996421 7. 32424 7. 040192 7. 041715 7. 195737 6. 440497  
8. 483409 8. 513978 8. 028863 8. 452668 8. 327286 8. 256265 8. 63766 8. 43117 8. 405534  
3. 853178 3. 263037 3. 685089 4. 248377 4. 038055 3. 574145 2. 820917 4. 393079 4. 066046  
6. 606085 6. 288066 6. 52331 7. 511948 6. 346792 6. 491081 6. 777595 6. 354622 6. 841206  
6. 564521 6. 489973 7. 286194 6. 191611 6. 418184 6. 352242 6. 794319 6. 69278 6. 763791  
3. 936585 3. 437582 3. 964644 3. 341826 3. 933377 3. 909869 3. 891563 3. 844355 3. 568106  
4. 174363 3. 589491 3. 790592 4. 18454 2. 966163 3. 362591 4. 044191 3. 642361 3. 402428  
4. 443183 4. 384345 4. 75741 5. 691154 5. 249024 4. 535977 5. 084083 4. 800012 3. 779027  
6. 735966 6. 762708 6. 448003 6. 345949 6. 488957 6. 19273 6. 166899 6. 938035 5. 811258  
6. 576478 6. 214867 5. 697994 6. 148074 6. 315497 5. 851521 6. 115942 6. 050328 5. 663886



1. 230276 1. 509211 1. 264217 1. 496791 1. 548822 1. 887433 1. 388829 1. 757287 1. 645797  
1. 705387 1. 03347 1. 325541 1. 324392 1. 319803 1. 955412 1. 967552 1. 53191 2. 447934  
8. 552242 8. 366714 7. 981282 8. 519238 8. 333812 8. 359775 8. 251218 8. 333525 8. 641999  
5. 197106 5. 18367 4. 647045 5. 448449 5. 190694 4. 204548 4. 96236 5. 369614 5. 815997  
5. 390045 5. 356706 5. 800841 1. 940007 5. 321562 5. 157433 5. 796906 1. 525293 1. 309617  
6. 871353 6. 431203 6. 5419 6. 46776 6. 481359 6. 406784 6. 517693 6. 473722 6. 427779  
4. 027497 4. 176635 3. 773556 3. 953988 4. 310598 3. 242175 3. 976308 3. 541091 3. 467106  
4. 963755 5. 292464 5. 515656 3. 488629 4. 5737 4. 24297 5. 234901 4. 667315 4. 261844  
2. 46706 3. 351645 2. 68777 2. 868667 3. 050201 2. 73135 1. 81037 2. 363689 1. 786915  
4. 462731 4. 902795 4. 40361 4. 55566 4. 778381 4. 310268 4. 741315 4. 522822 4. 170203  
4. 75025 5. 888562 5. 893198 5. 213341 6. 012437 5. 708539 5. 848221 5. 381738 4. 879776  
6. 521838 6. 68916 5. 821816 6. 375671 6. 38553 6. 282743 5. 990153 6. 838999 6. 10274  
7. 625794 7. 290113 6. 240947 6. 323814 7. 340989 6. 726409 7. 892183 7. 316407 7. 319271  
7. 766688 7. 830714 7. 895856 7. 777379 7. 738097 7. 813511 8. 04771 7. 62426 8. 168495  
7. 670744 7. 65617 7. 49163 6. 829122 7. 620919 7. 4632 7. 923055 7. 630909 7. 285425  
2. 58412 4. 446443 2. 712617 3. 51794 2. 819196 2. 599135 3. 520227 2. 756514 2. 906952  
4. 486897 3. 925524 3. 723188 3. 724207 3. 663263 4. 070077 3. 677977 3. 724766 3. 357716  
7. 888 8. 038065 7. 819188 8. 07047 8. 12107 7. 802499 7. 507999 7. 874708 7. 569809  
3. 440684 2. 992709 3. 704337 4. 26547 3. 360224 2. 825011 3. 615146 3. 240529 3. 44159  
3. 499938 3. 746491 4. 107465 2. 62521 4. 533984 4. 910634 3. 261705 4. 040135 5. 002715  
9. 175998 9. 840446 9. 385788 9. 274512 9. 573222 9. 51051 9. 378128 9. 698905 9. 235328  
6. 195299 5. 190604 5. 205144 4. 42324 5. 623072 5. 829398 5. 468094 5. 920721 4. 055542  
5. 509607 5. 19742 6. 333605 6. 852717 6. 430002 4. 853127 6. 474185 5. 881351 4. 860408  
2. 267011 2. 464663 2. 675378 2. 453995 2. 802147 2. 871802 2. 485342 2. 425321 2. 515472  
3. 279424 3. 636583 4. 674488 1. 813124 3. 480978 2. 70604 2. 639128 3. 153207 2. 083938  
2. 695383 3. 058993 3. 824392 3. 240427 2. 31301 2. 708166 2. 227064 3. 714863 3. 930232  
8. 831582 8. 614797 8. 506249 8. 11955 8. 677418 8. 741446 8. 775362 8. 276544 8. 883028  
9. 582265 9. 761593 10. 00806 9. 766657 9. 740678 9. 527688 9. 771037 9. 74027 9. 325238  
1. 779678 1. 630244 1. 74376 1. 583868 1. 467161 1. 667709 1. 789208 1. 287457 2. 020017  
4. 769538 4. 787754 5. 735165 5. 282128 4. 218815 4. 899911 4. 882986 4. 784358 4. 755109  
2. 74737 1. 493305 2. 466888 2. 494219 2. 239825 2. 613963 1. 967288 2. 059407 2. 084253  
5. 920031 4. 952761 6. 520197 6. 209508 5. 620374 4. 70166 6. 87084 5. 420324 5. 285628  
1. 713383 2. 081975 1. 986743 2. 173623 1. 681971 1. 818147 1. 798475 2. 023032 1. 878076  
1. 779787 1. 61933 2. 471207 2. 526773 1. 799411 2. 045445 1. 517612 1. 478656 1. 534593  
1. 517607 1. 629204 2. 436753 2. 121064 1. 71928 2. 287671 1. 613409 1. 907864 1. 545532  
5. 406002 5. 103343 5. 231924 4. 873974 4. 979083 4. 943365 6. 134597 5. 308944 6. 10159  
4. 183927 4. 695362 4. 295383 4. 196581 4. 205424 3. 565662 4. 525568 4. 650581 5. 160855  
2. 032156 1. 521269 2. 428588 2. 213003 1. 979907 3. 332985 2. 019577 1. 462867 2. 010296  
2. 850305 2. 521241 3. 063602 3. 585117 3. 503665 3. 5661 2. 988317 3. 204419 2. 72742  
4. 274262 3. 798974 3. 721258 3. 656576 3. 322822 3. 009281 3. 704192 3. 619991 4. 02231  
2. 188526 2. 020106 2. 859877 3. 605 2. 029998 2. 36979 2. 037795 2. 234631 2. 263635  
8. 070783 7. 879956 7. 67007 7. 71329 8. 631582 7. 748279 8. 118786 7. 496087 7. 407233  
3. 176231 3. 01954 4. 421125 3. 444621 4. 19046 3. 966556 3. 077227 4. 139239 1. 975511  
1. 545979 1. 758756 1. 966786 2. 025626 1. 887017 1. 830553 1. 521077 1. 71812 1. 616886  
6. 249016 6. 531436 6. 376891 6. 894294 6. 686539 6. 440699 6. 494921 6. 529565 4. 432667  
6. 240667 6. 747691 6. 542395 6. 302497 6. 437052 6. 608311 6. 430333 6. 225192 6. 351345  
3. 69586 3. 915917 3. 675694 3. 84533 4. 216859 3. 561788 3. 515231 4. 202117 3. 152244  
3. 946314 4. 80728 3. 875079 4. 140373 4. 898721 4. 632832 4. 253138 4. 847947 3. 852737  
4. 027072 2. 307925 3. 283749 3. 247365 2. 536726 1. 964932 2. 893956 2. 23134 2. 697334  
2. 851283 2. 905558 2. 325357 2. 606055 4. 369529 3. 889487 4. 475243 4. 006625 3. 153431  
6. 880214 6. 304769 6. 074609 4. 769614 6. 148999 6. 676578 6. 600919 6. 504555 6. 888995

5. 64324 6. 779935 6. 656037 6. 542837 5. 975428 6. 88875 6. 181244 6. 911947 5. 011298  
5. 486 4. 761571 5. 091189 4. 767398 4. 735061 4. 50415 4. 246115 4. 037817 5. 316678  
5. 141239 5. 280287 4. 971646 4. 665801 5. 169606 4. 633195 4. 800872 5. 354046 4. 597396  
10. 4138 9. 919779 10. 12306 9. 73394 10. 20163 9. 559683 10. 23316 10. 15694 10. 25621  
2. 875508 2. 82346 2. 427163 3. 144082 2. 391951 3. 219405 2. 410879 2. 38882 2. 606994  
1. 418332 1. 951629 1. 437785 2. 287469 1. 445928 1. 6216 1. 732321 1. 895802 1. 916867  
4. 087252 4. 435183 6. 193504 5. 044887 2. 979519 4. 222528 4. 502809 3. 558625 2. 885813  
4. 868023 3. 030776 3. 99107 3. 210215 3. 167808 2. 785867 4. 581384 4. 043148 3. 893906  
1. 624567 1. 733125 1. 731029 1. 676972 1. 932543 2. 16233 2. 626042 1. 572349 2. 472649  
2. 397704 1. 709814 1. 927777 3. 935909 2. 191976 2. 403489 2. 431066 1. 860446 1. 801079  
1. 639051 1. 450339 1. 377669 2. 850838 2. 244056 2. 553677 2. 176928 1. 686419 2. 812513  
1. 757564 1. 808199 1. 728073 2. 073287 1. 338686 1. 685357 1. 511419 1. 76019 2. 447207  
3. 34114 4. 642727 4. 506247 2. 810054 1. 954469 3. 881322 2. 555562 3. 785341 3. 074239  
2. 300524 3. 589824 3. 796018 2. 170814 3. 932906 3. 186709 2. 305656 2. 398034 2. 571085  
2. 035849 2. 026679 2. 550524 2. 417052 2. 464746 2. 218557 1. 977767 2. 15051 2. 986873  
2. 536314 2. 449614 2. 700703 3. 07747 2. 544289 3. 170217 2. 214265 2. 706512 2. 228542  
2. 939804 2. 501985 2. 864154 3. 019417 2. 302786 3. 444056 3. 458453 3. 01275 3. 13666  
2. 753608 2. 855273 2. 684945 4. 328992 2. 812871 2. 358467 3. 051158 2. 705936 2. 309965  
2. 786924 2. 011325 2. 531467 2. 323679 2. 066283 1. 552901 3. 044572 1. 717899 3. 272906  
6. 250226 7. 034249 6. 786787 5. 898604 6. 406944 6. 158677 6. 444924 6. 333828 6. 574723  
5. 293877 5. 33738 4. 944002 4. 084692 5. 097552 4. 862696 4. 953332 5. 381157 5. 975572  
9. 618263 9. 902382 9. 966064 9. 622379 10. 00121 10. 20402 9. 087513 9. 901751 9. 511779  
7. 942847 7. 374192 7. 402126 7. 35095 7. 316715 7. 131994 7. 438123 7. 690777 7. 343651  
1. 520921 1. 559617 1. 8354 2. 379981 1. 669943 2. 099385 1. 830647 1. 802946 1. 564611  
3. 569981 2. 862842 3. 604212 5. 13649 3. 334634 3. 361861 3. 532463 4. 466131 2. 605022  
1. 237244 1. 809771 2. 480783 7. 802803 1. 599228 1. 59383 1. 470094 7. 90703 9. 314138  
1. 895087 2. 203386 2. 546042 2. 16209 1. 026162 1. 955009 2. 307268 2. 279107 1. 97701  
4. 788305 4. 544913 4. 432174 3. 74137 4. 378757 4. 159335 4. 581382 4. 423591 5. 105823  
5. 949178 5. 879732 6. 058648 6. 246468 5. 941782 5. 945937 5. 980136 5. 940791 5. 679098  
1. 435509 1. 967846 1. 832328 2. 600635 2. 003202 1. 735226 1. 966273 2. 219779 1. 902542  
2. 743736 2. 749653 2. 813429 2. 656899 3. 110792 2. 530578 3. 574798 2. 758968 2. 849096  
5. 483284 6. 030825 5. 852087 5. 565132 6. 515686 4. 974569 6. 3343 5. 939987 6. 442841  
6. 315761 3. 481888 4. 933829 5. 056018 3. 817007 6. 834107 4. 982648 5. 318255 6. 126  
7. 064745 6. 858928 6. 917604 6. 388757 7. 122499 6. 512017 6. 872167 6. 888638 7. 213098  
6. 214418 5. 735682 5. 851438 6. 204861 6. 1727 5. 706244 5. 731979 5. 960881 5. 530206  
1. 32227 1. 20066 3. 054162 1. 535204 1. 715372 1. 831712 2. 799914 1. 560492 3. 123564  
2. 345196 2. 911802 2. 649836 2. 002819 2. 573587 2. 502375 2. 106891 3. 18611 2. 807406  
1. 406352 1. 13164 1. 86344 2. 168481 1. 122328 1. 189563 3. 7752 2. 001566 1. 69485  
3. 974856 4. 675906 2. 985132 4. 066062 4. 559072 4. 624975 4. 755931 3. 860152 3. 831998  
3. 485396 3. 239322 3. 168041 4. 748116 3. 871729 2. 451973 3. 899621 4. 33256 4. 594392  
9. 273529 9. 178432 8. 878367 8. 691074 9. 028099 9. 144721 9. 15352 9. 133386 9. 214787  
7. 764843 8. 244915 7. 948062 7. 241228 7. 78035 7. 45672 8. 4208 7. 586972 7. 863202  
6. 787657 7. 336358 6. 076477 8. 125032 6. 460247 6. 464626 6. 354681 7. 127521 5. 85252  
9. 118227 9. 221779 8. 841231 8. 574521 8. 929282 9. 063864 9. 026264 9. 046926 8. 500397  
3. 557938 3. 492416 4. 113417 4. 009853 4. 287471 2. 581442 2. 804056 3. 450949 3. 406503  
9. 137723 9. 554291 8. 762653 9. 085014 9. 120493 9. 198063 9. 196374 9. 120567 9. 521926  
7. 759975 7. 893734 8. 17361 7. 928926 7. 994444 8. 096061 7. 978874 8. 038063 7. 246  
9. 801852 9. 794097 9. 629951 9. 620108 9. 767067 9. 73185 10. 00551 9. 165324 9. 382762  
4. 328645 3. 603432 4. 118822 4. 238903 4. 054983 3. 690373 4. 352169 4. 542982 4. 07839  
3. 315685 3. 475861 3. 402636 2. 744305 2. 714516 3. 770163 2. 541071 3. 406072 2. 329189  
7. 647207 7. 793444 7. 34633 6. 796672 7. 572926 7. 538359 7. 385171 7. 345401 7. 526893

7. 762464 8. 031997 7. 647097 7. 74826 8. 48575 7. 474048 7. 201391 8. 26939 8. 825676  
3. 067117 3. 96202 4. 415165 3. 289078 4. 426365 4. 052311 3. 591505 4. 085007 3. 658376  
2. 216342 2. 354201 2. 515003 3. 135033 3. 386004 2. 277994 3. 159927 3. 302738 2. 88836  
4. 918003 4. 806671 4. 924046 5. 323172 4. 221474 4. 667939 4. 996029 4. 620284 4. 655592  
5. 952488 6. 326549 6. 29621 5. 900992 6. 203967 5. 600602 5. 509768 6. 531782 4. 645271  
5. 157906 5. 555003 5. 398494 5. 140541 4. 948844 4. 920209 5. 36247 5. 529555 6. 353587  
4. 723413 4. 457946 3. 75464 3. 363121 4. 680067 4. 469956 4. 600718 2. 582233 2. 461803  
1. 64934 1. 93813 2. 702108 3. 279919 2. 250915 3. 453748 2. 648028 2. 428084 1. 776945  
2. 577109 2. 420799 2. 963565 2. 151074 1. 399944 1. 820134 2. 001477 1. 924111 1. 081149  
1. 583155 1. 869185 3. 107683 1. 709776 2. 317079 3. 34795 1. 872532 1. 717143 2. 149594  
3. 6225 4. 183317 3. 012679 3. 422395 2. 769278 2. 87227 4. 156365 2. 871636 4. 050817  
8. 617851 8. 730155 8. 947039 8. 140019 8. 753286 8. 309699 8. 50762 8. 523249 7. 75992  
5. 204306 5. 977124 5. 545882 5. 142806 5. 506853 5. 463326 5. 387719 4. 933386 5. 682759  
2. 967688 2. 953365 2. 669727 2. 635277 2. 214692 2. 717461 3. 345748 2. 743483 3. 655398  
4. 264232 3. 997381 4. 102137 3. 698884 3. 414613 2. 88403 4. 335216 2. 987588 3. 921131  
3. 580068 4. 618527 4. 329266 3. 915275 4. 599437 3. 847624 3. 973499 3. 566011 3. 461758  
9. 317447 9. 147393 9. 326941 7. 684328 8. 997608 8. 955302 8. 889816 9. 109568 9. 013265  
4. 2354 2. 903023 3. 453871 3. 843617 3. 883073 3. 589234 4. 044768 4. 779774 3. 954502  
4. 696937 5. 88398 5. 967523 5. 172299 5. 848721 5. 695298 5. 248717 6. 141064 5. 487568  
4. 885545 5. 032104 5. 213601 4. 828207 5. 332603 3. 466153 5. 049814 5. 166499 4. 641213  
5. 017846 4. 72726 4. 539483 3. 652233 3. 729915 4. 39849 4. 855022 3. 090154 2. 962755  
2. 680677 3. 21196 1. 928273 2. 3613 2. 318501 1. 714434 2. 068424 2. 885165 3. 087796  
3. 979257 4. 030921 4. 252963 3. 661679 3. 43922 3. 712314 3. 934459 3. 185528 3. 208091  
2. 881365 2. 120882 2. 166747 1. 083839 3. 330144 1. 923985 2. 784292 2. 100713 3. 261471  
2. 921261 2. 444138 2. 48763 2. 293498 2. 31535 2. 265516 2. 493018 2. 188905 2. 791507  
4. 027028 3. 364512 3. 482839 2. 476628 2. 759748 3. 142285 3. 436186 3. 179032 3. 709302  
5. 181164 4. 597882 5. 504309 6. 409737 4. 891633 4. 320913 5. 052618 4. 719671 5. 647566  
5. 157492 5. 034646 5. 599629 4. 938459 5. 051909 4. 845792 5. 071237 5. 063947 5. 378231  
1. 899714 1. 452898 2. 832157 2. 069705 1. 700358 1. 047073 1. 937091 2. 496598 1. 948391  
6. 262861 6. 247665 5. 984665 6. 149355 6. 597248 6. 160936 6. 486674 6. 278001 6. 354849  
3. 951452 3. 704636 2. 910474 2. 504335 2. 808715 3. 236082 3. 273952 3. 054233 2. 731343  
3. 303382 3. 200877 2. 57286 3. 671958 2. 568464 2. 97269 3. 630393 2. 669698 2. 587893  
6. 349835 6. 347663 6. 264342 6. 104264 6. 156916 6. 110354 6. 204749 5. 97639 6. 723547  
4. 790084 5. 097391 4. 691676 5. 185744 5. 493261 4. 609628 4. 849165 4. 95855 5. 29558  
5. 67634 4. 808324 4. 444885 5. 384543 4. 68345 4. 83432 5. 795116 5. 648843 5. 010505  
6. 05073 5. 249302 5. 057631 5. 456133 5. 511929 6. 789245 4. 513927 5. 289672 4. 567043  
3. 508375 3. 385782 3. 454789 4. 338091 3. 566343 4. 397183 3. 7341 2. 543315 4. 004759  
6. 478827 6. 653448 6. 228976 6. 408302 6. 948605 7. 099309 6. 898367 6. 874328 6. 977467  
4. 186575 3. 394403 4. 558873 4. 40495 3. 25035 4. 513558 4. 306798 3. 245172 3. 754688  
4. 650877 4. 5785 4. 793578 5. 050457 4. 647394 4. 415287 4. 530665 4. 028704 3. 835289  
1. 086282 2. 112427 1. 867702 1. 338566 1. 159733 1. 549831 1. 651625 1. 546762 0. 866788  
2. 394498 2. 719387 3. 138054 3. 150657 2. 656428 2. 53582 3. 573179 2. 683485 3. 106777  
1. 929023 2. 231451 2. 757579 3. 202545 2. 717313 2. 059112 2. 174236 2. 822835 2. 47584  
3. 704558 5. 035098 4. 429783 3. 102599 3. 275251 4. 585969 4. 948495 3. 825574 4. 644018  
2. 899127 3. 530646 3. 313811 2. 775751 3. 244407 3. 531477 3. 240732 2. 830319 3. 095581  
5. 56608 5. 592594 4. 738885 4. 540261 4. 86277 5. 406645 5. 415422 5. 054804 5. 544287  
1. 213563 1. 724244 1. 32941 1. 040345 1. 449932 1. 960991 1. 30151 3. 36282 1. 075486  
8. 136514 8. 043685 7. 938762 6. 811558 7. 671382 7. 804774 7. 233734 6. 026418 7. 144085  
1. 989592 1. 815801 2. 99317 1. 955837 2. 369754 1. 994519 2. 251799 1. 411158 2. 719337  
3. 159897 2. 771455 2. 395607 4. 405131 1. 171791 3. 324553 2. 317771 2. 931642 3. 259184  
3. 994239 3. 833589 4. 490408 3. 435511 3. 411187 4. 733511 3. 6863 4. 020375 3. 026365

2.184941 2.458426 2.778074 2.449707 2.800346 3.736658 2.06637 2.297955 2.749503  
2.755657 2.975289 3.546073 2.652808 2.014568 1.719059 2.663808 2.498216 1.541738  
5.757825 5.237916 4.145893 5.920388 5.440389 6.578177 5.814554 5.611647 5.579455  
4.210483 4.392209 4.165214 4.804144 4.483058 3.735821 4.610557 3.734245 4.071091  
3.322554 4.647033 4.584874 2.28789 3.906795 4.02696 3.122416 5.076009 4.146932  
3.21852 2.672604 3.026927 2.194889 3.657815 3.423391 2.978661 2.568074 1.981954  
1.062661 1.651184 1.889153 2.107977 2.046567 1.709283 2.659533 1.672818 1.402593  
4.091616 4.067429 4.178834 4.690962 4.145892 3.603706 3.567457 4.276381 4.468484  
3.12457 2.664391 1.947921 3.701204 2.372924 2.054627 2.053198 2.921562 3.260818  
4.816292 5.137946 4.880009 4.588704 4.986299 4.699587 4.298031 4.442014 6.001169  
0.94365 0.932608 1.385618 1.698684 1.747259 1.634018 1.366328 1.970651 0.845798  
3.595943 2.68833 3.181211 2.710309 1.45592 2.401604 1.877058 3.506707 2.118274  
3.248778 4.250864 3.537101 4.547405 3.86094 4.205501 4.467766 4.193716 4.395151  
0.860064 0.726271 1.577626 1.935659 1.213508 0.403332 0.815902 0.822396 0.984831  
1.351796 1.380306 1.170849 1.673959 1.310465 1.024957 1.5372 1.961817 2.364171  
1.412913 1.255402 1.208111 1.488265 1.000109 1.264976 1.488265 1.030142 0.917799  
1.979077 2.096068 2.035476 4.084754 2.775057 1.611797 2.469673 1.242696 1.931469  
0.971402 0.857196 0.835377 1.248108 0.931559 0.96654 0.729768 0.954965 1.261443  
0.84825 0.874796 0.655395 1.142487 0.685856 1.729457 0.671829 0.646665 0.9998  
1.822745 4.141453 2.639266 2.429782 1.460827 1.452539 1.553365 1.54094 4.814499  
0.97898 0.990724 0.845806 1.10695 1.859296 1.093748 1.189917 1.192226 1.462008  
1.749079 1.709571 1.206241 1.769282 1.025002 2.823275 1.426589 1.446807 1.481226  
0.542973 0.617588 0.462771 1.354846 1.15145 0.835796 0.458357 1.100039 1.447271  
1.257706 1.72425 0.998735 1.769101 1.04045 0.876858 1.601778 1.461805 2.709622  
1.410305 1.357307 1.45235 2.439935 1.302617 1.958216 1.30911 1.049576 2.85902  
1.085425 1.904289 1.217307 1.131159 2.187359 1.374402 0.938321 1.209674 4.866727  
1.316834 3.682956 3.006883 0.859052 1.731712 1.017414 0.609954 1.544206 1.266967  
0.971647 1.143828 1.313055 0.811209 0.876257 0.84254 1.194622 0.928574 0.698217  
1.771057 1.203545 0.910341 1.665948 1.105505 1.449635 1.813004 3.198965 3.243805  
1.186116 0.846641 1.332409 1.99186 2.572036 3.114654 0.993986 1.487412 2.283767  
0.810833 0.846139 1.054445 1.749187 0.830538 1.504817 1.031349 0.975214 1.034732  
0.947852 2.549351 0.732826 2.865709 1.079228 2.814242 1.148999 1.003508 0.770977  
0.723562 0.542137 1.152419 1.071685 0.65742 1.604706 1.661135 0.699324 1.11345  
0.84464 0.733958 0.533099 2.073839 0.578964 0.823086 0.712975 0.418519 0.66283  
0.883798 1.628384 1.224836 1.414117 0.829796 1.091299 0.573477 0.747954 1.282846  
0.933817 0.730801 0.565805 1.435961 1.363525 1.185178 1.196955 1.029901 1.155999  
2.961333 0.685082 1.202601 2.67605 0.915446 2.951752 1.491337 1.086141 3.768721  
0.905576 2.182213 0.788782 1.527635 1.048392 1.121677 3.238963 1.129022 4.345837  
0.685145 0.984816 0.999816 1.677149 1.018616 0.741266 0.981535 1.11257 3.387319  
1.61792 1.643354 1.238296 1.844101 1.534245 2.492082 2.727729 1.065963 1.281978  
0.78051 0.963471 1.473762 1.321678 1.106804 1.760345 1.405979 1.014083 1.140009  
1.171387 1.139424 1.222352 1.868604 1.297784 1.312869 2.42172 1.147522 2.767928  
1.417961 1.856451 1.324706 1.681474 1.801077 1.325636 1.598909 2.649391 4.521477  
1.06217 1.016479 0.979196 1.411754 1.036863 1.006893 0.980723 1.320354 0.99841  
1.089855 3.887743 3.618377 1.79972 0.680344 0.899753 1.03768 1.036769 1.465346  
1.070377 0.916348 0.75637 1.097167 1.765026 1.024086 0.93564 0.812582 0.895173  
1.058783 0.843455 1.440401 1.633692 2.347232 1.030137 1.179221 1.835836 2.180482  
5.667933 6.511546 6.122547 6.063126 6.46137 6.399696 6.413737 5.86919 5.967391  
1.251531 2.5568 1.145716 1.424034 1.067558 0.825174 1.201223 1.02762 2.992  
0.849936 0.631095 1.025883 0.621414 0.611457 1.258167 0.944674 0.802716 0.80908  
1.523713 1.106911 1.102411 1.635286 0.851918 1.14229 1.789786 1.434027 1.140895

1.146028 0.722157 1.427588 1.279961 0.71524 0.866204 1.430596 1.330104 4.638221  
1.686299 0.692816 1.313696 3.059037 0.953092 1.276426 2.63706 1.040261 1.146891  
4.198622 2.732574 2.512524 2.839278 2.72698 2.964019 2.575949 3.117278 5.302657  
2.028017 1.021092 1.952016 1.864887 1.65134 1.315295 2.196001 1.047506 3.492316  
1.183977 0.761897 1.445141 1.049615 0.516139 1.545405 0.95848 0.631217 1.251462  
1.263022 1.004222 1.771704 1.308995 0.954956 2.35248 0.85629 0.965591 2.668962  
0.768799 0.70018 3.224001 0.958108 1.179629 0.734298 1.317474 0.645119 1.874231  
2.013818 1.445152 1.822385 1.779479 1.840072 1.149017 1.869831 1.637677 2.586229  
5.924905 5.16931 5.725869 4.253046 4.547118 5.57315 5.331272 4.019912 5.222657  
3.835922 3.760593 2.769434 3.614376 3.481215 2.726554 4.461926 3.958576 5.832949  
1.599918 1.810666 1.584063 1.912819 1.578491 2.016022 1.935331 1.945863 1.640811  
2.171208 1.784528 1.959291 2.317142 2.020548 2.073999 1.915408 2.229025 2.064266  
1.962552 1.399058 2.057315 1.428311 0.901201 1.669655 1.55449 1.33354 1.5931  
2.477219 2.400288 1.936909 2.59676 2.107767 2.252943 2.54973 1.668392 2.968167  
5.901113 6.01406 6.02009 6.067438 5.881285 5.968142 6.253984 5.487089 5.918657  
2.703229 2.091808 1.93572 3.618416 1.979579 2.350763 2.333619 2.375885 2.088308  
1.53623 1.225364 1.65054 1.521437 1.310131 0.958851 1.342755 1.525203 1.707009  
1.376009 1.141353 0.834321 1.245538 1.031946 1.51816 1.402238 1.141789 1.933325  
1.409485 1.336183 1.214902 1.656765 2.292972 1.777553 1.446731 1.664868 1.44993  
2.05547 1.181023 1.745671 1.865409 0.996359 1.27442 1.679733 1.522127 1.310798  
1.648702 1.430712 0.936351 1.054449 1.152151 1.4788 2.271417 0.86303 1.895056  
1.176044 0.821126 0.93692 2.075089 1.133275 0.903812 1.804142 1.234275 0.984703  
1.173043 2.853097 2.52693 2.903375 1.270407 2.019217 1.856781 2.220873 2.585745  
2.989232 1.945661 2.899573 3.325735 2.026734 2.435589 2.311761 2.967915 2.751777  
0.635786 1.528202 2.254523 2.056935 1.123727 0.974117 1.539088 1.004509 1.687354  
1.80954 2.327013 2.518206 2.377538 2.218379 1.837456 2.350231 2.18987 2.625818  
5.218704 5.187289 5.269666 5.814669 4.960576 4.691151 5.849641 5.575762 5.457012  
2.845612 4.088047 3.205886 3.666208 2.452968 3.857992 3.451926 3.706047 3.821705  
2.149969 2.23178 2.153851 2.204031 1.547646 1.710772 1.840134 2.399862 2.61654  
4.046693 4.091949 5.67924 5.499329 4.906476 3.971384 4.901217 4.799507 4.952904  
4.898327 5.000547 5.296702 5.524337 4.000857 3.822501 4.389824 5.238699 5.226032  
5.861742 6.134678 5.506458 6.59639 5.899969 5.149081 5.328457 5.46147 5.657723  
3.290124 2.197679 2.384027 2.630605 3.452241 2.080207 3.585154 3.418614 2.123127  
2.404474 3.639202 1.65272 1.033965 2.559681 1.325988 3.848428 1.421889 3.957694  
3.242747 4.122662 3.078136 3.598109 3.510664 3.579594 3.327325 2.769885 2.958775  
1.209452 3.739174 4.048711 2.442288 3.197988 1.463306 3.446323 2.922282 4.222825  
4.907652 4.587669 5.154669 5.302348 5.319153 5.667593 5.039718 5.451775 4.373307  
4.800391 4.358489 5.31977 5.54511 5.767592 4.815344 5.384777 5.089016 5.164207  
7.365251 7.683939 7.777296 8.139747 7.935813 7.783372 7.528214 7.701865 6.153727  
3.206174 6.160337 2.756985 5.025166 4.582157 5.42026 4.133483 4.994028 6.053374  
5.372667 5.148958 4.642323 5.099804 5.210406 4.744098 5.668624 4.954589 5.223057  
6.752729 6.755939 6.716391 6.828592 8.252698 6.773977 6.966503 6.312044 6.198066  
7.268284 7.246917 7.143831 6.629059 6.919029 6.955339 7.214383 6.88632 7.266188  
4.044151 4.170308 4.125102 3.723965 3.546733 3.850884 4.012963 4.863492 3.751758  
6.174339 7.883612 8.044684 6.591585 7.159609 7.86306 7.269792 7.801494 6.917256  
4.615168 4.849196 4.019122 3.964502 2.78454 4.52813 4.918827 4.364906 4.58747  
2.611417 2.073405 2.02327 2.708409 2.838775 2.125392 2.442799 2.414178 2.341743  
1.363924 1.84724 1.646215 2.84438 1.755209 0.849493 1.868205 2.777547 2.093539  
7.691994 7.761253 7.824043 7.825071 7.713084 7.321087 7.820494 7.78653 7.576398  
2.360498 3.512744 1.748846 2.044064 2.29354 2.086526 2.518509 2.583177 2.740847  
6.84147 5.867202 7.122188 3.878458 6.060124 7.319402 6.774231 6.401136 6.844789

4. 324593 4. 032081 4. 379894 4. 788663 4. 723843 4. 418493 4. 405969 4. 40141 4. 490572  
4. 687994 4. 143409 4. 333952 3. 611247 4. 901391 4. 414918 5. 004868 4. 842835 3. 839492  
5. 309504 5. 556686 5. 416312 6. 142892 4. 81668 4. 519792 4. 904069 5. 144891 5. 565015  
2. 291228 2. 626967 2. 259678 2. 791516 2. 388658 2. 141089 2. 19752 2. 20551 2. 576638  
4. 195504 4. 290296 4. 792556 4. 889924 3. 757318 4. 430477 4. 437594 4. 309377 3. 78686  
4. 623733 4. 304851 4. 794138 3. 851078 4. 33841 4. 404648 4. 974352 3. 885303 4. 62828  
4. 082014 4. 936354 4. 935259 4. 742512 5. 085054 3. 843489 3. 950531 3. 573174 3. 87007  
5. 767602 6. 063954 5. 853264 4. 836765 5. 772567 6. 895769 5. 715592 6. 165086 5. 637246  
1. 407705 1. 651942 1. 190949 1. 998772 1. 33764 1. 723298 1. 537966 1. 731249 1. 754919  
4. 575962 5. 17169 4. 957634 4. 189531 4. 673694 4. 922472 5. 317434 5. 015071 4. 537102  
4. 018897 4. 12978 4. 316955 4. 700852 4. 27967 4. 341293 4. 496673 4. 313465 5. 990889  
4. 657042 4. 928926 4. 248689 4. 208498 4. 798596 4. 846567 5. 328695 4. 559362 4. 642573  
3. 434604 2. 735267 3. 24958 2. 904054 3. 455785 2. 980412 3. 82686 2. 144456 3. 735385  
2. 360417 2. 613618 2. 622617 2. 964399 2. 537495 2. 854171 2. 533378 2. 732669 2. 493781  
1. 941496 1. 407353 2. 011081 2. 211085 1. 54656 1. 564512 1. 592997 1. 723167 1. 856199  
7. 064865 7. 434697 7. 17105 6. 799051 6. 776967 7. 534296 7. 371628 7. 13412 7. 737035  
3. 479608 4. 410571 4. 329596 3. 654673 4. 20141 4. 163932 4. 485628 3. 969223 4. 810137  
4. 382593 3. 567397 3. 718931 4. 359701 3. 700382 3. 475459 3. 356935 2. 731954 2. 412603  
4. 809317 4. 367949 3. 80116 4. 239586 4. 61513 4. 500572 4. 069148 4. 631689 4. 287045  
3. 127403 3. 086208 2. 525405 3. 241181 3. 375829 3. 105076 2. 990348 3. 138451 3. 42399  
7. 71242 7. 841525 7. 431896 7. 388694 8. 121068 7. 230052 8. 048131 8. 039911 8. 099018  
1. 49212 2. 985801 2. 191252 3. 07191 2. 112412 3. 448338 1. 35582 1. 261989 3. 981294  
2. 555629 2. 902795 3. 527263 3. 642728 3. 537896 3. 012311 3. 755678 4. 102959 2. 864443  
3. 146482 2. 553515 3. 232145 3. 26728 3. 000614 2. 832774 3. 000103 3. 473725 3. 422899  
2. 933142 3. 102666 3. 728982 1. 832347 1. 613149 2. 668622 2. 192077 2. 763683 4. 086425  
2. 291747 2. 198275 1. 50535 1. 616332 1. 824723 2. 465305 2. 012762 1. 778296 2. 138877  
7. 29393 7. 290344 7. 302946 6. 329377 7. 042981 7. 070261 6. 908509 7. 101419 7. 388062  
4. 931355 5. 261537 5. 42708 5. 073392 5. 039217 4. 893783 4. 995069 4. 505189 5. 152933  
4. 404619 3. 034648 2. 624683 2. 905869 2. 417929 2. 294538 3. 89997 2. 888475 2. 858784  
3. 095353 1. 882299 3. 446217 2. 533604 3. 244547 2. 980227 2. 862913 3. 710584 2. 991774  
1. 538934 2. 470176 1. 678248 1. 613624 2. 228247 2. 104588 1. 852658 1. 555011 1. 746367  
4. 574367 4. 737692 3. 825755 3. 881785 3. 805749 3. 310898 3. 816154 4. 424251 4. 594046  
1. 865054 1. 775842 1. 724177 2. 666652 1. 470577 2. 345919 1. 624506 1. 709254 1. 788236  
5. 52818 5. 064018 4. 945833 5. 674941 5. 20334 5. 343494 5. 455114 5. 425838 5. 737815  
4. 313016 4. 349124 4. 800121 4. 638366 4. 638319 4. 672652 5. 211569 4. 658274 5. 722757  
3. 130317 2. 274007 3. 130804 0. 819095 1. 639541 2. 963527 3. 285098 1. 781053 3. 039794  
1. 815996 3. 372512 1. 569023 1. 887356 1. 729621 1. 751908 1. 151589 3. 436351 4. 338648  
4. 26641 3. 878669 5. 444144 2. 947459 4. 139831 3. 88923 5. 345969 4. 282577 4. 585794  
4. 822423 4. 90397 4. 93836 4. 725028 4. 51119 4. 077881 4. 667989 4. 765966 5. 174761  
6. 476566 7. 321798 6. 850286 6. 946571 7. 26798 6. 028981 6. 433653 6. 854528 6. 037683  
1. 114132 1. 467297 1. 619933 2. 112018 1. 457848 1. 732642 1. 40935 2. 104259 1. 656644  
2. 363661 1. 301756 2. 158458 1. 642032 3. 026202 2. 072384 2. 355696 1. 879141 3. 059766  
1. 624926 1. 755366 1. 900293 2. 443928 1. 731096 1. 437988 1. 39486 1. 460057 1. 900029  
5. 123836 4. 574968 4. 863256 5. 465281 5. 203232 5. 162641 4. 964695 4. 961377 4. 040523  
1. 313429 1. 612385 1. 263719 2. 168339 1. 57332 0. 997526 1. 17639 1. 694745 1. 314213  
2. 992844 2. 540869 2. 43373 2. 712325 2. 532121 2. 643737 3. 117798 2. 617431 2. 244366  
5. 082417 4. 998263 4. 533373 5. 068098 4. 813157 4. 346552 4. 553568 5. 470093 4. 827458  
5. 445034 5. 581825 4. 822587 6. 050263 5. 259242 4. 957913 5. 659003 4. 752559 5. 446526  
1. 632776 2. 688359 1. 891495 2. 085305 1. 565697 2. 105325 2. 15532 1. 447512 1. 449939  
6. 422836 6. 802308 6. 885419 7. 142776 7. 107212 6. 473101 6. 468708 6. 938919 4. 804674  
6. 866863 6. 819491 6. 91286 7. 405599 7. 124362 6. 234119 7. 659434 6. 379935 6. 592277

4. 670148 4. 328674 4. 673316 5. 068477 3. 89111 4. 528638 4. 513385 4. 336778 4. 064814  
2. 784926 3. 893632 3. 146356 3. 626013 2. 282937 3. 614644 2. 595477 5. 192342 2. 675151  
5. 419624 4. 709137 5. 659738 6. 498196 5. 695914 5. 423881 6. 527852 6. 093765 5. 675764  
6. 291358 6. 574787 6. 393056 6. 176489 6. 918023 6. 478541 6. 480418 6. 373591 6. 763558  
3. 135651 3. 617566 4. 214146 4. 054041 4. 129938 3. 771396 4. 003324 3. 994235 3. 951969  
7. 972302 8. 215034 7. 691022 7. 859702 8. 731808 7. 429444 7. 647302 8. 251141 6. 333141  
1. 879736 1. 976486 1. 688541 2. 243544 1. 531151 2. 059432 1. 428838 1. 308206 1. 780686  
4. 737295 5. 073554 4. 024815 3. 172843 3. 551726 4. 157903 4. 889627 4. 837952 7. 840383  
0. 803083 1. 239248 0. 72026 1. 241696 1. 063243 1. 292783 1. 362712 1. 148397 3. 634486  
2. 267884 1. 547605 1. 202703 2. 367363 1. 984901 1. 531093 1. 404819 1. 335897 1. 599628  
4. 479403 4. 929339 5. 299267 4. 576588 4. 613537 4. 587491 5. 109745 5. 021201 4. 145751  
9. 958749 9. 74631 9. 752682 9. 417693 9. 328255 9. 861478 9. 989624 9. 698055 10. 06442  
7. 260084 7. 378808 7. 24899 7. 663408 6. 456973 6. 856276 7. 307512 6. 7756 6. 800264  
7. 031795 7. 046806 7. 252395 6. 408175 6. 974296 7. 07538 6. 878143 7. 064187 7. 336934  
6. 038858 5. 447096 5. 442151 4. 244745 5. 357526 5. 782734 5. 662058 5. 676853 5. 021678  
10. 58585 10. 53958 10. 52366 10. 23603 10. 28879 10. 71321 10. 84612 10. 59055 10. 49863  
3. 816719 3. 825927 4. 148669 4. 350932 3. 712836 4. 706025 3. 383681 4. 033953 4. 23175  
7. 755778 7. 776878 8. 095945 6. 896475 7. 752899 7. 343218 7. 073074 7. 356349 7. 780428  
6. 404953 6. 523175 5. 921231 7. 535547 7. 258566 6. 071044 6. 868576 6. 59753 4. 804762  
5. 390367 5. 730613 5. 698249 5. 828908 5. 32169 5. 560406 5. 289478 5. 9769 5. 80567  
5. 846129 5. 521185 5. 673603 6. 995473 5. 838309 5. 400154 5. 863729 5. 390206 6. 18177  
4. 534312 3. 832236 3. 800425 3. 54256 3. 468498 3. 36292 3. 021487 3. 93621 4. 224682  
4. 774493 5. 017144 5. 19074 5. 205177 4. 926673 4. 926666 5. 192972 5. 073227 4. 747524  
4. 898147 4. 769937 4. 436748 4. 435873 4. 639404 4. 954909 4. 981337 4. 551588 5. 005266  
6. 072537 6. 660657 5. 656072 5. 817107 7. 182468 6. 390599 6. 7487 7. 123682 7. 06291  
3. 600108 3. 85334 3. 480212 2. 760315 3. 788917 4. 146011 3. 817112 3. 711086 3. 601825  
2. 871895 2. 945041 2. 265926 2. 055306 1. 955753 2. 902809 2. 14106 2. 356072 3. 316143  
3. 919297 3. 060771 4. 49042 4. 151301 4. 833598 3. 899906 4. 109175 3. 500281 3. 623161  
6. 164652 6. 481802 5. 302352 6. 238548 5. 536503 6. 196639 6. 643814 7. 416288 6. 072546  
3. 845669 4. 235737 4. 123066 4. 646824 3. 894932 3. 886661 3. 615828 3. 706759 3. 560551  
1. 558432 1. 74883 1. 791481 3. 798618 0. 738425 2. 7761 1. 23139 1. 241858 1. 593161  
1. 579105 1. 752892 1. 431259 1. 573758 1. 346385 1. 104174 1. 293143 1. 414561 2. 463383  
4. 842638 4. 93312 5. 035014 4. 521827 4. 928081 4. 523732 4. 411121 4. 549234 3. 450451  
3. 047973 3. 455267 4. 35751 3. 631695 3. 295381 3. 305697 3. 578097 4. 177868 3. 967683  
5. 122552 5. 574784 4. 013844 5. 379535 5. 896955 5. 548429 4. 136976 5. 021886 4. 2336  
6. 335022 6. 787171 7. 676918 6. 137371 7. 124383 6. 519714 6. 901124 6. 851227 6. 155048  
1. 670308 1. 823352 2. 399251 1. 935312 1. 761543 2. 347676 1. 846885 2. 02196 1. 632426  
6. 929823 6. 786874 6. 554641 6. 846302 7. 131895 6. 747956 7. 216532 6. 929393 6. 978292  
8. 509467 7. 825226 8. 189487 7. 921414 8. 591937 8. 024728 7. 857522 8. 648721 8. 463429  
7. 602584 7. 912807 7. 339251 6. 727486 7. 80225 7. 225712 7. 821046 7. 524193 7. 330035  
9. 605292 9. 35148 9. 514377 9. 761969 9. 468343 9. 232481 9. 545082 9. 304625 9. 374886  
2. 032761 2. 904693 2. 03939 1. 860715 1. 70198 2. 57879 2. 14984 1. 877239 2. 165505  
7. 378084 7. 298842 7. 607296 7. 732765 7. 649805 7. 125145 7. 296549 7. 54281 7. 11318  
4. 417743 5. 546192 4. 528932 4. 768757 5. 257959 4. 086936 5. 14334 4. 473375 4. 605213  
2. 750214 2. 795862 2. 835897 3. 654605 3. 503659 3. 061193 3. 03489 2. 505561 2. 987331  
5. 849903 5. 56234 6. 317217 6. 280048 5. 437659 5. 942334 5. 852619 6. 018698 4. 657953  
6. 625856 6. 73802 6. 470832 6. 154187 6. 822911 6. 482166 6. 564342 6. 656253 6. 763222  
3. 000402 2. 823189 3. 018043 3. 732827 2. 417248 2. 928124 2. 881145 3. 288111 3. 732827  
2. 877564 2. 545283 2. 975257 1. 93083 2. 634312 3. 840598 2. 232765 2. 949165 3. 057053  
4. 216058 5. 254312 5. 129957 5. 244811 4. 829554 4. 352015 5. 627612 4. 791632 4. 572522  
6. 897531 7. 07037 8. 030178 5. 853316 7. 331861 7. 110079 7. 432362 7. 217876 6. 781011

6. 792498 6. 923013 7. 000181 6. 72576 7. 174939 7. 227917 6. 855674 6. 962829 5. 845957  
1. 984812 2. 421054 2. 352064 2. 381502 2. 259902 2. 350092 2. 409691 2. 630932 3. 419491  
6. 123259 6. 272689 5. 697439 5. 612625 6. 915014 5. 057232 6. 512954 6. 195938 5. 540629  
1. 9975 2. 023 1. 692499 1. 627752 1. 251091 2. 709921 1. 694738 1. 984291 2. 433832  
2. 262725 3. 038914 3. 727499 2. 512339 2. 803174 3. 613219 2. 508692 3. 444152 2. 568653  
4. 837079 5. 116531 5. 602838 4. 880796 4. 853846 4. 100247 5. 365337 5. 366736 5. 100429  
4. 02708 3. 83015 3. 582712 3. 527007 3. 711535 3. 077857 3. 13872 3. 550005 3. 298465  
8. 404774 8. 708277 8. 247639 8. 362456 8. 907588 8. 85105 7. 862796 8. 766928 8. 188171  
8. 96752 8. 723152 8. 947306 8. 574227 9. 151864 8. 653658 8. 974518 9. 003389 8. 865674  
6. 37639 6. 436983 6. 406913 6. 699992 6. 776136 6. 18365 6. 449195 7. 052376 6. 226299  
6. 330335 6. 185651 6. 155695 7. 157276 6. 18495 5. 352465 6. 210023 6. 157544 6. 041953  
3. 939822 2. 399413 3. 896391 5. 023945 4. 265865 4. 608727 5. 363323 4. 250818 4. 190034  
8. 036656 7. 512665 7. 350401 8. 280878 7. 6502 7. 511497 7. 280122 7. 979697 7. 079204  
2. 560414 2. 896338 2. 296677 2. 69362 2. 478651 2. 369425 2. 25315 2. 336941 2. 192688  
7. 036079 6. 972696 6. 739605 6. 863843 6. 723228 6. 669409 6. 630232 6. 399667 7. 155353  
1. 723605 1. 650518 1. 331298 1. 512118 1. 340596 2. 0732 1. 315962 1. 343451 1. 228093  
1. 521433 1. 531249 1. 959626 1. 385094 0. 963002 0. 512875 2. 22991 0. 876012 0. 641041  
7. 892668 7. 876482 8. 204175 6. 769286 7. 758668 7. 685036 7. 799924 7. 881543 6. 67257  
6. 129882 6. 287117 5. 651815 7. 142318 6. 215043 5. 615574 5. 778466 6. 153199 5. 957647  
4. 161405 4. 057816 4. 340751 3. 324956 4. 242292 3. 671197 4. 265361 4. 594693 4. 579882  
2. 503032 2. 425211 2. 777828 3. 201571 4. 523194 2. 820395 3. 495662 2. 728588 3. 173436  
5. 130618 5. 134822 5. 097885 4. 914803 5. 532009 4. 354829 4. 876057 4. 531101 5. 24226  
6. 749254 6. 835503 6. 709321 7. 220515 6. 247385 6. 251714 6. 832873 6. 707747 6. 796439  
6. 295503 6. 220968 6. 526858 4. 966931 5. 957788 5. 663286 5. 728493 5. 963177 5. 952727  
2. 490376 1. 885268 2. 085457 2. 873271 2. 232122 2. 55356 2. 189829 2. 32728 3. 289383  
2. 199417 1. 490456 2. 228003 2. 716126 1. 893135 1. 814385 1. 819139 1. 894578 2. 224053  
7. 628714 7. 649987 7. 756963 7. 514398 7. 559989 7. 422853 7. 805699 7. 382648 7. 799556  
3. 744906 3. 902752 4. 566082 4. 312441 3. 810942 4. 23397 3. 795314 4. 082559 4. 300202  
3. 546396 2. 885405 4. 007154 3. 663692 3. 826257 3. 643777 3. 960325 3. 678512 3. 217488  
5. 856744 5. 599212 5. 578099 4. 84858 5. 948702 5. 907782 5. 901254 5. 821275 5. 262499  
5. 554546 6. 075644 5. 681209 4. 855679 6. 196363 5. 544983 5. 877016 5. 557252 4. 820804  
6. 195338 6. 215393 6. 395545 5. 418826 6. 520412 6. 415795 6. 6098 6. 53431 6. 038162  
5. 912239 5. 712886 6. 851437 5. 460082 6. 285434 5. 099269 5. 756999 5. 943015 5. 792896  
3. 235919 3. 57251 3. 908764 2. 779989 2. 154777 3. 775327 3. 235919 3. 347318 3. 235919  
5. 932425 6. 108255 5. 594979 4. 774834 5. 802667 5. 63643 5. 286322 5. 821684 5. 224468  
5. 107155 6. 14016 5. 252261 4. 589717 5. 475905 5. 677 5. 70413 5. 795299 4. 545199  
4. 615425 3. 714648 5. 180902 4. 426576 5. 222504 4. 129697 4. 727513 5. 283244 4. 17629  
3. 939918 1. 856482 4. 332533 3. 207598 3. 273978 3. 006932 3. 161058 2. 756402 2. 848329  
4. 488349 4. 989361 4. 430729 4. 795211 4. 450052 4. 300459 4. 275765 4. 580239 3. 835477  
2. 99045 3. 873109 4. 069262 4. 568704 3. 396292 3. 877801 3. 709286 3. 948615 2. 299154  
5. 987989 6. 299564 6. 362091 5. 45813 6. 179188 5. 678862 6. 025639 6. 394566 6. 410529  
4. 144343 4. 740169 4. 416784 5. 075831 4. 326184 4. 792542 4. 039967 4. 431792 4. 461758  
6. 401654 6. 734552 6. 524848 6. 989868 6. 656917 6. 396878 6. 868689 6. 155082 6. 350021  
1. 087911 1. 212313 1. 793114 2. 037329 1. 288731 1. 241123 1. 225519 1. 129218 1. 294298  
5. 442174 5. 362788 3. 543121 1. 943826 5. 016875 4. 958293 5. 830262 2. 979958 4. 579925  
1. 517237 2. 947423 1. 076218 1. 771406 1. 370635 1. 733498 2. 145831 1. 830333 1. 059419  
3. 515802 4. 028386 4. 527834 4. 981702 3. 96429 3. 698511 3. 691543 3. 294165 3. 694413  
9. 673685 9. 736745 9. 716657 9. 021183 9. 50874 9. 765008 9. 616642 9. 891132 9. 467783  
6. 406889 6. 648317 6. 557369 6. 448914 6. 842094 6. 432547 6. 637559 6. 894097 6. 335208  
6. 49882 7. 304842 6. 869433 5. 394056 7. 169476 6. 821997 6. 96482 6. 940141 6. 703371  
4. 572437 4. 430884 4. 075166 3. 767919 4. 810931 3. 770426 4. 688246 4. 318594 4. 824363



8. 286951 8. 117858 8. 016762 7. 588406 7. 918504 8. 261105 8. 045331 8. 154035 8. 438707  
4. 407253 4. 522724 4. 793994 6. 669918 5. 041509 4. 063542 5. 634131 4. 717191 4. 688267  
3. 858582 3. 599258 2. 24923 2. 301448 4. 620913 3. 44542 4. 96826 3. 597209 3. 718636  
3. 508334 3. 990359 3. 967686 3. 225671 4. 195091 4. 490166 4. 114345 3. 981754 5. 471821  
7. 56772 7. 882615 8. 179951 6. 391437 7. 562144 7. 581468 7. 621866 7. 703957 6. 689988  
5. 323331 5. 039922 4. 695848 4. 947397 4. 810237 5. 285504 4. 942959 4. 886662 5. 021752  
1. 947625 2. 27864 1. 60749 1. 76075 2. 85073 2. 040585 1. 965352 2. 377184 2. 142389  
6. 071275 5. 959851 5. 660175 7. 150385 6. 322005 5. 554786 6. 082367 5. 94266 6. 351447  
5. 481803 5. 573023 4. 879238 6. 21062 5. 635613 5. 057463 5. 277683 5. 546292 5. 738963  
4. 547918 4. 024111 3. 800528 3. 821215 4. 124837 4. 860775 3. 806831 3. 973711 4. 059574  
3. 117606 4. 430354 5. 239109 4. 498422 3. 806094 2. 431662 3. 386204 2. 750885 1. 912991  
2. 08636 2. 811818 2. 311071 2. 792084 2. 42955 3. 604774 1. 837219 1. 99086 2. 040372  
4. 469517 4. 88567 4. 314922 4. 280141 4. 46335 4. 296831 4. 473588 4. 101054 4. 413947  
5. 463733 4. 991889 5. 223176 5. 888402 5. 12568 5. 257013 5. 151883 5. 10557 4. 799765  
5. 010893 4. 956558 4. 866605 3. 51399 5. 064771 4. 87205 5. 103427 4. 75807 4. 815319  
5. 25981 5. 819859 5. 982859 4. 906204 5. 920468 5. 252319 5. 669971 5. 610526 4. 926106  
5. 16681 5. 971878 5. 370982 4. 297031 5. 93392 4. 562103 6. 432506 5. 245621 5. 876562  
4. 905548 5. 308262 5. 90726 5. 106885 5. 970554 5. 159351 5. 885981 5. 367155 5. 10494  
5. 331576 5. 741553 5. 021889 3. 233656 4. 161076 5. 251959 5. 961865 5. 376071 5. 319568  
4. 825523 5. 066899 4. 908755 4. 956198 5. 363714 4. 322923 5. 198959 4. 892985 3. 853764  
2. 186367 1. 429347 1. 91128 3. 179353 1. 921733 2. 595577 2. 356529 1. 46387 1. 906849  
1. 922534 3. 341399 2. 452318 3. 088026 4. 001878 2. 550815 2. 775379 2. 724435 2. 821576  
1. 533473 2. 71513 2. 406179 2. 430894 1. 552333 2. 113272 1. 646863 1. 96462 2. 201973  
3. 974478 3. 121514 4. 116455 3. 479555 4. 490943 3. 101873 4. 23698 4. 59734 3. 18564  
6. 266634 6. 939986 6. 576598 6. 542005 6. 664341 6. 473492 5. 898475 6. 85144 5. 369236  
5. 256528 6. 042544 6. 101574 5. 372443 5. 795454 5. 020118 4. 981579 6. 028002 5. 285095  
1. 544629 1. 251251 1. 873678 1. 996046 1. 084374 3. 120067 2. 377579 1. 473891 1. 104136  
1. 978567 2. 055761 1. 987734 2. 386444 2. 229027 3. 26218 2. 643816 2. 036085 2. 243925  
4. 08362 4. 014747 3. 352103 2. 202433 3. 406053 3. 589994 3. 790505 4. 427647 2. 976636  
1. 497094 1. 90335 1. 865699 2. 096894 1. 669775 1. 777865 1. 526717 1. 738009 1. 505941  
5. 22832 5. 939056 6. 247622 6. 837008 5. 40389 5. 53775 6. 674501 5. 951618 7. 865397  
6. 381996 6. 505729 6. 272022 6. 486111 6. 610545 5. 536506 5. 85799 6. 37184 5. 979768  
1. 551566 2. 665507 1. 815376 2. 130094 0. 521981 0. 976561 2. 161252 2. 816907 2. 041271  
8. 428719 8. 127389 7. 976317 7. 983899 7. 748274 7. 844574 7. 95044 8. 063352 7. 993587  
0. 815213 0. 936993 2. 286992 0. 868147 1. 265573 1. 105603 0. 619793 1. 250062 0. 731671  
3. 59593 3. 577477 3. 125224 3. 103419 3. 922035 2. 641056 3. 610354 3. 153217 3. 041276  
3. 229046 3. 102895 2. 704323 2. 772857 3. 414653 2. 143419 3. 438314 2. 899161 4. 171165  
3. 296133 3. 394613 3. 005804 4. 035852 3. 949597 3. 800746 3. 831547 3. 215528 3. 529224  
5. 670376 6. 31154 5. 354829 5. 421853 5. 681833 5. 768159 5. 912149 5. 956692 6. 229795  
2. 436774 1. 831315 2. 640364 2. 239184 2. 301526 2. 098485 2. 439068 2. 514879 2. 57776  
6. 019912 4. 88953 5. 050472 5. 433388 5. 587228 5. 344048 5. 302377 5. 539455 4. 739587  
7. 803816 7. 308766 7. 536586 6. 832265 8. 016839 7. 294211 7. 48873 7. 392503 7. 010124  
8. 037222 7. 850416 7. 597204 7. 330186 7. 810007 7. 475994 7. 94822 7. 885588 8. 108352  
3. 314371 3. 157362 4. 640491 4. 232697 3. 749559 3. 378918 3. 962005 3. 796399 4. 224834  
5. 040025 5. 098295 5. 060891 5. 111793 5. 384195 4. 688345 5. 160686 4. 892817 4. 401565  
5. 309975 6. 084632 5. 436834 5. 351413 5. 922107 5. 096248 5. 715499 5. 489653 4. 556505  
10. 11201 10. 24507 10. 00968 9. 80628 10. 14612 10. 87958 9. 354738 10. 41632 9. 122614  
6. 392826 6. 34122 5. 559439 5. 50037 5. 896578 6. 099332 6. 163085 6. 09381 6. 439483  
4. 735733 4. 555793 5. 582998 5. 332326 5. 182877 4. 61826 4. 959103 4. 629741 4. 799975  
5. 205507 3. 850075 4. 368582 4. 238237 3. 655636 4. 133767 3. 506128 4. 832546 4. 069233  
2. 210177 2. 372718 1. 912031 1. 655238 2. 814781 1. 717025 1. 640836 2. 109623 1. 955769

2.415666 2.947393 2.30784 1.946274 2.033946 2.986321 2.90658 2.416983 2.945737  
3.567366 2.913275 4.347925 5.516239 3.55845 3.145962 3.43508 3.481232 3.928139  
3.970631 4.482663 4.216027 4.723748 4.164672 2.669649 4.145549 4.849934 4.243901  
6.680472 6.023454 6.263824 6.757082 6.146573 6.430682 5.808682 6.194604 5.791212  
3.704178 2.503713 2.300099 2.050272 2.398208 2.117516 2.076146 2.866907 2.09776  
4.579793 4.348869 4.795698 3.379731 4.088742 4.577065 4.663062 4.005796 3.905259  
7.900205 8.177076 8.275728 7.615031 7.742977 8.126642 8.087307 7.8266 7.602136  
5.294919 6.089747 5.779779 5.058004 6.035876 5.350522 5.57112 6.025354 5.233028  
3.913943 3.031228 4.669622 3.923751 4.005314 4.205469 4.349127 4.473055 4.436008  
5.275709 5.922722 6.655336 5.400276 5.600453 5.323928 6.655628 5.309754 6.719544  
5.92721 5.722373 6.096536 6.23075 6.234926 6.20748 5.805434 5.835565 5.469241  
1.677314 1.614005 0.747624 1.740169 2.052389 3.796961 0.753825 2.359178 1.774167  
5.514522 4.5913 4.462312 4.438666 4.806672 5.00728 4.043712 4.287553 3.699116  
7.736142 8.030671 7.983098 7.771388 7.973701 7.934163 7.490432 7.934928 6.813932  
2.492511 3.551335 3.903935 1.664132 2.805487 2.254164 2.424912 2.348336 3.185297  
5.060014 5.145061 5.234498 5.458774 5.165073 5.022986 4.522723 5.022478 4.259831  
4.974432 4.71576 4.264164 3.359932 4.809134 4.375024 4.341889 4.451396 3.61093  
2.388896 2.47752 2.796684 2.584482 2.271381 2.267313 2.263076 2.303277 1.589439  
4.512817 4.18046 4.674373 5.070493 5.048224 3.733514 4.55182 5.137565 4.29586  
3.98373 3.496725 3.520736 3.899399 3.973646 4.009443 3.556823 3.541353 3.441887  
1.98335 2.305277 2.22361 2.590833 2.575864 2.310761 2.479867 2.440009 2.171991  
4.040158 3.076337 5.176156 3.203812 4.761016 3.464197 3.486848 4.246142 4.215666  
3.804266 4.761 5.062034 4.81431 4.885956 4.661389 4.537348 4.463853 4.482277  
6.946282 7.14327 7.04816 7.036066 7.188526 6.920807 6.956733 7.122674 6.411401  
6.084879 5.617167 5.885396 5.564352 6.044724 5.26007 5.040336 5.881485 3.885096  
3.375815 3.713998 4.872121 0.602703 4.328568 5.185777 3.211643 5.293454 3.859658  
5.201562 5.857762 4.82389 5.584856 6.068431 5.659959 5.831104 5.601386 5.318937  
2.568619 2.208228 3.064271 2.6354 2.006038 3.205788 2.142364 2.675835 2.269912  
6.453897 6.794882 7.393698 6.088466 6.940678 6.690026 6.764442 6.398365 5.989934  
3.530593 3.018565 2.942291 3.226486 2.880797 3.09563 3.046747 3.105133 2.717293  
2.114044 2.234426 1.870847 1.993288 1.408457 1.549492 1.797103 2.211457 1.383123  
3.676285 3.565344 3.565579 3.541814 2.791062 3.279453 3.888735 4.069598 3.102442  
2.750322 2.872317 3.420271 2.557987 2.245709 2.731363 1.974127 2.47041 1.138321  
1.5903 1.300043 2.019013 1.629319 1.141658 2.012272 1.420323 1.489887 1.266364  
4.90814 5.047949 4.888911 3.949447 4.833049 4.933951 5.096045 4.913792 4.73633  
3.234005 4.466308 3.895987 3.833093 4.740916 3.043679 4.197981 4.403183 4.165886  
6.1463 6.180976 6.110776 4.398869 5.935478 5.931354 6.31831 6.258549 5.514554  
2.892728 4.051647 3.265934 3.331042 4.795906 3.791468 4.632748 3.562688 2.52621  
5.601335 5.703965 5.919949 6.729419 5.776391 5.516171 5.83275 6.24983 6.028057  
3.23756 3.19175 2.723834 3.732873 3.160238 2.68826 2.923823 3.109252 3.116934  
5.881908 6.328673 5.825703 4.363261 6.10634 6.078685 6.112115 5.949899 5.274392  
1.985224 1.415842 1.849449 2.382315 0.955583 1.703774 1.298214 1.202709 1.417674  
0.421946 1.207987 1.028479 1.560282 1.03039 1.556339 1.483665 0.732483 1.142996  
1.031739 0.586476 0.933756 1.048711 0.832276 1.42109 1.182143 1.04998 1.268575  
1.684989 0.885909 1.596237 1.983858 0.760378 1.194788 2.767534 2.797814 3.462232  
0.768766 1.074092 1.585381 1.188475 2.221281 1.200401 2.10983 1.293548 1.034855  
1.470142 1.371526 2.068241 3.094231 1.008502 1.438615 1.498439 2.34822 1.780929  
1.199815 1.355759 1.330258 1.846821 1.768424 1.409982 1.349037 1.02602 1.959896  
1.336234 1.112534 2.683014 1.563422 1.570709 1.11291 1.45816 0.996872 1.48167  
1.843913 1.775922 1.838329 1.638496 1.999774 2.120975 1.864999 2.474156 2.280098  
1.108085 1.191206 1.476513 1.441751 0.750507 1.363076 0.989199 0.561986 1.412154

1. 940547 3. 074725 3. 538322 2. 80383 2. 286602 3. 094734 2. 140784 2. 264408 2. 293728  
5. 391795 5. 601406 5. 486393 5. 821353 5. 214264 5. 315383 5. 44506 5. 298192 5. 152409  
5. 46079 4. 951737 4. 833681 6. 378211 5. 604335 3. 612087 6. 314842 5. 586617 4. 918429  
5. 615889 5. 523782 5. 423639 6. 274503 5. 297502 5. 674436 6. 068046 5. 869194 6. 215265  
0. 953917 1. 297475 0. 921593 0. 919123 1. 229868 0. 872957 0. 874135 0. 953593 0. 965666  
1. 282637 1. 217239 1. 141819 1. 870328 0. 799655 0. 833324 1. 766117 2. 948947 1. 817999  
6. 697811 6. 827677 6. 660268 7. 018181 6. 958153 6. 310698 6. 816127 6. 763947 7. 403485  
1. 048377 1. 932075 1. 063872 1. 74321 1. 104364 1. 391073 1. 48044 2. 035935 1. 338963  
4. 321568 4. 511039 5. 278242 3. 497391 5. 250622 7. 210441 5. 223218 3. 579452 7. 08409  
2. 056347 2. 124515 1. 836512 3. 679106 1. 837743 2. 240738 2. 217991 1. 915332 2. 205553  
7. 18897 6. 714324 5. 449292 6. 328485 7. 827195 5. 361692 6. 071531 6. 580159 5. 359878  
4. 807756 4. 601292 4. 66664 3. 271503 3. 266628 5. 014304 5. 256355 4. 421558 3. 499992  
2. 707148 3. 024717 2. 89338 3. 000254 2. 499262 2. 265136 2. 505415 2. 741079 2. 155193  
2. 893629 2. 048557 2. 14144 3. 586506 3. 704839 1. 800265 3. 540452 3. 345623 3. 735322  
5. 85782 5. 82561 5. 664452 5. 630686 5. 521987 5. 915561 5. 191042 5. 700886 2. 671135  
4. 648215 4. 170429 4. 668874 4. 410013 4. 638576 4. 303275 4. 23246 4. 363314 3. 596938  
2. 309056 2. 77462 2. 082433 1. 71196 1. 64471 1. 374469 1. 662619 1. 843276 1. 757073  
2. 32842 2. 591043 3. 129786 2. 050107 3. 160881 3. 050493 3. 114201 2. 654061 1. 6193  
4. 74141 4. 17283 5. 238911 4. 223248 4. 299199 4. 547498 4. 430141 4. 408011 3. 323089  
7. 464284 7. 492043 6. 54443 6. 033578 7. 18006 7. 296616 6. 932292 7. 507302 7. 11371  
5. 469782 6. 069266 5. 323489 4. 53611 5. 53554 5. 870315 6. 079793 6. 159213 5. 275189  
2. 593384 2. 665576 3. 004059 3. 494353 2. 65263 2. 808014 2. 879752 2. 709981 2. 888912  
3. 069247 3. 884986 3. 592846 2. 844526 3. 836666 3. 598203 3. 758692 4. 555879 3. 233339  
4. 275347 3. 886954 3. 896165 3. 948842 3. 860829 4. 277715 3. 080853 3. 910523 3. 927067  
2. 705149 1. 082673 1. 33097 1. 230073 1. 030102 2. 628036 1. 057572 1. 516394 1. 189069  
0. 779367 1. 62082 0. 626 0. 792518 1. 064199 1. 430594 0. 620709 0. 992754 2. 119512  
1. 138505 1. 299128 1. 392789 1. 311166 1. 232563 1. 460556 0. 822997 1. 249594 2. 98581  
1. 635977 1. 211756 1. 376569 1. 712012 1. 638554 1. 351127 1. 606109 1. 543916 1. 409199  
2. 494065 0. 791749 1. 925252 2. 857654 1. 209513 0. 692623 1. 260452 1. 211244 1. 199703  
1. 116028 1. 918194 2. 153663 2. 123965 1. 18953 2. 987231 2. 579224 2. 267563 2. 240038  
0. 933687 1. 199284 1. 043912 0. 954892 0. 941794 1. 219453 1. 268804 0. 760054 0. 832836  
2. 789288 2. 257226 1. 902633 2. 622108 1. 940527 2. 110451 1. 882297 2. 243726 3. 188644  
7. 754979 9. 078786 8. 522925 7. 693156 8. 717968 8. 441101 8. 226917 8. 780514 7. 114633  
6. 908301 6. 641749 7. 331053 6. 193444 7. 156798 6. 40735 6. 44445 6. 683925 7. 369524  
2. 815325 2. 069577 2. 157126 2. 778046 1. 919455 1. 311434 2. 239688 3. 198756 2. 990164  
4. 869433 4. 768113 4. 642044 5. 551517 5. 123476 5. 356622 5. 422888 5. 22825 4. 181361  
7. 494633 7. 001322 7. 302535 7. 046698 8. 023643 7. 281055 7. 964349 6. 987723 7. 781925  
4. 253736 4. 361347 4. 315958 4. 291161 4. 940257 4. 180165 4. 244012 4. 804871 3. 89628  
1. 947352 1. 996057 1. 678656 2. 657069 1. 717932 2. 323482 2. 037731 1. 829474 1. 753372  
3. 117958 3. 737945 3. 580656 4. 457603 4. 118251 3. 737276 2. 796283 3. 27919 2. 788096  
5. 315408 5. 26926 6. 062083 5. 532387 5. 884699 4. 994113 6. 056536 6. 170144 5. 175698  
7. 481664 7. 731738 7. 415466 7. 700334 7. 381566 7. 569643 7. 664543 7. 755876 7. 374561  
3. 299453 3. 214072 3. 689662 4. 899446 2. 928799 2. 584581 3. 179697 3. 809526 3. 961918  
3. 481291 4. 439385 3. 780409 3. 7925 4. 226669 3. 69438 4. 5095 4. 2147 3. 873159  
6. 556559 5. 759938 5. 798588 5. 752289 5. 672216 5. 660229 5. 746943 5. 753069 7. 011944  
4. 312986 3. 778279 4. 823279 3. 729409 4. 34009 3. 86239 3. 752013 4. 763569 3. 981347  
4. 554816 4. 568923 5. 155056 4. 646407 4. 550266 4. 551936 4. 43328 4. 854131 3. 900241  
3. 811643 4. 654167 4. 39446 4. 660729 4. 875225 3. 557026 4. 486639 4. 951499 4. 59875  
2. 616306 2. 547003 2. 483687 2. 281935 3. 151189 2. 890135 3. 321393 2. 406154 2. 256644  
6. 589862 6. 250799 6. 232074 7. 050637 6. 583027 5. 545556 6. 303525 6. 119373 7. 098876  
5. 994114 5. 54263 5. 444815 5. 654061 5. 546921 5. 50898 5. 61293 5. 342719 5. 440852

4. 24029 4. 351686 4. 917361 3. 411722 4. 343146 3. 784254 4. 169079 3. 866944 3. 846326  
7. 452637 7. 58272 7. 516925 7. 134124 7. 712268 7. 445932 7. 073941 7. 261579 7. 271036  
6. 311679 6. 9296 6. 394124 7. 326863 6. 643186 6. 37094 6. 448697 7. 000552 6. 832889  
4. 470019 5. 490733 4. 802522 4. 972066 4. 870724 5. 030279 4. 897275 5. 072964 5. 171475  
0. 852222 1. 446139 1. 087254 1. 443258 0. 760722 1. 297586 0. 745152 1. 471335 1. 778003  
6. 491111 6. 346389 5. 953847 6. 127771 6. 013052 6. 760079 6. 324052 6. 484946 5. 422441  
5. 219496 5. 156099 5. 543727 4. 671787 4. 912515 4. 285599 5. 018562 5. 131582 5. 485798  
3. 05835 4. 3723 3. 776327 3. 476914 3. 441963 4. 12782 3. 07364 3. 730713 2. 629224  
1. 94372 1. 791828 2. 324098 1. 629935 1. 531236 2. 65372 2. 571805 1. 834128 1. 518918  
5. 981502 6. 844687 5. 591228 6. 13733 5. 84475 6. 139115 6. 14248 6. 491034 5. 533179  
4. 230229 4. 267558 4. 993034 4. 784424 3. 806793 4. 601437 5. 173582 3. 698132 5. 590495  
1. 630165 0. 933968 1. 816924 2. 766996 1. 56618 1. 170855 1. 784342 1. 411222 3. 313812  
4. 740344 3. 456598 4. 966339 3. 595843 3. 94769 4. 553626 4. 533502 4. 208602 4. 430089  
4. 47164 4. 216893 3. 927323 4. 350733 4. 253425 4. 523523 4. 248837 4. 674264 5. 278196  
4. 32015 4. 3161 4. 280344 2. 824651 4. 155642 3. 116086 4. 097225 4. 372853 3. 636519  
3. 789773 3. 811877 4. 124762 4. 021142 5. 104177 4. 697607 4. 25604 3. 329352 4. 218641  
7. 407639 7. 572298 6. 847024 7. 449024 6. 813451 7. 016041 7. 509667 7. 155336 7. 375283  
5. 896478 5. 691327 4. 7597 3. 899279 5. 368758 4. 729546 5. 123961 5. 557912 5. 437655  
6. 412019 6. 328812 6. 846441 5. 917442 6. 945303 5. 581738 6. 886889 6. 703337 6. 266307  
5. 679091 5. 923053 5. 524305 6. 431735 5. 618611 4. 402026 6. 815022 6. 643983 7. 019599  
5. 132244 4. 406028 4. 85715 4. 770398 5. 099489 4. 965808 5. 093501 5. 019538 4. 057727  
10. 43604 10. 27267 10. 22664 10. 11731 9. 816393 10. 45994 10. 48554 10. 08076 10. 43236  
2. 257165 3. 105127 3. 865085 3. 692936 3. 699354 3. 976322 2. 340149 4. 048149 2. 120938  
6. 529075 7. 325495 6. 854501 6. 046864 6. 497589 7. 515085 6. 915685 7. 412366 7. 294995  
1. 814418 1. 444405 2. 189944 1. 660983 1. 847993 2. 233266 1. 534923 1. 798428 1. 96126  
5. 626675 6. 221825 5. 787575 4. 851083 5. 919055 5. 637007 4. 540356 5. 685975 5. 392344  
7. 759635 6. 872066 7. 860712 7. 795933 7. 592948 7. 105225 7. 71619 7. 787728 7. 68266  
5. 826892 5. 461924 5. 402944 5. 759152 5. 36498 5. 458306 5. 608037 4. 995187 5. 178564  
2. 69494 2. 950293 2. 587133 3. 438452 2. 728906 2. 801496 2. 434573 2. 535634 2. 908381  
5. 3379 4. 472877 4. 496035 3. 988491 4. 658543 4. 605675 4. 855297 4. 270991 5. 256765  
4. 811941 4. 713506 4. 774248 4. 267647 4. 447702 4. 732668 4. 907434 4. 752206 4. 982811  
3. 961487 4. 200788 4. 500484 4. 520184 3. 67668 4. 200977 4. 042611 4. 086309 4. 320197  
3. 289317 4. 234199 3. 267735 2. 611315 3. 808384 2. 61665 3. 259334 3. 278333 2. 64561  
5. 318969 5. 858629 5. 36892 4. 82613 5. 164123 3. 998867 4. 311685 5. 15431 4. 919697  
3. 3331 3. 928546 3. 813245 3. 564802 3. 406122 4. 513293 3. 834963 4. 371981 3. 981438  
4. 064495 4. 03963 5. 401588 4. 939069 5. 061977 4. 584816 4. 179665 4. 634472 4. 940596  
2. 833264 2. 34454 1. 892256 1. 666755 3. 038407 2. 593749 3. 175742 2. 700822 2. 480559  
3. 816448 4. 173601 3. 186604 3. 637184 3. 712321 3. 343323 3. 712705 3. 328415 2. 915066  
4. 619684 5. 162833 4. 820021 5. 514821 4. 543914 4. 541583 4. 820266 4. 905907 5. 118963  
1. 646028 0. 825327 1. 149867 1. 158906 1. 05085 1. 327789 1. 836942 1. 332501 1. 576731  
7. 169942 7. 380827 7. 03427 7. 395717 7. 244444 7. 487263 6. 90598 6. 946552 6. 349923  
7. 001423 7. 344205 7. 066884 7. 90703 7. 034803 7. 37339 6. 847036 7. 216087 6. 72676  
5. 776087 5. 732573 5. 450857 4. 8841 5. 969658 4. 948112 5. 636913 5. 879241 6. 214859  
5. 808949 5. 980333 6. 150715 6. 089523 6. 063581 5. 4614 6. 440994 6. 026166 5. 87872  
5. 488774 5. 013905 5. 303971 5. 5499 5. 462612 4. 591506 5. 256657 5. 177395 3. 917143  
3. 332224 3. 564956 4. 017916 2. 120154 4. 018297 2. 631796 3. 036057 2. 876357 2. 156035  
6. 236246 6. 763003 7. 015504 6. 524868 6. 382016 6. 40266 6. 050549 6. 948573 6. 138128  
4. 377048 3. 895895 4. 592557 4. 281462 4. 67474 3. 819538 4. 751146 4. 811317 2. 917032  
2. 663486 2. 417889 3. 244634 3. 174771 2. 570053 2. 604927 3. 037291 2. 70205 3. 409026  
6. 167391 6. 405348 5. 243671 5. 692413 6. 491875 5. 78774 6. 475031 5. 831341 6. 25861  
3. 981574 3. 774746 3. 925108 4. 393666 4. 092885 4. 734153 4. 045483 4. 124869 5. 229057

5. 295051 5. 470901 5. 330072 4. 320399 4. 421282 5. 375184 5. 325303 5. 047588 6. 301576  
7. 50455 7. 15952 7. 540966 7. 181351 7. 508787 7. 115571 7. 46985 6. 963704 8. 036785  
5. 174443 5. 468597 4. 631386 5. 517352 5. 478866 5. 279458 4. 825553 4. 858033 4. 215783  
2. 541728 3. 201532 2. 920196 3. 043482 2. 616599 2. 481481 2. 572341 2. 449986 3. 560769  
3. 894421 3. 018319 3. 833019 3. 65806 3. 282556 3. 070528 4. 257242 3. 605279 3. 277676  
6. 592683 7. 365587 6. 970289 6. 770015 6. 997792 6. 90613 7. 3508 7. 069293 7. 403628  
6. 244866 6. 244177 5. 983927 5. 284398 5. 81519 6. 800462 6. 519678 6. 077469 6. 653922  
6. 395933 5. 799346 5. 980442 6. 521935 6. 027996 5. 801409 6. 492556 5. 745576 5. 755757  
1. 614575 1. 94739 1. 897462 2. 240415 2. 044654 3. 08426 2. 325897 1. 650834 1. 83558  
5. 859905 5. 637001 5. 437105 4. 784543 6. 002234 5. 76917 5. 972152 6. 070922 6. 138796  
1. 856523 2. 045149 1. 966217 2. 309943 2. 244101 2. 273089 2. 123668 3. 059557 3. 796507  
6. 640208 6. 291091 6. 374837 6. 405922 6. 572778 6. 132554 6. 313349 6. 316357 6. 49047  
4. 926224 4. 297212 4. 543296 4. 044421 4. 279869 3. 785272 4. 021152 3. 888859 3. 588803  
5. 864551 5. 090161 5. 263877 4. 729348 5. 7131 4. 597571 5. 507403 5. 331415 4. 41813  
4. 795824 5. 401435 5. 161342 5. 466711 5. 676865 5. 590168 5. 379639 5. 308374 5. 000996  
4. 494139 3. 547172 4. 757768 3. 801628 3. 544235 4. 462914 5. 16251 3. 578502 4. 860022  
4. 968818 4. 929198 3. 977805 4. 289671 4. 792641 4. 812393 4. 309425 4. 871655 5. 238916  
3. 476344 2. 802702 4. 340902 4. 545007 4. 357419 4. 220251 4. 632564 5. 233304 4. 155151  
4. 98124 5. 269397 5. 109564 3. 983557 5. 578947 5. 010172 5. 44191 5. 178656 5. 869972  
2. 808865 1. 658866 1. 491124 2. 112663 2. 960377 1. 354911 1. 356513 1. 332331 1. 194002  
5. 453393 4. 869068 5. 311233 4. 855498 4. 444215 3. 726012 4. 407876 4. 297469 4. 152385  
2. 54394 2. 614094 2. 562601 3. 18319 2. 919134 3. 168747 3. 112446 2. 609467 2. 987853  
4. 760758 5. 100905 4. 699241 4. 78545 4. 84868 4. 732561 4. 642795 4. 748334 4. 479062  
4. 735141 4. 361487 4. 708093 5. 581395 4. 51621 3. 954928 3. 860347 5. 03942 5. 144256  
5. 88318 6. 613451 5. 874227 5. 917449 6. 789025 5. 444225 6. 257957 6. 161798 5. 902447  
2. 700043 3. 335463 2. 706739 5. 341708 3. 456299 3. 886451 2. 304285 3. 464829 3. 539205  
2. 578173 1. 823746 2. 320862 1. 10394 3. 380912 4. 356681 2. 066067 4. 86083 2. 172248  
3. 032755 1. 577838 2. 540588 3. 922046 2. 871777 2. 705922 2. 808414 2. 755703 2. 496821  
5. 84587 4. 454834 5. 035532 6. 224472 5. 796479 5. 209487 5. 990601 5. 37548 5. 202711  
5. 616 5. 190474 5. 209867 4. 940615 5. 862647 5. 450597 5. 160146 5. 184874 4. 774176  
5. 656733 5. 654308 6. 114861 3. 613004 5. 249421 5. 846174 5. 804751 5. 47006 5. 605352  
7. 570112 7. 558401 7. 12023 7. 015014 7. 686677 7. 819579 7. 208579 6. 994633 7. 382983  
2. 300796 2. 440677 3. 132163 3. 293238 2. 861017 3. 538651 3. 930426 2. 570072 1. 918867  
2. 49069 3. 354501 2. 329185 2. 746388 2. 484682 3. 244109 2. 559605 2. 130799 2. 086531  
3. 8691 4. 145901 3. 404148 3. 226692 3. 45287 4. 577283 4. 269132 3. 506174 3. 482399  
1. 909696 1. 519492 1. 714653 2. 88733 2. 217791 0. 902553 1. 51032 2. 010762 1. 751056  
7. 117839 6. 786408 6. 605425 6. 274536 6. 646459 6. 534706 6. 712418 6. 843614 6. 789844  
1. 759546 2. 918023 2. 840622 1. 391275 1. 715473 2. 371299 1. 912495 2. 214692 2. 215106  
5. 154572 5. 423529 5. 419362 6. 064213 5. 365991 5. 110048 5. 322282 5. 515236 4. 166539  
2. 896154 4. 431751 3. 299532 4. 104775 3. 855954 4. 120283 4. 505923 3. 091535 3. 441006  
2. 548257 3. 497502 3. 410228 2. 460841 3. 828509 2. 873319 2. 898286 2. 96916 2. 255221  
5. 674198 5. 712748 5. 874936 6. 243334 5. 442889 5. 237426 5. 187509 5. 471264 4. 680839  
5. 518577 6. 018777 5. 875506 5. 32143 6. 168965 4. 827698 5. 56919 5. 713962 4. 116127  
4. 631958 4. 472378 5. 160487 4. 672811 3. 959909 3. 453328 4. 410779 4. 332353 4. 32775  
4. 495445 4. 289775 4. 622558 4. 802369 5. 050723 4. 508387 3. 803394 4. 970572 3. 652688  
5. 709756 5. 563024 6. 166547 6. 324431 5. 081636 5. 383316 5. 679771 5. 850156 5. 711802  
4. 20673 3. 494647 4. 115729 3. 591868 4. 903131 3. 949141 3. 483111 4. 656384 3. 562121  
3. 747804 2. 795296 2. 967923 3. 027867 3. 412108 2. 831393 2. 922889 2. 458272 2. 159703  
3. 07488 1. 805593 0. 507002 3. 644483 3. 131052 1. 989537 1. 331127 0. 762098 2. 573736  
6. 093852 6. 026359 6. 482501 5. 844009 6. 163205 6. 528086 5. 952026 6. 153239 6. 061667  
6. 807555 7. 12149 7. 082209 7. 096219 6. 545975 7. 391985 7. 581939 6. 901197 6. 579909

5. 625003 5. 767265 5. 343618 4. 199622 5. 673573 5. 947153 5. 559994 5. 529765 5. 080017  
4. 921016 5. 144289 4. 698673 4. 145275 4. 547476 3. 462763 4. 415107 4. 581637 4. 408812  
1. 552566 1. 583053 1. 701916 3. 445013 2. 040157 1. 894902 1. 570469 1. 485826 2. 566981  
3. 378047 3. 501144 3. 140651 2. 838776 3. 373675 2. 700759 3. 254306 3. 389983 3. 222311  
3. 746455 3. 326038 4. 195694 4. 147762 3. 550212 4. 402623 4. 242033 3. 755063 2. 865189  
2. 463905 2. 418351 2. 534932 2. 349629 3. 541059 3. 195575 2. 460866 3. 228084 3. 905114  
5. 255198 5. 616841 5. 165056 4. 794436 6. 002774 5. 389609 5. 619102 5. 241337 5. 472325  
1. 9767 1. 685242 1. 778581 2. 200628 2. 135206 1. 771897 1. 781726 1. 374416 2. 194661  
4. 63544 4. 674448 3. 960307 4. 269633 4. 404493 4. 269739 4. 611925 4. 383978 4. 748995  
4. 723352 4. 596101 4. 935924 4. 172559 4. 42202 4. 782096 4. 369325 5. 63958 4. 581669  
2. 616437 1. 97041 2. 27793 1. 715072 2. 882833 1. 99087 2. 668496 2. 434542 2. 777445  
4. 46803 4. 038114 4. 009141 2. 958637 3. 864436 3. 497683 3. 786876 4. 781375 3. 993416  
1. 945636 2. 545746 2. 091173 2. 288697 1. 945767 3. 453036 2. 083688 1. 732323 1. 910465  
4. 351471 3. 682425 3. 533866 3. 47791 4. 474126 2. 964012 3. 1491 3. 427613 2. 941431  
5. 910956 6. 158593 6. 625321 6. 113209 6. 197646 6. 129457 5. 835837 6. 488588 4. 985491  
5. 910455 4. 206005 4. 668878 6. 189687 4. 990434 4. 624052 5. 258208 4. 636882 4. 990877  
3. 890301 4. 650322 4. 254912 4. 397555 3. 122997 3. 582346 4. 294755 4. 164721 3. 83817  
3. 567493 4. 401167 4. 105831 5. 696317 4. 076373 3. 609507 3. 651767 4. 389327 5. 00262  
1. 735358 1. 19718 1. 515369 1. 827091 1. 266576 1. 922567 1. 013615 1. 038806 0. 839978  
3. 365727 3. 002557 2. 801545 2. 737381 2. 970652 3. 141045 2. 731441 3. 355118 4. 076166  
2. 375566 3. 893241 2. 970439 3. 774361 4. 554838 3. 341653 3. 364669 4. 252535 2. 506825  
2. 614624 2. 46135 3. 262074 2. 09548 3. 921108 3. 738337 3. 419197 3. 141596 4. 095269  
7. 416491 7. 157547 7. 050922 6. 640951 6. 768724 6. 585411 7. 124354 6. 626549 7. 332231  
3. 764197 2. 610155 3. 084529 3. 100927 2. 995636 3. 373596 2. 706017 3. 619325 3. 499968  
1. 00695 1. 228845 1. 311595 1. 899307 1. 694242 1. 569896 1. 012984 1. 015605 1. 263097  
1. 680743 1. 620483 1. 919159 3. 141819 1. 773622 1. 876213 1. 370557 1. 45593 2. 032622  
1. 24942 2. 231945 1. 636623 2. 312103 1. 844777 1. 641198 1. 067259 1. 803865 1. 876769  
3. 233631 3. 557748 3. 115358 3. 248134 4. 001434 3. 508503 2. 668146 3. 380899 2. 836557  
5. 251474 5. 111072 4. 997643 2. 857596 4. 891205 4. 967974 5. 368318 5. 179766 5. 687301  
6. 203773 6. 493018 6. 615845 5. 324537 6. 055264 6. 122528 6. 35903 6. 231141 6. 088053  
5. 354954 5. 451593 4. 866138 4. 989522 4. 877816 5. 530996 5. 385673 5. 785011 4. 587015  
1. 604278 2. 289208 2. 10928 2. 011367 1. 416912 2. 011367 2. 174158 2. 463024 1. 992381  
4. 442224 3. 274233 4. 034694 4. 870284 3. 859562 4. 424715 4. 692379 4. 046744 4. 803719  
2. 56463 3. 236576 2. 856943 2. 955462 2. 814937 2. 609695 2. 211815 3. 100413 2. 471854  
3. 725098 3. 337516 3. 537297 3. 924302 4. 023294 3. 407093 3. 32296 3. 70063 3. 914506  
2. 693605 3. 710883 4. 230026 2. 996027 4. 328796 2. 794438 4. 750491 4. 306418 2. 629879  
7. 965291 7. 032045 8. 055422 7. 785394 7. 741794 8. 0683 7. 64151 8. 106192 6. 948292  
6. 14101 6. 393899 6. 472137 5. 147681 6. 925112 6. 513953 5. 841495 7. 108019 6. 852577  
3. 284226 2. 520564 2. 540456 2. 125573 1. 959906 3. 472869 2. 408002 2. 509592 2. 984169  
2. 635267 2. 236941 1. 906868 1. 117427 1. 315239 3. 225032 1. 526673 1. 476825 2. 705375  
3. 004217 3. 492491 1. 817447 1. 775361 2. 673426 3. 365348 2. 986398 2. 472921 2. 946278  
8. 516641 8. 485158 8. 579949 8. 693929 8. 68517 8. 936686 8. 904866 8. 772524 8. 154898  
2. 74123 2. 435779 2. 408551 2. 889646 2. 164 1. 510288 2. 441385 2. 468762 1. 671555  
3. 485669 3. 364048 3. 717931 3. 385172 3. 247055 3. 971121 3. 459237 3. 48559 2. 691457  
1. 661379 0. 826713 1. 603961 1. 949736 1. 691492 1. 003523 2. 38882 1. 359386 2. 168841  
3. 726689 3. 123079 3. 21106 2. 495588 3. 751065 2. 852657 2. 75478 2. 880822 4. 074409  
3. 170744 3. 056195 2. 950734 3. 272115 3. 866711 2. 668937 2. 34547 3. 859517 2. 440359  
6. 411498 6. 451436 6. 270967 6. 683237 5. 788064 6. 430592 6. 50581 6. 158985 6. 631025  
3. 498413 3. 344628 4. 288635 4. 465447 2. 328764 3. 77625 4. 379209 2. 685409 4. 022305  
1. 495165 1. 750583 1. 240124 1. 838094 1. 193155 2. 23341 1. 270475 1. 228475 1. 297178  
3. 560851 1. 964629 4. 40352 1. 608757 2. 160197 2. 570846 3. 894335 2. 514488 3. 954236

2. 566127 3. 408706 3. 923831 3. 999113 3. 119222 3. 286788 2. 252512 2. 601077 2. 809949  
1. 883115 2. 211594 1. 353458 2. 368686 1. 452219 2. 978364 1. 972832 1. 636873 2. 200299  
4. 495618 4. 606353 4. 209828 2. 563867 5. 088618 4. 011674 3. 807157 4. 240542 2. 704434  
1. 566771 1. 346291 1. 79285 2. 660521 1. 529166 2. 099738 1. 835449 1. 496074 3. 126017  
3. 742891 4. 083988 4. 27589 3. 728204 4. 215512 5. 689077 4. 154333 3. 921481 5. 140492  
4. 044853 3. 860752 4. 962112 4. 65621 5. 100875 4. 918486 5. 291144 4. 702552 5. 916076  
3. 914269 4. 935457 3. 936435 3. 747134 4. 045976 4. 245854 4. 721109 4. 493915 3. 172516  
4. 195717 5. 325474 5. 050407 5. 044713 5. 466407 3. 221279 4. 572286 4. 57967 3. 522183  
6. 121803 6. 626891 6. 449255 5. 54632 6. 360642 6. 903897 6. 484504 6. 625372 4. 737551  
5. 750914 5. 246692 5. 567201 3. 575142 5. 341737 5. 563657 6. 152025 5. 069303 4. 844743  
1. 594376 1. 924856 2. 764272 2. 343564 2. 68934 2. 193565 2. 148354 2. 17559 2. 030697  
2. 715531 2. 498797 2. 664482 2. 043803 2. 685365 2. 655488 2. 417337 2. 658366 2. 384479  
4. 062569 4. 226464 3. 678793 2. 847513 4. 564475 5. 715682 4. 002528 4. 792752 4. 425568  
10. 29869 10. 14469 10. 22056 10. 47427 9. 980344 10. 10878 10. 60083 10. 0208 10. 78949  
2. 030534 2. 749733 1. 275344 2. 371958 2. 160808 0. 985028 2. 825009 3. 469518 2. 434247  
5. 517093 4. 84773 5. 743838 4. 798885 5. 283197 5. 308563 4. 213228 5. 512804 5. 990565  
1. 505944 1. 337559 1. 888822 1. 733486 1. 814028 2. 477893 2. 254023 1. 210777 1. 628616  
1. 591496 1. 895773 1. 487719 2. 19701 1. 409243 1. 721219 1. 289878 2. 160471 1. 509537  
5. 963707 5. 72983 5. 62119 6. 220699 6. 096592 5. 259276 6. 33351 5. 850463 5. 344894  
1. 554787 1. 154699 1. 673645 1. 109349 1. 741632 1. 787936 1. 479201 0. 751371 1. 131495  
1. 788308 3. 334188 2. 182261 2. 515385 2. 507353 2. 09157 2. 357442 1. 650381 1. 857521  
4. 431712 4. 420054 4. 451551 5. 036211 4. 053448 4. 974724 4. 850843 4. 692035 5. 736424  
5. 330629 5. 551506 5. 172777 3. 866118 5. 03682 4. 679655 5. 538033 4. 948798 5. 37338  
6. 635747 6. 025874 6. 128508 6. 241296 7. 105274 6. 545368 6. 563653 6. 684392 7. 046548  
4. 946922 4. 692683 4. 323557 3. 332102 4. 730448 5. 143232 4. 015115 4. 827349 4. 477391  
7. 682478 7. 528744 7. 556577 8. 007905 7. 528646 7. 69162 7. 862131 7. 710749 8. 039008  
4. 344733 4. 368547 4. 20811 4. 467067 4. 176759 3. 831477 4. 376966 4. 378134 3. 251553  
4. 345494 4. 283628 4. 161549 4. 337017 4. 504179 4. 92994 4. 548172 4. 062548 3. 561472  
6. 483577 3. 963181 5. 514888 5. 057019 5. 146296 6. 530508 5. 806068 5. 608345 6. 518352  
5. 414211 5. 136633 4. 911756 5. 577483 5. 697358 5. 107776 5. 778126 6. 070802 4. 955343  
2. 407669 1. 91974 1. 07791 2. 34794 1. 661998 1. 369485 1. 859073 1. 69702 1. 802995  
4. 134609 3. 431818 3. 649482 3. 819784 4. 880971 5. 119922 4. 086016 4. 582295 5. 056863  
1. 975468 2. 427992 2. 16212 3. 555602 2. 169195 2. 02859 1. 82157 1. 581515 2. 103445  
5. 639076 5. 889367 5. 760442 5. 456812 5. 224032 5. 646435 5. 752352 6. 220722 6. 256508  
0. 881787 1. 360995 1. 65407 0. 960031 1. 250321 1. 468162 1. 177519 1. 397433 1. 149818  
8. 800509 9. 400468 9. 08823 8. 279186 9. 10733 9. 016923 8. 930287 8. 893161 8. 762927  
5. 035855 5. 689882 5. 341992 3. 228831 4. 746754 5. 05191 5. 157404 4. 496897 3. 974516  
2. 864046 2. 766828 2. 811425 2. 944405 3. 304981 2. 354483 2. 781332 2. 941124 2. 908913  
2. 034692 3. 589801 3. 741288 2. 876751 2. 958695 2. 45181 3. 087531 3. 069831 3. 799927  
5. 887589 4. 591476 4. 638 3. 885949 4. 862572 5. 167619 4. 957445 4. 949857 5. 314284  
4. 446061 4. 917011 4. 17559 4. 338173 4. 802846 5. 526652 4. 940089 3. 88306 5. 130778  
6. 87801 6. 936713 6. 065761 7. 515922 6. 591842 5. 90203 6. 82078 6. 701924 6. 241065  
5. 009594 4. 595852 4. 331407 4. 408565 4. 406508 4. 435549 5. 048389 4. 623333 5. 456649  
2. 820108 3. 231759 3. 48732 3. 144649 3. 461109 3. 624848 2. 403679 3. 57371 3. 051044  
6. 448143 6. 525301 6. 335886 6. 572032 6. 234236 6. 390694 6. 840064 6. 397503 6. 667859  
6. 127763 6. 475708 5. 845403 5. 637334 6. 01846 5. 68042 5. 963315 5. 259973 5. 522991  
7. 531169 7. 123865 7. 350478 7. 471399 7. 100735 7. 178883 7. 393163 7. 446281 5. 969018  
3. 563908 3. 510065 3. 580174 2. 924736 3. 20565 3. 426949 3. 392673 3. 241671 3. 543087  
6. 002518 5. 813894 5. 853562 5. 33386 5. 850284 5. 610982 5. 603305 5. 852814 6. 029058  
1. 370795 1. 326579 1. 640766 1. 47527 1. 292273 1. 753838 1. 648839 1. 845567 1. 74544  
3. 743437 2. 893208 2. 207507 2. 932497 2. 137297 2. 940472 2. 53109 3. 399705 2. 998849

4. 103064 3. 872973 3. 69644 3. 683253 4. 270605 3. 768205 3. 918566 4. 107495 2. 869442  
1. 339989 1. 243871 0. 804645 1. 954892 1. 520381 1. 346999 1. 259873 1. 90343 2. 369291  
4. 586136 4. 556881 4. 199671 2. 869343 3. 640573 4. 163611 3. 073894 3. 96084 2. 952301  
1. 856623 1. 324197 1. 393496 1. 902552 1. 488825 1. 916821 3. 038709 2. 083522 2. 244007  
1. 156352 2. 493177 2. 428801 3. 357847 1. 670547 1. 531141 1. 269877 1. 147878 3. 166571  
3. 620977 3. 190933 2. 718855 2. 664412 2. 792671 2. 033636 1. 991218 1. 69498 2. 802614  
3. 101125 2. 831067 2. 412758 2. 506082 3. 036833 3. 452458 2. 963919 3. 24382 4. 150926  
3. 729328 4. 255323 4. 047374 4. 830098 3. 890822 3. 433879 3. 832827 3. 093871 2. 915883  
6. 437634 6. 030857 5. 828987 6. 466838 5. 867576 6. 595581 6. 260125 5. 950053 7. 17726  
2. 414521 2. 53185 2. 875658 2. 869648 2. 205668 3. 742944 2. 490461 2. 549681 2. 702511  
4. 902379 4. 161267 3. 345785 4. 384441 5. 615182 4. 641603 3. 772985 3. 132975 4. 718971  
5. 865494 5. 273554 4. 071338 3. 523483 6. 298676 3. 930119 6. 070099 4. 479615 4. 746962  
2. 186129 2. 742501 2. 463067 2. 314447 1. 752735 2. 070905 1. 809765 2. 694942 1. 460271  
1. 226719 1. 419356 1. 026653 1. 00953 1. 107695 1. 151475 1. 845754 1. 521219 1. 503538  
2. 28239 1. 104582 1. 728359 1. 080224 0. 851629 0. 909702 4. 181804 1. 153546 3. 014368  
3. 556535 2. 995027 3. 310255 3. 022395 2. 377092 3. 152171 2. 483753 3. 54322 3. 50468  
2. 53569 2. 672105 2. 280274 3. 15326 2. 381094 3. 101724 2. 021025 2. 159881 2. 561986  
5. 792344 4. 528917 4. 433452 3. 341832 4. 896934 4. 296398 5. 008961 4. 638401 5. 612543  
2. 31712 1. 253994 1. 661688 2. 054697 1. 330194 1. 162724 2. 092199 1. 621345 2. 945561  
4. 167098 4. 345835 2. 786164 4. 333674 4. 95067 4. 716808 5. 28556 3. 486182 3. 594547  
3. 218736 3. 225335 2. 638085 3. 771387 3. 229511 3. 981177 4. 078711 2. 977442 3. 311647  
5. 895485 6. 687455 6. 046326 5. 609599 5. 650774 6. 015284 6. 175905 5. 733439 6. 293863  
2. 106204 0. 995886 1. 176173 1. 81967 1. 61964 1. 212182 1. 313061 1. 217191 1. 415806  
2. 858199 3. 237842 2. 558708 2. 485478 2. 887121 2. 091488 3. 84729 3. 15376 3. 439499  
6. 888425 6. 56609 6. 776223 5. 134716 5. 985221 6. 958908 6. 869199 7. 174293 5. 931204  
4. 946981 4. 971112 4. 769819 4. 569156 4. 81894 4. 843643 5. 068077 4. 965645 5. 771152  
5. 854267 6. 439696 6. 057691 5. 188424 6. 408491 6. 729261 6. 042793 5. 904412 5. 550125  
2. 674585 2. 159482 2. 189347 2. 802977 2. 755031 1. 927982 2. 209641 3. 281925 1. 571045  
5. 624373 5. 468713 5. 186021 4. 416825 5. 196428 4. 841638 5. 455489 5. 616082 4. 931992  
6. 915872 6. 293565 6. 540364 6. 066982 6. 50795 6. 14278 6. 652043 6. 584732 6. 427821  
3. 080146 1. 864596 2. 179955 2. 793632 2. 505128 2. 094539 2. 50656 3. 181734 3. 002835  
3. 061593 2. 369859 1. 904295 3. 615622 3. 635596 3. 333425 3. 18981 2. 319876 2. 170056  
3. 256867 2. 817066 2. 897198 2. 868385 3. 318542 2. 866242 3. 692636 2. 833515 2. 710807  
6. 35782 6. 242273 6. 4931 5. 814281 6. 118524 5. 844656 6. 80401 6. 318345 6. 828932  
5. 920391 5. 86127 6. 083992 6. 627372 6. 08879 5. 82903 6. 245863 6. 265898 5. 716451  
3. 972167 3. 155668 3. 657615 2. 763634 2. 927619 3. 227831 3. 881203 3. 324663 3. 634709  
7. 595238 7. 117954 7. 450188 7. 57198 7. 558072 7. 386114 7. 511114 7. 778465 7. 782841  
2. 712956 3. 649297 4. 027806 3. 969291 2. 113412 2. 324693 3. 430133 3. 556308 2. 902219  
5. 860062 6. 381584 5. 88116 5. 666804 6. 487242 5. 991376 5. 993313 6. 624856 6. 180795  
2. 831154 3. 224971 2. 874188 3. 43195 3. 454681 1. 908888 3. 862606 3. 311529 2. 024402  
4. 904508 4. 754765 4. 446687 5. 100877 4. 696582 4. 621191 4. 712932 3. 772586 4. 904651  
7. 660089 7. 482548 7. 020801 6. 067617 7. 601959 8. 241123 6. 445426 7. 267703 6. 890969  
6. 222892 6. 214146 6. 129473 5. 678593 6. 800877 5. 282665 6. 36167 6. 042354 4. 644354  
4. 2355 3. 807546 3. 931226 4. 616104 4. 137262 4. 68588 4. 087902 4. 285117 4. 399921  
5. 862593 5. 098197 6. 794281 4. 577434 5. 955577 6. 217532 5. 148146 5. 931511 4. 579586  
4. 094573 4. 014686 4. 338826 3. 898309 4. 142249 2. 87991 4. 418746 4. 729992 4. 706605  
6. 770137 6. 783213 6. 350863 6. 006541 6. 977233 6. 130361 6. 808921 6. 531994 6. 054759  
7. 462733 7. 078676 7. 622045 8. 016765 7. 269121 7. 384575 7. 815933 7. 471435 7. 494643  
4. 582631 5. 009115 4. 568688 4. 620738 5. 178176 4. 125392 4. 592476 4. 153355 4. 370858  
2. 057628 1. 428616 1. 598497 1. 657597 1. 607033 1. 744548 1. 827385 3. 276323 2. 298433  
3. 430358 3. 736574 3. 557822 3. 109336 3. 258745 4. 577839 4. 088574 3. 665224 3. 210508



6. 263687 5. 132215 5. 10574 5. 000259 6. 368618 5. 634023 6. 267482 4. 155024 4. 381932  
4. 843336 4. 813992 4. 856155 4. 620057 4. 999649 5. 027906 5. 219252 5. 060178 4. 576341  
2. 262428 1. 010022 2. 076471 2. 475904 1. 314938 2. 319785 1. 367263 1. 797729 1. 138063  
5. 949847 6. 87863 6. 098258 6. 812735 6. 155908 6. 530707 7. 010436 6. 114789 6. 668168  
5. 061911 5. 157894 5. 196581 5. 413835 5. 393188 5. 134606 5. 46048 5. 53756 4. 445477  
7. 645248 7. 645315 7. 693227 7. 768322 8. 029175 7. 735733 7. 412261 8. 041944 6. 967215  
2. 07508 1. 437164 2. 946147 2. 251061 2. 03934 2. 062173 1. 882211 1. 914972 1. 491228  
1. 784385 3. 962011 2. 339063 3. 218098 2. 319692 2. 582291 2. 660559 2. 789655 2. 824405  
2. 2721 3. 535218 2. 472784 2. 041077 2. 492699 2. 075638 2. 172177 2. 914266 2. 679138  
6. 410752 5. 077223 5. 367099 5. 583644 5. 791837 5. 51359 5. 929139 5. 052255 5. 704727  
2. 469021 3. 13625 2. 535426 3. 729535 3. 078811 3. 486849 2. 88495 3. 706199 3. 664262  
1. 673635 3. 203309 2. 755818 1. 971066 2. 534993 3. 224431 3. 433487 2. 754735 3. 967158  
3. 324046 1. 900095 2. 66235 2. 300757 2. 711586 2. 487847 2. 54963 2. 430287 2. 020057  
3. 416781 3. 133452 2. 575251 3. 100713 3. 539057 3. 245877 3. 353532 2. 836947 2. 772826  
1. 984681 1. 517253 1. 761975 3. 335497 1. 806654 1. 602133 2. 3781 2. 173571 1. 507168  
7. 994311 7. 872131 7. 316146 7. 617684 7. 768057 7. 556031 7. 98639 7. 376704 7. 891977  
4. 560942 5. 062368 4. 776809 5. 090833 4. 043919 3. 906552 4. 389548 4. 482655 4. 253073  
1. 836872 2. 223302 1. 684988 3. 276823 1. 933797 2. 857245 1. 752241 2. 438088 2. 237834  
2. 489591 1. 415001 0. 954841 2. 250356 1. 760208 2. 186792 1. 270548 1. 720168 2. 386392  
2. 418501 2. 0114 2. 392523 1. 668573 1. 848832 2. 579691 1. 728907 2. 164526 2. 40251  
2. 610428 2. 337296 2. 853015 2. 128405 2. 308471 2. 965576 2. 430663 3. 258444 3. 749714  
4. 110672 2. 831253 4. 171866 3. 639164 3. 312191 3. 299705 3. 460317 3. 762155 2. 713242  
3. 336897 2. 259708 2. 038708 2. 282948 2. 054118 2. 487943 2. 432569 1. 616413 3. 495646  
2. 310114 2. 404196 2. 18766 2. 943472 3. 49889 2. 932079 2. 636129 2. 300243 3. 450102  
1. 492514 1. 734079 1. 468356 1. 274564 1. 807424 1. 257208 1. 906235 1. 317961 1. 149305  
7. 387444 7. 682556 7. 427594 7. 661901 7. 39474 7. 802341 7. 396327 7. 354805 7. 450608  
1. 543423 1. 48324 1. 5435 1. 348622 1. 705292 2. 009513 1. 572251 1. 583907 1. 827201  
3. 402173 4. 141768 3. 568207 3. 119481 3. 511019 3. 416511 2. 943187 3. 753424 4. 535743  
2. 233968 1. 806661 2. 10769 2. 597009 2. 246209 1. 943574 2. 14633 2. 767752 1. 976213  
4. 612838 4. 440379 2. 931274 3. 277398 2. 855684 3. 799003 3. 160786 2. 532581 3. 000214  
6. 338369 6. 521555 6. 650146 6. 757627 6. 512739 6. 99673 6. 128285 6. 740041 5. 270165  
5. 47289 5. 232557 3. 700924 3. 782182 5. 916543 3. 582167 5. 187995 5. 092699 5. 029745  
4. 61208 6. 19602 6. 239939 5. 23442 5. 181287 5. 729277 4. 39843 5. 587128 7. 123249  
2. 665072 1. 856757 1. 442164 2. 043161 1. 75407 1. 465534 1. 544319 1. 78402 2. 137397  
2. 424546 3. 402434 2. 933322 2. 189503 2. 528294 3. 28863 4. 20981 2. 578452 2. 845157  
2. 99891 3. 420115 3. 72114 3. 836461 2. 351028 3. 258271 2. 804811 3. 656024 2. 716403  
4. 815879 5. 361669 4. 880649 5. 012727 4. 793374 4. 186088 5. 24572 5. 022006 3. 835267  
1. 839258 1. 380039 2. 017971 2. 300394 2. 153095 2. 007232 2. 223808 2. 510951 1. 747087  
0. 828596 1. 351434 0. 936873 1. 73443 0. 953643 1. 109599 1. 228934 1. 230717 1. 153525  
6. 545297 6. 828861 7. 138629 6. 196158 6. 572438 6. 937282 6. 571859 6. 844266 6. 848591  
1. 223853 3. 256256 1. 948686 2. 832363 1. 458228 2. 525891 2. 249997 2. 553503 2. 093242  
5. 193271 6. 022935 5. 756459 5. 028044 5. 765853 5. 702744 6. 271183 5. 872624 6. 077724  
1. 327982 2. 18297 1. 891658 2. 978139 2. 408027 2. 134734 2. 408241 2. 868266 2. 097615  
6. 152125 6. 090959 5. 538087 5. 696167 6. 062591 5. 969999 5. 773124 6. 48125 5. 933818  
3. 971799 3. 610878 3. 251132 3. 802176 3. 352798 2. 909514 3. 323598 4. 006676 3. 138897  
3. 066865 2. 523244 2. 794155 3. 477132 3. 404424 2. 738701 3. 370391 3. 623219 3. 566851  
4. 463161 4. 685512 3. 784899 3. 280301 2. 853398 3. 486832 4. 30568 5. 246381 5. 042365  
6. 169471 6. 723861 6. 228183 5. 423688 6. 591968 6. 725023 6. 249314 6. 441252 7. 477785  
3. 591103 3. 029811 3. 115552 3. 587382 2. 942117 2. 984214 2. 240194 3. 865388 3. 714305  
3. 701184 2. 668402 2. 911464 2. 133301 2. 462 2. 07331 2. 205375 2. 965428 2. 666531  
6. 752804 7. 257889 6. 335034 6. 094327 6. 235109 7. 232246 6. 75504 7. 205612 7. 404128

4. 979341 4. 969769 4. 988539 4. 013418 5. 215931 4. 359381 6. 06663 4. 288575 4. 440724  
3. 38923 3. 550336 3. 159472 2. 998292 3. 889687 3. 96829 3. 461181 3. 669525 3. 477527  
4. 030639 3. 460357 5. 521247 2. 97227 3. 737049 3. 011445 3. 385296 3. 783625 4. 33976  
7. 410672 6. 617934 6. 409697 7. 087008 6. 860811 6. 960906 7. 502149 7. 265496 7. 142538  
2. 834537 3. 606294 3. 213609 4. 774075 3. 14021 3. 787695 3. 250299 4. 707408 3. 922939  
5. 515725 6. 023121 5. 791316 6. 229684 4. 95907 4. 691909 5. 611158 5. 718296 5. 868963  
1. 849509 1. 886234 2. 09562 2. 406796 1. 868667 1. 735599 1. 723913 1. 920397 2. 341526  
4. 815673 4. 237444 4. 636164 3. 489091 4. 875582 5. 03055 4. 155129 4. 152922 4. 292659  
3. 512185 2. 977257 3. 136052 3. 18499 3. 41864 3. 497583 3. 30284 3. 763714 2. 239249  
4. 40797 4. 726637 3. 926994 4. 357448 4. 178189 3. 948068 4. 725206 4. 378221 3. 987122  
6. 727342 6. 67773 6. 039998 6. 458915 6. 647369 6. 520356 6. 880917 6. 615539 7. 072053  
1. 043618 0. 96274 1. 246541 1. 462207 0. 885638 1. 29192 1. 291256 1. 407395 1. 156171  
3. 764503 2. 477865 3. 345518 3. 60218 1. 912779 3. 308049 3. 116168 3. 956314 3. 26675  
1. 700149 1. 506713 2. 047469 1. 893131 1. 917722 1. 661858 1. 75147 2. 073566 2. 009874  
4. 465806 4. 102666 3. 997463 3. 118887 4. 477363 3. 463894 4. 214538 4. 765791 3. 605848  
3. 336608 2. 732823 3. 764149 3. 964654 2. 8327 3. 319652 3. 011536 3. 518046 3. 414126  
7. 224202 7. 845323 7. 560569 7. 696459 7. 667697 8. 049093 7. 342116 7. 182619 7. 068619  
1. 934062 2. 32048 1. 920782 2. 347226 1. 315309 2. 888101 2. 004518 1. 95054 2. 603334  
2. 695771 2. 235847 2. 523885 2. 112339 2. 753433 2. 633462 3. 645987 2. 483066 3. 604115  
1. 5854 3. 480884 1. 611551 2. 737345 3. 029643 1. 870991 2. 719587 2. 748711 1. 845785  
2. 824216 1. 375664 2. 703814 1. 916359 2. 009042 2. 688036 2. 108346 1. 788999 1. 551969  
1. 207721 2. 023062 1. 794184 1. 38501 1. 907848 1. 581955 2. 005842 2. 048649 1. 942168  
3. 715324 4. 08895 4. 019799 3. 657081 4. 205063 4. 650652 4. 155707 4. 455244 4. 684611  
2. 016289 2. 446309 2. 566505 2. 907248 2. 601814 2. 172142 2. 269149 2. 629321 2. 4164  
6. 696634 7. 464946 6. 727934 6. 667405 6. 919853 7. 010371 7. 109883 6. 802094 7. 272624  
5. 581048 4. 681492 4. 739081 3. 4506 5. 359332 4. 911129 5. 572093 5. 229608 4. 701724  
5. 038201 4. 892097 5. 092099 6. 045232 5. 090439 5. 650455 5. 151301 5. 321806 5. 00133  
0. 982583 0. 821339 1. 299359 1. 013928 1. 051653 1. 200075 1. 021746 1. 455176 1. 134125  
2. 368783 2. 710103 2. 574953 1. 781242 2. 228201 3. 145514 1. 536031 1. 92474 2. 812369  
4. 913903 4. 690376 5. 025909 3. 244806 4. 223976 4. 169833 3. 557279 4. 351881 4. 713004  
8. 10051 7. 779656 7. 799708 7. 519882 7. 644651 7. 620588 7. 804652 7. 793306 8. 063903  
7. 092683 7. 070472 6. 920196 7. 161903 6. 989959 7. 233727 6. 824556 7. 094293 6. 743359  
6. 02485 5. 713313 5. 624649 4. 933445 5. 188347 5. 529744 5. 762485 5. 609208 6. 455091  
6. 700459 6. 79451 6. 917908 6. 503719 6. 630454 7. 024258 6. 950707 6. 760335 7. 251679  
4. 244827 4. 988891 4. 887795 3. 559604 5. 492754 4. 86629 4. 826743 4. 540192 5. 029493  
4. 90884 4. 951198 4. 785065 4. 978485 4. 986154 5. 006203 5. 087126 5. 041825 5. 269573  
1. 986461 2. 405564 2. 342158 3. 169907 2. 366215 2. 218468 2. 682887 1. 952629 2. 2078  
1. 436412 1. 138873 1. 442496 1. 266411 1. 484757 3. 394794 1. 736687 1. 418325 2. 045937  
4. 415631 4. 041347 4. 252025 3. 058757 4. 014252 4. 145468 3. 3827 4. 624753 3. 833173  
4. 312685 4. 623 5. 316888 3. 930777 5. 507379 4. 757128 4. 574642 3. 534332 4. 902301  
3. 160484 3. 108022 3. 100548 3. 186909 3. 363843 3. 234989 2. 54112 3. 812286 3. 11048  
5. 593861 5. 223747 5. 411867 5. 455658 5. 628858 5. 627288 5. 18966 5. 296493 5. 066001  
5. 673535 4. 781866 5. 607168 3. 711266 5. 912656 4. 456369 5. 783366 5. 686363 3. 032792  
5. 226793 4. 333704 5. 402463 5. 265802 5. 010552 4. 06301 5. 090131 4. 728404 4. 403099  
2. 354893 2. 483291 2. 257248 2. 320568 2. 413307 3. 211644 2. 645415 1. 985022 1. 351602  
6. 204384 5. 725358 5. 639758 5. 492637 5. 627365 5. 489891 5. 617071 5. 402494 6. 732011  
2. 622787 2. 009377 2. 426509 4. 861408 3. 106333 2. 349897 2. 398088 3. 405874 1. 917265  
2. 762895 2. 692498 2. 387416 3. 449248 3. 471041 2. 381813 2. 66396 3. 24965 2. 753188  
3. 041535 2. 737506 2. 438219 3. 317188 2. 730968 1. 781864 2. 345582 2. 420233 2. 870857  
4. 186463 3. 663886 3. 530203 3. 456965 3. 712612 3. 438295 3. 409318 3. 595745 4. 77263  
3. 387555 3. 000314 3. 72014 4. 237985 2. 559524 3. 496667 3. 658389 3. 366893 2. 860877

2. 099274 2. 515842 1. 609294 2. 994914 2. 386736 1. 217343 1. 595887 1. 898007 1. 665019  
4. 778679 4. 474937 4. 172881 4. 903871 4. 517805 5. 277812 4. 778702 4. 269428 4. 741577  
1. 318349 1. 551384 1. 693479 3. 296373 1. 766108 1. 231935 1. 661506 1. 497831 1. 290809  
5. 073431 5. 280595 5. 115122 4. 393203 5. 0008 5. 193901 4. 881022 4. 643838 5. 969872  
4. 053437 4. 154712 4. 249648 3. 263225 4. 133126 3. 457528 4. 654821 4. 129037 4. 141716  
1. 55528 1. 217533 1. 238413 1. 833634 1. 085757 2. 642555 1. 923463 1. 262247 2. 220472  
1. 173136 1. 358781 0. 74861 1. 391481 1. 574381 1. 23739 1. 318606 1. 301031 1. 51713  
2. 555515 1. 815804 1. 821445 1. 552228 1. 520888 1. 518354 1. 480092 1. 463348 1. 540619  
1. 5407 1. 27234 1. 633459 1. 9626 1. 86593 1. 136739 1. 756791 1. 543071 1. 53384  
2. 957773 2. 605115 1. 922725 2. 485035 2. 687706 1. 638873 1. 768747 2. 226409 1. 902119  
1. 657784 1. 992413 2. 978481 1. 787025 2. 185066 2. 045012 2. 049596 1. 906505 1. 520126  
4. 280283 3. 863623 5. 053153 4. 943489 5. 026742 5. 267092 5. 431757 4. 236137 4. 935451  
4. 566998 4. 516355 4. 844112 3. 565486 4. 052638 4. 468461 4. 09142 4. 510239 4. 305345  
1. 10778 1. 245153 0. 998546 0. 864428 0. 661181 1. 054716 1. 039172 0. 670264 1. 426201  
9. 097213 9. 230669 9. 109035 9. 367481 8. 990175 9. 168666 9. 337668 9. 319966 8. 961944  
4. 155593 3. 83884 3. 5228 2. 379328 3. 276739 3. 578273 4. 089406 3. 353738 4. 304038  
5. 553451 5. 627232 5. 494223 6. 26419 4. 852622 5. 162494 5. 321375 5. 855107 6. 100918  
2. 379787 3. 096952 3. 682064 3. 569289 3. 811582 1. 458486 3. 155725 2. 541345 3. 621446  
6. 217861 6. 621923 5. 531629 7. 088011 6. 855805 5. 369654 7. 254426 6. 375579 7. 634368  
2. 867644 3. 098474 3. 110365 4. 02716 3. 636028 2. 938554 3. 628417 3. 923787 3. 562063  
2. 114401 2. 207373 1. 860999 1. 727732 1. 677963 1. 669277 1. 723555 1. 802889 1. 36425  
2. 484122 2. 275284 2. 320803 3. 086388 1. 650088 2. 685154 1. 808153 2. 568736 1. 801467  
0. 973 1. 679966 1. 034292 1. 921646 1. 232014 1. 386386 1. 873293 1. 418129 1. 917144  
5. 207644 5. 402944 5. 28716 5. 104235 5. 970841 4. 804006 5. 687405 5. 361149 5. 198796  
1. 774784 1. 848721 2. 338396 1. 883088 1. 513261 2. 593145 2. 22921 1. 486253 1. 220838  
3. 433762 2. 677694 3. 548959 4. 634054 3. 226846 3. 907981 3. 325758 3. 417006 3. 434601  
1. 407852 1. 380754 1. 454839 2. 739365 1. 559921 2. 101303 1. 283344 1. 986199 1. 141314  
1. 912864 1. 54207 1. 604553 2. 772405 2. 616659 2. 226501 2. 999708 1. 743219 2. 337528  
2. 252642 3. 252376 2. 605677 2. 582674 3. 138068 2. 280111 3. 102288 2. 92715 2. 985366  
1. 265034 1. 53561 1. 174872 1. 433791 1. 28697 0. 966154 1. 327903 1. 043334 0. 958824  
6. 751243 7. 103129 6. 510556 7. 305474 6. 994869 6. 471705 6. 698033 7. 129948 6. 951367  
4. 506541 3. 35087 4. 754218 5. 388416 3. 803056 4. 793261 4. 233176 5. 56373 3. 326029  
2. 098739 2. 499789 1. 984694 2. 586887 2. 214925 2. 953987 2. 997178 2. 809054 5. 281867  
3. 241935 3. 102723 3. 133676 2. 599845 3. 516607 3. 159813 2. 702317 3. 295239 2. 676611  
5. 125998 5. 076233 4. 969024 3. 915201 5. 199951 4. 331769 5. 350728 5. 32172 5. 357027  
4. 984775 3. 477102 3. 510499 3. 711363 3. 81727 4. 692354 3. 690987 3. 933816 5. 555712  
7. 844098 7. 948135 7. 692159 7. 90365 8. 125255 7. 607277 7. 75941 8. 04094 7. 45195  
6. 822843 7. 161214 7. 26825 7. 59826 7. 164309 7. 070839 7. 104852 6. 977796 6. 631533  
3. 583749 3. 256667 4. 347442 3. 330041 3. 515435 3. 801252 4. 043701 3. 638252 3. 047075  
3. 38797 3. 374373 3. 628597 3. 060356 3. 503758 3. 215954 3. 176086 2. 765623 2. 965649  
4. 806878 4. 6774 4. 214411 3. 811908 4. 985753 4. 446118 4. 461685 5. 332248 4. 694048  
3. 542113 3. 884808 3. 752866 3. 484953 3. 589009 3. 580455 3. 696096 3. 668966 4. 181133  
4. 471258 5. 146657 3. 947509 3. 44411 4. 172985 4. 659477 3. 960151 4. 249649 4. 581928  
6. 132465 5. 942564 5. 70903 6. 88061 6. 312453 5. 686933 6. 543157 6. 143271 6. 368661  
1. 583023 1. 462268 1. 745977 1. 730126 1. 427716 1. 569485 1. 593805 1. 528577 2. 614778  
3. 141025 3. 379241 3. 102959 2. 838975 2. 872923 3. 636616 2. 87525 2. 997339 3. 176634  
2. 867079 2. 426272 2. 928392 2. 195524 2. 494733 2. 764506 2. 212767 2. 002381 2. 052272  
3. 079943 3. 275549 2. 763057 2. 536898 3. 254427 3. 768132 3. 22534 3. 23974 2. 329488  
3. 596863 4. 357604 4. 869323 4. 320716 4. 63203 4. 240151 5. 082835 5. 014793 5. 411674  
1. 33747 1. 434216 1. 417483 1. 125421 1. 328052 1. 946456 1. 502924 1. 314233 1. 416822  
5. 082493 5. 274648 5. 183066 5. 067401 5. 307255 5. 229586 4. 933143 5. 321869 4. 306282

6. 31967 5. 251927 5. 694456 5. 981702 5. 194081 5. 902588 6. 046625 5. 173828 5. 698678  
1. 845508 2. 142665 1. 768561 2. 737584 3. 045116 1. 809279 2. 172428 2. 750348 1. 7777  
4. 350604 4. 865309 5. 213849 4. 822984 3. 642976 4. 667797 4. 323219 4. 243047 5. 211774  
7. 886485 8. 057383 7. 895875 8. 07998 7. 366005 7. 995329 7. 930644 7. 978405 7. 457812  
2. 02645 1. 661759 2. 277514 2. 052152 1. 498033 1. 898479 1. 885169 1. 657982 2. 014041  
2. 610284 3. 907709 3. 180719 3. 364255 4. 13829 3. 615694 3. 269563 3. 230285 3. 818692  
1. 610183 1. 438198 1. 335254 1. 571184 1. 532673 1. 464108 1. 363261 1. 246396 1. 615593  
6. 063932 6. 008782 5. 674472 6. 17356 5. 416835 5. 659286 5. 608007 5. 181558 6. 517566  
4. 88655 5. 406471 5. 178411 4. 486866 5. 281423 4. 95064 5. 391452 4. 448036 4. 41226  
5. 119026 4. 755091 4. 36863 4. 734509 4. 939237 4. 113285 4. 47169 4. 799972 4. 560097  
3. 543831 3. 83926 3. 48544 3. 168277 3. 701615 2. 714741 3. 175361 3. 331753 2. 948309  
6. 451359 6. 178661 6. 108707 5. 645492 5. 980622 5. 666908 6. 209644 6. 075986 6. 288603  
4. 966658 4. 873674 4. 966658 4. 604006 5. 077867 4. 706181 4. 911956 5. 047789 5. 304165  
4. 588785 3. 481106 4. 565285 4. 323657 4. 380668 3. 916785 4. 43895 4. 619716 3. 591091  
5. 921631 5. 321211 6. 057344 5. 619985 5. 751159 5. 185047 5. 758216 6. 179806 4. 547114  
8. 350555 8. 425516 8. 803957 7. 427946 8. 718105 7. 969169 8. 126938 8. 467735 7. 451468  
3. 988928 3. 22586 1. 875391 3. 105407 4. 106884 2. 238269 3. 967105 3. 912451 2. 85247  
7. 640998 7. 123531 7. 663036 7. 23601 7. 422365 6. 978601 7. 57067 7. 498411 7. 086433  
7. 548987 7. 097807 7. 136196 6. 560925 7. 039454 7. 125047 7. 46532 6. 927643 7. 807203  
4. 488895 4. 061535 4. 726684 4. 636436 3. 82228 3. 62025 5. 339639 4. 350046 4. 533579  
4. 125567 3. 376299 4. 18826 3. 666834 3. 641566 3. 584005 3. 37219 4. 648685 3. 24039  
6. 647531 6. 854605 6. 087054 5. 719806 6. 634089 6. 464772 6. 560589 6. 695632 6. 904603  
6. 624285 6. 582219 6. 015464 6. 899391 6. 583663 6. 115547 6. 236338 6. 276072 6. 364848  
3. 111863 4. 098739 3. 316728 3. 277149 4. 467168 3. 356588 4. 443963 4. 240232 3. 873648  
3. 795159 5. 276786 4. 787322 2. 509782 5. 224678 5. 512905 4. 912732 4. 578533 4. 273499  
6. 933888 7. 083544 6. 620727 6. 243425 7. 025154 6. 361604 7. 220938 7. 027173 6. 570601  
1. 358107 1. 792255 1. 489499 2. 058838 1. 648967 1. 275801 1. 711269 1. 932766 1. 591531  
3. 502764 4. 232983 4. 309993 3. 744224 4. 629394 3. 021238 4. 527534 3. 064526 5. 499105  
1. 693336 1. 661281 2. 093488 1. 399134 1. 222164 1. 920212 1. 45742 1. 420351 3. 098531  
7. 641111 7. 988595 7. 098433 7. 73154 7. 886746 7. 940387 7. 766973 7. 702595 7. 543389  
6. 778712 6. 13058 6. 408525 6. 956221 6. 745376 6. 646712 6. 511864 6. 470635 6. 239379  
6. 725175 7. 015766 6. 727756 7. 297794 6. 783859 7. 057098 6. 76162 6. 833575 7. 1404  
5. 115659 3. 23258 3. 866326 5. 588321 4. 29967 4. 668577 4. 641241 4. 803937 5. 516288  
3. 790374 3. 617406 5. 003132 4. 931171 3. 84505 3. 733516 4. 761448 4. 798166 4. 456438  
5. 17538 5. 007044 5. 221016 5. 50471 4. 653935 5. 236817 5. 216391 4. 975746 4. 003897  
5. 373192 4. 588694 4. 99691 4. 727345 4. 274935 4. 318188 5. 185291 4. 978601 4. 460041  
5. 464996 4. 973589 5. 074332 5. 267021 4. 82563 5. 098732 5. 270197 4. 857416 5. 152291  
2. 82512 3. 951585 4. 591953 2. 834414 3. 654044 4. 184319 4. 013701 3. 762577 1. 932579  
1. 407835 2. 079149 2. 506475 2. 22071 1. 299129 2. 594414 1. 670162 2. 554985 2. 632158  
6. 399719 6. 022093 5. 952006 5. 754416 6. 386225 6. 242036 6. 327316 6. 567903 5. 827613  
2. 707276 1. 381878 1. 493318 2. 356581 3. 167449 1. 695753 1. 872008 3. 315436 1. 795276  
8. 133729 8. 219517 7. 821297 7. 797172 8. 15019 8. 218227 8. 190189 8. 254944 8. 215512  
2. 431165 3. 195651 3. 317894 3. 517315 2. 975019 2. 957731 2. 697622 2. 456891 1. 699393  
2. 662919 3. 123915 3. 693697 3. 029105 3. 389978 3. 399717 4. 412568 4. 199726 1. 975201  
2. 126592 3. 012986 2. 126778 2. 471334 2. 236722 2. 178637 2. 286559 1. 875209 1. 646254  
6. 378709 6. 224211 6. 10138 6. 925623 5. 605668 6. 566563 6. 182589 6. 772637 6. 449112  
5. 719166 5. 17754 5. 186512 5. 107111 5. 272427 4. 501223 5. 619818 5. 277672 5. 650288  
7. 571469 7. 745758 6. 925652 7. 335187 7. 688008 7. 46921 7. 81751 7. 64211 7. 83467  
4. 126751 4. 99594 4. 733719 5. 10771 5. 400512 5. 180673 4. 217511 5. 034734 4. 404484  
1. 336678 1. 425727 1. 584641 2. 036339 1. 451989 1. 26359 1. 328047 1. 534242 1. 820001  
6. 091025 6. 37706 5. 795856 5. 337155 5. 987624 6. 212157 5. 468678 5. 95378 5. 254585

2. 225593 2. 75168 2. 850745 2. 427635 2. 870779 2. 475672 2. 000077 2. 021854 1. 63238  
4. 994196 3. 042077 3. 821504 4. 777053 3. 802237 2. 267162 3. 539123 3. 774788 4. 304304  
6. 478403 6. 048142 5. 629032 7. 399926 5. 967765 5. 947765 6. 516056 6. 272591 6. 096784  
3. 022985 2. 60794 2. 42112 2. 968871 2. 590011 2. 672483 2. 843163 2. 128869 2. 097951  
2. 124925 2. 321016 2. 516054 2. 09581 1. 627029 1. 96986 2. 032778 2. 714288 1. 481977  
6. 556235 6. 948894 6. 983128 3. 313757 6. 684379 7. 232193 6. 889312 6. 693454 6. 525279  
3. 148834 3. 038256 3. 598692 3. 750871 4. 506299 4. 996662 2. 815567 5. 461817 3. 876036  
5. 020616 4. 579446 5. 084599 4. 877719 4. 692267 5. 038075 5. 22042 5. 303267 5. 137229  
6. 471411 6. 59559 6. 127025 6. 015924 6. 626019 7. 110735 6. 627347 6. 537846 6. 75481  
4. 713283 5. 187035 5. 581179 6. 087259 5. 339117 4. 358279 4. 981861 5. 104218 5. 281825  
2. 999904 3. 376796 3. 248839 2. 35309 2. 564584 2. 911527 2. 860841 2. 328085 3. 047411  
7. 676525 5. 689221 6. 975975 6. 149851 6. 035759 8. 275795 6. 630182 7. 288959 8. 260242  
5. 475832 6. 160737 5. 529727 4. 871045 6. 075934 5. 056836 5. 509413 5. 780657 4. 753993  
6. 873796 7. 685722 7. 557098 7. 131177 7. 682417 6. 820658 7. 409679 7. 268197 6. 247368  
4. 147513 3. 580366 3. 74987 3. 989759 4. 520392 3. 821401 3. 981022 3. 536667 3. 903422  
3. 88808 5. 073012 4. 058069 3. 458016 4. 02233 4. 298814 3. 717683 4. 543235 3. 537397  
7. 033266 6. 644094 6. 329313 6. 147201 6. 697485 6. 781029 7. 087048 6. 270471 6. 273888  
2. 535685 1. 90668 2. 305087 2. 153788 1. 613175 2. 107535 1. 732539 1. 875301 2. 398463  
3. 801463 3. 685803 3. 960131 3. 339251 4. 509808 3. 563001 4. 285971 4. 41713 3. 383102  
1. 88855 2. 393422 2. 115423 2. 339032 1. 973211 2. 420951 1. 990313 1. 712631 2. 236117  
7. 757562 7. 925378 7. 879428 8. 165161 8. 029623 7. 952561 8. 012571 7. 60507 8. 393935  
6. 849183 6. 603821 6. 376204 6. 077763 7. 204943 6. 580963 7. 0547 6. 706052 6. 418606  
4. 157281 3. 803005 4. 364846 4. 013368 3. 820194 4. 14174 4. 489755 4. 003302 4. 515515  
4. 173995 2. 762176 2. 867155 2. 823644 4. 328219 5. 029777 4. 075042 4. 474685 3. 864033  
3. 135899 4. 330444 4. 242364 3. 858993 3. 740324 3. 255631 4. 115582 3. 979286 4. 240966  
6. 339867 5. 660125 6. 070505 6. 086853 6. 165332 6. 104183 5. 560994 6. 024251 6. 627262  
7. 349908 7. 503831 7. 819186 7. 121215 7. 2718 7. 751242 7. 634314 7. 219913 7. 796636  
1. 478778 1. 859752 1. 384542 1. 749656 1. 530155 1. 410883 1. 715979 1. 19574 1. 13297  
3. 847867 4. 033655 4. 520625 4. 524634 4. 014535 3. 797961 4. 351597 4. 245921 3. 759262  
4. 139319 3. 919699 4. 653224 3. 728858 4. 017778 4. 700689 4. 180615 3. 748633 5. 246013  
2. 847612 4. 675869 4. 412134 4. 069765 3. 32714 4. 073409 3. 807652 3. 632069 2. 410546  
7. 076638 7. 263198 6. 915645 6. 221975 7. 290952 7. 383395 7. 516855 7. 374378 7. 305942  
1. 453449 1. 892945 2. 161103 2. 826504 1. 998317 2. 240003 2. 322261 2. 040543 1. 411257  
5. 142954 5. 550252 5. 278849 4. 036843 5. 119893 4. 549376 4. 981246 5. 095187 6. 450979  
3. 8798 4. 992749 5. 04447 4. 884028 4. 32296 4. 976957 4. 82067 5. 222593 3. 812832  
2. 703365 2. 681471 2. 95154 2. 789028 2. 288186 3. 123608 2. 355438 2. 249651 1. 666767  
3. 117312 3. 506376 4. 143972 3. 025938 3. 436788 3. 388491 2. 343335 3. 903366 2. 002793  
2. 459973 2. 486459 2. 598922 2. 838055 2. 187945 2. 578974 1. 85646 2. 421997 2. 416779  
2. 466643 3. 429187 2. 315519 3. 453635 2. 779724 2. 966671 3. 088853 2. 901895 2. 789849  
1. 070194 0. 735677 0. 493371 1. 331014 1. 262537 0. 212523 1. 715413 3. 290762 2. 17198  
6. 268701 6. 734935 6. 67909 3. 945609 6. 308374 6. 53432 5. 832117 6. 478298 5. 909047  
3. 422251 4. 007117 3. 427411 3. 580164 3. 260319 4. 317587 2. 974742 3. 351727 3. 387388  
1. 699753 2. 074449 1. 415312 2. 875757 1. 516607 2. 124935 1. 642335 2. 018599 2. 201902  
6. 984657 7. 07864 7. 034271 6. 39361 7. 030427 6. 239079 6. 895509 7. 033351 5. 917001  
2. 183839 2. 842962 3. 534902 1. 816268 2. 600214 2. 624029 1. 996219 2. 810138 3. 382124  
1. 58678 1. 372491 2. 021741 2. 328281 2. 018114 3. 290557 1. 763098 2. 303599 1. 58678  
2. 71803 2. 826363 3. 51888 3. 10029 2. 293866 2. 673286 2. 62857 2. 453424 2. 711927  
3. 552116 3. 240418 3. 682584 4. 190538 3. 658382 3. 483814 3. 381102 3. 588413 3. 895352  
1. 133277 1. 590669 0. 997224 2. 034748 1. 330451 1. 238741 1. 194388 1. 297962 1. 42239  
5. 61566 5. 609804 5. 827344 5. 247162 5. 466035 5. 570567 5. 861201 5. 70161 5. 266636  
3. 55454 3. 564207 1. 872004 2. 264064 2. 986339 1. 891239 1. 971797 2. 927543 2. 903651

3. 894301 3. 183562 4. 463477 4. 970325 4. 318185 3. 148049 3. 801941 3. 621359 3. 177021  
5. 773754 5. 950499 6. 293361 5. 447345 6. 352278 5. 181669 5. 967826 6. 296954 5. 233934  
7. 449017 7. 374587 6. 795345 7. 893813 7. 256689 6. 381178 7. 440952 6. 959659 8. 270376  
4. 318107 4. 778823 4. 344792 4. 193961 4. 584545 5. 422832 5. 128101 4. 154443 4. 428034  
2. 533187 1. 175864 0. 901619 1. 429468 0. 752277 0. 832685 0. 87615 0. 809286 0. 846004  
7. 034352 7. 206034 6. 927684 6. 568524 7. 270161 7. 627259 7. 224743 7. 234535 7. 66492  
2. 441227 2. 597448 2. 684721 2. 918291 2. 560578 3. 076348 3. 44903 2. 704885 3. 018218  
7. 879846 8. 153313 8. 129388 7. 83849 7. 97641 7. 813363 7. 964725 7. 859958 8. 001811  
3. 984402 5. 32907 4. 90734 6. 506275 5. 414484 4. 891242 4. 470591 6. 089329 4. 507304  
5. 480239 4. 818525 5. 620545 6. 635077 6. 162597 5. 204203 6. 14854 5. 286955 5. 532217  
5. 311099 5. 394689 3. 922665 4. 416413 5. 172618 3. 576249 4. 894891 3. 98601 3. 046748  
3. 076058 3. 484081 2. 885028 3. 488484 3. 207124 2. 084351 2. 743305 3. 329524 3. 288538  
1. 334996 1. 21099 1. 633045 1. 806336 1. 23838 2. 288728 1. 292785 1. 739037 1. 203404  
6. 191553 6. 342736 6. 255512 6. 23889 6. 534941 6. 646345 6. 188971 6. 432158 6. 775537  
9. 561551 9. 884549 9. 375502 9. 433019 9. 770564 9. 824079 10. 19714 9. 436482 10. 2945  
2. 187975 3. 128241 3. 027139 1. 78753 3. 693306 3. 172529 3. 978327 2. 551332 1. 971471  
6. 588743 6. 610089 6. 314546 6. 360866 6. 725784 6. 53744 6. 586114 6. 482967 6. 988928  
6. 460036 6. 741578 6. 736066 5. 395144 6. 571217 6. 779678 6. 758957 6. 624385 5. 561921  
3. 240943 2. 210679 2. 92832 3. 060441 2. 340648 2. 075172 2. 23497 1. 540797 3. 09434  
3. 483525 3. 037747 1. 943559 2. 455372 1. 858716 2. 575868 2. 796729 2. 719266 2. 46144  
2. 9661 3. 154305 3. 673174 3. 454703 3. 671974 2. 379866 2. 599273 2. 927064 3. 215957  
1. 750443 1. 35463 1. 508258 1. 307113 1. 324841 1. 688533 1. 451105 1. 337674 1. 230214  
2. 382145 2. 715627 2. 015572 3. 347921 2. 178845 1. 91872 2. 746505 2. 616899 2. 586969  
2. 602272 2. 814898 1. 884131 2. 145066 3. 025845 2. 710348 2. 69667 2. 869814 3. 076457  
2. 424136 3. 239921 3. 898118 3. 828143 3. 456107 2. 963157 3. 072689 3. 455079 2. 660427  
2. 355031 2. 460977 1. 915662 2. 435045 2. 105786 1. 966144 1. 864792 2. 275349 1. 898333  
3. 318964 3. 086282 2. 964285 3. 281378 2. 494606 3. 141541 3. 65077 2. 53867 3. 69569  
5. 125088 5. 207286 5. 021348 6. 673878 6. 358158 5. 266483 5. 7762 6. 034197 4. 569943  
2. 073224 1. 426009 1. 55351 1. 466005 2. 292316 2. 040343 2. 29092 2. 576693 1. 97692  
1. 488764 1. 362121 1. 572853 1. 252273 1. 099269 2. 551484 1. 248654 1. 708445 1. 583806  
4. 377509 4. 757148 4. 669661 4. 403001 3. 925313 4. 87998 4. 180693 4. 873416 4. 754057  
4. 243875 4. 234623 5. 065602 2. 62069 4. 777304 3. 880428 3. 922799 3. 627984 3. 219099  
2. 000203 2. 466158 1. 987275 1. 753314 1. 590795 2. 489022 2. 09918 3. 227835 1. 891882  
4. 352471 4. 224343 4. 001243 3. 655266 3. 974076 3. 982419 4. 119024 4. 222262 4. 2619  
2. 543337 2. 387696 2. 719181 2. 906172 2. 369854 3. 419648 2. 45907 2. 49238 3. 234467  
3. 106196 2. 890989 3. 940577 2. 825375 3. 742045 3. 977654 2. 899735 3. 049334 3. 04121  
5. 080117 4. 491329 3. 722158 3. 8893 4. 328371 4. 921205 4. 51777 4. 549557 4. 855322  
2. 937182 3. 011132 3. 543439 1. 402524 3. 173584 2. 782022 3. 22253 3. 211577 3. 495651  
4. 007159 4. 568072 3. 568155 3. 054662 3. 639963 4. 095448 4. 182871 3. 908952 5. 685364  
1. 838622 2. 240884 1. 607896 1. 607665 1. 772611 1. 211401 1. 515177 1. 473749 1. 524737  
1. 907359 1. 472083 2. 415402 2. 761938 1. 42035 2. 598251 2. 335983 2. 58904 1. 576782  
3. 787159 3. 461939 3. 661036 4. 545522 3. 533244 3. 585438 3. 790224 3. 856225 3. 842608  
2. 856034 2. 325171 3. 016047 3. 919886 2. 423415 2. 383749 3. 12359 2. 335373 3. 894336  
8. 996035 8. 136812 6. 905467 7. 364657 8. 841038 8. 151514 7. 161072 8. 463597 7. 514157  
3. 51343 3. 259017 3. 430319 3. 459985 2. 750078 3. 103633 2. 914086 3. 58579 3. 654325  
7. 760128 7. 907995 7. 786647 7. 163062 7. 532567 7. 662833 7. 731599 7. 913468 7. 432919  
3. 202823 2. 763793 4. 268176 3. 107575 4. 096102 3. 454387 5. 219651 3. 256033 3. 276474  
5. 729705 5. 909738 6. 179866 6. 176248 5. 640126 5. 56759 5. 244035 6. 324527 5. 45404  
1. 856322 2. 499782 3. 181904 4. 299002 2. 466402 2. 645184 2. 616844 2. 936661 2. 184954  
1. 227729 0. 999302 1. 675653 3. 628058 1. 787971 1. 950091 1. 242295 1. 284761 2. 165692  
2. 890382 2. 612644 3. 552047 2. 457409 2. 705803 2. 388359 2. 618638 3. 181757 2. 800577

5. 769567 5. 657809 5. 896654 4. 785858 5. 866711 4. 936755 5. 065053 5. 649988 3. 977777  
4. 503538 3. 960118 3. 065709 2. 90056 4. 224879 3. 769546 3. 654051 3. 618824 2. 894933  
4. 497734 4. 188941 4. 847495 3. 569853 5. 305628 4. 674682 4. 469695 4. 335212 5. 023638  
8. 971367 8. 460132 8. 435223 7. 309217 8. 646669 8. 3482 8. 841429 8. 465207 8. 273384  
4. 299688 3. 638116 3. 729841 5. 428438 4. 149902 4. 160009 4. 050095 2. 892073 3. 259373  
3. 532016 3. 762643 3. 487801 3. 789234 4. 069861 4. 572201 4. 081837 4. 067014 3. 906343  
5. 622545 6. 053342 5. 457275 4. 128898 5. 985612 5. 478137 6. 26258 4. 861347 5. 519688  
6. 099264 5. 509507 6. 18848 5. 428501 5. 765009 5. 3134 5. 784766 5. 84979 5. 197895  
6. 723224 7. 499515 7. 085005 6. 275367 7. 015644 6. 671 6. 920384 7. 045725 5. 417999  
6. 158165 6. 056239 6. 227377 5. 205642 6. 658264 6. 281523 6. 622895 6. 276048 6. 025035  
1. 560464 1. 965361 1. 40563 1. 041393 2. 601102 2. 159637 1. 503015 0. 844859 1. 793139  
4. 793586 4. 643679 4. 355531 1. 764383 4. 336929 4. 667592 4. 416284 4. 239273 4. 175872  
5. 130311 5. 050103 5. 20939 4. 152513 5. 238269 5. 325745 4. 49308 4. 947342 4. 847853  
3. 295934 2. 661523 3. 487913 4. 179412 2. 560346 3. 05769 2. 604571 3. 377264 2. 072145  
5. 362193 5. 147851 5. 126554 6. 048175 5. 828554 5. 430285 5. 864437 5. 629118 5. 984333  
3. 60034 2. 999993 2. 932029 3. 510223 3. 254862 4. 879072 3. 68978 2. 682719 3. 324497  
6. 696483 6. 4273 6. 956711 6. 518689 7. 189294 7. 429485 6. 544332 6. 965476 6. 965476  
8. 205507 7. 743972 7. 652302 7. 673852 7. 426521 8. 062474 7. 518931 7. 3143 7. 238162  
6. 076931 5. 841063 5. 846848 6. 213132 5. 925088 6. 000352 6. 005665 6. 303389 5. 308218  
6. 512916 6. 899856 6. 192762 5. 653128 7. 570959 6. 5975 6. 612728 6. 088191 5. 706592  
1. 722814 1. 018919 1. 293307 1. 008356 1. 250982 1. 317677 1. 316952 0. 738188 0. 85351  
2. 271513 2. 952826 1. 475348 2. 804256 3. 641877 1. 890803 3. 085939 1. 823803 1. 909816  
1. 582954 2. 53271 1. 808634 2. 856485 2. 545355 1. 537202 2. 294683 1. 899641 2. 150811  
1. 907764 2. 699323 2. 236469 2. 726784 1. 639164 2. 069974 1. 414723 1. 406259 1. 830236  
1. 667863 1. 628083 1. 608105 2. 017618 1. 745811 2. 030637 1. 547792 1. 569716 1. 845264  
4. 166015 3. 354722 3. 922297 2. 671953 2. 710404 3. 149267 3. 347441 3. 142941 1. 748057  
2. 150624 1. 519656 2. 018706 2. 851627 1. 563198 3. 600055 2. 161646 1. 708246 1. 561701  
5. 380216 5. 29811 5. 412854 5. 241632 5. 458139 4. 568413 5. 348358 5. 330739 4. 609267  
7. 462063 7. 219845 7. 316858 7. 80713 6. 867697 7. 146274 7. 41132 7. 391804 6. 887582  
5. 861485 5. 929848 5. 560438 5. 170283 5. 450291 6. 149722 5. 642049 6. 075502 5. 269079  
5. 122294 5. 669116 5. 410358 5. 813875 5. 862461 5. 410902 5. 413333 5. 643076 3. 957889  
4. 060893 3. 439639 3. 598014 2. 783784 2. 800596 2. 872719 3. 450648 2. 954014 3. 794997  
3. 280143 3. 02542 4. 093094 4. 96838 3. 316135 2. 671926 3. 024155 3. 500737 2. 600973  
1. 521115 1. 529632 1. 599007 1. 953618 1. 402369 1. 460821 1. 754621 1. 198812 1. 388769  
6. 620503 5. 542396 6. 350322 6. 639359 6. 812841 6. 253516 6. 676606 6. 533655 6. 847018  
8. 206918 8. 01696 8. 004801 8. 229257 8. 318385 7. 920886 8. 247358 7. 981354 8. 531814  
6. 15882 5. 738565 5. 541568 7. 284838 5. 83896 5. 649162 6. 609517 5. 262356 6. 366567  
4. 982414 3. 789989 4. 000485 3. 117793 5. 162492 4. 529003 4. 177733 4. 149632 5. 577201  
5. 226745 5. 291982 5. 971068 5. 159409 5. 307077 5. 09416 5. 555372 5. 077057 4. 946633  
9. 480727 9. 057799 9. 365756 9. 27343 9. 067654 9. 046366 9. 593556 9. 148864 8. 776502  
1. 890495 2. 24198 2. 185944 1. 914987 2. 309029 1. 576149 1. 446544 1. 859254 2. 655704  
0. 943393 1. 499533 1. 469727 1. 871719 1. 445868 1. 220964 1. 561986 0. 90075 1. 194984  
1. 542623 1. 6194 1. 971007 2. 283551 1. 303621 2. 052632 1. 826518 1. 774756 1. 711322  
6. 565665 7. 013466 6. 920503 6. 760555 6. 906219 6. 162301 6. 416574 6. 591484 6. 376738  
5. 698427 5. 224866 5. 224237 4. 919157 5. 709941 5. 099427 5. 441005 5. 372389 5. 573013  
2. 858298 2. 181303 2. 94494 1. 422609 2. 439843 2. 296319 2. 709987 4. 711296 1. 469636  
4. 00835 3. 624826 3. 26613 4. 707267 4. 675209 3. 545287 3. 164402 4. 433587 3. 760499  
2. 379278 2. 457491 2. 707796 2. 747347 2. 975603 1. 345404 1. 657582 2. 113319 1. 520533  
5. 090081 5. 59553 5. 634854 5. 229242 5. 426962 5. 806095 5. 166535 5. 924324 3. 824849  
2. 565542 1. 59146 1. 60998 1. 24757 2. 102035 2. 977305 2. 076457 1. 615585 2. 602003  
5. 577693 5. 672461 5. 243679 3. 083134 5. 866363 5. 23763 5. 931202 5. 187847 5. 917718

2.01394 4.02968 5.447495 7.224267 1.379613 4.204002 5.944707 5.792232 2.215913  
6.98277 6.892889 6.951757 7.277409 6.892995 7.422964 6.7858 7.353759 6.050636  
1.122957 1.23228 0.85254 1.233001 1.084498 1.088351 0.827641 0.92989 1.486609  
0.835608 0.909062 1.357409 0.927963 1.484123 0.795974 0.795732 1.146107 0.951964  
4.49615 2.857219 3.911032 3.536154 3.354329 3.955718 3.7554 2.781366 4.541971  
3.807986 2.354241 1.768166 2.465418 3.116057 3.718861 3.167435 2.562437 2.590875  
2.698326 1.863528 2.753952 2.279847 2.297311 2.212272 2.259257 2.297945 2.291866  
1.567711 2.579551 1.018333 1.583802 1.20363 0.923664 1.951729 1.144204 1.258782  
1.456028 1.677321 1.903577 3.146964 1.658921 1.74254 2.266908 2.395346 2.031237  
0.869985 0.898021 1.878939 1.112107 0.912909 1.194972 0.904981 0.926368 1.179156  
10.69065 10.70179 10.70392 10.61213 10.79592 10.60271 10.70798 10.7891 10.44198  
2.191611 2.152235 3.107715 2.445713 2.304347 2.902898 2.440193 2.421725 3.333051  
6.851563 6.590069 6.800009 6.004194 5.454466 6.831661 7.143372 7.03715 7.380347  
8.487394 7.968953 7.70001 7.892013 7.844091 7.471164 7.87648 7.785808 7.53952  
1.417914 1.986268 1.985804 1.889802 1.601981 2.610498 1.719315 1.900252 1.690784  
2.80528 3.360369 3.657075 4.615683 4.539788 5.402421 3.604936 7.077138 2.462315  
1.819921 2.068125 1.845489 2.488794 2.082388 1.889541 1.778639 1.784905 2.111986  
0.711319 0.925058 0.871426 1.667518 1.167823 1.673634 1.062647 1.111797 1.279581  
1.017139 0.603054 2.099247 0.960778 0.890085 1.058175 0.69841 1.033791 1.426585  
2.199797 0.803115 1.415932 1.442039 1.845036 1.112532 0.990899 1.356154 1.086939  
5.029258 5.170762 5.323524 5.362379 5.290177 5.35724 4.56998 5.219431 4.653203  
3.283636 0.578204 0.677235 1.120769 0.807029 1.209063 0.787061 1.064378 1.628325  
1.700985 2.458233 1.175235 2.028504 0.933621 1.504356 0.916418 1.110905 2.162289  
1.519523 1.44972 1.715549 2.759958 1.837453 2.318372 1.30284 2.073717 1.430158  
2.15568 2.210105 2.733219 2.664828 2.91318 3.168849 1.916147 2.733427 2.178853  
2.711604 2.72495 3.068862 2.431035 2.290448 2.644169 2.701078 2.920876 1.831558  
3.49783 2.96601 3.371749 3.214449 4.067611 3.322549 4.313186 3.106443 3.436433  
8.147531 7.758152 8.020006 7.907084 7.886326 7.777059 8.555861 8.145348 7.273004  
2.560377 3.845871 4.439765 3.782349 2.933294 3.018595 3.061802 3.349624 1.90604  
1.332609 1.408092 2.280681 1.734088 1.611149 1.268627 1.463268 2.123425 1.54044  
2.396093 2.432159 3.947758 3.470972 2.416223 3.11211 2.827384 2.493103 2.381076  
0.615551 1.291885 1.156614 0.909103 1.471404 1.771171 2.199797 1.315242 2.005991  
1.395207 1.840687 2.14725 2.0053 1.36499 2.460881 0.923999 1.062543 1.704898  
1.109113 1.841557 1.263047 1.580858 1.31667 1.826058 1.009736 1.209565 1.16786  
0.922073 0.986816 0.958745 2.026531 0.92966 1.38821 1.039735 1.267689 1.484005  
8.797166 8.455279 8.42884 8.063116 8.306886 8.266426 8.409425 8.486411 8.142463  
4.980879 4.654661 5.129948 4.932692 4.468423 4.166121 4.403698 4.581842 3.353643  
4.461421 3.597747 3.773448 4.358902 3.448581 4.045038 4.438005 4.28592 2.66573  
2.028942 2.434988 1.84903 2.374912 2.095782 2.29823 2.385286 1.852643 2.013231  
4.254335 4.47635 4.461608 4.553712 4.262725 4.041162 4.963386 4.007309 5.051391  
1.232954 1.364927 0.966293 1.697084 1.601051 1.290767 1.357911 1.460753 1.029436  
1.628444 1.237819 1.577452 2.075309 1.594185 1.655347 2.925017 1.435693 1.792544  
1.310853 1.32669 0.927135 1.440433 1.586096 1.142938 1.0534 1.332152 1.492094  
6.566169 6.687058 6.357294 5.641201 6.640367 6.228838 6.56106 6.603276 5.787976  
3.057436 2.672584 3.402274 2.705392 3.688663 3.394081 3.308949 3.388385 2.831441  
8.398923 8.594654 8.485667 8.533442 8.362261 8.288628 8.611096 8.652017 8.127535  
5.813324 5.472926 4.945027 5.947141 5.495502 5.474575 5.613344 5.631511 5.696484  
4.458646 5.498165 4.91005 4.449686 5.955126 5.943445 6.137885 4.399497 5.489397  
1.349138 1.74092 1.728387 2.246082 1.815966 1.811092 2.798469 2.796179 1.215897  
7.064427 7.061694 7.138443 7.152321 7.501496 7.057331 7.719633 7.035574 7.239242  
2.574846 2.283994 2.672632 1.825388 2.786935 3.044155 2.470841 2.811977 2.228243



2. 432961 2. 604549 3. 155309 3. 316722 2. 907691 3. 73176 3. 28362 2. 766546 3. 144504  
6. 081686 6. 128786 5. 8119 5. 551713 5. 983341 5. 932534 5. 958636 6. 130278 6. 105418  
6. 860474 6. 282427 6. 71094 4. 783536 6. 223001 6. 15489 6. 071479 6. 554218 7. 218761  
2. 555995 1. 828118 2. 54911 2. 810119 1. 38325 1. 782675 1. 858161 1. 22054 1. 773524  
1. 364494 2. 445598 3. 162526 3. 819078 3. 344781 2. 752709 1. 799994 3. 49085 1. 980485  
2. 912742 3. 201925 2. 788781 1. 231684 4. 126248 2. 064627 2. 943583 3. 032023 2. 873842  
5. 578525 5. 329016 4. 890261 4. 057934 5. 386324 4. 95555 5. 799481 5. 435427 5. 344105  
8. 377783 8. 171141 8. 3706 8. 350483 8. 078627 8. 018412 8. 615427 8. 016446 7. 776093  
5. 793937 5. 704811 5. 975291 4. 631581 6. 353727 5. 696413 5. 782432 5. 970589 5. 664745  
3. 216375 3. 34376 4. 104046 4. 332982 3. 878219 3. 949845 3. 520666 4. 68019 3. 957498  
2. 76783 2. 399892 1. 844312 3. 126723 2. 797668 2. 622507 2. 389581 2. 710064 2. 659658  
3. 294152 3. 482843 2. 529139 2. 605345 3. 004822 3. 755908 3. 513237 2. 866508 3. 033911  
8. 501189 7. 896521 9. 026681 9. 03182 7. 701179 7. 328693 7. 758547 7. 292031 8. 906499  
7. 153446 6. 842454 7. 403036 5. 607645 6. 519535 7. 238577 7. 318767 7. 475981 7. 514338  
4. 26527 4. 241917 4. 559394 4. 890921 4. 431808 3. 783051 4. 440167 4. 332032 4. 341651  
2. 24878 1. 362729 1. 305275 2. 087821 1. 381373 1. 256003 1. 445032 1. 378413 1. 138235  
3. 242929 4. 476333 3. 932714 3. 331616 4. 049436 4. 227501 4. 4911 4. 043417 4. 015131  
1. 637914 1. 761935 2. 982416 3. 920555 2. 644082 2. 261369 2. 112079 1. 403933 3. 637694  
5. 070227 4. 805284 4. 623137 3. 06512 4. 930919 4. 451186 4. 73109 5. 141294 3. 139962  
6. 338693 6. 684081 6. 208039 6. 488957 6. 8645 6. 2794 6. 363579 6. 484684 6. 395059  
2. 792203 4. 530877 2. 82541 3. 59288 3. 496901 2. 424569 3. 016462 3. 469947 3. 545612  
4. 473163 3. 366044 4. 627095 4. 494938 4. 81724 4. 050222 4. 543443 4. 635115 4. 554969  
3. 712696 4. 164916 3. 495626 3. 58113 4. 433588 4. 21029 3. 974875 3. 881629 3. 069981  
2. 158531 2. 186612 2. 316419 2. 361152 2. 22266 2. 189213 2. 636334 2. 52264 3. 2364  
5. 682484 5. 769868 5. 586419 5. 487679 4. 706439 4. 738613 5. 107034 5. 425575 5. 807277  
3. 028829 4. 384924 3. 925655 3. 503652 3. 838461 2. 757863 3. 212353 3. 564079 2. 605404  
4. 752815 4. 552383 4. 500795 4. 388868 4. 447106 4. 676815 4. 570243 4. 475241 5. 431806  
7. 29788 7. 541332 7. 779512 7. 411938 7. 454427 7. 814351 7. 299827 7. 410165 6. 02311  
4. 23577 5. 050011 5. 236181 4. 79127 5. 154081 3. 950708 5. 903953 4. 95209 4. 837081  
7. 574816 8. 07576 7. 815528 7. 225029 7. 869749 8. 030481 8. 011667 8. 004109 7. 181639  
1. 993708 2. 097083 1. 883342 2. 66611 2. 024374 1. 788188 2. 466539 2. 293645 2. 580464  
7. 503618 7. 248136 7. 705679 6. 916738 7. 517442 7. 64625 7. 384242 7. 475092 7. 70786  
7. 730381 7. 745498 7. 61112 8. 653657 7. 799579 7. 668319 7. 523842 7. 748206 7. 216797  
1. 560739 1. 902026 1. 579019 1. 718371 2. 210675 2. 724412 2. 290167 1. 625765 1. 959594  
8. 241949 7. 393011 7. 635674 7. 845802 7. 260549 7. 814871 8. 297685 7. 931505 8. 258521  
4. 655734 4. 743148 4. 467872 4. 62062 4. 949061 4. 86164 4. 562831 4. 570166 4. 990901  
4. 705103 3. 521631 3. 576709 3. 157719 4. 393883 2. 716946 2. 688154 4. 198915 2. 510922  
1. 451569 1. 558267 1. 460269 1. 736077 1. 523982 2. 600995 1. 432717 1. 589857 2. 097943  
4. 411961 4. 055353 4. 463501 3. 430993 4. 441826 3. 435969 4. 295207 4. 179798 4. 720733  
5. 651393 6. 858311 6. 834451 5. 710387 6. 064333 5. 802204 5. 922261 6. 246151 3. 816209  
6. 393333 6. 591343 6. 328556 4. 513033 6. 414022 6. 16756 6. 410234 6. 574196 4. 865752  
5. 237925 4. 790734 3. 740737 4. 732424 4. 092112 4. 246112 4. 819699 4. 609908 5. 061068  
1. 998785 2. 384565 2. 844315 3. 828358 2. 523492 3. 004844 2. 316682 3. 135818 2. 590031  
2. 66305 2. 007861 2. 91438 2. 100723 2. 419263 2. 18312 1. 948213 2. 24255 2. 143148  
6. 03144 5. 603912 5. 559371 5. 371642 6. 610311 5. 56867 5. 271315 5. 726504 4. 333952  
1. 399617 1. 704407 1. 515289 2. 211317 1. 632993 1. 511314 1. 461889 1. 192853 1. 99584  
2. 344455 2. 130827 2. 072467 3. 348862 4. 094914 1. 941362 3. 498753 1. 7279 2. 394454  
1. 565415 1. 37532 1. 210645 1. 848534 0. 947329 1. 986906 1. 31569 1. 111631 1. 210407  
6. 040445 5. 455478 5. 380801 5. 489241 5. 457856 5. 518653 5. 269277 5. 839256 5. 449745  
3. 321206 3. 290102 3. 604629 4. 091115 3. 80712 3. 372332 2. 6918 3. 818647 3. 028688  
1. 732878 2. 560941 2. 419821 2. 701035 1. 479448 2. 412004 1. 765429 1. 174062 4. 181835

5. 03307 4. 463264 4. 640742 4. 972203 4. 790232 4. 582562 4. 583102 4. 671434 3. 509871  
4. 380063 4. 377787 4. 670982 5. 165475 4. 295804 4. 702467 4. 442542 4. 536495 4. 382937  
4. 863427 5. 272416 6. 085164 6. 029053 6. 002052 6. 107361 5. 971447 5. 520247 7. 151349  
7. 520678 7. 456705 7. 277576 7. 725711 7. 389269 7. 472985 7. 746009 7. 114655 7. 875556  
6. 917577 6. 688903 6. 263773 6. 54433 6. 979293 6. 526754 6. 738426 6. 641999 6. 778232  
5. 968704 5. 899376 5. 504502 5. 034162 5. 745889 5. 847215 5. 143739 5. 927545 5. 955646  
2. 85113 2. 192436 2. 779575 3. 30899 2. 430471 3. 051184 3. 324218 2. 97841 3. 551091  
2. 367361 2. 920226 2. 36261 3. 283453 2. 690234 3. 513208 2. 560991 2. 879602 3. 095635  
1. 020458 0. 95318 1. 023611 1. 420957 0. 830653 1. 097188 1. 319258 1. 299409 1. 255885  
0. 821094 1. 193617 0. 98146 1. 785065 1. 128618 2. 479911 1. 270121 1. 492796 1. 362364  
1. 708074 1. 553767 1. 555675 1. 494949 1. 737041 1. 133875 1. 215125 1. 74365 2. 9159  
3. 095351 3. 628692 3. 467121 5. 006575 3. 751566 4. 392826 3. 592762 3. 506114 3. 300734  
5. 403562 5. 627423 4. 761872 4. 664983 5. 60298 5. 52069 5. 615221 4. 89339 4. 573934  
1. 221204 1. 386571 1. 31195 1. 830469 2. 318904 1. 394185 1. 519322 1. 105398 1. 920221  
1. 744959 1. 577271 1. 094923 2. 158824 1. 579361 1. 632532 1. 331272 1. 310856 1. 872111  
3. 041203 2. 298153 2. 433331 2. 286833 2. 086629 2. 123477 2. 920388 2. 811262 1. 662646  
6. 321859 6. 222176 6. 251459 5. 643601 6. 165878 6. 487018 5. 985522 5. 679078 5. 56547  
1. 740386 1. 405646 1. 599152 2. 287439 1. 352022 1. 736728 1. 589388 1. 698326 1. 516938  
5. 419083 5. 761393 5. 882767 3. 468723 6. 001875 5. 384427 5. 822105 5. 040935 5. 423615  
4. 262093 3. 255137 4. 509992 3. 236689 3. 999022 4. 124298 3. 612317 4. 438677 3. 380261  
3. 705256 4. 589057 2. 629372 2. 980617 3. 795277 2. 745204 3. 712646 3. 425333 4. 133927  
5. 819423 5. 815724 5. 248982 5. 193715 5. 575523 5. 970602 5. 53933 5. 049964 5. 550458  
1. 898538 1. 32205 1. 231197 2. 716655 1. 582533 1. 22155 1. 649712 2. 074251 1. 791414  
1. 295099 1. 810684 1. 423897 2. 424184 1. 186147 1. 889051 1. 577975 2. 058732 1. 11843  
1. 98832 2. 93262 2. 890656 2. 759852 2. 324401 3. 599073 2. 462186 2. 807161 2. 747585  
1. 778626 2. 084339 2. 308135 1. 700389 1. 334908 1. 682321 1. 730479 2. 018084 1. 103385  
1. 105646 1. 52621 0. 991971 1. 355791 0. 915789 1. 43683 0. 967716 1. 094107 0. 714325  
5. 797779 5. 438021 4. 969743 6. 057498 5. 476602 6. 030784 5. 819703 5. 123964 5. 769133  
4. 168433 4. 36105 4. 319669 2. 696861 4. 608973 3. 876684 5. 215233 3. 528732 2. 563084  
1. 91842 1. 155268 1. 43962 1. 652153 2. 780562 1. 691956 2. 229566 1. 909267 1. 879108  
1. 184554 1. 228165 1. 257031 1. 839887 1. 109768 1. 689684 1. 107978 0. 769876 1. 373738  
5. 384466 5. 303004 5. 667632 5. 332618 5. 664743 5. 567418 5. 793391 5. 076255 4. 701123  
6. 126192 5. 974455 5. 553588 6. 729434 6. 338687 5. 755714 6. 474895 6. 500628 5. 019656  
7. 211696 7. 29001 7. 092801 7. 222005 7. 245444 7. 19613 7. 056008 7. 111884 7. 053193  
5. 845187 6. 014209 6. 320436 5. 809074 5. 650527 5. 7598 5. 89543 5. 617076 6. 559054  
6. 048393 6. 33304 6. 585618 6. 21212 6. 851409 6. 273771 5. 625591 6. 528138 5. 26648  
1. 318661 1. 663926 1. 814951 2. 606131 1. 196442 1. 437789 1. 145995 1. 443713 1. 16409  
2. 378963 1. 785043 1. 501827 2. 287404 2. 262492 2. 045103 1. 897437 1. 593289 2. 150839  
1. 805732 2. 004451 2. 213643 2. 65813 0. 994663 1. 69444 1. 593741 1. 431199 1. 15984  
4. 080637 4. 389887 3. 632684 3. 840023 4. 906431 4. 077708 3. 659068 3. 744897 3. 167894  
2. 333644 3. 625156 2. 238057 3. 057995 3. 287883 3. 190173 2. 743935 2. 69795 2. 345875  
5. 847557 6. 505246 5. 56281 4. 973022 6. 366226 5. 932846 5. 839819 5. 882537 4. 667018  
4. 843385 4. 605874 5. 472587 4. 362816 4. 712971 4. 588259 4. 580011 4. 480898 4. 391109  
4. 517471 4. 2777 4. 684499 3. 55396 4. 214619 4. 60093 4. 58578 3. 977034 3. 09933  
4. 834242 4. 541234 5. 157311 4. 534006 4. 41722 5. 301838 4. 323082 4. 875879 4. 487526  
0. 867636 1. 216866 1. 19889 1. 237714 1. 236223 2. 372761 1. 047075 0. 877723 1. 522024  
1. 191304 1. 261391 1. 22635 1. 216323 1. 718458 1. 900089 1. 955529 1. 182795 1. 740413  
1. 51098 1. 474799 1. 487429 2. 490979 1. 490294 0. 992053 1. 476712 2. 046017 1. 067624  
5. 628793 5. 777356 5. 539557 5. 743758 5. 739374 5. 481391 5. 534468 5. 80356 5. 261984  
5. 961586 6. 14945 6. 414323 6. 30524 5. 690144 5. 732197 6. 192234 5. 884514 5. 611274  
7. 269229 7. 543023 7. 702517 7. 206904 7. 543969 7. 664995 7. 233861 7. 592159 7. 137779

2. 595517 2. 56961 2. 740159 3. 906307 2. 24458 2. 691167 2. 411056 1. 866308 2. 586525  
5. 716024 5. 179941 4. 886904 4. 922417 4. 993908 5. 072412 5. 327773 5. 603158 5. 513428  
5. 970293 5. 431551 5. 644163 5. 810872 5. 623852 5. 132823 5. 493523 6. 112889 5. 465514  
5. 835383 4. 481757 4. 758777 3. 828902 5. 117837 4. 780776 4. 802148 4. 893381 4. 805537  
4. 716802 4. 091907 5. 178641 5. 201005 4. 777912 3. 910095 5. 845537 3. 57485 3. 718187  
8. 528549 8. 004788 8. 159451 7. 473856 8. 080449 7. 827296 8. 386263 8. 145913 8. 642253  
4. 225406 3. 68148 5. 245348 4. 329543 3. 167046 1. 596428 4. 087756 4. 89602 4. 577784  
3. 321961 3. 308973 3. 175946 3. 482878 3. 945929 3. 2278 3. 227399 3. 017987 2. 911033  
5. 695753 4. 899878 5. 463402 3. 838983 5. 148936 4. 973375 4. 830434 4. 918347 4. 958788  
5. 397869 5. 225354 4. 796084 5. 604732 5. 448474 5. 740095 4. 309195 5. 6735 4. 910826  
4. 219944 3. 086092 3. 846918 2. 947942 2. 68557 3. 698671 4. 099903 3. 601668 3. 523629  
3. 670001 3. 224973 4. 311397 3. 69013 3. 894697 3. 246726 3. 114315 3. 794173 3. 523025  
7. 03524 6. 555685 7. 120799 5. 649368 6. 536913 5. 993999 6. 623761 5. 946408 6. 859591  
6. 813078 7. 045947 7. 004583 6. 528489 7. 107832 7. 054919 6. 506109 7. 125543 6. 153174  
2. 615545 2. 468079 2. 207231 1. 770003 2. 123157 2. 274007 3. 102658 2. 097006 1. 951582  
3. 40709 3. 561206 4. 708894 5. 190574 5. 270352 3. 853055 4. 337545 3. 038774 3. 649602  
4. 614043 4. 053743 4. 365771 4. 268404 3. 976634 4. 537114 4. 504482 4. 644397 4. 507273  
1. 773001 2. 549038 2. 432183 2. 668147 3. 090642 3. 903407 3. 217248 2. 231505 2. 090505  
6. 241691 6. 033588 6. 050744 6. 114659 6. 104653 5. 723362 6. 699707 6. 288577 6. 301504  
6. 879131 6. 879385 6. 105715 7. 450546 6. 906635 6. 712827 6. 339147 7. 29278 6. 07191  
10. 47899 10. 4887 10. 77784 10. 57877 10. 59418 10. 29077 10. 64126 10. 51596 9. 952032  
1. 894062 2. 002403 1. 937879 2. 680192 1. 731221 1. 776312 2. 013186 1. 681985 1. 59695  
6. 402291 6. 984948 6. 880377 6. 936494 7. 163881 6. 878428 6. 746207 6. 961527 6. 823748  
7. 930602 8. 140857 8. 08368 7. 393993 8. 039987 8. 441165 8. 241263 7. 76233 8. 500822  
3. 4297 2. 674236 2. 499106 2. 909393 3. 624053 2. 517791 2. 997802 2. 982366 2. 760995  
2. 352405 3. 162862 2. 96245 2. 893477 2. 691269 2. 123715 2. 579052 4. 817862 3. 29817  
0. 235822 2. 437193 0. 814027 0. 496759 1. 688568 0. 682092 0. 786194 0. 86903 0. 740899  
4. 467083 4. 519048 4. 3003 4. 880161 4. 792159 5. 337075 3. 216805 4. 301625 4. 373659  
2. 116979 2. 657303 2. 198989 2. 039397 2. 235991 2. 275448 2. 205037 2. 523221 2. 617797  
10. 23473 9. 983358 9. 90605 9. 749012 9. 931667 10. 10998 10. 26074 10. 08751 9. 834311  
3. 24328 3. 582869 4. 360824 4. 129363 3. 294529 2. 668357 3. 453476 4. 147317 2. 635541  
1. 98774 2. 557639 1. 486693 3. 53297 2. 435446 2. 365739 1. 781264 3. 203204 2. 514228  
3. 851091 3. 88628 4. 329876 3. 602569 3. 500846 3. 988245 4. 108088 3. 657637 4. 116246  
5. 017223 5. 694866 5. 260958 5. 842041 5. 499751 5. 299933 4. 699088 5. 6405 5. 628642  
4. 219271 4. 137209 3. 806462 4. 513156 3. 652186 4. 362051 3. 298411 4. 016853 3. 404104  
6. 167223 6. 050613 6. 211358 6. 306562 5. 33593 5. 96123 6. 069336 6. 482078 6. 269773  
2. 378094 4. 489719 4. 178799 4. 764995 4. 915112 2. 868561 4. 860252 3. 595657 3. 443658  
5. 932784 5. 79822 6. 886771 7. 596426 5. 538619 6. 025842 5. 803397 6. 366033 4. 728461  
6. 735126 7. 137197 6. 865892 6. 068917 6. 918027 6. 651309 6. 510654 6. 735564 6. 338817  
7. 552513 7. 643855 7. 289125 7. 107634 7. 276632 7. 516851 7. 637302 7. 57972 7. 334183  
6. 408511 6. 397059 6. 49675 5. 809502 6. 840312 6. 165389 6. 585099 6. 057079 5. 115904  
5. 62722 6. 073733 6. 291377 6. 058212 5. 741462 5. 811178 6. 466253 6. 117876 5. 443144  
5. 726167 6. 188924 5. 673832 5. 346889 5. 941273 6. 5189 5. 741022 6. 435568 5. 8042  
6. 378998 6. 137378 5. 767052 6. 972274 6. 43714 6. 418583 6. 53806 6. 202617 6. 739299  
9. 767162 9. 888861 9. 844008 10. 23519 9. 898676 9. 981677 9. 579858 9. 891746 9. 489099  
3. 751294 3. 839546 3. 132918 2. 647198 2. 643012 3. 59252 2. 787653 3. 210262 4. 533867  
6. 836717 6. 896631 7. 288405 7. 424188 7. 212547 5. 946258 6. 608976 6. 884489 5. 653889  
9. 205633 9. 949366 9. 95927 9. 236093 9. 908833 8. 481626 8. 190055 8. 052341 8. 753638  
4. 234343 4. 412035 4. 311363 4. 692363 4. 703683 4. 028952 4. 212124 4. 006012 3. 803812  
3. 863877 4. 516088 4. 157241 3. 742121 3. 904006 3. 943937 3. 926051 3. 38152 3. 700744  
10. 07764 10. 21955 10. 17616 10. 3203 10. 19121 10. 1909 10. 21633 10. 27667 9. 83034

2. 462027 3. 207427 2. 592712 2. 338679 1. 594352 3. 572082 2. 496527 2. 21225 1. 51189  
5. 346235 5. 519673 5. 815441 5. 521612 5. 423933 5. 480242 5. 400407 5. 53401 5. 369924  
2. 658772 2. 960265 2. 434479 2. 408522 2. 162577 3. 382702 2. 840534 2. 981035 3. 462565  
2. 917333 2. 475378 5. 617549 3. 655558 1. 541955 2. 94695 5. 591252 3. 141035 3. 347711  
4. 490336 3. 053694 4. 159686 2. 581363 4. 620021 3. 913042 4. 388884 1. 450355 1. 343013  
4. 869187 5. 025374 5. 104283 2. 116301 4. 91086 4. 843852 5. 169349 1. 058391 2. 405781  
1. 289631 1. 834387 1. 448603 2. 329436 0. 932984 1. 239458 2. 237269 1. 549257 1. 736715  
5. 567863 5. 677899 5. 848501 5. 389228 5. 672719 5. 882626 4. 899948 5. 508193 4. 793272  
2. 580689 2. 185492 2. 57716 2. 74534 2. 893264 2. 208764 2. 283578 1. 999873 1. 953061  
1. 454998 1. 816035 1. 472354 1. 244625 2. 196376 1. 32031 1. 804238 0. 918509 0. 787473  
5. 712663 5. 939718 6. 054338 4. 922943 5. 988492 5. 521649 5. 918737 5. 906633 4. 323289  
2. 933025 1. 966163 3. 14373 2. 946455 2. 585244 2. 956829 2. 199438 2. 931097 3. 165983  
5. 58746 5. 912855 5. 54141 4. 933338 5. 733643 5. 843638 5. 500277 5. 617889 6. 15093  
8. 117258 7. 84059 6. 834646 6. 66342 8. 102092 7. 296599 8. 036707 7. 236533 8. 210837  
9. 273184 9. 066673 9. 321925 8. 712237 9. 048136 9. 120611 9. 258336 8. 971533 9. 266311  
4. 440638 3. 399167 3. 869302 3. 843688 3. 601472 2. 792681 4. 483169 3. 625957 3. 066644  
5. 805038 3. 867983 5. 496901 5. 745637 5. 579958 5. 591773 4. 971069 5. 771679 5. 909278  
7. 542366 7. 8626 7. 907736 7. 301891 7. 773291 7. 434402 8. 078242 7. 120009 7. 639123  
4. 663109 4. 604227 4. 15733 3. 249671 4. 860449 4. 945717 3. 442999 4. 967917 4. 874543  
3. 412556 3. 893638 3. 309131 2. 953524 2. 970371 2. 846043 3. 336453 3. 680033 3. 426958  
4. 242588 3. 430427 4. 680257 5. 765994 3. 766871 3. 371716 4. 291273 3. 274583 4. 083631  
5. 625876 5. 906784 6. 177844 4. 287048 6. 065405 5. 733868 5. 857133 5. 824036 5. 529211  
6. 324209 6. 676819 6. 465035 7. 019463 6. 734333 6. 403695 7. 001176 6. 604091 6. 316069  
3. 998675 3. 450223 2. 60435 2. 448277 4. 101726 1. 921306 3. 436257 3. 557728 3. 784967  
1. 786495 2. 239497 2. 62234 2. 521934 2. 493989 2. 400501 2. 279188 2. 130938 2. 325547  
8. 748595 8. 21865 8. 38651 8. 447559 8. 558126 8. 354109 8. 242286 8. 538857 8. 27983  
2. 52133 2. 828286 1. 743877 1. 669299 2. 106398 2. 172828 1. 630645 2. 177119 2. 337563  
3. 352893 3. 338114 4. 187876 3. 206491 3. 199745 3. 300059 3. 965611 3. 495432 3. 182993  
5. 897816 6. 587524 5. 820518 5. 881948 6. 22846 5. 78589 5. 802024 6. 027394 5. 866068  
6. 3651 6. 147065 5. 68173 5. 747629 5. 890721 6. 317023 5. 816161 5. 37891 6. 005985  
4. 331254 3. 749098 5. 423363 4. 829947 4. 673199 5. 467712 5. 169919 4. 505462 5. 352889  
1. 53236 1. 561979 1. 694764 1. 556979 1. 239579 1. 075967 1. 822227 1. 483004 0. 840027  
7. 258088 4. 134088 5. 459672 5. 184375 4. 500292 5. 172522 5. 243541 4. 804713 5. 026133  
2. 978324 2. 247073 4. 583584 3. 674389 2. 525682 1. 7933 2. 634679 2. 987539 2. 94437  
2. 728462 3. 865945 4. 105218 3. 289406 2. 921603 3. 600588 3. 582217 4. 402417 3. 209705  
2. 290828 3. 846448 3. 291063 2. 080092 3. 461605 3. 373912 4. 544848 0. 887542 1. 923616  
7. 489915 7. 379951 7. 445879 6. 911434 7. 519813 7. 471307 7. 363502 7. 506932 6. 854015  
4. 484858 5. 62814 5. 600596 2. 043485 3. 576865 4. 078614 4. 223775 5. 041852 3. 573197  
2. 388189 2. 405914 1. 496319 1. 941864 3. 555437 1. 871907 2. 32338 1. 56871 1. 329786  
10. 65967 10. 19776 10. 06915 9. 307156 9. 528787 10. 50264 10. 61024 10. 21372 9. 745952  
1. 476667 1. 092559 1. 626983 1. 769052 3. 31465 0. 919734 3. 034775 1. 706479 2. 011982  
5. 048991 4. 599252 5. 29044 1. 43359 5. 611596 3. 038948 5. 530449 3. 642344 4. 225707  
11. 09379 11. 02877 10. 95083 10. 93075 10. 75952 11. 28332 10. 9152 10. 96322 10. 65291  
4. 038076 5. 02308 4. 772518 4. 758064 5. 872823 5. 80689 4. 629135 5. 683323 3. 830667  
1. 106673 1. 414933 1. 247919 1. 970181 2. 123602 2. 555393 3. 392835 1. 679732 2. 647897  
5. 755426 5. 933116 5. 674668 6. 385215 6. 122711 5. 632383 6. 55539 5. 719713 5. 749514  
2. 466494 1. 2436 2. 139046 2. 372415 1. 424014 1. 231476 1. 800657 1. 418054 1. 090358  
3. 159395 3. 387233 2. 534591 3. 43501 2. 61915 3. 18552 2. 937628 1. 574507 3. 53197  
0. 932767 1. 273357 1. 092081 0. 804459 1. 094515 1. 103964 0. 954057 1. 394724 1. 101355  
1. 645847 1. 288439 1. 050384 1. 744493 1. 259205 1. 510751 1. 341764 1. 611765 2. 354624  
4. 388914 6. 079884 4. 803856 4. 379648 5. 684902 4. 861738 4. 212676 6. 333468 3. 720756

3. 778062 5. 230607 3. 325419 4. 500903 6. 633759 4. 414969 4. 612235 3. 457907 2. 322135  
6. 443039 6. 302655 6. 626724 6. 121566 6. 460025 6. 331166 6. 083182 6. 566604 5. 356998  
4. 964002 4. 561183 4. 820712 5. 159683 4. 937498 4. 287333 4. 700348 4. 844579 4. 814953  
10. 00834 10. 13588 9. 995232 10. 41343 10. 42835 9. 92886 9. 618924 10. 36334 9. 106864  
8. 057249 8. 178809 8. 060253 8. 398973 8. 540182 7. 506474 7. 89577 8. 053184 7. 887673  
1. 117537 1. 570417 1. 659279 1. 647469 1. 410096 1. 547844 0. 881228 1. 830966 1. 171283  
1. 747678 1. 048313 1. 486255 1. 975911 1. 611279 1. 563025 1. 293276 1. 73842 1. 486124  
1. 330222 1. 232873 1. 364078 1. 353637 1. 433468 1. 264079 1. 17836 1. 689584 1. 146896  
4. 472093 4. 81659 3. 71576 3. 630458 4. 041045 4. 550168 4. 616691 4. 964275 5. 384896  
1. 620856 1. 705854 1. 697909 1. 645122 2. 073602 2. 338667 1. 280023 1. 65292 1. 713323  
0. 994037 1. 559292 0. 978675 0. 678019 4. 905653 0. 906996 1. 216589 2. 422486 2. 00478  
3. 465719 3. 466458 3. 518823 2. 395828 3. 485096 3. 548792 3. 474925 3. 73636 3. 213669  
3. 201246 3. 497247 2. 924286 3. 907668 3. 645677 3. 25439 3. 80756 4. 320321 3. 56882  
5. 545787 5. 304664 5. 572302 3. 869645 5. 825905 5. 447976 5. 77133 5. 843486 4. 730271  
6. 173768 6. 633556 6. 471186 5. 514818 6. 374661 6. 193785 6. 527136 6. 941105 6. 271041  
5. 519883 5. 71438 5. 795183 4. 903841 5. 616516 5. 628598 5. 368776 5. 849678 5. 624899  
4. 049656 2. 751365 2. 676103 3. 001329 4. 615028 3. 418444 4. 544322 3. 551425 3. 662857  
2. 068019 2. 161693 2. 10786 2. 645435 1. 734895 1. 920392 2. 014295 1. 99854 2. 468454  
6. 027879 3. 971761 5. 143515 4. 959923 4. 829012 5. 504107 4. 857291 5. 517589 4. 631625  
4. 451443 4. 037606 4. 468745 4. 285969 4. 6551 4. 302783 4. 467184 5. 709854 4. 239461  
2. 75463 1. 283767 2. 09663 1. 025806 1. 449238 2. 480046 1. 844926 1. 206163 1. 096776  
2. 904479 3. 265773 3. 246327 3. 452015 2. 544614 3. 026249 2. 893893 3. 156704 3. 244606  
2. 507006 2. 694347 2. 526419 3. 482577 2. 605834 2. 794377 2. 271104 3. 083558 2. 685686  
6. 128067 5. 645265 5. 346658 5. 369965 5. 872505 5. 924145 6. 077119 6. 400264 6. 509079  
3. 953805 3. 74445 5. 002006 3. 551201 4. 699883 3. 295457 4. 256496 3. 862191 4. 749462  
3. 355073 3. 33849 3. 806641 3. 488601 3. 539964 3. 276113 3. 4303 2. 89286 3. 394643  
2. 682388 2. 126336 2. 673664 2. 290198 2. 103865 2. 830909 2. 350088 2. 340514 3. 27819  
1. 185878 2. 054714 1. 866326 1. 358663 1. 639371 1. 427924 1. 344493 1. 406435 1. 395549  
2. 790457 2. 234319 2. 399139 3. 344707 2. 576907 1. 97823 2. 899153 4. 841895 3. 063505  
3. 03453 2. 197397 2. 780758 2. 802658 2. 135134 2. 714214 3. 166413 2. 879747 2. 56472  
7. 652601 7. 150752 7. 675397 7. 7831 7. 762146 7. 04541 7. 608061 7. 569725 6. 47086  
5. 172983 5. 662237 4. 869681 5. 032627 6. 185115 5. 253958 5. 382668 4. 79865 5. 697293  
3. 010856 1. 781796 2. 182366 3. 278042 1. 20467 3. 889123 2. 292436 1. 284716 0. 414722  
5. 975666 3. 130272 5. 413363 4. 852753 5. 458229 3. 41235 3. 444464 4. 382058 1. 31993  
0. 88593 2. 546552 1. 618409 1. 351991 1. 390739 2. 664893 1. 705881 1. 608192 0. 995978  
2. 409146 2. 217349 1. 726097 2. 517273 2. 204703 2. 35466 1. 880945 2. 149011 2. 84301  
2. 524263 2. 042622 2. 036367 4. 663153 3. 472251 2. 254773 4. 038194 2. 95282 2. 896509  
5. 089506 3. 886363 4. 980879 2. 222669 4. 842767 3. 609978 5. 675402 3. 850595 1. 603826  
2. 459019 2. 530881 1. 812092 2. 221773 3. 348184 2. 007325 2. 731066 2. 761167 2. 194534  
6. 85554 5. 981917 6. 841799 5. 619023 6. 84495 6. 061621 6. 001092 5. 822121 4. 746493  
9. 097638 8. 387968 9. 042073 8. 209186 8. 25825 8. 486757 8. 473182 8. 646765 8. 63852  
4. 756005 5. 750636 4. 778761 4. 362535 4. 81685 4. 518365 5. 280671 5. 492013 4. 748505  
2. 106398 1. 959181 2. 395147 2. 93249 2. 180161 2. 770623 2. 378905 2. 678395 2. 33367  
3. 026753 3. 298381 3. 193196 2. 053531 3. 455126 3. 414555 2. 83141 3. 63391 2. 416592  
6. 026499 6. 04393 6. 471552 5. 256431 6. 095529 6. 312326 5. 790917 5. 876121 6. 389015  
4. 942948 3. 756967 4. 972025 4. 002534 4. 215796 3. 72132 4. 301743 4. 536314 3. 531447  
5. 075868 5. 865797 6. 794364 6. 018569 6. 796412 4. 852767 6. 607529 5. 733521 2. 580894  
2. 059387 2. 29302 2. 057452 2. 317268 2. 122284 8. 467686 2. 345462 2. 273998 2. 028104  
0. 68819 1. 211134 1. 415691 1. 935287 1. 53139 1. 809376 1. 295023 1. 126187 1. 196517  
0. 827046 5. 362796 1. 273275 0. 843486 3. 163996 5. 970578 5. 447362 1. 343443 1. 046799  
1. 750699 1. 521124 0. 839795 1. 480069 2. 749662 1. 906285 1. 130509 0. 517161 1. 770363

2. 320845 1. 407439 2. 050692 2. 370786 2. 025251 2. 393059 1. 601595 2. 22399 1. 909515  
1. 500374 3. 148268 0. 629087 1. 026011 2. 316607 1. 58403 2. 624287 0. 870574 0. 789673  
4. 76385 4. 033887 5. 361297 4. 453217 4. 138434 3. 96066 4. 310005 4. 1791 4. 151631  
5. 774409 5. 742212 5. 389511 4. 410368 5. 676249 5. 162515 5. 55939 5. 611749 5. 828405  
4. 285065 3. 932764 4. 634194 4. 246329 3. 490003 3. 560966 4. 113575 3. 483308 3. 729053  
4. 304113 4. 997943 4. 62697 5. 65063 4. 977896 3. 398737 5. 066311 4. 695596 3. 840226  
5. 094041 5. 41373 5. 069623 4. 245247 4. 442441 5. 010866 5. 044656 4. 829333 5. 899009  
4. 278418 5. 020228 4. 423221 4. 745442 4. 335606 4. 307389 4. 249351 4. 031929 2. 824223  
5. 140826 5. 077086 5. 11155 4. 982388 5. 170366 4. 312798 4. 640405 5. 164479 4. 433379  
0. 790087 1. 587499 2. 069319 2. 733063 0. 991673 1. 327242 1. 249265 1. 381785 1. 728012  
2. 246442 2. 049165 2. 308987 1. 938972 2. 100254 2. 558216 2. 087809 2. 830089 1. 902911  
2. 07392 0. 42815 0. 366885 1. 978398 0. 819438 1. 834473 1. 687741 1. 695194 0. 650147  
5. 876318 5. 139707 5. 597023 5. 555485 5. 279569 5. 548635 6. 236535 5. 463515 5. 326787  
8. 800196 9. 073853 8. 960109 9. 517238 8. 624151 9. 301936 9. 029228 8. 839764 8. 227481  
3. 22617 3. 996592 4. 21254 4. 347359 5. 073234 4. 380569 4. 084748 4. 78524 3. 437389  
4. 461157 5. 172716 4. 59678 5. 170995 4. 815759 5. 219109 4. 510149 4. 746377 4. 605394  
6. 161347 6. 859103 6. 521709 6. 824291 6. 161867 6. 630337 6. 065196 6. 603866 5. 833068  
5. 537982 4. 61324 4. 952106 6. 129212 5. 123432 4. 896807 5. 286075 5. 523309 5. 347346  
2. 810016 3. 475598 4. 110936 1. 45474 3. 889384 3. 708681 4. 912555 3. 480232 1. 297769  
1. 91067 2. 947751 3. 273185 1. 919096 1. 183208 4. 197721 1. 649996 2. 780305 1. 918174  
2. 75853 2. 630733 3. 211601 3. 137298 2. 822131 2. 562424 2. 705801 3. 0456 2. 589152  
5. 592085 5. 321169 6. 049684 6. 093962 5. 424035 5. 650453 5. 199505 5. 157926 4. 895005  
6. 454274 5. 933357 6. 840945 6. 515096 6. 634646 5. 958747 6. 045491 6. 584725 6. 119542  
0. 910124 1. 494578 1. 167079 0. 916435 1. 017574 2. 21595 1. 200011 1. 564025 1. 860865  
1. 856362 2. 598876 1. 943958 2. 162055 2. 535536 2. 988069 1. 337959 2. 695246 0. 90828  
7. 146246 6. 231882 6. 678119 6. 101864 6. 070573 6. 4843 6. 95187 6. 840047 7. 277232  
2. 860041 2. 584986 2. 854917 2. 509522 2. 246596 3. 065045 3. 153688 3. 470979 3. 217931  
3. 510681 3. 573505 3. 873058 4. 302321 3. 238358 3. 622775 3. 171449 3. 565588 3. 60304  
1. 354619 1. 659554 1. 583737 1. 944724 2. 305417 1. 502302 1. 632883 1. 853938 1. 829608  
1. 31876 1. 364041 2. 392366 2. 126557 1. 717292 1. 660616 1. 93239 2. 217624 1. 564316  
10. 08259 9. 923388 9. 671682 7. 56224 9. 34138 10. 44807 10. 34763 10. 31009 9. 145296  
1. 293451 1. 667899 1. 883253 1. 749751 2. 10888 1. 545014 2. 163461 1. 850544 2. 063172  
2. 164031 1. 170973 1. 578705 1. 475008 1. 162636 1. 630368 1. 791111 1. 520854 1. 942939  
3. 831717 3. 944013 3. 426915 4. 540985 2. 519457 3. 783374 3. 781617 3. 935314 2. 618202  
6. 75525 7. 214851 7. 083289 6. 664714 6. 60594 6. 524877 7. 012019 6. 9901 7. 068606  
1. 366983 1. 447537 2. 140865 1. 72617 1. 092883 1. 7573 1. 238284 1. 736676 2. 145845  
3. 296163 3. 141381 3. 248639 3. 436829 2. 678578 3. 379875 2. 992036 3. 578238 3. 632816  
2. 491614 2. 28129 2. 16904 4. 042767 2. 673276 3. 185094 2. 377013 2. 723601 3. 080774  
5. 5864 6. 045875 5. 25254 5. 760004 7. 900129 5. 990019 6. 384933 6. 256363 6. 53818  
4. 259471 2. 796912 3. 426455 3. 089844 4. 426924 3. 977165 3. 782612 4. 10613 3. 856704  
2. 862018 1. 700498 1. 872763 1. 935619 1. 735804 5. 233158 2. 522779 2. 162905 2. 037467  
9. 353701 8. 142603 9. 12631 7. 041873 7. 560945 8. 013163 9. 657741 8. 264254 8. 096282  
2. 652721 3. 130424 3. 833245 0. 418139 4. 075864 4. 322918 1. 448714 3. 575271 2. 483569  
1. 692547 1. 795426 1. 562853 2. 492914 1. 276193 2. 052456 1. 577969 1. 615154 1. 382119  
6. 579777 6. 5659 6. 472709 5. 315557 5. 836415 6. 607373 6. 767716 6. 914631 6. 015815  
4. 633151 4. 398655 5. 04689 4. 203352 4. 604027 4. 412056 5. 01884 4. 306223 4. 436142  
1. 829007 2. 040593 2. 068077 2. 05539 1. 875645 2. 23198 1. 887433 2. 190856 2. 26296  
4. 238068 4. 681094 4. 15782 3. 306711 4. 067406 4. 110911 3. 836285 3. 593561 4. 273764  
5. 946087 6. 367945 6. 366437 5. 528499 5. 562623 6. 110157 5. 683674 6. 009461 5. 53915  
1. 735802 2. 086092 1. 840297 1. 239914 1. 167172 3. 077554 2. 005563 1. 342304 2. 858286  
1. 235883 1. 363286 1. 00297 1. 879587 0. 910259 1. 186343 1. 264309 1. 207737 1. 159611

8.798966 8.451919 8.182032 8.409395 7.828435 8.666411 8.383332 8.174144 8.33674  
0.917465 0.917811 1.523204 1.246796 1.308349 1.882347 1.373795 0.798808 1.037766  
5.223903 5.47391 5.188221 5.55684 5.757776 5.12062 6.157689 4.923268 5.289214  
7.019108 7.674793 6.971657 8.271612 6.799444 6.987102 7.507719 7.553445 6.170105  
2.886525 3.714568 3.632397 2.888896 4.026393 3.09137 2.67751 3.93158 2.08702  
6.184313 6.383617 6.059425 6.955745 6.413807 6.130325 5.959463 7.027298 6.034302  
6.767763 7.272966 7.039116 6.132087 7.478663 6.2539 7.703774 7.47228 6.510929  
3.562689 3.025215 3.186293 2.208594 3.955329 4.840012 3.956905 4.581184 3.75302  
1.736271 2.823359 2.157479 2.919219 4.93898 2.69596 3.754996 4.474305 3.277718  
6.706591 6.583795 7.565237 6.230535 6.625766 6.640182 6.445935 6.728443 6.1068  
2.189589 1.623536 2.592273 3.704769 1.979849 2.965855 2.21369 2.36598 2.143238  
1.619088 1.333355 1.762548 2.010245 2.052452 2.266326 2.241995 1.333537 3.021295  
2.25786 3.884208 2.60325 3.565865 3.665114 2.243873 2.836862 3.38573 2.321599  
6.706926 5.960259 6.430392 6.630195 6.158957 5.330399 6.641694 5.939743 5.882774  
3.101656 2.397291 2.453971 2.443249 2.490648 2.768242 2.251661 2.988331 3.258423  
4.324447 4.965508 4.482869 3.821136 4.578266 4.519601 4.584861 4.602735 4.581998  
7.625154 7.596068 7.40545 6.434989 7.516881 7.278452 7.6098 7.358626 7.283009  
1.293013 0.968504 1.258196 1.584574 1.098946 1.317219 1.37473 1.219403 0.790788  
5.634943 5.549883 5.947802 6.773996 5.626336 5.877246 5.944659 5.442934 4.819704  
4.022174 3.857279 4.149278 3.743586 4.197198 3.313425 3.657591 3.359451 2.7305  
5.399064 5.461515 5.413198 5.792527 5.511168 5.477787 5.352636 5.482724 5.668093  
4.15805 4.15794 4.084528 4.553267 4.346323 4.329513 4.178517 3.562559 2.040727  
1.10285 2.197654 1.735223 3.463053 0.926212 1.251376 1.475963 0.957308 2.434116  
6.920547 7.414334 6.545703 7.27979 7.232977 7.178489 7.086931 7.460072 7.053546  
1.463462 2.360111 0.79361 1.341075 2.163467 1.312893 1.341631 0.932314 0.903747  
2.439252 2.700395 3.0027 3.397608 2.526724 3.355647 2.134629 2.735455 2.546725  
7.897207 6.229106 7.42904 6.372565 6.954001 8.174956 7.109117 7.478858 8.660266  
4.544574 4.902589 5.721153 4.918462 5.121892 5.028425 4.81015 4.883496 4.013069  
3.341323 3.312467 4.140646 2.48818 3.716894 5.421373 1.79537 2.997269 2.669932  
5.119397 4.960131 4.809417 5.338116 5.154051 5.629506 5.025028 5.191748 5.762248  
1.906875 1.7796 2.926376 2.393958 2.344949 2.244665 2.010422 2.486995 2.043531  
4.390473 4.490343 5.090537 4.368072 4.316018 3.782018 4.293807 4.366556 4.350424  
7.502655 7.699976 7.684675 8.144279 8.288839 6.708495 7.191451 7.890878 7.753083  
5.551087 5.161332 5.147415 4.845994 4.741 3.887336 5.199393 4.926879 5.566215  
1.689581 1.345859 1.480126 3.279985 1.527561 2.42979 2.332144 1.963083 1.52225  
0.860511 1.484702 1.256219 2.411998 1.047905 1.985723 1.599361 1.41467 1.489347  
1.621844 2.119646 1.877116 2.060818 1.318021 2.264948 1.52618 1.241365 1.723873  
1.822221 1.537416 1.54416 2.093849 1.599735 1.945927 1.814525 1.283458 1.588156  
4.747927 4.978691 5.143542 5.774536 5.0578 4.962725 5.006512 4.932603 4.848873  
2.300095 2.785388 2.669962 2.817635 2.833978 2.53654 2.531788 3.200668 2.675574  
4.213377 3.480495 3.348228 4.284244 4.007474 3.857999 3.736965 3.851864 3.707605  
4.12001 4.305483 4.416939 4.508896 4.588948 4.169447 4.002295 4.335975 3.949498  
2.629531 3.568216 2.936901 2.598237 2.833986 2.667195 2.816951 2.700002 3.710794  
6.927469 7.7419 7.937808 7.222127 6.9908 7.618269 7.446921 6.796216 6.939658  
2.57462 2.285361 2.303443 2.311908 2.869101 3.423076 2.486779 1.879468 3.558339  
6.397396 5.939601 6.16665 5.365782 6.221183 5.604479 5.706018 5.959139 5.838191  
6.344028 6.761869 6.63345 6.090832 5.967371 6.18086 6.057069 6.43379 6.36679  
6.909711 6.577214 7.150057 7.026337 6.458951 7.019217 6.693202 7.091858 6.320597  
1.988823 1.535757 1.577407 1.814237 1.776591 1.816901 1.912804 1.951386 1.746072  
1.588837 1.85435 1.028804 2.327144 0.901706 1.587305 0.925535 1.972919 1.03626  
1.58417 0.619688 1.076143 0.959553 1.399501 1.359001 1.123282 1.045281 1.263133

2. 622926 1. 778897 1. 701679 3. 285063 1. 625311 2. 30467 1. 796671 1. 306366 2. 822757  
2. 324279 4. 662682 2. 712448 2. 719184 3. 896459 4. 191896 3. 108002 1. 402005 1. 659737  
1. 266794 0. 954681 0. 966465 0. 65414 1. 063839 1. 527857 1. 778128 0. 971909 2. 808143  
6. 533034 6. 930478 6. 486169 6. 766474 6. 536625 5. 33197 6. 69562 6. 746152 6. 209282  
1. 533559 1. 684309 1. 776685 2. 102343 1. 410649 2. 01441 1. 729966 1. 633499 1. 666806  
1. 860481 2. 410083 2. 631466 2. 414946 1. 859748 2. 030598 1. 576183 1. 923921 2. 136731  
3. 870744 3. 350754 4. 598437 4. 424657 4. 759687 3. 460573 3. 780374 3. 746927 3. 809184  
1. 835569 1. 489171 1. 815196 1. 806352 1. 766463 1. 227177 2. 114481 1. 779723 1. 865318  
1. 713423 2. 279572 2. 934276 3. 084642 2. 002958 5. 529921 3. 309641 3. 222405 3. 27837  
5. 824166 5. 53403 5. 67624 5. 465239 5. 816813 5. 648498 6. 259195 5. 291598 5. 939627  
4. 007551 3. 603065 3. 27465 3. 256227 3. 321277 2. 89154 4. 12029 3. 409669 2. 983429  
1. 663962 1. 704429 2. 902298 3. 294952 2. 274142 3. 233058 1. 425866 1. 476175 1. 958777  
2. 221821 1. 8525 1. 904051 3. 664277 1. 465173 1. 904051 1. 715987 2. 111846 2. 684364  
1. 699093 1. 324982 1. 410501 1. 841914 2. 225654 1. 630145 1. 835428 1. 697808 1. 67395  
1. 661601 2. 004164 1. 864533 3. 271491 1. 806556 2. 806502 2. 616557 2. 436335 2. 254937  
2. 356137 1. 680765 1. 57409 1. 73395 1. 990504 2. 139676 1. 711041 1. 549028 1. 643036  
1. 808845 2. 013453 2. 549133 2. 022538 2. 154315 1. 705573 1. 236277 2. 815037 2. 56739  
1. 061256 1. 193909 1. 885753 1. 918799 1. 37377 1. 599983 1. 390891 1. 114478 1. 292699  
2. 707186 3. 408352 2. 251563 2. 442928 2. 902351 4. 912198 3. 156314 3. 109464 3. 390697  
1. 144079 1. 323074 2. 348489 1. 11039 1. 342717 1. 528826 0. 979108 1. 096323 1. 318327  
3. 505292 3. 143239 2. 15115 2. 270321 2. 192124 2. 167403 2. 355993 1. 651517 2. 708078  
1. 24363 1. 480085 1. 449988 1. 26997 1. 726851 1. 262568 1. 8759 1. 347851 1. 904562  
7. 359781 8. 052519 7. 671097 8. 158087 7. 428238 8. 171623 7. 998327 7. 887854 8. 10349  
6. 477347 6. 491116 6. 209417 5. 57504 5. 707131 6. 30838 6. 093828 6. 47833 5. 294403  
1. 88028 1. 389406 1. 30165 1. 669729 1. 397873 1. 391093 1. 449238 1. 313401 1. 208414  
1. 137787 1. 051534 1. 38893 1. 387951 1. 203987 1. 092549 1. 068695 1. 080332 1. 611506  
1. 657767 1. 144618 1. 426863 1. 480771 2. 756958 1. 596013 2. 077477 1. 834671 1. 752038  
1. 623318 1. 765953 1. 225388 1. 653472 1. 415761 1. 927833 1. 364782 1. 396513 1. 378788  
1. 591058 1. 588443 1. 897795 1. 703513 1. 735506 1. 862038 1. 255276 1. 505304 1. 189808  
2. 139299 1. 61838 1. 600522 1. 844122 3. 949579 1. 77973 1. 43421 1. 985589 1. 776696  
1. 182777 1. 644619 1. 688576 1. 765506 1. 62498 1. 834599 1. 345469 1. 782552 1. 47327  
1. 918732 1. 750219 2. 911081 3. 339073 1. 377489 3. 623593 2. 076088 2. 175252 2. 617458  
1. 681144 2. 582698 2. 699893 2. 697467 2. 247415 1. 950069 2. 316918 2. 21849 1. 791819  
2. 14574 1. 828504 1. 98386 2. 75985 1. 972834 1. 614094 2. 499181 1. 445976 1. 542572  
1. 669476 1. 334383 1. 939269 1. 791114 1. 633984 2. 57624 1. 4929 1. 813573 2. 723823  
1. 490789 0. 971958 1. 598678 2. 034191 1. 005681 1. 464383 1. 18706 1. 009883 1. 424067  
5. 899789 6. 067586 5. 598792 5. 164132 5. 587663 6. 262966 5. 738964 5. 519626 5. 626362  
4. 821914 5. 416173 5. 78683 4. 318305 4. 639539 5. 19081 4. 845123 5. 905378 5. 349531  
4. 752582 5. 082947 4. 495653 3. 671429 4. 759441 4. 346256 4. 607674 5. 074878 3. 541498  
3. 308851 3. 372798 4. 572001 4. 554198 4. 955699 3. 10481 4. 558006 4. 132294 3. 872514  
4. 684048 5. 204257 4. 230982 2. 434464 4. 403149 5. 063152 5. 13922 4. 398487 4. 263392  
4. 96682 4. 684809 5. 081057 3. 465111 6. 106939 5. 25413 4. 819979 4. 712154 5. 937252  
4. 464253 5. 165556 4. 087858 4. 283061 4. 644055 4. 546744 4. 848015 4. 751817 4. 927012  
7. 108006 7. 250699 6. 984764 7. 382003 6. 674909 6. 534182 6. 582956 7. 122487 6. 920897  
6. 791895 6. 017639 6. 554459 7. 605246 5. 765831 5. 612024 6. 278636 6. 211192 6. 443896  
7. 351414 7. 475338 7. 67327 7. 133308 6. 691551 7. 128916 7. 61226 7. 197398 7. 364824  
1. 01505 1. 503998 1. 491319 1. 278223 0. 94681 0. 953765 1. 400704 1. 325073 2. 140896  
4. 185534 5. 141949 3. 580552 5. 116422 3. 722472 4. 11265 3. 864189 4. 08949 4. 25679  
1. 320078 3. 080937 2. 423163 1. 271059 2. 034229 2. 456192 3. 427031 2. 874788 1. 086855  
3. 874266 2. 904798 4. 229725 4. 12474 4. 083865 3. 624484 5. 154276 4. 302889 4. 702801  
1. 588954 1. 598034 2. 741452 3. 237469 1. 744588 1. 542243 2. 600977 1. 563606 2. 171423



1. 700675 1. 091144 1. 213674 1. 522396 0. 986833 1. 534929 1. 063805 1. 09919 1. 509909  
2. 881244 4. 493784 3. 818247 2. 713473 2. 779332 2. 181337 2. 863456 2. 648827 2. 255596  
6. 036417 5. 50072 5. 831088 6. 570017 5. 830254 5. 217238 5. 947184 6. 678816 6. 818217  
5. 740767 4. 542755 5. 745232 6. 677242 4. 977352 4. 63776 5. 987384 5. 815049 5. 314444  
6. 750588 6. 584543 6. 968478 5. 339659 6. 46622 6. 945012 6. 140812 6. 828453 5. 327545  
9. 889674 9. 787056 9. 593853 9. 084304 9. 800346 9. 534298 9. 712099 9. 720549 9. 916782  
1. 713963 1. 782048 1. 641095 2. 169309 1. 901167 3. 198135 2. 909652 1. 823249 1. 679905  
5. 249493 5. 84448 6. 189671 5. 612266 5. 570489 5. 204864 5. 256271 5. 470716 4. 58053  
6. 793617 6. 934893 6. 24604 5. 655433 6. 62368 7. 073003 6. 623241 7. 058233 5. 853632  
3. 465938 2. 941756 3. 001561 3. 319222 3. 030429 2. 888827 3. 876562 2. 789319 3. 033361  
2. 39125 1. 466213 1. 517692 2. 575071 2. 124694 2. 650961 2. 812895 1. 926581 2. 191568  
6. 354426 6. 815806 6. 573428 3. 043043 5. 788904 6. 15264 6. 458824 6. 185404 6. 691302  
2. 027407 1. 890637 2. 371668 3. 509863 2. 723335 3. 098941 2. 29527 3. 803619 3. 249983  
1. 874795 1. 544604 1. 30066 2. 277481 1. 699233 1. 468843 1. 663856 1. 120157 1. 30558  
6. 357981 6. 093863 5. 903794 5. 6335 5. 903992 6. 25026 5. 94255 6. 261204 6. 459805  
0. 862931 1. 486731 0. 969811 2. 021876 1. 16669 0. 89969 1. 006416 1. 210117 1. 060406  
5. 113618 5. 299089 5. 899686 4. 129793 3. 995744 5. 202431 4. 662478 4. 386353 3. 906102  
1. 806323 1. 201169 3. 003737 2. 360417 2. 80772 2. 435534 2. 171124 2. 843643 2. 036222  
5. 751462 5. 347152 4. 438389 4. 031682 5. 435447 3. 90334 4. 693884 4. 313446 4. 828947  
1. 475157 1. 261864 1. 393386 1. 598934 1. 143135 1. 925075 1. 856333 1. 603732 1. 335565  
2. 538528 2. 251245 2. 831499 4. 032848 3. 351249 1. 80456 3. 864417 2. 656005 4. 282569  
6. 823733 6. 902192 6. 835551 6. 311958 7. 063144 6. 907832 6. 592275 7. 079283 6. 772474  
2. 567155 2. 39154 2. 569943 2. 311434 2. 4415 2. 619253 2. 440936 2. 217325 2. 514764  
2. 276673 2. 981114 2. 717036 3. 330015 3. 53825 2. 718441 2. 971487 2. 258332 2. 739548  
1. 711741 1. 288636 1. 602815 2. 63138 1. 618316 1. 335918 1. 57455 1. 152427 1. 748776  
4. 339586 4. 970035 3. 144115 2. 843785 5. 033432 4. 106784 4. 877565 5. 85194 5. 683005  
1. 149196 1. 579419 1. 495262 1. 890263 1. 527213 1. 319515 1. 90873 1. 292286 2. 100846  
5. 285954 4. 906213 5. 700624 4. 184657 4. 50148 5. 114555 5. 644657 4. 822762 4. 800762  
1. 595523 2. 082402 1. 878135 1. 939881 1. 668328 2. 16694 3. 943791 1. 176432 1. 894962  
5. 774563 5. 88441 5. 818705 6. 583365 6. 044674 4. 59622 6. 418204 6. 52754 5. 697657  
1. 486072 2. 024929 1. 979977 1. 774172 1. 366557 1. 520251 1. 595916 1. 617235 1. 725089  
7. 271811 6. 954923 6. 789145 6. 822523 7. 379626 7. 051868 7. 476351 7. 17023 7. 131177  
4. 462684 4. 350724 4. 587037 4. 358462 4. 907805 4. 618688 4. 498711 4. 410325 4. 829687  
8. 059297 7. 605152 7. 426973 7. 298422 7. 743955 7. 813136 8. 107891 8. 082687 7. 511784  
5. 574885 5. 058241 5. 009228 4. 627593 5. 040652 4. 281592 4. 872807 5. 02043 5. 330581  
3. 210707 3. 092915 3. 503443 3. 829726 2. 515628 2. 100817 3. 068878 4. 029892 2. 002251  
7. 255964 7. 11712 6. 801759 6. 947152 7. 179021 6. 842736 6. 906118 7. 198349 7. 2993  
4. 542592 3. 976119 4. 901324 3. 211667 4. 341839 4. 885307 4. 568712 4. 932386 4. 037303  
1. 115318 1. 595371 1. 415469 2. 029144 1. 486779 1. 282733 1. 042348 1. 739185 1. 140734  
3. 538051 3. 791061 3. 528095 2. 890365 3. 708125 3. 32859 3. 926704 3. 813731 3. 780496  
4. 186816 3. 508955 4. 448727 3. 550937 4. 127848 4. 003916 4. 030212 3. 712081 3. 742542  
2. 703864 2. 693003 2. 36132 3. 34961 2. 361888 2. 740609 1. 824965 1. 674033 2. 284239  
3. 838743 3. 418342 2. 800591 2. 368872 3. 292281 2. 513743 3. 492148 2. 679531 2. 634513  
1. 883998 1. 808223 1. 752041 2. 339132 1. 690671 1. 851898 1. 639186 1. 678748 2. 238718  
2. 501668 3. 379603 2. 290151 2. 116391 1. 881176 3. 369452 2. 156633 2. 901265 3. 627592  
1. 114098 1. 251497 0. 99622 1. 84525 1. 3478 1. 20175 1. 578255 1. 596312 0. 893523  
1. 16758 1. 401541 1. 541585 1. 833868 0. 978278 1. 577463 1. 919539 1. 296516 1. 073086  
2. 227764 1. 764157 2. 080854 3. 62906 2. 120751 2. 458241 2. 37226 1. 750183 2. 209272  
1. 106958 1. 314573 1. 230786 1. 120596 0. 966694 1. 217832 1. 316844 1. 207377 1. 770668  
1. 116953 1. 308727 1. 369319 1. 299876 1. 869138 2. 404097 1. 018722 1. 163475 1. 00735  
1. 460302 1. 758357 1. 970394 2. 694393 1. 962223 2. 105533 2. 175811 1. 69882 1. 77174

4. 333428 4. 578263 4. 04294 3. 603831 3. 709659 4. 629459 5. 229595 4. 295353 3. 484152  
5. 778396 5. 689384 5. 481929 5. 384645 5. 696331 5. 63685 5. 813699 5. 538104 5. 390036  
6. 15008 6. 766127 6. 312871 6. 366636 7. 368781 6. 307048 6. 772518 7. 15826 5. 111206  
2. 832863 3. 475513 3. 549545 4. 911874 3. 934598 3. 352966 3. 940684 3. 929936 3. 372943  
7. 274157 6. 500515 6. 882898 7. 578463 6. 754552 7. 219415 7. 252237 6. 785748 7. 504126  
2. 557589 3. 354424 2. 662927 2. 028886 2. 245924 2. 447423 2. 524642 3. 673996 3. 65015  
1. 253394 4. 893086 2. 87371 2. 144597 2. 420054 1. 959631 0. 897599 2. 293681 2. 683425  
5. 934017 5. 550356 5. 828188 5. 88839 5. 711552 5. 440443 5. 920062 5. 2338 5. 746249  
3. 978599 4. 728716 5. 179327 4. 901635 4. 844317 3. 904512 4. 306155 4. 472393 4. 37372  
0. 624249 2. 132676 0. 862372 1. 867561 1. 340827 0. 77184 0. 35378 1. 897133 1. 872453  
7. 489994 7. 540007 7. 332084 7. 450032 7. 590977 6. 995248 7. 589736 7. 41953 7. 731493  
4. 550924 4. 934686 4. 889552 4. 373955 5. 551581 5. 366947 5. 678833 4. 990167 4. 592277  
4. 824187 4. 384285 3. 987456 4. 499156 4. 418686 4. 529794 4. 617125 4. 851706 5. 052803  
2. 154746 2. 220929 1. 399411 1. 335962 1. 747062 1. 402585 2. 017386 1. 530832 1. 402684  
4. 751776 4. 175489 4. 382831 4. 310957 4. 507043 4. 256346 4. 779323 4. 237343 3. 705416  
1. 243284 1. 208216 1. 139718 1. 58662 1. 77529 1. 59117 1. 566762 0. 984193 1. 134728  
4. 309243 4. 315221 4. 133264 5. 104549 3. 912369 2. 565085 4. 609381 4. 75237 3. 876357  
3. 677615 4. 592412 3. 232155 3. 886236 4. 61247 4. 709311 3. 203756 4. 253727 2. 911045  
1. 574191 1. 176016 1. 618853 1. 764694 1. 421943 2. 062056 1. 502455 1. 067728 1. 566823  
2. 863655 2. 978733 2. 295276 2. 019457 3. 457821 3. 721519 3. 589551 3. 913445 3. 215626  
1. 72357 1. 280722 1. 853318 1. 466936 1. 635887 1. 860211 1. 219092 1. 065013 1. 232627  
7. 292047 7. 6355 7. 332448 7. 721516 7. 496328 7. 557256 7. 544597 7. 687845 7. 350867  
3. 952576 4. 173503 5. 595442 4. 577704 4. 589278 4. 008347 4. 475016 4. 182891 4. 750682  
1. 941015 2. 327271 2. 011854 1. 692095 1. 776935 2. 158493 2. 52368 2. 079175 2. 971383  
3. 601152 4. 286336 3. 837604 4. 471821 4. 59859 4. 326013 4. 434435 3. 466653 3. 624127  
5. 49815 5. 253641 6. 504636 6. 09886 5. 780707 4. 806357 5. 384441 5. 109976 6. 281978  
5. 750959 5. 949497 5. 989763 5. 667993 5. 615166 5. 695931 5. 480053 5. 531201 5. 649474  
5. 117265 4. 153139 4. 845116 4. 474088 5. 634673 4. 793895 4. 473549 4. 709054 4. 425243  
4. 239293 4. 242042 3. 93865 4. 499553 4. 415883 4. 176588 3. 850163 4. 545525 3. 741114  
6. 996803 6. 418105 6. 713071 6. 194302 6. 208873 6. 813165 6. 346881 6. 512755 5. 485548  
4. 219025 4. 491047 4. 071325 2. 643653 4. 22298 3. 237478 5. 020688 4. 613902 3. 375128  
4. 523172 4. 52383 4. 410194 1. 687515 4. 086882 4. 018698 4. 263811 4. 578297 4. 689503  
5. 268233 4. 734443 4. 80903 5. 348848 5. 348934 4. 869833 5. 740495 5. 561477 5. 678088  
4. 245406 3. 279816 3. 514036 4. 652552 3. 710952 4. 483775 3. 551727 3. 735479 2. 484975  
2. 474818 3. 276896 3. 073597 2. 392709 3. 359801 3. 650295 3. 018858 3. 717084 3. 756443  
5. 710339 4. 891234 5. 393028 3. 51516 4. 710097 5. 111863 5. 190889 4. 169221 5. 900403  
6. 568826 5. 957373 5. 935595 5. 737282 5. 46099 6. 507946 5. 852629 5. 324437 5. 718026  
5. 848263 6. 343167 6. 148457 6. 609466 6. 303597 6. 285677 5. 985091 5. 856389 6. 769361  
5. 654308 5. 594867 5. 898018 5. 278671 5. 330213 5. 275866 5. 558975 5. 847538 5. 843793  
2. 649066 2. 488518 2. 247713 3. 001037 1. 983008 1. 992813 3. 16696 2. 032663 2. 896886  
8. 195975 8. 125921 8. 339391 8. 570361 8. 341476 7. 923895 8. 241758 8. 337872 7. 665173  
6. 110372 5. 503342 5. 390028 4. 543953 5. 806672 4. 930901 5. 880929 5. 551763 5. 80374  
6. 188345 6. 590354 6. 480733 6. 30289 6. 491107 6. 288681 6. 990102 6. 382091 7. 104584  
6. 467964 6. 232293 6. 120597 5. 907402 6. 241701 6. 661772 6. 216269 6. 366916 7. 011241  
4. 983586 5. 215597 4. 727348 5. 395941 5. 548742 5. 384669 5. 084598 5. 604578 4. 473113  
2. 911868 3. 893568 2. 527388 3. 000619 4. 346941 3. 848627 3. 445948 2. 913556 3. 002224  
2. 866658 2. 643941 3. 280507 3. 392366 2. 802162 3. 670086 2. 827534 2. 971586 2. 846317  
7. 21307 7. 009669 7. 567991 7. 164001 7. 053646 6. 888438 7. 613892 7. 208613 5. 881432  
5. 377712 4. 816803 5. 245487 5. 118784 4. 286887 5. 281713 4. 046393 3. 288983 5. 571426  
3. 420693 4. 426211 4. 377056 5. 060828 3. 704077 3. 889733 4. 131214 3. 638679 4. 081936  
3. 755647 3. 348633 3. 582153 2. 526406 4. 168449 4. 233684 4. 163636 2. 888998 3. 949092

3. 380071 3. 888606 3. 312528 2. 314284 3. 263332 3. 972266 3. 315485 3. 019215 3. 338465  
1. 385309 2. 235241 1. 824784 1. 913595 1. 942459 2. 419256 2. 237131 2. 13082 2. 008583  
1. 378877 1. 595213 1. 415947 1. 730558 2. 164201 2. 184507 1. 28695 1. 168746 1. 279253  
2. 816115 3. 165771 3. 323122 3. 025823 3. 213485 3. 08644 2. 884737 3. 376104 2. 792213  
8. 565989 8. 613893 8. 824498 7. 794501 8. 451192 8. 346755 8. 908444 8. 541986 9. 002176  
6. 183095 5. 861739 6. 408087 5. 27106 5. 939861 6. 360892 6. 398828 6. 002179 6. 32135  
6. 801565 6. 972539 6. 616513 7. 146573 6. 693988 7. 330517 6. 972079 7. 123783 7. 441911  
4. 46978 4. 35825 3. 750772 3. 318536 5. 216827 4. 264552 4. 786192 4. 231383 4. 229892  
6. 002534 6. 374186 5. 301011 5. 515091 6. 175282 5. 500203 6. 487624 6. 357296 6. 51859  
1. 091994 1. 151252 1. 094751 1. 311319 1. 212151 1. 306136 0. 85803 1. 109183 1. 057936  
7. 765537 7. 651144 7. 650046 7. 489467 7. 208327 6. 925328 6. 996662 8. 363062 8. 121849  
5. 203968 5. 169288 5. 466752 5. 587426 5. 050207 5. 11612 4. 925265 4. 815301 5. 890805  
5. 453247 5. 317678 4. 981852 5. 364818 5. 55713 4. 296425 5. 857552 5. 308127 5. 219039  
6. 992924 7. 191816 6. 711351 6. 580666 6. 583431 7. 031365 7. 270982 6. 781528 7. 235104  
6. 316206 6. 558314 6. 295272 6. 418947 6. 434907 6. 193135 6. 904018 6. 235412 6. 799918  
5. 855917 5. 55996 6. 111805 3. 444044 4. 99515 5. 255172 5. 45841 5. 1116 3. 453952  
1. 835393 2. 21035 1. 728451 2. 321622 1. 930952 2. 548988 2. 232879 1. 649955 3. 048058  
2. 534229 3. 632579 2. 732627 3. 444759 3. 546962 3. 493025 3. 678304 3. 611512 3. 188709  
1. 222311 1. 571545 1. 524197 1. 137364 1. 763497 1. 344956 1. 430753 1. 364301 1. 560046  
2. 961566 2. 248954 2. 303453 2. 916435 2. 607638 2. 50097 2. 504772 2. 350879 2. 101505  
3. 740792 2. 663777 3. 642984 2. 828065 3. 419486 3. 139036 3. 0598 3. 311188 3. 373234  
1. 971354 1. 393361 2. 933961 3. 019718 2. 037704 1. 832654 2. 023166 1. 816496 1. 944645  
1. 7102 2. 338756 2. 041714 1. 716862 1. 476153 2. 118058 1. 910968 1. 783713 2. 099897  
3. 383205 2. 608272 3. 759326 2. 82453 3. 304988 2. 348259 4. 887579 2. 737422 2. 637178  
4. 584469 3. 243502 2. 762553 2. 54906 3. 484898 4. 838298 3. 387587 2. 387326 3. 406997  
4. 880453 4. 082164 4. 062859 3. 46157 2. 958071 3. 768128 2. 490057 4. 207219 3. 103201  
2. 429935 2. 937582 2. 570159 3. 317915 2. 836656 2. 534807 2. 893238 2. 221951 2. 449495  
4. 282612 4. 407958 2. 843057 2. 56084 4. 882437 4. 070914 4. 751846 4. 829753 4. 536375  
3. 481521 3. 034369 3. 318152 2. 874715 3. 318152 4. 258706 3. 809653 3. 891618 3. 34627  
2. 001024 2. 481714 2. 705846 2. 191732 2. 366208 2. 391435 2. 562944 1. 784883 2. 511629  
1. 411807 1. 049025 1. 838526 1. 752149 1. 313119 1. 780685 1. 389657 1. 342316 0. 989462  
2. 196655 1. 412737 1. 731056 2. 509516 1. 533421 1. 449076 1. 758776 2. 015583 1. 627876  
5. 957884 5. 573593 5. 609903 5. 368982 5. 920136 5. 972764 5. 46436 6. 136273 5. 551779  
5. 008093 4. 711777 5. 168037 3. 382736 5. 348472 4. 98915 4. 874691 4. 7676 4. 386335  
7. 708306 7. 396215 7. 700394 7. 22932 7. 666727 7. 506788 7. 189122 8. 003208 7. 130131  
6. 455044 7. 17029 7. 208175 7. 754369 7. 390086 6. 508236 6. 619743 6. 83091 6. 846543  
4. 348414 4. 441691 4. 247816 2. 928537 3. 834023 3. 884024 3. 991201 4. 086718 4. 78457  
1. 350629 1. 782566 1. 216994 2. 078846 1. 744355 1. 915854 1. 318498 2. 047285 1. 515497  
7. 02726 6. 623878 6. 462147 7. 351943 7. 094768 6. 883075 6. 753885 6. 468776 7. 084168  
6. 647271 5. 9234 5. 777927 6. 207276 6. 10435 5. 139945 5. 691599 5. 788137 4. 653392  
4. 231424 3. 451378 4. 809112 3. 576655 4. 35535 3. 152516 3. 586924 3. 635637 4. 011112  
8. 124457 7. 502857 8. 263085 7. 052049 7. 695075 7. 334902 8. 093407 7. 601464 7. 217579  
5. 275415 5. 175415 5. 068867 3. 549846 4. 770255 4. 344351 4. 467309 4. 58276 3. 589752  
7. 750438 7. 630795 7. 013631 7. 274075 7. 67476 7. 253655 7. 341092 7. 612266 6. 581676  
1. 874443 2. 231295 2. 335132 2. 793127 2. 543353 2. 341831 2. 187925 2. 310726 1. 515822  
6. 206343 5. 244701 6. 60481 5. 458042 6. 195595 7. 003558 5. 304644 6. 39571 7. 572895  
3. 576915 3. 70874 3. 210827 4. 151031 3. 852078 3. 508078 3. 495753 4. 043639 4. 746985  
6. 105714 5. 489834 6. 519589 5. 263984 5. 739902 6. 135877 6. 598512 5. 180556 7. 944456  
3. 17263 3. 506055 2. 501804 3. 656288 2. 011237 2. 371749 3. 278363 2. 316155 3. 386743  
1. 479461 1. 494108 1. 735104 2. 070899 3. 234349 2. 58077 2. 524764 1. 786682 2. 65351  
5. 703964 4. 621762 4. 412369 3. 854076 4. 753723 5. 861091 6. 068725 5. 010778 4. 32487

4. 011617 3. 806126 4. 162509 3. 740132 3. 216298 2. 944058 3. 528833 4. 38875 3. 29256  
1. 844128 1. 915794 1. 923123 2. 087308 2. 078965 2. 429627 2. 273248 1. 64902 2. 227786  
5. 93629 6. 665567 5. 770674 5. 193711 6. 318885 5. 671734 6. 532 5. 782112 6. 189993  
4. 991574 4. 955256 5. 211835 5. 430368 4. 627529 5. 253598 4. 608057 5. 202816 3. 781047  
4. 351192 3. 738627 4. 177377 3. 435665 3. 82906 3. 510963 3. 861026 4. 082824 3. 582647  
2. 549017 2. 592149 3. 050699 2. 548278 2. 229896 2. 432751 2. 540054 3. 020715 2. 173677  
6. 127178 5. 949891 6. 446954 6. 287489 6. 104399 5. 26897 6. 61586 6. 299984 5. 903971  
6. 804115 6. 823658 6. 251393 5. 681814 6. 219782 6. 880851 6. 440542 6. 787862 6. 810153  
1. 534924 2. 318382 2. 378711 2. 23078 2. 426731 1. 825975 2. 275932 2. 315487 2. 401729  
6. 439916 6. 47179 6. 390873 6. 090853 6. 197339 6. 063226 6. 533744 6. 481481 6. 8209  
6. 619463 6. 287066 6. 138053 5. 657582 6. 174106 5. 935264 5. 30047 6. 725074 5. 792582  
4. 633554 4. 503719 3. 949208 5. 057081 4. 185953 4. 472613 4. 41783 4. 410906 3. 01997  
4. 350951 4. 536411 3. 826601 4. 735493 4. 323443 4. 409541 4. 630563 4. 411562 4. 766319  
6. 722643 6. 132994 6. 72741 6. 252738 6. 989075 6. 36557 6. 527615 7. 243206 6. 376992  
4. 291641 4. 905188 4. 619875 5. 466804 4. 532028 4. 207599 4. 582314 5. 132529 4. 541992  
7. 547548 7. 436216 7. 532859 6. 65684 7. 554566 7. 231934 7. 44156 7. 416147 7. 065297  
5. 959043 6. 361759 5. 746199 5. 986063 5. 987313 5. 789211 6. 281572 6. 353376 5. 189642  
5. 400968 5. 616625 5. 056104 5. 720448 5. 498312 5. 226208 5. 537253 5. 987013 5. 237999  
6. 398644 5. 83051 6. 737418 5. 1147 5. 652794 6. 735999 6. 469029 5. 744712 6. 564659  
5. 085307 4. 613326 5. 367036 3. 631246 5. 119896 4. 911192 4. 737579 4. 376881 5. 919764  
6. 316918 6. 314264 6. 108499 6. 913461 6. 273257 6. 561265 6. 014676 6. 458765 6. 678853  
3. 392866 4. 501565 4. 266217 3. 747575 4. 865455 4. 038549 4. 188684 4. 634916 4. 408924  
4. 440914 3. 743776 2. 792559 4. 876796 3. 680953 2. 698624 3. 564068 4. 40725 2. 721904  
3. 095279 3. 05651 2. 475031 2. 549889 3. 328575 1. 883215 2. 689552 2. 278469 2. 244542  
4. 716487 5. 12215 4. 648767 3. 287363 4. 27967 4. 594603 4. 954882 4. 816177 4. 558942  
3. 983062 3. 37034 4. 397884 4. 95671 3. 770686 4. 508327 3. 939431 3. 62401 3. 848279  
4. 725796 4. 467562 4. 01471 5. 830893 4. 531433 4. 171325 3. 977485 4. 146165 3. 918995  
3. 680372 2. 823707 3. 4395 2. 371674 2. 593247 3. 296662 2. 535728 3. 155149 2. 400012  
6. 496395 5. 683255 6. 254154 7. 246963 6. 160958 5. 613679 6. 182841 6. 352804 6. 774613  
5. 718576 5. 594851 6. 429228 6. 335027 5. 617803 5. 172108 5. 453687 5. 675922 4. 800982  
5. 943263 6. 281744 5. 69433 2. 617825 5. 563245 5. 33834 5. 545504 5. 902084 4. 491267  
4. 891305 5. 277159 4. 320373 6. 291511 5. 337661 4. 924786 5. 626166 5. 200911 4. 505315  
4. 570128 4. 295675 3. 738677 4. 033246 4. 390542 3. 790797 3. 23774 4. 395283 3. 920954  
3. 796852 3. 645089 3. 800455 2. 406052 3. 105548 3. 362827 4. 161401 3. 832396 2. 519693  
4. 770304 4. 837876 4. 705386 4. 395669 4. 878976 4. 614055 5. 235426 5. 000917 4. 633985  
1. 386714 2. 003477 0. 942824 2. 648924 2. 117917 0. 990014 1. 045347 1. 140575 1. 614023  
3. 747458 4. 030453 4. 190859 4. 579534 3. 418664 3. 821993 4. 48233 3. 925968 3. 311761  
5. 387396 4. 369578 4. 921212 4. 108374 4. 801434 4. 725405 4. 999739 4. 653082 4. 805646  
5. 42377 6. 063399 5. 366658 6. 568322 6. 040289 5. 008798 5. 556965 4. 913196 4. 277764  
5. 443123 5. 587986 5. 379556 5. 509329 5. 597496 5. 091936 5. 410054 5. 641326 5. 44079  
2. 032652 2. 085731 2. 223755 3. 628152 1. 883319 1. 755017 1. 872547 1. 243679 1. 567366  
6. 040122 6. 292599 6. 22301 7. 143202 5. 876858 5. 840345 6. 500464 5. 682299 5. 639283  
6. 227099 6. 460389 6. 159967 5. 416372 6. 745508 6. 205654 6. 47868 6. 143839 5. 989737  
4. 712899 4. 343806 4. 856044 5. 267555 4. 542285 4. 78172 4. 843794 4. 120174 4. 411078  
8. 542881 8. 424943 8. 271964 9. 276003 8. 445114 8. 130846 8. 334038 8. 79112 8. 620794  
5. 923931 6. 087189 6. 035964 5. 221899 5. 977367 6. 593205 5. 924157 5. 749152 4. 667214  
4. 83267 5. 635139 6. 145931 4. 782416 5. 466044 5. 419693 6. 14333 6. 097115 5. 172847  
6. 764379 5. 998839 6. 868734 6. 04354 5. 916285 4. 570876 6. 13214 6. 261565 6. 544767  
5. 08944 5. 338904 5. 078709 5. 695871 5. 032461 4. 572598 5. 106047 5. 668856 5. 800575  
5. 631735 5. 589989 5. 614643 4. 781282 6. 108277 4. 661655 5. 576978 5. 396592 4. 452923  
4. 845292 4. 896839 4. 707984 6. 234677 5. 273877 4. 903675 4. 684968 4. 499706 4. 669343

5. 706065 4. 776074 4. 547208 6. 32975 4. 99005 5. 347174 4. 884897 5. 398222 5. 545949  
5. 05702 4. 701753 5. 357305 6. 000774 5. 153971 5. 188272 5. 053622 5. 202249 4. 869127  
2. 330039 2. 694988 2. 618746 2. 805455 2. 997716 2. 980287 2. 456705 3. 215586 2. 388019  
6. 003405 6. 246099 5. 994073 6. 280508 6. 428813 5. 957656 6. 248028 6. 149755 5. 76609  
4. 915386 4. 57497 4. 079611 5. 714873 4. 786278 4. 710232 5. 176988 4. 774401 5. 072554  
6. 793732 6. 942496 7. 158996 7. 966702 7. 261148 6. 298331 7. 288817 7. 323503 6. 963835  
6. 132958 6. 091252 5. 341445 5. 504685 5. 990139 5. 476155 5. 67494 5. 832693 5. 50845  
3. 63875 3. 693569 3. 45084 4. 116033 2. 942575 2. 812167 3. 076085 3. 239627 3. 340462  
8. 73283 8. 346551 8. 819965 8. 561643 8. 648617 8. 767685 8. 393939 9. 018897 8. 658988  
3. 070355 4. 055899 2. 963786 3. 095404 3. 126806 3. 241426 3. 392337 3. 827092 2. 208122  
4. 717279 3. 905081 3. 694404 4. 025675 4. 08497 4. 172557 4. 706832 3. 816535 3. 817996  
5. 21557 4. 954259 5. 025408 5. 456967 5. 23117 5. 158654 5. 091132 5. 837066 5. 186111  
3. 1748 2. 390289 2. 257841 3. 231418 2. 304619 3. 051965 2. 280998 2. 428996 3. 155599  
6. 614016 6. 440589 6. 195476 6. 661161 6. 379365 6. 686613 6. 600119 6. 410204 6. 981147  
1. 398112 1. 344044 1. 677339 1. 521775 1. 510709 1. 65308 1. 938964 1. 499479 1. 518982  
7. 465857 7. 213132 7. 111011 6. 231833 6. 893149 6. 58828 7. 670977 7. 085148 7. 749812  
7. 841031 7. 708982 7. 583833 7. 480085 7. 754902 7. 085294 7. 059376 7. 982714 7. 059519  
3. 189254 3. 185955 4. 631452 3. 463519 2. 97463 2. 37442 2. 655883 4. 775758 4. 547207  
7. 044084 7. 114689 6. 632335 6. 83786 7. 135304 6. 756538 7. 159725 7. 109626 6. 604286  
5. 429569 5. 256287 5. 677958 6. 447291 5. 39973 5. 220875 5. 232496 5. 642936 4. 337163  
5. 541625 4. 94327 6. 286298 5. 186807 5. 469836 4. 925087 5. 111949 5. 476634 4. 968496  
3. 263709 2. 964842 3. 242647 2. 955097 3. 879823 2. 865711 2. 981927 3. 495973 2. 947848  
1. 831918 1. 150328 0. 984871 1. 468819 1. 683873 0. 983478 0. 925598 1. 384618 1. 262098  
6. 356137 6. 140811 6. 290317 5. 7584 6. 599971 6. 500837 6. 385583 5. 855306 6. 785164  
7. 002639 6. 783357 6. 670917 6. 81139 7. 637619 6. 605802 6. 702676 7. 060022 6. 385766  
4. 658594 4. 468886 4. 749913 4. 344227 4. 120566 4. 761044 4. 405441 4. 447855 4. 057337  
4. 209657 4. 019051 3. 716003 3. 62341 2. 978382 3. 529027 3. 661775 3. 414227 3. 323277  
4. 938048 5. 485361 4. 955626 3. 958461 6. 044508 5. 859835 5. 113319 5. 381654 5. 256272  
1. 904878 2. 026589 1. 657326 2. 183557 1. 716514 2. 217795 2. 16849 2. 060782 2. 009852  
6. 690787 6. 141862 6. 293718 6. 602501 6. 498989 6. 28698 6. 517272 6. 691692 6. 42812  
5. 014319 4. 02368 3. 805509 3. 403464 4. 121507 3. 902595 3. 621736 4. 17565 3. 860511  
6. 701265 6. 66975 6. 270965 5. 611073 6. 382632 6. 579144 6. 403429 6. 570835 5. 772101  
6. 85796 6. 730535 6. 982454 6. 903897 6. 420853 6. 997079 7. 317417 6. 439824 6. 364825  
2. 089312 1. 75505 2. 210178 3. 030069 2. 442295 2. 001799 2. 476443 2. 520581 2. 836516  
4. 482717 4. 033418 4. 943836 4. 729051 4. 204579 4. 853528 4. 683815 4. 928411 3. 108079  
6. 423624 6. 744587 5. 645238 6. 630413 6. 807119 5. 519711 6. 593234 5. 864734 6. 881967  
1. 453165 1. 542068 1. 61794 1. 368998 1. 38118 1. 458267 1. 41523 1. 308718 1. 534045  
5. 671937 6. 591256 5. 837779 5. 384533 6. 625264 5. 761206 6. 147112 6. 463107 5. 725145  
7. 173145 6. 951783 7. 019982 7. 189721 6. 592715 6. 504407 6. 965127 7. 160347 6. 56903  
1. 95794 3. 102031 2. 613793 3. 007675 3. 007931 3. 103483 2. 390982 2. 628404 2. 589551  
2. 581872 1. 946856 2. 209193 2. 141049 2. 930212 2. 972925 1. 968651 1. 964543 1. 696857  
5. 754264 5. 528607 5. 169842 5. 060068 5. 590926 5. 589663 5. 468469 5. 851994 5. 589931  
3. 266907 3. 873578 3. 633507 4. 474178 4. 435579 3. 952268 4. 3538 4. 215201 3. 925468  
5. 889347 5. 957528 6. 355226 6. 483269 6. 316948 6. 533256 6. 350655 6. 610493 5. 742207  
5. 053996 4. 342808 5. 558421 7. 467964 3. 669323 3. 823006 3. 834206 6. 192378 6. 104001  
9. 448978 9. 767411 9. 585515 9. 736885 9. 888137 9. 252463 9. 5301 9. 66595 9. 882367  
1. 845883 1. 813542 1. 528075 1. 595988 3. 176532 2. 178183 1. 604411 2. 039743 1. 24949  
2. 156678 2. 184059 2. 248255 2. 963538 2. 131518 3. 146351 2. 043771 1. 980526 2. 486999  
1. 476303 1. 703668 2. 210114 2. 522823 1. 805543 1. 716846 1. 833249 2. 124809 3. 250599  
2. 48081 2. 761077 2. 475327 2. 606112 1. 88307 1. 89877 2. 128419 2. 506406 2. 086789  
4. 492373 4. 858663 5. 075596 3. 941489 4. 303724 5. 031202 4. 330651 5. 650616 3. 675242

5. 525381 5. 729409 5. 095295 4. 7736 5. 661776 5. 572279 5. 988553 5. 201413 5. 234691  
1. 561497 1. 976933 1. 761552 1. 748693 1. 79233 1. 65955 1. 444568 1. 790966 1. 928311  
6. 708408 6. 58969 6. 585532 6. 315431 6. 636924 5. 93718 6. 474796 6. 686126 7. 147531  
3. 601485 3. 431676 3. 620212 2. 870068 4. 509741 3. 213675 4. 044191 3. 308051 3. 739907  
7. 01033 6. 514208 6. 858871 6. 816861 6. 548239 6. 532769 6. 697782 6. 353272 6. 893431  
1. 707413 0. 953031 1. 249595 1. 233072 2. 047181 0. 949096 0. 796825 1. 233321 1. 098246  
4. 27641 4. 448928 4. 393865 4. 234329 5. 166756 5. 578511 4. 607451 4. 400828 4. 651272  
5. 481573 5. 340533 4. 967209 4. 857393 4. 987941 4. 865018 4. 349328 4. 697379 4. 004312  
3. 493167 2. 996064 2. 915843 4. 011273 3. 133492 2. 448604 2. 662268 2. 486414 3. 2538  
7. 944654 7. 994277 8. 371155 7. 80847 8. 11904 8. 073116 7. 90401 7. 71628 6. 503057  
5. 673952 5. 908206 6. 188743 4. 751113 5. 985176 6. 197744 5. 578221 6. 696786 5. 386046  
2. 731211 3. 414242 3. 194229 2. 871839 3. 604507 3. 14204 3. 560968 3. 692081 2. 663093  
4. 083926 3. 567381 2. 893064 3. 320467 3. 530314 3. 597368 3. 743106 3. 47419 3. 09107  
5. 872011 6. 091471 5. 678816 6. 103098 5. 54791 5. 115955 5. 830598 6. 038114 6. 418338  
3. 700911 3. 531541 3. 77536 2. 840928 3. 129483 3. 897338 4. 050198 3. 545962 4. 462924  
5. 098044 4. 424364 4. 977492 5. 268402 4. 522272 4. 978519 4. 656275 5. 110245 5. 329935  
6. 985678 5. 350743 5. 581182 4. 619909 4. 988237 5. 090562 6. 125201 4. 864434 5. 972875  
4. 751566 3. 893368 3. 614505 3. 73837 3. 695945 3. 329624 4. 710704 3. 675866 3. 234953  
6. 246381 6. 536886 5. 689243 6. 242852 6. 538318 6. 176337 6. 229575 6. 305607 5. 67858  
3. 994327 3. 75886 3. 448487 5. 267583 5. 090896 3. 823494 4. 522541 3. 208722 3. 448586  
2. 746441 2. 259929 2. 480819 2. 151361 2. 836475 3. 836405 2. 803789 3. 371382 4. 086241  
2. 415232 2. 882814 2. 871416 2. 071165 2. 56456 3. 153513 2. 111901 3. 206838 2. 675673  
2. 574456 2. 922152 2. 881759 3. 017573 2. 372832 3. 055122 3. 778959 2. 865979 2. 685048  
2. 481986 2. 275345 2. 156979 2. 405877 2. 284043 2. 328917 2. 345403 1. 96488 2. 391253  
1. 992634 2. 426164 3. 19907 2. 257599 2. 4636 2. 495263 2. 309154 2. 572169 1. 902737  
2. 212975 1. 653001 1. 939933 2. 328388 2. 044812 2. 304835 2. 044247 1. 859178 2. 077753  
7. 002487 6. 962171 6. 466775 7. 706308 6. 595523 6. 963524 6. 842498 6. 82668 7. 119319  
4. 513641 3. 406307 3. 156137 1. 303866 5. 20395 4. 737775 4. 82883 5. 35545 3. 057389  
2. 037603 1. 664315 1. 799882 2. 852335 2. 195382 1. 858785 2. 074389 1. 564842 1. 802551  
5. 771531 5. 853683 5. 633883 5. 256817 5. 707606 5. 654705 5. 862301 6. 125106 6. 25902  
4. 580832 4. 993634 5. 198387 4. 283641 4. 76511 5. 029201 5. 283908 4. 615956 4. 42247  
2. 2435 2. 166087 1. 825555 3. 077628 2. 005145 1. 973258 2. 444828 1. 709254 1. 640058  
3. 356627 2. 499543 3. 341893 2. 846125 2. 647918 2. 440638 3. 044317 3. 098436 3. 689761  
3. 087108 3. 207815 3. 171612 3. 339374 2. 48785 4. 03069 2. 869766 2. 980508 2. 611671  
4. 113241 2. 861798 3. 629776 3. 205451 2. 86835 2. 89971 3. 532098 3. 252092 2. 605136  
2. 520301 3. 232699 3. 20452 4. 232231 2. 726342 3. 52844 2. 5935 2. 911125 3. 151963  
7. 474237 7. 173924 6. 905292 6. 559759 7. 118652 7. 048968 7. 164185 7. 132896 7. 289518  
5. 33649 5. 553913 5. 399168 4. 742426 5. 49519 4. 64811 6. 435647 5. 389013 5. 888781  
3. 78626 4. 115586 3. 927121 4. 113533 4. 603525 4. 052381 3. 422961 4. 312694 3. 71151  
3. 512547 3. 809294 2. 619936 3. 439142 3. 226428 2. 943527 3. 517591 2. 852263 3. 939225  
7. 249491 7. 191646 7. 007563 6. 906596 6. 884236 7. 363024 7. 407658 7. 416233 7. 058153  
2. 243553 1. 942791 1. 850679 2. 118084 1. 827621 1. 360401 1. 620002 2. 106631 3. 225402  
2. 584148 4. 235437 4. 113456 3. 295959 3. 814472 3. 846553 3. 249584 3. 093764 2. 940784  
4. 04724 3. 264478 3. 088114 3. 687557 3. 924131 2. 866973 3. 362112 3. 744244 2. 237333  
6. 559351 6. 318617 6. 427223 7. 056758 6. 611492 6. 64851 6. 637154 6. 474926 6. 376484  
3. 275099 4. 039019 3. 943252 3. 829983 3. 376275 2. 906278 3. 995578 3. 113877 4. 082761  
5. 162586 6. 299798 5. 857394 5. 570558 6. 527154 4. 449134 6. 074363 6. 008342 5. 617969  
5. 380195 4. 653521 5. 777566 5. 989215 4. 568061 4. 760196 3. 605081 5. 43144 4. 769764  
1. 437892 1. 630486 1. 515636 1. 578517 1. 260518 0. 849649 3. 601369 2. 034256 1. 292295  
5. 345844 4. 639959 4. 828516 4. 759378 4. 599657 3. 963141 4. 876123 4. 160146 5. 517241  
4. 970438 5. 1032 5. 189945 6. 444213 5. 486263 5. 924265 5. 495635 5. 313235 5. 231212

7. 189969 6. 965008 6. 900828 7. 165639 7. 449893 6. 79319 7. 368996 7. 271393 7. 33837  
2. 564921 2. 492841 2. 089589 2. 475374 2. 469049 2. 929078 2. 043693 2. 681407 2. 664614  
3. 180643 2. 669747 1. 692637 3. 519831 3. 901664 2. 989543 3. 624643 2. 508175 2. 688654  
3. 217853 2. 726797 3. 062648 2. 604906 2. 701726 3. 146708 2. 128757 2. 91618 2. 881545  
1. 096736 1. 463788 1. 179368 1. 217862 1. 260142 1. 191778 1. 228733 1. 297143 1. 373146  
6. 467964 5. 651055 5. 652439 6. 255817 6. 164913 5. 608999 5. 840926 5. 547045 6. 118188  
1. 815819 3. 362739 2. 129431 1. 685373 2. 271345 2. 134677 1. 959144 1. 87164 2. 348369  
3. 734273 3. 939425 3. 108058 1. 783803 4. 019507 3. 636515 4. 61165 4. 277274 4. 152435  
7. 230218 6. 989243 7. 87274 7. 416593 8. 165588 7. 008064 7. 619539 8. 016453 7. 246702  
4. 133054 4. 42316 2. 23955 2. 403076 1. 819886 3. 128089 4. 306808 2. 652896 3. 140949  
4. 324437 4. 005918 3. 713146 5. 827714 4. 2235 4. 102155 4. 376688 3. 342371 3. 494305  
4. 385233 3. 970892 4. 123361 4. 488661 4. 890086 4. 785377 4. 588348 3. 120001 3. 350286  
5. 827787 6. 134611 5. 209514 4. 486925 6. 533784 5. 558209 6. 039755 5. 443346 5. 333076  
6. 719479 7. 029777 6. 732678 7. 200914 6. 919376 6. 874541 6. 778919 6. 968467 6. 6159  
6. 615433 6. 881389 7. 341049 4. 37487 6. 178462 6. 3977 6. 169171 6. 006803 5. 690114  
1. 522235 1. 475232 1. 26217 1. 820584 1. 764485 1. 27756 1. 412044 1. 577385 1. 49801  
4. 183736 4. 719309 5. 393705 5. 178682 4. 946485 3. 927566 4. 223933 4. 504583 4. 199455  
6. 675566 6. 829435 6. 747892 5. 745565 6. 504746 6. 707658 6. 423964 6. 55797 5. 640389  
3. 684174 3. 269205 3. 494563 3. 737061 3. 653675 3. 356177 3. 821865 2. 029222 3. 338982  
1. 651734 2. 088185 1. 614621 3. 324434 1. 362663 2. 23416 2. 436162 2. 430795 3. 775215  
1. 185139 1. 370751 1. 750471 2. 654835 0. 740806 0. 778442 0. 800634 1. 314019 1. 441994  
2. 346292 2. 303406 2. 190517 2. 374492 1. 814753 2. 060013 2. 171788 1. 974097 2. 621696  
3. 466826 3. 180366 3. 856074 3. 734046 3. 465065 2. 309547 3. 522581 3. 146509 3. 19597  
7. 528211 7. 678815 7. 706204 7. 598209 7. 723087 7. 860891 7. 179804 8. 087502 6. 80643  
3. 493894 3. 97897 3. 233561 5. 014513 5. 085623 4. 347237 3. 848269 2. 921054 3. 835666  
2. 940315 4. 318863 4. 351119 4. 007073 4. 404815 3. 908198 3. 64582 3. 319421 4. 019015  
1. 389066 1. 456405 1. 466269 2. 27353 1. 430999 1. 924629 1. 358176 1. 305077 1. 50498  
5. 89231 5. 783569 4. 802438 5. 392635 5. 489239 4. 647111 5. 821323 4. 909234 5. 015855  
6. 940865 7. 293612 7. 473055 6. 067596 7. 303324 7. 070397 6. 987118 6. 512932 7. 882526  
4. 804554 4. 702256 4. 866169 4. 317364 4. 279378 5. 419821 4. 525542 4. 750549 4. 398883  
1. 287785 1. 395733 1. 515699 1. 347412 1. 129459 1. 365298 1. 494576 1. 442876 1. 340907  
6. 325095 5. 832835 6. 181998 6. 705196 6. 695505 5. 399145 5. 732858 6. 048907 5. 843668  
1. 877347 1. 958252 1. 635611 2. 79509 1. 64075 2. 056113 0. 983304 1. 769272 1. 226495  
4. 462897 4. 212144 5. 167103 4. 992626 4. 344668 4. 306896 4. 384918 4. 473598 4. 763594  
1. 711392 1. 431358 1. 610617 1. 910936 1. 7222 1. 679351 1. 841438 1. 851241 1. 384896  
3. 415677 2. 500486 3. 453719 2. 202843 2. 130005 4. 016586 4. 289808 4. 390992 3. 077404  
2. 599396 2. 12641 2. 200035 3. 092525 3. 380681 2. 98128 2. 287162 2. 466156 3. 411018  
1. 053365 1. 768492 1. 193169 1. 357 1. 173424 1. 318981 1. 785286 1. 08088 1. 376475  
2. 452288 2. 738527 2. 909452 2. 528592 2. 275223 3. 54539 2. 51904 2. 34365 2. 386367  
3. 534116 3. 459374 2. 991933 3. 913587 2. 755732 2. 182285 2. 981671 2. 563759 2. 277593  
1. 956056 2. 008884 3. 40913 1. 655986 1. 009369 3. 010003 1. 752242 2. 433319 1. 946844  
5. 039522 4. 347929 5. 178316 5. 037948 4. 493718 4. 798032 4. 37293 3. 997756 4. 39766  
7. 450101 7. 78276 7. 262389 7. 140844 7. 560249 7. 647365 6. 697224 7. 463446 6. 067083  
2. 827218 2. 428394 2. 613129 3. 464161 2. 545976 2. 836124 2. 241838 2. 868987 2. 344957  
2. 958106 4. 604714 3. 733273 4. 14143 3. 131883 5. 311574 4. 501953 5. 288508 3. 762186  
6. 837649 7. 020251 6. 97253 6. 954056 6. 939003 6. 770292 7. 275513 7. 108219 6. 792122  
2. 657968 3. 418429 3. 172572 2. 61181 2. 626392 2. 551029 3. 113557 2. 621199 3. 11172  
3. 469622 1. 586079 1. 43753 1. 561061 1. 448242 1. 57591 0. 915284 1. 386532 0. 927444  
1. 876847 1. 257107 2. 0091 2. 405053 1. 374492 1. 990776 1. 867916 1. 38171 2. 241835  
6. 015695 6. 066415 5. 993157 6. 549212 5. 974336 6. 184581 6. 135547 6. 201325 5. 908657  
5. 629602 6. 019728 5. 407149 5. 938856 5. 970287 5. 787201 6. 246266 5. 636691 5. 976799

6.084434 6.102798 5.919664 5.316167 6.321962 6.44772 6.320459 6.246883 5.853949  
2.041884 2.236307 2.39907 2.675657 2.34157 1.614214 2.282969 2.211683 2.140369  
2.57944 3.078288 3.130843 3.46662 2.644629 3.495781 3.322623 3.046531 2.608887  
3.846654 3.122669 3.753611 3.45797 3.401175 3.579678 4.03437 2.960948 3.906463  
2.272709 1.713901 2.045263 2.090236 2.461487 2.373937 1.855126 1.951771 1.244171  
2.0772 2.034628 2.403523 2.263441 2.52659 2.113082 2.971807 2.806021 2.431026  
4.045609 4.021289 3.828246 4.108814 3.987134 3.506723 5.103283 4.374065 5.040837  
5.715789 5.801992 5.746679 5.920801 4.654273 4.602096 5.977669 5.386081 5.455987  
0.661517 0.943422 1.128926 1.013739 0.997548 1.933296 1.222718 0.589735 1.072038  
1.237719 1.294179 1.539668 2.229947 1.274613 1.111687 1.381733 1.429248 1.839741  
7.291559 7.33446 7.670162 6.438757 7.605205 7.839595 7.324827 7.690415 6.817476  
3.514545 3.244131 1.769465 3.177975 2.222887 4.187735 2.284278 2.745016 3.967235  
1.680898 2.38031 1.961823 3.710757 1.589034 1.709034 1.230779 2.684985 1.359097  
2.475962 3.391191 3.075083 3.162009 3.500512 4.877264 3.013962 2.061596 3.326641  
1.567442 1.627344 1.181275 2.226417 1.593714 1.837237 1.681109 1.268405 1.908862  
7.787432 7.540626 7.726301 6.882292 7.718284 7.374451 7.756958 7.537565 7.942449  
6.488546 6.177515 6.732546 6.224311 5.954056 6.046403 6.30204 6.658045 4.336947  
1.742331 1.41295 1.802652 1.389162 1.316686 1.393444 1.248376 1.834211 1.328424  
2.770999 1.052962 0.923496 1.474057 1.639492 1.721819 1.326549 1.210143 0.828948  
1.690359 2.020122 1.99289 2.197297 1.427286 1.614303 1.739322 1.516683 1.154995  
6.35209 5.787956 6.516783 6.624699 5.338811 5.949952 6.050633 5.845429 6.394924  
6.368852 5.77068 6.174049 5.930828 6.062111 6.14346 6.488272 5.870288 6.356834  
3.800792 4.29802 3.444438 4.555105 4.40003 2.505988 4.546517 3.641064 3.200689  
5.724719 4.909679 5.138966 5.527977 5.695312 5.810487 5.672285 5.503163 4.507563  
1.73214 1.113107 1.822018 4.070414 1.368356 1.838045 2.589088 0.795693 1.424471  
1.781905 2.533921 2.240309 3.501054 2.421641 2.168463 1.751128 1.864097 1.764513  
2.319738 1.63783 1.008802 1.413204 1.372275 2.556666 3.080715 2.760901 2.002235  
4.613764 4.542061 3.671207 4.498924 4.171443 4.257675 4.786427 4.395637 3.817248  
3.86272 2.482293 3.025604 3.431379 2.569397 2.863909 2.628358 2.280573 2.719389  
8.227111 8.203635 8.079213 8.255964 8.593904 8.086474 8.139728 8.406952 8.375671  
2.098116 2.112863 2.94483 2.378237 2.620435 3.090599 2.338382 3.59467 4.324447  
7.909077 7.154755 7.599497 7.670953 7.352472 7.076894 7.381914 7.346743 7.786017  
1.394185 1.040738 1.264739 1.412267 1.094316 1.247438 1.185342 1.750058 1.851512  
5.782436 5.445269 5.438208 4.697964 5.661492 5.841949 5.651344 5.700162 4.710873  
2.634864 3.093741 2.919161 3.846353 3.081311 2.817818 2.546266 3.314441 2.645326  
1.662263 1.174471 2.12952 1.59503 1.471985 1.353824 1.393783 1.545404 1.230837  
1.748487 1.58353 1.702764 2.116658 2.020731 1.615882 1.412122 0.954923 2.96805  
0.892682 1.333498 1.078186 1.437112 1.152964 1.176371 1.645968 1.078186 1.160739  
1.826362 2.339152 1.724303 1.880797 1.980627 2.758815 1.532147 1.468136 2.390142  
1.834538 1.390213 1.245725 2.140538 1.390409 1.115897 1.509155 1.271965 1.916133  
5.232783 5.540941 4.8376 5.566526 5.150888 4.840302 5.19453 5.880985 5.882858  
1.497079 1.540191 1.425502 2.029993 1.334567 1.847662 1.74394 1.47543 1.222844  
4.204329 4.365554 4.045836 4.372373 3.362513 4.2919 4.180194 4.325182 4.167363  
3.12964 2.18599 2.386326 2.787064 2.257336 1.966762 3.426287 2.338865 1.944091  
3.16268 2.851345 2.476608 3.439647 3.674213 3.365733 3.054689 3.667315 4.314657  
1.569959 2.222862 1.682923 2.044789 1.853427 2.068844 2.698338 2.148892 1.433267  
2.937909 2.937094 3.417795 2.604147 2.754113 2.925901 2.761116 3.044313 2.957659  
1.551776 1.698595 1.965409 2.20682 1.394598 1.837131 1.710157 1.83743 1.498975  
5.276356 6.487877 5.468689 4.171679 4.450602 4.867203 4.953598 5.346822 3.875391  
2.808709 2.433352 3.083002 2.671326 2.0271 3.019539 2.58698 2.629869 2.893978  
2.905135 2.100276 2.014997 2.129642 3.050222 3.116232 1.787651 1.872268 3.270086



5. 872514 6. 01226 5. 218326 5. 55864 4. 867174 5. 350465 5. 451521 5. 40994 5. 978312  
3. 324571 2. 867298 3. 041088 3. 470837 4. 355495 3. 757182 3. 133922 3. 608043 3. 66002  
2. 270358 2. 793554 2. 882715 1. 961198 2. 229944 2. 990634 2. 894785 1. 842574 2. 15371  
5. 04394 5. 020914 5. 446435 5. 558773 5. 326394 4. 898188 5. 176184 5. 098294 5. 009195  
4. 96193 4. 98656 5. 817561 6. 228361 5. 653633 5. 363752 5. 118169 5. 428294 4. 648794  
1. 282097 1. 363615 1. 394046 1. 983984 1. 255339 1. 658401 1. 274288 1. 260215 1. 361802  
4. 578024 5. 904502 5. 5626 5. 739119 5. 786294 5. 31918 5. 510183 5. 41931 4. 447026  
2. 111703 1. 919356 2. 417144 2. 65082 3. 180695 3. 302988 3. 111522 3. 263028 2. 450984  
2. 403982 2. 460372 2. 988355 2. 031097 2. 245129 3. 446385 3. 106159 3. 818855 2. 553841  
7. 250921 7. 459786 7. 654199 7. 391103 7. 253723 7. 523425 7. 210816 7. 317765 6. 340751  
3. 125492 2. 677629 2. 667085 3. 272813 2. 078621 2. 508563 2. 702861 2. 87847 3. 42486  
2. 108663 2. 014204 2. 718615 3. 184874 2. 288552 1. 936655 2. 396513 2. 077076 2. 443389  
5. 052983 5. 472617 5. 853598 6. 101336 6. 100987 4. 320425 6. 091808 5. 311316 4. 192458  
2. 21252 1. 562333 2. 09762 2. 212182 1. 947778 1. 873602 1. 765472 1. 761841 1. 760383  
6. 09206 6. 127677 6. 2875 4. 737923 6. 238888 6. 003842 6. 214495 6. 324183 7. 845781  
1. 867289 1. 791744 2. 566142 3. 422769 2. 727312 3. 312191 1. 943159 2. 289475 2. 311641  
6. 100398 6. 126851 6. 01338 3. 439771 5. 714648 5. 972025 6. 395993 5. 827715 5. 34697  
6. 424461 6. 43084 6. 610081 6. 632781 6. 054891 6. 587185 5. 82192 6. 456551 6. 637462  
5. 467885 5. 51994 4. 990389 5. 651729 5. 705634 5. 545168 6. 120294 5. 65921 5. 60957  
4. 051285 4. 202054 4. 226805 4. 86858 3. 817433 4. 782527 4. 108729 4. 204348 3. 574921  
6. 008898 6. 267574 5. 500162 6. 62866 5. 944111 6. 42339 5. 865193 5. 959106 6. 13856  
4. 861393 3. 917009 4. 534123 3. 102069 3. 41582 3. 790898 4. 412682 4. 553221 5. 26993  
2. 276145 1. 885651 1. 522178 2. 373919 2. 258717 1. 851461 3. 407782 1. 854009 2. 191241  
5. 964141 6. 378036 6. 765406 6. 741927 6. 768128 6. 057943 5. 53227 6. 643904 5. 398435  
8. 058599 8. 065976 7. 663929 7. 674445 7. 639904 8. 122041 8. 037288 8. 102077 7. 871157  
2. 844831 3. 383048 3. 002515 1. 509292 1. 799931 2. 033527 1. 933988 1. 825011 1. 428306  
3. 517112 3. 982123 3. 45995 2. 600103 3. 723918 4. 412048 4. 203699 3. 74021 4. 392834  
1. 258825 0. 834681 1. 708657 1. 469473 1. 462531 2. 233727 0. 966655 1. 769551 1. 659604  
3. 858802 4. 145987 3. 267209 2. 260155 4. 410252 3. 635044 2. 586842 4. 517626 2. 129856  
1. 941689 1. 788661 2. 529012 2. 49461 1. 748197 2. 941898 2. 494729 2. 111772 1. 832607  
0. 89588 0. 928542 1. 217359 1. 954082 1. 057906 2. 449859 1. 180274 1. 4626 1. 140789  
8. 989757 8. 482879 8. 242548 8. 64337 8. 34264 7. 90764 9. 095683 8. 402317 9. 192433  
5. 37802 5. 873034 4. 838939 3. 082354 4. 785614 5. 116716 5. 180641 5. 819268 4. 514731  
6. 131356 4. 592179 5. 572072 6. 019123 4. 848629 6. 023809 5. 279826 5. 019403 5. 57385  
4. 689952 5. 170774 4. 589538 2. 821573 5. 170327 3. 882003 4. 127148 4. 011765 2. 23253  
5. 080153 4. 697354 4. 583052 6. 113675 4. 435476 4. 56674 4. 415044 4. 11591 3. 603554  
2. 366787 2. 504019 3. 585165 3. 76777 2. 669287 3. 067183 2. 565852 3. 055941 2. 612255  
5. 020874 4. 400717 4. 917582 4. 287806 4. 539 4. 008195 4. 716011 5. 064229 3. 39279  
8. 033837 7. 682135 7. 969227 7. 854748 7. 415241 7. 625865 7. 968382 7. 619192 7. 659956  
4. 933283 3. 51176 4. 142223 3. 85254 3. 660207 5. 353545 4. 199229 3. 34082 4. 346043  
3. 474827 4. 02137 3. 998268 3. 346059 4. 574325 3. 599613 3. 68843 4. 466074 2. 793476  
2. 244103 1. 745671 3. 22335 2. 578899 2. 117489 1. 769115 2. 233799 2. 027229 3. 380967  
2. 035093 2. 591927 1. 976646 1. 897831 1. 957923 2. 432803 2. 254926 1. 927111 2. 027998  
5. 028069 5. 662948 6. 366223 6. 75398 5. 967756 5. 688331 5. 612437 6. 221276 5. 182186  
5. 362261 5. 93058 5. 570908 5. 567894 5. 685787 5. 444097 5. 893787 5. 212172 4. 941566  
5. 319184 5. 317597 5. 431067 5. 122117 5. 532561 5. 307401 5. 606668 5. 85166 5. 493884  
3. 132394 2. 000344 2. 446883 3. 135996 2. 379099 3. 32265 2. 868452 2. 705378 3. 211346  
2. 683822 3. 023455 3. 175587 2. 841182 2. 582266 3. 262071 2. 817548 3. 397929 3. 444254  
3. 640415 3. 182134 3. 751313 2. 261232 3. 307019 2. 808995 2. 814429 3. 225251 4. 488243  
4. 026389 4. 690056 5. 406905 4. 489549 4. 178502 3. 788732 5. 085661 3. 96922 5. 20382  
7. 947588 7. 918155 7. 635983 8. 47593 7. 897162 7. 811934 8. 228641 8. 112189 7. 871474

3. 294934 2. 586362 3. 841246 3. 342351 3. 619396 4. 045349 3. 301162 3. 876131 3. 112193  
5. 112002 5. 041877 4. 557135 5. 427591 4. 773055 5. 003649 5. 43334 5. 397761 6. 504258  
4. 07421 2. 74666 4. 469318 2. 664554 2. 889883 4. 200154 3. 266715 4. 549532 3. 255742  
3. 641482 3. 740015 4. 919266 3. 909961 4. 002523 4. 659322 4. 654311 3. 968811 3. 36528  
2. 043393 1. 937014 2. 212845 3. 320415 2. 485699 2. 252374 2. 852064 2. 251239 2. 351503  
4. 401749 4. 518234 4. 70746 4. 108553 4. 038769 3. 954818 4. 26263 4. 636762 4. 220897  
4. 395745 5. 126256 5. 29555 4. 829081 5. 482198 4. 634263 5. 551619 4. 467266 3. 02903  
2. 090135 2. 399998 1. 953045 1. 867402 2. 093657 1. 899501 1. 867536 2. 17913 2. 203691  
6. 451253 6. 066533 5. 792764 5. 240414 6. 500522 6. 070152 6. 507626 6. 231743 5. 963006  
9. 834674 9. 613624 9. 44439 9. 682764 9. 74144 9. 39521 9. 744114 9. 705911 9. 998088  
5. 860231 6. 384442 6. 624759 5. 149414 5. 444573 6. 036582 5. 791407 6. 217705 5. 540213  
4. 350739 4. 599742 5. 594703 4. 331912 4. 471869 3. 784469 4. 307419 5. 011791 4. 367132  
3. 948747 5. 074602 4. 349548 4. 188992 4. 804115 3. 704067 4. 578749 4. 485357 4. 21623  
1. 359593 3. 273628 1. 419476 3. 144612 1. 656032 2. 851585 1. 942458 1. 632904 1. 581595  
2. 109573 1. 968541 1. 695394 2. 477466 2. 734737 1. 346769 1. 681966 1. 916822 1. 47997  
2. 633515 2. 59995 3. 231696 2. 825936 2. 388618 2. 823528 2. 349312 2. 067719 2. 446352  
4. 132543 4. 186341 3. 867832 2. 153324 4. 962497 3. 361504 4. 316462 4. 275764 3. 872889  
1. 637924 2. 368976 2. 565072 2. 614398 2. 305205 2. 586216 2. 02753 2. 399662 2. 666156  
5. 342642 5. 301382 4. 849288 6. 324308 6. 29551 5. 827529 5. 317818 6. 367142 7. 206411  
3. 235045 3. 279953 3. 549255 1. 671735 2. 663983 2. 86268 2. 23474 1. 848665 3. 541455  
2. 145671 1. 985449 2. 214872 2. 392539 2. 200795 2. 036543 2. 202925 1. 876771 1. 708213  
2. 23797 2. 094302 2. 398366 3. 303653 1. 943137 2. 276407 2. 712834 2. 674865 3. 103964  
5. 228125 4. 954507 5. 580657 4. 454766 4. 339502 3. 355104 5. 199091 4. 627005 5. 503159  
3. 547886 3. 710677 3. 727257 3. 600697 3. 894461 3. 79473 4. 063525 3. 649302 4. 204304  
9. 254785 9. 478833 8. 966981 7. 713672 8. 771578 8. 862461 8. 658555 9. 042593 8. 676038  
5. 327054 5. 865476 5. 523863 5. 119162 5. 238396 5. 334498 4. 746916 5. 40403 4. 280184  
6. 436278 6. 640565 6. 535225 5. 688309 6. 685333 6. 841343 6. 563122 6. 501341 7. 086747  
3. 531997 3. 55903 3. 526637 3. 162442 2. 920301 2. 899002 3. 746262 3. 522432 2. 152097  
5. 601205 5. 940519 4. 837967 5. 789071 5. 048664 5. 138415 5. 768494 5. 613686 5. 902055  
4. 007012 3. 372559 3. 017256 3. 33619 3. 305274 4. 087692 3. 862474 3. 873971 4. 459048  
5. 757566 5. 452832 6. 208385 5. 863678 5. 156129 5. 560373 4. 31839 5. 007867 4. 654966  
1. 718296 2. 176937 2. 286568 2. 3933 1. 508461 2. 304633 2. 343344 1. 932036 2. 310403  
5. 28681 4. 031369 3. 574034 5. 94104 5. 047876 4. 817302 4. 542828 3. 725394 3. 856175  
7. 54343 7. 458353 6. 937378 6. 493908 7. 402829 7. 227069 7. 458509 7. 450609 7. 925025  
2. 067268 1. 842924 2. 146762 2. 501715 2. 178235 2. 033724 1. 659256 1. 961746 1. 688068  
1. 734967 2. 08158 1. 357589 2. 027343 1. 814064 1. 596284 1. 986875 2. 582877 2. 149962  
4. 253405 5. 443906 5. 389713 6. 497033 4. 823553 4. 116349 4. 666185 5. 395728 4. 740479  
1. 205803 1. 144722 1. 328292 1. 446701 1. 526252 1. 567905 1. 218113 1. 200304 1. 167998  
2. 546416 3. 190396 3. 377105 4. 292424 3. 047785 3. 190396 2. 181488 2. 512007 4. 359385  
3. 273755 3. 17784 2. 641694 2. 247203 4. 91386 4. 117439 3. 321752 2. 889271 3. 986951  
5. 361485 5. 060905 4. 709712 5. 135701 5. 906718 5. 031398 5. 600242 5. 235817 4. 565095  
5. 537985 5. 541261 6. 230363 4. 98151 5. 626338 6. 059733 5. 169824 5. 44879 4. 848022  
2. 997109 4. 643962 3. 685276 5. 170138 4. 28283 3. 97442 3. 835293 4. 761128 4. 795664  
2. 364603 2. 486159 2. 094981 1. 300545 3. 129897 1. 944425 2. 244757 2. 248692 3. 864639  
3. 988675 3. 919716 3. 604791 4. 87933 4. 577043 3. 64977 4. 203769 4. 074214 3. 687078  
4. 121067 3. 469159 4. 307948 3. 739952 4. 326513 4. 032205 4. 107929 4. 69608 3. 104032  
5. 228145 5. 211207 5. 753167 5. 559131 5. 235303 5. 802104 5. 170168 5. 577287 4. 857236  
5. 629108 5. 556427 5. 949258 5. 783215 5. 609335 5. 436778 5. 592798 4. 999284 4. 384094  
7. 464373 7. 717334 7. 500963 7. 262513 7. 750909 7. 739449 7. 784569 7. 35019 7. 370161  
1. 190095 1. 671249 2. 951646 2. 133158 1. 510902 1. 892299 1. 693 1. 840197 1. 677138  
4. 088401 3. 918586 3. 693247 2. 565494 3. 804047 3. 985938 3. 488358 3. 421762 3. 454961

2.697477 2.7136 2.581259 3.648627 2.545388 2.982704 2.387268 2.66644 2.483762  
4.225314 4.010606 4.673372 4.279343 4.436329 4.019997 4.131734 3.507283 3.900381  
6.165017 5.899287 6.057109 6.18431 6.101925 5.743582 6.31678 6.13959 5.830844  
5.585771 4.789567 5.305205 5.316142 4.544352 4.583941 4.300405 4.482381 4.442742  
1.695776 2.481632 2.021823 3.504459 2.851372 2.216677 2.341559 2.021823 2.10243  
7.346063 7.673763 7.473915 6.783653 7.354337 7.449009 7.523403 7.478103 7.207393  
6.162505 6.207724 5.27624 5.101848 5.632048 5.527192 5.412577 4.985196 5.695468  
7.208295 7.776362 7.346024 8.384389 7.008652 7.472103 7.802138 7.327195 6.831562  
4.82338 5.132109 4.11792 3.397947 4.979844 4.600728 4.598587 4.437991 5.71479  
3.769819 2.883661 3.040994 3.740281 3.677965 3.572639 3.648898 4.025529 2.243168  
4.668257 4.75879 4.027272 4.679545 5.189883 4.736421 5.036194 4.759402 4.01789  
5.144159 5.533086 5.75839 4.417641 5.529513 5.236681 5.885025 5.445214 5.298447  
2.439337 2.882229 3.505224 2.924331 2.293132 2.919558 2.233889 3.641485 3.355404  
3.18684 3.823071 4.182158 3.105722 4.187065 3.051861 3.71478 3.41756 3.697057  
5.126113 5.902905 5.686089 5.490195 5.816417 4.736848 4.933635 5.777566 5.406978  
3.445766 3.500167 2.972024 3.709721 3.18457 3.435023 2.757313 2.454607 3.502564  
3.891882 4.344089 4.084224 5.281837 4.524278 4.933716 5.639146 5.327331 4.67202  
6.455426 5.931837 6.673795 4.061418 5.962067 6.4377 6.203856 5.499475 5.532636  
5.314764 3.688963 4.10379 4.999299 4.056441 4.534653 4.562405 3.853524 5.140115  
5.207802 5.390586 4.502387 4.267387 5.347049 5.209413 5.983444 5.565505 4.759332  
2.344415 2.994553 2.992699 2.936173 2.80744 3.516733 2.612212 3.371953 2.960393  
2.648376 2.332323 3.227051 2.362567 2.736137 4.602113 2.539441 2.347582 2.58445  
2.28245 3.771692 3.619411 3.510017 3.840309 4.243946 3.294169 4.215603 2.84561  
6.453495 6.162534 6.21047 5.957586 6.460199 6.110858 6.502583 5.990458 6.449639  
7.333586 7.154151 6.017371 6.87153 7.36066 7.01454 6.546316 6.51395 5.875145  
6.293102 6.739655 6.591581 6.678108 6.763899 6.942042 6.267486 6.492223 6.044688  
6.005161 6.028806 6.076489 6.948622 5.836852 6.184838 6.430384 6.306036 6.361647  
4.584736 5.849288 5.600368 3.113399 5.106883 6.085412 4.336441 4.374355 6.196912  
3.485363 3.117309 3.345734 2.785853 3.096902 2.346422 3.122247 2.913625 2.496364  
5.419174 5.083631 4.870268 5.174527 5.583169 4.980836 5.12622 5.203417 5.177128  
2.823499 2.193736 2.668254 1.513135 2.987413 2.358498 2.22263 3.124034 2.304422  
6.128468 5.999715 6.425606 5.748871 6.084095 6.671474 6.392139 5.916436 5.84954  
4.61024 4.400784 4.913014 4.208218 3.725317 3.512821 5.049748 3.868861 3.268294  
6.308788 6.485802 6.690302 6.45264 6.22512 6.540238 6.129971 6.368448 5.822797  
1.846169 1.980292 1.717851 2.464348 1.63256 1.636751 1.933571 1.89049 1.79035  
1.694883 2.237562 1.772774 1.980182 1.691682 2.063904 1.361683 1.609264 1.838249  
5.336923 5.098664 4.436854 4.575971 5.648192 4.022226 4.94798 5.149599 3.548153  
1.38293 1.493957 1.05523 1.381753 1.164263 1.075895 1.260606 0.902613 1.399099  
6.755813 5.848742 6.00961 6.169811 5.882899 5.884428 6.321033 6.205337 6.420824  
5.454745 4.323459 3.724749 4.421816 4.177965 4.727418 5.896101 5.362498 4.695137  
3.84123 4.464073 4.454825 3.297737 4.426518 4.034386 3.889669 4.32609 3.947597  
2.042546 1.741901 1.623117 2.379617 1.607699 1.952586 2.89197 1.722366 1.755659  
4.109448 3.962656 4.042728 2.932357 3.887912 3.476428 3.831136 4.560852 4.128313  
5.496708 5.697821 5.741124 6.102534 5.95191 5.451874 5.541757 5.608379 5.018457  
4.406994 4.016807 4.28915 3.773465 4.479363 4.200967 3.704141 4.777362 4.35041  
4.808145 5.077239 5.254632 4.355255 5.000032 5.365348 4.718068 4.876511 4.997317  
4.754834 5.024485 4.054926 4.915419 5.132779 3.905589 4.791437 4.997445 4.143895  
1.690497 1.592176 1.759703 2.257147 1.560909 2.015943 1.721943 1.690547 1.927001  
3.252149 2.318112 2.892585 2.931806 3.938238 2.580293 2.947809 4.36367 2.743336  
3.953353 4.94629 4.856715 3.510577 3.562188 3.291506 4.631722 3.784463 5.409011  
3.68201 3.653432 2.877569 2.226303 2.854602 2.623947 3.296583 3.607823 4.65949

5. 553971 5. 858899 5. 535978 5. 086455 5. 660581 5. 588942 5. 849775 5. 40109 5. 592455  
6. 459632 5. 73226 5. 847955 6. 593821 6. 429952 5. 528223 6. 169409 5. 231485 6. 023225  
4. 009045 4. 47946 3. 918154 4. 420006 4. 342482 4. 670991 4. 286901 4. 065405 4. 078326  
4. 750368 4. 696929 4. 718045 4. 448039 4. 484264 4. 373392 4. 064276 5. 031291 3. 38585  
6. 610698 6. 48325 6. 151947 6. 408348 6. 254491 5. 974732 6. 522376 6. 431645 5. 962929  
2. 216917 2. 486562 2. 717174 2. 643047 2. 108182 2. 303637 2. 468035 1. 727755 2. 856775  
8. 763541 8. 649728 9. 103004 8. 88512 8. 405374 9. 144942 9. 170471 8. 567913 8. 816253  
1. 626569 1. 460279 2. 073471 2. 836176 2. 514828 3. 457996 1. 980537 3. 248928 2. 164956  
2. 956375 3. 677417 3. 924012 3. 723057 3. 190278 3. 838116 3. 615421 3. 658967 2. 529255  
5. 87526 5. 962231 5. 42861 4. 710935 5. 243782 4. 874317 5. 521384 5. 610563 6. 206026  
2. 207098 2. 285342 2. 096068 2. 816585 2. 215692 1. 648236 1. 805867 2. 431459 2. 76825  
2. 775837 2. 462788 3. 462549 2. 590471 2. 792628 3. 588921 2. 164374 2. 71836 2. 282039  
4. 768969 4. 080537 4. 93898 3. 604986 4. 399224 4. 667925 4. 995954 4. 641783 3. 467298  
4. 949259 4. 520613 5. 386588 5. 405948 3. 948209 4. 544109 4. 165348 4. 770181 3. 900561  
2. 605108 2. 515578 3. 356982 3. 293121 2. 313682 2. 102697 2. 56952 2. 525533 3. 818616  
6. 856279 6. 734812 6. 706951 5. 002055 6. 617214 6. 715092 6. 947985 6. 747187 5. 996408  
6. 205509 6. 061397 7. 123233 4. 298235 6. 154414 6. 286956 6. 654855 5. 957787 6. 0206  
5. 707483 4. 923831 5. 369815 5. 871074 6. 103904 5. 890463 6. 09535 6. 362244 4. 873409  
2. 275297 1. 973785 2. 104604 2. 324669 1. 916183 1. 697519 2. 417822 1. 828489 2. 252323  
6. 862293 6. 75882 6. 631829 6. 891629 7. 297183 5. 802138 6. 669173 6. 62876 6. 226947  
3. 550948 6. 036542 5. 500465 4. 923321 4. 714705 5. 603974 4. 56576 5. 545796 3. 421235  
7. 829247 7. 757405 7. 488681 7. 747907 7. 710083 7. 883812 8. 002486 7. 965207 7. 275695  
1. 779051 1. 581213 1. 202243 2. 116813 2. 170337 1. 599389 1. 357094 1. 705752 1. 634017  
4. 866611 3. 879542 3. 914113 3. 793873 4. 314004 3. 833642 4. 221184 4. 654611 4. 072921  
3. 050255 1. 496928 2. 669239 3. 016145 1. 373238 1. 347579 3. 4264 2. 70502 2. 382411  
4. 592148 4. 413793 4. 908319 4. 515182 4. 696521 4. 386325 4. 278841 4. 506497 4. 302885  
5. 200845 5. 077814 4. 92901 4. 56481 4. 942527 5. 492111 4. 912798 4. 944832 5. 918121  
1. 618591 2. 560386 1. 492352 3. 086717 1. 552409 1. 238553 2. 10374 1. 641207 1. 75835  
3. 255835 4. 922611 4. 402408 3. 04738 4. 58967 3. 98695 3. 367852 4. 099907 3. 973498  
5. 997277 5. 181777 5. 536962 5. 979514 5. 162056 4. 947353 5. 285735 5. 277548 5. 548513  
1. 267778 1. 545839 1. 373142 1. 226336 1. 675829 0. 947004 1. 345187 1. 056761 1. 273191  
4. 383133 3. 906574 4. 049579 2. 187651 4. 549513 3. 380667 4. 119822 4. 081591 3. 453077  
1. 670677 2. 175492 1. 812499 1. 900288 1. 347844 1. 598551 1. 276308 1. 5167 1. 903506  
5. 276152 5. 380944 5. 218067 4. 976775 5. 449473 5. 126036 5. 213989 5. 386148 5. 157103  
3. 552233 3. 523557 3. 495352 3. 164522 3. 845551 3. 506323 2. 901851 3. 560389 3. 475201  
3. 509409 2. 722926 2. 08833 3. 465709 2. 483952 3. 138029 3. 270001 2. 762737 3. 095896  
6. 446698 6. 267511 6. 464034 6. 270073 6. 35593 6. 292111 6. 330739 6. 377644 5. 501651  
6. 892777 6. 856235 6. 629765 7. 145272 7. 231133 6. 482468 6. 948175 6. 396644 7. 085919  
7. 03343 7. 329685 7. 308691 6. 078384 7. 410704 6. 631171 6. 950572 7. 180653 6. 318985  
3. 991102 4. 120786 5. 342373 3. 037593 4. 320838 5. 685061 3. 378972 3. 713376 4. 827364  
1. 504814 1. 560124 1. 67627 1. 645792 1. 38372 1. 868829 1. 21692 1. 534361 1. 988141  
2. 350369 2. 360809 2. 133297 2. 457056 2. 037727 2. 242369 2. 396593 1. 647098 2. 388815  
1. 390506 1. 200278 1. 440132 1. 60845 1. 577316 2. 121328 1. 353273 1. 144556 3. 245616  
8. 923079 9. 032044 8. 796703 8. 789075 8. 517525 9. 052361 8. 768082 8. 119654 8. 824835  
2. 993204 2. 996593 2. 263665 3. 144946 3. 35834 3. 241751 3. 366385 3. 302061 3. 808298  
1. 133484 1. 420269 1. 220943 1. 591463 1. 134107 2. 014539 1. 886248 1. 119885 2. 277404  
6. 829114 6. 631507 6. 545714 6. 713077 6. 390508 6. 760948 7. 1154 6. 782128 6. 507269  
4. 297138 3. 853249 3. 726306 3. 064266 3. 180102 3. 558675 3. 292471 3. 871848 3. 44824  
5. 54413 6. 026256 6. 228578 6. 056146 6. 167269 5. 913631 6. 339716 6. 324104 5. 334475  
4. 446508 4. 708835 3. 829813 3. 645915 4. 817094 4. 765293 5. 187629 4. 344651 4. 74444  
3. 198287 4. 589601 4. 365603 3. 831194 3. 063668 3. 78764 3. 718377 4. 255863 3. 96991

4. 714252 4. 533577 4. 566308 3. 816823 4. 522621 5. 095255 3. 850549 4. 277851 4. 798772  
4. 657707 4. 605753 4. 675379 3. 253262 3. 365636 3. 413877 4. 044781 3. 526222 3. 919152  
7. 42275 7. 813937 7. 089379 7. 227774 7. 047497 7. 416496 6. 931842 6. 963204 7. 224372  
7. 910663 8. 047117 8. 068865 7. 880117 7. 919419 8. 067449 7. 928943 7. 684851 8. 198296  
3. 662714 3. 734516 4. 354993 3. 06686 3. 808657 3. 397881 3. 074959 4. 206109 2. 786998  
2. 751705 3. 677752 2. 860495 2. 514168 2. 64554 2. 830009 2. 874717 3. 273956 3. 262363  
5. 063073 4. 211597 3. 812281 7. 028447 4. 974777 3. 59319 3. 790413 5. 898933 5. 684251  
8. 063164 7. 927936 8. 46548 7. 40815 6. 764596 8. 065077 8. 032902 7. 438322 7. 984774  
7. 816756 7. 763431 7. 128984 8. 089375 7. 77068 7. 561578 7. 886646 7. 173566 7. 376602  
5. 890346 5. 302135 5. 347224 6. 519337 5. 876692 5. 16624 5. 416516 5. 481299 6. 040585  
5. 235904 4. 775869 5. 36876 4. 300511 4. 996695 5. 720793 4. 890913 4. 97497 4. 549926  
3. 197797 2. 732729 1. 987371 1. 606226 2. 845444 2. 426311 2. 665691 2. 016477 2. 29278  
5. 174791 4. 59299 4. 220003 4. 024398 4. 522549 4. 082063 3. 945495 5. 716498 3. 636917  
5. 793817 5. 722849 5. 700059 5. 339233 5. 777288 6. 168308 5. 308299 5. 413353 5. 371977  
6. 127076 6. 306451 6. 6387 5. 812032 6. 100218 6. 228686 6. 065059 6. 231118 5. 809386  
2. 627454 2. 669355 3. 069982 3. 090035 2. 453875 2. 761819 2. 865571 2. 507892 2. 380659  
1. 30738 1. 206102 1. 323592 2. 426783 1. 491727 1. 060707 1. 642087 1. 383786 1. 091332  
3. 694511 3. 339876 2. 947649 2. 16292 2. 664312 2. 924367 2. 380781 3. 798275 2. 802087  
1. 900242 2. 193158 2. 856005 1. 938708 2. 143189 3. 443852 2. 494566 3. 496226 1. 325247  
7. 46238 7. 728943 7. 757694 7. 023344 7. 197783 7. 850316 7. 706475 7. 187948 6. 173201  
1. 24076 1. 12733 2. 099466 1. 990907 1. 245505 1. 976296 1. 444467 1. 64683 2. 148126  
5. 483043 5. 538455 5. 855259 5. 035336 5. 760462 5. 798396 5. 442509 5. 338481 6. 154997  
9. 707945 10. 07169 9. 957113 10. 1985 10. 5314 9. 261102 10. 65736 10. 56496 10. 66805  
6. 898472 6. 701212 6. 445557 6. 923952 6. 776927 6. 480885 7. 004336 6. 119449 7. 11924  
1. 192307 1. 289797 1. 13753 1. 556905 1. 453242 1. 227774 1. 172859 1. 585351 1. 464724  
2. 611592 3. 093747 2. 967582 4. 302833 3. 560797 2. 414224 3. 230304 3. 012238 3. 109687  
1. 077216 2. 409485 0. 709123 1. 479541 1. 260184 1. 189229 1. 671547 2. 057248 1. 428707  
8. 645916 8. 482821 8. 917909 8. 450643 8. 411727 7. 895452 8. 559034 8. 478246 8. 255736  
4. 539014 4. 710787 4. 95302 4. 851265 4. 618876 4. 899537 3. 177511 4. 960746 4. 411955  
5. 312694 5. 451836 5. 582302 5. 040798 4. 620534 4. 505557 5. 565567 5. 126376 5. 65523  
3. 531687 5. 073008 3. 235183 3. 826108 4. 71502 3. 678305 4. 079747 4. 778741 3. 680875  
1. 338329 2. 56389 1. 999246 2. 085417 1. 944972 1. 736645 1. 788163 2. 137023 2. 984687  
1. 797928 1. 875551 2. 332728 2. 643819 2. 387288 1. 678576 2. 273204 2. 54839 2. 417792  
1. 176195 1. 006843 1. 685621 1. 090259 0. 98903 1. 012101 1. 043763 1. 036536 1. 456621  
2. 393385 2. 323667 2. 344296 3. 077497 3. 837456 3. 905168 3. 562144 2. 891062 2. 646544  
1. 116973 1. 305991 1. 255558 1. 795222 1. 66368 1. 599725 1. 312265 1. 172289 1. 663552  
1. 423038 1. 996029 1. 200331 1. 826634 1. 629381 0. 988195 1. 203184 1. 478921 1. 655714  
0. 827114 1. 541583 1. 252813 1. 645308 1. 409492 1. 114455 1. 465782 1. 214139 1. 432384  
1. 335306 1. 381733 1. 12081 1. 600714 1. 600714 1. 421465 1. 109093 1. 132859 1. 046544  
1. 644078 0. 837009 2. 007675 3. 530059 2. 337007 4. 440254 2. 173523 3. 207134 3. 766047  
1. 946909 1. 922803 2. 517765 2. 024013 1. 986173 1. 659105 1. 592919 1. 329988 1. 800212  
1. 824333 2. 122459 1. 863874 2. 742095 2. 463153 2. 310913 2. 470344 2. 240095 2. 030558  
2. 192583 2. 670158 3. 005625 3. 446439 2. 524914 2. 452155 3. 127496 2. 426079 2. 699562  
5. 980052 5. 509311 5. 11426 5. 547454 4. 76399 6. 500441 4. 233824 5. 729928 5. 277834  
6. 237091 6. 057541 6. 30227 5. 76134 5. 931941 5. 96296 6. 342528 5. 851032 6. 50249  
5. 912234 4. 590165 2. 839085 4. 02764 4. 939619 4. 317463 5. 464817 5. 3446 4. 082212  
1. 781605 2. 083472 1. 556348 1. 650632 1. 989451 2. 178718 2. 524701 2. 103489 2. 05104  
1. 808693 1. 561696 2. 026369 2. 055126 1. 799316 1. 510073 1. 59414 1. 879788 1. 201273  
2. 960406 3. 548007 3. 016613 3. 08044 3. 317989 3. 003094 3. 611225 2. 130101 3. 367714  
6. 594463 6. 940373 6. 69276 6. 099476 7. 096454 7. 268125 6. 532816 7. 06749 6. 407366  
4. 726682 4. 437698 4. 925145 4. 75126 4. 672453 4. 234861 4. 518229 5. 51837 4. 342802

2. 069131 2. 283846 1. 970404 2. 440668 2. 588591 2. 058211 2. 690579 1. 790076 2. 245351  
4. 69611 5. 536503 5. 18961 5. 227431 5. 478038 4. 968581 4. 848915 5. 429861 3. 110609  
4. 35599 2. 653178 2. 72604 3. 274146 3. 021453 2. 936161 2. 928291 3. 874281 3. 606237  
3. 217102 3. 00019 3. 829206 3. 900904 3. 346428 2. 960981 3. 304019 2. 553087 2. 150897  
5. 618469 5. 987182 5. 811679 4. 894969 5. 760849 5. 729952 5. 461022 5. 381645 4. 502888  
5. 282875 5. 470224 5. 418471 6. 190224 6. 193023 5. 103902 5. 501526 5. 276721 5. 371573  
4. 730665 4. 916691 5. 080796 5. 151913 5. 105744 5. 638819 5. 621773 4. 838035 4. 528434  
5. 651926 6. 141333 5. 811648 6. 466387 6. 429091 5. 979225 6. 190029 5. 724115 5. 988234  
1. 45523 2. 014449 1. 500891 2. 027657 2. 046816 1. 508768 2. 498377 1. 685262 1. 852418  
4. 799589 4. 765039 4. 087177 4. 462173 4. 666212 2. 822402 3. 971334 3. 96807 3. 184985  
5. 289226 4. 763353 5. 857425 6. 530921 5. 58029 4. 762036 5. 342872 5. 421784 5. 606941  
2. 040021 1. 38969 1. 99686 1. 177519 1. 410767 1. 126171 1. 44366 1. 573795 2. 227907  
2. 932103 2. 510445 3. 449473 5. 494283 2. 738105 3. 192471 2. 608212 3. 095349 3. 489869  
3. 559232 4. 491201 4. 018158 4. 158835 4. 450326 3. 288866 4. 318305 3. 962562 2. 211395  
3. 043726 4. 111438 4. 153875 4. 054368 3. 522118 3. 059103 3. 721083 3. 628314 3. 388  
5. 1705 5. 623773 5. 343759 5. 19251 5. 146723 5. 134668 5. 490604 5. 698472 3. 686934  
2. 686121 2. 572897 1. 976924 2. 643141 2. 267304 1. 806567 2. 007847 2. 023879 2. 552107  
2. 054302 1. 59423 2. 675914 1. 644273 1. 794883 1. 892325 2. 612516 1. 568562 3. 41034  
1. 263051 3. 349817 1. 902489 3. 068503 3. 516398 2. 03189 3. 53813 1. 559878 7. 313247  
1. 770946 1. 401424 1. 663291 2. 528644 1. 578207 3. 064238 2. 7638 2. 497348 1. 420623  
2. 329214 1. 183984 3. 00925 1. 507625 1. 635023 1. 102435 1. 442376 1. 587197 7. 679378  
3. 088664 3. 111131 3. 969248 4. 12548 3. 43579 4. 179508 3. 777804 3. 821783 2. 235337  
2. 217089 3. 136509 2. 724314 3. 000195 1. 803175 2. 634761 2. 091774 1. 733646 2. 45527  
7. 674657 7. 536623 7. 385982 6. 799601 7. 676302 7. 892789 8. 019858 7. 729964 8. 188269  
6. 900084 6. 916003 6. 221368 5. 545197 7. 190604 6. 742953 6. 884975 7. 137502 5. 769482  
5. 914762 5. 630014 5. 370038 5. 286372 5. 791988 5. 804613 6. 100691 5. 290838 4. 530068  
6. 056147 5. 615591 6. 250708 6. 969051 4. 742122 5. 891187 5. 703973 5. 704202 5. 961491  
2. 503324 2. 542612 2. 409318 3. 245579 2. 573164 2. 904846 2. 844053 2. 455483 3. 41356  
6. 358582 5. 866718 5. 645565 3. 569458 6. 310527 5. 880055 6. 101812 6. 403199 6. 060181  
1. 107284 1. 201944 1. 414583 1. 907415 1. 23921 2. 014878 1. 345228 1. 11946 1. 608582  
2. 018376 1. 784273 2. 434086 2. 264174 2. 586795 1. 733539 2. 769592 2. 218243 2. 176773  
3. 529281 3. 818058 3. 75547 3. 517008 5. 188128 4. 078034 4. 667098 3. 386034 4. 334968  
2. 887746 2. 750302 2. 599455 3. 193417 2. 473747 2. 346083 2. 598452 2. 271723 2. 001977  
4. 192502 1. 638524 1. 85727 1. 86439 1. 463805 2. 628082 1. 670003 1. 640923 2. 518899  
1. 919621 2. 169881 1. 845797 2. 938717 1. 889836 2. 245065 1. 927681 1. 756763 1. 756024  
6. 942233 6. 25923 5. 842502 7. 443307 7. 637752 6. 56829 7. 117235 6. 70981 7. 753362  
7. 881264 7. 6493 7. 617457 8. 433035 7. 603389 7. 064631 7. 598255 8. 187357 8. 211434  
0. 726802 1. 184634 0. 635219 1. 018882 0. 61444 1. 129961 0. 888123 0. 641233 0. 873804  
6. 836624 6. 576634 6. 766427 6. 785953 6. 517362 6. 966699 7. 185986 5. 601394 7. 124534  
6. 197887 5. 824418 6. 552516 6. 376304 6. 211411 6. 138213 5. 577152 5. 517287 5. 332574  
5. 626384 5. 977784 5. 444718 5. 224495 5. 888215 5. 792953 5. 417367 5. 362414 6. 040713  
2. 487508 2. 709591 3. 416965 1. 420565 5. 128303 3. 255159 3. 016608 2. 512698 1. 707192  
2. 491563 1. 775982 2. 358619 2. 397546 1. 51703 2. 032187 1. 476512 1. 766808 2. 32774  
0. 933058 0. 984879 0. 883455 2. 342231 1. 231436 1. 076585 1. 079034 0. 855101 1. 714781  
5. 425876 4. 768248 5. 183269 3. 644788 4. 914596 5. 469786 4. 940044 5. 1959 4. 607411  
1. 427886 1. 803779 1. 776764 1. 879248 1. 650246 1. 126905 1. 278976 1. 21514 1. 95123  
4. 924553 6. 059328 5. 572225 5. 261404 6. 210652 5. 592211 4. 575257 5. 837047 4. 917033  
3. 306711 2. 374527 2. 44534 2. 869128 2. 14472 2. 126686 2. 024015 2. 028592 2. 498358  
4. 24708 5. 424699 4. 086617 5. 407901 5. 016235 4. 336912 4. 462575 4. 776615 4. 902371  
5. 249343 4. 856436 4. 874724 4. 894319 5. 472487 4. 92295 4. 830142 5. 029731 4. 531103  
1. 426419 1. 715994 1. 780669 1. 886171 1. 455329 1. 756128 1. 576831 1. 447539 1. 167598

5. 213872 4. 703197 5. 403118 5. 386509 4. 318455 4. 869346 4. 782814 4. 802219 4. 336145  
2. 005611 2. 842147 1. 760912 4. 143875 2. 232226 2. 261696 2. 26899 2. 559485 1. 829456  
6. 472724 6. 384043 6. 307993 6. 192491 6. 899512 5. 738327 6. 137495 6. 330744 6. 086303  
5. 003325 5. 623261 4. 825082 5. 413056 5. 935724 4. 553126 4. 953789 4. 405571 5. 561283  
4. 434649 4. 611275 4. 448879 4. 597402 4. 153972 4. 472922 4. 659483 4. 680383 5. 077511  
5. 267103 4. 89053 4. 913172 5. 565173 4. 828308 4. 934256 4. 683149 5. 042339 5. 838969  
6. 863965 7. 474145 7. 201958 7. 347365 7. 514668 7. 203198 7. 243762 7. 010898 7. 4419  
6. 975013 6. 839634 6. 980447 7. 909936 6. 654357 6. 366948 6. 920041 6. 858765 7. 149735  
7. 069532 6. 958954 7. 318902 5. 538383 6. 464839 6. 52837 7. 294061 7. 019952 7. 422558  
1. 613746 2. 078955 1. 158134 1. 311988 1. 65578 1. 436428 1. 200913 1. 559728 2. 003511  
5. 199243 5. 440482 4. 573303 5. 097491 5. 254891 5. 220719 4. 405023 4. 981475 5. 351143  
5. 084465 5. 051558 5. 388467 4. 522915 5. 104572 4. 852475 4. 949681 4. 918582 5. 138811  
5. 531617 5. 947806 5. 178313 4. 884865 5. 935906 4. 837407 5. 400419 5. 275464 5. 540188  
6. 245964 6. 287325 6. 201641 6. 200916 6. 233963 6. 290838 6. 492218 6. 013964 6. 617967  
2. 161214 1. 701187 2. 23404 3. 418908 2. 438749 2. 230488 2. 788604 2. 989088 2. 707706  
6. 669319 6. 318389 6. 562204 5. 816784 6. 721103 6. 647044 6. 965207 6. 288506 6. 681387  
3. 286685 3. 411903 3. 600676 3. 478662 4. 078517 3. 836277 5. 279301 2. 394728 5. 010618  
1. 725883 1. 994474 1. 970652 2. 469584 1. 55604 1. 624432 1. 489325 1. 825674 1. 598667  
1. 247814 1. 301929 1. 495746 1. 789073 1. 245459 2. 162196 1. 436737 1. 55368 1. 104828  
6. 651999 7. 027573 8. 446087 6. 776542 6. 923289 6. 336797 7. 641938 6. 509096 6. 682384  
1. 872627 1. 366982 2. 345386 2. 919591 1. 141242 1. 832507 1. 349229 1. 264319 2. 59847  
2. 84831 2. 720966 2. 304319 2. 395387 2. 423919 3. 307253 2. 235315 3. 03631 2. 502861  
6. 73871 6. 645551 6. 831504 5. 471234 6. 692247 6. 462378 6. 429734 7. 14308 6. 827752  
11. 23132 11. 4149 11. 55218 8. 25532 11. 18542 11. 23032 11. 42619 11. 37367 11. 4215  
1. 592922 3. 308907 1. 387317 2. 943735 2. 366668 3. 250028 1. 928288 1. 701743 1. 869672  
2. 017791 2. 147944 1. 906256 1. 955766 1. 318263 2. 765498 1. 980565 2. 024623 1. 574681  
0. 778297 0. 814997 0. 921372 0. 711641 0. 838755 1. 769731 1. 732449 1. 25823 1. 177623  
6. 380089 6. 46786 6. 455213 4. 943024 6. 368592 6. 257834 6. 172631 6. 126548 6. 625336  
5. 661587 4. 91852 5. 802663 6. 127307 4. 435164 4. 80824 5. 075034 5. 36328 4. 586273  
2. 822377 2. 440583 2. 827684 3. 021956 2. 886647 2. 693022 1. 993643 2. 57506 3. 611156  
5. 589238 6. 714764 5. 909592 7. 595675 7. 605009 6. 505537 6. 802935 7. 622173 7. 157154  
7. 555691 7. 548003 7. 312391 8. 443662 7. 668641 8. 058232 7. 349308 7. 497605 8. 065451  
2. 236658 2. 036956 1. 909251 1. 591165 1. 94319 2. 137347 2. 005754 1. 452039 1. 722484  
1. 55499 2. 116456 1. 744415 2. 014609 1. 681692 2. 345181 0. 829915 1. 944353 1. 6128  
8. 784118 8. 640206 8. 79773 7. 879776 8. 303548 8. 895184 8. 579108 8. 509582 8. 74024  
3. 02374 2. 553435 3. 502808 3. 580434 3. 331384 2. 729968 2. 946409 2. 976143 3. 062032  
3. 876165 2. 787053 3. 22743 3. 207785 3. 835236 1. 729254 3. 76368 4. 412868 3. 405607  
6. 218495 5. 603778 5. 786424 6. 050625 5. 663333 5. 869643 5. 635527 5. 606364 6. 149351  
6. 755921 7. 122645 6. 892265 6. 313746 7. 083849 7. 167202 6. 915655 6. 856923 6. 131937  
7. 96598 7. 338232 6. 924216 6. 681289 7. 188848 6. 549644 7. 133285 7. 335467 6. 953373  
5. 199492 5. 032762 5. 698923 5. 871425 5. 578528 5. 21632 5. 595835 5. 673416 5. 594132  
4. 390492 3. 025492 3. 560461 3. 949108 4. 659501 3. 642392 3. 529666 3. 571944 4. 715694  
5. 876937 6. 309415 6. 390956 4. 179318 6. 498301 6. 188529 6. 334901 6. 064404 5. 96405  
7. 003796 6. 928607 6. 695255 6. 443793 6. 61279 6. 68609 7. 085365 6. 923503 6. 595706  
5. 711039 5. 537165 5. 430507 5. 807898 5. 746519 5. 83058 5. 337639 5. 386424 5. 273871  
3. 624822 3. 456011 3. 970842 4. 071765 3. 757403 3. 333206 3. 188038 3. 993118 3. 844354  
3. 467068 2. 618727 3. 393524 2. 186752 3. 937099 3. 488713 3. 047598 3. 599987 2. 796693  
4. 377933 4. 766254 4. 674917 4. 458967 4. 693172 5. 207989 4. 516856 4. 464226 3. 597142  
5. 379748 5. 897267 4. 645329 5. 872383 5. 906543 5. 338718 6. 233066 4. 676215 4. 469319  
5. 734564 5. 836275 5. 691946 4. 652298 5. 413998 5. 47221 6. 047542 5. 760242 5. 345105  
3. 038186 3. 079812 3. 943967 2. 196459 4. 021058 1. 806763 3. 87708 2. 540866 1. 763714

4. 958534 5. 312728 4. 594694 4. 883359 5. 228088 4. 740294 4. 981982 4. 609417 4. 927032  
2. 259023 3. 697853 3. 569676 2. 898008 2. 820705 3. 374462 2. 892818 2. 91592 2. 8407  
4. 084358 4. 542918 4. 809577 4. 528853 4. 42421 4. 911195 4. 703474 3. 935195 2. 975574  
4. 931158 4. 689373 4. 422433 5. 273505 6. 000827 4. 256055 5. 684315 4. 748737 5. 035592  
2. 164167 1. 878637 1. 599438 1. 810196 1. 883628 2. 058738 2. 07459 1. 335307 1. 629949  
7. 054655 6. 311882 5. 959096 5. 349485 6. 776169 6. 070045 6. 244843 6. 254691 6. 681492  
1. 172991 1. 210435 1. 047749 1. 26983 1. 439069 1. 478952 1. 204296 1. 00105 3. 202374  
6. 354424 6. 017401 5. 74406 5. 937053 6. 523226 5. 542785 6. 195935 6. 440791 5. 303798  
0. 959264 1. 074098 0. 597666 1. 342941 1. 238235 1. 62068 1. 337823 0. 91503 1. 769375  
2. 24989 3. 095939 1. 772546 2. 422637 2. 016329 1. 869202 1. 208837 1. 820081 2. 169491  
2. 021571 1. 71675 1. 747788 1. 655692 1. 703634 1. 432978 1. 616651 1. 660497 1. 418025  
1. 261268 1. 848413 1. 755096 2. 193131 1. 613004 1. 849902 1. 484867 1. 514506 1. 318165  
4. 666516 4. 780252 4. 505229 3. 996806 5. 282438 4. 636168 4. 846318 4. 616595 5. 107001  
5. 343926 5. 447144 4. 996072 5. 167824 5. 441651 5. 917423 5. 162067 4. 960717 4. 771455  
5. 987818 5. 959784 5. 214007 5. 47391 5. 562222 5. 585274 4. 722038 5. 480221 5. 82169  
4. 278807 3. 727457 5. 213816 4. 639571 5. 347841 3. 152754 4. 955335 4. 902443 3. 150521  
6. 496266 6. 03668 5. 803686 6. 305259 6. 791278 4. 457306 6. 399021 6. 309217 5. 938847  
1. 684567 1. 404146 2. 19188 1. 919938 1. 540145 1. 133954 2. 007984 1. 5751 1. 283296  
7. 604167 7. 893152 7. 718539 7. 398382 7. 561544 8. 045405 7. 739862 7. 873487 7. 994898  
2. 026867 2. 423587 2. 037181 4. 534087 2. 855985 3. 109509 2. 607952 2. 557574 3. 049911  
9. 779313 9. 853841 9. 702665 9. 560771 9. 683148 9. 485074 9. 784342 9. 836688 9. 312756  
3. 051332 3. 084046 2. 713246 3. 099612 3. 339803 3. 353557 2. 667391 3. 550022 3. 996567  
9. 552997 10. 04386 9. 847114 9. 382649 9. 784715 9. 997263 9. 751833 9. 767627 8. 282312  
2. 107334 2. 123695 1. 688153 1. 932891 3. 530721 2. 320645 2. 833573 1. 523981 2. 005968  
8. 626407 8. 59625 7. 696988 8. 362293 8. 247852 8. 330847 8. 315893 8. 455344 8. 397665  
1. 609871 1. 284135 1. 911699 1. 976609 1. 276122 1. 134671 1. 717088 1. 328102 1. 260231  
4. 072617 5. 084604 4. 06107 3. 607723 4. 940709 3. 91081 5. 310987 4. 931961 4. 118764  
2. 774106 2. 772047 3. 526693 1. 973327 2. 625808 1. 761249 3. 074503 3. 648507 4. 762139  
5. 735806 6. 033366 5. 924853 5. 58415 5. 968826 5. 874191 6. 013019 5. 950733 5. 519608  
3. 737647 4. 691493 3. 761315 4. 862683 3. 243912 4. 491164 4. 146304 5. 215147 3. 516311  
5. 807375 5. 783341 5. 783015 4. 922115 5. 566307 4. 533923 5. 592361 5. 776039 5. 571471  
6. 18596 6. 510487 6. 246925 6. 478621 6. 135708 5. 68987 6. 790681 6. 508784 6. 705959  
6. 27426 6. 763789 6. 338204 5. 581353 6. 5648 5. 796738 5. 818923 6. 277876 5. 057138  
3. 07563 2. 9589 2. 967185 4. 241486 3. 80022 3. 378452 2. 887112 3. 633691 3. 300371  
4. 102287 4. 448212 3. 525173 3. 909026 3. 7251 3. 402942 4. 056874 3. 814675 3. 538151  
4. 22968 3. 586945 5. 114186 3. 556448 3. 697353 3. 898198 3. 824042 3. 734718 3. 921996  
1. 087538 1. 150491 0. 811794 1. 239394 1. 011931 1. 515319 2. 141433 1. 333559 0. 900325  
3. 654298 3. 533733 3. 888824 3. 49162 4. 473067 3. 202163 3. 488312 3. 995037 4. 055754  
1. 45824 1. 917866 1. 361337 1. 736597 1. 503877 1. 791828 1. 604335 1. 286435 1. 502982  
5. 646694 5. 838874 5. 021935 4. 126679 5. 42464 5. 78769 5. 052482 5. 465759 6. 252875  
6. 551361 6. 259619 6. 418331 7. 074497 6. 569432 6. 760671 6. 697365 6. 685396 6. 90832  
5. 92115 5. 938481 5. 420509 6. 431752 6. 509795 6. 005081 6. 086957 6. 368237 6. 574394  
7. 011182 6. 271068 6. 061137 6. 363457 6. 890544 6. 026077 6. 095587 6. 815953 5. 734622  
3. 007791 1. 082201 3. 787474 4. 356972 2. 900577 2. 25409 0. 486458 1. 80536 2. 578175  
3. 128229 3. 492654 3. 508484 2. 901159 6. 767711 2. 258468 3. 722373 3. 237138 3. 493084  
3. 125537 2. 440048 2. 820229 2. 600344 3. 500122 3. 296869 4. 293552 2. 39636 3. 408649  
3. 038655 3. 333995 2. 885435 3. 57026 2. 729334 2. 847097 2. 872062 3. 579873 2. 899362  
4. 830679 4. 896656 4. 660606 4. 183591 4. 543936 5. 363951 5. 340029 4. 737309 4. 979655  
4. 519123 4. 411684 4. 738432 5. 420212 4. 397758 4. 398616 5. 079327 4. 210054 3. 224488  
2. 023387 1. 95861 2. 274197 2. 74216 2. 349792 3. 301895 1. 753036 2. 130857 2. 911921  
5. 63655 5. 056772 4. 421898 6. 284167 5. 302556 4. 944693 5. 951103 5. 937104 5. 76562



3. 962001 2. 688428 2. 49951 3. 116137 2. 617273 3. 557884 2. 997433 2. 71319 2. 75899  
2. 963411 3. 674533 4. 468378 3. 4034 3. 639724 3. 66682 3. 449868 3. 814733 3. 781312  
2. 117967 1. 755419 1. 868886 1. 213012 1. 631525 1. 310533 1. 389451 1. 362047 1. 584297  
7. 489103 7. 460229 7. 111173 7. 345555 7. 402103 7. 440716 7. 372309 7. 44078 7. 529149  
7. 312019 5. 767133 6. 048641 6. 664528 6. 560484 6. 69634 6. 764226 6. 580883 6. 685874  
2. 325276 2. 127723 1. 398093 3. 681551 2. 420388 2. 943392 2. 480758 2. 498315 2. 727355  
9. 10001 8. 762993 8. 849423 8. 802112 8. 728476 8. 754116 8. 693033 8. 766326 8. 691212  
2. 380055 2. 637524 3. 083189 2. 109712 3. 708242 2. 526553 2. 01806 3. 147336 2. 285535  
6. 537756 6. 517253 6. 633829 2. 16388 6. 331509 6. 777443 7. 128454 2. 143074 2. 401143  
4. 462648 4. 162357 3. 204556 1. 925312 4. 003041 4. 317343 3. 893737 4. 237977 4. 391315  
10. 2681 10. 10068 10. 1095 9. 767203 10. 24676 9. 462738 9. 989686 9. 683714 9. 769798  
6. 090421 6. 221375 6. 055091 6. 679028 6. 329376 5. 864194 6. 170809 6. 375846 6. 324283  
5. 566787 4. 938819 5. 313569 4. 563838 5. 542861 5. 970806 5. 469207 5. 651365 5. 478497  
6. 018192 6. 496997 6. 141182 6. 538435 6. 719687 6. 009252 6. 488457 6. 051201 5. 159401  
3. 77067 4. 508836 4. 602721 3. 722773 3. 817663 4. 056665 4. 576018 5. 18625 4. 223996  
8. 615107 8. 600607 8. 267919 8. 147199 8. 404811 8. 448117 8. 60648 8. 637943 8. 297692  
6. 612665 7. 003394 6. 765549 6. 631857 6. 492328 6. 146737 6. 315282 6. 511659 5. 97589  
9. 104619 8. 822261 9. 149131 8. 910393 9. 259374 8. 755869 9. 084683 9. 295244 9. 121105  
9. 4811 9. 814139 9. 221027 9. 341935 9. 475619 8. 713102 9. 273351 9. 786621 8. 379406  
7. 731091 7. 898716 8. 236579 8. 245545 8. 058974 7. 168005 7. 859987 8. 197945 7. 374588  
9. 987582 10. 05801 9. 814743 10. 08363 9. 829423 9. 600853 9. 925422 9. 986129 9. 740263  
8. 057104 8. 241517 8. 550903 7. 986678 8. 411493 7. 952654 8. 458278 8. 461456 8. 142472  
6. 521103 6. 269326 6. 532488 6. 887481 6. 480131 6. 222125 6. 462214 6. 619291 6. 033147  
3. 120782 2. 203702 2. 608622 4. 146017 2. 758772 3. 7703 2. 680464 3. 619946 4. 188399  
6. 90284 4. 487894 5. 622773 4. 73893 5. 141357 7. 034118 6. 342792 5. 699761 6. 871993  
7. 158521 7. 128105 7. 050032 7. 464153 7. 350262 7. 251694 7. 355423 7. 471526 6. 81049  
8. 709896 9. 259752 9. 188852 9. 358905 8. 86565 8. 573375 9. 324587 8. 879637 9. 007818  
5. 854639 5. 640305 5. 634107 5. 0491 5. 267058 5. 433431 5. 921642 5. 849203 5. 642633  
4. 117127 3. 907424 4. 213926 2. 26017 4. 982339 3. 39925 3. 956491 2. 913023 3. 723759  
4. 941337 4. 44056 4. 918132 4. 461755 5. 426887 4. 781079 4. 910972 4. 845954 4. 981761  
5. 805142 6. 178504 6. 131105 5. 964425 6. 136179 5. 895578 6. 384957 6. 208679 5. 98653  
6. 401238 6. 481201 6. 4863 6. 128869 7. 161728 6. 807397 6. 502287 6. 587278 5. 743631  
9. 272912 9. 231501 9. 524324 9. 065218 9. 396426 9. 485054 8. 78957 9. 339327 8. 527495  
8. 939087 9. 063485 9. 185571 8. 488999 9. 225593 9. 135675 9. 278347 8. 985684 9. 346095  
1. 674423 2. 251687 1. 596622 2. 061732 2. 975937 2. 087609 3. 550799 1. 808044 1. 805988  
1. 446021 1. 715338 2. 284622 2. 689432 2. 575437 2. 882306 1. 869752 1. 748368 1. 77451  
1. 62721 1. 52045 2. 072896 2. 440201 1. 30285 1. 719021 1. 646554 1. 591778 1. 743315  
2. 47372 2. 412675 2. 665907 2. 86307 2. 631278 2. 348736 2. 176636 1. 958516 1. 960593  
7. 738985 8. 013012 8. 097246 7. 033688 7. 901831 7. 835415 7. 305052 7. 40599 8. 714623  
5. 080511 4. 521975 4. 986481 4. 698964 5. 09977 4. 42425 4. 951239 5. 203146 5. 438961  
3. 564414 3. 721255 3. 442371 3. 395756 4. 329015 3. 535421 3. 394103 3. 535738 3. 306807  
5. 927893 4. 332593 6. 041533 0. 751128 5. 131589 3. 491144 4. 633578 3. 944271 4. 380166  
6. 722792 6. 697137 6. 814546 7. 22317 6. 711596 6. 112554 6. 720169 6. 675982 6. 02017  
5. 988906 6. 037507 6. 213352 5. 763455 5. 983703 5. 886455 5. 976037 5. 85194 6. 357118  
4. 872107 4. 905694 4. 708103 3. 30062 4. 533559 3. 801432 3. 7727 4. 767816 3. 020186  
2. 089821 1. 923453 2. 260176 2. 82137 2. 379754 2. 292363 2. 078345 1. 994486 1. 709044  
7. 076056 7. 00159 6. 5984 6. 729259 6. 893191 6. 652247 6. 906145 6. 202514 6. 183806  
1. 817661 1. 303702 2. 197852 2. 078584 1. 349917 1. 308803 1. 41982 1. 427937 1. 545023  
4. 968943 4. 643112 4. 618212 4. 481984 4. 913556 4. 581035 4. 980263 5. 621448 4. 336368  
5. 711925 5. 951891 5. 761008 5. 198495 5. 651034 5. 296757 5. 31469 5. 71021 4. 753886  
5. 683137 5. 713734 5. 912887 5. 443524 5. 691433 5. 93008 4. 827565 5. 726433 5. 209371

5. 496246 5. 37095 5. 257722 5. 185529 5. 188745 4. 173426 5. 389769 5. 303442 4. 401835  
5. 085366 4. 733193 5. 479856 4. 604066 5. 043614 4. 177416 4. 203596 4. 723706 5. 463461  
7. 243655 6. 596346 7. 089827 6. 265098 5. 547055 7. 038462 6. 301936 6. 367827 7. 705611  
1. 889066 1. 695777 1. 555941 1. 828146 1. 969903 1. 724152 1. 957331 1. 827567 2. 444087  
1. 412793 0. 843065 1. 010539 1. 090944 1. 746617 1. 332376 1. 374629 1. 617067 1. 640831  
3. 076229 2. 399706 3. 757022 3. 5442 3. 056365 1. 870909 2. 503241 3. 061902 2. 673229  
1. 996698 2. 610317 1. 972532 3. 770193 2. 195772 1. 951126 1. 854354 1. 739203 2. 216327  
3. 364526 4. 650309 4. 144566 3. 065564 4. 920457 4. 093418 4. 917051 4. 901199 3. 393118  
0. 980502 1. 679832 0. 961604 1. 265112 0. 993557 1. 801568 1. 02823 1. 015764 1. 17003  
5. 34942 5. 822261 5. 161108 4. 227885 7. 290537 4. 476676 5. 24111 5. 232126 5. 34942  
2. 825506 2. 489662 2. 984133 3. 433829 3. 085958 2. 892607 2. 777635 3. 078564 1. 766512  
3. 965084 4. 344106 4. 117188 4. 77983 4. 281432 4. 327644 4. 36937 4. 008289 4. 326246  
5. 369409 5. 320782 5. 225127 5. 623395 5. 729935 4. 842219 5. 192759 4. 97703 5. 186005  
6. 748159 6. 665446 7. 018987 5. 539013 6. 602941 6. 93458 7. 058643 6. 835402 6. 639238  
10. 21283 10. 28316 10. 22184 10. 20729 10. 33381 9. 785809 10. 24248 10. 61097 10. 16141  
5. 276835 5. 521227 5. 921172 5. 177861 4. 470269 6. 126958 6. 19658 5. 735114 4. 811814  
5. 920148 5. 716107 5. 695303 5. 571709 6. 017516 5. 902095 6. 178539 5. 850257 6. 488598  
8. 449065 8. 639831 8. 470999 7. 954997 8. 759634 8. 198994 8. 240565 8. 61936 7. 982525  
6. 726671 6. 851043 6. 901546 6. 603423 6. 461501 6. 615628 6. 775516 6. 703032 7. 103775  
7. 045014 5. 877901 6. 904616 7. 32425 7. 292471 6. 444335 7. 331925 6. 445677 6. 792097  
7. 29157 7. 400615 7. 2121 7. 161657 7. 017561 7. 476588 7. 728034 7. 075094 7. 45503  
3. 167511 3. 18417 2. 802952 3. 202262 3. 090466 3. 801698 3. 399294 3. 68506 3. 8614  
6. 742069 6. 773026 6. 756243 7. 286887 6. 851076 7. 130504 6. 912813 7. 009889 6. 496812  
5. 048889 3. 906399 4. 847095 4. 629441 4. 329552 4. 74049 5. 14964 4. 312009 4. 788941  
5. 054649 5. 086962 5. 215025 4. 779298 5. 067119 5. 072272 5. 16745 5. 115172 5. 825792  
5. 739042 5. 596004 6. 352866 6. 179732 5. 861216 5. 588042 5. 763752 5. 549749 4. 084976  
1. 44269 2. 508041 1. 319632 2. 577445 1. 190491 1. 425047 1. 39077 1. 372169 1. 846931  
3. 125876 3. 237701 4. 786402 2. 934383 2. 290458 3. 243171 4. 009975 3. 026695 3. 347281  
7. 026826 7. 062591 6. 842313 6. 022549 7. 489595 7. 221364 7. 337106 7. 220568 6. 93972  
4. 028902 4. 702467 4. 350163 3. 967412 4. 840691 4. 354438 4. 653163 4. 202512 4. 638059  
2. 434776 1. 649367 2. 302509 2. 991217 1. 635466 2. 600774 2. 542756 2. 2262 2. 699376  
4. 715054 5. 499058 4. 794616 4. 632591 5. 21347 4. 824255 5. 456264 5. 052264 4. 770407  
3. 43217 2. 533104 2. 760279 2. 849757 1. 924746 3. 022717 2. 311714 2. 963563 2. 667224  
5. 232137 3. 334604 4. 314095 4. 713224 5. 197182 1. 563793 4. 325325 3. 797746 2. 7028  
6. 540895 6. 4901 7. 309528 6. 831299 6. 015918 7. 32543 6. 736601 6. 776594 5. 854445  
8. 475476 8. 286588 8. 15201 9. 112417 9. 441201 8. 47683 9. 023357 8. 639958 7. 452835  
1. 62529 2. 25551 1. 903855 3. 290708 1. 673143 2. 171558 1. 550802 1. 829386 2. 05093  
1. 497857 1. 399089 1. 542603 1. 069739 1. 421795 1. 890379 1. 19747 1. 648718 1. 600716  
1. 359772 1. 468494 1. 395571 1. 627294 1. 387124 1. 486454 1. 509129 2. 444175 1. 552462  
0. 987006 1. 583809 1. 499466 1. 293092 1. 423404 1. 914111 1. 159997 1. 183334 1. 439282  
1. 581251 1. 495822 2. 023034 1. 45822 1. 782122 1. 337683 1. 469474 0. 919409 2. 432021  
4. 455343 4. 483654 3. 722335 5. 482883 4. 91613 2. 682882 3. 909961 3. 774182 2. 784478  
5. 703555 5. 474243 6. 09499 5. 451061 6. 489605 5. 309374 5. 797731 5. 734007 3. 918107  
8. 091331 8. 19526 7. 891445 7. 857166 7. 860178 8. 33395 8. 325616 7. 907481 7. 725287  
1. 409395 2. 426842 2. 155859 2. 557143 2. 084794 1. 953214 1. 752323 1. 416533 2. 051718  
1. 463087 1. 870409 1. 895841 1. 482732 1. 453794 1. 840839 1. 398624 1. 919569 1. 68843  
2. 220484 4. 359987 2. 926349 2. 761609 2. 319191 2. 997358 2. 732143 2. 071858 2. 896385  
7. 40005 7. 049212 7. 181532 6. 400324 6. 725362 6. 989302 7. 177197 7. 208023 6. 643364  
5. 973773 5. 665671 5. 247199 5. 9535 5. 750984 5. 787301 6. 371098 6. 295211 5. 196627  
9. 966685 10. 16834 9. 981724 8. 990355 10. 18257 9. 927485 10. 01855 10. 08623 10. 04101  
4. 551009 4. 9691 4. 348971 4. 874025 4. 99729 4. 384677 3. 509317 4. 648846 3. 715604

8.428969 8.661855 8.454765 8.507647 8.842333 8.310519 8.566712 8.452807 8.541978  
5.734454 5.833049 5.719863 3.845337 5.512735 5.408529 5.760935 5.304109 6.415655  
4.518223 4.631749 4.689104 4.410832 4.856967 4.246588 4.543676 4.635701 4.259302  
6.889699 6.485618 6.443015 7.600402 7.213854 7.259887 6.884967 7.18183 6.838638  
6.735202 6.62729 6.243752 7.187726 6.619531 6.869032 7.133046 6.479899 6.919137  
7.110921 7.438602 7.578481 7.293539 7.985414 7.649184 7.015021 7.91548 6.563889  
3.037782 2.319843 3.761682 3.272901 3.286188 4.0549 2.787889 3.138324 3.56434  
4.769167 4.846623 4.230554 4.516078 4.938247 4.597697 4.214511 4.69111 4.551511  
6.799783 6.498222 6.524343 6.694644 6.420638 6.670591 7.025422 6.834367 7.146851  
1.745114 3.679014 3.001732 1.990089 2.826713 2.676845 3.060979 1.852564 2.516389  
7.362852 7.236288 7.685829 6.755729 7.495721 7.385539 7.683886 7.864019 7.399555  
2.97147 2.464805 3.051841 4.138121 2.85156 3.400072 3.382674 2.151198 2.713839  
2.298443 2.091206 1.674928 1.834718 1.870134 1.772499 1.542093 1.546252 1.849223  
2.474787 2.353554 3.145014 4.047981 2.636432 2.591028 2.740681 2.822016 2.06678  
5.374805 5.348861 5.361717 5.340674 3.969712 3.821192 5.414964 5.167085 4.83999  
1.898799 2.324787 2.872472 2.496838 2.611684 1.945193 2.351972 2.789274 1.930554  
1.339618 1.339595 1.366642 1.428228 1.405609 1.446241 1.496235 1.739661 2.055169  
5.971282 5.82906 5.124693 4.494652 5.845186 4.788836 5.332431 5.296297 6.070664  
2.193095 2.49013 1.950154 2.131969 2.208833 2.717257 1.76731 1.78121 1.634378  
3.291675 3.938384 4.15008 3.91269 3.693976 3.250162 3.613223 3.499746 3.538164  
4.128638 5.685751 5.21358 5.057726 5.696766 3.456587 6.028787 5.77866 5.339549  
2.804291 4.164625 3.170578 4.311542 3.97196 2.441767 4.593698 3.646929 4.566987  
1.094104 0.682034 0.975167 1.077563 1.213625 1.200965 1.22893 1.171875 0.858891  
2.601929 3.23841 3.018917 2.488484 3.371212 3.250018 3.119645 3.646102 3.481468  
1.760881 1.565791 1.786208 1.715825 1.7978 1.488907 1.470652 1.829566 1.708866  
6.14617 6.43819 6.103304 6.530965 5.759869 6.435741 6.339605 6.45464 6.616621  
5.608189 6.016491 6.114278 6.043082 6.082509 6.107876 5.923244 5.489439 5.456834  
3.667006 3.607265 4.216374 4.493202 3.916056 3.127096 2.685005 3.681559 3.365755  
6.363507 6.46498 5.76922 6.184868 6.165604 6.264636 5.71782 6.034039 6.486681  
7.281486 7.099486 6.926675 7.20818 7.276761 7.56544 7.312354 7.142037 7.566834  
6.959099 7.109356 6.090715 6.630998 6.945392 6.970136 7.162742 6.078714 6.508203  
6.785519 6.003101 6.257762 6.36903 6.421958 6.197751 6.427696 6.44515 6.167529  
6.884671 6.737476 7.448447 7.865454 6.803902 6.36441 6.752485 7.418903 6.508999  
1.012358 0.916051 1.492525 1.297178 1.403424 1.559268 0.783333 1.520398 1.938219  
1.499006 1.50681 1.472509 1.997078 1.486165 1.893397 1.182779 1.338708 1.259134  
3.911501 4.814876 4.640451 4.81031 4.508952 4.45993 3.711708 4.884386 5.498145  
1.952297 1.761633 1.752786 2.120129 2.721986 1.787084 2.266536 2.021614 2.371271  
6.254159 6.768079 7.080016 7.085211 7.352902 6.902411 6.802457 7.09939 6.26193  
7.505196 7.573661 7.788499 7.990083 7.835325 6.897408 7.824447 7.497748 8.224222  
4.632963 4.243052 5.038815 4.808901 4.548205 5.202154 4.555626 4.935354 4.823501  
7.728675 7.933832 8.651333 7.730965 7.825306 7.534765 7.74341 7.917016 7.63127  
5.424694 4.82963 5.626948 6.185773 5.387433 4.727472 5.390974 4.83334 5.116396  
1.212892 1.081745 1.558298 3.077312 2.477803 2.009143 1.80721 1.879383 1.771173  
7.627838 7.536997 7.364593 5.704473 7.485152 7.289887 7.306327 7.312244 6.472597  
4.119682 3.443038 3.944735 4.217875 5.049165 3.21391 4.45631 3.846606 3.995796  
1.48458 1.767928 2.268632 1.45313 2.007355 1.436545 1.677599 2.195936 1.707611  
1.441683 1.89077 1.382835 1.656434 1.65518 1.340684 1.395768 2.207901 1.781043  
4.453725 4.832069 4.721268 5.066989 3.885408 3.94966 4.223927 4.278592 4.676012  
1.847708 2.157479 1.86244 2.128588 1.515269 2.111333 2.08537 1.85738 1.633441  
1.234151 1.782018 1.957198 1.39479 1.27327 2.911648 0.826555 1.153812 1.192152  
5.187671 4.852864 5.773261 3.57126 4.580828 5.143419 4.82862 5.702834 5.116163

2. 6863 2. 729077 3. 175905 5. 235646 3. 912226 4. 171697 3. 011738 3. 882561 4. 091102  
8. 57114 8. 70023 8. 467652 8. 326074 8. 964437 8. 678421 8. 844651 8. 749108 8. 608146  
4. 267648 4. 141966 4. 183401 6. 229369 5. 239335 3. 788417 4. 402407 3. 523196 4. 818438  
8. 715558 8. 523185 8. 721199 8. 304325 8. 28149 8. 286292 8. 864514 8. 379822 7. 80995  
4. 943213 4. 278576 4. 734019 4. 246089 5. 139404 4. 842431 4. 549603 4. 91854 3. 785674  
1. 75886 3. 079624 1. 701703 1. 819771 1. 956721 1. 357626 1. 588245 2. 629737 1. 317281  
6. 667401 6. 068143 6. 197576 6. 140049 6. 070016 5. 676671 6. 497759 6. 252723 6. 284851  
3. 643589 3. 812611 4. 034951 3. 814648 4. 297128 3. 419727 3. 888969 4. 019038 3. 933082  
3. 691714 3. 434782 3. 521367 3. 743332 3. 035028 3. 466157 3. 621122 3. 659324 3. 502028  
6. 66142 6. 234371 5. 735295 5. 739059 5. 52211 6. 64282 5. 967876 5. 882255 6. 836673  
6. 757292 7. 040032 6. 823066 7. 160167 7. 021711 6. 92098 6. 834407 6. 871761 7. 365476  
5. 950551 5. 156528 6. 389606 2. 369978 6. 080874 4. 399033 6. 917809 5. 41393 5. 645575  
3. 659424 4. 075617 4. 589151 4. 508311 2. 724165 3. 125538 2. 721475 3. 671933 3. 913831  
5. 265734 4. 677046 4. 051409 3. 282302 4. 012271 4. 297396 3. 537025 3. 25795 3. 559352  
4. 739763 5. 084496 4. 16724 4. 189098 5. 312193 4. 858385 5. 32292 4. 996494 3. 617844  
5. 570692 5. 244749 5. 215099 5. 692477 5. 442831 5. 806578 5. 794756 5. 354833 5. 227407  
5. 066222 5. 293875 3. 922678 5. 033739 5. 082031 4. 695957 7. 323625 4. 393198 5. 698634  
1. 600816 3. 319757 2. 971345 3. 459133 1. 579686 2. 897946 3. 271406 1. 697811 4. 636688  
3. 317817 4. 847391 4. 314084 4. 936888 4. 400924 4. 174822 4. 55831 4. 604025 4. 238889  
6. 047128 6. 179934 6. 400968 5. 669758 6. 351191 6. 173849 6. 309773 6. 055473 6. 412736  
3. 404979 3. 389383 3. 386533 3. 284702 3. 662156 3. 678895 3. 709461 3. 85259 3. 374224  
3. 313549 4. 560703 3. 815248 3. 435746 4. 790348 3. 747963 3. 893409 4. 535888 3. 967699  
6. 318659 7. 083345 6. 678462 6. 33103 6. 659442 6. 265332 6. 55828 6. 958884 6. 919934  
7. 616949 7. 801162 6. 916107 7. 81294 7. 665639 7. 519952 7. 416559 7. 383907 7. 42552  
2. 21077 1. 827046 2. 954938 2. 50817 2. 202923 2. 374724 1. 792073 1. 469877 2. 168323  
1. 745326 1. 824801 1. 855916 2. 707962 2. 233314 1. 749481 2. 329306 2. 046936 1. 64299  
6. 536213 6. 041011 6. 507448 6. 835807 6. 257027 5. 969508 6. 41761 6. 009619 5. 942815  
5. 493272 5. 514879 6. 56353 5. 735248 5. 405165 5. 333148 6. 106638 6. 323818 5. 535515  
2. 140785 2. 000505 1. 440343 2. 599151 1. 341019 2. 260015 1. 817122 1. 73263 1. 769813  
1. 831776 1. 850709 2. 085592 1. 989982 2. 176834 1. 818925 2. 78463 1. 912947 1. 82983  
2. 80638 2. 430984 2. 898456 2. 642722 2. 447545 3. 0769 2. 346028 2. 396676 4. 382969  
3. 139952 2. 546173 3. 621154 3. 547181 3. 323679 3. 628285 2. 545625 2. 391529 3. 303137  
1. 934825 2. 178225 1. 859533 1. 561002 1. 667401 2. 278625 1. 913383 1. 819887 1. 673802  
6. 574284 6. 653673 6. 744608 6. 22833 6. 353938 6. 93598 6. 851409 7. 245013 6. 426213  
6. 680034 6. 843635 6. 782328 5. 14168 6. 519786 7. 766873 5. 717825 6. 761932 6. 039695  
5. 663096 5. 222455 4. 765738 6. 680491 5. 513813 6. 254982 6. 251953 6. 187466 6. 770455  
4. 474105 4. 649853 3. 908725 4. 548652 4. 356025 5. 75631 3. 514371 4. 45547 4. 479425  
5. 309562 5. 402851 5. 215498 4. 234664 5. 614313 5. 492194 5. 654074 5. 022092 4. 08156  
2. 649119 2. 058042 1. 732263 2. 382307 1. 883343 1. 809515 3. 600645 2. 882071 3. 67511  
1. 937791 1. 465708 1. 475577 1. 831077 2. 125286 1. 558962 1. 31015 1. 416141 1. 178181  
5. 355165 6. 170578 6. 698138 5. 500471 6. 776603 5. 887143 6. 138398 6. 464259 5. 688368  
4. 195 5. 313356 3. 904275 3. 603198 4. 765565 4. 860337 4. 987056 5. 308193 4. 480826  
8. 238533 8. 042298 8. 358821 8. 882679 8. 346324 8. 025688 8. 49249 8. 187085 8. 266616  
6. 158704 6. 139216 5. 808556 6. 961933 6. 447823 5. 593132 6. 033643 5. 996336 5. 596505  
6. 082948 6. 253958 6. 213551 5. 555532 6. 000243 5. 94165 5. 785262 6. 032121 5. 800686  
3. 390705 3. 333037 2. 691923 3. 024979 3. 52835 2. 512736 3. 409345 3. 250564 3. 819969  
4. 333914 3. 34635 3. 323326 2. 292041 2. 942233 4. 828063 3. 40856 4. 135915 4. 506972  
2. 242783 2. 633176 2. 995768 3. 504333 2. 842648 2. 636908 3. 304724 2. 619473 3. 022574  
6. 832393 7. 124903 6. 996352 6. 579287 7. 275919 6. 63649 6. 947573 7. 167723 6. 525575  
6. 360327 6. 486646 6. 502957 6. 289534 6. 532524 6. 307196 7. 193359 6. 564592 6. 234047  
2. 075933 1. 736517 2. 425435 2. 429048 1. 780553 2. 336952 2. 282872 1. 529306 2. 065122

8.087261 7.800362 7.913379 7.254913 8.192162 7.989938 8.228574 7.880296 8.511785  
6.598664 6.305384 6.560446 6.312379 6.367333 7.007817 6.927068 6.559516 6.785534  
4.945536 5.657106 5.307578 5.551856 5.930576 5.078377 5.803676 6.127316 6.093636  
5.784632 5.780541 5.442153 5.828427 5.837679 5.409465 5.878215 5.915844 6.317553  
3.27851 3.180039 3.291314 2.474668 3.399056 3.586843 3.404608 3.384223 2.29158  
7.743774 6.894414 7.395031 6.949348 7.485472 7.81114 7.811724 7.185461 7.646211  
8.899454 8.336266 8.358776 8.593282 8.586926 8.496421 8.564256 8.726435 8.895224  
4.669476 4.937417 4.594608 4.653906 5.359026 4.460218 4.809912 4.456977 4.478084  
4.846704 5.259487 5.621375 5.792985 5.690852 5.666031 5.780699 5.748371 6.358032  
5.902784 6.371549 5.889952 6.204607 5.995717 5.518631 6.138478 6.13104 6.10384  
5.686176 6.384844 5.723137 4.895962 5.750328 5.744289 5.376625 5.460286 6.221626  
5.792338 6.141251 5.803058 6.340731 5.956672 5.68442 6.070648 5.775881 5.376986  
5.788735 5.98585 4.596164 5.724691 3.404314 4.462899 5.218279 6.085312 5.556964  
8.152554 8.099759 7.863247 6.806733 7.887415 7.694063 8.024858 7.744403 7.657101  
7.718383 8.085461 7.905979 7.608437 8.256792 7.170837 7.897505 8.224276 7.955593  
6.608018 6.664249 6.581963 5.617629 6.199812 5.967446 6.290237 6.706988 6.030971  
6.6393 6.320146 6.191966 5.847182 6.729415 6.066215 6.242653 6.197155 6.239915  
5.735811 6.057916 5.635261 5.876742 5.874979 5.293183 5.784256 5.20414 6.404102  
6.68701 6.464582 6.415649 7.288717 6.83586 6.726026 6.511015 7.040614 7.218271  
1.525959 1.704215 1.354578 1.714944 1.411256 1.039007 1.000444 1.33505 1.420718  
1.287177 1.543028 1.504319 1.856558 1.574234 1.248674 2.489723 1.813602 1.714318  
6.418325 6.75864 7.457816 7.016692 7.062291 7.358082 7.451777 7.154754 6.591684  
5.204227 5.268396 4.730273 4.705469 4.76775 5.144088 4.861182 4.694418 4.766829  
3.830412 4.218058 3.50718 4.44184 3.793362 3.713669 4.428083 3.676037 4.353372  
4.712677 4.868372 5.132646 5.31933 5.382883 4.525211 5.14182 4.746047 3.578936  
3.90137 3.784014 3.05421 2.321032 2.717725 2.161436 3.596562 2.600903 3.660541  
1.144619 1.326076 1.131468 1.365182 1.367329 2.020831 1.385466 1.472228 1.56069  
2.784865 3.309397 2.349748 2.658235 4.542895 2.575526 4.214844 2.36136 2.869425  
7.056969 6.955738 6.651489 7.065106 7.136165 7.049141 7.115058 6.652848 7.359878  
1.550757 1.706693 2.0013 2.789017 1.520002 2.157246 2.093221 1.534784 2.26415  
5.098 5.617003 4.810633 4.277267 5.518694 5.796856 5.07615 5.822941 5.433873  
3.095396 3.602953 3.261793 3.942462 3.125551 2.331645 2.466734 2.116758 2.721362  
1.347924 1.579681 1.631525 1.3357 1.966721 2.570723 1.478039 1.450692 1.144327  
4.21339 2.653476 3.97728 3.087398 3.728727 2.928001 3.875286 4.45318 3.796754  
5.730428 6.887466 5.909927 5.478306 7.078556 6.624048 6.36591 6.061463 6.438406  
5.407685 5.673939 5.12098 5.290437 5.528391 5.357345 5.148005 5.336528 6.238468  
4.016139 4.689103 3.375934 3.842092 5.419546 2.995867 5.631087 3.641736 3.794227  
4.731869 4.829114 4.522221 5.055363 4.717016 4.713334 4.908938 4.342757 4.945383  
5.96258 5.947012 5.644608 6.101989 5.756784 5.720547 6.243371 5.720381 5.920822  
1.773958 1.949118 2.355188 2.233714 2.421562 2.447459 2.575874 2.27956 2.328777  
3.700389 3.199642 3.986995 5.188121 3.429942 3.360326 3.691761 3.88645 3.75768  
2.560856 2.687005 2.448625 2.479375 2.496756 2.782961 3.073562 2.021699 2.716606  
5.380435 5.172084 4.616277 5.196752 5.132854 4.976526 6.020874 5.518627 4.944098  
6.508576 6.242012 5.892222 6.176217 6.037976 5.569869 6.342675 6.391731 6.778309  
7.529841 7.748148 7.688972 7.137232 7.334902 7.79033 7.65253 7.732639 7.471923  
3.002183 3.775914 2.772977 2.832863 3.098404 3.047599 2.961549 3.134452 2.723235  
3.883243 2.950384 3.579253 3.76977 4.429083 4.167988 3.706148 3.533278 4.461854  
7.748188 7.520176 7.076133 6.957217 7.612972 7.00703 7.733197 7.282555 7.425092  
3.678149 4.197554 3.264639 2.190745 4.035405 4.356355 3.695227 4.888655 2.784366  
3.224764 3.33513 2.965259 3.260004 3.081191 3.150441 3.191777 3.382212 3.219102  
7.295239 6.653943 6.592884 5.525276 6.412855 6.939011 7.089432 6.493916 6.598185

3. 860613 3. 629578 3. 705182 3. 097381 3. 227296 2. 557792 3. 326796 2. 921824 3. 023924  
2. 754955 2. 695697 3. 128322 3. 341684 2. 411266 2. 394507 2. 620393 2. 755763 2. 800842  
4. 226287 3. 194757 2. 514697 2. 392313 3. 689235 3. 774162 2. 853005 3. 01153 3. 536242  
6. 034475 6. 164056 6. 551868 6. 136549 6. 27539 6. 25232 5. 979779 6. 374164 5. 153758  
5. 822034 5. 59522 6. 203298 5. 437903 5. 409963 6. 039299 6. 436124 6. 266463 5. 763807  
5. 006995 4. 611146 3. 930146 6. 265663 4. 44145 5. 137038 4. 562011 6. 482213 4. 400095  
3. 921027 3. 32124 2. 707797 3. 086663 4. 808262 4. 581589 4. 320038 4. 042892 2. 573743  
4. 006404 4. 513215 4. 385149 4. 159644 4. 895994 4. 457031 3. 985223 4. 529887 3. 408253  
2. 684059 1. 790543 3. 194035 1. 537445 1. 877437 1. 24104 3. 749356 1. 301944 1. 911585  
7. 278877 7. 592648 7. 980632 6. 972209 7. 497679 7. 508096 7. 005475 7. 333185 5. 726347  
3. 693239 3. 059671 3. 513758 2. 681185 2. 94868 4. 913869 2. 709716 3. 678212 5. 154182  
2. 431853 1. 315211 2. 230699 1. 873447 1. 451278 1. 144646 1. 553095 1. 480524 1. 957431  
5. 96746 5. 970728 6. 334107 5. 651981 6. 161816 5. 942961 6. 555217 5. 729295 6. 324792  
0. 766679 0. 977298 1. 000307 1. 75973 0. 966401 1. 592602 0. 839321 1. 211103 1. 217353  
5. 441686 5. 379083 4. 638089 5. 21933 5. 093844 4. 768725 5. 15389 5. 820234 4. 530347  
3. 031481 2. 842531 2. 783776 2. 828036 2. 304071 3. 651163 3. 88758 3. 340582 2. 859536  
1. 414021 1. 581456 1. 984102 2. 211397 2. 079207 1. 21022 1. 557132 1. 370049 1. 925153  
8. 990105 9. 258398 8. 929482 8. 6735 9. 275277 9. 105706 8. 854616 9. 09776 8. 796214  
0. 895356 1. 561699 1. 044577 1. 220234 1. 115567 2. 253187 1. 459115 1. 248844 0. 922695  
1. 130599 1. 022374 1. 321065 1. 496181 1. 359149 1. 697539 1. 168516 1. 026035 1. 234008  
1. 643779 1. 732583 2. 036938 2. 080587 1. 595732 2. 271725 2. 522729 1. 847458 1. 996042  
3. 815967 3. 959149 3. 78274 4. 201439 3. 54972 4. 435116 3. 454396 3. 645766 3. 901246  
3. 46187 3. 746471 3. 629574 3. 496436 3. 792664 4. 114181 4. 811817 4. 051729 2. 619123  
4. 392966 4. 131095 3. 670113 4. 509353 5. 1916 3. 754088 3. 868459 4. 031443 2. 439626  
3. 397042 2. 690922 3. 39739 4. 735279 3. 897221 3. 487685 4. 061566 3. 070947 3. 633013  
1. 710386 1. 436858 1. 574606 1. 747784 1. 653398 1. 978468 1. 575142 1. 439764 1. 559312  
5. 837995 5. 580141 5. 252341 5. 980432 5. 470458 5. 098668 5. 068544 5. 141137 4. 534906  
4. 550701 4. 927484 4. 37508 4. 101658 5. 017967 5. 021084 4. 216073 4. 61015 4. 48757  
3. 805529 3. 976872 3. 903714 3. 963589 2. 926 4. 102205 3. 673245 3. 603514 3. 827521  
1. 880193 2. 108139 1. 725717 2. 540314 2. 750402 1. 763958 2. 449071 1. 969293 1. 924002  
3. 133261 2. 904074 2. 566387 2. 470577 1. 201511 1. 039669 3. 42406 3. 219626 3. 134823  
1. 694384 1. 5402 1. 887579 1. 684694 2. 799117 2. 90574 1. 906351 1. 840189 1. 211554  
3. 437297 4. 148211 4. 191246 3. 023607 4. 753533 3. 884148 3. 884975 4. 073818 3. 542197  
2. 1136 2. 584849 3. 244652 2. 805636 2. 210624 3. 179818 1. 841512 1. 550475 1. 886173  
3. 947622 2. 389839 2. 76754 3. 400334 3. 625592 2. 928814 1. 677053 2. 119673 2. 215101  
2. 587965 3. 032059 2. 179512 2. 348268 3. 215245 1. 530232 2. 407939 2. 969018 1. 667992  
5. 279539 3. 970998 4. 182735 5. 192295 4. 622082 4. 076255 4. 087496 4. 087496 3. 64869  
2. 787066 3. 324343 2. 783665 3. 602732 2. 611063 3. 429161 2. 518782 3. 323626 2. 119382  
1. 651569 2. 126159 2. 317825 3. 047896 1. 386715 2. 263921 2. 067696 1. 820666 2. 170813  
6. 632557 6. 48981 6. 944447 7. 54654 6. 277168 6. 734359 6. 91455 6. 565229 5. 610749  
2. 27076 2. 114403 3. 435704 2. 738538 1. 951326 2. 025746 2. 450808 3. 01747 3. 057477  
0. 971575 1. 908048 1. 136671 1. 270241 1. 297942 1. 443966 0. 757151 1. 232293 1. 227292  
2. 710871 2. 156118 3. 251592 3. 178153 2. 811958 3. 952457 2. 720012 2. 894529 2. 527841  
3. 343109 2. 69767 3. 203345 4. 331051 2. 448131 3. 496997 3. 109391 2. 825847 3. 240731  
2. 717984 1. 862193 2. 474167 3. 774752 1. 982906 1. 416694 3. 41845 3. 486024 3. 335094  
1. 875824 4. 139508 2. 471929 2. 416823 3. 059303 2. 484952 2. 820122 2. 401939 2. 393898  
4. 214788 3. 205161 2. 591785 4. 33062 3. 921148 3. 255713 4. 084484 3. 281655 4. 663849  
3. 808284 4. 740154 3. 696871 4. 260693 3. 721308 0. 58396 2. 244885 2. 586967 2. 46397  
0. 775536 1. 019103 1. 195792 1. 165867 1. 185489 1. 448597 1. 293438 1. 591838 1. 23041  
2. 026782 1. 438577 2. 394339 2. 67546 1. 777606 2. 811212 1. 78928 1. 893218 2. 458294  
0. 906947 1. 740609 1. 959617 1. 948447 2. 117274 1. 392685 2. 020688 0. 758737 2. 116834

1. 822405 2. 573274 2. 134195 1. 985585 2. 057535 1. 991933 2. 148836 1. 9135 2. 099649  
1. 607582 2. 055888 1. 477151 3. 173851 1. 783124 1. 650789 1. 603353 1. 765745 1. 247932  
3. 307722 4. 721897 4. 945444 3. 367177 3. 463918 4. 33866 3. 870893 3. 779427 3. 004691  
1. 933978 3. 229792 3. 161727 1. 884232 3. 91708 2. 908144 2. 977893 1. 976405 1. 478901  
4. 026295 4. 339521 4. 482149 3. 941031 3. 270381 3. 231797 4. 723664 3. 584781 4. 264112  
4. 085413 3. 798963 4. 045048 4. 89593 3. 768638 3. 547505 3. 740867 3. 301696 3. 535867  
4. 481762 4. 658703 3. 892679 2. 570095 3. 348711 3. 355423 3. 895529 4. 359779 4. 399856  
1. 999648 1. 893811 1. 390319 2. 144291 2. 012322 2. 121791 1. 656074 2. 051929 2. 367065  
2. 132657 1. 653283 1. 643133 2. 195181 2. 914838 1. 411951 2. 124095 1. 750662 1. 276041  
6. 415481 6. 52141 6. 037512 6. 291815 6. 301776 6. 81621 6. 393402 6. 079913 6. 652206  
5. 590572 4. 834997 5. 383982 5. 555747 4. 493935 5. 085723 6. 017144 4. 800387 5. 323362  
5. 657234 5. 642305 5. 830011 5. 198545 5. 295224 5. 936989 6. 058866 5. 865147 4. 805773  
9. 779735 9. 52074 9. 670392 8. 344353 9. 630958 9. 541511 9. 679468 9. 601906 9. 434624  
2. 889002 3. 695927 3. 31135 3. 821225 3. 611341 3. 820098 3. 680972 3. 229073 3. 149634  
2. 168136 2. 223473 1. 773811 3. 077379 2. 132201 2. 429954 2. 363579 3. 805774 2. 002859  
4. 814158 5. 372371 5. 526706 4. 19478 5. 166727 5. 041361 3. 774001 5. 490573 4. 197087  
5. 736197 5. 138036 5. 419337 3. 817848 4. 04703 4. 928813 4. 485737 5. 116243 5. 102785  
4. 379067 3. 436444 4. 637622 3. 936076 4. 489975 3. 278217 3. 348509 3. 635008 2. 603509  
2. 805042 3. 630485 4. 593373 2. 860132 4. 025357 4. 409073 3. 646909 3. 866184 3. 322849  
2. 527682 1. 706329 2. 469166 2. 806516 2. 095719 2. 412037 2. 422229 2. 213557 2. 717023  
0. 984964 1. 263144 1. 304829 2. 826972 3. 088364 0. 897735 2. 255773 0. 735973 1. 388613  
2. 951239 4. 046723 3. 064912 3. 989396 3. 705273 2. 967835 3. 656314 3. 263119 3. 675646  
4. 704052 5. 641565 5. 74356 6. 593941 5. 458759 5. 876928 5. 250523 5. 363294 5. 002048  
3. 578775 3. 107968 3. 614017 2. 854936 3. 507519 2. 728441 3. 968601 3. 910192 4. 806065  
3. 171194 3. 347722 3. 211287 3. 485652 3. 13779 3. 23511 3. 210849 3. 389586 3. 149852  
3. 447748 2. 947523 2. 679333 2. 363207 3. 584411 3. 275932 3. 779356 3. 421278 4. 13412  
2. 805543 2. 458118 2. 444276 3. 443195 3. 00517 2. 498698 3. 289817 3. 069231 3. 681822  
2. 186115 2. 141545 2. 413911 2. 271958 1. 822462 1. 438378 1. 607274 1. 581433 1. 495158  
4. 39225 4. 557518 4. 354627 4. 281575 5. 12047 4. 356014 3. 913048 3. 707174 3. 872976  
2. 128322 1. 870119 1. 823456 3. 113438 1. 778131 2. 407909 2. 637946 1. 741829 2. 011002  
1. 769076 2. 6944 1. 399779 1. 404638 2. 435975 2. 615972 1. 054317 2. 018578 1. 521852  
1. 628795 2. 594462 2. 128848 1. 714429 2. 022819 2. 328875 2. 346022 2. 565433 2. 075835  
4. 675557 4. 931162 4. 964754 3. 654469 4. 433973 5. 35161 3. 835404 4. 694522 3. 511449  
2. 701808 2. 060722 3. 189363 2. 18656 3. 534747 1. 278883 1. 951759 1. 901034 2. 788671  
2. 672205 4. 814806 3. 397329 4. 259813 3. 810065 2. 858902 2. 387742 3. 163112 3. 112338  
2. 002212 0. 992469 1. 192958 1. 313521 1. 78413 1. 45792 1. 080125 1. 554218 1. 228634  
3. 308365 3. 162296 3. 35437 3. 113249 3. 287043 3. 984144 3. 414853 3. 55901 3. 300886  
2. 908499 2. 223069 2. 203866 2. 941988 1. 856037 2. 166948 1. 868337 2. 411584 2. 150881  
3. 079731 1. 46988 2. 607641 2. 267294 2. 359535 3. 03064 2. 068073 2. 350218 2. 577591  
7. 161397 7. 204637 6. 22846 6. 67843 6. 716089 6. 884257 7. 197807 7. 382246 7. 359311  
6. 941413 7. 457534 7. 110045 6. 758157 6. 930704 7. 732708 7. 28095 7. 188775 7. 240914  
2. 604181 2. 596989 2. 805489 3. 200696 1. 92861 2. 977973 2. 301903 2. 109481 1. 967684  
4. 455379 4. 38373 4. 387198 4. 934916 4. 287852 3. 855864 4. 088871 4. 441232 3. 187281  
7. 975543 7. 296763 7. 579171 6. 671102 7. 444412 7. 44154 7. 802118 7. 27468 6. 969227  
1. 429273 1. 835373 1. 533152 1. 886182 1. 598377 1. 429744 1. 582116 2. 044871 1. 17944  
4. 447515 4. 321435 4. 605118 3. 830441 4. 437129 4. 024752 4. 024752 3. 552204 3. 730267  
6. 786731 6. 023701 6. 527024 6. 640302 5. 678913 6. 325993 7. 387309 6. 210734 4. 729366  
2. 909723 3. 379283 3. 928454 4. 043092 3. 160895 2. 943304 2. 487884 3. 643376 2. 903275  
4. 027334 3. 9691 3. 594213 3. 623742 3. 718353 3. 117048 4. 664284 3. 333339 3. 406877  
5. 838552 6. 250932 4. 578191 5. 877203 4. 99537 5. 264908 6. 102787 5. 512443 5. 876259  
2. 625515 1. 974202 2. 442032 2. 009122 3. 19282 2. 455455 2. 912049 2. 091925 3. 969722

2. 856961 2. 230932 2. 153502 1. 82515 2. 104036 3. 178341 2. 951067 2. 511141 2. 37126  
1. 625565 1. 372079 1. 13265 1. 692068 1. 355761 1. 324071 1. 15157 1. 268598 1. 468805  
3. 75216 3. 240878 3. 771509 3. 359999 3. 256337 4. 524231 3. 183264 3. 845661 3. 705075  
2. 369334 2. 154713 2. 443025 2. 349719 2. 159607 2. 140072 1. 976466 2. 133671 2. 274736  
5. 586503 5. 780154 5. 470657 5. 283918 5. 796705 5. 481935 5. 614488 5. 5303 5. 342126  
1. 203305 1. 241474 1. 379432 1. 718276 1. 287864 1. 711978 1. 399817 1. 273503 2. 073337  
7. 291596 7. 492295 7. 414112 7. 790796 7. 531062 6. 89927 7. 715334 7. 477143 6. 791132  
7. 277376 6. 61454 6. 920336 6. 918665 6. 073647 6. 798909 6. 690868 6. 262327 6. 06362  
5. 074913 5. 76722 5. 211436 4. 757738 5. 575892 4. 930109 4. 575429 5. 227166 4. 334057  
4. 120332 4. 396344 4. 445818 4. 617703 3. 972871 4. 296142 4. 615574 4. 107973 3. 940806  
2. 529223 2. 510455 3. 17552 3. 416486 2. 507255 2. 644214 2. 176695 2. 065263 2. 434201  
4. 353287 4. 738136 4. 854068 5. 825042 4. 891297 4. 512024 4. 749909 4. 738654 5. 249615  
2. 051145 2. 100122 1. 989681 2. 427927 2. 293516 2. 190406 1. 617373 2. 09843 2. 612868  
4. 181412 3. 30117 5. 582451 3. 578254 5. 368271 4. 274943 4. 743098 4. 038709 2. 741442  
5. 968167 5. 951476 5. 469142 6. 634809 6. 197236 5. 814718 5. 540684 5. 368074 5. 846486  
2. 97417 3. 891702 3. 122348 2. 512082 2. 806147 3. 571951 2. 502268 2. 913602 4. 635324  
1. 999313 1. 536208 1. 495759 1. 712021 2. 763574 1. 532458 2. 981179 1. 492147 1. 692705  
3. 871252 3. 172483 3. 028201 3. 201622 3. 200296 3. 706399 3. 42271 2. 584204 2. 823081  
2. 440794 2. 6877 3. 161483 3. 275611 2. 186018 2. 338536 2. 312055 2. 695468 2. 881324  
2. 608753 2. 194528 3. 007784 2. 916386 2. 349131 2. 762501 2. 603349 2. 901866 2. 790373  
5. 853516 5. 418263 6. 091739 5. 422774 5. 847292 6. 403307 6. 410067 5. 75412 6. 074929  
5. 633702 5. 74152 5. 368481 5. 444564 5. 696495 5. 11178 5. 712807 5. 705176 6. 000006  
4. 622999 4. 123146 3. 613688 3. 369867 3. 912574 4. 667297 3. 348529 3. 596428 4. 34313  
5. 669472 6. 556331 6. 001731 8. 976424 7. 184494 5. 132326 7. 162499 5. 434439 5. 839599  
1. 39641 1. 396608 1. 139477 1. 551899 1. 690082 1. 567829 1. 286913 1. 957943 1. 170345  
3. 580311 3. 155615 3. 701688 4. 187701 5. 237431 4. 242148 4. 130555 4. 672077 4. 046458  
2. 272794 1. 836676 2. 658259 2. 73401 1. 779357 2. 098611 1. 435763 1. 705821 1. 932437  
3. 139533 2. 466923 2. 39106 2. 585523 2. 268411 2. 730587 2. 38699 2. 213869 2. 415828  
2. 473921 2. 467284 1. 949198 2. 636001 3. 479389 3. 204537 2. 452193 2. 712448 2. 382162  
5. 702371 6. 055491 6. 346175 6. 466768 6. 048548 6. 510018 6. 247769 6. 350582 7. 468344  
2. 857846 2. 674753 2. 34944 2. 852833 2. 47235 2. 847511 2. 709967 2. 900418 2. 085665  
3. 723927 3. 096662 3. 085148 2. 780245 3. 139975 3. 050225 3. 439813 2. 883629 2. 879094  
7. 634588 7. 507946 7. 843622 7. 84516 7. 786842 7. 778394 7. 783638 7. 595719 7. 448165  
5. 242071 5. 413656 4. 845751 5. 588833 5. 192067 4. 626489 5. 560337 4. 87678 3. 683032  
4. 004492 5. 350062 3. 951457 5. 549924 4. 353374 4. 256231 4. 321053 4. 111177 4. 138314  
3. 163273 3. 174553 3. 789082 3. 782595 3. 816832 3. 208973 3. 460428 3. 591923 3. 04601  
4. 76589 2. 121297 3. 963755 3. 85243 3. 683088 5. 081626 4. 305979 4. 424012 4. 732148  
4. 225855 4. 947191 5. 720185 5. 012433 4. 505177 4. 006424 4. 57446 4. 755244 1. 983531  
5. 723665 4. 757787 5. 546041 6. 243784 5. 997293 6. 077186 3. 875547 5. 368131 5. 300352  
6. 095934 6. 361773 6. 494101 5. 627032 5. 930851 6. 542754 6. 360391 6. 401359 6. 197285  
3. 124516 2. 213692 2. 451568 2. 796634 2. 336897 2. 608602 2. 306738 2. 553369 3. 173077  
2. 038459 2. 01227 1. 906283 2. 359511 1. 835949 2. 089381 1. 736392 1. 765234 1. 799374  
4. 314311 3. 910562 3. 355074 4. 610059 4. 411739 2. 691604 4. 005256 3. 592209 2. 948571  
2. 505525 2. 341808 1. 684376 2. 404216 2. 139808 2. 10103 2. 061715 2. 452559 2. 255944  
4. 616693 5. 72819 5. 505891 5. 391526 5. 434003 5. 677054 5. 601823 5. 051284 4. 373648  
4. 045863 3. 6239 2. 237898 4. 245163 3. 637109 3. 426258 4. 487258 4. 362786 2. 336371  
4. 853654 5. 215783 5. 863231 4. 607576 5. 219175 3. 970268 5. 025717 4. 888635 4. 680426  
4. 751787 5. 308536 4. 486127 3. 145021 4. 982104 4. 335215 4. 46886 4. 60484 3. 731779  
9. 108301 9. 421752 9. 164059 8. 527524 8. 789691 8. 937664 8. 897902 9. 025252 9. 053751  
1. 721685 2. 405928 3. 265109 2. 702488 2. 280724 1. 573761 2. 330205 2. 067028 1. 714845  
1. 339124 1. 136044 1. 021602 0. 867465 1. 018865 1. 284141 1. 280802 1. 438391 1. 359876



5.183245 4.946547 5.857018 6.436611 5.547451 5.333187 4.605336 5.426508 5.763399  
6.690619 6.924014 6.618247 7.902453 6.932466 6.532339 7.356968 6.852408 7.550482  
6.362738 6.125614 6.077787 6.760391 6.636724 6.307502 6.260361 5.930541 6.605636  
1.089654 2.547418 3.785159 1.253094 3.542861 1.658674 2.141695 1.856147 0.888797  
7.594821 6.856367 7.1633 6.97658 7.340018 7.111969 7.317192 7.502724 7.840607  
5.331793 5.93561 6.182404 5.74806 5.655628 5.242636 5.962528 6.126103 5.94599  
5.336237 5.1442 5.906138 5.863101 5.549585 5.17356 5.689452 5.380148 4.826782  
3.427511 2.491957 3.976133 4.030552 3.134579 3.750258 3.815501 3.060042 3.750241  
3.224122 3.457848 3.64668 2.3773 2.22666 2.724772 2.643192 2.744167 2.386138  
3.2625 3.2625 3.429091 4.144212 3.445544 3.100616 3.93167 3.713806 3.2625  
7.489511 7.309035 7.572727 6.689051 7.130555 7.346099 7.40242 7.270013 6.769817  
6.150989 5.898348 6.228221 6.882906 5.999996 5.305955 6.221238 5.663348 5.393549  
5.383434 5.626428 4.93016 4.492036 5.4619 4.967911 5.590631 5.303763 6.764326  
4.661628 4.011833 4.144135 1.546182 4.216305 4.180172 4.353761 4.416642 3.905438  
6.545937 6.038718 6.095795 6.475008 6.337489 5.628236 6.514493 6.619456 6.502784  
3.979844 3.640121 3.100201 4.442275 3.850399 3.453056 3.647553 3.796319 3.386564  
2.401207 2.647005 3.370428 2.770543 3.177096 2.339501 2.529579 3.866142 3.43213  
8.129461 7.804774 7.64661 7.429616 7.986508 7.681332 7.688113 8.020377 7.480883  
2.185695 2.838903 3.367445 2.1027 2.571954 2.499923 2.065444 2.697787 2.203231  
6.789115 6.465439 7.372883 6.963539 6.587369 7.277138 6.979893 7.044417 6.759318  
2.279372 1.959196 1.92073 2.581196 1.759161 1.86525 1.78077 1.130248 2.244568  
2.004311 2.103319 1.502238 0.909662 0.663334 0.232035 1.056663 1.799817 1.415502  
5.684109 5.972074 6.223606 6.503462 6.611209 6.308536 6.289224 6.322924 5.81057  
6.656628 6.712472 6.382635 6.463785 6.728685 6.485136 6.505884 6.544525 6.827564  
2.251211 1.732715 2.409486 1.932218 3.176275 1.395046 1.204641 1.07827 1.63813  
4.602389 4.129697 4.008914 3.711071 3.701446 3.487857 3.73064 3.597159 4.100811  
2.804857 3.153973 2.874357 4.611383 5.005541 2.349673 2.81828 4.330893 2.536854  
1.445242 2.099209 2.850353 3.150911 2.014615 1.902005 1.451751 2.047227 1.728313  
5.67799 5.757294 5.911185 5.306346 5.897611 5.597956 5.143018 5.644241 4.630868  
1.881799 1.149234 1.201329 2.176853 1.684243 1.425609 1.524186 1.03199 1.67822  
2.682395 3.106491 2.888242 2.313393 3.204989 2.735591 2.926242 2.801349 1.543904  
1.878996 1.461072 1.617971 2.105783 1.562269 1.446394 1.815771 1.476146 1.700191  
5.363707 5.922845 5.185901 4.259094 5.762118 5.483521 5.608907 5.813934 4.611864  
8.673939 9.117733 9.227177 8.698019 9.172873 9.618506 9.340295 8.522489 8.636679  
3.326249 3.84889 3.443442 3.242993 3.054388 3.065115 4.377423 4.003219 3.303532  
6.659937 5.723438 6.211875 5.718586 5.392397 5.783065 6.373411 5.981009 4.966509  
6.32297 6.115956 5.520496 4.986375 6.037691 6.048253 5.509234 6.002425 6.240411  
3.367743 4.567507 4.895017 5.237629 4.793298 3.574263 5.247253 5.006477 3.975605  
6.435577 5.112035 5.72996 5.836336 6.02115 6.574272 6.316771 6.543776 6.774289  
3.7487 4.2301 3.021008 2.014137 4.092566 3.233206 3.904975 4.464422 4.6847  
3.322808 3.555689 3.681457 2.625972 3.82496 3.767416 3.687614 3.316619 3.151973  
1.291436 1.470958 1.260605 1.66869 1.688067 1.478893 1.432305 1.547077 1.786807  
5.65641 5.907033 5.270266 1.899533 6.049783 5.629892 5.87306 5.043038 3.442258  
4.653929 2.813409 4.072857 3.795809 2.750236 4.17784 3.237048 4.398386 5.626701  
4.141363 3.350839 3.210238 3.784039 3.659918 4.305116 4.286962 3.292433 3.541211  
4.71641 4.727319 3.936768 5.574505 4.104226 4.676022 4.097939 3.272655 4.734758  
5.087445 5.836426 5.426554 3.788533 6.208881 5.68091 5.68012 6.149944 6.325417  
4.771243 5.365548 4.857292 6.276427 4.36291 5.176466 4.572067 4.674153 4.402589  
7.016781 7.072795 6.577453 6.347345 6.698591 6.703948 6.835101 6.563996 7.137839  
5.991655 5.966592 6.23466 5.559381 5.91166 5.790285 5.924747 6.552469 5.840132  
4.143591 4.378237 3.950262 3.076596 3.783004 4.31109 3.463249 3.710868 4.930146

2. 554857 4. 111245 1. 724103 3. 107299 4. 870558 4. 008319 1. 947221 5. 292724 5. 778502  
5. 286785 4. 141997 5. 058228 3. 167404 4. 194916 4. 974075 4. 200474 4. 046351 4. 534249  
7. 298708 7. 707857 7. 709392 7. 779315 7. 339689 7. 005175 8. 116892 7. 394335 7. 986858  
3. 442929 3. 238328 4. 165547 3. 825117 3. 958098 3. 553655 4. 193318 3. 107125 3. 102081  
6. 447952 6. 010499 6. 237379 5. 17594 5. 712831 5. 765288 6. 192509 6. 042338 6. 308334  
4. 839653 4. 844253 4. 22814 1. 808694 4. 714484 4. 371326 4. 499838 4. 089481 4. 110374  
4. 396101 4. 211118 4. 217853 4. 069449 4. 52823 4. 520042 4. 314122 4. 714383 2. 650552  
1. 712968 1. 387384 1. 229213 2. 102784 1. 038144 2. 860436 1. 386433 1. 677056 1. 788481  
0. 957494 1. 532048 1. 665984 2. 054235 1. 872719 1. 8243 1. 418224 1. 01219 1. 872212  
2. 028901 1. 936 2. 400146 2. 966871 2. 266032 2. 002572 2. 438704 1. 866268 1. 547989  
1. 894324 1. 915145 1. 556563 2. 41847 1. 850266 1. 700647 1. 876088 3. 133998 2. 002939  
4. 742289 5. 081772 5. 030987 5. 41449 4. 42137 4. 501494 4. 781831 4. 779549 4. 850609  
2. 692142 3. 614027 3. 134641 3. 293556 3. 38375 3. 117777 2. 649646 3. 067103 3. 154938  
5. 191786 4. 258964 4. 244875 3. 077254 5. 806837 4. 885209 4. 205911 4. 197101 4. 849601  
5. 384304 5. 77016 5. 741996 2. 767981 5. 65281 5. 643203 5. 581476 5. 258584 4. 822096  
7. 126367 7. 434919 6. 845076 5. 483986 7. 228051 6. 368841 7. 221026 6. 955154 7. 238145  
8. 094643 8. 066452 8. 130031 8. 252734 8. 18382 7. 884782 8. 291921 8. 153811 8. 290634  
6. 469468 6. 072067 7. 666509 6. 658906 6. 769391 6. 348116 6. 106257 6. 831819 6. 541726  
3. 994406 4. 530948 5. 017651 3. 481545 4. 684909 4. 819611 4. 040164 4. 571945 4. 20293  
4. 813418 5. 706094 5. 28901 5. 731944 5. 950037 5. 334675 5. 623873 5. 798914 5. 319259  
2. 301908 3. 120842 1. 91948 3. 021121 2. 634631 2. 393472 1. 945998 1. 451158 2. 212036  
2. 161122 1. 713943 1. 424483 1. 612331 1. 193438 2. 831329 1. 494499 1. 36807 4. 541461  
1. 769145 1. 932834 2. 611216 2. 723629 2. 692534 2. 591291 1. 671909 2. 745438 1. 542916  
5. 265215 5. 290116 4. 523601 5. 15063 3. 776368 4. 99872 5. 379654 5. 674829 5. 719134  
3. 616329 3. 219669 2. 791518 2. 11091 2. 626043 5. 032996 3. 090911 2. 952597 3. 330589  
5. 311025 5. 592652 5. 10664 7. 554496 7. 597015 4. 399774 7. 304222 6. 002276 6. 736531  
1. 126516 1. 071241 1. 455731 1. 94113 1. 343779 1. 654458 1. 39488 1. 411419 1. 414953  
5. 21199 4. 68735 4. 942244 4. 231534 5. 372675 3. 752522 4. 598376 4. 857866 3. 733718  
3. 037941 4. 272281 3. 79395 4. 270151 3. 792011 3. 728964 3. 997743 2. 758712 4. 054353  
5. 335557 5. 953946 5. 471151 6. 039421 5. 866516 5. 25902 6. 073575 5. 912892 6. 414175  
8. 452362 8. 540283 8. 714855 8. 292802 8. 093542 8. 606747 8. 727649 8. 420795 8. 132974  
5. 326111 5. 2642 4. 348108 4. 725852 4. 778529 4. 08752 4. 93433 4. 698333 4. 282832  
4. 630283 4. 977763 4. 993826 4. 506891 4. 51774 4. 314425 4. 684869 4. 418362 4. 75616  
1. 889764 1. 818174 2. 127103 3. 071382 2. 584059 3. 150792 2. 297249 2. 215909 2. 952907  
3. 997506 4. 731024 3. 835102 2. 921437 3. 86181 3. 877429 4. 696808 3. 874312 4. 676891  
1. 694734 1. 973662 1. 416858 1. 411688 0. 919955 1. 310522 1. 239506 0. 782094 1. 081461  
1. 536086 2. 233799 1. 700583 1. 999195 2. 002763 1. 593572 2. 792788 2. 130682 2. 608941  
2. 987845 3. 115093 2. 136437 4. 564538 2. 555091 2. 934931 2. 503781 2. 169871 1. 403673  
7. 643349 7. 684815 7. 281466 7. 748932 7. 921962 7. 79393 7. 698644 7. 697784 7. 633352  
4. 10462 4. 764515 4. 22934 3. 996369 3. 523544 4. 557983 3. 670733 3. 897913 2. 731393  
2. 154475 2. 078336 1. 962016 2. 004558 2. 197024 1. 593783 1. 641972 1. 825715 2. 28411  
6. 59841 6. 768775 6. 390473 4. 662478 6. 795698 6. 386449 6. 256649 6. 313727 6. 443277  
3. 487666 4. 294494 4. 313791 3. 926579 4. 098555 3. 811382 3. 64384 3. 56125 3. 876083  
2. 303641 1. 922009 1. 325871 4. 217345 0. 906126 1. 909764 1. 850786 1. 845691 3. 15705  
8. 518459 8. 590171 8. 541335 2. 739188 8. 370028 8. 304674 8. 364838 1. 867915 2. 087084  
8. 212426 7. 786263 7. 76129 7. 92415 7. 829705 7. 098339 8. 059452 7. 929403 7. 980201  
2. 826593 2. 619554 3. 055542 3. 041907 3. 299487 2. 927868 3. 089432 2. 833857 2. 938393  
3. 612478 3. 146173 3. 563447 1. 566817 2. 938476 2. 235027 3. 134549 1. 757507 1. 751707  
2. 624713 2. 360183 1. 988524 2. 172866 2. 265357 2. 974837 2. 48991 2. 20087 2. 833609  
7. 906829 8. 206173 7. 660748 7. 908178 8. 061408 7. 727088 8. 002366 7. 650035 7. 911348  
5. 709207 5. 64472 5. 967677 5. 614729 5. 843851 6. 044661 5. 420995 5. 286477 5. 087202

6. 1092 6. 256189 5. 370072 5. 246076 6. 09209 6. 369347 5. 6175 5. 976137 4. 581891  
5. 043175 5. 140796 4. 629614 5. 224698 4. 370569 5. 073072 4. 543501 5. 079447 4. 531808  
5. 015706 4. 442149 5. 045448 4. 054827 5. 32025 4. 558086 4. 787584 4. 900935 4. 462405  
6. 323242 6. 725941 6. 419583 5. 645074 6. 399124 6. 262816 5. 17964 5. 72835 5. 437431  
6. 784711 7. 052278 7. 0066 6. 407751 7. 55104 6. 771376 7. 151976 7. 085951 5. 678069  
5. 345207 5. 104403 6. 002909 5. 410666 5. 226922 4. 49794 4. 760502 5. 188365 4. 625878  
4. 493875 4. 317591 4. 393501 3. 442217 4. 680979 3. 791085 4. 411956 4. 282501 3. 958564  
2. 160233 2. 373 2. 533597 2. 724403 2. 46301 1. 947012 2. 125673 1. 663984 2. 734747  
2. 186048 1. 903324 2. 099355 2. 399827 1. 510199 1. 857414 1. 798452 1. 813677 2. 197984  
6. 861192 6. 915965 6. 492104 6. 309636 6. 857229 6. 255576 7. 062672 6. 584889 6. 250278  
3. 74766 4. 588812 2. 967182 5. 255172 4. 106439 3. 187029 4. 730286 2. 947368 3. 799299  
2. 259105 2. 201765 2. 735312 1. 372838 1. 426845 0. 95287 1. 309575 1. 235647 1. 548667  
2. 315848 1. 658974 3. 194813 3. 004714 2. 091784 3. 09784 2. 723479 2. 451673 2. 049097  
3. 485642 2. 98388 2. 24293 2. 697841 2. 217491 3. 313945 1. 654164 2. 403939 1. 811085  
3. 217625 2. 914216 3. 476577 3. 589359 3. 633067 3. 853717 3. 392484 3. 655707 4. 421489  
2. 094729 1. 999626 2. 448161 3. 287249 1. 776682 1. 855325 2. 158193 2. 114896 1. 810529  
5. 036983 4. 819284 4. 910676 4. 426402 4. 978779 4. 467395 6. 321187 5. 616669 5. 422028  
6. 108314 6. 837446 6. 803655 6. 05489 6. 846049 6. 085578 6. 257438 6. 305577 6. 761042  
5. 891801 6. 141617 6. 288137 6. 365463 6. 265955 5. 948309 6. 38585 6. 159675 5. 299727  
4. 126771 3. 116499 5. 138881 4. 363107 4. 221448 3. 946709 3. 984803 4. 296253 4. 56541  
7. 012416 7. 301405 7. 065484 7. 254526 7. 128113 7. 311456 7. 118378 7. 22031 7. 454425  
4. 93016 5. 340363 4. 465007 3. 965517 5. 367875 4. 927406 4. 526194 5. 003614 3. 743082  
3. 814291 4. 446617 4. 599412 5. 512012 4. 093793 5. 110058 5. 022292 4. 682144 4. 690997  
4. 635807 4. 153083 3. 674144 3. 978176 3. 790682 4. 201618 4. 679727 4. 170259 4. 696232  
3. 005465 3. 295095 3. 432286 3. 215873 2. 256951 3. 114748 2. 654528 2. 801685 3. 326623  
3. 469605 3. 660615 3. 678613 2. 776999 4. 367255 3. 105828 4. 173208 3. 791333 3. 507498  
1. 023268 1. 064677 0. 941047 1. 053767 0. 755558 1. 145547 0. 699879 2. 605322 0. 495903  
6. 202738 6. 598942 5. 546388 6. 15688 6. 784464 5. 776923 6. 66586 6. 194424 6. 189685  
2. 934213 2. 63456 2. 107635 2. 795004 1. 967356 1. 768185 2. 050511 2. 724001 1. 07766  
2. 102464 1. 554784 2. 198529 1. 695363 2. 168734 2. 359075 2. 002411 1. 522741 1. 707837  
5. 302527 5. 651428 4. 894307 5. 420559 5. 769567 5. 204018 5. 152976 5. 188311 4. 175859  
5. 268543 5. 165597 5. 086199 5. 160679 4. 747579 5. 733205 5. 11481 4. 933592 4. 378956  
5. 902505 6. 205845 6. 439313 5. 557686 8. 088651 5. 865618 6. 393906 6. 057748 5. 432624  
1. 298524 3. 019993 3. 179665 3. 875175 3. 117555 2. 325702 3. 060509 1. 790037 1. 794907  
5. 259723 6. 09051 5. 469958 5. 689479 5. 345617 5. 636289 5. 384779 5. 653502 5. 154746  
3. 870583 2. 490762 4. 369715 1. 839939 3. 45936 4. 058488 3. 929824 3. 178873 5. 209233  
6. 645325 6. 34625 6. 426365 5. 976772 6. 573738 6. 421888 6. 396862 6. 4167 6. 083376  
6. 376378 6. 085215 6. 442523 6. 293498 6. 333399 5. 516141 6. 154147 6. 047495 6. 293689  
3. 664924 3. 388187 3. 664924 2. 475837 3. 520627 3. 887319 4. 579894 3. 942633 4. 299013  
1. 140544 1. 172468 2. 119367 1. 088648 2. 162206 1. 447256 1. 256843 2. 076851 1. 620972  
7. 855711 7. 884489 8. 290394 8. 471558 8. 372172 7. 614145 7. 976129 8. 162881 7. 163418  
3. 066012 3. 709588 3. 576883 4. 118457 2. 368373 3. 069863 3. 805197 3. 30787 4. 609415  
1. 456669 1. 548639 1. 613089 1. 667367 1. 832704 2. 087567 1. 556319 1. 301064 1. 813305  
2. 849103 2. 237401 3. 233614 2. 765827 2. 819301 3. 533035 2. 41438 2. 98309 2. 490493  
6. 157776 6. 498076 6. 272236 6. 421171 5. 965831 5. 978878 6. 335522 6. 056326 5. 988487  
1. 56054 1. 314567 1. 233318 1. 238502 1. 642468 1. 891256 1. 393519 1. 184531 1. 609327  
2. 228321 2. 176832 1. 912887 3. 027135 2. 157855 2. 336893 1. 73514 2. 140348 2. 156299  
1. 854678 1. 476001 1. 340018 2. 092038 1. 221021 1. 507824 1. 130087 2. 420857 1. 399198  
2. 859971 1. 696516 1. 577757 1. 914796 2. 091442 1. 77967 1. 942353 2. 353746 2. 463377  
2. 432689 2. 049603 1. 945522 1. 155467 1. 993691 2. 597391 1. 867915 1. 533509 2. 41588  
4. 300932 4. 498642 5. 115306 5. 109087 4. 383231 3. 41586 4. 433205 4. 250741 4. 038487

4. 306354 3. 40868 3. 970341 4. 175122 3. 146782 4. 79316 3. 138847 4. 347795 3. 705601  
8. 121968 7. 63024 7. 61223 7. 697385 7. 187191 8. 419584 7. 981854 7. 639577 8. 130542  
3. 118713 3. 376363 3. 621611 3. 308403 3. 829663 2. 850609 3. 201155 3. 037932 3. 336351  
8. 32468 8. 445548 8. 518742 8. 384864 8. 554507 8. 427545 8. 972556 8. 494071 7. 995372  
4. 736426 4. 557558 5. 541512 5. 860291 5. 470069 4. 735485 4. 611562 5. 521008 4. 795102  
6. 799253 6. 180229 6. 267041 7. 268794 6. 770144 6. 221871 6. 437467 5. 934851 6. 565832  
8. 040233 7. 695181 7. 830459 8. 41652 7. 709776 7. 840943 7. 884683 7. 516432 7. 954446  
4. 848969 4. 84639 4. 887959 4. 757297 4. 999627 4. 575798 4. 594554 4. 904699 4. 785234  
3. 073176 2. 865894 3. 394297 3. 647585 2. 742723 3. 718237 2. 829352 3. 242224 2. 442976  
4. 403071 4. 206414 4. 589672 4. 104641 4. 553802 4. 323373 4. 765429 4. 182768 4. 478894  
4. 458917 4. 951718 5. 112829 4. 905325 4. 96122 4. 842167 4. 725461 5. 271032 3. 983677  
5. 45764 5. 521368 5. 377148 4. 592654 5. 272463 4. 31736 5. 358716 5. 004421 5. 505759  
6. 631273 7. 072052 6. 448165 6. 155971 6. 391068 6. 64351 6. 857213 6. 657318 6. 715774  
5. 781539 5. 460654 5. 661906 6. 088469 5. 50262 5. 165673 5. 354432 6. 002239 5. 781481  
2. 288158 2. 423431 2. 256021 2. 196414 1. 773984 1. 979246 1. 759054 1. 989673 1. 613649  
4. 803437 4. 230966 4. 51552 4. 313411 4. 33517 4. 565614 3. 597856 4. 624933 2. 816338  
7. 576031 7. 436364 8. 0318 6. 801867 7. 721388 8. 152805 7. 386256 7. 844873 6. 374829  
7. 847357 7. 4757 8. 513844 8. 241643 8. 848098 7. 986631 8. 225639 8. 577751 7. 923633  
2. 657619 1. 730845 2. 19568 1. 888397 2. 614212 1. 769771 2. 926134 2. 687428 3. 652558  
2. 776857 2. 542475 3. 073489 2. 484675 1. 979541 2. 373349 2. 73501 2. 078386 3. 101027  
6. 117428 5. 94221 6. 669165 6. 435448 6. 539447 6. 105244 6. 725397 6. 308514 6. 647233  
2. 092128 2. 221301 2. 215591 2. 303199 1. 885562 1. 628904 2. 512595 1. 274293 2. 062971  
3. 38822 4. 486169 5. 037299 4. 427523 4. 681858 3. 524261 5. 288134 2. 642335 5. 636179  
2. 168127 2. 177959 2. 728002 3. 0794 2. 740435 1. 788692 2. 721795 2. 800448 3. 383081  
4. 19295 3. 957313 3. 499102 1. 886745 6. 346635 3. 753495 4. 319167 4. 386059 4. 738723  
1. 687227 1. 28708 1. 547942 1. 683211 3. 739064 3. 135674 1. 994802 1. 13523 5. 47231  
2. 242331 2. 464039 2. 192182 2. 696821 2. 022897 2. 261635 1. 762243 1. 656288 3. 066385  
7. 490709 7. 568006 7. 258277 7. 257419 7. 382415 7. 361937 7. 679563 7. 467427 7. 168619  
7. 469361 7. 705652 7. 37904 7. 675951 7. 721911 7. 484969 7. 476075 8. 027576 7. 252113  
7. 817497 7. 948686 7. 674404 7. 564204 7. 767015 7. 744366 8. 28055 7. 75539 7. 372085  
4. 000775 3. 724133 4. 17833 4. 764221 3. 594072 3. 296146 3. 375737 3. 99256 3. 391846  
2. 971223 2. 53159 3. 581192 3. 124922 3. 129409 2. 596781 2. 214399 3. 580642 1. 97326  
3. 902607 4. 753448 4. 373924 4. 462948 5. 048963 4. 578815 3. 530125 4. 294359 3. 523259  
2. 56545 2. 909964 3. 477298 1. 843278 2. 808355 3. 00547 3. 18816 1. 960172 2. 321043  
5. 059563 4. 296348 4. 287999 4. 384553 5. 039984 4. 694286 4. 890724 5. 009329 4. 441068  
1. 39728 2. 17717 1. 244378 1. 899854 1. 368347 1. 959719 1. 540473 1. 328826 2. 29924  
6. 483438 6. 151172 6. 473084 5. 4928 5. 862169 6. 266984 6. 757367 6. 218444 6. 555832  
5. 721158 5. 717882 5. 615289 5. 797482 5. 094447 5. 281825 5. 424913 5. 470702 5. 860329  
3. 062694 2. 109453 1. 654838 3. 316548 3. 078634 4. 276793 3. 622606 4. 568424 3. 763066  
4. 587974 5. 152282 4. 593685 4. 570841 5. 639419 4. 320094 4. 430183 4. 937462 4. 783301  
3. 390592 3. 485585 1. 448502 1. 757894 2. 975067 3. 80802 3. 375115 3. 738344 3. 672005  
2. 818045 2. 205432 4. 529612 2. 602343 2. 096155 3. 363328 2. 095651 2. 189032 4. 750557  
0. 98794 1. 859611 1. 77629 1. 361078 1. 263584 2. 701477 2. 064444 1. 713626 2. 447376  
2. 560724 2. 587214 2. 778701 4. 200036 2. 719625 3. 184963 1. 974337 2. 859638 2. 469217  
2. 548428 2. 37821 3. 065781 2. 573197 1. 85349 3. 348135 1. 885056 2. 642172 1. 81581  
1. 560751 2. 949615 1. 81081 2. 099911 1. 456209 2. 332903 2. 016857 1. 488767 2. 667035  
5. 428724 5. 374848 5. 020717 4. 810138 5. 845717 4. 850833 5. 040773 5. 027558 5. 494199  
8. 75932 8. 966389 9. 055384 8. 006382 9. 291112 8. 533574 8. 640321 9. 023509 7. 717489  
2. 820744 1. 848496 2. 847263 4. 520647 2. 462762 2. 29343 2. 803188 2. 283832 2. 697073  
7. 058588 7. 157131 6. 808401 7. 443386 6. 927116 6. 992185 7. 175008 6. 828391 6. 783005  
3. 121605 4. 114622 3. 161042 4. 212141 3. 223483 4. 001852 3. 636257 3. 584412 3. 667382

3. 289766 3. 990433 4. 56315 4. 948208 4. 35979 4. 521206 3. 157844 5. 106239 3. 679085  
2. 723979 1. 943726 1. 354527 0. 946825 3. 088405 1. 552422 2. 345164 2. 632114 4. 680078  
4. 258823 4. 537233 4. 926935 4. 047421 5. 18265 4. 184326 4. 437872 5. 166142 4. 322178  
7. 425888 7. 193922 6. 718359 7. 129476 6. 953376 6. 998875 7. 624974 7. 543665 7. 376718  
2. 716369 3. 128263 2. 994555 2. 840303 4. 029797 3. 902655 3. 801899 2. 891502 3. 104138  
5. 687833 5. 101235 5. 844777 5. 500516 5. 602411 5. 547925 5. 411358 5. 165127 4. 891836  
3. 788745 2. 950555 2. 405247 2. 620077 3. 26362 2. 37207 2. 267634 4. 498304 2. 148581  
3. 177362 2. 932135 3. 35479 3. 703889 3. 515399 2. 748357 3. 59016 3. 217601 2. 707547  
4. 026508 3. 219436 3. 849038 3. 777332 3. 608042 4. 718299 3. 438167 4. 030883 3. 938958  
4. 334538 4. 715131 4. 117286 3. 71915 4. 229203 4. 345096 3. 762526 4. 007681 3. 535381  
5. 125439 5. 440227 5. 408041 2. 814138 4. 969887 5. 438877 4. 931689 4. 917505 6. 298882  
1. 318354 1. 682666 1. 142233 1. 892067 1. 846381 1. 500498 1. 748169 1. 593408 1. 97015  
1. 890205 2. 094216 1. 708218 1. 66308 1. 529428 2. 08929 2. 05076 1. 927022 1. 833076  
4. 439471 4. 595305 4. 191355 5. 176566 8. 417098 4. 297561 5. 012559 5. 822354 5. 35796  
1. 964796 1. 746903 2. 640652 1. 962494 2. 170138 2. 184993 2. 633518 2. 208404 2. 232136  
1. 149554 0. 849031 1. 017682 1. 755911 0. 589384 0. 882796 1. 472041 1. 070144 1. 074078  
3. 234044 2. 465802 3. 064336 3. 273501 2. 490177 2. 222041 1. 437783 3. 049777 2. 989647  
1. 761672 3. 568038 2. 269794 2. 535914 2. 670289 2. 66098 2. 193533 1. 709406 1. 624597  
4. 444606 4. 43857 4. 678818 5. 103429 4. 721199 4. 515522 4. 602664 4. 800867 4. 764402  
6. 24529 6. 169134 6. 53223 7. 090367 6. 388898 6. 029791 6. 183725 6. 589498 5. 225922  
3. 207153 2. 86581 2. 970983 2. 993412 3. 613288 3. 572092 3. 373297 3. 397968 2. 725681  
7. 511408 7. 585265 7. 527032 7. 663679 7. 552884 7. 008743 7. 570189 7. 648315 7. 168709  
4. 219181 4. 530777 5. 071251 4. 8489 5. 193263 4. 28382 4. 383907 4. 7812 4. 154584  
4. 27822 3. 23943 3. 023251 2. 407811 4. 21391 3. 199258 2. 44692 3. 44987 3. 721882  
5. 722979 5. 039033 5. 877015 5. 670827 5. 298678 4. 978865 5. 55578 5. 017136 5. 696106  
4. 634296 4. 604471 4. 263334 4. 762637 4. 805981 4. 272848 4. 677977 4. 174461 1. 766858  
2. 424953 2. 143308 2. 918489 2. 942722 2. 316899 2. 937099 2. 489344 2. 258329 2. 538915  
2. 691003 1. 760699 2. 489529 2. 526122 2. 029749 2. 567918 2. 801973 3. 30694 3. 212545  
5. 096117 5. 324726 6. 017531 5. 844127 5. 68786 4. 712098 5. 984667 5. 403263 6. 4275  
1. 508821 1. 262146 1. 307276 1. 140393 1. 186841 1. 612477 1. 275797 1. 087263 1. 561767  
1. 75688 1. 617637 2. 375731 2. 560634 1. 335412 2. 361964 1. 588912 1. 452402 1. 875281  
5. 416933 4. 797342 5. 065298 4. 642388 5. 162981 5. 311302 5. 30939 4. 947129 5. 301348  
4. 764778 4. 805385 5. 501382 6. 137149 5. 14741 5. 02184 5. 3589 5. 194769 3. 720539  
3. 613109 4. 119531 3. 399337 3. 951157 4. 023736 4. 92908 4. 707116 4. 159911 3. 409258  
2. 513395 2. 209833 1. 694434 2. 251578 2. 413377 1. 732004 2. 132355 2. 086865 2. 572744  
7. 574281 8. 240258 8. 353293 7. 555421 8. 363611 7. 970329 7. 965562 7. 720583 7. 220414  
5. 222751 5. 244568 4. 40906 4. 153266 4. 723644 3. 891962 4. 793549 4. 692653 4. 631186  
6. 598906 6. 900609 7. 193367 6. 665 7. 37889 6. 617979 6. 768358 6. 913044 7. 128224  
9. 170009 8. 93783 8. 778756 8. 200329 8. 592552 8. 845213 8. 760564 8. 787649 8. 595136  
1. 727742 1. 790174 2. 253054 3. 978909 1. 813174 1. 715077 0. 842327 2. 201945 2. 429845  
3. 71785 3. 776657 3. 272208 2. 93472 3. 414759 3. 065083 4. 323517 4. 012214 2. 602326  
8. 679711 8. 123328 8. 155249 7. 505593 8. 311973 7. 636447 8. 046821 8. 384742 8. 423566  
10. 72171 10. 81948 10. 71333 10. 65021 11. 04926 10. 54558 10. 91824 10. 7585 10. 59036  
5. 239932 5. 624475 4. 607027 3. 0965 5. 40714 5. 596664 5. 38928 5. 005723 6. 091986  
1. 932077 1. 920937 2. 883505 2. 696203 2. 096726 1. 20606 2. 681601 2. 204153 1. 94467  
7. 250444 7. 351998 6. 634742 7. 418268 7. 17405 6. 998915 6. 982099 7. 406968 6. 808386  
1. 980488 2. 011026 1. 401084 1. 848596 3. 001674 1. 037465 1. 459857 3. 771167 0. 614219  
3. 713163 3. 687502 4. 378084 4. 989274 3. 906219 4. 867708 4. 030771 4. 92362 4. 352479  
3. 266383 3. 149183 4. 173921 2. 677445 3. 427177 4. 013785 3. 526515 2. 921166 3. 17357  
2. 107926 2. 017231 2. 225377 2. 377442 2. 388964 2. 769985 2. 090653 2. 645989 1. 873656  
2. 780622 1. 709233 2. 153512 2. 547272 2. 836863 2. 308765 1. 623115 1. 904453 2. 862453

8. 145483 8. 317961 8. 407413 7. 400914 7. 898682 7. 708242 8. 455651 7. 828092 8. 408186  
7. 427868 7. 038682 7. 056844 7. 135252 6. 85174 7. 072518 7. 073191 7. 150723 7. 569574  
4. 004302 5. 142076 3. 466855 6. 689661 4. 800167 4. 57083 4. 052552 4. 587274 2. 973144  
6. 218185 6. 317043 5. 568045 4. 329962 6. 235659 5. 393434 5. 471626 5. 986611 5. 611475  
4. 6651 4. 39619 4. 572895 4. 940803 4. 062763 3. 552468 2. 797277 2. 436871 4. 584457  
5. 330695 5. 970878 3. 128083 5. 834443 5. 133278 4. 262246 4. 390304 5. 245891 3. 832965  
5. 878539 5. 55465 5. 149509 5. 735844 5. 499158 5. 735087 5. 132836 5. 049613 5. 383755  
4. 967233 4. 55542 4. 162821 3. 892185 4. 22564 5. 060482 5. 040499 4. 473472 4. 261568  
6. 640214 6. 510975 7. 445652 6. 39288 6. 19718 7. 434817 6. 855262 6. 33568 6. 814797  
5. 104645 5. 306941 5. 28723 3. 600004 4. 845023 5. 192604 4. 815049 5. 065175 4. 294122  
1. 454558 1. 230399 1. 434295 1. 548297 1. 469836 2. 945919 1. 424303 1. 413396 1. 232206  
5. 473008 5. 049806 4. 886121 5. 018394 5. 343832 4. 680892 5. 26605 5. 009944 4. 344382  
3. 301212 4. 468606 4. 761424 3. 309197 4. 162924 3. 755216 4. 294905 4. 179942 4. 396788  
3. 49671 3. 003282 2. 395845 2. 071657 2. 924016 3. 148583 2. 229615 2. 5002 2. 361142  
5. 259147 4. 700191 3. 772741 3. 486589 5. 523578 5. 2125 4. 959368 4. 82216 5. 122471  
5. 303038 6. 216864 6. 968975 5. 741773 5. 029118 6. 577081 6. 529819 6. 438392 5. 671259  
5. 342951 6. 005163 5. 486827 6. 56892 6. 219999 5. 448498 6. 152823 6. 384458 5. 598774  
4. 477945 5. 134179 4. 945661 4. 831775 5. 008766 4. 399253 4. 522071 5. 033137 3. 473396  
2. 20509 2. 007119 2. 401342 2. 733995 2. 210592 2. 98816 2. 703331 2. 647328 3. 132622  
3. 874721 3. 253557 4. 631552 4. 269562 2. 26189 3. 125468 4. 505732 4. 210651 3. 019684  
2. 864 3. 504605 3. 496936 3. 255432 3. 098417 3. 702073 3. 282538 3. 629846 4. 237033  
4. 619386 4. 770894 4. 544219 2. 974403 4. 964487 4. 72201 4. 391372 4. 091401 4. 433316  
7. 545055 7. 307321 7. 049831 7. 456028 7. 427499 6. 463952 7. 527221 7. 261542 7. 603122  
7. 97724 6. 691275 7. 787441 7. 715655 6. 883604 7. 009761 8. 090556 7. 781281 6. 825295  
4. 633786 5. 045065 4. 124596 4. 382274 4. 359663 4. 365266 4. 828504 4. 882501 3. 163997  
5. 966466 4. 722882 5. 249494 5. 24795 4. 961586 5. 271506 5. 584165 5. 770423 6. 062633  
1. 614529 1. 82381 1. 95203 2. 677493 2. 69326 2. 782017 2. 140223 2. 690932 2. 365398  
5. 070754 5. 560241 6. 080189 4. 231196 5. 808862 5. 207426 5. 661305 4. 949941 5. 436098  
5. 701996 4. 419181 4. 946537 2. 982448 4. 994731 4. 34958 6. 036107 5. 668388 4. 571989  
4. 77606 4. 261637 3. 76115 3. 995442 3. 966535 5. 332652 4. 511676 4. 578981 4. 744511  
6. 271439 6. 663624 6. 020071 5. 835279 7. 050251 6. 071661 6. 682015 6. 594745 6. 372907  
1. 74112 2. 728756 2. 414204 1. 902251 2. 886381 1. 669634 2. 759278 2. 019119 1. 522245  
3. 313902 2. 591566 3. 027939 3. 364809 2. 900618 3. 616129 3. 73706 4. 583048 2. 707136  
4. 750585 5. 178051 5. 378234 5. 274412 4. 967387 4. 331365 4. 972148 5. 168839 4. 911997  
1. 109218 1. 077758 1. 318387 1. 17375 2. 252974 1. 425898 2. 277306 3. 10766 1. 291738  
6. 271084 6. 252648 5. 86516 6. 118982 6. 508037 5. 679166 6. 761304 6. 543212 6. 844569  
8. 983886 9. 725323 9. 303404 8. 593446 8. 841793 9. 226529 9. 320549 8. 736937 9. 180564  
1. 351516 0. 84494 1. 72971 2. 843509 0. 748235 2. 080586 1. 180112 1. 207534 0. 807107  
6. 271471 6. 614508 6. 378722 4. 818515 6. 702834 6. 677297 6. 126157 6. 766344 6. 861637  
3. 21498 2. 675124 2. 608075 3. 007894 3. 264924 2. 851292 3. 519984 2. 804575 3. 07291  
2. 216804 1. 669358 1. 759678 2. 150955 1. 373365 2. 172896 1. 381589 1. 361564 2. 195356  
2. 53903 2. 210186 3. 439691 1. 486263 3. 321891 2. 430889 3. 913051 2. 197107 4. 470908  
3. 762776 3. 808586 3. 093179 3. 158224 3. 247318 4. 189996 3. 502265 3. 544569 2. 432678  
2. 30208 3. 163885 2. 609009 2. 115308 3. 243977 3. 948718 2. 583343 1. 918745 1. 707461  
6. 769392 6. 968135 6. 702051 5. 476944 6. 734975 7. 042537 6. 852316 6. 752172 6. 332405  
2. 574037 3. 263453 3. 101867 1. 983117 1. 441976 2. 93577 3. 065266 3. 10263 1. 206937  
4. 770808 4. 318497 5. 032535 4. 1136 4. 834459 5. 111109 4. 397062 4. 805612 4. 607898  
2. 701967 3. 125968 3. 598557 2. 619541 2. 527764 3. 507182 3. 746151 3. 098033 2. 099164  
4. 460432 4. 499389 4. 717487 4. 858937 5. 175973 4. 272452 4. 919015 3. 31573 4. 276598  
5. 65391 4. 988659 4. 567568 6. 147476 4. 441941 5. 267518 3. 471836 4. 755299 5. 199365  
6. 419736 6. 723777 6. 239954 4. 834324 6. 290598 6. 139109 6. 419736 6. 343618 7. 503699

1. 358877 1. 354053 1. 378151 1. 880856 1. 315607 2. 178472 1. 487676 1. 46751 1. 976224  
7. 503948 7. 752195 7. 639905 7. 055793 7. 344774 7. 546447 7. 668895 7. 236485 7. 999636  
5. 684189 5. 433443 5. 423848 5. 318895 4. 810897 6. 118444 5. 752616 5. 339329 5. 683852  
6. 539357 6. 99728 6. 329622 6. 535245 6. 287561 6. 453523 6. 493688 6. 601258 6. 99538  
4. 507395 4. 047716 3. 942049 3. 278837 3. 223691 3. 103352 3. 98415 3. 581154 3. 974026  
3. 62357 3. 37241 4. 204939 4. 604444 3. 739969 4. 245663 4. 531948 3. 72025 2. 637926  
2. 221945 1. 790311 3. 255424 2. 936181 1. 656631 1. 888805 2. 378636 2. 3421 2. 627862  
5. 281112 6. 743481 5. 817875 5. 904972 6. 312512 6. 200629 6. 077318 6. 181558 6. 510746  
5. 503371 5. 148544 5. 204104 4. 338742 5. 732412 5. 234537 4. 813864 5. 472152 4. 798396  
5. 086505 5. 375326 5. 352096 5. 348673 5. 357756 5. 377527 5. 466882 5. 313231 5. 904633  
6. 697875 6. 740685 7. 019797 5. 791415 6. 314758 6. 548929 6. 873793 7. 064763 4. 950956  
5. 427541 4. 869995 4. 33001 4. 597288 4. 662288 4. 079645 4. 927615 5. 028926 5. 165954  
4. 245281 5. 283306 4. 358319 4. 124236 4. 805544 2. 978504 4. 692411 4. 510632 4. 640975  
4. 459582 5. 312819 5. 108227 4. 905205 4. 411176 4. 970035 4. 172155 4. 33023 5. 934384  
1. 835058 1. 727587 2. 130027 1. 60743 1. 599911 2. 152313 1. 485587 1. 224579 2. 344111  
2. 211666 1. 498577 1. 565987 2. 08332 1. 663037 1. 910687 1. 862384 1. 874277 1. 926657  
4. 479774 4. 502959 3. 576168 3. 83957 4. 452812 3. 897744 4. 203873 4. 079368 4. 510236  
5. 974292 5. 863754 2. 725781 5. 165127 3. 467534 3. 74969 5. 363106 6. 78509 7. 160959  
2. 078328 2. 493837 2. 100837 2. 883954 3. 457283 2. 897461 2. 755351 2. 196448 2. 408545  
6. 351381 7. 044728 6. 559872 7. 121351 6. 76694 6. 698679 6. 826693 6. 788301 6. 919985  
8. 053369 8. 319529 8. 122938 8. 567392 8. 142167 8. 087738 8. 563304 8. 288722 7. 707215  
3. 955653 2. 894881 3. 121351 1. 799709 3. 906709 3. 048601 3. 116833 3. 32076 1. 969175  
6. 923381 7. 136618 7. 46512 7. 084474 7. 433818 7. 193236 6. 603519 7. 339229 6. 075259  
6. 714337 7. 444469 7. 50155 6. 429669 7. 540388 7. 102725 7. 026859 7. 555921 6. 607571  
8. 137507 7. 687597 8. 563441 8. 522055 8. 438471 8. 033869 7. 854715 8. 224941 7. 346114  
6. 525577 6. 34314 6. 506293 6. 021082 6. 034202 6. 132616 6. 047339 5. 968547 5. 671945  
6. 803242 7. 315863 7. 220669 7. 416135 6. 338187 7. 361252 7. 273378 7. 047573 6. 921941  
5. 679247 4. 901782 4. 99765 5. 819019 5. 026624 4. 653848 5. 121443 4. 95217 4. 447002  
7. 829048 7. 825731 7. 701057 6. 754158 8. 181359 7. 410893 7. 724661 8. 055745 7. 759521  
5. 94888 6. 298937 4. 135753 7. 738543 6. 04928 3. 334638 6. 842323 7. 364495 7. 456257  
6. 598077 6. 640564 6. 470293 6. 267001 6. 776104 6. 581866 6. 754819 6. 515482 5. 868526  
2. 544534 2. 98373 2. 827673 3. 013177 2. 864351 2. 405874 2. 422581 2. 911476 2. 721611  
2. 998973 2. 450389 1. 889762 1. 440866 2. 235167 1. 484107 2. 599717 1. 932174 3. 429588  
2. 710883 2. 021098 2. 65955 3. 167967 3. 242976 2. 829127 2. 397517 2. 509669 2. 911028  
6. 0043 5. 887701 5. 756406 5. 848012 6. 589292 5. 713291 6. 664304 5. 949922 5. 742236  
1. 017626 0. 811275 1. 403733 1. 005995 1. 387092 1. 075883 0. 75443 1. 47412 0. 989134  
4. 426549 4. 956745 4. 318564 4. 629229 4. 259708 3. 88229 4. 875335 4. 532358 4. 517764  
4. 05332 4. 864941 4. 825162 2. 920422 4. 665138 4. 565582 3. 444894 4. 914948 2. 933459  
6. 722205 6. 484164 6. 321048 5. 269779 6. 929744 6. 578468 6. 533274 6. 138577 6. 30609  
5. 711018 5. 53133 5. 581348 4. 825607 5. 548597 5. 235273 5. 49191 5. 195093 5. 370952  
5. 955168 6. 247371 5. 737845 6. 143112 5. 858478 5. 750906 6. 091616 6. 343371 5. 898712  
5. 859945 5. 246783 4. 997332 6. 037807 5. 171125 4. 249167 4. 012868 5. 190497 5. 366755  
1. 395679 1. 3843 1. 435126 3. 737504 2. 389263 1. 298323 0. 972461 1. 480609 1. 188114  
3. 903731 3. 494882 4. 060817 3. 011891 3. 580355 3. 038091 2. 804759 3. 504051 4. 319989  
5. 507588 5. 959213 5. 537436 5. 413333 5. 549858 5. 22541 6. 151917 4. 971776 4. 979637  
1. 691249 1. 135804 1. 308051 2. 720561 1. 714876 1. 725542 1. 795493 1. 399666 1. 54249  
2. 75325 2. 474717 2. 306917 2. 351364 2. 46477 1. 631884 1. 799842 2. 312749 2. 33896  
5. 710139 2. 960797 4. 360944 3. 678336 4. 031858 5. 890673 3. 976588 5. 432368 6. 655744  
1. 960927 3. 123038 3. 026411 2. 853726 2. 38849 3. 303242 2. 203239 2. 426859 2. 180031  
2. 073824 2. 523595 2. 988858 2. 553079 1. 738627 1. 160574 1. 974858 2. 14269 1. 783898  
1. 82785 1. 97826 1. 992612 1. 62952 1. 200117 1. 714812 3. 361283 2. 493958 1. 399848

6. 361332 6. 484167 5. 236164 4. 595526 5. 271268 4. 73429 5. 179645 5. 515931 4. 579459  
4. 037523 3. 984107 3. 614211 4. 89095 3. 810631 3. 913706 3. 940682 3. 571731 3. 344997  
8. 192073 8. 173544 8. 303467 7. 168399 8. 001117 7. 704948 7. 836164 8. 435814 7. 066715  
2. 311051 2. 945812 2. 169379 2. 533588 2. 383878 2. 667166 1. 978524 2. 202954 2. 308989  
5. 981021 6. 280345 6. 061171 5. 993375 5. 960682 6. 153688 6. 114818 5. 94971 6. 563722  
2. 133326 2. 162079 2. 817495 2. 507209 2. 503778 2. 025444 2. 391267 2. 285916 2. 398974  
4. 374217 4. 079979 4. 125283 3. 08405 3. 982631 4. 12188 4. 053093 4. 313644 4. 004834  
3. 295764 3. 714806 3. 734376 3. 963792 3. 90447 3. 140614 3. 609791 2. 587522 3. 250986  
6. 847038 6. 177107 6. 732231 6. 470741 6. 05435 5. 659412 6. 599888 6. 390349 6. 520584  
3. 811491 3. 791288 3. 709741 1. 588203 3. 456838 2. 866968 3. 803817 3. 299014 4. 274665  
5. 6506 6. 391513 6. 105795 5. 949372 6. 125923 5. 626147 5. 906499 5. 62223 5. 256258  
1. 649529 1. 793439 1. 559247 2. 118644 1. 851437 1. 942727 1. 549111 1. 651277 1. 809132  
3. 304667 3. 28739 3. 289572 4. 041561 3. 696048 4. 628526 3. 185292 3. 667734 3. 488708  
5. 20944 5. 791908 4. 637217 4. 555474 3. 691617 5. 467766 5. 559377 5. 22124 4. 584836  
2. 43578 3. 53697 2. 030005 2. 019896 2. 470799 2. 941469 2. 929443 1. 742292 1. 568052  
5. 528019 5. 838167 5. 539724 5. 965166 5. 208862 5. 539365 6. 630921 6. 206476 3. 413278  
2. 799932 2. 869295 3. 422972 2. 314222 3. 644119 2. 557367 4. 217872 2. 679845 3. 234922  
5. 326415 6. 13566 5. 629452 4. 573055 6. 201385 4. 125124 4. 789715 5. 816531 4. 455245  
3. 008832 3. 139521 2. 069147 2. 631437 3. 330252 2. 063855 3. 39386 2. 569485 2. 826501  
2. 366544 2. 900243 1. 667096 2. 728247 1. 803728 2. 02522 2. 12936 1. 95864 2. 78144  
6. 189769 6. 805907 6. 295321 5. 329578 6. 479123 6. 554771 6. 213817 6. 467772 5. 902978  
6. 787931 7. 045355 6. 537929 6. 779071 6. 608438 6. 610906 6. 440692 6. 511231 6. 600079  
2. 608352 1. 662212 2. 366508 2. 406643 2. 580032 2. 580204 2. 167625 2. 239436 1. 846216  
6. 911566 6. 48595 6. 46232 6. 913046 6. 787528 6. 523012 7. 180868 6. 672917 6. 895185  
4. 356373 4. 269844 2. 932279 3. 785734 3. 574316 5. 274055 4. 05199 4. 464074 3. 546714  
1. 946406 2. 168435 1. 843477 2. 566513 1. 719279 1. 72477 2. 349055 2. 573586 2. 231444  
1. 670533 2. 616705 2. 533275 3. 677726 3. 292423 2. 420499 2. 909811 2. 665593 3. 464928  
7. 917066 8. 695722 8. 49123 7. 353339 9. 86056 7. 696058 7. 863617 8. 41991 8. 509646  
2. 147053 1. 697298 1. 702351 2. 384013 1. 425227 1. 949442 1. 582186 1. 524262 1. 021961  
4. 53608 4. 546996 3. 773731 4. 707884 4. 999478 3. 745858 4. 129752 4. 548809 3. 823003  
2. 748423 1. 204201 2. 258344 1. 905732 3. 095809 5. 203591 4. 195591 1. 205536 4. 392635  
2. 245466 2. 103365 2. 001761 2. 489455 2. 020285 1. 685321 2. 056329 1. 749862 1. 900195  
8. 884523 9. 070134 9. 204274 9. 306969 8. 911399 8. 762034 8. 747603 9. 490034 9. 198398  
2. 980633 2. 819722 2. 960672 3. 579501 2. 882856 3. 467484 2. 92156 2. 789154 3. 389174  
4. 486853 5. 833651 4. 687559 6. 664882 5. 708569 5. 564974 5. 315254 5. 137257 5. 295149  
3. 476438 2. 931922 4. 138702 2. 565931 2. 970447 3. 559573 3. 98386 3. 310117 3. 965672  
3. 488187 4. 37678 3. 49882 3. 891217 4. 149105 3. 988786 3. 865575 4. 032829 3. 313816  
1. 616984 2. 530572 2. 270585 2. 576541 2. 303704 2. 639151 2. 184015 2. 449789 3. 063456  
0. 890059 1. 296323 1. 224095 1. 823039 1. 023153 1. 296323 1. 980521 1. 109979 2. 040896  
2. 900611 3. 449587 2. 914923 3. 231462 3. 026258 3. 981087 2. 916267 3. 864683 3. 352425  
6. 741963 7. 054587 6. 918476 6. 468117 7. 016894 6. 495343 6. 770945 7. 093521 7. 307763  
4. 511358 4. 344091 2. 472335 5. 21647 3. 226641 3. 855883 4. 981893 4. 676522 4. 759099  
2. 277687 2. 718515 2. 69601 2. 900315 1. 885267 2. 909421 2. 459833 2. 412989 2. 411303  
6. 683849 7. 022172 7. 249965 6. 335114 7. 15831 6. 99673 7. 228796 7. 201733 6. 524877  
4. 895331 4. 874974 4. 667324 4. 998258 5. 214097 4. 972245 4. 725941 4. 361069 4. 738463  
4. 157987 3. 863694 4. 788214 3. 521747 3. 268083 3. 717766 3. 542166 3. 865654 4. 090395  
3. 892968 3. 145563 3. 56792 4. 343945 4. 119095 4. 107499 3. 878031 4. 43838 3. 792366  
6. 262558 6. 169958 5. 367688 5. 379665 6. 589868 6. 202621 5. 843199 5. 986468 5. 757205  
2. 743724 2. 885455 3. 024696 3. 106777 3. 004462 2. 903488 2. 253758 2. 901721 2. 761887  
6. 188209 6. 504391 6. 092874 6. 755952 6. 357658 5. 978494 6. 54399 6. 186495 5. 789695  
5. 633307 5. 926914 5. 474087 6. 524861 6. 161653 4. 820297 5. 707729 5. 702966 5. 238355



4. 298451 2. 600838 3. 579657 3. 565833 4. 36813 4. 241135 4. 084466 3. 03026 3. 383307  
7. 492283 7. 606931 7. 707575 6. 758699 7. 934519 7. 510551 7. 753164 7. 739646 7. 047366  
7. 281336 6. 957955 7. 357466 6. 50662 6. 759176 6. 587013 7. 673044 6. 481654 5. 797848  
4. 013505 3. 863036 2. 872951 3. 679005 4. 420485 2. 61055 3. 577633 4. 030146 3. 986396  
1. 92356 1. 965919 2. 321858 2. 053151 1. 716554 2. 941888 1. 915276 2. 289194 1. 804172  
5. 091513 5. 131032 5. 864538 4. 751719 5. 114841 4. 286705 5. 344393 5. 048543 4. 213651  
5. 181205 5. 965595 5. 396002 4. 491776 5. 836157 5. 219966 5. 90031 5. 21344 5. 492371  
1. 349854 2. 00654 3. 264151 3. 472247 2. 426833 1. 695753 1. 72695 2. 266638 1. 916518  
6. 400333 6. 232616 6. 853465 6. 176393 6. 306288 6. 314444 6. 71289 6. 454304 6. 877147  
5. 597139 6. 044614 5. 718817 6. 103042 6. 00501 5. 613793 5. 545132 5. 267544 4. 919943  
7. 32242 7. 728684 7. 598702 7. 664056 7. 554704 7. 841323 7. 933511 7. 679968 7. 596372  
1. 234007 1. 046271 1. 442045 2. 367537 1. 951132 1. 382315 1. 367811 1. 541432 1. 450299  
1. 751714 1. 326184 1. 63343 1. 733077 1. 586128 1. 619295 1. 776982 1. 859005 1. 23637  
3. 517247 5. 306145 4. 612525 3. 033619 3. 636104 3. 224614 3. 588854 3. 500362 3. 917577  
6. 692472 6. 686468 6. 67506 7. 012142 6. 775008 5. 972955 6. 809159 6. 926753 6. 060941  
5. 194857 5. 071011 4. 980595 5. 510817 5. 105794 4. 980719 4. 885966 5. 377807 4. 628503  
2. 321173 2. 945969 4. 525592 2. 681177 2. 979635 2. 858417 3. 02141 3. 390222 3. 1777  
0. 968539 1. 598789 1. 403348 1. 259086 0. 966915 1. 638595 0. 949245 1. 747872 1. 521181  
2. 891336 2. 47528 2. 314782 2. 843599 2. 222449 2. 341479 2. 30223 1. 989816 2. 174944  
2. 318182 2. 978751 2. 483359 1. 75477 1. 76323 1. 69482 1. 887898 1. 823701 3. 292554  
2. 546212 1. 608188 2. 169249 2. 27257 1. 747009 1. 775087 2. 046909 1. 630447 1. 851996  
1. 158085 1. 489185 1. 134869 1. 668015 1. 154553 1. 396395 1. 931328 1. 65216 1. 042533  
1. 493364 2. 096226 1. 518072 3. 209609 1. 929904 1. 366447 1. 984825 1. 304283 2. 38645  
4. 768095 3. 971339 5. 159695 4. 603993 3. 955487 4. 571914 4. 375755 4. 051557 4. 699862  
6. 760656 6. 455477 6. 526734 7. 453119 6. 779474 6. 85908 6. 829248 7. 056201 5. 714871  
8. 579637 8. 453254 8. 695949 8. 552444 8. 565881 8. 482972 8. 963787 8. 465494 8. 653204  
4. 379742 4. 700387 4. 918029 4. 275591 5. 211589 4. 973739 4. 621393 4. 932715 3. 878869  
5. 279051 5. 3625 4. 818297 5. 542341 4. 517588 4. 872359 4. 640593 4. 770382 4. 767603  
3. 479029 2. 235522 3. 236824 3. 155472 3. 699176 2. 20347 3. 701856 3. 70608 3. 765684  
5. 550912 5. 792191 5. 918292 5. 025007 5. 54967 5. 525183 5. 088915 5. 679303 4. 624145  
5. 175932 4. 891213 5. 726576 5. 029155 4. 107751 4. 875297 4. 492422 5. 071846 4. 310562  
1. 16933 1. 494918 2. 021759 2. 874989 2. 300076 2. 061504 0. 918365 1. 079146 0. 87114  
3. 755551 3. 651013 3. 532664 3. 095179 3. 259133 3. 152931 3. 104314 4. 000142 3. 370936  
6. 544084 7. 015077 6. 717905 7. 003459 6. 712033 6. 48406 6. 376718 6. 600534 7. 099346  
2. 343753 2. 213753 2. 314158 3. 130501 2. 096097 3. 248089 1. 929189 2. 546545 3. 312496  
4. 289789 2. 835788 3. 993909 5. 095101 4. 320411 5. 456873 3. 597307 4. 176769 4. 677956  
6. 172702 6. 933767 6. 701135 5. 924173 7. 196429 6. 429618 6. 644862 7. 135553 6. 733441  
1. 279887 1. 544063 1. 957761 1. 500863 1. 35232 1. 488846 1. 573301 1. 915773 1. 596604  
1. 438584 1. 813244 1. 809409 1. 653711 1. 786291 1. 580926 1. 739597 1. 806699 2. 179143  
5. 977067 6. 874175 5. 434739 5. 594666 7. 443517 6. 213289 7. 353665 6. 85367 5. 586912  
8. 736254 9. 207338 9. 227804 8. 825276 9. 488037 8. 976255 8. 789759 9. 660379 9. 058273  
4. 864124 4. 882459 4. 802101 4. 790588 5. 271408 5. 381812 5. 388998 5. 230414 5. 655911  
1. 560359 1. 383053 1. 304372 1. 497378 1. 056569 1. 376892 1. 638094 1. 558099 1. 47509  
6. 497842 5. 714453 5. 978292 6. 005484 5. 714381 6. 133043 6. 092218 6. 054563 6. 314828  
4. 079564 3. 245742 3. 475456 2. 68761 3. 758549 2. 7582 3. 707297 3. 406958 3. 20641  
3. 194047 3. 478949 2. 861004 2. 802531 3. 451412 2. 968807 2. 380592 2. 132007 2. 838085  
1. 241432 0. 980894 1. 494922 1. 896279 1. 924564 1. 426749 1. 409441 1. 088552 2. 198642  
1. 628067 1. 912383 1. 973622 2. 364194 1. 581662 1. 728724 1. 420196 1. 484029 1. 492753  
3. 871624 3. 808414 4. 234857 3. 231299 4. 106156 2. 968853 4. 11849 4. 164313 3. 361165  
6. 365102 5. 938837 6. 484138 5. 534996 7. 078185 6. 69859 5. 9463 6. 762225 7. 14947  
3. 501298 4. 283919 4. 751192 4. 508258 4. 038546 3. 231035 3. 009533 3. 780685 3. 66067

6. 78897 7. 061611 6. 748814 5. 542127 6. 913933 6. 159172 7. 008948 6. 72966 7. 007305  
1. 883071 2. 380775 2. 294231 1. 947939 2. 436967 2. 425087 2. 163975 1. 702436 2. 426638  
4. 315649 3. 876636 4. 366053 4. 649699 4. 263021 3. 70084 4. 090387 3. 919909 4. 131892  
3. 319569 6. 879965 1. 568867 1. 012969 3. 205336 2. 37487 2. 017079 3. 324332 5. 000248  
0. 949914 0. 886878 1. 107057 1. 369818 0. 969793 1. 179502 0. 844924 1. 557936 1. 174554  
3. 757827 4. 186667 3. 84294 4. 926223 4. 733918 4. 459146 4. 670444 4. 636498 3. 449231  
2. 295406 1. 126521 1. 223736 2. 20871 1. 24703 2. 035593 1. 649269 2. 237319 5. 832035  
3. 121674 3. 535374 3. 159913 3. 588214 4. 105282 2. 945126 3. 663302 4. 263185 2. 617489  
6. 178964 5. 319755 5. 643289 5. 886805 5. 577756 5. 345354 6. 052293 5. 727925 6. 243738  
1. 244266 1. 090203 1. 725778 1. 265052 2. 337829 4. 649549 1. 450123 3. 039739 5. 58933  
3. 588825 3. 784573 3. 944082 3. 635708 3. 50974 4. 076572 3. 381482 4. 114696 2. 732744  
0. 991287 1. 054469 2. 492564 1. 490333 1. 290361 1. 36575 0. 874835 1. 933404 1. 203079  
1. 074997 1. 386888 2. 823468 1. 616526 1. 117256 1. 8126 1. 590389 1. 366048 3. 509208  
2. 661632 2. 524796 0. 845889 1. 624524 1. 619414 1. 624524 2. 588992 0. 769487 2. 06814  
1. 211348 2. 36625 4. 157807 1. 845524 1. 857464 1. 877758 1. 471644 4. 115929 1. 819932  
2. 399634 2. 381476 2. 787016 2. 437275 2. 331914 2. 319822 1. 628046 1. 927464 2. 604907  
4. 648583 4. 04114 3. 878894 5. 874711 3. 560092 3. 800897 4. 418078 3. 862839 4. 530331  
4. 92776 5. 862281 5. 37708 4. 072026 4. 954576 5. 286027 5. 175167 5. 302317 5. 333009  
3. 499929 2. 913897 2. 554762 2. 471114 3. 594661 3. 144067 2. 882688 3. 268418 2. 755918  
2. 364864 1. 933315 2. 323975 2. 764908 2. 378357 2. 072474 2. 558829 2. 069071 2. 180326  
4. 668588 4. 507572 3. 767924 3. 604832 4. 61713 4. 242937 3. 857317 4. 678771 4. 436965  
3. 92831 3. 700511 4. 14203 2. 709824 5. 46832 4. 665306 5. 649661 4. 616537 5. 665663  
2. 245183 2. 80538 2. 860349 2. 969355 2. 551022 2. 428029 2. 559332 2. 279176 2. 809619  
4. 522978 4. 720191 4. 730179 3. 581602 5. 256165 4. 187127 4. 970721 4. 774223 3. 928517  
1. 378806 1. 51363 2. 054829 2. 822313 1. 869754 2. 09584 2. 615365 1. 882774 2. 268053  
3. 218287 4. 353088 4. 381187 2. 919984 3. 927425 4. 599892 2. 783145 3. 022577 3. 953867  
3. 159496 2. 900545 4. 387771 4. 453267 2. 909991 4. 244964 2. 476499 3. 722881 3. 420971  
1. 810173 1. 72087 1. 840057 1. 759979 1. 996412 2. 233636 1. 719476 2. 510135 2. 162667  
3. 909261 3. 627024 4. 486969 2. 950521 4. 042433 4. 344378 4. 222045 4. 191616 3. 240591  
1. 281516 0. 907464 1. 372084 1. 855261 1. 122931 1. 209032 1. 565653 1. 389122 1. 329279  
3. 785515 4. 640677 4. 408494 3. 526275 4. 736524 3. 970989 5. 108203 3. 954715 3. 177372  
2. 14998 1. 634769 2. 052898 2. 026417 1. 530933 1. 749682 1. 82992 1. 737441 2. 224188  
1. 777279 2. 284303 2. 008395 2. 07109 1. 838324 1. 674663 3. 416087 1. 897889 2. 616223  
2. 952973 3. 272923 4. 08357 3. 846029 3. 37876 3. 525753 2. 988095 2. 913413 4. 48817  
3. 248643 3. 145969 2. 768823 2. 360367 2. 440794 3. 131901 3. 741602 2. 726293 3. 188418  
2. 541535 2. 332774 2. 387256 2. 683239 1. 804624 1. 739449 2. 168076 1. 70866 2. 489672  
1. 972345 2. 827993 2. 080043 2. 692418 1. 568529 2. 93035 1. 743055 2. 611056 1. 690312  
5. 658909 5. 601083 4. 950827 5. 75598 5. 998737 6. 54979 5. 659398 5. 528632 6. 510949  
5. 386632 5. 21663 5. 389346 4. 16643 4. 954864 5. 740346 5. 2881 5. 092754 4. 778629  
4. 874431 4. 790475 4. 976596 4. 813212 4. 178818 5. 046447 3. 825265 4. 430618 3. 96461  
7. 52418 7. 420524 7. 468118 7. 453408 7. 536201 7. 520582 7. 386275 7. 716316 7. 580264  
2. 752284 1. 425315 1. 42456 1. 825968 1. 549853 1. 394981 1. 090598 1. 731676 1. 113548  
2. 474204 2. 578077 2. 079682 2. 813426 2. 575454 2. 419639 2. 54706 2. 857892 2. 627482  
2. 217283 1. 184855 2. 341023 1. 448973 2. 559743 1. 32756 1. 26851 1. 276392 1. 159259  
7. 846851 7. 813051 7. 483197 7. 732949 7. 985266 7. 556177 7. 738907 7. 663841 7. 825974  
6. 441245 6. 157747 6. 56146 4. 835095 5. 826727 6. 017918 6. 474596 6. 525433 5. 040793  
6. 790636 7. 118341 6. 473563 7. 531545 6. 705384 6. 99988 7. 203825 6. 92019 7. 29059  
5. 819295 6. 22254 6. 648679 5. 963223 6. 104337 5. 27145 6. 04401 5. 993514 5. 854594  
1. 940498 1. 790015 2. 072063 2. 32028 1. 671001 2. 320531 1. 574552 1. 740368 1. 837842  
7. 584344 8. 060558 7. 478278 7. 519363 8. 045823 7. 527405 7. 525398 8. 195804 8. 300167  
6. 014092 5. 991742 6. 385691 4. 302607 5. 768686 4. 892304 5. 909686 5. 71128 5. 351987

6. 499408 6. 06441 6. 310465 5. 224394 6. 131864 5. 616327 5. 618705 6. 504492 6. 674987  
1. 311794 1. 581132 3. 795392 1. 909357 2. 458688 2. 355959 2. 230168 1. 78839 1. 321786  
5. 731693 5. 717117 5. 776905 6. 059396 6. 014873 5. 698366 5. 530232 5. 998802 5. 698366  
6. 379911 6. 188981 6. 551672 6. 934854 6. 308066 6. 901202 6. 596838 6. 229126 6. 016201  
1. 343088 1. 789293 1. 477538 2. 457813 1. 811188 1. 552478 1. 316225 2. 162715 1. 327267  
6. 490346 6. 969189 6. 335966 6. 641971 6. 88929 6. 413805 7. 024999 5. 989233 6. 828931  
3. 6379 4. 005772 4. 391047 3. 153646 3. 535143 3. 681919 3. 845358 4. 056159 2. 48162  
4. 205255 3. 498877 4. 576865 5. 195897 4. 254337 4. 073035 2. 963034 4. 132396 3. 059948  
1. 863839 2. 257562 1. 029917 1. 563373 3. 717593 1. 39868 2. 616851 2. 018776 3. 037505  
1. 431894 1. 122062 0. 957349 2. 140387 0. 657057 0. 976399 1. 21111 1. 421811 1. 106348  
5. 309008 5. 43838 5. 177459 4. 733382 5. 264133 4. 885892 4. 439676 5. 123668 3. 921027  
5. 173788 4. 579549 3. 59926 1. 904228 5. 227921 1. 091349 4. 613203 4. 574704 4. 920443  
7. 142277 7. 614876 6. 589278 6. 961873 7. 704445 7. 737194 7. 793475 6. 606034 5. 314148  
2. 404838 2. 843108 2. 595958 3. 079169 2. 947007 2. 308354 2. 553491 2. 61094 2. 014568  
5. 623582 5. 303801 5. 531233 5. 926832 6. 018175 5. 769608 6. 154202 5. 750557 6. 28884  
7. 284785 7. 329943 6. 782036 6. 270664 7. 085878 6. 954633 6. 767686 6. 827075 6. 637939  
6. 785809 6. 993627 7. 062068 6. 153419 7. 121285 7. 172073 7. 113296 7. 146107 7. 319109  
1. 735492 1. 682448 1. 471416 3. 189629 1. 376561 1. 365294 2. 93853 1. 840897 1. 583394  
2. 318468 1. 850888 2. 175815 2. 220483 2. 563508 1. 407169 2. 659687 1. 628752 1. 399203  
1. 395859 1. 858592 1. 449228 2. 177212 1. 39381 1. 846194 1. 905567 1. 271232 1. 818824  
9. 709128 9. 493107 9. 55332 9. 715439 9. 784842 9. 528845 9. 801155 9. 710156 9. 515796  
1. 813686 3. 50917 3. 089042 2. 830873 1. 751931 1. 729745 2. 241227 2. 048993 1. 613259  
2. 062479 1. 30996 1. 885057 1. 999839 3. 239066 1. 283695 0. 989434 1. 483052 3. 72814  
7. 30017 7. 333834 7. 563988 7. 772168 7. 588498 7. 099076 6. 936775 7. 436543 7. 153763  
1. 181724 1. 233745 1. 173055 1. 036098 1. 006939 2. 235413 1. 570995 1. 476563 1. 577651  
2. 682704 3. 329282 2. 563706 2. 487621 3. 383833 2. 612922 2. 381334 2. 634105 2. 724078  
5. 830764 6. 537359 5. 93398 5. 611557 6. 510294 5. 956797 6. 424264 6. 364876 5. 236679  
6. 136997 6. 33847 5. 643351 5. 520296 6. 191877 5. 787401 6. 034935 5. 939244 4. 759573  
1. 350156 1. 990685 1. 350676 1. 696923 1. 916557 1. 855427 0. 956026 1. 326529 1. 614807  
0. 508719 3. 476658 2. 058025 5. 088096 2. 687007 1. 255462 5. 320313 2. 627165 3. 107821  
9. 142959 9. 462391 9. 642642 8. 881716 9. 293863 9. 539124 9. 026523 9. 137989 8. 485485  
1. 472875 1. 803201 2. 036419 1. 624248 2. 039448 1. 886836 2. 207308 1. 70687 2. 400042  
2. 761895 3. 128524 3. 020721 4. 22044 2. 579673 3. 77565 3. 552305 3. 72142 3. 016424  
10. 39215 10. 21796 10. 15521 9. 539647 10. 09874 10. 06755 10. 61725 10. 09906 10. 81129  
0. 982571 1. 137565 1. 0634 1. 535235 1. 107458 1. 232739 1. 549498 1. 356249 1. 632417  
5. 172473 5. 13025 5. 845914 3. 621974 3. 86213 3. 761823 5. 368484 3. 714251 5. 641657  
8. 414439 8. 807411 9. 047902 8. 276776 8. 820771 8. 790181 7. 899894 8. 685639 6. 932928  
8. 213887 8. 147618 8. 056277 8. 129043 8. 214686 7. 94407 8. 311507 8. 144697 8. 108773  
3. 597461 2. 29439 3. 062283 2. 785266 3. 801017 3. 854072 3. 805816 3. 890753 4. 41415  
7. 013151 7. 144786 7. 36409 6. 57452 7. 134597 7. 078266 7. 141109 6. 901194 7. 353286  
4. 325276 4. 146275 4. 379782 3. 791555 4. 565683 4. 403879 4. 070355 4. 288404 5. 099649  
1. 437413 1. 533852 1. 615923 2. 400623 1. 461898 1. 670964 1. 329916 1. 425575 1. 787995  
2. 41741 2. 521159 2. 288416 2. 272555 1. 941188 2. 312784 3. 66195 2. 063794 3. 004816  
6. 038111 4. 282138 5. 353481 6. 316505 5. 181227 7. 144867 5. 35183 5. 899809 6. 668465  
2. 919542 3. 038633 3. 897044 3. 910915 4. 103492 2. 826363 3. 013987 4. 351971 4. 362833  
1. 497496 1. 284705 1. 716101 1. 544668 1. 228452 1. 426504 1. 534601 1. 860997 2. 288284  
4. 618429 3. 964341 4. 412689 4. 865877 4. 678884 4. 69928 4. 262721 2. 711522 5. 293375  
3. 600776 4. 280931 3. 89894 3. 843067 4. 106817 4. 223773 4. 894787 4. 410211 4. 060188  
8. 074744 7. 885996 7. 758031 7. 604141 7. 765128 8. 10365 8. 092828 7. 906907 8. 122065  
3. 373242 3. 661345 4. 177068 2. 542801 3. 666703 3. 476625 3. 62498 2. 997015 3. 735264  
4. 239991 5. 229992 4. 751364 4. 722017 4. 430831 4. 776128 4. 693378 4. 761299 3. 758002

8. 100342 7. 781619 7. 688992 7. 233806 8. 000735 7. 560875 7. 828825 7. 839157 7. 293137  
3. 568089 2. 217473 2. 027361 2. 214289 2. 575555 2. 18668 3. 903818 2. 247452 2. 6813  
4. 793026 5. 234988 4. 619981 4. 625832 4. 430174 3. 074981 5. 110674 3. 76719 3. 718257  
5. 968208 5. 696625 6. 028031 5. 252217 5. 745316 6. 024804 5. 741445 6. 3116 6. 944955  
3. 142062 2. 280862 3. 512217 3. 034989 1. 723625 3. 400905 2. 13314 2. 516499 2. 85562  
3. 397961 2. 085991 3. 029485 2. 487937 2. 719653 2. 404362 2. 396536 3. 797377 3. 123493  
5. 05134 4. 599299 4. 348572 4. 830157 3. 962139 4. 467829 4. 099897 4. 431961 3. 516921  
1. 563884 2. 832096 2. 589444 1. 86547 3. 108857 1. 92055 3. 197967 2. 252616 2. 22542  
4. 756706 4. 487886 4. 690684 4. 958367 4. 252099 4. 527189 4. 050098 3. 318213 4. 861019  
2. 625969 3. 36297 2. 583158 2. 705695 2. 700438 3. 020345 2. 466605 2. 700746 2. 528955  
3. 260358 2. 676963 2. 603443 2. 347024 2. 533752 3. 255045 2. 986117 2. 881471 3. 192765  
1. 574872 1. 671493 2. 857153 1. 832306 1. 473043 1. 829018 2. 271333 2. 291368 1. 793792  
3. 68131 3. 018799 3. 782512 3. 612708 4. 500221 2. 823722 4. 413346 3. 191598 5. 062392  
6. 619314 5. 769791 6. 01898 6. 780878 6. 77362 7. 40206 6. 7783 5. 928441 7. 150242  
1. 321145 1. 221063 1. 114323 1. 759927 1. 08969 1. 198324 1. 689737 1. 236958 1. 055496  
7. 178794 6. 543372 6. 640736 6. 659653 6. 603705 7. 240583 6. 129083 7. 354861 7. 614954  
5. 767723 5. 700379 5. 5788 5. 452128 5. 334231 5. 785337 6. 251453 5. 67846 5. 384313  
0. 874795 0. 861066 1. 552895 1. 042157 1. 152222 1. 250203 1. 210123 0. 81647 1. 119353  
1. 131081 1. 238523 1. 054491 0. 969384 1. 178229 2. 064735 1. 277717 1. 013616 1. 078811  
5. 659498 5. 295113 5. 376052 3. 272111 5. 487416 4. 40754 4. 618149 5. 338922 5. 776732  
7. 839459 7. 821151 7. 514849 7. 814788 7. 823134 8. 073632 7. 13584 7. 837346 7. 347359  
2. 767656 1. 349575 3. 285682 2. 189989 2. 359563 1. 934059 3. 752539 2. 496981 1. 863348  
1. 82782 1. 165196 1. 246983 2. 236979 1. 517633 2. 023005 1. 49256 1. 45287 1. 116174  
7. 108651 6. 805376 6. 478104 6. 667258 6. 691764 7. 596093 7. 288214 7. 277347 6. 602034  
6. 451839 6. 637811 6. 317537 6. 892841 6. 360773 7. 011479 6. 756867 6. 65695 6. 623853  
7. 399023 7. 59382 7. 147297 6. 758157 7. 394514 7. 443021 7. 695752 7. 377986 6. 735162  
6. 248307 4. 396613 4. 45312 4. 595273 3. 560362 3. 923347 4. 224413 4. 397643 4. 233287  
9. 153448 9. 259593 9. 104111 8. 804093 9. 148506 9. 026519 9. 270828 9. 123023 9. 038845  
7. 891085 3. 755278 6. 068848 3. 451554 4. 892999 8. 393161 6. 684779 7. 004173 8. 43524  
9. 941271 9. 593621 9. 778571 9. 084507 9. 995741 9. 25806 9. 844736 9. 591364 9. 317342  
1. 207148 1. 390142 1. 510381 2. 058729 1. 132047 2. 183919 1. 573493 1. 491103 1. 495582  
1. 887016 3. 358775 3. 600459 2. 124091 3. 033471 3. 190307 2. 856049 3. 705761 2. 697399  
8. 143836 7. 944271 8. 333837 8. 155042 8. 176379 7. 878716 8. 157403 8. 389628 8. 527492  
2. 569719 1. 914585 2. 200419 2. 554579 2. 018117 1. 683689 2. 119367 1. 924804 1. 751321  
6. 963437 7. 303321 7. 016913 6. 957828 7. 343193 6. 724517 6. 953224 7. 11206 7. 612882  
2. 161516 2. 661008 2. 207868 7. 143327 1. 977795 2. 836705 1. 8933 7. 066575 8. 454485  
1. 985038 3. 12413 2. 202512 1. 796614 2. 752579 1. 789543 2. 137709 1. 848785 2. 16587  
1. 95386 2. 321953 1. 787265 3. 405797 1. 72011 2. 112542 1. 910006 1. 952389 1. 525028  
2. 654648 3. 169239 2. 471734 2. 780889 2. 296639 4. 000741 1. 961109 2. 476358 3. 642749  
5. 204614 4. 689207 5. 873599 6. 247705 5. 616408 5. 277952 5. 781328 5. 563151 5. 042961  
6. 210146 6. 558585 6. 111182 5. 441054 6. 110161 6. 0578 6. 399586 5. 977866 5. 68469  
1. 839018 2. 953232 1. 706016 1. 557914 1. 935081 3. 105854 2. 033524 2. 635582 2. 697968  
1. 876432 2. 74983 1. 515458 2. 667477 2. 414465 1. 892457 1. 650102 1. 256663 2. 762185  
5. 659003 5. 342591 5. 614805 3. 144282 5. 721252 5. 634446 5. 697362 5. 247677 5. 000563  
6. 559803 6. 508109 6. 766609 6. 840113 6. 643668 6. 484993 6. 94655 6. 524282 6. 636881  
1. 305561 1. 634482 1. 437137 1. 439175 2. 324464 1. 756611 1. 541666 1. 438966 1. 90884  
1. 739524 1. 730516 1. 348965 2. 195426 1. 519786 1. 226125 1. 413323 1. 401573 1. 952558  
6. 734397 6. 549634 6. 394097 6. 202928 5. 896088 5. 979388 6. 486446 5. 701211 6. 646817  
1. 45771 1. 640693 1. 384213 1. 667677 1. 644432 1. 435773 1. 953207 1. 772861 1. 759254  
1. 839202 1. 733044 2. 071217 2. 036457 1. 515491 1. 242996 1. 132509 1. 17664 1. 727242  
2. 650569 2. 163545 2. 581807 3. 095611 1. 996835 2. 755706 2. 531367 2. 275373 2. 13357

3. 358089 2. 95445 2. 42214 3. 380672 2. 679531 2. 610354 3. 02524 2. 467433 2. 852841  
4. 647746 4. 094629 5. 210359 3. 679092 4. 503764 3. 828967 5. 246311 4. 321277 4. 589186  
8. 676994 8. 465577 8. 522622 8. 44848 8. 323542 8. 629835 8. 46557 8. 723952 7. 96125  
2. 44026 1. 967234 3. 227733 2. 473992 2. 053597 2. 752069 1. 532288 2. 866775 2. 302986  
2. 64822 3. 7904 2. 257381 3. 029811 3. 204758 2. 774329 2. 576138 3. 923007 3. 196671  
3. 542788 3. 198656 4. 243681 3. 087913 2. 80464 3. 594927 3. 003469 2. 914536 2. 321718  
1. 479587 1. 710856 1. 880848 1. 758564 2. 462747 2. 49925 1. 325696 2. 038412 2. 398861  
3. 306443 3. 687862 3. 372659 2. 556088 3. 149996 1. 927475 3. 957551 3. 759259 1. 977774  
2. 227957 1. 899825 2. 062231 3. 442475 1. 966417 2. 957979 2. 351002 1. 946887 2. 428145  
1. 336172 1. 806625 1. 847873 3. 423931 2. 113381 3. 196838 1. 027862 0. 715076 1. 396152  
0. 936842 1. 442898 1. 414297 1. 400206 1. 489445 2. 018955 1. 229291 1. 038603 2. 366488  
3. 127165 2. 563277 2. 820474 2. 392351 3. 825318 2. 591619 3. 119943 3. 387865 1. 831601  
2. 208985 2. 771733 2. 032229 2. 262638 2. 759804 2. 175722 1. 990697 2. 097412 1. 919561  
2. 469531 4. 017849 3. 791559 3. 457796 2. 63433 3. 781495 2. 611834 2. 75862 2. 728404  
2. 663389 3. 610263 2. 835296 2. 504834 3. 229891 2. 275749 2. 874309 2. 781516 2. 732569  
1. 730432 1. 403292 1. 573872 1. 965991 1. 475929 1. 740437 2. 383869 1. 570445 1. 636871  
4. 350973 4. 816519 4. 790387 6. 054055 5. 630841 4. 451543 5. 1737 4. 529298 3. 634152  
9. 542745 9. 146424 9. 189732 9. 002121 9. 064199 9. 085287 9. 707847 9. 168505 9. 31676  
3. 56205 3. 701243 3. 330908 3. 838463 3. 944226 3. 736266 2. 954309 3. 546542 3. 954815  
7. 154016 7. 263622 6. 320923 5. 92457 6. 788501 6. 794333 6. 823411 7. 307033 6. 222567  
4. 457693 5. 167947 5. 017929 4. 731585 4. 660528 4. 541358 4. 802956 4. 495953 5. 493685  
7. 283497 7. 361607 7. 614274 7. 407801 7. 65522 7. 415981 7. 638378 7. 759957 8. 600979  
2. 159776 2. 873484 1. 704572 3. 102752 1. 831535 1. 511033 2. 099339 2. 581106 4. 121174  
4. 64859 5. 075762 4. 544557 5. 683514 5. 410561 6. 733487 4. 596916 4. 852065 5. 2476  
1. 989817 2. 674841 1. 581696 1. 784401 1. 241392 1. 859746 1. 574758 2. 803499 2. 686615  
3. 807106 3. 472012 3. 483726 3. 877408 3. 318261 3. 679069 4. 126519 4. 274448 4. 280168  
5. 32593 5. 622763 6. 348345 5. 450998 5. 650617 5. 161438 5. 243885 5. 800053 4. 729624  
2. 160946 1. 895412 1. 650145 1. 66949 1. 578749 2. 172064 1. 740035 1. 82899 1. 408691  
6. 33928 7. 01809 6. 177003 5. 569779 6. 563988 5. 915687 6. 389364 6. 862604 6. 994236  
7. 862325 7. 173802 6. 998082 5. 901232 7. 315084 7. 306493 7. 005999 7. 158289 6. 952086  
4. 188758 4. 567914 4. 913134 4. 569329 4. 418372 5. 577364 4. 662543 4. 85191 5. 695178  
4. 939874 4. 936696 4. 684554 5. 126444 5. 405367 5. 432024 5. 602885 5. 122262 5. 076831  
6. 095195 6. 585106 5. 984275 5. 778259 5. 960944 5. 358047 5. 994372 6. 133289 6. 408402  
4. 01391 3. 973364 4. 092845 4. 819216 4. 37635 3. 12769 3. 095828 4. 366651 3. 841079  
8. 802365 8. 513002 8. 095722 7. 869735 8. 71219 8. 538059 8. 819817 8. 615174 8. 691612  
2. 798053 2. 712922 2. 733359 4. 597004 3. 336193 4. 183411 2. 545963 2. 931207 3. 748147  
5. 996532 5. 710103 5. 391441 3. 805333 6. 512182 5. 967425 5. 599405 5. 026896 5. 289652  
1. 823936 2. 724736 2. 918446 2. 676614 2. 000753 3. 652411 4. 058756 2. 524325 2. 512716  
8. 696616 8. 410613 8. 24174 8. 474693 8. 234229 8. 553774 8. 224574 8. 220307 8. 396929  
7. 007342 7. 146894 6. 682998 6. 811895 6. 24919 6. 689787 6. 811708 6. 98905 7. 301792  
2. 490492 1. 966363 1. 918418 2. 68025 1. 60549 1. 992329 1. 356342 1. 908831 1. 628487  
5. 658075 5. 037889 4. 873864 3. 963203 4. 60409 5. 190944 4. 864536 5. 333955 4. 180422  
5. 952128 5. 845766 5. 779545 6. 061537 5. 698263 5. 657482 5. 789833 6. 064644 5. 628711  
1. 373576 0. 862464 1. 065673 1. 76453 1. 31767 2. 093351 0. 993502 1. 066271 1. 371997  
5. 967025 6. 588176 6. 374725 5. 897398 6. 953705 5. 826115 6. 324899 6. 23164 5. 29021  
1. 029856 1. 31181 1. 194529 1. 180056 1. 366967 1. 472839 1. 220453 1. 185202 1. 15253  
8. 448784 7. 899972 8. 102739 1. 562692 8. 105341 8. 37737 8. 008072 7. 903177 10. 42899  
1. 255816 1. 168481 1. 202885 1. 012775 1. 116242 1. 422286 1. 331336 0. 940098 1. 126766  
2. 60158 1. 212485 3. 40406 1. 038571 2. 705284 1. 861244 1. 115529 1. 036762 3. 728656  
6. 097211 6. 179956 5. 620463 5. 484817 6. 200105 6. 23086 6. 121081 5. 698927 5. 123435  
6. 931387 6. 956051 6. 723912 7. 232408 6. 99977 6. 590299 7. 390555 7. 002368 7. 516227

2. 546417 1. 48223 1. 722721 1. 869422 2. 642224 1. 163903 1. 69607 2. 046029 2. 028221  
4. 447722 4. 686482 4. 085456 4. 536779 4. 212706 4. 543316 4. 462931 3. 976988 3. 491787  
1. 918438 1. 480918 1. 537299 2. 772565 1. 667021 2. 263728 2. 027106 1. 549572 2. 169681  
5. 354401 5. 650043 5. 501833 5. 148182 5. 874814 5. 659834 6. 138215 5. 508174 4. 904051  
2. 225211 2. 061754 1. 777001 2. 38864 1. 641558 2. 152936 2. 129238 2. 46137 2. 074526  
1. 746288 1. 98803 2. 974663 2. 293808 2. 08653 2. 746565 2. 485512 2. 528749 1. 725639  
4. 150103 2. 383803 3. 419072 3. 243166 3. 622736 3. 370106 2. 708225 3. 263493 3. 284047  
1. 305969 1. 350473 1. 360012 2. 847048 1. 325172 1. 25522 0. 935819 1. 155017 1. 859632  
7. 70819 7. 358851 7. 257225 6. 972462 6. 657752 7. 655657 8. 226922 7. 703077 7. 344996  
2. 390577 1. 677862 1. 959343 2. 71138 2. 160375 1. 9034 1. 697345 2. 105776 2. 019844  
5. 308441 5. 568243 5. 24905 6. 412254 8. 213927 4. 734843 6. 060973 5. 97058 6. 42108  
6. 289421 6. 230159 6. 595167 5. 905214 6. 424988 6. 312151 6. 685001 5. 855849 5. 026388  
4. 769181 4. 460343 4. 54291 4. 392694 4. 841334 3. 999142 4. 038209 4. 003017 3. 856511  
4. 929385 5. 098892 5. 059536 4. 31294 4. 905956 5. 044758 5. 088965 5. 038769 5. 224307  
6. 841895 6. 578221 6. 668137 7. 032096 7. 361873 5. 830648 5. 999937 6. 657359 5. 799391  
2. 398593 2. 501478 2. 927662 3. 30499 2. 778412 3. 058432 2. 917329 3. 129136 2. 648035  
2. 844638 3. 926605 2. 061894 4. 230443 2. 312499 1. 888868 3. 352855 3. 120983 2. 929228  
4. 719568 3. 260425 3. 171761 3. 243716 3. 692573 2. 781511 2. 87352 1. 706282 2. 72308  
3. 893696 4. 672126 3. 602068 4. 136914 4. 742632 4. 799291 4. 024815 4. 773723 4. 209489  
3. 641439 2. 864004 2. 789541 3. 330734 2. 699876 3. 233948 3. 221815 2. 761295 3. 282193  
1. 729636 2. 262773 2. 263374 2. 045214 1. 809629 1. 788646 1. 964799 2. 285199 1. 480499  
5. 109577 5. 737086 5. 630072 5. 763476 5. 706784 5. 764284 5. 719184 5. 504274 5. 754799  
3. 203629 2. 660266 3. 076395 2. 007933 2. 929916 2. 373604 3. 148459 2. 94413 3. 333329  
6. 123794 5. 251956 5. 717646 4. 428797 5. 537602 5. 819222 5. 355562 4. 961061 5. 768562  
2. 479008 2. 775641 2. 574657 2. 933699 2. 353692 2. 115441 2. 5087 2. 82626 2. 012697  
2. 051781 1. 463056 2. 172887 1. 808247 1. 845787 1. 441751 1. 873217 1. 663474 2. 501118  
5. 993453 6. 312665 5. 908419 5. 278414 5. 866033 6. 370766 5. 372465 5. 612403 5. 925668  
8. 399714 8. 407988 8. 219242 8. 732726 8. 334414 8. 205897 8. 610109 8. 365263 8. 172331  
11. 15727 10. 86222 11. 16039 10. 53571 10. 55464 10. 86782 11. 04583 10. 84849 11. 01759  
6. 177405 6. 061908 6. 292475 6. 417965 6. 739147 5. 769326 6. 91056 6. 242007 6. 448195  
1. 196332 1. 783378 1. 648055 1. 810867 4. 232004 2. 312088 1. 808101 2. 749808 1. 340648  
6. 963238 6. 910645 6. 575436 7. 000175 6. 738198 7. 290958 7. 344635 7. 114303 6. 234588  
2. 6417 1. 773319 1. 042139 1. 925724 2. 243919 1. 261689 1. 718095 2. 330008 2. 831877  
3. 990473 3. 761569 3. 941087 2. 670097 4. 693686 1. 898976 2. 899447 4. 808527 3. 570798  
4. 914913 4. 899491 4. 770347 3. 977619 4. 782455 4. 477277 4. 410268 4. 448403 5. 300133  
7. 398579 7. 195003 6. 6899 7. 004461 7. 393181 6. 74246 7. 402215 6. 619152 7. 181807  
6. 801538 6. 747494 6. 888159 5. 425152 6. 803635 6. 693302 6. 843838 6. 765399 6. 927163  
3. 51205 4. 158523 3. 587569 2. 970586 4. 157465 4. 075737 3. 85063 4. 137032 3. 206964  
3. 852047 3. 878008 2. 622198 2. 656783 3. 706411 2. 589957 4. 698729 3. 501684 4. 023816  
5. 560229 5. 796975 5. 967595 4. 374586 6. 194838 5. 065988 6. 283514 6. 177513 6. 159273  
4. 034857 4. 044939 4. 048634 3. 776212 4. 510113 3. 844158 5. 393012 3. 599553 3. 275174  
6. 344593 5. 808754 6. 446366 5. 899 5. 75687 5. 861752 6. 628255 6. 038619 5. 625672  
4. 0018 4. 804431 2. 508445 3. 23813 4. 193599 2. 676962 3. 606834 4. 467417 3. 64808  
5. 836768 6. 236803 6. 111742 6. 375757 6. 122269 6. 721006 6. 506715 6. 265317 5. 943207  
4. 833994 4. 615855 3. 853191 4. 794438 4. 736565 4. 103145 4. 543586 4. 776586 3. 389661  
2. 444702 2. 066574 2. 268118 2. 669265 1. 856949 2. 376688 3. 24047 1. 838563 2. 323844  
2. 501502 3. 287515 2. 573611 2. 761373 3. 429128 3. 340047 3. 703956 3. 375894 3. 972232  
3. 413998 3. 312139 4. 38052 3. 497573 3. 771569 3. 326797 3. 825068 3. 286871 2. 425235  
6. 841609 7. 085624 7. 007845 7. 773282 6. 956549 6. 430047 7. 03319 7. 490035 6. 898147  
3. 457471 4. 431371 3. 674465 3. 762441 3. 654709 4. 24902 4. 93373 3. 557125 3. 09829  
4. 247033 4. 794295 3. 633247 2. 942696 4. 777525 3. 630041 4. 019995 4. 022616 3. 46856

1. 829459 2. 423551 1. 769043 3. 382613 2. 086165 1. 784616 2. 0716 2. 142288 2. 320663  
6. 214473 6. 880861 6. 531119 5. 099381 7. 257847 6. 533896 7. 278261 6. 97869 7. 083573  
3. 035407 3. 557977 3. 450849 4. 048921 3. 125728 4. 778542 2. 905348 3. 094742 3. 641087  
3. 968323 3. 987815 3. 456039 3. 990612 5. 727872 3. 7903 3. 736734 4. 551247 2. 888513  
5. 743777 5. 638831 5. 856953 3. 999259 5. 246049 5. 95986 5. 82073 5. 471516 4. 698796  
8. 180492 8. 050044 7. 743784 7. 63253 7. 916764 7. 927329 8. 121088 8. 005459 7. 778553  
4. 85879 3. 911929 3. 974902 3. 144504 4. 439706 5. 523263 4. 778062 4. 878945 5. 652112  
4. 543816 4. 019741 4. 268343 4. 835452 4. 819208 4. 28821 3. 540041 5. 474667 4. 017269  
1. 190124 1. 815409 1. 34253 1. 921873 1. 344983 2. 349261 0. 981019 1. 85585 1. 553716  
0. 897452 0. 966394 1. 707741 3. 41491 0. 697729 1. 439679 0. 696056 0. 943271 0. 438377  
9. 573436 9. 17967 9. 751252 9. 879528 9. 296917 9. 258546 9. 373216 9. 443762 8. 152544  
1. 613853 2. 052833 2. 069618 3. 413423 3. 041932 1. 781926 1. 306068 1. 700023 2. 096629  
2. 611414 1. 884683 2. 275978 1. 618315 1. 478225 2. 091148 3. 222223 2. 580225 4. 899425  
6. 659616 6. 629859 6. 303554 6. 742173 6. 836847 6. 00366 6. 461097 6. 550964 6. 540277  
3. 565911 4. 184575 3. 70433 2. 811438 3. 998143 3. 091713 3. 268282 2. 664144 3. 404418  
2. 847484 4. 036754 3. 262349 3. 668109 3. 687053 1. 989071 3. 320953 3. 200862 4. 472974  
5. 558612 5. 20427 5. 795094 6. 033372 5. 032041 5. 802892 6. 092599 5. 828686 6. 347993  
4. 708867 4. 944478 5. 185405 2. 847482 4. 445316 4. 77995 4. 544603 4. 803031 4. 760646  
1. 664654 3. 554392 0. 866901 1. 7061 4. 067995 1. 497848 1. 489613 2. 72507 1. 580044  
6. 786501 6. 649685 6. 794839 7. 008998 6. 797506 6. 481804 6. 754539 7. 075182 6. 240478  
2. 398332 3. 673286 1. 916718 3. 371347 4. 010605 2. 191769 4. 337665 2. 827576 2. 65804  
2. 896518 3. 25017 1. 796194 2. 833559 2. 755815 2. 601516 3. 928053 3. 148821 2. 421675  
2. 30861 1. 914994 2. 673586 3. 088635 2. 828603 2. 511774 2. 81664 2. 876495 2. 702793  
3. 219204 3. 099549 3. 260697 3. 019154 3. 624271 2. 709373 2. 874399 4. 078659 3. 702849  
1. 909637 1. 688559 2. 102745 1. 652347 1. 330322 1. 495129 1. 826642 1. 918047 1. 47376  
2. 154718 1. 618031 1. 4208 2. 545585 1. 12047 1. 925953 1. 585017 1. 827836 2. 421547  
3. 87305 4. 679347 4. 949263 5. 493849 3. 984486 4. 306444 5. 368773 4. 025237 3. 539885  
6. 064096 5. 887831 6. 820898 6. 506443 6. 04121 5. 787368 6. 20901 6. 513219 4. 156118  
7. 335017 7. 788524 7. 443871 6. 739504 7. 412414 7. 602038 7. 690926 7. 707204 7. 419913  
3. 802442 4. 037402 5. 281377 2. 664084 4. 344716 3. 996624 4. 594154 3. 488645 2. 943866  
4. 316253 5. 105035 7. 490019 6. 085315 3. 503966 4. 759437 5. 02646 5. 414371 3. 909096  
1. 308841 1. 209409 1. 330725 1. 447031 1. 548234 1. 960697 1. 206012 1. 407585 2. 200971  
1. 848472 2. 301527 2. 871194 2. 053772 2. 887168 3. 233157 1. 944702 2. 232193 1. 743733  
1. 701963 2. 358957 2. 219873 2. 282751 2. 222725 1. 574269 3. 748364 1. 947116 1. 303334  
2. 849133 3. 536271 3. 586408 3. 18912 4. 397185 3. 256101 2. 494428 2. 787147 2. 997886  
8. 808262 8. 772024 8. 814188 8. 314721 8. 886852 8. 793922 8. 945884 8. 706115 8. 569343  
6. 826045 6. 494725 6. 882836 6. 798506 7. 673899 6. 007852 7. 041838 6. 676992 5. 882166  
6. 93135 6. 368032 6. 470231 6. 562939 6. 260638 6. 615604 6. 79409 6. 503444 7. 370429  
5. 517381 5. 534826 6. 185819 5. 454026 5. 925729 5. 49283 5. 644362 5. 814905 4. 858356  
3. 72441 2. 669279 3. 141139 2. 524675 2. 711929 3. 266164 2. 469396 3. 060603 3. 217301  
1. 046461 1. 118992 1. 62471 1. 58476 1. 556332 1. 329082 1. 399657 1. 122667 1. 652559  
6. 692583 7. 137094 7. 594922 6. 73917 6. 998473 6. 872507 7. 235201 7. 118287 6. 058678  
7. 498243 7. 572925 6. 89172 7. 199395 8. 252416 7. 478895 7. 813448 7. 442192 7. 194863  
4. 222195 4. 594234 3. 27009 4. 921669 5. 606368 4. 858711 4. 144156 4. 606204 4. 598761  
6. 255184 6. 232562 6. 302124 6. 559162 5. 978281 6. 110368 5. 872398 6. 205621 6. 725366  
6. 060213 6. 193572 5. 979133 6. 02032 6. 993959 5. 194698 5. 119998 6. 040314 4. 253879  
7. 125797 6. 623952 6. 388372 6. 592212 7. 227382 6. 95079 7. 20458 6. 598986 7. 198439  
8. 006425 8. 015982 7. 820625 7. 495457 7. 943725 8. 409052 8. 315099 8. 393279 8. 270522  
8. 01137 7. 572379 8. 081752 8. 50822 7. 743228 7. 904941 8. 268365 8. 172261 6. 87332  
8. 080165 7. 950269 7. 648381 7. 800942 7. 780077 7. 343697 8. 210261 7. 602529 7. 712021  
7. 434191 7. 535655 7. 347322 4. 745747 8. 117745 7. 104166 7. 792868 7. 438703 7. 383374

7. 13505 7. 267761 6. 845248 6. 161589 7. 424152 7. 565921 7. 264025 7. 489831 6. 92659  
9. 647087 9. 770753 9. 675069 9. 349558 9. 354821 9. 577031 9. 69909 9. 806442 9. 69849  
4. 798194 4. 604138 4. 235789 4. 475838 4. 477027 4. 564024 5. 021977 4. 534858 4. 72441  
2. 747157 3. 312847 3. 910674 2. 608974 3. 306418 3. 662818 3. 932124 4. 024705 1. 652618  
4. 87975 5. 455784 5. 441457 3. 754887 5. 065104 4. 379903 5. 141077 5. 359362 5. 095816  
6. 486586 6. 287219 6. 849769 7. 006447 6. 813673 6. 899834 6. 414386 7. 191061 7. 679813  
3. 489224 4. 624063 3. 814941 4. 166486 5. 130987 4. 665579 4. 44593 4. 174595 3. 732953  
6. 092076 6. 0525 5. 621393 7. 138476 6. 024148 6. 296146 6. 543032 5. 144439 6. 034264  
5. 145651 5. 411265 5. 099801 5. 214179 5. 381411 5. 155459 5. 313309 5. 651436 5. 877753  
8. 969846 9. 522963 9. 319186 9. 021908 9. 173142 8. 237134 9. 197273 9. 265064 9. 10544  
3. 04268 2. 67064 2. 851008 3. 672745 2. 887434 4. 714355 2. 671503 2. 424603 2. 282355  
5. 779354 6. 213199 6. 327969 6. 028897 6. 056566 6. 073022 5. 793781 6. 33152 5. 02901  
7. 416648 6. 693441 6. 877635 7. 379794 6. 644179 6. 19681 7. 444649 6. 549545 7. 262016  
2. 301308 2. 657684 2. 651112 2. 631837 2. 965384 3. 081992 4. 124591 3. 04074 1. 62424  
5. 229799 5. 493515 5. 256485 4. 996596 5. 745397 6. 055447 5. 098968 5. 554179 4. 9519  
6. 120032 5. 993265 6. 111128 6. 736502 6. 26719 6. 259659 5. 589327 6. 711684 6. 538556  
2. 871221 2. 760881 2. 29046 3. 090521 2. 77166 2. 038601 2. 521105 2. 195882 2. 18115  
1. 961556 1. 287479 2. 367963 2. 347041 2. 784274 1. 652125 2. 173088 1. 847213 2. 147317  
4. 857065 5. 099629 5. 759166 4. 869194 5. 139486 5. 09718 5. 552984 4. 878139 3. 701729  
2. 713271 3. 408783 3. 597557 3. 7315 3. 038614 3. 109809 3. 301811 3. 736635 3. 068345  
7. 77914 7. 736488 7. 145589 7. 515249 6. 867776 8. 704067 6. 985975 7. 522714 10. 36913  
2. 979382 2. 942977 2. 671219 2. 978758 2. 922432 1. 870915 2. 705406 2. 315648 1. 8122  
6. 805441 7. 240506 6. 844934 7. 240682 7. 17696 6. 681353 6. 323996 7. 369113 7. 235454  
10. 56533 10. 82622 10. 44665 10. 33469 10. 55441 9. 872426 10. 32994 10. 79444 10. 45736  
6. 680718 6. 309886 5. 936476 6. 550465 6. 418317 5. 864098 6. 031714 6. 145761 6. 228688  
9. 150821 8. 714963 9. 032643 9. 58241 8. 73732 8. 769391 9. 272825 8. 935485 9. 489418  
7. 558801 7. 375553 6. 811174 5. 76139 7. 015046 6. 403758 7. 504536 7. 340307 7. 482999  
6. 783242 6. 995043 6. 778144 7. 625741 6. 916274 6. 270504 6. 950234 6. 930278 6. 967367  
9. 414731 9. 096486 9. 164596 8. 937599 9. 307729 8. 829754 9. 198338 8. 939678 9. 477679  
4. 966597 5. 660332 5. 760875 6. 280396 5. 502013 5. 229037 6. 179457 5. 144631 5. 802028  
7. 750142 8. 03301 7. 596616 7. 374395 7. 589441 7. 32219 7. 772978 7. 621286 7. 558546  
3. 388817 4. 330137 3. 67748 3. 337429 4. 152971 3. 150285 3. 095862 3. 52366 3. 121606  
5. 744965 3. 501884 2. 459392 5. 226867 3. 490574 4. 168143 4. 825151 5. 444342 4. 054575  
4. 602403 5. 018592 5. 323018 3. 396713 5. 357725 5. 148306 5. 101839 5. 056652 4. 669189  
4. 49002 4. 347956 5. 401275 4. 209049 4. 298113 4. 154594 4. 571185 4. 789769 4. 154301  
4. 144306 4. 805749 4. 862902 4. 078915 4. 266979 4. 500433 4. 703227 4. 150805 4. 249593  
6. 027241 6. 107116 6. 163064 7. 086001 6. 844648 7. 062636 6. 59906 6. 90124 6. 008519  
5. 045311 5. 171415 4. 827461 6. 759625 5. 50603 4. 573897 5. 491069 4. 874426 4. 308146  
2. 223788 2. 459355 2. 225917 2. 260712 2. 031964 2. 174248 2. 613432 1. 971992 2. 187618  
3. 565253 3. 818938 3. 205275 4. 357071 3. 678084 3. 69333 3. 618013 3. 89522 4. 017371  
1. 690971 2. 533993 2. 185478 2. 445873 1. 282224 2. 916065 2. 272943 2. 339112 1. 74486  
5. 687591 5. 529407 6. 17 6. 085416 5. 878703 5. 324108 5. 56828 5. 299062 6. 275446  
4. 890296 5. 588225 4. 79883 6. 16285 6. 345938 6. 003801 5. 591639 5. 479712 5. 079203  
1. 759043 1. 358412 1. 653783 1. 984362 1. 120197 1. 389247 1. 004048 1. 324927 1. 411937  
6. 344936 6. 654218 5. 861418 6. 209971 6. 67161 6. 761027 6. 604157 6. 354055 6. 855866  
1. 025773 1. 337404 1. 292938 1. 16917 1. 362857 0. 951193 1. 043225 1. 451512 1. 128207  
6. 753333 6. 266882 6. 175511 5. 732829 6. 411597 6. 356126 6. 314207 6. 314738 6. 291524  
7. 109777 7. 340454 7. 068751 7. 11109 7. 374084 7. 742558 7. 371342 7. 177719 6. 156496  
5. 883322 5. 405196 5. 148935 4. 721074 5. 440375 6. 624133 5. 8372 5. 863984 5. 55379  
5. 437026 5. 552922 5. 451958 5. 394479 5. 057536 4. 728888 5. 167879 4. 614477 4. 755964  
7. 432911 7. 362253 7. 692015 7. 14294 7. 453979 8. 015097 7. 657698 7. 941601 7. 956283



7. 524021 7. 365397 7. 627688 6. 585701 7. 217725 7. 120367 7. 587279 7. 277343 6. 836625  
7. 9705 8. 081767 8. 386345 7. 766344 8. 093127 8. 237162 8. 155047 8. 081573 9. 396226  
4. 500107 3. 504585 4. 192863 1. 972724 3. 587378 3. 364755 3. 931608 3. 614571 3. 163124  
2. 426016 3. 367041 3. 406755 3. 940273 2. 8903 3. 123184 3. 314332 3. 216809 3. 154775  
6. 226769 6. 33883 6. 486144 6. 035713 6. 2176 6. 240228 6. 403979 6. 11015 6. 019149  
9. 817099 9. 663758 9. 576926 9. 089183 9. 962077 9. 260798 9. 758272 9. 553388 10. 24357  
6. 341056 5. 991931 6. 068588 4. 675532 6. 239142 6. 392087 5. 948926 6. 316747 6. 338115  
5. 373057 5. 254373 4. 772951 6. 010991 4. 585063 4. 427618 4. 929781 5. 803521 3. 782633  
6. 091068 6. 209188 5. 760323 6. 488831 5. 714006 5. 436549 6. 086389 5. 734718 5. 335351  
5. 689135 5. 643506 5. 852015 4. 195003 6. 183023 5. 270693 5. 551286 6. 244329 6. 381882  
4. 07116 3. 675458 3. 392136 2. 787839 4. 720229 2. 619921 3. 806886 3. 491669 3. 801713  
4. 595064 3. 534799 3. 640732 2. 875623 3. 012091 2. 903554 2. 607335 2. 67888 4. 544308  
0. 939936 1. 153853 1. 57451 1. 572595 1. 573898 1. 685169 0. 927022 1. 176628 1. 012345  
4. 534365 4. 016075 4. 422504 3. 906358 4. 473025 4. 365499 3. 673519 4. 959325 3. 557095  
7. 672266 7. 209656 7. 288023 7. 216278 7. 68117 7. 391835 7. 432091 7. 497198 6. 368187  
6. 444322 6. 238541 6. 021603 5. 659159 4. 710779 5. 854968 5. 99929 5. 335847 5. 979327  
6. 292611 6. 011167 5. 976429 4. 832312 6. 134937 6. 086385 6. 147172 5. 890707 6. 550407  
2. 138845 2. 851817 2. 372186 2. 519214 2. 480141 2. 565846 2. 396795 2. 933193 2. 972133  
1. 589421 1. 878062 1. 923526 2. 356649 1. 677065 2. 057777 2. 048169 1. 828313 2. 15072  
3. 661402 3. 621742 3. 538004 4. 151312 3. 991323 4. 028846 3. 185519 3. 448504 3. 036586  
6. 940473 6. 307728 6. 213979 7. 273298 7. 101635 5. 987308 6. 434151 6. 801068 5. 218013  
3. 179002 3. 978312 2. 826696 4. 008456 3. 746989 4. 103485 3. 641544 3. 969075 2. 960002  
6. 881273 7. 058924 6. 728753 7. 067942 7. 323682 7. 072905 7. 18011 7. 20975 7. 063032  
6. 602688 6. 853257 6. 817591 6. 761315 6. 609925 6. 390618 6. 341123 6. 958771 5. 55861  
5. 513122 3. 81645 5. 079745 4. 264398 4. 972835 5. 360753 3. 859144 4. 931605 4. 24572  
7. 922137 7. 626969 7. 756973 7. 850171 7. 930958 6. 906324 7. 730186 7. 51148 7. 905429  
4. 018659 4. 456816 4. 13091 5. 271507 3. 964509 4. 259189 4. 481699 4. 117543 4. 681698  
4. 536099 4. 710642 4. 30367 3. 731377 4. 696077 3. 863029 4. 215549 4. 89229 4. 741303  
3. 944225 3. 792957 2. 359241 3. 889972 3. 65304 3. 610761 4. 965658 3. 893488 4. 143179  
8. 035972 8. 143572 7. 92799 7. 738585 8. 485582 8. 513861 8. 04873 7. 781355 7. 884478  
2. 261202 3. 591393 2. 01511 1. 667739 2. 201906 1. 933313 2. 145086 2. 952064 2. 273386  
2. 609175 1. 644388 1. 892755 2. 176262 2. 586738 2. 628455 1. 714489 1. 471139 1. 871905  
1. 438848 1. 30953 1. 321453 1. 76258 1. 058669 1. 18714 1. 380877 1. 202717 3. 195227  
2. 2216 2. 577687 3. 254741 3. 207608 2. 794145 2. 763706 2. 507132 2. 657934 2. 648936  
1. 658502 1. 584982 1. 67235 1. 885154 1. 60144 2. 207697 1. 546285 1. 427339 1. 477867  
2. 923966 2. 118809 2. 825592 2. 718022 2. 584261 3. 151051 3. 122085 3. 374677 3. 391612  
1. 482415 2. 200648 2. 030002 1. 755651 1. 482415 1. 351519 1. 567487 1. 653328 1. 686457  
1. 226146 1. 267732 1. 931559 1. 43166 1. 371635 1. 622496 1. 292357 1. 222903 1. 803908  
5. 323884 5. 149429 3. 598843 4. 910986 5. 891969 3. 698498 3. 843684 4. 955397 3. 179375  
5. 095142 4. 546714 5. 977116 5. 211016 4. 064735 4. 502345 5. 503673 4. 951213 4. 136368  
6. 331287 5. 461139 5. 0862 5. 048119 5. 69619 5. 483333 5. 967689 5. 230614 5. 889541  
5. 742722 6. 081744 6. 03408 4. 79596 6. 149116 5. 821959 5. 871789 5. 802932 5. 628091  
1. 770446 1. 929331 1. 473509 1. 713415 1. 351786 2. 033015 2. 109227 2. 337224 2. 377485  
1. 150993 1. 565983 1. 104788 1. 316176 1. 323798 1. 605587 1. 335378 0. 829274 0. 868995  
8. 294676 8. 379162 8. 140674 8. 04224 11. 83076 7. 953102 8. 353195 9. 230871 8. 932185  
7. 349652 8. 067184 7. 060464 6. 213842 7. 39455 7. 638523 7. 131639 7. 046987 7. 423711  
4. 920357 5. 041115 5. 371442 5. 34458 4. 726609 4. 320851 5. 579914 5. 025158 3. 976376  
6. 526456 6. 715329 6. 338093 6. 20117 6. 232112 6. 516321 6. 275158 6. 394266 6. 384436  
6. 19072 6. 196901 5. 527898 5. 590603 7. 290664 5. 430677 5. 298993 6. 472394 5. 340308  
6. 285653 6. 493993 6. 658323 5. 902876 6. 718769 6. 71037 5. 899391 6. 764785 5. 631552  
3. 660465 3. 319102 2. 460228 3. 158588 2. 086188 2. 889876 3. 671162 2. 75445 2. 223792

7. 811337 7. 71316 7. 849089 6. 029269 7. 877038 7. 621825 7. 777538 7. 659105 8. 198203  
3. 950164 2. 937645 3. 856548 3. 120218 3. 075385 3. 653308 3. 365148 3. 623077 2. 757258  
6. 294929 6. 54407 6. 21194 5. 551547 6. 543305 6. 44309 6. 59618 6. 636952 6. 764659  
5. 457336 7. 046801 5. 844943 6. 078597 6. 784874 6. 357922 6. 361553 6. 036546 6. 371082  
6. 719188 6. 565516 6. 081651 6. 435565 6. 46663 6. 432902 6. 663427 6. 767979 6. 14028  
4. 517241 4. 545227 5. 422052 5. 276224 4. 699396 4. 986974 4. 547835 4. 976688 3. 850298  
7. 052064 7. 164791 6. 68665 6. 914534 7. 145521 6. 954561 7. 492692 7. 430178 7. 554248  
3. 077805 3. 00998 2. 981457 2. 31371 2. 963354 3. 812408 3. 394135 3. 346013 3. 112627  
5. 666062 5. 5023 5. 445094 5. 842926 4. 840701 5. 292031 5. 160273 4. 926851 5. 131991  
3. 314913 3. 994887 3. 743517 3. 717487 3. 753234 4. 441502 3. 141896 4. 097276 3. 459216  
7. 30751 7. 293859 6. 85668 7. 073142 7. 073026 7. 070781 7. 165141 7. 444422 7. 484641  
7. 387126 7. 181937 6. 925331 6. 798929 7. 18977 7. 604629 7. 474904 7. 367235 7. 118193  
5. 322593 3. 884159 5. 262337 2. 590731 4. 760039 4. 160771 5. 527617 4. 368372 5. 384501  
4. 918011 4. 874286 5. 166999 4. 1718 4. 551753 5. 539951 4. 664236 4. 924172 5. 280781  
4. 559006 4. 819574 4. 794589 4. 950559 5. 166025 4. 792966 4. 728464 5. 491581 4. 887055  
4. 502133 4. 371726 4. 108943 1. 950563 3. 692551 3. 424694 4. 051428 4. 266804 4. 139114  
3. 529822 4. 159952 4. 53227 3. 983668 3. 503101 4. 469553 4. 180405 4. 092184 4. 493907  
1. 35226 2. 683372 1. 939228 2. 893108 1. 821552 2. 455321 2. 281471 2. 267807 3. 247975  
8. 963467 9. 706215 8. 727155 8. 416024 9. 33295 9. 12841 8. 48572 8. 866263 8. 723535  
5. 455875 5. 425382 5. 291804 5. 898012 5. 429925 5. 163562 5. 615275 5. 538767 5. 44151  
2. 323495 1. 822766 2. 173506 2. 139597 1. 649378 3. 393406 2. 486856 1. 734578 3. 474169  
4. 907202 5. 280221 5. 25041 4. 533156 5. 413152 4. 3362 5. 655235 5. 451906 5. 039708  
6. 335272 5. 84288 5. 671379 5. 384624 5. 849157 5. 573841 6. 039697 6. 103907 5. 904624  
7. 266437 7. 212759 7. 28782 7. 204682 6. 772432 7. 102973 7. 097578 7. 025674 7. 110893  
5. 21005 5. 848517 5. 249062 5. 877955 4. 717843 5. 604257 5. 680956 5. 662152 5. 997889  
6. 887083 6. 938953 6. 779632 7. 033589 7. 134391 7. 164699 7. 278604 7. 396021 7. 461518  
5. 65468 6. 064166 5. 787813 4. 95001 6. 144015 4. 794386 5. 915646 5. 325801 6. 101607  
7. 710781 7. 430171 7. 192954 7. 644333 7. 229887 7. 172515 7. 9945 7. 412515 7. 452767  
8. 725384 8. 98697 8. 697188 8. 60863 8. 826989 8. 589256 8. 680737 8. 888619 8. 648808  
5. 924165 6. 392693 5. 709749 4. 363549 5. 959288 6. 333389 6. 208944 6. 125945 5. 524894  
2. 440183 2. 795488 2. 936603 2. 832974 2. 253653 2. 292193 2. 102282 2. 565998 3. 525678  
7. 071726 6. 605704 6. 621179 7. 835165 6. 801987 7. 105048 6. 641362 7. 122971 5. 240181  
3. 862706 4. 998911 4. 98737 4. 618656 5. 36051 5. 057245 5. 767324 5. 377523 4. 361387  
7. 494968 8. 705891 9. 070765 7. 850521 8. 681574 8. 168073 8. 593208 8. 353627 7. 290531  
5. 624018 5. 131406 5. 600298 4. 265667 4. 690119 6. 236757 5. 460071 5. 270808 4. 789202  
6. 338263 6. 424591 5. 563063 6. 110184 6. 298232 6. 272355 6. 002908 6. 098187 6. 098042  
6. 127402 6. 214499 5. 961937 6. 241871 4. 63626 6. 390555 5. 515722 5. 458003 6. 097332  
5. 339011 5. 987108 5. 753551 5. 756341 5. 473021 5. 292526 5. 706299 5. 25071 6. 273026  
4. 987282 4. 99241 5. 082092 5. 750825 4. 845804 4. 394729 4. 988261 4. 881692 4. 685218  
9. 921692 9. 710518 9. 961593 9. 495667 9. 862291 9. 762368 10. 425 9. 72132 10. 07442  
4. 189982 3. 772104 3. 636458 3. 604859 3. 733821 4. 879485 4. 15308 4. 704337 4. 517343  
6. 183582 5. 531818 5. 270229 4. 262777 5. 394232 5. 806368 5. 524044 5. 445471 5. 395899  
5. 554252 5. 372284 5. 349761 5. 371097 5. 849896 5. 633143 5. 447691 5. 729422 5. 7853  
4. 359534 3. 117824 3. 491021 3. 076487 3. 791512 4. 345031 2. 907875 3. 589448 2. 623844  
7. 78499 7. 596398 8. 039718 7. 658644 7. 871101 7. 650239 8. 150812 7. 733041 7. 946674  
6. 499512 6. 638683 6. 420976 6. 301937 6. 403987 6. 047419 6. 258396 5. 910765 6. 165934  
1. 493072 1. 625856 1. 479067 3. 078695 1. 784951 2. 697933 1. 787154 2. 491374 1. 807815  
6. 15176 5. 218019 4. 486878 5. 425856 5. 526901 5. 537477 5. 773447 5. 504669 5. 116527  
4. 431163 4. 474594 4. 27875 3. 09872 4. 86875 3. 787619 3. 866468 4. 59408 3. 785464  
8. 187571 8. 074924 7. 260493 6. 998347 9. 278703 7. 609629 7. 622967 8. 405117 6. 579703  
6. 59573 6. 834202 6. 479604 6. 75367 6. 92279 6. 143785 6. 963354 6. 499595 6. 264518

6. 119484 6. 195102 5. 637422 6. 120256 5. 952245 5. 841616 6. 246409 5. 981886 6. 218581  
6. 601442 7. 02362 6. 504223 7. 313158 6. 150388 6. 367849 6. 754342 6. 715461 6. 449857  
6. 39553 6. 47831 5. 805483 5. 860513 6. 483489 6. 341575 6. 41383 6. 262242 6. 89595  
3. 518619 4. 367493 4. 852331 4. 902099 4. 030549 4. 293315 4. 791273 4. 197117 3. 152798  
2. 771465 2. 653967 2. 321329 3. 389826 2. 395894 3. 431469 2. 182584 3. 084012 2. 717082  
8. 881621 9. 393984 9. 122798 8. 691277 9. 566312 9. 006563 8. 842436 9. 139267 7. 918294  
6. 703146 6. 956524 7. 010136 6. 694546 6. 840277 6. 807859 7. 227779 7. 05703 6. 723979  
1. 419693 1. 231544 1. 404931 1. 63309 1. 390751 1. 431558 1. 688186 1. 163227 1. 484672  
2. 077421 3. 22016 1. 663238 2. 893036 3. 855034 1. 883305 2. 262446 2. 514668 5. 365773  
2. 171176 1. 54629 2. 10659 2. 540163 2. 067751 1. 885659 1. 793904 2. 302667 2. 372173  
4. 896744 4. 405315 3. 436642 3. 063155 4. 156423 4. 558469 4. 777337 4. 672143 3. 390772  
6. 340962 6. 264686 6. 210873 6. 907553 6. 730996 6. 179784 6. 206905 6. 457216 7. 047351  
7. 356255 7. 474577 7. 133046 7. 188792 7. 390509 7. 618492 7. 606991 7. 254005 7. 16858  
2. 58346 2. 452567 3. 191495 2. 948657 2. 72767 3. 238838 2. 583388 2. 659501 2. 460564  
1. 269869 1. 90506 1. 739975 1. 502017 1. 903139 1. 46266 1. 626252 1. 935717 2. 647124  
5. 802194 5. 71088 5. 038365 5. 280238 5. 431532 4. 976473 5. 623972 5. 374899 5. 11038  
2. 191186 2. 444367 2. 113213 2. 79813 1. 204368 1. 722301 1. 918436 3. 119488 3. 761034  
7. 988615 7. 917467 8. 083691 7. 956901 7. 802722 7. 829951 7. 858205 8. 375242 8. 118366  
2. 510801 2. 442311 2. 674594 4. 364867 3. 158184 2. 208582 3. 838989 2. 34616 2. 531838  
6. 767253 6. 689006 7. 10805 7. 741606 7. 311818 7. 313647 6. 819859 6. 846202 6. 123181  
4. 62938 5. 392091 5. 454463 5. 420577 5. 472929 5. 706119 4. 770047 5. 258687 4. 089854  
4. 897533 5. 270142 4. 536619 4. 077881 5. 130518 4. 754191 5. 595075 4. 954677 4. 3515  
2. 54052 1. 660288 2. 37557 2. 280457 1. 47251 1. 972629 1. 187779 2. 014552 2. 04513  
6. 609008 6. 685834 6. 156601 6. 66711 6. 803401 6. 813616 6. 593001 6. 422367 6. 895113  
1. 889343 1. 797106 2. 253809 2. 745196 2. 027261 2. 273658 2. 016513 2. 246921 1. 673586  
2. 058005 2. 094306 2. 16333 2. 186629 2. 399983 2. 175202 2. 515078 2. 205677 1. 741177  
3. 321548 3. 388872 3. 4256 2. 85285 3. 210069 3. 302834 2. 867318 3. 441362 2. 825265  
2. 681009 3. 696716 3. 254183 2. 947618 2. 951515 3. 310633 3. 07485 4. 032479 3. 618314  
2. 682188 2. 35201 2. 113599 2. 166569 2. 363999 1. 718663 1. 950099 2. 801224 2. 174314  
4. 129769 4. 994371 4. 388519 4. 577847 4. 826494 4. 76492 4. 434779 3. 87358 3. 818556  
1. 123519 2. 155073 1. 741929 1. 539044 2. 497775 1. 486312 2. 31699 1. 101383 1. 347715  
6. 546954 6. 073551 6. 891201 6. 344596 7. 057755 6. 404495 6. 461425 6. 177724 6. 094671  
3. 644527 2. 559091 3. 641583 3. 995783 3. 6119 4. 0887 2. 967996 4. 15316 3. 031017  
3. 990797 4. 48272 4. 025589 3. 452354 4. 161411 5. 504454 4. 313356 4. 464625 5. 115707  
7. 486421 7. 573139 7. 434727 7. 251645 7. 357662 7. 59222 7. 277042 7. 416524 7. 210417  
10. 35088 10. 48085 10. 47941 10. 51501 10. 48798 10. 33671 10. 36842 10. 50859 9. 540623  
6. 012016 5. 482746 5. 722917 6. 071057 5. 901123 5. 526247 6. 14525 5. 285779 5. 735994  
7. 346848 7. 28543 6. 772622 5. 447221 7. 171903 6. 919192 7. 016515 7. 115873 6. 953468  
5. 785987 6. 370118 5. 883042 5. 770028 5. 915374 6. 555757 6. 36698 6. 330458 6. 541109  
6. 97328 6. 666927 6. 789068 6. 66128 6. 680944 6. 484078 6. 967366 6. 663305 7. 100028  
3. 492028 3. 917471 4. 038553 4. 521295 3. 380893 3. 73316 4. 111828 3. 604898 3. 195563  
2. 855857 3. 034583 2. 738933 2. 638571 2. 805468 2. 955917 3. 774103 2. 875313 3. 973741  
6. 971703 6. 972068 6. 568373 6. 461572 6. 60903 6. 919294 7. 019113 6. 874264 7. 352406  
4. 459752 4. 091861 4. 280858 4. 427856 3. 492696 3. 922722 4. 319746 3. 515264 5. 433075  
5. 603072 5. 276104 5. 447681 3. 630689 5. 686432 5. 234655 5. 832024 5. 699438 4. 807587  
4. 01992 4. 559188 4. 323953 5. 017335 4. 188875 4. 015742 4. 661228 4. 626048 3. 790175  
1. 705264 2. 875695 2. 562117 3. 573924 2. 64551 2. 925769 2. 354522 1. 894355 2. 310921  
10. 22406 9. 840083 10. 25382 10. 14018 9. 740905 9. 929561 10. 24193 9. 949896 10. 22253  
3. 399677 3. 734339 3. 589061 3. 529736 3. 258678 3. 401483 3. 265645 3. 37233 4. 071513  
3. 880986 3. 32515 4. 208102 3. 135594 4. 315973 3. 539791 3. 757784 4. 447974 4. 591329  
2. 56323 1. 858319 2. 948577 2. 308128 2. 03874 2. 635759 2. 267672 2. 335973 2. 045129

1. 491587 1. 540264 1. 613777 2. 971546 1. 959036 1. 815956 2. 274159 1. 65413 1. 858612  
5. 454337 5. 275126 6. 326429 4. 525804 5. 379905 5. 293201 5. 459145 5. 941303 4. 444885  
3. 371704 3. 352639 3. 348245 3. 260561 3. 163397 2. 996783 3. 589172 3. 162069 3. 359606  
9. 494051 9. 750827 9. 299521 9. 701408 9. 573896 9. 853347 9. 27725 9. 484323 9. 598687  
8. 084534 7. 9388 8. 209842 8. 373786 7. 78486 7. 45882 8. 097231 8. 057796 7. 73133  
3. 189954 5. 281709 3. 843386 3. 824043 5. 318242 3. 337699 3. 96673 4. 379425 3. 059361  
5. 470887 4. 006312 5. 215892 4. 100417 4. 894525 4. 838433 4. 693611 5. 13802 5. 031473  
3. 664334 4. 138409 4. 62333 4. 333488 4. 507301 4. 736263 3. 567366 4. 155071 3. 720167  
1. 990625 1. 990197 1. 790612 2. 922104 1. 597354 1. 559138 1. 403994 1. 901945 1. 815811  
3. 157538 2. 712675 2. 481843 1. 511177 2. 904639 2. 599805 2. 374693 2. 145589 2. 241976  
4. 41655 4. 467487 4. 388998 4. 523264 4. 658162 4. 629351 3. 55476 4. 216496 3. 404243  
3. 416697 3. 000503 2. 959984 2. 882809 2. 238218 2. 639365 2. 657452 2. 860744 2. 428438  
3. 62681 3. 395594 4. 325187 3. 411818 4. 192035 4. 40687 3. 839795 3. 344808 3. 296009  
1. 277148 1. 368051 1. 515631 1. 209052 1. 188416 1. 857094 0. 903949 1. 706814 1. 736061  
3. 752282 3. 700838 4. 359514 4. 081832 4. 026489 3. 024174 3. 625302 4. 105543 3. 149112  
10. 98915 11. 27667 11. 05575 10. 75674 11. 04123 11. 46873 11. 09806 11. 48831 10. 31284  
3. 713601 2. 415987 3. 431378 2. 963173 3. 210024 3. 308569 3. 112163 3. 989749 3. 043208  
8. 45481 8. 090808 8. 241576 8. 36164 8. 315536 8. 174906 8. 599664 8. 267816 7. 405321  
2. 662254 2. 126966 2. 656542 2. 933772 3. 604461 2. 937878 2. 505199 2. 792543 3. 218764  
4. 000956 3. 271731 3. 601103 2. 047478 4. 207047 3. 50429 3. 48787 4. 23417 3. 160766  
5. 688675 5. 381388 5. 087795 4. 866949 5. 420064 5. 434984 5. 082569 5. 557826 5. 554616  
6. 04876 6. 461422 6. 281114 5. 465357 5. 594697 6. 016819 6. 605494 6. 314372 5. 956803  
6. 310372 5. 563429 5. 411064 5. 230833 4. 976037 4. 89578 6. 177642 5. 100571 4. 514275  
2. 671699 3. 177887 2. 674999 2. 990158 4. 454218 2. 950075 4. 495837 3. 527295 2. 689412  
7. 952979 7. 852349 7. 829772 8. 858111 8. 238435 7. 87568 8. 062126 7. 953576 5. 080377  
4. 863432 4. 547591 4. 052639 4. 041059 4. 753548 2. 645518 5. 34432 4. 503781 3. 894147  
5. 557335 6. 145535 5. 704659 5. 6028 6. 599311 5. 91111 6. 354555 6. 508525 6. 153505  
5. 346327 5. 957918 5. 4089 5. 721735 5. 287136 6. 024932 5. 036916 6. 001517 4. 122673  
6. 57735 6. 172346 6. 764847 6. 721544 6. 500576 5. 834937 6. 354357 6. 545036 7. 761848  
6. 112525 6. 444918 5. 972233 5. 125927 5. 927827 4. 561577 5. 778996 5. 975979 6. 200332  
6. 331732 6. 263156 5. 819454 6. 140526 5. 611117 5. 734464 6. 16748 5. 515188 5. 815433  
6. 917343 6. 581027 6. 817773 7. 114446 7. 186869 7. 066951 6. 989966 7. 278485 6. 731166  
5. 458537 5. 551477 5. 417203 5. 062291 5. 69797 5. 512738 5. 901658 5. 427617 6. 356251  
6. 623907 6. 503986 5. 59637 6. 380254 6. 67944 6. 21438 6. 82181 7. 015394 6. 458862  
8. 606398 9. 100724 9. 086552 9. 862822 8. 909722 8. 920394 9. 29644 9. 167961 7. 906026  
6. 216101 6. 07673 6. 392814 6. 226307 5. 865171 6. 07107 5. 879258 6. 017425 5. 073467  
6. 505905 5. 922508 6. 214701 5. 848392 5. 232121 5. 452474 5. 941131 5. 948838 5. 310702  
8. 736219 8. 587889 8. 386509 8. 149551 8. 42824 8. 008898 8. 691885 8. 752427 8. 831525  
2. 774177 2. 94868 4. 648467 2. 812212 3. 32784 2. 820193 3. 718618 3. 453147 3. 076809  
5. 69024 5. 589493 5. 607279 5. 064195 6. 147022 5. 37414 5. 771935 5. 747447 5. 291923  
5. 729783 5. 677155 5. 809937 5. 580793 5. 538415 6. 008286 5. 711601 5. 64734 5. 438497  
4. 980996 4. 873651 5. 57959 4. 150502 5. 147285 5. 049755 5. 058176 4. 694568 5. 487478  
1. 792929 2. 842106 1. 656211 1. 54809 2. 991488 1. 638849 3. 608253 1. 638172 1. 848747  
8. 350616 8. 730463 8. 3253 8. 425787 8. 577579 8. 85596 8. 474774 8. 287706 8. 156119  
3. 116544 6. 241623 3. 852438 3. 716622 5. 549386 5. 224179 3. 850107 4. 915384 3. 998901  
6. 281579 6. 00617 5. 630174 6. 45197 6. 096572 6. 48358 5. 953817 5. 404357 5. 485996  
6. 570259 6. 118264 6. 276841 6. 004118 6. 311768 6. 445183 6. 709635 6. 783891 6. 060464  
4. 717006 4. 500219 4. 760326 4. 281525 4. 380574 4. 580041 4. 411258 4. 042872 3. 950445  
6. 303088 6. 552576 6. 222033 6. 707573 6. 538516 6. 756366 6. 942819 6. 489168 6. 086146  
5. 485874 5. 717866 5. 804336 5. 713418 5. 759603 4. 772856 5. 007001 5. 484533 4. 652205  
2. 76492 2. 78143 3. 301634 3. 065522 3. 083561 3. 028988 2. 62476 2. 670113 2. 888238

5. 344817 5. 535254 4. 950705 5. 514269 5. 410767 4. 873639 5. 156761 5. 345452 5. 311617  
8. 72371 8. 294876 8. 63893 7. 497408 7. 962672 8. 250857 9. 027996 8. 281944 8. 55356  
3. 49382 4. 001069 2. 845556 4. 053146 3. 533675 3. 191384 4. 431205 3. 938293 4. 311286  
5. 53268 5. 951723 5. 624588 4. 372297 5. 835089 6. 277957 6. 223782 6. 302322 5. 720992  
9. 269549 9. 284926 9. 156364 8. 761231 9. 269912 9. 008646 9. 048817 9. 187416 9. 108326  
8. 961847 9. 052175 9. 061745 8. 800571 9. 02981 9. 753842 9. 294142 9. 098819 9. 229958  
7. 46844 7. 556644 7. 790584 6. 58881 7. 321482 7. 681962 7. 275419 7. 375419 7. 161844  
8. 658757 8. 948502 9. 100207 8. 18917 8. 36088 8. 907999 8. 904994 8. 610248 8. 110253  
5. 537151 5. 936195 6. 051422 4. 925681 5. 744219 5. 389153 6. 000603 5. 210557 4. 606293  
1. 23319 1. 653486 1. 466255 1. 791153 1. 575517 1. 776629 2. 291022 2. 516661 1. 694577  
5. 033528 4. 996054 4. 333214 3. 937655 4. 601041 4. 045554 4. 282229 4. 959242 4. 445499  
4. 258176 5. 065213 4. 565124 3. 904401 4. 39268 4. 960583 5. 252813 5. 19811 4. 029156  
5. 167679 5. 512842 5. 004877 4. 40194 5. 682193 5. 202513 5. 046349 5. 155594 4. 606334  
8. 933156 8. 869872 8. 792076 9. 162635 8. 937051 8. 914631 9. 001547 8. 890571 8. 342486  
3. 566199 3. 069111 3. 386764 3. 189568 3. 500147 3. 289666 3. 888052 4. 047118 4. 28717  
6. 628563 7. 035838 6. 699392 7. 04645 6. 900736 6. 719248 6. 384178 6. 863455 6. 181934  
2. 901547 1. 916095 2. 986527 1. 738223 2. 870151 3. 112782 2. 482117 2. 449756 2. 255088  
5. 470714 5. 654535 5. 285452 5. 886144 5. 749036 5. 578234 5. 879061 5. 673332 4. 144055  
5. 682218 7. 127878 5. 946791 6. 672838 6. 529466 6. 578535 6. 555925 6. 384638 6. 643094  
6. 163573 6. 640951 5. 883737 6. 329816 6. 533443 5. 379003 6. 049386 6. 01722 6. 201877  
4. 850536 4. 62926 4. 310637 5. 307432 4. 60224 4. 745412 4. 688422 4. 745811 4. 126487  
7. 301135 7. 026605 6. 654798 6. 703651 6. 782792 6. 7767 6. 891466 7. 111789 7. 587039  
6. 568558 5. 889761 6. 420115 6. 216022 6. 058654 6. 730811 5. 579318 6. 640504 5. 531408  
2. 588958 3. 445909 2. 036887 2. 573995 3. 461025 2. 092267 3. 817677 1. 820372 3. 275253  
1. 921782 2. 758642 2. 333985 2. 215881 2. 54451 2. 399286 2. 791998 3. 679337 1. 998981  
5. 616565 5. 475731 6. 106547 5. 742575 6. 180837 5. 870383 6. 010071 6. 151259 5. 03261  
5. 481774 6. 024329 6. 270363 5. 814456 5. 356721 4. 745027 5. 498151 5. 397396 5. 088627  
6. 386529 6. 227551 6. 290503 5. 124234 6. 103469 6. 145884 5. 909653 6. 421554 5. 487216  
5. 863904 5. 629813 6. 102596 4. 959959 5. 284289 5. 594465 5. 30738 5. 919795 5. 724762  
4. 963761 4. 962061 4. 229109 4. 451712 6. 498217 4. 323252 4. 779669 4. 679327 4. 58481  
4. 617953 3. 775785 4. 512722 4. 925519 4. 09925 3. 134563 3. 290678 3. 699478 3. 112164  
5. 653473 5. 592314 4. 290763 4. 615137 5. 196531 5. 359029 4. 835674 5. 315695 4. 176158  
2. 843852 3. 134976 1. 545365 4. 379167 4. 257015 2. 433961 3. 823703 1. 84581 2. 013491  
2. 064781 1. 17392 1. 572561 1. 815252 1. 155656 1. 521445 1. 217164 0. 697113 1. 440725  
4. 553891 5. 01868 3. 813526 4. 263348 5. 014584 4. 270737 4. 080469 4. 062506 4. 194712  
1. 623705 2. 71426 1. 93081 1. 368095 3. 264216 0. 787695 3. 451122 2. 554359 2. 515114  
8. 812117 8. 626364 8. 069124 8. 433062 8. 683431 7. 995167 8. 192991 8. 666621 8. 06972  
2. 790231 2. 461838 1. 746719 3. 118211 2. 597558 1. 850929 3. 318265 1. 625376 1. 452785  
1. 880861 2. 235505 2. 308518 2. 089304 1. 78197 2. 237377 2. 434337 2. 034697 2. 048419  
4. 174052 4. 817129 3. 994326 3. 787035 4. 423146 5. 034068 5. 16674 4. 183568 3. 673503  
7. 480274 7. 625718 8. 093386 7. 729264 7. 930681 6. 630561 7. 144542 7. 559819 7. 298617  
4. 469151 3. 692302 4. 653819 2. 704643 3. 805939 4. 207918 4. 414538 3. 510896 3. 882715  
5. 312035 5. 23934 4. 74571 5. 726249 5. 252481 5. 610615 5. 379263 5. 154443 5. 584516  
5. 975247 5. 900015 6. 445223 6. 780082 6. 10809 6. 924434 5. 680383 6. 051077 6. 071281  
6. 39943 6. 482174 6. 376782 5. 107047 6. 200033 6. 113301 6. 057785 6. 051804 6. 827627  
2. 228429 2. 2965 2. 375715 2. 67097 2. 810686 3. 418997 2. 983899 2. 930306 1. 932247  
3. 941516 3. 846306 3. 237706 2. 202981 2. 878118 3. 472242 3. 272401 2. 725277 3. 767249  
4. 740086 4. 856938 4. 881194 4. 526409 6. 343913 4. 249762 4. 697649 4. 86266 5. 291005  
4. 898998 4. 807624 4. 973259 4. 790264 5. 11023 4. 920238 4. 853273 4. 604446 5. 69123  
6. 919003 7. 442413 7. 578291 7. 358923 6. 632338 7. 666697 6. 836253 7. 053298 5. 605444  
4. 059246 3. 662512 4. 377935 5. 74267 4. 305511 4. 130609 4. 116344 4. 435432 3. 65469

5. 790845 6. 159947 6. 345733 5. 903182 5. 66642 5. 544129 6. 119483 5. 472595 5. 408261  
2. 999441 1. 816158 2. 133163 3. 369775 1. 48166 1. 642618 1. 832383 1. 74756 2. 193852  
6. 428848 6. 680924 6. 094778 6. 667545 6. 634074 6. 256645 6. 410144 6. 69881 6. 636348  
3. 492058 3. 015042 3. 159255 2. 959678 4. 38751 3. 152438 3. 257766 2. 267634 2. 93251  
5. 870357 4. 976279 5. 201188 3. 508266 5. 170211 5. 773797 6. 23241 4. 898141 5. 246802  
5. 92716 5. 45365 5. 734108 4. 213818 5. 39587 6. 034228 5. 373531 5. 545001 5. 578465  
6. 980842 6. 929214 6. 885301 6. 287915 7. 12037 6. 510463 6. 739627 6. 770334 6. 496674  
5. 265341 5. 66375 6. 065566 4. 444827 6. 166842 4. 947039 5. 187657 5. 449365 4. 680981  
8. 293483 8. 60143 8. 723559 8. 225847 8. 096445 8. 47372 8. 1052 8. 331922 8. 769133  
2. 639874 1. 366162 1. 551658 3. 121331 1. 860938 3. 193294 1. 818852 1. 099317 1. 861196  
2. 381385 2. 683672 2. 300868 2. 258229 2. 208719 1. 984022 2. 539987 3. 230287 2. 397254  
9. 155416 8. 510862 8. 725383 7. 953777 8. 436073 8. 717574 8. 917653 8. 586128 9. 110078  
6. 574947 7. 080179 6. 353476 7. 261641 6. 886822 6. 764683 6. 3169 6. 915251 6. 735866  
4. 828301 5. 15618 4. 883417 5. 307799 5. 485696 4. 850727 5. 483255 5. 072782 5. 747296  
6. 799029 6. 882853 6. 570752 6. 329331 6. 503884 6. 856695 6. 647446 6. 627666 7. 040477  
6. 716392 6. 260831 6. 708978 6. 395876 6. 951878 6. 593083 6. 742785 6. 597903 6. 148741  
7. 662303 8. 286854 8. 277424 7. 723053 7. 863123 7. 654964 8. 356961 8. 545443 7. 560777  
6. 644517 6. 527049 6. 489219 7. 476011 6. 104619 6. 448492 6. 597179 6. 671335 6. 596556  
3. 571233 3. 185935 3. 830284 2. 954262 3. 871899 3. 090482 3. 892 3. 540612 3. 009101  
6. 80562 6. 709913 6. 945809 6. 385755 6. 935184 6. 319247 7. 020036 6. 571416 7. 082382  
7. 630884 7. 848592 7. 225921 6. 73616 7. 622575 7. 442823 7. 625809 7. 306512 6. 986267  
6. 362752 6. 138254 5. 617775 6. 491628 6. 427962 6. 317561 6. 861154 6. 320547 6. 863244  
6. 373267 6. 23369 6. 114432 5. 901553 5. 774625 6. 525915 6. 285636 6. 245109 6. 83004  
4. 785934 4. 714181 5. 005601 3. 637686 4. 55768 3. 763164 5. 132362 4. 4346 4. 510038  
4. 058749 4. 478037 3. 932894 2. 411389 6. 268704 4. 290508 4. 192285 4. 202501 5. 028885  
5. 319643 5. 742579 4. 818368 6. 250284 4. 99723 5. 212318 5. 564698 4. 618944 5. 159117  
5. 995222 6. 244705 6. 358767 5. 46723 6. 168034 6. 194855 6. 300048 6. 3528 5. 928201  
5. 837885 5. 281402 5. 134644 4. 740842 5. 617269 5. 91065 6. 065627 5. 639861 4. 988299  
6. 357149 6. 269785 6. 205419 6. 374941 6. 370567 6. 481466 6. 458325 6. 096787 6. 258705  
3. 458261 3. 467866 4. 685333 3. 519746 3. 9214 4. 643363 3. 908362 3. 618624 3. 666703  
7. 264711 7. 098135 7. 000874 7. 551525 7. 275817 7. 140276 7. 160436 7. 198218 7. 35732  
1. 501174 1. 501502 1. 707542 1. 715358 1. 406154 2. 352111 2. 794924 2. 372549 1. 327807  
3. 779561 3. 234903 4. 647156 3. 510231 3. 934446 1. 763246 3. 911856 4. 313881 2. 927965  
1. 695691 1. 54649 1. 21003 1. 513535 1. 487924 1. 363206 1. 423708 1. 396934 1. 399963  
2. 660496 2. 588265 2. 30185 2. 838058 2. 986343 2. 481121 2. 125357 2. 534855 2. 65051  
3. 807513 4. 437762 4. 323898 4. 632369 4. 938703 5. 462009 4. 113591 4. 749533 4. 412486  
5. 304275 4. 479699 5. 021641 5. 024449 5. 133728 5. 275975 5. 783948 4. 941461 5. 244272  
6. 785799 6. 583488 6. 437344 5. 951174 6. 883692 6. 558006 6. 762563 6. 651581 6. 339378  
7. 540307 7. 604618 7. 880857 7. 837953 7. 786556 7. 761398 7. 699089 7. 553105 7. 518392  
3. 010817 1. 776822 1. 936224 3. 538341 2. 719953 1. 625022 2. 31431 3. 248251 3. 357549  
8. 483189 8. 648168 8. 846152 8. 136436 7. 676175 7. 211772 8. 068621 7. 756607 8. 622613  
6. 987284 6. 193611 6. 435073 6. 404659 6. 890768 5. 987207 6. 455997 6. 644798 6. 204474  
3. 792266 3. 650382 3. 207112 3. 417893 3. 579904 5. 15073 4. 380743 3. 039205 2. 411473  
2. 619421 2. 40804 4. 18473 3. 2815 2. 902585 3. 09709 3. 031563 3. 238869 2. 224784  
5. 053475 4. 391481 5. 860732 6. 062081 4. 731368 4. 681832 5. 990244 6. 216008 3. 7451  
2. 959764 3. 124932 3. 239551 3. 346502 3. 791376 3. 581199 3. 534949 3. 87338 3. 755606  
3. 033878 2. 994476 2. 675651 3. 474164 3. 871367 3. 193884 3. 625767 3. 748496 3. 297807  
4. 057789 3. 829118 3. 676334 1. 550763 3. 440643 3. 855767 3. 408662 3. 387688 2. 967569  
4. 475799 5. 093362 3. 909824 4. 324611 4. 33786 4. 257596 5. 205338 4. 046611 4. 253118  
4. 799859 4. 479725 4. 580608 5. 047857 4. 208904 4. 329056 4. 528871 4. 582415 3. 457467  
7. 202219 7. 180866 7. 237763 6. 41455 7. 112964 7. 104815 7. 302946 7. 345495 7. 048392

3. 923149 3. 874204 4. 543771 4. 639192 4. 503636 3. 415604 3. 703979 4. 212936 2. 689294  
1. 291609 1. 994452 1. 734429 1. 604324 3. 659306 1. 373579 1. 779682 1. 873732 2. 093362  
6. 009897 5. 207894 5. 689442 4. 903235 5. 985069 4. 951061 5. 877425 5. 190002 6. 295704  
2. 569605 2. 12476 2. 726331 2. 508871 1. 959635 2. 717201 2. 941598 2. 49235 1. 85889  
4. 47762 4. 564347 4. 055369 3. 56243 3. 717314 4. 509011 3. 763332 3. 961838 2. 638737  
6. 573131 6. 404742 6. 247553 7. 095934 6. 003645 5. 85862 6. 397927 5. 961471 6. 223116  
1. 446145 2. 552971 1. 872395 1. 91641 1. 840017 1. 575307 1. 720533 1. 872395 1. 447193  
4. 308173 4. 737456 4. 138351 4. 017192 3. 749293 4. 224271 3. 706392 3. 089383 5. 234886  
7. 906614 7. 667877 7. 946971 7. 76572 7. 03694 7. 872992 7. 742159 7. 567574 7. 399915  
5. 260507 5. 207652 4. 658367 4. 01292 5. 198259 4. 842812 4. 988238 5. 081337 5. 17046  
5. 577476 6. 133434 5. 982551 4. 501506 6. 240009 5. 733577 5. 70003 5. 836523 5. 146322  
2. 09428 4. 168054 3. 462579 3. 613709 3. 928839 2. 73688 3. 892301 2. 242362 3. 722146  
4. 149122 4. 290601 4. 388752 4. 062418 4. 382341 4. 635356 3. 665561 4. 294109 4. 131177  
6. 687591 6. 772496 7. 187983 6. 751771 6. 720108 6. 49476 6. 64261 6. 492422 6. 085815  
7. 410425 8. 174371 7. 676853 7. 866524 7. 567407 8. 134355 7. 304857 7. 57114 6. 538015  
4. 993964 4. 564145 4. 692757 4. 677288 5. 274276 4. 906864 5. 293285 4. 764014 4. 896758  
4. 850414 5. 2113 4. 978488 4. 532969 5. 072901 5. 229359 4. 939064 5. 170652 5. 53691  
3. 876669 3. 128132 3. 641396 3. 715402 3. 847655 3. 460604 2. 698773 3. 606687 2. 642556  
6. 452558 6. 565799 5. 969559 6. 067532 6. 269541 6. 417136 6. 420273 6. 288674 6. 043607  
7. 299622 7. 021442 7. 272529 6. 965488 7. 357696 7. 192315 7. 248001 7. 350548 7. 251075  
1. 460768 1. 686759 1. 790171 2. 141844 2. 359871 1. 568164 1. 609354 1. 54922 1. 333039  
6. 207592 6. 008144 6. 238248 6. 41982 5. 871539 5. 549299 6. 448864 6. 204829 6. 192113  
6. 406507 6. 472206 6. 137357 6. 750449 6. 569651 6. 244008 6. 693376 6. 599154 6. 840407  
5. 738124 5. 690869 4. 974023 4. 39085 5. 199592 5. 316396 5. 741271 4. 898687 5. 938231  
1. 822493 2. 540396 2. 498598 3. 037483 3. 238997 2. 58681 1. 965389 3. 758282 2. 157391  
7. 662003 7. 981135 7. 571656 7. 36061 8. 139668 8. 508175 7. 847978 7. 822147 6. 427854  
4. 244586 4. 285596 4. 874648 1. 881656 4. 295465 4. 848688 4. 409104 4. 815481 3. 971245  
5. 844243 5. 956999 5. 252627 5. 642123 6. 017371 5. 099385 5. 449711 5. 973046 5. 310086  
7. 093942 6. 906926 6. 909607 6. 605938 6. 611292 6. 446327 7. 262874 6. 544445 6. 726454  
2. 707395 2. 151093 2. 249926 2. 285574 2. 641591 1. 944581 2. 609842 2. 886544 2. 462894  
1. 920882 1. 704783 1. 952489 2. 330016 1. 665679 1. 811948 1. 949447 1. 278033 1. 601075  
3. 875121 4. 83318 4. 738396 3. 491107 4. 130045 4. 645765 4. 75023 4. 496183 4. 213498  
3. 662251 3. 872251 3. 857809 3. 626321 3. 385137 4. 530021 3. 956777 4. 231077 3. 099494  
7. 00411 6. 546868 6. 269119 6. 594132 6. 793095 7. 065981 6. 647073 6. 614514 5. 687331  
2. 119784 1. 742167 1. 316302 2. 414481 2. 339037 2. 606876 1. 515206 1. 28045 2. 098685  
7. 071692 6. 52841 6. 880129 6. 221092 6. 37898 5. 814957 7. 01574 6. 3375 6. 551662  
1. 991304 2. 232286 1. 893805 2. 698747 2. 140201 1. 907273 1. 842519 2. 204409 2. 397347  
7. 528631 7. 649645 7. 43304 6. 985919 7. 925297 7. 637123 7. 649645 7. 135954 7. 349473  
3. 55435 4. 346812 3. 316742 4. 91119 4. 033619 3. 879646 3. 214499 3. 887562 4. 382337  
4. 964407 5. 454834 4. 971398 4. 722175 5. 898609 5. 459215 4. 602906 5. 55038 4. 591707  
7. 055906 7. 102137 6. 861247 6. 684764 6. 957074 6. 768163 7. 238776 6. 906876 7. 039157  
1. 823384 2. 575967 2. 999642 2. 685702 1. 827131 1. 73758 2. 195581 2. 496863 1. 823384  
7. 694449 7. 157529 7. 713762 6. 91475 7. 775306 7. 613219 6. 90002 7. 272357 7. 035398  
4. 668149 4. 502449 4. 716842 4. 807296 5. 166941 4. 180983 4. 427111 4. 952361 5. 09258  
1. 404656 2. 318588 0. 875977 2. 203602 1. 982166 2. 420372 1. 003792 1. 07458 1. 770397  
3. 0874 4. 269652 1. 764976 5. 737712 3. 350319 3. 736427 2. 737211 2. 412293 3. 078082  
5. 515814 6. 25077 5. 673283 6. 153048 6. 803561 6. 211973 6. 15153 6. 138968 7. 064674  
1. 012607 1. 302596 1. 357552 1. 322557 1. 681224 1. 607045 1. 386266 0. 92097 1. 160205  
6. 436892 7. 018182 6. 558336 6. 455481 6. 76536 6. 93582 6. 234095 6. 831404 6. 506755  
5. 328134 5. 535578 5. 923265 5. 093849 6. 059806 5. 19023 5. 578665 5. 358908 4. 784564  
5. 45896 5. 916296 5. 127605 4. 130876 5. 575295 6. 285225 5. 93108 6. 239483 5. 096502

5.116513 4.05683 4.65107 4.694545 3.579052 5.089526 4.251789 5.163347 5.34969  
1.609991 1.485214 1.648911 2.523295 0.939652 1.629609 1.411997 1.304738 1.63906  
3.902898 4.621251 3.721772 3.826243 3.41286 3.000713 3.772287 3.269455 3.357843  
7.791191 8.001755 7.843339 8.082357 8.044024 8.4062 8.306411 7.732893 7.813715  
5.889919 6.178542 6.11145 5.44867 6.042625 6.050149 6.050188 6.078163 5.403171  
7.361685 7.319836 6.955664 6.348777 7.114274 7.201308 7.041548 6.974865 7.151227  
7.571376 7.842551 7.672675 7.341292 7.400263 7.678214 7.698508 7.696378 7.482196  
2.525849 2.997588 3.376058 3.008948 3.562424 2.933166 2.09967 3.442157 2.944101  
3.351742 2.74025 2.790632 2.132888 3.130056 2.437468 3.636592 3.486294 4.074992  
6.787671 6.493199 6.533951 7.112225 6.813537 6.565278 6.771581 6.541549 6.939702  
5.12904 4.967808 4.96613 5.298605 5.036593 4.264257 4.499285 5.092384 5.225296  
5.521998 6.042887 5.468613 6.533007 5.766824 6.22179 5.993343 5.785957 6.826659  
6.926937 6.96196 7.022351 7.072789 6.883833 5.948531 6.958469 7.396763 7.409019  
7.884062 7.995561 7.762219 7.80822 8.108371 7.416822 8.058835 7.889033 8.376464  
4.862062 5.30079 5.195169 2.531404 5.110707 4.550316 5.014704 4.815107 4.502625  
3.947558 3.911837 3.807166 3.933052 4.580113 4.409996 4.607767 3.85152 4.589098  
1.379287 1.612337 1.523396 1.842285 1.044063 1.875099 1.686472 1.128601 1.403032  
5.142998 4.681953 4.856243 4.129471 5.269961 4.494737 4.412864 4.309324 5.664693  
3.365204 2.645325 3.684791 2.857199 3.32082 3.123296 2.725445 3.049587 3.02262  
5.080791 6.280979 6.535693 4.697048 6.23807 5.273733 6.197629 5.384438 5.382494  
9.037579 8.673119 9.276192 8.608482 9.136128 8.996325 9.291387 9.04909 9.892914  
6.085324 6.313134 6.215611 5.997416 5.986505 5.936193 5.833746 6.264847 7.582195  
5.994783 6.117506 6.082342 4.825645 6.21728 5.821207 6.286561 6.101034 6.431328  
5.071143 4.962578 5.090228 4.380458 5.052221 4.864988 4.686494 4.868417 5.134868  
5.883989 5.015959 5.624481 4.494273 5.400527 5.554385 5.163318 5.321637 5.838204  
9.764131 9.688843 9.496552 9.040842 9.716277 9.727526 9.435299 9.696427 9.749344  
2.040636 2.247248 2.159607 1.809424 1.953694 2.728057 2.148995 2.438533 1.8195  
5.680792 5.276159 5.091092 5.809795 5.526275 5.618394 6.027258 5.557208 4.399117  
5.819714 5.845557 5.042491 4.642068 5.894405 5.150489 5.630158 5.403061 6.093899  
4.784982 5.096987 5.604163 5.889945 6.01566 4.571097 4.45899 5.295848 4.299453  
6.796893 6.216892 5.769472 6.986922 6.403053 5.904722 6.50354 6.527074 7.050818  
2.142695 2.21851 2.866014 2.184779 2.780831 2.484588 2.796244 2.910429 2.485373



GSM604463GSM604463GSM604463GSM604463GSM604464GSM604464GSM604464GSM604465GSM604465

|          |          |          |          |          |          |          |          |          |
|----------|----------|----------|----------|----------|----------|----------|----------|----------|
| 2.352958 | 1.509023 | 1.181152 | 2.246093 | 2.277162 | 2.099129 | 1.752794 | 2.256439 | 1.12504  |
| 3.133853 | 3.068669 | 3.546733 | 3.675331 | 3.426986 | 3.488556 | 3.591076 | 4.151576 | 4.836036 |
| 8.259331 | 8.554904 | 8.524451 | 8.010109 | 8.548705 | 7.958747 | 8.57693  | 8.503729 | 8.200316 |
| 6.292351 | 6.426437 | 6.787111 | 6.468032 | 6.561454 | 5.967206 | 6.38308  | 6.769153 | 6.437362 |
| 2.726688 | 1.683765 | 1.68176  | 1.464265 | 1.862487 | 1.827524 | 1.640867 | 1.940658 | 2.610993 |
| 4.806596 | 5.817663 | 0.800895 | 4.083933 | 0.568693 | 1.640756 | 1.647188 | 1.855145 | 2.044045 |
| 3.042164 | 1.304869 | 1.840446 | 2.107701 | 1.60793  | 1.784872 | 1.249127 | 2.545502 | 1.193421 |
| 1.082175 | 2.569766 | 1.120371 | 1.764821 | 4.129195 | 2.127172 | 2.565875 | 1.690713 | 0.930308 |
| 1.805242 | 1.931742 | 2.848502 | 1.793965 | 1.930547 | 2.371577 | 1.052342 | 1.513473 | 2.024994 |
| 2.305559 | 0.902055 | 0.740773 | 0.738799 | 0.586119 | 0.774089 | 0.75315  | 1.064019 | 0.792401 |
| 7.307368 | 6.951763 | 6.124977 | 6.896265 | 6.273298 | 5.543796 | 3.801225 | 4.992873 | 3.057186 |
| 9.910555 | 8.437939 | 8.970597 | 9.735719 | 8.032821 | 8.152678 | 6.723201 | 6.861088 | 6.785757 |
| 4.110306 | 1.79208  | 3.161109 | 4.383984 | 0.755463 | 1.828429 | 2.849773 | 0.665772 | 3.469973 |
| 3.859339 | 2.114232 | 1.173495 | 3.662175 | 2.880424 | 0.913068 | 1.239687 | 1.359798 | 0.837752 |
| 6.741731 | 6.093285 | 5.777477 | 6.979685 | 6.084462 | 7.679917 | 3.800447 | 3.193254 | 4.106974 |
| 6.813522 | 7.374199 | 7.526818 | 2.53725  | 7.099824 | 4.041767 | 6.155342 | 5.17007  | 4.709131 |
| 5.406302 | 1.850159 | 6.005168 | 3.521584 | 1.609938 | 3.620724 | 1.679514 | 2.650295 | 1.368035 |
| 5.242087 | 3.552521 | 2.96072  | 1.608329 | 1.079999 | 1.065915 | 2.597802 | 3.641175 | 1.399684 |
| 2.003593 | 1.087868 | 3.698089 | 3.104285 | 2.374551 | 1.085403 | 0.798155 | 1.087306 | 0.81009  |
| 0.691465 | 0.986362 | 1.173161 | 1.075416 | 0.564835 | 1.247076 | 1.332665 | 0.700645 | 0.677099 |
| 3.093541 | 1.123908 | 2.757424 | 2.232521 | 4.749521 | 1.361832 | 1.708928 | 3.021713 | 1.854085 |
| 1.830563 | 1.98642  | 2.676808 | 1.458598 | 3.110667 | 2.309874 | 2.066158 | 3.555217 | 2.300405 |
| 0.820862 | 1.154232 | 0.97692  | 0.716394 | 0.592071 | 0.533446 | 0.696436 | 1.175645 | 0.568764 |
| 0.813738 | 0.84236  | 0.646747 | 1.126093 | 2.493432 | 0.88824  | 0.623618 | 0.867795 | 0.599827 |
| 0.623712 | 1.570784 | 0.596007 | 0.861022 | 0.449841 | 0.835571 | 0.86724  | 0.922418 | 0.604875 |
| 1.27959  | 1.498849 | 0.633693 | 0.566601 | 0.596358 | 0.894139 | 0.982273 | 1.148417 | 0.636734 |
| 0.769206 | 0.745532 | 0.893033 | 0.720128 | 0.594049 | 0.455143 | 0.673822 | 0.567423 | 0.477415 |
| 0.784026 | 1.258851 | 0.693973 | 1.033906 | 0.608991 | 0.764259 | 1.388817 | 1.26122  | 0.776668 |
| 0.986466 | 0.845671 | 0.81853  | 0.934426 | 0.409138 | 1.186965 | 0.75597  | 0.939511 | 0.562368 |
| 0.687934 | 0.869736 | 0.618413 | 1.333056 | 1.143352 | 0.999701 | 0.784325 | 1.506251 | 0.735375 |
| 0.627095 | 0.837447 | 0.768338 | 1.234863 | 1.053861 | 0.910224 | 0.618235 | 1.409755 | 0.945874 |
| 0.860313 | 0.982057 | 1.286207 | 1.0036   | 0.864687 | 0.721961 | 0.700713 | 1.057619 | 0.754731 |
| 1.047834 | 1.165354 | 0.937195 | 1.14119  | 0.858947 | 1.220575 | 1.240211 | 1.511153 | 1.921297 |
| 1.007384 | 1.206112 | 0.778144 | 1.064626 | 1.108188 | 0.773919 | 0.822172 | 1.544836 | 0.736029 |
| 0.855836 | 1.157188 | 0.896232 | 0.789169 | 0.863246 | 0.652913 | 0.738569 | 2.170379 | 0.726998 |
| 0.74196  | 0.88051  | 0.553562 | 0.984018 | 0.510622 | 0.845856 | 0.772203 | 1.3976   | 0.726829 |
| 0.716073 | 0.579658 | 0.823371 | 0.977481 | 0.537105 | 0.684965 | 0.756631 | 0.900467 | 1.0485   |
| 0.996143 | 1.129314 | 0.782234 | 1.839466 | 0.603136 | 1.184089 | 0.859842 | 1.330799 | 1.352167 |
| 0.921929 | 0.522835 | 0.76297  | 1.301734 | 0.882398 | 0.746122 | 0.934757 | 0.942004 | 0.90994  |
| 0.803708 | 0.778312 | 0.753772 | 1.024717 | 0.660196 | 0.655821 | 0.765756 | 1.436751 | 0.573498 |
| 0.612951 | 0.783112 | 0.891446 | 1.20865  | 1.108548 | 0.99813  | 1.011617 | 0.606381 | 0.922331 |
| 3.182531 | 2.263861 | 3.745413 | 5.019347 | 4.472734 | 2.275512 | 3.348557 | 3.526446 | 1.29629  |
| 4.258117 | 3.880047 | 3.415083 | 2.320873 | 1.383823 | 0.930687 | 1.308454 | 1.078428 | 0.768708 |
| 0.659583 | 1.263721 | 0.766001 | 1.508418 | 0.895771 | 0.890974 | 1.05345  | 0.936375 | 0.822391 |
| 0.816659 | 3.102366 | 0.985773 | 1.162413 | 1.102491 | 1.690424 | 1.95233  | 1.831392 | 0.540254 |
| 1.579988 | 1.218837 | 3.8747   | 1.322719 | 1.201636 | 1.564932 | 1.252659 | 1.266799 | 0.90329  |
| 0.870533 | 1.050066 | 0.606665 | 0.964233 | 0.737362 | 0.425994 | 2.309622 | 0.757268 | 0.640643 |
| 3.542638 | 1.001551 | 2.502546 | 0.93107  | 0.837769 | 1.669915 | 1.046616 | 2.467987 | 0.905003 |
| 5.436933 | 4.890256 | 3.984026 | 5.009589 | 4.01259  | 4.917032 | 4.396952 | 4.927078 | 4.294145 |
| 1.986321 | 2.381539 | 2.07431  | 2.304076 | 1.994491 | 1.664957 | 1.730947 | 2.940292 | 2.519002 |

3. 276748 3. 944814 2. 403289 3. 057862 1. 590876 1. 510436 1. 68231 2. 018658 1. 72976  
1. 38695 1. 637588 1. 658671 1. 132526 1. 240186 1. 26342 1. 225058 1. 523287 1. 336441  
3. 929252 2. 058976 3. 570413 3. 0203 4. 67879 3. 230431 4. 428261 6. 749661 4. 465688  
3. 112281 2. 375617 3. 398988 2. 279716 3. 015743 3. 280258 3. 425488 4. 123796 3. 736839  
5. 876148 5. 459042 5. 764095 6. 534235 5. 802266 6. 090471 6. 522103 6. 453425 5. 74279  
8. 844394 9. 025286 9. 140656 8. 282569 9. 02044 8. 476827 8. 875957 8. 623207 8. 692999  
1. 537778 1. 399576 1. 563073 1. 254926 1. 125422 0. 892561 0. 997744 1. 113286 0. 994827  
5. 769978 4. 274825 4. 589333 4. 035039 4. 446285 5. 381183 4. 181643 4. 685566 4. 110058  
4. 649978 3. 555082 3. 435683 4. 8221 3. 76056 4. 087321 3. 688823 3. 715725 4. 096927  
9. 534237 8. 826311 8. 97976 9. 379272 8. 143553 9. 451087 8. 70413 8. 450434 8. 859387  
1. 285257 1. 494596 1. 338912 2. 094032 1. 012425 1. 720466 1. 610617 1. 672521 1. 43659  
4. 632174 4. 928026 4. 293099 4. 428416 4. 324174 4. 67969 4. 751224 4. 668545 4. 795602  
6. 320727 4. 816681 5. 118554 5. 843599 5. 296997 7. 298472 6. 240184 4. 885675 5. 072229  
2. 673399 4. 667688 4. 812753 2. 410159 2. 184321 1. 543933 3. 416424 2. 186473 2. 251096  
3. 583245 3. 174307 4. 706977 3. 456536 3. 523257 3. 172247 4. 764917 3. 327257 4. 677214  
5. 386941 2. 55049 5. 305359 4. 906897 4. 676857 3. 852134 5. 162097 4. 456771 3. 500772  
1. 063461 1. 096079 1. 078206 1. 288055 0. 834448 0. 998445 0. 955753 0. 937223 1. 097925  
5. 733236 6. 019603 5. 307291 4. 737849 5. 165937 5. 600758 5. 591709 4. 880971 5. 639825  
1. 182461 1. 123692 0. 825228 1. 009167 0. 690801 1. 412387 0. 743295 1. 003214 1. 068599  
1. 011607 1. 590028 0. 571434 0. 492087 0. 684637 0. 607664 0. 564813 0. 678726 0. 992516  
2. 289351 3. 368245 5. 167241 2. 315524 1. 836453 0. 864266 2. 286588 1. 580519 0. 940716  
4. 487142 2. 755595 6. 178544 6. 579093 3. 149873 5. 19514 2. 334117 3. 918443 3. 947271  
2. 898737 4. 846366 3. 638253 4. 96465 2. 5495 1. 418419 1. 448448 3. 23996 1. 544365  
3. 381665 3. 233709 4. 103797 3. 85874 4. 877183 3. 161939 3. 553891 4. 568906 3. 221743  
1. 292482 2. 565542 1. 232063 2. 347365 5. 002848 1. 404138 1. 597823 1. 57407 0. 888122  
1. 225506 2. 876227 2. 828264 1. 121313 1. 26132 1. 950759 1. 516095 1. 071534 1. 207486  
1. 139843 3. 061722 1. 603668 0. 918888 0. 959185 1. 544716 0. 474249 0. 895463 0. 875583  
0. 963005 1. 038821 0. 973235 1. 442409 0. 909527 0. 693911 0. 706129 1. 087388 0. 553587  
1. 227525 1. 232388 0. 634796 1. 240177 0. 87744 0. 892937 0. 622762 0. 748502 1. 013051  
1. 869615 1. 676879 1. 798791 2. 52993 1. 965295 1. 897278 2. 002952 1. 590109 1. 664005  
1. 500584 0. 91957 0. 89144 0. 972172 0. 953603 0. 694642 0. 614095 1. 563965 0. 800991  
3. 63541 5. 340561 4. 041361 3. 67045 5. 252037 3. 055746 5. 40356 6. 360555 4. 567944  
3. 928692 3. 873292 4. 268488 4. 478763 4. 284799 4. 386782 4. 336291 5. 095405 5. 261266  
3. 029922 2. 98419 2. 243923 2. 81603 2. 563221 2. 516582 3. 649553 2. 960233 3. 025122  
4. 686214 6. 676553 1. 029218 4. 084116 1. 803453 1. 20097 1. 158236 2. 169024 0. 794274  
2. 855564 2. 108184 2. 585321 2. 358795 3. 828935 2. 395161 2. 598118 2. 303187 2. 348092  
2. 042747 2. 101799 3. 253988 3. 377166 3. 787612 0. 813913 3. 386897 2. 872389 2. 245693  
1. 351013 1. 826782 1. 009282 0. 717941 0. 76157 1. 506657 0. 757437 1. 000482 1. 210235  
6. 274795 5. 389186 4. 578334 5. 211113 3. 599216 2. 617259 4. 062933 2. 559137 3. 062407  
2. 078307 3. 45657 4. 513263 1. 487537 1. 696884 1. 505791 1. 891618 1. 820613 2. 907087  
3. 173546 3. 032044 3. 329694 0. 958103 0. 920219 0. 94994 1. 364783 0. 888081 0. 579364  
3. 137549 2. 833439 3. 553494 3. 00325 2. 655779 4. 424519 3. 422504 2. 795744 4. 597787  
1. 091691 0. 930851 1. 111952 0. 990851 1. 601812 1. 550114 0. 872654 0. 814126 1. 084832  
1. 447609 1. 282636 1. 470385 1. 302955 1. 389248 1. 207095 1. 634117 1. 554584 1. 453775  
1. 969736 2. 600893 3. 284633 3. 075956 2. 07073 2. 794964 2. 891484 2. 685456 3. 631964  
1. 084092 2. 960311 2. 227686 1. 766648 0. 761147 4. 045163 1. 171348 2. 512975 1. 242591  
3. 127983 2. 735862 2. 199782 3. 273846 2. 816139 2. 762636 2. 130043 2. 431929 2. 134406  
3. 062782 4. 018025 4. 313402 3. 191888 3. 889719 3. 775957 2. 663401 3. 376749 2. 957188  
0. 876076 1. 610395 2. 003257 0. 919898 0. 869162 0. 785776 0. 88932 0. 892076 1. 009842  
6. 171811 5. 399662 4. 666473 5. 962922 3. 454571 1. 890328 4. 445782 4. 388133 2. 513775  
0. 773993 4. 301997 3. 804948 1. 677144 0. 904299 0. 740185 0. 865502 1. 403053 0. 732496

1.168004 1.627297 1.258817 0.914526 1.061418 1.732571 1.445815 1.318515 0.970661  
0.814136 0.931911 1.13347 1.157421 1.413288 0.904052 0.78338 1.696156 0.982168  
1.593636 1.257927 0.945505 1.341891 1.110538 1.334173 1.084748 3.36272 1.92854  
0.702996 0.972575 0.642644 0.637244 0.739305 1.608107 1.626287 0.870372 0.923549  
2.735319 3.310403 3.799324 3.873796 4.030721 3.191663 2.88527 3.234439 3.571597  
1.394109 1.930174 1.283226 1.174759 1.917044 1.530681 1.233132 1.413976 1.147324  
1.373709 1.601295 1.565649 1.182503 2.016017 1.551834 3.515442 1.408215 2.427979  
2.226302 1.531125 1.986335 2.022035 1.85069 2.003026 1.527699 1.794099 1.518434  
3.028378 2.657396 3.803754 1.528353 3.373992 3.323996 2.455966 1.772508 3.175809  
1.932162 1.991726 2.432024 1.983856 2.536554 2.059802 1.785511 2.351313 2.699299  
0.989541 1.342762 1.119958 1.685388 0.814149 0.999625 1.565215 1.311709 1.566851  
1.075947 0.916757 2.250437 1.271092 4.547617 1.159233 1.23426 1.271455 0.849  
0.885858 1.366891 1.107915 0.955882 0.95508 2.097508 1.669221 1.555429 1.170071  
1.681766 1.542962 1.358257 1.388317 1.307826 2.076651 1.527939 1.401273 1.656249  
2.531943 1.947253 1.900206 1.869391 3.890449 1.457841 1.573902 2.244781 1.533155  
2.93565 1.963583 1.723657 1.123944 1.586089 1.830915 1.064672 1.560769 2.089595  
1.003273 1.436151 0.89996 1.700041 0.794336 1.606149 0.917172 1.506955 0.929155  
1.843744 2.800694 1.785441 2.740573 3.072686 2.807664 1.789131 3.227889 2.289554  
1.543782 1.298237 0.916809 1.797046 3.767507 1.644875 1.386453 1.210756 1.296115  
5.178362 3.939831 3.581591 5.550806 4.229093 4.384113 3.420134 4.687765 5.587245  
1.323854 2.407837 1.112924 1.067423 1.738466 1.163324 1.559329 1.84113 1.535344  
5.853582 5.095051 5.228841 4.642936 4.83184 4.414696 5.155486 5.430359 5.24446  
1.384882 2.18132 1.255164 1.732836 1.382995 1.200962 2.246728 1.384056 1.819127  
2.809771 1.779596 2.472789 2.409957 1.714776 2.4185 1.814184 1.807358 1.853924  
1.013674 1.587819 1.207305 2.068284 1.137834 1.370611 1.257433 1.155538 1.990556  
1.125591 0.882888 0.752678 0.693241 0.690494 1.103779 0.571704 0.948439 0.789695  
5.354535 1.697196 5.250948 2.178804 3.469937 2.485541 3.32116 2.490182 1.00919  
0.848585 0.915176 0.981033 1.39295 1.148869 0.77128 0.554322 0.832304 0.84092  
2.1319 3.357656 2.625611 3.400497 3.599468 2.554705 1.653847 2.455346 2.637077  
1.055772 0.999988 1.955751 0.838832 2.034467 2.033408 1.047243 0.961821 1.328886  
0.94841 1.883722 0.802439 2.027054 1.784554 2.041079 1.193763 1.169071 1.394779  
0.976552 0.964658 0.929882 0.960586 0.587853 0.860385 1.049222 0.978564 1.242727  
1.241286 1.853432 1.166562 1.718015 0.715866 1.000083 1.489868 2.278055 1.030947  
1.081396 1.110835 0.889876 0.975865 0.747123 1.09267 0.664327 1.203218 0.978844  
2.079579 1.763994 1.900612 2.205698 2.146047 2.889854 1.759946 1.935213 2.161153  
1.264387 2.405096 1.755926 2.453404 0.784527 1.588749 1.078161 1.115893 0.836901  
3.37468 4.019378 2.141204 3.773526 4.630893 3.688704 3.257772 4.154122 3.635961  
2.566763 1.715298 1.617306 1.8928 1.207246 1.786335 3.192639 1.981868 1.899739  
4.676039 3.992508 2.122643 2.841056 2.914126 2.619499 3.313379 1.101184 3.620801  
1.361645 1.221965 1.676989 1.145553 0.947281 1.273583 0.966559 1.887037 1.1705  
2.307448 2.157476 1.970181 1.349303 1.457183 1.39874 1.451778 1.699832 2.330617  
5.161477 5.274159 4.776715 4.303746 5.948572 4.260969 4.911866 4.440274 4.071597  
3.549533 4.259233 3.765326 1.520687 4.80578 1.890581 3.395768 2.543744 2.055174  
1.815746 1.792298 1.839887 2.679231 2.555169 2.608684 1.367672 1.95483 2.340811  
4.069746 4.280072 4.276866 3.886872 3.417508 1.770726 1.991804 2.502817 2.580753  
2.302091 3.939293 2.877215 2.557249 2.443664 1.904236 1.54287 2.127709 1.87485  
1.530858 1.528237 2.067757 1.352442 1.995113 2.038933 1.669918 1.921435 2.039473  
2.043757 1.62951 2.193218 2.306174 2.111431 2.006613 1.600525 1.958766 1.998714  
1.083631 0.817588 3.554941 2.641367 1.361442 0.967288 1.505977 2.106918 0.834987  
0.941232 2.411398 1.400411 1.994487 0.99628 1.607151 1.003996 0.925503 1.614132  
1.492752 1.920686 1.453738 3.839713 1.198393 2.594276 1.768971 1.201643 1.414484

4. 346117 4. 757422 4. 669952 5. 054266 4. 573756 2. 576699 3. 043965 3. 031183 4. 186964  
1. 567847 1. 760049 2. 260631 1. 807601 2. 13477 2. 39005 3. 440293 2. 067961 1. 628643  
2. 062543 2. 705966 1. 547839 1. 251772 2. 63537 2. 256279 1. 333155 1. 656162 1. 25156  
1. 828815 3. 073357 1. 120874 2. 062811 1. 022571 2. 68029 2. 726107 1. 661407 1. 291117  
3. 160799 5. 15275 3. 424029 4. 176057 4. 417847 1. 687185 2. 472387 1. 982891 2. 365237  
3. 104767 3. 197925 3. 074377 3. 356748 2. 558966 3. 106741 3. 173181 3. 185563 2. 65264  
4. 029731 4. 327451 4. 944545 3. 722971 4. 124859 4. 555685 4. 327462 4. 678123 4. 344715  
1. 076625 1. 936236 1. 664636 2. 553815 0. 968787 1. 173808 0. 9107 1. 87952 1. 529328  
2. 245748 2. 17974 2. 304243 2. 255426 1. 923127 1. 724097 1. 612012 2. 516957 2. 00819  
1. 648232 1. 103642 1. 090054 1. 903456 1. 370604 2. 300124 1. 123703 1. 628022 1. 482665  
4. 671027 4. 805896 4. 406271 5. 374066 5. 042362 1. 251895 3. 673686 4. 901792 1. 839549  
1. 435615 2. 636567 1. 774792 1. 314087 1. 488863 2. 1673 1. 847501 2. 502883 1. 513649  
2. 712598 4. 264352 2. 14679 1. 469365 1. 778188 1. 457929 2. 025367 2. 111661 2. 03916  
3. 57426 3. 470383 6. 104771 5. 036947 4. 384052 4. 505953 3. 94651 5. 493201 3. 715007  
1. 472654 0. 928564 1. 176373 3. 526755 1. 335493 2. 566815 1. 484241 1. 581236 1. 939798  
2. 158347 1. 4796 1. 860478 2. 87956 2. 142498 1. 835443 0. 828557 1. 619643 1. 820447  
1. 488087 1. 505428 1. 646897 1. 829236 1. 747783 1. 546316 1. 559739 1. 742103 1. 022892  
4. 312404 3. 047467 3. 822839 4. 004849 5. 396607 5. 493231 3. 576004 4. 62326 4. 415552  
1. 393267 1. 481351 1. 174089 1. 474326 1. 086679 2. 108935 1. 046058 1. 342073 2. 100716  
2. 770021 2. 713788 2. 821689 3. 454022 2. 571546 3. 467179 2. 428188 2. 604511 3. 915722  
6. 875014 7. 048245 6. 889619 6. 831943 7. 262871 6. 822927 6. 810745 7. 17088 7. 297251  
2. 197569 1. 136351 1. 238844 1. 59981 1. 82155 1. 852645 1. 65025 1. 269304 1. 209634  
4. 851352 5. 397407 3. 172741 5. 149029 5. 484681 5. 265767 3. 615906 4. 648368 5. 327109  
2. 436249 4. 017451 3. 457937 3. 359547 3. 100072 2. 328043 3. 682265 1. 960252 2. 030868  
2. 018214 2. 050095 3. 584835 2. 062359 2. 581524 2. 428218 1. 264989 1. 759991 2. 015813  
0. 89944 1. 450329 1. 114924 1. 237908 1. 161944 1. 212465 1. 123787 1. 494752 1. 258432  
2. 779529 3. 194287 2. 193726 1. 919763 3. 673097 2. 072229 4. 061939 3. 122839 3. 011583  
1. 734998 1. 410342 1. 287093 2. 147739 1. 443975 1. 627753 1. 665731 1. 369835 2. 188915  
3. 908107 3. 509392 3. 652705 4. 148133 4. 12556 4. 603799 4. 936082 4. 290481 4. 207306  
1. 590796 2. 128552 1. 198761 1. 401122 2. 091143 1. 5921 1. 876918 1. 374385 1. 28167  
3. 713663 3. 87912 4. 117208 2. 978994 3. 626084 2. 562911 3. 84382 4. 202037 3. 052906  
4. 512823 2. 913567 4. 495934 3. 343813 3. 700711 2. 68514 3. 766803 2. 230592 3. 985449  
2. 073711 1. 573117 1. 614446 2. 385995 2. 151151 1. 673709 1. 224579 2. 007035 2. 936602  
1. 702797 1. 644661 1. 74448 1. 763715 2. 313817 1. 645508 1. 80706 1. 831822 1. 884097  
6. 558377 3. 25042 5. 287142 5. 604113 4. 396421 4. 199132 4. 631054 4. 175631 5. 854561  
1. 059891 1. 33998 1. 583732 1. 650162 2. 195087 2. 080162 1. 963325 1. 597059 2. 025878  
5. 873116 4. 610006 4. 948777 5. 462901 4. 985392 5. 092257 5. 211531 5. 705368 5. 125942  
1. 569318 1. 424087 1. 075163 1. 332098 0. 902391 1. 155324 1. 220211 1. 024691 1. 039178  
1. 448968 1. 523504 1. 468408 1. 013394 1. 537947 1. 191766 0. 991044 1. 106634 1. 176974  
3. 884154 4. 1579 3. 602287 3. 655523 3. 032156 3. 813873 2. 992955 3. 000642 4. 172333  
3. 221008 3. 394289 3. 284175 2. 950971 3. 316735 2. 628363 2. 823017 3. 18605 3. 524622  
1. 371707 1. 475672 1. 408439 2. 001312 1. 548313 1. 497565 1. 316359 1. 787749 1. 585526  
1. 741591 1. 372812 1. 487185 1. 511006 2. 479185 1. 466864 1. 021432 1. 87629 1. 420416  
4. 040229 3. 149336 4. 128993 3. 05555 3. 737324 3. 757539 3. 559045 3. 157111 3. 618684  
1. 581733 3. 269806 1. 627396 3. 55301 1. 725768 2. 45452 1. 877242 1. 642016 2. 241073  
3. 777474 2. 364008 1. 863032 3. 138122 3. 25017 3. 890678 1. 263699 1. 470327 1. 671176  
2. 485263 1. 734677 1. 102154 2. 085042 1. 754116 1. 676239 2. 154531 2. 068766 2. 165552  
2. 022039 2. 836931 2. 709575 2. 259608 2. 933198 2. 339721 1. 861231 2. 50743 2. 398024  
1. 617509 3. 418151 1. 972631 2. 123043 3. 057084 2. 969871 2. 488166 2. 321104 2. 795761  
1. 517605 1. 771263 1. 197225 2. 490303 1. 393653 1. 48599 1. 695526 1. 655677 2. 48571  
2. 091219 1. 330842 1. 71883 2. 262716 2. 314015 1. 76057 1. 491546 1. 912484 1. 642654

2. 281896 1. 564758 2. 476949 1. 355703 1. 379057 1. 474765 1. 582796 3. 342159 2. 710763  
9. 966602 9. 649007 9. 682373 9. 809791 9. 530297 10. 03271 9. 962011 9. 937668 9. 714902  
3. 651332 4. 356319 4. 409423 5. 019988 2. 947632 3. 387836 3. 495158 2. 898702 2. 303391  
1. 087512 2. 209597 1. 272732 1. 914621 1. 144741 1. 557585 1. 936665 1. 933059 1. 416886  
3. 032872 3. 541302 2. 270078 3. 777399 4. 079537 2. 661054 2. 602767 2. 770635 2. 414557  
2. 410835 2. 615201 1. 901853 1. 849235 1. 637532 1. 77603 1. 591236 2. 070462 1. 390644  
2. 680094 1. 677246 2. 402165 2. 20751 1. 808201 2. 38453 1. 480905 3. 132242 3. 381221  
2. 230991 2. 406412 2. 339119 2. 306804 2. 163233 1. 977242 2. 249498 2. 837055 2. 319604  
2. 285275 3. 354416 2. 887061 2. 402375 3. 172008 2. 453919 2. 883974 3. 396169 2. 680957  
4. 831857 4. 113054 3. 662682 6. 057297 4. 913806 3. 074359 5. 749344 5. 55104 3. 737868  
1. 578466 1. 663317 1. 434365 1. 997692 1. 93089 1. 800926 1. 710887 2. 328375 1. 517666  
2. 666049 1. 545762 2. 520887 3. 175293 2. 590935 2. 326662 2. 206809 2. 578393 2. 132229  
1. 235765 1. 17893 1. 268505 1. 647811 1. 819825 1. 322347 1. 605818 2. 073572 1. 483993  
3. 06103 3. 119288 3. 672418 2. 372772 3. 325322 2. 295449 2. 318874 1. 662208 1. 840379  
1. 479842 1. 973847 1. 51278 1. 694557 2. 588253 1. 884931 1. 270489 1. 305142 1. 946296  
2. 174826 3. 095506 2. 143372 1. 930604 2. 068374 2. 284489 1. 87907 1. 539195 1. 920891  
2. 453323 2. 585678 2. 303475 3. 165267 2. 45655 2. 208854 2. 263402 3. 037267 2. 184589  
1. 90872 2. 105812 2. 747049 3. 387123 1. 941317 2. 709943 1. 884334 2. 372357 2. 323624  
2. 535251 2. 088528 2. 402837 2. 778731 2. 611654 2. 406377 2. 282651 2. 801977 2. 439149  
1. 50901 1. 967584 2. 350626 1. 005906 2. 049161 1. 06377 1. 563487 1. 067576 1. 225847  
0. 643762 0. 893428 0. 84739 2. 264075 0. 978105 1. 162064 0. 780309 0. 899498 0. 837489  
1. 971557 3. 207375 2. 670282 4. 047659 3. 280023 2. 95473 2. 719214 2. 904553 2. 723747  
4. 36136 1. 80413 4. 07973 4. 062322 3. 830584 1. 861621 3. 380869 2. 324916 2. 698767  
4. 051552 4. 737086 3. 80463 3. 663033 3. 930771 3. 238961 3. 784172 3. 108434 3. 174786  
5. 509721 4. 572275 5. 345669 4. 58202 4. 305596 7. 403642 5. 577206 4. 54512 5. 200118  
5. 968936 2. 542073 3. 784312 2. 996429 4. 637692 2. 842779 2. 927471 2. 49535 2. 483805  
0. 936267 1. 326397 0. 663408 1. 191267 1. 886339 0. 963253 1. 432757 1. 582605 0. 759784  
1. 112109 2. 040204 2. 027157 1. 714908 2. 298139 2. 575612 1. 247631 1. 680468 1. 930626  
2. 827538 1. 115644 1. 325088 2. 16329 1. 810919 1. 496445 0. 98691 3. 140982 1. 543117  
1. 758449 2. 827209 2. 624056 2. 860329 2. 819189 4. 00539 3. 226017 2. 300096 3. 757593  
1. 917062 2. 282031 2. 844304 1. 661046 2. 23051 2. 071947 2. 117361 1. 496672 2. 52243  
1. 1571 2. 285477 1. 777502 2. 670111 1. 950889 1. 651609 2. 12577 2. 386582 2. 189492  
2. 160868 3. 248311 2. 266353 4. 69125 3. 092328 3. 206638 3. 51227 1. 870667 3. 169055  
2. 469685 1. 669879 1. 761434 3. 223305 2. 989443 2. 545579 1. 67721 1. 747809 1. 628619  
7. 505682 7. 533346 7. 505057 6. 762714 8. 036988 7. 145923 7. 608998 7. 008029 7. 203937  
1. 904975 1. 097069 0. 982172 1. 815372 0. 937292 1. 73938 1. 365002 1. 257758 0. 998946  
3. 017013 3. 575692 3. 499045 3. 762809 5. 74515 4. 084337 3. 768796 3. 83041 3. 98777  
2. 352852 2. 397328 2. 698329 2. 600389 2. 649219 2. 86842 2. 869949 2. 88624 2. 99802  
2. 890024 4. 082089 2. 183314 1. 809564 5. 143037 2. 133393 1. 288993 2. 121616 1. 928572  
1. 609891 1. 65317 1. 348915 2. 487685 0. 976914 2. 018729 1. 491068 1. 694686 1. 465945  
1. 697385 2. 396913 2. 26729 2. 311633 2. 726414 1. 711123 2. 362023 1. 929833 2. 151736  
1. 446673 1. 941346 1. 242047 2. 493959 1. 409818 1. 520096 2. 070454 2. 206946 1. 556227  
4. 811025 5. 070687 4. 90834 4. 6776 5. 024966 3. 756945 4. 426205 4. 3673 4. 348741  
1. 1237 1. 159848 1. 045564 1. 882859 1. 634459 0. 757516 0. 974861 1. 100569 1. 599923  
2. 921394 2. 929204 2. 006673 1. 993925 2. 188194 2. 205059 2. 15772 2. 022162 3. 155442  
1. 658035 2. 540438 0. 932529 1. 084571 0. 899977 0. 70187 0. 804557 0. 97748 1. 411777  
2. 738038 2. 229246 2. 417842 1. 92415 1. 907797 1. 752453 1. 644396 2. 257245 2. 296937  
0. 80144 1. 785479 0. 65313 0. 59701 0. 674441 1. 192329 1. 571531 1. 067457 1. 24508  
1. 680458 2. 748993 1. 902769 2. 177293 2. 819824 1. 633744 2. 708375 2. 431266 1. 570052  
6. 774463 6. 473608 6. 840612 6. 471641 6. 395525 6. 923177 7. 379099 7. 169208 6. 695212  
1. 132278 1. 166007 0. 939135 1. 211906 4. 981089 1. 622675 1. 175057 1. 123269 1. 356376

4. 017054 4. 908401 4. 484358 5. 408715 5. 444964 3. 119543 3. 656221 5. 139804 4. 061919  
1. 469834 2. 533924 5. 520173 3. 249722 4. 514654 1. 438249 1. 955875 1. 337689 1. 848618  
2. 505237 3. 546686 3. 380052 2. 748802 2. 688096 3. 064276 2. 406775 2. 496063 2. 287851  
3. 323971 2. 459237 2. 009099 3. 157962 2. 727155 3. 156866 2. 349345 3. 333141 3. 627701  
2. 224835 1. 244576 2. 004159 2. 42329 2. 364776 1. 519067 1. 773775 1. 873121 2. 011544  
4. 344118 3. 493098 2. 937667 4. 264522 2. 891294 2. 374003 2. 593885 2. 743735 3. 506612  
2. 980042 2. 596437 2. 12902 3. 39097 2. 542843 2. 754248 2. 808444 2. 337146 2. 510657  
1. 714655 4. 278502 2. 641267 1. 333071 1. 238708 1. 150017 1. 323722 0. 737232 1. 691927  
3. 017665 2. 405079 2. 202933 2. 337842 2. 138383 1. 694702 2. 26608 1. 596764 1. 764214  
3. 080326 3. 321037 3. 083 3. 31251 3. 496238 3. 031833 3. 1027 2. 813995 2. 544905  
1. 083434 2. 470964 1. 943648 1. 216298 3. 090196 1. 84884 1. 332596 2. 361891 1. 113488  
4. 962459 5. 639051 5. 477679 3. 978208 6. 079203 4. 000699 5. 136121 5. 181422 5. 163755  
2. 150401 1. 451458 1. 921287 2. 858244 2. 26778 2. 476756 2. 286017 2. 093422 2. 270845  
3. 083619 3. 53019 3. 406885 2. 841879 3. 752064 4. 589109 4. 031195 3. 472412 3. 473557  
5. 096192 3. 655428 1. 190141 0. 952551 1. 116148 3. 045003 2. 088985 1. 468643 2. 127426  
1. 397991 1. 153999 1. 859633 1. 687827 0. 930212 2. 019854 1. 798924 1. 972334 1. 351237  
2. 352797 2. 576119 2. 738598 2. 244613 2. 296165 2. 827194 2. 490653 2. 906199 2. 349581  
1. 744019 1. 62735 1. 452636 3. 675418 1. 392242 1. 920047 1. 524084 1. 208683 1. 253203  
4. 408267 4. 686353 5. 002407 4. 921014 4. 011617 3. 851487 5. 385144 4. 002342 4. 511758  
3. 535048 4. 769371 4. 533353 3. 345954 4. 508296 3. 107997 4. 824559 3. 228611 2. 976315  
0. 973682 1. 099579 0. 914544 0. 941208 1. 059341 1. 303719 1. 10623 1. 172644 1. 167085  
1. 070261 2. 515787 1. 487301 1. 491264 1. 975499 1. 139108 1. 363447 1. 096536 1. 410597  
3. 16746 2. 626179 1. 823073 2. 489306 2. 359615 1. 972925 3. 366131 3. 497497 3. 668024  
1. 418371 1. 369825 2. 067487 1. 807334 1. 418371 1. 311451 1. 295022 1. 554039 1. 199566  
1. 526289 1. 519912 1. 258509 1. 492225 1. 377395 1. 39194 1. 455668 1. 411913 1. 230241  
2. 32874 2. 778905 3. 021926 3. 095321 2. 140328 2. 871616 2. 166943 2. 683998 3. 223039  
1. 447373 2. 232109 2. 009725 2. 01297 1. 50014 1. 923776 2. 062862 1. 880437 2. 391487  
2. 086962 2. 041894 0. 979575 1. 109631 2. 683905 1. 511394 0. 988877 2. 735899 2. 93775  
1. 177371 1. 123754 1. 058207 1. 565615 1. 303851 0. 816902 1. 172283 1. 198397 0. 902394  
2. 809354 2. 291538 3. 367529 5. 245215 4. 944989 3. 027109 5. 072893 2. 816319 4. 621799  
3. 25024 2. 951893 3. 157283 2. 590417 2. 700417 2. 13255 2. 269553 3. 614868 2. 04941  
2. 2408 2. 700425 2. 739975 4. 116249 2. 282919 2. 964961 2. 670489 2. 469971 2. 866546  
2. 285116 1. 786409 1. 856627 1. 542507 1. 841709 1. 998484 1. 260553 1. 695224 1. 419581  
2. 840867 4. 254969 5. 412474 4. 168442 3. 819141 3. 260617 3. 488992 2. 678889 3. 166874  
2. 592822 2. 251695 2. 43101 2. 3298 2. 085619 1. 846236 2. 374074 2. 231333 1. 91114  
3. 601118 1. 971303 2. 261045 2. 290924 2. 603706 2. 397022 3. 801216 2. 710271 2. 606111  
0. 922709 1. 277913 0. 954313 1. 314688 0. 944707 0. 861302 0. 790474 0. 47854 1. 518001  
2. 605699 1. 862339 2. 051321 1. 784372 2. 057405 1. 488347 3. 566337 2. 067292 2. 643283  
3. 038251 2. 668906 2. 373376 2. 12877 1. 941994 2. 368941 1. 230038 1. 689837 1. 169223  
4. 807248 5. 327285 6. 289331 5. 904557 4. 323406 4. 240342 5. 140718 4. 883849 5. 729023  
2. 281572 1. 8919 1. 85237 2. 037539 1. 646723 1. 808224 1. 838481 1. 561245 1. 107537  
2. 736941 4. 688163 3. 061613 2. 328823 2. 621788 2. 427332 2. 144036 2. 611185 2. 855857  
1. 375536 1. 189499 1. 834658 3. 997744 3. 357044 1. 921956 1. 550723 2. 014955 3. 267012  
2. 143416 2. 3617 2. 776205 2. 145491 2. 250058 1. 929383 2. 582734 1. 883428 2. 070876  
2. 69678 3. 510204 2. 638709 2. 166906 2. 781278 3. 397753 2. 942959 3. 291832 2. 45865  
0. 73711 0. 936196 0. 747056 1. 613205 0. 902035 1. 337834 0. 88133 1. 009342 1. 224452  
2. 273142 3. 486129 2. 144041 2. 080759 1. 419746 1. 413419 1. 931441 1. 912291 2. 568632  
5. 123057 4. 780964 4. 416374 4. 230694 4. 896328 5. 284129 4. 379423 5. 236249 2. 949046  
2. 583399 2. 118794 2. 348816 3. 132501 3. 249382 2. 89899 2. 145334 2. 928345 2. 684434  
4. 474956 3. 313714 4. 154171 4. 312774 4. 037027 4. 003307 3. 694477 3. 469586 3. 766528  
1. 145962 1. 704885 1. 254677 1. 859214 1. 297748 1. 254947 1. 381312 1. 558422 1. 030501

2. 589629 2. 319466 2. 089338 2. 033189 2. 326315 2. 705234 2. 11715 1. 382898 2. 057279  
3. 374046 3. 738969 4. 371941 3. 753155 3. 590894 2. 903528 3. 110624 4. 063467 3. 552185  
2. 004374 1. 140437 3. 138546 1. 848395 2. 371548 1. 910676 3. 757618 1. 869483 1. 944151  
1. 102435 0. 820975 1. 289668 1. 317171 1. 474259 1. 435246 1. 325681 0. 828796 1. 274836  
2. 366738 2. 932441 2. 231501 2. 470652 2. 32703 2. 298211 2. 649465 2. 125388 2. 55171  
1. 783743 1. 305496 1. 468177 1. 872578 1. 235426 1. 835676 1. 074311 1. 978625 1. 405301  
2. 038508 2. 017975 1. 096487 1. 261682 1. 569483 0. 831782 1. 493845 1. 325492 0. 80633  
1. 433498 0. 816879 1. 602972 1. 526167 3. 047928 2. 933998 1. 201255 1. 362382 2. 654056  
1. 369366 1. 763365 1. 271451 2. 16248 1. 451135 2. 020547 1. 79614 1. 810313 1. 613814  
1. 524833 1. 554109 1. 484554 1. 62235 1. 190946 1. 424674 1. 499311 1. 947513 1. 875078  
1. 389571 1. 823954 1. 729991 1. 729991 1. 717113 1. 753687 1. 65482 2. 094658 1. 81908  
1. 889355 1. 47744 1. 964773 2. 133212 1. 42415 2. 572772 1. 490184 1. 920847 2. 146912  
1. 245943 2. 277345 1. 762465 3. 483128 2. 377591 1. 724996 1. 564619 1. 755482 3. 459098  
4. 790057 3. 632853 3. 865997 2. 628346 3. 67115 4. 397855 3. 397865 4. 517637 3. 800521  
1. 034679 1. 194208 1. 00758 0. 854001 1. 045072 1. 041946 1. 177342 1. 131099 1. 569209  
1. 209012 1. 009234 1. 095035 1. 200523 1. 688488 1. 253741 1. 073432 1. 133918 1. 654914  
1. 922212 2. 983575 1. 463095 1. 076643 0. 967092 1. 760479 1. 289253 1. 270901 0. 991506  
2. 695396 3. 157534 2. 971388 2. 924313 3. 195972 3. 490028 2. 669474 2. 851397 2. 941078  
1. 738849 1. 941924 1. 738901 1. 692669 1. 748611 1. 960523 1. 751331 1. 590281 1. 748406  
1. 067196 0. 694283 0. 662879 1. 389098 1. 391411 1. 998054 1. 683165 2. 955532 1. 435725  
1. 357526 1. 617255 2. 023376 1. 71515 1. 301609 1. 993767 1. 359911 1. 41674 2. 714996  
1. 657914 1. 176666 2. 547694 1. 361738 1. 199036 1. 603486 2. 262217 2. 235514 1. 459718  
3. 446953 2. 572663 3. 33784 2. 815868 2. 684763 3. 31356 2. 735232 3. 759209 3. 552018  
1. 938677 1. 425917 2. 035844 1. 588438 1. 914471 1. 749938 2. 110939 2. 088451 2. 032571  
1. 651915 1. 50622 1. 735941 1. 736143 1. 244954 1. 593166 1. 467181 1. 866984 1. 419928  
2. 022168 1. 45733 1. 106066 1. 84918 1. 12075 1. 327985 1. 176969 1. 570699 1. 403097  
2. 936861 2. 472741 2. 007964 2. 158762 3. 159987 1. 768125 1. 944999 2. 27865 2. 780973  
1. 632025 1. 981225 1. 585625 1. 777409 2. 172044 2. 103635 1. 781105 1. 967836 2. 003705  
0. 957364 2. 702975 1. 609198 1. 485376 0. 587307 2. 812122 0. 953113 0. 742466 3. 386237  
1. 12487 1. 732468 1. 208004 1. 737437 1. 492649 1. 445065 1. 196395 1. 227848 1. 136072  
1. 105416 1. 286439 1. 11346 1. 343022 1. 307962 1. 647525 1. 203678 1. 135935 1. 349967  
1. 184452 2. 05894 2. 389534 1. 375233 1. 394973 1. 666237 1. 272666 1. 24037 1. 049868  
2. 572941 1. 747115 2. 151457 2. 345588 2. 198768 2. 369894 2. 16634 2. 287723 1. 617147  
3. 098411 1. 34341 2. 061375 3. 906196 1. 871307 2. 748034 1. 940924 2. 277926 2. 360018  
2. 559793 2. 702641 1. 695634 1. 457637 3. 272438 2. 1836 2. 990857 2. 20705 2. 662932  
1. 692115 2. 015324 1. 574471 1. 704374 2. 275948 2. 039621 1. 888849 3. 822158 4. 01128  
3. 391564 3. 330748 4. 706275 4. 042731 3. 111586 2. 613886 4. 86276 3. 632655 4. 054154  
1. 199079 1. 127778 1. 619595 1. 273578 1. 673026 1. 632196 1. 541855 1. 278544 1. 099487  
1. 537993 1. 386928 2. 013836 1. 613112 1. 9231 1. 764783 1. 641393 1. 374281 1. 784564  
4. 352366 3. 801623 4. 477528 3. 485738 3. 98452 2. 396206 2. 615292 2. 646199 1. 808257  
2. 211958 3. 203259 2. 270574 2. 083915 3. 139302 2. 458655 3. 054555 3. 573219 2. 202445  
1. 812356 1. 541238 2. 194205 1. 720959 1. 573602 1. 648477 1. 772031 1. 375461 2. 455598  
1. 693699 1. 625064 1. 482624 1. 894038 1. 865642 1. 604033 1. 795921 1. 746062 1. 633312  
1. 55642 1. 493052 1. 614481 1. 316307 1. 653729 1. 343925 1. 614035 1. 444774 2. 226631  
4. 265184 4. 161573 3. 000831 5. 172795 2. 937019 3. 980353 3. 916121 2. 507002 3. 086141  
2. 308348 1. 374332 1. 437776 1. 441924 2. 217578 2. 030714 1. 889762 1. 763564 1. 582123  
3. 687536 3. 349392 4. 056904 3. 657771 3. 525037 3. 480018 3. 308831 3. 639431 3. 494466  
2. 077843 0. 910273 1. 973003 2. 024752 1. 680181 2. 178287 1. 264028 1. 920542 2. 010821  
2. 063198 3. 141295 2. 713859 2. 598045 3. 08028 2. 198673 2. 17902 2. 612243 2. 619072  
6. 174423 6. 373792 6. 368503 5. 244418 7. 034592 2. 843192 5. 502832 6. 7598 5. 50371  
1. 284341 2. 896195 2. 084491 1. 108189 1. 268091 1. 50912 3. 111674 1. 267015 1. 949961

0.822291 1.825606 1.119403 0.820774 1.080972 0.833325 1.382952 0.755768 1.184347  
2.770127 2.738398 3.530069 3.198366 1.755473 3.324045 3.100743 4.329025 3.761633  
2.655481 3.874549 3.922379 3.835904 3.144995 2.930566 3.89129 2.589114 2.830984  
1.875153 3.834657 1.538811 1.453164 1.834284 2.486077 2.725169 1.090901 1.960162  
2.091066 2.570049 3.08919 1.229337 2.579678 1.537204 1.901219 1.218984 2.107878  
2.496434 5.053318 2.552467 4.839974 2.75182 2.659535 2.299672 2.553877 3.167819  
2.275961 1.868669 1.7737 1.903038 1.283733 1.437106 1.718276 1.758984 2.026185  
1.465205 3.097529 3.460453 2.457444 1.476373 2.019183 3.874862 2.423782 2.77522  
2.594552 1.56548 3.41254 1.730912 3.249811 1.54088 1.534944 1.710784 1.942507  
5.73287 6.415413 4.869506 4.326432 5.589946 4.591399 5.503455 5.506226 5.720455  
3.47019 3.633291 4.36298 3.912286 3.58898 3.441966 4.250993 3.665621 3.240498  
2.571853 2.294622 2.097569 3.021994 2.570351 4.733821 2.533362 2.327073 2.442128  
3.780348 3.458487 3.72443 3.295494 5.075355 4.745504 3.49092 2.955548 3.627414  
1.201935 1.036846 0.977342 1.323046 1.774444 1.142138 1.237216 1.468978 1.1495  
0.685116 0.849589 1.264496 1.971962 2.28199 0.718951 0.845897 1.200991 0.979949  
2.820558 1.704169 2.034889 1.558373 1.660685 1.710954 4.727264 4.288269 3.690114  
3.110699 1.552697 3.200216 1.551119 2.029617 2.68114 1.624766 1.943956 2.034938  
1.446052 0.945883 1.731518 1.674319 1.274309 1.182231 1.454526 2.27583 1.491083  
1.594074 0.834281 1.793749 2.658998 1.218681 2.322115 2.259487 1.616666 1.679986  
1.56036 1.380506 1.142176 1.162651 1.55491 0.910751 1.373725 0.89084 1.493299  
2.012677 1.02868 1.635102 1.585487 1.867356 1.144978 1.510281 1.998487 1.480541  
3.289536 3.456273 3.435466 3.532018 2.717915 3.668352 3.713445 3.724123 3.395177  
1.88741 1.174829 1.528014 1.758504 1.573257 1.29989 1.522653 1.176905 1.53301  
2.533879 3.257284 2.069932 3.51657 2.778961 1.846569 1.857058 2.103689 1.814117  
3.023678 2.906679 2.934501 2.854344 3.028169 3.251747 3.277864 2.986682 2.690712  
1.62711 1.816058 1.363269 1.679006 1.983425 2.333084 1.807197 2.243744 1.856182  
1.639804 2.660066 2.154924 2.634833 2.346923 1.775567 2.426429 3.062736 2.3532  
3.363008 4.147119 3.957394 4.149579 5.117403 3.680391 3.799186 3.299206 3.342163  
3.341854 2.759266 2.030362 2.801084 2.781684 1.363252 1.556591 1.693587 2.453663  
2.410642 2.506647 2.633719 2.08537 2.318924 1.868267 2.32152 2.249083 3.50525  
3.700564 1.464123 3.662406 2.248496 3.180888 3.747466 3.838897 3.402207 2.884493  
4.042631 2.101764 1.747168 1.499623 1.089169 0.532008 1.393787 1.616412 3.582098  
3.82619 4.828792 2.706091 2.302073 4.69714 2.219371 1.592436 1.6636 2.313262  
1.278892 1.261677 1.290321 1.802625 1.098169 1.630756 1.602634 1.846791 1.754224  
2.557383 2.360714 0.900951 0.935945 2.800296 1.89542 1.827002 3.221885 0.979479  
3.905874 2.678034 2.177406 4.689708 1.86232 2.765715 2.807036 4.210024 5.026598  
7.676954 7.039468 7.498606 7.711235 7.397886 7.474696 7.27435 6.602881 7.03961  
2.945378 2.335336 3.139324 1.666774 2.277532 2.490737 1.663761 1.490338 1.799704  
8.5198 8.194253 8.172368 8.462702 9.206335 8.368811 8.346742 7.817527 6.979317  
1.677906 1.152325 1.96416 3.347427 1.629334 1.116919 1.812569 0.995394 1.409409  
4.396635 3.825265 4.030387 4.181128 4.201913 2.894199 3.280443 4.06401 3.904275  
2.286151 2.063556 1.985707 1.658838 3.023631 2.417047 2.598436 1.654462 2.012296  
5.019538 5.172804 2.159069 3.265294 1.89616 3.030974 2.237223 2.463862 2.973437  
3.406704 4.937889 3.311655 3.226739 3.692687 4.315261 3.425502 4.149812 4.122456  
3.107219 2.125424 1.885921 1.466354 1.844032 1.839619 1.231591 1.634145 2.315397  
5.847212 4.419739 2.670348 2.518985 3.125319 1.917181 1.688791 2.715863 1.713039  
3.41176 2.184911 2.228471 3.106092 3.446151 2.553661 2.029352 2.497273 3.494313  
2.815808 2.604546 2.28065 3.263811 3.432921 3.08835 3.345786 3.289996 3.459342  
1.741577 0.815228 0.606689 1.667621 4.428501 1.582475 1.793288 2.699898 2.764861  
2.364311 2.915102 1.634059 1.891463 1.967493 1.350484 1.431375 1.697396 2.177466  
1.650214 0.792291 1.06208 1.074602 1.412194 1.074788 0.843389 1.045377 1.382503



1. 572364 2. 596938 2. 181094 2. 598071 1. 984499 2. 158088 1. 870793 1. 852217 2. 469165  
1. 592531 4. 547087 3. 715732 2. 196555 3. 129817 3. 269107 2. 680313 2. 158498 2. 599073  
1. 72146 2. 053618 2. 946555 3. 232527 2. 886151 1. 993546 1. 904809 1. 928231 2. 247904  
1. 545648 2. 775001 1. 385198 2. 133797 1. 860904 1. 43835 1. 972076 1. 673558 1. 920879  
3. 708457 4. 069577 4. 099007 2. 478095 3. 202617 2. 541662 2. 530829 2. 81509 2. 685237  
2. 187827 2. 774399 1. 104123 2. 39174 1. 352628 2. 981639 1. 731135 2. 075791 2. 772127  
1. 272091 1. 421668 1. 090813 1. 678809 1. 134347 1. 564927 1. 473436 1. 21152 1. 5437  
2. 305711 2. 776283 1. 931358 2. 204226 2. 178439 2. 098111 1. 521505 2. 320545 1. 593025  
3. 270952 3. 331311 2. 068696 2. 844135 2. 150208 1. 752835 1. 530293 2. 163599 2. 284225  
2. 522678 1. 624094 1. 691097 1. 293526 1. 79859 2. 020268 2. 118778 1. 625589 2. 07321  
2. 057207 1. 824317 1. 733923 1. 242416 1. 758347 1. 459699 2. 225515 2. 029973 2. 66518  
2. 274445 2. 448091 3. 407741 3. 657595 3. 399258 2. 606793 2. 052446 3. 50721 3. 582987  
2. 186926 2. 632292 2. 842023 1. 680741 2. 896493 2. 555262 1. 631316 1. 61342 2. 179663  
4. 756338 3. 357905 2. 28326 5. 750152 3. 664348 1. 323345 1. 048604 1. 831849 1. 427375  
6. 646145 7. 497222 6. 796631 6. 08563 6. 66414 4. 493059 5. 353311 4. 913337 4. 992976  
1. 119483 1. 111021 1. 23531 1. 21115 1. 539519 1. 276745 1. 864343 1. 96431 1. 185237  
2. 783357 2. 789735 2. 801645 2. 566648 1. 960312 2. 495209 2. 97451 3. 571956 2. 336117  
2. 658874 3. 337286 2. 336597 2. 56843 3. 023017 2. 368176 3. 13585 2. 656288 2. 423297  
1. 976739 2. 939169 1. 879097 1. 955039 2. 839726 1. 986813 2. 318157 2. 815284 2. 111949  
2. 316216 2. 251016 2. 048596 1. 457076 1. 557046 2. 170228 2. 30431 1. 561099 2. 070175  
2. 397959 2. 934703 3. 069903 2. 521006 3. 052409 2. 293498 2. 513451 2. 592598 2. 453134  
5. 78204 6. 806789 6. 340309 5. 983422 6. 235062 6. 845143 6. 243027 6. 874741 6. 240214  
5. 269878 4. 701277 4. 700692 5. 323004 3. 287266 2. 952985 5. 543117 4. 715001 5. 652215  
2. 495464 1. 482768 1. 335349 1. 77116 1. 448186 1. 454647 2. 017281 2. 041445 1. 827346  
3. 154756 3. 781977 3. 219026 4. 225004 3. 240257 2. 807149 4. 561631 3. 75294 3. 971424  
4. 854284 4. 325553 4. 039121 5. 823872 5. 40241 3. 336913 3. 96262 4. 571573 5. 428021  
2. 542161 2. 981426 2. 911073 2. 796412 2. 015777 3. 571073 2. 808511 4. 586733 4. 053724  
1. 148348 1. 255973 1. 80854 1. 868064 1. 625281 1. 422658 1. 410567 1. 817487 2. 578722  
1. 106461 1. 992758 0. 597474 1. 498244 0. 323559 0. 602665 1. 470806 0. 920776 1. 527046  
3. 306358 2. 830441 3. 132083 3. 398708 3. 764145 2. 497793 2. 433116 4. 148969 3. 096911  
3. 229108 3. 616833 3. 373928 3. 845421 3. 202773 3. 621106 3. 653309 3. 775274 3. 503322  
1. 092444 2. 022846 0. 954976 1. 007044 1. 423392 1. 331961 2. 473775 1. 230411 1. 474918  
1. 3762 1. 386603 1. 006696 2. 425002 1. 342005 1. 377742 1. 71935 1. 676041 1. 197955  
1. 169957 2. 650958 3. 764913 1. 451066 2. 450313 1. 614282 1. 779843 1. 084749 1. 09759  
2. 71792 2. 300247 2. 721427 2. 389946 1. 82039 2. 850512 3. 66788 2. 161054 1. 719248  
2. 953506 3. 460519 1. 270197 3. 051621 1. 860773 1. 096308 2. 987151 2. 115488 1. 86665  
2. 95104 5. 138867 5. 895143 4. 139688 4. 783077 3. 597988 3. 892404 5. 749841 3. 775246  
4. 894322 4. 15313 5. 67361 3. 886504 5. 905849 3. 873104 3. 576904 4. 477521 4. 748503  
1. 780877 1. 858678 1. 454846 1. 750405 1. 467769 1. 438252 1. 694156 1. 475663 1. 41332  
2. 520961 2. 308593 2. 749422 2. 997489 2. 14509 2. 998192 2. 250555 2. 102377 1. 759294  
2. 64419 0. 970131 2. 47737 2. 6549 2. 21115 2. 963814 1. 7469 3. 050537 2. 131381  
3. 423838 2. 51089 1. 736336 4. 033371 1. 921535 1. 388933 4. 50318 1. 886048 4. 072969  
4. 473218 3. 315332 2. 581832 1. 671281 2. 639431 2. 734917 3. 147156 3. 378687 2. 614632  
4. 506084 3. 047559 3. 790828 3. 927372 3. 714754 2. 75882 3. 01996 3. 15014 2. 437467  
7. 843135 7. 837362 6. 85361 6. 993063 8. 113132 6. 337691 7. 729323 6. 796466 5. 650728  
1. 617717 1. 963359 2. 49396 1. 749964 2. 197777 1. 901893 1. 718664 1. 499908 1. 760366  
2. 959926 2. 305372 3. 477765 2. 825939 3. 386927 3. 182508 3. 657189 2. 02138 2. 814317  
1. 327869 1. 553692 1. 306072 1. 684876 1. 524964 1. 411529 1. 72788 1. 915741 1. 968641  
3. 204978 4. 141672 3. 736165 4. 442391 4. 689854 3. 378833 3. 81116 2. 871866 3. 396593  
2. 268016 1. 002366 1. 248695 1. 405198 1. 064339 1. 855817 1. 259229 1. 336143 1. 388359  
4. 755683 4. 167778 4. 63944 4. 070431 5. 027321 3. 522558 3. 621265 3. 185965 4. 165366

0.922565 1.065286 1.768176 2.635222 1.922775 1.643234 0.997076 1.840245 1.983419  
2.599594 2.594471 1.860309 2.812755 2.473648 2.78885 1.88382 2.908109 2.974765  
1.514769 1.23277 1.474527 1.601993 1.584739 1.657681 1.529206 1.294923 1.755539  
3.979922 4.182625 5.219501 3.909484 4.978083 3.154543 3.079352 2.934029 4.211529  
1.259319 1.945778 1.249881 1.060327 0.746156 0.454853 2.706617 0.864826 0.814873  
3.071155 2.402895 2.043504 3.092258 2.648801 2.243911 2.440604 1.931333 1.956405  
0.922414 1.159842 1.160381 0.864159 0.761914 1.843961 0.992175 1.429888 1.77568  
5.446484 6.014673 5.490928 5.761065 6.419125 5.522382 6.516175 7.325158 5.938106  
1.534755 3.622271 0.787426 3.211843 0.928399 2.343167 2.031102 1.273473 1.016388  
2.668064 2.451844 3.525119 1.773914 1.284721 2.462193 1.846605 2.570017 1.087737  
1.731585 1.242452 2.406078 2.264186 1.669039 1.658118 2.176341 2.77844 1.69308  
1.635909 2.339535 0.92448 1.589199 1.76592 5.224518 1.015853 1.426837 1.578521  
2.880744 2.380351 2.21455 2.414421 3.141681 2.703371 2.371412 2.013246 3.107787  
3.485829 4.215273 2.8243 0.969223 1.936118 0.8276 0.802239 3.453567 1.469825  
2.974717 2.414481 3.203038 2.632698 3.089472 2.98695 2.512687 2.784371 2.684806  
4.142606 4.58345 4.046385 3.062441 3.43194 4.281446 3.588166 2.322617 2.526378  
1.454366 1.583524 1.511644 2.485203 1.528555 1.459335 2.010941 1.714653 2.045179  
3.645295 4.422477 2.46987 3.542587 4.412628 3.969481 4.1975 4.471424 4.060587  
2.372644 2.429274 3.539553 2.140629 2.105396 1.850608 2.730498 2.771521 2.703628  
1.820277 2.116453 2.04187 1.752551 1.935207 1.773469 2.098796 2.266643 1.312014  
1.908777 2.036556 2.416259 1.800614 1.537593 1.972194 1.348474 1.468117 2.11244  
3.954772 3.064131 3.721688 3.497944 3.138353 2.0265 2.674297 1.571724 2.164932  
2.013249 1.865031 1.967272 2.552076 2.124456 1.727997 2.696527 2.00085 1.442436  
0.808951 1.616148 0.705151 1.606656 0.60773 4.989406 1.165539 1.206418 0.817348  
1.857195 1.59952 2.874482 1.503796 2.182756 1.637039 1.483778 1.599159 1.749742  
1.531738 1.712874 1.461275 1.361534 1.133418 1.3153 1.271346 1.406992 1.829591  
5.26333 4.339436 5.441395 3.534596 5.370765 5.262606 4.255658 3.955937 4.200424  
1.475007 2.068188 0.865747 0.786055 1.687168 1.899349 2.224108 2.572632 1.728688  
5.18315 5.628858 6.322408 4.258246 3.427688 5.103746 2.804979 3.887378 6.196212  
2.817582 2.627524 4.009099 2.482495 3.298925 2.723801 4.213419 2.698318 2.653024  
1.815429 1.74722 1.926231 1.146859 2.16868 1.442091 1.571575 1.28196 1.230185  
1.636238 1.910212 1.048597 1.529332 1.090977 1.419859 1.829659 3.452484 1.124508  
0.877907 0.913274 0.669841 1.398581 1.690599 1.016505 1.497855 1.811406 1.050604  
2.81093 0.809864 2.081856 2.398374 1.993714 1.334995 2.421224 1.536474 1.772192  
3.167218 2.379144 3.025019 2.939026 3.861992 2.184324 3.754412 3.023532 2.364673  
8.2598 8.003686 8.857553 7.569656 8.211265 7.24116 7.969764 6.863841 6.817602  
2.365156 2.102374 2.396063 3.357793 2.519735 4.062504 2.540203 2.47879 2.838638  
1.792189 1.730998 1.893565 2.508192 1.484044 1.865783 1.480429 1.907226 2.173621  
2.179534 3.182727 2.861318 3.486663 2.702173 1.918054 2.995985 2.887178 3.7122  
2.05389 2.188371 2.601328 2.051957 2.022423 2.083725 1.94122 2.541984 1.847542  
1.600463 1.734888 2.069839 1.373413 2.004013 1.878623 1.989287 3.306934 1.80214  
1.64099 1.635913 1.782164 1.795576 2.120893 1.958835 2.224402 1.348279 2.425579  
4.025427 4.048383 2.867763 3.293238 3.031814 3.172382 2.886563 2.507297 3.272474  
2.957965 2.626527 2.696886 2.98281 3.018176 2.088439 1.844052 1.78251 3.38688  
2.638558 2.350215 2.21499 2.246022 2.676287 2.355511 2.882899 3.799471 2.927899  
3.591779 3.282853 2.999729 3.34595 3.798274 2.556265 2.503361 2.97451 4.169101  
3.861468 2.45574 3.731315 3.738672 3.775675 1.833362 1.457199 0.735175 2.062887  
2.521638 2.083716 2.515943 1.460279 2.160599 2.62091 2.646503 2.319452 1.909651  
1.95527 1.448374 1.70471 1.891969 2.533065 1.563562 1.469126 2.78887 1.617005  
1.557449 2.670974 1.854897 2.05124 2.517877 2.86082 1.681633 1.739054 2.383109  
2.172932 1.860852 1.885477 2.032564 2.167758 2.103333 1.809046 2.190275 2.174

2. 514758 3. 034345 2. 080847 2. 455438 2. 625472 3. 430568 3. 787772 2. 580745 2. 531012  
2. 716329 2. 142803 3. 258228 4. 404989 3. 459201 2. 696209 3. 644559 2. 085948 4. 719567  
6. 126589 4. 458643 5. 74828 4. 704361 4. 506959 5. 551855 5. 31307 5. 25695 4. 842095  
2. 781405 2. 390248 2. 830896 2. 701902 2. 849656 2. 671524 2. 500559 2. 439102 2. 488205  
1. 622043 1. 321779 1. 181897 0. 906184 1. 703381 1. 002599 1. 635364 1. 267002 0. 964727  
2. 745026 3. 214006 2. 026914 1. 239634 1. 364179 1. 845046 1. 441917 1. 175192 1. 901949  
1. 87579 1. 595635 1. 67936 2. 13339 1. 597897 1. 324106 1. 394403 2. 020044 1. 844038  
2. 237198 2. 209362 1. 989874 2. 215935 3. 402194 2. 119599 2. 154281 2. 987646 2. 895834  
2. 411087 3. 00687 2. 895944 3. 349159 3. 252984 4. 426894 3. 776294 4. 678915 3. 590142  
1. 009234 1. 670067 1. 483909 1. 658768 1. 252431 0. 998353 2. 101408 0. 863055 1. 069304  
1. 752499 1. 469526 1. 478834 2. 012686 2. 386919 2. 293288 1. 84905 2. 426325 1. 882537  
1. 361441 1. 120484 1. 925823 2. 161298 2. 212056 2. 124743 1. 974087 1. 181318 2. 369664  
4. 590132 3. 542697 4. 874786 5. 410486 4. 550565 5. 350274 5. 904492 6. 331508 6. 314916  
2. 790406 2. 716831 2. 97987 1. 863168 2. 747426 2. 460067 2. 045797 2. 300976 2. 394831  
4. 993092 4. 954367 1. 115404 4. 197982 2. 613286 2. 973617 1. 413661 1. 123816 5. 154158  
7. 448639 7. 072051 1. 748772 5. 647812 5. 43407 2. 211225 1. 997299 5. 851585 2. 711504  
6. 77409 7. 048144 6. 939571 6. 425146 7. 066371 6. 925276 6. 748614 6. 639568 6. 651434  
1. 30268 1. 328431 1. 567765 1. 410973 1. 414682 1. 487734 1. 731105 1. 907589 2. 222322  
1. 563 1. 231045 0. 980674 1. 267369 1. 365223 1. 131687 1. 103187 1. 425702 1. 480212  
4. 839027 6. 200618 5. 288768 5. 119005 5. 589924 4. 011111 4. 940305 4. 743828 4. 821957  
1. 166338 1. 224668 2. 04323 1. 201295 2. 089251 1. 125015 1. 119584 1. 193565 1. 187965  
7. 114176 8. 20355 7. 034356 7. 323545 8. 00717 7. 160725 8. 070814 7. 630541 6. 812901  
3. 523677 6. 857026 3. 775826 3. 710629 4. 321755 2. 439402 3. 802166 3. 421794 2. 605999  
1. 331111 1. 96717 1. 077087 0. 957847 2. 868938 0. 844924 1. 518507 3. 2428 2. 200215  
4. 646943 2. 489517 2. 559696 3. 508032 3. 205121 2. 412111 3. 6332 3. 085711 2. 401171  
2. 811891 2. 872184 3. 060568 3. 889675 3. 481788 3. 759017 3. 012288 3. 195834 3. 833746  
4. 552594 4. 222941 3. 776541 1. 702255 2. 692521 4. 81918 3. 731015 3. 204705 1. 752415  
1. 810081 2. 623682 1. 996208 1. 793409 1. 880693 2. 263093 1. 916731 2. 79212 2. 601737  
3. 087029 1. 275132 1. 38073 2. 998862 1. 929474 2. 130861 3. 212809 2. 063028 1. 424769  
1. 696783 1. 395301 2. 168051 3. 063964 2. 610754 2. 223672 2. 148946 1. 616555 3. 617438  
8. 57502 8. 415345 8. 572059 8. 950131 8. 09821 8. 536964 7. 533116 8. 596003 8. 409343  
2. 091443 1. 721697 2. 195426 1. 675997 2. 24083 2. 924952 1. 727746 1. 904924 2. 270905  
1. 201179 1. 445738 1. 316087 2. 479071 2. 062269 1. 02798 1. 251524 1. 296272 0. 892482  
1. 747298 1. 79493 1. 854424 1. 940717 2. 214695 2. 248453 2. 316894 2. 280321 2. 383298  
1. 638749 1. 574038 2. 237871 2. 255542 1. 450982 1. 731587 1. 545288 1. 735509 1. 786107  
3. 440193 3. 45875 3. 060555 4. 983061 4. 593621 3. 929158 4. 087025 3. 588708 3. 484223  
2. 113703 3. 461197 1. 298708 2. 255628 1. 926982 1. 591743 1. 976563 1. 903265 1. 536548  
4. 319881 4. 285793 4. 069647 3. 949689 3. 277829 3. 461434 2. 374727 2. 853701 2. 647561  
3. 03181 2. 636053 3. 274211 2. 196289 3. 094974 3. 056083 3. 97091 4. 614663 3. 775678  
5. 943105 6. 261189 5. 93112 3. 969758 6. 631409 4. 678202 6. 067164 4. 666453 6. 326603  
2. 755228 1. 247316 0. 977182 2. 954564 2. 522612 1. 572237 1. 937021 2. 42459 1. 464258  
1. 446257 1. 460069 1. 868173 2. 035388 1. 047385 2. 109716 1. 411447 1. 601472 1. 090707  
3. 145645 2. 815846 2. 716992 3. 031447 2. 806895 3. 096066 2. 723608 2. 787594 2. 719468  
2. 914162 2. 81891 2. 587457 2. 481332 3. 721938 2. 321157 3. 263727 2. 816621 2. 258803  
1. 167531 1. 997512 1. 217659 1. 153058 1. 414675 1. 833068 1. 285726 1. 306072 2. 043097  
1. 342053 1. 960006 0. 907336 1. 177477 1. 491637 1. 051255 1. 404269 1. 862019 1. 263832  
2. 902385 1. 40472 2. 552976 2. 306756 1. 928262 3. 562549 2. 374692 1. 828386 2. 421454  
1. 270185 1. 251452 1. 772608 1. 52861 2. 467754 1. 296637 1. 536259 1. 525581 1. 809407  
3. 115827 3. 164729 4. 022948 2. 51176 2. 573203 2. 739435 2. 393196 2. 092953 2. 206942  
2. 912023 3. 290719 2. 990892 4. 264234 4. 265635 5. 137553 4. 617257 5. 20406 4. 824301  
2. 190304 2. 486034 1. 947286 1. 817266 2. 003773 4. 999409 3. 945851 1. 737003 3. 012423

4. 749654 5. 221158 4. 788919 4. 397851 3. 996172 4. 606257 5. 281049 4. 344509 4. 918444  
1. 494913 2. 894646 2. 90054 1. 469213 2. 303468 2. 418671 1. 607943 2. 127452 1. 339499  
1. 230794 5. 217182 2. 739015 1. 043065 1. 311885 2. 636196 3. 799126 2. 095478 3. 175738  
3. 821504 4. 797716 4. 108177 3. 387824 5. 90598 2. 612633 3. 345192 3. 722785 3. 311843  
3. 545308 5. 500777 4. 723031 4. 114351 5. 531053 2. 911913 3. 501728 2. 804705 2. 721177  
3. 947055 2. 929991 3. 125798 3. 562983 3. 294557 3. 445207 3. 054943 3. 291368 2. 945655  
1. 816462 1. 190019 0. 995727 1. 424811 0. 864865 1. 369873 1. 620308 1. 927024 1. 076924  
2. 159685 1. 676044 4. 068598 1. 236283 3. 296472 1. 961119 1. 332544 1. 208978 2. 416235  
3. 013501 3. 36299 2. 981757 2. 890312 3. 901167 4. 3322 3. 307919 4. 180447 3. 543276  
1. 238062 1. 254335 1. 83348 1. 99531 1. 545004 2. 18091 2. 001858 4. 077618 0. 760205  
1. 795976 2. 211662 4. 132891 3. 796813 4. 615832 2. 858664 1. 962821 2. 845172 3. 337651  
4. 221704 5. 148877 5. 320321 5. 310811 5. 097486 5. 593897 5. 150808 4. 54949 5. 988961  
2. 350139 2. 060256 2. 047455 2. 135983 1. 970697 1. 718309 1. 723375 2. 339856 2. 400621  
5. 025111 3. 501311 5. 021713 5. 346323 4. 319776 5. 433158 4. 297306 4. 965281 5. 15956  
1. 66879 1. 307376 2. 244468 1. 343983 3. 336626 0. 990828 1. 126775 1. 540909 1. 644821  
7. 456802 7. 804075 6. 807257 7. 302764 7. 472629 6. 660435 7. 453703 8. 004553 7. 318909  
2. 100808 2. 287714 2. 067292 3. 298964 1. 744141 1. 84263 1. 587095 2. 352431 2. 213519  
1. 420969 2. 603614 1. 258578 1. 532995 1. 415591 1. 536658 1. 751538 1. 104573 1. 535902  
2. 950296 4. 909252 4. 779746 4. 407667 3. 810071 3. 169601 3. 930721 2. 364648 3. 717197  
3. 503879 3. 539255 3. 702262 2. 458721 3. 220076 2. 591408 2. 501833 2. 938648 2. 387521  
1. 965595 1. 896752 2. 624401 2. 616462 1. 73917 2. 153484 1. 839762 1. 92471 1. 913926  
2. 197125 2. 002436 2. 30851 3. 258735 2. 602024 2. 332659 2. 045443 3. 447581 1. 644526  
2. 845277 3. 239198 3. 577868 2. 550302 2. 86515 1. 855367 1. 915991 2. 349017 3. 708869  
2. 490481 0. 920902 1. 536125 2. 520269 1. 485129 1. 149448 1. 428749 1. 966161 1. 906791  
5. 996251 5. 866835 6. 77491 7. 052067 5. 577591 6. 081278 5. 381684 3. 747285 1. 421451  
1. 158763 1. 525164 1. 314782 2. 391326 1. 743229 2. 08464 1. 684099 1. 369367 1. 546463  
2. 966991 2. 449161 1. 019736 3. 026636 1. 447805 3. 838523 5. 357308 1. 927391 3. 530649  
7. 52416 7. 792616 7. 946898 8. 155593 6. 916813 7. 064376 7. 372209 7. 383877 7. 515858  
1. 234694 1. 668627 1. 860814 1. 81357 2. 267463 2. 309375 1. 62231 1. 348893 1. 223619  
3. 626962 3. 474992 4. 951099 3. 153566 4. 342651 2. 576089 1. 967276 2. 196811 2. 385558  
1. 981744 2. 523741 2. 261192 1. 821938 3. 551302 2. 917072 2. 712886 2. 157086 2. 528689  
1. 735977 1. 634095 2. 663369 2. 924444 2. 259005 1. 42058 1. 713737 1. 606872 2. 33988  
2. 967808 3. 410587 3. 20286 2. 796658 2. 658391 3. 628869 2. 152808 2. 932054 2. 190579  
1. 350889 3. 775597 2. 620982 2. 454572 2. 029679 1. 719353 1. 913224 1. 218616 2. 40209  
1. 055805 1. 15058 1. 150924 1. 090563 0. 967895 1. 548168 1. 154309 1. 116933 1. 261286  
3. 873634 4. 246175 3. 252069 3. 09763 3. 422789 2. 973203 3. 131667 3. 422342 3. 670513  
2. 536123 3. 073384 2. 998614 2. 799169 2. 456189 3. 024018 2. 359556 2. 329016 1. 65142  
1. 880227 1. 934037 2. 475366 3. 512474 1. 914568 2. 023354 1. 907062 1. 815502 2. 669985  
4. 312519 1. 988974 3. 040717 2. 626794 3. 290234 3. 775499 3. 166189 3. 232992 3. 084395  
1. 351391 1. 174466 1. 274297 1. 395473 1. 046019 1. 193856 1. 231645 1. 367544 1. 466159  
1. 134704 1. 38778 1. 148929 1. 171512 1. 211646 1. 492154 1. 373436 1. 087354 1. 090559  
3. 163933 4. 577437 4. 199475 2. 289023 4. 128467 4. 413478 3. 619581 3. 750397 3. 37993  
1. 752914 2. 35472 1. 518393 1. 624335 2. 465507 1. 812521 1. 718408 1. 713318 2. 337701  
3. 825864 2. 838788 3. 37204 2. 485674 3. 046242 3. 620778 1. 976943 3. 06599 2. 89386  
3. 525386 3. 176248 3. 102801 3. 252347 3. 886403 3. 499879 3. 186358 3. 390156 3. 115873  
6. 554883 3. 621205 6. 666897 6. 325961 6. 330825 5. 502766 5. 783373 6. 48673 5. 981947  
1. 531808 2. 548819 1. 763139 1. 619942 2. 272818 1. 557489 1. 632817 1. 749132 2. 135856  
1. 633017 1. 579833 2. 165111 2. 716052 2. 185142 2. 91969 2. 17472 1. 90801 1. 912598  
1. 758625 2. 242738 1. 573932 2. 452463 1. 510347 1. 710054 2. 374713 2. 948187 2. 06034  
1. 691778 1. 687155 1. 173304 1. 342347 1. 208145 1. 960426 1. 304946 1. 74111 1. 524358  
0. 881382 0. 828936 0. 957624 2. 519078 0. 781134 1. 057916 0. 918915 1. 902186 0. 642089

1. 581964 1. 724925 2. 363654 1. 88998 2. 304119 1. 820474 1. 726951 1. 605609 1. 276537  
3. 191093 3. 609371 4. 091522 3. 794032 4. 550639 2. 93856 3. 751551 2. 887526 4. 319668  
1. 992885 1. 317592 2. 763928 1. 768259 1. 22398 1. 601335 1. 863683 2. 022964 1. 842091  
1. 985328 2. 183123 1. 840698 2. 439413 2. 645885 2. 556655 2. 454628 2. 163751 1. 993626  
1. 777387 2. 313766 2. 23465 2. 275275 2. 194388 2. 676177 1. 971904 1. 380471 1. 957743  
2. 139015 2. 145465 2. 744722 2. 535435 2. 291954 2. 087466 2. 022979 3. 171788 2. 784538  
2. 704385 1. 803319 1. 487666 1. 736367 2. 247881 2. 826816 1. 786785 1. 993769 2. 660218  
1. 896755 2. 823588 1. 879306 1. 679013 1. 903738 2. 071077 1. 953265 2. 069877 2. 217523  
2. 279069 3. 260215 2. 241932 2. 101129 2. 313673 2. 883999 1. 961006 2. 881003 1. 498571  
3. 83547 4. 879846 4. 470407 2. 031716 2. 294017 3. 192328 1. 617916 1. 82782 2. 675988  
2. 237716 2. 364663 1. 6426 1. 015117 1. 568598 1. 341246 1. 697357 1. 413803 1. 303776  
2. 049652 2. 887582 3. 229824 2. 991993 2. 422269 2. 108599 2. 022365 1. 797569 1. 804048  
1. 469867 1. 811206 1. 910588 1. 781628 2. 167726 2. 088691 2. 660778 2. 092726 2. 875493  
2. 854977 3. 785444 3. 03905 3. 558993 2. 703793 3. 814971 3. 259913 3. 707211 3. 061062  
1. 068005 1. 465321 1. 3139 0. 679481 1. 310018 1. 104963 0. 99654 1. 026666 0. 846207  
1. 917657 1. 713482 1. 376184 1. 693407 1. 424817 1. 655247 1. 460188 1. 68071 1. 172586  
0. 996415 1. 076774 1. 142794 1. 202544 0. 98012 1. 372277 0. 951293 1. 134274 1. 122034  
1. 743585 1. 434426 1. 686144 1. 52951 1. 338734 1. 09165 2. 113268 1. 704452 1. 642414  
2. 43404 2. 482278 1. 943676 1. 853707 1. 926549 1. 617198 1. 533478 1. 4241 2. 359551  
2. 92876 3. 625153 2. 488413 3. 021402 3. 5113 3. 374588 2. 487646 3. 177332 3. 010151  
2. 276808 1. 272402 1. 50478 1. 372978 1. 707411 1. 208645 2. 153065 1. 885734 1. 743069  
2. 303259 1. 564713 2. 26636 3. 983417 1. 692869 2. 108844 1. 901488 2. 388846 2. 253567  
2. 386564 2. 9156 3. 042099 2. 95501 2. 486445 3. 900022 1. 877079 2. 046479 1. 623353  
1. 166607 2. 097325 1. 055816 0. 74417 1. 741745 2. 015747 1. 021773 2. 289691 1. 325909  
2. 205495 5. 36069 4. 868705 5. 628712 3. 975798 2. 517979 4. 835062 4. 00659 2. 934716  
3. 99837 3. 427771 2. 909812 2. 885399 1. 769922 2. 390176 2. 843715 1. 729407 1. 471759  
2. 725156 1. 723003 1. 771926 2. 607667 1. 386001 2. 855404 1. 802848 2. 517801 1. 751186  
3. 913966 5. 371806 5. 242131 4. 445226 5. 412328 5. 175215 5. 861236 5. 097864 5. 537335  
2. 766842 2. 920368 2. 668688 3. 227508 3. 024108 2. 0572 3. 063805 2. 21765 3. 418603  
2. 900521 4. 258716 3. 642954 3. 271761 3. 471593 2. 623459 3. 781943 3. 539184 3. 930711  
7. 903159 7. 865771 7. 785382 8. 053014 7. 751085 7. 971075 7. 710779 7. 706322 7. 101883  
3. 880518 3. 720019 4. 990762 3. 502933 4. 702686 2. 579407 2. 960677 4. 473376 3. 812654  
1. 99436 1. 14942 1. 283665 1. 592344 1. 376293 1. 435596 1. 361618 1. 271451 1. 78417  
1. 454041 1. 485865 2. 010938 1. 86251 1. 484626 2. 895377 1. 322317 1. 637783 2. 218138  
3. 370887 4. 305555 4. 443181 4. 369281 4. 360226 2. 426456 4. 2493 3. 027324 2. 471079  
3. 492342 3. 888266 4. 830922 3. 79913 4. 450979 3. 08337 2. 429295 2. 745752 3. 06506  
0. 830109 1. 227863 0. 935432 0. 94757 0. 72152 0. 629096 0. 658482 1. 505038 1. 246964  
5. 153536 4. 292444 4. 117404 3. 900852 5. 78109 0. 835557 4. 0483 4. 0064 4. 876024  
3. 40287 1. 996084 2. 57364 2. 357075 3. 593333 2. 911427 2. 695431 3. 187192 1. 810118  
2. 727845 2. 040862 3. 277168 2. 452931 2. 517773 3. 188595 2. 696494 3. 150209 2. 833783  
2. 453195 3. 792807 4. 799404 3. 627688 3. 501872 3. 871136 2. 243683 2. 546603 3. 870614  
2. 547864 4. 730956 2. 742674 2. 001325 3. 468836 2. 048396 2. 193487 2. 142453 2. 110953  
1. 942692 1. 699296 1. 982344 1. 947913 1. 747248 2. 220236 1. 441021 1. 994792 2. 563231  
2. 862421 2. 965696 2. 640346 3. 582927 3. 930523 2. 52435 3. 203425 3. 366105 3. 057554  
1. 114745 1. 19775 1. 456491 1. 06218 0. 815048 0. 883957 1. 150518 1. 11157 1. 094954  
0. 924035 1. 329727 0. 726991 1. 214921 1. 009617 0. 790895 0. 90502 1. 071795 1. 300431  
2. 341881 2. 716678 2. 421385 2. 344446 1. 885667 2. 315909 2. 461464 2. 183614 2. 120991  
2. 306205 3. 991274 4. 009408 4. 446949 4. 533228 2. 208251 4. 061706 3. 747383 3. 878804  
1. 60825 1. 101204 2. 235448 2. 832195 1. 280187 2. 057288 2. 072226 2. 540608 1. 93278  
3. 135783 2. 877758 4. 11676 3. 121673 3. 92844 5. 105278 3. 542545 4. 586069 3. 910972  
2. 193664 1. 709071 1. 423428 1. 933733 1. 673595 1. 767724 1. 396512 1. 672644 1. 382252

2.008937 2.614416 3.74307 3.95119 2.574687 2.341096 2.173873 3.005338 1.970944  
2.823331 3.638066 3.200784 3.278136 3.57028 3.325086 3.281275 3.106973 3.367425  
0.90349 1.352309 1.181608 2.903254 1.487331 1.486052 2.05596 2.095479 1.766935  
3.105548 1.19466 1.210502 3.061354 1.245704 0.878882 0.753579 2.586645 1.565932  
3.271557 3.768411 4.182818 4.322124 5.016232 2.522238 3.596165 4.181571 3.444425  
1.983458 1.435716 1.832181 1.428317 1.143546 1.679331 1.023399 0.90825 1.172346  
4.994438 6.72002 4.467479 4.586365 6.029977 1.851224 6.692114 5.473433 4.940067  
2.605833 2.820234 2.709304 3.140509 2.832493 2.711681 2.557714 3.360925 3.309606  
4.476056 2.198849 4.115617 5.241744 4.121363 1.525882 2.524642 3.149929 1.898747  
2.094426 2.709549 2.947766 2.573027 2.974218 2.434408 2.043566 2.346475 3.68799  
2.156491 1.916481 1.932257 1.692044 1.727565 1.472645 4.856509 2.180487 2.020908  
1.439931 1.501188 1.662964 1.40514 1.63931 1.201941 1.672986 1.599504 2.364912  
2.706096 1.34861 3.221605 3.331591 1.964682 2.512672 2.325117 2.009956 2.180999  
2.627331 2.24088 2.347435 2.467393 1.835507 1.77478 1.843007 2.17722 2.619426  
2.003308 1.860373 2.907039 2.074432 2.293423 1.711848 1.397556 2.070426 1.743476  
5.882568 6.884585 7.250534 7.642805 7.059388 4.896585 6.235094 7.279228 6.917597  
0.684845 1.05028 3.399856 1.242351 0.675187 1.024246 2.277427 0.936662 0.588006  
0.897074 1.405386 1.233648 1.505618 1.565274 1.345461 1.014134 2.003563 1.501974  
3.728251 2.393555 3.332657 3.463298 2.113547 2.962724 2.417075 2.534855 3.289784  
2.368395 1.974832 2.182966 1.672066 2.257302 2.425346 2.088421 1.765988 2.80882  
3.863504 3.271811 2.649436 2.686303 3.594177 1.878886 3.44734 3.617235 2.02267  
4.756507 4.67178 4.470443 4.034968 4.597382 5.720357 4.156173 4.680877 5.366417  
4.102788 4.463043 3.915927 3.067119 3.001002 3.625079 3.603353 2.909195 3.140945  
1.99189 2.687143 2.572588 3.033446 2.630576 2.179211 2.185412 2.56992 2.631479  
1.599514 1.853685 1.680653 1.104521 1.113364 1.604407 1.837722 1.004919 1.218007  
3.306508 4.960019 5.057689 3.422541 5.759505 2.589504 2.592415 2.296745 2.768671  
1.866388 2.588869 1.946419 1.885523 1.742557 1.756746 1.900904 2.209357 2.592692  
3.251534 3.064792 3.409828 2.934457 3.427591 2.4667 3.721758 4.085371 4.432627  
4.066048 4.778689 2.557194 3.491498 3.58518 3.890526 4.955552 4.168086 4.596455  
2.539374 3.589724 1.755121 3.528473 2.051211 3.237847 2.273261 2.67253 2.840414  
2.617912 5.703534 5.276069 4.729336 4.86454 3.926622 3.641867 2.586671 3.958028  
2.874563 2.235436 2.405184 2.491725 3.07257 2.83678 1.695295 2.237643 2.425276  
1.218688 2.8315 2.691096 0.99988 4.052248 2.256365 4.373401 2.28284 1.185079  
2.240365 1.92226 2.218865 2.810492 1.85652 1.710819 2.440607 2.070963 2.635782  
2.74347 4.644257 2.043354 1.938028 2.871357 2.154366 1.699426 1.9541 2.134472  
1.509299 2.302029 2.277203 1.722616 1.631856 1.530561 2.666463 4.269331 2.633479  
1.876814 2.845505 1.199734 2.27805 1.486242 1.774804 1.821134 1.405582 1.869049  
3.155177 3.239395 2.919373 2.462578 3.913195 2.636657 2.325799 2.402985 4.026792  
2.489894 1.865104 2.025508 1.944534 1.587439 2.332939 1.495167 2.65308 2.248481  
4.443183 4.008617 4.525633 3.559403 4.263624 2.928273 3.299825 3.2656 2.870508  
2.522713 2.768841 3.092857 2.380879 3.056077 2.537406 3.121993 2.602243 3.149452  
4.623815 4.640375 5.299388 2.627983 5.2435 4.37305 5.18541 4.955678 5.607095  
1.250239 1.316852 0.630876 2.475984 0.922665 1.686899 0.788994 1.591166 1.31505  
1.121651 2.08925 1.324347 2.040086 0.980535 0.789012 1.113639 2.077159 1.193174  
1.562722 1.359444 1.754924 1.433712 1.553231 1.611066 1.513337 1.443423 1.753252  
2.015917 2.392641 2.225359 4.959878 1.931157 2.095063 2.128951 2.036681 1.728919  
1.692878 1.245948 1.850103 2.139799 1.696881 1.955255 1.637494 2.875382 1.809599  
5.229379 4.479663 2.971399 4.969941 4.512961 4.008709 3.613127 4.702222 4.024184  
1.062546 1.368129 1.195333 1.492779 1.288548 1.580521 1.340229 1.571691 1.532849  
5.512577 5.006811 3.845677 2.83689 5.083856 2.357888 2.502886 5.695965 1.950969  
4.099938 3.622688 3.546793 3.380878 4.145115 4.44301 4.722319 4.377811 4.755157

1.994013 2.339765 2.426877 2.318247 1.910895 2.865227 2.278151 2.277368 2.923151  
2.054885 2.164543 2.214701 2.719845 2.307562 2.3034 1.919272 2.24734 2.000536  
2.174821 1.738396 1.726106 2.05453 2.083231 2.820112 2.192014 2.796521 1.999275  
1.158109 0.823375 1.37721 1.928607 1.741012 1.439855 1.056894 0.861713 1.131712  
1.651984 2.38342 2.094057 1.258692 1.099655 1.779434 2.545761 2.774438 2.376714  
3.530317 2.901622 1.087188 2.758487 0.911028 1.239294 1.149444 1.720911 1.409387  
2.266205 3.347051 1.653921 2.02682 3.297194 2.11204 2.082629 2.582092 2.371138  
1.066727 0.9125 1.087166 0.770548 0.873812 1.580942 1.261351 1.427796 1.313038  
1.492592 1.335689 1.977118 3.05211 0.905653 1.723777 1.900088 1.201541 1.10779  
3.480526 2.245165 1.910638 2.593299 2.67525 2.340645 2.464988 1.729523 2.459399  
5.669058 6.275634 5.678218 6.541827 6.363129 5.248682 5.151673 5.67979 6.344288  
1.459108 1.288708 1.131327 1.773122 1.252907 1.536722 1.442659 1.620114 1.411812  
0.927561 1.815195 1.085038 1.346902 0.842271 1.144407 1.294039 1.44196 1.095063  
0.859039 0.76394 0.670617 0.687775 0.427797 1.140647 1.061794 0.484043 0.854913  
1.37653 1.169549 1.023925 0.53193 1.859639 1.039507 1.019667 0.969072 1.322474  
1.134445 0.943255 0.775344 1.062811 0.571935 1.150675 0.773044 1.285879 1.004229  
1.06982 0.888973 0.653108 1.191071 1.134941 1.076454 0.881779 1.114867 0.948392  
0.852627 1.26027 1.273054 0.921015 3.533316 0.993941 1.23047 1.491815 1.494777  
2.257754 1.135778 0.601263 2.153267 1.415726 5.836898 1.836862 1.303911 0.871846  
0.634646 0.741142 0.732773 1.18126 0.618026 1.073707 0.651559 1.060023 0.585012  
1.522884 1.031348 0.663347 1.596301 1.010777 1.35349 1.156789 1.321781 2.187543  
2.798385 2.156576 3.051145 4.473204 3.302018 3.579371 3.328702 3.943316 2.914643  
1.101123 0.797165 0.596316 1.046661 0.840516 1.382335 0.980569 1.102698 1.309312  
1.061566 1.202724 1.002256 1.174719 1.536036 1.750809 1.374706 0.981746 1.325017  
2.099851 2.093007 1.101451 1.999667 1.527781 2.43528 1.293455 1.712468 1.781153  
0.643268 2.902693 1.594292 1.299747 2.968449 1.275905 0.919352 1.362903 0.995236  
1.718465 2.33989 2.66158 4.245346 2.015937 1.87494 2.243973 2.173764 2.516021  
4.85228 4.9162 3.841254 3.285063 4.930486 3.651331 4.196461 4.872227 3.861269  
1.736682 0.92703 2.920367 1.044148 1.733842 1.336741 1.463787 3.366193 2.352489  
1.590277 1.665083 1.816949 1.48921 1.00814 1.732551 1.884644 1.627969 2.172684  
2.798721 3.052733 3.497202 5.11612 4.460404 3.948991 4.439741 4.806317 4.432317  
0.57818 0.913816 0.719675 0.724192 0.610989 1.365796 0.943438 0.803653 0.849735  
1.057881 1.508617 1.161752 1.404965 0.728924 2.511244 1.724078 0.92307 1.790891  
1.473567 1.236291 1.481114 1.354691 1.264041 1.157269 1.138896 1.108196 0.985416  
1.666997 3.096931 2.196836 3.136793 1.88757 2.74057 1.489611 3.581394 2.263685  
5.027229 3.003283 3.439249 3.042698 2.703315 2.310941 2.874074 2.177912 2.757543  
1.266121 1.630243 1.619979 1.578664 1.384264 1.806952 1.447093 1.505798 1.694438  
2.220579 1.155513 1.294317 0.420777 0.693996 0.54111 0.914356 0.774539 0.650115  
3.024155 4.201045 4.554931 5.039658 4.335217 4.680115 4.155665 4.627012 4.409222  
0.792121 0.729108 0.806692 1.159812 0.685321 1.102261 0.707012 1.157847 1.040579  
3.305336 4.003291 4.582241 1.8892 4.128935 2.896378 2.775382 3.452862 4.772817  
0.545329 0.868956 0.725534 0.901518 0.553369 0.7372 1.162472 1.353845 0.950539  
4.272958 3.592663 3.25078 3.153995 4.23035 2.860603 2.775173 2.620766 2.165521  
1.519859 1.35391 1.166913 1.785353 1.244916 2.667382 1.672131 0.881324 1.274448  
4.809215 5.099425 4.322687 3.746753 4.263921 3.460041 4.235047 2.302995 3.364194  
1.095885 0.809839 1.582639 2.015475 1.237549 1.309118 0.849249 0.820618 0.950919  
1.002516 1.387033 0.747073 1.24383 0.886497 1.805557 0.761125 0.879269 1.790428  
1.233825 1.098547 1.091029 0.858554 0.924106 0.764054 0.810935 1.379713 0.937109  
2.353879 2.199269 1.409186 1.7564 1.799869 1.587058 1.070113 1.454509 1.354157  
0.730659 0.932633 0.66882 1.46597 0.577213 0.949701 0.564739 0.965329 0.930587  
1.4699 1.575538 1.529115 2.312045 1.032227 1.758834 1.415264 1.772736 0.984776

1. 819547 3. 858497 2. 637456 1. 96099 2. 864359 3. 231946 2. 177215 2. 116338 3. 212172  
1. 111146 1. 631561 1. 425967 1. 162855 1. 564047 1. 278681 2. 078458 1. 526783 1. 436243  
4. 439634 1. 29374 1. 495107 1. 377134 1. 541457 0. 842381 1. 115506 1. 327266 1. 555735  
2. 497333 3. 27652 2. 707536 2. 027972 2. 576585 1. 806374 2. 62905 1. 946875 2. 105658  
0. 896853 1. 025787 1. 204537 0. 896422 0. 80065 0. 559132 0. 834486 0. 702748 0. 73364  
1. 502959 1. 923862 1. 133301 1. 53889 1. 203434 1. 115653 1. 15153 1. 098102 1. 031146  
0. 953569 0. 966239 0. 718078 1. 051816 0. 70179 0. 83078 0. 839284 0. 987574 0. 784014  
1. 685434 2. 326438 3. 290834 1. 328706 2. 899926 1. 301032 1. 251911 1. 392036 0. 654798  
0. 305198 0. 635515 0. 456068 0. 794643 0. 598836 0. 97426 0. 703173 0. 78872 0. 645121  
1. 713003 1. 706038 2. 256678 1. 947266 3. 162121 1. 494531 1. 693825 1. 46981 1. 516039  
5. 924639 6. 033851 6. 194832 5. 33593 6. 23382 5. 632481 5. 393522 4. 946218 6. 460116  
1. 669926 1. 040787 0. 852087 1. 331103 0. 925849 0. 627208 0. 979906 1. 044791 1. 809103  
1. 234895 1. 210938 0. 70873 1. 183173 1. 111101 1. 005218 1. 224767 1. 261928 0. 945038  
2. 452999 2. 272475 2. 441792 1. 411515 1. 988427 1. 733766 1. 532581 1. 159357 1. 14026  
0. 789853 0. 922337 0. 985949 0. 851867 1. 360575 1. 107348 1. 210324 1. 886009 1. 390953  
1. 59783 1. 510986 2. 591922 1. 5909 1. 722896 2. 290791 1. 988668 1. 960927 3. 018255  
1. 183489 1. 935269 1. 821298 1. 429923 0. 937903 1. 046506 1. 266164 3. 039562 0. 87926  
2. 247762 2. 358198 5. 588651 2. 732153 4. 596674 2. 487944 4. 261164 1. 956118 3. 401329  
1. 329766 3. 094206 1. 288764 1. 874157 1. 262071 1. 352758 1. 471424 1. 332969 1. 219773  
1. 326488 1. 479472 1. 310673 1. 971943 1. 106557 1. 630159 1. 419073 1. 578373 1. 190749  
1. 18233 1. 055014 0. 60327 5. 851665 0. 972993 0. 618885 1. 359662 0. 853001 2. 049082  
1. 101463 1. 478357 1. 794899 0. 964114 1. 316679 1. 018896 1. 249513 1. 281326 1. 362314  
0. 650187 0. 654519 1. 020806 1. 383581 0. 8902 1. 040232 1. 30206 0. 571247 0. 489879  
1. 053694 1. 749178 1. 714589 1. 933703 1. 433282 0. 975215 1. 273 1. 115815 0. 88461  
0. 785 2. 09673 1. 519985 3. 317551 0. 900992 1. 299492 0. 998416 0. 679722 1. 139389  
1. 802799 1. 904602 1. 660354 3. 637236 1. 627065 1. 742939 1. 159809 1. 92499 1. 714447  
1. 993877 2. 751201 1. 73646 1. 964797 3. 304933 2. 734157 1. 928166 2. 119428 2. 36126  
0. 92085 0. 969738 0. 533449 2. 012178 0. 880032 0. 981987 0. 81094 1. 603871 0. 729198  
0. 801915 1. 00409 0. 704919 2. 060711 0. 807988 1. 730975 1. 005631 1. 736047 0. 909842  
5. 195285 5. 269834 4. 826513 3. 524047 5. 052488 5. 6897 3. 455089 5. 030078 4. 78433  
0. 844447 0. 829712 0. 701042 0. 983267 0. 669734 1. 451021 0. 64717 0. 755744 1. 493157  
0. 751604 1. 162658 0. 85823 0. 864327 0. 748927 1. 586192 1. 555706 0. 879063 0. 88818  
4. 636088 4. 353054 4. 20819 2. 84975 4. 631426 3. 493159 2. 280168 2. 595967 4. 17919  
3. 786539 2. 343882 4. 01705 2. 262354 3. 072527 3. 862744 3. 056665 3. 199528 1. 965379  
1. 410401 2. 021086 1. 25754 1. 444193 2. 391141 1. 421848 0. 962096 1. 551391 2. 288795  
2. 586995 1. 257653 2. 092857 2. 580824 2. 288284 1. 175544 1. 370679 1. 671064 1. 483916  
1. 484268 2. 11371 1. 360031 2. 645433 1. 190649 1. 265577 1. 890533 1. 185748 1. 46398  
3. 068119 3. 844425 4. 069083 3. 064796 3. 922555 2. 526243 3. 322301 2. 2095 2. 358037  
2. 16558 1. 79615 2. 269375 2. 047684 2. 245244 2. 140686 1. 934697 1. 699118 1. 518289  
3. 427921 3. 228438 4. 081 4. 868003 2. 70109 3. 258079 4. 207785 3. 828592 3. 27054  
2. 102212 1. 039954 1. 859429 1. 68614 1. 366076 1. 946278 2. 155437 2. 564007 1. 598501  
0. 779299 1. 15975 1. 107523 1. 071757 0. 932583 1. 01031 1. 67386 1. 182034 1. 144168  
8. 809134 8. 640981 8. 982765 9. 1109 9. 131879 9. 129338 9. 216849 9. 291662 7. 939599  
1. 006762 1. 332789 1. 04966 1. 275258 1. 267001 1. 410792 1. 530933 0. 960154 1. 435889  
2. 124937 3. 089412 1. 658276 2. 021811 1. 719727 2. 513775 1. 831953 3. 451417 3. 546867  
1. 43364 2. 706299 2. 202437 2. 635624 1. 968986 1. 752957 1. 937935 1. 769531 2. 638005  
3. 341284 3. 764371 3. 396908 3. 167187 3. 921281 3. 262785 3. 301085 3. 532385 3. 019036  
6. 52019 6. 116403 6. 462984 6. 775083 7. 135115 6. 130242 6. 600687 5. 940234 6. 66044  
4. 365534 4. 001226 5. 010389 3. 691837 4. 796304 4. 589558 4. 129342 3. 699694 5. 461853  
0. 691122 0. 797885 1. 050761 0. 746797 0. 74498 0. 689295 0. 777004 0. 876086 0. 963162  
1. 474968 1. 496595 0. 91112 2. 915582 2. 405004 2. 033286 1. 693956 1. 139255 1. 336689



6. 572711 6. 418209 7. 661587 6. 224724 6. 808585 3. 764848 5. 852055 4. 929849 4. 381416  
2. 744131 3. 313323 1. 642883 1. 859256 1. 930552 1. 209905 3. 178937 2. 712086 2. 571368  
1. 712086 1. 662589 2. 570753 3. 372448 2. 016777 1. 200029 0. 967069 1. 151575 0. 552164  
1. 98349 5. 373427 1. 810491 3. 498797 4. 029421 1. 320316 3. 479861 1. 192905 2. 424431  
2. 039197 3. 146102 2. 864675 2. 421787 4. 265677 3. 700086 2. 120683 1. 73766 2. 709994  
0. 775169 1. 352479 0. 907815 1. 892327 0. 885657 1. 44986 0. 805628 0. 612877 1. 145102  
3. 582487 4. 218032 3. 263965 3. 771994 2. 82385 3. 616882 3. 318349 4. 253833 3. 67991  
1. 740343 1. 599688 1. 360148 1. 256747 1. 955371 2. 034162 1. 173087 1. 704782 1. 464665  
3. 660208 5. 74599 6. 180123 6. 085427 5. 598458 2. 082753 4. 522321 6. 242506 4. 111904  
1. 643861 3. 482994 4. 337698 3. 579267 4. 329912 3. 702254 4. 048782 4. 051647 2. 795387  
4. 692642 1. 475427 1. 018178 0. 868626 2. 02427 0. 899955 1. 105164 1. 080509 0. 989882  
2. 147951 2. 214389 2. 619486 2. 795033 4. 342925 1. 801167 1. 643424 1. 136776 1. 675052  
2. 041536 2. 469868 1. 598118 2. 892068 2. 427237 2. 150077 2. 419318 2. 681439 4. 283503  
2. 896566 2. 048686 1. 459187 4. 155679 2. 776259 2. 155087 2. 810358 2. 448643 1. 646502  
2. 379252 4. 798703 2. 843279 4. 02779 2. 234438 1. 995259 3. 331788 2. 666402 1. 679556  
1. 750202 2. 280361 2. 19375 2. 556096 1. 577801 1. 539322 1. 748314 1. 863486 2. 758488  
7. 014585 6. 967769 6. 808367 6. 303467 7. 109086 5. 957702 5. 654713 4. 888321 4. 612214  
5. 385743 3. 950374 4. 403521 5. 14952 5. 396152 5. 5578 4. 337674 5. 283247 5. 282183  
2. 047014 2. 485 1. 23605 1. 380091 1. 693872 1. 069668 1. 604146 2. 211082 1. 718392  
4. 01019 2. 964943 3. 28315 3. 198909 3. 084096 4. 420521 2. 664836 3. 943811 4. 787583  
6. 239812 5. 325295 5. 607825 6. 07108 5. 825202 5. 495801 4. 707251 5. 563161 6. 738424  
2. 21288 2. 017281 2. 043487 1. 653517 2. 634536 1. 82268 1. 97121 1. 912472 2. 800217  
5. 13278 6. 303171 5. 763227 1. 627934 5. 730725 2. 238829 3. 994198 2. 136571 2. 513185  
4. 812394 4. 451846 6. 828211 3. 146642 3. 423074 3. 809993 4. 272895 5. 117797 4. 683537  
5. 375222 5. 753568 6. 231955 5. 885744 6. 024358 5. 596954 5. 898144 5. 773729 5. 88936  
1. 260731 2. 502006 2. 028162 3. 584585 2. 43951 1. 450544 2. 170419 1. 775757 0. 89431  
1. 235537 1. 214448 2. 090676 1. 060231 1. 035146 1. 095486 1. 303422 1. 678873 2. 953901  
2. 172454 3. 962264 2. 108398 1. 435852 2. 241049 1. 575722 2. 437178 2. 246775 1. 959388  
1. 458274 1. 299358 0. 393631 1. 325587 0. 71475 0. 588635 0. 880482 0. 580345 0. 733951  
3. 467266 0. 903039 6. 281975 1. 119432 1. 860956 0. 958215 0. 797579 0. 866877 0. 93333  
5. 192949 4. 07268 4. 272136 2. 636034 4. 560184 0. 955857 2. 271314 1. 694671 1. 234174  
1. 859943 1. 101975 0. 750367 2. 583204 0. 76883 1. 125819 1. 602249 1. 631977 2. 337235  
1. 17477 1. 179146 0. 604855 0. 934066 0. 679281 1. 159773 0. 982921 1. 00519 0. 987321  
1. 637809 2. 145615 1. 102873 0. 873429 1. 183985 1. 06612 1. 358988 1. 383214 1. 130032  
1. 324064 0. 628847 0. 672108 1. 367415 0. 805859 0. 910078 1. 58298 0. 809205 0. 971577  
1. 899751 2. 21582 2. 65762 2. 082446 2. 157508 0. 987051 3. 111899 3. 296576 1. 494898  
2. 597684 3. 175889 2. 138324 2. 617579 2. 909418 2. 424718 3. 304212 1. 756271 2. 3763  
2. 095221 0. 767799 4. 465919 0. 944577 1. 176842 1. 374809 0. 803953 1. 012325 0. 78501  
3. 347514 4. 197742 4. 56839 2. 929192 3. 941074 4. 924066 4. 099726 5. 096065 5. 243281  
1. 547865 1. 117017 1. 166315 0. 776262 1. 00811 1. 079636 1. 247141 1. 026437 0. 706283  
3. 149698 1. 576714 5. 654509 1. 024416 2. 873155 1. 119303 1. 115741 1. 509001 1. 184449  
2. 091579 1. 543749 1. 893335 1. 521563 1. 109885 1. 508678 1. 547956 1. 559707 1. 709857  
1. 101096 1. 436724 1. 025181 1. 321195 1. 249228 4. 113287 1. 298158 0. 909134 1. 155445  
0. 899051 1. 35412 1. 127214 0. 780646 0. 691558 0. 705911 0. 873813 0. 992302 0. 820945  
0. 729554 1. 460313 0. 908989 1. 009747 0. 186593 1. 114142 0. 963794 1. 446402 0. 678047  
3. 899519 1. 478259 2. 242945 2. 156811 4. 286976 1. 565999 1. 587178 1. 84777 2. 789176  
1. 329084 1. 907644 3. 006966 2. 139747 3. 322605 2. 894976 2. 804591 3. 062028 2. 476279  
2. 730616 2. 619055 3. 610677 2. 017172 3. 663102 1. 938223 1. 346532 1. 503696 2. 060799  
1. 320809 1. 310125 3. 841563 1. 852705 1. 723443 1. 482732 1. 262966 1. 217188 0. 984162  
4. 774649 3. 527605 2. 773697 2. 472428 2. 891121 5. 22621 3. 15869 1. 363038 1. 128974  
0. 830084 2. 082131 1. 392714 1. 41399 1. 215718 1. 316254 1. 063666 1. 582277 0. 991574

1. 221217 0. 80452 2. 258143 0. 821796 1. 416126 1. 0195 1. 340354 2. 094102 0. 729716  
3. 283727 2. 200596 1. 914122 1. 919277 2. 788261 1. 724349 1. 828371 1. 697288 2. 549371  
0. 834808 0. 805736 0. 594481 1. 917185 0. 584906 1. 138055 0. 974714 0. 453652 1. 318376  
1. 252538 1. 877626 1. 437186 1. 00609 1. 840586 1. 484304 0. 665336 2. 689371 1. 207046  
3. 561958 2. 773375 4. 179134 3. 026012 2. 843426 3. 331815 4. 479779 3. 407811 3. 32561  
4. 632486 3. 215148 5. 374463 5. 296322 4. 61022 5. 129607 5. 817628 4. 933058 4. 558507  
2. 351239 1. 143836 1. 047239 1. 329932 0. 876543 1. 355067 1. 020435 1. 348558 1. 156028  
1. 320248 1. 436246 1. 199544 2. 317274 1. 462522 1. 519243 1. 620764 2. 136037 1. 337489  
3. 578494 3. 809196 1. 313706 5. 115201 0. 80397 1. 273205 1. 506825 1. 554254 1. 531852  
1. 03032 1. 458543 1. 158213 2. 778187 1. 718213 1. 04388 0. 986502 1. 336199 0. 838151  
1. 618893 1. 66051 2. 149496 1. 188682 1. 358689 1. 502034 1. 54482 1. 866282 1. 06361  
3. 591435 2. 990637 2. 659409 3. 747619 3. 410206 2. 476702 3. 620404 2. 258047 3. 540774  
6. 110838 6. 716404 7. 354009 1. 684384 4. 942676 2. 752603 4. 736896 3. 874728 5. 535254  
2. 251629 2. 610154 2. 019072 2. 086723 1. 625914 1. 269467 1. 771154 1. 920497 1. 775252  
1. 675451 1. 664 2. 079996 1. 567669 1. 259217 1. 522685 1. 618165 1. 607825 1. 43381  
1. 137409 1. 162865 0. 967572 1. 27792 1. 42445 1. 086834 1. 539696 1. 008398 1. 216646  
2. 924719 3. 435816 2. 073045 2. 673911 2. 367365 2. 457883 4. 298818 2. 421607 3. 997025  
3. 854002 2. 555854 3. 901349 3. 457591 2. 789949 3. 73437 3. 173087 3. 645584 3. 986983  
1. 826855 2. 376424 2. 563016 2. 196553 1. 756699 1. 713418 1. 309153 2. 929309 1. 129576  
1. 665543 2. 046397 1. 310434 1. 615112 2. 582557 1. 378534 1. 121325 1. 360811 1. 436979  
3. 314139 3. 629778 1. 18614 3. 971903 2. 210343 1. 349204 1. 430529 3. 368959 2. 99389  
5. 70201 6. 272219 5. 637097 5. 553783 5. 712531 5. 561195 6. 538016 6. 243851 6. 611704  
2. 112282 2. 420653 2. 444744 2. 044526 5. 120001 1. 58948 1. 440475 2. 725847 1. 957877  
6. 987386 7. 307806 6. 538223 6. 716158 7. 287999 6. 168758 7. 348168 7. 036252 6. 712095  
6. 006973 6. 521373 5. 778384 5. 54585 7. 396514 5. 578535 6. 180655 6. 367898 6. 218225  
5. 98245 4. 739265 5. 392501 5. 783713 3. 405496 6. 342829 6. 28872 5. 472308 4. 892  
6. 231712 5. 166224 6. 605897 5. 74381 6. 357038 6. 147395 7. 475619 7. 447091 7. 558574  
7. 618132 8. 079249 7. 447398 8. 167887 6. 874177 7. 725178 8. 126663 7. 234818 7. 424654  
6. 79862 7. 130745 4. 523644 5. 220513 3. 751182 5. 041541 3. 727211 3. 10984 2. 989032  
1. 45967 0. 987933 2. 005772 1. 657296 2. 838149 0. 797709 1. 260497 1. 022139 0. 325327  
2. 14959 1. 753689 2. 066807 2. 369204 2. 90576 2. 81821 2. 539899 2. 512935 2. 090027  
2. 11761 2. 301898 1. 43825 2. 348649 2. 829286 2. 43039 2. 748833 2. 62887 2. 534205  
2. 267337 2. 787342 0. 992727 2. 379646 1. 827844 2. 684779 0. 727811 0. 957371 1. 69205  
1. 351865 1. 144657 1. 553785 0. 867903 0. 888952 1. 151561 1. 38592 1. 598933 1. 98029  
1. 72766 1. 325443 2. 281429 1. 805007 1. 51439 1. 5288 1. 176385 3. 150263 1. 727159  
2. 24519 2. 840815 2. 503016 1. 672121 3. 206559 2. 768687 1. 958155 2. 747863 3. 580057  
1. 146342 1. 479685 1. 946005 1. 771654 1. 04298 2. 056288 0. 895929 2. 029956 2. 553758  
2. 169021 1. 029918 1. 21332 1. 643225 1. 567938 1. 808825 2. 000964 1. 560785 1. 420459  
0. 99662 0. 594226 0. 74695 1. 025847 0. 825703 1. 172119 0. 949222 1. 255175 0. 81071  
0. 795564 0. 900474 0. 969721 0. 888286 0. 913509 0. 79735 1. 071843 0. 943505 0. 76764  
1. 313946 1. 064769 1. 744 0. 759681 0. 442839 0. 879998 0. 803396 1. 205643 0. 660454  
1. 202075 1. 688096 1. 360437 2. 11011 1. 654639 0. 867708 1. 67319 2. 634516 1. 129202  
1. 802659 0. 934671 0. 662864 2. 375702 1. 197276 0. 791041 1. 466398 1. 229273 1. 257041  
3. 134328 3. 693948 2. 904464 2. 328891 2. 61478 2. 411809 2. 697714 1. 8296 2. 795855  
1. 294731 1. 100308 1. 220392 1. 505244 1. 046053 1. 940123 2. 147881 1. 450395 1. 268256  
1. 525023 0. 730341 2. 16595 2. 241117 0. 707682 4. 67102 1. 157014 1. 333979 0. 816369  
4. 343029 2. 656057 0. 678284 0. 958613 1. 629592 1. 661398 1. 224065 1. 479904 1. 908925  
4. 430881 5. 44054 6. 852338 3. 098401 3. 184902 2. 074697 2. 010057 5. 776256 1. 567527  
3. 133921 3. 939712 4. 239742 4. 642619 3. 171953 3. 930116 2. 943465 3. 57973 5. 002857  
2. 733043 2. 365931 2. 78898 3. 348702 2. 886697 2. 890912 2. 113493 2. 603749 3. 282117  
0. 869038 1. 449799 2. 971706 1. 636109 2. 000876 1. 811513 2. 39794 1. 298588 2. 146034

1. 57135 0. 592556 1. 178817 1. 264664 0. 920468 1. 240672 1. 74194 1. 256146 0. 9039  
1. 596777 1. 380539 1. 131391 1. 783808 1. 921154 1. 930747 1. 00063 1. 393552 2. 017403  
0. 688972 0. 722942 0. 711389 1. 251281 0. 534908 0. 940406 0. 859097 0. 899473 1. 663649  
2. 106458 1. 237084 0. 772192 0. 950183 1. 284061 1. 426257 2. 217719 1. 634115 1. 601255  
1. 732405 2. 515892 1. 476254 1. 905631 1. 28212 1. 17278 2. 23277 0. 864535 1. 313072  
1. 989498 2. 111345 2. 461321 2. 408977 1. 422764 2. 602142 1. 6758 2. 069645 2. 48081  
1. 076769 0. 85934 1. 21106 1. 275173 1. 048638 0. 922065 1. 351434 1. 077245 1. 084626  
1. 019623 1. 540911 1. 312536 0. 952529 1. 792332 0. 708763 1. 333318 1. 513012 1. 796764  
1. 277211 0. 750474 0. 992932 3. 810482 0. 768773 0. 860893 1. 117432 2. 411054 1. 164867  
0. 817698 0. 822193 0. 513431 0. 913915 0. 583507 0. 81688 0. 694372 1. 535809 0. 923205  
1. 149328 2. 537124 0. 821244 2. 68179 1. 138629 1. 039806 1. 461738 1. 456192 1. 246974  
1. 133418 1. 521666 1. 554436 1. 181876 1. 214227 1. 733636 0. 922384 1. 737489 1. 003524  
3. 638902 2. 361876 2. 239682 2. 709116 2. 039706 1. 063252 2. 76346 1. 584366 1. 27756  
0. 97875 1. 716074 1. 014096 1. 095941 1. 820277 1. 27705 0. 915655 1. 535644 0. 87357  
1. 255232 1. 333583 0. 728144 1. 024091 2. 048285 1. 080964 1. 025496 1. 027256 0. 77831  
3. 667802 2. 779848 3. 197787 2. 875073 2. 658095 2. 626802 2. 862441 3. 216607 3. 516941  
2. 810074 2. 987263 1. 890273 2. 77756 3. 344876 2. 87489 3. 137856 3. 611519 3. 026341  
2. 98238 2. 685549 2. 182396 1. 541325 2. 59519 2. 786207 2. 827441 2. 4357 2. 547565  
0. 933763 1. 295207 1. 949729 2. 586286 1. 723763 1. 542016 0. 956323 1. 210656 2. 456348  
1. 10504 1. 424366 0. 836574 1. 131253 0. 715222 1. 050196 1. 651848 1. 272304 1. 814796  
1. 756663 2. 008247 1. 461144 1. 873008 2. 67706 1. 786783 1. 864216 1. 346023 1. 483792  
1. 509026 0. 90561 1. 08193 1. 701585 1. 09666 1. 879207 2. 451659 1. 718481 1. 745089  
2. 209746 1. 54963 2. 052278 3. 764246 1. 472523 0. 663661 0. 755222 2. 799884 1. 831006  
1. 099472 2. 234255 0. 577149 1. 486298 1. 247516 1. 007962 1. 16442 1. 937403 0. 988006  
4. 111573 5. 245774 4. 988033 2. 093021 3. 011262 2. 217671 3. 896683 2. 747853 5. 913864  
1. 230427 1. 620717 1. 427833 0. 805484 0. 971628 1. 165998 1. 316228 1. 319275 1. 274675  
0. 974702 1. 175668 1. 123054 1. 41427 0. 667157 0. 720365 0. 745373 0. 81648 0. 794989  
0. 962901 0. 652144 0. 903273 1. 906079 0. 742028 0. 716523 0. 890108 0. 78056 0. 455033  
1. 347512 0. 461888 3. 791988 2. 541209 2. 333222 1. 467376 2. 086003 1. 970316 4. 786386  
1. 484227 2. 704871 1. 776473 1. 641982 0. 646592 1. 094338 0. 760426 0. 994822 0. 646817  
1. 13947 1. 336961 0. 768314 1. 58678 1. 385998 1. 70964 1. 519909 1. 157056 1. 265394  
2. 958509 3. 492065 3. 201754 2. 067954 3. 147752 2. 485813 1. 765031 3. 600671 2. 300137  
3. 573286 3. 511538 3. 616976 2. 88667 3. 191382 3. 634884 3. 602339 1. 917491 2. 686567  
1. 947591 0. 910178 4. 260841 2. 211175 1. 369365 1. 152139 1. 654018 1. 167134 1. 094685  
0. 569798 0. 704278 0. 931169 1. 104559 0. 702831 0. 627105 0. 820119 0. 842514 0. 963345  
0. 955142 1. 350666 1. 627872 1. 227771 1. 945689 1. 501051 2. 028072 1. 935729 1. 659484  
2. 362821 3. 759166 3. 436851 2. 190235 2. 333727 3. 771803 3. 35464 3. 137968 2. 65373  
0. 979296 0. 895928 0. 609627 0. 811294 0. 428829 1. 408698 0. 720592 1. 848162 0. 754415  
5. 610984 1. 547023 2. 626449 1. 761195 4. 085023 2. 779552 3. 438913 1. 306296 1. 258176  
2. 416765 1. 946833 1. 405047 1. 482602 2. 243035 1. 560245 2. 023101 1. 07959 0. 631086  
3. 34203 3. 708805 3. 681355 3. 576363 4. 003449 2. 671108 3. 003866 3. 454607 4. 119965  
1. 502974 1. 770538 2. 246529 2. 122534 1. 707458 2. 228171 2. 039989 2. 438358 2. 883646  
2. 071976 2. 294499 1. 7916 1. 842981 2. 025572 1. 882669 1. 96261 1. 597637 1. 896558  
1. 030264 1. 360003 1. 718165 1. 33844 1. 2354 1. 226327 2. 319738 1. 23268 1. 450591  
1. 997601 3. 005456 5. 409292 6. 367531 4. 958332 5. 834661 2. 467272 1. 676823 1. 636261  
0. 717174 1. 688557 1. 343455 1. 791748 1. 072221 2. 199261 1. 147006 1. 856609 0. 997098  
2. 58424 2. 429638 2. 287165 2. 677869 2. 244554 1. 681501 2. 867233 1. 748064 3. 020657  
2. 206544 2. 143655 1. 418294 1. 977474 2. 626258 1. 441084 1. 127824 1. 110894 1. 446547  
1. 91678 1. 002745 1. 467796 1. 752333 1. 687804 1. 965035 1. 319157 2. 15398 1. 554162  
1. 236281 1. 538014 1. 119481 1. 558675 2. 000625 1. 420512 1. 018297 1. 395972 0. 821431  
3. 389472 2. 221383 2. 882499 1. 750523 3. 545954 1. 525369 2. 585571 3. 856217 2. 202267

1.018009 1.089678 0.883935 0.969655 0.689814 0.909526 0.775885 0.888865 0.95607  
1.048145 0.90747 0.649187 1.441227 1.270362 0.837577 0.661303 0.991249 0.993993  
1.012408 1.398712 0.421935 0.521597 0.656045 1.173075 0.672567 1.589991 0.902637  
1.595406 1.482558 0.875939 1.166445 0.592448 1.392845 0.485189 2.357493 1.597014  
0.857111 2.322302 1.889334 1.916424 0.987895 1.692998 1.336004 1.010823 1.720318  
2.308911 2.608005 4.206618 1.334361 2.618395 2.474324 4.678827 2.290945 3.994871  
0.924905 0.654329 1.564679 1.999984 1.722566 1.564896 1.828198 1.718442 1.81685  
1.027461 1.243166 1.27401 1.486127 1.002406 1.319009 1.095906 2.760865 0.908126  
2.916071 2.665871 1.99801 1.878089 2.640456 2.412061 3.673407 2.195931 1.732563  
4.64319 4.979646 5.39996 3.928466 4.977918 4.575247 4.550102 5.22158 5.293598  
2.510677 1.248918 1.334679 1.431375 1.011012 1.096591 1.360373 2.72696 1.159643  
3.080301 2.165432 3.556312 2.156615 2.890743 3.26014 2.928182 3.500129 2.25457  
3.085057 4.96314 6.968439 6.639336 8.229417 3.881976 5.140023 3.593686 2.506498  
0.824523 0.848572 2.417229 1.354751 1.113815 1.155059 0.887354 0.879178 0.842635  
0.810929 0.877855 0.735485 1.106155 0.874576 1.065565 0.726858 1.462387 0.889766  
1.468799 1.528989 1.523346 1.688332 2.063587 1.446093 1.840459 1.614678 1.720763  
1.656885 2.074896 1.963587 2.976841 2.069635 1.88028 1.541495 1.750245 1.944845  
1.470793 3.009157 2.454884 2.105124 1.575337 2.711847 1.388903 2.320358 1.557678  
2.99738 2.266097 2.894292 2.778255 1.77529 1.8105 1.792789 1.529968 2.048024  
0.997343 1.426321 1.116976 1.947963 1.444782 0.998227 1.37323 1.259917 1.171224  
0.85053 1.046726 1.100208 2.147806 0.748497 1.0101 0.674852 1.697763 1.746889  
1.170286 1.691039 1.430026 1.720767 1.438365 1.870121 1.303588 1.700532 1.126117  
3.313156 1.623599 1.373557 1.740111 2.701343 1.201162 1.282382 0.950242 0.909005  
6.24988 3.531265 5.87524 5.176951 2.767805 5.524499 7.335229 5.275924 4.18215  
3.555194 2.896711 2.712353 1.843314 2.982311 3.308239 2.659091 2.716522 2.765538  
2.908302 2.511525 2.300192 2.275687 2.031616 2.922997 2.909833 2.919368 3.835576  
3.56538 2.740737 2.419498 2.74026 3.139741 2.047374 3.108472 1.990676 1.724458  
3.819093 5.331265 3.862744 2.213284 3.26825 1.315884 4.108066 1.244571 1.998796  
1.51731 2.426981 1.523829 2.117849 1.456294 1.647901 1.769396 1.909137 1.831378  
0.915211 1.322534 0.767242 1.082626 0.711581 0.65409 0.953858 0.811748 0.722786  
0.844388 1.22372 0.79034 2.261375 0.781054 0.736052 1.062006 1.29799 1.31282  
3.005085 4.500193 3.814503 1.739791 3.634378 2.059638 1.666017 2.411514 1.727027  
2.585235 2.596488 2.066015 2.319055 2.977138 3.115204 2.751182 2.541973 1.752905  
1.377751 1.124487 1.128202 1.076971 0.997316 1.050472 1.243562 1.046082 0.944929  
3.341338 4.053105 4.459525 3.697726 4.547027 4.636623 4.663853 3.423629 4.687284  
1.390929 1.383436 1.76768 1.56435 2.798449 2.767601 3.668673 2.002908 1.762537  
6.135301 6.443597 6.869921 1.250665 1.441838 5.726465 5.059118 4.68785 2.656862  
4.521016 4.072359 4.158992 1.971558 6.314813 2.276115 2.530044 6.053518 5.155018  
0.661628 1.19859 2.007638 1.251591 0.930253 1.275007 1.382468 1.028204 0.671555  
0.968137 1.462502 0.813966 1.01371 0.918593 0.902294 0.881331 1.209055 0.888423  
2.759408 3.43448 3.059289 2.948785 4.156142 3.246801 3.127541 3.566796 2.141661  
0.590525 0.538181 0.590525 1.729345 0.712102 0.862483 0.862103 0.862484 0.770469  
3.453886 2.205664 3.659249 2.281586 4.157378 3.696258 3.788315 3.397794 3.863176  
1.210666 0.750546 0.696211 0.724351 0.482962 0.856616 0.907552 0.531692 2.432663  
0.804877 0.502921 0.730813 0.671709 0.937975 0.97939 0.769919 0.780186 0.562415  
4.321321 3.342867 4.565724 3.957845 4.297059 3.172752 3.285332 4.058761 4.559313  
1.007633 4.519944 1.170044 2.047516 0.92334 0.686972 1.670109 1.166418 1.672987  
3.59278 3.659176 3.108222 2.368085 3.236879 3.495126 3.701095 3.531351 2.074328  
4.042324 3.661418 3.709915 3.452332 3.706867 4.081263 3.554226 3.965459 4.474905  
1.92426 2.628744 1.466665 3.070991 2.524955 1.593363 1.502999 1.816384 1.45078  
1.365602 2.937389 2.791227 5.703942 3.478525 3.448789 2.688204 2.381888 2.821699

2.682485 2.798807 2.718811 3.652738 2.261186 2.436329 2.830293 1.094713 3.084471  
2.792873 2.931354 2.431519 2.205963 3.294235 2.40588 2.764165 2.991428 2.129576  
0.617446 0.792159 0.799379 1.653735 1.581695 0.661557 0.886519 1.491058 0.927115  
1.244043 0.910718 0.681031 2.074078 0.922781 0.922185 1.369806 0.908343 1.50139  
2.653488 6.481436 3.27084 3.570671 1.839664 2.093131 3.287117 2.982796 2.834569  
1.332116 1.297059 0.987877 1.568516 1.231371 1.320567 1.298744 1.015106 1.218071  
1.757592 2.560041 1.538539 1.482232 1.94671 2.308411 2.360605 3.060982 2.516464  
2.166805 1.647192 1.698892 1.430263 0.413031 1.266851 1.032437 1.545425 0.881177  
1.157731 1.456196 2.503808 1.026814 0.7208 1.016358 0.597691 0.861806 0.91692  
0.920167 1.452621 1.406713 0.789547 0.966074 0.900191 0.975508 0.783014 0.622697  
1.249983 1.348371 2.628534 1.128842 1.849592 2.544704 0.834157 1.049294 1.32131  
1.104123 1.467134 0.948231 1.788216 0.819436 1.825119 1.227586 1.537661 1.074983  
1.268536 1.321386 1.178985 2.00169 2.482535 1.498535 1.286892 1.312234 1.669353  
1.173077 1.510034 3.063291 3.273444 3.050406 3.611408 2.274686 4.06817 1.938441  
4.089374 2.7896 3.643266 4.006729 1.94372 3.762471 2.200257 3.893366 3.132705  
1.075462 1.239502 3.52531 1.168909 0.80764 1.338268 0.730072 1.641754 0.714441  
0.41746 0.772366 0.560929 0.906521 1.288271 1.066908 3.293951 1.761122 0.9291  
3.2093 2.144911 3.86952 1.62687 3.361275 1.682161 1.787439 2.514018 2.962214  
3.711908 3.150214 3.13053 2.207371 3.651583 3.786552 4.790004 3.056742 2.660857  
1.516266 1.510906 1.692326 3.021949 1.634294 3.185221 2.446416 2.280837 1.561028  
1.380314 0.924633 0.812877 1.258643 1.078044 1.072685 1.088295 1.941462 0.967486  
2.787149 1.884735 3.566954 3.276757 2.698392 2.865775 2.775186 2.48218 3.69438  
3.636877 3.477263 3.65969 2.373665 3.958844 3.209379 2.670416 3.726026 2.734711  
1.387436 1.655245 1.225981 2.117908 1.074736 1.52369 2.976346 2.169646 1.303616  
0.985592 1.072087 0.971358 1.478855 0.781322 1.171279 1.073584 1.472512 1.067338  
1.10842 1.035334 0.699963 2.026659 1.68803 1.177773 0.771133 2.463544 1.292846  
1.039897 1.205196 0.833961 1.260691 2.026321 1.198593 1.330746 1.015676 1.409154  
1.733278 3.219251 2.504713 4.020377 2.526454 1.889483 2.382263 3.54365 1.806164  
2.028201 3.594319 2.330669 2.920568 3.777508 4.057649 1.133721 3.61822 2.622418  
1.270331 1.247463 1.046361 1.575655 1.401525 1.113525 1.860303 1.65334 1.189327  
3.547098 5.282392 2.927614 2.449027 3.38819 2.710118 1.830947 3.076968 2.202247  
1.136406 0.87955 0.776689 0.844961 0.56605 0.933078 0.728258 1.124204 1.189194  
4.951481 2.045838 1.611643 1.957227 1.307722 1.650072 2.175866 2.609333 1.829224  
1.703669 1.582029 2.309031 1.883601 2.318323 2.867116 1.980942 2.057365 1.499143  
6.143744 6.306574 5.927859 6.474937 6.768117 5.606747 6.519464 6.006078 5.960245  
1.101085 0.87686 1.047248 0.777075 1.099116 1.098565 0.7074 1.088989 1.029414  
5.781145 5.031603 4.765809 6.058381 5.892224 6.655012 5.521869 5.586618 5.334442  
4.420586 3.367679 4.59801 4.366852 4.048425 4.844422 5.455313 5.16764 5.060583  
3.334719 3.342132 4.042543 3.286848 3.26446 3.138211 2.956702 3.774102 3.043918  
3.616875 4.172312 3.031632 1.780198 3.84217 2.108531 2.494481 2.666532 2.352806  
1.126958 1.165253 1.173523 2.991085 1.331947 1.194075 1.107155 1.442195 1.194783  
2.581342 5.16586 3.624169 2.844334 3.151668 2.713737 1.335528 1.346499 2.436288  
3.5064 2.389521 2.422897 2.427552 2.269279 1.980962 1.723802 2.144076 2.723593  
1.491403 2.084215 1.379431 1.821884 2.619979 1.757878 1.94578 2.186126 1.612794  
1.679675 0.845358 0.727309 1.136075 0.918088 1.579788 0.933963 1.774516 1.280773  
1.498325 2.379141 1.961882 1.692528 3.809675 1.782003 2.011562 2.588141 2.013818  
3.347108 2.627546 2.470246 3.739806 3.678484 4.574972 4.078599 3.830861 2.599811  
1.644355 1.441675 0.891199 2.733676 1.075187 1.037807 0.944853 1.513604 1.226556  
4.389654 0.505042 2.31009 0.59563 1.412355 0.748703 2.01727 2.697485 0.770762  
2.796046 3.245161 3.613206 3.141727 3.962 3.062121 3.512527 2.284681 3.857085  
1.807529 1.503873 1.648878 1.728564 1.287007 2.411003 1.177703 1.258902 1.164068

6.888826 7.077579 7.364946 7.028374 6.898972 6.910755 7.335668 6.950835 7.477225  
2.091999 0.957663 1.198437 0.988709 0.900924 1.203803 0.998587 1.341952 1.093005  
1.434952 2.926768 1.220828 1.046482 0.915134 1.594176 1.156822 2.522501 1.836308  
4.00737 5.060361 4.647446 3.106002 5.449909 1.999606 4.446819 3.90792 2.734134  
1.83817 3.550941 1.777926 3.025474 1.121055 2.022979 1.408772 1.96826 2.365552  
1.89403 1.864558 2.003093 1.819571 1.521521 1.78934 2.561224 1.562156 1.467678  
4.50411 3.032784 3.730532 4.642098 4.11573 3.736249 4.002757 4.148255 4.17984  
3.670157 3.205849 2.4853 4.278711 3.714428 3.008596 5.123637 4.434763 4.816558  
5.787027 5.703023 5.756547 5.354468 5.914441 5.320545 5.971163 6.104794 5.846917  
2.215216 2.539196 2.119354 2.759317 3.199603 3.173216 2.286367 1.618058 2.465076  
2.463883 3.771747 2.8523 3.884914 2.012636 1.715273 2.059941 2.241585 2.35301  
3.675766 3.650334 3.516824 3.824798 3.429111 4.507542 4.09894 3.25147 3.899557  
5.891796 6.778856 6.154929 6.145707 6.895427 6.076585 6.009507 5.993692 6.143259  
6.780156 6.079385 5.134503 5.539269 4.574003 9.399409 6.956984 5.403484 5.905928  
2.301713 1.49915 1.378296 1.712659 1.434634 1.897813 1.447635 2.634273 1.171467  
1.428562 1.065084 1.268305 1.277931 1.621535 1.577351 1.720744 1.392763 1.193426  
4.015349 5.707776 4.560633 4.144319 4.713235 2.092092 1.726424 3.009698 1.536004  
1.561197 1.804474 0.89093 1.392442 1.0846 1.347459 1.242545 1.104721 1.064583  
3.592082 4.218599 4.575891 3.714263 5.699127 1.909546 2.146787 2.092337 1.680561  
0.915196 0.898516 0.616555 1.202478 1.324555 0.883358 0.797782 0.813218 1.384659  
1.257112 1.415917 1.182219 1.524716 1.096727 1.258172 1.856199 1.342584 1.198486  
3.647667 2.698698 4.613796 2.954877 4.170485 2.956229 3.27025 3.57611 3.063671  
4.384097 5.346618 4.72892 4.818325 5.507999 2.412721 3.866024 4.311944 4.501905  
1.592273 3.029387 2.996535 1.627003 3.28095 2.259926 3.53529 3.956249 2.628116  
0.792942 0.97711 0.877563 0.769233 0.708369 1.967213 1.088069 0.748108 0.774055  
1.321503 1.258955 1.078405 1.292112 0.979731 1.485538 1.342679 0.972121 1.112373  
0.998333 0.839038 0.711874 1.354134 1.704861 1.97638 0.977675 1.520764 0.629124  
1.276641 1.162099 0.730624 1.454737 1.439067 0.966807 1.189577 1.32629 1.085614  
1.429044 1.810749 0.948228 0.812879 1.007808 1.129739 0.941285 0.912619 1.337565  
0.951479 1.070655 4.697489 0.993558 0.824604 1.195122 2.131308 2.091942 0.920873  
1.432091 1.400145 1.35444 0.704087 0.766789 1.348978 1.14943 1.323113 1.124728  
2.329298 2.436711 1.263023 2.118991 1.19637 1.570157 1.48958 2.122113 1.715517  
0.811036 0.955323 0.878683 1.381999 0.609952 0.877027 0.802121 0.925617 0.889547  
6.239652 6.375398 3.937126 4.812268 5.370175 3.533846 5.348971 5.873521 5.301454  
1.019941 0.869345 1.450521 1.993917 1.043544 1.336164 1.045727 1.221291 1.048434  
1.371403 1.179899 1.615384 1.73972 1.245913 1.731295 1.293371 1.397857 1.469302  
4.320771 3.971358 4.577907 4.398967 4.338656 3.925093 4.471181 4.12488 3.905022  
0.930072 0.803355 1.124495 1.050558 1.368666 1.0194 1.005532 2.557486 1.042596  
0.947414 1.017653 0.610687 1.051162 1.165758 0.810626 1.107243 2.349116 0.965893  
1.252733 1.046426 1.053683 1.33833 1.12337 1.072708 1.47243 0.844941 0.874598  
0.625756 0.914109 0.886732 1.478321 0.810246 0.654394 1.165657 1.742427 0.768058  
5.913548 6.038076 6.32862 5.284227 5.959801 6.290163 5.558953 6.187128 4.569639  
1.008223 1.145196 0.744628 1.0304 0.94071 1.535036 1.058913 0.891794 0.815287  
1.367935 2.475767 1.755521 1.256048 1.482488 1.695149 1.476306 1.246895 1.905921  
1.053936 1.048648 0.817294 1.57009 0.83662 1.189348 1.14396 1.405496 0.947208  
1.657658 1.488438 1.501023 1.501023 1.626855 1.021731 1.596418 1.640936 1.896579  
3.92575 2.395282 3.144768 1.82909 3.212573 2.374671 2.32654 2.331207 2.591488  
1.218035 1.316908 0.803822 1.422098 1.607503 1.100359 0.91818 1.425159 1.185513  
1.65367 1.405469 2.141877 3.000938 1.577357 1.648488 1.879086 2.16363 2.571898  
5.463799 4.547708 7.828234 4.915792 6.580052 2.722884 3.884796 3.288205 1.923331  
1.343781 1.837423 0.993319 1.629574 3.323955 0.734755 3.597351 3.128353 1.617451

2.849215 4.647679 3.179138 3.57247 3.741014 4.0504 3.686223 3.116088 3.357622  
2.912542 4.328424 4.437356 2.188289 1.88047 1.502382 1.394163 2.489313 1.888625  
4.908336 6.201776 5.794985 5.722708 5.17313 5.452826 4.26506 2.246216 2.691043  
0.585236 0.680717 0.73702 0.432689 0.429134 0.957274 0.529399 1.111426 0.405374  
1.575014 1.829708 2.672287 4.775931 3.229397 2.350633 1.600022 3.20735 2.655843  
3.628409 3.718535 4.017682 4.504825 3.778144 4.367458 3.082214 3.036124 5.083772  
0.954102 1.118959 0.786026 0.962848 0.825815 0.9424 0.918209 1.364109 0.802745  
2.533785 2.059957 1.934713 1.877818 2.677374 2.844573 2.275002 3.020335 3.230247  
5.368637 2.873464 2.923891 2.006047 2.166755 4.725613 2.248246 2.014777 2.167718  
5.110271 1.052549 1.401675 1.993408 1.226241 0.797786 1.099038 1.685329 2.15066  
0.940826 1.177187 0.711083 1.089511 0.601104 1.060499 0.741221 1.010309 0.688557  
1.157181 2.555719 1.108988 1.214665 2.206288 2.056996 1.177516 1.17639 1.321823  
1.421524 1.205999 0.579595 1.061576 0.523568 0.811979 0.824793 0.995551 0.728912  
2.149853 1.814154 3.18703 1.706164 2.858892 1.95774 1.89094 1.765521 1.824478  
4.320263 2.09694 4.484888 3.825786 3.190644 4.156751 3.199873 3.728246 4.562156  
3.176855 3.571945 5.522384 1.936765 3.331163 2.189352 4.028059 1.587062 2.487097  
3.656238 3.878323 3.970365 4.404779 5.377139 2.073311 2.136217 2.758608 1.521642  
0.895039 1.339302 1.022067 1.602596 0.961052 1.152613 1.070142 1.334769 1.024827  
1.448147 4.477511 4.384053 3.750736 3.781787 0.764827 0.915061 0.417416 0.84406  
1.396224 0.821972 0.730956 0.821146 0.494432 1.311867 0.788132 1.015467 0.906255  
1.29468 0.561998 0.72946 0.498316 0.635868 1.232435 0.60746 2.437632 1.296471  
1.563962 2.316108 6.109137 2.473002 5.909905 1.090601 4.512892 1.722675 1.435246  
1.001606 0.951391 1.082551 1.323517 0.638276 0.91562 1.007259 0.774091 0.654508  
3.878882 2.943894 4.842872 2.936296 4.194939 2.570876 3.297429 4.373842 4.079691  
3.959747 0.685325 3.424916 3.010993 0.711506 1.358133 1.316522 0.91684 1.234465  
2.766494 2.22866 1.07434 1.377535 1.308196 1.458696 1.591774 3.028778 3.351037  
2.709448 2.700932 2.10069 1.920313 3.432157 2.864123 1.795021 1.32167 1.979947  
0.870816 1.081184 0.956179 2.155423 1.0031 1.211569 1.693758 1.386678 1.044008  
1.492913 1.381093 1.207649 1.27156 1.340962 1.899634 1.115894 1.366185 1.2456  
4.784576 4.144584 3.91302 4.596097 3.964683 4.499624 3.790935 4.311474 4.852454  
2.188185 2.311253 2.254325 1.985891 2.336932 2.472262 2.439547 2.628993 3.333784  
5.109476 4.779133 4.964689 4.90802 4.964009 4.728839 4.411127 5.003184 5.315227  
1.156585 0.864509 1.038319 0.897266 0.83326 0.914812 1.28604 2.897745 1.134215  
2.065883 2.528343 2.77911 1.709649 2.957203 1.998963 2.937138 1.949529 1.55745  
1.160324 1.558587 1.405149 1.400493 1.125118 1.096437 1.466311 0.859411 0.910481  
1.249714 1.744927 1.545448 1.983276 1.434843 2.191193 1.602111 1.272547 1.800606  
1.346825 1.281026 1.452038 2.010665 1.192473 1.561517 1.51467 2.797534 1.816637  
2.347431 2.726894 2.576501 4.581405 2.476611 2.894944 2.454586 1.690747 2.821866  
3.491469 1.330494 4.122306 4.035245 3.458655 3.07584 2.609157 2.071173 3.3842  
0.68339 0.78331 0.756583 1.064729 0.609349 1.231139 0.789627 1.025278 0.731955  
2.433166 1.566467 1.362681 2.177523 1.355666 1.246817 1.591861 1.490959 2.499314  
2.335212 2.610519 1.306861 4.267191 3.951992 0.896999 0.88316 1.624448 1.126553  
7.409567 6.822576 6.907594 7.15371 6.08177 7.899352 7.224933 7.529148 7.615229  
1.375684 1.678825 1.042474 1.35784 0.877515 1.064926 0.908361 0.862461 0.876455  
2.801734 3.065956 4.514255 3.452658 3.429295 3.479688 4.456442 2.612396 3.520671  
0.748481 2.239598 3.103983 1.485607 1.656635 0.849028 1.282805 2.679865 4.40586  
1.217877 0.999769 1.33143 1.187386 1.572719 1.020694 1.483109 1.348639 1.283179  
3.09544 1.837395 2.826098 2.21514 2.322611 1.180792 1.35553 1.713228 1.107153  
0.974411 0.967977 0.656235 1.191847 0.561165 1.591101 0.976117 1.42781 0.873733  
1.196305 1.262129 1.757597 2.878856 2.34211 1.690853 0.922463 2.121356 1.115198  
1.748523 1.492025 1.01695 0.875084 0.852254 1.405031 1.062844 1.76237 1.178039

3.466833 3.136251 3.495469 2.87543 3.031713 2.654091 3.141164 3.61925 2.756097  
1.273629 1.77655 2.215883 1.981159 2.422577 2.982767 2.02148 2.224717 1.020165  
3.732866 4.220935 4.020478 2.936853 4.296231 3.292158 3.965173 5.406037 4.711317  
5.286532 3.194802 2.219308 2.88274 2.448509 2.289153 2.186199 3.856911 3.87325  
2.341994 2.376968 2.936726 2.624436 1.925992 2.844947 3.074994 1.798539 2.152507  
1.652021 0.928715 0.66478 1.141377 2.925169 0.482556 0.48707 0.729416 0.665466  
1.288048 1.536116 2.217604 1.903914 1.638298 2.022885 1.713186 1.693196 2.03837  
2.056479 1.98015 1.921306 1.779643 1.62145 2.165197 1.361052 1.508114 2.712024  
1.429583 1.38588 1.060846 1.24714 1.459802 1.326841 1.082143 1.752659 1.593444  
2.568033 1.273467 2.476213 2.781999 2.142278 1.500379 2.456063 1.966455 3.599292  
1.513862 1.463671 1.743072 1.078694 2.683817 1.646862 1.417289 2.407065 1.884803  
1.300669 1.204641 0.874851 1.413526 1.018316 1.171272 0.967726 1.69192 1.001657  
2.899527 1.95694 1.611722 4.07972 1.646561 2.22392 1.613318 1.455451 1.755856  
2.044455 3.963571 3.239114 2.363875 2.962634 2.451814 2.416675 2.39664 1.931827  
1.301395 1.674788 1.768464 1.597533 1.833823 1.359355 1.454861 1.696183 1.923038  
1.520038 1.704302 1.839643 2.146882 1.804414 1.88424 1.686373 1.688228 1.904359  
1.986214 0.924202 0.847151 1.558578 1.165526 1.647954 1.997445 1.908728 1.267036  
2.88658 3.269937 3.624689 2.630386 2.103987 2.206054 2.867716 2.620947 3.504651  
2.892018 3.948336 3.934353 3.085354 2.720626 3.128841 3.856918 3.101344 3.712251  
1.529436 1.574429 1.605971 1.327357 2.042421 1.965631 1.465789 1.724133 1.304771  
3.045945 3.411215 3.143104 3.340054 4.0687 3.23373 3.255508 3.628772 3.522184  
1.164969 1.340707 1.394047 1.30119 1.239379 1.514061 1.125564 1.993556 1.23245  
5.470178 2.861622 4.255803 4.199671 5.085648 4.164911 2.848758 4.008114 2.747577  
5.198795 4.831361 6.159172 6.685327 6.911197 6.464454 6.729264 7.027776 6.940909  
2.480637 2.444534 2.929907 3.636319 4.009399 3.496287 3.234677 3.074111 3.272089  
1.440219 2.197934 1.280452 1.773389 1.668148 1.860618 2.30294 2.123977 2.528684  
2.802007 2.553919 2.531017 2.821673 2.888127 4.167829 2.817761 2.234174 4.24048  
1.84804 2.150859 1.90111 2.343311 1.793947 3.030388 2.049235 1.764602 2.615002  
3.000469 1.705724 2.729717 2.09613 3.320455 2.162005 2.818819 2.736441 2.579098  
1.237877 1.02418 0.822817 1.679196 0.851831 1.124953 2.099553 1.575596 0.74305  
2.560997 1.024619 1.070735 2.040083 1.538629 1.887707 3.00976 1.666236 0.91641  
0.65039 1.111702 0.354325 0.564356 0.523704 0.874495 0.57123 0.91211 1.370567  
3.175138 4.863154 5.007739 4.628547 5.446508 2.886732 3.848844 3.765809 4.393428  
1.48928 1.372946 1.789482 1.586912 0.937415 1.307759 1.105164 1.091437 1.013292  
2.096852 2.566116 2.501761 2.013479 1.665245 2.770669 2.225774 2.161285 1.952851  
4.810287 5.945515 5.000066 4.330273 5.395717 6.640127 4.616429 5.40565 4.728886  
1.648052 1.125519 1.857368 2.009393 1.852786 1.371704 1.747062 2.225928 0.950781  
2.042443 2.23926 2.687484 1.252535 1.898226 2.694695 1.191179 1.969516 1.299793  
2.925443 3.02931 2.570801 2.107317 2.75825 2.20035 2.657412 2.955249 2.49749  
1.823703 2.2987 1.389519 2.155614 3.358757 2.406585 2.021232 2.647485 2.419587  
7.293798 7.846506 7.875765 7.616496 7.683253 7.526974 7.90284 7.479493 7.620006  
2.957434 3.111592 3.95781 3.830071 3.685583 2.236634 2.615567 2.226865 2.173025  
7.146678 5.608138 5.132183 5.205144 4.846951 7.510545 6.126929 4.630622 3.868117  
1.809726 4.424765 1.146653 2.787344 1.472438 1.532336 1.124846 1.368647 0.649846  
1.562457 1.640846 1.194468 0.696456 1.292584 1.481537 1.384326 0.965133 0.906993  
1.120109 1.161021 1.060331 1.399916 1.050502 0.962508 0.989175 1.044641 0.695096  
6.762811 6.742963 7.394252 7.54504 8.058595 4.499334 7.202368 7.643326 7.386645  
1.601281 2.383403 1.860259 1.516363 1.336127 1.754379 1.505348 2.367757 1.541246  
2.685373 2.263485 1.319874 1.819315 1.435262 1.202489 1.23592 1.827183 1.315501  
3.605265 2.720391 3.231184 3.286346 3.354309 2.996682 3.530003 3.020274 3.770661  
6.982623 5.716576 3.786177 4.212431 4.257214 4.15498 3.739638 4.094853 4.460148



4. 811826 3. 303561 3. 956613 3. 95242 2. 183435 1. 609229 3. 139855 3. 569841 3. 88538  
2. 251752 2. 954772 1. 297583 1. 663002 1. 053833 1. 956879 1. 333934 1. 379789 1. 393274  
3. 992819 4. 099711 2. 90823 3. 796588 4. 243448 3. 441746 4. 589822 4. 80862 4. 198161  
1. 449122 2. 331061 2. 037915 2. 100825 3. 924697 1. 868243 1. 448854 1. 263868 1. 24809  
3. 485352 3. 581016 4. 778179 3. 937093 4. 794091 2. 416979 3. 742052 2. 403748 4. 053196  
1. 797343 1. 454489 1. 480955 1. 790988 1. 689914 1. 669084 1. 188585 2. 106957 1. 293594  
2. 325763 1. 404603 2. 867549 3. 160268 1. 574066 1. 585625 1. 482139 1. 822828 2. 511128  
1. 505315 2. 114957 1. 365071 2. 200128 1. 923417 1. 734207 1. 884274 2. 274233 2. 677179  
2. 232476 1. 406177 0. 766576 2. 040261 0. 86834 1. 400579 1. 681863 1. 188383 2. 301045  
4. 017336 2. 927913 2. 831031 2. 576638 2. 463232 2. 024631 2. 286535 1. 99256 2. 468871  
1. 385343 1. 419026 1. 02018 1. 286696 1. 722872 1. 722189 1. 442649 1. 500331 1. 159197  
1. 894541 1. 261651 1. 904835 1. 800528 2. 403378 1. 369893 1. 789233 1. 823933 1. 35991  
2. 970364 3. 759319 1. 996774 1. 629466 2. 816628 1. 204596 2. 175681 2. 132424 2. 295435  
5. 652565 4. 835677 5. 696773 3. 538912 5. 014568 4. 603459 4. 871312 4. 762115 4. 847268  
1. 549981 1. 484482 1. 289803 1. 722158 0. 971305 1. 385326 1. 250162 1. 601563 1. 685248  
2. 643747 2. 476413 3. 211917 1. 853093 1. 851662 1. 113525 1. 497322 1. 187904 1. 224933  
4. 020559 1. 574608 2. 510487 1. 966897 2. 620532 1. 983945 1. 375821 2. 260896 2. 691086  
2. 303099 2. 537633 2. 340407 2. 778641 2. 536443 2. 061205 2. 114779 3. 294724 2. 566102  
3. 614591 4. 3754 5. 233181 5. 4145 4. 444879 5. 129386 3. 936671 4. 529341 4. 799199  
3. 925494 3. 627142 4. 091495 2. 902905 3. 28132 4. 878035 1. 828244 2. 114628 2. 677075  
1. 138469 2. 735003 0. 852757 3. 485932 2. 354022 1. 302296 1. 203112 1. 135393 1. 346573  
5. 683471 4. 878293 4. 147696 3. 096546 4. 509797 3. 804354 3. 929997 4. 42696 4. 75777  
1. 081529 2. 60584 2. 731095 1. 500371 3. 103409 1. 177681 1. 797138 2. 503923 2. 336162  
1. 365377 2. 010948 0. 880077 1. 2948 1. 158801 1. 600803 1. 611 1. 351119 0. 877141  
3. 299688 2. 471486 2. 132755 2. 330067 2. 650576 2. 04075 2. 120372 2. 8099 2. 573303  
3. 481658 4. 587362 4. 25435 3. 469225 3. 609524 3. 666704 4. 086869 3. 834985 4. 321875  
2. 973905 0. 651299 1. 110652 1. 22901 0. 866 1. 675103 0. 915785 1. 622868 0. 846555  
3. 764711 1. 831428 1. 687462 2. 46513 2. 455363 1. 8888 1. 814397 1. 560949 1. 366223  
0. 508242 2. 129571 1. 539183 1. 028438 0. 710414 0. 958273 2. 418922 1. 032146 2. 22268  
2. 411336 2. 642332 3. 011902 4. 016421 2. 350479 2. 900207 3. 337563 3. 535873 2. 194948  
6. 198401 5. 946236 5. 388853 6. 693176 5. 712946 5. 62384 6. 223824 6. 791201 6. 927951  
0. 933613 1. 144167 0. 63854 1. 194429 0. 795386 1. 038644 0. 843845 0. 662037 0. 999306  
2. 134279 1. 682939 1. 656108 2. 679329 1. 973234 2. 688245 3. 221886 1. 94028 2. 260117  
1. 144016 1. 674149 0. 997002 1. 365445 1. 380525 1. 384422 1. 467277 1. 59858 1. 435077  
3. 427199 3. 266597 2. 890637 2. 994015 2. 455511 1. 921045 2. 332254 1. 83105 2. 560853  
2. 963304 1. 513282 1. 628805 1. 905356 1. 252498 1. 646281 1. 608326 1. 117532 2. 329032  
1. 072964 0. 945487 0. 741285 1. 675139 1. 053464 1. 207981 0. 65981 1. 068896 1. 459011  
2. 552983 2. 830724 1. 899897 1. 430454 1. 484184 2. 305984 1. 395987 1. 931269 0. 939144  
1. 456559 1. 838774 1. 80316 1. 762643 1. 49109 1. 793941 2. 132947 1. 698094 1. 731756  
1. 270297 1. 16459 1. 04705 1. 460714 1. 354972 1. 650644 1. 186678 1. 423081 0. 857485  
1. 424686 1. 085951 0. 932862 1. 300342 1. 276848 1. 646447 1. 278818 0. 998653 1. 444681  
1. 025638 1. 675999 1. 978806 1. 554146 1. 73939 2. 052041 1. 31032 1. 343828 2. 368542  
1. 518364 1. 94398 2. 102014 2. 039403 1. 65063 1. 637499 1. 587842 1. 428781 1. 990166  
5. 872918 6. 30674 5. 996883 2. 796199 5. 186999 5. 300057 4. 481665 6. 686796 5. 841111  
3. 510847 2. 772392 3. 345931 2. 173797 3. 5635 2. 443577 3. 481429 3. 444246 2. 887945  
2. 79418 3. 825916 1. 515166 2. 030466 1. 960864 2. 242395 1. 888985 1. 992896 1. 630937  
2. 352362 3. 619242 2. 422721 2. 792193 3. 948069 2. 547859 2. 960285 2. 230832 3. 038221  
6. 878418 7. 173002 7. 688728 6. 966271 7. 099756 7. 351178 6. 994798 7. 403084 6. 684906  
1. 452044 0. 87869 1. 730812 1. 132421 1. 139952 2. 303954 1. 487445 1. 189418 1. 452807  
1. 351437 0. 90595 1. 29212 1. 819426 0. 953604 1. 390371 1. 555017 1. 363032 0. 919438  
1. 572623 1. 723926 1. 101166 1. 577016 1. 941542 1. 596483 1. 089274 1. 180195 2. 219418

8. 287689 8. 735881 8. 888625 8. 646138 8. 930279 5. 913408 9. 220752 8. 818542 8. 743412  
1. 236068 1. 1855 1. 349437 1. 817609 1. 430734 1. 72704 1. 562186 1. 465076 1. 543231  
2. 128677 2. 359052 2. 083682 2. 711303 2. 432979 2. 106193 2. 273508 3. 097528 1. 648191  
2. 348694 2. 719643 1. 801281 1. 689235 1. 915488 1. 701168 1. 74163 1. 558701 1. 786792  
3. 44726 1. 786008 4. 242949 3. 736687 4. 896616 5. 501656 2. 840711 3. 715464 3. 202739  
1. 759105 1. 946607 2. 050976 2. 331208 2. 478548 2. 578474 1. 71848 2. 344736 1. 739563  
2. 224705 1. 817953 1. 289945 1. 817953 1. 910107 1. 728005 1. 950494 1. 462758 1. 748324  
2. 019621 1. 403048 2. 333445 1. 630603 1. 551821 2. 092118 1. 392798 2. 166623 1. 88693  
2. 574679 1. 361184 1. 801435 1. 953583 2. 191028 1. 204332 2. 43357 1. 63436 2. 813005  
3. 845542 3. 272886 4. 161513 3. 360935 3. 213887 2. 90362 3. 604049 3. 480849 3. 012209  
1. 014158 1. 623869 1. 698808 1. 538521 0. 791591 0. 974603 1. 1862 1. 011788 1. 281622  
3. 932444 3. 380967 2. 883266 2. 486106 3. 989285 3. 748568 2. 996286 4. 173629 2. 961206  
3. 165108 4. 290565 3. 814934 4. 515012 2. 059361 4. 808738 3. 322044 3. 451841 3. 561599  
2. 025416 1. 712909 2. 199966 3. 04419 2. 023385 4. 518989 2. 392827 1. 625678 2. 249815  
3. 735202 3. 513997 2. 81028 4. 106642 3. 023009 3. 891436 2. 98625 3. 385544 4. 063756  
1. 318543 1. 903537 0. 990976 3. 086939 1. 709153 0. 783726 1. 336748 1. 674478 2. 143968  
1. 986521 1. 709052 3. 34323 3. 496281 1. 046612 1. 300104 1. 004377 2. 494981 2. 51843  
0. 963139 0. 928075 3. 729466 1. 135887 1. 849254 1. 607077 1. 277909 1. 161548 1. 594657  
1. 181842 1. 68501 1. 77535 1. 601794 1. 856123 1. 610196 1. 250071 1. 481082 1. 547009  
7. 025874 5. 597782 5. 545053 5. 060004 4. 97501 1. 753067 6. 261102 2. 422983 1. 580745  
1. 172518 1. 011264 1. 079133 1. 287806 1. 270896 0. 913077 1. 411119 2. 090636 1. 096481  
2. 071842 1. 471944 2. 307376 2. 088061 0. 925655 1. 736625 1. 25321 1. 481776 2. 135048  
0. 876337 1. 727194 1. 188346 1. 806484 1. 092222 0. 957786 1. 421856 1. 481436 1. 244391  
1. 472476 1. 906453 1. 986917 1. 414133 1. 349165 1. 653746 1. 090281 1. 798171 2. 055875  
3. 192492 3. 880048 1. 530269 4. 365471 3. 115487 3. 615192 1. 997903 2. 060196 2. 053618  
1. 925714 2. 17748 1. 172478 3. 808297 2. 092997 2. 307169 1. 549838 2. 0929 2. 509975  
2. 056566 1. 203196 1. 339531 1. 580974 1. 147801 1. 587983 1. 272712 1. 498594 1. 194808  
2. 858717 3. 47272 3. 611835 3. 779514 3. 270601 3. 511548 5. 320174 4. 874296 3. 589821  
1. 550901 1. 718322 1. 662695 1. 92742 1. 519141 1. 078351 1. 567125 1. 970824 1. 651677  
3. 045254 2. 84738 1. 843972 3. 557541 2. 719093 2. 676716 4. 026195 3. 490336 3. 246759  
1. 724545 2. 405018 2. 826466 2. 212861 2. 576509 2. 459202 3. 45384 2. 05567 2. 910326  
2. 149443 1. 566054 1. 729133 2. 350834 2. 528112 1. 062361 1. 459196 1. 679704 2. 055608  
5. 027228 5. 825384 5. 48668 4. 442381 4. 356636 5. 881341 5. 194197 5. 334809 4. 339837  
1. 752144 1. 261206 2. 280774 1. 660194 1. 752489 1. 660562 2. 144925 1. 407699 1. 516146  
2. 202588 2. 181388 1. 706401 3. 452294 1. 218931 1. 320994 1. 23355 1. 407304 2. 388442  
3. 131835 3. 799299 4. 614281 4. 922008 3. 049198 2. 355738 6. 647862 2. 593242 2. 210362  
3. 51956 4. 467694 1. 813062 3. 466023 3. 370727 4. 522825 2. 969818 3. 260013 4. 296238  
0. 77601 1. 184656 1. 240846 1. 523847 0. 998139 0. 966388 1. 090126 1. 808126 1. 268126  
3. 233658 4. 160416 3. 47462 3. 162162 3. 661373 2. 453753 2. 250915 4. 738259 2. 584821  
3. 164065 3. 561183 3. 203926 2. 679601 2. 165234 3. 03627 2. 675456 2. 578269 2. 880891  
1. 957656 1. 52253 2. 258495 1. 07086 4. 388727 2. 211749 1. 149159 1. 375042 1. 951358  
1. 763406 1. 219325 1. 891933 2. 201965 2. 067508 1. 772341 1. 33719 1. 531785 2. 182155  
1. 415496 1. 526307 3. 645968 1. 972666 1. 417691 1. 565652 1. 015535 1. 585213 1. 023364  
2. 389592 3. 13073 1. 593003 2. 495436 2. 264202 3. 290462 1. 925989 1. 9187 2. 335888  
0. 67697 1. 096908 0. 77229 1. 602897 0. 904901 0. 849416 0. 605316 0. 83949 2. 873069  
2. 687394 2. 847173 3. 319235 2. 856278 2. 784293 3. 036326 2. 217557 1. 852173 2. 778437  
3. 80744 2. 228246 3. 444504 1. 52659 2. 12634 2. 253031 2. 573867 1. 371144 1. 71362  
4. 026019 2. 296023 2. 608962 2. 896054 1. 999863 4. 171396 1. 787727 2. 648844 1. 162073  
5. 107896 4. 844758 2. 126874 3. 390347 4. 26474 3. 054253 3. 522795 3. 003434 4. 278375  
0. 845718 0. 851333 1. 04618 1. 466252 1. 360116 0. 825591 0. 937872 1. 756052 0. 942432  
2. 376263 2. 040806 2. 378561 2. 311767 2. 503483 3. 047477 1. 87864 2. 86718 2. 021044

3. 231683 2. 52332 1. 319864 1. 331347 3. 000961 1. 38444 1. 244557 1. 395009 3. 835882  
2. 06669 1. 887799 2. 050472 2. 053991 2. 127052 2. 023882 1. 650714 2. 20297 1. 904986  
4. 412292 4. 421572 3. 804294 4. 891551 3. 87478 3. 999112 4. 667274 5. 902236 5. 939313  
2. 136767 2. 381561 2. 242081 2. 354214 1. 963096 3. 009607 1. 748418 1. 914207 2. 542387  
1. 608235 0. 719439 0. 916815 1. 572345 0. 893305 1. 8859 1. 076783 1. 506398 1. 130563  
3. 378505 2. 626084 1. 967454 1. 914542 2. 925044 1. 312059 1. 388668 1. 78712 0. 911226  
2. 001911 1. 771145 2. 785174 1. 492166 1. 110774 1. 518067 2. 38893 1. 891727 2. 495947  
1. 50413 2. 651948 1. 266833 1. 857992 1. 3326 1. 090662 1. 387915 1. 970855 2. 690939  
4. 990923 4. 950407 3. 512483 4. 09852 3. 853059 3. 750331 3. 406421 4. 11325 4. 196641  
2. 0449 3. 13064 2. 777783 1. 54082 2. 0463 1. 333374 1. 67644 1. 617601 1. 491881  
1. 223771 1. 545918 1. 257895 1. 770819 2. 381788 2. 257804 1. 404398 1. 097403 1. 577883  
4. 250637 3. 572253 4. 90323 5. 265433 3. 466953 4. 823942 2. 622427 3. 153579 3. 448655  
7. 38715 7. 576823 7. 110354 7. 990364 7. 795135 7. 678918 7. 331127 7. 693662 7. 884067  
4. 068552 1. 834482 3. 727163 3. 92879 3. 685279 4. 143241 2. 450996 2. 456729 2. 30363  
1. 137651 1. 849924 1. 383873 0. 909409 0. 988718 1. 029913 1. 38746 1. 842089 0. 958063  
2. 517201 1. 359369 3. 169665 2. 308976 3. 610193 2. 384884 4. 458245 3. 390902 2. 066155  
1. 018581 1. 156813 1. 331485 1. 59443 1. 161642 1. 164554 1. 212975 1. 446239 1. 403001  
2. 915974 2. 088385 2. 696544 2. 146293 2. 045207 2. 511257 1. 856509 2. 60642 3. 049124  
1. 289892 1. 302749 1. 981095 0. 964878 1. 934255 2. 273465 1. 442298 1. 086215 1. 22989  
0. 913335 1. 913418 1. 204483 1. 458876 1. 353203 1. 274123 1. 020533 1. 173495 0. 930274  
4. 301142 4. 130196 3. 791096 5. 070991 4. 406099 5. 934852 4. 270137 4. 34098 4. 595092  
2. 015458 1. 798095 2. 497245 1. 605899 3. 731086 1. 616092 1. 282521 1. 384409 1. 808259  
2. 249145 3. 605455 2. 385458 3. 971899 1. 827136 2. 32411 2. 442755 2. 915803 2. 93211  
2. 379575 2. 531027 3. 100535 3. 317345 3. 67389 1. 929817 2. 479406 2. 325422 2. 087736  
3. 24645 2. 379464 3. 393581 1. 770328 2. 545513 1. 727111 1. 702167 1. 671158 2. 09145  
2. 359124 2. 227587 2. 467938 2. 052727 1. 729912 2. 034216 1. 928675 2. 255759 2. 646114  
7. 320901 7. 739396 6. 812 6. 958403 8. 24372 6. 933314 6. 771256 6. 76564 6. 684635  
1. 714546 2. 686815 2. 077567 2. 876756 2. 341895 1. 753188 2. 298411 1. 91219 2. 338945  
0. 941226 1. 589955 1. 378412 0. 911709 0. 770518 3. 385769 1. 498715 1. 191253 1. 014998  
1. 909566 1. 193899 1. 361261 1. 182199 1. 165007 1. 641943 1. 257036 1. 792057 1. 430255  
1. 883256 1. 284906 1. 163323 1. 620019 1. 234919 1. 570656 1. 258448 1. 545936 1. 372391  
3. 145461 4. 03805 3. 54934 5. 670469 5. 137578 3. 0476 4. 787257 2. 698823 2. 568452  
0. 935504 3. 601577 1. 324719 0. 835164 2. 192782 1. 204622 1. 723784 1. 49906 1. 776851  
1. 626023 1. 14676 1. 077341 1. 739546 0. 976394 0. 837837 1. 419181 1. 845158 1. 191279  
1. 906442 2. 180037 1. 483097 1. 614869 2. 030226 1. 460212 2. 714119 1. 377478 2. 075229  
1. 449805 1. 479208 1. 643157 1. 586316 1. 838196 1. 491446 1. 631003 1. 7363 1. 211254  
1. 158692 1. 160785 1. 510212 1. 98307 1. 802044 1. 597899 1. 473979 2. 243419 1. 80199  
4. 052635 3. 865672 3. 69126 3. 255554 3. 190035 3. 335657 3. 530273 3. 48556 4. 219808  
4. 58719 4. 034431 4. 034431 5. 291403 4. 973798 4. 465727 3. 952388 2. 340101 4. 587264  
1. 348009 1. 730423 1. 452485 2. 303375 1. 481623 1. 523783 1. 807548 2. 603583 1. 37084  
1. 533935 1. 655867 1. 562593 2. 194167 1. 376774 1. 749677 1. 735909 1. 869097 1. 501339  
4. 04071 2. 013711 1. 201732 4. 569243 2. 246154 1. 65891 1. 464366 2. 716445 1. 328637  
4. 795317 5. 405612 5. 839855 3. 224017 4. 845715 5. 308535 3. 892148 4. 858543 4. 56378  
5. 683693 5. 023281 5. 08464 3. 357644 3. 941355 3. 517423 4. 37674 3. 55438 3. 970425  
3. 776061 4. 252826 4. 188177 3. 9154 4. 095629 2. 422467 3. 378738 3. 501089 3. 68778  
4. 246322 5. 370314 1. 680418 2. 195958 3. 94026 1. 561203 3. 743762 3. 118754 1. 561203  
2. 08135 2. 650299 1. 924683 1. 214747 2. 291128 1. 965853 2. 167916 1. 331749 1. 404633  
2. 099781 1. 428417 2. 86806 2. 667384 2. 228785 1. 749528 2. 355943 1. 384345 1. 981839  
3. 581496 4. 401224 3. 640048 1. 9488 3. 116193 1. 60751 2. 529543 1. 615596 2. 224529  
4. 742317 2. 745517 1. 915584 1. 839385 1. 586063 3. 325403 1. 746882 2. 019904 1. 963522  
2. 501969 2. 337992 1. 882552 1. 710518 2. 500762 2. 395993 1. 527437 1. 858763 1. 679405

1. 661999 1. 195091 1. 045296 2. 293096 2. 176896 1. 983107 1. 657079 1. 955014 3. 099974  
1. 262484 5. 668183 3. 521268 3. 711205 3. 725932 2. 838455 4. 276564 4. 647771 3. 612524  
3. 533443 3. 302633 3. 621222 3. 710902 3. 011011 3. 449539 3. 225166 3. 145725 3. 175914  
1. 505302 1. 00833 1. 136966 1. 387457 1. 212834 1. 509276 1. 853374 1. 269608 1. 297788  
3. 340374 3. 004392 3. 157918 3. 536197 3. 003599 3. 56438 3. 183366 3. 13166 3. 557221  
7. 873217 8. 018833 7. 65568 7. 390791 8. 090428 7. 400597 7. 481057 7. 969836 7. 768259  
4. 123046 3. 577306 3. 418674 3. 290893 4. 056636 4. 111196 3. 148995 2. 489807 3. 480168  
3. 279947 1. 747954 2. 704979 2. 390088 2. 238692 2. 718024 1. 991112 1. 905357 3. 046056  
1. 623655 2. 070673 2. 133962 1. 497568 2. 665455 1. 402676 2. 989388 1. 743672 1. 55157  
2. 448086 1. 838115 1. 422403 2. 061684 1. 434507 1. 454799 1. 878231 2. 240077 2. 113904  
2. 174645 1. 47992 1. 868018 2. 077635 2. 175796 2. 330894 1. 704632 1. 735737 2. 407527  
3. 683915 5. 059216 4. 075637 3. 853001 4. 112697 3. 430047 3. 320213 4. 229208 4. 238358  
1. 856642 2. 892202 2. 085894 1. 342823 1. 982974 2. 720199 1. 821837 2. 581398 2. 379776  
1. 967366 2. 226912 2. 135146 2. 041319 1. 587703 3. 125748 2. 547222 2. 022035 2. 19262  
4. 618947 4. 697645 3. 78631 5. 195889 4. 683491 3. 664406 6. 256792 6. 051475 6. 240812  
2. 930515 1. 853709 3. 054369 0. 863543 2. 227408 3. 263682 2. 02906 2. 864369 2. 20868  
1. 944195 2. 577202 3. 484931 3. 054921 2. 892839 2. 025177 2. 278115 2. 420606 2. 151974  
2. 098553 2. 123692 2. 406785 1. 869105 2. 493237 1. 486512 2. 330819 2. 780932 3. 198582  
1. 699013 1. 687267 1. 087479 1. 33028 1. 89566 1. 665257 1. 448037 1. 876283 1. 332052  
1. 549726 1. 929482 1. 393048 1. 495855 3. 027368 2. 855987 1. 4521 1. 475781 1. 692419  
1. 703672 1. 833799 1. 154393 1. 638748 0. 999007 0. 971929 0. 86189 1. 867737 0. 739395  
1. 894398 1. 330994 1. 001734 1. 416511 1. 148297 1. 398164 1. 578709 1. 689115 1. 263428  
2. 606504 3. 706088 2. 071128 3. 476987 3. 181283 2. 114627 2. 170683 4. 315579 3. 447343  
1. 582519 1. 478245 1. 216419 1. 443776 1. 298679 1. 230033 1. 963354 0. 931623 0. 888751  
4. 470832 2. 477243 3. 047541 3. 413533 2. 569476 1. 793318 1. 993919 1. 528006 1. 410466  
4. 601058 1. 931355 2. 79151 5. 547487 2. 370392 4. 609559 2. 597156 2. 509631 2. 422727  
1. 283445 1. 688581 1. 249215 1. 329969 1. 425641 1. 775834 1. 748793 1. 836436 2. 088162  
1. 846103 2. 303055 2. 666722 4. 127425 1. 887917 3. 23926 3. 625534 3. 181947 3. 505218  
1. 392803 1. 424042 1. 036519 1. 597651 1. 376891 1. 303494 2. 2774 1. 376121 1. 035689  
2. 404714 2. 200693 2. 836412 1. 757 2. 261437 2. 804243 1. 634139 3. 163067 3. 966864  
2. 970644 2. 419744 3. 103766 3. 585324 3. 177397 3. 756121 2. 713766 2. 719368 2. 889341  
0. 998019 1. 3116 1. 970875 1. 772932 1. 474178 1. 324852 1. 202769 1. 927663 1. 718295  
1. 047818 1. 400524 1. 651999 1. 289314 1. 524805 2. 566128 1. 554083 1. 105057 1. 625541  
5. 289961 6. 800487 6. 044451 5. 972967 6. 412144 4. 874371 7. 095836 6. 276965 5. 879681  
6. 097959 4. 826869 5. 179049 5. 476722 5. 041342 4. 359291 5. 084401 4. 437499 4. 765249  
1. 547069 1. 889564 1. 385698 2. 181611 1. 642993 1. 502837 1. 312703 1. 341808 1. 956644  
1. 585535 2. 838253 2. 404782 1. 446196 1. 926018 1. 423086 2. 118105 2. 339387 1. 364828  
3. 305621 2. 527321 2. 454401 2. 007745 2. 210524 2. 32996 1. 88905 2. 038016 2. 015884  
2. 581663 3. 185801 4. 349475 2. 493784 4. 321169 2. 203812 2. 382027 3. 050333 3. 083178  
1. 485569 1. 844212 1. 425496 2. 525543 1. 961813 1. 210386 1. 711661 1. 307717 1. 005882  
1. 964482 1. 136837 1. 331534 1. 030607 1. 515044 2. 004924 2. 845931 1. 396959 0. 986665  
1. 493608 2. 971592 1. 791283 1. 364935 2. 016581 1. 261207 2. 675943 1. 985237 2. 267087  
2. 549411 3. 593891 3. 056556 1. 897978 4. 685646 1. 899445 4. 353805 3. 375744 2. 692039  
1. 093519 1. 631775 1. 262566 0. 893275 0. 961297 1. 398203 1. 454009 1. 191791 0. 958951  
3. 294879 2. 095354 4. 614051 2. 281811 3. 33951 3. 69856 2. 543503 2. 660598 2. 965869  
1. 184475 1. 30419 0. 659173 1. 171239 1. 128588 1. 517012 1. 292575 1. 533384 1. 262432  
1. 756388 1. 813834 1. 944679 2. 562 1. 572035 2. 034975 1. 290633 1. 953465 1. 795497  
1. 19679 1. 317986 2. 077341 1. 470206 1. 320396 2. 301296 1. 474644 1. 774994 1. 572987  
2. 369961 1. 019295 1. 358034 1. 288367 0. 922118 2. 267146 1. 100645 1. 131062 1. 039814  
4. 026668 5. 04494 3. 008932 1. 552414 1. 209029 5. 531519 1. 495012 1. 529522 1. 135089  
2. 136713 2. 375538 2. 077124 1. 944131 2. 701248 1. 398498 2. 537966 1. 747173 1. 97712

3. 46701 3. 776012 3. 259522 3. 527419 3. 046434 3. 347779 2. 716469 3. 400491 3. 210123  
2. 357143 2. 429869 1. 706048 1. 62749 5. 739415 2. 100281 1. 42517 1. 648131 1. 488268  
5. 557918 6. 339375 6. 452566 7. 283877 5. 246748 6. 677473 5. 404911 5. 211421 5. 692996  
2. 356561 2. 530369 0. 984746 1. 46575 1. 371517 1. 217413 1. 998462 1. 144986 1. 40593  
2. 037579 1. 817151 1. 380341 1. 833627 2. 544356 2. 372598 2. 306958 1. 740005 2. 160052  
1. 177524 1. 880543 1. 126975 0. 855263 1. 189157 1. 406936 1. 381103 1. 687063 0. 832264  
1. 370023 2. 391635 0. 871418 0. 873681 1. 283506 1. 725773 1. 264005 1. 57984 1. 452256  
3. 33982 2. 229776 1. 892144 3. 205886 1. 875615 3. 176984 1. 727625 1. 698971 2. 175463  
3. 091095 3. 079352 3. 029375 2. 231232 3. 804182 2. 615471 3. 290969 2. 01347 2. 256013  
2. 471026 2. 381577 3. 027458 3. 317584 1. 81307 2. 260745 3. 410982 2. 279915 3. 140043  
6. 473949 6. 729846 7. 041099 5. 777089 5. 610288 6. 099181 6. 202099 6. 459975 6. 34366  
1. 741429 2. 016731 1. 886802 2. 923413 1. 590377 1. 699576 1. 479217 2. 040034 3. 040994  
2. 21695 2. 066824 1. 279874 1. 56639 1. 905791 1. 653465 0. 994571 1. 961658 1. 46265  
2. 053272 2. 794583 3. 211891 2. 262459 3. 689003 3. 459366 2. 334782 2. 532652 2. 299006  
2. 015389 1. 501918 1. 260699 2. 056426 1. 769357 1. 749328 1. 651257 1. 922245 1. 868794  
0. 982466 0. 899272 0. 765134 1. 122816 1. 325886 1. 798422 1. 121524 0. 833373 0. 768165  
2. 45132 1. 765488 1. 767852 1. 433904 2. 50296 1. 994216 2. 136368 2. 578432 2. 026352  
3. 163333 3. 286697 3. 25576 2. 146202 2. 763074 2. 289842 2. 070258 1. 941997 2. 496426  
2. 874623 3. 844406 2. 993435 2. 624229 3. 53937 3. 506269 3. 224988 3. 834866 3. 546281  
1. 697148 1. 858775 1. 899127 1. 57978 1. 579878 1. 703363 1. 298182 1. 503517 1. 674975  
2. 167282 3. 288969 1. 817938 2. 396237 2. 926733 3. 174886 2. 836257 3. 268669 2. 980816  
3. 510727 3. 183974 3. 087292 2. 99305 3. 433671 2. 969368 4. 0382 3. 222522 4. 182075  
1. 83573 1. 276419 0. 977976 1. 697573 2. 0214 1. 224027 1. 533296 1. 27603 1. 981141  
1. 066302 0. 803173 1. 396135 2. 549427 1. 241622 1. 988562 1. 789571 2. 439582 2. 049498  
1. 82134 1. 8249 1. 606514 1. 196445 3. 225287 2. 211323 1. 31548 1. 845502 2. 298132  
2. 497647 2. 281838 2. 648275 3. 265185 3. 068946 3. 173161 2. 935635 4. 172727 2. 920892  
1. 249873 1. 663809 1. 297325 1. 052007 2. 244303 1. 517283 1. 560035 1. 374313 1. 022067  
4. 422187 3. 951546 2. 359369 3. 883904 3. 217803 3. 141874 3. 39903 4. 385489 3. 663428  
2. 169243 3. 759244 3. 772998 5. 282292 2. 888059 4. 432484 3. 27108 4. 706379 3. 949208  
1. 082308 1. 167663 0. 803166 1. 381543 1. 030604 1. 272487 1. 580558 0. 934783 0. 927632  
2. 189202 2. 466903 2. 499231 2. 663569 2. 266305 2. 220063 2. 094308 1. 812409 2. 634304  
3. 499271 2. 475696 4. 617333 3. 084426 2. 622036 5. 427892 4. 425152 2. 708871 3. 497494  
2. 529098 2. 840436 2. 459618 2. 448198 2. 130562 1. 807434 2. 23118 2. 891483 2. 824547  
2. 525164 0. 874497 3. 397986 0. 841901 0. 876744 5. 177434 2. 876181 1. 894391 1. 091223  
5. 330012 4. 549845 4. 506893 4. 726265 5. 074029 4. 438748 4. 442317 4. 557613 4. 411687  
2. 944804 5. 873532 5. 525673 4. 818081 5. 900066 3. 294055 5. 017629 5. 346288 2. 573668  
1. 150001 1. 159758 1. 487494 0. 878859 0. 745097 0. 98678 1. 20388 1. 896211 0. 965731  
2. 082901 1. 574325 1. 081937 1. 707985 1. 01791 1. 590023 1. 644605 1. 285549 1. 291734  
2. 72257 2. 595102 2. 150921 2. 282492 2. 368525 2. 731484 2. 642622 2. 43914 2. 549319  
2. 735888 2. 164614 2. 778598 2. 136756 1. 905779 2. 147346 2. 020346 1. 678859 2. 11207  
3. 0567 1. 305545 1. 668411 1. 878798 1. 705514 2. 617041 1. 87625 1. 817264 1. 67072  
1. 41691 1. 485584 1. 645312 1. 553287 1. 426729 1. 347283 1. 450788 1. 363501 1. 359732  
2. 700787 2. 762574 3. 396555 3. 421375 3. 397007 2. 769521 3. 041815 3. 221917 2. 842128  
4. 489565 6. 238253 5. 107529 4. 876142 5. 491648 4. 041396 5. 411782 5. 343652 4. 670252  
4. 358134 5. 263823 3. 126408 2. 933086 5. 329744 3. 589732 4. 467305 3. 23051 3. 934821  
4. 866034 2. 996607 4. 141121 4. 313969 3. 392182 4. 691054 3. 794945 4. 162818 3. 725039  
1. 572593 1. 870079 1. 522352 1. 001654 2. 455328 1. 403582 1. 335951 1. 095807 1. 182176  
0. 808602 1. 284235 0. 733747 1. 036128 0. 871156 2. 325134 1. 526144 1. 028711 0. 964219  
7. 272297 6. 743129 6. 872898 6. 614143 6. 462464 5. 87765 6. 993111 6. 444869 5. 752408  
4. 457033 1. 886008 2. 008563 4. 547103 3. 222136 2. 192466 2. 341567 2. 645647 3. 242798  
3. 507035 2. 759849 2. 899886 3. 925039 3. 99319 2. 410682 3. 697164 2. 323407 2. 641253

1. 080668 2. 011622 1. 197492 2. 696607 1. 252933 1. 527811 0. 892346 2. 91983 1. 110937  
3. 884592 3. 362705 3. 589403 4. 886173 5. 312541 1. 901337 2. 498901 2. 682475 3. 692565  
4. 395314 4. 276132 5. 350992 2. 91077 3. 719618 4. 635731 4. 004171 5. 485217 3. 991959  
1. 722507 1. 339079 1. 331043 1. 789483 1. 411954 1. 372986 1. 32624 1. 420674 1. 343165  
1. 22875 1. 227959 1. 156553 1. 971069 1. 538421 0. 987011 1. 35192 1. 831454 1. 366269  
2. 074658 1. 487877 2. 045992 2. 651943 2. 307946 3. 977134 1. 729571 2. 101165 1. 76025  
3. 085786 2. 275207 2. 604626 1. 772421 1. 823605 1. 47389 1. 358349 1. 484985 1. 945754  
2. 709414 2. 725356 1. 517567 1. 432217 1. 890952 2. 568698 1. 604948 2. 864056 1. 269206  
4. 862191 3. 893191 5. 847002 5. 634793 3. 789193 5. 192747 3. 165465 4. 523845 4. 144522  
1. 598723 1. 719131 1. 444545 1. 913235 1. 552919 1. 643016 1. 557426 1. 850344 1. 68851  
1. 378819 0. 903725 0. 975684 1. 141078 1. 286613 1. 037321 1. 166895 1. 081521 1. 363698  
2. 80536 2. 72047 3. 199104 3. 919866 3. 257617 2. 841678 3. 885761 2. 036083 2. 963892  
5. 930612 4. 989628 5. 05432 4. 980992 6. 610071 5. 26423 6. 305724 6. 171619 7. 32806  
2. 607086 3. 36269 0. 9864 1. 999914 2. 053057 2. 127424 1. 896859 1. 036866 1. 090753  
1. 003935 1. 557959 1. 07781 1. 378319 1. 329386 2. 226052 1. 256682 1. 581743 0. 942845  
1. 272847 1. 480533 1. 298988 2. 010325 1. 484327 1. 711588 1. 162998 1. 055699 2. 427764  
1. 216017 1. 707314 2. 213339 2. 030231 2. 559916 1. 716574 1. 363977 3. 312881 2. 521202  
1. 371241 1. 461954 1. 015853 1. 90597 1. 026224 2. 936184 1. 474262 1. 292027 1. 307293  
1. 976865 2. 258849 2. 205861 3. 199045 2. 869165 3. 442452 2. 607148 2. 715746 2. 473185  
3. 246548 3. 390043 4. 412131 3. 765839 4. 524296 4. 32101 4. 941871 4. 574828 4. 839704  
0. 945225 0. 92195 0. 968914 1. 595064 0. 727126 0. 858993 1. 20256 1. 235092 1. 101641  
1. 713784 1. 330861 0. 921393 0. 727527 1. 570969 1. 431379 0. 666999 1. 10646 2. 327273  
1. 417668 1. 480965 1. 721684 2. 281919 1. 957747 1. 713145 1. 036354 1. 433158 1. 204074  
1. 040523 1. 239858 0. 925564 1. 202651 0. 860997 0. 981518 0. 935316 1. 512706 1. 108154  
0. 917279 1. 168011 1. 39987 5. 262689 2. 01717 1. 005895 1. 529368 1. 353862 1. 128865  
2. 323828 2. 9479 2. 366756 2. 194185 2. 548983 2. 726724 1. 834326 2. 666855 2. 388485  
3. 437067 2. 467696 2. 43319 2. 019479 3. 343619 1. 897238 3. 877912 1. 826645 1. 325766  
1. 814078 1. 709935 1. 306226 1. 94688 1. 475663 1. 608347 1. 73239 1. 220144 1. 281327  
3. 78408 4. 595763 4. 049721 4. 679289 4. 849199 4. 844095 4. 831167 4. 405549 4. 533564  
2. 563994 1. 947595 1. 71831 2. 943179 1. 493393 1. 748662 1. 489594 1. 909559 2. 167404  
2. 208143 2. 473323 2. 506947 2. 214049 1. 654826 1. 700545 1. 460341 2. 130817 1. 686772  
1. 714015 1. 632796 1. 00455 1. 928177 2. 083964 1. 837564 1. 542713 1. 583214 2. 311927  
1. 444002 1. 681472 2. 164475 1. 42922 1. 658513 0. 993923 1. 473517 1. 705789 1. 526293  
6. 465998 7. 23415 7. 772144 6. 627337 6. 641832 5. 863934 6. 866196 6. 111759 6. 066285  
2. 905612 2. 006993 3. 499165 3. 196485 2. 147696 3. 067941 2. 545544 2. 625949 3. 528559  
2. 42199 1. 358255 1. 428707 1. 973701 1. 611966 1. 186371 1. 008243 1. 229453 1. 593187  
2. 340329 3. 091639 2. 782704 1. 991859 1. 680059 2. 648309 3. 156502 3. 640008 1. 901755  
5. 915988 6. 655835 3. 143735 4. 19492 6. 460165 4. 284938 1. 939977 2. 200808 2. 865202  
2. 608669 3. 416273 3. 842784 2. 703986 3. 530825 2. 452269 2. 686241 2. 358894 2. 687239  
1. 333388 1. 310888 1. 82607 2. 216554 1. 396691 1. 38659 1. 821233 0. 95124 1. 265882  
2. 438018 1. 986984 1. 402088 1. 53398 3. 887922 1. 97179 2. 226468 1. 958351 2. 933685  
1. 559376 2. 040129 1. 591035 1. 791332 1. 634753 1. 761507 1. 543 1. 779883 1. 416722  
2. 531657 2. 822624 2. 377753 2. 688197 1. 582045 1. 983787 3. 943451 2. 272496 3. 074336  
1. 900092 1. 574467 1. 515687 2. 746809 1. 424611 1. 785987 1. 550017 1. 492861 1. 789018  
2. 503625 3. 465465 1. 159004 1. 261744 2. 514306 1. 865195 1. 461635 2. 294835 1. 545935  
1. 653186 3. 661073 2. 099684 2. 23562 3. 334181 3. 111371 3. 832301 3. 602818 2. 814816  
1. 468665 1. 625035 1. 063039 1. 73272 1. 551429 1. 176946 1. 464557 1. 265626 1. 305155  
4. 72411 5. 584628 4. 489216 3. 854673 4. 304091 4. 10996 4. 160744 4. 335526 4. 166657  
4. 019132 4. 991981 3. 698711 4. 280633 3. 473577 2. 423367 5. 618467 2. 195684 3. 925479  
1. 493396 1. 865493 1. 974023 2. 078665 2. 428907 2. 111164 1. 739876 1. 750398 2. 259804  
2. 222061 1. 443157 3. 571917 4. 14047 2. 120284 3. 377532 2. 075382 1. 96963 4. 192599

6.951225 6.283351 6.464278 4.448419 3.422734 2.76737 3.133758 5.170015 5.379413  
3.461153 2.843604 4.953492 3.377303 3.898824 4.764181 3.71425 1.846095 2.61766  
1.004365 1.45652 0.905908 1.32442 0.616565 1.422205 0.814426 1.297467 1.710411  
3.225935 3.830252 4.063052 4.024966 2.905423 4.3736 4.357898 3.967316 3.991437  
1.040892 1.302535 1.250977 1.196308 0.960044 0.919646 1.327018 1.105645 1.027469  
0.864319 1.655357 1.412217 0.991302 2.085597 1.291485 1.010855 1.75032 1.28488  
1.896193 1.188983 1.687293 1.577998 0.689114 1.584014 2.240142 1.571494 1.071311  
4.429144 3.409794 3.896797 4.602647 4.29987 4.468953 4.445782 4.910797 4.220459  
3.503276 3.188865 1.797434 2.140124 2.341663 2.115408 2.341056 1.675834 1.968892  
2.814679 3.068195 4.310448 3.269804 3.209325 2.352826 3.221592 3.836461 3.64023  
3.095719 2.17656 1.815657 1.801853 1.719516 1.458487 1.195507 1.443585 1.400301  
2.067768 2.196624 3.700972 3.785835 3.474946 2.743034 3.155699 2.987197 3.635098  
3.125509 2.890916 4.944046 3.784797 2.280959 2.287482 3.187304 3.59032 3.671411  
1.514003 1.291538 1.550185 1.74148 2.040352 1.637743 1.367781 1.888861 1.569546  
3.381994 1.663388 1.470911 1.852961 2.085992 2.402349 1.937348 1.784798 1.987663  
3.925104 3.603791 5.500523 1.160863 0.7689 1.79162 2.295715 1.51109 0.803245  
1.331345 1.564088 2.05955 1.278851 1.077849 1.291711 1.075483 1.729985 1.3763  
4.704222 5.554055 3.639459 6.40245 6.104229 2.690179 2.166052 4.645685 2.451054  
2.461551 2.966499 1.512156 3.295537 2.938186 2.838083 1.865688 1.700472 2.852242  
2.004904 2.213569 2.38565 1.894039 2.223255 3.000142 1.921337 2.670513 1.676112  
2.682967 2.388619 4.047885 2.97218 3.245253 1.782652 2.620431 2.353378 1.955416  
1.639583 1.429699 1.977608 2.149597 1.677163 2.488684 1.883076 1.574547 1.961307  
2.721088 2.70138 2.878485 2.88663 2.259394 3.400704 2.220627 2.864825 2.980061  
2.948902 2.043611 1.549894 2.414639 1.220376 1.198652 1.520091 1.42809 1.234903  
2.231598 2.600473 1.587503 2.095598 3.467926 2.848404 3.015328 3.024839 2.460237  
2.072677 2.784463 3.173165 1.875227 2.068432 2.574018 2.347126 2.91409 2.013086  
1.617203 2.470407 2.471889 1.437649 0.699104 1.249342 1.848778 2.19622 1.874712  
4.052941 2.80293 4.155856 3.690122 2.779397 3.129204 3.124038 3.440629 3.658781  
1.064173 1.265932 1.887676 2.379347 1.120101 1.019734 1.560755 1.464262 2.313375  
1.0084 1.293199 1.613175 1.150121 1.335564 1.070867 1.073622 1.215303 1.126849  
5.984136 6.122986 6.055479 4.60795 6.092969 2.175283 2.863287 3.475836 3.357201  
1.417575 1.755865 1.330483 0.934323 1.826539 1.60079 1.311752 1.771972 1.236305  
1.931657 3.128023 3.158661 1.330157 2.299324 2.398755 3.839639 2.569387 2.842427  
2.414994 2.667041 2.500685 3.04367 2.191383 2.157909 1.881764 2.160138 2.196421  
1.012618 1.312717 0.931875 1.559177 1.454856 1.033898 2.011878 1.516739 1.808547  
1.566257 1.819247 1.825026 1.592103 2.72463 1.360319 1.550659 0.970632 1.960334  
1.821957 2.103149 2.719321 3.314245 1.734987 1.813956 2.360559 1.585192 2.933496  
1.652916 2.005963 2.0738 2.711275 2.307449 1.585999 1.427983 1.929339 2.311507  
1.72377 1.811059 2.201958 1.680249 2.131376 1.632669 1.8659 2.295276 1.386564  
6.393206 7.013526 7.218388 7.291959 6.701159 3.160069 5.176526 4.939295 4.35701  
3.406096 5.132496 5.212715 4.211222 5.157336 2.901193 4.720228 4.050865 3.990205  
2.23474 2.795858 1.869443 2.109521 2.274123 1.01757 1.151347 1.541819 1.300575  
6.480358 5.281183 4.643141 4.054462 6.234384 1.886838 3.02916 2.671613 3.761393  
1.11972 1.460215 1.177862 1.461415 1.35338 1.761498 1.465954 1.671682 1.440668  
2.493078 1.718792 3.529129 1.377986 1.723081 1.643911 2.860282 1.587961 2.469303  
1.813305 2.44831 2.882164 3.297255 2.282214 1.715277 1.940304 1.999487 3.043186  
2.714992 3.80275 2.662385 3.665808 2.386729 2.531934 4.963511 4.240011 5.204248  
3.783428 3.690676 4.169636 2.043214 3.588383 2.092803 2.516015 2.327345 2.766068  
1.32046 3.043281 2.479695 1.137279 2.09305 1.815985 1.813393 1.116014 1.564506  
2.452558 3.270932 1.474436 1.568107 1.869459 1.42497 1.844824 2.75886 1.725778  
1.421569 1.251452 1.253908 2.209346 1.30965 1.477089 1.181637 1.313319 1.933584

3. 202579 3. 016989 3. 238949 2. 809355 2. 730469 3. 463036 3. 16057 2. 65922 2. 964917  
3. 486488 4. 018426 3. 175368 2. 63561 3. 716525 2. 85619 2. 518567 3. 059126 2. 671161  
1. 201759 0. 829624 0. 848446 1. 567303 1. 141794 1. 312624 1. 288946 1. 68968 1. 204607  
1. 770693 1. 702123 2. 116388 1. 923634 1. 741325 2. 119524 2. 237923 2. 875313 2. 598562  
2. 121719 4. 046918 2. 455762 2. 696476 4. 399427 2. 226505 5. 125462 5. 641593 4. 076109  
2. 018701 1. 941621 1. 560539 1. 264884 2. 450718 1. 54762 1. 379344 1. 261511 1. 552338  
1. 385069 0. 947387 1. 345939 1. 436009 1. 594492 2. 052741 1. 469057 0. 535047 2. 064018  
3. 154407 2. 412059 2. 058235 2. 417939 2. 079052 1. 992364 2. 320581 1. 768744 1. 668298  
2. 01824 2. 790677 2. 20288 2. 300528 2. 283865 3. 212137 2. 920436 2. 285499 2. 816711  
1. 982626 1. 170854 1. 194962 1. 518427 1. 098097 1. 286448 1. 477163 1. 313518 1. 520979  
1. 767884 2. 215498 2. 725648 1. 831939 2. 55376 2. 890272 3. 16496 3. 861076 4. 144114  
1. 758296 1. 337943 1. 200207 1. 057068 0. 932328 1. 497446 1. 425785 1. 282606 2. 044319  
3. 876785 4. 011992 2. 651096 3. 372576 2. 162025 2. 858611 4. 134656 2. 115283 2. 027249  
1. 409718 3. 313905 4. 780142 0. 923241 0. 842803 1. 250464 1. 130732 1. 273594 2. 191085  
1. 642906 1. 417653 1. 43811 1. 905323 1. 07665 3. 395297 1. 095455 1. 675817 1. 058794  
1. 158431 1. 054586 0. 773928 1. 449861 1. 296674 2. 175048 1. 112498 0. 9656 1. 429225  
3. 068615 1. 864867 1. 499765 1. 561077 1. 164617 1. 163082 2. 649269 0. 690018 1. 722334  
6. 216468 7. 189437 7. 123541 6. 350955 6. 828607 4. 688655 5. 185929 5. 972919 5. 538139  
2. 184511 1. 906173 2. 306289 2. 18364 2. 592344 3. 24285 3. 179296 2. 002734 2. 760094  
1. 329608 0. 947465 0. 955935 0. 792207 1. 101348 1. 266747 1. 08922 0. 7921 1. 194726  
2. 00644 1. 410166 1. 283524 1. 299883 1. 547082 1. 232261 1. 141695 1. 10884 1. 337845  
4. 09555 3. 777588 3. 766433 1. 681821 2. 438733 2. 309436 2. 003486 1. 66089 1. 206953  
1. 327727 1. 946259 1. 89051 1. 549476 3. 197136 1. 638215 2. 620606 2. 033307 1. 894086  
9. 012299 8. 738076 7. 11732 7. 734797 7. 41692 8. 743507 7. 525191 6. 893722 6. 852772  
2. 901664 2. 422003 2. 519874 2. 408201 2. 01702 1. 632858 1. 59155 2. 60911 2. 430232  
1. 41163 1. 447123 2. 98708 1. 263483 1. 688596 0. 871481 1. 555989 1. 497003 2. 290423  
1. 879697 2. 12959 2. 482085 1. 766084 1. 270831 1. 718271 1. 271487 1. 41402 1. 842556  
2. 011682 2. 780295 3. 246535 5. 269041 3. 379338 2. 454206 2. 493216 2. 041189 1. 863907  
1. 260696 2. 134854 1. 233202 1. 438102 1. 050324 1. 320421 1. 288736 1. 245997 1. 378761  
5. 423243 3. 469861 3. 409472 2. 916742 2. 857361 3. 059229 3. 031349 2. 453074 3. 797044  
3. 668328 3. 404607 4. 421048 4. 98827 2. 318507 1. 517728 2. 471993 1. 383947 1. 739502  
0. 969578 2. 082271 1. 367427 1. 13845 1. 106084 1. 152225 1. 209449 0. 92072 1. 342049  
1. 428233 1. 446805 1. 562705 1. 352036 1. 20772 1. 191155 1. 542323 1. 99536 1. 17016  
5. 495496 5. 380333 5. 912509 4. 345151 4. 883841 3. 886335 4. 654719 4. 221923 4. 982026  
3. 19549 1. 633424 2. 42456 2. 271426 2. 123781 3. 268285 3. 055381 3. 496554 3. 100963  
5. 048155 5. 497483 4. 647071 5. 72729 5. 947833 5. 358748 5. 806253 5. 875551 5. 048807  
2. 609347 3. 449553 2. 134848 5. 282673 4. 198 3. 20827 4. 167787 3. 675533 3. 089393  
3. 992224 5. 132308 4. 70643 4. 828197 4. 956413 3. 102521 3. 321026 3. 674897 2. 953339  
1. 290377 1. 57955 3. 353815 1. 984797 0. 735406 1. 153255 1. 318222 1. 901557 1. 790285  
8. 255738 8. 851252 9. 581173 8. 879665 8. 072362 8. 410563 7. 934553 7. 15537 8. 138026  
6. 733531 6. 443445 6. 788007 6. 458935 7. 134458 2. 476778 5. 942641 5. 555649 5. 766605  
5. 407677 4. 159913 6. 29775 6. 090636 5. 192399 3. 28635 4. 298594 3. 972465 4. 484504  
2. 749841 5. 241407 4. 159746 4. 240966 4. 02583 1. 447786 2. 604459 4. 02636 1. 862269  
4. 225608 4. 037297 5. 335062 5. 23219 5. 056985 5. 27852 5. 021998 4. 85408 4. 794229  
2. 379724 2. 300233 3. 073642 3. 813282 3. 870425 1. 195796 2. 410511 1. 25249 1. 240559  
2. 053392 1. 633758 1. 851334 1. 832854 2. 090943 1. 8121 1. 746984 1. 818416 2. 222928  
1. 320494 2. 570666 2. 032795 1. 360457 1. 636483 1. 871636 2. 180581 1. 413318 1. 582019  
3. 576945 3. 460384 3. 431782 3. 379336 3. 017158 2. 98956 3. 921596 3. 81977 3. 238748  
3. 486461 3. 425449 3. 548122 3. 932178 3. 235779 3. 745021 4. 098692 4. 390384 4. 392877  
1. 438772 1. 588372 2. 400849 2. 100214 1. 488066 2. 222299 3. 596797 1. 436367 1. 840767  
0. 980488 0. 995762 1. 000927 1. 060748 0. 719475 0. 857159 0. 85989 1. 355141 0. 857159



1. 743248 1. 776852 1. 902965 1. 471724 1. 879925 1. 876527 1. 378655 1. 851498 1. 313327  
5. 134022 5. 27343 6. 22304 5. 767028 6. 177748 2. 221976 3. 422918 3. 837595 3. 071411  
4. 38037 4. 010282 3. 681826 4. 060441 3. 488023 4. 039321 4. 123627 4. 744617 5. 489477  
1. 546784 2. 755167 1. 323124 1. 25204 1. 530613 1. 440393 1. 533487 1. 572031 1. 754505  
2. 046996 3. 748865 1. 927433 2. 142612 2. 150837 1. 164667 1. 179586 1. 24133 1. 31751  
1. 157004 1. 725866 1. 806727 2. 274798 1. 145028 1. 615296 1. 573114 3. 017607 1. 036182  
2. 387582 4. 87923 0. 762886 0. 021966 4. 752777 3. 558854 7. 215393 7. 84861 5. 115144  
1. 638395 2. 341974 2. 242656 3. 015386 2. 044945 1. 966362 2. 142246 1. 538818 1. 38867  
2. 106705 1. 783908 2. 156103 2. 457403 1. 798704 2. 03316 2. 489355 2. 252777 2. 472782  
1. 163762 1. 28706 1. 050061 1. 740927 1. 275562 1. 295597 1. 217476 1. 083492 1. 05822  
2. 670378 2. 540231 3. 050114 3. 417029 2. 457107 2. 863786 3. 052856 2. 923945 4. 073185  
5. 362988 3. 735786 5. 66744 4. 571575 3. 243121 1. 643096 1. 735159 1. 701868 3. 735511  
1. 777297 2. 291962 1. 23572 2. 229136 1. 87535 2. 125821 2. 140448 1. 992894 1. 932029  
1. 573193 1. 276654 1. 46424 2. 83505 4. 475689 1. 42437 1. 024426 1. 694962 1. 685202  
2. 062892 1. 753653 2. 607396 1. 359356 2. 408197 1. 751099 1. 339437 1. 825794 1. 649883  
2. 839312 2. 44297 2. 856892 2. 495146 2. 621606 2. 659888 2. 334613 2. 222402 2. 491205  
2. 041897 2. 171376 2. 027922 1. 84561 3. 052971 2. 048446 2. 195227 2. 25288 2. 422725  
2. 428456 2. 107719 3. 543275 3. 450981 2. 135541 4. 074981 4. 218842 2. 623604 2. 612992  
1. 80097 2. 019505 1. 704319 1. 794648 2. 049279 1. 432838 1. 347881 1. 310746 1. 475976  
4. 782508 3. 683849 3. 539487 2. 040786 2. 444072 2. 149036 2. 372756 2. 563046 1. 356502  
1. 189216 1. 471149 0. 993153 0. 801096 1. 020773 1. 079556 1. 556434 0. 936711 0. 911172  
2. 338059 1. 856805 2. 376202 2. 516861 2. 087477 2. 172546 2. 541962 2. 283164 2. 144992  
2. 030037 1. 274928 2. 456576 1. 568795 2. 534542 2. 255103 0. 709983 0. 817143 2. 384459  
2. 680805 1. 474034 1. 568838 0. 819316 1. 674308 1. 572076 2. 157281 1. 819426 1. 561172  
4. 651456 5. 313207 4. 822337 4. 509483 5. 202014 4. 506882 5. 159394 5. 404952 6. 609505  
3. 140176 3. 491189 3. 907534 2. 660938 3. 612531 2. 949204 4. 00269 4. 573166 3. 524163  
1. 747781 2. 818906 2. 589083 1. 186415 2. 05912 1. 741657 1. 355339 1. 447992 1. 739681  
3. 767356 3. 634376 4. 671014 2. 941353 4. 823936 2. 913043 3. 948371 3. 623439 4. 381888  
2. 813522 3. 994138 3. 968235 6. 335335 4. 454092 3. 031983 5. 53178 5. 017937 3. 85583  
2. 184142 4. 052288 1. 344761 4. 067859 0. 984737 1. 174979 2. 539661 1. 00942 1. 460945  
1. 193505 1. 095068 0. 781149 1. 203566 1. 052523 1. 185003 0. 858979 1. 931041 0. 710036  
1. 342833 3. 076043 1. 775565 2. 603441 2. 520832 3. 231194 1. 61788 1. 928925 3. 251194  
4. 556651 4. 187048 4. 609211 4. 376176 4. 783136 5. 010304 5. 169875 4. 731682 5. 302151  
1. 664082 1. 135538 1. 339825 2. 578389 0. 883627 1. 302692 1. 237444 1. 551446 1. 255278  
1. 200542 1. 38737 2. 907238 1. 947963 1. 488153 1. 103241 1. 741462 1. 5707 2. 236095  
1. 619387 2. 334106 1. 933035 1. 954197 1. 727567 2. 664898 1. 945459 1. 458657 2. 373417  
1. 598836 2. 385405 2. 074678 2. 617417 1. 88581 1. 582813 1. 673128 1. 580915 2. 224391  
3. 032296 2. 856895 2. 580204 1. 926617 1. 426524 3. 114499 1. 753605 1. 559988 2. 244941  
2. 429488 4. 314723 3. 187854 5. 007135 2. 148127 2. 128149 2. 567627 2. 472837 3. 248485  
1. 261226 0. 95105 0. 864585 0. 942128 1. 041743 1. 238921 1. 173906 0. 967194 1. 025441  
1. 3517 1. 101863 1. 279468 1. 400254 1. 502187 1. 365226 1. 341522 1. 509834 1. 467565  
2. 085818 2. 772092 3. 868614 1. 928575 1. 472139 2. 537059 1. 543593 2. 092684 1. 649845  
1. 509696 1. 388218 1. 332384 1. 572555 1. 312471 1. 261035 1. 41116 1. 929118 0. 895982  
4. 177111 4. 386796 3. 611745 3. 21689 3. 726552 2. 787015 3. 057557 3. 175184 3. 625276  
1. 524242 1. 57487 2. 509874 1. 429021 2. 234744 1. 68213 1. 559336 2. 029329 1. 42037  
2. 952424 2. 710535 1. 930751 2. 524859 1. 71213 1. 778455 1. 608348 2. 312234 1. 975407  
1. 401838 2. 280141 1. 063208 1. 809042 1. 738776 1. 357091 1. 314959 1. 661288 1. 413983  
2. 198631 2. 629536 2. 353577 3. 333755 3. 53098 3. 651317 3. 74447 3. 599764 3. 76911  
1. 057357 2. 547085 2. 397988 3. 585818 1. 092815 1. 384082 0. 965241 0. 959679 1. 201791  
3. 509911 3. 298258 3. 993944 4. 309422 3. 993853 2. 326693 2. 192892 2. 787834 3. 600177  
1. 869418 2. 694934 2. 309063 2. 099626 1. 860852 1. 660857 1. 844827 1. 551918 1. 84094

2. 817349 4. 777162 6. 114239 2. 176276 2. 402956 1. 641489 2. 061347 4. 209 3. 356359  
1. 288813 1. 855408 1. 380221 1. 507928 1. 431847 1. 266927 1. 260785 1. 576048 1. 019229  
0. 857354 1. 093247 0. 802316 0. 956554 0. 921016 1. 266278 0. 772584 1. 059637 1. 023561  
1. 977164 1. 986901 2. 996143 2. 787794 2. 712205 2. 347514 1. 857956 3. 797641 2. 06349  
2. 109785 2. 207438 2. 153084 1. 702468 2. 00489 2. 198471 1. 675328 1. 965422 2. 390068  
2. 175807 1. 873686 1. 374316 1. 996781 1. 459482 1. 32524 1. 46555 1. 718902 1. 718307  
5. 381561 4. 352695 1. 381265 5. 201829 4. 936466 1. 95999 4. 199457 1. 868101 1. 952252  
2. 800805 2. 483589 3. 331546 1. 791787 1. 657494 2. 742979 2. 308192 2. 80095 2. 524623  
3. 11183 3. 36151 3. 482937 3. 043345 3. 098014 2. 945383 4. 084241 3. 915618 3. 887448  
1. 842169 2. 56405 1. 585218 3. 578136 1. 685142 2. 660497 3. 668893 2. 052338 2. 09935  
3. 007773 1. 917197 1. 587884 2. 051769 3. 149718 2. 67619 1. 476736 1. 454183 2. 985102  
4. 148035 4. 653041 3. 987079 3. 322269 4. 2856 3. 155947 4. 174361 2. 746978 3. 375491  
2. 174752 1. 373414 2. 042536 2. 409654 1. 770878 1. 670261 2. 446925 2. 24068 1. 483198  
2. 458875 2. 314138 2. 520676 1. 978523 2. 766659 1. 648541 2. 136756 1. 470279 2. 182895  
4. 174367 2. 297667 3. 412812 2. 081717 3. 343907 3. 262312 3. 30005 3. 308754 3. 841498  
3. 248631 4. 600789 4. 201067 4. 739171 4. 863894 4. 477864 5. 594398 5. 494663 5. 653887  
6. 053685 7. 034252 7. 01304 5. 441601 6. 588496 3. 99618 5. 706765 5. 74855 5. 485465  
1. 784508 2. 55534 1. 750636 1. 498415 1. 578197 1. 309393 0. 882412 1. 440541 1. 847623  
1. 834792 3. 339877 2. 046582 1. 928182 1. 810269 1. 972065 2. 90061 2. 881067 2. 337916  
2. 314184 2. 398238 2. 770334 4. 290434 2. 646443 2. 983617 3. 927237 2. 412898 3. 208299  
1. 136067 1. 093904 1. 901476 1. 375556 1. 441154 1. 102831 1. 229867 1. 545539 1. 468067  
2. 943567 3. 034999 3. 223772 3. 413457 2. 410337 4. 043151 3. 360561 3. 222379 2. 429939  
2. 001149 0. 985394 1. 025284 1. 663399 0. 926936 1. 362918 1. 001738 1. 433886 0. 863609  
5. 764495 4. 907825 5. 957297 6. 570832 6. 394369 5. 358959 4. 954648 5. 434602 5. 325971  
2. 034104 2. 499235 2. 21089 3. 0296 1. 345602 1. 993965 1. 803176 2. 011235 1. 849052  
2. 995764 3. 13055 2. 55635 2. 940155 3. 079042 2. 797434 3. 001577 2. 575894 2. 858747  
2. 55661 2. 226208 2. 20694 1. 991034 2. 262406 2. 167376 2. 017525 2. 153788 2. 291589  
1. 750303 1. 192803 0. 957117 1. 659565 2. 315125 1. 606224 1. 136147 2. 464688 1. 639929  
3. 849585 4. 162609 3. 460193 3. 374398 3. 629897 3. 763805 3. 277216 3. 747957 4. 381356  
3. 369546 3. 053751 2. 953262 3. 162008 2. 601739 2. 919291 2. 708517 3. 14589 3. 158824  
3. 475216 2. 572623 1. 34929 4. 903591 1. 16944 1. 435925 1. 926565 4. 047144 1. 617955  
2. 579519 1. 616027 0. 939469 1. 079006 1. 480144 1. 340903 2. 609811 1. 748256 2. 701772  
3. 868136 4. 806278 4. 417362 2. 511215 3. 432475 2. 042662 4. 046628 2. 589612 1. 572245  
3. 460306 2. 18075 1. 563879 2. 008294 1. 574763 2. 517231 1. 351561 1. 766907 1. 659634  
1. 601819 1. 758886 1. 869078 1. 755372 1. 671385 2. 200246 1. 571817 1. 539984 2. 005282  
1. 982732 1. 193414 1. 159133 1. 463064 0. 906329 1. 319692 1. 647363 1. 293919 1. 611422  
1. 269423 1. 08188 1. 359922 1. 280226 0. 827857 1. 39551 0. 854358 0. 740052 1. 283436  
5. 512164 3. 866176 3. 889444 2. 703829 3. 417969 3. 763171 2. 927512 3. 25096 4. 03836  
1. 583971 1. 461631 1. 14171 1. 163826 2. 101871 1. 40569 2. 186711 1. 619443 1. 058848  
2. 348157 2. 507821 2. 215786 2. 888332 2. 874248 2. 106746 2. 52114 2. 957217 2. 82688  
1. 801784 3. 283036 3. 003575 2. 368032 3. 791264 3. 065856 2. 429874 2. 521053 3. 468271  
1. 019632 2. 915613 0. 911541 2. 07162 1. 618128 1. 312501 1. 430575 2. 779691 1. 532951  
3. 309667 4. 304241 2. 664066 3. 049498 3. 313518 2. 893895 4. 929525 3. 299275 2. 562368  
2. 081005 1. 839317 1. 749333 2. 01248 1. 213819 1. 363315 2. 590142 2. 269954 1. 867811  
1. 770234 1. 414725 1. 315969 1. 655251 1. 574301 1. 417456 1. 473676 1. 595067 1. 17331  
1. 555127 1. 203726 1. 683334 1. 485021 1. 34398 1. 518868 1. 268532 1. 814242 1. 372236  
3. 838251 3. 166429 4. 054274 2. 648243 2. 044628 3. 05943 2. 148157 1. 876633 2. 720065  
5. 684914 5. 560743 5. 376173 4. 906106 5. 207089 5. 181898 6. 829651 5. 912594 6. 218266  
3. 535215 4. 140078 3. 97375 3. 319321 2. 840321 3. 812434 3. 587806 3. 294148 2. 940285  
5. 079826 4. 253392 5. 384632 4. 999408 5. 607261 3. 996619 4. 973926 4. 281704 2. 561146  
4. 471902 5. 030843 2. 773564 4. 590669 0. 506524 4. 070584 1. 104174 1. 741309 3. 955982

2.133731 3.324653 3.111111 1.974643 3.420226 1.284286 1.568342 3.674745 2.605628  
3.043481 2.195968 1.355512 2.071682 4.034253 2.726951 3.238066 3.326182 2.149202  
3.022371 3.096667 3.254803 2.645161 2.323133 2.682627 3.167307 4.102222 3.933357  
0.791305 1.875146 2.545189 3.30246 1.455968 2.469157 0.404879 2.139038 3.267212  
2.187265 2.197554 2.594434 2.02436 2.459884 2.025692 1.950051 2.507066 1.861608  
1.870683 1.962007 1.507239 1.391115 1.46293 1.006853 1.428094 0.876631 1.432263  
2.790414 2.66042 3.626197 2.173316 3.70432 2.447229 3.309234 1.464947 2.894476  
0.677839 2.184019 3.390414 1.104594 4.214759 2.531998 2.628437 1.016304 2.681932  
4.271826 2.061973 3.182836 3.966906 3.602946 3.073514 2.976574 4.25799 4.378239  
4.940154 3.777595 4.589996 4.678234 3.12997 4.881965 3.135153 2.384407 3.927676  
7.410867 6.64564 7.15279 7.633064 6.93453 6.515336 7.155355 7.163048 6.736137  
1.267011 2.016666 1.417593 1.244287 1.107838 1.568027 0.950546 1.4286 1.221997  
3.505822 2.396462 2.42629 2.177858 3.270341 3.410443 2.311047 2.850061 3.496681  
6.916432 6.723816 6.220636 6.832147 5.979633 6.340588 6.102929 5.94439 6.237089  
3.787913 3.037057 3.680374 3.409825 3.02762 2.883918 3.231413 2.549644 3.162137  
3.296085 3.045513 2.90304 2.304203 4.37566 3.930041 3.437932 4.283748 2.944639  
6.599689 6.825852 7.06687 6.792481 6.018277 5.724726 6.980985 6.745946 6.330751  
1.563195 1.789643 1.730073 2.523057 1.203001 1.848882 1.499418 1.534443 2.417317  
2.137878 3.002064 1.512339 3.696512 1.400103 3.846119 2.906098 2.242564 3.379412  
1.102092 0.783415 0.919703 0.788196 0.710915 0.845256 1.278551 0.908706 1.01623  
2.115789 1.822186 1.859653 2.068845 1.903907 2.114701 1.672933 2.458023 2.606451  
3.053609 2.949787 1.78315 1.631592 3.163105 2.20221 2.474549 1.502641 2.231119  
0.795273 1.870512 1.382663 2.116126 1.031819 0.737018 0.843895 0.9271 1.018671  
0.984538 0.808466 0.669141 1.312446 0.743619 2.08834 1.630087 2.573028 1.532215  
2.456469 1.215894 1.001413 1.342135 4.459976 1.651431 1.656498 2.489674 1.144495  
4.077874 2.840916 2.15442 1.549116 1.635958 1.787601 1.869 1.47285 1.934446  
2.22967 1.573895 2.655157 2.050178 2.795312 1.201247 3.189002 1.512719 2.068918  
3.116819 2.643187 3.126178 1.449346 3.358107 1.675909 1.674731 2.911396 1.902061  
2.787274 2.876544 3.588713 2.369076 3.456506 2.658013 2.560801 2.566145 3.754867  
0.638298 1.047081 0.781217 0.894157 0.564993 0.888032 0.869028 0.766618 0.479425  
2.036696 2.013489 3.497355 2.158121 3.249592 2.590397 3.135141 4.009195 3.410864  
3.647191 4.132557 3.567179 4.671012 4.454547 3.506417 4.280697 4.689896 3.859657  
0.640287 0.810136 1.124565 0.64744 0.791255 3.233135 0.767264 1.132601 1.00259  
0.948614 0.701997 1.052163 1.121806 1.048124 1.094885 0.575032 1.198743 0.913623  
3.892932 4.32508 4.543876 4.103677 4.90411 3.992905 5.562154 4.456742 4.225548  
0.918772 1.554705 1.114424 0.919587 0.765006 0.910685 0.577714 1.21743 0.602197  
3.674046 3.582639 4.581924 3.710205 3.200534 1.666714 3.518555 2.299447 1.477706  
4.072384 3.975939 3.806089 2.817747 3.496886 3.98129 3.917518 4.328663 3.146033  
0.904953 1.042106 0.743199 0.831725 0.76556 1.075879 0.917543 0.623156 0.854108  
1.084756 0.701581 0.534187 2.736664 0.676043 1.070069 0.66832 0.789364 0.893834  
1.987699 1.149249 1.45891 1.271704 1.496623 1.849677 0.760165 1.352175 1.308878  
1.574725 3.597899 2.761244 1.807473 2.70679 1.719378 1.804614 1.868741 2.43444  
0.609732 0.951486 0.488189 0.916821 0.658092 0.992322 0.697116 1.014873 0.721286  
1.21818 1.301146 2.080358 2.545643 1.177265 1.187027 1.536963 4.287306 1.747285  
1.55682 2.195578 0.997626 1.474067 1.155243 1.189606 1.285872 1.196073 1.474296  
1.892383 1.539535 3.699144 2.230336 1.929792 2.536428 1.403892 2.060154 1.882065  
1.530974 1.588276 1.125732 2.29075 1.318899 1.246661 1.451079 1.759699 1.508633  
3.112732 2.410481 2.428255 3.779707 3.185093 3.567027 2.771275 2.094251 4.133339  
0.952061 1.438554 0.772708 0.816167 0.932697 1.918029 1.378248 0.916742 1.222367  
1.516696 3.720673 2.644813 3.362967 2.873402 3.492507 2.987226 3.61354 2.978959  
0.961802 1.217996 1.276603 0.793359 1.689814 1.031964 1.230822 1.15132 1.861554

2. 592391 3. 246594 2. 206316 0. 935631 2. 354913 1. 124696 1. 117244 1. 158578 1. 186103  
4. 71155 5. 022283 4. 640089 3. 058304 4. 467148 4. 535936 5. 034932 4. 637491 4. 122847  
1. 405186 2. 972827 1. 599942 2. 339994 1. 619596 2. 110963 2. 094073 2. 292261 3. 062811  
1. 443888 2. 215006 3. 022367 2. 710569 3. 396108 1. 930051 1. 370783 2. 665799 2. 390736  
0. 597561 0. 855366 1. 229491 1. 325637 2. 728214 1. 515582 0. 795133 0. 915814 3. 287095  
1. 04686 1. 077594 0. 802397 0. 85071 0. 949685 1. 014512 0. 749989 1. 284011 0. 585946  
1. 386782 0. 989894 0. 789108 1. 163179 0. 777178 1. 118888 0. 813234 0. 888137 0. 708295  
0. 928812 0. 435924 0. 566862 0. 785128 0. 747867 0. 584394 0. 725103 1. 013639 0. 68677  
1. 579332 2. 626274 1. 531956 2. 985817 1. 572097 2. 619674 2. 372656 2. 022935 2. 725456  
2. 476466 1. 263903 1. 898393 1. 953939 2. 477742 1. 945359 1. 962326 1. 256361 2. 620753  
6. 614224 5. 463961 5. 465747 6. 267002 6. 836488 6. 568514 6. 168326 6. 137067 6. 434471  
1. 397038 0. 897355 0. 605938 1. 762761 1. 172725 1. 781233 1. 241492 0. 876422 1. 281616  
0. 585962 0. 767285 0. 689487 0. 773266 0. 504308 0. 847087 0. 619826 0. 864823 0. 706648  
2. 293781 2. 899174 2. 652294 2. 080831 3. 581617 2. 74294 3. 305952 2. 521436 2. 562061  
0. 58307 1. 189869 1. 48457 1. 157952 0. 635688 1. 335151 0. 999602 1. 451117 0. 641548  
0. 945901 1. 4935 1. 102281 1. 741429 1. 672969 1. 113379 1. 844154 1. 509264 1. 558144  
1. 745268 3. 757321 2. 515783 2. 612723 2. 09215 3. 823519 1. 347603 1. 955166 2. 285874  
0. 830017 1. 227314 0. 559305 1. 099408 0. 908772 0. 808829 0. 88775 0. 780215 0. 983954  
1. 171363 2. 765987 2. 064405 1. 398448 1. 683851 1. 887054 3. 386002 2. 456291 2. 573273  
2. 45396 3. 039211 2. 918044 2. 37553 2. 720234 1. 746216 2. 184543 2. 70747 1. 569775  
0. 292914 0. 612771 1. 558882 0. 885167 0. 581405 1. 385427 1. 536565 0. 683843 0. 87901  
3. 046916 1. 481221 2. 687048 3. 420809 1. 466929 2. 22781 1. 302146 1. 588805 1. 926482  
0. 980826 0. 979994 0. 727654 1. 22158 0. 807256 1. 22953 1. 04226 1. 525671 0. 530819  
1. 124365 1. 404266 1. 342211 1. 886175 1. 061978 1. 33373 1. 553337 1. 972086 1. 21648  
2. 267505 1. 739814 3. 089102 2. 294998 1. 858327 1. 939303 2. 192134 1. 794184 1. 509814  
7. 953259 7. 811478 8. 146098 6. 282407 8. 054344 5. 742936 5. 195399 5. 14154 6. 717678  
0. 696458 0. 678944 0. 511025 1. 391751 1. 109755 0. 850933 0. 854942 0. 846481 0. 56731  
3. 613439 0. 922684 1. 327955 1. 859651 0. 932027 1. 290559 2. 780599 0. 797816 1. 19807  
0. 879191 2. 344493 0. 971093 1. 471689 1. 122533 1. 088439 1. 04844 0. 963218 1. 803471  
0. 655753 1. 299419 0. 747943 1. 102147 1. 23108 0. 685392 0. 926475 1. 241187 0. 865649  
1. 470212 1. 189974 1. 504591 1. 547141 2. 163811 1. 112378 1. 753067 2. 054421 1. 323274  
9. 932613 9. 406426 10. 06724 8. 44065 10. 42777 9. 644199 10. 13754 9. 151486 7. 841019  
3. 715558 2. 8309 4. 564008 3. 247659 4. 226122 3. 969982 3. 073629 2. 567469 4. 699272  
1. 609525 1. 354425 0. 987238 2. 14781 1. 495314 1. 286307 1. 807782 1. 571265 1. 445083  
1. 763805 2. 905605 0. 669759 1. 228229 1. 806866 0. 98361 1. 522831 1. 471515 0. 648173  
1. 041522 2. 11629 3. 706939 1. 298938 3. 785183 2. 436212 3. 277722 4. 48888 1. 85853  
1. 293617 0. 801119 0. 797267 1. 862851 1. 33384 0. 563069 0. 841887 1. 423174 1. 26077  
2. 579766 4. 12162 4. 941109 4. 470858 4. 12697 3. 091549 3. 270842 3. 014167 1. 951683  
2. 401241 1. 484372 1. 795126 1. 885373 1. 668002 1. 535298 1. 624922 1. 836796 1. 193404  
0. 810761 0. 794474 0. 73448 1. 004721 0. 515894 0. 475231 0. 702734 0. 483906 0. 53821  
1. 505395 1. 112 1. 518649 1. 603562 1. 182612 1. 23977 0. 725959 0. 813734 0. 814931  
5. 051686 4. 695422 5. 120389 4. 368667 4. 379824 5. 090654 4. 260844 5. 518454 4. 414498  
3. 107301 2. 480582 2. 025772 2. 848745 1. 562697 1. 280189 1. 578918 2. 658966 2. 810987  
3. 183445 3. 13786 1. 667138 1. 949667 3. 575779 1. 953991 1. 070855 3. 685336 2. 180596  
1. 274128 1. 006057 0. 934409 1. 243541 1. 049406 1. 049676 1. 997419 1. 264653 1. 168978  
2. 712502 2. 948947 1. 80589 1. 806904 2. 069004 1. 771438 2. 634536 3. 334882 3. 274375  
6. 210706 6. 440484 7. 070189 6. 306017 7. 171158 5. 820259 7. 254376 7. 488949 6. 233971  
0. 901522 1. 040022 0. 697818 1. 132442 1. 058544 1. 147333 0. 964325 1. 253236 0. 908856  
1. 75853 2. 524476 2. 895266 1. 309824 2. 234207 1. 835478 2. 127981 2. 461525 1. 773665  
1. 082184 1. 617491 1. 16636 1. 423223 1. 122576 2. 458357 0. 997778 1. 082026 1. 779757  
0. 917792 1. 112591 0. 741393 1. 902867 0. 595787 0. 921392 0. 833578 1. 636527 1. 631607

0.732788 1.069642 0.592102 0.53808 0.651032 0.511046 1.252245 0.422539 0.733222  
1.918355 1.329376 1.448864 2.491705 1.189893 1.779773 1.452987 2.068872 2.471052  
3.910685 4.175603 2.89361 3.321107 4.995673 2.678985 3.51393 5.158671 2.042278  
1.420836 1.680385 0.796491 1.423386 0.537519 1.195157 0.769324 1.156864 0.779894  
0.983554 0.767247 0.769278 0.96612 1.655802 1.040817 0.830481 0.874128 0.857729  
1.395543 2.695426 1.874676 1.637458 1.336027 2.276769 0.894573 2.754053 1.079549  
2.927852 2.084317 3.865357 1.222937 1.854533 1.08973 1.427797 2.407089 1.208605  
3.500609 3.891201 3.867519 4.385799 5.112639 4.060298 3.886414 4.063111 4.262668  
1.289755 1.372982 1.091977 0.982383 0.913567 1.476859 1.242737 1.591367 1.130403  
3.277609 2.550758 3.370893 2.47292 3.190426 2.365753 2.158189 2.195697 2.12032  
0.766408 1.049053 0.776728 1.725457 0.704256 1.085628 0.743011 0.815831 0.88321  
0.733646 1.343393 0.914396 0.808195 0.772843 1.05825 1.186617 0.62747 0.723574  
1.827104 5.148595 1.517342 5.701165 0.951701 0.772353 1.056497 1.283525 0.614727  
4.482053 3.933353 4.207903 4.656563 4.452615 5.795042 4.188589 3.985732 4.677003  
4.554395 2.42097 5.560118 2.992493 3.758347 4.111328 3.548915 3.133304 2.49114  
0.872417 1.559459 1.49789 0.619197 1.566246 0.930779 0.996981 1.388283 0.774704  
0.823402 1.207022 0.654019 1.184044 0.78399 1.028502 0.82776 1.127885 1.101418  
1.065854 0.948601 1.065854 0.780842 0.824832 0.922443 1.044227 0.797987 0.976496  
2.470668 2.344315 1.527214 2.757781 2.829921 2.74891 2.957132 2.170094 3.04124  
1.41186 1.31566 1.376009 1.819602 2.128759 1.654315 1.312094 1.303571 1.493025  
1.12665 1.502364 1.149169 1.934167 0.930448 1.110845 0.869414 1.684853 2.179792  
1.00974 1.053873 2.008179 0.460659 0.823108 1.699698 0.639556 0.850532 0.695081  
2.221162 3.17993 3.025978 3.222426 3.017839 2.807261 2.672461 3.913749 3.642798  
0.931768 1.262584 1.044681 1.770995 0.959165 1.819789 1.186512 1.219686 0.815609  
0.855415 0.765776 1.009222 0.871112 0.581642 0.703231 0.648849 1.046961 0.862202  
3.361553 3.959866 3.670271 3.560236 4.6135 4.06362 4.284151 4.946925 3.857496  
1.19376 1.788917 1.593493 3.022198 1.049808 2.089357 2.139178 2.039359 1.208679  
1.312926 1.990715 1.116042 1.808324 1.14865 1.802881 0.766786 1.430456 1.987828  
0.79664 1.151871 1.420881 1.901712 1.29622 1.058905 1.73817 0.805363 1.643261  
1.997033 2.431832 1.710182 1.812897 1.73034 2.164301 1.676052 1.54729 2.661474  
0.825637 1.743026 1.075665 0.653592 0.906613 0.791477 0.753029 0.81279 1.8643  
0.881832 1.761441 1.541575 1.334683 0.840461 1.43978 0.846751 0.802323 1.110308  
5.139421 5.265661 5.035305 4.769737 3.575933 3.531095 4.605689 3.762208 4.965462  
0.947201 1.230474 0.734953 0.676869 0.554173 1.038302 1.114118 1.233318 1.565621  
0.912902 1.436389 0.675595 0.997692 2.558896 1.468501 1.310389 0.917429 0.868126  
0.88925 0.674642 0.453533 1.126046 0.53354 1.05803 0.612034 0.529953 0.679821  
0.681121 1.222157 0.585648 1.122104 0.863798 1.190281 0.690839 1.248975 0.679665  
1.515034 1.123214 0.927046 1.169401 0.749879 0.593489 0.571243 1.61516 1.608586  
1.221199 1.246668 0.709949 1.178334 1.268752 0.897715 1.738988 1.143565 0.495629  
0.773856 1.786423 0.930613 1.171609 0.63618 0.980469 1.604288 1.193898 0.659459  
2.136306 1.359601 0.696938 2.207043 1.397196 1.617176 2.732075 1.232722 1.27639  
0.79167 1.715457 0.951878 1.216628 1.079532 1.349243 1.045545 1.311402 1.516169  
1.203464 1.502503 0.59923 1.050928 1.057882 1.236879 0.84414 0.727406 0.713188  
3.339148 4.091362 4.206172 4.838946 5.078564 3.887893 2.470578 3.638891 3.529784  
3.125908 4.308851 3.90281 3.956744 4.357608 4.455106 3.566737 4.023613 3.328679  
0.987347 0.845448 1.791919 0.659082 1.341312 0.99245 0.944095 1.105483 0.954748  
0.830609 1.100612 0.538582 2.201639 0.69905 0.62475 0.759127 1.21906 0.682949  
1.29368 1.146835 0.364552 0.765911 0.477145 1.238308 0.714181 1.027213 0.623246  
1.123493 1.779962 1.174483 3.716587 5.167087 1.393939 4.028713 1.679383 1.606844  
0.902112 2.087296 1.698676 0.726713 1.153552 1.167623 1.413566 2.030003 2.075371  
1.314666 1.280288 0.918326 1.747048 1.121882 1.303873 0.964235 1.656639 1.47951

|           |           |           |           |           |           |           |           |           |
|-----------|-----------|-----------|-----------|-----------|-----------|-----------|-----------|-----------|
| 1. 57508  | 1. 105484 | 2. 34636  | 1. 291936 | 1. 124975 | 1. 280407 | 2. 133173 | 1. 355538 | 1. 396818 |
| 1. 497927 | 1. 298779 | 0. 917926 | 0. 879411 | 0. 958535 | 1. 857077 | 1. 268867 | 1. 091625 | 1. 005527 |
| 2. 636126 | 1. 383777 | 2. 257242 | 1. 465165 | 1. 312606 | 1. 260261 | 1. 061549 | 2. 377005 | 1. 114925 |
| 1. 312566 | 1. 769366 | 0. 943448 | 1. 594703 | 1. 137919 | 1. 122942 | 1. 194338 | 1. 857265 | 1. 704763 |
| 0. 851753 | 0. 972203 | 0. 82997  | 0. 796275 | 0. 534634 | 0. 796207 | 0. 95115  | 0. 910786 | 0. 801222 |
| 0. 709787 | 1. 206951 | 0. 918352 | 1. 028339 | 0. 607719 | 0. 856054 | 0. 707376 | 0. 758914 | 1. 070818 |
| 1. 090136 | 2. 406344 | 1. 379257 | 1. 839432 | 1. 376379 | 1. 305123 | 1. 871387 | 2. 297549 | 1. 555641 |
| 3. 36098  | 3. 650359 | 1. 077303 | 0. 87904  | 1. 250873 | 0. 988497 | 1. 224946 | 0. 833036 | 0. 367933 |
| 2. 11102  | 3. 354034 | 2. 55981  | 2. 486619 | 2. 421269 | 2. 109223 | 1. 770955 | 1. 7468   | 2. 193997 |
| 1. 400715 | 1. 436127 | 1. 353234 | 2. 470535 | 2. 999853 | 1. 390355 | 1. 244729 | 3. 905168 | 1. 11208  |
| 0. 872686 | 1. 226075 | 0. 935299 | 3. 732528 | 1. 40468  | 1. 267607 | 0. 961084 | 0. 665254 | 0. 702873 |
| 3. 855213 | 2. 384961 | 1. 9528   | 1. 469983 | 1. 761608 | 1. 268257 | 1. 24528  | 1. 207666 | 2. 234165 |
| 1. 355642 | 3. 321803 | 2. 68861  | 1. 062335 | 1. 035136 | 1. 266772 | 1. 17184  | 1. 146305 | 1. 647594 |
| 0. 757429 | 1. 3797   | 0. 637265 | 0. 971974 | 0. 511009 | 1. 282437 | 1. 399913 | 0. 977844 | 0. 551402 |
| 0. 926656 | 1. 00113  | 0. 962123 | 0. 969933 | 0. 921338 | 1. 399017 | 1. 482556 | 1. 002273 | 0. 840875 |
| 0. 932208 | 1. 598568 | 0. 878524 | 1. 208157 | 1. 108758 | 0. 898957 | 0. 893768 | 0. 604752 | 0. 762046 |
| 1. 093697 | 1. 005408 | 0. 787452 | 1. 417638 | 0. 785313 | 1. 261506 | 0. 876281 | 2. 002937 | 0. 916682 |
| 2. 374745 | 2. 121017 | 1. 61041  | 2. 659335 | 1. 974001 | 2. 615922 | 2. 911818 | 1. 876908 | 2. 836737 |
| 2. 118441 | 1. 025001 | 1. 084474 | 0. 761056 | 0. 824955 | 0. 97809  | 1. 300827 | 1. 914201 | 0. 647763 |
| 0. 851454 | 3. 450397 | 0. 645967 | 0. 871539 | 0. 614812 | 0. 89211  | 0. 955047 | 0. 938495 | 0. 757072 |
| 4. 777037 | 3. 637143 | 2. 897018 | 4. 015768 | 4. 537157 | 3. 577684 | 4. 338188 | 4. 674038 | 2. 447294 |
| 5. 108566 | 5. 470415 | 5. 416543 | 2. 088586 | 3. 441766 | 2. 230663 | 6. 060801 | 2. 235344 | 2. 407661 |
| 2. 824392 | 2. 890343 | 2. 543428 | 2. 161534 | 1. 689444 | 1. 544434 | 1. 913672 | 2. 76843  | 1. 714219 |
| 2. 478659 | 3. 208542 | 2. 142819 | 2. 196685 | 3. 011016 | 3. 573644 | 2. 128073 | 1. 357992 | 3. 780162 |
| 1. 043354 | 3. 925054 | 0. 794242 | 1. 261422 | 1. 374214 | 1. 032818 | 0. 821517 | 1. 035946 | 0. 950202 |
| 3. 096114 | 1. 992351 | 5. 278618 | 5. 246987 | 4. 466805 | 2. 114626 | 1. 135482 | 1. 8072   | 2. 781623 |
| 2. 49508  | 2. 946331 | 2. 716387 | 2. 037688 | 2. 455198 | 2. 531517 | 1. 504593 | 2. 874069 | 1. 251511 |
| 1. 545592 | 1. 168239 | 1. 357351 | 2. 177892 | 1. 007546 | 1. 161428 | 1. 127219 | 3. 839009 | 1. 412548 |
| 4. 49114  | 4. 64133  | 3. 777223 | 4. 280392 | 5. 243457 | 3. 901366 | 4. 727541 | 5. 312355 | 3. 764018 |
| 1. 465033 | 3. 102659 | 1. 71766  | 2. 245018 | 1. 579152 | 1. 391645 | 1. 168469 | 1. 971092 | 2. 827816 |
| 4. 138467 | 2. 449902 | 2. 497589 | 2. 406873 | 3. 863489 | 2. 888146 | 2. 78433  | 1. 928071 | 2. 683087 |
| 1. 228696 | 2. 102166 | 2. 005237 | 1. 035556 | 2. 477903 | 1. 423885 | 0. 999604 | 1. 745365 | 0. 921699 |
| 0. 91596  | 1. 027062 | 0. 810423 | 1. 473889 | 0. 850067 | 0. 822667 | 1. 024281 | 1. 119869 | 0. 861385 |
| 2. 23106  | 2. 721324 | 3. 943304 | 3. 050796 | 3. 591541 | 2. 78863  | 2. 677161 | 3. 212769 | 3. 124298 |
| 4. 796993 | 3. 86942  | 4. 016086 | 3. 465309 | 4. 396509 | 4. 026197 | 3. 696523 | 4. 241725 | 4. 379779 |
| 3. 761958 | 4. 63991  | 5. 471749 | 4. 872963 | 5. 017791 | 4. 798882 | 4. 208191 | 4. 31724  | 5. 010679 |
| 1. 150063 | 1. 633064 | 1. 242842 | 1. 319251 | 0. 758764 | 1. 170099 | 1. 048395 | 1. 385446 | 0. 626305 |
| 1. 607671 | 1. 635724 | 1. 202108 | 2. 080912 | 1. 479533 | 1. 773014 | 1. 17047  | 1. 597121 | 2. 214903 |
| 3. 616854 | 3. 95265  | 3. 115144 | 4. 55143  | 4. 244567 | 4. 56956  | 3. 768862 | 3. 65892  | 3. 986413 |
| 5. 509793 | 5. 227789 | 5. 176241 | 4. 169002 | 4. 830232 | 5. 398717 | 5. 04034  | 5. 158337 | 5. 79564  |
| 0. 900835 | 1. 235845 | 1. 097822 | 1. 392355 | 1. 337154 | 1. 29321  | 1. 757616 | 1. 35664  | 1. 536886 |
| 1. 767597 | 1. 980312 | 2. 929535 | 1. 785131 | 3. 378393 | 1. 876596 | 1. 997322 | 2. 083633 | 1. 482818 |
| 1. 890778 | 3. 76281  | 0. 734558 | 3. 464332 | 0. 762666 | 1. 203083 | 0. 560017 | 2. 877318 | 2. 154653 |
| 0. 738806 | 0. 747477 | 1. 119391 | 2. 101708 | 0. 602246 | 0. 422521 | 0. 755316 | 0. 959827 | 0. 939588 |
| 0. 913883 | 0. 862636 | 1. 90152  | 1. 374645 | 2. 347766 | 1. 306261 | 0. 526992 | 1. 932599 | 1. 096695 |
| 4. 275148 | 4. 107802 | 3. 371508 | 4. 973973 | 3. 283925 | 3. 664868 | 3. 28925  | 3. 355102 | 3. 960984 |
| 1. 610609 | 2. 350712 | 2. 406022 | 1. 542449 | 1. 908235 | 1. 992034 | 1. 54294  | 1. 857737 | 1. 875425 |
| 3. 599415 | 4. 586452 | 6. 120367 | 4. 464711 | 3. 531474 | 5. 722824 | 5. 337896 | 5. 85301  | 4. 562148 |
| 0. 786412 | 0. 790885 | 0. 877682 | 1. 293636 | 0. 740887 | 1. 844385 | 0. 883884 | 0. 647306 | 0. 817841 |
| 0. 733521 | 1. 695047 | 0. 65893  | 0. 93383  | 0. 690672 | 0. 857383 | 0. 836597 | 0. 79428  | 0. 581233 |
| 2. 147368 | 2. 452319 | 3. 994187 | 2. 278364 | 3. 005385 | 2. 221645 | 2. 46975  | 2. 521531 | 2. 903561 |

6.638477 6.718265 7.162312 6.598684 6.871325 6.922189 6.712474 7.019471 7.816837  
1.722781 2.137728 2.960127 2.063794 2.309908 2.625623 1.706776 3.084295 2.188232  
0.793283 1.571143 0.688235 1.283875 1.61796 0.564252 1.29816 1.176573 0.854211  
0.611906 0.649842 1.042891 0.818032 1.013726 1.124659 0.963029 0.93565 1.253485  
1.236291 1.638773 1.459346 1.036853 0.988866 1.303885 1.179631 1.063682 1.351545  
0.946666 1.813258 0.797977 1.453756 2.259832 1.042147 1.701202 1.654229 1.24604  
1.775349 1.207521 1.387651 1.481294 1.651654 1.185915 1.530049 1.049591 1.170534  
0.924217 1.345557 4.674822 0.650203 0.911524 0.635974 0.662966 1.018729 0.416505  
3.222954 1.8614 1.648644 2.651359 5.102237 1.89784 3.306057 1.684653 2.029647  
1.016583 0.918015 1.417052 1.230162 1.365422 1.253501 1.401264 2.142833 0.944587  
1.073097 1.391342 1.061829 2.038113 1.199028 1.835046 0.642663 0.829812 0.844008  
0.642716 0.721539 0.829224 0.984826 0.382579 0.718333 1.062984 1.170337 0.660401  
2.762963 2.496022 3.021875 2.892177 4.009196 3.089576 3.287981 3.794084 3.306352  
4.290675 3.088359 2.972955 3.962516 3.728769 4.429748 3.533163 3.979901 4.824742  
1.914862 1.383252 1.713526 0.987676 2.401364 0.79778 0.931597 1.274527 0.86715  
8.232994 6.080915 5.799169 7.016043 5.24264 6.932827 5.817327 6.507104 6.614304  
1.256845 1.556066 1.292052 1.333949 1.205934 1.696226 1.605692 1.675596 1.287971  
2.982648 2.489667 2.304663 3.402852 2.732413 2.217621 2.407625 2.513433 2.471085  
2.417438 1.812722 2.459675 0.683225 2.174462 1.606914 2.869613 1.594364 1.033911  
1.334057 1.3447 1.28637 2.271617 1.624056 1.038521 1.724122 3.382983 1.271403  
1.481482 1.305267 1.768325 1.871855 1.938442 0.93386 1.114216 1.566321 1.157591  
0.896496 2.49199 2.325082 1.014724 1.024995 1.035224 0.529315 1.986488 1.316099  
3.885973 4.063091 5.416497 2.529188 3.091903 3.748672 3.568714 3.028071 3.838464  
3.085765 2.086941 1.639863 1.723696 1.205683 1.655618 1.38999 1.679845 1.444979  
1.1341 0.840427 0.799625 1.307843 1.127462 1.041869 1.215097 1.156742 1.042274  
4.928893 3.983658 4.241 3.902773 3.987964 2.775487 3.557961 3.255626 3.614356  
1.252072 1.17436 1.100361 1.300352 1.633876 0.730002 1.221848 1.25881 1.157909  
4.946447 4.553106 4.540841 3.735706 4.097497 5.010381 3.932225 4.002785 4.852347  
1.024138 2.086515 1.109464 1.73738 1.908767 1.075886 1.105331 1.563873 0.571449  
0.903075 0.719872 0.745939 1.066506 0.760394 0.855236 0.858853 0.48604 1.123438  
1.202235 0.812234 1.794722 1.041201 1.069367 0.932397 0.897795 0.945737 1.00155  
2.571551 3.896086 1.205876 4.504657 2.119047 1.432334 2.578179 1.308846 2.510509  
1.168157 1.314012 0.991609 1.139436 0.989339 0.924575 1.090914 0.93698 0.657017  
0.828457 4.242417 1.415908 1.134804 1.027056 1.46172 0.942836 1.008552 1.090765  
2.293638 1.072654 1.651328 1.442929 0.885103 1.888898 1.410205 1.207975 1.175655  
1.270114 1.407013 0.956718 0.985098 1.635221 0.594454 1.342051 0.982533 1.799202  
2.256302 2.399649 1.849117 1.722577 1.6591 1.514617 2.900668 2.30447 2.226227  
2.626328 1.629406 3.037554 1.882322 0.964344 2.140482 1.167183 1.386789 0.99591  
2.866121 3.173895 2.260097 2.286658 2.309546 2.201675 2.959406 3.005791 2.715247  
3.462322 3.99872 3.374569 3.98667 2.542238 4.110602 2.847896 3.386786 3.306654  
2.063455 3.104154 2.39688 2.995821 2.347198 3.158877 2.6279 3.062245 4.574705  
1.203948 0.929955 0.851741 1.304549 0.873535 0.89628 1.256419 1.064564 0.810383  
1.231263 2.291041 1.688193 2.165028 1.190195 1.431466 1.479259 1.43711 1.526718  
2.021882 1.546672 2.089398 2.375394 1.435948 3.092132 2.602586 2.247035 2.431833  
3.681235 3.466704 2.840921 2.622649 3.079387 2.129765 2.772325 2.889042 2.913473  
0.763833 0.531218 0.448837 1.818057 0.615517 1.637419 0.831375 0.67958 1.024064  
0.688947 1.404691 1.691092 0.950367 1.15587 1.366038 0.822497 1.061957 0.910012  
2.404048 2.33601 2.558205 3.04524 2.197907 2.237772 2.225035 3.404344 2.41943  
0.780014 0.450284 0.635313 1.6767 1.026973 0.752646 0.979882 0.931817 0.61088  
3.472755 4.321005 4.628843 4.44506 5.588703 3.09102 2.514968 4.369686 2.798414  
2.807456 2.010505 1.779237 2.961392 2.029093 1.456855 1.754737 2.195789 1.370313

1. 552183 0. 945548 1. 474204 2. 778805 0. 843909 2. 010716 1. 487734 0. 913938 1. 566891  
1. 442843 2. 013503 1. 371288 1. 870421 1. 367728 2. 598844 1. 858618 2. 455534 2. 250745  
1. 381642 1. 417022 1. 157941 2. 132602 1. 308526 2. 014627 1. 081217 1. 286661 2. 587976  
1. 699959 1. 79695 1. 623797 2. 429629 2. 851561 1. 390005 2. 829741 1. 185688 1. 648828  
1. 232724 1. 061986 0. 833008 1. 752763 0. 985898 1. 364135 1. 37196 0. 966289 1. 248629  
1. 682767 1. 910061 1. 484373 1. 890583 6. 112865 1. 852309 2. 150317 1. 777898 3. 33575  
8. 114406 7. 805887 8. 210756 6. 788173 7. 945713 7. 223504 6. 890548 7. 150366 8. 472995  
2. 605437 2. 177332 2. 441921 1. 704474 1. 392208 2. 535502 2. 043773 2. 68001 1. 478564  
1. 863852 2. 736058 2. 393648 2. 647891 3. 580075 3. 035239 2. 344459 2. 643563 2. 42487  
0. 819417 1. 245564 1. 113733 1. 282321 1. 102937 1. 403015 1. 180422 1. 13434 1. 060377  
2. 945254 3. 682953 3. 283777 3. 555331 2. 895796 3. 662876 2. 834814 2. 393156 3. 606344  
2. 035935 1. 149521 1. 070335 1. 335771 1. 691606 1. 633561 1. 565934 1. 58223 1. 281605  
0. 876472 1. 136612 0. 597914 0. 919887 0. 58118 0. 634457 1. 174655 0. 854198 0. 762979  
1. 443775 3. 160439 3. 237531 2. 571678 4. 096592 3. 773396 2. 773534 2. 976102 2. 790079  
0. 8689 1. 171836 1. 036115 0. 961096 1. 105928 0. 677609 0. 755884 1. 238392 0. 39404  
2. 360778 1. 909262 4. 701437 2. 209491 0. 906455 1. 12429 1. 799756 1. 698189 0. 793404  
1. 957034 4. 543538 3. 305393 3. 106921 2. 462372 2. 541723 3. 077677 2. 016734 4. 307727  
1. 691052 0. 871597 1. 173216 0. 957135 1. 198496 0. 855594 1. 320054 0. 91513 1. 190619  
2. 286338 3. 299419 5. 22174 2. 468976 3. 004434 2. 351296 2. 547092 2. 702532 2. 610758  
1. 741071 1. 355252 1. 092464 1. 934802 1. 830031 1. 880327 1. 012303 1. 443802 1. 762847  
2. 439111 1. 397145 1. 867507 1. 009328 0. 875861 1. 289289 1. 335972 1. 327179 1. 480611  
3. 924907 2. 733106 3. 496004 4. 704623 3. 054863 3. 981347 3. 570317 3. 451215 2. 272678  
1. 626373 2. 803609 2. 867269 1. 659294 2. 018669 1. 818107 1. 947313 3. 097301 3. 192182  
1. 532695 1. 901829 0. 853191 3. 201744 2. 717007 1. 209403 1. 047395 1. 874333 1. 788819  
1. 007415 2. 530969 2. 711069 4. 188805 4. 631654 1. 116328 4. 810955 3. 11444 1. 114893  
4. 966443 4. 830707 5. 076467 4. 308155 4. 850316 5. 578348 5. 242654 5. 157167 5. 677969  
1. 143954 1. 546904 1. 364451 1. 487203 1. 004428 0. 897207 1. 354288 1. 268091 1. 202144  
5. 176868 5. 598775 4. 48295 4. 203163 4. 357644 3. 554579 4. 654966 5. 015816 3. 700821  
3. 834789 3. 259978 3. 05395 2. 410361 3. 001797 4. 098235 3. 195538 3. 461949 4. 168692  
3. 872823 4. 184408 3. 821931 4. 073746 2. 811223 2. 826744 2. 969505 3. 110461 3. 049003  
0. 984552 1. 712093 1. 3157 1. 409808 1. 15166 1. 320737 1. 072135 1. 463864 1. 941636  
9. 977988 9. 842901 9. 697665 9. 692448 9. 6954 9. 555472 10. 04566 9. 798799 9. 602936  
2. 58931 2. 022033 1. 580092 1. 591091 2. 202933 1. 407691 1. 884348 1. 446201 1. 263644  
1. 952267 2. 184261 2. 271525 1. 67552 1. 354726 1. 602965 2. 393709 1. 935882 1. 913001  
2. 410676 1. 749592 1. 836048 1. 909922 1. 736441 1. 909532 2. 551388 2. 77083 2. 000292  
1. 464768 1. 763244 2. 682717 3. 181787 2. 562114 2. 801118 3. 082102 3. 217337 2. 681195  
5. 514245 3. 342895 3. 546636 3. 269131 4. 391198 3. 169076 3. 528325 2. 858918 5. 637711  
2. 098453 1. 385444 0. 900464 1. 382186 1. 860649 1. 030285 1. 909928 1. 455357 2. 025948  
2. 073592 2. 101549 3. 143983 2. 089048 2. 331423 2. 034662 2. 168263 1. 994475 2. 797988  
3. 637579 4. 188844 3. 803605 3. 641035 4. 828209 3. 067523 4. 258307 3. 772021 3. 429186  
4. 365973 3. 800875 3. 515686 4. 225448 3. 575135 4. 704042 4. 899234 3. 84536 4. 317766  
3. 089572 2. 735246 2. 410389 2. 697976 2. 735141 2. 825879 2. 702299 3. 160277 3. 092684  
4. 556104 4. 840063 6. 256906 6. 864323 5. 243368 5. 10386 5. 803612 6. 109022 5. 37347  
1. 375213 1. 589146 1. 079734 2. 846739 1. 437224 1. 185377 1. 074787 0. 994 0. 893601  
1. 726659 2. 029266 1. 077921 1. 140314 0. 873618 1. 685866 1. 455387 1. 174932 1. 045247  
1. 816856 2. 803716 2. 881226 2. 232781 1. 437699 2. 174735 3. 057996 1. 941256 2. 750864  
2. 290261 2. 178929 1. 493487 2. 995889 1. 799857 2. 440745 2. 058952 2. 751583 1. 862716  
2. 434985 2. 369859 3. 369122 1. 741659 1. 85813 2. 329822 2. 620507 2. 504691 1. 812957  
3. 514856 3. 357829 5. 04631 4. 06766 4. 38194 3. 916731 2. 568785 3. 709248 4. 844071  
1. 525563 1. 28665 1. 266526 1. 507885 2. 326333 0. 864924 0. 931849 1. 007527 1. 836649  
1. 187652 1. 652441 1. 278447 1. 119883 1. 172622 1. 41203 0. 94038 1. 754634 0. 807069



2.064715 2.574225 3.546588 2.768568 2.097207 2.000999 2.278338 2.343383 2.374027  
4.368912 4.53305 5.84713 4.70828 6.005551 3.439685 4.501453 5.075282 3.739099  
4.028647 1.647428 3.826355 2.419231 1.75355 1.402065 3.479121 2.146515 3.656425  
0.994684 1.32844 1.120682 1.000606 1.072167 1.540977 0.699727 1.64205 0.617437  
2.018111 1.419106 1.685838 2.306655 1.925021 1.80797 2.163804 1.68432 2.152767  
2.775914 1.184245 2.437261 1.317296 2.420976 1.924583 2.199891 2.359892 2.403362  
2.889856 2.273045 1.806042 2.12813 1.665579 2.062484 1.772518 1.962471 2.376203  
1.358926 1.234503 1.869176 1.232188 1.241957 1.387782 2.322694 1.927716 1.417968  
0.536481 0.511096 2.961849 0.220112 2.49137 0.764026 1.107432 2.493017 0.47039  
1.379635 1.275481 2.267148 1.092524 1.199151 1.111338 0.980297 2.930444 2.791074  
6.407829 5.753063 6.453027 6.454265 6.931208 7.268009 6.573848 6.62866 7.245328  
1.424275 3.508731 2.395347 1.769025 2.617053 2.068034 1.887907 2.757537 1.271252  
2.672992 2.979019 3.352493 2.432094 3.361428 3.009873 2.256002 3.250319 2.756258  
2.437873 2.355519 2.154309 2.777166 2.432499 2.142315 2.496758 2.469373 2.310256  
8.074588 7.818734 8.123796 7.966141 7.752779 8.762488 8.318697 8.21987 8.129593  
5.868253 5.76377 6.571533 7.223932 6.333441 7.132751 6.78953 6.969918 7.092456  
1.14189 1.151194 0.940245 1.515711 1.154716 1.331415 1.575663 1.138683 2.107447  
3.493025 3.643324 3.6624 2.669354 3.421939 4.08269 3.879094 4.770699 4.724507  
5.557658 6.495823 6.323042 5.927152 6.737283 5.972326 6.09487 5.283959 6.228482  
1.497216 1.901198 1.335584 1.735771 1.37026 1.699416 1.926177 1.117679 1.436247  
1.254044 0.927826 1.36366 1.426948 1.36257 1.831342 1.272854 1.873237 1.845198  
3.000724 1.922014 1.938603 2.347474 2.276492 2.647973 4.452538 3.269517 2.37237  
5.371981 6.680815 6.014875 6.076299 5.354199 6.156594 6.405192 6.482534 5.961811  
0.977593 2.165631 2.967008 3.225525 2.378331 0.852277 1.205177 2.185459 2.926452  
2.575241 3.061779 2.317797 2.832151 2.49985 3.368674 2.839993 3.285969 2.916402  
6.997098 7.69706 6.574421 6.815935 6.720284 7.568599 6.57908 6.477632 6.144566  
1.891977 2.741779 1.664277 5.746729 1.636411 3.546325 1.082819 3.363195 2.660931  
2.177187 1.877662 2.484268 2.492034 2.812376 1.916026 2.757312 2.38568 2.148657  
7.850938 7.552466 7.79138 7.409357 7.646853 7.520948 7.924168 7.640168 7.599827  
2.608919 2.347569 3.337121 2.526827 3.30523 3.108797 2.672474 2.745771 2.611487  
1.530834 2.291479 1.461825 1.388388 1.400472 1.982113 1.355462 1.870296 1.64398  
7.273171 7.696514 7.568767 7.217261 7.195575 4.880465 4.02534 5.111701 5.226459  
3.574965 2.972219 3.856422 2.876261 3.726902 3.28163 3.130677 2.653172 2.847711  
3.64593 3.550683 4.020152 4.003133 4.23949 4.657084 3.862546 3.796459 4.542723  
5.707095 4.586355 5.677857 6.090642 5.900146 5.08855 6.450411 6.91153 6.2339  
4.711691 5.707983 4.569809 3.795927 3.017946 2.572595 2.239506 2.055319 2.236877  
2.891473 3.914964 4.123795 3.970939 3.929373 3.458409 2.603783 3.68848 3.851229  
1.028232 2.393141 1.250843 1.020665 1.11672 1.571451 1.067652 1.47268 1.146409  
5.195365 6.105296 5.01126 5.371653 6.867798 6.504877 8.119159 7.868586 7.300177  
5.584822 4.74931 4.652377 3.795342 3.813791 5.998105 4.038355 2.778683 3.360192  
1.480113 1.6234 1.45618 2.284828 2.204578 1.312839 1.141429 1.357645 2.482539  
7.106406 6.88174 6.117092 5.877885 7.031145 7.606125 6.795828 6.513901 7.01831  
1.261599 1.093137 0.940306 1.13119 1.507825 1.139332 1.02317 1.370892 1.214385  
1.502105 1.608966 1.780573 1.12514 1.18251 1.711876 0.913083 1.398763 1.280812  
1.083215 1.812303 1.564664 1.662306 2.839597 0.786531 3.300121 1.397209 2.125937  
1.49428 2.651371 1.163413 1.581647 1.172009 1.625257 1.443367 2.485306 1.134737  
2.039396 1.872842 1.662608 2.437229 2.643852 2.423545 2.138785 2.697318 1.721623  
6.731099 6.989277 7.127904 7.173382 7.329445 6.475056 7.027183 7.598045 7.826107  
5.478427 6.13035 6.505228 6.59317 6.697994 3.69571 7.117143 5.91608 5.684894  
6.776555 7.948367 7.769366 7.354378 7.611865 5.420056 8.138053 7.969639 7.629898  
1.235291 1.278177 0.788912 1.226627 0.983354 1.409151 1.790425 1.335241 1.75318

1. 232688 1. 732207 1. 269062 1. 965565 1. 867496 2. 57664 1. 783248 1. 913414 1. 622553  
3. 459639 3. 416642 2. 557205 2. 118503 3. 943374 1. 787147 3. 450147 2. 577586 2. 798575  
2. 270521 2. 374973 2. 662696 2. 228753 2. 337099 1. 200825 1. 74758 1. 855922 2. 0482  
1. 794341 1. 1421 0. 767441 1. 109565 1. 396246 1. 375726 1. 08498 1. 242491 1. 483746  
1. 967184 1. 689548 1. 763465 1. 887257 1. 325227 1. 892825 1. 472383 1. 798083 2. 119773  
1. 654967 2. 361375 2. 035704 2. 370853 1. 720803 1. 801615 1. 598167 1. 788457 2. 022541  
1. 740668 3. 528048 2. 164754 3. 009547 3. 685221 1. 883208 2. 713963 2. 163928 2. 450287  
5. 339663 5. 576305 6. 00313 4. 252313 5. 453932 5. 533913 4. 86276 6. 552574 6. 203958  
2. 108094 1. 466465 1. 799738 2. 242209 1. 849274 1. 503229 1. 423663 1. 787479 1. 516929  
2. 519655 2. 298566 2. 035805 1. 316656 2. 462565 2. 089733 1. 966897 2. 121498 1. 721697  
1. 861477 1. 722562 1. 449068 1. 579195 1. 342722 2. 308313 1. 341203 1. 717099 1. 559699  
4. 245474 1. 410778 2. 273929 3. 883256 2. 20269 2. 737604 2. 477145 2. 420476 2. 259261  
1. 251007 1. 191521 1. 742588 1. 43452 1. 195161 1. 092139 1. 236733 1. 628655 1. 307773  
1. 202178 1. 848849 1. 675775 1. 6406 1. 696514 1. 331621 1. 4593 1. 613804 1. 400487  
1. 275633 2. 245171 0. 760648 0. 705307 1. 14447 1. 344863 1. 218146 0. 952925 1. 461482  
1. 474754 2. 036845 1. 840912 1. 281355 1. 556622 1. 707709 1. 161235 1. 434309 1. 753431  
1. 499507 1. 766575 1. 858808 2. 056524 2. 020863 1. 76475 1. 770735 1. 4158 2. 290029  
1. 445077 1. 83941 1. 628113 1. 627082 1. 16623 1. 41456 1. 122768 1. 94116 1. 363868  
0. 592881 1. 084805 2. 385082 1. 195585 1. 081396 1. 47445 1. 013873 1. 040531 1. 901796  
0. 811834 0. 886576 0. 678877 1. 18087 0. 776807 0. 698218 1. 104278 0. 61054 1. 083921  
1. 596931 1. 32831 1. 783202 2. 055505 2. 025729 2. 424535 1. 197586 3. 176529 2. 003316  
1. 637764 1. 630923 1. 480959 1. 90423 1. 581446 1. 763078 2. 003079 1. 90203 2. 164652  
1. 322276 3. 671141 3. 085385 1. 318376 1. 496349 2. 100523 1. 065077 1. 173028 0. 922794  
0. 93722 1. 304272 0. 614856 1. 084516 0. 680487 0. 903554 1. 07966 1. 308334 0. 970884  
3. 334067 3. 459113 3. 390588 0. 877577 0. 826744 2. 012268 0. 640328 1. 412435 1. 196856  
1. 705306 2. 531536 2. 530806 2. 149044 2. 288011 1. 58181 1. 793601 2. 171213 1. 247204  
0. 906121 3. 861323 2. 081097 1. 946633 4. 051937 1. 17679 1. 001292 2. 314456 1. 643767  
1. 613607 2. 186406 1. 146423 0. 909414 2. 563218 1. 062238 0. 896 1. 70777 1. 291719  
0. 880144 0. 764463 1. 266976 1. 4172 0. 999399 1. 034233 1. 478082 0. 643667 0. 866007  
1. 08878 0. 818907 1. 187011 0. 902699 1. 744292 0. 962481 0. 652862 1. 17096 1. 646443  
1. 205029 1. 008115 0. 466192 1. 799723 0. 429983 1. 14667 0. 777604 0. 892414 0. 79112  
1. 166139 2. 060049 1. 46538 1. 99606 4. 062306 0. 982597 1. 157837 1. 106424 1. 11799  
1. 704679 2. 429592 3. 804824 2. 702087 2. 873381 1. 931022 2. 013016 2. 209917 2. 223695  
0. 723747 1. 37192 0. 849135 1. 359341 0. 481013 0. 994161 1. 298646 0. 857052 0. 871794  
2. 535941 1. 706051 0. 983889 1. 38098 1. 79394 1. 238291 1. 353373 1. 214828 1. 70201  
1. 190758 2. 472445 1. 364185 2. 422847 1. 312726 1. 416373 0. 861843 1. 265009 0. 88554  
7. 141032 4. 245716 5. 355998 3. 87868 5. 429559 5. 256115 3. 301891 5. 456566 2. 305699  
1. 302925 2. 129712 2. 652234 2. 696604 2. 856754 1. 434465 2. 59231 1. 387318 1. 614312  
3. 067559 3. 477424 3. 484032 1. 178573 4. 62031 0. 97269 1. 025014 1. 003211 0. 80789  
2. 845743 3. 032521 2. 495503 2. 40929 3. 796733 1. 550408 2. 530509 2. 387343 2. 614979  
3. 616775 3. 446443 1. 229347 3. 962935 1. 964961 1. 289601 1. 019343 1. 25843 1. 633537  
2. 836406 1. 54911 1. 990804 3. 809084 2. 691181 1. 374511 1. 198365 2. 312917 1. 7716  
2. 079524 1. 762399 2. 449487 2. 377634 2. 30538 2. 504025 3. 089584 2. 884807 2. 032986  
0. 670662 1. 12004 0. 921079 1. 176247 0. 99885 1. 066338 1. 315621 0. 974744 1. 256226  
1. 31006 1. 183252 1. 287118 2. 407454 1. 414478 1. 785408 1. 352652 1. 891206 1. 21395  
3. 656568 1. 826168 2. 712413 3. 001571 3. 513692 3. 623541 3. 446126 1. 866701 2. 072726  
1. 300326 1. 640998 1. 349866 2. 142496 1. 899496 1. 211586 1. 461419 1. 830516 2. 411284  
1. 652514 1. 908383 2. 362003 1. 680152 2. 394252 1. 850334 1. 514507 1. 725436 2. 089474  
1. 994418 1. 494093 0. 973042 1. 410263 1. 354965 1. 296444 0. 894511 1. 716471 1. 16473  
2. 294649 2. 232331 2. 338687 4. 028156 1. 746593 1. 388602 1. 626453 1. 605175 1. 715396  
1. 266433 1. 900309 1. 070961 1. 369006 1. 956793 1. 078594 1. 523969 1. 463765 1. 296682

1. 335744 1. 489303 1. 285053 2. 053812 2. 025655 1. 69085 1. 709827 1. 416717 1. 45783  
3. 777582 4. 124758 3. 735909 4. 209844 4. 181508 3. 84972 4. 060764 3. 583642 3. 660778  
0. 963354 1. 505055 1. 263042 1. 096797 1. 209156 1. 118506 1. 310302 0. 873984 0. 925977  
0. 963435 1. 157523 1. 090834 1. 248695 1. 05359 1. 472486 0. 693295 1. 948562 0. 939564  
5. 070348 2. 96007 2. 942347 3. 364104 5. 103075 3. 643144 3. 819953 3. 299375 3. 330613  
7. 586303 7. 067149 7. 504209 6. 917602 7. 362264 6. 939213 7. 339421 7. 506814 7. 346917  
2. 569901 1. 994457 1. 793562 1. 928022 1. 872496 2. 480187 1. 820162 2. 154218 1. 916929  
3. 272814 5. 543955 5. 622943 2. 290983 1. 728282 2. 111674 1. 992344 1. 389557 3. 404123  
5. 73977 6. 962104 7. 068792 6. 8597 7. 156578 6. 375943 7. 071592 7. 350842 6. 713499  
1. 367598 2. 225316 2. 160244 1. 702734 1. 780824 1. 076329 0. 946217 1. 492621 1. 121074  
1. 35964 1. 181646 1. 190282 1. 038895 3. 234911 1. 648974 1. 239422 0. 877468 1. 29111  
1. 281 1. 022566 1. 113995 1. 338405 1. 558561 1. 538824 1. 430679 1. 244438 1. 347475  
2. 471906 1. 935504 2. 315641 2. 741891 2. 268182 1. 763566 1. 551823 1. 434956 1. 819375  
3. 612219 3. 19579 2. 818487 1. 664178 3. 390659 2. 090515 2. 339997 1. 421221 1. 333551  
3. 064933 4. 173101 3. 067736 1. 841187 2. 253252 2. 382 1. 856768 1. 716404 1. 995937  
3. 17499 3. 595884 4. 92761 1. 129746 2. 946397 3. 068282 2. 610507 3. 832264 3. 925875  
4. 306672 5. 00457 5. 16358 2. 320961 4. 967445 2. 778088 2. 755909 4. 706756 2. 734244  
1. 210189 2. 302129 1. 826723 1. 235095 1. 435787 1. 458009 1. 063697 1. 620594 1. 787147  
1. 855464 2. 67374 1. 432771 2. 659612 1. 610913 2. 247027 3. 034378 1. 497769 1. 512525  
2. 726241 2. 054484 3. 024977 1. 625499 2. 724436 1. 786963 1. 800351 3. 354171 1. 993868  
1. 463352 1. 701258 1. 980358 2. 031094 1. 13451 1. 278561 1. 73571 1. 064911 1. 131765  
0. 929115 1. 020406 0. 636429 1. 344384 0. 968822 1. 409512 1. 238734 1. 547412 1. 22401  
3. 808739 1. 35 4. 750072 5. 248434 5. 375799 2. 041623 2. 020671 3. 429869 2. 238142  
2. 502657 1. 949262 3. 133584 3. 782781 3. 092192 2. 225872 2. 686766 1. 972821 2. 178919  
2. 500411 2. 036808 1. 765674 1. 771974 2. 713673 2. 826992 1. 910143 2. 194803 2. 053394  
1. 45608 1. 273711 1. 338657 1. 345446 1. 190551 1. 045234 2. 044451 1. 269901 1. 083505  
1. 429771 1. 833007 1. 491243 1. 20365 1. 928109 1. 252597 1. 816149 1. 174416 2. 081321  
1. 152834 2. 259892 1. 594143 1. 892261 0. 874397 0. 880824 1. 09067 1. 743355 1. 207525  
2. 499194 2. 723548 1. 970881 3. 463552 2. 361566 1. 501607 1. 585773 1. 89791 2. 718007  
3. 306689 3. 948847 1. 761726 2. 827119 3. 972113 1. 588425 1. 352424 1. 700516 1. 484903  
0. 709954 1. 262209 0. 868171 1. 637213 1. 098356 1. 898481 1. 314259 2. 124386 1. 771486  
2. 444274 2. 265061 1. 808814 2. 128708 1. 855194 2. 823187 2. 405307 2. 219687 3. 281521  
2. 235224 2. 238182 4. 177925 2. 708968 3. 826099 1. 825019 2. 175311 1. 947293 2. 570124  
1. 290578 2. 011014 1. 416026 2. 315531 2. 135599 1. 26111 1. 952701 1. 745823 1. 937882  
3. 086823 1. 837567 2. 585761 2. 597591 2. 7867 1. 893734 2. 862349 3. 455762 2. 502871  
1. 658329 1. 79086 1. 642093 1. 602522 1. 290152 1. 328632 1. 663188 1. 458864 2. 022538  
1. 536716 2. 262334 1. 785104 1. 859032 2. 066695 2. 302956 2. 659147 2. 138291 1. 563643  
0. 924558 1. 293239 1. 092029 0. 890269 0. 917114 0. 910048 0. 748516 0. 69484 1. 002363  
1. 947557 1. 056588 0. 961652 1. 431877 0. 885755 1. 073305 1. 677673 1. 987939 2. 011573  
1. 539159 0. 7302 1. 102664 1. 128773 1. 585157 1. 465566 1. 806784 1. 38471 1. 12766  
2. 225323 2. 808665 3. 878022 4. 292538 3. 250396 1. 675682 3. 01403 1. 915001 2. 113816  
1. 729121 2. 011736 2. 875604 2. 083365 2. 602706 1. 637051 1. 371131 2. 858148 2. 908362  
1. 120562 1. 329868 1. 057996 1. 472305 1. 300217 1. 29977 1. 064988 1. 223262 1. 348081  
1. 840649 2. 805146 1. 873815 1. 406422 2. 338734 2. 415978 1. 926343 1. 916232 1. 710219  
1. 354979 2. 105286 1. 601551 2. 449542 1. 201303 1. 407461 1. 432441 1. 804788 1. 196803  
1. 340556 1. 614389 2. 8383 2. 413836 1. 52657 1. 640418 1. 079006 1. 601449 2. 000719  
1. 884602 1. 370602 1. 684111 1. 417176 1. 918283 1. 589616 1. 812891 2. 351599 1. 303229  
2. 209813 1. 773074 2. 003941 2. 538484 1. 903937 1. 662008 1. 967837 1. 714591 2. 008846  
1. 794971 2. 046174 1. 399257 1. 078129 1. 272817 1. 158312 1. 196827 1. 861795 1. 141008  
2. 382912 2. 715621 5. 452929 2. 459233 2. 874322 2. 793103 1. 766715 1. 958468 3. 091971  
4. 525565 3. 842501 4. 826669 3. 091209 3. 650371 4. 948899 5. 147831 4. 550224 5. 088617

|           |           |           |           |           |           |           |           |           |
|-----------|-----------|-----------|-----------|-----------|-----------|-----------|-----------|-----------|
| 1. 420691 | 1. 526305 | 1. 458282 | 1. 387913 | 1. 365431 | 1. 503112 | 1. 638217 | 1. 658059 | 1. 565961 |
| 4. 05738  | 2. 017056 | 1. 49938  | 1. 924013 | 1. 302708 | 1. 757963 | 1. 177916 | 1. 446809 | 1. 826174 |
| 2. 497751 | 2. 636357 | 3. 632972 | 1. 22398  | 1. 498604 | 1. 57116  | 1. 830912 | 1. 499664 | 2. 482976 |
| 1. 095492 | 1. 136519 | 1. 30795  | 0. 963443 | 1. 069591 | 0. 776664 | 1. 184548 | 1. 064846 | 1. 103333 |
| 3. 789589 | 3. 170504 | 2. 655648 | 3. 028545 | 2. 189516 | 2. 520462 | 2. 414284 | 3. 831337 | 2. 389654 |
| 1. 709676 | 1. 946506 | 1. 495042 | 1. 515307 | 1. 429496 | 1. 248978 | 1. 536432 | 1. 434116 | 1. 775495 |
| 1. 935537 | 1. 139072 | 1. 016349 | 1. 19666  | 1. 195493 | 1. 394379 | 1. 312459 | 1. 763395 | 1. 479081 |
| 1. 378934 | 1. 607297 | 1. 280919 | 1. 666137 | 1. 645934 | 1. 507513 | 1. 36939  | 1. 844251 | 1. 667571 |
| 1. 873763 | 1. 305364 | 1. 083377 | 0. 908431 | 1. 124933 | 1. 178939 | 0. 790058 | 1. 817892 | 1. 068718 |
| 2. 041797 | 1. 979288 | 1. 265053 | 0. 995895 | 1. 006937 | 0. 894186 | 0. 929091 | 1. 417859 | 1. 353073 |
| 1. 054381 | 1. 70046  | 2. 058824 | 1. 252961 | 1. 383061 | 1. 424705 | 1. 326296 | 1. 534523 | 1. 397403 |
| 1. 142732 | 1. 415473 | 1. 193143 | 2. 587169 | 1. 40368  | 1. 490047 | 1. 329845 | 1. 043682 | 1. 522139 |
| 1. 006186 | 1. 221554 | 0. 795413 | 0. 82329  | 0. 834285 | 1. 306905 | 1. 416553 | 0. 775746 | 2. 288483 |
| 1. 182657 | 1. 456318 | 1. 006538 | 2. 004894 | 1. 110258 | 0. 913108 | 1. 09539  | 1. 521138 | 1. 344633 |
| 3. 302657 | 5. 727361 | 2. 319873 | 1. 769789 | 3. 615833 | 1. 279898 | 1. 202234 | 1. 883941 | 1. 371605 |
| 1. 470721 | 1. 503586 | 1. 117138 | 1. 795232 | 1. 417619 | 1. 777287 | 1. 204942 | 1. 365588 | 1. 27982  |
| 1. 459733 | 1. 952774 | 1. 920193 | 1. 51539  | 1. 452678 | 1. 638759 | 1. 727825 | 2. 09408  | 2. 417231 |
| 1. 636352 | 1. 638407 | 1. 945091 | 1. 729375 | 1. 46133  | 2. 43449  | 1. 695858 | 1. 720411 | 1. 641494 |
| 2. 48483  | 2. 005315 | 2. 279688 | 2. 230737 | 3. 043656 | 3. 071318 | 1. 994622 | 2. 60074  | 2. 354975 |
| 1. 681615 | 1. 960511 | 1. 877247 | 2. 651713 | 2. 642682 | 1. 854156 | 1. 626978 | 1. 419168 | 2. 180086 |
| 2. 809289 | 3. 083637 | 2. 171107 | 1. 968603 | 3. 221574 | 1. 723708 | 2. 340264 | 2. 391838 | 1. 569781 |
| 0. 576671 | 2. 614674 | 2. 048818 | 1. 832048 | 0. 778943 | 1. 798521 | 1. 329704 | 2. 022242 | 1. 668586 |
| 0. 964635 | 1. 326492 | 1. 200634 | 0. 84292  | 1. 091437 | 1. 4463   | 1. 237854 | 1. 249623 | 1. 145998 |
| 1. 256998 | 1. 073734 | 0. 712399 | 1. 200076 | 1. 282367 | 1. 077978 | 1. 256938 | 1. 808353 | 0. 912479 |
| 0. 892316 | 1. 076411 | 0. 654984 | 1. 262378 | 1. 744794 | 0. 738556 | 1. 899272 | 2. 260957 | 1. 997613 |
| 1. 281526 | 1. 406525 | 1. 398044 | 1. 061255 | 0. 963575 | 0. 80298  | 0. 896304 | 1. 504824 | 1. 242336 |
| 1. 314441 | 1. 269678 | 1. 181072 | 1. 145388 | 1. 155096 | 0. 862929 | 0. 974504 | 0. 811971 | 1. 013101 |
| 2. 084958 | 2. 012443 | 1. 751477 | 2. 859203 | 2. 65042  | 1. 899566 | 1. 748765 | 1. 628775 | 1. 962865 |
| 1. 052822 | 0. 478821 | 1. 135878 | 2. 340122 | 0. 738247 | 0. 902899 | 1. 026553 | 1. 420638 | 0. 788238 |
| 2. 871278 | 1. 04706  | 3. 395555 | 3. 11921  | 5. 531257 | 4. 663282 | 1. 245394 | 1. 165315 | 2. 538709 |
| 1. 373613 | 1. 922636 | 1. 032778 | 1. 521208 | 1. 880531 | 1. 345562 | 1. 502263 | 1. 605371 | 2. 037282 |
| 1. 925974 | 1. 801457 | 0. 757699 | 0. 834029 | 0. 447441 | 1. 167684 | 1. 76053  | 1. 145318 | 1. 474765 |
| 1. 520934 | 2. 722839 | 2. 004713 | 1. 727015 | 2. 063724 | 2. 415138 | 1. 961147 | 3. 024151 | 2. 293333 |
| 1. 556037 | 2. 428599 | 1. 00358  | 2. 020124 | 1. 633877 | 1. 691702 | 1. 324987 | 1. 772632 | 2. 800979 |
| 2. 181372 | 1. 228674 | 0. 775398 | 0. 914007 | 1. 072501 | 1. 176874 | 0. 997418 | 1. 521677 | 1. 028695 |
| 3. 259776 | 2. 478405 | 3. 020661 | 1. 972524 | 1. 754195 | 1. 630416 | 1. 99389  | 2. 013529 | 3. 177488 |
| 1. 08297  | 1. 009876 | 0. 761752 | 0. 945546 | 0. 925177 | 1. 207596 | 1. 269291 | 1. 424367 | 1. 021025 |
| 2. 15782  | 1. 961658 | 2. 844902 | 1. 284169 | 1. 90886  | 2. 351046 | 1. 86181  | 2. 272454 | 2. 631501 |
| 1. 393353 | 1. 482234 | 1. 409604 | 1. 464956 | 1. 887309 | 1. 805182 | 1. 460041 | 1. 701678 | 1. 782959 |
| 2. 54478  | 2. 80049  | 1. 905914 | 2. 931452 | 2. 278664 | 1. 845678 | 2. 475911 | 1. 857442 | 1. 667591 |
| 3. 130721 | 1. 767806 | 1. 782871 | 1. 56795  | 1. 611979 | 1. 466695 | 1. 611209 | 1. 529486 | 1. 568783 |
| 0. 734851 | 0. 869096 | 0. 699146 | 1. 739728 | 1. 002337 | 0. 92553  | 1. 031907 | 1. 218518 | 0. 985427 |
| 4. 582699 | 2. 08597  | 1. 58955  | 2. 862918 | 2. 060188 | 1. 500346 | 1. 365898 | 2. 88299  | 1. 169749 |
| 1. 40734  | 1. 020989 | 0. 896326 | 0. 547511 | 1. 335798 | 1. 129424 | 0. 722447 | 1. 044724 | 1. 218607 |
| 1. 285557 | 2. 682269 | 1. 608727 | 1. 939793 | 1. 69901  | 1. 766232 | 1. 272478 | 0. 850857 | 1. 553587 |
| 1. 884967 | 2. 224854 | 2. 023763 | 1. 574805 | 2. 094714 | 1. 531775 | 2. 301217 | 2. 834646 | 2. 971108 |
| 1. 54878  | 2. 147501 | 1. 953473 | 2. 868585 | 1. 575448 | 2. 608704 | 1. 703921 | 1. 763381 | 1. 044915 |
| 1. 916619 | 1. 757264 | 2. 09232  | 2. 1832   | 2. 451218 | 1. 793925 | 1. 822343 | 1. 806607 | 1. 805837 |
| 2. 091816 | 2. 446402 | 1. 871811 | 1. 499638 | 1. 590563 | 2. 640748 | 2. 048202 | 2. 103261 | 2. 345262 |
| 1. 224105 | 1. 207659 | 2. 40038  | 1. 203491 | 1. 276941 | 1. 59905  | 1. 198024 | 1. 090304 | 0. 948456 |
| 3. 770534 | 0. 770131 | 1. 381617 | 1. 382705 | 1. 026259 | 1. 704818 | 1. 348184 | 2. 683665 | 1. 186312 |

3.298358 3.06178 3.363159 4.069448 3.379806 2.587391 2.111691 2.979817 2.239404  
2.624238 2.424899 2.747141 1.919126 2.619712 2.731795 1.673391 2.176426 2.15663  
1.751525 1.218538 4.448136 4.120519 2.953266 1.76378 4.454946 1.885731 2.075031  
2.121808 3.831172 1.590644 1.995755 2.380147 3.766744 3.727044 1.497666 2.440446  
1.064141 1.887547 1.077169 1.482408 1.355275 1.452409 1.383623 1.303928 1.258463  
1.976968 2.750733 2.04821 1.925036 1.866115 1.359397 2.738672 1.830853 1.919827  
4.295829 2.562289 3.107563 3.620513 3.139417 4.23125 2.695582 3.18179 3.371759  
1.571018 2.148231 1.292214 1.74639 1.404322 1.551427 1.332922 1.539633 1.486362  
3.412311 3.739343 4.447791 3.261611 5.762764 1.679319 1.65569 2.480679 2.095776  
2.055179 3.456862 3.392112 1.815231 1.428244 1.766871 1.601198 2.914171 2.672848  
2.110592 1.892274 2.604544 3.054505 1.754737 1.70653 1.955925 2.520947 2.158422  
2.589706 2.422831 2.370998 2.647696 2.285785 2.896282 1.901155 1.889018 2.612214  
2.090057 1.867432 1.627961 1.813908 2.273414 1.54756 1.711333 1.844184 2.157814  
5.705972 5.745908 5.451295 3.87541 5.369383 2.123752 2.434189 3.07341 3.433417  
1.202216 2.720572 1.341787 1.278076 1.24658 1.83965 1.40307 1.414161 1.361676  
3.767801 2.895261 3.158752 1.279413 4.060089 2.103114 2.293544 1.299443 1.952536  
1.075079 2.62519 1.531134 1.795672 1.133867 2.070537 2.714217 1.398427 1.189785  
2.601215 1.924527 1.616928 1.77149 2.999498 1.508314 1.904489 2.336658 1.765344  
6.550916 6.292453 6.550157 5.499037 5.542352 2.268551 4.374441 5.709687 2.685435  
1.834627 1.228888 1.205849 1.703469 2.038496 1.527996 1.513864 1.702577 2.868986  
6.050317 5.600828 4.624108 3.677075 4.316354 4.734311 5.241736 3.764083 3.58469  
1.782684 1.537807 1.334823 1.633441 1.600207 1.093959 1.841518 1.495978 1.265377  
5.249565 4.146524 5.335865 2.658293 1.774237 1.591128 3.607308 1.366712 1.81182  
1.781258 1.31823 1.703817 2.087397 1.52276 2.095506 1.0987 1.336271 2.067425  
1.213537 0.840994 1.103041 1.025923 1.217158 1.385032 0.760891 1.002331 1.140096  
1.313096 2.030195 1.707058 1.307244 1.252029 1.522564 1.08389 1.484848 2.048903  
2.303832 2.844265 3.090946 1.63806 2.168226 2.664115 1.567984 1.535954 2.680607  
1.220985 1.135346 1.344368 1.385173 1.339596 1.111038 1.517757 1.732114 1.272683  
1.450391 1.325095 0.581707 1.946818 1.371071 1.578169 0.803119 2.315679 0.836429  
2.519918 3.686852 3.477408 1.538857 4.661599 1.893576 3.012881 1.733393 1.952137  
3.458717 2.209843 2.279174 2.856086 2.676843 2.127773 2.470946 2.16283 2.448982  
0.811468 1.171745 1.328323 1.206855 1.033049 1.339607 1.358897 1.177809 1.37769  
2.884825 1.833713 1.761586 2.291145 1.922423 1.723417 2.493694 2.364021 2.259726  
1.926382 2.806927 3.39851 2.258087 2.069852 1.915066 1.742388 2.279286 2.390727  
0.919278 1.373202 2.551523 2.06949 1.533493 1.563461 2.038966 0.962779 1.847228  
5.129032 5.313558 5.138971 5.571138 5.382906 5.32378 5.300586 5.230447 6.516136  
1.386107 1.403721 1.332046 1.204304 2.372836 1.20567 1.508472 1.727053 1.1128  
4.035297 3.767156 3.232682 2.836925 3.179525 3.19522 2.51429 2.32534 3.490325  
1.74775 2.39001 2.891955 3.56063 2.348522 2.084869 2.092361 1.989152 2.264804  
0.790597 1.265813 1.527262 0.73101 1.091543 1.759673 1.948898 2.13363 1.173671  
2.387865 2.710669 1.255993 2.481442 2.513016 1.925013 1.8459 2.617484 1.689966  
1.164495 1.898991 1.022325 1.629413 1.153692 0.7357 0.82866 1.345321 1.089139  
2.332407 2.553886 3.55678 4.663398 1.637514 2.387491 4.130684 2.434721 2.67959  
3.197928 4.068193 4.139935 4.526643 5.006318 2.715808 5.807791 4.000986 3.833905  
3.401592 2.873519 4.79559 5.658257 3.164465 2.14977 3.566443 2.405373 2.722921  
2.418089 1.308206 3.927208 1.971148 1.053616 1.809477 2.578775 1.853607 2.010727  
2.812733 2.841684 2.793044 3.47487 3.082082 2.57412 2.90173 3.459334 3.395171  
1.519927 0.909749 2.788182 1.552359 6.380853 4.0326 1.373746 1.562417 1.41239  
5.203986 3.504763 3.476154 1.356859 3.029022 3.432974 1.320711 1.01104 2.974564  
1.431299 1.616527 1.033276 2.433063 2.090728 2.408528 1.546471 1.304315 1.432583  
2.041252 2.228066 2.710599 2.177587 2.726579 1.580558 2.066259 1.203456 1.422687

2. 531796 2. 535686 2. 235079 2. 238431 1. 911081 1. 993639 2. 104297 1. 928207 2. 227563  
1. 292103 1. 184603 1. 06318 1. 415698 1. 548692 1. 925271 1. 632814 2. 39854 1. 752796  
3. 489337 4. 539261 3. 951654 3. 708769 3. 99155 4. 385823 4. 046516 3. 554393 4. 602134  
1. 16345 1. 408205 1. 072108 1. 865282 1. 26096 0. 973296 1. 237841 1. 164564 1. 634108  
5. 548571 6. 091183 6. 098004 6. 145897 6. 260402 6. 253236 6. 196845 6. 736683 5. 979886  
2. 740441 0. 99075 1. 009652 0. 879067 0. 916935 2. 077282 1. 249538 1. 128409 0. 984183  
3. 157734 2. 307046 3. 360172 2. 503445 3. 606621 3. 52527 3. 012444 3. 909195 3. 201294  
3. 045231 3. 128602 2. 135829 2. 682171 4. 999253 2. 739668 2. 374831 2. 98215 2. 74043  
1. 273095 1. 432089 1. 206316 1. 424244 1. 488973 1. 94841 1. 536589 2. 429499 1. 483948  
1. 085661 1. 39905 1. 352613 1. 362197 2. 059388 1. 442411 1. 251917 1. 342637 1. 248754  
1. 767724 1. 654726 1. 450511 2. 690156 1. 245367 1. 767039 1. 345602 1. 943482 1. 453937  
1. 293867 1. 150129 1. 153673 1. 383767 0. 820244 1. 773495 0. 80268 1. 75643 1. 388284  
0. 911114 1. 422583 1. 142677 1. 441527 1. 229387 2. 039332 0. 858099 1. 599638 1. 485915  
1. 094066 1. 417878 0. 900416 1. 666803 1. 185955 1. 206497 1. 081336 0. 933004 1. 086823  
3. 124344 2. 016761 3. 550171 1. 991639 2. 000042 1. 828642 1. 68905 1. 39666 2. 035502  
1. 70534 1. 514604 2. 332738 2. 342344 2. 441388 1. 865044 1. 408659 1. 934308 1. 189473  
1. 281695 1. 651354 1. 412688 1. 748555 1. 246974 1. 122365 1. 294656 1. 764274 1. 19901  
2. 597619 3. 10447 2. 903496 3. 084473 3. 109847 2. 380066 2. 487185 2. 446354 2. 885511  
2. 159608 1. 722051 0. 871527 2. 734376 1. 508926 0. 883287 1. 289555 1. 204201 1. 684836  
1. 725419 2. 321915 1. 726306 1. 647593 1. 709843 1. 590486 2. 03326 2. 038704 1. 440806  
3. 080483 2. 776018 3. 331184 2. 361471 3. 155216 3. 300399 2. 829776 3. 551711 3. 193996  
1. 62227 5. 390406 2. 389906 3. 542949 5. 133439 2. 165397 2. 419174 2. 165562 3. 468153  
2. 653805 4. 56015 2. 852999 2. 540312 2. 909773 3. 928721 2. 165359 2. 73073 3. 288489  
8. 648354 9. 152262 9. 206608 8. 705848 9. 120867 9. 181644 8. 905621 9. 15412 9. 173334  
8. 674847 8. 355892 8. 890009 8. 270434 8. 605694 9. 197098 8. 856669 8. 68855 8. 763582  
9. 330284 8. 735132 9. 012295 9. 108409 8. 91138 9. 913014 9. 570561 9. 176948 9. 149917  
4. 76119 4. 111071 4. 97803 5. 207833 4. 899263 7. 016095 6. 215675 6. 040259 7. 153854  
8. 724612 8. 914773 8. 732219 8. 640254 8. 747136 9. 023104 9. 000794 8. 764667 8. 702555  
9. 143023 9. 823347 9. 506131 8. 971935 9. 397327 9. 593681 9. 531513 9. 469989 9. 132694  
5. 134457 6. 895834 5. 349443 6. 892851 4. 494207 3. 109501 7. 180734 6. 427136 6. 131412  
2. 743499 3. 330137 2. 240511 3. 098052 2. 908343 1. 675096 2. 651553 3. 577652 2. 637302  
1. 207639 1. 084021 0. 614242 1. 680187 0. 408947 1. 116501 1. 072951 1. 049415 1. 502714  
1. 756598 2. 181803 2. 134098 2. 137707 3. 132417 2. 228638 1. 42754 1. 586185 2. 090395  
5. 524486 5. 780212 5. 688297 4. 916642 6. 01321 4. 584563 5. 309266 4. 880411 4. 676367  
6. 115474 5. 803981 5. 908502 5. 298227 6. 02246 3. 832624 5. 370297 2. 555848 1. 184826  
2. 13685 1. 853453 3. 526305 2. 118652 3. 717198 2. 425259 2. 544787 1. 607533 3. 118409  
2. 913372 1. 269932 1. 619001 2. 319093 1. 383429 2. 192152 2. 142375 1. 784118 1. 754494  
1. 055736 1. 1281 0. 79973 1. 806115 1. 515636 1. 494677 0. 974732 1. 164033 1. 437325  
2. 134282 1. 874757 2. 155628 1. 8131 2. 07172 1. 742016 2. 255139 1. 645645 2. 811986  
1. 756493 2. 041244 0. 776503 1. 201934 1. 200436 1. 382473 1. 705087 1. 415976 1. 486963  
2. 060916 2. 353644 2. 499021 2. 619243 2. 758209 2. 428865 3. 030783 2. 025002 2. 550435  
2. 187666 2. 158741 1. 961789 2. 017554 1. 308969 1. 452198 1. 459471 2. 062232 1. 293447  
1. 714763 2. 563483 1. 923436 1. 585253 2. 086098 2. 031283 1. 825984 2. 664456 2. 196175  
4. 520785 4. 586464 4. 623136 3. 788276 4. 483795 4. 234248 4. 210907 4. 368221 3. 630036  
0. 485138 1. 470179 1. 411163 2. 674794 2. 617823 2. 092436 1. 54516 2. 7609 0. 939262  
2. 101474 2. 170338 2. 076431 2. 134879 2. 608842 2. 218887 1. 946255 2. 471543 1. 805015  
2. 385907 3. 463831 1. 725163 1. 639946 1. 300075 1. 658097 1. 592911 1. 686417 2. 687023  
1. 396392 2. 444668 1. 161288 1. 752163 0. 99236 1. 64141 1. 41278 1. 093836 1. 187738  
2. 183078 1. 824148 1. 5213 2. 642056 1. 658247 2. 058115 1. 610544 2. 211176 2. 737457  
1. 383951 2. 235953 1. 539129 2. 362907 1. 180247 1. 477662 1. 743026 2. 164232 2. 029336  
2. 845395 5. 355552 2. 45965 4. 216535 3. 068918 4. 106615 3. 609199 2. 644024 3. 267958

1.786673 1.98364 1.078281 2.287791 1.099559 0.93934 0.733274 2.457697 0.597388  
3.911815 4.987837 5.014414 3.540282 3.630373 3.365326 3.659209 4.194505 3.002928  
4.063827 3.733156 4.867898 4.127116 3.760135 3.230454 4.363627 2.734131 4.015482  
1.92768 2.111837 1.672547 2.044571 1.748901 1.810609 1.399725 2.507706 2.808581  
4.780338 4.914461 4.698581 3.847769 5.695885 5.643403 2.82767 3.246513 2.641319  
1.517945 1.573196 0.846521 1.143967 1.11696 0.725182 1.489683 0.971346 3.210518  
3.055346 3.714769 3.234107 3.529681 3.212822 3.07584 2.857182 2.610007 3.052672  
1.085078 1.859043 1.777509 2.611313 1.439092 1.602037 1.869897 1.395322 2.24291  
0.984539 1.622412 1.549628 2.713963 1.061416 1.753251 1.898128 2.48451 1.739191  
2.076146 3.913092 3.794756 6.090188 3.359716 1.504128 3.043288 4.403496 3.479068  
2.032886 1.009296 1.318982 1.852671 1.814096 2.23975 1.490578 1.489932 1.259624  
3.143394 3.535071 3.40964 2.271073 3.164826 2.766089 2.284555 3.29724 4.301621  
2.01074 1.361979 1.467366 1.12109 1.280639 0.948959 1.32597 1.905339 1.450941  
2.385756 1.821135 1.629109 2.875193 2.067605 2.110772 1.669364 2.154045 2.243895  
3.460913 5.367401 3.393463 2.629343 5.252751 1.859262 2.374053 1.745336 2.55048  
1.133115 3.830731 1.653989 1.331808 2.892391 0.953863 2.525005 1.452948 1.694612  
2.16052 1.389061 3.954096 2.025742 1.938208 1.545288 1.663809 2.14353 1.617083  
2.05538 2.562481 2.954154 2.495434 2.595653 2.935837 2.692627 5.103952 3.285488  
1.89455 1.741308 1.451017 1.546129 1.54263 1.669938 1.32062 1.576794 1.377769  
1.526723 1.6508 1.587763 1.608594 1.539869 1.275978 1.579944 1.583828 1.502144  
1.603241 2.233486 1.851173 1.260303 1.57448 1.459824 1.799173 1.460525 1.911246  
2.047631 1.705726 1.23715 2.119762 1.705726 1.492717 1.844578 2.063854 1.652933  
1.285545 1.553756 2.98769 2.229939 2.145602 1.951914 1.48942 1.204006 1.97978  
1.564076 1.643895 1.132095 3.18189 1.456503 1.237387 2.207611 1.646106 1.572702  
1.414438 1.471206 1.528438 1.529241 1.514209 2.091079 1.422905 1.558593 1.507733  
2.604408 2.464383 1.656217 3.280159 2.373221 2.098669 2.337315 2.226343 1.612133  
1.390721 1.738585 1.451272 1.730883 1.075392 1.347614 1.340897 2.205458 1.30042  
1.634589 1.710193 1.625384 1.556194 1.358467 1.631493 1.151606 2.348492 1.581455  
1.894089 1.978455 2.387689 1.624675 1.916982 1.621504 1.414229 1.433944 1.68225  
1.308816 0.854314 1.284072 1.367644 0.700513 1.170158 1.071448 1.430339 1.13847  
1.940733 3.96346 1.706584 1.173569 1.486131 1.006499 2.895926 1.327274 1.672145  
1.157325 1.421094 0.839154 1.177942 1.753718 0.857992 1.021129 0.942676 0.701865  
1.43951 2.188983 1.649196 1.83293 1.677637 1.686681 1.087088 2.128035 2.330004  
0.859968 1.315217 0.695234 1.383551 1.037062 1.33967 1.005209 1.133543 1.108538  
2.105582 1.777389 1.991198 2.972149 1.860207 1.807324 1.677603 2.439084 1.892036  
3.704146 2.975068 3.640584 3.028022 3.328118 3.728587 1.973134 1.755092 3.19176  
2.592006 2.98593 4.312305 4.449742 3.018099 2.413107 3.824893 3.251293 3.078997  
2.658293 2.36194 3.498788 2.746239 2.201696 2.777629 2.332521 2.764287 2.149461  
2.137939 3.258033 2.087342 2.359987 2.741047 2.17564 2.381474 2.423866 2.172471  
2.025097 1.556101 1.806739 1.848734 1.617747 2.135366 1.699376 1.534544 1.880597  
1.613522 2.178368 2.309266 1.958661 2.418922 1.361954 1.584075 1.91503 1.571903  
1.687278 2.327632 1.806279 2.219284 1.234328 1.54064 1.477227 1.791678 1.204306  
3.143 2.996578 3.02388 1.575955 1.851961 1.606454 1.687079 1.946047 1.442951  
2.141771 2.823918 2.854441 1.770745 2.234736 2.556107 2.337471 2.156842 3.237327  
1.35241 1.752906 1.943431 2.381372 1.325122 1.633836 2.129726 2.562387 1.928366  
1.23176 1.230752 0.989123 1.648889 0.787353 0.771036 1.885771 1.318055 1.67676  
1.72928 3.733625 2.358932 2.340578 1.85247 1.804037 1.705331 1.830814 2.169366  
4.13184 3.325628 3.552438 3.244421 3.362012 2.802452 2.427018 2.502267 1.851102  
0.846353 1.81373 1.619806 0.699114 1.436224 1.23735 1.140254 1.151277 3.199516  
1.371387 1.379658 1.523309 1.39241 1.278732 1.459226 1.691242 1.411899 1.443219  
2.040507 1.821857 1.410277 1.695143 2.324519 1.607104 1.843835 2.863376 1.37225

2. 466745 1. 974412 2. 293704 2. 491797 2. 757038 2. 315146 2. 592801 1. 969846 2. 226876  
1. 229647 3. 438362 5. 686435 2. 148977 2. 398174 5. 92788 3. 180029 3. 860261 3. 678763  
1. 792468 1. 23982 0. 999341 1. 775783 1. 217341 1. 100452 1. 325183 1. 465058 1. 070898  
7. 169943 7. 154258 6. 783415 7. 020146 7. 077365 7. 497138 7. 127918 7. 205559 7. 550819  
4. 090293 4. 935361 4. 597628 4. 728143 4. 889633 5. 34697 4. 260757 5. 125955 5. 673067  
4. 067404 2. 89702 3. 552504 3. 444086 3. 487757 4. 122922 3. 541906 3. 138529 4. 191624  
8. 081018 7. 864037 8. 173624 8. 226102 8. 199651 4. 660173 8. 634997 9. 239928 9. 149233  
3. 618743 3. 834818 4. 443639 2. 766858 3. 567632 3. 978577 4. 147232 3. 97959 4. 117599  
6. 383241 5. 146384 5. 268943 3. 614838 4. 769999 4. 91438 4. 540658 4. 991651 4. 668709  
9. 313277 7. 459469 8. 250535 8. 518636 6. 823436 10. 26001 7. 137682 6. 327335 6. 399825  
3. 241097 2. 65946 2. 02637 5. 434837 3. 85682 2. 839557 3. 405316 4. 508063 3. 444082  
2. 563507 2. 317593 2. 196652 2. 063406 2. 563606 1. 63236 2. 634369 1. 884156 2. 858781  
3. 842387 5. 733376 6. 149413 2. 814511 4. 66204 2. 245592 4. 483458 6. 279022 4. 265498  
0. 528488 1. 01274 1. 212777 2. 279874 0. 747065 2. 705984 0. 806354 2. 704325 0. 813028  
0. 93532 1. 739846 2. 480123 1. 774584 1. 66885 1. 774033 2. 168149 1. 896475 3. 980554  
1. 5234 1. 725225 1. 54322 2. 150644 1. 335754 2. 209344 1. 750742 2. 372804 1. 498811  
4. 644444 3. 635909 4. 524658 2. 697464 4. 791892 5. 084538 4. 437579 3. 864052 3. 821447  
0. 955252 1. 327536 1. 404093 0. 946337 2. 120042 1. 11921 1. 670822 1. 140034 1. 395121  
0. 742145 0. 575823 1. 099652 1. 042126 1. 126268 0. 818432 1. 308358 1. 609788 1. 185371  
1. 187158 1. 045378 1. 515085 1. 208571 1. 169768 1. 011248 0. 986993 0. 862725 1. 449245  
1. 496223 3. 055675 1. 448615 3. 262638 1. 844116 1. 83097 1. 234216 1. 520518 2. 014113  
1. 878007 1. 913057 1. 897192 2. 48129 2. 544644 1. 914338 1. 081041 2. 216036 1. 980807  
2. 918246 1. 617002 2. 064384 1. 126005 1. 916031 1. 316374 1. 381076 1. 538629 2. 420102  
1. 787231 1. 596398 1. 733619 1. 563394 1. 422314 1. 591597 1. 638831 2. 20907 2. 374466  
4. 079798 3. 784184 2. 595455 4. 253127 3. 568078 2. 89374 2. 799249 2. 973267 3. 511606  
1. 799916 2. 788945 3. 541836 1. 738702 3. 068546 2. 147324 2. 181646 3. 48532 3. 133502  
1. 689395 4. 36294 3. 317488 2. 818092 1. 466003 2. 839592 3. 99816 1. 353125 2. 733316  
2. 360481 1. 965049 1. 688873 2. 768885 1. 969277 1. 752635 2. 076231 1. 532281 1. 718101  
2. 304019 2. 48157 2. 278591 2. 769635 2. 474892 2. 577464 2. 417308 3. 111998 2. 497488  
2. 202438 1. 409072 1. 953763 2. 408696 2. 676041 2. 319706 3. 560342 1. 379288 2. 257995  
1. 405521 1. 200519 1. 195116 1. 729821 1. 103742 1. 159479 1. 202072 1. 25167 1. 551697  
2. 516421 2. 11126 1. 64301 1. 594998 3. 201962 2. 328905 2. 000376 1. 799806 2. 109932  
2. 992114 2. 0478 2. 099394 2. 435091 3. 45787 2. 665321 1. 592672 2. 448668 2. 561564  
1. 1781 1. 080682 1. 559061 0. 836002 1. 686981 1. 065577 1. 371396 1. 651668 0. 877345  
5. 649177 6. 132867 5. 324129 5. 656099 4. 943779 4. 939356 3. 125107 4. 242263 3. 925762  
7. 304403 6. 07234 7. 112253 7. 247047 6. 985159 7. 627348 7. 269872 6. 814897 7. 442591  
2. 038602 2. 012367 2. 040813 2. 38843 2. 721582 1. 805406 2. 156589 2. 330538 1. 948851  
9. 528587 9. 683805 9. 311649 9. 613416 9. 735768 9. 683317 9. 836361 9. 817588 10. 13535  
2. 464538 4. 657739 3. 520372 2. 87606 2. 658182 2. 565736 6. 737145 4. 748135 4. 894234  
1. 333256 1. 534591 1. 293527 1. 274977 1. 490021 1. 703116 1. 661405 1. 721765 1. 104542  
1. 694869 1. 376843 1. 430142 1. 600239 1. 017811 1. 191908 1. 316974 1. 57965 1. 979272  
3. 909198 3. 782967 4. 09343 3. 351047 2. 91216 3. 183422 3. 167041 3. 619229 2. 337942  
7. 528383 7. 761647 7. 613115 7. 010929 7. 574066 7. 335729 7. 317006 7. 232671 7. 276953  
2. 156538 2. 178233 1. 927209 2. 923335 1. 600363 2. 160067 1. 462647 1. 690851 3. 168189  
5. 792768 5. 655117 5. 22953 5. 908884 6. 151177 6. 469921 5. 678116 6. 308563 6. 041766  
8. 350979 8. 743106 8. 586048 8. 491791 8. 554882 7. 852907 8. 949892 8. 536182 8. 54033  
2. 669759 1. 851862 3. 555538 2. 375824 1. 741983 3. 256027 1. 711208 2. 445843 3. 314923  
5. 674368 5. 796244 6. 208762 5. 845988 6. 067232 5. 149774 6. 033904 5. 790493 5. 568099  
2. 934358 2. 689853 3. 159737 3. 218914 2. 677684 2. 149679 3. 026464 2. 766447 2. 952317  
3. 64069 4. 38782 5. 887851 5. 078274 3. 858405 5. 363454 4. 235536 5. 000917 5. 240338  
6. 332084 6. 144534 5. 430126 7. 218873 6. 369099 6. 908945 7. 403634 6. 090718 7. 104015



3. 355705 3. 058791 3. 114689 3. 11472 3. 454134 5. 936499 4. 262799 4. 725103 4. 620562  
2. 148486 1. 74431 1. 6555 2. 028444 1. 801858 1. 819799 1. 186846 2. 097961 1. 943391  
4. 022107 3. 738324 3. 08578 3. 41124 2. 781524 2. 801339 2. 195541 2. 485051 3. 06884  
4. 560202 4. 337042 4. 117017 2. 552409 3. 833832 4. 17987 2. 45818 3. 327359 4. 105121  
4. 893547 3. 525566 3. 723175 2. 750617 5. 061792 5. 10658 5. 291218 4. 637615 4. 831741  
1. 987712 2. 634564 2. 050336 3. 872033 2. 880738 2. 353975 2. 308187 2. 914226 2. 785901  
7. 123477 7. 233723 7. 288205 6. 970489 7. 148654 7. 330263 6. 36159 6. 214688 6. 418604  
7. 52111 8. 211848 8. 281685 8. 149039 8. 570321 5. 566261 8. 752524 8. 283317 8. 229256  
5. 723275 5. 635715 6. 010262 5. 385105 6. 771325 4. 261485 6. 155606 6. 956335 6. 803439  
5. 261329 5. 550315 5. 305545 5. 621802 5. 62486 5. 681653 5. 371319 5. 718125 5. 707198  
5. 818117 5. 57517 5. 507 5. 625367 5. 814893 5. 949928 5. 458205 5. 229725 5. 67635  
8. 046823 8. 251413 8. 001942 7. 82774 8. 050737 8. 167322 8. 403911 8. 361105 8. 517555  
0. 941795 0. 8955 1. 670413 2. 546903 1. 778869 0. 961037 0. 800578 0. 892239 1. 323485  
5. 370007 5. 508236 5. 533918 5. 86513 5. 735266 6. 662062 5. 622449 5. 440339 6. 046281  
7. 424689 7. 041902 6. 881447 6. 739335 6. 890221 6. 582447 6. 537874 6. 401217 5. 964287  
1. 034731 0. 928792 2. 484767 0. 933968 0. 926899 1. 046041 1. 019685 2. 387719 2. 357313  
6. 31973 6. 505571 6. 186739 5. 933948 6. 843898 6. 492903 5. 862165 5. 69638 5. 870609  
4. 30316 3. 265579 4. 629533 3. 539266 5. 110354 3. 608807 3. 57714 3. 518301 2. 818658  
4. 223784 2. 619736 3. 836412 3. 946875 4. 473536 5. 250333 3. 566162 3. 903916 2. 675121  
1. 552022 2. 098189 1. 726616 2. 59909 2. 274001 2. 017815 1. 283121 2. 384772 1. 386144  
1. 136997 1. 309487 1. 29379 1. 444242 1. 422472 1. 13859 1. 426138 0. 972566 1. 474601  
1. 386133 1. 818589 1. 874353 2. 032872 1. 687568 1. 555566 1. 215297 2. 137113 1. 885732  
1. 697185 1. 57614 1. 781833 1. 806617 1. 878384 2. 328722 1. 483213 1. 855422 1. 786181  
4. 916224 4. 720934 5. 380441 4. 099694 4. 68846 4. 107163 3. 711573 3. 866501 2. 799834  
3. 747289 3. 606889 4. 030229 3. 607304 4. 4439 3. 657992 3. 207374 3. 536394 2. 984829  
6. 781662 6. 615724 6. 920061 6. 369611 6. 748937 6. 141688 6. 598058 5. 581733 6. 093369  
4. 742731 3. 869066 3. 748071 3. 595043 3. 016729 2. 627022 1. 468235 1. 910445 2. 747195  
2. 401377 2. 251392 1. 391801 1. 561688 1. 410039 1. 383554 1. 113219 1. 465825 0. 994852  
6. 610257 5. 414708 7. 313361 7. 33765 6. 876825 7. 966548 6. 824539 7. 287029 7. 724141  
2. 366332 2. 670865 2. 112456 2. 332147 2. 167589 1. 712474 2. 120046 2. 453241 2. 027788  
1. 085337 1. 356713 2. 128257 1. 856524 2. 033219 2. 080316 2. 114686 1. 363726 1. 688556  
1. 558225 1. 240727 1. 35862 1. 15763 2. 765855 1. 100585 1. 394872 1. 98974 1. 606237  
2. 235814 2. 141228 1. 028784 1. 90611 1. 677793 2. 388198 1. 934694 1. 430584 1. 379318  
1. 605885 1. 759039 1. 373115 1. 104213 1. 372914 1. 259752 1. 247435 1. 660784 1. 199257  
2. 004302 2. 261587 2. 244954 1. 517514 1. 050081 1. 466856 1. 557124 1. 281986 1. 074892  
2. 117511 1. 990056 1. 962771 1. 53894 1. 960676 1. 418867 1. 272083 1. 744278 1. 88065  
6. 822005 7. 112578 6. 683754 6. 312124 6. 855927 6. 3514 6. 724707 6. 203882 6. 712511  
1. 540184 2. 775598 2. 178698 2. 987507 1. 369805 1. 600351 1. 353627 1. 139825 1. 824333  
6. 236132 5. 541996 5. 785203 6. 320379 5. 842715 6. 035219 4. 662585 5. 78614 5. 17892  
7. 54938 7. 292122 7. 655048 6. 540686 7. 623854 6. 949275 6. 926949 6. 987176 7. 10473  
4. 607787 4. 672776 4. 336386 4. 24363 4. 439001 4. 138932 4. 99559 4. 338244 4. 513983  
2. 324647 2. 519301 1. 898757 2. 084185 1. 785212 2. 899347 2. 043344 1. 844218 2. 535044  
1. 413911 1. 992355 2. 185719 1. 389997 1. 519811 1. 606616 1. 367756 1. 565977 1. 643019  
6. 021838 4. 585283 5. 444419 6. 865899 5. 169537 6. 121592 4. 828719 4. 082736 5. 145917  
9. 127754 9. 012298 8. 463043 8. 74048 8. 714274 7. 577936 8. 397864 8. 771015 8. 22837  
2. 75198 2. 499269 2. 622894 2. 519541 2. 836705 1. 978279 1. 981321 1. 906577 2. 318023  
1. 481968 1. 182306 1. 563607 1. 318438 1. 064395 1. 252733 1. 235883 0. 809543 0. 956522  
7. 601488 7. 595627 8. 113354 7. 253344 7. 834818 7. 242153 8. 106263 7. 967837 7. 744797  
7. 058282 7. 463253 7. 40734 7. 175809 7. 527605 7. 435054 6. 602321 7. 189107 7. 216321  
4. 188546 4. 415191 3. 090718 3. 115759 4. 97425 4. 271902 4. 986557 4. 622966 5. 117359  
2. 021614 3. 342854 2. 007107 1. 681358 1. 708623 2. 278053 1. 659168 1. 851318 3. 138258

5. 426971 4. 894931 4. 722382 5. 657302 5. 027105 6. 113821 5. 307683 5. 950544 5. 964197  
7. 238216 7. 566215 7. 905977 6. 922558 7. 566701 5. 699023 5. 903546 6. 359799 6. 191993  
10. 29567 9. 58771 9. 790449 10. 20109 9. 561067 10. 68005 9. 950871 9. 631975 9. 116594  
6. 764609 7. 671521 7. 504345 7. 809427 8. 247572 8. 309414 8. 224515 7. 555246 8. 024151  
1. 694888 2. 746581 2. 232014 2. 03519 1. 619766 1. 720181 2. 388505 2. 027396 2. 01842  
6. 626824 6. 072966 5. 994469 6. 213957 6. 348325 7. 165227 6. 043158 6. 363446 6. 266429  
6. 266339 6. 745675 5. 8618 6. 018091 5. 785385 5. 712179 6. 306237 7. 336192 6. 110775  
8. 419293 7. 952655 7. 827867 8. 254302 7. 523521 8. 666739 7. 763609 8. 219896 8. 145373  
9. 052898 8. 616214 9. 327785 9. 302035 9. 201625 8. 896766 9. 764686 9. 469472 9. 281727  
2. 208564 2. 100672 2. 061526 1. 648942 2. 308842 1. 519132 1. 462892 1. 880212 1. 551161  
5. 668646 6. 00198 5. 808289 5. 352721 5. 250832 6. 208757 5. 233202 5. 105142 5. 08004  
1. 277884 0. 912789 1. 336292 0. 715237 1. 901736 4. 397421 1. 326365 1. 853824 2. 503049  
1. 96956 3. 731551 3. 19662 2. 791726 4. 271432 2. 339448 3. 53001 2. 452514 3. 024571  
1. 356768 1. 035039 0. 688168 1. 401353 0. 695065 1. 347271 1. 289095 2. 963291 0. 73674  
4. 236725 3. 019818 4. 624684 2. 991134 3. 719596 3. 565947 4. 538527 2. 428921 2. 570793  
4. 750703 4. 9094 4. 804582 5. 444119 4. 531604 3. 10697 3. 946971 4. 506682 5. 347091  
5. 905413 5. 901431 6. 308152 6. 001065 6. 098635 5. 840269 6. 778948 6. 229882 6. 486022  
1. 561326 1. 240301 1. 574865 1. 575578 1. 456972 1. 325606 1. 346782 1. 433829 2. 125159  
1. 362961 1. 236529 1. 297542 1. 225034 1. 154683 1. 888688 1. 110347 1. 165937 1. 165937  
5. 460638 5. 424006 6. 272896 5. 65115 6. 15565 5. 818976 4. 639623 5. 318508 5. 173229  
5. 208295 4. 830755 4. 857884 4. 850893 5. 14356 5. 048905 4. 724332 4. 910243 5. 260272  
4. 773098 3. 619269 4. 23893 4. 807825 4. 67142 5. 023012 5. 017084 4. 640047 5. 420735  
7. 148259 5. 106778 7. 40435 5. 889707 4. 802669 5. 656091 3. 730106 3. 941697 4. 519378  
6. 64222 6. 417132 6. 569556 7. 034765 6. 828249 7. 436178 7. 116185 6. 345654 7. 191042  
4. 081591 2. 943132 2. 658592 2. 963985 2. 438025 3. 108685 2. 346373 1. 874982 2. 765441  
5. 262639 6. 084197 5. 647973 6. 24904 5. 93353 6. 005243 4. 739575 4. 759761 5. 946628  
7. 022515 5. 333857 4. 977672 5. 327039 6. 752017 6. 128273 6. 588735 6. 566676 6. 977603  
2. 004386 1. 305503 3. 081676 1. 954854 2. 788094 1. 107255 2. 644852 1. 180373 2. 337561  
1. 248168 2. 14709 1. 239906 0. 998743 2. 158856 1. 382562 1. 260664 1. 192248 1. 423544  
6. 326951 6. 825894 6. 604672 6. 332475 6. 560915 5. 626302 6. 070727 5. 572215 6. 059794  
6. 707963 7. 189231 6. 790206 6. 124186 6. 976495 5. 497095 5. 553347 6. 5549 6. 455926  
3. 569564 2. 633371 2. 733775 2. 372891 2. 152792 3. 575871 3. 337878 2. 895164 3. 339621  
5. 642703 6. 266482 5. 552646 5. 293331 5. 779543 5. 846008 6. 06337 6. 02823 6. 753722  
3. 627533 3. 056868 2. 780507 3. 347472 2. 516234 3. 634502 3. 216097 3. 544777 2. 752068  
4. 228346 4. 231639 3. 934414 4. 481016 4. 509455 4. 942432 4. 93167 4. 868846 4. 656203  
4. 443805 5. 964899 5. 396125 6. 100685 5. 660713 4. 353352 5. 094832 5. 834294 6. 01467  
3. 692703 2. 80867 2. 288184 3. 698197 2. 494288 2. 819944 1. 899652 2. 275723 2. 66913  
3. 199638 3. 279067 3. 201694 2. 834991 2. 512723 3. 318304 3. 636237 3. 085416 4. 125337  
1. 781625 2. 76248 2. 141983 2. 123538 1. 423767 2. 536922 2. 221481 1. 83345 1. 518641  
0. 577758 1. 25002 1. 048802 1. 580151 1. 909349 0. 987685 1. 069542 1. 275274 1. 765965  
1. 774661 1. 826811 2. 391832 3. 596204 2. 18631 0. 99768 3. 323929 1. 354264 2. 795142  
2. 647753 2. 726449 2. 982959 3. 138826 2. 157301 2. 709012 2. 761975 3. 008538 2. 214429  
1. 307564 1. 079987 1. 361744 1. 307137 1. 49796 1. 567311 1. 664478 1. 351712 1. 177291  
2. 304532 2. 247637 2. 792459 2. 131669 2. 250972 1. 921494 2. 573823 2. 800807 2. 429226  
2. 351066 2. 06352 2. 854345 2. 042858 2. 710605 1. 950924 2. 003284 1. 250396 2. 905587  
1. 08929 1. 465781 1. 523621 1. 385529 1. 839484 1. 617598 1. 29062 1. 487305 2. 22883  
1. 416801 2. 378606 2. 867669 1. 229484 1. 22553 1. 595043 1. 618406 2. 231953 1. 350186  
5. 415215 4. 916532 5. 922396 4. 729143 5. 369325 4. 281121 3. 543229 3. 368367 1. 729724  
1. 299167 1. 520969 2. 056047 1. 086053 1. 466135 2. 349806 1. 395391 1. 143344 1. 009629  
2. 233753 1. 837793 1. 668699 1. 493316 1. 658315 1. 430684 1. 436652 1. 716215 1. 663973  
0. 997637 1. 074084 0. 872213 1. 406196 0. 760214 0. 878339 0. 947279 1. 601623 1. 413143

2. 875371 1. 529742 3. 338494 1. 535447 2. 970049 5. 558735 2. 026882 2. 31123 2. 47626  
1. 65892 1. 157509 1. 46476 1. 790286 1. 226527 1. 254141 2. 059711 1. 583063 1. 364067  
1. 440852 0. 735913 2. 276758 2. 957297 1. 245509 1. 628524 3. 088763 1. 895237 1. 623879  
1. 374443 1. 480503 1. 516785 1. 923634 0. 851789 2. 183115 1. 839511 0. 928777 2. 095479  
1. 407195 1. 400166 1. 055195 1. 612508 1. 344801 1. 168306 1. 629101 2. 083336 1. 037172  
2. 880502 3. 713784 4. 625778 2. 434971 3. 486619 2. 648485 2. 880578 2. 622045 2. 361264  
2. 867817 2. 56227 1. 693822 4. 493082 1. 781506 2. 690717 1. 917705 1. 836547 2. 21709  
1. 756397 1. 061718 1. 658555 1. 566201 1. 516158 1. 452689 1. 736852 1. 893159 1. 243603  
5. 058136 3. 886197 3. 014475 3. 494162 3. 120693 4. 112672 3. 49274 3. 097303 4. 850436  
2. 368064 0. 788465 2. 563049 2. 288559 2. 830303 2. 039764 2. 858227 1. 876891 1. 954213  
1. 722972 1. 791491 1. 652449 2. 273066 3. 751122 1. 751681 1. 705778 2. 441711 2. 430043  
1. 221941 0. 988993 1. 442667 1. 280597 1. 184102 0. 874273 1. 190943 1. 070276 2. 013697  
4. 175853 4. 551307 4. 178835 4. 124416 4. 6138 4. 166575 4. 057435 3. 236533 3. 824344  
1. 259506 1. 652678 2. 271943 1. 504999 1. 203686 1. 380326 1. 258152 1. 096695 1. 169844  
1. 665951 1. 895519 1. 655391 1. 155166 1. 4576 1. 375724 1. 942387 1. 705335 1. 750078  
2. 029644 2. 419803 2. 816532 1. 945264 2. 447572 2. 712686 2. 09727 1. 622451 2. 46279  
1. 196856 3. 898851 1. 232766 3. 606947 1. 817459 1. 340455 1. 160585 2. 88416 1. 399709  
2. 183898 1. 213804 1. 974206 2. 266685 1. 398334 1. 362284 3. 198099 1. 58261 2. 686064  
0. 917536 1. 768036 0. 54793 1. 512563 1. 302887 0. 909993 0. 717871 0. 663916 0. 534557  
1. 398903 2. 397592 2. 695363 2. 122786 2. 767757 2. 459771 1. 590093 2. 112361 1. 75174  
3. 552794 4. 092152 4. 185036 4. 212449 4. 000994 2. 745481 3. 853838 3. 336253 2. 627648  
1. 945644 2. 164792 1. 350395 1. 829017 2. 264283 2. 505857 1. 378593 1. 548062 1. 7532  
0. 997506 1. 251903 0. 804345 1. 085508 1. 0716 1. 730065 1. 462404 2. 264982 1. 112506  
4. 654171 1. 349108 1. 33749 1. 05444 1. 102757 1. 606961 1. 099994 1. 114965 1. 391558  
4. 528534 5. 286504 5. 528893 3. 710065 4. 991351 1. 579956 2. 226188 2. 752138 1. 897683  
1. 90625 3. 341448 2. 186462 2. 112139 2. 661255 2. 919239 2. 662977 2. 58421 2. 673171  
0. 92112 0. 858001 1. 144616 1. 160836 1. 733223 1. 094953 0. 806114 0. 822119 0. 784437  
2. 435438 2. 562595 2. 517548 2. 051265 1. 835776 1. 648028 1. 746399 1. 397337 2. 423606  
1. 778273 0. 987725 1. 39773 3. 016295 1. 337799 1. 689113 1. 97082 2. 615132 1. 551697  
1. 130091 1. 06807 1. 213156 1. 190521 1. 033099 1. 4297 1. 19278 1. 382643 1. 167615  
1. 76714 2. 240707 2. 974962 2. 883839 3. 090925 2. 855528 2. 726085 2. 829983 2. 773727  
0. 810767 0. 946696 1. 19722 0. 750833 0. 822793 1. 042063 1. 09763 0. 829338 0. 709696  
1. 440527 1. 787619 1. 043476 1. 240853 1. 703874 1. 229645 1. 23377 1. 653618 1. 436906  
1. 544308 1. 25626 1. 614351 2. 255999 2. 376501 1. 145621 1. 104371 1. 04735 1. 516424  
1. 550954 3. 846104 4. 390323 1. 979963 3. 158346 3. 493878 2. 609501 2. 786949 2. 899529  
2. 074571 0. 654961 0. 860746 2. 13899 1. 088366 2. 145641 6. 036393 2. 392997 1. 330198  
3. 476204 2. 848713 2. 418377 3. 688167 4. 304715 2. 293037 2. 203872 1. 811375 2. 571858  
2. 321319 2. 646244 3. 764799 2. 186988 3. 058849 2. 605854 2. 216523 2. 560536 3. 144741  
0. 853667 0. 582531 2. 035566 1. 045331 2. 350001 0. 527105 0. 793343 0. 932779 0. 79139  
2. 184283 2. 332154 1. 080337 1. 378624 1. 515998 1. 934759 1. 869953 1. 849311 1. 162109  
2. 01727 2. 223898 3. 838923 2. 585873 3. 460932 2. 296031 2. 101473 2. 924333 2. 468701  
4. 066741 1. 832455 3. 348183 2. 150251 5. 056515 6. 051675 4. 627908 1. 546436 3. 470456  
1. 208367 1. 867404 2. 132922 3. 13344 0. 875041 1. 723879 1. 648598 2. 799555 2. 453494  
1. 245608 3. 727466 0. 971463 1. 297595 0. 77419 1. 071951 1. 174223 1. 641001 1. 279939  
3. 654395 3. 81819 3. 713102 3. 985919 3. 79721 2. 336551 3. 783757 3. 038699 3. 541782  
1. 996314 3. 571466 3. 673819 1. 510811 3. 147486 2. 900012 1. 122181 1. 173658 1. 555922  
1. 552795 1. 211357 1. 169966 2. 076463 0. 942856 1. 401316 1. 152952 1. 96897 1. 078375  
1. 391466 2. 018335 2. 211072 2. 225934 1. 69564 1. 843393 1. 272999 1. 32964 1. 390401  
4. 728744 3. 498809 4. 667719 2. 433434 3. 253403 3. 722844 4. 006448 5. 480527 3. 57118  
4. 596514 5. 462519 4. 746037 5. 264607 4. 985145 4. 755801 6. 644225 5. 797597 4. 79097  
1. 858817 1. 515757 1. 514032 1. 698028 1. 975518 1. 999308 1. 512215 2. 430243 1. 741817

2. 27152 0. 940623 2. 052959 2. 544526 1. 184873 1. 239327 0. 35739 1. 825646 1. 511887  
1. 266415 1. 478748 1. 42112 1. 397887 1. 346839 1. 005704 1. 579055 1. 3107 1. 613768  
2. 399583 2. 615573 2. 695492 2. 682942 2. 87098 3. 150337 2. 584195 2. 308509 2. 119369  
0. 831366 1. 356765 0. 873002 0. 748172 0. 712372 2. 104221 0. 614268 0. 95548 1. 434931  
1. 447605 4. 168749 0. 985872 2. 134724 0. 939279 0. 989763 3. 642822 0. 94165 3. 549573  
2. 007415 1. 867014 2. 024627 2. 180203 1. 797284 1. 37734 1. 877125 1. 824852 1. 780518  
1. 151181 1. 077825 1. 288156 1. 083118 0. 727047 0. 825319 1. 326293 0. 994585 0. 974163  
1. 245831 1. 240438 2. 242815 1. 051553 1. 322563 1. 470296 1. 134528 1. 968039 1. 909152  
2. 082785 3. 166367 3. 251338 2. 295385 2. 884775 3. 491418 3. 441965 2. 711358 2. 927043  
3. 369983 4. 509687 3. 77396 5. 322347 4. 247995 5. 829005 5. 610206 3. 628914 3. 065748  
2. 266406 2. 329173 1. 327501 1. 78087 1. 611175 1. 221755 1. 689165 2. 244996 1. 668389  
2. 92505 2. 602479 4. 542847 1. 553977 5. 337743 2. 441026 2. 733617 3. 654807 2. 154586  
1. 717828 2. 484877 1. 601689 1. 529187 1. 611885 2. 208283 1. 393273 1. 65556 2. 10954  
1. 41026 2. 50196 1. 874356 1. 929423 2. 062065 2. 626302 1. 766503 2. 336403 1. 830706  
1. 77856 0. 963184 2. 055593 1. 167244 1. 002875 0. 95331 1. 695835 0. 908365 2. 374327  
2. 402768 2. 853908 2. 659522 2. 04539 3. 246359 2. 440016 2. 684256 2. 662479 2. 455047  
1. 396546 4. 233995 4. 637331 1. 36389 2. 208046 1. 738579 1. 250045 0. 834467 2. 10128  
1. 158098 1. 294564 1. 092494 1. 218711 0. 721931 1. 234509 0. 920773 1. 485939 1. 319343  
1. 451831 1. 333487 1. 008252 2. 217104 1. 745058 1. 50194 1. 108108 1. 408152 2. 165352  
1. 681129 1. 792111 0. 971567 3. 414668 4. 880018 4. 250233 5. 825865 6. 321281 2. 642449  
4. 400134 4. 595636 5. 631895 4. 904433 2. 964947 5. 641968 5. 10697 1. 5123 0. 779863  
2. 335167 2. 479195 2. 229456 1. 895454 2. 542842 1. 639575 2. 206997 2. 360163 1. 791613  
1. 096178 3. 212877 1. 95851 1. 245792 1. 341628 0. 858979 0. 860878 2. 275489 1. 119234  
1. 470987 3. 792909 1. 659035 1. 218416 1. 833192 1. 731301 1. 940147 2. 368042 2. 421444  
1. 064056 0. 853726 1. 040451 1. 053972 0. 846131 0. 871893 0. 991903 1. 323864 0. 700783  
1. 899247 0. 940637 0. 821811 1. 507764 1. 347805 1. 845492 1. 349469 1. 519555 1. 612978  
1. 33736 1. 412802 0. 887861 1. 762716 1. 238702 1. 311594 1. 048515 1. 437445 1. 149978  
1. 157033 0. 692077 1. 626154 0. 829057 1. 582062 0. 87501 0. 602382 1. 666289 0. 569081  
1. 408066 1. 987026 1. 548505 1. 554614 1. 092611 1. 281758 1. 384837 1. 387703 1. 627595  
2. 224677 1. 108631 1. 140178 1. 787155 1. 25803 0. 980711 1. 341477 0. 819736 1. 833145  
3. 452593 2. 433763 3. 718287 3. 011566 3. 225485 1. 51417 2. 085066 1. 822365 2. 043675  
1. 717732 1. 431362 1. 478951 1. 745969 1. 250227 1. 909877 1. 477738 1. 504245 1. 818575  
2. 159466 2. 65684 2. 897971 1. 505123 1. 474228 1. 47663 2. 159772 1. 842475 1. 876385  
2. 134654 2. 272517 1. 645474 3. 080148 2. 365072 2. 927022 2. 044628 2. 485567 2. 576668  
3. 90833 4. 648275 2. 742846 3. 074931 3. 553485 1. 7665 2. 989838 3. 749299 3. 082511  
1. 459547 2. 077276 1. 132907 2. 480556 2. 102605 1. 631556 1. 902448 1. 663027 2. 214488  
3. 501234 3. 463446 3. 907567 3. 815032 3. 200051 3. 300466 2. 057826 1. 826707 1. 735967  
1. 510813 2. 229337 2. 064432 1. 233819 2. 059931 1. 003915 2. 196 1. 351588 1. 17607  
2. 294984 2. 90892 3. 923705 1. 655248 3. 777314 2. 684293 2. 450392 2. 77101 3. 774964  
6. 051618 4. 557835 3. 266134 4. 731553 2. 804358 5. 093184 2. 15923 1. 808714 3. 542847  
1. 072469 1. 083452 0. 633796 1. 238204 0. 746234 1. 021373 1. 136403 1. 761058 1. 303093  
3. 51641 4. 271315 3. 765275 4. 712125 4. 616093 5. 540508 1. 873535 4. 932677 1. 709774  
2. 640796 3. 148847 3. 061312 4. 899438 3. 839947 1. 644779 2. 81471 3. 078655 2. 088755  
1. 463499 1. 627259 0. 972716 1. 359566 1. 265866 1. 321044 1. 671039 1. 115942 1. 3976  
2. 116148 1. 724906 1. 430348 1. 420444 0. 582123 0. 724832 1. 708582 0. 605002 0. 649074  
1. 063374 4. 774148 2. 421476 0. 537861 2. 96678 2. 134355 1. 710536 1. 480183 0. 857588  
2. 49184 3. 053391 2. 351301 3. 454428 2. 321715 2. 785915 2. 564477 2. 708367 2. 536391  
0. 881063 1. 315515 1. 443136 1. 039523 0. 940275 1. 280761 1. 541285 1. 100257 1. 128283  
1. 03121 1. 035981 0. 884761 1. 129959 1. 135353 1. 631266 1. 066115 0. 863437 2. 242327  
1. 512674 1. 302921 1. 786036 1. 375999 2. 023499 1. 40226 1. 678195 1. 183443 2. 047533  
0. 877319 1. 935563 0. 576204 1. 692492 0. 924289 0. 696716 0. 944338 2. 638977 1. 393549

1.745487 2.47849 1.801948 1.868882 1.497964 1.317011 1.758721 1.608716 2.252251  
2.710145 2.208044 2.953671 2.970181 3.351743 2.554147 3.005418 1.827434 3.391055  
2.367837 1.566707 1.959555 2.269561 2.105266 2.97701 1.540074 2.222039 2.623792  
1.999977 2.790281 2.002058 1.644058 2.132397 1.578381 1.862492 2.212831 2.227695  
1.67036 3.709874 1.935203 1.709002 1.087989 1.875159 1.411253 2.695316 1.219231  
1.68523 1.811433 1.890564 1.410134 0.616264 1.285509 1.093736 1.261231 1.794527  
3.693224 2.177254 3.126169 2.51262 2.658873 2.222 1.443558 2.248263 2.011118  
1.383869 1.609531 1.46082 1.410482 0.852932 1.356736 1.688668 1.559758 1.41844  
1.514334 1.483343 2.393507 1.570532 1.605085 1.433366 1.574493 1.695537 1.414345  
0.998128 0.984838 0.850164 1.124411 1.412135 0.903551 0.989304 1.396814 1.156019  
2.330444 1.530965 2.375375 1.733662 1.677427 1.477221 1.55772 1.649564 1.320975  
0.773982 2.32192 0.91107 1.739158 1.28898 2.088349 1.19894 2.447926 1.406593  
2.247729 4.227415 3.21054 3.476491 4.606611 2.056114 3.280414 2.242805 2.370095  
0.856138 1.502241 0.792734 1.554375 0.808187 0.860082 0.711162 0.986239 2.088994  
2.175536 2.836882 2.173982 3.220494 2.28978 3.104855 2.389551 2.910488 2.942379  
2.174203 2.339507 2.325575 2.26914 1.713831 2.087431 2.174099 2.388536 2.38718  
1.99566 2.428723 1.45179 1.892099 1.99092 2.037639 2.621824 2.280821 1.857876  
0.554986 0.797519 1.100823 0.88363 2.290477 0.917373 1.059378 0.929946 0.868695  
0.913378 1.493842 2.706032 1.146768 1.104842 2.977978 0.979014 0.661201 2.471958  
2.846868 2.883302 2.177326 2.289824 2.256384 1.708588 2.077399 2.714078 3.26096  
1.958234 1.885786 2.075218 2.105265 2.154514 2.031011 2.599847 1.761849 1.593662  
2.601981 2.613626 1.63636 3.059434 2.259217 2.560041 2.314811 2.697291 2.358005  
1.387415 1.323073 1.247395 1.602466 1.245671 1.689364 1.664364 1.549401 1.380028  
2.654381 3.150552 3.212435 3.102525 3.280855 2.456149 2.748004 3.125443 3.101942  
4.462596 4.330357 5.077575 6.40149 4.6666 4.414318 4.858863 3.339722 3.433481  
1.843528 2.824063 2.449965 3.927265 2.42895 1.745558 1.901158 1.969692 1.25373  
0.984504 2.087244 0.991411 1.092428 1.187127 1.466018 1.820654 2.660436 2.391741  
1.824334 1.798841 2.14666 2.576494 2.051847 1.651915 1.554046 1.35411 1.536827  
1.242497 1.298961 1.632385 1.004449 0.814329 1.033376 0.701004 1.176042 1.791241  
1.212371 1.806277 1.214319 2.089591 1.150959 1.217787 1.247661 0.705115 1.37704  
3.73777 5.04937 4.871219 5.021801 4.73437 4.802283 3.775949 5.31938 5.758434  
2.308503 1.797869 2.351843 3.346993 1.887844 1.941931 1.663041 1.825918 2.536962  
2.230145 1.899971 2.311187 2.493164 2.02947 2.541716 1.720269 2.219292 1.728232  
4.813163 2.845111 3.345135 1.959932 2.162175 3.576279 2.133448 1.868724 1.807349  
1.562029 1.156193 0.857562 1.129847 1.095656 0.833299 1.270753 1.636856 0.824891  
5.128711 6.551866 7.896178 5.260507 4.843198 5.223212 5.572993 4.448283 4.717858  
2.233041 2.799138 1.513199 2.759346 2.12212 2.678733 2.087256 2.225792 2.232926  
2.596987 3.590143 3.975989 1.371149 2.746517 3.715047 1.332537 2.045569 2.281742  
1.878485 2.936334 1.423939 2.21487 1.309457 1.665307 1.221617 1.496386 1.939248  
2.216483 1.698947 1.541069 1.704343 1.791864 2.729381 2.10111 1.074228 2.582609  
1.49846 1.253332 0.922015 0.939354 0.846259 1.261981 1.37644 3.7325 1.071374  
1.200309 3.098779 2.312078 2.921582 1.946772 2.411816 1.665075 2.805233 2.32599  
1.003328 1.508242 1.850484 1.305274 0.945908 1.571717 1.050348 1.755089 2.240252  
3.74211 4.206013 6.217182 4.802662 4.579654 4.301226 4.636774 2.81399 4.69329  
3.397102 3.617251 2.186406 2.921686 1.643904 3.137282 1.357219 1.629167 1.882045  
2.02496 2.083524 2.003234 2.015218 1.760904 1.779854 1.425567 1.476216 2.150389  
1.639331 2.070417 2.28347 2.376975 2.068157 2.070411 1.669984 1.51105 2.925694  
3.770249 1.471056 1.712981 1.897584 1.582679 1.278882 1.58912 2.94286 2.038823  
0.978498 0.958508 0.582543 1.176954 0.920748 0.731566 1.22891 0.817551 0.685682  
1.428069 1.517922 0.725352 2.44029 1.801358 1.335176 0.60075 2.248391 2.112943  
3.116304 5.204071 3.663121 2.114482 4.410259 1.094313 3.146275 1.501468 2.16814

1. 731555 4. 675127 3. 151898 1. 68484 2. 087012 2. 028948 2. 94388 2. 22211 1. 461866  
1. 370149 1. 389265 1. 09884 1. 531241 1. 436429 1. 412854 1. 406112 1. 836641 1. 547657  
1. 687248 1. 373884 1. 216765 1. 494418 1. 511249 0. 879636 1. 223188 1. 232243 1. 160272  
3. 03317 4. 030275 3. 812034 3. 126346 2. 809512 3. 176278 3. 20233 4. 430747 3. 991646  
1. 693915 1. 750541 2. 051266 1. 456753 1. 470961 2. 157381 2. 086209 2. 768519 1. 745216  
1. 798864 1. 668591 2. 191302 2. 137934 2. 189996 1. 870848 1. 780168 2. 084085 2. 683314  
2. 651496 2. 323631 3. 747745 2. 70832 3. 91442 2. 468949 1. 574934 3. 370447 3. 708798  
2. 210028 1. 51789 1. 585281 2. 466614 1. 164253 1. 587179 1. 152768 1. 719278 1. 870516  
1. 520317 2. 193741 2. 229024 2. 027606 1. 866877 0. 900856 1. 603614 2. 459091 1. 540454  
1. 393147 1. 319456 1. 448346 1. 862575 1. 396521 2. 480164 1. 51662 1. 461013 0. 875729  
1. 146403 1. 560479 1. 586605 0. 830425 1. 896728 1. 34767 1. 370784 2. 86954 0. 834743  
3. 392417 1. 346737 2. 101147 1. 053461 2. 02892 1. 22995 1. 965926 1. 343925 1. 076199  
1. 604722 1. 300078 0. 981473 1. 032407 0. 844528 0. 98687 1. 050814 1. 376668 1. 081909  
2. 656313 2. 956352 2. 101098 2. 149992 2. 698609 2. 783145 2. 51296 3. 209427 2. 368529  
1. 623922 1. 435762 1. 204749 1. 428053 0. 945404 1. 054909 0. 811156 1. 380424 1. 16434  
3. 115096 2. 598641 4. 676504 5. 595711 2. 256333 3. 509685 3. 478978 3. 011779 2. 501978  
1. 908141 2. 479144 1. 545878 1. 909 1. 608124 2. 0011 2. 127098 2. 716228 2. 450594  
0. 87844 1. 526251 2. 694931 1. 963045 1. 898288 0. 9486 2. 360779 1. 498588 2. 478611  
1. 916453 1. 461713 2. 264965 1. 67821 1. 434236 3. 309085 1. 772421 1. 232784 2. 628994  
3. 172521 1. 872483 3. 63798 2. 287202 3. 424573 1. 669843 1. 622566 2. 201996 1. 858178  
2. 868663 2. 053965 1. 912935 1. 214499 1. 218942 2. 708936 1. 658506 2. 350011 1. 706308  
1. 513071 2. 755207 1. 884665 1. 726591 2. 113885 1. 258798 2. 302808 1. 377458 1. 822158  
1. 553511 3. 617444 4. 409561 2. 304434 1. 621691 4. 587908 3. 078153 4. 698197 2. 339399  
1. 348985 1. 226105 1. 526865 1. 526625 1. 341652 2. 356052 1. 500654 1. 378986 1. 405873  
0. 99216 1. 089108 0. 609146 0. 823797 0. 712574 0. 871986 1. 405215 0. 65344 0. 726611  
1. 729307 2. 297741 2. 750543 2. 970495 1. 886663 2. 419913 2. 28747 2. 04716 2. 937856  
1. 540978 1. 341348 1. 329356 1. 251451 1. 309908 1. 132177 1. 235918 1. 467324 1. 122087  
2. 830943 2. 038809 1. 198114 1. 337529 2. 345322 1. 249831 3. 172231 2. 498363 0. 922655  
2. 466665 2. 551829 2. 092034 2. 048283 3. 003908 1. 684127 2. 504727 3. 987751 2. 477188  
1. 214745 1. 37674 1. 851119 0. 638623 0. 721392 2. 099359 1. 047913 0. 947269 1. 233395  
1. 937109 1. 350802 1. 280173 2. 145038 2. 157706 2. 400961 1. 308047 2. 730347 1. 552257  
2. 590287 1. 419219 1. 380485 1. 618858 0. 966675 1. 477871 1. 316437 2. 322787 1. 976665  
1. 172459 0. 894937 1. 831411 1. 414546 1. 053386 1. 460406 1. 260878 1. 393752 1. 610399  
1. 496285 1. 941906 1. 510192 1. 516432 1. 410759 1. 422522 1. 489067 1. 141406 1. 355677  
2. 885619 4. 124978 4. 059724 3. 240214 4. 804332 3. 176701 3. 094956 3. 703733 2. 83305  
1. 49193 1. 60999 1. 916749 1. 710695 1. 531088 1. 974824 1. 347924 0. 986534 1. 685684  
1. 000755 1. 148241 0. 658108 1. 473502 1. 03003 0. 901518 1. 214521 1. 778701 1. 920102  
1. 456582 1. 517795 1. 621379 3. 388782 1. 179532 1. 260902 1. 280966 1. 231593 1. 834201  
3. 65151 2. 324885 2. 891433 2. 506934 4. 133056 2. 11183 2. 137471 2. 581446 4. 389995  
0. 747462 1. 001651 1. 839737 1. 924191 1. 161076 1. 122926 1. 522281 1. 329002 1. 142641  
1. 968978 1. 505156 1. 447898 1. 954459 0. 713771 0. 981995 0. 846709 0. 475935 0. 963825  
1. 073666 0. 88683 1. 174921 1. 193473 0. 759705 0. 857615 1. 073148 0. 973596 0. 836956  
1. 148413 1. 716476 2. 69466 1. 536885 1. 099057 1. 054646 1. 153174 2. 570129 1. 783494  
0. 957093 0. 988983 1. 018097 1. 024491 1. 059975 1. 091886 0. 99397 1. 035072 1. 160626  
2. 228739 1. 71573 1. 603492 3. 091942 1. 508497 1. 696111 1. 918519 2. 377868 2. 269812  
1. 258624 0. 911605 1. 834769 1. 022509 0. 964688 0. 871619 1. 126181 0. 96958 1. 188098  
1. 624348 1. 792259 2. 327065 2. 126694 2. 18088 1. 672143 1. 808403 1. 701134 1. 1478  
2. 006801 2. 398248 1. 937287 1. 92805 2. 206446 3. 426173 3. 340823 2. 548968 2. 052641  
1. 008542 2. 690682 1. 450573 1. 852581 2. 044109 3. 338587 1. 097091 1. 194889 2. 254796  
1. 079895 1. 202412 0. 795995 1. 786174 0. 928538 0. 820954 1. 1471 1. 756392 1. 123817  
1. 828676 3. 322824 1. 239779 2. 395911 1. 418997 0. 968429 1. 075228 1. 031243 1. 141734

1. 855614 1. 681456 1. 527948 1. 454985 1. 354451 0. 81932 1. 05708 1. 035994 1. 814667  
4. 372121 3. 981497 4. 722516 5. 415525 3. 178913 3. 81734 5. 041587 4. 292933 5. 923629  
1. 304716 1. 913544 1. 052622 0. 904605 0. 985487 0. 870464 1. 25968 1. 992231 1. 387045  
1. 041167 0. 614848 0. 554267 0. 973606 1. 037805 1. 384404 0. 878597 0. 829955 0. 738613  
3. 679759 3. 557675 3. 85486 2. 154431 3. 831668 3. 24253 2. 39548 4. 532823 3. 304775  
7. 775796 4. 541506 7. 794294 1. 937997 3. 741589 5. 838371 3. 002517 2. 77448 5. 390076  
1. 68021 1. 319566 1. 742033 1. 469483 2. 077469 2. 463735 2. 211953 2. 021761 2. 526532  
1. 041327 1. 062292 0. 767474 1. 34108 0. 716747 0. 920109 1. 074571 0. 959546 1. 206102  
1. 428366 1. 693273 1. 332288 1. 195218 1. 133291 2. 113818 1. 258304 1. 416762 1. 35597  
2. 043054 2. 120389 1. 065658 1. 649249 1. 160522 0. 863652 1. 376803 1. 435545 1. 14551  
1. 402698 0. 884857 0. 929514 1. 396929 0. 892011 1. 273991 0. 622669 1. 05894 0. 965522  
1. 437857 1. 503436 3. 441882 1. 822427 1. 153122 1. 122992 1. 819243 1. 324155 1. 359375  
2. 85199 2. 399181 2. 664131 3. 697093 3. 470771 2. 744418 2. 440048 2. 410573 2. 634866  
1. 495963 1. 862438 1. 349667 1. 83193 1. 924843 1. 307317 1. 975881 1. 814751 1. 791255  
1. 533161 2. 3865 1. 624536 1. 860216 2. 537019 2. 233402 1. 523482 1. 513326 2. 176663  
1. 236858 0. 814877 1. 370225 1. 224666 0. 741121 1. 323641 0. 911398 1. 140613 0. 9722  
1. 311438 1. 126574 0. 938228 3. 145007 1. 083377 1. 198696 1. 002238 3. 95236 0. 884352  
2. 049513 0. 801757 1. 210241 0. 874936 1. 165794 0. 802121 1. 107633 1. 010457 0. 623591  
1. 109305 1. 38102 1. 188067 1. 415702 0. 990773 1. 054354 1. 508996 1. 365254 1. 019731  
2. 901658 1. 509779 2. 066445 1. 777695 2. 386997 1. 67696 1. 871536 2. 065774 1. 868388  
1. 334095 0. 790764 0. 923109 0. 729479 0. 771909 0. 847571 0. 606426 1. 490202 0. 964298  
1. 881878 2. 153993 1. 546532 2. 060456 1. 879894 1. 949378 1. 887016 1. 475375 1. 596714  
3. 808014 2. 829506 3. 706278 4. 154894 4. 995339 2. 335287 2. 463122 2. 509695 2. 358849  
2. 690164 2. 044718 2. 68122 3. 129754 2. 323729 1. 54524 1. 876937 3. 371825 1. 889736  
0. 495377 1. 272031 0. 734892 1. 229174 0. 551651 0. 726562 0. 813964 0. 780479 0. 608499  
2. 500989 1. 445125 1. 57477 2. 129471 1. 943879 1. 498366 1. 584578 1. 490086 2. 725103  
4. 969032 5. 174297 3. 727123 3. 375012 3. 717531 2. 273488 3. 683145 3. 056989 2. 396113  
1. 253476 1. 593594 0. 940772 1. 165471 0. 920393 1. 033982 1. 169538 1. 306198 0. 953942  
1. 171503 1. 499532 1. 558478 1. 838799 1. 207795 1. 306017 1. 571533 1. 342028 1. 905491  
1. 683523 1. 197848 1. 480371 2. 445128 1. 363923 1. 20967 1. 30839 1. 551298 1. 838506  
2. 099246 2. 0452 1. 709917 2. 868352 2. 51123 1. 706661 1. 530704 2. 015102 1. 699933  
4. 403267 0. 83938 3. 53964 1. 236008 3. 094319 1. 289124 0. 974015 1. 056756 1. 933723  
1. 339749 1. 173733 1. 20759 2. 371687 1. 110854 1. 15777 1. 837476 0. 987581 0. 780288  
1. 167589 1. 797512 1. 241244 1. 356277 1. 468629 1. 636428 1. 320871 1. 51946 1. 473466  
1. 453181 1. 374761 1. 647048 1. 969099 2. 441041 1. 506666 2. 189698 2. 588118 1. 218614  
0. 614271 1. 133954 0. 777278 0. 674924 1. 470278 1. 574287 0. 809347 1. 359471 0. 932329  
2. 172326 1. 035522 1. 589566 1. 719461 1. 159169 3. 183829 1. 368217 1. 552219 1. 578002  
2. 496249 1. 432247 1. 097352 1. 582175 1. 071603 2. 218413 1. 193248 1. 474459 1. 066268  
1. 84499 1. 838005 1. 646769 2. 408896 2. 823936 1. 725901 2. 004952 1. 869091 1. 686247  
0. 932523 0. 961922 0. 90464 1. 917153 0. 835322 0. 916418 0. 702033 0. 76081 0. 887515  
1. 14253 1. 396114 1. 275149 1. 191108 1. 149777 1. 21732 0. 9121 2. 236154 2. 067804  
2. 10266 2. 977421 3. 852083 3. 913956 1. 689692 2. 916493 1. 27764 1. 421411 2. 125018  
1. 121751 0. 817265 1. 31165 0. 644847 2. 222055 0. 656818 1. 215597 0. 955611 0. 697171  
2. 849873 2. 495843 1. 702708 1. 750289 0. 956327 1. 931582 5. 319247 1. 040208 1. 57058  
1. 828821 4. 111803 2. 845472 4. 01917 2. 071532 3. 786707 2. 946438 1. 665847 1. 47522  
2. 025969 1. 634853 1. 949199 2. 892882 1. 925095 1. 660565 1. 214207 1. 690287 2. 348856  
1. 24329 1. 274571 1. 70321 1. 97954 0. 977983 1. 166784 1. 329714 1. 144835 0. 896633  
2. 950889 1. 536149 1. 351915 1. 623093 2. 167392 2. 717083 1. 533314 2. 214882 2. 180766  
1. 931554 2. 006085 2. 027614 1. 850421 2. 149492 1. 946922 2. 178531 2. 917405 1. 837314  
1. 975987 1. 519001 5. 578956 6. 726262 4. 099039 2. 153076 2. 035622 2. 719867 3. 194349  
1. 337756 1. 325831 0. 944595 1. 291221 1. 043413 2. 153768 1. 260405 1. 220232 1. 174058

1. 447352 1. 133841 1. 604927 1. 153927 1. 730042 1. 417412 1. 658708 2. 195092 1. 060378  
1. 596349 1. 677323 1. 896103 2. 508632 2. 474985 1. 606059 1. 732851 2. 154864 1. 310688  
1. 810482 3. 530319 1. 39561 2. 314489 2. 733013 3. 04461 1. 498906 1. 809243 1. 933508  
1. 943947 1. 572534 1. 576363 1. 604772 1. 311479 1. 577492 1. 753703 1. 731849 1. 689792  
1. 438262 2. 165376 1. 983369 1. 61261 1. 18111 0. 802098 1. 867067 1. 300238 1. 753131  
0. 904 0. 937459 1. 347735 0. 891434 1. 39825 1. 445645 1. 581653 1. 268398 1. 897599  
1. 940498 1. 276867 1. 003963 1. 98286 0. 864904 1. 4692 1. 235519 1. 087259 1. 734287  
1. 003339 1. 306193 1. 647975 3. 066164 2. 713545 2. 280892 1. 890107 3. 309824 2. 800612  
1. 843398 1. 503605 0. 749471 1. 605975 1. 209901 0. 974115 1. 465376 0. 887604 1. 499443  
1. 301259 1. 564735 1. 455168 2. 010785 1. 689943 1. 068041 1. 654034 1. 869824 1. 570919  
1. 645398 1. 712403 1. 380537 1. 763243 1. 169887 1. 615226 1. 727299 1. 657678 2. 180865  
1. 197464 1. 213645 0. 702743 1. 109426 0. 771514 1. 07447 1. 402885 1. 543355 1. 398757  
1. 669163 1. 076696 1. 169583 2. 006532 1. 580374 1. 901009 1. 607027 2. 027322 1. 717973  
2. 263697 2. 980626 1. 274908 2. 231656 1. 405401 1. 713469 2. 416428 1. 724371 2. 122723  
1. 039275 1. 133817 1. 065227 2. 696958 1. 161477 0. 747461 1. 215314 1. 38478 1. 288112  
1. 71269 1. 414853 1. 690315 1. 290336 2. 181235 1. 282714 1. 286409 1. 406671 1. 777714  
2. 17509 1. 525338 2. 0135 1. 591802 1. 825691 1. 425062 1. 717096 1. 372211 1. 575675  
1. 189032 1. 50655 0. 790695 2. 807789 1. 016021 1. 614147 1. 065601 1. 075337 0. 937989  
2. 733724 0. 470511 0. 855322 2. 041121 0. 989217 1. 317596 1. 81698 3. 050174 1. 039116  
1. 394614 2. 63875 2. 407122 4. 614385 2. 696417 2. 562528 3. 649538 1. 473997 2. 675235  
3. 252048 2. 544268 2. 751107 2. 360283 3. 389143 2. 148424 1. 925404 1. 477806 2. 792037  
1. 142686 2. 664421 2. 283917 1. 699546 1. 349401 1. 007669 0. 904635 1. 465705 1. 252794  
2. 356929 2. 378565 2. 695051 2. 244799 2. 338454 3. 001054 2. 056679 2. 732646 3. 253386  
6. 147971 5. 874166 3. 818551 3. 77042 3. 012516 3. 062939 2. 709409 3. 783407 3. 307575  
1. 413674 1. 107283 1. 655173 1. 658681 1. 671692 1. 465538 1. 246577 1. 591664 1. 39172  
1. 998571 1. 993497 2. 211261 3. 062501 2. 28633 2. 719093 2. 01238 2. 126164 2. 95523  
1. 141534 1. 245822 0. 902953 1. 925721 0. 954836 1. 175686 1. 113882 1. 000938 1. 155574  
2. 097851 2. 091549 4. 431739 2. 034214 2. 322642 2. 240927 1. 965869 2. 063073 2. 373774  
2. 069 1. 3864 2. 342423 1. 25121 4. 162781 1. 517407 1. 575525 1. 886667 2. 321994  
1. 61466 1. 868659 0. 971636 1. 25409 0. 960136 1. 01225 1. 151617 1. 534959 1. 555771  
2. 3292 1. 883855 0. 84719 1. 709894 0. 999832 1. 829812 1. 285591 1. 923587 1. 202284  
1. 178377 1. 657866 1. 229024 1. 941134 0. 9978 0. 800307 1. 076068 1. 292653 1. 01706  
1. 054674 1. 314543 1. 149824 1. 706476 1. 124129 1. 74671 1. 20555 1. 665936 1. 093561  
1. 147731 2. 424412 1. 040805 1. 185732 1. 092796 1. 047434 1. 357647 0. 945316 1. 258053  
2. 835593 2. 370546 1. 703421 2. 123687 2. 870851 2. 997475 2. 383762 2. 213561 2. 756762  
1. 039641 1. 321891 1. 958362 1. 003641 0. 82657 0. 689777 1. 142306 1. 101652 0. 543897  
1. 303444 1. 628585 1. 302188 1. 638217 0. 962534 1. 004852 0. 835161 1. 002906 0. 941786  
2. 459926 2. 149676 3. 407528 3. 268221 2. 836098 1. 867923 2. 451891 2. 407077 2. 418272  
4. 090012 3. 841988 3. 397252 4. 569729 3. 210793 3. 013372 4. 55937 3. 94374 3. 74486  
0. 780741 1. 019813 0. 967716 1. 583351 1. 298599 1. 107134 1. 237081 1. 770369 1. 630443  
2. 111833 2. 793163 1. 467947 2. 647811 1. 602332 1. 155636 1. 924055 1. 432859 1. 48653  
1. 281865 0. 979677 1. 097281 1. 200789 0. 958123 0. 886848 1. 33215 0. 884377 1. 100108  
2. 098819 2. 501715 2. 769812 2. 711182 3. 105288 2. 535328 2. 509761 2. 083067 2. 135653  
1. 950193 2. 139708 2. 557638 2. 737286 3. 323422 2. 092661 2. 354127 2. 470085 2. 710985  
1. 1117 1. 384887 2. 186938 1. 526334 0. 962471 1. 898327 1. 595443 2. 804704 1. 573244  
1. 427442 2. 314261 1. 714579 2. 535672 2. 53972 2. 528725 1. 764877 2. 963418 1. 775107  
1. 346768 2. 397777 1. 610165 1. 081662 2. 05297 1. 905496 1. 434939 1. 212429 1. 995091  
1. 830732 2. 289051 2. 255776 2. 110307 1. 731855 1. 479477 1. 963918 1. 629399 2. 406668  
1. 668573 0. 637647 0. 847636 0. 94718 0. 936249 1. 021928 0. 98043 1. 287007 0. 678969  
1. 526672 1. 97524 1. 787295 2. 241735 1. 953299 1. 457966 1. 308185 1. 622222 1. 404769  
1. 099291 1. 215378 0. 929997 1. 197741 0. 917582 1. 032293 0. 869429 1. 40062 1. 524261



0. 923442 1. 670178 0. 880227 0. 92043 1. 300464 1. 187238 1. 283871 1. 489142 1. 198451  
1. 133741 3. 45896 1. 473288 2. 007288 1. 2168 1. 928522 1. 690388 3. 581857 1. 313833  
1. 500529 2. 740891 1. 411231 1. 891948 1. 532296 1. 958868 2. 243012 1. 744671 1. 781727  
1. 228087 0. 967827 1. 088243 2. 220166 1. 114863 1. 088633 1. 020405 2. 371771 1. 089916  
1. 076605 1. 144294 1. 416176 1. 853269 0. 984698 1. 60201 2. 166586 1. 826125 2. 862234  
2. 313294 2. 355587 3. 021279 2. 520845 2. 533887 2. 296928 2. 407543 2. 661643 2. 497742  
0. 587491 0. 970446 1. 345334 0. 690846 1. 066617 0. 823337 0. 988714 0. 934154 0. 982291  
1. 809587 1. 4797 1. 797749 1. 917433 2. 514648 2. 510437 2. 036488 1. 842123 2. 273804  
1. 258899 2. 670633 2. 123483 2. 328277 3. 962845 2. 037994 2. 796422 2. 946756 2. 76844  
1. 326907 1. 065695 2. 198482 0. 762296 0. 540198 0. 751016 1. 041831 1. 005458 1. 115977  
3. 417096 2. 738628 2. 738362 2. 903422 3. 164959 2. 610975 3. 598603 2. 085277 2. 431862  
2. 895132 2. 978914 5. 151153 1. 73186 1. 927981 2. 110942 2. 126424 1. 844023 1. 211133  
1. 44759 1. 185642 1. 093474 1. 814879 0. 806123 1. 315054 1. 032894 0. 912074 1. 166939  
4. 3921 2. 200512 1. 45577 1. 964694 2. 634172 1. 699715 2. 738612 0. 900835 1. 220146  
1. 580734 1. 404243 2. 505556 1. 984678 1. 917964 1. 821327 2. 166182 1. 613627 1. 694457  
2. 166123 3. 937374 2. 474016 0. 819888 1. 428744 2. 831615 4. 635388 2. 837843 5. 921188  
1. 201029 1. 983804 1. 819809 1. 841026 1. 866012 1. 492299 1. 498272 1. 592807 1. 488475  
1. 688108 1. 578949 2. 08372 1. 432812 1. 730178 1. 429235 1. 384258 2. 148459 1. 647375  
1. 927002 1. 7103 1. 56901 1. 933087 2. 50787 2. 207671 1. 834772 3. 232962 2. 305381  
3. 003236 3. 232515 1. 571537 1. 267341 3. 516137 2. 309578 0. 956079 1. 599205 1. 189964  
1. 366914 1. 265323 1. 497573 1. 632975 1. 368906 0. 963311 2. 275625 1. 182671 0. 824021  
2. 507393 1. 588222 1. 894659 1. 74334 1. 814091 1. 586922 1. 369093 1. 877647 1. 307879  
1. 922431 1. 353885 2. 075498 2. 937143 1. 57262 3. 149615 2. 063573 2. 076076 1. 754547  
1. 607609 1. 23909 1. 029903 1. 365306 0. 868286 1. 573554 1. 136236 1. 18868 0. 955996  
1. 152294 1. 112517 1. 069182 1. 138519 1. 168047 1. 088053 1. 215998 1. 010043 0. 936669  
2. 6098 1. 66811 2. 901848 1. 973701 0. 898141 1. 22009 0. 998314 1. 89389 2. 004321  
2. 859376 2. 283375 2. 507801 2. 095779 2. 567554 2. 142033 1. 994545 2. 121256 2. 168981  
2. 379269 3. 012456 1. 744466 1. 524374 1. 448491 2. 756373 0. 917121 1. 091245 1. 120389  
2. 205173 2. 311983 1. 971801 2. 438571 1. 87934 1. 850622 2. 141792 2. 044875 2. 225658  
1. 538594 1. 438028 0. 938193 1. 201112 1. 125666 1. 319434 0. 932379 1. 318389 1. 627744  
1. 651051 1. 37794 1. 024746 0. 940562 1. 503066 1. 134302 1. 213206 1. 228717 1. 077819  
3. 693083 1. 483802 2. 151218 1. 183742 1. 635513 2. 191191 1. 45477 1. 875866 2. 717317  
2. 532015 3. 687475 4. 400123 2. 824219 3. 279546 3. 500828 2. 925277 2. 815278 3. 141478  
1. 793738 2. 558163 1. 500213 0. 796521 1. 534131 0. 941946 1. 319112 0. 888001 1. 632964  
3. 564612 2. 908805 4. 887989 3. 017763 3. 250108 3. 328324 4. 805301 4. 506789 4. 696167  
1. 618748 2. 720247 3. 443742 1. 989063 1. 690399 2. 587229 1. 933127 2. 416079 1. 900501  
0. 654075 1. 322648 1. 136655 1. 796477 0. 773371 1. 388504 1. 322532 2. 483335 1. 53337  
3. 574797 3. 005705 2. 399566 2. 231764 2. 928088 2. 423543 1. 762821 1. 82294 2. 497016  
1. 979657 2. 930489 2. 584394 1. 592676 1. 033399 0. 71845 0. 861095 1. 994547 3. 17135  
1. 183251 3. 685307 3. 223665 1. 505624 3. 9412 1. 364521 2. 051864 2. 168887 1. 168845  
1. 784637 1. 641228 2. 081846 2. 387928 2. 084387 2. 352405 2. 284348 1. 608699 2. 208046  
1. 068089 1. 737907 1. 520739 1. 510122 2. 074746 1. 0303 1. 137118 1. 746214 2. 897422  
1. 543029 1. 451042 1. 544861 1. 955923 1. 862561 1. 284429 1. 342466 1. 620367 1. 675846  
0. 785496 1. 733085 1. 051095 2. 012061 3. 959474 1. 518464 0. 723728 1. 292891 2. 303128  
1. 443378 1. 439836 1. 308913 1. 289466 1. 38554 1. 401193 1. 318282 1. 420666 1. 52632  
1. 979035 1. 288261 1. 134679 1. 151243 2. 90341 1. 317613 1. 554626 1. 29146 1. 138212  
1. 781752 3. 615927 1. 974811 2. 417017 2. 375324 1. 794263 2. 595401 2. 234754 2. 208331  
0. 86496 1. 129031 1. 190551 2. 007487 0. 959255 1. 285144 1. 075953 1. 336586 1. 050024  
3. 272641 4. 460964 1. 693019 1. 417677 1. 11322 1. 999929 2. 274836 1. 504582 1. 439069  
1. 186423 1. 395789 1. 452762 1. 049789 1. 936901 1. 313488 1. 977047 1. 300557 1. 403985  
4. 626949 4. 2809 3. 559908 5. 534453 4. 122331 4. 636851 3. 751645 4. 69691 3. 7942

0.989683 1.675358 2.264814 1.698797 0.684702 1.158108 0.802911 0.844609 0.98193  
1.567896 1.095939 1.733894 1.96304 1.377716 1.543482 1.194824 2.219805 1.379243  
1.093216 1.281817 0.512035 0.731594 0.649087 0.959899 2.547285 0.698387 1.955533  
0.9976 1.990275 2.116032 1.608914 1.163838 1.420738 1.115493 1.342071 1.889554  
1.200354 1.060612 0.874048 1.060167 0.853623 0.916645 1.087316 1.282401 0.729104  
1.691873 1.958319 1.798848 1.590526 1.404608 1.572081 1.18011 1.835356 1.591248  
1.450521 2.954833 2.788082 2.475436 2.17687 1.849414 3.168813 1.765432 1.260721  
1.532888 1.592329 1.175612 1.352262 1.5976 1.341602 2.00391 1.043672 1.43413  
1.869464 2.471723 2.499072 3.408888 2.709825 2.440833 2.648782 2.217934 2.894722  
2.476873 1.821583 0.905467 1.862902 1.027275 0.853753 1.424705 0.804726 2.378952  
1.901152 1.137252 1.031286 2.683324 1.269132 1.919736 1.348631 1.538444 1.424222  
1.430813 1.791686 1.200316 1.755318 1.648977 1.6174 1.587011 1.197378 1.393445  
2.649013 1.908867 2.663021 2.180522 3.571731 1.906103 2.914068 2.571462 1.929037  
2.12742 2.907014 2.480068 2.688788 1.678001 2.309939 1.907364 2.661117 1.881655  
1.161336 1.523 1.441819 1.228339 2.22962 1.028477 1.435956 1.098648 1.073455  
1.202584 1.556385 1.693496 1.241933 1.935513 1.943683 2.12283 1.652067 1.51327  
2.630654 3.120278 2.723933 2.678352 3.211491 2.971166 2.325764 1.885474 2.956967  
3.034649 1.136775 3.099017 1.669956 4.315679 1.827187 1.309589 1.308744 1.59018  
1.980206 2.37516 1.981406 2.723501 2.054908 2.159205 2.566491 1.59714 2.091614  
2.726707 0.945027 1.000807 0.874429 1.537455 1.479931 0.605593 0.680616 2.228653  
0.77643 1.42926 1.702982 0.34126 1.674105 1.617743 2.691102 2.529363 0.696615  
1.448628 1.05232 1.065028 1.307483 1.228297 0.85464 1.496408 0.963325 1.298129  
2.034991 2.049815 2.132195 2.956931 2.119962 2.939065 1.841534 1.915251 3.456661  
2.239394 2.137178 1.842453 2.156816 1.130378 2.014759 2.336903 1.911932 1.337077  
1.679989 2.257103 4.484094 2.864995 2.475731 6.18925 1.966319 2.459069 1.279071  
1.828371 2.445821 1.346454 1.770551 1.192021 1.682727 1.654817 1.242111 2.033521  
1.846252 2.021456 1.615158 1.894781 1.360411 1.49413 1.618982 2.497372 1.832588  
1.875155 1.614261 1.47758 1.609498 2.198443 1.978563 1.129504 1.492219 2.251058  
1.631714 2.501374 2.147941 1.955834 1.46863 2.921008 1.858308 1.992346 1.81138  
2.438937 2.067971 1.728358 1.907184 2.061283 2.745539 1.779483 1.957487 2.139477  
1.803333 2.053469 1.707712 2.024839 1.609426 2.024202 1.602188 1.930396 2.054795  
4.131546 3.941871 2.275765 4.42531 4.589598 2.111512 2.79826 1.503215 2.577131  
1.274228 0.834246 2.277468 2.162335 1.545035 1.201392 0.820607 0.54188 1.270075  
1.417678 1.365072 1.09398 2.207121 1.144507 0.893967 1.132002 0.993868 1.526953  
1.902978 1.128565 1.94282 1.596163 1.658922 1.870909 1.583065 1.754625 1.973281  
8.053051 6.901411 8.560953 8.484674 8.612216 4.31985 8.049461 8.364189 7.886914  
1.780163 2.252916 1.53519 1.307625 2.417003 1.648508 3.280644 1.888985 1.730369  
3.885365 3.249654 3.58173 4.376489 2.629109 2.388106 2.849389 3.364455 3.33269  
1.607653 1.2967 1.034393 1.341827 1.214741 1.480479 1.347267 1.982637 1.165932  
2.414617 1.607072 1.794909 1.44302 2.297318 2.108998 1.830443 1.732875 1.996792  
1.868962 1.030503 1.212885 1.284493 1.270325 1.221039 1.765355 2.284375 1.394823  
2.483755 2.65017 2.224012 2.469952 1.962379 3.134224 1.60397 1.998174 2.04744  
1.521396 2.236375 0.832573 1.203229 1.659895 1.089736 1.111847 1.357453 1.060673  
1.349863 1.466089 1.03324 1.228988 0.540263 0.757488 1.011249 0.877401 1.121131  
3.519654 2.839085 2.748976 2.052575 2.39428 2.820278 3.910929 1.830117 3.076276  
1.777311 1.633491 1.246691 1.099061 1.142712 1.553329 1.641009 1.44255 1.236997  
2.970291 3.998552 2.787346 3.699568 3.2396 2.735101 2.954462 2.941158 2.746727  
1.681159 1.175421 1.031196 2.264234 1.450679 1.685072 1.99564 1.4012 1.323006  
1.551446 2.096667 1.542584 1.936561 1.453259 1.282921 1.887532 1.29326 1.748974  
2.578184 1.984476 1.985365 1.871924 1.662806 3.237994 1.847956 2.324455 1.459674  
2.200407 1.391147 1.846017 1.862929 1.58394 1.266152 1.358308 1.119716 2.967853

2. 559839 2. 348246 2. 173078 2. 84009 2. 271482 1. 842523 2. 459205 2. 290003 1. 898611  
1. 244607 1. 853851 1. 456943 1. 919566 1. 579708 1. 623468 1. 460717 1. 744246 1. 472722  
1. 745539 1. 718402 1. 633732 1. 128257 1. 668746 1. 227505 2. 088801 2. 816292 1. 173529  
1. 934994 3. 505707 4. 71571 2. 946859 0. 999668 3. 328335 1. 600499 1. 487909 1. 72066  
0. 817509 3. 120479 3. 247111 1. 711473 2. 460525 1. 591269 1. 140789 3. 064433 2. 847529  
1. 02131 1. 705308 2. 795782 0. 693023 1. 191149 1. 887565 0. 754049 0. 605583 1. 286342  
6. 604476 6. 423966 6. 823381 7. 003472 6. 867126 7. 114888 7. 138692 7. 667606 6. 599088  
3. 738912 4. 976658 3. 002039 4. 777295 4. 695182 4. 629776 5. 069702 4. 325139 2. 893048  
1. 000285 1. 26734 1. 801915 0. 741942 1. 316326 1. 356954 0. 668574 1. 278734 2. 19633  
4. 455629 5. 694894 4. 23029 4. 335502 4. 054968 2. 720341 2. 85693 2. 666865 3. 139477  
3. 235529 3. 027444 3. 373527 6. 468187 3. 072149 2. 93718 3. 702153 2. 10725 3. 211839  
3. 595486 3. 946098 3. 435766 3. 207612 3. 036603 3. 734415 4. 100118 4. 043147 3. 050582  
1. 753425 1. 022586 1. 166149 1. 716787 1. 064378 1. 346974 1. 384862 1. 846159 1. 740246  
1. 948561 2. 497288 4. 300838 3. 620359 3. 678093 3. 269612 1. 704232 2. 786976 3. 318822  
2. 670415 1. 30874 2. 566634 1. 327673 1. 468947 2. 028747 1. 254137 2. 016283 1. 822131  
0. 649336 1. 655022 2. 504506 2. 01589 1. 924351 3. 794245 3. 536239 3. 024563 2. 567022  
1. 204371 0. 424365 2. 256464 0. 874321 1. 060369 2. 002741 1. 261154 1. 011134 2. 086335  
1. 076074 1. 200639 0. 980574 3. 511795 1. 399437 1. 81446 1. 269064 1. 758906 1. 795314  
3. 072128 3. 455866 3. 239635 2. 864489 2. 146129 1. 506004 2. 023291 2. 063798 1. 284397  
1. 638232 2. 033408 2. 290405 1. 677659 1. 904068 2. 694945 2. 091091 2. 254842 2. 282339  
1. 922595 1. 099632 2. 054981 1. 736578 1. 519671 1. 038931 1. 169339 1. 866336 1. 249505  
2. 40181 1. 24655 2. 393964 1. 653411 2. 824567 2. 648116 1. 594779 3. 214958 3. 270858  
0. 961931 1. 318736 1. 587315 1. 181114 0. 583488 0. 953667 0. 619868 1. 385549 1. 755406  
1. 83004 1. 970213 2. 126777 1. 294026 1. 331886 1. 679477 1. 877264 2. 56638 2. 120114  
2. 382558 3. 045331 2. 551123 1. 595317 2. 93151 1. 199185 2. 759345 2. 107082 1. 987986  
0. 980954 1. 054912 0. 752767 1. 746295 1. 505488 2. 039079 1. 062194 1. 134547 1. 105024  
2. 130587 2. 727169 2. 263171 2. 686469 2. 495737 2. 297971 2. 566303 2. 305928 2. 602515  
3. 499409 2. 755023 2. 61483 2. 407641 3. 482415 2. 374448 2. 449743 3. 657216 3. 805034  
1. 039582 1. 029037 1. 516006 1. 014901 1. 519295 0. 923296 1. 038559 2. 294201 1. 187022  
2. 501873 1. 410196 2. 677554 1. 128968 2. 060922 2. 229446 2. 603041 1. 659799 3. 02437  
1. 291828 1. 351975 0. 971601 1. 327054 1. 188745 1. 460379 1. 300853 1. 333413 1. 344929  
0. 909835 1. 453397 1. 029394 0. 982775 0. 687258 1. 49995 0. 928674 1. 077351 1. 261555  
2. 116446 2. 4475 1. 195209 1. 469914 1. 493052 1. 865404 0. 923766 1. 867303 1. 479573  
1. 834792 1. 695495 1. 948185 1. 318498 0. 943023 1. 308829 1. 147793 1. 186147 1. 087745  
2. 397593 1. 627598 1. 430477 2. 206293 1. 753867 1. 345051 1. 615643 1. 753309 2. 555668  
0. 838742 0. 981432 0. 446272 1. 085288 0. 74238 1. 557847 0. 741383 1. 20394 0. 769647  
1. 560617 1. 083813 1. 503411 1. 245036 1. 644506 1. 573848 0. 979701 1. 654966 2. 609315  
1. 721222 1. 529287 1. 772873 1. 801156 1. 408516 1. 791088 1. 583362 1. 582862 1. 750418  
1. 336049 1. 519588 2. 069462 1. 352606 2. 299881 1. 519914 1. 371801 1. 624153 1. 272211  
1. 201434 1. 339146 0. 488573 1. 018955 0. 57589 0. 756394 0. 83804 0. 563364 0. 599967  
1. 88079 1. 538428 2. 445231 1. 343231 2. 08523 1. 277522 1. 412952 1. 368386 1. 22837  
2. 771404 0. 918462 1. 747686 2. 231265 4. 69421 1. 322114 2. 2367 3. 85051 1. 562512  
3. 220284 2. 941382 4. 227252 5. 468392 5. 452887 3. 949621 4. 808741 4. 930772 4. 60975  
1. 178094 0. 851605 0. 799517 1. 935405 1. 177476 0. 952636 1. 554583 0. 765194 0. 762592  
1. 778644 1. 938077 1. 741663 1. 382729 1. 644422 1. 285123 1. 67027 1. 682526 2. 139078  
1. 585224 1. 666021 2. 531057 1. 450982 1. 810086 1. 588606 1. 856364 1. 515458 1. 411599  
1. 511351 3. 057693 1. 682623 2. 473911 1. 769627 3. 160964 1. 654996 2. 922675 2. 090519  
2. 098347 3. 44653 3. 439265 2. 384534 4. 348053 3. 571784 3. 827797 3. 182308 2. 183599  
0. 966769 1. 198836 1. 050829 0. 969808 1. 922963 1. 205023 1. 431488 1. 258495 1. 084879  
1. 590137 2. 232214 1. 38627 1. 46102 1. 720738 1. 639415 1. 814476 2. 062506 1. 892388  
1. 548756 1. 214697 1. 634199 2. 730565 1. 960593 1. 499735 1. 271428 1. 049988 2. 291179

1. 697048 1. 187524 1. 124071 2. 155381 2. 236931 1. 881444 1. 807073 1. 767392 2. 46578  
2. 142874 2. 064157 1. 368305 1. 106298 1. 446075 1. 680053 1. 316891 1. 710187 0. 774271  
2. 020783 2. 012014 1. 740464 2. 578041 1. 57248 3. 482674 2. 244495 1. 626524 1. 796894  
1. 131106 2. 140223 0. 889658 2. 007189 0. 909958 0. 69102 0. 951632 1. 889483 1. 242659  
3. 907198 2. 036666 3. 151389 3. 070054 3. 628596 2. 530856 2. 032439 2. 376935 1. 552708  
2. 546624 0. 998808 1. 296325 1. 056999 1. 091074 1. 839308 1. 304291 1. 722154 1. 791037  
2. 334289 2. 726342 3. 691236 3. 02805 4. 562436 2. 220033 1. 809244 2. 171376 1. 87766  
2. 141827 1. 410039 2. 751503 2. 530543 2. 576524 1. 563182 1. 367119 1. 141085 1. 880348  
0. 683912 2. 690715 1. 910694 1. 954425 0. 677109 2. 480585 1. 028352 0. 549911 0. 950555  
1. 894539 2. 249334 1. 814607 1. 905184 2. 193822 2. 82413 2. 320891 2. 09363 1. 977345  
2. 490122 1. 358487 1. 125375 0. 810189 1. 16571 0. 769236 1. 474067 0. 904745 1. 758201  
1. 475084 1. 340013 1. 311427 2. 133679 1. 751956 1. 86216 1. 069522 2. 223567 1. 209908  
1. 42338 1. 712184 1. 364502 1. 556104 1. 403116 1. 161216 1. 295098 1. 095525 1. 040203  
1. 303686 1. 649368 1. 536519 2. 306983 1. 311281 1. 174786 1. 31119 1. 85766 0. 825309  
2. 431025 1. 398281 2. 632303 1. 769159 2. 29702 1. 542827 1. 802022 1. 225191 1. 375667  
1. 079196 1. 228425 1. 161122 1. 39255 1. 666221 1. 434944 1. 257814 1. 406415 1. 171354  
1. 606804 1. 547323 1. 813882 1. 410276 1. 596509 1. 122786 1. 371788 1. 274682 1. 140692  
2. 890045 1. 793764 3. 832364 4. 277532 4. 780012 1. 699349 2. 334341 3. 922702 2. 666404  
1. 895771 1. 283052 1. 716133 2. 12343 2. 357438 2. 311942 2. 003345 1. 950997 1. 977453  
3. 882887 3. 878783 1. 924731 4. 436577 1. 757307 2. 473101 2. 196539 1. 708588 1. 659201  
3. 314185 1. 635291 2. 896458 3. 013816 2. 25538 1. 642729 1. 646496 1. 642807 1. 700773  
4. 053595 2. 895678 3. 729864 5. 072604 2. 921392 4. 268169 4. 362645 1. 750415 1. 778413  
2. 119389 0. 973099 1. 203581 3. 026951 1. 27768 1. 924486 1. 752772 1. 157261 2. 038973  
1. 157033 0. 964558 0. 69919 2. 052314 1. 272588 1. 443551 1. 150121 1. 513006 1. 452731  
0. 526078 0. 467621 0. 683086 0. 472302 0. 521108 2. 318637 0. 578597 0. 757458 1. 030074  
1. 017617 1. 303334 1. 03881 1. 218726 0. 900207 1. 088542 0. 772079 1. 065128 1. 051236  
1. 16084 0. 971271 1. 303251 1. 004625 1. 573086 1. 317653 1. 317479 1. 461424 1. 106981  
1. 287249 1. 054457 1. 086712 1. 117615 1. 256503 0. 739749 1. 328513 1. 27353 0. 960809  
1. 698691 2. 098693 2. 230733 2. 115955 1. 183716 1. 901627 1. 221923 2. 08343 2. 75258  
1. 891296 0. 963944 1. 530499 1. 605806 1. 376691 1. 048597 3. 240065 1. 476724 1. 534397  
0. 498384 1. 76093 1. 135634 1. 75773 2. 145273 2. 208275 1. 45877 1. 145081 1. 548278  
1. 415592 1. 991663 1. 829772 2. 295166 1. 437432 1. 788118 1. 685275 1. 887579 1. 51239  
2. 957219 2. 332734 1. 373304 1. 617041 1. 797504 1. 395667 1. 818042 0. 91483 1. 291035  
2. 273265 1. 58277 1. 564524 1. 483253 1. 510651 1. 451295 1. 889585 2. 216241 1. 712891  
0. 777556 0. 774486 0. 82171 1. 283289 0. 716438 1. 210892 0. 742984 1. 071263 1. 457776  
3. 651084 2. 57635 2. 369125 2. 193851 2. 738822 2. 874344 1. 858411 2. 397581 1. 61907  
0. 982901 1. 584755 0. 944725 1. 663699 2. 168844 1. 538943 1. 328943 1. 737393 1. 2925  
3. 990688 2. 460714 4. 026344 4. 042903 4. 865007 3. 512254 2. 379827 3. 41928 3. 345936  
2. 808153 2. 509729 2. 46562 3. 212134 3. 294979 2. 97981 2. 978159 3. 478045 2. 624707  
1. 212133 3. 327796 1. 500323 1. 62457 1. 430048 1. 402625 1. 237762 1. 6082 1. 39942  
1. 766201 2. 370549 1. 707448 1. 708647 1. 699917 1. 174445 1. 464756 2. 237891 1. 52225  
2. 882972 3. 863376 3. 428864 3. 883099 4. 333831 3. 005815 4. 727103 3. 430501 3. 344173  
0. 515175 2. 427971 1. 221092 3. 298262 2. 987079 1. 062451 2. 548779 0. 942929 1. 525389  
1. 606037 1. 19941 1. 158163 1. 848052 1. 382911 1. 350903 1. 386745 2. 182899 1. 201502  
1. 83641 1. 383531 1. 376917 1. 609358 1. 393236 2. 004413 1. 37016 1. 351455 1. 265957  
2. 095771 1. 38 1. 547032 2. 063386 1. 879084 2. 317214 1. 938966 2. 442758 2. 33576  
1. 973247 2. 587807 3. 487183 2. 939271 3. 637348 2. 255287 2. 120589 1. 965324 1. 982945  
1. 091187 1. 405312 0. 969786 1. 518886 1. 189302 1. 100347 1. 553876 1. 759516 1. 261244  
0. 514364 0. 782938 0. 738646 1. 418491 1. 451902 1. 741789 1. 681043 2. 080713 1. 172737  
0. 845007 0. 87772 0. 725438 1. 07506 0. 704465 1. 132477 0. 930064 0. 877607 1. 045492  
1. 098995 1. 225926 3. 397458 1. 481411 1. 579458 1. 306731 1. 296296 1. 35004 1. 336507

4. 730323 5. 583508 3. 030596 3. 26191 6. 929185 4. 749633 5. 356006 4. 169067 2. 326711  
1. 716601 1. 248892 1. 360308 2. 596483 1. 97665 1. 15807 1. 508389 1. 452889 1. 410382  
1. 398046 1. 881271 1. 855826 1. 86027 1. 926584 1. 421822 1. 144574 1. 788048 1. 305465  
1. 930575 2. 340996 1. 956043 1. 771516 1. 731802 1. 748321 1. 682322 1. 782428 1. 746891  
2. 523075 2. 262399 2. 765164 3. 406749 1. 728254 1. 79197 1. 230845 1. 727385 1. 372038  
1. 211507 1. 807436 1. 264373 1. 524645 1. 783861 1. 384383 2. 150747 1. 898523 1. 658299  
1. 513365 1. 155802 1. 231301 2. 21386 1. 286362 1. 410975 1. 30725 1. 996021 1. 666089  
1. 873074 0. 830933 1. 367142 1. 230746 1. 13215 1. 051565 1. 444666 1. 598286 1. 663624  
2. 796993 2. 280254 2. 26874 1. 658657 1. 679405 2. 88171 1. 324438 1. 823842 2. 224093  
1. 350526 1. 949647 1. 040916 1. 03379 1. 084546 1. 21913 1. 221665 1. 184898 2. 078885  
2. 913775 3. 519742 3. 469342 3. 038545 4. 525366 3. 880433 3. 694269 3. 062368 3. 056813  
1. 024252 3. 66819 2. 480056 2. 707147 1. 1921 2. 961971 2. 769571 2. 115144 1. 273703  
1. 910751 2. 905678 1. 27484 1. 441143 1. 440619 1. 992997 1. 411955 2. 588345 1. 345799  
1. 50327 0. 717919 0. 683495 1. 530918 2. 040321 1. 742053 1. 232588 1. 138893 0. 713165  
1. 371037 1. 948926 1. 469503 1. 559805 1. 638578 1. 691177 1. 548202 2. 087222 1. 406424  
0. 994486 0. 932426 1. 396852 1. 408839 1. 351757 0. 972171 2. 719269 0. 809296 0. 685201  
0. 917301 1. 326437 1. 128754 1. 429003 1. 254597 1. 08646 1. 222043 2. 001474 1. 041943  
3. 633425 1. 09586 0. 873232 1. 409518 1. 064138 4. 130378 2. 123343 2. 472985 1. 83397  
6. 536709 3. 820429 6. 363379 5. 142193 4. 785753 2. 721769 3. 292466 3. 408301 3. 985393  
2. 53392 2. 273223 1. 88592 2. 090185 2. 27018 1. 245072 1. 474533 1. 460124 3. 166878  
1. 835833 1. 77917 2. 892578 1. 735821 2. 396054 1. 532161 1. 532549 2. 110896 2. 509108  
3. 314377 2. 830968 2. 432774 3. 593896 2. 076767 2. 535448 2. 220483 2. 183218 0. 978974  
1. 865633 1. 546963 1. 997518 2. 494823 3. 556062 2. 808069 2. 237506 2. 433044 2. 084429  
3. 166668 2. 36238 2. 5606 2. 45627 2. 815067 2. 871728 2. 8349 2. 849148 2. 474665  
1. 852145 1. 663605 2. 00753 1. 739033 2. 390195 2. 067911 2. 363022 1. 761466 2. 550043  
2. 584339 1. 839919 1. 561114 1. 784754 3. 15161 2. 176096 2. 068617 2. 275248 2. 279703  
4. 468695 4. 64558 4. 985977 1. 92486 2. 425746 1. 790587 1. 224016 3. 128297 3. 402084  
8. 219203 7. 185364 7. 476861 6. 345556 5. 724228 7. 43478 5. 935175 4. 326858 3. 749976  
2. 962891 4. 267039 4. 367723 5. 332697 5. 313715 2. 652251 2. 369462 2. 663498 3. 302317  
1. 425246 1. 665478 1. 072594 2. 421732 1. 617694 2. 072098 1. 549817 1. 296758 1. 779066  
1. 176398 1. 323416 0. 830373 0. 776416 1. 287056 0. 561132 0. 840931 0. 691029 0. 887683  
1. 55148 1. 454692 1. 051973 1. 18949 0. 672912 1. 107652 1. 264195 1. 241137 1. 781262  
1. 808717 1. 262625 1. 608586 2. 320039 1. 398359 2. 43138 1. 552497 1. 327015 1. 668666  
1. 150046 2. 269325 2. 307212 0. 488636 3. 456356 1. 135233 1. 217758 0. 637544 1. 600349  
2. 643538 2. 775966 2. 405048 3. 28131 2. 740925 2. 194169 3. 645642 2. 748418 3. 509608  
2. 132675 2. 990351 3. 106708 2. 639815 2. 732021 2. 491939 2. 168476 2. 282451 3. 296734  
2. 576076 3. 1549 3. 918413 2. 494567 1. 683288 2. 506203 3. 048521 1. 848759 3. 932847  
1. 465043 1. 898349 1. 33532 1. 289983 1. 302135 1. 741457 1. 845662 1. 372482 1. 579112  
2. 031508 1. 472748 1. 113762 1. 000491 2. 193582 1. 296562 0. 958769 1. 433326 1. 251307  
2. 064805 1. 38582 1. 172017 1. 660096 1. 29581 1. 589045 1. 659982 1. 175422 2. 317868  
1. 108086 1. 459987 0. 96479 1. 651747 1. 216901 1. 76982 1. 333122 1. 270087 1. 678729  
5. 75124 6. 238073 4. 49137 4. 497521 5. 488109 5. 900619 2. 753085 4. 990014 3. 910581  
1. 33038 2. 654147 2. 212866 2. 478764 1. 323246 1. 592063 1. 062444 2. 003691 0. 774529  
1. 959471 2. 546436 2. 383516 2. 711842 2. 158936 3. 0653 2. 403723 3. 036289 2. 633203  
0. 433074 0. 990536 0. 848765 0. 867377 1. 504266 0. 729824 1. 430505 1. 388082 0. 562143  
4. 771808 4. 258109 5. 815134 3. 578238 4. 983658 2. 842914 4. 424701 5. 370562 3. 843322  
7. 572503 6. 315302 7. 35209 5. 743271 6. 529627 6. 474789 6. 75244 4. 862029 7. 417271  
5. 630276 4. 384407 3. 292774 4. 75601 2. 073007 3. 202916 2. 664412 2. 291749 3. 508128  
1. 499253 2. 133965 1. 790677 1. 642201 0. 815759 0. 872218 1. 317644 1. 319153 1. 189105  
4. 33642 3. 712928 3. 35687 3. 935945 5. 355095 3. 320731 3. 233026 4. 170531 3. 678743  
5. 916285 3. 958332 4. 266233 0. 908205 2. 809528 0. 898035 4. 410462 3. 450885 1. 185736

2.19802 0.954459 0.789782 1.499562 1.190588 0.751041 0.89137 0.788442 0.967164  
1.524947 1.427398 1.786802 2.229291 1.065329 1.177121 1.456436 1.538907 1.434266  
1.782353 1.660766 1.18793 2.89661 3.730939 1.376896 1.187686 1.147305 1.808236  
1.512836 1.51136 1.208821 2.343825 1.23862 1.199119 1.302767 1.24259 1.194519  
1.480817 1.832587 1.189417 1.720768 2.289901 2.066974 2.150124 2.054967 1.617882  
1.439774 1.724905 1.260403 1.70367 1.306724 1.366176 1.574397 2.599109 1.701255  
3.358304 3.151599 2.566434 2.047315 4.517069 3.496712 1.865354 2.234279 2.910992  
4.483307 4.025962 4.480488 2.325407 5.153802 1.796299 2.036791 1.904325 2.655487  
1.130567 1.112392 1.19757 1.129121 0.961441 1.37909 0.973695 1.072835 0.670246  
1.047494 1.388445 1.223382 1.042948 1.33502 2.015679 1.405653 1.344577 1.25087  
0.702034 0.839948 0.845516 0.749231 1.443051 0.926374 1.144542 1.067643 1.050478  
4.396651 5.561815 5.999734 6.18396 6.10793 3.820999 3.108071 4.124465 3.635765  
1.767481 2.352313 1.867973 1.301653 1.186257 1.413225 1.007699 1.188659 1.088874  
0.899881 1.493064 1.397695 1.032807 1.045219 1.260317 1.200569 1.646696 1.07482  
1.844641 1.235153 1.618961 2.534839 1.479188 1.235206 1.436955 2.310669 1.04047  
2.371696 4.237867 2.66666 2.496134 2.613462 2.921955 1.961423 3.123542 3.207413  
1.182383 1.265545 1.094062 1.630195 1.291367 1.128531 1.120839 1.003146 1.283879  
2.845241 2.838882 2.81037 1.883487 3.168922 2.579755 3.1711 3.643235 3.252117  
2.892448 1.602513 2.056488 1.479196 2.171145 1.815174 2.608577 3.79858 2.512264  
1.260155 1.674111 1.549147 1.369621 1.369301 1.838988 1.207548 0.931143 1.272554  
1.458 1.629189 2.580545 1.561303 1.570247 1.677746 1.285388 2.084682 1.608718  
2.973644 2.411786 2.986101 2.143093 3.016361 2.434769 1.940396 2.491062 3.024438  
0.892747 1.997281 1.072286 0.801227 1.134809 1.088604 1.07291 0.882083 0.619958  
1.68078 3.808949 1.884694 2.536638 2.765314 1.43175 1.709719 0.84834 2.024251  
2.501737 2.959782 1.140493 3.911653 1.394702 1.881596 1.479329 0.717791 2.507614  
4.246156 1.244074 6.003129 1.505665 5.364561 1.35515 1.490265 2.715574 2.565489  
1.188861 1.760172 1.37476 2.811707 4.048883 1.00973 1.961463 2.592246 1.378765  
1.944119 2.05811 1.534125 1.586845 1.938441 1.244275 1.44297 2.499481 1.261844  
2.848145 2.30795 3.887335 3.412106 3.609445 1.457064 1.184994 2.584679 1.891977  
3.253045 3.021337 3.350491 2.441585 2.82719 4.091209 2.423443 2.172162 1.983602  
3.493528 2.530853 2.629812 0.662082 1.579478 2.943537 1.548635 0.925955 1.193345  
3.691236 1.642189 2.032918 3.39859 4.186284 1.622483 1.744258 1.406572 1.619017  
5.733721 6.131313 5.100909 4.056541 6.604002 5.370989 5.342722 6.055076 4.763994  
1.620563 1.745009 3.235543 1.051662 2.605375 1.126262 1.371303 1.586461 1.963721  
5.172567 3.406189 4.649202 3.505916 3.602001 3.695539 4.131588 2.247967 3.96239  
1.892756 1.052159 0.863118 3.911801 0.976634 1.169718 1.969773 1.323947 2.552603  
4.696987 4.466386 4.360786 3.263365 4.347125 4.695709 3.812295 3.988946 4.258771  
0.740553 1.25504 1.349496 1.337946 1.327965 1.288122 1.355159 1.935375 1.440656  
3.686465 1.478964 2.110994 2.164104 2.332798 2.123452 2.669299 2.445946 2.275261  
0.831564 2.839325 0.805007 1.046158 3.036053 2.335319 1.087813 1.210651 0.831986  
3.354665 3.391411 1.638845 2.357664 3.935238 2.717487 3.565053 3.226194 2.889581  
1.276267 1.569078 2.218584 1.577706 2.749258 1.897955 1.898447 1.320584 1.246602  
3.835084 1.4651 1.987129 1.413923 2.686537 1.406943 1.422691 2.560412 2.464474  
6.556064 4.743686 3.852203 2.909887 3.66601 4.784829 2.434971 2.865877 2.19317  
2.2367 2.045114 1.969773 1.436341 1.240557 1.567839 1.371482 2.368719 2.089535  
1.743949 1.308617 2.328381 1.50858 1.990855 1.44302 0.833786 1.645849 1.724616  
0.829945 1.149244 1.090846 1.17392 1.138277 0.715308 1.284815 1.899787 1.040059  
2.152697 5.547847 1.96317 1.18641 0.584526 1.730934 3.324096 1.06293 0.617139  
1.71601 2.030958 2.048358 1.807418 3.416563 2.039157 1.55774 2.155741 1.887237  
2.293674 2.057884 1.727046 2.424889 2.065116 3.657536 1.808159 2.027208 1.483397  
2.648935 2.52717 2.893167 2.604604 2.754048 4.087442 2.633618 2.254855 3.291981

1. 620343 1. 353409 3. 438402 2. 013541 2. 72773 2. 130193 1. 8376 1. 623865 1. 439065  
1. 830918 4. 90731 3. 871632 5. 38027 2. 98309 4. 787393 5. 349201 2. 39705 5. 205019  
1. 034361 3. 723331 1. 194491 3. 008685 1. 203838 1. 719519 1. 685371 1. 622499 1. 723194  
0. 924053 1. 334584 0. 813342 0. 849364 1. 184152 0. 807956 0. 888252 1. 238866 1. 025198  
1. 233227 1. 158586 1. 612006 1. 656087 1. 786597 1. 502569 1. 327455 1. 48253 1. 20492  
1. 533047 1. 723859 1. 264676 1. 93669 1. 305212 1. 919933 1. 365568 1. 525263 1. 624196  
1. 940479 2. 479651 2. 028462 1. 836969 3. 044637 1. 656822 1. 97646 1. 939995 2. 722847  
2. 200769 2. 205287 1. 756412 2. 44988 1. 990242 1. 937104 2. 178142 2. 29056 1. 924679  
4. 403227 3. 693344 4. 868353 4. 572091 5. 160481 4. 115878 3. 974785 4. 466254 3. 775623  
2. 298331 2. 237091 2. 790519 2. 726435 2. 611515 2. 072256 2. 15356 1. 942202 2. 044775  
1. 115214 1. 340427 2. 013767 1. 52649 2. 744344 2. 849205 2. 273178 1. 115193 3. 399281  
1. 698844 1. 628758 1. 81675 1. 840989 1. 31197 1. 626619 1. 596727 1. 60904 1. 442714  
0. 815945 1. 560012 2. 705326 2. 205332 1. 593516 0. 918199 2. 002998 0. 754036 1. 078035  
2. 080104 2. 666386 1. 813279 1. 430634 2. 225688 2. 38578 1. 945738 1. 634078 2. 218496  
2. 278517 3. 816327 4. 217374 2. 792523 4. 796405 4. 56177 3. 896586 3. 035935 3. 114439  
1. 236308 1. 29419 1. 080473 1. 330858 0. 779421 0. 99633 1. 038814 1. 65822 0. 896582  
3. 190504 2. 844863 2. 489523 2. 740182 2. 521003 3. 09007 2. 73856 2. 547344 2. 627945  
1. 522545 0. 956256 1. 302126 1. 329765 1. 923132 1. 416807 1. 024558 1. 103913 1. 666325  
0. 97676 1. 232856 1. 087747 0. 76256 0. 967804 0. 859258 1. 006448 0. 999771 1. 134261  
3. 828243 1. 857571 2. 469931 2. 567172 3. 686099 2. 852617 4. 952471 5. 005077 3. 934271  
1. 801551 1. 209088 1. 050226 1. 496325 1. 038397 1. 369036 1. 179466 1. 289251 1. 263536  
1. 65367 1. 754637 1. 025461 1. 836875 1. 013314 1. 319506 1. 650323 1. 940348 0. 994246  
1. 290882 1. 883805 1. 157325 2. 537279 0. 978389 1. 228782 1. 426032 1. 18919 1. 159029  
2. 738878 1. 408045 1. 363949 1. 094298 1. 224916 1. 246337 1. 153125 1. 334591 1. 472057  
1. 377478 3. 172751 1. 863034 2. 435912 1. 08895 0. 974852 1. 291418 2. 012106 2. 605196  
1. 342659 3. 126858 3. 458589 1. 583849 3. 386083 2. 703552 1. 840791 3. 234373 1. 980638  
1. 717943 1. 324029 1. 098192 1. 702592 1. 155596 1. 450835 1. 029508 2. 657492 1. 298671  
1. 151005 1. 230757 1. 272858 1. 710538 1. 353188 1. 407043 1. 448289 1. 382699 1. 401634  
2. 339939 3. 628945 4. 035613 2. 009594 2. 652923 2. 149626 2. 631679 3. 150668 2. 527814  
2. 486631 2. 167771 2. 105667 2. 037282 2. 509583 2. 847262 2. 791015 2. 186438 2. 904087  
2. 46489 2. 807306 3. 5812 1. 167275 1. 218575 1. 745971 1. 141441 1. 52275 1. 243005  
1. 275413 1. 499168 0. 942677 1. 266198 1. 576223 2. 064539 0. 686712 1. 660035 1. 704786  
0. 785048 0. 76179 1. 281262 4. 027031 2. 918753 1. 256066 1. 042258 1. 256895 0. 73581  
1. 15917 1. 092359 1. 155922 1. 318315 0. 837634 1. 006602 0. 860121 1. 156836 1. 438073  
3. 304103 5. 015221 4. 782427 2. 208046 1. 529405 0. 990056 3. 210081 3. 880799 1. 831515  
1. 636307 2. 568988 2. 855799 0. 61111 0. 888343 2. 926808 2. 274326 3. 147187 3. 585451  
2. 910947 2. 816689 3. 885459 3. 399697 3. 92522 3. 282077 3. 820342 3. 561078 3. 57737  
1. 246101 1. 463484 2. 222236 3. 184183 4. 599632 0. 613507 1. 620496 2. 157372 3. 039173  
2. 020558 2. 815382 2. 797371 3. 93959 1. 429731 1. 415334 1. 538527 2. 431042 2. 410543  
3. 579304 1. 583232 1. 357344 2. 714768 1. 326702 1. 619446 1. 566529 1. 688025 2. 019206  
1. 043276 0. 965661 0. 912588 1. 635473 1. 340587 1. 476346 1. 109923 0. 994519 1. 094788  
2. 955816 2. 017609 1. 565033 1. 011334 1. 177042 1. 243811 1. 229237 1. 552149 0. 960863  
0. 979595 1. 205464 0. 899771 1. 419689 1. 132208 1. 189798 0. 888998 1. 571324 1. 25241  
7. 821835 8. 29874 7. 136533 7. 115864 8. 544118 6. 608334 8. 168243 7. 349731 7. 897517  
3. 570622 2. 298977 2. 909706 1. 974597 4. 966887 3. 266365 1. 746288 1. 648415 2. 542398  
2. 426073 1. 449189 1. 274107 1. 4446 1. 274616 1. 263515 1. 210958 1. 202544 1. 118327  
2. 834324 2. 859459 2. 956272 3. 106449 3. 134526 3. 332262 2. 591821 3. 136081 3. 077381  
1. 551562 0. 65332 3. 145951 2. 835483 1. 388948 1. 473461 2. 048418 1. 140745 1. 245254  
0. 341733 3. 65821 3. 18455 2. 317566 2. 704962 1. 768425 5. 211564 3. 008344 1. 895994  
2. 050232 2. 841604 1. 882085 1. 574908 2. 083421 1. 388242 1. 463885 1. 623958 1. 561639  
0. 961203 1. 495253 1. 672959 2. 000033 0. 677531 2. 157191 1. 814367 1. 550373 1. 341848

1. 832394 1. 589568 1. 069356 0. 972794 1. 48002 1. 32251 1. 496121 1. 362971 1. 154377  
4. 470856 4. 300508 4. 283825 3. 586979 4. 728122 1. 800039 2. 695567 2. 568805 2. 0372  
1. 140334 1. 096856 1. 102419 0. 959381 0. 888242 0. 883331 0. 929928 0. 947134 0. 952009  
3. 107162 1. 819484 2. 051354 1. 157816 1. 923516 1. 961536 1. 964726 1. 880311 1. 576067  
2. 143915 2. 573079 2. 516524 1. 701338 2. 426053 2. 297173 2. 340969 2. 450513 2. 045263  
1. 296236 1. 585292 1. 031255 1. 515049 1. 478147 0. 870757 1. 562789 1. 427407 1. 332712  
2. 387091 1. 913572 1. 415853 0. 593247 2. 866044 1. 136608 0. 928457 1. 416376 0. 613096  
1. 949498 1. 726346 3. 308313 1. 749808 2. 253307 1. 847137 2. 156294 1. 614438 1. 7566  
1. 451305 1. 332623 1. 637723 1. 477607 1. 35936 2. 108016 1. 496088 1. 330465 1. 436909  
1. 325597 0. 924966 0. 739901 0. 930384 0. 430389 1. 348642 0. 80802 1. 652365 0. 888671  
1. 496973 1. 81278 1. 885357 3. 772989 2. 8857 1. 441734 4. 288241 2. 174664 2. 462233  
1. 154443 1. 334902 1. 447787 1. 100138 4. 239546 1. 788304 1. 697614 2. 129614 1. 498079  
1. 175119 2. 712205 2. 264353 2. 208383 1. 225602 1. 34771 1. 990242 0. 937849 1. 661936  
2. 357581 1. 665248 2. 796557 2. 497336 2. 236847 2. 509479 2. 754636 2. 583992 1. 652082  
2. 623206 5. 045709 4. 853193 0. 86645 3. 512476 1. 568858 0. 764623 1. 452528 3. 072644  
3. 04191 2. 325998 2. 138353 3. 326294 1. 82439 3. 758719 1. 726163 2. 79175 2. 083208  
3. 479345 1. 618556 2. 661278 2. 213328 0. 696043 3. 061054 2. 300099 1. 249222 1. 848794  
1. 837257 1. 854923 2. 554069 1. 749029 1. 950028 1. 534107 1. 645035 1. 916534 1. 928765  
0. 75651 1. 998371 2. 423268 1. 599357 1. 292971 1. 935732 1. 90181 2. 272767 1. 739842  
0. 903642 0. 920746 0. 939282 0. 673668 0. 418525 0. 810457 0. 863056 1. 977892 1. 902785  
3. 272997 3. 78912 0. 966156 0. 64316 1. 131218 0. 396998 1. 958314 1. 099452 0. 682053  
1. 369329 1. 656402 1. 387616 1. 623203 2. 011158 1. 380964 1. 199866 1. 845664 1. 333831  
2. 430052 2. 573359 2. 19259 2. 31986 2. 472185 1. 940994 2. 331733 1. 694719 1. 760093  
3. 95296 3. 150028 3. 766994 3. 454145 2. 381002 4. 052832 3. 764923 2. 4428 3. 0424  
0. 665144 1. 101745 1. 093675 1. 710399 1. 040627 1. 970297 1. 371983 1. 574046 2. 021718  
1. 115229 1. 673267 1. 016996 1. 794171 3. 33411 1. 230567 0. 82591 2. 154957 1. 73071  
3. 443503 4. 576182 5. 373824 4. 460676 5. 484675 4. 41468 3. 816758 2. 924086 3. 814629  
2. 689558 2. 510011 2. 392923 2. 027936 2. 428763 2. 089471 2. 901996 2. 285627 2. 384301  
1. 190972 1. 230024 1. 192548 1. 580523 1. 06801 1. 037929 1. 440174 1. 314149 1. 302858  
2. 259086 2. 163153 2. 426825 1. 903186 2. 408395 2. 033512 1. 642273 1. 640335 1. 492343  
2. 359817 1. 265738 2. 487368 1. 343537 1. 404482 2. 868549 1. 9811 1. 354726 1. 78607  
1. 332328 1. 5427 1. 614426 1. 437422 1. 591003 1. 312658 1. 367933 1. 168475 1. 147015  
3. 07317 2. 536421 2. 604424 2. 006108 2. 064271 2. 660177 2. 530125 2. 743758 3. 610874  
2. 214319 1. 482089 2. 055644 2. 068493 3. 523698 2. 30853 2. 343541 3. 521906 4. 184013  
2. 776505 2. 59093 3. 977319 3. 881327 2. 530453 2. 430557 2. 380211 4. 41372 3. 453229  
1. 29515 1. 434748 1. 0124 1. 219273 0. 98271 1. 283783 1. 077701 1. 372583 0. 793144  
2. 088786 1. 525259 1. 152949 1. 346284 0. 862886 0. 995213 1. 13304 1. 084285 1. 796498  
1. 383821 1. 5548 1. 601253 1. 297615 1. 495555 1. 260174 1. 781733 1. 157759 2. 072693  
1. 302799 1. 487835 1. 883662 2. 207717 1. 61225 1. 663611 1. 457925 2. 040662 2. 089049  
0. 764332 2. 608774 0. 494776 0. 988214 0. 492996 1. 191765 0. 863963 1. 397391 1. 666193  
0. 827498 2. 151016 2. 09503 0. 998384 2. 678235 1. 676357 1. 145233 2. 835142 1. 245206  
1. 595863 1. 712488 1. 300139 1. 423701 1. 420689 0. 99704 1. 143007 1. 303989 0. 870323  
1. 631716 1. 455984 1. 211687 1. 483981 1. 732926 2. 332514 1. 519886 1. 525658 0. 95236  
0. 86582 1. 279434 0. 851704 1. 787272 0. 652312 0. 484925 1. 285839 0. 991201 0. 780027  
0. 488856 0. 747915 1. 223291 1. 322382 1. 218129 0. 338134 0. 686803 0. 734865 0. 966496  
1. 631856 1. 09373 1. 373713 1. 505443 0. 842988 1. 193708 1. 574958 1. 206083 0. 990084  
1. 010097 0. 895142 1. 312215 1. 012483 1. 79559 1. 499898 0. 93919 1. 258255 1. 031361  
2. 350681 1. 847694 1. 471355 1. 962557 1. 215549 2. 068625 1. 632935 2. 225465 2. 238303  
2. 3692 2. 421452 4. 78052 3. 24166 2. 738944 2. 825542 2. 19253 2. 836966 3. 65418  
1. 271311 0. 979033 1. 187125 1. 277921 2. 192117 1. 162479 1. 321164 1. 167027 1. 173844  
1. 142317 0. 917559 1. 603987 1. 750838 1. 066282 1. 834585 1. 177057 0. 982151 1. 622629



1. 76826 1. 770522 1. 565202 1. 767927 1. 479458 1. 984504 1. 777267 1. 769074 2. 175627  
1. 783829 1. 235545 0. 996805 1. 596728 1. 316114 1. 376623 1. 282493 1. 043724 1. 104049  
0. 85129 1. 456604 1. 013327 0. 891814 1. 802374 0. 917709 0. 676584 1. 035982 0. 78731  
1. 515221 1. 9921 2. 205453 2. 091561 2. 069223 1. 593333 1. 844598 1. 881284 3. 177531  
2. 493343 1. 84273 1. 635451 2. 32281 2. 250615 1. 761626 1. 668018 1. 943803 2. 37363  
1. 365682 1. 605795 1. 68337 1. 386175 1. 097289 1. 277582 1. 758404 1. 051613 1. 546212  
3. 491141 3. 271008 3. 702593 4. 194355 2. 744532 3. 097212 2. 504527 2. 725196 3. 491034  
5. 935551 5. 190398 5. 211505 4. 414629 4. 637972 3. 334462 3. 522087 3. 748656 3. 590393  
1. 729349 2. 316042 2. 698824 1. 540674 1. 710197 2. 656313 1. 372017 1. 726429 1. 622461  
0. 988107 2. 005935 0. 977284 1. 500815 1. 096502 1. 360715 0. 907118 0. 950342 0. 845707  
2. 110649 2. 674924 2. 216485 2. 553747 2. 777584 2. 492863 2. 267608 2. 437574 2. 204972  
2. 870967 1. 824941 1. 703165 4. 40829 2. 815568 2. 153482 3. 65992 2. 373146 2. 873832  
3. 085396 3. 483721 3. 621999 2. 745228 3. 477978 3. 553064 3. 115365 2. 842567 4. 304202  
0. 775819 2. 812812 1. 826282 0. 967612 2. 229536 1. 290101 1. 209838 1. 072982 1. 122187  
1. 512643 1. 29706 0. 929167 1. 117584 1. 059272 1. 02455 1. 435508 1. 379926 0. 967359  
1. 112176 1. 554576 1. 005711 1. 24455 1. 112176 1. 103483 1. 448591 1. 223405 1. 597709  
1. 437064 1. 237611 0. 969758 2. 684198 0. 965281 1. 450277 1. 566198 1. 378833 1. 018528  
2. 287364 1. 945732 2. 02879 2. 135267 1. 63251 4. 005821 1. 460982 1. 143069 2. 732806  
4. 552737 4. 84327 3. 598182 4. 415669 4. 261375 3. 572835 3. 072154 2. 237332 2. 739652  
3. 530021 3. 810603 3. 886058 4. 512686 3. 425263 3. 031489 2. 733532 1. 348121 1. 569011  
1. 878715 2. 652909 1. 955989 3. 049703 1. 871074 2. 522126 1. 80303 1. 396582 1. 896507  
1. 446997 1. 143647 1. 736629 1. 469656 1. 86159 1. 637448 1. 409374 1. 39246 1. 180732  
0. 97394 1. 751602 1. 189454 1. 042894 1. 15905 1. 615976 1. 423221 1. 54137 1. 092651  
2. 073163 2. 474916 1. 234563 1. 139579 2. 433198 1. 152734 1. 50435 1. 747867 1. 576463  
2. 333932 1. 873361 1. 630952 2. 089245 1. 376594 1. 670203 2. 254464 1. 996563 1. 359475  
0. 963816 1. 219498 0. 601532 0. 681603 0. 831881 0. 755115 0. 875863 0. 941743 0. 808631  
1. 475705 2. 238752 3. 617958 1. 551669 1. 736022 1. 608978 1. 388997 1. 575408 1. 961991  
1. 542407 1. 586785 1. 244073 1. 3004 1. 678923 1. 428584 1. 300584 2. 391134 2. 384731  
3. 421629 1. 133974 1. 164322 2. 262394 1. 251779 1. 429171 1. 382288 2. 952413 1. 446281  
0. 617969 1. 519078 1. 003744 1. 086142 1. 213962 1. 137176 1. 31027 1. 127628 1. 052311  
1. 972674 1. 912588 4. 647614 2. 650275 2. 186297 1. 839311 2. 072448 1. 784549 2. 525783  
1. 38276 1. 966407 1. 686162 1. 212047 1. 353824 1. 925714 2. 189334 1. 386618 1. 731805  
1. 899431 1. 005073 1. 563371 1. 628864 1. 144345 2. 800091 1. 845055 1. 543618 1. 581559  
2. 565719 1. 420967 1. 289371 3. 166413 2. 323852 1. 0585 1. 64429 1. 775894 1. 671867  
0. 924436 0. 706102 0. 857858 0. 82714 0. 867711 0. 99356 0. 964128 0. 818344 0. 626576  
1. 510309 2. 145386 1. 85585 1. 471931 1. 742346 1. 493286 1. 726754 1. 466112 1. 434325  
1. 371342 1. 339753 1. 314221 1. 231407 1. 263489 1. 150275 2. 067667 1. 421766 0. 956734  
1. 958391 1. 41187 1. 731272 1. 331672 2. 06699 2. 189407 1. 714312 1. 854036 1. 474917  
2. 964058 3. 296995 3. 116488 3. 317437 2. 344676 3. 091226 2. 903707 2. 895532 3. 136547  
2. 788336 2. 039935 0. 954066 1. 943334 1. 741394 2. 072089 3. 081898 1. 201253 2. 347987  
2. 575807 0. 842161 1. 810778 1. 702822 2. 171559 1. 529072 1. 227063 2. 037161 1. 387919  
2. 368675 2. 830959 3. 960993 3. 172766 3. 665793 2. 311486 4. 239699 4. 23283 3. 875097  
2. 091267 1. 704121 1. 879608 1. 599189 1. 871336 1. 532771 1. 183055 1. 460703 1. 42035  
1. 864524 1. 777892 1. 36595 2. 021843 1. 730962 1. 354494 1. 749929 2. 162945 2. 898324  
1. 285776 1. 748232 1. 316721 0. 981167 1. 823154 1. 341288 1. 747375 1. 650211 1. 120249  
1. 85665 1. 378371 1. 006726 0. 910964 1. 308055 1. 737796 1. 258047 1. 538249 1. 941758  
1. 518463 1. 157146 1. 768407 0. 922271 1. 106454 1. 245882 0. 95043 1. 173876 1. 512703  
1. 001439 2. 022337 1. 51527 2. 102748 1. 85146 1. 483221 1. 270049 1. 778616 1. 543606  
2. 110355 2. 614351 2. 453133 1. 881634 1. 456322 1. 763785 1. 780718 1. 658229 1. 863751  
4. 617039 4. 136862 3. 325658 3. 574317 3. 719397 3. 654379 5. 237036 2. 488376 3. 514416  
1. 183666 1. 267112 0. 878768 1. 155918 1. 073534 1. 128004 1. 247721 0. 957562 0. 988093

1.693881 3.934797 2.349331 2.415243 1.468645 1.285423 1.367392 1.119767 1.276141  
1.483616 1.007355 0.84792 0.688775 0.960701 1.024068 1.070839 1.148053 1.166483  
0.800953 0.998848 0.943238 1.02373 1.166036 0.878874 0.892181 1.115311 0.786548  
2.219374 1.264029 2.412875 3.471569 1.348335 1.922074 1.59319 2.879624 1.666538  
2.207043 1.808487 3.017778 2.995608 2.541359 1.630565 2.970269 2.995143 3.300266  
0.984104 0.689137 0.941064 2.236474 1.4582 1.572687 0.892549 1.03709 1.012696  
5.477726 4.229224 1.083192 3.278549 1.87516 1.478445 1.536834 4.375937 2.24514  
1.961105 3.155541 4.056802 2.935114 3.902972 3.202981 2.575691 3.741763 3.301867  
1.692436 1.830903 1.42341 1.516696 1.99582 1.131519 1.631492 1.393992 1.370076  
1.083018 1.167254 1.318534 1.350232 1.775688 1.281332 0.994717 1.096378 0.951977  
2.253683 1.987553 1.671105 1.844476 2.194783 2.404739 2.189205 1.582307 2.425656  
1.216715 2.263994 1.134504 1.359677 1.994622 1.161012 1.493898 1.244429 1.849999  
1.023028 1.018877 1.023334 1.045261 0.777482 1.159943 1.167377 1.519832 1.189949  
1.429238 2.68542 2.019605 2.804407 2.295337 0.93325 1.178198 1.933281 1.458974  
2.053608 2.218734 1.686903 2.027616 1.787218 1.910897 2.046631 2.870166 1.928916  
1.439292 1.492482 1.088399 1.581626 1.075388 1.590231 1.87191 1.987346 1.446003  
1.531088 2.688036 1.802755 1.563384 1.624508 1.835667 2.392612 1.698266 1.85387  
2.271282 1.086257 2.057988 1.538634 0.857239 1.299479 0.849714 0.946469 1.135004  
1.534361 1.797468 1.876523 1.693219 1.996027 2.315366 1.801957 1.827968 1.792464  
1.960652 1.982112 1.943512 2.487272 1.704442 2.143447 2.296106 2.716539 2.33363  
1.896115 1.730197 1.749554 1.872071 1.033077 1.567126 2.21221 1.299507 1.650809  
2.725586 2.135038 1.051099 1.603048 0.989554 2.281541 1.026002 1.718491 1.184561  
1.453261 1.447173 1.136584 2.076372 1.420737 1.541475 1.005716 1.315836 0.912669  
3.700618 2.0149 1.641343 2.796331 1.876625 1.668246 2.064246 3.131212 1.801525  
1.132646 1.693567 1.617658 0.910487 1.202793 0.974662 0.881232 1.509229 1.015277  
1.283288 1.673057 1.33236 1.49441 0.962648 0.942997 1.302489 1.731776 1.102528  
1.040596 1.089538 1.493548 1.379143 0.817844 1.237447 0.891456 0.71109 1.612776  
1.451027 1.163945 1.265456 1.747956 1.392995 1.28389 1.639184 1.763781 1.622581  
1.817667 2.525795 1.300779 1.675598 2.627577 1.409773 1.240473 1.70534 1.753305  
1.390227 1.794231 0.97891 1.895433 1.568582 1.31021 1.898954 1.519243 1.029015  
1.21308 1.601857 1.570152 1.033783 1.068839 1.781974 1.757092 1.495079 1.572429  
1.843971 1.648392 1.76083 1.49798 1.509677 2.934191 1.671453 1.93435 1.96639  
3.156703 2.977037 1.990595 2.694208 2.034899 2.163099 2.649298 2.586884 1.726403  
1.751815 1.685051 2.129671 1.71574 2.117905 1.273637 1.774122 2.453747 1.823347  
1.554559 2.727528 2.606039 1.219177 2.81543 1.825126 1.449033 1.457 2.610128  
1.255323 1.369669 1.638326 1.523069 1.20732 1.168764 1.220569 1.06389 1.3129  
4.787547 3.919577 5.787949 5.173605 4.065287 4.317501 5.148523 5.602623 5.140531  
7.253711 7.837927 7.088644 5.924934 7.479357 6.29671 6.814726 5.402211 6.820224  
3.46926 1.927679 2.105763 1.778657 2.250175 1.937246 2.226573 1.752809 1.429701  
0.782666 1.415029 0.725644 0.977446 0.747679 0.880505 0.708191 0.758391 1.261906  
1.632352 1.788329 2.242247 1.92553 1.128876 1.239635 1.789333 1.668383 1.367221  
4.039325 3.135473 2.855207 1.86689 1.495458 2.725717 1.564861 1.453614 3.036336  
2.27783 2.666105 1.87706 3.122041 2.018584 2.768494 3.777602 2.420221 3.459271  
1.186873 0.907765 0.961712 1.525788 2.561216 1.212629 2.449668 0.922766 1.947318  
6.143775 5.22282 6.248408 3.940442 4.66677 3.444297 3.490577 2.305278 2.488867  
2.025777 2.050292 3.554529 1.971737 2.255617 1.314095 1.345518 1.947574 1.547238  
6.556012 4.935626 4.561661 1.008758 1.637945 5.720535 2.363088 2.270245 3.045836  
1.590666 1.444792 1.568116 2.01813 1.199142 1.397073 1.20681 1.679044 1.45206  
0.857501 1.367429 1.044128 0.855918 0.907599 1.20299 1.169104 0.890426 1.268884  
1.489481 1.265447 1.366744 1.359043 1.004355 1.273763 1.489602 2.045443 1.543887  
1.283946 2.242185 1.574266 1.163384 1.760322 0.860839 1.97647 1.592461 0.341967

2.422466 2.277673 2.153218 2.357423 2.56578 2.65077 2.105563 2.208136 2.013559  
0.742342 0.945897 0.758745 2.050157 1.399274 1.833193 1.179958 1.61842 2.135355  
2.782732 2.737302 2.844195 3.310142 2.812139 3.704899 2.360618 3.839286 2.957167  
1.123843 1.763912 1.476077 1.45127 0.941255 1.468773 1.578014 2.126122 1.364737  
0.938381 1.435713 1.066051 1.540999 0.97089 1.176696 1.039537 0.942245 1.710601  
1.201064 1.102793 0.89231 1.265198 0.974536 1.085866 1.004983 1.135579 1.096012  
2.003627 1.347543 1.806241 2.735303 2.755205 1.707045 1.417638 1.930361 1.449077  
1.53031 2.106282 2.300388 2.884802 2.864305 3.316353 1.863588 2.714265 2.792376  
0.98674 1.110438 1.668552 1.330872 1.099709 2.481248 1.229963 1.232244 1.714074  
1.821075 1.606188 1.705563 1.995943 2.269235 1.848067 1.340668 1.77407 1.800001  
1.324102 1.167564 2.739384 1.06049 1.563797 1.653978 1.187296 1.288568 1.414573  
4.92852 3.65197 3.355215 3.147397 6.762952 3.005683 5.030773 3.916332 3.917277  
1.141367 1.604201 1.469254 1.804265 1.370521 1.563846 1.210917 1.197926 1.721374  
1.43424 1.301138 1.909032 2.217068 1.316355 1.119104 1.043972 1.168408 1.102857  
1.970652 2.176004 2.160684 1.793715 2.311378 2.357168 2.380949 2.386285 1.955891  
1.535571 2.180237 1.213931 2.508472 0.579742 2.892575 1.634992 1.326114 1.69855  
5.172523 3.656616 3.646536 4.205065 5.566765 2.54405 3.557647 2.058637 2.194884  
6.80057 6.341962 6.479437 6.391153 6.436577 6.965834 6.490334 6.952166 6.62401  
4.372949 5.333293 5.735706 4.470714 4.711114 5.201531 5.56146 6.684618 5.79357  
0.906298 1.084535 1.238494 1.255817 0.98346 0.828186 1.600407 0.985274 1.233814  
1.678042 2.056898 2.364072 1.730261 1.718405 2.435193 2.459745 1.83482 2.529717  
1.431401 1.423545 1.394084 1.324241 1.349132 1.642331 1.39526 1.089402 1.589005  
0.850546 1.3147 1.032316 1.357641 0.936221 1.444348 1.025925 1.143628 0.83244  
2.393354 1.453356 1.36734 1.564215 2.23069 1.804276 1.747887 1.633908 1.414596  
1.185332 1.286923 1.499289 0.815896 0.566542 1.656515 1.654403 0.997318 1.31582  
0.870303 0.74472 3.244053 1.387597 1.129619 1.899874 1.583808 1.519571 1.297482  
3.858376 3.909944 4.339754 1.790468 3.87066 2.635771 1.902444 2.422771 2.323803  
2.270744 2.514636 2.495092 1.778087 2.655736 0.746392 3.162078 2.672721 2.17127  
1.354489 1.914689 1.904385 0.899174 1.425295 1.404422 1.017383 1.438057 0.990545  
1.016521 1.202819 1.259347 2.914579 1.296728 1.718125 1.231834 1.759383 2.870903  
1.427285 2.240423 2.48996 1.636182 1.650899 1.121153 1.875516 1.892543 1.143917  
1.543964 1.392745 2.218019 1.082283 1.566125 1.64996 1.386281 1.551172 1.23575  
1.594352 2.170535 2.43474 2.246079 1.777353 1.882968 2.904736 1.789146 2.094926  
1.771512 3.328335 2.423007 1.888149 1.713947 3.11714 1.881885 2.43896 2.593399  
1.354986 2.110619 0.882178 1.723564 1.036237 1.400941 1.303723 1.860169 2.502419  
2.051827 2.316082 1.876564 2.970729 2.573801 1.060506 1.549795 1.606822 2.152281  
0.856709 0.938011 0.672356 1.412836 0.908763 0.963421 0.80376 1.270293 1.370336  
3.190543 2.385031 3.001619 3.572856 3.291111 3.497495 3.797632 2.626907 2.657936  
1.128479 1.18821 0.828535 1.262865 0.706932 1.02392 0.865149 1.675168 0.983531  
2.11518 2.041763 2.373643 1.376157 2.304511 2.425139 2.702808 2.376761 2.811668  
5.977473 2.471986 4.661223 4.43619 4.50012 2.448475 4.184093 5.746508 4.892124  
4.461957 5.370878 5.79691 5.755078 5.23019 3.308432 6.497222 5.970098 3.36494  
2.097176 3.013814 3.228167 2.594421 2.778135 2.878285 2.804617 2.585482 3.216697  
1.335167 1.932289 1.485629 2.06451 1.668151 1.65534 1.758132 2.470641 2.480317  
0.81992 1.20646 0.995059 1.146933 1.205831 1.300414 1.219396 1.108997 1.553174  
2.151951 2.799269 3.407599 1.91919 2.062094 1.745366 1.745487 2.27129 1.900874  
0.9783 3.720651 3.634097 2.349204 2.864008 1.053532 5.026259 0.878733 1.882591  
1.497129 1.538414 1.285684 1.492369 0.805297 1.305579 1.132207 0.801682 1.116275  
1.945574 5.015414 4.910389 2.341523 3.913133 1.163745 1.292031 1.11364 0.882069  
3.741767 2.308366 2.050685 3.142593 1.471928 2.835606 2.631453 2.041707 2.467285  
2.090131 1.358522 1.260896 3.390843 1.079718 1.135858 4.333096 1.397048 1.194591

1. 613382 1. 333009 1. 50783 1. 535326 1. 940801 1. 351914 2. 1728 1. 556392 1. 275024  
0. 578362 1. 491767 3. 430548 4. 440604 0. 932308 0. 843771 1. 837453 1. 138311 1. 232898  
0. 994927 1. 617137 0. 836388 1. 819615 2. 135453 0. 962814 1. 8602 0. 92972 1. 194486  
1. 923968 4. 772029 4. 576237 1. 022372 1. 016226 6. 145776 4. 201943 1. 555972 2. 400723  
1. 182061 1. 47513 1. 139269 1. 081103 1. 061106 1. 439888 1. 553904 1. 79365 1. 239753  
1. 615169 3. 066849 1. 831281 3. 106593 2. 48646 2. 889987 3. 558777 2. 856747 2. 647025  
1. 698194 2. 505874 1. 428075 2. 806647 0. 738282 2. 39086 2. 569155 1. 142387 1. 478865  
1. 459981 1. 90187 1. 570407 1. 639034 1. 163474 1. 791301 1. 334954 2. 248799 1. 249971  
3. 225259 3. 848471 4. 252115 4. 037067 4. 397307 4. 375999 3. 844428 5. 615195 5. 217383  
2. 471303 1. 089354 0. 995674 0. 663712 1. 908656 1. 13971 0. 910618 1. 22446 1. 475783  
1. 291162 1. 922186 1. 206344 1. 432229 2. 379386 1. 193772 1. 656422 1. 679274 1. 41125  
4. 651403 3. 896438 0. 656059 4. 699644 3. 297379 2. 608244 5. 56589 2. 232259 3. 988087  
1. 228755 1. 084795 1. 625281 2. 300417 1. 486045 2. 144687 1. 225259 1. 979035 1. 21386  
2. 214662 1. 108882 1. 456205 1. 007854 0. 806339 0. 969458 1. 183394 1. 000386 1. 605227  
1. 048531 1. 099041 1. 34515 1. 354172 0. 837644 1. 453985 1. 075652 1. 123697 1. 900534  
1. 339529 2. 341173 0. 942608 1. 208852 0. 706042 1. 00509 1. 301239 0. 877964 0. 923142  
1. 299398 1. 763086 1. 351387 1. 284685 1. 070564 1. 523283 1. 272268 1. 134811 1. 792644  
1. 266408 1. 744787 1. 646648 1. 336612 1. 34965 1. 764964 1. 401218 2. 204962 1. 042775  
1. 494786 1. 38723 2. 095904 2. 033748 1. 448129 1. 410148 1. 286037 1. 240573 1. 021976  
1. 566219 3. 206162 3. 698055 1. 559895 1. 61005 1. 629695 1. 306624 1. 714292 2. 09594  
1. 364544 1. 682462 1. 137997 3. 23896 4. 519514 1. 292356 2. 123035 3. 185784 1. 032688  
2. 169256 2. 983098 3. 489809 3. 063003 3. 465011 3. 576275 2. 557288 2. 969894 3. 036496  
0. 681916 1. 514626 1. 028344 1. 445101 0. 895653 1. 095155 0. 824324 0. 68405 0. 88047  
3. 598675 5. 039009 4. 46398 4. 573664 3. 374631 3. 610285 3. 399942 5. 43755 4. 301258  
1. 38957 1. 71794 2. 17776 1. 836071 1. 492948 1. 804906 1. 425163 1. 833228 1. 258011  
1. 821892 2. 003975 1. 789254 1. 517251 1. 725975 1. 985815 1. 971551 2. 785106 1. 627376  
1. 375413 0. 933339 1. 432005 1. 294615 0. 813964 1. 582394 1. 004851 1. 412718 1. 473662  
8. 583083 8. 900008 9. 469871 9. 169751 9. 04839 5. 299246 8. 686104 9. 112658 8. 396092  
3. 292112 4. 750541 4. 851603 5. 379511 4. 26104 3. 19427 2. 715146 3. 426028 4. 269418  
1. 394659 1. 717053 2. 516122 1. 72309 1. 877257 1. 506985 1. 433603 1. 345097 2. 745425  
1. 148611 1. 814359 1. 290323 0. 910224 0. 765294 1. 039616 1. 005658 1. 140106 0. 802969  
1. 165425 1. 295158 0. 904329 1. 141426 0. 720213 1. 834339 1. 119703 0. 964386 1. 133639  
1. 397066 1. 195976 1. 14037 1. 873401 1. 045037 1. 796555 1. 387387 1. 461113 1. 387177  
1. 292513 3. 885497 1. 318172 2. 980499 3. 020629 2. 136273 2. 225466 2. 475358 1. 676678  
1. 579252 1. 342897 1. 274605 1. 98083 1. 218836 1. 479303 1. 498191 1. 580995 1. 564956  
2. 608955 1. 77438 3. 698931 1. 948082 3. 274371 1. 916393 1. 843438 2. 019431 2. 192119  
1. 114222 1. 503508 2. 539118 2. 156734 1. 244296 1. 525262 0. 999009 1. 245657 1. 459994  
1. 018141 1. 244865 1. 788115 1. 569394 0. 982598 1. 174214 1. 302477 1. 861917 0. 943286  
1. 209629 2. 108836 1. 324621 1. 622306 1. 934876 1. 727492 1. 121916 1. 42895 1. 838284  
1. 720802 2. 003794 1. 367322 2. 412358 1. 714903 1. 875859 1. 840047 1. 95386 1. 308135  
1. 12511 1. 117136 1. 772121 1. 166861 1. 644161 1. 570877 1. 803409 1. 851077 1. 210572  
2. 601879 3. 183342 2. 471186 2. 197372 2. 546641 2. 69419 1. 620994 1. 273014 2. 104375  
1. 391782 1. 395353 1. 137826 1. 030973 0. 751137 2. 196126 0. 890693 1. 297135 1. 968156  
1. 431468 2. 227556 0. 866631 2. 139962 1. 395562 1. 195526 1. 130403 1. 578381 1. 581244  
1. 751921 1. 942714 2. 418913 1. 554671 1. 717367 1. 285729 0. 970127 2. 245574 1. 152815  
0. 952668 1. 438351 1. 21363 1. 200372 1. 444238 1. 507928 2. 240788 1. 52302 0. 890573  
1. 62312 1. 347261 1. 203626 1. 267941 1. 053762 2. 113606 1. 386779 1. 270421 1. 267464  
2. 218241 1. 508795 2. 160245 1. 61783 1. 442233 1. 966502 1. 485596 2. 193389 1. 763735  
3. 227365 1. 737133 2. 244099 1. 896882 2. 446653 1. 951596 2. 100117 1. 796316 2. 435325  
0. 918642 2. 311964 2. 097618 1. 260448 2. 224562 2. 253907 2. 191865 1. 389386 2. 458944  
3. 481102 4. 00131 3. 913766 3. 744045 3. 438589 3. 615775 3. 720129 2. 961929 3. 49746

1. 995164 1. 147932 1. 40608 2. 581312 1. 707197 1. 561146 2. 300964 1. 782563 2. 098644  
2. 521489 1. 697973 1. 992196 2. 999149 1. 833847 1. 852048 2. 229842 1. 755405 3. 307722  
2. 28666 0. 94582 0. 783004 1. 780616 1. 50065 2. 975599 1. 043769 0. 803717 0. 67308  
1. 148653 0. 954444 0. 984385 1. 361955 0. 632524 0. 9393 0. 979036 1. 430771 3. 783134  
1. 279129 4. 754704 4. 266934 1. 438414 3. 5839 1. 856257 1. 990752 3. 169534 2. 420389  
1. 814027 1. 581474 1. 227397 2. 2034 1. 687998 1. 594875 1. 583046 1. 79562 1. 124489  
3. 171112 2. 271082 3. 158894 3. 270059 2. 7256 2. 31691 2. 145651 2. 41034 2. 42153  
2. 260928 1. 698132 1. 980784 1. 409875 1. 903228 1. 584719 2. 002962 2. 380484 1. 392691  
2. 229451 2. 384469 1. 744105 2. 398774 1. 92532 2. 087546 1. 702408 1. 714971 1. 986771  
1. 037458 1. 25007 1. 101615 1. 385837 1. 265022 1. 316315 1. 166762 1. 520109 1. 639461  
3. 627025 4. 184405 3. 497996 2. 801009 4. 259011 3. 536048 3. 710042 4. 274654 1. 535651  
2. 053661 3. 327941 2. 548467 2. 570542 2. 09536 2. 676268 2. 576611 1. 627661 2. 805938  
1. 664943 1. 262661 1. 285294 2. 538429 1. 995345 0. 871084 1. 272594 1. 614124 1. 482325  
1. 292923 1. 77284 1. 394849 1. 748484 1. 005717 1. 159897 0. 918286 1. 992005 1. 389551  
2. 276515 1. 690023 2. 837283 1. 917026 2. 10915 2. 598617 1. 58387 1. 69664 1. 574783  
2. 755534 1. 02752 1. 572069 1. 319655 1. 599108 1. 536769 1. 598322 1. 344999 1. 233185  
1. 702148 3. 123213 1. 551927 1. 237776 1. 296325 1. 366206 1. 841408 1. 004663 1. 119388  
2. 13371 2. 101752 3. 93389 2. 845788 2. 261075 2. 734921 2. 653576 2. 98677 2. 405511  
2. 643733 3. 754257 2. 813237 2. 872651 3. 635806 3. 266587 2. 727734 2. 723626 3. 061876  
0. 986488 1. 11323 0. 81915 1. 235244 5. 262108 0. 945054 1. 103272 1. 184233 1. 082675  
1. 601791 1. 059722 0. 915306 0. 969929 1. 214629 1. 260064 1. 745388 1. 315222 1. 081254  
1. 563846 2. 713299 2. 285889 1. 791464 2. 912587 2. 218052 1. 419342 1. 06623 3. 558126  
1. 435267 1. 037348 1. 287817 1. 383309 1. 192833 1. 20243 1. 58105 1. 397721 1. 279116  
1. 443979 1. 905024 1. 487766 1. 77169 1. 209753 1. 698203 1. 039144 1. 416461 1. 012351  
1. 067251 1. 493674 0. 770087 1. 073905 0. 890673 1. 090203 0. 957495 1. 104651 1. 007473  
1. 525971 1. 63925 1. 820982 1. 328365 1. 343452 1. 802672 1. 578369 1. 930044 1. 772797  
1. 757754 1. 578724 1. 58356 1. 498821 1. 60668 1. 497785 1. 934975 1. 719483 1. 581262  
1. 813521 1. 570619 2. 177263 2. 414429 1. 859643 1. 902728 2. 026536 1. 856543 2. 192568  
1. 625164 1. 08445 1. 448323 1. 187079 1. 124322 1. 924682 1. 729083 1. 144764 1. 530579  
1. 079007 1. 189146 0. 916919 1. 616295 0. 830314 1. 043897 1. 313644 0. 358968 0. 46108  
2. 112552 1. 864659 2. 110958 2. 320558 2. 332295 2. 359022 1. 918067 1. 610281 1. 758149  
0. 502359 0. 743017 2. 467023 1. 054425 2. 159975 2. 505813 1. 928613 1. 594993 2. 833418  
1. 205913 2. 261033 1. 502941 1. 777318 0. 796339 0. 831399 1. 065778 1. 611156 1. 722593  
1. 047988 0. 978822 1. 244753 1. 012207 0. 850709 1. 152663 0. 703255 2. 686764 0. 903934  
1. 388979 0. 917743 0. 678434 1. 970537 0. 838081 1. 333603 0. 823603 1. 581708 0. 968587  
1. 614156 1. 721546 1. 544018 1. 794855 1. 528729 2. 04006 2. 030182 1. 724479 1. 976825  
0. 758366 1. 635774 1. 026325 1. 09225 1. 401243 0. 747206 0. 648395 0. 874782 0. 987971  
2. 262197 1. 017182 1. 398609 1. 084898 2. 068993 1. 094618 1. 176308 1. 175491 1. 592002  
1. 869186 1. 40439 1. 567324 1. 400459 1. 671938 1. 187095 1. 175885 1. 917767 1. 994701  
0. 895279 1. 130287 1. 256035 2. 962419 1. 022225 0. 88822 1. 018297 1. 084646 0. 731408  
2. 606119 2. 1118 2. 049765 2. 817373 2. 743663 2. 980231 1. 902221 3. 04538 2. 890169  
1. 156155 2. 351491 1. 561333 1. 328103 1. 106238 1. 465694 1. 719908 1. 371285 1. 27653  
2. 175461 2. 155683 2. 306102 1. 937823 1. 886508 1. 949466 1. 506635 1. 666416 2. 023048  
2. 825174 1. 882138 1. 906496 1. 939967 1. 484971 2. 040075 1. 570762 2. 207219 1. 348127  
5. 284341 4. 665136 5. 393825 5. 167889 5. 127936 1. 937314 2. 294449 1. 647998 3. 961904  
2. 418579 2. 556393 2. 100635 3. 266563 2. 275666 1. 765389 2. 223266 2. 336676 3. 218802  
1. 85205 1. 412126 1. 96962 1. 833688 1. 701461 1. 691283 2. 294784 1. 768715 1. 571935  
1. 875597 1. 842597 1. 750144 1. 584107 1. 188231 1. 813626 1. 030709 0. 742059 1. 979447  
1. 253773 1. 986248 1. 324921 0. 920736 1. 386632 1. 331376 0. 946148 1. 348036 0. 980209  
1. 417358 1. 132713 1. 191533 1. 603813 1. 382526 1. 34253 1. 184386 1. 472488 1. 245974  
2. 486873 3. 531225 2. 955438 1. 376914 2. 321832 3. 705686 2. 571105 1. 861281 2. 484798

3. 571846 4. 450395 3. 060797 2. 810385 2. 6127 2. 024256 2. 554584 1. 974838 1. 849292  
0. 990824 1. 584984 1. 008508 1. 399395 0. 768693 1. 101613 1. 294277 1. 556894 1. 239227  
2. 475736 2. 803975 1. 97554 3. 590887 2. 246177 2. 879094 1. 779437 2. 334117 2. 448381  
1. 633106 1. 9896 1. 07681 1. 137234 1. 259074 1. 300059 1. 275054 1. 508659 1. 453714  
3. 614147 1. 485171 2. 196415 1. 052233 1. 294286 2. 392305 0. 873329 1. 047053 0. 708547  
5. 598325 4. 191505 4. 846173 3. 694197 4. 117695 3. 279907 2. 992144 3. 628814 4. 318142  
1. 725852 1. 960638 1. 471032 1. 416274 2. 729627 1. 506126 2. 855538 1. 912058 1. 15849  
1. 341375 1. 69991 1. 162054 1. 781812 1. 558038 1. 586549 1. 058174 1. 0534 1. 637174  
1. 494596 3. 210226 1. 753788 3. 660955 1. 844329 1. 935616 1. 599929 1. 756313 1. 364607  
1. 681143 3. 91347 4. 706928 4. 142654 4. 801913 2. 319134 1. 794169 4. 098355 3. 213279  
1. 969562 1. 943798 4. 848374 1. 37085 1. 701016 1. 485913 1. 771744 1. 330841 2. 235746  
2. 5505 3. 540405 2. 5505 3. 56404 2. 493535 2. 639718 2. 950761 2. 945817 2. 514311  
1. 393584 1. 722185 2. 040981 1. 99752 1. 217205 1. 604189 1. 37357 2. 269202 1. 717945  
2. 442758 3. 25962 3. 751643 3. 580563 3. 773844 4. 616153 1. 953459 2. 355689 2. 258327  
1. 735062 1. 24609 0. 669195 2. 156044 1. 763413 3. 115931 2. 176877 1. 411542 1. 033535  
1. 658942 1. 887401 1. 050784 2. 817043 0. 667632 1. 609115 1. 047931 0. 904387 2. 094391  
0. 992261 1. 278701 1. 786379 2. 169579 1. 536019 1. 209773 0. 744815 1. 472385 1. 668013  
0. 827829 0. 970922 1. 20314 1. 433973 2. 064956 0. 968246 1. 22575 1. 781662 1. 138929  
4. 092973 4. 200746 5. 693243 5. 774992 4. 206444 1. 836851 4. 134058 4. 07745 2. 6091  
2. 638935 4. 230583 3. 604068 2. 790081 3. 542116 1. 059378 2. 15707 1. 474663 2. 13549  
1. 788932 1. 413018 1. 128408 1. 722205 0. 698429 1. 69013 1. 173006 0. 818774 2. 210224  
1. 649148 1. 03529 1. 613092 1. 315562 1. 174387 1. 738481 1. 577226 1. 516473 2. 286759  
1. 254895 1. 559264 2. 065807 1. 596979 1. 713934 1. 548627 1. 421269 1. 751423 1. 228778  
1. 058173 2. 208023 1. 058226 1. 207432 1. 174213 1. 255269 1. 454546 1. 267765 1. 803046  
2. 456407 2. 267741 2. 071305 2. 852985 2. 466361 2. 158057 2. 408923 1. 999615 3. 092688  
2. 683111 1. 463122 1. 602947 3. 366399 4. 967636 1. 992449 1. 909862 2. 112528 2. 493933  
3. 369705 3. 609815 2. 991701 3. 688272 4. 291216 3. 36614 3. 314644 4. 431079 3. 167446  
1. 415286 2. 118742 1. 577916 2. 651604 2. 388503 1. 668507 1. 460002 1. 512019 3. 079069  
2. 539342 2. 590413 2. 162346 3. 075411 2. 046098 2. 425754 2. 525188 3. 002877 2. 871267  
1. 124123 1. 522189 1. 534906 1. 575465 2. 983361 1. 451701 2. 024267 1. 569186 1. 280115  
1. 676404 1. 891728 1. 700159 2. 033557 2. 116083 2. 122045 2. 370609 3. 535903 2. 682251  
1. 373034 1. 41123 1. 784247 1. 826718 1. 522391 1. 950867 1. 422555 1. 22301 1. 726724  
2. 363905 1. 281698 1. 973387 2. 111201 1. 898732 1. 719816 1. 573657 1. 602686 1. 789176  
2. 601786 0. 683706 1. 499636 0. 89936 2. 394545 2. 641153 1. 416485 1. 060132 3. 644341  
4. 250274 3. 378534 2. 928671 0. 822207 2. 332562 1. 083948 2. 682468 1. 659451 1. 479093  
1. 260471 1. 104427 0. 631629 1. 076405 0. 728954 0. 688434 1. 242728 1. 147503 0. 994579  
3. 602827 2. 692333 3. 313108 2. 021896 2. 811551 2. 399296 1. 995584 1. 969533 2. 40514  
2. 111191 2. 027309 2. 10303 1. 871451 1. 737939 1. 911982 1. 558694 1. 607599 1. 799678  
0. 883433 3. 505571 3. 088489 2. 604137 0. 86197 1. 111101 3. 527937 1. 994653 0. 528917  
2. 196733 3. 058925 2. 782827 3. 174023 2. 705312 3. 118883 2. 938472 2. 573138 2. 809431  
1. 716938 1. 687657 1. 363466 3. 905978 1. 896572 1. 577297 1. 836738 1. 96428 1. 964908  
1. 28959 1. 295546 1. 179408 0. 72858 1. 454015 1. 500936 0. 73114 1. 074014 1. 772388  
1. 313687 1. 958588 1. 600963 1. 631013 1. 429966 1. 77055 1. 24085 1. 393948 1. 275368  
1. 75857 2. 216592 1. 609443 2. 371619 2. 104024 1. 283434 1. 617709 2. 235611 1. 415224  
4. 10194 6. 329003 5. 897127 5. 843666 4. 999569 5. 888237 4. 974013 5. 508457 6. 463969  
0. 494504 1. 139162 3. 247508 2. 683839 0. 742392 3. 149819 0. 986356 3. 326267 1. 677429  
1. 279517 1. 572156 1. 174116 1. 376811 1. 07236 1. 140888 1. 048558 1. 846804 1. 435145  
1. 566165 1. 196926 1. 455145 1. 707646 0. 988403 1. 320489 1. 289515 1. 111696 1. 458562  
3. 502002 3. 294994 2. 565985 3. 682848 2. 312004 1. 933685 2. 07958 3. 295594 2. 889792  
1. 407045 1. 769475 2. 345022 1. 722216 1. 620304 1. 698819 1. 708891 1. 480573 2. 012823  
1. 019966 0. 991759 0. 989574 1. 262823 0. 901646 1. 077972 0. 842986 1. 171147 1. 688679

2. 784703 2. 297914 2. 598266 2. 611433 3. 232029 2. 201566 2. 202094 2. 392905 2. 674868  
1. 256193 1. 098429 0. 887727 1. 237431 1. 306987 1. 064128 1. 261347 1. 366638 1. 164447  
1. 832367 2. 485167 3. 638776 4. 438953 1. 623379 2. 935658 2. 476762 2. 829596 1. 929486  
3. 702966 2. 523198 1. 444 2. 056702 3. 520802 2. 255316 3. 021213 2. 735404 2. 247191  
1. 989196 1. 262123 1. 914633 1. 076573 2. 577374 0. 988241 1. 007383 1. 543519 0. 914717  
0. 980182 0. 917374 1. 355084 1. 065619 0. 735189 1. 054463 1. 127866 1. 24143 1. 399198  
1. 473377 1. 317885 3. 115622 1. 96601 1. 832673 2. 496038 1. 249347 1. 774872 2. 0746  
1. 649206 2. 74486 1. 585977 2. 493503 1. 848763 1. 34151 2. 092654 1. 29539 1. 193756  
0. 896495 0. 832293 0. 677934 1. 952989 0. 83327 1. 16722 1. 021349 1. 41043 1. 682383  
2. 489589 4. 770961 3. 560356 2. 968294 5. 060033 1. 418219 4. 415365 3. 026313 3. 113804  
3. 421359 4. 996774 3. 223904 5. 358484 5. 148617 2. 157313 4. 634609 2. 133109 2. 654476  
1. 941585 1. 309739 2. 139257 1. 424109 2. 83756 1. 310055 1. 397822 1. 36549 3. 087424  
1. 772217 5. 097898 2. 514255 2. 140891 2. 606275 2. 185155 1. 908999 2. 878101 2. 901281  
1. 010134 0. 884579 1. 480263 1. 216812 0. 876734 1. 236628 0. 625635 1. 18842 1. 073963  
4. 807993 5. 219869 5. 229854 2. 779538 5. 329526 4. 860116 3. 414192 2. 985735 2. 544013  
1. 27541 2. 113738 0. 994183 1. 554504 1. 46322 1. 317275 1. 505415 1. 275673 1. 645326  
2. 765908 2. 200802 3. 6058 3. 200597 3. 42023 3. 287732 2. 105347 4. 202275 2. 544879  
1. 220699 0. 812776 2. 31715 0. 850764 1. 281172 2. 464514 1. 070528 0. 98577 1. 259922  
0. 880212 1. 246176 1. 235793 1. 100769 1. 036357 0. 752294 0. 990341 1. 139994 0. 82747  
5. 253182 5. 235167 6. 687859 7. 005523 6. 738968 3. 795726 7. 806134 7. 223645 7. 573447  
1. 679614 1. 456724 1. 541701 1. 084635 1. 002586 1. 815904 1. 116517 1. 094768 1. 786217  
0. 744316 2. 925259 2. 449955 1. 125226 0. 749617 0. 819716 1. 640211 1. 309808 1. 174544  
1. 325229 1. 464668 1. 225706 2. 060318 1. 081836 0. 954125 0. 677861 1. 222873 1. 026084  
1. 03508 0. 869653 0. 965172 1. 469229 0. 688939 0. 793741 0. 69342 0. 904911 1. 069857  
1. 14896 0. 899326 0. 918033 0. 87616 0. 941864 1. 135941 1. 04199 0. 913927 1. 022159  
1. 956483 2. 875221 2. 479856 2. 041493 2. 513438 1. 526712 2. 165367 1. 656411 4. 115431  
1. 470843 1. 183056 1. 255999 0. 95767 0. 954862 1. 17883 0. 989201 0. 888481 1. 16497  
1. 193614 1. 06061 1. 16238 0. 920354 1. 281873 1. 204487 1. 391242 2. 025748 0. 925679  
1. 120688 2. 586683 1. 093696 2. 830182 1. 751387 2. 009538 1. 253345 1. 21809 1. 099342  
3. 431811 1. 525266 4. 137815 1. 841816 2. 791045 3. 613825 3. 109175 1. 28656 2. 380531  
1. 358422 1. 539608 1. 30639 2. 036414 1. 410452 1. 85106 1. 335653 1. 299701 1. 474573  
4. 530648 2. 687013 3. 118722 4. 02786 2. 429768 2. 685745 3. 440831 3. 191289 3. 302501  
0. 998506 0. 449628 0. 313082 0. 74344 1. 188212 1. 52764 2. 365252 1. 987448 2. 335463  
2. 579627 1. 833797 2. 920957 2. 388023 3. 601291 1. 76398 1. 908818 2. 688757 2. 699723  
0. 994101 1. 304539 1. 550864 0. 954643 0. 766319 1. 435372 1. 627695 2. 137507 1. 103789  
2. 14172 1. 630949 2. 420023 2. 698997 2. 666193 3. 716603 1. 67626 2. 168359 1. 819936  
1. 298398 0. 863248 0. 667479 0. 578036 0. 789363 0. 743359 1. 078601 0. 67266 0. 628506  
1. 662126 1. 526065 0. 941541 1. 905725 1. 616079 1. 03893 1. 52049 2. 347522 1. 265568  
1. 849421 2. 055682 1. 857091 2. 101895 2. 104544 1. 594838 2. 28752 1. 949442 1. 699108  
1. 782127 1. 794895 1. 708608 1. 984915 2. 907022 1. 881056 1. 94158 2. 252666 1. 751675  
1. 309365 1. 227471 1. 681221 1. 200804 1. 768406 1. 391179 1. 023533 1. 257735 1. 602467  
1. 678238 2. 587034 1. 603751 1. 078961 1. 752268 1. 398951 1. 204944 1. 664884 1. 72355  
2. 089708 1. 592273 2. 223584 2. 557908 1. 289089 2. 250393 1. 532898 1. 984334 2. 559511  
1. 150011 1. 114186 0. 967983 1. 115961 0. 960334 1. 162484 1. 322475 0. 876529 1. 646857  
1. 801717 2. 180929 1. 995358 2. 738102 1. 44846 1. 999931 1. 621744 1. 869423 2. 1744  
1. 281807 1. 36845 0. 680424 1. 116214 0. 867691 1. 18493 1. 306888 0. 984461 1. 039683  
1. 118101 1. 332962 1. 526757 2. 385883 1. 305898 1. 628129 1. 77381 1. 35025 1. 38519  
2. 002705 1. 667296 1. 558766 1. 686698 1. 28189 1. 550063 1. 357361 2. 065232 3. 251929  
1. 998239 1. 37257 2. 274939 2. 279849 1. 591402 1. 557803 1. 945418 2. 390522 2. 047575  
0. 832311 1. 370463 3. 23094 1. 419924 1. 376375 0. 767065 0. 936799 0. 951469 0. 905968  
2. 157315 3. 835701 4. 163209 4. 124 3. 984304 3. 98571 3. 41141 3. 028917 3. 076749

1. 488244 1. 510699 2. 447809 1. 862975 1. 245901 1. 256669 1. 331083 2. 624683 1. 706615  
1. 892885 1. 79461 1. 856603 2. 306812 2. 120538 2. 347452 2. 052099 3. 149587 3. 704231  
2. 958845 2. 806234 1. 95174 2. 48124 2. 216937 2. 308053 2. 94225 2. 540265 2. 756211  
1. 031591 1. 176747 1. 25958 1. 318299 1. 261097 0. 857391 1. 101811 1. 312773 0. 636621  
0. 993468 1. 218929 0. 815184 1. 178771 2. 176481 1. 028854 0. 835868 2. 413896 0. 957772  
4. 472682 4. 299044 3. 958798 4. 084876 4. 131085 3. 804017 3. 662454 3. 920345 4. 760973  
1. 085472 1. 531775 1. 367524 0. 99122 1. 034904 1. 181146 1. 284793 0. 870812 0. 846233  
1. 149356 1. 289682 1. 499694 1. 520228 2. 193941 2. 036883 1. 189128 1. 610787 1. 85493  
0. 898213 1. 621643 2. 199503 1. 074876 2. 15462 1. 394542 1. 040546 0. 707758 1. 024773  
1. 429226 1. 309207 1. 488522 2. 075109 1. 050202 1. 148695 1. 167916 2. 099323 1. 405269  
3. 015107 2. 243632 2. 417211 3. 606732 3. 024541 2. 890501 2. 588765 2. 711486 2. 844741  
1. 823957 1. 451862 1. 203157 1. 415775 1. 429744 2. 160851 1. 68928 1. 344428 1. 24998  
1. 910886 1. 444814 1. 775113 3. 281771 3. 01529 1. 93205 2. 667665 2. 13129 2. 083825  
1. 741808 1. 393144 1. 417282 1. 097386 1. 173528 0. 89225 1. 082834 1. 325619 0. 869833  
2. 192811 2. 640278 2. 604444 2. 094745 2. 691805 1. 587616 1. 563701 1. 696566 2. 024437  
1. 196469 1. 419771 2. 521504 2. 429943 1. 901302 1. 339175 1. 719057 2. 502995 1. 791023  
1. 215497 1. 521061 0. 940904 0. 895207 0. 82797 1. 240034 0. 62484 0. 725679 0. 82223  
5. 244393 4. 424154 4. 186685 5. 017555 5. 326811 6. 088563 4. 264327 4. 224594 4. 578899  
1. 145576 1. 053996 1. 307612 1. 1438 1. 786468 1. 258156 1. 23656 1. 076299 1. 302315  
0. 938877 0. 932428 0. 821138 2. 643885 0. 824334 1. 043646 0. 526316 0. 990511 0. 722598  
1. 370215 0. 977526 1. 696148 1. 241345 1. 001723 1. 259378 1. 529072 1. 437046 1. 100075  
0. 785097 1. 72468 1. 309576 1. 454492 1. 12607 1. 566555 1. 128099 1. 763899 1. 014205  
1. 997246 0. 965116 1. 065805 1. 923985 1. 202415 2. 14365 1. 278258 1. 698419 1. 722669  
2. 031198 2. 225882 2. 627524 1. 994708 1. 522418 1. 618467 2. 145732 1. 648237 1. 99193  
1. 490961 2. 486978 1. 842569 2. 308002 2. 592744 2. 131101 2. 403659 2. 01302 2. 590815  
2. 718784 3. 187918 3. 542828 3. 029976 2. 881331 3. 291152 2. 032651 1. 807249 2. 061116  
1. 64145 1. 616793 1. 643995 2. 391302 1. 49869 1. 473767 1. 990853 0. 918967 1. 627444  
1. 718325 0. 893293 1. 822365 1. 873917 1. 615506 1. 139419 1. 865804 2. 918716 1. 709818  
4. 566591 5. 944225 4. 74744 2. 013552 4. 1637 2. 172946 1. 729583 1. 665405 1. 985155  
1. 638192 1. 36055 1. 730942 2. 362242 1. 660807 2. 324577 1. 918801 1. 373952 1. 304554  
2. 721163 2. 715997 1. 825705 1. 801973 2. 719883 1. 784418 2. 260812 3. 436876 1. 593448  
2. 247676 1. 188883 1. 770774 2. 289013 2. 636422 2. 483209 1. 941713 1. 403515 1. 822857  
2. 176687 2. 449992 2. 539206 3. 181148 4. 115871 2. 734343 2. 966791 1. 835605 3. 005114  
2. 751525 2. 793514 2. 175037 1. 584094 1. 945102 1. 959452 1. 373184 1. 32093 2. 061806  
1. 314024 2. 555818 2. 726227 2. 017008 2. 057508 2. 702721 1. 897697 2. 229113 2. 090099  
2. 985505 1. 997395 2. 375159 1. 684851 2. 398387 2. 46556 1. 866656 2. 167027 2. 084907  
5. 644119 1. 752921 2. 104205 2. 166964 3. 557949 2. 507687 1. 832021 3. 306209 2. 640616  
5. 4051 4. 673323 4. 790403 0. 424088 6. 081806 3. 684045 2. 061667 1. 292044 3. 716403  
2. 965993 2. 841188 2. 819969 3. 88391 3. 226448 2. 640731 3. 136702 3. 242546 2. 934893  
0. 868764 0. 930456 0. 677341 2. 024007 1. 37826 1. 46165 1. 313437 1. 611451 1. 660983  
1. 671266 2. 067053 2. 655344 1. 622473 1. 80437 1. 631263 1. 692799 1. 628538 1. 610999  
1. 463257 0. 764064 1. 167841 1. 202359 1. 283751 1. 582115 1. 141611 1. 282131 1. 170271  
1. 282067 1. 467391 2. 226722 2. 288614 2. 058966 2. 004661 2. 045362 2. 489614 1. 562013  
1. 90759 1. 391431 1. 740305 1. 779795 1. 322448 1. 236854 1. 200354 1. 152383 1. 290429  
2. 538966 2. 563448 3. 141746 1. 892138 2. 231472 2. 194719 2. 002013 2. 049371 2. 79791  
1. 468719 3. 2578 4. 425304 5. 249504 3. 169487 0. 915863 3. 331065 2. 901359 2. 080666  
1. 871005 2. 730744 3. 179506 3. 071196 2. 393347 2. 850839 2. 152354 2. 679649 3. 385412  
3. 845911 2. 779181 3. 199998 4. 066195 3. 38432 3. 254683 2. 913802 3. 23316 3. 656545  
2. 07708 1. 780795 1. 671705 2. 063499 1. 880673 3. 269957 1. 662854 2. 310648 2. 007822  
1. 630406 2. 652214 1. 243796 0. 959205 1. 692456 1. 653071 1. 466526 1. 707649 1. 414328  
2. 210246 1. 142612 2. 582745 3. 138039 4. 261376 1. 123765 1. 177296 2. 373864 1. 439373



1. 447356 2. 388815 1. 887295 1. 536672 1. 500208 1. 403603 1. 611597 1. 273244 1. 610175  
1. 315288 1. 776765 1. 105757 1. 562466 1. 148234 1. 22012 1. 246728 1. 732112 1. 460803  
2. 361992 3. 821524 2. 632527 1. 670818 3. 279146 1. 80467 1. 771631 4. 368443 1. 549628  
1. 711183 0. 501843 0. 982513 0. 947897 1. 215223 1. 779254 0. 974422 1. 364532 1. 358875  
1. 306588 1. 281236 1. 146629 1. 488311 1. 441874 1. 581599 1. 245559 0. 977846 2. 915721  
3. 866032 5. 02334 4. 761259 5. 222339 4. 36633 3. 337317 4. 7186 4. 110056 4. 179259  
3. 505798 3. 026225 3. 492483 2. 21215 3. 322064 4. 034412 3. 085246 2. 841733 1. 883408  
1. 05447 2. 434264 1. 24317 1. 006545 1. 898834 0. 850083 1. 414592 1. 36187 1. 197134  
2. 140938 2. 204651 1. 772065 1. 402752 2. 167042 1. 966461 2. 615778 1. 358644 2. 175571  
1. 448981 2. 671744 1. 787675 3. 631821 1. 920093 1. 698012 2. 101609 2. 812068 2. 055107  
1. 11138 1. 370742 1. 274885 1. 768054 0. 916939 1. 222845 1. 185544 1. 374087 1. 222845  
2. 699883 1. 436419 1. 557831 1. 316524 1. 21012 1. 411367 1. 141619 1. 886132 1. 215661  
1. 606246 1. 659164 1. 308334 1. 961672 1. 83359 2. 223638 1. 920215 1. 870403 1. 732445  
2. 218753 1. 852308 1. 661022 1. 833372 2. 227241 2. 190192 1. 857524 1. 485114 2. 054016  
3. 089368 3. 258291 3. 633754 2. 108862 3. 070755 2. 236606 2. 383156 2. 224476 2. 164589  
1. 087512 1. 38655 1. 687763 1. 0917 0. 706886 0. 943747 0. 953003 1. 464576 1. 706428  
1. 22797 1. 642023 1. 051799 1. 859176 1. 218283 1. 711351 1. 751093 1. 173433 0. 658812  
1. 221654 1. 064139 1. 416458 0. 957107 1. 162794 1. 210264 1. 134443 1. 198346 1. 102066  
1. 540939 1. 553125 1. 418938 2. 731824 2. 434219 2. 189826 1. 269577 1. 54746 1. 400685  
2. 277277 2. 047766 3. 202568 1. 506116 3. 020737 1. 79735 2. 468995 1. 763912 3. 041683  
2. 664551 1. 691991 1. 940396 2. 004505 2. 719407 2. 362789 2. 284779 1. 649286 1. 603158  
5. 24884 6. 688377 5. 445429 4. 835697 5. 199768 3. 149866 4. 929871 5. 542897 5. 819801  
1. 236761 1. 302347 0. 699675 1. 809419 1. 804001 1. 730495 0. 753605 1. 273678 2. 011098  
3. 19082 2. 266921 1. 891757 3. 17343 2. 668462 2. 722426 1. 981653 2. 141756 2. 408048  
2. 027756 4. 045703 2. 560672 1. 733437 2. 13535 2. 935623 1. 604639 2. 222789 1. 752248  
0. 867715 1. 285967 2. 12656 1. 469962 0. 956932 1. 121521 0. 661738 1. 132758 2. 257801  
1. 574819 1. 49569 2. 584291 2. 307545 1. 441682 1. 47097 1. 416686 2. 218314 1. 334805  
3. 165655 3. 950778 1. 328692 4. 103671 1. 24597 4. 146464 2. 133354 1. 648147 3. 193774  
1. 409342 1. 512962 1. 474263 1. 719095 1. 216291 1. 130582 2. 269396 1. 502566 1. 606475  
1. 811002 2. 037248 1. 532451 1. 298121 1. 446494 1. 662466 2. 675822 1. 45777 1. 313941  
7. 116956 6. 050536 7. 48153 7. 08961 5. 965032 6. 208096 5. 989005 5. 732077 5. 773954  
2. 753213 2. 399386 2. 913653 2. 62808 3. 219447 2. 972883 2. 856141 2. 750041 3. 454414  
0. 948551 1. 227926 0. 879738 1. 82568 0. 789005 0. 946955 1. 068688 1. 357323 0. 818613  
5. 134268 5. 078077 4. 604284 3. 109384 3. 892076 4. 459434 4. 072001 2. 997247 2. 781862  
1. 689405 3. 928842 1. 355087 1. 637382 1. 07191 1. 599901 1. 347701 1. 521625 3. 182177  
2. 380935 2. 034187 1. 56653 1. 802209 1. 8041 1. 218635 1. 834324 1. 753597 1. 618723  
1. 258422 1. 790122 2. 259905 2. 79642 2. 856713 2. 820015 1. 117852 2. 468249 1. 81681  
3. 154343 1. 933816 1. 61225 1. 558318 1. 418075 0. 846819 3. 19268 2. 099256 1. 170874  
1. 438476 1. 172793 1. 125755 1. 369856 1. 028392 1. 266675 1. 358597 1. 462029 1. 61654  
2. 041906 1. 852243 2. 106916 2. 206164 1. 916217 2. 19037 2. 52777 1. 531657 2. 7641  
1. 959816 1. 274973 2. 008018 0. 571093 1. 307858 1. 357837 2. 337439 3. 037247 3. 01832  
2. 036288 2. 815425 2. 316271 2. 109102 3. 246287 2. 405615 2. 247239 2. 19181 1. 986851  
1. 865699 1. 698938 1. 435835 1. 795216 1. 775025 2. 05392 1. 393292 2. 622617 1. 38666  
2. 506253 2. 168137 2. 7505 3. 001586 2. 4352 2. 165236 1. 925694 2. 63647 2. 165236  
2. 175511 2. 355313 2. 115836 2. 546522 2. 296381 2. 711161 2. 310427 1. 756454 2. 162402  
1. 03549 4. 949194 2. 698599 1. 647694 4. 216886 2. 793122 1. 62873 4. 931071 1. 118818  
1. 362845 1. 136961 1. 131888 0. 950465 1. 465319 1. 151811 0. 912362 1. 801187 0. 935399  
3. 391958 3. 311504 2. 945447 3. 094725 2. 729464 2. 328741 2. 582508 2. 549966 2. 850998  
1. 402805 1. 016146 1. 678314 1. 836093 1. 371322 1. 384525 1. 976113 2. 29532 1. 627927  
0. 999275 1. 342022 1. 770074 1. 232764 1. 533231 1. 205161 1. 12174 1. 26519 1. 106002  
1. 872549 1. 548728 2. 848738 1. 69225 2. 080067 1. 979697 1. 675081 1. 711283 2. 679277

6.84226 7.384951 6.681802 7.032051 6.014729 5.824364 6.968416 7.537944 6.047356  
1.254362 1.195653 1.082277 1.045615 0.729785 1.207241 1.171933 1.312662 0.97027  
1.842673 1.231191 0.875378 1.439936 0.830278 1.181301 1.423466 1.76167 0.779034  
1.299482 1.453393 1.288497 1.053521 1.164192 1.158053 3.772319 1.547803 1.012709  
2.126069 3.444381 1.494926 1.302471 1.455169 2.669405 2.909245 2.340268 1.625111  
2.049918 1.720166 1.405832 3.086774 2.164841 1.892215 1.470628 1.88045 1.275436  
1.207401 1.170777 1.29183 1.634465 0.921922 1.579546 1.201347 0.959835 1.583671  
1.608314 1.565834 1.921351 1.984827 2.575973 2.351944 1.584573 1.848826 2.068952  
1.464118 2.657176 1.397356 2.437337 1.672839 1.753085 1.724372 2.241529 1.74028  
1.228227 2.428142 1.348629 1.527678 1.041467 1.357542 1.204156 1.364861 1.525351  
2.649695 2.480719 1.860606 2.091044 3.22358 1.774863 2.305621 2.858867 3.835762  
1.837036 1.681948 1.408671 1.478014 1.27094 1.369134 2.09776 1.550206 1.539624  
1.038783 4.809108 3.38581 4.488061 3.801534 2.95608 5.183664 4.697136 3.459608  
1.872643 2.09216 1.490562 2.746098 1.633409 3.073004 2.209442 1.673912 1.519702  
1.635863 1.315413 1.21146 1.14103 1.879078 1.098332 1.118282 1.098869 1.525369  
1.730199 1.471939 1.530892 1.76349 1.611468 2.002074 1.546139 2.099604 1.420737  
4.594903 5.227381 3.562676 2.044769 4.316832 1.920134 2.282815 2.490639 3.756916  
2.415304 3.077856 2.371251 3.361835 2.405016 1.839331 1.810558 2.186533 2.49403  
2.479359 2.379881 0.859378 1.581892 2.205298 2.29392 0.529266 1.050392 0.953312  
3.146839 2.332151 2.617488 2.617488 4.000261 3.535475 2.619298 2.874167 2.493358  
2.813154 3.195709 2.585196 1.184457 3.330846 1.469072 2.078002 0.994396 1.817901  
1.239772 1.359003 1.507243 2.360039 1.201297 2.021634 2.983856 1.757634 2.238583  
2.135266 1.909853 1.469521 2.151568 1.741974 1.848511 2.250491 1.350565 1.713875  
2.213222 1.472157 1.222042 1.762757 2.588491 1.173007 1.217809 1.375411 2.366572  
1.338996 1.909744 1.835437 2.58849 1.609644 1.492457 1.45032 1.20927 1.872139  
1.354834 2.4884 1.754246 1.610682 1.00138 1.401035 1.473324 1.211503 1.109602  
1.032707 1.108527 2.134769 1.133255 1.258865 0.911342 1.053327 1.141957 1.640473  
1.89858 1.083358 1.246194 1.777382 0.943353 1.489598 1.263273 1.990688 1.105909  
1.35809 1.907626 1.159916 1.475859 1.058426 1.292416 1.42175 0.938287 1.20637  
1.8637 1.428431 0.97644 1.201223 1.102251 1.088518 1.279508 0.715613 1.715119  
1.305378 1.067058 1.968023 1.51093 1.666679 1.265942 0.850778 1.63174 1.713931  
2.207814 1.465927 1.92502 1.790492 1.295438 1.443767 1.87033 1.395489 1.365657  
2.625429 2.573131 2.608671 2.79865 2.525412 2.333624 2.20826 2.549206 3.322597  
1.754269 1.427926 2.444796 3.499294 1.63543 1.906171 1.753689 1.882367 1.679647  
2.766021 4.035053 2.650351 3.119864 3.855678 3.38764 2.046953 4.776987 4.4914  
8.39233 8.9465 8.833847 8.128314 8.176351 8.297958 7.963204 8.762575 8.597063  
1.291077 1.709945 1.956703 1.538159 2.156175 1.975449 1.614143 1.702213 1.680339  
3.069671 3.936264 3.025949 1.530439 2.732646 1.347409 1.508043 1.893594 1.742944  
3.288563 2.932221 3.827235 2.594492 3.827654 2.913455 2.329408 2.04098 2.394424  
1.406257 1.712791 2.121255 1.892629 1.676331 1.526859 1.897681 1.707775 1.696286  
0.918817 2.364115 1.887209 1.877954 0.648144 1.106759 1.510627 1.824697 1.013366  
0.483585 0.583794 0.832427 0.79049 1.145532 0.709027 0.799829 0.61572 0.682125  
0.8151 1.0124 1.071121 1.528341 0.89326 1.011548 0.799348 1.063518 1.355217  
1.467734 1.50138 1.58666 1.46287 1.658374 1.439171 1.874078 1.505809 1.365647  
3.180681 2.950698 3.642044 1.774793 3.697308 2.337963 3.688097 0.805623 2.224403  
1.601636 0.966101 0.576556 0.497135 0.668527 0.586021 0.767575 1.522714 0.912288  
2.253696 2.339355 3.061805 1.58985 1.504387 2.235729 1.582597 1.572571 1.357375  
2.231718 2.479066 3.240672 2.156271 3.236936 1.224534 2.018663 2.179559 1.206055  
2.069481 2.14912 2.464086 2.066401 2.700309 2.511354 2.133844 3.310563 2.084814  
1.010312 1.285762 1.893523 1.071558 1.242532 0.785503 1.115024 0.998231 0.994241  
2.220529 3.491484 1.574786 4.422555 2.187622 1.006852 2.301491 1.427963 1.487523

3.13096 4.83711 4.111841 3.995483 5.264028 4.879388 2.93417 3.237634 3.129734  
2.404017 1.441519 2.241513 1.933143 2.225046 1.98874 2.072497 2.439464 2.96644  
3.800109 5.353071 4.821268 2.878278 4.548927 2.436094 4.070007 2.94281 3.275101  
1.23352 1.05219 1.404191 1.405527 1.233251 1.200975 0.96993 1.26189 0.904462  
2.518901 1.136548 2.43598 3.113834 2.040228 2.069328 2.424999 2.280695 1.794917  
1.312323 1.066893 1.089615 1.164118 0.856586 1.897186 2.933657 0.902564 1.006556  
2.364028 2.251295 2.036189 2.097815 3.179579 1.400538 2.30459 2.379544 2.152147  
1.104239 1.404773 1.306264 1.809077 1.035623 1.23759 1.73285 0.844663 1.385279  
1.42683 2.822396 2.561017 3.061234 1.077975 3.095361 1.683337 2.460994 1.855418  
1.199584 2.042824 1.557439 1.477052 1.06902 1.389122 1.329309 1.568513 1.231118  
3.592839 2.825818 6.036163 2.955259 3.001024 3.654738 4.650306 4.740063 4.703502  
1.373889 1.511256 1.157768 1.263845 1.436611 1.337245 0.857167 1.602741 1.335188  
2.124792 1.318467 2.154785 1.201956 1.459726 2.299615 1.560635 1.726723 1.457727  
1.478857 1.291392 1.444055 1.224969 1.096839 1.127543 1.04526 0.751041 0.956711  
1.41843 1.333864 1.280312 1.472422 1.193276 1.353817 1.105329 1.206389 0.879221  
3.816847 2.970644 1.141003 0.831919 1.586106 1.125518 0.731365 2.095823 0.820545  
1.995799 1.731858 2.132109 1.623357 2.332002 1.676369 2.654957 1.869437 1.951037  
1.950779 2.942391 2.849928 1.663062 1.543623 2.047137 1.456622 2.395349 2.4732  
2.13843 2.329321 2.511513 1.740673 1.85752 2.074094 3.790405 2.295453 2.883546  
4.428487 5.432336 4.387458 2.618057 4.080828 2.159909 2.232869 2.454941 2.008448  
1.115498 1.374493 0.490724 1.911268 1.156849 1.456836 0.970263 3.1525 0.866538  
1.566192 1.670717 1.426062 1.684885 1.608231 1.957544 1.212432 1.821659 1.606156  
2.361222 1.803114 2.646252 2.59853 1.679633 0.925214 1.557438 1.945277 1.159265  
1.54195 2.297235 2.67947 1.806497 2.953851 2.824496 2.843534 2.451745 1.582445  
0.997787 0.859998 1.968931 1.306337 1.462157 1.3748 0.881811 0.736518 2.250616  
1.216265 1.10173 0.824761 1.961685 1.580083 1.811553 1.072386 1.401145 0.851973  
1.434708 2.046248 2.210419 1.447327 1.38441 1.762026 1.57285 1.91238 2.115236  
6.966888 5.729673 6.292011 5.561203 7.418257 5.720016 5.67395 5.443746 6.197698  
2.020369 2.885876 2.22023 1.618206 2.464403 1.39679 1.232976 2.482086 1.269119  
2.678499 2.229214 1.884738 1.9323 2.249123 1.602808 1.508401 1.980527 1.946427  
1.149074 2.4934 1.662713 1.496395 1.049898 1.601098 1.513358 1.067054 1.892341  
1.943267 1.841275 2.09215 2.37552 2.676761 1.570684 2.039809 2.074765 1.321309  
1.620372 2.606786 1.667813 2.348333 0.944837 1.21264 0.902206 2.013279 1.414338  
1.463732 1.134798 0.863801 1.095733 0.950104 0.820709 0.964419 0.663616 0.839787  
1.420078 1.160179 0.986175 1.180835 2.064214 1.357973 1.225575 1.406644 1.094275  
0.686732 1.121914 0.974426 2.352593 0.839212 1.138513 0.838047 0.734847 1.132306  
2.384382 2.424824 2.978756 2.300273 1.376707 1.83043 1.548337 1.585905 1.907813  
1.166881 1.392165 0.929264 1.093797 1.880082 1.624505 1.479239 1.953504 1.180038  
4.363278 4.171966 5.520536 4.935325 5.965072 2.847796 5.114269 3.482429 3.834459  
1.42813 1.508317 2.546222 2.443178 1.194976 1.305794 1.48377 1.791896 1.434354  
1.589923 1.330392 1.909856 1.357327 1.74298 1.073286 1.41757 1.428495 2.185317  
2.136815 1.648594 1.714651 2.592004 1.538615 2.003878 1.781962 2.502678 2.076652  
1.51635 1.992199 1.900998 1.740788 2.744473 1.354639 1.822344 1.660562 1.392523  
1.931303 2.043554 3.03136 1.135648 0.625915 0.382705 0.450964 0.487256 1.10571  
2.599485 1.618235 1.671486 2.608047 0.780697 1.966112 1.278512 1.647953 1.68094  
1.322356 0.904156 0.414007 1.131024 0.949497 1.130528 0.741143 1.049812 0.538602  
1.219616 0.920047 0.941179 1.375903 0.923292 2.403396 0.999204 0.769363 1.772472  
2.303231 2.297863 3.334395 2.061152 2.686064 2.420242 2.152852 2.51837 2.661591  
1.149624 0.914883 0.982832 1.099402 0.940848 2.298684 1.197179 1.955537 2.794201  
1.034858 1.912015 1.369723 1.680132 1.028091 1.151884 1.24714 1.562225 1.851211  
1.007491 1.200985 1.719287 1.094122 1.292674 1.094379 1.237967 1.34227 0.913697

1. 675568 1. 629353 2. 238113 1. 81569 2. 83621 1. 337539 1. 648776 2. 384812 1. 695802  
0. 998898 2. 132094 1. 110315 1. 085732 1. 527278 0. 931148 1. 881642 2. 174381 1. 156305  
1. 628435 1. 594611 0. 979429 1. 750821 0. 988067 1. 078163 1. 399199 1. 638555 1. 801308  
1. 329525 1. 660763 1. 241891 0. 752781 1. 440294 2. 675321 2. 431987 1. 067102 1. 86095  
1. 382634 2. 201667 1. 038457 1. 938493 1. 239777 1. 036506 1. 588557 1. 373467 1. 057882  
1. 960671 1. 359701 1. 818087 2. 553399 2. 211236 2. 422755 2. 065608 1. 57397 1. 85549  
1. 740479 1. 735305 1. 617911 1. 993848 1. 731892 1. 71213 2. 040743 1. 776553 1. 66618  
0. 986153 3. 940035 4. 690319 3. 753741 2. 860455 1. 367464 1. 249586 1. 391851 1. 327372  
0. 878057 1. 425522 0. 758104 1. 358762 0. 778158 1. 175018 0. 941692 1. 110837 1. 399675  
5. 528738 5. 072125 6. 50702 5. 766392 5. 663895 3. 835787 6. 404506 6. 840731 7. 107882  
1. 854201 1. 093711 1. 130674 1. 522276 1. 469267 2. 143438 1. 140655 1. 517643 0. 834514  
1. 369031 0. 750402 1. 082668 1. 200527 1. 640016 0. 960052 0. 976851 0. 979642 0. 851841  
6. 132751 7. 27323 7. 774529 5. 948159 7. 647044 3. 621992 5. 591618 4. 452586 6. 402778  
2. 997691 2. 112839 1. 638816 1. 90403 2. 047248 2. 59032 1. 718568 2. 001887 1. 566291  
1. 694137 1. 383559 1. 433646 1. 60054 1. 656247 1. 667515 1. 60797 1. 018237 1. 503082  
1. 66746 1. 863036 2. 005666 1. 836589 1. 875161 2. 090153 1. 822606 1. 512287 1. 479935  
1. 156976 2. 370268 1. 662234 3. 798172 1. 34064 0. 756752 1. 916841 1. 038602 0. 660285  
1. 078124 1. 691113 1. 183509 0. 763958 1. 018716 1. 026945 0. 967879 1. 090848 1. 252  
1. 680963 2. 958844 1. 491286 2. 158235 1. 726972 1. 588273 1. 695199 1. 577746 1. 603237  
2. 360262 2. 037706 2. 770768 1. 610405 2. 178568 1. 399241 1. 309107 1. 802061 1. 662251  
0. 980116 1. 074893 0. 958771 2. 047725 1. 262177 2. 357022 0. 934659 1. 110125 0. 705425  
3. 166906 2. 609123 2. 602498 2. 699642 3. 473757 3. 803658 2. 984223 3. 597561 2. 107769  
2. 539807 3. 950698 3. 279078 2. 670384 3. 732032 2. 88077 2. 152058 3. 072961 2. 494292  
1. 938282 4. 715643 2. 033748 2. 368272 1. 441562 1. 619891 2. 124726 1. 516634 1. 380095  
1. 396445 1. 403111 0. 866892 1. 409583 0. 797776 1. 233172 1. 057316 1. 326555 2. 06779  
4. 399677 4. 462468 4. 697122 4. 42803 5. 256917 1. 224143 1. 615897 2. 052169 1. 457886  
2. 914101 1. 418812 3. 128746 0. 994791 1. 532434 1. 369965 1. 71014 1. 697943 1. 103399  
3. 947098 3. 207866 3. 391533 2. 860894 2. 036223 3. 982153 4. 6866 2. 146851 3. 974187  
0. 962528 1. 383162 1. 112108 1. 081247 0. 994224 1. 616127 1. 347637 1. 759704 1. 045986  
2. 022053 2. 279715 2. 007099 3. 160817 1. 718181 2. 772697 1. 909654 1. 93324 1. 796268  
1. 53975 1. 264154 1. 246268 1. 230516 2. 139218 1. 720893 2. 030258 1. 499377 2. 296898  
1. 686334 2. 238832 1. 949891 2. 512589 2. 302094 2. 198927 2. 21768 2. 64137 2. 300185  
3. 98148 5. 148163 3. 173284 1. 913755 3. 867853 1. 853305 2. 10936 2. 41678 1. 662948  
7. 994782 8. 497684 8. 26352 8. 573511 8. 868762 5. 670412 6. 952976 6. 640197 6. 780479  
2. 107232 2. 00184 1. 80637 1. 41603 2. 512381 1. 557259 1. 952065 2. 472121 2. 758261  
1. 130384 1. 341929 1. 411182 1. 643778 1. 565361 1. 461244 1. 750053 1. 475742 1. 336029  
1. 215357 1. 261656 0. 96419 1. 231748 0. 885607 2. 287259 0. 804713 1. 464652 1. 72778  
0. 736963 0. 898588 1. 122636 0. 803692 3. 684984 1. 250914 0. 953247 1. 390303 2. 124239  
2. 485351 1. 970365 2. 700808 1. 435599 2. 536056 2. 005986 1. 866019 3. 302551 3. 114694  
2. 791065 2. 871115 3. 380823 2. 640379 2. 388957 1. 554814 2. 309386 1. 946681 2. 296155  
0. 92603 1. 453556 0. 978043 1. 759739 0. 900683 0. 997986 1. 166469 1. 430991 1. 236463  
1. 60813 2. 08339 1. 157171 1. 701833 1. 445231 2. 252308 1. 264715 4. 932335 1. 185299  
1. 467707 1. 15594 0. 965831 1. 04227 1. 051596 1. 269484 1. 313632 0. 968742 1. 133291  
1. 157249 1. 155926 1. 913582 2. 716071 1. 780389 1. 376429 1. 551506 1. 470266 0. 906673  
5. 683083 4. 935773 6. 054296 6. 996637 6. 375632 6. 800419 4. 032302 4. 072749 6. 331653  
2. 437611 1. 095152 2. 088885 1. 510253 1. 867889 1. 510812 1. 086276 0. 953915 1. 947687  
1. 629359 1. 77582 1. 754182 2. 1012 2. 759295 2. 853944 1. 713949 1. 452875 2. 809588  
1. 269879 1. 111592 1. 072261 1. 094121 1. 04514 1. 170335 0. 807717 1. 603903 1. 028223  
1. 202836 1. 333097 0. 919814 0. 989588 0. 892857 1. 019639 1. 011623 0. 793506 0. 697206  
2. 903841 1. 916184 1. 298878 1. 647004 2. 045131 1. 912566 1. 954685 1. 758097 1. 857757  
2. 165271 3. 111589 2. 851602 2. 431715 1. 920492 2. 78013 2. 005439 2. 383611 2. 542256

2.055406 1.964349 1.303862 1.348636 1.135647 1.412814 2.077712 1.512968 1.913081  
3.471894 2.227914 2.588833 2.338779 1.998311 1.980866 2.231627 2.636493 2.109469  
1.63528 3.058683 3.635497 1.399959 2.046633 1.286378 1.248742 2.150048 1.561052  
1.014797 0.852066 0.952521 1.664398 2.62785 1.707326 1.227953 0.972712 0.887824  
1.479933 0.93297 0.792358 1.358873 1.015527 1.157658 1.47339 1.165613 0.899563  
2.001482 2.704924 2.60435 2.181467 2.631053 2.397931 2.932416 2.540685 2.469262  
2.146105 2.946166 1.852935 2.767318 2.449683 1.905804 2.032979 2.093846 2.603781  
2.212783 1.219095 1.711099 1.138435 1.401964 1.903315 1.576444 1.709174 1.155804  
1.971027 2.492781 2.654517 1.779924 2.397162 2.126033 1.979948 2.340477 2.969439  
2.384653 3.208196 1.046362 1.689599 1.34678 1.558594 1.74344 1.990477 1.851029  
1.827838 1.664713 3.240015 2.173092 2.233784 1.442829 1.42372 1.585063 2.268285  
1.493856 1.205448 1.050807 1.624703 1.338551 1.193538 1.281996 1.308692 1.319595  
0.497297 1.212307 0.716208 0.723826 0.32955 0.606408 0.376764 1.023475 0.764697  
1.929497 2.965768 3.026156 2.440294 2.842082 3.086102 3.005293 2.500852 2.99338  
1.650471 1.430583 2.734734 2.153875 1.692614 1.811515 2.05287 2.87717 1.839786  
2.8719 3.615879 2.106111 3.151528 2.516451 3.901989 2.983055 3.188292 2.600361  
1.504002 2.003847 0.983211 1.430166 1.342205 1.028512 3.264954 1.678088 1.574209  
1.227793 2.604803 2.076692 2.132379 1.5173 1.126374 1.234731 1.641172 1.248862  
1.417582 1.565984 1.691238 2.298798 1.236741 1.18501 1.936775 2.505813 1.717774  
0.971481 1.231124 0.957482 1.320682 1.364902 1.509245 1.373655 1.204081 0.848499  
1.743811 1.236896 1.328934 2.44534 2.035171 1.773922 1.454131 2.318559 3.130249  
1.818855 1.637071 1.65002 1.624988 1.424696 1.514358 1.555451 1.485496 1.987621  
1.625447 1.490792 3.187631 1.418132 1.617862 2.034322 2.346256 1.423083 1.403178  
1.1249 1.75259 1.303657 1.929102 1.622573 1.527761 1.534365 1.091361 2.363279  
1.381821 2.948344 1.180077 1.174012 1.293604 2.009181 1.282579 1.696949 1.289048  
0.949217 1.454929 0.891106 0.850645 1.255257 1.92004 1.666318 1.474315 1.200307  
1.826187 1.416567 0.670183 3.167637 1.720437 1.706637 2.099968 2.045925 1.791134  
1.203119 1.399547 1.845539 0.967403 2.310323 1.400973 1.315692 1.510534 0.802869  
6.454633 5.385771 4.284309 4.675697 5.251703 3.846781 5.019992 2.193338 3.658353  
4.077819 3.60243 4.577806 3.207643 4.415692 3.358836 3.520292 3.12224 3.539137  
3.099726 2.543214 2.618732 2.557173 2.947252 2.3997 2.763078 3.202949 2.770864  
2.744707 1.393557 2.856874 1.193948 1.684264 1.298798 1.98796 1.149524 1.687113  
1.725766 2.107088 1.990019 2.160934 1.840064 3.587776 2.325437 3.628908 2.888133  
2.09845 2.060716 2.130151 1.085886 1.123146 4.236788 1.900964 1.183818 1.614318  
1.059314 1.263166 2.03662 1.587218 1.479995 1.230925 1.114394 1.264026 0.71133  
1.616334 1.554289 1.668881 1.506659 2.494684 1.110513 2.050366 1.551585 1.67944  
3.631585 3.01699 2.992681 2.176758 1.990996 2.218229 1.771646 1.787438 1.398129  
1.603484 2.072576 1.448251 1.448251 2.142465 1.936459 1.376828 1.853057 1.630608  
1.307271 1.429021 1.634379 1.446487 1.135319 1.296295 1.369361 1.477842 1.343455  
1.909695 1.368423 0.776988 1.080214 1.400666 1.376858 0.762789 1.212205 1.399128  
1.152538 1.902991 1.378034 1.642013 1.676609 1.709325 1.355544 1.330811 1.542487  
2.050313 1.294388 0.887201 1.431545 1.053373 1.644388 2.12355 1.386211 1.133352  
1.802489 1.446566 2.059272 1.3652 0.932863 0.849936 0.984865 1.432313 0.866195  
0.853547 0.913167 0.71838 1.347824 0.912159 1.172387 1.45034 0.560933 0.575733  
1.924106 1.771336 2.000568 1.867796 2.260073 2.603173 2.017491 1.51571 1.646018  
1.923179 1.784024 2.284542 1.326261 3.319955 2.835864 3.06138 3.351465 3.20319  
5.69153 6.046516 7.717552 4.233668 5.138424 4.746975 5.150442 4.306198 4.399447  
2.008776 4.198481 1.424938 2.698512 1.749533 2.113424 1.798447 2.011634 3.239424  
1.263043 1.736988 1.74032 1.178934 1.173053 2.436716 2.088009 2.172456 1.357184  
2.095292 2.10431 2.175147 1.925649 1.405492 1.490906 1.487861 1.833563 1.923654  
2.246204 2.68064 3.090334 1.518709 2.461234 2.108826 2.501298 2.545733 3.140541

1. 325332 1. 010461 1. 149245 1. 797507 0. 873108 2. 172179 1. 117613 1. 123762 1. 086766  
1. 894977 1. 753358 2. 142479 1. 447173 1. 809757 1. 016573 1. 577387 1. 198733 1. 56336  
1. 343649 1. 138231 1. 191913 1. 458487 1. 187172 1. 559336 0. 924745 2. 014616 0. 965867  
1. 451491 1. 582626 1. 381101 1. 040525 1. 348272 1. 752126 1. 511378 1. 228446 1. 29707  
5. 221455 5. 353042 3. 389121 5. 889166 3. 561163 4. 304729 3. 509848 3. 113109 2. 025847  
1. 626174 1. 920102 1. 271866 2. 455507 1. 605779 1. 643158 1. 421078 1. 510005 1. 69738  
1. 023114 1. 126073 0. 901033 1. 484764 0. 689153 0. 707916 0. 955322 1. 025595 0. 709988  
1. 477028 1. 058723 0. 771528 1. 426812 1. 363285 1. 044752 1. 290086 1. 821935 1. 311935  
1. 049425 1. 070841 1. 71613 2. 071983 1. 906281 2. 816702 1. 80189 2. 253369 2. 975643  
1. 45277 0. 886988 1. 012316 1. 299159 1. 171061 1. 49996 0. 98497 0. 989161 1. 07386  
1. 163108 1. 287409 0. 991676 1. 900655 2. 129301 1. 219595 1. 223313 1. 476733 1. 072753  
2. 075764 3. 803843 2. 35999 3. 150505 2. 587628 1. 252829 3. 302542 3. 729996 2. 172918  
1. 517838 1. 516102 1. 219226 1. 12329 0. 812616 1. 376931 1. 068261 1. 675953 0. 947775  
3. 891664 4. 141622 5. 598701 4. 394284 4. 188207 2. 51403 3. 096372 2. 196406 3. 206701  
2. 201211 3. 860714 0. 83029 2. 315396 2. 972738 2. 268998 2. 652589 3. 594807 1. 291908  
4. 645195 2. 621518 3. 92895 2. 603883 0. 891194 2. 451689 0. 875454 1. 938969 1. 971411  
1. 974765 2. 900909 2. 656966 2. 20265 2. 512553 1. 577655 2. 325826 1. 228063 3. 105629  
2. 176603 1. 576325 0. 871379 0. 794505 0. 639482 1. 146673 0. 92211 2. 743565 1. 359719  
1. 616097 2. 173013 1. 834965 1. 510983 1. 516668 1. 898461 1. 624998 1. 552832 2. 130277  
5. 151131 4. 836999 4. 478242 5. 214134 4. 208002 4. 592148 4. 1941 4. 576778 3. 915144  
1. 888162 2. 105861 2. 0656 2. 4032 2. 895881 2. 339991 1. 991844 3. 566081 1. 690861  
1. 530138 2. 230649 0. 859307 1. 237836 1. 511029 1. 403093 1. 692586 2. 273983 1. 305785  
2. 317669 2. 14155 2. 375814 2. 000255 2. 265833 2. 690399 1. 948851 2. 194789 1. 900683  
0. 528739 2. 159789 1. 419834 0. 76906 1. 036358 4. 254989 1. 275431 1. 284714 1. 719144  
2. 040621 2. 265962 1. 735103 2. 101631 2. 211491 2. 094307 1. 979084 2. 052001 2. 048128  
0. 899969 1. 296978 1. 342402 1. 131801 4. 089383 1. 071662 1. 389392 1. 296596 0. 864039  
3. 061266 1. 610233 2. 861279 2. 823986 2. 746119 1. 90128 1. 581617 2. 067044 2. 798564  
2. 036228 1. 434835 1. 349546 1. 320808 1. 827045 1. 064681 1. 443907 1. 381274 1. 35179  
2. 337101 2. 021156 1. 708002 3. 333639 1. 84128 1. 947354 2. 041095 2. 97605 1. 964709  
1. 41989 1. 122361 1. 124223 1. 876746 1. 708118 1. 236683 1. 245295 2. 206433 1. 426267  
0. 878728 1. 259906 0. 743874 1. 0549 1. 444856 1. 161764 1. 842345 1. 626638 1. 529838  
1. 292505 2. 773144 1. 959923 0. 893015 1. 631353 1. 072626 1. 411319 1. 34154 0. 844476  
1. 463921 1. 641477 1. 052609 1. 61931 2. 219624 1. 401179 0. 994659 1. 950427 1. 167858  
5. 713222 7. 150276 6. 370592 2. 826173 6. 833528 6. 795499 5. 250872 3. 60001 5. 048993  
2. 414538 2. 324824 1. 52409 2. 91033 2. 815291 2. 144191 2. 62594 2. 363949 1. 794175  
3. 380217 2. 128942 3. 253007 2. 211741 2. 997774 2. 177852 2. 24596 3. 082045 2. 41122  
2. 563595 4. 263278 4. 963413 5. 238708 3. 57773 3. 226091 3. 685618 4. 444022 4. 311158  
3. 112794 3. 754568 3. 451346 2. 283265 2. 673539 2. 838831 3. 198985 2. 566827 4. 485081  
0. 922254 1. 248476 1. 434377 1. 454802 0. 683047 1. 097968 1. 448277 1. 096377 0. 933106  
1. 499756 2. 900682 1. 904469 2. 316106 2. 006358 1. 939472 2. 272819 1. 698849 3. 055764  
4. 964095 4. 660793 2. 019268 3. 729711 2. 73223 3. 2864 5. 115141 2. 002455 2. 206628  
3. 096598 2. 409719 1. 09394 2. 291716 1. 481118 0. 744766 0. 56914 3. 926829 2. 621964  
2. 708946 2. 792468 2. 591733 2. 461086 2. 178007 2. 594339 2. 282608 2. 614879 3. 035964  
1. 733349 2. 311389 2. 077807 2. 134371 2. 063204 1. 614761 1. 648545 1. 526393 1. 582859  
2. 23944 1. 161296 2. 019489 1. 978916 2. 380498 1. 614552 1. 564884 2. 807344 2. 582035  
1. 372342 1. 972043 1. 9803 1. 911152 1. 946483 2. 015071 1. 751764 1. 690515 1. 507322  
0. 795207 1. 4219 2. 25819 2. 899624 2. 027006 2. 721353 1. 81745 1. 034865 1. 049058  
2. 414602 1. 925327 1. 445807 2. 897226 1. 965016 1. 424762 1. 47127 1. 810726 1. 342189  
1. 087971 0. 511873 0. 731864 0. 999162 2. 489173 1. 341143 1. 067279 0. 946561 1. 748122  
3. 559607 2. 744755 2. 83865 2. 509597 3. 439856 2. 467148 2. 489223 2. 292043 1. 891306  
1. 896176 3. 271104 4. 60192 2. 843525 3. 189095 1. 46067 1. 908733 2. 1639 2. 292203

|          |          |          |          |          |          |          |          |          |
|----------|----------|----------|----------|----------|----------|----------|----------|----------|
| 3.02575  | 3.14156  | 1.81805  | 0.94368  | 1.463658 | 3.628758 | 1.54882  | 1.49417  | 1.466486 |
| 1.439959 | 1.430392 | 1.244283 | 1.620685 | 2.229978 | 2.431897 | 1.859991 | 2.337055 | 1.832832 |
| 2.417856 | 1.550576 | 1.368839 | 1.530092 | 1.522872 | 1.896289 | 1.631804 | 2.148626 | 2.906101 |
| 3.710087 | 2.110851 | 2.86595  | 3.54818  | 3.04033  | 1.930918 | 3.83261  | 1.693988 | 2.859705 |
| 2.962404 | 2.960174 | 3.273114 | 2.161761 | 2.448693 | 2.047774 | 1.87893  | 1.94218  | 1.973412 |
| 0.929317 | 1.203098 | 0.901098 | 0.484374 | 0.87717  | 1.622071 | 0.932289 | 1.707777 | 0.930853 |
| 2.227638 | 2.376522 | 1.491066 | 2.056807 | 2.523487 | 1.743391 | 1.394956 | 1.532052 | 1.239652 |
| 1.288857 | 2.286298 | 1.494445 | 2.36835  | 2.303816 | 1.694768 | 1.812989 | 1.641638 | 1.474378 |
| 4.321398 | 2.714367 | 4.650591 | 4.111458 | 4.782841 | 2.690857 | 3.808536 | 3.909414 | 3.675893 |
| 2.540899 | 1.022222 | 2.213728 | 2.01657  | 1.850672 | 3.0657   | 0.952987 | 1.589427 | 1.305476 |
| 1.115124 | 2.285767 | 0.968517 | 1.0895   | 1.7327   | 1.230239 | 0.88     | 1.196116 | 1.092977 |
| 1.990219 | 1.841146 | 1.572149 | 1.584714 | 1.589489 | 1.518458 | 1.254284 | 1.392178 | 1.489677 |
| 6.340186 | 7.644351 | 7.23348  | 6.496418 | 4.834293 | 4.244032 | 5.923435 | 5.741373 | 6.617834 |
| 1.669189 | 2.305246 | 1.539564 | 1.554237 | 1.534165 | 2.390687 | 1.584069 | 1.73815  | 1.195925 |
| 1.586692 | 0.834472 | 1.967674 | 1.70699  | 0.849214 | 0.920631 | 0.709301 | 2.493663 | 0.689913 |
| 1.222342 | 1.190531 | 0.941129 | 1.143709 | 1.020057 | 1.506481 | 1.159974 | 1.931902 | 0.987569 |
| 4.713463 | 5.311486 | 4.229447 | 4.297778 | 4.848967 | 3.407484 | 4.726745 | 4.11172  | 3.869331 |
| 4.208994 | 4.522194 | 4.075835 | 3.160078 | 4.481038 | 4.96293  | 3.824915 | 4.3952   | 3.358812 |
| 3.851317 | 3.144571 | 2.960931 | 4.120688 | 4.913296 | 4.022202 | 5.16161  | 4.223236 | 4.623119 |
| 2.304173 | 2.729766 | 2.150318 | 2.684329 | 4.339475 | 1.697468 | 1.748019 | 2.107226 | 3.385924 |
| 3.240848 | 3.757265 | 3.204684 | 2.352449 | 1.94404  | 1.161892 | 1.297053 | 1.683551 | 2.129989 |
| 1.387091 | 0.264246 | 1.094721 | 2.627141 | 2.550523 | 1.383698 | 1.328446 | 1.217262 | 1.110261 |
| 2.485613 | 2.759441 | 1.908589 | 2.132103 | 2.852511 | 2.25063  | 1.93382  | 2.323192 | 1.746705 |
| 1.604479 | 1.625017 | 1.085458 | 1.557854 | 1.303363 | 1.520976 | 1.308281 | 1.137885 | 1.587093 |
| 1.71302  | 1.958853 | 1.957866 | 1.797267 | 1.764498 | 1.817635 | 2.520853 | 3.149378 | 2.120624 |
| 1.168459 | 1.507883 | 1.176366 | 1.620951 | 1.256721 | 1.526475 | 0.614903 | 0.977774 | 1.723432 |
| 2.313357 | 2.235165 | 3.032066 | 2.283523 | 3.146265 | 2.016283 | 2.058915 | 2.141185 | 1.997636 |
| 5.178696 | 0.818448 | 2.690869 | 0.996052 | 4.361488 | 0.979575 | 1.118221 | 1.232797 | 0.668278 |
| 1.155036 | 1.598362 | 0.977534 | 2.010781 | 1.328096 | 1.252545 | 1.13431  | 1.401183 | 1.394935 |
| 0.929699 | 1.225812 | 0.903512 | 1.161833 | 1.024159 | 1.054227 | 1.502195 | 1.141109 | 0.941289 |
| 1.775023 | 1.519837 | 1.787135 | 1.696461 | 2.67426  | 1.71425  | 2.253213 | 1.612972 | 1.41688  |
| 2.747038 | 1.393292 | 2.145263 | 1.370558 | 3.113641 | 1.840679 | 2.183106 | 1.897903 | 2.086948 |
| 5.015674 | 4.83765  | 4.899153 | 5.128854 | 5.470817 | 5.867899 | 4.803383 | 5.638636 | 4.97065  |
| 7.269507 | 7.225661 | 7.161325 | 8.247491 | 7.554186 | 6.436338 | 7.405341 | 7.155387 | 7.072372 |
| 0.950348 | 1.293979 | 0.902349 | 1.534109 | 0.819685 | 1.153077 | 1.570254 | 1.181375 | 1.356344 |
| 2.053613 | 4.715567 | 2.577861 | 1.321572 | 1.482038 | 2.656377 | 1.851267 | 1.219577 | 1.679576 |
| 0.95525  | 2.232333 | 0.691487 | 1.865916 | 0.626803 | 1.595538 | 0.699747 | 1.622303 | 1.663814 |
| 2.345324 | 1.741765 | 5.197993 | 1.875148 | 3.234135 | 1.459056 | 1.908464 | 1.132735 | 1.234552 |
| 1.278355 | 1.085588 | 0.785013 | 1.499031 | 0.542336 | 0.829465 | 0.743265 | 1.199401 | 0.525613 |
| 1.11164  | 2.332663 | 1.216745 | 6.310305 | 1.183796 | 1.622007 | 5.116501 | 1.881632 | 1.366866 |
| 4.292756 | 1.055968 | 0.817838 | 1.189833 | 1.123256 | 1.362724 | 1.560324 | 2.233357 | 2.892647 |
| 1.538948 | 1.698159 | 1.927033 | 1.617916 | 1.046427 | 1.191298 | 0.906202 | 1.05291  | 1.182044 |
| 4.86391  | 4.16621  | 4.489552 | 5.42426  | 4.506006 | 6.724735 | 5.466548 | 5.80375  | 4.921219 |
| 4.178013 | 5.457883 | 4.898954 | 4.173252 | 5.709888 | 4.981752 | 4.570725 | 3.919586 | 4.415796 |
| 2.308253 | 2.149242 | 2.016553 | 1.473233 | 1.692483 | 2.123105 | 2.440538 | 1.910068 | 2.291738 |
| 2.715936 | 1.864899 | 1.993836 | 1.525168 | 2.985026 | 2.09047  | 3.444699 | 0.976483 | 0.860036 |
| 5.856881 | 6.460532 | 6.32968  | 6.104083 | 6.992296 | 6.527087 | 5.875818 | 6.35364  | 6.600801 |
| 4.80441  | 3.862131 | 4.525433 | 4.316038 | 4.450772 | 2.819601 | 3.612723 | 3.92294  | 4.52947  |
| 5.388903 | 6.331803 | 6.799868 | 6.577938 | 5.850651 | 6.18959  | 6.431013 | 5.695069 | 6.433276 |
| 6.8622   | 6.520002 | 7.191554 | 7.164654 | 7.569249 | 7.535346 | 6.08073  | 7.383298 | 7.1895   |
| 2.552145 | 1.973238 | 3.001137 | 2.386018 | 3.010165 | 3.457805 | 2.613802 | 3.100719 | 2.873137 |

4. 505113 6. 388371 6. 050761 5. 599535 6. 864896 4. 474318 5. 494722 6. 307924 6. 142827  
3. 479988 2. 965282 3. 269384 2. 077955 3. 794663 3. 213965 4. 487177 3. 075747 3. 518022  
3. 000181 4. 237128 3. 28348 2. 490446 3. 69378 2. 146577 4. 064874 2. 653857 2. 244147  
2. 605365 3. 974544 3. 971989 1. 733121 3. 198469 1. 979238 1. 915556 2. 342941 1. 968211  
7. 044806 6. 892179 7. 00112 6. 181839 7. 286486 6. 576928 7. 552178 7. 786748 7. 145212  
5. 547065 5. 444993 4. 064669 5. 045314 5. 109277 2. 373332 5. 510599 5. 854736 4. 891287  
4. 353801 5. 165395 3. 597078 4. 155289 2. 818789 5. 53013 4. 637034 5. 421281 5. 589295  
2. 717923 1. 484607 2. 397347 2. 753528 2. 2084 1. 905473 2. 346054 2. 39341 2. 224596  
5. 397725 4. 954179 5. 108901 5. 256618 4. 280109 6. 165904 5. 232669 5. 346516 5. 402017  
7. 303562 7. 055825 6. 61544 6. 707651 6. 426177 6. 562849 6. 220037 6. 034862 5. 930443  
5. 348221 6. 003154 4. 883497 4. 592682 5. 468696 4. 57011 5. 007876 4. 815963 5. 080942  
10. 03716 10. 23415 10. 21703 10. 26291 9. 947968 9. 8594 10. 38428 10. 10419 10. 25801  
4. 63537 5. 65488 4. 803709 5. 195955 4. 307076 6. 853283 5. 032271 5. 066329 4. 560312  
5. 802657 6. 758196 6. 421074 6. 225615 6. 100135 5. 995613 6. 441371 5. 874435 6. 295576  
6. 866343 6. 773175 6. 597154 6. 728515 7. 324398 7. 447026 7. 505707 7. 817241 6. 993127  
5. 974477 4. 737032 4. 99758 5. 387685 6. 210724 6. 571113 5. 635297 5. 694192 6. 459027  
7. 860878 8. 684941 7. 746669 7. 465863 7. 654019 7. 73745 8. 032688 7. 798058 7. 651035  
1. 356312 0. 905594 0. 634797 1. 270108 0. 543693 0. 743633 0. 732809 0. 987317 0. 579199  
1. 100752 1. 42041 0. 870613 1. 494768 0. 796447 1. 112602 1. 897451 3. 258206 1. 080948  
8. 029267 8. 494917 8. 549438 7. 561862 8. 866103 8. 189524 8. 509213 8. 060212 7. 98728  
2. 087852 1. 629578 1. 259758 2. 548381 2. 079757 2. 735913 1. 545407 1. 712164 1. 410273  
2. 511583 2. 204046 1. 586544 2. 42315 2. 478251 2. 483744 2. 318838 2. 205992 1. 968932  
8. 180023 8. 658271 9. 052554 8. 647501 8. 705328 8. 019029 9. 34062 9. 100438 8. 933628  
1. 728082 1. 310939 2. 559721 1. 664777 1. 896015 1. 440571 1. 590627 1. 747338 2. 280019  
2. 266341 1. 221922 2. 117606 3. 901804 1. 401438 1. 954387 1. 327345 1. 928092 1. 690959  
4. 964845 5. 628553 5. 483454 5. 15823 6. 285532 4. 955454 6. 761217 6. 613516 6. 560655  
3. 919074 3. 301556 3. 671616 4. 586859 3. 6522 3. 842856 4. 786458 3. 066165 4. 974453  
2. 707687 2. 521578 2. 235164 3. 061956 3. 426892 2. 303378 2. 323488 2. 873382 1. 246607  
1. 893226 1. 418376 1. 757213 1. 540977 1. 215675 1. 15789 1. 39671 2. 593012 1. 414631  
3. 468706 3. 053532 2. 731407 3. 119053 2. 645658 4. 267554 3. 00097 2. 571509 2. 930691  
1. 857858 1. 608863 1. 970038 3. 926488 2. 053611 1. 402768 1. 976486 2. 023251 2. 330004  
2. 004556 2. 068476 2. 094735 2. 597971 2. 383916 1. 802825 1. 884415 2. 450008 2. 130173  
2. 19122 3. 449336 3. 895951 3. 069767 2. 392888 1. 57515 2. 923455 1. 906941 2. 029689  
3. 365955 2. 119978 1. 462097 1. 187039 3. 446697 3. 326413 2. 032356 1. 945127 2. 919945  
3. 220132 2. 690797 3. 523784 2. 557172 4. 236115 5. 094678 3. 19811 3. 895895 4. 208296  
4. 689199 4. 308637 4. 759093 5. 52937 3. 755292 5. 560009 5. 663678 5. 220938 4. 954063  
5. 340757 4. 432612 4. 658745 5. 427264 3. 569141 4. 985848 4. 479002 4. 206982 5. 391456  
6. 431621 6. 622595 6. 423753 4. 955375 5. 683902 6. 369162 6. 008109 6. 544559 6. 113206  
5. 551493 6. 358988 7. 845603 6. 723435 6. 617283 7. 191724 7. 317675 6. 343653 6. 47556  
5. 11276 5. 224397 5. 39682 3. 979715 4. 5919 5. 465863 1. 600528 4. 065303 4. 364424  
5. 752548 6. 196773 5. 034204 5. 334718 6. 074133 6. 027653 6. 645746 5. 557263 6. 587899  
3. 918429 4. 723968 4. 400574 4. 440987 5. 860423 3. 930396 5. 910285 5. 751293 4. 48434  
4. 60342 4. 424209 4. 16078 5. 42952 2. 468538 4. 562722 3. 249393 3. 20437 3. 742519  
1. 432438 1. 777914 1. 452161 1. 859757 1. 859526 1. 303372 1. 571478 2. 08352 1. 879951  
2. 487773 2. 432956 2. 459755 2. 948855 2. 707724 3. 222677 2. 707057 3. 095582 3. 612199  
6. 825363 7. 172054 7. 118364 6. 661539 7. 42841 7. 043783 6. 980544 6. 903096 6. 804891  
7. 29307 7. 66948 7. 411261 8. 046969 7. 590708 7. 655613 7. 804171 8. 030869 7. 972216  
6. 507546 5. 941191 6. 897331 4. 570187 6. 727597 7. 187929 6. 792231 6. 756793 6. 430203  
7. 481137 7. 613069 6. 973381 7. 233002 7. 720939 7. 53292 6. 733956 6. 308725 6. 720149  
7. 778363 7. 908484 7. 963168 8. 107876 8. 027864 7. 420938 7. 843965 7. 850808 8. 04497  
3. 699678 5. 790071 4. 29334 4. 227694 4. 86707 3. 191522 4. 426147 5. 695521 5. 226601



7. 584643 7. 685889 7. 462812 7. 547054 7. 292818 6. 869354 7. 288688 7. 061965 6. 903861  
3. 123035 3. 98098 2. 417703 3. 084284 3. 374051 4. 216477 3. 174638 4. 214995 4. 503496  
4. 168068 3. 609052 3. 00659 4. 160468 3. 47829 4. 559273 3. 487482 5. 00086 4. 4711  
1. 586379 2. 549983 2. 604583 2. 067954 4. 594278 2. 619599 5. 063691 2. 674089 1. 812113  
0. 999036 1. 483262 0. 757895 2. 118289 0. 942348 1. 2711 1. 333012 1. 417794 0. 776389  
3. 569903 1. 113179 1. 06057 3. 501516 1. 538647 1. 446588 1. 500012 1. 687481 1. 005191  
1. 059701 1. 356334 1. 111687 2. 01566 1. 140739 1. 528001 1. 095639 1. 352025 1. 070955  
1. 938142 2. 187134 2. 855375 1. 813005 2. 407062 3. 189581 2. 272793 3. 140232 1. 949151  
0. 733979 1. 152848 0. 70804 1. 177823 0. 923199 0. 745327 1. 330309 1. 056347 1. 210498  
1. 288388 0. 705837 2. 312482 1. 498714 0. 822149 1. 97208 1. 128923 1. 300074 1. 587146  
1. 745967 1. 672655 1. 11847 0. 598915 0. 885274 1. 464129 1. 351496 2. 980641 2. 177683  
1. 606215 1. 435718 1. 394294 1. 028403 1. 284668 1. 365947 1. 616958 1. 807737 1. 360655  
2. 597491 1. 696544 1. 713158 2. 93523 1. 09674 1. 456136 1. 751993 1. 307509 1. 604551  
1. 452581 2. 644424 3. 344082 1. 492877 1. 204667 1. 520012 1. 298603 1. 58103 2. 807718  
3. 092161 2. 870004 2. 314175 2. 179706 2. 499343 1. 948064 2. 49208 2. 132769 2. 011446  
1. 481046 2. 345023 1. 515068 1. 443635 1. 839481 1. 159241 1. 272725 2. 821511 1. 065895  
0. 925962 1. 460528 0. 726254 1. 289975 0. 891191 1. 005126 0. 883646 1. 262551 1. 018114  
3. 198206 2. 549512 3. 732973 3. 426139 2. 171367 3. 873615 2. 586364 2. 925647 2. 559998  
1. 574115 1. 185408 1. 04444 2. 211678 0. 781833 1. 400199 1. 4595 1. 201151 1. 654852  
1. 383889 1. 447198 1. 416685 2. 753194 2. 338229 1. 964313 1. 405948 2. 238032 1. 713776  
2. 381174 1. 187876 0. 659432 1. 663822 3. 622468 2. 262527 1. 265289 1. 59131 2. 029275  
1. 432938 0. 906528 1. 415526 1. 144052 1. 432721 1. 390531 0. 79743 1. 85393 0. 833514  
0. 853768 1. 240536 0. 881912 1. 785509 0. 741916 0. 902325 0. 619924 0. 805447 1. 008492  
1. 032797 1. 504968 0. 763643 0. 531523 1. 008666 0. 794681 0. 684907 0. 747821 1. 086948  
1. 915071 2. 303722 2. 28559 2. 282954 1. 550997 1. 693649 2. 044905 2. 027116 1. 641543  
2. 796253 1. 769485 2. 675038 2. 25471 2. 114486 1. 790802 1. 595405 2. 853294 2. 151432  
7. 983061 7. 641115 7. 853748 7. 444366 6. 712254 6. 468014 6. 364863 5. 263706 4. 466911  
5. 717024 5. 207429 5. 867211 6. 314169 5. 855699 5. 89291 6. 129027 5. 643016 6. 208224  
9. 623999 8. 540221 8. 759321 8. 357365 7. 465957 8. 54302 7. 716853 6. 400864 5. 329354  
6. 007796 5. 471103 6. 106683 5. 141196 5. 620586 6. 253796 5. 845857 5. 807952 5. 540008  
0. 8312 0. 915654 0. 789282 2. 176453 1. 020509 2. 371007 0. 699455 1. 227319 0. 849559  
1. 407869 0. 987774 1. 305555 1. 333293 1. 185018 1. 248376 1. 080704 0. 920643 0. 841474  
9. 001733 9. 099572 8. 881344 8. 920995 9. 448697 8. 921571 9. 169567 9. 002425 8. 835335  
3. 918956 3. 276492 2. 828959 3. 820864 3. 056154 3. 881671 4. 78549 3. 808609 4. 889256  
1. 286073 1. 846597 0. 35167 0. 644503 0. 517447 0. 600875 1. 604604 0. 780857 0. 932427  
6. 19857 6. 473552 6. 151733 5. 953585 6. 173016 6. 5204 6. 421418 6. 775954 7. 037561  
5. 809402 6. 161172 6. 178419 7. 139427 7. 204914 6. 167806 6. 643895 5. 794625 5. 977071  
1. 059466 2. 95135 1. 083424 1. 222788 0. 915149 1. 583506 1. 295087 1. 302759 1. 308731  
1. 055156 1. 035107 0. 832882 0. 922752 1. 25198 1. 666565 1. 03459 0. 917563 1. 207078  
1. 345029 1. 728797 1. 038092 1. 43365 1. 062585 1. 260737 1. 128787 1. 331571 0. 999996  
1. 692591 1. 389651 1. 153756 1. 179554 2. 667873 1. 081034 1. 481552 1. 316118 1. 312986  
1. 094818 0. 855117 0. 798398 1. 210716 0. 82469 1. 043296 1. 279768 1. 009499 1. 029095  
3. 499295 1. 369519 1. 495085 2. 125646 1. 503844 1. 105879 1. 48075 1. 309678 1. 650145  
1. 799764 1. 299516 1. 907304 2. 031203 1. 847178 1. 148606 1. 958939 1. 757256 1. 619843  
8. 012528 8. 397449 7. 974619 7. 673393 7. 860549 7. 848604 8. 158234 7. 646216 7. 571434  
1. 734025 0. 91822 2. 572911 1. 130405 1. 79345 2. 242279 1. 102268 1. 039136 1. 077017  
2. 979042 2. 753192 2. 753878 3. 334595 3. 301711 3. 290458 3. 123904 2. 890816 2. 513923  
2. 74706 2. 4879 2. 386562 3. 189056 1. 659698 1. 779055 1. 284587 2. 074369 2. 21606  
2. 834277 3. 194029 2. 296075 2. 731022 2. 190404 2. 448832 2. 262754 2. 526779 2. 645072  
1. 603206 2. 261683 1. 737254 1. 533516 1. 484947 2. 009778 1. 435546 2. 15965 2. 150232  
5. 654975 5. 651247 5. 340439 5. 44774 4. 819476 6. 374352 5. 156483 3. 95753 4. 173153

6.062319 6.305361 6.41287 6.467232 6.104278 6.38529 6.201182 6.015151 6.742552  
1.782597 0.910563 1.297754 1.978718 1.661516 2.086813 0.910099 0.621165 1.040631  
3.078509 3.05251 1.704679 5.522467 1.713647 4.3768 3.415855 2.164113 4.33752  
1.9377 1.912766 1.431003 1.66819 1.081617 1.141109 1.504621 1.070268 1.522783  
6.183355 6.289535 5.750746 5.903293 6.328547 5.918801 6.057638 6.126844 5.739158  
4.995372 4.224328 4.227757 4.275277 3.058683 6.294847 3.377688 3.478894 5.072715  
7.450217 7.43046 7.303071 7.366114 7.662354 6.695119 7.726048 7.807759 8.381668  
2.501041 1.981105 2.828581 2.81299 2.589421 4.819103 4.037431 4.485153 4.041291  
0.953823 1.66225 1.494887 1.673772 1.146762 1.052039 1.209308 1.763191 1.532477  
1.425099 1.072495 0.887257 3.951742 1.342698 1.640531 1.11708 3.269615 1.573145  
9.31652 8.25078 9.444464 9.235656 9.695615 8.951521 10.09124 10.72808 10.42212  
2.802341 3.551504 4.066582 2.923211 3.531716 2.681631 2.89088 3.163262 4.197438  
6.681784 5.257051 6.734048 6.575526 6.159278 6.083089 8.102076 7.871092 7.365058  
7.124469 7.76434 6.716037 7.049443 6.793299 7.82129 7.305938 7.315799 7.233998  
5.634222 4.678584 4.835321 5.076193 5.042283 5.50664 5.097567 4.73906 5.165  
4.933574 5.977389 5.15979 5.675492 4.966833 5.911326 5.062663 5.492643 5.355087  
3.333955 1.967499 -0.01253 1.337663 3.560832 1.079737 1.866861 4.492803 0.917819  
1.367812 2.577108 3.561761 2.999421 2.354387 2.15693 1.542578 2.28491 2.294844  
1.919903 1.641741 1.782809 1.503499 1.790689 1.611728 2.198739 1.457145 1.894056  
0.879257 1.173355 0.787457 1.076999 0.998776 1.18623 1.094189 0.780843 1.372222  
1.100814 3.347311 0.960706 1.106582 0.685702 1.250712 0.848503 0.658561 0.918207  
3.723124 2.124 1.752696 2.527739 0.9803 1.455172 2.212232 3.806385 2.125799  
1.400189 3.167472 1.659706 1.465974 1.296151 1.931142 1.547511 1.953152 1.501644  
1.245928 1.956033 1.70796 1.631892 1.575725 1.292685 1.458125 1.79308 1.503903  
1.538756 1.748066 1.925043 1.265744 1.375833 1.836558 1.611137 2.091341 1.497647  
1.818422 1.766092 2.487149 1.917717 1.299304 1.488543 2.113055 1.507821 1.345713  
5.983681 5.332568 4.221375 3.718509 4.382174 3.386896 2.354573 4.119675 3.961664  
1.194876 1.496943 1.259239 1.526995 1.477329 1.17747 1.375161 1.0264 1.302202  
1.969557 2.584835 1.751741 2.514098 2.113616 2.265447 1.784804 2.259415 2.212321  
3.751205 3.146642 3.457888 3.11758 3.823157 3.651123 3.331183 3.85381 3.658098  
1.523752 1.07316 0.131263 0.316938 2.342706 1.00225 0.915369 0.823122 1.14799  
0.962862 1.195398 0.440382 0.874359 1.087176 0.918589 1.085068 0.720677 0.49331  
1.16404 0.883766 0.38093 1.817906 0.541352 0.671298 0.457737 0.643116 0.265272  
2.091955 1.502694 1.227092 2.058973 1.393785 1.111904 1.4983 1.45306 1.123832  
2.162819 2.912201 2.483426 2.655632 3.582434 1.760359 2.764417 1.840909 1.846085  
2.297125 2.204055 1.5532 2.191089 3.185857 3.105742 2.572326 1.844263 2.906438  
3.433024 2.38804 4.61523 7.093759 4.267674 1.231867 3.133736 2.382522 2.591159  
4.223142 4.961656 1.917613 3.02454 4.659932 5.96902 4.846369 2.70934 2.508605  
3.120737 2.208369 1.08656 2.562015 1.331455 1.842432 0.957004 2.644452 0.736884  
1.09208 0.944839 0.781236 0.997052 0.861465 0.797213 1.640956 0.789296 0.960781  
2.894751 1.4287 1.516279 1.225749 1.521326 1.352523 2.68141 1.768236 2.431678  
2.176744 2.212549 1.303361 3.299118 2.068675 4.4584 1.172018 2.925977 0.938232  
0.973768 1.690436 0.599838 1.902232 1.063348 1.207169 1.1102 1.267034 1.111896  
4.136129 1.112941 4.379618 1.353106 0.962511 0.978498 0.926718 1.304947 1.039669  
3.956802 4.115161 1.441958 4.260548 2.124733 4.704711 4.805896 4.955441 2.115459  
1.963541 2.558076 2.155577 2.759019 2.423029 2.004967 1.731101 1.553745 1.84434  
1.587401 1.335855 0.811368 2.4068 1.107201 0.888903 1.247857 1.520898 1.366306  
1.935404 1.002609 1.818284 2.347329 0.989099 1.497371 1.470485 1.885967 1.572117  
1.586292 2.033306 2.388577 2.821281 1.549625 1.513647 2.461507 1.920508 2.600302  
1.337497 1.646138 1.4023 1.525863 0.908045 1.214066 0.971157 1.233718 0.984992  
1.034276 1.235037 1.189688 1.303861 1.384734 1.779731 1.322542 1.620288 1.711611

3. 294675 1. 677872 1. 671517 2. 643333 2. 235007 1. 194395 1. 298771 1. 658959 1. 558732  
1. 720627 0. 834123 4. 27869 2. 301793 1. 564053 2. 606549 2. 343414 3. 516533 1. 975758  
0. 529448 1. 856289 0. 246308 0. 645221 0. 753261 0. 761941 0. 773712 1. 023175 3. 931932  
1. 501772 4. 369441 0. 777933 1. 634683 2. 821367 0. 842252 2. 17657 2. 063454 2. 494611  
0. 682602 1. 663763 1. 539545 1. 056295 1. 069845 0. 814852 1. 948855 0. 987929 2. 223632  
1. 702753 1. 487934 1. 478746 1. 446304 1. 230007 1. 540733 1. 274861 1. 725367 1. 533608  
2. 044747 2. 281345 2. 270661 2. 980086 0. 969746 2. 992354 1. 675705 1. 176534 1. 484355  
2. 236932 1. 587603 3. 533447 1. 973032 1. 883272 2. 856643 1. 987545 2. 119184 2. 085889  
0. 997049 1. 775552 1. 298225 1. 947926 1. 520231 1. 487835 0. 979524 1. 658007 0. 843482  
4. 38904 3. 773189 3. 792797 3. 979572 4. 333515 2. 391371 4. 510682 3. 746426 3. 196968  
0. 838361 2. 074555 1. 255039 4. 115608 1. 258329 1. 084013 2. 949745 1. 631727 1. 730912  
0. 899446 2. 549564 0. 842546 1. 587839 0. 969904 1. 292927 0. 895817 1. 416158 0. 916192  
1. 857824 1. 913761 1. 913761 1. 510131 1. 391248 2. 450938 0. 718197 0. 739396 3. 427938  
1. 231141 0. 755619 1. 17668 2. 014051 0. 813272 2. 429633 1. 499663 0. 701971 2. 196694  
2. 19422 2. 591722 2. 983039 2. 152597 2. 137024 2. 722678 2. 277813 1. 689056 1. 772391  
2. 190746 3. 435983 3. 745469 3. 931495 4. 397899 4. 16893 3. 604103 2. 9661 4. 488395  
0. 846183 0. 813414 0. 95177 2. 441027 3. 940169 1. 441759 3. 042919 3. 473267 0. 798151  
2. 191562 3. 21245 1. 480132 1. 430864 1. 373261 2. 524395 2. 279974 1. 619945 1. 757094  
4. 175413 2. 680964 3. 244432 2. 933344 3. 682698 5. 62487 2. 449755 4. 443493 3. 283315  
1. 969544 1. 52139 2. 162759 2. 292558 2. 579692 2. 636394 2. 495976 1. 322202 2. 475257  
3. 386855 3. 000943 2. 50518 2. 558482 2. 218859 2. 579614 1. 99583 1. 963261 3. 193658  
0. 871689 1. 096408 2. 234931 1. 441633 0. 914394 1. 480416 2. 248385 0. 956846 1. 029935  
1. 729306 1. 616348 1. 566587 1. 810031 1. 453425 1. 435906 1. 641245 1. 845416 0. 984366  
1. 244447 1. 907669 1. 826837 2. 042165 2. 414204 2. 464609 1. 053171 2. 12272 2. 194673  
2. 982626 2. 850821 2. 674632 3. 580818 2. 854954 2. 5616 2. 301807 2. 908387 3. 13546  
5. 596037 5. 287521 4. 239746 6. 063425 4. 806132 3. 813987 4. 496789 2. 873997 2. 717202  
5. 174875 3. 567685 1. 774731 2. 621478 3. 466788 1. 063942 1. 021692 3. 601039 3. 388199  
1. 668071 0. 418328 1. 56639 0. 862737 1. 774478 0. 857006 0. 982102 1. 642421 0. 548711  
2. 09946 2. 041783 2. 775806 2. 602312 2. 083523 1. 795887 2. 368047 2. 243923 2. 268033  
0. 686915 0. 922164 1. 120225 1. 079463 1. 011434 1. 275092 1. 109069 0. 99929 0. 712277  
1. 498803 1. 917654 1. 642105 1. 977732 1. 686472 1. 128929 2. 042281 1. 545115 1. 129306  
2. 937466 3. 246208 1. 70146 2. 518196 2. 439054 2. 659525 3. 026472 2. 298653 2. 457007  
1. 124957 1. 225948 0. 874324 2. 57401 1. 239388 0. 759943 0. 89629 1. 150877 1. 016705  
1. 321158 1. 342804 1. 218274 1. 953189 0. 971754 1. 616537 1. 27156 0. 99464 1. 167495  
6. 624864 7. 380753 6. 867725 7. 025551 7. 801382 7. 101376 8. 077253 7. 7841 7. 558912  
0. 810651 0. 943781 1. 635984 1. 113805 0. 639721 1. 272972 0. 689062 1. 6639 0. 552669  
1. 162373 2. 11967 1. 844016 1. 599688 1. 476919 1. 61892 1. 9571 1. 358186 2. 147878  
1. 898218 1. 304472 1. 505912 1. 142485 1. 218548 2. 129465 1. 319784 1. 092604 2. 431391  
2. 972279 2. 545333 2. 900717 1. 533011 2. 977505 1. 986931 2. 42596 0. 994328 2. 333265  
4. 761407 3. 6399 2. 831215 3. 063729 2. 490508 3. 92362 2. 531065 3. 002418 4. 321267  
1. 168559 0. 844958 0. 803648 1. 809203 1. 508486 1. 021756 1. 350638 1. 381609 1. 123885  
3. 783783 2. 271458 1. 886571 2. 657967 3. 580367 2. 064809 1. 754303 2. 324591 3. 658159  
3. 218329 3. 476159 2. 503911 3. 137499 1. 943198 2. 989363 2. 379431 3. 782803 2. 076751  
2. 828825 3. 506356 3. 028132 3. 172741 2. 58434 3. 307065 2. 87262 2. 483187 2. 550703  
4. 357858 5. 50676 3. 110555 3. 002627 2. 39033 2. 849197 1. 754779 2. 78008 1. 393415  
3. 119992 1. 588445 1. 284301 4. 035533 1. 627733 2. 199964 0. 939794 5. 839864 1. 213451  
4. 558024 4. 702546 6. 367135 4. 799006 6. 094418 4. 28886 4. 628819 3. 556674 2. 538747  
1. 075692 1. 866757 0. 954153 1. 569337 1. 030326 1. 831736 1. 016429 2. 235361 1. 807007  
2. 587165 2. 450773 2. 464022 2. 815329 2. 859891 2. 89888 2. 382996 2. 068629 3. 426394  
2. 257476 1. 6542 2. 111533 2. 920928 1. 691131 1. 862113 1. 382102 2. 299819 3. 212811  
2. 891808 2. 358514 2. 489869 2. 726945 4. 040574 2. 155876 1. 186105 2. 739586 2. 192345

1.126078 0.858771 0.742585 1.269748 0.876973 1.580629 1.184659 0.907463 0.833713  
1.486282 1.701724 2.159197 1.550624 1.218046 1.085623 1.097886 1.387633 1.153214  
1.322117 0.530356 1.069777 2.501698 0.707685 1.543483 0.914855 0.951002 1.326799  
2.915916 0.739764 4.219101 4.684536 3.629313 4.220059 4.679099 5.697357 4.072471  
1.560037 2.698959 1.610372 1.168943 2.260548 1.626502 1.818593 2.760007 3.611451  
2.991706 1.959351 1.337555 2.569005 1.724415 2.281733 1.243397 2.168275 2.725025  
1.527698 2.095127 2.512473 1.726732 1.848765 1.784227 1.9559 1.885452 1.641803  
2.823787 2.083796 3.439633 2.324299 3.571628 1.952253 2.773563 1.567939 1.922455  
1.405457 1.189794 1.355717 1.312493 1.307698 1.390911 1.12799 1.113225 1.606558  
0.852946 1.36256 0.998137 2.568615 0.554607 1.232764 1.548134 1.824404 1.580423  
2.774566 2.291422 1.620418 1.387882 1.423751 2.149996 1.175865 3.490731 2.202094  
1.41756 2.468774 0.700946 1.923715 2.092603 2.488327 1.764577 1.299187 2.865655  
1.275623 1.396617 1.70283 1.217137 1.631053 1.812485 1.041946 2.003928 1.702022  
1.090405 1.650445 1.215437 1.816073 1.891888 1.402012 1.986135 1.780296 2.171354  
2.224964 2.113626 1.962859 3.16341 2.842489 2.752473 2.413768 2.314988 2.727454  
1.992282 1.527445 1.23605 1.318474 1.945671 1.48013 1.549743 1.90746 1.51056  
2.056132 1.583672 1.016584 1.413072 3.013743 5.28105 4.138866 3.74788 1.848133  
1.845293 1.879952 1.804227 1.780691 2.178195 1.345605 1.483924 1.428556 2.119186  
2.064296 1.806124 2.54402 2.81132 3.310287 2.385641 2.266409 2.385207 3.452775  
0.986924 1.608643 1.163446 1.753151 1.84423 1.732071 1.348373 1.366452 1.000983  
1.965615 2.401552 6.330002 2.132287 2.13775 2.195445 2.242704 2.151632 1.958225  
0.895066 2.476921 2.303485 1.475882 1.405542 1.169711 2.061039 2.880722 2.318207  
1.541175 1.94748 1.333129 1.649124 1.144183 1.336266 1.637999 1.382153 1.632098  
3.112054 6.291388 4.582327 6.112269 1.865457 3.015233 5.956868 7.014385 3.397734  
2.186164 1.382253 1.338827 1.977105 3.576239 3.503704 1.771814 2.169398 2.469161  
1.272544 1.385808 1.631423 3.115978 1.600075 2.206922 1.281427 3.747764 2.48125  
0.765817 0.211612 1.127828 3.269415 0.638772 0.863124 0.544986 1.774349 1.970727  
2.440462 1.944958 1.484086 1.305812 1.055113 1.621398 2.113704 1.503843 2.481447  
1.15124 1.985973 1.689831 2.482702 1.358803 2.297491 1.639027 2.475465 2.668229  
0.925344 1.204306 1.328096 1.137462 1.213623 1.152391 1.292566 2.433715 2.291239  
1.474674 1.04863 0.706111 2.130641 1.121911 1.787049 1.011661 1.658145 1.390055  
4.269543 4.445649 3.431003 6.413694 3.427664 4.646837 3.495972 3.015051 3.139359  
4.644529 1.46598 1.767949 2.968559 6.446069 3.810448 2.826062 3.287827 4.037569  
2.031746 3.392236 1.506194 2.281591 2.996887 3.837831 2.553626 1.168491 2.426865  
0.594085 1.253729 4.002406 1.15796 3.625886 0.60149 4.912801 1.091675 0.671229  
1.78011 1.301838 1.273856 1.829823 1.637121 2.284659 1.576395 1.931416 2.912666  
1.672798 1.697278 1.789308 1.799742 3.029055 1.118101 1.228997 1.65555 1.374969  
2.179922 2.620715 2.077508 2.444645 2.98158 2.532378 2.698958 3.218317 2.682248  
2.06959 2.028505 2.67611 4.837754 3.560002 3.516499 0.977918 5.147047 4.173872  
2.96457 2.159673 0.754911 1.024178 0.729371 0.793032 1.086642 0.988607 0.663335  
1.205426 1.277307 1.2633 3.681223 1.28112 0.783856 0.967115 1.073526 0.750105  
0.969287 1.311235 1.160244 0.894731 2.74073 1.263535 1.67429 1.69495 0.811153  
1.732862 4.814272 3.472494 1.410126 2.195497 4.010215 3.485627 5.774701 4.40169  
1.052139 1.557447 1.579623 1.632287 1.03671 1.336697 1.109936 1.391521 1.37483  
1.674427 2.382456 1.355901 1.5852 2.856637 1.020536 1.470519 1.245683 1.779047  
2.151386 1.539846 0.338852 0.386105 0.977751 0.897382 1.021635 0.516427 1.030484  
2.530805 3.453453 2.013905 2.55413 2.157578 2.414036 1.218542 2.810087 3.249638  
2.253996 2.434164 3.089938 2.610303 2.109141 2.709496 2.025694 1.599196 2.120233  
0.754782 0.743898 0.504617 0.877719 1.125465 1.590678 0.609485 1.034528 0.573968  
3.453224 1.330774 1.678478 1.494372 2.814658 2.636407 1.529017 3.173872 1.240049  
1.433077 3.471733 2.416366 2.129278 2.530538 3.804443 3.012195 2.71848 1.455398

1.699846 3.766722 2.037619 2.447329 1.803291 1.254944 2.96935 1.433703 1.575036  
1.702943 1.00724 3.605829 1.396438 1.912466 1.410427 1.711456 1.53832 1.674498  
1.192526 1.552133 0.883069 2.602445 1.120118 1.048923 1.255354 1.141409 1.046178  
2.262667 3.005575 2.941321 2.85456 1.741987 2.167631 2.220776 2.132841 1.972362  
3.035045 1.94073 2.050381 1.875527 1.498503 2.441558 1.516665 1.93256 2.644381  
1.700377 0.461065 0.746693 1.041404 0.400722 1.57767 0.500452 0.846738 1.623262  
2.368247 1.222303 1.840582 1.678459 2.346552 2.052715 1.371663 1.725917 1.715708  
3.32107 4.428728 2.118469 1.583695 1.490325 0.678421 1.115017 1.243746 0.872092  
1.725225 2.305617 1.053016 1.650814 1.404955 2.080841 1.865977 1.348484 0.92467  
1.294838 1.794406 2.189457 1.273028 2.1403 1.83508 2.137257 1.696988 0.75171  
3.034315 3.180896 2.820438 2.716312 3.115768 3.667152 3.05822 2.759753 3.581019  
0.716452 1.29867 1.413535 2.190279 1.284719 0.990182 1.035366 2.617108 1.300288  
3.265531 5.050147 4.3541 4.025285 4.180097 5.366677 2.628901 2.155769 3.42808  
4.121567 1.203802 4.169642 1.942343 2.186928 0.99171 1.46007 2.473567 1.57738  
2.760139 2.506616 2.368262 3.305114 2.572743 3.324678 1.906474 2.798913 2.172208  
1.655116 1.529629 1.344916 2.831867 1.75188 1.443514 1.086063 2.384566 2.330678  
1.864824 1.229557 0.766143 1.014109 0.796007 2.09625 1.205164 1.311688 2.092201  
1.338346 0.6326 1.163962 0.885256 0.993843 0.896164 1.158953 0.721476 0.923883  
1.853726 2.339742 1.581117 1.105805 2.13458 1.389427 2.174109 2.759291 1.800394  
1.991396 5.094982 4.05949 2.36894 2.002812 5.263088 1.11932 0.878707 0.914453  
1.653727 3.709265 2.207752 3.06859 2.1224 2.245436 2.252097 4.50834 1.863138  
3.540907 3.269879 4.553822 4.175906 3.778608 4.032525 2.612028 2.762345 4.791105  
3.225614 3.396124 3.236127 4.139726 2.675698 2.872367 3.622844 2.5905 2.17173  
4.707414 4.952257 5.882007 4.238798 3.082956 2.334927 3.736528 3.732173 2.603866  
3.204066 3.764126 3.74938 3.572298 3.881277 3.301328 3.566383 3.308216 3.677311  
1.519066 1.454702 2.033179 2.402376 2.268862 1.174453 1.275375 1.32558 1.291999  
2.399117 3.039548 1.896276 3.43968 2.988308 2.75966 1.69621 3.172095 2.727644  
1.938263 2.168305 2.048815 1.143468 1.97473 2.901972 1.597127 2.052197 1.412448  
0.632107 0.809639 0.692767 0.62324 0.683572 0.714454 1.15761 1.322739 0.956545  
1.218434 1.668657 1.672072 2.349293 1.497628 1.936286 1.478967 1.644428 1.353496  
1.869311 1.459939 2.774582 0.617248 1.352739 2.16705 1.570274 1.650034 1.855047  
0.875243 3.480067 2.476553 1.110957 2.277394 1.566218 3.062877 0.864133 0.913303  
2.542032 1.855041 2.587709 3.240932 2.237877 2.635714 2.452086 2.706065 2.48163  
2.406597 3.901773 2.85608 3.846845 2.972304 3.326371 3.136532 3.366777 3.239093  
0.954048 1.503527 1.10115 0.86852 0.640413 0.862969 1.045999 0.856981 2.14888  
1.222714 0.512011 1.163846 3.505176 1.503907 3.701298 1.731784 1.569796 0.594678  
1.512529 1.577193 1.301216 2.06699 1.204615 1.09857 1.634577 1.19568 2.091804  
0.951317 1.014414 1.792839 0.848443 1.355204 2.164886 3.91153 2.488476 1.0972  
1.907174 2.259889 1.7327 2.675322 1.920428 1.838755 1.400708 2.511728 1.937046  
0.764815 1.018459 0.630724 1.290955 1.406208 1.704925 1.900694 1.235707 1.682903  
3.517373 2.511011 3.464075 3.535154 3.667964 4.577854 2.859812 3.575898 3.259499  
1.151244 0.863918 1.080117 1.164394 1.011498 0.945181 0.751085 0.945475 0.74618  
1.655668 1.638029 1.427632 2.887413 4.020367 1.178966 1.232116 1.022111 3.434498  
1.200867 0.721179 1.723154 1.163368 1.824 2.451092 0.950742 2.016459 0.828507  
1.905909 0.910436 1.533818 2.292228 1.709216 1.581576 0.958489 1.136748 0.959212  
4.894026 5.916943 4.651044 6.406617 5.443613 3.11971 4.931097 2.379401 2.466462  
0.972694 1.498205 0.658528 0.834372 0.981612 0.973226 2.138814 1.335456 0.873909  
1.044124 1.334894 0.730143 1.907954 0.704463 1.237804 1.092671 1.372383 0.910625  
1.78229 1.706366 1.828607 1.192058 1.898911 1.786898 1.859036 1.605515 2.241884  
2.03113 2.548641 1.528295 2.950551 3.175202 3.719113 3.316556 2.722782 2.588436  
2.503132 1.926027 1.307508 1.342285 1.326823 1.219574 1.605795 1.448213 1.613618

3. 380306 3. 929371 3. 972815 3. 324985 2. 718242 2. 776455 4. 861297 2. 871649 3. 494681  
2. 181028 1. 893202 1. 959466 1. 75667 2. 314957 1. 949128 1. 720834 2. 248031 2. 202297  
1. 00239 2. 446217 0. 686123 2. 298159 0. 831529 1. 068456 0. 897205 2. 730217 0. 903989  
1. 45365 1. 297419 0. 961678 1. 186479 1. 427072 1. 500858 2. 162852 2. 171836 1. 480466  
3. 360988 1. 901644 5. 604876 0. 727491 0. 538063 3. 583125 1. 523171 0. 994681 2. 738302  
2. 541015 1. 770429 2. 308494 1. 941104 3. 237804 1. 308949 3. 628786 1. 648568 2. 417829  
1. 980288 1. 764948 1. 387816 2. 164287 1. 346884 1. 628412 1. 736416 1. 463667 1. 673373  
3. 330677 1. 705439 1. 706109 1. 994664 2. 297921 2. 827738 4. 700086 5. 344224 4. 54189  
2. 692021 1. 954558 5. 129253 0. 952758 2. 677166 1. 505115 2. 417526 1. 49209 1. 041208  
2. 329849 4. 520166 2. 942762 3. 73849 2. 017423 2. 201472 3. 054758 1. 719603 2. 084116  
1. 678949 1. 911167 1. 623302 1. 029558 1. 307343 1. 571134 1. 235331 1. 841421 1. 570565  
6. 132023 7. 298107 7. 22306 5. 620279 6. 525142 6. 219421 6. 6436 6. 762613 6. 247066  
1. 54883 0. 821869 0. 642851 1. 052283 0. 966019 1. 218108 0. 709492 1. 542207 0. 652979  
1. 242235 3. 100495 1. 110193 1. 170318 0. 992232 0. 888149 1. 125729 2. 235327 0. 676987  
1. 068413 3. 404325 2. 443465 3. 388342 2. 951421 1. 123422 1. 66907 1. 494039 1. 40158  
2. 393551 2. 368248 2. 246497 1. 191893 1. 313901 1. 511001 1. 490921 1. 879056 2. 731773  
5. 556525 6. 753125 5. 597299 6. 166552 5. 124025 4. 757082 4. 891382 5. 152454 5. 296307  
2. 43435 2. 531441 1. 591163 1. 902708 2. 203398 2. 339966 1. 903723 1. 969017 2. 498052  
2. 956728 6. 476381 2. 440874 0. 667385 4. 144727 6. 635317 3. 009103 1. 96474 4. 243501  
1. 340307 2. 91082 2. 311753 2. 156035 1. 690069 2. 130123 2. 889265 2. 033565 1. 554341  
1. 122067 1. 166175 2. 115076 2. 04857 1. 424678 1. 302161 1. 804106 2. 121154 1. 777884  
1. 863297 2. 181122 1. 597856 3. 45798 1. 056692 1. 027089 2. 275662 1. 656864 1. 446962  
1. 250834 3. 396466 1. 446517 1. 991398 0. 857198 1. 400759 2. 442903 2. 691656 2. 645161  
2. 13657 1. 567293 1. 150826 1. 286355 1. 805161 1. 286783 1. 445415 1. 321334 0. 902758  
2. 703164 3. 900807 4. 684018 1. 550844 2. 283502 2. 665029 1. 684253 2. 073445 2. 987047  
1. 723098 1. 462128 1. 939993 1. 780294 1. 573635 1. 505197 1. 623112 1. 459814 1. 511975  
2. 722069 3. 513369 3. 73931 2. 100074 3. 654523 2. 059962 3. 613932 2. 982117 2. 409245  
2. 178483 2. 106183 1. 749232 2. 111448 4. 196944 2. 109605 2. 224337 2. 066619 2. 516403  
1. 636613 1. 798253 1. 959733 1. 137557 1. 391051 1. 515112 1. 520471 1. 638184 1. 457283  
2. 138919 0. 917603 1. 22831 1. 472946 1. 460402 1. 432836 2. 040099 1. 592444 2. 120752  
4. 102581 2. 627453 4. 485043 2. 05981 2. 809096 1. 047988 2. 281529 2. 689198 2. 787973  
1. 319913 1. 498064 1. 135647 1. 441976 1. 402032 1. 25587 0. 935994 1. 68181 1. 130021  
2. 236578 3. 222049 3. 113505 1. 659089 1. 875993 1. 929937 3. 116254 2. 492825 2. 774926  
1. 91373 3. 886521 3. 809139 3. 553317 3. 688949 4. 957829 2. 794866 4. 099972 3. 499891  
6. 0324 6. 940655 6. 749567 6. 493868 6. 468573 7. 105554 6. 845263 6. 549831 8. 302668  
1. 836036 3. 196616 2. 407687 2. 688092 2. 048546 3. 113407 1. 803567 2. 419243 2. 829563  
1. 106887 0. 878579 0. 858015 0. 682651 0. 893023 1. 198123 1. 321636 0. 895509 1. 107393  
4. 771363 4. 025612 4. 228473 4. 888538 3. 222703 4. 413382 4. 935681 4. 369406 4. 78937  
7. 097094 5. 874363 6. 571768 5. 542744 6. 497951 2. 152545 7. 088554 5. 28664 4. 173014  
2. 677508 1. 866015 1. 96826 1. 208581 2. 239844 2. 01841 2. 021697 1. 912235 2. 040323  
0. 964138 0. 678342 0. 66729 0. 502915 1. 070403 1. 09942 1. 17982 1. 224839 1. 992748  
4. 804627 5. 104792 5. 715722 4. 088157 5. 864736 5. 064442 5. 800662 3. 458719 3. 767168  
1. 191775 1. 525546 1. 988961 1. 258456 1. 276619 0. 986992 1. 751552 1. 180594 2. 178517  
3. 243589 2. 954126 2. 931671 2. 814961 2. 724206 2. 142767 2. 700349 2. 790452 2. 509725  
5. 49569 5. 754624 5. 563051 5. 683762 4. 167818 5. 920341 4. 759594 2. 978189 4. 607051  
0. 781547 1. 85237 0. 998317 1. 753579 2. 30236 1. 306043 1. 082514 1. 651212 1. 113645  
2. 169846 1. 805659 2. 462443 2. 946764 2. 714723 1. 763865 1. 481827 3. 294954 2. 18452  
2. 778133 1. 797059 2. 179108 2. 164746 3. 656716 1. 541495 1. 879594 2. 230057 1. 984608  
1. 304177 1. 392202 2. 824499 1. 915896 2. 048444 1. 756138 0. 658609 1. 314501 1. 884582  
1. 422293 4. 453348 1. 611211 1. 823741 4. 834152 1. 603761 3. 880791 2. 836001 1. 559859  
2. 516669 1. 957775 1. 58034 1. 470737 2. 232893 1. 824479 1. 397968 1. 706447 1. 7037

1. 443749 2. 204356 3. 004393 3. 972008 2. 104873 2. 628115 2. 417971 3. 002924 2. 716517  
1. 03972 1. 069315 0. 922161 1. 142782 1. 049362 0. 902053 1. 194316 1. 411884 0. 966624  
1. 3348 1. 993751 1. 656443 2. 272732 1. 021247 2. 078838 1. 995028 2. 391136 0. 509396  
1. 739679 2. 051705 1. 417267 1. 602784 1. 289258 1. 307641 1. 39762 2. 22091 1. 93329  
3. 827513 1. 153194 3. 222734 1. 182333 0. 552968 1. 022147 1. 096766 0. 653064 1. 354869  
1. 759685 3. 129431 1. 946451 2. 887286 1. 071365 1. 159346 1. 331616 1. 451969 1. 045728  
4. 910007 4. 167424 4. 653836 4. 175231 5. 154382 4. 397426 4. 985419 4. 590125 4. 72337  
0. 580394 1. 06354 1. 122875 1. 450946 0. 508758 1. 225008 0. 983176 1. 137982 1. 172917  
1. 447689 3. 926744 2. 72126 3. 049622 3. 142298 3. 147707 1. 660487 0. 977967 4. 748985  
0. 929256 1. 439243 1. 254955 1. 238194 1. 514303 1. 643217 1. 314673 0. 992334 0. 927815  
0. 647383 0. 892247 0. 448949 1. 113869 2. 511717 2. 26808 0. 467946 0. 202119 0. 502319  
1. 473099 1. 297194 0. 718558 0. 983739 0. 674532 1. 194272 0. 884337 0. 877695 1. 14886  
0. 658489 1. 388715 0. 670646 0. 416239 3. 400448 0. 810174 0. 848282 1. 113195 0. 810174  
2. 875996 3. 558539 4. 360613 3. 993918 3. 689977 3. 524812 2. 937006 3. 469527 4. 028715  
1. 034187 1. 462019 0. 895704 1. 692877 1. 07961 0. 984524 0. 922116 1. 638439 0. 928048  
3. 467917 2. 234986 3. 029019 2. 725164 4. 253471 1. 585271 2. 94993 3. 264853 2. 585445  
1. 128429 0. 948702 1. 148476 1. 129693 0. 952581 1. 675687 1. 203871 1. 659057 1. 094295  
1. 637421 4. 083165 4. 282635 1. 82404 2. 538419 1. 471801 3. 494904 2. 814309 2. 113787  
1. 300864 4. 182161 0. 955234 1. 36146 1. 245762 1. 827864 1. 594321 1. 312402 1. 560422  
0. 86606 1. 224834 1. 431298 1. 020478 1. 042442 1. 157967 1. 050477 1. 100216 1. 177937  
1. 925082 0. 984946 1. 701759 1. 331994 1. 401488 1. 288231 3. 86956 2. 08662 2. 615893  
4. 129992 1. 898626 3. 61468 2. 689574 3. 687208 2. 112619 5. 654632 6. 219596 4. 588732  
1. 916807 1. 909019 1. 744088 2. 013669 1. 834746 1. 40131 1. 568545 1. 797831 2. 4788  
2. 336921 2. 292238 2. 36658 2. 341519 2. 282578 2. 93439 2. 099669 2. 053064 2. 614537  
2. 145795 1. 802471 2. 906297 1. 117811 2. 156538 1. 890066 1. 549716 1. 187818 1. 971509  
1. 609734 1. 325207 1. 090301 3. 006459 1. 421143 1. 021992 0. 783621 3. 117879 0. 364176  
2. 797443 4. 667449 3. 714372 6. 007178 5. 224154 3. 513158 5. 896556 4. 935528 4. 873792  
0. 938945 1. 577077 1. 810762 3. 18824 2. 953018 2. 65462 1. 862209 1. 681114 1. 786884  
3. 231663 4. 547472 3. 228192 1. 09952 4. 614196 0. 945455 1. 643425 1. 001508 2. 70864  
1. 145541 1. 82824 0. 793605 2. 593777 1. 991567 1. 395106 2. 669922 2. 620807 1. 722699  
4. 022764 4. 309734 5. 073724 6. 202296 6. 682015 4. 363845 3. 586506 4. 792202 3. 593152  
1. 904507 3. 221862 1. 448318 5. 909164 2. 006662 2. 929812 6. 33938 1. 915404 3. 209986  
2. 300148 2. 625991 2. 02015 3. 044868 3. 140112 2. 561279 3. 107559 2. 408098 2. 287374  
0. 884964 1. 350664 1. 000569 1. 412206 1. 13224 0. 42136 1. 072852 1. 528016 1. 040675  
1. 549473 1. 622174 2. 910279 1. 348182 1. 484207 1. 454684 1. 285365 1. 969941 2. 856956  
2. 078782 1. 570944 1. 860813 2. 684743 1. 661153 1. 907008 1. 948839 1. 945386 2. 659508  
9. 83738 9. 593242 10. 158 9. 912229 10. 21732 10. 08243 10. 16033 10. 14365 10. 02963  
6. 59831 4. 587411 4. 721394 3. 326983 4. 804238 4. 417708 4. 160099 4. 233235 5. 845172  
7. 427507 7. 14696 6. 487169 6. 739761 7. 198122 7. 776737 7. 493665 7. 118352 7. 151533  
1. 589803 3. 092024 2. 994852 1. 857324 1. 68203 1. 251192 2. 182924 2. 587536 3. 066995  
1. 53315 1. 457929 1. 480875 2. 300707 1. 578487 2. 137201 1. 657351 1. 572004 1. 374267  
0. 911611 1. 150119 1. 049256 1. 182908 1. 132439 1. 468132 1. 430705 1. 108196 1. 09724  
2. 945848 2. 867978 2. 559704 3. 493208 3. 28591 4. 269847 2. 58132 2. 227478 2. 77881  
4. 61424 5. 139638 3. 440799 6. 895012 3. 401296 4. 06414 3. 502022 3. 704023 3. 885575  
1. 165985 1. 180912 0. 889965 1. 230576 2. 631957 0. 748296 1. 418667 1. 099861 0. 745774  
2. 696283 3. 583465 0. 583748 3. 995028 1. 345279 1. 07723 1. 073988 1. 121548 0. 915918  
1. 180134 1. 691382 1. 462146 1. 690611 1. 159325 1. 449911 1. 420893 1. 38636 1. 486261  
2. 424839 1. 717954 2. 080164 2. 51081 2. 392461 3. 803261 2. 079197 2. 418506 1. 829826  
2. 786997 2. 968466 3. 199293 2. 831631 2. 94767 3. 128567 2. 299572 3. 178886 2. 947613  
3. 636581 0. 896741 2. 10645 2. 712498 1. 083066 0. 744065 1. 334119 1. 457644 2. 406942  
4. 644871 5. 274067 4. 571886 3. 795094 4. 0127 3. 995646 5. 402882 6. 138646 5. 513594

0.76331 2.714079 1.980168 2.180981 2.110873 1.006643 1.613526 1.21558 1.642616  
1.002043 1.02475 1.073607 1.489939 1.094876 0.923872 1.316178 1.690046 1.546152  
4.744868 1.784988 3.007026 1.713446 1.998531 1.429566 1.481885 2.225736 1.318329  
1.12795 0.96865 0.890238 1.157783 0.84583 0.90448 0.838728 1.113338 0.705593  
0.902468 1.132891 1.237766 1.242635 1.88854 0.99479 1.978542 1.468429 1.549846  
1.534047 1.148328 1.093865 1.052587 2.276804 0.790528 1.228787 3.427907 1.576379  
2.541373 5.794638 0.63077 4.693689 2.262738 0.979207 1.487775 1.720766 1.338982  
1.743824 1.967908 2.558699 1.690411 2.617016 2.530267 0.9118 1.675256 1.971568  
1.738905 0.858711 0.792817 0.984029 0.856615 1.107235 1.326988 1.42619 0.536568  
1.300371 2.493441 0.733463 1.128481 1.25852 1.549167 1.628707 2.821571 2.485015  
1.059457 1.443193 2.363809 1.469524 1.260629 1.497884 1.138684 1.275551 1.390585  
1.199217 2.76087 0.937983 0.908676 0.776103 1.936741 1.221757 1.030033 1.236938  
1.170634 0.877189 0.792794 0.717718 0.574119 1.005198 0.520806 0.849011 0.4486  
1.461679 2.192613 2.483209 1.877656 1.987386 2.516409 2.410579 2.326836 2.44637  
3.329198 3.594952 1.971039 3.468199 2.255808 1.709029 2.783106 2.671576 3.623383  
0.849482 1.370268 1.43212 2.439391 0.778726 1.443114 0.53454 0.949938 1.17759  
1.421527 1.099743 1.968408 0.883817 0.880404 1.721037 0.926171 1.514948 1.095186  
2.317168 1.21529 1.743042 1.657175 4.138446 1.634859 1.963545 2.29208 1.76047  
1.406781 1.261304 1.439619 3.142335 1.172044 1.932504 1.175495 2.135107 1.143767  
4.134553 4.598026 4.01959 2.787965 3.400431 6.406143 3.196631 3.94975 4.352402  
2.679439 2.833433 3.793111 3.861615 2.740567 2.927078 2.964284 3.350613 2.327359  
2.747671 7.724971 6.170045 3.640654 1.377145 1.690627 1.327176 5.032459 3.4675  
1.198157 2.105377 1.222733 2.481565 0.841972 2.917688 1.686325 1.740236 1.861175  
2.903303 1.158918 0.798358 3.291574 2.195276 1.12938 1.977797 1.354436 2.296249  
1.139785 1.307589 1.492761 1.0853 1.430881 1.715303 2.129058 2.275321 1.127664  
1.052262 2.659131 0.889742 2.496386 1.293181 1.080382 0.979136 1.651593 2.014186  
2.62903 3.812445 5.808384 3.239537 3.192022 2.577637 2.744296 2.951823 1.084587  
4.443076 2.997688 1.016127 2.315251 0.69841 1.602071 1.050902 1.294023 1.144464  
2.811842 2.511248 3.496348 2.943903 1.16898 1.685103 1.197425 1.36209 1.276633  
3.316613 2.526874 1.79247 3.716809 1.927256 2.745173 2.876936 2.757163 2.441158  
1.832345 2.164697 1.92566 2.171116 1.412184 1.366313 1.129807 1.760786 2.32699  
1.009862 1.765038 3.156436 2.417166 1.145303 1.593482 2.115539 2.699149 1.274229  
1.187016 0.890825 4.426567 2.494812 3.834112 2.027395 2.051323 1.596091 0.905705  
0.719121 1.58036 0.635384 1.469399 3.546828 2.453729 3.750934 1.989047 1.616858  
1.943157 1.974513 2.072326 2.175456 1.428642 1.19726 1.799607 1.224146 2.398842  
2.566692 1.159925 1.849862 1.03953 0.919234 1.426698 1.479431 1.919814 1.578144  
3.119731 1.031375 0.891493 1.217268 1.153491 2.806184 1.255708 1.71715 1.190452  
0.672256 1.79966 1.857961 1.693403 1.492321 1.743193 1.205808 1.696669 1.783216  
3.436564 1.322206 1.409469 3.140164 1.513853 1.617394 1.993219 1.598385 2.299819  
3.0964 2.220249 3.460246 4.928086 4.397392 2.738539 3.964454 3.39015 3.080257  
1.984772 0.720773 0.701794 1.053498 0.859271 1.265301 1.41019 1.331874 1.865439  
2.964651 3.451138 3.484516 4.288428 5.693667 3.794063 4.120848 2.814347 5.154524  
5.399092 5.835683 5.986861 4.404071 6.54309 5.337938 6.452612 6.378454 5.949974  
0.871986 0.896271 1.084368 1.67407 1.412549 1.491008 0.905644 1.29065 1.706181  
1.233756 1.541507 1.205465 1.167995 1.463698 1.727116 1.295107 1.40929 1.464334  
1.593907 2.924904 1.140149 0.964097 0.508743 0.96461 2.359227 1.539056 1.259062  
4.289193 4.379252 3.138975 3.509638 3.59288 3.679338 3.622494 4.084296 4.161133  
1.886225 2.820391 1.159603 1.912858 2.503571 1.349968 1.642166 1.941878 1.568193  
1.820005 2.362633 1.764079 1.128885 1.845499 1.941803 1.297125 2.030452 1.869976  
1.827735 2.757261 3.230596 2.263146 2.680927 2.849993 2.391435 2.878327 3.288412  
2.164426 1.925284 1.453789 3.011134 5.071833 3.933745 2.075021 2.970529 3.127955



1. 791133 4. 221077 4. 977617 3. 433218 4. 604296 0. 633892 1. 199733 0. 938585 1. 111808  
0. 848813 1. 71374 0. 747012 1. 408592 0. 668425 1. 837326 1. 499045 2. 053171 2. 471644  
6. 720921 2. 339353 6. 447744 0. 748293 6. 029571 1. 366459 3. 52403 6. 103965 2. 705407  
1. 475401 1. 443955 1. 714777 1. 302737 0. 947605 1. 604528 1. 157054 1. 94268 1. 269135  
1. 216535 1. 516512 0. 69499 1. 436823 3. 977273 1. 450951 1. 224571 0. 881928 1. 371997  
4. 773509 3. 706421 5. 614897 5. 32932 3. 373666 5. 032531 4. 358249 4. 936698 4. 580952  
2. 184098 3. 18995 1. 873973 2. 852505 2. 780384 2. 608921 3. 078942 1. 981567 1. 762035  
0. 576115 1. 940799 0. 685454 1. 762607 1. 711823 1. 506365 2. 15687 1. 924831 0. 714298  
1. 475794 1. 134085 0. 832285 1. 159931 1. 221497 1. 197586 1. 638834 0. 758262 1. 541221  
1. 461592 2. 117413 0. 832564 1. 34006 1. 405195 1. 197099 1. 293752 1. 832732 1. 126144  
1. 689874 1. 304915 1. 082216 2. 285338 1. 200412 1. 206246 1. 825474 1. 522721 2. 417358  
1. 564234 1. 888527 1. 537309 2. 224852 1. 444963 2. 204328 2. 188968 3. 129972 2. 909997  
0. 589165 0. 60448 0. 932984 1. 254824 1. 39959 1. 282769 2. 727151 0. 818183 0. 569754  
2. 67774 2. 325028 1. 999043 3. 016738 2. 988226 2. 499197 1. 983023 2. 949832 3. 493907  
0. 622411 1. 395792 1. 059091 1. 06956 2. 653351 1. 355859 2. 950508 0. 894942 1. 191781  
2. 452521 2. 629059 1. 036643 1. 512648 1. 846859 1. 463294 1. 72415 2. 090301 2. 865842  
2. 271227 3. 090514 1. 363965 1. 391742 2. 149887 2. 654646 3. 466809 1. 948623 2. 188128  
3. 897842 6. 12433 2. 341718 6. 545886 5. 927114 2. 269679 5. 209293 3. 009979 3. 142319  
2. 085151 2. 122799 1. 658834 1. 875495 3. 211706 1. 332054 2. 956321 1. 641372 1. 62986  
2. 113329 1. 285078 1. 549175 0. 88316 2. 203468 1. 358403 1. 426092 1. 641332 1. 079696  
2. 388454 3. 329761 2. 789866 4. 022559 2. 558113 2. 507508 2. 414755 1. 314063 1. 100348  
1. 342233 2. 085848 0. 72627 3. 401387 0. 956776 1. 369125 1. 641613 2. 703613 0. 875447  
2. 026979 2. 112696 2. 454662 1. 590525 2. 07427 1. 63284 1. 332559 1. 609672 1. 794202  
2. 983428 4. 301591 3. 108114 3. 789325 4. 844205 1. 350393 3. 993629 3. 295758 4. 688422  
1. 81072 1. 368983 1. 229321 3. 030397 2. 370984 2. 040553 1. 258301 2. 833371 2. 543999  
1. 641182 1. 16824 1. 722013 1. 749318 0. 977152 1. 484591 1. 480035 1. 074394 1. 323281  
3. 853597 3. 359999 3. 733205 3. 412489 2. 727647 4. 216311 2. 437626 2. 48901 3. 953946  
1. 823459 0. 592914 1. 589426 1. 202958 0. 90275 0. 834384 1. 761026 0. 745242 1. 819449  
1. 685934 2. 870239 2. 082171 2. 233192 3. 400219 3. 381859 3. 231432 1. 990102 1. 595002  
1. 968279 1. 60857 1. 126911 2. 619184 2. 366532 1. 283253 1. 141956 1. 372135 1. 893435  
4. 865062 4. 432818 4. 293657 3. 814613 4. 610205 3. 613427 4. 055197 5. 078371 4. 244951  
1. 139748 1. 519118 1. 57759 3. 06719 1. 676213 2. 047612 2. 660631 3. 148098 1. 70018  
1. 320639 1. 683135 1. 261734 2. 281768 2. 433692 1. 235624 1. 652097 1. 422816 1. 978225  
1. 302023 1. 384398 1. 55815 0. 806241 2. 696145 1. 11994 1. 360837 1. 435643 1. 34477  
3. 998505 3. 847431 5. 296388 4. 970479 6. 326607 3. 214912 5. 56522 4. 175463 4. 409157  
1. 030226 1. 554733 0. 974422 1. 215749 0. 885351 0. 975806 1. 093595 1. 161946 1. 149321  
1. 254653 1. 862114 3. 036909 1. 880933 2. 896686 2. 197791 2. 504144 3. 036501 3. 999302  
1. 589417 1. 837754 2. 146011 2. 328603 2. 508534 1. 799654 1. 862307 1. 447165 2. 537476  
0. 953699 0. 882194 1. 29392 1. 906753 1. 961141 0. 898411 0. 901999 3. 387108 1. 144646  
3. 186396 3. 156767 2. 130144 2. 491912 2. 680631 2. 57133 2. 254596 2. 767748 2. 348264  
1. 984463 1. 216397 1. 048394 0. 748525 1. 032151 1. 374876 0. 813807 0. 9904 0. 822013  
2. 28899 1. 805042 1. 918076 2. 100834 2. 122871 2. 126676 1. 888681 2. 327328 2. 01263  
2. 025956 1. 265253 1. 814309 1. 995802 1. 954183 1. 510085 1. 527269 2. 354926 2. 048948  
2. 115134 2. 311905 1. 961169 1. 849019 1. 92352 1. 189136 1. 373968 2. 023821 2. 493328  
1. 92787 3. 065557 1. 88826 2. 190457 2. 535202 2. 465079 2. 557405 2. 723188 2. 131552  
1. 338615 2. 679825 1. 548434 1. 726455 1. 346332 1. 480106 1. 459959 1. 375438 1. 529695  
3. 56176 2. 592484 1. 991499 1. 655783 2. 323481 3. 811027 0. 99104 1. 564117 2. 051803  
2. 130334 2. 742711 2. 396075 3. 928284 3. 335436 3. 633882 2. 847319 3. 152489 2. 58299  
5. 423651 1. 928027 2. 350845 4. 569286 2. 04136 2. 533403 1. 729538 4. 471595 1. 519308  
3. 194732 2. 231122 2. 447731 1. 473275 2. 111669 2. 357413 1. 445374 1. 487053 1. 531658  
1. 10931 0. 559479 0. 823564 1. 291552 2. 441308 2. 69218 2. 720513 1. 148994 4. 822081

2.842575 2.878935 3.343328 3.089311 3.542556 1.14009 2.147999 3.973426 2.892148  
1.106572 2.11413 1.299489 0.956018 1.18512 1.4115 1.257228 0.766344 3.835708  
3.627817 3.267783 3.38939 2.715043 5.465726 4.441215 4.070643 4.23359 3.799911  
1.254341 1.065823 1.743542 1.053364 1.148364 1.429411 1.127003 1.320111 1.110154  
2.842267 3.571871 4.636788 3.418911 2.60171 2.345232 2.430416 1.714766 2.069349  
1.386409 1.432434 1.513929 1.55288 1.616492 1.468019 2.498353 1.7189 1.98717  
1.515618 1.315256 1.582455 1.539133 1.818134 1.734592 1.786489 1.323422 1.732616  
5.265924 2.230846 3.209449 2.155203 6.192363 5.185921 0.777059 1.047259 2.359394  
1.337527 2.029328 1.930285 1.399771 1.980289 1.793962 1.078313 1.91123 2.6103  
6.555609 5.27192 5.192296 5.667601 7.122218 4.760839 4.172247 6.68568 4.909209  
1.786714 2.79809 1.764083 1.936665 1.073216 1.486297 2.214342 1.18084 1.816474  
3.068934 2.623633 2.799802 3.430326 2.925721 2.122742 1.442499 2.117651 1.740273  
4.681663 4.592651 4.039395 4.511046 4.873475 5.117029 3.014286 5.546328 4.043256  
1.991598 1.882004 1.729334 1.874615 2.362492 2.0379 1.762576 1.896632 2.089321  
1.667033 3.667401 2.852016 2.953662 2.90791 2.894792 1.83843 3.332641 2.93006  
1.823064 1.903953 2.131027 1.387507 1.857908 2.075582 2.015333 2.102105 1.74405  
1.198553 1.070637 2.350093 2.491501 3.657066 1.22484 1.594356 1.107427 1.273526  
2.134613 1.064096 1.532851 2.054685 1.419764 1.433286 1.366291 1.306741 1.435231  
1.200136 1.06272 1.087377 1.10479 1.242343 0.807046 1.184519 1.960593 0.951926  
1.932981 2.978509 3.168061 3.726668 4.82039 2.349672 2.322505 2.458355 2.778163  
2.554713 7.010672 4.407811 3.499227 3.191465 2.380146 3.350922 3.25971 2.053298  
2.123738 2.369093 2.178981 2.532627 2.613294 2.246034 2.064786 2.271309 2.737464  
3.051273 1.425302 2.692106 3.365721 3.073492 2.475169 3.054779 3.581209 1.748366  
3.24211 2.701631 1.722004 2.735345 2.750114 4.622001 2.513116 2.646649 4.568085  
1.517451 1.246668 2.015946 2.199406 1.957758 2.341847 1.562775 1.659246 1.907205  
1.542745 1.644846 0.66391 2.303455 1.26921 1.821542 2.310766 1.366518 1.872059  
2.770378 1.439905 2.662773 0.976234 2.273448 1.219639 0.594445 0.911999 1.220122  
1.005283 1.921476 0.980795 0.637132 1.16195 1.601788 2.256113 2.287129 2.440986  
1.993767 1.400778 1.690449 1.926959 2.339445 1.511982 1.171736 1.092503 1.210672  
0.8401 0.569622 0.797066 4.439242 1.15391 0.431247 0.471752 0.666255 1.731282  
2.151572 2.730324 1.469328 1.887476 0.709003 1.097086 1.012361 1.106421 1.159322  
1.527175 1.230439 1.101114 1.372555 1.00281 1.277775 2.262674 1.791711 1.691744  
1.362934 1.374775 2.035143 1.651594 1.108408 2.320015 1.720338 1.88766 1.875017  
1.548636 1.101708 0.879545 1.32365 1.200996 1.15101 1.006947 1.028269 1.061881  
2.030217 1.921105 2.81536 2.96821 1.849568 2.158083 1.982061 1.535803 1.853495  
2.208455 3.257742 2.086485 2.178437 1.967895 2.847767 3.927226 1.232125 2.085423  
5.27871 5.485056 5.064566 3.17027 4.666513 1.593197 4.443024 1.7133 2.871802  
2.854816 3.160264 3.317417 3.350251 2.75557 2.804208 4.454952 2.655697 5.56623  
1.143734 1.619732 0.923727 1.599359 0.966086 0.716084 0.923693 2.060629 1.121419  
1.267974 1.8601 1.039419 1.079015 1.330525 2.051917 0.891256 0.878176 0.820859  
1.161823 1.437538 2.475358 1.552245 1.894348 2.688059 1.126144 2.053831 2.058306  
2.319176 3.392639 2.527625 3.193569 2.416776 2.767628 2.711016 2.402249 3.75478  
4.678999 5.192644 4.439864 5.705428 4.665971 5.398406 5.587081 5.613851 5.541881  
4.131682 3.463579 5.458009 2.923771 2.454293 1.74204 1.685891 1.800511 1.127452  
0.87592 1.052954 1.195295 1.866789 1.443183 2.230508 1.245335 2.190329 3.628056  
1.392056 1.792017 1.62268 1.889898 1.832406 2.541861 1.80852 1.236626 2.034384  
0.929236 1.14753 1.091369 2.000134 3.281349 1.271013 1.405647 1.468791 1.919084  
1.684171 0.911888 1.839966 2.545051 1.196107 1.228971 0.993895 1.211084 2.008662  
1.414352 1.873865 2.134166 1.433085 2.765765 3.18074 1.508269 0.846113 1.604582  
3.36776 1.050316 4.767486 4.004124 3.517514 2.299491 2.728257 1.824443 1.641588  
1.068833 0.790052 0.996767 1.214025 1.107968 0.836703 0.97969 1.070707 0.910139

0.525006 2.079519 0.606684 1.279828 0.293927 0.874454 0.65735 0.827807 0.740006  
1.493054 1.50895 1.621086 2.040609 2.156084 1.443767 1.478549 2.735012 1.883368  
2.170966 1.569196 2.65914 1.599101 2.074244 1.34959 1.407888 2.050872 1.36348  
2.362879 3.543806 3.405345 2.757131 2.822243 2.872771 2.791925 2.863295 2.956712  
0.987819 2.269526 0.987232 1.138512 2.68657 0.940652 1.009655 1.504664 0.960388  
2.018578 2.759341 1.946546 1.237881 1.598111 2.495739 1.696547 2.219787 2.771944  
4.411172 4.811767 3.921376 3.373722 4.731126 4.948366 4.430799 3.381533 3.179642  
1.247217 1.503667 2.486865 1.99308 2.501955 1.298651 1.254643 1.458457 1.747235  
0.711632 0.599117 1.268394 0.841377 0.487728 0.640349 1.718284 1.834638 1.60856  
1.378626 2.381321 3.331705 4.0789 0.332033 1.243873 1.189732 2.843202 0.440145  
1.011694 0.972078 1.163594 1.335555 0.8883 1.009804 0.866318 1.055472 1.173778  
1.075597 1.157207 0.727504 1.814864 1.03802 1.018349 1.608852 1.285335 0.822392  
2.034531 2.475955 2.727301 1.469162 1.88542 3.826399 1.358075 1.428742 1.666882  
1.72217 1.162426 0.856137 2.686182 0.613703 0.981795 1.918021 1.238929 1.414051  
2.495115 4.573105 3.116004 1.966198 2.582832 2.281426 3.781814 1.582754 2.370688  
1.20531 2.428716 2.070996 3.858922 3.550131 4.426212 2.083086 4.295697 2.790103  
2.342799 2.226933 2.799994 2.268386 2.070441 2.188569 2.129188 2.193263 2.522406  
3.337144 2.402478 2.621088 3.806979 3.240052 3.199817 3.800069 4.739937 3.309766  
0.304605 1.48091 1.146183 4.914469 0.914375 3.852189 1.897179 0.320921 1.116744  
1.180362 1.415761 0.906261 1.200224 1.30587 1.313017 1.155246 1.134526 0.985134  
2.162133 3.514086 3.559015 1.716676 2.281187 1.706625 2.560852 1.206448 1.257113  
1.21874 1.487001 0.80668 1.229595 0.817255 0.628195 1.165046 0.958675 0.874489  
2.430679 2.69689 3.356114 4.443888 2.192919 2.371447 2.937523 3.499703 2.133245  
0.598179 0.608978 0.709312 1.102047 0.654185 0.333774 1.43599 0.748888 0.980412  
2.878506 0.747405 0.605491 0.824433 0.802672 0.56603 1.942543 1.015676 1.573875  
2.566029 2.858285 2.997803 3.05305 3.782574 3.735442 2.984899 2.782229 2.569793  
1.984405 2.192191 3.513615 1.912714 2.998376 1.452829 0.869711 1.047471 1.64248  
1.242113 1.101581 1.573121 1.688789 1.955848 1.373213 1.061395 1.775494 1.086703  
3.75237 3.857345 3.948245 3.717627 3.813117 4.072546 3.6079 4.003898 3.562852  
1.620002 2.321672 1.802186 1.261375 1.152036 1.973206 1.628504 0.843491 1.226945  
1.316602 1.917562 2.759907 1.447514 2.759255 2.524247 1.779508 2.380572 2.225995  
2.085653 0.702139 1.155586 0.885506 0.759751 1.611142 2.298968 1.10494 1.226434  
0.996024 1.204193 1.133845 1.00673 0.852065 1.298973 1.159694 1.001159 0.720241  
4.319511 4.973739 4.685783 2.694925 5.756135 2.44121 3.365922 3.196639 3.62267  
1.319783 1.460951 0.53495 0.951585 1.370221 1.023369 1.079944 1.232127 3.136659  
3.729576 3.592736 1.215827 2.422523 1.392575 1.94051 1.034234 0.655442 1.11748  
1.049989 1.628399 2.256589 2.021792 3.383947 1.77408 1.206812 1.651337 2.218938  
1.938993 1.672552 1.610437 1.462264 1.642638 1.691827 1.658016 2.00175 1.3277  
1.751172 0.965687 1.397641 1.368926 1.1652 1.775552 1.573183 1.657909 1.165723  
1.921348 0.927147 1.52818 1.810736 1.756204 1.758679 1.438798 1.84664 1.272211  
1.363415 1.053614 2.091106 2.369307 1.778982 1.352513 1.209731 1.377561 3.273618  
1.235417 0.573105 0.905839 0.905839 0.546746 0.620833 1.030603 0.794761 1.002917  
3.413275 6.258716 3.636794 2.403376 3.394571 3.86968 3.063138 2.77755 3.131022  
2.222846 2.090663 2.026579 2.341058 2.999576 3.226685 1.157123 1.063502 1.670345  
1.354138 1.916829 0.965485 1.157638 1.212183 1.989156 1.092686 1.424606 1.199272  
1.119075 1.1409 1.314421 1.179917 1.308101 1.68605 1.713156 1.014564 1.775321  
3.506578 3.309073 2.540712 1.922559 4.111973 1.528433 2.69319 2.015956 1.296969  
0.920407 0.961674 1.0526 0.849916 0.650739 1.013532 1.291629 1.051159 1.140158  
1.557007 1.006637 1.758737 1.62597 1.37852 1.501061 1.610508 1.733449 1.640277  
1.86427 1.483515 1.155264 3.145874 1.408428 1.342765 1.301945 1.565872 1.290722  
3.35504 3.306936 2.538573 3.069938 3.682986 2.768414 2.491061 3.454327 2.40871

2. 25392 2. 126289 2. 231018 3. 395582 2. 095384 1. 739237 2. 26595 1. 937452 2. 255815  
3. 608878 3. 876581 3. 458775 4. 517898 2. 831205 3. 021223 0. 765432 2. 326407 1. 896638  
0. 652891 1. 578598 1. 511732 0. 652891 0. 519972 1. 007973 1. 507437 0. 77332 2. 106411  
1. 343286 2. 005321 2. 078009 2. 047422 0. 991163 1. 872575 1. 490963 1. 472294 1. 357729  
1. 883303 0. 867 2. 791766 1. 391521 2. 445143 1. 606653 1. 610315 0. 984965 2. 009761  
1. 398086 1. 91622 1. 922345 1. 797371 1. 894365 1. 795081 1. 486586 1. 923406 2. 232995  
0. 807876 1. 733839 1. 171547 1. 173603 0. 956489 0. 841717 1. 551297 1. 431092 1. 989134  
1. 208165 3. 268172 1. 595304 1. 12716 1. 245349 1. 151842 1. 393704 1. 361124 1. 202946  
2. 177736 2. 111193 3. 316138 1. 074474 1. 685502 1. 280858 1. 138058 1. 239147 2. 036446  
2. 939431 3. 363056 4. 631533 3. 210011 3. 157703 2. 688959 3. 371507 3. 177785 2. 61464  
3. 004485 4. 933891 4. 321241 4. 331835 4. 029018 2. 886283 4. 608248 2. 972333 2. 434869  
1. 405039 2. 362247 1. 337908 3. 86775 0. 961705 3. 216311 1. 545716 0. 875237 1. 612871  
0. 926758 1. 42582 0. 633508 3. 443696 0. 556386 1. 560807 0. 695118 2. 372096 1. 981663  
4. 553581 4. 31092 4. 427891 1. 20761 3. 367415 3. 48364 5. 955583 1. 484177 1. 304263  
3. 864856 3. 220099 4. 526239 2. 83405 1. 764546 2. 034881 2. 033353 1. 497545 3. 100303  
1. 471631 1. 941699 2. 834872 3. 84139 3. 04461 2. 62679 3. 911183 3. 396205 1. 492989  
0. 721876 0. 93335 0. 718988 1. 063887 0. 624648 0. 626612 0. 813268 1. 2458 0. 698541  
2. 330799 1. 521343 1. 788689 1. 434724 2. 325659 0. 939062 1. 531559 0. 669766 1. 168824  
1. 877479 2. 426844 1. 919796 1. 07527 1. 565588 1. 803775 3. 566006 2. 307242 3. 626678  
1. 025259 0. 772729 0. 981897 1. 143042 0. 770741 0. 737006 1. 358873 1. 071555 1. 466957  
1. 580411 1. 259022 0. 844896 1. 135075 0. 811715 1. 907901 1. 089136 2. 134907 0. 872686  
1. 225347 1. 397118 0. 998242 1. 0803 0. 846902 0. 730467 1. 413079 1. 326236 1. 335886  
1. 060467 0. 677634 1. 046696 1. 036711 1. 045532 1. 142193 1. 395917 1. 006764 1. 185837  
1. 849803 1. 6926 2. 452779 2. 290959 1. 971285 1. 614732 2. 99276 1. 576709 2. 525601  
1. 677921 1. 716346 1. 412703 1. 252538 0. 877098 1. 325824 1. 404854 2. 457646 1. 234899  
2. 566235 2. 365454 3. 272215 3. 196936 3. 65939 3. 375548 2. 535181 3. 207513 2. 710822  
3. 969993 4. 225015 1. 260336 4. 785299 1. 970375 3. 94493 4. 198947 4. 790583 6. 029303  
0. 885328 1. 229435 1. 291829 1. 192604 0. 587176 2. 382555 1. 48325 0. 811183 0. 213934  
1. 236992 1. 803033 2. 438666 3. 090302 2. 324459 2. 665605 2. 663839 1. 347832 1. 52813  
3. 192623 4. 109535 2. 169712 2. 87371 2. 28806 2. 486467 2. 900706 2. 721485 2. 315332  
2. 29828 4. 364707 2. 679906 4. 351708 3. 38565 2. 340524 2. 231411 2. 935262 3. 295093  
3. 292319 2. 003806 1. 799405 1. 560154 1. 148581 1. 162486 0. 896288 3. 284706 2. 570934  
6. 894549 6. 246433 6. 304005 6. 066518 7. 530398 6. 763945 6. 641678 7. 077673 6. 699956  
1. 450401 1. 140643 2. 341567 2. 483309 0. 749302 1. 731821 1. 513853 1. 177105 1. 12347  
1. 483818 1. 312866 2. 15716 1. 52136 0. 78128 3. 783574 1. 317578 0. 99372 0. 513336  
1. 132715 0. 859407 1. 001383 1. 036949 1. 339264 0. 713335 1. 368434 1. 103571 1. 369016  
0. 680821 1. 169456 3. 89523 1. 389055 1. 046754 1. 122611 1. 657658 0. 882232 0. 770616  
2. 720206 2. 236093 3. 09502 2. 624472 2. 387062 2. 313941 1. 553657 1. 857241 2. 159517  
1. 378513 1. 56272 1. 39158 2. 726593 1. 196622 2. 438048 1. 620449 1. 283882 2. 004801  
1. 858672 0. 717237 0. 947897 1. 293063 0. 673176 1. 590326 1. 83404 2. 130879 0. 857176  
1. 623735 2. 249427 5. 712041 1. 504845 2. 772975 0. 464923 3. 81435 2. 241187 1. 291921  
1. 706996 1. 385854 1. 281513 1. 562535 1. 303344 1. 663823 1. 451486 1. 022564 1. 468146  
2. 28587 2. 053561 2. 066466 3. 956176 2. 214876 1. 959592 3. 299929 1. 43187 2. 280287  
1. 335264 1. 425888 2. 50154 2. 201733 1. 892568 1. 62174 1. 427041 1. 816616 2. 263201  
1. 767519 1. 473861 1. 772113 3. 064194 1. 551721 2. 036048 1. 956973 1. 664809 1. 514855  
2. 379986 1. 104379 1. 188931 0. 763673 1. 142885 3. 38739 0. 965874 2. 043058 1. 014289  
2. 316283 1. 834187 1. 900509 2. 903466 1. 881666 2. 434945 2. 384758 3. 130441 1. 780208  
0. 632564 1. 506329 1. 447788 2. 17159 1. 535601 1. 458197 2. 818586 2. 282566 1. 050119  
3. 854952 2. 917361 1. 862434 2. 594333 1. 819031 3. 699984 3. 350017 3. 63505 1. 537369  
3. 296717 2. 468009 1. 359084 1. 180913 1. 174006 1. 481364 1. 056631 1. 781472 0. 711459  
1. 097701 1. 453537 1. 255075 1. 07563 1. 059457 1. 089056 1. 048673 1. 589927 1. 59022

0.85155 1.415794 1.140971 1.33954 1.441299 1.220835 1.42953 1.183034 1.02402  
2.475336 1.555732 1.851291 1.77813 2.972987 0.915464 1.806034 1.372281 2.035926  
1.741439 1.972955 1.848116 2.587041 1.535515 4.017012 1.84145 2.400761 1.142987  
1.123437 0.877771 1.832295 3.230126 2.211048 1.665174 0.952149 2.531999 2.054798  
3.032464 1.983129 1.760073 1.525442 1.795136 2.245327 1.813138 2.233793 2.254623  
2.2668 0.983631 1.104081 1.014337 0.788695 1.251405 1.192758 1.074742 2.205124  
1.86213 1.682601 1.648037 2.984352 2.391901 1.588246 2.33149 1.799915 2.154245  
2.307689 1.808669 1.515396 1.789391 3.856187 2.204295 1.426374 3.224877 3.361349  
4.505387 2.930188 3.942946 5.165657 4.318445 4.630382 3.201357 5.979324 4.28938  
1.963212 1.203513 1.692788 2.504163 1.885945 2.316351 2.767821 2.794794 2.101198  
1.522079 1.491138 1.410166 2.343322 1.722404 1.518849 1.770658 2.074911 2.448289  
1.484829 1.714943 2.178071 2.729047 1.576703 1.512855 1.523386 2.15589 1.377316  
4.604113 3.053412 4.220187 5.074242 3.697284 6.639297 3.966098 4.293582 4.047797  
6.683656 6.279335 6.982538 6.456381 6.790474 6.711209 6.945436 7.328787 7.513041  
5.080747 5.374633 5.138005 5.333508 6.085845 4.786671 4.764707 4.630625 5.451259  
7.523805 7.208433 6.933164 6.967423 7.520009 6.544604 7.106347 7.713838 7.565075  
5.847624 7.024457 6.625683 6.597864 6.724336 6.860532 6.518881 6.767399 6.884221  
3.076573 2.24634 3.4895 3.446471 2.861372 2.838317 2.472683 2.935605 2.912895  
1.544681 2.186786 2.264681 1.125983 2.352362 1.532767 1.743046 1.431687 1.937666  
8.75592 9.086821 9.266143 9.248016 9.299765 8.254579 9.273311 9.050036 8.913742  
4.721236 4.159546 4.816133 5.751134 5.496859 5.544865 5.226756 5.628682 5.760753  
2.980151 2.579424 2.931255 2.365545 1.973102 2.689311 2.114903 2.583237 2.423011  
2.155314 2.578124 1.861159 2.292673 2.465627 2.199681 1.205278 2.142915 1.964762  
6.482021 6.933951 6.466978 6.508949 6.683553 6.504799 6.494803 6.346058 6.525376  
9.599732 9.408845 9.259108 9.585163 9.658274 9.30317 9.362666 9.35467 9.671087  
5.351759 5.719124 5.618184 6.4284 5.988467 6.752035 6.763395 6.211003 6.611207  
7.532672 7.340774 7.720424 7.52872 7.491027 6.464833 6.962717 7.708548 7.417033  
2.547593 2.429072 2.339439 2.8551 2.199875 4.818336 2.957205 3.282217 3.676587  
2.961497 1.656185 3.349678 4.032758 4.275441 3.753688 5.252303 3.320525 4.96308  
7.878605 7.995186 7.451336 7.967112 8.17179 8.108328 8.178518 7.692704 7.931071  
6.955045 6.348363 7.345671 7.741829 6.670891 6.8487 8.39603 8.704818 8.805039  
1.435661 1.47027 1.369589 1.934786 1.613114 1.558809 1.37763 2.362334 1.594094  
6.646691 6.087721 6.363912 5.318136 5.95854 6.895434 6.327723 6.852984 7.043293  
2.222987 2.49259 2.088634 2.549495 2.041854 2.514847 2.319089 2.292421 2.315643  
7.277349 7.416929 7.609777 7.028548 7.429225 7.797036 7.254724 7.493277 7.402085  
5.600565 4.412035 5.834491 5.938072 5.296893 6.575894 5.396031 5.537745 5.634312  
5.419799 4.02065 5.500959 5.612259 5.350223 6.726453 5.207179 5.697063 6.066777  
2.328916 1.895411 2.195802 2.722528 2.901642 2.076364 2.564151 3.074297 2.652301  
2.456212 2.852574 2.658879 3.020697 2.239124 3.025593 2.817821 3.495141 3.421729  
8.067664 8.205839 8.608605 7.826313 8.16663 7.538729 8.033592 7.916193 7.751338  
1.221284 1.054926 1.219873 1.867561 1.46642 1.685468 1.319902 1.294938 1.430627  
7.752406 7.379102 7.547796 7.226864 7.889567 7.902802 7.599435 7.436062 7.690617  
4.141504 3.411371 3.905411 4.525885 3.777603 3.451535 4.621807 5.262886 4.528269  
3.124366 2.811541 1.664535 4.115919 2.862996 2.804894 1.758889 2.039981 1.66956  
5.486618 5.687088 5.201069 6.411676 3.317168 5.636141 4.841863 5.578041 5.403948  
2.750724 2.938775 2.138307 1.859208 2.154276 1.723888 3.065613 4.11709 2.281057  
4.542913 5.642465 5.045296 5.084056 5.239951 6.218835 5.071957 5.180044 3.862136  
1.990203 1.647221 1.775916 2.012638 1.298854 3.242754 1.987382 2.107202 2.389065  
1.872138 2.191582 1.555976 1.935845 2.076725 2.276704 1.737114 2.124814 2.560874  
6.660426 7.067641 7.052732 6.000858 6.572406 7.752936 6.745472 7.569763 7.404533  
4.352932 4.769283 4.825699 4.660393 4.77514 5.374719 5.401338 5.227073 5.373154

7.160898 7.005468 6.61212 7.02448 6.863591 7.210435 7.323016 6.777068 6.864142  
5.644953 6.068977 6.1945 6.203221 6.269764 5.286128 6.60913 6.255092 5.815817  
3.059253 3.156869 2.791996 2.684677 3.115916 2.404612 3.950461 3.813198 4.082635  
1.78595 2.378315 2.094815 1.613095 1.762184 1.903244 2.059402 2.011888 1.612991  
5.353369 5.62494 5.456343 5.549073 5.553776 7.389082 6.625617 6.208105 6.344021  
2.050369 2.745281 1.844502 2.30862 2.258203 1.715353 2.726349 2.868526 2.596266  
4.885122 3.335501 3.097946 4.325181 2.914333 4.633237 3.925455 4.702388 3.583582  
2.550498 3.136265 2.250275 2.502668 2.9679 5.069454 2.584266 2.595912 4.26519  
0.923279 1.874836 2.662189 1.966099 2.023747 1.463067 1.189926 1.587099 1.846939  
2.815353 2.973435 2.632899 3.290741 2.527149 3.187371 2.534558 3.675304 2.831147  
1.154368 2.468389 1.968325 2.010664 2.430367 1.337372 1.532444 1.677126 1.964302  
5.132431 5.695873 4.970302 5.257937 5.756231 4.9555 5.819333 5.177202 5.579226  
3.193694 3.218732 2.01 3.041073 2.02917 2.71621 2.267399 3.267307 3.143759  
7.891845 7.4832 7.514666 7.429116 7.439961 8.226279 7.363257 6.308328 6.483201  
4.990543 5.327781 5.151851 6.103273 5.40804 5.815329 5.642362 5.946683 6.179963  
4.587516 5.92261 5.612016 6.230929 5.152622 4.755452 4.932288 4.817227 5.516557  
2.959205 3.283708 3.328832 2.811763 3.363346 3.647945 3.739824 4.117837 3.832964  
9.236375 9.516563 8.859966 9.552189 9.040562 9.691939 9.232974 9.523542 9.360983  
1.80497 1.715789 1.527922 1.226823 1.508309 1.759986 1.38039 1.522847 1.806804  
1.292345 1.573887 1.040784 1.287788 1.696954 1.202075 1.239179 1.199156 1.513748  
1.471815 1.478879 1.303087 1.465814 1.482413 3.017838 2.066398 2.000401 1.412267  
5.059442 5.080221 5.89145 5.072572 5.515145 4.168239 6.417997 6.495441 6.679817  
5.280434 3.933992 4.653461 4.348783 4.574093 4.538369 4.119095 3.916603 4.397499  
2.682953 3.634749 2.648764 2.046042 2.796771 6.04392 2.525344 2.080477 1.719097  
7.559058 7.687096 7.342366 7.821516 7.592328 7.800868 7.804762 8.101592 7.70069  
2.407123 2.597745 1.92632 1.967311 2.378438 1.868515 2.178352 1.956835 1.944602  
2.408288 2.903678 2.147305 2.269858 2.444776 3.490303 1.902463 2.764609 3.005811  
1.501166 1.24074 1.648829 1.770002 1.452305 1.512907 1.510208 1.342533 1.205244  
5.908719 5.454317 4.858317 5.3055 5.386201 5.949175 6.141012 5.015548 5.487421  
2.931208 2.719796 2.59687 2.875941 2.670455 3.133755 2.700156 2.865388 3.088785  
2.933312 2.323314 2.514234 2.412061 1.867147 1.358284 1.296033 1.37084 1.726455  
2.28216 1.793136 1.391992 1.688762 2.291699 1.733354 1.341294 1.510435 1.319172  
3.158834 1.497175 1.575231 3.21724 1.462834 2.417119 2.382203 1.427548 2.317483  
5.125718 5.31538 4.85694 4.685696 5.707982 5.157541 4.761273 5.680694 5.253261  
3.301157 2.807687 1.903026 3.680665 2.786219 3.04613 2.771689 3.15393 3.657503  
2.487946 2.775166 2.468642 2.633001 3.091167 3.618663 2.833839 3.057199 2.867714  
4.974059 4.695059 4.422656 4.815334 4.546226 4.74237 4.108075 4.664828 5.099646  
5.760777 5.751301 6.446144 5.76178 6.237203 5.698505 5.840815 5.325954 6.464365  
5.254057 4.306152 5.653597 5.581414 6.492591 6.284866 6.279809 6.992645 7.326362  
6.784361 6.688652 6.36243 5.332 5.593522 6.360684 6.494048 5.69279 5.801081  
2.699158 2.432347 2.116424 2.288142 2.883523 2.080748 2.818814 2.469923 3.117846  
0.880037 1.546361 1.633742 1.112477 1.547015 1.338644 1.313137 1.468771 1.233089  
3.403605 2.999079 3.144232 3.238602 3.734015 2.976222 3.576604 3.203592 4.147574  
8.024819 8.052236 8.397024 8.226223 9.061827 8.209383 8.212711 8.446265 8.905184  
2.049798 2.873716 2.554241 2.365432 2.181545 1.921646 2.539745 2.335325 1.772257  
7.806891 8.476473 8.737208 8.140493 9.099052 8.893646 8.760854 8.851316 9.232879  
7.061531 6.190827 6.100097 7.523033 7.168366 7.391709 7.457395 6.91046 7.179522  
5.870167 6.320234 5.031515 4.735697 5.902436 5.365577 5.526146 6.274932 5.609905  
4.836776 4.780637 4.387937 4.97608 4.496492 7.192853 4.26482 4.916373 4.559429  
11.24736 10.92798 11.20654 10.92823 10.71933 11.08759 11.26034 11.19478 10.82529  
4.096519 2.85313 2.458794 2.998457 4.96163 4.365328 4.534584 4.630498 5.714742

3. 851633 3. 196205 4. 369993 1. 855615 4. 141095 2. 122405 2. 445274 1. 879456 1. 955948  
1. 868399 1. 667574 1. 403712 2. 909356 2. 300758 2. 195679 2. 01282 2. 589951 1. 489483  
7. 957454 7. 121753 7. 435304 8. 308735 7. 085012 6. 409855 7. 082317 7. 398263 6. 227281  
5. 592282 7. 037914 6. 198701 5. 472698 5. 845295 5. 6649 5. 984691 6. 165808 5. 431981  
3. 537703 4. 365199 4. 020494 4. 024587 4. 212713 3. 910698 2. 847265 4. 315729 3. 927718  
4. 823511 5. 060199 5. 232555 5. 161847 6. 597321 5. 369083 6. 968641 6. 86415 6. 485656  
3. 875579 3. 508936 3. 730051 4. 707731 4. 631131 3. 868779 3. 828324 4. 680273 4. 935295  
3. 230011 3. 380629 3. 001149 4. 04279 2. 946795 2. 234842 3. 145015 3. 254012 3. 174341  
1. 101625 1. 633803 2. 053759 2. 853959 1. 593727 1. 534722 1. 643264 1. 840704 1. 575077  
4. 393059 4. 10149 4. 85758 4. 484614 3. 957495 4. 12722 4. 53032 4. 920283 4. 958461  
4. 797044 3. 902515 3. 862495 4. 32707 4. 334399 5. 0473 3. 832672 2. 727966 4. 122857  
9. 55591 9. 680793 9. 722843 9. 64347 9. 917041 9. 76958 9. 594293 9. 897371 9. 799325  
10. 21563 9. 950062 10. 45493 10. 68816 10. 71553 9. 832173 11. 09326 11. 16494 11. 40424  
10. 32804 10. 32937 10. 26293 10. 44661 10. 2572 10. 85741 10. 23809 10. 21288 10. 3276  
6. 572907 6. 540384 6. 346954 7. 465951 6. 173763 6. 465572 6. 970447 7. 050457 7. 541725  
6. 587023 6. 05544 5. 802288 6. 330014 6. 949489 7. 234285 7. 105012 6. 7245 6. 476611  
4. 376427 5. 003722 5. 582489 4. 529346 4. 608486 5. 262594 5. 6832 5. 119126 4. 64794  
5. 409251 5. 171809 5. 806697 5. 882653 6. 390441 6. 022032 6. 603207 6. 436966 6. 592945  
5. 365989 6. 344172 6. 295216 5. 710717 6. 658467 3. 503515 6. 062157 5. 969138 6. 134089  
2. 630795 3. 233738 2. 055814 1. 639166 2. 434449 1. 855239 2. 555625 1. 940925 3. 1345  
6. 709719 7. 792677 7. 429487 7. 41949 7. 175393 7. 679628 7. 545192 7. 523258 7. 234956  
8. 032705 6. 935136 6. 889591 8. 130062 5. 357036 11. 02532 8. 387346 5. 823034 8. 245033  
0. 927985 1. 675046 0. 979294 1. 879896 1. 019748 1. 004381 1. 129544 1. 714236 1. 350541  
2. 098329 1. 643536 1. 724059 1. 300839 1. 330923 1. 53817 1. 052547 2. 271894 1. 594534  
5. 268043 2. 455674 6. 06513 7. 173086 4. 356191 7. 114662 5. 692018 5. 778558 6. 631469  
5. 873343 5. 837576 5. 594066 5. 368532 6. 533143 5. 258271 6. 174769 6. 596757 5. 71109  
11. 77347 11. 79193 11. 89322 11. 73176 11. 79972 11. 89831 12. 08232 11. 90754 11. 82881  
4. 632162 3. 866114 4. 559052 5. 125175 4. 673944 4. 466537 5. 432823 5. 386772 4. 876527  
8. 017451 8. 487645 8. 11673 8. 09178 7. 9484 8. 040675 7. 654841 7. 570413 7. 465161  
7. 681023 7. 164272 7. 497257 7. 526035 7. 590659 6. 600091 7. 664152 7. 602263 7. 39396  
3. 711559 3. 019438 3. 182056 3. 620863 2. 806102 5. 692129 4. 494241 4. 924372 4. 800449  
1. 318039 2. 372443 2. 052469 2. 160253 2. 087725 3. 013486 2. 557411 1. 879299 2. 135769  
5. 349871 4. 76123 5. 121039 4. 79927 4. 894543 5. 944472 5. 185356 5. 182058 5. 354113  
2. 481966 2. 551858 2. 106958 2. 296874 2. 677145 1. 898345 2. 574496 2. 38403 2. 778007  
2. 663445 2. 16095 1. 555109 3. 820325 1. 927752 2. 252487 1. 991794 2. 475281 2. 300668  
5. 337766 4. 956864 5. 337514 5. 460006 5. 837421 6. 728324 5. 680659 5. 921527 6. 361393  
5. 532074 5. 684262 5. 75545 5. 905926 5. 815324 4. 996614 5. 180132 5. 682267 5. 371426  
6. 387373 5. 31297 6. 356983 6. 601582 6. 541165 8. 063201 7. 282047 7. 419046 7. 117153  
6. 484802 6. 349754 6. 447671 6. 227926 6. 440497 7. 318456 6. 770479 6. 805831 6. 613945  
5. 940147 6. 017534 5. 956431 5. 863056 5. 743105 5. 742641 5. 628498 5. 741935 5. 978541  
5. 028348 5. 160816 5. 924966 4. 333731 4. 956842 3. 968835 4. 916261 4. 314775 5. 695447  
7. 785576 8. 10778 7. 804244 7. 714038 8. 223457 7. 703043 8. 220486 8. 020919 7. 745732  
7. 192307 7. 567859 6. 697798 6. 816922 7. 002714 7. 759582 7. 160494 7. 263659 7. 140661  
7. 18448 7. 1325 7. 324364 7. 482041 7. 394417 8. 000784 7. 534553 7. 619692 7. 535245  
4. 732672 3. 211737 4. 427791 3. 769555 3. 654746 4. 199988 3. 476952 4. 510757 4. 468379  
6. 447388 6. 595655 6. 412716 7. 091666 5. 467634 6. 30014 6. 108545 6. 307735 5. 573355  
5. 924536 5. 231101 6. 542221 6. 532362 6. 553965 5. 216938 7. 101675 7. 195082 6. 935518  
6. 062783 6. 067268 5. 331607 6. 29639 5. 714014 6. 443951 5. 654591 5. 627541 5. 873671  
6. 752244 6. 38804 6. 805395 6. 000911 6. 972364 8. 385747 7. 533918 7. 681632 8. 100044  
3. 31966 2. 541252 3. 163736 2. 815041 2. 900715 3. 941531 3. 414735 3. 704001 3. 814164  
5. 977364 5. 239645 2. 00411 9. 323152 6. 885677 9. 754012 6. 384313 8. 215269 8. 95094

7. 095073 6. 644931 6. 826068 6. 737395 7. 441106 6. 397254 7. 110039 6. 572828 6. 973337  
7. 46749 7. 49508 6. 741146 6. 886108 7. 188414 5. 856841 6. 449226 6. 515212 6. 214361  
4. 293478 4. 198979 5. 582878 5. 064278 4. 835016 5. 553133 5. 541793 4. 932337 5. 661689  
4. 40732 4. 616721 4. 554797 5. 291182 4. 522987 5. 272724 5. 595146 5. 401752 5. 37362  
3. 407528 2. 668342 3. 876412 3. 982089 4. 003432 5. 485451 4. 560714 5. 788504 5. 21408  
9. 36851 9. 715695 9. 299812 8. 70552 10. 10373 9. 730817 9. 865391 8. 915217 9. 813155  
8. 498467 8. 21116 8. 309456 7. 756433 7. 867041 8. 1683 7. 69899 7. 136687 6. 718177  
3. 601703 2. 725141 2. 26973 3. 141385 2. 729239 2. 618138 2. 130852 2. 66652 2. 954652  
4. 80626 6. 183689 6. 223964 5. 827074 5. 92938 5. 936333 5. 346209 7. 064306 5. 755306  
5. 711826 5. 098201 4. 283948 4. 943834 4. 589936 4. 355725 3. 989118 5. 178316 5. 074307  
3. 639246 3. 479703 4. 937949 4. 92872 4. 499865 5. 025154 4. 058912 5. 021516 3. 553  
4. 276043 3. 119666 4. 336324 3. 646899 3. 37942 5. 016426 3. 721795 4. 291024 4. 043189  
8. 967619 8. 886507 8. 319932 8. 630469 8. 063497 8. 137957 7. 635088 7. 809245 7. 636059  
7. 280341 7. 293559 7. 038009 7. 559434 7. 287354 7. 665703 7. 309129 7. 908674 7. 559291  
7. 419271 7. 527748 7. 595753 7. 687848 7. 28535 5. 584479 7. 955321 7. 652779 7. 708381  
5. 127641 5. 322112 6. 225132 6. 549356 5. 703891 4. 733213 5. 824869 5. 729999 5. 94926  
4. 820459 4. 966301 4. 222058 5. 165463 5. 526179 6. 16794 5. 205236 5. 553147 5. 70706  
2. 069315 2. 463386 2. 54967 2. 515672 3. 152902 2. 222501 1. 939375 1. 658391 2. 938731  
2. 359299 3. 409714 2. 457513 2. 53892 2. 238403 2. 763884 2. 95104 3. 120877 3. 55373  
5. 73744 5. 461271 4. 671057 5. 682128 4. 710973 4. 955988 4. 495193 3. 967542 5. 185881  
1. 806253 2. 13747 1. 35096 2. 232091 1. 662393 2. 918125 1. 328386 2. 050513 3. 878021  
8. 061166 7. 861355 7. 729123 7. 175617 7. 658742 7. 19401 7. 453849 6. 938721 6. 808697  
6. 0358 5. 993362 6. 060893 6. 044614 6. 088542 6. 372453 5. 711815 5. 626736 5. 841918  
5. 88337 5. 626474 5. 875948 6. 749997 6. 262126 5. 213547 5. 991442 5. 928557 5. 527415  
5. 998863 6. 199142 6. 490864 6. 333227 6. 140934 6. 094028 5. 753141 5. 95799 5. 794448  
6. 425582 6. 052541 6. 530743 6. 402898 6. 423244 7. 043894 6. 93131 6. 858454 6. 837275  
2. 604789 2. 955828 2. 095897 3. 049449 2. 210929 2. 37689 2. 258718 2. 571105 1. 988391  
3. 317379 3. 233358 3. 965667 3. 871911 3. 095719 3. 780282 2. 734853 3. 034291 4. 214461  
1. 468364 1. 615397 1. 540044 1. 356123 1. 575643 2. 2334 1. 515376 1. 470102 2. 479185  
6. 538655 6. 47207 6. 806384 6. 074454 7. 303449 6. 212719 5. 981538 6. 322962 6. 393658  
4. 807098 4. 934017 4. 139771 3. 82828 4. 318893 4. 393006 4. 108404 3. 702144 3. 964519  
6. 180526 6. 023946 6. 156118 7. 253958 6. 735387 6. 433022 6. 325087 6. 926531 6. 360395  
3. 791206 4. 123463 4. 433373 4. 744575 4. 764644 4. 351721 4. 832732 5. 60176 4. 791825  
5. 949728 5. 759102 5. 60746 5. 035274 5. 238376 6. 556374 5. 504953 5. 525816 5. 455981  
7. 567815 7. 184703 7. 099557 6. 905989 6. 981525 7. 35939 7. 375594 6. 967954 5. 867985  
4. 492584 3. 842544 4. 654461 4. 856294 4. 177124 3. 66339 4. 504919 4. 300365 3. 078071  
5. 135331 6. 121394 5. 306615 5. 389008 5. 4936 5. 546181 5. 818658 5. 242387 4. 809957  
5. 12143 5. 606649 5. 263728 5. 757659 5. 397072 6. 340804 5. 903216 4. 793541 5. 213131  
1. 852487 1. 7596 2. 947557 2. 188533 1. 49041 1. 467127 1. 695251 2. 366019 2. 389362  
9. 098636 9. 666028 9. 527515 9. 069954 10. 03511 9. 046761 9. 393289 9. 220123 9. 367798  
1. 45142 2. 038034 1. 443216 1. 572942 1. 625542 1. 572835 1. 909979 2. 219014 2. 434766  
6. 229917 6. 10174 6. 390156 5. 826638 5. 969274 6. 096362 6. 070311 6. 067514 5. 766805  
6. 463665 6. 575306 6. 473467 6. 154739 6. 385948 6. 936132 6. 309828 6. 687953 6. 660109  
6. 123087 5. 602435 5. 801612 6. 208816 5. 128964 5. 693801 5. 836127 6. 129415 5. 809385  
1. 274296 1. 736204 2. 262024 1. 568921 1. 384601 1. 380137 1. 701705 1. 312589 1. 199739  
6. 166956 5. 943677 5. 206002 5. 451353 6. 30122 5. 742826 6. 770257 6. 486076 6. 760031  
8. 728284 8. 534147 8. 696253 8. 305249 9. 075217 8. 846919 8. 587633 8. 903234 9. 226257  
6. 204946 6. 303059 6. 410325 5. 786337 6. 513651 6. 311332 7. 216547 6. 359079 6. 644304  
6. 507386 6. 475171 7. 013808 7. 11647 6. 525158 6. 701144 6. 759284 6. 985294 6. 45676  
1. 585672 1. 300366 2. 214383 1. 515473 2. 043187 1. 452597 1. 236972 1. 918876 1. 388494  
7. 90647 8. 000425 8. 164336 8. 089351 8. 694477 8. 261783 8. 291747 8. 419646 8. 259573



6. 650767 6. 266655 6. 762373 6. 912574 7. 08924 7. 459219 7. 139376 7. 12929 7. 442964  
8. 107923 8. 335421 8. 19558 8. 407279 8. 272319 8. 277749 8. 14128 8. 020305 7. 969864  
4. 177724 3. 687409 3. 874227 4. 502463 4. 605674 6. 407338 5. 070278 4. 532069 4. 706481  
6. 285228 5. 308136 6. 112256 5. 854978 5. 487752 5. 574334 5. 837045 6. 17685 5. 693918  
5. 512834 4. 670688 4. 888528 3. 980336 5. 156052 4. 203989 4. 918 4. 597725 4. 831678  
5. 999332 4. 936936 6. 203211 6. 167688 5. 877086 5. 347484 6. 461967 6. 21502 6. 471968  
5. 255416 3. 424786 4. 488387 5. 749591 3. 831521 6. 371351 5. 653403 5. 505919 5. 722807  
7. 582751 7. 064017 7. 033796 6. 588669 6. 813066 6. 78168 6. 862195 6. 570427 6. 995891  
5. 550559 3. 734915 5. 022335 3. 505941 4. 03023 3. 761885 4. 923733 4. 943014 4. 963025  
2. 64375 2. 606147 3. 382958 2. 419857 2. 089764 3. 953795 2. 742123 3. 384508 2. 584333  
2. 22472 2. 621692 2. 245578 2. 436218 2. 891731 2. 961142 1. 878341 2. 834863 2. 964226  
2. 079493 2. 870524 3. 27537 2. 448007 3. 048643 2. 14817 2. 871654 3. 514962 2. 845863  
3. 84338 3. 925752 3. 94667 4. 663151 3. 11847 5. 62674 4. 591775 3. 557413 3. 815895  
3. 025479 3. 637239 3. 09287 3. 59211 2. 68729 4. 453751 3. 483398 3. 601328 4. 460297  
1. 813511 2. 268495 3. 153126 2. 074904 2. 465203 3. 46154 2. 726079 2. 795349 3. 307297  
3. 938654 6. 055882 5. 662843 4. 562397 6. 315401 4. 451494 4. 143027 5. 174156 4. 940635  
7. 04404 8. 008761 7. 574058 6. 871561 6. 882545 7. 073005 7. 214375 6. 907634 6. 579863  
4. 668984 4. 29285 4. 980472 4. 719961 3. 869882 4. 391425 4. 11482 5. 144836 4. 759546  
6. 772585 5. 699928 4. 583682 6. 546806 5. 6577 6. 985353 5. 96856 4. 859563 6. 180025  
0. 891048 1. 560077 1. 024444 3. 065691 1. 188121 1. 078305 1. 199478 3. 206142 0. 967667  
2. 770841 2. 648684 2. 733666 3. 03265 3. 365279 4. 538159 2. 098705 4. 163832 3. 641975  
6. 635683 6. 121364 6. 579576 5. 801814 6. 525655 7. 762587 6. 647235 6. 806071 6. 412946  
3. 804026 4. 513588 4. 336217 3. 467517 4. 567198 3. 759787 3. 310388 3. 352723 3. 97932  
2. 696254 4. 702747 3. 88895 5. 214358 4. 596527 1. 942772 1. 499469 3. 550238 3. 872353  
9. 166948 9. 813089 9. 696546 9. 089089 9. 80485 8. 727543 8. 310468 8. 517284 8. 854997  
4. 639655 5. 089296 3. 729208 4. 997905 5. 033467 5. 189911 4. 726197 5. 398853 4. 413034  
5. 532357 4. 964419 4. 846162 4. 752451 4. 718084 5. 511582 5. 352091 6. 152814 5. 511638  
5. 791308 6. 519377 6. 237859 6. 580498 6. 737937 6. 942072 6. 151171 7. 283833 7. 324003  
6. 175745 5. 685164 6. 040587 5. 860575 5. 936408 6. 887545 6. 864797 7. 340635 7. 211428  
6. 164295 6. 574013 6. 07881 6. 093039 6. 077385 6. 096407 6. 484712 6. 453021 6. 399672  
7. 848239 8. 067513 7. 303321 7. 672577 7. 796642 7. 71992 7. 477877 6. 8997 7. 503412  
3. 903401 5. 650496 6. 464684 5. 737441 6. 204881 6. 786937 6. 063963 6. 212261 6. 937204  
6. 423812 6. 42822 7. 541166 6. 042487 7. 196475 3. 045415 5. 547508 5. 307618 5. 347007  
6. 58176 6. 739396 7. 278167 7. 416929 6. 593079 6. 563681 5. 738277 4. 97862 5. 685151  
6. 287585 6. 932377 6. 343811 6. 679179 6. 036018 5. 751127 5. 752831 6. 589917 6. 734846  
3. 708417 4. 936847 5. 65955 4. 81078 4. 755156 5. 022498 4. 534517 4. 463591 4. 432079  
5. 580658 5. 166597 5. 777408 5. 056854 4. 284091 7. 117026 5. 938539 6. 361955 6. 331107  
3. 694604 4. 591759 3. 857098 4. 173154 5. 085591 5. 754074 5. 159525 3. 819824 5. 212029  
2. 441247 2. 245672 3. 115875 2. 938634 2. 272278 2. 362472 2. 765761 3. 269743 2. 272634  
4. 367486 4. 818678 4. 662082 5. 195823 5. 31189 7. 104157 4. 419997 4. 039372 5. 265201  
3. 662914 3. 046172 2. 93231 3. 006367 2. 943379 3. 117754 2. 671524 2. 840437 2. 975608  
5. 412069 6. 286997 5. 289026 5. 183465 7. 009126 6. 136873 5. 456058 6. 098983 5. 950857  
1. 599199 1. 324533 1. 602779 1. 529113 1. 639749 1. 868599 1. 936358 1. 053733 1. 782464  
7. 852257 7. 586484 7. 492196 7. 354661 7. 270541 7. 880658 7. 776274 7. 653925 7. 537598  
6. 026515 6. 167586 6. 107452 6. 144657 6. 014654 6. 833432 6. 446854 6. 465479 6. 579492  
9. 568934 9. 592586 9. 118852 9. 347292 9. 248281 9. 84575 9. 399924 9. 03668 8. 685483  
4. 425882 4. 801727 4. 120177 3. 96335 4. 375286 4. 873732 4. 469181 5. 992658 5. 697376  
6. 085854 6. 01638 5. 685694 5. 806715 6. 104094 6. 708124 7. 081828 6. 766803 6. 230763  
6. 096875 6. 624929 5. 402364 7. 100545 6. 374903 7. 139405 7. 26236 6. 883839 6. 821789  
4. 952957 5. 152212 5. 293449 4. 587805 4. 290363 5. 096368 5. 112594 5. 025323 5. 679573  
8. 922568 8. 49226 8. 502985 8. 977922 8. 985381 9. 221 9. 055058 9. 277104 9. 538626

3. 488531 4. 624216 3. 046442 3. 146503 3. 500589 5. 219488 4. 815179 4. 411248 4. 817612  
7. 804151 8. 194057 8. 099147 8. 080913 8. 29733 8. 005127 7. 764155 8. 778323 8. 610064  
5. 510645 4. 765551 4. 791832 5. 036669 5. 042412 4. 577205 5. 536055 5. 781776 5. 906118  
5. 815427 5. 577821 6. 378732 6. 123121 6. 055764 6. 372606 6. 705532 6. 845552 6. 397238  
4. 914756 3. 098377 3. 838556 4. 548049 3. 57283 5. 024979 3. 028193 4. 183321 3. 861846  
6. 154769 6. 343803 6. 706223 6. 141117 5. 907246 5. 847677 5. 77896 5. 677062 5. 867299  
4. 716258 3. 574468 5. 32412 5. 618015 5. 076169 5. 311595 5. 553482 5. 11388 5. 325019  
6. 947092 6. 915537 7. 072818 7. 039938 7. 209615 6. 529808 6. 635232 7. 262856 7. 37065  
5. 290959 4. 82481 4. 848495 4. 947672 4. 957475 4. 330859 5. 348248 5. 572176 5. 190755  
4. 909045 6. 685314 6. 094692 5. 202034 4. 612336 4. 791113 3. 127458 3. 246708 3. 751449  
5. 518695 5. 583247 5. 838822 4. 732746 7. 332369 6. 486944 6. 48255 6. 072849 6. 063918  
2. 227247 1. 296532 1. 282715 2. 330973 1. 286414 3. 685842 1. 720666 1. 640239 1. 865545  
1. 444783 1. 532461 1. 346591 1. 3638 1. 686025 1. 709922 1. 411358 1. 56141 1. 661238  
6. 029825 6. 188252 6. 093742 5. 992292 5. 646805 5. 611994 5. 800322 5. 964599 5. 688981  
6. 811063 6. 74544 6. 572163 6. 864396 6. 977559 6. 761065 6. 765367 6. 383935 6. 452799  
1. 660409 1. 68997 1. 267199 1. 917335 1. 808446 2. 208385 1. 590383 1. 165634 1. 691506  
8. 184276 7. 93459 8. 129467 9. 193363 8. 751642 9. 082007 9. 084376 9. 488312 9. 190229  
2. 829494 1. 761646 1. 959708 1. 788515 2. 321524 6. 01594 1. 982764 2. 116747 2. 96712  
6. 149265 6. 941858 6. 500885 6. 631855 6. 583838 6. 549513 7. 071134 6. 58488 6. 366903  
2. 622427 2. 343166 1. 710452 3. 450868 1. 926067 1. 941133 2. 013564 1. 533679 2. 59773  
2. 400381 2. 438639 2. 104568 2. 040171 2. 273532 2. 4728 2. 388664 2. 137899 2. 492626  
6. 839424 6. 441827 6. 828457 7. 470913 7. 432146 7. 701106 7. 02083 7. 801048 7. 80751  
5. 160131 4. 529126 5. 840984 5. 809755 5. 955382 6. 05924 5. 307258 5. 66342 5. 818203  
7. 256599 7. 257085 7. 539085 7. 57559 7. 541438 8. 010343 7. 019029 7. 722601 7. 485336  
6. 780259 6. 234128 6. 067072 6. 527477 5. 922577 6. 80765 6. 145127 6. 157716 6. 245556  
8. 148065 8. 140803 8. 258517 8. 004151 7. 690833 8. 210001 7. 518447 8. 096228 7. 728006  
9. 974596 9. 808919 9. 406003 9. 981174 9. 900641 10. 37041 10. 38854 10. 47731 10. 59195  
5. 113138 3. 238546 3. 529482 4. 718996 5. 045723 4. 712685 3. 488513 3. 814972 5. 861064  
7. 2004 7. 671726 7. 612565 7. 137816 7. 170649 6. 45266 7. 271352 7. 044735 7. 084278  
1. 295577 1. 283864 1. 080729 0. 845079 1. 777178 1. 477967 1. 543224 1. 492686 1. 682146  
5. 671115 4. 762592 5. 415052 5. 371996 5. 089812 4. 787274 5. 585825 5. 699049 6. 235548  
9. 503549 9. 461447 9. 580403 9. 792422 9. 569475 9. 74654 9. 739793 9. 962047 10. 03561  
1. 995476 2. 269937 1. 465501 1. 348366 1. 341161 1. 641224 1. 818896 1. 808963 1. 773253  
4. 774094 4. 151416 4. 097565 5. 383755 4. 269881 4. 926151 5. 045126 5. 392868 5. 18192  
1. 780243 2. 291506 1. 686717 1. 53145 2. 288873 1. 491911 1. 159649 1. 736974 2. 237835  
4. 363238 4. 065789 3. 132808 4. 747219 3. 949469 3. 058782 4. 35544 4. 3989 4. 602591  
5. 474533 5. 299745 5. 027676 4. 697275 5. 528467 5. 036659 4. 505854 4. 875994 4. 762338  
4. 631707 3. 457128 3. 512361 5. 405127 4. 746303 6. 116882 5. 026444 5. 403187 5. 383527  
3. 08324 3. 511362 3. 85416 3. 168175 3. 83177 3. 65406 2. 685559 3. 242361 3. 573278  
3. 473354 3. 090234 1. 420637 2. 663603 1. 639256 4. 103641 1. 520645 2. 212941 1. 82171  
6. 846938 6. 041143 6. 7469 5. 978363 5. 863275 6. 849355 6. 124466 5. 550982 5. 213994  
5. 68953 6. 167808 5. 533931 5. 608607 6. 201996 5. 881757 5. 922255 5. 739987 5. 27619  
7. 783377 7. 641925 7. 901437 7. 96675 8. 015611 7. 746613 8. 027047 7. 873606 7. 869951  
2. 556518 2. 504541 2. 52283 2. 549939 3. 093167 2. 977181 2. 898521 2. 872345 2. 982166  
8. 257912 8. 373429 7. 890146 8. 926046 9. 345087 8. 774706 8. 646845 8. 779679 8. 615089  
7. 993151 7. 383484 6. 604874 7. 242151 7. 741999 8. 116952 7. 344549 7. 486128 7. 707427  
0. 823108 2. 729848 1. 192786 1. 899665 0. 989801 1. 479494 1. 061247 1. 247885 1. 012376  
4. 744181 4. 619219 4. 787999 5. 032636 4. 794217 5. 492501 5. 772681 6. 144378 6. 096398  
1. 919833 1. 835737 2. 18484 2. 121016 2. 784214 2. 23635 1. 813755 2. 610879 2. 123111  
6. 826563 7. 2268 7. 108613 6. 697547 7. 126102 6. 050591 6. 904883 6. 672345 6. 571862  
7. 443573 6. 923738 7. 81689 8. 21309 8. 313524 5. 492965 8. 509529 8. 486187 8. 507249

4. 169215 2. 185915 2. 992788 3. 205709 1. 824772 3. 266515 2. 800158 2. 359207 3. 875287  
3. 838005 3. 526856 4. 464303 5. 346626 4. 617731 4. 976528 4. 370349 4. 93919 3. 543406  
3. 068356 3. 373716 3. 825105 3. 024182 3. 863907 2. 494243 2. 476608 2. 968566 2. 377677  
3. 46106 3. 314279 3. 950141 3. 089463 3. 505014 4. 187758 4. 095178 3. 780706 4. 749523  
5. 458471 5. 046415 5. 706828 5. 544307 5. 055069 6. 000928 6. 366003 6. 867028 6. 840011  
3. 804982 3. 753072 3. 314307 3. 831317 3. 797237 4. 183614 3. 971114 4. 752016 4. 317913  
7. 427421 7. 601561 7. 249058 6. 551361 7. 777311 6. 267207 6. 395475 5. 22367 6. 091744  
5. 288854 4. 980028 5. 694852 6. 208697 4. 752036 6. 17285 4. 64959 4. 841049 5. 131022  
7. 610257 8. 100969 8. 322104 7. 607982 7. 948285 7. 125122 8. 1383 8. 086509 8. 22445  
2. 637454 2. 431264 2. 405825 2. 030574 2. 904934 2. 866052 1. 91077 2. 114081 2. 735281  
7. 252737 7. 669509 6. 932014 7. 427318 7. 750242 7. 053222 7. 248342 7. 624184 7. 023819  
7. 057442 7. 280882 7. 872098 7. 238906 7. 399978 6. 783557 7. 53009 7. 532933 7. 524719  
5. 155305 3. 734162 4. 083975 1. 836039 3. 606814 2. 40543 3. 119209 2. 846369 2. 974547  
5. 058945 4. 318672 4. 660198 4. 932591 4. 758 5. 820525 4. 583563 5. 544376 5. 36912  
5. 772753 5. 464713 5. 639178 5. 018857 5. 307317 4. 633818 5. 394621 5. 872325 4. 968297  
7. 661767 6. 861554 7. 753012 7. 353516 7. 679344 8. 141744 8. 346631 8. 126475 8. 31706  
1. 6573 3. 162148 3. 732783 4. 008686 3. 777518 1. 245482 4. 215477 2. 496734 3. 498088  
5. 07493 4. 838358 3. 597399 4. 577247 4. 439238 4. 258066 5. 498956 4. 920726 4. 225397  
2. 021354 4. 342729 3. 773519 2. 093772 3. 804459 2. 34415 2. 774724 4. 304072 3. 226234  
5. 905553 6. 232126 6. 105011 6. 113135 5. 512124 5. 664484 6. 838096 6. 380497 6. 064076  
8. 595657 8. 296437 8. 054926 7. 996033 7. 727947 7. 8886 6. 891332 6. 04073 6. 960659  
4. 911279 3. 70666 4. 806322 4. 432471 5. 062376 4. 283938 4. 750943 4. 865501 4. 688343  
10. 32836 10. 9074 10. 51411 10. 44066 10. 90142 9. 931506 10. 22189 10. 0628 10. 67679  
3. 515455 3. 191858 2. 781496 4. 083842 4. 37318 3. 779606 3. 246098 3. 246396 2. 564594  
3. 119912 2. 013958 1. 961038 1. 47158 1. 849161 1. 682216 2. 645413 2. 563966 2. 581387  
5. 535867 4. 886188 5. 896946 5. 737895 5. 229174 4. 098978 5. 824697 6. 570557 6. 605129  
8. 877514 9. 012282 8. 308075 8. 517941 8. 69848 7. 550827 9. 036798 8. 468491 10. 00371  
5. 042859 5. 514304 5. 048579 4. 221813 4. 952523 5. 21657 5. 092254 3. 859326 4. 125078  
1. 960692 2. 235954 2. 451465 2. 141535 1. 808802 1. 910289 1. 43507 1. 526624 2. 441779  
2. 90057 1. 968135 3. 480047 4. 059945 3. 306098 3. 260364 3. 500046 4. 266668 4. 459588  
2. 495946 2. 167947 1. 225714 1. 31247 2. 179737 1. 590879 1. 470518 2. 091915 1. 406268  
2. 595417 3. 022325 3. 448597 3. 478277 3. 243568 4. 283519 2. 785464 2. 689861 2. 827148  
3. 108448 3. 938675 4. 400279 4. 336319 4. 199868 4. 914382 2. 645436 2. 995685 5. 415592  
1. 619624 1. 664056 1. 51748 1. 705508 1. 776661 1. 825465 0. 988365 1. 512933 2. 452124  
7. 120553 7. 493072 7. 756748 7. 109067 7. 37816 7. 140951 7. 895383 7. 67259 7. 422608  
4. 393346 5. 399741 4. 78312 4. 747496 5. 009963 4. 751939 5. 541548 5. 473217 4. 990714  
2. 304287 2. 057935 2. 81443 2. 732153 2. 352651 2. 664765 2. 674311 2. 636487 1. 978161  
4. 489056 3. 394642 3. 6447 3. 857668 3. 413608 2. 945356 2. 935715 3. 536492 3. 016179  
3. 270387 4. 690863 4. 323197 3. 985746 4. 616568 4. 215112 3. 712759 4. 576081 3. 997427  
5. 625405 5. 466427 5. 056125 4. 725736 4. 815063 5. 997579 5. 859269 6. 431416 6. 289446  
2. 506013 2. 369549 2. 428015 4. 376662 1. 706321 2. 964831 1. 737528 2. 001387 2. 787013  
1. 120757 0. 76704 0. 775737 0. 854386 1. 005908 0. 950642 0. 871622 0. 993226 1. 645921  
1. 813463 2. 014734 2. 037196 2. 941572 2. 001458 2. 414598 1. 672037 2. 359189 2. 346389  
5. 865016 6. 125752 6. 069887 5. 428417 6. 049708 5. 988586 5. 733407 6. 068775 5. 82937  
4. 872304 5. 414412 5. 028446 4. 744614 5. 163229 5. 636549 5. 408472 4. 49352 6. 117057  
7. 462895 7. 677921 8. 064263 7. 908556 7. 738499 8. 308095 7. 856453 7. 815683 7. 871782  
4. 97136 4. 740143 4. 154314 5. 292176 4. 358033 5. 27612 4. 72961 4. 36626 4. 858842  
2. 780298 3. 497182 2. 447204 4. 712298 2. 30662 3. 733873 1. 96164 1. 207308 2. 977234  
4. 820962 4. 666669 4. 42464 4. 910567 5. 615576 5. 210346 4. 876188 5. 780641 6. 099439  
6. 373771 7. 59651 6. 642058 6. 71928 6. 781052 7. 195286 7. 215606 7. 456922 6. 88174  
5. 840704 5. 461327 5. 549376 5. 517437 4. 466124 5. 071193 5. 12857 4. 707246 5. 126592

4. 677581 3. 712619 3. 984492 3. 742379 3. 601529 4. 921147 4. 088784 2. 773347 4. 276396  
0. 987429 1. 331674 1. 1764 1. 365853 1. 158345 1. 756742 1. 055735 2. 628351 1. 792256  
2. 916059 1. 874386 2. 293496 2. 880184 2. 54776 2. 334233 2. 447287 2. 105387 3. 322099  
2. 533589 1. 889631 3. 378304 3. 55207 1. 954046 3. 570166 2. 715787 2. 019515 2. 857014  
6. 561632 6. 573995 6. 301228 5. 91017 7. 242289 7. 337266 6. 946809 6. 930807 6. 953801  
1. 582413 1. 933404 1. 266212 2. 042645 1. 349513 1. 074091 1. 27227 1. 451868 1. 304647  
2. 519678 3. 035402 2. 557059 1. 878093 2. 596477 3. 286652 2. 369873 1. 62512 2. 413541  
5. 189913 5. 328739 4. 502774 5. 570738 5. 161921 4. 825186 4. 659539 4. 574963 4. 476073  
5. 664241 6. 417235 6. 673883 5. 792586 5. 253709 5. 770269 6. 847452 5. 912313 5. 760091  
2. 578403 3. 024056 2. 717638 3. 16273 3. 006598 3. 377604 2. 398889 2. 219116 1. 794335  
2. 567688 3. 065869 4. 314887 3. 531389 4. 427422 2. 85241 3. 737353 2. 633379 2. 627528  
7. 881763 8. 094424 7. 944795 7. 861974 8. 174675 8. 129839 8. 268063 7. 924584 7. 785115  
9. 079816 9. 091777 8. 869832 8. 173829 8. 821042 8. 279539 8. 573781 8. 561826 8. 707724  
5. 836317 6. 485694 5. 915973 6. 60115 6. 300389 5. 843016 6. 144135 6. 388605 6. 070188  
3. 460988 3. 403513 3. 465768 3. 148942 2. 919644 4. 369691 2. 99523 2. 968254 4. 137568  
2. 715511 2. 94178 2. 943583 2. 339863 2. 244047 2. 351125 2. 164745 2. 162979 3. 250618  
3. 116576 2. 972973 3. 291323 3. 157647 3. 073914 2. 47028 2. 908481 3. 023713 3. 480588  
6. 479339 5. 037025 5. 877173 7. 088659 4. 538326 6. 14381 6. 279578 5. 173146 6. 135979  
4. 917255 4. 975064 5. 347215 4. 92499 2. 887599 5. 328555 4. 905915 5. 033678 4. 219689  
8. 859124 8. 657871 8. 396395 8. 14362 8. 795595 8. 297923 8. 129351 6. 74578 7. 758776  
1. 574491 1. 93608 1. 597831 1. 977227 1. 366958 1. 438815 1. 970091 1. 687427 1. 20844  
4. 543225 4. 875119 5. 425216 3. 797025 3. 283489 3. 212772 3. 625621 3. 65239 4. 41755  
5. 458358 5. 824475 5. 676612 6. 19521 6. 04492 5. 316743 7. 075788 5. 897317 6. 447404  
2. 065544 1. 596991 1. 945893 2. 440017 2. 514409 1. 688482 2. 216801 2. 370814 2. 431273  
2. 369498 1. 947445 1. 252688 2. 374924 1. 965012 2. 64284 2. 706804 3. 134424 2. 201168  
5. 973582 4. 665727 4. 756522 5. 67542 5. 672087 6. 154635 5. 097188 5. 098173 5. 675745  
2. 227761 2. 23693 2. 118895 2. 22743 1. 074361 2. 348917 1. 242019 2. 85079 1. 662691  
2. 704122 2. 25923 2. 099401 2. 36669 2. 015652 1. 237401 1. 624042 1. 393658 2. 508388  
7. 170709 6. 773727 6. 771086 7. 284948 7. 344744 7. 755623 6. 633831 6. 943343 7. 175469  
5. 179209 5. 665879 5. 183926 5. 607412 5. 448212 6. 104126 5. 386544 6. 250477 5. 829775  
2. 601712 3. 165066 3. 280331 2. 450698 2. 410486 1. 788124 2. 31872 2. 402769 2. 488474  
7. 410205 8. 448672 7. 848618 7. 420638 8. 340831 8. 516938 7. 979125 8. 010519 8. 10394  
6. 150088 7. 04874 6. 424194 5. 991008 6. 073821 5. 506579 6. 969026 5. 866052 5. 621793  
4. 508315 4. 307441 4. 278056 5. 826523 4. 895628 5. 793786 5. 519227 5. 882152 5. 966639  
4. 388187 5. 452112 5. 149812 5. 71418 5. 320409 4. 875163 4. 614812 4. 793347 4. 336951  
7. 803339 8. 158783 7. 105494 7. 149785 7. 41209 7. 45871 6. 692024 5. 906612 6. 384452  
1. 152796 2. 096762 1. 006724 2. 189269 1. 368365 1. 709258 1. 306519 1. 828918 2. 059108  
5. 102607 4. 992864 3. 919145 2. 453051 4. 019944 3. 631215 3. 961783 3. 666341 3. 534508  
2. 790034 2. 618321 3. 381257 3. 642098 3. 398947 4. 154988 3. 905201 4. 40511 3. 688004  
5. 014589 3. 533282 4. 879142 4. 310491 5. 780021 4. 345914 5. 034186 4. 453109 5. 286004  
1. 227491 1. 004238 1. 505905 1. 21443 1. 064279 1. 132496 0. 933534 1. 338375 1. 720989  
2. 879123 3. 74787 3. 523151 3. 810471 2. 606519 3. 935881 3. 337788 3. 707647 2. 759319  
7. 572674 7. 460536 7. 392213 7. 004194 7. 250491 7. 347524 6. 708599 6. 95738 6. 68281  
6. 741887 6. 398921 6. 265461 6. 539117 7. 128458 6. 344888 6. 598969 6. 829971 6. 726924  
6. 309633 6. 325305 7. 333882 6. 985081 7. 177149 7. 749469 6. 514908 7. 048351 7. 264231  
7. 529322 8. 028122 7. 289014 7. 399161 7. 656814 7. 650803 7. 423902 7. 779778 7. 88498  
8. 241898 8. 601001 8. 474408 8. 358376 8. 393843 8. 691474 8. 488603 8. 676036 9. 06115  
8. 42037 8. 887228 8. 576001 8. 493676 8. 499783 8. 221785 9. 03102 8. 382598 8. 652709  
3. 432639 3. 833971 4. 150176 3. 925912 3. 662418 3. 920404 4. 307621 3. 994064 4. 081705  
2. 152756 3. 500442 0. 879969 1. 972109 2. 573959 1. 68402 1. 462778 1. 919189 2. 13456  
2. 353744 2. 253406 2. 434938 2. 681392 2. 505223 3. 206446 2. 441454 2. 185921 2. 175944

5. 967013 6. 068322 6. 165553 5. 860436 6. 259904 6. 032466 5. 778681 4. 910308 5. 54846  
2. 962795 4. 14167 3. 891799 4. 402955 4. 437361 2. 999334 3. 681438 3. 6819 3. 799297  
1. 598128 2. 945427 1. 244424 1. 601034 1. 141664 1. 604663 1. 41092 2. 183391 2. 796868  
0. 794077 0. 821867 0. 698718 1. 049327 0. 602349 0. 755288 0. 834373 0. 557517 0. 776236  
1. 756786 2. 3685 3. 058981 4. 281856 2. 73286 1. 932228 1. 908874 2. 35154 2. 201839  
7. 308827 7. 132956 7. 416883 7. 607411 6. 868607 6. 465107 6. 947176 6. 974436 6. 509518  
1. 322201 0. 919857 1. 526627 1. 370434 0. 939125 1. 065699 1. 81555 2. 915373 1. 296944  
6. 247982 5. 418922 5. 450545 5. 519054 4. 533245 6. 396727 5. 618458 5. 112654 5. 568514  
4. 824293 4. 764612 4. 808298 4. 899536 4. 088844 5. 49995 6. 204092 5. 200195 5. 581992  
4. 047346 4. 619231 4. 458515 4. 878116 4. 566002 4. 909925 5. 422432 5. 301502 5. 284317  
2. 622498 3. 326615 1. 628588 2. 456835 4. 776933 2. 066913 2. 024043 2. 14225 1. 815953  
5. 591746 6. 416794 6. 035306 5. 782677 5. 681412 5. 64697 5. 840325 5. 633566 6. 641558  
6. 060875 5. 857494 5. 876191 5. 462928 5. 750085 5. 370951 5. 569117 5. 290905 5. 485613  
2. 586758 2. 596039 2. 66173 3. 318296 2. 57635 1. 888758 1. 920787 1. 602364 2. 283946  
3. 003466 4. 675201 3. 794313 3. 586001 2. 485832 2. 143726 1. 687681 1. 657006 1. 44687  
5. 32913 5. 581133 5. 838558 5. 555945 5. 755767 6. 03749 6. 400303 6. 649015 6. 452011  
3. 538895 2. 410962 3. 312911 3. 879344 2. 633932 3. 214624 3. 556781 3. 998708 3. 502074  
4. 584854 3. 876211 2. 746163 2. 618696 2. 921767 3. 52276 2. 494022 2. 995148 2. 626381  
1. 820012 2. 079064 1. 922198 1. 81688 1. 916639 2. 0386 1. 638998 2. 230825 1. 664995  
3. 62966 3. 795102 3. 953871 3. 026903 3. 130695 4. 150662 4. 025077 3. 847235 4. 055011  
4. 622379 5. 734516 5. 291358 4. 725339 5. 172147 5. 77223 4. 62412 4. 149034 4. 1302  
7. 616878 7. 111902 7. 238835 7. 123281 6. 697778 8. 305379 7. 68968 6. 491241 6. 948778  
1. 305879 1. 390372 1. 417545 3. 442718 2. 654228 1. 452369 1. 407017 2. 059221 1. 896526  
5. 902257 6. 199876 6. 263667 5. 317294 5. 893257 5. 916 6. 172086 6. 14869 5. 905016  
8. 22148 7. 385592 8. 790849 8. 38067 8. 308727 7. 56588 9. 495877 9. 674278 9. 485029  
6. 252909 6. 315647 6. 28966 5. 034508 6. 225854 6. 770757 6. 5885 6. 082304 6. 873051  
5. 40352 4. 713069 4. 92861 4. 828746 5. 410785 5. 603636 4. 459834 5. 392708 4. 690353  
5. 688452 6. 781069 6. 298305 6. 477399 6. 655375 5. 432379 6. 654403 6. 422745 6. 076829  
7. 848286 7. 803373 7. 633324 7. 737996 7. 86037 7. 988347 7. 414313 7. 383459 7. 520999  
5. 993573 5. 859639 6. 320497 6. 2445 5. 240946 7. 052695 7. 123414 6. 884538 7. 51086  
7. 427006 7. 65642 7. 436503 6. 983322 7. 859284 7. 024539 7. 359368 7. 389787 7. 328675  
6. 186955 6. 721304 6. 404131 6. 008727 6. 189877 4. 779735 5. 964409 5. 826667 5. 567136  
6. 008173 6. 016133 5. 919573 6. 363962 5. 42872 4. 499539 6. 182278 5. 685144 4. 858992  
5. 338076 5. 740248 6. 016396 5. 676279 6. 182613 5. 465126 5. 83459 6. 716653 6. 118872  
7. 044763 7. 814387 8. 003237 7. 355649 7. 490693 7. 810579 8. 450935 7. 467856 7. 635923  
2. 17967 1. 707221 1. 826017 2. 074191 1. 804692 1. 746952 1. 598095 2. 025572 1. 669413  
5. 188464 5. 128601 4. 47298 4. 417228 5. 083526 5. 329421 5. 579405 5. 368284 4. 982414  
3. 901457 3. 513827 4. 876133 4. 796207 4. 501471 3. 710241 4. 365573 4. 584249 4. 846026  
3. 792059 3. 512432 4. 059481 3. 930146 3. 83368 3. 465675 4. 903903 4. 488461 4. 477856  
2. 318882 3. 373992 4. 309394 2. 477985 3. 337408 3. 179374 3. 134454 4. 035326 3. 368349  
3. 550769 4. 203905 3. 349021 3. 441201 2. 755615 4. 052743 3. 326802 2. 678401 3. 990901  
1. 875886 1. 812342 1. 988581 1. 793247 1. 639015 2. 0414 2. 204074 1. 882725 1. 855226  
8. 007216 6. 515354 7. 579869 5. 62575 6. 720855 7. 81329 7. 33228 5. 095352 2. 796  
8. 708189 8. 809538 8. 743689 8. 311778 8. 65774 8. 306561 9. 007442 8. 883948 8. 637291  
8. 594924 9. 234879 8. 799377 8. 853488 9. 161184 7. 188674 9. 203794 9. 001623 9. 157798  
8. 597513 8. 851555 8. 770134 9. 058655 9. 565363 8. 662404 9. 829719 10. 3519 9. 961529  
3. 425969 1. 982082 1. 714518 1. 450962 1. 141508 1. 496175 1. 828672 1. 469498 1. 565499  
4. 856464 5. 638336 5. 479066 3. 603452 4. 862633 5. 402451 5. 536965 4. 425754 5. 292278  
4. 291487 3. 439106 2. 904301 4. 003665 4. 3218 3. 703678 3. 150602 3. 709191 3. 412507  
5. 805146 7. 569818 6. 798644 6. 286266 6. 22918 5. 56632 5. 838157 5. 363 5. 850698  
1. 150334 1. 255285 1. 415097 0. 829808 0. 944125 1. 216524 1. 202678 1. 235239 1. 573232

2. 110272 1. 624499 1. 947147 1. 479647 2. 752766 2. 166985 1. 609536 1. 993532 1. 820504  
4. 484828 4. 140635 4. 856562 3. 292089 5. 433358 3. 220576 2. 611303 5. 139496 4. 076478  
4. 858767 4. 366356 2. 149941 3. 827487 4. 156599 3. 723503 3. 771256 4. 225527 4. 59743  
5. 791097 4. 981369 6. 039984 5. 721264 6. 191971 6. 788434 6. 076451 6. 331563 6. 738645  
6. 849812 6. 429131 6. 584543 6. 593733 5. 608127 5. 661243 6. 964624 6. 417702 6. 087563  
2. 204863 2. 142978 2. 07036 2. 349002 1. 886035 2. 542578 1. 452004 1. 600737 1. 787516  
2. 182702 1. 798687 2. 440977 1. 708539 1. 98801 2. 625811 1. 820122 3. 408785 1. 943884  
6. 359481 6. 081663 5. 547837 5. 743082 6. 378637 5. 713525 6. 121929 5. 805226 6. 224458  
3. 831929 3. 98381 2. 964123 3. 175528 4. 207148 5. 163984 2. 683446 4. 369623 3. 813725  
8. 965866 7. 588868 6. 538444 6. 791589 6. 987862 7. 018656 6. 522273 7. 547397 7. 114395  
4. 619424 4. 744655 4. 305859 5. 27796 4. 649878 5. 921394 4. 891578 4. 580638 3. 923058  
1. 103441 1. 934501 1. 2369 1. 517732 1. 254171 3. 837872 1. 549168 1. 109381 1. 221661  
5. 49298 7. 007053 5. 433468 5. 919674 6. 136202 5. 240449 6. 155303 6. 791563 5. 975298  
3. 766346 2. 880576 3. 698379 3. 066468 2. 383188 3. 704439 3. 158976 3. 624721 2. 886943  
4. 144601 4. 317198 2. 28202 3. 044671 4. 000412 4. 866671 2. 419429 3. 749848 3. 502738  
3. 116404 2. 588088 3. 262687 3. 239377 2. 67971 2. 606654 3. 258052 3. 047482 3. 307103  
3. 270005 2. 588234 2. 457429 3. 322644 2. 928348 4. 155519 2. 85235 3. 20305 3. 732037  
0. 885321 1. 826391 0. 826581 1. 207526 1. 053074 1. 618386 1. 754532 1. 070311 1. 466338  
4. 071441 3. 157341 4. 742823 4. 593001 3. 328167 4. 278411 3. 669436 3. 06631 3. 803738  
6. 84462 7. 670704 7. 183872 6. 766486 7. 604853 6. 657598 7. 118912 6. 835059 6. 26278  
3. 326818 2. 408529 3. 727183 4. 311259 3. 842423 5. 396119 3. 276516 3. 027715 2. 773422  
2. 318721 3. 097962 1. 733086 1. 6235 1. 515009 3. 09827 5. 020273 1. 32363 4. 843771  
1. 771322 1. 90155 1. 874862 1. 931943 3. 558584 1. 692622 1. 25907 2. 070845 1. 7738  
3. 923356 3. 064174 2. 321843 2. 060233 1. 941122 2. 491466 3. 490906 2. 59504 2. 110901  
7. 094688 7. 39387 8. 076974 7. 684785 8. 568839 7. 556195 8. 239657 7. 996132 7. 884443  
5. 076393 5. 632601 4. 897239 5. 317386 5. 19952 5. 271905 5. 84312 5. 482733 5. 415457  
2. 045013 1. 798336 2. 598017 1. 645814 2. 052128 2. 674585 2. 211578 3. 125869 4. 032555  
5. 590814 5. 841289 4. 504999 4. 177579 5. 383168 4. 879901 3. 693884 4. 663806 5. 034618  
5. 714638 4. 571878 4. 467396 4. 743734 4. 335997 4. 967532 3. 178427 3. 59552 3. 590343  
5. 825718 4. 410457 6. 182633 5. 920803 4. 997153 5. 273122 3. 88289 3. 487566 3. 034668  
1. 982682 1. 847918 1. 832598 1. 19206 1. 912526 1. 678504 2. 137059 1. 631851 1. 257875  
6. 475174 6. 314858 6. 939908 6. 519968 5. 694237 6. 677888 6. 605906 7. 109875 6. 743218  
6. 570563 6. 845033 7. 396015 7. 702275 7. 467754 6. 76504 6. 635952 5. 796725 6. 361522  
4. 744165 5. 480609 3. 988465 5. 014626 5. 451794 3. 528203 4. 648483 5. 16959 5. 141521  
5. 473441 5. 270577 5. 326453 5. 364459 5. 738941 6. 125948 6. 061676 5. 937101 5. 817406  
3. 637248 3. 128567 1. 679751 3. 463206 2. 427058 3. 809205 3. 687871 3. 23701 3. 603073  
2. 88454 3. 049036 3. 299479 3. 553109 3. 439649 3. 75941 3. 728147 3. 22739 3. 08427  
2. 770104 2. 608542 0. 76614 2. 244394 2. 113354 1. 926539 0. 446625 2. 054749 1. 587393  
1. 415442 3. 620563 2. 82628 2. 972616 3. 490548 2. 584137 3. 019174 3. 507111 3. 977018  
1. 102689 1. 137062 1. 457859 2. 054333 1. 531246 2. 640813 1. 58404 2. 652516 3. 200342  
5. 958144 6. 078643 5. 616903 6. 957511 6. 403627 7. 131399 6. 696057 6. 131399 6. 358701  
6. 768122 6. 753672 6. 746892 6. 75313 6. 520207 7. 553717 6. 10079 6. 16432 6. 174154  
2. 8302 3. 384267 2. 849002 3. 474326 3. 303282 3. 076955 2. 617099 2. 885495 3. 811954  
1. 606782 0. 741204 1. 459134 0. 288616 1. 051303 3. 063468 1. 498507 1. 751724 2. 210435  
3. 008977 1. 752723 1. 322034 2. 654699 1. 451053 1. 64606 1. 694955 2. 157634 1. 517266  
6. 011666 6. 180656 4. 600397 4. 055181 4. 297231 4. 716048 4. 160369 3. 319447 3. 521399  
4. 745122 2. 227137 4. 3353 4. 390342 2. 686025 2. 272555 3. 309649 2. 718304 1. 977734  
3. 022396 2. 641547 2. 031591 3. 161439 2. 836545 2. 566633 2. 92517 3. 362834 2. 998262  
4. 891694 4. 516819 4. 89847 4. 695028 5. 781242 5. 671524 6. 029499 5. 484425 5. 786318  
4. 902544 2. 940546 4. 81637 5. 749246 5. 846938 5. 536731 5. 580578 5. 723121 6. 49834  
2. 891898 2. 862959 2. 207188 3. 610684 3. 270072 3. 488704 3. 802056 3. 13848 2. 900622

3. 463696 3. 222644 4. 111434 3. 911747 3. 95333 4. 64275 4. 070101 3. 485661 4. 698885  
4. 98173 2. 939507 3. 682289 3. 873167 4. 951887 7. 462205 5. 912197 4. 805128 6. 673488  
3. 159705 3. 13713 3. 234126 3. 410531 3. 431993 3. 936644 4. 039065 4. 221036 3. 880024  
4. 986013 4. 271688 3. 632973 4. 394016 4. 645951 3. 374169 3. 42294 4. 159513 3. 522569  
2. 377152 2. 260109 2. 645963 2. 928531 2. 301666 3. 284642 4. 199397 2. 603738 2. 553349  
6. 75965 6. 910599 6. 270477 6. 827154 5. 838405 7. 71116 8. 419318 8. 12189 9. 191506  
0. 682568 1. 41421 2. 453997 0. 625162 0. 676063 0. 848748 0. 781211 1. 990763 0. 824399  
2. 000495 0. 834077 1. 286739 1. 212047 1. 082606 0. 644696 1. 239914 0. 937672 0. 963783  
1. 176248 1. 832031 0. 915299 0. 769675 1. 340064 1. 976825 1. 639723 1. 362952 1. 020624  
1. 667966 3. 060535 2. 103035 1. 333213 1. 143821 2. 152938 1. 022155 1. 084097 2. 414964  
1. 343753 1. 294932 1. 035775 2. 479514 1. 033969 1. 127421 1. 418161 1. 32156 1. 646848  
2. 334975 2. 486548 1. 688403 2. 542442 2. 497718 1. 252005 1. 550518 2. 249775 2. 985775  
1. 638013 1. 600526 1. 829981 1. 974561 1. 270754 1. 239031 1. 912173 1. 675021 1. 349562  
4. 472926 3. 789203 4. 794219 3. 92718 2. 88608 3. 182867 4. 765064 5. 475935 5. 11456  
7. 490195 7. 658606 6. 838311 7. 686865 7. 252238 7. 937874 7. 228627 7. 262481 7. 520687  
3. 284782 3. 684278 4. 138277 1. 985934 4. 725785 4. 961978 3. 739017 3. 412489 3. 6671  
1. 248371 1. 09147 1. 435758 1. 061849 1. 006206 1. 116947 1. 015146 1. 266151 0. 758494  
3. 073594 2. 585938 2. 019461 2. 812453 3. 790976 3. 013702 4. 069214 3. 01392 2. 681386  
1. 609352 1. 804755 1. 6174 1. 701083 1. 916728 1. 894231 3. 317993 1. 694499 1. 647353  
2. 097902 1. 57031 2. 059654 1. 500426 1. 477507 2. 32671 1. 894002 2. 209229 1. 323069  
7. 86026 8. 149546 8. 284264 8. 167326 8. 606656 8. 278461 8. 47286 8. 347937 8. 221173  
8. 04369 7. 65544 7. 50843 6. 126919 6. 649571 7. 305257 5. 800664 4. 294022 4. 573784  
5. 221548 6. 520824 4. 530954 5. 403845 5. 031939 5. 271132 4. 929343 4. 435201 4. 37304  
3. 381649 4. 115658 3. 031171 2. 610054 2. 980202 3. 911286 3. 047406 2. 657471 3. 168706  
4. 016766 4. 635158 4. 104087 6. 128368 4. 500479 6. 972485 4. 882312 3. 806069 5. 167391  
1. 286143 1. 679891 1. 263366 2. 351578 1. 32399 1. 625736 1. 638151 1. 745584 1. 831007  
2. 804301 4. 109862 3. 489349 1. 062455 1. 464294 1. 263111 1. 606595 2. 913414 0. 804106  
6. 352482 5. 448678 6. 079174 6. 161772 5. 595695 7. 293149 6. 420305 6. 727841 6. 276704  
4. 280192 4. 250678 4. 861757 3. 365308 3. 480077 5. 082576 3. 768533 2. 359723 3. 519386  
6. 114292 5. 755923 6. 167106 5. 850072 5. 98294 6. 037707 6. 113368 6. 327657 6. 422544  
1. 678954 1. 044217 2. 263766 1. 265791 1. 294331 1. 922808 1. 48746 2. 066725 1. 497478  
1. 558531 2. 136455 1. 440541 1. 90372 1. 593687 1. 581816 1. 342991 2. 069786 1. 515291  
2. 240733 1. 86426 2. 747526 2. 575425 1. 786051 2. 144123 2. 487074 2. 55916 2. 151374  
3. 957185 4. 898412 3. 823857 5. 194979 4. 065277 5. 036293 4. 100154 5. 512695 4. 033935  
5. 186151 5. 260002 5. 200417 4. 862737 5. 008467 4. 745195 4. 69172 4. 910527 5. 18142  
4. 099493 4. 09002 4. 997665 3. 436629 3. 267192 4. 506622 4. 251577 3. 961409 3. 95589  
3. 294413 2. 731832 3. 272658 3. 583151 3. 140167 3. 465636 2. 907561 3. 226971 2. 969071  
7. 766868 8. 084396 7. 719402 7. 367596 8. 433972 7. 569366 8. 169712 7. 687159 7. 412745  
5. 524189 5. 812838 5. 815377 5. 560661 5. 684744 5. 866691 5. 375986 6. 295689 5. 494676  
7. 335803 7. 199118 7. 404915 7. 6239 7. 20584 7. 095383 7. 398322 7. 890785 6. 976326  
4. 126304 3. 081782 4. 305854 3. 788091 3. 907471 5. 380978 4. 301604 4. 425966 4. 12905  
7. 518292 6. 943763 6. 506278 6. 911976 7. 383159 7. 250648 7. 250704 6. 770125 6. 710319  
1. 395708 2. 136947 1. 353594 2. 154664 1. 470371 1. 177517 0. 810738 1. 209911 1. 136597  
2. 850927 3. 441588 4. 304129 3. 410965 2. 891522 3. 055356 3. 802864 3. 427023 3. 223686  
3. 079881 1. 513816 2. 208343 2. 58461 2. 129901 2. 231428 1. 540455 2. 260048 1. 502656  
6. 935212 7. 108116 6. 96208 6. 652691 7. 320201 6. 35486 6. 905519 6. 445569 6. 88076  
5. 865855 6. 582651 6. 375903 5. 593547 7. 109615 5. 416684 5. 851162 6. 519862 6. 332296  
7. 286042 7. 354433 7. 910125 8. 028688 7. 347687 7. 241255 7. 935491 7. 618726 7. 794279  
1. 451289 1. 785806 1. 619574 1. 187532 1. 05549 1. 299473 2. 165966 1. 04312 1. 152695  
3. 329172 3. 247016 3. 663634 3. 813027 4. 047835 5. 272761 5. 02036 4. 790427 4. 839941  
7. 033872 7. 375147 6. 159425 5. 820272 6. 287975 6. 996887 7. 441758 7. 060656 6. 969575

7.087564 5.989638 6.665228 6.994312 7.904078 7.332148 7.224946 6.866479 6.996997  
4.314974 4.060549 4.416946 4.786809 4.206401 4.833971 4.674599 4.280759 4.68417  
8.950824 9.485667 9.190925 8.676239 9.440933 9.141635 9.247887 8.96868 8.933084  
6.764681 6.136346 5.731896 6.959383 5.707411 5.440439 6.176182 5.577042 4.470569  
1.669678 1.989617 1.476659 2.773446 1.592032 1.61173 1.517641 1.767086 2.721867  
7.009242 7.575644 7.411582 7.408974 7.433934 7.085669 6.961914 6.50823 6.762253  
7.208832 6.837645 6.725604 6.683054 6.715929 7.125754 7.381968 7.108476 7.106479  
6.553303 6.608134 6.083401 6.552498 6.343026 7.140672 6.626179 7.287466 6.953066  
1.761516 3.034684 2.750345 2.652094 2.623378 2.086487 1.629517 2.095374 1.824495  
4.488531 4.999528 4.902986 4.791564 4.527412 5.022526 5.116049 4.595773 4.007119  
9.187295 8.73376 9.029384 8.450134 8.549638 9.045346 8.961946 8.300929 8.824449  
3.267479 1.538357 4.329802 2.251716 2.248668 2.693977 1.225192 1.843037 2.157756  
2.852634 2.359863 2.376293 3.147991 2.562259 2.782002 3.003908 3.226723 2.480961  
6.565905 6.618562 6.6019 6.497489 6.3694 6.612284 6.169151 5.749131 6.162201  
3.4712 2.660325 2.427606 2.490381 1.877119 2.80168 2.024806 2.215541 3.142807  
1.66426 1.10609 0.699808 0.992938 1.133321 2.989223 0.686506 0.842806 0.756539  
1.682975 2.166105 2.209959 1.749162 1.613656 1.52001 2.053259 1.662984 1.702104  
3.652626 3.960194 3.335333 3.370568 4.036742 3.220621 2.865718 3.591925 3.435672  
8.091929 7.916291 8.095251 7.932973 8.117813 7.243308 7.83837 7.658924 7.748715  
7.953132 6.989066 8.149524 7.835421 7.680993 8.776855 8.10112 8.290217 8.030921  
7.229051 6.945891 6.90237 7.604467 7.426586 7.233162 6.757337 7.590866 7.482707  
4.534832 4.460141 4.652234 4.847209 5.891257 5.154066 5.499176 5.315269 5.572647  
4.05401 5.187938 4.838862 6.155031 4.76718 5.820663 3.798781 3.849938 4.967299  
5.118782 5.761419 5.123475 5.68372 5.674315 6.23601 5.374474 5.906316 6.024267  
6.765668 7.683985 6.803422 7.485631 7.776201 6.686628 6.953348 6.946747 7.351283  
6.430846 6.798433 6.673622 5.798199 7.141835 6.872551 7.166804 6.495334 6.399265  
8.681284 8.28109 8.484341 8.812381 8.357275 9.322154 8.893117 8.767831 8.494828  
6.046434 6.189386 4.552637 6.026141 5.536159 6.379243 5.817838 6.365549 5.726101  
6.354619 6.008651 5.022286 5.522995 6.389774 5.882044 6.570862 7.088643 6.750673  
9.620471 9.438259 9.724971 9.736075 9.680333 9.328382 10.09807 10.14605 9.803438  
7.797168 7.938804 7.847048 7.550897 8.220867 8.523765 8.309798 8.464411 8.678272  
8.361563 7.722619 8.564671 8.623573 8.644745 8.89181 8.693937 8.581714 9.034969  
9.694828 9.495544 9.630757 9.870615 9.604451 9.716836 9.849083 9.682094 9.572547  
7.251058 6.619252 7.3746 8.013248 7.37184 8.876303 8.093135 8.342179 8.780685  
8.060739 6.793662 6.562445 7.185732 6.196569 8.66078 7.441794 7.081288 6.994737  
2.653505 4.469522 4.910833 6.537791 4.738398 3.87634 4.399501 4.833544 5.566071  
6.890894 6.183251 6.872155 7.264943 7.002477 7.184873 7.358585 6.933093 7.053378  
5.991448 4.850687 4.863789 5.101763 5.002844 6.232862 6.421764 4.914155 5.377969  
4.607675 5.644894 3.710547 5.978105 4.568999 5.753196 6.167074 5.782253 3.796681  
2.771839 3.769049 4.851794 3.742565 3.202493 4.295655 3.321646 4.515679 2.545655  
6.323308 5.564177 5.48797 5.887506 6.819189 6.23338 6.111928 6.004096 6.425098  
5.05435 5.538219 5.708699 5.730611 4.904166 5.145757 5.781798 5.904317 6.062605  
9.135927 9.333548 9.371379 9.040926 9.07406 9.466619 8.959117 9.24613 9.016511  
8.40243 8.059772 8.700901 8.525768 8.139727 8.453534 9.417235 8.587153 8.418502  
5.588533 6.294039 5.555231 5.600235 5.936197 5.93238 6.038386 6.112796 5.858687  
8.561756 7.943185 8.111037 9.132625 8.22437 8.045804 8.880139 7.905618 9.385856  
8.922857 8.517904 8.569981 9.001323 8.598677 9.145699 8.844844 9.088281 9.138732  
3.642508 4.578367 4.11028 4.653142 3.362146 5.178856 4.831525 5.518843 4.860049  
8.975309 8.875851 8.728097 8.835235 9.108402 7.612366 8.725773 9.415652 8.98292  
7.079807 7.348277 7.231276 7.491922 7.43337 7.936298 7.559366 7.726688 7.702387  
4.129778 4.225985 4.27049 4.339167 4.7253 6.191514 5.653904 5.044001 4.585847



7. 436792 7. 417832 7. 060676 7. 240058 7. 431374 7. 034601 7. 711637 6. 785424 7. 675511  
9. 46862 9. 666273 9. 64729 9. 240043 9. 64906 10. 14412 9. 852586 9. 691016 9. 537931  
5. 188188 5. 355107 5. 473848 4. 961784 5. 437804 3. 322994 5. 240145 3. 882159 3. 738874  
4. 643825 4. 434137 5. 360334 5. 573345 5. 103538 5. 877151 5. 812306 5. 375015 5. 664088  
5. 986778 6. 579417 6. 244882 6. 36279 6. 189698 6. 513867 6. 138809 5. 948072 6. 402675  
7. 465322 8. 446753 7. 984338 7. 884064 7. 947624 8. 269865 7. 908607 7. 983384 7. 881321  
7. 862506 7. 504316 7. 727023 7. 311576 7. 66137 7. 838573 7. 608021 7. 273446 6. 914044  
2. 638223 2. 479736 1. 769256 2. 61084 3. 086281 2. 053744 1. 590383 1. 97116 2. 000528  
2. 749944 3. 966242 4. 126806 3. 714438 4. 77564 3. 813839 2. 822379 2. 728599 2. 656144  
7. 079426 7. 170417 7. 797383 7. 251256 7. 974674 8. 167011 7. 38784 7. 622385 8. 239693  
1. 263422 1. 396783 0. 977722 2. 909588 1. 510399 1. 15315 1. 714743 1. 664236 1. 511701  
6. 047598 5. 395453 5. 031138 5. 273901 4. 859777 6. 864901 4. 92948 5. 082415 5. 496319  
2. 757469 2. 986693 2. 825067 3. 687123 3. 291474 2. 970384 3. 780675 3. 795993 3. 349795  
2. 994762 3. 123415 3. 192412 2. 83187 3. 510405 4. 25197 3. 210759 3. 890303 3. 904304  
3. 675533 2. 91967 3. 40323 3. 80644 3. 57271 3. 941928 4. 338448 4. 483077 5. 057394  
1. 354786 1. 231679 1. 64504 1. 06544 1. 903566 1. 210548 1. 380687 1. 314942 0. 835721  
3. 944441 3. 896186 3. 668827 3. 52205 4. 580446 4. 242976 4. 896835 4. 627967 4. 960808  
8. 800206 7. 781029 7. 869412 7. 10264 6. 990654 8. 416531 6. 783399 4. 409024 3. 608839  
1. 877234 1. 308846 1. 766135 1. 718586 1. 401778 1. 930158 1. 347002 1. 012501 1. 522378  
1. 70326 1. 943251 1. 673907 1. 746059 3. 218784 1. 639744 1. 427119 1. 415063 2. 027779  
1. 733163 3. 131087 3. 1945 2. 297037 3. 641449 3. 609735 2. 828277 1. 853048 2. 350806  
2. 393162 2. 315972 3. 052521 2. 653628 3. 05665 2. 349214 3. 567786 3. 617104 4. 155127  
1. 34012 1. 300939 1. 201459 2. 349557 1. 827478 2. 24485 2. 151842 0. 832135 2. 017271  
5. 393116 5. 549773 4. 864398 4. 486982 4. 032906 5. 951922 5. 977616 6. 083115 6. 400435  
5. 198338 5. 885564 6. 123381 6. 235813 6. 579722 5. 560747 6. 155514 6. 042616 6. 068185  
4. 036896 2. 950269 3. 114648 3. 112187 3. 437739 3. 267281 2. 877509 3. 637513 2. 924515  
4. 857848 4. 859755 5. 684509 3. 198467 5. 599679 3. 151873 6. 615749 8. 917554 7. 573604  
9. 122177 9. 104598 9. 296176 9. 105593 8. 610008 9. 252221 9. 086309 9. 204104 9. 183306  
4. 530222 5. 869166 4. 825679 4. 91362 3. 947975 4. 17667 6. 20257 6. 909806 6. 818658  
6. 038956 5. 705801 5. 673358 5. 815404 5. 757201 5. 818392 6. 28095 6. 095357 6. 166536  
6. 300291 6. 323889 6. 444667 6. 342201 6. 585566 7. 015722 6. 558931 7. 071788 6. 89743  
2. 693527 3. 351367 3. 846346 3. 613292 3. 745111 3. 856294 3. 688907 3. 835159 4. 026331  
5. 313347 5. 333686 5. 340553 4. 972474 5. 135512 4. 81211 4. 310698 4. 265248 4. 793231  
2. 303775 3. 610516 2. 103765 5. 643832 2. 210922 2. 222435 1. 916819 2. 706633 2. 382207  
4. 126429 4. 763563 3. 668645 4. 205119 4. 246428 4. 59975 4. 409646 4. 067648 5. 072362  
5. 624288 5. 479839 4. 234178 4. 404786 5. 469469 6. 164096 5. 835422 5. 936507 6. 125083  
2. 63507 3. 598845 3. 286906 1. 911797 3. 576078 2. 726911 3. 792888 4. 188248 4. 182665  
1. 983072 1. 950137 2. 033446 1. 815339 2. 309651 2. 440642 1. 605501 1. 558251 1. 576144  
2. 036428 2. 119713 2. 193739 2. 340624 0. 968862 2. 245 2. 831247 2. 717619 2. 378361  
1. 824756 2. 32319 2. 097255 2. 166193 1. 81494 2. 922946 2. 122177 2. 221972 2. 192658  
1. 415782 1. 819628 1. 843736 1. 527709 1. 977558 2. 325122 1. 868644 2. 522018 3. 04106  
5. 197106 5. 754671 4. 979204 4. 769057 5. 134581 5. 156438 5. 150768 5. 606057 5. 562328  
8. 782839 8. 448373 8. 696773 8. 593489 9. 004138 9. 028262 8. 771574 8. 547109 8. 698333  
5. 944197 5. 670429 6. 164132 5. 952142 5. 558805 5. 595909 7. 404626 7. 899666 7. 398276  
3. 304471 2. 054411 1. 125504 2. 691498 2. 394178 3. 749384 1. 665244 2. 008308 2. 260435  
7. 072424 6. 76255 6. 653109 6. 95121 6. 844026 6. 837908 6. 534713 7. 751186 7. 116844  
1. 403229 1. 035584 1. 178085 1. 678393 1. 521003 1. 442594 1. 966227 1. 965583 2. 384131  
6. 422396 7. 645767 7. 878788 5. 999428 7. 290284 6. 094816 8. 037966 7. 661822 7. 426048  
1. 324473 1. 83628 1. 61667 3. 142144 1. 210234 1. 491139 1. 300677 1. 365366 2. 305828  
1. 498457 2. 401227 3. 146333 2. 307995 3. 507215 3. 823022 3. 129021 3. 366173 3. 075509  
5. 150516 5. 662291 5. 227591 4. 909056 5. 293531 5. 113385 5. 886698 5. 899842 5. 899912

5.604495 6.653747 5.725631 4.840473 5.926195 4.589203 6.630024 6.346426 6.205808  
4.735869 5.418366 4.547172 4.435511 5.554552 4.978146 5.138391 5.067285 5.44438  
2.099782 2.740302 2.111128 1.629326 1.703382 2.802109 2.880108 4.085207 3.031454  
6.531652 4.742783 6.469272 6.154389 4.380061 6.344035 5.783642 5.315604 5.809844  
5.982332 5.776274 6.151709 6.433061 6.339242 6.886859 6.306414 6.622817 7.023287  
0.945273 1.83562 2.279076 2.124113 1.667859 2.702444 2.021446 3.874269 3.327113  
8.56744 8.574177 7.904323 8.404782 8.726785 8.745842 8.379179 8.28006 8.199147  
6.593667 7.089392 7.449077 6.57852 7.851117 6.692891 6.399882 5.772812 6.252114  
4.126225 3.192597 3.950242 4.164284 3.001275 4.432361 5.517128 5.207525 4.859017  
2.097644 2.121621 1.762141 1.931777 1.66126 1.948098 1.7982 2.302067 1.456934  
7.135672 6.375859 6.566564 5.826651 5.906175 7.038974 6.462523 6.252277 6.062966  
5.089774 4.938243 6.002613 4.552029 5.58483 5.056019 6.029102 5.457772 5.74339  
7.745881 8.230709 8.093378 7.980588 8.663314 6.556778 7.872075 7.994829 7.800684  
7.153759 7.194639 6.505246 6.327334 7.129989 6.379704 6.277768 6.215218 6.077834  
6.072901 5.183088 5.697145 6.248128 5.991382 6.407605 6.047126 5.14867 6.029149  
2.576752 1.64501 1.342308 1.585059 1.37622 1.135784 1.759935 1.557905 1.80586  
4.002536 3.508948 4.203193 3.622785 3.18113 3.129724 4.281279 3.09525 3.050588  
1.874516 2.2638 1.936584 1.679578 1.37762 2.675186 1.2561 1.785033 1.832509  
4.372109 5.506212 4.403508 4.063061 4.600145 4.528241 5.195669 4.874141 4.520949  
2.970116 3.1465 2.700803 4.891325 3.703195 3.559166 2.624673 3.090711 3.361963  
4.503821 4.41129 4.510011 4.877912 4.822659 4.522664 4.681448 5.421836 5.431197  
4.729703 4.576218 6.859928 5.019156 5.144353 4.826415 4.107152 5.687106 4.841624  
2.000187 2.743712 4.594052 3.791051 4.081669 4.142039 3.502218 5.116412 4.523929  
5.875236 6.186978 6.064583 5.732738 6.619464 4.792951 6.448732 6.641488 6.715173  
7.381306 7.945351 7.635156 6.919093 7.912935 7.262116 7.410288 6.739136 6.938563  
5.466816 3.843646 4.942447 5.496659 4.79194 4.974537 5.13592 5.350236 5.617825  
3.536907 5.164539 4.893009 5.224835 4.611431 4.335752 5.42756 5.953029 5.719468  
5.734228 6.465629 5.991582 5.401834 6.125667 4.50773 5.552577 5.689757 5.578921  
1.63563 1.859424 1.781081 1.71318 1.525702 1.565305 1.425936 1.733236 1.785721  
2.083876 2.654188 1.755906 2.177791 2.344046 2.145744 2.371953 2.32426 2.9691  
3.268534 3.932217 2.900138 4.151468 3.064897 2.971408 3.414449 3.19644 3.508681  
2.621866 1.848433 2.349402 1.543671 1.602033 1.479313 2.037147 1.535383 2.038278  
3.449412 3.256383 4.03262 3.568985 3.764431 4.231431 3.29083 3.932855 3.989599  
7.025024 7.999883 7.498525 7.658872 6.997586 7.890526 7.487942 8.066977 7.496733  
5.872726 7.262531 6.479437 5.962356 7.491119 6.705581 8.06486 8.067983 7.960429  
5.580132 6.590673 5.328133 6.08213 6.154237 5.738446 5.693698 5.214775 5.95068  
0.943824 1.295462 1.209656 2.332073 1.116144 1.025641 1.290564 1.234817 1.498258  
7.588149 7.540535 7.082529 7.319822 6.651821 3.95255 4.656793 6.584287 7.472822  
6.275105 6.152118 6.246191 6.192022 6.416342 5.952246 6.189121 6.00026 5.556626  
1.523521 1.37028 1.937407 1.817975 1.740656 1.245319 1.32603 1.679531 1.387989  
1.134266 1.298426 0.893457 1.7316 1.645819 1.290486 1.059037 1.706147 1.630321  
7.174337 7.272564 7.528218 7.470866 7.609482 7.755873 7.457055 7.694866 7.57422  
4.165203 5.363425 5.290451 4.608818 3.643883 5.164163 3.95836 4.225865 4.429219  
5.63337 5.048089 5.559042 5.714407 6.197236 5.621038 6.787657 6.020266 7.083274  
2.904659 3.371019 3.113917 2.578036 3.087292 3.456345 2.485941 2.700032 3.430249  
2.236778 2.697348 2.500519 1.450875 2.244396 3.061203 2.12943 3.232944 2.733808  
2.74553 2.674954 3.102208 2.753069 3.519957 2.434395 3.544009 3.511398 2.39304  
5.588643 4.772609 4.537442 4.005632 4.455994 3.882244 4.937901 5.840956 5.225109  
5.113976 5.62585 5.704883 5.154368 5.222708 4.903275 5.011392 5.380027 5.2847  
6.37088 7.037521 5.915019 7.17416 6.117553 6.894019 7.832948 7.157554 7.330461  
5.933903 6.613313 6.569914 6.600653 6.449994 5.755489 7.185218 6.901134 6.899854

1. 646596 0. 988146 0. 871278 1. 032328 1. 015582 1. 127524 0. 986134 2. 029677 1. 179646  
6. 78425 6. 556305 7. 376792 6. 919149 7. 44038 7. 852757 7. 482199 7. 316909 7. 4533  
5. 462138 5. 337201 5. 327374 4. 587614 5. 013397 5. 514406 5. 216785 4. 72791 5. 153989  
4. 208212 4. 967337 4. 331582 4. 058898 4. 563401 4. 975732 4. 812952 3. 473537 4. 561407  
6. 291088 6. 880441 6. 67502 6. 539316 7. 020638 6. 438321 6. 857869 6. 121664 6. 661212  
5. 790115 6. 077213 5. 68014 5. 657189 5. 449845 5. 374745 5. 704077 5. 639082 5. 040501  
1. 99267 2. 092331 2. 463403 3. 119521 1. 469867 1. 852632 3. 043755 0. 902042 2. 352206  
6. 33409 6. 727174 6. 902952 7. 738523 7. 611101 2. 777992 6. 110491 5. 545216 5. 527789  
6. 751852 6. 941257 7. 132039 6. 937389 7. 063055 6. 425981 7. 638344 6. 79544 6. 935317  
7. 847256 7. 163251 7. 165024 7. 028773 6. 862372 7. 026772 7. 095429 6. 254053 6. 509228  
2. 380386 2. 152064 1. 99334 2. 131868 2. 633434 3. 156638 2. 19965 1. 413643 2. 071599  
4. 498417 6. 018498 5. 469745 5. 021403 5. 703017 5. 126694 5. 212088 3. 774827 4. 105195  
2. 295787 3. 129537 2. 278219 2. 039729 2. 510229 2. 830183 3. 614925 3. 33904 3. 253057  
4. 430063 4. 216723 2. 955888 3. 331583 4. 743946 5. 297713 3. 969742 4. 548067 4. 846347  
4. 255239 5. 118212 5. 3885 4. 18718 4. 492958 5. 74384 5. 777356 5. 503849 5. 817486  
2. 510694 2. 650326 2. 709193 2. 049118 2. 228626 3. 735077 1. 956227 2. 088912 2. 651576  
3. 959117 4. 86716 4. 529329 4. 162909 5. 086586 4. 501199 5. 07909 5. 549456 5. 472841  
2. 168341 2. 063315 1. 755335 2. 36583 1. 271297 1. 521484 1. 675408 2. 681093 1. 320635  
4. 723969 5. 293868 4. 548548 5. 507022 5. 245171 5. 946111 6. 195171 5. 473579 5. 323706  
5. 875286 6. 196652 6. 024191 6. 301789 5. 838436 5. 678247 5. 765829 5. 988972 5. 483008  
2. 429394 3. 300015 3. 265845 1. 217323 3. 720227 1. 671188 2. 439986 2. 185064 2. 867037  
5. 164284 5. 318055 5. 316425 4. 802855 5. 507542 5. 420184 5. 82327 4. 918627 4. 892056  
4. 843061 4. 787252 4. 85426 4. 817848 4. 239206 4. 636801 4. 11799 4. 416048 5. 180259  
3. 549726 3. 484528 4. 030001 3. 930674 3. 430993 4. 094274 3. 533287 4. 006954 4. 484169  
5. 83137 6. 044956 6. 352536 6. 443915 5. 905127 6. 344577 6. 220845 6. 559107 6. 688402  
1. 56965 1. 973517 1. 493459 1. 757702 1. 752855 1. 589833 1. 828144 1. 974744 1. 754958  
1. 330676 1. 496241 1. 435639 1. 692589 1. 234809 1. 237424 1. 138219 2. 390698 1. 293648  
2. 186721 2. 399394 1. 567732 1. 743024 1. 833056 1. 725156 2. 205462 2. 59832 1. 966199  
2. 305693 2. 829519 2. 783019 2. 779459 1. 980415 2. 703968 3. 304733 2. 700682 2. 743183  
4. 417571 3. 79767 4. 525668 4. 295733 4. 52024 5. 90796 5. 512244 5. 874503 5. 808357  
7. 267008 5. 919107 7. 445119 6. 947001 5. 091372 6. 288885 5. 336714 3. 449294 2. 744436  
7. 214868 8. 09509 7. 227747 6. 950312 7. 283329 7. 890431 7. 0064 7. 288366 6. 838726  
4. 166415 4. 861109 5. 343853 3. 754613 4. 788777 4. 048674 4. 034661 4. 4692 5. 239029  
1. 976462 1. 785625 1. 495086 1. 449424 1. 701812 2. 259824 4. 259077 5. 038929 2. 68039  
7. 926722 7. 446482 8. 108207 8. 40548 8. 133862 8. 266805 7. 904882 8. 49383 8. 475038  
2. 40144 1. 499991 2. 141259 1. 663675 0. 858373 1. 062705 1. 346993 1. 41652 1. 217302  
5. 775193 5. 695436 6. 020111 5. 997062 6. 253704 6. 350269 6. 36799 6. 493315 6. 798719  
5. 903097 7. 4219 6. 886967 6. 81567 6. 911533 4. 34404 6. 08845 5. 944105 5. 870936  
1. 486211 1. 461573 1. 640391 1. 709416 1. 890859 1. 544225 1. 452821 1. 338864 1. 932504  
7. 126418 7. 069861 7. 246968 7. 048548 6. 534771 7. 803907 7. 828543 7. 443882 7. 468489  
2. 215211 4. 391267 2. 462384 2. 761342 2. 835508 3. 293418 2. 432859 2. 81786 2. 997881  
4. 954488 4. 625595 4. 538614 5. 235458 4. 319256 4. 288257 3. 750394 4. 807309 4. 326737  
3. 241353 4. 038895 3. 647994 2. 444209 1. 497992 3. 459732 1. 190089 1. 150655 1. 464226  
1. 236174 1. 413465 1. 623427 1. 434179 1. 627486 1. 481763 1. 454071 1. 228091 1. 649335  
3. 20784 1. 193916 5. 749087 1. 102626 2. 179455 2. 210126 2. 271797 1. 733285 1. 889255  
3. 716206 3. 670231 2. 243292 3. 716851 3. 279236 5. 922692 3. 492273 3. 879233 5. 136588  
4. 886039 4. 51048 4. 357092 5. 261688 5. 302555 5. 358941 5. 294761 5. 557117 5. 761008  
3. 607125 3. 133342 3. 917891 4. 500319 4. 380763 4. 157923 6. 244606 5. 071197 5. 396398  
3. 491473 3. 66749 3. 307457 3. 381708 2. 465958 3. 012166 3. 008711 3. 463701 2. 844356  
2. 391663 1. 786655 2. 640242 2. 207427 2. 126233 2. 471189 1. 136029 1. 857092 2. 343103  
4. 196803 4. 143689 5. 960845 6. 836957 5. 300465 5. 899353 5. 563218 6. 551481 6. 007555

6. 64341 6. 698489 6. 671241 7. 45589 7. 321693 7. 003006 6. 691881 6. 215342 6. 93799  
3. 383692 3. 463363 2. 428858 2. 610941 4. 497946 3. 301593 1. 055402 3. 551872 5. 276351  
5. 225531 5. 220383 5. 458364 5. 446715 6. 626051 5. 593152 4. 58001 5. 18748 6. 807207  
5. 348376 6. 133232 5. 537599 5. 822204 5. 62578 5. 844696 5. 714678 6. 104938 6. 025618  
8. 140559 8. 291473 8. 775893 7. 9394 8. 206304 8. 713995 8. 535732 9. 443263 8. 955441  
5. 353547 4. 192264 4. 786134 4. 639983 4. 889816 4. 988713 5. 264976 3. 93325 4. 899718  
2. 680388 2. 946997 1. 212036 2. 332157 2. 239223 1. 370922 2. 136096 2. 054442 1. 482767  
7. 054492 6. 054809 5. 898267 6. 682475 6. 547091 6. 72219 6. 48259 7. 311983 6. 451108  
1. 761033 2. 16468 1. 978899 2. 879188 2. 451123 2. 469517 1. 581604 2. 522104 2. 522104  
8. 411214 8. 48056 8. 056215 8. 006477 8. 563733 7. 866913 8. 370222 8. 511654 9. 002788  
7. 447504 8. 240207 7. 627446 7. 273252 7. 933492 6. 922542 7. 678516 7. 408021 7. 138972  
2. 843006 3. 227156 3. 439283 3. 128954 3. 808076 2. 664172 3. 39394 3. 823205 4. 046632  
7. 865547 8. 614047 8. 451998 8. 468741 8. 189134 5. 89735 8. 488593 8. 495007 8. 092557  
3. 431792 3. 270217 3. 745305 2. 865408 3. 468068 2. 98155 3. 841497 3. 809264 3. 328111  
7. 284842 7. 558682 6. 332895 6. 763878 7. 378813 7. 108913 7. 522484 7. 436185 7. 166434  
0. 734555 0. 869851 0. 706618 0. 618324 2. 021175 0. 996809 2. 186331 0. 918076 1. 228053  
1. 703179 2. 201296 3. 441876 2. 996604 2. 420402 1. 815404 2. 161451 1. 885848 2. 986828  
3. 550087 3. 175755 2. 720436 3. 263624 3. 560728 2. 567406 3. 364152 3. 343643 2. 97801  
4. 862891 5. 814033 5. 718284 4. 877151 5. 921842 5. 002606 5. 804185 5. 909426 6. 012119  
4. 19772 4. 374427 4. 928847 5. 032467 5. 321614 5. 607527 4. 829334 5. 254047 5. 316948  
2. 756263 2. 526125 2. 50176 2. 995068 3. 094693 2. 503259 2. 714754 3. 104914 3. 788523  
5. 721975 6. 632356 6. 569341 6. 238126 6. 081478 6. 186979 6. 217828 6. 03626 6. 126472  
1. 716382 1. 709481 1. 485791 3. 505573 2. 042105 3. 59343 1. 594195 1. 234354 1. 408555  
4. 285724 3. 148104 4. 010046 4. 327339 5. 288632 4. 720165 4. 193517 3. 380575 4. 485539  
4. 759208 3. 150084 3. 421402 3. 175422 2. 301809 2. 991688 2. 324473 2. 315334 1. 929657  
3. 436878 3. 528439 3. 165744 2. 858951 2. 77739 3. 014467 2. 916894 4. 17112 4. 116574  
6. 739141 7. 535182 7. 463558 6. 665239 7. 405124 6. 691739 6. 968917 7. 121393 6. 772929  
1. 723734 2. 582646 1. 971033 2. 107532 1. 53387 3. 100183 1. 380474 1. 548659 2. 701597  
4. 733586 5. 780542 4. 439847 4. 678552 5. 957611 4. 631578 6. 514143 7. 506343 7. 434645  
3. 541201 2. 816304 4. 207068 4. 900289 3. 041105 3. 99113 3. 020407 4. 09263 2. 975881  
1. 813414 1. 775534 2. 307365 1. 600382 2. 080236 2. 201736 2. 491426 1. 769354 2. 122303  
5. 342524 4. 782651 5. 584225 5. 388402 5. 351865 5. 356853 5. 799483 5. 782477 5. 987956  
1. 790042 1. 760161 2. 877615 2. 226581 2. 097316 2. 282645 2. 569612 2. 459792 1. 940609  
1. 077425 1. 533626 1. 218381 2. 299778 1. 246607 1. 352775 1. 74524 1. 232933 1. 467814  
4. 038222 2. 610739 3. 105118 2. 180685 2. 888236 2. 781446 2. 861402 2. 561756 2. 64719  
1. 126615 1. 381336 1. 040815 1. 9396 1. 086475 0. 785451 1. 29586 1. 09949 2. 598681  
5. 531138 6. 765963 5. 691524 5. 257398 6. 108758 5. 718199 6. 153618 5. 735394 4. 840439  
1. 443249 1. 222103 1. 667675 1. 034766 2. 332288 2. 345972 1. 928689 2. 315613 3. 142621  
5. 65222 5. 64472 5. 513675 5. 0184 5. 804822 5. 864539 6. 298069 5. 785413 6. 007031  
1. 216388 1. 397097 1. 819277 2. 041561 1. 974762 1. 231331 1. 465328 1. 743857 1. 323957  
7. 439159 7. 887251 7. 130561 6. 612624 7. 802069 6. 862894 7. 68225 7. 12111 6. 913033  
1. 494141 1. 416118 1. 057598 1. 470013 1. 412089 1. 708445 1. 330281 1. 87399 1. 215899  
3. 975103 3. 542872 3. 916535 4. 75468 3. 139464 3. 290428 2. 672136 2. 639242 2. 941973  
3. 145118 2. 554469 2. 927823 2. 526861 2. 316953 2. 969774 2. 579139 2. 564267 3. 098266  
2. 013633 2. 0068 2. 237811 2. 773912 1. 658644 2. 709203 2. 196793 1. 546115 1. 996699  
7. 267959 7. 304054 7. 329147 6. 49374 6. 700709 5. 696307 6. 305002 6. 482245 6. 529237  
3. 620568 2. 83162 2. 915373 3. 075281 4. 336544 3. 410032 5. 553936 5. 299509 4. 706848  
3. 273331 3. 876532 3. 845452 3. 587081 4. 041376 3. 154886 3. 480379 2. 82471 3. 686244  
3. 117729 2. 234821 2. 567772 2. 439589 2. 12052 2. 690258 3. 02176 1. 842607 3. 17005  
6. 324881 6. 133635 5. 898401 6. 219048 5. 897615 6. 235037 5. 282128 6. 327199 6. 713878  
5. 707119 6. 490321 6. 679909 5. 513148 6. 123981 4. 947373 4. 919349 5. 919589 5. 293723

6. 341187 6. 955071 6. 557571 5. 871936 6. 384538 6. 061773 6. 488431 6. 201638 6. 433785  
5. 879015 6. 33003 6. 227095 5. 001833 6. 314978 6. 160777 6. 602794 6. 53698 5. 974187  
5. 802015 5. 838532 5. 777811 6. 403973 4. 778399 5. 858533 5. 067054 5. 643478 5. 877986  
4. 188399 4. 126201 3. 849255 3. 773444 2. 910211 3. 00479 4. 062337 3. 219624 3. 343233  
1. 922544 1. 459126 1. 818681 2. 191859 1. 923051 2. 658498 1. 345801 2. 162441 1. 824091  
5. 645157 5. 871466 5. 747209 5. 574019 5. 215984 4. 820924 5. 787226 6. 226214 5. 705686  
2. 779884 5. 027529 3. 716166 5. 413406 3. 963248 3. 323815 4. 535574 4. 880218 5. 234667  
7. 088284 7. 084029 6. 435538 6. 791402 6. 978259 7. 073603 6. 580067 6. 396241 6. 335733  
4. 383651 3. 812705 4. 176678 4. 444313 3. 450181 3. 665753 2. 582355 2. 615208 2. 683053  
11. 53868 11. 30407 11. 32263 11. 55937 11. 36117 11. 60004 11. 41293 11. 22543 11. 22753  
2. 928185 3. 924424 3. 073955 2. 727987 3. 14372 3. 563046 2. 87563 2. 894862 2. 895815  
1. 790279 2. 399003 1. 811751 3. 153123 2. 89071 3. 78858 2. 066612 1. 701886 2. 180957  
7. 30597 8. 062683 7. 782351 7. 761237 8. 087631 6. 669083 7. 723597 7. 529973 7. 547858  
4. 794507 5. 279748 5. 59505 5. 266322 5. 357695 4. 227192 4. 555192 4. 419082 4. 399475  
5. 551356 5. 312204 4. 789512 5. 461491 5. 208402 6. 392895 6. 690993 7. 347289 6. 26001  
7. 948816 8. 336089 8. 20242 7. 962094 8. 033604 7. 67091 8. 351395 7. 882737 8. 165177  
3. 645954 3. 755128 3. 292309 4. 600451 4. 254845 1. 915996 4. 063008 2. 746704 2. 984515  
6. 406553 7. 07022 6. 89284 6. 419394 6. 392896 4. 980152 6. 867398 6. 699681 6. 379269  
6. 374113 6. 655594 6. 163356 5. 751959 6. 725821 5. 85509 6. 391591 5. 767524 6. 003707  
6. 291727 6. 822605 7. 040779 5. 74533 6. 939674 6. 172283 6. 621238 6. 98594 5. 747787  
4. 595308 3. 696195 4. 356022 5. 037209 4. 897863 4. 591509 5. 08952 4. 784167 5. 492347  
5. 92292 5. 063983 5. 71825 4. 638658 5. 721331 5. 474557 5. 87782 5. 770905 5. 45478  
1. 819701 3. 435319 2. 438997 2. 484647 3. 025003 2. 924933 1. 862508 1. 82271 1. 851945  
4. 157581 3. 758818 3. 519007 4. 34884 4. 279174 3. 139272 5. 403185 4. 426832 4. 411308  
1. 780182 2. 124613 2. 672164 1. 84721 2. 281597 2. 572045 1. 98543 1. 788381 1. 912739  
2. 843437 2. 398367 3. 231383 2. 437581 1. 901836 1. 868342 2. 318391 2. 612942 2. 478421  
6. 257399 6. 812436 6. 570736 5. 938381 6. 225177 6. 106561 6. 525859 5. 890106 5. 880723  
2. 152538 3. 877622 2. 558795 2. 623898 2. 791433 3. 436084 2. 774214 2. 834686 3. 843355  
3. 979028 3. 29161 4. 053988 4. 266216 3. 219932 4. 178033 5. 251262 5. 196153 5. 478792  
1. 729643 3. 470028 2. 928736 1. 705486 2. 650791 1. 156117 1. 825158 1. 624629 1. 764957  
5. 200769 4. 966741 5. 256805 4. 045078 4. 515848 4. 175491 4. 713638 4. 721159 3. 368469  
1. 496126 1. 667533 2. 040022 3. 368227 1. 634682 1. 812868 2. 128615 2. 546407 2. 787706  
7. 802851 7. 840288 7. 398681 7. 532239 6. 668738 7. 577537 7. 303434 7. 142416 6. 596452  
5. 090284 5. 524025 5. 938257 4. 952994 4. 954778 5. 005903 6. 237621 5. 146704 5. 360005  
2. 87494 3. 931244 3. 214295 3. 583025 3. 616089 3. 245491 3. 403269 2. 58179 4. 044562  
6. 375112 6. 604599 5. 795616 6. 51804 6. 181878 7. 449578 6. 207754 5. 720968 6. 647916  
4. 364067 5. 937209 4. 028284 5. 669092 3. 495742 2. 716184 3. 231935 3. 005544 3. 834379  
4. 435294 4. 899451 4. 134865 3. 357061 5. 550307 4. 82112 3. 64377 4. 094929 4. 376704  
1. 998445 1. 695039 1. 86506 2. 039746 2. 235607 1. 959788 2. 406302 1. 633595 2. 60579  
4. 010262 4. 117067 4. 540654 4. 373499 4. 821519 4. 103505 3. 970814 4. 13166 4. 851023  
6. 202866 5. 513941 5. 90582 6. 172775 6. 048041 6. 363651 5. 855469 5. 583236 6. 048773  
4. 44224 4. 545681 4. 106928 5. 243273 4. 04192 5. 358661 5. 485189 5. 548362 5. 767877  
1. 87389 1. 637736 2. 421614 1. 830291 1. 564492 1. 854272 1. 658452 2. 522997 2. 371949  
2. 927667 2. 576666 2. 903682 2. 682451 3. 112028 3. 172905 3. 013968 2. 631843 2. 721397  
3. 66291 4. 396275 4. 138517 4. 309448 4. 519639 3. 940134 4. 089865 4. 521411 3. 90663  
5. 514446 5. 154498 4. 796072 6. 586595 5. 709479 5. 304254 6. 015165 6. 858985 6. 278928  
6. 383781 6. 87598 6. 680263 6. 947339 6. 533353 7. 313188 6. 224789 6. 700787 7. 187934  
4. 218137 4. 693197 4. 099458 4. 318338 4. 098223 3. 780876 4. 090897 3. 414087 4. 269356  
2. 021354 2. 084787 2. 44908 2. 357027 1. 970906 1. 939549 2. 202296 2. 262906 2. 15458  
6. 67406 7. 22001 7. 125727 6. 532505 6. 714307 5. 936606 6. 536658 7. 135694 7. 109072  
2. 568478 4. 41899 1. 919267 4. 12895 3. 452289 3. 852832 3. 798568 3. 10557 2. 996726

4. 735375 3. 937749 4. 150301 6. 139052 5. 331733 7. 048636 5. 020403 6. 219661 5. 624999  
8. 154719 7. 729379 7. 7386 8. 197588 6. 879183 8. 738659 8. 170213 7. 688072 8. 024605  
2. 218845 1. 72374 1. 174447 2. 291445 2. 089458 4. 653819 1. 529363 1. 409741 1. 233955  
4. 802485 3. 565106 4. 297305 5. 454187 4. 064218 4. 902522 4. 399623 4. 939716 5. 27291  
5. 311318 6. 979902 5. 429725 6. 215434 6. 221237 4. 521362 5. 856023 5. 731474 5. 554386  
7. 260181 7. 591288 7. 483241 7. 489447 8. 232354 8. 658769 7. 721663 7. 98826 8. 301911  
5. 849176 5. 863746 6. 567248 5. 895922 6. 133346 5. 713567 5. 429774 6. 275897 5. 277337  
2. 329797 3. 410878 2. 257625 2. 877842 2. 561858 3. 814463 3. 000973 2. 611902 3. 195317  
4. 198251 3. 773902 3. 980623 4. 440158 4. 539399 4. 521428 4. 698017 5. 019507 5. 006718  
2. 913998 2. 216927 1. 583126 2. 852515 2. 090538 1. 984293 2. 134087 2. 103639 2. 132133  
2. 392448 2. 28421 2. 952944 2. 655232 2. 692024 2. 854631 2. 743082 3. 36973 2. 788731  
1. 460553 2. 641774 4. 009391 1. 650719 2. 667945 3. 723883 1. 177204 2. 029506 4. 035669  
6. 750133 5. 938197 6. 543121 6. 246383 6. 375261 7. 495087 6. 535572 6. 755374 7. 094519  
1. 699759 2. 191764 2. 650721 2. 55368 2. 594439 2. 358493 2. 175062 2. 155127 2. 558132  
3. 366306 3. 101763 2. 971806 3. 983121 3. 363836 3. 50547 4. 547529 3. 704865 3. 872783  
4. 885718 5. 491085 5. 555153 5. 97593 5. 470455 5. 979796 5. 269281 6. 04905 5. 812721  
1. 685304 1. 847862 3. 091574 2. 579623 2. 351583 2. 250766 1. 885468 1. 852685 2. 471905  
4. 899107 5. 573271 4. 136581 6. 129135 5. 648396 5. 850106 5. 969889 6. 041122 6. 402479  
6. 490486 7. 065667 6. 296303 6. 056934 6. 382539 6. 545698 6. 894954 5. 793041 6. 365521  
7. 037362 6. 052346 6. 115041 7. 228518 6. 469063 7. 405724 6. 984432 7. 287663 7. 126614  
3. 662207 3. 762192 3. 956231 3. 509408 4. 468394 4. 418795 3. 65964 4. 266316 4. 392084  
5. 398402 4. 636013 5. 318419 3. 844938 5. 040053 5. 312412 5. 016099 6. 648074 4. 215029  
4. 782603 4. 076754 3. 329899 4. 307933 4. 053518 4. 1975 3. 98613 3. 717797 3. 560727  
2. 542799 1. 780718 1. 701226 1. 371153 2. 343149 1. 528079 2. 017219 1. 461636 1. 97518  
2. 789105 1. 470633 1. 69182 1. 33126 1. 34937 1. 877499 1. 645731 0. 970742 1. 46381  
5. 486347 4. 610299 5. 117397 6. 222572 5. 430988 6. 189247 5. 453741 6. 503306 6. 454389  
5. 444205 4. 575195 3. 904706 5. 223292 4. 53502 5. 519142 5. 414959 5. 568638 2. 976741  
2. 602117 2. 790013 2. 644011 2. 672921 2. 679319 2. 67628 2. 22448 2. 821917 3. 435109  
6. 525157 6. 7417 6. 701295 6. 285235 6. 1145 7. 525979 6. 885709 6. 962178 7. 240441  
1. 091522 2. 404432 1. 339755 2. 700328 2. 01227 2. 280024 1. 709034 2. 250874 1. 500779  
5. 170899 4. 427891 3. 311291 2. 395536 6. 006367 3. 943489 4. 209573 4. 34938 4. 088539  
3. 947832 4. 661308 4. 559826 4. 101558 3. 776034 4. 264991 4. 968326 3. 310587 3. 776015  
3. 475598 3. 537933 3. 995232 3. 805494 4. 063194 5. 185995 4. 689826 4. 43109 3. 918704  
3. 235995 4. 174707 4. 628265 4. 001844 3. 771936 4. 753261 4. 347937 3. 901979 3. 650404  
3. 213993 2. 860057 2. 864994 4. 886456 4. 813723 5. 566271 3. 603839 5. 600159 4. 819989  
3. 797519 4. 266144 3. 65594 4. 503439 4. 374175 4. 757556 4. 833175 3. 589209 4. 711179  
3. 108975 2. 47669 3. 535788 3. 390171 3. 610024 3. 27952 3. 666204 3. 482102 2. 609397  
4. 082607 3. 252653 4. 53055 2. 763923 3. 765636 4. 437713 3. 778146 4. 464408 3. 990721  
5. 725744 4. 84815 5. 733967 5. 482215 5. 548261 5. 902307 6. 033148 5. 660015 6. 056978  
2. 453666 1. 480878 1. 51799 1. 453359 3. 056039 2. 165777 1. 290427 1. 952934 2. 137798  
5. 053887 4. 823295 5. 479025 4. 233337 5. 264348 5. 109828 4. 755082 6. 523466 5. 662815  
7. 102026 7. 402219 6. 916955 7. 438654 7. 422279 6. 292011 7. 176002 6. 604492 7. 1037  
4. 592905 4. 738827 5. 184843 5. 227299 4. 487823 3. 873737 5. 075281 4. 951006 4. 361602  
1. 607608 1. 256025 1. 192655 1. 956748 1. 376804 1. 964972 1. 636801 1. 570559 1. 421414  
4. 143203 3. 532131 3. 73744 4. 349925 4. 0166 4. 496156 4. 838892 3. 819556 4. 607888  
2. 087297 2. 281224 1. 850878 1. 833973 2. 928594 2. 295127 2. 00035 2. 815063 2. 132557  
5. 115195 4. 776085 5. 804889 5. 548184 5. 644176 5. 776826 6. 398593 6. 795427 6. 179517  
2. 719342 2. 307665 2. 387098 3. 773552 2. 543642 2. 494635 2. 812876 2. 711078 3. 327435  
3. 833217 2. 099209 2. 83101 3. 039411 1. 953664 4. 860316 3. 137477 2. 236479 3. 036551  
4. 620984 4. 803804 4. 645215 4. 177101 4. 822181 4. 206958 4. 446211 4. 50655 4. 66963  
1. 597611 2. 591797 0. 944852 1. 626598 1. 993784 1. 544621 1. 507594 1. 018267 2. 815606

5. 571175 6. 873381 6. 704487 6. 654299 6. 413006 6. 21552 6. 289634 6. 212416 6. 929841  
3. 48422 3. 320066 3. 824682 4. 207146 2. 947963 2. 680193 3. 264997 3. 786659 3. 58159  
1. 905937 1. 164327 1. 601458 2. 379189 2. 813451 2. 359848 2. 59567 2. 357218 1. 647242  
3. 324304 2. 794873 2. 03629 2. 502455 2. 462689 4. 022902 2. 507625 2. 951136 3. 427367  
2. 067068 2. 91931 2. 046263 2. 622459 1. 540272 1. 996969 1. 668099 1. 39147 1. 542071  
9. 529972 9. 796675 9. 737567 9. 639312 9. 954469 9. 842308 9. 841686 9. 869348 9. 797919  
4. 221833 4. 111944 4. 115793 5. 07801 5. 251796 5. 889467 5. 542749 5. 178113 5. 405152  
3. 880292 4. 068353 3. 868475 3. 694638 5. 915992 3. 483682 3. 091112 3. 691384 3. 766888  
2. 896142 2. 794201 3. 152077 3. 2427 2. 994213 2. 315384 2. 950319 2. 648288 1. 960181  
4. 765998 2. 452041 4. 311872 4. 386651 3. 923391 3. 774252 3. 290867 4. 925812 4. 595205  
3. 185433 2. 326481 1. 885403 2. 463429 2. 287827 2. 66509 2. 213043 3. 224521 2. 577559  
4. 515677 3. 809501 4. 664164 4. 784252 3. 674207 2. 593542 4. 370971 4. 491156 3. 800326  
4. 231304 1. 836024 2. 501687 3. 840625 2. 632534 2. 118416 3. 197771 1. 781089 2. 680812  
6. 409974 6. 70016 5. 97508 6. 402886 6. 014864 6. 98129 6. 804109 6. 679557 6. 201591  
3. 91815 4. 136201 4. 034579 3. 64426 3. 800175 3. 875367 3. 848782 4. 124435 3. 638389  
8. 235384 8. 5048 8. 49805 8. 289416 8. 420641 7. 957962 8. 521595 8. 428611 8. 538719  
6. 584097 6. 990537 7. 07371 6. 032962 6. 216758 6. 457671 6. 41593 5. 220957 5. 830887  
5. 958704 6. 272742 6. 328848 6. 115707 6. 380061 6. 353633 6. 542905 5. 880089 6. 594406  
3. 71452 2. 858102 4. 27359 4. 699206 3. 331463 4. 685873 3. 507624 4. 268215 3. 405744  
2. 483644 2. 147617 2. 114021 3. 278677 2. 088969 3. 203999 3. 012485 3. 483489 2. 459573  
3. 400529 2. 264939 2. 326062 3. 035758 2. 283588 4. 81558 4. 172713 3. 879823 2. 574512  
3. 328918 4. 048254 3. 591792 4. 075664 3. 877254 3. 998934 4. 521435 3. 914772 3. 59492  
9. 044935 8. 265563 8. 818759 9. 396833 9. 240095 9. 479195 8. 780334 9. 640634 9. 525295  
7. 078893 7. 162883 6. 917713 6. 395931 6. 886794 6. 416059 6. 79934 6. 013963 5. 870389  
7. 184668 7. 590197 7. 369363 6. 942992 7. 037845 6. 601478 7. 012821 6. 570457 7. 137544  
5. 886897 4. 755935 4. 864104 5. 853394 5. 314937 5. 231193 4. 442212 4. 61935 5. 495191  
3. 440369 2. 549924 3. 616839 2. 358659 3. 07568 4. 073754 2. 442823 3. 180296 3. 859131  
6. 957845 6. 515696 7. 469297 6. 710493 5. 967112 6. 533071 6. 650696 6. 070074 5. 323493  
4. 59145 2. 754551 3. 181134 2. 987339 2. 741445 3. 74757 3. 727074 3. 089756 4. 593323  
6. 657088 6. 333007 6. 627886 6. 259412 6. 717216 5. 960561 7. 000907 7. 08602 6. 92733  
6. 286183 6. 903008 6. 350362 6. 812049 6. 938959 6. 488645 6. 884766 6. 954579 6. 376253  
2. 02796 2. 244639 2. 092863 1. 954211 1. 725404 2. 275471 2. 294434 1. 334579 2. 94582  
3. 071822 2. 358575 1. 79046 2. 633615 2. 192237 2. 349109 2. 348975 2. 346727 2. 6535  
7. 3502 6. 827587 7. 676411 7. 178175 7. 129893 8. 01204 7. 307 7. 376082 7. 973255  
4. 311047 3. 788123 4. 058614 3. 920226 4. 005176 4. 06515 3. 995336 4. 0786 3. 668239  
3. 272455 5. 022396 4. 23271 5. 183887 3. 410507 4. 677486 5. 013562 3. 291235 5. 292724  
4. 814871 4. 228794 4. 526362 5. 083075 4. 081584 5. 588848 5. 584567 4. 990228 4. 36442  
7. 768757 6. 95146 7. 206358 7. 464048 7. 640858 6. 886152 6. 608571 6. 939355 7. 437006  
5. 826467 6. 46618 5. 119558 6. 264328 5. 414449 5. 980389 5. 626844 5. 249218 5. 594978  
10. 18342 10. 16922 10. 32562 10. 28753 9. 927147 10. 67058 10. 55245 10. 08758 10. 40337  
4. 431754 4. 258684 5. 058027 5. 175339 4. 739957 5. 537066 4. 442953 5. 416848 5. 306183  
2. 020896 1. 218382 1. 381524 1. 028475 2. 36868 1. 67429 1. 214999 1. 484242 1. 566284  
1. 565515 2. 202984 1. 143922 1. 77285 1. 316701 1. 833202 1. 448111 1. 472317 1. 431655  
6. 8101 7. 546734 7. 138085 6. 848543 7. 458608 6. 656833 7. 636164 6. 826185 7. 146637  
6. 0592 6. 115704 6. 541352 5. 491275 5. 317561 5. 63829 5. 839923 5. 675705 5. 308083  
7. 243066 5. 258829 6. 953943 6. 387697 6. 694347 6. 372281 6. 641781 7. 598937 6. 867413  
1. 354889 1. 579619 1. 684466 1. 659723 1. 748143 1. 436523 1. 643949 1. 658513 2. 714832  
7. 684098 7. 749775 7. 356638 7. 702332 7. 973042 7. 697829 7. 350342 8. 008185 8. 506047  
6. 488325 6. 17948 5. 268037 6. 665548 6. 37894 7. 610269 6. 445651 6. 652433 6. 52421  
4. 354054 3. 664031 4. 831553 4. 607043 3. 492547 4. 708057 3. 953109 3. 992046 3. 86467  
3. 867406 3. 899223 3. 698782 5. 550709 4. 095928 5. 97935 4. 967385 4. 998483 5. 390413

2. 657106 3. 157198 2. 52881 3. 080287 2. 719979 2. 593547 2. 669299 3. 334092 2. 672481  
4. 627179 3. 72903 4. 853189 4. 892507 4. 144836 6. 775618 4. 914168 5. 403833 5. 384178  
2. 819049 3. 420253 3. 060392 5. 018219 2. 927816 3. 662576 4. 515573 2. 286772 2. 492765  
8. 21128 8. 420722 8. 237855 8. 005147 7. 921586 7. 811627 8. 476667 8. 281876 8. 645353  
7. 068771 6. 655303 7. 320075 7. 471183 7. 455268 6. 49404 8. 159971 8. 044925 7. 711446  
2. 846616 2. 05989 2. 060383 2. 654284 2. 001062 1. 338768 1. 904049 1. 963665 2. 313314  
4. 422553 4. 269231 4. 523474 4. 638416 4. 433484 3. 772777 3. 876577 4. 53897 3. 666316  
3. 377543 3. 906453 2. 709711 3. 563214 2. 839697 2. 9714 2. 264436 2. 75892 3. 565667  
2. 868402 1. 997006 1. 695101 2. 146419 2. 448736 2. 366979 1. 630443 2. 211306 1. 755314  
4. 79281 6. 322644 5. 37158 5. 570689 6. 487598 5. 528027 6. 14805 7. 318032 6. 111378  
3. 791637 3. 237283 2. 499428 3. 325242 3. 10945 2. 709821 4. 333928 3. 024035 2. 588596  
4. 739275 4. 364979 4. 790964 5. 182907 4. 112437 5. 119928 4. 045426 4. 635735 4. 160716  
3. 964789 3. 759825 4. 263419 4. 117597 3. 27819 4. 476958 4. 222676 3. 096041 3. 905268  
2. 046462 1. 923398 2. 157809 2. 182515 2. 196156 2. 103385 1. 965279 2. 298178 3. 40612  
1. 682873 1. 569951 1. 375895 1. 892418 1. 62499 1. 608095 0. 847144 1. 904542 2. 310446  
1. 886865 1. 536462 1. 143044 1. 964489 1. 640275 2. 150022 1. 503567 1. 963835 1. 687323  
1. 988368 3. 009617 2. 385348 1. 605453 2. 345291 2. 335687 1. 457453 1. 68393 1. 993057  
2. 346942 3. 417553 3. 686614 3. 26362 2. 928489 2. 661696 3. 081821 2. 316148 2. 95929  
3. 36199 4. 454317 3. 466292 3. 890302 4. 54958 4. 271111 4. 002754 4. 850419 4. 373157  
1. 579456 1. 292427 2. 489704 0. 96276 1. 098182 0. 995813 1. 860004 2. 437056 1. 528256  
2. 404473 1. 93079 1. 226783 1. 558134 1. 714566 2. 406248 2. 170079 2. 280663 2. 000488  
3. 017291 1. 835173 3. 237669 3. 059562 1. 404931 3. 660488 2. 546153 2. 740509 2. 274259  
5. 882358 5. 705933 6. 524475 6. 56021 5. 925758 6. 379493 7. 008519 7. 079513 7. 314571  
3. 633076 2. 252754 3. 672469 4. 113054 1. 836645 2. 14678 2. 743854 1. 832321 2. 985552  
2. 754877 4. 275394 2. 149726 3. 948251 2. 853448 4. 787538 4. 223713 2. 311944 2. 986896  
1. 611847 1. 547091 1. 606919 3. 400957 1. 216428 1. 898175 1. 49558 1. 530134 1. 773697  
2. 541345 1. 962803 0. 759882 1. 802123 1. 546712 0. 83594 0. 866616 0. 962809 2. 195023  
2. 791264 1. 993834 2. 422123 2. 103646 1. 949683 3. 035589 2. 917417 2. 853034 2. 983918  
1. 492801 1. 366871 1. 056941 1. 882907 1. 001279 1. 416688 0. 974796 0. 826236 0. 819752  
3. 338139 3. 271357 3. 241988 4. 993128 4. 549278 3. 158854 3. 390087 3. 942878 4. 045986  
1. 823892 2. 68623 0. 966525 1. 20922 1. 362848 1. 254316 1. 320799 1. 576267 0. 936601  
1. 679228 2. 105444 1. 518657 2. 607863 1. 491228 1. 475655 1. 177564 1. 647619 1. 475655  
1. 824587 1. 996502 1. 130061 1. 525214 1. 653462 2. 058892 1. 612352 1. 41617 1. 75082  
5. 74627 5. 88608 5. 08553 4. 99039 5. 189118 6. 257487 6. 090503 6. 004504 4. 996323  
5. 551094 5. 854917 5. 360256 5. 092041 6. 516281 6. 19783 5. 912698 5. 368914 6. 276089  
1. 615225 1. 293892 1. 509018 2. 038954 1. 653174 1. 787805 2. 0859 2. 437212 1. 798388  
4. 767261 4. 404628 4. 792152 3. 354654 4. 880579 5. 075687 4. 357343 4. 595301 4. 385404  
3. 564462 3. 889235 4. 139513 3. 488498 3. 986288 3. 453897 2. 637416 3. 619157 2. 78524  
2. 195586 2. 302306 1. 731571 2. 456498 2. 105985 2. 010077 1. 840142 2. 191802 2. 57045  
2. 468982 2. 100329 1. 953924 2. 161501 2. 23239 2. 321104 1. 791502 2. 428079 2. 300656  
6. 235501 7. 202488 6. 35515 5. 936699 6. 760564 5. 771829 6. 707899 6. 887902 6. 591935  
2. 34957 1. 586925 1. 804738 2. 199796 2. 399125 1. 814464 2. 183431 2. 661342 2. 41146  
5. 703262 6. 104175 5. 630944 4. 93535 5. 323187 5. 849103 5. 359039 5. 095373 5. 501374  
2. 402535 4. 614175 4. 713827 3. 87937 4. 077199 1. 462353 1. 518713 2. 595703 5. 393543  
1. 387705 1. 865974 1. 661836 2. 57341 1. 994585 2. 815442 1. 342054 2. 042428 1. 947377  
4. 829733 5. 734904 4. 942032 4. 601448 5. 462775 4. 515329 4. 301075 4. 053867 4. 770365  
1. 319329 1. 618326 1. 762043 2. 057448 3. 592464 1. 971078 1. 665833 1. 477645 2. 397446  
1. 574863 1. 044208 1. 001119 1. 302089 1. 673312 1. 175851 1. 615479 1. 708007 1. 476043  
3. 872972 3. 519755 3. 870815 2. 547112 3. 394096 3. 896575 3. 782761 3. 558709 3. 584583  
2. 634708 2. 759545 2. 29551 3. 232514 1. 767029 2. 687653 2. 492071 2. 78244 2. 746182  
2. 661846 3. 922821 2. 707125 2. 517405 2. 148633 3. 092981 2. 372149 2. 527574 2. 254054



9. 762064 9. 841112 9. 92146 9. 803372 9. 755727 8. 555354 10. 31431 9. 824204 9. 729389  
2. 840564 2. 397618 1. 968294 2. 152497 1. 649359 2. 829961 2. 490568 2. 726227 2. 197591  
4. 431938 4. 60383 2. 484762 3. 031034 2. 946986 3. 618033 2. 848197 2. 941448 2. 951123  
2. 88629 3. 198582 2. 85739 2. 218355 2. 864409 3. 467723 2. 498313 2. 759253 2. 933328  
4. 378776 3. 345621 4. 086028 4. 047777 4. 583119 3. 803181 3. 342685 4. 14843 3. 498575  
2. 805332 2. 893093 2. 771057 3. 916424 3. 471866 1. 655876 3. 189754 1. 747278 4. 139244  
3. 675557 4. 752899 3. 674847 3. 939269 3. 75475 4. 064247 3. 830112 4. 05011 4. 322104  
4. 122681 2. 240357 4. 70206 3. 087539 3. 29788 3. 065917 3. 153923 3. 254043 1. 952002  
1. 290982 2. 326674 2. 205675 1. 535449 1. 997377 1. 855159 1. 847858 2. 766852 2. 82281  
3. 506499 3. 285219 4. 014375 4. 518578 4. 021152 3. 952728 3. 395005 4. 005339 4. 642726  
3. 392669 4. 424727 3. 338969 3. 656459 4. 113415 4. 053252 5. 43633 3. 75789 3. 978647  
1. 119588 1. 870434 1. 50483 2. 398598 2. 246888 1. 797901 1. 231996 1. 46526 1. 711342  
2. 447894 1. 04319 1. 601325 1. 809281 1. 879547 1. 80163 1. 500155 2. 13449 2. 88043  
2. 506656 2. 118011 1. 841087 2. 071667 1. 678787 2. 258692 1. 886254 2. 538076 1. 758608  
4. 825509 5. 87423 5. 560515 3. 756702 4. 613703 4. 583989 4. 758925 4. 218762 4. 182895  
2. 456806 2. 96865 2. 381444 2. 703173 2. 772192 2. 946824 2. 581656 2. 079134 2. 197415  
1. 989912 2. 090034 2. 515839 1. 822749 2. 228148 2. 36985 1. 816391 2. 492911 2. 070226  
4. 137509 3. 841367 5. 100808 4. 701179 4. 971998 4. 328452 4. 219073 5. 375529 5. 162005  
3. 657537 3. 901858 4. 11505 4. 380912 3. 790238 3. 73033 3. 930461 3. 056891 3. 603271  
0. 932299 1. 9405 2. 692022 2. 535586 2. 329848 1. 87995 1. 592445 2. 54997 2. 343843  
1. 32495 2. 073079 1. 58035 1. 436991 1. 272219 1. 39261 1. 451627 1. 787604 1. 484274  
2. 338781 3. 063014 3. 687602 2. 701728 1. 391423 1. 78298 2. 197702 2. 505911 3. 300071  
2. 641153 2. 668044 2. 708838 3. 942944 2. 623263 3. 100761 2. 409531 2. 706256 3. 44612  
4. 660933 4. 799623 4. 246947 4. 463158 4. 692637 5. 166778 3. 771688 5. 429464 4. 70861  
1. 48329 1. 612322 3. 062213 2. 009461 3. 315508 1. 891184 2. 864741 1. 908217 1. 720844  
6. 847031 7. 485221 6. 769217 6. 941209 7. 171953 7. 033761 7. 5254 6. 696917 7. 141446  
2. 323796 2. 558193 3. 253367 2. 508685 2. 756324 3. 380566 2. 474544 2. 733323 3. 061369  
2. 474312 2. 190063 2. 2655 2. 061055 2. 234007 1. 746766 2. 187622 1. 815348 2. 280415  
2. 825588 3. 947921 3. 394834 2. 833003 3. 139273 4. 643191 3. 314163 2. 441797 3. 597102  
1. 284614 1. 459106 1. 435839 1. 819413 2. 213802 1. 613259 1. 588811 1. 968807 1. 179348  
5. 958622 6. 683613 6. 319543 5. 852182 6. 021681 5. 172004 6. 174222 5. 873145 5. 868563  
5. 524612 5. 359807 5. 294424 4. 936164 5. 721493 5. 138234 5. 683165 5. 262999 4. 762736  
2. 404703 3. 334129 2. 681147 3. 692512 2. 759907 2. 487392 2. 55145 3. 031619 2. 965745  
5. 059749 3. 448104 3. 120725 3. 558868 3. 80232 4. 833333 4. 104067 4. 722259 4. 308675  
6. 023657 6. 28041 7. 065043 5. 761797 6. 259714 5. 373933 6. 014849 5. 284036 5. 103026  
4. 592685 3. 898467 3. 414476 3. 95937 3. 481995 4. 115886 3. 782833 3. 706958 3. 474532  
1. 097005 1. 810223 1. 738173 1. 643821 1. 735908 1. 884912 2. 661489 1. 21677 1. 57725  
4. 755667 4. 160468 5. 037749 3. 965763 5. 047272 3. 452651 4. 956064 4. 680833 5. 14843  
3. 121879 4. 00892 1. 428172 2. 100531 1. 461108 3. 200294 1. 296568 2. 044086 1. 713679  
5. 102751 4. 508551 4. 673532 4. 942617 4. 76489 3. 940241 5. 12417 5. 528022 4. 959713  
2. 902159 2. 231147 1. 76153 1. 916373 1. 967407 2. 04479 2. 178353 1. 882465 2. 753502  
2. 782175 1. 896983 2. 311467 1. 53669 2. 992779 2. 311243 2. 271987 1. 408772 2. 198314  
2. 277658 1. 652207 2. 152095 2. 095755 1. 893648 2. 227888 2. 368843 2. 275622 1. 984373  
6. 917674 6. 345319 7. 171486 7. 133253 6. 737932 6. 354786 6. 244711 6. 146647 6. 530699  
2. 712889 3. 043584 2. 818677 2. 783454 2. 858032 2. 57448 2. 404162 2. 676184 2. 036879  
5. 109544 4. 858392 5. 015108 5. 834871 5. 214961 4. 528445 5. 034782 4. 426836 4. 657675  
2. 960131 3. 328894 3. 874167 2. 604927 3. 204913 3. 871628 4. 510467 3. 582106 3. 656018  
2. 230077 2. 904031 2. 232986 1. 946923 1. 94053 2. 804843 2. 064661 2. 269349 1. 620699  
2. 162179 1. 968136 1. 501454 1. 58994 1. 775087 5. 478458 1. 748047 1. 81447 2. 466139  
4. 935367 5. 67454 4. 746207 3. 963831 5. 303172 5. 147118 5. 153468 5. 342082 5. 59822  
3. 669752 2. 755995 2. 710252 3. 347298 2. 798524 3. 397454 3. 936305 4. 344296 4. 066483

3. 202374 2. 094199 2. 321107 2. 466018 2. 711051 2. 154606 2. 486815 1. 868981 2. 049991  
1. 754392 1. 779748 1. 825163 1. 680379 2. 357342 2. 154239 1. 736996 2. 073559 1. 646987  
7. 740899 7. 7918 7. 515213 7. 651935 7. 230677 7. 625555 7. 568215 7. 219155 7. 143559  
7. 016588 7. 761882 7. 766715 6. 568516 7. 409229 6. 58402 7. 178778 6. 724271 6. 882439  
5. 505152 5. 465934 5. 479174 5. 282146 4. 143955 5. 696175 5. 886668 4. 784768 5. 384694  
4. 802846 5. 244609 4. 997775 4. 651755 5. 09788 5. 466737 4. 787675 4. 796789 5. 069207  
2. 560815 4. 253946 3. 940542 3. 73161 3. 580176 3. 598445 3. 937467 4. 616006 3. 928021  
1. 828502 1. 716418 1. 545874 2. 156909 1. 66036 2. 096613 2. 015307 1. 77224 1. 710205  
2. 837773 3. 30928 3. 594224 3. 724998 3. 159557 4. 626083 1. 611656 2. 289572 1. 374042  
2. 037257 1. 922406 2. 163942 2. 965374 2. 281039 2. 099395 2. 459828 2. 83735 2. 72133  
3. 534853 2. 668392 4. 48054 4. 237608 3. 340889 3. 94743 3. 724156 4. 357598 3. 642683  
3. 49874 3. 469954 4. 375586 2. 003962 2. 982891 3. 061305 3. 641885 1. 761359 2. 886039  
4. 422031 4. 424078 5. 76105 4. 296189 4. 980161 4. 08964 4. 844092 3. 866795 5. 120044  
8. 533701 7. 871376 7. 90557 7. 77021 7. 740607 8. 409826 8. 204321 7. 845739 8. 173307  
6. 626686 7. 086562 6. 684479 7. 330519 6. 414645 6. 995907 6. 211648 6. 39568 6. 06778  
6. 982679 7. 188745 7. 079832 7. 09868 7. 130264 7. 194295 7. 183154 6. 38511 7. 05675  
6. 379147 6. 779499 6. 610007 6. 786926 6. 485272 6. 490789 6. 578703 6. 497588 6. 167921  
2. 129748 2. 167936 2. 162321 0. 909156 1. 162595 0. 90454 2. 03455 2. 522589 1. 271121  
6. 684839 6. 364906 5. 859632 6. 297341 5. 842658 6. 901521 6. 223227 6. 262324 6. 535993  
5. 467817 4. 839299 5. 484743 6. 023283 4. 861258 5. 734941 6. 212965 6. 38234 6. 412997  
4. 818006 3. 794154 4. 58673 5. 509664 3. 157053 2. 976431 4. 376759 3. 789998 3. 711901  
5. 713542 5. 729641 6. 60663 7. 335146 5. 962035 6. 312743 6. 848601 7. 032476 6. 71844  
4. 403657 3. 730424 4. 111073 4. 084145 2. 813838 5. 047261 4. 092773 4. 716177 4. 545509  
1. 896022 1. 997572 1. 745785 1. 682842 1. 753607 1. 683873 1. 620246 1. 905142 1. 438072  
1. 392399 2. 139756 1. 819791 1. 660826 1. 508147 1. 821289 1. 733125 1. 263749 1. 733931  
3. 000488 2. 138018 2. 768313 3. 97761 1. 368963 3. 138314 4. 489979 3. 127363 3. 20009  
1. 5875 0. 830762 1. 26563 1. 517717 1. 805765 1. 518376 1. 239579 1. 908484 1. 154844  
5. 776029 6. 093882 5. 98651 6. 010704 7. 020168 5. 81079 6. 569377 6. 204818 6. 439224  
5. 137768 4. 429027 4. 488049 4. 571803 5. 908388 5. 983521 4. 709779 5. 489781 5. 432445  
6. 029444 5. 095993 5. 707816 6. 466829 5. 024816 5. 197932 5. 559817 5. 746601 5. 077948  
2. 080015 1. 468831 1. 07184 2. 313158 0. 87984 1. 413456 0. 928948 0. 993635 1. 034405  
2. 378819 1. 837537 2. 556855 2. 315466 1. 964604 3. 017424 2. 072961 3. 019432 2. 010974  
2. 552825 2. 580027 3. 418409 2. 229165 2. 744205 2. 084383 3. 742561 2. 190459 2. 131811  
5. 076518 4. 824671 3. 805293 3. 703106 5. 527481 4. 712712 4. 988648 5. 129081 4. 874993  
6. 021234 4. 706198 6. 454082 5. 315392 6. 173197 7. 140563 7. 72015 7. 872042 7. 166389  
4. 613188 5. 67542 4. 839217 5. 018483 4. 314622 4. 441929 5. 845509 3. 802468 4. 996959  
3. 551241 5. 365302 4. 900279 6. 134875 5. 984995 3. 513535 5. 328732 4. 150272 4. 615141  
0. 862282 0. 824883 1. 354088 1. 851117 0. 580163 1. 664776 1. 231709 3. 097174 2. 585041  
6. 48498 6. 15727 6. 158711 6. 339905 5. 785014 6. 224127 6. 094684 6. 369974 6. 637554  
5. 500644 5. 730063 6. 269631 6. 588024 6. 570757 5. 730255 5. 899328 6. 171308 6. 127611  
7. 258889 8. 13364 8. 3361 7. 594302 8. 291409 7. 047029 7. 525554 7. 559263 7. 514079  
4. 649838 4. 853647 5. 533614 5. 659588 5. 734896 4. 756472 5. 780195 5. 343183 5. 630972  
2. 753015 2. 883786 3. 320126 2. 646334 2. 507452 3. 147917 2. 980388 3. 851226 3. 2108  
1. 523747 1. 287159 1. 268579 1. 611773 1. 513915 3. 323423 1. 718924 1. 609369 1. 517421  
2. 732199 1. 947746 1. 874572 2. 566653 1. 945182 3. 712185 2. 429589 1. 977375 2. 436431  
5. 01156 5. 280047 5. 119639 5. 695772 6. 493169 5. 301145 5. 452343 5. 93027 5. 443284  
6. 202217 6. 634166 6. 010198 4. 85268 6. 604106 6. 574407 7. 028737 7. 995148 8. 002742  
3. 770805 2. 852217 1. 579612 3. 797602 2. 600956 5. 064272 1. 965675 3. 112063 4. 610422  
2. 954806 3. 052594 2. 749729 3. 092634 2. 668055 2. 38443 2. 593714 3. 431891 2. 962598  
8. 108835 8. 371047 8. 194384 8. 268836 8. 777998 8. 713104 8. 271029 8. 285786 8. 368404  
8. 576149 8. 45674 8. 375214 8. 058201 8. 627549 8. 056849 8. 72767 8. 481541 7. 970935

4. 718684 4. 278407 4. 665154 5. 177404 3. 700356 4. 501975 4. 082702 3. 623907 4. 644002  
4. 493516 4. 317908 4. 443821 5. 342486 3. 408536 4. 555896 3. 042807 2. 861144 3. 54127  
2. 022892 1. 997789 1. 984429 2. 435189 2. 49722 2. 504052 2. 179926 1. 784888 2. 550853  
6. 389641 5. 881742 5. 388371 6. 11265 5. 52574 6. 020554 5. 732709 5. 289749 5. 927903  
3. 645255 3. 635804 3. 679149 4. 31004 4. 115362 3. 774307 4. 26213 4. 447754 4. 885905  
1. 873259 1. 86361 3. 688026 2. 916281 2. 749604 2. 989367 2. 173221 3. 067972 3. 20505  
3. 203673 3. 25122 2. 796813 2. 320496 2. 861819 3. 054033 3. 381693 2. 462934 2. 616358  
4. 00721 1. 713765 2. 108773 3. 111961 1. 241356 1. 618773 2. 027187 1. 381925 1. 794392  
7. 124722 7. 262846 7. 563904 8. 246599 7. 872679 7. 900438 8. 212437 8. 341969 8. 15006  
2. 201366 2. 255461 2. 884499 2. 248145 2. 278696 3. 365093 2. 223185 1. 629266 2. 906891  
2. 883202 3. 140912 2. 667088 3. 313533 2. 488862 2. 926535 3. 256253 4. 37333 2. 989197  
8. 233917 7. 700395 7. 729691 7. 319103 8. 109859 6. 979844 7. 974688 8. 787584 8. 710839  
3. 627537 4. 007677 4. 298721 2. 92548 2. 937854 4. 597635 4. 194287 4. 143113 2. 9115  
2. 261101 1. 994232 2. 46868 2. 684346 2. 322354 2. 104396 1. 644938 2. 477524 1. 66533  
3. 987897 3. 897046 2. 775657 4. 051975 3. 464674 3. 502954 3. 111601 3. 835283 3. 348805  
1. 183437 1. 188452 2. 167846 2. 159094 1. 843836 1. 786297 3. 28022 2. 314701 1. 64052  
2. 929882 2. 127781 2. 164963 2. 18842 1. 997703 2. 983086 2. 37895 2. 483025 2. 235757  
2. 766604 4. 093588 3. 434819 4. 0319 2. 655249 3. 102026 2. 973294 2. 726523 2. 942882  
4. 939851 4. 293367 4. 525967 3. 747954 3. 663359 4. 68719 4. 18965 4. 249538 4. 407106  
1. 319492 1. 753989 1. 873158 1. 142364 1. 366798 2. 569225 1. 388811 1. 342157 1. 948523  
2. 215363 1. 950495 2. 635295 2. 602924 2. 098624 1. 456221 1. 278851 1. 271666 1. 75365  
1. 898179 2. 623194 2. 598892 1. 929477 2. 706784 2. 078433 2. 423744 2. 346411 2. 353382  
5. 298256 5. 519546 4. 899107 5. 266466 4. 77417 6. 534596 5. 999083 4. 879687 5. 039139  
3. 774155 5. 150908 4. 493394 4. 170209 4. 358507 3. 526359 3. 5416 2. 910698 3. 901856  
1. 676437 2. 220072 1. 758171 1. 908761 2. 379927 1. 509569 1. 839618 2. 086404 2. 109594  
2. 459412 3. 352419 2. 118059 3. 087564 3. 162658 2. 411379 3. 039602 2. 492299 2. 827678  
1. 307424 2. 900716 3. 437443 2. 834766 2. 642191 3. 212629 2. 151171 1. 812379 1. 763983  
3. 958146 3. 082039 1. 959596 3. 072402 2. 865745 2. 610879 2. 101025 3. 638384 2. 621698  
5. 40273 5. 449843 5. 755882 5. 740632 5. 966539 5. 992327 5. 48033 6. 064507 6. 110144  
1. 881997 1. 596919 2. 413775 1. 555824 2. 419786 1. 612986 2. 365665 2. 839439 1. 872625  
2. 983022 2. 206724 2. 261022 2. 692722 3. 957399 3. 907594 2. 408579 3. 516306 3. 201427  
4. 10196 4. 385163 4. 858412 5. 094224 5. 953052 5. 257094 4. 468565 4. 289081 4. 918437  
4. 153079 3. 585718 4. 367699 4. 733822 4. 451352 5. 417439 5. 208356 5. 148771 4. 830721  
3. 430408 3. 123959 2. 851918 4. 011035 3. 586819 3. 091062 3. 411055 3. 535519 4. 073545  
1. 606267 1. 292311 1. 697417 1. 469096 1. 694583 1. 769101 2. 03343 1. 96337 2. 422925  
5. 973164 5. 699643 5. 650106 5. 701052 4. 974406 5. 663478 5. 899528 5. 996959 5. 297195  
5. 548414 6. 19097 5. 843474 6. 186204 6. 303351 6. 290512 6. 550381 5. 861214 5. 808394  
3. 415161 3. 249256 3. 229246 3. 713455 4. 488425 4. 295827 5. 13705 4. 736561 5. 570274  
5. 395809 3. 645078 4. 464021 4. 291961 3. 839426 5. 15397 5. 151771 3. 718287 2. 962301  
5. 912913 5. 449396 5. 83521 5. 771689 5. 580112 6. 008874 5. 535748 6. 179032 5. 966884  
0. 900107 1. 521962 0. 775451 1. 042871 0. 912955 0. 973944 1. 180643 1. 257982 0. 955917  
4. 029815 4. 195569 3. 871656 4. 32647 2. 737711 4. 57074 3. 905342 3. 015729 4. 115861  
5. 460703 3. 69092 4. 857963 5. 364872 4. 864528 6. 251158 5. 44303 5. 145952 4. 579096  
4. 087516 3. 796252 4. 029515 3. 334515 3. 903854 4. 867307 2. 791253 4. 626882 4. 449567  
1. 109726 0. 920028 1. 00783 0. 928889 1. 03438 0. 86512 1. 058499 1. 090188 0. 939686  
1. 493242 1. 025241 2. 038252 1. 680058 1. 970164 2. 16076 1. 701559 1. 850005 1. 567692  
5. 239618 4. 791268 5. 310162 5. 23537 4. 97977 3. 943952 4. 753399 4. 763945 4. 98189  
3. 800161 5. 436039 3. 871231 5. 379055 4. 732444 3. 761887 4. 935382 4. 619109 5. 078629  
5. 812357 6. 418119 7. 138091 6. 627566 6. 288595 6. 810465 7. 585559 7. 234545 6. 515005  
6. 494917 5. 393895 5. 678375 5. 565937 5. 334293 7. 150318 6. 386763 7. 101979 6. 045108  
4. 098088 3. 698542 4. 576835 3. 682065 3. 726519 2. 974694 3. 49452 2. 594715 3. 23927

5. 942623 5. 404978 5. 526406 5. 962464 6. 14051 6. 365451 7. 728098 7. 958127 7. 488264  
1. 788381 2. 117362 1. 864067 1. 187868 1. 849147 1. 745454 1. 874057 2. 514576 2. 185904  
1. 628363 1. 799523 1. 905243 2. 431547 1. 899838 1. 80913 1. 795477 2. 207636 1. 252124  
4. 661875 4. 560916 4. 469614 4. 359388 4. 563206 4. 571956 5. 018737 4. 702992 4. 657144  
5. 940156 5. 49612 4. 461471 5. 34635 4. 750508 5. 357111 5. 226782 5. 274126 5. 41379  
3. 614602 3. 297766 3. 718644 4. 618818 4. 116853 3. 875986 4. 513889 4. 999413 4. 596606  
8. 397497 8. 758841 8. 545524 7. 905702 8. 582775 7. 700053 8. 105786 7. 922348 8. 189416  
4. 534184 3. 974859 5. 126841 3. 847091 3. 458955 4. 650276 4. 492572 4. 475739 4. 28193  
2. 946864 4. 757463 3. 410562 3. 65338 4. 828091 4. 459467 3. 445943 3. 343271 3. 560915  
8. 605215 8. 470835 8. 11066 8. 279704 8. 427515 8. 49872 9. 049581 8. 546432 8. 763732  
1. 705145 1. 305256 1. 048331 2. 141174 1. 12754 1. 624414 1. 320572 1. 754059 1. 337523  
1. 295094 1. 506007 1. 612043 1. 704882 1. 94853 3. 323145 1. 478761 1. 639459 1. 549189  
2. 099762 1. 882272 1. 059914 1. 38588 1. 210329 1. 373454 1. 364308 2. 220651 1. 460822  
1. 345422 1. 637182 1. 587239 2. 208338 1. 537395 1. 750513 1. 322149 2. 369225 1. 782993  
2. 353521 3. 914195 2. 645117 3. 345935 3. 791425 3. 522741 3. 766985 2. 985156 2. 946508  
6. 899203 6. 797538 7. 519678 6. 830229 7. 112037 6. 387979 8. 026846 7. 809397 8. 17235  
1. 721839 1. 308313 1. 403546 1. 037959 1. 893926 1. 691212 1. 472904 1. 216504 1. 912248  
2. 858126 3. 323252 2. 77759 2. 775153 2. 659577 3. 820944 3. 413959 4. 660146 3. 323368  
1. 303849 1. 63952 1. 900588 1. 371571 1. 124803 1. 231349 1. 021312 1. 419721 1. 101764  
1. 487786 5. 544853 0. 583997 1. 72949 2. 926578 0. 908646 1. 147893 2. 79504 1. 1017  
2. 591448 2. 046959 2. 961019 2. 772315 2. 801928 2. 717501 2. 106512 3. 233363 3. 570746  
1. 322323 1. 118675 2. 113026 2. 177516 2. 361626 1. 276516 1. 248558 0. 896468 0. 756418  
5. 817471 6. 020415 5. 747937 5. 973957 5. 563896 6. 842135 7. 024284 7. 153763 7. 219729  
3. 622923 2. 144394 2. 996512 2. 366613 2. 861002 3. 323946 2. 717972 2. 882134 2. 982131  
2. 45208 1. 613386 2. 021221 1. 834042 1. 550984 1. 940163 2. 159667 2. 016182 2. 849921  
2. 765286 2. 838753 3. 189006 2. 72855 3. 248422 3. 106696 2. 551103 2. 40675 2. 414501  
1. 887707 1. 242341 2. 853067 2. 660274 2. 077483 4. 320333 2. 246912 3. 167516 2. 284894  
2. 920833 3. 303803 2. 207767 2. 453173 2. 740688 3. 56884 2. 560375 2. 529074 2. 942768  
2. 527156 2. 399381 3. 521093 2. 917161 2. 203669 2. 911305 1. 539003 1. 563617 2. 320209  
6. 275739 5. 58607 6. 241185 5. 670586 5. 844002 4. 739161 5. 758599 6. 151495 5. 644145  
4. 538706 4. 460861 4. 122705 2. 559333 3. 630823 4. 04817 4. 40958 4. 859159 5. 405659  
4. 629157 5. 739854 4. 524548 5. 038971 5. 334132 6. 712701 6. 510101 4. 264808 4. 245022  
0. 973233 1. 151249 1. 676354 1. 790758 0. 904283 1. 133289 2. 371852 2. 136168 1. 006902  
3. 212815 3. 558359 2. 622455 3. 19224 2. 946468 2. 294966 2. 728752 2. 539627 3. 422365  
3. 527616 3. 563907 2. 597822 2. 924382 2. 23565 2. 738981 3. 049245 2. 803896 2. 97789  
2. 824788 2. 908147 2. 985643 3. 440285 3. 474093 2. 930139 3. 112001 2. 857451 3. 015177  
5. 821266 4. 57329 5. 461181 5. 476073 6. 607572 4. 766609 6. 263386 7. 950034 7. 208198  
7. 03032 6. 265057 7. 001446 7. 633472 7. 084884 6. 717909 7. 362068 8. 024445 7. 317166  
6. 584029 6. 5947 6. 521264 7. 289104 6. 487747 7. 30126 7. 556223 7. 359438 7. 590462  
1. 849308 1. 545057 1. 451261 1. 731049 1. 645275 2. 428016 1. 649024 2. 437294 2. 169577  
6. 198891 5. 352629 6. 018489 4. 599081 5. 595036 2. 924824 3. 905878 2. 421297 2. 673684  
4. 172834 4. 936663 4. 491933 4. 897997 5. 088244 5. 915923 5. 330358 5. 661292 5. 672229  
3. 177353 2. 996044 3. 281705 4. 153431 4. 001532 3. 436032 4. 112848 4. 365107 4. 036314  
5. 042364 4. 829202 5. 304194 4. 575506 5. 45281 5. 160889 5. 396363 5. 168325 4. 775591  
3. 769376 3. 603596 2. 927853 4. 46658 4. 687716 4. 099234 4. 450318 4. 491105 3. 63965  
6. 000381 5. 261121 6. 054345 5. 736167 4. 296887 3. 890335 2. 273099 2. 900959 2. 068336  
4. 061364 4. 823954 4. 992616 3. 333944 5. 280897 5. 939047 4. 853099 5. 096 4. 396744  
3. 814199 2. 84672 3. 548407 4. 383113 3. 099085 4. 587584 3. 48478 3. 515763 3. 781092  
2. 322768 1. 729065 1. 963711 1. 420507 2. 108824 1. 551302 1. 694815 1. 527113 1. 738405  
1. 293379 1. 901701 2. 093327 1. 311216 2. 08653 1. 894894 1. 175082 2. 164601 1. 477121  
1. 87445 1. 269548 1. 582879 1. 544828 1. 335494 1. 06738 1. 298709 1. 516521 1. 505296

4. 45517 3. 809775 6. 998047 4. 997353 4. 706915 8. 097555 5. 82478 2. 903171 6. 10307  
3. 198249 3. 766329 4. 060102 3. 847651 3. 903512 3. 164444 3. 330919 3. 038599 2. 978549  
1. 301644 1. 325733 1. 335413 3. 126814 1. 272114 2. 434039 1. 596238 1. 482983 1. 75497  
2. 092558 2. 773493 2. 31371 2. 698275 2. 77346 2. 536696 2. 709157 2. 298906 2. 995427  
4. 596851 5. 377376 4. 512128 4. 597631 4. 761601 4. 400639 5. 246715 4. 414354 4. 794502  
3. 17172 3. 373224 4. 31862 4. 098757 3. 523361 4. 354058 3. 367957 4. 375296 4. 453169  
2. 200456 1. 844802 2. 397767 2. 328983 2. 015465 2. 166124 2. 556114 2. 575613 2. 160547  
3. 938447 4. 278127 2. 774924 2. 562968 4. 234371 3. 075399 3. 23779 4. 302793 3. 103976  
3. 624947 4. 263912 3. 581935 3. 773348 3. 99607 3. 571447 3. 106395 4. 498175 4. 874794  
2. 913234 2. 558759 2. 629811 2. 39546 3. 002676 2. 544784 3. 565649 3. 276905 2. 884207  
5. 237309 4. 668854 4. 287363 4. 792689 4. 207658 3. 588821 5. 150795 4. 265201 4. 785853  
1. 444499 1. 613685 1. 309103 1. 826194 1. 90112 1. 80342 2. 258801 1. 394896 2. 092323  
3. 659204 3. 007454 4. 255974 3. 764229 3. 99312 2. 286182 4. 080633 2. 370789 2. 720528  
4. 676277 4. 862237 3. 696346 3. 686115 2. 903564 6. 261619 3. 080407 2. 847886 2. 393459  
3. 260288 4. 36739 4. 449858 3. 854915 4. 466571 2. 860546 5. 019663 3. 607863 4. 589104  
2. 44223 2. 879014 1. 569829 3. 832158 1. 940732 2. 98709 1. 220112 1. 38239 0. 944174  
1. 581168 1. 932525 1. 39503 1. 180519 2. 339596 1. 982824 1. 378782 1. 009491 1. 490087  
1. 341348 1. 336897 1. 170159 1. 906448 1. 467406 1. 783022 1. 245195 2. 78895 3. 031927  
1. 089738 1. 423912 1. 085505 1. 684796 0. 915264 0. 899845 1. 166896 1. 423825 1. 27577  
3. 310512 3. 334223 2. 734968 3. 901082 2. 929705 4. 389408 3. 366142 4. 741925 3. 949302  
7. 455168 6. 284355 6. 552212 6. 511122 5. 116754 6. 683344 5. 833673 5. 059345 5. 002458  
4. 153084 3. 737271 3. 933901 3. 690405 4. 345811 4. 279994 2. 986294 4. 796925 3. 719507  
2. 253572 2. 054696 2. 283445 2. 453423 2. 061357 1. 659487 1. 867392 2. 491743 2. 457992  
1. 67817 1. 562023 0. 973989 3. 177213 1. 138008 2. 866571 0. 683994 1. 073536 2. 690204  
1. 178369 1. 516509 2. 586551 1. 320835 1. 511849 2. 110436 1. 820123 2. 348566 1. 510846  
1. 950993 2. 411964 2. 193901 1. 742626 1. 965295 2. 217463 3. 547599 2. 113948 1. 878676  
5. 431877 5. 124192 5. 33158 5. 523955 5. 62691 6. 212022 5. 230014 4. 869905 4. 345929  
5. 409899 5. 876522 6. 405649 6. 353978 6. 246501 5. 308942 6. 721365 6. 519093 5. 965122  
2. 665063 3. 806904 3. 339246 1. 260153 3. 132969 4. 224594 3. 575459 4. 994482 4. 458778  
5. 022429 5. 814417 6. 318391 4. 66336 6. 233973 2. 566491 5. 076412 3. 758586 3. 69461  
1. 767018 1. 916378 1. 669071 1. 754905 1. 884615 2. 27613 1. 408086 2. 08942 1. 585257  
1. 816459 1. 679785 2. 335575 1. 998121 1. 718113 1. 840938 1. 579301 1. 538277 2. 13751  
3. 180692 3. 15224 2. 970918 3. 155361 2. 667365 4. 882284 3. 227728 3. 931053 3. 611398  
7. 421323 7. 553126 6. 771382 7. 757692 7. 427703 7. 494853 7. 513183 7. 890463 7. 945086  
5. 298809 4. 637408 4. 922128 5. 51101 4. 334008 6. 621223 4. 695975 5. 782938 4. 796688  
4. 227575 2. 713376 2. 920768 2. 931998 3. 001248 2. 388066 2. 223925 2. 429581 3. 722125  
2. 313823 1. 959595 2. 009846 2. 470068 2. 013292 2. 047546 1. 757676 2. 31393 1. 945082  
1. 971269 2. 069787 2. 665995 2. 93729 1. 816475 3. 333619 2. 251426 3. 448309 3. 327155  
1. 795162 1. 468356 1. 766236 2. 605795 1. 440058 1. 279745 2. 631411 1. 450091 1. 79347  
6. 681496 7. 424405 7. 62507 6. 838211 7. 250502 5. 365706 7. 413965 7. 347128 7. 578836  
2. 932725 2. 567442 4. 288052 2. 752441 2. 968031 3. 714192 3. 180038 3. 707571 2. 903421  
7. 273275 6. 621629 6. 854789 6. 464174 6. 762592 8. 310631 6. 65966 7. 719223 7. 775863  
2. 073894 2. 110285 2. 25801 1. 931193 1. 670099 2. 824661 1. 926212 3. 515789 1. 630697  
4. 089525 4. 852732 4. 17996 3. 393085 4. 69384 3. 926253 4. 495716 4. 140483 4. 296111  
5. 041846 5. 261762 5. 866 5. 331093 5. 073136 6. 771386 5. 760492 3. 716591 5. 213831  
3. 486572 3. 478763 2. 077241 2. 55966 2. 091705 5. 211682 1. 359543 2. 040067 2. 812714  
1. 292024 1. 588457 1. 600927 1. 48914 0. 994526 1. 166674 1. 349379 1. 278149 1. 359789  
2. 589084 2. 255141 1. 968063 2. 349593 2. 551213 2. 462135 2. 56284 2. 244944 2. 862839  
1. 382255 1. 974972 1. 675815 1. 69331 1. 132229 1. 348684 1. 626736 1. 041742 1. 792052  
2. 296564 2. 677273 1. 790209 2. 432922 3. 371506 1. 896506 2. 922153 3. 352782 3. 521239  
5. 877784 6. 412656 6. 069249 4. 760136 5. 921978 6. 169401 6. 472324 6. 711832 6. 251282

2. 562157 3. 002583 3. 095272 1. 61103 3. 032831 2. 75557 2. 638703 3. 787633 3. 127289  
1. 163917 1. 213107 3. 13866 1. 993767 3. 219151 1. 620378 0. 933247 1. 050162 1. 062221  
3. 619493 4. 164076 4. 151249 4. 2827 4. 278023 4. 769155 4. 204599 3. 771853 4. 091644  
1. 491655 1. 063741 1. 603694 1. 789917 1. 318059 1. 642529 0. 993959 1. 104576 1. 378703  
3. 595981 5. 345094 4. 955775 4. 702297 4. 478383 3. 513164 4. 405074 4. 9671 3. 644508  
2. 069663 2. 457491 2. 171684 1. 815219 2. 069237 2. 163444 3. 045118 2. 195414 1. 673814  
5. 964134 6. 752202 7. 059828 6. 902398 7. 12013 5. 887524 7. 45597 7. 572425 7. 644866  
1. 722404 1. 85823 1. 976735 3. 009854 2. 110242 1. 894903 1. 385507 1. 537333 2. 065686  
5. 795937 5. 912624 5. 939446 5. 948947 5. 584431 6. 028624 5. 580854 5. 484974 5. 729893  
4. 300572 2. 320036 1. 493133 5. 340632 4. 551192 1. 253347 3. 977115 3. 568626 2. 809901  
2. 038896 1. 858649 1. 878394 2. 349721 2. 728901 2. 494206 2. 03424 1. 848514 2. 104247  
4. 164292 4. 478782 4. 805371 4. 148841 4. 568771 4. 291459 4. 374778 4. 314337 4. 506003  
2. 090422 2. 302097 2. 292065 1. 907084 2. 260365 2. 234629 1. 635414 1. 925737 1. 866764  
7. 859238 6. 349992 7. 210327 7. 694621 6. 27958 6. 76167 5. 947457 5. 909609 5. 735052  
4. 13897 5. 185811 4. 167565 5. 278483 4. 206143 5. 127137 4. 917593 4. 589046 3. 543665  
5. 886703 6. 486905 6. 181292 5. 78697 5. 084931 6. 089415 5. 954909 5. 601616 5. 592349  
2. 476559 2. 55502 3. 328946 2. 255161 1. 705199 1. 971556 2. 345853 2. 880687 2. 987907  
3. 470227 3. 847402 2. 679855 1. 557071 2. 412686 2. 068468 2. 218521 2. 351499 1. 264215  
5. 926685 4. 950657 4. 898141 4. 341284 4. 773286 4. 594196 4. 735921 3. 584317 3. 502858  
5. 226402 4. 278854 4. 942472 3. 266563 4. 614616 4. 609635 4. 763514 4. 512051 4. 192383  
1. 624497 1. 654749 1. 767603 1. 951637 1. 610376 1. 594942 1. 776167 1. 815381 1. 549973  
2. 558424 2. 414187 2. 169763 2. 190217 2. 29053 1. 912014 1. 860227 3. 040411 2. 166297  
1. 339252 1. 472258 1. 39122 1. 604129 1. 601564 1. 542905 1. 924802 1. 019089 1. 688939  
4. 249214 4. 689156 2. 471368 3. 139001 3. 098111 3. 837853 3. 222695 3. 655163 3. 268324  
3. 827509 2. 59332 4. 32334 3. 686534 4. 3225 3. 838123 4. 853028 3. 64863 4. 716627  
1. 960304 2. 152005 2. 685607 2. 083095 2. 082564 1. 621989 2. 555894 2. 187254 2. 015572  
5. 730673 4. 673307 4. 057703 3. 267087 4. 604175 7. 111696 5. 095884 4. 602294 5. 683212  
3. 739001 4. 283875 2. 436366 7. 35627 4. 471798 2. 04932 2. 531301 1. 835125 5. 674199  
4. 251027 4. 962973 3. 241565 4. 106777 3. 240203 3. 244789 2. 738432 3. 54704 4. 341283  
3. 4925 3. 191991 3. 86898 3. 039796 3. 558877 4. 119843 4. 240478 5. 552021 3. 285772  
1. 685656 1. 89239 1. 621376 2. 171614 1. 63116 2. 063028 1. 460258 1. 652321 1. 542889  
4. 147922 3. 71575 4. 245678 5. 057059 4. 300216 5. 733031 4. 481715 5. 569753 4. 858183  
3. 769015 3. 992645 3. 503352 5. 873729 2. 763503 3. 770681 3. 712963 4. 489579 4. 530286  
6. 530133 7. 428745 6. 650604 6. 826626 7. 329102 6. 861754 6. 990964 7. 366046 7. 464843  
1. 367755 1. 47495 0. 622517 0. 843486 0. 883004 2. 168021 1. 907508 0. 921149 1. 368892  
6. 883961 6. 631532 6. 250075 6. 061409 5. 353746 3. 777799 4. 488717 4. 92637 3. 800579  
5. 644203 5. 969777 6. 297904 5. 776578 5. 718889 6. 011581 5. 549588 5. 918964 5. 589355  
7. 203448 6. 383075 6. 809759 6. 455082 6. 604209 6. 67551 7. 147503 6. 854506 6. 79233  
5. 959842 8. 183178 7. 38105 5. 359148 6. 883615 7. 499541 7. 581839 8. 054491 7. 718564  
7. 703577 6. 338443 6. 887149 7. 675737 7. 384506 9. 091993 6. 615604 6. 68556 7. 280263  
7. 815643 7. 891776 7. 690342 8. 038922 8. 201744 8. 393563 8. 039955 8. 354976 8. 731277  
2. 503206 1. 974885 2. 798931 1. 373836 1. 456211 1. 671394 1. 082268 1. 786218 1. 528268  
1. 913427 2. 658939 2. 472119 1. 509758 2. 882323 1. 763595 1. 679214 2. 641317 1. 660013  
4. 873863 5. 368007 5. 012296 4. 695762 3. 879665 4. 212926 4. 698785 3. 343824 3. 499474  
4. 175569 3. 747094 3. 564212 4. 52393 5. 846384 3. 710851 3. 418185 3. 850737 4. 331182  
2. 124577 2. 158286 1. 42379 2. 038626 1. 831599 2. 422679 1. 731131 2. 143029 2. 153218  
4. 937743 5. 92902 6. 127672 4. 877653 6. 821999 4. 729964 5. 638241 6. 785163 6. 260692  
1. 434735 1. 283941 0. 994501 1. 502098 1. 330276 1. 562305 1. 160244 1. 178076 1. 378044  
7. 468464 6. 29872 7. 090832 5. 792283 3. 844567 6. 699743 5. 82826 3. 664513 3. 059446  
7. 548605 7. 985709 8. 077098 8. 343568 7. 852996 7. 592376 8. 291507 7. 921868 7. 943743  
0. 88384 1. 25224 1. 308928 1. 180034 1. 081096 1. 206519 1. 039896 1. 076013 1. 129202

3. 904393 4. 686893 3. 25515 4. 87941 3. 29263 3. 781683 3. 294354 3. 753623 3. 692694  
2. 633489 2. 432647 1. 361749 1. 694918 1. 618037 1. 726314 1. 56592 1. 710211 2. 434969  
7. 535787 8. 112736 8. 081835 7. 648573 7. 956572 6. 109997 6. 720436 6. 733957 6. 519514  
1. 125966 2. 590406 2. 047697 1. 154668 1. 110816 1. 273272 1. 100758 1. 329473 2. 352456  
1. 596339 2. 188205 1. 176788 1. 006112 1. 23011 1. 721088 1. 554811 1. 857831 1. 393499  
0. 832915 1. 152015 1. 209852 1. 213785 0. 603286 0. 941617 1. 066598 1. 62009 0. 950357  
1. 156668 1. 206824 0. 85689 1. 177365 0. 81209 1. 096316 1. 123984 1. 565653 1. 306868  
2. 100923 2. 096062 3. 30689 0. 827219 2. 880698 2. 23238 2. 890538 1. 748057 2. 309326  
2. 361269 2. 106639 2. 241175 2. 076823 3. 080678 2. 251474 2. 884283 2. 186066 3. 029684  
1. 863137 2. 860886 2. 695736 2. 355149 2. 919945 2. 595175 2. 517815 2. 185908 2. 553817  
4. 402687 4. 579969 2. 852076 4. 440023 3. 783217 4. 285739 4. 04769 5. 547731 5. 082968  
4. 812058 5. 791482 5. 266995 4. 466124 5. 504548 5. 039489 4. 827761 5. 127989 3. 992054  
1. 369903 1. 083035 0. 966405 3. 194061 2. 678663 1. 013766 1. 501896 2. 409227 1. 307843  
1. 593243 3. 297403 1. 66324 2. 894327 3. 797059 2. 456303 1. 99705 3. 09725 3. 200416  
0. 728432 1. 117487 1. 849548 1. 794788 1. 18898 0. 869709 1. 070771 1. 20842 1. 556613  
0. 922123 1. 615724 1. 828492 1. 43047 1. 718637 1. 69716 1. 559593 1. 278664 1. 776721  
1. 873859 1. 930595 0. 526815 1. 069241 0. 819004 1. 032397 1. 221561 1. 290848 0. 774496  
3. 137229 2. 812856 1. 830001 2. 459353 3. 177669 2. 999014 3. 468357 3. 81407 2. 000762  
4. 869626 5. 463581 5. 970167 4. 832859 4. 645113 4. 874342 4. 777923 4. 746715 5. 549049  
2. 144581 1. 313689 1. 616624 1. 285353 1. 984806 1. 189551 0. 992736 1. 535436 1. 526032  
2. 084539 2. 927046 1. 284184 1. 170708 1. 920111 0. 813169 3. 019302 3. 902328 3. 121663  
1. 268972 2. 438927 1. 279987 1. 667596 1. 560355 1. 19769 0. 979019 2. 170505 1. 697608  
3. 9154 3. 802672 3. 997559 3. 539182 3. 081112 3. 894685 3. 452827 3. 342402 3. 880911  
8. 116978 7. 460605 7. 745058 7. 875111 7. 365862 8. 565584 8. 76674 8. 129903 7. 636971  
3. 514159 4. 607311 3. 881291 4. 019394 3. 840767 2. 920388 4. 386919 3. 535243 3. 333489  
1. 870177 1. 522556 1. 718147 1. 571951 1. 917725 1. 598398 1. 49082 1. 560114 2. 005983  
1. 523733 0. 759472 0. 641435 1. 412839 0. 612759 0. 861195 1. 183611 1. 672352 0. 793504  
6. 12271 4. 852575 5. 680672 7. 308841 5. 098145 7. 443868 5. 396272 5. 031219 5. 983734  
4. 235108 3. 172923 4. 523055 5. 367204 2. 298933 5. 112469 3. 193162 3. 73342 4. 484187  
3. 194056 4. 037884 2. 801793 2. 8359 3. 21484 2. 289306 3. 362714 3. 851358 3. 651372  
2. 546677 1. 82709 1. 620054 1. 489706 1. 499479 2. 149196 1. 977805 2. 967666 1. 876232  
2. 455933 3. 149223 3. 791245 5. 208101 5. 277338 3. 464776 2. 202594 2. 404371 2. 563324  
2. 426415 3. 551826 3. 444664 5. 183197 3. 695379 3. 416186 4. 860244 2. 884435 3. 075363  
7. 171284 7. 451571 6. 736365 6. 433731 6. 819335 7. 06657 7. 53888 7. 350667 7. 1071  
1. 896311 0. 778298 0. 91617 1. 70827 1. 323113 1. 542441 0. 940596 1. 614369 0. 866403  
0. 971508 2. 939082 3. 175168 2. 473132 0. 835113 0. 923245 1. 183975 1. 826407 0. 762263  
2. 114489 2. 120078 2. 404657 2. 061693 2. 667258 4. 152245 2. 043431 2. 007518 3. 772961  
5. 491974 6. 380158 5. 659232 5. 789939 5. 71568 5. 265151 6. 00285 5. 366584 6. 029365  
7. 05258 7. 455132 6. 819394 7. 687818 6. 69766 7. 323226 7. 1722 6. 760839 6. 462084  
1. 63049 1. 3397 0. 747013 2. 175568 0. 973735 1. 280027 1. 790779 1. 959527 1. 227675  
1. 557981 1. 551562 0. 978108 1. 061216 1. 115998 1. 665837 1. 440295 1. 096562 1. 012294  
1. 339648 1. 681713 1. 575821 2. 109445 1. 228088 1. 107637 1. 855348 1. 573973 0. 772372  
1. 752327 2. 455903 1. 890905 1. 996513 2. 444411 1. 804192 1. 917734 1. 788901 2. 005604  
1. 766192 2. 557018 2. 554155 1. 979368 1. 569519 1. 735075 3. 334623 1. 901049 2. 690852  
1. 269059 1. 439912 1. 143298 1. 842486 1. 091561 1. 483329 1. 412754 1. 493247 1. 665017  
6. 224244 6. 747101 5. 860555 5. 952387 6. 228003 6. 409135 6. 134282 6. 054465 6. 994054  
1. 624746 1. 591804 1. 634853 1. 847368 1. 142881 1. 161977 1. 340284 1. 381294 0. 914739  
5. 407544 4. 883081 5. 030081 4. 311362 4. 730813 5. 692219 5. 049201 4. 382336 4. 957949  
1. 982176 2. 272818 2. 078829 2. 034001 1. 698115 1. 759784 1. 816531 2. 097163 1. 992558  
2. 517397 1. 655098 1. 421402 2. 726894 1. 234816 1. 705552 1. 778677 1. 937726 1. 231863  
6. 830677 7. 628745 6. 060708 7. 414907 5. 427554 6. 888499 5. 927024 4. 23268 6. 847282

8. 483388 7. 582869 8. 066882 8. 507609 7. 933802 8. 301408 8. 592424 8. 764437 8. 379793  
7. 780173 7. 635009 7. 492941 7. 410814 8. 235149 7. 216794 7. 800831 8. 130146 7. 103722  
1. 284014 1. 552161 1. 149526 1. 342627 1. 046113 1. 645225 1. 075066 1. 024141 1. 357168  
4. 894183 5. 292448 5. 19386 5. 582015 6. 202399 6. 070103 5. 649054 5. 072728 5. 893631  
1. 601388 1. 696938 1. 576918 1. 360524 1. 456735 1. 264321 1. 036357 2. 804083 1. 592468  
1. 397959 2. 79533 3. 045022 2. 334116 3. 439183 1. 629706 2. 576374 2. 125687 2. 170597  
7. 32439 7. 336248 7. 271717 7. 327485 7. 351629 7. 628638 7. 016035 7. 460934 7. 809687  
2. 75417 2. 08622 2. 47473 2. 300334 1. 883208 1. 940867 2. 40715 1. 606998 1. 99552  
5. 486734 4. 955066 5. 112575 5. 461047 5. 181467 4. 824401 5. 271806 4. 563731 4. 001524  
1. 418126 1. 315521 1. 509759 2. 665849 1. 265468 2. 188745 2. 001814 2. 146132 1. 658348  
6. 224865 6. 70012 5. 938462 7. 16477 6. 644382 6. 479664 6. 830941 6. 144473 6. 668653  
1. 325542 1. 306202 1. 624603 1. 407049 1. 262826 1. 488971 0. 993289 1. 347859 1. 945159  
1. 858849 1. 875218 2. 501047 2. 187403 2. 469181 1. 608877 1. 976542 1. 578558 2. 719314  
3. 766731 2. 718916 4. 44866 1. 768642 4. 200985 3. 468477 3. 267478 3. 951796 4. 288815  
2. 059384 1. 803461 3. 37571 1. 689294 1. 829327 1. 701108 2. 132414 2. 491262 2. 5536  
1. 398163 1. 994186 1. 241393 1. 806174 1. 249506 2. 429593 1. 862171 1. 524502 1. 700882  
6. 370265 6. 491168 6. 801864 6. 851921 6. 365786 6. 8444 6. 779237 6. 822582 7. 131373  
2. 04206 1. 329046 2. 020616 1. 538683 2. 513357 2. 461494 1. 234456 2. 148861 1. 405264  
2. 225262 1. 850607 1. 729981 2. 100771 2. 003411 1. 646103 1. 830173 1. 929545 2. 329355  
1. 181219 1. 2393 1. 235237 1. 177412 1. 254844 1. 417979 1. 38571 1. 716193 1. 229825  
1. 233659 0. 898925 1. 13664 2. 624146 2. 737291 1. 442361 1. 201549 1. 913085 1. 517115  
8. 519339 8. 792395 8. 820704 8. 243748 8. 501728 8. 585997 8. 950207 8. 84564 8. 776833  
5. 558785 5. 645683 5. 278584 5. 682911 6. 295173 5. 762801 5. 954061 5. 408598 5. 248685  
3. 22772 3. 918531 4. 117325 4. 442828 4. 303468 3. 2331 4. 437244 5. 126124 4. 94258  
5. 053473 5. 483906 5. 333249 5. 614149 5. 409855 6. 001042 5. 780472 5. 720049 5. 89917  
6. 523611 6. 799373 6. 845137 7. 374288 6. 899391 6. 809174 5. 318305 5. 857148 7. 2787  
6. 278341 7. 155705 6. 306394 7. 095244 5. 70052 5. 952891 6. 967145 6. 267725 5. 527575  
6. 491261 6. 171348 6. 324714 4. 813734 4. 891787 6. 106976 5. 427575 4. 770955 5. 224712  
6. 638654 6. 326283 6. 522601 6. 902961 6. 469092 6. 456856 6. 922541 6. 231453 6. 33375  
2. 10998 1. 355323 1. 397206 1. 901467 1. 38669 1. 554601 1. 325766 1. 357118 1. 583971  
2. 26903 1. 483292 1. 371163 2. 238247 1. 270105 1. 666563 1. 968641 2. 053426 2. 021788  
0. 86446 1. 024148 0. 925003 0. 694777 0. 69397 0. 963353 0. 653833 1. 154467 1. 580192  
2. 989428 2. 756857 2. 543166 2. 901537 2. 496722 2. 844178 2. 108381 1. 945282 2. 631622  
0. 828448 1. 41649 1. 101898 1. 463873 1. 525142 0. 969222 1. 551322 0. 981276 1. 803905  
3. 184849 4. 42095 4. 307417 4. 780697 4. 181186 5. 389318 3. 07394 3. 650515 4. 131866  
3. 609886 2. 77419 3. 758679 3. 401468 2. 649621 2. 775674 3. 027374 3. 248156 4. 048235  
6. 920689 6. 34989 7. 145952 7. 170552 6. 631454 7. 335826 6. 747608 7. 031892 7. 164866  
2. 452199 2. 249454 2. 597217 2. 582808 1. 627442 1. 95344 2. 041279 2. 831744 1. 47953  
1. 316518 1. 819766 1. 989497 3. 221839 1. 42106 1. 17346 1. 506816 1. 598551 1. 293244  
2. 545785 1. 644059 1. 138472 2. 834942 0. 734537 0. 899616 1. 07788 0. 843503 1. 451216  
2. 775356 3. 528822 3. 057264 3. 394442 2. 684411 2. 896891 3. 558068 2. 967938 2. 645851  
0. 990643 1. 048845 1. 092384 1. 612007 0. 950574 0. 922392 1. 016055 1. 329877 0. 85545  
1. 141881 1. 225863 0. 753733 2. 017901 1. 006836 1. 272892 1. 044183 1. 295685 1. 061065  
3. 077499 3. 490079 3. 184269 4. 509888 4. 377022 3. 518193 3. 235996 2. 490423 2. 921994  
1. 71007 1. 456189 1. 987505 1. 662656 1. 672501 1. 785824 1. 854418 1. 846531 1. 60109  
2. 721601 2. 990539 2. 700931 2. 200681 2. 62746 2. 049721 3. 978609 2. 315695 1. 681231  
2. 1985 2. 163387 2. 384404 2. 92771 1. 928718 2. 030468 2. 445116 1. 875606 1. 915751  
1. 900796 2. 145849 2. 330243 3. 440113 1. 864345 2. 562317 2. 044177 1. 961813 2. 841001  
5. 423871 3. 795608 5. 315648 3. 720073 5. 30353 7. 187996 5. 756044 6. 571295 6. 069008  
3. 060329 2. 727487 3. 735221 4. 393795 2. 238889 2. 432008 4. 317127 2. 628581 2. 625046  
6. 955247 7. 674945 6. 709742 6. 979698 7. 404191 6. 359694 7. 081305 6. 942956 7. 375777



3. 174293 4. 184606 3. 377039 3. 400848 2. 99041 3. 53401 2. 272475 3. 446761 2. 655406  
1. 499006 1. 58668 1. 394074 1. 848853 2. 304267 2. 888336 1. 629803 1. 855663 1. 555723  
4. 736836 4. 38832 5. 469599 4. 500016 4. 170389 3. 680767 4. 335395 3. 227433 2. 451  
1. 31909 1. 481203 1. 762849 1. 254866 1. 411592 1. 622411 2. 121028 2. 656456 1. 259026  
2. 747632 2. 915193 3. 713497 4. 763827 4. 743962 2. 512009 3. 634724 2. 46855 2. 869321  
1. 186305 1. 419874 1. 395732 1. 260893 1. 893118 2. 305164 1. 307925 1. 399575 1. 331848  
6. 75009 5. 524433 5. 486251 6. 039034 4. 810381 6. 656657 5. 780729 5. 986507 5. 983424  
1. 380155 1. 291621 2. 155273 1. 79792 1. 341021 1. 815375 1. 436841 1. 271271 1. 904386  
1. 604918 1. 400142 1. 755702 1. 511362 1. 113442 1. 691795 1. 237694 1. 56643 1. 323333  
1. 114358 1. 370612 1. 098514 1. 151708 1. 195219 0. 903136 1. 038481 1. 287145 1. 431045  
0. 989986 1. 104424 2. 116416 0. 834289 2. 638077 2. 222581 1. 722778 1. 558346 2. 793457  
2. 648124 3. 369836 3. 30006 3. 69318 2. 898167 3. 665275 3. 959573 3. 351315 2. 921114  
5. 183083 6. 186751 6. 194529 6. 544549 5. 311901 3. 189265 5. 105964 5. 353861 5. 259904  
5. 336097 4. 096182 4. 585111 4. 549812 4. 876552 4. 19095 4. 900558 3. 983707 4. 390528  
6. 582163 6. 735167 6. 0659 6. 186634 5. 890409 5. 689228 7. 110829 6. 851632 6. 050004  
6. 53977 6. 047396 6. 808867 5. 850431 7. 081987 5. 613599 6. 63873 5. 958573 6. 193484  
1. 496885 0. 992562 0. 763026 1. 187665 1. 37436 1. 150159 1. 256367 1. 029623 1. 143504  
2. 266157 2. 726417 1. 924894 1. 920626 1. 930659 1. 540908 2. 311668 1. 573999 2. 915926  
3. 325213 3. 70133 4. 502172 3. 283296 3. 171037 3. 259878 3. 869926 3. 325255 4. 584036  
5. 697846 5. 371182 5. 776775 4. 915717 5. 048949 5. 827945 5. 80118 6. 184314 5. 533783  
3. 710506 1. 195545 2. 493697 1. 979062 1. 540851 1. 281577 1. 432722 1. 228834 1. 243983  
3. 537618 3. 503471 4. 606519 4. 529328 3. 840371 3. 311625 3. 375627 3. 587056 3. 171921  
4. 672943 5. 220669 4. 804492 4. 942264 4. 576438 5. 290585 3. 816034 3. 441908 3. 433155  
1. 551559 2. 273745 1. 63435 1. 839132 1. 899684 1. 915939 1. 481377 2. 432537 2. 604128  
4. 162008 3. 501847 3. 678713 3. 74342 3. 988484 3. 745965 3. 733222 3. 424711 3. 99511  
4. 051651 3. 473806 3. 867114 4. 979965 3. 343996 5. 561917 4. 138597 2. 74201 2. 825374  
2. 503739 1. 806161 1. 633941 2. 249697 1. 842854 4. 787191 3. 4195 3. 19989 2. 421897  
2. 397679 2. 250138 2. 381712 2. 433054 2. 364729 2. 020304 2. 258827 2. 697286 2. 403685  
6. 33139 6. 713268 5. 132005 6. 381569 5. 56891 6. 73707 6. 737687 6. 908324 7. 178425  
4. 87035 5. 19589 4. 307762 3. 245925 5. 453747 5. 555366 5. 398996 5. 11541 4. 963573  
2. 797192 2. 658454 2. 829424 3. 615964 3. 521518 2. 437277 2. 090602 3. 332771 3. 189192  
7. 311318 6. 14404 5. 40877 6. 192044 5. 253223 5. 939254 6. 189459 6. 651215 4. 539955  
3. 815812 3. 898717 4. 315969 4. 746462 3. 916383 5. 131784 3. 186314 4. 552294 2. 621328  
4. 822456 5. 655913 4. 808204 4. 833041 4. 323106 3. 735874 5. 444783 5. 73286 4. 953169  
0. 841803 1. 192131 1. 037999 1. 005663 0. 833339 1. 019454 1. 239583 1. 531298 1. 152705  
1. 485853 1. 490852 1. 766634 1. 726543 0. 968359 1. 417234 1. 224259 1. 726415 1. 759405  
3. 995276 4. 906005 5. 215118 4. 76078 4. 315137 3. 970347 3. 748 3. 252573 4. 886837  
1. 038612 1. 39126 1. 001315 1. 849704 1. 657994 3. 687359 1. 773256 1. 439518 2. 426764  
1. 520093 2. 095137 1. 232911 1. 503907 1. 50189 2. 186049 1. 826166 1. 360922 2. 361033  
4. 56068 5. 202899 5. 279008 4. 733026 5. 034604 2. 918906 3. 958112 5. 229416 4. 830883  
2. 723833 2. 423823 2. 081217 2. 152447 1. 848843 2. 240366 2. 05267 2. 16121 2. 482493  
4. 357587 4. 221077 4. 775231 3. 884728 3. 329581 3. 676505 5. 132164 4. 822028 5. 125897  
1. 927342 1. 737639 1. 520971 1. 637519 2. 067596 1. 904006 1. 566807 2. 076326 1. 673034  
4. 048735 4. 005279 2. 854234 5. 006674 4. 724832 3. 037209 3. 818607 2. 460475 3. 23122  
3. 430388 3. 392573 3. 121148 3. 861674 3. 091783 5. 27965 3. 366271 3. 461802 4. 054445  
3. 48977 2. 954745 4. 008776 5. 044695 3. 777638 3. 87051 3. 500035 5. 250022 4. 130038  
2. 072638 2. 720807 2. 124642 1. 76012 1. 980057 2. 468458 1. 99869 2. 382011 1. 904612  
1. 791555 1. 987564 1. 926444 1. 800163 1. 71223 1. 826201 1. 99222 2. 054863 2. 357652  
1. 849862 2. 542623 1. 800542 1. 670617 2. 183554 2. 009916 2. 487624 2. 570122 2. 679812  
2. 386235 1. 517538 1. 448988 1. 557066 1. 617232 1. 53978 1. 609635 1. 433392 1. 690661  
5. 786952 5. 845185 6. 074561 6. 998531 6. 350645 6. 32098 7. 16489 7. 286646 6. 232211

7. 111263 7. 278559 7. 126296 7. 144829 7. 535048 7. 656753 6. 892203 6. 601756 7. 341737  
1. 7661 1. 747395 2. 981052 2. 278376 1. 008413 2. 997787 1. 665954 1. 955196 1. 487208  
8. 528272 7. 66156 8. 11064 7. 3526 6. 898437 8. 32171 7. 06017 5. 594388 4. 441649  
3. 213144 4. 388823 4. 228464 4. 190226 4. 015275 3. 134393 4. 917876 3. 629776 4. 382099  
1. 63213 2. 455948 4. 09201 1. 449737 1. 630314 3. 123973 1. 723903 2. 735197 2. 83819  
2. 219661 1. 85466 2. 251998 2. 18414 3. 230501 2. 804497 1. 808248 2. 489454 2. 290849  
4. 199046 4. 25289 4. 603303 5. 214407 4. 945725 5. 61374 4. 48571 4. 415203 5. 146659  
1. 403271 1. 545523 1. 816136 2. 161963 2. 378924 1. 565775 1. 516785 1. 504059 2. 499281  
8. 530805 8. 337845 8. 179303 7. 978079 8. 239303 7. 323671 7. 796178 7. 279328 7. 292885  
3. 710835 3. 322785 3. 587174 3. 845731 4. 126673 3. 118036 4. 174746 4. 06651 3. 530074  
3. 117852 2. 967119 2. 597078 4. 929658 3. 694782 1. 878251 2. 123642 3. 028248 3. 756986  
1. 8726 1. 808194 1. 699456 1. 598718 2. 308503 1. 599696 2. 141594 3. 139504 2. 324991  
2. 586612 2. 832816 3. 129912 1. 948587 1. 907356 3. 327348 1. 539455 2. 650338 1. 582542  
4. 638378 4. 00721 5. 050438 3. 435443 4. 089739 4. 362294 4. 456731 5. 372475 4. 919059  
1. 257611 1. 888407 1. 091698 1. 702547 0. 788293 1. 213605 1. 273045 1. 669757 1. 755436  
4. 620294 4. 463319 4. 576704 5. 471645 4. 699795 5. 250001 4. 497932 4. 671625 4. 838893  
2. 58022 2. 088865 2. 359676 1. 606791 2. 618811 2. 146344 1. 438965 1. 988612 2. 703983  
2. 81572 3. 427837 3. 874337 3. 558964 3. 378391 4. 333143 3. 252899 5. 822967 4. 578836  
2. 415713 1. 597847 2. 825961 3. 625931 2. 894517 1. 952797 1. 86822 2. 098103 2. 36988  
2. 620722 3. 643383 3. 018458 2. 63963 3. 508987 4. 506779 3. 23067 2. 936721 4. 024699  
3. 868147 4. 328965 4. 814097 3. 944872 4. 715511 5. 618412 5. 395222 5. 543185 5. 586672  
2. 131268 2. 355521 2. 063499 1. 82433 2. 63072 1. 869392 2. 179579 1. 960442 2. 741422  
2. 930202 2. 579421 2. 872056 3. 419122 2. 172705 3. 21779 2. 561228 2. 970662 3. 721077  
4. 403029 2. 791955 3. 518917 2. 91351 4. 138886 3. 054399 3. 461862 3. 380623 3. 073678  
5. 36791 4. 45321 5. 225087 5. 666089 4. 807028 5. 920577 5. 06395 6. 593616 5. 592058  
2. 202073 2. 075222 2. 317848 2. 611165 2. 77577 2. 694731 2. 369814 2. 483764 2. 091977  
9. 253003 9. 350605 9. 229972 9. 600372 9. 45011 9. 613065 9. 585628 9. 658181 9. 364467  
3. 638423 3. 871917 2. 877912 3. 489334 3. 71002 4. 370137 3. 508006 3. 309224 3. 966699  
1. 927843 1. 466162 1. 640088 2. 074774 1. 826571 2. 361129 1. 7433 1. 712578 1. 28735  
4. 891771 4. 65585 4. 257063 5. 802217 5. 048483 5. 402832 6. 073014 6. 635726 5. 888521  
6. 461503 5. 091368 5. 863753 4. 246055 3. 959229 4. 022942 3. 612595 1. 936771 1. 596609  
4. 405145 4. 696506 4. 841726 4. 65165 5. 094858 4. 252372 4. 74471 4. 607276 4. 319469  
2. 551921 1. 901641 1. 59007 1. 562096 1. 163465 1. 838272 1. 404391 1. 740754 1. 287446  
0. 991395 1. 307434 1. 257239 2. 046767 1. 27092 0. 866114 0. 950743 0. 819701 0. 721416  
7. 682648 6. 940324 7. 326409 7. 453999 7. 887036 6. 839137 7. 816412 7. 696816 7. 452342  
4. 67804 4. 473155 5. 360397 3. 250142 4. 733687 5. 008786 5. 775883 5. 160992 5. 152062  
3. 913873 4. 583411 4. 477175 3. 533295 3. 237821 4. 800532 4. 394247 4. 507215 4. 953513  
2. 061585 2. 264632 1. 943047 2. 598333 2. 789004 2. 857943 2. 29681 2. 66314 2. 842233  
1. 661983 1. 008142 1. 370883 1. 768097 1. 486776 1. 866153 1. 703699 1. 573986 1. 543746  
3. 125863 2. 410107 2. 174769 2. 405585 2. 997138 2. 876659 2. 242633 2. 613437 2. 140793  
1. 097893 1. 534502 1. 094793 1. 25366 1. 662671 1. 391569 0. 815356 1. 369605 1. 265889  
4. 476235 3. 924489 3. 950353 3. 520897 5. 400376 5. 0976 6. 097045 5. 276612 4. 002477  
3. 705408 1. 556141 1. 754797 1. 362511 2. 224772 1. 240468 0. 156974 3. 681776 2. 68255  
2. 194749 2. 445893 1. 703333 1. 94351 1. 505369 3. 161366 2. 170842 2. 368353 2. 001245  
3. 077163 4. 957939 4. 093317 4. 576571 4. 836511 4. 214566 3. 502432 3. 983529 4. 864991  
2. 220384 2. 032041 2. 291678 1. 312397 1. 39179 1. 686558 2. 216464 2. 121743 1. 976792  
2. 370363 1. 326835 2. 123912 2. 215692 1. 678373 1. 468078 2. 209386 1. 874196 1. 958122  
3. 564298 4. 486496 3. 744663 3. 955294 4. 147637 3. 986344 4. 855436 3. 450579 4. 735068  
2. 38818 1. 873179 2. 913399 2. 21827 2. 818581 2. 391916 2. 611524 2. 259704 3. 354772  
5. 633268 5. 770484 5. 994858 3. 390811 5. 647456 6. 285501 6. 333282 6. 230833 6. 951976  
1. 996943 2. 063307 1. 471728 3. 226848 2. 191329 1. 983519 1. 355622 2. 048961 1. 629462

2. 21455 2. 548406 2. 860322 2. 267539 3. 147868 3. 544963 2. 453592 2. 315913 1. 982878  
1. 777277 2. 030382 1. 61266 2. 157579 2. 255354 2. 015533 1. 790154 2. 002126 2. 665228  
1. 859535 1. 685871 1. 28211 1. 889976 2. 373708 1. 197637 2. 204157 2. 582383 1. 388888  
2. 04015 1. 474458 1. 96915 2. 964654 1. 772335 1. 309161 2. 277913 1. 810038 1. 777495  
1. 633892 2. 028539 1. 390747 1. 644111 1. 442569 1. 83038 1. 672857 1. 5497 1. 670113  
2. 609269 1. 753861 2. 012656 1. 472341 2. 110752 1. 79504 1. 227942 0. 845873 1. 439087  
1. 652808 1. 238465 1. 508011 2. 658803 2. 071396 1. 253485 1. 776772 2. 383812 2. 828547  
1. 921228 2. 870839 2. 224953 2. 81906 2. 168873 3. 012546 2. 223744 2. 490042 2. 189143  
5. 287564 4. 567691 4. 315278 4. 223579 4. 388597 6. 715619 5. 588437 5. 333107 5. 416944  
5. 370126 6. 363153 5. 924334 6. 060103 5. 180867 5. 564848 5. 048433 6. 211274 5. 655471  
5. 085325 5. 69169 5. 235668 5. 146631 4. 952059 4. 589793 5. 21787 5. 488964 5. 437057  
4. 94457 4. 699894 4. 831778 3. 748514 3. 765503 3. 995072 4. 187809 3. 607574 3. 907333  
5. 197097 3. 185043 3. 890852 4. 094644 3. 098916 6. 059873 4. 828236 3. 992573 3. 499188  
6. 138737 7. 047741 7. 172054 7. 210101 7. 224788 6. 398558 6. 238163 6. 478878 6. 430766  
4. 759931 4. 628657 4. 368605 4. 972847 4. 857771 5. 137667 4. 465509 4. 479397 4. 290685  
2. 796723 2. 377173 2. 982424 2. 230224 2. 678432 3. 608469 3. 382732 3. 189021 3. 428307  
1. 448568 0. 768288 1. 03042 0. 936334 0. 908855 1. 207149 1. 086478 1. 805026 1. 033688  
3. 43633 3. 374666 3. 204732 2. 384132 3. 150562 4. 415234 2. 786599 3. 399233 2. 881278  
5. 219065 4. 68051 3. 953049 3. 420345 3. 320434 3. 769699 3. 741182 3. 834971 4. 024337  
3. 831594 2. 597235 3. 068927 2. 572332 3. 362554 4. 032722 4. 347218 4. 536502 5. 371477  
1. 633182 1. 495906 2. 107236 1. 642164 1. 139777 3. 889751 2. 589484 1. 755802 1. 387023  
1. 93625 1. 492624 1. 119345 1. 048619 0. 857128 1. 239069 1. 256176 0. 879806 1. 163428  
5. 554744 5. 537936 5. 33943 5. 868291 5. 568324 5. 701103 5. 172075 4. 981664 4. 681549  
5. 605691 7. 095764 5. 953282 5. 936886 6. 993077 6. 714353 6. 810155 7. 165185 7. 09529  
2. 2804 2. 878782 3. 081922 3. 123912 3. 190974 3. 076943 3. 107334 2. 710866 2. 66202  
6. 971466 3. 788859 5. 48723 5. 202112 5. 215317 4. 785165 4. 968855 3. 685715 3. 112086  
3. 796207 4. 048657 4. 551932 3. 886154 4. 301325 4. 482104 5. 127784 4. 001773 4. 52537  
1. 274474 2. 333363 1. 464402 1. 310198 1. 239693 1. 659866 1. 494731 2. 491875 1. 74418  
4. 618835 4. 751775 4. 750971 4. 417843 4. 385737 5. 678047 5. 940588 4. 924198 5. 1627  
2. 571285 2. 825274 2. 305657 3. 459182 2. 809672 4. 124448 2. 527611 2. 788512 2. 687381  
2. 086484 1. 966398 1. 780225 1. 713364 1. 747703 2. 207686 2. 454228 2. 005961 2. 406701  
5. 672983 5. 787923 4. 924457 5. 902511 5. 818358 3. 943053 5. 524553 5. 176589 4. 389586  
1. 435996 2. 063335 4. 427481 3. 571786 2. 600569 3. 583885 2. 319865 3. 099006 1. 852089  
1. 539831 2. 158837 1. 745918 1. 856276 2. 38808 1. 678823 1. 663298 1. 967865 2. 545282  
4. 048659 4. 947992 4. 085466 2. 299721 3. 75524 3. 681155 5. 151726 5. 039463 4. 357287  
1. 912343 1. 515517 1. 671208 2. 134564 2. 247219 2. 209852 1. 846102 1. 804144 2. 113302  
4. 299688 3. 262247 4. 513837 4. 573647 4. 04592 5. 162234 3. 899617 4. 78421 4. 25773  
1. 250516 1. 637685 2. 925507 3. 688367 4. 468024 1. 579591 1. 647475 1. 589421 1. 506388  
0. 885535 1. 312272 1. 635044 1. 180147 2. 111357 0. 925283 2. 161119 2. 307445 2. 331843  
1. 755146 1. 888024 2. 004475 1. 857843 2. 8184 2. 136012 1. 523329 1. 662542 2. 028947  
1. 757005 1. 648371 1. 646033 1. 899009 1. 906662 1. 689251 2. 213909 1. 903237 1. 766537  
1. 539519 1. 353216 1. 327919 1. 905617 1. 048752 1. 416543 1. 428218 1. 350976 1. 1939  
2. 61725 2. 049433 1. 424256 3. 062899 2. 215939 2. 192009 1. 929844 1. 929236 2. 181274  
7. 252451 6. 080216 6. 722913 7. 513079 6. 241184 7. 911171 8. 083426 7. 689745 7. 299615  
2. 003011 3. 352036 3. 389714 4. 056568 1. 784844 3. 674086 2. 751983 2. 960523 2. 449632  
3. 786408 4. 104942 1. 455668 2. 029612 3. 238608 2. 201987 1. 959801 3. 437368 4. 315215  
4. 298833 1. 169839 1. 313938 1. 031323 1. 383766 2. 472148 1. 677545 1. 97416 0. 964357  
7. 526438 7. 099631 7. 301952 8. 22885 7. 295863 8. 334957 7. 283826 7. 784879 8. 363847  
2. 993846 1. 944108 2. 216913 2. 771468 2. 447516 2. 218719 2. 602257 2. 2761 2. 377517  
1. 933483 1. 953324 2. 127108 2. 559508 2. 379835 2. 410557 2. 916569 2. 598269 2. 419416  
3. 827318 4. 674062 4. 576365 2. 459173 3. 708077 3. 117546 3. 915234 3. 836445 4. 062321

1. 622332 2. 063186 2. 318366 1. 81699 1. 4182 1. 746387 2. 666934 1. 676662 1. 564866  
2. 778396 4. 552099 4. 241558 6. 093688 3. 678137 3. 220861 3. 929288 5. 805838 5. 524014  
2. 826042 3. 499011 3. 328113 4. 422931 2. 660965 3. 661752 3. 765583 3. 92927 3. 911272  
2. 434311 2. 986275 2. 431079 2. 752424 1. 365617 2. 948604 3. 244013 2. 916328 2. 970892  
2. 032553 1. 424031 1. 668694 2. 017928 1. 299808 1. 202155 1. 399315 1. 557648 1. 999434  
4. 153542 2. 867526 3. 370305 5. 532607 4. 325293 5. 106655 4. 225071 5. 272511 4. 35874  
1. 249052 1. 598445 1. 028938 1. 484633 1. 38052 1. 306065 1. 494684 1. 428704 2. 023317  
2. 692116 3. 35482 2. 920605 3. 198085 2. 7632 2. 680348 2. 989387 3. 064767 3. 015619  
2. 51186 2. 209717 2. 494221 2. 323558 2. 030106 3. 066754 2. 577009 2. 50926 2. 363849  
1. 922252 1. 491511 1. 281369 1. 857223 1. 585885 1. 578927 1. 405835 1. 700533 1. 778796  
1. 772775 2. 293852 2. 340787 1. 913386 4. 309042 1. 82641 2. 111789 2. 459003 1. 506979  
2. 061266 2. 051251 1. 569454 1. 520043 1. 360144 1. 728819 1. 848683 1. 91212 1. 786194  
1. 573497 1. 36936 1. 394786 1. 925414 2. 051027 1. 445986 1. 423244 2. 171691 1. 533488  
1. 4196 1. 761644 1. 345399 1. 925957 1. 806421 1. 9248 1. 67823 1. 843484 1. 690737  
3. 803479 4. 458383 4. 860948 4. 552665 4. 756508 5. 685631 4. 269486 4. 940141 4. 472378  
2. 366936 3. 123792 2. 790495 4. 426609 3. 239622 2. 919318 2. 405501 3. 80444 3. 867399  
1. 886126 1. 284751 1. 790936 1. 746832 1. 575636 2. 374425 1. 84569 1. 835626 2. 025087  
2. 055358 2. 252008 2. 547305 2. 637912 1. 941366 1. 681426 1. 893848 2. 078921 2. 389265  
1. 582462 2. 337074 1. 330082 1. 592971 1. 863841 1. 624353 1. 699459 1. 526361 2. 907106  
2. 828943 2. 825664 2. 615199 2. 562496 2. 672943 3. 373585 2. 61103 2. 710015 3. 131439  
2. 940356 3. 915318 4. 328837 2. 781631 2. 977933 4. 935025 4. 848865 4. 575975 3. 002003  
2. 19731 3. 313012 2. 161865 1. 836698 2. 418289 2. 27067 2. 501684 2. 293039 3. 071937  
4. 059485 4. 012605 3. 898964 4. 615428 5. 0995 5. 065139 4. 225201 4. 03111 4. 921182  
1. 433788 1. 628984 1. 600989 2. 027823 1. 410505 1. 206987 1. 259453 1. 356549 1. 423488  
4. 147421 3. 917808 3. 159865 3. 404941 3. 907037 4. 547143 3. 432373 4. 317407 3. 02278  
5. 631907 4. 805739 5. 584167 5. 731448 5. 206371 6. 717337 5. 691404 6. 42777 6. 739897  
3. 590594 2. 850462 4. 428023 3. 781344 4. 368316 5. 324669 5. 332863 4. 692503 4. 702323  
2. 300358 2. 548177 1. 720428 2. 288788 4. 290997 2. 024322 4. 525041 3. 564603 3. 340761  
8. 282126 7. 642435 8. 012846 8. 416661 8. 131814 8. 594597 8. 129238 8. 109704 8. 289703  
2. 615746 2. 804054 1. 943709 3. 132321 2. 917008 2. 877661 2. 920606 3. 404113 2. 143258  
1. 636628 1. 895641 1. 778008 2. 0324 1. 721913 2. 50258 2. 156413 2. 83521 3. 461948  
1. 082 4. 089294 1. 687763 1. 958501 0. 862749 0. 813332 1. 150932 1. 313749 2. 105128  
4. 413147 5. 212633 4. 598773 5. 431841 4. 495984 3. 624819 4. 31387 6. 018296 4. 918902  
3. 458621 3. 545095 4. 226152 3. 807886 5. 10327 4. 580078 4. 395441 4. 779031 3. 886677  
4. 754923 4. 585353 3. 379953 4. 806266 6. 206199 6. 125483 4. 63905 5. 355815 5. 109968  
3. 217916 3. 088698 2. 491799 3. 457508 3. 618308 5. 70132 5. 440738 3. 510097 6. 139406  
2. 741775 2. 7499 3. 047594 3. 228547 3. 446238 4. 07767 4. 125707 3. 332728 3. 724043  
1. 364159 1. 150733 1. 554209 1. 675908 1. 16315 1. 696727 1. 261287 1. 772147 1. 519437  
1. 160451 1. 543624 1. 561082 1. 890024 1. 518838 1. 564153 2. 200979 2. 702615 1. 650404  
1. 885216 2. 304978 2. 519707 3. 435563 2. 373948 2. 645702 2. 803496 3. 117738 2. 318337  
2. 931286 4. 104822 4. 097027 5. 454759 4. 037444 2. 869269 4. 193542 4. 425343 3. 958851  
2. 389454 2. 052027 2. 336935 2. 703116 2. 613183 3. 031205 2. 847078 2. 047098 3. 429293  
1. 597149 2. 184082 1. 607283 1. 303147 1. 729732 1. 415381 1. 704316 1. 385262 1. 076036  
3. 110934 3. 099587 3. 717567 2. 645382 2. 927859 3. 40648 3. 328111 3. 245253 3. 916296  
2. 615623 1. 613299 2. 166305 3. 226018 3. 281655 3. 47808 2. 044269 2. 205879 1. 609406  
1. 629966 2. 578705 2. 109735 2. 488759 2. 292911 1. 748653 2. 50258 2. 880639 2. 980931  
2. 925241 3. 243396 3. 107021 3. 675312 3. 144138 3. 046089 3. 076464 2. 895991 3. 232744  
2. 158899 2. 469091 2. 17871 2. 6938 2. 765223 2. 896073 2. 459372 2. 273237 2. 980234  
7. 703307 7. 042934 7. 867354 7. 634096 8. 555056 8. 352581 8. 689027 8. 474454 8. 570131  
5. 849078 5. 915635 6. 240713 5. 743625 6. 125062 5. 672959 6. 776683 6. 232657 5. 9177  
2. 039161 1. 869301 2. 463253 1. 879912 2. 281332 1. 718513 1. 847659 1. 988999 1. 756271

1. 930871 1. 710382 1. 205803 1. 681247 1. 454321 1. 839355 1. 098622 1. 34889 1. 805741  
2. 208091 3. 315423 2. 270686 2. 030222 2. 279438 2. 472784 1. 763331 1. 988882 1. 645734  
2. 178263 2. 464306 1. 910015 2. 335458 1. 79108 1. 767493 1. 795687 2. 564992 2. 149735  
3. 015687 4. 486968 4. 44386 4. 043262 3. 614964 3. 864091 4. 842369 5. 269637 5. 887595  
2. 632662 3. 282613 2. 593184 3. 790922 2. 837088 5. 030581 2. 972684 2. 55245 2. 736648  
7. 853044 8. 039402 7. 939372 7. 967787 7. 897311 8. 273963 7. 953044 8. 225367 8. 357491  
4. 914014 4. 749103 4. 097846 3. 572263 4. 528164 4. 933809 4. 659016 4. 103848 5. 1778  
1. 758755 1. 526992 1. 651077 2. 282807 2. 62441 1. 422021 1. 919921 1. 615182 2. 280565  
1. 658784 1. 607044 2. 5688 1. 54544 1. 97131 1. 895357 1. 089737 1. 629438 1. 98611  
4. 039903 3. 730386 3. 392319 4. 39429 3. 63355 4. 876821 4. 440882 4. 329427 3. 559189  
4. 743661 5. 042091 4. 97969 5. 05242 5. 448456 5. 367964 4. 620402 5. 469256 5. 459737  
4. 141436 4. 034962 3. 078808 4. 172482 3. 556682 5. 218929 5. 133715 4. 872801 4. 134257  
1. 83244 2. 660411 1. 415521 1. 431275 2. 000475 2. 013324 2. 311594 3. 227832 2. 002367  
3. 262831 4. 039426 2. 780064 4. 822369 2. 826824 2. 212525 3. 313017 3. 240918 3. 425786  
2. 690303 2. 463265 1. 91168 2. 19482 2. 330885 1. 514642 1. 863437 2. 044538 2. 240697  
1. 753983 1. 554224 2. 265288 1. 243314 1. 717695 1. 289256 1. 410389 1. 718947 1. 455368  
1. 290013 1. 481987 1. 267988 1. 195627 1. 171994 1. 647322 1. 328137 1. 427895 1. 11089  
5. 480327 4. 763248 4. 134961 5. 31387 4. 948607 5. 050552 5. 202078 6. 285941 5. 654517  
6. 283889 4. 750258 5. 275186 5. 899168 5. 062849 7. 161842 5. 754267 5. 509401 5. 04267  
1. 487804 0. 885381 1. 285048 1. 19501 1. 423301 2. 028503 1. 390988 1. 266687 2. 242433  
4. 479272 2. 406229 2. 875522 4. 260314 4. 072382 3. 61751 1. 532559 2. 672375 3. 324223  
3. 560972 3. 827163 3. 500767 3. 9944 3. 978388 3. 733541 3. 028686 3. 777826 4. 186638  
2. 701005 2. 769056 2. 324483 2. 074489 3. 343802 2. 505473 2. 629363 2. 454148 1. 992695  
6. 183989 6. 065317 6. 176538 5. 710602 5. 827983 5. 569638 5. 810483 4. 811681 4. 853891  
1. 525332 1. 628081 1. 374781 1. 190525 1. 180887 1. 71718 1. 376408 1. 545177 1. 282286  
3. 499024 4. 494085 4. 230125 3. 551067 3. 457111 3. 762372 2. 168011 3. 448511 4. 024917  
1. 2001 1. 862509 1. 676025 1. 815557 1. 136176 2. 525223 2. 1934 2. 072531 2. 06717  
6. 829967 6. 559338 6. 991431 6. 874862 4. 248441 4. 784264 5. 126857 3. 293171 3. 776669  
0. 64583 1. 530991 1. 478316 1. 592988 1. 336109 1. 974307 2. 17045 1. 281993 1. 100402  
3. 565488 4. 09003 3. 189376 1. 208633 1. 583131 2. 567495 4. 218765 1. 6039 1. 614204  
4. 089168 3. 623608 3. 892402 6. 590995 2. 621534 4. 025085 3. 73962 1. 842932 5. 028044  
2. 467076 2. 91916 2. 465348 3. 04175 3. 536278 2. 613975 3. 318859 4. 638276 5. 557516  
1. 30087 1. 453439 1. 511344 1. 372336 1. 146391 1. 31601 0. 833214 1. 19784 1. 196636  
7. 155713 7. 950125 7. 281795 6. 919002 7. 591832 6. 450927 6. 754716 6. 954594 7. 930505  
0. 881422 1. 256563 0. 828245 1. 31116 1. 095132 1. 090294 1. 02905 1. 113731 1. 103242  
1. 708741 1. 485787 1. 285393 1. 15168 0. 780571 1. 318235 1. 23503 1. 763235 0. 869836  
6. 906501 5. 978991 7. 293271 6. 451038 6. 400867 6. 865753 7. 522142 7. 538742 7. 130507  
2. 320748 3. 785512 3. 535633 2. 636811 2. 959232 3. 858285 3. 68928 4. 185905 3. 650371  
4. 435448 3. 849014 3. 260482 3. 23767 3. 244704 4. 097843 3. 796394 3. 275156 2. 661528  
4. 804536 6. 348482 6. 230714 6. 085527 6. 150067 3. 897808 6. 62682 6. 962296 6. 755322  
2. 441158 2. 197392 2. 297309 2. 384663 1. 997563 2. 466651 2. 077257 2. 517385 2. 644665  
1. 779908 0. 925423 0. 681054 1. 144342 0. 80994 0. 966291 0. 673688 2. 74339 0. 582169  
1. 078651 1. 676832 2. 680133 1. 645832 1. 735525 1. 701182 0. 730557 1. 319396 1. 041108  
4. 778514 5. 249689 4. 814825 5. 325318 4. 495039 3. 576162 4. 278602 4. 483167 3. 943435  
4. 370669 4. 598311 3. 453525 4. 370669 4. 007959 3. 904726 4. 858552 5. 189953 3. 628291  
2. 736752 2. 094068 1. 823649 2. 283774 2. 602464 2. 543674 2. 351157 2. 789539 2. 699667  
1. 652173 1. 870966 2. 753167 1. 645991 1. 861953 1. 42138 1. 674581 1. 646971 1. 263972  
2. 679116 1. 375359 1. 69338 1. 604933 1. 498291 1. 472206 1. 713905 1. 159909 1. 404342  
1. 818401 2. 61205 1. 916472 2. 365087 1. 873908 2. 062397 1. 613928 2. 217859 2. 159704  
5. 081723 5. 77813 6. 302329 6. 035439 5. 624063 5. 870293 6. 072304 5. 581931 5. 872175  
2. 533139 2. 866984 2. 140705 2. 020998 2. 825735 2. 923496 2. 346557 2. 485789 2. 743045

1. 794765 2. 066096 1. 775388 1. 845079 1. 874412 1. 730932 1. 554015 1. 898602 1. 680545  
1. 584922 2. 231214 2. 298885 1. 729202 1. 954221 1. 62579 2. 317613 2. 712356 1. 986343  
1. 778076 1. 911402 1. 370967 3. 241752 1. 923648 1. 865989 1. 457982 2. 24943 3. 040473  
1. 686675 2. 080644 1. 545263 1. 221865 1. 288072 1. 488979 1. 529274 1. 341141 1. 985435  
4. 930398 4. 39998 5. 467114 5. 447125 5. 093851 5. 316565 5. 23664 5. 737828 5. 799541  
3. 733372 3. 865736 4. 679196 5. 451628 4. 18369 4. 684006 4. 278521 4. 139613 4. 262814  
2. 947581 1. 722625 3. 296754 2. 514674 3. 206723 3. 36338 3. 054555 3. 554583 3. 002422  
3. 272201 2. 631592 4. 30224 3. 909808 2. 574516 3. 817911 3. 665804 2. 167299 2. 418722  
2. 620154 1. 941095 2. 672335 2. 7983 2. 232716 2. 657377 2. 916452 2. 406101 2. 240346  
2. 038012 2. 571313 2. 637932 3. 400924 3. 244394 2. 73611 2. 539933 2. 183687 2. 243301  
1. 366487 1. 802712 1. 577335 2. 252293 1. 367468 1. 627013 1. 403852 1. 51773 1. 974956  
3. 862419 3. 289444 2. 902959 3. 486574 3. 883992 4. 081139 2. 98655 3. 472939 4. 998354  
7. 345127 6. 724393 6. 825526 7. 238857 6. 47113 6. 945132 7. 165848 7. 967176 7. 700358  
2. 348061 2. 205201 2. 573836 2. 032903 2. 382297 2. 910695 2. 13645 3. 735649 1. 987226  
1. 280827 2. 333498 2. 012088 2. 636495 1. 309302 2. 257561 1. 606426 1. 517745 1. 965276  
4. 752399 3. 554912 2. 45305 2. 814098 3. 037276 3. 462444 2. 899114 3. 276393 2. 554974  
3. 883718 3. 855958 3. 235103 3. 908975 2. 428895 4. 660201 4. 218219 4. 17454 5. 716576  
7. 452852 6. 855707 7. 624187 7. 110128 7. 320132 6. 774667 7. 694603 7. 709604 7. 532521  
3. 354041 2. 530381 2. 063815 2. 582956 2. 27576 2. 396449 2. 130587 3. 065767 2. 661421  
1. 562177 2. 149395 2. 302595 1. 318266 2. 099954 1. 864689 1. 501754 1. 601195 1. 508713  
1. 428573 1. 293372 1. 232989 1. 827059 1. 247597 1. 297668 1. 482049 1. 370752 1. 283667  
5. 208955 5. 572908 5. 131304 6. 789722 5. 519796 5. 882645 5. 826925 5. 004986 5. 704492  
4. 099785 4. 058107 4. 723233 4. 326649 4. 899308 5. 566027 5. 864748 5. 039958 5. 406267  
1. 97374 1. 361285 1. 565523 1. 842226 1. 853563 1. 991458 1. 911733 1. 28544 2. 200519  
4. 113919 3. 366021 2. 582847 2. 97226 2. 835231 2. 124749 2. 012228 3. 308809 2. 156278  
4. 111675 3. 223023 4. 799055 3. 33884 3. 304265 3. 491379 2. 759037 2. 195291 1. 766264  
3. 867834 2. 032053 1. 888812 3. 084005 3. 029847 1. 749783 1. 774089 2. 813709 2. 62805  
4. 326572 3. 938199 3. 323603 3. 833707 4. 698285 4. 646304 4. 826708 3. 75979 5. 385837  
1. 872041 1. 75692 1. 636501 2. 058558 1. 478614 1. 807973 1. 423203 1. 719566 1. 940051  
3. 130476 3. 708047 4. 188973 3. 362809 3. 000514 4. 197895 3. 236166 3. 560601 4. 273295  
2. 437735 1. 637897 1. 136583 1. 648033 1. 517702 1. 462475 1. 930171 1. 569942 1. 867294  
2. 150308 2. 576258 1. 672478 3. 628095 1. 933916 2. 008122 1. 640198 2. 292779 2. 426266  
7. 182539 7. 52495 7. 096871 8. 244878 7. 436262 9. 019321 8. 096425 7. 834479 7. 5081  
2. 761182 2. 310406 2. 721935 3. 396272 2. 377602 2. 455836 2. 40277 2. 647261 2. 301388  
5. 14338 3. 838181 4. 932251 4. 803758 5. 818158 6. 770031 6. 69314 6. 165677 6. 412256  
4. 106064 4. 122595 4. 706084 5. 767266 4. 98596 5. 373676 4. 924338 4. 807744 5. 136304  
3. 109048 1. 892689 3. 417981 4. 76732 3. 540063 3. 302156 3. 26109 3. 882411 2. 597157  
5. 885122 6. 402191 6. 302604 5. 906001 6. 003674 6. 344046 6. 08912 5. 350253 6. 431301  
4. 768424 3. 633061 5. 624219 3. 349404 1. 504327 5. 790594 4. 794014 5. 256107 4. 174114  
5. 505199 3. 508317 2. 687882 4. 711351 4. 658441 6. 137342 5. 059792 3. 940191 6. 713539  
1. 157253 1. 665444 0. 844488 1. 298654 1. 189974 2. 184545 1. 308354 1. 033302 1. 320411  
2. 125587 2. 921801 1. 537477 1. 518616 1. 650119 2. 69899 1. 556724 2. 0022 2. 126601  
1. 289996 1. 486836 1. 954767 2. 429122 1. 435947 1. 208817 1. 470938 1. 605338 1. 470906  
1. 675204 1. 546483 2. 038402 2. 223277 1. 734324 1. 857673 1. 945131 1. 369295 1. 690419  
1. 388439 0. 538558 0. 853292 1. 475141 2. 020002 1. 506259 1. 206312 1. 173463 1. 10026  
1. 336727 1. 331538 1. 817638 1. 182865 1. 217563 1. 635049 1. 715298 1. 440084 1. 807244  
5. 045718 4. 637122 4. 513017 5. 820561 4. 871472 5. 701734 4. 80022 4. 863907 5. 447173  
2. 339876 2. 431421 1. 531408 2. 142843 1. 613855 2. 272913 2. 327266 1. 70809 0. 990691  
3. 005764 2. 710968 2. 30973 2. 956616 2. 423006 4. 616162 2. 185598 2. 1293 1. 788389  
2. 586831 3. 151879 2. 580349 2. 504543 2. 791 2. 898782 2. 921985 3. 060286 3. 729208  
3. 874534 4. 627915 4. 7076 3. 35755 3. 438332 3. 045813 3. 908446 5. 320238 3. 398774

6.167626 5.305636 5.199689 5.976715 5.662948 6.839843 6.116112 5.915335 6.181197  
2.131316 2.485125 2.370614 1.953663 3.07976 2.075451 2.033661 2.932931 1.783095  
2.595693 2.687094 3.167707 2.660073 3.484563 2.195104 2.944564 3.537359 3.794818  
5.05411 4.210338 4.455164 4.153955 5.312314 6.604012 5.414529 6.440724 6.273686  
2.15309 1.723097 2.187908 1.562536 1.807964 1.961139 2.730915 2.728944 2.028744  
3.668006 3.29093 3.39529 2.772338 3.568583 3.359487 4.110757 2.969455 4.332583  
6.183341 7.352182 7.448493 6.782342 8.210414 5.073476 7.827649 7.258475 7.259854  
1.70877 2.019779 2.765546 1.453432 1.943309 1.563324 1.699659 2.439301 1.878494  
2.021335 1.983244 1.79111 2.256181 1.602978 2.697527 2.30888 2.769417 1.599222  
5.720371 5.394309 5.757119 5.969964 6.003572 6.330287 6.634119 6.615948 6.781312  
1.822512 2.15408 2.410024 2.945769 2.060923 2.009127 2.320798 1.658801 2.018468  
3.126543 2.812322 3.082141 3.114312 3.486086 3.036646 2.856716 3.297016 3.86461  
2.472211 2.35161 2.061194 2.392986 2.242153 1.834855 2.75899 2.245441 2.670476  
3.873543 3.985941 5.302551 4.195325 5.385653 3.900667 5.025511 4.631835 4.806381  
2.475896 4.157526 5.700694 3.353073 2.91057 3.963024 3.018725 4.702331 4.760478  
3.780842 3.739885 4.467308 3.971331 4.478953 2.656683 3.886456 4.395839 3.837949  
1.681647 1.561521 1.372481 1.395092 1.73083 1.804249 1.138287 1.980476 1.030081  
3.02062 1.897175 1.761022 1.967165 1.560061 1.689633 2.048908 1.54471 1.940534  
1.580218 1.814057 1.872167 2.924607 2.187599 1.379714 1.383649 1.931977 1.235195  
2.959513 3.089005 3.334964 3.811964 3.594025 3.059982 3.051281 3.310284 3.841615  
4.711234 4.520124 4.738938 4.919056 4.431083 5.137377 4.904675 3.988028 3.862617  
3.84269 2.094501 3.177745 3.219741 3.321855 3.159676 3.442812 4.56503 3.516341  
1.478573 2.417514 1.918831 1.609692 2.645109 2.097509 1.685439 2.148353 2.003045  
2.401933 1.678966 1.723541 2.136028 2.094409 1.847355 1.462289 2.082154 1.74258  
2.505813 1.857953 2.471811 2.746877 2.511471 2.716444 2.582901 3.002489 2.897398  
8.581831 8.262334 8.409696 8.069086 9.000778 8.889411 8.654259 8.676757 8.724777  
5.730571 6.148432 6.178451 5.410348 6.369495 6.59614 6.297843 6.431059 6.929904  
1.567732 1.131181 1.156503 1.012286 0.853684 2.467432 1.583741 2.976081 2.049435  
2.330813 1.87483 1.701562 1.854699 2.139248 2.268215 1.850048 1.892511 2.746252  
2.102987 2.236621 2.09622 2.326435 2.664986 2.082169 2.648906 2.462032 1.683061  
2.367776 2.151501 2.387707 2.518913 2.426411 2.023548 1.773851 2.640639 2.450087  
3.816139 3.889755 4.930512 5.162217 3.784498 4.663894 4.675412 4.750289 4.970993  
3.666609 3.056634 2.492095 2.807871 2.754695 2.739267 3.470855 4.928966 4.005943  
2.403903 1.786945 1.726401 2.004535 2.916427 2.481881 2.035673 2.881937 2.679802  
8.116217 9.005295 9.012345 8.528569 8.71039 8.554841 8.034095 8.828135 8.733586  
1.292033 0.935199 1.31486 1.646999 1.403651 1.694427 2.081447 1.505215 1.475096  
3.050061 2.112186 2.721294 3.434077 2.135762 2.348489 2.012744 3.157115 2.902552  
2.305995 2.931452 3.281476 3.322584 3.384025 3.520729 3.906944 3.483019 5.475352  
2.619513 1.976685 2.261217 2.2737 2.38012 2.690716 2.665701 2.271786 3.637319  
3.117746 3.242201 3.657334 3.881951 3.92465 4.279956 3.35095 3.520704 3.89047  
4.305014 4.878875 5.250417 5.945618 5.251873 5.631698 5.666726 5.075935 5.224675  
6.753909 6.698678 6.609138 6.124079 6.05835 5.843284 6.446094 6.430436 5.730902  
2.844091 3.005749 2.416058 2.917004 3.131434 2.912198 2.570874 2.873974 2.408727  
5.112565 3.629971 5.021127 5.555587 5.25709 5.559459 5.073345 5.504919 5.551263  
5.132788 4.608907 5.963183 4.670164 4.64835 6.258593 4.821985 5.385252 4.850532  
3.572701 2.68552 3.273275 2.840805 3.86666 3.723797 2.83011 3.612174 3.589489  
4.711302 4.993476 4.605234 4.253645 4.941009 3.717581 4.140551 3.525808 4.243979  
1.636429 2.204627 1.470253 1.857799 2.041008 1.61507 1.551178 1.571849 1.706521  
5.137393 5.510463 5.848324 2.845793 5.724819 4.827874 5.146143 4.378212 5.358953  
2.001266 2.009579 2.322342 2.718993 2.652049 1.975129 2.052077 2.446669 2.106589  
1.528392 2.213798 2.218766 1.668102 1.872134 1.612983 2.14146 1.95305 1.746979

5. 789744 3. 507223 3. 793532 5. 242741 4. 660618 8. 375964 4. 460023 4. 219537 3. 13695  
7. 101969 6. 761662 6. 911562 6. 690486 7. 023528 7. 404437 6. 318817 6. 331166 6. 614513  
4. 519485 3. 590728 4. 438452 3. 455455 5. 253599 5. 323581 4. 496178 3. 922947 4. 424314  
4. 80786 4. 311251 4. 325087 5. 071837 3. 03558 5. 558671 5. 315443 5. 259996 5. 69807  
3. 619922 3. 604066 3. 609197 4. 302835 4. 033206 3. 750625 4. 658749 3. 745289 4. 154961  
6. 405708 6. 650733 6. 209936 5. 566321 6. 713676 4. 317788 7. 065927 6. 51326 6. 055376  
1. 053222 1. 43731 1. 012272 1. 884403 1. 328819 1. 16867 1. 321824 1. 56317 1. 235871  
5. 971192 5. 127863 5. 904357 4. 125239 5. 150454 6. 179114 6. 097512 5. 89548 6. 073236  
1. 63277 2. 732859 1. 743871 1. 816663 2. 144744 1. 935886 2. 160271 2. 327053 2. 154821  
6. 727106 5. 949684 7. 139659 7. 101803 5. 704934 6. 001961 6. 639338 7. 769075 7. 17439  
2. 267015 2. 835632 3. 238028 2. 497987 1. 55829 2. 204914 2. 215417 2. 424544 1. 812556  
2. 171852 3. 055501 2. 207087 2. 152465 1. 673279 2. 36142 2. 577091 2. 181741 2. 423991  
1. 723191 2. 659224 3. 392299 2. 415712 1. 446866 2. 449873 1. 567735 1. 911176 1. 989109  
1. 901156 1. 766133 1. 987461 2. 038598 2. 469271 1. 840946 1. 6694 2. 987845 1. 750074  
4. 683771 4. 062037 4. 407392 3. 936527 3. 111332 2. 387618 4. 073588 4. 409777 4. 43076  
1. 894138 3. 094119 1. 013927 1. 609603 2. 261955 1. 145778 0. 943243 2. 090481 0. 935702  
0. 763086 1. 625271 0. 831382 2. 233528 2. 415021 0. 979729 0. 895187 2. 007606 1. 54342  
4. 411107 4. 485698 3. 151559 5. 707797 3. 898514 2. 482956 3. 97991 5. 829742 3. 933556  
3. 407831 2. 625886 2. 568665 1. 835822 2. 502574 1. 920611 1. 851545 1. 737872 1. 283192  
2. 539137 2. 121164 3. 296691 2. 847177 2. 161754 2. 246724 2. 447818 3. 049985 2. 624384  
1. 770717 1. 9115 2. 49953 3. 407611 1. 886782 2. 435156 2. 03779 3. 299121 2. 01537  
1. 861774 4. 083249 1. 915397 3. 212921 3. 052145 5. 17356 1. 942581 2. 439226 3. 768083  
7. 61628 6. 758686 6. 960542 7. 039494 5. 916071 7. 226927 5. 855504 5. 55908 4. 326947  
3. 413939 4. 169541 4. 491467 4. 511503 3. 27549 3. 449892 3. 857174 3. 569632 3. 697896  
7. 377517 6. 258347 6. 306217 6. 829712 6. 895592 7. 596791 7. 425161 7. 389751 7. 144692  
0. 868005 1. 076336 0. 867376 1. 048166 0. 886086 1. 139557 0. 680095 0. 540596 2. 514299  
4. 39522 4. 040386 3. 069488 3. 64681 2. 60463 2. 306946 2. 236436 2. 009807 1. 868717  
1. 885657 2. 090683 1. 510951 1. 857997 2. 052967 1. 668737 1. 448211 1. 798606 1. 790458  
1. 966668 1. 964238 2. 260617 2. 394804 2. 135554 3. 493476 1. 680184 2. 009804 2. 350119  
5. 570566 5. 567781 5. 624959 4. 967578 5. 682643 2. 855844 5. 614504 6. 360115 5. 973562  
2. 646021 3. 334115 2. 646698 2. 48995 1. 323194 2. 211387 2. 024536 2. 007901 1. 871111  
1. 782217 2. 360563 2. 473714 1. 795935 2. 452075 1. 99156 2. 310865 2. 725119 2. 464423  
6. 220864 6. 913973 5. 970761 5. 979026 6. 199593 5. 456461 5. 479207 5. 071338 5. 332324  
3. 14646 2. 955519 2. 963837 3. 6895 3. 01666 3. 18816 2. 848525 3. 107855 3. 2264  
2. 499078 3. 857997 3. 302768 4. 049986 3. 650139 2. 628294 4. 759444 4. 717221 4. 396279  
4. 196896 5. 702568 5. 516579 5. 506577 5. 211497 4. 39891 4. 45521 4. 957169 5. 080508  
3. 299779 3. 605927 3. 256558 4. 478341 3. 026667 5. 54221 3. 972643 2. 875121 4. 336405  
1. 658928 1. 600855 2. 138276 2. 010213 1. 600139 1. 856284 1. 250926 2. 9007 1. 507874  
6. 305092 6. 293606 6. 354517 6. 326252 6. 392324 5. 725533 6. 452413 6. 469847 6. 436732  
4. 353804 3. 565069 2. 353311 4. 237838 3. 81732 3. 675105 3. 98531 2. 50236 2. 543705  
3. 019764 4. 33733 4. 268481 4. 114411 4. 805898 2. 955004 3. 044627 2. 47175 2. 81577  
6. 993644 7. 428894 7. 13446 6. 554675 6. 922294 6. 174734 6. 898103 6. 483978 6. 528445  
4. 822055 5. 544515 3. 481707 4. 688154 5. 198819 3. 334249 5. 492911 4. 722855 4. 355711  
2. 761781 2. 384487 2. 153846 3. 039395 3. 088782 3. 073908 2. 380941 2. 742858 3. 416694  
3. 342738 3. 482485 3. 604222 3. 913034 3. 96195 3. 896245 3. 228833 4. 307621 3. 004883  
1. 293654 1. 873231 1. 007751 1. 818163 1. 807696 1. 682476 1. 507455 1. 439865 1. 221811  
2. 581263 1. 718844 2. 379858 1. 758945 1. 670483 1. 760416 1. 543427 2. 093632 2. 347604  
1. 853089 3. 077439 2. 146271 1. 888887 2. 869488 3. 644307 1. 203726 1. 347333 1. 678219  
6. 386025 5. 494591 5. 740845 6. 263146 5. 364409 5. 633688 4. 900045 3. 830977 3. 219078  
2. 03603 1. 403292 1. 447427 2. 772512 1. 849525 2. 003598 1. 805238 1. 527721 1. 586638  
2. 310699 2. 716469 1. 649896 1. 957232 2. 639865 2. 068506 2. 420469 2. 10133 2. 287101



6.027281 5.964411 6.000365 6.550073 5.567574 5.981522 5.486154 6.310889 6.38031  
3.408773 3.174222 2.983269 3.259561 3.213726 3.64682 4.624531 3.23302 4.102007  
6.059363 5.376162 7.34039 7.085166 6.056448 3.885859 6.424323 5.749509 6.395167  
2.582081 3.633666 2.389288 1.378212 2.027337 1.584343 1.873001 2.089548 1.372631  
3.079511 2.332765 1.070739 3.076199 1.246117 2.030153 1.83584 1.569649 2.050856  
3.449137 2.032517 2.844085 3.09498 2.943592 3.076416 2.427021 3.099883 2.666794  
2.018021 1.988974 2.206253 2.647843 2.055601 2.458364 1.781716 2.816415 1.741044  
5.887462 5.795736 5.205127 5.91223 5.943792 5.827102 6.489024 6.129968 5.993354  
2.070769 2.8678 1.616054 2.168888 2.719425 2.426113 2.607435 2.454923 1.887071  
6.032162 6.532513 6.718458 4.875201 6.299346 4.982548 4.091957 3.799558 5.507295  
4.819115 5.271059 5.560057 4.826464 3.745029 3.931 6.359083 4.673734 5.066546  
2.197908 2.956453 2.22543 3.100269 2.277987 2.280455 2.133096 2.08977 2.822889  
4.683817 4.572612 4.782106 5.218199 5.373754 4.550447 3.665576 3.812291 3.401801  
5.518819 6.346404 5.84826 5.994379 5.923289 4.004103 4.888224 5.208025 3.929177  
1.312397 1.938396 1.522549 1.183954 0.864418 1.060246 1.35617 1.072547 2.049783  
5.884623 4.566509 5.683042 5.538124 4.091416 3.746138 3.610582 1.752319 1.609205  
4.407619 5.362013 4.618487 5.293184 4.498022 3.641936 5.278869 2.486706 3.183735  
8.285526 8.016885 8.141531 7.561191 7.292221 7.526685 7.073831 6.918475 7.171725  
1.034938 1.122599 1.200078 1.275579 1.016792 1.390742 1.618762 0.997449 1.13493  
2.227986 1.952516 2.071069 1.627354 2.089191 2.207854 1.871584 1.776305 1.670625  
8.151269 8.529945 8.102363 7.442554 8.690446 7.760092 8.263028 8.683702 7.608522  
1.531149 1.932629 1.694037 1.614506 1.477695 1.833541 1.910016 1.782551 1.406814  
2.498733 3.168091 2.236003 3.885332 2.294978 2.28683 2.371707 3.43544 2.56682  
2.426136 2.54998 2.788584 3.319762 2.101018 2.252311 4.229416 2.924548 2.697946  
5.01807 5.672296 5.390146 5.413805 4.671657 6.307479 6.110869 6.340097 5.470392  
1.428813 1.948649 1.553546 1.890929 1.321583 1.366404 1.573089 1.351395 1.265252  
0.927255 1.372408 1.36476 1.481374 1.718386 1.401275 1.189767 1.114184 1.599046  
2.13902 1.718262 1.806789 1.769277 1.725908 1.967797 2.184975 1.92633 2.363218  
2.908013 1.432521 2.575356 1.676494 1.808061 2.197949 3.054032 2.85176 2.439213  
3.166252 3.324457 3.091641 3.826216 3.553566 3.55198 3.505844 3.50217 3.214833  
1.361833 1.326261 1.353177 1.445591 1.329712 1.577026 1.300241 1.743115 1.064381  
4.109403 3.091632 4.575789 3.339466 2.738868 4.335394 4.336201 4.090402 2.989001  
7.153023 7.029698 7.282196 6.810082 7.102272 7.026391 6.902411 7.051773 6.669923  
3.199744 4.069163 3.828693 3.865124 3.188312 4.30382 3.264174 3.203502 3.27753  
5.158089 5.418688 4.513026 3.130999 5.043155 4.474456 5.152876 5.435619 5.29202  
7.38224 8.342141 8.20725 8.394884 8.256783 6.714449 7.803643 7.411649 7.427707  
2.055242 3.013891 2.044253 2.175844 2.757474 1.567071 1.309201 1.484161 1.871053  
5.69223 6.344631 6.702095 6.515215 6.639399 4.788314 6.101556 5.946028 6.288231  
8.300787 7.974635 7.617432 7.898792 8.065565 8.003985 8.301704 7.954064 7.975554  
3.967968 3.843037 4.302567 4.414755 3.458657 3.460851 4.054872 4.372085 4.715025  
5.810017 5.815731 5.925609 5.199355 6.077529 6.317845 6.378736 7.078352 6.338248  
1.911911 2.234336 1.771965 1.922488 1.775127 1.91262 1.793057 1.956136 1.51865  
7.215578 7.250123 6.941435 6.492753 7.299563 6.963339 6.318952 6.60145 6.635235  
7.73276 6.264946 7.194206 6.244346 4.14398 7.106555 7.589601 6.973279 6.333463  
1.55033 1.291573 1.029121 1.348705 0.89775 1.069269 0.986934 1.418771 1.400812  
4.406566 5.297767 5.11228 4.650142 5.055249 5.084056 5.309919 4.652961 5.296444  
2.025892 2.352107 1.56575 2.488003 1.747161 1.845495 1.977922 1.711652 1.879167  
2.087791 2.633413 1.604828 3.488435 2.0695 2.034834 2.137201 2.054598 2.44889  
6.12029 5.583092 7.083524 6.418026 5.685411 4.006734 6.873785 6.8453 5.556253  
1.43229 1.425811 1.513111 1.522257 1.693675 1.430036 1.2054 1.297629 1.380336  
2.375579 4.967852 1.78922 2.144895 1.460828 1.404703 1.658624 2.341657 1.855936

4. 855627 5. 315332 4. 5253 3. 601376 4. 413929 4. 194504 3. 766032 3. 960273 4. 126678  
1. 796369 1. 340465 1. 523698 1. 431272 1. 190901 1. 596323 1. 124281 2. 187203 1. 436014  
4. 136049 4. 260545 5. 186883 4. 001007 5. 645785 4. 564368 4. 870133 4. 588189 5. 085462  
4. 651521 3. 808452 4. 823169 5. 028015 4. 157766 3. 687308 4. 059348 4. 566572 3. 920177  
1. 038239 2. 044185 1. 131403 1. 068175 1. 368147 1. 780265 1. 167882 1. 086347 2. 523425  
0. 990733 1. 723541 1. 176063 1. 285628 0. 618114 1. 774737 0. 854988 1. 588359 0. 965178  
3. 096315 3. 820097 2. 59798 3. 425679 3. 538299 4. 051844 3. 169511 2. 498918 2. 582392  
4. 117072 4. 466276 4. 31354 3. 285856 3. 366888 4. 719216 4. 106073 4. 055412 4. 576245  
2. 58176 1. 802513 2. 523076 2. 453244 2. 442326 2. 149487 1. 946694 2. 996692 2. 308438  
1. 70774 2. 126652 1. 211879 1. 383694 2. 324175 1. 535235 1. 693 1. 295721 1. 067395  
1. 611361 1. 742804 1. 128167 0. 915768 1. 165772 1. 513111 1. 357703 0. 986792 1. 026487  
2. 957183 2. 849562 2. 721088 1. 787295 2. 809272 2. 324349 1. 842811 2. 64095 2. 41581  
2. 362157 2. 931604 3. 136364 1. 943436 2. 747182 3. 128315 2. 354018 2. 682765 3. 838139  
2. 823091 3. 48769 2. 971626 2. 546819 2. 944907 3. 208104 2. 621176 2. 624051 2. 037815  
8. 703521 8. 347526 8. 703846 8. 569396 8. 432129 9. 80244 8. 401254 8. 078475 7. 346375  
5. 752789 5. 286852 4. 354059 4. 695498 4. 974201 4. 90495 5. 699693 3. 909903 4. 691678  
3. 929346 4. 103009 3. 855639 4. 170903 3. 002616 3. 787768 4. 581759 4. 14628 4. 557643  
1. 245686 1. 166182 1. 252496 1. 378936 1. 317376 1. 432352 1. 602304 1. 479863 1. 235106  
1. 977388 0. 831185 0. 913832 1. 295238 1. 168281 3. 950157 1. 582937 1. 999024 2. 788972  
3. 037162 1. 209997 2. 509486 2. 480668 2. 244965 1. 126205 0. 811664 2. 525642 2. 287104  
1. 379363 1. 911644 1. 918793 1. 544689 1. 18141 1. 364823 1. 505056 1. 526179 1. 118835  
1. 185747 1. 519781 1. 24092 1. 703504 1. 420118 1. 469603 1. 062172 1. 314515 1. 191377  
5. 443462 5. 13 5. 073497 5. 323497 5. 441409 4. 300306 5. 709315 5. 127451 5. 192435  
6. 914545 7. 226593 6. 530161 5. 366099 5. 666134 4. 374809 7. 124654 7. 108357 5. 967455  
5. 406935 4. 873265 5. 209185 5. 40892 4. 239376 4. 382164 3. 484446 3. 607685 4. 487024  
6. 075232 6. 711212 6. 365238 4. 586391 6. 791569 6. 435062 7. 250214 7. 822158 7. 301226  
1. 409012 1. 56005 1. 203178 1. 986658 2. 046895 1. 092784 1. 433587 1. 377553 1. 133851  
4. 623929 5. 419827 5. 16391 4. 698918 5. 194746 4. 357965 5. 247385 4. 229279 4. 633214  
9. 876726 10. 04385 9. 964451 10. 05628 10. 4312 10. 4832 9. 754954 9. 919982 9. 980141  
1. 682438 2. 084486 1. 016359 1. 281141 1. 282275 1. 540779 1. 073868 0. 990103 1. 641356  
5. 823492 6. 482244 5. 569583 5. 349059 5. 645133 5. 792728 5. 455598 5. 329209 6. 060606  
2. 372446 2. 930506 2. 372612 3. 349394 2. 847639 1. 902895 3. 067115 2. 345456 3. 377319  
0. 568358 0. 779381 0. 520216 2. 046703 1. 286533 0. 996068 1. 578993 1. 61154 0. 999359  
5. 916284 5. 441273 6. 815716 6. 090943 6. 283953 5. 222373 6. 261299 5. 366826 5. 189882  
1. 160262 1. 027431 1. 081449 1. 036037 1. 110332 1. 159421 1. 546193 1. 538351 0. 724232  
1. 90659 1. 916408 1. 717525 2. 544087 1. 90659 1. 773338 3. 187576 2. 280793 1. 736904  
9. 326599 9. 133164 9. 225374 9. 649503 9. 442019 9. 682963 9. 29394 9. 0297 9. 311814  
6. 204747 6. 399314 6. 04807 6. 091755 6. 680091 6. 070622 6. 177553 6. 182023 5. 550957  
2. 903267 4. 029259 4. 67546 4. 586213 4. 621626 3. 122059 3. 877613 3. 210279 3. 571546  
4. 792163 5. 045002 4. 235314 4. 067569 5. 775207 4. 282521 5. 330699 5. 289172 4. 550649  
1. 994675 2. 019852 1. 854037 2. 040756 1. 532829 2. 48924 1. 911322 1. 909998 2. 014865  
5. 365864 4. 268915 4. 117394 6. 277176 3. 843847 4. 305059 4. 643609 3. 594047 2. 879051  
4. 175973 4. 072589 4. 998505 3. 628827 4. 606062 4. 31745 4. 682515 5. 003154 5. 03601  
3. 400732 4. 04787 3. 853822 3. 976598 3. 903811 3. 519621 3. 834466 3. 863716 3. 473099  
1. 602668 1. 620805 1. 542313 1. 68516 1. 854419 1. 549004 1. 788119 1. 669676 1. 356581  
2. 862389 3. 719841 3. 806462 5. 045188 6. 067049 5. 788446 3. 387554 4. 341014 4. 499945  
1. 22256 1. 408424 0. 999264 2. 19079 1. 160843 1. 071842 1. 013547 1. 655992 1. 013944  
1. 731571 1. 855372 1. 550956 1. 523439 1. 346814 1. 696568 1. 3202 1. 555002 1. 413175  
3. 072123 1. 849556 3. 141371 3. 534409 3. 209059 3. 458593 2. 94048 5. 021063 4. 252406  
1. 458326 1. 147464 1. 477735 1. 792687 1. 172939 1. 238589 1. 183493 1. 610887 1. 168181  
1. 587552 2. 709257 2. 04367 1. 776172 1. 757243 1. 788318 4. 877148 2. 096132 2. 331448

7. 498296 7. 517598 7. 86552 7. 398752 7. 580065 7. 358413 7. 680383 7. 375503 7. 581195  
6. 541841 7. 509616 7. 073897 6. 753696 6. 446084 6. 956259 6. 821376 6. 335277 6. 805147  
3. 480956 2. 365048 3. 183985 3. 956265 3. 635719 4. 167329 3. 302537 2. 12919 2. 041423  
2. 084204 1. 547949 1. 465914 1. 615945 1. 382899 1. 661807 1. 274615 1. 249991 1. 071494  
6. 441038 6. 490878 6. 231619 6. 362296 7. 246344 5. 946223 6. 830582 6. 834931 6. 327388  
2. 089235 0. 806166 1. 291513 0. 977784 1. 080311 0. 763001 1. 055003 1. 169845 0. 8348  
1. 877554 1. 301674 1. 550204 2. 410041 1. 768623 1. 891665 3. 428831 1. 456655 3. 161246  
5. 354211 5. 537682 5. 294285 6. 656914 6. 078287 5. 980716 6. 263563 6. 906383 7. 222006  
4. 446107 3. 407463 5. 083834 2. 248388 3. 623155 5. 48361 5. 647311 2. 110517 2. 547361  
3. 808133 3. 567422 2. 220243 5. 017772 4. 14617 4. 058014 5. 366655 7. 036393 5. 90053  
1. 126013 1. 288941 1. 986834 0. 805755 2. 094013 2. 589172 0. 942742 2. 761862 1. 402343  
9. 88818 9. 791728 9. 599177 10. 02832 9. 852612 10. 11281 9. 899708 9. 487449 9. 807402  
1. 474772 2. 39804 2. 067351 2. 48375 1. 872416 2. 234404 2. 196483 3. 208151 1. 541348  
3. 099421 3. 172173 2. 746832 1. 858264 2. 709667 5. 096288 3. 306376 3. 363168 1. 406848  
4. 455068 5. 152387 4. 394313 5. 910964 5. 553245 4. 145322 4. 190609 5. 880125 4. 547516  
8. 853356 7. 969075 7. 791479 7. 815145 7. 543097 7. 001889 8. 023619 5. 6749 5. 013465  
1. 713944 2. 122578 2. 014344 1. 864014 2. 069517 1. 923621 1. 43995 1. 590843 1. 456973  
7. 090738 7. 430965 7. 189189 6. 520886 7. 084997 7. 275769 7. 455485 7. 38522 7. 404339  
3. 359146 3. 25984 3. 394659 2. 706398 2. 983231 2. 463422 3. 309428 3. 902421 4. 272232  
3. 661292 5. 852879 5. 936856 4. 652483 5. 24788 4. 158108 4. 511051 4. 948144 4. 690668  
4. 446715 4. 272378 3. 865535 5. 445182 4. 441028 5. 930202 4. 941268 1. 29315 3. 562683  
8. 420189 7. 321768 7. 859657 7. 514175 6. 397241 6. 235559 7. 258015 3. 784646 3. 757895  
1. 435874 1. 712854 2. 698636 3. 394184 1. 992958 3. 205809 1. 738875 2. 38781 2. 383605  
4. 201644 4. 464235 4. 178826 3. 787979 4. 363778 3. 764145 4. 440548 4. 786808 4. 447539  
1. 479984 2. 098753 1. 280442 1. 693046 1. 826088 1. 292046 2. 523733 1. 393707 1. 486741  
4. 272563 4. 692414 6. 025864 4. 148691 4. 990523 3. 998914 5. 668181 5. 378127 5. 042705  
6. 020057 5. 885433 6. 280323 6. 123998 5. 836076 6. 042527 6. 152382 5. 982036 6. 133068  
3. 602894 3. 209499 2. 358362 3. 537216 2. 35547 1. 140261 1. 746636 3. 686271 2. 111665  
6. 324558 6. 885102 6. 336592 6. 144537 6. 349839 6. 40541 6. 753584 6. 648278 6. 502253  
6. 546315 6. 944196 6. 633855 6. 499949 6. 963873 6. 993524 7. 069735 7. 568405 6. 668515  
2. 021204 1. 781081 1. 495942 2. 452157 1. 791012 1. 638638 1. 826855 1. 28249 1. 536704  
2. 259076 1. 600868 2. 650868 1. 90071 1. 721132 2. 12644 2. 382545 2. 590929 2. 134703  
3. 938506 4. 575221 3. 419642 2. 749286 2. 824892 3. 039048 3. 473436 3. 26956 3. 468833  
5. 18658 5. 268376 5. 043671 5. 374093 5. 247439 4. 967769 4. 975941 4. 997504 5. 36738  
7. 782707 8. 112117 7. 666782 7. 310595 7. 772776 7. 332071 7. 352199 7. 221675 6. 946635  
2. 337361 3. 43143 2. 522708 2. 851307 2. 866526 2. 60061 2. 005079 3. 216606 2. 362998  
9. 581839 9. 81497 9. 367354 10. 05993 9. 702131 8. 834927 10. 53902 10. 57578 10. 69977  
2. 242089 2. 017663 2. 12462 2. 749441 2. 519902 2. 287593 2. 632979 2. 746765 2. 404292  
4. 630511 4. 205744 5. 910226 5. 077749 4. 583526 4. 971628 5. 016491 3. 373245 4. 571743  
7. 321021 7. 587965 7. 134396 7. 215631 7. 583746 7. 585348 7. 298358 7. 219235 7. 142046  
1. 141693 1. 318933 0. 947242 1. 13968 0. 952705 1. 032825 1. 151768 1. 213644 1. 071231  
1. 353043 1. 223119 0. 829602 1. 276121 1. 078988 1. 435165 1. 8374 1. 243291 1. 132888  
1. 746893 1. 386949 1. 143596 1. 002217 1. 359528 1. 230814 1. 037707 1. 386878 1. 57865  
3. 941082 4. 889358 4. 36633 3. 341345 4. 920017 3. 766079 4. 909439 4. 516514 4. 258797  
10. 99845 11. 06892 10. 72277 11. 21604 11. 06025 10. 59782 10. 42212 10. 65833 10. 45513  
5. 055016 4. 390726 5. 375896 3. 923084 5. 683944 3. 891281 6. 119868 6. 489764 5. 874256  
10. 96466 10. 33818 10. 60796 10. 75303 10. 38806 10. 99455 10. 55071 10. 28803 9. 73462  
6. 365942 6. 488829 6. 078922 5. 875649 6. 415303 6. 606065 6. 229515 6. 244842 6. 244284  
4. 483056 4. 680881 4. 986103 5. 192215 5. 17527 5. 897376 6. 226172 5. 858111 5. 041905  
4. 30741 2. 995946 3. 648273 4. 784498 4. 674606 3. 919732 4. 240655 4. 830768 3. 832486  
3. 040987 3. 431495 3. 579233 3. 710225 2. 854456 3. 384824 3. 596961 3. 965694 4. 167686

6.197581 4.697247 4.348685 5.915411 3.837211 4.215794 5.366687 5.049165 4.927693  
9.975368 9.628191 9.914896 9.987179 9.697458 10.02831 9.712044 9.800748 9.739086  
4.255337 5.289034 6.034913 4.386122 4.726096 5.475434 5.059206 5.646845 5.428934  
5.568497 6.394265 6.99928 5.702233 7.081048 3.271717 6.692946 7.351574 6.625178  
3.975561 4.492054 5.066708 4.991403 5.226189 4.698842 4.737827 4.454087 4.546464  
3.120448 3.676546 3.635616 2.510201 2.575513 1.519035 2.467079 2.116034 2.434246  
5.005808 4.891491 4.326515 4.77762 4.646587 4.519952 4.531031 4.893363 5.56661  
2.103115 1.566598 1.373404 2.312693 1.335341 1.271324 1.47819 1.871284 1.42582  
6.207018 6.062681 6.214982 5.931479 5.975833 6.096889 4.995337 5.439009 5.472903  
1.373191 1.365565 1.002225 1.635794 0.843516 1.702345 0.877009 1.294247 1.108909  
6.069727 6.589575 6.079696 5.563547 6.087905 6.359601 5.827799 5.888763 5.273793  
2.766838 3.019398 2.621168 2.644953 2.727085 2.697515 2.818006 2.731217 2.923913  
2.762554 2.537285 2.68898 2.69956 3.035443 2.403797 2.354463 2.767526 2.291955  
3.39588 2.136178 1.671908 2.456042 1.916226 5.161972 2.151681 2.132959 4.307592  
1.335559 2.360885 1.714881 1.695545 1.801727 2.139133 2.15293 1.290339 1.751692  
1.30791 1.815222 1.610614 1.398561 1.275912 1.581613 1.669089 2.504742 1.506333  
1.521529 1.800422 2.122868 2.258931 2.333491 1.548413 1.387466 2.459399 1.970664  
1.634393 1.054302 1.387862 1.169952 1.441029 1.566762 1.38747 1.265239 1.569786  
1.339262 3.586507 2.809869 1.095988 1.642568 1.681067 1.225087 1.434295 2.389849  
1.726847 2.477736 2.210367 3.653789 2.175172 1.887001 2.226629 2.962136 2.414219  
5.292999 5.993418 5.228269 4.628079 4.610758 5.544916 5.49577 5.138942 4.524841  
1.285511 1.756299 2.153454 2.124139 1.401819 1.851377 1.624467 1.255486 2.336083  
0.686641 1.872291 0.97489 1.381156 0.356568 1.628285 1.021856 0.833224 0.582876  
3.438395 1.474788 1.251525 2.006489 1.930179 1.173438 1.78379 1.069274 1.534076  
1.727119 3.177679 1.35218 1.91428 3.874689 2.398788 3.151772 2.659283 3.220006  
1.114737 1.425382 1.420935 1.560591 1.529099 3.59805 1.174995 1.325719 1.775856  
2.401303 1.946532 0.990668 2.387863 1.378221 1.593337 1.628148 1.366287 1.609908  
1.642028 1.868418 1.26702 1.328048 1.884895 1.495989 1.190118 1.392597 1.944803  
1.834963 1.107323 1.767637 1.639186 1.401297 1.377095 1.030475 1.666085 2.155324  
1.581366 1.678063 1.089892 1.558294 1.463714 1.042812 1.466355 1.654188 1.141773  
3.823894 3.425716 3.352784 3.253173 3.433732 3.445083 3.433882 3.382443 3.205807  
1.855033 1.43416 1.918636 1.578207 1.942073 1.753413 1.422121 1.494427 1.45286  
1.154811 1.397959 1.13448 2.260006 1.585744 1.632634 1.228508 3.036895 1.063323  
1.213031 1.411485 0.775451 1.124245 0.990478 1.866947 0.803154 1.987955 1.025935  
1.830877 1.9679 1.36115 1.640512 1.899874 1.581842 1.5089 1.468869 1.674817  
6.950532 7.494441 7.22316 7.1184 7.19696 6.773286 7.439145 7.358566 7.354409  
2.201247 1.350595 1.542293 1.425571 1.593677 1.918662 1.381954 1.157165 2.017345  
2.860934 3.299807 2.069556 1.932059 2.036653 2.768344 2.109244 2.293863 2.598261  
2.125345 2.377586 2.070829 2.644709 2.46324 2.505231 2.107222 2.874897 2.966169  
4.53629 3.777559 4.137104 4.385092 4.248769 6.349149 5.328572 4.986337 6.244672  
1.947089 2.073199 2.261385 5.10096 2.461585 6.870816 3.411437 3.708905 3.578903  
1.223946 1.404488 0.867371 1.347169 0.986375 1.26435 1.113723 1.019667 1.710712  
5.695058 5.488205 6.002138 6.151897 5.459071 7.757186 5.705376 5.860534 6.442671  
6.602349 6.203143 6.552424 6.08365 6.484185 7.383597 6.511968 6.696351 5.950715  
5.361144 4.014824 4.993014 5.435356 4.140168 6.437027 4.036099 4.31639 3.918384  
1.996923 2.273218 2.000595 1.693501 2.4259 2.506953 2.001607 2.517498 2.859233  
3.042914 3.925464 3.158913 3.857473 4.104125 3.512957 4.74097 2.629542 4.548421  
7.832693 7.665317 6.937042 7.035304 6.758817 7.720825 7.115401 5.560668 6.296347  
0.97791 1.128351 0.7492 1.131388 0.819223 1.120387 0.707662 1.057254 0.742513  
1.957064 1.622253 2.00589 1.539813 2.150447 1.504327 1.314599 1.183867 1.910914  
3.537425 2.600714 3.394857 3.43953 3.124232 3.581602 4.054699 2.981317 2.975863

2. 734997 3. 40401 3. 692388 3. 155314 3. 14981 3. 97402 3. 605882 2. 905534 2. 911425  
5. 693976 4. 440842 5. 22216 5. 295387 4. 631081 3. 549012 4. 295696 3. 96269 3. 292042  
3. 307334 3. 335426 2. 702467 3. 600956 2. 288727 3. 782808 2. 922038 4. 8903 2. 575696  
1. 666635 2. 703172 3. 962169 1. 216034 2. 522857 1. 54157 1. 704068 1. 284998 1. 57536  
1. 439044 1. 43841 0. 958342 1. 744755 1. 142287 1. 693804 1. 401822 2. 846498 1. 479916  
2. 801831 3. 864009 2. 763454 3. 042858 3. 599579 2. 290149 3. 617931 1. 753168 2. 532661  
7. 061123 6. 960135 7. 355096 7. 12588 6. 653115 5. 973361 7. 55668 6. 41359 6. 646901  
5. 645045 6. 042006 6. 384056 6. 737032 6. 313328 6. 221076 6. 033129 6. 588019 6. 207638  
3. 389531 4. 327829 2. 296001 5. 039245 4. 277308 2. 750534 2. 745424 3. 999084 2. 918048  
5. 030076 5. 120342 4. 982894 4. 832743 4. 775134 5. 241456 5. 148841 3. 8536 4. 765867  
5. 599175 4. 397186 5. 428697 5. 887294 4. 473568 5. 521717 5. 331684 4. 916193 4. 068935  
3. 033754 2. 065764 2. 01384 1. 811987 1. 91626 1. 468984 2. 888078 1. 629228 2. 031849  
3. 603745 1. 844242 3. 129771 3. 572175 2. 94801 3. 439902 2. 549793 2. 694946 3. 259268  
2. 232392 1. 369204 1. 50867 1. 380103 2. 722844 1. 684446 1. 650629 2. 128768 1. 370413  
1. 66032 1. 228287 1. 196091 1. 301662 1. 216094 1. 330584 2. 516622 1. 28021 1. 451228  
1. 453549 1. 493907 1. 138717 1. 397316 1. 510364 1. 480943 1. 391156 1. 198778 1. 320549  
5. 241361 5. 374203 6. 556734 5. 382251 5. 872525 5. 71218 5. 590908 4. 406316 4. 394964  
4. 888364 5. 06346 5. 594356 5. 763849 5. 304512 4. 831216 4. 408285 2. 72258 3. 195734  
6. 622644 7. 612833 7. 745987 7. 629382 7. 831901 4. 456399 7. 222133 6. 70013 7. 038157  
2. 675235 2. 201561 2. 463278 2. 202517 2. 212521 2. 570847 1. 985732 2. 465994 1. 946785  
5. 866981 4. 767907 5. 288022 5. 75384 5. 567117 5. 747338 5. 538675 5. 165708 5. 753496  
3. 407826 5. 442155 4. 503904 2. 565313 5. 907304 2. 496516 2. 438875 3. 077142 2. 93315  
2. 700026 2. 931845 3. 088178 3. 597441 3. 380537 2. 730921 2. 319851 2. 948574 2. 472271  
1. 092868 1. 465341 1. 771098 1. 869279 1. 629828 2. 064336 1. 609178 1. 140935 1. 846109  
2. 195385 1. 900719 2. 324818 2. 368413 2. 065987 2. 1931 1. 858591 1. 449183 2. 160858  
2. 80865 3. 543223 1. 806199 3. 176094 2. 158492 1. 80814 2. 625471 2. 807895 1. 958612  
6. 278314 6. 699082 6. 589719 5. 869258 6. 067751 6. 532641 6. 511532 6. 421197 6. 507929  
3. 66543 5. 223901 2. 689651 3. 931446 3. 88005 6. 58817 2. 499535 2. 362096 3. 692534  
2. 997771 4. 052743 4. 448425 3. 454495 2. 579488 5. 164684 4. 179914 2. 777016 2. 22231  
3. 748151 4. 399087 5. 158841 4. 272326 4. 603255 4. 500845 5. 258953 5. 491045 5. 397103  
5. 077801 2. 505177 3. 454494 3. 795425 3. 253413 4. 965693 2. 859997 3. 816832 3. 438732  
5. 781657 5. 396424 5. 814483 6. 272693 5. 984088 5. 876092 5. 433985 4. 679228 4. 457755  
2. 601527 3. 860132 2. 368541 5. 241231 1. 982318 1. 543985 3. 652913 2. 757667 4. 537829  
0. 803917 1. 185282 1. 28277 1. 573318 1. 439969 1. 486505 1. 008419 1. 168686 1. 155522  
5. 424934 5. 771483 6. 139506 4. 789111 6. 817296 5. 264109 5. 666652 6. 812046 6. 017307  
2. 095067 1. 344742 1. 663334 1. 249387 1. 051043 2. 546844 1. 909666 1. 58581 1. 410485  
1. 990005 2. 288318 1. 849691 1. 995946 1. 649037 1. 571475 1. 445515 1. 469554 1. 815729  
1. 969352 2. 292409 2. 231261 1. 958491 1. 35497 1. 94078 2. 417585 1. 543805 2. 607117  
1. 82412 2. 026701 2. 84293 3. 056799 2. 517552 1. 91451 2. 549195 3. 05219 3. 928671  
5. 460153 5. 167713 4. 908386 5. 985316 5. 693025 6. 555241 5. 670583 5. 575596 6. 039489  
2. 205908 2. 548541 2. 941588 2. 154927 1. 928088 1. 573919 1. 66546 2. 407449 2. 496219  
1. 908526 1. 624366 1. 848781 1. 681447 1. 287124 2. 030337 2. 432752 1. 766192 2. 093484  
5. 996569 5. 319427 5. 552989 5. 299997 5. 165683 6. 293729 4. 142201 5. 599775 5. 585257  
7. 131908 8. 247272 7. 731802 6. 648856 7. 83542 7. 964637 7. 770165 8. 272584 8. 669264  
4. 358931 5. 033204 5. 298926 3. 443016 4. 111641 3. 367005 4. 127247 3. 94326 4. 302055  
5. 460313 6. 056573 5. 630757 4. 885173 5. 417815 5. 637231 5. 653223 5. 509657 5. 468917  
7. 921526 7. 96086 7. 428175 7. 985862 7. 926697 7. 743179 7. 853447 7. 755688 7. 676534  
1. 20953 1. 467145 1. 456474 1. 351898 1. 608065 1. 492578 1. 485592 1. 219226 1. 81463  
5. 054901 4. 694469 4. 242318 4. 836301 4. 64859 5. 445894 4. 226222 4. 31766 5. 303061  
3. 004992 2. 488125 2. 999647 1. 764203 2. 345417 1. 842869 1. 99554 2. 114514 1. 862333  
7. 939247 6. 967332 7. 629259 7. 717645 7. 532025 7. 725666 7. 810173 7. 68533 7. 970365

1. 25422 1. 526158 1. 117154 1. 27883 1. 106672 1. 386479 1. 157597 1. 818834 2. 06624  
1. 080606 1. 797969 2. 307311 1. 224792 1. 445749 1. 927521 1. 650684 2. 650901 1. 643044  
1. 022199 2. 044177 1. 250064 1. 010378 0. 915639 1. 631193 1. 019084 1. 07581 1. 704762  
1. 032231 0. 867559 1. 60691 3. 925749 1. 983476 1. 893117 1. 843837 1. 157633 1. 764829  
1. 14569 2. 831806 1. 062618 0. 558353 3. 503052 1. 876984 3. 102687 2. 698701 0. 950746  
2. 466257 0. 865857 1. 848175 3. 090444 1. 427616 1. 590915 2. 329865 2. 367747 2. 413417  
2. 09539 1. 262294 1. 95316 1. 439553 1. 664975 1. 303003 1. 742987 1. 581963 1. 494481  
6. 531771 6. 085646 6. 631185 7. 21761 6. 649274 7. 369189 7. 171784 7. 301647 7. 305779  
2. 168898 1. 895518 2. 638435 1. 722352 1. 480588 1. 435146 2. 92855 2. 258136 1. 177695  
6. 730615 7. 391758 6. 998656 6. 767682 6. 220495 6. 44862 7. 554109 7. 156171 7. 365755  
1. 45239 1. 854459 1. 70818 1. 440096 1. 674718 2. 081327 2. 641379 1. 878407 1. 792855  
1. 384682 1. 343545 1. 254611 1. 794378 0. 805505 2. 60724 1. 362727 1. 070947 1. 037318  
1. 258737 2. 229757 1. 708876 2. 445637 1. 709532 1. 423215 1. 21424 1. 579661 1. 100303  
4. 557984 4. 808968 4. 441988 3. 800625 4. 641752 3. 56991 4. 142643 4. 501814 4. 237352  
1. 68702 1. 834957 1. 37738 2. 184107 1. 535207 1. 770328 1. 652157 1. 948636 1. 543448  
1. 221359 1. 343831 1. 274325 1. 144244 0. 969978 0. 895652 1. 128819 1. 624054 0. 941369  
2. 03752 1. 875561 3. 19079 2. 196745 2. 860261 2. 10396 1. 934255 2. 498559 2. 401149  
1. 932991 2. 640488 1. 909466 3. 101407 2. 062912 2. 404393 2. 278437 2. 818158 2. 262769  
1. 790979 1. 552468 1. 733464 2. 11361 1. 276825 1. 804066 1. 543468 2. 326636 1. 702136  
1. 602366 1. 315824 1. 320153 1. 612458 0. 898503 1. 5626 1. 6846 1. 64319 1. 417699  
2. 694276 3. 658179 3. 56993 1. 583389 1. 56688 3. 85162 1. 571124 1. 095483 1. 756  
6. 151307 7. 256946 6. 530755 5. 301651 7. 220505 6. 569044 6. 600752 5. 798159 5. 732698  
4. 513573 1. 525698 2. 873989 2. 563577 3. 274742 3. 092444 2. 185304 3. 163148 2. 55196  
1. 095295 1. 316069 1. 198955 1. 693777 1. 095949 1. 263999 1. 429386 1. 441225 1. 049581  
8. 069332 8. 150679 8. 484109 8. 326698 7. 419102 7. 666067 8. 283441 8. 052179 7. 761146  
3. 624736 2. 614567 2. 14436 2. 667387 2. 601871 3. 211816 3. 550601 3. 27858 2. 723479  
5. 725534 6. 211645 5. 553013 5. 706402 6. 418892 5. 860688 5. 118388 6. 367224 5. 649936  
1. 448781 1. 439948 1. 661233 1. 75656 1. 497402 1. 800285 1. 431726 1. 711809 1. 00826  
8. 150702 9. 387829 9. 252521 8. 674194 9. 595319 8. 211106 9. 740096 10. 31484 10. 51792  
1. 41526 1. 806198 1. 681947 2. 675858 1. 650012 1. 358839 2. 037138 2. 449505 1. 882199  
1. 8443 1. 88974 1. 439825 1. 583245 1. 135873 1. 520213 1. 387121 1. 223343 1. 948663  
1. 292701 1. 429198 1. 433976 1. 293401 0. 849636 1. 099425 1. 305075 1. 067094 1. 166122  
1. 108625 1. 574287 1. 481405 2. 917832 1. 423569 1. 063574 1. 146123 1. 49218 1. 195034  
2. 730637 1. 391032 2. 391818 1. 594212 1. 775859 1. 80545 2. 71184 1. 808393 1. 789315  
0. 884235 1. 175679 0. 632335 0. 810791 0. 63966 1. 065609 0. 727947 1. 227137 1. 227133  
1. 479709 1. 94261 2. 19989 1. 422427 1. 885737 1. 88523 1. 589332 2. 526681 2. 401939  
4. 63381 5. 150004 4. 850396 4. 595781 5. 3893 5. 749432 4. 711392 4. 862573 5. 213449  
1. 29875 1. 896374 1. 47277 1. 327768 1. 592391 1. 344014 1. 685938 1. 643595 1. 651101  
2. 287281 2. 226501 2. 31944 2. 095208 2. 51522 2. 520102 2. 320045 2. 035209 2. 537287  
2. 453463 2. 277589 2. 023907 1. 926754 1. 571084 2. 717043 2. 052889 2. 226368 2. 396082  
1. 214965 1. 855382 1. 675581 1. 600984 1. 429541 1. 901021 1. 330175 1. 806543 1. 796925  
1. 912806 1. 517799 1. 368233 2. 144225 2. 456676 2. 107556 2. 215279 1. 869152 2. 879596  
8. 736464 7. 807109 7. 186301 8. 371758 7. 407537 9. 131761 9. 143462 8. 841079 9. 598577  
2. 209203 2. 289231 1. 597154 1. 463278 2. 994123 2. 450807 2. 071989 3. 10173 2. 44372  
1. 921407 2. 71696 2. 309598 2. 66096 1. 32059 2. 841111 1. 685756 2. 526573 1. 791578  
1. 965404 1. 056954 0. 90725 1. 577127 1. 421167 1. 545338 1. 448568 1. 199761 2. 186462  
1. 544845 1. 983973 1. 266286 1. 324579 1. 242583 1. 478341 1. 616345 1. 523855 1. 081371  
1. 065272 1. 542583 1. 321417 1. 324427 1. 961428 1. 611828 1. 271504 1. 279612 1. 633599  
2. 207429 2. 082992 1. 272653 1. 232325 1. 316456 1. 834494 1. 357859 1. 884636 1. 058381  
5. 172991 5. 233902 5. 37305 5. 53732 5. 465939 5. 416666 5. 239179 6. 217443 6. 023023  
2. 928076 1. 94508 1. 909353 1. 731133 2. 775434 2. 381516 2. 235579 1. 862958 2. 790422

4. 989817 5. 244946 3. 965914 3. 895222 4. 479446 6. 763068 5. 131991 4. 171052 4. 514592  
4. 041675 5. 376645 5. 188378 3. 227813 5. 569584 4. 577073 4. 197779 2. 854106 4. 334002  
4. 975581 6. 144547 5. 674465 5. 548712 5. 873053 6. 066752 6. 792198 6. 561449 6. 877845  
5. 964405 6. 97445 6. 740951 6. 743942 5. 658928 6. 124451 6. 87434 6. 620367 6. 665063  
1. 546309 1. 107058 0. 858444 1. 049255 0. 759253 0. 927472 1. 136018 1. 205368 1. 210693  
1. 059836 0. 92163 0. 575841 2. 440601 1. 377158 1. 171996 1. 044776 0. 951022 1. 249004  
1. 694517 1. 740868 1. 907696 1. 998497 1. 730872 1. 729201 1. 650801 1. 830524 1. 698884  
1. 739049 2. 370491 1. 815589 1. 8264 2. 277982 2. 074844 1. 959874 2. 675415 2. 254869  
1. 768874 1. 789158 2. 713281 1. 668986 2. 200108 1. 525508 1. 411351 1. 734692 2. 282936  
2. 05208 1. 991764 1. 878875 3. 167393 2. 213152 1. 266321 2. 237777 2. 739597 2. 02868  
3. 633384 1. 780583 3. 691499 1. 846088 2. 625868 2. 924126 2. 567257 2. 624066 1. 780611  
0. 853671 1. 389236 1. 874316 1. 668789 1. 568208 1. 945089 1. 570244 2. 183436 1. 738933  
1. 672764 1. 577653 1. 367861 1. 976308 1. 682663 1. 063194 1. 63319 1. 673599 1. 401406  
1. 505538 1. 305652 0. 954396 2. 259746 0. 964651 1. 168285 1. 256466 1. 377629 0. 747779  
4. 106366 2. 804192 3. 060116 3. 175448 3. 308736 3. 633444 3. 489539 4. 529745 4. 993073  
5. 09006 5. 423938 5. 18118 4. 859589 5. 224762 5. 041542 5. 106101 4. 568297 5. 249795  
7. 100445 6. 33544 6. 869967 6. 559067 6. 14158 6. 679183 6. 293188 6. 488833 6. 922032  
3. 723602 3. 285804 5. 058604 4. 108179 4. 86013 3. 114583 4. 298835 3. 742111 3. 612244  
1. 548402 1. 418033 1. 428689 2. 536124 0. 986114 2. 627443 1. 440394 2. 027163 1. 586402  
6. 10119 6. 322052 6. 176814 5. 664379 6. 155084 6. 979101 5. 282063 5. 434616 6. 449069  
7. 19948 6. 496894 7. 260356 7. 441284 6. 637533 7. 802545 6. 997655 7. 174878 7. 421292  
1. 874004 1. 675527 1. 45335 1. 622666 1. 595466 1. 786373 1. 126488 2. 250761 1. 092569  
0. 905914 1. 089428 0. 936329 1. 501398 1. 676068 1. 163541 0. 921564 1. 964471 0. 608474  
3. 180978 3. 624593 3. 789984 3. 102509 3. 127082 2. 711945 2. 710572 2. 65844 2. 274549  
2. 627938 4. 227866 4. 057309 4. 391276 2. 85938 4. 538479 4. 183049 4. 302066 5. 212917  
4. 769249 5. 57368 5. 198815 5. 557651 5. 414513 6. 019005 7. 393286 7. 38727 7. 402782  
4. 339295 3. 396965 2. 85964 4. 247125 3. 588245 3. 77936 3. 577071 3. 792139 3. 085016  
8. 669158 8. 675213 9. 537254 9. 447685 9. 374319 7. 524881 9. 924246 9. 327442 9. 210084  
6. 508918 4. 820284 6. 526987 6. 915713 5. 473336 6. 194887 6. 767311 7. 302467 6. 843859  
7. 262497 7. 256841 7. 089468 7. 048042 7. 593561 5. 533226 7. 666579 7. 687697 7. 54485  
4. 038416 5. 011902 5. 148495 4. 979756 4. 434224 3. 738796 4. 378047 4. 924525 4. 146454  
1. 7137 1. 391299 1. 265627 1. 615435 1. 389167 1. 493464 1. 47338 1. 798542 1. 623818  
4. 044056 4. 778019 4. 84434 3. 590737 4. 471618 4. 31117 4. 941209 5. 189715 5. 163568  
1. 984826 2. 496354 1. 708111 2. 953026 1. 586423 1. 598212 1. 366369 2. 673476 1. 566122  
2. 461402 2. 514509 2. 974822 3. 228946 2. 803228 3. 627727 2. 401824 3. 294321 2. 616828  
3. 288003 2. 250082 3. 103733 3. 429493 3. 178864 3. 01634 3. 27521 2. 500685 2. 110695  
2. 496581 2. 08421 1. 852534 3. 477974 1. 645699 1. 81326 2. 973539 1. 356232 1. 961549  
3. 007489 3. 389574 4. 147136 3. 555326 4. 185229 3. 616319 4. 377329 4. 712337 4. 205957  
2. 147777 3. 383763 3. 023774 2. 398219 3. 092604 2. 465952 2. 874823 2. 210495 2. 362502  
1. 418527 2. 135229 1. 577318 0. 707508 1. 46805 0. 874334 1. 24151 1. 386546 1. 242863  
3. 576897 2. 868117 4. 009121 3. 582172 3. 335537 3. 681525 4. 242645 3. 806214 4. 08151  
1. 134676 1. 28656 1. 45687 2. 221442 1. 285599 2. 496738 1. 792383 1. 914576 1. 360735  
2. 634677 1. 465872 1. 394517 2. 789112 1. 51352 1. 650728 1. 303853 2. 049351 1. 3373  
1. 775634 1. 753567 2. 326533 2. 266704 2. 618828 2. 032851 2. 505539 2. 255896 1. 823147  
3. 685293 2. 922048 4. 074637 3. 109766 3. 32947 2. 596758 2. 463044 2. 554315 2. 752656  
2. 676514 2. 146044 1. 871665 1. 975145 1. 871665 1. 988983 1. 70475 1. 555293 2. 253811  
3. 229701 2. 483132 3. 748864 3. 436232 3. 659744 2. 966797 3. 061027 3. 017447 3. 294214  
4. 080896 3. 038745 4. 46194 3. 688251 3. 302083 4. 139831 2. 615025 3. 565652 2. 731129  
2. 731533 2. 772276 3. 172714 3. 797378 3. 218225 3. 214119 3. 244109 4. 506589 3. 033478  
3. 713752 4. 09745 4. 20591 4. 579923 4. 48561 5. 182555 4. 867106 5. 279531 4. 108207  
3. 594052 3. 652643 3. 60342 3. 769157 3. 772585 4. 043952 3. 981578 4. 64748 4. 586336

1. 396544 1. 733229 2. 035355 1. 795036 3. 341798 2. 171351 1. 934601 1. 342252 1. 729608  
2. 545995 1. 8711 2. 771985 2. 182817 2. 777306 2. 288612 2. 316401 2. 926471 2. 019196  
1. 265866 1. 3823 1. 62709 2. 089311 1. 882781 1. 636171 1. 273257 1. 277551 0. 764521  
1. 980154 1. 470983 1. 746767 1. 449024 2. 499604 1. 460725 1. 366229 1. 46038 1. 808622  
4. 314809 5. 206292 4. 740803 6. 199094 5. 062213 3. 577462 5. 856893 4. 980543 5. 235405  
8. 016231 7. 766027 7. 501179 7. 858516 6. 934298 6. 617258 7. 466885 7. 633652 7. 181529  
6. 452505 6. 001632 5. 989843 5. 899309 4. 845356 7. 09032 5. 791427 5. 359309 5. 724677  
0. 708944 1. 233715 0. 258478 1. 872114 1. 23398 2. 783274 1. 800276 2. 544757 2. 030248  
2. 937867 2. 06473 2. 285772 2. 790548 2. 941197 3. 008221 2. 147389 2. 98259 2. 494559  
5. 363274 2. 100843 2. 046487 1. 689385 3. 085111 1. 300602 1. 442378 4. 190168 1. 861369  
1. 732395 3. 325379 2. 943649 2. 153983 1. 929728 2. 182268 1. 410517 1. 593093 1. 931861  
4. 864027 4. 231351 5. 074967 4. 99152 4. 550126 5. 129058 5. 589464 4. 936819 5. 260183  
3. 105976 2. 77349 2. 654224 3. 207903 3. 026793 3. 210758 3. 632834 3. 449088 3. 431426  
5. 254956 5. 574245 4. 863053 4. 850987 5. 488306 5. 738866 5. 395542 5. 58184 5. 926223  
2. 15167 1. 204651 0. 676997 1. 432342 1. 662047 1. 785974 0. 926097 1. 782019 1. 042249  
2. 301365 3. 640756 1. 561666 2. 958882 2. 418662 1. 814348 1. 516867 1. 489517 2. 816431  
3. 775876 2. 065998 1. 348576 1. 465123 1. 081792 2. 07868 0. 686875 1. 404899 0. 965934  
4. 528248 3. 794807 4. 423179 5. 275228 4. 766857 3. 731483 5. 169075 5. 233788 4. 73023  
9. 637949 9. 288324 9. 149644 9. 682904 9. 624177 9. 899166 9. 426297 9. 840113 9. 635051  
2. 459383 3. 121738 2. 339987 3. 651168 2. 613994 3. 801722 4. 46275 3. 657662 2. 545795  
1. 140216 1. 692795 1. 564307 1. 06193 1. 482027 1. 464175 1. 094606 0. 907908 2. 189542  
2. 248534 1. 666704 1. 990861 2. 761114 2. 41997 2. 523212 3. 041254 2. 137527 3. 160551  
1. 88667 1. 996177 1. 829019 1. 675381 2. 000046 1. 780638 1. 842395 2. 388918 2. 307485  
1. 380552 1. 314407 1. 680274 1. 364808 1. 156165 1. 466856 1. 40032 1. 718187 1. 447322  
1. 183162 2. 513429 1. 156424 1. 094168 1. 186698 2. 124491 1. 794995 1. 103821 1. 742031  
3. 078993 2. 632299 3. 951672 3. 546994 4. 359324 3. 406391 4. 034826 3. 599008 3. 346381  
2. 732007 2. 027095 3. 313251 1. 354533 1. 88827 2. 368698 1. 63299 2. 450452 2. 018992  
1. 327865 1. 488661 1. 318213 1. 184959 1. 877545 1. 442047 1. 179076 1. 612483 1. 173217  
0. 69862 0. 830902 1. 261076 1. 153661 1. 797184 1. 028089 1. 018278 1. 201587 1. 008377  
1. 283983 1. 325172 0. 795957 1. 89393 1. 022373 0. 93509 1. 281471 1. 504873 1. 33309  
3. 068965 3. 621176 3. 961516 2. 075464 3. 765038 2. 477892 3. 713578 3. 700849 4. 179428  
1. 849564 1. 126471 1. 150594 3. 223243 0. 871094 1. 344171 1. 123784 1. 338038 1. 453604  
1. 651827 1. 751562 2. 033757 2. 000665 2. 557905 1. 540623 1. 873853 1. 876937 2. 444571  
2. 879599 2. 147 3. 294691 2. 265308 2. 348974 1. 878531 1. 694174 1. 638153 1. 592079  
3. 120285 1. 993628 2. 146936 2. 226729 2. 719185 1. 914333 2. 464688 2. 203395 2. 699324  
0. 828348 1. 144385 1. 653574 1. 600944 1. 221264 1. 21702 0. 888379 1. 568659 1. 908991  
0. 995567 1. 33041 1. 434088 0. 873409 1. 487761 1. 012473 0. 751632 1. 835775 0. 664588  
2. 242127 2. 430637 2. 375435 3. 300354 2. 36438 2. 208098 2. 13051 2. 793056 2. 358909  
7. 100245 8. 308447 8. 237632 8. 364328 8. 28723 7. 024259 8. 398926 7. 838277 7. 444595  
2. 431149 2. 132195 2. 593144 2. 20911 3. 207561 2. 390949 2. 924601 2. 148053 2. 256653  
6. 250808 7. 430768 6. 342733 6. 430681 6. 924618 5. 696266 6. 435651 6. 596742 6. 19843  
2. 104283 2. 281879 2. 203994 2. 315835 2. 523703 1. 893157 1. 997771 1. 744411 1. 833017  
1. 497746 1. 505183 1. 635262 2. 04606 1. 845885 1. 176908 1. 80617 1. 762013 1. 248322  
4. 507505 3. 881893 5. 196995 4. 695648 4. 377026 3. 646434 4. 35793 4. 325817 4. 498755  
3. 922513 2. 870865 3. 8271 4. 855919 4. 625526 4. 337225 3. 527768 2. 776842 4. 043693  
1. 706426 1. 686805 1. 389233 1. 032478 1. 686805 1. 286484 1. 294221 1. 778999 2. 135895  
2. 345261 1. 723848 2. 180658 1. 652147 2. 639072 2. 689968 1. 896114 1. 846797 2. 127229  
1. 649892 2. 153655 1. 974283 2. 505252 2. 515182 2. 17256 1. 808689 2. 321148 2. 651349  
10. 46775 10. 58789 10. 48865 10. 38711 10. 61314 11. 36101 10. 89487 10. 49809 10. 55129  
2. 481692 1. 635148 1. 82013 1. 814208 1. 635148 1. 199625 2. 190138 1. 573889 0. 859765  
1. 751114 1. 501049 3. 341798 1. 999728 1. 18257 1. 546604 1. 672939 2. 061581 2. 225719



2.086976 1.877448 2.239218 2.063422 1.699639 2.234473 1.863031 2.064867 1.782705  
1.865222 1.472836 2.455688 1.400891 1.613816 1.754569 1.149908 1.77627 2.236991  
2.641876 2.766737 3.466886 3.561716 3.484167 3.357553 3.647935 2.987705 3.179052  
3.528402 3.942023 3.652485 3.490166 3.689585 4.313848 4.868173 4.110167 4.920863  
3.285178 3.17503 5.730541 4.529715 4.713958 3.481438 2.50491 3.683864 2.400261  
2.976934 2.051625 2.044541 2.378212 2.200977 2.608263 2.53365 2.116266 2.513607  
1.272025 1.295135 1.159044 1.07495 1.566038 1.46449 2.111652 1.057506 1.513247  
2.504696 3.35966 4.732863 2.942627 4.455809 3.650245 4.034118 5.231817 3.632342  
1.74421 2.467124 2.370819 1.636074 1.924842 1.896107 2.524262 2.604654 1.848722  
1.947369 2.372375 1.783062 2.879755 1.906581 2.013409 2.150034 2.066706 2.319125  
3.696505 2.216232 4.098825 3.886064 2.804063 3.327308 3.613593 3.660364 4.182873  
3.058807 3.678436 2.966225 2.974057 2.944399 2.936815 3.728359 4.258509 3.145349  
3.285104 2.829872 3.713159 3.55867 1.757931 2.722865 2.372846 2.105065 1.977817  
0.917796 1.04019 0.951687 1.297176 1.154061 0.79314 1.248385 1.265761 1.13953  
0.852708 1.209957 2.153979 1.643309 1.773659 1.23959 1.243728 1.548981 3.016976  
3.181054 3.522035 3.121775 3.003703 1.900335 1.441705 3.541562 1.876667 1.38898  
1.785893 2.666624 1.681786 1.733355 3.075114 2.116889 1.912897 2.192143 1.685452  
1.639563 1.363446 1.90893 2.18546 1.294898 1.712308 1.797197 2.01076 1.503534  
3.398208 5.518923 3.388198 2.892211 2.941141 2.45582 2.09946 3.215884 2.127902  
1.953976 1.979626 1.294406 2.322667 1.794868 1.165296 1.3892 1.465626 1.227887  
5.968552 5.704965 6.190562 5.525576 5.539568 4.533423 6.202918 6.56664 5.979084  
4.943653 4.638226 5.408737 3.954921 3.794494 4.958443 4.568388 3.112135 2.699929  
0.720064 1.507923 0.884399 1.962627 0.678086 0.799765 0.988996 0.876918 1.408801  
2.005698 3.916055 2.063192 2.4403 3.479148 2.22735 2.311984 2.289586 2.064153  
5.778171 4.197751 4.843315 5.29788 5.596135 5.381169 5.808081 5.282519 4.439632  
8.370947 8.369555 7.792263 8.114769 7.472665 7.822881 7.400671 7.057983 6.115647  
4.924179 5.782104 6.114881 4.988926 6.136218 6.154743 6.518687 6.510349 6.498159  
2.865516 3.505706 3.422207 4.454869 3.716795 4.422756 4.442627 4.136854 3.19075  
1.526092 2.283237 1.600281 1.726294 1.760914 1.668965 1.859721 2.198317 1.234838  
6.731677 6.814384 7.204139 6.595247 7.1587 3.849939 7.000354 7.012369 7.220159  
6.815502 6.869702 7.312589 6.984625 6.83351 7.710166 6.808851 7.228031 7.187164  
1.325431 1.444895 1.369478 1.260155 1.276447 1.668324 1.430894 1.620757 1.499253  
2.149453 1.294042 2.168074 2.085166 2.55973 2.701478 2.584416 3.747583 1.738616  
5.177097 5.920398 4.479693 4.268026 4.088143 3.856289 4.77609 5.106452 4.635672  
2.505786 2.487578 2.466921 2.13923 3.171593 2.990401 2.227632 2.020363 2.537544  
6.417107 5.905956 6.012577 5.344628 5.208871 5.697111 6.065984 5.856178 6.404316  
4.557572 3.784635 4.927745 5.427385 4.830573 3.466835 4.787688 5.770743 4.872926  
6.201058 6.119664 6.849488 6.116727 6.431855 6.346571 5.942432 5.725083 6.592112  
3.092112 4.069478 4.138031 3.952299 4.672849 3.805768 5.442508 2.534444 3.963026  
1.78143 2.786319 1.511718 3.404766 2.480207 3.78725 3.455379 3.712553 3.379018  
1.354818 1.159844 1.873558 1.827507 0.914863 1.328032 1.033513 1.171596 1.021244  
1.065394 1.091785 0.881077 1.131337 1.146 1.074208 0.964807 1.428976 0.927279  
7.983728 8.108618 7.744791 7.858172 8.050738 8.180923 7.852463 8.02544 7.18361  
2.332657 1.875474 1.789529 2.856313 2.315582 2.309487 2.17653 2.460988 1.935721  
1.263525 0.937303 0.662165 1.710087 0.767266 1.655188 0.861733 1.452873 1.161842  
1.258552 1.387925 1.524533 3.920813 1.92908 5.558585 4.859551 2.775145 3.748671  
4.256533 4.296838 4.438903 3.395827 4.064661 5.382878 4.425209 4.083301 4.083201  
3.374292 3.643214 3.457537 3.947796 4.252992 2.983045 4.516513 5.815537 5.52745  
1.637097 1.938273 1.705278 1.388856 1.740372 2.116681 1.229773 1.64741 1.648632  
3.764677 5.371883 4.093658 4.379413 1.944003 3.47936 3.903676 2.202686 1.959992  
3.226339 2.8846 3.25172 3.300677 4.032447 3.116609 2.803507 2.878171 3.00492

1. 861341 2. 228593 2. 326999 2. 580788 2. 177488 1. 976504 2. 415271 2. 700648 2. 384392  
4. 608333 4. 323899 4. 530198 3. 507453 3. 902118 3. 874503 2. 436778 2. 693682 2. 946319  
5. 101948 6. 03187 5. 951377 5. 82975 5. 14501 6. 098091 5. 716662 5. 11732 4. 582731  
1. 945686 1. 283512 1. 625364 2. 067376 1. 500132 2. 847218 1. 036747 1. 808356 1. 454704  
4. 505478 3. 372999 2. 349107 3. 449695 3. 339354 6. 255575 4. 003232 5. 487199 5. 383263  
0. 915431 1. 066921 1. 355254 1. 257397 1. 08398 1. 352029 0. 833016 1. 879012 0. 87252  
5. 736865 6. 019104 5. 45455 4. 065173 4. 715422 5. 10967 4. 142654 5. 174258 4. 914433  
5. 193939 4. 733163 5. 566184 4. 486054 4. 624304 3. 708507 5. 711456 4. 222558 3. 972051  
6. 679594 7. 17236 6. 598743 5. 710706 6. 355473 6. 052781 5. 947191 6. 31283 5. 680079  
6. 447972 6. 701628 6. 703873 6. 003082 6. 351575 5. 372902 6. 405722 6. 491648 7. 346394  
2. 154197 1. 893788 1. 910037 2. 330027 2. 36402 2. 242365 2. 10977 2. 285749 3. 318537  
4. 529383 2. 369636 3. 597839 2. 688248 3. 214068 3. 266424 4. 552436 3. 541441 4. 318692  
4. 010073 4. 107625 3. 716662 3. 90632 2. 592659 3. 793271 2. 308639 3. 640185 2. 110202  
4. 449158 3. 357116 3. 073342 3. 805385 2. 877719 4. 245347 3. 775046 5. 565445 5. 24713  
7. 388992 7. 986318 7. 555872 7. 087713 7. 18231 8. 100522 7. 411848 7. 404455 7. 148291  
2. 962547 3. 120445 2. 63107 2. 911196 2. 774829 3. 848596 3. 395918 4. 146992 3. 644217  
2. 097518 2. 595538 2. 353015 2. 008838 2. 060791 2. 112683 1. 653087 2. 31755 1. 821284  
4. 600596 4. 074089 4. 313527 5. 05479 4. 646454 5. 295301 4. 725737 2. 916231 3. 317215  
5. 672963 4. 822485 5. 556529 4. 642424 5. 717685 5. 804098 5. 103486 6. 334476 5. 037783  
5. 000491 3. 315499 5. 098435 5. 926301 4. 01722 5. 397103 5. 778454 5. 655748 4. 051528  
3. 444227 0. 863034 0. 9865 2. 554369 1. 027018 1. 426878 1. 155191 3. 067346 3. 66042  
1. 634821 0. 935201 1. 383672 1. 106878 3. 077758 1. 843875 0. 678695 0. 753044 1. 345091  
2. 283377 2. 300976 2. 512557 2. 073361 1. 756635 2. 150066 1. 804103 2. 268565 2. 001703  
5. 525744 6. 677192 6. 452084 6. 212384 6. 92985 6. 718214 6. 991853 7. 325158 7. 15903  
4. 500169 1. 928547 2. 804225 3. 858219 1. 787271 2. 46219 2. 516072 2. 654555 1. 985631  
1. 663699 1. 563909 1. 151276 1. 630287 1. 068457 1. 107616 1. 164881 2. 035728 0. 580814  
2. 431302 1. 968697 1. 982677 1. 972846 2. 93851 3. 513087 2. 221179 2. 38802 2. 421274  
2. 765019 3. 104646 2. 555899 3. 755245 4. 610322 3. 297178 3. 059785 3. 089646 3. 420171  
2. 72784 5. 436179 4. 462406 4. 153776 5. 236021 3. 806076 5. 041073 4. 424872 3. 992153  
1. 894224 3. 789771 4. 411528 4. 071062 2. 431111 2. 359862 2. 57299 4. 294092 4. 000441  
0. 83097 1. 536019 1. 066767 1. 014351 1. 441954 0. 961505 1. 068408 0. 917956 0. 776831  
3. 631009 3. 543033 2. 890423 4. 142199 4. 189271 3. 210138 4. 406302 5. 53308 3. 978469  
2. 696403 1. 190164 1. 998487 1. 587709 2. 999789 3. 164524 1. 888274 4. 919836 4. 168524  
7. 800396 8. 297422 7. 849051 7. 742109 7. 717352 6. 950977 8. 020103 7. 779948 7. 549861  
1. 502427 2. 295763 2. 548701 2. 495904 2. 336422 4. 437889 3. 203224 2. 967843 3. 233966  
3. 144465 3. 715232 3. 770282 2. 904993 4. 241116 2. 735914 3. 157307 3. 488776 3. 731008  
2. 020697 1. 583629 1. 670501 2. 529673 1. 725294 1. 739 1. 793852 2. 04076 1. 571572  
1. 656408 1. 372273 1. 381278 1. 480648 1. 326326 1. 6649 1. 221044 0. 9859 0. 94279  
1. 397229 1. 69575 1. 467712 1. 791897 1. 450355 1. 795352 2. 074206 2. 177115 1. 761912  
1. 665378 1. 979105 2. 045414 2. 054444 1. 691992 1. 65332 1. 473023 1. 754606 1. 349278  
2. 688705 2. 499609 2. 206838 2. 84852 2. 577874 2. 153611 1. 102458 1. 367784 2. 825178  
1. 854178 1. 934465 1. 429112 1. 707301 1. 228977 1. 225186 1. 072675 1. 288233 1. 625367  
1. 125222 0. 796918 1. 571064 1. 655877 1. 551647 1. 754038 1. 482789 1. 151031 1. 774526  
1. 423426 1. 547651 1. 423475 2. 082037 1. 134675 1. 699361 1. 370821 1. 226825 1. 681447  
1. 220859 2. 18907 1. 452753 1. 323637 1. 63425 1. 43935 1. 4289 1. 339597 1. 388207  
1. 459166 1. 698508 1. 17632 1. 524571 1. 628648 1. 435429 1. 06121 1. 212197 1. 167992  
4. 579529 4. 963319 4. 615869 3. 928017 5. 272988 4. 05074 4. 500707 4. 354684 5. 442054  
2. 165973 4. 026593 2. 55531 3. 383424 2. 418616 3. 935255 3. 551652 2. 433084 3. 038542  
2. 960944 3. 453781 3. 525656 3. 441435 2. 807266 4. 888269 3. 939966 4. 241583 4. 394144  
3. 19433 3. 497709 3. 636581 3. 60848 2. 674454 2. 804381 3. 572735 3. 893285 4. 024317  
4. 452142 3. 632421 4. 093753 2. 702127 3. 664429 4. 360347 3. 399828 4. 643371 4. 178007

1.166666 1.518508 1.07523 1.114673 0.985921 1.431364 1.208461 1.001243 1.334544  
1.712763 1.928123 1.692733 1.580195 1.720081 1.604757 1.622559 1.950593 1.856542  
2.87801 3.58387 3.551966 2.950704 3.370034 3.398514 2.536841 4.556445 2.946683  
1.069983 1.258663 1.303196 2.034028 0.982683 1.510143 1.136787 1.267496 1.319191  
1.438163 1.127619 1.018744 2.794418 1.241355 2.147138 1.071072 1.575238 1.228688  
1.437465 1.852282 1.286576 1.964213 1.655699 1.186885 1.077568 1.215558 1.135329  
1.831308 2.151085 1.265768 2.131162 1.579807 1.774751 1.612072 1.21761 1.335753  
2.247714 3.660601 2.999562 1.785221 3.266057 2.658767 2.780901 3.685904 3.497292  
1.050222 2.127532 0.884709 1.533424 1.449554 1.138981 1.316338 1.562056 1.698081  
2.618396 1.686083 1.473522 1.56443 1.997516 2.630518 1.531518 1.733502 1.926015  
1.138416 1.208087 0.864202 1.035474 0.629948 0.872491 1.164737 1.001056 1.088033  
1.534959 1.631335 1.102641 0.842869 3.631335 4.328183 2.485851 1.614723 3.227609  
2.117485 0.845337 1.390609 1.386958 1.145485 1.375129 1.856383 2.116555 1.533433  
3.092068 2.405295 3.274996 3.735596 2.710539 4.209895 3.507086 3.054526 3.409719  
1.289439 1.647648 1.362837 1.483263 1.614704 2.037913 1.583323 1.038303 1.648256  
2.901331 2.797765 3.558534 2.354198 2.420492 2.725315 2.718776 2.80196 2.003814  
1.772794 1.909235 1.921685 1.874409 1.349686 1.616612 4.081798 1.560698 1.656633  
1.284142 0.80084 1.456987 1.333187 0.699565 0.684869 0.95779 1.767942 1.10581  
1.977585 1.739679 2.199033 1.713014 2.670986 2.953382 2.355995 2.814349 2.221012  
1.507041 1.652106 2.041795 1.901148 1.699492 1.912867 1.532448 1.859275 1.304756  
1.422203 2.049018 2.273501 1.974659 2.059416 2.063518 1.634058 2.828518 1.924029  
4.985736 4.402567 4.005527 4.890061 4.938827 4.000907 3.64139 3.858394 3.448768  
6.260218 6.254227 6.436924 5.722303 5.905911 7.263779 6.565032 7.100859 7.086527  
1.262216 1.013328 0.696128 1.300014 2.132378 1.825351 2.405836 1.755991 2.138658  
5.17863 5.400571 5.444157 5.539369 5.845638 5.699831 5.165417 4.649041 5.207189  
7.096976 6.104252 6.685358 7.185068 6.30186 7.329753 7.151525 7.295209 6.791457  
9.155591 9.631689 9.327273 9.093538 9.689671 6.823681 10.27528 10.46557 10.33075  
2.314884 2.43335 2.362477 2.492955 1.961943 2.573994 1.887668 2.101035 2.069226  
4.491367 4.483133 4.609599 3.671088 3.071416 4.073987 5.485542 3.862502 3.579751  
2.454072 2.878297 1.7079 1.372189 1.816191 1.389807 1.511162 1.448411 1.265227  
6.96129 6.406622 5.933031 5.440112 6.127159 5.654073 6.235547 5.680409 4.047426  
2.34569 3.266679 2.362067 4.139349 2.486816 3.989025 4.890959 4.12645 3.041475  
1.385324 1.38436 1.836676 1.778911 2.147885 1.560408 1.400419 1.807628 1.649521  
5.99471 5.098194 5.644649 5.581035 6.071137 6.254325 6.89184 7.071841 6.178468  
3.467635 1.932021 2.849988 2.946597 2.325608 3.253673 2.899228 2.415288 2.835683  
3.724549 3.860435 3.401011 3.926601 4.18967 3.93528 3.102344 2.910209 3.183211  
3.787486 3.524169 2.093016 3.873061 3.873949 2.773021 3.983657 6.03857 3.888865  
4.57645 4.103295 4.233204 5.152779 4.1949 4.342602 5.068775 4.97514 5.257188  
3.158245 2.880324 3.584091 2.125797 2.887297 3.499863 3.198112 2.433562 3.729807  
4.753847 4.33042 4.965017 4.482734 4.902519 5.341455 5.480968 5.754858 5.680278  
3.46806 3.229487 2.554901 1.647134 4.242273 1.173471 2.157558 2.06657 2.107084  
1.579221 1.580472 2.036193 1.8256 0.960922 1.230143 1.590332 1.506037 1.42875  
1.548843 1.187769 1.577094 1.330675 1.080025 1.750043 1.216397 1.267409 1.485746  
7.016146 7.412726 6.91175 6.330823 6.918582 6.708121 6.629249 6.553646 6.693533  
2.87419 3.307326 2.758104 3.51101 3.075454 3.878186 2.611689 2.911615 2.461351  
4.134035 2.415456 1.974354 1.980799 2.856662 1.434943 3.343304 2.7248 3.084212  
1.943298 2.540026 2.328382 2.939321 2.433419 2.462674 1.816857 2.093505 2.163245  
4.512666 5.677203 5.494108 5.375022 5.897733 2.814638 4.782157 5.306588 5.511672  
1.786908 1.816999 1.518786 0.932856 1.520759 1.958686 1.244729 1.233333 1.343736  
4.072593 3.684045 4.554541 5.379344 3.771877 4.575008 4.727698 3.713995 4.859365  
3.441169 3.060519 5.00056 5.975784 4.871412 4.230148 5.164533 4.532198 5.306142

3. 709623 4. 409592 6. 079628 4. 653205 3. 857227 5. 070809 5. 059061 3. 980485 4. 947749  
2. 139093 1. 731618 1. 494115 2. 294586 2. 321613 2. 515298 1. 874608 1. 660682 1. 764523  
3. 23682 3. 187287 2. 093524 4. 249687 2. 34667 2. 789375 4. 272014 2. 060473 4. 180767  
3. 674378 3. 499946 3. 995301 3. 415257 3. 716611 4. 683852 3. 686883 2. 492813 2. 095517  
2. 075312 1. 121482 1. 885804 1. 329201 2. 558654 1. 819974 1. 174963 0. 992038 1. 311538  
6. 247749 5. 241889 5. 825917 6. 36235 6. 073364 5. 195949 5. 815187 6. 481459 5. 355364  
2. 152707 1. 710918 1. 870911 1. 528975 1. 643817 1. 362369 1. 406306 1. 816669 1. 580422  
1. 959778 1. 778061 1. 539129 3. 038962 1. 989487 2. 61329 2. 121621 1. 987545 2. 487696  
3. 722161 2. 413933 2. 330317 2. 794706 2. 951006 3. 216526 2. 117908 2. 041844 2. 681521  
2. 095152 1. 449486 0. 742119 1. 664462 1. 316417 1. 409796 1. 249203 2. 143857 1. 537189  
1. 61422 2. 535205 2. 040887 1. 579044 1. 324913 1. 394242 1. 958267 1. 144427 1. 71068  
3. 445946 5. 035184 3. 602415 3. 153764 2. 628178 2. 762277 4. 828029 3. 983094 3. 432916  
2. 193778 6. 317508 7. 336001 4. 427744 7. 613112 2. 297998 3. 274601 4. 763776 2. 396908  
7. 555424 7. 615782 7. 563919 6. 835687 7. 748732 7. 572922 7. 982923 7. 416537 7. 116745  
3. 101028 4. 439483 3. 753039 3. 565629 4. 110789 5. 028693 3. 968239 3. 236733 5. 089709  
4. 472954 5. 406758 5. 033338 4. 778846 4. 360985 4. 430984 3. 960715 4. 864458 5. 030186  
2. 431823 3. 100959 3. 103475 2. 719326 2. 937052 3. 276603 2. 607663 2. 709059 3. 279215  
9. 568155 9. 174993 8. 878683 9. 346891 9. 366042 9. 632632 9. 236045 9. 056402 8. 987662  
1. 926642 3. 666424 2. 099972 3. 396706 2. 234211 2. 375251 2. 091182 2. 803041 1. 978072  
1. 687027 2. 217498 2. 791189 2. 209297 2. 703972 1. 563529 1. 446414 1. 975068 2. 114125  
1. 397733 1. 412436 1. 04323 1. 155195 0. 695862 0. 911295 1. 15939 2. 275498 2. 320947  
5. 249286 5. 005489 5. 184256 3. 879795 5. 483459 3. 927467 5. 072352 4. 725453 5. 014708  
2. 397127 1. 962505 2. 08348 2. 222466 1. 934428 2. 044354 2. 141699 2. 110755 1. 812083  
2. 488393 2. 136055 1. 979452 2. 077577 1. 954438 2. 206365 1. 453857 2. 228805 1. 621904  
6. 691423 5. 537443 5. 805199 6. 412379 5. 820661 5. 49186 5. 839906 5. 232515 5. 04125  
3. 448829 2. 784384 2. 100277 2. 888398 2. 081684 3. 604138 2. 246994 2. 010004 2. 51188  
3. 415001 2. 580532 2. 683131 2. 22174 2. 939385 3. 305267 3. 342475 4. 53137 2. 90355  
1. 302369 1. 851584 1. 570536 1. 243678 1. 274978 1. 764396 1. 346814 1. 436455 1. 425622  
4. 614246 4. 872754 4. 546736 3. 656321 3. 702198 6. 907488 5. 08759 4. 500729 5. 619815  
2. 554998 2. 470359 2. 484766 2. 325524 2. 314308 2. 288489 1. 810312 3. 052328 2. 257731  
3. 102846 3. 45845 3. 666812 2. 833406 3. 011006 3. 227847 3. 335644 2. 675194 2. 843799  
2. 149584 2. 355484 2. 173634 1. 96112 2. 215051 1. 628298 2. 020952 1. 472424 1. 917601  
1. 605437 1. 560273 1. 381297 2. 389269 2. 056837 1. 884192 1. 709816 1. 596703 0. 990809  
1. 411808 1. 401008 2. 96658 2. 928023 2. 117832 1. 870526 2. 011854 1. 851054 2. 17203  
3. 16546 2. 40267 2. 271882 2. 391844 2. 982911 2. 457633 2. 7506 1. 784343 2. 356878  
1. 787627 1. 484907 1. 71517 1. 714941 1. 690584 2. 140734 1. 592397 2. 112273 2. 003332  
1. 930662 2. 344365 2. 398545 2. 909686 2. 525217 2. 621034 2. 194642 2. 399466 2. 364327  
2. 640848 3. 793299 2. 710852 4. 054699 3. 920387 2. 954309 2. 915637 3. 579768 3. 321716  
3. 998893 5. 859224 3. 857361 3. 637418 4. 758501 4. 248338 4. 065927 4. 597894 5. 549057  
2. 463495 2. 538565 2. 530312 3. 218126 2. 552163 3. 03128 2. 410878 2. 678014 3. 235906  
4. 767571 4. 409432 4. 139382 2. 688327 3. 869158 3. 145666 2. 851336 3. 074135 2. 333647  
1. 264502 1. 50912 0. 635071 0. 972444 1. 087388 1. 810682 1. 753392 1. 733221 1. 464419  
3. 026836 2. 336244 2. 910599 3. 460034 2. 821632 3. 478124 3. 450138 2. 455471 3. 292847  
2. 159134 2. 508692 2. 600995 2. 119862 1. 648276 2. 45639 1. 723069 2. 049684 3. 201696  
2. 287015 2. 516361 2. 062447 2. 67063 2. 16001 2. 081759 2. 175899 2. 180677 1. 904967  
4. 277224 3. 622168 1. 955665 2. 206314 3. 577383 3. 323643 3. 642214 4. 145977 3. 436567  
4. 385651 4. 251973 4. 917965 4. 074613 4. 824912 5. 225718 4. 194302 4. 421904 4. 508992  
1. 633439 2. 296495 1. 887635 1. 931677 1. 693108 2. 995935 2. 375634 1. 985313 1. 711006  
2. 599009 2. 127512 2. 525218 3. 159605 2. 647817 3. 40916 2. 477278 2. 60826 3. 041257  
2. 00484 2. 114503 2. 189258 2. 43636 1. 963815 2. 364218 2. 452235 2. 794473 2. 901156  
8. 036616 7. 600356 7. 317727 8. 124225 7. 870549 7. 130389 8. 236253 8. 663479 8. 417465

1. 453543 2. 054913 1. 591205 1. 915707 1. 904424 2. 199319 1. 765987 1. 702141 1. 748906  
7. 205426 6. 967714 7. 694073 7. 252105 7. 382233 5. 449923 7. 448637 7. 755157 7. 621186  
4. 96321 3. 541244 3. 85301 3. 820231 3. 698303 3. 257713 2. 890218 4. 615903 4. 896837  
2. 795504 2. 419216 2. 335709 3. 561958 2. 526553 3. 787861 3. 373821 2. 855262 2. 923999  
3. 130303 2. 816363 2. 908508 2. 411322 3. 850689 3. 227269 3. 696894 2. 472175 3. 089036  
2. 298825 1. 566896 2. 273584 2. 389301 1. 888759 2. 383705 2. 22539 2. 225309 2. 169892  
1. 699494 1. 451108 2. 3985 2. 093067 2. 386556 2. 234402 2. 159265 2. 46072 3. 236971  
1. 738949 1. 713948 2. 013598 1. 553531 2. 251512 1. 243902 2. 040523 1. 558266 1. 669528  
1. 840736 2. 07831 1. 701157 2. 043134 1. 880466 1. 819631 1. 955949 1. 742188 1. 714899  
2. 141235 2. 165084 2. 556 2. 474651 2. 22344 2. 631876 2. 421769 3. 647762 3. 472737  
1. 657437 1. 345023 2. 648602 1. 571713 1. 513172 1. 377418 1. 21963 1. 919985 1. 537945  
1. 301741 1. 262583 1. 916202 1. 548164 1. 434816 1. 929327 1. 002732 0. 853806 1. 670949  
7. 251252 5. 150367 4. 659985 5. 805647 4. 159407 7. 943106 6. 417016 2. 823631 3. 369057  
1. 619208 2. 3094 1. 471908 1. 536078 1. 395035 1. 449754 1. 332331 1. 463312 2. 05558  
2. 002053 1. 41906 2. 329851 1. 689632 1. 372754 1. 790432 1. 916994 1. 70356 1. 905191  
1. 982927 1. 952512 1. 508376 1. 752034 2. 301119 1. 836963 1. 747957 1. 857171 2. 63223  
1. 321921 1. 025302 1. 60047 1. 200062 1. 868409 1. 509003 1. 394643 1. 27879 1. 661825  
3. 060593 2. 770546 3. 643186 2. 91609 3. 082201 3. 212667 2. 707605 3. 350582 3. 440876  
1. 862427 1. 736937 1. 829781 1. 803664 1. 950677 2. 416583 1. 464225 1. 712853 1. 92774  
0. 964572 1. 609146 0. 906845 1. 101735 1. 061776 0. 768224 1. 442535 0. 634869 0. 944635  
1. 391148 1. 600784 1. 422367 1. 603752 1. 343665 1. 28999 1. 786182 1. 66993 1. 710314  
2. 575892 1. 882893 1. 377599 2. 324153 2. 180315 2. 426024 2. 079646 3. 744033 2. 369686  
2. 880748 3. 45959 2. 860243 2. 472268 2. 535081 2. 811194 3. 44962 2. 877001 2. 070748  
4. 772575 4. 102287 5. 480324 3. 953569 3. 285758 4. 284918 4. 948695 3. 095491 3. 405757  
3. 299546 3. 286323 3. 279641 2. 438049 3. 664816 2. 561481 2. 00246 2. 449902 2. 760506  
4. 172164 4. 728717 4. 208309 4. 789264 4. 54443 4. 38835 4. 649338 4. 382526 5. 31626  
2. 85415 2. 494142 1. 885766 2. 916541 1. 996876 2. 174106 2. 598022 2. 504451 1. 726399  
1. 294879 0. 877282 2. 767586 3. 376469 1. 415235 1. 885109 2. 448374 1. 403101 4. 535116  
2. 577873 3. 002306 3. 290231 3. 769696 2. 977378 3. 407517 2. 918448 2. 335962 3. 010478  
5. 511503 4. 578567 4. 479036 6. 575163 4. 76761 6. 516608 5. 888678 5. 310687 6. 025239  
2. 920763 2. 77289 1. 516862 2. 091738 2. 303368 2. 260398 1. 867561 2. 151324 1. 894036  
2. 543506 2. 484784 2. 083267 1. 941491 2. 005235 2. 615877 2. 500073 2. 511246 2. 854809  
4. 536282 3. 929583 4. 719218 3. 992953 4. 239969 4. 872245 4. 853673 4. 268602 4. 909912  
3. 785669 2. 709751 2. 978202 3. 043312 4. 691921 2. 400129 3. 003572 3. 21168 2. 629631  
1. 813094 1. 872302 1. 529219 1. 800108 1. 986017 1. 430524 1. 641878 1. 995906 2. 149688  
2. 417776 1. 578228 2. 700662 1. 586206 3. 402846 2. 630539 3. 379664 3. 192336 2. 018285  
1. 24759 2. 224083 2. 054089 2. 796149 1. 473715 1. 441618 2. 065222 2. 169103 1. 992892  
2. 215907 1. 815565 1. 792451 2. 019802 1. 848613 2. 799185 1. 649859 2. 458213 3. 357482  
2. 283649 3. 07893 2. 90789 2. 346674 2. 43734 3. 540087 3. 515672 1. 818296 2. 505733  
4. 583645 3. 164003 3. 674581 4. 559093 3. 953777 4. 06558 3. 840672 3. 755859 4. 157499  
5. 574518 5. 027849 4. 647106 5. 068379 4. 972011 6. 5367 5. 266956 5. 819959 5. 33093  
1. 318016 1. 256474 1. 070078 1. 206965 0. 732253 1. 168091 1. 022478 1. 288282 1. 500054  
3. 410208 2. 866393 3. 67187 2. 352442 3. 457945 4. 092272 3. 472884 2. 460806 3. 494835  
7. 688053 6. 20663 7. 451458 7. 542422 7. 203743 8. 630301 8. 125674 7. 793584 7. 931646  
2. 915634 3. 631944 3. 548707 3. 559806 3. 319074 2. 279556 3. 472734 3. 051369 2. 537542  
1. 031324 1. 930047 0. 841159 1. 135057 0. 838266 1. 039891 1. 175967 1. 046762 1. 432909  
3. 908634 4. 655683 4. 112497 3. 847347 4. 040259 4. 854666 4. 96531 4. 136032 4. 302432  
5. 200552 5. 493097 6. 162373 6. 78686 6. 638979 2. 578064 6. 479027 6. 588197 5. 682337  
2. 644268 2. 090061 3. 000694 3. 369133 2. 94301 3. 452988 2. 575429 3. 077072 2. 486585  
1. 669173 1. 131299 1. 323966 2. 615398 1. 801686 1. 866572 2. 027237 2. 05559 1. 074688  
1. 462224 1. 718133 1. 635202 1. 532973 2. 054205 1. 983105 1. 981968 1. 03808 2. 645206

1.753396 1.44496 1.043187 1.577511 0.912911 1.682312 1.853543 1.510046 1.506552  
1.128116 1.692229 1.49444 2.025437 1.885433 1.934428 1.304496 1.182059 2.065637  
2.33694 2.268283 2.087187 2.446591 2.265231 4.056357 1.942053 2.398416 2.192993  
3.041322 2.416251 2.311741 3.264477 2.729937 3.121481 2.137328 2.558441 3.710453  
3.008393 3.174555 1.724247 2.89983 2.517799 4.882916 4.108257 4.138333 5.660363  
2.679812 3.308952 2.828288 3.045428 3.359783 2.942728 2.2759 2.220089 2.544215  
4.203976 2.993332 3.838528 3.446145 4.439676 5.754147 4.660396 4.152068 6.008806  
2.709032 2.132308 2.720204 2.570698 3.061856 2.520644 2.758058 3.536496 2.844097  
1.199725 1.429418 1.139144 1.16515 1.438688 1.320559 0.971765 1.265391 1.10002  
3.543598 4.577454 5.220678 4.923368 4.680444 4.025596 5.456497 5.826551 5.059004  
5.264428 5.292108 5.811001 6.337592 4.787591 6.231698 5.391532 6.33004 5.128323  
3.627444 3.849387 3.441227 5.038386 4.216515 3.42982 5.778595 3.865513 3.993402  
3.357326 2.572226 4.063124 2.8001 3.969856 2.8466 4.170151 5.308069 3.564597  
1.576162 2.006883 1.378522 1.757765 1.236626 1.472585 1.361108 1.468864 1.569767  
3.130424 3.072573 2.340809 2.251763 2.201964 2.131167 1.529406 2.421473 2.511815  
3.321012 3.87447 3.446034 4.281446 3.095004 2.71168 3.049728 2.541999 2.644441  
3.06648 2.989083 3.745425 3.820456 3.121325 2.070192 2.670016 2.266096 3.731956  
6.737879 6.249838 7.25132 6.513247 4.384221 3.777279 6.113394 5.452954 5.332732  
5.30937 5.717182 5.00917 4.855309 5.606932 5.209212 4.25206 4.913966 5.241449  
1.914881 2.109992 1.663828 2.225482 2.51434 1.641788 2.105851 2.438469 2.248587  
10.04362 10.23913 10.07622 9.587071 9.772297 10.40312 10.24355 10.19628 10.02794  
3.06251 2.406658 2.444283 3.304573 2.046985 4.024226 3.279204 3.448297 3.354934  
2.820563 2.834276 2.892118 4.43657 1.928256 2.053617 2.277678 2.065397 1.863213  
2.476251 1.588896 1.630398 1.645308 1.5576 2.740479 1.38128 2.295703 1.948726  
2.824772 3.552936 3.169987 4.993595 5.312029 3.513379 3.560131 5.17331 3.894341  
1.404844 1.002397 1.144942 1.624596 1.411668 1.895746 1.508076 2.062784 1.014165  
2.464403 1.554704 1.883643 2.524735 1.957508 2.693161 2.61324 2.284995 2.377571  
1.95967 1.561177 1.680035 1.85884 1.641017 1.974223 1.654992 1.922227 2.165506  
2.521154 3.687559 3.247892 2.973295 3.024932 3.782777 4.000181 2.973807 3.034398  
4.590573 4.628411 4.741436 4.413678 5.481651 5.007498 5.374481 4.742896 4.525541  
4.384838 3.335922 5.209322 3.771678 3.895787 5.441889 5.627221 5.131702 5.718728  
4.558999 4.03788 4.438171 4.074877 3.649423 3.519888 4.602909 3.887305 4.063435  
1.434606 3.107283 1.23724 2.155747 3.031447 1.868762 1.849202 2.58522 2.238896  
2.049428 2.28262 1.749012 2.53049 2.108623 1.626118 1.701068 1.603328 2.042131  
2.066954 2.13801 2.502068 2.667586 2.285839 1.958039 1.98754 1.940252 2.495667  
4.150594 3.627178 4.04322 4.281191 4.070505 4.286803 5.315799 3.163785 3.901228  
2.732415 2.825295 2.886174 3.139662 3.356276 3.331787 4.017978 3.242942 3.325407  
2.359628 2.678728 2.653658 3.053956 2.788547 2.383962 2.451278 3.315986 3.212472  
2.131889 1.96415 1.788066 2.56256 3.657765 1.684926 1.469508 1.49414 1.506642  
5.011052 4.982687 5.035635 4.6715 5.101539 4.878635 5.632512 5.336877 4.979841  
1.351066 2.148833 2.929174 1.50611 2.462967 3.352728 2.779845 1.22049 3.297944  
1.495558 1.861993 1.739801 1.543559 1.190612 1.446084 1.550265 1.282684 1.218794  
2.786477 2.903824 2.066381 3.351487 2.392028 2.062101 2.588808 2.912197 2.351984  
1.886418 3.090271 2.907688 2.378381 1.348185 1.860561 2.159136 1.612426 1.71722  
5.411206 6.339811 4.668792 5.050703 4.715448 4.209526 5.174405 4.89325 5.322284  
4.575065 4.477733 5.116496 5.563707 4.605999 5.248183 5.23623 5.01431 4.817007  
2.714489 2.459171 2.43306 3.432254 2.409103 2.669492 1.943018 2.487949 2.619707  
5.371016 6.205075 6.188014 5.887038 5.870695 3.812981 6.672716 5.852659 5.171229  
5.88281 7.070421 6.109226 6.569423 6.628719 5.455227 6.236521 5.678989 5.814661  
3.447558 2.800292 3.384294 3.248208 3.079093 3.579548 2.811952 2.635651 2.729823  
1.214049 1.797699 1.096524 1.257204 1.51539 1.128688 1.754237 1.319925 3.047542

2. 344547 1. 920051 1. 509344 1. 145551 1. 12174 1. 254688 1. 492315 2. 028806 1. 594887  
3. 67117 3. 074249 3. 454672 3. 644358 4. 47079 4. 465638 3. 511449 4. 389311 4. 691034  
1. 99805 2. 668738 1. 840779 3. 248792 1. 783734 1. 946905 1. 882318 2. 79599 1. 670955  
2. 855505 2. 266485 1. 654649 3. 539646 2. 349544 2. 319734 2. 728791 3. 236594 2. 467395  
1. 291139 2. 291186 1. 452684 1. 732781 1. 819594 1. 912752 2. 823646 1. 389974 1. 711777  
1. 662608 1. 567464 2. 103962 1. 60841 2. 130214 2. 47124 2. 318051 1. 952491 2. 120005  
3. 060594 2. 842069 2. 575901 2. 14655 2. 64367 2. 74003 2. 932936 2. 649967 2. 85989  
4. 672976 2. 848917 3. 755289 3. 933162 4. 054439 4. 641586 4. 981967 4. 000984 4. 763307  
1. 083552 0. 903805 1. 282776 1. 770466 1. 595783 0. 894443 1. 563804 2. 262639 0. 940347  
2. 622848 3. 215685 3. 325137 4. 767988 2. 700876 2. 999729 2. 689294 2. 884991 2. 566534  
4. 183858 4. 026221 3. 405396 4. 067879 3. 840729 4. 740074 4. 287149 4. 955568 5. 669822  
4. 149107 4. 05467 4. 86686 3. 262081 3. 618396 3. 961099 4. 551805 2. 726487 3. 283033  
4. 244808 3. 197607 3. 572197 2. 636231 3. 77078 3. 86765 3. 531527 2. 895017 3. 675746  
4. 231816 3. 621179 3. 203301 3. 013745 4. 474996 2. 431925 2. 760314 4. 250434 2. 902334  
1. 204476 3. 27557 1. 561839 1. 059893 1. 079124 1. 450133 2. 384406 3. 005694 1. 395287  
1. 8461 2. 004083 1. 832951 2. 982664 2. 581891 1. 942337 4. 13175 2. 802306 2. 57798  
3. 525295 2. 671385 3. 849393 3. 661861 3. 851321 4. 256322 3. 325292 3. 678561 3. 818032  
2. 103935 2. 13894 2. 100074 2. 607344 1. 948706 1. 576395 1. 89648 2. 341789 2. 048961  
2. 013295 2. 902664 2. 123242 1. 587899 2. 305122 2. 212678 1. 858822 2. 833598 1. 886891  
2. 990853 3. 327842 3. 327632 3. 793065 2. 684472 2. 657429 2. 392007 2. 45169 3. 07881  
4. 393126 5. 086416 4. 538386 5. 227281 3. 511933 3. 600648 4. 876134 4. 423497 4. 730268  
2. 617473 4. 052742 3. 591301 3. 750207 3. 117827 2. 674449 2. 38096 2. 42065 2. 665218  
4. 200649 4. 632463 4. 474766 3. 654009 3. 950213 3. 048826 4. 445924 4. 231155 4. 955196  
1. 930719 1. 795757 2. 218714 1. 764895 1. 908895 1. 654501 1. 67234 1. 403563 1. 132254  
3. 013676 1. 861886 1. 449342 2. 478026 2. 391687 2. 244375 1. 52933 1. 950651 2. 295175  
3. 398757 2. 600914 1. 912147 1. 763655 1. 717563 1. 589272 2. 067676 2. 224355 1. 933583  
3. 047463 3. 287696 3. 194417 3. 951707 3. 147353 2. 768307 2. 601474 2. 323279 2. 833234  
1. 15723 2. 049964 1. 412981 1. 830991 1. 891552 1. 948334 1. 776121 1. 518473 1. 143694  
7. 343404 6. 81232 6. 534648 7. 395558 6. 935778 7. 332402 7. 455803 7. 32833 7. 07382  
2. 83328 2. 38407 2. 656603 3. 211626 3. 537987 2. 865018 2. 171809 3. 026195 2. 403094  
3. 273886 2. 924202 3. 445639 4. 633391 3. 909861 3. 025024 3. 081835 3. 255434 3. 608975  
1. 651547 2. 834685 2. 024122 1. 429036 2. 506201 2. 933572 1. 521635 1. 862227 1. 863063  
4. 913126 6. 158923 5. 963592 6. 453537 5. 414095 3. 897672 5. 906096 6. 358586 6. 166335  
3. 961118 3. 823531 3. 945941 3. 300788 3. 77286 4. 31579 3. 101173 3. 868145 3. 656669  
3. 375208 3. 738038 4. 497854 4. 317269 3. 168986 3. 510417 4. 314992 3. 44175 3. 763649  
6. 357316 4. 372756 6. 084603 5. 377067 4. 835 5. 936091 6. 291893 4. 718785 4. 793987  
1. 394015 1. 868427 1. 420927 3. 78011 0. 956134 2. 631886 1. 229157 3. 108662 1. 764526  
1. 654756 1. 165127 1. 174059 1. 190032 1. 141709 1. 208778 0. 973236 0. 844316 1. 073114  
2. 736405 3. 35924 2. 991904 2. 228573 2. 585546 2. 781159 2. 583334 3. 43966 2. 612831  
2. 38054 2. 00014 2. 994677 1. 724229 1. 618828 1. 995026 2. 422049 1. 955028 1. 482944  
3. 536053 3. 592257 3. 010504 2. 779478 3. 333126 1. 667857 1. 968913 2. 886618 2. 642145  
6. 525942 7. 344794 7. 035576 6. 723869 6. 416554 6. 945231 6. 429975 7. 274739 6. 570618  
0. 934187 1. 366607 1. 44766 1. 673134 1. 734524 2. 277382 1. 364772 1. 566895 1. 408343  
2. 221405 2. 293595 2. 210462 2. 307821 2. 355038 2. 213051 2. 171504 2. 004207 2. 067955  
1. 825546 1. 411751 1. 678597 2. 067518 1. 514165 1. 555002 1. 694442 2. 357064 1. 520439  
1. 379699 1. 631657 1. 209239 1. 578177 1. 616097 1. 383884 1. 42371 1. 567127 2. 680696  
1. 714559 1. 621024 2. 006696 1. 956439 1. 661663 1. 924357 1. 832524 2. 064257 1. 882895  
4. 40714 4. 379604 5. 667577 5. 758167 5. 647229 3. 788287 3. 931382 5. 504179 6. 004231  
4. 900934 4. 013862 5. 957034 4. 896906 5. 518379 5. 146392 5. 973185 5. 83929 5. 990023  
4. 358468 3. 492573 4. 05811 5. 045891 2. 768317 4. 083993 3. 276025 3. 393621 3. 987915  
4. 319883 2. 46105 3. 49278 2. 265671 3. 051619 2. 040592 1. 675153 1. 611148 1. 718434

1. 357287 1. 006825 1. 060882 1. 032564 1. 127376 1. 680304 0. 956338 1. 555307 1. 117855  
1. 827757 2. 834031 2. 439068 1. 692838 2. 722755 2. 738379 3. 91015 2. 614418 2. 227767  
5. 145092 5. 6055 6. 243899 5. 483682 5. 365911 5. 697567 5. 20366 5. 640339 5. 413616  
1. 949119 2. 202117 2. 455212 2. 194211 2. 509442 2. 107704 2. 018788 3. 148684 1. 893311  
3. 008297 3. 364134 3. 24069 3. 405667 2. 16243 2. 812366 2. 639179 2. 601389 3. 365972  
3. 555045 3. 042655 3. 973242 3. 588746 3. 307008 4. 324437 4. 075617 5. 043718 3. 865388  
2. 716996 2. 432942 1. 662525 2. 045178 2. 223592 2. 680114 2. 145261 1. 702817 2. 122649  
1. 98134 2. 665783 2. 293805 2. 813039 2. 474945 2. 804978 2. 49481 3. 001269 2. 867146  
4. 370626 3. 187124 2. 763105 3. 786586 2. 951959 4. 633328 3. 039497 2. 789778 2. 807875  
4. 530213 5. 445932 5. 496227 4. 504221 4. 297696 6. 127248 6. 987182 4. 178133 5. 515731  
1. 245358 1. 037476 1. 623626 1. 548707 1. 355874 1. 619575 1. 347673 1. 898603 1. 389761  
5. 187236 4. 920319 5. 707033 4. 58979 5. 601724 5. 483617 5. 981076 4. 818679 4. 209163  
2. 012094 3. 065553 1. 694135 2. 362303 2. 401615 1. 579796 2. 488995 2. 400028 2. 353316  
6. 441099 6. 228815 6. 87041 5. 796616 6. 267148 6. 567165 6. 622686 6. 461248 6. 013939  
1. 012211 1. 479557 2. 619506 2. 437276 1. 251914 2. 306502 1. 295488 1. 861042 1. 081618  
2. 314914 2. 867381 3. 703957 2. 317644 2. 215863 2. 156671 1. 651804 3. 241411 2. 053065  
5. 984216 4. 981433 5. 895624 5. 652796 4. 795783 6. 439203 6. 474113 6. 577512 6. 976299  
2. 406552 2. 40493 2. 201811 2. 33445 2. 192875 1. 994783 2. 494744 2. 741285 2. 407842  
2. 239702 2. 426131 2. 251618 2. 816403 2. 304832 2. 083743 2. 730428 1. 577325 2. 62392  
10. 35492 10. 29031 10. 43025 9. 947114 9. 877355 8. 913303 11. 41806 11. 26992 10. 97083  
2. 86219 1. 779846 2. 186918 3. 969891 3. 514105 2. 938866 1. 961185 3. 486839 2. 893153  
0. 889565 1. 393273 2. 492889 1. 008622 1. 884907 0. 899486 1. 473282 0. 985275 1. 663376  
2. 783733 3. 495824 2. 369211 3. 160604 2. 988966 4. 32806 3. 203215 3. 817954 4. 102053  
3. 94353 3. 805036 2. 254036 2. 797088 2. 372416 1. 64705 1. 553275 2. 04087 3. 414419  
1. 122065 1. 12654 0. 967479 1. 173884 0. 988025 1. 21527 1. 263033 0. 825016 1. 423856  
1. 62744 1. 942408 1. 56149 1. 410188 1. 864873 1. 162907 1. 527823 1. 52622 1. 387187  
2. 392558 2. 346636 2. 585436 2. 333176 2. 856524 3. 092905 1. 926497 2. 883885 1. 989115  
4. 364583 3. 668436 3. 471897 4. 135453 4. 019718 4. 701671 4. 803868 5. 608548 5. 748897  
1. 62096 1. 861571 3. 271203 1. 723888 2. 335152 1. 816009 1. 581636 1. 121998 2. 873922  
5. 566892 6. 190459 5. 72156 4. 606348 5. 127607 5. 085878 6. 732002 5. 892441 5. 42864  
2. 24302 1. 618906 2. 564671 1. 934072 1. 885404 2. 24037 2. 063188 2. 561386 2. 77942  
1. 502267 1. 507491 1. 52855 1. 433601 1. 433605 2. 296573 1. 300012 1. 927371 1. 668029  
3. 672838 3. 242527 3. 315881 4. 293767 2. 52553 3. 366148 3. 599085 3. 106393 3. 925526  
1. 976342 2. 095517 2. 286088 2. 347551 2. 022216 1. 901766 2. 341266 2. 107421 2. 30421  
3. 345664 3. 408125 3. 676463 3. 515242 3. 330549 3. 56499 2. 849222 3. 888858 3. 633826  
2. 305506 2. 702193 2. 336262 2. 5897 1. 967059 2. 369288 2. 082217 2. 000716 2. 095456  
2. 187733 2. 204927 2. 850341 1. 506826 2. 031647 3. 034845 1. 709363 1. 403256 1. 340804  
3. 083807 3. 195466 2. 673205 2. 605704 2. 304365 2. 03576 2. 253015 2. 485074 2. 875088  
3. 282435 3. 429946 3. 957197 2. 663345 3. 708098 3. 841677 3. 42664 3. 475147 3. 992146  
1. 583939 1. 98737 1. 771663 1. 833302 1. 708714 1. 839473 1. 610715 1. 558168 1. 282703  
2. 226208 2. 183446 2. 386917 1. 972813 2. 568479 2. 188802 2. 017779 3. 155015 2. 45518  
1. 671348 1. 566048 1. 377374 2. 09614 1. 442739 1. 187097 2. 382709 1. 308498 2. 987402  
8. 432599 8. 757772 8. 460743 8. 555722 8. 5417 8. 248143 8. 850314 8. 44077 8. 750229  
6. 227572 4. 61965 4. 145252 6. 369898 5. 815322 6. 542661 6. 388032 6. 103009 6. 338425  
1. 67194 1. 378817 1. 550505 1. 339727 1. 242649 1. 264079 1. 274971 1. 164649 1. 181629  
2. 146477 1. 483849 1. 657499 1. 788001 1. 55149 3. 167769 1. 613392 2. 264802 1. 481883  
2. 404456 1. 075884 0. 933705 1. 337503 2. 348204 1. 072376 2. 165606 1. 639796 1. 370546  
2. 10869 1. 994932 1. 514475 1. 851229 1. 989363 1. 73117 1. 789213 1. 888581 1. 577329  
2. 691276 3. 044538 2. 260496 3. 288774 3. 778906 3. 616877 2. 95907 3. 250011 2. 465789  
1. 608708 1. 628361 1. 607561 2. 899797 1. 558807 2. 325649 1. 498571 1. 390947 1. 456452  
2. 394129 2. 04383 1. 009099 1. 61472 1. 665796 1. 514482 1. 44033 1. 288488 2. 537837



2. 630644 1. 574307 2. 098202 2. 096039 1. 683774 1. 625612 1. 963922 2. 072078 1. 968228  
1. 261835 2. 218909 1. 675351 3. 186383 1. 363112 1. 515976 1. 534369 2. 088131 2. 680439  
1. 372174 2. 046491 1. 861513 1. 83644 2. 905831 1. 572561 2. 766938 1. 862991 2. 428187  
3. 719899 4. 259703 2. 863658 3. 458416 3. 141691 4. 828372 4. 033957 3. 280975 4. 097218  
1. 357544 1. 889885 1. 581728 2. 200358 1. 09826 1. 387992 1. 77745 1. 758148 1. 226903  
1. 742671 3. 643065 1. 857733 1. 814787 3. 175808 2. 952144 2. 893565 3. 095745 3. 685618  
3. 916294 3. 478273 5. 606428 4. 324808 3. 556355 4. 814999 3. 427091 5. 170754 4. 475552  
0. 923736 0. 55788 0. 763564 0. 661455 0. 297837 0. 787851 0. 907427 1. 038053 0. 622381  
1. 608428 1. 628865 1. 473738 1. 768523 2. 198793 1. 58968 1. 349033 1. 898793 1. 985572  
7. 295158 7. 453189 7. 653598 7. 475086 7. 108319 7. 827701 7. 300146 8. 172259 7. 580382  
1. 850714 2. 32364 2. 175169 1. 912612 1. 936377 2. 23072 1. 739993 1. 961041 2. 370656  
4. 621028 4. 249588 4. 869236 4. 513437 5. 058045 4. 939355 4. 004095 4. 978054 4. 995574  
1. 381528 0. 953669 0. 846288 1. 554695 1. 226005 1. 18361 0. 987973 1. 182746 1. 223586  
8. 515613 8. 671416 8. 526287 8. 128915 8. 571842 8. 251388 8. 525955 8. 247664 8. 341942  
5. 378719 3. 877738 4. 453237 4. 540761 4. 161082 5. 531393 4. 318398 4. 858111 5. 034689  
1. 65674 1. 58799 1. 977003 2. 126978 2. 11392 1. 745472 2. 279375 1. 546258 1. 197199  
1. 708965 1. 5343 1. 821252 1. 788922 1. 8954 1. 887936 1. 779092 1. 7876 1. 885611  
2. 561281 3. 542734 2. 581386 2. 787735 2. 506216 2. 508696 1. 895302 1. 757824 2. 807242  
1. 992905 1. 191601 1. 335364 1. 775558 1. 310771 1. 824438 1. 779593 1. 716002 1. 10483  
6. 343228 6. 663975 6. 768902 5. 679052 6. 759946 6. 05305 5. 75687 6. 263499 6. 458367  
1. 822901 1. 629875 1. 479962 1. 593518 1. 806002 1. 444136 2. 564635 2. 258608 1. 734922  
2. 348386 1. 333273 1. 211915 1. 818216 2. 499908 1. 300645 1. 090602 1. 95596 2. 296299  
2. 396853 3. 227057 2. 905074 2. 186246 3. 168651 2. 981623 2. 614557 2. 559026 2. 393105  
2. 389452 1. 489228 1. 519144 2. 166119 1. 324151 1. 24196 1. 454251 2. 191036 1. 785425  
1. 397435 1. 601801 1. 553257 2. 01019 1. 069701 1. 393574 2. 439755 1. 643327 2. 161459  
1. 752403 2. 699799 1. 407236 1. 323345 1. 219692 1. 90826 1. 151071 1. 455381 2. 111031  
2. 378599 2. 891694 2. 164087 2. 150637 2. 30502 2. 45278 2. 151818 2. 720858 1. 858436  
2. 89912 2. 137328 2. 864751 2. 630308 2. 485794 2. 869844 2. 403756 2. 159208 2. 61979  
2. 006418 2. 142976 1. 682993 3. 401229 1. 706408 2. 150869 2. 889029 2. 022929 2. 639851  
2. 192253 1. 482755 1. 771353 2. 439153 1. 839041 2. 426586 1. 844989 1. 885652 0. 98418  
3. 438951 3. 453272 4. 005974 3. 135513 3. 473034 4. 505622 3. 589029 3. 997207 3. 067942  
1. 869062 1. 888205 1. 902814 2. 058741 1. 68378 2. 016951 2. 80049 1. 991865 2. 270461  
1. 893295 2. 445192 2. 273998 2. 141144 1. 695011 1. 493859 2. 244128 1. 961709 1. 101301  
4. 247423 4. 986644 3. 277998 4. 854626 4. 375741 5. 32186 4. 616349 3. 612902 4. 638146  
6. 416198 6. 522072 6. 468764 6. 861228 5. 955362 6. 377998 6. 441911 6. 707149 6. 585531  
1. 261505 1. 271312 0. 959219 1. 1299 1. 077814 1. 112282 1. 240354 1. 410118 1. 039569  
4. 132498 4. 310309 4. 501961 4. 115625 3. 489568 5. 871337 5. 727874 4. 551451 4. 827916  
4. 387775 2. 746832 3. 79247 3. 768145 3. 684316 5. 042677 3. 193414 3. 543936 3. 866084  
2. 302674 1. 897268 2. 845554 2. 933942 3. 114883 1. 619426 2. 198083 1. 858298 2. 18805  
1. 167726 1. 172401 1. 168652 1. 798887 1. 618117 1. 174226 0. 830095 1. 124247 1. 663958  
1. 225928 2. 386127 2. 296222 2. 50114 2. 392459 2. 211095 2. 055766 2. 303509 2. 719717  
3. 217815 3. 709129 3. 226442 3. 888489 3. 639994 3. 982181 3. 549232 3. 870402 3. 408094  
1. 43746 2. 208389 1. 71442 1. 869138 1. 826355 2. 091819 1. 587504 2. 092434 1. 533782  
2. 382471 3. 136559 2. 834313 2. 370442 2. 504293 2. 681861 3. 330606 3. 475644 3. 253488  
2. 99461 3. 149341 2. 658233 2. 408417 3. 131972 2. 909253 3. 230073 3. 364948 3. 373067  
1. 281491 2. 175298 1. 582015 1. 530574 1. 469826 1. 479431 1. 363483 1. 237155 1. 490982  
4. 356513 3. 833669 4. 333581 4. 226159 2. 075347 4. 604213 2. 813741 2. 528321 3. 103451  
2. 728228 2. 330392 2. 840598 2. 886964 2. 142027 4. 066182 1. 122822 2. 439836 4. 477111  
1. 655379 2. 029928 1. 425195 1. 903371 1. 57961 1. 616558 1. 639985 1. 936332 1. 409018  
5. 219047 4. 47675 4. 792384 3. 550735 3. 927913 4. 748248 3. 927079 3. 931038 3. 397016  
4. 424006 4. 69036 4. 974294 5. 375812 5. 416795 4. 953267 5. 215341 5. 555823 5. 088982

2.598565 2.211758 1.423219 2.6407 1.799679 1.894005 0.909856 2.406931 2.231352  
2.571016 2.265551 2.11869 2.541124 3.245849 2.727209 2.491829 3.427925 2.277918  
2.167674 3.083143 1.716773 1.24286 3.266064 1.932236 1.68863 3.501624 2.2247  
0.82285 1.113472 1.041993 0.944002 1.283358 1.387582 0.627571 0.971947 0.873902  
1.09276 2.821166 1.619833 1.420497 1.727203 1.609618 0.927159 1.54075 1.529713  
1.257498 1.284782 1.2942 1.715799 0.947425 1.488207 1.532469 1.644317 1.490329  
1.719962 1.9385 1.687243 2.19907 1.990483 1.622779 2.335123 2.270252 2.136623  
3.304153 3.448333 2.372254 3.945489 3.644042 4.96973 1.785299 3.332929 2.813807  
1.79262 1.989432 1.260764 1.454886 1.403868 1.518601 1.386178 1.459825 1.24683  
1.824477 1.657562 1.644686 1.623107 2.117474 1.619868 1.428922 3.332451 1.183318  
6.73944 6.584901 6.458389 7.080153 6.897675 6.773343 6.653665 6.811952 6.349095  
1.125847 0.619662 1.041303 1.85621 1.156931 1.759918 2.607585 1.814963 1.209686  
8.906186 9.079851 8.546269 8.864284 8.423448 9.119288 8.614441 8.906315 8.631894  
3.764335 2.997136 3.349564 3.169984 2.831213 2.801643 2.679302 2.359362 3.216421  
2.505622 3.04454 3.128826 1.750031 3.509354 2.642935 1.784368 2.707229 2.512007  
4.295918 3.882031 4.200271 4.018306 4.555499 3.161077 3.102115 2.976236 3.948399  
2.957253 1.720311 2.177342 2.108314 1.75147 2.0885 1.69914 2.280575 2.791663  
2.133112 3.169422 3.414195 4.599039 3.795696 4.944282 3.595172 4.527185 2.401694  
2.255688 2.828112 3.253124 2.223296 3.96946 4.269878 3.038314 2.536068 3.184385  
3.027042 1.739969 2.139344 1.531874 3.193604 2.415214 1.665428 2.464699 1.852593  
4.20792 4.538088 3.664497 3.610671 3.791639 4.554697 3.700256 3.577824 4.99861  
1.47447 1.509193 1.530409 0.733625 0.726595 1.490141 0.660055 1.054621 1.638231  
5.722797 5.06134 7.022845 5.28903 5.898458 5.909657 5.719902 6.300855 6.414466  
9.225878 8.30342 8.887602 8.727581 8.777191 9.861716 9.034825 8.092756 8.322812  
2.298681 1.362245 1.897742 1.82551 2.44508 1.654483 2.709661 1.681241 2.483558  
1.907415 2.097489 1.577561 1.833389 1.581035 1.626625 1.432586 2.032555 2.203697  
1.512816 2.310926 2.12425 3.49454 1.7951 3.021034 1.874116 2.088813 3.162262  
4.661977 3.182673 3.040483 3.302002 2.928093 3.117326 3.868166 3.344448 2.898918  
7.059073 6.066803 5.410613 4.033893 4.502354 4.071087 5.599672 5.236706 6.123465  
1.273887 1.665037 1.804763 2.138327 1.156762 1.606674 1.311394 1.2799 1.269643  
8.504439 7.464716 8.842123 8.443854 8.362086 9.465775 9.076306 9.104337 9.046443  
2.292027 1.313615 1.756129 2.723905 1.913806 2.816756 1.64386 1.688278 1.827122  
7.154934 7.707505 7.518489 7.082116 7.239482 5.737258 7.443769 6.868583 7.022253  
6.769603 6.306417 6.201817 6.530372 6.650766 6.169737 5.925774 5.875468 5.021038  
1.967501 2.189691 2.076676 2.668552 2.584868 2.288475 2.313821 2.239316 3.11452  
1.976545 2.037566 2.434824 1.88656 2.318328 2.044841 2.23468 2.860432 1.993997  
1.125165 1.650035 1.05355 1.702632 1.497219 1.117768 1.182285 1.296329 1.844446  
1.604165 2.284121 2.207821 1.812856 1.455547 1.787534 1.54786 1.28329 1.964258  
3.158927 4.011048 2.891513 3.114482 4.241296 3.541045 3.137261 3.690256 2.579376  
2.415583 2.254461 2.349595 2.966934 2.018371 1.522464 2.121312 1.638481 1.857153  
2.242364 1.51527 2.048001 1.940327 3.099696 2.404361 1.949803 1.673388 1.862037  
2.539083 2.72873 2.477383 2.714545 1.828394 2.756813 1.633814 2.132316 2.553127  
3.255226 4.053154 3.750973 4.929806 4.488453 3.454429 4.060011 4.161479 3.996331  
3.16526 3.179065 3.304258 3.416877 3.491526 3.00417 3.716102 4.104578 2.556405  
5.725546 7.244154 6.539108 6.041685 7.217307 6.547438 6.176267 6.252882 7.178505  
2.115224 2.422833 2.352332 3.150148 2.041079 3.764724 2.063059 2.143562 3.596797  
1.966247 1.247544 1.351103 1.594223 1.472829 1.11013 1.476156 1.424784 1.344269  
2.726165 3.115976 1.969589 3.189514 1.855871 3.181424 2.328502 2.555652 2.23922  
3.139333 4.395332 2.447482 4.440567 3.443105 3.254857 3.065346 4.083169 3.172646  
2.236679 1.243581 1.19285 1.657142 1.697452 1.400219 1.599671 1.499557 1.696628  
3.714079 1.572124 2.931294 3.017427 1.82651 3.106905 1.492532 1.244597 2.006001

1. 167166 1. 851454 1. 78599 2. 135062 1. 303613 1. 317787 2. 257794 2. 215216 1. 687471  
5. 561372 5. 643342 4. 759347 2. 947857 3. 142526 3. 303841 2. 98181 3. 326551 2. 918609  
6. 829016 7. 161732 6. 93804 5. 599676 5. 671336 7. 325485 5. 836026 4. 377421 5. 187304  
1. 755672 1. 456873 1. 321454 1. 455671 1. 432329 1. 263738 1. 243526 1. 573776 1. 398742  
3. 481648 2. 607385 3. 512114 3. 530841 3. 184928 2. 991141 4. 840014 3. 826205 4. 773389  
3. 225734 2. 326882 2. 072691 2. 119122 1. 814865 2. 371005 2. 003857 1. 428042 1. 692679  
2. 089673 2. 585205 2. 226398 3. 131947 3. 207505 2. 723155 3. 008335 2. 166101 2. 261763  
4. 880373 5. 317785 5. 160609 4. 670053 5. 025207 3. 979314 4. 112337 5. 353556 4. 431751  
4. 20816 3. 81308 3. 976096 4. 159539 4. 82302 3. 219986 2. 434866 3. 478965 4. 317386  
2. 369562 2. 635018 2. 589821 2. 786825 2. 124087 2. 16147 2. 901938 2. 166945 2. 745666  
1. 939037 1. 294264 1. 473301 2. 907124 2. 340316 1. 780243 1. 244251 1. 099114 1. 531983  
1. 634638 0. 849694 1. 138077 3. 175859 1. 318522 1. 060945 1. 646295 1. 626934 1. 738263  
2. 457695 2. 098475 1. 621153 1. 880473 4. 413311 2. 293156 1. 522753 1. 854234 1. 554625  
2. 632882 1. 880926 2. 038963 2. 237701 2. 425592 2. 884804 2. 55157 2. 50413 2. 62006  
7. 627794 8. 35768 7. 425653 7. 615878 7. 95034 8. 260011 8. 098867 7. 887092 8. 319151  
2. 054559 1. 604917 2. 594389 2. 926639 2. 085569 2. 970775 3. 649199 1. 536994 2. 307102  
3. 696247 3. 293428 2. 716237 2. 943472 3. 62863 2. 859376 3. 405737 2. 903961 2. 60317  
5. 566738 5. 980092 5. 816931 5. 51605 5. 837741 4. 906662 5. 07625 5. 832934 4. 910114  
7. 22612 4. 455472 5. 670097 4. 401764 3. 866633 3. 34764 5. 269521 2. 413962 2. 078945  
1. 966824 1. 564896 2. 035797 1. 94316 1. 337792 2. 989428 2. 191571 2. 166702 2. 032625  
5. 87726 6. 22808 6. 20009 4. 25867 4. 620013 4. 232078 4. 938905 4. 290893 3. 927599  
5. 82622 6. 417977 5. 787038 6. 978231 7. 519777 3. 24798 4. 508909 4. 467858 4. 974789  
7. 162408 7. 739002 7. 536575 7. 269778 8. 263688 6. 39662 5. 737997 5. 275592 6. 284232  
5. 566637 5. 850755 5. 833338 6. 011725 5. 945303 7. 563575 7. 78246 6. 834796 7. 281637  
1. 32275 1. 292812 1. 360877 1. 704932 1. 771995 2. 497308 1. 406073 1. 743113 1. 984675  
1. 603952 1. 622481 1. 801993 2. 913767 1. 521965 1. 686084 1. 222438 1. 300936 1. 149657  
1. 310044 1. 255674 2. 428226 1. 950982 2. 705842 1. 936409 1. 337274 1. 153782 1. 559465  
1. 567173 1. 595243 1. 678222 1. 124452 2. 522667 1. 994519 1. 938947 2. 061409 1. 72389  
2. 238774 1. 4871 1. 452211 1. 305086 2. 283697 2. 168123 2. 172098 1. 358498 1. 271897  
3. 429927 4. 414902 2. 554915 2. 643827 4. 240505 3. 382929 3. 396101 3. 595787 2. 91934  
2. 428132 2. 515427 3. 06249 2. 307203 2. 194216 1. 456327 2. 125941 2. 836178 2. 441027  
4. 989384 6. 391471 5. 686263 6. 758196 6. 656353 3. 230129 5. 519644 4. 597699 5. 524648  
3. 087197 4. 666527 3. 140201 3. 52872 4. 102819 5. 43773 5. 879755 3. 587608 5. 259248  
3. 966456 4. 365419 3. 769158 2. 990795 4. 784369 3. 064247 4. 778092 3. 695774 3. 409036  
1. 734175 1. 19911 1. 370614 1. 262181 1. 768271 1. 68937 1. 904477 2. 920715 1. 169567  
1. 779586 2. 299616 2. 07695 1. 809837 1. 333203 2. 096325 2. 359568 2. 061183 1. 454632  
3. 61904 2. 516382 3. 673405 1. 420721 2. 760061 2. 843805 3. 408601 2. 091334 2. 805416  
6. 568693 7. 075663 5. 723165 5. 922878 6. 959814 6. 670621 5. 969632 7. 362764 7. 771306  
3. 983544 3. 158632 2. 331649 1. 662013 2. 635416 5. 497544 2. 074524 1. 932595 1. 543089  
0. 8887 0. 905236 0. 85467 2. 299138 0. 828682 0. 82381 4. 603828 0. 815244 1. 271768  
6. 045832 5. 60546 5. 899793 6. 326672 6. 564953 6. 516875 5. 917803 6. 809066 6. 244067  
3. 951392 4. 694398 4. 100782 4. 322256 4. 02944 5. 268909 4. 121524 4. 131516 3. 65278  
5. 252256 5. 358898 5. 47552 5. 128194 6. 222517 4. 369262 6. 200742 5. 227325 2. 605144  
6. 020288 6. 775582 5. 854632 6. 110088 6. 190492 5. 84399 6. 846168 6. 407053 6. 32461  
3. 758326 4. 798529 4. 603892 3. 649164 4. 024889 3. 791011 4. 399027 4. 991697 4. 449212  
1. 650648 1. 78929 1. 691657 2. 277007 2. 092611 2. 15455 2. 263234 2. 302493 2. 147094  
8. 365807 7. 708086 7. 987719 8. 450484 8. 272714 7. 981737 8. 619569 7. 799722 8. 027284  
5. 596286 4. 234242 4. 913997 4. 991083 5. 125531 6. 478092 4. 478763 6. 510555 6. 340238  
1. 037489 0. 965189 3. 413519 3. 251421 1. 696576 1. 533676 0. 777955 1. 7337 1. 421823  
3. 225705 2. 923542 2. 461974 2. 428315 2. 189541 1. 990901 2. 277674 3. 025192 3. 046545  
1. 968068 2. 303366 1. 869143 2. 84929 1. 944676 1. 730687 2. 300295 2. 31513 1. 775369

1. 075545 1. 405078 1. 184525 1. 459061 0. 879511 0. 922655 1. 26756 1. 529971 1. 184614  
3. 897342 5. 967333 4. 055838 3. 170038 3. 993731 3. 266156 2. 857165 2. 538759 4. 082745  
5. 767526 4. 241515 3. 702758 5. 449235 5. 902113 7. 122856 6. 53547 6. 69983 7. 597608  
4. 181498 4. 959065 3. 865551 5. 663015 5. 346918 5. 449011 4. 311426 4. 660871 4. 783032  
1. 618625 1. 093354 1. 467076 1. 436288 1. 455006 1. 526645 1. 211498 1. 161124 1. 181923  
4. 42837 4. 560893 2. 404662 1. 449264 3. 910678 1. 687983 2. 223292 1. 999273 2. 725759  
6. 789382 6. 949015 7. 365831 7. 147669 7. 539426 7. 200403 6. 949111 6. 853826 7. 315664  
1. 418163 1. 410634 1. 660987 1. 898834 1. 586033 2. 558597 1. 695523 1. 989859 1. 570544  
6. 040766 4. 869649 4. 616441 4. 235232 5. 644483 4. 71136 4. 661901 4. 898299 3. 87271  
5. 648809 6. 266413 6. 527181 6. 170449 6. 173922 6. 135185 6. 010589 7. 216917 7. 428472  
3. 323406 3. 636136 4. 49605 2. 806511 3. 185979 3. 011109 3. 57965 4. 224881 2. 957901  
3. 625309 2. 168956 1. 950534 2. 974452 3. 269625 4. 997264 3. 290795 2. 28104 4. 291138  
3. 098205 2. 813995 2. 803931 3. 208558 3. 857883 2. 520915 2. 296795 2. 492759 2. 425478  
4. 857923 4. 605388 5. 034678 5. 407399 4. 418372 5. 112423 4. 928169 4. 702386 4. 973154  
1. 862081 0. 991946 1. 031172 0. 998297 0. 634995 1. 102592 1. 070287 1. 14803 1. 09456  
4. 586041 4. 584978 4. 729565 4. 352334 4. 33472 4. 761099 5. 889884 6. 250026 5. 949406  
6. 470271 6. 184071 6. 007228 5. 332067 4. 561704 6. 756672 6. 377532 6. 916644 6. 243581  
4. 952821 5. 436031 3. 207343 5. 965944 4. 196325 5. 458617 4. 581628 4. 344037 5. 71407  
4. 447631 4. 583408 4. 033763 3. 655782 4. 92324 3. 655547 6. 642487 4. 81541 2. 946869  
6. 547094 5. 831899 6. 362184 6. 384363 6. 514753 6. 517499 7. 138747 6. 652593 6. 8144  
3. 499119 3. 854617 4. 515845 4. 305239 2. 976732 4. 83735 3. 071781 3. 738088 3. 214201  
1. 826463 1. 714947 1. 347875 2. 221302 1. 364807 3. 050896 1. 753757 2. 042768 1. 754915  
5. 130703 6. 314803 4. 952882 5. 333 5. 401033 6. 723345 4. 902566 5. 588447 5. 272816  
2. 651818 2. 239245 2. 144588 2. 901669 2. 231539 3. 166914 3. 024719 2. 953836 3. 488148  
5. 787489 5. 128032 5. 73711 6. 059564 5. 777791 5. 806384 5. 778878 5. 485105 5. 419335  
3. 859475 5. 775135 4. 955287 5. 035746 5. 467637 4. 031432 3. 744011 5. 176851 4. 698079  
1. 102 1. 205928 1. 588004 0. 731976 1. 434929 1. 371898 1. 616634 2. 358871 1. 761622  
5. 453533 4. 35993 4. 53572 4. 981294 4. 308091 3. 548387 4. 593325 3. 907771 3. 740018  
4. 605814 3. 537535 4. 576069 5. 536855 4. 527287 4. 306147 6. 208004 4. 745804 4. 780499  
1. 37172 0. 83746 0. 763247 1. 103887 1. 186796 1. 229404 1. 262797 1. 067547 0. 848812  
5. 637224 4. 962802 5. 900294 5. 225961 4. 663765 5. 230999 3. 426918 4. 741399 5. 078638  
1. 225071 1. 040801 1. 328425 1. 139009 1. 172819 1. 400087 1. 273489 1. 91032 0. 98471  
4. 153097 4. 469915 4. 584136 4. 065911 5. 16844 2. 174691 3. 111712 2. 688531 2. 370433  
1. 903166 2. 171589 1. 426611 2. 688681 1. 743664 2. 265521 2. 043316 2. 030249 2. 594582  
5. 933134 5. 248869 5. 769751 4. 256281 5. 712064 5. 182771 4. 302564 4. 883152 4. 222121  
1. 474179 2. 09105 0. 999727 1. 404089 1. 42199 1. 069283 1. 529445 2. 444658 2. 523209  
2. 509177 2. 670366 3. 095798 2. 416275 2. 743149 3. 002305 2. 296749 2. 103942 2. 070367  
1. 074994 1. 657424 1. 38073 3. 002759 1. 676591 2. 375445 2. 167506 1. 526419 2. 731463  
5. 507186 5. 122973 5. 783855 5. 054761 4. 445887 5. 056802 5. 516549 4. 750278 3. 525881  
5. 367257 5. 396323 5. 142621 5. 404738 5. 947981 4. 103661 5. 867721 5. 459094 6. 151194  
2. 095283 2. 166728 1. 974945 2. 686717 1. 769465 1. 760837 1. 689151 1. 427192 1. 971788  
1. 570015 1. 736526 1. 276978 1. 508433 1. 675899 1. 152663 1. 031307 1. 414381 1. 197719  
2. 149905 2. 038367 2. 046416 2. 319043 1. 823579 2. 160352 2. 664908 2. 24657 1. 773797  
10. 96633 10. 38026 11. 06253 10. 91997 10. 1946 10. 22275 10. 1453 9. 797223 9. 97456  
5. 492309 5. 010644 4. 297514 4. 451204 3. 958718 4. 680792 4. 987955 4. 905307 4. 096978  
1. 000867 1. 133928 1. 254443 1. 225245 1. 186987 1. 363371 1. 07634 1. 136242 1. 089443  
3. 168679 4. 067157 3. 870176 2. 96195 4. 018867 2. 739194 3. 585504 3. 612454 3. 567883  
2. 66346 2. 111504 3. 153242 3. 146993 2. 067724 3. 232717 3. 130224 2. 551098 2. 723389  
6. 716788 6. 637125 5. 504227 7. 103217 6. 18034 6. 090153 7. 140348 6. 86574 7. 344253  
4. 570534 4. 774651 4. 608468 5. 720236 4. 635273 5. 990535 6. 24827 5. 375397 5. 154175  
5. 145311 5. 20892 4. 97463 5. 049364 4. 933168 3. 979796 4. 575417 4. 734291 4. 043217

1. 548924 1. 020096 1. 908062 1. 41506 0. 956742 1. 69537 1. 677017 1. 145792 2. 096903  
8. 489181 7. 348012 7. 219083 7. 624592 6. 583774 6. 869396 6. 489343 5. 033868 3. 542032  
1. 110709 0. 932182 1. 022355 1. 368894 0. 828327 2. 981061 0. 914004 1. 644861 1. 267948  
6. 015873 5. 919022 5. 474303 5. 967707 5. 516042 5. 225651 6. 565393 5. 443862 5. 810297  
6. 005595 5. 824728 5. 391202 6. 032419 5. 90761 5. 690419 6. 850364 5. 793068 5. 725139  
2. 390426 1. 982788 2. 637714 1. 810936 2. 634658 2. 420875 2. 292435 1. 973734 1. 858906  
3. 563136 4. 810001 5. 066909 5. 316185 5. 131936 5. 331911 5. 964543 6. 296868 6. 061605  
4. 040351 4. 157259 5. 24336 4. 665273 4. 072616 3. 501573 4. 1682 4. 36287 4. 524296  
6. 151999 6. 102121 5. 923348 5. 48938 5. 462249 5. 19678 4. 597438 5. 308857 4. 324879  
5. 853961 6. 78809 5. 910177 6. 43066 7. 10004 6. 227091 6. 057379 6. 634134 6. 337594  
2. 268035 3. 977083 2. 098556 2. 521618 2. 389656 2. 31639 2. 538051 3. 265973 2. 993365  
2. 747509 2. 342359 2. 187261 2. 248755 2. 289556 2. 570593 2. 641649 2. 147588 2. 896543  
3. 684711 3. 046884 3. 120778 2. 837809 3. 834163 3. 887874 3. 411381 3. 52586 4. 235212  
7. 288154 7. 225173 6. 217022 7. 548934 7. 282471 5. 925416 7. 055719 7. 270499 7. 30158  
4. 429121 4. 304265 4. 679891 4. 433587 4. 109802 4. 477398 4. 56116 4. 856018 5. 096283  
2. 319817 1. 778819 1. 504441 2. 174362 1. 982652 1. 861286 1. 541533 2. 330329 2. 63445  
2. 910029 2. 945154 3. 334763 3. 934295 3. 039906 3. 015034 2. 798514 2. 122616 2. 111235  
3. 570688 3. 688071 4. 481133 4. 210807 4. 171466 2. 947525 3. 094145 4. 256929 4. 284457  
5. 77059 4. 576011 5. 100699 5. 788655 5. 361387 7. 811623 5. 89245 6. 210351 6. 096426  
5. 526072 4. 763204 4. 281809 4. 198309 4. 385877 5. 215939 4. 914164 5. 290533 5. 131902  
1. 946629 3. 702029 1. 918553 2. 532891 2. 653223 2. 687778 1. 923637 1. 981237 2. 180147  
1. 658098 1. 370732 1. 46326 0. 977619 1. 316443 1. 29812 1. 264467 1. 52694 1. 097028  
1. 543336 2. 140194 1. 216324 1. 467214 1. 940156 1. 48298 1. 644457 1. 284638 1. 356288  
4. 582014 2. 938326 3. 761155 4. 680376 3. 71234 7. 669581 5. 761808 5. 44896 6. 88353  
2. 796489 3. 752731 3. 913134 4. 282662 4. 353531 3. 483606 4. 451128 3. 499275 3. 471061  
1. 415989 1. 333419 1. 105095 1. 252118 1. 926947 2. 126326 1. 442487 1. 883697 2. 006961  
1. 767624 1. 991802 1. 516223 1. 752971 1. 716934 1. 297984 1. 267478 1. 447626 2. 100286  
3. 493455 4. 603395 4. 398926 5. 004636 3. 23743 4. 143282 4. 179695 2. 978494 3. 060172  
2. 953727 3. 565737 2. 672888 4. 241084 3. 470265 3. 590219 3. 846865 3. 754584 3. 912218  
1. 621148 2. 31945 1. 85426 3. 099117 2. 46458 1. 379212 1. 280557 2. 000127 1. 437971  
7. 57452 7. 561715 7. 24202 8. 728892 7. 709603 8. 293483 7. 681042 7. 561478 7. 858004  
5. 420288 5. 804839 6. 49474 5. 692864 5. 916328 4. 740018 5. 79243 5. 438458 6. 081709  
1. 143613 1. 022595 1. 012547 1. 285972 1. 42115 0. 839671 1. 024121 1. 3824 1. 151772  
2. 176685 1. 334911 2. 356391 1. 54057 2. 80902 1. 534908 2. 043463 1. 514631 1. 624475  
1. 221858 1. 746365 1. 550201 1. 222698 1. 387612 1. 419459 1. 787829 1. 57818 2. 001293  
1. 391415 1. 507361 1. 539699 1. 54027 1. 316754 1. 086581 1. 355574 1. 901211 1. 403615  
2. 795549 3. 030201 2. 970176 3. 601504 3. 379411 3. 535548 3. 214951 3. 096663 4. 322962  
4. 378565 5. 36657 4. 840726 4. 951928 5. 201961 3. 9106 4. 402689 4. 60648 4. 140405  
6. 12561 6. 251439 6. 188816 5. 981913 5. 747122 6. 363845 7. 16385 6. 457494 6. 25352  
1. 288364 0. 715228 0. 825215 1. 190993 1. 227302 1. 314335 1. 581149 2. 921711 1. 522568  
2. 55858 2. 158722 2. 869896 1. 512651 3. 222008 2. 779833 2. 472077 1. 931088 3. 613304  
2. 2554 2. 413879 3. 235988 3. 214192 2. 8556 2. 126233 3. 013035 2. 052867 2. 703453  
5. 454249 6. 417662 6. 99175 5. 819287 6. 487464 3. 692478 7. 436766 7. 060862 7. 02128  
1. 852599 1. 652353 1. 754275 1. 630264 1. 674507 1. 607696 2. 000701 1. 824902 2. 312014  
6. 451883 7. 200835 6. 772885 5. 471186 6. 182725 6. 498252 7. 140045 7. 144503 6. 626683  
5. 538543 5. 384652 5. 026213 5. 981817 5. 536523 4. 723233 5. 292811 4. 635097 4. 972643  
2. 267774 1. 607129 2. 025067 1. 640648 1. 928989 1. 888737 2. 254071 1. 877981 2. 79981  
1. 334217 1. 353695 1. 429998 1. 814196 1. 74444 1. 409332 1. 685175 1. 788519 1. 322285  
4. 3557 4. 202866 4. 137633 3. 456237 3. 694166 3. 090726 4. 591 2. 78914 4. 019736  
1. 617274 1. 753451 0. 900072 1. 265074 1. 152231 1. 382363 1. 672878 1. 631021 1. 579483  
2. 292486 1. 799884 2. 447837 2. 849274 1. 929055 2. 110283 2. 168222 2. 104207 2. 812817

2.178264 1.651181 1.699756 2.294217 2.583455 1.580344 1.941699 2.542307 2.377186  
1.787706 1.590164 2.570102 1.91371 1.613828 1.924838 1.713413 1.960407 2.764896  
1.718097 1.301101 1.857039 2.061095 1.276179 1.689826 1.110391 1.605873 1.39436  
1.927031 1.956676 1.636475 1.530449 1.343634 1.608971 1.4821 1.310903 1.585745  
2.079071 1.850115 2.179879 2.806035 2.722363 2.593142 2.648799 2.557806 2.253535  
5.106591 4.702594 5.670123 5.968554 4.837451 5.70621 5.988385 6.415432 5.667428  
1.499756 1.73397 1.368321 2.133649 1.683772 2.949888 1.847619 1.472318 2.384479  
5.466523 6.089736 5.773441 6.011799 6.412361 6.11634 7.199564 7.560412 6.81542  
3.075998 1.310926 1.642272 2.963961 1.908293 2.23986 1.2617 1.561265 1.963328  
1.369957 1.345498 1.415755 1.453442 1.701273 1.241843 1.328073 1.645841 1.512612  
5.141367 5.958163 5.397335 6.178353 6.459506 5.595195 5.336938 6.333296 6.013979  
3.726947 1.226418 3.594916 6.299073 5.009289 3.790974 3.690884 1.488036 4.274763  
1.788731 1.998435 1.69745 1.302292 1.519431 1.498604 1.602015 1.660656 1.649125  
7.615751 7.794839 7.433324 7.107232 7.671542 6.96987 6.749837 7.230065 6.991411  
6.906416 6.612613 6.713532 6.107983 7.185125 6.429731 6.558056 7.412324 7.343568  
6.452221 6.603677 6.430271 6.876503 7.295854 6.459741 7.610215 7.842059 7.406363  
5.492492 5.888277 6.544779 6.482723 5.470564 6.372654 6.228637 7.001966 7.309058  
1.589593 1.716659 2.030261 2.706657 1.843892 1.406871 1.463691 1.809876 1.680642  
1.349027 1.510935 0.983375 1.240132 1.964365 1.161982 1.204831 1.943754 1.731535  
3.490612 4.298101 3.861135 3.720614 3.419605 2.507024 2.454341 2.072747 2.300954  
1.151477 1.899249 1.05517 1.435113 0.852463 0.799056 0.651806 1.469494 0.710793  
3.89652 3.303329 4.621936 4.023367 3.161817 4.143852 5.141588 5.37559 4.093202  
1.951016 1.616738 1.965985 2.045543 2.731536 1.780363 1.740909 1.616878 1.418409  
1.014074 1.297099 1.045215 1.55549 0.954311 1.250548 1.508649 0.889409 1.238537  
3.031981 3.438053 4.454633 4.766638 3.697975 2.679986 3.00532 3.369802 3.692144  
3.261981 2.552858 2.798158 2.775765 2.440357 3.217346 2.530167 3.765395 4.134085  
4.887992 3.098632 3.384064 5.936062 3.849246 3.393493 3.902409 3.275307 4.733518  
6.425521 5.823266 6.081728 5.759169 6.296586 5.449667 7.136726 7.96864 7.876533  
2.522453 2.16973 2.215093 2.7092 2.665711 2.588993 2.855565 2.632109 2.182443  
3.281026 4.045328 4.394718 3.909453 2.347825 3.683878 4.2757 2.897654 3.901468  
2.39092 2.373242 2.422605 2.226052 2.253572 2.419533 2.070961 2.083793 2.335042  
4.871393 3.544033 4.573528 5.283679 4.971208 5.107763 4.113205 4.256289 4.745403  
5.343827 4.454038 4.70605 4.994097 3.803531 5.248134 4.847275 4.796109 3.991748  
2.215156 2.447432 2.299205 3.108325 1.9734 2.131191 2.186286 1.747993 2.144027  
2.138004 2.785355 2.032311 1.997131 1.822869 2.260124 2.144446 2.286869 1.837068  
3.76289 3.269179 1.744239 3.53617 3.664165 5.099915 2.558251 3.236217 3.694157  
3.886854 3.570521 3.880577 2.857193 3.906609 3.096423 3.319978 3.619904 3.344985  
2.340664 2.484106 2.587821 1.993725 2.827565 1.963201 2.480464 2.751191 3.011379  
1.026521 1.401516 1.52416 2.452113 1.720306 1.579674 2.223507 1.306418 1.635169  
2.642276 3.028828 5.149423 3.38843 4.611922 2.506881 3.146279 3.17846 4.059844  
6.311767 5.800442 6.156423 5.285996 5.569675 5.842092 5.421936 5.003701 4.613038  
1.790491 1.090332 0.818006 0.989524 0.945178 1.009208 0.940086 0.76709 1.07011  
5.733115 5.749246 5.385074 5.374391 4.395653 3.934008 2.958811 1.19572 2.450566  
0.685953 2.274111 1.284386 1.576506 3.846056 1.567175 1.113626 1.993881 2.168387  
1.623519 1.139919 1.089948 0.691471 0.502854 1.016357 0.80885 1.161232 1.347974  
1.633747 1.265274 1.551963 4.629797 0.597484 1.546476 1.227648 2.11543 3.254067  
1.440572 2.779788 1.57633 2.527848 2.233029 2.150246 2.244282 3.293968 1.93736  
0.913001 0.835584 0.927556 2.127741 1.174511 1.434498 0.812329 1.333443 1.040314  
2.103479 2.263186 2.74055 2.372084 2.467398 2.533446 2.397005 2.381807 1.136301  
5.521511 4.128844 1.581881 2.587986 4.013893 2.533898 3.327524 1.628434 3.107044  
3.896742 1.957954 3.608006 3.427763 2.938732 4.176037 4.558201 3.974551 4.564093

1. 428833 2. 451073 2. 688028 1. 994928 2. 626095 3. 120365 1. 670031 1. 793171 1. 330771  
4. 312444 3. 6101 5. 217728 4. 87353 4. 347547 4. 360033 5. 682973 5. 703973 4. 835667  
2. 010608 1. 868109 1. 841139 1. 439344 1. 927697 1. 70996 1. 824977 2. 838274 1. 702015  
3. 17193 3. 20909 3. 758462 3. 670654 3. 364413 5. 048024 3. 555888 3. 834749 3. 434541  
2. 040768 3. 333051 1. 426355 1. 55473 2. 233727 1. 297712 1. 522842 1. 67802 3. 02065  
3. 229334 4. 843814 2. 880234 4. 848145 5. 238422 5. 052313 5. 458078 6. 340901 4. 660582  
1. 609226 1. 817386 1. 207062 1. 899973 1. 557546 1. 418776 1. 702437 1. 099394 1. 240293  
1. 318744 1. 056107 1. 524375 1. 063408 0. 919634 0. 981513 1. 244599 1. 551771 0. 995587  
5. 143344 4. 788624 5. 427717 3. 074443 3. 866058 4. 66705 3. 065935 5. 167872 4. 773262  
3. 180857 3. 608169 3. 522955 1. 766114 2. 133331 1. 281979 2. 283716 2. 080814 1. 4114  
1. 909383 1. 455358 3. 216127 2. 709382 1. 545619 5. 102784 2. 24792 1. 446083 1. 148224  
6. 816251 6. 826106 6. 098383 5. 734469 6. 702688 6. 223056 6. 496913 4. 310058 3. 264019  
1. 595885 2. 167541 0. 960858 1. 800343 1. 387213 1. 426107 1. 152326 1. 675916 1. 201343  
4. 225564 3. 747256 4. 166986 3. 840813 4. 04022 3. 696662 4. 493822 4. 507314 4. 889181  
1. 099885 1. 993458 1. 7068 1. 418425 1. 484736 0. 950873 1. 266695 1. 159966 1. 283768  
3. 092969 4. 794821 4. 647526 3. 865242 5. 290386 3. 115933 4. 336095 3. 602028 3. 821682  
1. 564685 1. 35424 1. 09747 1. 387757 1. 710388 1. 532411 1. 286998 1. 654709 2. 465029  
3. 553291 2. 990167 3. 642356 3. 161287 3. 715287 4. 626299 3. 827095 3. 565257 3. 414054  
2. 937192 2. 416784 3. 695178 2. 153648 0. 870368 2. 670644 1. 774681 2. 41348 1. 958026  
6. 161205 6. 432956 5. 923338 5. 380881 5. 797445 5. 244451 5. 523998 5. 542652 5. 822714  
1. 839504 1. 943955 1. 400157 1. 379844 1. 367185 1. 335993 1. 727725 2. 209505 1. 600456  
4. 451291 4. 225717 5. 047448 3. 883565 4. 470891 3. 993531 4. 983107 5. 166118 4. 002742  
6. 336362 6. 524201 6. 28033 5. 199229 6. 739254 6. 671291 6. 430995 6. 497085 6. 119226  
1. 851415 2. 762472 2. 38779 2. 346134 1. 342091 1. 667446 2. 244689 0. 861733 1. 778485  
3. 261834 4. 601168 3. 357118 1. 728607 1. 858031 1. 537819 1. 232171 1. 188327 1. 363346  
1. 182993 1. 326882 2. 000873 0. 933653 1. 485851 1. 390063 1. 284388 1. 1366 1. 51723  
1. 970746 1. 317549 0. 953788 3. 106842 0. 985939 1. 081922 1. 798835 1. 592188 1. 779074  
5. 944291 6. 86411 5. 923742 5. 899303 6. 18694 5. 426864 6. 383597 6. 358075 6. 170663  
3. 146078 4. 681724 2. 719732 2. 807459 2. 868673 3. 505196 4. 044918 2. 480659 2. 739847  
1. 864349 1. 10905 1. 008781 0. 925595 1. 078179 1. 190101 1. 072049 1. 725012 1. 578693  
4. 897459 5. 959619 6. 270729 4. 838779 4. 466221 3. 631794 3. 404567 2. 089401 3. 356457  
2. 198693 1. 520143 1. 506322 3. 01338 2. 277896 2. 397482 2. 208373 2. 540525 1. 612952  
1. 516741 1. 789799 1. 538494 2. 300228 1. 709463 2. 713608 1. 843461 1. 226067 1. 406502  
1. 517218 0. 728231 1. 358995 1. 950151 0. 959241 1. 242934 1. 482078 1. 26193 1. 758442  
6. 438204 7. 1862 8. 062487 8. 414561 8. 071015 7. 41635 8. 933943 6. 164355 6. 566254  
5. 264528 4. 954074 4. 618565 4. 420103 4. 751969 5. 409825 5. 444065 4. 660222 5. 751216  
1. 87137 2. 955998 2. 990703 2. 016283 1. 972757 1. 916488 1. 882414 2. 106409 2. 086054  
5. 595653 4. 478705 5. 300145 4. 112763 4. 122169 4. 838942 5. 118357 4. 007336 3. 023333  
10. 08376 8. 055147 9. 290814 8. 164023 8. 10272 7. 947588 8. 078997 7. 623705 2. 062988  
5. 849984 6. 637751 6. 006512 5. 99933 6. 619017 6. 506936 6. 701743 6. 013469 5. 248949  
1. 925342 2. 219411 1. 351679 1. 905619 2. 036903 1. 675152 1. 872374 1. 850116 1. 709505  
1. 674071 1. 70024 1. 876348 1. 646784 2. 37186 1. 5153 1. 561213 1. 378468 1. 887024  
1. 614787 2. 400711 2. 160086 1. 817372 1. 939353 4. 085041 2. 014223 1. 788234 1. 775399  
2. 63383 2. 854685 2. 64651 2. 193508 1. 960548 2. 368099 2. 183879 3. 241734 2. 447704  
2. 444838 2. 5293 3. 743085 2. 319744 2. 561492 1. 764667 2. 410537 2. 631918 2. 329881  
2. 378218 3. 148292 2. 804804 2. 14151 3. 393588 3. 271644 2. 940455 1. 98856 3. 416573  
3. 209166 3. 023818 3. 401725 4. 713528 2. 94662 4. 116158 2. 398348 3. 207526 2. 664865  
3. 761852 4. 045911 2. 627862 3. 526222 3. 739869 3. 799254 2. 756144 3. 574551 3. 370176  
1. 230331 0. 330879 0. 986657 0. 849739 1. 247317 0. 47375 0. 677735 1. 178275 0. 727373  
3. 375119 3. 128292 3. 365901 2. 402365 2. 733618 3. 081569 3. 332743 3. 131784 3. 074027  
2. 389701 3. 280237 3. 110622 3. 40161 4. 47525 3. 240023 2. 209758 2. 386064 2. 606585

4. 867203 3. 868788 4. 369862 3. 19743 4. 004867 2. 96815 3. 194413 2. 205725 1. 89169  
1. 294091 1. 521401 1. 315421 1. 355949 1. 332496 1. 247136 1. 203752 1. 274388 1. 147511  
5. 13267 5. 555844 5. 715839 5. 394104 5. 223438 5. 397648 5. 818468 4. 529724 4. 84242  
4. 403164 3. 760206 3. 961798 4. 046155 3. 770364 3. 8766 3. 372108 4. 144325 3. 893094  
4. 548853 3. 997342 5. 236958 3. 807653 5. 662244 3. 571072 5. 021156 3. 684626 5. 247621  
2. 843769 2. 123496 2. 468493 3. 137856 2. 218861 2. 883199 2. 615786 2. 932043 2. 656854  
3. 29968 3. 801048 4. 399716 3. 706159 5. 113396 2. 834392 2. 795313 2. 306249 3. 257857  
5. 614994 6. 070658 5. 727004 6. 414763 6. 257778 6. 159011 5. 96887 6. 549064 6. 22769  
1. 243351 2. 249893 2. 091203 1. 814092 1. 84127 1. 570884 1. 655354 1. 663046 2. 593231  
3. 911437 4. 626505 4. 516803 3. 792045 4. 125034 4. 865385 2. 749379 1. 961028 1. 75944  
1. 929461 0. 499633 0. 57358 1. 872166 2. 448394 0. 757719 0. 813142 0. 666329 0. 800239  
4. 457439 3. 342993 2. 755414 3. 64113 3. 179825 2. 517462 3. 119917 2. 761786 3. 696728  
6. 384183 7. 059029 6. 711453 6. 043388 6. 489868 5. 544203 6. 908276 6. 833094 6. 490665  
5. 801612 5. 93647 5. 316826 5. 728092 6. 306279 4. 222047 5. 243099 6. 389742 6. 441806  
2. 060792 1. 86438 2. 00532 1. 91601 1. 874527 1. 785091 2. 244864 1. 773982 1. 823557  
4. 391578 5. 304632 4. 663184 5. 054925 4. 566064 4. 509888 4. 168089 4. 572478 5. 007009  
2. 10878 2. 077933 1. 445987 2. 093956 2. 120905 1. 575299 1. 336576 2. 229737 1. 241264  
2. 356408 1. 972325 2. 913951 3. 621113 1. 658688 2. 455403 1. 473794 1. 842544 1. 71054  
3. 96971 2. 576414 2. 964601 3. 948078 3. 76056 5. 229003 4. 240561 3. 109307 3. 471377  
4. 137011 4. 286231 4. 162208 4. 45926 4. 592979 4. 310205 3. 262564 4. 486101 5. 316524  
2. 365902 3. 746366 1. 953168 3. 422364 2. 269161 2. 394068 2. 097922 3. 156304 2. 448363  
2. 04589 1. 973594 1. 972525 2. 081672 2. 228873 2. 071127 2. 283967 2. 084254 1. 994901  
5. 904526 5. 521024 5. 53934 4. 67006 4. 143952 5. 592527 4. 799157 4. 138181 4. 565703  
2. 410007 2. 644826 2. 383275 1. 880025 2. 419658 3. 423459 2. 448088 2. 690915 2. 879927  
1. 252792 1. 14258 1. 054174 0. 904528 1. 348314 1. 263845 1. 088306 1. 092356 0. 774804  
1. 935244 2. 295056 2. 933609 2. 651553 2. 652557 2. 316255 2. 5544 2. 458561 1. 692581  
1. 61652 2. 230602 2. 105479 1. 93224 1. 966817 1. 8882 1. 873844 1. 72448 1. 721113  
1. 137668 1. 080176 1. 244961 1. 281285 0. 999991 1. 13678 1. 284653 2. 477526 1. 744276  
4. 162752 4. 827719 3. 336486 3. 631694 2. 834517 4. 89187 2. 359814 2. 155597 2. 42612  
6. 445584 7. 078219 6. 072355 4. 614562 6. 428204 6. 344069 6. 470533 6. 239029 5. 570571  
1. 735187 3. 655417 2. 10464 2. 596529 2. 867916 2. 291916 2. 469676 2. 603044 1. 882153  
0. 930406 0. 84437 1. 177068 1. 30679 1. 231278 0. 997784 1. 383309 1. 265727 1. 684797  
6. 110661 4. 517042 7. 120912 7. 211315 6. 027849 3. 280007 6. 451146 4. 873962 2. 189644  
1. 73338 1. 489958 1. 464008 1. 2597 2. 011683 1. 55993 1. 757942 1. 444176 2. 321571  
5. 302266 5. 72618 4. 933707 4. 620944 5. 841895 4. 953513 5. 746772 5. 641777 4. 947703  
2. 299167 1. 673718 1. 600139 1. 975597 1. 679668 1. 975043 1. 860189 1. 955163 1. 541586  
3. 20479 2. 119664 1. 85558 2. 854502 2. 465705 1. 479935 1. 676098 1. 825979 1. 409068  
1. 575847 1. 325682 0. 918518 1. 239048 0. 893273 1. 5898 1. 382422 2. 076416 0. 944869  
1. 00595 1. 842876 1. 187562 1. 112583 1. 388575 1. 066683 1. 390062 1. 401535 1. 418786  
1. 647118 2. 49604 1. 284776 1. 871335 1. 839967 2. 338428 1. 630374 1. 407136 1. 394992  
2. 342638 2. 253832 2. 523674 1. 390052 2. 700296 2. 106083 2. 984635 1. 785778 2. 032388  
1. 925783 1. 721622 1. 607779 1. 63247 1. 62903 1. 296587 1. 603493 1. 878838 1. 859381  
1. 36177 1. 468656 1. 352887 2. 009859 1. 334779 2. 614095 1. 383135 2. 099606 1. 39659  
1. 449572 1. 555626 1. 553259 1. 739107 1. 980607 1. 559109 1. 209436 2. 402304 1. 782058  
1. 598599 1. 835704 1. 495164 1. 594716 1. 698405 1. 603649 1. 715559 1. 631485 2. 131977  
3. 917998 4. 456607 3. 686008 4. 342963 3. 919559 4. 517347 3. 635233 4. 866538 4. 05615  
3. 442494 5. 159874 4. 790185 3. 070311 4. 038112 3. 988001 2. 134556 2. 980468 4. 925605  
1. 697545 2. 064009 2. 219188 2. 736317 2. 390243 1. 793789 1. 854369 2. 074057 3. 284984  
1. 147771 2. 708358 2. 914307 3. 627036 1. 677746 2. 092552 3. 167815 1. 507937 2. 213282  
1. 471848 1. 464412 1. 497532 2. 230646 1. 466264 2. 063343 1. 871286 1. 692309 1. 974282  
2. 315862 2. 08196 2. 502263 2. 054571 0. 921667 1. 974184 1. 795255 4. 520152 1. 51112



4. 970558 5. 973585 4. 55949 5. 080251 5. 430392 6. 426924 6. 228147 5. 789577 5. 384569  
3. 69373 5. 618196 4. 336113 2. 702508 5. 067725 3. 536123 3. 954952 5. 272208 4. 527703  
4. 742505 4. 980715 4. 527258 5. 270593 4. 813673 4. 721463 5. 218209 5. 874254 5. 582863  
2. 737954 3. 399854 2. 549659 2. 981112 3. 027903 2. 437881 3. 362525 2. 807867 2. 667049  
3. 265446 4. 737923 3. 507258 2. 754113 3. 340513 3. 356158 3. 356909 4. 322496 3. 794837  
1. 784608 1. 41364 0. 76538 1. 666499 1. 684549 1. 525351 1. 550529 1. 322295 1. 665694  
1. 072267 1. 269947 2. 774689 1. 889527 1. 010826 1. 391235 1. 050091 0. 730931 0. 886771  
4. 094098 4. 98436 4. 623367 4. 055252 6. 162765 4. 429833 4. 724351 4. 859774 3. 575456  
3. 206045 3. 214748 2. 130854 2. 102177 2. 323897 6. 595424 6. 209274 2. 366836 2. 153321  
1. 510722 1. 657494 0. 989083 1. 637769 1. 438974 1. 209359 1. 267805 1. 994883 1. 30785  
1. 705504 1. 854651 2. 14637 1. 809925 2. 289506 1. 92566 1. 731898 1. 756375 2. 154249  
3. 159388 3. 014466 1. 980625 2. 338199 2. 477737 2. 483339 3. 637402 3. 846479 2. 22001  
5. 142174 4. 452913 4. 941673 5. 1421 3. 979949 5. 552979 5. 309973 5. 655766 3. 966841  
4. 288788 2. 84496 4. 115545 4. 78467 4. 566295 2. 866172 1. 806107 1. 76826 1. 640941  
5. 679301 6. 516576 5. 990284 6. 102222 5. 497591 6. 513498 6. 839509 4. 498317 6. 739696  
1. 938437 1. 940157 1. 682802 1. 393342 1. 626515 1. 643478 2. 258717 1. 883229 1. 57788  
9. 455149 8. 862913 9. 1116 8. 339126 7. 18562 8. 306582 7. 958144 6. 760843 4. 564741  
1. 346524 2. 31994 1. 114584 1. 163109 0. 807213 0. 954673 1. 044469 1. 020638 0. 950799  
5. 649666 6. 632675 6. 095706 5. 896145 7. 001466 6. 823507 6. 335623 5. 832896 5. 984089  
2. 111841 1. 842363 1. 951873 1. 578564 1. 850691 1. 838964 2. 299114 1. 765722 2. 336003  
1. 322537 1. 652225 1. 520496 1. 809296 2. 792876 1. 853471 1. 613835 1. 45252 1. 377584  
2. 173406 1. 664659 1. 897201 3. 206526 2. 607309 2. 601906 1. 95136 2. 261553 2. 621156  
1. 721747 1. 151711 2. 014354 1. 273243 1. 161334 1. 165316 2. 131605 1. 66842 1. 082536  
9. 123864 9. 271623 9. 358218 8. 980708 9. 260057 9. 214547 9. 127157 8. 790796 8. 480019  
3. 464844 1. 659052 2. 63556 1. 581567 1. 704242 1. 65049 1. 95856 1. 784867 1. 973972  
1. 557483 2. 813547 0. 868731 1. 27646 1. 276804 1. 503892 1. 271276 1. 80215 1. 8215  
8. 013647 8. 605512 8. 707229 8. 204831 9. 342884 6. 345412 8. 844108 8. 83572 8. 977021  
2. 658003 2. 094996 3. 486223 3. 567532 4. 072189 2. 369035 1. 314343 2. 454652 1. 725657  
3. 672821 4. 049128 3. 432009 3. 841018 2. 63896 5. 721183 4. 7708 2. 72807 3. 401824  
1. 488521 1. 349492 1. 185846 1. 258725 1. 020198 2. 682444 1. 992897 1. 588289 3. 59029  
0. 831231 1. 109652 1. 148844 1. 137507 0. 833819 2. 384237 1. 303543 1. 048484 0. 893917  
10. 23878 10. 06362 10. 5751 10. 1932 10. 16208 10. 17849 10. 30667 10. 49613 9. 912358  
7. 006712 7. 217402 7. 109895 7. 160803 6. 873219 6. 496642 7. 203684 6. 842052 6. 644412  
1. 090496 0. 985279 1. 364843 0. 802425 0. 446027 1. 118194 0. 970681 1. 819009 0. 848421  
1. 532906 1. 824777 1. 349935 1. 9241 1. 594605 1. 835572 1. 372357 2. 114574 1. 323917  
1. 461246 0. 922336 0. 988252 1. 684104 1. 15863 1. 260954 1. 056126 1. 381496 1. 524674  
8. 280318 8. 428002 8. 025477 8. 699863 8. 815441 7. 967339 9. 141631 9. 369732 8. 586864  
6. 29202 5. 692712 5. 614948 6. 139532 5. 941769 5. 60354 5. 317329 6. 178948 5. 715165  
5. 134674 4. 588047 5. 437105 5. 649676 4. 933095 4. 389085 6. 197737 6. 491668 6. 534892  
2. 199282 1. 967292 1. 971756 1. 583808 4. 146245 2. 380773 2. 894571 3. 216339 2. 486938  
2. 655653 2. 58657 3. 015049 2. 464519 3. 593689 3. 362897 3. 224339 3. 019424 2. 443  
1. 627435 2. 369713 3. 132745 2. 181977 1. 069844 1. 130574 2. 692754 1. 184563 1. 473854  
5. 258154 5. 692107 5. 258154 5. 701607 5. 2542 5. 200826 5. 762703 4. 994778 4. 975307  
2. 192013 1. 749006 1. 933963 1. 975529 1. 573648 1. 767811 1. 294541 1. 230859 1. 352637  
2. 09828 2. 35446 2. 106474 2. 314277 2. 468894 1. 540256 2. 360456 2. 10208 1. 482515  
2. 060232 1. 952558 1. 467247 1. 630271 1. 881071 1. 507199 1. 529831 1. 408994 1. 456915  
4. 373993 5. 13507 4. 456319 3. 783586 4. 140657 4. 625075 4. 432032 4. 22712 3. 6523  
3. 28573 5. 710356 5. 229665 4. 58729 4. 420822 3. 994228 5. 614147 4. 115426 4. 118444  
3. 4857 4. 37397 2. 693122 2. 577237 3. 49781 2. 713815 4. 330613 3. 025783 3. 608477  
2. 55829 3. 338556 2. 655545 3. 279583 2. 84505 3. 334257 2. 490646 3. 701194 3. 524985  
3. 376906 2. 813092 2. 744096 3. 279443 2. 733074 3. 00951 2. 65247 3. 510876 3. 113111

4. 947096 4. 961584 6. 137701 6. 512697 5. 463929 5. 843453 5. 155941 5. 049044 5. 987143  
1. 6494 2. 128058 1. 843414 1. 093773 1. 493018 2. 318034 1. 113657 1. 540321 1. 541584  
7. 389181 7. 253837 6. 699504 6. 109843 6. 602108 4. 436993 5. 860041 5. 049322 3. 598735  
2. 05282 3. 053201 2. 566749 2. 240739 1. 713591 1. 922473 1. 881314 1. 952443 2. 691  
2. 11602 2. 598817 3. 102644 1. 622507 2. 633215 2. 260339 2. 241857 2. 828342 2. 382101  
1. 832817 1. 319265 1. 905675 2. 877883 2. 03429 2. 48359 1. 524973 1. 406216 2. 523251  
2. 328998 2. 610234 2. 742508 2. 939644 2. 308799 2. 59421 3. 530502 2. 575037 3. 056029  
4. 64232 4. 408469 5. 165215 4. 481616 4. 334429 4. 631475 5. 871192 6. 231424 5. 610963  
7. 638755 6. 510593 6. 551274 6. 890872 7. 120584 7. 531624 7. 503842 8. 231792 7. 227026  
3. 711759 2. 496046 3. 200951 0. 686231 2. 184249 1. 695902 1. 769263 2. 275683 2. 599391  
1. 774061 2. 274973 1. 918809 2. 041624 2. 526444 2. 102574 1. 927888 2. 834649 1. 528202  
2. 679706 3. 012048 2. 825939 3. 747288 1. 621707 3. 209314 1. 85078 2. 267146 2. 841377  
7. 681963 7. 076086 7. 163587 7. 435463 7. 236879 6. 499744 7. 246344 7. 129802 6. 893567  
1. 839833 1. 576719 1. 52644 1. 972111 1. 213852 1. 249652 2. 033846 2. 015625 2. 269385  
1. 431023 1. 577166 1. 612093 1. 292313 3. 14244 1. 954963 1. 529114 1. 99639 2. 777253  
2. 313866 1. 886886 2. 829707 3. 505045 2. 585424 3. 249811 3. 701307 4. 109807 4. 397072  
3. 477102 3. 707098 3. 858158 2. 497382 3. 781373 4. 454182 3. 066517 4. 636037 3. 296915  
2. 023129 2. 191943 2. 492229 2. 545363 2. 626071 2. 187424 2. 400932 2. 299511 1. 38108  
2. 43849 1. 770288 4. 986051 3. 61457 3. 130526 2. 556172 2. 46482 3. 00189 3. 582919  
1. 362871 1. 265609 1. 700854 1. 597256 2. 677044 1. 677388 2. 083874 1. 282467 1. 659165  
1. 29479 1. 283483 1. 758931 1. 072059 0. 865863 1. 179523 1. 884108 1. 143904 1. 346084  
3. 832953 6. 128855 4. 829749 4. 443139 6. 567071 5. 721443 3. 880922 3. 52482 3. 6123  
7. 391823 8. 168832 7. 2563 6. 827122 7. 124375 7. 543418 6. 923984 6. 855335 7. 370222  
1. 995523 2. 122234 2. 395124 3. 308712 2. 023961 3. 512847 2. 911498 2. 143373 2. 78099  
4. 689035 4. 097894 5. 151584 5. 365661 4. 794898 5. 052959 5. 161742 5. 865988 5. 156363  
1. 934161 1. 969016 2. 013156 1. 935945 1. 868321 1. 611711 1. 811414 1. 740795 1. 739299  
6. 619958 7. 318683 6. 463611 6. 572573 6. 477444 7. 732128 7. 327692 7. 744076 7. 744097  
2. 459985 2. 494205 2. 299336 2. 357487 2. 775535 2. 333995 2. 367275 2. 749641 3. 052018  
2. 133929 2. 618932 2. 935053 3. 307154 2. 561825 2. 279948 1. 993437 4. 043955 2. 545392  
4. 005345 5. 41687 4. 974563 5. 376622 4. 445211 3. 915157 5. 269334 4. 972162 4. 943268  
2. 223835 1. 588959 1. 840274 1. 916931 1. 516607 2. 477866 1. 338642 1. 969929 1. 627388  
2. 840948 3. 668935 1. 918018 3. 418768 2. 466165 2. 948005 1. 997787 2. 262154 1. 888326  
3. 170997 3. 825153 3. 76551 3. 575831 3. 884226 4. 201141 4. 026011 4. 50793 4. 365002  
2. 451064 1. 932272 2. 136639 0. 903001 2. 279695 2. 486099 1. 616582 2. 172161 1. 774844  
2. 706104 2. 970427 2. 844418 3. 061102 3. 141423 2. 156522 2. 294423 2. 093227 2. 400999  
6. 083961 5. 051467 5. 791348 5. 537205 5. 668149 7. 319909 6. 005404 6. 14064 6. 256522  
4. 642935 4. 295749 4. 199051 4. 362672 4. 032052 4. 733481 4. 785767 5. 671504 5. 425082  
1. 90624 1. 74326 1. 303326 2. 269492 1. 595897 1. 501617 1. 35762 2. 222167 1. 490209  
2. 322349 1. 884645 2. 31425 1. 881602 1. 962706 3. 02912 2. 020667 2. 284423 3. 311282  
2. 926442 2. 158987 1. 800722 2. 126791 2. 350668 2. 275227 2. 902278 1. 60797 2. 384541  
3. 327763 3. 289094 4. 750378 5. 369723 3. 862126 4. 477963 4. 889426 3. 979074 4. 532944  
1. 165223 1. 768567 0. 872586 1. 37853 1. 810652 1. 130788 1. 008879 1. 389205 1. 239146  
7. 387191 7. 016552 7. 174019 7. 204064 7. 119278 7. 628397 6. 987253 6. 876053 6. 875127  
2. 08489 2. 780622 1. 532138 1. 975652 1. 97507 2. 752467 1. 72518 2. 070701 2. 45169  
4. 022949 2. 487115 3. 045869 3. 30864 2. 999728 2. 494798 2. 997688 4. 008556 2. 5671  
6. 890512 5. 823696 6. 031873 5. 814134 6. 818503 7. 214352 7. 530316 8. 0664 7. 67338  
4. 517912 4. 025205 3. 932324 4. 224518 4. 337219 3. 0557 3. 461483 2. 744587 3. 200219  
4. 274132 4. 949883 5. 386953 4. 551529 5. 525202 6. 373097 5. 88398 5. 898278 5. 284401  
2. 737724 2. 655794 2. 265342 2. 414638 1. 960856 2. 578993 3. 308605 2. 215087 3. 003867  
2. 427227 2. 728489 2. 396476 2. 41539 2. 323022 3. 028578 2. 567779 3. 451209 3. 801668  
1. 369434 1. 708473 1. 886301 2. 975525 2. 773775 2. 033666 2. 177773 2. 717124 2. 652842

1. 931235 2. 286981 2. 105526 1. 697948 2. 161486 2. 060594 1. 681655 2. 049591 1. 77344  
2. 82387 2. 329518 1. 85382 2. 962368 2. 574672 3. 091603 2. 375655 2. 967718 2. 196762  
1. 951907 1. 919324 2. 304298 2. 043091 2. 071121 1. 806489 2. 184983 2. 165852 1. 99709  
2. 779041 2. 322337 2. 901155 2. 250508 2. 214036 1. 906221 2. 238515 2. 028767 1. 79851  
1. 756508 1. 607638 1. 350881 3. 019063 1. 894826 1. 724144 1. 627447 2. 194789 1. 572108  
1. 666743 1. 888403 2. 62173 2. 748143 2. 48356 0. 977117 1. 504313 2. 466041 2. 153119  
4. 355121 3. 550452 5. 349343 3. 75431 4. 661242 3. 800543 3. 76219 3. 912748 3. 966673  
5. 232831 6. 24117 5. 361901 5. 586513 5. 460047 6. 706601 4. 871844 6. 405426 6. 70676  
3. 203133 2. 953254 4. 542983 4. 754015 4. 003881 4. 905738 5. 230316 4. 477417 5. 0436  
3. 837722 4. 872981 3. 424893 3. 965596 3. 507472 3. 989078 5. 497232 5. 951879 3. 61483  
2. 434446 4. 405295 3. 895696 4. 933586 3. 37693 3. 187519 4. 451842 4. 241623 3. 281692  
2. 36929 2. 781337 2. 039149 3. 810712 2. 123441 2. 726168 1. 879164 3. 535623 3. 716069  
4. 802349 5. 277307 3. 307581 6. 804385 3. 957152 3. 235913 5. 230577 4. 956223 4. 356584  
3. 533712 2. 89253 1. 969355 2. 333171 2. 840671 2. 661773 2. 799069 2. 700805 3. 790348  
2. 363891 3. 717866 2. 484535 2. 95425 3. 862743 2. 026094 3. 294388 3. 17006 3. 168456  
3. 516887 3. 188029 4. 319933 3. 170917 2. 998657 4. 378483 2. 391191 3. 110369 3. 55559  
3. 116469 2. 675163 3. 059713 3. 515546 3. 20546 3. 80354 3. 133141 3. 794686 3. 261211  
3. 562144 4. 568704 3. 860088 3. 109246 4. 378175 3. 981266 3. 941719 3. 986761 3. 950371  
0. 981789 0. 981609 1. 197681 2. 392207 0. 824092 1. 317873 1. 054238 1. 346537 1. 252512  
6. 196949 6. 032776 6. 140221 5. 3609 4. 345633 5. 816806 5. 797611 5. 872295 5. 148312  
5. 875107 5. 439455 6. 236613 5. 877821 6. 311779 6. 333013 6. 497276 6. 917228 7. 068709  
3. 421448 4. 377628 3. 873466 3. 693517 3. 684144 5. 309433 4. 612547 4. 20092 4. 19625  
6. 262066 6. 198835 5. 371482 5. 301364 5. 70156 5. 603641 5. 845284 5. 213313 5. 982012  
6. 10125 6. 399028 5. 862727 5. 23689 5. 63052 6. 813434 5. 57589 6. 638145 6. 251267  
2. 758182 3. 513175 3. 918767 4. 174698 4. 867968 4. 257972 3. 841487 3. 841384 3. 331836  
2. 707305 4. 45082 3. 748643 4. 491147 2. 541368 1. 636579 2. 283277 2. 664457 2. 64579  
2. 598189 3. 272205 2. 641022 2. 653438 2. 43095 2. 759525 2. 500963 2. 905258 2. 814967  
3. 76196 2. 674998 3. 913613 4. 90286 4. 065973 3. 606066 4. 915138 3. 547939 4. 404033  
2. 456399 3. 759243 3. 949925 5. 668174 4. 635158 3. 428124 4. 293719 5. 112495 3. 665564  
2. 464265 2. 808512 2. 816087 3. 587247 2. 327888 2. 642567 2. 329086 2. 288116 2. 939651  
2. 366054 3. 553968 3. 241103 1. 039674 2. 586596 1. 572827 1. 792592 2. 582418 1. 694003  
4. 741331 3. 141757 4. 141022 3. 776718 3. 687638 4. 339027 4. 511284 4. 632025 4. 808242  
5. 763456 5. 596523 5. 440382 4. 247222 5. 625602 4. 552854 5. 424849 4. 400966 4. 216396  
3. 071457 2. 377117 2. 555423 2. 150739 1. 74209 3. 140213 3. 371377 2. 453996 1. 833656  
3. 156514 3. 258722 3. 604037 1. 794526 3. 175783 2. 984803 2. 245469 3. 996116 2. 291541  
3. 456332 2. 917842 2. 598761 2. 544662 2. 006188 2. 360968 2. 470146 2. 183269 3. 822831  
2. 580415 2. 644483 1. 425034 0. 514233 1. 750512 1. 392647 1. 515273 1. 989556 1. 128562  
3. 953334 4. 660614 3. 477857 4. 873433 6. 051953 5. 070057 4. 734003 2. 973768 2. 966138  
3. 37746 3. 713992 4. 098054 3. 578439 5. 1438 2. 071012 2. 229509 2. 703222 2. 187254  
2. 937164 2. 082092 2. 460598 2. 37711 3. 515583 2. 705343 2. 82644 4. 167969 3. 457827  
5. 298724 5. 69575 5. 975017 6. 459224 5. 484474 6. 822139 5. 691584 5. 427285 5. 261182  
1. 222965 1. 770001 1. 064006 1. 566703 2. 026442 1. 864842 1. 095575 1. 677628 1. 497636  
6. 083664 6. 279129 5. 344251 5. 985381 6. 062908 6. 667368 6. 448899 6. 198047 6. 600235  
1. 102877 1. 107331 1. 444923 1. 325612 1. 044725 1. 202777 1. 073995 1. 780481 1. 849388  
1. 597498 1. 246817 1. 225206 1. 468505 1. 444721 1. 975787 2. 068058 1. 087623 1. 345241  
3. 846206 4. 785271 4. 375505 3. 518409 3. 602066 3. 812272 3. 398978 4. 027213 3. 246898  
10. 31514 10. 80812 10. 83163 10. 53346 10. 928 8. 981828 11. 07176 10. 46635 10. 55512  
2. 940865 4. 450098 3. 500651 4. 319385 3. 729665 2. 337295 3. 036907 3. 396037 3. 954331  
6. 240891 6. 424108 6. 197332 6. 31545 6. 597013 6. 106046 6. 965224 6. 58088 6. 505153  
6. 268385 6. 867145 6. 086906 5. 700026 6. 752733 6. 297321 6. 321305 6. 66819 5. 478633  
1. 919757 2. 257361 2. 659096 3. 125618 2. 769968 2. 410495 2. 381915 2. 365429 1. 94076

4. 056135 3. 319968 4. 762266 4. 21093 2. 616408 3. 607435 2. 808317 2. 589196 2. 232079  
2. 714919 2. 961843 3. 07808 2. 23821 3. 596732 2. 996453 2. 3167 3. 208843 2. 360182  
2. 800028 1. 906561 2. 179126 2. 76809 2. 432853 5. 202891 4. 03846 3. 489999 3. 616324  
1. 211827 1. 139556 0. 968164 1. 396465 1. 733063 1. 381423 1. 785176 1. 716667 1. 54928  
1. 428637 1. 147943 2. 510239 1. 938675 1. 512469 1. 892445 1. 437901 2. 061253 1. 675985  
3. 198459 3. 08814 2. 495704 3. 826067 3. 4327 3. 307837 2. 813949 3. 640876 3. 315625  
1. 497013 2. 150647 3. 424513 2. 378411 1. 931542 1. 826986 1. 848577 1. 926853 3. 794131  
3. 415547 3. 955882 3. 052881 3. 547228 4. 471768 4. 321012 2. 946262 5. 696874 3. 748733  
5. 978346 6. 716799 6. 631539 5. 235201 7. 121867 5. 691011 6. 636068 6. 753529 6. 051407  
5. 52103 5. 602732 5. 893172 5. 016444 5. 734966 4. 214605 4. 258548 4. 820912 4. 567617  
1. 602759 2. 156361 2. 336546 1. 92674 1. 293274 1. 488522 1. 414533 2. 034564 1. 353904  
1. 425201 1. 775752 1. 386626 2. 624453 1. 601126 1. 833575 2. 496834 2. 115805 2. 975185  
6. 079512 5. 934848 6. 395583 6. 876054 5. 886536 6. 809917 6. 583555 6. 521045 7. 143465  
8. 333054 8. 326178 8. 425695 8. 461197 8. 180392 8. 138795 8. 649898 8. 666051 8. 718636  
3. 702746 3. 018963 3. 126878 2. 959617 3. 388009 2. 167173 3. 351226 4. 103095 3. 121021  
7. 617361 7. 37801 7. 877316 7. 01103 7. 205673 7. 271648 8. 583899 8. 26902 7. 880302  
2. 838539 2. 643824 3. 03954 2. 06637 2. 544937 2. 584723 2. 008721 2. 122424 2. 072089  
1. 502261 1. 837435 2. 061095 1. 621486 1. 147951 1. 155671 2. 118475 1. 731022 1. 672123  
2. 900143 3. 886173 3. 38062 5. 007533 3. 50918 3. 445695 3. 372163 3. 112392 3. 1159  
1. 23802 0. 919599 2. 600379 2. 192405 2. 375406 2. 468802 1. 121458 1. 707711 1. 841299  
3. 014445 3. 459987 3. 02329 2. 663488 3. 043854 2. 455305 2. 923421 2. 785411 2. 328001  
3. 847872 2. 320557 2. 863775 2. 190322 1. 97823 2. 230719 2. 897653 2. 439326 2. 607483  
6. 676729 7. 135672 6. 531519 6. 909388 6. 717799 6. 960511 6. 644151 6. 946003 6. 750587  
2. 763389 2. 860393 3. 194394 3. 993131 3. 35232 6. 295197 3. 672696 3. 738633 3. 349883  
2. 989172 1. 71351 1. 756796 1. 929372 2. 193233 1. 712104 2. 028293 1. 827321 1. 884943  
1. 557385 1. 278907 1. 183107 2. 093891 0. 944496 1. 232916 0. 970349 0. 917629 1. 302643  
4. 92604 3. 894638 4. 247326 4. 903847 4. 732939 5. 204154 5. 379957 4. 553356 5. 043727  
8. 236475 6. 852359 7. 585655 7. 555111 6. 547458 6. 629895 6. 485998 4. 450523 3. 768039  
2. 038823 2. 388496 1. 718407 2. 195239 2. 655221 2. 102876 2. 231576 2. 462165 2. 594781  
1. 84938 1. 987859 1. 865815 2. 897413 2. 050202 2. 531622 2. 181936 2. 694953 2. 072821  
1. 948971 1. 382096 1. 749909 1. 496889 2. 840936 2. 183851 1. 631196 2. 998797 1. 625519  
1. 39615 1. 484611 1. 549183 2. 399424 1. 553012 2. 420553 1. 345589 2. 06492 2. 536195  
1. 96263 2. 580252 2. 862793 3. 947263 3. 078566 2. 034817 1. 419825 1. 58514 2. 009682  
1. 211626 1. 427054 1. 655479 2. 616094 2. 031215 1. 47249 1. 484656 1. 250456 1. 74758  
2. 941046 2. 00133 2. 269155 2. 684276 2. 861984 2. 752839 2. 265034 2. 586735 2. 113753  
1. 35407 1. 746509 1. 647445 2. 413523 1. 84671 1. 823724 1. 691378 1. 393268 1. 759067  
8. 048232 7. 748985 7. 697384 8. 046192 7. 757935 7. 540387 9. 231905 9. 55388 9. 143487  
3. 126522 4. 299082 2. 853553 2. 043997 3. 490991 2. 250012 3. 149193 1. 985336 3. 336205  
3. 604469 3. 323449 2. 317517 2. 727714 2. 924008 2. 340671 3. 51732 3. 386994 2. 959664  
8. 241722 8. 091319 8. 007777 7. 92827 7. 491664 8. 300553 8. 056864 8. 188333 7. 81344  
2. 8441 2. 900813 1. 684405 1. 590952 1. 952631 2. 690235 3. 013319 1. 580647 1. 593323  
2. 030873 2. 276467 2. 441495 3. 988557 2. 689696 1. 697899 1. 609426 1. 923893 2. 149779  
7. 635772 7. 704782 7. 550123 7. 74336 7. 659992 7. 707309 7. 317007 8. 243755 8. 25957  
1. 347132 2. 343463 2. 223599 2. 53357 2. 463877 1. 554207 1. 449719 2. 176246 2. 074917  
6. 272054 4. 541291 4. 503022 6. 380832 4. 128287 5. 817814 3. 821699 3. 71858 3. 81859  
3. 603172 2. 913667 2. 359556 2. 552614 2. 793722 2. 161241 2. 921423 3. 274968 2. 625525  
5. 005876 4. 96748 2. 879792 4. 080904 4. 928246 4. 585984 6. 155995 5. 605419 5. 221374  
2. 665918 2. 154616 2. 057618 2. 031741 1. 243016 1. 749853 1. 813552 1. 823597 1. 289617  
10. 13572 9. 538102 9. 953258 10. 24549 10. 01903 10. 27262 9. 960346 9. 748566 9. 602662  
5. 107618 5. 198267 4. 615402 4. 099696 4. 443985 5. 391247 4. 635004 4. 91898 5. 123519  
7. 747635 8. 096002 7. 769841 7. 229109 7. 838057 7. 716715 7. 58134 7. 842028 7. 490722

8. 503865 8. 517602 8. 688574 8. 803886 8. 567332 7. 856301 8. 067841 8. 525663 8. 193164  
1. 996962 1. 720416 1. 873583 1. 243102 1. 452792 2. 110882 1. 835465 1. 401438 1. 71336  
2. 08646 2. 176839 1. 74379 2. 069831 1. 858283 1. 883608 1. 865843 2. 111391 1. 938502  
8. 728137 9. 460719 8. 980965 7. 982419 8. 93876 6. 961924 7. 585795 7. 360069 7. 74512  
0. 906364 1. 19611 0. 783385 1. 672058 1. 06209 1. 32281 1. 368549 1. 097151 1. 069682  
1. 449002 1. 360413 1. 492157 1. 05943 1. 776144 2. 026938 2. 51735 1. 554267 1. 119404  
7. 948458 8. 254355 8. 03822 7. 836749 7. 960649 8. 186517 8. 072271 7. 687236 7. 842847  
1. 971308 1. 668622 2. 179849 2. 171004 2. 36556 2. 027411 2. 084269 2. 348265 2. 50014  
6. 982092 7. 291046 7. 179857 5. 952283 6. 884291 6. 018356 6. 819973 6. 281327 6. 27747  
0. 87984 1. 509183 1. 92251 2. 121552 1. 801945 1. 323933 1. 259848 1. 322665 1. 325041  
2. 152765 2. 157431 2. 759478 2. 290733 3. 034869 1. 854755 2. 057933 2. 495979 2. 024633  
6. 387942 6. 733009 6. 70876 6. 228068 7. 186256 6. 71073 6. 94475 6. 343431 6. 772982  
4. 744078 5. 335682 5. 078242 4. 588841 5. 303545 5. 485723 6. 304522 5. 550718 5. 661352  
4. 867913 4. 668413 4. 304358 5. 141997 4. 341544 6. 60936 6. 17924 5. 8161 7. 117952  
1. 829886 2. 104028 2. 465107 2. 938746 2. 510953 2. 644261 2. 287811 3. 054295 1. 825429  
6. 814008 7. 57597 7. 025539 6. 857076 7. 147012 7. 381761 7. 021835 6. 7668 6. 986546  
3. 708712 5. 045231 5. 222342 3. 890093 4. 918739 5. 587764 4. 683413 4. 241326 5. 033846  
4. 394437 3. 547304 4. 091395 3. 754323 5. 470714 4. 108226 4. 416961 4. 648312 4. 641523  
1. 124757 1. 24603 1. 113394 1. 261581 1. 100985 1. 26183 0. 823536 0. 873207 0. 951315  
4. 155469 5. 341336 4. 352172 3. 747344 5. 595487 5. 169736 5. 513179 4. 392327 4. 510525  
4. 244729 3. 567986 4. 632294 3. 364069 4. 003366 4. 008199 4. 253368 3. 291052 3. 779633  
2. 685828 3. 289677 3. 986333 4. 286656 3. 996401 3. 595535 1. 3188 3. 373082 2. 778517  
7. 648739 8. 044487 7. 374913 6. 935139 7. 293466 7. 020183 7. 519388 7. 255538 7. 226951  
3. 244676 3. 539749 4. 501078 3. 282454 4. 004852 3. 398948 4. 49141 5. 050145 4. 369922  
5. 032051 5. 872781 5. 079172 5. 866286 5. 15348 5. 894928 5. 676686 5. 474454 4. 882915  
1. 024171 1. 106256 1. 352006 1. 256228 1. 156284 1. 96475 1. 393587 1. 505579 1. 702215  
8. 622457 8. 438601 8. 727094 8. 392223 8. 374236 8. 70767 8. 311094 7. 529822 7. 731888  
1. 448169 1. 402151 1. 495285 1. 772551 1. 424058 1. 521577 1. 304734 1. 780579 1. 806686  
4. 826509 5. 403697 5. 056769 3. 185579 4. 238496 5. 75805 5. 484409 4. 514854 5. 252848  
2. 878728 3. 129576 2. 900106 3. 135466 2. 567622 2. 604121 2. 564803 2. 894617 2. 57238  
2. 430854 3. 71087 2. 411339 2. 746627 2. 749606 3. 787184 2. 500822 3. 456509 2. 295117  
1. 342436 2. 366715 1. 343869 0. 826661 1. 086768 3. 330098 0. 873527 1. 047386 1. 50257  
0. 916667 0. 807794 1. 337506 0. 850947 1. 841853 1. 271359 1. 474671 1. 05379 1. 164264  
4. 405519 0. 770686 1. 266189 0. 353955 1. 176928 6. 85602 0. 758782 1. 564094 5. 614822  
4. 946854 5. 566247 4. 927334 4. 249394 4. 583341 5. 373419 4. 162135 4. 175683 4. 685546  
5. 339421 6. 626211 5. 81237 6. 520368 5. 76258 5. 475206 5. 859773 4. 472691 5. 424344  
1. 671596 1. 500554 1. 63973 2. 75144 1. 325768 2. 136092 1. 616168 1. 790315 1. 666079  
1. 68488 2. 334383 1. 514436 2. 668202 1. 614114 4. 094953 1. 726785 2. 380915 4. 181355  
6. 745279 5. 762701 6. 882086 7. 9964 6. 088841 7. 306146 7. 313765 7. 669125 8. 156185  
1. 104881 1. 342593 1. 574505 1. 85309 1. 894102 1. 441733 1. 400121 1. 082416 1. 547647  
2. 67115 1. 357381 1. 688282 1. 260177 2. 416357 0. 956751 1. 091022 1. 250487 1. 68568  
7. 410701 7. 392206 7. 397256 7. 115269 7. 151859 6. 848417 7. 281077 6. 846073 6. 772019  
1. 393711 2. 241662 1. 309594 1. 251003 1. 080594 1. 60235 1. 238544 1. 417698 0. 872927  
6. 783682 6. 330969 6. 15578 5. 976443 6. 57088 6. 000174 6. 623717 5. 715607 6. 031402  
10. 37393 10. 55935 10. 23113 10. 34463 9. 336908 10. 19822 9. 47951 8. 823735 9. 663809  
1. 634341 1. 658709 2. 109953 1. 951966 2. 216148 1. 874093 1. 791371 1. 778713 1. 59391  
1. 202186 1. 424299 0. 886062 1. 199711 0. 861857 1. 023089 1. 373738 1. 035104 2. 255681  
2. 594064 4. 172149 5. 198003 3. 963062 4. 350025 4. 241726 6. 149795 4. 777458 4. 678033  
3. 522652 4. 714571 5. 66038 4. 398122 4. 797978 5. 890215 6. 360958 6. 772712 6. 710188  
2. 077753 1. 963978 2. 212852 2. 168258 1. 77407 2. 302277 2. 344371 3. 222219 1. 709441  
4. 156252 2. 934909 4. 476264 2. 230556 2. 620801 3. 468247 2. 655308 3. 938334 3. 158096

2. 853103 2. 948251 3. 006054 2. 488072 4. 14994 5. 30844 3. 959146 3. 298351 4. 197201  
2. 626289 1. 580268 1. 709643 1. 883676 1. 358649 2. 950075 1. 908982 1. 162158 1. 611704  
4. 228695 5. 424833 4. 975509 6. 089804 5. 536425 4. 175659 6. 438348 5. 899638 5. 90816  
4. 298768 4. 544936 4. 423149 4. 681865 4. 390859 5. 461521 4. 876448 5. 241287 4. 036766  
3. 055431 3. 304383 3. 086424 3. 993181 2. 265056 3. 104046 3. 526775 2. 540327 2. 069218  
2. 221524 1. 525976 1. 358603 2. 42929 1. 792498 1. 704025 2. 182468 1. 321277 1. 706442  
2. 045425 3. 144788 2. 080084 1. 673831 1. 562996 2. 712873 1. 901124 2. 379473 2. 083574  
4. 799791 5. 219131 3. 767406 2. 231837 3. 928293 5. 758741 5. 220083 5. 475485 3. 824534  
1. 131607 1. 263265 1. 02907 1. 318254 0. 861512 1. 522712 0. 912415 1. 000829 1. 139899  
2. 861832 2. 254541 2. 353556 2. 53101 2. 025595 2. 656919 2. 124511 3. 511567 1. 945952  
1. 437656 1. 687933 1. 183034 1. 345267 1. 255762 1. 780004 1. 332306 1. 535426 1. 72175  
4. 935454 5. 254318 3. 406301 1. 070326 4. 559727 4. 557542 2. 729467 4. 060797 4. 487814  
1. 335697 1. 797278 0. 963622 1. 394869 1. 172543 0. 927615 1. 363596 1. 058729 1. 10129  
1. 258093 1. 38618 0. 871956 0. 963053 0. 769767 1. 123452 0. 98633 1. 492063 1. 186643  
1. 602245 1. 440909 1. 357912 1. 386439 1. 190317 1. 611861 1. 461012 1. 522949 1. 627611  
0. 915076 1. 297305 1. 226567 2. 008996 0. 999852 1. 129294 0. 978478 1. 538696 0. 800329  
0. 62076 1. 250905 1. 188922 1. 230333 1. 825474 1. 306267 2. 419448 1. 778494 1. 327613  
6. 135068 6. 124623 6. 313958 6. 560901 6. 520794 5. 913576 6. 33325 5. 878965 6. 02426  
4. 252782 5. 223939 4. 375833 4. 532588 5. 520302 4. 483545 4. 948126 4. 460029 4. 6636  
1. 301219 1. 447675 1. 436675 1. 83311 1. 702207 1. 416883 1. 239925 2. 095731 1. 505675  
6. 575229 6. 202181 5. 98228 6. 140631 6. 089457 5. 997102 7. 186973 7. 947167 7. 475037  
3. 049263 3. 553752 4. 843577 4. 23504 3. 915251 4. 755239 3. 917059 3. 723325 4. 431096  
2. 566023 2. 060951 2. 525253 2. 628038 3. 838336 2. 404033 1. 736892 3. 186361 3. 135656  
3. 638829 2. 80244 3. 161498 2. 777632 3. 602131 2. 831384 2. 960943 3. 557481 2. 978936  
1. 536802 1. 187672 0. 975218 1. 289883 1. 157399 0. 96876 1. 265096 0. 98909 2. 054136  
2. 906481 2. 514251 2. 314406 2. 190472 2. 196182 3. 544992 1. 981021 2. 399041 2. 689082  
5. 327205 5. 698771 5. 193215 5. 437241 5. 956012 5. 437615 6. 564108 5. 71859 5. 723887  
1. 124714 1. 74611 1. 259185 1. 752281 1. 729687 1. 120759 1. 350212 1. 013645 1. 140463  
1. 550282 1. 53804 2. 166453 1. 79086 1. 361523 1. 033022 1. 117578 1. 415073 1. 121427  
2. 036362 1. 571947 1. 932291 2. 127628 1. 738768 1. 789522 2. 380135 2. 157651 1. 842022  
3. 090649 3. 262253 2. 282422 2. 304827 2. 114468 4. 734802 2. 16564 2. 56191 1. 939681  
0. 995003 0. 880634 0. 856476 1. 12875 1. 182356 1. 41287 0. 919899 1. 799503 0. 949436  
6. 981612 7. 734941 8. 320647 7. 259355 7. 334062 8. 081937 7. 781774 7. 464095 6. 822995  
5. 555765 5. 285712 5. 646746 4. 985442 5. 469017 5. 266606 5. 03101 5. 754975 4. 649335  
1. 078366 0. 916045 0. 980531 1. 753957 1. 28048 1. 152805 0. 935739 2. 225109 1. 12591  
2. 183905 2. 353033 1. 771251 2. 48068 1. 675229 1. 469463 1. 75503 2. 104173 2. 226747  
2. 73927 2. 643787 2. 219774 2. 178576 2. 044135 2. 304003 2. 069281 2. 268197 2. 280107  
4. 311112 3. 709141 5. 165433 5. 712525 5. 165253 4. 987781 6. 128034 5. 80135 6. 257958  
3. 203995 4. 345251 3. 528681 1. 981475 2. 286379 6. 194481 3. 683788 2. 316116 3. 254915  
2. 326956 2. 537245 2. 46064 4. 319718 2. 173467 3. 548791 3. 535897 3. 093421 3. 519357  
4. 77081 5. 254645 4. 034287 4. 398879 5. 058103 7. 293329 5. 365378 4. 260085 3. 942659  
3. 854568 3. 274225 4. 285733 3. 069572 2. 134408 2. 885684 3. 021649 3. 446238 3. 013586  
2. 283607 1. 652039 1. 944582 1. 671119 1. 590172 1. 357599 1. 85891 1. 869766 2. 292349  
1. 378938 0. 917957 0. 779405 1. 028637 1. 077157 1. 191463 0. 935838 1. 058931 1. 098982  
3. 148593 2. 833835 2. 552338 3. 505202 3. 814429 2. 67614 3. 204776 3. 120643 3. 124138  
6. 675702 7. 011513 6. 604611 6. 654865 6. 921666 7. 542264 7. 412959 7. 222897 6. 743982  
1. 368106 1. 408064 2. 435248 0. 847093 2. 571012 2. 129951 1. 389848 1. 579773 0. 993053  
1. 198245 1. 415919 1. 294155 1. 422692 1. 236208 1. 519922 1. 613426 1. 407479 1. 205252  
0. 870003 1. 4384 1. 211443 1. 172524 1. 563212 1. 980135 1. 151087 2. 273186 0. 978753  
2. 730178 2. 76873 3. 083716 2. 855441 2. 270869 2. 576885 2. 431036 2. 692436 2. 68503  
1. 972206 1. 934733 1. 42127 2. 030083 1. 148275 1. 616936 2. 230698 1. 357299 1. 150098

2. 212903 3. 984322 3. 020546 2. 776816 3. 078388 3. 048509 2. 876578 3. 467256 3. 014164  
1. 522928 2. 087005 2. 4962 1. 771749 1. 912591 2. 105316 1. 940002 1. 653516 1. 732258  
2. 442918 2. 717331 2. 412438 3. 204086 2. 524285 3. 09233 2. 579613 2. 066434 2. 09235  
4. 648577 4. 783316 4. 603283 5. 620517 4. 3841 5. 156069 5. 304705 5. 504083 5. 137359  
1. 924143 1. 99305 2. 119352 1. 37654 1. 719595 1. 784711 1. 455673 1. 678482 2. 127225  
3. 599678 0. 908326 0. 900702 1. 96264 1. 629007 1. 900555 0. 768505 1. 830448 0. 948273  
2. 565506 2. 041098 2. 320905 2. 207491 2. 294172 3. 099511 2. 371371 3. 768268 3. 198467  
1. 553898 1. 12395 1. 152087 1. 149485 1. 684017 1. 333851 1. 284456 1. 690403 1. 259251  
4. 069685 2. 886995 3. 962627 3. 646802 3. 748504 4. 692888 4. 473717 3. 44381 3. 999108  
1. 097047 1. 157873 1. 260253 1. 516142 1. 282718 4. 164244 1. 354026 1. 313006 2. 187293  
2. 791106 2. 11606 1. 835769 2. 360547 2. 469292 2. 087348 2. 1428 2. 351156 1. 660535  
6. 807185 7. 646464 7. 565047 6. 598244 7. 957892 7. 016186 7. 268075 6. 999765 7. 315383  
1. 827862 1. 960196 1. 477858 2. 195722 1. 564681 1. 643154 1. 709853 1. 477058 1. 872172  
5. 045737 2. 99199 4. 202889 1. 39304 5. 026703 4. 455595 5. 506633 6. 948461 6. 185965  
2. 355663 1. 795227 3. 042529 2. 6127 2. 682927 2. 220172 3. 109262 2. 418932 3. 690978  
2. 403416 2. 940557 3. 323779 2. 39086 3. 373297 3. 093058 2. 903608 3. 129769 2. 670286  
5. 873359 5. 558323 5. 659353 6. 110998 5. 543586 6. 572002 5. 719678 5. 368899 5. 839918  
1. 294919 1. 511969 1. 567579 1. 137421 3. 41953 1. 867702 1. 94875 1. 886207 2. 233286  
1. 532075 0. 944734 1. 414338 4. 216942 2. 135027 2. 4555 0. 800118 2. 658494 1. 201712  
2. 334145 2. 27242 2. 332521 3. 588058 2. 581081 2. 870631 2. 63224 3. 089659 2. 863477  
2. 533211 2. 549533 2. 2933 2. 554216 2. 778421 2. 744626 2. 115017 2. 459252 2. 723451  
4. 577183 4. 751245 4. 652107 3. 81009 3. 874653 4. 421802 4. 028522 4. 065244 5. 223797  
3. 231179 2. 283767 4. 021875 3. 077627 2. 613254 2. 8455 2. 866945 2. 702734 2. 930288  
3. 140015 2. 596118 1. 929624 3. 145958 3. 310584 3. 489651 4. 135604 2. 506411 2. 96775  
2. 260192 2. 606383 2. 664661 1. 830116 1. 942771 2. 391927 1. 647421 2. 01306 1. 46756  
1. 507527 1. 686918 1. 220452 1. 383086 1. 763621 1. 713638 2. 027208 1. 604061 1. 836778  
1. 2783 0. 857707 1. 359742 1. 170291 1. 599679 1. 0794 1. 173784 1. 494066 0. 980373  
3. 30462 3. 453374 3. 617912 2. 226903 2. 73744 2. 894286 2. 855158 3. 437196 3. 539778  
1. 962893 1. 601986 1. 832418 1. 585004 2. 079819 1. 375952 1. 480338 1. 909832 1. 419534  
4. 852145 5. 294833 4. 250219 4. 301439 5. 424476 6. 799803 6. 072344 5. 8552 6. 302957  
-0. 2691 3. 598376 3. 60561 1. 553963 4. 167065 4. 153458 2. 715342 2. 068123 3. 292366  
4. 828917 4. 350218 4. 806813 2. 836533 4. 330676 3. 415164 4. 104319 3. 694355 3. 253693  
4. 99664 3. 289067 4. 988681 4. 819536 6. 219531 4. 460425 5. 493444 4. 595244 4. 854186  
1. 832407 1. 304437 1. 804496 2. 240694 1. 872611 2. 245941 2. 188223 2. 609672 1. 627172  
6. 629256 5. 88212 6. 021777 6. 582023 6. 548142 6. 617207 6. 716711 7. 13124 6. 729562  
4. 448583 5. 36407 5. 741178 4. 788282 6. 138813 2. 809868 5. 904044 5. 709667 5. 44043  
1. 688319 1. 86911 1. 930977 2. 659872 1. 493698 1. 699977 1. 649721 2. 763782 1. 775775  
4. 156652 4. 19834 4. 406584 4. 556954 4. 878905 4. 222086 3. 459247 3. 74775 4. 0894  
3. 804077 4. 158895 2. 680954 3. 462585 3. 413284 3. 331242 3. 774643 4. 650282 4. 042981  
1. 715951 1. 647626 1. 563827 1. 612485 2. 048369 1. 888838 2. 17623 1. 995331 2. 052049  
1. 842557 1. 152818 1. 698292 1. 768108 2. 359655 2. 067496 1. 752102 2. 04849 1. 80645  
3. 615914 3. 718663 5. 651509 2. 918844 3. 874316 4. 644666 4. 757188 4. 683114 4. 120119  
2. 33958 2. 497267 2. 933303 2. 017038 2. 036549 1. 326768 1. 425799 1. 615735 2. 526861  
2. 733852 2. 539559 2. 344924 3. 085584 4. 355102 3. 640919 2. 240775 4. 473374 2. 58344  
4. 384875 2. 733169 3. 297177 5. 034034 0. 248664 2. 47746 2. 447358 2. 10702 2. 231645  
5. 227377 6. 46816 5. 11723 5. 266893 6. 209446 2. 650345 5. 789256 5. 099831 7. 073934  
5. 343312 4. 571029 4. 982727 4. 685522 4. 173242 4. 851748 4. 006416 4. 32066 4. 41561  
1. 58023 0. 880933 1. 819785 1. 056911 1. 39918 1. 860539 1. 148147 1. 694899 1. 142528  
1. 009247 1. 249534 0. 921892 1. 673863 1. 663798 0. 55397 1. 122621 2. 17301 1. 401043  
3. 167652 3. 895266 3. 724635 3. 282787 2. 970616 3. 303274 3. 185294 3. 348131 4. 11937  
6. 806296 6. 382152 6. 634478 5. 952332 6. 486201 7. 036189 7. 221663 6. 312144 5. 863112

3. 947922 3. 725375 4. 052323 3. 752399 4. 172931 4. 188638 3. 258055 3. 937724 3. 901501  
4. 187659 4. 863535 4. 438543 5. 185774 3. 90127 5. 305944 4. 482505 4. 849059 4. 647401  
4. 049123 5. 512805 4. 729996 5. 46246 4. 167265 3. 392534 4. 864251 5. 205463 5. 990651  
6. 662386 6. 490482 6. 668699 6. 365495 6. 842621 6. 835575 6. 719878 6. 638653 6. 959454  
5. 614478 5. 492156 5. 909571 5. 078339 5. 797888 4. 727545 6. 287635 5. 974779 5. 494155  
5. 266129 5. 332608 5. 996686 5. 550715 4. 722888 5. 781354 7. 525559 5. 821278 6. 529701  
2. 950873 3. 212329 2. 796852 3. 572668 3. 388786 2. 999156 4. 052087 2. 926654 3. 761994  
1. 6185 2. 077069 2. 611524 1. 410779 1. 500749 1. 045992 1. 137756 1. 196641 1. 467291  
2. 918576 4. 536528 3. 699769 3. 538581 3. 456654 3. 759939 2. 981912 3. 31575 2. 918098  
5. 752352 5. 942793 5. 964499 5. 761234 6. 37262 5. 701993 6. 192461 6. 061763 6. 204362  
8. 517156 7. 920519 8. 449706 7. 355463 8. 425718 8. 524294 8. 881965 9. 195829 9. 077418  
7. 532338 8. 454192 8. 518933 7. 953901 8. 476343 5. 842612 8. 4503 8. 125411 8. 479362  
6. 212736 5. 897616 6. 19731 6. 118917 5. 712072 7. 22824 6. 793526 6. 573908 6. 770204  
3. 536497 3. 481979 3. 734488 3. 255334 4. 397422 2. 731293 4. 024096 3. 600654 3. 051609  
5. 915529 5. 906023 5. 516783 5. 560545 5. 842264 5. 707676 5. 65482 5. 630162 5. 639582  
2. 552792 2. 888691 4. 250473 4. 776464 3. 946315 5. 169719 3. 065876 3. 296388 5. 190237  
7. 363151 6. 619542 6. 478117 4. 951542 5. 073685 5. 721187 6. 00898 4. 069325 3. 087929  
1. 57657 1. 182224 0. 922624 1. 324393 1. 43617 1. 436594 1. 032503 1. 853951 1. 185188  
2. 098724 1. 74973 2. 479177 2. 101109 1. 78666 1. 9548 1. 967737 2. 677624 2. 00653  
4. 754914 5. 574211 4. 017308 5. 004451 4. 910635 4. 794252 5. 145842 4. 898625 5. 131879  
6. 033956 5. 833896 5. 811566 5. 806203 6. 187121 6. 320289 5. 961394 6. 355289 6. 716314  
7. 825545 8. 085872 7. 88818 7. 535899 7. 635723 7. 660331 7. 444288 6. 930206 7. 275833  
6. 568702 6. 274446 5. 972164 6. 511332 6. 028685 6. 11924 6. 739024 5. 864645 6. 732517  
8. 013018 7. 418917 7. 800528 7. 058881 6. 967275 3. 180262 6. 685649 2. 61233 2. 910691  
4. 987258 6. 535994 4. 825722 6. 426106 5. 919295 4. 355003 3. 927975 5. 529484 6. 073671  
4. 484376 4. 462556 4. 583454 4. 192754 4. 207057 4. 519977 3. 207803 3. 495968 4. 18135  
2. 598397 3. 568913 3. 51144 2. 388467 3. 143941 2. 980605 4. 802717 3. 094063 4. 423426  
6. 437788 5. 730897 6. 157456 5. 738495 5. 480164 6. 281226 5. 383385 5. 089678 5. 80898  
3. 221644 2. 171899 2. 868826 2. 746642 3. 443572 2. 174932 2. 142708 3. 12925 2. 801883  
2. 039644 2. 597429 2. 307902 2. 328029 1. 85027 2. 402466 2. 002947 2. 330614 2. 241076  
1. 654316 1. 226734 1. 376923 1. 654316 1. 879454 1. 527266 2. 52504 1. 862265 3. 529319  
2. 356161 2. 526652 2. 882195 2. 197054 2. 411504 2. 831914 2. 400577 1. 889499 1. 969693  
1. 641958 2. 516742 2. 613862 1. 761911 2. 764889 2. 128026 2. 647376 2. 846464 4. 044647  
2. 668256 2. 284407 1. 899241 4. 349072 1. 630892 1. 817511 1. 462255 1. 661663 1. 882365  
4. 285243 2. 339582 2. 672811 2. 033363 3. 734119 2. 280173 2. 409126 3. 011617 2. 277196  
1. 958133 1. 534893 1. 567735 1. 772408 2. 226443 1. 815313 1. 633486 1. 601359 2. 460336  
2. 878067 3. 656839 3. 397381 2. 554407 3. 263364 2. 318356 2. 769042 2. 391411 3. 09408  
3. 345179 3. 187212 2. 858466 4. 044709 4. 111961 3. 76385 2. 968131 3. 046826 2. 150736  
1. 081109 1. 191935 0. 99044 1. 588715 0. 865856 1. 808187 1. 128329 0. 810553 0. 935316  
3. 435303 3. 931018 3. 432772 3. 699771 4. 141377 4. 263813 4. 441591 4. 508949 4. 745642  
6. 017671 5. 737796 6. 27806 6. 065684 5. 686725 6. 046663 6. 542342 6. 205621 6. 082603  
3. 359274 2. 591296 3. 095257 3. 261527 3. 095209 3. 692072 3. 138136 3. 534352 3. 658568  
2. 569524 2. 729387 2. 169758 1. 926576 2. 349652 1. 865535 2. 230791 1. 986389 2. 318471  
4. 321438 4. 014562 5. 21736 4. 410055 4. 78598 5. 654695 5. 037148 5. 541327 5. 693662  
1. 260679 1. 471436 2. 676863 2. 859565 1. 418076 1. 14909 1. 257482 1. 704509 1. 977243  
3. 108687 2. 137568 3. 051499 2. 623951 1. 727015 3. 238228 3. 334703 1. 907315 2. 049228  
2. 407198 2. 855498 2. 058005 1. 628729 2. 255713 1. 617571 1. 47193 1. 608117 1. 617057  
1. 411534 1. 563713 1. 218747 1. 4572 1. 132713 1. 219723 1. 321734 1. 355197 1. 150942  
1. 449511 1. 183444 1. 33897 1. 746768 1. 580619 1. 604958 2. 231105 1. 233916 1. 337632  
2. 276035 2. 840972 2. 501378 2. 522972 2. 503997 2. 41956 2. 972551 3. 054541 2. 77934  
2. 819661 2. 17336 3. 04836 5. 429896 3. 076431 2. 267451 1. 839186 3. 384261 3. 948982



4. 523218 4. 132917 3. 035134 4. 729292 3. 309185 4. 919419 5. 390704 5. 015103 5. 501741  
3. 07339 3. 091618 3. 133045 2. 657233 3. 393933 3. 800784 3. 544543 2. 348513 2. 685103  
4. 413047 4. 504274 3. 912369 5. 271578 4. 098324 6. 996442 5. 240729 6. 194844 4. 850545  
4. 162242 5. 040904 4. 632036 4. 547416 4. 492811 4. 905678 5. 531812 6. 080896 6. 132427  
7. 358745 7. 187555 7. 392695 6. 438597 7. 218003 7. 207525 7. 477182 7. 350752 7. 38165  
2. 795813 2. 97662 2. 923735 3. 058268 3. 503733 2. 477162 2. 478523 2. 673801 2. 998301  
4. 943615 5. 447534 3. 786628 4. 202573 5. 259134 3. 067729 6. 592183 6. 406198 4. 515483  
6. 335998 6. 520558 5. 852196 6. 482577 6. 254542 6. 24517 6. 651241 5. 403504 6. 344328  
7. 377497 7. 62631 7. 102739 7. 383441 7. 415136 6. 892299 7. 686106 7. 61839 7. 910754  
6. 700225 6. 14873 6. 051209 6. 510193 6. 166453 7. 409527 6. 344676 6. 386479 6. 651871  
4. 352631 4. 295368 4. 054009 3. 678842 5. 0118 5. 189415 4. 843321 4. 842782 5. 421878  
3. 457754 4. 469935 3. 971888 3. 052688 3. 594657 3. 739961 4. 906187 2. 874122 2. 35451  
3. 300887 2. 47519 2. 432237 3. 611075 3. 043077 3. 631602 3. 148671 3. 262338 3. 025388  
2. 859926 2. 537248 2. 247485 3. 014921 2. 443546 3. 764577 2. 165331 1. 755846 2. 498109  
5. 764981 5. 378039 5. 082407 4. 648906 5. 114913 5. 489018 5. 487252 4. 215875 4. 514114  
1. 833336 1. 708108 1. 806495 1. 832536 1. 683568 1. 832862 1. 438394 1. 583806 1. 631974  
7. 232593 7. 337392 7. 374949 6. 671702 7. 592594 6. 742761 7. 583423 6. 688954 7. 198165  
2. 459949 2. 256317 1. 935148 2. 32869 2. 882059 4. 788029 3. 016913 2. 85727 2. 999948  
3. 02759 2. 939762 2. 482798 2. 736471 2. 389243 2. 51057 2. 726678 2. 818689 3. 045601  
2. 523971 1. 943625 2. 970712 2. 406519 2. 683706 2. 697453 2. 904622 3. 479185 2. 842368  
3. 956448 3. 424938 3. 397989 4. 07384 4. 365825 3. 810575 5. 440722 4. 238112 3. 487191  
6. 881503 6. 706943 7. 021622 6. 235247 6. 465332 7. 563419 7. 194337 6. 95596 6. 729585  
6. 030974 5. 022611 6. 249826 6. 016852 3. 826154 5. 418064 4. 588584 2. 879143 3. 445338  
4. 154936 4. 230565 4. 967971 3. 617868 4. 522139 4. 55579 4. 322936 4. 389942 3. 098922  
2. 283876 2. 777794 2. 285105 2. 029565 2. 609053 2. 579175 2. 461467 2. 680454 3. 01184  
7. 670947 9. 063429 6. 925129 7. 627711 9. 36125 6. 780468 6. 360081 8. 268163 7. 159164  
7. 303976 7. 912248 8. 090306 8. 292078 8. 087347 4. 859024 8. 059128 8. 27664 7. 782178  
1. 33764 2. 634732 3. 794751 1. 335072 1. 711963 1. 39895 1. 465134 2. 023227 1. 091703  
6. 592303 6. 918621 5. 847306 5. 785294 6. 442545 5. 803149 5. 919384 6. 138498 6. 349914  
8. 166023 6. 695279 7. 610945 7. 62076 6. 141391 7. 103152 6. 670378 6. 13456 3. 942583  
6. 870126 8. 195919 8. 062409 7. 432212 7. 935412 7. 558661 8. 042262 8. 067629 8. 269409  
5. 019128 5. 716214 5. 822644 5. 845042 6. 380473 4. 026048 6. 425414 5. 961315 6. 050795  
6. 983993 7. 462279 6. 912695 7. 282463 7. 409012 7. 202702 7. 226386 7. 34408 7. 811221  
1. 413974 0. 907862 1. 266393 1. 41483 1. 176149 1. 439032 0. 842717 0. 965839 1. 003189  
1. 181873 1. 485713 2. 579496 1. 496063 1. 577892 1. 892202 1. 034527 1. 342019 2. 070429  
2. 226346 1. 888803 2. 012067 2. 090278 2. 45259 3. 06939 2. 607995 2. 476664 2. 478932  
2. 775419 3. 173619 2. 458365 2. 412621 2. 25034 2. 661373 1. 631042 2. 193969 3. 113101  
3. 32399 3. 842426 3. 717191 4. 98923 3. 46633 2. 541822 2. 685404 3. 324797 2. 744396  
2. 764035 3. 859354 2. 808865 3. 330706 2. 704785 2. 598343 2. 975301 3. 386415 3. 113713  
4. 993824 4. 450503 4. 907306 6. 239632 5. 589788 4. 791949 5. 203205 5. 84368 6. 176145  
1. 415456 1. 626611 1. 622644 2. 121696 1. 578142 1. 660532 1. 426281 1. 752012 2. 787695  
3. 083201 2. 986818 3. 666464 3. 737527 3. 665031 2. 619945 3. 810305 5. 312494 4. 089479  
1. 371538 1. 965066 1. 596613 1. 532305 1. 492473 1. 731519 1. 485571 2. 156125 2. 115174  
6. 029208 5. 341269 6. 035199 6. 289958 6. 312914 6. 571401 6. 934704 7. 320072 6. 986934  
1. 813406 1. 627547 2. 052103 2. 407846 2. 047689 2. 070058 1. 571726 1. 80396 1. 662755  
6. 309327 6. 275681 6. 735877 6. 825225 7. 130134 6. 676707 7. 315307 6. 971897 6. 873298  
1. 308915 1. 457651 1. 212702 1. 272189 1. 503327 1. 249071 1. 301675 1. 766477 1. 974068  
1. 592126 1. 242262 1. 441514 1. 50468 1. 617068 1. 679236 1. 480587 1. 965649 1. 420207  
3. 612969 3. 89935 4. 03348 4. 403996 3. 204655 3. 403259 3. 969842 4. 335959 4. 524966  
1. 105161 1. 108127 0. 925287 1. 142283 1. 013233 0. 993177 0. 998933 1. 354404 1. 227865  
6. 602176 6. 974092 6. 68116 6. 941586 6. 489377 6. 685376 7. 57623 6. 500981 6. 696573

5.136876 4.752088 5.98865 4.975283 4.191397 5.630045 5.20664 4.525639 5.892902  
0.901954 0.911747 1.140261 1.036587 1.367823 1.689539 1.384785 1.625526 1.182267  
6.300499 6.780755 6.868913 6.248868 6.70019 5.148392 5.859239 6.352147 6.193693  
6.692607 6.294222 6.173739 5.653882 5.436942 6.809612 4.909977 4.972709 4.426505  
1.516087 2.322926 1.285323 1.729077 1.620251 1.595044 1.504976 1.578264 1.32455  
2.372479 1.516911 2.083086 1.617364 1.196927 1.355692 1.754444 1.53832 1.513752  
5.529456 5.745732 5.672353 4.667471 5.485355 4.782371 6.031209 5.575414 5.358998  
4.074498 5.252146 5.084314 5.59854 6.036169 4.302851 5.674254 4.539561 4.129826  
5.118539 5.036664 4.755115 3.561304 4.420149 4.631002 4.533521 4.790111 4.36322  
5.179772 5.332193 3.587108 4.74058 4.836451 4.470501 5.690991 7.259982 6.320721  
5.248494 4.291035 5.489725 5.305693 4.497737 5.159226 3.556911 3.630607 3.789915  
3.570405 3.468037 3.179769 3.243127 3.070843 3.71577 3.612999 4.0005 4.272989  
4.256587 5.120457 4.707113 4.777438 4.203596 4.710798 4.527906 5.62369 4.481366  
7.165748 6.585912 6.906296 7.402354 7.025859 6.011527 6.320026 6.05495 6.558022  
7.208982 7.148654 7.005745 6.928255 7.301505 4.994161 6.115412 6.33477 6.471436  
4.674925 3.367366 3.579177 4.07433 4.15079 4.205093 3.818607 4.242024 3.653487  
7.322676 6.598711 7.303878 7.172738 6.51098 7.137964 8.218156 8.276814 8.144644  
1.644748 2.168173 2.866933 1.745789 2.886953 2.33889 2.833981 3.118486 2.651817  
2.16455 2.755159 2.609268 2.463272 1.935878 3.323933 2.639999 2.129874 2.659168  
5.21274 5.805067 5.052573 5.669742 5.024339 6.421818 6.247616 5.718895 6.209513  
6.753176 6.210145 6.917175 7.48609 6.878365 6.594665 8.060717 8.098933 8.074969  
1.795756 3.118772 3.449729 2.615719 2.179169 3.054769 3.122315 3.542373 3.602243  
4.268259 4.008221 4.274586 5.039738 3.582984 3.241839 3.998899 3.811656 3.851921  
2.358515 2.925269 2.559161 2.388468 2.616558 2.075855 2.807459 4.300039 3.154376  
4.286796 3.091002 3.895518 4.235433 3.995707 4.386071 4.140331 4.88562 4.121402  
2.936543 2.091437 3.601826 3.669922 2.459092 3.870619 2.980601 2.854737 3.849462  
6.37478 5.623172 5.470389 6.82974 6.387962 6.129455 6.236032 6.630541 6.468452  
6.833061 6.537719 6.271125 6.552695 6.18829 5.992249 6.364888 6.075265 5.744624  
7.504301 7.319513 7.306057 6.940919 7.423917 5.906504 7.626575 8.196474 7.442172  
7.681515 6.295111 6.076581 6.862667 6.93079 6.939994 7.575468 8.033634 7.400083  
1.499629 2.64796 2.879713 2.230879 1.894571 1.973003 2.18973 1.978062 2.05377  
1.011039 1.506266 2.386942 1.16252 1.73407 1.607528 0.949086 1.310451 1.818263  
2.682991 2.294619 1.921928 1.851971 2.455962 2.31857 2.533095 2.271546 1.996141  
3.254547 2.71466 3.47885 2.580073 3.300459 3.565433 4.045087 3.987387 4.259818  
5.404153 4.869276 5.114616 4.172387 4.22159 4.497525 5.29277 5.446955 4.86014  
4.294328 4.324419 4.646441 5.047006 3.898121 5.020363 4.270982 3.766238 4.56068  
5.556752 4.657096 1.97616 2.938796 4.118726 1.800397 3.465153 2.560937 3.888734  
2.669133 3.038221 2.613118 3.706421 2.336197 3.01185 2.471104 3.078225 3.343353  
7.356428 5.385375 5.980481 5.893116 6.624534 6.275241 7.057178 6.514362 7.36415  
7.06356 4.82146 5.828566 6.288806 6.646722 7.290936 8.276623 8.977556 8.626123  
3.340229 4.43401 2.051528 2.980138 2.568224 6.132047 3.434713 2.22234 2.892311  
6.582693 5.97015 5.515013 4.917176 6.793375 7.383822 7.245059 7.401872 7.046743  
4.104198 3.916235 4.062316 3.731722 3.692697 4.984026 4.639121 3.903383 4.454607  
8.125295 7.808793 7.973544 7.975605 7.97057 9.138333 7.613597 7.886467 7.693503  
8.107415 7.011724 7.471078 7.795092 7.760293 8.052301 7.357247 6.936127 6.526979  
7.488205 6.942923 6.465708 6.798355 7.768176 7.694595 10.92075 11.01288 11.03885  
2.641325 3.827723 3.054139 3.445945 3.498803 3.454942 3.035171 2.767535 3.341119  
3.414615 2.640399 2.314154 2.423831 2.823777 2.432598 1.798886 3.256323 2.439481  
4.759526 2.687526 4.415905 6.079399 2.875581 2.88575 2.087125 2.664764 2.808688  
7.155658 6.212105 6.469187 6.699958 6.046764 6.349293 5.962078 4.937294 5.254458  
6.320738 5.217834 6.191165 6.150471 6.684142 5.292523 6.861387 7.507422 7.518886

3. 79825 3. 87328 1. 982934 2. 12915 3. 417032 3. 60676 3. 027262 2. 149466 2. 557743  
4. 888786 5. 287406 5. 142631 4. 548395 5. 392683 4. 781782 6. 480898 6. 318578 7. 099867  
3. 149617 2. 990135 3. 417427 4. 241371 4. 012591 5. 630541 2. 931175 3. 955396 4. 096119  
1. 85541 2. 939509 2. 106332 2. 64097 2. 319396 3. 548721 2. 695818 3. 132614 2. 909629  
2. 856284 3. 073494 3. 376851 3. 515658 3. 504808 3. 438986 3. 423052 3. 340519 3. 25837  
4. 720124 4. 795142 4. 524154 5. 247935 5. 118155 2. 684779 5. 532788 4. 559313 5. 431517  
2. 388291 1. 558166 1. 692047 2. 557867 1. 988524 1. 474099 1. 650288 1. 966152 1. 910015  
4. 841038 7. 373603 6. 606478 5. 984181 4. 399754 6. 493874 6. 667565 4. 676819 6. 787725  
7. 086864 6. 007655 5. 884359 7. 238796 6. 528409 6. 738971 6. 899093 6. 034632 5. 411509  
3. 240349 3. 471292 2. 218164 3. 655284 2. 965975 3. 733877 3. 379516 3. 415665 2. 827244  
2. 759382 1. 427014 0. 980553 1. 765139 1. 849345 1. 153547 1. 165719 1. 594817 1. 205582  
2. 509008 2. 411877 3. 368576 2. 987343 2. 444676 3. 026715 2. 632426 2. 340517 3. 124176  
6. 292226 5. 743245 5. 872499 6. 200683 5. 237608 6. 591011 5. 618947 5. 280479 4. 813676  
3. 730806 3. 561325 3. 263857 3. 87506 3. 6713 3. 445031 3. 374134 3. 326298 4. 064179  
2. 343465 3. 409613 2. 477633 2. 571797 2. 691135 2. 534168 2. 736719 3. 697026 3. 050782  
8. 816806 8. 658132 7. 445832 8. 806551 8. 182384 9. 133165 8. 714496 8. 260584 8. 424262  
1. 659392 1. 447158 0. 885242 1. 427922 1. 174547 1. 983849 1. 67986 1. 517243 0. 945239  
5. 182143 3. 496899 5. 361858 3. 943433 4. 59408 6. 305 4. 795357 3. 956363 4. 425242  
6. 135134 4. 98603 5. 305865 5. 904599 5. 282045 4. 862371 5. 729344 4. 741682 4. 462253  
5. 389127 4. 818168 4. 818824 4. 935368 5. 367003 4. 610982 4. 397119 4. 807162 4. 362115  
4. 719668 3. 493495 3. 700419 4. 071543 3. 409854 4. 471697 4. 280671 4. 401723 3. 364643  
5. 728965 5. 059431 6. 176046 6. 511438 5. 652849 5. 74738 5. 735258 6. 266088 5. 162896  
1. 67128 1. 637313 1. 380084 1. 341868 0. 786238 1. 088019 1. 149804 1. 678689 1. 250978  
3. 208862 3. 634232 2. 318199 2. 684255 2. 621772 2. 893541 2. 643464 3. 216213 2. 923736  
10. 02607 9. 814501 9. 631968 10. 66009 9. 773724 10. 96507 9. 793833 9. 718058 9. 530858  
9. 214102 8. 680262 9. 157186 9. 32536 9. 371772 9. 754755 8. 745126 8. 88899 9. 22691  
5. 841551 5. 569724 5. 637949 6. 161141 5. 294121 6. 089515 5. 689007 6. 094343 6. 09826  
5. 89063 3. 822407 4. 393046 4. 718032 4. 937691 6. 069982 5. 604564 6. 43725 6. 5212  
2. 066274 1. 322814 1. 953323 2. 29128 2. 682294 2. 423845 1. 762864 2. 876971 3. 086684  
1. 771013 2. 00988 2. 505126 2. 473409 1. 962031 2. 040014 1. 864363 2. 09146 1. 655276  
3. 477681 3. 456939 2. 718735 1. 992656 3. 337647 3. 082165 3. 005368 2. 698019 2. 746193  
4. 427319 3. 826732 3. 731082 4. 53818 4. 924995 5. 291691 5. 788658 6. 460027 4. 898008  
6. 882525 5. 919183 6. 718538 7. 169305 7. 37427 6. 593404 7. 916787 8. 101938 8. 167135  
6. 82277 6. 271425 7. 068733 6. 796809 7. 015641 4. 898138 8. 273367 7. 872479 7. 927241  
3. 036404 2. 669331 4. 465462 2. 43516 2. 826309 2. 71703 2. 647442 2. 962728 3. 783205  
5. 627867 6. 153763 5. 357332 5. 407739 4. 730216 2. 058182 2. 430977 3. 58317 4. 040181  
2. 247003 2. 687191 2. 335635 2. 422238 2. 676045 2. 4044 2. 034609 2. 324623 2. 263599  
4. 434653 4. 305765 4. 611144 4. 567689 4. 50562 5. 205635 5. 812975 5. 37887 5. 361689  
2. 150782 1. 366029 2. 960602 1. 417971 2. 270587 1. 781072 2. 524795 2. 363014 2. 232474  
3. 370072 3. 00703 3. 392517 3. 718059 3. 395668 3. 492489 4. 224501 3. 761625 3. 914421  
7. 301557 7. 769553 7. 849032 7. 371584 7. 758286 6. 634308 8. 228491 8. 306876 7. 932862  
6. 630589 6. 012567 6. 951308 5. 329692 6. 33726 6. 330467 5. 276508 5. 717323 6. 013379  
1. 684707 2. 618866 1. 103821 2. 376027 1. 53576 1. 985615 1. 436208 1. 459662 1. 939986  
3. 726477 1. 818067 2. 745386 3. 654561 2. 647188 3. 567139 4. 620971 5. 282342 3. 796467  
3. 202718 2. 131581 2. 158948 2. 488646 2. 227147 2. 132859 2. 450816 3. 249098 2. 29764  
9. 487033 8. 270296 6. 878724 7. 383548 6. 724892 6. 87287 7. 194876 6. 308909 6. 988894  
3. 005371 2. 492478 2. 581187 1. 809727 2. 062357 1. 706072 2. 153141 2. 221954 2. 259597  
4. 008759 3. 08539 3. 143411 3. 556233 3. 87005 3. 896527 3. 531937 4. 965066 4. 080561  
4. 874077 5. 510135 5. 558062 6. 319921 3. 527956 5. 365408 5. 437166 3. 512034 5. 200336  
4. 590335 2. 889323 6. 192337 4. 712242 3. 032385 3. 675173 3. 306931 2. 949933 3. 499105  
3. 309844 2. 643308 3. 468828 3. 096362 4. 18783 4. 438901 3. 023181 1. 921278 3. 299471

1. 674586 3. 10826 2. 73101 3. 024016 3. 068475 3. 643822 3. 527789 3. 864822 4. 464863  
1. 991365 1. 853798 2. 013634 2. 467885 2. 285436 2. 24842 1. 718508 2. 34729 1. 926266  
2. 299413 2. 271813 2. 231263 2. 185421 2. 380373 4. 447993 2. 552271 2. 79875 3. 165157  
1. 915736 1. 976181 3. 780017 2. 216385 2. 661856 2. 261779 2. 933352 1. 757586 2. 396815  
7. 105141 6. 201903 6. 928654 6. 536903 6. 505848 6. 697976 6. 252639 4. 836641 4. 802707  
1. 848591 2. 348621 1. 46679 2. 292444 1. 136541 2. 680136 2. 566342 3. 388629 3. 109969  
2. 632966 2. 053809 2. 172987 2. 077484 1. 884485 1. 483671 1. 926807 2. 57259 2. 124058  
6. 323389 5. 81062 5. 436262 5. 467341 5. 685644 6. 109948 6. 831605 6. 544896 7. 168493  
1. 852517 2. 291188 1. 675418 2. 157945 2. 059131 2. 308181 1. 720164 2. 052623 1. 602785  
5. 845858 5. 915987 5. 2689 5. 158413 5. 6071 5. 504043 5. 412865 5. 937655 5. 461877  
4. 426357 4. 182533 4. 818935 4. 408019 5. 257574 3. 21124 4. 073679 5. 138379 3. 775246  
7. 920016 6. 587199 6. 015228 6. 027365 6. 183685 7. 314294 6. 614842 5. 336128 4. 649349  
1. 718326 1. 975081 2. 184539 1. 71631 1. 642824 1. 816798 2. 09503 2. 054764 1. 630605  
6. 172799 6. 684603 6. 539584 5. 319772 6. 489049 5. 772817 6. 299504 5. 846174 5. 61659  
1. 667257 1. 785053 1. 860322 2. 535609 2. 923075 1. 988199 1. 721991 1. 620266 1. 457109  
5. 067884 5. 408791 4. 951314 5. 375484 5. 82193 5. 676974 6. 334744 6. 643774 6. 314688  
1. 760366 1. 336517 0. 702741 1. 029608 1. 264205 1. 509625 1. 218063 1. 803635 1. 450036  
6. 000401 6. 513261 6. 057469 5. 744514 5. 566887 5. 316887 4. 372469 3. 603445 3. 377381  
1. 4276 2. 570481 1. 123817 2. 190423 1. 55805 1. 425767 1. 001952 1. 093065 1. 144671  
4. 717771 3. 933534 4. 277877 4. 799462 4. 332382 5. 672685 4. 243075 3. 018176 4. 568951  
8. 095536 7. 760965 7. 309941 8. 1584 8. 394154 6. 885921 7. 926371 8. 392773 7. 101713  
2. 202274 2. 308989 2. 345786 1. 787135 2. 289873 1. 836952 2. 13835 2. 542041 3. 019389  
6. 231398 5. 835931 6. 066572 6. 417588 5. 275256 5. 564213 6. 357594 5. 999373 5. 848079  
7. 700263 7. 664421 7. 251092 7. 00938 7. 706334 6. 918554 7. 461092 7. 551816 8. 143909  
6. 002412 6. 529471 6. 012958 6. 337585 6. 865605 5. 969948 6. 538266 6. 074119 6. 130048  
1. 571273 1. 401745 1. 195025 1. 154538 1. 389574 1. 28061 1. 332331 1. 324678 1. 318452  
7. 019423 6. 212577 6. 887853 6. 633271 6. 234354 2. 980819 4. 700394 5. 133752 5. 592957  
6. 657158 8. 122787 7. 535962 7. 148601 7. 715378 7. 467345 7. 163737 7. 207144 6. 742318  
4. 914534 4. 262323 5. 45163 5. 086062 4. 803275 5. 696943 4. 742261 3. 502842 4. 304717  
2. 888998 3. 205406 2. 710836 3. 54229 3. 073956 3. 424757 3. 38051 3. 47092 3. 239938  
5. 280868 5. 250398 7. 440234 6. 087712 3. 993884 3. 40641 4. 765972 5. 64382 4. 278776  
5. 210679 5. 882507 6. 497327 5. 981861 6. 389269 5. 969039 6. 328891 6. 939476 6. 105092  
1. 965082 2. 226598 1. 94971 2. 249302 1. 998934 2. 304847 2. 303806 1. 936717 2. 050475  
3. 782102 2. 965332 2. 897833 3. 20724 3. 754066 3. 240893 3. 498322 4. 669326 4. 526115  
9. 787147 9. 405942 9. 68518 9. 271145 9. 434474 9. 803687 9. 376619 9. 1908 8. 426143  
3. 37674 2. 572511 3. 404908 2. 81482 3. 405348 2. 893582 2. 636178 2. 886759 2. 591893  
3. 591468 3. 3023 2. 709268 3. 147685 2. 722086 3. 030699 3. 302129 3. 487899 2. 658699  
2. 041552 2. 256668 3. 682415 1. 934665 2. 681702 1. 990266 3. 364706 2. 480539 3. 23392  
1. 793588 2. 24601 2. 582801 2. 411996 2. 307007 1. 995887 1. 874092 2. 856463 2. 547806  
2. 564134 3. 206449 3. 058602 3. 086506 2. 863538 2. 831706 3. 011471 2. 639612 2. 667715  
3. 088881 2. 681139 2. 0191 4. 082102 2. 514782 3. 305723 3. 964868 3. 055787 4. 276103  
7. 512708 6. 997842 7. 419666 7. 093781 6. 831052 8. 193459 7. 153515 7. 381523 7. 528751  
1. 358622 1. 561762 1. 685129 2. 24105 1. 651541 1. 542093 1. 464809 2. 126988 1. 589212  
1. 46422 1. 516931 1. 063933 1. 488307 2. 027465 1. 52019 1. 294059 1. 338701 1. 476579  
6. 023508 6. 185773 6. 396299 5. 933304 6. 3994 5. 724437 6. 006099 6. 170463 5. 65031  
2. 424425 1. 353119 1. 883292 1. 925846 1. 738551 1. 909482 1. 25923 1. 331025 0. 83225  
2. 259777 3. 674449 2. 298262 2. 186513 2. 559685 2. 509692 2. 619906 2. 703948 3. 568188  
1. 054436 1. 510486 1. 807286 1. 805189 1. 184269 1. 222626 1. 160869 1. 319817 1. 013945  
4. 004165 2. 707968 3. 259445 3. 445113 3. 043768 3. 237974 2. 845477 2. 776459 2. 899613  
2. 970076 2. 364799 3. 463561 2. 882738 3. 357238 2. 649585 3. 355327 2. 855576 3. 044115  
2. 445917 3. 259372 3. 867501 3. 896876 3. 530201 3. 632423 4. 238222 3. 585528 4. 607987

1. 644971 1. 437625 1. 642842 1. 883115 1. 754723 1. 344147 2. 097855 1. 286038 2. 55026  
3. 566781 3. 519038 4. 086875 4. 334948 4. 171996 3. 725174 3. 450689 3. 824657 3. 630184  
3. 72337 3. 440102 3. 920147 3. 009349 4. 190942 3. 15287 3. 333012 2. 988793 3. 269989  
4. 622891 3. 356485 3. 354764 3. 382689 2. 761748 3. 247088 3. 085376 4. 530937 3. 581242  
1. 969728 2. 664771 3. 257378 3. 458988 2. 705183 3. 423792 2. 832959 2. 750574 2. 337462  
1. 498567 2. 327725 1. 772974 2. 502603 1. 928471 2. 311614 2. 666391 2. 602883 1. 791535  
7. 011568 7. 475546 7. 128464 7. 554322 7. 265956 7. 720797 6. 931535 7. 406698 7. 363094  
2. 816381 3. 199681 2. 788503 2. 700097 2. 215015 3. 686736 3. 226598 3. 904086 2. 118476  
9. 816634 10. 13966 9. 935341 9. 424032 10. 14953 9. 544877 9. 544625 9. 215892 9. 515354  
7. 60696 7. 69988 7. 244743 8. 020367 8. 391337 7. 713726 7. 134422 7. 01554 7. 404716  
3. 549108 3. 86704 4. 528968 3. 578503 4. 093774 3. 917976 4. 652243 3. 335966 3. 362762  
4. 54913 4. 06585 5. 321923 5. 308464 3. 547274 5. 616086 5. 766475 4. 088111 4. 782238  
9. 495336 8. 465139 9. 306378 9. 03253 8. 797464 9. 669487 8. 852737 9. 322192 9. 514713  
3. 516457 2. 013172 2. 397101 2. 325418 1. 952544 2. 236127 1. 546831 2. 102146 2. 532491  
6. 038632 5. 56529 6. 118097 5. 812885 6. 03239 6. 618647 7. 064612 6. 698299 6. 83778  
9. 464786 9. 441503 9. 284336 9. 187948 9. 317434 9. 28003 9. 67388 9. 307329 9. 185598  
8. 051958 7. 664185 7. 823793 8. 026067 7. 787836 7. 805734 7. 975161 7. 748234 7. 510262  
1. 620785 2. 181721 2. 055101 2. 125109 2. 111535 2. 647195 1. 837774 2. 373433 1. 559004  
4. 892037 3. 103166 4. 34993 3. 787044 3. 416433 4. 062467 3. 143124 4. 542075 3. 719624  
1. 628316 1. 981872 1. 792278 1. 438133 1. 496876 1. 854191 1. 073324 1. 825447 1. 865552  
2. 536707 2. 143472 2. 599751 1. 958156 2. 730211 3. 099177 2. 679685 2. 175841 3. 30879  
3. 788315 3. 513538 2. 452195 3. 511044 3. 382308 2. 6206 3. 592049 3. 029497 2. 756543  
2. 738851 2. 917086 2. 514696 2. 571477 2. 866406 2. 364556 1. 800581 2. 805628 2. 35399  
6. 984279 7. 157339 7. 168061 6. 998613 7. 522664 6. 450136 6. 628057 6. 443985 6. 78987  
2. 280758 1. 178486 1. 534568 2. 105563 1. 344519 0. 990223 1. 142159 1. 069256 0. 608222  
6. 173198 5. 099356 6. 62105 6. 147362 7. 051566 6. 119123 6. 175192 6. 38704 6. 560953  
1. 602853 1. 911134 2. 054577 1. 903758 2. 742509 2. 34133 1. 66482 2. 792322 2. 326462  
1. 259252 1. 597405 1. 953918 1. 063445 1. 157806 1. 377524 1. 388757 1. 164189 1. 810214  
2. 732767 4. 99639 2. 817858 2. 878861 3. 259688 4. 267143 2. 961237 4. 085376 3. 441987  
2. 152944 2. 58365 2. 054467 2. 191093 2. 044122 2. 59472 2. 454727 2. 433915 1. 547397  
1. 386689 1. 512148 1. 373652 1. 535152 1. 229699 1. 915782 1. 366927 1. 650175 2. 086233  
5. 93493 5. 975725 5. 255935 5. 510349 5. 274149 4. 685975 5. 706426 5. 384135 5. 499983  
1. 209351 1. 332541 1. 292025 1. 522092 2. 268712 1. 672422 1. 384453 1. 739705 1. 444718  
1. 873404 2. 163737 1. 895047 2. 471211 2. 250064 2. 281328 2. 237901 2. 294386 1. 8738  
4. 733582 5. 344234 5. 62497 4. 101734 4. 680675 6. 270677 5. 799731 4. 003315 5. 153822  
3. 730121 3. 723302 3. 553638 3. 998491 3. 447795 3. 481287 3. 486283 4. 432196 3. 79069  
3. 576558 4. 834012 4. 622695 3. 9954 4. 676028 4. 222482 3. 864524 4. 900987 4. 756365  
4. 148298 4. 860443 4. 985921 4. 766467 4. 539389 5. 163037 4. 819544 5. 03389 4. 601573  
1. 586877 2. 066628 1. 924178 2. 727106 2. 333099 2. 727723 1. 661386 2. 058755 2. 465496  
7. 346157 7. 85125 7. 504011 7. 645786 8. 152248 7. 508443 7. 953073 7. 89604 7. 699339  
3. 069087 3. 012348 3. 218389 3. 328358 2. 986705 4. 046743 3. 549519 3. 242784 2. 470245  
3. 648549 3. 293495 3. 219989 3. 730211 4. 840967 2. 382574 2. 526993 4. 408636 3. 278859  
5. 853572 6. 942406 6. 338012 6. 887095 6. 004162 6. 457325 6. 511588 6. 278819 5. 702821  
4. 052494 3. 628998 4. 028884 3. 984364 4. 179545 4. 005205 2. 705365 3. 251694 3. 516485  
1. 770663 1. 556804 1. 676253 1. 42734 1. 115467 2. 642135 1. 288715 1. 627479 1. 120333  
5. 658592 6. 599522 6. 282081 6. 346063 6. 455888 4. 090801 5. 420646 5. 868342 6. 251582  
4. 127226 1. 751797 1. 244512 1. 135186 2. 130245 4. 276325 0. 969318 2. 449736 1. 61393  
2. 216167 1. 669415 1. 80733 2. 274629 3. 659588 3. 159181 2. 555915 1. 700172 2. 500713  
3. 134421 3. 225162 3. 609374 4. 179616 2. 853231 2. 449846 2. 619104 2. 411242 3. 478652  
6. 018928 4. 577141 3. 891253 4. 185232 3. 460305 2. 941569 1. 954635 1. 359236 2. 170261  
4. 510311 4. 021754 4. 686097 4. 603655 4. 499452 5. 568612 4. 795859 5. 340513 5. 154059

2. 049391 2. 980318 2. 308951 2. 630295 1. 96473 4. 599891 2. 702142 2. 158325 3. 029425  
9. 348532 9. 644856 9. 372265 9. 582652 9. 948153 7. 570515 9. 46087 9. 362439 9. 335298  
5. 513022 4. 143422 3. 978137 4. 603665 4. 634964 4. 444802 4. 417679 4. 248475 4. 419248  
2. 854602 2. 740846 3. 052172 2. 855551 3. 446501 2. 714778 3. 085323 3. 271139 3. 310043  
0. 984728 1. 471186 1. 248061 1. 631347 1. 242124 2. 425384 1. 974068 2. 116262 1. 81914  
2. 540124 2. 747347 3. 697436 2. 239727 2. 904426 2. 508399 2. 054196 2. 582253 2. 58395  
4. 544876 4. 124103 4. 830573 5. 124286 3. 966385 4. 17341 4. 712953 4. 606171 5. 05467  
2. 354994 2. 764533 3. 465437 3. 229084 2. 283604 2. 190647 3. 032478 4. 20824 3. 261453  
2. 615026 1. 401584 3. 669866 1. 922471 2. 673935 4. 253584 4. 09007 3. 35072 3. 00199  
5. 330134 6. 19266 6. 74522 6. 241695 6. 153529 6. 177958 6. 020847 6. 282305 6. 646925  
3. 13464 3. 510192 3. 136749 4. 37106 3. 801491 4. 229662 4. 706173 5. 136109 4. 205257  
1. 149765 0. 841132 1. 037402 0. 951592 1. 805791 1. 245229 1. 498674 1. 358467 2. 012764  
2. 690958 2. 110226 0. 929278 1. 784145 1. 818129 1. 649524 1. 203637 1. 577497 1. 273632  
1. 369444 1. 815757 1. 437361 1. 122406 1. 379614 1. 361306 1. 732701 1. 718409 2. 008317  
2. 73484 1. 697092 1. 824114 2. 590883 1. 799826 1. 848462 1. 611467 1. 742455 1. 799608  
1. 872072 2. 646913 2. 590184 3. 46247 3. 000414 2. 221929 2. 358398 2. 053754 2. 249122  
9. 348615 9. 68509 9. 60637 9. 582266 9. 422707 9. 826505 9. 384524 9. 550055 9. 528197  
5. 844355 5. 17939 6. 219685 5. 98182 6. 190943 6. 799145 7. 255065 6. 943155 6. 526526  
1. 676306 1. 913442 2. 669728 2. 804707 1. 841166 3. 418166 1. 815046 2. 649719 3. 13129  
3. 202016 1. 480694 1. 629933 2. 656913 1. 51081 1. 627786 1. 96236 1. 303997 1. 951207  
2. 611232 3. 002868 2. 262861 2. 361914 2. 621136 2. 599151 2. 320253 2. 696834 2. 76852  
2. 164194 0. 831527 0. 763583 2. 083203 1. 246518 1. 369989 1. 64556 1. 277403 2. 180582  
1. 797134 1. 539392 1. 517137 2. 073863 1. 830638 1. 544091 1. 545846 1. 536331 1. 520398  
1. 889368 1. 716066 1. 882047 2. 522652 1. 872072 1. 305513 1. 362662 2. 515923 2. 326332  
3. 824829 4. 819853 4. 66851 4. 885577 4. 830564 4. 607521 5. 176749 4. 975259 4. 278468  
2. 35634 2. 320977 2. 568285 2. 720302 2. 310543 2. 666553 2. 752625 2. 616812 3. 197664  
2. 275823 2. 103925 3. 088807 2. 631254 3. 312166 2. 914891 2. 588996 3. 068599 3. 334735  
3. 561405 4. 237111 3. 965566 4. 116213 2. 747044 6. 113075 4. 763953 4. 538708 5. 779244  
1. 974115 2. 021424 2. 747734 1. 252167 1. 872332 1. 332765 1. 654052 2. 631624 2. 435751  
3. 81943 3. 876655 2. 863498 3. 042118 2. 89647 3. 595815 2. 697786 3. 073239 2. 852853  
1. 905188 1. 489121 1. 056914 1. 318542 1. 962141 1. 386546 1. 438011 1. 459998 1. 474792  
1. 648336 1. 376357 1. 534363 1. 639789 1. 243977 1. 563222 1. 887958 1. 778751 2. 616636  
2. 294453 2. 511492 3. 181274 3. 282279 3. 393552 3. 027507 2. 432192 2. 596373 3. 273674  
2. 164756 3. 314959 2. 530611 3. 169912 3. 22474 2. 389783 2. 956656 3. 105914 2. 19474  
6. 223754 6. 589084 5. 463254 5. 709917 6. 134597 6. 658686 7. 074657 7. 397279 7. 191542  
1. 102481 0. 929017 1. 374427 1. 100319 0. 535646 0. 894161 1. 241525 0. 831638 1. 471406  
1. 603092 1. 602101 1. 820425 2. 250085 1. 700714 1. 592811 1. 212035 1. 806725 1. 387686  
2. 818308 2. 988651 3. 61706 2. 490255 3. 190065 3. 801353 2. 656396 2. 428314 3. 26682  
4. 448971 6. 081781 5. 770049 5. 269946 5. 162908 5. 58774 5. 260533 4. 937582 5. 529457  
6. 542063 6. 217261 6. 547101 5. 504838 5. 646367 5. 978147 6. 571687 5. 607647 6. 165109  
4. 080465 4. 617409 4. 702016 5. 144255 3. 763816 4. 670515 4. 790263 4. 526363 4. 666858  
4. 143881 3. 201437 4. 189196 4. 035226 3. 515944 3. 832517 4. 182321 2. 191187 3. 44375  
2. 217517 2. 210646 2. 293077 2. 351551 2. 755234 3. 009876 2. 166696 2. 541011 2. 582681  
1. 363446 1. 488171 1. 549685 1. 331559 1. 734587 1. 460998 1. 674107 1. 849673 1. 305894  
4. 386964 4. 93103 4. 249414 3. 852848 4. 166764 3. 70861 5. 338658 4. 764213 4. 641218  
6. 486539 6. 616889 6. 357158 5. 471194 6. 629127 6. 907769 8. 115708 6. 786342 7. 011295  
4. 148455 2. 664021 2. 970083 2. 994461 2. 659567 2. 390485 3. 31687 2. 409206 4. 221189  
2. 146072 1. 302692 1. 699049 2. 470812 1. 726686 2. 04013 1. 640694 1. 900959 1. 984968  
1. 631895 2. 803215 2. 225229 1. 327692 1. 697949 1. 62583 2. 447329 1. 832418 1. 890491  
1. 577611 2. 638269 1. 815231 2. 412514 2. 319225 1. 996659 1. 911427 1. 981089 1. 809466  
3. 043894 3. 042456 2. 81887 2. 538503 2. 684601 2. 717654 1. 921469 2. 1393 2. 285476

2. 674424 1. 990588 1. 856603 2. 199184 2. 390286 2. 233218 1. 986485 1. 558296 3. 353311  
5. 908925 7. 346907 5. 32775 5. 462971 7. 267562 6. 129606 6. 924512 6. 486185 6. 126796  
4. 196872 4. 72111 3. 997325 3. 658199 5. 636063 5. 480666 5. 275143 3. 885202 5. 099555  
1. 814503 1. 410101 1. 378511 2. 619595 1. 909736 0. 946086 1. 369483 2. 465289 2. 989591  
4. 830653 4. 501455 5. 546935 5. 787231 5. 281332 5. 128132 4. 516297 5. 041951 4. 447752  
2. 821709 3. 428338 4. 351356 3. 767005 3. 446448 2. 351523 2. 758444 4. 024293 3. 051175  
2. 811288 3. 382958 2. 287171 2. 670088 2. 597162 2. 497545 2. 149944 3. 046377 2. 646054  
3. 078688 2. 269114 2. 713164 3. 128382 2. 130663 3. 818437 3. 46536 3. 460865 2. 806817  
6. 229586 4. 427939 5. 336801 7. 015267 6. 044384 7. 545543 5. 437156 3. 448907 5. 985166  
1. 113368 1. 608839 1. 713478 1. 080905 0. 643214 1. 456346 1. 170313 1. 260819 1. 244875  
6. 557713 6. 47558 6. 442253 6. 075855 6. 053151 5. 305124 6. 626908 7. 092932 6. 835127  
5. 668968 5. 501865 6. 494778 6. 301099 5. 735467 7. 110663 6. 666463 6. 465955 6. 020049  
5. 354452 6. 220321 5. 859096 5. 847328 6. 582856 5. 18112 5. 169566 5. 671247 6. 144376  
2. 188402 2. 034733 1. 593124 1. 878772 2. 147957 2. 072059 1. 926311 2. 634728 2. 024511  
4. 551573 3. 665573 3. 012523 4. 179328 4. 089919 2. 134322 3. 147405 1. 417511 1. 688597  
4. 35738 4. 050681 4. 389718 3. 978655 3. 539676 5. 28356 4. 215033 4. 691157 5. 166039  
3. 683754 3. 348707 4. 303923 4. 612449 3. 28601 4. 411641 4. 04965 4. 398814 4. 032531  
3. 358581 4. 757787 4. 709935 2. 44393 3. 481031 3. 881873 3. 261002 1. 972287 3. 030739  
3. 219698 2. 885422 2. 461835 3. 705981 3. 121905 3. 067853 3. 199154 2. 588756 2. 606203  
2. 783913 3. 294424 3. 353194 3. 0906 3. 277351 2. 632857 3. 285529 3. 089922 2. 908354  
3. 181144 3. 882749 3. 09345 3. 170665 2. 972716 4. 133947 4. 484732 4. 348578 4. 316782  
4. 532878 3. 435895 3. 889138 3. 569445 3. 344925 4. 617917 5. 291869 4. 672821 5. 058851  
3. 018649 2. 964998 2. 781108 3. 072983 2. 781061 2. 266439 1. 715179 2. 359403 2. 658201  
4. 086465 3. 456707 5. 5526 4. 767587 4. 725689 4. 388509 4. 939607 3. 942915 4. 081963  
1. 398082 1. 724054 1. 22559 1. 642501 1. 410087 1. 216628 1. 580784 1. 54881 1. 607097  
4. 564539 5. 532217 5. 756494 5. 777891 5. 766686 5. 517144 6. 423858 6. 188614 6. 773228  
2. 639209 2. 279785 2. 624377 3. 079419 3. 234742 4. 05826 3. 032377 2. 788471 3. 387745  
3. 358335 4. 82696 4. 515159 3. 8126 3. 015444 5. 535125 4. 582406 5. 167104 4. 942604  
1. 724661 1. 875949 1. 22754 1. 403516 2. 191676 1. 856773 1. 804303 3. 240178 1. 801857  
4. 111348 3. 319247 3. 534198 3. 369732 3. 447346 3. 00991 4. 053735 4. 258872 4. 251334  
3. 538009 3. 132893 2. 161907 3. 45578 2. 78218 3. 417923 2. 446292 3. 576016 4. 033297  
1. 274834 3. 248735 1. 614321 1. 862328 1. 291551 0. 971246 1. 456477 2. 297645 1. 379108  
6. 985602 6. 300338 6. 020206 6. 491464 4. 863843 5. 887343 7. 033112 8. 116339 7. 075522  
2. 485718 2. 768396 3. 073331 2. 736555 2. 325263 2. 567965 2. 411325 2. 365135 2. 767977  
7. 361073 6. 438039 7. 49692 7. 7086 7. 953535 7. 093248 7. 903422 8. 778484 8. 168442  
2. 605195 1. 741161 2. 725292 1. 824776 1. 695133 2. 460409 1. 727571 1. 95505 2. 620162  
6. 519718 7. 304678 7. 129313 6. 827183 7. 618674 7. 116542 6. 87965 7. 189029 7. 359541  
1. 373275 1. 35724 1. 995401 1. 629232 1. 52782 3. 160707 1. 721124 1. 23051 1. 206994  
8. 289034 7. 704085 8. 171138 8. 729618 8. 39073 8. 427855 9. 028611 9. 03109 9. 240845  
4. 081524 3. 8139 3. 446303 3. 960337 4. 629323 2. 637964 3. 355954 4. 128068 4. 175104  
2. 94699 3. 741006 3. 463963 3. 948771 2. 960276 4. 228115 3. 391366 2. 842322 3. 229218  
1. 598825 1. 251376 1. 399492 1. 594797 1. 009388 1. 244074 1. 683479 1. 691131 1. 587819  
6. 674423 7. 29164 7. 17691 6. 50217 7. 406793 6. 778787 6. 774508 6. 964028 6. 457373  
7. 11685 7. 593466 7. 480943 6. 878046 7. 219291 7. 187121 7. 833145 6. 971146 6. 991921  
1. 48872 1. 32071 1. 323632 1. 744129 1. 305918 1. 848254 2. 134171 1. 788993 2. 297568  
1. 341588 1. 698845 1. 226032 1. 317546 1. 264849 1. 320053 1. 45728 1. 644686 1. 365596  
1. 229796 0. 968192 1. 112343 1. 192016 1. 487706 1. 55464 1. 023815 1. 263164 1. 773647  
4. 553701 5. 015981 4. 23552 4. 586414 5. 252935 4. 969598 4. 397874 4. 463026 5. 211744  
6. 790275 6. 898918 7. 02447 6. 362891 7. 156194 6. 645371 5. 997642 6. 096543 6. 094591  
3. 797832 1. 648158 1. 444175 1. 419429 1. 481288 1. 911297 1. 808041 1. 548336 1. 506419  
1. 176446 1. 194537 0. 935309 1. 425469 0. 693953 0. 727448 1. 582947 0. 84548 1. 271739

3.856809 3.246334 2.193526 2.551648 4.184502 3.783322 3.358485 3.68276 3.964676  
3.752247 5.148512 3.013543 4.307985 4.309342 3.525516 3.730869 4.540081 5.20237  
1.559675 1.791714 1.041036 1.287028 1.263095 1.399521 1.520704 2.168944 1.876782  
1.139421 1.296062 1.696827 2.706026 2.054186 2.189238 2.233482 1.633229 1.328601  
1.585628 1.89749 2.943404 2.899061 2.478245 3.910645 3.94852 2.806774 4.067085  
8.305065 8.389135 8.597616 8.290178 8.377295 8.742093 8.493067 8.359472 8.250358  
8.073873 6.809194 6.050919 6.454401 7.192831 6.851436 7.387641 7.291464 7.475291  
6.553448 5.855896 6.18687 7.935367 4.917517 7.005966 5.566213 4.947924 5.08954  
6.948281 6.246718 6.718349 6.793519 5.334006 5.745938 6.768361 5.886738 5.072055  
4.311198 2.805322 3.961797 3.030838 3.3097 3.075802 3.050724 3.057693 3.700773  
4.951518 4.390847 4.906529 3.909353 4.107453 3.559139 3.385186 3.792748 3.84393  
1.087685 1.190486 1.387329 1.307555 1.280782 2.197525 1.834835 1.572703 1.959562  
5.136668 5.740547 6.110691 5.964384 6.05823 5.310818 5.814874 5.579076 6.152109  
5.059743 4.828382 5.327604 5.215856 5.20474 5.219432 5.183463 4.323231 3.551345  
3.083107 2.050088 4.262215 1.78531 1.93275 2.884205 2.89094 2.577011 2.202753  
3.622491 3.159154 3.868176 2.57809 2.30187 3.157867 3.045912 3.473884 2.732646  
1.476408 2.236289 1.816479 1.387157 1.793276 1.467573 2.005276 2.638155 1.597175  
5.007306 5.453607 4.243806 3.873824 4.618354 2.138594 2.649817 3.425613 3.540379  
4.539421 5.341374 5.450277 5.870798 3.396284 2.450394 5.131029 3.920254 4.184295  
7.026724 5.699115 5.597013 7.145174 6.129174 6.612761 5.982902 6.210499 6.175631  
5.074149 5.642408 5.22629 4.664882 5.285707 6.377063 5.300482 5.952903 4.94668  
1.85259 1.991163 3.645931 1.808034 3.006455 2.98306 1.635722 1.509003 1.442237  
7.35392 6.768929 8.035536 7.369569 7.84656 8.35447 9.074962 9.573848 9.469382  
1.447188 1.850577 2.714364 2.736149 1.967202 3.60022 2.444785 2.799454 3.66777  
6.27667 6.831174 6.346711 6.076918 6.510399 3.808056 6.079665 4.986253 5.415896  
4.043773 3.527154 1.860152 2.519489 2.851255 2.158234 3.171848 2.388003 1.841445  
6.177688 6.473538 6.232504 6.086511 6.296266 7.17313 5.866369 5.610909 6.459222  
1.395416 1.297316 1.247309 2.603811 2.364637 1.947348 1.495367 2.086464 2.445861  
1.271755 1.133629 1.601793 1.419454 1.286594 1.34421 1.103207 1.207178 1.135197  
1.264978 1.567848 1.810501 1.349358 1.393973 1.58636 2.116657 1.696456 2.019157  
2.767513 1.716641 2.142311 2.476208 1.465322 2.558559 1.904218 2.441204 3.371896  
3.691534 2.832773 4.410346 2.584238 3.882526 3.509123 3.343773 3.309205 3.269647  
4.452717 3.13327 3.185001 2.791998 3.125331 2.342377 3.381794 3.218443 4.041819  
1.176527 1.388571 1.094283 1.417391 1.624425 1.340872 1.392875 1.0301 1.997423  
9.459973 9.887637 9.688498 9.760833 9.86781 9.664584 10.13832 9.724474 9.511025  
3.663444 3.39997 2.722796 2.773426 2.779775 2.697691 2.836933 3.152052 3.214566  
6.224192 6.682835 6.609273 6.361436 6.877786 7.339609 7.07127 6.4801 6.527394  
5.90508 4.855353 4.836011 2.679796 4.327985 5.758134 5.092082 2.687147 4.09262  
2.872499 2.977093 2.413386 2.726093 2.442617 2.920185 2.540515 3.301045 3.444249  
2.740313 1.979665 2.550634 2.172554 2.184177 2.574971 2.438293 1.827511 2.924746  
8.191665 8.472474 8.684055 8.476931 8.940258 9.679751 9.622252 9.191112 9.358166  
4.519747 4.343472 5.060289 5.624034 5.184243 5.295839 4.292198 5.357395 5.227945  
1.726066 2.305687 1.962858 1.965391 2.145338 1.606108 1.921894 2.61495 2.093597  
4.89644 5.314577 4.06696 4.242664 3.216086 4.98883 3.013584 3.698748 3.718004  
5.572849 5.167105 5.023513 4.962732 5.225742 4.609286 6.754263 6.80277 6.384092  
2.446377 2.162801 2.230994 2.403784 2.732962 2.565857 1.498005 2.362011 1.916587  
2.992802 3.11525 3.149742 2.868971 2.958025 2.297155 3.099684 2.886918 2.307701  
3.263037 3.583798 2.858797 3.064951 2.700506 4.862539 3.362089 3.038937 3.750481  
1.460539 2.637525 2.790971 2.501299 2.660824 2.120971 3.29236 2.151202 2.013994  
2.579883 2.775835 3.352058 3.465289 2.586437 4.716608 3.471878 3.987862 2.32838  
4.783574 5.433658 5.289561 4.997558 5.737374 4.28013 4.730026 3.632589 4.227873



3. 293938 4. 211175 3. 278639 3. 54567 3. 075824 3. 357438 3. 592801 2. 591566 2. 194476  
3. 744983 3. 248311 4. 035148 3. 432681 2. 585189 3. 247978 4. 071262 3. 888175 3. 409366  
5. 07011 5. 767177 5. 696141 5. 694631 6. 41602 5. 443605 7. 121241 6. 505121 6. 921488  
5. 042313 5. 353012 4. 458624 5. 367686 5. 451625 5. 457103 6. 051582 6. 127838 6. 124392  
4. 022076 4. 206594 3. 616906 4. 023395 3. 759097 3. 857558 4. 521512 3. 239629 3. 602445  
5. 768973 5. 655602 5. 276535 4. 666578 4. 54519 4. 56853 4. 49188 3. 253005 3. 847542  
7. 689634 7. 516335 7. 771524 7. 222155 7. 814304 7. 695686 7. 706436 7. 230707 7. 781446  
2. 245736 1. 842471 2. 260442 3. 446383 2. 938191 2. 204476 1. 817824 2. 505335 3. 542915  
4. 484735 4. 844558 4. 890417 4. 175157 4. 671588 4. 040366 4. 210876 4. 133093 4. 493254  
2. 203721 2. 321574 3. 339744 3. 115083 2. 277344 2. 137187 1. 981844 2. 658397 2. 509793  
2. 14854 2. 02374 1. 824102 3. 388 2. 349575 1. 924703 2. 224569 3. 077036 3. 238509  
9. 93882 9. 099042 10. 07166 9. 688697 10. 07514 9. 234201 10. 06385 10. 86211 10. 71142  
3. 330774 3. 345626 3. 187199 2. 663666 3. 299313 2. 727719 2. 989262 1. 884162 1. 775803  
3. 822689 5. 107739 4. 778234 4. 914737 4. 317492 3. 634252 5. 282397 4. 027423 4. 829826  
3. 088642 4. 245437 3. 718598 3. 488968 3. 975382 3. 547765 3. 976746 3. 939762 3. 854204  
2. 644873 3. 973901 1. 815807 3. 540829 2. 395972 2. 202997 2. 412381 2. 707066 2. 204961  
1. 458522 1. 32322 0. 755821 2. 081011 1. 442408 0. 456094 1. 475308 1. 869364 1. 868458  
5. 905288 5. 587282 6. 411144 4. 901642 5. 480055 6. 723221 5. 310977 5. 844085 5. 564002  
3. 147264 4. 056906 3. 772255 4. 485167 3. 821682 3. 046091 2. 276629 2. 162796 3. 659867  
5. 416239 4. 874249 5. 170862 5. 583421 4. 85311 6. 643995 5. 794128 5. 869464 5. 33178  
6. 767366 6. 611222 5. 810977 6. 566452 6. 784857 6. 619833 6. 341378 7. 228974 7. 140351  
3. 453467 3. 834409 4. 624869 3. 391924 3. 38014 5. 311671 4. 392507 4. 486096 4. 220404  
2. 748944 2. 171175 2. 2176 2. 030045 2. 743173 1. 950257 2. 173381 2. 494667 2. 840293  
5. 561322 4. 798884 4. 738773 5. 246463 4. 240561 4. 859027 4. 801888 4. 67148 4. 200189  
5. 170328 5. 59073 6. 077835 5. 227658 6. 013853 5. 883969 6. 777873 6. 555245 6. 492899  
2. 591129 1. 96207 2. 991258 3. 978448 2. 737009 2. 214542 1. 291933 1. 810406 1. 835239  
7. 615976 7. 110669 7. 451704 6. 673154 7. 056627 7. 720272 7. 233965 7. 609115 7. 593593  
2. 282007 2. 494237 2. 195674 1. 880333 2. 433408 2. 59568 1. 785502 2. 892373 2. 533121  
1. 752522 1. 304806 1. 301635 1. 457639 0. 964572 1. 480432 1. 334684 1. 370046 1. 272513  
1. 820396 3. 342984 2. 605622 3. 393229 2. 435714 1. 813588 2. 432481 2. 527915 2. 739658  
5. 474788 5. 22128 5. 559347 5. 433776 5. 668526 3. 656441 5. 66237 6. 305332 5. 697256  
1. 748669 1. 658536 1. 53995 1. 656206 1. 691184 1. 727908 1. 758516 1. 757712 2. 261287  
2. 07294 1. 74835 1. 646011 1. 737902 1. 779479 1. 584609 1. 328722 1. 486945 2. 017419  
5. 0921 5. 132563 5. 036465 5. 005422 5. 802645 6. 427025 4. 718065 4. 785275 4. 622991  
1. 694276 1. 78948 2. 146904 2. 500474 2. 406895 2. 513659 1. 400424 2. 095989 2. 041189  
1. 878433 2. 038765 2. 683473 2. 240278 2. 885653 3. 116643 2. 344083 2. 011948 1. 982264  
1. 15402 1. 897213 2. 14687 2. 353799 1. 335651 2. 039801 1. 450491 1. 518936 1. 383141  
7. 064181 7. 027409 7. 421488 7. 516329 7. 247449 6. 786036 7. 585253 7. 203096 7. 310452  
1. 875445 1. 71964 1. 725205 2. 46531 1. 772545 2. 133665 3. 876191 2. 15308 2. 341791  
1. 717231 2. 900898 2. 214438 1. 504501 1. 640166 2. 217666 3. 288553 1. 612837 1. 520665  
1. 742143 1. 563205 1. 651033 1. 962186 1. 954031 2. 570356 2. 306293 1. 728215 2. 858063  
6. 54445 7. 384279 6. 852297 6. 743914 6. 606797 6. 336878 6. 143927 5. 546147 6. 136488  
4. 200473 3. 0586 4. 361521 3. 845633 4. 011368 6. 151635 4. 464732 6. 179509 5. 522605  
1. 869142 1. 493572 2. 475918 1. 873064 1. 427705 1. 580035 1. 561077 1. 669295 1. 827306  
3. 625282 3. 640218 3. 044052 1. 850306 2. 064671 3. 304297 2. 721975 2. 317192 3. 378049  
1. 807697 1. 362423 1. 813743 1. 808258 1. 723909 2. 001463 1. 656208 2. 223576 1. 55121  
7. 934443 6. 653287 7. 346752 6. 962198 7. 037371 7. 472152 7. 694092 6. 640928 7. 317561  
3. 129447 3. 700086 2. 827654 3. 888578 3. 186659 3. 374743 3. 530432 2. 770037 2. 448247  
6. 676844 6. 230689 6. 48187 6. 026293 4. 809685 5. 880763 5. 673487 5. 566857 4. 907712  
5. 830653 6. 718361 6. 466551 5. 777534 5. 755484 4. 960474 6. 437397 5. 159715 5. 681  
5. 515305 7. 274893 7. 579682 6. 434236 5. 758366 5. 594388 7. 167885 6. 546455 5. 981971

5. 941497 5. 438524 5. 337924 4. 117457 5. 467356 5. 001402 5. 047971 6. 579875 5. 588648  
4. 076539 4. 261256 3. 154146 4. 210457 5. 03679 3. 11569 3. 97269 4. 546167 3. 814538  
2. 302958 2. 046093 2. 079112 2. 687411 2. 613078 2. 78076 3. 068857 2. 013681 2. 30606  
5. 495058 5. 538055 5. 854381 5. 995775 5. 187568 5. 783422 6. 199628 5. 782873 5. 990309  
2. 99556 3. 055827 3. 311258 3. 160502 3. 435062 3. 347456 3. 037847 3. 33443 3. 22169  
1. 622697 1. 027258 2. 31126 1. 350266 1. 663623 1. 468029 1. 403252 1. 185034 1. 401328  
7. 245094 7. 483373 6. 513341 7. 011357 6. 944919 7. 259358 7. 491917 7. 144789 6. 998508  
7. 426424 6. 949686 6. 547918 6. 480342 6. 13495 7. 265292 6. 758472 5. 991766 6. 319887  
5. 172316 4. 492925 5. 591054 5. 566519 5. 711188 5. 744996 5. 429845 4. 774456 3. 296187  
7. 456237 7. 439759 7. 217798 7. 051553 7. 615579 7. 436142 6. 966795 7. 106702 7. 145184  
1. 689403 1. 5121 1. 988638 1. 483711 1. 689822 1. 656448 1. 786158 1. 967455 1. 854521  
3. 208107 5. 132441 4. 261333 4. 967996 5. 191682 4. 721798 5. 343819 4. 746637 5. 54408  
4. 024805 3. 809869 3. 250293 4. 672621 3. 250313 4. 86552 4. 183769 4. 109294 3. 244091  
1. 803644 2. 635315 1. 375299 1. 428061 1. 82845 1. 516262 1. 426539 1. 293017 1. 203371  
1. 615736 1. 971852 1. 245332 1. 44055 1. 686928 1. 671609 1. 382712 2. 366886 1. 929747  
6. 016297 5. 338196 5. 753986 5. 942512 5. 186097 6. 21701 5. 452964 5. 993291 5. 36397  
5. 372745 4. 877965 5. 698279 5. 567876 4. 020745 6. 146723 5. 074114 5. 146466 4. 534852  
4. 996018 6. 325739 5. 815134 5. 354804 6. 257807 3. 633398 6. 691736 6. 298825 6. 074486  
6. 387235 5. 663821 5. 615479 6. 612959 5. 868486 6. 596199 5. 986192 6. 023819 6. 013344  
4. 789168 3. 994449 4. 630238 4. 855098 5. 005989 5. 111663 5. 069316 4. 222546 5. 132123  
1. 733602 1. 251477 1. 404126 1. 896074 1. 232612 1. 171576 1. 907814 1. 253133 1. 737284  
6. 848907 5. 730061 6. 229072 5. 523929 4. 770175 5. 670352 6. 17252 6. 181752 6. 676655  
4. 675364 5. 110911 5. 920512 3. 554192 6. 567161 1. 915204 3. 437864 2. 762541 2. 706917  
1. 143403 1. 197684 1. 166366 1. 143403 2. 493948 1. 672471 1. 506327 1. 419069 1. 09232  
1. 021447 1. 015191 1. 372399 1. 82412 1. 182104 1. 751439 0. 908999 1. 921804 1. 267321  
4. 871693 5. 303824 5. 829175 5. 444615 5. 973332 5. 852238 5. 247835 6. 896331 6. 210681  
4. 844613 4. 894012 3. 54109 4. 531937 4. 475708 2. 818517 3. 822626 4. 425491 3. 513449  
4. 727459 4. 981157 5. 555058 5. 768168 5. 283512 3. 535963 5. 592981 4. 029956 4. 818543  
5. 840196 6. 393794 6. 037927 6. 319113 6. 070119 6. 669483 6. 118118 6. 511115 6. 612179  
5. 925659 6. 48569 6. 295095 6. 094513 6. 349273 6. 197967 6. 824228 7. 11552 7. 312364  
8. 832458 9. 157712 8. 950316 8. 663349 8. 741175 8. 528611 8. 154602 8. 298235 8. 469175  
4. 620884 4. 117611 5. 670159 5. 664746 4. 144156 5. 149339 5. 781427 6. 0431 5. 385326  
3. 584332 3. 225803 3. 046192 2. 650832 3. 607711 4. 098718 3. 179601 4. 290873 3. 641054  
6. 421241 6. 30742 6. 684585 6. 434682 5. 887462 3. 637058 5. 495931 3. 575004 4. 482804  
6. 300699 5. 278161 5. 623578 5. 480802 6. 007892 5. 976434 6. 192761 6. 068542 6. 063583  
7. 950356 7. 779527 7. 895925 7. 634909 8. 151074 8. 850702 7. 745906 7. 778306 8. 353995  
9. 282369 8. 969969 9. 279284 9. 372039 9. 418159 9. 289196 8. 887222 8. 764364 8. 825554  
1. 444433 1. 155273 1. 570738 1. 1268 1. 213593 1. 168554 2. 759545 1. 157896 2. 032362  
3. 470373 3. 123666 3. 598297 3. 581739 3. 306857 3. 010009 4. 548114 4. 60537 4. 219502  
2. 230136 2. 423172 2. 517413 2. 498093 2. 640906 1. 547135 1. 789235 2. 323662 2. 166102  
3. 281825 2. 11344 1. 692441 1. 752147 1. 94719 2. 240971 2. 35227 2. 171083 1. 922209  
3. 058702 2. 488239 3. 853427 3. 243147 3. 44782 2. 278914 3. 08525 2. 926729 2. 779704  
4. 376511 4. 071502 5. 535368 3. 65252 3. 48469 3. 862167 3. 454295 3. 195472 3. 476937  
6. 92822 7. 14152 6. 677713 6. 250787 7. 06682 6. 298311 6. 269729 6. 758969 6. 577077  
8. 474397 8. 610099 8. 252676 7. 772839 8. 078025 8. 173577 8. 150575 7. 672765 7. 869339  
7. 018451 6. 480552 6. 945126 6. 576091 6. 776573 7. 562527 6. 851115 7. 10877 6. 994153  
6. 290257 4. 766785 5. 781456 5. 210476 5. 307437 5. 677977 5. 823604 6. 171387 4. 631652  
7. 30398 6. 866473 6. 481978 6. 747454 6. 869877 6. 04363 5. 892514 5. 101126 5. 94909  
7. 763568 6. 934438 7. 315087 7. 218035 7. 723067 7. 33289 7. 155614 8. 197483 7. 971975  
8. 350307 8. 258552 8. 657465 8. 563379 8. 830233 7. 959855 8. 941478 9. 195779 8. 764786  
3. 153171 2. 386955 2. 752555 2. 805635 2. 009441 3. 717871 2. 97154 2. 048782 3. 174035

1. 877199 2. 1928 1. 553089 2. 421031 2. 218628 2. 286201 2. 960114 2. 742517 2. 202498  
5. 767374 6. 488598 5. 732955 4. 871864 6. 344378 5. 896769 5. 817364 6. 362656 6. 537585  
1. 825602 2. 913944 1. 68886 2. 268528 2. 792301 2. 674693 3. 652465 2. 177672 2. 523606  
5. 621902 3. 462503 4. 830843 2. 92037 5. 745827 6. 296568 5. 478817 6. 127993 4. 587362  
5. 870853 5. 996528 6. 014116 5. 988913 6. 193518 6. 709351 6. 069469 6. 128502 6. 005809  
5. 243656 5. 302556 5. 215214 5. 217014 5. 808368 5. 896488 5. 736451 5. 728313 5. 52755  
5. 058718 5. 196542 4. 650735 4. 544237 4. 885884 4. 809812 5. 438134 3. 6642 5. 044158  
6. 347674 4. 954426 5. 149525 5. 884709 5. 121982 5. 847978 6. 346308 5. 352792 6. 147659  
4. 324208 3. 303496 1. 422316 2. 861898 2. 711754 3. 489061 1. 808123 2. 893963 2. 624846  
3. 609711 2. 684611 3. 684426 3. 202005 4. 112975 5. 809846 4. 488781 3. 824793 3. 741981  
2. 559785 3. 703201 3. 670647 3. 999352 3. 290775 4. 192661 3. 400166 3. 667184 3. 89243  
2. 600719 1. 933847 1. 864728 2. 371309 1. 907558 1. 863433 2. 454714 1. 796319 2. 031661  
2. 297264 1. 948642 1. 579224 2. 039928 2. 159268 1. 907752 1. 955489 2. 585054 1. 352057  
8. 042656 8. 212421 8. 166314 7. 885957 8. 382801 7. 574106 7. 594375 7. 711078 7. 527306  
6. 332944 6. 086314 6. 477708 6. 136476 6. 347936 7. 490178 6. 667975 6. 713186 6. 845677  
7. 044287 7. 097155 7. 021239 7. 479821 7. 035835 6. 16468 6. 912881 7. 475703 7. 211307  
1. 832315 2. 266101 1. 303292 1. 889137 1. 613549 2. 151485 3. 018005 2. 958064 2. 313865  
4. 464098 4. 064839 4. 092416 4. 592187 4. 820697 3. 740602 4. 130558 4. 670393 4. 700658  
4. 582596 4. 186101 4. 86786 3. 943263 5. 050659 5. 62267 5. 503845 5. 581304 5. 563296  
1. 701605 1. 694468 1. 921758 1. 851358 1. 508509 1. 846526 2. 006022 2. 508936 3. 026939  
5. 900345 5. 038134 4. 656053 5. 152267 6. 604754 5. 804878 5. 734231 3. 748872 3. 375258  
7. 529209 8. 823574 7. 711954 9. 062753 6. 984708 4. 862588 7. 990623 2. 811656 4. 153489  
6. 803192 6. 841104 5. 635151 6. 287092 6. 249238 6. 358181 6. 399582 6. 498524 6. 551613  
7. 199551 7. 013988 7. 592198 7. 327642 7. 637638 6. 612312 7. 380766 6. 841473 6. 999274  
2. 960939 2. 901304 3. 027635 2. 670848 1. 977098 2. 552388 2. 739876 2. 118859 2. 89477  
1. 866672 1. 64821 1. 735676 2. 761594 2. 150021 1. 755997 1. 835363 2. 022229 2. 21823  
8. 765643 7. 900554 8. 995487 9. 049361 8. 81456 7. 597123 9. 809408 9. 548655 9. 344474  
5. 325489 6. 049957 5. 786527 5. 669719 6. 167907 5. 487284 5. 674039 5. 621774 6. 030138  
4. 694832 3. 374358 3. 04901 3. 553088 3. 169603 5. 619816 3. 630072 2. 011093 2. 997413  
3. 820007 5. 703975 5. 114261 3. 569692 4. 374864 3. 538827 2. 914799 3. 001524 5. 903301  
7. 1999 8. 215186 7. 893857 7. 333357 8. 412333 4. 26093 8. 234909 8. 427621 8. 080845  
6. 894534 6. 861817 6. 70758 6. 926314 8. 215594 5. 727858 7. 304915 7. 379641 7. 198769  
1. 937058 2. 310267 1. 735754 1. 964653 2. 679389 2. 588647 1. 551291 2. 224846 1. 535138  
5. 948662 7. 01039 6. 68462 5. 929028 6. 635636 6. 08516 7. 257308 7. 155278 7. 252057  
1. 055676 1. 185161 0. 857299 2. 127507 1. 51357 1. 057912 0. 860208 1. 016138 1. 305357  
2. 433085 2. 642974 1. 754013 1. 575366 3. 381438 2. 889562 2. 387631 2. 772753 2. 20604  
1. 546638 1. 811158 2. 041011 2. 657587 2. 677967 3. 383729 1. 864408 2. 922772 2. 691745  
5. 795038 4. 374224 4. 222358 4. 275534 2. 597345 1. 949447 3. 505305 2. 617637 1. 792868  
1. 551116 1. 398315 2. 071027 2. 200189 1. 874525 2. 66886 1. 813929 1. 796545 1. 841142  
4. 503682 4. 389378 2. 252 3. 749679 3. 556178 5. 066901 2. 030921 2. 728082 4. 557223  
1. 206449 1. 140229 1. 315344 1. 444533 1. 142204 1. 121823 1. 104949 1. 4717 1. 256241  
4. 491988 3. 46702 3. 472167 3. 71784 4. 300432 4. 139831 3. 636235 3. 300105 3. 25249  
6. 785821 6. 645009 6. 736194 7. 095117 7. 269915 7. 261552 6. 818514 7. 839037 7. 399404  
10. 03921 8. 817962 8. 971819 9. 576785 9. 250651 6. 963389 9. 334424 7. 45202 5. 428591  
3. 085506 1. 196973 1. 190975 1. 170276 1. 231361 1. 091868 0. 893909 1. 57827 1. 252132  
7. 919567 7. 840333 7. 170516 7. 326989 7. 672935 9. 032665 7. 486691 7. 113151 7. 136788  
8. 383798 7. 236176 6. 810469 7. 871742 6. 496786 8. 991506 7. 116315 7. 091338 7. 117257  
1. 677389 1. 25563 2. 16411 1. 96795 2. 361063 3. 417906 1. 798395 1. 555816 2. 639498  
1. 14824 1. 478116 1. 394357 1. 216717 1. 226554 1. 496292 0. 993152 0. 905638 1. 030455  
2. 407133 3. 456103 2. 423757 2. 938789 2. 576357 2. 766682 2. 277296 2. 518879 2. 533943  
4. 313228 3. 978735 4. 239604 3. 409065 4. 424006 4. 730746 3. 086133 2. 879565 3. 451271

2. 592869 2. 398822 1. 954628 1. 553792 2. 167601 3. 142202 1. 663115 1. 477573 2. 317525  
1. 837264 1. 328452 2. 355165 1. 953213 2. 172712 1. 747893 2. 083612 1. 851129 1. 897243  
7. 988013 6. 423659 7. 718416 7. 337039 7. 376875 7. 0037 6. 993343 6. 766533 6. 133607  
6. 745576 6. 849411 6. 461508 6. 583691 6. 644416 6. 669569 6. 267834 5. 230301 5. 706385  
7. 088282 7. 522966 7. 158784 7. 525448 6. 750184 6. 813876 7. 145126 7. 468182 7. 460474  
6. 606676 7. 306879 7. 138749 7. 109686 7. 083923 7. 168174 6. 777157 7. 033717 7. 039815  
6. 976458 5. 685189 6. 026896 6. 66905 5. 147459 6. 83012 6. 375025 5. 488282 5. 945855  
4. 707556 4. 86565 4. 355383 4. 704929 3. 635959 5. 476252 4. 922733 4. 162787 4. 506713  
7. 507051 7. 434079 7. 579844 7. 403178 7. 628862 7. 597916 8. 059036 7. 985958 7. 683998  
3. 06612 1. 739514 1. 650718 1. 649934 2. 995549 2. 136025 1. 843734 1. 462322 2. 685063  
2. 924669 4. 153621 4. 640977 4. 164578 4. 521346 4. 255971 4. 516175 4. 37289 4. 705258  
2. 881944 2. 277135 2. 891262 3. 385084 3. 480517 2. 809931 2. 721868 2. 98414 2. 612225  
2. 406814 1. 572514 1. 859669 2. 189669 2. 142845 2. 049968 1. 65261 1. 740051 2. 048439  
1. 677483 1. 911463 1. 659259 1. 354335 2. 102151 1. 779311 1. 524626 1. 810927 1. 582806  
5. 164372 5. 567249 5. 271383 4. 885353 5. 825525 5. 147212 6. 053105 5. 400668 5. 414491  
1. 715501 2. 201294 2. 198176 2. 073786 1. 7871 1. 868116 1. 777081 1. 882821 1. 960169  
1. 336284 1. 559305 1. 315284 0. 945523 0. 999213 1. 042317 1. 900638 1. 373286 1. 295683  
3. 452461 3. 462916 3. 796526 3. 730755 2. 829998 4. 85351 2. 799813 3. 91883 3. 946699  
6. 773978 6. 751956 6. 50901 5. 769839 6. 261099 5. 811157 6. 393885 6. 006859 5. 797526  
1. 676539 1. 472474 1. 849813 1. 137237 1. 938349 2. 52567 1. 618976 1. 311065 2. 498596  
6. 522294 4. 194631 5. 330544 6. 342956 4. 771982 5. 875813 6. 024547 7. 344806 7. 461784  
5. 829205 6. 320361 6. 074512 6. 118306 5. 853669 6. 751768 6. 421294 6. 406835 5. 947504  
6. 503961 5. 84108 5. 836782 6. 578112 5. 636917 5. 50743 5. 80831 5. 637348 5. 688578  
2. 525225 2. 785048 3. 667433 2. 793947 2. 663106 2. 487134 2. 517232 2. 424565 2. 074707  
1. 102721 1. 779675 1. 304736 1. 834178 1. 641945 1. 206266 1. 380535 2. 410258 1. 594696  
1. 44655 2. 105655 1. 217611 0. 561564 0. 857152 1. 905171 0. 925027 1. 19135 1. 820343  
0. 859361 0. 874063 0. 709718 1. 072958 0. 800566 0. 710012 1. 519768 1. 93365 0. 744134  
1. 104207 1. 505714 1. 262853 1. 80807 0. 593205 2. 673584 1. 131385 1. 979332 0. 95551  
1. 014433 3. 375496 1. 597706 1. 952092 2. 778706 1. 2553 1. 358458 1. 183029 2. 072251  
1. 253165 1. 174162 1. 101144 3. 110782 0. 853212 2. 383789 1. 138252 1. 403443 1. 264938  
0. 73468 1. 700775 0. 991601 1. 2871 1. 227459 1. 192456 0. 856135 1. 113312 0. 783397  
3. 867692 3. 304533 3. 838064 2. 867221 2. 928444 3. 451477 2. 984054 3. 156059 3. 18043  
1. 153546 2. 196885 1. 758593 1. 861565 1. 48656 1. 216594 1. 374471 1. 48205 2. 02572  
1. 344484 2. 034071 1. 120298 0. 914792 0. 905361 1. 343756 1. 704753 1. 342196 1. 195814  
1. 371773 1. 253385 0. 979225 1. 861711 2. 121324 2. 899487 0. 914805 1. 302903 0. 558846  
0. 89595 1. 851674 1. 464584 3. 104977 0. 4233 2. 714961 0. 957075 1. 455078 3. 180522  
1. 608723 1. 133098 0. 866149 1. 760252 1. 634646 1. 215774 1. 39113 1. 488624 1. 346654  
1. 652722 0. 779776 0. 999891 0. 722592 0. 537283 0. 736549 0. 962766 0. 715066 0. 66303  
1. 242561 1. 695564 1. 428802 2. 094736 1. 763273 1. 227997 1. 934056 2. 339588 1. 350899  
1. 047571 1. 357756 0. 652838 1. 278764 0. 730415 0. 651366 1. 53668 1. 240283 0. 651366  
2. 5394 2. 856695 1. 703624 2. 351091 3. 256094 2. 806209 2. 89316 3. 202527 1. 621123  
1. 500443 2. 040925 1. 46874 2. 623357 1. 401792 3. 465205 1. 868124 1. 780409 2. 05701  
1. 048172 1. 812302 2. 568902 2. 560268 1. 104883 2. 210068 2. 961502 1. 679352 1. 962362  
3. 203692 3. 130092 2. 949858 3. 720324 2. 947327 3. 963831 3. 366894 3. 274262 3. 458202  
1. 557214 1. 749574 1. 218605 1. 733313 1. 111593 1. 932438 1. 589513 2. 538583 2. 248774  
3. 70381 1. 650926 2. 5812 3. 976206 3. 913588 3. 092476 3. 70212 3. 538214 3. 935149  
1. 918669 2. 088045 2. 193041 1. 916022 3. 50962 3. 138866 2. 135188 2. 491036 2. 744963  
2. 138162 2. 825428 2. 548346 1. 725803 3. 299933 3. 367629 1. 948266 2. 365513 1. 593183  
5. 165651 4. 636018 4. 125487 5. 083062 4. 327653 4. 42098 4. 240307 5. 12891 5. 121044  
1. 048524 1. 3778 0. 970518 1. 207286 0. 999876 1. 124679 1. 309675 1. 656204 0. 993844  
2. 814044 2. 62979 2. 545202 3. 048867 2. 22183 2. 575195 2. 538522 1. 920256 1. 798843

3.913154 4.453997 3.800257 3.88833 1.769992 2.915511 3.709184 1.64772 1.029032  
8.936323 9.26337 9.064135 8.757821 9.268607 8.28503 9.288546 9.183315 9.343777  
3.971182 5.126585 4.599701 5.116006 3.62052 2.5998 2.982822 4.487134 4.203648  
3.454182 2.561536 3.765398 3.422355 4.338373 2.90915 4.726999 4.37857 4.625728  
3.741784 2.668967 2.969256 2.893895 2.856323 3.134628 3.943114 5.187903 3.563312  
1.589334 2.086882 1.097711 2.247029 1.093117 2.495562 0.923958 1.089111 1.291366  
1.147534 1.651211 0.948327 1.073556 1.47019 1.123226 1.486824 1.32743 1.029331  
4.916545 3.239082 4.865268 5.336766 5.218784 4.931835 6.564412 6.491011 6.747674  
2.208514 1.847966 1.396241 1.600273 2.089489 1.936689 1.822616 1.548322 3.141943  
1.668806 1.275653 1.393377 2.023767 1.838164 1.679161 1.990954 2.439377 1.579212  
1.994823 1.179566 0.872463 1.068752 0.964941 1.241992 1.159558 1.218363 1.251406  
2.349538 3.546817 3.445598 3.026308 4.361795 3.052108 3.766564 3.380856 2.968358  
3.400192 3.561208 3.875261 3.685744 3.491739 3.970946 3.871014 4.452357 4.396416  
7.011721 7.567264 6.525955 6.49247 7.364105 5.012551 6.845423 7.148594 6.269315  
2.056499 1.634566 2.087051 1.789682 1.94809 1.540318 1.265914 2.707892 1.439022  
6.887777 5.393351 6.369457 6.830884 6.645533 5.914813 6.445065 6.376736 6.323579  
1.270325 1.243018 1.122391 1.967314 1.223299 1.287947 1.598839 2.052477 1.068339  
1.789714 2.090425 1.740508 2.072491 1.536687 1.520127 1.920975 1.773224 1.767541  
1.862645 2.307376 2.024083 2.362487 2.788909 1.881852 1.838619 2.935699 2.494941  
3.58123 4.621064 4.234061 3.729403 3.443603 4.912242 3.330131 3.286955 3.640353  
3.506166 4.291953 4.031656 4.778185 3.756293 4.537574 4.118249 4.787835 3.900807  
1.992183 2.080745 2.091709 1.882699 1.59686 1.779269 1.94484 2.724655 1.837566  
1.762645 1.996484 2.634471 2.172497 2.235383 1.95611 2.231575 1.898031 2.098164  
1.041966 2.417928 1.035178 1.351826 1.471607 2.402735 1.281231 2.033386 1.791543  
1.793381 1.602676 1.345514 1.415787 1.36845 2.644997 2.019023 1.171448 2.445357  
1.274151 2.059462 2.730544 2.068633 2.138901 1.79598 1.911036 1.822163 1.667825  
3.481763 4.531408 2.803523 2.541855 2.728124 2.713222 1.630413 2.724939 3.713132  
2.014705 1.824418 1.456155 1.914187 2.060837 3.320798 1.745831 3.185388 1.172829  
2.178518 2.729557 2.920022 1.926537 2.315983 4.013446 3.403752 2.638554 2.494427  
5.914694 6.148073 6.448476 5.833224 5.872589 6.353647 7.080383 6.543215 6.190661  
2.876288 3.313599 3.976486 4.760147 3.54464 4.402758 3.86871 3.447359 4.320854  
7.398119 8.005203 7.271333 7.669722 7.65291 7.212239 7.248219 7.826714 7.363323  
3.983677 3.698683 2.971669 3.567848 4.30688 3.016144 3.847534 3.054074 4.124897  
1.797624 2.196535 1.543019 2.045841 1.733402 1.618222 1.726127 1.988548 1.795235  
1.376466 2.215901 2.187795 1.662027 1.592128 2.673243 1.56409 2.405 2.69493  
2.833155 2.793123 1.739306 2.030661 2.890324 2.211436 2.137412 2.256908 1.895791  
0.800176 1.266297 1.581695 1.372235 0.839476 2.278236 1.368592 1.107868 1.265  
1.847801 1.025347 1.580705 1.588135 1.40099 1.948961 1.409178 1.659011 1.691146  
2.294507 2.37824 1.830936 3.327142 1.727174 1.65756 2.576085 3.044899 2.416505  
2.330806 3.753028 1.491932 1.531731 1.131485 1.507987 1.328434 1.955023 1.262487  
1.386424 1.554162 1.236815 1.389605 1.414974 1.597206 1.635918 1.43169 1.875786  
1.402422 1.567699 1.252227 1.125033 0.900369 2.486018 2.592782 1.060151 1.593903  
1.194149 1.532016 1.813869 0.828162 2.052621 1.6871 1.278525 0.957342 1.301545  
1.434328 2.165319 1.159923 1.513791 1.056705 0.93758 1.207674 1.330996 1.65963  
2.532842 2.503847 2.162396 2.577248 2.878451 6.242122 4.026877 3.972106 4.940719  
2.894752 1.16892 1.249211 1.713201 1.400377 1.511938 2.715492 1.002061 0.932369  
2.299895 2.711789 1.572876 2.387067 2.399718 2.073758 1.747536 2.060212 2.071563  
2.470743 3.768985 2.454302 2.085168 2.482233 3.21931 2.939243 2.39243 3.812638  
0.953515 2.192194 1.113304 1.596108 2.429721 1.498407 0.901845 2.483043 1.402351  
6.737258 7.608642 7.091034 7.878912 6.946672 7.098799 6.965571 6.733851 7.176108  
1.427782 1.392185 1.706794 1.362128 0.958726 1.2932 0.92783 2.066451 1.625318

1. 908479 2. 74813 1. 951531 2. 744357 2. 529031 2. 049358 1. 924764 1. 927829 2. 065068  
2. 020543 1. 709357 2. 819822 2. 058564 1. 565973 2. 65485 1. 968897 1. 707728 2. 307047  
5. 200375 4. 414403 4. 969989 5. 169994 4. 906545 5. 04133 4. 722562 4. 359114 5. 011413  
4. 109125 3. 089887 4. 188237 5. 055343 4. 366558 4. 94849 5. 097912 5. 273691 5. 653056  
2. 264991 2. 881267 3. 366095 2. 860875 2. 6253 2. 839312 2. 651307 2. 79322 3. 756751  
4. 165463 2. 485538 3. 372516 3. 273128 3. 845909 3. 44151 3. 898759 3. 322144 3. 170404  
1. 82053 2. 216232 2. 086818 2. 771266 3. 18351 2. 415654 4. 316291 2. 406324 3. 3343  
1. 77422 1. 676593 1. 413774 1. 781233 1. 34537 1. 447812 1. 38048 1. 506761 1. 768628  
1. 528164 1. 693661 1. 840939 1. 741046 1. 338435 1. 495852 1. 492646 1. 186373 1. 739679  
1. 283812 1. 165099 0. 989779 1. 628185 1. 107821 1. 622243 0. 968362 0. 978161 0. 889093  
4. 846517 5. 70758 3. 75167 4. 444395 3. 755758 3. 680533 5. 027289 4. 539332 5. 291066  
2. 124549 2. 651071 2. 415323 2. 139171 3. 154097 2. 938958 2. 154307 1. 643499 2. 401161  
3. 057355 3. 988677 3. 447391 3. 718006 2. 661069 3. 034426 3. 61391 3. 73384 2. 711146  
1. 102829 1. 20631 0. 919143 1. 69484 0. 878216 1. 120628 0. 767071 1. 044722 1. 530763  
1. 107628 1. 534675 1. 095492 1. 885407 0. 94871 1. 386697 1. 437566 1. 278703 1. 120141  
4. 741794 4. 025011 3. 997362 4. 564685 3. 908552 4. 658462 4. 806116 4. 288051 5. 357898  
1. 467887 1. 505806 2. 161769 1. 594142 1. 993609 1. 64737 1. 504061 3. 042242 1. 806416  
3. 067707 2. 699912 1. 676355 2. 45337 2. 505499 3. 143674 2. 577622 2. 581863 2. 189652  
1. 173518 1. 510649 1. 822722 1. 739862 0. 526708 1. 188341 1. 190303 1. 58489 0. 649628  
1. 438243 1. 118763 1. 291528 1. 305144 1. 901188 2. 235551 1. 585536 0. 939235 1. 499631  
3. 182595 4. 609062 2. 658502 2. 801679 2. 126882 2. 861856 2. 058615 3. 129635 3. 269981  
2. 432364 1. 026761 1. 009433 1. 201615 1. 047316 1. 406105 0. 966846 1. 224015 0. 962363  
2. 549106 3. 065142 2. 03573 4. 113414 3. 137161 2. 79658 2. 040721 1. 657193 2. 828402  
1. 619561 1. 709013 2. 146508 1. 700396 2. 069626 1. 696302 1. 676581 1. 757703 2. 228005  
1. 774906 0. 9287 0. 951658 0. 8503 1. 365207 0. 989461 1. 450237 1. 278253 0. 863875  
4. 494663 4. 419819 4. 770385 5. 17964 4. 57979 5. 223311 4. 924132 4. 58108 4. 700615  
1. 253791 2. 558703 1. 665357 2. 041765 1. 632251 1. 718269 2. 143747 1. 553688 1. 98701  
8. 772898 9. 527625 8. 419423 9. 440403 9. 093134 8. 918351 8. 372268 8. 984724 9. 540286  
4. 832165 4. 156058 4. 599014 4. 952706 4. 377661 5. 248411 4. 302615 4. 049986 4. 200947  
2. 219829 3. 358115 3. 008175 2. 290605 1. 969796 2. 297883 2. 11466 1. 860198 1. 92941  
2. 528176 2. 249001 1. 945024 2. 37737 2. 44936 3. 599003 1. 679517 2. 470238 2. 025746  
3. 476275 3. 077468 2. 981011 4. 069286 2. 319822 2. 543364 3. 597913 2. 66448 2. 461803  
8. 786251 7. 109942 8. 353245 7. 787354 7. 190743 7. 638686 7. 299777 6. 325466 5. 31812  
0. 887361 2. 682531 1. 726445 1. 692869 1. 296771 2. 660831 1. 754485 1. 603865 1. 240114  
0. 589527 0. 935316 0. 890099 1. 181891 1. 003192 1. 313901 1. 208184 0. 822964 0. 655708  
7. 92299 5. 781517 7. 111952 5. 856373 5. 768514 5. 122153 5. 671475 4. 104656 3. 551096  
1. 734079 1. 403505 1. 938661 1. 716782 1. 512116 2. 157146 1. 467925 1. 818858 1. 462114  
3. 838271 2. 251014 1. 601697 1. 829663 2. 681602 2. 280069 1. 743116 3. 111323 1. 974514  
3. 313274 2. 556756 1. 880949 2. 756428 2. 355697 5. 675118 2. 078451 3. 08943 4. 174341  
0. 976227 0. 882349 0. 79351 1. 248095 0. 847985 2. 283565 1. 154067 1. 406179 1. 075277  
5. 540465 6. 071818 5. 016613 5. 631473 5. 37687 4. 000807 5. 191062 3. 866125 3. 77843  
5. 53388 1. 131978 3. 123085 5. 65864 4. 914506 8. 646329 7. 804301 6. 023788 8. 569404  
1. 436728 1. 843279 1. 038178 1. 471772 1. 781443 1. 765578 1. 572727 1. 904648 2. 043934  
2. 056279 1. 545778 1. 661926 2. 429543 2. 169226 2. 773362 1. 55573 1. 63933 2. 010277  
4. 403246 3. 9158 4. 968547 4. 389302 4. 605474 5. 048505 5. 067817 3. 606119 4. 373576  
5. 124232 4. 069487 3. 979556 5. 124166 4. 068334 3. 359285 5. 046554 5. 504478 4. 567021  
4. 091101 4. 571452 4. 534944 4. 08725 3. 463158 4. 591766 3. 540696 5. 683742 4. 88384  
8. 37926 7. 905492 8. 472275 7. 568698 6. 946019 7. 593873 7. 45698 5. 878566 4. 684573  
2. 59143 2. 072137 3. 915817 2. 962542 2. 612607 3. 288832 1. 827676 2. 464648 3. 838766  
5. 534746 5. 273668 4. 729601 4. 871622 5. 192674 5. 895653 6. 410968 5. 031221 4. 75485  
5. 728408 5. 227609 4. 207796 6. 110412 3. 828273 3. 478134 4. 357745 5. 384916 4. 971321

1. 801159 2. 029877 2. 122731 2. 230489 1. 91302 1. 523766 1. 383516 1. 835992 1. 912055  
7. 036517 7. 464088 7. 337903 6. 847613 7. 146823 7. 275926 8. 064256 6. 742878 6. 901438  
1. 296196 2. 515503 1. 535718 2. 371539 2. 71447 1. 470582 1. 309055 1. 681747 1. 470582  
1. 623118 1. 617979 3. 386385 1. 437965 1. 943991 3. 976178 1. 967195 2. 896945 2. 860431  
3. 293794 3. 151729 2. 085488 2. 934133 2. 718244 2. 282693 3. 424449 3. 692008 2. 970752  
7. 186679 7. 140816 7. 244718 6. 970983 6. 768399 7. 321812 8. 224155 7. 96183 7. 478968  
6. 577233 6. 8761 6. 105728 5. 917377 6. 73615 6. 335164 6. 653342 5. 990517 5. 995964  
1. 61985 1. 618703 1. 871763 1. 901842 2. 007169 2. 197572 1. 525078 2. 102743 2. 175363  
1. 453452 1. 471401 1. 902721 1. 7655 2. 449411 1. 422819 1. 353387 1. 549997 1. 575523  
4. 003407 3. 211399 2. 049791 5. 002429 2. 08942 5. 428421 3. 577617 4. 298608 4. 091752  
1. 513049 1. 55217 1. 656719 1. 91404 2. 028882 1. 814177 1. 713846 1. 994154 1. 86952  
5. 158761 5. 569233 6. 074175 4. 122843 4. 953712 2. 774899 3. 688775 3. 892467 4. 229405  
5. 410681 6. 164387 3. 723313 5. 637295 5. 771036 4. 957657 5. 213742 5. 333189 5. 948952  
2. 789108 2. 667672 2. 114597 2. 583232 3. 286639 2. 41737 2. 47035 3. 159959 3. 1717  
0. 595005 0. 263514 0. 976059 0. 889311 1. 42872 3. 367045 1. 549913 1. 48159 0. 543993  
4. 503855 4. 99551 4. 770765 4. 841798 5. 078223 5. 080121 4. 310378 4. 053565 5. 080417  
2. 459816 1. 944817 2. 175625 1. 727746 1. 622537 1. 218432 3. 520402 1. 324548 2. 783704  
5. 599709 6. 581913 5. 746974 4. 636326 6. 702466 6. 231742 6. 776084 6. 620546 5. 965027  
2. 675232 2. 330794 2. 539967 2. 482975 2. 888893 1. 832029 2. 41045 1. 500998 2. 892163  
5. 36902 5. 506199 5. 74337 5. 627061 5. 774874 4. 825354 5. 97144 5. 288893 3. 859559  
4. 946278 5. 163173 5. 569747 4. 770841 5. 312664 4. 336804 5. 538807 6. 148305 5. 821277  
5. 173252 4. 420638 6. 142767 5. 693792 6. 102979 6. 09389 6. 381532 7. 238136 7. 266837  
2. 669345 2. 430499 2. 3226 2. 441454 2. 279026 3. 469898 2. 341489 2. 262609 2. 972816  
1. 874146 1. 846989 1. 666066 2. 086887 1. 708942 1. 980908 1. 647846 2. 225792 2. 007795  
2. 027827 1. 226423 1. 666936 1. 321394 1. 258849 1. 262685 1. 248842 1. 556237 1. 601032  
1. 321696 1. 356179 0. 940359 1. 253385 1. 447769 1. 010619 0. 917488 1. 3169 0. 805888  
1. 469829 1. 519228 0. 945448 1. 609299 1. 681482 1. 416701 1. 547474 1. 469521 1. 198766  
4. 25356 4. 298968 3. 523464 3. 198316 4. 409925 2. 753022 2. 984161 3. 501964 3. 483389  
6. 671132 6. 115095 6. 009447 6. 391149 5. 69112 6. 084075 5. 806196 6. 350123 5. 197097  
3. 727327 2. 37105 2. 635684 2. 459625 2. 471847 3. 611919 2. 590292 3. 335069 3. 820395  
2. 482167 2. 018843 2. 855194 3. 295563 2. 629294 1. 84375 3. 008152 4. 216264 4. 605378  
3. 487164 4. 60254 3. 333122 2. 664026 4. 661425 4. 401104 4. 379026 3. 359964 3. 136915  
5. 462418 4. 794845 4. 087098 5. 342015 5. 109876 3. 969191 4. 42618 5. 60337 5. 786375  
2. 807408 4. 069269 3. 576313 2. 53593 2. 956904 2. 052837 2. 974552 2. 562797 2. 194091  
1. 376431 3. 446877 3. 085789 3. 516453 1. 236978 1. 722449 2. 52186 2. 045608 4. 093465  
3. 843843 5. 602627 4. 698274 4. 937898 4. 872314 4. 182309 3. 951856 3. 121104 3. 920491  
1. 967229 2. 064444 1. 851731 2. 547972 1. 860097 1. 774996 2. 010963 2. 066483 1. 854437  
1. 12085 1. 496958 1. 265025 1. 506174 1. 192806 1. 863732 1. 064881 1. 500938 1. 119629  
9. 062249 9. 022136 9. 002248 7. 961344 8. 788135 7. 647232 9. 498523 9. 651628 9. 298074  
3. 387153 1. 718487 0. 495969 3. 071556 5. 300327 3. 495028 4. 424325 3. 624996 1. 291758  
1. 143099 1. 56106 1. 707934 2. 741198 1. 595702 1. 72796 2. 160977 1. 615196 1. 397185  
1. 459018 1. 75824 1. 351846 1. 421848 1. 933696 1. 763519 1. 417031 2. 224201 1. 309407  
2. 424509 2. 03171 2. 117339 1. 811387 1. 921286 2. 283192 1. 922635 1. 922628 2. 001198  
2. 71076 2. 7495 2. 943367 4. 523579 3. 254403 2. 323994 3. 831788 3. 808994 3. 251431  
2. 698607 2. 365724 3. 057147 3. 678479 3. 625937 2. 955354 2. 442775 2. 440565 3. 612461  
1. 355814 2. 382806 1. 409141 2. 167539 1. 110186 1. 764098 2. 81162 1. 814433 3. 915897  
2. 422302 2. 168191 2. 351292 2. 413385 2. 419569 2. 197353 2. 099427 1. 816919 1. 899975  
7. 347288 7. 827539 7. 94367 7. 382935 7. 318608 6. 96013 6. 958106 6. 773949 6. 81512  
1. 338163 1. 878208 2. 689579 1. 443985 1. 35049 2. 528332 1. 210991 1. 977192 1. 261187  
2. 077895 1. 290089 1. 706912 1. 402389 2. 417621 1. 568157 1. 32455 2. 296755 1. 847215  
1. 877735 1. 795236 2. 557356 2. 937384 2. 524469 3. 662124 2. 381442 2. 592433 2. 086085

3. 581785 2. 615888 3. 460264 3. 916855 3. 027983 3. 327722 3. 891888 4. 126697 5. 08668  
5. 414765 6. 034101 5. 514057 6. 171039 5. 848152 5. 757852 6. 552013 5. 50049 5. 936467  
2. 184332 1. 607433 3. 512783 1. 743965 3. 531274 1. 713841 1. 711159 2. 014632 1. 484906  
3. 516958 3. 592115 4. 13603 4. 840684 4. 720591 4. 945425 4. 02983 4. 494065 4. 932262  
4. 638724 4. 43444 4. 154249 4. 240787 4. 416343 4. 209582 4. 200644 4. 766193 5. 201918  
1. 446676 2. 357039 1. 334813 1. 581489 1. 389931 2. 139654 1. 789959 2. 338461 2. 917986  
2. 848576 2. 784603 2. 498108 2. 925907 3. 23894 3. 12856 3. 377735 4. 259152 3. 086748  
2. 334603 1. 74034 2. 500501 3. 187426 2. 997455 1. 401554 1. 472616 1. 718356 1. 609422  
5. 244672 4. 623735 3. 70776 4. 848882 4. 973393 5. 6229 5. 822112 5. 10773 5. 426877  
3. 174916 3. 051747 2. 743629 3. 024792 1. 805987 3. 076971 3. 038239 3. 072948 2. 692654  
2. 076476 2. 071943 1. 193832 1. 222498 2. 360801 1. 982999 2. 561575 1. 863251 3. 416599  
2. 035528 1. 318196 2. 077011 2. 038889 1. 860404 2. 267628 2. 062515 1. 571313 2. 057621  
4. 26834 3. 758365 3. 824945 3. 497466 3. 734035 3. 874322 4. 100381 4. 293432 4. 421117  
1. 479581 1. 561775 1. 058287 1. 22133 1. 469761 2. 395375 1. 249652 1. 225071 1. 022484  
1. 451828 1. 75251 1. 324613 1. 423205 2. 134575 2. 789536 2. 551155 1. 8453 1. 990109  
2. 007412 2. 128176 1. 464991 2. 004273 2. 690895 1. 656963 2. 10718 1. 654454 2. 831763  
4. 032875 4. 514541 3. 492839 4. 761587 4. 308914 4. 205133 5. 018806 5. 540161 3. 945307  
2. 788595 3. 561086 3. 322848 2. 895139 1. 831729 2. 262346 2. 422788 1. 965934 2. 318716  
1. 489359 1. 936206 2. 009819 2. 142748 1. 737107 1. 685427 1. 565671 1. 834074 1. 847615  
5. 990288 6. 12689 6. 995028 6. 37651 6. 361913 6. 344239 6. 63544 6. 674415 6. 867545  
2. 233194 4. 598054 4. 784061 2. 651997 1. 93181 2. 259447 2. 278107 2. 861216 3. 73543  
3. 873944 3. 089547 3. 899076 3. 259836 2. 355088 3. 897696 3. 422605 3. 480577 4. 045669  
4. 188166 2. 912276 3. 034594 3. 937324 3. 88856 3. 449167 4. 990297 4. 014062 3. 558062  
5. 214255 5. 590705 5. 40029 5. 833514 5. 141467 6. 126558 5. 42509 5. 679516 5. 632578  
2. 44583 2. 36167 2. 95437 2. 968462 2. 264006 1. 605632 2. 073737 1. 710107 1. 840186  
1. 987439 2. 027153 1. 146823 1. 276239 1. 846864 1. 401456 1. 993601 1. 103519 1. 191581  
5. 103118 5. 605687 6. 128171 5. 506337 5. 998076 5. 6728 6. 151837 6. 1276 4. 867967  
1. 3307 1. 385439 1. 325056 1. 524822 1. 76734 1. 53665 1. 408137 1. 147441 1. 858345  
1. 937388 2. 102828 2. 549594 1. 960633 2. 416626 2. 734877 4. 310943 2. 597671 1. 863371  
5. 719757 6. 090512 5. 724292 5. 098924 5. 27309 5. 813617 6. 778178 6. 645737 7. 192636  
4. 909913 4. 622437 4. 969045 4. 250801 4. 182965 4. 478176 4. 986441 4. 881087 4. 470877  
4. 864739 5. 458727 5. 56272 6. 295754 6. 180151 5. 954258 5. 148199 5. 655159 5. 904737  
1. 377155 2. 379287 2. 334075 1. 49572 2. 295008 1. 883995 2. 872239 2. 242094 2. 078798  
2. 782563 3. 184069 3. 212879 2. 926593 3. 38072 3. 251537 3. 380126 3. 58851 3. 462833  
2. 596367 2. 046127 2. 083622 2. 562325 2. 533446 3. 789365 2. 179365 2. 676017 2. 170862  
4. 84848 3. 984481 5. 116961 5. 496401 5. 67409 5. 97124 6. 483063 6. 020618 6. 259906  
1. 625253 1. 486373 1. 80469 1. 444688 1. 477712 1. 864049 1. 78549 1. 735736 1. 573806  
3. 65112 3. 677871 3. 908111 2. 897986 2. 611457 3. 264172 3. 893213 3. 920701 4. 545869  
7. 203409 8. 051798 8. 329364 6. 942857 8. 663721 5. 717403 8. 641847 8. 392306 8. 433748  
3. 322005 1. 498086 3. 28548 1. 424103 3. 817102 5. 689377 4. 689446 4. 337873 5. 622101  
4. 760189 5. 272521 4. 888957 5. 233677 4. 857885 4. 744331 4. 601648 5. 368748 4. 783143  
1. 926055 1. 10779 2. 052496 1. 797171 1. 626687 1. 814393 1. 323114 1. 283562 1. 77604  
1. 612271 2. 339853 1. 837826 2. 160336 1. 712068 2. 069738 1. 913306 2. 405429 2. 070857  
8. 658453 7. 523321 7. 751565 7. 506765 7. 87251 8. 107194 8. 144826 8. 455143 8. 186651  
2. 111234 1. 73764 0. 732246 3. 269018 1. 003286 2. 326967 2. 478926 0. 893551 1. 941711  
5. 548021 4. 780361 5. 909662 5. 552788 6. 065136 5. 670197 5. 512049 5. 613744 5. 650059  
6. 437021 5. 78078 6. 196705 3. 887933 5. 746865 5. 644639 4. 918228 6. 258486 6. 393828  
2. 479191 2. 041282 3. 167922 2. 896294 2. 10858 3. 537291 2. 037062 2. 433224 3. 338314  
2. 469509 2. 270505 2. 431451 2. 004032 3. 023837 2. 219648 2. 562389 2. 294657 2. 808202  
6. 301753 5. 823438 6. 064477 6. 231794 5. 460366 7. 093411 6. 261839 6. 411075 5. 837104  
5. 132184 4. 96414 5. 345361 4. 441488 5. 50108 2. 881422 5. 18113 5. 278753 4. 772188



3. 320167 3. 30288 3. 077792 4. 625218 4. 245535 4. 766517 3. 322445 4. 447915 4. 085658  
3. 778647 3. 436939 5. 354651 2. 495872 4. 870228 3. 346474 3. 845805 3. 875104 4. 363262  
1. 951411 3. 042609 2. 107573 1. 950984 2. 485928 1. 794744 1. 81185 1. 613825 1. 750608  
6. 454663 7. 314129 7. 215501 6. 847276 6. 860689 5. 382725 7. 378366 6. 849442 6. 782747  
4. 655526 4. 77831 5. 393016 4. 420246 4. 861381 4. 70788 4. 245451 3. 797657 4. 478413  
2. 282308 2. 730639 3. 069947 1. 996274 1. 858242 1. 77632 2. 156964 2. 17333 2. 258451  
4. 732718 5. 069816 5. 320378 5. 39098 5. 346496 5. 736476 5. 408209 5. 89193 5. 507568  
5. 816778 4. 847112 5. 451894 4. 559829 5. 029745 5. 189467 5. 078609 4. 032171 4. 620831  
6. 464785 6. 322142 6. 903316 6. 953315 7. 311321 5. 287524 6. 120043 5. 841293 5. 730576  
2. 983577 2. 40456 2. 387572 2. 530238 2. 399538 2. 839146 2. 366061 2. 688355 2. 745385  
4. 091638 4. 58127 4. 92461 4. 494006 4. 103636 4. 824356 3. 874066 4. 577965 4. 763022  
0. 964315 0. 982087 0. 917489 2. 317351 1. 112084 2. 282212 1. 280952 1. 121839 1. 18755  
1. 072849 1. 636729 1. 087291 1. 214704 0. 962136 1. 04108 1. 339081 0. 970379 1. 311244  
1. 538476 1. 402079 1. 762707 1. 046659 1. 481659 1. 586859 1. 488967 1. 283226 1. 257772  
1. 651074 2. 186905 1. 42112 2. 040151 1. 710121 1. 780326 1. 985387 1. 478324 2. 365516  
1. 368635 3. 146708 1. 285803 1. 910165 2. 9552 2. 610849 1. 994718 2. 313402 1. 596572  
1. 143428 1. 750435 1. 310316 1. 375687 1. 234032 0. 904984 1. 915062 1. 30554 2. 819451  
1. 719613 3. 936673 1. 737759 1. 221982 2. 401838 2. 051585 1. 548694 1. 849562 1. 654891  
3. 052709 3. 604485 3. 591136 3. 318832 3. 483711 3. 616137 2. 521821 3. 283329 2. 727557  
4. 761246 4. 443118 4. 860367 5. 193475 6. 022724 4. 991126 5. 775061 4. 093725 6. 008347  
0. 983114 1. 522283 1. 46478 1. 430001 1. 27476 1. 631859 1. 230572 1. 386702 1. 048821  
1. 803677 1. 669934 2. 01678 2. 632676 1. 663206 1. 66099 1. 818744 1. 445309 2. 769431  
3. 39344 2. 813359 3. 21637 3. 54918 3. 378897 3. 67267 2. 747322 2. 979413 2. 89974  
2. 440192 2. 10859 3. 686499 3. 151264 2. 37628 2. 917395 2. 942504 2. 76361 2. 1693  
2. 728456 3. 188237 2. 604296 3. 680664 3. 545916 3. 088839 2. 819948 3. 265299 3. 209924  
3. 845934 4. 390683 3. 942096 4. 619934 5. 421294 2. 106463 2. 996815 5. 834755 3. 968426  
1. 258452 0. 974174 1. 354556 1. 154209 0. 977833 1. 810497 1. 050829 0. 808533 1. 129966  
4. 838508 5. 087665 4. 238125 4. 79133 5. 245578 4. 613793 6. 045937 7. 200218 6. 783818  
2. 065067 3. 034724 2. 07233 2. 841838 1. 869053 3. 122403 2. 131903 2. 226396 2. 249183  
1. 778127 1. 803786 2. 562271 1. 965262 1. 476114 2. 390283 1. 969382 1. 342639 1. 555793  
2. 284148 2. 419956 2. 439325 3. 448399 1. 710985 2. 106627 2. 775402 2. 12328 2. 242867  
3. 085053 1. 71001 2. 228479 2. 530315 2. 501912 2. 094494 2. 699466 2. 38149 1. 798568  
1. 1916 0. 61442 1. 233194 0. 943947 1. 41155 0. 541382 1. 063539 1. 036529 3. 007009  
3. 020747 2. 355516 1. 923717 3. 078273 2. 787241 2. 583216 2. 375779 2. 712353 2. 443561  
1. 648256 2. 280021 1. 905986 2. 056409 2. 321886 2. 602736 2. 294705 2. 048807 2. 094894  
5. 269797 5. 733151 4. 968154 6. 120222 5. 676291 6. 219478 5. 215702 5. 735837 4. 862052  
6. 037005 6. 590579 7. 049003 5. 738779 6. 66418 6. 409283 5. 864581 6. 193002 5. 80493  
2. 632912 3. 304789 1. 450549 2. 267568 1. 162751 3. 613669 2. 697235 1. 680398 1. 835935  
3. 562534 2. 791189 2. 835957 2. 716064 3. 19866 3. 204629 2. 62649 3. 067814 3. 35553  
4. 437518 5. 02429 4. 770813 5. 729174 2. 960647 4. 72561 4. 935121 5. 451824 5. 238357  
3. 669459 4. 078859 4. 005675 3. 973825 3. 814047 4. 584415 3. 969126 3. 116969 3. 815442  
7. 113295 6. 745447 7. 121886 5. 852662 5. 334575 8. 31797 7. 481382 6. 512437 6. 906987  
7. 537084 7. 293243 7. 297145 7. 36501 7. 689569 7. 387732 7. 363589 6. 996009 7. 029855  
7. 402964 7. 326978 7. 091669 7. 250282 7. 119793 5. 594461 7. 098678 6. 257903 6. 383555  
3. 505607 3. 330217 3. 099721 3. 599829 3. 004648 3. 67782 3. 656724 4. 441723 2. 805303  
2. 96243 8. 151133 2. 104709 4. 500474 4. 045389 2. 894266 2. 106608 2. 682054 3. 027427  
4. 773388 6. 997776 2. 410304 1. 860597 2. 109557 4. 908157 2. 116264 1. 100203 2. 260222  
3. 425798 3. 867517 3. 913884 3. 839556 2. 984509 5. 199638 3. 903562 3. 838325 4. 398106  
7. 330487 7. 288025 7. 787745 7. 757165 7. 891532 5. 303915 8. 448465 8. 565557 8. 070743  
4. 149387 5. 202961 5. 472156 3. 781757 4. 118854 5. 827753 6. 431842 5. 050367 5. 86853  
1. 631959 2. 340994 2. 310347 1. 652735 1. 429581 1. 846279 1. 800178 1. 812936 1. 603689

1. 819008 2. 125661 1. 964696 2. 138931 2. 120319 2. 028615 2. 249702 2. 073644 1. 799196  
7. 528695 7. 022328 7. 298789 6. 712232 6. 628062 6. 747647 6. 110235 5. 507459 6. 252044  
2. 268381 1. 31996 1. 697193 2. 038704 1. 761259 2. 435282 1. 664262 1. 90154 1. 991103  
1. 342193 1. 005225 0. 817217 1. 148842 0. 989977 1. 529398 1. 302008 1. 158787 1. 266657  
1. 632743 4. 475949 1. 428355 2. 663446 1. 125625 4. 0464 1. 111171 1. 145408 3. 435867  
2. 576617 2. 505136 1. 365807 1. 921081 2. 361136 1. 515696 1. 847989 2. 14592 2. 652038  
3. 957322 4. 377004 4. 970417 5. 788293 5. 938267 2. 562945 5. 510014 4. 187364 4. 588906  
1. 137318 1. 386369 1. 141607 1. 863847 1. 032141 1. 499449 1. 14849 1. 392512 1. 077232  
2. 922357 2. 623691 2. 788128 2. 480898 3. 353514 2. 833818 3. 030854 2. 567306 2. 789168  
2. 113964 1. 897794 1. 691101 2. 247418 1. 710854 1. 842192 2. 086973 1. 800438 2. 237756  
2. 838479 2. 093996 3. 48087 3. 375738 2. 461038 4. 122393 3. 790763 3. 127597 2. 203424  
3. 939646 4. 158605 4. 253881 4. 779596 4. 776247 4. 244608 3. 386079 3. 672875 4. 141682  
2. 212807 3. 221489 1. 519929 1. 313071 2. 638612 1. 066005 1. 092913 1. 720427 1. 92618  
1. 557108 1. 518582 1. 073878 0. 897104 1. 750236 1. 443893 0. 950295 0. 977639 1. 631256  
5. 662829 5. 720912 5. 968178 5. 732755 6. 253375 6. 484918 5. 724283 6. 860569 6. 638398  
2. 347233 3. 287856 3. 59106 2. 863437 3. 10085 3. 301072 2. 423995 3. 523642 3. 280971  
2. 068548 2. 354854 2. 170466 2. 021566 1. 8623 1. 565471 1. 695496 1. 818805 2. 492972  
4. 56451 5. 794437 5. 013754 4. 559051 5. 412288 5. 18443 4. 949564 4. 528176 4. 251495  
5. 089283 4. 401055 4. 684537 5. 130062 4. 37697 5. 629613 4. 75719 5. 304541 4. 760164  
2. 124769 3. 548944 1. 412224 1. 389389 1. 479962 1. 230828 1. 919043 1. 57916 1. 168308  
1. 301793 0. 873828 1. 179134 2. 144278 0. 860104 1. 089481 1. 360847 1. 00972 1. 278855  
2. 736269 2. 90691 2. 716 2. 66157 3. 937094 3. 764051 3. 810465 3. 756442 4. 604222  
7. 756364 7. 75535 7. 924871 7. 778603 7. 794582 8. 489365 7. 98085 8. 047497 7. 778124  
7. 154954 6. 763662 6. 954149 7. 317523 6. 819837 6. 55003 6. 180331 5. 940178 5. 953037  
3. 466509 4. 011398 4. 570124 3. 014322 4. 746604 4. 735806 3. 566981 2. 5741 3. 723591  
2. 575558 2. 087728 2. 375075 2. 056192 2. 044804 2. 408374 1. 715178 1. 805966 1. 618773  
5. 470533 5. 134899 4. 938554 6. 014363 5. 090859 5. 069394 5. 741323 5. 945 6. 265446  
2. 545359 2. 418854 4. 163872 3. 310371 3. 466548 5. 546089 4. 605223 4. 729593 5. 21218  
7. 266247 7. 302123 7. 621167 7. 649023 7. 679998 7. 836823 7. 690155 7. 738076 7. 845367  
5. 267835 4. 864084 4. 504911 5. 46713 4. 595708 5. 072483 6. 204278 4. 836165 6. 264272  
5. 866123 5. 499295 5. 248982 7. 057557 5. 442368 5. 522115 5. 662312 6. 01056 5. 2244  
5. 186587 3. 102103 3. 995678 2. 42859 3. 089094 4. 793618 3. 685054 2. 399616 1. 721364  
2. 002297 1. 782106 1. 416723 2. 374196 1. 629 1. 69476 1. 786475 1. 634361 1. 690283  
2. 764741 2. 335095 3. 543833 2. 422633 2. 905156 2. 191437 2. 531313 1. 705793 2. 241738  
4. 712689 4. 119245 4. 080481 3. 359901 5. 120103 4. 727952 5. 481238 5. 223268 5. 652226  
1. 195396 1. 031784 0. 940657 1. 159451 1. 081904 1. 162958 1. 263306 1. 007461 2. 161636  
6. 5936 6. 783485 6. 428459 6. 590567 6. 528596 6. 691266 6. 466603 5. 944234 6. 291764  
2. 244362 3. 139888 2. 303647 2. 516687 2. 258219 4. 265078 2. 958058 2. 790431 3. 133711  
5. 341286 4. 813101 4. 990667 4. 454017 4. 863018 3. 902935 4. 075741 4. 1119 4. 140306  
2. 169132 2. 242335 1. 38479 2. 30859 1. 800125 3. 580167 2. 933004 3. 2104 3. 184652  
4. 569811 3. 802105 4. 725237 5. 335933 4. 856778 5. 01546 5. 557336 6. 097952 5. 171893  
7. 318145 6. 596543 7. 750809 7. 460616 7. 036831 8. 535544 7. 462897 7. 414772 7. 141294  
5. 803553 4. 32472 4. 591944 4. 988103 3. 725655 4. 396502 4. 985525 5. 050089 5. 460832  
7. 385579 7. 436586 7. 620921 7. 713552 7. 412926 7. 263913 8. 023366 7. 679144 7. 931114  
3. 285285 3. 42355 2. 761342 3. 304129 3. 416206 5. 031703 4. 094769 4. 977461 5. 379331  
6. 092505 6. 691535 5. 67992 6. 237315 5. 85857 6. 017291 6. 107813 5. 837655 6. 076016  
5. 73562 6. 694362 5. 419388 6. 098384 5. 89458 5. 570069 4. 897019 5. 413739 5. 641695  
6. 523483 5. 439099 4. 733984 5. 648309 3. 981328 5. 035341 4. 889895 4. 583327 4. 703233  
5. 651584 5. 681099 5. 697829 5. 767035 5. 413512 5. 740509 5. 991807 5. 904717 6. 292598  
6. 377558 5. 465905 5. 554899 7. 311191 6. 558452 6. 473285 6. 925159 7. 472972 7. 407724  
7. 460984 7. 58924 7. 83768 7. 316049 7. 380372 7. 005007 7. 741637 6. 906924 7. 138953

0. 856526 2. 315585 2. 605271 1. 358904 1. 409061 1. 921332 3. 013305 1. 47248 2. 217212  
4. 982994 4. 309365 5. 253597 3. 521228 5. 391082 2. 95328 2. 637885 2. 230694 3. 67419  
4. 711821 4. 720548 4. 390553 4. 001634 4. 884941 3. 826038 3. 826998 3. 330048 3. 674281  
5. 944385 6. 209217 6. 312111 5. 457754 6. 394727 6. 767364 6. 875031 6. 636129 6. 106776  
4. 895161 5. 306604 4. 575309 3. 554821 5. 183859 4. 249119 4. 438079 4. 64722 4. 907396  
6. 656777 6. 765826 7. 215291 6. 337006 6. 775368 5. 777173 7. 022511 6. 059981 6. 167464  
7. 996147 7. 193921 7. 143997 7. 433287 6. 895915 7. 196162 6. 860807 6. 804035 6. 860737  
4. 600016 3. 800028 4. 47857 4. 538091 4. 64005 6. 830462 5. 888791 5. 820463 6. 186067  
6. 563172 5. 177561 6. 752464 6. 41882 6. 868951 7. 607678 6. 473498 6. 629734 7. 515785  
7. 617533 7. 321128 7. 086092 7. 482803 7. 151991 6. 887191 7. 151803 7. 084403 7. 188404  
2. 496304 1. 354941 1. 300092 2. 076502 1. 732799 1. 794092 1. 524204 1. 763367 1. 169134  
1. 835717 2. 025249 1. 948658 1. 83755 1. 57081 1. 744021 1. 531691 2. 500594 1. 446679  
4. 591069 5. 188269 4. 698056 4. 836647 5. 047227 4. 841864 5. 151158 4. 862058 5. 395478  
2. 880545 2. 887799 3. 471227 2. 273342 3. 613897 3. 641017 4. 010229 4. 177065 3. 888101  
5. 262487 6. 760249 6. 103585 5. 19803 5. 974177 5. 419657 6. 05644 5. 895801 5. 528341  
5. 979203 5. 378824 6. 169042 4. 720537 5. 318765 6. 891166 5. 724949 5. 958445 5. 883846  
3. 730726 3. 528116 2. 834361 3. 227681 3. 530522 3. 062409 3. 271702 2. 81317 3. 38189  
3. 339119 5. 215755 5. 205005 3. 816216 5. 480673 5. 145658 4. 672505 4. 341448 3. 349001  
5. 744126 5. 784499 4. 614725 5. 369357 6. 019572 4. 060889 5. 282352 4. 49041 4. 297942  
5. 474151 4. 038676 5. 538429 4. 958889 5. 187848 5. 437902 5. 211916 4. 762882 5. 275578  
7. 849499 8. 828601 9. 038024 8. 969384 9. 419929 6. 004459 9. 687852 9. 315668 9. 070044  
5. 28557 5. 489245 6. 049392 4. 890657 5. 825147 6. 539964 6. 215289 5. 903075 5. 366625  
4. 876442 5. 9609 5. 808276 6. 136727 5. 429594 5. 43531 4. 729191 5. 474292 5. 331348  
4. 63439 4. 495029 5. 452758 4. 546134 4. 437072 4. 828794 5. 212995 5. 037565 5. 718567  
3. 642338 3. 088389 3. 4043 2. 296188 4. 175017 3. 582558 2. 72723 4. 506398 3. 842466  
7. 83585 8. 099175 7. 438821 8. 002624 7. 896129 7. 724728 7. 972394 7. 878045 7. 647675  
5. 061144 4. 939683 5. 085994 6. 217214 5. 797747 4. 397327 4. 847514 5. 429774 5. 360318  
6. 981467 7. 07984 7. 05192 6. 746128 7. 02878 7. 278857 7. 465944 6. 838769 7. 187241  
1. 444149 1. 504896 1. 802336 1. 577981 1. 517616 1. 743 1. 530385 1. 69491 2. 230424  
2. 228442 2. 621131 2. 184592 2. 509086 1. 308043 2. 199586 2. 167555 2. 690886 2. 545729  
5. 0258 5. 582946 4. 964997 5. 274416 5. 22998 4. 977813 5. 259563 4. 785205 4. 314855  
5. 340694 4. 269277 4. 849139 5. 05576 5. 809646 5. 229988 5. 219111 5. 432633 5. 281937  
10. 05208 9. 841754 9. 484381 9. 382588 9. 827059 10. 30802 9. 822475 9. 88079 9. 692549  
5. 290149 4. 45085 4. 593769 5. 004267 5. 177758 6. 477709 5. 620388 6. 668397 6. 071424  
2. 560063 3. 184167 2. 00072 2. 283285 2. 50232 3. 67981 3. 409975 1. 788465 2. 094004  
8. 85402 8. 76148 8. 780316 8. 580588 8. 351873 8. 45904 8. 747319 8. 573363 8. 266718  
6. 114153 5. 666791 5. 395635 4. 364149 4. 674448 5. 915017 5. 33492 5. 210691 4. 906956  
5. 039643 3. 148564 4. 532163 5. 074274 3. 682309 5. 259555 3. 720184 4. 603347 4. 272772  
5. 694405 6. 33315 5. 90872 6. 205933 6. 063058 5. 612001 7. 167855 7. 695804 6. 85988  
5. 799279 5. 76043 5. 346466 5. 332881 5. 162449 6. 074896 6. 225756 5. 983649 5. 61428  
6. 27904 5. 888106 5. 893279 6. 442593 5. 942361 7. 162092 7. 105303 6. 900852 7. 387204  
5. 886919 5. 987898 5. 711933 5. 670562 5. 710702 5. 12601 5. 738965 5. 821852 5. 334474  
3. 286799 3. 717114 3. 876017 2. 898743 2. 991353 3. 866317 3. 907828 4. 691477 4. 709048  
7. 320599 7. 899544 7. 401909 7. 327014 7. 589812 7. 369906 7. 101051 6. 905752 6. 797257  
4. 784963 4. 982652 5. 662665 4. 975629 4. 929404 5. 789608 5. 564172 5. 923073 5. 537765  
2. 510598 3. 10683 2. 707781 4. 307933 3. 394562 2. 924165 2. 808545 5. 446463 4. 726813  
4. 048151 4. 178806 4. 839832 4. 187947 4. 549829 5. 5902 4. 98042 4. 751084 4. 675489  
7. 286489 7. 039551 7. 163249 7. 507834 6. 848787 6. 866925 7. 758165 7. 777103 7. 692593  
4. 597051 4. 61758 5. 433303 3. 914674 4. 694961 5. 197528 3. 833902 4. 288382 4. 755362  
4. 446108 3. 868162 4. 807641 3. 973407 4. 217368 4. 874892 4. 101638 4. 298242 4. 321372  
7. 144615 7. 127433 7. 134575 7. 162411 6. 403503 6. 689675 7. 545487 7. 227117 7. 046558

3. 064222 3. 459084 3. 265271 4. 535475 3. 728519 4. 452815 2. 47691 4. 339427 5. 187041  
6. 163207 6. 482672 5. 607704 6. 405068 6. 627988 5. 210806 5. 875086 6. 003537 6. 154109  
6. 865792 6. 547404 6. 233155 5. 615763 6. 2219 7. 294692 6. 467068 6. 558661 6. 204137  
4. 967136 5. 37124 6. 111182 4. 499735 5. 74237 4. 595382 5. 346776 5. 612109 5. 402022  
1. 53464 1. 101689 2. 029657 1. 457334 1. 71859 2. 008018 1. 541108 1. 292948 1. 635226  
5. 492704 4. 240562 3. 79456 3. 271718 3. 382379 4. 086317 3. 942259 3. 885782 3. 798769  
6. 803128 7. 672216 7. 350507 7. 144163 7. 144575 6. 874293 7. 035211 6. 770102 6. 828753  
1. 940302 1. 8313 1. 607212 2. 122466 2. 108125 2. 268462 2. 301367 2. 3567 1. 70566  
4. 170245 4. 026392 4. 178554 4. 220682 4. 849489 4. 434294 4. 688866 4. 560545 4. 519932  
3. 315813 3. 597951 3. 971227 3. 765835 3. 344829 3. 994331 3. 404693 5. 381845 3. 668542  
4. 817928 3. 837603 4. 832122 2. 747754 4. 559989 4. 933953 6. 42338 7. 098297 6. 557175  
8. 456059 9. 434203 9. 189436 8. 077649 9. 306255 6. 237133 7. 885572 6. 899325 7. 334526  
4. 315391 4. 309501 4. 15724 4. 576752 4. 778865 4. 544711 4. 761293 4. 266188 5. 251542  
3. 285049 2. 937338 2. 829027 2. 674701 4. 479332 3. 239805 3. 109623 2. 527875 2. 77058  
6. 159499 6. 57597 5. 95816 5. 831854 6. 515756 5. 161288 5. 468221 5. 32504 5. 49302  
6. 835245 6. 488478 6. 599505 6. 052909 6. 854098 5. 375396 6. 088199 6. 867623 6. 469128  
2. 636271 2. 118641 2. 765395 3. 687501 2. 639214 2. 726872 3. 203597 2. 434216 2. 976186  
5. 857969 5. 083962 6. 412984 5. 681553 6. 03017 5. 515749 6. 010203 6. 499978 5. 840885  
5. 174138 4. 030597 5. 650481 5. 431461 4. 868293 5. 119075 5. 167324 5. 100279 5. 629486  
5. 379061 4. 205046 4. 420357 5. 056077 3. 995171 5. 323286 4. 989176 4. 877836 5. 056322  
6. 496495 6. 993432 6. 667676 6. 910941 6. 148683 6. 332398 6. 996156 6. 53106 6. 441681  
4. 408096 4. 560818 4. 034253 4. 799336 3. 515853 3. 568628 4. 280317 4. 384036 3. 702727  
2. 391497 2. 89239 2. 292393 2. 58048 2. 297256 2. 375129 2. 225684 2. 868394 2. 315846  
5. 094926 5. 087489 4. 660535 3. 871283 4. 34656 4. 085849 4. 898485 5. 019505 5. 13895  
6. 301758 6. 194966 7. 222869 6. 867707 6. 258834 6. 940292 6. 327108 6. 850755 7. 271695  
2. 429959 1. 228904 1. 237759 1. 868673 1. 190325 2. 001778 1. 325143 1. 836295 2. 206978  
6. 012826 5. 887178 5. 452412 5. 293029 4. 772593 5. 454035 5. 782647 5. 314272 5. 682691  
2. 222491 1. 917222 1. 604628 1. 576501 1. 403755 2. 021652 1. 534946 1. 472838 1. 565363  
5. 070631 3. 961933 4. 857363 3. 482059 4. 695138 5. 890633 6. 632756 4. 921952 6. 346993  
7. 818629 7. 664465 8. 285478 7. 454989 7. 859494 7. 621994 7. 742155 8. 018219 8. 098705  
6. 893673 6. 750602 6. 912612 7. 364824 6. 660603 7. 211651 6. 51796 6. 897072 7. 318343  
6. 391214 6. 740196 7. 247941 7. 373613 6. 61846 8. 353149 7. 589851 7. 111069 6. 889502  
3. 750259 4. 483617 5. 085844 5. 074587 5. 145804 4. 626972 6. 133337 6. 817596 5. 805439  
9. 183597 9. 572001 9. 486247 8. 588393 9. 664588 5. 731069 10. 36281 10. 14534 10. 05145  
7. 733012 8. 007479 7. 793696 7. 720821 7. 898783 7. 379473 7. 721157 7. 864158 7. 977282  
6. 450118 6. 965247 7. 031128 7. 118706 6. 689125 7. 480762 7. 388701 7. 32067 7. 336052  
6. 112366 6. 260643 5. 421752 5. 974249 6. 030888 6. 07827 6. 121424 5. 653218 5. 168326  
7. 161944 7. 073748 7. 101402 6. 841208 7. 350211 7. 009913 6. 820461 7. 386992 7. 216174  
7. 440952 7. 216493 6. 999565 7. 055524 7. 130175 6. 760956 7. 427221 7. 255196 7. 057524  
7. 515954 7. 539182 7. 531398 7. 980377 7. 77649 7. 502933 7. 794948 7. 779601 7. 065508  
5. 24745 5. 128001 5. 571251 5. 123408 5. 719534 5. 661479 6. 204195 5. 747604 5. 512118  
5. 559143 3. 720631 5. 535315 4. 283336 5. 051549 5. 936267 5. 753665 6. 148425 6. 815219  
3. 145992 3. 191861 3. 372608 3. 07683 3. 587919 3. 361511 3. 920469 4. 242648 3. 964715  
8. 708703 9. 083421 8. 815176 8. 12575 8. 431811 7. 718401 7. 673471 8. 419737 7. 93042  
5. 221422 5. 090991 5. 116879 5. 632111 5. 277847 6. 079235 6. 292576 6. 233538 5. 81828  
5. 987799 6. 089528 5. 868255 6. 834985 5. 947748 6. 224303 6. 21251 5. 903961 5. 631677  
3. 773501 3. 180601 3. 173119 2. 446524 3. 435626 2. 670508 3. 980088 3. 223632 2. 915585  
1. 482479 2. 312745 1. 538306 1. 948652 2. 260461 1. 175578 1. 543913 1. 215743 2. 694223  
5. 260998 4. 836229 4. 805937 4. 318026 5. 480513 4. 271012 4. 689112 5. 341174 4. 854272  
7. 07268 7. 686169 6. 708371 6. 646449 7. 916524 8. 009968 6. 990434 7. 512972 7. 769563  
8. 431155 8. 577255 7. 99071 8. 112831 8. 39026 8. 695251 7. 979227 7. 540509 7. 64427

3. 322174 2. 74954 3. 208424 3. 271422 3. 550943 3. 884144 3. 747189 4. 138423 4. 164917  
4. 889422 5. 941151 5. 753902 5. 46508 5. 991831 4. 694276 4. 879033 5. 42668 6. 219059  
1. 27623 1. 972293 1. 54344 2. 052879 1. 734206 1. 564557 1. 23933 1. 766782 2. 904611  
2. 495055 2. 858874 2. 150432 2. 197493 2. 038316 2. 301184 2. 153915 2. 563273 2. 417445  
3. 579792 3. 545464 5. 050821 4. 209316 3. 611582 5. 024427 4. 243331 5. 377483 3. 880854  
6. 596899 6. 06406 6. 431549 6. 469641 6. 496897 6. 52267 6. 220353 6. 285078 6. 848208  
1. 510585 1. 521823 1. 497489 1. 766159 2. 762311 1. 96625 1. 583143 1. 567761 2. 143551  
8. 905342 8. 531266 9. 393056 9. 781097 9. 151542 7. 598903 9. 667842 9. 406625 9. 130216  
2. 233897 2. 345994 1. 864046 1. 924111 1. 812482 2. 028855 4. 22548 2. 325122 1. 98201  
2. 241128 2. 1454 1. 846958 1. 51583 1. 929401 1. 407128 1. 410237 1. 728875 2. 602031  
4. 831643 4. 810846 4. 566985 5. 366791 4. 556748 4. 592078 4. 271455 4. 503699 4. 559608  
7. 6214 5. 654512 6. 693112 7. 230231 6. 706238 6. 710469 5. 671842 5. 379793 2. 37011  
6. 208091 7. 114571 6. 434035 5. 930464 6. 406095 6. 276223 6. 579742 6. 367001 6. 779773  
2. 268301 2. 546626 2. 51425 2. 115326 2. 77624 2. 362981 2. 939586 2. 147619 3. 257336  
3. 9241 3. 311157 5. 652779 4. 982965 3. 469737 4. 562432 4. 213538 3. 658521 3. 721273  
6. 316732 5. 893264 6. 319402 7. 00617 6. 496348 6. 493332 7. 249404 7. 091518 6. 865495  
2. 890455 4. 552992 4. 521595 4. 297516 3. 240432 4. 225993 3. 068529 3. 800964 4. 28046  
5. 116221 4. 951875 5. 706626 4. 280493 5. 310939 4. 710142 5. 932464 5. 160762 4. 273791  
2. 051572 1. 895605 1. 93427 1. 983173 1. 714718 2. 36158 1. 585303 1. 754935 1. 479532  
5. 402975 3. 284056 4. 945132 4. 702955 5. 082878 4. 592748 3. 621053 4. 275725 5. 146979  
5. 963358 5. 402424 5. 081971 5. 854781 4. 880907 5. 301762 5. 587924 5. 443654 5. 313775  
1. 314599 1. 571691 1. 436037 2. 201073 1. 70818 1. 22121 1. 280807 2. 313688 1. 026189  
0. 999011 1. 112219 1. 26361 1. 464229 1. 27285 1. 643697 1. 294274 1. 265634 1. 736527  
1. 006018 1. 601778 1. 386024 1. 99984 2. 097439 1. 460024 1. 585253 1. 721921 1. 472826  
3. 347448 4. 079949 3. 49041 3. 347809 3. 297985 3. 715452 5. 066283 5. 126518 3. 962378  
6. 342304 6. 43188 6. 751513 6. 424619 6. 727849 5. 837212 6. 113329 6. 085551 6. 32031  
6. 563185 6. 524111 6. 274894 6. 123135 6. 0095 6. 474177 6. 857797 6. 290618 6. 688477  
3. 586512 4. 137589 3. 367844 3. 64343 4. 01859 2. 277869 4. 727262 4. 976623 4. 584276  
4. 018247 3. 677493 3. 517352 3. 212976 3. 61233 4. 0151 3. 659919 4. 421259 3. 908913  
3. 749869 4. 761263 4. 187678 2. 650925 3. 450073 2. 598349 2. 738163 1. 84424 2. 456211  
2. 406422 2. 933571 2. 306393 1. 937246 3. 404285 3. 662128 3. 874395 4. 162568 3. 919333  
2. 340786 2. 255965 2. 776912 2. 353707 2. 053435 2. 774336 2. 689079 2. 627466 3. 061778  
6. 494131 6. 460703 6. 70445 6. 332267 6. 857832 6. 250558 6. 781358 7. 448924 7. 107285  
1. 604662 1. 947674 1. 281164 1. 865066 1. 363834 1. 711737 2. 058425 1. 582949 1. 69824  
3. 228058 3. 202654 2. 395781 4. 792855 2. 45396 5. 169933 2. 834009 1. 890074 3. 429084  
10. 9421 10. 44922 10. 647 10. 65289 10. 46179 10. 0442 10. 59052 9. 448565 7. 848514  
6. 02024 6. 074207 5. 112502 5. 716067 5. 817003 5. 797299 5. 660438 4. 570806 5. 157108  
7. 03278 6. 915524 6. 456338 6. 197311 6. 311214 6. 40047 6. 476641 6. 138358 6. 195465  
5. 13762 6. 234494 4. 735607 6. 016501 4. 383725 4. 950795 5. 125479 4. 949608 5. 333851  
3. 023574 2. 203079 3. 206437 3. 022153 2. 891102 3. 365163 2. 733051 2. 978518 3. 456228  
1. 862659 2. 377106 1. 492537 1. 676275 1. 116121 2. 898191 1. 734007 1. 814328 1. 388973  
7. 260508 7. 197144 7. 646364 7. 46062 7. 181529 6. 836427 8. 000695 7. 317218 7. 052659  
2. 221701 3. 312517 3. 551885 2. 947702 2. 500424 2. 075581 2. 844199 3. 113253 3. 097984  
8. 023463 7. 545879 8. 0316 7. 347497 7. 757381 7. 194361 7. 637957 7. 633592 7. 460778  
5. 685036 6. 31879 5. 94897 6. 505836 6. 507449 5. 614747 6. 283413 6. 060275 6. 070107  
5. 781062 5. 859752 6. 107407 6. 0086 5. 657241 6. 248175 6. 164199 6. 738216 6. 767108  
7. 917733 8. 383651 8. 575826 7. 939689 8. 344088 7. 15748 7. 283685 7. 334511 6. 814625  
6. 50935 6. 837218 7. 066746 6. 592649 6. 395286 5. 22914 4. 299133 3. 337802 5. 865378  
5. 8572 6. 95805 7. 242356 5. 890387 6. 943994 6. 774134 5. 876936 5. 99832 6. 075451  
1. 85714 1. 847466 1. 788981 2. 42689 2. 252818 2. 726466 2. 34098 2. 439945 2. 439808  
7. 962287 8. 036653 7. 878641 7. 811846 7. 859579 7. 888463 7. 95612 7. 716308 7. 794518

2. 942099 2. 528137 3. 480239 3. 35558 2. 780836 2. 530991 1. 753421 2. 587216 3. 449987  
6. 958649 7. 202077 7. 068248 6. 732326 7. 4589 7. 288286 7. 157968 6. 757467 7. 385992  
7. 155139 7. 03002 6. 807185 7. 064588 6. 722006 6. 308328 6. 769019 7. 176781 7. 271201  
4. 821791 5. 309577 5. 236248 5. 213223 4. 97225 4. 750584 5. 742908 4. 717634 4. 151615  
2. 433503 2. 929892 1. 903979 3. 070789 1. 945743 2. 587909 2. 235111 2. 565601 3. 056197  
2. 634853 2. 995686 2. 888319 2. 693023 2. 426264 2. 974331 2. 402345 2. 389097 3. 128167  
1. 423731 1. 784669 1. 357559 1. 340502 1. 692999 1. 512106 1. 047664 1. 698514 1. 691828  
6. 470365 7. 497179 7. 200384 7. 034173 7. 379756 7. 170772 6. 92316 6. 817645 6. 843331  
7. 603622 8. 03531 8. 089088 7. 550239 8. 1275 8. 008359 7. 757901 7. 620722 7. 671444  
2. 143702 1. 770822 2. 13282 2. 791626 1. 832393 2. 849473 2. 764439 2. 412913 2. 000617  
3. 466839 4. 423795 4. 238261 2. 88162 3. 539328 4. 327736 4. 835327 4. 73571 3. 949664  
4. 246422 3. 203323 4. 20618 3. 221801 2. 251433 4. 825961 4. 045329 4. 592591 4. 006426  
6. 549115 6. 670754 6. 999166 6. 461956 6. 266297 5. 989783 6. 664485 6. 480246 5. 39117  
5. 65134 5. 848648 5. 132553 4. 266601 4. 225919 3. 245303 5. 081157 4. 480157 4. 959561  
5. 011686 4. 544378 4. 529587 4. 988865 4. 723111 5. 200144 5. 536464 4. 785357 4. 74434  
5. 124662 3. 928894 4. 600484 1. 483218 4. 388794 3. 188391 5. 018551 4. 671323 5. 166184  
6. 422437 6. 282304 6. 731154 5. 571223 6. 412189 6. 373578 6. 658274 6. 014129 5. 779143  
5. 094324 4. 75743 5. 423874 4. 600648 4. 867363 3. 675284 4. 773393 4. 151889 5. 264563  
5. 205793 5. 270384 5. 230997 5. 377121 5. 111503 5. 824678 5. 737113 5. 476191 6. 257886  
7. 51127 7. 241231 7. 644751 7. 181353 7. 201882 6. 286256 7. 359305 6. 661023 7. 025292  
4. 671909 3. 288546 3. 102672 6. 089829 4. 112668 4. 435458 5. 457199 4. 3186 4. 178613  
1. 798214 1. 7924 1. 995724 2. 115716 2. 395334 2. 02508 2. 103013 2. 331799 2. 282472  
6. 451459 7. 032243 6. 959299 5. 756831 6. 114567 6. 196907 5. 965785 5. 913416 5. 570807  
5. 461963 5. 61242 5. 935223 6. 184525 5. 399572 5. 31596 6. 209901 5. 474215 6. 060743  
4. 817524 4. 379923 5. 817194 4. 147116 5. 555853 5. 392941 4. 692468 3. 67088 3. 946304  
2. 528334 1. 612951 1. 854073 1. 704439 1. 926855 2. 255381 1. 948047 2. 510559 2. 158903  
7. 319705 7. 687542 7. 325985 7. 299991 7. 278259 6. 807923 6. 839214 7. 076305 6. 978385  
7. 957601 7. 733908 7. 993341 7. 797458 8. 712309 7. 58156 9. 161126 8. 632361 8. 832161  
6. 345359 5. 871705 5. 43663 4. 857811 5. 732664 5. 672968 5. 228497 4. 999619 5. 476398  
2. 66914 2. 139602 2. 723117 2. 429386 2. 273465 2. 177871 2. 958206 2. 308435 2. 429971  
4. 601505 4. 933494 5. 404519 4. 299857 3. 7354 5. 107929 4. 632643 4. 638202 4. 787882  
5. 129515 5. 751701 5. 32899 6. 140569 4. 815139 4. 753139 6. 22439 6. 333037 6. 445765  
5. 063974 4. 902054 5. 208246 5. 246722 5. 247377 6. 103065 5. 398662 5. 567845 5. 631355  
5. 183235 5. 44739 5. 663216 5. 224074 5. 772412 4. 86165 5. 534784 5. 628064 5. 895828  
1. 960041 2. 558375 2. 147007 2. 242072 1. 540845 3. 048831 1. 816705 1. 923913 3. 074399  
6. 48021 6. 850466 6. 562774 7. 424048 7. 015671 7. 479244 7. 255152 7. 255857 6. 918412  
2. 614034 2. 803998 2. 303437 3. 412408 1. 994406 2. 3653 2. 368187 2. 438134 2. 686199  
7. 174788 5. 693543 6. 861717 7. 204064 5. 964749 6. 277657 6. 022691 6. 127533 6. 462433  
5. 122234 4. 302433 4. 494054 5. 336846 5. 662286 4. 503772 6. 483337 6. 009647 5. 43268  
5. 69344 5. 066727 5. 334078 5. 08977 5. 794385 5. 631155 5. 712397 5. 526295 5. 410793  
6. 942861 7. 077344 6. 784797 7. 347131 6. 715343 6. 934091 6. 853121 7. 576569 7. 285376  
7. 218037 7. 239152 7. 664986 6. 996577 7. 510414 7. 199584 7. 447217 6. 99306 7. 310966  
4. 195628 5. 203389 5. 516076 4. 72926 5. 496501 4. 552194 6. 212362 5. 646139 5. 327217  
3. 10305 3. 333004 3. 907173 4. 395664 4. 133188 3. 303655 4. 407611 4. 971874 3. 977955  
4. 592225 4. 95358 4. 994389 4. 918233 5. 154123 5. 703933 5. 739003 5. 549514 4. 90332  
4. 214635 3. 660356 4. 762909 5. 064949 4. 692975 3. 131594 4. 94628 4. 379055 4. 291191  
5. 037396 4. 82846 5. 238547 5. 314818 5. 033263 4. 357072 5. 467499 5. 031196 5. 398615  
7. 844551 7. 942882 7. 852429 7. 599985 8. 170988 7. 441024 8. 104631 7. 446822 7. 908063  
4. 774958 2. 340543 3. 447024 3. 815716 3. 08244 4. 15054 2. 549121 2. 577016 2. 136551  
6. 152885 6. 263584 5. 86471 4. 769727 6. 100447 5. 565021 5. 556354 5. 199106 5. 392913  
6. 861329 7. 274736 6. 752127 6. 796352 7. 210981 7. 330186 7. 970412 7. 756802 8. 016276

3. 614146 3. 628726 4. 489527 4. 17578 3. 961848 4. 294315 4. 470547 4. 897719 4. 107248  
6. 680824 6. 682189 6. 653799 6. 325969 6. 857957 6. 247762 6. 83808 6. 547837 6. 588304  
6. 182891 6. 278296 6. 089134 5. 5787 5. 042883 5. 663212 5. 437028 4. 49113 4. 763092  
3. 480936 4. 753647 4. 217214 3. 689799 4. 675333 5. 95766 5. 791823 5. 242265 5. 944622  
4. 92433 4. 714215 5. 147098 3. 823255 5. 567101 5. 535595 4. 778365 4. 551352 4. 400267  
4. 683105 5. 398551 4. 197805 5. 514319 4. 972275 4. 120315 4. 948255 5. 097493 3. 712863  
4. 724204 4. 515085 4. 378133 4. 445338 4. 722726 5. 65947 5. 370452 5. 548727 5. 068115  
7. 126588 7. 889518 7. 986061 7. 338166 7. 70643 7. 436343 8. 072491 8. 041468 7. 714688  
6. 984328 7. 696747 8. 070719 7. 456196 7. 649079 4. 743076 7. 59746 6. 488574 6. 872452  
3. 526111 3. 871627 4. 81911 3. 808023 3. 005897 3. 597307 3. 49269 4. 620528 3. 295288  
5. 750207 5. 637394 4. 939336 4. 288049 5. 377276 5. 305236 5. 537405 4. 72829 5. 136049  
5. 757788 5. 462654 5. 777751 5. 745751 6. 249337 5. 671761 5. 048858 4. 793484 5. 366944  
3. 23301 3. 760973 3. 216497 5. 186403 5. 401307 4. 402097 4. 562108 4. 649792 4. 942471  
7. 198963 7. 486719 7. 440479 7. 433431 6. 995367 7. 235945 7. 663607 7. 043369 7. 219319  
5. 682273 5. 398886 5. 683554 5. 479917 4. 787642 6. 039423 5. 254929 5. 284255 5. 183604  
6. 623157 6. 708234 5. 8389 5. 364136 5. 536687 5. 665288 6. 134054 5. 784528 6. 032006  
5. 355197 4. 647416 5. 033558 4. 896256 4. 841495 5. 719358 4. 852251 4. 787817 5. 28657  
6. 837283 7. 106122 6. 701439 6. 161847 6. 660826 6. 874226 7. 140831 6. 527244 6. 728763  
4. 640249 3. 30558 4. 878861 4. 131448 4. 324423 3. 18127 4. 96669 5. 208133 4. 164526  
5. 622441 6. 004364 5. 586486 5. 532894 5. 67335 6. 051802 5. 520857 4. 782781 5. 589832  
1. 713871 2. 223611 1. 967405 1. 533577 2. 007733 2. 703635 2. 246747 2. 610704 1. 885668  
2. 762202 4. 415392 3. 108429 2. 340763 4. 435836 4. 751268 2. 709264 3. 132328 2. 844485  
1. 528807 3. 104296 2. 63254 3. 201416 1. 62069 2. 196444 1. 740791 3. 785577 1. 947563  
4. 949268 4. 705375 5. 786716 5. 23295 4. 736759 4. 870089 4. 746124 5. 827295 5. 55665  
1. 936004 1. 377031 2. 452027 2. 359904 1. 870604 2. 350021 2. 013403 2. 454871 1. 792537  
4. 58903 5. 185667 4. 879207 4. 690939 5. 042017 4. 650334 6. 316339 5. 884178 6. 160886  
1. 973113 1. 32108 1. 993776 2. 791246 2. 095984 3. 30828 1. 440065 3. 399085 2. 330857  
5. 616035 5. 799021 6. 323887 6. 172219 5. 649963 6. 088995 6. 372518 5. 608692 5. 324084  
2. 244506 1. 865459 2. 499766 2. 560536 2. 768587 2. 885084 1. 89829 2. 158932 3. 259062  
5. 324746 4. 188918 4. 796825 4. 283963 4. 776061 3. 415755 6. 426341 6. 047063 5. 709641  
5. 964316 6. 486368 5. 39592 5. 351383 5. 938927 6. 081975 5. 94218 5. 894431 5. 601035  
6. 059567 6. 113442 5. 707517 5. 435 6. 158414 6. 033209 5. 957472 5. 422744 6. 178341  
3. 378416 3. 217048 3. 632282 2. 984767 3. 17247 3. 15444 2. 98725 3. 406395 3. 725874  
7. 55539 7. 418517 7. 950521 7. 616433 8. 183511 5. 973286 9. 031549 9. 293146 8. 76314  
4. 324612 5. 775149 5. 544183 5. 724536 5. 290641 5. 600925 5. 65077 5. 908663 5. 30658  
7. 09931 7. 496203 7. 007416 7. 499748 7. 597049 7. 815116 7. 943129 7. 3638 7. 034578  
2. 813202 3. 503215 3. 477443 3. 153529 1. 854664 2. 925125 3. 720916 3. 473253 3. 677237  
1. 604343 1. 27163 1. 52876 2. 3891 0. 810868 1. 447252 1. 239736 1. 27517 1. 956465  
6. 17347 5. 927657 6. 258401 6. 034859 6. 181138 6. 05099 6. 071376 6. 120644 6. 407704  
4. 919385 4. 380617 5. 541654 6. 035823 5. 178757 6. 024263 6. 261271 6. 062616 6. 146088  
6. 660995 6. 879849 7. 199743 6. 140318 7. 182165 6. 19259 6. 718956 6. 583965 6. 567038  
4. 173944 5. 894512 4. 601757 4. 467293 4. 739762 3. 016955 5. 914894 5. 925557 5. 38923  
5. 33976 4. 047463 6. 292264 5. 172993 5. 421619 5. 674654 6. 824204 6. 815099 6. 78472  
2. 79982 2. 490836 1. 930467 2. 162982 2. 254582 1. 701281 1. 42844 2. 245162 1. 690735  
3. 499171 3. 131934 3. 617657 3. 869291 3. 921044 3. 474967 3. 267072 4. 115876 3. 364214  
6. 17695 6. 409607 5. 96852 4. 72277 6. 725414 5. 978347 6. 568593 6. 42114 6. 278011  
5. 494479 5. 039177 5. 364868 5. 23131 6. 034779 5. 327401 5. 594587 5. 551011 5. 952691  
5. 097607 4. 567899 4. 292829 4. 679466 4. 976136 5. 171955 5. 057553 5. 046574 5. 134971  
4. 423238 4. 60995 4. 076097 3. 427899 4. 284032 5. 563545 5. 056265 4. 806141 5. 362707  
6. 004612 5. 728705 4. 655534 4. 310474 3. 58434 5. 963617 4. 724056 3. 824207 3. 91762  
7. 15878 7. 52277 6. 50401 5. 637424 6. 668451 6. 171602 6. 170698 6. 024833 6. 048094

1. 458514 0. 930624 1. 683416 1. 057068 2. 026964 2. 59537 1. 868932 2. 3176 1. 662379  
4. 604583 3. 963548 4. 239064 4. 645005 3. 686413 4. 750302 4. 451097 5. 50135 4. 081565  
5. 244258 5. 503178 4. 632885 6. 843469 4. 637723 5. 726929 4. 145888 5. 775793 6. 002136  
5. 333752 5. 062402 5. 926866 4. 90579 5. 285938 5. 503494 5. 876639 4. 945246 5. 41763  
5. 447828 6. 044289 5. 131251 4. 812478 5. 853073 6. 301603 6. 202635 5. 563994 5. 557403  
6. 717648 6. 769173 6. 797386 6. 589826 6. 402584 5. 92341 6. 265584 6. 321283 5. 894122  
6. 563958 6. 530535 6. 421263 6. 810905 6. 749747 6. 760967 6. 377388 5. 916505 7. 048064  
3. 973338 4. 921854 4. 360498 4. 165765 4. 424527 5. 165623 4. 544561 4. 634589 4. 544647  
2. 507669 2. 493815 2. 314777 2. 288568 2. 42905 2. 298118 1. 935705 2. 172906 2. 001648  
3. 562351 4. 659369 4. 459888 3. 203334 5. 056067 4. 964868 5. 168914 4. 195908 5. 294883  
2. 597874 3. 142651 2. 526272 2. 495733 2. 087679 2. 744917 2. 446709 4. 168231 3. 033468  
5. 832094 6. 067487 6. 719598 6. 734999 5. 889221 7. 212251 6. 964869 7. 164027 7. 245486  
4. 752721 4. 364314 4. 339824 4. 251595 4. 736862 4. 777759 4. 76196 4. 138709 4. 542912  
3. 909739 2. 443498 2. 743658 2. 571999 3. 228369 2. 966377 2. 64117 3. 665411 3. 133351  
3. 916078 3. 203317 4. 431433 4. 435091 3. 371279 4. 053679 4. 016668 3. 652385 4. 760526  
4. 625156 4. 416476 4. 400977 4. 729548 4. 422669 4. 26354 5. 078456 6. 103962 4. 516689  
5. 512126 6. 022871 5. 995694 5. 494347 6. 046416 5. 043512 6. 408927 6. 339003 5. 729513  
4. 420543 3. 708683 3. 618271 4. 045279 3. 756324 4. 992918 3. 208993 4. 063737 4. 836432  
6. 370725 6. 161678 6. 103024 6. 186921 6. 079323 6. 119013 6. 272366 6. 413801 6. 307759  
4. 10533 3. 691255 4. 729081 1. 535594 4. 13115 2. 939209 3. 241312 3. 770168 2. 129514  
5. 782842 6. 637153 6. 247621 5. 990708 6. 007674 5. 878353 6. 459699 6. 143096 4. 977972  
6. 953449 7. 21852 6. 859799 6. 636769 6. 794941 5. 653416 6. 457008 6. 200462 6. 382096  
2. 912942 2. 069981 3. 473472 4. 132045 3. 876259 2. 559672 2. 633017 3. 063042 3. 167042  
4. 167488 3. 893131 4. 049928 3. 910854 4. 535326 4. 631167 4. 753622 4. 098447 3. 929621  
6. 181224 5. 878291 6. 222704 5. 928134 6. 336109 5. 886973 6. 343855 6. 816124 6. 846784  
5. 257882 5. 455924 5. 179981 4. 7901 4. 911715 5. 293336 4. 92434 4. 691834 5. 434783  
2. 792598 2. 8894 2. 95955 2. 818882 2. 918051 3. 437503 2. 84897 3. 227735 3. 952188  
7. 5348 7. 183407 7. 276069 6. 735197 7. 397138 7. 014171 7. 644619 7. 628821 7. 063995  
6. 540743 6. 913731 6. 522889 7. 009923 7. 199581 6. 302164 6. 744004 6. 379942 6. 781218  
4. 828053 4. 256625 4. 969703 5. 267117 4. 553551 3. 877458 4. 112934 3. 907405 3. 947353  
6. 498369 5. 979804 6. 864248 6. 79424 6. 782162 6. 654269 7. 314141 7. 582225 7. 584283  
5. 016353 4. 91995 4. 645258 4. 640802 4. 879285 5. 331435 5. 206957 5. 20648 4. 723413  
6. 106268 5. 970426 6. 496664 6. 07205 6. 454346 5. 112502 6. 8425 6. 40807 6. 34361  
6. 398967 6. 317199 6. 596772 6. 462281 6. 839743 6. 422815 6. 496458 6. 018146 6. 914661  
7. 163491 7. 383977 7. 223836 7. 213293 7. 507193 7. 157216 6. 802395 7. 151954 6. 866565  
5. 639381 4. 867485 6. 267878 5. 204414 5. 86385 5. 494927 6. 038627 4. 981062 5. 889587  
4. 626875 5. 224296 5. 217305 5. 028152 4. 804813 4. 516606 4. 878634 4. 041459 4. 828737  
5. 338115 5. 205727 5. 704203 4. 972002 5. 544816 5. 335869 6. 229749 6. 099519 5. 721268  
3. 623648 4. 417981 5. 574821 5. 374142 4. 25937 4. 137288 4. 452733 4. 687107 4. 562917  
1. 93928 2. 738935 2. 263542 3. 003912 2. 232043 2. 355059 1. 591022 2. 206175 2. 19406  
7. 00362 7. 213461 7. 058329 6. 414252 7. 672283 7. 319766 7. 762797 8. 109168 7. 927368  
5. 793575 5. 185094 5. 096218 4. 942766 4. 916801 6. 379433 5. 435107 5. 87844 5. 475943  
6. 001463 5. 820236 5. 228124 6. 293927 5. 290512 5. 24855 6. 23344 6. 859165 6. 455971  
4. 441146 3. 908373 4. 212442 3. 355997 4. 111386 4. 446026 4. 566551 4. 459709 4. 234868  
7. 57491 7. 255523 7. 360964 7. 073773 7. 59053 7. 147599 7. 797597 7. 572408 7. 967175  
6. 306409 5. 114299 5. 562404 6. 027981 5. 636083 6. 169934 5. 716584 5. 833528 5. 797169  
5. 324112 4. 700703 5. 590433 5. 122302 5. 23036 5. 247136 5. 408628 5. 357776 4. 95484  
3. 814727 3. 370631 3. 020972 3. 506375 2. 741427 3. 60872 3. 651497 4. 203628 3. 908825  
7. 093235 7. 810003 7. 627127 7. 309163 7. 710153 5. 177679 6. 572552 6. 928222 7. 220791  
3. 625052 3. 469817 3. 715812 3. 63116 3. 335923 3. 742793 4. 007196 4. 421902 4. 171129  
7. 785849 7. 998096 7. 72823 7. 364693 7. 726785 7. 430111 7. 093612 7. 443848 7. 544518



5. 885175 6. 034396 6. 152796 5. 534172 6. 40994 6. 723282 6. 566199 7. 246265 6. 270301  
2. 963136 3. 621958 3. 540213 2. 965048 3. 589859 3. 936698 4. 000402 3. 199789 4. 142954  
7. 466494 6. 545359 6. 79981 6. 897672 7. 079893 7. 246545 6. 951628 7. 093684 7. 05259  
5. 051496 4. 684585 5. 06991 4. 197655 4. 896846 3. 888074 5. 302401 4. 264191 4. 235138  
4. 724825 4. 904454 4. 589827 4. 19355 4. 569522 4. 282055 4. 205905 4. 128111 3. 75061  
6. 597071 6. 119026 6. 273752 6. 270404 6. 202997 6. 560335 6. 861437 6. 900936 6. 575128  
6. 183538 5. 491259 6. 564927 6. 043656 6. 1113 6. 350335 5. 856114 6. 59647 6. 097336  
5. 347243 6. 272783 5. 324943 5. 204367 5. 434212 5. 303825 4. 722231 4. 268888 5. 268309  
2. 876674 2. 985551 2. 587866 3. 238382 3. 019859 3. 25927 2. 834707 3. 317601 3. 414468  
4. 809093 5. 710188 5. 794655 5. 927391 5. 350337 6. 379862 5. 249117 5. 640831 5. 630581  
5. 798982 6. 503327 5. 820391 6. 104825 6. 474819 6. 913172 6. 424173 5. 943499 6. 361614  
6. 788234 7. 1457 7. 425591 7. 030556 7. 080072 6. 419704 7. 128439 6. 711542 7. 092038  
7. 128695 5. 938361 6. 856585 7. 098835 6. 749587 6. 002799 7. 18115 6. 996106 6. 530615  
5. 227829 5. 289948 4. 510039 5. 324284 5. 276069 4. 909049 4. 891731 4. 014038 4. 0307  
9. 173886 9. 024302 8. 614927 8. 59522 8. 707556 8. 820138 8. 62704 9. 018355 8. 668587  
1. 129089 1. 958709 1. 262657 1. 164744 1. 773267 1. 929678 1. 099292 1. 550853 2. 318787  
4. 702919 3. 950404 4. 85512 4. 995107 4. 711687 5. 03458 5. 795047 6. 245422 5. 776979  
4. 836271 4. 705474 4. 757663 3. 467378 4. 148479 5. 202852 6. 270936 6. 376006 6. 522745  
2. 174195 2. 704051 2. 275879 2. 923641 2. 019628 2. 431222 2. 389665 3. 137942 2. 375192  
3. 791626 4. 579649 2. 858987 4. 601394 3. 811405 4. 702073 2. 878638 4. 4829 4. 52167  
4. 601004 4. 359055 5. 069479 4. 510776 5. 078315 5. 665814 4. 979762 4. 715118 5. 903967  
2. 608453 2. 734459 2. 734993 3. 060041 2. 530955 3. 324262 4. 024858 3. 006009 3. 61818  
8. 191832 8. 894807 8. 380456 8. 595275 8. 804906 6. 484161 9. 649272 9. 712507 9. 84992  
6. 4522 6. 794772 6. 427659 6. 971823 5. 714036 6. 674268 7. 055631 6. 379767 6. 839333  
8. 539392 8. 257759 8. 530236 8. 095564 8. 707398 8. 126362 8. 451632 7. 924937 8. 568845  
6. 960898 7. 452699 7. 619498 6. 830758 7. 400342 6. 707147 7. 602636 7. 393262 7. 150133  
1. 884477 1. 940856 2. 045709 2. 089853 2. 062118 1. 874871 1. 719509 2. 330011 2. 166131  
3. 342805 2. 930909 3. 567447 3. 296751 2. 87259 3. 687255 3. 730766 3. 502989 3. 962493  
5. 882429 6. 281742 6. 648385 6. 285848 6. 166714 6. 887312 6. 798866 6. 496688 5. 985108  
7. 170685 6. 963571 7. 156384 6. 324979 7. 650989 6. 150603 7. 782459 8. 504965 8. 262866  
5. 835428 4. 015516 5. 585959 5. 65134 5. 125684 6. 866603 6. 1981 5. 876569 6. 604377  
5. 431335 5. 53513 6. 244557 6. 042477 5. 937804 4. 838649 5. 979611 6. 01716 6. 277947  
2. 459167 3. 250225 2. 926377 3. 286542 3. 304231 3. 614222 2. 942757 3. 394472 3. 146409  
8. 05545 8. 055095 8. 185226 7. 313523 8. 254134 7. 638386 7. 717981 7. 600346 7. 779855  
3. 776434 2. 09802 2. 737816 3. 520893 2. 992585 4. 671527 3. 412956 3. 951156 3. 042049  
4. 990579 4. 419771 3. 868102 4. 18194 5. 093738 3. 72929 3. 976392 4. 391627 4. 412182  
5. 832621 5. 248996 5. 556031 4. 866805 5. 479225 5. 76915 5. 984886 5. 738642 5. 658202  
1. 85672 1. 974412 1. 604638 1. 853915 1. 995022 3. 576052 1. 952661 2. 72194 2. 346501  
6. 895125 7. 216245 6. 519304 6. 34849 6. 722613 6. 173666 6. 176856 5. 26101 5. 241992  
2. 855107 3. 403029 2. 906931 2. 62495 2. 274272 5. 614384 3. 537228 2. 258433 3. 476275  
4. 452093 4. 681213 3. 835987 3. 900593 4. 090724 3. 866097 4. 528469 4. 447162 4. 392968  
5. 527089 5. 277191 5. 442926 5. 233523 5. 681491 4. 29889 4. 702796 5. 838314 4. 66316  
2. 08119 2. 815498 1. 639827 5. 264259 2. 223361 2. 97019 4. 587951 2. 758909 2. 450059  
7. 123695 7. 16709 7. 036818 6. 203022 6. 702807 7. 096549 6. 474739 5. 712538 6. 521742  
4. 037726 3. 710301 4. 656291 4. 217575 3. 646801 4. 026433 5. 40516 4. 05949 4. 658524  
3. 07783 2. 367733 2. 37731 2. 781885 2. 371564 2. 676516 2. 300946 2. 323715 3. 046582  
5. 571985 5. 482854 5. 746492 5. 829964 6. 471753 5. 422377 6. 492251 6. 05129 6. 028959  
2. 737372 3. 139478 3. 904466 4. 104977 4. 569125 6. 377323 4. 472997 4. 702655 4. 973158  
4. 879504 4. 665799 2. 966227 3. 05707 4. 137046 5. 50113 5. 133325 4. 988784 4. 750588  
4. 471784 4. 595286 4. 978894 3. 80071 4. 467373 5. 166589 4. 796464 4. 624646 5. 748251  
4. 673099 3. 852439 4. 948859 4. 36421 4. 761714 5. 035346 4. 887683 5. 076289 4. 220234

6.098253 6.158051 5.587841 5.773752 5.987704 5.599787 5.707873 5.192548 5.60047  
5.750605 6.440532 7.073534 6.345128 6.472508 6.40472 6.360021 6.157574 6.259442  
3.121493 2.434046 3.149949 2.917147 2.279992 2.607525 2.806807 2.40612 2.662581  
3.916574 3.219541 3.750608 2.890721 3.382402 4.490395 3.560856 3.595751 3.814689  
3.703129 4.428029 4.645577 3.874431 4.735185 4.390374 4.585663 4.930735 5.604747  
7.141338 7.599704 7.01434 7.613853 7.45948 7.414818 7.283083 6.758133 7.061649  
3.999574 3.296832 4.836977 5.009607 4.516924 4.355625 5.731679 6.164615 6.031658  
6.063156 5.521486 5.991167 5.030863 6.044908 6.765645 6.038219 6.15007 5.883393  
2.909189 2.072639 2.686392 2.832044 2.7939 2.314659 2.247143 3.17691 3.109782  
4.276107 3.541372 4.158088 3.336819 4.262074 3.821829 3.990731 3.669995 3.62262  
7.401653 8.207309 7.783543 7.152036 7.988927 7.060017 7.466411 7.195702 7.407173  
2.206299 2.179417 2.13123 2.716639 2.456957 2.712547 2.081147 2.180294 2.131589  
2.421279 2.938226 2.972847 2.81021 2.795483 3.542853 2.251596 2.152173 2.450007  
6.908432 7.319385 6.949597 7.292631 6.842005 6.400089 7.567216 6.893911 6.745461  
5.915479 4.984141 5.985946 5.71705 5.037916 5.74851 6.402179 6.78311 6.759433  
5.589539 5.626023 5.942496 5.314785 6.068449 5.149275 5.925546 5.604444 5.729699  
5.395018 5.669237 5.513661 5.554201 5.484379 5.492142 5.324701 5.558082 5.993263  
6.672322 6.932899 6.851408 5.957515 6.459599 4.731385 5.647734 5.227986 5.395653  
3.251354 3.341016 3.288176 3.075074 3.406279 3.434814 3.368735 3.2082 3.445362  
5.703213 4.771007 6.449002 6.293685 6.384395 5.873259 6.685181 6.893078 6.939046  
6.246202 6.412238 6.413839 7.462719 6.325186 7.117028 7.124311 6.901181 6.745038  
7.087623 6.801676 6.987867 6.051287 6.308893 6.429921 6.952465 6.891543 7.014717  
5.060447 4.807987 4.686518 4.993931 4.53871 5.733431 4.998973 5.576745 5.505787  
7.418933 6.801518 6.695588 6.361578 7.014789 6.878888 6.872139 6.825452 6.154835  
8.322989 7.505936 6.952119 6.946198 7.096168 8.149828 6.844016 5.164824 3.944614  
5.529991 4.891987 5.484347 5.992082 4.925326 3.72259 5.426278 5.044231 4.597542  
7.412688 8.157329 8.008357 6.875416 7.89138 6.919984 8.267034 8.139784 8.083944  
6.896084 6.357518 6.805638 6.295675 6.700421 5.927754 6.24892 6.265751 6.057752  
5.849172 5.869722 6.674884 5.737505 6.380818 4.747167 6.239276 5.70743 6.093072  
3.360555 3.809659 3.287538 3.80387 4.013494 3.251566 2.778084 3.29133 4.59332  
3.143771 3.000768 3.568135 3.11869 3.071159 4.257495 3.270103 3.514475 4.303467  
5.09011 4.136163 4.629164 4.565243 3.371461 5.937874 4.361491 4.89313 3.370766  
6.041598 5.904334 5.400358 4.43083 5.345602 5.66969 5.038813 4.672928 4.730383  
6.224381 4.88929 5.721271 6.120331 6.868894 2.258963 1.864465 5.801141 3.998257  
1.60447 1.570646 1.634259 1.753892 1.20598 1.683367 1.323944 2.014148 2.31847  
5.651149 4.688325 4.77016 4.866816 4.776362 4.863054 5.534723 4.726626 4.765165  
1.143025 1.615112 1.642195 3.107911 1.944218 2.34729 1.335383 1.36432 1.863273  
3.45463 3.471156 3.344861 3.892505 2.792209 4.173557 3.226269 3.142001 3.051083  
4.974323 4.66461 5.496087 3.879583 4.466551 6.847156 4.81336 4.318706 3.736923  
5.699971 4.959892 5.908209 5.033379 5.830249 5.735826 5.732578 5.702773 5.115215  
4.647728 4.496008 4.290373 4.279344 4.552618 5.19963 5.30721 4.889704 5.214007  
2.674596 3.162594 2.04779 3.155805 3.290526 4.942648 2.562084 1.554971 3.547873  
5.707216 6.54823 6.093059 6.327653 5.351378 5.369575 5.902626 6.1238 5.822651  
4.758532 4.697598 3.713914 3.911204 3.252186 4.388111 4.906976 4.335385 4.711623  
6.062365 6.836396 6.570627 6.130267 6.307501 6.149372 6.192836 6.717116 6.767452  
5.330425 4.9978 5.398102 5.851356 5.570384 6.763864 5.610975 4.803181 5.753124  
3.949983 3.045703 4.393465 3.144252 3.60063 5.155835 4.630407 5.309143 4.803851  
6.68022 6.331093 5.925291 7.022376 6.077628 6.655939 6.047097 5.312579 4.933419  
6.276839 5.817907 5.555137 6.635616 5.531674 5.97533 5.743847 6.006475 5.867719  
6.447719 6.625938 6.716948 6.858029 7.023448 5.675847 6.329037 5.973518 5.967465  
2.144744 2.628413 2.150298 2.032468 2.774437 4.27388 2.034582 3.354911 3.051124

6. 398772 6. 855985 6. 003662 5. 888077 4. 675991 6. 173375 5. 594121 5. 585263 5. 448095  
7. 160811 7. 140035 6. 829156 6. 683872 6. 687198 6. 019053 6. 571309 6. 259369 6. 706519  
2. 063043 1. 369184 1. 670461 1. 750329 2. 221072 2. 016931 1. 669542 1. 744428 2. 050739  
4. 129864 4. 6783 4. 23079 4. 649655 5. 312592 4. 628941 4. 795802 4. 341605 3. 473293  
6. 875219 6. 658905 6. 671924 6. 554167 6. 710079 6. 071138 6. 571179 6. 404723 6. 481889  
3. 71569 4. 361423 4. 425435 3. 654137 3. 904136 3. 833946 4. 283988 4. 33346 4. 433002  
5. 122915 4. 947059 4. 851916 3. 947529 4. 015545 3. 899833 3. 961549 4. 747953 4. 245388  
4. 331298 5. 235621 3. 911584 5. 09209 4. 292262 4. 154108 3. 897849 4. 490804 4. 481636  
6. 053175 6. 067167 6. 205099 5. 748329 5. 907441 5. 829916 5. 87268 5. 768578 5. 082872  
2. 993059 3. 037007 3. 602668 5. 721725 2. 34845 6. 16066 5. 692723 5. 639365 4. 824289  
5. 045476 3. 943036 4. 152861 2. 950711 3. 041433 5. 601241 3. 219444 2. 902462 3. 785591  
5. 913246 4. 876532 7. 21792 5. 814397 6. 040922 5. 92234 6. 217682 5. 09503 4. 89436  
1. 525541 2. 006584 2. 037427 2. 542131 2. 023078 1. 555567 1. 620677 3. 229643 1. 427938  
6. 310252 6. 449275 6. 320737 6. 510826 6. 28472 6. 13704 6. 312168 5. 88812 5. 727579  
6. 6958 7. 488848 7. 204258 5. 317376 7. 050248 6. 059843 6. 568234 5. 920543 6. 337782  
4. 545566 3. 945997 2. 643977 3. 297614 3. 999076 3. 775926 3. 380978 2. 613209 4. 830169  
4. 962804 5. 423908 5. 048072 4. 798926 4. 8645 5. 945605 5. 233263 4. 552221 5. 15436  
3. 85879 3. 220327 2. 906683 3. 563785 4. 135602 3. 899461 3. 873025 4. 262261 2. 412976  
5. 471862 4. 601268 5. 78268 6. 785543 6. 483386 5. 996566 5. 698679 6. 68857 6. 29027  
7. 41492 7. 146508 7. 350186 6. 694784 7. 168552 7. 146402 7. 02341 6. 64986 6. 842302  
7. 159547 7. 157049 7. 41306 7. 990045 7. 038204 8. 079296 7. 534001 7. 604916 7. 882736  
7. 023768 6. 938135 6. 684562 6. 850691 5. 990189 6. 282395 6. 203414 5. 401649 6. 012711  
7. 129965 7. 537878 7. 783337 7. 73372 7. 899224 6. 53398 7. 748401 7. 837163 8. 023006  
3. 126614 4. 845531 3. 28897 3. 01137 2. 52883 2. 098148 2. 465244 2. 610208 2. 448433  
6. 200177 7. 092375 6. 573148 5. 716522 6. 777788 6. 656837 6. 461994 6. 652832 6. 036615  
5. 032396 3. 127229 5. 02438 4. 360927 5. 3245 5. 325263 5. 471737 6. 42426 5. 556744  
6. 388298 6. 732446 6. 672199 6. 400108 7. 059989 6. 350747 6. 594285 5. 826946 6. 521019  
1. 678514 2. 490345 3. 842478 1. 975873 1. 873585 1. 78457 1. 822418 1. 510674 1. 208296  
3. 60499 3. 116705 3. 841386 4. 042574 3. 75174 3. 60697 3. 410247 3. 180485 3. 202086  
6. 014795 6. 575034 6. 510835 5. 745373 6. 526849 6. 288937 6. 55312 6. 618004 6. 20975  
3. 59246 4. 199944 4. 254831 3. 546533 3. 127458 3. 225585 5. 190992 5. 117294 5. 553362  
3. 629823 3. 950085 3. 649314 3. 946755 4. 013152 4. 133535 3. 538358 4. 70005 4. 729747  
7. 047223 7. 3094 7. 013188 6. 823824 6. 926015 6. 254197 6. 807517 6. 801876 6. 639072  
5. 497535 5. 442676 6. 506037 5. 997634 5. 35731 6. 199769 6. 030189 5. 131075 5. 296943  
5. 870738 6. 339851 6. 81512 6. 260877 6. 669522 6. 395289 7. 111114 7. 085816 6. 86468  
8. 474355 8. 294649 8. 425648 7. 20347 8. 390727 6. 227396 8. 07325 8. 341724 8. 166214  
6. 866805 7. 632432 6. 555523 6. 803296 7. 190735 6. 250194 6. 490192 6. 592952 6. 532649  
6. 894758 6. 51913 6. 807299 6. 172822 6. 674889 5. 333682 6. 159971 6. 545425 6. 538537  
1. 663143 2. 691194 2. 184708 2. 442312 2. 087387 1. 909882 1. 775283 2. 238712 2. 217758  
2. 313266 2. 054125 2. 589552 2. 058807 1. 797974 2. 577238 2. 060331 2. 305507 2. 800222  
7. 378524 8. 051344 7. 92054 7. 165095 8. 041194 6. 819821 7. 654741 6. 768205 6. 571368  
4. 058009 3. 245519 3. 92735 2. 995347 3. 437574 4. 026604 3. 650894 3. 43676 4. 316719  
6. 959989 6. 695781 6. 745677 6. 730242 6. 800492 6. 489405 6. 912351 6. 603468 6. 526107  
6. 749958 6. 762848 6. 913992 6. 836859 6. 671536 6. 301542 6. 745933 6. 893789 7. 006174  
2. 36523 3. 21639 2. 845405 2. 072164 3. 334403 2. 995611 2. 219749 2. 605133 2. 871613  
5. 089303 4. 568339 4. 588893 4. 193139 4. 626013 4. 271577 4. 886271 4. 160478 4. 426491  
2. 922665 3. 680312 3. 696383 2. 861166 3. 293712 2. 276418 3. 275071 3. 210543 3. 757953  
6. 055502 6. 15485 6. 270108 5. 891578 6. 36025 6. 162908 6. 213807 4. 834911 5. 668535  
3. 241718 2. 306431 2. 751071 3. 439188 2. 839006 3. 849516 2. 938829 2. 924235 3. 460057  
7. 031222 5. 962856 6. 450281 5. 7521 7. 244072 6. 703807 8. 345072 6. 224332 8. 394495  
6. 385357 6. 636078 6. 736201 5. 830059 6. 191627 6. 084418 5. 411729 5. 009269 5. 519091

4. 649654 4. 562777 4. 3083 5. 398885 3. 828138 5. 574977 5. 264256 5. 262993 4. 919085  
6. 300493 6. 127902 6. 417673 6. 105825 5. 95974 5. 930573 6. 183258 5. 629308 6. 233747  
2. 337829 2. 762607 2. 637145 2. 487366 2. 523528 2. 884712 3. 051502 2. 766309 2. 655976  
9. 833541 10. 0454 10. 0451 9. 820282 10. 16184 8. 996457 10. 53937 10. 35565 10. 14591  
3. 555778 5. 108426 4. 605772 3. 666492 4. 234618 3. 751964 3. 500065 3. 38467 2. 903696  
7. 983257 7. 576427 8. 01815 7. 762893 7. 783758 8. 361735 8. 408608 8. 00703 8. 102423  
4. 788351 4. 642001 5. 667962 4. 993147 5. 522668 6. 15209 5. 488023 6. 343872 6. 197001  
7. 201462 7. 589902 7. 15662 7. 009454 6. 986784 6. 551255 6. 964337 6. 50032 6. 003619  
2. 870275 2. 964021 2. 883341 3. 060382 2. 860571 2. 912896 3. 160625 3. 697919 3. 475087  
8. 079579 7. 7012 8. 542419 8. 831212 8. 538142 6. 730605 8. 991061 8. 895974 8. 869563  
3. 772204 3. 322668 4. 825421 4. 242718 4. 123515 4. 958696 5. 262386 5. 462159 4. 558889  
6. 53541 6. 901672 6. 701604 5. 864191 6. 688263 6. 248038 6. 214327 5. 991827 6. 124876  
3. 616121 4. 363646 4. 131602 4. 849421 4. 933143 4. 160922 5. 535153 5. 07436 5. 364259  
5. 354424 5. 711001 5. 533446 5. 531174 5. 982357 5. 806008 5. 931902 5. 215161 5. 711932  
7. 57847 7. 908055 8. 568556 7. 666409 7. 82862 5. 458141 8. 407468 8. 379256 8. 34002  
5. 055506 5. 13202 5. 531367 5. 20714 4. 759623 4. 523525 6. 124204 5. 339757 5. 966257  
5. 924821 5. 800775 5. 762856 6. 368901 6. 118406 5. 95109 6. 478439 5. 523826 5. 815853  
5. 475509 4. 062846 4. 866597 5. 176322 4. 401245 4. 190886 4. 776549 5. 677053 5. 131441  
2. 985246 3. 616269 2. 951225 3. 327013 2. 507985 2. 811117 2. 61809 2. 699766 3. 249811  
8. 058717 8. 270077 8. 18423 8. 304902 8. 124664 8. 20436 8. 48648 8. 678226 8. 721566  
3. 991213 3. 104827 4. 435783 2. 660855 4. 096897 4. 422929 2. 608681 3. 436429 3. 80585  
6. 766598 6. 882382 7. 378501 6. 698684 7. 58903 5. 785513 6. 440767 6. 577887 6. 411849  
6. 700592 6. 608117 6. 933885 6. 630302 6. 671775 6. 629139 6. 843228 6. 540567 7. 000961  
6. 091726 7. 195528 6. 697784 5. 995443 6. 985842 5. 032863 5. 343063 6. 501152 6. 51495  
6. 01733 6. 68986 6. 550602 6. 303174 6. 13277 5. 981338 6. 015358 5. 760761 5. 955484  
7. 264538 7. 243385 7. 394572 6. 88024 7. 406201 7. 535647 7. 18045 6. 389017 7. 261225  
4. 02685 3. 89808 4. 193431 3. 92162 3. 96188 3. 097143 3. 099215 4. 016925 3. 763834  
3. 697154 2. 744888 3. 341299 3. 194758 3. 269082 3. 655704 3. 792604 4. 576418 3. 655704  
1. 482838 1. 505602 1. 283054 1. 977157 2. 244778 1. 399008 1. 565449 1. 611358 1. 705044  
6. 973584 7. 325523 7. 944571 6. 676932 7. 121065 6. 527018 6. 805101 6. 510602 6. 629948  
6. 498567 5. 328613 5. 59439 6. 035165 6. 492725 7. 404163 6. 133826 5. 701871 6. 499434  
6. 823431 7. 747552 7. 318734 6. 86963 7. 259181 6. 638406 7. 357242 7. 024931 7. 147046  
4. 578848 4. 1878 4. 01279 4. 718437 4. 640777 5. 115283 5. 577359 5. 649217 5. 78736  
3. 417996 3. 634072 2. 797984 3. 78359 3. 424941 3. 705553 3. 892403 4. 249395 3. 949542  
4. 283937 3. 159468 4. 272984 5. 165371 5. 287177 4. 3023 4. 605074 4. 76432 4. 539079  
4. 337541 5. 701527 5. 669332 4. 230161 4. 61098 3. 668015 5. 405316 5. 276364 4. 838121  
7. 733354 8. 30713 7. 612194 7. 018928 8. 106655 7. 558835 7. 940048 7. 543372 7. 861934  
7. 517877 5. 75907 5. 350024 6. 709118 5. 828999 7. 956863 6. 508793 6. 773091 6. 92546  
4. 601962 5. 170631 5. 629771 4. 882142 5. 51665 5. 249783 5. 334985 5. 548676 5. 560554  
2. 45543 1. 32007 1. 908523 1. 913765 2. 725428 1. 819298 1. 874952 3. 607613 1. 669552  
3. 874312 3. 116435 4. 26899 3. 218532 3. 681916 3. 318366 3. 736308 3. 869708 3. 602883  
5. 562003 5. 839211 6. 292478 5. 834703 5. 983644 5. 96018 5. 787667 5. 670995 5. 75876  
7. 317972 7. 816489 7. 458652 7. 976195 7. 981228 8. 002381 7. 803685 7. 809678 8. 487731  
3. 149415 3. 970677 3. 215797 2. 753595 4. 08435 4. 433351 3. 36108 4. 549448 3. 418804  
4. 045068 5. 114458 3. 57895 4. 905888 5. 455303 2. 377219 4. 430541 4. 403306 4. 853731  
2. 046274 2. 809214 1. 934468 2. 453444 2. 236718 1. 920037 2. 043088 1. 623443 1. 820026  
2. 521622 1. 965274 2. 440612 2. 090089 2. 775413 2. 505722 2. 439856 2. 370407 2. 217364  
4. 674967 4. 874241 4. 854846 4. 463506 3. 257668 4. 334461 4. 282778 4. 120414 4. 354988  
1. 838928 2. 314872 1. 803453 1. 932158 1. 608628 1. 295483 1. 118196 1. 792663 1. 459104  
7. 86396 7. 761198 7. 862172 7. 54315 8. 22186 6. 863813 8. 083893 7. 6223 7. 871897  
4. 967532 5. 654213 6. 011244 6. 01482 4. 68783 6. 174954 5. 80486 5. 310093 5. 502426

5. 687841 5. 405693 5. 281985 5. 719153 5. 269339 5. 502062 5. 32802 6. 806981 6. 241182  
6. 26026 6. 339187 5. 72376 5. 188848 5. 895158 5. 615367 7. 329285 6. 975361 6. 644104  
2. 18049 2. 212496 1. 910136 2. 802023 2. 065671 2. 943891 2. 095695 1. 811032 2. 479078  
8. 647597 8. 571245 8. 728532 7. 989891 8. 439204 8. 217998 8. 717839 7. 95748 7. 577782  
8. 25429 7. 258551 7. 667185 7. 583767 7. 287162 6. 7339 8. 096422 8. 150651 7. 956126  
1. 792087 2. 074583 3. 092351 2. 826257 2. 936779 3. 229539 2. 883065 1. 936888 2. 004093  
4. 389033 4. 552445 4. 285833 3. 720724 5. 663777 4. 01539 5. 90824 5. 041036 4. 111748  
2. 557041 3. 211988 3. 253357 2. 818425 3. 081785 2. 438993 2. 877404 2. 676014 3. 203119  
2. 359562 1. 497861 2. 950297 2. 623897 2. 2496 2. 725835 2. 063183 1. 66805 3. 082416  
7. 068057 7. 67854 7. 487885 7. 439334 8. 082681 6. 763691 6. 952898 6. 93677 7. 263392  
5. 577417 5. 426836 5. 768868 5. 047249 4. 779464 5. 503376 4. 382188 5. 054723 5. 213021  
1. 486485 1. 69302 2. 174552 2. 017373 2. 274963 1. 948003 1. 565159 2. 411086 3. 273929  
3. 178414 3. 125891 3. 916733 2. 513546 3. 701505 3. 203375 3. 155295 3. 932023 4. 011587  
3. 771664 4. 20768 4. 254119 3. 834541 3. 899305 4. 670247 3. 699027 3. 879416 3. 894778  
6. 989265 7. 108033 7. 213522 6. 992642 7. 13814 7. 169524 7. 063766 7. 387282 7. 670503  
6. 475247 6. 904928 6. 892277 6. 648929 6. 49759 7. 117365 7. 302204 6. 586285 6. 805637  
8. 911085 9. 181901 8. 90525 8. 667425 8. 911393 8. 156207 8. 444105 8. 126713 8. 442756  
4. 49851 3. 420558 3. 943471 3. 618743 4. 190087 5. 16903 5. 02838 5. 075653 5. 300624  
5. 100823 5. 490886 5. 039136 4. 704535 5. 536739 5. 160086 4. 704824 5. 304976 4. 471094  
3. 1204 2. 338539 1. 934478 2. 698966 2. 183737 2. 231261 2. 186586 2. 564201 2. 526107  
2. 511401 2. 637632 1. 615346 2. 940176 1. 634392 1. 338672 1. 165581 1. 633959 1. 513413  
4. 880883 5. 663499 5. 262787 4. 90628 5. 292311 2. 990695 4. 038137 4. 139372 3. 82335  
5. 223805 4. 120368 4. 752954 2. 779625 4. 217442 3. 409226 5. 141562 4. 069992 4. 806089  
6. 3672 5. 540911 5. 148947 6. 437868 5. 370467 5. 783711 7. 278696 6. 429111 6. 326747  
4. 384018 4. 375783 4. 13295 4. 058747 4. 440191 4. 083898 3. 333662 4. 38126 3. 066984  
3. 981951 4. 360234 5. 309106 5. 44981 4. 327536 4. 190571 5. 572757 7. 098563 6. 40724  
1. 440765 2. 000843 2. 015067 1. 54383 2. 833101 2. 211992 1. 774326 2. 295615 2. 673338  
6. 887423 7. 273544 6. 936452 6. 529922 7. 963808 7. 685871 8. 111294 7. 071662 7. 215103  
7. 742598 8. 124508 7. 902862 7. 906784 7. 986736 7. 20646 7. 235 7. 179203 7. 714089  
6. 015584 6. 103898 3. 417488 5. 12215 5. 568684 5. 017341 2. 224223 2. 778687 4. 563255  
8. 868788 8. 880783 8. 896337 8. 959298 9. 124901 9. 431417 8. 909397 8. 709939 9. 061718  
6. 986605 6. 589166 6. 764768 6. 586027 6. 891111 5. 110969 6. 195562 5. 868776 5. 334326  
7. 34235 7. 154307 6. 817821 7. 205034 7. 207268 7. 057338 8. 296234 7. 954176 7. 848216  
8. 079913 7. 402686 7. 58186 7. 692936 7. 15305 8. 29914 7. 347637 6. 994195 6. 95137  
5. 387933 4. 776253 5. 54183 5. 447874 5. 666567 6. 727027 5. 683925 6. 022671 6. 498989  
7. 298758 7. 435434 7. 542667 6. 66051 7. 050562 7. 560104 6. 577437 6. 572133 7. 301512  
3. 952812 3. 854681 3. 725882 3. 89591 4. 326591 3. 79582 3. 677912 3. 725366 3. 81272  
9. 933506 10. 12134 9. 772811 9. 47304 9. 978434 9. 731559 9. 605499 9. 552227 9. 625326  
4. 658801 4. 603678 3. 642891 4. 295327 4. 900298 5. 224779 4. 535615 4. 200198 5. 29983  
5. 670892 4. 887146 5. 566024 5. 434249 4. 330407 3. 798229 4. 889136 4. 872542 3. 010784  
6. 46547 5. 629815 6. 067931 6. 337282 5. 833842 6. 900334 6. 335276 6. 230079 6. 746322  
8. 151198 6. 861838 6. 966331 7. 348091 6. 770283 7. 514668 7. 43272 7. 18004 6. 889836  
3. 701069 4. 533692 3. 903487 3. 888619 5. 258566 3. 245739 3. 358335 1. 966394 2. 417545  
4. 299269 3. 85643 4. 106945 3. 894699 4. 582078 4. 63563 4. 094288 4. 300363 5. 0819  
2. 033679 3. 620164 3. 002677 2. 419054 2. 710466 3. 009552 3. 119892 2. 604947 3. 157976  
4. 167427 3. 025112 2. 825813 3. 416107 3. 065421 4. 236408 3. 122687 2. 677338 2. 930855  
6. 094333 3. 548973 3. 447104 5. 104985 5. 099885 5. 626718 4. 26828 4. 382762 4. 971961  
7. 143743 7. 405092 7. 247693 6. 735223 7. 449142 6. 770035 7. 527424 7. 304808 7. 350809  
5. 142967 4. 413826 4. 863155 5. 356551 5. 37309 3. 679842 6. 421201 6. 65996 5. 353273  
4. 256103 3. 534433 3. 949835 3. 887535 3. 746026 4. 297515 3. 974962 4. 004717 4. 098144  
2. 389729 2. 102574 2. 046948 2. 301176 1. 57821 2. 075277 2. 098547 1. 539638 2. 162787

7. 415131 7. 529802 7. 560795 7. 512694 7. 917832 7. 135202 7. 691942 7. 262065 7. 382308  
4. 773878 4. 31553 5. 677473 5. 129479 5. 205278 4. 837852 5. 107566 4. 309394 4. 281569  
3. 714158 3. 717325 4. 992654 3. 329389 4. 390713 4. 973661 4. 560493 5. 101116 4. 659478  
3. 114675 1. 91048 3. 033542 2. 227683 2. 431507 4. 148466 3. 978405 3. 052926 3. 079407  
3. 970286 5. 070084 4. 251698 4. 71181 4. 546689 5. 355985 4. 929615 5. 305795 4. 430995  
1. 537701 1. 75916 1. 716383 2. 041065 2. 073805 4. 940979 2. 009058 1. 416037 4. 193917  
5. 4968 5. 533877 5. 559803 4. 725418 6. 00248 4. 585152 4. 521826 6. 239694 5. 533441  
4. 626411 4. 877791 4. 820782 4. 890418 5. 750561 5. 323122 5. 399612 5. 359476 4. 86135  
6. 327591 6. 167205 6. 167234 6. 550992 5. 965223 6. 630113 6. 341271 6. 349194 6. 406063  
3. 025197 3. 049782 3. 926362 3. 644785 3. 715961 3. 700157 3. 474271 3. 346002 3. 856159  
5. 982817 5. 00165 5. 280803 6. 058164 5. 57187 4. 177049 4. 665752 4. 406302 4. 991048  
5. 455659 5. 749793 5. 45099 5. 764812 5. 779273 4. 343585 4. 575296 4. 97092 4. 752069  
4. 430546 5. 54767 5. 742526 4. 095308 5. 587948 3. 954886 5. 31536 4. 938743 5. 055279  
6. 80095 7. 075566 6. 824363 6. 712579 6. 526597 6. 723076 6. 510405 6. 416721 6. 22127  
5. 915862 6. 20642 5. 981557 5. 79889 6. 301436 5. 918332 5. 898505 6. 042484 6. 059642  
2. 208352 0. 87056 1. 622075 2. 966026 1. 284358 0. 933175 1. 087659 3. 183077 0. 963858  
0. 786901 0. 543322 0. 868443 0. 897719 1. 312178 0. 837214 1. 014628 0. 968519 1. 870178  
2. 412189 3. 323198 2. 962023 2. 655137 3. 049727 2. 844601 3. 829362 2. 759569 3. 381705  
6. 52664 6. 733731 5. 877763 6. 925758 6. 603562 6. 108185 6. 669073 6. 169885 6. 429724  
4. 734582 4. 296121 5. 218035 4. 480904 4. 69941 5. 387301 4. 747778 5. 191503 4. 416138  
8. 268279 7. 64662 8. 417028 8. 059092 8. 182626 8. 096571 8. 166665 8. 026893 8. 201144  
3. 064304 3. 045863 2. 896698 2. 751896 2. 968483 3. 395002 2. 856135 3. 295679 3. 539652  
6. 601581 6. 803196 6. 379566 6. 040391 6. 144841 6. 007899 6. 218067 6. 60174 6. 70157  
4. 091916 3. 382106 4. 273049 4. 011566 5. 014704 5. 537494 4. 310625 4. 731535 4. 226554  
4. 620574 4. 879952 4. 348747 4. 214843 3. 912424 5. 868747 4. 359478 3. 937406 4. 365096  
2. 399808 2. 743998 2. 210311 2. 192499 2. 118665 3. 839387 2. 903588 2. 65182 3. 281149  
6. 305515 6. 379684 6. 363777 6. 415929 5. 944595 7. 216719 6. 380411 6. 152594 6. 463748  
4. 599514 3. 674911 3. 09281 3. 393997 4. 04033 4. 550337 4. 438616 2. 521241 3. 33741  
1. 767947 2. 091657 1. 854962 2. 564267 1. 968363 1. 616992 1. 793596 1. 131803 1. 438413  
2. 540525 1. 695395 2. 366502 2. 765156 2. 790307 4. 597728 2. 525637 2. 534136 3. 301042  
7. 384057 7. 118712 7. 006868 6. 400153 6. 895306 6. 427563 7. 186318 7. 180157 6. 911719  
3. 351028 3. 344193 3. 563202 3. 183918 4. 245008 4. 010412 4. 247331 5. 235767 4. 329557  
2. 054671 2. 773104 1. 769403 1. 761484 2. 077634 1. 977079 1. 288977 1. 629913 1. 744862  
2. 450446 2. 02423 2. 700204 2. 805457 1. 901899 2. 452857 2. 890986 2. 017904 2. 123005  
7. 440772 5. 305288 6. 663597 7. 256227 6. 333818 2. 941149 5. 03112 5. 744379 6. 229366  
2. 104637 3. 194824 2. 1651 1. 742207 2. 295949 2. 069617 2. 988963 2. 278865 2. 687272  
2. 358043 2. 376674 2. 111315 1. 563112 2. 296813 2. 120707 2. 245879 2. 913178 1. 78036  
5. 836074 6. 416033 6. 287851 6. 197433 6. 594047 5. 816982 6. 353599 6. 517249 6. 979731  
1. 830608 1. 829801 1. 921462 1. 973448 1. 469944 1. 898279 1. 8775 2. 210517 1. 463228  
4. 478858 3. 683252 4. 429576 3. 347416 3. 512393 5. 346501 4. 428063 4. 626261 2. 855772  
2. 3064 2. 679092 2. 826992 3. 086328 2. 284589 2. 419933 2. 928199 2. 751882 2. 941923  
1. 935551 1. 228487 1. 255292 1. 384776 1. 645601 5. 953628 1. 54939 2. 732513 1. 462379  
5. 703069 5. 672402 5. 440961 4. 95133 4. 854229 4. 740623 5. 503809 4. 413104 4. 920861  
4. 880401 5. 280369 5. 987796 5. 526799 5. 193635 5. 405072 5. 281894 5. 365157 5. 104064  
3. 715254 4. 988004 3. 393567 3. 464532 3. 04189 2. 814564 3. 030325 2. 909298 2. 773711  
2. 363636 3. 213435 2. 265545 3. 463361 2. 745409 4. 212595 4. 049781 3. 210748 2. 915239  
1. 604119 2. 839134 2. 387267 2. 799725 1. 797591 2. 195016 2. 234463 2. 318681 3. 405267  
4. 005489 4. 171016 4. 216395 3. 246498 3. 47358 3. 225974 4. 265806 3. 919016 2. 995463  
1. 057047 1. 382279 1. 122594 1. 474678 0. 900972 1. 264921 1. 528881 1. 395388 1. 032959  
7. 353131 7. 532848 6. 741348 7. 356592 7. 218116 8. 15945 7. 25421 6. 759959 7. 455574  
5. 311993 5. 071715 5. 165429 5. 693995 6. 510745 5. 988914 5. 475404 5. 972682 6. 521192

4. 5718 5. 995144 4. 685034 4. 525272 4. 240616 4. 485021 4. 744618 3. 80392 5. 09987  
7. 049407 7. 077097 7. 140169 7. 40378 6. 835873 6. 674131 7. 019073 8. 085174 7. 281043  
7. 169603 6. 646166 7. 183381 7. 184679 7. 418773 7. 954968 6. 853269 7. 63503 7. 70987  
4. 982297 5. 02513 5. 978014 4. 604966 5. 205593 5. 570314 4. 656716 4. 816066 5. 086877  
6. 411346 6. 190506 5. 732951 5. 791366 5. 592975 5. 836033 5. 998753 6. 090343 5. 994275  
2. 548192 3. 075105 3. 222683 2. 89683 2. 635266 3. 061331 2. 55809 2. 525156 2. 135565  
1. 502442 2. 258692 2. 156704 2. 750141 2. 596232 1. 950584 1. 559635 1. 804128 1. 873338  
5. 584546 5. 579361 5. 935489 5. 669257 5. 755538 6. 970889 6. 47932 6. 75203 6. 853514  
3. 991959 2. 760075 1. 442407 1. 698424 2. 062749 2. 049919 1. 685724 3. 116733 2. 03494  
3. 942923 4. 872298 5. 278913 4. 915429 4. 635976 4. 233754 5. 130112 3. 085206 4. 368197  
6. 95943 6. 23192 6. 837582 6. 785428 6. 915989 6. 47121 6. 898113 7. 198931 6. 976223  
2. 023675 1. 900045 2. 342194 2. 252226 2. 400434 1. 808989 1. 968298 2. 411519 2. 02136  
2. 352161 2. 851261 4. 023606 3. 027421 2. 751912 4. 4988 3. 236635 3. 539605 3. 407111  
1. 677706 1. 954593 2. 177719 2. 644287 1. 269714 1. 365001 1. 399925 1. 660852 0. 963883  
7. 624366 7. 79448 7. 56642 7. 649147 6. 939238 8. 465218 7. 169367 6. 320406 6. 459405  
5. 114951 4. 100457 5. 020233 4. 61563 5. 530939 5. 155255 5. 240376 4. 888041 5. 113663  
5. 158739 3. 814786 6. 203116 5. 234937 5. 842019 4. 700933 5. 409499 5. 752405 5. 432593  
1. 67248 1. 429554 1. 446438 1. 849783 1. 896902 1. 459454 1. 301461 1. 969994 1. 398277  
6. 764521 6. 537769 6. 819215 7. 579746 7. 476514 6. 938578 7. 203379 7. 062775 6. 812333  
3. 634548 3. 031749 3. 81804 3. 7899 3. 614253 3. 459739 4. 635365 4. 409982 3. 431556  
3. 200252 3. 672095 4. 21183 2. 373525 4. 548566 5. 011074 2. 731344 3. 987803 4. 391279  
8. 368485 8. 639844 8. 703335 8. 642874 8. 701148 8. 803181 8. 715191 8. 686502 8. 868042  
6. 28237 6. 366192 6. 765766 6. 584088 6. 018196 6. 639819 7. 177103 6. 923164 7. 341494  
4. 893099 5. 791851 5. 211814 5. 31265 5. 049608 4. 680009 4. 6597 5. 807916 5. 66737  
7. 764949 8. 168796 7. 823021 7. 373947 7. 227958 7. 480191 7. 608287 7. 589463 7. 210068  
5. 572612 5. 660184 4. 583537 5. 618569 5. 889167 6. 729218 5. 899001 6. 391225 6. 164487  
1. 918371 1. 805068 1. 648675 1. 58538 1. 428588 1. 998782 1. 686001 1. 193199 1. 407111  
2. 393143 4. 14884 3. 715195 2. 612733 2. 804235 2. 481875 2. 282228 2. 482602 2. 58555  
1. 907617 1. 491139 4. 113491 3. 044778 1. 290816 2. 163457 1. 843214 3. 091029 2. 692508  
6. 614453 6. 624876 6. 363365 6. 004415 6. 509974 6. 525389 7. 119659 6. 0624 6. 268507  
7. 141495 7. 241445 7. 263976 7. 903769 7. 13034 6. 782408 7. 617713 7. 529242 7. 328309  
3. 524058 3. 544896 3. 136588 2. 954943 3. 81531 3. 764641 4. 410312 3. 009443 4. 061813  
6. 19637 6. 488895 6. 339709 6. 379998 6. 557878 5. 044723 6. 313131 6. 015113 6. 229568  
5. 456581 4. 830398 5. 487811 5. 0792 4. 405288 6. 514181 5. 479048 4. 542613 4. 892012  
5. 329032 5. 176671 5. 262855 3. 878144 5. 324946 5. 214238 5. 277116 5. 345676 5. 726354  
5. 000519 4. 050941 3. 99559 3. 634345 3. 885176 4. 402114 5. 012367 3. 981705 4. 784896  
2. 373474 1. 824969 1. 943784 2. 59584 2. 539063 4. 690598 2. 886481 3. 084951 3. 701688  
2. 088507 2. 840257 1. 105256 1. 56339 1. 5122 2. 078156 1. 686615 1. 653283 1. 175626  
5. 686197 6. 211352 5. 584127 6. 914612 6. 182572 6. 993368 6. 402543 6. 610301 6. 557875  
3. 264952 1. 875163 1. 694955 2. 361248 2. 55377 2. 021093 2. 863479 3. 11223 3. 773028  
8. 927239 8. 768354 8. 627877 8. 406613 8. 749456 8. 360482 9. 13673 8. 971114 8. 866141  
5. 473693 5. 953901 5. 796581 5. 839232 5. 801561 5. 59821 5. 26633 5. 814966 5. 090429  
5. 541888 5. 428993 6. 034518 5. 92471 5. 823945 4. 692078 5. 730027 6. 115327 5. 51854  
3. 536444 3. 787683 4. 00222 2. 860143 3. 198988 4. 039596 3. 619645 4. 191092 4. 252027  
5. 53552 6. 589592 5. 537437 5. 375611 5. 955005 5. 104393 5. 471887 5. 853719 5. 16079  
1. 782655 1. 909409 0. 919996 2. 052581 1. 765626 2. 214471 1. 595666 1. 835728 1. 532851  
2. 861254 3. 181183 3. 572005 3. 811219 2. 723243 3. 341253 2. 725435 4. 160405 2. 405348  
2. 431042 2. 560173 2. 692486 2. 860508 3. 069667 3. 290943 2. 972468 4. 277582 3. 607235  
1. 362052 3. 612088 1. 752842 1. 835435 2. 441711 1. 425647 1. 882132 1. 547059 1. 58064  
1. 795141 3. 575987 1. 589195 0. 991427 1. 8276 2. 494486 2. 141967 1. 96753 1. 594974  
1. 010729 1. 37022 1. 789658 1. 375919 2. 049591 1. 948744 1. 560785 1. 592985 1. 120392

6. 775664 7. 152246 7. 402546 7. 434339 7. 469465 6. 353992 7. 363404 7. 730382 7. 964302  
3. 109882 4. 016824 3. 752835 4. 538026 3. 523957 4. 560903 4. 008914 4. 141476 3. 714309  
1. 955077 2. 281524 1. 611937 2. 459187 1. 625332 2. 357049 2. 146576 2. 423914 1. 41746  
5. 90701 5. 12166 5. 288085 4. 845198 3. 959496 6. 169818 5. 362534 6. 109149 5. 494562  
1. 211527 0. 852292 1. 125365 1. 88582 1. 017578 1. 310936 1. 048448 1. 536413 1. 649346  
2. 244894 2. 477824 1. 764875 1. 483778 2. 162654 1. 622086 1. 541635 2. 477786 1. 557352  
2. 616673 3. 604853 3. 55697 3. 008616 3. 349854 1. 493242 0. 775575 3. 482852 1. 319461  
2. 78557 2. 263817 2. 354449 2. 843721 2. 988018 3. 06156 3. 121859 2. 863439 2. 752923  
1. 558549 2. 47555 1. 797761 2. 565385 2. 491096 1. 5746 1. 801528 1. 311074 1. 802395  
6. 291962 6. 05598 5. 681997 6. 093033 6. 18586 4. 978642 6. 997404 6. 927732 6. 649126  
6. 262776 6. 236976 6. 731268 6. 659609 6. 881662 4. 781885 7. 028282 6. 385518 6. 044971  
4. 817474 4. 265638 5. 177065 4. 755218 4. 899106 5. 799655 5. 56365 5. 540179 5. 49643  
7. 282564 7. 465204 6. 902858 6. 901017 7. 352759 6. 503301 7. 500425 6. 440261 7. 24018  
6. 765156 6. 902542 6. 411054 6. 634983 6. 609018 6. 609093 5. 337812 5. 980678 5. 156186  
3. 766142 5. 170913 4. 711698 4. 297602 4. 017333 5. 216987 4. 307216 4. 584431 4. 063599  
5. 189638 4. 613602 4. 387654 3. 803006 4. 395484 6. 096684 5. 870747 5. 776578 5. 653773  
3. 392177 4. 077517 3. 586539 4. 400711 4. 593014 5. 037284 4. 899499 4. 585205 4. 03681  
4. 41695 3. 407697 4. 306501 4. 025991 4. 366541 4. 410886 3. 597303 3. 7721 4. 083899  
5. 327824 5. 330898 5. 237599 5. 079851 5. 921746 4. 936794 6. 086106 6. 851159 6. 349458  
7. 331243 6. 330149 6. 315358 6. 706854 6. 72931 7. 143756 8. 652467 8. 530781 8. 729812  
4. 588077 4. 106314 4. 662838 4. 835943 4. 684574 4. 656595 4. 435961 4. 200406 4. 64753  
5. 849423 6. 662675 6. 98758 6. 219529 7. 46763 6. 879042 7. 200962 6. 285546 6. 463128  
5. 011195 4. 515772 4. 743545 4. 694813 4. 572507 3. 217758 4. 489305 4. 440584 4. 40265  
2. 873523 1. 530874 1. 447414 2. 307833 1. 889912 1. 367163 1. 480611 2. 327936 2. 077086  
6. 383511 5. 751746 6. 36273 6. 964971 6. 742078 7. 146268 7. 201985 7. 275979 7. 160479  
1. 736639 1. 987288 1. 492645 1. 727379 1. 192185 1. 221626 3. 551852 1. 157497 2. 119027  
3. 948619 4. 872165 4. 388615 4. 973117 3. 969816 4. 649727 4. 239046 3. 814291 3. 776253  
5. 566473 5. 200576 5. 495683 6. 506084 5. 140529 5. 435163 5. 417727 6. 723028 6. 696239  
3. 481369 3. 32746 3. 889932 3. 780245 3. 189005 3. 936551 4. 043831 3. 716695 3. 681553  
6. 665046 7. 602976 7. 04522 6. 417225 7. 040051 6. 074888 6. 814115 5. 994466 5. 836032  
1. 54416 1. 771895 1. 011923 1. 273235 1. 311611 1. 250431 1. 126019 5. 113252 2. 830911  
7. 595795 7. 897356 8. 002648 7. 618797 7. 369787 7. 563167 7. 649833 8. 384337 8. 133817  
1. 51978 1. 531998 1. 023786 1. 61141 0. 961974 1. 17374 1. 126901 1. 650521 1. 275736  
4. 272045 3. 885833 4. 493134 5. 104717 4. 480106 5. 178222 4. 718146 5. 578803 4. 774208  
3. 834118 3. 899956 2. 768904 2. 717899 2. 489044 4. 398681 2. 966478 2. 655388 3. 505035  
6. 208171 5. 865336 5. 349957 6. 083694 5. 912122 5. 177301 6. 143442 6. 667005 5. 626274  
3. 791491 3. 017959 3. 050867 4. 169612 3. 678376 3. 61575 3. 967192 3. 792444 3. 146553  
6. 098958 5. 642414 5. 663534 6. 109939 6. 322122 7. 379104 6. 449633 6. 36614 6. 671544  
4. 628133 5. 125258 4. 422883 4. 053251 4. 204383 4. 482496 5. 165856 4. 4455 4. 44029  
2. 554883 2. 356713 3. 172732 4. 527555 2. 526803 1. 782318 1. 787645 2. 227663 2. 746537  
3. 772727 4. 767793 5. 084234 3. 447778 4. 582499 4. 622359 4. 236764 3. 60236 4. 456873  
8. 202757 8. 395885 8. 32755 8. 253806 8. 359175 7. 226376 8. 587708 8. 408221 8. 046779  
2. 117295 1. 602314 1. 459075 2. 959997 1. 157849 1. 751905 1. 69723 1. 60267 1. 359175  
7. 972423 8. 868358 8. 673519 8. 581694 8. 887012 8. 624228 8. 643823 8. 681335 8. 660831  
1. 712551 1. 993091 2. 212488 1. 473699 1. 839902 2. 01772 2. 110272 1. 918147 1. 93471  
9. 669198 8. 555703 9. 072138 7. 879405 8. 449931 8. 598663 8. 441486 7. 066989 6. 094841  
2. 328523 2. 4252 2. 993456 2. 846273 2. 632609 1. 93467 2. 409464 2. 560119 2. 180106  
5. 208698 4. 793688 5. 087851 5. 962605 5. 266204 6. 192855 5. 404245 6. 158468 5. 692533  
6. 037883 5. 298293 6. 159638 4. 581174 5. 645501 5. 23551 5. 774786 6. 087924 5. 428472  
8. 332253 8. 931357 8. 393397 7. 968814 8. 589774 8. 150777 8. 696852 8. 336209 8. 599256  
2. 871645 3. 844343 3. 757649 3. 224603 4. 334891 3. 619682 3. 079814 2. 956091 3. 307662



2. 237159 2. 946111 2. 142493 2. 910679 2. 472747 3. 178055 2. 560072 2. 949744 2. 617589  
2. 424066 2. 966938 3. 274478 3. 503092 2. 989658 2. 909879 2. 508681 3. 074216 3. 199632  
5. 872976 5. 092298 6. 029085 5. 713927 5. 839873 6. 620078 6. 565684 6. 04924 6. 693941  
1. 572367 1. 464913 1. 721906 2. 118631 2. 515822 1. 768874 1. 521374 1. 910208 1. 40002  
8. 274433 9. 232989 8. 644734 8. 850017 9. 395222 8. 284356 9. 049518 8. 28642 8. 388117  
4. 916725 4. 323834 4. 935687 5. 300064 6. 015204 4. 625512 5. 519517 4. 876999 5. 511888  
1. 469995 4. 226405 2. 121931 3. 339734 2. 645645 3. 295114 2. 823574 3. 477071 3. 299005  
5. 205653 3. 898313 5. 535038 5. 489265 5. 793704 5. 661742 5. 91932 5. 819053 5. 577957  
4. 316915 3. 726455 4. 199026 3. 723747 3. 786515 4. 602235 3. 805637 3. 486903 4. 350354  
3. 989838 3. 178103 2. 816011 2. 800208 4. 202254 1. 768586 3. 823623 3. 655782 3. 508878  
4. 141019 3. 106078 4. 666011 3. 294321 3. 901715 3. 524229 3. 196929 4. 134805 2. 889028  
0. 838237 1. 822372 1. 416988 1. 574261 1. 524127 0. 963164 1. 077736 0. 807545 1. 08753  
2. 086377 1. 985551 0. 959466 2. 106048 1. 50515 2. 643794 1. 619785 1. 950855 3. 38829  
5. 106338 5. 522184 5. 220781 5. 314511 5. 405023 5. 728502 4. 611282 5. 406012 4. 914847  
7. 199869 7. 140912 7. 014569 7. 098912 7. 068838 6. 828344 7. 224743 7. 369951 7. 325191  
8. 759374 8. 710743 8. 860564 8. 742658 8. 791059 8. 938649 8. 602356 8. 0719 8. 230361  
2. 795547 2. 873752 2. 063299 2. 500372 2. 710562 1. 871815 2. 443766 2. 07246 2. 226205  
3. 229411 3. 565164 3. 432393 4. 570411 1. 499243 4. 289535 4. 130739 4. 906954 4. 389427  
1. 556055 2. 802926 1. 930586 2. 708788 2. 093954 1. 755146 1. 653135 3. 206856 1. 484138  
6. 839467 6. 35735 5. 891922 6. 817275 6. 120388 6. 842949 6. 901301 6. 272383 7. 124607  
2. 353546 2. 209336 3. 338877 2. 589011 3. 087925 5. 179048 4. 296625 2. 414472 3. 040861  
1. 753454 2. 39902 2. 196449 3. 123937 3. 471761 2. 194044 2. 00884 2. 910788 3. 819853  
6. 225263 6. 096784 6. 362138 5. 818135 6. 365729 6. 063354 6. 487476 5. 430145 6. 005579  
3. 618353 3. 708646 3. 425047 3. 657833 2. 564593 4. 077619 3. 668286 4. 128895 4. 219717  
3. 802895 4. 546279 4. 94411 4. 791462 5. 338221 4. 869023 4. 779154 4. 935194 5. 157992  
2. 615521 3. 575488 3. 640624 3. 186188 3. 723559 2. 266964 4. 245706 3. 197773 4. 338984  
4. 542042 3. 466694 5. 152898 4. 061091 3. 061559 3. 603644 4. 39349 4. 393997 4. 181036  
4. 596599 5. 108352 5. 614594 5. 787823 5. 075272 5. 796911 5. 282386 5. 389599 5. 927447  
4. 971789 5. 441802 4. 509251 5. 255941 4. 914212 4. 712492 5. 071172 4. 263911 5. 19198  
4. 594049 4. 48141 3. 580311 2. 91548 3. 75066 3. 328333 3. 775126 3. 769479 3. 693494  
3. 472694 3. 651373 3. 60149 2. 308456 4. 498331 3. 39252 3. 117774 2. 698034 3. 53552  
5. 16009 5. 495628 5. 458871 5. 847278 5. 433694 6. 227441 6. 224241 5. 508613 6. 424348  
5. 431231 4. 891526 5. 47094 5. 85145 5. 659049 5. 631224 5. 501904 4. 780254 5. 844751  
6. 054052 4. 528445 5. 381242 4. 596123 5. 159895 6. 974722 3. 934378 4. 937299 6. 362778  
2. 14867 1. 338663 1. 417283 2. 110595 1. 395624 1. 488495 1. 512826 1. 699812 2. 147607  
6. 169476 6. 11436 5. 121541 6. 703683 4. 770204 7. 009154 5. 45779 4. 577682 4. 872294  
1. 971087 2. 102263 2. 088966 2. 82431 2. 333925 1. 832713 1. 713685 1. 921574 2. 298399  
1. 900206 2. 124899 1. 974626 1. 297285 1. 19196 1. 834232 1. 669535 0. 883532 0. 797311  
2. 452093 2. 77973 2. 776683 4. 498161 2. 634902 2. 859598 3. 05458 3. 928055 3. 837999  
3. 967938 4. 124821 3. 915839 4. 701401 5. 07196 4. 127053 5. 765624 5. 816416 5. 151787  
4. 677486 4. 910038 5. 619506 4. 607121 5. 115246 4. 894049 5. 078844 4. 54587 5. 150106  
0. 914018 1. 328413 0. 928391 1. 175369 0. 938085 1. 485762 1. 236821 1. 050512 1. 055424  
2. 039991 1. 245849 1. 120845 2. 452959 1. 126584 1. 072557 1. 042737 1. 209287 1. 276471  
1. 714956 2. 313774 2. 043221 1. 983185 2. 348545 2. 056897 2. 29284 2. 729199 2. 64342  
1. 214477 1. 837075 1. 021017 0. 757094 1. 100612 0. 819732 1. 760688 1. 627621 1. 26771  
2. 448257 2. 100884 1. 899599 1. 925976 2. 150287 2. 27432 2. 189286 2. 057361 2. 012439  
2. 269421 2. 9172 1. 887262 1. 887262 1. 628745 1. 341789 1. 460108 1. 677152 1. 89232  
1. 820602 1. 346114 1. 194726 2. 151997 1. 379128 1. 138586 1. 468361 2. 384676 1. 833529  
1. 119558 2. 522609 1. 179165 2. 346843 1. 513585 1. 472486 1. 683636 1. 499953 2. 501335  
1. 8825 1. 293761 1. 439307 1. 098541 1. 709959 1. 373025 1. 709037 1. 136125 0. 935663  
1. 706347 2. 160671 2. 858472 2. 095432 1. 761851 1. 894263 1. 745417 2. 34097 1. 326438

4. 105016 3. 527214 3. 212151 3. 928859 3. 243101 3. 650539 2. 45546 2. 905603 4. 435784  
1. 199577 1. 292854 1. 59905 1. 434792 0. 919978 1. 470895 1. 174715 1. 347113 1. 262064  
1. 632766 1. 83628 1. 001699 1. 653596 1. 045475 1. 068632 1. 090799 1. 289288 1. 254793  
6. 915572 7. 400696 6. 631337 7. 643338 6. 628591 5. 949029 5. 193164 4. 14909 6. 39798  
2. 178443 2. 989364 3. 658721 3. 461237 2. 329672 1. 883602 1. 99341 2. 221341 2. 463342  
1. 750739 1. 852734 2. 246862 1. 576815 1. 65099 1. 60099 1. 492034 1. 599978 1. 596153  
1. 636538 2. 861217 3. 500011 1. 862749 1. 42792 2. 166114 2. 190972 3. 140719 2. 762414  
1. 4219 6. 062431 6. 067322 2. 256591 1. 9797 4. 927236 5. 128941 2. 737876 4. 338712  
7. 04893 7. 04632 6. 393944 5. 989122 6. 468607 6. 305132 6. 523529 5. 591909 6. 24593  
2. 125253 2. 346436 2. 0089 2. 458736 1. 97403 2. 19982 2. 247741 1. 29321 2. 128613  
3. 75444 4. 670491 3. 568287 2. 519253 2. 788869 2. 238323 2. 022871 2. 269514 2. 007126  
2. 448324 2. 220345 1. 795894 2. 772247 1. 982178 2. 132911 1. 733407 1. 79811 3. 468427  
4. 00211 5. 897175 5. 605376 5. 296247 6. 224013 5. 108256 6. 174677 5. 343186 4. 781507  
1. 981571 1. 654313 2. 002438 1. 645758 1. 499962 1. 58751 1. 469169 1. 613143 1. 756863  
5. 339641 5. 895204 5. 247461 5. 742482 5. 488515 5. 877248 4. 820952 6. 110766 6. 391324  
3. 675971 2. 810251 4. 432044 2. 158144 2. 96824 2. 433132 3. 186776 3. 564184 2. 678865  
1. 147476 2. 052356 1. 200123 1. 200336 0. 922664 1. 233811 0. 773727 2. 131961 0. 902326  
1. 609624 1. 940204 2. 293091 2. 175789 1. 50754 2. 284409 2. 334466 1. 898058 1. 919439  
2. 431458 3. 438506 3. 705025 3. 124619 2. 958695 3. 31372 3. 346663 3. 193114 4. 203492  
0. 58346 1. 746096 3. 293697 0. 907807 1. 75687 1. 72094 1. 325419 1. 43863 1. 202134  
2. 053663 2. 350472 2. 768023 1. 812172 1. 809755 2. 251077 1. 774549 2. 50871 2. 06596  
2. 753826 2. 114135 2. 068979 2. 305734 2. 812939 1. 26609 1. 302327 2. 481824 2. 113688  
3. 709464 3. 945976 3. 194379 2. 759941 2. 602052 4. 361841 5. 361401 3. 226291 5. 293035  
2. 735102 2. 376416 3. 020038 3. 449181 2. 49719 2. 447975 2. 575685 3. 222637 2. 636961  
2. 237019 1. 699218 1. 541222 2. 124333 2. 318905 1. 920551 2. 490787 2. 210692 1. 95989  
5. 952163 5. 998468 6. 089788 6. 093937 5. 969612 6. 150587 6. 354057 6. 65189 6. 082818  
1. 120719 1. 07913 1. 093785 1. 280751 2. 093797 1. 616855 1. 59681 1. 200462 2. 117836  
7. 23483 7. 491042 7. 748284 7. 782034 8. 296282 5. 168538 7. 670667 7. 823363 8. 152965  
8. 098639 7. 762279 7. 37685 7. 529268 7. 55079 7. 810525 7. 848358 8. 750284 8. 377256  
2. 256657 1. 960291 2. 703216 2. 472013 1. 518055 1. 762969 1. 780859 2. 117403 1. 947892  
2. 562732 3. 012975 3. 016532 2. 300756 2. 678844 2. 077464 2. 691256 2. 214089 1. 61526  
3. 937759 2. 354952 1. 813319 1. 711676 2. 097475 1. 735581 1. 986519 1. 493713 1. 586767  
1. 933017 1. 790801 1. 736761 1. 541493 1. 644704 2. 316787 1. 344083 1. 305621 1. 723936  
3. 62218 1. 990421 2. 257803 2. 509007 1. 988914 2. 358078 2. 915148 2. 008282 3. 322746  
5. 494156 6. 057481 4. 891035 5. 216218 5. 007357 5. 65648 5. 001399 5. 480524 5. 088037  
5. 085717 4. 516771 4. 847187 4. 439951 4. 659904 5. 292609 3. 891219 3. 561575 4. 791637  
7. 773883 5. 169304 4. 953006 5. 46106 5. 677201 4. 216179 4. 774382 3. 455254 2. 775868  
1. 557969 1. 6394 2. 322427 1. 405787 1. 276791 1. 67257 2. 351972 1. 865866 1. 743771  
1. 988287 1. 87663 3. 944662 1. 877744 2. 203415 3. 088849 2. 275959 3. 024061 1. 461561  
11. 73215 11. 3809 11. 38194 11. 60733 11. 3253 11. 68794 11. 51829 10. 64077 9. 865648  
1. 3146 0. 992599 1. 034296 1. 215117 1. 041959 1. 061651 1. 025501 1. 407374 0. 733443  
2. 118666 2. 06644 2. 095858 1. 474792 2. 71736 2. 604634 1. 743375 2. 67561 1. 688997  
6. 937142 6. 970424 5. 655921 7. 301998 6. 544836 7. 66213 6. 327083 6. 46864 7. 030054  
6. 840782 7. 146377 6. 873998 6. 795184 6. 907699 7. 460575 7. 440588 7. 159146 6. 845688  
1. 326549 2. 158064 2. 225628 3. 885016 1. 668647 3. 140937 1. 494858 1. 904965 3. 285795  
4. 891105 2. 579348 2. 800931 2. 886631 3. 199577 2. 063785 2. 162312 3. 097544 2. 614863  
7. 352974 7. 097927 7. 484915 7. 177106 7. 453148 7. 546571 6. 825211 6. 962909 7. 029396  
2. 384595 2. 259197 2. 274847 2. 378478 2. 471827 2. 362869 2. 346401 2. 532164 3. 027017  
2. 053405 2. 785888 1. 787897 1. 925453 2. 228707 2. 088187 2. 243705 3. 48659 1. 664017  
1. 818559 1. 508079 2. 38554 2. 07915 2. 048207 1. 852263 1. 366503 1. 938478 1. 80709  
2. 803138 2. 859412 3. 687011 2. 351711 2. 616684 3. 882833 2. 445161 3. 380537 2. 846516

2. 34469 2. 388038 2. 372816 1. 511983 2. 087718 1. 712572 1. 762399 1. 884268 3. 168107  
3. 951022 4. 003956 3. 542011 4. 000836 3. 662874 3. 986769 3. 631002 4. 612162 4. 205754  
1. 874687 3. 16893 2. 086903 3. 273426 2. 411498 3. 061627 1. 949144 2. 576057 2. 310589  
7. 383649 5. 169351 5. 704294 6. 073432 4. 198047 5. 786687 4. 857855 5. 372867 2. 121165  
1. 157522 2. 912987 1. 568397 1. 278613 1. 919656 1. 152876 1. 199725 1. 763354 2. 00625  
2. 162295 1. 668757 1. 012545 1. 90625 1. 88152 1. 160626 1. 569446 1. 71463 2. 753132  
3. 076515 3. 453848 2. 77244 1. 966481 2. 843614 1. 994686 2. 588881 3. 777583 1. 777026  
1. 874185 1. 721165 1. 193364 1. 115313 1. 196568 1. 692366 0. 985653 1. 354831 1. 057673  
2. 741577 1. 971612 1. 771065 2. 100049 2. 087274 1. 570098 1. 490061 1. 477539 2. 257955  
3. 654912 3. 217221 2. 775553 3. 395572 2. 744136 4. 498739 3. 29491 2. 695372 3. 336018  
4. 241665 4. 780708 5. 546509 4. 195464 4. 854318 4. 025234 4. 292223 3. 867145 4. 581653  
2. 686418 2. 724831 2. 218499 2. 241864 3. 917972 2. 781807 2. 619223 3. 364153 1. 900256  
1. 658194 1. 855846 2. 260383 1. 572918 1. 795325 2. 259936 1. 651565 1. 729284 1. 768707  
2. 37934 2. 68513 1. 457774 4. 097551 1. 422924 3. 415587 1. 77078 1. 344868 1. 786809  
1. 144286 1. 27414 0. 769851 1. 362238 0. 925391 1. 341345 1. 086624 0. 846539 2. 039332  
3. 025248 2. 747473 4. 142888 2. 932673 3. 034542 2. 974866 2. 054287 1. 917034 2. 281807  
0. 791842 4. 454676 2. 745374 4. 126683 3. 449721 2. 889801 2. 536459 4. 006979 3. 234327  
1. 30865 1. 509136 1. 243571 1. 235531 1. 155118 1. 387829 1. 973498 1. 395369 2. 170017  
6. 053808 6. 412101 5. 614147 6. 26246 6. 651462 6. 806767 6. 480336 6. 055999 6. 475342  
2. 849985 1. 07908 1. 2967 0. 831987 1. 302209 2. 06335 1. 112662 1. 05535 1. 231657  
4. 270637 4. 425508 4. 369205 4. 057555 5. 20165 4. 846882 5. 544006 4. 634692 5. 008067  
1. 476796 1. 722159 0. 856023 1. 855642 1. 267966 1. 123806 2. 693522 1. 049365 1. 95872  
0. 894279 1. 207517 1. 094106 0. 982396 1. 785096 1. 212032 1. 902587 2. 616398 0. 548408  
5. 562521 5. 885245 5. 286048 5. 608945 5. 834784 6. 81326 6. 135678 5. 866504 5. 630424  
5. 946296 6. 430982 6. 241254 5. 732448 6. 092238 5. 835514 5. 585364 5. 320319 5. 35268  
3. 379203 4. 221408 3. 553899 4. 450533 4. 701155 3. 391463 3. 777845 5. 695748 4. 816088  
2. 579649 4. 008645 3. 017105 2. 705033 2. 280903 3. 92213 2. 374415 3. 536085 3. 949062  
2. 852629 3. 119922 3. 09982 3. 114701 3. 294675 3. 228734 3. 403837 3. 540552 2. 821243  
5. 236895 3. 401084 3. 805044 4. 304402 3. 622698 6. 127823 4. 426305 2. 818336 4. 65526  
4. 599578 5. 353112 4. 971897 4. 714753 4. 437358 5. 819231 5. 638737 5. 904649 5. 189344  
5. 160368 6. 205615 6. 295524 5. 840027 5. 825042 4. 193826 4. 780742 4. 85147 4. 928269  
6. 826157 7. 114392 7. 348341 6. 81208 7. 770249 5. 399444 7. 131384 7. 391353 7. 68626  
7. 649884 7. 832163 7. 479612 7. 057198 6. 872898 8. 121236 7. 610364 7. 457147 7. 130832  
6. 279977 6. 016822 4. 605991 4. 917591 4. 246285 4. 9214 5. 030341 4. 669669 4. 667714  
1. 337177 1. 638307 1. 313489 1. 362327 1. 285638 1. 253576 3. 755772 1. 261802 1. 518348  
1. 547973 1. 949964 1. 755044 2. 458116 1. 235542 1. 977483 1. 479723 1. 430016 1. 612086  
2. 672172 4. 810577 6. 818296 6. 782673 4. 322317 2. 965681 5. 386053 2. 396774 2. 967259  
4. 88661 4. 439653 4. 907959 5. 405354 5. 344235 4. 137634 4. 696649 4. 649684 4. 159858  
5. 31251 5. 794549 4. 944333 4. 951256 5. 252584 5. 203676 5. 45644 6. 247423 5. 684339  
3. 271437 3. 686835 3. 380625 3. 205725 2. 45997 3. 095265 2. 89973 4. 097153 3. 839102  
3. 94538 2. 521851 3. 078613 3. 558359 3. 933383 3. 331529 2. 139475 2. 189917 2. 710213  
4. 192255 3. 392376 2. 424943 2. 819068 3. 128908 2. 30592 3. 725388 2. 995428 2. 899162  
1. 908974 1. 606907 2. 183224 1. 729911 1. 395079 1. 792495 1. 496888 1. 281575 1. 480272  
6. 658922 7. 163827 7. 199952 6. 23614 6. 814635 6. 970962 6. 317278 6. 512784 6. 423643  
1. 612316 1. 449025 1. 304533 1. 327681 1. 502132 1. 300379 1. 324499 1. 830229 1. 593099  
3. 26096 4. 859188 3. 871807 2. 563598 3. 278586 2. 853758 2. 434954 3. 389192 3. 090373  
8. 015244 8. 96316 9. 170597 8. 948187 8. 828752 7. 092573 9. 174954 9. 366525 9. 00597  
5. 964546 5. 816026 6. 080059 5. 726191 6. 32833 8. 042144 8. 594412 6. 238863 6. 900532  
5. 804402 6. 513191 6. 733233 6. 832002 6. 851885 5. 116072 7. 024719 6. 866663 7. 038246  
5. 882954 5. 62945 4. 385871 6. 103716 4. 943229 6. 300994 6. 142845 5. 685407 6. 171288  
2. 950199 3. 681605 3. 482629 2. 895601 3. 261758 2. 909757 2. 832383 2. 915383 3. 089635

9. 28347 6. 90661 8. 58311 7. 239232 8. 224564 3. 931552 6. 717209 6. 641083 3. 58775  
1. 088412 1. 142076 0. 737316 1. 327128 1. 428322 0. 895687 1. 004372 0. 955644 0. 94684  
6. 681708 6. 832657 6. 250416 6. 072749 6. 311335 6. 482615 6. 578968 6. 527597 6. 137098  
6. 357603 6. 819903 5. 900236 6. 421752 6. 892835 5. 469014 6. 342809 5. 831513 5. 24366  
3. 741639 3. 168002 3. 776019 3. 051932 2. 724622 3. 157451 3. 269679 2. 709828 3. 312925  
1. 295351 0. 730106 1. 772764 1. 460557 1. 757712 1. 235867 0. 941319 0. 957026 0. 935932  
5. 290035 4. 863039 4. 152011 6. 127576 4. 639619 6. 568217 5. 436138 5. 698461 5. 295463  
4. 070463 3. 582932 3. 396302 4. 492867 2. 401546 5. 354561 5. 296781 4. 243677 4. 636867  
4. 078743 4. 370214 3. 181413 3. 493948 3. 954743 5. 180417 4. 772585 4. 348931 4. 304611  
2. 680972 3. 180457 3. 038795 2. 633508 2. 520086 1. 855727 2. 865909 3. 65872 3. 195836  
1. 089059 0. 816078 0. 727329 1. 04546 1. 277336 0. 983135 0. 990066 1. 300215 2. 813541  
1. 854564 1. 507234 2. 020535 2. 435102 2. 168892 1. 643912 1. 339439 2. 383892 2. 21515  
6. 166346 5. 588493 5. 808107 5. 308207 4. 988896 5. 356985 5. 625037 4. 708921 5. 525892  
2. 670416 2. 051045 1. 728442 2. 224489 1. 878961 3. 008369 2. 814786 1. 588999 1. 610412  
5. 232311 3. 809878 5. 170278 4. 937702 4. 997846 4. 837649 5. 318585 4. 785719 4. 336159  
2. 040442 2. 210585 2. 612516 2. 50306 1. 900166 1. 9919 2. 055397 2. 561315 2. 454915  
2. 316162 4. 179827 2. 957834 2. 924545 2. 862833 2. 26624 2. 05264 2. 438843 3. 283607  
1. 874168 2. 612131 2. 489558 1. 569784 1. 845732 2. 546537 2. 601309 2. 246436 3. 412523  
1. 513688 1. 764355 3. 415813 1. 531439 1. 580351 3. 525278 2. 868292 1. 095615 1. 529008  
4. 680298 4. 335351 4. 848974 4. 430571 5. 15918 5. 099633 4. 656976 4. 495035 4. 877844  
1. 379771 1. 682013 1. 500249 1. 55251 1. 380767 1. 178757 1. 070016 1. 317226 0. 913215  
4. 518156 5. 456027 5. 081684 5. 190879 4. 94016 4. 367051 4. 663892 4. 804586 4. 893473  
2. 357061 2. 295147 2. 722436 2. 497542 2. 713218 2. 411811 2. 580415 2. 360971 2. 701672  
2. 729021 2. 712333 3. 607307 3. 234787 2. 725418 3. 131583 3. 327182 3. 426062 2. 883956  
5. 231678 6. 145314 5. 776951 5. 353049 4. 648157 5. 519785 4. 919219 5. 45494 5. 609095  
7. 28424 7. 804723 7. 437389 7. 871615 8. 310196 4. 476699 8. 99398 9. 178674 8. 552118  
1. 671264 1. 979207 1. 583747 1. 889003 1. 74093 1. 761105 1. 457549 2. 322935 1. 720271  
4. 994508 4. 600252 5. 042189 3. 693336 3. 950321 3. 863514 4. 942198 4. 33831 4. 091538  
1. 692085 2. 574785 2. 301557 2. 057279 2. 46897 2. 802661 2. 095225 1. 156807 2. 158818  
2. 075715 1. 178708 1. 440844 1. 647341 1. 039232 1. 503146 0. 975398 1. 509462 1. 538647  
4. 990273 3. 619607 5. 18042 4. 68366 3. 808599 5. 053906 4. 783475 3. 921626 4. 448413  
6. 191993 5. 569923 6. 043608 5. 873382 5. 874778 5. 83746 5. 061657 3. 855038 4. 77506  
1. 779978 1. 671232 1. 243558 1. 572258 1. 16633 1. 787121 1. 086601 1. 662187 1. 522637  
3. 580792 3. 249361 3. 515024 4. 249076 3. 572645 4. 063168 3. 728527 4. 593629 4. 259265  
4. 255475 4. 538513 5. 143513 4. 215152 3. 948879 3. 926841 4. 460832 3. 829835 3. 862831  
1. 257752 0. 58508 0. 848869 1. 606201 0. 810898 1. 032579 0. 636628 0. 970565 0. 525722  
3. 58878 3. 295756 3. 198173 3. 298006 2. 41512 3. 637058 2. 878033 3. 360787 4. 209443  
5. 596492 5. 089108 5. 682307 5. 152604 5. 708019 5. 363293 5. 803889 5. 855101 5. 654202  
1. 741308 2. 007092 2. 112497 1. 04248 2. 180568 2. 078481 1. 967198 1. 968438 1. 447468  
1. 51232 2. 136919 2. 112744 1. 454859 1. 062442 1. 388651 1. 688748 1. 142644 1. 420612  
3. 766494 3. 810326 4. 762531 3. 782638 4. 723338 5. 229482 4. 742156 4. 756155 4. 924895  
5. 218104 4. 210882 4. 537648 5. 506591 5. 63291 5. 538345 4. 625249 3. 501211 4. 463592  
1. 663064 2. 44498 3. 03977 2. 417545 2. 531191 2. 174852 2. 092377 1. 506208 2. 398076  
3. 140868 3. 189203 2. 83671 2. 749901 3. 670158 1. 752564 2. 473445 1. 687771 1. 647148  
4. 197215 4. 22011 3. 357033 1. 925686 2. 746713 3. 483409 1. 643564 1. 863989 2. 516312  
2. 148355 2. 014102 1. 559592 1. 803247 0. 877074 2. 56875 1. 295822 1. 181681 1. 935125  
1. 915308 1. 40038 1. 686549 1. 585065 1. 622476 1. 591062 1. 473563 1. 360844 1. 423523  
5. 392161 7. 158346 5. 773396 5. 951143 5. 939342 6. 017318 5. 426368 5. 407446 5. 891616  
4. 500802 5. 859756 4. 642936 5. 218496 4. 031961 3. 715984 4. 45781 4. 747281 3. 397011  
3. 75058 3. 427225 2. 597279 2. 797775 3. 569685 2. 553138 3. 102808 3. 288388 2. 062768  
1. 881517 3. 072357 2. 313429 2. 070648 3. 653908 3. 899523 2. 652637 2. 056603 1. 840415

5. 141531 1. 960578 3. 674722 3. 49254 2. 413785 5. 630647 2. 086647 2. 550835 3. 600432  
5. 225435 3. 842265 4. 650769 5. 000165 4. 75319 5. 900944 5. 249097 5. 068007 5. 026873  
2. 021068 1. 967607 3. 286185 1. 464304 1. 31026 1. 576042 1. 339811 1. 332457 1. 101965  
1. 680055 1. 546762 0. 922116 1. 878331 1. 751112 3. 024882 1. 13473 1. 050075 1. 6469  
0. 87832 1. 322576 0. 740749 2. 119531 1. 091603 2. 685339 1. 419966 2. 549082 1. 660267  
2. 032959 1. 587597 1. 632457 1. 626141 0. 868634 0. 97477 1. 378606 1. 892916 1. 241216  
1. 650924 1. 306073 3. 1142 2. 720935 0. 853398 0. 844269 1. 073824 1. 978128 1. 055976  
6. 706413 6. 121855 5. 880873 5. 847696 7. 197105 5. 455868 5. 078273 5. 691947 6. 315825  
2. 62744 2. 45841 1. 945078 2. 553366 2. 466287 2. 823356 1. 954324 1. 811436 2. 693755  
0. 975186 1. 608559 0. 894668 2. 023224 1. 031662 1. 240989 0. 669169 1. 576394 0. 777265  
3. 267593 3. 44882 4. 551721 4. 954687 3. 312964 3. 935341 3. 62678 3. 222642 3. 623191  
6. 448007 3. 530751 3. 530429 3. 331773 2. 542105 3. 193792 2. 274827 2. 679145 2. 466444  
3. 414346 2. 641505 2. 577397 3. 156903 3. 005496 3. 74376 3. 17152 2. 343387 3. 629706  
2. 230599 2. 10725 2. 268107 1. 760245 2. 205168 2. 748326 2. 594931 2. 431497 2. 504151  
4. 402151 1. 899554 4. 217689 2. 935369 4. 344001 2. 367843 2. 746228 4. 503568 2. 840753  
3. 555108 2. 589293 3. 739549 2. 525317 2. 730864 1. 773371 4. 599852 3. 403072 2. 084118  
4. 277567 4. 066793 3. 857044 3. 08928 4. 051972 3. 811169 3. 424481 3. 406533 3. 369673  
1. 705944 1. 708557 1. 995614 2. 767885 2. 054621 2. 777699 2. 324661 2. 568424 1. 904166  
1. 894352 1. 988419 2. 053022 2. 599462 2. 650005 2. 328638 1. 960989 1. 8947 2. 444202  
1. 52843 1. 774923 1. 632366 1. 425327 1. 086385 1. 192427 1. 142682 3. 147978 2. 160172  
2. 373088 3. 368546 2. 116474 1. 779992 2. 637246 2. 686203 2. 917394 3. 518861 3. 351222  
1. 557458 2. 135014 1. 447472 1. 851588 1. 625399 2. 467596 1. 385443 2. 000795 1. 84898  
0. 927943 1. 002036 0. 768381 1. 124495 0. 866339 1. 09783 0. 841237 1. 065824 1. 033323  
2. 016344 2. 005008 1. 540746 1. 82316 2. 010603 3. 637404 2. 035187 2. 493771 1. 764432  
1. 581815 1. 471483 1. 691267 1. 424311 2. 137032 1. 390317 1. 441438 1. 309525 1. 372956  
2. 658354 2. 472934 2. 561173 2. 696501 2. 217291 1. 774266 2. 866166 1. 463934 2. 094574  
2. 548662 2. 417243 2. 148448 2. 652804 2. 385478 2. 667071 2. 360704 2. 123396 2. 828756  
5. 501821 5. 586914 4. 649727 5. 875556 6. 329587 5. 746285 5. 792676 6. 309663 5. 819116  
1. 540782 1. 611385 1. 054014 1. 411705 1. 639028 2. 008599 1. 370776 1. 426628 1. 9268  
1. 888548 1. 959409 1. 66553 1. 121512 1. 632443 1. 605518 1. 442781 1. 689999 1. 874017  
2. 631629 3. 289821 1. 819109 2. 116708 2. 128226 2. 640009 2. 449498 2. 324108 2. 642169  
4. 941033 5. 626432 4. 786456 4. 930795 5. 479881 4. 364599 5. 473305 6. 012879 5. 78705  
2. 412209 2. 766305 2. 353679 2. 621662 3. 160983 2. 519223 2. 101945 2. 885969 3. 258011  
1. 886302 1. 248424 1. 666182 1. 71496 1. 645747 1. 631425 1. 41772 1. 399803 1. 726168  
2. 124751 1. 064371 1. 297292 1. 397077 1. 107641 0. 772244 1. 156441 0. 892695 1. 111081  
1. 852027 1. 641923 1. 178054 1. 88387 2. 452021 2. 385651 1. 68845 1. 074062 1. 746903  
2. 412213 1. 870485 1. 94456 2. 534199 2. 457272 2. 060291 2. 160041 3. 576583 2. 177304  
4. 818884 5. 387669 5. 239562 4. 746391 5. 858135 5. 416105 4. 670396 4. 982418 4. 919157  
4. 987806 5. 09168 4. 572914 4. 789962 3. 933474 4. 819411 4. 831862 4. 242328 5. 024495  
4. 565765 4. 512083 4. 432071 2. 37845 4. 953646 4. 950813 5. 152937 5. 941387 4. 754778  
1. 403048 1. 432316 1. 698762 1. 388868 1. 034608 1. 493176 1. 823983 0. 964874 1. 087535  
2. 289189 2. 370307 2. 629747 2. 647854 2. 248683 1. 721441 3. 221272 2. 973284 1. 701939  
1. 43075 1. 448897 0. 774994 1. 633277 1. 01207 1. 350029 1. 445159 1. 583217 0. 973571  
5. 950835 4. 872742 5. 440005 4. 058796 6. 179761 6. 554481 6. 600324 6. 479273 6. 685467  
1. 419849 1. 607019 1. 045972 1. 034596 1. 285349 1. 516511 1. 378531 1. 711997 1. 188986  
3. 969373 3. 878338 4. 066328 4. 569997 4. 374241 4. 236862 4. 661634 5. 335222 4. 908236  
5. 559413 6. 068017 5. 386114 5. 702467 5. 476531 5. 112261 5. 635442 5. 256691 4. 806407  
1. 986385 3. 958725 2. 865137 2. 264165 2. 914538 2. 329496 4. 337762 4. 129353 3. 845063  
1. 362273 1. 174462 1. 065472 1. 818968 1. 006693 1. 200363 1. 444917 1. 440891 1. 419821  
1. 744558 2. 16893 1. 618815 1. 829163 1. 69678 2. 099001 1. 58095 1. 581048 1. 909059  
1. 433815 1. 182794 1. 304186 1. 261102 1. 159844 1. 27181 1. 206275 1. 230109 1. 24457

2. 880609 1. 598649 2. 684097 3. 768338 1. 607573 2. 054218 2. 628729 2. 023392 3. 178134  
1. 98336 1. 578545 1. 484341 1. 218134 1. 299106 1. 484577 1. 949084 1. 05192 1. 515864  
1. 192994 2. 628353 2. 50639 2. 57626 1. 500281 2. 363265 1. 722544 1. 513253 3. 003238  
2. 192648 2. 085788 1. 952666 2. 206222 1. 943401 1. 935754 1. 845974 1. 859186 2. 688646  
9. 426869 10. 17071 10. 27583 9. 887013 10. 07589 8. 237193 10. 88127 10. 13349 10. 17643  
7. 134272 7. 382214 6. 562863 7. 921649 7. 631757 6. 944874 6. 936578 6. 117846 6. 096311  
2. 352885 1. 472679 1. 583995 2. 890371 2. 189915 1. 6396 2. 362984 1. 897984 2. 662627  
2. 119573 1. 878433 2. 803292 2. 034909 1. 244215 4. 098972 2. 610089 2. 045087 3. 263154  
2. 063153 1. 517819 1. 528125 1. 897116 1. 729171 1. 841815 1. 536782 2. 218989 2. 242725  
1. 436332 1. 912555 1. 026781 1. 469804 1. 737023 1. 007512 1. 367132 1. 401094 0. 833764  
3. 339238 2. 963369 2. 41567 3. 32787 2. 67584 2. 764112 2. 702492 3. 385417 4. 263558  
3. 524942 2. 887238 4. 420048 4. 076353 5. 233294 5. 474115 6. 563002 6. 983168 6. 887523  
2. 105226 2. 029381 1. 965636 2. 465851 1. 944982 2. 319966 1. 87132 2. 278307 2. 553001  
5. 227885 5. 954637 5. 071683 4. 842147 5. 177615 5. 204471 5. 527966 6. 473526 5. 350354  
0. 982963 1. 258491 0. 926862 1. 958764 0. 956191 1. 144407 1. 058893 1. 342165 1. 385661  
0. 755777 1. 046014 1. 25991 1. 434646 1. 199992 1. 179344 1. 347486 1. 365911 1. 231667  
6. 199413 6. 518732 6. 700631 6. 720602 6. 749032 5. 284976 5. 914614 5. 892464 5. 753741  
1. 477882 0. 97799 1. 305748 0. 953401 1. 17523 1. 254829 1. 186346 1. 484279 1. 233  
1. 578726 1. 557079 1. 044832 1. 688772 0. 892798 1. 165627 1. 040167 1. 18527 0. 97629  
1. 123481 0. 884696 1. 085876 1. 181039 1. 130241 4. 087036 1. 075782 1. 113839 1. 469535  
2. 396334 3. 12949 4. 730022 2. 852597 3. 032522 3. 235874 3. 188055 3. 073603 3. 221408  
1. 536331 1. 201843 1. 050944 1. 410649 1. 157721 1. 307802 0. 962801 1. 123495 1. 653109  
1. 25475 1. 635084 1. 297244 1. 433229 1. 455061 1. 277712 0. 993473 1. 565263 1. 217521  
2. 102114 2. 175286 2. 399386 2. 401873 2. 259428 1. 755477 1. 653523 2. 219609 1. 90324  
1. 556314 1. 812066 1. 617436 1. 826604 2. 220857 1. 492942 2. 329302 1. 872307 1. 479904  
0. 933393 0. 190115 1. 52361 1. 164534 1. 177329 0. 782164 0. 911701 0. 896496 2. 320076  
2. 141164 0. 786964 1. 298248 2. 456101 1. 205206 0. 993718 1. 564081 1. 525636 1. 069067  
2. 06706 1. 850714 2. 035212 2. 023139 2. 298132 2. 02359 2. 096711 2. 085411 2. 05712  
1. 478172 2. 117855 1. 989102 1. 733453 1. 677423 1. 768193 1. 216889 1. 874467 1. 658576  
1. 181398 1. 466615 1. 046854 2. 298348 1. 517477 1. 771838 1. 867226 1. 093225 0. 835791  
3. 063149 2. 293268 2. 692716 4. 008337 3. 725813 2. 560924 2. 138805 2. 355837 2. 45859  
3. 317747 3. 154161 3. 989111 4. 484423 2. 347126 7. 520713 4. 483915 3. 939842 4. 681055  
3. 745826 2. 803389 3. 136195 4. 135865 2. 979946 4. 594328 3. 935311 3. 462265 2. 865574  
2. 006606 2. 079208 1. 626564 2. 309472 1. 486065 1. 458441 2. 212232 1. 3575 1. 740985  
1. 441304 1. 832082 1. 333747 2. 158618 2. 762781 2. 108521 2. 130437 1. 965842 1. 080208  
4. 414005 3. 421905 4. 902797 4. 393345 4. 721092 4. 447659 4. 740798 4. 764563 4. 305023  
2. 848035 1. 901533 2. 708103 2. 9989 4. 523592 2. 495959 3. 275085 3. 880422 3. 299358  
3. 24738 2. 834673 2. 838249 2. 539188 2. 546408 3. 305756 3. 067422 4. 05136 2. 375046  
2. 19508 3. 488962 2. 624789 3. 215696 2. 746595 4. 60516 4. 255126 1. 853414 2. 131419  
4. 654928 4. 835623 5. 144786 3. 844508 5. 141574 3. 641876 3. 638532 3. 37421 4. 674995  
2. 996243 3. 524764 4. 409436 3. 666316 3. 361724 4. 091317 4. 457788 5. 147251 4. 546856  
1. 733932 1. 547226 1. 323703 1. 427844 1. 23185 1. 944702 1. 27718 1. 483161 1. 981262  
1. 492846 1. 321538 1. 089009 1. 494983 1. 343401 1. 285217 1. 563979 1. 854254 1. 333464  
2. 009482 2. 051565 1. 842024 2. 952417 1. 641898 1. 595708 1. 692578 1. 884703 1. 802979  
2. 102512 2. 999374 1. 909445 2. 851749 3. 195493 2. 91747 2. 622049 2. 877282 2. 325826  
7. 130748 8. 073742 7. 774361 7. 69686 7. 838716 5. 568476 8. 17586 8. 526682 8. 181795  
4. 486408 4. 680301 4. 756337 4. 348979 4. 854533 3. 65869 3. 699123 3. 79109 3. 419264  
1. 68097 1. 56467 1. 909054 2. 110391 2. 454043 1. 391725 1. 70947 2. 671632 2. 146739  
1. 387328 1. 789214 4. 669649 2. 795671 1. 933353 2. 154597 2. 612003 1. 893182 2. 223176  
1. 718394 1. 38957 1. 030557 1. 072621 2. 185815 2. 68463 2. 643416 1. 459587 1. 430494  
3. 069899 3. 137767 2. 746505 4. 473355 4. 108852 3. 315221 5. 303741 4. 067509 4. 058542

1. 019166 0. 942077 0. 736638 2. 503965 0. 830779 2. 050093 1. 03235 1. 682726 1. 884273  
4. 788714 5. 021259 5. 718156 5. 736861 4. 356181 4. 658933 5. 868822 5. 199327 4. 679739  
1. 933534 1. 434887 1. 655871 1. 326884 1. 137451 1. 858193 2. 215997 1. 741773 1. 981306  
3. 437743 3. 945561 4. 123389 2. 588225 3. 517215 3. 483145 4. 395153 3. 04557 3. 50513  
1. 171618 1. 314319 2. 030601 1. 442649 1. 086266 1. 228409 1. 3071 1. 357699 1. 561949  
3. 038338 3. 477666 2. 488189 3. 303766 3. 005312 2. 2283 3. 525715 2. 565877 2. 818668  
2. 772264 2. 247431 2. 448672 2. 955822 1. 793041 2. 570012 2. 364863 2. 301792 2. 020482  
8. 3853 7. 600901 7. 950351 7. 200144 6. 236866 7. 691601 6. 664003 5. 326251 4. 932288  
0. 99026 1. 381199 1. 119435 1. 112774 1. 212356 1. 37788 0. 867222 2. 058708 1. 968685  
2. 551103 2. 99884 3. 983621 1. 876918 1. 734785 1. 603942 3. 160272 2. 740942 2. 080069  
2. 315225 0. 857225 1. 517754 1. 686698 3. 204977 1. 277739 1. 534728 1. 442567 1. 427577  
1. 354659 2. 493573 1. 189082 1. 64288 1. 995568 1. 89984 1. 901182 1. 97429 1. 775609  
2. 17951 1. 533359 1. 969497 1. 916131 2. 348458 2. 019135 1. 259426 1. 498068 2. 330582  
2. 657034 1. 795926 2. 439397 1. 730098 2. 780469 2. 013994 1. 901493 1. 996719 2. 305597  
4. 672272 4. 788633 5. 257977 6. 115603 4. 915772 4. 720076 5. 727237 6. 563185 5. 612929  
1. 132313 1. 112392 2. 200097 1. 753646 1. 534032 1. 981051 1. 402078 1. 529193 1. 234987  
1. 340492 1. 249442 1. 291795 1. 658924 1. 881086 1. 23896 1. 39261 1. 816916 2. 601504  
5. 962149 6. 253398 6. 769482 6. 186449 6. 373388 4. 398029 6. 972319 7. 236039 7. 399505  
1. 722863 2. 266712 1. 292649 1. 922614 2. 389168 1. 593549 1. 883068 2. 510783 3. 169052  
1. 523387 1. 552073 1. 520418 2. 076821 2. 000024 1. 807799 2. 776098 2. 284169 1. 597746  
7. 237954 7. 330743 7. 165239 6. 750612 7. 279086 5. 593104 6. 856869 6. 373215 6. 881882  
3. 460836 3. 205422 3. 067946 2. 170895 3. 127179 2. 223815 2. 541309 1. 975823 2. 3662  
1. 304283 1. 522215 2. 041418 1. 832664 1. 004249 1. 576184 1. 041296 2. 884894 1. 344194  
2. 134744 1. 432396 1. 988157 3. 00282 3. 55683 3. 02298 1. 874086 3. 945576 2. 333578  
4. 512865 3. 15874 3. 506869 4. 212136 3. 504944 3. 77172 3. 735195 3. 149512 3. 612256  
1. 867953 2. 759626 2. 257929 2. 249373 2. 383099 1. 956441 2. 104882 2. 320139 2. 332254  
2. 984995 1. 675601 1. 699981 1. 86169 2. 806305 3. 082887 2. 646627 2. 935298 3. 715607  
3. 75671 3. 4428 2. 323686 2. 323764 1. 883741 2. 142295 2. 645227 2. 890842 2. 1478  
6. 387715 6. 732964 6. 555995 5. 963534 5. 876893 5. 56521 6. 174751 6. 211562 6. 471823  
1. 597795 2. 527102 1. 718324 1. 290705 1. 123071 1. 173824 1. 495272 1. 71269 1. 331969  
5. 135254 5. 584032 5. 109361 5. 771851 5. 298749 5. 296994 6. 281249 6. 158144 5. 447557  
3. 175371 3. 784033 2. 351598 2. 112312 3. 613114 3. 808656 2. 197242 2. 368806 3. 857883  
1. 765367 2. 028924 1. 875853 3. 538403 1. 303822 1. 323075 2. 082289 2. 351561 1. 359599  
2. 186234 2. 877408 2. 617913 2. 995305 2. 055904 2. 28137 1. 825139 2. 319704 1. 945423  
1. 998023 1. 474914 1. 687185 2. 884798 1. 818855 1. 811914 1. 659575 1. 520664 1. 520854  
6. 131497 6. 473505 6. 767667 6. 247094 6. 431244 5. 156459 5. 540109 5. 251273 4. 850853  
2. 143756 1. 603849 2. 336379 1. 948568 2. 305391 2. 469046 1. 784955 2. 16858 2. 535302  
1. 735252 2. 348331 1. 841238 1. 943487 2. 120861 1. 668919 1. 883109 1. 896865 1. 381735  
1. 700075 1. 722125 1. 910505 2. 372265 1. 796596 1. 603216 1. 859189 1. 632245 2. 301401  
2. 679858 1. 673858 1. 408504 0. 911215 1. 238486 1. 724645 2. 517918 1. 391663 1. 156471  
3. 62388 3. 449609 2. 463936 2. 96096 2. 135022 1. 751863 2. 512503 2. 914596 2. 081452  
1. 426033 1. 609861 1. 496883 1. 227472 1. 158028 1. 573997 1. 423274 1. 227985 0. 951743  
4. 082533 4. 188727 4. 635465 4. 739762 4. 739762 5. 403251 4. 803926 4. 885755 4. 694499  
2. 957174 3. 650397 2. 984187 3. 026741 3. 583109 3. 256931 2. 873394 2. 527685 3. 744429  
5. 50076 5. 330436 5. 062252 5. 910357 6. 207576 4. 946301 5. 498281 4. 682704 5. 12232  
2. 437573 2. 81018 3. 145259 3. 634774 2. 769937 3. 821967 2. 599749 3. 044698 3. 305504  
3. 853546 5. 471807 4. 822783 4. 907105 4. 397687 4. 080556 3. 984809 3. 806842 3. 772862  
1. 653114 1. 96166 1. 926508 2. 14174 1. 92412 1. 424569 2. 32859 2. 153042 1. 611879  
3. 606802 2. 481289 2. 102456 2. 21857 3. 620164 3. 948789 3. 110938 4. 044392 2. 953819  
6. 249598 3. 595659 6. 496379 3. 435082 3. 018159 3. 71009 3. 583399 2. 334891 1. 934308  
1. 562886 1. 687056 1. 333726 2. 375963 2. 183088 1. 513921 1. 4687 2. 142495 1. 22099

3. 503574 4. 015838 3. 999495 4. 31412 4. 676731 4. 224832 4. 668852 5. 248307 5. 073806  
1. 538782 1. 431011 1. 555977 1. 507329 1. 097517 1. 695589 1. 193667 1. 582708 1. 135689  
1. 454724 2. 891098 1. 623213 3. 755963 1. 447266 2. 16073 1. 54065 1. 297522 2. 040407  
6. 056496 5. 56312 6. 135549 6. 101227 6. 019433 6. 544433 6. 047884 6. 591387 6. 490369  
1. 431931 2. 330443 2. 202009 2. 183223 2. 551291 1. 980128 1. 713578 2. 26061 1. 773567  
6. 729105 6. 87016 6. 262771 6. 139107 7. 153135 7. 186926 6. 516716 7. 004208 7. 001324  
4. 465634 3. 952629 5. 571078 5. 258932 4. 947679 4. 80963 6. 087582 5. 455537 5. 326128  
4. 714907 5. 392728 5. 286442 4. 483569 5. 779046 5. 070836 5. 509092 5. 294639 5. 568436  
6. 981323 6. 384005 6. 870412 6. 469785 6. 796623 6. 455541 7. 202486 7. 449639 7. 745291  
6. 104135 7. 04847 6. 451616 6. 228724 6. 596137 6. 23638 6. 939514 7. 312786 6. 44503  
3. 83613 3. 859513 4. 654767 3. 308655 2. 993706 3. 657523 3. 210914 2. 848866 4. 052942  
1. 634205 1. 983568 1. 150681 2. 459496 0. 857065 1. 64674 1. 597675 1. 028988 1. 24958  
2. 549722 3. 594427 3. 224934 2. 797654 2. 262835 3. 298264 2. 64545 2. 171866 1. 866971  
2. 59978 3. 296591 2. 349492 2. 705409 3. 058459 2. 689409 3. 169402 3. 319796 2. 874171  
3. 227627 3. 983637 3. 173382 2. 989763 3. 180042 2. 869 2. 744359 3. 100351 3. 049286  
5. 605757 1. 966294 2. 46749 3. 560424 2. 808643 4. 428249 2. 916805 2. 439153 2. 853333  
6. 761898 5. 824859 5. 874167 6. 594428 6. 687765 7. 093724 6. 846714 6. 646646 7. 332184  
8. 13323 8. 150428 8. 383392 8. 153193 7. 80288 7. 965417 8. 058855 8. 076814 8. 07668  
1. 978846 2. 29605 2. 853595 2. 652197 2. 325976 3. 263302 2. 345447 2. 727456 2. 307729  
6. 697818 5. 477578 6. 521162 7. 022735 6. 017074 8. 077606 7. 184501 7. 0295 6. 784292  
3. 882138 5. 769258 5. 86077 5. 764232 4. 471889 7. 29647 5. 383968 5. 475113 6. 186971  
4. 483859 3. 875101 4. 609409 4. 890041 4. 300592 4. 772431 4. 440394 5. 16748 5. 052887  
2. 271259 2. 743054 1. 90681 1. 83172 2. 38452 2. 508549 2. 522317 2. 535146 2. 979971  
1. 97606 1. 726022 2. 067056 2. 206714 1. 69108 2. 15113 1. 452726 1. 360887 1. 953613  
7. 676155 7. 92384 7. 828573 7. 777116 7. 823055 7. 28887 8. 105703 7. 911425 8. 093446  
6. 834162 5. 879885 5. 82659 7. 343831 5. 436744 6. 301612 6. 685431 6. 311118 6. 409338  
5. 072628 4. 781281 5. 230654 4. 172067 5. 144849 5. 707535 4. 716679 4. 620646 4. 414692  
3. 90432 4. 557533 4. 00497 5. 162733 4. 150176 2. 639082 4. 216968 4. 398383 5. 510478  
3. 041875 2. 199595 2. 378788 1. 979215 2. 75279 2. 189988 1. 955345 2. 415448 2. 666748  
5. 77599 4. 913268 5. 767621 6. 010434 5. 16859 6. 021055 5. 85076 6. 285005 5. 188743  
6. 228667 6. 508575 5. 74258 6. 808849 5. 715046 5. 909711 8. 307521 8. 233701 8. 042353  
2. 996124 2. 718347 3. 814982 3. 322746 3. 14149 3. 67024 3. 168249 3. 372117 2. 77927  
3. 6014 4. 25407 4. 694763 3. 586721 3. 208995 3. 322692 4. 151207 4. 000249 4. 368385  
3. 972179 3. 906676 3. 494799 3. 433291 4. 480432 3. 848743 4. 659031 4. 578204 3. 861058  
4. 92083 4. 726947 4. 532146 5. 026731 4. 57149 4. 825516 5. 310572 5. 046227 4. 930859  
2. 889073 3. 309209 3. 97502 3. 631551 4. 111472 2. 706492 2. 630878 2. 867896 2. 654083  
5. 690587 6. 431765 6. 533089 5. 810766 5. 778754 6. 309344 5. 959127 6. 108101 6. 267581  
7. 822228 8. 484072 8. 405619 8. 116612 8. 768264 8. 140327 8. 185122 7. 968345 8. 467284  
1. 539527 1. 843521 2. 117063 1. 756921 1. 630196 3. 311311 1. 973424 3. 384315 3. 062658  
1. 658431 2. 053672 1. 641065 1. 888776 1. 987552 2. 194086 1. 754136 1. 606105 2. 782788  
3. 111769 3. 625297 5. 183151 5. 180331 4. 622345 3. 656324 5. 410572 3. 858646 5. 143999  
3. 978203 4. 300086 4. 462277 3. 983473 4. 804927 3. 920417 4. 487987 3. 597504 2. 103711  
6. 047293 6. 673358 7. 027502 6. 780662 7. 003603 6. 020882 7. 181563 7. 521948 7. 363293  
6. 657967 7. 573711 6. 85001 6. 335489 7. 406296 6. 485245 6. 738679 7. 279868 6. 369008  
6. 214486 6. 617607 5. 760361 5. 619762 6. 278691 5. 586902 5. 184415 5. 53783 6. 330727  
3. 807679 3. 883133 3. 042555 3. 832452 3. 847203 4. 229031 3. 920438 3. 908882 4. 036082  
2. 928313 2. 917803 2. 543933 2. 960243 3. 15155 2. 589547 2. 998252 2. 836667 2. 875901  
9. 67172 9. 507868 9. 61147 9. 197221 9. 676245 10. 13828 9. 544873 9. 421578 9. 33497  
4. 697043 5. 417096 4. 038565 4. 918354 4. 49395 5. 190984 3. 805238 4. 696779 5. 120965  
4. 829515 5. 300181 4. 318392 0. 974157 5. 903871 1. 494555 1. 529882 0. 866975 2. 075618  
5. 349703 6. 099834 5. 969116 5. 160819 5. 212372 5. 011146 6. 834351 6. 237702 7. 103902



4. 960196 3. 95353 4. 847509 5. 443623 4. 582235 6. 318531 5. 510451 5. 468517 5. 553921  
6. 585614 6. 628252 6. 897363 6. 801552 5. 852808 7. 324422 7. 591616 8. 260006 8. 174356  
3. 555723 2. 493819 2. 437501 2. 562638 3. 31007 4. 392842 2. 406332 2. 068944 3. 22413  
1. 405556 2. 159404 2. 366058 1. 585383 1. 426457 1. 595775 1. 868461 1. 36288 1. 991635  
7. 323535 7. 629108 7. 334471 7. 056139 7. 172201 6. 763436 7. 307395 7. 382119 7. 330976  
2. 486107 1. 627648 1. 79538 2. 190733 2. 010848 1. 769874 1. 704311 1. 6229 1. 795607  
2. 91896 2. 368575 0. 801866 1. 163695 0. 927772 1. 581279 4. 045682 1. 677795 1. 327868  
7. 429766 7. 884709 7. 456651 6. 954683 7. 852171 6. 910178 7. 138629 7. 214589 7. 346418  
3. 236225 3. 061087 2. 711696 2. 871435 3. 749899 3. 610816 2. 751616 3. 051623 2. 765596  
4. 943309 5. 516415 5. 318524 5. 718044 5. 502726 4. 701182 5. 83618 6. 428485 5. 920577  
2. 132956 1. 425246 2. 501895 2. 205356 2. 607491 2. 22447 2. 278029 2. 385586 2. 976587  
7. 814897 7. 243018 6. 85703 5. 37639 6. 640486 7. 167034 6. 355888 5. 212109 5. 856931  
3. 5314 2. 339419 2. 595125 3. 461221 2. 926175 3. 918979 2. 376479 1. 336728 3. 517622  
7. 205107 8. 150664 7. 353862 7. 034799 7. 669819 7. 739124 7. 798746 7. 233471 6. 994942  
6. 247061 6. 631399 6. 899718 6. 883521 7. 011757 7. 592283 6. 651071 7. 92003 7. 120825  
9. 153563 8. 732151 9. 217442 9. 08139 8. 736993 9. 060065 8. 301025 7. 050047 7. 146722  
7. 619249 7. 079304 7. 257211 7. 49025 7. 762348 7. 563432 7. 387662 7. 018319 7. 116618  
7. 74373 5. 343233 6. 267035 7. 05686 6. 489648 7. 775118 6. 664955 6. 989074 6. 53456  
5. 96737 4. 356032 5. 3716 6. 63421 5. 483742 5. 178988 4. 15481 5. 220116 5. 212587  
3. 293926 2. 92784 4. 162308 4. 011635 2. 874817 2. 368355 2. 163353 1. 957935 3. 027701  
2. 495281 2. 409591 3. 249839 3. 3455 2. 335035 2. 725062 2. 921223 3. 449508 3. 500801  
6. 18797 6. 346033 6. 061272 6. 078405 6. 008654 4. 986161 6. 624904 5. 828132 5. 40092  
5. 064785 5. 554033 4. 218381 5. 034624 5. 872055 5. 148899 4. 570841 5. 531202 5. 756293  
5. 445591 4. 840299 5. 587736 4. 608318 4. 344191 4. 789109 4. 03312 4. 50229 4. 75716  
4. 721954 4. 659449 4. 561526 4. 560806 4. 776418 5. 067288 4. 325283 5. 124227 4. 787166  
1. 785025 1. 753525 2. 154403 2. 404449 2. 125397 1. 613814 2. 361522 2. 178441 1. 66123  
2. 264681 2. 544324 1. 7813 2. 689498 1. 591364 2. 474865 3. 043549 1. 849032 2. 049181  
4. 908268 5. 491751 5. 459226 4. 479794 4. 979953 5. 129394 5. 473765 5. 233183 4. 188502  
2. 504564 2. 462538 3. 027559 3. 139832 3. 492645 2. 666807 3. 186111 2. 79571 2. 352142  
1. 699753 2. 26279 3. 154257 2. 917209 1. 916314 2. 548029 2. 205727 1. 599843 1. 638101  
7. 067509 5. 817933 7. 040935 6. 544585 6. 643717 7. 769739 6. 661606 7. 053609 6. 700238  
5. 453284 4. 844286 5. 426939 6. 01794 5. 503184 6. 557411 6. 038442 6. 586158 6. 587181  
6. 332098 5. 469147 5. 375119 5. 861327 5. 551913 7. 078742 6. 233733 6. 388469 6. 958144  
6. 824756 7. 18469 6. 973722 7. 41638 7. 225161 6. 82533 6. 876975 7. 074125 6. 797459  
5. 087468 4. 932369 5. 050453 5. 184814 5. 270456 5. 930831 4. 998176 5. 114097 4. 934536  
7. 938257 7. 649195 7. 992895 8. 184947 7. 390103 8. 468604 7. 728802 7. 331485 7. 315486  
5. 950652 5. 884425 5. 858512 5. 181699 6. 543333 5. 664079 4. 861458 5. 382893 4. 869241  
0. 877051 1. 561867 1. 207494 1. 443855 1. 879853 1. 744516 1. 934732 1. 650642 1. 949066  
4. 625262 3. 328251 2. 943777 3. 891719 2. 850237 4. 366309 4. 200594 3. 36156 4. 71574  
3. 715623 3. 436851 3. 80181 3. 61494 4. 728015 3. 147256 3. 657601 4. 935801 4. 202604  
1. 968704 1. 973205 0. 716883 1. 863409 0. 764813 1. 384762 0. 834182 1. 058372 0. 959548  
3. 723982 3. 683226 4. 125841 4. 119196 3. 963485 3. 94434 4. 056643 3. 25459 2. 907537  
3. 21461 3. 614267 3. 518603 3. 789052 3. 385108 3. 625879 3. 395912 3. 499772 3. 18769  
3. 547925 3. 905973 4. 31207 3. 593859 4. 668241 4. 513933 4. 783826 4. 322733 4. 599803  
2. 495189 1. 844231 2. 413963 2. 79144 2. 622706 3. 066675 2. 179375 2. 491467 2. 76871  
4. 023452 3. 077222 3. 043812 2. 621811 3. 691679 3. 004193 3. 010218 2. 795152 3. 431702  
3. 893631 4. 142361 3. 557136 3. 417954 3. 758273 4. 487853 4. 510249 4. 880728 3. 772109  
6. 081423 5. 628743 5. 523639 6. 257825 4. 932408 7. 855999 5. 723248 4. 352187 5. 088493  
2. 54462 3. 284042 3. 17092 3. 415718 4. 943802 2. 540885 3. 62271 3. 040099 3. 263832  
2. 992897 3. 608752 3. 510324 2. 293116 3. 149171 3. 512988 3. 64941 2. 943348 3. 040791  
1. 213794 1. 838583 1. 364021 2. 29613 2. 26906 1. 429075 1. 531843 1. 26107 1. 837246

4. 306154 3. 402457 4. 959872 3. 052415 3. 764562 3. 435396 3. 57324 3. 592693 3. 997522  
4. 302501 5. 047239 3. 491193 4. 068767 4. 37092 4. 593136 4. 493002 3. 702044 4. 65101  
7. 062174 6. 866795 7. 124118 6. 443969 7. 431028 6. 670247 7. 137211 6. 670537 6. 8787  
5. 08996 5. 786764 5. 145619 6. 099018 5. 074018 4. 906542 4. 539652 5. 194632 4. 677219  
5. 898415 6. 115 5. 865397 5. 681502 5. 737532 6. 816645 6. 528855 6. 204424 6. 672289  
1. 374966 1. 383408 2. 051981 1. 524342 1. 810371 1. 552573 1. 190273 1. 242064 1. 490321  
2. 935402 3. 005078 3. 560186 2. 875513 4. 026909 3. 038335 3. 241804 3. 086322 3. 682603  
5. 574487 5. 450251 5. 234854 5. 304871 5. 105416 6. 172915 6. 072569 5. 626932 5. 578483  
3. 984504 3. 933862 3. 083977 4. 434623 3. 106958 5. 009378 4. 38179 3. 231698 4. 349439  
3. 327362 4. 152998 2. 350014 2. 693678 2. 847806 4. 032934 4. 765795 3. 831864 5. 113057  
5. 658795 4. 106981 5. 363255 5. 116273 5. 573472 4. 484071 5. 217205 5. 231726 4. 752131  
5. 681769 4. 672537 4. 748126 5. 482006 5. 111191 4. 952209 4. 998764 4. 790102 5. 187682  
2. 254581 2. 630386 2. 407771 2. 449055 2. 350306 1. 630738 2. 332446 2. 482774 2. 497068  
5. 118027 5. 904471 5. 557701 5. 165497 5. 315863 5. 582746 5. 326081 5. 525891 5. 672706  
6. 390778 4. 976667 5. 381972 4. 53489 5. 270627 5. 010173 5. 249367 4. 10336 5. 774034  
5. 805505 7. 078237 6. 313031 5. 756103 5. 547938 7. 441552 5. 838482 6. 584211 5. 821069  
9. 385944 9. 654518 9. 292524 9. 74168 9. 710482 9. 277778 9. 422829 9. 575291 9. 400257  
5. 708775 6. 258192 5. 307153 5. 778789 5. 824203 5. 346742 4. 997767 5. 514242 4. 87125  
5. 659959 5. 487851 5. 611047 4. 169369 5. 393076 3. 649893 4. 91387 3. 478059 3. 621346  
6. 604632 5. 796257 6. 607509 6. 928241 6. 120427 6. 790131 7. 034873 7. 535814 6. 798536  
5. 153885 4. 348013 4. 986512 4. 851396 4. 816543 2. 613119 4. 875203 5. 070754 4. 597351  
6. 510931 6. 198188 6. 398853 6. 510005 7. 060152 6. 364404 6. 615763 5. 723222 6. 014226  
2. 613351 2. 054629 1. 863528 2. 632373 2. 531615 3. 536526 2. 683342 1. 925697 2. 913475  
2. 514916 1. 772187 1. 56111 1. 601278 1. 500024 3. 20941 1. 578228 1. 75951 1. 939716  
4. 854265 4. 074614 4. 362205 5. 428479 3. 833673 4. 793914 5. 49667 4. 483497 4. 703606  
2. 344334 2. 588329 2. 852005 2. 251272 2. 707848 2. 930238 2. 924756 2. 914639 3. 634315  
5. 544289 5. 664119 6. 329224 5. 343648 6. 161074 4. 767893 6. 122361 6. 236113 4. 717231  
5. 847262 5. 72082 6. 674399 5. 734707 6. 495358 7. 122054 6. 571901 6. 980097 7. 283055  
6. 984171 6. 92863 6. 680759 6. 851134 6. 647892 6. 833624 7. 252675 7. 023213 6. 777932  
3. 1323 4. 276246 3. 72237 2. 718499 2. 936339 3. 311336 3. 810874 3. 882068 4. 462827  
1. 93104 2. 427825 1. 481794 1. 85874 2. 2607 1. 820745 1. 699608 1. 833376 1. 533092  
3. 876108 3. 017198 3. 756971 3. 847092 4. 446255 3. 148064 5. 303319 3. 972054 3. 783821  
1. 2193 1. 572074 0. 909644 1. 531157 1. 000319 1. 48854 1. 293272 1. 486998 1. 222261  
6. 174788 6. 140889 6. 289667 5. 988064 6. 32497 6. 622489 6. 951563 6. 784611 6. 940906  
1. 181406 1. 287214 0. 994296 1. 312341 1. 111902 1. 214901 1. 182091 1. 212547 1. 123767  
3. 162468 4. 056942 3. 773956 4. 62099 2. 288281 3. 727512 2. 67766 2. 752121 4. 361793  
2. 812563 3. 324808 3. 60229 2. 326744 3. 720026 2. 836148 3. 070604 1. 790254 2. 959133  
5. 185286 5. 438956 4. 623563 5. 107258 4. 777613 4. 746042 3. 024446 3. 876498 4. 59248  
2. 167121 2. 051691 2. 204781 2. 375617 1. 300903 1. 75494 1. 960997 1. 405922 2. 789221  
5. 594696 5. 639878 4. 956566 5. 308056 5. 832327 5. 85097 5. 739584 6. 158446 5. 530399  
3. 622208 4. 221788 4. 161985 4. 02815 4. 174857 4. 143328 4. 839595 5. 117533 5. 149488  
6. 955829 7. 12952 6. 554551 6. 62256 6. 876014 6. 832127 6. 829728 6. 306706 6. 489779  
2. 188019 1. 776765 2. 340921 2. 172581 2. 730048 4. 498502 2. 75661 1. 963154 2. 084115  
1. 299918 1. 259406 1. 184706 1. 796017 1. 412845 1. 368294 1. 809838 1. 549066 1. 555058  
1. 955356 1. 390575 1. 785024 1. 602915 0. 981648 2. 013975 2. 047924 1. 668859 1. 333302  
1. 570525 1. 484492 1. 200307 0. 974681 1. 049801 1. 248982 1. 456895 1. 658873 1. 453884  
1. 124139 0. 579591 3. 684991 0. 759898 0. 431719 0. 509403 0. 84422 0. 633371 1. 019551  
6. 208048 5. 856604 4. 899535 4. 230422 5. 447952 7. 185749 5. 019193 5. 700943 5. 801148  
4. 536522 0. 943884 2. 670029 2. 933928 3. 934116 1. 175942 1. 14661 1. 725181 1. 101662  
2. 903231 4. 006538 2. 433074 2. 453391 0. 529484 1. 698787 0. 731951 2. 078779 1. 538163  
0. 93029 4. 55394 5. 416329 2. 229396 3. 83425 1. 209874 1. 579605 1. 652338 0. 516992

3.242252 3.187044 2.590722 1.080717 1.602871 1.584692 0.929944 0.811085 1.0004  
3.068202 2.940393 1.22101 0.882571 1.628143 1.134463 1.469909 1.066509 1.337915  
3.875685 4.381608 4.567112 4.932242 4.406659 4.614404 3.95825 4.558601 4.117949  
6.067159 5.031219 6.726955 6.370743 6.389154 5.694599 5.755978 6.639868 6.373885  
2.542342 2.441125 2.389052 2.858403 2.654147 2.276407 2.71337 2.796045 2.445656  
2.363138 2.262522 2.601339 2.310156 2.466882 1.509547 1.801645 2.459928 3.354719  
5.117466 3.414449 4.987356 4.554784 4.784591 5.873112 5.246871 5.394701 5.616294  
9.03067 8.409934 8.798673 8.419939 8.437725 8.74908 8.971227 8.676758 8.970055  
6.048487 6.277046 6.134149 5.511036 6.296977 5.917642 6.151322 6.803704 6.855784  
6.107651 5.540301 6.557568 4.254829 6.672322 5.474066 6.000054 6.035885 5.476816  
8.210788 8.371599 7.658433 8.078161 8.32099 8.124427 8.607907 8.488332 8.160591  
4.487388 5.76952 4.973212 5.042181 4.861421 4.713881 5.604476 5.031224 4.337625  
6.909446 6.949246 5.664469 5.226333 6.085301 8.519294 7.42245 7.553829 8.011521  
6.384132 5.105655 5.69678 5.257951 4.188585 6.061999 4.621929 4.852222 5.331911  
6.515879 7.002383 6.405944 7.195532 7.663345 6.013882 7.621706 7.4499 7.686559  
7.416193 7.758417 7.110659 7.300588 7.122111 7.262601 8.397558 8.497182 8.582933  
6.095553 6.982359 6.38515 6.433268 6.29515 6.401749 6.270638 6.416569 6.573627  
6.634914 6.29354 6.265181 5.867033 6.907272 5.217499 6.681704 6.537194 6.898996  
6.587689 7.193507 6.68474 6.568064 6.145867 6.391965 6.741523 6.495073 5.961956  
3.125925 2.656179 4.404257 2.756665 2.764895 4.955543 3.359756 3.801246 3.767139  
5.110092 6.282873 5.903015 6.063962 6.229739 5.301664 6.149758 5.872876 5.435991  
8.485172 8.890245 8.228489 8.57306 8.845672 8.752249 8.10723 8.247025 8.574477  
4.551367 5.144029 4.890359 4.957054 5.025128 5.10338 4.672893 4.583357 4.62622  
4.93269 4.714594 4.796435 5.10379 3.693197 5.106376 4.836074 5.235192 5.005828  
3.494401 3.147277 3.178948 3.444835 2.926195 2.345291 3.40153 2.941668 2.961231  
8.719325 9.202337 8.853187 8.495353 9.205305 7.708744 7.768551 7.430782 7.807864  
4.524093 5.232052 6.072372 5.534734 5.980607 5.97229 6.488496 6.464384 6.710674  
5.270829 4.68822 5.044955 5.187719 5.211789 4.054178 4.679686 3.464729 4.319049  
3.956946 2.639398 3.165462 3.519887 2.712943 3.843619 4.091158 5.596791 5.288197  
4.530553 4.721292 4.005665 2.966529 4.148077 3.09146 3.410823 3.31095 2.899094  
5.659305 6.617027 5.726901 5.734132 5.832075 5.655597 5.802307 5.26725 5.710594  
6.883475 7.0254 7.265271 6.994195 6.561497 6.663489 6.833344 6.686538 7.131009  
4.029886 4.531505 4.674292 4.745013 3.883641 4.799137 5.408538 5.569806 5.158384  
1.800043 2.49622 1.767459 1.972535 2.023791 2.510455 1.737597 1.663299 2.076931  
3.241773 2.47685 4.076405 3.476644 2.729408 3.360549 3.276959 4.104036 3.495633  
8.193217 8.861392 8.84999 8.248592 8.969697 7.800435 8.909102 8.394067 8.670681  
3.523327 3.977393 3.402789 4.012528 2.583609 3.808255 3.168285 3.164833 3.415123  
3.330569 2.478174 2.136372 2.279461 1.943251 2.027844 2.011631 2.435181 2.048592  
1.67244 1.510581 0.978832 1.907469 1.163124 1.168648 2.625868 1.555319 2.798466  
7.977958 8.764485 8.46855 7.507202 8.030635 6.175527 6.851597 6.871057 6.313204  
6.961954 6.869317 6.774567 7.236196 6.382698 6.53607 6.408733 7.154034 7.104973  
6.286003 6.533515 6.163116 5.741856 6.077236 5.598967 6.034951 5.949114 6.147568  
4.688193 5.335495 5.352746 5.115692 4.689015 5.758047 5.45915 4.681101 5.849443  
10.4858 10.02121 10.50116 9.747723 10.53684 10.1865 10.42549 10.18053 9.67652  
6.026428 5.580216 5.855126 5.609903 5.626293 5.521516 5.766711 6.805416 5.723042  
2.954714 2.217921 2.115315 2.157854 2.691075 2.003011 1.897083 2.179678 2.231612  
5.369975 6.073677 5.360252 6.043531 6.063333 5.483563 5.857851 6.285997 4.91708  
2.410936 2.733092 2.496544 2.102926 3.306593 2.496698 4.879601 4.021207 1.643445  
7.119387 5.491047 6.71517 6.361849 4.566182 6.713008 5.223676 6.057086 4.930822  
3.972072 5.424027 5.245312 3.564076 4.526872 5.417069 4.575165 3.724238 5.743422  
2.267418 2.789649 2.691256 2.378827 2.563455 3.584435 2.156641 2.532795 2.435555

4. 2415 3. 654258 4. 490509 4. 067575 4. 153894 3. 989804 3. 802134 5. 241242 4. 649595  
8. 542364 9. 163333 9. 061311 8. 446287 8. 77157 8. 562686 8. 924417 8. 80277 8. 780986  
7. 410842 7. 365812 7. 412512 7. 339153 7. 968032 7. 465778 7. 085662 7. 089114 7. 200567  
6. 283613 6. 793633 6. 700265 6. 340975 6. 923967 6. 648881 6. 573742 6. 452268 5. 715199  
5. 544623 5. 072306 6. 290527 6. 06427 6. 198504 4. 98223 7. 178831 7. 278731 7. 057151  
3. 16902 2. 121641 3. 942829 4. 184321 4. 855001 3. 917407 2. 914722 2. 061298 1. 602386  
4. 863723 4. 437456 5. 010107 4. 96113 4. 90141 5. 618269 5. 076839 5. 338469 5. 843395  
2. 793928 2. 954595 3. 880256 2. 930178 2. 596389 3. 122473 3. 725345 3. 339642 3. 935955  
6. 459493 6. 412494 6. 352936 6. 291556 6. 050967 7. 015024 6. 507018 7. 299143 6. 166764  
1. 403443 2. 134988 2. 107307 2. 592064 2. 427256 3. 949484 4. 123952 1. 884274 4. 512945  
7. 182531 7. 018339 6. 976881 6. 773115 7. 687968 7. 212582 7. 82649 7. 358572 7. 576102  
5. 304951 5. 206041 5. 240621 5. 469125 5. 455787 4. 274735 5. 327494 5. 303719 4. 991031  
4. 541565 3. 150549 4. 73891 4. 254429 4. 835601 4. 011706 4. 481025 3. 003357 4. 539278  
6. 134773 6. 544034 6. 324257 6. 589885 6. 752327 6. 922282 6. 736821 6. 546152 6. 274697  
5. 614614 6. 130009 5. 795835 6. 17583 5. 917887 5. 889059 5. 873531 6. 066015 5. 165652  
1. 752605 2. 178353 1. 800103 2. 512564 1. 805987 2. 464917 2. 365756 2. 648778 2. 179511  
5. 58509 4. 043995 4. 817826 4. 562753 3. 634921 5. 453863 4. 823859 5. 169205 4. 788989  
3. 918372 3. 098512 3. 136571 3. 121451 4. 153644 3. 548183 3. 804175 2. 781572 3. 176235  
4. 061781 4. 007314 3. 313031 4. 342222 4. 5612 4. 572498 4. 260957 4. 665262 4. 503972  
6. 350491 6. 555749 6. 929987 7. 486939 7. 019894 8. 226005 6. 490247 7. 284094 8. 259313  
4. 168008 4. 870591 4. 695926 4. 807643 4. 304906 4. 535219 4. 934848 5. 93873 5. 079318  
5. 693821 6. 284043 5. 546564 4. 931153 6. 18004 4. 887165 6. 048537 4. 935802 5. 572252  
6. 997158 5. 724497 6. 884817 6. 551496 7. 070688 7. 810992 8. 175454 8. 02376 7. 608256  
2. 808762 5. 086486 5. 176801 6. 250457 4. 973316 4. 530035 5. 676571 5. 971478 5. 542157  
2. 852649 2. 413698 2. 410965 3. 200492 2. 638445 1. 831295 2. 962709 3. 547494 3. 447346  
3. 900894 3. 560545 4. 439845 4. 00112 3. 146699 3. 590254 4. 673206 3. 544328 3. 03866  
4. 331343 3. 836849 2. 50726 2. 933907 3. 901264 3. 101397 3. 949861 3. 298655 3. 50741  
3. 02421 2. 654538 2. 561372 2. 444657 3. 922436 2. 938441 3. 476404 3. 847664 3. 144842  
4. 487867 3. 876618 4. 199159 5. 271477 4. 748166 4. 667768 4. 80004 4. 779243 4. 979546  
3. 798029 4. 465669 3. 374267 3. 780724 3. 920398 4. 707532 3. 494133 4. 046771 4. 151572  
2. 285426 1. 785021 1. 796217 1. 823715 1. 54516 2. 214463 1. 782006 2. 018228 2. 14214  
3. 830411 4. 736607 4. 183412 3. 983387 4. 136572 3. 702003 5. 316424 4. 510898 4. 636712  
1. 751177 2. 139238 2. 930411 2. 01775 1. 751177 1. 21766 1. 665417 1. 63515 1. 3843  
2. 241877 3. 100956 2. 525252 2. 242241 2. 663021 3. 139571 1. 757748 1. 924249 3. 493402  
5. 289778 6. 052523 5. 958556 4. 859005 5. 241926 5. 458766 6. 013727 4. 810953 5. 33017  
5. 711379 5. 730195 5. 304594 5. 791509 5. 524025 4. 780146 5. 546493 3. 915978 5. 018131  
6. 208664 6. 099469 5. 366324 5. 826478 5. 901009 6. 145612 5. 433809 5. 152011 5. 566535  
1. 79054 2. 031977 1. 814961 2. 156515 1. 53794 1. 626244 1. 895168 1. 988569 2. 015522  
4. 196922 3. 764254 3. 469846 2. 759778 4. 197295 2. 737793 3. 379569 3. 704192 3. 97163  
3. 944416 3. 651093 3. 923184 4. 182391 3. 992115 4. 313733 3. 552108 3. 587962 4. 27558  
4. 391624 4. 247577 4. 748582 4. 023736 4. 727691 3. 070316 3. 938503 4. 674115 4. 974393  
1. 930931 2. 024113 2. 008046 2. 827981 3. 517916 1. 900136 1. 939401 2. 183301 2. 078676  
2. 043979 1. 446202 2. 900933 2. 349068 2. 437846 1. 704662 1. 823745 1. 860282 2. 517639  
1. 936149 1. 454126 1. 705581 1. 415105 0. 705653 3. 641899 0. 877348 0. 940675 1. 587777  
5. 100693 6. 347073 5. 388977 5. 86475 5. 938088 5. 826408 6. 726482 5. 641424 5. 735868  
2. 467789 3. 194294 3. 471151 2. 54903 2. 725342 1. 860706 1. 500458 1. 850253 1. 370623  
6. 299967 6. 244345 5. 666276 5. 681361 5. 428556 5. 138591 6. 107966 5. 930431 6. 228764  
2. 074345 2. 024212 1. 680445 2. 595208 1. 885374 1. 822639 2. 015103 1. 930451 1. 77029  
3. 49162 2. 621822 2. 514054 1. 923975 2. 721461 2. 727948 3. 033828 2. 430038 3. 194966  
2. 723998 4. 680209 3. 594086 2. 612842 4. 304365 2. 836196 4. 432308 4. 194911 3. 084086  
1. 479798 1. 946727 2. 210688 1. 922654 1. 678347 2. 036217 2. 280002 1. 401838 2. 309039

4. 781465 3. 253374 3. 789325 4. 031083 3. 727115 2. 155956 2. 698518 4. 003552 3. 597102  
4. 501292 3. 725261 3. 855477 3. 876693 4. 229641 3. 189906 4. 219179 5. 003677 3. 509702  
3. 625044 3. 954426 3. 075216 3. 231589 2. 982726 3. 460072 2. 975741 2. 638467 2. 919634  
7. 320295 7. 518965 7. 070471 7. 048223 7. 636521 6. 908705 7. 340674 6. 481307 6. 896436  
4. 202393 3. 26032 4. 232433 3. 509601 4. 243571 4. 95567 5. 515031 4. 210528 2. 823642  
7. 522863 7. 536453 7. 220737 7. 038057 7. 524392 6. 715813 7. 263867 7. 34707 7. 307755  
6. 477137 6. 858351 6. 428211 6. 305542 6. 536297 6. 234 6. 844932 5. 91547 6. 58759  
3. 765749 3. 18224 3. 080364 4. 800559 3. 233903 2. 232149 2. 35671 3. 377242 3. 68661  
6. 99218 7. 323611 6. 957339 7. 354143 7. 131716 6. 985367 7. 062648 7. 421775 7. 654761  
6. 109658 5. 614833 5. 374797 4. 917628 5. 80162 4. 859245 4. 819683 4. 624681 4. 499722  
1. 090458 1. 33366 0. 714148 0. 819961 0. 979059 1. 185248 0. 675087 1. 15832 0. 822374  
5. 474556 5. 244027 4. 815851 5. 505423 4. 308671 5. 496146 4. 379531 4. 812941 5. 279259  
6. 767233 7. 226738 7. 1553 6. 859299 6. 876376 6. 263421 7. 937289 7. 229699 7. 103536  
8. 412517 8. 694817 8. 730478 8. 876165 8. 756239 8. 418017 8. 466375 8. 137182 8. 479646  
1. 345694 1. 622623 2. 145545 1. 567998 1. 447853 1. 439995 2. 302627 2. 747633 2. 088669  
5. 470543 4. 58138 5. 321307 5. 357886 5. 134286 5. 378793 6. 546303 6. 468031 5. 630638  
7. 349532 7. 0938 7. 217331 7. 027251 7. 299064 8. 057075 7. 258296 7. 10981 7. 169531  
2. 357699 1. 653376 2. 166964 1. 691896 2. 815426 1. 599317 1. 521717 1. 573645 1. 968561  
2. 324413 1. 776875 1. 78963 2. 505941 2. 061122 1. 677636 1. 402333 1. 610375 1. 338666  
1. 524799 2. 667222 0. 825353 2. 195403 1. 407183 0. 833411 0. 606309 1. 117136 1. 242659  
1. 071765 1. 43349 2. 933412 1. 011613 0. 840876 1. 19867 1. 315039 0. 970672 1. 026136  
2. 952433 2. 989314 1. 669744 1. 703487 1. 849084 2. 028393 2. 668923 1. 650944 2. 993499  
6. 699848 7. 592058 7. 7129 7. 181283 8. 243282 4. 60254 6. 954073 6. 380747 6. 421206  
1. 426689 2. 231622 1. 239902 2. 312751 1. 536981 0. 846429 2. 331426 1. 773149 1. 239155  
3. 657528 3. 113729 4. 390221 3. 888484 4. 136632 4. 034053 4. 281827 3. 609697 4. 264198  
3. 05955 2. 620692 3. 235148 2. 860209 3. 386386 3. 289406 3. 056046 4. 079808 3. 365435  
5. 562363 5. 028042 4. 843273 5. 151605 5. 301533 5. 305099 5. 510459 5. 320384 5. 659547  
5. 912523 6. 434813 6. 240639 5. 611083 6. 025135 5. 989236 5. 209055 5. 706982 5. 557166  
7. 595726 7. 076872 7. 491233 8. 067064 7. 405387 6. 95942 7. 889023 8. 005816 7. 420543  
3. 472722 4. 170108 3. 190932 3. 689037 2. 800839 2. 890454 3. 336877 3. 253842 2. 71198  
3. 033369 2. 139583 2. 573393 2. 366718 1. 771557 2. 019186 2. 253651 2. 68748 2. 669607  
5. 8693 5. 696595 5. 924862 5. 655683 5. 681552 5. 505335 6. 089682 5. 901681 5. 538366  
4. 569482 4. 932661 4. 503335 4. 793498 3. 693709 3. 549786 4. 049384 4. 465139 3. 879089  
6. 188298 6. 26886 6. 150342 6. 472037 6. 67346 6. 645355 7. 336133 7. 162804 7. 287859  
6. 752557 6. 578141 5. 994382 6. 527567 7. 211616 7. 274938 6. 738686 6. 480402 6. 990342  
2. 508794 2. 466749 2. 301168 2. 494448 2. 41131 2. 55986 1. 831166 3. 273132 2. 465169  
2. 262327 1. 926322 1. 338041 2. 341366 2. 093591 1. 853621 1. 284473 2. 875216 1. 543894  
2. 626069 2. 224564 4. 365528 3. 709704 3. 004055 3. 791629 3. 469907 3. 392636 2. 880824  
3. 328436 4. 607821 4. 231003 3. 186173 4. 294027 3. 923924 4. 155751 5. 52292 5. 478969  
4. 239105 3. 58303 4. 697035 5. 049718 4. 758709 3. 964315 4. 965497 3. 933103 4. 736717  
7. 881258 8. 311339 8. 406842 7. 714266 8. 711832 7. 135512 6. 735734 7. 354629 7. 2933  
3. 616283 3. 592027 3. 427183 3. 4504 3. 561576 3. 780944 4. 458267 3. 206539 4. 529939  
4. 646595 4. 847204 4. 510521 4. 731601 4. 362295 5. 620638 3. 941965 5. 472239 4. 834729  
7. 617322 7. 176505 7. 146946 6. 487577 7. 58583 6. 740612 7. 078764 6. 3352 7. 372966  
6. 606529 6. 594009 6. 992067 7. 523028 6. 407616 6. 575062 7. 355235 8. 074868 7. 324122  
6. 074978 5. 883302 6. 116218 5. 294713 6. 894506 5. 305819 5. 63394 5. 89377 6. 096607  
5. 566874 5. 936348 6. 371007 5. 078679 5. 620599 5. 892272 6. 664882 6. 909517 6. 160098  
5. 699734 5. 947226 5. 812998 5. 372202 5. 66473 5. 310803 6. 037937 5. 466667 5. 881196  
6. 180878 6. 383583 6. 087167 6. 006186 5. 323812 6. 138761 5. 837663 5. 528409 5. 897663  
7. 982802 8. 637194 8. 180097 8. 224529 8. 353398 8. 580215 8. 084434 7. 904051 8. 455219  
4. 22405 5. 651594 3. 903224 5. 07991 5. 032315 6. 960147 5. 793787 6. 158072 6. 026849

7. 980951 7. 835167 7. 871216 6. 484771 7. 616639 7. 465148 7. 853839 6. 578484 6. 755775  
1. 125919 1. 182321 0. 824999 1. 863872 1. 08705 0. 809624 1. 876322 2. 179866 1. 165107  
4. 719257 4. 026761 4. 487951 5. 08082 4. 074297 3. 901655 3. 885326 4. 855101 3. 395848  
5. 03685 4. 626409 3. 915279 4. 367926 3. 812288 4. 904311 4. 8212 4. 813119 4. 746844  
5. 614664 6. 359587 5. 774249 5. 959523 5. 739126 6. 521674 5. 221163 5. 936397 6. 171369  
3. 34523 3. 29822 3. 137256 3. 46982 4. 229834 3. 814117 3. 118181 2. 983505 3. 585986  
3. 577454 3. 526597 3. 578337 3. 099543 3. 502113 4. 046319 4. 267649 3. 320499 4. 366182  
1. 390386 1. 07058 1. 248311 1. 285651 1. 751182 1. 447715 1. 551223 1. 281568 1. 384788  
2. 55799 4. 163921 3. 73352 4. 264599 3. 039855 2. 799053 3. 009031 4. 219835 3. 859873  
5. 231612 4. 627125 5. 338308 5. 880752 4. 729041 3. 803132 5. 281065 4. 828674 4. 661925  
3. 361696 3. 377484 3. 404394 3. 89821 2. 794984 2. 96765 3. 278124 3. 422351 2. 615132  
1. 744915 1. 457257 1. 240446 1. 335283 1. 522803 2. 497947 1. 449534 1. 775149 1. 390532  
0. 805706 3. 56986 1. 574568 1. 86127 1. 003771 1. 136902 2. 832477 0. 630281 1. 348754  
7. 396884 7. 119793 6. 508139 7. 241171 6. 86313 7. 761498 7. 431834 6. 731105 7. 296611  
5. 960278 5. 947601 5. 74761 5. 428127 6. 482425 6. 229545 6. 139986 6. 510506 6. 832322  
5. 605078 3. 562134 5. 783072 4. 510055 5. 298736 6. 583601 7. 906847 8. 132168 8. 223166  
4. 197335 3. 858587 4. 049893 3. 502459 4. 039204 4. 976762 3. 836224 3. 716672 4. 253018  
3. 729515 2. 54433 4. 088077 4. 284753 3. 802821 4. 449853 3. 109596 4. 096551 3. 940734  
1. 413975 1. 620285 1. 455689 1. 304004 1. 360862 1. 830762 2. 184421 1. 849422 2. 124494  
4. 302648 3. 962273 5. 160736 4. 800962 4. 738498 5. 366001 6. 654575 4. 551749 5. 137734  
7. 395463 7. 680405 6. 450953 6. 512521 6. 759029 6. 883078 6. 932192 6. 783575 6. 539054  
3. 405921 2. 851756 2. 673226 4. 639845 3. 273313 2. 876264 2. 924064 2. 379969 3. 13031  
3. 339008 2. 794127 2. 34303 2. 870215 2. 9316 3. 108494 2. 895751 3. 036635 2. 620142  
3. 955518 3. 917772 4. 406223 4. 218527 4. 579506 4. 898889 4. 365977 4. 92254 4. 186276  
4. 357912 5. 424028 4. 458431 4. 463522 4. 57289 5. 230674 5. 674707 5. 326557 3. 975784  
5. 87403 6. 14534 5. 745395 6. 03674 6. 302292 6. 665103 6. 92674 5. 983185 5. 766539  
1. 306771 1. 852587 0. 871485 2. 046945 1. 602132 1. 268538 1. 331206 0. 962115 1. 267327  
1. 837718 1. 081017 2. 707031 2. 598095 1. 341511 1. 632838 1. 520287 1. 677805 0. 982609  
1. 976616 1. 622615 2. 058381 2. 289268 2. 136338 2. 231252 1. 882389 2. 0746 2. 025327  
5. 147613 5. 287797 5. 577031 6. 039073 4. 724322 6. 108352 5. 888936 5. 367079 5. 010811  
5. 417706 6. 187904 6. 257241 5. 312466 6. 60635 4. 890239 5. 386932 5. 782195 5. 401365  
1. 619537 1. 823559 1. 092885 2. 254562 1. 226379 2. 641193 1. 491004 1. 693547 1. 391942  
3. 023347 4. 368299 4. 022001 4. 791767 5. 162754 2. 581816 3. 969799 4. 483672 5. 143075  
3. 938832 5. 206589 3. 69134 3. 245295 4. 010374 5. 133839 4. 279026 5. 185396 3. 800863  
2. 554595 2. 310053 2. 305209 1. 985863 2. 392824 2. 197326 2. 580644 2. 439858 2. 127904  
6. 546848 5. 452783 6. 349107 6. 168199 6. 827388 6. 29972 6. 153176 6. 502957 6. 716183  
5. 767485 5. 197916 5. 30567 5. 531964 5. 424923 2. 235909 4. 298026 7. 077204 5. 80603  
1. 187307 1. 217151 1. 613035 1. 135917 1. 441035 1. 087341 1. 047416 1. 842923 0. 850014  
1. 273285 0. 967232 2. 992212 1. 189348 1. 872024 0. 949143 1. 409425 0. 960247 0. 958315  
0. 994689 1. 260427 0. 941256 0. 791469 1. 299435 0. 967414 1. 591936 0. 621059 1. 082506  
3. 609675 4. 057016 4. 972203 4. 626818 4. 505342 4. 172698 4. 632233 5. 548375 5. 436368  
1. 987256 1. 945179 1. 682211 2. 044463 2. 116446 2. 206322 1. 873629 1. 816998 1. 955968  
1. 192936 1. 406881 1. 483511 2. 085366 1. 152425 1. 579303 1. 282875 1. 461449 1. 393503  
1. 195629 1. 532751 1. 113915 1. 160957 1. 005628 1. 18296 1. 223261 1. 989379 1. 884764  
7. 539055 8. 215875 8. 084663 7. 614168 7. 916225 7. 206091 7. 829351 8. 103508 7. 564472  
4. 177794 4. 453856 4. 153416 4. 309083 5. 796802 4. 973004 5. 182823 5. 50822 4. 695709  
1. 953577 2. 378498 1. 783221 1. 78149 1. 667417 2. 236914 1. 90528 1. 935783 2. 895358  
3. 873389 4. 37553 4. 154837 3. 284543 3. 67701 5. 093371 3. 915002 2. 518498 3. 560542  
2. 896217 1. 16334 1. 347996 4. 045069 1. 151157 5. 295547 2. 161186 0. 812707 1. 434428  
3. 046261 2. 900283 3. 164597 3. 046261 3. 143017 3. 38874 4. 273978 2. 943873 3. 81131  
4. 42519 4. 453243 3. 912745 4. 221713 4. 438006 4. 49371 3. 925693 3. 113594 3. 470303

2.400024 2.079926 2.9979 2.774866 2.507732 2.473597 2.632784 2.815611 2.512112  
3.406195 1.96084 3.121711 1.586957 3.894287 3.54812 4.262211 4.038871 2.392929  
4.702468 4.420145 4.565932 3.468956 3.87829 4.654329 5.582577 6.383767 5.240136  
2.868684 2.558358 3.498915 3.342528 3.214975 2.616518 2.498089 3.469449 3.771199  
7.850411 8.016311 8.015668 7.759966 8.013688 7.070376 7.730835 7.407348 7.478808  
5.807555 5.435608 6.029513 5.498571 5.886091 4.565321 6.141754 5.354654 5.320953  
4.348258 4.772715 4.299435 3.04358 2.104431 1.878109 3.052488 3.997661 3.484668  
0.971019 1.027636 0.99981 4.171802 0.921014 1.295544 1.208935 0.658534 1.824163  
4.211224 4.263882 3.754973 3.921132 3.234318 4.014341 2.937228 3.679577 3.116912  
4.71494 3.957805 3.823315 4.311214 4.254086 3.962524 4.266448 4.120868 4.20753  
1.837813 1.55722 1.522448 1.52821 1.703685 2.01296 1.905022 2.95412 1.474008  
1.389198 2.202033 1.594546 1.484363 1.392714 1.715729 1.449062 1.595553 1.927756  
6.644479 4.725347 5.112544 5.042096 5.571848 4.68668 5.359954 5.019221 5.010961  
1.541585 2.414202 1.566061 3.105151 2.55613 2.578447 1.448004 2.128343 1.82409  
3.956497 3.890902 3.10642 3.06836 2.910143 2.30036 2.475601 2.404657 3.626464  
3.437502 3.650725 3.404051 4.222774 4.113403 4.759722 4.319966 4.778304 5.185614  
3.049635 2.914659 3.278442 2.419036 2.711082 3.100133 2.218293 2.783763 2.985422  
3.012592 3.791501 3.309826 4.985265 4.264939 3.572689 1.58807 2.280818 2.11381  
2.581259 2.6144 2.730775 2.643381 2.66954 2.774852 2.25796 2.478455 2.679589  
2.923228 6.389711 2.931253 1.986098 5.559546 1.683564 2.421986 1.69979 1.691123  
3.743441 3.544757 2.831911 2.816627 3.854269 4.221038 3.499684 3.872939 3.474499  
1.294452 1.394529 1.312243 2.210681 2.392538 1.723714 1.845814 1.805925 1.857917  
6.073955 6.81236 6.652977 6.110826 6.45574 7.038097 6.903325 5.957213 6.317265  
4.377712 3.784479 4.557965 5.148902 4.459308 4.118595 3.980816 5.173091 5.131388  
6.029848 4.63698 5.653078 5.4799 4.594808 6.331944 7.125029 6.939238 7.590852  
5.734945 6.628098 5.907537 6.457599 6.458492 5.933715 6.536635 6.992884 6.556542  
1.788236 2.098545 2.239405 1.980263 2.124483 1.726141 2.147956 2.419747 2.110809  
4.631208 3.46333 4.064913 4.190647 4.371699 5.348924 5.898258 4.376041 5.418652  
4.726462 4.906914 4.451356 5.329291 4.312844 5.322889 4.731678 4.660369 4.941497  
3.040181 1.835419 2.860944 2.250868 3.222794 1.899376 1.748394 2.537285 2.133136  
4.762467 1.959054 3.622508 4.567883 5.390815 4.743777 4.106561 5.166839 4.705212  
7.794793 8.038855 7.164016 7.360264 7.727495 7.288626 7.728784 7.750226 7.170665  
6.702121 6.780224 6.015882 6.144398 6.5428 6.978759 6.949007 7.35601 6.770638  
1.732421 1.603605 1.966301 2.588039 1.487566 1.868491 2.427651 2.56479 1.98204  
2.951845 2.3118 2.209736 3.2858 4.237028 4.159773 5.127705 3.785246 3.759965  
4.55541 4.175844 3.455918 4.03665 4.334476 4.722467 3.89591 4.876236 3.984612  
3.534572 4.86163 5.076165 3.800444 4.491654 4.462515 4.168468 3.939064 3.818337  
6.495549 5.84036 6.294767 6.369892 5.578075 5.331758 6.023613 5.268408 6.285712  
8.017304 7.612644 7.710676 7.345371 8.0048 7.715193 7.291325 6.917273 6.842082  
4.09971 4.296686 4.24333 5.146252 4.215281 4.658646 4.985126 4.569508 4.80739  
5.944041 6.057322 6.241258 6.621234 6.897037 6.606815 6.959327 7.083653 6.488303  
3.732577 4.204883 3.46707 2.9053 3.133447 3.492007 3.856996 2.729512 2.682363  
1.332714 1.409896 1.746259 2.146726 1.287175 4.159466 1.350278 1.047583 1.436552  
2.707613 2.672974 2.572674 2.793819 3.03512 3.367048 2.347937 3.093078 3.206193  
1.893154 1.465247 0.918185 1.573155 2.302853 1.183113 1.706012 1.051226 1.160922  
1.443049 1.610053 1.23726 1.541532 1.306192 1.428372 1.237966 1.19969 0.916617  
4.817777 4.897291 5.872176 4.174177 4.290427 6.086217 5.091172 4.180992 5.519656  
1.463196 1.372037 1.045929 1.58886 1.252663 1.392661 1.180971 1.435497 1.837473  
5.932481 6.553462 6.223217 6.063265 5.923459 6.095243 6.612128 6.282305 5.874767  
3.095438 3.580491 2.943298 3.653465 2.990666 5.375609 2.66583 2.795691 2.097046  
4.257721 3.311975 4.318873 4.229221 4.37408 2.45569 4.786911 5.208366 3.553253

10. 23432 8. 866868 9. 360525 9. 500223 8. 611928 8. 454866 9. 410904 7. 615012 6. 435228  
2. 526183 1. 799821 3. 002976 1. 809945 1. 844924 2. 459567 1. 967455 1. 994949 1. 765234  
1. 751851 1. 639131 1. 794722 2. 38782 1. 391925 2. 366576 1. 796196 2. 190453 1. 385886  
4. 459861 5. 539603 5. 156144 4. 193369 6. 464204 7. 606217 5. 775453 4. 495532 5. 443987  
3. 727168 3. 190484 3. 685318 3. 858546 2. 108302 4. 145214 3. 761654 2. 244683 2. 078295  
6. 400153 7. 122535 7. 178715 7. 429339 6. 739145 7. 846282 7. 629748 7. 654774 7. 178453  
5. 720249 6. 078215 6. 373378 5. 991223 5. 929337 7. 001661 6. 011844 6. 325716 5. 974466  
2. 796569 3. 398993 3. 06329 3. 353258 2. 666453 2. 929088 3. 955517 3. 056357 3. 660398  
4. 930725 2. 252537 1. 97564 3. 458819 2. 649627 3. 837511 3. 725425 0. 604633 2. 910135  
6. 155922 6. 568225 6. 681181 6. 885823 7. 115402 6. 295437 7. 277547 6. 026629 6. 563092  
6. 35605 6. 787013 6. 817945 6. 797879 6. 631969 6. 246964 6. 927335 6. 204197 6. 226435  
2. 09013 2. 704001 2. 564843 2. 298999 2. 099665 1. 915333 2. 071342 2. 991097 2. 715013  
0. 87271 1. 089157 1. 543338 1. 092179 0. 923506 3. 036844 2. 853407 3. 115066 0. 646489  
1. 166707 0. 993928 2. 550303 1. 14511 1. 880037 2. 039134 2. 024912 3. 859081 2. 051898  
6. 447675 4. 989376 5. 589982 4. 998428 5. 98434 5. 450476 5. 34173 6. 306854 7. 338113  
1. 15066 0. 694971 0. 94187 1. 778616 1. 301861 1. 864418 0. 951144 1. 314423 1. 747316  
1. 469446 1. 535053 1. 14995 2. 071546 1. 120464 1. 502618 1. 42702 1. 474489 1. 61205  
4. 306978 4. 22668 4. 100094 3. 955894 5. 320411 5. 650107 5. 643055 5. 204663 5. 38046  
5. 813916 6. 836373 6. 962666 6. 548351 6. 994187 6. 664246 7. 302178 6. 647372 6. 122858  
5. 527987 7. 111739 6. 964094 6. 827758 7. 121967 7. 204142 6. 422092 5. 855105 5. 84573  
7. 801638 7. 622062 7. 377506 7. 986806 6. 963051 7. 850912 7. 445713 7. 619772 7. 413541  
3. 264415 4. 937751 3. 978942 5. 114336 5. 405071 6. 183162 5. 342943 4. 280003 6. 651836  
2. 183268 1. 283402 2. 463011 2. 915524 1. 3554 1. 786057 1. 179842 3. 0601 2. 439889  
1. 906171 2. 351041 2. 380415 2. 626565 2. 834612 2. 696634 2. 510495 3. 020023 2. 168078  
2. 975285 1. 726069 1. 481943 1. 765553 3. 886982 1. 850086 1. 519071 2. 007515 1. 797704  
3. 321304 3. 058329 3. 42526 4. 177214 3. 671031 3. 550244 2. 698534 3. 184676 3. 362667  
1. 059414 0. 838661 1. 12417 1. 129263 1. 118138 1. 45286 1. 465106 1. 294383 1. 661325  
2. 905954 3. 090501 2. 553096 3. 693019 2. 538942 2. 908852 2. 731803 2. 822346 2. 927919  
4. 7481 3. 435355 4. 865806 4. 050566 4. 701698 5. 583536 5. 225484 4. 897534 4. 501192  
6. 98187 5. 320483 5. 582359 6. 282383 6. 057881 7. 497055 5. 749948 5. 433058 5. 715198  
1. 731012 2. 4522 2. 210366 1. 551582 2. 079856 1. 928269 1. 833005 2. 213421 2. 033425  
2. 250183 1. 943958 1. 982845 2. 045287 2. 250707 2. 457109 2. 070582 2. 636777 2. 491967  
4. 215023 3. 743248 3. 805036 3. 621837 4. 715133 5. 160122 4. 525379 4. 611122 5. 072106  
2. 422625 1. 680381 2. 013069 1. 513521 1. 199781 2. 427561 2. 027589 1. 71861 1. 293212  
4. 619062 4. 024434 4. 600626 4. 533519 4. 82123 6. 271986 5. 484688 5. 083044 5. 708175  
6. 833904 7. 877912 7. 527398 7. 935365 8. 077985 7. 425345 7. 836675 7. 787265 7. 560689  
1. 90799 1. 236694 1. 48124 1. 617049 1. 650201 1. 329769 1. 912079 1. 722003 1. 483074  
4. 791291 4. 488278 4. 393626 5. 113922 4. 591008 4. 876736 5. 127785 5. 180466 4. 684072  
3. 583386 3. 303154 4. 418339 4. 884118 3. 759066 3. 779657 3. 535622 3. 147447 3. 551826  
1. 51298 1. 462268 1. 167375 1. 719222 1. 58154 1. 6966 1. 138229 0. 935749 1. 219495  
1. 036254 1. 573045 2. 212555 1. 880883 1. 142667 2. 371257 1. 905889 1. 575615 1. 837621  
1. 650141 1. 019586 1. 12781 2. 16606 1. 04789 0. 887358 0. 905997 1. 012122 1. 746576  
2. 470121 3. 696506 2. 125097 1. 79671 2. 674509 2. 591498 2. 986284 2. 894353 2. 756202  
3. 393047 4. 19351 2. 545455 2. 60472 2. 217537 2. 789487 1. 847815 1. 921257 2. 812157  
2. 391513 1. 810123 1. 743016 1. 956884 1. 753584 1. 816322 1. 549204 1. 614496 1. 328054  
5. 417223 5. 372906 5. 148881 5. 887871 5. 45448 5. 814526 5. 409212 6. 005436 5. 857585  
7. 580588 8. 228807 8. 417743 8. 010079 7. 832961 7. 728035 8. 174503 7. 848454 7. 924492  
3. 424349 2. 954336 4. 152093 2. 287636 3. 655172 4. 336193 2. 9435 3. 462272 4. 310025  
5. 296225 4. 778157 4. 708054 5. 017928 4. 761402 5. 072306 5. 349084 5. 302727 5. 280993  
2. 674148 2. 298062 1. 778317 1. 664964 1. 994466 3. 791852 1. 538214 2. 032529 2. 091194  
3. 024653 3. 235292 2. 901627 5. 388484 3. 660649 2. 685388 4. 567673 5. 404028 5. 353651



6. 475748 6. 805689 6. 917764 6. 977935 7. 125759 7. 116262 7. 669704 7. 613466 7. 343412  
2. 895981 2. 56122 4. 448663 3. 628514 3. 897171 3. 504218 3. 340122 3. 393294 2. 643351  
6. 754061 6. 819327 6. 826041 6. 993625 7. 036295 6. 642267 6. 768196 6. 325081 6. 538783  
5. 080887 5. 278298 3. 948574 5. 334839 3. 800316 4. 109087 4. 494391 4. 221759 3. 806373  
6. 084686 6. 283084 6. 811838 4. 769708 6. 40841 6. 467291 6. 736023 7. 235438 5. 809062  
8. 217735 7. 361985 8. 114216 8. 098245 8. 173538 8. 721911 6. 869752 8. 168586 8. 216529  
6. 326919 6. 943853 7. 54211 6. 973095 8. 276974 7. 758859 6. 49007 6. 738006 7. 386734  
3. 271378 3. 410405 2. 941236 3. 168951 2. 80686 2. 964303 3. 31177 3. 225405 2. 609854  
6. 913984 5. 962064 6. 467401 7. 272369 6. 829482 7. 255965 6. 518359 6. 480184 6. 365717  
6. 589221 6. 462806 6. 180956 6. 337241 6. 609788 6. 446712 6. 281475 6. 95342 6. 63623  
4. 600763 4. 055856 4. 820342 4. 861931 3. 786734 5. 166712 5. 254623 3. 238771 4. 748742  
5. 175399 6. 200428 6. 032566 5. 647907 5. 550573 5. 53566 6. 477859 6. 125634 6. 166452  
1. 942108 1. 088992 1. 059566 1. 716372 1. 19471 2. 049284 2. 305723 2. 173122 1. 776413  
2. 328498 2. 580893 1. 556799 1. 085113 1. 555037 1. 428478 1. 821813 2. 122194 1. 23284  
4. 947827 3. 014708 4. 521856 4. 31417 4. 701456 4. 347948 3. 910747 4. 51036 4. 246288  
1. 036518 1. 48595 1. 549333 1. 172811 1. 436015 1. 133035 1. 359118 1. 496913 1. 134727  
1. 357365 1. 61291 1. 386348 1. 848431 1. 560415 1. 238466 1. 02689 0. 823796 1. 138656  
1. 369614 2. 499329 1. 404609 1. 301068 1. 762822 1. 789927 1. 826635 1. 52726 1. 961543  
2. 103516 1. 523667 1. 014713 1. 906385 1. 549119 1. 196596 1. 250836 1. 669335 1. 152186  
3. 447327 2. 624984 2. 87637 5. 278457 4. 265901 4. 793311 3. 280802 3. 926206 3. 763583  
1. 422143 1. 711592 1. 659182 1. 43484 2. 537771 0. 787984 2. 028051 1. 848897 1. 107475  
1. 970894 1. 257347 1. 667782 1. 139453 1. 574715 1. 663988 1. 784136 1. 703973 1. 765485  
2. 862435 1. 765766 3. 264099 3. 306658 3. 181264 2. 627479 3. 786195 1. 919239 1. 639191  
2. 056184 2. 14094 1. 790118 1. 886951 1. 813011 2. 071515 1. 778828 1. 941034 1. 95694  
6. 640311 6. 247726 6. 068407 6. 358795 6. 944643 7. 35016 6. 166323 6. 28694 6. 802522  
2. 393983 2. 824944 2. 903812 3. 399186 2. 090097 3. 072062 2. 84629 1. 620269 2. 283977  
1. 920978 1. 868003 1. 793408 1. 699666 2. 259911 1. 784106 1. 762147 2. 256752 1. 451089  
9. 489433 10. 26077 10. 3699 9. 963555 10. 52439 6. 189237 10. 45747 10. 53193 10. 06857  
6. 729609 7. 743704 7. 512218 6. 648411 7. 318034 6. 963516 7. 114439 7. 772325 7. 375734  
1. 076038 3. 355162 1. 595919 1. 517733 2. 85059 1. 830912 1. 300114 0. 912963 3. 397962  
3. 823319 3. 666233 1. 969459 3. 053436 3. 108818 2. 782052 1. 884961 1. 770644 2. 174098  
1. 997931 2. 948155 2. 389465 2. 11956 2. 163539 2. 758692 1. 724303 2. 855545 2. 090288  
5. 206263 4. 074629 5. 567671 4. 132833 4. 777018 4. 675741 5. 299248 4. 785413 5. 116332  
5. 489778 6. 629066 6. 164747 6. 58851 6. 441629 5. 143562 6. 553089 5. 457916 6. 342319  
1. 797878 2. 021295 1. 586589 3. 101529 2. 640467 2. 726536 2. 628805 1. 930554 2. 682301  
1. 207986 1. 325677 1. 675952 1. 567924 1. 078425 1. 190457 1. 110726 1. 203704 1. 054776  
3. 212626 2. 203208 1. 249642 0. 96864 0. 910786 1. 784794 1. 096784 1. 484343 1. 901026  
2. 591038 2. 886548 2. 129748 3. 714597 3. 917192 2. 501414 2. 271336 3. 821876 3. 048708  
0. 79494 1. 92217 0. 95262 0. 859748 0. 947174 0. 83705 0. 546841 1. 044015 0. 807492  
1. 874359 2. 300997 1. 412876 1. 502525 1. 91531 1. 7785 2. 240279 1. 984481 1. 570185  
6. 507776 6. 396044 5. 92882 5. 048502 5. 990726 5. 742292 6. 864766 5. 660839 5. 935079  
1. 263927 2. 467387 1. 234794 1. 230617 0. 726278 1. 441729 1. 024306 0. 906615 0. 995846  
2. 967185 2. 083888 2. 290471 1. 749193 2. 331987 2. 701673 2. 398847 2. 379724 2. 289505  
7. 234001 7. 404322 6. 948825 7. 312938 7. 350842 7. 885419 7. 866108 7. 509858 7. 668244  
0. 867726 0. 973492 0. 915762 0. 92548 0. 790972 1. 219948 0. 741771 1. 375793 0. 548064  
2. 482404 1. 322099 1. 662407 2. 255873 1. 445279 1. 683004 2. 171025 2. 460078 2. 396103  
1. 302872 0. 975113 1. 409562 1. 780311 0. 751613 1. 187973 1. 355998 1. 987094 1. 841036  
8. 603406 8. 8948 8. 438263 8. 418454 8. 335672 8. 749053 8. 38367 8. 037705 8. 251521  
2. 039231 2. 788037 1. 457539 1. 951802 1. 935736 1. 939465 1. 595047 3. 30126 1. 513548  
1. 027939 1. 460047 1. 21014 1. 185226 0. 770686 1. 38662 0. 675472 1. 083744 0. 68902  
4. 671703 4. 573656 5. 15562 4. 962866 5. 4443 4. 738385 4. 973248 5. 282933 4. 702235

1. 277068 1. 519324 1. 284736 1. 75209 1. 514948 2. 136685 1. 309312 2. 144629 1. 854376  
1. 70278 1. 826231 0. 859368 1. 709914 1. 106854 0. 849108 1. 126992 1. 778869 1. 728454  
1. 26693 1. 759213 1. 326157 1. 945579 0. 955216 1. 526409 1. 67435 1. 999127 1. 343036  
1. 991107 1. 837519 2. 348034 1. 850398 1. 636715 1. 760418 1. 838011 1. 782332 2. 632394  
1. 541079 1. 752432 1. 64935 2. 290493 1. 58704 1. 382037 1. 658375 1. 326528 1. 598749  
3. 438897 2. 210331 2. 500567 2. 456552 3. 431639 2. 511747 2. 774494 2. 505809 3. 000989  
6. 063033 5. 82146 6. 173399 6. 611098 5. 614012 6. 423783 6. 229019 7. 488955 7. 17929  
1. 177062 1. 87574 1. 566024 2. 062233 1. 632944 2. 412863 1. 454891 1. 358731 1. 620088  
1. 063953 0. 841927 2. 486924 1. 474577 1. 412116 1. 020634 0. 990403 1. 474749 1. 662242  
2. 615363 2. 4392 2. 025666 2. 528545 1. 696822 2. 125451 2. 17093 2. 493488 2. 744219  
1. 28627 1. 112016 1. 359657 1. 182081 0. 721736 0. 97511 1. 500617 1. 288398 1. 151423  
1. 143881 1. 290985 1. 055663 1. 353552 1. 588355 1. 036071 1. 366616 1. 022098 1. 10603  
1. 199894 2. 296207 1. 077471 2. 076452 2. 552732 1. 341421 2. 470882 1. 819434 1. 343324  
1. 189567 1. 084223 1. 320482 0. 914069 1. 40815 1. 676691 1. 396232 1. 244703 1. 121739  
1. 500319 1. 169511 1. 087274 1. 419559 0. 900638 1. 446326 1. 688135 1. 180556 2. 416749  
1. 544527 1. 002303 0. 664727 0. 997349 2. 131195 2. 453003 0. 973792 1. 625159 1. 592516  
4. 400267 3. 146505 3. 154669 3. 72353 2. 223981 4. 337781 3. 951022 2. 677758 4. 73487  
1. 745687 4. 904381 1. 941376 4. 412909 0. 92157 3. 768638 3. 047609 5. 364119 5. 343817  
1. 726249 1. 816106 1. 815712 2. 219033 3. 109658 1. 57914 2. 009516 2. 784307 1. 474083  
2. 101891 2. 864885 2. 675525 3. 040892 2. 881671 2. 921679 2. 343708 2. 382007 2. 832161  
6. 012317 4. 583063 5. 839995 3. 962135 3. 364417 4. 649193 5. 400062 4. 66431 4. 786455  
1. 902811 1. 308695 0. 856554 1. 108275 0. 913576 1. 451925 1. 167986 1. 81255 1. 13957  
2. 17144 3. 225705 3. 417496 2. 705939 2. 248358 2. 480008 1. 883312 2. 012128 2. 030038  
1. 692964 1. 129802 0. 753051 1. 688602 1. 368522 0. 937077 1. 136878 1. 303321 1. 046467  
1. 432788 2. 179647 2. 634881 2. 655629 2. 100895 2. 195015 2. 105608 2. 229211 2. 332139  
1. 097681 1. 495352 1. 470515 1. 954714 1. 872747 1. 734353 1. 828178 1. 243322 1. 533289  
4. 385494 3. 656418 4. 272324 3. 829582 3. 63259 4. 426347 4. 206574 3. 638693 3. 64166  
1. 458064 2. 081561 1. 99025 1. 561054 1. 753621 1. 746001 1. 87083 2. 215455 1. 438997  
1. 143991 1. 148421 0. 919186 0. 455316 4. 168598 2. 154128 1. 188991 1. 599551 0. 733687  
0. 869658 2. 465614 1. 107246 1. 391195 1. 064838 1. 138992 1. 278042 1. 878466 2. 113562  
6. 791643 7. 498504 6. 841791 6. 5975 6. 754197 6. 836812 7. 553409 7. 146879 7. 266634  
0. 934871 1. 588237 0. 969464 1. 222276 1. 042214 1. 32195 1. 118368 1. 205682 1. 314803  
3. 494456 5. 014957 2. 949639 3. 288025 3. 125403 4. 068536 4. 077005 4. 980711 2. 773664  
2. 529298 3. 953368 3. 160864 4. 817612 3. 84786 5. 518171 3. 621654 2. 925134 3. 75147  
5. 136793 4. 914391 5. 656251 5. 028944 5. 271472 4. 911446 5. 343627 4. 665357 4. 853405  
6. 103457 5. 030693 5. 992504 4. 159728 4. 831765 5. 088638 4. 632063 4. 178432 3. 357034  
1. 259112 1. 82489 2. 539367 1. 907512 1. 483576 2. 17188 2. 078563 2. 004476 2. 319874  
2. 385014 1. 800765 3. 485117 1. 88816 1. 556824 6. 69269 2. 290945 1. 399643 1. 559024  
1. 541851 0. 449261 4. 515084 0. 544198 1. 225333 0. 713192 0. 500857 1. 702595 1. 109183  
1. 598517 1. 383553 1. 210558 1. 849227 1. 348335 1. 217222 1. 456955 1. 363151 1. 641273  
5. 469968 3. 934311 3. 835049 3. 733531 3. 402036 3. 834834 3. 856368 3. 969858 4. 184457  
8. 214087 8. 096117 5. 639253 8. 335375 7. 277156 8. 069646 7. 230133 7. 211631 6. 486621  
1. 911789 1. 963447 1. 876108 1. 911057 1. 45983 2. 568486 2. 1806 1. 911463 1. 741444  
4. 719915 5. 52009 3. 786447 4. 692263 4. 695207 4. 559658 1. 407856 1. 79028 2. 579645  
7. 648659 6. 811598 6. 734881 7. 638869 2. 151371 6. 418326 5. 12039 4. 154541 2. 817454  
4. 855026 2. 871903 5. 427512 3. 467762 4. 143054 4. 917445 5. 784953 1. 552028 1. 897925  
1. 219529 4. 927194 4. 69404 1. 633969 1. 662089 1. 722789 1. 292005 1. 690853 1. 632254  
5. 616218 5. 919221 5. 32848 6. 713369 5. 654189 2. 979455 2. 651468 3. 867513 2. 171492  
4. 583951 2. 591419 4. 244373 2. 14133 3. 774379 1. 478637 1. 438776 3. 312863 1. 541113  
2. 397719 2. 139803 1. 393364 1. 864669 1. 54066 1. 527853 2. 020542 1. 752548 1. 180396  
5. 678361 4. 973529 5. 940148 6. 298036 3. 39716 4. 476049 3. 824977 4. 318997 5. 602087

4. 087673 2. 877652 4. 365352 4. 38565 3. 642093 3. 420919 2. 226583 2. 642117 1. 416913  
1. 047543 1. 14808 0. 93183 1. 100364 0. 955485 1. 014908 1. 075231 1. 711594 1. 08473  
6. 325491 6. 138084 6. 492628 6. 782285 6. 67504 6. 52193 6. 59059 7. 026371 6. 746782  
6. 987077 5. 635572 4. 81534 7. 116746 4. 004566 4. 937935 5. 101331 4. 301223 5. 696842  
5. 319005 3. 757271 2. 694796 3. 186751 1. 929223 1. 266801 1. 551231 1. 703684 1. 378404  
3. 302548 2. 910796 5. 416998 1. 966663 5. 068554 1. 943289 2. 011848 2. 384085 2. 348196  
4. 623974 4. 727865 6. 251951 3. 40102 4. 614239 4. 075105 2. 142661 4. 291484 5. 140892  
4. 167011 1. 006354 4. 250335 4. 683887 2. 158394 2. 809995 2. 030688 1. 982983 2. 563342  
5. 242209 5. 824845 5. 723438 6. 312439 4. 643764 1. 54638 1. 639211 3. 883137 2. 32886  
3. 184487 4. 238923 5. 078374 4. 397507 1. 589614 1. 691882 1. 822759 1. 637629 2. 407049  
1. 110099 1. 274443 1. 243716 1. 848781 4. 66335 1. 138474 0. 581687 0. 86623 0. 926533  
4. 157033 1. 311389 7. 366182 2. 272234 4. 520286 0. 969532 1. 034925 1. 753815 1. 019989  
1. 513508 1. 629181 3. 490649 6. 21359 4. 15713 1. 314372 0. 704237 0. 498722 1. 23106  
7. 132248 2. 868545 3. 484853 6. 096509 3. 372071 2. 946822 2. 487784 3. 680324 4. 338462  
1. 576124 1. 146238 1. 134305 1. 066608 1. 461836 2. 060167 1. 680943 1. 345232 2. 742767  
1. 264731 0. 997117 1. 550457 4. 479845 2. 701642 1. 384861 0. 857699 1. 318572 1. 127535  
4. 881346 5. 120474 5. 220932 5. 19751 5. 802686 5. 158431 4. 520503 4. 438377 4. 493211  
4. 761934 4. 27507 5. 17914 4. 976734 1. 642645 1. 77187 1. 928906 2. 57578 2. 937144  
2. 036181 2. 789915 3. 258474 2. 283689 1. 948779 1. 841003 2. 001686 4. 719381 1. 468419  
7. 248398 6. 607513 7. 250365 6. 437213 5. 668302 6. 059637 5. 521037 5. 071405 5. 555251  
7. 047147 7. 598663 7. 484508 7. 756782 7. 253372 7. 099057 7. 683301 7. 455715 7. 720619  
3. 757128 4. 366463 2. 47497 4. 030377 1. 168581 2. 426167 2. 241222 2. 150523 1. 694478  
9. 35984 8. 542525 8. 484806 9. 449022 3. 44171 9. 912362 7. 69138 7. 853928 8. 381719  
6. 855691 7. 128408 5. 885066 6. 258153 6. 349863 5. 98594 2. 1442 3. 692255 4. 429185  
3. 566885 1. 895384 3. 418567 3. 453728 3. 941761 1. 753525 0. 93525 1. 208835 0. 657708  
3. 948919 5. 725743 5. 699534 1. 438028 3. 006932 0. 955008 0. 956259 0. 945729 1. 259915  
1. 150332 2. 253755 1. 287285 1. 498176 0. 771341 0. 760422 1. 346709 0. 955573 0. 714628  
4. 562766 3. 688571 2. 614272 3. 033456 2. 132998 3. 574591 2. 491964 3. 154139 3. 397589  
1. 658399 3. 77712 1. 742629 1. 665926 5. 764362 1. 205246 1. 071838 1. 545006 2. 457481  
5. 006995 2. 135011 2. 523266 1. 210584 2. 35596 4. 363061 1. 452017 1. 167362 1. 984844  
3. 798325 0. 722603 2. 227219 5. 030317 0. 561387 2. 114328 1. 516185 1. 608942 2. 033492  
1. 642862 1. 711637 1. 204546 1. 523067 1. 557649 2. 166288 3. 744558 1. 319195 3. 163622  
3. 354746 2. 42547 1. 730488 1. 129728 2. 042052 1. 804867 1. 556685 1. 382885 1. 276655  
2. 985616 4. 162034 1. 723571 1. 92687 2. 093046 0. 723586 1. 024915 2. 387608 2. 45472  
1. 421831 2. 927365 0. 837849 1. 259939 0. 581978 1. 892078 0. 811263 1. 487421 0. 929118  
2. 507076 1. 306478 1. 481596 1. 374568 2. 366872 1. 000959 0. 975451 1. 818092 1. 534309  
0. 961634 4. 177724 2. 888929 1. 358029 3. 957177 1. 547621 1. 952562 2. 393577 2. 002048  
1. 30293 0. 834763 2. 795795 1. 854852 1. 740371 2. 022383 1. 277628 2. 353159 2. 133925  
4. 58963 4. 105755 3. 61714 3. 836228 4. 083592 6. 580472 7. 282537 3. 032506 5. 588539  
5. 827725 3. 014157 5. 831823 6. 325763 6. 055903 3. 421836 2. 204415 3. 935823 3. 581885  
0. 96943 1. 698484 1. 4209 1. 24016 1. 940486 1. 296809 1. 091242 1. 604032 1. 048258  
3. 278628 2. 264095 2. 449804 6. 647985 1. 792817 1. 896156 2. 059296 2. 051959 1. 781833  
1. 345717 1. 995194 2. 32161 2. 762817 0. 955836 1. 227295 1. 258085 1. 756091 1. 184543  
5. 023886 4. 577562 5. 509334 3. 356306 3. 920481 1. 970573 2. 401098 1. 833631 1. 929496  
7. 582298 7. 167604 6. 096648 7. 28306 4. 906208 5. 70622 4. 248559 5. 709214 6. 105285  
1. 278003 1. 227411 2. 2402 2. 585183 1. 018218 1. 999802 1. 282561 1. 263505 2. 144625  
6. 264186 4. 211709 4. 138963 4. 027969 2. 990693 3. 141439 4. 961115 3. 137629 2. 836588  
5. 349014 4. 444734 4. 355262 5. 909025 4. 118993 3. 814412 3. 42425 3. 797175 3. 365168  
6. 660255 7. 761781 7. 099193 7. 490497 7. 440229 8. 122643 7. 445233 7. 426732 7. 180325  
3. 636769 3. 361378 3. 299221 3. 059577 4. 016078 4. 553663 3. 272032 4. 2993 3. 670474  
6. 151807 5. 057248 3. 756125 1. 032142 0. 917505 5. 49302 5. 029472 1. 84083 0. 866611

2.135638 1.929046 1.860246 2.308183 2.246793 2.279907 2.216709 2.672961 2.085085  
2.477184 3.51259 3.917181 3.976525 4.193529 5.361492 3.796803 3.439768 4.187457  
0.917453 1.386179 0.99751 2.576396 1.501002 2.125411 2.439256 1.616109 2.800696  
1.842122 2.113779 1.561393 1.546736 2.013127 1.673853 2.475626 2.181928 1.83871  
3.000565 3.278179 2.015255 3.497876 3.560038 2.487264 3.008445 3.682124 3.142002  
3.733648 4.13589 3.950481 4.931262 4.142498 2.451773 3.425261 3.515605 4.01256  
2.266056 1.948617 2.389898 2.942637 2.662475 2.924207 1.710355 2.596632 2.287013  
3.042698 1.869825 2.239082 2.19259 3.577586 2.206733 3.287733 3.415851 3.448392  
2.060364 1.87005 2.330972 1.299506 1.806967 1.34071 2.507167 1.617519 1.554303  
1.198062 1.016659 1.128796 1.158985 1.008418 1.54026 0.804541 1.36669 1.186112  
1.985462 1.092617 1.716116 1.410968 1.277169 1.622012 1.327051 1.097776 3.398296  
5.043656 5.631463 5.788002 5.140256 4.715166 3.709613 5.92635 5.657442 5.216503  
4.898667 5.828367 4.262456 5.648113 5.904569 4.905648 6.466688 4.1178 4.87944  
5.818373 5.720788 5.593819 4.885873 5.769466 4.960248 4.837682 4.887394 5.360862  
1.711616 2.369087 2.151451 2.33777 1.69631 2.116743 2.247343 2.271876 2.788134  
5.068058 5.338639 5.142899 4.794469 4.855695 4.414175 5.572007 4.669326 4.539436  
2.38978 2.377533 2.002404 2.637136 2.265497 2.590995 2.115367 2.349031 1.588563  
6.353126 5.694092 5.321523 5.173091 5.145659 3.196934 4.100703 3.229789 4.222017  
1.224399 4.009276 2.657735 2.507249 4.066085 4.217793 3.388511 2.181572 3.103113  
7.708981 8.354459 8.149776 8.19449 8.327999 6.016551 8.60802 8.081399 8.415439  
3.835297 4.441759 4.744804 4.356802 4.204088 4.10732 4.459087 3.832182 3.968674  
7.422857 7.55388 6.872028 7.044081 7.432969 7.630224 7.157397 7.512627 7.529794  
6.200262 6.08396 5.783719 5.046102 5.573001 6.048817 6.079175 5.711194 6.603161  
8.136977 7.395778 7.759703 7.815364 7.565012 8.259012 8.257874 8.899904 8.580068  
5.874465 3.959989 5.334973 5.895014 4.87142 5.642428 4.81649 5.841604 5.08599  
5.035016 3.632818 3.483275 4.26088 4.508508 5.865588 3.712668 3.676496 3.306467  
1.389792 1.921959 1.558963 1.556805 1.083974 1.360923 1.316923 1.620565 1.088  
8.011301 6.914938 7.037616 7.203857 6.969624 7.315161 5.948573 5.782845 6.803658  
1.538604 1.638847 1.631937 1.771937 2.247023 1.534504 1.506442 1.798366 1.718429  
4.684338 4.438236 6.12337 6.035612 5.877443 5.75001 4.787988 4.091014 3.469186  
6.05903 6.658513 5.854321 5.544313 6.638918 6.180328 6.307799 5.89654 6.418068  
2.635234 4.054728 2.719161 2.154404 2.569461 1.888005 1.978026 2.038186 2.22453  
3.943861 4.73053 4.954059 5.892784 4.885918 4.692106 5.266239 3.973885 5.286269  
2.236375 2.177693 2.398486 2.422635 1.852183 2.407294 1.835479 2.644574 2.192517  
3.565796 4.456618 3.605425 3.605335 4.442004 2.907392 5.865221 5.389269 4.661604  
4.36966 4.398475 5.45297 5.008798 4.419375 3.179696 4.346278 2.732912 5.08641  
1.526493 2.15582 1.590918 1.777443 1.868139 1.259974 1.372849 2.232391 1.377356  
4.875194 3.633356 4.879691 4.244377 4.957454 4.480477 4.799374 3.789886 4.53167  
4.501406 4.787455 4.771506 4.53263 4.541993 4.281473 4.311661 4.453822 4.355639  
2.737767 1.520467 2.781507 1.549929 3.10017 1.574092 1.736498 1.569128 1.467233  
3.41491 3.854409 3.678016 3.438517 4.258604 2.787062 4.959244 5.63746 5.253229  
7.788764 8.048438 8.336494 7.819417 8.353703 7.690299 8.308202 8.429653 8.609806  
1.529635 1.834507 1.444228 1.629216 1.826386 2.579136 1.474501 1.532122 2.294694  
1.400787 1.126012 1.149948 2.244133 2.301195 1.103084 1.22247 1.29437 2.185932  
6.78692 6.019038 6.922399 6.673509 7.070473 5.950701 7.563044 8.027206 8.160678  
3.893293 4.26165 4.097606 2.668927 5.02997 4.058691 3.760372 3.623182 3.337362  
6.426967 6.556776 6.218199 5.619103 6.091794 6.122034 6.131441 6.573968 6.020146  
2.817208 2.893188 2.19877 1.467529 1.877556 2.648857 1.660403 1.276533 1.725234  
4.520884 4.308317 3.632901 3.281598 2.040724 4.749792 4.1759 3.274333 3.318062  
1.90961 1.442199 1.469524 1.818148 1.301834 1.398085 1.144391 1.646869 1.271075  
2.047197 1.701384 2.573611 2.435568 2.571293 1.73723 2.616265 3.071294 4.597707

3. 029361 2. 694208 3. 812776 3. 772304 3. 893397 3. 588628 2. 962387 3. 363252 3. 951401  
1. 516283 1. 203275 1. 101326 1. 710992 0. 847118 0. 929299 1. 180569 1. 30583 1. 471185  
1. 702966 2. 018607 0. 764935 1. 593445 1. 12538 0. 960647 1. 346163 1. 826811 1. 381688  
3. 778316 3. 990223 3. 322692 4. 152689 3. 192463 5. 308662 3. 936871 3. 391972 3. 167184  
4. 548103 4. 806237 3. 947674 4. 415985 3. 535029 4. 178908 4. 466989 3. 234025 4. 619417  
4. 135335 3. 53053 3. 92785 4. 384279 4. 235605 4. 679958 4. 27762 3. 542297 4. 66673  
7. 002863 6. 711394 6. 653129 7. 034669 7. 148748 7. 63064 7. 276799 6. 682446 7. 296883  
5. 089258 3. 46297 4. 417534 3. 244399 3. 004702 4. 833792 4. 265334 4. 483456 2. 709498  
3. 138249 2. 341013 1. 522381 1. 790932 2. 069378 1. 548346 1. 666032 2. 426543 1. 889239  
3. 105248 2. 721088 3. 618265 3. 412868 2. 945582 5. 644564 3. 169405 4. 776741 3. 113954  
6. 247335 6. 151104 6. 196634 5. 835975 6. 080147 6. 621046 6. 402389 6. 280595 6. 126181  
6. 906189 6. 469478 6. 535966 6. 915839 6. 877715 7. 119378 6. 606764 6. 385028 5. 608845  
8. 391335 8. 41995 8. 386966 8. 00919 7. 901461 8. 494391 8. 061617 7. 986897 7. 924757  
4. 974564 6. 490541 4. 246587 4. 918504 4. 260008 6. 502005 5. 937951 3. 828642 3. 893978  
2. 152363 2. 142499 1. 479596 1. 390978 2. 290811 5. 675563 2. 155925 1. 573441 2. 40454  
7. 454108 7. 794437 6. 835932 6. 054587 6. 338599 6. 914916 7. 477871 7. 804907 7. 504657  
2. 614771 2. 393458 2. 13174 2. 98022 2. 355164 1. 982265 2. 108475 2. 186599 2. 730248  
4. 839773 4. 651446 2. 624582 2. 398519 1. 967178 5. 471281 3. 33895 5. 091165 4. 804093  
2. 477613 3. 218966 3. 043323 3. 464919 2. 886218 3. 043217 2. 766606 3. 093542 3. 516644  
5. 488268 5. 045233 5. 822765 6. 287344 6. 028855 5. 482514 5. 608882 6. 077033 5. 519774  
3. 564232 3. 65612 4. 021667 4. 794577 3. 85417 4. 03465 4. 978194 4. 270608 3. 140059  
2. 861 1. 374103 2. 086933 2. 339229 2. 394997 2. 119848 1. 51991 2. 046598 1. 872667  
3. 450047 3. 289158 3. 503254 3. 348807 4. 389369 2. 312233 2. 816985 2. 720856 3. 504518  
4. 479699 4. 65423 4. 325596 4. 88211 4. 528437 4. 723244 4. 484299 4. 842847 4. 442047  
2. 715347 2. 039309 1. 996541 2. 480447 2. 633279 2. 431293 1. 54728 2. 541704 2. 504332  
8. 722133 8. 548609 8. 792709 8. 22315 8. 357049 8. 905029 8. 339527 8. 123033 8. 539891  
4. 310632 2. 832586 4. 375788 4. 984091 3. 882961 6. 482748 5. 970387 5. 380776 4. 744346  
2. 01584 1. 867955 2. 067666 1. 920632 2. 505123 3. 351712 1. 964481 2. 187996 2. 03935  
2. 168561 1. 891859 1. 350546 2. 770942 2. 397384 1. 9462 2. 370384 1. 885036 1. 575956  
2. 752486 2. 834615 2. 504157 3. 135138 2. 902507 2. 217134 2. 71512 2. 492885 2. 632959  
7. 780548 7. 900829 8. 152567 7. 350679 7. 732116 7. 707781 7. 706466 7. 69728 7. 611096  
4. 789137 4. 777281 4. 623194 4. 75057 4. 092774 3. 578407 3. 58503 5. 587504 3. 967997  
2. 668247 3. 328241 1. 997949 1. 901269 2. 24935 2. 203816 2. 918087 4. 420311 2. 5246  
2. 295452 3. 772783 4. 229625 3. 136558 3. 015795 1. 316192 1. 72506 3. 100208 1. 674687  
2. 002364 2. 368564 1. 907809 2. 062173 1. 894886 1. 629094 1. 806365 2. 17878 2. 138853  
1. 45582 0. 908296 1. 537004 1. 278313 0. 902086 2. 594795 1. 312965 1. 218905 2. 430451  
7. 326698 6. 734563 5. 896634 5. 965064 6. 204264 6. 289759 6. 294904 6. 360243 6. 774276  
6. 672952 6. 892695 6. 822613 6. 961597 6. 67388 6. 829423 6. 864507 6. 90981 6. 670732  
4. 489721 4. 491671 5. 555607 2. 95478 4. 843062 3. 456603 3. 066827 3. 857133 3. 953058  
4. 696388 5. 932546 5. 213861 5. 980753 5. 409195 4. 731358 4. 872209 5. 235364 5. 64347  
3. 933376 3. 901733 4. 508849 3. 518679 3. 865238 3. 168281 3. 575919 3. 489383 4. 082681  
2. 1024 2. 070366 2. 16501 2. 771004 1. 975881 2. 392794 2. 075449 2. 262643 1. 931075  
2. 370924 2. 236382 1. 726869 2. 252618 2. 41372 3. 20846 3. 10346 2. 231382 2. 445887  
7. 9932 8. 732553 8. 311983 8. 20852 8. 589396 6. 839846 9. 285312 8. 811885 8. 875168  
3. 319965 2. 295018 1. 970971 2. 540213 2. 014945 2. 438006 2. 191656 2. 145919 2. 042204  
0. 89354 1. 334879 1. 8123 1. 314964 1. 440895 2. 355825 1. 357854 1. 118439 1. 219456  
3. 489405 3. 26191 3. 898371 3. 386019 3. 994306 3. 132706 3. 834502 4. 159039 3. 893515  
2. 424457 4. 129624 2. 007872 2. 276953 2. 733549 2. 326846 1. 879987 3. 608089 2. 244834  
3. 571117 2. 068024 2. 887875 2. 334315 2. 151272 1. 823346 1. 96507 2. 321681 4. 050818  
8. 45659 8. 57317 8. 617325 7. 924611 8. 593304 7. 911827 8. 241646 8. 460364 8. 393444  
1. 611358 1. 211164 1. 060112 1. 429549 1. 569726 1. 367053 1. 091499 1. 07461 0. 989494

2. 693629 2. 471412 2. 589284 2. 585738 2. 596356 4. 886562 2. 744622 2. 87837 4. 442362  
3. 258387 2. 853793 2. 224924 2. 748634 2. 401796 2. 598809 3. 820352 4. 819568 4. 12459  
1. 363778 1. 368828 1. 183192 1. 863983 0. 898432 1. 92579 0. 995352 1. 598821 1. 071885  
4. 49661 4. 219652 4. 377064 5. 007265 3. 469771 4. 196699 5. 25113 3. 621208 4. 505545  
7. 552704 7. 042458 6. 930304 7. 838531 7. 61079 7. 107656 7. 172451 6. 74003 6. 722089  
1. 647579 1. 64662 2. 041823 2. 411851 2. 604033 2. 029727 1. 781159 1. 751895 2. 32125  
1. 41806 2. 046993 1. 341875 2. 757035 1. 27757 1. 296776 1. 315935 1. 396009 1. 313476  
2. 974599 2. 449523 2. 510661 2. 397196 2. 61733 4. 196478 2. 860709 2. 971796 3. 010773  
1. 313836 1. 308929 1. 253471 1. 444185 1. 395433 1. 410004 1. 634346 1. 537204 1. 895449  
1. 90419 3. 843034 1. 707774 1. 923987 5. 894899 3. 35342 2. 254863 1. 425847 3. 042679  
5. 404399 5. 491517 6. 20467 5. 712887 5. 352742 5. 594888 5. 536767 6. 109906 5. 895996  
2. 007898 1. 662176 2. 640828 1. 660775 2. 116758 2. 037363 2. 61535 3. 850396 2. 706748  
5. 168514 5. 480291 4. 967534 4. 660433 2. 907527 3. 79697 3. 97696 4. 548648 6. 569028  
4. 021621 4. 636091 3. 82603 3. 891712 4. 569062 3. 642333 4. 428234 4. 914262 5. 345243  
3. 091473 1. 845903 1. 817633 1. 89525 1. 497956 1. 973694 1. 653793 1. 657267 1. 600492  
3. 03977 3. 511968 3. 920687 4. 429393 3. 143239 4. 303428 3. 897392 3. 314485 3. 558661  
2. 354115 2. 942057 3. 100473 1. 871658 2. 935187 2. 758814 2. 819374 3. 316123 3. 46925  
5. 388561 4. 178615 5. 718871 4. 86263 5. 067302 3. 820111 4. 087818 4. 1136 3. 703022  
2. 697732 4. 243971 3. 662302 4. 157383 3. 90421 2. 642683 2. 753322 4. 921489 3. 977756  
4. 85625 4. 178436 4. 699394 5. 465047 4. 248517 5. 48366 4. 92632 4. 614581 5. 021793  
2. 193228 2. 820316 3. 115383 1. 66091 1. 378212 3. 864096 1. 558953 2. 619 2. 765396  
3. 936584 2. 802297 3. 579849 2. 936728 3. 90739 4. 155028 3. 88192 4. 000482 4. 143592  
1. 012143 1. 426187 1. 450241 1. 245097 1. 16082 0. 928672 0. 844559 2. 531397 1. 194465  
2. 842631 1. 892315 1. 905847 2. 245074 3. 832245 1. 836995 1. 790453 1. 006497 2. 248594  
4. 806922 6. 435033 6. 186382 6. 451916 5. 833465 6. 229743 5. 728855 7. 071664 5. 906107  
5. 729929 5. 257129 4. 600698 5. 166613 3. 855777 5. 181119 6. 987224 6. 651648 6. 579816  
2. 211846 2. 395882 1. 492483 1. 804935 2. 654082 2. 568412 1. 43266 2. 249214 2. 254183  
2. 46061 2. 988268 2. 311555 3. 186834 2. 835259 2. 974034 2. 5946 2. 119057 1. 963684  
8. 930364 7. 687521 7. 226877 8. 428422 8. 314705 8. 891622 8. 356305 8. 746834 7. 958369  
1. 863456 2. 674482 2. 470909 2. 260555 3. 291326 2. 561362 2. 895688 2. 987788 2. 473198  
6. 840414 6. 216421 6. 727462 4. 871866 7. 167331 6. 60752 5. 500843 6. 946642 6. 615136  
1. 310613 1. 215456 1. 350622 1. 280182 1. 53305 1. 569223 1. 164904 1. 080918 1. 451514  
1. 095346 0. 788202 1. 465837 1. 21718 1. 163488 0. 973196 1. 205718 1. 244497 1. 809012  
1. 899856 2. 632582 1. 683234 2. 467693 2. 433967 2. 093386 1. 583339 1. 904753 2. 660742  
4. 363093 5. 94949 3. 300611 3. 771668 4. 675019 5. 900788 5. 182898 4. 751795 5. 456189  
1. 890391 0. 666938 2. 600107 2. 158215 1. 729404 2. 470015 4. 060975 3. 129754 3. 496156  
1. 439496 1. 343451 1. 852076 1. 868321 2. 010238 2. 074955 1. 081194 1. 576677 2. 108743  
4. 937362 5. 235746 5. 561129 5. 836864 5. 425634 5. 911247 5. 835865 6. 178577 6. 166279  
1. 875572 1. 909983 1. 581838 1. 86955 1. 834931 1. 701515 1. 381294 1. 900829 2. 34855  
2. 55469 2. 454459 1. 733937 1. 248375 2. 474947 1. 386397 1. 302659 1. 531497 1. 940192  
1. 692843 1. 960255 2. 584738 1. 874239 2. 010041 2. 04781 1. 790909 1. 873177 1. 717605  
2. 138048 2. 908451 2. 172929 2. 368338 2. 873496 2. 202061 2. 813879 3. 84704 2. 167403  
1. 815045 1. 27586 1. 546916 1. 065229 1. 248695 1. 249809 1. 369277 1. 532164 1. 142939  
1. 610505 2. 098363 2. 834304 2. 992703 2. 252788 1. 837495 4. 851755 2. 469853 2. 812353  
1. 861795 1. 296042 1. 583563 3. 25768 1. 286737 1. 389512 2. 09856 2. 202625 2. 195586  
5. 769271 5. 10885 4. 448046 6. 28366 4. 650465 5. 223066 4. 252995 6. 433487 6. 8524  
3. 47105 2. 684526 3. 986075 4. 198011 3. 742493 2. 737742 3. 98664 3. 453068 3. 90718  
2. 650415 3. 730735 2. 809645 1. 990747 2. 25561 2. 357381 2. 42518 2. 736068 1. 605647  
2. 050857 1. 871464 2. 189338 2. 119333 2. 111311 2. 316758 2. 63169 2. 250718 2. 674681  
6. 131491 5. 261966 5. 482824 6. 379114 6. 343121 7. 7284 6. 849553 6. 033801 6. 023485  
4. 736651 4. 673693 4. 631343 4. 39879 4. 304912 4. 827931 5. 104724 5. 264708 4. 987049

7. 982503 7. 901886 7. 738993 8. 18325 7. 967363 8. 692859 8. 247539 8. 092827 7. 825612  
1. 942512 2. 63149 2. 11693 2. 769452 1. 750095 2. 596376 1. 898469 2. 222154 1. 974985  
2. 077079 1. 405227 2. 361363 1. 598 2. 454223 1. 755958 1. 421748 2. 395688 2. 925807  
5. 093566 5. 121886 4. 859747 4. 680451 5. 943976 7. 301541 5. 545619 4. 812506 4. 967973  
4. 035105 3. 58419 4. 067809 3. 479581 3. 545869 3. 787447 3. 439583 3. 07511 3. 907469  
7. 279114 6. 987278 6. 645723 6. 712197 7. 09456 6. 114445 7. 04312 6. 827141 6. 989787  
3. 092314 2. 873944 3. 449904 2. 989962 3. 851112 3. 187371 2. 572337 3. 119896 2. 759663  
5. 462946 5. 220756 5. 322224 5. 922679 5. 09686 4. 694451 5. 459857 5. 738276 5. 943615  
1. 379436 2. 393986 1. 86294 2. 777307 2. 079313 2. 208631 2. 39778 1. 938125 3. 404548  
1. 462503 1. 332328 1. 953368 1. 860156 1. 675191 3. 10173 1. 805165 1. 895917 2. 281912  
6. 426528 6. 709048 6. 080658 5. 350459 6. 452918 4. 797624 5. 372346 5. 187897 4. 917426  
7. 04833 6. 082075 6. 234708 6. 572754 6. 165706 7. 053997 7. 792319 8. 690423 8. 679502  
7. 743076 7. 40266 7. 877126 7. 45811 8. 126218 8. 013416 7. 812446 7. 731599 7. 90093  
6. 187798 6. 37006 5. 514118 5. 357044 5. 93043 4. 436172 6. 021663 6. 068697 5. 85014  
4. 231915 4. 10477 4. 686442 4. 380625 3. 73199 4. 292585 5. 052433 5. 211306 4. 929675  
6. 608819 7. 021833 7. 104785 5. 687792 6. 984137 6. 251351 6. 511845 6. 893 7. 179406  
5. 946847 6. 394044 6. 47796 6. 808639 6. 06443 6. 480942 6. 123976 6. 774343 6. 207523  
7. 398145 7. 355166 7. 462615 7. 510523 7. 49083 6. 504902 7. 854799 7. 690563 7. 654854  
6. 418497 7. 276407 6. 806988 7. 126534 7. 281006 7. 160221 6. 678354 7. 111259 6. 811076  
6. 625246 7. 877641 7. 286893 6. 941375 7. 53372 7. 705327 7. 350838 6. 882006 7. 589038  
5. 092828 5. 701102 5. 431471 4. 409354 4. 901503 4. 472622 5. 485432 5. 373951 4. 906793  
4. 408006 3. 457014 3. 256855 4. 613514 5. 166381 4. 659751 6. 40075 6. 038971 6. 751993  
5. 644276 5. 14339 4. 739428 4. 767313 6. 170837 6. 256528 4. 318885 6. 518336 7. 191561  
1. 565302 1. 971252 1. 266455 2. 327238 2. 426918 1. 698962 1. 129735 1. 16192 1. 908509  
5. 551669 5. 431068 5. 856386 4. 740718 5. 443219 5. 187038 6. 346831 6. 067939 5. 889503  
5. 101797 5. 292031 4. 782894 5. 248887 5. 639293 5. 354698 5. 046004 4. 528169 5. 183843  
8. 146285 6. 354367 6. 392088 6. 380529 5. 421508 7. 056622 6. 480534 4. 774432 3. 420206  
1. 314388 1. 039244 2. 451917 1. 97745 1. 225797 1. 210932 2. 695423 1. 877338 2. 079797  
1. 607279 2. 954352 1. 743019 3. 486308 2. 097288 1. 810447 2. 026712 1. 910306 1. 700079  
3. 465463 3. 465498 3. 106891 2. 769211 3. 967918 4. 333083 2. 759708 3. 866981 3. 337432  
1. 321008 1. 552035 2. 067982 2. 071347 1. 483956 2. 182562 1. 185888 1. 718266 2. 159596  
1. 530145 0. 90392 1. 390251 1. 708649 1. 564452 1. 211836 1. 185111 2. 394717 1. 472057  
2. 202993 1. 551807 2. 917521 1. 311143 2. 121354 1. 956734 1. 683506 1. 910962 2. 382336  
1. 823222 3. 530379 2. 93184 3. 83135 3. 495341 2. 084085 2. 344923 2. 7926 2. 767427  
5. 018486 5. 454618 4. 785196 3. 813914 4. 66068 4. 213174 4. 877997 4. 78594 4. 148908  
4. 547811 5. 462328 4. 135449 5. 172595 5. 854821 5. 3967 5. 601053 4. 870035 5. 467488  
3. 668513 1. 387635 1. 401326 1. 520977 1. 797778 4. 477125 1. 771222 1. 874551 1. 566774  
4. 137122 4. 312831 5. 042846 4. 531442 3. 943951 3. 962471 4. 48475 3. 267556 2. 746003  
4. 589835 3. 997457 3. 079202 3. 719062 2. 70407 2. 687512 4. 025961 4. 233799 4. 905408  
1. 826641 1. 403279 1. 994816 2. 481514 2. 629292 1. 538435 1. 163196 1. 498423 2. 256521  
5. 654531 6. 55874 5. 922156 5. 593578 5. 487868 6. 59648 6. 128531 5. 623168 6. 2031  
1. 936536 1. 887417 1. 015075 2. 00298 1. 685847 2. 045086 1. 596041 1. 307547 1. 770632  
5. 058784 4. 368973 4. 440955 4. 867508 4. 46348 5. 655225 4. 805646 5. 045004 4. 884643  
2. 949183 1. 95865 3. 185399 3. 455466 3. 015826 3. 721649 2. 157754 3. 387449 4. 02936  
3. 368911 3. 812997 3. 892668 5. 460626 3. 659075 4. 383294 4. 998305 3. 1097 5. 103161  
2. 38162 2. 91836 3. 844039 3. 608841 2. 683787 3. 43666 2. 427238 3. 076631 3. 738127  
1. 954147 1. 793192 1. 438717 1. 998121 1. 563694 1. 453722 1. 492682 1. 527928 1. 564338  
7. 698436 7. 421881 7. 280974 7. 0578 7. 306716 6. 609254 7. 117929 6. 971362 7. 548216  
3. 326402 4. 630731 3. 900466 3. 252346 3. 644918 4. 495235 4. 229598 3. 618537 3. 718352  
1. 908313 1. 437779 1. 213823 2. 286306 1. 178077 2. 557879 1. 781197 2. 474374 2. 035978  
5. 06434 6. 647757 6. 922122 5. 90209 6. 427122 6. 039235 6. 706643 6. 081898 6. 101138

4. 622984 5. 317068 4. 992901 2. 687584 4. 387968 4. 519188 5. 317464 4. 152014 4. 220263  
5. 306746 3. 425087 5. 217858 4. 639017 5. 430187 6. 085652 4. 785438 5. 153826 5. 779655  
4. 941616 4. 603877 4. 233228 4. 512119 4. 74367 4. 391172 3. 929144 5. 169003 3. 880347  
5. 718076 5. 652071 5. 678468 6. 144559 6. 242402 4. 236866 5. 774834 3. 887502 4. 657266  
0. 987505 1. 837101 1. 552178 1. 296731 0. 874178 1. 111896 1. 967049 1. 755699 1. 680937  
5. 977453 4. 905956 5. 191621 5. 438222 3. 818872 5. 178461 4. 046935 3. 483444 2. 193599  
3. 292391 3. 10615 2. 949118 4. 949163 3. 153266 3. 570338 2. 010806 2. 986209 3. 832184  
6. 430557 6. 33137 6. 305561 6. 425465 6. 185428 5. 754832 6. 022303 6. 35417 6. 206487  
1. 344632 1. 955457 1. 999003 1. 374919 1. 082389 1. 727713 1. 243946 1. 389521 1. 661335  
6. 755927 6. 299957 6. 272547 5. 7398 4. 825943 2. 28909 5. 493559 2. 809833 2. 255272  
5. 02487 6. 001022 5. 617565 5. 409908 5. 696209 4. 316251 4. 284693 4. 244699 5. 048827  
8. 256347 8. 463433 7. 858627 8. 140756 8. 002403 7. 419964 7. 910835 7. 632143 7. 456178  
8. 879165 9. 401798 9. 213653 9. 589075 9. 712307 7. 560535 9. 614312 9. 693214 9. 577026  
1. 127096 1. 49767 1. 39315 1. 919533 1. 717116 4. 200354 1. 907688 0. 997518 1. 376583  
9. 612764 9. 49751 9. 07911 9. 764456 9. 550441 9. 975873 9. 301954 9. 338145 9. 784551  
7. 025194 7. 686501 7. 439571 7. 199197 7. 839835 7. 249919 7. 498779 7. 528916 7. 569138  
1. 119124 1. 288162 0. 857435 1. 163494 2. 679002 1. 576723 1. 201233 2. 728408 1. 281137  
5. 850833 5. 050708 6. 017668 5. 492529 5. 131617 6. 097287 5. 376265 5. 029992 6. 147926  
5. 331587 4. 642375 5. 258341 4. 550979 4. 811348 5. 191002 5. 444167 5. 252802 5. 155558  
4. 792247 5. 527562 5. 000295 4. 490373 3. 971343 4. 878438 5. 233072 4. 473769 4. 979094  
3. 976773 1. 327462 3. 862205 3. 54599 4. 13088 4. 929903 5. 350287 5. 426212 4. 661254  
5. 374031 5. 328897 5. 125964 4. 891459 5. 368169 5. 19365 5. 215674 5. 857937 5. 372413  
2. 624011 3. 690112 2. 931076 3. 311016 2. 668156 3. 326379 3. 317555 2. 59589 2. 769555  
7. 71778 6. 156945 7. 704467 8. 646951 7. 394607 9. 171788 7. 121477 6. 105327 6. 720108  
3. 796877 4. 213353 4. 626602 4. 489438 5. 059827 4. 161169 3. 550066 4. 529902 4. 226747  
4. 202595 4. 680128 5. 837445 3. 232269 3. 623711 5. 175477 6. 114701 6. 297486 5. 651789  
4. 825278 4. 534939 4. 311874 5. 239242 6. 305614 4. 896247 3. 000051 5. 801315 5. 190839  
4. 543648 4. 362191 4. 786706 4. 861738 5. 104787 5. 153948 6. 633945 6. 281615 6. 332589  
5. 25297 5. 452367 5. 075125 5. 576236 4. 109665 5. 9921 5. 259504 4. 855168 3. 948903  
7. 520296 7. 282416 7. 718213 7. 387293 7. 814579 7. 486684 8. 135431 8. 02816 7. 898232  
4. 935716 4. 453726 5. 467343 6. 652941 5. 974926 6. 106619 6. 422288 6. 413257 6. 195151  
5. 038565 4. 826158 4. 5578 4. 821355 4. 954147 4. 970321 5. 790962 5. 411078 5. 576331  
3. 344517 2. 622486 3. 173391 3. 913575 4. 04586 3. 649594 4. 214402 4. 050188 3. 220693  
1. 960448 1. 839216 1. 855103 1. 532339 2. 690888 1. 965691 1. 836068 1. 720137 2. 11637  
3. 33548 2. 606711 3. 21912 3. 515696 4. 075647 3. 305909 3. 625154 3. 495775 4. 138695  
5. 018008 3. 602042 5. 053289 5. 487278 5. 030113 4. 286968 5. 246709 4. 968267 4. 981073  
1. 952197 2. 486001 2. 393356 3. 749517 3. 315109 3. 307888 4. 052449 2. 721671 2. 585975  
7. 997514 7. 909032 7. 933684 7. 845378 7. 516336 7. 105531 7. 525022 7. 91106 7. 761361  
2. 416858 2. 231051 2. 161083 1. 827571 1. 961878 1. 621281 2. 429849 4. 085862 2. 455791  
1. 418859 1. 357077 1. 276822 1. 364384 1. 228879 1. 302726 1. 364958 1. 679157 1. 832378  
1. 862473 1. 283866 1. 71287 2. 169044 1. 060768 1. 786591 1. 646959 1. 260925 1. 515133  
4. 920993 4. 828647 5. 270689 5. 629011 5. 320792 5. 642235 5. 320775 5. 866336 5. 530823  
1. 647075 1. 573549 1. 814935 1. 804528 1. 677008 1. 627003 1. 324653 1. 886775 1. 561115  
7. 343721 7. 842093 7. 572373 7. 240166 7. 425329 7. 757118 7. 571784 7. 697485 8. 224303  
3. 599054 3. 277333 2. 462475 4. 150217 2. 959556 3. 152919 4. 015471 2. 956682 3. 342253  
2. 860316 2. 893772 3. 338807 1. 741773 3. 332003 2. 98953 2. 473577 2. 560055 3. 067613  
7. 178313 6. 976307 7. 746787 6. 378488 7. 475636 7. 284221 7. 305997 6. 645618 6. 759832  
1. 284944 1. 310507 1. 571277 1. 885834 0. 968316 1. 777009 0. 862762 0. 948378 0. 737916  
2. 510697 4. 299609 3. 176063 2. 822925 3. 529237 3. 189565 2. 758232 2. 977378 3. 089856  
1. 305759 1. 300861 1. 82654 2. 106896 1. 61974 1. 730853 2. 119161 1. 804621 1. 654216  
2. 521743 3. 401775 3. 130047 3. 52987 2. 392153 3. 821767 3. 108777 3. 204497 2. 91095



1. 213368 1. 807818 1. 824758 1. 589365 1. 534045 1. 117196 1. 418662 1. 773643 1. 768088  
3. 624411 3. 715344 3. 974524 4. 791354 4. 461201 2. 405794 2. 801592 3. 762435 3. 304103  
2. 623232 3. 476805 2. 827965 2. 060665 2. 287349 3. 611602 3. 016352 2. 315395 2. 318773  
8. 139212 8. 862903 8. 416106 7. 875633 8. 015026 7. 305266 7. 736579 7. 027967 6. 683417  
4. 090884 3. 447011 4. 028349 3. 209208 4. 214032 4. 482108 3. 118893 2. 623839 2. 13773  
3. 057513 2. 938251 1. 94774 3. 222334 2. 21343 2. 195011 2. 493849 2. 083931 3. 57073  
6. 280664 6. 110543 5. 664079 5. 961501 5. 541455 6. 896832 5. 841985 5. 715557 5. 530915  
5. 824772 5. 831237 6. 508443 5. 829085 5. 600798 4. 887851 5. 226203 5. 285169 4. 447815  
5. 848443 4. 338916 5. 958553 5. 039288 5. 065251 4. 707702 4. 301101 5. 223229 4. 668515  
6. 733186 7. 030734 6. 450945 6. 926448 7. 186943 7. 32141 7. 467526 7. 775791 7. 290268  
5. 84848 5. 574108 6. 505551 5. 54087 5. 728741 6. 424006 6. 580755 6. 293363 5. 920441  
8. 635468 9. 490105 8. 966195 8. 431738 9. 225261 8. 71012 8. 804003 8. 420417 8. 179547  
1. 188213 2. 816201 0. 745756 1. 458694 1. 173517 1. 807155 1. 038363 1. 295578 1. 53048  
4. 475779 3. 890396 2. 69906 3. 514846 2. 821856 5. 478808 3. 246131 4. 096921 4. 323253  
5. 330638 4. 982541 5. 716482 5. 84978 5. 451982 6. 503748 6. 674397 6. 760437 6. 87119  
3. 250351 2. 980752 4. 160934 2. 161215 2. 861086 2. 754952 2. 876911 3. 772107 2. 329518  
1. 857841 2. 21191 1. 601302 1. 931375 1. 359785 1. 986383 1. 769778 1. 815942 2. 190293  
6. 266908 6. 063987 4. 696701 5. 187629 6. 470308 6. 632053 6. 144397 6. 092024 6. 11555  
6. 985133 6. 560947 6. 956914 6. 680978 7. 39047 7. 24331 6. 999916 7. 661844 8. 048447  
6. 709132 7. 633283 6. 638082 7. 225521 7. 130263 7. 484887 7. 042632 7. 480994 7. 518827  
2. 747932 2. 111623 2. 975972 2. 625649 1. 722636 2. 768857 3. 256486 2. 7917 3. 377666  
4. 060182 4. 346499 3. 847291 2. 813664 3. 31843 4. 477636 6. 363575 6. 662336 5. 497596  
7. 669019 7. 340519 8. 280192 7. 210312 7. 410646 7. 227457 7. 83487 7. 851189 7. 660061  
8. 323395 8. 94576 8. 72549 8. 771433 8. 720326 8. 558825 8. 774155 8. 664047 9. 041018  
1. 969343 2. 045636 1. 821952 3. 133762 1. 621626 2. 098637 1. 459015 1. 947758 1. 694749  
3. 176888 4. 017106 3. 213425 2. 336037 2. 952758 3. 03849 1. 891915 1. 867462 2. 413221  
4. 415114 4. 49177 4. 875441 4. 957899 4. 697638 4. 526694 3. 773679 4. 977209 3. 422763  
10. 40364 9. 868933 10. 33105 10. 4649 10. 42323 9. 955963 10. 60147 10. 69905 10. 59116  
4. 776262 5. 539005 5. 907668 4. 68661 5. 641185 6. 598032 5. 848844 6. 311174 6. 328798  
2. 389522 1. 757248 2. 619016 2. 881213 2. 081255 2. 563282 2. 199046 2. 99468 2. 963078  
2. 178728 1. 710931 2. 647126 1. 366995 3. 492012 1. 786789 2. 316366 2. 863371 3. 479114  
2. 359846 2. 95673 2. 232987 2. 162684 2. 878857 3. 090202 2. 471334 2. 276404 2. 835749  
3. 248513 3. 226578 1. 48415 4. 786971 3. 63861 2. 432581 2. 451456 3. 711753 4. 185824  
5. 557258 4. 747964 6. 282423 6. 364146 5. 927155 6. 719572 7. 422193 6. 889359 7. 360996  
8. 328208 7. 920399 8. 369004 8. 461139 8. 539457 8. 067674 8. 886153 8. 855669 9. 160474  
0. 956573 1. 027466 2. 244694 1. 21355 0. 762188 1. 797137 0. 9819 1. 391318 1. 106271  
1. 424165 2. 348948 1. 751704 1. 900678 2. 125583 2. 520328 2. 216534 3. 40609 2. 973274  
4. 045443 3. 765017 4. 338631 4. 215434 4. 291903 4. 804704 4. 565786 4. 682043 4. 585168  
4. 86831 4. 609863 6. 122393 2. 394906 6. 228427 1. 856842 3. 317007 2. 612037 3. 057317  
3. 719396 4. 290828 2. 962167 4. 651799 3. 827833 3. 816112 4. 13074 4. 002292 3. 911629  
2. 410771 4. 160635 2. 977795 1. 880025 4. 518332 1. 782977 2. 023692 1. 847282 2. 537316  
8. 12697 8. 080048 8. 112983 7. 941239 7. 728763 8. 27716 8. 230892 7. 772359 8. 108623  
0. 892231 1. 96735 1. 37169 1. 440858 3. 352026 1. 929329 1. 48876 1. 376791 1. 676531  
4. 067125 3. 264976 3. 637759 3. 286376 4. 109458 3. 676077 3. 584992 3. 359968 3. 128553  
5. 445921 4. 544848 5. 411629 5. 669689 5. 000099 4. 992664 4. 7029 4. 199372 5. 040124  
6. 127506 5. 655947 6. 678444 6. 649387 6. 184272 6. 463922 7. 325594 6. 502836 7. 409849  
4. 627344 4. 92768 4. 568031 5. 180829 4. 6245 3. 707104 5. 443543 5. 682425 5. 602953  
6. 532296 7. 311798 6. 753992 6. 518737 6. 750588 6. 162569 6. 990393 6. 593521 6. 419485  
7. 500877 7. 810943 7. 702331 7. 493801 7. 779662 7. 070346 7. 804604 7. 483373 7. 480714  
7. 568633 6. 671073 6. 222655 7. 621255 5. 384877 7. 892671 6. 389403 5. 575429 5. 952253  
6. 601946 6. 355476 6. 66529 6. 805324 7. 029098 7. 040165 6. 46935 6. 89692 6. 979537

2.066149 1.169792 1.949224 1.057647 0.958379 1.223563 2.171269 1.638699 1.128979  
2.053874 1.354694 1.286941 2.718966 1.340476 1.59137 1.021226 2.338438 1.902975  
1.769491 3.522066 3.796105 3.674908 3.828027 3.420811 3.198472 3.344021 4.336629  
1.288382 0.991046 0.82741 1.36213 1.023861 1.039796 1.471468 1.608024 1.94487  
1.627117 2.899026 1.777865 2.057442 2.611601 2.681968 2.431568 1.686568 2.201327  
5.447431 6.112238 5.91472 5.68694 5.723921 6.155244 6.329458 6.163109 5.816074  
2.569777 1.724878 1.856175 2.03251 1.804661 2.63074 2.293333 2.23465 2.279456  
2.008619 2.30872 1.833173 1.679738 3.179358 2.777864 3.109009 2.38401 2.680668  
3.031443 4.287681 3.028361 3.288364 2.894726 2.263665 2.152831 1.95967 2.100795  
1.470049 2.033873 2.759311 1.664464 3.129208 1.51866 1.770097 2.258788 2.312147  
1.564613 1.928666 2.397358 2.672379 1.969578 2.424797 1.988349 2.65158 2.152381  
3.768108 4.218224 4.408734 5.001755 4.56842 4.577038 4.436869 4.895683 4.813838  
5.256602 5.05858 5.08004 4.875584 5.24032 4.074476 4.800326 3.815837 3.535498  
4.896569 5.457275 3.907623 4.28632 5.33833 3.978542 5.758262 5.782703 4.646375  
7.078154 6.522167 7.09053 6.993898 6.532967 7.988866 7.187131 7.17076 6.975675  
3.460275 1.937373 2.152899 2.497428 2.046574 2.6979 2.809437 2.742174 2.8335  
2.994697 2.837883 2.90513 2.009658 2.855837 2.435194 2.344874 3.460697 3.459302  
3.511397 4.126155 2.624978 2.828231 1.896914 3.700058 3.084634 2.422836 2.637988  
5.149304 3.295148 5.322066 4.659266 5.128848 5.663623 5.080732 5.559774 6.371146  
1.249242 0.96047 1.027362 1.157936 0.913264 0.857635 1.004298 0.770517 0.601802  
1.731924 3.268419 2.091317 1.94894 2.770141 3.433027 1.190003 2.326485 2.036368  
3.851275 4.550536 4.720341 3.576414 4.093539 4.107074 4.540463 4.798572 5.25035  
4.029728 3.323176 3.051924 5.463391 5.101661 1.89892 4.241118 3.694857 3.627939  
1.781611 1.733019 1.391069 1.94329 1.875683 2.461755 1.590624 2.190494 1.869029  
4.784909 4.157545 3.884452 4.936088 4.041424 4.080988 4.417054 4.72242 4.625107  
4.251365 2.698019 3.947879 3.00267 3.77879 3.874361 3.808887 4.046138 3.729003  
2.036611 1.245967 1.660128 1.539007 2.142474 1.629319 1.787804 1.319181 1.74265  
5.214146 2.910538 4.945338 5.0466 3.960205 4.893694 3.794086 3.879916 3.665807  
1.552537 2.104036 2.435377 1.966665 2.070663 1.419393 2.164233 2.363716 2.38801  
1.553503 1.802949 1.65461 1.611646 1.23853 1.201267 1.479369 1.844144 1.203828  
1.010573 1.256732 1.775467 1.142123 0.803693 0.856079 0.908655 1.076976 0.698563  
0.918507 1.017145 1.172546 0.782278 1.770971 0.965718 1.266406 0.788498 1.559987  
0.952158 1.152842 0.641949 0.610519 0.751681 1.12189 1.281971 1.2927 0.873093  
1.916607 3.472728 2.911202 2.841726 4.177288 2.767454 2.529392 2.585236 3.709611  
1.321198 0.939187 0.797404 1.088556 1.218084 0.795191 1.135785 0.950429 0.961413  
3.56095 3.952996 3.232278 3.785089 4.836314 4.562854 4.092004 4.039063 3.911382  
2.936683 2.717316 2.85789 3.511339 4.392252 2.598549 3.07741 2.266011 2.700102  
4.566445 3.545261 4.051604 3.564174 4.759685 4.060297 6.412757 7.061789 6.758995  
2.207268 1.455337 1.215105 1.393674 1.472438 1.229926 1.810244 1.474726 1.48773  
7.597055 6.836982 7.219751 7.494905 7.034289 7.491234 7.450735 7.26937 6.779966  
2.070263 2.25791 1.407803 1.659137 1.592741 1.522977 1.259871 1.963403 2.039737  
3.64087 3.984735 4.118114 4.485541 3.299465 3.628412 3.909663 3.962306 3.615115  
2.468863 2.387454 2.392508 2.739118 2.812519 3.499712 2.279939 3.206463 2.857511  
5.716102 6.022623 5.200109 6.80393 6.493014 5.699577 6.203375 5.995637 5.353243  
1.675839 2.065659 1.879919 1.511836 2.177395 1.293058 1.560649 1.482746 2.093529  
3.22293 1.43309 1.154532 2.629576 2.90404 1.766735 3.838444 2.487225 2.984383  
0.751295 4.344761 0.566883 0.682867 0.728933 7.070501 0.651372 0.981772 2.274979  
2.835782 3.557881 3.34021 2.335861 3.99888 4.912617 1.361 2.36901 4.201659  
1.791194 4.137336 3.151644 2.517154 2.812211 2.068218 2.346888 2.663515 1.922616  
1.685945 1.0361 0.841815 1.132947 1.225102 1.105039 0.910342 1.061175 1.314535  
3.138467 2.02332 1.623682 1.628235 2.234873 1.731004 1.463733 2.150476 2.095394

1. 397173 1. 186576 1. 43294 1. 474626 1. 085932 1. 385243 1. 629651 1. 391221 2. 236088  
1. 266424 1. 289545 1. 44118 1. 260627 1. 865737 1. 629217 1. 096879 2. 074295 1. 469174  
1. 361416 2. 117468 1. 865002 2. 409078 2. 467274 2. 010397 2. 512716 2. 851782 1. 939306  
1. 414064 2. 017324 1. 040258 1. 814381 1. 670661 1. 423083 1. 961561 1. 411335 1. 329599  
1. 233349 1. 199442 1. 821276 1. 26767 1. 367619 1. 279154 1. 365752 1. 242878 1. 353418  
1. 393484 1. 29611 1. 099318 1. 298511 1. 296226 1. 287852 1. 717164 1. 692383 0. 771313  
0. 566826 0. 552425 0. 683934 0. 77732 0. 833105 0. 853926 1. 246897 2. 271256 0. 625553  
2. 659911 2. 18638 2. 862654 2. 362478 1. 755711 1. 671835 0. 80412 1. 692974 2. 901726  
2. 501335 2. 26326 2. 506646 2. 426264 2. 48802 2. 745521 3. 070024 2. 700237 2. 381344  
2. 292293 2. 264331 1. 680162 1. 399781 1. 298376 2. 737534 1. 530288 1. 635887 1. 897074  
5. 023168 5. 733016 5. 124218 4. 327707 5. 732534 5. 722169 4. 231996 5. 793944 4. 125995  
4. 424831 5. 36853 4. 976406 3. 310324 5. 083042 4. 402768 4. 519588 2. 476845 2. 895252  
1. 172161 2. 128797 1. 967343 1. 544534 1. 914218 1. 209752 1. 53619 0. 946563 0. 940326  
1. 061966 0. 673143 0. 455763 1. 610804 1. 857868 1. 100734 0. 615307 0. 885129 1. 100734  
6. 883068 7. 411361 7. 711344 7. 204502 7. 729633 7. 78287 7. 09877 7. 68111 9. 151823  
2. 328071 2. 247134 1. 768338 2. 19917 1. 813266 1. 757358 1. 747751 1. 724539 2. 501742  
2. 849237 2. 631697 2. 801638 3. 184277 3. 155961 3. 003236 2. 718351 3. 260318 3. 323986  
10. 30681 10. 8498 10. 9369 9. 614843 10. 91479 8. 615369 9. 515819 9. 000649 9. 362368  
2. 064789 2. 437507 2. 990804 2. 654643 2. 254167 3. 418154 2. 242088 2. 099969 2. 511888  
4. 497483 4. 397275 5. 18632 4. 662685 5. 128389 5. 223762 5. 734281 5. 311508 5. 567622  
2. 203811 1. 9751 2. 385624 1. 991335 1. 833962 2. 344484 2. 163645 1. 762056 2. 337943  
3. 385688 3. 637433 5. 431055 3. 25148 3. 170736 2. 461565 3. 453414 3. 626062 3. 339409  
2. 475753 1. 85912 1. 473816 1. 561765 2. 574344 2. 407673 2. 01008 1. 919417 2. 960589  
2. 040583 1. 475094 2. 321744 1. 973442 1. 27599 1. 6655 1. 309021 2. 086303 1. 360346  
0. 708223 1. 0548 1. 340863 2. 001249 1. 45059 1. 656104 1. 133592 1. 473856 2. 376712  
2. 38341 2. 054445 2. 146965 2. 046858 2. 125112 1. 941784 1. 849561 1. 933596 1. 914828  
2. 275415 1. 739925 1. 923926 1. 955262 1. 297739 1. 600488 1. 706036 1. 413811 1. 893612  
1. 288296 2. 018444 1. 518704 1. 502707 1. 76425 1. 529572 1. 440014 1. 14294 2. 018058  
1. 858279 1. 909831 1. 920428 1. 845812 1. 573038 2. 261697 2. 484638 2. 169551 2. 251007  
4. 689586 1. 917629 2. 131714 4. 18546 2. 856691 2. 972811 1. 910167 1. 271188 3. 788655  
1. 839955 1. 244325 1. 64485 2. 342678 1. 719828 1. 606836 1. 565012 1. 376097 2. 247811  
1. 85381 1. 060694 0. 908478 1. 694715 1. 067347 2. 188155 1. 39231 1. 173819 0. 925635  
1. 303611 1. 745528 1. 557042 1. 423375 1. 0938 0. 934062 1. 359464 1. 177408 1. 34856  
1. 056064 1. 307486 2. 502504 1. 496104 2. 193404 1. 63667 1. 781892 2. 116951 2. 428656  
1. 29603 1. 627125 1. 476939 1. 415838 1. 306748 2. 53965 1. 731419 1. 480159 1. 645487  
3. 643423 2. 895239 3. 830036 2. 93162 3. 524207 4. 676145 4. 639514 4. 859673 4. 83748  
1. 712076 1. 735098 1. 735566 1. 847306 1. 432141 1. 911396 1. 489466 2. 039487 2. 189524  
1. 767157 1. 771897 1. 98719 2. 327152 2. 486648 1. 962648 1. 399763 1. 407075 1. 407075  
4. 070675 3. 533626 3. 925304 3. 816952 4. 358143 4. 397169 3. 94288 5. 082528 4. 420051  
2. 271397 1. 722421 2. 343339 2. 871884 1. 811523 3. 001159 2. 235858 1. 836216 2. 197518  
4. 455711 5. 063114 4. 395961 4. 961949 3. 963486 3. 457658 4. 581892 4. 679319 4. 55883  
1. 305631 1. 537928 2. 089624 1. 295203 1. 854563 1. 826963 1. 885484 1. 920916 1. 376299  
5. 62334 5. 412708 5. 785687 5. 945253 5. 724849 6. 177672 6. 389334 5. 504998 5. 43324  
2. 84936 1. 840206 1. 527002 2. 33442 1. 682914 1. 785328 1. 698252 1. 953102 1. 629582  
2. 956767 2. 738542 2. 602681 3. 777164 3. 19604 3. 224197 3. 09136 2. 98625 3. 533151  
2. 707516 3. 628416 4. 234422 4. 33146 4. 486323 3. 615409 2. 688477 3. 754999 4. 450036  
6. 15268 4. 977569 6. 140159 5. 074483 5. 071623 4. 308728 5. 560406 5. 134822 5. 507501  
1. 49208 1. 634968 1. 659424 3. 660817 1. 51859 1. 761872 1. 014397 2. 277417 2. 110309  
2. 562025 1. 431543 2. 048513 1. 401689 2. 026876 1. 216152 1. 440969 1. 513531 1. 613163  
4. 252481 4. 009927 4. 128287 4. 719364 5. 314123 4. 69429 5. 637917 5. 221523 5. 274569  
2. 052702 2. 131728 1. 422846 1. 653376 1. 115483 1. 513901 1. 709101 1. 210253 1. 444696

1. 813562 1. 82001 2. 239676 1. 491847 1. 800123 2. 330179 1. 909777 3. 004198 2. 574222  
2. 170873 1. 263275 2. 304642 1. 734826 1. 707789 2. 129661 2. 49098 2. 382068 1. 833503  
4. 769208 1. 993096 2. 67942 1. 838079 1. 919777 1. 350906 3. 228914 1. 538055 1. 55294  
2. 313707 2. 190046 3. 060859 3. 439905 2. 022326 2. 188613 2. 272353 2. 85715 1. 596691  
1. 757174 1. 792456 1. 768945 1. 594837 1. 341159 2. 449889 1. 690562 2. 067677 1. 815961  
1. 504637 1. 772104 1. 608594 1. 695049 1. 383179 1. 320236 1. 441478 1. 671469 1. 446162  
5. 794099 5. 25025 5. 962783 5. 820379 6. 306057 4. 459939 6. 565255 5. 967091 5. 510119  
5. 475665 5. 616509 4. 684745 6. 086284 4. 719993 4. 24276 5. 433532 5. 086767 5. 16303  
2. 892899 2. 546658 3. 511416 3. 047613 4. 650794 2. 88123 3. 025903 3. 629984 3. 743453  
4. 216561 4. 788758 3. 822035 3. 711497 3. 855213 5. 263733 6. 076619 5. 741173 5. 651768  
1. 265907 1. 02569 0. 670185 0. 772353 1. 858198 1. 21422 0. 946358 0. 930797 0. 743489  
2. 150957 2. 276855 1. 835368 4. 892988 2. 867771 2. 089306 2. 13934 2. 603625 2. 894295  
1. 943037 0. 433381 0. 806456 1. 17431 1. 245421 1. 063608 1. 141132 2. 27775 0. 914535  
4. 431223 4. 278295 4. 55796 4. 716595 4. 427964 5. 117557 4. 852114 4. 996632 5. 334776  
6. 530787 3. 81439 5. 22957 5. 184855 3. 292717 4. 936491 4. 596242 3. 846741 3. 163422  
4. 465487 4. 686519 5. 256587 4. 123957 5. 67466 4. 906487 4. 292466 5. 045596 5. 016057  
3. 401325 2. 437483 3. 943394 4. 076267 2. 234161 3. 378162 3. 18575 5. 461896 4. 225979  
1. 694924 2. 966903 1. 946539 1. 790465 1. 799235 2. 271227 2. 788358 1. 985245 2. 252251  
1. 687421 1. 819549 1. 431994 1. 592658 2. 122499 1. 748423 1. 650256 2. 108895 1. 151831  
4. 600517 2. 899869 3. 469257 4. 563695 2. 89337 2. 31131 3. 156271 2. 433786 2. 841313  
2. 252433 1. 467344 2. 284308 1. 826652 2. 246852 4. 392986 1. 574785 2. 292802 1. 701362  
2. 802124 2. 109637 2. 832381 2. 518176 2. 281876 2. 318766 2. 605968 2. 421918 1. 413275  
0. 932636 2. 602955 1. 311411 1. 678918 2. 913973 1. 585868 1. 599858 1. 683287 1. 282117  
2. 046076 1. 86863 2. 297427 1. 915403 1. 422532 2. 704404 2. 184616 2. 576875 2. 099379  
3. 627942 4. 467002 4. 404566 4. 086551 4. 869809 3. 964336 2. 371073 3. 966795 2. 980564  
2. 692648 1. 913451 1. 824149 1. 905861 2. 806353 1. 551809 1. 103805 1. 337687 1. 031865  
1. 942059 4. 338895 3. 494676 3. 090718 2. 885744 3. 042748 3. 540786 2. 358659 2. 605282  
2. 511162 2. 742461 2. 446234 1. 696568 2. 892155 2. 32346 3. 399611 2. 067134 2. 839811  
1. 689655 1. 998797 1. 6854 2. 647661 2. 252506 2. 736939 2. 683547 2. 12601 2. 216277  
1. 241185 1. 333077 1. 65143 2. 303298 2. 212613 1. 215741 1. 436537 1. 820909 1. 82083  
1. 396707 1. 097411 1. 530921 2. 584086 1. 319384 1. 032488 1. 442258 1. 301014 1. 570465  
5. 545873 5. 487262 5. 568423 5. 014539 5. 503374 4. 301294 5. 700316 5. 06944 5. 260201  
1. 757897 1. 726702 2. 747087 2. 290067 2. 359341 1. 687097 1. 544881 1. 663799 1. 582619  
6. 232295 5. 843939 5. 809938 5. 598824 5. 67015 6. 668968 5. 887478 5. 683765 5. 707818  
5. 092966 4. 380882 3. 59042 3. 864351 3. 700285 3. 222508 2. 847623 2. 819897 3. 548512  
1. 352292 1. 029983 1. 383751 1. 195904 1. 015138 1. 241999 0. 984104 1. 427616 1. 016673  
1. 532492 1. 51489 1. 455424 1. 549371 1. 417195 1. 533929 1. 42793 1. 486243 1. 409066  
5. 477637 5. 724238 5. 423202 5. 484315 5. 417724 3. 475684 6. 146571 5. 268004 4. 890697  
1. 294981 1. 631855 0. 938448 1. 477933 1. 092825 0. 853424 1. 34736 1. 387063 1. 863861  
1. 923034 3. 165966 2. 238709 2. 126799 2. 975156 1. 948981 2. 644412 2. 307967 1. 861555  
5. 444589 5. 162172 5. 376964 5. 889285 5. 702941 4. 100054 5. 177479 5. 221956 4. 923536  
2. 575327 2. 1968 1. 956376 2. 970017 1. 885525 0. 932241 1. 779747 2. 241326 2. 667969  
1. 445646 2. 213057 3. 341741 1. 802779 1. 381559 2. 451071 2. 368364 2. 32514 1. 843149  
4. 136706 4. 799011 4. 711553 4. 248029 4. 488441 4. 753929 4. 630513 4. 230869 4. 091108  
2. 266894 0. 832267 1. 143223 1. 478127 1. 565668 2. 596787 1. 213376 1. 014184 1. 325586  
1. 729137 1. 792004 2. 053995 2. 3047 2. 242623 2. 153662 2. 069931 1. 708269 2. 189283  
1. 462585 0. 811629 5. 355081 4. 490053 3. 042641 1. 571602 2. 50471 1. 882328 1. 190564  
1. 823166 1. 373677 1. 486605 2. 686783 2. 263367 1. 441205 2. 064116 1. 178089 3. 027629  
4. 848608 4. 7876 5. 997824 4. 418782 5. 347509 3. 672441 4. 104066 2. 557535 2. 737953  
2. 279853 2. 710667 2. 138947 2. 140187 2. 116255 2. 450348 2. 477696 1. 980798 2. 43098  
6. 820084 6. 716958 6. 468366 6. 189052 5. 641764 6. 853184 7. 306668 7. 183667 6. 741701

1. 921101 2. 087707 2. 745158 2. 22082 1. 984048 1. 795431 1. 616496 1. 820183 1. 895696  
2. 844352 2. 364263 1. 382435 2. 459873 2. 930526 2. 515411 2. 910116 3. 909692 2. 415743  
1. 316176 0. 831467 1. 711737 1. 894056 1. 847501 1. 373355 1. 524055 2. 330478 1. 613723  
1. 504551 1. 146321 1. 4923 1. 716088 3. 510128 2. 446357 2. 828118 1. 664943 1. 38962  
2. 26673 2. 077414 2. 699671 2. 978541 2. 527895 1. 488886 1. 559656 1. 763354 2. 593797  
1. 853729 1. 990327 2. 947549 1. 571191 2. 052117 1. 494375 1. 73838 1. 313062 2. 66413  
2. 007742 1. 636679 1. 281979 2. 129062 1. 837935 1. 981365 2. 052381 2. 954101 1. 527361  
2. 692521 2. 462143 3. 243429 2. 678782 3. 625323 2. 58282 2. 364667 2. 33868 2. 798462  
1. 443287 0. 872829 1. 025618 1. 438407 1. 063383 1. 477133 1. 529999 0. 972922 2. 758622  
1. 202714 0. 58914 0. 954011 0. 8857 0. 944536 1. 654886 1. 430825 0. 724913 0. 935047  
1. 307416 1. 746978 1. 688723 2. 259777 2. 318632 1. 70626 1. 900575 2. 146966 2. 767018  
4. 066678 4. 438735 4. 525192 4. 745613 3. 782949 3. 258925 3. 486615 3. 830337 3. 587551  
1. 853198 1. 614774 2. 028587 1. 451776 2. 046325 1. 265723 1. 833625 1. 97688 1. 354752  
1. 84654 2. 542364 1. 901254 2. 443965 2. 345105 1. 964809 1. 913379 1. 716893 2. 107453  
2. 951857 3. 374986 2. 445055 2. 182505 2. 554634 2. 699379 2. 476724 2. 718553 3. 222885  
1. 610157 1. 969991 2. 369329 1. 663503 3. 326359 2. 311789 1. 081729 2. 205411 2. 687404  
5. 571689 5. 422987 6. 251175 3. 551965 5. 525729 2. 591347 4. 062218 5. 356971 3. 308447  
4. 252876 3. 049428 3. 40322 3. 079184 3. 200224 2. 787774 2. 173839 2. 38509 2. 599607  
6. 588209 6. 326566 5. 877029 5. 860694 5. 921014 5. 885244 6. 137873 6. 269729 6. 222341  
4. 567245 4. 624306 4. 298954 5. 094748 4. 588002 4. 950933 4. 661213 4. 655413 4. 718744  
2. 347931 2. 528913 2. 542184 2. 362144 2. 992817 2. 058118 2. 895056 2. 752923 2. 898814  
1. 887245 3. 647097 1. 973131 1. 66838 2. 55497 2. 848289 2. 581406 2. 366507 2. 604297  
3. 42773 3. 887156 4. 256479 3. 27943 4. 281597 3. 022281 3. 337275 2. 800922 3. 136904  
1. 908356 2. 204066 2. 681166 2. 067146 2. 31276 2. 428832 2. 61154 2. 054155 1. 836346  
2. 480089 2. 346459 2. 294479 2. 15331 0. 963832 1. 68558 1. 337119 2. 085332 2. 089381  
1. 357132 1. 936477 1. 724026 1. 894005 1. 500351 1. 527794 1. 210382 1. 626624 1. 676703  
1. 334925 1. 400385 1. 067224 1. 405645 2. 222194 1. 406319 1. 190046 1. 364905 1. 022041  
1. 923704 1. 555098 0. 86657 0. 772047 1. 802028 1. 024873 0. 994713 0. 854732 0. 863422  
3. 637379 3. 843895 3. 641885 5. 838247 2. 85577 3. 583901 2. 810625 5. 675959 4. 80842  
1. 874187 3. 167755 2. 81517 1. 881024 2. 132345 2. 315319 1. 467374 3. 175577 2. 473825  
3. 700571 3. 064252 3. 879608 3. 726849 3. 202173 3. 337989 2. 782007 3. 802293 3. 560387  
1. 018599 1. 850056 2. 891756 1. 509168 1. 247119 2. 142219 1. 265693 1. 357212 1. 008785  
1. 574975 1. 895816 2. 226525 1. 723643 1. 591634 1. 452449 1. 49306 1. 914441 1. 025442  
2. 371315 2. 61963 2. 889464 2. 889244 2. 999958 2. 479629 1. 969152 2. 48609 2. 836619  
1. 979746 1. 201293 1. 30124 1. 842751 1. 471955 2. 891735 1. 634454 1. 620641 2. 072999  
2. 129955 2. 994507 2. 980749 1. 507652 1. 534018 2. 837958 1. 305943 1. 40932 1. 167723  
1. 90991 1. 869283 2. 034504 2. 288914 2. 138285 2. 260708 1. 882554 2. 54279 2. 808715  
1. 28866 1. 823265 1. 666332 1. 326171 1. 334997 1. 646075 1. 613015 1. 005059 1. 44003  
5. 221773 6. 874444 5. 276622 5. 460601 6. 528949 6. 613694 5. 604464 5. 749364 4. 97093  
2. 369393 1. 750177 1. 697876 2. 947645 2. 345805 2. 091373 1. 993577 2. 59078 2. 238556  
6. 795399 5. 29235 6. 242815 5. 724967 6. 898068 4. 747001 5. 240969 6. 188006 4. 988542  
1. 594759 1. 994672 1. 77662 2. 343325 1. 789314 2. 313379 3. 103539 2. 002722 2. 969684  
1. 314195 1. 565093 1. 540447 2. 61869 1. 365547 1. 53191 1. 208 1. 343713 2. 235436  
1. 97834 2. 564267 1. 767065 3. 084242 2. 272251 1. 758664 4. 267621 2. 661336 2. 372517  
2. 069796 1. 576209 1. 911441 1. 454791 2. 08909 1. 311926 1. 804861 2. 843092 2. 417502  
1. 751155 1. 479399 1. 514652 1. 955152 1. 340955 1. 428066 2. 02105 1. 790906 1. 29473  
1. 261469 1. 288183 1. 00132 1. 197214 0. 800322 1. 456673 1. 075098 1. 285754 1. 348036  
1. 830702 1. 219377 1. 659359 1. 227683 1. 604292 1. 182747 1. 45406 1. 770227 2. 413779  
2. 551531 3. 484683 4. 012808 3. 226863 3. 577133 2. 790526 3. 01352 4. 562162 3. 844194  
0. 721131 1. 525848 1. 469156 0. 864228 1. 345119 1. 362641 0. 642525 0. 798858 0. 849283  
1. 601382 1. 996816 2. 256341 2. 13972 1. 884461 1. 764952 2. 632925 2. 088546 2. 604642

1. 247562 1. 431666 1. 956873 1. 600126 1. 988534 2. 391597 1. 248381 1. 578469 1. 30613  
1. 930066 2. 223712 1. 829323 2. 348566 2. 072475 2. 639884 1. 528335 1. 892707 1. 881744  
1. 852526 1. 330703 1. 496082 1. 550838 1. 734463 1. 114109 1. 099074 1. 514996 1. 117078  
4. 13451 4. 14143 3. 990595 5. 119533 3. 936476 4. 127386 4. 040144 4. 460817 4. 448088  
4. 479905 3. 786381 3. 832272 5. 251301 4. 670471 4. 251189 3. 67487 4. 476314 4. 158399  
5. 465363 5. 652782 4. 382886 5. 283476 5. 463271 6. 039371 5. 576274 5. 30772 5. 416958  
2. 373718 2. 100125 1. 946038 2. 017274 2. 475097 1. 768039 2. 146674 2. 441633 2. 65816  
3. 341409 3. 033207 3. 75531 2. 236234 1. 686146 3. 031849 3. 158376 4. 114741 3. 206887  
2. 586735 2. 273504 2. 962955 2. 386583 1. 957384 1. 827545 1. 851992 1. 730295 3. 153529  
2. 135613 1. 950283 2. 745068 2. 019432 2. 003136 3. 140369 2. 117935 2. 297401 2. 155813  
0. 613334 3. 508103 0. 968621 2. 134644 1. 363623 7. 141038 1. 582652 0. 99157 2. 109627  
2. 63266 2. 198947 2. 940861 3. 086918 3. 2266 4. 388156 3. 030887 2. 607713 3. 913511  
3. 767019 3. 608532 4. 019337 5. 034198 4. 648422 4. 520446 4. 263922 4. 752586 4. 709162  
0. 882188 1. 343557 0. 931948 1. 24667 1. 003054 1. 155141 1. 077638 1. 122776 1. 211485  
1. 97042 2. 330668 2. 264106 2. 506149 2. 224579 2. 316955 1. 968137 2. 2265 2. 66369  
1. 665958 1. 69331 2. 36472 1. 755711 1. 965295 2. 063654 1. 68532 1. 505019 1. 807814  
2. 252481 2. 248385 2. 183455 2. 75234 2. 512301 2. 83813 2. 976187 2. 597236 6. 498709  
2. 881344 3. 288339 4. 232624 3. 619758 3. 731817 4. 425031 4. 238999 3. 454847 3. 255264  
3. 080516 3. 416916 3. 576989 2. 849863 2. 841233 3. 558846 3. 849159 3. 975004 3. 008139  
1. 437954 1. 569225 2. 216307 2. 462904 1. 925684 1. 523103 1. 567287 1. 796229 3. 343499  
2. 374793 2. 368307 2. 195899 2. 180604 2. 510131 2. 073485 2. 249622 1. 510921 2. 088606  
4. 586434 4. 087399 4. 112166 4. 318612 3. 928535 5. 769338 4. 529615 5. 086971 7. 192779  
4. 733632 5. 235872 5. 412728 5. 001866 6. 186167 5. 613939 6. 715044 6. 240397 6. 903073  
2. 152231 1. 099408 1. 543869 1. 565495 1. 372526 1. 513221 1. 511781 1. 451031 1. 717157  
4. 900202 4. 627831 2. 358333 2. 92317 2. 05225 6. 636915 2. 372228 2. 347331 2. 183809  
3. 686386 4. 63342 2. 784732 2. 400554 3. 176366 1. 972183 2. 567242 1. 992346 1. 440217  
4. 472187 3. 676039 2. 743222 1. 609608 3. 097813 2. 977704 3. 579813 2. 936656 1. 579726  
1. 494853 1. 689351 4. 132455 1. 703815 2. 358406 1. 25077 1. 552574 1. 176643 1. 513416  
1. 318013 1. 286234 1. 321964 1. 540895 1. 668637 1. 131465 1. 269686 1. 568782 0. 725726  
2. 322118 2. 490656 3. 290062 2. 439759 2. 493009 2. 126981 2. 328705 1. 640047 3. 147145  
5. 198096 4. 119896 4. 952896 5. 26105 5. 157924 6. 450935 6. 248675 6. 550026 6. 088836  
3. 607098 3. 464122 3. 297239 2. 903627 2. 928315 3. 42756 2. 933992 3. 432737 3. 533275  
7. 275977 5. 554702 7. 198148 7. 37353 5. 704968 6. 418299 6. 911059 6. 685621 7. 157091  
2. 101304 2. 817934 2. 619622 1. 928318 2. 055852 2. 017037 2. 6454 2. 003306 2. 859751  
7. 27229 6. 944288 7. 51296 7. 773525 6. 841288 8. 09823 5. 004184 6. 492013 6. 294516  
2. 845783 2. 362405 3. 11826 2. 289738 3. 844942 2. 811545 3. 319983 3. 50058 3. 492635  
3. 095246 3. 136033 3. 223825 2. 28191 3. 324071 3. 552254 3. 218887 3. 213853 3. 218411  
1. 49263 1. 881905 2. 43729 2. 145184 1. 421553 1. 344089 2. 096417 1. 835448 2. 345878  
3. 00267 0. 904851 1. 044269 2. 638221 1. 85895 6. 952285 1. 222226 2. 002545 3. 479835  
2. 779792 2. 451918 3. 981716 3. 543021 2. 948694 3. 710462 3. 300966 3. 335564 3. 840221  
2. 648889 1. 985093 2. 403132 2. 574442 2. 671581 2. 940699 2. 823571 2. 296629 3. 115912  
3. 011278 2. 083675 1. 959419 2. 400852 0. 828058 2. 924205 1. 492386 1. 374476 4. 233662  
2. 5138 3. 1864 3. 166378 3. 043314 3. 195339 2. 404636 2. 923797 3. 886389 4. 307657  
2. 121838 3. 120062 2. 231328 2. 581839 2. 412665 2. 373978 3. 449095 2. 474602 2. 507902  
2. 03589 2. 351239 1. 643571 1. 427973 2. 0797 1. 429357 1. 393969 2. 097962 1. 580852  
4. 350347 5. 683357 4. 978519 5. 63988 5. 477706 2. 135355 2. 172957 2. 272922 1. 368412  
5. 575507 5. 544487 5. 276103 4. 453416 5. 741725 5. 94286 5. 829216 5. 846529 5. 807415  
1. 72587 1. 781019 1. 323908 1. 520182 1. 21455 1. 611513 1. 579831 1. 749077 1. 852631  
1. 447282 1. 549336 1. 668828 1. 999959 1. 367403 2. 476602 2. 420488 2. 07171 1. 519521  
1. 922085 2. 731928 2. 146376 2. 025579 1. 767597 1. 911774 1. 540545 1. 68434 2. 222885  
2. 389892 2. 074613 1. 69085 3. 322512 2. 378676 2. 351765 2. 126405 1. 808537 2. 401337

3. 357817 4. 985773 4. 845445 3. 536673 4. 962693 2. 830088 3. 333581 4. 360718 3. 488281  
1. 115561 1. 423761 2. 173403 1. 214352 1. 236914 1. 334048 1. 083248 1. 768721 1. 635385  
2. 840562 2. 622816 1. 979288 2. 338909 2. 220327 1. 928758 2. 744346 2. 233955 2. 372603  
3. 348171 3. 114988 3. 064636 3. 2077 3. 496395 4. 056617 3. 546306 3. 548506 3. 026975  
3. 300573 2. 630094 3. 781308 2. 385926 3. 429359 2. 853839 3. 654388 2. 565431 3. 24806  
1. 45042 1. 224519 1. 173004 3. 757068 1. 882898 1. 461613 1. 133733 1. 918297 1. 489062  
2. 317089 1. 353175 3. 780283 1. 215163 3. 825875 0. 745537 1. 988479 1. 918348 3. 210339  
1. 456488 1. 252616 1. 787111 1. 763295 3. 077986 2. 518708 2. 236805 1. 141665 1. 921644  
1. 380449 1. 94428 1. 353137 1. 143561 0. 768267 1. 871085 1. 44438 1. 910816 1. 176562  
6. 63402 5. 597743 6. 536373 6. 015655 6. 007718 7. 079815 6. 36986 6. 378494 6. 637102  
5. 227158 1. 321503 1. 145487 1. 919468 1. 173851 1. 978185 1. 127174 1. 157994 0. 897278  
3. 624385 3. 312324 4. 14648 3. 22424 2. 953637 3. 083744 2. 761838 3. 346937 3. 560536  
5. 436146 1. 973711 1. 43995 1. 603004 2. 336033 2. 671738 1. 741937 1. 622928 2. 114169  
1. 934851 1. 878121 2. 457192 2. 16749 2. 244541 1. 833378 1. 305855 2. 505142 2. 481022  
1. 969901 1. 689834 2. 259832 2. 677527 2. 207472 2. 042177 2. 186023 1. 875907 1. 599964  
4. 96618 4. 777504 5. 450878 5. 826311 5. 582706 5. 619224 6. 286013 6. 742024 6. 844899  
2. 514646 2. 690045 2. 793451 2. 663588 2. 357123 3. 187942 3. 262382 2. 219274 2. 938808  
1. 239625 1. 218519 1. 570421 1. 900641 1. 62974 1. 451305 1. 389255 1. 266394 1. 983218  
3. 595306 3. 539463 3. 356217 3. 717458 3. 985853 4. 624886 3. 228059 3. 669094 4. 69517  
1. 909018 2. 826509 2. 819361 2. 023598 2. 794535 3. 483904 4. 04955 2. 617447 2. 252021  
2. 712488 2. 686262 2. 289392 2. 171962 1. 430972 3. 308763 3. 30105 2. 06888 3. 511823  
8. 704844 8. 485908 8. 535647 8. 485908 8. 991654 8. 742302 8. 222558 8. 709513 8. 308936  
2. 891338 2. 572725 2. 778235 2. 882473 3. 083194 2. 610801 3. 450726 2. 285917 2. 708369  
3. 145732 2. 163841 2. 787627 3. 039025 2. 45826 2. 403752 2. 952765 3. 299513 2. 484963  
3. 550013 3. 562688 3. 53306 3. 548387 3. 266691 3. 828301 3. 252381 3. 106543 3. 423438  
3. 941159 4. 711189 4. 277105 2. 331562 4. 925486 4. 694019 2. 664461 2. 605857 2. 484464  
3. 900885 3. 182272 3. 893233 4. 249853 3. 231962 4. 285886 4. 432523 4. 639731 3. 975554  
0. 958237 1. 944642 1. 633678 1. 598165 1. 60455 1. 687792 1. 060584 1. 719589 1. 449255  
2. 078682 2. 298604 2. 048525 2. 558026 1. 816283 2. 479542 2. 101466 2. 620324 2. 714114  
0. 925982 1. 28024 1. 009085 1. 219554 2. 008163 0. 897201 1. 17443 0. 825814 1. 263583  
1. 150555 0. 961133 1. 974213 1. 205998 1. 011453 2. 099928 1. 350484 2. 649844 0. 778727  
1. 479082 0. 228601 0. 38631 1. 928061 0. 650496 3. 786401 1. 72464 0. 763381 0. 812519  
1. 572821 2. 632267 1. 324823 1. 741135 2. 086874 1. 612884 1. 900325 1. 839421 2. 443571  
2. 494614 2. 043678 2. 415685 2. 662414 2. 203503 2. 534368 2. 398629 2. 343788 1. 850667  
2. 740476 2. 544462 2. 361425 3. 934019 1. 996339 4. 673114 3. 934676 2. 533617 3. 372751  
1. 649794 1. 156555 0. 998205 1. 530772 0. 980328 1. 284595 0. 886564 1. 629683 1. 176067  
1. 822697 1. 602297 1. 441616 1. 933595 1. 738174 2. 143491 1. 557992 2. 450313 1. 930566  
2. 100923 1. 739284 2. 239313 2. 365252 2. 273907 2. 336817 1. 884048 2. 227049 2. 055701  
1. 187254 1. 520134 0. 858093 1. 443688 1. 758724 4. 143669 1. 40767 0. 842375 0. 63411  
5. 256288 6. 623667 6. 78495 6. 368063 6. 489994 5. 652981 6. 625447 6. 282306 6. 039346  
1. 418162 1. 072733 1. 424168 1. 709813 0. 902356 1. 119105 1. 340739 1. 372091 1. 824351  
1. 524376 2. 97173 2. 45063 1. 667274 2. 432803 1. 566222 1. 599773 2. 999649 2. 229409  
1. 765877 0. 999738 1. 090151 1. 035383 1. 026922 1. 087856 1. 088676 1. 370379 1. 04459  
1. 040631 0. 901314 1. 180815 1. 000912 1. 181212 1. 605555 1. 11966 0. 877102 1. 076678  
3. 327748 2. 741799 3. 835389 4. 345196 2. 984844 3. 769005 5. 386247 3. 947175 3. 902012  
1. 531804 0. 939928 1. 320248 1. 839518 2. 421345 2. 451698 0. 809954 1. 697685 1. 738844  
2. 095317 2. 059082 1. 503034 1. 560058 1. 89517 2. 637887 1. 865619 3. 135757 1. 814538  
3. 506313 2. 760611 4. 803815 4. 086195 2. 562871 3. 858574 2. 816681 4. 91463 2. 587754  
3. 455937 3. 997428 4. 273768 4. 1386 3. 194219 3. 659109 3. 795187 4. 320616 3. 084408  
4. 360659 4. 734697 4. 813706 5. 059685 4. 461898 4. 433208 5. 005439 5. 240854 4. 763001  
3. 509822 4. 113544 3. 097444 3. 637381 3. 675752 2. 817224 2. 944561 2. 838869 3. 2783

4. 891883 5. 591054 4. 255012 4. 358584 5. 779897 4. 803291 4. 123528 5. 135337 3. 513862  
2. 013525 2. 180027 2. 528602 1. 629608 3. 13879 3. 257688 2. 066115 2. 412656 2. 43152  
1. 09643 1. 428648 1. 385495 2. 043833 0. 566166 1. 647289 1. 14167 1. 01331 0. 951585  
2. 287256 2. 143949 2. 552494 2. 059786 1. 484863 2. 359297 1. 58386 1. 715064 2. 724819  
2. 80049 2. 98869 2. 189646 2. 230405 2. 608591 3. 607339 2. 436261 2. 42546 2. 82249  
2. 640147 2. 298689 2. 414787 2. 101382 2. 313838 2. 481622 1. 692771 2. 535743 1. 95358  
1. 380324 2. 076636 1. 258815 2. 3469 1. 432698 1. 747581 1. 241346 1. 440718 1. 198524  
3. 417497 3. 577293 3. 666054 3. 863796 3. 484592 2. 53181 3. 535734 3. 231389 3. 681237  
3. 370091 3. 548015 3. 773094 3. 15694 3. 506048 3. 795589 3. 681103 3. 189282 3. 513024  
3. 807155 3. 529904 5. 698134 2. 945865 5. 154262 3. 861559 5. 527104 4. 792407 3. 363252  
5. 220572 4. 154803 4. 571314 2. 18312 3. 793785 7. 987821 3. 034669 2. 175356 4. 020561  
3. 464242 2. 819324 3. 620724 4. 657992 4. 73253 3. 599567 5. 403071 3. 939097 4. 145076  
2. 034523 2. 426601 1. 957887 2. 324992 2. 175256 1. 653386 2. 23462 2. 278857 2. 190763  
2. 154686 2. 346248 1. 903348 3. 360426 2. 039165 2. 516519 2. 132009 3. 10574 2. 824375  
2. 06806 2. 385175 2. 051873 1. 927723 2. 353366 2. 040076 2. 408776 2. 062102 2. 501497  
1. 655216 1. 657661 1. 416684 1. 83549 1. 143905 1. 793373 1. 473651 1. 204179 1. 044388  
5. 479887 4. 632746 4. 980973 4. 4583 4. 162885 5. 673961 5. 284333 5. 600907 5. 880223  
3. 338097 4. 02593 2. 960836 4. 02897 3. 918775 3. 94355 2. 722583 2. 688788 4. 173821  
1. 720495 1. 636849 1. 807283 2. 379394 2. 689355 2. 503558 2. 47529 2. 376084 1. 739732  
2. 36537 1. 405568 1. 011394 1. 04411 0. 86806 2. 643671 0. 999587 1. 323405 1. 339846  
2. 489795 2. 632814 2. 059256 1. 763394 1. 816821 1. 498638 2. 103735 1. 829632 1. 665428  
3. 628235 3. 180833 3. 33939 2. 566785 4. 453927 2. 322237 2. 766539 3. 754739 4. 205098  
5. 891265 6. 200879 5. 436855 4. 873867 5. 497908 4. 691925 5. 729297 4. 46897 4. 014102  
1. 165131 1. 3869 1. 720616 1. 471897 1. 868288 1. 442212 1. 758171 1. 665307 1. 398072  
2. 361338 2. 342091 2. 67598 2. 401704 1. 870093 2. 76689 1. 816265 2. 4238 2. 283325  
2. 675417 2. 359238 2. 12947 2. 12395 1. 490312 1. 17765 1. 949173 1. 977187 1. 968815  
4. 699656 3. 832077 3. 106697 2. 181285 2. 234024 2. 195839 3. 235767 4. 588919 4. 964388  
1. 752102 3. 792919 2. 868772 3. 783701 3. 096415 1. 581208 2. 500491 2. 063566 1. 313966  
4. 648559 5. 316606 4. 495116 4. 520245 5. 051638 3. 603899 5. 971957 5. 397154 4. 729776  
1. 711724 1. 671709 1. 795626 2. 11861 1. 80727 2. 193053 1. 503148 1. 422592 1. 63902  
0. 855362 3. 581208 1. 923036 0. 817834 1. 954186 4. 901773 0. 266758 3. 575898 2. 605189  
2. 249121 3. 294873 2. 829952 2. 608664 2. 229499 2. 6781 2. 976651 2. 583222 3. 144851  
2. 748717 1. 299934 1. 469182 3. 532578 1. 910239 2. 115584 1. 875407 1. 802974 2. 502435  
3. 26483 2. 663323 2. 914699 2. 776979 3. 136535 3. 810134 2. 870756 3. 146208 2. 597474  
2. 473354 2. 670313 3. 391691 4. 189102 3. 617316 3. 260163 3. 503788 2. 915961 4. 276402  
3. 962722 3. 397542 5. 074386 4. 123992 4. 469814 3. 752588 3. 582806 3. 755738 3. 709453  
1. 870138 0. 981219 0. 827204 0. 803528 1. 666515 1. 126807 1. 958171 1. 70965 1. 171633  
1. 229119 1. 769812 1. 265145 1. 734515 1. 961554 1. 89197 2. 64993 1. 814699 2. 497862  
2. 31419 3. 048863 1. 890998 1. 505363 2. 175341 2. 106673 2. 170281 2. 096635 1. 737443  
2. 164148 2. 148347 2. 307721 1. 769281 2. 744189 1. 928916 1. 795719 2. 198923 2. 246464  
9. 935082 8. 883455 9. 232628 9. 912326 8. 365177 9. 509581 8. 317989 7. 141103 7. 279066  
1. 939711 2. 136308 1. 890796 1. 776809 2. 224239 2. 205654 1. 715338 2. 015605 1. 628582  
1. 043846 1. 523139 1. 151699 1. 170717 1. 252696 1. 30486 1. 654608 1. 760567 1. 146773  
2. 119781 2. 050255 2. 121149 1. 076034 1. 147545 5. 450315 1. 817914 1. 358904 1. 082354  
1. 317898 1. 39634 2. 487712 1. 96404 3. 477399 1. 426978 1. 392311 2. 402917 2. 749688  
1. 518685 1. 51039 1. 51039 2. 006029 2. 825151 1. 196608 1. 585288 1. 568681 1. 636918  
4. 77372 4. 042688 4. 626115 4. 20208 3. 160601 3. 249658 4. 173716 2. 742458 4. 935261  
1. 452407 2. 27773 2. 466553 3. 281853 2. 206186 2. 145755 2. 913258 4. 32336 2. 064992  
3. 436941 4. 472143 4. 090163 2. 443935 3. 048226 2. 319225 2. 928188 3. 298733 4. 632793  
1. 833367 3. 061919 2. 634549 2. 733126 3. 009927 3. 25612 2. 375104 2. 642745 3. 780098  
2. 867691 4. 072411 4. 652267 3. 895067 4. 13197 3. 590429 4. 316247 4. 63629 4. 650126



3.958078 3.944005 3.633348 3.415065 3.5323 3.71668 3.330758 2.858876 3.432944  
0.6448 1.007748 1.23678 1.039678 1.103414 1.981301 1.329445 1.881238 0.83419  
1.075956 0.96784 1.269712 2.013485 1.263228 1.137296 1.343077 1.710357 0.898245  
3.693654 2.924889 3.174862 3.502957 4.937251 4.782576 4.165684 5.800222 2.235848  
1.781322 3.046243 3.676163 1.286478 4.373294 2.241736 4.248222 5.179047 2.451777  
2.327006 2.83258 2.953215 2.610258 2.508608 2.306448 2.036516 2.741254 2.112827  
4.503943 4.335765 2.982563 1.957078 3.929304 6.534068 3.199806 2.817604 5.389103  
2.239388 1.896979 2.151071 2.293933 1.918678 2.384317 1.94679 1.999467 2.067637  
1.205999 1.292071 1.410828 2.464019 2.334765 5.764866 2.25103 1.963258 2.018032  
2.975932 2.651433 5.300397 3.526303 2.765767 1.993975 2.906935 3.302241 3.47087  
1.87166 1.684132 1.939482 1.841286 1.989731 3.079466 1.538405 1.801234 1.96096  
2.324911 1.38776 1.511345 1.115131 1.142503 1.397154 1.291354 1.424436 1.16518  
0.743235 1.369169 0.73042 1.377489 0.890018 3.740834 1.026787 0.808414 3.032256  
1.421266 1.614535 1.445636 1.389265 1.175908 1.898418 2.11447 1.357469 1.362657  
6.270732 1.656498 1.900226 6.109561 4.762961 1.883067 2.853999 2.438752 3.063475  
1.575868 1.618376 1.687131 1.170152 1.413473 1.298933 2.193498 1.535739 1.337084  
1.87901 2.29341 1.37062 1.962936 1.864783 2.085421 1.746265 1.624553 1.375698  
1.091356 1.490817 0.869111 0.688646 0.946321 4.66188 0.761462 0.915478 1.13886  
1.276391 1.181311 1.208955 1.253122 1.491383 1.155737 1.072382 1.650434 1.457124  
5.438792 5.882451 6.263763 4.655935 5.940313 5.529269 5.528846 4.633339 3.992337  
1.637717 1.620434 1.871871 3.786197 1.486846 1.611461 1.584879 2.438821 1.779035  
1.528185 2.317165 1.458991 1.536979 1.507513 1.96961 1.377968 2.520598 1.745076  
1.911504 1.790569 2.183292 2.055761 1.325889 1.646989 1.503135 1.695846 1.941473  
5.036335 3.838554 3.32949 4.564805 2.242417 1.806778 1.582822 2.358173 3.874757  
0.807031 2.885021 0.969453 1.802344 1.924826 0.654707 1.158906 1.808574 0.744382  
1.861214 3.05647 2.338921 1.470138 2.463491 2.290644 1.337419 1.405224 1.7631  
2.418717 1.601048 2.643813 1.930255 3.052079 1.748444 2.379588 2.243137 1.959761  
4.396741 3.881494 2.361961 2.149082 1.060087 4.119742 3.05023 3.218949 4.907763  
5.840685 3.794065 3.896039 3.083585 3.692466 5.145927 2.858989 3.664032 2.317409  
3.171262 2.375403 3.100729 4.762195 2.531042 2.759903 3.00818 3.869891 3.576425  
1.784556 2.477976 2.027514 3.268831 2.334212 2.709665 2.06577 2.686961 2.952568  
2.60626 3.323735 3.126926 3.288374 3.398806 3.39068 3.519846 3.357866 3.20293  
1.003588 2.955363 1.853959 1.700256 2.116491 1.855259 2.317573 1.870281 1.314104  
1.97026 1.085502 1.530144 1.737775 1.759479 1.783909 1.458422 1.904989 1.892052  
1.646052 1.216577 1.568935 2.216251 1.579845 1.379374 1.318921 1.694217 1.367096  
0.720176 1.08423 1.150455 1.167395 1.179451 0.78879 1.062329 2.780915 0.997286  
2.415576 2.295355 2.188062 2.098298 2.295355 1.804073 2.495735 2.378262 2.288667  
1.71162 1.237688 1.362279 1.15924 1.877234 1.384781 2.036913 2.734457 1.103822  
2.361541 2.716622 3.654996 2.345731 2.307548 3.338201 1.350684 2.718983 2.310304  
1.051192 0.874366 1.199322 1.186763 0.999119 1.641553 1.045 1.63693 1.630546  
0.835087 1.018156 0.996698 1.198493 0.939577 1.397908 0.695204 0.736829 2.084372  
4.925965 5.439272 6.86994 3.677475 5.600699 5.728742 6.006263 4.587576 4.261931  
3.913197 2.145444 2.032887 2.778041 2.796309 5.035461 2.948189 2.058275 3.521733  
2.951409 2.488176 3.226611 3.332473 2.979552 3.113496 2.874813 2.82682 3.022107  
1.342946 1.714398 1.562355 1.789508 1.374433 1.931471 1.151953 1.601037 1.547681  
2.03237 0.783238 1.244374 2.096063 0.359557 3.968989 0.964474 1.215556 6.300994  
5.896008 6.47741 6.094701 6.479396 6.777348 5.476451 5.821578 5.203404 5.978487  
2.189034 3.349672 3.042089 1.764003 2.428607 1.079709 1.131452 1.969893 1.384381  
1.481435 1.334352 1.53073 1.433845 1.356808 1.87441 2.117043 1.39184 0.896409  
5.981319 6.435542 6.810222 4.098107 5.878158 3.254927 3.659432 3.581516 3.495178  
1.366814 1.642273 1.518478 1.721377 1.722113 1.798055 2.14648 1.938041 1.301996

2. 939396 2. 734299 2. 492893 1. 562132 2. 203607 2. 274969 2. 544689 1. 878669 1. 799203  
4. 335441 3. 205562 3. 383628 3. 95453 2. 790983 3. 929768 3. 172277 4. 48511 3. 96913  
2. 50031 1. 993224 2. 894183 2. 242669 2. 396105 2. 319376 2. 086487 2. 111982 2. 025986  
1. 999727 1. 595126 1. 61435 2. 053559 1. 211721 1. 977629 2. 50439 1. 61066 1. 145319  
1. 569395 0. 84111 2. 391313 1. 625397 0. 339169 2. 03776 0. 811124 1. 38564 1. 348315  
1. 826307 1. 908077 0. 167413 1. 975073 2. 801399 7. 575526 2. 336108 1. 699516 2. 395069  
3. 2855 2. 11829 3. 191102 3. 262481 2. 845438 2. 489177 2. 235925 2. 456635 2. 546198  
3. 09343 3. 200452 3. 862458 3. 543892 3. 008326 3. 26682 3. 060359 3. 134472 3. 345807  
1. 566998 1. 175809 1. 366538 2. 129909 1. 650278 2. 022582 1. 103414 3. 035552 1. 483301  
1. 943998 2. 848573 2. 300229 2. 049027 2. 1482 1. 841799 2. 2182 2. 42132 2. 988685  
0. 705705 1. 435385 0. 913281 1. 292065 1. 157381 7. 897571 1. 509109 0. 734271 0. 59582  
0. 999666 1. 088572 1. 178486 1. 117325 1. 068361 1. 699954 1. 067562 0. 735767 1. 085644  
1. 697798 2. 142121 2. 114287 1. 553162 1. 831323 2. 264653 1. 41581 1. 335902 1. 690287  
2. 664823 6. 220307 2. 904077 2. 272418 1. 594337 8. 995364 1. 362894 2. 338872 6. 939371  
2. 646061 2. 123216 2. 490416 2. 785161 2. 4068 2. 456737 2. 466297 2. 405829 2. 917177  
2. 138634 3. 062005 1. 764035 0. 922463 0. 173196 5. 990754 4. 715052 1. 120566 2. 811738  
1. 767511 1. 860361 2. 807662 2. 371813 1. 611619 0. 908662 2. 134061 1. 629115 1. 663803  
1. 751586 1. 56389 1. 797605 1. 719115 1. 438743 1. 432015 1. 7481 1. 419424 1. 948334  
4. 508415 3. 049606 4. 034392 2. 241005 3. 097472 6. 30874 2. 102084 2. 925707 4. 013015  
5. 856124 5. 489943 4. 070936 5. 851859 4. 100398 6. 626191 4. 643411 5. 677743 2. 491903  
0. 350694 2. 753638 0. 5959 1. 620902 0. 870403 0. 754437 1. 162849 1. 677158 1. 888946  
0. 673052 2. 369846 0. 759497 0. 920861 1. 844573 1. 180591 0. 844609 1. 960844 1. 464042  
1. 523731 2. 160352 1. 585623 1. 413165 1. 738913 1. 742035 1. 39419 1. 602363 2. 031877  
4. 37024 3. 298398 3. 765579 5. 07426 4. 72719 4. 794289 4. 824801 4. 597096 3. 96361  
1. 660953 1. 903975 1. 819323 2. 155658 2. 175897 2. 05253 2. 297559 2. 10367 2. 267113  
2. 426103 2. 380963 2. 340676 2. 430403 2. 465839 2. 59862 1. 946171 2. 763882 1. 803139  
1. 526227 1. 914579 1. 296071 2. 214256 1. 226044 1. 421699 1. 20959 1. 710708 1. 182945  
1. 495738 1. 437195 1. 574369 2. 680441 1. 914455 1. 662034 2. 590384 2. 337316 1. 860846  
3. 682181 4. 065683 4. 178415 3. 684698 4. 43117 3. 06483 3. 949283 3. 456743 4. 2374  
2. 195398 2. 830674 1. 980328 1. 921488 2. 964641 2. 576377 2. 279696 3. 191358 2. 550253  
1. 315029 1. 187862 1. 783185 1. 757058 1. 591811 1. 743133 1. 562812 1. 618503 1. 763297  
2. 452465 3. 264293 2. 222321 3. 355841 2. 724468 2. 579704 2. 469036 2. 865407 3. 513306  
3. 871476 4. 821043 4. 574175 4. 120644 5. 543916 4. 893804 4. 324959 4. 869731 5. 018111  
2. 901729 1. 648345 2. 802553 2. 774227 3. 22524 2. 772716 2. 587822 2. 541376 2. 821567  
1. 826695 1. 620147 3. 638584 2. 376161 2. 067713 1. 855298 1. 939398 1. 940339 2. 145406  
1. 472676 2. 09053 2. 271331 1. 721573 1. 624261 1. 266681 1. 487331 1. 544601 1. 334559  
3. 921472 4. 179465 4. 241267 4. 758213 4. 182492 3. 779704 4. 644169 3. 587045 3. 898529  
0. 822314 0. 697224 1. 229377 1. 070571 1. 873912 2. 015818 0. 84094 1. 456216 1. 314249  
1. 906498 1. 800396 1. 451957 2. 149915 2. 002599 1. 580195 1. 768739 2. 088896 1. 68795  
5. 214955 5. 486194 5. 491089 5. 923965 5. 114921 4. 861343 5. 142312 5. 13647 5. 826669  
1. 542046 2. 20848 1. 785729 1. 787971 1. 572384 1. 218827 1. 654416 1. 918601 1. 826077  
0. 791297 0. 863506 0. 414823 1. 080699 0. 636547 1. 94572 1. 122944 0. 909841 0. 634634  
4. 479067 3. 556709 4. 281633 4. 515873 4. 167231 5. 391992 3. 405513 3. 865801 3. 257193  
1. 442649 2. 198601 1. 752809 1. 839676 1. 584205 1. 8439 1. 818114 1. 40606 2. 254584  
5. 248907 5. 83342 3. 923102 2. 627114 3. 231031 3. 903799 4. 241185 4. 953786 5. 000625  
2. 038571 2. 834786 3. 200846 2. 620635 3. 059041 3. 27966 3. 378479 3. 880527 3. 056422  
2. 639441 4. 033754 4. 551057 5. 140046 4. 648238 5. 049445 3. 114487 3. 225209 5. 440601  
2. 914548 3. 814135 2. 359105 2. 692661 1. 317937 2. 321408 2. 495961 3. 595429 1. 818505  
1. 18214 1. 197346 1. 157715 0. 850546 1. 155981 0. 893985 1. 32381 1. 059134 1. 104052  
0. 901194 0. 809442 0. 61222 0. 782163 0. 396386 0. 813448 0. 894295 0. 876671 0. 560856  
2. 503002 1. 693092 1. 93507 1. 664592 2. 029531 2. 094569 1. 934335 1. 738977 2. 46075

4. 525154 3. 807687 4. 594587 4. 372187 4. 219709 3. 921053 4. 667817 5. 623762 4. 351126  
1. 331857 1. 686867 0. 79761 1. 883971 1. 348354 1. 816806 1. 078943 1. 092683 1. 205859  
4. 852308 4. 84303 4. 515201 4. 456495 4. 722646 4. 114284 4. 174718 4. 739567 4. 586153  
2. 379058 1. 79024 1. 2656 2. 208212 2. 748702 2. 659579 1. 312723 1. 617752 1. 832483  
1. 890772 1. 243658 1. 518078 2. 305137 0. 974765 1. 027935 0. 995031 0. 660425 1. 442527  
3. 902731 3. 647835 4. 382291 2. 845902 3. 487734 4. 142026 5. 055651 4. 154031 4. 184166  
2. 90571 3. 235152 2. 558721 3. 19885 3. 265349 1. 854873 2. 428806 1. 852138 2. 228948  
3. 241649 2. 702908 4. 854695 3. 843667 5. 000718 4. 391713 4. 074627 3. 742512 5. 209435  
1. 481247 1. 463184 1. 094373 1. 54147 1. 48587 1. 294918 1. 379642 1. 282511 1. 603242  
5. 852938 4. 326629 4. 117216 5. 040678 4. 650719 4. 757088 4. 202912 4. 963804 5. 262922  
1. 581229 1. 221195 1. 353377 1. 534401 0. 96643 1. 124562 1. 362856 1. 535846 0. 76181  
2. 096175 1. 690134 1. 546021 1. 820344 1. 865787 2. 052771 2. 607176 2. 278652 1. 709687  
4. 991965 4. 983991 5. 01206 5. 634123 5. 252311 5. 152294 5. 532869 5. 211107 5. 058467  
2. 571548 2. 354352 2. 398172 3. 070836 1. 821902 2. 710298 2. 499412 3. 566929 3. 058453  
1. 111862 1. 042914 1. 324882 1. 664429 2. 178494 1. 103216 1. 322236 1. 092384 0. 925642  
3. 997934 1. 198832 2. 153225 1. 232349 1. 182926 1. 191567 1. 722739 1. 592266 0. 726318  
1. 584849 1. 621039 0. 939832 1. 215399 0. 928488 1. 610916 0. 7856 0. 700407 0. 915867  
5. 245542 6. 637221 6. 689192 6. 195779 6. 245869 4. 630929 6. 20413 5. 613221 5. 650899  
2. 139332 2. 24142 2. 045164 1. 641929 2. 082005 2. 059044 2. 049946 2. 007348 2. 243377  
1. 741053 1. 277054 1. 582287 2. 346436 1. 379182 2. 393314 1. 667219 2. 314795 1. 583441  
1. 23542 1. 283682 1. 000947 2. 265154 1. 392221 2. 261579 1. 31168 1. 727747 1. 555545  
6. 134552 4. 02873 4. 583118 4. 990496 5. 208676 3. 236589 4. 07964 2. 778965 2. 618008  
2. 731909 1. 192969 0. 879975 2. 663342 1. 067902 1. 501183 1. 494717 0. 81441 1. 806457  
2. 640086 2. 30906 2. 303185 1. 350064 1. 480248 1. 981859 2. 166116 1. 80975 1. 723382  
1. 741722 1. 583961 1. 544713 1. 755545 1. 941261 2. 331944 1. 494588 3. 20041 2. 262465  
4. 362236 3. 25894 3. 137078 4. 21531 4. 329552 3. 703974 3. 888293 4. 037106 3. 620847  
1. 391846 1. 309234 1. 213032 1. 617258 0. 666351 1. 285304 1. 019348 1. 296157 0. 927929  
3. 975349 5. 975786 4. 626148 4. 053888 4. 76833 5. 194351 4. 676406 5. 018845 5. 455561  
0. 882948 0. 886761 0. 596648 1. 062485 1. 001093 0. 929878 0. 76827 1. 475108 1. 779432  
4. 652894 6. 296425 5. 613336 5. 121292 5. 280304 5. 328489 5. 495336 6. 77933 5. 614038  
2. 175589 1. 518115 2. 04106 2. 700721 1. 74343 1. 568488 1. 452727 1. 789561 2. 370077  
1. 689208 2. 612448 1. 786141 1. 85185 1. 988625 1. 606624 2. 083807 1. 562785 1. 741492  
5. 369436 1. 157765 3. 546262 1. 594014 1. 407547 1. 59955 1. 500168 1. 844784 2. 471067  
1. 827615 2. 288901 1. 807452 3. 096066 2. 356685 1. 620985 1. 828974 2. 319213 2. 03865  
2. 738331 2. 334047 2. 338614 2. 09874 2. 704737 2. 165224 2. 191122 1. 987056 2. 405507  
3. 06079 3. 140074 5. 262762 2. 810606 3. 96044 4. 096555 3. 017163 2. 599282 4. 148687  
1. 32893 1. 127078 1. 383327 2. 020813 1. 977019 1. 5416 1. 332448 1. 495378 1. 213026  
5. 755214 6. 764281 5. 937488 6. 042832 5. 752974 5. 527065 6. 219317 6. 271691 5. 964553  
1. 722236 1. 196747 1. 493071 1. 586648 1. 852685 1. 723769 1. 068368 1. 529942 1. 343857  
2. 279783 3. 270086 2. 138345 4. 1533 4. 071371 3. 47528 2. 208669 2. 497093 2. 569425  
1. 529334 2. 295422 3. 621959 2. 951195 2. 92706 2. 507792 2. 884044 2. 813997 3. 479616  
3. 955959 4. 05819 5. 45088 4. 825823 5. 314504 5. 960896 5. 441769 4. 694636 5. 00147  
1. 609218 1. 65156 2. 361071 1. 842431 1. 697779 4. 47984 2. 392312 1. 937783 3. 593835  
6. 310376 6. 544502 6. 215097 5. 408866 5. 962085 5. 818609 6. 581305 6. 125977 5. 875944  
1. 18218 1. 404675 1. 334453 1. 426301 1. 222193 1. 509293 1. 39324 1. 379786 1. 235742  
4. 396701 4. 307744 4. 86921 4. 828533 5. 353328 5. 113764 5. 352529 5. 396567 5. 288124  
2. 222133 2. 205335 1. 664475 1. 935985 1. 382832 1. 766673 1. 733006 1. 526677 1. 662856  
2. 496298 3. 036854 2. 859858 2. 831461 2. 554805 2. 183423 2. 059576 2. 034635 2. 92026  
3. 732161 3. 290327 3. 933623 2. 572181 2. 859946 4. 049993 2. 942817 2. 281173 2. 63263  
1. 524623 1. 361348 1. 217116 1. 055093 0. 983701 0. 992286 1. 577988 1. 341301 0. 921451  
5. 046998 5. 018568 4. 937039 4. 795317 5. 082258 3. 826527 4. 505769 4. 662416 3. 826527

1. 02905 1. 455767 0. 872881 1. 161106 1. 446138 1. 044765 1. 154328 1. 29734 1. 008836  
6. 782934 6. 529 6. 330977 5. 784939 6. 998601 5. 788159 6. 339146 6. 825285 5. 986918  
2. 023745 1. 382338 1. 675769 4. 305694 3. 448448 1. 970559 3. 784206 3. 431353 2. 849813  
4. 094116 4. 773991 4. 8484 4. 375121 5. 641718 2. 474799 4. 698679 4. 354389 3. 819538  
1. 963999 1. 180464 1. 307403 2. 002813 1. 548513 2. 384275 2. 372248 2. 538823 1. 525252  
5. 377834 5. 226641 6. 341538 6. 44475 5. 885845 6. 122983 6. 460987 5. 900766 5. 93799  
4. 621792 2. 611442 5. 037703 5. 212942 3. 683212 5. 283601 4. 685623 4. 619537 5. 186335  
3. 990845 3. 806739 3. 641946 5. 164082 4. 365415 4. 334848 4. 337099 4. 42841 4. 855615  
2. 37252 2. 346135 1. 778082 2. 797243 2. 327634 2. 420661 2. 170116 2. 567906 1. 63363  
2. 324571 1. 274034 1. 752868 1. 570049 2. 083891 1. 668292 2. 042142 2. 30475 1. 381347  
6. 631286 7. 345183 5. 948876 5. 459517 6. 702709 7. 112647 8. 536173 7. 562775 7. 602726  
5. 457022 3. 993812 4. 955225 3. 719242 6. 047481 4. 826619 6. 242556 6. 029474 6. 707327  
2. 572772 1. 808465 2. 468863 2. 229788 2. 979871 2. 182158 1. 65511 1. 648631 1. 8918  
1. 335014 1. 527145 1. 257172 1. 746858 1. 296941 1. 524045 1. 444097 1. 309155 1. 470543  
3. 252819 2. 546687 2. 288983 3. 417049 2. 571377 3. 535028 2. 584906 2. 559442 1. 8855  
0. 623007 0. 972433 0. 859376 0. 782466 1. 912331 1. 513189 0. 737011 2. 221175 0. 826663  
4. 115683 3. 339053 3. 039574 3. 118939 3. 858523 4. 03599 3. 212898 3. 423501 3. 212833  
0. 930116 1. 265798 0. 857308 2. 563199 1. 103207 1. 10483 2. 584203 2. 163339 0. 931563  
0. 980039 1. 674186 1. 01295 2. 087462 0. 896426 1. 319034 1. 124804 1. 198117 1. 565142  
1. 617975 1. 492225 1. 362478 0. 902308 1. 29079 1. 506876 1. 252205 1. 255874 1. 391852  
7. 580062 6. 639643 7. 277861 5. 681794 7. 288325 7. 542972 6. 842623 6. 020971 5. 84903  
3. 006795 1. 386668 1. 865316 3. 189305 1. 758311 2. 141442 1. 952525 2. 185725 1. 736818  
1. 358503 2. 015379 2. 077387 2. 092741 2. 354097 1. 459699 1. 770055 1. 177392 1. 734837  
3. 292562 3. 8563 3. 261254 3. 532448 3. 295574 3. 323587 3. 521714 3. 428199 3. 277802  
6. 590224 5. 159619 6. 421944 5. 332199 6. 499742 5. 906415 6. 572203 5. 932522 6. 416083  
2. 356533 1. 678023 1. 948091 2. 618875 1. 871588 2. 209697 1. 461763 1. 738922 1. 952709  
2. 289756 2. 611408 3. 657601 4. 11491 3. 694614 2. 462335 3. 096461 2. 321536 3. 001423  
1. 535422 3. 641888 1. 203257 1. 614937 2. 764697 1. 434576 1. 421105 1. 984447 3. 228782  
2. 085669 1. 864384 3. 25733 2. 050693 2. 159327 1. 80369 2. 904532 1. 857688 2. 531879  
1. 925639 1. 613171 1. 711896 2. 364416 2. 341161 1. 599507 2. 24744 2. 235117 1. 758528  
1. 200841 1. 528881 0. 938316 2. 03397 1. 194579 0. 905239 1. 130813 1. 945119 1. 134846  
3. 881499 3. 635942 4. 519296 4. 012311 3. 173252 3. 345102 2. 941993 2. 959415 3. 206965  
3. 193749 3. 072297 3. 138781 3. 147414 3. 877516 4. 725006 4. 26822 3. 472786 3. 489285  
3. 763005 4. 055612 4. 131613 3. 975765 4. 109539 4. 710382 3. 030952 3. 345592 4. 250799  
2. 71571 2. 80141 2. 017142 1. 789639 1. 985314 2. 158901 2. 241755 1. 855655 2. 396685  
6. 327418 6. 647459 5. 897708 5. 650179 6. 273862 6. 070491 6. 217749 5. 961726 6. 043985  
1. 752297 1. 991328 1. 722904 1. 908026 1. 157529 1. 769307 2. 035653 1. 564345 1. 556935  
3. 854496 2. 952154 3. 399048 4. 792301 0. 703281 1. 512448 2. 037765 2. 23086 3. 583718  
2. 449174 1. 616356 2. 499283 2. 334687 2. 014817 1. 978718 1. 77724 2. 057688 2. 022368  
2. 174245 1. 280258 1. 217496 1. 321326 1. 226147 2. 071499 1. 586393 2. 036486 1. 520726  
6. 483732 6. 891263 6. 799117 6. 609195 7. 082689 4. 920393 5. 661818 6. 208938 6. 762585  
2. 553297 2. 337955 3. 057085 2. 160585 1. 825238 1. 740434 1. 622505 2. 544009 2. 561355  
1. 731522 1. 759468 1. 51569 1. 786428 1. 766079 1. 928924 2. 117493 1. 659352 1. 6793  
2. 005966 1. 954894 1. 767607 1. 930873 3. 014819 2. 086835 2. 061021 2. 690699 1. 61485  
1. 120758 1. 213161 1. 081252 1. 96896 0. 984412 2. 90041 1. 200586 2. 049975 1. 123913  
0. 750113 1. 194077 0. 705205 0. 898728 0. 721901 1. 259441 0. 819185 1. 165647 0. 687401  
1. 648462 1. 442559 1. 695158 2. 148169 1. 230168 3. 588954 1. 623146 1. 469727 2. 022608  
2. 731375 2. 914459 3. 059688 3. 730645 3. 246582 3. 206634 2. 91193 2. 946644 2. 830508  
1. 455477 1. 428992 2. 268044 1. 141367 1. 568482 1. 605055 1. 042257 1. 180723 1. 84065  
1. 36681 2. 209401 2. 930516 2. 805513 2. 34144 1. 405392 1. 62966 1. 470028 1. 986126  
1. 112967 0. 832898 0. 773481 0. 963367 0. 974701 2. 011235 0. 967524 0. 845198 1. 406963

4. 076119 4. 409679 4. 618783 4. 724733 4. 728821 3. 622313 4. 263319 3. 356599 3. 394964  
2. 181551 1. 415964 1. 700715 1. 641954 2. 012557 1. 462803 2. 105908 1. 31541 2. 736256  
4. 762639 4. 144924 5. 649101 6. 523283 5. 265259 4. 748732 5. 881919 4. 203413 4. 752926  
3. 022579 1. 418136 1. 995249 2. 24756 2. 196735 1. 417823 2. 658814 1. 402682 2. 413496  
2. 655432 2. 657804 2. 588965 2. 444256 3. 279885 3. 316322 2. 937204 2. 362208 2. 521762  
1. 014865 1. 699869 0. 953653 1. 318042 0. 723728 2. 5995 0. 549645 0. 735181 1. 041091  
1. 40929 1. 40929 1. 464746 1. 269432 1. 428625 1. 509582 1. 385747 2. 200867 1. 602727  
1. 53606 1. 30712 1. 407648 2. 547818 1. 065624 1. 241618 1. 336461 1. 14166 1. 825032  
2. 976253 2. 897509 1. 761061 1. 271658 1. 833637 1. 899723 2. 476346 4. 035246 1. 417338  
0. 929606 1. 611664 0. 746733 1. 302426 0. 780484 1. 637837 1. 403958 0. 678569 1. 020686  
5. 074933 6. 373621 6. 184091 4. 892652 5. 809604 6. 296214 5. 50241 5. 591113 5. 374799  
1. 953604 2. 068458 2. 473039 1. 881398 1. 660919 1. 473804 1. 830671 2. 338574 2. 079722  
3. 632506 1. 164319 1. 916184 1. 390537 3. 161706 2. 728277 1. 425432 2. 180818 1. 714858  
1. 167043 1. 108923 2. 185363 1. 976008 2. 029317 1. 994063 1. 574839 1. 359638 2. 166254  
5. 13905 4. 742366 4. 783318 3. 728316 5. 120229 4. 289078 4. 302497 4. 364812 4. 282917  
1. 298009 1. 000631 1. 668526 1. 23706 1. 879055 1. 152006 1. 389622 1. 841487 1. 354351  
2. 899433 1. 617414 1. 546271 1. 752769 1. 728902 2. 612455 0. 748763 1. 54646 1. 898051  
4. 657266 5. 450098 4. 931604 5. 42747 5. 844103 4. 136855 5. 558342 4. 377912 4. 244397  
5. 613809 5. 641025 4. 617391 5. 678469 4. 938622 5. 438322 5. 520019 5. 247952 5. 340786  
2. 035382 2. 692976 2. 229001 2. 358463 2. 7941 1. 912321 2. 416273 2. 610255 2. 505494  
1. 408633 1. 21183 1. 026295 1. 63424 0. 910822 1. 595082 1. 425321 1. 479295 1. 191074  
2. 608738 1. 729888 2. 518809 2. 857119 2. 857119 1. 731278 1. 675119 1. 990817 1. 967283  
3. 299285 2. 536261 2. 49412 1. 915712 2. 423217 2. 574916 2. 24619 1. 796835 2. 621669  
1. 528302 1. 537401 1. 088647 1. 133358 2. 302535 1. 558112 1. 863669 1. 327415 1. 290785  
1. 349817 1. 47823 1. 630942 2. 484707 1. 630784 2. 293756 1. 004911 2. 49117 2. 111288  
1. 569356 1. 278804 1. 295917 1. 071456 1. 407122 1. 184836 1. 525745 1. 145436 1. 232962  
3. 322713 3. 958528 4. 105467 4. 159968 3. 337593 3. 180232 3. 213785 4. 224876 4. 140483  
1. 043889 2. 069179 1. 415087 1. 906016 1. 108363 1. 191369 1. 318856 1. 501753 0. 741994  
1. 759126 0. 795475 1. 009663 1. 203598 1. 229427 1. 304756 1. 152007 1. 341885 1. 126991  
1. 644597 1. 355091 1. 239921 1. 927032 1. 063483 1. 202266 1. 347581 1. 606608 2. 431377  
4. 755494 4. 342526 4. 377554 2. 399873 4. 745951 2. 751043 4. 328445 3. 687278 3. 380025  
4. 047926 4. 601213 3. 878773 3. 497792 1. 946818 4. 204665 3. 993797 2. 516252 3. 065149  
0. 91318 1. 705197 0. 711568 1. 958488 1. 257619 1. 424626 0. 833679 1. 478796 0. 854617  
1. 833417 1. 324248 1. 339846 2. 512313 2. 091331 1. 43376 1. 362639 1. 21424 1. 329251  
4. 479599 5. 136644 3. 852797 4. 347371 4. 261876 3. 577483 4. 00647 3. 635994 4. 770182  
1. 014587 2. 519534 2. 120803 1. 054701 0. 685722 1. 204421 1. 067785 1. 398563 1. 03442  
1. 41705 1. 466925 1. 85757 2. 169966 1. 810369 1. 289736 1. 645135 2. 410547 1. 10165  
1. 578485 1. 900627 2. 293767 1. 592526 2. 634602 1. 932032 2. 739757 2. 445362 1. 588931  
0. 986514 1. 358257 1. 081464 1. 240806 1. 206207 1. 300193 0. 941317 1. 785962 1. 482113  
1. 479926 1. 39741 1. 765104 2. 09738 1. 527054 1. 369282 1. 466997 2. 226392 1. 885335  
5. 08786 1. 308637 2. 129084 4. 033712 1. 830866 5. 312959 1. 856867 3. 464554 3. 829731  
2. 473795 2. 066108 2. 527275 2. 525464 2. 392734 2. 96942 2. 018881 2. 28195 3. 196041  
2. 286595 1. 0275 2. 089655 2. 472942 1. 67689 1. 927205 1. 545717 2. 080786 2. 025908  
1. 098873 1. 644479 3. 626514 1. 036244 1. 166818 1. 261059 2. 172321 3. 528475 2. 846499  
3. 355846 4. 016107 5. 250242 3. 537132 4. 021477 3. 8514 4. 84834 3. 534308 4. 469578  
3. 818405 4. 168414 4. 485608 3. 709607 3. 896542 4. 448068 4. 020778 4. 745478 3. 635603  
1. 671709 2. 702557 2. 160773 2. 04082 2. 1731 2. 724952 2. 286436 2. 730825 2. 310824  
3. 487978 2. 128753 2. 70623 2. 833912 1. 960797 2. 523606 1. 127086 3. 484805 1. 999142  
2. 666131 2. 962247 1. 467857 3. 232796 1. 779808 2. 435146 1. 639163 3. 001292 2. 404309  
2. 031909 1. 665452 1. 430555 2. 591501 0. 97585 2. 22028 2. 703615 2. 342055 2. 52862  
1. 40993 1. 554369 1. 893078 1. 948081 1. 630754 2. 416089 1. 419272 2. 577486 2. 734004

5. 524215 5. 297553 5. 165638 3. 831146 5. 468191 6. 143913 6. 065449 6. 067277 5. 348962  
0. 903221 0. 993965 0. 91913 1. 079035 0. 689265 2. 3672 2. 414648 1. 143131 0. 640797  
1. 517398 2. 248274 0. 946028 0. 976281 2. 118519 3. 4915 0. 97403 2. 479733 2. 270268  
2. 906422 2. 336533 2. 002339 2. 09925 2. 341051 2. 08411 1. 893303 1. 868009 2. 219114  
1. 228883 1. 236209 1. 548334 1. 425757 1. 282231 1. 544191 1. 306327 1. 079424 1. 202818  
1. 050313 1. 636884 1. 790454 1. 471483 1. 283323 1. 043021 1. 251208 1. 466388 1. 453231  
3. 018718 2. 783964 2. 841101 2. 243429 2. 61425 2. 040276 3. 198897 2. 296017 2. 791172  
0. 82186 1. 172347 1. 322345 1. 686186 0. 205869 4. 701882 2. 154459 0. 884255 0. 860693  
2. 814625 1. 135577 1. 437698 2. 476875 3. 129339 2. 081617 1. 713921 1. 762544 2. 548131  
3. 432463 2. 031566 3. 868176 3. 371414 2. 134019 4. 017264 1. 608111 1. 160841 1. 836245  
1. 661541 1. 080927 1. 572069 0. 956601 0. 815694 1. 775372 2. 053662 0. 999076 1. 148472  
1. 469432 1. 824058 1. 227499 2. 242325 1. 975231 0. 941844 2. 550301 1. 802776 0. 599324  
2. 206084 2. 15975 1. 207735 1. 98348 2. 234651 1. 947647 1. 739753 1. 663264 1. 714615  
2. 876942 4. 338044 2. 908369 3. 720249 3. 349565 3. 298653 3. 658637 3. 126495 4. 162125  
1. 331441 1. 179088 1. 180375 0. 937167 1. 48337 1. 402329 1. 400402 1. 91795 2. 572334  
1. 690839 2. 468493 2. 358659 2. 795872 2. 566065 1. 611705 1. 388974 1. 422683 1. 966873  
3. 971943 3. 63045 4. 349702 3. 048805 4. 750993 3. 110007 4. 400299 2. 834209 3. 365522  
4. 416232 3. 807579 3. 925293 5. 401837 4. 586319 4. 499339 4. 707537 5. 380364 4. 70587  
2. 406304 1. 740805 1. 852406 2. 308475 1. 840893 1. 899225 2. 243622 1. 292129 1. 282025  
2. 672293 2. 097065 1. 497137 1. 228937 0. 997337 2. 641039 1. 247929 1. 565753 2. 49308  
1. 315218 1. 731462 1. 454324 1. 507956 1. 506591 1. 7926 1. 309218 1. 209004 0. 901575  
2. 489956 2. 172356 3. 919755 2. 894313 3. 09339 2. 096052 2. 063212 3. 136114 3. 849019  
2. 822541 3. 811947 3. 312041 3. 323292 3. 10082 4. 287978 4. 153662 3. 90915 3. 352562  
1. 512149 2. 621098 1. 468882 1. 66068 1. 884141 2. 853876 1. 874734 1. 782064 1. 882809  
2. 220098 2. 334292 1. 821893 1. 586432 1. 922276 1. 926441 2. 432822 1. 532033 2. 259168  
0. 851297 1. 122219 1. 564371 0. 949332 1. 120232 0. 929702 1. 200212 0. 96728 0. 872659  
3. 612626 4. 17544 4. 046103 2. 938377 3. 388653 3. 039423 3. 022599 2. 565988 3. 678436  
1. 096358 1. 37756 0. 986052 1. 603762 0. 615297 1. 27636 0. 713808 1. 362873 0. 529142  
2. 500334 2. 349423 3. 093406 3. 096513 2. 37843 2. 92693 2. 385185 2. 22805 2. 875564  
4. 587901 3. 810351 3. 643996 3. 329928 3. 512718 3. 557517 3. 582252 3. 173404 4. 942474  
1. 078809 1. 281201 2. 406026 1. 270449 1. 234212 1. 461194 1. 729836 2. 086281 1. 254143  
2. 944375 5. 194805 3. 495394 2. 902624 3. 053291 2. 85008 2. 246856 3. 184999 2. 033726  
2. 262095 4. 53855 2. 029941 1. 879624 1. 93896 3. 312378 2. 799471 3. 489522 2. 842158  
1. 557266 1. 311658 1. 711473 1. 557266 1. 549479 4. 147557 1. 802507 1. 218294 1. 738533  
1. 321452 2. 106516 2. 005803 1. 291972 1. 519112 1. 636292 1. 641487 1. 311106 1. 610674  
5. 408869 4. 726671 4. 91695 3. 673713 4. 956606 4. 935071 4. 253368 4. 762229 5. 42401  
1. 273661 1. 788952 1. 692667 3. 18813 1. 501921 1. 894045 1. 622094 2. 339335 3. 234241  
4. 243775 4. 197507 3. 699034 3. 477953 3. 827459 3. 87864 3. 370876 3. 943452 3. 651236  
1. 696404 3. 199756 2. 617704 3. 415113 2. 349455 2. 141147 2. 188712 3. 519107 3. 556563  
5. 8404 5. 97227 6. 779188 5. 715514 5. 79001 6. 592347 5. 665331 5. 484118 6. 692512  
3. 371644 2. 497355 2. 737481 2. 613436 2. 44963 2. 262951 2. 656029 2. 689717 1. 543188  
1. 315833 0. 91691 2. 080799 1. 407237 1. 035976 1. 909687 1. 478495 1. 394962 1. 001139  
1. 419614 1. 181436 1. 34461 1. 618654 0. 732745 1. 25207 1. 122907 0. 854887 2. 133737  
3. 426557 2. 014775 2. 26108 2. 151248 3. 06837 2. 323386 2. 518805 1. 91746 2. 791765  
3. 203895 2. 422305 3. 415952 4. 283484 3. 573153 4. 207568 4. 615918 4. 450179 3. 941332  
1. 854626 2. 416149 2. 197797 2. 601098 1. 580486 1. 500888 1. 524555 2. 705997 2. 145919  
1. 95547 1. 649361 2. 383321 1. 526502 2. 259022 1. 340925 2. 06235 1. 776208 1. 614843  
0. 984257 1. 577599 1. 104679 0. 948119 1. 267229 0. 912756 1. 128592 1. 370031 1. 061423  
4. 149977 3. 240464 3. 967431 4. 308356 3. 894322 3. 125802 3. 806625 3. 973756 4. 036299  
1. 77117 2. 587589 1. 652441 2. 670979 2. 430284 4. 134957 1. 849716 3. 214872 1. 56722  
4. 710804 5. 235423 4. 478588 4. 691168 4. 855229 4. 768877 6. 245914 3. 87936 5. 32156

2. 8865 2. 521161 2. 775843 2. 11735 3. 316205 1. 666754 4. 580691 3. 908219 3. 50518  
1. 649611 1. 644375 2. 323114 2. 323486 2. 081453 2. 045964 1. 594311 2. 426132 2. 020657  
1. 98873 2. 075356 2. 608811 2. 080263 2. 894819 2. 809572 2. 747942 1. 887186 3. 372984  
1. 624564 2. 262479 1. 519927 1. 239993 2. 125773 0. 994996 2. 352266 1. 756658 1. 436017  
2. 570801 3. 268964 2. 665093 1. 748333 2. 318358 1. 972673 1. 832348 1. 61253 2. 312511  
2. 643616 3. 252669 2. 834592 2. 166704 3. 044684 2. 355469 2. 982154 2. 403586 2. 642616  
2. 347073 1. 716004 1. 782563 1. 774882 2. 026844 1. 75814 1. 824681 1. 639193 2. 321556  
2. 049646 3. 062255 2. 381969 2. 13468 2. 699058 1. 76647 1. 476662 1. 665548 1. 61151  
2. 840616 3. 175593 3. 293916 2. 594148 4. 201091 3. 455012 3. 730833 3. 287902 2. 64566  
6. 824366 6. 557265 5. 858711 6. 532661 6. 399817 5. 962785 6. 152381 6. 291888 6. 587129  
6. 357243 6. 433317 5. 826614 6. 942549 6. 379643 6. 195824 6. 907906 5. 952769 6. 252999  
0. 970456 1. 166676 1. 391536 1. 171913 0. 853878 1. 073901 1. 442783 1. 410787 1. 711592  
1. 896141 2. 919877 1. 797573 2. 979633 0. 92299 1. 609307 1. 182197 2. 415557 1. 14381  
1. 895896 0. 86657 1. 177995 1. 535398 1. 475481 1. 84866 1. 246711 2. 200967 1. 058657  
2. 348534 2. 238658 2. 707362 2. 294675 1. 822829 1. 560113 2. 000923 2. 190918 1. 813136  
1. 378749 1. 236742 1. 557581 1. 53834 1. 39934 3. 670452 1. 57139 1. 96317 1. 70947  
2. 01391 2. 456649 2. 598152 2. 267808 2. 427362 2. 563075 2. 696644 2. 590123 2. 377192  
1. 112487 1. 393678 1. 127065 1. 142635 1. 120149 1. 225687 1. 159913 1. 863359 1. 554284  
2. 097952 1. 915284 2. 357404 2. 438476 2. 870014 2. 485603 2. 325115 2. 426571 2. 320084  
1. 04793 1. 037265 1. 297931 1. 410572 1. 192383 1. 565018 0. 752819 1. 604639 1. 664012  
1. 867142 1. 543516 1. 923655 2. 481882 1. 188691 1. 382968 1. 29942 1. 425028 1. 51023  
1. 321199 1. 752515 1. 195713 1. 500798 2. 202414 1. 625996 1. 346225 1. 86492 1. 889485  
2. 426552 1. 085082 1. 619934 2. 173928 0. 908369 2. 245703 1. 222167 1. 867475 1. 055717  
2. 666145 1. 929852 1. 519856 1. 684326 1. 62542 2. 33571 1. 047937 1. 552885 1. 517258  
4. 82941 4. 036281 5. 428136 5. 181991 4. 676068 3. 454167 6. 079672 5. 700432 5. 667801  
4. 141292 3. 205926 4. 471273 2. 312687 4. 200585 3. 722525 3. 653056 4. 321454 3. 582076  
2. 327501 1. 118142 2. 265191 2. 782453 2. 100766 1. 830328 1. 826736 3. 305445 1. 82703  
2. 137236 1. 660275 1. 467208 0. 87411 1. 078861 1. 739755 1. 013862 1. 741292 1. 125048  
2. 409657 2. 402613 2. 338539 2. 08212 2. 816451 2. 902253 2. 664569 3. 571694 2. 624418  
2. 073994 3. 073007 1. 530855 1. 812708 1. 922393 5. 929198 1. 61177 3. 200028 2. 793736  
2. 408495 2. 141355 1. 612957 1. 525444 2. 434802 2. 221499 1. 859675 2. 418953 2. 172724  
1. 5753 1. 674908 1. 454275 1. 900087 2. 46743 1. 872429 1. 557491 1. 638626 1. 261263  
1. 529619 3. 227248 2. 173834 3. 299114 3. 166741 3. 266884 1. 499138 2. 762094 2. 272662  
3. 186316 1. 677061 2. 576078 3. 025529 3. 347912 3. 006201 1. 974784 2. 086639 1. 317589  
2. 554163 2. 746396 3. 295172 4. 410022 2. 592515 2. 594759 2. 501245 3. 815537 2. 556263  
7. 011665 6. 343959 7. 165341 7. 452731 6. 625894 7. 69385 7. 251695 7. 825932 7. 573268  
0. 840956 0. 759786 0. 496248 1. 033649 1. 430203 3. 20825 0. 715568 0. 9386 1. 739588  
2. 270714 2. 329347 1. 992195 3. 633666 2. 031203 3. 561436 2. 165622 2. 875678 2. 759309  
4. 558628 4. 261087 4. 546691 4. 618008 4. 950471 6. 117966 5. 161618 5. 293392 5. 021583  
2. 072086 1. 094229 1. 872931 1. 535323 3. 906682 7. 186488 1. 659579 1. 765015 1. 669851  
3. 704459 4. 480841 3. 722537 3. 758393 4. 252845 6. 399086 3. 276996 4. 064529 3. 817788  
1. 456907 1. 698989 1. 68086 1. 901823 1. 691718 2. 250773 1. 791541 2. 622932 1. 814086  
4. 570109 3. 405975 4. 438536 5. 284976 4. 302861 4. 588015 4. 071733 4. 896375 4. 166417  
2. 504259 2. 31164 1. 664624 2. 281973 2. 330806 1. 821676 2. 40642 2. 77833 1. 625992  
2. 87432 1. 930115 3. 205229 3. 556852 3. 461655 4. 842292 2. 5025 3. 870792 3. 7101  
3. 070994 4. 173157 2. 769587 2. 821508 3. 216399 3. 633047 1. 695661 2. 93214 2. 802313  
1. 226079 1. 932504 1. 572067 2. 545343 2. 090187 1. 740478 1. 633517 1. 488103 2. 142698  
1. 178516 1. 577353 1. 055795 1. 151936 0. 745539 1. 050453 1. 060597 1. 365663 1. 134333  
1. 217292 0. 914969 0. 778308 1. 245331 1. 480409 1. 263891 1. 255743 1. 082187 1. 192175  
2. 204953 2. 421238 1. 737297 2. 178079 2. 00479 2. 136745 2. 475662 1. 944657 2. 725761  
5. 460368 5. 412397 6. 543824 5. 719666 5. 023295 5. 96982 5. 606415 6. 183026 6. 039259

6. 923054 4. 745913 7. 081414 7. 741481 6. 331054 9. 927741 4. 627486 5. 60138 7. 949092  
2. 229651 3. 530486 2. 314174 2. 755894 2. 572999 4. 322278 2. 730745 2. 923621 3. 386339  
1. 855799 1. 995228 2. 134321 3. 77063 1. 040325 3. 017863 2. 045408 1. 400471 1. 353891  
7. 034099 6. 761 6. 857073 6. 082365 5. 756827 5. 435241 6. 816728 6. 529752 6. 947783  
0. 9291 1. 68392 1. 222007 1. 003703 1. 118573 1. 74769 1. 02062 1. 085394 1. 109272  
1. 560091 1. 591946 3. 532931 1. 477502 1. 483367 3. 187909 0. 882898 2. 894575 0. 867853  
3. 216086 2. 006867 2. 426194 3. 589904 3. 121846 4. 425227 2. 992914 8. 192011 5. 575292  
1. 398932 1. 181813 1. 576474 1. 104288 1. 090623 1. 85051 1. 023415 2. 089245 1. 389056  
2. 11894 4. 657894 4. 679622 1. 026071 5. 643117 3. 143634 5. 753535 6. 269427 5. 6106  
5. 090017 4. 337079 3. 790929 4. 65932 4. 209443 4. 05151 3. 015575 2. 355642 4. 655703  
1. 867724 1. 696986 1. 597802 2. 069076 1. 485617 1. 578205 1. 914038 1. 734261 1. 614777  
3. 25541 2. 626036 3. 046432 2. 281188 3. 755229 3. 496598 3. 177945 3. 273069 2. 267134  
7. 327835 7. 768273 7. 289389 7. 101782 7. 448081 7. 115624 7. 443819 7. 233168 7. 681605  
1. 619838 1. 770993 1. 326864 1. 658915 0. 902312 1. 312766 1. 192579 2. 318962 1. 017351  
1. 444076 1. 561391 1. 19805 1. 536298 1. 386973 1. 415009 1. 59495 1. 78869 1. 517671  
1. 03399 2. 646678 1. 319527 0. 999256 0. 815529 0. 781008 0. 897193 2. 060718 1. 716497  
1. 756271 1. 457564 2. 230953 1. 284741 0. 78139 1. 564433 0. 837492 0. 919901 1. 139005  
1. 351085 1. 072937 1. 384315 1. 100117 0. 821395 1. 056495 1. 001957 1. 05349 0. 836819  
3. 254886 3. 994854 4. 76503 3. 133156 3. 965728 3. 234156 4. 549056 3. 90246 2. 925123  
1. 146823 1. 297935 1. 665441 2. 039414 1. 38154 1. 406775 1. 361573 1. 407353 2. 257766  
2. 514859 2. 465444 2. 060165 2. 365961 2. 214451 2. 389644 2. 448409 2. 729303 2. 416262  
1. 605315 1. 1267 1. 434232 1. 082739 1. 208701 1. 371925 1. 202506 1. 068507 1. 309588  
2. 191829 2. 243647 2. 235839 1. 348106 1. 803605 1. 755153 1. 79702 2. 472036 2. 011549  
2. 086982 1. 789392 1. 789823 2. 283682 2. 117646 3. 797037 2. 070846 1. 887856 3. 383337  
1. 614261 1. 192935 1. 079347 1. 421948 1. 295809 2. 395589 1. 586542 1. 523044 0. 868985  
1. 446193 2. 003239 2. 56694 2. 162728 2. 161108 2. 300481 1. 56293 1. 93625 1. 407882  
1. 611532 1. 142659 0. 88492 1. 499451 1. 091354 1. 011741 1. 199637 1. 089989 0. 879715  
1. 269299 1. 082591 2. 269133 2. 093949 1. 090772 1. 221483 1. 316305 1. 550857 1. 77849  
1. 047269 1. 220192 1. 062728 1. 082154 1. 07298 1. 229503 1. 101729 1. 028708 0. 821083  
1. 725602 1. 83661 1. 281954 1. 863775 1. 199812 1. 966906 1. 204701 1. 333781 1. 20997  
1. 190611 1. 273206 0. 766174 2. 171168 0. 896512 0. 912715 1. 943447 1. 137591 1. 247927  
1. 193312 0. 979546 0. 677455 1. 20581 2. 072401 1. 661938 1. 140545 1. 662943 0. 723239  
3. 075521 2. 040851 2. 236981 2. 504446 3. 652644 2. 36383 3. 316124 2. 965071 1. 81504  
0. 826081 0. 819119 1. 265533 1. 108335 0. 690053 1. 575631 0. 854599 1. 096465 1. 459401  
1. 451942 1. 392416 2. 536028 2. 524296 1. 198455 1. 881669 1. 462441 1. 188081 2. 111466  
2. 145385 1. 704413 1. 547298 1. 719176 1. 954349 2. 843932 1. 381572 2. 463189 1. 81569  
0. 889251 1. 303812 0. 993049 1. 375375 1. 096352 1. 565815 1. 242258 1. 546584 0. 731274  
1. 708571 2. 654147 1. 211975 1. 500517 2. 174459 2. 6536 1. 734383 3. 393303 1. 948489  
1. 299026 1. 266366 0. 998658 0. 94865 2. 08651 1. 5773 1. 237722 1. 41369 0. 728622  
2. 16872 1. 724354 1. 784202 1. 877653 1. 801267 2. 076314 1. 685526 2. 434843 2. 318106  
2. 974197 2. 447014 3. 223773 3. 820893 2. 670729 4. 416255 2. 685994 2. 779027 2. 666669  
1. 483281 1. 243906 1. 253173 1. 800321 1. 213626 1. 4301 2. 209381 1. 040033 1. 133518  
1. 051033 1. 454863 1. 210728 1. 491803 2. 282735 2. 277723 1. 550704 2. 371272 1. 915025  
1. 54898 2. 25606 1. 391286 3. 427264 1. 596787 5. 009999 1. 797509 2. 18287 1. 009168  
1. 461917 3. 238684 4. 386051 2. 716552 2. 588796 2. 387471 1. 541356 3. 100824 2. 537115  
1. 626834 1. 653614 1. 52364 2. 57659 1. 370351 3. 087909 1. 286394 1. 66468 2. 30835  
2. 624644 2. 101607 2. 051615 1. 762884 2. 015475 4. 749505 1. 598455 2. 171684 1. 810036  
0. 496472 1. 764047 0. 297607 0. 97315 3. 173889 2. 294023 4. 177205 3. 402263 2. 567484  
2. 266242 4. 371208 1. 66522 2. 244446 1. 641262 2. 574012 1. 378865 2. 098811 1. 930883  
2. 466185 3. 287945 2. 597353 1. 537163 3. 133184 2. 184629 2. 540903 2. 447894 2. 147905  
1. 142278 1. 003689 1. 093931 1. 684947 1. 285156 1. 291313 1. 083266 1. 304996 1. 479326



0.951916 0.745324 0.808324 1.00897 1.927752 0.723809 1.081408 1.157058 1.282864  
1.627634 1.554415 1.745345 2.724772 1.777257 1.743081 1.555507 1.286534 1.461944  
2.738951 3.758732 2.779744 2.820253 3.223633 2.916337 3.136312 1.934524 2.983204  
1.858314 1.422886 1.665262 1.144846 1.138838 1.521089 1.802208 2.127195 1.403106  
2.511446 1.701051 3.052602 3.78438 2.70253 2.011967 1.70614 2.306437 3.273648  
2.935588 3.031884 2.497157 2.866205 2.834422 2.428083 3.60563 2.769568 3.159656  
2.433705 2.795792 3.320071 3.097449 2.481917 5.118055 4.533566 1.977196 3.27701  
1.168743 1.456929 1.026396 1.134384 1.244583 1.188113 1.214322 1.060054 1.084225  
1.900017 1.295447 1.922754 2.009587 1.199689 3.957098 1.854209 3.148781 3.046464  
0.828373 2.61347 5.829031 2.168173 0.660026 5.705618 0.858651 3.363961 4.491259  
1.910613 0.966009 1.617377 2.810976 0.859772 2.083037 0.622666 0.516606 1.914808  
1.003251 0.774103 0.822863 1.20244 0.929283 0.931632 1.084559 1.595057 1.148484  
0.890235 0.629614 0.008822 2.917024 0.870015 1.306904 1.393261 0.434114 0.403499  
1.40747 1.517776 1.231559 1.174847 0.960118 1.466071 1.563683 1.514507 1.004902  
3.720777 3.218297 3.616123 3.390523 2.572902 2.929898 2.731357 1.8578 2.906986  
2.405366 2.448884 3.149474 2.655039 2.039025 1.832731 2.393894 2.332713 3.119468  
1.744579 2.531308 3.444808 2.192048 1.324213 3.901349 2.903568 1.139771 1.875143  
1.845988 2.608796 1.760687 2.245658 2.614456 1.811923 1.893429 2.143829 3.080785  
1.549326 1.650764 1.23638 1.649571 2.330754 1.78739 2.441941 3.348043 3.00637  
2.816083 1.383051 1.984948 2.2491 1.9956 2.154822 1.965614 2.994481 2.30932  
0.971127 1.53958 1.389921 1.478568 1.165227 0.756199 1.008763 1.399691 0.679907  
0.86502 1.505917 1.035823 0.841579 1.167944 1.727667 0.996744 2.666657 1.390855  
2.999097 2.271829 0.948806 1.616871 1.536725 2.750358 1.735836 1.479748 1.324728  
0.881808 1.049278 1.04765 1.072172 1.984519 1.777117 1.725961 2.69964 0.653256  
0.772332 0.635015 0.641506 1.025631 0.833656 0.802834 0.622592 0.925517 0.863177  
4.660438 5.171342 5.866055 5.381437 6.661135 4.661287 5.617421 6.408003 5.921784  
2.690872 3.012681 2.922028 3.441683 3.002225 3.590124 3.416248 3.223939 3.576214  
1.385714 1.119337 1.021228 1.107743 1.325738 1.996119 1.034481 1.773599 1.198235  
2.419376 2.975677 2.491276 3.252626 2.960408 4.30882 2.421836 2.191205 3.358819  
1.129551 4.815041 0.995589 1.049953 0.841972 1.434655 0.710096 1.291177 0.9878  
1.059988 1.031867 0.713158 0.702392 0.712313 1.361766 0.587688 0.480629 1.02975  
1.368069 1.283203 0.965661 1.63894 1.057819 0.820478 1.121381 1.814423 1.310185  
2.301201 1.606949 1.330622 3.17664 1.649742 1.987513 2.638531 1.801131 1.063696  
2.690963 2.927924 2.364645 3.196688 1.911634 2.16555 1.751899 3.560013 3.248495  
1.255484 1.592059 1.212558 1.211081 1.009863 0.994907 1.732792 1.079173 1.803469  
4.031718 3.742915 0.786513 0.596615 2.372732 1.659832 2.125458 1.587887 1.055047  
2.840026 2.369424 1.388616 3.272044 3.290297 4.041518 2.718742 3.687779 3.365246  
5.90972 1.072853 0.939399 1.087474 1.902235 4.831259 0.912554 1.682861 1.533454  
1.478912 2.690653 1.440894 4.926089 1.461422 4.266944 1.092594 1.71592 1.438257  
2.373255 2.032257 1.813651 3.765049 2.047912 3.473533 5.761851 2.031181 2.360199  
0.776409 0.890668 0.92212 2.739778 1.005714 3.127185 1.81902 0.800472 2.113873  
2.426322 3.280399 2.773997 2.000658 2.650962 4.438925 2.385607 3.039264 2.408493  
1.079684 2.002833 0.914872 1.965364 1.07863 3.304521 1.571142 1.190468 1.606558  
2.940375 2.933898 3.714028 1.780799 3.01428 3.885529 2.057143 2.651753 3.533166  
0.995272 1.957153 0.836025 1.66731 0.857174 1.036905 1.4351 1.506057 1.382675  
4.069837 3.466782 2.214761 4.810913 3.896669 2.94397 2.596774 2.385631 1.55685  
3.652175 3.268653 2.482138 2.263079 2.262169 3.411431 3.057583 2.417879 3.285105  
5.639652 3.75155 5.823472 5.381233 7.782396 5.717673 5.90314 5.30435 7.19954  
5.098763 0.753456 0.591468 0.791538 3.938196 1.889672 1.138017 1.776565 1.480368  
1.349459 0.777864 2.767017 0.859965 1.098688 2.424745 1.468479 1.200584 1.329116  
4.702125 3.568583 4.315939 4.569011 4.381552 3.373584 3.050873 2.379161 2.545364

1. 237179 1. 126396 0. 922966 1. 039698 2. 478238 3. 271882 5. 74161 1. 578669 0. 776709  
1. 497789 3. 553445 1. 075255 1. 269048 0. 53807 2. 714273 0. 909593 1. 11785 1. 436518  
1. 429967 1. 188402 0. 853261 3. 872746 1. 247718 1. 092401 0. 55051 0. 819504 0. 417878  
1. 429876 2. 050424 1. 693236 1. 873768 2. 535881 1. 480087 1. 848954 2. 3616 2. 413016  
3. 530385 2. 266783 1. 816571 3. 414966 2. 766202 2. 517647 4. 22417 2. 719059 2. 719059  
1. 61199 1. 456593 6. 303851 2. 088029 3. 739281 1. 086114 2. 275838 1. 300901 2. 191243  
6. 08967 6. 46923 6. 255272 6. 280019 6. 067147 6. 606231 5. 938936 6. 548545 6. 284336  
1. 26801 1. 197021 1. 777158 0. 722235 0. 918838 1. 291493 3. 360065 0. 983218 1. 602159  
3. 168038 3. 509908 3. 848786 3. 423727 4. 380005 3. 54954 2. 338217 3. 215444 3. 645134  
0. 695129 1. 641287 0. 87384 0. 968114 0. 757694 2. 236978 0. 977081 1. 986861 1. 433092  
2. 527252 0. 912843 3. 603938 1. 158786 0. 866151 1. 148127 1. 096682 1. 686261 1. 223455  
1. 227582 2. 024259 1. 033947 1. 642264 1. 321623 2. 355608 1. 258276 1. 43294 1. 219382  
2. 343387 1. 720526 1. 248686 2. 076953 1. 589097 3. 046579 1. 994664 2. 203763 1. 443053  
0. 881141 1. 155866 0. 743052 1. 14334 2. 056401 1. 355079 1. 137121 1. 08368 0. 83906  
1. 584864 1. 637227 1. 097699 1. 235163 1. 220884 3. 097563 1. 190221 1. 070775 1. 089779  
2. 551762 1. 050922 1. 012987 1. 612389 1. 818296 1. 165054 3. 546954 1. 445738 1. 368568  
2. 771795 1. 064884 1. 808668 0. 885615 0. 822302 1. 447473 2. 430534 2. 151266 2. 009615  
6. 127046 5. 59876 6. 200145 6. 603246 6. 340905 6. 815928 5. 802117 6. 960027 7. 062254  
0. 782615 1. 731584 3. 089684 1. 811111 1. 129708 1. 114422 1. 409105 0. 979461 0. 69733  
1. 995539 0. 971888 1. 346295 0. 888709 3. 30961 1. 122485 1. 555715 1. 387606 1. 665956  
0. 913621 0. 828176 1. 074028 3. 050458 0. 424556 3. 365636 0. 942891 0. 86818 0. 770617  
2. 971645 2. 983656 3. 457387 3. 519888 3. 46859 3. 250671 2. 858015 2. 844339 3. 622472  
2. 453679 3. 221189 3. 174541 0. 891685 5. 416808 5. 24141 3. 022301 1. 704119 3. 527803  
2. 132679 1. 487665 1. 315497 1. 653237 1. 396087 2. 441787 1. 016985 1. 445028 0. 749468  
5. 125843 5. 083019 5. 216945 4. 61419 5. 129107 5. 275299 4. 709091 4. 865808 4. 800562  
1. 140936 1. 523442 1. 060388 2. 127082 1. 124576 1. 543558 1. 828975 0. 945436 1. 415825  
3. 682522 1. 048109 0. 93097 1. 266905 0. 810001 2. 062822 0. 912952 2. 156044 1. 534542  
7. 472286 7. 239514 7. 512822 7. 816571 7. 697278 8. 131789 7. 814356 7. 965255 7. 728694  
4. 544563 3. 34166 4. 048484 1. 246541 1. 536317 6. 1626 1. 440961 1. 839586 1. 035029  
1. 447974 1. 2502 1. 333315 0. 863844 1. 688864 1. 674566 0. 881282 1. 09675 3. 223502  
0. 870575 1. 173277 0. 992943 1. 089593 1. 441685 0. 762537 1. 155715 0. 938243 1. 095545  
0. 6281 1. 114622 0. 441345 0. 717674 0. 908959 1. 029654 1. 123778 1. 40515 0. 930539  
2. 129162 2. 442645 2. 743869 2. 289473 1. 421032 1. 441099 1. 428026 1. 858277 2. 269469  
6. 559574 4. 383521 5. 964936 7. 508348 6. 792797 9. 250509 8. 011344 6. 254708 7. 998133  
2. 749451 3. 16371 2. 181349 2. 62317 2. 864428 2. 534874 2. 033518 1. 89568 2. 837034  
5. 073144 4. 507626 5. 299358 4. 746175 4. 901714 5. 711249 4. 685508 5. 001041 4. 905145  
0. 769355 1. 283602 1. 050665 1. 769311 1. 345836 1. 728002 1. 174176 1. 057163 1. 764882  
2. 65153 3. 148243 2. 684965 3. 475817 3. 738807 5. 32187 2. 498141 3. 620682 2. 783526  
0. 859602 2. 433383 1. 280766 1. 155875 0. 793649 2. 539603 1. 193084 1. 097638 1. 48536  
1. 478072 0. 762944 1. 352761 1. 5701 1. 344037 6. 388361 1. 289817 1. 674186 4. 659734  
1. 455077 1. 637559 1. 255333 1. 674641 1. 316815 4. 105764 1. 49345 1. 803477 2. 593222  
0. 963748 1. 975151 1. 697925 1. 649211 2. 421094 3. 106839 1. 79781 1. 971347 1. 917574  
0. 743441 0. 802216 0. 656696 4. 232893 1. 221423 8. 410814 1. 485404 1. 617815 5. 416338  
2. 335306 3. 132766 4. 315105 3. 948904 2. 698178 3. 092352 1. 926006 2. 613426 1. 734561  
0. 66448 1. 624201 0. 769238 1. 028096 1. 043132 0. 78567 0. 607476 1. 566992 0. 790418  
0. 918801 1. 399902 0. 84829 0. 733484 0. 844631 1. 394082 0. 733539 2. 156174 0. 900736  
3. 169301 3. 874531 3. 280798 2. 796262 3. 161676 3. 539914 2. 626272 2. 89376 2. 494872  
4. 636678 1. 894615 2. 270841 2. 402513 1. 719866 1. 491052 3. 429555 1. 514464 1. 345764  
1. 890842 2. 651989 2. 323597 1. 691004 2. 817689 1. 484518 1. 721626 2. 806729 2. 255085  
1. 736491 1. 215152 1. 634202 1. 715857 1. 320307 1. 268345 1. 479048 0. 958644 2. 166599  
11. 47982 10. 70035 11. 04062 10. 85279 10. 78764 11. 11756 11. 27334 10. 60206 10. 29173

1. 887276 2. 760872 2. 663356 2. 084518 3. 012042 6. 921898 3. 62642 1. 985307 2. 398991  
2. 611421 1. 51076 3. 067348 3. 616764 3. 4321 8. 389507 2. 881545 3. 374598 2. 852021  
1. 263428 2. 141164 1. 796742 2. 201371 2. 196968 1. 350718 1. 709376 2. 549679 2. 102614  
2. 001771 2. 506342 2. 391839 3. 10391 2. 803738 7. 497982 2. 636886 3. 090224 4. 631556  
1. 619443 1. 779099 1. 498912 1. 679014 1. 464263 2. 415401 1. 327795 1. 771732 1. 43687  
2. 225558 3. 978905 1. 462139 2. 842824 2. 509336 4. 974649 3. 973454 2. 797832 4. 04833  
7. 296753 6. 78323 7. 343132 7. 336501 7. 147744 7. 980108 6. 482325 7. 21321 7. 152433  
5. 548639 6. 354931 5. 515998 5. 513142 5. 366776 4. 743517 5. 190355 4. 621686 4. 983696  
2. 273116 2. 449032 1. 643843 1. 531354 1. 787114 1. 609643 1. 768683 0. 837452 1. 388166  
2. 743715 2. 169673 2. 520445 3. 586913 3. 101228 4. 828528 2. 739534 3. 038735 3. 488827  
4. 017757 4. 589153 3. 957467 3. 597002 4. 415923 3. 972539 3. 229573 3. 021809 4. 256378  
3. 141572 3. 188395 3. 283967 2. 415375 3. 633586 6. 240701 4. 05113 3. 198988 4. 085214  
1. 992118 2. 507037 2. 010931 1. 654212 1. 871204 2. 39023 1. 668036 2. 312526 2. 109894  
1. 581679 1. 759746 1. 049308 1. 202233 1. 251373 1. 941215 1. 640683 1. 895051 1. 069934  
2. 164817 2. 58657 2. 178213 3. 886725 1. 581557 6. 047161 1. 159083 2. 058319 6. 505704  
9. 164097 9. 208326 8. 885626 9. 223708 9. 146571 10. 80623 8. 740234 8. 832235 9. 843094  
2. 3248 1. 552402 1. 101304 0. 975143 0. 974875 3. 115499 1. 293014 1. 662841 2. 757031  
0. 811172 1. 375827 0. 665719 0. 818564 0. 786037 4. 179575 0. 796429 0. 805552 0. 418001  
0. 421495 0. 394455 1. 621287 0. 266088 0. 372571 6. 267434 0. 666023 2. 695364 0. 727156  
2. 434546 3. 534737 3. 135121 3. 001002 3. 287342 7. 770961 3. 197269 2. 627316 7. 819881  
3. 803015 4. 646394 5. 291468 4. 337135 4. 748766 5. 495581 4. 660204 4. 679759 5. 386713  
5. 588081 4. 88842 5. 752619 5. 306143 5. 521303 5. 546625 5. 553354 6. 635199 5. 702629  
4. 458907 6. 193589 5. 71877 5. 230881 5. 963658 5. 225753 5. 56481 6. 457341 5. 824575  
1. 382466 2. 417831 3. 152306 3. 486677 2. 88083 1. 311492 2. 973407 2. 950767 2. 526736  
1. 997112 2. 686309 1. 474869 1. 508807 3. 235565 6. 712069 1. 514117 0. 960578 5. 035281  
6. 846957 6. 292854 6. 581045 6. 824333 6. 538933 8. 248648 6. 759688 7. 662172 7. 987131  
0. 994048 1. 180676 1. 853658 1. 181823 1. 097382 1. 326169 1. 612289 1. 627722 1. 986699  
4. 157728 2. 553997 3. 48755 3. 566811 3. 062761 4. 980543 4. 483497 3. 204008 3. 164972  
4. 772343 5. 154202 5. 029798 4. 384432 5. 167463 4. 411191 4. 37239 5. 328014 5. 324017  
1. 453702 1. 151094 1. 109169 1. 300664 0. 552935 4. 048794 0. 721203 0. 575734 0. 546967  
2. 160849 1. 681415 2. 152077 2. 111357 1. 393315 3. 445671 1. 425136 2. 013839 2. 698134  
2. 065813 3. 544479 0. 876538 0. 321752 2. 537426 7. 566778 1. 414603 0. 786275 3. 973365  
6. 782807 5. 520253 4. 194704 6. 47613 4. 153273 5. 859766 4. 151531 2. 509115 3. 607232  
0. 714655 1. 177784 1. 120073 2. 29518 0. 850866 0. 826479 2. 279271 1. 202477 0. 91765  
0. 691178 1. 81503 1. 311026 1. 066487 0. 909239 0. 669715 0. 471274 0. 960309 1. 336199  
5. 239848 4. 708725 5. 393593 4. 340231 5. 585791 6. 206647 6. 385865 6. 025432 5. 999643  
7. 479997 7. 190581 6. 523955 6. 382424 6. 564851 6. 587336 6. 472823 5. 284757 5. 96234  
5. 265498 6. 837725 4. 26059 4. 744354 6. 152154 9. 317426 2. 692465 4. 000292 7. 211352  
0. 950451 1. 639673 1. 021396 0. 805887 1. 562947 2. 949873 1. 086619 0. 832565 1. 670229  
2. 223006 0. 971072 1. 827043 1. 166817 1. 406486 4. 342779 1. 799614 3. 57465 1. 27118  
1. 733807 3. 350917 1. 847399 2. 047379 2. 166513 3. 81403 1. 498023 1. 997085 2. 364981  
2. 016984 3. 047329 4. 13141 2. 487632 2. 901902 2. 195002 2. 113648 2. 403317 4. 591993  
3. 472894 1. 652039 2. 255816 1. 605373 2. 708276 7. 476541 2. 097372 1. 376328 3. 94907  
1. 410061 1. 245852 1. 846001 1. 615688 1. 656073 1. 206151 2. 053744 2. 408257 1. 331967  
4. 915699 4. 667382 5. 312562 4. 84454 3. 88603 10. 52767 3. 664817 3. 636248 9. 459458  
3. 331953 2. 208066 2. 37151 1. 637946 2. 604944 8. 425187 2. 662115 3. 267794 6. 807127  
2. 91575 2. 430766 1. 978683 1. 877558 1. 847632 9. 208195 1. 313905 0. 799988 5. 904771  
3. 454815 4. 653249 5. 20987 3. 592064 3. 724442 7. 908083 3. 346733 4. 620477 5. 16828  
2. 084172 1. 219616 1. 791841 1. 343918 0. 894963 1. 008809 1. 06663 1. 132514 1. 306106  
1. 427649 2. 315056 1. 234206 0. 918792 1. 957745 6. 64845 1. 614769 2. 982508 3. 277954  
2. 839797 2. 205492 1. 615646 1. 61593 1. 542219 1. 651806 1. 323791 1. 592806 1. 124386

0. 728395 1. 898614 1. 484251 2. 156367 1. 409793 5. 015132 2. 392804 2. 574192 3. 00756  
4. 099187 1. 682194 2. 5704 3. 66349 1. 546949 7. 255398 0. 953135 1. 483967 6. 673504  
4. 394853 7. 527844 3. 184743 3. 048808 3. 56536 8. 928697 3. 21151 3. 454247 5. 743587  
1. 367353 1. 230073 1. 754736 1. 850111 1. 223807 2. 977558 1. 214196 1. 465795 1. 009548  
1. 667091 0. 598495 1. 636887 2. 918351 0. 394333 3. 080149 0. 691071 1. 339931 2. 320322  
4. 932792 1. 637774 1. 459223 1. 993976 0. 945423 7. 574951 1. 241653 2. 428569 2. 928854  
5. 476851 2. 762459 1. 729894 2. 170678 3. 205637 10. 39589 2. 036749 2. 899157 7. 032142  
1. 458297 2. 645546 1. 585874 1. 199624 2. 486805 8. 705143 1. 150992 3. 976498 5. 661372  
2. 446784 2. 395479 1. 894006 1. 830604 1. 584498 1. 563603 2. 245736 1. 567889 2. 155461  
7. 378362 7. 921435 8. 201208 8. 285623 8. 249613 6. 526229 8. 623076 8. 692396 8. 690931  
4. 73111 4. 209793 4. 24918 3. 648346 3. 920353 5. 700848 4. 901798 4. 679103 4. 980424  
2. 274881 2. 298708 2. 151316 1. 684159 1. 806577 2. 919475 2. 464207 2. 185647 1. 939881  
6. 807185 6. 17364 6. 538549 7. 021874 6. 464493 5. 915919 5. 956173 6. 933158 7. 383382  
6. 596058 6. 524307 6. 61526 7. 373161 6. 818438 8. 173624 7. 764087 6. 880661 6. 740956  
7. 64288 7. 87952 7. 890607 7. 462647 7. 542492 7. 297611 7. 862976 7. 454931 6. 673174  
8. 356468 8. 29078 7. 914772 8. 43501 8. 042887 8. 966682 7. 881346 7. 828277 8. 011693  
7. 028581 6. 293228 6. 503697 6. 756456 6. 362228 8. 057236 6. 406007 5. 528197 5. 930682  
0. 8036 1. 305723 0. 815757 0. 974343 0. 725984 1. 287936 0. 951138 0. 933631 1. 128815  
6. 037025 3. 151956 4. 463589 4. 254181 5. 670259 4. 482415 5. 764918 5. 139187 4. 980019  
7. 131693 6. 734386 6. 823004 7. 300356 6. 945322 6. 615662 8. 034775 7. 871154 7. 111373  
4. 748271 4. 842415 5. 892498 5. 552041 5. 714377 5. 319177 5. 613562 6. 105892 6. 257089  
1. 084269 1. 292247 1. 506648 1. 55215 1. 213326 1. 563714 1. 408423 1. 819662 0. 962027  
4. 699448 5. 530682 4. 720091 4. 447093 5. 622896 4. 785973 4. 732744 4. 42247 4. 82213  
2. 686135 5. 10763 4. 665222 4. 934841 4. 471432 3. 495318 4. 036019 4. 792971 4. 828982  
4. 564413 4. 344365 3. 414037 5. 199649 3. 381988 4. 895041 3. 896237 4. 56986 4. 006593  
7. 604879 6. 589387 7. 699028 8. 04931 7. 685064 8. 735516 8. 235519 8. 030585 8. 408415  
9. 538927 8. 802926 9. 195895 8. 858889 8. 547405 8. 851898 8. 171925 7. 141743 7. 375092  
6. 802366 6. 84045 6. 256075 6. 675149 6. 785846 7. 160089 6. 69103 6. 986537 6. 11232  
10. 16043 9. 774194 10. 04512 10. 25433 9. 607718 10. 00392 9. 940647 9. 88801 9. 899522  
7. 81433 7. 904085 7. 847055 7. 983113 8. 438418 8. 41104 8. 116184 7. 919903 7. 871967  
9. 519876 9. 110139 8. 766177 9. 565061 9. 130936 9. 478413 9. 182476 9. 606814 9. 3809  
5. 047256 5. 941281 5. 619536 5. 443618 5. 559575 5. 040362 5. 380243 5. 437502 4. 864458  
7. 174677 6. 273184 6. 839567 6. 771526 7. 05508 6. 373178 6. 813305 6. 661716 6. 107315  
8. 434345 8. 309957 7. 689114 8. 328312 7. 911807 7. 786704 8. 005246 7. 719266 7. 806556  
2. 402355 4. 492167 3. 904016 2. 209834 4. 116334 1. 552568 1. 766645 1. 697093 1. 962097  
5. 006231 6. 805604 5. 271706 5. 52798 5. 82772 5. 435781 5. 707477 4. 401257 5. 064288  
3. 736811 5. 411708 5. 655714 5. 650454 5. 507454 5. 39085 3. 799271 5. 059982 4. 187823  
1. 441391 1. 06727 1. 199041 1. 435976 1. 159607 1. 523741 1. 137203 1. 665442 1. 918789  
4. 399682 3. 746126 3. 070369 5. 03324 3. 140634 5. 352341 3. 289426 4. 297262 3. 985593  
5. 055521 4. 627171 4. 685502 2. 344898 5. 066736 4. 151119 4. 233297 3. 201201 4. 951986  
6. 419424 6. 899835 7. 094546 6. 655231 7. 32914 7. 157955 6. 195511 7. 053532 6. 690656  
5. 672937 5. 843175 6. 619324 7. 088572 6. 606723 6. 440492 6. 217801 7. 170313 6. 601797  
4. 463548 4. 622798 5. 090035 5. 555674 3. 290377 5. 44224 4. 348348 5. 221733 5. 032495  
4. 671375 4. 601933 5. 948469 4. 733118 4. 917587 5. 248281 5. 752058 5. 252083 5. 68646  
5. 010911 5. 250136 6. 450946 5. 555829 6. 423897 2. 990784 5. 548423 5. 301325 6. 772476  
3. 351597 4. 095579 3. 65775 3. 704504 3. 706548 4. 531435 3. 410595 3. 728501 3. 508598  
3. 258221 2. 972718 3. 599759 3. 475799 3. 467078 4. 390478 3. 549627 4. 270142 3. 834933  
4. 257447 3. 567759 3. 744635 4. 485229 3. 515984 3. 670436 3. 901166 3. 133492 3. 475781  
9. 405764 8. 625223 9. 82676 9. 509945 9. 572437 9. 113078 10. 08948 10. 16924 9. 986724  
7. 35071 6. 832633 6. 817566 7. 303839 7. 565355 7. 554033 6. 903344 7. 120754 6. 983786  
2. 496922 3. 926581 2. 209403 2. 49539 2. 820851 2. 606142 1. 953675 1. 876508 1. 711048

1. 696574 2. 402516 2. 494881 2. 008856 2. 401657 1. 949587 1. 855729 1. 493221 2. 134565  
2. 963294 2. 863581 2. 870583 3. 040478 2. 729411 2. 594552 1. 967409 2. 377579 2. 788668  
2. 738932 2. 274946 2. 864787 2. 611561 2. 732464 2. 708512 2. 529131 3. 277899 2. 3584  
4. 82013 5. 19301 3. 94875 4. 083699 5. 0076 6. 179658 6. 254469 6. 402347 6. 182021  
1. 22223 1. 684493 1. 352281 1. 686588 2. 165615 1. 536109 1. 130977 1. 904243 2. 04314  
3. 576452 3. 478838 4. 632085 4. 672372 4. 552479 4. 6338 4. 784943 4. 679844 4. 992429  
3. 925845 5. 257781 4. 646826 3. 75028 4. 323715 4. 076973 4. 195051 3. 257231 3. 73344  
2. 144874 1. 418937 1. 579606 1. 980597 1. 673412 1. 698123 1. 298027 1. 759076 1. 40662  
1. 037518 1. 681711 1. 031172 1. 781102 1. 57233 1. 370229 0. 855727 1. 679809 0. 864948  
8. 252537 7. 717197 7. 449375 7. 89684 7. 493261 6. 909724 7. 424629 7. 655782 7. 34449  
2. 498176 2. 278959 1. 608685 2. 781457 1. 886612 2. 022693 2. 031316 2. 395717 2. 367025  
1. 622304 2. 01332 1. 428127 1. 708314 1. 209734 2. 509553 1. 274096 2. 275243 1. 681371  
2. 29769 0. 796242 1. 03702 1. 619019 1. 045466 1. 860753 1. 608912 1. 986588 0. 905194  
5. 716046 6. 427496 5. 892355 6. 135795 6. 037593 6. 20328 6. 098355 5. 878049 6. 728301  
2. 201933 1. 55604 2. 134202 1. 879208 1. 637557 2. 731846 1. 872797 3. 448007 1. 999519  
5. 599146 4. 584827 5. 46711 4. 869111 5. 624309 5. 246342 4. 5662 5. 345686 5. 059406  
3. 454974 3. 421091 4. 515994 2. 858971 4. 232425 3. 892803 3. 10103 3. 172716 3. 517711  
1. 215713 2. 330223 2. 346212 2. 754995 3. 62817 1. 454752 1. 689609 3. 079716 1. 804905  
6. 57509 7. 132362 6. 557243 6. 388824 6. 076647 6. 286062 6. 734015 6. 461003 6. 796092  
7. 41317 7. 453711 7. 204935 7. 699826 7. 188901 8. 032349 7. 78542 6. 845306 7. 180684  
2. 440669 2. 648651 2. 226636 2. 755928 2. 648651 2. 298009 2. 212942 2. 056289 2. 298009  
2. 437746 2. 640246 2. 679385 3. 185888 3. 97386 4. 523384 4. 114054 3. 945929 4. 164917  
5. 822954 5. 350545 5. 253674 5. 519705 5. 556279 5. 852609 5. 548726 5. 673509 6. 527403  
7. 410768 7. 645911 6. 889435 6. 932445 7. 182738 7. 338625 7. 520938 7. 181651 7. 013222  
6. 755295 6. 713166 6. 87222 6. 286973 6. 739576 7. 212384 6. 693989 6. 936377 6. 773291  
1. 763763 1. 839101 1. 9727 2. 235426 1. 988712 2. 241895 1. 568828 1. 947371 2. 409472  
4. 242987 5. 633553 4. 891157 4. 682135 5. 053053 3. 793235 5. 036522 5. 603582 5. 775702  
6. 293978 7. 909702 7. 665212 7. 830292 7. 610193 6. 992705 7. 882179 7. 458563 7. 352273  
6. 394689 4. 96205 6. 032575 5. 889369 5. 447573 7. 001805 5. 825653 6. 439036 6. 185212  
7. 407971 7. 93906 6. 879776 7. 461224 7. 145243 6. 541561 7. 531083 7. 559213 6. 73449  
6. 702267 6. 764075 7. 443751 7. 504715 7. 727432 7. 041268 6. 914564 7. 113531 7. 459731  
5. 968589 7. 534952 6. 574042 6. 568262 7. 372876 6. 986172 6. 368972 7. 321734 6. 677695  
5. 617361 5. 72247 4. 963126 5. 692324 6. 69726 6. 040375 5. 962982 5. 58371 5. 422468  
5. 736282 5. 872418 5. 406266 5. 400072 5. 237884 6. 120006 5. 52133 5. 719894 6. 129211  
6. 035596 5. 714605 5. 685243 6. 112313 6. 536315 6. 861083 6. 114215 6. 36017 6. 341423  
5. 226909 5. 919857 6. 045106 5. 922294 5. 95602 6. 277398 5. 848294 5. 809288 6. 053223  
6. 085785 5. 753571 6. 051862 6. 095085 6. 05478 6. 507128 5. 882529 6. 658209 6. 200434  
3. 47447 4. 807312 3. 648195 5. 046679 2. 606882 2. 699269 3. 883044 4. 621065 4. 604019  
6. 847168 6. 55749 6. 778152 6. 574238 7. 152193 6. 94359 6. 876706 7. 373002 7. 12162  
6. 282804 6. 186686 6. 39123 5. 647123 6. 392852 6. 936648 6. 517769 6. 692937 6. 433796  
2. 324398 4. 070896 1. 942881 2. 853043 3. 415012 2. 676117 2. 665257 2. 027278 2. 37102  
3. 491908 3. 399706 3. 040517 4. 30381 5. 144195 3. 647272 3. 254375 3. 843874 2. 983308  
6. 159827 6. 355752 6. 222501 6. 877492 6. 785575 6. 4529 6. 838209 5. 901688 5. 86398  
6. 89055 6. 815807 7. 07249 7. 387545 7. 540747 6. 751063 6. 524708 6. 629401 7. 272731  
7. 576937 7. 395328 7. 640302 7. 921815 8. 093701 8. 293398 7. 845272 8. 369622 8. 449182  
7. 143311 7. 320885 7. 044476 6. 802861 7. 114758 7. 254509 7. 407858 7. 450371 7. 502115  
5. 625832 4. 808158 5. 430399 5. 846742 4. 752426 5. 709911 5. 422222 6. 096637 5. 503825  
6. 362538 5. 885625 6. 152988 4. 915394 5. 899609 6. 87004 6. 167682 6. 229935 6. 663347  
7. 355131 7. 767149 7. 560372 7. 394973 7. 791993 7. 643191 7. 477203 7. 642117 7. 545771  
10. 13711 8. 43472 9. 241126 8. 827299 8. 064111 10. 21964 8. 854739 7. 102202 7. 107929  
6. 763048 5. 938009 6. 302646 6. 796575 7. 35994 7. 567929 7. 061357 7. 214065 6. 945645

6. 523488 6. 851796 6. 850978 7. 396744 7. 062009 7. 001254 6. 955284 7. 121528 7. 002843  
6. 332661 6. 125198 5. 819284 6. 538713 5. 9867 5. 426959 5. 957063 5. 868089 5. 962862  
9. 141043 8. 338567 8. 844467 7. 663356 8. 857776 9. 582854 8. 954303 9. 62565 9. 548003  
5. 062523 4. 720333 4. 946948 5. 177452 4. 730244 3. 173022 4. 833734 5. 649485 3. 944975  
6. 507767 6. 948527 6. 350113 7. 550036 6. 788098 6. 579365 7. 113138 7. 304504 6. 932398  
1. 934204 1. 690702 1. 869078 1. 606231 1. 248534 1. 57722 1. 204098 2. 085799 1. 562929  
3. 244242 3. 809575 3. 824933 3. 416856 4. 075698 4. 410256 3. 78889 4. 291945 4. 378697  
4. 529669 5. 430688 3. 73046 5. 9454 5. 597187 7. 324709 6. 269035 6. 847583 6. 644641  
3. 088323 2. 507342 3. 247717 2. 80747 2. 629713 3. 165243 3. 090663 3. 879376 3. 536253  
5. 537469 5. 990471 5. 763038 5. 818798 5. 723908 4. 707479 5. 798815 5. 927596 5. 699189  
3. 920671 3. 283035 3. 575867 3. 345398 3. 35855 2. 820337 3. 170998 3. 739454 3. 269241  
3. 77046 3. 003658 2. 916759 3. 63277 2. 524823 3. 623047 3. 734175 2. 949695 2. 793369  
6. 017627 6. 478129 6. 48853 6. 299822 6. 49743 6. 551231 6. 484012 6. 478164 7. 034302  
7. 923047 7. 978056 7. 511676 7. 510191 8. 645951 6. 510561 8. 413506 8. 927749 7. 924349  
7. 622074 7. 628915 7. 419205 7. 664482 7. 456491 7. 0598 7. 426252 7. 696943 7. 307674  
1. 560919 2. 039946 1. 296262 1. 870229 1. 892019 2. 236242 1. 239427 1. 450348 1. 489106  
2. 74779 3. 000561 3. 059567 1. 711503 1. 651808 1. 810872 1. 771401 1. 976115 2. 937029  
1. 979526 1. 580203 1. 888133 2. 56721 1. 471055 1. 852648 1. 342252 2. 202645 1. 600353  
3. 030297 4. 390105 3. 434879 2. 384064 4. 396373 3. 917557 2. 557998 1. 818092 2. 582431  
3. 411967 3. 527627 4. 665136 4. 140791 3. 909853 2. 790686 3. 247504 4. 247583 3. 967683  
5. 412945 5. 488589 6. 018689 5. 061391 5. 993538 5. 685709 6. 264072 6. 606058 6. 554895  
1. 319122 2. 54971 0. 875078 1. 699195 1. 516188 1. 190146 1. 720681 1. 038562 1. 303725  
1. 81072 2. 504057 1. 835879 2. 316387 2. 343517 2. 643764 2. 10554 2. 716254 2. 512485  
3. 765445 5. 531564 6. 123546 5. 6819 5. 449312 3. 132184 3. 292174 3. 853041 5. 986998  
2. 217776 3. 346203 3. 118111 1. 997342 3. 047589 2. 515565 1. 937022 1. 464986 1. 396576  
1. 540353 1. 662264 1. 784136 1. 528631 1. 523208 1. 884749 1. 502596 1. 377437 1. 579256  
1. 598122 2. 233012 1. 598365 1. 894746 1. 832256 2. 437852 1. 881638 2. 549496 1. 78554  
2. 44359 1. 650727 2. 525469 1. 447049 1. 859793 2. 405448 2. 414395 2. 98226 1. 579977  
2. 798847 2. 811305 3. 450737 2. 991439 2. 956379 3. 279178 2. 90625 3. 117194 2. 432162  
2. 031905 2. 251445 2. 804969 2. 143133 3. 151288 1. 798802 3. 131119 1. 438857 2. 016371  
2. 464117 1. 083115 2. 722836 1. 510589 3. 16136 3. 25549 2. 95972 2. 646562 3. 407415  
2. 010783 1. 877472 1. 692969 1. 763643 1. 849826 1. 805919 1. 400271 2. 13862 2. 309112  
2. 098196 2. 141087 1. 620417 1. 429172 1. 963335 2. 020024 2. 095441 1. 102002 1. 472566  
4. 44912 5. 146596 2. 433881 4. 042997 3. 086469 5. 888422 4. 393584 4. 018666 2. 591098  
5. 475913 6. 660256 6. 043743 5. 511759 5. 973897 5. 912801 6. 927059 7. 08412 6. 98503  
1. 640567 3. 64471 2. 574109 4. 300021 2. 844494 2. 483941 1. 706624 3. 086431 1. 650036  
3. 594501 3. 265262 2. 562052 2. 222353 2. 838187 2. 474103 1. 940908 2. 523508 2. 324946  
2. 156308 2. 130118 2. 088402 1. 865339 2. 764659 2. 599147 2. 268443 2. 25163 2. 052597  
3. 431148 1. 813728 1. 607526 1. 721182 2. 781872 1. 60201 1. 894959 1. 563582 1. 970586  
7. 595265 7. 35618 7. 144677 6. 61927 7. 290433 7. 14995 7. 531564 6. 834992 6. 863116  
1. 046103 0. 998971 1. 341268 1. 69873 1. 240161 1. 222423 1. 205311 1. 542369 1. 830021  
6. 933657 6. 914973 7. 149662 8. 075686 7. 038109 7. 085228 6. 844642 6. 354404 6. 217544  
6. 065377 5. 736977 6. 560495 7. 19292 6. 170136 6. 655881 6. 910499 7. 338988 6. 70918  
7. 946069 7. 231367 7. 508019 7. 878944 7. 373024 7. 208242 7. 592985 7. 631122 7. 384202  
5. 455085 5. 084584 5. 456289 5. 949821 6. 015598 6. 03068 6. 697039 6. 403888 6. 771375  
4. 70708 5. 954133 4. 938476 5. 64251 5. 197493 6. 24267 5. 623241 4. 864488 5. 351065  
7. 667209 7. 101214 7. 232685 7. 431233 7. 033479 8. 285577 7. 069304 6. 897327 6. 819897  
6. 374052 6. 056483 6. 026949 6. 162048 6. 236412 6. 142625 6. 127026 6. 753749 5. 803889  
10. 42254 9. 989491 9. 970358 10. 22793 9. 870579 8. 233206 8. 940761 8. 982263 6. 643933  
7. 430828 7. 690181 7. 943613 8. 337111 7. 855558 4. 220142 6. 770481 5. 675342 3. 345766  
9. 571912 8. 650488 9. 272702 9. 579998 8. 955202 10. 30402 9. 286598 9. 566664 9. 844278

2. 439412 2. 525512 4. 067296 1. 491832 1. 18769 1. 312271 1. 516604 1. 620527 1. 610336  
6. 698944 7. 044462 6. 668988 7. 305573 7. 206035 5. 823494 7. 266415 6. 360869 6. 586084  
5. 747029 1. 792462 5. 289299 4. 902504 4. 940455 2. 097446 5. 248628 5. 22004 3. 874991  
7. 223474 7. 044505 7. 162595 6. 865653 6. 151832 6. 623349 7. 183278 7. 661968 6. 872595  
6. 72881 6. 243489 7. 757012 6. 352107 6. 453063 6. 434243 5. 200289 5. 782554 5. 287267  
3. 029861 1. 539376 3. 527669 3. 288036 4. 350533 4. 45273 6. 382643 4. 798109 3. 191189  
8. 992795 9. 074259 9. 22016 9. 416389 8. 999907 9. 880665 9. 695183 9. 421261 9. 402857  
3. 294778 3. 909942 2. 621939 4. 059291 3. 553493 3. 281362 4. 161989 3. 905325 3. 824326  
6. 950821 7. 805103 6. 656001 7. 010091 7. 013212 6. 32731 6. 8187 6. 235666 6. 584281  
8. 284772 8. 560388 8. 449387 8. 02554 8. 518329 7. 698585 8. 871442 8. 385157 8. 803564  
5. 384557 6. 156424 5. 600709 5. 42208 5. 175261 4. 461443 5. 27427 5. 521124 5. 024871  
6. 888528 7. 719882 7. 418739 7. 143587 7. 372961 7. 430747 6. 542469 7. 096327 7. 287936  
4. 138743 4. 719966 5. 994646 3. 349315 5. 404201 4. 84871 4. 7848 4. 900319 5. 969112  
5. 687042 6. 000197 6. 243934 4. 561463 6. 684626 6. 403493 6. 67563 5. 666881 5. 887289  
6. 136219 6. 118595 6. 384397 6. 728787 6. 634782 6. 777007 5. 877656 7. 040154 6. 78008  
6. 825465 6. 866449 5. 815406 6. 380058 5. 761935 6. 554756 6. 39624 6. 655593 6. 062511  
6. 338306 6. 442013 5. 35536 6. 327888 5. 61452 5. 402934 5. 745131 5. 050654 6. 45807  
4. 543206 4. 104094 4. 819615 5. 735164 3. 895253 4. 452834 5. 693333 4. 904399 4. 515456  
3. 781137 3. 171467 3. 810938 4. 635073 3. 720862 4. 668198 2. 953519 3. 373362 4. 093138  
6. 634641 6. 878781 6. 536912 6. 741638 7. 4699 7. 33323 7. 387897 6. 647272 6. 332642  
7. 566276 7. 49811 7. 657352 7. 608871 7. 305225 7. 712187 7. 399843 7. 761926 7. 729251  
3. 48709 3. 733446 3. 6769 3. 882398 3. 614435 3. 705449 3. 867392 3. 238119 3. 34103  
3. 06378 1. 979111 2. 457845 2. 149494 1. 910903 1. 608649 1. 749682 1. 799569 1. 698668  
5. 674579 4. 903892 5. 971317 5. 681 5. 780138 5. 031961 5. 741552 5. 860325 5. 542259  
5. 242161 4. 826284 4. 424391 4. 019149 4. 398557 6. 105971 3. 938595 1. 722334 3. 544252  
6. 604176 7. 914759 7. 193037 6. 71745 7. 094155 6. 704945 6. 613932 6. 52128 6. 68525  
3. 188301 2. 985338 3. 97904 3. 436266 3. 873052 3. 821775 3. 47275 3. 438642 2. 924837  
2. 416903 2. 598586 2. 310532 2. 481303 2. 815081 2. 649917 1. 192636 3. 211033 3. 182443  
7. 924243 8. 92751 8. 650204 8. 53738 9. 359572 8. 070692 9. 17249 8. 687272 9. 166015  
5. 456237 6. 510408 6. 105304 6. 310671 6. 177588 4. 397411 7. 005177 6. 365812 6. 338055  
5. 890782 5. 364715 6. 114038 5. 403787 5. 869278 6. 451261 5. 544954 5. 564049 5. 871959  
0. 834272 1. 36494 1. 324276 1. 4422 1. 310504 1. 72983 1. 556509 1. 246355 2. 156524  
3. 290828 3. 360827 3. 640275 3. 971277 3. 987653 4. 058155 3. 008614 3. 59223 3. 429753  
4. 662259 3. 095921 4. 304709 4. 919211 4. 348881 4. 143726 3. 639435 3. 906457 4. 66673  
2. 384641 2. 497111 2. 862913 2. 795051 3. 040323 3. 437356 2. 581232 4. 87219 3. 395135  
3. 88449 2. 758295 3. 145224 4. 337579 2. 515933 3. 231724 4. 137167 3. 166703 5. 588135  
2. 391672 2. 461713 3. 400426 2. 875771 2. 633089 3. 232324 2. 516088 2. 533551 2. 992873  
2. 895199 2. 118774 3. 189675 2. 586702 2. 623817 3. 330664 2. 851628 3. 346099 3. 478641  
5. 693122 5. 899227 6. 182923 5. 623583 6. 337382 6. 330778 6. 210852 4. 765719 4. 54115  
1. 882177 2. 462009 1. 457758 1. 373242 1. 467016 2. 346062 1. 625292 2. 281821 2. 355312  
10. 27507 9. 719264 9. 84479 10. 45533 9. 981584 10. 07499 9. 44685 10. 17097 9. 949096  
5. 127862 7. 072778 6. 365447 5. 293349 5. 32164 6. 910578 3. 831729 6. 74559 5. 807239  
3. 167506 3. 334702 3. 593305 2. 715876 3. 115517 2. 482515 2. 17838 2. 131869 3. 454132  
2. 455423 1. 902021 2. 04383 2. 4551 1. 916663 1. 634537 1. 713548 1. 692406 2. 446527  
4. 83266 4. 173716 4. 041582 5. 404614 4. 502259 5. 915116 4. 02868 4. 633003 5. 21527  
4. 03184 4. 084342 3. 552964 4. 806472 4. 096033 3. 205477 4. 150991 3. 90445 4. 633632  
1. 960528 1. 497716 1. 572866 3. 194992 1. 790418 5. 789826 1. 643044 1. 451728 2. 386727  
4. 804111 4. 632285 4. 64483 3. 595026 4. 2298 4. 556239 4. 813314 4. 730696 4. 031962  
3. 443372 4. 051509 3. 666045 3. 518655 3. 668839 3. 896749 3. 056173 3. 959592 4. 304363  
1. 951063 2. 10507 1. 923849 1. 282 2. 780096 1. 739656 1. 790609 2. 369597 2. 08944  
5. 95394 5. 005635 4. 80141 5. 676164 4. 908543 6. 009282 6. 0347 6. 392597 7. 058126

7. 099143 6. 263145 6. 124862 7. 085252 6. 083616 6. 561472 7. 901205 7. 751851 7. 646423  
2. 076569 2. 637032 2. 897296 3. 214604 2. 309441 1. 888889 2. 968733 4. 046122 3. 639821  
6. 529309 6. 654049 5. 562688 5. 7011 4. 426152 5. 869075 5. 214514 3. 328607 4. 54726  
6. 309211 5. 362529 5. 894913 6. 422264 5. 918862 5. 830532 5. 996345 5. 970073 5. 993877  
3. 985703 4. 673487 4. 905575 4. 961967 4. 504547 5. 251609 4. 685473 5. 372863 4. 933001  
2. 452445 1. 400532 1. 289714 1. 320618 1. 15577 1. 395757 1. 464273 2. 175912 1. 473903  
2. 328723 1. 842744 2. 254702 2. 001766 2. 976443 2. 121774 2. 67195 2. 516382 2. 768482  
1. 097799 1. 432865 1. 361908 1. 400993 1. 454118 1. 847305 1. 124193 1. 304688 0. 790473  
3. 45277 4. 406278 4. 593263 4. 193737 3. 912331 4. 986935 5. 116045 4. 92629 5. 065417  
1. 20464 1. 388476 1. 449035 1. 15162 1. 331901 0. 894297 1. 499011 1. 191323 1. 374326  
7. 473078 7. 386651 7. 793142 7. 792082 7. 036567 8. 199385 7. 661517 8. 399306 8. 437429  
6. 050561 7. 161212 7. 113904 6. 958236 6. 859143 7. 51221 7. 006711 6. 884963 7. 061279  
2. 200249 1. 506582 1. 412527 1. 552202 3. 30911 1. 72544 2. 254164 1. 917818 1. 941302  
3. 401791 2. 82351 3. 327227 3. 169068 2. 701105 3. 881996 3. 645193 2. 650807 3. 756075  
4. 987505 5. 199174 5. 365648 5. 033871 5. 405499 4. 487187 4. 906338 4. 938944 4. 735176  
3. 65373 3. 696698 4. 021838 4. 066863 4. 21683 4. 307455 4. 331519 4. 200406 4. 747367  
4. 20312 4. 938816 4. 897362 4. 308352 3. 961676 5. 253322 4. 799431 4. 951064 3. 934699  
3. 079375 3. 493421 3. 839436 4. 210754 4. 017284 4. 626307 4. 155101 5. 423131 5. 043088  
5. 542945 6. 152359 5. 139881 6. 304556 6. 495534 5. 941861 6. 453464 5. 364314 6. 210636  
3. 688171 3. 886799 4. 052432 4. 694816 4. 19171 4. 890073 4. 024047 3. 849417 4. 406684  
4. 894965 5. 097793 4. 623557 5. 104849 4. 162999 4. 138607 3. 861841 3. 811417 4. 270728  
3. 849051 3. 370701 3. 112862 3. 415644 3. 752501 5. 502101 4. 411474 3. 270992 4. 64127  
4. 531899 3. 305152 3. 634679 4. 303194 4. 002828 3. 222157 3. 431828 3. 758215 4. 334765  
7. 481604 7. 304495 8. 230818 7. 350298 7. 848064 6. 986121 7. 797589 7. 307362 7. 470984  
1. 634997 2. 179307 3. 024465 1. 368294 2. 032877 2. 155279 1. 980056 1. 839826 1. 703942  
2. 896897 2. 433875 2. 324227 2. 034987 1. 914533 2. 501965 1. 953678 2. 348726 2. 044166  
4. 613366 4. 880747 4. 295856 4. 270689 4. 080696 3. 340015 3. 246415 3. 8454 4. 410486  
2. 419961 2. 018848 2. 445238 2. 7676 2. 952553 2. 740035 2. 238706 2. 438015 3. 175031  
3. 360258 3. 339929 3. 433834 2. 89445 3. 355362 4. 30686 3. 280343 4. 095794 4. 428878  
2. 896055 3. 079179 2. 365009 2. 141562 2. 43494 1. 781631 2. 01212 1. 943419 1. 811935  
1. 539841 1. 699312 2. 817989 1. 926912 2. 68337 2. 91526 2. 255534 2. 273532 2. 524724  
5. 248465 6. 136117 5. 373129 5. 145117 5. 813481 6. 234749 6. 045156 6. 010944 6. 315072  
2. 515118 3. 190427 2. 439842 2. 629579 2. 706606 3. 921283 2. 316561 2. 351327 2. 649754  
3. 159694 4. 047859 5. 334365 5. 399 4. 774464 4. 635859 4. 683873 5. 3373 5. 148499  
5. 84654 6. 081354 6. 524965 6. 499153 6. 437281 5. 577756 6. 551849 6. 560774 6. 464602  
4. 361061 5. 50099 4. 670687 4. 658128 4. 57488 4. 862695 4. 786079 3. 607514 5. 546132  
5. 334719 5. 994216 4. 837006 6. 603557 5. 110839 5. 145566 5. 123148 6. 712561 5. 189717  
4. 713674 3. 954911 4. 994452 4. 319955 4. 216047 5. 245013 4. 275185 5. 423082 4. 899047  
6. 420403 6. 71671 6. 365506 6. 650079 6. 649308 6. 783441 6. 122265 5. 953329 5. 682582  
3. 455922 5. 116971 5. 152177 5. 568602 3. 747437 4. 126519 4. 695411 4. 380194 3. 635025  
4. 869293 4. 265387 4. 984172 4. 767342 4. 568568 5. 403688 5. 14737 4. 201841 4. 71467  
3. 251835 3. 187521 3. 323807 2. 29985 2. 699781 2. 948218 2. 947081 2. 485973 4. 321734  
5. 458241 4. 58133 6. 201059 6. 108432 5. 377038 5. 849747 4. 966231 5. 962137 5. 441477  
8. 526496 8. 013142 8. 350842 8. 386716 8. 178609 8. 651382 8. 458483 8. 323966 8. 508086  
4. 974216 6. 099981 4. 897033 5. 680096 4. 838993 4. 097932 5. 854225 6. 214946 4. 516374  
5. 407104 4. 859009 4. 969699 5. 556816 4. 731268 5. 024444 4. 619229 5. 071131 4. 886082  
4. 760625 5. 648877 5. 651609 5. 512943 5. 604264 4. 900354 5. 438933 5. 691048 5. 18556  
1. 246597 0. 946397 0. 847613 1. 19402 0. 887752 1. 015208 0. 916906 1. 192899 1. 713094  
1. 418857 1. 948842 1. 566628 1. 402187 1. 737066 1. 843948 1. 678329 1. 241348 1. 540059  
0. 842603 1. 292227 1. 642194 1. 320177 1. 553542 1. 135172 1. 347168 0. 965259 1. 491169  
7. 048216 6. 248936 7. 081901 6. 204512 6. 756103 7. 332943 7. 262137 7. 299604 6. 887788



1. 469145 1. 726283 1. 959933 1. 391124 1. 654452 1. 47615 1. 173964 1. 301064 1. 322291  
8. 614589 9. 022569 8. 924048 9. 016348 8. 100448 9. 633991 8. 624667 8. 775005 8. 257268  
3. 020114 1. 511043 1. 434761 1. 424673 1. 066797 1. 125266 1. 565729 1. 504749 1. 345052  
6. 091849 6. 097259 5. 45095 4. 712101 5. 980293 6. 038947 6. 074996 6. 644539 6. 199764  
1. 782897 1. 792883 2. 423356 2. 803833 2. 862019 2. 819605 3. 199582 3. 613311 2. 928569  
2. 701687 2. 271433 2. 320623 2. 293666 2. 027302 2. 016144 2. 326714 1. 763752 2. 614082  
1. 500293 1. 558533 2. 314073 1. 98382 1. 931645 1. 997119 1. 855441 2. 19724 1. 660954  
3. 321098 2. 918123 3. 437222 3. 267362 3. 213895 2. 901617 3. 068142 2. 956715 3. 040466  
3. 980486 5. 461646 5. 112914 4. 534204 4. 562395 3. 140867 3. 778854 4. 445549 3. 909596  
4. 356708 4. 436165 4. 717164 5. 147863 4. 996055 4. 274945 4. 454953 4. 62021 4. 998093  
1. 184769 1. 408113 2. 633313 1. 543608 1. 935079 1. 470495 1. 20445 1. 588079 1. 90015  
4. 924221 3. 41948 4. 508136 3. 959346 3. 645223 4. 762837 3. 424423 4. 275633 3. 986285  
1. 454975 1. 949298 1. 487027 2. 305606 2. 325252 1. 987361 1. 413446 2. 14276 1. 719318  
1. 024844 1. 324433 1. 389972 2. 283408 1. 554636 0. 813626 1. 460042 2. 935624 1. 635929  
3. 874447 4. 209565 3. 77548 3. 768214 5. 025291 3. 737294 4. 016956 5. 267578 4. 961694  
1. 034243 1. 396364 0. 966198 1. 501351 1. 623246 0. 659858 0. 977317 0. 872881 0. 986857  
5. 416086 4. 484065 5. 333741 5. 227467 4. 733184 5. 968911 5. 28136 5. 992518 6. 117189  
4. 642602 5. 41458 5. 01553 4. 05754 2. 093693 5. 453245 4. 078164 2. 432959 2. 694276  
4. 847242 5. 255438 3. 761298 5. 233753 4. 651335 5. 570421 4. 912829 5. 614677 5. 674606  
8. 416844 7. 615537 7. 919626 8. 136472 7. 973446 8. 401716 8. 104995 8. 126824 8. 056003  
5. 546455 5. 985819 5. 013334 6. 288319 5. 584116 5. 874605 5. 564121 5. 624787 5. 407129  
6. 815535 6. 401326 5. 674706 5. 077039 4. 709434 5. 281905 4. 916876 3. 10894 2. 612321  
7. 28739 6. 93818 7. 148149 7. 69769 7. 148291 7. 511895 7. 704229 8. 016634 7. 589726  
5. 138819 4. 027623 5. 524272 5. 019397 5. 479442 5. 811418 5. 342215 5. 721861 6. 460564  
5. 269307 5. 587696 5. 611246 4. 463164 5. 066973 4. 80396 6. 16171 6. 240796 4. 835416  
2. 497032 2. 3684 1. 659958 2. 078449 3. 490025 1. 277884 1. 728036 2. 918193 2. 214189  
3. 981996 3. 970234 3. 004312 4. 481597 3. 835544 4. 692423 4. 742014 3. 78754 3. 649987  
6. 833975 7. 567387 6. 817907 7. 024949 7. 402758 6. 45637 6. 799823 7. 149023 6. 965239  
4. 403423 4. 929847 5. 236136 5. 273248 4. 286322 4. 578855 5. 935557 4. 234802 4. 614286  
8. 018994 7. 727216 6. 837481 7. 757908 6. 499012 8. 000348 6. 585097 4. 987558 4. 469475  
3. 746033 3. 497488 4. 697301 4. 322436 4. 976926 3. 975126 4. 453083 4. 876016 4. 205929  
3. 640177 2. 424098 3. 553827 2. 144821 3. 827542 0. 869953 2. 200634 2. 63798 2. 518503  
2. 369166 4. 22401 4. 861953 3. 396878 4. 492883 2. 522623 2. 559698 3. 449318 3. 401471  
6. 587659 5. 430558 5. 472079 4. 601289 4. 579099 4. 83537 4. 312291 3. 607129 3. 342499  
5. 146535 4. 928947 5. 610992 6. 185081 5. 281147 5. 765858 6. 660113 6. 250793 6. 360103  
8. 322663 8. 500783 8. 328184 8. 446302 8. 543534 8. 261986 8. 605512 8. 609074 8. 317988  
3. 627433 1. 991268 2. 747428 2. 95068 2. 526001 2. 857032 4. 392817 2. 884694 2. 921288  
3. 534967 4. 450006 5. 433047 3. 817321 4. 385626 2. 524661 2. 798744 2. 297885 2. 818424  
4. 356803 5. 350979 4. 565463 5. 295286 5. 678163 5. 946255 6. 066169 6. 254135 5. 235975  
3. 476555 2. 927504 3. 903739 4. 940919 3. 180279 5. 234502 3. 996244 3. 654571 5. 046531  
2. 465087 2. 05339 3. 256843 3. 099689 3. 245654 3. 618341 3. 369658 3. 277698 4. 133555  
1. 421251 1. 69402 1. 465958 2. 189379 2. 06495 2. 979424 1. 652904 2. 115056 1. 480774  
3. 494431 2. 879097 3. 321568 4. 08657 3. 455678 4. 976667 4. 272653 2. 944428 4. 330707  
1. 275508 1. 158157 0. 850895 1. 572719 1. 668992 2. 083211 1. 318547 2. 297226 1. 465689  
2. 212399 1. 936199 1. 713944 1. 617599 1. 201209 1. 681769 1. 409868 1. 84186 1. 347104  
2. 245679 2. 240768 1. 457637 2. 457873 2. 204942 2. 972363 2. 098324 2. 366445 3. 373968  
3. 807321 3. 589216 3. 922478 3. 62492 3. 530442 5. 242197 4. 263141 4. 256015 6. 02805  
2. 614994 2. 22299 2. 911521 3. 676243 2. 195338 2. 982303 2. 845137 2. 970414 2. 307949  
6. 930259 7. 354446 6. 900223 6. 390798 7. 426596 5. 925073 6. 375071 6. 398812 6. 779492  
5. 546438 5. 096856 4. 263692 5. 366667 5. 464383 6. 598374 6. 269387 5. 805855 6. 706962  
8. 440621 8. 177685 8. 131793 8. 577226 8. 377743 8. 971381 8. 185428 8. 506642 8. 54043

2. 371793 3. 254846 2. 292268 3. 222214 2. 928458 3. 497662 3. 550495 4. 031108 3. 227105  
2. 492952 2. 382225 1. 978186 2. 233912 2. 048484 2. 318888 1. 743392 1. 649347 2. 06733  
4. 638829 1. 248392 2. 439848 2. 547017 3. 661677 5. 478548 4. 058115 4. 481019 4. 259678  
4. 576643 4. 831436 5. 215382 5. 612121 5. 118856 5. 49333 5. 613253 6. 208003 5. 743615  
10. 43665 10. 18559 10. 28549 10. 24989 10. 28624 9. 565808 10. 33594 10. 20916 10. 43524  
6. 292756 5. 771854 6. 321586 6. 660688 6. 258099 6. 147354 6. 8778 6. 487689 6. 219814  
6. 840594 6. 012384 6. 341633 6. 219319 7. 832872 6. 944027 7. 02711 7. 54566 7. 046208  
5. 916024 5. 862277 7. 101405 7. 455375 6. 895515 6. 484059 6. 964217 7. 571855 7. 680972  
2. 349325 2. 245523 2. 990719 2. 398535 2. 829865 2. 933474 2. 363603 2. 80251 3. 110187  
1. 925645 2. 446649 2. 060315 1. 716073 1. 903756 1. 903709 2. 394257 2. 493149 1. 943843  
2. 720783 2. 334858 2. 447534 2. 293916 2. 639536 2. 554311 2. 30653 2. 471845 1. 902636  
6. 885097 6. 306371 6. 846593 7. 006034 6. 887874 7. 298039 7. 78764 7. 363437 7. 056718  
2. 150266 2. 206768 2. 546099 2. 486059 2. 527482 1. 895953 2. 310065 3. 243643 2. 277831  
4. 889825 3. 12694 2. 517719 2. 747124 4. 753929 6. 654474 3. 214076 3. 2333 5. 437673  
3. 92071 2. 428298 2. 54914 4. 829208 4. 27913 5. 993903 3. 532338 2. 898344 5. 071934  
3. 339508 1. 976761 1. 626554 2. 52767 2. 294089 5. 983155 2. 069655 1. 892336 4. 241389  
3. 843022 3. 107328 3. 842587 3. 790187 3. 439551 3. 495884 3. 828202 3. 596782 4. 817384  
8. 075679 7. 725931 8. 027848 8. 135155 7. 953141 8. 148282 8. 603323 8. 307797 8. 961975  
6. 06851 5. 671649 5. 390001 6. 642827 6. 204943 7. 429629 6. 736823 7. 290108 6. 980965  
1. 685246 1. 777542 1. 529336 2. 59234 1. 96046 1. 363019 1. 527985 2. 121744 1. 860916  
7. 33453 7. 406446 6. 960625 7. 610756 8. 177455 8. 336779 7. 211687 7. 913961 8. 339518  
4. 94155 5. 700092 4. 181864 3. 941663 5. 722401 4. 46054 2. 96535 3. 0138 4. 929297  
7. 675735 6. 610031 7. 604713 8. 379416 7. 312 8. 565597 8. 079466 7. 910704 9. 178087  
1. 61882 1. 425623 1. 293035 1. 342334 0. 913868 1. 815228 1. 478844 1. 450029 1. 725116  
1. 103783 1. 584196 0. 90077 0. 839464 0. 8561 0. 991607 1. 348469 1. 83181 0. 916467  
3. 205779 4. 719918 2. 911682 5. 559606 5. 318044 5. 857274 2. 811809 6. 33759 5. 747166  
0. 768869 1. 24984 0. 47261 0. 676678 1. 120831 0. 943801 0. 859459 0. 796353 0. 641437  
4. 82857 4. 648674 4. 444946 4. 049333 4. 640512 5. 116213 5. 224026 4. 988569 4. 559537  
8. 34096 8. 640972 8. 607014 7. 816622 8. 828917 8. 757152 8. 292782 8. 518831 8. 178713  
7. 775926 8. 318878 8. 550127 8. 183397 7. 675891 8. 822045 7. 831838 8. 196174 8. 122725  
2. 986647 3. 669338 3. 273025 3. 95648 4. 113849 3. 702027 2. 908628 3. 798759 3. 396519  
8. 207523 8. 622366 7. 527318 7. 81361 8. 659031 7. 360826 9. 296142 9. 264739 9. 442832  
9. 050341 9. 23791 9. 156952 8. 832692 9. 137402 8. 71893 9. 267409 9. 917182 9. 28938  
2. 935599 2. 44131 1. 866596 2. 240548 1. 992295 3. 336169 1. 792493 2. 900881 2. 723392  
2. 006003 2. 119007 3. 931046 4. 289746 3. 420062 6. 977208 2. 706322 3. 718966 3. 045677  
6. 425551 6. 17558 6. 145707 6. 287173 6. 512919 7. 092727 7. 136088 6. 998486 6. 302982  
7. 550359 7. 267503 7. 440205 7. 415223 7. 013162 6. 954917 7. 500937 7. 621841 7. 376197  
6. 126153 5. 978454 6. 0349 6. 040165 6. 746758 6. 392379 6. 527398 6. 948254 6. 519041  
9. 55162 9. 384337 8. 968683 9. 246947 9. 513972 9. 52185 8. 972525 9. 196898 8. 739805  
8. 681913 8. 090197 8. 142652 8. 36516 7. 822439 8. 275562 8. 022222 7. 478202 7. 336383  
7. 634893 6. 846283 6. 835972 7. 000396 6. 521089 7. 029743 6. 752076 5. 561082 5. 947806  
1. 722133 1. 125499 1. 072675 2. 034791 1. 037473 2. 469853 0. 959534 1. 505619 1. 561089  
3. 208948 3. 990238 4. 927315 3. 498551 5. 526196 5. 764976 4. 255691 3. 883792 4. 864171  
2. 55674 1. 677297 2. 061661 1. 744082 1. 352398 1. 284301 2. 298083 1. 410996 1. 626194  
1. 665896 2. 118124 1. 931051 1. 61731 2. 755065 2. 684486 1. 580241 2. 086572 1. 061732  
2. 673776 2. 503153 3. 186193 3. 10484 2. 579202 2. 818919 2. 387888 2. 937663 2. 76122  
11. 0063 5. 625904 7. 193994 6. 633022 7. 497832 11. 66684 8. 271356 9. 631217 11. 35718  
2. 168317 3. 619296 2. 202617 2. 412098 3. 128004 1. 948466 2. 767929 2. 486492 2. 340692  
11. 57119 5. 561226 8. 259212 6. 461164 9. 431451 12. 24102 10. 11109 11. 30725 11. 73343  
3. 155015 3. 029245 3. 009206 2. 64075 2. 328238 4. 239373 2. 664953 3. 66201 3. 287939  
10. 56996 5. 394425 6. 474787 7. 569317 7. 210561 11. 16869 9. 094756 10. 36378 11. 21095

1.169933 1.216858 0.964057 1.016517 1.671912 1.395375 0.864932 1.591244 1.20479  
1.361186 1.482407 0.998378 1.235771 0.889905 2.039665 0.861066 1.419201 1.434504  
2.278137 3.703246 2.45145 4.46378 3.603073 2.487933 3.255432 1.908023 3.027305  
2.985499 2.392433 2.950253 3.29666 2.376464 2.040813 2.480388 2.352172 2.8084  
8.900685 9.130113 8.45027 8.589497 9.186823 8.391444 9.204787 8.787032 7.849642  
2.697889 2.484899 1.197757 4.268459 1.753532 1.372091 1.382124 1.491461 1.595386  
4.967759 5.935794 5.315755 5.876714 5.112089 5.273567 5.924506 5.222513 5.779204  
2.906054 4.625432 4.087269 3.908863 3.365023 2.735133 2.252426 3.522371 3.652556  
5.12509 3.952641 5.973935 6.418877 5.657627 6.959675 6.241505 5.662025 5.991213  
3.218301 2.259093 2.775317 1.922183 2.95186 3.375898 3.002262 3.095253 4.131783  
4.756593 5.460104 3.230278 5.682335 3.822913 7.237784 5.175352 5.085509 6.227618  
1.883378 2.872567 2.335059 3.057663 1.959801 2.033452 1.983916 2.879271 2.720416  
3.747124 2.602981 2.518067 2.798552 3.425989 2.760217 3.287135 3.407809 2.405386  
1.834092 1.245446 1.937745 1.65254 1.407025 1.292895 2.193545 2.263322 2.836687  
1.72265 1.598291 1.446123 2.364802 1.766619 2.44668 1.858053 2.221604 2.262415  
5.322336 5.38502 5.966848 5.315278 5.396648 5.848758 6.51208 6.370765 6.178757  
6.331119 7.125426 6.585198 6.323412 6.755424 6.679246 6.491518 6.650302 7.290691  
7.343268 7.904085 7.721149 7.295653 7.607142 7.599168 7.514525 7.264007 7.384346  
3.012893 1.433629 1.424507 2.920513 1.37827 2.396156 1.563596 1.870037 1.754786  
4.843913 4.748315 5.178032 4.737549 5.443674 5.346731 5.758009 4.776249 4.941937  
7.962592 7.816945 7.801085 8.175761 8.060364 8.130045 8.106461 8.009906 8.06031  
4.003824 5.36818 3.874608 4.271456 3.99466 5.779909 5.237789 3.620716 4.589076  
1.808679 2.338067 2.127845 1.82995 1.141327 3.076565 1.839927 1.699274 1.840966  
2.253351 2.276424 2.385631 3.240271 2.98768 6.226967 3.04668 3.597062 4.718791  
8.500701 8.264789 8.256525 7.856669 7.887909 8.379535 8.605487 8.526593 8.448291  
8.021973 8.133344 7.591341 7.853441 7.285309 8.199879 7.952749 8.277885 7.962777  
7.251359 8.249894 7.809196 7.627947 7.499522 6.266129 8.562757 7.263967 7.984856  
3.790564 2.196025 2.778034 2.319205 2.069708 4.018775 4.291711 3.40797 3.172416  
6.58118 6.672752 6.966922 6.693265 7.393381 8.913884 6.876134 6.355124 7.041834  
0.711227 1.272649 0.765492 1.511395 0.935167 2.323653 1.001973 1.423846 2.352175  
2.081358 2.966435 2.766272 2.293758 1.996615 4.296355 2.79372 2.224595 1.872281  
2.244821 3.080193 2.475775 2.529524 2.833349 2.915445 2.402825 2.744577 2.463223  
1.330195 2.139358 1.711595 2.074083 1.478252 1.24227 1.955668 1.159632 1.092427  
1.528652 1.887906 1.80969 2.220781 1.449335 2.095833 2.424352 3.129844 1.731999  
6.040414 5.856845 5.825249 5.53291 6.406562 5.463825 6.295333 6.854216 6.729111  
2.621693 1.607763 2.821742 1.57186 1.588562 1.89879 1.653735 1.57961 1.787561  
2.515678 2.4079 3.095675 1.689687 1.923165 4.745336 3.585659 1.779737 4.619864  
4.175622 3.181792 4.080334 5.79194 3.76745 3.300558 4.160387 3.182369 3.500664  
1.902636 2.283701 2.261321 2.759449 1.816288 2.47126 2.102903 2.151403 2.518077  
7.812611 7.0697 7.205337 6.953181 6.848247 7.086596 6.252637 4.678289 4.617751  
2.625709 4.435861 4.102313 4.098613 3.045225 3.680031 3.224042 2.893783 3.121056  
3.737266 4.064249 3.834919 4.707119 3.567974 4.394402 4.440767 4.111809 4.47419  
2.752794 2.355981 2.310201 2.748425 1.531399 2.885172 2.002123 1.92722 3.120152  
4.661516 5.25913 5.088678 3.8856 4.456653 3.439967 5.213138 4.57983 4.415088  
4.407661 3.369822 4.488101 5.139278 4.720598 4.812615 3.278815 4.424708 5.030517  
5.045438 5.98753 5.527625 6.157693 5.735521 6.76222 6.48728 5.20344 5.939078  
0.782139 1.24417 1.670304 1.97833 1.232969 3.012453 1.745136 1.815105 1.757387  
7.22243 7.505181 6.508313 6.694735 6.914351 6.953062 6.846249 6.444226 6.780464  
6.194419 4.592129 5.0507 6.745846 6.552384 5.99022 6.638037 6.276616 6.179551  
1.833807 2.052782 2.129839 1.794383 1.870658 2.34048 1.906196 2.04035 2.020249  
4.867757 4.249716 5.800351 4.865921 6.653403 5.957374 5.801856 7.976153 7.098257

6. 982754 5. 923974 7. 225132 6. 661548 7. 017421 5. 90713 7. 528766 7. 898572 8. 307256  
5. 50574 4. 530333 5. 715541 6. 096292 5. 39832 5. 863681 6. 770697 6. 718259 6. 452908  
3. 479205 3. 884394 4. 494015 4. 607249 4. 813978 3. 871358 3. 778622 3. 616343 4. 097813  
5. 894819 5. 435826 5. 284222 5. 689178 6. 491752 5. 418043 6. 312258 5. 551485 5. 921559  
4. 376845 2. 542611 2. 29715 2. 683729 3. 344113 3. 324096 3. 0154 2. 34276 3. 624848  
2. 60279 3. 722018 2. 945485 3. 000588 3. 216706 3. 199841 3. 066825 4. 071438 3. 602965  
5. 036147 3. 557449 3. 346219 4. 908435 3. 853556 4. 752537 5. 480478 5. 716852 6. 265852  
9. 537879 9. 913158 9. 569841 9. 218492 9. 891986 10. 27682 10. 03415 9. 923246 9. 800196  
2. 10388 1. 990546 1. 519972 1. 997395 1. 288465 3. 441116 1. 839509 1. 599367 1. 629218  
8. 032815 8. 50895 7. 503807 8. 14411 7. 724487 8. 884618 8. 311144 7. 736552 7. 948414  
4. 77933 4. 992364 5. 019098 5. 560836 5. 105824 5. 990588 4. 999305 5. 974896 6. 197878  
8. 128157 8. 659869 8. 260155 8. 780573 8. 214327 8. 637268 8. 5308 8. 505638 8. 114657  
9. 980144 9. 570646 10. 06707 9. 605537 9. 630844 9. 955972 9. 649265 9. 484513 9. 688182  
7. 267066 6. 67785 6. 534522 6. 887253 5. 746233 7. 384332 6. 781616 6. 429391 6. 574917  
6. 669534 6. 271823 6. 218633 5. 579926 6. 526835 6. 20699 6. 694682 6. 965764 6. 86615  
6. 505528 6. 921185 6. 054107 6. 406771 6. 838733 5. 743819 7. 234794 7. 036272 7. 045182  
5. 399484 5. 424294 6. 125045 5. 772582 5. 235781 6. 242325 6. 196611 6. 398326 6. 41054  
2. 868361 4. 159052 4. 006478 3. 477517 3. 594707 3. 315594 4. 769852 4. 929027 4. 672997  
6. 757635 5. 89515 5. 408839 6. 201488 5. 45817 7. 24782 6. 781453 6. 603292 7. 348125  
5. 631545 5. 336526 5. 256738 6. 117472 5. 86586 5. 249644 5. 067367 4. 736881 4. 701766  
1. 728487 1. 26836 1. 781959 1. 740628 1. 619795 1. 777743 1. 609672 1. 932618 2. 407642  
4. 644577 3. 262206 4. 764979 4. 120026 3. 997608 4. 279932 3. 09099 4. 120513 3. 976371  
6. 871098 5. 931004 7. 82109 6. 598551 7. 769738 7. 312406 8. 411457 6. 964436 7. 199533  
7. 819019 7. 322152 8. 09223 7. 541265 7. 550843 8. 001801 7. 518828 7. 700236 7. 865495  
8. 273146 7. 474584 8. 387158 8. 928939 8. 687808 8. 641205 9. 123823 8. 555696 8. 492432  
7. 174162 6. 748589 6. 380678 7. 126347 6. 807286 8. 27809 7. 73247 7. 775576 8. 321759  
5. 867543 5. 942675 5. 941318 5. 801881 6. 44926 6. 974934 6. 923646 6. 287469 7. 081642  
8. 899664 9. 113479 8. 829578 8. 695732 9. 257211 9. 012631 8. 911263 8. 64958 8. 831084  
4. 046414 2. 711099 2. 888124 2. 901778 3. 4536 3. 701068 2. 934593 3. 264266 2. 95459  
4. 77603 4. 684622 5. 454705 5. 263692 4. 956048 6. 08159 5. 134854 6. 189837 6. 421221  
1. 603847 1. 718425 2. 277179 1. 965311 2. 836029 3. 566278 1. 636847 1. 655508 1. 759973  
8. 671871 8. 676671 8. 306319 9. 07846 8. 784008 9. 946313 8. 82447 9. 579793 9. 917879  
5. 842154 5. 781085 5. 897299 6. 496799 6. 716433 8. 107132 7. 067539 7. 341506 7. 6566  
2. 508222 1. 870971 2. 647653 2. 473747 2. 43439 3. 168542 2. 436581 2. 966672 2. 107632  
7. 499005 8. 23551 7. 627651 7. 731406 7. 04306 9. 294383 8. 31956 8. 135189 9. 023332  
4. 370783 3. 903925 3. 419282 3. 832148 4. 430336 4. 085786 3. 331343 4. 123535 3. 79904  
4. 773451 4. 48533 4. 555417 4. 989417 5. 651564 7. 142397 5. 623155 6. 067424 6. 4571  
4. 857953 4. 783305 4. 406584 5. 584914 5. 244828 6. 366455 5. 577842 5. 476273 6. 266044  
3. 027112 3. 08241 3. 348263 2. 144128 3. 136438 4. 984963 3. 841475 3. 075007 3. 499963  
9. 30954 9. 31787 9. 176719 8. 961905 9. 637693 10. 30497 9. 682337 9. 935854 10. 16226  
5. 25159 6. 317658 6. 178087 5. 453166 5. 435485 7. 047681 6. 191641 6. 124328 5. 974216  
1. 047765 4. 376163 6. 064472 2. 099535 1. 471894 7. 460429 1. 631188 1. 322736 2. 550751  
2. 414196 2. 671866 2. 519505 2. 445767 3. 250338 3. 315869 3. 506914 3. 080014 2. 821897  
4. 30117 2. 901345 2. 592782 2. 580738 2. 550687 5. 53114 2. 091203 2. 333692 2. 072003  
6. 385751 5. 459739 6. 824432 6. 374915 5. 524368 6. 77727 5. 237748 3. 310012 4. 253256  
8. 520257 7. 729631 8. 552938 8. 342993 8. 506495 8. 448256 9. 078192 8. 96916 8. 898736  
6. 638661 5. 901257 6. 938993 6. 667829 6. 674444 7. 005479 7. 110878 6. 956196 7. 190138  
3. 727193 3. 06077 3. 07513 3. 013434 3. 709087 3. 514391 3. 181644 3. 242959 3. 222732  
4. 621454 3. 916611 4. 356292 4. 356292 5. 017068 4. 848191 4. 696342 4. 594327 4. 020655  
1. 841177 1. 05136 1. 565247 2. 070253 2. 645044 1. 745459 1. 723806 1. 516942 1. 452748  
2. 513278 2. 276948 2. 871945 2. 530832 2. 980068 2. 857357 3. 207713 3. 161207 2. 503652

2. 205147 2. 009255 1. 773214 1. 93233 2. 394304 4. 67921 3. 778113 2. 291857 4. 512223  
4. 674911 5. 285107 4. 273234 4. 668561 5. 728063 5. 123087 4. 939503 5. 44092 6. 055185  
4. 062329 3. 166971 3. 761154 2. 962398 3. 362472 3. 856921 4. 671074 3. 852977 4. 220179  
1. 818074 1. 62009 3. 64281 3. 202629 3. 651013 3. 082365 3. 599638 4. 98159 5. 822561  
1. 77581 3. 582824 2. 12841 1. 612485 3. 500871 2. 796046 2. 704415 1. 610614 2. 639216  
4. 727105 5. 630204 5. 109255 5. 477171 5. 545654 3. 825129 4. 326844 5. 114902 4. 974979  
5. 471289 6. 417244 6. 437937 6. 508274 6. 502531 6. 286717 5. 26488 5. 19694 6. 138229  
2. 363788 2. 858998 2. 996793 2. 961504 3. 7057 3. 37534 3. 033748 3. 782464 3. 241808  
2. 829749 1. 70891 1. 710078 1. 274441 2. 443962 1. 711745 1. 916057 1. 57975 1. 263321  
2. 6644 3. 140007 3. 509514 1. 559263 4. 649399 1. 378382 4. 109442 3. 180714 4. 890956  
5. 89358 4. 122454 5. 343155 5. 31087 5. 255658 5. 326727 6. 020868 5. 206008 5. 556548  
5. 205812 6. 248083 6. 120863 4. 013585 4. 777228 5. 095425 5. 489457 5. 00532 5. 980237  
6. 135761 6. 907869 6. 49618 6. 523362 6. 021085 6. 460422 6. 740734 5. 840036 6. 662274  
4. 85304 3. 085521 2. 281893 5. 521122 3. 736565 3. 090791 2. 74497 2. 776453 2. 408739  
4. 196218 3. 54022 4. 242612 4. 245764 4. 283536 5. 257581 4. 920225 4. 828974 3. 7348  
2. 130251 2. 800859 1. 838667 1. 817277 2. 099788 2. 383664 2. 460446 2. 313603 1. 859878  
6. 36443 5. 538183 5. 415224 6. 685085 5. 460948 8. 199227 6. 418865 4. 851527 5. 745987  
5. 575082 5. 95059 5. 512171 5. 4754 5. 278093 5. 776504 5. 887287 5. 623076 5. 063737  
4. 657274 4. 947441 4. 313557 5. 414831 3. 580667 3. 529288 3. 687555 4. 14203 5. 005891  
2. 489491 2. 303689 2. 897223 2. 705841 2. 632665 2. 431102 2. 038883 2. 577162 2. 019604  
2. 026004 1. 628997 1. 7559 2. 314106 1. 873865 2. 129902 1. 756413 1. 962373 1. 700678  
2. 662885 1. 987401 1. 967742 1. 841008 2. 66008 1. 224855 1. 283055 2. 769305 2. 636535  
6. 807954 5. 735558 5. 743549 4. 581751 3. 820126 6. 253112 6. 312363 4. 23847 4. 133107  
2. 881369 3. 394997 3. 088111 3. 262599 2. 304916 2. 744568 2. 651536 2. 908369 2. 751102  
2. 399166 3. 122295 3. 262381 1. 944283 2. 33533 2. 504822 2. 761104 2. 479482 2. 546263  
6. 186395 4. 988378 5. 343901 5. 813083 4. 496794 6. 023976 3. 951374 3. 503145 4. 061112  
5. 532538 4. 714145 6. 647584 3. 910296 3. 390731 5. 668844 4. 875509 3. 12199 1. 77228  
1. 283515 1. 153791 1. 144169 1. 889016 1. 477023 1. 373815 1. 307597 1. 566801 1. 735697  
2. 841561 3. 221726 3. 688476 3. 465289 3. 319983 3. 556777 3. 932974 3. 522456 2. 93556  
5. 150837 3. 613555 5. 332167 5. 035634 5. 124613 5. 053617 4. 669046 5. 246098 5. 378106  
5. 433081 6. 052223 6. 263538 6. 027185 5. 65091 5. 21613 6. 011021 6. 060016 5. 791904  
2. 64349 2. 548038 2. 256665 3. 751417 1. 699327 2. 373913 1. 680121 1. 316931 1. 872731  
7. 627412 7. 35434 7. 250436 6. 908364 6. 727714 7. 833811 6. 287396 5. 867228 6. 50678  
1. 040637 1. 387799 1. 391206 1. 23405 1. 387799 2. 393374 1. 05288 2. 787811 2. 176774  
1. 214487 1. 30959 0. 903533 1. 14596 1. 320341 0. 638959 1. 311064 1. 060928 1. 126492  
1. 523463 1. 715836 1. 210403 1. 008103 1. 231774 1. 958315 1. 550368 1. 625969 1. 225165  
1. 684922 1. 827033 1. 967331 1. 957829 2. 014283 1. 499188 1. 78042 2. 07506 1. 770694  
1. 933071 2. 724939 2. 367539 1. 730954 1. 608255 1. 577519 2. 006472 1. 825923 1. 46727  
1. 685277 2. 431982 1. 636605 2. 292159 1. 541475 1. 585151 1. 701597 1. 313558 2. 390813  
3. 697337 5. 108458 3. 796281 3. 498935 3. 52015 2. 805514 2. 138159 2. 825569 2. 176278  
1. 799385 3. 415551 1. 793752 1. 551356 2. 131636 1. 736205 1. 464199 1. 800794 2. 684048  
1. 189649 1. 623966 1. 063109 1. 460409 0. 700871 1. 051932 0. 947005 1. 629977 1. 18807  
4. 549782 3. 493757 3. 917704 4. 665661 5. 070666 3. 281504 5. 261116 5. 653734 5. 841459  
7. 921628 7. 274527 8. 021195 8. 218009 7. 416827 7. 585088 6. 5038 7. 029617 7. 818123  
2. 734749 2. 615898 2. 58202 2. 694065 3. 069873 2. 883808 3. 167209 3. 415606 2. 916442  
3. 837616 1. 919855 2. 937634 2. 656841 3. 248024 3. 230787 2. 577944 2. 409477 2. 640107  
8. 948423 9. 953334 8. 71247 8. 008488 9. 569935 8. 210632 8. 013882 8. 058292 8. 340603  
3. 616639 4. 7066 4. 330969 3. 688149 4. 869357 4. 554944 3. 984528 3. 715843 4. 51821  
9. 609212 9. 899226 9. 657007 9. 622546 9. 999185 9. 09624 9. 386117 9. 022579 9. 173075  
7. 941846 7. 63078 7. 59905 7. 416968 7. 918879 8. 335267 8. 007382 7. 707846 7. 925019  
8. 157386 8. 372753 8. 294508 7. 75861 8. 390485 7. 90232 7. 241255 6. 68038 6. 633828

9. 227723 9. 41836 9. 320139 9. 237584 9. 688915 9. 459428 8. 883384 9. 11309 9. 442028  
6. 401785 6. 286669 5. 756937 6. 622357 6. 830672 6. 503729 6. 695842 6. 270608 6. 218072  
8. 94179 9. 336098 9. 172649 8. 160865 9. 138864 8. 592489 8. 721653 8. 413541 8. 274763  
9. 814133 10. 19444 10. 07418 9. 621213 10. 03772 9. 620748 9. 786838 9. 612111 9. 570768  
4. 672245 3. 988847 4. 205906 4. 291859 4. 742364 4. 666076 4. 143666 4. 199044 4. 230676  
2. 007265 2. 013279 1. 734886 2. 632463 2. 321705 1. 824841 1. 944656 1. 593753 1. 19568  
1. 151818 1. 715824 1. 109913 1. 876817 1. 873779 1. 141104 1. 331223 2. 061245 1. 58868  
10. 20804 9. 966582 10. 43288 10. 26768 10. 42109 10. 32736 10. 36258 10. 06141 10. 46275  
1. 057053 0. 949128 1. 016293 1. 056451 0. 933067 1. 155506 1. 064325 1. 480499 0. 969076  
0. 858109 1. 21617 1. 095513 1. 374242 1. 824475 1. 476155 1. 483785 1. 817674 1. 37548  
4. 973897 2. 596516 3. 630642 4. 121188 3. 01262 5. 243111 1. 309961 2. 448689 2. 636143  
1. 575243 1. 357488 1. 33647 1. 306943 1. 201934 1. 508004 3. 45258 1. 415381 0. 999186  
7. 843564 7. 32648 7. 586855 7. 435608 7. 611309 7. 782165 7. 280146 7. 668512 7. 609169  
8. 572602 9. 281171 8. 848007 8. 588194 9. 277043 9. 04374 8. 936132 8. 399854 9. 103846  
1. 244144 1. 535681 1. 953853 2. 965901 2. 275727 1. 649801 2. 848358 2. 092249 2. 494664  
1. 684432 1. 880076 2. 19937 2. 679262 2. 319887 2. 373116 1. 292643 2. 328655 1. 864755  
3. 459328 3. 626217 3. 194999 4. 264047 3. 073765 3. 495357 3. 791548 4. 443188 4. 264458  
2. 296541 3. 299676 2. 768566 3. 374432 4. 711553 2. 712141 4. 057931 3. 355322 3. 697979  
3. 436204 2. 209038 1. 949486 1. 96002 2. 714804 1. 944711 2. 086434 2. 607649 2. 295514  
4. 749562 5. 058777 4. 999396 4. 87029 4. 851435 4. 782684 4. 939365 4. 550891 5. 27254  
2. 540558 2. 230538 2. 422968 2. 463055 2. 264808 2. 69372 2. 622365 2. 257767 2. 316249  
3. 702336 3. 977505 5. 906366 5. 101595 4. 66499 5. 986239 5. 960212 5. 280488 4. 512583  
6. 104307 5. 646931 6. 992014 6. 177398 5. 995468 5. 88837 6. 445882 6. 583046 6. 629481  
3. 685255 2. 28821 3. 292658 3. 610468 3. 400895 2. 971736 3. 521202 2. 629168 3. 141985  
5. 971972 6. 098755 6. 679412 6. 866007 6. 423796 6. 467734 7. 059292 7. 296118 7. 011706  
3. 617923 1. 852055 3. 996545 1. 866486 3. 063839 3. 225453 5. 251985 4. 219914 4. 094338  
5. 53775 5. 688479 5. 641813 5. 569746 6. 076282 6. 215635 6. 044334 6. 171011 6. 066882  
3. 715448 2. 967862 1. 775897 1. 65011 2. 409403 3. 618638 2. 702393 2. 7978 2. 794564  
1. 441779 0. 819236 0. 735164 1. 656944 3. 277143 1. 042868 1. 187758 0. 905481 1. 363975  
2. 469263 1. 967353 1. 907136 2. 228061 2. 429384 2. 470642 2. 934468 2. 143808 2. 154732  
4. 597469 5. 082551 5. 221868 5. 590274 5. 183353 4. 351514 5. 9057 5. 819524 5. 894359  
1. 259554 1. 815694 2. 272165 1. 649884 1. 982928 1. 93859 1. 687495 2. 988961 2. 367392  
6. 42358 6. 124394 6. 609464 8. 166799 7. 125238 8. 492709 7. 167093 8. 067439 7. 122756  
3. 451447 3. 522962 3. 365986 2. 94519 4. 390476 3. 424943 3. 654328 3. 176959 3. 326661  
1. 544744 2. 849413 2. 737224 4. 532154 2. 708246 3. 483824 2. 979707 1. 974123 3. 964823  
3. 309474 1. 904498 2. 408726 3. 266749 3. 243507 3. 92533 4. 098777 4. 176011 3. 453957  
3. 746859 2. 873101 3. 32962 4. 346136 3. 06179 4. 978036 4. 124453 3. 205786 4. 175804  
5. 354631 5. 148111 5. 38165 6. 34927 5. 015924 6. 050151 6. 858296 6. 100442 6. 930485  
3. 353381 3. 612485 3. 606451 3. 243864 1. 924177 3. 935624 3. 761416 2. 557187 3. 850725  
3. 312229 3. 400014 3. 135494 4. 136108 3. 302577 5. 184677 2. 429877 4. 490892 3. 826655  
1. 488087 1. 048869 1. 852975 2. 428079 1. 533087 1. 923717 2. 533183 1. 594322 1. 652947  
5. 117717 3. 439671 5. 212028 5. 774146 4. 996424 5. 116423 6. 060386 5. 765243 5. 633092  
3. 11136 4. 525201 4. 073232 2. 857538 2. 979664 2. 506521 4. 467223 3. 16879 3. 202606  
6. 568307 5. 619181 6. 034786 7. 035793 6. 689776 7. 282775 6. 998758 7. 535341 7. 50619  
3. 301873 4. 124568 4. 220641 4. 433765 2. 347235 3. 339073 3. 271265 3. 176978 2. 95933  
3. 719549 3. 380568 4. 150865 3. 588867 4. 001507 4. 491498 4. 806683 3. 552899 4. 503831  
4. 346658 3. 614442 4. 804343 4. 287267 3. 867126 4. 770918 4. 412485 4. 593739 4. 212718  
1. 881177 1. 907804 2. 400195 2. 012476 2. 057204 2. 008551 1. 181738 1. 915585 2. 417867  
2. 087584 1. 790433 1. 914498 2. 069323 2. 552362 2. 287391 1. 233012 1. 978505 2. 269312  
2. 613858 1. 95798 2. 355502 2. 671583 2. 129886 1. 817533 2. 166292 2. 302926 2. 937404  
4. 031577 3. 289189 4. 315206 3. 1218 3. 595843 4. 692057 4. 684315 4. 172288 4. 391096

2. 563274 3. 300242 3. 016948 4. 989085 2. 802457 2. 747444 3. 873808 4. 059443 3. 788266  
2. 820703 3. 772924 4. 450898 4. 400984 4. 591559 2. 02992 4. 599208 3. 036592 3. 520602  
3. 119793 2. 3928 3. 848832 3. 126949 3. 663714 4. 027499 2. 76609 4. 957268 3. 41073  
4. 496049 3. 89549 3. 698579 3. 504014 3. 330419 3. 989648 3. 460067 3. 531141 3. 967884  
3. 265537 2. 915413 3. 51057 3. 791447 3. 17661 4. 124209 3. 702684 3. 816913 3. 944306  
4. 071491 3. 519206 4. 431788 5. 434923 4. 833815 4. 224815 3. 573766 3. 969398 4. 095464  
3. 737214 2. 491861 2. 348048 3. 204899 2. 372437 3. 989727 3. 922441 3. 342707 2. 939466  
2. 003089 3. 043102 1. 617703 1. 9727 2. 42212 2. 129341 1. 649492 2. 17336 1. 894794  
1. 702213 1. 18566 0. 847157 1. 365906 1. 192548 1. 372998 1. 410105 1. 011594 1. 448646  
7. 788306 8. 143065 7. 859247 7. 685042 8. 225247 6. 539477 7. 894262 8. 035659 7. 89726  
1. 779423 1. 412192 1. 100343 1. 753386 2. 091431 1. 785105 0. 916344 0. 882326 0. 769135  
3. 789928 3. 673678 3. 521547 2. 732734 3. 055061 4. 145678 3. 719619 3. 499166 4. 060914  
8. 849164 8. 172099 8. 516739 8. 092798 7. 96641 7. 116787 7. 472449 6. 795785 4. 992115  
8. 410484 7. 730673 8. 017678 7. 732848 6. 371961 5. 243084 9. 933375 9. 653279 8. 684793  
5. 169798 4. 296762 5. 293181 4. 958269 4. 289819 5. 779259 4. 221632 3. 540286 3. 77406  
4. 72706 5. 389535 5. 375678 5. 51167 5. 205402 4. 890045 5. 820826 4. 870566 4. 738397  
0. 724135 1. 108486 0. 664543 2. 487726 1. 925694 1. 327644 0. 811213 1. 128273 1. 15613  
5. 4502 5. 650751 5. 590525 6. 028679 5. 448483 5. 002864 5. 646854 6. 119493 5. 476737  
3. 088574 3. 442121 4. 399761 4. 499838 3. 929749 4. 071615 3. 725399 3. 839883 4. 922793  
1. 325523 2. 317072 1. 179013 1. 604447 1. 655608 2. 059941 1. 380857 1. 361199 1. 203897  
0. 942439 1. 206849 1. 338915 0. 89927 1. 259401 1. 338296 1. 498225 1. 285476 0. 919958  
1. 804977 1. 653772 2. 91853 1. 954207 2. 070726 1. 253204 1. 622386 1. 487583 2. 976955  
1. 638367 1. 60411 1. 746243 1. 577865 1. 605666 2. 302411 1. 78729 1. 947779 1. 867116  
3. 717761 3. 129403 3. 611958 2. 321422 3. 564495 2. 363633 3. 198521 2. 337995 4. 089608  
1. 715819 1. 733769 2. 857123 2. 213411 2. 337654 2. 275548 1. 901305 2. 111682 2. 759709  
5. 957662 6. 326234 5. 883009 6. 159827 5. 000819 5. 390709 5. 929489 6. 634459 6. 79047  
2. 521038 2. 37485 1. 993894 2. 735175 2. 306821 3. 93663 2. 856434 2. 569013 2. 238825  
5. 502864 5. 625427 6. 308897 6. 521788 6. 501621 5. 391333 5. 897858 5. 427263 6. 318967  
3. 069265 1. 582342 2. 934794 2. 967556 2. 035441 1. 816245 1. 791038 2. 625263 1. 538331  
7. 170368 7. 610555 6. 971393 7. 2794 6. 867643 7. 045935 7. 472722 7. 008832 6. 993835  
4. 701545 4. 422444 5. 269114 4. 703642 5. 216783 4. 844076 4. 971047 5. 765254 5. 869884  
3. 612411 3. 228496 2. 696136 2. 481602 1. 962422 2. 184929 2. 71393 2. 977325 3. 166378  
2. 985812 2. 505247 2. 574859 2. 76166 2. 066479 2. 386832 2. 480443 2. 410413 2. 054798  
3. 763318 3. 544169 2. 973319 5. 254727 4. 72619 4. 780011 4. 395465 5. 465115 5. 102291  
5. 824837 3. 555712 4. 737448 4. 948786 4. 009092 1. 393627 1. 464588 2. 013308 3. 001032  
1. 800761 2. 110179 2. 027231 2. 636374 2. 326581 3. 172843 2. 659938 2. 169881 3. 066819  
6. 070155 6. 49649 7. 255408 6. 253549 7. 673705 6. 338479 6. 689866 7. 380819 7. 063699  
1. 1908 1. 570341 1. 544282 1. 617523 1. 541207 1. 536285 2. 255364 1. 680739 1. 737264  
5. 585575 5. 421253 5. 925437 6. 859886 5. 275702 5. 817593 5. 854079 6. 593313 5. 916956  
7. 013031 5. 774657 5. 825058 6. 876261 5. 467296 7. 713965 6. 663634 6. 185919 6. 678785  
7. 11846 7. 243036 7. 064798 7. 758818 7. 41684 6. 721124 7. 073045 7. 177901 7. 377992  
9. 453422 9. 804135 9. 856025 9. 705205 9. 931474 9. 885566 9. 914279 9. 968679 9. 835385  
1. 566376 1. 892384 1. 025288 2. 06906 1. 610329 1. 11926 1. 267233 1. 837385 1. 834313  
2. 895434 3. 003064 2. 100901 1. 959105 1. 432838 1. 891896 1. 049352 1. 662328 1. 353162  
7. 00869 7. 2397 6. 943632 6. 841164 6. 824063 8. 001247 6. 710769 6. 998794 7. 064477  
4. 071608 3. 188325 3. 346853 1. 872909 2. 709395 2. 601209 2. 416003 2. 545675 2. 787546  
6. 91073 5. 325059 6. 527909 7. 325332 5. 095848 6. 213828 6. 03285 4. 826861 6. 462917  
2. 677089 2. 263424 3. 303794 3. 699341 3. 468659 2. 619531 4. 060462 3. 09225 2. 766781  
2. 448924 2. 185421 1. 469855 2. 155026 1. 833817 1. 386678 1. 812459 1. 741429 1. 871272  
1. 430179 4. 553405 5. 899477 4. 699474 2. 238183 2. 13627 1. 853592 2. 059408 1. 468196  
8. 096371 8. 104333 7. 895459 8. 262524 7. 926624 8. 148687 8. 053334 8. 049021 8. 105359

5. 702133 3. 78439 5. 254109 4. 364539 4. 321639 5. 910867 5. 31855 5. 646768 5. 337847  
5. 435151 5. 508356 5. 466553 5. 695836 5. 015742 4. 800376 4. 194671 4. 382577 5. 474142  
2. 98756 2. 258927 2. 56705 4. 468672 2. 904386 4. 032648 2. 685124 2. 627493 3. 037714  
6. 33047 7. 061442 6. 614755 6. 37301 6. 571379 5. 639037 6. 605622 6. 485203 6. 123659  
4. 910569 4. 761342 5. 10641 4. 239321 4. 507079 3. 66505 4. 586479 4. 12104 4. 41674  
4. 328863 2. 711022 3. 760845 4. 935667 3. 494656 4. 079417 4. 11687 3. 868202 5. 003514  
8. 640258 8. 989784 8. 575287 8. 567423 8. 589464 8. 333308 8. 857198 8. 754925 8. 844251  
10. 29408 9. 134916 9. 203452 8. 846353 9. 162867 9. 039571 9. 494688 9. 528384 9. 151889  
10. 88089 10. 11861 10. 02928 9. 489994 9. 808184 9. 488292 10. 48863 9. 822095 9. 334038  
3. 87155 3. 636289 3. 689228 3. 814999 3. 452747 3. 05417 2. 881092 4. 243888 2. 878206  
4. 983209 5. 156867 5. 061788 6. 045156 5. 000616 4. 57257 5. 649618 6. 247883 6. 221538  
7. 082469 7. 415746 7. 141415 7. 249492 6. 935522 7. 373952 7. 252252 7. 062604 7. 344685  
9. 430787 9. 346447 9. 350947 9. 12331 9. 396519 9. 43121 9. 925976 9. 920982 9. 534402  
5. 114182 6. 300484 5. 395496 5. 815886 5. 696634 6. 56738 5. 7357 5. 380742 5. 560671  
6. 084047 2. 45852 3. 39986 3. 930915 3. 962652 3. 643272 3. 606122 3. 711105 5. 151938  
1. 651266 2. 450047 1. 97109 1. 813977 1. 798724 1. 821619 1. 836495 2. 033811 2. 48003  
10. 93025 11. 02356 10. 64067 10. 84501 10. 5688 10. 72327 10. 76171 10. 66806 10. 50195  
9. 091221 9. 012602 8. 923449 8. 976149 8. 672633 9. 179046 8. 6982 8. 524132 8. 518084  
8. 625389 7. 570126 8. 29072 8. 251256 8. 100374 9. 274987 8. 45194 8. 655917 8. 687066  
3. 936573 5. 403099 5. 205538 5. 554141 6. 117767 5. 579715 6. 748809 6. 950482 6. 046087  
4. 631547 4. 901337 5. 106062 4. 082491 4. 553341 4. 910977 5. 123534 4. 989434 3. 94443  
6. 508062 5. 161757 6. 007187 5. 296216 6. 095931 5. 908853 6. 177272 5. 82474 6. 271048  
4. 317093 3. 763322 2. 891934 4. 297938 2. 79665 4. 702383 3. 221914 3. 444331 3. 233767  
10. 86053 10. 79994 10. 80717 10. 46457 10. 98028 10. 62527 10. 75964 10. 48705 10. 21957  
9. 254388 8. 517106 8. 708912 8. 031014 8. 250109 8. 480258 8. 184063 7. 742168 7. 587853  
1. 262951 1. 848457 1. 880817 1. 911865 2. 883326 2. 632847 2. 486499 1. 540547 2. 776266  
7. 303283 4. 586134 4. 803265 5. 251115 4. 644834 5. 762073 5. 549645 4. 501789 4. 791979  
6. 561456 6. 029 6. 542802 6. 750447 6. 483477 7. 65743 6. 598867 5. 990853 6. 682201  
1. 566306 3. 452063 1. 962893 2. 326127 1. 666983 2. 048695 1. 692697 2. 222086 1. 999318  
3. 426734 3. 351125 3. 047397 2. 984519 3. 929789 4. 717396 3. 262754 3. 571265 3. 766906  
3. 89052 3. 557514 3. 957758 4. 076164 4. 587099 5. 329169 5. 479719 5. 815113 5. 140824  
2. 828927 3. 337078 3. 679037 3. 394858 2. 987913 2. 877487 5. 470999 4. 78168 4. 766475  
5. 648784 5. 086797 4. 652805 5. 568002 5. 366752 6. 068397 5. 857036 6. 027731 5. 155854  
6. 82897 6. 409078 7. 117818 6. 888371 6. 841768 5. 609635 6. 521021 6. 362106 6. 41781  
0. 925389 0. 642378 1. 198424 0. 583414 0. 710045 1. 11717 0. 612225 1. 605663 1. 011511  
1. 073562 1. 078004 4. 725689 1. 577337 1. 043447 0. 6175 1. 777732 1. 124203 0. 711126  
9. 810129 9. 850582 10. 03323 9. 92394 10. 21357 10. 09296 9. 967828 9. 658423 9. 943139  
2. 285452 1. 820076 1. 379856 2. 338109 1. 430285 1. 847835 1. 726888 2. 035984 1. 515229  
2. 693121 1. 408296 1. 550916 3. 053954 2. 323114 1. 979202 1. 864458 2. 903776 2. 059051  
1. 620799 1. 036231 0. 982729 1. 135527 1. 035577 1. 718497 0. 893614 1. 057751 1. 410836  
1. 605352 1. 150595 1. 409192 1. 362322 1. 336546 1. 461476 1. 458823 1. 55526 1. 777134  
1. 930575 2. 659779 1. 213391 1. 729713 1. 600925 1. 675486 0. 950469 1. 405467 1. 219518  
1. 31014 1. 732133 1. 848633 1. 779944 1. 13967 1. 62477 1. 394093 1. 563988 0. 919957  
3. 766309 4. 069733 3. 968465 3. 731197 3. 433575 4. 540693 2. 985999 4. 339342 5. 340681  
1. 138861 1. 341276 1. 40251 1. 312401 1. 255735 1. 204623 1. 639659 1. 483063 1. 204623  
1. 388293 2. 889973 1. 949624 1. 685935 1. 248031 1. 400503 1. 552667 1. 778752 1. 855581  
2. 809462 4. 620822 3. 149156 2. 346596 2. 504897 2. 578607 2. 98626 2. 8127 2. 315716  
1. 586387 1. 518327 2. 356653 1. 735708 1. 930406 1. 799197 1. 661155 1. 787563 2. 216861  
2. 722201 1. 247927 1. 763451 1. 526533 1. 263945 1. 179626 1. 531284 1. 353109 1. 365293  
0. 983707 2. 250331 1. 953068 0. 905943 1. 485864 1. 337894 2. 22642 2. 532257 2. 220077  
2. 102104 2. 178267 1. 804174 2. 708254 1. 700198 1. 664045 2. 356433 1. 758553 2. 072058



6.003809 6.714497 6.118712 5.793887 5.900801 5.59612 6.807266 5.921116 5.802192  
2.60367 3.192979 3.992252 2.949806 2.87229 2.332554 1.817311 2.760978 1.354274  
6.608997 5.751206 5.484069 5.175618 6.18107 7.577005 6.672758 6.017682 6.461003  
4.114054 4.407429 4.823214 4.397883 3.112447 3.779582 3.970627 5.041972 3.951702  
1.21432 1.522828 1.414562 1.856185 1.052298 1.609696 1.430911 1.219936 1.227619  
7.111636 7.662299 7.422488 7.154364 7.091061 7.044785 7.851673 7.674782 7.330252  
4.519967 4.846297 5.091878 5.180431 4.644119 4.94556 4.822506 4.993525 5.301311  
5.265882 5.216015 3.495002 5.343324 5.308834 3.079981 3.293969 4.280117 2.675483  
6.727751 3.835858 4.379135 5.260275 6.046541 5.539802 6.542217 5.642356 5.028346  
1.819019 1.971318 2.212222 1.339066 2.47393 1.751104 1.998872 2.491992 2.24413  
1.749643 1.753002 2.060928 1.460138 1.188833 1.457355 1.588966 1.79669 1.552469  
1.46134 1.900284 1.273871 1.869863 2.078876 1.143138 1.094374 1.423132 1.358449  
2.559833 2.040148 2.831625 2.585407 1.554637 1.689221 2.025689 2.088947 2.169012  
1.158137 1.161803 1.28809 0.879351 0.898875 0.694581 1.276211 0.939761 1.210287  
1.218539 2.134533 1.218539 2.442891 0.839547 2.423584 1.908729 1.110951 1.127961  
1.948299 2.925505 2.388268 1.674556 1.886219 2.599727 2.171582 1.890836 1.602161  
3.729786 2.928738 2.120786 1.217304 4.056155 2.097733 2.444364 2.37653 2.597842  
0.998014 1.263518 1.164936 1.76448 0.99056 1.514912 1.456418 0.864726 1.835138  
1.076228 0.76929 1.448474 1.19053 0.833071 2.111127 1.089211 1.437796 0.817212  
1.344722 1.118279 1.061447 1.213204 1.369694 1.207751 1.112391 0.889472 0.751826  
1.199232 2.210263 2.805395 1.358181 3.490819 1.855017 1.378975 1.760952 1.006134  
1.41198 2.890263 0.450716 2.798494 1.981275 3.431214 2.574159 1.832339 3.225862  
1.064892 1.056149 0.782333 1.729613 0.640166 0.894648 1.031225 1.112093 1.279766  
2.137257 1.366859 1.094671 1.949458 1.443476 1.906489 1.3151 1.379531 0.800066  
3.261937 4.092364 2.108407 2.973898 2.953321 3.254521 2.881075 2.327907 3.121803  
1.394885 1.805739 2.622697 2.983008 2.081864 1.419737 1.709777 1.402891 1.955877  
1.173242 0.327769 1.010245 1.351183 0.435472 1.423029 1.161941 1.054309 0.973583  
0.802523 1.288556 1.019601 0.926676 0.806533 1.2968 0.863189 1.918638 1.446356  
1.289931 1.260234 1.299412 0.982395 1.142541 1.172514 1.847092 1.088142 1.386339  
1.304003 2.284793 1.491863 2.32295 1.846332 1.725274 1.588852 2.191292 1.784395  
2.516017 2.913613 2.736144 2.197539 2.473956 2.556642 2.18497 2.338817 1.918039  
1.782583 2.625187 1.621545 1.418419 2.367434 1.575842 1.46783 1.952175 1.157887  
4.313149 3.550835 3.146087 3.19329 2.158859 2.010318 2.332943 1.934816 2.424819  
8.351023 6.228771 7.643407 7.377824 6.481592 4.951713 6.900081 6.122652 3.289347  
0.941924 1.41299 1.096491 1.250486 1.090597 1.275649 1.084835 1.063063 1.005802  
5.645098 3.785049 4.213246 4.560947 3.283076 5.074841 5.303595 5.332332 5.243529  
1.858824 1.633858 1.824726 1.57452 1.722488 1.980016 1.272246 1.525934 1.663843  
0.976688 2.103198 1.151396 1.682524 1.1027 1.16689 1.24972 1.155473 1.456053  
1.444617 1.572609 1.552872 1.655049 1.370725 1.804091 0.891294 1.439959 1.173461  
1.657749 1.390331 0.948493 2.996646 1.011933 0.84301 1.38586 3.075062 1.957048  
3.606645 2.343723 3.314183 3.371229 3.410793 3.013973 2.747205 2.998597 3.724092  
1.892249 1.436728 1.006019 1.709465 1.35228 1.08289 1.216378 1.404666 1.24072  
1.165739 1.167099 1.073963 1.711448 0.862544 1.233951 0.958602 2.388929 1.138872  
1.815889 2.564512 2.506602 2.283945 2.196955 2.584097 2.487761 2.631448 3.576315  
1.408454 1.542108 2.295963 1.90089 2.012614 1.520422 1.701887 1.258359 1.760228  
3.899862 4.401843 4.097295 4.224587 4.02497 5.590944 5.084771 5.79096 5.262116  
1.714487 2.414295 2.009884 1.596814 2.450913 1.828284 1.529176 1.497588 1.721292  
2.248736 1.654296 1.45939 2.302314 2.006367 2.875833 2.354391 1.563522 2.271233  
3.007628 0.939929 1.831406 2.215728 1.686485 0.733486 1.859134 0.776614 2.025802  
6.661055 6.146471 7.16245 6.441547 6.562902 6.494804 7.124403 7.597593 7.724535  
1.754219 1.246424 1.698198 1.481777 1.958313 1.658196 1.428891 2.705695 2.476182

1. 733873 1. 754444 1. 689877 1. 388318 1. 645194 2. 098211 1. 632205 1. 11146 2. 1562  
1. 393264 1. 366777 1. 025958 1. 411701 1. 314234 1. 83946 1. 709951 2. 400478 1. 065646  
1. 385076 1. 411549 2. 813776 1. 98222 1. 641064 1. 887928 2. 21963 1. 349221 2. 252841  
1. 460592 1. 40293 1. 932783 2. 03719 2. 391035 3. 15211 1. 792642 1. 580782 1. 616666  
1. 466018 1. 633113 2. 412033 1. 678642 1. 810943 1. 804605 1. 782633 1. 391806 1. 888563  
4. 13128 3. 367736 2. 566108 3. 530963 2. 975488 4. 621005 2. 95503 3. 433263 3. 676062  
1. 788197 1. 706373 1. 827923 1. 683872 1. 851189 1. 989332 1. 306684 1. 289023 0. 959934  
2. 894411 2. 383052 3. 700776 3. 237902 2. 838281 3. 264429 2. 521797 3. 563111 2. 623151  
4. 708659 4. 784274 5. 606425 6. 541646 5. 42265 3. 807754 4. 37892 5. 157733 4. 498002  
1. 920345 1. 612088 1. 0478 1. 564557 0. 911649 1. 810987 1. 032572 0. 915794 1. 107783  
0. 88014 1. 008253 0. 723332 1. 329802 1. 497496 1. 050674 0. 968377 1. 720748 1. 502253  
2. 269665 2. 461884 2. 104439 1. 599809 2. 370453 2. 247304 2. 301275 2. 40365 2. 574779  
1. 524337 1. 284541 1. 257183 1. 44604 1. 429752 1. 317208 1. 470653 1. 32111 1. 813638  
1. 330042 1. 573888 1. 127176 1. 780337 0. 829958 1. 486413 1. 431061 1. 41063 1. 993699  
4. 199944 4. 358358 4. 59846 4. 222847 3. 535411 3. 79648 3. 632099 5. 407635 3. 742318  
5. 216761 4. 2266 3. 785459 5. 095621 5. 264595 3. 94318 4. 691826 4. 14359 4. 27868  
2. 064515 1. 999752 3. 223774 3. 393258 2. 620239 1. 719043 2. 440687 2. 316091 2. 709543  
2. 011866 2. 308796 2. 26754 3. 090271 2. 407906 2. 32123 2. 3283 2. 125666 2. 389611  
1. 425022 1. 630787 1. 382855 1. 275154 1. 324623 1. 744741 0. 882805 1. 306643 1. 487144  
2. 064093 0. 956731 1. 165063 2. 099619 1. 28049 1. 448541 1. 885847 2. 267325 1. 261307  
1. 631912 1. 228652 1. 366981 2. 858976 2. 13998 2. 313194 1. 23468 1. 346573 2. 883625  
4. 283457 3. 570665 3. 422486 4. 459844 4. 663249 3. 393929 4. 094446 3. 568553 3. 787104  
1. 712793 1. 566221 1. 669943 1. 736945 1. 692553 2. 141245 1. 85975 2. 467534 2. 382111  
2. 296615 2. 333109 1. 879658 2. 297654 1. 853982 3. 112277 3. 374014 3. 177089 3. 138197  
2. 326755 2. 069047 1. 753257 2. 467319 1. 232947 1. 204125 2. 675306 2. 003028 1. 764601  
1. 831144 2. 264588 1. 859358 1. 957959 2. 415346 2. 333321 2. 05901 1. 941259 2. 873802  
4. 827429 5. 419421 3. 988317 5. 551332 4. 644015 2. 084823 4. 326735 3. 410012 4. 755741  
1. 626967 1. 514784 0. 995669 1. 551864 1. 670354 1. 525878 1. 327141 1. 890792 2. 162609  
0. 953698 2. 226813 1. 77291 2. 074635 1. 611273 1. 312841 1. 265449 1. 589742 4. 180962  
3. 488143 3. 243029 3. 570488 3. 431211 3. 355391 2. 555708 2. 899054 2. 392062 2. 190622  
1. 044911 0. 995446 0. 943094 1. 120021 0. 559876 0. 808917 0. 921394 1. 513183 1. 113319  
1. 599376 1. 466478 1. 2263 1. 704057 1. 153157 1. 671329 1. 248278 2. 627865 0. 947064  
1. 064506 0. 86707 0. 76147 0. 865796 0. 684545 1. 133239 1. 173825 1. 657649 1. 353034  
4. 271748 1. 43683 4. 019157 0. 742522 0. 753643 0. 888389 3. 872821 2. 756605 1. 595481  
1. 843389 0. 97515 1. 126348 1. 283789 2. 808437 1. 74864 1. 584444 2. 789017 1. 596922  
1. 665339 1. 94716 1. 874516 2. 21179 2. 315826 2. 601093 1. 95749 1. 903575 1. 955972  
1. 495965 1. 144956 1. 169511 1. 454358 0. 943848 1. 245109 1. 607599 2. 10486 1. 18723  
1. 483063 2. 281598 1. 710591 3. 171297 1. 843836 2. 095493 2. 371635 2. 327595 1. 512489  
2. 037825 2. 215258 2. 570281 2. 192634 3. 332689 1. 772648 1. 948657 1. 842869 2. 316707  
2. 244991 3. 136383 3. 003079 3. 401777 3. 574145 1. 882327 2. 000134 2. 475078 2. 739279  
3. 265828 2. 181865 2. 456822 3. 054445 2. 469667 2. 524916 2. 405586 2. 435763 3. 171953  
2. 067944 2. 421226 2. 386993 3. 498224 2. 539396 3. 398254 3. 380246 2. 924541 2. 159188  
7. 328723 5. 285944 6. 433649 6. 804085 6. 39643 6. 758877 7. 547809 7. 679645 7. 413799  
1. 838324 1. 617506 1. 746921 2. 39471 2. 261409 2. 573045 1. 721421 1. 487673 2. 068634  
2. 255347 2. 758992 2. 470473 2. 075522 2. 905977 2. 94589 2. 013127 1. 341566 2. 770236  
1. 719406 1. 724481 1. 318981 1. 837139 1. 921561 1. 886008 1. 325915 1. 65713 1. 722222  
3. 985431 5. 660878 3. 554533 4. 423647 4. 413117 4. 473012 5. 481148 5. 897175 5. 325497  
2. 588811 2. 166796 2. 138681 1. 673051 2. 147869 2. 071 1. 976979 2. 934342 1. 853272  
5. 457755 2. 633726 3. 132759 4. 255426 3. 298764 2. 952676 4. 098836 4. 503103 5. 257644  
2. 310035 1. 561556 1. 847229 2. 001507 2. 601011 2. 299453 2. 212805 4. 258017 1. 943226  
3. 321845 1. 936885 2. 6194 2. 615144 1. 954422 2. 859922 2. 341125 2. 195935 2. 151304

5. 59284 4. 960788 4. 89111 5. 747893 6. 394668 5. 708513 6. 368688 6. 353735 5. 679541  
3. 68956 2. 899027 3. 866187 3. 521584 3. 798456 4. 275637 3. 448113 4. 395216 3. 654002  
3. 859157 3. 859 3. 694018 4. 276909 4. 208115 4. 892082 4. 485013 4. 994967 4. 446621  
1. 508641 0. 77491 1. 304817 0. 821941 1. 191928 1. 732494 1. 25764 1. 622559 0. 664554  
2. 670755 1. 495784 1. 639913 1. 389172 3. 383576 2. 322842 2. 756714 1. 5632 2. 509957  
3. 949426 3. 334647 4. 07953 3. 561183 4. 243971 3. 469657 3. 259057 3. 593548 3. 912293  
5. 574512 4. 726446 5. 739657 6. 358521 5. 995382 5. 577751 5. 600525 5. 968556 5. 057047  
3. 794759 3. 76652 4. 719278 3. 891983 4. 93735 5. 184496 2. 956641 4. 991561 4. 448087  
3. 165219 2. 4018 3. 402004 3. 014445 2. 214352 2. 172705 2. 716926 3. 033858 2. 620138  
1. 863172 1. 081286 1. 16964 1. 549445 0. 879414 1. 735184 2. 118113 1. 104292 0. 910934  
1. 524702 0. 885088 0. 867834 1. 296551 0. 828551 1. 019354 0. 978578 0. 924569 0. 80159  
3. 119303 4. 170501 3. 509267 3. 816125 4. 087193 3. 38522 3. 669739 4. 051866 3. 484521  
6. 183719 5. 933295 6. 266541 6. 079064 5. 191494 6. 34895 6. 414567 6. 792193 6. 426183  
2. 910753 3. 109579 4. 532645 2. 392268 3. 04883 2. 062066 2. 084073 2. 49562 2. 658355  
4. 006277 3. 318456 2. 908956 3. 623707 3. 474434 4. 052082 3. 536768 3. 198369 4. 180964  
2. 041441 1. 583239 2. 483546 2. 771999 2. 297908 1. 998252 1. 757091 2. 032144 2. 671064  
2. 474422 2. 744947 2. 166219 3. 031011 2. 714136 2. 570848 3. 064133 3. 193802 3. 185659  
1. 123724 2. 375523 1. 819289 3. 129579 1. 860949 2. 09947 2. 196878 2. 347354 2. 373773  
2. 673596 2. 829983 2. 108845 3. 035245 2. 308432 2. 660338 2. 286702 3. 24994 2. 759584  
1. 94917 3. 018376 2. 180871 2. 205773 3. 254292 3. 617766 1. 884845 2. 060503 1. 555377  
2. 924678 3. 432726 2. 709454 3. 009278 2. 623956 2. 6066 1. 949222 1. 848084 2. 71024  
1. 469496 2. 030581 2. 269736 2. 25749 2. 074547 2. 312235 2. 666714 2. 400786 2. 360368  
1. 618047 1. 267426 1. 637225 1. 169539 1. 18761 1. 223937 1. 105905 1. 1311 1. 328641  
5. 608893 4. 607264 3. 881992 4. 618159 4. 129272 4. 336047 5. 027854 4. 741602 5. 036  
3. 093895 3. 280899 2. 819463 2. 391574 3. 146609 3. 907046 2. 933897 3. 020176 3. 403335  
1. 79249 1. 174699 1. 26627 1. 945022 1. 945022 1. 647093 2. 141815 1. 76027 1. 919367  
3. 232388 1. 932569 2. 678627 3. 22669 3. 617649 2. 629728 2. 12155 2. 292222 2. 566383  
1. 911155 1. 275541 1. 279748 1. 097283 0. 745825 1. 062433 1. 421061 1. 174663 1. 62659  
1. 570689 1. 419723 1. 693403 2. 235692 1. 481843 1. 604719 1. 915451 2. 116408 2. 100818  
2. 92747 3. 117478 2. 333967 2. 080532 3. 975163 2. 443009 2. 459677 1. 897457 2. 69347  
4. 132709 4. 703293 4. 504293 4. 821875 5. 092829 2. 896175 3. 996594 3. 376705 4. 068235  
3. 577247 3. 021494 3. 066213 3. 056698 3. 220496 3. 664669 2. 607461 2. 733235 2. 613892  
2. 269601 2. 624291 2. 09807 1. 89989 1. 662486 6. 267046 3. 044617 2. 634944 3. 753896  
5. 536176 5. 680432 5. 093517 4. 119395 4. 863857 3. 676597 5. 302295 3. 269799 4. 252603  
2. 319909 1. 005525 2. 019509 1. 86293 2. 108328 2. 102621 1. 486862 1. 35207 1. 363806  
1. 333109 1. 754743 2. 09121 2. 177607 1. 514054 1. 466318 1. 568242 1. 958038 1. 47674  
1. 535407 2. 136725 2. 15879 1. 820507 1. 749677 1. 89691 1. 960721 1. 587609 1. 942106  
1. 514691 1. 843299 1. 115259 2. 11242 1. 691272 1. 286513 1. 216382 1. 486173 1. 296728  
1. 620503 1. 684934 1. 150976 1. 510014 1. 516492 1. 434688 1. 091063 1. 797399 1. 633327  
6. 826594 6. 94376 6. 685758 4. 942999 5. 552287 6. 812246 6. 015208 4. 567902 4. 240533  
2. 534141 2. 885104 2. 289075 2. 300742 2. 597907 2. 820406 2. 592219 2. 10633 2. 494861  
2. 059315 1. 95781 1. 838118 1. 063616 2. 311059 3. 26969 1. 889379 1. 883404 1. 637461  
2. 840176 4. 669512 3. 947558 3. 313156 5. 176602 3. 319205 3. 631813 5. 136886 2. 977347  
1. 344117 1. 881765 1. 501795 1. 567205 1. 187707 1. 585804 1. 356951 1. 72083 1. 614334  
0. 818873 0. 844775 0. 551274 1. 370638 0. 670668 1. 134109 0. 849571 0. 919402 0. 600819  
0. 943137 1. 222822 1. 043647 1. 165459 0. 898444 1. 260951 0. 853581 1. 043428 1. 274476  
2. 306057 1. 421969 2. 256524 2. 279758 1. 164535 2. 693487 2. 96833 2. 534335 1. 910145  
1. 636154 1. 603501 1. 709287 2. 253982 1. 642066 1. 931342 1. 613304 1. 650522 2. 035876  
2. 000336 2. 24858 2. 105543 2. 503706 2. 797354 2. 648948 1. 697908 2. 194867 2. 170859  
2. 243367 2. 019024 3. 253543 2. 348486 2. 225893 2. 054094 1. 781933 2. 362215 2. 191949  
7. 976343 7. 969005 7. 009967 7. 780704 7. 894831 7. 6521 7. 506602 8. 113218 7. 961281

5. 947716 6. 406434 5. 473116 6. 327186 6. 043464 6. 129755 6. 832227 6. 096108 5. 344869  
1. 572893 1. 436164 1. 580673 1. 53419 2. 025165 1. 414573 1. 750872 1. 502261 2. 308473  
1. 768969 1. 983172 2. 053096 1. 760275 2. 026456 1. 852198 1. 906339 2. 515943 2. 500603  
1. 870734 2. 308995 2. 219416 1. 750134 1. 775028 1. 895427 1. 714194 1. 885475 1. 95465  
2. 121846 1. 41531 1. 406641 2. 42178 2. 254194 1. 63033 1. 71728 1. 874554 1. 529361  
2. 666901 1. 98981 2. 646881 1. 958962 1. 528652 3. 02731 1. 644963 1. 624974 2. 036241  
2. 009423 1. 501434 2. 101619 2. 376947 2. 20171 2. 094586 2. 005847 1. 914522 2. 025434  
0. 833988 1. 080325 2. 725994 0. 669545 1. 612813 1. 298508 0. 932907 0. 813162 0. 624086  
1. 031944 1. 465475 3. 617197 2. 282983 1. 605288 1. 475623 1. 507181 1. 417538 2. 564964  
6. 139715 6. 316541 7. 401966 6. 577436 7. 355206 7. 159929 7. 772043 8. 165744 7. 912683  
6. 346516 6. 192549 6. 024628 5. 830381 5. 972568 6. 22568 6. 25776 5. 430815 6. 259176  
6. 402173 6. 920022 6. 084787 6. 868698 6. 798908 6. 007423 7. 418084 6. 462028 5. 583716  
1. 741383 3. 034005 2. 041606 1. 092994 1. 315034 1. 381514 1. 792037 1. 671821 0. 963605  
1. 504151 1. 907768 1. 692598 1. 398958 1. 340747 1. 256953 1. 544882 2. 160965 1. 58127  
1. 568752 2. 841992 1. 89764 1. 27912 2. 548856 1. 624858 1. 854645 1. 195905 1. 458234  
2. 389921 1. 909839 1. 963429 1. 883107 1. 864733 2. 482067 1. 904163 1. 916926 2. 014246  
3. 321735 2. 391926 3. 059119 2. 590614 2. 933073 3. 012038 2. 581387 2. 701927 2. 55596  
1. 834258 3. 687978 4. 266399 1. 969392 4. 105436 1. 999523 1. 681026 1. 490785 2. 100352  
2. 939574 2. 471287 2. 673527 1. 58855 1. 476519 1. 368952 1. 407611 2. 270561 1. 63627  
2. 378151 1. 637993 1. 441497 1. 973341 1. 598142 1. 190242 1. 148362 1. 172366 1. 426184  
2. 53415 3. 456657 1. 991783 2. 118933 3. 064431 2. 066416 2. 23316 2. 357193 1. 926744  
2. 159167 2. 671609 3. 407846 2. 955144 4. 260213 2. 566824 2. 999671 1. 795375 3. 741623  
1. 822778 2. 055593 2. 045505 1. 741655 1. 958198 1. 767801 2. 291093 2. 143484 1. 511526  
3. 184622 4. 716502 3. 2573 4. 417837 4. 433895 4. 299647 4. 101174 4. 623488 5. 00435  
2. 874606 3. 591406 3. 583691 3. 315922 3. 465228 3. 4598 2. 774642 3. 147962 2. 939793  
1. 375611 2. 873265 1. 468014 2. 725658 2. 124268 1. 996975 1. 823875 2. 02568 2. 23089  
1. 366972 3. 358114 1. 341227 2. 254427 2. 2034 1. 868005 1. 344016 2. 163168 1. 439757  
1. 077822 1. 275024 1. 352601 1. 684101 1. 851645 1. 196187 1. 438184 1. 64202 2. 140093  
1. 913117 1. 884353 1. 480167 1. 981039 2. 736718 2. 29004 1. 808012 1. 191318 2. 003946  
4. 156248 2. 698733 2. 087575 1. 638404 1. 94218 1. 84072 2. 097182 1. 334142 1. 03629  
2. 827624 2. 579791 1. 905207 2. 831082 2. 816012 2. 339183 2. 72507 2. 807085 2. 976911  
2. 390264 1. 87923 1. 683895 1. 920082 2. 234723 2. 154284 3. 831862 2. 055382 2. 603167  
2. 399458 1. 977942 2. 560269 2. 377971 2. 033932 1. 871543 1. 935423 2. 253376 1. 740276  
5. 276496 6. 064989 6. 27196 4. 616098 6. 252433 5. 975639 6. 232926 6. 938751 6. 805398  
0. 850742 1. 149055 1. 215405 1. 647806 1. 134696 1. 249119 1. 679031 1. 63655 1. 200166  
3. 751129 4. 122942 4. 082494 2. 020968 2. 369529 3. 492142 2. 171821 1. 361686 1. 716948  
0. 603529 1. 11449 0. 861998 1. 26382 1. 368557 0. 800084 1. 266516 1. 706634 1. 261481  
8. 296424 5. 604692 6. 83859 6. 793351 5. 937566 5. 689136 6. 241178 4. 746432 2. 600734  
2. 586463 2. 249332 2. 380928 2. 967038 1. 609114 2. 775697 2. 139775 1. 873322 2. 761364  
5. 334731 3. 746548 5. 679932 5. 606733 5. 189217 5. 004065 5. 992634 6. 373268 6. 952648  
1. 820883 1. 695795 2. 736394 2. 138475 1. 634259 1. 735711 2. 06217 2. 476345 1. 665268  
1. 461988 2. 326041 1. 751637 2. 190546 1. 72486 1. 24604 1. 490752 2. 026746 1. 357347  
2. 276703 2. 173095 1. 8661 1. 489682 1. 618744 2. 100799 1. 283673 1. 525137 2. 064863  
2. 586819 3. 419313 2. 787334 2. 45795 1. 894668 2. 293514 3. 232022 2. 052373 2. 150606  
3. 121716 3. 225619 3. 035807 4. 260409 2. 370501 1. 880286 2. 049397 2. 069272 1. 951547  
4. 299391 5. 298966 5. 138124 4. 916507 5. 257981 5. 130611 4. 790877 3. 793562 4. 873308  
0. 966311 1. 040359 1. 251737 0. 84683 0. 725786 0. 862645 1. 209454 1. 102164 1. 058717  
2. 026472 1. 649307 1. 709117 1. 759389 1. 760497 1. 799719 1. 855565 1. 964769 1. 236164  
1. 244403 1. 142953 1. 269149 1. 724014 1. 350074 1. 986638 1. 407409 1. 580694 1. 771223  
2. 182673 2. 081441 1. 915593 1. 885503 2. 544784 2. 074275 2. 073933 3. 029511 2. 089687  
1. 718152 2. 096722 1. 917103 2. 958188 1. 991096 2. 943155 1. 420561 1. 741133 2. 724709

2. 723204 2. 704947 2. 270936 2. 954276 3. 534062 1. 822788 1. 664334 1. 565035 2. 895789  
2. 510761 2. 399376 1. 259446 2. 583437 3. 028523 2. 043416 1. 915146 1. 764771 1. 81894  
3. 72946 3. 661873 3. 652251 4. 114359 4. 369708 4. 975834 4. 519102 4. 213415 3. 293367  
2. 154629 1. 187928 1. 239749 2. 871018 1. 759414 1. 583568 2. 570769 1. 795584 2. 274461  
2. 744735 3. 086098 1. 955427 2. 770139 2. 723043 3. 060379 2. 046719 2. 687351 2. 150177  
4. 697254 4. 43601 4. 501214 4. 471651 4. 030064 4. 162469 3. 456021 4. 208767 5. 658716  
3. 041896 3. 620483 4. 081292 1. 626816 3. 013916 2. 941055 3. 102492 4. 076906 1. 628266  
2. 998451 2. 092902 2. 939197 2. 9482 3. 30409 2. 775225 2. 625662 3. 690549 3. 731115  
1. 73881 1. 713619 1. 525725 2. 202446 1. 622766 1. 17555 1. 828559 2. 247675 2. 331022  
2. 071644 1. 849808 2. 347812 1. 894937 1. 818574 1. 961122 2. 868246 1. 925236 1. 824558  
2. 039682 3. 597698 4. 576095 3. 580171 3. 771277 3. 872459 2. 708044 2. 129675 2. 823105  
1. 461837 1. 425659 1. 159295 1. 108292 2. 416272 1. 39142 1. 449298 1. 259895 1. 201315  
6. 674985 5. 149031 5. 406904 6. 360144 5. 903564 5. 541612 5. 995932 5. 807086 6. 236282  
2. 763748 3. 333581 1. 984182 2. 979953 1. 59951 1. 588202 1. 171568 1. 474185 1. 622323  
1. 476947 1. 595285 1. 542861 2. 123533 1. 202876 1. 592091 1. 603521 1. 780849 2. 238563  
1. 757231 1. 03058 1. 196582 1. 590471 1. 611489 1. 439923 1. 266773 1. 213441 1. 528432  
2. 726408 2. 020226 3. 343051 4. 171716 3. 569231 2. 721292 3. 313649 3. 369722 3. 446861  
2. 377021 1. 811701 1. 726718 1. 669506 2. 171829 1. 966674 2. 63715 3. 013054 2. 217858  
2. 893872 1. 867197 2. 154323 2. 619649 1. 966603 1. 943768 2. 021401 2. 362556 1. 766626  
2. 03213 2. 154018 2. 510492 1. 792682 2. 140707 1. 767293 2. 376485 2. 188146 2. 330208  
1. 5764 1. 09392 1. 668048 1. 589865 1. 589892 1. 310372 2. 379204 1. 226151 2. 313554  
0. 606464 0. 882588 0. 948666 0. 983497 0. 611105 0. 909237 0. 73187 0. 733646 0. 69713  
4. 827752 6. 357913 6. 777616 5. 360637 6. 319039 4. 696277 6. 513763 4. 73277 5. 074551  
1. 87406 2. 825647 3. 535485 4. 133868 3. 05345 3. 403971 3. 742476 4. 806246 5. 617907  
0. 762887 1. 119664 0. 661899 1. 358367 1. 699604 1. 671821 0. 981708 2. 035556 1. 77759  
2. 136662 2. 874961 1. 977708 1. 718047 1. 701829 0. 775849 1. 461446 2. 567363 1. 373432  
0. 82202 1. 623364 1. 753665 1. 86109 2. 383653 1. 691682 1. 473031 1. 225993 1. 582137  
2. 401771 2. 381536 2. 936708 2. 704749 3. 239342 3. 051836 3. 109856 4. 397846 3. 213772  
3. 429905 2. 373437 2. 94749 1. 779021 3. 197352 3. 672649 3. 941259 5. 271956 4. 33539  
1. 292997 0. 86311 1. 485082 0. 975158 1. 539476 0. 970652 1. 600714 1. 034548 1. 046422  
1. 903419 4. 096956 3. 557042 2. 737711 3. 111491 2. 441415 3. 935584 2. 606055 2. 811324  
7. 619539 8. 073917 7. 676466 8. 230712 8. 423526 7. 629158 7. 528032 8. 66928 8. 329672  
1. 837917 1. 584345 2. 367945 3. 089936 2. 209776 1. 692554 1. 514646 1. 627485 2. 029614  
3. 906543 2. 724335 3. 643673 3. 314168 2. 927675 2. 396337 1. 72747 1. 971101 2. 045131  
1. 053967 1. 629795 2. 266616 1. 567781 1. 312137 1. 488983 1. 490952 2. 38905 1. 212275  
2. 309613 4. 261804 2. 842414 3. 208804 2. 72141 2. 671363 3. 64688 3. 129237 3. 321783  
2. 627029 3. 279153 3. 44065 2. 930908 3. 231994 2. 921539 2. 889832 2. 862378 2. 988338  
2. 244133 2. 928347 2. 754822 3. 064589 1. 775238 1. 587482 1. 922266 2. 211043 2. 050508  
1. 540164 1. 085977 1. 127688 1. 505352 2. 031647 1. 021342 1. 140405 1. 07879 1. 720873  
4. 44023 2. 652247 3. 662942 3. 673118 4. 647977 3. 978763 3. 561562 5. 098022 4. 720106  
1. 84973 3. 245604 1. 237145 3. 273553 2. 491275 2. 210457 2. 55801 1. 390719 1. 913123  
2. 642168 2. 601616 1. 706407 1. 461514 2. 307242 2. 675028 2. 084129 2. 343864 2. 1695  
2. 390506 2. 606195 2. 263138 1. 817929 1. 665908 1. 728512 1. 593762 1. 448419 2. 612699  
1. 685196 1. 509538 1. 913405 1. 474114 1. 884645 1. 54503 1. 512057 1. 77533 1. 88414  
1. 598725 1. 527593 1. 505863 1. 802003 1. 461101 1. 733588 1. 387682 1. 436764 1. 695383  
2. 113327 2. 43287 2. 179029 3. 158917 2. 242657 2. 8657 3. 101558 2. 182563 1. 690787  
3. 630854 4. 139319 3. 758943 3. 021106 3. 752562 4. 298016 3. 493765 3. 802994 4. 552765  
1. 156616 1. 002423 1. 094742 1. 745496 1. 258661 1. 586494 1. 129771 1. 668988 1. 146938  
2. 572137 3. 472072 3. 429445 3. 458387 3. 482244 4. 252898 3. 424598 3. 61517 3. 855775  
2. 353907 2. 037602 2. 557553 2. 069173 2. 444504 1. 617862 1. 120562 1. 430769 1. 398825  
1. 365328 1. 367749 1. 222778 1. 403743 1. 545765 1. 371229 1. 266846 1. 381183 1. 292177

1. 306427 1. 717567 1. 188988 1. 889893 1. 071492 2. 193659 1. 671394 1. 746926 1. 816766  
1. 478785 1. 857021 2. 228886 1. 980547 3. 415188 2. 006168 1. 339085 2. 18861 1. 442435  
1. 947856 2. 103918 2. 495179 2. 421869 2. 364099 2. 333687 1. 991435 2. 274495 2. 574514  
2. 609666 2. 052488 3. 083501 1. 283777 1. 451963 1. 07179 1. 11453 1. 596757 1. 536682  
1. 357053 1. 32595 1. 978826 1. 379264 2. 269925 1. 631514 2. 126877 1. 769119 2. 229119  
1. 269399 1. 775317 2. 447366 2. 31819 1. 890304 1. 480239 1. 445986 1. 659411 1. 893999  
1. 909329 1. 79571 2. 202969 2. 332275 2. 11851 1. 458209 1. 47762 2. 032141 2. 094484  
0. 997105 1. 345018 1. 527448 1. 275747 0. 617342 1. 478581 1. 024213 0. 876183 1. 570374  
1. 6321 1. 683082 1. 924774 1. 786393 2. 298953 1. 618048 1. 841806 2. 01982 2. 001169  
2. 448203 2. 122326 1. 605925 3. 039101 1. 852945 2. 804168 1. 948736 1. 385982 1. 239657  
3. 21876 1. 437911 1. 042466 1. 612219 1. 521835 3. 45872 1. 553936 1. 413464 1. 606208  
1. 331869 1. 679721 0. 693928 1. 230808 1. 107471 1. 124363 1. 245108 1. 645813 1. 301609  
1. 860814 1. 984804 1. 205429 1. 166036 1. 272784 1. 348536 1. 137946 1. 412713 1. 102621  
2. 844432 2. 145752 2. 584062 3. 777226 2. 865825 2. 510231 2. 522741 2. 41548 2. 328103  
2. 13221 2. 175884 2. 256716 3. 283315 2. 808533 1. 897157 1. 64315 1. 757759 2. 344667  
2. 233822 2. 334941 1. 828806 1. 766842 1. 51815 2. 616115 1. 743278 1. 415594 1. 487073  
1. 718005 0. 981503 1. 529475 1. 899222 1. 128229 1. 884851 0. 987521 1. 292094 1. 766238  
1. 640749 1. 852693 2. 279214 2. 361509 1. 504896 2. 410618 2. 106538 2. 329273 1. 663259  
1. 423427 2. 125031 1. 574176 1. 83917 1. 707514 1. 533735 1. 500216 1. 549683 1. 291868  
2. 240401 2. 820624 3. 509628 2. 52854 2. 90125 2. 196964 2. 13409 2. 749874 2. 706886  
6. 656656 3. 79113 4. 380288 3. 39968 4. 535024 4. 512582 5. 155253 3. 821058 3. 307033  
1. 875296 1. 78132 1. 403493 2. 55172 2. 382296 1. 837635 1. 333536 1. 962183 1. 752923  
6. 812281 6. 160359 6. 189052 6. 021131 6. 343762 5. 402346 6. 75091 6. 077911 5. 471921  
1. 93245 1. 600704 2. 030332 1. 935785 1. 372105 1. 499151 1. 892299 1. 450488 1. 322256  
7. 242166 6. 888571 6. 734458 6. 655861 6. 782958 6. 385416 5. 771951 5. 47932 5. 916127  
2. 166822 2. 778295 1. 912089 3. 421672 2. 409726 2. 257763 2. 004242 2. 095732 2. 485042  
1. 120409 1. 42952 1. 072026 1. 032811 1. 15533 0. 831669 1. 356196 1. 053174 0. 864678  
6. 641059 5. 487473 5. 359718 6. 871644 5. 279053 6. 706577 6. 015124 5. 948453 6. 596521  
1. 263725 1. 56678 1. 828704 2. 279194 1. 26657 2. 037645 1. 888589 2. 133953 1. 249043  
6. 432493 6. 296276 5. 312609 6. 391022 6. 046199 5. 707668 6. 352086 6. 753005 5. 909385  
4. 932387 3. 441785 4. 309359 5. 550734 6. 010207 5. 929008 4. 428301 5. 588842 5. 642065  
2. 998635 2. 630252 2. 176942 2. 476276 2. 190512 2. 753846 2. 524631 2. 450634 2. 34866  
2. 805083 2. 708735 2. 379565 3. 02447 3. 002647 3. 51461 2. 316086 3. 803975 2. 300405  
6. 589712 6. 884672 6. 489997 6. 747554 6. 810014 6. 825917 6. 362077 6. 323508 6. 701765  
1. 639255 2. 04786 2. 793982 1. 480879 2. 48135 1. 645282 1. 500185 2. 213736 3. 218789  
1. 632239 2. 692732 2. 021431 1. 409379 3. 983764 1. 944286 4. 162326 1. 964402 2. 247006  
2. 476619 2. 617648 1. 829557 2. 060348 2. 648942 1. 952284 2. 138136 1. 895561 2. 024147  
6. 785099 6. 840142 7. 182777 7. 377083 6. 672164 7. 772899 6. 542904 6. 519073 7. 412582  
2. 932379 4. 370988 4. 4419 3. 460737 3. 887339 2. 512646 3. 514952 2. 592187 4. 089041  
2. 390199 1. 489276 1. 401596 1. 516436 1. 686608 1. 650272 1. 952065 1. 537601 1. 765084  
2. 438048 3. 515993 3. 815159 3. 510091 4. 003032 3. 453218 2. 719324 4. 001698 3. 608324  
5. 570585 5. 467417 4. 979844 5. 215585 6. 194654 6. 355567 6. 505537 5. 478779 6. 228063  
1. 091087 1. 369462 1. 689179 1. 27017 1. 484404 1. 006542 1. 497755 2. 347534 1. 570632  
6. 478537 6. 382619 7. 09479 6. 690125 6. 806901 6. 639682 8. 005211 8. 055185 8. 042635  
2. 129062 1. 247517 1. 390962 2. 19114 1. 61651 2. 137766 3. 907595 2. 409767 1. 883873  
2. 984331 3. 141361 2. 57563 3. 351894 2. 906941 3. 762203 3. 328819 2. 686228 2. 754814  
2. 915118 2. 455684 3. 053252 2. 674674 2. 446388 3. 052768 2. 851983 2. 836895 2. 408759  
1. 859977 1. 398124 1. 075835 2. 448467 2. 272572 1. 326301 1. 382792 1. 73042 1. 460517  
2. 758042 2. 755995 3. 781266 2. 95242 3. 247827 3. 305299 3. 146431 3. 245473 3. 489087  
1. 388421 2. 165508 1. 414877 2. 254065 1. 655859 2. 219615 1. 857104 2. 45371 1. 540887  
1. 445427 1. 938847 1. 789882 1. 908064 2. 08671 1. 703192 2. 181357 1. 884642 1. 451668

2. 206731 3. 280811 2. 59904 3. 063833 2. 417641 3. 8426 2. 498715 3. 024966 2. 930625  
7. 339742 7. 337623 6. 781455 6. 743275 6. 796292 8. 163442 6. 705431 5. 129274 5. 590302  
1. 375742 1. 050193 1. 454339 0. 917779 1. 094208 1. 744517 0. 757661 0. 875161 1. 044983  
1. 896366 1. 606499 1. 506885 2. 01224 1. 915797 1. 828411 1. 871283 2. 411368 2. 2299  
1. 990176 3. 142006 1. 336516 3. 054612 2. 678253 3. 340038 2. 683135 3. 325591 3. 062796  
3. 760451 3. 0128 3. 687286 3. 600596 2. 910021 3. 415094 3. 376669 3. 300308 4. 863233  
1. 847238 2. 234714 1. 640041 1. 691517 2. 206252 1. 956009 1. 759966 2. 494302 1. 617477  
7. 280021 7. 706374 7. 405634 7. 729874 7. 700828 8. 036591 8. 249186 7. 63873 8. 182113  
2. 005041 2. 571031 2. 109858 2. 899106 2. 511103 1. 628021 2. 519082 1. 595921 2. 169477  
4. 800701 5. 164691 2. 921052 3. 95556 2. 646696 3. 411501 2. 665241 4. 424145 4. 30225  
4. 290356 1. 727376 2. 881146 1. 159529 1. 026622 2. 644784 3. 249801 3. 451531 2. 153071  
2. 831919 2. 522881 2. 735763 2. 400721 4. 099386 2. 501895 1. 887998 2. 760817 2. 549637  
4. 674052 3. 794469 4. 312766 3. 558193 3. 862006 3. 539838 3. 231577 4. 17992 3. 72968  
2. 336187 1. 057022 2. 883319 1. 190029 1. 743808 1. 228344 1. 128146 1. 000803 1. 286077  
3. 04734 2. 988574 2. 512654 2. 600127 2. 567226 2. 984029 3. 246824 3. 482905 1. 853874  
3. 504663 3. 507287 3. 585573 3. 387948 3. 060249 3. 337662 3. 153857 3. 173653 3. 941119  
1. 922746 2. 183126 1. 799763 2. 63155 1. 919562 2. 35449 2. 11781 2. 06516 2. 156457  
8. 743295 8. 464584 8. 527305 8. 90889 9. 029353 9. 487793 9. 891798 9. 506492 9. 790638  
1. 881497 1. 893269 1. 731739 1. 821162 1. 103574 1. 945491 1. 956639 1. 544888 1. 687668  
2. 28088 1. 364905 1. 240399 1. 599267 1. 659144 0. 933913 1. 158931 1. 734223 1. 323087  
1. 536384 2. 613243 1. 281503 3. 717543 3. 829361 1. 424626 1. 205862 3. 720575 1. 913944  
1. 851669 0. 687306 0. 348493 1. 788786 1. 125036 0. 739298 0. 877309 1. 154416 1. 137584  
3. 889473 2. 343398 3. 044727 2. 036866 3. 684857 2. 435787 4. 108833 2. 416978 2. 374536  
1. 971302 3. 99585 3. 734165 2. 843104 2. 031573 2. 121908 2. 460784 1. 415322 2. 474929  
5. 294908 6. 105322 5. 499922 5. 905402 6. 565697 7. 064714 6. 267642 6. 621654 6. 679036  
1. 450839 1. 116805 2. 625726 1. 755545 1. 241394 1. 844404 1. 725642 2. 5263 2. 388286  
3. 808317 2. 953914 3. 427996 2. 697893 3. 19589 2. 704476 2. 47927 3. 160238 3. 508794  
0. 800231 0. 929246 1. 441635 1. 007618 1. 247325 0. 945678 0. 952635 1. 056717 0. 945678  
4. 246896 3. 908729 4. 125607 4. 163337 3. 354995 3. 792809 2. 655832 2. 97772 3. 414111  
5. 45464 4. 836976 4. 594724 4. 606403 5. 686624 5. 661893 6. 274575 5. 388756 5. 800643  
2. 507186 1. 732893 3. 041421 1. 872707 2. 00799 1. 652298 1. 462588 2. 039347 1. 803636  
3. 884799 3. 80685 3. 339673 3. 823928 3. 978648 4. 113371 4. 196662 4. 860286 4. 17989  
1. 351871 1. 707982 1. 544808 1. 577538 1. 559494 1. 131483 1. 591831 1. 452085 1. 6469  
1. 138051 2. 242403 1. 728681 1. 384345 0. 943826 1. 529452 1. 764097 1. 955276 1. 271671  
3. 358768 4. 590081 4. 518344 4. 467007 3. 520182 2. 673846 2. 893885 2. 418147 2. 323555  
1. 919633 2. 558662 2. 454862 2. 395882 2. 158816 2. 175834 2. 028851 2. 3912 1. 945928  
6. 104998 6. 633489 5. 217526 6. 215994 6. 688447 6. 190218 7. 665401 6. 577508 6. 564186  
1. 615277 1. 499159 0. 778691 1. 877876 1. 170647 1. 059275 1. 990488 0. 898815 1. 00088  
2. 556347 3. 827873 2. 856417 3. 312093 3. 640886 3. 550131 3. 592039 3. 449203 2. 829125  
1. 392641 1. 108132 2. 927467 1. 080151 0. 533956 0. 853381 1. 413189 2. 09886 0. 76394  
2. 055408 2. 282864 2. 043225 2. 696525 2. 106841 2. 815363 1. 632147 1. 872291 2. 301003  
1. 917035 1. 952939 2. 905963 2. 393086 2. 314608 3. 083666 2. 490408 2. 689826 2. 557922  
1. 587461 1. 330737 2. 062496 2. 175572 1. 792918 2. 285599 2. 278808 1. 751096 2. 019602  
0. 934694 1. 113548 1. 231504 1. 858965 1. 370465 0. 998234 1. 323151 1. 225939 1. 16921  
5. 822245 5. 017334 5. 670545 4. 562613 5. 858162 6. 700488 7. 192851 5. 713289 6. 584666  
1. 965521 2. 18622 1. 678107 1. 757225 1. 606099 2. 51035 1. 786814 2. 342511 1. 815793  
2. 350949 2. 444039 1. 803981 2. 826218 3. 296741 1. 983121 3. 042684 2. 847257 2. 995708  
2. 137591 2. 289676 1. 769158 1. 653082 1. 884951 1. 79646 1. 52664 2. 309554 2. 109102  
2. 289524 1. 010149 1. 142482 1. 174947 1. 513149 2. 36368 1. 55247 1. 602021 1. 033428  
2. 383925 2. 064578 1. 848097 2. 109256 1. 856555 2. 399434 2. 404448 2. 785826 2. 168473  
1. 26148 1. 814879 1. 31032 2. 339438 2. 361486 1. 011939 1. 851688 1. 51836 1. 712076

4. 537378 4. 789886 4. 594739 4. 617697 4. 445806 4. 813424 4. 267161 4. 799856 4. 052703  
1. 368994 1. 447838 2. 006803 2. 044546 1. 481901 1. 488409 2. 038215 1. 743916 1. 480414  
2. 87485 3. 146267 2. 611571 3. 069798 2. 703942 2. 777245 2. 729004 2. 535202 2. 861149  
0. 904694 1. 260917 0. 781248 0. 826526 0. 776395 1. 103904 1. 039417 1. 17641 0. 815818  
3. 834384 2. 803728 2. 000603 3. 043752 3. 476181 1. 033894 3. 648502 2. 088558 2. 264167  
1. 141163 1. 532307 1. 137903 0. 960099 2. 258834 0. 897447 0. 559106 1. 728238 1. 190144  
3. 939106 3. 962435 3. 174943 2. 002322 3. 485905 1. 713792 2. 306289 2. 363003 3. 037965  
1. 607812 1. 538495 1. 585575 1. 599468 1. 395441 1. 543556 1. 494433 1. 778222 1. 438236  
1. 259423 1. 590135 0. 871005 1. 222199 0. 987597 1. 103461 0. 972845 1. 402138 2. 031055  
2. 384117 2. 302251 2. 830072 3. 05206 2. 792949 2. 662354 2. 971577 2. 989574 4. 091065  
1. 106057 1. 6277 1. 67865 2. 645891 1. 546699 1. 683712 1. 558422 1. 771476 1. 441911  
2. 797385 3. 634439 3. 236986 3. 086873 3. 250738 3. 473334 3. 409968 3. 052039 2. 956858  
0. 834754 2. 044339 1. 556897 1. 888838 0. 962565 1. 28473 1. 238415 0. 94265 1. 986354  
1. 111441 1. 646744 1. 445287 1. 290521 1. 7104 0. 967336 0. 995545 1. 423304 1. 706467  
1. 321347 1. 808429 1. 183244 1. 596791 1. 149197 1. 361026 1. 225963 1. 445386 1. 406331  
0. 505645 0. 872364 0. 700712 0. 569139 0. 968904 0. 504461 1. 279496 0. 875466 1. 051985  
2. 109168 1. 796754 1. 091124 2. 073976 2. 401048 1. 573219 1. 643464 2. 078041 1. 914594  
2. 270071 1. 662024 1. 926273 1. 359109 1. 362833 2. 225761 1. 597338 1. 832329 1. 322382  
2. 577872 2. 640406 4. 072222 2. 502933 3. 408992 4. 361187 5. 034285 4. 418854 3. 680962  
0. 906453 2. 40292 1. 875851 0. 685285 1. 622632 2. 050534 1. 182671 3. 329635 0. 979543  
1. 809505 1. 809505 1. 58501 2. 350313 2. 200863 1. 565578 1. 50975 1. 585771 2. 460331  
1. 240803 1. 046867 0. 999165 0. 898701 1. 381551 0. 953425 1. 390169 1. 692214 0. 925486  
1. 397431 3. 076186 1. 137389 2. 186418 1. 506459 2. 699997 1. 467389 0. 30195 1. 051291  
1. 216796 1. 758667 1. 127149 1. 402061 1. 367865 1. 291168 1. 874803 1. 43376 1. 536476  
1. 512779 1. 70313 1. 894075 1. 154565 1. 756638 1. 081959 1. 363593 4. 668911 1. 435399  
1. 513133 1. 265705 1. 864516 1. 743786 1. 23359 2. 345023 1. 574429 2. 451264 1. 897064  
3. 614347 3. 710055 4. 285323 4. 643263 4. 081584 3. 490982 3. 844276 4. 083306 4. 317  
0. 969046 1. 781856 1. 17184 1. 190904 1. 23137 0. 706754 0. 977382 1. 350459 0. 88894  
1. 756362 1. 617934 1. 5351 1. 657484 2. 252395 1. 929799 1. 264241 1. 98966 1. 634954  
1. 08327 1. 631852 1. 206189 2. 079914 1. 853565 1. 26153 1. 24212 2. 154952 2. 370129  
1. 013348 1. 093528 0. 889482 1. 646428 1. 341187 1. 381469 2. 374643 1. 346774 0. 92814  
1. 733271 2. 432132 1. 972787 1. 67352 1. 977492 1. 798684 1. 617657 1. 946346 1. 416323  
2. 586644 2. 512423 2. 605075 2. 148027 2. 069608 1. 987547 2. 549177 2. 717019 3. 248718  
1. 934341 1. 980491 1. 740651 2. 271939 1. 935204 2. 898338 1. 995749 2. 595445 2. 338422  
1. 897351 1. 934522 1. 697011 1. 785988 1. 499138 1. 449071 1. 914982 1. 379533 1. 229535  
0. 967516 1. 058097 2. 728286 1. 851899 0. 734473 2. 102911 1. 457307 0. 984615 0. 917709  
1. 69557 1. 498861 1. 705848 1. 673674 1. 340668 1. 666568 1. 146157 1. 707838 1. 348239  
1. 301645 1. 48602 1. 825444 0. 821369 1. 235966 1. 399051 1. 173503 1. 871166 0. 967157  
1. 808874 1. 201437 1. 252296 2. 030909 1. 086632 1. 334856 0. 70339 1. 63561 0. 920477  
0. 606425 1. 746057 0. 73794 0. 833854 0. 479206 1. 251889 1. 319329 0. 937237 0. 61666  
0. 719357 1. 179276 1. 071038 1. 592222 2. 67501 1. 507777 1. 819649 1. 599511 2. 29091  
1. 925234 2. 108485 1. 806482 2. 807528 2. 060314 2. 640715 2. 086157 2. 912296 2. 285375  
3. 500451 3. 259205 4. 162736 3. 372954 3. 335242 2. 452343 3. 172499 2. 731186 4. 214503  
7. 686724 7. 970656 7. 752963 7. 691709 7. 854331 7. 580986 8. 377407 8. 058718 7. 941464  
4. 549064 3. 840598 4. 157771 3. 538693 2. 588163 3. 011787 5. 015839 2. 668091 3. 750715  
5. 748313 4. 531714 5. 031625 4. 188611 4. 080312 5. 912744 5. 926898 5. 800033 5. 560506  
1. 251324 1. 735236 1. 209516 1. 313355 1. 951458 2. 146987 1. 309421 1. 207452 1. 072976  
1. 862892 1. 954577 2. 455635 1. 84368 1. 984193 2. 236203 2. 165321 2. 1282 2. 518951  
1. 71793 0. 984507 1. 807714 2. 492205 1. 934369 1. 29495 1. 561381 1. 285346 1. 861077  
1. 032661 0. 975729 1. 128628 1. 257959 1. 419792 1. 157535 1. 244232 1. 615837 1. 258284  
1. 392455 1. 305273 0. 886999 0. 978742 1. 301118 0. 999501 1. 247922 1. 029141 1. 264236



4. 678645 5. 729542 5. 233017 5. 548791 5. 91587 6. 473578 5. 840541 6. 301757 5. 816919  
5. 867994 6. 795616 7. 132725 6. 112242 7. 025287 5. 425308 7. 101919 5. 816601 5. 897863  
2. 415319 1. 817721 2. 415965 2. 082096 1. 908846 2. 541923 1. 688689 1. 646806 2. 168685  
1. 431523 1. 339719 1. 507155 1. 572144 1. 114519 1. 226286 1. 336183 1. 047901 1. 353078  
1. 496981 2. 328393 1. 400828 1. 619771 1. 59193 1. 182128 1. 792307 1. 368526 1. 62606  
7. 139277 7. 736313 7. 589437 7. 03072 7. 206688 6. 856986 7. 113696 7. 091807 7. 123927  
5. 205228 5. 777632 5. 823623 6. 793016 6. 707259 3. 989236 3. 625652 5. 317879 3. 645255  
1. 584478 1. 941683 1. 738796 1. 58293 1. 409273 1. 514201 1. 211456 1. 483893 1. 561957  
6. 013256 5. 405139 5. 289329 6. 299785 6. 407978 7. 179598 6. 192188 6. 823264 6. 868291  
2. 890482 3. 767306 4. 042605 1. 273667 4. 910893 3. 279453 5. 981943 4. 950116 3. 54398  
2. 014844 1. 719711 2. 016218 1. 625471 1. 964984 1. 835258 1. 788296 1. 768019 1. 578667  
0. 893398 1. 369759 0. 872218 1. 158264 1. 136219 1. 365929 1. 162598 1. 014023 2. 050963  
5. 843548 3. 26706 4. 588249 3. 656097 4. 454266 7. 536125 3. 477202 4. 015315 3. 35317  
2. 598526 1. 945701 1. 678948 1. 590787 1. 919452 1. 618717 1. 724623 3. 63862 1. 542649  
0. 761099 0. 762877 1. 418475 1. 326335 1. 473982 1. 556425 0. 712399 2. 15433 0. 448593  
3. 172118 2. 894953 3. 018015 3. 876153 2. 125574 4. 349219 2. 558541 2. 167432 2. 991852  
1. 264337 1. 365777 1. 451447 2. 759605 1. 702866 1. 506268 1. 65124 1. 137187 1. 634313  
2. 322636 2. 740725 2. 640605 2. 323196 2. 185601 2. 427668 2. 460105 1. 879025 2. 270656  
2. 839662 1. 490181 1. 688345 3. 826259 1. 95005 3. 669996 1. 603441 1. 654351 1. 291504  
1. 4385 1. 577319 1. 876667 1. 948494 1. 42572 1. 618555 1. 446241 1. 481572 1. 502899  
3. 149306 2. 673373 2. 784631 2. 734132 2. 266739 1. 78085 2. 227099 2. 365509 2. 055437  
0. 640786 1. 483062 1. 169268 1. 127264 1. 020311 1. 483666 1. 170051 0. 890934 1. 474953  
4. 759951 5. 278483 5. 565116 1. 874443 3. 512529 2. 382537 3. 037605 4. 705739 1. 446593  
2. 513469 2. 13454 2. 389186 2. 7077 2. 39625 2. 183285 2. 522885 2. 522216 2. 224855  
1. 535882 1. 965614 1. 249026 1. 240486 1. 63573 2. 447129 2. 34528 2. 379277 1. 913781  
3. 257271 2. 979552 2. 78173 3. 506399 2. 912229 2. 830778 2. 450252 3. 443606 3. 265412  
1. 298859 2. 15771 1. 273076 2. 716313 1. 369624 1. 06054 1. 253574 1. 542033 1. 638965  
1. 511422 1. 129141 1. 272486 1. 514878 1. 40814 1. 943707 1. 414132 1. 493946 2. 769805  
2. 196277 1. 837145 3. 316151 3. 645657 2. 751235 2. 350434 1. 906298 2. 403483 1. 813722  
1. 665326 1. 285072 1. 283058 2. 660857 2. 114502 2. 252712 1. 781073 1. 206883 1. 958456  
1. 478462 2. 781614 1. 308232 2. 796399 1. 582127 1. 661331 1. 821015 1. 724062 2. 140392  
3. 930024 3. 864926 3. 819755 1. 763558 3. 328246 2. 51812 3. 904372 3. 544245 4. 218162  
1. 181938 2. 551479 1. 989529 1. 202574 1. 761779 1. 456346 1. 690612 2. 374124 1. 296761  
1. 711481 1. 399969 2. 068813 1. 625711 1. 645068 1. 729587 1. 34453 1. 385598 1. 318494  
2. 076901 1. 425919 1. 338623 2. 10523 1. 834976 2. 189094 1. 571584 2. 027804 1. 619569  
1. 635797 2. 624527 2. 53713 1. 786126 1. 874876 1. 818931 1. 480475 2. 949464 2. 23573  
1. 41111 2. 455555 1. 361133 1. 799033 1. 429951 1. 91955 1. 909161 2. 299181 1. 87052  
1. 378223 1. 343293 1. 698741 1. 340407 2. 080378 1. 287894 1. 040331 1. 228259 2. 015205  
4. 056043 3. 132709 2. 369457 3. 557454 2. 640111 3. 222142 2. 466908 3. 344932 3. 468361  
1. 609358 1. 049045 1. 20525 1. 150272 1. 075211 1. 029596 0. 729473 1. 187125 0. 757374  
2. 057572 1. 591721 1. 12359 1. 503799 2. 109216 1. 683545 1. 167768 1. 208123 2. 061091  
1. 653749 1. 550908 1. 877441 2. 197209 3. 060615 2. 295259 2. 359004 2. 659883 1. 37979  
1. 165407 1. 971793 1. 378523 2. 248103 1. 54489 1. 611764 2. 059846 2. 055087 1. 40201  
1. 171217 1. 068299 1. 735807 1. 353666 1. 471157 1. 285423 1. 795474 1. 427629 1. 932041  
6. 034132 5. 761368 5. 24403 4. 014317 4. 956023 4. 827661 4. 21281 4. 358748 4. 696567  
3. 040033 3. 059353 2. 013541 1. 683396 2. 544525 1. 926584 4. 348711 3. 648014 2. 40833  
1. 654169 1. 600862 1. 515302 2. 022141 1. 182854 1. 372321 1. 624385 1. 231828 1. 315052  
4. 663484 4. 662702 5. 883408 6. 026313 4. 643591 5. 049489 4. 89481 4. 366187 5. 121408  
1. 204327 2. 786924 1. 579381 1. 571832 1. 476167 1. 118284 2. 069303 1. 495819 1. 303648  
2. 042899 3. 785959 2. 593552 1. 830458 2. 082414 1. 19369 2. 01231 1. 720557 2. 230152  
2. 594788 3. 085293 3. 286804 3. 971641 1. 94064 2. 28678 2. 28346 2. 463643 2. 270423

5. 646354 5. 324774 4. 008779 4. 153477 3. 701886 5. 944092 4. 026104 4. 124986 5. 798473  
5. 200557 5. 465057 5. 007321 5. 230922 5. 04167 5. 514681 5. 015374 5. 309601 5. 419872  
5. 533379 4. 547063 5. 298471 6. 227224 4. 756539 6. 94844 5. 443063 4. 867125 5. 002096  
1. 912692 1. 477227 2. 429359 2. 072359 1. 869161 1. 409661 1. 221482 2. 015494 1. 514922  
1. 819342 1. 897521 1. 6475 2. 374437 2. 214218 1. 753387 1. 768648 1. 848259 1. 887384  
2. 676057 1. 280945 3. 183604 1. 568324 2. 128027 4. 029569 2. 587734 2. 722396 1. 940051  
1. 873575 1. 417403 1. 334689 1. 292601 1. 387754 1. 440116 1. 390425 1. 130025 3. 035067  
5. 644171 6. 250574 6. 192713 5. 719112 6. 361033 4. 543145 5. 044372 3. 96794 5. 075547  
2. 501909 2. 810412 2. 298208 2. 640125 2. 201369 2. 246666 2. 950653 2. 639765 2. 236827  
4. 752674 3. 428918 4. 604428 4. 67767 4. 74322 4. 631222 5. 295079 4. 586569 5. 606229  
5. 996601 7. 130167 7. 025714 6. 878109 7. 609906 3. 92827 8. 078254 7. 367343 7. 029829  
2. 99151 2. 92253 2. 790065 4. 094332 2. 861675 3. 761552 2. 906681 3. 432174 2. 217699  
4. 620111 4. 795618 7. 253509 7. 222059 4. 963039 2. 324383 5. 885805 3. 901718 4. 439458  
10. 53862 10. 54832 10. 69606 10. 54651 10. 56314 8. 474344 11. 28268 10. 93928 8. 489685  
3. 339556 3. 258597 3. 13046 3. 045491 3. 429201 3. 102659 3. 251808 5. 557108 5. 160457  
1. 376225 1. 890482 1. 439256 1. 04563 1. 146486 1. 524307 1. 802443 1. 439492 1. 709934  
5. 636853 3. 906198 5. 119196 4. 572187 4. 981352 5. 727849 6. 275066 5. 732269 5. 586595  
3. 067845 2. 719471 2. 188199 2. 20062 3. 010081 3. 200965 3. 024618 3. 491418 3. 857766  
7. 192467 6. 937701 7. 511956 7. 215378 7. 274612 6. 901365 7. 272801 7. 260001 7. 26692  
6. 303348 6. 878841 7. 255668 6. 557493 7. 152781 6. 836765 7. 479346 6. 938901 6. 774119  
0. 859004 1. 138264 1. 304306 1. 83189 1. 427015 1. 557282 1. 537486 1. 58531 2. 363643  
8. 445229 7. 511762 7. 646212 8. 043826 6. 054838 7. 279124 6. 01138 4. 771082 4. 303281  
2. 757526 3. 180002 2. 51231 2. 210164 3. 115242 2. 666705 2. 173125 2. 702721 3. 765966  
2. 598121 2. 703621 2. 489495 2. 701801 2. 914233 3. 691507 3. 319014 3. 307333 3. 418426  
1. 966042 1. 589024 1. 930282 2. 227844 2. 10004 2. 271847 2. 223636 1. 152603 1. 996626  
5. 997963 6. 663199 5. 538602 5. 51795 5. 89315 5. 192487 6. 076726 5. 529947 5. 646757  
4. 906112 4. 916273 3. 919055 3. 091076 4. 421321 3. 283943 3. 253789 2. 711882 2. 200391  
4. 567306 5. 0795 3. 940085 6. 278009 5. 483084 6. 54329 5. 514648 5. 862963 5. 610248  
6. 090641 6. 417272 6. 2908 6. 000658 6. 053433 6. 397573 6. 640979 6. 522494 6. 59429  
1. 58857 2. 227653 2. 627421 3. 023008 1. 845165 1. 332186 1. 343114 1. 905981 2. 183992  
2. 629487 3. 040174 2. 043999 2. 451889 2. 480244 2. 644059 2. 84432 1. 663595 2. 998462  
3. 279887 3. 665832 2. 981866 2. 677988 2. 665464 5. 308638 2. 475016 2. 424488 3. 426797  
3. 155954 2. 329057 2. 582207 3. 072805 2. 876678 2. 565836 2. 628659 2. 849303 3. 62215  
3. 667532 2. 313372 2. 562923 3. 06441 3. 530867 4. 535624 3. 793244 2. 603265 2. 777138  
1. 913177 4. 556396 2. 199175 2. 358778 3. 735339 2. 987642 3. 360068 3. 310302 2. 672386  
7. 806289 6. 794502 7. 585745 8. 091458 7. 38094 6. 53745 9. 483485 9. 970002 9. 306016  
2. 880181 2. 510577 2. 118598 2. 481723 2. 192604 1. 737642 2. 347858 3. 105568 2. 63927  
3. 470093 2. 892838 2. 526069 3. 538724 2. 910921 3. 267452 4. 04791 2. 887481 2. 699341  
5. 695131 4. 795192 5. 356169 5. 561137 6. 024759 7. 877588 5. 910671 4. 01708 6. 410213  
1. 880617 1. 855273 3. 051849 2. 016476 2. 302871 2. 288092 2. 115065 2. 885985 2. 827339  
3. 62483 3. 455151 3. 675991 3. 634507 2. 884593 4. 41573 4. 17345 3. 482727 4. 614985  
3. 026352 1. 573134 2. 027091 1. 999265 1. 511745 1. 421579 1. 471983 1. 436202 1. 749196  
3. 806663 5. 265581 4. 447529 4. 600203 3. 623427 3. 65005 4. 305571 4. 446481 3. 650204  
7. 564445 6. 400369 8. 049281 7. 901229 7. 818723 8. 258608 8. 066882 8. 688914 8. 622489  
3. 428524 3. 881557 3. 66649 3. 023363 3. 914827 3. 66149 5. 130017 4. 824734 3. 319411  
1. 915629 2. 057755 1. 959802 2. 04069 1. 479372 1. 900815 2. 284391 2. 031023 1. 905325  
1. 835237 1. 157207 1. 66586 1. 029735 1. 626636 1. 047794 1. 415558 1. 429249 1. 187458  
2. 532802 1. 496014 2. 566944 1. 796695 1. 551215 1. 340721 2. 729442 1. 54516 1. 754226  
1. 500747 0. 809037 0. 815637 1. 233139 0. 74048 1. 147656 0. 817229 1. 102306 1. 598793  
11. 02099 9. 821878 10. 88895 10. 55738 10. 82207 10. 69335 11. 78359 11. 89684 11. 68991  
3. 045002 2. 644109 2. 615573 3. 377829 2. 892536 3. 674519 2. 14116 3. 913242 2. 460592

2. 967465 4. 082575 3. 771948 2. 866533 2. 928547 2. 732582 3. 078695 2. 395274 3. 105459  
2. 474863 2. 831205 2. 144828 1. 605251 2. 016705 1. 490839 1. 840175 2. 435845 1. 595661  
1. 482187 1. 460623 1. 275776 1. 705674 1. 929405 1. 340134 1. 169072 1. 489802 1. 043342  
4. 596141 5. 974837 5. 624649 4. 790354 5. 376139 5. 296095 5. 121514 5. 908815 4. 35838  
5. 436852 4. 736584 6. 17273 5. 901484 5. 4229 7. 275198 6. 777087 6. 02217 7. 011079  
8. 542094 5. 950101 7. 45654 8. 112408 7. 006188 7. 000114 6. 363529 6. 090681 5. 985977  
3. 474892 4. 110916 2. 805084 4. 552722 4. 54515 2. 810599 4. 443095 4. 278815 3. 859622  
10. 87183 10. 85116 10. 97959 11. 09002 10. 87624 11. 21189 11. 45859 11. 15605 11. 16215  
5. 103154 5. 039585 5. 410775 5. 306795 4. 709906 5. 063709 3. 468444 3. 377704 4. 596274  
2. 854939 2. 643156 2. 827419 2. 582398 3. 671289 3. 356451 3. 523982 3. 693962 2. 770931  
4. 046922 3. 799054 3. 13456 4. 316775 2. 89076 2. 715906 1. 668774 2. 082159 1. 625153  
2. 894562 2. 035013 2. 222324 3. 175793 2. 450865 2. 104499 2. 696141 2. 793978 2. 468781  
0. 902265 1. 17273 0. 70954 1. 402315 1. 197864 1. 1258 0. 866564 0. 951247 1. 264769  
6. 929881 6. 525086 5. 643379 6. 464012 4. 983821 6. 372115 5. 678493 5. 121257 6. 327447  
4. 944657 6. 085697 2. 899747 4. 143227 4. 985787 10. 58254 3. 651829 2. 933745 8. 303796  
1. 087407 1. 339599 1. 100812 1. 498481 1. 013927 0. 966901 1. 61001 1. 237824 1. 346029  
4. 32284 5. 128057 3. 759418 4. 688554 4. 091666 8. 74212 3. 880209 4. 736356 6. 177333  
3. 883578 3. 188737 2. 511511 2. 781365 3. 329117 2. 881321 2. 878456 3. 169964 3. 357237  
3. 0237 2. 477114 2. 769453 2. 528456 3. 163104 8. 042559 3. 255861 2. 093825 1. 95743  
2. 123015 2. 785074 3. 218781 1. 673066 2. 361648 1. 199458 1. 325787 1. 532033 1. 304185  
2. 657596 3. 700009 2. 394457 2. 31043 2. 053691 3. 254927 2. 416732 4. 176199 2. 167819  
1. 871957 2. 694211 3. 270781 2. 357064 3. 761168 2. 619152 3. 165357 3. 036163 3. 183212  
9. 475209 9. 197254 8. 632286 9. 050237 8. 259043 8. 043195 8. 373084 7. 556639 7. 949043  
4. 63308 8. 859559 5. 238466 3. 838247 4. 754379 11. 2333 4. 324849 7. 21294 10. 44315  
4. 393334 5. 264237 3. 739917 3. 615183 3. 304901 9. 745546 2. 455279 2. 774494 5. 710802  
2. 94098 3. 437662 2. 508114 1. 616414 2. 584904 2. 527729 2. 168073 2. 85199 2. 386809  
3. 143538 3. 148869 2. 564535 3. 646532 2. 535298 8. 911841 2. 405151 4. 017324 6. 791086  
2. 958131 2. 876716 3. 323031 2. 42684 3. 44269 8. 817829 2. 575798 2. 699666 4. 474442  
2. 76858 2. 885452 2. 092768 2. 505717 2. 358367 2. 174524 2. 041698 1. 901884 3. 05587  
7. 522043 6. 9766 3. 931377 5. 976095 3. 296322 2. 44845 2. 890754 2. 214651 2. 104415  
3. 717634 7. 094414 3. 038044 4. 626011 3. 195695 9. 032484 1. 55404 2. 580265 6. 905078  
8. 905964 9. 031992 3. 021909 5. 212301 4. 149988 11. 57365 3. 118901 4. 732386 10. 45947  
7. 210073 7. 796987 7. 799549 7. 048877 7. 710435 6. 970376 7. 591918 6. 820671 7. 140636  
9. 861906 9. 79692 9. 802202 9. 295525 9. 863668 10. 21807 10. 0904 10. 40617 10. 19466  
1. 130616 1. 231011 1. 091734 2. 577391 1. 797616 1. 592539 1. 695282 1. 347835 1. 805978  
2. 604643 2. 511055 2. 801258 2. 075125 2. 301178 2. 055735 2. 428008 3. 218861 2. 410339  
3. 824917 4. 707611 4. 040233 4. 693679 4. 428765 4. 28525 4. 025839 3. 521961 4. 631839  
2. 775836 2. 48053 2. 132721 2. 396773 3. 497443 2. 71882 3. 515739 2. 802377 3. 588302  
1. 19945 1. 359892 0. 824302 2. 053121 1. 961562 1. 103794 1. 198389 1. 338125 1. 145815  
4. 800348 5. 053963 4. 147898 5. 073467 2. 517572 4. 852334 5. 264804 2. 694934 4. 556384  
2. 979909 1. 803453 2. 937662 2. 801889 2. 024293 2. 185077 2. 61718 5. 307133 5. 949713  
4. 770896 5. 159264 4. 873668 4. 551138 4. 668 5. 084278 4. 654434 4. 839166 5. 15012  
2. 195721 2. 082421 2. 95129 2. 62601 1. 49398 1. 760956 1. 983352 1. 56078 2. 087839  
1. 773721 1. 151537 2. 622141 1. 542159 2. 25373 1. 468098 1. 476834 1. 930595 2. 446933  
2. 029121 1. 947128 1. 783765 4. 653597 1. 790872 3. 425869 2. 147043 1. 414655 1. 980791  
1. 226544 3. 240701 1. 610475 1. 556239 1. 054699 0. 891234 0. 915054 1. 203574 1. 783977  
1. 353811 1. 48402 1. 102033 1. 370899 1. 010539 1. 225125 1. 499129 1. 474621 1. 759071  
4. 177762 3. 288784 4. 765465 2. 939835 4. 077834 3. 413853 2. 842784 3. 935913 4. 332252  
1. 254853 0. 983488 1. 629242 1. 295328 1. 042643 1. 123044 1. 073178 1. 23024 1. 088086  
0. 922205 0. 790692 1. 656759 0. 891597 1. 471072 1. 316326 0. 636941 0. 842734 0. 876697  
2. 834912 3. 476246 3. 951719 3. 173797 3. 689675 3. 556695 3. 33886 3. 851326 2. 122619

2. 779196 3. 994598 3. 36491 3. 833975 4. 947232 3. 874402 4. 072574 3. 248397 4. 799894  
2. 09408 2. 356338 1. 882703 1. 937423 2. 033688 1. 715136 2. 063255 1. 985104 2. 331687  
0. 906217 1. 144894 0. 874435 2. 454791 1. 586175 0. 922269 0. 839692 1. 056949 0. 774826  
0. 752384 1. 487159 1. 559783 2. 690511 0. 88419 2. 09661 1. 548442 1. 936177 1. 441063  
1. 13804 1. 679232 1. 00311 1. 892829 0. 992206 1. 271607 0. 889433 0. 867188 0. 992228  
3. 9881 3. 403559 4. 283155 3. 817678 5. 127506 5. 098161 3. 993212 4. 654175 4. 50027  
6. 663069 5. 750167 6. 539267 6. 076995 5. 257059 6. 449779 5. 403895 3. 093068 3. 507156  
5. 022718 3. 705022 3. 759963 6. 335055 5. 302515 6. 658547 5. 211084 5. 683956 4. 674607  
2. 11711 1. 548434 1. 952838 2. 083263 1. 638284 2. 345195 1. 703834 1. 642407 1. 296883  
3. 974665 4. 397522 4. 891419 4. 376137 5. 399548 3. 964976 4. 566995 4. 463133 5. 065083  
0. 80226 0. 693311 0. 785754 0. 745145 1. 281867 1. 270729 0. 582249 0. 757756 0. 793502  
0. 958989 0. 993815 1. 185885 1. 635168 1. 455029 1. 404686 1. 519893 1. 122361 1. 171021  
6. 292199 5. 898125 4. 636967 5. 287427 5. 261547 4. 221934 6. 790502 7. 370159 7. 38907  
2. 033387 1. 397646 1. 631145 1. 487704 2. 050924 2. 04112 1. 878761 1. 798142 2. 006969  
2. 045928 1. 921121 1. 65886 2. 004362 2. 600314 1. 77881 2. 707723 1. 309166 1. 939491  
1. 517781 1. 226031 1. 346494 1. 532685 1. 017342 1. 877895 1. 239223 1. 812378 1. 093082  
3. 02773 3. 433526 2. 94142 2. 746073 2. 361249 2. 776271 2. 863242 2. 501075 2. 641674  
1. 904091 1. 560441 1. 834809 1. 904091 2. 152834 2. 589711 1. 971635 2. 680113 1. 707432  
3. 519458 2. 816357 1. 757858 2. 287691 2. 429233 1. 389254 3. 374371 3. 430456 1. 582058  
2. 012754 1. 652977 2. 419706 2. 658745 1. 721138 1. 845067 1. 699556 2. 176571 1. 988655  
5. 122938 5. 687722 5. 674478 4. 426262 4. 550841 5. 402347 3. 625984 5. 231766 5. 576004  
1. 10533 1. 458771 1. 544753 2. 474284 1. 454001 1. 996148 2. 210713 2. 234286 2. 745245  
3. 208946 5. 842127 4. 500211 4. 603923 7. 147713 9. 449341 3. 684701 4. 079548 9. 888119  
6. 631032 6. 200839 6. 42704 6. 757509 6. 417118 8. 141045 6. 698405 6. 118252 6. 766246  
1. 381601 2. 58191 1. 531451 2. 535261 1. 831756 2. 380422 2. 371915 2. 702006 2. 849393  
1. 790954 1. 292999 1. 638713 2. 058638 1. 522616 1. 651439 1. 835338 2. 085719 2. 079354  
1. 92933 2. 398923 2. 567037 2. 406338 2. 581231 2. 588338 1. 44544 1. 712578 1. 301861  
2. 569874 2. 699852 3. 370946 2. 621237 2. 262329 2. 39788 1. 995786 1. 823786 2. 753299  
7. 00337 8. 398252 8. 200533 8. 068691 7. 899686 8. 708889 7. 980087 7. 940979 8. 128253  
4. 41119 4. 476814 4. 643906 4. 10027 4. 247205 4. 661206 5. 400409 4. 624345 4. 659827  
2. 259909 1. 092635 1. 604119 1. 75307 1. 139799 1. 189987 2. 564911 1. 389061 1. 415554  
1. 404453 1. 014862 1. 219237 2. 13661 1. 931254 2. 947376 2. 490763 3. 093324 5. 002214  
6. 003835 6. 645255 5. 320654 5. 702573 5. 878777 5. 690023 6. 720307 7. 130856 6. 309919  
5. 070222 5. 572285 5. 130696 6. 400912 5. 069531 3. 038272 7. 104682 5. 82347 5. 612847  
2. 549569 2. 342836 2. 111737 2. 206812 2. 423296 2. 822813 2. 175827 1. 610847 3. 818009  
1. 323009 0. 876612 0. 676419 1. 370335 0. 774051 0. 971288 1. 018537 1. 016976 0. 998129  
1. 894154 2. 342654 2. 593852 2. 702866 2. 068119 3. 233691 3. 195951 2. 441707 2. 773585  
4. 857115 4. 261273 3. 414966 4. 319278 3. 81865 4. 838671 4. 314315 4. 355819 4. 62336  
3. 122391 2. 862666 3. 113656 2. 243891 3. 112033 6. 354356 2. 701588 3. 86495 5. 320866  
2. 76557 2. 016276 1. 975991 2. 203636 4. 096008 6. 930237 2. 148779 2. 815272 5. 599997  
1. 20452 1. 358697 1. 226094 1. 840517 1. 357329 1. 459278 1. 357526 1. 136694 1. 33214  
4. 410716 3. 199163 4. 610303 2. 510081 3. 719297 4. 602437 4. 926356 5. 334919 5. 377828  
1. 158747 1. 294339 1. 434693 1. 741169 1. 729977 1. 349828 1. 140774 1. 158641 1. 211556  
4. 6337 5. 225757 5. 678094 5. 366978 5. 105516 5. 438851 5. 368013 6. 100616 5. 299195  
1. 32649 1. 221712 0. 992998 1. 693641 2. 851187 2. 356394 1. 512857 1. 718964 1. 326598  
1. 663033 1. 863064 2. 357789 2. 41369 1. 733223 2. 150968 2. 092507 2. 590888 1. 862721  
2. 995541 3. 824229 2. 089153 2. 303665 2. 197635 2. 005872 1. 625679 1. 872894 2. 852798  
2. 052939 1. 985701 1. 90508 1. 334497 2. 336085 1. 11521 1. 600908 1. 334874 1. 644173  
5. 015868 5. 323075 6. 022005 5. 254436 6. 089351 5. 247299 4. 586288 4. 426844 3. 971342  
9. 694696 9. 822631 9. 547341 9. 116418 9. 59586 8. 428291 9. 534951 9. 195798 9. 094687  
3. 699797 2. 942528 3. 835663 1. 756706 2. 488908 4. 906632 2. 674991 2. 08986 2. 401859

3. 113369 1. 500756 2. 893012 2. 920021 4. 923594 6. 373546 2. 213693 2. 450759 4. 165295  
4. 560199 1. 886139 1. 487902 1. 821794 2. 928036 3. 182969 3. 411362 2. 147172 1. 946257  
1. 584636 0. 800676 1. 740007 2. 016892 3. 227823 1. 666641 1. 591103 3. 410527 2. 964839  
2. 467087 1. 972451 1. 676089 2. 840378 1. 520801 1. 613703 1. 417511 2. 003375 1. 499153  
1. 783127 1. 120103 1. 2274 1. 845159 2. 920585 2. 781708 2. 139551 1. 67148 1. 46812  
3. 146192 1. 745605 2. 706245 2. 767433 3. 184937 3. 074249 3. 826741 3. 997294 4. 010557  
1. 477437 1. 13552 1. 94835 0. 560046 1. 348306 3. 016428 2. 717377 1. 365563 3. 230823  
2. 780748 2. 441262 2. 442795 2. 459078 2. 667913 3. 218555 2. 125764 2. 508438 3. 154313  
1. 857412 1. 859819 1. 842354 1. 557239 2. 253448 2. 466114 1. 894658 2. 306479 2. 085402  
3. 840141 2. 952923 2. 935588 3. 390024 3. 566286 5. 830161 4. 000028 3. 542512 5. 50007  
5. 773258 5. 304218 6. 190012 6. 281772 6. 320249 6. 123306 7. 06513 6. 845558 6. 821658  
1. 536046 2. 692074 1. 720704 1. 769745 2. 02101 1. 450943 1. 36496 1. 733336 1. 362918  
8. 31784 7. 346765 8. 597149 7. 806275 7. 821915 9. 146291 8. 874931 8. 683842 8. 376485  
4. 113119 2. 92561 4. 187801 4. 028429 5. 365416 3. 455248 3. 682116 4. 647754 3. 972844  
1. 926468 2. 710053 1. 835509 1. 865138 1. 700203 1. 607672 1. 508952 1. 341541 2. 601663  
1. 67783 1. 423545 1. 372712 1. 617069 1. 093396 1. 745673 1. 471014 1. 527379 0. 951424  
1. 250772 1. 645565 2. 323124 1. 627533 1. 745609 2. 34858 2. 000036 2. 153005 2. 674067  
1. 212789 1. 201537 1. 668253 1. 484426 1. 55573 2. 115647 0. 866062 1. 232739 1. 336123  
1. 476326 1. 895665 1. 853128 1. 354333 1. 586037 1. 52309 2. 397314 1. 726468 1. 28516  
2. 256489 2. 871055 3. 181827 1. 74179 2. 212219 1. 895666 2. 217072 3. 097462 2. 647063  
7. 740117 8. 317904 7. 845028 7. 773371 7. 771648 8. 252835 8. 152156 8. 528036 8. 183575  
1. 400847 1. 103071 0. 99594 1. 595572 0. 844946 0. 797697 0. 794346 1. 30939 1. 503261  
2. 09349 1. 897741 1. 331799 1. 759825 1. 174204 2. 186328 1. 493437 1. 234362 1. 42117  
1. 476713 1. 354994 1. 240174 2. 129411 1. 287135 1. 292599 1. 607599 1. 527353 1. 270484  
5. 345571 4. 426725 4. 953779 5. 29299 5. 559703 6. 53645 6. 830391 7. 836734 8. 248707  
6. 432416 8. 233191 7. 392436 6. 992884 8. 160977 4. 791267 8. 596486 7. 864523 7. 727134  
7. 716079 7. 265184 7. 260219 7. 501455 6. 811248 7. 202672 6. 053133 6. 918708 6. 742887  
5. 756566 3. 077089 6. 785929 3. 913776 3. 831724 4. 135957 2. 852521 2. 741656 1. 807296  
3. 83177 3. 363325 3. 882958 4. 848826 3. 262499 4. 567196 3. 301785 3. 386557 2. 824791  
5. 431706 5. 41609 5. 578126 5. 714426 5. 391367 4. 696231 6. 244403 4. 229463 5. 350678  
1. 032855 1. 793433 1. 437458 1. 949497 2. 08858 0. 953051 0. 990177 1. 228613 1. 66713  
2. 315689 3. 009526 1. 621325 2. 934855 2. 465355 2. 04371 3. 148647 2. 223944 1. 356791  
3. 239612 1. 959672 2. 117097 2. 625084 1. 894162 1. 525706 1. 921594 1. 990078 1. 831341  
2. 25119 2. 044887 1. 586785 2. 443392 3. 47728 3. 83395 1. 694874 1. 442195 1. 454509  
4. 766257 4. 783401 5. 182941 6. 012502 4. 794279 6. 081854 5. 909963 6. 519601 6. 881809  
2. 277585 2. 256506 2. 344486 2. 094927 1. 985998 2. 777087 2. 141061 2. 574217 2. 178106  
1. 377536 1. 240482 1. 336008 1. 40861 0. 921381 1. 406251 1. 325281 1. 930278 1. 136471  
1. 184637 1. 460702 1. 264109 2. 697837 1. 843984 1. 217164 1. 661887 1. 364184 1. 073085  
1. 404791 1. 037861 0. 988024 1. 535623 1. 656864 1. 837154 1. 646886 1. 561485 2. 276229  
3. 218038 3. 296716 3. 209901 3. 379601 3. 333607 4. 198561 3. 296147 3. 824942 3. 671871  
1. 685263 2. 034003 1. 658549 2. 695946 1. 612257 2. 206157 1. 83399 2. 244369 2. 246243  
2. 097407 1. 153039 1. 441373 1. 933392 1. 27858 1. 814256 1. 606876 1. 662042 1. 437826  
5. 385384 5. 33445 5. 34836 4. 97607 5. 454296 6. 490654 6. 275211 4. 273084 4. 477159  
5. 972249 5. 536546 5. 479011 5. 619775 5. 282882 5. 579825 6. 079774 5. 610123 6. 348082  
8. 537851 8. 305697 8. 241595 7. 738213 8. 816084 8. 720251 8. 538106 8. 353064 8. 130544  
6. 135533 6. 303319 6. 882107 6. 401146 6. 283658 7. 196173 6. 966179 6. 946355 7. 084549  
7. 597139 5. 713592 7. 802884 6. 681954 6. 159589 5. 998846 7. 088496 6. 978592 6. 686365  
8. 377157 7. 544625 8. 051992 7. 985587 8. 069692 8. 334763 8. 269608 8. 643589 8. 835591  
3. 937928 5. 181053 3. 812576 4. 785171 4. 100507 3. 240873 4. 630235 3. 523835 4. 557946  
7. 318566 7. 089419 7. 045098 6. 251968 6. 273066 7. 878817 6. 3832 5. 114754 5. 466409  
4. 225117 3. 651522 4. 802939 4. 459828 4. 49399 4. 852693 4. 703531 5. 370023 4. 947517

6. 377209 6. 316683 5. 358674 5. 970896 5. 499119 7. 800451 7. 216933 5. 261019 5. 782088  
1. 441098 1. 700681 1. 932868 1. 86362 1. 427499 1. 159263 1. 66825 1. 872611 1. 426757  
3. 597162 3. 185466 2. 569048 3. 304063 3. 113368 3. 157387 3. 861803 3. 097522 3. 378463  
1. 245364 1. 0464 1. 419539 1. 626251 1. 257061 1. 284195 0. 719778 1. 005549 1. 584644  
3. 895025 2. 020714 1. 978583 3. 005489 5. 198154 3. 309046 5. 540566 2. 763821 4. 536668  
1. 562863 2. 004765 1. 11727 1. 544628 1. 801358 1. 474956 1. 488924 2. 651888 2. 328922  
5. 346532 6. 062752 5. 741339 5. 188311 4. 668602 5. 385916 5. 373052 5. 612267 4. 83432  
1. 667174 3. 415936 2. 219358 2. 683264 2. 20607 2. 084354 1. 908556 2. 365714 1. 512918  
1. 745596 1. 965624 2. 261929 1. 99936 1. 561365 2. 283838 2. 376785 1. 825207 2. 574245  
2. 946504 1. 786301 1. 861514 1. 648397 2. 528899 2. 030892 3. 981057 1. 953705 1. 63873  
1. 238191 1. 417545 1. 67305 1. 67601 2. 210921 1. 568693 1. 27947 2. 2437 2. 042757  
3. 453351 5. 2136 6. 138279 3. 839758 6. 180645 6. 050089 5. 086287 6. 142565 8. 389098  
5. 08758 5. 656495 5. 23475 4. 645463 5. 329834 4. 835441 4. 908468 5. 18927 5. 586138  
2. 611287 1. 797624 2. 485805 2. 95814 2. 301913 2. 339756 2. 188865 1. 978532 2. 629695  
1. 524616 1. 594409 2. 120681 2. 467866 1. 681357 1. 385354 1. 689346 1. 443685 1. 51846  
3. 392929 3. 663353 4. 663888 3. 979498 4. 840312 4. 563416 5. 105033 5. 045033 5. 122703  
4. 72275 5. 319015 5. 675247 4. 118644 5. 354265 5. 495832 5. 981821 5. 895674 5. 656406  
4. 098261 4. 448325 4. 67774 4. 550218 4. 336156 4. 052531 4. 92294 4. 024542 4. 824868  
3. 39817 2. 778032 1. 833122 2. 765268 2. 89976 5. 062439 4. 045864 3. 686309 5. 301633  
5. 830426 5. 300861 5. 980412 6. 189406 5. 821359 6. 161652 6. 549023 6. 118124 6. 832965  
3. 73667 5. 228339 4. 472234 4. 590916 4. 14107 4. 198551 4. 981688 5. 251132 5. 539642  
1. 600026 2. 215616 3. 02505 2. 316294 2. 53213 1. 520127 1. 63889 1. 926233 2. 264251  
2. 894594 2. 768838 3. 025158 3. 093692 3. 375649 3. 488005 2. 808008 2. 960093 3. 403081  
2. 600603 3. 095774 2. 705742 2. 368516 2. 673422 2. 546204 5. 474069 5. 896844 5. 391651  
2. 684444 1. 909827 2. 122567 3. 754307 2. 111432 2. 476436 2. 571949 2. 372857 2. 575478  
6. 445475 6. 323761 6. 844933 5. 961002 6. 289761 6. 333867 6. 343385 5. 65941 5. 532899  
2. 633692 2. 428929 3. 139512 2. 830197 2. 493107 2. 418097 2. 093604 2. 119367 2. 362625  
9. 009709 9. 263765 9. 097929 9. 381889 8. 946161 9. 271728 8. 717607 8. 311738 8. 754401  
4. 971071 2. 15204 2. 10411 4. 765768 0. 799503 0. 583559 3. 107664 1. 286002 2. 837173  
1. 780081 2. 320866 1. 779295 2. 430783 2. 158892 2. 89785 2. 025429 2. 391035 2. 235498  
4. 660194 4. 761995 5. 127628 3. 843454 4. 880515 4. 119612 5. 732416 4. 885861 4. 71034  
5. 957657 6. 213503 4. 886238 4. 954148 5. 114528 3. 170429 4. 614998 3. 72097 3. 640528  
2. 64533 2. 300622 3. 327715 3. 045045 3. 534653 4. 246326 3. 163973 3. 243339 2. 91411  
7. 27315 7. 016511 6. 362869 6. 885252 7. 147704 7. 604944 7. 457399 7. 745238 7. 28216  
3. 700827 3. 211254 3. 530851 3. 891529 3. 836771 2. 971045 4. 642239 3. 610012 4. 178636  
5. 414524 6. 098532 6. 212324 5. 692167 6. 654522 6. 090122 5. 834836 5. 378651 5. 514932  
4. 879439 5. 209528 5. 034775 4. 106452 5. 487776 6. 423484 6. 682794 5. 672134 6. 863897  
6. 833013 5. 795678 6. 315479 7. 421118 7. 203379 6. 628412 7. 048904 6. 658581 6. 928848  
4. 458764 4. 621038 4. 162459 4. 610564 4. 54752 5. 067021 4. 557595 4. 844591 4. 25451  
1. 655743 1. 661243 2. 044066 1. 517954 2. 28494 4. 706963 2. 164414 1. 855107 1. 586822  
2. 579442 2. 722714 2. 277823 2. 359548 2. 234207 2. 969714 3. 01202 2. 263844 3. 055256  
4. 371417 4. 900862 4. 401027 4. 160121 4. 592329 6. 273927 5. 675067 4. 518694 4. 334776  
3. 060476 2. 667297 2. 62125 3. 264674 2. 736515 3. 24212 3. 073492 3. 383781 3. 668207  
4. 704323 4. 633692 3. 236886 3. 846906 3. 26014 3. 723345 4. 051953 4. 12818 3. 536378  
3. 233747 1. 908678 2. 496058 3. 170964 3. 922206 3. 938479 3. 800323 2. 870978 3. 630281  
2. 976784 2. 154735 3. 092064 1. 527952 2. 184517 2. 14571 1. 626867 2. 403506 1. 903648  
1. 014164 1. 114396 1. 539005 1. 618413 1. 216858 2. 188507 1. 817542 1. 756485 2. 14032  
2. 620692 2. 118159 2. 419167 1. 506787 1. 501715 3. 130482 1. 165199 1. 498146 3. 516566  
7. 973198 7. 588782 7. 535833 7. 411288 7. 463534 6. 907563 8. 507839 7. 893088 8. 644514  
4. 37428 4. 789451 4. 21112 3. 989774 3. 579438 4. 594378 4. 676893 3. 082874 3. 807895  
1. 087988 1. 50472 1. 362966 2. 62834 1. 538918 1. 986308 1. 665141 1. 701321 2. 870606

9. 238106 8. 917699 9. 464631 9. 633441 9. 272368 8. 991236 10. 55628 10. 58206 10. 46743  
3. 126062 3. 057285 2. 350898 2. 636605 3. 552879 5. 42618 3. 321371 3. 029757 4. 800697  
4. 167274 3. 537099 3. 841636 3. 329093 3. 925975 3. 762704 4. 980633 6. 399652 5. 308932  
2. 133416 2. 659019 2. 355401 2. 05217 3. 207206 2. 412994 3. 253548 2. 417535 2. 633007  
4. 790839 3. 704482 3. 508457 4. 631008 3. 738397 5. 288242 4. 789826 4. 905833 4. 536798  
4. 158052 5. 071541 5. 635701 5. 58925 5. 342504 5. 783331 4. 964456 4. 883226 5. 756966  
1. 256913 1. 803168 2. 261444 1. 862015 1. 754902 1. 920303 2. 371123 2. 613956 1. 916344  
2. 388122 2. 290339 1. 54591 1. 991636 1. 230651 1. 953146 1. 708699 1. 99042 2. 248433  
3. 125401 2. 482216 2. 447341 2. 320428 2. 810909 4. 830492 3. 451608 3. 784128 3. 678427  
1. 564876 1. 886212 1. 664833 1. 408397 1. 596339 1. 566941 1. 687417 2. 722909 2. 518489  
8. 921684 9. 430959 9. 83654 9. 391583 9. 539135 8. 373946 10. 13243 10. 13359 10. 25666  
2. 017102 1. 718308 1. 299036 2. 417688 2. 859735 4. 52595 2. 454463 2. 881906 4. 350165  
9. 027389 9. 185255 8. 876039 8. 643179 9. 107979 7. 915913 9. 446911 9. 115452 8. 789052  
3. 799468 2. 970056 3. 487264 2. 769846 3. 754546 4. 961344 3. 873123 4. 25569 4. 324786  
4. 998604 4. 436397 4. 239923 3. 698786 3. 375233 5. 140764 3. 245484 3. 821372 3. 101429  
7. 146097 7. 52663 8. 313389 7. 694599 8. 075658 8. 360172 9. 110882 8. 601302 8. 249804  
2. 605998 2. 650937 1. 780896 2. 43231 2. 188161 4. 309191 2. 460044 2. 050047 2. 113894  
5. 731814 5. 57815 5. 517035 5. 254913 5. 592484 6. 56649 5. 477975 5. 715813 5. 320999  
6. 691291 6. 271936 6. 859863 6. 68548 6. 127758 6. 261282 7. 332637 7. 266268 6. 695342  
4. 162897 4. 613326 2. 673531 4. 407839 3. 2513 6. 098919 4. 33285 2. 654761 4. 580874  
2. 210025 2. 714876 1. 992318 4. 28115 2. 924181 4. 231667 2. 405312 2. 772774 2. 536498  
9. 196376 9. 584508 9. 336508 9. 284935 9. 297883 8. 981686 10. 26553 10. 0277 9. 864086  
2. 332273 1. 274757 1. 171204 1. 468253 2. 66751 1. 907058 1. 481807 2. 430258 1. 350745  
3. 398917 2. 447747 3. 076886 2. 602317 4. 058912 1. 864644 3. 041824 2. 05391 2. 685534  
1. 736999 2. 36448 1. 777096 2. 161517 1. 678898 1. 594361 2. 664541 3. 071693 3. 731964  
6. 076147 5. 189051 5. 706792 6. 189466 5. 896106 6. 430798 6. 688722 7. 454832 6. 74207  
7. 879008 7. 036591 7. 188519 8. 292298 6. 882989 6. 271262 7. 43199 5. 595462 5. 572577  
3. 502502 2. 092991 2. 161762 1. 640505 2. 644749 2. 163167 2. 273474 2. 897647 2. 302176  
1. 798337 1. 932162 1. 301689 2. 27014 1. 784489 3. 968712 2. 037073 1. 813331 1. 585519  
8. 232451 8. 176464 8. 207296 8. 210672 8. 194937 7. 864948 8. 216768 7. 807674 8. 239576  
6. 311403 5. 958432 5. 653472 5. 409362 6. 112404 7. 813064 5. 839692 6. 027095 6. 649865  
4. 71601 3. 382085 5. 187877 5. 364044 4. 858348 5. 391444 5. 030424 4. 474756 5. 511591  
2. 635259 2. 555454 2. 502283 2. 718959 2. 925496 2. 665734 2. 338298 2. 794227 2. 341594  
3. 747791 4. 210894 2. 053792 4. 537693 4. 129902 5. 363724 3. 512696 4. 651305 5. 626375  
5. 864332 5. 614503 5. 357413 5. 470321 4. 972207 5. 619235 5. 03316 5. 156406 5. 787238  
5. 63242 6. 174014 5. 711941 5. 839002 5. 339208 5. 950606 4. 928658 4. 940384 5. 061241  
3. 554176 3. 17622 3. 363875 3. 080246 3. 497392 4. 611767 4. 26793 2. 890038 3. 68645  
5. 636734 5. 84789 5. 148836 6. 207161 4. 723677 5. 001633 5. 903615 5. 825091 5. 454164  
1. 620881 1. 972237 2. 166406 2. 155855 1. 972274 1. 549694 1. 768146 1. 549433 1. 953643  
1. 537755 2. 083799 2. 692578 2. 212483 3. 226656 3. 204459 2. 97311 2. 908712 2. 778175  
8. 302567 7. 704256 8. 00151 7. 616407 8. 233454 8. 626741 8. 14468 8. 107799 8. 62654  
6. 071736 6. 448342 6. 677062 5. 408097 6. 395993 4. 205752 5. 715231 4. 432127 4. 950333  
2. 896126 3. 149254 2. 644739 2. 540968 3. 448386 3. 99158 3. 25933 2. 536877 4. 234612  
5. 251469 5. 31707 5. 924966 5. 883526 5. 802933 5. 117131 5. 665378 5. 748288 6. 0741  
7. 483736 5. 980202 6. 563225 6. 198969 6. 168807 6. 213859 6. 089681 6. 098995 6. 555231  
6. 776411 6. 762823 7. 395619 7. 184752 6. 291761 6. 736887 5. 672939 6. 842654 6. 864566  
7. 333834 7. 17168 7. 814212 7. 41195 7. 062816 7. 58555 7. 491882 7. 104621 6. 775925  
6. 908903 5. 399181 6. 246884 6. 820597 6. 773959 8. 280393 7. 56187 7. 874928 7. 611709  
8. 004061 8. 756387 8. 529701 8. 157603 8. 406523 8. 280062 8. 398169 8. 397221 8. 172805  
2. 606824 3. 924824 3. 827735 2. 397401 3. 781668 2. 316873 4. 775767 2. 86013 3. 128943  
7. 987216 6. 687773 7. 694638 8. 120376 7. 624597 8. 746159 7. 796731 7. 50416 7. 615332

2. 987227 2. 425855 3. 352426 3. 472202 1. 994837 2. 426515 2. 49843 2. 927155 2. 20188  
2. 379579 2. 510594 1. 681337 2. 231775 1. 811346 1. 938728 2. 232836 1. 876057 2. 610248  
7. 646468 7. 38077 7. 197137 6. 826489 7. 34664 7. 815849 7. 289277 7. 296176 7. 390275  
1. 445388 1. 832823 2. 097829 3. 176571 2. 539176 2. 523892 2. 852328 2. 555948 2. 476151  
1. 599684 1. 885355 1. 440693 1. 508425 1. 980499 2. 365767 2. 039535 1. 613492 1. 567474  
1. 690134 1. 834855 2. 175542 1. 971147 2. 022999 2. 795921 1. 635276 1. 956598 2. 831978  
2. 464526 4. 859742 3. 100523 4. 16076 3. 778887 3. 857517 4. 22157 5. 391216 4. 393007  
2. 292398 1. 933968 3. 064536 2. 935075 3. 245033 3. 782156 2. 362882 3. 344148 3. 346541  
3. 776414 5. 759593 5. 202959 3. 690895 5. 855988 1. 897389 4. 075709 4. 032045 4. 2342  
5. 855605 6. 463128 6. 207982 5. 79746 6. 114261 5. 591339 6. 168736 5. 399685 5. 64567  
2. 533554 3. 018776 3. 388041 3. 732614 3. 505997 3. 378311 2. 893701 2. 182535 2. 694592  
5. 360149 4. 510991 5. 268302 6. 049311 4. 759391 6. 513819 5. 672324 5. 948809 5. 895724  
2. 560943 2. 342606 2. 705542 1. 685414 3. 467736 1. 482558 1. 925814 2. 206807 1. 877323  
1. 173056 1. 131362 1. 18038 1. 252602 1. 211056 1. 085588 0. 923678 1. 229593 1. 803043  
6. 495792 7. 044381 6. 516879 5. 338449 7. 031359 6. 492262 6. 946487 7. 043204 6. 302193  
1. 888063 1. 500674 1. 47054 1. 557668 1. 127273 1. 311282 1. 412106 1. 180889 1. 264285  
3. 137457 3. 251505 2. 715844 2. 628168 3. 075458 3. 284199 4. 339251 3. 120398 3. 071134  
3. 794793 3. 747386 3. 327132 2. 91079 3. 20471 5. 240515 3. 457638 3. 32833 2. 263503  
3. 218005 4. 237229 3. 749746 2. 925962 3. 907198 2. 796322 2. 888699 3. 709677 3. 240103  
2. 269513 1. 739363 1. 565674 3. 461257 3. 128638 2. 614473 1. 967598 1. 706264 1. 520375  
7. 145209 6. 328966 6. 928653 7. 525857 6. 393927 7. 829602 7. 61581 7. 880192 7. 531046  
1. 666003 1. 794773 1. 231784 1. 242144 1. 010494 1. 422417 0. 943925 1. 242841 1. 680452  
3. 327174 3. 247607 2. 588383 2. 895624 3. 375928 3. 74294 2. 333942 3. 211526 2. 916622  
1. 671794 2. 162914 1. 993658 1. 532884 1. 808749 2. 232504 1. 572197 1. 870565 1. 433986  
3. 329857 4. 328028 3. 761154 2. 80477 4. 323354 3. 260374 3. 782181 2. 467655 3. 022753  
1. 215637 1. 394054 1. 677805 1. 594327 1. 425678 1. 849465 1. 310891 2. 654184 1. 946702  
8. 242346 8. 873375 8. 561213 8. 165868 8. 796343 4. 197828 7. 884233 8. 048649 8. 463648  
1. 998593 2. 076527 2. 149917 2. 11409 1. 993578 2. 281851 1. 538743 1. 37187 2. 106756  
0. 975066 1. 738273 1. 797712 1. 166262 1. 196719 1. 330996 1. 804134 2. 011614 1. 19278  
2. 280514 2. 361983 2. 80117 2. 88039 2. 517679 2. 140839 2. 759207 2. 096229 1. 568385  
3. 278599 2. 673507 3. 226131 2. 596071 3. 416875 3. 382908 2. 600003 2. 955061 2. 728751  
1. 906453 2. 457013 1. 743682 2. 828024 1. 703516 2. 354796 2. 269813 2. 683566 2. 635084  
6. 01917 6. 193104 6. 068695 6. 362076 6. 194105 5. 439927 4. 775314 4. 957565 4. 43843  
2. 873498 2. 332824 2. 780748 2. 574868 2. 472083 2. 538024 2. 46009 2. 661186 2. 715543  
2. 023383 2. 34699 4. 026198 3. 130781 2. 914535 3. 089032 2. 862136 3. 936617 3. 594293  
3. 918786 4. 270346 4. 231858 3. 735315 3. 333225 4. 369674 3. 68667 3. 890016 3. 867905  
3. 750882 2. 9596 3. 266366 3. 212012 3. 576519 3. 140029 2. 9509 3. 31206 3. 363534  
1. 840399 1. 754183 1. 653052 3. 590156 1. 68335 2. 713339 1. 692969 1. 903119 2. 242552  
2. 374852 2. 75014 2. 433344 3. 156083 3. 114294 2. 898109 2. 994184 2. 05299 2. 768419  
2. 371271 1. 854936 2. 209019 1. 455427 1. 97528 2. 007046 1. 677536 2. 582768 1. 359724  
1. 460479 1. 135045 1. 563822 1. 433988 1. 256157 1. 430741 1. 599229 2. 152212 1. 593211  
1. 627916 1. 253128 0. 800584 1. 52282 1. 33953 1. 357003 1. 710902 1. 384458 0. 877103  
5. 116405 6. 120299 4. 222423 4. 991246 3. 880522 4. 105251 4. 261551 3. 343353 2. 863549  
2. 739673 1. 812 1. 093932 1. 631016 1. 291837 0. 965491 1. 218664 1. 657244 1. 103881  
1. 600469 1. 598179 1. 201969 1. 456966 0. 911735 1. 568912 1. 306543 1. 418052 1. 288187  
4. 168767 4. 106844 4. 428213 4. 52292 5. 048975 5. 836995 5. 041424 4. 450223 4. 616281  
2. 831953 2. 806297 4. 534026 3. 415781 3. 95293 2. 928447 3. 726086 2. 81711 4. 691525  
2. 828583 3. 396668 3. 166291 3. 569592 2. 918809 4. 020762 3. 73217 3. 74564 3. 173832  
1. 318871 1. 308469 1. 427517 2. 791241 1. 738794 1. 2862 1. 416564 1. 523046 2. 070894  
3. 051157 4. 504803 2. 618205 3. 111386 3. 281317 3. 416766 4. 249929 3. 656114 3. 701595  
7. 818164 7. 310441 7. 473128 8. 243546 7. 687778 8. 608243 7. 991431 7. 909129 7. 705872



3. 215127 2. 895163 3. 332497 3. 329303 3. 619254 2. 744561 3. 825004 4. 957403 3. 75391  
1. 895254 1. 280696 1. 254602 1. 170541 1. 17338 1. 495463 1. 419428 1. 430793 1. 363719  
3. 154225 2. 324385 2. 654874 2. 845019 3. 544086 2. 447369 2. 282374 3. 045378 2. 95871  
3. 062251 3. 635618 4. 815862 2. 591561 3. 065106 2. 771672 2. 636476 3. 283686 3. 511289  
4. 655872 4. 443648 4. 412902 5. 094308 4. 657404 4. 856927 5. 329702 5. 098032 5. 153392  
4. 269628 5. 334427 5. 521795 3. 066772 3. 113156 4. 688433 4. 158971 3. 051783 4. 496911  
2. 04775 1. 977375 2. 442469 2. 074428 2. 184223 2. 486607 2. 247118 2. 044657 2. 663798  
2. 517653 1. 647286 3. 489218 2. 714304 1. 232978 1. 761757 2. 067229 1. 50719 2. 889745  
3. 543357 3. 703662 4. 209048 4. 224106 4. 379763 4. 615742 4. 726538 3. 78005 4. 359795  
3. 850912 2. 842227 2. 834173 3. 25374 3. 390368 4. 380482 2. 323274 4. 258875 3. 137411  
2. 519515 2. 111839 1. 777017 3. 270133 1. 754823 1. 993641 2. 2288 1. 649052 3. 210469  
2. 690187 3. 697129 2. 609197 2. 291557 2. 525087 2. 5945 4. 071183 3. 670253 3. 096863  
5. 189325 5. 253672 5. 101286 4. 512763 5. 507793 5. 898463 5. 992732 5. 390369 5. 265784  
2. 537607 2. 988895 3. 142067 2. 853227 2. 361704 1. 874669 2. 417037 2. 631619 2. 412221  
5. 624856 6. 33394 6. 317453 5. 855947 6. 22028 5. 730842 6. 204263 6. 313813 5. 915244  
2. 712007 1. 36262 1. 689503 1. 303457 1. 19937 1. 159443 0. 978862 1. 111923 1. 427075  
3. 107258 3. 19009 3. 674663 3. 000867 3. 444376 4. 534723 3. 963571 5. 341402 4. 482935  
2. 830414 3. 792929 2. 722507 1. 854946 2. 958042 2. 293146 2. 058045 2. 884073 2. 797742  
3. 295818 1. 646827 2. 738289 2. 330561 2. 073485 1. 892514 2. 118794 3. 537594 4. 046386  
7. 051457 7. 004359 7. 354939 7. 25962 8. 068986 7. 349819 7. 086572 7. 442216 7. 203571  
7. 177941 6. 996098 6. 85068 6. 485713 7. 072352 6. 64975 7. 285612 6. 843267 6. 734609  
3. 369742 2. 95354 2. 780088 3. 497999 3. 421954 3. 397794 2. 892618 2. 943601 3. 294876  
4. 023848 5. 444691 4. 964232 5. 228536 4. 783347 3. 961675 5. 414634 6. 563299 5. 735635  
2. 437109 2. 315945 1. 844559 3. 160142 3. 319669 3. 309069 2. 416364 2. 904643 2. 923925  
2. 569737 3. 493846 2. 920407 3. 409919 1. 719063 2. 096741 3. 565648 2. 199422 2. 544495  
4. 301042 4. 184313 5. 146006 5. 077505 5. 426338 3. 556362 3. 034218 4. 062782 4. 482339  
2. 496815 2. 142887 2. 165609 2. 265669 1. 784954 2. 261238 3. 363667 2. 955965 2. 544714  
1. 372642 0. 86981 1. 396087 1. 393789 1. 0013 0. 840624 1. 492531 2. 420047 1. 867878  
4. 956602 4. 356061 5. 697485 4. 801296 5. 087664 3. 897383 4. 103594 4. 147709 4. 97009  
5. 256965 5. 160949 5. 438406 5. 679703 5. 425873 5. 276546 6. 205972 5. 236713 5. 390278  
3. 223386 2. 787759 3. 241035 3. 220087 1. 105175 4. 732871 3. 784264 4. 318979 2. 830671  
2. 804093 2. 799523 1. 839933 1. 475791 2. 107617 2. 662812 1. 684775 2. 699115 1. 714063  
5. 213014 5. 331991 4. 912419 6. 258266 6. 050838 4. 420797 6. 00586 6. 675862 6. 395401  
4. 820648 3. 142441 3. 938414 3. 471213 3. 663113 3. 646762 3. 19865 3. 190105 3. 56588  
2. 624677 1. 728991 1. 707377 2. 092031 1. 303338 1. 45869 1. 782366 1. 870024 1. 69894  
3. 654575 3. 04737 2. 857761 3. 520598 2. 283575 1. 645948 3. 277538 3. 968116 3. 048001  
3. 595706 2. 506404 2. 868196 3. 222752 2. 706274 2. 728259 2. 257516 2. 268108 3. 467439  
1. 15572 1. 147232 1. 583874 1. 331343 1. 255827 1. 093731 1. 225501 1. 194145 1. 07516  
2. 844855 3. 556676 3. 549095 3. 248449 3. 331068 2. 71171 2. 322872 3. 010221 3. 144425  
3. 518436 2. 277011 2. 807979 5. 221053 3. 896462 5. 124603 4. 519828 6. 63475 5. 39914  
1. 282256 2. 56155 1. 780712 3. 652214 3. 809323 2. 760829 1. 866121 1. 630322 1. 10974  
1. 700696 1. 483531 1. 885946 1. 898485 1. 539423 1. 285058 1. 043764 1. 496196 1. 319912  
4. 67397 4. 899772 5. 729154 5. 266861 5. 138126 4. 133767 4. 757106 4. 907836 4. 717517  
5. 577647 4. 029377 5. 118326 5. 782233 5. 342612 5. 343427 4. 037444 4. 455244 4. 552273  
3. 653408 3. 427943 3. 797889 3. 518223 3. 612207 3. 779634 3. 490195 3. 004772 3. 470753  
1. 757258 2. 484855 1. 885394 1. 721228 1. 188432 1. 634286 2. 14756 1. 770065 1. 00675  
1. 52031 1. 806007 1. 326206 1. 298034 1. 232886 1. 646399 1. 369496 1. 358475 1. 284628  
1. 484145 1. 544236 2. 25368 1. 435388 2. 090149 2. 699166 1. 945656 1. 280118 1. 085442  
1. 50938 2. 08662 1. 133434 1. 859645 1. 501792 1. 62468 1. 203857 2. 769033 1. 158932  
1. 592526 1. 534531 1. 418629 1. 613929 2. 042359 1. 01814 1. 199839 1. 16659 1. 779073  
1. 424504 2. 210047 1. 496482 1. 766939 1. 251225 1. 427372 1. 509601 1. 584045 2. 107537

3. 163713 2. 717898 2. 948607 3. 288979 3. 442713 2. 95134 3. 090466 3. 184618 3. 223867  
3. 030919 1. 991342 2. 425797 2. 836817 2. 270821 2. 356511 2. 942788 2. 061442 2. 507887  
2. 170959 1. 785204 1. 792975 1. 752756 2. 248687 1. 563248 1. 907737 1. 407748 1. 717834  
1. 653432 1. 67258 2. 211674 2. 081788 2. 566719 2. 025884 2. 232116 2. 512395 3. 409023  
3. 786859 4. 994232 4. 930785 2. 937961 2. 858081 2. 201526 4. 678181 3. 381708 2. 461366  
6. 025488 6. 266214 5. 515097 3. 96766 7. 106504 5. 261647 6. 382982 6. 122305 5. 548058  
5. 355016 6. 065148 4. 960359 4. 843207 5. 402897 4. 082518 5. 17176 4. 818863 4. 919338  
5. 411978 5. 168435 4. 873163 5. 642817 5. 097807 5. 920372 5. 513779 6. 167831 5. 894134  
2. 726643 3. 319233 2. 066955 1. 356921 2. 161754 2. 090092 2. 096191 1. 992356 2. 097875  
2. 153453 2. 899106 2. 789936 2. 352788 1. 885566 2. 363486 2. 037919 2. 024406 2. 361447  
4. 335346 4. 470618 4. 974901 5. 379141 4. 195033 5. 630303 5. 985956 5. 367088 5. 744092  
3. 915151 3. 229907 3. 103475 2. 352697 2. 965221 2. 957809 2. 439933 3. 130885 2. 643455  
3. 038572 2. 484955 2. 356042 3. 627332 2. 772679 3. 477929 3. 518227 3. 657282 3. 975801  
4. 42142 2. 978732 3. 464746 5. 148413 2. 100969 3. 567814 3. 305165 2. 576104 3. 164305  
1. 616687 2. 848958 1. 826455 2. 709778 1. 980639 1. 916592 1. 921994 2. 262326 2. 048948  
2. 72755 4. 058238 2. 768565 2. 876929 4. 242563 3. 033937 3. 507053 3. 605646 3. 235324  
10. 18562 9. 937481 10. 24829 10. 22119 10. 46267 10. 12433 10. 60126 10. 54971 10. 74359  
4. 407548 4. 555461 4. 973398 3. 647349 3. 295535 5. 140463 4. 13346 2. 181372 2. 885933  
1. 564041 1. 940726 1. 558225 1. 567264 2. 881581 1. 818836 2. 166797 2. 207941 1. 822399  
2. 911547 3. 460374 3. 938646 3. 573678 2. 429181 2. 684185 2. 964977 3. 107267 3. 384313  
2. 757495 3. 637884 3. 05833 3. 679871 2. 640607 3. 110811 2. 265775 2. 328232 3. 471751  
2. 026607 1. 682033 1. 4403 2. 239456 1. 668867 2. 316482 2. 671828 2. 332079 1. 964028  
1. 576949 2. 238453 1. 849511 1. 529468 1. 562568 1. 65642 1. 264956 1. 49541 1. 384935  
1. 742463 3. 318248 2. 233542 2. 67348 3. 489578 2. 097932 2. 286823 1. 810418 2. 15894  
3. 354147 2. 954913 3. 942903 3. 817904 4. 391926 4. 060491 3. 78795 4. 189749 4. 060927  
1. 750217 1. 869157 1. 96264 1. 533466 2. 22275 2. 634172 2. 034156 1. 981636 2. 899478  
2. 323893 1. 85884 2. 048877 2. 820704 2. 54982 2. 434866 2. 147588 2. 052605 1. 873896  
5. 178135 5. 046389 5. 880726 4. 388228 1. 870882 4. 900172 3. 580851 4. 834124 2. 255272  
4. 168699 3. 759678 2. 912814 5. 35267 1. 046216 4. 687186 2. 776325 2. 866922 4. 501168  
2. 378998 1. 936945 2. 62104 2. 931878 2. 804772 1. 769641 1. 965039 2. 944025 2. 072853  
1. 176703 1. 735802 2. 223884 1. 770454 1. 536427 2. 069919 1. 463768 1. 144715 1. 245954  
2. 792552 2. 818411 3. 153048 1. 996916 2. 74437 2. 653262 2. 748366 3. 312967 3. 138679  
6. 061501 6. 559286 6. 904186 5. 83865 6. 501289 5. 913439 6. 235267 6. 125342 5. 88724  
4. 188142 5. 472614 3. 966182 3. 512484 4. 463571 2. 422373 2. 622651 2. 608757 3. 011739  
2. 084636 1. 929872 3. 134621 2. 309209 2. 301819 1. 944763 2. 328296 2. 333575 2. 255784  
1. 744728 2. 149179 1. 272324 1. 159062 1. 768563 0. 891142 1. 222042 0. 989227 0. 998517  
2. 346748 1. 960072 2. 247801 2. 154491 2. 680707 2. 279371 1. 59065 3. 585156 2. 086003  
9. 660179 7. 987339 8. 399072 8. 434618 7. 943346 9. 393382 8. 394428 5. 96898 6. 178278  
8. 412844 8. 351972 7. 547217 8. 236942 6. 675852 7. 570285 7. 553304 6. 373587 5. 955471  
3. 684032 2. 526372 3. 73903 3. 590947 2. 94854 4. 457435 4. 932607 2. 231034 2. 976042  
2. 623826 3. 79778 4. 95629 3. 820485 4. 012253 2. 417269 3. 610558 2. 019291 3. 969361  
2. 296618 2. 784376 1. 996052 2. 236415 2. 12368 1. 723 2. 219913 2. 532244 2. 621868  
3. 048069 3. 013912 2. 481665 3. 615655 3. 332353 3. 420924 2. 920019 4. 368056 3. 2147  
2. 825469 3. 376153 3. 31217 2. 987042 2. 788748 3. 206238 2. 565662 3. 166129 2. 612181  
2. 142207 2. 182301 2. 188195 3. 110957 2. 984712 2. 472611 2. 07505 2. 414704 2. 477871  
3. 456421 2. 631058 3. 962759 2. 403507 3. 407381 3. 645431 2. 76033 4. 18565 4. 468661  
6. 503755 6. 469813 7. 331868 6. 675274 6. 772993 7. 263151 6. 701717 7. 11142 7. 201916  
1. 72221 1. 419513 2. 379651 1. 191166 1. 265414 2. 351707 1. 372875 1. 506312 1. 786676  
4. 758456 5. 498306 4. 759308 3. 932852 3. 228833 4. 152336 6. 041577 2. 311838 3. 501907  
2. 938265 1. 685841 1. 801593 1. 70744 1. 449727 2. 491321 3. 11436 1. 511533 2. 163894  
4. 608723 2. 61762 2. 939401 3. 085815 2. 90617 3. 491459 3. 595204 3. 984871 2. 83003

2.07318 2.275693 2.062089 2.027973 2.216884 1.818601 1.251155 1.706243 2.066651  
3.051503 3.794691 4.290202 4.732422 4.374665 3.783483 3.725647 4.766071 4.812636  
2.383529 2.033328 1.61006 2.327675 1.834314 2.080795 1.787112 2.471201 2.005202  
1.874612 2.025311 1.858619 1.896138 1.644455 2.072035 1.574936 2.379411 1.490121  
3.246311 1.964129 1.969917 2.426331 2.136083 1.819041 2.146161 1.799391 1.766436  
5.0879 6.326378 5.498989 4.719619 4.817741 3.176271 2.713959 3.282528 3.652482  
1.711102 1.480895 2.093162 1.453887 2.778026 1.502504 1.396092 1.268968 1.672884  
2.38447 1.518314 1.792268 2.807341 2.04214 1.945078 1.642899 1.8308 1.994723  
1.696022 1.678383 1.560477 1.528269 1.344267 1.208998 1.235255 1.695824 1.505927  
3.815088 2.478401 2.911587 3.18768 2.445973 2.506735 2.256678 2.087742 2.180592  
1.625325 1.617749 1.423808 1.384921 1.597147 1.772331 1.565393 2.040989 1.929861  
2.934663 3.512635 2.934663 3.71641 3.309787 3.26587 4.048048 2.25526 3.718779  
1.207311 2.323478 1.93811 1.840519 2.295901 1.624342 1.353088 1.236047 1.751426  
1.780376 1.328481 2.820071 2.131107 3.23768 1.691089 1.599524 1.538381 1.134409  
11.55505 11.46705 11.57774 11.0427 11.70067 10.57 11.01054 10.39337 10.50345  
7.561069 7.640863 7.891181 7.939826 7.594178 7.07623 7.803765 8.082096 7.774051  
5.216492 4.18325 5.711952 3.05792 5.016775 1.065065 2.094784 2.132169 2.020855  
6.38576 6.854096 6.520604 6.587732 6.579246 6.139558 6.21531 5.546246 5.94617  
1.258784 1.541499 0.907885 1.077671 1.165196 1.218233 1.076804 1.636237 0.931421  
1.753765 3.245262 2.315924 2.120606 2.784437 2.76771 2.610637 2.754711 2.896312  
7.959281 7.400784 7.863605 7.163118 8.429985 7.224953 8.747489 9.506973 9.000899  
2.493028 1.564026 2.293911 2.697774 2.46821 2.105118 2.301945 3.446701 2.428007  
5.990864 3.94567 3.796255 3.834696 4.628426 5.023945 4.27658 4.232404 4.008132  
7.00394 7.540297 7.029797 6.536696 7.034038 6.953891 7.269596 7.621567 7.167971  
3.867671 2.582675 3.666497 3.969148 3.545923 4.382396 3.223325 4.180801 3.752621  
2.154238 1.761045 1.152656 1.409152 1.421942 1.638811 1.576237 2.462974 1.327447  
9.055374 9.206591 8.686848 8.49463 9.191304 8.073546 9.165412 9.157177 9.188544  
4.464428 4.256878 4.321733 3.525203 3.392326 5.01522 3.592053 4.029092 4.096134  
7.73818 6.847483 7.074896 7.390165 6.989407 7.846045 7.444747 7.247006 7.386677  
1.844588 1.379381 1.598579 3.203786 1.978219 1.119003 1.766131 1.667497 2.289975  
2.047044 2.479876 3.106003 2.006515 3.390712 2.887089 2.39941 3.333439 3.742959  
1.510882 1.132032 2.126429 1.060101 1.664157 2.890116 1.564944 2.011137 3.060471  
3.868943 3.540759 2.60894 3.857632 3.566526 2.704985 2.28421 3.608446 3.79411  
2.175825 2.637646 1.885862 2.081816 2.195303 1.984289 2.560524 2.199216 2.387053  
2.102979 3.371682 2.707224 1.724936 2.820931 3.41563 2.952336 2.102335 2.521762  
3.461511 2.702306 1.846532 1.835624 1.200586 2.037206 2.048579 1.894983 1.962196  
2.8406 1.728527 1.60536 2.419673 2.453092 3.662042 1.875708 2.911038 2.041889  
3.253975 3.846895 3.173276 3.064711 3.284189 3.761321 2.856928 2.52629 2.420957  
4.440197 4.593071 3.110904 5.145615 4.247441 3.961016 2.614444 1.791137 3.744147  
4.019117 5.272383 3.443451 8.54301 3.168266 2.691068 4.6001 2.8896 7.516079  
2.62072 2.248605 2.337532 2.424323 2.624664 2.82457 2.657739 2.65425 2.891932  
4.077342 2.390038 5.224711 1.636944 2.593456 1.704211 2.730365 2.448759 1.697685  
3.565032 3.472496 4.494521 3.926842 4.204552 4.978553 3.364973 4.117737 3.638072  
3.140612 3.428753 3.462602 5.446361 3.406337 6.817298 5.65607 4.977513 5.319321  
1.476121 1.073955 0.825642 0.791176 0.715732 1.935944 0.765807 0.985718 2.129095  
0.602595 0.377567 2.38525 0.602595 1.054347 1.075893 1.454728 0.693777 0.520882  
2.062879 1.59145 1.390794 0.890774 1.709636 1.693678 1.401501 0.987593 1.146322  
2.007632 2.960996 3.669034 1.823736 3.341457 3.685143 2.738407 1.929052 2.380792  
8.2839 7.802221 7.679774 8.632093 6.349733 5.412836 6.744557 6.294521 7.801128  
8.277568 8.660597 8.321977 7.821679 8.462049 7.890403 8.906985 8.701035 8.604473  
6.999273 7.709204 7.483082 7.215672 7.732497 6.743007 7.604169 8.099443 8.095098

2. 669769 2. 192665 2. 158966 2. 216069 2. 45101 2. 029292 1. 617688 1. 625977 2. 300494  
2. 391531 2. 187696 2. 437891 2. 742166 3. 409222 2. 515229 2. 715864 2. 783426 2. 467273  
2. 009439 1. 761536 1. 579842 1. 402646 1. 618281 1. 843985 1. 366649 1. 840744 1. 360187  
5. 599097 4. 05979 4. 878575 5. 130301 4. 72243 4. 025387 4. 497695 3. 982843 4. 371439  
5. 485211 5. 124525 6. 071866 5. 595122 4. 832029 5. 407644 5. 230116 5. 027385 5. 527766  
7. 077463 7. 862586 8. 090581 7. 062029 7. 342533 7. 478153 7. 588803 7. 425388 7. 532105  
4. 817719 4. 691051 5. 411807 4. 802502 5. 667293 6. 830071 6. 668832 6. 690751 6. 765174  
6. 258781 6. 086671 5. 177254 5. 813764 5. 795301 5. 777911 6. 359062 6. 402159 6. 66378  
2. 957457 2. 311662 2. 37353 2. 27082 3. 378292 3. 016792 1. 567031 2. 054638 2. 809963  
6. 565389 6. 431912 6. 828526 6. 707042 7. 416496 6. 701552 7. 131411 7. 275394 7. 168448  
5. 992138 6. 050618 5. 752467 7. 153789 6. 542672 4. 897142 5. 850947 5. 378567 5. 91231  
8. 210007 8. 179694 8. 261738 7. 851919 7. 924851 7. 616133 8. 017454 7. 73987 8. 200394  
6. 218453 6. 715381 6. 828391 7. 219141 6. 681109 6. 821682 6. 423955 6. 649615 6. 711008  
6. 203348 6. 443915 5. 497509 6. 182441 6. 712888 5. 952543 6. 489078 6. 540749 6. 50526  
3. 870616 1. 497126 2. 057038 1. 220844 1. 58396 1. 408965 3. 25034 2. 565528 1. 440437  
2. 161653 1. 801105 2. 192297 2. 918865 2. 989993 2. 522722 1. 820684 1. 733861 1. 998036  
2. 066131 1. 680923 1. 924334 1. 883733 2. 164359 2. 174555 1. 972571 2. 003538 1. 83332  
5. 377039 5. 634122 5. 526759 6. 185996 5. 500633 6. 189999 4. 927132 4. 795298 4. 707185  
1. 839047 2. 776358 2. 256495 2. 578889 2. 129359 2. 406482 2. 149031 1. 780891 2. 444135  
1. 362466 1. 884291 2. 017576 1. 91782 1. 530215 2. 449694 2. 320596 1. 843101 2. 106984  
1. 165094 1. 296207 1. 321167 2. 270031 1. 608397 1. 222626 1. 519564 1. 192944 1. 721561  
1. 966669 1. 244088 1. 829099 1. 87265 2. 033198 2. 855659 2. 476869 1. 183423 1. 233484  
1. 615016 0. 684393 1. 36696 2. 62744 1. 539375 1. 179667 1. 511155 1. 568917 1. 00742  
6. 424192 5. 644798 6. 932301 6. 828557 5. 662099 7. 678987 5. 454855 5. 531867 5. 067726  
1. 583269 2. 167297 3. 389948 3. 437804 3. 807208 4. 28864 2. 287556 3. 381458 2. 596006  
1. 059016 1. 390968 1. 792675 1. 937526 1. 503983 1. 504822 1. 784764 1. 405623 1. 116652  
2. 767774 2. 377347 2. 975405 3. 016368 3. 949917 2. 789582 3. 39891 3. 573744 3. 283136  
1. 384933 1. 610205 1. 0325 1. 281424 0. 935406 1. 073821 1. 07158 1. 782654 1. 295767  
3. 06742 2. 299099 2. 164809 3. 217152 2. 30552 1. 865324 1. 789576 3. 100179 3. 14155  
0. 799853 3. 178373 2. 790727 1. 982986 2. 376299 1. 350726 2. 334559 1. 827873 2. 914304  
1. 359176 1. 782751 1. 274434 1. 36446 1. 278358 2. 382343 1. 569608 2. 162355 2. 604874  
1. 740162 1. 863128 1. 835052 1. 901794 1. 246827 2. 144314 2. 448294 2. 434925 1. 428578  
1. 45343 1. 775177 1. 062051 2. 510901 1. 566445 1. 114718 1. 224376 1. 863321 1. 547263  
3. 16068 3. 358046 1. 762418 2. 797819 4. 597942 3. 790138 3. 855238 3. 143613 2. 181614  
1. 610087 1. 368569 1. 387869 1. 204147 1. 456132 1. 308733 1. 197169 1. 207157 1. 790434  
1. 238949 1. 423282 1. 486353 1. 816121 0. 7087 2. 315771 1. 138577 1. 694836 0. 937135  
3. 55753 3. 390467 2. 664304 3. 056411 3. 508496 1. 99656 2. 925858 3. 001405 3. 677266  
2. 247487 1. 441494 2. 948436 2. 493226 2. 886824 2. 240338 1. 376277 1. 517109 2. 090367  
4. 347695 4. 400419 4. 3344 2. 895487 4. 989557 4. 447664 4. 20586 4. 937249 4. 317384  
2. 746226 2. 114159 1. 80314 3. 115245 1. 837463 1. 335269 0. 862233 2. 11633 2. 081207  
2. 960997 2. 968699 2. 993385 2. 262411 1. 976377 3. 031465 1. 911763 2. 119187 2. 262984  
2. 99336 2. 039913 2. 872974 2. 257833 2. 662605 1. 92212 1. 96501 2. 158769 2. 064223  
1. 978079 2. 525284 0. 945642 1. 461207 1. 978914 4. 175171 1. 289504 2. 076617 3. 879634  
1. 638456 1. 189966 1. 353803 1. 467416 1. 423328 2. 072926 0. 968816 1. 446712 1. 578247  
2. 51515 3. 744375 3. 044039 3. 089548 3. 251397 2. 841265 2. 608798 2. 234697 3. 926677  
2. 699077 2. 408547 3. 035712 2. 165982 3. 117817 3. 136805 3. 033695 2. 839098 3. 260846  
4. 207542 4. 502193 4. 642645 3. 745819 3. 776462 4. 149964 4. 210701 3. 505682 4. 392326  
1. 371713 1. 839287 1. 816524 2. 257947 1. 871137 1. 328906 1. 728518 1. 527305 1. 845303  
2. 321542 1. 937002 2. 973113 1. 962332 2. 16297 2. 23817 2. 286707 2. 467223 2. 182458  
1. 906663 2. 659464 3. 288103 3. 062789 2. 324812 2. 854151 2. 845225 2. 210024 1. 887599  
3. 779113 2. 68933 3. 319681 4. 526939 3. 760657 4. 598078 4. 125663 3. 170314 4. 650563

2. 200565 4. 225177 2. 872105 2. 560398 2. 916977 1. 257432 3. 09124 3. 885879 2. 588556  
2. 395522 2. 727248 2. 612757 1. 220312 3. 41251 1. 340231 1. 487805 2. 556632 1. 355301  
3. 403535 2. 928017 4. 621837 3. 342465 5. 243051 3. 208255 4. 488161 2. 727649 3. 601687  
3. 276063 2. 318905 2. 837135 1. 45189 4. 25373 2. 761574 2. 286006 1. 755112 2. 715824  
2. 407072 2. 166748 2. 150061 2. 577862 2. 435653 1. 709529 2. 086724 2. 593201 2. 185284  
7. 075532 8. 076129 7. 281032 8. 588982 8. 945431 8. 10902 7. 711583 7. 937641 7. 962462  
2. 653949 2. 618146 3. 249741 2. 427244 2. 96744 2. 643287 2. 044081 2. 788663 2. 228642  
3. 15365 2. 220351 3. 464552 2. 906385 4. 641195 2. 31934 3. 399546 3. 008205 2. 141834  
1. 551766 2. 583146 2. 810797 4. 182725 2. 071486 4. 041698 2. 725265 2. 741965 3. 44687  
2. 612743 1. 382302 1. 217979 2. 270639 2. 18256 3. 092902 1. 203822 2. 977511 3. 967167  
1. 297493 1. 918646 1. 511391 1. 551394 2. 251571 1. 424542 1. 264595 1. 720976 1. 327804  
1. 843847 1. 825813 2. 975935 3. 116614 2. 850798 1. 957756 2. 486646 1. 916967 2. 002507  
1. 843894 1. 128387 1. 640227 1. 732681 2. 050451 1. 770818 1. 416498 1. 229288 1. 15632  
3. 472692 2. 838428 1. 913488 2. 066987 2. 878284 3. 081721 2. 652671 2. 261388 2. 141795  
5. 369956 4. 267055 5. 654541 5. 515431 5. 52675 5. 552431 5. 580788 5. 915721 5. 409791  
5. 179908 5. 872995 5. 517339 5. 726667 5. 938144 5. 244328 4. 751125 5. 055155 6. 096745  
1. 876553 2. 550087 1. 947945 3. 169808 1. 319396 2. 148352 1. 831902 3. 928297 0. 988187  
0. 720448 0. 710257 1. 530281 0. 924292 1. 44137 1. 161155 1. 341089 0. 981627 0. 911761  
1. 578302 1. 552717 2. 100194 1. 853781 1. 080855 2. 553802 1. 590836 2. 008647 2. 036218  
4. 546087 3. 242972 2. 67959 3. 217888 4. 147372 3. 291474 4. 111807 3. 562736 2. 884849  
0. 88457 0. 91835 1. 134027 1. 525223 1. 063574 0. 949314 1. 058511 1. 227809 0. 91455  
4. 172385 2. 600111 1. 427996 2. 068013 1. 593214 1. 459096 2. 195466 1. 880026 3. 571353  
1. 033699 1. 449848 1. 288085 1. 244409 1. 165148 0. 92193 0. 968048 0. 787895 1. 50112  
4. 512221 4. 646628 5. 153104 3. 982371 4. 390484 5. 482755 4. 259187 5. 782656 5. 322742  
1. 694353 1. 325281 1. 410603 2. 040931 1. 54997 2. 515843 1. 051229 1. 499375 1. 876054  
1. 929429 1. 556826 2. 898318 2. 43726 1. 616012 2. 333651 1. 479278 1. 756949 2. 236311  
5. 350873 4. 929288 5. 081288 6. 474121 4. 797735 7. 082995 6. 009527 5. 705854 6. 925255  
2. 891821 3. 599706 3. 169624 2. 829211 3. 157732 2. 514598 3. 362212 3. 934986 2. 86588  
5. 161834 3. 707265 5. 087434 3. 960447 2. 932887 4. 668827 3. 624334 3. 855216 4. 3533  
5. 152361 5. 202218 5. 202417 4. 845628 4. 591949 3. 559631 6. 271425 6. 333827 6. 4177  
5. 808979 5. 756439 6. 857981 6. 98367 5. 474848 7. 494001 5. 594212 4. 888266 6. 16429  
1. 695164 2. 306577 1. 291137 1. 464597 1. 152535 0. 884682 2. 098632 2. 04497 1. 939658  
0. 544681 3. 002146 3. 293393 3. 324822 2. 915486 0. 87449 1. 226625 1. 705423 0. 947016  
2. 731701 3. 113785 2. 372848 3. 636978 2. 32037 2. 593914 3. 014828 2. 457603 2. 424067  
1. 864305 1. 699479 2. 73114 1. 412179 1. 906473 1. 508374 1. 618469 1. 937581 2. 40269  
3. 121865 3. 360914 4. 005134 3. 121865 3. 46025 3. 525185 3. 511681 3. 316939 3. 742595  
2. 698198 2. 999863 1. 649382 2. 100422 2. 163355 3. 256207 2. 26996 2. 491901 4. 25862  
7. 332877 7. 567051 6. 937141 6. 141179 6. 742111 6. 991991 7. 690459 7. 013352 7. 376831  
6. 02371 6. 517173 5. 932168 6. 19673 6. 195596 7. 019602 7. 025893 6. 48241 6. 382608  
1. 62755 1. 66753 1. 83159 1. 197312 1. 100411 1. 537785 1. 765723 1. 41114 1. 901125  
3. 157224 3. 569413 3. 101182 2. 987585 2. 680046 3. 334754 2. 66525 2. 842165 2. 467548  
7. 143654 6. 945506 6. 785052 6. 245825 5. 147218 6. 137513 4. 580171 3. 669639 3. 06526  
1. 46798 1. 193724 1. 750739 1. 350227 1. 043437 1. 24592 1. 646584 1. 455704 1. 194678  
3. 181536 3. 360598 2. 682769 2. 272532 1. 876618 1. 803746 2. 209894 2. 198864 2. 074425  
1. 981613 2. 788611 1. 982576 2. 086915 1. 994832 1. 961684 2. 292351 3. 011049 2. 93459  
1. 3051 1. 570863 1. 555386 1. 698988 1. 126235 1. 42715 1. 529326 1. 103863 1. 670956  
1. 406348 2. 706021 1. 321263 1. 374078 1. 579638 1. 69016 1. 121074 1. 252832 1. 638057  
2. 385749 2. 827177 2. 133048 2. 447345 2. 291503 2. 333287 2. 555676 2. 120965 2. 310501  
2. 268023 1. 475225 2. 580599 1. 896285 2. 082768 2. 083568 1. 97941 2. 351314 1. 757945  
2. 408885 2. 52566 3. 009551 2. 15093 3. 52008 1. 920507 2. 995663 3. 016213 2. 36154  
1. 747088 1. 235522 2. 256148 1. 351718 3. 578132 0. 81374 2. 476798 2. 509658 1. 228772

4. 559069 3. 59479 3. 346708 1. 607652 3. 140622 3. 32818 4. 183594 4. 269639 5. 179025  
2. 494069 1. 933117 1. 933268 1. 592578 1. 823429 2. 19816 1. 924598 1. 988477 2. 286842  
3. 456438 3. 5997 2. 527952 4. 043981 2. 254501 3. 644477 2. 641222 2. 927003 2. 977044  
2. 837807 3. 697305 3. 084746 3. 023515 2. 988865 2. 797053 3. 565387 3. 326652 3. 746477  
1. 181933 1. 78352 1. 100724 1. 757763 1. 54399 1. 562989 1. 239054 1. 2077 1. 183269  
2. 765311 2. 094167 2. 179189 2. 867659 1. 991628 2. 63672 2. 484289 2. 59425 2. 356518  
3. 386368 3. 088409 2. 979684 3. 780283 2. 977826 3. 239305 3. 362795 2. 925509 2. 850861  
4. 695748 2. 080911 1. 160748 2. 098895 2. 450308 2. 58502 2. 4558 2. 747798 1. 843314  
2. 357303 2. 082216 2. 327551 1. 491126 1. 960423 1. 645463 2. 421235 1. 930355 1. 725537  
0. 886198 1. 181001 1. 102396 1. 55897 1. 830762 2. 027165 1. 301739 1. 818089 1. 415859  
1. 214042 1. 538888 1. 512013 1. 416963 0. 91579 1. 028475 1. 444256 1. 460051 0. 944445  
7. 60998 7. 644741 7. 330415 7. 179956 7. 812543 7. 582393 7. 340889 7. 415342 6. 20804  
1. 414553 2. 604431 0. 989627 1. 30499 3. 135033 1. 947946 2. 21473 2. 941958 2. 429332  
2. 780929 2. 717064 2. 983439 3. 171348 3. 062656 3. 023478 2. 911419 3. 748628 3. 743567  
9. 308793 6. 814961 6. 505235 7. 802006 5. 979248 9. 166348 7. 257917 5. 695941 7. 286843  
1. 185203 1. 609042 1. 906342 1. 829807 1. 425853 1. 260467 2. 086012 2. 041599 1. 445346  
2. 365973 2. 659455 3. 112039 2. 929879 3. 019307 3. 403304 2. 971544 2. 394162 2. 111033  
4. 820385 6. 319231 4. 865631 5. 536965 5. 340232 6. 642326 6. 296136 4. 200789 7. 017921  
1. 993507 1. 431512 1. 519896 3. 091379 1. 856068 1. 373695 1. 616953 1. 276143 1. 619649  
0. 902498 1. 324815 0. 928408 1. 116337 0. 47362 0. 769816 0. 679806 0. 829091 0. 769816  
4. 215216 3. 251547 4. 113658 6. 190268 4. 169459 3. 470759 5. 396013 5. 069652 4. 645794  
6. 495564 6. 912655 7. 031975 6. 070105 5. 287031 5. 684478 6. 754794 6. 581547 6. 802963  
3. 034706 3. 373141 2. 036073 3. 133311 2. 708798 3. 501785 3. 489606 2. 208434 2. 46243  
1. 207829 1. 204695 1. 151954 1. 920262 1. 258814 2. 073745 1. 370074 1. 42637 1. 222789  
3. 31621 2. 744272 2. 974549 3. 513381 2. 557503 2. 773212 2. 205257 2. 753516 2. 830652  
10. 52725 10. 61763 10. 37142 10. 41103 10. 71815 10. 54127 10. 74995 10. 72209 10. 72865  
1. 472139 1. 845596 1. 63067 1. 629682 1. 750712 2. 394886 1. 857052 2. 805941 1. 788042  
4. 853542 3. 718415 2. 072365 6. 062742 4. 258034 5. 315742 3. 57145 2. 879308 2. 960732  
2. 88895 3. 0156 2. 111408 2. 552309 1. 917279 2. 229962 2. 402081 1. 789144 2. 164746  
2. 322642 2. 036759 2. 546248 2. 764016 2. 195718 2. 410843 2. 844772 2. 716629 3. 202449  
6. 155568 6. 156167 5. 872147 7. 342218 4. 927905 7. 695984 6. 563536 5. 704604 6. 990625  
3. 381627 2. 777617 3. 469012 4. 3482 3. 327551 4. 018386 3. 749554 4. 162306 4. 434083  
2. 045699 2. 793454 2. 030558 2. 090765 1. 924295 1. 34978 1. 840456 2. 127013 2. 016936  
1. 83477 1. 693716 2. 445882 2. 203179 1. 196817 2. 036537 3. 126877 1. 696074 2. 645409  
6. 595819 5. 978088 6. 370689 8. 123526 6. 312456 6. 12699 7. 316773 7. 11441 6. 638931  
1. 178623 1. 848177 1. 831683 1. 215866 1. 868377 2. 155984 1. 124373 1. 524733 2. 112818  
1. 743317 1. 489268 1. 405837 2. 230859 1. 846652 1. 380646 1. 644541 1. 112885 1. 508673  
2. 901503 2. 716723 3. 688241 3. 789281 3. 539362 3. 051235 2. 833342 2. 783775 4. 097726  
1. 365787 0. 579889 1. 497102 1. 868782 1. 592357 1. 963104 1. 605176 2. 354897 1. 592758  
3. 023644 3. 014568 3. 39321 2. 897433 3. 215476 3. 055273 2. 567032 2. 771139 2. 716133  
2. 433781 2. 14369 3. 514275 2. 347107 2. 637558 3. 351105 2. 438406 2. 718213 2. 552319  
2. 01685 3. 927869 3. 998837 2. 260066 2. 922235 3. 914594 2. 113829 1. 070771 2. 45806  
5. 077197 5. 231911 5. 06725 5. 517205 4. 024757 6. 055564 4. 75225 6. 124579 3. 111894  
2. 262164 1. 313164 1. 008582 1. 247403 1. 940797 1. 066276 1. 226806 1. 474702 2. 263106  
1. 878755 2. 911664 1. 605979 2. 092512 2. 423096 1. 971981 1. 589194 2. 173154 2. 056573  
3. 384417 1. 96834 1. 71791 3. 715456 2. 638654 2. 593538 1. 767156 3. 039511 1. 641605  
3. 977021 2. 2503 1. 661302 1. 985153 2. 311554 2. 194569 2. 630839 1. 957992 3. 312931  
1. 483789 2. 438241 1. 181322 1. 200189 2. 410802 0. 896435 1. 028209 0. 72459 0. 94188  
3. 680003 2. 774241 3. 616902 2. 909617 3. 505152 2. 731645 2. 552338 2. 766883 2. 142599  
2. 679835 3. 365964 3. 359829 4. 184574 3. 518688 3. 525416 2. 943671 2. 823918 3. 931345  
3. 365421 1. 3574 2. 42869 3. 488338 1. 093677 5. 256696 3. 152472 4. 141457 5. 311921

2. 61324 4. 011083 2. 885983 3. 177315 3. 862532 2. 830246 2. 731776 2. 926814 3. 20508  
1. 218194 1. 741001 1. 370393 1. 60187 1. 678552 1. 225856 1. 621255 1. 862355 1. 305462  
5. 67616 4. 134284 5. 144946 3. 864528 4. 451066 6. 012939 3. 726224 4. 326026 4. 737543  
2. 728977 2. 230595 2. 914957 3. 358635 2. 96253 2. 851973 2. 871557 3. 404065 4. 143524  
2. 248424 1. 251704 1. 219239 1. 791084 1. 682182 3. 002819 2. 610961 2. 549154 2. 918185  
1. 593036 2. 219696 1. 514637 2. 061201 1. 344207 1. 045873 1. 49908 2. 033286 2. 002127  
1. 788716 2. 063817 1. 86435 2. 023425 1. 245656 1. 23264 1. 350832 1. 377786 1. 759255  
6. 669143 4. 987759 5. 680908 6. 125822 4. 908279 5. 386677 5. 231867 4. 133497 3. 252293  
2. 079859 2. 868751 1. 915341 2. 229655 2. 919083 3. 821401 2. 155442 4. 023941 1. 86082  
2. 054347 4. 853414 2. 29666 2. 581884 1. 517302 2. 95772 2. 836278 3. 306371 2. 955646  
1. 283693 1. 096691 1. 970421 1. 819424 1. 361109 1. 184054 0. 980614 1. 549032 1. 935675  
5. 802243 4. 623539 5. 845679 5. 906331 5. 009169 5. 96796 4. 760849 6. 291308 6. 178321  
3. 227114 2. 834883 3. 170053 2. 750592 3. 225028 2. 444261 2. 914856 3. 201 2. 692886  
1. 520736 2. 449882 1. 633397 2. 266791 1. 442934 2. 948214 2. 029918 2. 451978 1. 406407  
2. 276162 2. 10896 2. 27629 1. 504877 2. 152692 2. 489782 2. 099732 2. 71814 2. 017208  
0. 965519 1. 514987 1. 030311 1. 330454 1. 308352 1. 524249 1. 143054 1. 524316 1. 491771  
1. 939459 1. 349324 1. 838815 2. 304308 2. 75579 3. 732426 2. 253046 2. 745627 1. 929478  
2. 621933 2. 17415 1. 95824 1. 622744 2. 429482 2. 121181 2. 387434 1. 860113 2. 687254  
4. 104683 4. 119735 3. 094424 2. 275475 3. 683114 2. 918896 3. 822363 3. 985233 4. 241202  
1. 367234 1. 34417 1. 944686 2. 281462 1. 080509 1. 504343 1. 449539 1. 726276 2. 204997  
2. 000395 2. 649713 1. 490778 1. 580434 1. 502017 2. 285511 1. 661216 2. 10601 1. 183678  
2. 193608 1. 345395 1. 19684 3. 307637 1. 612744 2. 461856 2. 178228 1. 535118 2. 022298  
2. 397015 4. 339536 3. 17547 2. 529156 2. 045193 1. 540095 1. 721806 2. 745249 2. 309527  
1. 544775 2. 580201 2. 243505 1. 955976 2. 395641 2. 086326 2. 09826 1. 80916 2. 212469  
2. 178236 2. 451621 2. 441245 2. 800367 2. 260278 2. 711306 2. 233034 2. 370284 2. 675657  
4. 291974 4. 35189 4. 788029 4. 115603 4. 565873 4. 243411 4. 581092 4. 983975 4. 366759  
1. 637723 2. 04452 1. 864746 2. 15684 1. 820005 1. 941848 1. 757346 1. 764774 2. 139793  
2. 965137 2. 27523 1. 70498 2. 235378 2. 021834 2. 243008 3. 138174 2. 419814 1. 760763  
3. 461816 3. 063943 3. 00543 2. 997818 3. 033434 2. 953139 3. 599213 3. 711614 3. 828307  
1. 795716 1. 974596 2. 142155 2. 179721 2. 45105 1. 381163 1. 284725 2. 469942 1. 531043  
1. 611045 1. 743207 1. 762114 1. 77848 1. 885419 1. 815717 1. 81174 2. 131554 1. 652035  
4. 053382 5. 87682 5. 942126 6. 233477 4. 75504 5. 740234 6. 145238 5. 339846 5. 83076  
3. 540718 4. 001103 1. 250233 2. 642682 5. 35676 4. 179203 4. 040465 3. 099939 4. 623617  
5. 735955 3. 031089 4. 669614 5. 550074 3. 004145 6. 687601 3. 985401 2. 802251 4. 144693  
4. 630481 3. 545234 2. 780091 4. 836776 3. 575527 3. 789425 2. 886864 4. 749119 3. 731104  
1. 027858 1. 57827 2. 419024 2. 358356 1. 872773 2. 651262 2. 536187 1. 674683 1. 6828  
3. 263769 3. 203833 3. 592984 3. 232912 3. 565496 4. 217466 3. 503223 4. 091895 3. 892835  
4. 276511 4. 016868 5. 015862 4. 142988 4. 570436 6. 10528 4. 784125 3. 886841 3. 782008  
1. 289345 1. 529168 1. 386423 1. 594564 1. 516617 1. 6439 2. 116129 1. 405552 1. 554294  
2. 320335 4. 06558 2. 129404 5. 037235 3. 800529 2. 359037 2. 168298 2. 51882 1. 648617  
2. 965991 3. 049364 3. 559543 4. 541705 3. 547677 3. 867943 2. 953741 2. 837524 4. 2561  
2. 456511 2. 259069 2. 381654 1. 341182 2. 368148 3. 051981 2. 660492 1. 969982 2. 409471  
1. 380465 1. 028171 0. 757195 1. 010254 1. 318242 1. 585271 1. 334815 1. 284844 2. 404877  
2. 940877 2. 783848 3. 117898 3. 582204 3. 903623 4. 289193 3. 413776 3. 287544 4. 340974  
2. 766757 2. 220663 2. 351914 3. 04855 1. 608342 2. 551876 2. 22349 2. 283333 2. 013803  
4. 438687 3. 826243 4. 097682 3. 84601 3. 772033 5. 430542 4. 391266 3. 631596 4. 560304  
3. 189889 3. 494683 3. 220351 3. 400464 3. 534931 3. 341776 2. 978744 3. 330764 3. 21592  
0. 911611 0. 893281 1. 300399 1. 080481 1. 133074 1. 74053 1. 013185 2. 068242 0. 818865  
1. 195373 1. 235171 0. 645943 1. 345331 0. 68312 1. 127831 0. 921201 1. 379138 1. 365864  
3. 042613 3. 817694 2. 994656 2. 957612 3. 478399 3. 756224 2. 975684 3. 250244 2. 764317  
2. 593598 2. 04097 2. 566159 2. 802724 2. 481448 2. 213737 2. 306602 2. 580381 3. 117375

1.042142 1.31049 1.009034 1.916147 1.19584 1.024767 1.257028 1.131531 1.840278  
4.855693 5.212393 5.797285 1.35499 4.523411 4.238633 6.307632 2.570698 4.669838  
3.799484 3.599398 3.34247 3.279634 3.117288 3.260025 3.034994 4.952969 3.44402  
2.352947 1.458197 1.742501 2.01231 1.329192 1.304068 1.605782 1.373989 2.435211  
1.509732 1.103082 0.866834 0.865506 2.087194 1.165166 1.255857 1.264749 1.180113  
1.696872 1.734339 1.881869 2.050424 1.691562 1.295589 1.038072 1.216892 1.715795  
1.584119 1.981554 1.50118 1.617347 1.818662 1.627218 1.312338 1.376707 1.047572  
1.904379 1.112169 1.85135 1.999272 1.670381 2.762344 1.322129 1.331986 1.682139  
1.055061 2.540901 1.327703 1.842867 1.274598 1.155801 1.328654 1.17426 0.915539  
2.363717 3.867192 2.395991 3.688979 3.262082 3.87024 3.274108 2.056945 2.751909  
3.828877 3.697833 3.150381 3.376057 2.448965 3.719644 2.968402 3.403642 3.445685  
2.612888 2.822528 2.140435 3.090191 2.650361 2.673332 3.147255 3.878245 2.671178  
4.575209 5.519605 5.77975 5.751959 5.600575 5.708357 5.94456 5.18673 4.677582  
3.323668 3.170732 4.046308 3.115746 3.409058 3.012584 2.954802 2.767243 3.025906  
2.719494 3.093158 1.842997 2.185777 2.090832 2.566978 2.147615 2.401277 1.840973  
2.40704 2.466456 2.744871 5.390649 3.42389 4.626341 2.411162 3.996 3.695041  
8.662635 8.688617 8.704837 8.906726 8.42844 8.729373 8.434778 8.636705 8.381429  
2.852243 1.990771 2.831776 2.541407 3.39442 2.910565 2.299625 1.762594 2.623042  
4.215893 3.646997 5.136113 4.44006 4.182315 5.02314 3.692147 4.152733 5.533216  
1.346406 1.995341 2.270946 1.928327 1.707461 2.278498 1.961804 4.812468 2.596214  
1.767795 2.489135 3.091016 3.776617 3.536456 2.056711 1.815583 3.379412 2.191487  
1.00967 2.035782 1.813801 3.834951 2.837985 2.224735 1.128631 1.719399 1.925977  
2.085857 3.106244 2.868434 2.685818 3.313201 1.52534 2.772516 1.809741 1.823916  
1.197568 1.429308 1.483699 1.76979 1.443752 1.237182 1.223941 2.617122 1.937721  
2.558711 2.922258 2.626417 2.717558 2.416547 2.633381 2.932784 3.238801 2.521663  
2.669718 3.780765 4.138258 3.015287 2.742958 2.264131 3.63561 3.879443 2.428736  
0.701078 2.023106 0.958754 1.502245 2.179233 1.235951 1.581237 1.724328 1.888216  
3.625944 3.396908 3.793568 3.143096 2.648074 3.416525 3.208078 2.976831 2.571394  
2.264663 1.881976 2.336242 2.424595 1.806533 2.011253 2.146328 2.598632 1.895747  
2.031752 2.614684 2.09562 2.977194 2.31628 1.843371 1.794861 1.629021 1.489478  
1.667641 1.44541 1.32042 1.633719 2.24504 1.621861 1.477777 1.196708 1.096843  
1.694174 1.811296 1.520781 1.78826 1.765481 1.388351 1.304697 1.35857 1.631902  
2.635028 3.399293 3.645017 3.668489 3.280839 3.446476 3.337439 3.82019 3.157603  
1.644992 2.114356 0.949633 1.301605 2.093385 2.064548 1.426306 1.422664 1.072027  
1.122043 1.064921 1.365084 1.284777 1.335934 2.630164 1.606701 1.074494 1.433656  
1.925933 2.465927 2.126757 2.187328 2.846868 2.0999 1.976606 2.212274 2.395495  
1.651278 2.048111 2.031618 1.757154 2.354954 1.67933 1.997291 2.734638 2.38679  
1.686528 2.388708 1.8702 2.349074 1.921044 2.243121 2.018001 2.005949 1.904029  
6.518185 7.226464 5.794256 8.428548 5.4849 4.221856 7.017438 6.977154 5.402845  
2.314823 2.933667 3.818555 3.749818 3.454935 3.520235 3.492495 3.79296 3.052811  
1.583358 0.791865 0.835832 1.399788 0.696888 0.709997 1.013432 0.888683 0.982506  
5.59111 5.180359 5.61011 4.862455 4.756092 4.107547 3.922521 5.883999 5.090855  
1.499404 3.092628 1.774666 2.438318 2.049429 2.217933 1.768487 3.453545 1.625154  
7.25025 6.036545 7.596173 6.773931 7.236386 7.382839 7.080066 7.198216 7.033775  
4.43575 2.433667 3.674783 5.101649 3.167167 2.21896 1.703836 1.650072 2.221506  
1.997142 1.736174 1.423042 2.177037 1.451431 1.370668 1.230182 1.606702 1.081702  
1.567066 0.787544 1.036305 0.736998 0.96338 1.249807 2.075988 3.838743 3.004466  
1.412359 1.091105 2.18874 1.225816 1.45917 1.535666 1.168603 1.680078 1.293069  
2.364612 1.799117 1.852587 2.381647 2.918056 2.698206 2.270974 2.860109 2.451945  
2.950364 3.946754 3.502957 4.439591 3.228622 3.37654 2.931436 3.25211 3.617862  
1.877645 1.443775 1.461612 1.432626 2.518006 1.220953 1.666978 1.499532 1.578306



1. 186719 1. 537874 1. 075595 1. 534588 1. 319004 1. 503707 1. 25855 1. 401044 1. 583098  
3. 951499 3. 33257 3. 308419 3. 601361 2. 181878 3. 246462 3. 237042 1. 995148 2. 418828  
1. 204709 2. 956988 1. 598206 1. 083089 1. 293271 2. 325565 1. 332077 2. 126691 1. 737018  
1. 38769 1. 694636 1. 36324 1. 073466 1. 309416 1. 465212 1. 168109 1. 240254 1. 5382  
1. 465264 1. 470163 2. 202501 2. 178135 1. 65504 2. 205668 2. 506696 2. 188703 2. 539152  
3. 125482 3. 015899 3. 329894 4. 56699 2. 892431 3. 924083 2. 554384 2. 724898 3. 592201  
1. 267172 0. 943512 1. 192432 2. 2724 1. 100102 1. 921273 1. 408716 1. 465709 1. 701555  
1. 763712 2. 322496 1. 50094 1. 522825 2. 407803 1. 879493 2. 659794 3. 335119 3. 649061  
1. 02733 1. 517504 1. 542581 1. 234984 1. 114409 0. 918119 2. 550745 1. 746876 1. 318482  
1. 007018 1. 292026 1. 002822 1. 22015 1. 329888 1. 632718 0. 883112 1. 495686 1. 359786  
3. 517312 4. 202138 4. 044377 3. 604198 4. 390431 3. 723989 3. 311492 4. 478259 4. 536542  
1. 86716 2. 304658 2. 285866 2. 342714 2. 599724 1. 954298 2. 028772 2. 85409 2. 442426  
0. 814071 1. 719019 0. 736895 0. 731755 1. 096213 1. 320218 0. 997826 1. 752497 0. 967941  
1. 333333 1. 337946 0. 963076 1. 679993 0. 915144 2. 101034 1. 302147 1. 254381 1. 379377  
0. 949803 1. 493695 0. 755972 1. 527463 0. 948843 1. 17617 0. 89951 1. 075931 1. 46762  
1. 368791 1. 664243 1. 222477 1. 098129 1. 575393 1. 031328 1. 241361 1. 139049 1. 37479  
3. 46796 1. 615559 1. 946616 2. 462045 1. 328852 1. 694531 1. 70415 2. 048495 1. 318589  
1. 251744 2. 010107 0. 815579 1. 258968 1. 563342 2. 267521 1. 649446 1. 901326 1. 215135  
2. 637593 2. 53799 1. 734271 2. 673531 2. 455494 2. 137796 1. 790194 2. 383852 1. 999503  
2. 232662 2. 211573 2. 201703 2. 784248 2. 521484 2. 108173 2. 196477 3. 256151 1. 993301  
2. 860431 2. 375769 2. 689491 2. 297903 2. 846048 3. 075386 2. 674856 3. 780229 2. 276798  
5. 533691 4. 771701 5. 700832 6. 200267 5. 612092 6. 205836 5. 539897 4. 89687 5. 734432  
1. 863311 1. 853096 2. 102544 2. 980118 1. 690566 2. 161047 1. 968388 1. 556326 2. 258955  
1. 261995 1. 260783 1. 820405 1. 730474 1. 404274 1. 17218 1. 732288 1. 728376 1. 420938  
0. 97095 1. 177932 1. 388633 1. 223609 0. 947757 1. 138719 1. 41874 1. 071037 1. 025299  
1. 604581 1. 834468 2. 379522 1. 323447 1. 993352 1. 584291 1. 702037 1. 267246 1. 644828  
2. 837381 2. 08581 2. 217816 1. 658975 2. 786483 2. 868218 3. 277787 2. 839099 2. 060202  
2. 27248 2. 217895 1. 732376 2. 199091 1. 825636 1. 97541 1. 435292 2. 710162 2. 426822  
3. 543251 3. 328133 2. 73486 3. 668071 1. 904431 3. 501024 4. 267197 3. 082138 2. 888259  
2. 742088 2. 220073 3. 683907 1. 930856 2. 465382 2. 576979 2. 371061 2. 781809 3. 053033  
1. 425413 1. 491417 1. 635621 1. 987703 0. 863699 1. 088804 1. 580209 1. 073375 1. 577892  
5. 18194 2. 854389 4. 290068 4. 15517 3. 902582 5. 619071 3. 735538 3. 797 2. 685632  
1. 39707 1. 611218 1. 957419 2. 138764 1. 174304 1. 761619 1. 926032 1. 765206 1. 61752  
2. 730832 2. 773711 2. 674913 3. 679225 2. 895139 3. 094085 2. 947166 2. 899539 2. 714868  
4. 893357 4. 892749 5. 940557 6. 084551 5. 790862 3. 421654 6. 50312 5. 83373 5. 29772  
6. 205089 6. 926056 6. 749495 6. 391006 6. 341469 6. 666924 6. 639033 6. 569477 6. 468864  
2. 136266 2. 233688 2. 819064 3. 109016 3. 674067 4. 543698 2. 290285 3. 04012 2. 796892  
1. 393407 1. 879241 1. 757957 2. 024346 1. 256364 1. 404465 1. 445289 1. 376285 1. 667122  
1. 122945 1. 803668 1. 032711 1. 288991 1. 192101 1. 569226 1. 942637 1. 544748 1. 102561  
1. 330549 1. 296453 1. 616083 1. 341974 1. 536354 1. 369701 1. 437581 1. 423683 0. 935444  
0. 961203 1. 153948 1. 242262 1. 1262 1. 36586 1. 065442 0. 915092 1. 076676 1. 321865  
1. 349258 1. 056944 1. 597068 1. 167586 1. 463763 1. 327994 1. 256744 1. 173539 1. 359534  
3. 188458 3. 2342 3. 205275 2. 312803 3. 724373 4. 528361 3. 107755 2. 535163 3. 349  
5. 886855 4. 137286 4. 782213 3. 768346 3. 099268 5. 287437 4. 171889 2. 958026 2. 892872  
2. 956279 4. 082707 4. 497133 4. 11587 1. 822371 3. 719584 5. 337583 3. 257549 2. 738231  
5. 606215 5. 390288 6. 741834 6. 420539 5. 178173 5. 213835 5. 735434 5. 780062 5. 864839  
8. 195256 8. 060479 8. 195899 8. 457932 8. 169031 8. 327077 8. 592968 8. 644367 8. 804777  
1. 730191 2. 095475 1. 644322 2. 316398 1. 732713 1. 59157 1. 635706 1. 642373 1. 577851  
5. 079824 7. 257504 7. 759779 7. 746437 7. 715761 3. 978579 6. 231574 4. 816713 4. 419899  
8. 709251 9. 107926 8. 788375 8. 815794 9. 157661 8. 569437 9. 125798 8. 684376 8. 800508  
1. 327264 1. 226962 1. 788246 1. 273382 1. 752026 2. 208944 2. 522351 1. 306596 1. 870306

3. 359626 3. 157801 3. 656895 2. 665391 2. 702526 3. 020536 3. 717389 3. 40735 3. 124729  
1. 735339 2. 0269 1. 869293 1. 845189 1. 437086 1. 839457 1. 7722 2. 29233 1. 911347  
1. 091109 3. 164248 3. 983474 2. 496497 2. 829573 1. 601139 1. 784592 1. 015884 1. 757596  
1. 476993 1. 088471 2. 462886 0. 519775 0. 956389 2. 351983 1. 460352 3. 726063 1. 57525  
2. 470141 2. 945489 3. 02334 2. 311895 2. 169161 3. 161427 3. 87926 2. 121244 2. 369538  
4. 025371 2. 667782 2. 68247 1. 951274 2. 475828 2. 553864 1. 734669 1. 972606 1. 788328  
1. 68488 1. 7033 1. 526707 1. 519038 2. 320034 1. 54206 1. 322333 1. 968291 1. 213641  
1. 503088 1. 507958 1. 368647 1. 508498 1. 758057 2. 040845 1. 159525 1. 538944 1. 077564  
1. 772602 2. 185688 1. 568928 1. 508888 1. 557892 1. 973553 1. 516641 0. 791925 1. 214056  
2. 472629 2. 5022 2. 69697 2. 50166 2. 12127 2. 673752 2. 293779 2. 412695 2. 574595  
4. 222966 5. 871306 4. 696124 4. 462469 4. 159115 4. 271919 5. 070467 3. 930909 4. 165108  
2. 757965 1. 636012 1. 895471 2. 614565 2. 865549 1. 875253 2. 649105 2. 189953 2. 06997  
3. 585738 3. 68854 3. 486291 4. 111643 3. 626955 3. 568039 3. 65179 3. 927479 3. 461877  
1. 296821 2. 396597 2. 24732 1. 756605 1. 661336 1. 145362 2. 358689 2. 549307 2. 059141  
1. 673706 1. 35416 1. 646764 1. 057433 1. 398015 2. 133832 0. 973191 1. 523857 1. 478655  
1. 246602 1. 56816 1. 082134 1. 451167 1. 103993 1. 021786 1. 087719 0. 826362 1. 228239  
3. 701006 3. 807522 5. 45264 5. 39186 4. 055434 4. 095022 3. 631666 3. 561254 3. 717165  
1. 293716 0. 743233 1. 84224 1. 158389 0. 976868 1. 575773 1. 213867 1. 399655 2. 346472  
1. 893239 1. 56803 1. 584995 1. 525663 1. 067136 1. 39213 1. 062652 2. 238376 1. 874916  
5. 716973 8. 004376 6. 53542 4. 655969 6. 365228 4. 303786 5. 137158 6. 693806 4. 49578  
0. 986851 1. 162723 0. 985766 1. 435413 1. 674335 0. 992604 1. 302237 1. 262129 1. 000836  
1. 90547 1. 489345 1. 492615 2. 132819 2. 348114 2. 005822 2. 171675 2. 451167 1. 97945  
2. 767445 3. 107664 3. 095534 3. 450164 3. 083314 4. 246454 3. 075649 3. 161435 3. 279056  
2. 113211 2. 117946 2. 245101 3. 262038 1. 682091 2. 226128 1. 565236 2. 138777 1. 974546  
2. 443539 1. 829744 2. 602151 3. 475974 2. 945893 2. 950068 2. 655812 2. 295889 3. 345803  
1. 982046 1. 862761 1. 919154 2. 451889 2. 591189 2. 132171 1. 742858 1. 483336 2. 095601  
2. 565588 2. 378228 2. 942291 3. 896376 3. 502352 3. 467706 2. 656695 3. 470374 2. 873907  
1. 214221 1. 680384 3. 080014 2. 130887 1. 907497 3. 078179 1. 820242 2. 527174 2. 972541  
1. 670425 1. 59935 1. 712204 2. 066126 1. 997527 2. 334693 2. 879935 1. 768907 2. 461597  
1. 800764 2. 297815 2. 296346 2. 072116 1. 979685 2. 456013 2. 016652 1. 894561 2. 002248  
3. 200939 3. 270604 3. 716727 4. 75108 3. 6228 3. 096519 3. 703175 3. 292613 4. 350407  
1. 573689 1. 966205 1. 706069 1. 999642 1. 395008 2. 282344 1. 800262 2. 070728 1. 44117  
1. 381264 1. 090787 1. 477556 1. 892158 1. 064131 0. 965558 1. 594819 1. 980028 1. 401473  
2. 513512 2. 077087 2. 18147 3. 029238 2. 492616 2. 191333 2. 796378 2. 005195 2. 123091  
4. 614694 4. 088745 4. 196878 4. 539358 4. 764953 5. 480974 4. 867836 3. 422399 4. 252385  
0. 488866 3. 94557 2. 661073 2. 638157 3. 503315 3. 233737 3. 662955 3. 461005 5. 338263  
1. 636464 1. 443516 1. 334348 2. 529274 1. 432029 1. 819063 1. 853897 1. 518169 1. 441587  
5. 578349 3. 861765 3. 418005 5. 0392 3. 794721 4. 68365 2. 959551 2. 81566 1. 791161  
2. 554789 3. 638128 3. 331331 2. 437136 2. 625432 4. 697701 4. 164602 2. 670218 3. 83332  
8. 368518 8. 124079 8. 404034 8. 175404 8. 294234 9. 227089 8. 79822 9. 267534 8. 989438  
7. 84107 7. 272843 7. 316204 6. 92396 7. 375339 7. 249677 6. 372048 5. 878465 5. 629731  
1. 25162 1. 339424 1. 35001 1. 421454 1. 224138 1. 296538 1. 300904 1. 279603 1. 071267  
3. 642434 3. 527034 2. 462063 3. 326298 3. 778574 2. 266598 3. 716531 1. 989716 4. 297348  
0. 790598 1. 114847 1. 243791 1. 531354 1. 194968 1. 525644 1. 158604 1. 607561 1. 60067  
0. 869714 1. 614662 2. 66114 1. 372658 2. 849566 1. 252292 2. 214879 2. 349727 2. 043224  
1. 489427 1. 55795 1. 517016 1. 255177 2. 095324 1. 107275 1. 046718 1. 040351 1. 573527  
1. 510065 1. 694011 1. 388725 0. 883015 2. 024782 1. 232435 1. 503278 1. 25896 1. 49157  
0. 85517 1. 167839 0. 657299 1. 133495 1. 417072 0. 869162 0. 828109 1. 504445 1. 81965  
1. 494305 1. 712248 3. 29903 2. 380328 1. 209818 1. 692794 1. 595971 1. 801873 1. 546437  
1. 344754 1. 174188 1. 875865 1. 57024 1. 02375 0. 987814 0. 843046 0. 968423 1. 295789  
1. 850039 2. 482426 3. 163501 3. 474128 2. 321122 2. 586769 1. 734254 2. 160221 4. 187599

0. 893565 1. 431479 1. 500456 1. 289236 1. 099575 1. 471134 1. 147198 1. 252889 1. 394293  
2. 391473 2. 333506 1. 855636 1. 448835 1. 282381 0. 675979 1. 15536 1. 290486 1. 134672  
3. 45033 4. 848903 4. 603171 2. 386809 2. 206617 3. 551175 1. 928389 2. 328468 2. 268798  
3. 503896 3. 062791 1. 36743 2. 015042 1. 85526 1. 879558 1. 517116 1. 747774 2. 508857  
1. 286981 1. 54846 2. 888606 2. 220425 0. 574367 0. 756067 1. 134599 1. 44881 1. 077175  
1. 521318 0. 649201 1. 457073 1. 629203 0. 79847 0. 725826 1. 776858 2. 485124 1. 138496  
2. 995576 1. 087537 1. 326981 1. 445756 1. 353851 0. 615834 0. 740722 1. 688013 1. 152755  
1. 186699 1. 663173 1. 067147 1. 010199 1. 138713 1. 869228 2. 075045 3. 40138 0. 974806  
0. 820677 1. 061849 1. 299747 1. 167099 1. 177821 1. 691199 1. 150319 1. 693042 1. 744091  
1. 386758 2. 413654 2. 295191 2. 671114 2. 35024 1. 320301 1. 141828 2. 476933 3. 598231  
1. 294577 1. 538083 1. 436097 0. 980889 1. 807035 1. 232518 1. 299736 1. 840037 1. 091906  
1. 386707 2. 412798 1. 211852 2. 718867 1. 149563 1. 866568 1. 802913 1. 442028 1. 181034  
2. 01089 1. 992946 1. 403605 2. 796998 2. 048409 1. 721438 1. 785403 1. 682863 1. 759712  
1. 416297 1. 633529 2. 369054 1. 575524 1. 276673 1. 56273 1. 533294 2. 403839 1. 823356  
0. 754384 1. 310253 0. 494334 2. 108873 0. 755322 1. 078167 0. 804965 0. 904672 1. 097874  
2. 179172 1. 892206 2. 10896 1. 750879 1. 314319 2. 290982 2. 00934 1. 455668 2. 144103  
1. 158546 1. 017657 1. 150225 1. 119231 1. 143152 1. 084385 1. 235405 1. 46257 1. 181715  
0. 504725 0. 770621 0. 726807 0. 840799 0. 726686 0. 994667 1. 476658 0. 88387 0. 759638  
1. 676539 3. 704796 2. 509483 2. 040507 2. 979049 2. 025403 2. 327021 1. 837122 1. 781645  
1. 042847 1. 00163 1. 006444 1. 458113 1. 732353 1. 240488 1. 233777 1. 358001 0. 737744  
0. 689535 1. 487345 1. 240611 0. 59955 0. 761635 0. 533287 3. 151367 1. 577528 1. 399075  
1. 703627 1. 412305 1. 235603 1. 668212 1. 345511 2. 3842 1. 668554 1. 55225 1. 321004  
1. 387397 1. 42542 0. 874399 1. 801112 1. 441901 1. 41564 1. 190956 1. 188941 1. 596386  
1. 305756 1. 899708 1. 511133 1. 371699 2. 208565 1. 034274 2. 354457 2. 83249 1. 398229  
1. 791082 2. 557693 1. 614608 1. 918391 1. 592025 1. 611608 2. 28826 2. 049322 1. 336266  
2. 172898 2. 439866 1. 50677 2. 118428 1. 635015 1. 81504 1. 526268 1. 471086 2. 183193  
1. 820593 1. 494393 1. 475618 1. 71558 1. 288945 1. 635656 1. 877338 3. 972138 2. 11263  
1. 204833 0. 919384 1. 215619 1. 502585 0. 97165 1. 529716 1. 167232 0. 981127 2. 852456  
1. 840779 0. 982117 1. 234406 1. 269132 1. 072255 1. 0793 1. 054176 1. 581162 1. 670234  
1. 126139 1. 184825 0. 968248 1. 297401 1. 755317 1. 407579 0. 894488 1. 506176 2. 007896  
0. 983873 2. 20264 1. 380026 2. 410883 1. 778245 0. 960826 1. 493355 1. 9081 1. 319313  
1. 569442 1. 266252 1. 531254 1. 826697 1. 146833 2. 04672 1. 931765 0. 90616 1. 161698  
2. 306492 2. 236776 1. 268763 1. 719933 1. 34952 2. 299693 0. 884969 1. 095947 1. 911067  
2. 413405 2. 258946 2. 530241 2. 663141 2. 401742 2. 156142 2. 488267 2. 560673 1. 954323  
2. 119504 1. 194229 1. 680883 1. 428715 1. 487477 1. 629277 1. 715946 1. 853184 1. 884533  
1. 37659 3. 003557 2. 437875 1. 985971 2. 521887 1. 902151 2. 33081 2. 528317 2. 694228  
2. 481041 2. 298026 2. 784516 2. 439743 2. 339961 2. 65997 2. 612714 3. 321031 2. 115344  
1. 030699 1. 156363 0. 99181 2. 208475 1. 131734 1. 625442 1. 628117 1. 010714 1. 659531  
2. 811287 1. 95008 1. 973532 1. 738695 1. 85214 1. 834659 2. 285956 2. 126785 1. 613611  
1. 966559 1. 540624 1. 9641 1. 825854 1. 519685 1. 483296 1. 322754 1. 472183 1. 417064  
2. 725239 3. 087138 2. 24687 2. 588043 2. 487268 2. 686871 2. 873062 2. 243246 2. 637708  
1. 213587 1. 593231 2. 056419 2. 283776 1. 866177 2. 621083 1. 786964 2. 710314 1. 434395  
1. 260223 1. 882617 1. 341856 1. 792597 1. 617568 1. 460743 1. 78863 1. 2942 1. 283243  
1. 047635 1. 554475 0. 63595 1. 132236 0. 732912 2. 170756 1. 003711 0. 895999 1. 728737  
2. 073316 1. 468945 1. 754717 1. 890994 1. 727629 1. 593058 1. 432309 1. 689549 1. 800004  
1. 380869 1. 60514 0. 967399 1. 578196 0. 706861 1. 546633 1. 169665 1. 909047 0. 907945  
1. 72851 1. 413687 1. 768751 2. 899776 1. 002858 1. 40361 1. 706762 1. 4356 1. 250888  
2. 719404 2. 36462 3. 399071 3. 012703 2. 745776 2. 870916 2. 678411 3. 66257 2. 774484  
1. 616542 1. 944623 1. 176333 1. 704249 0. 696688 1. 079719 0. 898177 1. 467644 1. 158176  
1. 28582 1. 1788 1. 20192 1. 214925 1. 584263 0. 951423 2. 13988 0. 975314 0. 882609  
1. 268915 1. 283416 0. 977718 1. 768986 1. 064883 1. 349303 0. 964421 1. 340311 1. 217405

0.928347 1.328019 0.765016 1.178871 1.192056 0.817642 0.835823 0.588776 0.889322  
3.494679 1.03775 0.798883 0.806409 1.041871 3.584044 0.874623 0.717534 2.466403  
0.828298 1.366831 1.124789 1.925089 1.25599 1.653373 0.732377 1.701204 1.633839  
1.089041 1.24238 1.068686 0.741893 0.45873 0.984428 1.139936 1.101484 1.741207  
1.736452 2.13788 1.207834 1.945299 2.00736 2.010545 1.921413 2.221249 1.810464  
1.774092 1.59069 1.376401 2.032232 0.971145 1.601271 2.332488 1.789379 1.821674  
1.372592 1.56311 1.534193 0.987532 1.036133 1.086529 1.271692 1.005551 1.421425  
1.471211 1.51923 0.904786 1.846361 2.531812 0.901922 2.030612 1.151963 1.343397  
2.568492 3.472142 2.156326 3.872365 2.405255 2.030599 1.807016 2.390841 1.344229  
1.496239 1.136388 1.178594 0.866556 1.19552 1.427865 1.159746 1.399451 1.293042  
2.580249 3.628997 2.194057 2.163127 3.191798 3.661132 2.616519 2.86424 1.841233  
2.40362 0.671472 0.91156 2.079821 0.75989 6.266661 0.940057 1.438678 1.113711  
1.205846 1.049033 1.298049 1.548482 0.96338 1.438908 0.842686 1.658411 2.568918  
1.992574 2.171309 1.552609 1.987996 1.722829 2.199535 1.759411 1.934781 1.316906  
3.184469 2.991507 2.288997 2.907825 2.968828 2.074306 1.911185 2.295768 3.135505  
2.587495 1.75893 1.948516 3.306402 1.846076 1.97933 2.535157 0.941865 2.20733  
1.787625 1.752421 1.793599 1.774609 1.914036 1.764085 1.865986 2.266207 3.008348  
2.793898 2.64001 5.371258 3.837509 3.757326 3.703613 3.257701 2.8948 3.415287  
2.057473 1.068001 1.152412 1.27829 1.472056 1.644357 1.601883 1.481728 1.135842  
0.948125 1.329784 1.257484 1.15609 1.000476 1.655584 1.013512 1.446627 1.756809  
0.774024 1.36582 1.260769 1.736268 1.177716 1.228332 1.41364 1.437982 1.0159  
4.079184 1.693437 1.838536 3.300932 3.49515 3.386739 3.495202 2.181346 2.896161  
2.19265 1.872522 1.739868 2.616639 1.842399 2.491733 2.332526 2.221853 2.502618  
2.864649 3.053725 2.98334 2.084192 2.358848 2.417059 2.614876 3.366979 1.708815  
1.381964 1.34098 1.404979 1.888636 1.183766 2.058881 1.62905 1.944548 1.653304  
0.921328 0.926553 1.399968 1.13431 2.084023 1.344743 0.735235 0.878875 0.748557  
1.574524 2.321393 2.411445 1.805503 2.316424 1.905515 1.514282 2.074319 1.781974  
1.564861 1.45229 1.277676 1.323152 1.492222 1.982268 1.254172 2.673629 1.321387  
2.025344 1.644202 2.859855 1.684838 1.767574 2.451982 1.963171 1.86678 1.854733  
2.145688 1.865551 1.487445 2.668951 1.756963 2.216903 1.437492 1.864325 1.809952  
1.891961 1.332285 1.849035 1.349828 1.751346 1.667336 1.820634 1.924191 2.299428  
1.015649 1.645083 1.242851 1.826552 1.335576 1.187424 1.029255 1.286387 1.359028  
2.818583 2.054976 2.064881 2.058852 3.125793 3.836956 2.460626 3.329814 3.165497  
1.620699 2.224022 1.655455 1.198087 1.2972 1.420153 1.929909 2.228387 1.514019  
1.337407 1.838975 1.611557 1.123325 1.77605 1.351349 1.229591 1.760815 1.905404  
1.502628 1.973703 1.71223 1.991484 1.251804 1.526419 2.131379 1.41204 1.341298  
1.550025 1.726374 1.872608 2.904903 1.721423 2.475707 1.719181 1.65963 1.826222  
5.178365 4.508704 3.235828 3.144545 3.901906 3.543996 2.945187 4.569963 3.902295  
6.19569 4.673799 5.506344 5.723834 5.644964 6.929168 6.472205 6.307437 6.148747  
3.33646 2.56233 3.384717 2.448451 2.321907 2.446615 2.340028 2.30208 2.307583  
1.95111 1.524323 1.582116 2.93499 1.828591 2.192211 1.329639 2.38936 1.346332  
1.891632 1.375596 1.814479 1.972456 1.682399 2.218518 2.48155 1.360211 2.531019  
3.408212 3.158769 3.574437 2.958615 3.330903 3.175119 3.187199 3.542608 4.089343  
1.422268 0.908782 0.718577 1.394064 0.944733 1.075525 1.125189 1.444921 0.748693  
3.689149 3.181332 3.032576 3.461065 3.73575 2.797873 4.550328 3.184514 3.139573  
3.832506 3.661149 4.019479 5.507064 4.182446 4.766253 3.584756 4.538131 4.364179  
1.469554 1.418502 2.354644 2.261295 1.979965 1.219393 1.461138 2.374196 1.754497  
1.571893 1.983051 1.072482 2.034959 1.960938 0.966452 1.349372 0.81811 1.672806  
3.618838 4.107147 3.410836 2.642832 2.661432 3.327011 3.650335 4.827798 2.825532  
6.593387 6.697834 6.404274 5.991295 5.894457 5.993251 5.800121 5.753962 5.813019  
1.318969 1.652217 1.426381 1.332192 1.655578 0.439678 2.433756 1.450237 1.132514

1. 11449 1. 091353 0. 978241 1. 499371 0. 967609 1. 379151 1. 205188 1. 29876 1. 664927  
2. 395615 2. 514416 2. 227896 2. 985801 2. 414893 2. 460516 2. 23711 2. 269047 2. 651105  
1. 530667 1. 91805 1. 923692 0. 993774 3. 008692 0. 876332 1. 26728 1. 213953 1. 726122  
1. 032747 0. 890175 1. 059574 2. 198236 0. 8875 1. 483798 0. 817762 1. 694613 1. 047208  
2. 477108 2. 481588 3. 149665 1. 946485 1. 892961 3. 569372 2. 922997 2. 880597 2. 518875  
3. 500687 3. 616322 2. 756867 3. 214588 4. 204659 4. 829673 4. 220473 4. 184282 3. 959304  
2. 02697 1. 715874 1. 557212 1. 997576 2. 150093 1. 311188 1. 718938 1. 711101 2. 216724  
1. 300865 1. 080517 1. 605143 1. 122202 1. 594435 2. 466328 1. 224036 2. 70333 1. 248593  
1. 613859 1. 123912 1. 215872 1. 661425 1. 654772 1. 499413 1. 808229 1. 935932 1. 180832  
0. 852936 1. 581385 1. 781369 2. 365336 1. 228309 2. 346981 1. 893404 1. 305742 2. 225094  
1. 441325 1. 7128 1. 355376 1. 635302 1. 541082 1. 583659 1. 56141 1. 168887 2. 007184  
4. 824759 4. 88762 5. 300758 5. 252094 3. 478105 3. 75554 4. 506113 3. 76641 5. 459397  
2. 286182 1. 670722 2. 225318 1. 251438 2. 010851 1. 633428 1. 713127 1. 955221 2. 328082  
2. 624911 2. 795656 3. 843414 2. 197062 2. 509355 3. 865888 2. 020709 3. 318221 2. 426626  
2. 231265 2. 34208 1. 707297 3. 226008 1. 93771 3. 434307 2. 155685 1. 998006 3. 129792  
3. 766954 4. 15288 4. 403322 5. 382527 5. 136643 4. 070815 4. 32043 4. 428155 4. 460942  
0. 67119 0. 958073 0. 714337 1. 109924 0. 673208 1. 075537 1. 380239 0. 827207 0. 619558  
1. 521503 0. 725622 1. 920344 1. 155171 1. 040586 0. 991664 1. 490776 1. 37395 2. 070655  
5. 00449 4. 144281 5. 197398 4. 649634 4. 582821 5. 235413 5. 099963 4. 978696 5. 273513  
3. 406135 1. 258992 2. 294416 1. 544819 1. 884569 0. 84133 1. 771373 1. 287092 1. 269867  
1. 47044 1. 221114 0. 973701 1. 866938 1. 248622 1. 209306 1. 259874 1. 104737 1. 349188  
1. 958283 1. 021518 0. 835322 0. 945177 0. 982084 0. 846134 0. 79159 0. 810686 2. 007948  
1. 652976 1. 382738 2. 123641 2. 578441 1. 273819 1. 061465 2. 574405 2. 205468 1. 761957  
6. 671867 6. 143749 6. 141854 6. 829832 6. 365608 7. 009865 5. 551603 5. 170964 5. 491504  
8. 920677 8. 655457 8. 853565 8. 963613 9. 369161 9. 485767 8. 721061 9. 44388 9. 228454  
1. 386478 0. 931869 0. 613381 0. 691656 1. 175357 0. 90504 0. 915004 1. 742448 0. 852968  
7. 373344 6. 877347 7. 506119 7. 464711 7. 540031 6. 449209 7. 7502 7. 724891 7. 891725  
1. 202914 1. 745549 1. 537077 2. 002457 1. 029804 1. 475519 1. 64313 1. 192338 1. 439873  
2. 36413 1. 955366 2. 041862 2. 311062 2. 556035 2. 533292 2. 254109 2. 31674 2. 830379  
2. 38688 1. 103458 1. 18808 1. 625903 1. 361527 1. 695619 1. 889039 1. 511117 2. 640421  
6. 950724 7. 100629 6. 881256 6. 353407 7. 071183 7. 905554 7. 706579 7. 407233 7. 603995  
0. 738453 1. 643622 1. 003597 0. 855203 1. 084103 1. 404432 1. 603035 0. 768464 1. 566402  
8. 514722 8. 092429 8. 608737 8. 252346 8. 285408 8. 997674 8. 256101 8. 446408 8. 66548  
2. 163122 1. 381695 1. 710838 1. 846809 1. 36891 2. 96068 1. 277367 1. 28084 1. 255439  
1. 630968 1. 347034 1. 411976 1. 059927 2. 65015 1. 066924 2. 366162 2. 334433 1. 162631  
2. 948514 2. 522554 2. 016581 2. 266144 2. 677799 3. 032741 2. 397342 2. 334434 1. 623248  
2. 197117 2. 59943 2. 551197 1. 993305 1. 780873 3. 837293 2. 484641 1. 977703 2. 490324  
4. 859726 4. 5835 4. 122866 4. 775378 4. 891993 5. 19399 5. 128441 5. 469399 5. 22444  
8. 168695 7. 988266 7. 890476 7. 788868 7. 846597 8. 430924 8. 014217 7. 965144 7. 933033  
1. 715881 1. 363566 2. 255188 1. 600736 2. 526933 2. 286985 2. 495926 1. 226375 1. 588704  
1. 222003 1. 911622 0. 815656 1. 747214 1. 249198 1. 007495 1. 599072 1. 229713 0. 941398  
1. 586526 1. 587257 1. 552607 1. 631586 1. 216449 1. 325111 1. 491316 2. 239679 1. 753898  
2. 379174 2. 22862 2. 088122 2. 621218 1. 902281 2. 375488 2. 72292 3. 101495 2. 112921  
1. 74773 1. 230024 1. 334135 0. 907491 1. 204016 1. 458615 1. 395847 0. 682694 1. 103362  
2. 619037 2. 07489 1. 803735 2. 004039 1. 84673 1. 552709 1. 968489 1. 733033 2. 010054  
1. 361969 1. 893476 2. 004228 2. 114168 2. 064944 2. 212824 4. 173225 1. 490578 2. 101636  
3. 271273 1. 74144 1. 900816 4. 00338 1. 116442 1. 46331 1. 982021 0. 911119 1. 155832  
3. 261924 3. 564252 4. 442329 5. 573116 6. 359144 4. 345264 2. 746586 4. 692112 4. 762058  
1. 429152 1. 542789 0. 918472 1. 304225 1. 04084 1. 139432 2. 069604 0. 956903 1. 537082  
3. 23422 2. 490474 4. 056484 2. 942347 3. 463512 2. 855626 3. 459424 3. 557501 2. 898393  
1. 90192 1. 803956 1. 449518 1. 700066 1. 453184 2. 690242 1. 194024 1. 882657 2. 612943

1. 577744 1. 198309 1. 154833 1. 210093 1. 704859 1. 354946 1. 09613 2. 262203 1. 338574  
1. 855609 1. 85861 1. 783568 1. 664062 1. 659953 1. 717378 1. 755566 1. 427521 2. 90033  
4. 374724 2. 762 1. 671494 2. 351541 2. 77637 3. 414937 1. 786834 1. 501848 1. 533702  
3. 757308 3. 276818 2. 598524 2. 30385 2. 124009 3. 275998 2. 464982 1. 984727 1. 76109  
2. 09896 1. 734372 1. 867096 2. 343412 2. 194449 1. 75153 1. 999719 1. 772843 2. 169853  
4. 164548 5. 52813 5. 421507 5. 613972 6. 023248 5. 714618 5. 16586 4. 557716 4. 844161  
2. 753278 2. 758728 2. 711515 2. 747055 3. 215398 2. 909639 3. 144566 4. 566207 3. 619703  
3. 881674 4. 593583 4. 302369 2. 886582 4. 053115 4. 021064 3. 692525 3. 108735 2. 490062  
8. 093285 7. 666216 8. 039806 8. 302662 7. 570083 8. 605355 8. 060082 8. 251212 8. 166802  
3. 362307 3. 103712 2. 018278 1. 693545 1. 702172 2. 479468 1. 936219 1. 516907 1. 805882  
1. 433732 1. 486487 1. 241832 1. 91832 1. 5618 1. 734801 2. 467638 1. 325735 2. 02881  
1. 877255 1. 900788 2. 08577 2. 099512 2. 516125 2. 374082 1. 894358 1. 89204 1. 965529  
7. 345786 6. 327928 7. 495565 7. 283273 7. 575626 8. 384397 7. 958084 8. 163078 8. 209524  
1. 418867 1. 778259 1. 084691 1. 964479 1. 513369 1. 300673 1. 028702 1. 410461 2. 718922  
6. 365695 5. 666325 5. 381029 5. 506423 5. 565222 6. 770233 5. 558228 5. 308927 5. 316846  
4. 693467 2. 510185 3. 373475 3. 091267 3. 458098 2. 486132 3. 216569 3. 07404 3. 20667  
1. 696905 1. 737103 1. 45628 1. 958592 1. 755337 1. 715851 1. 831577 1. 990263 1. 2266  
1. 274009 1. 243236 1. 912149 1. 230916 1. 83207 1. 825146 1. 029725 1. 305981 1. 157613  
3. 728165 1. 223104 5. 113927 2. 0003 4. 432746 7. 542921 2. 437265 2. 325412 3. 323592  
6. 373979 4. 749391 5. 948144 5. 033239 6. 530764 8. 364349 6. 266838 7. 065782 7. 936902  
5. 206191 5. 372949 5. 799022 4. 452683 4. 466556 7. 086239 4. 46467 5. 573022 7. 225798  
1. 701915 1. 598887 2. 065007 2. 093956 2. 18919 1. 588576 1. 787029 1. 450083 1. 852645  
3. 752084 4. 091358 5. 396255 4. 866717 3. 965628 4. 773228 4. 681538 4. 279407 4. 365624  
3. 448775 2. 839599 2. 977243 3. 619504 3. 21041 3. 869171 2. 851274 3. 360263 2. 922025  
2. 29542 2. 472781 2. 495556 2. 044739 2. 418875 2. 2614 2. 159416 2. 820171 2. 732246  
10. 45632 10. 06938 10. 269 9. 942775 9. 58265 10. 23265 9. 48249 9. 020114 9. 037552  
1. 662033 0. 764268 1. 460173 1. 472748 0. 857843 2. 074794 1. 259056 1. 214892 1. 573151  
3. 295795 5. 00751 3. 845783 4. 757006 3. 842435 4. 779219 4. 838311 5. 455289 5. 556209  
7. 582921 7. 903116 7. 576965 7. 999025 8. 045511 7. 032212 7. 856524 7. 320502 7. 15858  
1. 148124 2. 75744 1. 160549 0. 732544 1. 586696 1. 348831 0. 616577 1. 230984 0. 786079  
1. 857215 1. 58025 1. 397449 1. 462085 1. 976727 1. 228907 1. 630275 1. 363644 1. 420611  
5. 684369 5. 750227 6. 432607 6. 07134 5. 921593 4. 776298 5. 882282 5. 955735 5. 84024  
4. 152697 5. 639236 5. 706105 5. 610308 5. 523256 5. 889689 5. 202463 5. 194475 5. 484091  
2. 835081 1. 57646 2. 165757 2. 224925 2. 296822 2. 467617 1. 928712 2. 671946 2. 390851  
10. 18227 10. 24118 10. 22206 10. 83729 10. 28263 10. 10253 10. 82884 10. 882 10. 87476  
9. 778654 8. 787302 8. 792896 7. 571581 8. 235282 9. 983725 7. 723552 7. 374709 6. 256921  
6. 285678 6. 47078 5. 744053 7. 278482 6. 357027 6. 965355 6. 56653 6. 010709 6. 882424  
6. 151743 6. 057707 5. 76008 6. 35334 6. 371069 7. 039686 6. 835034 6. 440959 6. 556896  
3. 817665 4. 13668 3. 134805 3. 626515 3. 353792 4. 064453 3. 227522 3. 618114 3. 7039  
2. 2165 2. 470241 3. 594505 2. 915881 2. 836382 3. 002613 2. 553481 2. 407788 3. 369522  
3. 947121 2. 517598 2. 726411 3. 518529 3. 00819 2. 813967 2. 521438 2. 026381 2. 473707  
7. 631972 8. 020589 8. 145672 8. 459886 8. 712748 6. 478926 8. 643485 8. 443955 8. 959874  
6. 199548 5. 393561 7. 073324 6. 838958 7. 031458 7. 949479 7. 389363 7. 685695 7. 662828  
2. 278931 1. 578886 1. 850002 1. 647793 2. 166652 3. 02271 1. 682069 2. 236646 1. 895251  
2. 75272 2. 286163 2. 849127 3. 594808 2. 964523 4. 070097 2. 471308 2. 707228 2. 43876  
2. 44813 2. 440401 2. 255699 1. 721111 2. 006169 2. 249777 2. 612828 2. 095726 2. 420417  
8. 703438 8. 655486 8. 690663 8. 095502 8. 789714 7. 784714 7. 754158 8. 933309 8. 191029  
4. 033956 4. 66306 4. 100037 4. 58628 4. 414726 4. 347308 3. 753001 4. 147149 4. 136996  
9. 076917 8. 850657 8. 57138 8. 319085 9. 321393 8. 963804 9. 316972 9. 276129 8. 725817  
3. 253022 4. 488323 5. 111921 3. 409279 3. 367589 3. 780277 4. 654145 3. 627461 4. 915646  
5. 412103 6. 128506 5. 780358 5. 630374 5. 514135 6. 198253 7. 729443 6. 157295 6. 809144

1. 828315 1. 618756 1. 60686 1. 996962 2. 033809 1. 845871 1. 690731 2. 14695 2. 365387  
6. 12134 6. 563005 5. 555277 5. 022371 5. 047113 6. 934123 6. 274072 4. 866607 5. 339551  
3. 663538 2. 858492 3. 384674 3. 410744 2. 897116 4. 197588 3. 009602 4. 934965 3. 484104  
4. 669259 4. 073027 3. 561979 4. 967142 4. 788457 3. 491902 5. 125918 5. 197816 5. 283549  
2. 429155 3. 167309 3. 674826 3. 091918 3. 364183 3. 440512 2. 905233 3. 436124 3. 21151  
6. 170746 6. 177836 6. 323567 6. 352393 6. 175439 6. 905045 6. 479596 6. 23876 6. 87629  
1. 830447 2. 027694 2. 847731 2. 332914 2. 60525 2. 06061 2. 394637 2. 84203 2. 246148  
2. 452755 3. 725271 2. 512013 3. 052797 3. 455031 5. 184284 1. 853533 2. 225364 2. 220124  
3. 020873 1. 768239 2. 63697 2. 861895 2. 457141 2. 975409 3. 600047 3. 428754 4. 154655  
6. 565237 6. 15262 5. 304802 5. 723238 6. 051354 5. 25144 7. 5193 6. 68073 7. 609172  
3. 441049 3. 613182 3. 962029 4. 003554 4. 241161 5. 173893 2. 991475 3. 633968 3. 836607  
1. 711885 1. 20688 1. 554654 1. 915668 1. 199143 1. 441206 1. 166698 1. 352333 1. 494276  
2. 520483 2. 535872 3. 335317 2. 272372 3. 022252 3. 77052 2. 424196 3. 247717 3. 271717  
4. 983259 4. 54698 4. 65717 5. 07092 4. 508081 5. 687944 5. 52951 5. 241472 4. 895368  
4. 407173 3. 801618 5. 385319 5. 635483 5. 24172 5. 853051 5. 164087 5. 466595 6. 219238  
3. 653077 2. 849752 3. 545051 3. 23552 3. 577668 4. 261907 4. 21728 5. 668766 3. 740292  
6. 724979 5. 223728 5. 925153 5. 74768 5. 438842 6. 896408 6. 256503 5. 71616 6. 071262  
2. 26153 2. 531783 2. 955884 2. 64848 2. 650033 3. 297709 2. 397329 4. 170964 3. 655387  
3. 247797 3. 813797 3. 121451 3. 230199 4. 104802 2. 080207 1. 155325 1. 855756 1. 43363  
1. 645308 2. 041513 2. 038271 1. 967312 1. 979542 1. 843028 1. 186747 1. 471329 1. 877609  
4. 565145 5. 040297 5. 173527 5. 256085 4. 379153 5. 90022 5. 625019 5. 186876 5. 735154  
1. 732266 2. 912724 2. 422111 2. 674187 1. 795503 1. 877555 1. 91674 2. 252722 1. 691502  
1. 919396 1. 990538 1. 828487 0. 969473 1. 412081 1. 358261 3. 783516 3. 15006 2. 075982  
1. 602163 1. 104726 2. 352796 2. 79404 1. 543158 1. 873737 1. 33563 1. 175203 2. 355723  
2. 574392 2. 468118 2. 79445 2. 748456 2. 528502 3. 250527 3. 24043 3. 244239 2. 946375  
2. 382188 3. 317298 2. 454196 3. 168014 2. 360783 3. 921369 3. 001891 3. 209273 3. 152587  
1. 760155 2. 692867 2. 851577 2. 305725 2. 532028 1. 70238 2. 386728 2. 38257 1. 409789  
1. 692435 3. 35329 2. 597719 2. 346134 2. 938762 1. 492261 1. 408028 2. 214559 2. 225712  
2. 031744 1. 654697 1. 497654 1. 58641 1. 080466 1. 34676 0. 882254 1. 4547 1. 648836  
3. 361348 2. 881743 3. 788614 3. 068788 4. 000597 3. 527389 2. 945483 3. 789291 4. 072652  
4. 163086 4. 236801 3. 730346 4. 558068 3. 100144 3. 233084 3. 650165 3. 175964 3. 22315  
1. 150385 1. 857537 1. 639671 1. 313729 0. 754417 1. 154207 0. 843563 1. 196183 0. 31673  
5. 239414 6. 916097 4. 988218 5. 847538 5. 231667 5. 222949 4. 572051 4. 006484 4. 507636  
1. 338655 1. 823887 2. 083547 2. 038091 1. 335033 2. 176411 1. 148519 1. 89521 2. 092752  
1. 869739 1. 219926 1. 562456 1. 816122 1. 280973 2. 10898 1. 42951 1. 570063 1. 587368  
1. 318344 2. 103 1. 76994 2. 292716 1. 189954 1. 159155 1. 544389 1. 567118 2. 184693  
6. 043948 6. 030541 6. 426664 5. 870994 6. 817481 6. 508554 6. 955044 5. 548934 5. 749606  
2. 368718 1. 314846 3. 440913 1. 388338 1. 683083 1. 977034 2. 311194 3. 705496 2. 339579  
1. 861579 1. 988604 2. 296161 2. 242342 2. 565448 2. 576344 2. 064208 2. 300375 2. 01077  
2. 618605 2. 771079 2. 698124 2. 61577 2. 833105 2. 505849 2. 541482 2. 424028 2. 755162  
2. 027612 1. 251292 1. 64639 1. 75087 2. 141065 1. 544664 1. 491303 2. 012751 1. 633386  
1. 102802 1. 784623 0. 84253 2. 642511 1. 736244 2. 014884 1. 78839 3. 256687 3. 125239  
2. 079463 2. 223248 1. 726284 1. 646465 1. 492418 1. 521916 1. 283579 2. 001189 1. 422404  
2. 41132 2. 684174 3. 61559 2. 252074 3. 140222 1. 907984 2. 917629 3. 667427 2. 160891  
3. 206807 2. 371612 2. 480485 2. 63008 2. 742989 2. 710141 2. 80865 2. 293027 2. 302776  
2. 17374 2. 574859 2. 901681 1. 857164 2. 858835 2. 552055 2. 706494 3. 267074 1. 889758  
8. 311748 8. 583383 8. 588558 8. 164734 8. 603971 8. 031726 8. 768256 8. 425603 7. 951559  
1. 332026 1. 765657 2. 906803 2. 494511 2. 165207 2. 407989 1. 119299 2. 452789 1. 329036  
4. 711683 3. 854752 4. 991467 5. 296306 4. 101891 5. 798074 5. 212914 5. 837096 6. 031474  
1. 625918 2. 020126 2. 268265 1. 935692 2. 382378 2. 070383 2. 282668 1. 827326 2. 879656  
1. 993115 2. 349136 2. 670376 2. 720179 2. 997145 2. 672248 2. 170036 2. 736111 3. 089693

2.004121 3.222617 1.23763 2.92336 1.698317 1.600015 1.105642 1.736885 1.740626  
1.057406 1.69211 0.91297 2.375017 1.539208 2.510121 1.242728 1.037722 1.203484  
6.211804 6.070024 5.007687 3.844776 4.322781 3.256357 4.955095 3.985262 5.587007  
1.089745 1.17541 1.653644 1.632073 1.519256 1.044139 1.936204 1.537956 1.326376  
1.435238 1.437892 0.951004 1.751913 1.601976 1.45464 2.329788 0.855502 0.748437  
4.267645 2.52471 3.287258 5.357819 4.988233 3.107735 4.221459 3.909415 4.135535  
6.103773 6.166093 4.967513 5.145756 5.843984 6.253488 6.979315 6.461106 6.598678  
2.283843 1.554223 1.92342 1.431733 2.925527 2.131592 1.615578 2.269089 2.380598  
5.065579 5.586249 4.347586 3.948213 3.961614 4.444294 4.958444 4.168559 5.024374  
1.227601 1.55664 1.091207 2.71005 0.980175 1.79487 1.098525 1.507842 1.630273  
1.673346 1.153628 1.295555 1.383999 1.116057 1.236019 1.288756 0.974671 1.536767  
4.965346 5.74957 6.408068 5.790285 6.567993 4.707922 5.962418 5.916099 5.426527  
2.531364 2.589781 3.202227 3.932172 2.878418 4.25353 3.513584 3.444643 3.736556  
1.160351 1.122658 1.625118 1.922374 2.426886 2.00464 0.97244 1.58925 1.514706  
1.448906 0.724052 0.711756 1.194597 0.969715 1.378806 1.369419 0.974171 0.821607  
2.446826 3.128979 1.872856 2.680777 3.51774 2.813785 3.071508 3.679243 3.092774  
1.791457 2.80833 1.783565 1.292139 1.469389 1.708287 2.169675 1.470471 1.937387  
1.798493 1.474606 1.611564 1.353909 2.890035 1.681126 1.814792 1.771777 1.43157  
4.960275 5.891004 4.660379 5.836502 5.586482 6.463292 5.772591 6.136336 6.444017  
3.47413 2.861678 1.809814 2.676715 2.243141 2.671973 1.988953 1.967844 1.802503  
1.562324 1.75454 2.193255 2.438039 2.382659 1.292642 1.903874 1.961377 2.115432  
1.351722 1.30378 1.053838 1.742028 0.979627 1.211603 1.179864 1.357987 1.271322  
1.649387 2.121594 0.922563 1.441374 1.17755 0.982708 1.26984 1.364541 0.770565  
1.578255 1.707486 3.735998 2.238502 3.559596 2.377518 1.361709 2.168073 2.072687  
1.922178 1.392168 1.625266 2.635157 1.3692 1.575195 1.454729 1.759159 2.453723  
1.697581 1.949132 1.914993 1.41195 1.803858 3.144585 2.833472 1.930341 2.766362  
2.380845 1.715625 2.206458 1.763925 1.90729 2.095976 1.999979 2.682542 1.628573  
1.544964 1.282818 0.950096 1.719627 1.674308 1.219782 1.611026 2.292923 1.353213  
2.009182 2.385161 1.710367 1.506807 1.441381 1.87596 1.88294 1.688646 1.40474  
1.285301 0.694486 0.792603 1.354803 0.9525 1.058705 1.720552 3.774684 1.710277  
4.592151 5.314056 4.585487 4.765474 4.182093 4.240128 4.092092 4.58824 2.321769  
2.524067 1.989871 2.579618 2.420026 3.104962 2.088473 2.436955 2.12787 2.841458  
6.333565 4.910229 4.885171 4.297946 4.940647 4.782957 5.087315 4.527451 4.438841  
1.381568 3.092462 2.455184 1.491613 3.379765 1.955409 2.606039 2.44438 1.907479  
1.570746 3.203436 3.066868 1.469053 1.703163 0.68441 0.859268 1.469053 1.145075  
3.869975 3.498649 3.960019 3.609383 4.441793 2.224887 2.535906 2.200561 2.381094  
4.327531 5.80204 5.230652 6.055858 5.946807 5.041916 5.19306 6.414127 6.006058  
1.000088 1.334913 0.959328 1.382248 1.241273 0.98125 1.361235 1.294589 1.139638  
3.641992 3.47029 2.66561 3.742969 3.347309 2.159931 3.08282 3.127958 2.855141  
1.54264 1.57003 1.444107 1.870955 1.600889 2.522677 1.522587 1.999394 1.209661  
0.779906 0.925173 1.794851 1.2512 1.875725 1.228884 1.380295 2.089038 1.609884  
1.40444 1.676375 1.747243 1.568781 1.592123 1.856297 1.458724 1.647728 1.207677  
5.690094 5.585056 2.954093 5.607997 5.593836 6.411398 5.911861 6.492025 6.365774  
1.031109 1.055564 0.852424 2.303632 1.748343 0.917907 1.46161 0.76822 0.731411  
2.013467 1.911284 1.583349 2.284554 1.848259 1.599431 1.68148 1.339774 1.927927  
3.366158 3.701086 3.293001 3.899246 3.484883 3.24845 3.150026 3.853314 3.441916  
1.958152 2.840171 2.15308 1.678612 2.425164 2.08869 1.745374 3.164366 1.848378  
1.98693 3.064761 2.649495 2.711998 2.585584 2.213314 2.992705 3.199318 2.051054  
1.875473 1.541413 2.426383 2.79124 2.318145 2.04302 1.84554 2.041101 1.72483  
3.450498 2.918226 2.779978 1.928415 2.599877 2.587619 2.977432 3.169601 2.64308  
2.357445 2.27149 1.729273 3.457716 3.305729 1.570377 1.286507 2.364632 2.738304



4. 282492 5. 107226 3. 915783 4. 695274 5. 372896 7. 611769 3. 660136 4. 441071 4. 899129  
4. 632892 4. 220704 5. 883741 5. 757764 4. 177237 5. 825656 5. 330966 6. 139753 5. 911036  
4. 696344 4. 260401 4. 200594 4. 094513 4. 450208 4. 724092 4. 6515 3. 85244 3. 681838  
1. 025748 1. 069977 1. 49603 1. 34644 1. 056736 1. 764051 1. 634493 1. 405735 1. 763629  
4. 257532 3. 627943 4. 153498 4. 108522 4. 43015 4. 291122 4. 649367 5. 076735 5. 502249  
3. 891401 2. 018181 2. 734197 4. 991604 3. 42992 2. 941444 2. 934382 3. 964154 3. 078134  
1. 300129 2. 288996 1. 769959 2. 571926 1. 947862 1. 797967 1. 928496 1. 788067 2. 249228  
1. 552346 1. 649614 1. 868315 2. 144499 1. 954862 2. 035174 1. 944915 2. 261532 2. 111278  
3. 079447 4. 300323 1. 968801 3. 904491 1. 736286 2. 812562 2. 505687 2. 484529 2. 02298  
1. 34201 1. 949636 1. 689617 1. 42226 1. 334577 1. 388319 1. 67693 1. 380999 1. 558754  
1. 705501 2. 001555 1. 777579 1. 468649 1. 67495 2. 002369 2. 075332 1. 675009 1. 916215  
1. 20157 1. 238954 1. 110821 1. 182175 1. 04707 1. 088943 0. 883117 2. 250873 0. 914345  
2. 058921 2. 057581 2. 279726 2. 30194 2. 598346 1. 712654 2. 235281 2. 029021 1. 714321  
2. 338946 1. 883304 2. 147095 1. 166105 1. 040708 1. 2996 1. 158152 2. 307672 1. 030401  
3. 188568 3. 342496 2. 893097 2. 882681 3. 127292 2. 190602 2. 604946 2. 486041 2. 386807  
2. 477069 1. 856106 2. 775808 2. 076496 2. 342973 2. 445309 1. 395653 2. 337086 1. 767213  
1. 396262 1. 528093 1. 121769 1. 342004 1. 664956 1. 364243 1. 219659 1. 267217 0. 931083  
1. 28699 1. 372944 2. 57435 1. 090448 1. 374888 1. 451484 2. 068487 1. 018281 1. 987733  
3. 021892 2. 6964 3. 087263 2. 171298 3. 601012 2. 212013 3. 339477 2. 730513 3. 006153  
2. 385275 3. 863367 2. 6222 3. 797525 3. 232042 2. 846291 2. 96432 3. 54003 3. 737051  
3. 440936 3. 717341 3. 634184 4. 071678 3. 271324 3. 148028 3. 942839 2. 840859 3. 705824  
2. 253503 2. 985503 2. 293205 3. 316601 3. 949606 3. 79456 2. 757499 2. 591624 3. 009793  
1. 504958 1. 731564 1. 530326 1. 625265 1. 161788 1. 189276 1. 123976 1. 802315 1. 517415  
3. 818715 2. 970086 3. 493018 2. 311695 2. 590856 2. 289701 2. 321664 2. 136123 3. 032049  
3. 960305 2. 743906 2. 739713 2. 579705 2. 511072 2. 919447 3. 328254 3. 084642 2. 94346  
0. 921058 0. 915471 0. 782303 0. 797175 1. 237719 1. 201041 1. 072874 1. 475321 0. 692724  
1. 179467 0. 975502 3. 155405 1. 389793 1. 895687 2. 267479 1. 130537 2. 003501 2. 33871  
1. 492319 1. 610202 1. 853394 1. 393972 1. 181656 1. 528601 1. 618183 1. 473088 1. 491261  
2. 298368 3. 74789 3. 059328 3. 312482 2. 717998 3. 012161 2. 837196 3. 096609 4. 770325  
3. 92277 4. 786193 4. 261838 4. 328303 4. 471571 3. 626722 4. 290276 4. 199579 4. 212827  
2. 698495 3. 125044 3. 11715 1. 969869 3. 434746 3. 49259 3. 19567 2. 773992 3. 588126  
1. 027026 3. 056796 1. 134057 1. 523624 0. 772321 1. 027633 1. 280969 2. 721467 1. 225134  
2. 780794 2. 500453 1. 880811 2. 060297 2. 61884 1. 759412 1. 945438 3. 104873 2. 718619  
1. 881869 2. 140793 2. 563468 2. 372143 2. 544226 1. 959551 2. 310118 2. 190693 2. 762975  
1. 625448 3. 054391 2. 183058 2. 309064 2. 488494 2. 555908 2. 052489 2. 704832 3. 811296  
2. 348449 2. 069998 1. 780207 1. 510851 1. 923774 1. 472691 1. 814196 1. 237277 1. 472691  
1. 56326 2. 382092 2. 842802 2. 980529 3. 157567 2. 032172 1. 85635 2. 769094 1. 857009  
2. 58962 1. 351377 1. 564371 1. 646026 2. 037468 1. 6285 2. 198393 1. 713404 1. 591547  
1. 063862 1. 127509 1. 365758 1. 00287 1. 138813 1. 444312 1. 216699 1. 069822 1. 529186  
2. 245625 1. 715778 2. 757856 1. 86476 2. 479744 2. 001363 2. 972003 2. 538296 2. 796097  
3. 376444 3. 407804 3. 88552 2. 760683 3. 008052 2. 872823 3. 529807 3. 08114 4. 264827  
1. 394138 2. 283914 1. 998288 1. 900917 1. 262681 1. 40618 1. 321502 2. 008284 1. 385924  
3. 083242 3. 231945 3. 922896 3. 657983 4. 489898 3. 208857 4. 640327 3. 235366 5. 163733  
1. 414983 1. 390359 0. 853627 1. 378285 0. 986944 1. 567477 1. 333059 1. 375342 1. 289722  
2. 756186 2. 63818 2. 227616 2. 406465 2. 484003 2. 765445 2. 149765 2. 537278 2. 660354  
0. 62404 2. 748787 1. 249532 1. 790941 2. 494178 1. 803415 1. 066353 1. 146799 2. 600493  
1. 158634 1. 142813 1. 140138 1. 16782 0. 765675 0. 955331 1. 402028 1. 199831 1. 05826  
3. 2761 4. 350331 3. 837863 4. 524823 3. 732767 4. 072023 3. 642649 4. 016735 3. 987906  
1. 122788 1. 20766 1. 258349 0. 864737 1. 392313 1. 690945 1. 251218 1. 347438 1. 081204  
2. 016405 2. 162377 1. 716315 1. 674411 2. 564975 1. 447104 1. 910721 1. 785434 1. 517498  
2. 437257 1. 587811 1. 774492 1. 760327 1. 51336 1. 706676 1. 7983 1. 515815 1. 429588

1. 861239 2. 423754 1. 905375 1. 96315 2. 69375 2. 385118 1. 133625 1. 363512 1. 392115  
2. 57272 2. 37866 4. 559323 3. 428722 4. 444062 3. 702288 5. 007624 3. 124065 3. 322319  
2. 164105 1. 895975 2. 069371 2. 720833 2. 137569 2. 095181 1. 719803 1. 912744 1. 754044  
1. 956064 2. 637111 2. 311962 2. 511479 1. 946718 2. 431152 1. 79704 2. 353493 2. 223758  
1. 681159 1. 928077 1. 217134 2. 746841 2. 137778 1. 826858 1. 831796 2. 054714 1. 579125  
1. 450335 1. 99368 0. 995829 1. 369281 0. 99373 2. 079907 1. 489107 1. 485951 1. 282777  
2. 089036 2. 341995 2. 740369 3. 298275 2. 027331 1. 397294 2. 238135 1. 867545 1. 71466  
1. 258479 1. 88654 1. 649195 2. 110078 1. 959302 1. 711943 2. 561258 2. 621159 1. 907961  
1. 444887 2. 483969 2. 53696 1. 54017 1. 291767 1. 581149 1. 953517 1. 73472 1. 939962  
3. 534615 1. 788907 3. 43931 2. 896069 2. 706403 2. 430493 3. 039751 2. 37305 3. 607289  
7. 234483 6. 972481 6. 715524 6. 992797 6. 725965 6. 475231 6. 535508 6. 66389 7. 035224  
4. 875117 4. 140344 4. 381773 4. 952237 4. 59514 5. 121267 3. 728931 4. 392155 3. 859733  
5. 12977 6. 656887 3. 61105 4. 148448 4. 848145 3. 891522 5. 040916 3. 801361 4. 615179  
3. 766908 3. 106298 3. 845528 3. 128757 3. 063619 3. 06484 3. 54588 3. 227123 2. 848189  
2. 05111 2. 158006 2. 205995 2. 022777 2. 621618 2. 149429 2. 184964 1. 714389 2. 207444  
1. 997266 2. 4089 1. 609548 2. 955295 1. 708589 2. 404322 2. 159711 3. 244266 2. 019111  
1. 40824 1. 434841 1. 469701 1. 51023 1. 267769 1. 662184 1. 559338 1. 554419 1. 582904  
1. 35783 2. 232446 1. 536848 1. 193311 1. 043144 1. 662813 1. 185837 2. 04301 1. 125402  
3. 303958 3. 506277 3. 564847 2. 866418 2. 982631 2. 728213 1. 306215 3. 843639 3. 322313  
1. 900137 2. 05666 2. 80411 2. 290278 1. 682212 1. 550119 2. 055848 1. 513503 2. 699453  
2. 232887 1. 311304 1. 815816 1. 30165 2. 088913 1. 762582 1. 661956 1. 726892 1. 559605  
2. 023766 1. 613822 2. 524858 1. 958125 1. 763664 1. 424449 1. 872416 1. 676159 1. 783945  
1. 935078 2. 323992 2. 451037 1. 97541 2. 226069 1. 814259 1. 836546 1. 842507 1. 808075  
1. 638757 1. 546295 1. 308747 1. 850058 1. 278494 1. 309136 1. 002624 1. 389625 0. 993344  
1. 659456 2. 276318 2. 279532 2. 214282 2. 558154 2. 28483 2. 508612 1. 778866 2. 07269  
0. 978837 1. 281861 1. 104538 1. 957031 1. 037885 0. 788829 1. 260822 1. 324776 1. 257624  
6. 079741 5. 200296 4. 937291 5. 913006 5. 661708 2. 618815 6. 481297 5. 299929 3. 829167  
5. 706262 5. 232557 3. 921205 5. 764596 5. 199611 4. 654701 5. 512153 4. 101721 3. 887386  
2. 803736 2. 287496 4. 701388 2. 723139 1. 178225 1. 454296 0. 98092 0. 473327 0. 899347  
1. 213011 1. 616227 1. 366247 1. 213011 1. 324894 1. 704433 1. 131154 0. 63381 2. 167869  
2. 944343 1. 881529 1. 621944 1. 734368 1. 920727 1. 764941 2. 062681 1. 884388 1. 814803  
1. 705675 2. 456813 1. 98398 2. 052621 2. 09214 1. 556575 1. 98466 2. 239356 2. 056408  
8. 621683 9. 158194 8. 82614 8. 302902 8. 401311 8. 552325 9. 122071 8. 533078 8. 33585  
3. 844731 3. 225075 4. 675047 4. 56042 2. 95691 3. 223934 3. 57938 2. 986164 2. 355342  
1. 546058 1. 481619 1. 275399 1. 453756 1. 844106 1. 366707 1. 452405 1. 733581 1. 176927  
2. 716755 3. 0703 3. 914589 3. 948348 2. 468815 2. 77941 4. 062641 5. 053139 4. 267732  
2. 805362 2. 988556 3. 476409 2. 235456 4. 105952 1. 884509 2. 546775 1. 697279 1. 277308  
2. 066036 2. 522615 1. 769491 1. 31741 2. 062652 1. 980383 1. 395702 1. 884355 1. 731995  
0. 866623 1. 257751 1. 268102 1. 861394 1. 671653 2. 352198 1. 439746 1. 386056 1. 631768  
1. 946681 1. 52816 2. 571632 1. 857898 2. 321472 1. 54417 1. 877562 1. 537554 1. 690215  
1. 380212 1. 082821 0. 926548 0. 995442 1. 251769 0. 910957 1. 160801 1. 400471 1. 374196  
3. 362168 2. 584751 2. 311594 4. 44064 2. 994055 2. 885756 3. 008154 2. 734879 2. 715397  
1. 232543 1. 921729 1. 134991 2. 701234 1. 377997 1. 282703 2. 025103 1. 572717 1. 215971  
2. 459379 1. 296354 1. 966929 1. 999296 4. 260012 2. 441575 2. 580648 3. 19367 2. 29546  
4. 980203 4. 244812 5. 388987 3. 369991 2. 801565 3. 651425 3. 804444 2. 058525 2. 884231  
0. 800542 1. 444452 0. 978226 1. 069134 1. 988104 1. 180851 1. 128278 1. 154464 0. 758707  
1. 523727 2. 501335 1. 489187 2. 150243 2. 193532 2. 108226 1. 782361 2. 8772 2. 005326  
3. 169477 3. 13882 3. 33426 2. 46626 3. 171374 3. 615 3. 343339 2. 733422 3. 322724  
1. 604278 1. 688343 1. 198712 1. 511442 1. 463324 2. 061087 1. 364986 1. 497256 1. 859952  
5. 668013 5. 027265 6. 24908 5. 675684 5. 708717 5. 11864 6. 478883 7. 117951 7. 104005  
1. 047456 1. 01253 1. 254106 1. 711457 1. 433912 1. 194166 1. 709978 1. 429308 1. 23255

3. 283729 4. 202413 3. 02615 2. 168906 3. 041673 1. 969894 2. 206296 1. 599476 2. 576524  
2. 444719 2. 712343 2. 982237 2. 566463 2. 851801 2. 749594 2. 734828 3. 092865 2. 757154  
2. 478757 1. 893769 1. 122904 3. 096677 2. 671719 3. 266572 1. 802535 1. 670778 1. 952929  
5. 487774 3. 551976 4. 688939 4. 871719 4. 477187 6. 033714 5. 00374 6. 098613 5. 440126  
1. 87533 0. 974424 0. 962279 1. 579428 1. 251984 1. 070053 1. 229113 1. 899318 1. 269949  
2. 915083 2. 588586 2. 49083 3. 683941 3. 56907 3. 169038 2. 345753 2. 765661 3. 364405  
1. 473988 1. 640627 1. 394321 1. 319566 1. 455748 1. 620132 2. 006411 1. 31035 1. 545236  
0. 805162 0. 88901 1. 119329 0. 55086 1. 195459 2. 142387 1. 029555 3. 024363 1. 230707  
1. 064941 1. 24854 1. 168611 1. 31369 0. 745317 1. 21449 1. 110813 1. 084485 1. 56619  
1. 463389 1. 759411 1. 302858 1. 398101 1. 634762 1. 860584 1. 581484 1. 252429 1. 678251  
0. 972621 1. 668748 1. 228865 0. 935024 1. 621479 1. 064629 1. 365645 0. 941963 1. 573733  
4. 590465 3. 703266 3. 662824 1. 955892 2. 608438 2. 054222 2. 026137 1. 897542 2. 185479  
2. 641946 3. 417965 5. 34853 3. 932954 4. 20964 3. 799067 5. 086639 4. 708078 2. 431278  
3. 702216 3. 529073 3. 783405 3. 391063 3. 534454 3. 57854 3. 800034 3. 814865 3. 462911  
3. 020272 3. 847213 2. 091284 1. 871972 4. 722971 2. 112398 3. 289012 2. 07395 1. 598478  
3. 086562 2. 241693 4. 018428 3. 332002 2. 134107 2. 4965 2. 26182 3. 763166 2. 284777  
1. 878227 1. 941142 1. 914697 1. 993501 2. 465684 2. 040197 2. 372845 2. 336151 1. 978859  
1. 859151 2. 207193 1. 860352 1. 862481 1. 656759 1. 957784 1. 899766 1. 401399 2. 003124  
3. 35035 2. 620721 2. 114291 1. 43792 3. 260233 2. 06658 3. 970266 3. 173892 2. 997595  
1. 75045 1. 178267 1. 464479 2. 225831 1. 86711 1. 656183 1. 533531 2. 270788 1. 629141  
2. 447434 1. 684012 1. 442088 1. 456364 1. 077628 1. 573905 1. 810581 1. 291614 1. 004227  
3. 123658 2. 476387 1. 904286 2. 569054 2. 580358 1. 891101 1. 82377 2. 214359 2. 171944  
2. 143985 1. 97616 2. 04411 2. 56399 2. 247752 2. 314822 2. 691434 2. 354678 2. 103366  
1. 98722 2. 39753 2. 324567 2. 295918 2. 53283 2. 25146 2. 48345 2. 318884 1. 799014  
4. 432503 5. 411926 4. 410644 6. 795471 4. 991578 4. 199525 5. 021655 3. 771653 4. 234117  
2. 169843 2. 675982 1. 436649 2. 522994 2. 70406 1. 668918 1. 669311 1. 879345 2. 878293  
1. 747373 2. 034944 1. 749338 2. 488896 1. 80419 1. 792274 1. 773773 1. 801926 2. 137435  
1. 91615 2. 004187 1. 440963 1. 848442 1. 507423 1. 435367 1. 813408 2. 202523 1. 723508  
2. 13759 4. 501456 3. 832749 2. 830315 5. 059913 1. 259461 2. 681926 2. 649198 2. 383248  
4. 492909 3. 051615 3. 455365 3. 369257 3. 276418 3. 807375 3. 083226 3. 663942 4. 521534  
6. 029849 5. 238498 5. 844558 5. 819707 5. 435748 4. 394681 3. 827662 5. 004091 4. 702211  
1. 108769 1. 973977 1. 287721 1. 511399 1. 19005 1. 58455 1. 907935 2. 82823 1. 235108  
1. 383578 1. 284071 1. 307782 2. 466426 2. 664783 1. 572577 0. 704787 2. 8411 1. 912151  
1. 402532 1. 764285 1. 290616 1. 568885 1. 150459 1. 35046 2. 263911 2. 42099 1. 548632  
2. 204582 2. 327595 2. 512287 2. 155472 2. 828363 2. 580815 1. 647267 2. 102252 2. 631831  
3. 605261 4. 053423 3. 072912 1. 820732 4. 238965 1. 876135 5. 345502 4. 601312 4. 805249  
1. 737915 1. 540593 1. 580604 2. 217183 1. 23848 1. 457621 1. 175765 1. 41149 1. 036329  
1. 399267 1. 317933 1. 167027 1. 460927 1. 477285 1. 178571 1. 718512 1. 234499 1. 278929  
2. 036864 2. 312538 2. 753396 3. 259763 2. 350238 2. 195186 2. 243578 2. 72696 2. 250905  
6. 891922 7. 247846 7. 176711 6. 113442 7. 585266 6. 879056 6. 605866 6. 701286 6. 371458  
2. 766206 2. 194455 2. 963607 3. 733599 2. 584324 3. 017625 3. 316118 1. 965442 2. 691534  
2. 195108 1. 528776 1. 750836 1. 674616 1. 31686 1. 320148 1. 272911 1. 846964 1. 230635  
4. 374119 4. 441578 3. 616417 5. 00192 3. 118501 4. 615618 3. 649144 3. 786212 2. 29205  
3. 729654 5. 05905 5. 908458 4. 081538 5. 40121 4. 500396 5. 446353 4. 983677 4. 508153  
1. 116868 1. 854451 1. 290391 2. 274038 1. 337013 1. 385258 1. 180548 1. 427171 1. 248024  
3. 277295 4. 123535 4. 151063 4. 250073 4. 38371 3. 658804 3. 68357 4. 10741 4. 103127  
3. 084594 2. 642665 2. 946227 3. 326142 3. 438674 2. 64979 2. 600109 3. 608348 2. 868257  
1. 608337 1. 608265 1. 59122 1. 639562 1. 345078 1. 350407 1. 655927 2. 000235 1. 359679  
3. 160306 3. 53826 3. 547979 2. 311177 3. 171206 2. 836422 2. 848244 3. 034086 4. 248638  
1. 340509 1. 209564 1. 3324 1. 137356 0. 798094 1. 014757 0. 733427 1. 342619 1. 022915  
1. 271846 1. 440917 1. 410157 2. 367854 1. 596152 1. 553451 1. 582563 1. 870581 1. 670073

5. 262932 5. 846678 4. 968863 5. 343878 5. 114669 5. 153109 4. 021829 4. 740185 4. 956841  
1. 545084 1. 144984 2. 693843 1. 847486 2. 16838 1. 925393 1. 75766 1. 835865 1. 841386  
4. 897477 4. 608083 5. 460804 4. 311936 4. 679219 5. 961813 5. 13021 4. 142551 4. 99845  
2. 097107 2. 542001 2. 700529 2. 335985 2. 33463 3. 298171 2. 323014 2. 356247 3. 637724  
3. 277388 1. 767997 2. 595773 3. 033759 2. 217451 2. 059104 2. 197841 2. 001897 2. 39684  
1. 538562 1. 522602 1. 671124 2. 049368 2. 190577 1. 622057 1. 315483 1. 641577 1. 41479  
1. 429584 1. 209306 1. 566521 0. 95518 1. 820032 1. 144261 0. 815696 1. 086839 1. 449564  
7. 648215 7. 556827 7. 390766 7. 751567 7. 809262 7. 316131 7. 278836 7. 740092 6. 613219  
4. 700321 4. 669594 4. 562442 4. 953445 4. 687173 3. 943863 3. 580721 4. 983543 3. 685147  
1. 660516 1. 605585 1. 371317 1. 62238 0. 823008 1. 240512 1. 326441 2. 307531 0. 94486  
2. 835827 2. 834619 3. 105423 3. 585537 3. 129823 3. 281331 2. 915777 2. 821918 3. 727121  
1. 925007 2. 311328 1. 58223 2. 327347 3. 038985 1. 213412 1. 285247 2. 552396 3. 137963  
2. 2901 2. 565412 2. 462608 2. 935622 2. 507572 2. 75467 2. 374231 2. 213524 2. 643781  
4. 074316 5. 424186 5. 604443 5. 811757 5. 193985 4. 705605 5. 196255 4. 614055 5. 292365  
2. 403417 2. 037432 2. 392733 3. 111464 2. 466147 2. 057139 2. 680906 2. 477046 2. 020366  
2. 459621 3. 080118 2. 469132 2. 645848 2. 628323 2. 185471 2. 080497 2. 79036 3. 411313  
6. 154736 5. 633149 5. 644896 5. 486644 5. 833789 5. 759977 5. 957817 6. 383255 6. 092399  
1. 900527 2. 090043 1. 582972 1. 912758 2. 49095 1. 857634 1. 381656 1. 379235 1. 288359  
3. 947453 3. 964317 3. 750925 1. 970097 2. 752265 2. 699895 5. 175699 4. 386315 3. 763392  
0. 91768 1. 530912 0. 782016 1. 164643 2. 925724 0. 953527 0. 805238 1. 367037 1. 30716  
6. 662532 6. 815707 6. 29921 6. 530697 5. 30921 6. 35124 4. 829101 5. 138786 5. 0436  
2. 799007 2. 54501 2. 274626 1. 807526 1. 957495 2. 954483 1. 993107 2. 653622 2. 636936  
2. 300879 2. 106874 2. 743494 2. 543998 2. 91659 2. 242722 2. 559385 2. 464891 2. 859475  
2. 068783 1. 948834 2. 528275 2. 292963 2. 4857 2. 516005 2. 605366 1. 732404 2. 119514  
2. 371714 1. 990927 2. 965112 2. 325536 2. 86208 2. 733022 2. 882811 2. 923636 3. 028684  
1. 927665 3. 26591 2. 364805 2. 314839 2. 170966 2. 629659 3. 304222 2. 35813 2. 495962  
2. 695641 2. 774183 2. 551329 3. 067489 2. 30489 2. 834692 2. 757164 2. 680009 2. 68225  
5. 250607 5. 121913 4. 355372 4. 706288 6. 04979 5. 144753 5. 384894 3. 115035 3. 972263  
3. 317632 3. 512314 2. 997616 3. 18803 3. 449574 3. 067936 3. 256849 3. 269417 3. 342744  
1. 451231 2. 076992 1. 846976 1. 653163 1. 521163 2. 077846 1. 800709 1. 582453 1. 967779  
5. 696904 6. 720126 7. 033352 7. 084313 7. 157767 4. 256629 6. 713423 6. 139367 6. 748493  
3. 012897 3. 312712 2. 55363 2. 158558 2. 901859 2. 955991 2. 324915 2. 948175 2. 791495  
1. 667296 0. 964543 1. 06493 2. 602025 1. 077082 1. 588986 3. 313224 1. 3505 1. 30542  
1. 62148 1. 870509 1. 418164 1. 492415 1. 983338 1. 665821 1. 156625 1. 46671 2. 386745  
1. 665471 1. 359915 1. 953914 1. 851972 3. 680559 1. 642608 1. 971218 1. 480048 1. 88306  
1. 3604 1. 147031 0. 395502 1. 329074 2. 050779 2. 082807 1. 4807 0. 947645 2. 648268  
2. 218181 2. 480852 0. 764572 1. 665329 1. 810039 1. 594769 1. 333672 1. 317581 1. 647871  
7. 266366 6. 598164 7. 055797 7. 585015 7. 227567 6. 334359 7. 31758 7. 132882 7. 264218  
1. 712707 1. 833218 1. 377622 1. 57973 1. 958132 1. 260955 1. 626389 2. 125122 1. 269608  
3. 431895 2. 146339 3. 67872 3. 392975 4. 832693 4. 128218 4. 531799 3. 095119 3. 562771  
5. 017527 3. 848135 5. 720687 4. 769517 5. 508347 3. 071054 5. 795188 5. 053133 5. 393932  
2. 12716 2. 559721 1. 615437 1. 212742 2. 462173 1. 844252 1. 822753 3. 133523 1. 653033  
1. 052748 1. 836271 1. 069171 1. 500862 0. 984225 1. 339796 0. 888621 1. 827457 2. 837444  
2. 625455 2. 04493 2. 333059 2. 552063 1. 888507 2. 713546 2. 742185 3. 171738 2. 264217  
2. 795871 2. 501252 2. 51093 2. 411352 1. 985241 2. 590789 2. 893353 2. 679084 2. 650626  
2. 936132 3. 533533 1. 549485 1. 561049 0. 826544 1. 866874 0. 866641 1. 299577 0. 733494  
1. 261294 1. 868504 1. 190542 1. 836695 1. 03501 1. 37659 1. 181136 1. 203781 1. 791999  
2. 480504 2. 541699 2. 063398 2. 484007 2. 230855 2. 202503 2. 292418 1. 942833 2. 747428  
4. 032991 4. 613391 5. 801534 3. 904021 4. 38593 4. 059112 5. 089137 3. 652275 4. 246405  
1. 430162 1. 433201 3. 449511 1. 39725 2. 169019 1. 229823 1. 284386 1. 505771 1. 199564  
1. 503044 2. 548304 4. 232651 5. 401495 2. 526885 4. 253267 2. 296594 2. 581201 3. 077372

2. 437508 1. 981444 2. 712572 2. 253221 2. 943986 2. 528631 2. 376115 2. 422596 2. 53922  
2. 267225 3. 685115 3. 202305 2. 689337 2. 601257 3. 426622 1. 437219 1. 607892 1. 573043  
1. 94392 1. 370812 3. 306646 2. 029177 2. 280759 1. 362433 1. 629923 2. 167394 2. 089574  
1. 639473 1. 925596 1. 932483 2. 246225 2. 794624 2. 146194 1. 645616 2. 08972 2. 124344  
4. 914084 5. 251876 5. 476423 6. 867157 6. 141562 2. 419976 3. 439411 5. 626157 3. 340802  
1. 756694 2. 190518 1. 684556 2. 002903 1. 946327 2. 392481 1. 34931 1. 858966 1. 576427  
4. 193345 4. 518796 5. 54247 3. 851032 4. 671656 3. 169338 5. 797766 4. 786642 4. 720891  
1. 743654 1. 449555 1. 148942 2. 177474 1. 449076 1. 300924 1. 710336 2. 155289 1. 429404  
2. 32732 2. 848194 1. 946154 2. 117308 2. 083504 3. 346092 2. 356209 2. 474191 1. 843773  
1. 519639 2. 2208 2. 004665 1. 740474 1. 920894 1. 752111 1. 657161 2. 573092 2. 134628  
2. 304778 2. 242965 2. 949286 3. 14594 2. 122636 2. 734995 2. 212394 2. 001456 2. 332869  
3. 536541 2. 08344 3. 651282 3. 745442 2. 842948 3. 274664 4. 096953 3. 24164 3. 020499  
5. 807904 5. 114454 4. 91646 5. 762846 5. 181374 5. 884505 6. 435775 5. 801725 6. 074074  
2. 486956 2. 513115 3. 435205 4. 139198 3. 902286 4. 385303 4. 179098 2. 721213 3. 361042  
1. 494226 0. 942588 1. 208031 1. 097462 1. 348664 1. 965594 1. 394458 1. 249521 1. 318276  
10. 27933 9. 448945 9. 734509 10. 19215 9. 902496 10. 67772 10. 28358 10. 22839 10. 48563  
1. 874388 1. 861196 2. 082269 1. 830536 1. 32695 2. 206398 1. 421883 1. 576006 1. 67676  
2. 405648 2. 95868 2. 486289 1. 887103 2. 068411 3. 05431 1. 485561 1. 759885 1. 852528  
2. 559237 2. 124872 1. 163251 2. 930208 2. 539753 1. 325857 1. 708817 1. 561359 1. 654845  
1. 134315 1. 805883 1. 190544 4. 079232 1. 183705 1. 770682 1. 352259 1. 276315 1. 158978  
0. 939124 1. 036272 0. 617216 0. 694135 0. 434922 1. 43952 0. 63217 0. 520475 1. 309928  
1. 327845 1. 394786 0. 450812 0. 837252 0. 976298 0. 966559 1. 249847 0. 860023 0. 474321  
0. 937601 0. 647314 0. 657743 1. 447467 0. 454709 1. 066403 0. 842326 1. 054214 0. 818581  
1. 018361 1. 644376 1. 104428 1. 223061 1. 181586 1. 49992 1. 626506 1. 132955 0. 706716  
0. 7021 1. 123446 0. 799828 1. 226023 1. 224104 0. 702484 0. 616096 1. 232205 0. 618922  
1. 439245 2. 037494 1. 011989 2. 323823 3. 074906 2. 575805 1. 0144 3. 275496 1. 821578  
1. 10448 0. 950779 0. 619714 0. 959417 0. 769837 1. 217058 0. 811605 1. 26193 1. 497454  
2. 003627 3. 115071 2. 20723 2. 908991 3. 368952 3. 076751 2. 395576 2. 353486 2. 378019  
3. 998782 3. 808622 4. 653368 4. 635875 4. 821816 3. 957231 4. 104753 4. 353884 3. 525468  
1. 320028 1. 390302 1. 45276 1. 405366 1. 203296 1. 210976 1. 242212 1. 723108 1. 291358  
1. 173857 1. 860126 1. 295264 1. 940039 1. 123833 1. 905936 1. 203665 2. 218658 1. 63901  
2. 554646 3. 29733 1. 49176 2. 893341 1. 518492 1. 105949 2. 822527 2. 260116 3. 167602  
1. 799153 1. 767376 1. 350696 1. 229679 1. 797672 1. 291168 1. 417673 1. 300826 1. 316473  
5. 199246 5. 255066 5. 875728 5. 264253 5. 759125 5. 466497 5. 662468 4. 843626 4. 662723  
4. 943389 3. 879388 3. 388604 3. 81595 4. 568078 5. 388491 5. 002024 6. 036789 4. 426184  
5. 219163 3. 625873 2. 97218 4. 761457 4. 006897 4. 59138 4. 688569 4. 438479 4. 492378  
4. 645413 4. 214081 4. 419582 4. 435331 4. 857947 4. 998392 5. 165947 4. 97216 5. 789518  
9. 239036 8. 645526 8. 618978 7. 692336 7. 955561 8. 803426 8. 074438 6. 855874 6. 203604  
1. 573215 1. 709599 1. 658639 2. 209241 1. 99746 2. 029877 2. 049078 3. 281066 3. 335769  
2. 482023 2. 232853 2. 196167 2. 352773 2. 12595 2. 727568 2. 013332 3. 434767 2. 353785  
7. 876609 8. 686606 8. 825199 8. 700825 8. 608538 8. 025012 8. 485383 8. 287841 8. 698859  
1. 802732 1. 299545 2. 023221 1. 996594 1. 798868 2. 106009 1. 694738 2. 018219 2. 147399  
3. 518079 2. 651827 4. 042658 2. 737714 2. 742242 4. 226061 3. 428215 4. 108447 3. 850862  
6. 361708 6. 446944 5. 686891 5. 607447 6. 207454 5. 398406 5. 916675 6. 077992 5. 547876  
3. 102805 3. 244149 2. 988783 3. 911666 2. 647296 4. 683568 3. 068516 3. 608219 3. 773955  
6. 502094 5. 812732 5. 792588 2. 103994 5. 934316 4. 173544 3. 982749 4. 383582 5. 384001  
0. 904845 1. 966855 2. 315709 1. 630715 0. 986879 1. 47824 1. 436723 0. 9936 0. 733588  
2. 494332 2. 642293 1. 755442 2. 34846 2. 452628 2. 682253 2. 545655 2. 670709 2. 014049  
4. 00435 4. 116171 4. 076679 3. 861858 3. 899717 4. 266606 3. 928943 4. 128243 3. 691725  
1. 509117 2. 18724 1. 349069 2. 56496 1. 460709 1. 194444 2. 058354 1. 437306 1. 589763  
3. 395586 3. 246321 3. 20184 3. 495189 3. 352915 4. 444218 3. 766223 3. 42436 4. 274527

1. 816647 1. 602995 2. 383771 2. 954855 1. 467821 1. 70633 3. 154955 1. 309072 1. 5863  
6. 80786 6. 037698 6. 538462 7. 232117 6. 288809 8. 323194 7. 257581 7. 641943 7. 486898  
3. 52693 3. 027133 3. 760136 3. 918479 3. 547572 3. 963091 3. 590515 3. 811332 3. 696502  
1. 576681 2. 121855 1. 378978 3. 028427 1. 339489 1. 542712 1. 780653 1. 148952 1. 685314  
2. 313098 2. 900014 1. 524242 2. 238124 2. 811527 3. 049489 1. 48088 2. 046052 2. 459085  
1. 166248 1. 191496 3. 207828 0. 928428 1. 14775 2. 636499 1. 399745 2. 041348 1. 281145  
1. 801419 2. 826475 3. 832986 3. 017577 4. 88705 3. 169186 3. 671856 3. 449091 4. 30588  
6. 286709 5. 948708 6. 389635 6. 338421 5. 758426 6. 116088 6. 506412 6. 069436 5. 933203  
3. 299953 3. 932694 2. 724114 4. 262525 3. 850935 5. 587523 3. 532886 4. 055806 5. 178829  
1. 676166 1. 74995 2. 910118 3. 000714 1. 248695 1. 841136 1. 273345 1. 455675 1. 415016  
1. 132522 1. 504153 1. 456028 0. 832888 0. 870824 2. 631603 0. 920735 1. 431691 0. 666763  
3. 921408 3. 474221 4. 627986 3. 819181 3. 65566 4. 007254 4. 920598 4. 155795 3. 992995  
6. 293373 6. 511465 6. 755128 7. 25404 6. 700704 7. 585426 6. 387215 6. 551421 6. 129268  
3. 548808 3. 369227 3. 071321 3. 095387 3. 220183 4. 125829 3. 439965 3. 834816 3. 338568  
4. 489331 4. 062556 4. 008588 3. 890205 4. 717538 7. 585981 5. 103298 4. 777373 5. 816576  
2. 211256 2. 322458 2. 07698 1. 194254 1. 379221 1. 91125 1. 88006 1. 638823 1. 318337  
5. 62838 4. 867799 4. 422656 4. 083634 6. 089969 5. 142161 6. 220493 5. 938393 6. 320722  
3. 205104 1. 663182 3. 108434 3. 667182 2. 653636 3. 139066 3. 300923 3. 195847 3. 678187  
4. 598284 4. 075505 4. 594905 4. 734639 4. 591453 5. 664823 5. 116358 4. 666503 4. 915435  
6. 318852 5. 99032 5. 994468 6. 738182 6. 866188 7. 686304 6. 98278 6. 817822 6. 87669  
4. 1738 2. 949736 5. 127202 4. 696143 3. 686242 5. 465627 4. 924201 5. 618581 5. 301148  
1. 259824 1. 309531 0. 832492 1. 574315 1. 326947 1. 355274 1. 40996 1. 713248 1. 473202  
5. 241601 3. 704398 3. 296058 7. 127675 5. 290803 3. 590962 4. 737259 6. 002759 5. 485421  
1. 669442 1. 648919 1. 610766 1. 295636 0. 903759 7. 000057 2. 285476 2. 988283 2. 909453  
1. 870552 1. 827933 2. 113441 2. 061696 2. 461261 1. 862077 1. 976374 2. 486824 2. 488636  
7. 578036 6. 825447 7. 778606 8. 115412 8. 02421 6. 776084 8. 540742 8. 938648 8. 691782  
7. 607207 8. 44719 7. 982427 8. 274 8. 287069 7. 223988 7. 960341 7. 959084 7. 663339  
6. 799243 6. 973311 4. 933327 8. 477736 4. 461944 7. 850117 6. 096099 3. 630857 8. 122773  
6. 459666 5. 161796 6. 053919 6. 729594 6. 292282 7. 386899 7. 193856 7. 01707 7. 280603  
3. 413679 2. 628044 2. 124602 2. 258142 2. 182183 2. 613901 2. 222494 2. 989961 2. 285894  
2. 575502 1. 80971 2. 904825 2. 894897 2. 468721 3. 964834 1. 945784 2. 450014 3. 115261  
2. 593509 2. 626805 2. 227354 2. 257947 2. 312577 7. 168776 5. 741642 5. 177064 5. 104719  
3. 268124 2. 802841 3. 554737 2. 640864 3. 648183 3. 95677 4. 361988 4. 917714 5. 032507  
4. 564056 4. 145852 2. 621998 3. 875599 3. 827013 6. 672295 4. 732807 5. 156694 5. 840206  
3. 577574 2. 265676 2. 792213 3. 864589 2. 420821 2. 991066 2. 821707 2. 396695 4. 324233  
1. 148072 1. 310738 0. 929113 1. 019859 2. 027554 1. 078354 0. 601822 0. 472312 0. 936717  
1. 379292 1. 406278 2. 085615 1. 489462 1. 025893 1. 823513 1. 381863 1. 692891 1. 205715  
1. 972474 2. 190259 2. 583553 2. 865311 3. 480979 2. 901479 1. 723227 1. 827554 2. 768418  
2. 901887 2. 851803 4. 349406 2. 811815 2. 461532 2. 960779 3. 780576 2. 950762 2. 671681  
0. 812905 2. 223379 4. 373264 0. 925414 4. 493868 1. 189098 1. 090582 2. 069854 1. 259477  
0. 602938 0. 817719 0. 832183 1. 713767 0. 571649 1. 004272 0. 933888 1. 228595 1. 815115  
4. 36305 5. 477172 5. 203805 3. 764484 3. 380313 2. 845783 2. 711132 2. 862045 3. 901334  
1. 055543 3. 953093 2. 646954 1. 701123 2. 432522 1. 552459 3. 929513 1. 430488 1. 936789  
1. 090833 0. 909281 0. 770539 1. 073696 3. 159123 0. 938893 1. 059369 1. 209503 0. 999976  
1. 398331 5. 015191 1. 53495 1. 802241 1. 046836 1. 243695 1. 762002 1. 423631 1. 139925  
1. 428175 0. 852303 0. 68692 1. 423619 0. 792402 1. 428549 0. 767567 1. 188463 0. 93222  
1. 075587 1. 59767 0. 832349 1. 731639 0. 968568 1. 269146 1. 162208 0. 954386 0. 780906  
4. 666412 4. 88537 5. 307038 5. 329858 4. 5438 1. 970428 4. 336436 5. 43539 3. 598376  
3. 038224 2. 521207 2. 643478 3. 372711 3. 797386 3. 634211 2. 752101 2. 710839 3. 115716  
2. 791794 2. 950491 3. 123595 2. 950941 2. 987811 2. 502191 2. 408448 3. 189487 3. 108703  
0. 933277 0. 893303 0. 495028 1. 013757 0. 723681 0. 934971 1. 125932 0. 871891 0. 770779

2.156239 1.445299 1.344668 1.385252 2.148643 3.909593 1.093914 1.808445 1.283075  
3.885025 2.307784 3.199044 3.260338 4.022686 3.403056 2.86571 3.684272 2.843183  
2.007838 2.307739 3.62302 1.344664 3.201425 1.544877 1.737227 3.818588 1.942057  
0.884527 0.84026 0.895613 3.293114 0.747959 1.069032 0.83758 1.127158 1.164467  
1.243493 1.168974 0.63296 1.050404 0.779335 1.32893 0.759467 0.917317 1.160266  
2.872569 0.840317 1.613956 1.326724 0.720452 0.882016 0.798807 1.194037 1.207535  
1.679511 1.197398 0.815085 1.789041 1.017965 1.280965 1.418979 0.775781 1.478775  
1.067161 1.369452 0.608754 1.002074 1.209103 1.106885 1.06808 1.219886 0.909203  
2.770407 3.003041 2.962405 3.402612 3.208011 3.283786 2.268201 2.915931 2.454689  
1.235496 1.216759 0.748517 1.347394 0.752318 0.892972 0.91026 1.631341 0.884466  
1.591028 1.286295 1.603199 1.152847 1.557732 1.32229 1.152825 1.899242 1.174126  
0.990056 1.641073 1.059971 1.175319 0.612633 0.775915 0.895603 2.493103 1.86916  
1.392302 1.125037 1.816627 1.607292 1.508521 1.383244 1.296215 1.287971 1.669162  
1.798 5.833822 0.865258 1.59553 0.931637 1.31709 1.566532 1.206768 1.913509  
3.353315 3.394358 4.149943 3.37887 3.401175 3.430979 3.012991 3.553641 2.909426  
1.129461 1.3905 1.053749 1.141051 1.320911 0.930017 0.798123 1.254416 0.936084  
1.160016 1.223297 1.051378 1.016361 0.797812 0.788033 1.157768 1.796953 0.799895  
0.595146 1.388751 2.288728 3.437253 2.761336 1.738721 2.123186 1.466943 2.526279  
1.053258 2.065088 1.085944 2.532928 1.210435 1.509152 1.227973 1.539963 1.675723  
2.616856 1.286121 1.830474 1.404732 2.374987 1.846497 1.246717 1.020451 1.379876  
1.499651 1.643463 1.876472 2.202664 1.641651 1.826935 1.640572 2.270928 2.134559  
0.880348 1.12468 1.613383 1.222964 0.906081 1.170016 2.018642 1.06824 1.35113  
1.42074 1.664548 1.038291 2.85602 1.390006 0.989525 1.162951 1.221097 1.74381  
2.7895 1.035102 1.27721 1.353729 0.777009 0.921293 0.922862 0.944123 1.137363  
2.994082 2.966637 3.941338 3.03795 1.84999 2.871622 1.611817 3.472831 1.714135  
0.923989 0.923895 1.071502 0.898756 0.629291 1.514824 2.388193 0.740614 1.739748  
0.964667 0.957973 0.781534 0.780202 1.08175 0.892037 1.334302 0.947935 0.910295  
0.948108 0.932144 0.965656 1.372983 1.251084 0.810582 1.215467 1.860522 1.331205  
1.752963 1.859182 1.666908 1.466509 2.012486 1.77181 1.45197 1.753076 2.031773  
2.990821 2.198719 2.490973 2.567266 1.985871 2.788419 2.80451 3.319128 2.762465  
3.68368 2.626031 2.557491 2.328087 3.309532 3.031399 2.93153 2.35595 2.950234  
2.040575 0.769699 0.869941 1.303256 0.624913 1.321821 1.274885 1.194832 1.8973  
1.781664 1.559229 1.671827 1.595867 1.635364 1.389935 1.735589 2.148439 1.55078  
1.395996 1.146231 1.116557 1.921702 1.291777 1.112736 1.371283 1.405629 0.69967  
0.967021 0.66508 0.764064 1.004457 0.657867 1.137713 0.924873 1.171895 0.933507  
2.514587 0.669735 0.266457 1.485248 0.631813 1.223079 1.056029 1.092696 0.671419  
1.6043 1.458096 0.793247 1.800441 1.779326 0.683912 1.720412 0.622128 2.938948  
2.585392 3.687395 3.866084 2.696304 3.807114 2.714902 2.587282 3.711577 1.634205  
1.18643 0.747554 0.801218 0.809729 1.468115 0.901272 1.059904 1.055328 1.049815  
1.674171 2.201875 2.890209 2.774104 3.121813 2.838695 2.239278 2.567152 3.838749  
1.906306 3.111877 2.750097 2.720061 1.831511 3.046731 2.095509 1.595971 1.568247  
2.03122 1.701552 2.491161 2.817054 2.066652 2.31277 1.792766 2.4901 3.220602  
1.722209 1.313296 0.992002 1.61597 1.12077 1.14345 1.44302 1.382834 1.548208  
3.108606 1.42874 1.037847 2.172136 1.422038 1.246994 1.134221 1.757065 0.964721  
0.900471 0.865254 0.660804 2.374986 1.056404 1.001541 0.985325 1.226174 1.191862  
2.818463 2.839722 1.907439 1.379628 3.575166 1.980459 2.470853 1.667252 1.492641  
2.61424 2.691706 0.889318 3.882794 1.086556 1.021935 0.973197 3.163104 0.966239  
1.098351 1.375725 1.617088 1.362415 1.257581 0.995553 1.448707 1.330029 1.681968  
2.014859 2.204084 1.615689 1.501809 2.244322 1.554382 1.359169 3.319916 2.334358  
1.182305 1.580334 0.973366 2.493755 1.362487 2.962936 1.289046 1.275408 1.222668  
1.535468 2.262804 2.994792 0.656367 2.041583 0.79324 1.081156 2.64616 1.069511

2.195816 1.962634 1.295364 2.862765 1.907884 1.496403 1.280516 2.159058 1.561484  
2.090856 2.939301 2.86895 3.267451 3.427759 2.675735 2.645101 3.432434 2.71226  
1.17513 1.085925 1.098674 1.012705 0.746494 1.117991 1.494293 1.020229 1.07918  
1.137818 0.930787 0.862362 1.234952 1.293631 0.894027 1.163322 0.786009 1.55659  
2.422993 1.861463 1.951211 1.993447 1.609734 1.993918 1.493982 1.856141 1.785135  
5.582931 4.991273 5.734864 5.153239 5.220299 4.647041 4.728221 5.452176 5.403482  
3.440701 3.573301 3.942057 3.340938 3.392039 4.05514 3.357809 3.512892 4.062575  
1.867696 1.871164 2.516831 1.945752 1.890658 2.22557 2.61625 1.67333 1.211492  
0.899243 3.204771 2.466227 1.951317 1.030843 1.060861 1.117177 0.569564 0.988918  
3.419529 2.987374 3.645994 2.947144 3.499746 3.901312 2.729017 3.158344 2.188221  
2.560431 1.668812 2.210002 1.660459 1.255897 2.705786 1.834591 2.0826 1.48006  
1.399239 2.161638 1.506489 2.179054 1.590884 1.989652 1.011482 1.687176 1.524835  
2.945907 3.961645 4.424329 0.993105 3.379052 1.051093 1.177079 1.418108 0.914921  
4.600174 3.447186 5.016687 3.606216 4.835277 4.641039 4.92611 2.926378 5.277952  
1.404733 1.612391 1.184548 2.30997 1.884782 1.658154 1.686984 1.505753 1.957612  
1.48974 1.172622 1.639355 1.36726 1.408757 1.262388 1.491165 1.475686 1.515344  
4.107039 2.344236 3.158966 3.836649 2.300534 3.354798 2.395926 2.519872 3.467994  
0.850377 0.907913 0.73068 1.129328 1.6048 0.744049 1.340401 0.898467 1.020689  
1.232304 1.588672 1.184228 1.603949 1.479456 1.804482 1.404682 1.688544 2.669919  
1.303379 0.571978 1.164809 1.414165 1.991804 0.796918 0.713563 1.149524 0.801233  
1.935258 2.26637 1.54245 1.407679 1.931375 2.545044 1.803604 2.782993 1.478391  
2.933562 1.048124 1.288917 1.402951 1.659912 1.799229 1.903875 1.748886 1.222479  
0.755513 1.028059 0.790599 1.47329 0.943916 1.095367 0.465087 0.659471 0.959731  
0.902773 1.087348 1.022165 0.977761 0.673557 1.058326 0.81375 1.143306 0.696425  
1.032329 0.883127 1.024596 1.460268 1.038552 1.72516 1.879435 1.57197 0.909575  
2.508271 2.164328 1.996648 2.780613 3.07746 1.979528 3.491539 2.498526 3.355884  
2.551587 2.483573 2.127688 1.579298 1.325759 1.952562 1.987593 1.769962 2.71038  
1.035553 0.903171 1.189288 1.200577 0.878567 1.070049 1.30192 1.154132 0.991477  
7.016344 9.172735 7.297382 5.3266 6.506137 4.026178 6.199691 3.21859 4.054761  
4.315612 4.310427 4.867061 3.179025 5.090737 4.328631 4.343326 3.748645 5.432612  
3.573418 2.374892 3.445146 2.588608 3.269752 2.530487 2.870009 2.477051 3.893161  
2.997297 2.50087 2.219488 3.171549 3.194391 3.542525 2.426445 2.828368 3.100588  
1.140176 1.795558 0.896697 1.258933 0.822891 1.687179 1.20449 1.36447 1.047886  
1.425453 2.575691 1.838145 0.904325 4.361911 0.980721 1.350356 0.944336 0.845581  
0.809997 1.10857 1.537685 1.312376 0.978292 0.809193 1.543081 1.498229 1.163096  
1.2931 1.484129 1.194822 0.955977 1.231599 0.871594 1.334301 1.104391 1.521063  
7.37098 2.856575 5.789753 7.743133 6.777238 9.239988 7.614419 8.361294 9.487418  
3.978053 4.042298 2.524481 4.397434 2.708897 2.667432 4.112358 4.630047 3.851991  
2.864706 1.833528 2.087826 1.291599 1.512828 1.48385 1.339617 1.291462 0.967272  
2.762994 1.254745 1.190863 2.008247 1.473367 2.438893 1.155303 1.869349 2.027255  
1.206222 1.752659 1.181433 1.906289 1.543318 1.753992 1.358277 1.706284 1.660415  
2.083428 2.253338 1.482573 1.484576 1.845722 2.139096 1.592584 1.849706 2.145853  
3.8758 5.297344 1.418272 3.644585 1.466 1.206681 1.391826 2.808066 1.277995  
2.042321 3.697811 1.161766 1.762319 3.103708 1.719168 1.534897 0.970839 2.034101  
2.802995 2.214343 2.214343 1.271035 1.211345 2.572154 1.276421 0.971203 3.126487  
1.173775 1.087985 0.832315 1.598892 0.753011 1.204852 1.235567 0.988481 1.181344  
2.422394 1.644314 2.266257 1.748391 2.722937 2.4595 2.890322 3.704347 2.496743  
1.834478 3.067559 3.942769 3.007427 3.246992 2.19791 3.203048 4.837199 3.152164  
1.958209 1.182935 1.312956 2.686173 1.127578 1.788636 1.581284 1.085599 1.640308  
1.177584 0.648584 1.773995 1.568874 1.815347 2.087244 0.722494 1.205529 0.908044  
1.847978 2.224109 1.849017 2.713542 1.888054 2.416343 2.714287 2.615651 1.428537



1. 636055 1. 754034 1. 879993 1. 156089 2. 27264 1. 320418 1. 737492 1. 697437 1. 320418  
2. 667522 1. 044968 1. 390375 2. 661953 1. 47896 1. 652603 1. 485954 1. 134171 1. 035241  
2. 234534 2. 89175 2. 577492 2. 502518 3. 078745 2. 794005 2. 015327 2. 606775 3. 155282  
2. 24643 1. 395769 2. 242048 2. 174245 2. 286904 1. 667543 1. 314553 2. 507695 2. 443384  
6. 299493 4. 472341 6. 681181 7. 872053 5. 806012 3. 215 2. 761413 4. 972927 3. 174545  
3. 657567 2. 625416 2. 871721 3. 816434 1. 424634 2. 100079 4. 58777 1. 852022 3. 630173  
0. 860444 1. 279688 0. 867853 0. 79985 0. 581909 1. 247033 1. 126386 0. 919547 1. 069091  
1. 165934 1. 345343 0. 964555 1. 853226 1. 121919 1. 073253 1. 200411 0. 927933 0. 909791  
1. 886562 1. 573617 1. 245366 1. 655972 1. 796185 1. 311466 1. 365323 1. 428981 1. 717539  
0. 649205 0. 811333 0. 669281 0. 864711 0. 75215 0. 96917 0. 760891 1. 092474 0. 696761  
1. 370728 1. 682358 0. 757755 2. 187342 1. 20572 2. 028395 1. 4472 1. 191491 1. 455394  
4. 989682 7. 148404 8. 734219 8. 057183 7. 162825 1. 949779 6. 233151 6. 201988 4. 550725  
0. 93933 1. 076014 0. 585409 1. 205697 0. 722673 0. 911257 0. 662955 0. 857255 0. 566287  
1. 148797 1. 449455 0. 966391 0. 97621 1. 121182 1. 321532 1. 396866 1. 531141 1. 776348  
1. 916801 4. 429863 4. 559284 1. 262967 5. 555636 2. 792254 1. 246352 3. 236012 3. 417636  
0. 906505 1. 129066 0. 66331 1. 247006 0. 573946 0. 885578 1. 05967 0. 830656 0. 821385  
2. 263254 1. 285595 0. 796951 1. 086772 1. 178798 1. 092414 1. 51028 1. 360834 1. 192019  
4. 712696 5. 313726 3. 938774 5. 054725 5. 580688 1. 889472 2. 4836 3. 015013 4. 542531  
0. 837297 0. 825352 0. 513561 1. 650919 0. 544485 3. 410506 0. 832381 1. 133489 0. 55902  
2. 995155 2. 37582 1. 411056 2. 794498 2. 28995 2. 031678 1. 876327 1. 558499 1. 666671  
1. 02953 2. 032181 0. 934669 1. 796191 0. 91119 1. 122234 1. 398603 2. 721286 1. 351845  
1. 381011 2. 617804 1. 65044 4. 143315 2. 908496 1. 324094 1. 363165 1. 661712 1. 797123  
1. 309177 1. 156774 1. 205302 1. 350938 0. 83753 1. 380101 1. 343901 1. 002133 1. 362151  
1. 274846 1. 715476 1. 694562 1. 102527 1. 258793 1. 656503 0. 980051 1. 147137 1. 156265  
0. 907228 1. 063244 1. 403988 0. 986721 1. 032519 0. 996602 0. 857338 1. 235274 1. 35679  
1. 15323 1. 330874 0. 991724 0. 98007 0. 773429 1. 053639 0. 838379 1. 377519 1. 654977  
4. 345332 5. 351256 4. 953754 5. 260449 3. 470879 2. 081372 2. 015713 1. 911275 3. 440303  
1. 862761 1. 632706 1. 359319 3. 192774 1. 471494 1. 387509 1. 537211 2. 552831 1. 465112  
1. 333915 1. 751177 0. 959617 1. 751177 1. 445531 1. 716486 1. 53102 1. 72852 2. 019963  
2. 455104 2. 672929 1. 898168 2. 058918 2. 272147 2. 602755 2. 44899 2. 219312 3. 346167  
0. 800877 0. 740179 0. 845047 1. 52265 0. 79383 1. 165524 0. 918205 0. 656422 0. 840859  
3. 101473 2. 209457 2. 395715 2. 32467 2. 330168 2. 939067 1. 620685 2. 354677 2. 854606  
1. 746778 2. 969976 1. 162865 1. 61284 1. 228505 1. 087049 1. 6217 1. 312456 1. 34027  
2. 650627 2. 951793 3. 811261 2. 478003 2. 016808 1. 512304 0. 917511 1. 578375 1. 892153  
1. 334278 1. 360056 1. 814947 2. 116379 1. 210447 1. 186472 1. 781842 1. 592154 1. 897392  
2. 380238 4. 182744 2. 024164 2. 285114 3. 182574 2. 780692 2. 250918 2. 263314 2. 979306  
2. 343784 4. 886935 5. 981871 3. 412155 3. 150494 2. 909463 1. 731688 2. 33758 2. 834  
4. 576608 5. 948918 4. 765798 2. 88028 4. 942045 4. 263855 4. 477003 4. 247181 4. 994172  
5. 146805 3. 621609 3. 454311 4. 435846 3. 444366 5. 626256 4. 787815 3. 020272 4. 286516  
7. 418875 7. 695278 7. 715129 7. 24046 8. 2108 7. 128072 8. 258333 8. 733962 8. 708699  
7. 172563 6. 55177 6. 392862 7. 2821 6. 127273 8. 600177 6. 38404 4. 556892 5. 634825  
7. 68816 7. 042853 6. 544623 6. 817419 7. 696387 7. 91514 6. 992776 7. 333091 7. 362892  
8. 989733 8. 833248 8. 651667 8. 994328 8. 673357 8. 886398 8. 670718 8. 535587 8. 804522  
1. 800417 1. 835732 1. 817778 1. 816471 1. 560288 2. 067209 1. 229439 2. 316589 3. 160541  
7. 936733 7. 529588 7. 43679 7. 453839 7. 291855 7. 618411 7. 659468 7. 350591 7. 92501  
2. 802323 3. 379153 3. 491303 4. 052737 3. 733006 3. 651105 2. 769329 3. 320747 4. 21644  
0. 985445 4. 107221 1. 569163 2. 644833 1. 239031 1. 730091 0. 938968 0. 914661 1. 299643  
2. 139716 1. 841412 2. 089804 1. 88325 1. 797105 1. 80744 1. 724168 2. 415409 1. 670482  
0. 876194 1. 289937 0. 957323 1. 213424 1. 409922 1. 180839 0. 885638 1. 1145 1. 073693  
1. 291651 1. 303626 2. 226188 1. 368733 1. 810739 1. 339954 0. 937463 1. 848064 1. 345789  
3. 354899 2. 194783 2. 545655 1. 858186 2. 350114 1. 496636 1. 559527 2. 128018 1. 998817

5. 252214 4. 539723 4. 485086 5. 8466 4. 619641 6. 571108 4. 640818 4. 90736 5. 369892  
5. 406042 4. 039053 5. 807945 3. 999436 5. 233957 5. 505147 5. 830029 4. 315781 5. 611522  
2. 460273 2. 974004 2. 31758 3. 136353 5. 031941 3. 40297 2. 639653 2. 433097 1. 915109  
5. 064121 4. 295243 5. 077344 4. 80544 4. 642237 5. 074762 5. 183757 5. 068899 4. 696623  
7. 420172 7. 363582 7. 413917 7. 314517 7. 77334 7. 199077 7. 918563 7. 9203 6. 968651  
5. 846279 4. 432183 5. 612691 4. 942405 6. 132373 6. 167567 5. 391772 6. 204696 6. 082218  
6. 916605 7. 568582 7. 296374 7. 628603 7. 165949 7. 186684 6. 953455 7. 073345 7. 057201  
7. 429423 7. 43934 8. 237493 7. 989843 8. 29306 6. 120957 8. 447452 8. 230201 8. 443851  
5. 133678 6. 988187 6. 034772 6. 432331 5. 621589 5. 121572 5. 326407 4. 700822 4. 844698  
6. 642729 6. 276062 6. 903106 6. 809463 7. 281457 4. 052353 7. 548902 7. 779646 7. 5058  
3. 968441 3. 615943 3. 449015 4. 288146 3. 153466 3. 740343 4. 439303 3. 720337 3. 569685  
4. 281816 4. 276413 4. 733825 3. 84238 4. 122176 4. 599514 4. 117801 5. 290792 5. 235639  
7. 865287 7. 175576 7. 738373 6. 953152 7. 237128 6. 997902 6. 700849 6. 711615 6. 749979  
2. 977744 2. 549125 2. 668563 2. 317936 3. 129711 2. 699032 3. 152382 3. 456192 2. 946296  
1. 782743 1. 972654 1. 96478 2. 13826 2. 730407 2. 271939 2. 170386 2. 230864 1. 927281  
3. 483311 3. 114495 3. 845096 4. 093631 3. 685094 6. 000485 5. 024414 4. 48862 5. 61919  
1. 314975 1. 281914 1. 603046 1. 701819 1. 501971 3. 430315 1. 48177 1. 490033 1. 39006  
1. 142263 2. 205273 2. 196015 1. 698043 1. 860308 1. 42677 1. 459656 2. 079813 1. 580045  
2. 702749 2. 782824 1. 600524 1. 383939 1. 371433 2. 019158 1. 59427 2. 434228 1. 045545  
1. 46528 2. 633584 1. 223262 1. 743171 2. 547342 1. 216852 0. 941707 1. 663101 2. 304603  
1. 749265 1. 910063 2. 05674 1. 634012 2. 690041 1. 523375 2. 615716 1. 981793 1. 758923  
1. 654013 3. 060447 1. 11304 1. 999973 1. 266928 1. 721536 1. 286186 2. 522262 1. 342081  
4. 3553 3. 057884 4. 886927 4. 993676 4. 124626 5. 465735 5. 173306 6. 044395 5. 766623  
1. 572414 2. 30788 2. 143351 1. 093948 1. 9479 1. 649902 1. 574014 2. 214211 1. 11534  
0. 759529 3. 159029 0. 706128 1. 931463 1. 464621 1. 269248 1. 0319 0. 759471 1. 928393  
1. 498327 1. 156527 1. 472646 2. 150572 0. 922626 1. 429055 2. 091841 2. 096285 1. 514158  
1. 518686 1. 23243 1. 876086 2. 048818 1. 640637 1. 145947 1. 32603 1. 917012 1. 410135  
1. 215743 1. 901304 1. 337335 1. 146425 1. 002704 1. 379126 1. 325049 1. 759222 1. 303492  
1. 054709 0. 999492 0. 978134 0. 800365 1. 327745 1. 092289 1. 094216 1. 306746 0. 935935  
4. 596449 4. 64088 4. 819764 6. 111516 5. 574035 5. 050272 5. 768594 6. 046904 5. 188132  
3. 974373 3. 085817 4. 970655 3. 215096 3. 962358 2. 298341 2. 57875 2. 269758 2. 127215  
8. 936485 7. 141809 8. 569546 9. 947937 7. 208357 9. 147779 8. 745887 6. 695734 8. 617233  
4. 914398 4. 565768 4. 524807 3. 984426 4. 132708 4. 864413 3. 783722 3. 938919 4. 048555  
7. 246757 7. 344932 7. 490714 7. 144179 7. 42133 7. 344779 7. 078358 6. 366015 6. 784551  
5. 668289 4. 713397 5. 12009 5. 96376 5. 56848 4. 870734 6. 171233 6. 584376 6. 322227  
4. 617607 4. 393969 4. 30903 3. 844 4. 612946 3. 815207 4. 714496 5. 370443 4. 854236  
6. 194421 6. 797721 6. 635184 5. 603999 6. 541084 5. 915382 6. 204541 5. 93011 5. 911774  
3. 772997 4. 19099 4. 401396 4. 638997 3. 427888 6. 354119 4. 248419 4. 720894 4. 061043  
6. 306807 5. 589945 6. 026654 6. 356861 6. 111408 6. 304659 6. 595046 6. 494185 6. 332462  
6. 878821 7. 285831 7. 232134 6. 33305 6. 296153 5. 125715 5. 513788 4. 272692 5. 455511  
6. 480563 6. 526923 5. 15967 5. 819419 5. 161512 5. 707458 5. 519651 4. 122234 3. 622382  
5. 146023 4. 726233 4. 682635 4. 663558 5. 278188 5. 015167 5. 426786 6. 263045 5. 901603  
3. 495461 3. 819252 3. 037722 3. 685323 3. 874983 3. 491417 4. 918597 4. 214747 5. 020435  
8. 015968 8. 040451 8. 25162 7. 027241 8. 193214 6. 840917 9. 635615 8. 942951 8. 651353  
5. 708052 4. 850138 5. 085317 5. 232774 5. 698276 4. 413104 6. 521861 5. 663738 5. 942984  
5. 598602 6. 141793 6. 007153 5. 850818 5. 851021 5. 391049 6. 447616 6. 34367 5. 857288  
6. 842591 6. 268347 6. 065399 6. 712734 6. 101517 4. 876161 7. 803819 8. 439528 8. 328603  
3. 784509 3. 746513 4. 441318 4. 710469 4. 723746 3. 854102 5. 567016 5. 01512 3. 176647  
2. 919093 4. 892981 4. 015191 5. 091827 4. 204268 2. 799599 3. 486152 4. 52576 4. 946757  
2. 888617 3. 877875 1. 313428 1. 584622 3. 524094 3. 437158 2. 619044 3. 80187 4. 101625  
6. 61712 3. 614287 3. 135548 4. 022415 0. 731794 1. 812685 2. 375834 1. 496291 1. 479467

2. 901454 1. 519022 2. 457914 2. 970379 2. 787644 2. 648966 2. 6587 2. 557078 4. 37196  
7. 873459 7. 855404 7. 72153 7. 58859 7. 952878 7. 597529 7. 911093 7. 682011 7. 545426  
2. 78457 3. 167445 3. 700457 5. 121897 2. 417067 2. 875891 3. 080851 2. 792048 2. 703364  
2. 642268 1. 795126 1. 828516 2. 410327 1. 99015 3. 930472 1. 789546 3. 338254 2. 219756  
1. 925664 1. 852641 2. 773673 2. 436588 2. 024244 1. 907343 1. 387124 2. 620331 2. 089104  
5. 96757 4. 087717 5. 424227 4. 94463 3. 611688 3. 02187 4. 662236 2. 998179 2. 995013  
3. 114799 2. 721939 4. 349871 2. 920141 4. 363444 1. 463201 5. 114938 2. 057161 4. 78077  
2. 589701 2. 660253 2. 42967 2. 364876 2. 35868 2. 485229 1. 58499 2. 448413 1. 685969  
3. 264259 4. 039268 3. 807079 5. 373298 3. 46803 4. 354415 4. 395949 3. 761879 4. 094032  
6. 098293 6. 574974 6. 030056 6. 51617 5. 955988 6. 036881 6. 60741 6. 215113 6. 473512  
1. 531822 2. 078999 1. 398385 1. 17719 1. 273974 1. 654577 0. 960514 1. 498776 1. 284039  
2. 522217 2. 524352 2. 49231 2. 56232 2. 643151 2. 5704 2. 845242 2. 702111 2. 120472  
6. 860337 6. 125465 6. 456961 6. 056383 7. 472252 6. 461378 6. 664048 6. 034716 6. 544108  
2. 853512 3. 879309 3. 407771 2. 148843 2. 705212 1. 853332 2. 652062 2. 368131 2. 445432  
2. 720919 1. 868308 1. 508432 1. 497441 2. 598907 3. 093135 4. 246386 2. 280618 1. 749351  
1. 969 1. 83829 0. 990762 1. 417165 2. 270853 1. 532682 1. 185957 2. 085128 2. 705783  
2. 860516 3. 036592 2. 293234 3. 242079 2. 543585 2. 213872 2. 367271 1. 990917 2. 778893  
1. 893425 1. 690522 2. 988297 1. 03951 1. 103652 1. 376255 1. 328126 1. 549897 2. 740284  
1. 716971 2. 572107 1. 650436 1. 836159 1. 842344 1. 65019 1. 388097 1. 440511 1. 552617  
1. 184223 1. 47083 1. 258583 1. 148382 1. 253121 1. 205727 1. 011754 1. 714307 1. 84499  
2. 990589 2. 269101 4. 489624 2. 647106 5. 274738 4. 722823 5. 084474 5. 02079 5. 463977  
1. 213333 1. 958706 1. 163511 1. 367767 1. 21049 1. 224275 1. 226765 2. 078188 0. 944755  
5. 171883 5. 653276 5. 09685 4. 380485 5. 215036 4. 641884 3. 93465 3. 748045 4. 067617  
1. 54454 1. 788219 2. 103702 2. 562688 2. 53921 1. 840167 1. 242535 2. 476216 1. 905268  
1. 764927 0. 956658 1. 753503 1. 560322 1. 816388 2. 027857 1. 859986 1. 810968 1. 675048  
2. 086599 2. 407671 2. 551002 2. 58997 2. 708101 2. 215175 2. 168403 2. 560919 1. 910116  
9. 235797 8. 720179 8. 554714 8. 731986 8. 082603 8. 616171 7. 831208 7. 91951 7. 315823  
2. 283459 2. 626458 3. 155948 3. 262913 3. 083577 3. 183422 2. 654798 3. 311546 3. 576072  
2. 332392 1. 586811 2. 125764 1. 60268 1. 71141 1. 739755 1. 629871 1. 242891 1. 499893  
2. 289887 2. 172435 4. 072232 4. 435408 2. 911627 3. 468878 2. 800707 4. 534196 2. 952184  
3. 506737 3. 977845 2. 194862 3. 259559 4. 737977 2. 767453 2. 426043 3. 948742 3. 978825  
6. 523937 7. 127113 6. 505522 6. 162303 6. 650005 6. 084569 5. 660895 6. 420992 6. 373479  
2. 274778 2. 865535 2. 751334 2. 259035 2. 22658 2. 245101 3. 912777 2. 212826 2. 598634  
4. 509526 4. 709168 4. 536478 4. 004121 4. 565448 4. 603246 3. 708284 4. 361253 4. 623355  
2. 094682 2. 906843 1. 53618 2. 056337 2. 844921 1. 900708 1. 68608 1. 999669 2. 020555  
6. 332293 5. 741543 6. 030058 4. 753605 6. 129978 5. 794684 6. 427135 6. 159543 6. 663952  
2. 831541 2. 75544 1. 733593 2. 190648 1. 242329 1. 414219 1. 308738 1. 235866 1. 60634  
3. 836088 4. 705226 5. 445989 6. 170468 5. 46021 5. 061712 5. 285864 5. 513839 5. 008605  
3. 706094 2. 459788 4. 257976 3. 709068 3. 621427 5. 162669 3. 305982 5. 015099 3. 52768  
2. 215098 2. 638277 2. 527885 2. 393522 2. 621388 3. 667236 2. 859065 3. 079844 2. 021483  
2. 189162 2. 598617 2. 223555 2. 4409 1. 950898 2. 562859 2. 073056 1. 968926 1. 751508  
9. 055016 9. 099001 8. 890405 9. 295855 9. 048514 9. 295934 9. 310441 9. 657713 9. 741172  
5. 625113 4. 693008 4. 866074 5. 100774 3. 737963 5. 158793 4. 730288 5. 0538 4. 682088  
2. 103044 3. 119484 3. 465206 2. 290752 4. 460364 2. 696405 2. 497774 2. 647555 2. 370178  
3. 843296 4. 517691 4. 383088 4. 90836 4. 717554 5. 587765 5. 275227 5. 916542 5. 549289  
3. 260381 3. 727493 3. 912217 3. 977494 2. 872898 4. 116047 4. 0854 4. 617525 4. 539717  
1. 460928 3. 232356 2. 089867 2. 106173 2. 191294 2. 490074 2. 045625 1. 913763 1. 514817  
2. 533363 3. 168323 2. 889476 3. 089568 2. 544121 2. 801776 3. 063472 2. 661617 2. 117709  
4. 628262 4. 203736 4. 135255 4. 509658 4. 200127 3. 988977 5. 18959 5. 564846 4. 548822  
1. 433751 1. 676437 1. 053737 1. 577139 1. 843712 1. 659347 1. 525449 1. 474007 1. 646037  
8. 026429 7. 777952 7. 433479 7. 209647 7. 975358 7. 548803 7. 800033 7. 513189 7. 899866

3. 241221 2. 57569 3. 597055 2. 53702 3. 363332 4. 189809 2. 786335 3. 695837 3. 151921  
2. 617744 1. 412743 2. 440524 3. 244412 2. 363681 2. 452436 2. 385467 3. 01453 4. 008736  
1. 445184 1. 942669 1. 77296 1. 376413 2. 169104 1. 482161 1. 518242 2. 287704 2. 236087  
1. 654693 2. 201357 0. 722033 1. 225634 1. 344255 1. 362602 0. 704184 1. 330375 1. 30092  
5. 170412 3. 285534 4. 467288 3. 894763 3. 870455 2. 327024 3. 792229 3. 535425 3. 01469  
1. 406171 2. 119666 1. 123404 1. 735849 1. 16699 1. 352425 0. 869893 0. 825789 1. 790287  
1. 651154 1. 264235 1. 878737 2. 552271 1. 648366 1. 186516 1. 435653 1. 666888 1. 880929  
3. 247387 2. 998992 2. 071904 2. 768855 3. 416449 4. 298012 3. 457186 3. 917505 4. 430167  
4. 795326 5. 303764 5. 55499 6. 08738 5. 859939 5. 029409 6. 303166 5. 190121 5. 56261  
2. 133073 1. 180917 2. 434002 2. 81051 3. 065958 2. 579651 2. 242785 2. 372832 2. 500062  
2. 900308 3. 944888 2. 700604 1. 444829 2. 247057 1. 743609 2. 994933 2. 377051 2. 698856  
2. 932655 1. 264033 1. 697762 3. 150058 2. 443546 1. 413122 1. 387221 1. 238027 1. 583571  
6. 621735 6. 751951 6. 745098 6. 588628 6. 775671 6. 970156 6. 83313 6. 551973 6. 584811  
1. 774899 3. 025522 3. 042617 2. 576735 3. 821742 3. 940495 2. 232482 2. 592105 3. 868425  
4. 902698 5. 690192 4. 664393 5. 222928 5. 98387 5. 716335 4. 855634 4. 767411 5. 783512  
4. 986306 4. 412744 4. 639076 5. 913905 5. 293998 5. 078722 5. 142087 4. 601197 4. 993636  
3. 152342 2. 572221 3. 09045 3. 81098 4. 098208 5. 271995 2. 74533 3. 729922 3. 400852  
6. 781366 7. 857654 6. 824479 6. 658025 7. 853227 6. 045722 7. 255339 7. 898604 7. 638847  
3. 755867 3. 682157 4. 680986 3. 869907 3. 928428 4. 169401 4. 189824 3. 79887 4. 581523  
9. 866973 9. 942129 9. 756252 9. 586881 9. 964466 8. 911321 9. 902539 9. 744482 9. 479452  
2. 33451 1. 888554 1. 886609 1. 717706 3. 213219 1. 825752 1. 855428 1. 437738 2. 172276  
1. 388281 1. 056225 1. 320324 1. 422383 0. 916832 1. 376381 1. 142549 1. 603628 1. 332158  
1. 820117 1. 875076 2. 053803 2. 568231 2. 029273 1. 905488 1. 918273 2. 213562 1. 755388  
1. 625364 2. 931999 2. 466013 1. 852808 2. 642182 2. 443755 1. 737808 1. 663376 2. 104159  
7. 855209 8. 669837 8. 181278 7. 794471 8. 179144 7. 453125 9. 165383 8. 526675 8. 068899  
6. 579229 6. 761067 6. 681307 6. 336231 6. 388113 6. 927807 6. 194567 6. 257228 6. 390931  
8. 191389 7. 777288 8. 000138 7. 833119 7. 763965 8. 664127 8. 173076 7. 773318 8. 160388  
4. 551259 4. 205319 4. 156055 4. 961453 5. 051506 6. 46906 4. 299102 4. 851169 5. 989469  
7. 101545 7. 502873 6. 891128 6. 673157 6. 609753 7. 387396 6. 82424 6. 739215 6. 818003  
4. 822424 4. 681032 4. 52739 3. 406328 4. 77297 4. 204702 4. 064609 3. 846618 4. 460051  
5. 206995 4. 326719 4. 984661 5. 584046 5. 230996 4. 296956 6. 533993 5. 595151 5. 283292  
1. 531694 0. 90541 1. 680074 1. 56955 1. 680074 1. 708785 1. 294387 3. 084586 1. 847393  
2. 075002 1. 937311 1. 966989 2. 835155 1. 834941 2. 167811 1. 690188 1. 891611 2. 139256  
5. 821794 5. 44277 6. 183146 5. 686337 5. 721428 5. 284841 6. 08906 5. 47841 5. 572318  
7. 699235 7. 434227 7. 258821 8. 088033 8. 405248 8. 010646 7. 514824 7. 849727 7. 755062  
5. 469105 4. 78419 5. 283514 5. 662904 5. 763524 6. 153411 6. 488494 5. 877095 6. 252347  
6. 70113 6. 88991 6. 853899 5. 956277 6. 693597 5. 921919 7. 12106 7. 229757 7. 132284  
6. 11555 6. 070164 5. 416295 5. 987279 6. 329179 6. 043066 5. 813441 6. 301492 6. 829077  
6. 343365 5. 752344 6. 915576 7. 128779 6. 283564 6. 239424 6. 892894 7. 157635 7. 636936  
5. 040477 6. 006009 6. 317413 5. 078718 5. 648367 5. 074034 4. 454967 5. 593685 4. 362158  
2. 013997 1. 640148 1. 584365 1. 981957 2. 017252 1. 959537 2. 332433 2. 176585 2. 894608  
6. 645756 6. 201638 6. 200118 6. 137184 6. 201501 4. 558003 5. 647751 5. 63707 6. 391954  
7. 378397 4. 576999 6. 879124 5. 838716 6. 735866 4. 799609 7. 118498 7. 973037 7. 831461  
3. 359606 3. 066368 5. 928213 3. 418204 4. 818037 4. 675268 5. 640239 5. 139425 5. 22891  
5. 860102 5. 067898 5. 65338 5. 602941 5. 180816 7. 142913 5. 443076 5. 461817 5. 966352  
5. 197841 4. 961571 5. 668623 5. 071567 5. 188216 4. 633655 5. 267332 5. 717879 5. 968699  
5. 85286 5. 920198 5. 152121 5. 21545 5. 93608 4. 674734 5. 485286 5. 774573 5. 493735  
5. 125672 6. 053146 5. 072136 5. 291003 5. 069417 5. 440769 4. 380054 5. 890601 5. 375281  
6. 460622 6. 27086 6. 522943 5. 66194 6. 387913 6. 883055 6. 493746 6. 669223 6. 88456  
3. 138004 2. 460642 2. 760042 3. 185631 2. 815883 3. 499304 3. 03295 3. 089204 3. 480918  
4. 932377 3. 737651 4. 090412 4. 121523 4. 150491 4. 380522 4. 512889 4. 231315 4. 603655

1. 79751 1. 986268 2. 538217 2. 482581 1. 674719 3. 059941 2. 023103 2. 364911 2. 211487  
1. 447172 1. 911425 1. 53492 1. 482203 1. 561244 2. 303872 1. 820224 1. 35817 1. 680508  
0. 941292 1. 21964 1. 08304 1. 19528 0. 621918 0. 804773 1. 137982 2. 10161 0. 836718  
1. 608651 2. 093358 2. 671445 1. 513876 1. 41489 1. 198058 0. 955441 1. 49018 1. 00807  
3. 784523 2. 742793 3. 786913 4. 309558 3. 140388 4. 107692 4. 866726 5. 254666 3. 760848  
5. 548895 5. 78455 4. 999206 5. 698636 5. 153237 7. 455947 6. 148504 3. 74769 4. 643324  
4. 161892 2. 706019 3. 0189 3. 898189 2. 585176 4. 515561 3. 039142 2. 586689 3. 754409  
7. 566462 8. 27115 7. 529369 8. 034629 8. 049572 7. 681763 8. 058012 7. 847568 8. 477731  
2. 20283 1. 557268 1. 862491 2. 533035 3. 043458 3. 054211 4. 036734 2. 82608 3. 522402  
6. 227533 6. 63742 6. 44001 6. 235214 6. 563792 5. 513541 6. 255848 6. 547126 6. 418045  
4. 337702 4. 273281 5. 517275 3. 728798 4. 997986 6. 382124 5. 249826 4. 373973 6. 458054  
5. 901426 5. 673319 6. 687982 5. 512973 5. 791045 6. 054284 7. 204004 7. 583278 8. 212845  
1. 205341 2. 071167 1. 830907 1. 365344 1. 892047 2. 371938 1. 800173 2. 148926 2. 027563  
3. 817374 2. 161354 4. 096635 3. 803874 3. 077976 4. 43087 5. 310144 5. 933548 4. 218408  
2. 895124 2. 129485 3. 384447 3. 245775 3. 29724 3. 306243 3. 884765 4. 901574 4. 058772  
1. 285824 0. 991165 0. 779109 2. 926531 1. 642151 1. 691774 0. 794302 1. 49893 1. 018764  
2. 620556 2. 940526 2. 896229 2. 894119 2. 714222 3. 493277 3. 808701 2. 919876 3. 374659  
2. 763358 1. 468436 2. 876968 1. 716944 2. 48979 2. 53184 2. 064518 2. 783619 3. 401674  
7. 548119 7. 686799 8. 006511 7. 766644 8. 203696 7. 161943 9. 124475 9. 117352 8. 871657  
1. 877571 1. 127154 1. 7488 1. 110022 1. 153014 2. 629116 1. 776428 1. 438565 1. 394526  
1. 034563 1. 005045 1. 53403 1. 564919 1. 186308 1. 01211 0. 675406 0. 805256 1. 040849  
4. 245225 2. 990958 2. 591207 1. 857877 3. 373661 2. 999389 1. 555767 3. 0725 2. 421783  
4. 421891 2. 779536 3. 810891 3. 450055 3. 001287 6. 006516 4. 998399 3. 477683 4. 958265  
4. 392564 3. 935702 4. 334596 5. 62723 4. 815282 5. 977706 5. 442385 6. 04113 4. 21284  
9. 794847 10. 07332 9. 926044 10. 02873 10. 17445 9. 261776 10. 01031 10. 10189 10. 13888  
5. 03567 4. 561403 4. 382106 4. 356903 4. 346178 5. 524821 4. 227623 2. 869579 3. 221074  
8. 503145 8. 083142 7. 926704 8. 263783 8. 67623 8. 432889 7. 980709 8. 545506 8. 189491  
9. 132057 9. 07355 8. 924205 9. 367468 8. 906793 9. 65893 9. 400798 8. 884751 8. 967136  
3. 35776 2. 94905 3. 496609 3. 984272 3. 271285 5. 808213 2. 581549 3. 16511 4. 309738  
8. 645866 8. 388564 8. 836322 8. 185745 8. 341759 9. 09209 8. 908129 9. 225206 9. 632523  
3. 128544 3. 032996 3. 12632 2. 946381 3. 309011 3. 142885 3. 396925 3. 346366 3. 40386  
8. 4198 8. 039912 8. 312392 7. 964087 8. 346184 8. 441687 8. 340931 8. 428366 8. 519327  
2. 839797 2. 971648 1. 700411 3. 190666 2. 616208 2. 275196 2. 391257 2. 460772 2. 218904  
10. 29747 9. 857632 10. 38494 10. 63521 10. 32213 10. 93555 10. 29843 10. 38056 10. 40124  
7. 089351 5. 176864 7. 701228 6. 762237 7. 704233 7. 216777 4. 894614 7. 720265 9. 09112  
2. 510794 2. 832363 1. 724651 2. 601085 2. 688226 2. 033612 1. 904704 1. 76206 2. 234408  
5. 051435 4. 072702 4. 482658 5. 297399 4. 346893 5. 619745 4. 49721 3. 84988 4. 251389  
3. 837694 2. 947278 3. 263329 3. 532704 2. 764557 3. 466297 2. 67514 2. 654214 3. 259112  
6. 18705 6. 369818 6. 208357 5. 351979 6. 094617 5. 825262 5. 934993 5. 997982 5. 72488  
1. 898665 2. 040878 2. 448717 2. 542736 2. 317643 2. 798461 2. 883689 2. 0449 2. 271477  
7. 662424 7. 934085 6. 951318 7. 53458 7. 511948 7. 067544 6. 780201 6. 63334 7. 1313  
4. 69863 3. 932479 4. 211371 3. 607237 3. 959364 4. 570383 4. 493529 4. 904812 3. 829113  
5. 647169 5. 821324 5. 800191 6. 267287 5. 187862 5. 494492 6. 101023 5. 596234 5. 404594  
3. 044769 2. 365803 3. 140131 2. 44441 2. 976238 2. 93584 2. 648631 2. 276555 2. 216109  
2. 507802 2. 099499 2. 379091 2. 263675 2. 580744 2. 690536 1. 885389 2. 918424 2. 77465  
1. 367742 1. 708093 1. 885668 1. 245772 1. 83963 2. 573776 1. 485842 1. 252506 1. 94624  
3. 180658 2. 995112 3. 155623 3. 589498 3. 148441 4. 865306 3. 863721 3. 648693 4. 850252  
7. 131628 7. 351661 6. 837091 6. 931774 7. 458752 7. 060892 7. 47072 7. 199831 7. 391073  
5. 727169 4. 523801 5. 349099 5. 006946 4. 948722 6. 258268 5. 203904 6. 643853 6. 24422  
8. 050251 7. 853745 8. 072921 7. 499114 7. 860299 8. 222902 7. 835538 7. 761599 8. 129202  
2. 007057 2. 384104 1. 774091 2. 114432 1. 843664 2. 142352 1. 859207 2. 049093 2. 008085

5. 977929 6. 467475 5. 559391 6. 157362 6. 323552 5. 669716 6. 317304 5. 703941 6. 825239  
7. 531704 7. 515995 7. 678693 6. 851789 7. 301376 6. 703531 7. 678284 6. 935236 7. 501739  
4. 832664 3. 238761 4. 789406 4. 552768 5. 163071 4. 878085 5. 0315 4. 501026 5. 743645  
5. 165223 4. 687305 5. 087877 5. 344089 5. 216771 5. 306289 5. 977269 5. 59549 5. 663421  
5. 532812 5. 208703 5. 432878 5. 809525 5. 784137 5. 103519 5. 643013 5. 102842 4. 778367  
1. 845463 2. 478183 1. 919717 2. 919084 2. 427641 2. 030433 2. 227091 2. 510887 2. 073017  
1. 774501 1. 796888 2. 205946 1. 98891 1. 587478 2. 544495 1. 857199 2. 457583 1. 793268  
10. 71335 10. 97103 10. 86591 10. 65522 11. 05555 9. 002895 11. 32711 10. 87069 10. 87775  
1. 445219 1. 493733 1. 177006 1. 942647 1. 380354 1. 93229 1. 021751 1. 133346 1. 278094  
4. 267644 3. 213797 2. 757799 4. 064316 3. 993735 5. 136187 4. 199035 4. 665807 5. 531991  
1. 592308 3. 101865 2. 003709 1. 915311 2. 627799 1. 138812 2. 183052 1. 935611 1. 808076  
6. 376579 7. 184885 6. 122974 7. 976536 6. 428139 9. 857351 6. 465888 5. 582919 7. 45924  
1. 332447 1. 466355 1. 548636 2. 276704 1. 26396 1. 449674 1. 020175 1. 304774 1. 449674  
1. 887239 1. 358074 1. 807008 1. 445153 2. 173216 1. 571701 1. 766692 3. 011858 1. 845401  
1. 970596 2. 372284 1. 755716 2. 437378 2. 130239 2. 012587 1. 518005 2. 31801 2. 28142  
1. 141915 2. 612736 1. 275738 1. 278624 1. 573884 1. 080962 1. 087051 1. 471898 1. 481887  
2. 304701 2. 150404 2. 271472 3. 157934 1. 757383 2. 69107 1. 720458 1. 97329 2. 148385  
1. 614544 2. 520885 1. 468105 1. 647216 1. 375736 1. 367294 1. 24188 1. 387402 2. 118203  
3. 1147 3. 254196 3. 124522 3. 342592 2. 918125 2. 739196 3. 714318 3. 03376 2. 608374  
1. 840148 2. 855652 3. 96573 1. 972086 2. 00283 2. 428353 1. 759971 2. 613291 1. 608945  
1. 910535 1. 806703 2. 996891 0. 991625 1. 640742 1. 598826 1. 841787 1. 290201 0. 985908  
3. 057063 2. 856384 2. 297506 2. 930001 2. 04255 3. 207565 3. 367361 2. 593521 2. 403902  
5. 706798 5. 830503 5. 293611 5. 400394 5. 795704 7. 674019 6. 567916 5. 659978 6. 850679  
3. 891203 2. 996545 3. 972006 3. 406648 3. 180442 4. 890209 4. 555497 4. 828813 4. 028397  
3. 849636 3. 769608 4. 090321 4. 735868 6. 524382 2. 680375 2. 903687 3. 024234 4. 160301  
2. 558076 3. 049249 2. 655657 2. 671012 2. 045342 2. 913969 2. 343812 2. 259353 2. 116307  
2. 17645 2. 960678 2. 346316 2. 366324 1. 836808 1. 845304 2. 533368 2. 858251 2. 593019  
8. 699963 7. 753482 8. 082589 8. 154678 7. 842627 6. 98223 7. 148671 6. 28704 5. 466886  
2. 534799 2. 957467 3. 49122 1. 946142 3. 233368 2. 317323 2. 966902 2. 768136 2. 346071  
4. 061553 3. 401337 5. 014688 4. 310584 5. 246116 4. 34773 6. 17829 5. 624235 5. 049451  
6. 058774 6. 880688 5. 835618 6. 317655 6. 92363 6. 002405 6. 356956 5. 627253 5. 757979  
3. 545214 1. 698693 3. 989968 4. 359024 4. 980655 6. 257615 5. 544491 4. 855879 5. 270359  
3. 705927 3. 438018 4. 541197 5. 190688 3. 157485 5. 42505 4. 41153 4. 822397 5. 83635  
1. 038483 1. 561624 1. 133728 1. 555565 0. 990902 1. 378917 0. 979722 0. 813622 1. 025914  
4. 696506 2. 951556 2. 934372 1. 679787 2. 657522 4. 489446 4. 581643 4. 274118 3. 302476  
7. 170555 7. 974669 6. 993385 7. 26147 7. 295197 6. 333384 7. 723552 7. 674957 6. 889098  
3. 813797 3. 290172 3. 2535 3. 603638 2. 728912 3. 602531 2. 804888 2. 401199 3. 637557  
1. 836939 1. 366827 1. 29659 1. 496363 1. 761734 1. 34389 1. 865804 1. 934589 2. 468285  
2. 100029 2. 292381 2. 360678 2. 06519 2. 334344 2. 002328 2. 583734 1. 466025 2. 463742  
3. 51149 3. 756536 4. 628904 4. 70913 4. 570138 5. 038525 4. 284202 4. 903109 5. 017192  
6. 583659 6. 213745 6. 482259 6. 953272 6. 001243 5. 241228 7. 068364 7. 321654 6. 917234  
2. 06104 2. 540089 1. 796312 2. 734403 2. 502537 2. 82771 1. 909068 1. 974741 1. 816405  
4. 926061 4. 875973 5. 242044 5. 230712 3. 948419 5. 746235 4. 999338 5. 490254 6. 180429  
6. 35071 5. 957998 5. 839608 6. 124995 5. 829103 6. 541845 6. 185878 5. 410762 5. 448026  
3. 072762 2. 533125 2. 579745 1. 613595 1. 741983 2. 063771 1. 733244 2. 218577 1. 773261  
2. 825733 1. 726794 1. 934404 1. 875492 1. 760145 2. 56275 2. 217856 1. 817456 2. 233036  
6. 177969 4. 964773 5. 393205 6. 553111 5. 688438 5. 841584 5. 358172 5. 708957 6. 225743  
1. 407217 1. 928314 1. 889802 1. 987724 2. 296868 1. 564969 2. 600023 1. 998336 1. 705461  
3. 308799 4. 367417 4. 738519 3. 858188 3. 101913 3. 107717 2. 541024 2. 92288 3. 028051  
4. 090774 3. 294545 3. 342255 3. 683726 2. 577483 4. 561739 4. 021563 3. 121178 3. 65073  
5. 724631 6. 738812 6. 914163 6. 335334 6. 222625 7. 560236 6. 806609 6. 926804 6. 563243

1. 249857 1. 324406 2. 110794 1. 926281 1. 168155 1. 458429 1. 013269 1. 584437 1. 237035  
4. 735059 4. 663421 4. 296199 5. 188089 4. 356042 5. 3648 4. 256419 4. 677418 4. 536096  
4. 249871 4. 122586 3. 121462 2. 959886 3. 533679 4. 327454 2. 902369 3. 975953 4. 67359  
6. 231904 6. 009277 5. 588144 4. 943035 5. 526212 5. 240009 5. 366772 5. 692872 5. 233106  
4. 79049 4. 894127 5. 091425 5. 16597 5. 495919 5. 264585 5. 33105 6. 279034 6. 381951  
1. 276416 1. 968544 2. 40538 1. 832645 1. 811125 2. 007015 1. 765396 1. 399808 1. 96443  
1. 782752 1. 45159 1. 220069 1. 052747 1. 531771 1. 183463 1. 188011 1. 379066 1. 368095  
1. 73856 1. 189053 1. 411283 2. 513487 1. 650339 1. 309377 1. 967995 1. 929467 1. 180723  
2. 504935 1. 855145 2. 823945 3. 394965 2. 611883 2. 71406 1. 742305 3. 335771 2. 339094  
0. 891471 1. 511445 1. 178923 1. 857198 1. 264519 1. 275835 1. 337779 2. 078438 1. 361523  
6. 168536 6. 587869 5. 974481 6. 940472 7. 804295 6. 033931 6. 981378 7. 497858 6. 980749  
1. 223134 2. 516735 1. 55796 1. 464357 1. 814087 1. 969062 1. 487367 1. 255254 1. 781035  
3. 220908 3. 709067 2. 533086 2. 578863 3. 348061 2. 893419 4. 03904 3. 638556 3. 502743  
0. 877863 1. 160258 1. 703951 1. 876945 1. 349926 1. 246892 1. 262443 1. 397971 0. 981192  
1. 379917 1. 456835 1. 806143 1. 856992 1. 333045 1. 1523 1. 083385 1. 616284 1. 511554  
1. 885486 1. 59686 1. 430617 1. 575999 1. 605189 1. 581974 1. 646974 1. 412932 2. 024012  
2. 665114 1. 894756 2. 302502 2. 498164 3. 021517 2. 514112 3. 103067 3. 81384 2. 772174  
1. 101482 1. 059407 1. 104721 2. 047599 1. 221116 0. 987915 1. 019187 1. 533013 1. 201822  
2. 167099 0. 612119 4. 824827 1. 514491 2. 383753 0. 961873 1. 014504 2. 421016 0. 7918  
1. 667661 0. 792611 2. 062161 1. 650353 1. 594366 0. 986098 0. 996636 1. 132934 1. 045431  
3. 822588 2. 070709 2. 116103 3. 322141 3. 385478 1. 632683 3. 35395 3. 578483 4. 262133  
4. 363487 1. 869401 3. 420586 2. 333888 2. 239243 1. 362301 1. 601197 2. 024042 1. 768236  
5. 534089 4. 965984 6. 145695 6. 069148 6. 518981 7. 148701 5. 887659 6. 306337 6. 346478  
2. 328793 1. 599407 2. 260422 1. 467107 2. 397662 2. 034907 2. 108449 1. 882784 2. 138582  
3. 990629 4. 015438 1. 666255 1. 092998 2. 955963 2. 957235 3. 592248 1. 890126 1. 62931  
2. 679647 3. 097154 2. 758327 3. 501999 2. 862836 3. 570081 3. 041307 4. 018134 3. 569686  
4. 956794 5. 124612 5. 229105 5. 702328 4. 529085 5. 120891 5. 782379 5. 120584 5. 264859  
1. 753421 1. 095786 2. 594166 1. 354487 1. 838924 1. 698234 1. 613977 1. 717715 1. 235235  
2. 001683 1. 567578 1. 302157 3. 232643 1. 637096 2. 802622 2. 765395 1. 362119 1. 083231  
1. 085066 2. 706973 0. 673398 1. 101291 1. 47451 1. 42121 1. 19823 1. 104837 0. 673315  
0. 973072 1. 477764 1. 099997 1. 616937 1. 241083 1. 089119 1. 549349 1. 584053 1. 174019  
1. 761204 2. 127369 1. 880131 2. 196072 1. 867632 2. 070951 2. 471355 2. 301615 2. 021192  
7. 58058 6. 540853 7. 541808 7. 290887 7. 491005 7. 90277 7. 189238 7. 725939 7. 043645  
1. 344179 1. 806164 1. 622877 2. 540556 1. 610234 1. 98375 1. 73549 2. 253403 1. 339301  
2. 26951 1. 986352 1. 38024 1. 337918 1. 940178 1. 726679 1. 356948 1. 52636 1. 044188  
3. 20714 3. 167794 3. 554058 2. 985624 3. 355473 3. 259978 4. 669209 4. 027773 4. 224197  
1. 310706 2. 166815 2. 076232 1. 274836 1. 408043 2. 182222 1. 491 2. 250713 0. 878965  
3. 323311 3. 329157 3. 305686 2. 768524 4. 326002 1. 880966 3. 357609 2. 996258 3. 854474  
3. 925171 3. 85737 4. 052141 2. 781242 3. 180145 4. 076325 3. 989366 3. 30307 2. 843105  
4. 319512 5. 956353 5. 848236 6. 061073 5. 927234 4. 179378 4. 558427 4. 670217 4. 402907  
1. 527713 1. 744391 1. 183678 1. 389832 1. 090442 1. 673131 1. 550519 1. 764576 1. 158977  
1. 974299 1. 928674 2. 174985 2. 005821 2. 34081 1. 883657 1. 961549 2. 698063 1. 890744  
1. 861515 2. 141337 1. 640063 2. 216377 1. 841715 2. 763913 1. 40549 1. 711277 2. 167921  
4. 450623 3. 500795 4. 215204 2. 993743 2. 355381 4. 951787 4. 38588 4. 251015 4. 402695  
0. 919305 1. 102398 0. 972682 1. 314465 0. 898548 0. 788833 0. 819908 1. 175158 1. 150614  
1. 66452 1. 494477 1. 107625 1. 651239 1. 314261 1. 578978 1. 780788 2. 459896 2. 078504  
1. 511757 1. 97232 1. 809687 1. 699512 1. 31923 2. 563726 1. 447801 2. 298679 2. 120907  
2. 470647 2. 403878 2. 079545 2. 689492 3. 104263 2. 437954 2. 526385 3. 254046 2. 414928  
1. 423474 4. 228742 1. 670567 2. 568102 1. 369285 1. 738531 1. 463616 1. 903158 1. 426983  
6. 909117 7. 044885 7. 277556 6. 69787 7. 062087 6. 177128 7. 792467 7. 515111 6. 750226  
3. 019249 4. 673937 3. 369429 2. 553287 3. 863638 4. 014223 3. 606453 3. 480569 3. 553158

1. 031823 0. 889367 0. 749166 0. 96702 1. 776961 0. 715418 0. 859109 1. 579245 1. 329406  
1. 45325 1. 979296 1. 520823 1. 720738 2. 704507 2. 12325 0. 823561 2. 233878 2. 027995  
4. 992402 5. 236817 5. 769229 5. 082358 5. 702284 3. 176342 4. 489615 4. 789292 3. 306683  
1. 527569 2. 523428 2. 505579 1. 276091 1. 718012 0. 886832 2. 541507 1. 468464 1. 159828  
4. 126042 4. 08034 4. 153611 3. 40078 2. 852925 4. 797601 4. 1648 4. 250744 3. 615672  
4. 923793 4. 608145 5. 508069 2. 877985 5. 156034 4. 373783 4. 019486 4. 081302 4. 643099  
7. 74525 6. 728871 7. 922776 4. 858951 8. 272429 5. 589908 3. 89419 3. 534235 4. 084692  
5. 007305 4. 981329 5. 197902 4. 832168 5. 851226 5. 441733 6. 030637 5. 805536 5. 9952  
1. 848907 6. 80842 3. 668169 1. 364501 2. 165108 4. 166881 3. 283178 3. 484626 3. 262637  
2. 089176 1. 450573 1. 544935 1. 934971 1. 132599 1. 109146 1. 24215 1. 220835 1. 471061  
3. 105096 1. 533058 1. 950645 2. 619616 1. 387057 2. 179823 2. 211426 2. 016745 2. 119805  
1. 567477 2. 312704 1. 816329 1. 885756 1. 868478 1. 372849 1. 868544 1. 886987 1. 466408  
3. 39827 3. 051796 3. 217178 3. 120657 3. 140322 3. 581031 2. 983016 3. 242609 3. 07059  
3. 011082 2. 100178 2. 138263 2. 939859 1. 943588 3. 38196 2. 699221 1. 860557 2. 391013  
1. 390566 1. 849257 1. 98038 1. 201169 1. 686205 1. 662589 1. 498613 2. 136602 1. 274682  
3. 745974 4. 825534 4. 898342 2. 986919 4. 115128 4. 523363 4. 090494 5. 291853 4. 996732  
3. 054996 1. 787664 3. 270276 1. 392626 1. 880151 1. 673899 1. 896365 1. 833507 2. 226268  
4. 142791 3. 791363 4. 252759 4. 338722 3. 895608 4. 491533 4. 072692 3. 876917 3. 72472  
1. 2163 2. 064358 2. 300427 2. 52919 1. 535367 2. 055578 1. 279297 1. 633492 2. 305014  
0. 843513 1. 577432 1. 049922 1. 073116 1. 864303 1. 440691 0. 832916 1. 388935 1. 005683  
0. 976589 1. 082994 1. 948672 1. 586573 2. 175426 1. 473407 1. 923071 1. 218639 0. 990349  
2. 828246 3. 086017 2. 41798 3. 154679 3. 25087 2. 634372 2. 301847 2. 864059 3. 060793  
2. 022245 2. 61278 2. 013443 1. 967619 1. 754581 2. 453879 2. 038519 2. 288383 1. 596226  
1. 990512 3. 603481 1. 715228 1. 898453 1. 5597 1. 49594 1. 144355 1. 617137 0. 801859  
3. 713954 1. 917839 5. 138361 3. 269873 5. 394665 1. 530454 4. 107339 3. 633129 2. 12531  
2. 747774 1. 767321 1. 270229 2. 703529 1. 680383 2. 82221 1. 215328 2. 748303 3. 300297  
2. 696115 2. 14695 3. 033088 2. 833035 2. 577412 3. 183869 3. 213568 3. 029347 2. 686355  
1. 319629 1. 083251 1. 056349 1. 657098 1. 22021 2. 206825 0. 901754 1. 109362 1. 646177  
6. 554559 7. 078101 6. 962386 6. 491772 6. 493941 5. 972181 6. 510194 6. 67767 6. 206619  
2. 696296 3. 419342 3. 120739 3. 483416 3. 276627 3. 550166 2. 93922 2. 854613 3. 089367  
1. 243513 1. 782772 1. 39463 1. 248639 1. 150091 0. 962194 1. 086125 0. 889214 1. 330224  
5. 992336 3. 772226 6. 47779 5. 889893 6. 063907 7. 314757 7. 086269 6. 216278 4. 896649  
1. 207533 1. 519219 0. 805345 2. 120449 1. 092888 1. 62367 1. 154725 1. 128914 1. 177583  
3. 146174 2. 800034 4. 070008 4. 591157 2. 993246 2. 71926 2. 927819 2. 717184 3. 8914  
1. 619319 1. 348396 1. 558009 1. 624991 2. 37712 1. 079159 0. 499912 1. 881273 1. 003946  
7. 609697 7. 805648 7. 616178 7. 291714 7. 887522 7. 866915 7. 68489 7. 169878 6. 446736  
2. 979561 3. 638995 2. 154195 2. 572135 2. 837648 2. 726805 3. 947657 3. 668369 3. 132854  
2. 225576 1. 874436 1. 856488 3. 010731 2. 347632 1. 820584 1. 695274 2. 142561 2. 481061  
2. 988602 2. 799378 3. 802913 4. 499666 3. 699363 2. 210094 4. 35724 5. 165024 3. 483282  
4. 991664 4. 490438 4. 150664 2. 615464 2. 790306 1. 534565 2. 098691 2. 297819 2. 001192  
1. 487999 2. 740395 2. 050745 1. 634231 2. 701479 2. 137239 1. 091536 2. 079535 1. 627355  
1. 393335 1. 658724 1. 307553 1. 140154 1. 517999 2. 167463 1. 51625 1. 405104 1. 594191  
1. 787048 2. 062323 1. 448492 2. 243033 2. 642554 2. 03972 1. 997841 2. 247755 2. 025606  
2. 298087 1. 821774 1. 785999 1. 127597 2. 280847 3. 1665 1. 490294 1. 710331 2. 466437  
1. 457258 2. 42683 1. 985091 1. 334517 1. 287891 1. 369517 2. 128498 1. 58932 1. 859413  
1. 565275 2. 58975 1. 72349 1. 608032 0. 947125 1. 421918 1. 102007 1. 212445 2. 635831  
2. 253111 1. 993134 2. 132775 2. 699815 2. 006456 2. 096454 2. 102905 2. 511446 1. 870782  
1. 936834 1. 506758 1. 032716 1. 45873 1. 782173 1. 908686 1. 223567 1. 462185 1. 655366  
6. 534965 4. 415875 5. 196718 4. 266965 4. 686012 5. 908071 4. 24744 2. 104389 4. 280609  
2. 367017 2. 665682 2. 511832 2. 218348 2. 116926 1. 968947 1. 807218 2. 450732 1. 929143  
2. 56393 1. 885678 2. 478091 1. 96321 2. 538971 1. 81292 1. 730671 1. 884441 2. 901965



6. 964576 1. 097642 0. 802519 1. 015513 1. 959255 0. 769366 1. 024019 0. 788473 2. 095084  
1. 891379 1. 09668 1. 34226 1. 593731 1. 180357 2. 725168 1. 716362 1. 623197 1. 478124  
2. 568557 2. 173775 0. 960998 1. 237043 0. 883564 2. 254227 1. 522852 1. 391087 1. 054534  
1. 710711 1. 674374 1. 525379 2. 189699 1. 335401 2. 027484 1. 469668 1. 781423 1. 581628  
1. 885529 1. 772108 1. 27567 3. 029486 1. 588857 1. 483444 1. 805544 1. 786028 1. 52589  
2. 417035 3. 243352 2. 855016 4. 059378 3. 213783 3. 278683 3. 213886 2. 740744 2. 701575  
4. 410062 4. 887756 3. 083731 4. 655306 3. 255481 5. 443911 3. 794195 4. 310579 4. 902667  
1. 3358 1. 296674 1. 329047 1. 023998 1. 497091 1. 504512 1. 471613 1. 206993 1. 496611  
0. 918814 1. 986237 0. 716553 1. 064172 0. 847602 1. 397492 1. 013411 1. 835573 1. 846537  
2. 965205 2. 363428 2. 405832 2. 703901 2. 183625 2. 871705 2. 164393 2. 283532 2. 157119  
1. 205792 2. 827374 1. 279268 1. 738024 0. 918112 1. 84331 1. 621544 2. 256725 1. 404136  
1. 489665 0. 816744 1. 186036 1. 721417 2. 751399 2. 202795 1. 863358 1. 035721 2. 065633  
2. 371874 2. 197118 2. 191971 2. 253564 2. 259853 1. 934902 1. 389005 2. 295604 2. 718867  
2. 319491 3. 352546 2. 822579 2. 916066 2. 11737 2. 309453 3. 379579 2. 464527 3. 078956  
5. 234645 5. 26905 5. 122824 4. 292811 6. 509485 4. 313328 5. 019847 3. 907583 4. 738347  
2. 344821 2. 131233 2. 339137 2. 451774 2. 48929 1. 545161 1. 454374 2. 044718 1. 690779  
4. 667076 5. 275708 4. 961685 4. 953126 5. 938368 5. 004105 4. 532493 4. 781275 5. 129844  
1. 386632 1. 295963 1. 413923 1. 0256 1. 570886 1. 477729 1. 090454 1. 394826 1. 734385  
8. 747733 8. 226827 7. 991597 8. 949181 8. 313941 9. 071104 8. 934018 8. 452902 8. 424264  
1. 415025 1. 732421 1. 442719 1. 336552 1. 186541 1. 421386 1. 353262 1. 164273 1. 399287  
1. 229253 1. 266211 1. 482824 2. 787813 1. 10467 1. 172456 1. 059379 1. 585563 2. 454161  
2. 972905 4. 661383 3. 77753 3. 037977 3. 590836 2. 083078 1. 781275 2. 094762 3. 117707  
4. 317225 4. 72501 4. 266048 4. 847282 4. 367815 5. 143526 5. 375412 4. 944619 4. 216565  
0. 782648 1. 155854 1. 563525 1. 850711 0. 787784 0. 774221 0. 798132 1. 195745 1. 167531  
2. 967757 2. 397956 1. 871766 1. 743861 2. 596225 1. 427704 1. 679677 1. 465005 2. 500433  
1. 576398 1. 103757 1. 84421 2. 079624 1. 802052 2. 442173 1. 158706 1. 118706 1. 139492  
7. 429898 7. 613259 8. 332456 8. 248157 8. 203508 5. 068152 9. 22487 8. 435939 8. 09673  
2. 27915 2. 776473 2. 514949 2. 031585 2. 68498 2. 086645 2. 532409 2. 956602 2. 78487  
2. 08959 1. 998035 1. 657627 2. 550638 1. 585586 2. 327034 2. 61752 2. 089589 2. 98017  
1. 752263 1. 392625 1. 880269 2. 25974 1. 846365 1. 876178 1. 772975 1. 565649 1. 75392  
1. 66093 1. 80031 2. 641179 2. 30691 2. 084179 1. 550592 1. 643638 1. 531105 1. 755676  
0. 684965 0. 929314 1. 279931 1. 022614 2. 404244 0. 99863 1. 260064 2. 180075 1. 133799  
2. 680779 2. 456589 1. 764071 2. 444769 2. 702723 2. 436182 2. 282287 2. 962923 2. 306525  
6. 887629 6. 191296 7. 659112 6. 456141 6. 045295 5. 775594 6. 463773 6. 481122 7. 036141  
1. 39217 1. 484815 1. 135794 1. 408719 1. 784777 1. 58882 1. 422171 1. 181207 2. 099042  
5. 73849 5. 477292 6. 115842 6. 155153 6. 361025 5. 990224 4. 800334 5. 655324 6. 459049  
1. 683395 2. 877525 1. 547906 1. 379319 0. 798467 2. 410703 1. 455596 1. 746777 1. 462972  
1. 145392 1. 401712 1. 374985 1. 559764 1. 251683 3. 735625 1. 500176 2. 037315 1. 118868  
3. 672863 2. 570266 2. 783014 2. 810188 3. 201281 5. 213392 4. 04972 4. 063521 4. 055961  
3. 572628 1. 860517 4. 55212 2. 909603 3. 246995 2. 877011 3. 395993 3. 299515 2. 220976  
2. 05773 2. 191673 2. 487807 3. 038218 2. 001362 2. 414237 2. 20672 3. 314138 1. 843706  
1. 546424 2. 013729 2. 852174 2. 694881 1. 9175 0. 995514 2. 128063 1. 774942 1. 7851  
1. 504782 1. 288629 0. 747195 1. 329062 2. 607307 1. 679955 0. 710314 1. 667668 1. 199027  
5. 58705 3. 424072 2. 385968 3. 427797 3. 44248 2. 967622 3. 210427 2. 502523 3. 549508  
4. 388268 3. 351359 4. 663467 3. 81431 4. 783934 5. 622786 5. 329917 4. 016555 3. 980747  
3. 412464 3. 143449 3. 458042 5. 33295 3. 248834 1. 983049 3. 096661 2. 136884 2. 197536  
3. 966441 3. 341903 4. 122179 4. 184108 4. 503586 3. 687762 3. 119071 4. 438317 4. 097511  
1. 941512 1. 26858 2. 4446 2. 007891 1. 849375 1. 702814 1. 325499 2. 409059 2. 224234  
1. 839358 2. 55574 1. 793062 1. 830125 2. 495646 2. 124184 2. 02922 1. 835518 1. 448841  
4. 033086 3. 245433 2. 837299 2. 710169 3. 11324 3. 08015 2. 890016 2. 646601 2. 277402  
2. 681554 3. 991735 2. 560402 2. 210276 3. 401464 5. 752275 4. 454144 3. 506914 4. 312999

2. 124163 1. 788356 1. 333111 1. 465184 1. 213848 1. 402697 2. 13421 2. 204686 1. 318897  
1. 687243 1. 692008 1. 377774 2. 175643 1. 993442 2. 127899 1. 633602 1. 910982 1. 947715  
2. 767954 3. 276454 3. 42403 3. 721108 3. 426167 3. 568756 3. 058005 3. 135095 3. 449596  
5. 588454 4. 236077 4. 717446 5. 436583 5. 060754 4. 895319 4. 432422 5. 184578 5. 514299  
1. 289885 1. 951729 1. 731949 1. 653315 1. 544703 1. 269194 0. 962025 1. 797978 0. 982191  
1. 506415 1. 556629 1. 291127 1. 548323 1. 368873 1. 378973 1. 480369 1. 471251 1. 584369  
1. 665232 1. 490273 1. 300697 1. 979289 1. 83651 2. 08278 1. 505271 2. 50919 1. 520823  
2. 333672 1. 372534 1. 103262 2. 078537 1. 207915 2. 231807 1. 255147 1. 484333 2. 353338  
2. 392509 2. 008805 2. 873713 3. 956602 3. 254333 2. 326674 3. 64521 4. 093341 2. 8735  
2. 127682 3. 318508 1. 586632 2. 21814 3. 240867 1. 845211 2. 454855 2. 148278 1. 86194  
3. 651219 3. 796246 4. 313097 2. 952021 3. 180544 2. 855077 3. 976903 2. 746422 3. 79411  
2. 40446 2. 781406 4. 227114 2. 373532 2. 010053 2. 26295 2. 133554 1. 935492 2. 281712  
4. 741705 4. 075565 6. 325578 2. 473012 6. 133268 2. 569544 2. 341833 2. 365563 3. 535808  
1. 007378 1. 068626 2. 178802 1. 293871 1. 5474 1. 001755 1. 039358 1. 269762 1. 287321  
2. 371247 2. 898448 2. 085318 3. 696613 1. 93021 2. 191793 3. 24139 3. 522763 2. 871126  
4. 869478 1. 765133 2. 021075 1. 106833 3. 0695 1. 659701 1. 441715 2. 04832 1. 380383  
2. 333343 2. 019605 2. 855295 3. 108002 2. 185434 1. 876224 2. 448093 2. 740522 2. 203022  
1. 958224 3. 033171 3. 474851 3. 211593 3. 418372 2. 986017 4. 24612 4. 307568 4. 630385  
1. 446088 1. 446088 0. 949303 1. 976981 0. 771442 1. 335227 1. 143415 1. 550808 1. 919393  
2. 016069 1. 904072 1. 630363 2. 344114 1. 996659 2. 078449 1. 980065 2. 684568 2. 951212  
1. 564108 1. 287425 0. 989917 2. 024134 0. 996908 1. 4757 1. 368417 1. 257164 1. 493206  
1. 874805 1. 921124 2. 285207 1. 055558 1. 86211 2. 853417 2. 920702 2. 537172 2. 55062  
1. 177655 1. 026796 1. 454944 2. 156307 1. 176259 1. 222806 1. 399179 1. 48094 1. 793533  
4. 061512 4. 363066 4. 816917 3. 759983 5. 05886 3. 647484 4. 913543 3. 458026 4. 344961  
4. 101568 3. 242175 3. 719136 2. 569531 3. 283886 2. 054509 1. 736775 2. 702123 2. 126829  
1. 149038 1. 548568 1. 666473 1. 884102 1. 246145 1. 334973 1. 67241 1. 600747 1. 225033  
1. 273522 1. 635529 1. 080914 0. 900542 1. 689427 1. 810342 1. 136139 1. 331844 1. 752378  
2. 38517 2. 877638 2. 286589 2. 742639 1. 957266 2. 428115 4. 126392 3. 883244 4. 875322  
2. 012027 2. 15053 1. 957553 2. 873122 1. 571618 2. 212513 2. 62052 2. 2511 1. 249809  
1. 165155 1. 394504 1. 838495 0. 887735 0. 849217 0. 72255 1. 054731 0. 997061 1. 338231  
1. 398711 2. 071065 1. 261588 1. 118298 2. 752312 1. 138007 1. 732051 1. 222655 1. 690946  
1. 141282 0. 918408 0. 847182 1. 144498 1. 018733 1. 62444 1. 411432 1. 426487 0. 770788  
0. 993402 3. 353576 2. 126782 2. 987284 2. 792125 2. 47696 2. 361428 2. 361231 1. 485004  
2. 478133 2. 076029 1. 944553 1. 95731 1. 733711 2. 133658 1. 941784 1. 730979 1. 826681  
1. 495939 1. 654988 1. 289206 2. 078833 2. 064013 2. 516089 1. 839643 2. 247992 2. 042184  
1. 084784 2. 40469 2. 696292 1. 458178 2. 516426 1. 924295 2. 431656 2. 148489 3. 182441  
4. 779544 6. 304091 3. 425991 5. 406245 5. 627409 4. 186722 5. 551804 7. 370446 5. 649784  
1. 622799 1. 724183 1. 349705 1. 395123 1. 427161 2. 650647 1. 475094 1. 712088 2. 207006  
3. 511622 1. 910862 2. 849697 1. 804919 0. 726567 3. 121191 1. 218346 1. 975638 1. 516259  
1. 579892 1. 98086 1. 554882 2. 037477 1. 900833 1. 032785 1. 381556 1. 470981 1. 55213  
1. 808659 1. 323381 0. 885861 1. 242715 1. 451332 1. 990017 1. 164252 0. 921958 1. 063579  
1. 416776 2. 077769 1. 484402 1. 753263 1. 876543 1. 957502 1. 233863 1. 974475 1. 434015  
8. 530514 9. 358512 8. 436257 8. 361471 8. 455073 8. 982218 7. 895672 8. 528782 8. 493757  
1. 839669 1. 549802 1. 3919 1. 809073 1. 308642 1. 987262 1. 311812 1. 596031 1. 580569  
1. 407959 3. 274878 1. 748254 1. 150734 0. 920767 1. 265229 1. 601015 1. 632322 1. 255274  
1. 829561 2. 10509 2. 708613 3. 044084 2. 777563 2. 147543 1. 972213 1. 989621 2. 085495  
1. 508269 1. 190044 1. 396997 2. 044356 1. 586061 1. 711314 1. 621787 2. 234819 1. 351161  
2. 121814 2. 150719 1. 590154 0. 839016 2. 951303 1. 417089 1. 447473 1. 994195 1. 387133  
0. 909355 0. 934382 1. 100173 1. 389639 1. 224222 1. 217765 1. 23933 1. 092347 1. 375623  
0. 872008 0. 928832 1. 206857 1. 830235 1. 084289 1. 295613 1. 103906 1. 161953 1. 007419  
0. 981369 3. 341828 0. 757938 1. 286867 1. 033763 1. 164204 1. 294142 1. 63004 0. 779391

2. 361927 1. 792637 1. 747801 2. 235807 2. 120355 1. 77515 1. 682032 1. 896318 1. 630304  
3. 458771 3. 860783 4. 84133 4. 688496 3. 932571 4. 289255 3. 7681 4. 360568 4. 398717  
2. 453625 2. 49567 2. 889648 3. 275009 2. 687772 2. 466867 2. 537113 1. 910529 2. 35397  
1. 589669 1. 866614 1. 263566 2. 315589 1. 294062 1. 716237 1. 389856 1. 284456 1. 288538  
3. 806813 4. 360727 4. 262731 4. 189914 3. 606181 4. 335847 4. 640996 4. 383201 3. 247079  
1. 176248 1. 368501 1. 200953 2. 173829 1. 194638 1. 385355 1. 446858 1. 705766 1. 115996  
5. 021302 2. 427155 5. 022495 4. 638604 2. 870809 2. 220984 4. 367035 3. 190165 4. 491076  
2. 184099 2. 46156 1. 088126 1. 590288 2. 095501 1. 99139 1. 699458 1. 370245 2. 083846  
1. 660248 1. 337349 1. 850822 1. 422116 2. 060305 1. 205147 1. 136271 0. 976416 1. 578977  
2. 497471 2. 060878 2. 670432 2. 053825 2. 593505 2. 260765 2. 545171 2. 68526 2. 948015  
1. 954265 1. 931898 2. 267752 2. 778008 2. 191669 2. 748997 2. 473186 2. 208333 2. 047682  
1. 994764 2. 166318 1. 317101 1. 693711 1. 594296 2. 007023 1. 087993 1. 390822 1. 928542  
3. 916489 5. 902929 3. 908108 3. 744552 3. 637022 3. 729055 3. 200655 3. 456262 2. 597086  
1. 75509 1. 075462 1. 267951 1. 67302 1. 668013 1. 488655 1. 437966 1. 538286 1. 374832  
1. 291065 1. 50139 1. 460728 1. 469806 1. 379021 1. 741404 1. 322882 2. 092577 1. 884031  
1. 254194 1. 966811 1. 789159 1. 886194 1. 51138 1. 385287 1. 985234 1. 103476 1. 905302  
1. 342001 3. 235727 3. 775013 2. 19015 2. 958378 1. 829598 2. 761837 1. 270102 1. 347991  
6. 186894 5. 043376 4. 735096 2. 515832 3. 167846 3. 442259 5. 228171 1. 592788 3. 210958  
1. 239011 1. 780071 0. 737176 2. 188141 2. 008033 2. 006172 1. 405777 1. 802068 1. 079682  
1. 938599 2. 744064 2. 597445 1. 413089 2. 841302 1. 11487 2. 2307 2. 015697 1. 539994  
2. 729977 2. 636353 2. 699623 3. 495488 3. 38746 3. 621786 2. 508386 2. 862581 2. 851428  
1. 970597 3. 126676 2. 191758 2. 186443 1. 826165 2. 114413 1. 901526 2. 656067 2. 31853  
1. 546516 0. 751588 1. 407862 1. 7097 0. 668082 0. 831097 0. 897154 2. 014839 1. 076447  
1. 012096 2. 061615 1. 319343 1. 587497 1. 719701 1. 404606 0. 936209 1. 351389 2. 980633  
2. 333051 0. 672371 0. 995264 1. 534557 0. 974159 1. 301987 0. 898382 1. 207644 0. 883448  
1. 731258 2. 289869 1. 236026 1. 815444 1. 48804 1. 179791 1. 154516 1. 863481 1. 270383  
4. 257578 2. 429684 1. 831268 1. 920608 1. 229736 1. 91374 2. 547623 1. 763025 1. 724404  
0. 870768 1. 445889 1. 005029 1. 502769 0. 701386 1. 157142 0. 954672 1. 404386 1. 318612  
3. 067384 2. 767111 4. 863244 4. 166116 4. 441868 2. 71558 2. 812882 3. 029374 3. 638895  
1. 71663 2. 407741 1. 450819 2. 484968 2. 258766 2. 168688 1. 86941 1. 76285 3. 350067  
3. 33346 4. 798489 2. 801143 3. 363637 3. 076358 1. 786379 3. 369926 3. 331065 3. 794464  
1. 974332 2. 961371 4. 516951 2. 593988 3. 940122 2. 281889 2. 888731 1. 793567 2. 624654  
3. 370172 3. 580952 2. 444699 3. 173222 4. 191625 2. 825767 2. 819837 3. 190868 2. 202923  
2. 630815 2. 113442 3. 920645 1. 793655 2. 674773 2. 339591 1. 993522 1. 370956 2. 802888  
1. 9734 2. 143983 1. 656423 2. 229351 1. 875529 3. 09126 2. 46811 2. 220907 3. 313106  
1. 375973 2. 418153 1. 043737 1. 55259 1. 378624 1. 402733 1. 229627 2. 595732 1. 512158  
3. 675824 2. 923195 3. 0243 2. 581628 3. 009129 2. 526227 3. 407647 2. 536833 2. 738442  
3. 713338 4. 436827 4. 662143 3. 220886 3. 950399 4. 507399 4. 941216 5. 580475 3. 764582  
1. 051748 1. 254877 0. 948316 1. 216305 0. 843 1. 411531 1. 313692 1. 495045 1. 423049  
3. 431079 3. 570089 3. 503716 3. 408894 3. 797889 3. 267405 3. 45554 3. 478446 3. 515137  
2. 281029 2. 44597 2. 376942 4. 054292 2. 733602 1. 711622 1. 802837 2. 946609 2. 284879  
5. 64666 5. 324682 6. 234014 5. 655689 5. 911712 5. 711485 4. 917041 5. 424729 6. 107699  
2. 137112 0. 942526 0. 460727 1. 5402 0. 612964 1. 14878 0. 67159 0. 858631 0. 65735  
0. 606011 0. 870971 1. 465578 0. 656596 0. 447572 0. 70836 0. 973574 0. 475306 0. 678029  
0. 913241 1. 048353 0. 634213 1. 70647 0. 505213 1. 015195 0. 992233 1. 101041 0. 666382  
1. 227113 1. 654953 1. 629195 1. 305629 1. 476807 1. 458057 1. 792399 1. 506998 1. 214703  
1. 984804 2. 36324 1. 976123 1. 6881 1. 657436 2. 091465 2. 409072 1. 32497 1. 370459  
0. 731693 1. 317818 1. 242663 1. 567724 1. 161549 0. 981481 0. 876648 1. 18097 0. 924926  
1. 829528 1. 346291 1. 186463 1. 239177 0. 755626 0. 931887 1. 066362 0. 6567 0. 783002  
0. 94731 1. 996077 1. 212006 0. 8178 5. 400348 2. 25741 1. 126825 1. 445818 1. 058859  
2. 098264 3. 423548 5. 081732 3. 94715 4. 929151 4. 36575 4. 405328 4. 463729 6. 254624

8. 358233 9. 007007 8. 751441 8. 881518 9. 129756 7. 540028 9. 477678 9. 366721 8. 986912  
1. 87653 1. 764572 1. 845846 3. 208333 1. 889617 2. 463503 1. 713579 2. 646527 2. 103862  
4. 644295 6. 092369 5. 810546 5. 265958 5. 140914 5. 130059 5. 447975 5. 695338 4. 834606  
6. 016829 5. 03322 5. 763575 5. 341088 5. 092502 5. 74149 5. 43294 5. 055605 4. 861647  
1. 041217 1. 326818 1. 131521 1. 193443 1. 029209 1. 185962 1. 391816 1. 43858 1. 242642  
6. 900211 4. 068835 6. 103202 7. 623702 3. 370188 4. 236429 3. 244236 1. 371208 4. 824448  
7. 03815 6. 314486 6. 184935 6. 452695 5. 121761 5. 683356 5. 312162 5. 598063 4. 873  
2. 874683 1. 956909 2. 703726 3. 815198 2. 346484 2. 687305 2. 051537 2. 749349 2. 916695  
1. 931479 1. 559865 2. 008176 1. 4212 2. 236652 1. 579371 2. 524476 1. 635763 1. 081739  
4. 949859 5. 664881 5. 864914 5. 250933 5. 332458 4. 880616 5. 504865 4. 687098 4. 548911  
1. 5733 1. 372595 1. 875687 1. 678089 1. 311077 1. 379023 1. 502895 1. 281954 1. 522485  
9. 861179 9. 461093 9. 660842 9. 116595 9. 067945 9. 043303 8. 723911 8. 272203 7. 715727  
0. 990297 0. 775438 1. 220841 1. 394057 0. 895695 1. 653333 1. 013104 1. 317678 1. 092999  
7. 655191 8. 237748 8. 149459 7. 98409 8. 570467 8. 884806 8. 593254 9. 238806 8. 977357  
0. 993064 2. 442163 1. 294232 2. 177562 2. 815037 3. 740953 3. 280666 1. 79469 3. 572772  
7. 632769 6. 072451 6. 99987 6. 488871 6. 546745 6. 79962 6. 416248 5. 295225 5. 596365  
2. 417365 1. 356331 1. 658004 1. 105355 1. 091294 1. 697698 1. 03281 1. 685858 1. 445647  
2. 294961 2. 997016 3. 154068 3. 31731 3. 146245 3. 604773 3. 566317 4. 195673 3. 569099  
1. 74513 2. 095553 1. 631157 1. 78561 2. 281181 2. 494028 3. 475579 1. 836897 2. 708549  
1. 430829 1. 799228 1. 680512 2. 024404 1. 78029 2. 015636 2. 290071 2. 043671 2. 178939  
3. 891894 4. 336065 3. 324436 4. 660684 3. 831203 4. 550174 3. 476597 4. 496701 3. 769684  
3. 928805 8. 08777 5. 417295 5. 225871 6. 91686 3. 933172 5. 658991 2. 358872 3. 424405  
1. 671365 2. 01869 0. 893768 1. 776122 1. 052796 1. 403656 0. 903079 0. 980722 1. 755889  
4. 961784 5. 732758 5. 178 4. 910922 3. 819412 5. 590104 2. 61847 2. 838934 3. 836207  
1. 149406 1. 757532 1. 028841 1. 082974 1. 302197 1. 044492 0. 958848 0. 878939 0. 736126  
10. 31697 10. 0069 9. 957419 10. 39727 9. 946303 10. 44575 9. 683975 9. 126529 8. 698034  
2. 224892 1. 331715 1. 645029 2. 532607 1. 784691 2. 028943 1. 366432 2. 587789 2. 008712  
11. 01075 10. 39397 10. 42565 10. 58808 10. 44146 10. 66435 9. 498242 7. 704508 5. 941765  
10. 98325 10. 34582 10. 76474 10. 33302 10. 17378 11. 10799 10. 25439 8. 396908 7. 642589  
2. 172105 3. 235292 3. 833039 2. 271586 3. 150642 2. 235642 2. 107607 1. 661164 1. 830723  
6. 75868 6. 432421 6. 931926 5. 874979 6. 863654 6. 06121 6. 91968 5. 95946 5. 945301  
6. 478353 5. 546427 6. 104277 5. 993099 5. 548545 6. 612592 5. 791048 5. 230071 5. 678941  
10. 4077 10. 43215 10. 10014 9. 733909 9. 863713 10. 39214 8. 808527 7. 94367 7. 750853  
11. 99512 11. 54958 11. 95596 11. 348 11. 92928 12. 02556 11. 85024 11. 58893 10. 93079  
1. 755179 2. 100425 2. 30474 4. 693394 2. 438423 2. 134263 1. 23261 2. 560745 2. 555955  
4. 036211 4. 706351 4. 937198 3. 266599 4. 504155 4. 465074 4. 373204 3. 599971 4. 271863  
1. 691772 2. 601896 3. 014725 3. 718508 3. 195275 2. 091846 3. 355089 2. 849393 2. 105743  
6. 991778 6. 210551 6. 107159 6. 459693 5. 88511 6. 089448 7. 002829 7. 009122 6. 400441  
6. 292165 6. 603073 6. 901919 7. 169096 6. 779613 6. 913715 7. 065918 7. 354299 6. 09533  
7. 442376 6. 194407 6. 705016 6. 818284 5. 591631 6. 686925 6. 05525 5. 399362 6. 015727  
3. 519461 3. 523684 3. 552161 3. 053744 3. 480804 4. 138038 3. 052289 2. 639775 4. 090638  
6. 285922 7. 278464 5. 858855 7. 043506 5. 820463 6. 319546 6. 004363 5. 337563 5. 599471  
5. 988804 5. 906382 5. 853923 5. 306683 6. 255122 6. 012453 5. 699924 5. 648147 5. 406674  
2. 985639 2. 138997 2. 742605 2. 877057 3. 307918 3. 814158 3. 614163 3. 190652 4. 203209  
4. 653601 3. 081996 4. 063565 1. 837871 2. 267232 1. 963169 1. 861974 1. 318447 1. 820479  
2. 39874 2. 989783 2. 424764 2. 477234 1. 84673 1. 679356 2. 70689 3. 441061 2. 174815  
5. 266525 2. 942268 3. 407447 3. 617489 3. 282694 2. 636636 4. 223216 2. 42026 2. 132762  
6. 813539 6. 738306 6. 692218 6. 102658 6. 803797 6. 542871 6. 694209 6. 353411 6. 205104  
6. 244557 6. 096702 6. 045475 6. 789332 6. 908215 6. 825313 5. 723515 6. 259994 6. 230035  
1. 029967 1. 117503 1. 064261 1. 228146 1. 534266 0. 994239 1. 172373 3. 516302 2. 224728  
7. 06082 6. 251965 6. 102858 6. 617982 5. 79762 8. 084842 6. 351469 4. 899758 7. 313088

2. 140415 2. 305336 2. 108789 2. 408046 2. 015175 1. 926689 1. 91042 2. 194095 1. 821594  
2. 287302 2. 706733 2. 148726 2. 01686 1. 965117 3. 720025 2. 182785 1. 624015 1. 772308  
1. 833895 2. 05838 1. 760266 1. 828318 2. 60252 2. 559139 2. 372265 1. 636772 2. 348058  
3. 243432 2. 691474 2. 617854 2. 574266 3. 306731 2. 409318 1. 788819 2. 177161 3. 424811  
2. 196642 2. 413718 2. 059945 2. 24469 2. 331116 2. 230529 2. 093612 2. 542451 2. 417569  
1. 782591 1. 699386 1. 269116 1. 670287 1. 531729 1. 676069 1. 943016 2. 509071 1. 947038  
5. 641628 5. 785491 5. 96768 6. 122895 5. 597534 5. 51436 6. 261524 5. 492321 5. 412964  
2. 267492 1. 420897 1. 70575 1. 513305 1. 718436 1. 716647 1. 648832 1. 758153 1. 856704  
7. 189008 7. 050675 7. 078565 6. 486147 6. 798248 7. 130273 7. 047451 6. 533454 6. 320032  
3. 171565 2. 809512 2. 506766 2. 8138 3. 099349 2. 277138 2. 711493 2. 302048 3. 557291  
4. 543184 3. 796437 3. 77508 3. 322476 3. 900697 3. 745043 5. 45507 3. 61515 4. 898455  
2. 950465 2. 229947 1. 741254 2. 649452 2. 094392 4. 256312 2. 740211 2. 011293 2. 217406  
5. 725869 5. 577347 5. 473376 5. 7203 5. 751946 7. 271127 7. 062585 5. 636345 5. 911994  
3. 746448 4. 161895 2. 728026 4. 45452 4. 326406 5. 019384 4. 953687 4. 252117 5. 076268  
4. 240662 5. 007427 4. 288469 4. 826079 5. 454145 4. 897256 4. 343739 4. 470879 4. 380281  
1. 758532 2. 644783 1. 498299 2. 170574 2. 002728 1. 739379 1. 063352 1. 430479 1. 736333  
2. 738508 1. 969608 2. 664205 2. 524841 2. 609628 1. 883932 2. 196327 1. 491816 2. 766837  
1. 251408 2. 136226 1. 3951 1. 951203 1. 817906 0. 969216 1. 166236 1. 639982 1. 114694  
2. 63314 2. 467809 2. 767264 2. 324015 3. 001654 2. 380812 2. 090517 2. 786528 2. 565447  
2. 283936 1. 700874 2. 314618 1. 832782 2. 568801 2. 304317 1. 769477 1. 476489 1. 954086  
1. 794922 2. 490649 1. 621922 1. 671761 1. 784694 1. 682612 1. 954522 1. 426932 2. 078499  
4. 360262 3. 882412 3. 601853 4. 052636 4. 896792 5. 575696 6. 343442 5. 758979 6. 223463  
4. 049688 4. 695532 3. 576873 4. 084956 3. 394217 7. 187154 4. 342722 2. 538645 3. 972686  
2. 089282 3. 002099 2. 253903 2. 033839 3. 11028 1. 865166 2. 188318 2. 741307 2. 628726  
2. 56017 2. 982999 2. 564871 2. 56017 2. 899224 2. 84798 3. 024745 2. 849041 3. 036907  
3. 661035 3. 712031 3. 600171 4. 022869 3. 436479 3. 293816 3. 577506 4. 24831 4. 150519  
4. 313902 1. 53223 4. 448915 4. 783968 4. 245348 5. 470111 5. 418094 4. 562834 6. 020608  
6. 875806 7. 961728 7. 958774 6. 879463 7. 684757 5. 610164 7. 373798 7. 113201 7. 871914  
1. 845345 2. 075696 1. 995454 2. 753435 1. 67622 1. 573823 1. 985571 2. 076673 2. 124106  
0. 88609 1. 895641 1. 13838 3. 001012 1. 440374 1. 394012 1. 189188 1. 184863 1. 513212  
1. 074566 2. 120731 3. 038988 1. 536902 2. 32593 2. 523908 1. 656491 1. 185039 0. 730561  
1. 514039 1. 646997 3. 036049 1. 563069 1. 472101 1. 523153 1. 21623 1. 820467 1. 111711  
1. 263815 2. 096029 2. 770823 2. 086475 1. 955637 2. 015624 1. 780107 1. 500643 1. 811406  
1. 212284 0. 711829 1. 105784 1. 2684 2. 086377 2. 030983 1. 641198 1. 783879 1. 832686  
1. 316082 1. 179184 1. 080004 2. 697783 1. 294888 1. 698417 1. 109011 1. 331447 1. 178719  
2. 329666 1. 458459 1. 239943 1. 901521 1. 519602 1. 088986 1. 941574 1. 577316 1. 973409  
1. 767271 1. 170663 0. 836678 1. 464995 1. 808154 1. 981263 0. 834295 2. 292217 1. 079811  
8. 077127 7. 548891 8. 358737 8. 053108 8. 742738 7. 896961 8. 913465 9. 084323 9. 076993  
5. 613545 5. 5963 5. 056939 5. 663504 5. 588944 6. 211331 5. 793303 6. 357965 6. 566985  
3. 028654 2. 385299 3. 193845 3. 754038 3. 889346 3. 542363 4. 262087 4. 046902 5. 370755  
2. 143246 1. 824005 2. 582293 2. 504359 2. 165743 2. 353743 1. 915293 1. 975673 1. 63457  
1. 999799 2. 808511 1. 860463 3. 635425 2. 898053 1. 604082 2. 045309 1. 838413 1. 505424  
1. 338635 2. 530996 1. 648937 3. 208729 2. 133188 2. 504017 2. 689757 2. 237363 3. 010097  
5. 759064 4. 120833 4. 735008 5. 463854 4. 862844 5. 036893 4. 737469 5. 445747 4. 136101  
2. 785757 2. 877215 2. 063157 2. 661338 3. 844514 2. 601798 2. 52814 3. 113454 3. 336386  
4. 779981 3. 69901 5. 080656 5. 326653 3. 182724 5. 273463 3. 502853 3. 478993 3. 789322  
10. 81278 10. 98553 10. 93713 10. 79701 11. 05494 11. 00768 10. 9548 10. 90975 11. 20247  
8. 076781 8. 421231 8. 344216 8. 081893 8. 405545 8. 495771 8. 993783 8. 813884 8. 759217  
4. 427274 5. 88258 5. 828015 5. 208291 5. 011147 5. 614458 6. 196688 5. 573883 6. 037273  
1. 738896 1. 639487 1. 475194 2. 010699 1. 432102 1. 248397 1. 381629 1. 637993 2. 115556  
6. 478913 6. 190474 7. 043242 7. 203372 7. 186365 7. 050693 7. 969646 8. 514329 8. 467576

7. 100297 8. 154995 7. 643475 7. 62079 7. 97505 6. 873447 8. 533093 8. 528804 8. 389608  
8. 550445 8. 835862 8. 863852 8. 843744 8. 890291 7. 222835 9. 240334 9. 401658 9. 381479  
3. 841674 5. 278198 4. 904836 5. 026936 5. 206473 5. 140185 6. 135836 5. 13849 6. 088209  
6. 609806 4. 946847 5. 450089 6. 246782 4. 9205 6. 31221 5. 366307 3. 77329 3. 925484  
7. 280574 7. 354397 7. 384391 7. 034495 7. 320106 7. 677754 7. 376413 7. 098595 7. 240879  
2. 855003 2. 210973 2. 211334 2. 553217 2. 845285 1. 953356 2. 761887 2. 713833 2. 620557  
4. 182012 3. 56555 2. 843732 3. 463007 2. 963665 3. 66768 3. 349514 2. 431738 2. 698501  
6. 02042 6. 793691 6. 406672 6. 162667 6. 011453 5. 508707 6. 538678 5. 6677 6. 087112  
3. 785833 3. 779392 4. 326673 2. 736681 4. 13665 5. 167122 3. 96273 4. 488356 5. 559059  
5. 180115 4. 170547 4. 202684 5. 483321 4. 696259 4. 957464 4. 252936 5. 53585 4. 861862  
1. 369785 1. 722192 1. 231267 1. 894975 1. 228305 1. 928936 1. 54388 1. 53649 1. 532919  
1. 426221 2. 510565 1. 883561 2. 586683 2. 269957 2. 460801 1. 958437 1. 533552 1. 854061  
3. 093541 2. 601852 2. 883838 2. 307143 2. 555543 2. 889493 2. 856963 3. 212753 2. 349714  
6. 923483 6. 825986 5. 951194 6. 693335 7. 168873 6. 77369 6. 129742 6. 611752 6. 543922  
5. 426398 5. 339369 5. 069099 5. 101907 4. 751302 4. 842927 4. 579668 4. 059405 5. 294474  
2. 354274 3. 622621 2. 857278 4. 349116 3. 060084 3. 083604 2. 621672 3. 237161 2. 890631  
5. 552984 6. 317359 5. 857503 5. 408087 6. 04215 4. 958435 5. 955474 5. 738598 5. 876439  
4. 349119 3. 622851 3. 198487 5. 031134 3. 558871 4. 26692 3. 28329 4. 448123 4. 559785  
4. 049226 3. 856738 4. 072998 5. 271048 4. 120941 3. 810957 3. 630142 3. 641253 3. 956171  
5. 814452 4. 887767 4. 832368 4. 92402 5. 540769 6. 380951 6. 285984 6. 564679 6. 491246  
5. 294671 4. 707884 4. 501527 4. 925942 5. 295509 4. 627056 5. 246291 5. 4849 5. 080386  
7. 403658 7. 08387 7. 267079 7. 239777 6. 795824 6. 611761 6. 678102 7. 168855 6. 746922  
8. 493471 8. 881602 8. 719586 8. 879147 9. 268548 8. 883652 8. 723949 8. 537262 8. 84303  
0. 616794 0. 896915 1. 679203 1. 942541 0. 741615 3. 801839 1. 588349 0. 777497 0. 87996  
8. 302486 8. 158388 7. 842716 7. 780833 7. 766384 8. 33738 7. 619435 7. 509467 7. 036023  
4. 043926 5. 515295 5. 900876 5. 677146 3. 779318 5. 091287 5. 557445 5. 518606 5. 24925  
2. 248451 2. 09932 1. 471965 2. 391516 1. 648717 1. 372093 2. 244206 3. 119987 1. 62091  
6. 934319 7. 524446 7. 708076 7. 219549 6. 939351 7. 278934 6. 429015 6. 240055 6. 550373  
8. 549631 8. 869477 8. 377428 8. 010932 8. 581322 8. 865473 8. 589033 8. 322219 8. 174909  
6. 464983 7. 217725 6. 689394 6. 303672 7. 647793 6. 957938 6. 573406 6. 726864 6. 89589  
3. 428311 4. 913293 3. 29536 3. 512842 3. 684585 3. 227082 3. 238974 2. 985399 2. 613077  
1. 154245 1. 09161 1. 893398 1. 304709 0. 962109 1. 354342 1. 527953 0. 776536 1. 367856  
2. 179958 2. 182794 2. 769714 1. 557381 2. 930056 2. 571581 2. 251779 2. 005313 2. 321175  
5. 257967 5. 363482 5. 578247 6. 128465 6. 067223 5. 757494 5. 957166 5. 065978 5. 61367  
6. 044841 6. 0855 6. 151938 5. 523768 5. 972269 5. 945096 5. 496181 6. 027912 6. 289743  
3. 206169 2. 264607 2. 31633 2. 908546 3. 788947 3. 645505 4. 946902 4. 805861 4. 213969  
1. 36031 1. 327513 1. 99602 1. 341665 1. 462657 1. 299412 1. 292464 3. 119088 1. 155723  
7. 902539 7. 890861 7. 098907 7. 079938 7. 434703 6. 694237 6. 635071 7. 152096 6. 730417  
2. 721645 2. 079785 2. 391388 3. 81049 2. 95834 4. 396532 3. 489831 3. 586851 4. 21185  
3. 045399 2. 308348 2. 5752 2. 743645 2. 865999 3. 947411 3. 102813 3. 218756 2. 966569  
9. 022634 8. 676091 9. 171304 8. 727038 9. 268059 8. 285955 8. 843039 8. 673356 8. 709336  
5. 982951 5. 95736 5. 503118 5. 060829 5. 718615 5. 590898 5. 520585 5. 274974 5. 49771  
10. 55238 10. 62598 10. 27544 10. 28436 10. 42914 10. 42378 9. 973641 10. 08633 10. 18332  
2. 600299 2. 858175 3. 71338 3. 123168 3. 420599 2. 156608 3. 449177 3. 325359 3. 160313  
1. 997099 1. 883598 1. 641099 1. 987761 1. 455986 2. 490522 1. 51893 1. 541442 1. 662589  
10. 78794 10. 66342 10. 77644 10. 73832 10. 75452 10. 55444 10. 49848 10. 49187 10. 52279  
9. 368297 9. 217976 9. 03363 9. 329944 9. 442512 9. 402058 9. 024709 8. 968997 8. 910691  
10. 05191 10. 02626 9. 900268 9. 932753 9. 618487 10. 39591 9. 813813 9. 846724 10. 05946  
6. 162802 7. 548574 5. 87018 6. 820467 7. 162624 6. 151157 6. 027606 6. 219156 6. 286896  
4. 240182 4. 25371 3. 784539 4. 215781 3. 610697 3. 899571 4. 834856 3. 426766 3. 792681  
8. 465542 8. 573086 8. 245656 8. 647582 8. 849958 8. 409223 8. 251977 8. 357778 8. 59672

8. 772169 7. 781596 8. 377925 8. 757902 8. 133124 8. 376936 8. 633637 8. 655829 7. 945552  
6. 73437 7. 563455 6. 994412 7. 097548 7. 751256 7. 043775 7. 204009 7. 33621 7. 176074  
2. 034779 1. 606825 1. 885248 2. 396835 1. 725295 1. 54243 1. 353368 1. 973162 1. 670502  
7. 284348 7. 815254 7. 516447 7. 54611 7. 775155 7. 964137 7. 37325 6. 932789 7. 598669  
7. 150317 7. 01579 7. 829608 7. 620843 7. 449126 7. 570391 7. 482185 7. 068871 7. 332752  
9. 803045 9. 677055 9. 284918 9. 798584 9. 637462 9. 175508 9. 354534 9. 353352 9. 489504  
10. 48398 10. 27804 10. 2139 10. 47565 10. 43504 10. 09308 9. 848369 10. 22465 10. 00339  
10. 88917 10. 82703 10. 74115 10. 89896 11. 00485 10. 6695 10. 97103 10. 82042 10. 70824  
6. 352629 6. 699855 6. 031784 6. 494505 6. 111107 6. 434851 5. 997126 5. 680579 5. 418138  
4. 4963 4. 328024 4. 712547 4. 895755 4. 509398 4. 572329 4. 2616 4. 513215 4. 301881  
8. 329506 7. 673609 7. 081061 7. 995102 7. 669877 8. 001416 7. 78492 7. 675297 7. 705195  
7. 96969 8. 394223 8. 017237 8. 297701 8. 822073 7. 908548 7. 068893 7. 866865 7. 586551  
8. 800837 8. 033495 8. 565442 8. 965218 8. 35075 9. 420877 8. 556911 8. 903063 9. 185915  
7. 385967 7. 064991 7. 162422 7. 056413 7. 500266 7. 516996 6. 986809 7. 284451 7. 34495  
8. 282951 8. 05258 7. 517228 8. 404129 7. 799221 8. 540468 8. 298018 7. 918877 7. 47441  
8. 680083 7. 983114 8. 264128 8. 55823 8. 557481 8. 913779 8. 659181 8. 412168 8. 084168  
5. 242526 4. 952066 5. 328477 5. 243794 4. 570069 4. 754595 5. 3288 4. 690111 5. 28433  
7. 135961 7. 133358 6. 788688 6. 439161 6. 876848 6. 713788 6. 535853 5. 997498 6. 416757  
7. 659028 7. 961496 7. 129934 7. 154672 7. 607934 7. 860087 8. 22035 7. 866505 7. 399641  
6. 969608 7. 608038 6. 671298 7. 221781 7. 445685 7. 73448 7. 31043 6. 676092 7. 054809  
8. 305964 8. 411063 8. 244543 8. 409557 8. 300641 8. 362077 8. 083968 7. 960524 7. 905158  
7. 412801 6. 362026 7. 566847 7. 051205 7. 037076 7. 864713 6. 77605 6. 990164 7. 361322  
8. 833776 8. 347604 8. 423135 8. 688914 8. 889898 7. 979358 8. 321084 8. 195113 8. 516953  
8. 832138 8. 331552 8. 637327 8. 799854 8. 671287 9. 119947 8. 401079 8. 017345 8. 353188  
8. 557517 8. 540098 8. 656054 8. 963959 9. 165725 9. 414313 8. 532337 8. 80497 9. 158631  
6. 598613 6. 151632 5. 928194 6. 814546 6. 303079 7. 256644 6. 718106 6. 84328 6. 109468  
7. 163418 6. 608745 6. 924373 7. 741093 7. 574991 7. 068621 7. 61136 6. 390617 6. 6552  
5. 894182 6. 593803 5. 981147 5. 75148 6. 591032 6. 35698 6. 071782 5. 895308 5. 792561  
7. 847919 7. 339422 7. 640756 7. 704745 7. 299449 8. 038938 7. 465249 7. 588922 7. 728387  
7. 384496 7. 887507 8. 169999 7. 635201 8. 537619 8. 112921 8. 507454 8. 004116 8. 003741  
6. 327276 6. 978243 6. 321619 6. 223517 6. 310179 5. 712735 6. 457673 7. 229671 6. 944736  
7. 390562 7. 852983 7. 786008 7. 459384 7. 834957 7. 417859 7. 797538 7. 719375 7. 914227  
9. 909222 10. 26039 10. 14508 10. 09606 10. 52176 10. 06614 10. 07928 9. 921683 9. 495838  
6. 200793 5. 345154 5. 944653 5. 245821 6. 383239 4. 466825 4. 92211 4. 832754 4. 744474  
6. 544429 6. 246024 7. 121457 5. 83912 6. 952217 7. 041698 7. 292911 7. 173433 7. 138688  
1. 732093 1. 631378 1. 69127 1. 631425 2. 465458 3. 53567 2. 88922 1. 28975 1. 213847  
5. 944389 5. 378231 2. 941917 5. 578406 3. 497552 1. 610607 1. 927504 1. 515929 2. 371617  
5. 844867 4. 878932 1. 636361 7. 877504 4. 031536 4. 096407 3. 954822 6. 311489 5. 578224  
5. 424248 4. 518127 4. 359008 5. 259453 5. 025433 5. 706798 6. 030736 6. 895161 7. 030982  
0. 635294 1. 36669 2. 199852 1. 55492 1. 007756 1. 315135 0. 831195 1. 572882 1. 097482  
4. 946148 2. 486253 5. 095045 1. 689277 4. 31805 4. 177183 1. 294876 4. 083257 1. 749948  
2. 470035 2. 203839 2. 525158 2. 018245 2. 342398 2. 175046 2. 538448 3. 245353 1. 984191  
6. 835291 5. 990979 1. 505735 3. 274962 3. 935774 2. 137428 7. 42723 8. 053879 8. 231329  
1. 886875 2. 477249 2. 118986 2. 63534 1. 453514 3. 475799 4. 251097 2. 564328 1. 964258  
2. 8902 1. 931068 1. 920654 1. 792619 2. 708312 1. 959945 1. 591399 2. 298377 3. 077802  
5. 734111 6. 883691 5. 976477 5. 702811 6. 341737 5. 64892 5. 772986 6. 628656 5. 559715  
1. 188259 1. 405601 2. 305149 1. 640293 2. 134928 1. 583206 1. 774772 1. 340538 1. 227343  
4. 44788 4. 720555 5. 086286 4. 753506 4. 889998 3. 395783 4. 470827 4. 751559 4. 246864  
2. 08202 1. 558634 1. 518515 1. 902873 1. 635671 1. 774631 1. 271676 1. 843602 1. 737124  
6. 996894 7. 133533 7. 441691 7. 222226 7. 318814 7. 236188 7. 158592 7. 174631 6. 822073  
5. 883877 5. 587934 6. 727843 6. 836458 5. 969119 7. 744126 6. 46072 6. 640185 6. 98486

2. 517127 2. 360757 2. 317872 3. 038125 2. 368051 2. 23934 2. 628792 2. 619484 2. 392536  
10. 50137 10. 60248 10. 48045 10. 93742 10. 61999 10. 55644 10. 9258 10. 85549 10. 44708  
1. 957463 1. 566717 3. 08169 2. 26413 2. 047645 1. 726436 2. 006791 2. 471981 2. 246274  
1. 791378 1. 52478 1. 606192 1. 175789 1. 775656 1. 701722 1. 294174 1. 978478 1. 508678  
2. 219132 1. 70198 1. 709902 2. 876 1. 556675 2. 488596 2. 004952 2. 557944 2. 210932  
7. 522929 7. 459829 7. 045651 6. 601249 6. 945668 7. 212249 7. 517924 7. 160576 6. 962172  
10. 22818 10. 03899 10. 02825 9. 954217 10. 02771 10. 31166 9. 860746 9. 42798 9. 649601  
4. 687256 4. 900342 4. 633194 4. 088001 4. 350615 5. 550265 5. 241395 5. 377416 5. 393233  
2. 651345 2. 929949 3. 688627 3. 660032 3. 947528 4. 235532 4. 417791 4. 014631 4. 154194  
2. 885143 4. 016157 2. 579719 2. 90761 3. 056111 4. 392423 3. 127681 4. 598765 5. 355293  
6. 396822 5. 463999 5. 615317 5. 623409 6. 588713 6. 835375 6. 458176 6. 222169 6. 271137  
5. 882134 6. 836749 6. 9292 6. 690523 7. 1167 6. 566623 6. 524311 5. 648374 6. 244784  
2. 858285 1. 996357 3. 144293 2. 572928 3. 253293 2. 641118 4. 387827 2. 883093 3. 630328  
1. 412064 1. 918118 1. 723207 1. 118166 1. 521211 2. 072848 1. 710696 2. 245022 1. 769979  
9. 067668 9. 145105 9. 394172 9. 27932 9. 471793 8. 732872 9. 718993 9. 534627 9. 616784  
3. 391967 2. 96957 4. 323328 2. 990914 3. 072942 2. 20655 2. 851015 3. 843352 3. 547805  
7. 918796 7. 867343 7. 963399 7. 994982 8. 055403 7. 706832 7. 914431 8. 094282 8. 398498  
6. 702407 6. 13 6. 989137 5. 788898 6. 383912 7. 07663 7. 034244 5. 573214 5. 59602  
7. 112836 6. 120278 7. 319126 7. 652958 7. 576922 6. 969875 7. 889681 7. 594562 7. 515912  
5. 683052 6. 620681 5. 475244 5. 360326 6. 463076 5. 784695 4. 656116 5. 68299 4. 572597  
5. 921784 5. 030759 5. 83742 6. 989633 6. 394608 8. 821049 7. 650468 6. 470351 7. 271972  
2. 346345 1. 15494 2. 104094 3. 398872 2. 298425 2. 120825 1. 89101 2. 743588 2. 911549  
5. 620837 5. 850381 6. 582374 4. 264467 5. 820022 6. 920853 6. 819815 6. 451435 6. 341165  
3. 880092 3. 716138 3. 159918 3. 986536 3. 581474 4. 937309 4. 559903 4. 628569 4. 608697  
9. 586443 9. 314922 9. 655065 9. 684964 9. 834554 8. 628554 8. 54976 9. 324525 9. 514203  
3. 897894 3. 259487 3. 362735 2. 829163 3. 652426 2. 821435 3. 40216 4. 098322 3. 82869  
3. 678243 2. 673937 2. 685291 3. 12641 3. 098816 4. 32705 4. 264484 4. 458506 3. 688692  
1. 973493 2. 693999 2. 293487 2. 49905 2. 41537 2. 469724 2. 262506 2. 559576 2. 336513  
2. 960599 2. 122908 2. 517066 3. 181867 2. 302135 1. 998924 1. 658681 3. 232171 3. 040027  
4. 327229 4. 769391 4. 506121 4. 853495 4. 233161 4. 784096 4. 439605 4. 02154 4. 54795  
4. 792306 6. 147234 5. 106862 4. 124322 5. 009356 5. 494085 5. 471985 5. 762292 5. 584901  
2. 974324 1. 858512 1. 435666 2. 30134 1. 852308 2. 556043 1. 474895 1. 850489 1. 7975  
6. 960688 6. 432412 5. 910602 6. 37202 6. 133391 7. 990892 7. 41196 6. 720397 7. 110114  
5. 670561 6. 079432 5. 466029 5. 953655 6. 484535 5. 446793 4. 95869 4. 986595 4. 946546  
6. 426425 6. 609245 6. 24371 6. 389476 6. 028742 5. 458201 5. 434497 6. 482638 4. 993809  
4. 367461 3. 286463 4. 136868 4. 061268 3. 935087 3. 894172 3. 481207 4. 266874 3. 520277  
3. 25563 4. 776521 4. 289596 3. 431763 4. 081111 2. 611855 4. 324532 6. 041575 3. 970599  
2. 248801 2. 09468 2. 078364 3. 346658 2. 882254 2. 690628 2. 458321 3. 15791 2. 909047  
1. 896586 2. 333657 2. 570293 2. 127539 1. 564596 1. 666002 1. 462979 1. 939002 1. 719879  
1. 158993 1. 221994 1. 135357 1. 656001 1. 615567 2. 151247 1. 301928 1. 714132 2. 032776  
7. 673959 7. 255798 7. 746927 7. 751569 7. 924856 7. 985053 7. 672316 7. 703737 7. 680595  
1. 5114 1. 810796 1. 917324 1. 472479 1. 57554 1. 449439 1. 73357 2. 281551 1. 603411  
5. 483761 3. 895341 5. 063304 4. 50464 4. 032809 5. 067545 4. 333121 5. 154327 5. 054308  
5. 031398 4. 785123 4. 55454 4. 76413 4. 193837 6. 078926 5. 234668 6. 430461 6. 193918  
6. 856832 5. 129159 6. 663857 7. 098001 5. 725468 7. 096795 6. 871349 7. 106466 7. 19734  
3. 112267 2. 081395 2. 430767 3. 033934 2. 940488 3. 485572 2. 3479 2. 261109 4. 397969  
6. 586238 5. 927105 5. 876636 6. 07127 4. 149501 5. 975727 5. 683092 5. 787989 5. 874317  
5. 424222 3. 973509 3. 746821 4. 99721 5. 921301 8. 054326 5. 675889 5. 601299 7. 734807  
10. 43151 10. 34524 10. 41232 10. 59585 10. 27488 10. 45796 10. 19617 9. 726476 9. 912563  
7. 523818 7. 283892 7. 749557 5. 485458 6. 940445 5. 129307 5. 112326 4. 558011 5. 099858  
1. 476313 1. 936668 1. 735635 1. 945773 2. 060827 2. 097465 1. 778089 2. 282536 2. 107843



3. 044575 3. 966537 2. 727627 3. 435786 3. 298854 4. 009957 3. 472107 4. 017868 2. 718747  
2. 308878 1. 75482 1. 547563 2. 09627 2. 086262 1. 985201 1. 301639 1. 537118 1. 980693  
1. 998477 2. 532646 2. 962228 2. 826086 1. 701168 2. 205355 1. 74681 1. 988273 2. 283313  
4. 20237 3. 776977 3. 319735 5. 130071 2. 93569 6. 017188 3. 675065 3. 836532 4. 305178  
1. 278074 1. 131623 1. 185196 1. 81109 1. 565881 1. 803679 2. 174372 1. 928289 1. 959851  
6. 117919 5. 333619 6. 524297 5. 402754 4. 845568 6. 665567 6. 717352 7. 407257 7. 084551  
8. 993368 8. 564768 8. 174785 8. 715271 8. 98742 9. 025856 8. 276705 8. 192925 8. 699567  
2. 497329 4. 134056 3. 001657 1. 590238 2. 319084 4. 134466 2. 406642 2. 630085 3. 53325  
4. 207981 3. 680906 4. 294123 4. 74361 3. 698467 4. 89592 4. 833541 5. 051301 5. 413738  
3. 021677 2. 485829 2. 551045 2. 650208 2. 018268 3. 395591 2. 658841 3. 094468 3. 737048  
7. 863209 7. 050381 8. 159144 7. 51008 7. 208775 7. 439112 7. 741574 5. 694194 6. 184245  
7. 398786 6. 944971 7. 332626 7. 534917 7. 399874 7. 604997 7. 812301 7. 936703 7. 930639  
3. 962568 5. 20845 3. 878534 4. 575779 4. 052016 7. 039396 5. 24636 4. 659552 5. 508671  
1. 678791 1. 805376 2. 664707 1. 705574 2. 996373 2. 461066 1. 88006 1. 707261 3. 061371  
2. 399435 2. 551161 2. 278594 2. 332214 2. 712033 3. 317132 3. 907062 4. 104985 2. 39005  
6. 154202 7. 198852 6. 505156 6. 781903 5. 347397 6. 283961 7. 132929 7. 157193 7. 297049  
5. 978887 6. 117659 6. 091664 6. 374033 6. 73854 6. 936087 6. 046768 6. 910999 6. 912468  
2. 728822 2. 311338 1. 970046 2. 172164 2. 711354 2. 274186 2. 32269 3. 501253 3. 132256  
2. 805022 1. 892735 2. 683035 2. 434507 1. 877441 1. 396048 3. 597027 2. 142143 2. 163703  
3. 408907 2. 215156 3. 736366 2. 56441 3. 479312 3. 124086 4. 187693 4. 360974 4. 131582  
5. 890248 6. 311123 5. 93986 5. 978172 6. 272937 5. 198248 5. 223995 5. 463679 5. 48798  
5. 486952 5. 444224 6. 260291 5. 623282 6. 296518 6. 392715 5. 723698 6. 415097 6. 779169  
6. 562889 6. 8864 6. 748533 6. 195766 6. 765777 6. 322924 6. 946688 6. 723237 6. 781539  
3. 530497 3. 39603 3. 958055 3. 394958 3. 720495 4. 557084 5. 429556 5. 688127 5. 746714  
3. 069561 2. 344322 2. 071899 2. 204118 2. 384312 1. 772598 1. 803615 2. 315575 3. 349126  
6. 198384 7. 23198 7. 069251 7. 04728 7. 508672 6. 333457 7. 690423 7. 368687 7. 444426  
4. 114127 3. 069268 3. 58527 4. 894799 3. 747074 4. 422675 3. 775079 4. 237921 5. 300239  
4. 002171 3. 038406 4. 098547 3. 599939 3. 963596 3. 916981 4. 6463 5. 107632 4. 898856  
3. 794814 3. 224214 2. 801034 3. 927812 4. 691482 3. 376268 4. 075396 3. 992667 3. 21996  
4. 059766 4. 268248 3. 027475 3. 975911 5. 018329 5. 35517 4. 533239 4. 276713 3. 969338  
2. 81975 2. 669065 3. 080955 3. 477205 3. 060939 4. 016425 2. 893215 4. 219927 4. 317091  
5. 956134 4. 395248 6. 610196 6. 437273 5. 688233 6. 296194 5. 538658 5. 558857 4. 586124  
1. 823624 2. 598491 2. 283347 2. 555349 2. 168199 2. 57102 2. 530566 2. 736685 2. 414375  
4. 96809 3. 013178 4. 715216 3. 795191 2. 422513 5. 443022 4. 180998 3. 706067 3. 266803  
6. 466186 5. 709203 6. 382933 6. 338902 6. 71036 5. 777179 5. 759496 6. 235007 6. 466374  
4. 058964 5. 388692 5. 049587 5. 417237 4. 892751 5. 232307 5. 239486 4. 987761 4. 623285  
4. 243683 4. 660122 3. 653942 3. 918553 4. 224973 4. 848037 4. 19695 2. 832906 3. 135977  
7. 266955 6. 372103 7. 719185 7. 78437 7. 606126 5. 377065 8. 365459 8. 710804 8. 237704  
5. 578454 5. 587827 5. 951323 5. 199194 6. 164282 6. 41441 5. 017528 5. 676863 5. 780386  
2. 545247 1. 239795 2. 175574 1. 396722 2. 886846 1. 373394 1. 773249 1. 472623 0. 994325  
1. 800209 1. 933459 2. 024554 2. 657932 2. 111946 1. 778274 1. 806301 2. 007869 2. 487672  
2. 421495 2. 42379 2. 664996 2. 420423 2. 608166 2. 497244 2. 673956 2. 638492 1. 787343  
1. 921886 1. 82753 2. 410294 1. 793189 1. 500246 1. 984055 1. 638471 1. 634156 1. 956151  
6. 148881 6. 063135 6. 541248 6. 5327 6. 879462 5. 483843 7. 079815 7. 085535 7. 171731  
3. 313447 4. 466399 4. 635891 5. 200284 3. 66647 3. 708484 4. 966767 5. 538851 4. 833975  
8. 725577 8. 725826 8. 357874 8. 424766 8. 303187 8. 408323 10. 08708 9. 620864 9. 12679  
2. 236131 2. 528221 2. 198367 2. 629936 2. 361955 1. 59332 2. 340858 1. 495196 2. 072803  
2. 556875 2. 493562 2. 511241 2. 472316 2. 149968 3. 05052 2. 390475 2. 569347 2. 190181  
6. 752083 5. 7115 6. 061586 6. 651339 6. 096528 6. 308231 6. 105706 6. 392759 7. 03554  
1. 779024 2. 053991 2. 640137 1. 552378 2. 179289 1. 583124 1. 870902 1. 878508 1. 571682  
4. 503444 4. 83558 4. 496735 6. 420707 4. 032456 6. 337119 3. 823647 3. 395602 3. 884429

1. 755153 2. 666152 1. 737549 2. 752997 3. 178842 3. 918693 2. 055177 2. 534632 2. 334519  
8. 50922 8. 401885 8. 532878 8. 709499 8. 743535 8. 167008 9. 301906 9. 40429 8. 805651  
5. 094916 5. 196108 5. 339472 3. 977611 4. 745893 4. 479992 4. 127335 4. 202292 4. 057596  
1. 607141 1. 799989 1. 474209 1. 733735 1. 457736 1. 48035 1. 437445 2. 043679 1. 516189  
6. 842717 6. 582329 6. 899735 6. 359936 6. 941385 8. 001251 7. 375148 7. 051538 6. 888484  
3. 255484 3. 000214 3. 36787 2. 853641 2. 212952 1. 941633 1. 397359 1. 256032 2. 25789  
7. 357152 8. 156869 7. 98804 7. 149853 8. 05274 7. 408856 7. 81116 7. 550298 7. 766158  
4. 449079 4. 991054 4. 142991 4. 468131 3. 681605 3. 935876 3. 880323 5. 21605 4. 17253  
4. 121521 3. 440122 3. 183966 3. 397767 4. 413549 4. 727475 4. 948684 5. 507413 4. 866988  
8. 657505 8. 203374 8. 333132 7. 671349 8. 28109 7. 892283 7. 501818 7. 250836 6. 695183  
5. 901184 4. 423381 5. 657938 5. 570295 4. 820296 5. 269416 5. 925152 7. 815244 7. 454322  
2. 863002 2. 439812 2. 821508 3. 341591 2. 229203 2. 499236 3. 073245 2. 405071 2. 621983  
2. 530269 1. 930197 3. 635112 1. 916146 3. 067382 4. 215542 2. 640599 3. 354001 2. 138621  
2. 370565 2. 081349 2. 230502 2. 734469 2. 493784 2. 760842 2. 304665 2. 529993 2. 349078  
6. 3427 6. 768005 6. 142203 6. 408387 5. 965921 5. 609099 7. 07909 7. 192926 5. 311072  
5. 62928 5. 787939 6. 433525 5. 160318 4. 019001 6. 51767 7. 257467 6. 590869 6. 688108  
3. 591535 1. 880091 2. 045802 2. 808776 1. 949679 2. 185099 2. 147387 1. 963979 2. 022051  
2. 856432 2. 684636 2. 57719 2. 463525 2. 555297 2. 721148 2. 956345 3. 127694 4. 459974  
7. 030817 7. 022058 6. 692129 6. 134935 6. 778573 7. 245523 7. 281523 5. 80727 6. 843905  
4. 914768 3. 842409 5. 596393 5. 718342 4. 859973 5. 588393 5. 649531 6. 118175 5. 488461  
1. 83225 2. 009183 2. 795873 1. 246317 1. 595814 1. 474185 1. 609614 1. 460418 2. 593931  
4. 802519 4. 787437 4. 995564 5. 738572 5. 69302 5. 238739 4. 855464 6. 465957 5. 686933  
3. 516474 1. 926872 4. 076437 4. 091534 4. 541269 2. 85603 5. 076587 2. 974633 3. 09417  
2. 378061 1. 880962 2. 43968 1. 858048 2. 414887 2. 699602 2. 178924 2. 354972 2. 115965  
3. 609249 2. 677932 4. 160156 4. 02263 4. 106457 3. 154035 2. 415831 2. 603478 3. 52767  
2. 681605 2. 924071 2. 404313 1. 631174 2. 145664 1. 588348 1. 961588 2. 124622 1. 618953  
3. 99955 2. 857616 2. 775274 3. 829149 2. 330746 3. 220218 1. 946376 1. 782909 2. 866535  
4. 692531 4. 287601 4. 227198 4. 386674 4. 773951 4. 157466 4. 059124 4. 71396 5. 1133  
2. 070626 1. 765472 1. 834265 2. 141458 1. 416376 1. 752928 1. 241984 1. 598048 1. 724744  
1. 751791 1. 959401 1. 218095 1. 086339 1. 806076 1. 773337 1. 310984 2. 546196 2. 102955  
1. 333767 1. 329748 1. 280811 1. 345606 0. 915219 1. 799658 1. 603604 1. 543563 1. 887483  
7. 144028 8. 078554 7. 549592 7. 193009 7. 297882 6. 904764 7. 715098 7. 302127 7. 930815  
1. 747382 1. 747524 2. 524044 1. 816672 2. 130599 2. 259022 2. 089527 2. 182968 2. 387323  
7. 087703 6. 821127 7. 150904 7. 691685 8. 394511 7. 868131 8. 599181 8. 064882 8. 36443  
6. 193408 6. 176028 6. 073413 5. 702283 6. 304226 5. 498042 6. 241512 6. 624556 6. 361181  
6. 341822 6. 169296 6. 230146 6. 27893 6. 083314 6. 738477 6. 098229 6. 328288 6. 579974  
4. 893533 5. 250982 4. 758361 4. 473982 5. 265021 4. 711981 5. 241224 5. 122645 4. 895626  
6. 767806 6. 785842 6. 881753 6. 537587 7. 037469 6. 031098 6. 476905 6. 502984 6. 546439  
3. 987089 4. 747518 3. 953271 3. 093839 2. 978567 2. 07716 3. 007909 3. 796445 2. 481174  
1. 727246 1. 845268 1. 305912 1. 640168 1. 08018 1. 375337 1. 362624 0. 928888 0. 809134  
5. 633773 5. 546567 5. 090509 4. 554468 4. 803862 5. 020778 4. 32749 4. 113673 3. 892361  
2. 629566 2. 594718 2. 604618 2. 942164 2. 365707 4. 007473 2. 647492 2. 138752 3. 180975  
5. 804459 5. 281381 6. 810797 5. 929362 5. 955095 5. 461896 5. 654411 5. 966914 5. 887401  
4. 979778 4. 674599 6. 46215 5. 668986 5. 907834 4. 834398 5. 07819 6. 098503 4. 912221  
4. 265699 4. 543107 3. 699171 2. 870166 4. 766567 5. 232425 5. 653069 5. 712717 5. 567172  
1. 900869 2. 605972 1. 659254 2. 260034 1. 926376 1. 663044 1. 940792 2. 009007 2. 351547  
6. 685937 6. 998219 6. 472466 6. 187649 6. 539422 7. 027942 6. 656742 7. 038441 6. 325021  
1. 150269 1. 227218 0. 854266 1. 967223 1. 177862 0. 964222 1. 398552 1. 032179 1. 22197  
2. 141432 3. 683071 2. 823269 3. 570718 3. 867894 2. 263581 2. 61236 2. 865452 2. 721668  
5. 66715 6. 028186 6. 783668 7. 812727 7. 001338 4. 616886 6. 675012 6. 802338 7. 047263  
6. 048927 5. 625197 5. 843535 6. 389456 7. 498416 7. 970875 9. 338036 9. 012108 8. 372594

3.883167 4.330647 3.755128 3.698082 3.859092 2.951963 2.943711 2.708417 3.77184  
1.640452 1.27223 1.097509 0.659848 0.656089 0.931559 1.111613 0.800722 1.859451  
3.060356 4.158484 2.72712 5.592404 2.586448 3.220805 1.299969 1.931452 0.950509  
5.030849 6.356355 6.754827 4.794741 6.774681 6.863305 6.617092 4.937774 5.451628  
4.607738 4.169162 3.561151 3.863606 4.882929 5.761124 6.356201 5.899459 5.597777  
6.693748 6.57044 7.160429 5.858972 7.060105 6.434625 7.299797 6.982659 7.725127  
3.181482 3.909345 3.168507 4.388406 4.253215 4.827504 5.729003 2.743833 4.752437  
5.298769 5.578165 6.063401 3.493783 6.346161 4.276041 6.618273 5.052445 5.668632  
0.886797 1.261227 1.029696 1.152971 0.607659 0.833913 0.776131 1.162495 0.679911  
1.919549 0.961283 0.935954 2.064847 0.912391 1.465165 0.93526 1.269048 1.149759  
1.502044 1.481846 1.997303 1.301938 1.292163 1.402113 1.666257 2.299031 1.856018  
1.182416 1.38633 1.723429 1.92452 1.211785 0.989074 1.499927 1.147966 1.261073  
2.186735 3.089275 1.271739 2.176377 1.749783 3.025368 2.027084 2.281831 2.206468  
0.847749 0.82025 0.658512 1.101517 0.850581 1.0691 0.977381 1.203015 0.989568  
0.937733 1.264468 0.750085 2.02666 1.104044 1.362868 1.239395 1.701789 1.125621  
7.296446 6.833953 6.72194 6.371447 6.804797 6.342163 6.395229 6.199182 6.328317  
4.02598 2.018502 0.57318 0.959407 3.176007 0.806399 1.513545 1.808933 1.048041  
4.841889 4.191991 4.211974 3.008739 4.782612 5.758563 5.522151 4.457101 4.080171  
0.859279 1.036195 0.872961 1.63476 0.695612 0.610999 0.588182 1.619517 1.11974  
1.200782 1.743164 1.561694 3.847461 2.169223 1.360078 1.659715 1.430321 1.593801  
1.508836 1.140762 1.322107 0.891967 0.864735 1.037141 1.275082 1.662865 0.874051  
1.503351 1.220397 0.917547 1.376153 0.998601 1.267456 1.223273 1.170285 1.178593  
0.893572 1.17589 0.942061 1.067453 0.915232 1.310963 0.779356 1.905722 1.050277  
1.220862 1.336038 0.814098 1.17793 1.092384 0.76064 1.13483 0.874875 0.757821  
1.532236 1.566609 1.692362 1.483694 2.350257 1.85752 1.353371 1.415077 1.898061  
1.42743 1.655934 1.64774 0.916914 1.334096 1.422187 1.416529 1.647502 1.479881  
0.790629 0.952063 0.58717 0.678963 0.547239 0.888632 0.92099 1.204159 0.723406  
1.513028 2.236659 2.612733 2.542597 2.847281 2.54004 2.337045 2.860653 3.644629  
3.213009 1.79936 4.087883 2.600807 2.869935 1.98907 2.236047 3.373341 1.843437  
1.016592 1.218569 0.980798 1.252539 1.711729 0.971823 0.99969 0.939651 0.9612  
3.044281 3.088266 3.119064 2.920233 3.008993 3.166221 3.216834 2.687632 3.244761  
3.777679 3.331824 4.473292 3.657829 6.317667 4.606882 4.461102 4.19248 3.854211  
1.750934 2.516586 2.247243 1.964648 3.094774 2.327951 2.396536 2.609342 2.29657  
4.170388 3.603617 3.605902 2.345893 2.175223 2.516409 4.668919 3.727612 3.845034  
4.950774 3.132471 4.316357 4.070676 4.223562 4.144118 3.789716 2.848552 3.936586  
2.225218 1.620736 1.891597 1.864364 2.339094 1.613301 1.873393 2.494153 2.019338  
0.951238 1.804204 0.967097 1.213563 1.064476 1.072533 1.234301 2.149473 1.101767  
8.763676 8.753073 8.838168 9.233143 8.816164 9.47938 9.393949 9.348502 9.547213  
6.760646 6.294656 7.03537 6.011238 5.74088 6.852174 7.299598 7.207158 7.322585  
1.67164 1.712746 2.199994 1.64659 1.795923 1.9345 1.917769 1.77997 1.605867  
6.145202 6.854954 6.188954 6.138071 6.255934 5.375872 6.319121 6.64881 6.395049  
8.127773 9.135702 8.719678 8.538622 8.419174 7.937895 8.175118 8.246352 7.854404  
1.946654 0.961754 1.597504 1.22505 1.543511 1.419748 1.183204 1.69993 1.412902  
5.131147 4.683049 3.932919 4.823883 4.584845 4.629989 4.649772 5.388321 4.909299  
4.848674 4.124727 4.053483 2.748877 2.500803 3.389748 4.943288 5.284122 4.10104  
2.281609 1.623282 1.891175 1.354198 1.706851 1.796525 1.747541 2.021536 2.003158  
7.123502 6.07788 5.998276 6.145204 6.347449 6.989384 7.022667 6.286107 6.866904  
5.293523 4.661241 5.242941 4.371567 4.662497 5.113834 3.850776 4.658319 4.70372  
3.229394 2.544103 3.318019 2.019694 2.013009 2.649598 2.264551 1.73157 3.097715  
0.885789 1.869183 0.885789 2.133299 1.587805 1.592348 2.017287 1.991899 1.980686  
1.063299 1.134274 1.261183 1.008697 1.270781 1.406941 1.422552 2.154775 1.190142

2. 247773 1. 207831 1. 582383 3. 06998 2. 952909 2. 677696 2. 222315 2. 4498 2. 347702  
2. 896359 4. 614658 4. 891073 4. 222075 3. 907353 2. 913282 3. 860391 4. 158477 2. 354117  
4. 181063 4. 095693 2. 352484 4. 408201 2. 559882 2. 502486 2. 998485 3. 459354 3. 371225  
0. 734406 1. 145947 1. 226575 1. 475765 2. 123604 0. 619682 1. 241361 1. 652456 0. 959374  
1. 71776 3. 863582 1. 375457 3. 172346 1. 84158 2. 169973 3. 296829 1. 516365 1. 83566  
1. 950666 3. 231693 2. 454299 1. 432131 2. 065692 1. 804937 1. 365295 1. 538555 1. 762681  
2. 759761 3. 056261 2. 829415 1. 937698 2. 934544 4. 041724 2. 845352 2. 521247 2. 409433  
1. 240228 1. 403747 1. 098244 2. 570065 1. 15783 1. 092026 0. 983815 2. 313247 1. 606825  
3. 667132 3. 439509 2. 546748 3. 058589 2. 553276 2. 262865 4. 26562 2. 24924 3. 957122  
7. 098705 7. 723382 7. 526579 6. 559273 7. 093446 6. 467519 6. 697201 6. 797076 6. 525915  
2. 127219 2. 748804 2. 80801 2. 123622 3. 177618 2. 053074 2. 793226 2. 587128 2. 331812  
6. 272931 6. 081058 5. 528691 7. 317388 5. 025998 7. 279539 7. 167267 6. 857739 7. 035212  
4. 433099 3. 865947 4. 68422 4. 358084 5. 015283 4. 289388 3. 751471 4. 660868 3. 395277  
4. 076659 6. 26035 5. 539701 5. 663239 5. 115171 5. 093446 5. 347992 5. 398343 4. 812536  
6. 49809 7. 028247 6. 525991 6. 457346 7. 035247 5. 831798 6. 112902 6. 489268 6. 023518  
2. 478362 3. 043459 3. 325665 2. 548775 3. 196447 2. 639905 4. 826798 3. 044658 2. 083149  
2. 531215 2. 254657 2. 620026 2. 480911 2. 364429 2. 666277 2. 162986 2. 014562 2. 449482  
2. 281549 2. 203241 1. 822808 2. 187194 2. 384846 2. 299006 1. 447875 2. 719556 2. 691743  
2. 63383 2. 224483 2. 880185 4. 567343 2. 272788 1. 87714 3. 328235 3. 603529 3. 123137  
1. 372433 1. 278925 1. 356518 2. 0989 1. 54819 1. 429089 2. 281946 1. 586738 2. 510072  
2. 723753 2. 630146 2. 256631 2. 10273 2. 613964 1. 83491 2. 104183 2. 105819 2. 506244  
1. 278211 1. 835006 1. 311183 1. 962982 1. 697938 1. 9078 1. 658003 1. 437473 1. 1772  
9. 22637 9. 478902 9. 371845 9. 103735 8. 994788 9. 418491 8. 755654 8. 768047 8. 936239  
2. 286661 3. 240245 2. 775313 2. 89033 2. 055356 2. 21588 2. 537818 2. 11009 2. 526717  
1. 599341 2. 483681 1. 732293 1. 714426 1. 587578 2. 714213 1. 91807 1. 591788 1. 597419  
0. 91736 0. 817856 0. 853511 1. 432144 1. 685637 1. 146 0. 840375 1. 405006 1. 038565  
1. 913252 1. 146246 2. 201909 0. 928171 1. 191497 1. 133413 1. 343823 2. 674677 1. 094911  
2. 546993 1. 582816 1. 707903 1. 421096 1. 842635 2. 210873 1. 917895 1. 909448 1. 304825  
1. 235435 1. 947385 1. 016654 2. 117442 0. 677159 2. 474262 1. 335842 3. 708493 0. 844222  
2. 471434 2. 497061 2. 454716 2. 531707 2. 390138 2. 388372 1. 778231 2. 098938 1. 872981  
5. 366622 5. 809871 5. 297032 4. 952717 5. 841976 5. 234148 5. 915188 5. 04442 4. 943148  
2. 54448 2. 910493 2. 000873 2. 765461 3. 35514 1. 85191 1. 978694 2. 437374 1. 230912  
5. 861498 6. 611214 5. 334389 5. 889163 6. 075498 5. 939947 5. 813535 6. 105581 4. 960404  
4. 958189 4. 618734 5. 091975 5. 380292 4. 325271 5. 332502 4. 148572 4. 806837 3. 971004  
6. 480245 5. 166262 5. 697043 5. 8473 5. 092983 6. 234877 5. 490008 4. 236606 4. 775074  
2. 478183 1. 827842 1. 827848 3. 072016 2. 288072 1. 963758 2. 476827 2. 735548 1. 616873  
3. 714371 1. 962337 1. 896933 1. 222904 2. 004517 1. 449852 1. 153074 2. 844121 2. 532598  
2. 42794 1. 807391 2. 750302 3. 061565 3. 28395 1. 548851 1. 426923 1. 003372 1. 448825  
6. 396354 6. 096844 6. 98791 6. 543508 6. 810813 6. 754026 6. 909778 6. 691403 6. 203486  
1. 045751 1. 958946 2. 050638 1. 397719 1. 476176 1. 319072 2. 151376 1. 910287 1. 767641  
1. 176202 1. 281101 1. 017582 1. 109159 0. 831975 1. 018741 1. 15632 1. 723148 1. 010809  
5. 455041 7. 384355 8. 988896 8. 105506 8. 173058 6. 684724 10. 15573 7. 302854 6. 733275  
2. 127569 2. 829294 1. 532185 2. 015605 2. 245166 1. 917738 1. 439193 2. 352102 1. 823192  
2. 101757 1. 653336 1. 730819 1. 747 1. 93017 1. 818399 1. 915499 2. 329165 2. 20585  
2. 513863 2. 028586 2. 632257 2. 62743 2. 436638 1. 903537 2. 427709 2. 375251 2. 276147  
2. 272133 2. 704385 2. 750702 4. 212288 2. 209217 3. 482205 2. 861367 2. 355965 2. 37866  
7. 82949 7. 979163 8. 069233 7. 784826 7. 979967 8. 648248 7. 317901 7. 66244 7. 950493  
5. 350462 4. 963783 5. 3358 5. 255404 4. 767716 4. 348435 5. 260903 5. 043557 5. 123088  
7. 416851 7. 762504 6. 876804 6. 348277 7. 398285 7. 103204 7. 433986 6. 557257 6. 998579  
4. 703109 5. 326934 6. 277675 7. 108893 5. 699957 3. 239351 3. 588803 5. 043529 4. 185778  
2. 641761 2. 137206 2. 898631 1. 79677 2. 694668 2. 826811 3. 91518 3. 272078 2. 731137

2.081725 3.298312 3.000006 2.570964 2.062662 2.39832 1.965502 1.657597 2.484203  
2.188654 1.54849 1.987709 1.485946 1.730978 3.072948 1.680912 2.237374 1.836631  
4.429935 4.861614 5.147262 5.554389 5.096349 7.027236 5.060525 5.809509 5.718623  
3.116185 2.52339 2.867419 2.605383 2.929808 2.835138 1.985983 2.063488 2.736513  
2.775154 3.186873 2.501165 3.415527 3.04536 2.569741 3.815299 3.527357 2.509092  
3.509286 2.864917 2.899829 2.781878 2.996671 2.760363 2.827481 2.566174 2.822564  
2.3407 2.361778 2.416899 2.587129 2.034008 1.70486 1.772343 1.973297 2.122711  
2.548454 2.308302 2.687537 3.593102 2.517813 4.738773 2.777419 2.479578 2.500251  
7.260592 6.633302 5.823782 6.614765 5.686642 5.702669 6.096366 6.075878 6.612297  
0.909793 1.462854 0.949348 0.833693 0.535125 0.768227 1.015605 0.988722 0.697482  
7.533963 6.941587 7.166278 6.927249 7.268508 7.354518 7.804795 8.201299 8.376009  
1.368504 1.735451 1.65326 0.774452 1.062826 1.01131 1.254405 1.428122 1.105892  
3.168076 2.362219 2.191307 1.944343 3.237681 2.674148 3.10381 2.017566 2.662314  
3.910236 2.989865 4.109314 4.110767 4.12338 3.782325 3.520862 3.148732 3.093013  
2.974484 2.238651 1.828387 1.134893 1.826964 1.989655 1.551331 2.302494 0.995407  
1.484549 1.272234 1.74346 2.820599 1.632001 1.748317 1.634331 1.277427 2.047618  
2.082529 3.096958 1.37364 1.532699 1.700387 1.647832 1.531183 1.922261 0.810494  
1.789845 2.445497 1.187565 1.732604 1.558264 1.650929 1.526848 1.651946 1.508781  
2.538718 3.361857 3.494972 3.709397 2.516689 2.134339 2.5647 2.339029 3.112495  
3.501181 2.987449 4.044925 3.388486 3.381637 3.628282 3.026678 3.122994 5.440788  
10.06144 9.211954 9.962905 9.770291 9.387763 9.769659 9.44885 9.158212 9.03298  
1.104584 1.731816 1.734879 1.331054 1.128439 1.511677 0.939665 1.204285 1.639017  
1.125343 1.426268 1.709839 1.350693 1.911686 0.972005 1.069224 1.38215 0.850145  
1.268149 0.838224 0.770441 1.125571 0.598568 0.938871 0.964522 1.060441 1.52828  
4.279795 3.654115 4.217454 4.501333 4.309505 5.03304 4.745364 5.20984 5.458793  
3.384301 4.161574 3.824929 4.863872 3.343365 3.08579 5.027117 3.811222 4.572067  
2.189417 1.98032 2.853106 1.417072 1.556252 1.898379 1.773688 1.585484 1.931872  
4.257077 4.476935 4.573181 5.019061 3.869338 3.754397 5.072554 4.101109 4.09227  
4.630592 4.514338 3.503323 4.840217 4.622893 4.812343 4.178616 5.776679 4.75112  
5.334561 5.752789 5.752507 6.464604 6.452849 5.479938 5.65822 5.408165 5.306773  
1.508523 1.553609 1.326962 1.846278 1.8019 1.746429 1.825886 2.353186 2.549966  
3.374861 5.088848 5.582983 5.477426 5.149836 5.115359 5.788246 5.637249 5.535716  
1.569936 1.591902 1.530194 1.627775 1.37921 2.038932 2.059865 1.905323 1.697816  
7.798058 8.101133 8.148288 7.664863 8.113616 7.614521 8.071501 8.208344 8.138868  
5.75352 5.944201 6.073018 5.445886 5.725733 6.115409 5.867846 6.586047 5.681414  
1.826057 2.739687 1.787194 2.625482 2.227755 2.255068 1.811336 1.608162 2.217035  
7.836751 6.955892 7.812153 7.172371 7.064515 7.461555 6.831339 5.582049 4.882969  
1.306281 1.87972 1.226665 1.664206 1.704701 1.209269 1.901621 1.595756 1.669275  
2.655793 2.045485 2.601735 2.814201 2.750279 2.770591 2.49716 2.592099 2.134108  
4.000884 3.799626 4.490905 4.762067 4.719144 5.899971 3.809732 4.130364 4.811041  
2.760191 3.632134 2.864824 2.139345 3.360528 2.355114 2.915924 2.876602 2.343299  
3.538722 4.302716 3.858809 4.465234 3.094998 3.970454 3.293714 3.571301 3.247769  
1.146249 2.368214 1.529434 1.93153 1.321448 1.550885 1.741735 1.819276 1.597342  
4.660944 4.421606 4.515409 2.900107 4.423497 5.048248 4.741359 4.902606 4.522891  
4.409988 3.978778 4.323566 4.238707 4.98299 4.320371 4.80781 4.138367 4.355484  
8.62264 9.003248 9.054896 8.890627 8.73519 9.117698 8.803357 8.564621 8.151668  
9.55451 8.283805 8.626534 8.133421 7.717229 8.030251 7.55374 5.917671 3.696367  
3.637556 5.477893 3.198116 5.804693 3.272714 2.27456 3.623584 4.49732 5.473636  
1.833655 1.881634 2.863896 1.798399 1.91345 1.924228 1.254185 1.688098 1.566754  
8.80506 8.658904 9.178717 8.748906 9.36186 8.208503 9.008143 9.008994 8.798534  
1.422221 1.341505 1.332348 2.037248 2.07232 1.211127 1.080435 1.547235 1.085129

2. 764193 1. 569089 1. 880822 2. 60034 2. 033405 2. 100897 2. 330386 2. 552244 2. 168937  
3. 113986 3. 476381 2. 731135 2. 814179 2. 663017 2. 962929 2. 681808 2. 838009 2. 023322  
2. 175107 2. 261273 1. 957173 2. 053366 2. 859881 3. 495635 2. 260109 3. 573828 3. 594082  
1. 044483 1. 768608 1. 186377 1. 094773 0. 793481 0. 899256 1. 071475 1. 76508 1. 131126  
6. 684079 6. 505697 4. 331692 7. 966256 5. 138969 6. 494072 5. 795355 4. 359565 5. 754479  
6. 203608 6. 64518 6. 185138 6. 167571 6. 337907 6. 257491 6. 826014 6. 0512 6. 776063  
1. 812344 1. 613765 1. 771389 2. 016539 1. 638767 2. 96003 1. 596422 2. 091799 1. 928866  
3. 777483 4. 276358 4. 633343 4. 216179 4. 40834 4. 571025 4. 973739 4. 390955 4. 228709  
3. 174648 2. 528295 3. 513419 3. 183392 3. 980021 3. 18247 3. 48103 3. 675892 2. 645865  
6. 121523 6. 048573 6. 311808 6. 801986 5. 666982 6. 04329 6. 944055 6. 745875 5. 949285  
1. 858645 3. 138406 2. 736737 3. 202028 2. 600883 2. 283215 2. 623315 2. 247546 2. 870163  
1. 883746 2. 543659 2. 369797 2. 772643 2. 845398 2. 536097 2. 565542 2. 570644 2. 237471  
1. 589461 2. 277188 1. 746369 2. 218953 1. 477892 2. 510591 1. 724243 2. 054937 2. 793201  
5. 292916 6. 426759 6. 081506 5. 525963 6. 280141 5. 455417 6. 069266 5. 973967 5. 775457  
1. 383314 1. 630699 1. 406413 2. 239018 1. 924747 2. 468829 1. 748902 1. 927498 1. 500959  
3. 335958 2. 999059 3. 443994 3. 356017 3. 30912 4. 228138 3. 699667 3. 465852 3. 11837  
7. 68412 7. 256135 7. 861664 8. 039935 7. 920174 6. 745931 8. 409019 8. 28342 8. 494268  
5. 675732 5. 802253 6. 481354 5. 756004 6. 686368 4. 240378 7. 473532 7. 145371 7. 240887  
3. 418569 2. 685541 3. 408366 1. 793332 1. 33662 2. 056764 2. 636228 3. 529963 1. 81083  
8. 457001 8. 700244 8. 031598 8. 099349 8. 379146 8. 139222 9. 200879 9. 079376 8. 959042  
2. 600059 1. 860688 1. 918619 2. 130105 2. 716006 3. 05852 1. 956887 2. 357689 2. 934538  
5. 15781 5. 192823 4. 687032 3. 658249 4. 712504 4. 205309 4. 993692 5. 100735 5. 60761  
0. 566687 1. 149472 1. 51506 0. 968813 0. 922631 0. 667247 1. 500248 1. 473973 1. 127089  
3. 782763 4. 879419 5. 156594 4. 226624 5. 969785 5. 876121 5. 5005 4. 635013 3. 94914  
9. 919491 10. 14524 10. 06736 9. 881322 9. 907879 10. 17011 9. 906011 9. 563111 9. 6153  
1. 906003 1. 597601 2. 059779 1. 867034 2. 376691 1. 918141 1. 938499 2. 039237 2. 247433  
5. 019391 5. 592059 5. 700094 5. 382145 5. 220013 4. 2384 5. 339503 5. 0713 4. 572068  
3. 909521 3. 756536 4. 003115 4. 370784 4. 739437 4. 616223 3. 766709 3. 604762 4. 522901  
6. 69229 6. 353302 6. 932617 6. 618095 5. 94371 5. 974887 6. 232106 6. 328327 5. 971263  
5. 151836 5. 846096 5. 572632 5. 720577 5. 54929 4. 576164 5. 326066 4. 786816 5. 040375  
1. 594418 1. 051311 1. 277518 1. 604069 1. 453196 1. 982774 1. 986687 1. 900635 1. 253755  
5. 291849 4. 563444 5. 548365 4. 48569 4. 863558 5. 350015 4. 754316 5. 241286 4. 476789  
1. 68448 1. 62404 1. 530938 2. 132248 1. 636326 1. 402944 1. 509279 1. 467698 2. 119986  
2. 521658 2. 23019 2. 382975 2. 533396 1. 834043 2. 462058 2. 154334 1. 528262 2. 287873  
1. 629886 2. 405272 2. 262677 2. 347592 2. 746734 2. 982156 2. 048416 2. 716061 2. 711814  
3. 718563 2. 819759 3. 194595 3. 138503 3. 149643 2. 968558 3. 225154 3. 243069 3. 231666  
5. 541087 6. 420072 6. 758508 6. 045302 6. 301951 6. 009339 5. 348355 5. 646379 5. 281961  
1. 863728 1. 961457 1. 234955 2. 026377 1. 586054 2. 416929 1. 946198 2. 351483 2. 15023  
6. 729523 5. 860777 6. 695731 5. 824604 6. 102018 7. 201518 6. 999277 7. 129185 7. 337946  
7. 103272 7. 212678 6. 954861 7. 336449 6. 798282 6. 256349 6. 231963 6. 891611 6. 62292  
7. 685964 7. 489288 7. 955337 7. 706499 7. 789667 7. 622922 7. 51259 7. 523576 7. 71114  
1. 68762 1. 711598 1. 267268 2. 230014 1. 222213 1. 415194 1. 281895 1. 722289 1. 658731  
6. 643075 6. 016221 6. 733049 7. 034894 6. 687197 6. 063931 7. 081433 6. 800711 7. 169177  
6. 192112 5. 584401 5. 979411 5. 904534 6. 534503 6. 460506 6. 594067 6. 631842 7. 058339  
5. 605123 4. 760063 5. 145897 6. 379061 6. 004175 5. 159722 5. 637874 4. 563241 5. 742125  
1. 934697 1. 924706 1. 970664 2. 091022 1. 960475 2. 927938 2. 693217 2. 276045 2. 201654  
5. 009976 5. 897219 4. 815908 5. 530142 5. 36659 5. 132076 5. 120083 5. 727885 5. 899202  
2. 923537 3. 96539 2. 15773 1. 627728 4. 44152 1. 745504 2. 736567 1. 367518 1. 586731  
2. 666404 4. 461046 3. 705077 2. 072877 3. 56136 1. 22502 3. 806307 3. 286762 1. 885534  
1. 094915 1. 643362 1. 197087 1. 528447 1. 017507 1. 379399 1. 108374 1. 214655 1. 788906  
1. 152186 1. 352642 1. 324359 1. 365602 1. 323687 1. 5619 1. 052192 1. 784376 1. 497066

|           |           |           |           |           |           |           |           |           |
|-----------|-----------|-----------|-----------|-----------|-----------|-----------|-----------|-----------|
| 1. 72475  | 1. 184072 | 1. 04376  | 1. 140733 | 3. 208579 | 1. 288015 | 0. 943384 | 1. 22189  | 1. 311697 |
| 3. 152781 | 2. 105266 | 0. 7928   | 2. 30623  | 0. 583624 | 0. 850278 | 1. 170208 | 0. 863583 | 1. 269497 |
| 2. 069056 | 0. 92785  | 1. 084602 | 1. 287592 | 1. 136756 | 1. 106442 | 0. 961406 | 0. 969453 | 0. 943474 |
| 1. 213083 | 1. 029964 | 1. 294902 | 1. 981341 | 1. 106337 | 0. 980792 | 1. 24888  | 1. 223531 | 0. 871251 |
| 3. 802739 | 1. 237307 | 2. 311949 | 3. 301919 | 4. 4472   | 1. 194201 | 2. 329328 | 2. 240701 | 1. 309381 |
| 2. 664528 | 3. 421106 | 3. 094938 | 2. 287321 | 2. 701575 | 3. 104783 | 2. 406508 | 1. 980465 | 1. 975006 |
| 5. 479263 | 3. 710722 | 3. 517462 | 1. 522081 | 4. 497299 | 1. 407787 | 1. 370157 | 1. 666071 | 1. 366742 |
| 1. 976707 | 1. 523967 | 1. 869372 | 1. 810107 | 2. 122249 | 2. 009388 | 1. 460697 | 1. 743452 | 1. 714281 |
| 6. 176042 | 6. 036277 | 6. 560876 | 6. 372113 | 6. 593804 | 7. 935265 | 7. 341998 | 6. 893559 | 7. 047165 |
| 3. 613184 | 0. 791242 | 1. 524346 | 1. 94709  | 1. 181867 | 2. 859697 | 1. 077616 | 1. 63781  | 2. 138244 |
| 2. 869951 | 2. 497151 | 2. 09565  | 2. 371591 | 2. 930704 | 2. 637888 | 3. 73124  | 4. 130976 | 3. 058047 |
| 9. 715561 | 10. 15814 | 10. 06885 | 10. 10759 | 10. 19084 | 10. 24936 | 10. 02241 | 9. 762266 | 9. 918387 |
| 3. 005455 | 2. 895612 | 2. 728768 | 3. 0995   | 2. 637022 | 4. 186236 | 2. 691292 | 2. 58778  | 2. 914502 |
| 1. 815854 | 2. 611187 | 4. 414509 | 1. 582441 | 2. 973399 | 4. 839024 | 2. 328661 | 2. 625749 | 3. 792765 |
| 1. 62466  | 1. 360499 | 1. 98963  | 2. 035032 | 1. 923415 | 1. 909246 | 1. 559957 | 1. 558467 | 2. 278266 |
| 4. 262678 | 2. 665108 | 3. 742242 | 4. 038627 | 3. 830035 | 5. 480667 | 3. 179974 | 3. 916203 | 4. 372554 |
| 7. 187211 | 7. 333329 | 7. 843699 | 7. 215663 | 6. 830221 | 7. 898643 | 7. 34678  | 7. 921974 | 7. 253685 |
| 2. 2568   | 1. 917241 | 1. 475586 | 2. 035219 | 2. 187545 | 2. 069442 | 2. 527221 | 1. 801983 | 2. 027588 |
| 7. 393682 | 7. 328221 | 6. 872437 | 7. 777549 | 7. 679414 | 7. 359013 | 7. 632401 | 8. 176131 | 7. 978585 |
| 8. 337107 | 6. 962721 | 8. 214319 | 7. 192983 | 8. 408195 | 8. 143719 | 8. 623488 | 8. 856274 | 8. 760622 |
| 6. 011336 | 6. 634772 | 7. 273729 | 6. 333914 | 5. 442533 | 6. 896485 | 6. 421375 | 6. 81762  | 7. 559259 |
| 3. 9157   | 4. 38498  | 4. 056283 | 4. 713754 | 5. 621885 | 3. 882901 | 4. 849833 | 5. 17253  | 4. 694661 |
| 5. 333369 | 3. 806785 | 4. 582078 | 5. 303376 | 4. 785102 | 3. 933156 | 5. 532405 | 4. 312721 | 5. 899971 |
| 7. 765904 | 6. 870209 | 7. 882591 | 8. 104968 | 6. 677059 | 8. 458853 | 7. 931586 | 7. 208442 | 7. 295758 |
| 3. 761111 | 3. 772733 | 4. 007391 | 3. 615336 | 4. 578727 | 3. 137562 | 4. 267287 | 4. 869347 | 5. 074608 |
| 2. 557579 | 3. 12198  | 2. 125744 | 2. 213298 | 2. 254296 | 2. 124224 | 2. 263116 | 2. 464895 | 1. 974735 |
| 7. 6528   | 7. 143429 | 7. 071072 | 7. 435637 | 7. 122191 | 8. 43698  | 6. 96509  | 7. 857794 | 8. 109217 |
| 1. 703998 | 1. 830987 | 1. 022254 | 1. 318078 | 0. 960295 | 1. 236544 | 1. 378559 | 2. 064163 | 1. 39874  |
| 1. 910504 | 2. 082795 | 2. 630865 | 2. 602031 | 2. 583125 | 2. 335754 | 2. 272783 | 2. 777412 | 2. 601532 |
| 1. 661381 | 1. 600826 | 1. 302529 | 1. 624275 | 1. 662396 | 1. 985914 | 1. 316009 | 1. 563761 | 1. 655289 |
| 1. 062812 | 1. 053004 | 1. 29503  | 1. 685077 | 1. 278652 | 1. 251148 | 1. 465179 | 1. 396571 | 1. 618915 |
| 9. 532411 | 9. 541052 | 9. 881906 | 9. 023867 | 10. 34281 | 9. 641948 | 9. 509395 | 8. 936599 | 9. 511061 |
| 7. 232072 | 6. 764147 | 6. 776838 | 6. 562006 | 7. 012975 | 7. 000436 | 6. 105698 | 5. 953432 | 5. 428306 |
| 7. 460233 | 5. 933927 | 8. 196049 | 8. 060328 | 7. 786093 | 6. 228288 | 8. 582335 | 9. 655394 | 9. 451819 |
| 6. 702903 | 5. 308663 | 6. 305515 | 6. 311877 | 6. 240385 | 6. 342153 | 6. 430691 | 5. 476136 | 5. 993281 |
| 4. 889965 | 4. 932963 | 4. 80157  | 5. 124033 | 5. 143016 | 6. 033664 | 5. 629642 | 5. 944306 | 5. 939102 |
| 2. 166613 | 3. 157354 | 3. 357895 | 3. 092755 | 3. 198817 | 3. 249524 | 3. 076285 | 2. 713726 | 4. 069641 |
| 7. 880611 | 7. 562394 | 7. 673812 | 7. 743801 | 7. 527546 | 7. 870189 | 8. 184409 | 8. 203848 | 7. 384752 |
| 1. 888387 | 2. 004417 | 2. 845193 | 1. 798351 | 2. 173356 | 2. 13357  | 2. 956552 | 2. 823553 | 2. 560851 |
| 9. 135609 | 8. 934054 | 9. 04222  | 8. 934517 | 8. 923968 | 9. 047844 | 8. 647388 | 8. 596354 | 8. 590306 |
| 7. 728666 | 6. 66105  | 7. 088408 | 6. 521669 | 6. 612193 | 7. 238355 | 6. 833668 | 6. 850563 | 6. 598187 |
| 6. 41158  | 6. 838834 | 6. 49301  | 5. 97648  | 6. 190631 | 6. 423159 | 6. 37978  | 5. 696593 | 6. 221332 |
| 4. 831871 | 5. 359265 | 4. 756678 | 5. 976516 | 4. 94151  | 4. 16965  | 5. 0227   | 5. 005337 | 4. 819494 |
| 7. 089256 | 6. 692937 | 7. 087188 | 7. 223035 | 6. 973703 | 7. 026814 | 6. 44673  | 7. 112993 | 7. 185143 |
| 6. 477433 | 6. 923785 | 7. 025681 | 6. 945647 | 5. 860849 | 5. 386582 | 6. 273268 | 5. 213414 | 6. 687932 |
| 5. 84115  | 5. 783121 | 5. 547132 | 6. 351268 | 5. 485853 | 5. 819095 | 6. 127733 | 5. 047428 | 5. 096473 |
| 3. 282514 | 3. 65775  | 2. 69472  | 2. 779874 | 2. 90973  | 3. 507775 | 3. 993316 | 3. 581701 | 2. 765663 |
| 5. 548439 | 5. 036174 | 6. 485096 | 5. 611921 | 5. 982894 | 6. 240518 | 6. 363516 | 5. 510804 | 6. 338671 |
| 5. 889199 | 6. 230506 | 6. 396728 | 6. 601124 | 6. 327151 | 5. 693465 | 6. 150665 | 6. 656978 | 6. 321366 |
| 7. 697165 | 7. 5286   | 7. 859856 | 7. 224459 | 6. 80795  | 7. 484571 | 7. 534269 | 7. 301113 | 7. 674389 |
| 1. 199436 | 1. 64644  | 1. 422407 | 2. 282601 | 1. 80587  | 1. 887025 | 1. 619244 | 2. 616807 | 1. 817983 |

5. 989336 6. 666442 5. 255516 6. 335638 6. 343508 4. 562316 5. 848796 6. 223081 4. 960518  
3. 607069 2. 181037 2. 665967 3. 744256 3. 959646 2. 763694 2. 298142 3. 768661 3. 686357  
5. 936255 5. 942445 6. 407206 5. 99537 6. 205555 6. 367459 4. 987477 6. 377553 6. 210053  
8. 727726 9. 085992 8. 704864 8. 602722 8. 705805 7. 926417 9. 059351 8. 776164 8. 200253  
5. 881691 5. 827904 5. 89682 5. 600459 5. 975996 5. 793697 6. 123472 6. 129895 6. 040622  
4. 788377 4. 983911 5. 640174 5. 809288 4. 636618 5. 558547 4. 834352 5. 392159 5. 457771  
5. 876632 6. 536706 6. 48503 5. 551073 6. 409701 5. 984595 6. 357441 6. 300566 5. 959839  
7. 358003 7. 877404 7. 98971 7. 530702 7. 49501 7. 309025 7. 922612 7. 145282 7. 865292  
5. 580496 5. 842661 5. 143061 4. 06809 6. 037877 2. 997066 5. 805743 4. 545207 4. 3124  
7. 542608 7. 854647 7. 413099 8. 340966 7. 947825 7. 932647 7. 918027 7. 183734 7. 403468  
7. 785504 6. 813591 7. 604962 6. 899973 7. 353123 8. 108169 7. 168561 7. 562375 7. 508965  
4. 754429 5. 271548 4. 697029 4. 397016 4. 632068 5. 274137 5. 603536 5. 095731 4. 43295  
4. 792455 5. 636538 4. 830052 5. 395683 5. 309349 6. 341104 5. 054711 4. 993639 4. 671887  
8. 832684 8. 638497 8. 836775 9. 438009 9. 076614 9. 263423 9. 193434 9. 500202 9. 361428  
6. 000552 6. 651157 6. 434855 7. 036794 4. 835573 6. 907428 6. 595348 6. 748997 6. 505597  
2. 490005 2. 966319 3. 531677 4. 231859 4. 487553 3. 996609 4. 817855 3. 442446 3. 739342  
7. 418532 7. 135199 7. 64847 6. 685397 7. 850589 6. 579299 7. 328772 7. 149663 7. 295013  
5. 712459 6. 015216 6. 083711 5. 754648 6. 573584 6. 149513 6. 563095 6. 830174 7. 132754  
6. 972908 7. 501769 7. 050041 6. 983997 7. 359419 7. 385716 6. 249426 6. 717963 7. 34409  
1. 063852 1. 096416 1. 105887 1. 529607 1. 577586 1. 334639 1. 783952 1. 724994 1. 543731  
7. 295123 7. 054801 7. 343737 7. 553086 6. 862193 7. 915428 7. 170898 7. 347623 7. 743559  
5. 78559 5. 601116 5. 845703 6. 574564 5. 687682 7. 116311 6. 482311 6. 660573 6. 762329  
3. 951251 3. 715216 3. 771738 3. 890917 3. 53968 3. 912003 3. 195172 3. 765108 4. 226911  
1. 361778 2. 077641 1. 269432 1. 31089 1. 357856 1. 535629 1. 543652 1. 811198 1. 494851  
5. 727667 5. 192988 6. 218116 6. 533122 3. 943772 4. 862968 4. 691488 3. 990451 5. 958047  
1. 364694 1. 246009 1. 519969 2. 319386 1. 088887 1. 814288 2. 041125 1. 591018 2. 665772  
2. 487586 1. 423384 1. 460083 2. 898263 1. 547649 2. 759509 1. 967032 2. 384382 3. 060696  
4. 782968 5. 067694 4. 339042 5. 336211 5. 409122 4. 360122 5. 346782 5. 031195 4. 948632  
4. 516286 2. 424528 1. 455404 2. 207888 1. 741165 2. 666394 5. 979374 3. 157506 4. 292587  
7. 90094 7. 914974 7. 521892 7. 593192 7. 796673 8. 747638 8. 326989 8. 197602 8. 234308  
3. 331408 4. 205815 3. 657346 3. 63573 4. 205719 3. 554301 4. 857808 3. 499683 3. 518955  
3. 990089 3. 991859 3. 318308 3. 188219 3. 138251 3. 776839 2. 778155 4. 361156 3. 497532  
1. 430096 1. 413728 1. 375436 2. 769816 1. 652446 1. 882354 1. 564428 1. 946846 1. 798472  
7. 780868 6. 573744 6. 573598 7. 663803 6. 559606 6. 143313 5. 763097 5. 156324 3. 732212  
4. 596289 4. 856616 4. 420847 5. 021959 3. 984841 4. 884089 5. 24653 5. 174433 4. 793721  
7. 097933 6. 620599 6. 827651 7. 097763 5. 882589 6. 552021 7. 046602 6. 778543 6. 542994  
4. 198402 4. 971878 4. 642081 4. 70186 4. 197303 4. 112905 5. 836449 5. 318279 4. 781792  
4. 505388 2. 892359 3. 17182 4. 075999 4. 769364 5. 119405 4. 073164 4. 334904 5. 067447  
9. 439695 8. 981351 8. 82292 9. 271253 8. 900324 9. 365585 8. 869493 8. 367246 8. 344382  
2. 165766 1. 459354 2. 468135 2. 048554 1. 987502 2. 286246 1. 679806 1. 536051 2. 279106  
3. 462757 4. 440457 3. 759345 4. 13248 4. 481867 5. 225275 4. 747611 4. 75321 4. 608856  
7. 133954 6. 865802 6. 986996 6. 634065 7. 321433 6. 943145 6. 596334 6. 938458 6. 858604  
4. 405061 5. 060017 5. 262646 4. 829665 5. 030096 6. 048676 6. 179387 5. 604969 5. 776928  
6. 677525 5. 044999 6. 053823 6. 332076 5. 85766 5. 41075 5. 911063 4. 409622 3. 319933  
5. 535125 6. 096092 5. 693224 6. 825485 6. 221852 6. 914859 6. 291405 7. 08836 7. 276403  
6. 965018 6. 621813 6. 024506 5. 762707 5. 786214 6. 144596 5. 75991 6. 230917 5. 994766  
5. 029469 5. 410706 4. 757443 5. 24996 4. 850984 6. 2692 5. 267937 3. 473939 5. 097838  
5. 376275 3. 517185 4. 011298 5. 046082 4. 820778 5. 329646 5. 204407 5. 356462 4. 219466  
6. 107974 5. 302586 5. 956168 4. 916443 4. 731932 5. 425891 4. 934523 4. 672979 5. 033495  
7. 814916 7. 560004 7. 212139 6. 822397 7. 238046 7. 862214 7. 773499 7. 716853 7. 280013  
5. 849679 6. 208399 6. 535189 6. 597874 7. 209373 6. 439192 5. 399318 6. 577631 6. 611188



4. 433034 4. 395737 4. 3699 4. 506842 4. 622992 3. 261893 4. 577313 4. 501608 4. 162116  
5. 188778 4. 290814 4. 67515 4. 877257 4. 190891 5. 488972 4. 270958 4. 950704 5. 153929  
9. 028265 9. 123983 8. 805806 9. 419549 9. 109386 9. 677174 8. 857047 9. 538269 9. 439517  
6. 47921 6. 573795 6. 061424 7. 127857 6. 844677 7. 153171 6. 873643 7. 072421 7. 17701  
7. 012257 7. 668903 6. 746858 7. 336244 7. 461689 7. 874346 7. 075776 7. 255048 7. 231788  
2. 101483 1. 524275 1. 096867 3. 088793 2. 433393 3. 175603 2. 012182 2. 570964 2. 177164  
7. 067962 7. 60031 6. 926858 7. 720329 7. 394486 7. 576792 7. 264091 6. 301544 5. 629028  
4. 055554 3. 826852 3. 360559 4. 560859 2. 945664 4. 203504 2. 746605 2. 793442 2. 635045  
2. 770225 3. 271268 3. 519253 2. 725703 3. 263452 3. 160263 2. 806802 3. 74069 4. 272465  
6. 285702 5. 671261 6. 059367 5. 360154 5. 532279 6. 183267 5. 833671 6. 035782 6. 766554  
8. 042287 8. 767358 8. 358207 8. 104291 8. 678003 7. 759341 8. 110365 8. 13021 8. 319975  
5. 098692 4. 093712 4. 777179 4. 841514 3. 228277 6. 282755 5. 26612 5. 615849 4. 115993  
5. 807461 5. 959396 5. 80921 5. 623901 4. 505026 5. 82054 4. 297834 3. 66315 4. 103281  
6. 093744 6. 5193 5. 947787 5. 127373 6. 482047 6. 777645 6. 506628 6. 869238 7. 223611  
3. 285282 4. 166182 4. 015312 4. 646236 4. 64188 3. 713594 3. 741314 3. 536771 4. 119466  
8. 082832 8. 015631 8. 258876 8. 05951 7. 846882 8. 18171 8. 015571 8. 200565 7. 900498  
5. 883335 5. 93696 5. 80171 4. 585753 5. 197698 4. 1975 4. 719487 5. 741583 5. 346604  
5. 086056 5. 29125 4. 857696 5. 109757 4. 92029 4. 964931 4. 833423 4. 98912 4. 299889  
7. 129188 7. 460876 6. 809513 6. 751605 7. 183693 7. 117264 7. 346851 6. 781076 6. 374843  
4. 918372 5. 427545 4. 845812 5. 418453 4. 857449 5. 80975 5. 237037 4. 837994 5. 188863  
5. 433322 5. 245621 5. 181858 6. 739186 5. 844607 5. 231543 6. 922785 5. 714199 5. 984105  
8. 075904 8. 347752 8. 382397 7. 9932 8. 700107 7. 617167 8. 377929 8. 379988 8. 667255  
5. 076244 5. 517404 5. 81282 6. 022357 6. 749079 5. 464003 5. 931539 5. 988067 5. 217261  
4. 022031 2. 751938 4. 11049 3. 15382 4. 243489 4. 573293 3. 752291 3. 495195 4. 47147  
2. 988561 3. 386375 2. 521228 3. 091781 2. 70551 2. 987992 2. 911168 2. 625218 2. 562692  
3. 405346 4. 314511 4. 746549 4. 314511 3. 317473 4. 51235 4. 657606 3. 507054 3. 723624  
6. 071029 6. 562037 6. 190382 5. 78543 6. 611181 6. 014966 6. 517304 6. 26184 5. 903559  
4. 484067 4. 720671 5. 369921 3. 925781 5. 085464 2. 851059 3. 711127 3. 93711 3. 947689  
5. 992985 5. 770608 6. 238451 5. 66602 5. 905212 5. 489532 6. 669027 6. 480498 5. 605777  
6. 65313 7. 116885 7. 354129 6. 567767 6. 773131 7. 144242 6. 300188 6. 38437 6. 142485  
6. 657304 6. 858614 6. 199658 6. 671448 5. 473374 7. 045509 6. 576483 5. 789322 6. 453432  
7. 239771 7. 368491 7. 304881 6. 63745 7. 567545 6. 163649 7. 92339 7. 907438 7. 203079  
6. 424039 6. 423904 6. 794035 5. 394004 6. 436686 6. 809029 6. 410067 5. 255243 4. 491968  
7. 380109 8. 266914 7. 566173 7. 443315 8. 045919 7. 265108 7. 544708 7. 400764 7. 787755  
5. 666579 5. 692668 5. 746229 5. 620515 5. 901104 5. 486601 6. 314933 5. 558705 5. 622984  
7. 628949 7. 310057 7. 971543 7. 457366 6. 930177 8. 13462 7. 639001 7. 601396 7. 023399  
7. 000988 7. 08936 6. 732988 6. 862999 7. 059033 6. 386748 6. 917119 6. 294866 6. 497444  
3. 639273 3. 605025 3. 558242 3. 587635 3. 579944 4. 082715 3. 575454 3. 348126 3. 465421  
5. 976568 6. 054404 6. 705101 6. 934101 6. 556435 7. 074847 6. 113343 6. 614749 6. 217836  
6. 728646 7. 164622 6. 262683 6. 751107 7. 104293 6. 966891 5. 724631 6. 4077 6. 903372  
10. 45486 10. 60763 10. 3247 10. 20029 10. 54829 9. 907055 10. 39744 10. 25965 10. 33134  
5. 741981 5. 508331 4. 921815 6. 048704 5. 467208 6. 850124 5. 882631 6. 186257 6. 21285  
4. 409536 5. 315822 4. 490275 4. 321104 4. 429788 4. 460781 4. 332445 7. 106745 3. 846664  
6. 782379 7. 265013 7. 364132 6. 900417 7. 195513 7. 88741 7. 333897 7. 3711 7. 307565  
5. 284672 5. 51476 4. 857158 4. 913949 4. 777262 4. 291265 4. 274667 4. 321868 4. 182814  
8. 221355 6. 861579 7. 216266 8. 104248 7. 384864 7. 622089 7. 006433 7. 313606 7. 491668  
8. 858805 8. 438798 8. 731904 9. 224121 8. 721089 8. 268936 8. 66552 9. 092167 8. 961297  
7. 401801 7. 672396 7. 773917 7. 440717 7. 74568 7. 644007 7. 639119 7. 49918 7. 282586  
1. 996286 2. 612659 2. 235316 2. 97226 2. 898272 2. 500954 2. 331906 2. 886456 2. 346812  
7. 355708 6. 906195 6. 506457 6. 278029 6. 420238 7. 219148 7. 249116 7. 466238 6. 555114  
4. 099091 3. 146855 4. 213617 4. 022267 3. 964369 4. 319999 3. 526218 5. 507733 4. 096449

5.466021 6.158231 5.402168 5.719332 5.764392 5.381773 5.732262 5.07021 5.409751  
6.743967 6.7771 6.408893 6.280628 6.034176 6.01783 6.909753 6.309674 6.186972  
6.617502 7.98054 7.713731 7.210406 7.216271 6.793192 6.63129 6.711836 6.56477  
3.988297 3.86091 3.555863 3.759172 3.918092 3.078081 3.503161 3.737453 3.238366  
3.959612 5.567845 4.924151 4.256203 4.362953 3.936325 4.936382 4.501973 4.604387  
4.566897 5.804985 2.921137 3.623933 6.76893 3.522308 3.854241 4.602038 4.519164  
7.224677 7.414148 7.401912 7.386582 7.430455 6.574328 7.234885 7.998703 7.429693  
6.0091 6.784425 6.97161 6.372192 7.366761 5.624133 6.351843 5.905113 5.505674  
9.295657 8.778908 8.988682 9.555235 8.96981 9.252447 8.942766 9.300589 9.157379  
6.617197 6.936775 6.819143 7.277427 6.429505 6.914355 6.482962 6.534964 6.647186  
8.672553 8.634115 8.796764 8.10148 8.696089 8.428584 8.620263 8.470372 9.022397  
2.478937 2.144301 2.7378 2.733462 2.234652 2.281351 2.184067 2.433035 1.721797  
1.47352 2.019097 1.285233 1.724914 1.708756 1.519813 1.23425 1.971873 1.212521  
5.77294 5.989576 5.857573 7.070093 6.84765 5.861406 6.328394 6.525189 6.687379  
3.650969 3.072967 2.926948 3.654725 3.549193 3.553846 2.740306 3.364999 3.666311  
4.776843 4.869171 5.516968 4.850539 3.447829 5.095131 4.978329 4.290186 5.77684  
5.380754 5.767831 6.075681 6.944614 6.672723 6.636041 6.69355 7.115688 7.485015  
1.575185 1.437412 2.919311 1.917114 1.543155 2.123693 1.404925 2.709569 2.360694  
3.008921 2.63042 5.448205 4.397726 4.559492 5.284174 4.492435 4.278043 4.64085  
3.913213 2.079761 3.511725 3.070949 3.569025 5.755288 4.757097 4.43479 4.921922  
2.498791 1.420804 2.325709 1.753168 1.807567 2.219496 1.243155 1.508193 1.673019  
3.083134 2.796856 2.870911 3.557679 3.929094 4.201422 3.856626 3.538156 3.684205  
7.064254 6.55712 7.043995 7.921531 7.14734 8.056763 7.505925 7.85942 7.829485  
2.805142 3.557898 3.495827 3.277481 3.033566 2.484402 3.364054 4.120963 3.01043  
3.395036 3.273423 3.569432 4.403848 3.982172 3.581091 4.525004 4.15493 5.499072  
5.280877 5.669819 4.838844 3.533837 5.742145 5.364856 5.900092 5.688255 4.59553  
6.260121 6.438925 6.059706 5.998502 6.039519 5.327934 6.562559 5.762341 6.318023  
4.441264 3.935565 4.953805 4.593668 4.026665 4.199899 4.04397 4.118942 4.538813  
4.185756 4.627972 4.282385 5.172826 4.130897 5.253015 4.5929 3.549498 4.354649  
2.119116 1.981927 2.376004 2.329376 2.320414 2.198931 2.387105 1.936573 2.610921  
3.889716 4.054542 3.792449 3.406372 3.759057 3.744382 3.627535 3.807661 3.565865  
6.881874 6.990875 6.990734 7.508456 6.715805 7.581168 7.217333 7.005578 6.712517  
6.406648 5.489645 5.335123 4.754317 3.433587 5.513304 4.281212 5.181048 3.17673  
3.034947 2.776046 2.38757 2.820826 2.683253 3.24975 2.777336 3.368793 2.703404  
3.877953 5.253477 4.606754 4.949845 3.548132 2.543779 4.165741 4.632927 4.318161  
6.001742 6.176164 5.898402 6.605166 5.646464 5.08983 4.910932 6.074753 5.223455  
2.051651 2.068049 1.934469 3.072695 3.875091 3.589099 2.338907 3.072812 3.685942  
5.707558 4.412076 5.683245 6.137961 5.661241 6.497383 5.866973 7.530235 7.332982  
8.366149 7.691783 7.455779 6.974709 5.709015 4.704406 6.324624 4.346002 3.279055  
8.742547 8.337472 9.250678 8.995298 8.088832 8.047852 7.856381 7.652534 6.701269  
4.339549 5.648761 4.529486 4.644701 4.523299 4.906026 4.05117 4.795796 4.540075  
4.415354 4.872597 4.301344 5.475571 4.47386 5.132961 5.026369 4.724414 4.539489  
7.969156 7.910957 7.024144 7.390707 7.583285 6.793519 7.691325 7.394265 7.831686  
9.137278 9.573342 9.145071 9.386655 9.418807 8.700745 9.344468 9.293871 9.653916  
7.598847 7.974334 7.731958 7.508486 8.080553 7.166027 7.344374 8.117846 7.305538  
5.619062 5.496629 4.919916 5.693653 4.800539 6.667169 6.067135 4.634107 5.962444  
3.710912 3.592619 3.567464 4.475869 3.687553 4.392313 4.608246 3.967406 4.314016  
3.828892 4.710048 4.287451 4.242038 5.278332 4.697084 4.744736 2.944905 4.431645  
4.525374 4.887261 5.341816 5.390558 4.554796 6.026814 5.352778 5.512078 5.352375  
4.026965 5.439607 5.395057 5.017461 5.084837 4.945865 5.560837 5.274178 5.00095  
5.008061 5.663304 4.856674 5.552556 5.496804 4.961379 5.987535 5.127748 4.470227

1. 33456 1. 048842 1. 292171 1. 523425 2. 400677 2. 342994 1. 101451 1. 930316 1. 77733  
8. 711758 9. 290202 9. 202039 9. 172559 9. 570945 6. 590812 9. 576925 9. 582531 9. 354095  
1. 822276 2. 477583 1. 701345 1. 955824 2. 350021 2. 859085 1. 772041 2. 863235 2. 424254  
7. 090401 6. 977051 6. 658681 5. 084139 6. 840824 6. 843424 6. 84506 6. 798517 6. 798602  
4. 21856 3. 486407 3. 806643 3. 114633 3. 655227 5. 248662 4. 324484 4. 129784 4. 227726  
2. 676155 2. 320284 1. 583974 2. 805882 2. 445581 2. 235291 4. 117846 1. 878091 3. 327608  
6. 523652 5. 237743 6. 561497 5. 923659 5. 62333 6. 253251 5. 845721 5. 745714 5. 91687  
6. 712586 7. 143257 6. 413834 7. 312719 7. 1695 7. 091112 7. 09759 7. 023648 6. 998974  
3. 260369 2. 139959 2. 469623 3. 066182 3. 445832 3. 95578 2. 447606 2. 697939 3. 040602  
6. 538465 6. 030827 6. 276725 6. 211844 5. 5764 5. 887457 5. 501648 6. 071637 6. 041045  
5. 079717 4. 07226 4. 836481 5. 561963 5. 206392 3. 714381 4. 062876 4. 065249 3. 826412  
1. 696914 2. 554891 1. 763677 1. 922068 1. 637957 1. 765485 1. 824938 2. 270161 2. 777477  
2. 274341 2. 149374 1. 952762 2. 111089 2. 203052 2. 875623 2. 164074 2. 207346 1. 730716  
3. 475407 2. 497115 2. 753366 1. 987329 3. 142556 2. 238186 2. 068915 2. 192277 2. 515122  
2. 454171 2. 913084 3. 072923 3. 247125 2. 577929 2. 184058 2. 147869 3. 518742 2. 891532  
1. 290477 1. 089218 1. 087185 1. 091166 1. 196525 0. 885393 1. 491971 1. 742402 1. 343172  
1. 889712 2. 744694 2. 297111 2. 274015 2. 730217 2. 260725 2. 414093 2. 392108 2. 490526  
6. 893932 6. 703518 6. 079604 6. 93356 7. 032551 6. 968762 7. 101806 6. 994697 7. 286399  
6. 771576 8. 462888 7. 814115 6. 228488 6. 353524 7. 945478 7. 962513 5. 824166 5. 811431  
2. 310337 2. 059805 2. 262449 2. 197291 2. 428697 3. 048001 3. 487735 2. 532288 2. 399887  
1. 915164 1. 475231 1. 356602 3. 20539 1. 898207 1. 457668 1. 222876 1. 482425 1. 237533  
2. 75624 2. 741604 4. 027365 3. 281629 3. 432789 5. 185911 3. 47483 5. 219593 5. 503967  
5. 105839 6. 314183 6. 406313 5. 338381 6. 689335 5. 869664 6. 336284 7. 489483 6. 437185  
5. 647527 5. 910826 5. 465023 6. 85408 5. 195466 5. 218148 5. 590005 6. 332982 5. 85643  
4. 51366 3. 411587 5. 007394 4. 478438 4. 408292 5. 361429 4. 148661 5. 534937 6. 178886  
2. 033034 2. 074789 2. 580958 2. 554742 2. 155669 1. 888201 1. 90689 1. 926821 2. 402692  
4. 857412 5. 616407 4. 42821 6. 17409 5. 325015 5. 485251 5. 290488 5. 436513 5. 492567  
4. 934372 4. 419414 3. 928514 4. 292069 3. 940843 5. 6013 5. 239897 4. 966113 5. 41354  
9. 503419 9. 886561 9. 842837 9. 528991 9. 65475 8. 473762 10. 41577 10. 48935 10. 15417  
3. 66387 1. 903699 2. 35189 2. 590555 1. 312057 2. 57647 1. 646581 1. 85035 2. 723454  
7. 923528 7. 804235 7. 857868 7. 959875 8. 493802 7. 872416 7. 447031 7. 951357 7. 899125  
1. 90235 1. 839691 1. 905899 2. 390445 1. 773969 2. 073114 2. 103782 1. 820875 1. 815403  
2. 127767 2. 735522 2. 636968 2. 088633 3. 265138 5. 755722 2. 02498 2. 873849 2. 784718  
2. 842954 4. 054959 3. 657285 3. 455808 3. 847415 4. 369815 3. 366219 2. 567327 4. 155339  
7. 72341 8. 532844 8. 523699 8. 44196 8. 437816 8. 232757 8. 090371 8. 824798 8. 520655  
5. 855305 5. 881589 5. 612825 6. 044837 6. 29809 5. 5626 6. 76435 6. 303271 5. 859764  
5. 148462 4. 575909 4. 947089 4. 312022 4. 46707 5. 569297 5. 044231 5. 581919 5. 824055  
9. 231857 9. 504711 9. 105244 9. 35968 9. 090212 9. 264024 8. 900458 9. 340355 9. 325611  
5. 237216 5. 743663 5. 50048 5. 550409 5. 367056 5. 290093 5. 376311 5. 993311 5. 327769  
7. 139469 6. 396791 6. 906 6. 6181 6. 12168 7. 140442 7. 070682 6. 045006 5. 935324  
5. 27285 6. 786834 6. 768508 6. 402887 6. 783601 5. 685861 6. 052275 5. 649629 5. 902108  
4. 118862 4. 088957 4. 012918 3. 540661 3. 427691 4. 086212 2. 940997 3. 10115 2. 920103  
1. 908073 2. 459119 2. 438548 2. 554186 2. 890558 2. 844737 2. 340011 2. 346271 2. 318003  
8. 420359 7. 78633 7. 964485 8. 499561 7. 930464 8. 944521 8. 479737 8. 29927 8. 048228  
7. 952147 7. 909263 8. 037228 7. 797695 7. 672912 8. 007075 7. 613831 7. 472897 7. 965314  
3. 890212 5. 143685 4. 516388 5. 360451 4. 955882 6. 113283 4. 101418 3. 931348 5. 439719  
3. 938037 4. 778125 5. 042803 4. 602973 5. 149034 5. 252714 5. 566602 5. 585601 5. 551226  
9. 527678 9. 475331 9. 534931 9. 531454 9. 682269 9. 844918 9. 740796 9. 340055 9. 316246  
3. 930094 4. 055251 4. 08731 4. 706308 4. 517801 4. 66247 5. 818702 4. 881646 4. 508506  
2. 950842 3. 942818 3. 818352 2. 885255 2. 696471 2. 503599 3. 343312 2. 52667 3. 29362  
5. 783433 6. 555082 5. 528378 5. 826753 6. 230241 5. 826575 6. 382992 7. 060525 6. 250839

6. 601591 5. 850477 6. 018732 6. 542757 6. 212082 6. 569088 6. 760788 6. 076685 6. 202464  
7. 604081 7. 657791 8. 050485 7. 022045 7. 460387 8. 746965 8. 166817 7. 412499 7. 827386  
2. 857722 3. 026005 1. 692584 3. 257866 1. 908557 1. 330259 2. 275749 1. 695027 1. 54433  
3. 256314 1. 251616 1. 179693 1. 269183 2. 796811 1. 294676 1. 107096 1. 585028 1. 509313  
3. 206463 3. 575668 3. 320659 2. 231498 3. 24721 2. 047176 1. 947783 2. 546855 2. 682982  
7. 941424 6. 52647 6. 599486 7. 070023 6. 845988 6. 709654 6. 316589 4. 978396 3. 31807  
2. 51455 2. 104255 2. 680825 3. 404906 2. 514087 2. 447897 2. 276227 2. 89783 3. 231145  
1. 572783 1. 436019 1. 812783 2. 287314 2. 01182 1. 275065 1. 470252 1. 464969 1. 624444  
5. 897835 5. 712646 5. 815021 5. 355457 5. 534393 5. 752442 6. 515658 6. 336406 5. 694834  
4. 001132 3. 438061 4. 572295 2. 655911 3. 013702 4. 755939 4. 295681 4. 657057 5. 064239  
7. 229729 6. 828553 7. 655611 6. 833078 6. 763608 7. 485868 7. 157912 7. 456042 8. 052643  
2. 576027 4. 900925 4. 396391 4. 941736 4. 975534 4. 234317 4. 643669 3. 435462 4. 510474  
2. 601146 3. 398208 1. 541823 1. 767077 2. 29688 1. 543518 2. 694967 2. 467758 1. 585676  
4. 041449 5. 111299 3. 833228 3. 599696 4. 669221 3. 812599 3. 692973 3. 112501 4. 325847  
2. 197646 2. 555361 2. 88271 3. 116552 3. 618284 3. 753745 3. 681553 4. 76354 3. 997206  
3. 876491 3. 917209 3. 601352 3. 68311 4. 159873 4. 881683 4. 285229 3. 967028 4. 996503  
5. 73429 5. 640816 6. 285841 6. 101761 5. 967836 6. 550499 7. 020858 6. 86248 6. 802462  
5. 647729 5. 284702 5. 563316 5. 607741 5. 03381 6. 367799 5. 281545 5. 140713 5. 470161  
2. 247825 2. 572534 2. 875522 2. 10145 2. 940011 2. 832661 2. 982153 2. 924037 2. 517547  
4. 897003 3. 476605 4. 792014 5. 584967 4. 499853 4. 769862 4. 542126 5. 284973 4. 30562  
6. 200465 6. 21755 6. 39191 5. 28068 6. 448516 6. 747567 6. 286428 6. 070493 6. 140986  
1. 608727 1. 573665 1. 07177 1. 601342 2. 228854 5. 273346 3. 932636 2. 528559 5. 854596  
1. 541393 1. 758948 1. 788895 2. 48059 1. 353126 1. 415336 2. 164988 1. 895465 2. 42017  
3. 186758 2. 376594 2. 340944 2. 755123 2. 615086 2. 937894 2. 626422 2. 723638 3. 01537  
7. 582558 6. 685454 7. 292512 7. 746364 7. 845051 8. 023593 7. 836999 8. 182267 7. 638922  
2. 063333 1. 442526 1. 681867 1. 993412 2. 667073 1. 968063 1. 86278 1. 8183 1. 763081  
7. 005833 6. 461097 6. 144464 5. 789414 6. 399471 5. 638048 6. 42749 6. 495567 6. 345441  
5. 691561 6. 807646 6. 399617 6. 260234 6. 645416 6. 443418 6. 792985 6. 157274 6. 492592  
3. 288002 2. 378609 2. 638284 1. 98192 3. 198967 3. 748976 2. 549717 2. 443241 2. 69835  
6. 545508 6. 163122 6. 447144 6. 608695 6. 570807 6. 513294 6. 188871 6. 491102 6. 517886  
4. 72114 4. 245941 4. 732081 5. 396226 4. 151789 5. 902365 5. 860507 6. 50947 5. 374876  
3. 993981 2. 679171 3. 269133 3. 83681 3. 61738 4. 341959 4. 73247 5. 463971 5. 482343  
4. 94245 4. 651918 5. 092192 5. 127398 4. 241457 5. 061678 4. 380396 4. 34963 4. 211882  
4. 897931 4. 031467 5. 291695 5. 432727 5. 677392 6. 031984 6. 781522 6. 135117 6. 868894  
1. 890378 1. 930995 1. 648034 2. 402598 1. 576344 2. 132609 2. 375788 1. 796467 1. 764047  
1. 59389 1. 201131 2. 129287 1. 903618 1. 361459 1. 354438 1. 656483 1. 407351 1. 519315  
5. 808186 5. 686254 4. 808199 5. 501522 6. 941769 3. 368322 6. 445035 6. 400844 5. 831224  
4. 475946 3. 858548 4. 418889 3. 597183 4. 795384 4. 887082 3. 872605 4. 251131 4. 035831  
6. 900142 7. 482899 6. 645983 6. 869831 7. 109951 6. 643032 7. 114096 7. 052162 7. 157592  
4. 666872 4. 699145 3. 169097 1. 844987 2. 407735 2. 978602 5. 221567 4. 241442 3. 962242  
2. 590568 2. 713838 2. 561892 3. 690368 2. 189353 4. 24838 3. 922441 2. 625161 2. 497515  
5. 127805 5. 702751 3. 492192 5. 141098 4. 228197 7. 020082 5. 049516 4. 709164 5. 170173  
4. 369821 3. 253899 4. 362566 3. 996605 3. 91084 4. 199141 3. 88087 4. 837073 4. 028979  
1. 372379 1. 816796 1. 157921 1. 706072 1. 23444 1. 498797 1. 258733 2. 362283 1. 986307  
6. 250097 6. 873625 6. 54822 5. 966327 5. 675475 5. 633513 6. 908098 6. 265278 6. 600863  
4. 274121 3. 945827 3. 859329 4. 411237 4. 587277 4. 935899 4. 241375 3. 780126 3. 861203  
3. 1769 3. 659159 2. 93297 3. 946066 1. 905939 3. 495384 4. 40038 3. 137002 2. 963919  
5. 452119 5. 683269 5. 367396 6. 113969 5. 43295 5. 420897 5. 444662 5. 643312 6. 115823  
5. 815332 7. 437847 6. 066842 6. 37167 5. 836103 5. 901492 6. 728542 6. 93836 7. 272355  
4. 269756 4. 482925 4. 647929 4. 146247 3. 95653 5. 16459 4. 93338 5. 452504 5. 261364  
2. 208102 2. 135151 1. 994226 2. 568029 1. 873344 3. 828427 2. 73076 2. 018301 2. 596442

5. 407789 5. 61582 5. 855667 5. 749993 6. 560744 6. 119102 6. 360281 6. 413727 6. 374892  
4. 755642 4. 612163 5. 728214 4. 909582 4. 824345 4. 145001 4. 517819 5. 783973 4. 799164  
1. 343925 1. 273672 1. 138738 1. 774037 1. 610353 1. 54128 0. 841189 1. 434098 1. 525432  
6. 287504 6. 926085 6. 5673 6. 347364 7. 119359 6. 42202 6. 215733 6. 436349 6. 740871  
3. 965033 2. 885726 2. 804761 2. 276337 3. 147492 6. 027288 3. 398843 4. 031102 4. 268302  
5. 968352 6. 818235 6. 667235 6. 323594 6. 972982 6. 441324 5. 760912 6. 425724 6. 497547  
7. 738524 8. 228716 7. 145869 7. 966872 7. 794926 7. 531794 7. 240267 8. 001287 7. 956212  
4. 505691 4. 107624 3. 93583 4. 051734 4. 618315 4. 310279 5. 007525 4. 130488 5. 036747  
6. 622872 7. 339434 6. 918043 7. 34082 6. 713766 7. 313209 7. 598073 7. 552187 6. 740592  
4. 776688 5. 411962 5. 017378 4. 905336 4. 685823 4. 760559 4. 894885 4. 614323 4. 698428  
8. 153759 8. 189981 8. 097717 8. 221123 8. 247494 7. 765804 8. 004908 7. 890937 8. 084517  
6. 861866 6. 28362 6. 806488 6. 642777 6. 204609 7. 163796 6. 429435 5. 978564 5. 968286  
1. 646804 1. 919769 2. 997717 1. 733207 1. 331364 2. 152278 1. 944036 1. 573637 2. 038224  
6. 596192 6. 856274 6. 59939 6. 745853 7. 006211 7. 095465 6. 798389 6. 933611 7. 235315  
2. 833573 1. 254262 1. 09278 1. 101191 1. 282577 1. 348127 1. 533218 1. 171643 1. 925368  
4. 662923 5. 940492 5. 489472 6. 929726 4. 548119 8. 117129 7. 241821 7. 662656 7. 817729  
2. 943216 2. 795585 2. 971793 2. 694919 3. 124741 3. 009561 2. 581912 3. 179467 2. 70939  
2. 926303 2. 301193 2. 568762 2. 565953 2. 461611 3. 185092 2. 725133 2. 476156 2. 593647  
2. 628518 3. 184905 1. 653442 2. 708338 1. 698395 2. 710424 2. 093404 2. 550382 2. 879532  
6. 834428 6. 621728 7. 051125 6. 737646 6. 843121 7. 125798 7. 080622 7. 328396 7. 007968  
4. 026919 3. 337837 3. 575453 4. 657838 3. 875225 3. 925391 3. 890441 4. 275446 4. 447751  
1. 29523 0. 957232 1. 342288 1. 664431 1. 009314 4. 200945 2. 992048 3. 621908 2. 057974  
2. 324851 1. 729044 1. 54146 1. 465624 1. 780844 2. 943423 1. 54001 2. 749557 2. 149431  
2. 890265 2. 686774 2. 523764 3. 156706 2. 670511 3. 465259 2. 693166 2. 748212 3. 974865  
6. 546351 6. 755007 6. 299075 6. 934905 6. 870713 6. 790208 6. 260614 6. 941219 6. 876637  
4. 208158 4. 395075 4. 283608 4. 714643 4. 621987 5. 31094 4. 845901 5. 216356 5. 595534  
5. 259692 4. 676517 5. 516993 5. 564194 5. 076916 4. 847041 5. 962495 5. 185748 5. 660928  
6. 046408 6. 197109 6. 173088 6. 25526 6. 46469 6. 271529 6. 680751 6. 370997 5. 522465  
1. 803862 1. 024739 1. 77849 0. 882853 2. 05494 2. 964608 1. 255168 1. 537081 1. 683832  
5. 082185 5. 02841 5. 350189 5. 061767 5. 364605 4. 123819 4. 89552 4. 777138 4. 672519  
1. 2383 0. 553945 1. 450696 3. 186604 2. 231447 1. 471605 1. 502843 1. 50726 1. 454616  
4. 340871 3. 960219 4. 549847 4. 546732 5. 2913 3. 05162 3. 450356 3. 708335 3. 051062  
4. 304974 3. 931275 4. 924024 4. 301796 5. 951583 2. 345898 5. 810516 5. 576795 4. 217431  
5. 351366 5. 321993 5. 408581 5. 393309 5. 045298 4. 921489 6. 218649 6. 335203 5. 606355  
5. 362542 5. 907382 5. 442044 4. 616299 5. 006722 6. 373809 5. 162237 5. 292818 3. 520467  
6. 263557 6. 470192 6. 195497 5. 806453 6. 957248 6. 199469 6. 543669 6. 753113 6. 736467  
4. 424607 2. 460852 4. 363002 4. 087885 3. 906714 4. 256991 3. 421081 3. 079573 4. 473694  
1. 992558 2. 446936 2. 108456 3. 148797 2. 19932 1. 872074 2. 917306 2. 563842 2. 344935  
4. 331345 5. 224608 4. 812536 4. 705871 6. 273212 4. 569739 6. 801756 6. 735288 6. 754196  
6. 592926 6. 564234 6. 440051 6. 086103 6. 595149 6. 099823 6. 208324 5. 791839 6. 089834  
6. 837681 6. 082686 6. 707124 7. 201823 6. 637507 6. 725716 6. 552616 7. 508803 6. 850345  
3. 742005 3. 830667 3. 751245 3. 913542 3. 868514 4. 27041 3. 27009 3. 267084 4. 171207  
5. 291057 6. 16193 4. 744587 5. 566674 5. 162717 4. 266962 5. 741169 4. 843745 5. 154896  
10. 16522 10. 34034 10. 26396 9. 649315 10. 43088 10. 10677 10. 08105 9. 924733 9. 798806  
6. 207462 6. 968779 6. 038854 6. 94551 6. 038586 6. 987809 5. 919183 6. 659476 6. 609283  
8. 395433 7. 989635 8. 515768 8. 824502 8. 316791 8. 378287 8. 697584 8. 429786 8. 571919  
4. 682025 5. 998339 6. 010705 6. 855648 5. 895169 6. 581784 6. 552417 5. 729577 5. 304875  
4. 682181 5. 180277 4. 704454 4. 782588 4. 557595 4. 227266 5. 237383 5. 143586 3. 917087  
2. 466393 1. 929612 2. 293864 2. 372429 2. 20537 1. 773057 2. 34796 3. 151043 1. 813249  
6. 222153 5. 664897 6. 329308 4. 949044 5. 166384 4. 860596 6. 014355 4. 819684 5. 852468  
2. 788905 1. 915257 2. 614686 4. 476256 2. 368991 2. 202233 2. 118467 2. 33887 2. 174808

3. 82025 3. 832296 5. 119596 2. 682249 3. 770938 3. 649218 3. 791891 3. 319998 4. 216189  
7. 925324 7. 72454 7. 444417 7. 149026 7. 741832 8. 101555 7. 845158 7. 606474 7. 817412  
1. 879472 1. 745025 2. 046063 1. 740045 1. 648824 2. 295779 2. 246087 2. 789295 1. 794448  
4. 270296 3. 720077 3. 84565 2. 785005 5. 254451 3. 361412 4. 155939 3. 298112 3. 642133  
8. 55586 8. 628386 8. 354965 8. 824488 8. 588994 8. 664486 8. 03022 8. 213977 8. 043285  
4. 192383 5. 369557 3. 909826 3. 109421 3. 793597 5. 674863 4. 987479 5. 463771 5. 798366  
7. 088543 7. 069593 7. 187573 7. 560476 6. 766793 7. 210852 8. 031356 7. 400159 7. 528858  
3. 989456 3. 618416 3. 669883 4. 585407 3. 670988 3. 915472 3. 709673 4. 681897 5. 18936  
7. 419476 6. 892338 6. 908102 6. 628535 5. 870436 6. 626025 6. 339767 5. 56704 6. 053742  
3. 216448 3. 006861 4. 156197 4. 239403 3. 561606 3. 904654 4. 368632 4. 984254 4. 997394  
4. 700389 5. 375232 4. 311787 3. 422251 4. 855718 5. 045148 4. 095178 5. 091231 4. 942456  
8. 190015 8. 073082 7. 939048 8. 454059 7. 743993 8. 241414 8. 330872 8. 510685 8. 246896  
6. 519735 7. 004446 7. 604079 6. 623872 7. 28354 7. 246467 7. 022951 7. 818762 7. 351673  
6. 547122 6. 157699 5. 462765 7. 594553 6. 605754 4. 558742 6. 195898 6. 186289 6. 318931  
8. 44456 7. 928768 8. 269426 8. 731897 7. 911272 9. 371803 8. 252691 8. 696545 8. 53608  
6. 473475 6. 195415 6. 131675 6. 316362 5. 807905 6. 308464 5. 661597 5. 902006 5. 762929  
7. 487662 8. 091921 7. 526633 7. 657847 8. 226884 7. 903207 7. 914983 7. 756065 7. 811709  
3. 548884 3. 916331 4. 268847 3. 69626 3. 55126 4. 142876 3. 865242 4. 656757 3. 624956  
3. 129246 1. 869796 2. 305933 2. 231304 2. 677131 2. 986478 1. 459096 2. 246344 1. 601136  
2. 174677 1. 542007 1. 615635 2. 974915 3. 917105 3. 717599 3. 351416 3. 415837 5. 131242  
1. 857044 1. 446148 1. 555627 1. 737448 1. 690201 1. 372673 1. 740217 0. 945293 1. 758974  
3. 168199 4. 106732 3. 337336 3. 605081 2. 90449 3. 445686 5. 288066 4. 630428 5. 722115  
4. 295463 4. 067526 4. 916683 4. 710842 4. 440995 5. 014274 4. 122723 4. 399251 4. 609837  
4. 169664 2. 912795 3. 173245 3. 719051 3. 93091 3. 258652 3. 420363 2. 872343 3. 405354  
6. 012016 5. 428261 5. 133496 5. 532119 5. 499378 5. 017484 5. 090911 5. 535885 5. 557875  
3. 206412 4. 454324 3. 559889 4. 633499 4. 318959 5. 20931 3. 416117 3. 156386 3. 475349  
5. 065503 5. 749187 5. 748148 5. 581731 5. 636387 6. 689261 6. 066526 5. 239869 5. 959746  
5. 316771 5. 470688 5. 559193 5. 497838 5. 12677 5. 463963 5. 675219 5. 521916 5. 626691  
2. 774896 3. 397979 3. 52559 4. 534211 3. 123773 2. 324064 3. 610174 3. 914066 3. 021153  
6. 251072 7. 11725 6. 844386 6. 911603 6. 93986 6. 353151 6. 685729 6. 756453 6. 677551  
6. 651272 7. 185111 6. 992912 7. 4421 7. 296353 6. 775253 6. 738604 6. 710747 6. 830196  
5. 900262 5. 848481 5. 620988 6. 041619 4. 961006 6. 002581 6. 069066 6. 46078 5. 92394  
1. 66393 1. 406889 1. 78367 2. 225668 1. 770626 1. 803313 1. 989592 2. 168109 1. 838599  
2. 237083 3. 431502 2. 660607 2. 098572 3. 064805 1. 97734 2. 012696 2. 008895 3. 10544  
6. 203652 6. 046085 6. 578737 6. 138685 6. 410145 6. 514957 6. 434088 5. 881067 5. 396437  
2. 445127 2. 407307 2. 502098 2. 118838 2. 663127 2. 986282 2. 203959 2. 617878 2. 060164  
1. 800015 2. 114915 1. 881099 2. 635386 2. 130251 2. 918621 3. 021209 2. 567223 1. 775145  
5. 12087 5. 241382 5. 487077 5. 530911 5. 428838 5. 393006 5. 550004 5. 205426 5. 391999  
2. 403573 1. 848531 1. 933009 1. 83521 2. 456149 1. 758637 2. 446132 1. 862096 1. 898266  
4. 402547 3. 877559 4. 574518 5. 757293 3. 773101 5. 343123 4. 726289 4. 387391 4. 18516  
6. 824707 7. 39474 7. 348813 7. 387419 7. 542232 6. 286687 5. 986924 6. 355998 6. 577331  
8. 891854 8. 963209 8. 812902 8. 313824 9. 045174 8. 486189 9. 488128 9. 398547 9. 086611  
5. 034521 5. 072947 5. 445193 4. 851265 5. 465825 4. 362546 4. 992231 4. 418493 4. 442778  
3. 079223 2. 77208 3. 375518 3. 53522 3. 55558 2. 764634 3. 803638 3. 794176 3. 572326  
5. 956652 5. 940886 5. 890305 5. 871581 5. 664585 6. 491526 5. 576148 6. 42013 6. 010427  
8. 265004 8. 788192 8. 22695 8. 514173 8. 99328 7. 289028 8. 081052 7. 917334 7. 73364  
5. 564816 6. 515051 6. 21271 6. 4152 6. 222443 5. 17982 5. 52314 5. 676757 5. 994229  
5. 516458 4. 768003 2. 584846 6. 076232 3. 079682 3. 770724 3. 258495 1. 98303 5. 63832  
1. 293274 1. 3071 1. 509569 1. 72055 1. 928485 1. 780862 1. 644999 1. 844598 1. 326365  
4. 093113 4. 466404 4. 02702 3. 246771 4. 265979 5. 059221 5. 125198 4. 141604 5. 266466  
7. 619396 6. 945254 7. 125458 6. 410414 7. 60607 7. 615526 7. 5064 7. 544101 7. 84634

5. 313014 5. 789949 6. 351636 6. 759838 6. 923296 6. 12931 5. 962141 5. 495456 5. 98628  
1. 727774 1. 593925 1. 38323 1. 354782 1. 441335 1. 752288 1. 570851 2. 01066 1. 270738  
6. 977307 5. 533014 5. 965563 3. 124973 6. 404983 6. 202918 6. 745812 5. 812246 5. 523638  
7. 663252 7. 405114 6. 361861 8. 0034 7. 344489 9. 258293 7. 737107 6. 980311 6. 98629  
7. 406963 7. 670299 7. 062189 6. 953852 6. 414509 7. 428669 7. 504099 8. 010036 7. 598609  
1. 924264 1. 687185 1. 977513 2. 669142 2. 337485 2. 725164 2. 082856 2. 751711 1. 952686  
3. 949699 3. 798272 4. 628669 5. 026132 4. 571233 4. 534694 4. 938327 5. 004954 4. 871757  
5. 15267 5. 457257 6. 160985 5. 09935 5. 184555 5. 621348 5. 987398 5. 435409 4. 726611  
5. 600602 6. 140169 6. 158123 5. 916571 7. 022762 5. 367021 7. 446069 6. 734227 6. 791809  
3. 143365 3. 619887 3. 978066 3. 577738 4. 541159 3. 402163 3. 972204 4. 200529 4. 60881  
2. 128838 3. 755878 2. 436192 3. 469284 3. 198583 3. 627584 3. 609327 3. 559301 3. 666667  
5. 231222 3. 426905 3. 699963 4. 134731 4. 188004 5. 133781 4. 654652 4. 811259 4. 373893  
5. 822077 4. 363792 6. 239188 3. 063927 3. 180243 5. 382137 5. 929388 5. 332779 4. 400653  
6. 811827 7. 132057 7. 102618 6. 635156 7. 034419 7. 799524 7. 214671 7. 161564 7. 106838  
8. 615088 8. 620129 7. 843591 8. 148347 8. 449729 8. 801152 8. 243651 8. 10255 8. 31787  
7. 184219 6. 625332 6. 40842 6. 581239 6. 684634 5. 751925 6. 411895 6. 317747 5. 846733  
6. 360537 6. 535736 6. 67445 6. 503375 5. 752135 6. 669295 6. 624979 6. 298807 6. 837418  
3. 517719 4. 245779 3. 497987 3. 616648 3. 285357 4. 309518 3. 956788 4. 392418 4. 315571  
1. 401566 1. 11458 1. 198931 1. 547165 1. 14612 1. 361161 1. 160112 1. 05873 1. 145454  
3. 007656 2. 902677 3. 933063 2. 97315 3. 659671 4. 288327 3. 283969 3. 734576 2. 975119  
7. 733436 8. 277914 7. 498434 7. 787353 8. 000815 8. 119638 7. 337622 7. 628003 7. 573717  
4. 771842 5. 601858 6. 001211 6. 025119 4. 164219 4. 10602 5. 801732 5. 631605 5. 343536  
8. 409022 8. 582854 8. 097908 8. 274208 8. 402406 8. 268645 8. 231588 8. 590026 8. 203458  
6. 319745 6. 196087 6. 631268 6. 166577 6. 47944 6. 424944 6. 282296 6. 870637 6. 8074  
7. 119258 6. 710227 6. 089987 5. 99473 5. 484367 5. 792299 3. 575909 2. 361501 3. 105905  
8. 448795 7. 999822 7. 568769 8. 077234 8. 275007 7. 293509 8. 057414 7. 72891 8. 090947  
1. 737295 1. 872184 1. 901425 1. 639567 2. 027192 2. 591337 2. 000988 2. 120255 2. 944829  
1. 932425 1. 827257 1. 930403 2. 965719 2. 569409 2. 177023 1. 949984 1. 871793 1. 941907  
2. 182213 2. 562155 2. 432699 1. 74701 2. 399554 2. 345054 2. 523163 1. 701232 2. 777215  
4. 450106 4. 276125 4. 210481 4. 784605 4. 068361 4. 279263 5. 455294 4. 827781 5. 370022  
5. 87522 6. 276839 5. 636594 5. 38372 5. 694009 5. 327622 5. 060672 5. 129335 5. 437152  
7. 147528 7. 946699 7. 529829 6. 913123 7. 18671 7. 576245 6. 963674 6. 99214 7. 081644  
7. 853322 8. 079983 8. 171637 8. 687908 8. 382783 9. 083319 8. 455926 8. 406954 8. 613934  
7. 976372 7. 118485 7. 908563 8. 12638 8. 146283 8. 114619 8. 39459 8. 148409 8. 320021  
4. 658091 4. 040117 3. 328938 5. 159503 4. 509081 4. 054472 4. 195394 4. 151604 4. 47498  
6. 01247 6. 196669 6. 114392 6. 769929 5. 824947 6. 063124 5. 493995 5. 412186 5. 841549  
3. 528032 5. 022244 3. 378974 4. 283925 4. 514727 4. 419635 4. 137097 4. 315634 4. 896666  
7. 136932 7. 474704 7. 088769 7. 219658 7. 483445 6. 718337 8. 121298 7. 115726 7. 377003  
6. 774625 6. 838315 6. 646618 6. 704691 7. 380188 7. 210227 6. 879134 7. 171375 7. 381017  
4. 834109 4. 080518 4. 120485 4. 477779 3. 910496 5. 273711 4. 647289 5. 110744 4. 427378  
4. 055797 4. 089603 2. 665051 3. 182549 4. 299515 3. 641854 3. 266822 2. 945064 3. 902133  
3. 682192 4. 691914 4. 492991 4. 44058 4. 116832 4. 491658 4. 622981 5. 507277 4. 247951  
2. 90627 3. 30911 2. 901476 2. 908087 3. 877895 3. 340506 3. 544297 3. 538654 3. 785238  
7. 335862 7. 516194 7. 371801 7. 602614 6. 111734 6. 834231 6. 708996 6. 408772 6. 793145  
7. 607503 7. 705758 7. 754229 6. 239916 7. 899099 6. 74688 6. 947831 6. 772394 6. 909504  
3. 093338 2. 812619 2. 954956 4. 13192 2. 546807 3. 350552 2. 787136 3. 363914 3. 66516  
5. 136631 5. 583489 5. 024328 5. 023406 5. 451456 5. 361985 5. 168503 5. 123313 5. 182091  
2. 75794 1. 945155 2. 141533 1. 723022 1. 7486 2. 244576 2. 64863 3. 077246 1. 851943  
6. 561009 6. 255276 6. 03648 6. 212082 6. 551199 4. 971484 7. 002071 6. 358697 6. 500483  
4. 593592 3. 70904 2. 959031 4. 721049 4. 689336 6. 208378 5. 017485 3. 999761 5. 127269  
3. 59682 3. 656096 3. 850539 4. 192095 3. 330199 4. 623413 3. 448792 4. 588668 4. 202684

2. 594541 2. 448647 2. 946715 2. 343639 2. 805921 3. 747621 3. 386229 2. 808928 2. 614263  
6. 208856 5. 711664 5. 563502 6. 140927 5. 745225 5. 965147 6. 322626 6. 399576 7. 024865  
2. 364708 5. 072662 6. 229826 6. 520194 4. 322947 7. 502833 6. 140841 5. 238909 5. 529737  
7. 015107 7. 167524 7. 043896 6. 927688 7. 219181 6. 701108 7. 707276 7. 319146 7. 338964  
2. 688085 3. 244902 3. 295781 1. 274016 2. 966797 2. 477212 3. 191888 1. 639867 1. 648402  
2. 53803 3. 114948 2. 176812 3. 139127 2. 972965 2. 681662 3. 028216 2. 71447 1. 920964  
1. 705364 1. 727049 2. 061188 0. 851022 1. 819046 1. 041995 1. 26807 1. 988121 1. 503604  
1. 634182 3. 454972 1. 931336 2. 346052 1. 495772 2. 090064 1. 444716 2. 347979 1. 985745  
3. 690305 2. 646414 4. 070275 3. 141599 4. 004299 4. 635603 4. 707552 4. 754285 5. 248246  
2. 651343 2. 910313 4. 674934 2. 726381 1. 986006 2. 472313 3. 950182 4. 734452 4. 358937  
2. 371335 2. 642358 2. 054999 2. 721089 1. 981656 3. 124497 2. 165213 1. 868505 1. 920732  
5. 90206 6. 179786 6. 25604 5. 828846 6. 433462 5. 677766 5. 436296 5. 86064 5. 720235  
4. 837936 4. 404125 4. 522274 4. 245935 4. 722108 5. 231124 5. 808244 6. 084427 5. 804131  
5. 439958 5. 938764 6. 433898 5. 607239 5. 717769 5. 884536 7. 38362 7. 033829 6. 933581  
8. 337987 7. 865087 6. 995418 7. 923573 6. 823292 7. 243959 7. 448933 7. 901395 6. 871583  
6. 701843 6. 709904 6. 586016 6. 05287 6. 183433 6. 64696 6. 75741 6. 716355 6. 19359  
7. 43122 6. 988865 5. 91365 6. 411345 6. 638332 5. 234265 5. 680163 5. 850955 6. 368807  
4. 974138 4. 105889 4. 472021 4. 627542 5. 141027 5. 17221 5. 176974 5. 099746 5. 238397  
7. 087673 7. 664976 7. 375186 7. 080814 7. 093485 6. 806965 7. 670151 7. 948614 8. 033424  
7. 357446 7. 884735 7. 471738 7. 337248 7. 647219 7. 125207 7. 364708 7. 506738 7. 505848  
6. 693063 7. 656046 7. 079417 6. 389344 7. 030314 6. 973457 7. 42241 7. 290767 6. 297908  
3. 372276 2. 844349 2. 310339 1. 815973 2. 862113 1. 448252 1. 743236 1. 524829 1. 67908  
6. 409086 7. 235307 6. 978185 6. 841811 6. 691727 6. 747276 6. 273349 6. 383469 6. 723478  
5. 785432 6. 262862 6. 176355 5. 772409 6. 115512 5. 800487 5. 211738 4. 614159 5. 651589  
6. 119908 6. 302466 6. 714328 6. 962839 6. 626839 7. 11944 7. 519837 6. 968351 7. 094508  
4. 458662 4. 1397 5. 30207 4. 834524 4. 771519 5. 720859 4. 56364 4. 760428 5. 913707  
2. 81293 3. 240889 2. 679071 2. 573412 3. 031103 3. 310555 3. 423307 2. 689754 2. 830519  
6. 870422 6. 799029 6. 78444 7. 082473 7. 039025 6. 925843 6. 976215 6. 274367 6. 77111  
3. 780649 4. 553211 4. 864294 4. 26514 5. 256834 4. 912046 4. 814548 5. 143505 4. 628033  
6. 045904 6. 470505 6. 417563 6. 322601 6. 670796 6. 374837 6. 358466 5. 550964 5. 758068  
8. 5286 8. 397624 8. 588938 8. 838525 8. 581211 9. 0285 8. 333252 8. 465735 8. 406794  
4. 65715 4. 441937 5. 399486 4. 277887 4. 783203 5. 368953 4. 79904 4. 93627 4. 705386  
6. 805763 6. 144846 6. 356515 6. 393148 6. 687622 5. 195713 7. 82272 8. 16057 7. 592417  
9. 453374 9. 334436 9. 50099 9. 517064 9. 295308 9. 477967 9. 105277 9. 13059 9. 350984  
1. 882399 2. 697005 2. 219732 2. 49813 2. 986313 2. 408979 3. 110665 2. 827812 2. 179248  
7. 492236 7. 088317 6. 848708 6. 745722 6. 82618 6. 762963 6. 341227 5. 662559 6. 194651  
4. 408885 4. 466194 4. 009246 5. 375815 4. 52258 5. 259824 4. 998978 4. 868832 4. 088697  
9. 032863 8. 34806 8. 804224 9. 182417 8. 915014 8. 682034 9. 329513 9. 813632 9. 523292  
5. 010546 5. 272149 5. 553716 5. 764032 5. 116707 4. 774803 4. 755469 4. 900685 5. 369186  
6. 709772 7. 011262 6. 708889 6. 325137 6. 367522 6. 515101 6. 733716 6. 797195 6. 729278  
2. 782682 3. 140593 4. 106621 3. 896063 4. 226782 3. 902192 3. 290312 4. 124699 3. 01244  
6. 370896 6. 408771 6. 532174 6. 320738 6. 114181 7. 157565 6. 345821 5. 905916 6. 046958  
3. 844994 5. 524332 4. 447571 3. 861157 4. 433119 5. 788447 5. 603129 3. 628817 4. 283021  
7. 870075 7. 298443 7. 453632 7. 3094 7. 807137 8. 637671 7. 506142 8. 032584 8. 001275  
8. 218443 8. 52513 8. 527078 8. 285809 8. 420118 6. 901921 8. 344976 8. 500938 8. 14167  
2. 156944 2. 397009 2. 494691 3. 833547 3. 25542 2. 227936 1. 906451 2. 540804 3. 572084  
6. 000165 4. 930807 5. 023874 5. 389644 4. 194724 5. 189686 4. 79785 4. 849079 5. 789995  
1. 715395 1. 751051 1. 405729 1. 659072 1. 093088 2. 075221 1. 813857 1. 683415 1. 381061  
4. 467021 4. 557008 5. 297632 5. 948192 4. 989331 5. 748885 5. 380976 5. 463988 5. 353589  
5. 577761 5. 922857 5. 862189 5. 064952 5. 84812 5. 999413 5. 736829 5. 464309 4. 574763  
6. 793045 6. 2257 6. 90839 7. 080253 6. 648249 6. 87418 6. 757288 7. 092467 6. 886627



8.735948 9.001724 8.664677 8.372045 9.022304 8.93637 8.650473 8.711828 8.573104  
9.03559 9.586241 7.856787 7.805669 7.539184 5.569286 6.899136 6.721578 6.081809  
5.715653 5.795564 5.847005 5.762664 6.039283 4.441248 4.956713 5.714297 4.971594  
6.195656 6.489518 5.993758 5.63157 6.532581 5.652351 6.261876 5.978049 6.177901  
7.77677 8.208201 7.661662 7.878278 8.499203 8.10991 8.487496 8.201113 8.384171  
7.81398 7.756464 7.499266 8.164255 7.635815 7.760052 8.041669 7.877526 8.0006  
8.631794 8.261848 8.17171 8.406973 8.306949 8.310988 8.051192 7.992261 8.305299  
5.460438 4.628406 4.893341 4.642731 4.604977 5.046893 5.048514 4.36268 4.637898  
6.623533 6.852985 6.433451 6.300577 6.380851 6.12195 6.481189 6.763182 6.0228  
9.765107 9.793272 9.8486 9.761859 9.463103 9.502046 9.88987 9.711551 9.350331  
3.594291 5.397013 4.633926 3.530772 4.32411 6.023974 5.616971 5.374519 5.813538  
6.008895 5.936096 5.986775 5.564274 5.372356 5.625369 5.754117 5.989186 5.965533  
7.71427 6.553187 6.897439 7.066933 7.014872 6.558896 7.736053 7.57561 7.277494  
7.373178 6.242919 6.9289 6.895627 5.815249 6.754256 6.758804 7.07628 6.05267  
6.036724 5.546588 6.090976 6.837502 5.871124 5.880315 5.84051 5.692745 5.648726  
6.741514 6.636921 5.797937 7.46767 6.611009 7.047995 6.547569 6.072383 6.080785  
5.156401 5.118409 3.248304 4.122383 4.74853 4.471013 4.656274 3.701734 3.953242  
3.792641 3.951296 3.756133 3.48318 4.251542 4.527772 3.626383 4.055879 4.023017  
4.715981 4.090188 5.675343 4.97563 5.079216 6.302663 2.73968 3.404406 3.940749  
4.789435 5.549347 5.232091 5.482685 5.525281 5.972574 5.470033 5.887083 5.89272  
1.802859 1.69019 1.56169 2.171469 1.422231 3.326474 2.445889 2.896399 3.127241  
4.661253 5.008419 4.202484 4.406315 5.224098 4.112202 5.162513 3.953206 4.11984  
6.058601 5.587355 6.517114 5.996804 5.557847 5.133778 5.888119 5.54988 5.535158  
4.465321 5.516121 4.740638 5.828972 4.486233 4.817569 5.34388 5.19553 5.177198  
7.894285 7.891071 8.039437 7.588579 8.177273 7.406777 8.06229 7.914777 7.854801  
4.527786 5.076557 4.662098 4.70379 4.486201 5.01194 5.314693 5.009187 4.372511  
1.653264 1.131435 1.078757 1.251081 1.332784 1.58557 1.520673 1.688425 1.140203  
7.519043 7.771497 6.756394 7.587236 7.387584 7.480546 7.253729 7.781965 7.757763  
7.598676 8.051637 8.095251 8.152565 8.107494 7.604855 7.810104 7.577123 7.256857  
9.033927 9.059928 8.661742 9.077723 8.77778 8.863667 9.201648 9.242502 9.132389  
10.0363 10.20466 10.40984 9.516433 10.28209 4.788445 8.56666 8.137317 7.815832  
5.15517 6.925664 6.83766 7.218641 7.489062 5.842449 7.901847 8.071018 8.055429  
2.480705 2.93137 2.688022 2.834709 2.401748 2.415208 2.046625 2.311319 2.729464  
5.850879 6.297747 6.010132 6.020768 5.507629 6.540989 5.798473 5.065738 4.742522  
5.420012 5.2698 6.035171 6.01481 4.53931 5.904244 5.016759 3.844503 4.723036  
2.897733 2.219225 2.258065 2.490304 2.792428 2.766469 2.696226 2.404139 2.434716  
3.18976 3.464832 2.959135 3.814583 3.513681 3.3052 4.609217 3.848436 4.238334  
7.93705 7.269296 6.575769 6.416535 6.674432 7.644419 7.231361 7.061324 6.92471  
6.00449 6.333254 5.984924 6.611543 6.875405 7.427994 7.573297 7.294471 6.34489  
6.692473 6.90443 6.983466 7.61923 7.365214 7.125765 6.498249 6.066593 7.09901  
5.704024 5.782414 4.667059 6.004907 5.410867 6.108336 5.603178 5.62786 5.598119  
8.609356 7.772965 8.677897 8.766463 8.318682 8.630782 7.725055 8.810246 8.130155  
3.230979 3.501282 3.433999 2.09904 2.793664 3.397479 4.155052 3.675868 3.771772  
7.912392 8.359258 8.295518 7.721312 8.74354 7.963042 7.846266 7.68461 7.566046  
4.667833 4.705474 4.970704 2.572878 4.124034 4.603346 3.402345 2.578263 2.114352  
7.079907 7.189087 5.978878 7.348143 6.767089 7.245431 6.97539 6.833475 7.141509  
4.077653 4.549597 4.528703 5.300446 5.219768 4.12598 4.795443 4.407266 4.983063  
7.967847 8.744938 8.796258 9.043169 8.790383 6.964443 8.669136 8.297426 8.135893  
2.125452 2.144534 2.213587 1.859764 2.60024 1.954252 1.814024 2.436565 1.769947  
5.568225 5.535032 6.168856 6.09262 6.479163 5.159164 5.859318 6.341167 6.14571  
4.749126 3.280567 4.708699 4.370152 4.806027 5.37509 5.809775 5.962127 6.317681

10. 38889 10. 33608 10. 47174 10. 02859 10. 45886 8. 655664 10. 85963 10. 85205 10. 74578  
6. 733175 5. 763053 6. 624061 6. 121693 5. 5144 7. 060674 6. 611502 6. 661002 6. 269092  
4. 918228 4. 91617 5. 878859 4. 604142 3. 700068 5. 596732 5. 348997 5. 281121 4. 024747  
4. 73672 5. 256022 5. 440612 5. 191743 5. 397231 5. 414543 6. 08678 6. 404095 5. 162472  
9. 434117 9. 739891 8. 94868 9. 593463 9. 39425 9. 039523 9. 490839 9. 2163 9. 778845  
3. 965385 4. 760543 3. 080101 4. 569091 3. 577205 3. 967064 4. 915701 5. 45406 5. 652754  
1. 932951 2. 457463 1. 642867 1. 652703 1. 664046 1. 454093 2. 558329 2. 240407 2. 691945  
6. 812539 6. 55861 6. 529034 6. 88451 5. 931666 6. 414271 6. 957094 6. 687626 5. 971683  
3. 755894 4. 406331 4. 196097 3. 443105 4. 216431 2. 564238 4. 080504 3. 46271 3. 349396  
1. 705358 1. 507264 1. 299533 1. 496827 2. 616447 1. 566806 1. 096478 1. 259867 2. 154698  
7. 677687 7. 588968 7. 861077 7. 545715 8. 31444 8. 445731 8. 257654 8. 618071 8. 22983  
6. 894671 7. 624911 7. 230737 6. 784827 7. 655034 8. 416136 7. 780847 7. 331779 7. 281789  
6. 173348 7. 266866 6. 390073 7. 048567 5. 483167 6. 832192 7. 074346 7. 213029 6. 699688  
8. 429333 8. 181439 8. 336318 8. 578736 8. 47273 8. 165761 8. 30163 8. 750183 9. 000665  
3. 090196 4. 105821 4. 289933 3. 798622 4. 186257 2. 997218 3. 303029 3. 226599 3. 197701  
4. 969252 4. 436725 3. 675204 4. 564307 3. 323849 3. 31272 2. 792604 2. 439234 3. 167997  
5. 166513 5. 863146 4. 359056 4. 756304 4. 178063 4. 806275 4. 858965 5. 063263 4. 688324  
5. 353354 6. 111976 6. 0427 5. 213506 5. 492582 4. 917289 5. 761138 5. 553232 5. 522828  
1. 80275 2. 356199 1. 704017 1. 71836 2. 156486 2. 222576 2. 435879 2. 57688 2. 777851  
1. 615052 1. 52845 1. 614142 1. 919303 1. 481214 0. 839735 1. 572712 1. 972265 1. 159621  
3. 619811 4. 679295 4. 195592 3. 698885 3. 73727 3. 30015 3. 707167 4. 244141 3. 870197  
6. 741684 7. 836262 7. 30696 7. 110578 7. 520714 7. 050299 7. 153955 6. 932739 7. 250712  
1. 247447 1. 285443 1. 127249 1. 258652 1. 009019 1. 899064 1. 004674 1. 249721 1. 455637  
8. 246711 9. 529317 8. 721501 8. 335414 9. 084826 7. 443556 6. 991481 7. 135494 7. 645279  
7. 188522 7. 087454 6. 013543 6. 891131 3. 667213 5. 434252 6. 588993 3. 33319 4. 914455  
3. 362712 2. 749489 3. 336758 2. 601558 4. 420115 4. 08112 2. 333527 2. 848684 2. 80707  
6. 614789 6. 717817 6. 638665 6. 355045 5. 779462 6. 403125 7. 205577 6. 298374 6. 238593  
4. 2453 4. 168855 4. 634839 4. 2331 4. 631089 4. 407968 5. 4969 4. 707002 5. 104914  
4. 872 4. 916859 5. 285694 4. 605277 4. 862308 4. 532913 4. 785095 4. 837426 4. 285152  
7. 530018 6. 899145 6. 83981 7. 341083 6. 906188 7. 228547 7. 435217 6. 606627 7. 787051  
7. 084282 6. 379892 6. 91184 5. 690782 7. 115693 6. 76047 7. 815803 8. 054936 7. 76529  
3. 5931 2. 06651 1. 945759 2. 780444 3. 432474 4. 301186 3. 305122 3. 467062 3. 812063  
2. 35397 2. 219634 2. 061885 2. 092303 1. 886398 2. 355621 2. 572606 4. 290153 3. 358736  
7. 187024 8. 003554 7. 207619 7. 656256 8. 232395 7. 838948 7. 558363 7. 218136 7. 729032  
4. 802913 4. 471151 5. 334936 5. 38848 5. 451204 5. 666049 5. 625156 5. 847029 6. 93621  
2. 687972 3. 090783 3. 482498 2. 545445 3. 138083 2. 732413 3. 13694 2. 960032 4. 153647  
3. 341699 6. 056012 4. 399266 2. 446965 3. 30819 3. 455574 2. 439024 5. 872434 4. 076979  
9. 214277 8. 092183 7. 749804 8. 338892 7. 607383 8. 560333 8. 190609 7. 773566 6. 568278  
2. 962309 2. 995934 2. 124251 3. 263837 4. 203858 6. 148897 3. 587794 2. 678198 4. 322163  
7. 186415 7. 14684 6. 827548 7. 154412 7. 647334 7. 024688 7. 21022 7. 154212 7. 154823  
5. 030027 6. 091571 6. 275676 5. 172983 5. 457627 4. 381229 4. 696775 5. 229166 5. 518644  
4. 731815 3. 974514 4. 787549 3. 6406 4. 273563 3. 010391 6. 806067 6. 769448 6. 948618  
7. 063669 6. 595129 7. 129369 6. 938414 7. 195242 7. 127444 7. 264663 6. 678905 6. 542781  
4. 917737 3. 618219 4. 32822 2. 239774 4. 606428 3. 182301 3. 331422 1. 824769 4. 030731  
2. 365554 2. 170939 1. 930274 3. 071262 1. 801479 1. 927613 2. 350274 2. 123568 1. 638142  
7. 787318 7. 46969 8. 006883 7. 938547 8. 000966 8. 011003 7. 983852 7. 87526 8. 20268  
1. 124308 1. 068642 1. 309343 0. 944999 1. 140961 1. 203602 1. 052245 1. 535249 1. 087199  
1. 943172 1. 845244 1. 929693 1. 944496 1. 708904 2. 032875 1. 977305 2. 022212 2. 366783  
2. 874811 2. 645791 2. 6746 1. 957157 4. 174931 3. 29528 3. 611828 2. 70396 2. 698691  
1. 576695 1. 588944 1. 481303 2. 01042 1. 926797 1. 615654 1. 946993 1. 656053 1. 492405  
1. 737308 2. 503147 2. 177356 2. 768017 1. 790337 3. 518724 2. 103574 1. 653312 1. 290446

6. 375995 7. 136162 6. 956809 7. 083644 7. 309889 7. 423923 7. 192216 7. 153449 7. 002395  
4. 254789 4. 366598 4. 217695 3. 545137 5. 083394 5. 458094 4. 783876 3. 889903 3. 740177  
3. 036288 2. 88957 3. 215674 2. 550617 3. 933826 5. 127643 5. 228705 4. 289186 3. 594403  
9. 4041 7. 563934 8. 33435 8. 152884 8. 240764 8. 230437 7. 730061 7. 354909 6. 914871  
5. 55058 5. 728997 6. 690487 6. 805461 5. 979097 4. 113246 5. 914578 6. 036549 6. 362164  
3. 999637 4. 789863 5. 011447 5. 573779 5. 193237 5. 751902 4. 818452 5. 47589 4. 004121  
5. 6479 5. 218619 5. 093187 4. 834201 5. 857515 4. 715625 4. 099074 4. 147568 4. 699815  
9. 572484 9. 505356 9. 41394 9. 672974 9. 42819 9. 655609 9. 274109 9. 363592 9. 099365  
3. 712603 4. 12901 3. 869872 3. 99049 3. 629114 4. 252262 3. 237024 4. 1928 3. 536005  
4. 497218 5. 036769 4. 75792 6. 0136 5. 794897 5. 347607 5. 871929 5. 898656 5. 21595  
3. 776061 3. 172024 3. 251959 3. 750329 3. 472921 4. 023055 3. 567696 3. 922733 4. 503957  
5. 27653 5. 305101 4. 856729 5. 396381 4. 373793 4. 954615 5. 491525 5. 904203 6. 073255  
6. 225477 5. 560856 5. 195797 5. 690956 5. 521386 5. 722847 6. 523637 6. 442127 5. 399457  
6. 230213 5. 792276 5. 877387 5. 383745 4. 743939 6. 357423 6. 711949 5. 575664 6. 560618  
3. 198444 1. 791828 1. 80989 1. 131505 3. 184398 3. 030642 2. 270962 3. 688725 2. 498615  
2. 149983 1. 789893 2. 277788 2. 432407 1. 990886 3. 51258 2. 170217 2. 177336 3. 886923  
4. 165325 3. 28867 2. 950638 3. 704887 3. 845455 3. 578349 3. 658278 3. 481678 3. 494777  
1. 462449 1. 208436 1. 438531 2. 321101 2. 258238 4. 801784 3. 233257 3. 016415 3. 440204  
6. 567931 5. 841661 6. 30729 6. 468545 6. 3845 5. 63319 6. 420319 5. 524119 5. 49762  
5. 762608 5. 880861 5. 270035 6. 412988 5. 738797 5. 802744 5. 928657 5. 783036 6. 000865  
7. 354944 7. 379636 7. 59556 7. 821441 8. 176412 7. 916415 7. 373138 7. 714385 8. 302961  
6. 32396 6. 90852 6. 58042 7. 187248 6. 343706 6. 179564 5. 983773 5. 750624 6. 098203  
9. 757099 9. 575817 9. 268809 9. 68601 9. 741424 9. 933293 9. 32958 9. 43785 10. 07844  
7. 210955 6. 280534 7. 143242 7. 024322 7. 455333 6. 208909 8. 361929 8. 362633 8. 2434  
3. 023593 1. 735144 1. 920445 2. 724432 2. 655761 2. 553405 2. 268935 2. 618365 2. 850642  
6. 691475 6. 211131 6. 384325 5. 901327 5. 74526 5. 524016 5. 380329 4. 568288 5. 607746  
2. 655513 3. 024382 3. 27697 2. 891857 3. 406789 3. 028582 4. 503332 3. 906975 3. 569616  
1. 315256 2. 147074 3. 402413 2. 908081 2. 011984 2. 539502 1. 969117 2. 70138 1. 970593  
5. 433139 4. 946167 4. 739056 5. 065165 5. 159321 6. 131015 5. 644826 5. 746536 5. 850061  
2. 139974 1. 891166 1. 3745 1. 680722 1. 902924 1. 485353 1. 693449 1. 535042 2. 099406  
4. 968071 4. 785824 4. 773143 3. 767266 4. 382044 5. 234542 4. 588368 4. 651155 4. 869789  
3. 644141 3. 872122 5. 207652 4. 31866 4. 366491 5. 547373 3. 956775 3. 268922 4. 807947  
3. 032471 2. 838257 2. 85583 3. 069665 2. 566212 3. 752906 3. 362018 3. 246233 3. 178269  
8. 260899 8. 805109 8. 631328 7. 944091 8. 342063 7. 9266 8. 511506 8. 887839 8. 66111  
6. 138658 6. 954686 6. 370471 6. 087584 6. 335938 5. 906634 6. 205551 6. 313292 5. 3387  
10. 76804 10. 52647 10. 53987 10. 99317 10. 5144 10. 69658 10. 41708 10. 4395 10. 79039  
5. 624965 3. 821294 5. 608536 5. 78607 4. 85231 4. 148077 6. 348074 3. 529387 4. 698818  
1. 475848 1. 29308 1. 798632 2. 897811 1. 551105 1. 430578 1. 212204 2. 366953 1. 800503  
5. 450782 5. 741522 5. 644094 5. 851716 5. 828596 6. 230688 5. 911565 5. 676643 5. 518253  
3. 345381 2. 588061 3. 659566 3. 924375 3. 949105 1. 78891 5. 037445 3. 94457 5. 528451  
6. 67113 6. 726602 6. 135792 6. 466655 6. 464219 5. 78158 6. 114797 6. 660427 6. 780496  
5. 220404 5. 812855 5. 39 5. 228436 5. 836768 5. 552541 5. 393166 5. 424282 5. 218248  
8. 179244 7. 968509 8. 564017 8. 146697 7. 959314 7. 825868 8. 157032 8. 112316 8. 180226  
1. 676481 1. 497642 1. 600552 1. 428799 1. 803986 1. 790348 1. 484336 1. 275689 1. 672006  
5. 648863 4. 678045 4. 764032 5. 719245 4. 726947 5. 08655 4. 804399 4. 270142 4. 410092  
6. 135327 6. 363994 4. 967262 5. 02777 5. 793328 4. 800094 5. 111423 5. 222751 5. 143379  
2. 103755 2. 097419 1. 025299 1. 668799 0. 82971 3. 857349 1. 936894 1. 288216 1. 271023  
6. 892266 6. 905634 6. 330564 6. 818207 6. 404385 6. 728743 6. 544046 5. 975519 6. 389103  
3. 150219 3. 851845 4. 659998 3. 884822 4. 092811 4. 212263 4. 839337 5. 271118 4. 473657  
6. 874123 5. 875862 4. 690864 6. 306446 4. 968538 7. 305262 5. 934406 4. 380836 4. 719747  
2. 555035 1. 803813 2. 308106 2. 017246 2. 886569 3. 428589 1. 652604 1. 980473 1. 896517

7. 140467 7. 226143 7. 029959 7. 560492 7. 646207 7. 733677 7. 051603 7. 188025 7. 487869  
8. 803276 9. 290334 8. 928809 8. 533841 8. 825794 9. 304444 8. 87763 8. 872729 8. 882583  
0. 900607 2. 479486 1. 02394 1. 355733 1. 793204 1. 393643 1. 310915 1. 135018 2. 044569  
5. 90556 5. 622699 6. 386285 5. 58383 5. 792264 6. 249921 6. 012688 6. 179203 6. 565197  
5. 119717 5. 034778 6. 251225 5. 520162 5. 011762 6. 286821 5. 920346 6. 660475 7. 186235  
2. 864915 4. 767023 3. 613209 2. 698631 3. 513567 2. 641238 2. 614979 3. 379875 3. 530953  
5. 459114 5. 27552 5. 360614 4. 767018 5. 310584 4. 450552 4. 376269 5. 044015 4. 638654  
7. 408828 7. 481582 7. 109325 7. 350243 6. 896089 6. 817275 7. 165317 7. 235651 6. 862643  
5. 809566 4. 944082 5. 712723 6. 729464 4. 918361 6. 537039 4. 885744 2. 39462 6. 582488  
1. 928281 1. 386518 1. 404119 3. 228597 1. 204407 1. 553638 1. 558334 3. 013806 1. 46427  
4. 319914 3. 334063 4. 243157 4. 184901 3. 136239 4. 331794 4. 340887 3. 984214 3. 495262  
7. 518171 6. 799287 7. 696578 6. 592129 6. 814787 6. 708465 5. 879182 6. 307419 6. 349279  
7. 973289 7. 591626 7. 253349 7. 781663 7. 002531 8. 194287 6. 441962 6. 048261 6. 753777  
2. 17722 1. 964556 2. 479178 1. 751407 3. 327791 2. 679742 3. 061322 1. 834542 2. 879451  
3. 028311 2. 275226 3. 217016 3. 770284 2. 374948 2. 441356 1. 771823 2. 27003 2. 17595  
1. 211722 1. 273818 1. 867183 1. 315199 1. 300691 1. 644632 1. 044656 1. 234926 0. 982789  
7. 46618 7. 618989 7. 30775 7. 341418 7. 569341 7. 534601 7. 648417 7. 836544 7. 876445  
7. 915553 7. 533988 7. 050803 7. 1609 7. 746811 7. 490507 7. 042291 6. 86064 6. 938477  
3. 96088 3. 394514 4. 483288 5. 06113 3. 242736 6. 576557 4. 152181 3. 807343 3. 853705  
1. 892182 2. 861633 1. 781006 2. 413462 1. 569211 2. 428763 2. 821979 3. 516489 2. 497276  
4. 165655 5. 175435 4. 553513 4. 792577 5. 374331 4. 851426 5. 041662 5. 143933 3. 179586  
1. 575242 1. 44159 1. 491076 1. 363077 1. 223577 1. 467001 1. 279607 1. 791581 1. 552958  
4. 66512 5. 945551 4. 63273 4. 611366 5. 344647 4. 112616 6. 010547 6. 077758 5. 848754  
1. 251653 1. 43081 1. 492279 1. 355161 1. 028602 1. 095991 1. 155968 1. 895323 1. 699862  
3. 676201 3. 698019 4. 158987 2. 714284 3. 890416 1. 383651 1. 983193 1. 956247 1. 372477  
4. 718182 4. 726075 4. 891461 4. 410711 3. 627455 3. 976999 4. 027214 3. 910665 4. 339473  
5. 916325 6. 010455 5. 781733 5. 225748 5. 872998 6. 101978 5. 424244 5. 554182 6. 222889  
8. 046317 7. 245516 7. 938912 7. 458238 7. 283365 9. 257994 8. 695195 8. 231807 8. 623118  
4. 203371 4. 72392 4. 389628 3. 796205 3. 042485 3. 525613 4. 47693 4. 328048 2. 952817  
6. 912003 6. 168181 7. 237817 7. 118365 7. 575365 6. 809713 7. 114028 6. 759765 6. 837308  
7. 201763 6. 672552 6. 53738 5. 940089 5. 878478 9. 242384 5. 782804 4. 771207 6. 047324  
8. 014272 8. 02407 8. 092425 6. 973471 7. 799182 6. 653752 7. 92026 7. 662614 7. 924035  
4. 751014 3. 065364 4. 533096 4. 83106 4. 51384 5. 173507 5. 70979 6. 096896 5. 715254  
2. 344701 2. 480664 2. 287366 3. 501718 2. 289976 2. 384497 1. 329101 1. 763141 2. 068183  
7. 84261 8. 202422 7. 863947 7. 052956 8. 051686 6. 992577 7. 530552 7. 575301 7. 290078  
7. 654886 8. 200804 7. 160246 7. 494686 7. 888513 7. 531575 7. 408693 6. 90128 6. 890372  
6. 93502 6. 820521 6. 931895 6. 641964 6. 448676 6. 316448 6. 106679 7. 184183 6. 82792  
5. 969001 6. 033358 5. 774469 5. 643571 5. 476874 6. 001084 5. 984276 5. 862311 5. 56128  
4. 466074 4. 001686 3. 055319 2. 42009 3. 066541 4. 805665 2. 620815 2. 334742 3. 277344  
2. 799473 2. 425893 2. 498525 3. 035096 2. 212804 3. 413911 2. 665371 2. 896024 4. 445324  
2. 858762 2. 724796 2. 50908 3. 240287 1. 802428 4. 404774 3. 285985 3. 276822 2. 975038  
7. 603986 8. 256868 8. 162161 7. 627938 7. 992107 6. 66127 7. 494641 6. 794987 7. 184498  
3. 37529 3. 151652 3. 438339 4. 274669 3. 58475 4. 481975 3. 780731 3. 131506 3. 591967  
6. 5404 5. 833807 6. 263721 6. 007235 6. 787725 6. 526024 6. 841596 6. 881303 6. 864442  
5. 860925 4. 748981 4. 398043 5. 739956 5. 021067 5. 019143 4. 808043 5. 822871 5. 395136  
9. 642791 9. 8403 9. 899359 9. 508173 9. 871134 9. 754496 9. 979332 9. 947592 9. 588494  
8. 89633 8. 67744 8. 200665 8. 989575 8. 413359 8. 229026 8. 297973 8. 05471 8. 146387  
6. 901244 6. 832319 6. 740064 7. 06053 7. 425442 7. 549913 7. 332309 7. 520697 7. 307185  
1. 51986 2. 360281 1. 361144 1. 229058 1. 930873 2. 039673 1. 014987 2. 405075 1. 463489  
2. 041551 2. 937657 2. 484302 2. 593985 2. 406324 2. 540636 3. 107165 1. 91811 3. 372229  
1. 698043 1. 829876 1. 747803 2. 012841 1. 527242 2. 007447 1. 643467 1. 40452 1. 427224

6. 674523 6. 346998 6. 776439 6. 478943 7. 249186 6. 881001 6. 999773 7. 714319 7. 556127  
7. 01622 6. 975782 6. 729101 6. 751116 7. 390339 7. 462791 7. 462764 7. 174447 7. 404806  
2. 531742 3. 148361 3. 794295 2. 856888 3. 578637 2. 829429 2. 031155 3. 357743 2. 386101  
2. 339383 2. 145618 2. 369162 2. 783287 2. 891859 2. 501915 2. 830632 2. 921992 2. 53779  
1. 860209 2. 364296 2. 092935 2. 378686 2. 574691 1. 993146 2. 150787 2. 337501 2. 548964  
2. 329476 2. 403997 3. 314693 2. 48018 2. 127905 2. 960509 2. 463698 3. 062219 3. 854776  
5. 439644 6. 251045 6. 408884 5. 247093 5. 465937 5. 912888 6. 235209 6. 017682 6. 028906  
3. 728081 3. 185032 3. 220352 2. 455153 3. 277301 2. 201855 2. 275072 3. 167472 2. 322643  
6. 49501 5. 665564 5. 522964 5. 161089 4. 618783 5. 952218 4. 010369 2. 525996 3. 866028  
7. 141729 7. 30088 7. 381262 7. 121112 6. 501338 7. 745591 7. 001147 6. 913132 7. 443654  
5. 572436 5. 156739 4. 759619 6. 246361 5. 557446 5. 538505 6. 03067 5. 53769 5. 955258  
2. 129754 3. 131608 2. 226651 2. 75179 2. 172574 3. 236975 2. 891728 3. 83947 2. 691681  
3. 793232 5. 145811 5. 80777 5. 019752 5. 357041 5. 551079 5. 960896 5. 038819 3. 989382  
3. 60258 2. 215098 2. 273063 3. 237178 4. 527923 4. 779926 2. 93662 3. 378773 3. 451185  
2. 033924 1. 877358 2. 581452 2. 434702 1. 511129 1. 923347 1. 384469 1. 627131 1. 599432  
2. 754353 4. 333436 3. 279848 3. 224194 1. 594987 3. 326636 3. 655028 3. 001988 3. 731489  
2. 070308 2. 662147 2. 239188 2. 163481 2. 278663 2. 220552 2. 344432 1. 745618 1. 655449  
3. 892689 3. 707982 2. 569352 1. 91242 3. 1395 3. 725097 2. 680903 5. 145641 3. 91193  
6. 311918 5. 339723 4. 890275 4. 792934 5. 353318 2. 970056 3. 33095 4. 238234 4. 631233  
3. 219851 4. 147913 4. 232757 3. 181219 4. 026637 4. 435728 3. 401097 4. 71176 5. 053394  
8. 289287 8. 895906 9. 12716 7. 998761 9. 55386 7. 643231 9. 504694 10. 16549 9. 986154  
4. 28591 3. 70539 3. 84129 4. 029966 4. 443312 5. 137773 5. 534141 5. 0517 4. 471941  
4. 072521 4. 376662 2. 768221 4. 631584 3. 31381 3. 743959 4. 944664 5. 409579 3. 834199  
1. 708458 2. 110447 2. 023074 1. 574758 1. 718332 3. 599341 1. 917404 1. 923388 2. 755426  
4. 620378 3. 026944 3. 732835 2. 854923 3. 928172 4. 50602 4. 325858 4. 363946 4. 29132  
2. 767855 3. 998446 3. 252451 2. 451956 3. 914987 5. 021811 3. 46144 3. 351046 2. 776131  
1. 923615 1. 987792 1. 778339 2. 438147 2. 245541 4. 844317 2. 582214 2. 457123 3. 378734  
1. 488181 2. 30918 1. 169929 1. 707156 1. 841239 1. 60997 1. 325549 2. 055205 1. 749532  
7. 756652 8. 05631 7. 785633 7. 381685 7. 609543 6. 379655 7. 962296 7. 834358 7. 749945  
3. 452308 3. 485605 3. 824039 3. 883826 4. 197689 4. 100613 4. 869628 5. 167103 4. 676209  
5. 65309 6. 482097 6. 206506 5. 585181 6. 678897 6. 571943 5. 329175 6. 040691 6. 373164  
2. 898315 3. 676615 2. 734763 2. 610767 2. 118818 2. 443056 2. 674852 3. 847269 2. 296935  
5. 489987 5. 676888 5. 028988 5. 107024 5. 630799 5. 869893 6. 503526 5. 828846 6. 247866  
4. 181265 4. 361474 4. 868757 4. 418229 4. 452701 5. 052588 4. 655315 4. 260175 3. 35369  
3. 010302 2. 411833 3. 079947 2. 785193 2. 546617 3. 264133 1. 860077 2. 467238 2. 651565  
2. 784973 3. 847621 2. 366233 2. 392684 2. 784973 2. 745499 3. 090281 3. 535281 3. 559111  
2. 251919 1. 653873 1. 990536 1. 905045 2. 581417 2. 429769 1. 745688 1. 832521 1. 798445  
4. 529239 4. 767567 4. 768157 4. 982603 4. 01402 5. 171648 4. 817219 4. 566768 4. 600601  
6. 153612 5. 166553 5. 455431 4. 965422 5. 858565 5. 645803 5. 891345 5. 600882 4. 779394  
1. 530024 4. 74042 1. 757934 1. 544181 1. 419506 1. 736558 1. 296782 1. 523446 1. 439741  
4. 067107 2. 81193 4. 127362 3. 382092 3. 811329 3. 824125 3. 704009 2. 725345 3. 345863  
2. 188231 3. 325418 2. 196367 3. 274129 3. 026772 2. 354114 2. 203727 2. 618025 3. 021595  
4. 458986 4. 478168 4. 678506 5. 112162 5. 016182 5. 867221 5. 373493 5. 78186 5. 563473  
7. 013956 7. 057718 7. 652888 7. 479293 7. 452756 6. 538617 5. 396309 6. 869547 6. 921526  
4. 676058 5. 420592 4. 952023 3. 86955 4. 732265 3. 41773 4. 22575 4. 640133 3. 788321  
6. 967866 6. 686328 6. 498158 6. 090766 6. 588656 6. 422211 6. 95089 7. 163157 7. 392332  
4. 901786 4. 365322 4. 345853 4. 033737 4. 370447 4. 38368 4. 453244 4. 725154 4. 928107  
3. 070463 2. 268213 3. 178626 3. 179282 2. 384002 5. 075022 5. 033348 2. 25287 3. 43269  
3. 700873 3. 647229 4. 520142 4. 14 4. 135401 4. 30179 4. 464466 4. 309531 4. 942194  
5. 738298 5. 451226 5. 88901 5. 820799 5. 407385 5. 76086 5. 511653 5. 880685 6. 419662  
8. 548908 9. 084073 8. 981114 8. 658347 8. 803083 6. 195937 9. 248202 8. 931037 8. 798227

6. 867441 7. 869927 7. 602428 7. 340278 7. 840314 7. 041725 7. 253196 7. 478641 8. 065648  
9. 321452 7. 076653 8. 321921 7. 558271 8. 300762 7. 1022 7. 615133 6. 002128 4. 741835  
2. 265682 2. 419423 2. 30766 2. 786058 1. 699061 6. 261232 3. 555507 2. 632963 5. 048292  
4. 635652 5. 359445 6. 687948 3. 861548 4. 559196 5. 18852 3. 526953 3. 875028 2. 948284  
2. 486935 1. 73248 2. 363787 2. 000812 2. 311362 1. 989212 1. 939081 2. 203612 1. 81008  
2. 761836 2. 302153 3. 301379 2. 858567 2. 738882 3. 609919 2. 437995 2. 001079 1. 522953  
6. 055286 5. 138427 6. 88143 6. 495118 6. 473443 5. 508559 6. 701952 7. 257337 7. 501426  
2. 189984 2. 758659 3. 118419 3. 088699 2. 53771 3. 134622 1. 886685 2. 4306 2. 410402  
2. 659419 3. 704498 3. 75849 4. 362759 2. 350048 3. 721209 4. 222433 4. 611917 4. 01698  
6. 049288 5. 976367 6. 494404 6. 927328 7. 100688 4. 950651 6. 783399 6. 066158 7. 176587  
8. 373969 6. 822135 7. 455925 8. 755235 7. 323175 8. 48034 8. 020844 8. 380194 8. 529891  
7. 194104 7. 610891 7. 362482 7. 007133 7. 194942 6. 312451 7. 639709 7. 592475 7. 446113  
4. 55167 1. 988571 4. 194352 3. 867185 3. 027922 0. 807415 3. 064162 2. 087685 1. 576483  
9. 154302 8. 716841 9. 428362 9. 408442 9. 03487 9. 673508 9. 753021 9. 452681 9. 898263  
6. 110501 7. 136381 6. 413374 7. 721677 6. 919338 7. 108454 7. 339169 6. 95992 6. 801543  
4. 979261 4. 697271 4. 961027 4. 340589 4. 249349 7. 190351 4. 89456 3. 975188 3. 667349  
8. 838821 8. 984548 8. 850356 8. 630351 8. 990275 8. 251403 9. 288125 8. 619712 8. 697997  
7. 859159 7. 492493 6. 182758 7. 249565 7. 842444 9. 186256 8. 159071 7. 70404 7. 460992  
7. 004664 6. 833808 6. 708538 6. 313006 6. 520009 7. 122044 6. 879327 6. 874719 5. 833114  
6. 767298 6. 696204 7. 609511 8. 075806 7. 487895 7. 559452 7. 499542 7. 299652 7. 227578  
3. 94128 3. 155527 3. 390348 3. 943713 3. 207038 3. 825918 3. 252956 4. 079962 4. 126856  
2. 042462 1. 745696 1. 692469 1. 957712 1. 963277 2. 350176 2. 100526 1. 390991 2. 480234  
4. 157979 4. 477188 3. 596724 2. 897482 4. 01645 3. 751353 5. 024706 4. 47469 3. 942085  
3. 404796 3. 068012 3. 406173 3. 080375 3. 714613 3. 338914 4. 106415 4. 281702 4. 659696  
2. 778436 2. 202751 3. 11731 1. 76525 2. 017076 2. 721466 2. 23353 2. 207616 2. 172258  
2. 529347 2. 765705 2. 347687 2. 42027 2. 033945 2. 311193 2. 052698 3. 192902 2. 496091  
6. 31295 5. 699533 6. 303902 6. 516489 5. 780619 7. 16878 6. 133232 6. 69334 6. 996799  
2. 207408 2. 20899 1. 734834 2. 183785 1. 715661 2. 183156 2. 322253 1. 851278 3. 264278  
4. 978294 3. 489996 4. 61574 4. 971616 4. 324958 5. 755644 5. 414464 5. 324469 5. 962375  
1. 416568 1. 297885 2. 382078 1. 867755 1. 954656 1. 803848 2. 297864 2. 351163 2. 169121  
3. 310039 3. 610734 1. 821901 1. 480577 1. 446704 2. 282597 3. 284944 2. 027717 2. 697999  
1. 834303 2. 08274 1. 972428 1. 754523 1. 534407 1. 942026 1. 900882 1. 953506 2. 230643  
2. 683441 2. 917645 3. 161625 3. 110512 3. 455539 3. 151828 2. 822621 2. 864464 2. 973666  
2. 336685 1. 717353 3. 226901 1. 943985 2. 225209 3. 138966 2. 755252 4. 055484 1. 619137  
3. 354215 3. 627881 3. 549583 3. 05433 3. 890281 4. 414959 4. 13689 4. 011106 4. 402712  
5. 822705 5. 675358 6. 037087 5. 437782 6. 1011 6. 748953 6. 168957 5. 744213 5. 586463  
3. 610881 4. 743716 3. 765875 4. 453324 4. 70917 4. 994453 4. 313093 4. 50205 4. 072309  
1. 8891 1. 738861 1. 701337 2. 145909 1. 728087 2. 716439 1. 541512 2. 015623 2. 27874  
7. 374839 6. 794098 7. 029925 7. 78741 6. 610689 8. 076632 8. 175013 7. 464408 8. 531764  
4. 324717 5. 325302 4. 255111 3. 050781 4. 549193 4. 343821 4. 392519 3. 972345 4. 715735  
5. 237901 5. 344143 5. 139595 6. 29611 5. 863496 4. 666739 4. 906321 5. 35811 4. 336256  
7. 552378 7. 27432 7. 784164 7. 471538 7. 532372 7. 8725 8. 441115 8. 948906 8. 524631  
2. 252578 2. 183386 2. 620341 2. 264033 2. 562364 2. 344924 2. 69764 2. 755904 1. 98508  
2. 928532 2. 175055 2. 645673 2. 97877 2. 755119 2. 451191 2. 172156 2. 528096 2. 294541  
7. 050416 6. 996596 7. 456788 6. 940588 7. 172686 6. 697852 8. 050386 7. 946993 8. 026476  
8. 165667 5. 969802 7. 034879 7. 38348 7. 004305 8. 726359 8. 173809 8. 687475 8. 498676  
7. 247677 3. 888327 6. 159243 4. 713118 4. 310884 6. 867909 2. 042986 6. 024795 3. 364913  
3. 870304 2. 605246 2. 36421 2. 986849 4. 001488 4. 797801 3. 429173 3. 330541 5. 2043  
6. 077465 5. 489784 4. 765788 5. 488351 6. 197333 5. 019384 6. 586527 5. 194743 5. 302003  
1. 257346 1. 596383 2. 241576 1. 430967 1. 719457 1. 640653 1. 931077 1. 162372 1. 161998  
1. 555841 2. 139859 1. 507417 2. 446933 1. 722264 2. 084568 1. 556909 2. 071695 1. 828622

1. 382792 2. 444656 2. 083615 1. 757572 1. 64147 1. 345895 1. 355615 1. 60495 1. 253195  
5. 440737 4. 216509 4. 985651 3. 978695 4. 718473 5. 581255 5. 105258 5. 811395 5. 300542  
1. 168876 2. 159658 1. 229408 1. 781201 0. 925031 1. 359635 1. 529547 2. 025361 1. 209171  
5. 425855 5. 319102 6. 176785 5. 419316 4. 765148 4. 951415 5. 950584 5. 392177 5. 931777  
2. 748771 2. 45096 1. 835907 4. 04168 3. 434517 2. 613042 2. 79579 3. 329471 2. 725957  
3. 295817 4. 023807 4. 114897 4. 866861 3. 766615 4. 177751 3. 880436 5. 581499 3. 219763  
7. 33756 5. 190421 6. 35302 5. 86149 5. 088857 5. 422172 4. 701982 4. 515785 3. 342952  
3. 086136 2. 485085 3. 071001 3. 185195 1. 777105 1. 857699 1. 730558 1. 77623 2. 492906  
3. 728389 2. 279029 1. 653589 2. 181396 1. 989226 2. 100039 4. 134476 1. 988808 2. 218297  
3. 949463 4. 467656 3. 674165 3. 41601 3. 227138 3. 739323 4. 060909 3. 65238 3. 161649  
5. 154572 4. 985661 4. 779337 3. 704215 4. 927939 4. 974315 5. 438056 5. 01473 4. 957272  
1. 133767 1. 669273 1. 303116 1. 976894 1. 555114 1. 829478 1. 345061 1. 695814 2. 005554  
2. 363764 2. 020377 2. 349056 3. 041099 2. 949652 2. 001675 2. 127342 1. 830721 1. 783506  
3. 649817 4. 266446 3. 663424 3. 398575 3. 969377 4. 244842 4. 178673 4. 679152 4. 074602  
6. 475985 5. 404523 6. 009626 6. 020193 5. 7175 5. 47492 6. 20882 6. 785429 6. 283921  
1. 346015 1. 546417 2. 179556 1. 083505 1. 519114 0. 763619 1. 358027 1. 980372 0. 715492  
5. 581361 6. 292284 5. 894808 5. 309725 5. 974777 4. 950998 4. 251622 4. 536558 4. 916722  
4. 840743 5. 623772 4. 222763 5. 272757 6. 558089 4. 758972 5. 582058 5. 420989 5. 654364  
2. 029474 1. 98302 1. 970467 1. 962758 1. 913769 2. 086124 1. 401805 2. 275264 1. 931978  
3. 41226 4. 839628 5. 0928 2. 249439 3. 181027 1. 902175 2. 013217 2. 220604 2. 673722  
4. 811595 4. 440956 4. 17414 4. 888604 4. 339594 4. 958352 4. 436703 5. 479611 4. 996407  
2. 833836 3. 55578 3. 989101 3. 285313 3. 105149 4. 283166 4. 813031 4. 244485 4. 241364  
6. 495496 6. 910764 6. 091333 6. 744414 6. 547453 6. 446025 6. 367604 6. 534028 6. 36716  
5. 005492 5. 163314 3. 684376 2. 14631 4. 426617 4. 992315 4. 752026 5. 085046 3. 968219  
2. 885193 2. 86306 3. 641462 2. 99488 2. 858945 3. 197886 3. 157722 2. 872212 2. 951283  
6. 239589 6. 377179 5. 852362 5. 62086 6. 126856 5. 760994 6. 676508 6. 56905 6. 542337  
10. 47105 9. 851999 10. 18212 10. 55729 9. 932972 10. 33718 10. 10563 10. 00211 9. 894617  
5. 362427 4. 61026 5. 015837 5. 537526 4. 931595 5. 751118 4. 690975 4. 600321 4. 836655  
5. 915375 6. 411553 5. 918143 5. 331335 6. 212954 5. 352401 5. 885693 4. 977343 5. 427579  
2. 469639 2. 781314 3. 086084 2. 148423 3. 002171 3. 247073 2. 205107 2. 940672 2. 686298  
3. 674161 2. 84902 3. 706739 3. 852767 4. 296577 2. 235282 4. 575997 2. 781961 2. 993485  
2. 645003 2. 797716 1. 722656 3. 769367 2. 956789 3. 691919 3. 043505 3. 169584 3. 495215  
2. 438139 2. 113581 1. 963029 2. 359044 2. 355433 1. 875774 1. 89793 2. 321744 2. 561394  
5. 227335 5. 385008 4. 601018 5. 094195 5. 022497 5. 745759 4. 657205 5. 088278 3. 996671  
1. 477149 1. 354489 1. 572704 1. 758073 1. 144367 1. 488478 1. 177599 1. 497775 1. 275833  
1. 779931 0. 955229 1. 477141 4. 068647 0. 931498 1. 792181 1. 549421 1. 789165 2. 308608  
4. 330673 5. 401516 5. 860998 5. 53413 6. 768944 5. 18728 5. 822779 5. 214884 5. 481425  
1. 518806 1. 121696 1. 45845 0. 721459 1. 165036 1. 35125 1. 291733 1. 395262 2. 20161  
1. 427671 1. 281716 0. 97872 1. 778433 1. 043383 1. 35132 1. 133407 1. 163002 1. 203254  
1. 561767 1. 386159 1. 035813 1. 52477 0. 947222 1. 382089 1. 24417 1. 478557 1. 404585  
1. 264193 1. 774894 2. 063669 1. 654915 2. 558648 1. 458442 2. 053897 2. 329403 2. 306713  
1. 745094 2. 10028 2. 309508 1. 862282 2. 901636 1. 623066 2. 153952 2. 126983 2. 322061  
2. 29103 2. 333714 2. 724595 3. 04638 2. 049712 2. 086532 2. 608476 1. 383463 3. 049269  
2. 084625 2. 041512 3. 224178 3. 090553 1. 715431 2. 332677 2. 229106 2. 197986 2. 681619  
4. 405908 1. 423874 1. 383108 1. 143789 1. 037191 0. 905495 1. 505254 1. 058267 1. 380826  
0. 952935 1. 681681 1. 228596 1. 043021 1. 219483 0. 896638 1. 002612 1. 257495 1. 71312  
2. 375652 1. 42678 1. 860338 1. 638268 2. 182329 1. 562012 2. 014435 1. 609811 1. 220719  
2. 384197 1. 711445 2. 692778 1. 754483 2. 979507 1. 793467 1. 636922 1. 63667 1. 832975  
2. 458511 3. 078913 2. 274103 2. 515528 2. 832643 2. 575826 2. 999686 2. 251754 1. 856044  
4. 204256 4. 664471 5. 143607 3. 796989 4. 225843 3. 539365 4. 322868 3. 527433 3. 570484  
2. 640193 2. 910712 2. 104125 3. 023271 2. 116621 3. 58937 2. 269302 2. 278836 3. 33462

1. 600386 3. 552282 3. 040651 3. 413925 2. 026876 2. 129871 1. 880781 2. 419471 2. 775709  
2. 657459 3. 087432 2. 48689 2. 806151 2. 783889 2. 404421 1. 884422 2. 68528 2. 599529  
2. 968087 3. 992733 2. 294793 3. 211256 3. 130063 3. 811591 3. 546778 2. 498238 2. 729033  
1. 48197 1. 705145 1. 227072 1. 862695 1. 001746 5. 756706 2. 193199 1. 500113 1. 976987  
5. 356768 3. 581842 4. 711454 5. 051116 5. 232575 4. 104616 3. 434937 4. 040985 3. 813551  
2. 250723 1. 944585 2. 804836 2. 029341 2. 928853 3. 558924 2. 688983 2. 463197 2. 645615  
4. 635337 4. 327557 3. 916858 4. 788645 4. 111787 4. 509305 4. 589133 4. 476576 4. 793088  
3. 926559 4. 082776 4. 088104 5. 067481 3. 816546 4. 054075 4. 318748 4. 356293 4. 366175  
1. 762431 1. 632814 1. 724055 2. 524651 2. 510202 1. 940195 2. 137854 1. 788495 2. 350213  
7. 519671 7. 979672 7. 705603 7. 798901 7. 62883 6. 86356 7. 030878 7. 320528 7. 192301  
6. 69172 7. 518705 7. 217214 7. 011261 6. 970265 6. 701424 7. 23716 6. 722606 7. 136962  
1. 015345 1. 211557 1. 001875 1. 1425 1. 754802 1. 347083 1. 210992 1. 935817 1. 870639  
6. 81225 6. 690478 6. 970137 6. 606538 6. 559542 7. 464539 7. 277588 7. 473528 7. 425236  
3. 154066 2. 768329 2. 64629 3. 93263 3. 912356 3. 475022 2. 826945 2. 305708 2. 683812  
6. 463266 6. 932931 5. 803685 5. 754184 6. 508635 6. 989132 7. 082124 6. 961152 7. 197324  
7. 25046 7. 743412 7. 649022 7. 482 7. 359953 7. 48155 7. 191041 6. 595602 6. 899454  
6. 478179 6. 746761 6. 006382 5. 647769 6. 814251 6. 005169 6. 506629 6. 339152 6. 51044  
4. 415298 4. 168664 3. 979369 4. 479948 4. 62874 4. 164087 4. 221656 4. 653072 4. 787174  
2. 56152 3. 393194 3. 23956 2. 953845 4. 178262 2. 649075 3. 968681 4. 187608 3. 472169  
2. 528382 2. 755343 2. 759384 2. 602493 2. 290126 2. 927911 3. 564069 3. 391714 2. 251415  
7. 256363 7. 514434 6. 308676 6. 505155 6. 584889 6. 058634 7. 322697 5. 581983 6. 261404  
5. 20137 5. 678497 5. 17837 5. 740649 5. 783638 6. 179613 5. 827476 5. 699637 5. 299096  
9. 224202 9. 251247 9. 521998 8. 667767 8. 746328 7. 873973 7. 335942 6. 999821 6. 583447  
2. 773519 1. 783474 1. 054067 2. 211426 1. 658391 2. 149698 2. 036827 1. 391263 1. 306363  
1. 608019 2. 104308 2. 682579 1. 608019 2. 185655 2. 58098 2. 321258 2. 507525 2. 832984  
10. 87117 10. 71988 10. 86073 11. 08707 11. 32143 9. 491101 11. 58142 11. 38147 11. 44017  
2. 384679 2. 461208 1. 680946 2. 402976 2. 769371 2. 117473 2. 785508 3. 253435 3. 334154  
2. 289741 1. 570186 2. 121642 3. 016238 2. 073316 2. 086738 2. 176454 1. 306289 2. 168686  
1. 761446 1. 383426 1. 368361 1. 894354 2. 03602 1. 791697 1. 472194 1. 381539 1. 85631  
4. 787058 5. 455014 4. 701756 5. 289001 4. 730717 4. 930054 5. 078308 4. 642612 4. 824574  
5. 596825 5. 414213 5. 525624 5. 0121 5. 333902 5. 538382 4. 954128 6. 164291 5. 19056  
3. 304355 3. 328521 3. 365792 5. 070156 3. 250483 3. 979781 3. 016907 3. 698553 3. 517084  
5. 341587 6. 056234 5. 607059 6. 554611 5. 968507 5. 814872 5. 867722 6. 444011 6. 127589  
2. 52044 2. 578368 2. 73905 2. 708499 4. 076844 3. 262148 2. 96396 2. 827119 2. 557491  
2. 399914 1. 318439 2. 214122 1. 526375 1. 255259 2. 646348 1. 915029 3. 140787 1. 155584  
2. 890813 2. 044693 2. 148596 1. 955878 1. 179106 2. 197124 0. 72308 1. 119499 1. 277332  
4. 608717 4. 706845 4. 90102 5. 547929 4. 734182 5. 501442 4. 890898 5. 145662 5. 072038  
4. 545575 4. 826135 4. 360148 4. 319347 4. 563211 4. 869978 5. 924773 4. 852614 4. 722885  
6. 97517 6. 918468 7. 193889 6. 67348 7. 748149 7. 841363 8. 38166 8. 22825 7. 818948  
7. 093288 7. 580078 7. 600697 7. 185499 8. 005679 7. 32635 7. 321397 6. 946491 6. 507935  
3. 46125 1. 939156 3. 742473 3. 9461 2. 575039 2. 282675 2. 055843 2. 968405 2. 057251  
1. 179288 1. 189783 1. 39217 1. 558247 1. 422323 1. 937823 1. 603356 1. 90313 1. 643239  
6. 030247 5. 677688 4. 869511 5. 461738 5. 336116 5. 435061 6. 006084 6. 376952 5. 945477  
6. 006324 5. 880891 5. 759683 4. 980739 7. 110397 8. 195882 7. 406462 8. 892051 8. 538796  
3. 900499 5. 63883 4. 645894 2. 863084 3. 70073 5. 813653 5. 998497 3. 954631 4. 164  
4. 828736 4. 575117 5. 42248 5. 392538 5. 17726 4. 209594 4. 734035 5. 469715 4. 890206  
2. 69579 2. 93761 2. 712255 3. 310533 3. 236553 2. 929115 2. 738054 3. 395099 3. 045768  
1. 66888 2. 817489 2. 42337 3. 30502 3. 326478 4. 23791 5. 760983 5. 765211 6. 306738  
2. 41811 2. 621069 2. 405798 2. 287615 2. 38429 2. 762182 1. 608958 2. 350338 1. 587796  
3. 810209 3. 492168 4. 119922 5. 129278 4. 194196 4. 394806 5. 2124 3. 919539 4. 533293  
3. 051373 3. 036259 3. 140342 2. 822428 3. 215088 3. 433859 3. 123808 3. 28648 3. 305743



3. 23792 3. 22569 3. 849319 3. 868608 3. 657049 3. 540255 2. 641397 2. 549309 2. 866305  
2. 134424 2. 221423 2. 481674 1. 700217 2. 104073 3. 49888 2. 197822 2. 446283 1. 66407  
1. 364906 1. 63146 0. 822897 2. 061571 2. 191788 0. 951977 0. 858711 1. 535681 1. 366646  
7. 196615 8. 202363 7. 079118 7. 563828 8. 333692 7. 683812 7. 924251 7. 995325 8. 105496  
5. 745083 5. 756207 5. 177052 5. 61861 6. 094079 6. 169817 5. 407929 5. 861619 5. 311746  
5. 937411 7. 092418 7. 124238 6. 781238 6. 400765 6. 679437 7. 162986 7. 323829 7. 166625  
8. 498581 8. 031836 7. 961817 8. 695258 8. 033484 8. 878406 8. 323532 8. 10265 8. 567976  
6. 478388 5. 758573 6. 193385 5. 965852 6. 126753 3. 562234 3. 527873 5. 864079 6. 051608  
9. 506149 9. 893278 9. 798551 9. 033839 9. 236391 8. 476057 8. 918997 8. 721001 8. 99652  
7. 819722 7. 844737 7. 469505 8. 216156 7. 048424 6. 671446 7. 287671 8. 117478 7. 461366  
3. 158387 3. 505993 3. 126418 3. 292201 4. 062501 3. 160906 4. 347209 3. 625787 4. 261644  
6. 355341 5. 829781 5. 549962 6. 692563 5. 718359 6. 636526 5. 116489 6. 317845 6. 770596  
9. 426886 9. 054933 9. 184065 8. 915365 9. 456747 9. 83969 9. 589459 10. 17051 10. 01058  
4. 033961 4. 206135 4. 642301 3. 98203 4. 376778 1. 661845 2. 148499 1. 855749 1. 334069  
3. 443144 3. 666062 4. 320898 4. 457372 3. 478004 4. 357256 3. 65566 4. 110992 3. 686287  
7. 980156 8. 167734 7. 797147 7. 179769 8. 082086 7. 932067 8. 164878 8. 002336 7. 780418  
6. 385856 5. 646341 5. 152936 5. 937444 6. 12115 6. 844849 5. 621589 6. 144437 5. 895636  
3. 937273 3. 969914 3. 253819 4. 084387 4. 155606 3. 967126 4. 011376 4. 392125 3. 391039  
3. 266071 4. 449277 3. 3483 2. 996828 3. 259028 3. 158137 3. 81411 4. 354082 3. 348832  
1. 955275 2. 630314 1. 81462 1. 433709 2. 240841 2. 208459 2. 081854 2. 127632 2. 747015  
2. 879379 2. 282735 2. 977526 2. 567819 2. 383139 2. 239082 2. 912295 2. 802843 2. 445562  
4. 241055 3. 498731 3. 411256 3. 789818 4. 344502 3. 398638 3. 995382 5. 556408 4. 632297  
2. 222722 2. 384864 3. 731413 2. 24903 2. 195529 2. 501238 2. 407095 2. 699721 2. 154937  
6. 487837 7. 555549 6. 801105 6. 671822 7. 131205 6. 778486 7. 165201 6. 584757 6. 800372  
1. 336907 1. 686269 1. 272469 2. 03753 1. 659061 1. 951163 2. 016349 1. 439926 1. 423574  
2. 031228 2. 089152 3. 000812 3. 876012 2. 233682 3. 860416 3. 478728 3. 508862 3. 179119  
3. 304991 2. 682341 4. 174612 2. 565214 4. 202706 3. 616999 4. 239229 3. 874329 4. 763479  
2. 231825 1. 869731 1. 905662 2. 589043 2. 871279 2. 176281 3. 630331 2. 257754 2. 179257  
2. 209995 3. 458706 1. 344815 1. 999312 3. 421659 1. 609514 4. 880076 2. 090793 1. 476359  
6. 880284 5. 660932 6. 032179 6. 659949 6. 489405 6. 736809 7. 557751 7. 769931 7. 425889  
5. 032783 6. 313825 4. 911646 4. 214502 5. 463135 4. 541191 4. 36545 4. 31223 4. 612484  
3. 348407 4. 219115 4. 166371 3. 675251 5. 751727 5. 110716 4. 476029 3. 296997 4. 996314  
2. 018604 1. 576969 1. 894195 1. 949608 2. 0439 1. 92582 1. 620764 1. 596518 1. 812244  
2. 187561 2. 421086 3. 351337 1. 805926 2. 187187 2. 623801 2. 07469 2. 278125 2. 444601  
6. 273376 5. 881533 6. 523621 6. 405431 6. 563508 4. 684982 6. 319931 6. 483601 6. 217182  
6. 73308 7. 749087 7. 336406 7. 497453 7. 166669 7. 067311 8. 050332 8. 170652 7. 922075  
8. 818536 8. 549769 8. 733279 8. 637189 8. 705951 8. 670456 8. 5904 8. 494191 8. 512088  
4. 982163 4. 318246 4. 546267 4. 723451 4. 537719 6. 076569 5. 499957 6. 068961 5. 384479  
6. 998714 7. 793886 7. 082006 7. 169704 7. 613309 6. 747959 7. 64724 7. 770266 7. 615614  
7. 719218 7. 957608 7. 889745 7. 741625 8. 133222 7. 255228 8. 338192 8. 043609 7. 051197  
7. 264076 7. 723483 7. 562962 6. 823728 7. 478401 6. 700513 6. 951178 6. 655884 6. 685429  
6. 053663 5. 928508 6. 080732 5. 223437 5. 604419 5. 421026 6. 185206 4. 144025 4. 981735  
1. 787364 1. 02533 3. 395325 2. 51101 2. 493072 1. 615554 1. 627198 2. 996727 1. 180933  
6. 943911 7. 19489 6. 250984 6. 514025 6. 556128 6. 269869 6. 949963 6. 579606 6. 251592  
5. 195894 5. 922517 5. 418076 5. 185743 6. 050997 6. 195569 5. 724566 5. 261008 5. 408262  
4. 08306 3. 693547 3. 74545 2. 609656 4. 411964 3. 21896 3. 64016 2. 956552 3. 094806  
1. 568658 2. 015505 1. 636554 1. 386831 1. 592507 1. 202242 2. 213085 1. 406577 1. 252122  
6. 228632 4. 759905 5. 124121 5. 898213 5. 874925 6. 285847 5. 004111 6. 508403 6. 015538  
4. 264734 4. 27839 3. 793113 4. 665646 4. 59415 5. 579434 6. 47039 5. 669799 4. 246328  
4. 708359 3. 024639 4. 890592 5. 150892 4. 78617 5. 637844 5. 111436 4. 60949 5. 449815  
1. 328734 1. 090628 1. 071527 1. 036679 1. 245275 1. 007233 1. 087112 1. 504625 1. 380182

3. 515701 3. 317668 3. 332922 3. 134739 3. 561992 3. 415462 3. 425484 2. 987824 3. 562717  
5. 8085 6. 421426 6. 126094 6. 356092 6. 831832 5. 801587 6. 181313 5. 89248 6. 358199  
5. 888306 5. 933514 5. 477465 6. 036948 5. 819105 5. 053071 5. 712276 4. 255978 4. 762928  
1. 751215 1. 631398 2. 466501 1. 15314 2. 511775 1. 401015 1. 428819 1. 941123 1. 815889  
5. 514541 4. 540623 5. 532661 4. 715596 5. 641498 6. 696272 5. 64982 6. 490478 4. 819234  
4. 776757 3. 636923 5. 125217 5. 034558 4. 073837 4. 113322 4. 851991 5. 266127 5. 266196  
5. 616553 6. 540415 5. 531224 6. 084256 6. 331092 5. 18897 5. 231413 4. 306732 4. 653309  
4. 405439 4. 643525 5. 282473 4. 047061 4. 575268 5. 079392 4. 449267 4. 706442 4. 936728  
1. 583892 0. 827729 1. 219853 1. 336806 0. 456241 1. 380544 0. 960397 2. 39238 1. 351496  
2. 636629 1. 960259 1. 610347 1. 761686 1. 30799 3. 943744 1. 359754 1. 478688 1. 534811  
2. 458829 2. 453401 2. 525814 2. 482968 3. 39144 2. 740577 2. 63909 2. 729593 3. 313153  
4. 762276 4. 335017 4. 790525 4. 500871 4. 758842 4. 322826 4. 851933 4. 642333 4. 58178  
6. 458574 6. 932957 6. 06688 5. 485427 6. 823944 5. 237321 6. 07322 6. 699286 6. 445367  
3. 012644 2. 984657 3. 324277 2. 721365 2. 836191 2. 717323 2. 385694 3. 084483 2. 760837  
5. 987288 6. 415375 6. 033603 4. 912187 5. 426796 5. 817653 5. 643786 6. 510575 5. 892616  
2. 582514 3. 278887 2. 303518 2. 248665 4. 087932 5. 280893 4. 261436 5. 499549 4. 590994  
7. 331168 6. 871821 7. 33854 7. 165284 7. 119505 7. 628176 7. 290241 7. 213881 7. 20502  
1. 384846 1. 145068 1. 554412 1. 786833 1. 806496 2. 065715 1. 472301 1. 548266 1. 099513  
5. 990986 4. 166825 5. 204157 4. 67311 4. 043752 6. 645466 5. 507373 4. 435493 4. 442789  
3. 655171 4. 959136 4. 76618 4. 326453 4. 998773 4. 609136 4. 857636 3. 565332 3. 856135  
4. 097208 4. 341431 4. 277196 5. 062974 2. 688995 6. 067406 4. 157595 2. 876292 4. 136916  
6. 882479 6. 910053 6. 559756 6. 757693 6. 373385 6. 542559 6. 963487 6. 410243 6. 500358  
2. 459295 3. 003725 2. 95363 2. 479795 2. 078814 2. 738141 2. 538631 3. 551611 3. 663903  
3. 118292 3. 865946 2. 18233 3. 472565 3. 162577 2. 442472 2. 821391 4. 85111 2. 583811  
3. 180086 2. 095597 3. 404554 2. 257437 1. 994472 5. 281014 3. 628488 2. 948212 3. 011579  
0. 59704 1. 583078 2. 6424 1. 946403 1. 750468 2. 513753 1. 666387 1. 427736 0. 959912  
4. 675826 3. 048639 2. 75619 4. 07821 2. 88494 3. 102895 3. 847404 3. 925348 4. 801419  
1. 547693 2. 161823 2. 077314 1. 586022 2. 048127 2. 202183 2. 020533 1. 632635 1. 507388  
5. 858353 6. 160698 5. 348863 5. 955153 6. 157603 7. 091049 5. 382881 6. 399013 5. 753424  
1. 387471 1. 266657 1. 008178 1. 171906 1. 360425 0. 889819 1. 331469 1. 518885 0. 945483  
2. 259055 2. 639933 2. 675287 2. 202859 2. 165937 2. 388337 2. 700406 2. 569089 2. 297885  
3. 421611 3. 082042 2. 834378 3. 383185 1. 988436 3. 003984 3. 046874 2. 734849 3. 123227  
3. 19647 2. 372128 1. 634545 2. 516509 2. 189344 6. 235707 2. 878108 2. 56223 4. 514527  
6. 846997 5. 48978 5. 947242 5. 732918 6. 886572 6. 268769 6. 267137 6. 417677 6. 337385  
5. 484969 6. 618448 5. 891541 5. 439884 5. 998216 5. 517529 5. 944107 5. 584827 5. 588988  
6. 014766 6. 167891 5. 500238 5. 969161 6. 067531 5. 409765 6. 207713 6. 35692 5. 903158  
4. 559647 3. 373383 3. 531862 3. 370446 3. 96183 3. 0662 3. 894546 2. 820912 4. 767476  
6. 236338 6. 999055 6. 635579 6. 87802 6. 157688 5. 41818 6. 995144 6. 77141 6. 83046  
1. 544784 1. 776129 1. 701619 2. 537963 2. 727887 3. 578103 2. 055693 2. 28517 3. 162787  
3. 52805 2. 835419 2. 744779 3. 08942 3. 197294 2. 977763 3. 406366 4. 444628 3. 997411  
8. 279385 8. 623784 8. 320577 7. 608438 7. 466534 6. 686632 8. 434788 7. 929805 7. 67673  
6. 110434 6. 274422 5. 99478 7. 126089 6. 718528 5. 97149 5. 656812 5. 872838 5. 720013  
3. 271974 2. 305217 2. 919502 2. 57366 2. 724814 3. 00681 2. 286891 3. 05593 2. 778461  
5. 292626 5. 937314 5. 331475 5. 218739 6. 568728 4. 198223 6. 001429 5. 991926 5. 485165  
5. 262419 4. 681425 8. 036936 4. 715129 3. 960171 2. 138161 2. 179498 3. 097956 4. 74358  
5. 111514 3. 607268 5. 306213 4. 418262 5. 612377 5. 595381 5. 819922 6. 388036 6. 923809  
8. 33204 7. 627314 8. 16745 8. 612809 8. 243965 8. 62908 8. 29922 8. 08071 8. 066854  
2. 403254 1. 860926 2. 096589 1. 880622 2. 266356 1. 816552 2. 010935 1. 968561 2. 461928  
3. 236164 2. 562115 2. 619294 3. 298535 2. 927637 3. 72629 3. 100782 3. 241922 2. 766766  
4. 908773 5. 286528 6. 015142 4. 502973 6. 089722 4. 755214 4. 700428 3. 958839 4. 336713  
6. 620673 6. 786566 6. 879457 6. 867464 6. 501189 5. 999936 7. 159521 6. 444428 6. 675903

11.01143 10.50808 10.81339 10.98006 11.09622 10.99545 10.87027 10.79064 10.82842  
1.392452 1.663803 1.446854 1.718603 1.717974 1.349282 2.093982 1.639213 1.704575  
6.653422 6.660568 6.832074 6.196726 6.646778 6.659152 6.700129 6.786935 6.864337  
6.819775 5.892051 4.401086 4.86347 5.76838 4.818247 5.68468 4.622082 3.763516  
2.1315 2.058967 2.042326 2.406433 2.249704 2.306138 3.268523 2.193583 2.452863  
2.408501 2.427877 2.55234 2.465595 2.710221 2.426539 1.677585 2.660438 2.49088  
3.754722 2.501429 2.805264 2.924764 2.227006 3.415813 2.838169 2.026749 2.292272  
2.626945 3.628697 3.701933 3.368684 3.494517 3.151366 2.077334 3.040884 3.71948  
4.149007 4.870348 4.437162 4.463337 4.395118 4.696463 4.641312 4.155571 5.154385  
1.951878 1.853847 2.928939 2.66765 2.101272 1.535448 2.398693 2.35207 2.637481  
4.687948 5.754171 5.519025 4.369993 5.07701 5.006053 4.191511 4.810997 5.73674  
3.653623 3.630555 3.85047 4.154195 3.543755 5.297192 3.051892 4.308172 5.160856  
6.421422 6.643251 6.468085 6.724168 7.059786 6.374297 6.677247 6.227644 6.409369  
5.765317 4.916506 6.150083 3.830698 4.962021 5.233076 6.175732 5.928233 6.258883  
5.02942 5.015467 5.294132 3.922033 4.638297 3.449483 4.884947 3.608982 3.701188  
3.101608 1.89466 3.118122 3.476131 2.453585 3.917513 2.423523 2.817286 2.66756  
2.819441 1.722101 1.798052 3.210184 1.71221 2.501398 2.182015 2.027253 2.002569  
4.375144 3.664222 4.457338 4.444411 5.108625 5.640325 5.781797 6.030547 6.488073  
1.081097 1.292646 0.815677 1.1269 0.814944 1.730486 1.166363 1.621752 1.034105  
2.974177 2.38178 2.820878 2.510356 2.485342 2.928201 2.93378 2.393218 2.756393  
3.10626 0.913921 0.68402 0.793873 1.067651 1.273302 1.295122 0.406065 0.786504  
4.384844 4.75963 4.414949 5.556512 3.578702 1.264893 1.921565 1.633293 2.425258  
5.366507 4.877019 6.613337 4.467757 4.949069 5.962104 5.80163 1.571994 4.029815  
4.140624 2.559544 6.45967 1.714306 4.527461 2.563858 1.575573 0.707489 3.226339  
2.34042 2.408731 3.084066 3.061746 2.279992 2.712655 1.619685 2.301995 2.384774  
3.813679 4.643335 3.298334 3.416886 5.239396 3.168311 2.222931 3.310815 3.948573  
6.849038 6.584747 6.621951 7.223369 7.139623 6.416133 6.692315 6.36265 6.551029  
3.397322 4.066191 3.485893 1.828009 3.075109 1.773011 2.568749 3.480771 3.364436  
7.243667 6.842387 6.840522 6.362352 6.525138 7.199736 6.378589 7.173508 6.786109  
0.873172 1.025149 1.015803 1.887909 0.967129 1.461425 0.864621 1.733932 1.076636  
6.741641 6.086611 7.601463 7.918276 7.315897 6.674102 8.294221 8.242049 8.569314  
1.483181 1.306747 1.490325 2.655063 2.070696 2.182692 2.297123 1.697559 1.596669  
2.308483 2.415008 3.316711 2.191292 2.009919 2.326117 1.933024 2.480269 2.807977  
4.177353 4.298207 4.003608 4.843071 4.308059 4.406882 3.828582 5.036848 5.089222  
5.627755 5.514429 5.079665 4.124668 5.191862 4.919238 4.662184 3.968196 4.52817  
9.765512 8.798398 8.829107 9.087359 7.954063 8.884492 8.591564 6.652672 5.897117  
6.301145 5.877641 6.192798 6.511282 6.402292 6.525054 6.507709 5.449294 6.480465  
6.039815 4.834991 5.214055 5.78839 4.993865 5.744961 5.981779 5.373616 5.703383  
2.776897 3.077227 2.518782 2.89442 2.051861 2.076463 1.641639 1.478825 2.211507  
4.65822 4.787546 5.116073 4.861067 4.577057 4.949335 4.561396 4.602595 5.025846  
3.915221 4.536793 4.419246 3.45884 4.611524 4.411659 4.325805 3.764454 3.237065  
2.870859 3.589634 2.776065 2.935932 2.648046 3.985575 2.653379 3.031499 3.362017  
3.477218 1.765369 1.426477 2.497479 2.481695 2.101201 1.097255 5.833988 3.669692  
6.663492 7.000151 6.978793 6.916175 7.331844 6.634868 6.605965 5.85454 6.480232  
6.637113 5.986108 5.59768 6.107436 6.487528 6.284048 6.102777 6.458087 6.602939  
6.168147 6.357482 6.104425 5.12699 5.836698 6.909064 6.657507 5.811093 6.214995  
2.051806 1.80514 2.481955 2.261618 2.13354 2.581114 2.273287 2.672802 1.68557  
1.282854 1.498338 1.486328 2.459064 2.155636 1.606883 1.594642 1.893635 1.627205  
4.219642 5.618287 5.019313 2.83742 4.894805 4.543527 5.602712 5.477365 5.516303  
3.874032 0.752517 1.262282 2.137036 1.170993 1.866709 1.078476 0.955974 0.816197  
2.428505 2.832486 2.835065 2.923723 3.313155 3.441066 3.334976 3.983152 3.257268

8. 906713 8. 818417 9. 055538 8. 956833 9. 769885 8. 865199 8. 624971 8. 511626 8. 01222  
4. 114572 5. 502748 4. 303932 3. 19778 4. 117565 2. 702592 2. 975197 3. 727 3. 439064  
4. 078784 3. 234692 5. 234367 1. 479375 3. 268585 0. 750975 2. 766952 3. 881867 1. 667266  
5. 687456 4. 651752 5. 140159 4. 847944 4. 298025 4. 382783 3. 88684 4. 051043 3. 697011  
2. 110478 3. 482356 3. 438871 2. 19343 2. 412052 2. 204133 1. 683622 2. 286709 1. 463779  
1. 405988 1. 273231 1. 649911 4. 233924 1. 376425 1. 200323 2. 027222 1. 438335 2. 671616  
5. 736507 5. 218616 5. 418506 5. 212763 4. 936501 5. 421527 4. 97417 4. 839768 5. 379341  
5. 690358 5. 497478 5. 074963 6. 234199 5. 126291 5. 694222 3. 981299 5. 989159 5. 655952  
8. 313812 8. 099325 7. 945118 8. 290131 7. 934238 7. 242069 8. 060502 7. 808565 7. 555227  
6. 033299 5. 880419 6. 23648 6. 109627 5. 764959 6. 148891 5. 414183 5. 738265 5. 530614  
1. 665506 2. 498646 2. 921714 4. 217886 2. 828289 1. 860566 1. 270104 1. 696336 1. 943867  
6. 62452 6. 986775 6. 618854 6. 391004 6. 058657 6. 78658 5. 849942 5. 464105 5. 585259  
4. 823839 3. 18159 5. 217632 4. 762881 5. 012283 4. 513212 4. 593586 5. 743386 5. 234353  
2. 899788 3. 487936 2. 90068 2. 496367 3. 251723 3. 582613 3. 405485 3. 143747 3. 674729  
4. 862443 4. 05409 4. 267952 4. 050653 5. 435948 5. 240459 4. 457182 5. 077929 5. 505663  
5. 809056 6. 171512 6. 142086 4. 46673 5. 634673 4. 561556 6. 105158 4. 951846 5. 311286  
3. 683537 3. 447764 3. 979602 5. 782642 4. 431202 4. 000699 5. 164961 5. 654286 5. 288128  
6. 210512 6. 897594 6. 387979 6. 771123 6. 186668 6. 215651 7. 468226 7. 271954 7. 480472  
6. 299876 5. 970879 6. 386694 5. 933108 6. 018474 5. 827207 6. 670134 6. 555321 6. 17807  
4. 804711 5. 541503 5. 655208 5. 640162 5. 690966 5. 457693 5. 820794 5. 382825 5. 8723  
7. 599769 7. 773211 7. 764763 6. 433443 7. 695275 7. 290138 7. 705122 7. 617195 7. 664491  
4. 498351 5. 303056 4. 483535 3. 289336 4. 478299 4. 073657 4. 493356 4. 459058 4. 306474  
5. 65154 5. 00012 4. 580081 5. 348068 5. 551649 5. 662826 4. 96885 5. 442653 5. 219333  
5. 545626 5. 432109 4. 787957 4. 47919 4. 709186 5. 388268 5. 895778 5. 080869 5. 388923  
5. 588587 5. 951259 6. 139404 5. 644155 4. 807755 6. 25117 6. 034405 5. 842899 5. 373868  
1. 32143 1. 22712 1. 178746 1. 266937 0. 83581 1. 789564 1. 368279 1. 969455 1. 200926  
1. 410618 1. 734728 1. 460333 2. 109392 1. 368593 1. 512032 2. 135321 1. 39277 1. 454994  
3. 148925 3. 154137 2. 666892 2. 7937 3. 45132 2. 425167 2. 328468 2. 43708 2. 357566  
3. 435037 3. 382116 2. 874982 3. 316042 3. 26985 4. 280091 2. 569082 2. 308969 2. 66982  
3. 383806 2. 474157 1. 438617 1. 949322 1. 383252 3. 271263 2. 371765 1. 778686 2. 915448  
4. 660393 6. 039056 4. 366242 5. 148531 4. 817178 5. 366684 4. 572877 5. 54306 4. 601557  
5. 709731 6. 39455 5. 799053 6. 045982 6. 370963 4. 962817 5. 780499 5. 838503 5. 880071  
5. 354584 4. 889156 5. 373989 6. 257196 4. 459294 5. 72 5. 344894 7. 315855 6. 616275  
2. 733646 2. 368165 2. 195747 2. 996167 2. 807548 3. 680008 2. 831593 2. 10881 2. 024004  
1. 329668 2. 530314 1. 414962 1. 514112 0. 953799 2. 592526 1. 254318 1. 418006 2. 293647  
5. 708935 6. 658404 6. 016945 5. 9283 6. 641494 5. 216785 6. 168156 5. 919489 5. 522671  
1. 491652 1. 318697 1. 556421 2. 061791 1. 31953 1. 436815 1. 822503 1. 529174 1. 709963  
5. 663592 3. 787051 4. 439161 4. 833584 4. 819666 5. 980158 5. 845237 4. 472911 4. 932026  
6. 714966 3. 055627 3. 575373 3. 068033 4. 408959 6. 181033 4. 278462 2. 633604 3. 583951  
4. 876328 5. 358602 5. 35308 5. 092076 4. 923792 4. 364665 5. 091657 4. 878327 4. 787421  
2. 564367 2. 909797 2. 689027 3. 384669 2. 740958 3. 62854 2. 92394 2. 636827 3. 18939  
3. 812545 4. 892506 4. 09019 4. 845543 4. 265429 3. 739372 5. 236294 4. 703618 4. 932122  
2. 025986 1. 99285 2. 055437 1. 988713 2. 451011 3. 286496 2. 814098 2. 884544 2. 35027  
1. 802856 1. 887177 2. 750101 1. 496814 1. 471354 2. 159535 1. 898169 2. 187166 1. 448737  
2. 889673 2. 155733 2. 677588 3. 037158 3. 215621 3. 276095 3. 22918 3. 301827 3. 476858  
3. 083114 3. 279321 2. 891269 3. 419455 3. 240438 3. 133308 3. 739187 3. 598047 3. 765979  
6. 596491 5. 938515 6. 081607 6. 519711 6. 012861 5. 413035 6. 61456 6. 616265 6. 289773  
3. 128709 4. 255256 3. 402825 2. 497763 2. 553085 2. 590485 3. 150026 2. 568241 2. 294157  
3. 516491 4. 152743 4. 443275 2. 86206 3. 193353 4. 216065 3. 20887 2. 631239 3. 036701  
1. 354942 1. 904551 1. 350366 1. 473237 1. 297204 1. 475373 1. 288504 1. 64365 1. 154785  
3. 003862 2. 873159 2. 812508 3. 025445 3. 194781 3. 227984 2. 746479 2. 825954 3. 396975

4. 961993 3. 614902 4. 380838 4. 039083 3. 713124 3. 840148 3. 152057 2. 40728 3. 482667  
6. 738204 7. 025851 7. 037762 6. 770579 6. 573654 6. 682356 7. 219466 7. 046263 7. 109651  
7. 580416 7. 622049 7. 058236 6. 36414 7. 338891 8. 030084 7. 768255 7. 760639 7. 728731  
0. 896497 0. 861483 0. 714762 1. 231935 0. 744666 0. 872282 1. 507159 0. 886821 0. 997168  
3. 208258 2. 874919 2. 92305 2. 418704 2. 406963 3. 797613 2. 415802 1. 988677 2. 945416  
1. 853196 2. 342747 2. 832911 2. 903651 2. 383307 1. 713268 1. 626118 2. 490819 1. 964274  
10. 21542 9. 249307 9. 484816 9. 170356 9. 033638 10. 31033 9. 902778 9. 656427 9. 759298  
4. 280682 3. 41458 4. 276804 4. 12175 4. 560916 4. 034529 5. 524651 5. 072235 4. 797174  
2. 425858 1. 823283 2. 099296 1. 770232 1. 745209 2. 217945 2. 236712 2. 157817 2. 005233  
5. 83297 5. 211538 5. 545933 5. 054729 5. 528852 5. 643744 6. 472671 6. 334867 5. 803604  
5. 204665 5. 764055 5. 834687 6. 438772 5. 57035 4. 74124 4. 929901 5. 322904 5. 095693  
1. 658399 2. 260624 1. 465405 2. 579445 2. 474172 3. 633312 2. 790633 3. 016659 3. 119542  
2. 799561 2. 861286 2. 783434 3. 382875 2. 905285 4. 056044 3. 191287 4. 266562 3. 959318  
7. 038527 6. 250969 6. 394233 6. 794733 6. 559784 7. 390845 7. 674575 7. 197017 7. 33483  
5. 158866 4. 671028 5. 074639 5. 012971 5. 462365 5. 473821 5. 443794 5. 162161 4. 412579  
6. 524974 7. 578881 7. 375424 6. 538498 7. 026053 5. 308927 5. 92697 5. 610241 5. 470143  
6. 597147 7. 331496 7. 528317 6. 87012 6. 853223 5. 640602 6. 66155 6. 372008 7. 034263  
2. 64637 3. 616306 4. 058856 3. 464198 2. 446858 3. 856815 4. 26974 5. 236801 3. 720861  
4. 488877 4. 405967 4. 35684 2. 761843 3. 18014 4. 90483 4. 08209 2. 733613 2. 685186  
2. 409109 2. 161411 1. 952227 2. 424061 1. 90876 2. 560378 2. 431975 2. 726656 2. 218244  
1. 46061 1. 926789 1. 438751 2. 170417 1. 545242 1. 372564 1. 558723 1. 64817 1. 761298  
4. 897947 4. 552932 4. 014927 4. 64097 4. 489002 4. 123636 3. 418086 2. 965035 3. 831952  
9. 200537 8. 787181 8. 737488 9. 182983 8. 661169 9. 910141 8. 99306 9. 358375 9. 391359  
3. 237799 3. 035047 2. 761975 2. 574081 2. 52276 2. 893305 3. 414007 4. 057111 4. 04987  
5. 361376 6. 094836 5. 538256 4. 332073 5. 815734 6. 475655 5. 949023 5. 743559 5. 662305  
4. 097095 4. 701849 5. 047581 4. 01421 3. 535938 3. 437944 4. 793807 3. 668879 4. 397178  
5. 748317 5. 311619 4. 898803 3. 971962 4. 341045 4. 738311 5. 646716 5. 277451 3. 952157  
4. 63846 4. 452857 4. 461928 4. 498953 3. 741312 4. 185731 4. 150129 4. 136231 4. 230488  
5. 661862 5. 610042 5. 913285 5. 453626 6. 107447 3. 964194 4. 88939 5. 063365 5. 125194  
4. 332589 3. 826416 5. 713305 4. 473421 4. 748644 4. 21981 4. 684536 4. 615216 4. 132512  
6. 819811 6. 772878 6. 542054 6. 652908 7. 177826 6. 844513 6. 497426 6. 229762 6. 458882  
5. 921563 6. 599786 6. 303418 5. 877346 6. 158634 5. 357181 6. 007092 5. 493772 5. 850381  
6. 583988 6. 650864 5. 526483 7. 533018 7. 150142 7. 749673 6. 780585 6. 671943 6. 950562  
7. 013817 6. 908406 7. 28592 6. 599959 5. 576971 7. 004064 5. 831303 2. 927336 3. 761925  
5. 52999 6. 19071 5. 802417 5. 323893 6. 084302 5. 010451 5. 614847 5. 971141 5. 49403  
8. 119998 7. 759165 7. 823196 7. 556096 7. 435025 7. 719272 7. 146908 7. 307755 6. 716309  
5. 354598 5. 567812 5. 69787 3. 73081 5. 94148 5. 084849 5. 369009 6. 443575 6. 358909  
3. 807277 3. 395337 3. 722851 3. 609977 3. 442238 2. 794971 4. 326718 4. 705624 4. 297142  
6. 041122 5. 028533 5. 351758 5. 879083 5. 42043 6. 81593 5. 830541 5. 739023 6. 192358  
6. 186628 5. 80997 6. 280905 5. 70088 6. 106886 5. 827527 5. 964144 5. 645562 5. 168812  
6. 186327 6. 368948 5. 835128 6. 613527 5. 513602 6. 498851 6. 303149 6. 149173 5. 944186  
6. 544743 7. 124499 6. 709879 7. 043994 6. 250824 6. 620917 7. 318078 6. 394744 7. 139886  
3. 741931 3. 411298 4. 045877 2. 466288 3. 621237 4. 227529 4. 786515 3. 132836 4. 911034  
1. 73332 0. 88091 1. 427536 1. 655774 2. 089686 1. 208989 1. 310197 1. 687301 1. 713843  
6. 718738 7. 007615 6. 538129 6. 550111 6. 314099 5. 885744 6. 745952 6. 26106 5. 654172  
4. 080636 4. 020889 3. 733534 2. 961217 3. 183504 3. 552347 3. 090318 4. 095449 3. 286384  
5. 188512 4. 2052 5. 66619 3. 759701 2. 818096 3. 856913 4. 060267 3. 129776 3. 284414  
4. 696473 4. 792957 4. 195586 3. 492876 4. 999973 3. 044568 2. 92374 5. 433264 3. 306606  
1. 571298 1. 773178 1. 188937 1. 160251 1. 085433 1. 31123 1. 600391 1. 448959 1. 42938  
6. 702052 6. 297172 5. 914388 6. 147048 6. 74208 5. 207266 5. 995126 6. 220202 6. 015094  
4. 86847 4. 369048 3. 546021 3. 803443 4. 103557 3. 138642 3. 824333 4. 526066 4. 452244

3. 512313 2. 293834 2. 918492 4. 35445 2. 111802 2. 741255 1. 581331 1. 742428 3. 192549  
1. 208255 0. 994821 1. 194482 1. 363656 1. 938608 1. 396901 1. 062528 1. 713762 1. 262124  
7. 049717 7. 500112 7. 393846 6. 711825 7. 561425 6. 697424 7. 306371 6. 491066 6. 932342  
5. 51583 5. 731203 5. 522226 5. 130133 5. 628339 5. 328517 5. 645864 5. 339076 5. 347365  
3. 212199 2. 263085 2. 108292 2. 878427 2. 236453 3. 765049 2. 501077 2. 486156 2. 31331  
7. 314705 7. 419163 7. 591256 8. 356563 7. 149402 7. 179578 7. 482364 8. 140959 7. 543736  
4. 925912 4. 705073 4. 614358 4. 451161 3. 886577 5. 331867 4. 963522 4. 885754 4. 859932  
5. 181251 5. 557843 5. 697703 5. 815179 6. 149024 4. 490548 4. 74045 6. 042162 5. 970901  
5. 967468 6. 110538 6. 622614 5. 252901 5. 592421 5. 754312 5. 170765 5. 426348 4. 697502  
8. 22134 8. 562445 7. 563621 8. 228803 8. 043743 6. 162018 9. 361248 9. 03158 9. 303117  
6. 054236 5. 508556 4. 385134 5. 279925 5. 106258 5. 374921 5. 981615 4. 89787 5. 586611  
1. 46784 1. 956063 2. 25105 3. 297549 1. 809885 2. 661085 2. 326978 2. 256894 2. 175993  
2. 357068 1. 930355 1. 764837 1. 793431 3. 066355 2. 610161 2. 169475 2. 317523 2. 393265  
1. 889562 2. 39002 1. 851619 3. 153991 1. 985093 2. 828924 1. 62123 1. 576932 1. 392954  
4. 574998 3. 37451 4. 587614 3. 3469 4. 261635 4. 505184 3. 674006 4. 509464 5. 245009  
4. 242798 2. 706979 4. 157806 4. 811839 2. 984887 4. 50451 3. 722126 4. 484932 3. 498191  
3. 872851 4. 061411 4. 669473 4. 351282 4. 887162 5. 471922 4. 323684 3. 221266 3. 483968  
7. 656527 6. 03736 6. 818702 8. 122526 6. 086462 7. 25769 6. 880073 4. 591635 5. 019482  
2. 097476 2. 757328 1. 877242 2. 417747 3. 454776 3. 34709 2. 982923 3. 791737 2. 564062  
2. 018193 3. 211317 2. 310319 1. 77245 1. 933176 2. 312666 1. 928158 3. 022885 1. 755105  
5. 008772 6. 175224 5. 353541 3. 671639 5. 547095 6. 296148 4. 600985 5. 040179 5. 384699  
4. 896241 5. 022713 4. 01722 3. 826175 5. 207348 4. 685511 5. 232507 4. 645637 5. 214011  
1. 725789 2. 149378 1. 391418 1. 655941 2. 010644 2. 650561 1. 664101 1. 442684 1. 672874  
6. 377044 4. 944701 6. 045844 5. 857506 5. 061437 5. 547287 5. 590667 5. 9332 5. 310755  
3. 568304 3. 200706 2. 962645 3. 462195 1. 866363 3. 288267 3. 120415 3. 334714 3. 375217  
2. 313174 2. 337211 3. 145517 1. 9939 2. 148026 2. 244431 1. 997458 1. 664283 2. 252115  
7. 518032 6. 408897 6. 570463 6. 675953 7. 131663 6. 799215 7. 037485 7. 665295 7. 891642  
2. 85375 2. 834259 3. 014913 3. 344147 3. 478328 5. 009549 3. 372645 3. 745909 4. 216385  
4. 177651 3. 345157 3. 871467 4. 305613 3. 916739 5. 333154 4. 870704 5. 01152 4. 130456  
4. 998191 5. 20371 4. 713596 5. 606312 5. 575663 5. 346263 4. 291074 4. 629527 4. 526592  
4. 614715 4. 632644 5. 015096 4. 321737 4. 824134 5. 166555 5. 324058 5. 626875 5. 351781  
3. 314533 2. 142214 3. 102894 1. 388823 2. 292512 4. 746108 2. 209933 2. 797955 1. 83637  
6. 475404 5. 337837 7. 02571 6. 095379 6. 048891 6. 195728 6. 930319 7. 062391 6. 792542  
4. 224653 3. 640111 4. 26224 3. 333574 3. 435636 3. 686006 4. 227286 5. 588918 3. 892623  
1. 819647 2. 250206 1. 977992 1. 798572 1. 717959 1. 835659 1. 878521 2. 046262 2. 425639  
7. 50394 7. 486272 7. 499022 7. 475527 7. 66753 7. 455947 7. 88724 7. 748507 7. 930294  
4. 117491 4. 563893 4. 069392 4. 453028 5. 083613 3. 808125 4. 677644 4. 609108 5. 351243  
4. 085207 5. 886762 5. 806185 6. 410542 5. 881021 4. 7655 6. 470906 5. 88033 6. 81504  
8. 512665 9. 340958 8. 909366 8. 436542 8. 756424 8. 280574 8. 855956 8. 498114 8. 586297  
3. 984175 4. 985763 4. 049782 3. 489284 4. 47899 3. 150288 4. 818055 3. 773887 3. 648611  
7. 128321 7. 291489 7. 959566 7. 060797 7. 192125 6. 607321 7. 381533 7. 451077 6. 62564  
5. 628617 5. 328007 5. 664182 5. 13385 5. 528661 5. 583688 6. 55683 5. 784565 5. 212154  
5. 542973 6. 696889 5. 797766 6. 016418 6. 864837 6. 159015 6. 360045 6. 501213 6. 377503  
4. 245012 4. 464303 5. 415892 3. 899096 4. 724634 4. 804777 4. 680191 4. 21077 4. 248728  
5. 81343 5. 001302 5. 703514 5. 437689 6. 199422 4. 995282 5. 96309 5. 480815 5. 497251  
5. 474617 5. 487927 5. 473985 6. 233362 5. 607154 5. 197971 5. 581451 4. 895532 5. 707937  
7. 982796 7. 642358 6. 575685 7. 301974 7. 145531 6. 305849 6. 66529 5. 021784 6. 995244  
3. 727578 5. 768431 4. 492262 4. 267287 5. 002848 4. 691913 4. 756694 4. 809855 5. 847289  
5. 823505 6. 503097 6. 295081 4. 366956 6. 098322 6. 932427 6. 332588 5. 357407 6. 193731  
2. 937932 5. 578565 4. 260338 3. 528489 3. 836316 2. 535409 3. 453388 3. 838121 3. 574676  
3. 556982 4. 753742 6. 271035 4. 626798 4. 637878 4. 395824 4. 512763 4. 232157 3. 397536

4. 664141 4. 907302 4. 876081 5. 749288 3. 795548 3. 911276 4. 817701 5. 713863 5. 329245  
5. 26466 4. 790552 4. 865245 5. 267068 5. 446379 4. 986935 4. 870666 4. 058583 4. 913678  
4. 940252 4. 489876 4. 820326 5. 543617 4. 779492 4. 974962 4. 809472 5. 451969 4. 368178  
5. 797002 5. 704298 5. 70242 5. 324347 5. 490516 6. 02232 6. 082649 5. 264552 5. 719448  
2. 904631 2. 264069 2. 24584 2. 530767 4. 027975 1. 921199 3. 198959 2. 370511 2. 768102  
7. 22672 7. 069193 6. 921354 7. 024287 7. 105693 7. 106408 7. 213786 7. 378887 7. 27321  
3. 145665 1. 770933 1. 911857 1. 403375 3. 071263 2. 493672 2. 145445 1. 932948 2. 314221  
2. 921604 2. 222929 2. 55539 3. 865802 2. 555267 3. 985897 3. 119512 3. 535089 4. 502441  
4. 048181 2. 76879 4. 084484 3. 413859 4. 834954 3. 698333 4. 307684 3. 884999 4. 253917  
1. 798956 1. 485896 1. 643705 1. 607371 2. 661919 1. 209045 1. 550837 1. 300283 1. 533319  
6. 691879 5. 680807 5. 391574 6. 196039 6. 279271 6. 935644 5. 8675 5. 583673 6. 468295  
1. 461881 1. 460856 1. 652008 1. 529684 1. 873811 1. 641679 1. 689469 2. 363803 1. 807598  
5. 371069 6. 259982 5. 760997 5. 204786 5. 707502 5. 646322 6. 263078 4. 328872 4. 647705  
6. 56631 6. 74917 6. 926813 6. 640583 7. 236704 6. 757365 6. 474842 6. 681155 6. 842613  
2. 651222 2. 530243 2. 758753 2. 695501 2. 976095 2. 284266 2. 200018 2. 945888 3. 209398  
6. 545728 7. 044515 6. 829795 5. 814356 7. 051409 6. 77321 6. 784523 6. 173244 6. 216258  
1. 856312 2. 981164 2. 014721 1. 872809 2. 087338 2. 778984 2. 063127 2. 470039 2. 577562  
5. 07177 5. 57429 5. 829705 4. 806016 5. 424902 5. 780161 5. 761401 5. 400818 4. 80694  
5. 275246 4. 71385 3. 402513 3. 616907 4. 958694 4. 189209 3. 800477 4. 60146 3. 524885  
3. 138926 4. 233903 4. 675663 4. 349521 4. 772225 4. 567227 4. 199041 5. 162605 5. 840846  
1. 8143 1. 783261 2. 552479 2. 716076 2. 704994 4. 234441 2. 540497 2. 457411 2. 667227  
5. 199271 5. 466004 5. 543251 5. 042564 5. 337794 4. 32183 6. 784948 5. 579894 4. 998161  
6. 59114 5. 556738 6. 669692 6. 271642 6. 734926 6. 652335 6. 394101 6. 383733 6. 321393  
4. 99078 4. 778478 5. 099186 4. 087295 4. 970187 4. 647266 4. 310983 5. 086984 4. 951189  
6. 545865 7. 265504 7. 107299 7. 076506 6. 130145 6. 852028 6. 983185 7. 532603 6. 315544  
4. 198396 3. 209501 4. 134246 4. 753927 4. 023177 5. 114115 4. 357218 5. 090611 4. 21314  
3. 473743 3. 19671 3. 187866 2. 460886 3. 396436 3. 106129 2. 741844 3. 665409 3. 566267  
7. 27231 7. 27919 7. 418151 7. 586172 7. 078846 7. 540169 7. 403839 7. 655471 7. 65433  
4. 007617 3. 298988 4. 319526 3. 081183 3. 158182 4. 147697 4. 539728 5. 73338 5. 33724  
4. 781811 3. 806715 4. 398588 5. 639974 4. 596183 4. 366656 4. 2538 3. 836422 3. 075831  
4. 347849 5. 073032 5. 07456 3. 889046 4. 213025 4. 244556 4. 409647 4. 23394 4. 419374  
6. 971762 6. 720321 6. 331731 7. 103125 6. 754734 7. 331602 6. 93808 7. 177674 7. 444754  
7. 663806 7. 678243 6. 82849 7. 828063 7. 380573 6. 902533 6. 904434 7. 303786 7. 152104  
6. 588746 6. 742449 6. 055781 6. 544084 7. 184795 6. 332547 7. 221699 7. 208189 6. 85687  
5. 627889 3. 497474 3. 96237 4. 987374 4. 655051 5. 041909 5. 222452 5. 648526 5. 99838  
5. 09817 6. 17199 5. 461374 6. 162635 5. 50694 5. 816414 5. 962598 5. 641971 5. 012188  
5. 395993 6. 033897 5. 986397 6. 12241 4. 65533 6. 496591 5. 916651 6. 180543 5. 730454  
3. 173377 3. 193149 3. 074662 2. 642487 3. 046404 2. 767069 2. 71181 2. 269949 3. 123922  
2. 918876 2. 65609 1. 450116 3. 469868 2. 026027 3. 984928 2. 34914 1. 978257 1. 671475  
4. 917203 5. 966536 5. 378523 4. 464717 6. 150765 5. 010063 5. 458902 5. 57329 4. 47819  
8. 240856 8. 03602 8. 260003 8. 894526 7. 958665 9. 505212 7. 670351 8. 371312 7. 966325  
2. 902365 3. 18696 2. 686064 2. 202244 3. 40582 3. 412107 3. 061614 3. 449116 3. 138027  
3. 6458 4. 167525 4. 021861 3. 869154 3. 981593 4. 416138 3. 697993 4. 226771 3. 934686  
6. 572826 6. 371907 6. 575967 6. 823492 7. 462449 7. 021565 6. 562675 6. 863232 7. 200245  
2. 266219 2. 158103 2. 3532 2. 818078 2. 566668 3. 090909 2. 367744 2. 489547 2. 160919  
7. 211729 7. 820427 7. 27002 7. 575449 7. 663461 7. 609954 7. 704683 7. 637341 7. 833478  
1. 794697 2. 185005 3. 333017 2. 363297 2. 54586 3. 053429 2. 946519 4. 883915 2. 99719  
4. 998852 4. 087093 5. 630498 3. 682594 4. 636494 3. 959841 5. 978399 5. 810622 6. 556987  
3. 720905 3. 952517 4. 091385 2. 895288 2. 758528 3. 110649 3. 191586 2. 731895 3. 290784  
2. 797051 2. 070382 2. 554374 2. 736942 2. 237009 2. 575625 2. 390648 1. 886273 2. 973804  
3. 876959 3. 832114 4. 316842 4. 078588 4. 100332 5. 205616 4. 442957 4. 546765 5. 119701

7. 407396 8. 002665 7. 827427 7. 401771 7. 962279 6. 201732 8. 311177 7. 514145 7. 630794  
7. 81288 7. 997433 7. 560834 7. 362016 7. 108068 7. 651033 7. 53986 7. 451367 7. 763298  
6. 132489 6. 34322 6. 309898 6. 252972 6. 147278 6. 967953 6. 44084 6. 556561 6. 537105  
5. 032683 5. 648004 4. 915776 5. 561347 5. 461877 5. 41616 5. 417525 4. 747446 5. 225337  
5. 946384 5. 948887 5. 342063 6. 118334 6. 268149 6. 113622 6. 318595 6. 353182 6. 199336  
4. 460401 5. 3178 4. 010336 5. 682844 5. 933836 5. 746634 5. 41303 5. 590859 5. 923954  
5. 945309 6. 761352 6. 263242 6. 874581 6. 020153 5. 313845 6. 681847 5. 697088 5. 907452  
3. 205902 3. 719449 3. 992127 3. 395746 3. 126864 3. 243821 3. 526625 3. 606666 4. 348751  
4. 004393 3. 10552 2. 390591 3. 334796 1. 800132 4. 516034 3. 356311 3. 389537 3. 880144  
4. 260193 2. 901949 3. 459237 3. 515755 2. 63187 4. 013938 3. 278683 4. 263775 2. 706402  
4. 974238 4. 866592 4. 411479 5. 501805 5. 626758 5. 641977 4. 735752 4. 265882 4. 232905  
5. 004103 4. 191758 4. 973108 5. 098247 3. 533995 6. 58565 5. 271504 5. 820096 6. 13837  
0. 857359 0. 963086 1. 230403 1. 627299 1. 00215 1. 044369 0. 95679 1. 103275 1. 011022  
6. 015686 6. 380621 5. 95662 4. 744022 5. 851245 5. 888884 5. 948502 5. 948616 5. 579324  
4. 815245 4. 400628 4. 554707 3. 965345 4. 225323 3. 95475 4. 38973 4. 132551 4. 428251  
3. 423111 3. 098766 3. 137261 3. 19037 3. 434171 4. 47708 3. 845877 3. 426693 3. 347584  
4. 913608 3. 408521 3. 326252 3. 612534 3. 063182 3. 263687 3. 490474 3. 412702 3. 591993  
4. 803085 4. 608151 4. 012065 4. 991542 3. 871086 5. 64338 4. 828842 5. 129896 5. 306888  
3. 948984 3. 93515 3. 6719 2. 958996 3. 811159 4. 737664 4. 609588 4. 429448 4. 066497  
4. 285304 3. 89957 3. 599878 4. 085382 4. 40175 4. 919521 5. 329587 3. 115205 4. 294365  
1. 384598 1. 325364 1. 376383 1. 373347 1. 122495 1. 396811 1. 420347 1. 65387 1. 5535  
5. 139623 4. 585342 5. 117112 5. 04061 4. 511967 4. 463006 5. 506506 4. 159217 3. 555322  
6. 73359 7. 037072 6. 586689 6. 753531 6. 927233 6. 92692 7. 399199 7. 205604 6. 684805  
6. 32628 6. 512446 6. 599314 7. 586108 6. 570868 7. 805406 7. 095087 7. 77652 7. 337888  
4. 373746 4. 318784 3. 674086 5. 118818 3. 61611 3. 477949 3. 641927 3. 451347 3. 468767  
3. 087305 2. 333834 4. 272352 3. 350024 4. 097712 4. 391808 3. 089784 4. 289682 3. 746894  
3. 110151 1. 937627 2. 833741 3. 346832 2. 409997 4. 106202 4. 532492 3. 763354 4. 246285  
4. 082922 4. 754129 4. 414227 4. 489693 4. 470769 5. 525387 3. 921416 4. 55577 4. 566717  
5. 004714 4. 917434 4. 770971 4. 641946 5. 559972 6. 536413 5. 099371 4. 966225 4. 967442  
3. 098428 3. 532233 2. 883112 2. 741999 2. 117608 3. 618112 4. 027639 3. 804076 2. 401836  
6. 171164 6. 22639 7. 041843 7. 017952 7. 106064 6. 553072 6. 995561 7. 067113 6. 419891  
5. 239578 4. 369345 4. 22132 5. 317567 4. 898639 7. 032213 6. 221405 6. 06322 5. 845919  
5. 852405 4. 085187 2. 586013 3. 884426 2. 306574 1. 452744 1. 455514 2. 002148 1. 197945  
3. 313838 4. 218509 3. 687034 5. 197538 3. 494251 3. 845683 3. 347779 3. 799954 3. 748772  
4. 512111 5. 605073 5. 174926 5. 330268 5. 498178 4. 811532 5. 646526 5. 160386 3. 969605  
6. 602886 4. 212504 5. 063953 4. 011882 4. 646299 5. 81418 4. 082798 4. 540845 4. 722221  
3. 527394 3. 175292 3. 757023 4. 792008 3. 422266 3. 471211 3. 292773 4. 612164 5. 235187  
6. 898011 5. 904241 6. 601052 6. 471044 6. 443685 7. 393089 7. 163676 7. 022822 7. 34264  
5. 217378 5. 314436 4. 525492 5. 008424 4. 833964 3. 777943 5. 249377 4. 133322 3. 625711  
7. 6172 7. 98667 7. 397867 7. 546732 8. 612141 7. 645465 8. 109877 8. 100942 8. 126109  
4. 925852 4. 426566 5. 114552 4. 70781 3. 782417 4. 508902 4. 705304 3. 373635 2. 923215  
6. 318526 5. 544788 6. 131554 5. 642601 5. 48749 6. 2524 6. 236434 5. 578526 4. 425916  
4. 003884 5. 046386 3. 694808 3. 479834 4. 02895 4. 071996 3. 408615 4. 425202 4. 59352  
3. 534836 3. 475915 4. 133173 3. 69081 3. 871321 4. 036099 3. 359173 3. 724617 4. 091925  
3. 884843 4. 428137 4. 500748 2. 687209 4. 583648 5. 031322 3. 970859 4. 075128 3. 383788  
7. 202527 7. 608063 6. 511723 7. 187455 6. 920117 6. 799387 7. 346824 6. 370247 6. 541956  
3. 216176 3. 78264 3. 490212 3. 279327 1. 748365 4. 087325 2. 903372 2. 486379 2. 05641  
7. 950053 7. 819362 7. 354924 7. 212717 7. 534754 7. 09049 6. 810211 6. 68878 6. 122876  
1. 687118 2. 716452 2. 056262 4. 274525 3. 386958 5. 653559 4. 275126 2. 785584 3. 156006  
8. 789979 8. 968442 8. 484784 8. 597811 8. 421377 9. 11623 8. 81259 8. 941631 8. 426177  
8. 004775 6. 799324 7. 949976 7. 983412 7. 970804 8. 681895 8. 353421 8. 598715 8. 321322



5. 247164 5. 577023 5. 143595 4. 922821 5. 574132 5. 095536 6. 25838 5. 221207 4. 238463  
6. 290735 4. 317169 5. 372511 5. 306605 5. 292436 5. 98145 4. 153457 3. 265597 4. 194709  
8. 908642 9. 057534 9. 327433 8. 392912 9. 085301 8. 321586 8. 915984 8. 634963 8. 378524  
1. 529264 2. 598364 1. 626879 1. 938026 1. 061021 1. 665403 1. 842971 1. 899877 1. 426418  
5. 601542 7. 277226 7. 002951 7. 128223 7. 343952 6. 763963 7. 278251 7. 584338 7. 702844  
5. 487512 6. 014355 4. 539473 5. 137267 4. 938857 5. 731113 5. 135197 4. 555319 5. 989223  
7. 095338 5. 499216 6. 110498 7. 359256 6. 625592 7. 931324 7. 127646 6. 655377 6. 858422  
5. 901027 6. 803035 6. 66769 5. 908919 5. 707616 5. 530708 5. 21806 5. 73102 4. 883715  
4. 321103 3. 913646 4. 024832 3. 573797 3. 766515 3. 524508 4. 490721 2. 910786 3. 34233  
3. 577763 3. 405443 2. 199775 3. 675682 3. 231157 3. 377995 3. 753668 3. 847011 2. 731735  
4. 715107 4. 160225 4. 016588 3. 5769 4. 350795 5. 401657 4. 844782 5. 062252 4. 018353  
5. 267124 4. 995817 5. 608183 6. 06954 5. 327146 7. 287243 6. 176885 5. 982906 5. 517165  
8. 585341 9. 033947 8. 494241 8. 2624 8. 437201 8. 393118 8. 382293 8. 209263 8. 274221  
1. 254293 1. 482861 2. 190815 1. 254293 1. 451668 1. 531912 1. 37394 2. 16342 1. 728656  
4. 533833 6. 627393 5. 870947 4. 475607 4. 467365 4. 857875 5. 190358 2. 668094 4. 674054  
6. 993625 6. 954694 6. 574684 6. 628148 6. 71448 7. 803118 7. 159426 7. 228784 6. 970172  
3. 667215 5. 701839 4. 991621 3. 933443 4. 894915 5. 466151 5. 632333 5. 744599 5. 595013  
4. 852523 4. 811919 5. 911445 6. 362936 5. 495317 6. 495523 4. 833982 3. 352793 4. 901775  
6. 376847 5. 739205 6. 215954 6. 099125 6. 97628 3. 828166 6. 609256 5. 084357 5. 426353  
5. 819917 5. 997885 5. 561853 5. 413844 5. 841639 3. 232579 4. 570398 3. 605186 4. 619982  
2. 465766 2. 376741 1. 403289 2. 856098 3. 604476 4. 030529 2. 240789 2. 328956 3. 773299  
5. 565975 6. 48042 5. 494817 6. 382344 6. 366633 6. 95621 6. 361349 6. 749406 6. 432211  
2. 532799 2. 48764 2. 031146 2. 778914 1. 329958 1. 345182 1. 463638 1. 652564 1. 30842  
8. 425918 9. 026293 8. 639987 8. 594951 8. 713072 8. 808712 8. 593209 8. 510463 8. 600115  
6. 395386 4. 68352 5. 356129 6. 30647 4. 649381 5. 361346 4. 857872 5. 081058 4. 076818  
3. 431905 3. 188952 2. 731344 4. 177289 3. 618758 4. 747848 3. 979706 3. 55795 5. 533233  
7. 083723 7. 751979 6. 916125 6. 903167 7. 304583 6. 604 6. 903403 6. 593679 6. 600218  
4. 057576 2. 842529 4. 305125 2. 727072 4. 474652 3. 688343 3. 644631 2. 713934 4. 219538  
1. 646303 1. 525882 1. 603692 2. 276914 1. 618303 1. 935251 1. 88469 2. 237772 1. 371479  
2. 585234 2. 381927 1. 658127 4. 279428 3. 138879 2. 467226 2. 979724 3. 09573 2. 353854  
5. 155159 4. 414822 5. 428378 4. 169302 4. 468571 5. 548365 5. 288871 5. 545651 4. 680048  
4. 089791 5. 237958 4. 240311 4. 256383 4. 616427 4. 114976 4. 673706 5. 011343 4. 024678  
5. 806702 3. 407224 4. 313989 6. 01002 4. 942241 5. 821058 5. 419296 5. 942034 5. 729215  
5. 129245 5. 566935 5. 526349 6. 194002 5. 421076 5. 633338 6. 090149 5. 594931 5. 166726  
7. 067224 7. 495206 7. 065965 6. 893341 7. 532242 6. 129492 7. 252249 6. 984183 7. 026345  
6. 519319 7. 187798 6. 592367 6. 053625 6. 449628 5. 916322 6. 565889 6. 098488 5. 971586  
4. 158498 4. 68611 3. 55773 2. 830404 4. 042924 3. 795127 5. 41816 5. 829038 5. 726815  
2. 277303 3. 229722 2. 561639 3. 086837 2. 662181 4. 222732 2. 457711 3. 24523 2. 185618  
5. 376898 6. 330479 5. 061686 4. 629554 4. 899471 4. 807813 5. 520019 5. 101761 5. 411885  
2. 592382 3. 189329 2. 579454 2. 560159 3. 2661 3. 440093 2. 870333 3. 328892 2. 790719  
6. 887705 7. 389486 6. 606182 6. 616629 7. 060591 5. 971432 7. 050095 5. 993823 6. 384453  
4. 479914 4. 521352 4. 322745 4. 372364 3. 695071 4. 033785 4. 157309 4. 79017 3. 897003  
3. 257625 3. 845087 1. 956912 3. 73035 3. 885699 2. 663179 4. 645028 4. 170105 3. 061571  
3. 566012 2. 277036 3. 126672 3. 576094 3. 692226 2. 948419 3. 494188 3. 958321 3. 141949  
7. 5896 6. 957011 7. 116986 6. 616014 7. 137857 7. 221692 6. 945883 7. 036001 7. 035444  
4. 827566 3. 647358 4. 312718 4. 785527 4. 950597 5. 457115 4. 166017 4. 553356 5. 203718  
7. 729741 6. 647613 7. 555463 8. 246936 7. 309612 8. 004779 8. 027488 7. 570298 7. 768266  
2. 972585 3. 940005 3. 767506 3. 47441 3. 294497 1. 353744 4. 482589 3. 221186 4. 515081  
3. 804843 4. 534128 4. 684067 4. 424889 3. 724606 3. 766044 4. 943368 3. 596026 4. 040783  
8. 229037 7. 61566 7. 434527 8. 766315 7. 961728 8. 032158 7. 149209 8. 074388 7. 42091  
3. 892904 4. 250535 4. 058684 2. 499009 3. 229354 2. 783915 3. 693915 4. 232815 4. 080005

2. 629329 2. 913943 2. 476066 1. 793259 3. 135323 2. 445533 2. 273028 1. 473022 2. 565899  
4. 87998 5. 758493 5. 851231 5. 242532 5. 867121 4. 474802 5. 240762 5. 152181 5. 178946  
2. 217224 2. 004499 2. 418345 2. 148823 1. 866837 2. 398753 1. 891306 2. 363126 1. 943972  
2. 763819 3. 410867 2. 986491 4. 189924 2. 905248 2. 243451 4. 567517 4. 244518 3. 458257  
7. 298102 6. 949443 6. 307902 7. 074102 7. 16629 7. 376969 7. 053107 6. 847764 7. 137282  
2. 616644 2. 146312 2. 52323 2. 935474 2. 627149 2. 573813 2. 217536 3. 362752 3. 365449  
1. 634031 3. 749393 2. 367744 2. 653728 2. 400474 2. 378151 2. 449706 2. 606838 2. 757339  
8. 353064 8. 209064 8. 361379 8. 809651 8. 677252 8. 392754 8. 838852 8. 663066 8. 435295  
1. 646982 3. 436163 1. 685568 2. 248279 3. 491675 2. 471025 1. 7545 2. 031275 2. 488627  
1. 936855 2. 374437 1. 868857 1. 758669 1. 554692 2. 458739 1. 710237 1. 15484 1. 70881  
5. 079441 5. 00346 6. 028031 4. 81692 4. 571449 6. 043322 5. 038114 4. 811435 5. 709314  
2. 517113 2. 925329 2. 715709 2. 747549 3. 169645 2. 219989 2. 592361 2. 755631 2. 491315  
7. 485535 7. 459637 7. 991965 8. 270463 7. 571341 7. 488481 8. 258656 7. 913677 8. 00571  
0. 835197 1. 118064 0. 942787 2. 388934 1. 153819 0. 737372 1. 171998 1. 290301 0. 785423  
4. 019804 4. 049304 4. 902879 4. 353754 3. 913373 5. 056486 3. 572255 3. 788589 4. 074767  
1. 45347 1. 154498 1. 774877 2. 481128 1. 612778 1. 402349 1. 411494 1. 101222 1. 867599  
4. 379519 3. 847231 4. 152073 5. 507702 3. 893637 5. 653882 5. 532719 4. 651677 4. 75229  
2. 757698 2. 400746 2. 570347 1. 743228 3. 694803 3. 497989 1. 79822 3. 58164 2. 594104  
4. 67008 4. 67563 4. 11198 4. 819053 4. 383234 3. 76208 4. 43192 4. 571734 3. 893939  
9. 608913 10. 54774 10. 33951 9. 779814 10. 5797 7. 818945 10. 09268 9. 993485 10. 01141  
4. 869668 4. 054372 3. 259121 3. 33218 3. 214009 4. 192544 4. 196465 5. 153116 5. 215667  
2. 201271 1. 902565 2. 526705 3. 334608 1. 924983 1. 991205 1. 625229 2. 516231 1. 597947  
6. 575687 6. 795716 5. 363643 7. 086121 5. 46054 6. 347305 7. 443438 7. 244109 7. 155406  
3. 973303 3. 390785 4. 363028 4. 228015 4. 984084 4. 77644 5. 750119 5. 825175 4. 959398  
7. 118752 7. 821436 7. 203905 7. 832659 7. 327996 7. 55698 7. 416505 6. 719285 7. 247647  
7. 221805 7. 795684 7. 781731 7. 259306 7. 829396 5. 990204 6. 070805 6. 099362 6. 353221  
2. 840568 2. 729865 2. 837847 3. 536437 2. 537019 2. 859287 2. 190884 2. 723916 2. 821865  
3. 904312 4. 54938 5. 025181 4. 704596 4. 890913 4. 162427 4. 588572 5. 383677 4. 300433  
1. 301523 3. 156298 2. 040652 1. 836743 1. 640473 1. 531591 1. 682514 1. 064878 1. 231063  
7. 265553 7. 672793 6. 768177 6. 614118 7. 210666 6. 763752 6. 817889 6. 960137 7. 082098  
4. 03692 4. 475187 2. 193057 3. 826171 3. 440759 2. 867272 1. 192444 1. 823158 1. 526124  
5. 402877 5. 031005 4. 935894 5. 103951 4. 863763 5. 140124 5. 800376 4. 562756 4. 786975  
3. 520992 2. 583322 3. 521457 3. 126064 3. 187122 5. 272016 3. 831842 4. 368164 4. 731551  
2. 961057 3. 139071 4. 439553 4. 736331 3. 267025 3. 477658 3. 253159 2. 721935 3. 614329  
4. 214225 3. 534353 4. 014421 5. 000272 4. 482472 4. 891751 4. 762212 3. 787263 4. 279837  
5. 407597 4. 326731 5. 444722 5. 208092 5. 07246 5. 605259 5. 098876 5. 51122 5. 239715  
4. 42243 3. 182452 4. 147243 1. 58053 2. 923315 2. 348576 1. 618075 2. 617389 1. 475847  
3. 191209 4. 737651 4. 732517 3. 040142 4. 249525 3. 50254 4. 769659 4. 160651 4. 335685  
7. 05965 5. 836743 7. 228769 7. 303853 6. 949245 7. 33188 7. 080447 7. 364524 7. 421971  
6. 431617 6. 114104 4. 328277 5. 160838 5. 975084 5. 446767 4. 831901 5. 389216 5. 658379  
3. 809712 5. 146879 3. 985102 3. 545268 3. 436489 4. 549374 4. 301389 4. 015193 4. 299652  
6. 463066 6. 41571 6. 435472 5. 536924 5. 810989 5. 147109 6. 305626 5. 499899 5. 640584  
3. 048531 5. 853819 4. 274208 4. 522497 4. 904415 5. 7437 4. 086116 4. 297439 4. 126884  
5. 105678 5. 668993 5. 096891 4. 663321 5. 443667 4. 587279 5. 648771 4. 465026 4. 337397  
4. 888953 5. 226708 3. 540837 5. 24196 4. 880406 5. 780133 5. 673373 4. 204123 5. 338127  
2. 825163 2. 361574 2. 800263 3. 115008 2. 120245 2. 443841 2. 697621 4. 616159 2. 951373  
3. 742468 4. 133883 4. 333072 3. 533236 4. 578287 3. 769869 4. 110826 4. 150714 4. 743466  
6. 813035 7. 02975 6. 889834 6. 480379 6. 710024 6. 619467 7. 047566 6. 827448 6. 485652  
6. 657374 7. 59837 7. 25808 7. 17394 7. 53908 7. 652777 7. 278888 7. 297673 7. 291786  
2. 673356 6. 230894 4. 114996 3. 056298 3. 502145 1. 519795 1. 688646 2. 379667 1. 720455  
4. 674494 4. 4968 4. 840725 4. 878742 5. 213598 5. 927081 4. 944288 5. 279759 6. 106136

6. 361468 7. 411954 6. 911979 4. 910631 6. 638987 5. 650349 5. 73136 5. 910336 6. 112038  
3. 074282 2. 943311 3. 591748 2. 823984 3. 414732 3. 730972 4. 434882 4. 017758 3. 91664  
5. 549264 5. 290915 4. 406379 5. 541795 4. 94859 5. 451114 5. 328859 5. 752204 5. 599536  
4. 247162 3. 776668 4. 071476 3. 817196 4. 492624 4. 719066 5. 076878 4. 551765 5. 192623  
1. 242341 1. 34836 1. 114709 1. 197488 1. 780472 0. 705639 1. 196372 1. 343635 1. 069317  
3. 774015 2. 36806 2. 962264 3. 502637 3. 023151 2. 843515 2. 609392 3. 021485 3. 196077  
5. 059679 6. 22172 5. 146819 5. 147155 5. 122323 4. 783554 5. 599933 5. 065553 5. 728767  
4. 215357 3. 727036 4. 147325 4. 768679 4. 281065 3. 766229 4. 465902 4. 141333 4. 711596  
5. 22351 5. 926477 6. 024003 5. 926091 6. 392273 5. 230537 5. 096151 4. 231232 5. 373611  
6. 748318 6. 918625 6. 364837 7. 260249 6. 025767 7. 374917 6. 649939 7. 334445 7. 096439  
1. 453676 1. 167774 1. 931627 1. 477646 1. 340154 1. 400308 1. 424065 1. 318606 1. 488222  
6. 010298 6. 032464 5. 867826 4. 850977 5. 740323 4. 236848 4. 598533 5. 092493 4. 64838  
5. 924215 6. 070496 5. 377689 5. 109982 5. 550939 5. 719364 5. 779134 4. 863006 5. 058425  
4. 83108 4. 874735 4. 196716 3. 130836 3. 972982 4. 614969 4. 074244 4. 810076 5. 532032  
5. 600311 4. 425534 4. 782341 5. 44839 4. 737086 5. 407614 4. 485437 4. 938226 4. 789242  
0. 929344 2. 020708 1. 142496 1. 280036 1. 598726 1. 797688 1. 44364 2. 075095 1. 462349  
4. 547209 5. 583078 4. 99521 4. 527425 5. 576321 5. 307411 4. 735721 4. 037889 5. 421469  
5. 976158 6. 335824 5. 386757 5. 107437 5. 519066 5. 515681 5. 711932 5. 139888 4. 920968  
5. 102821 4. 825023 3. 32939 3. 591835 4. 078099 3. 953313 4. 701221 3. 9395 3. 991953  
2. 263207 2. 032194 2. 119829 3. 391922 2. 568787 3. 507164 2. 510358 4. 518363 3. 669474  
6. 010021 6. 685745 6. 21529 6. 407162 6. 069532 5. 639028 6. 695312 5. 950999 6. 514097  
1. 736377 3. 779334 1. 587837 1. 457281 1. 034441 1. 160728 1. 752118 1. 452779 2. 252112  
5. 206046 3. 352521 3. 972991 4. 751773 4. 363408 3. 000186 2. 795841 2. 342837 4. 427246  
7. 411747 7. 412868 6. 756079 7. 075023 6. 908681 6. 983745 7. 06233 7. 397859 6. 521233  
4. 283958 4. 038175 5. 291108 4. 132237 4. 432065 3. 641318 4. 76509 4. 076239 5. 125578  
2. 667913 1. 980504 1. 900141 2. 422631 2. 031363 2. 505106 2. 143965 2. 289744 2. 343899  
4. 366083 4. 140081 3. 970183 5. 104753 3. 659955 5. 291306 4. 319445 4. 093212 4. 80031  
6. 491837 6. 211043 5. 906898 5. 73084 7. 207226 5. 083297 6. 759059 6. 435354 6. 596934  
5. 278892 6. 405035 5. 775985 7. 276255 6. 251518 5. 977986 6. 394204 6. 239654 6. 478894  
5. 082552 6. 240665 5. 977067 5. 41996 5. 621435 6. 003707 6. 481614 5. 644237 6. 49639  
4. 271493 5. 077082 4. 247387 6. 309528 4. 091396 4. 412462 4. 310284 5. 070914 4. 984354  
7. 448239 7. 867778 7. 282275 7. 429037 7. 768983 7. 317612 7. 509603 7. 424204 7. 396374  
6. 47854 6. 025231 6. 402328 6. 214054 5. 821623 6. 114376 5. 545551 5. 694157 5. 753156  
3. 261586 3. 370998 4. 178505 5. 630201 3. 949977 3. 360752 4. 660271 3. 233424 4. 214105  
5. 360071 5. 425179 5. 530348 4. 383594 5. 429876 5. 38227 4. 998946 4. 902699 4. 370174  
5. 097609 5. 293608 5. 136671 5. 094401 5. 419347 5. 763233 4. 862617 5. 176786 5. 080026  
6. 677234 6. 855748 6. 494915 6. 375077 6. 983145 7. 227664 6. 882414 6. 72333 6. 265721  
6. 643813 5. 89761 6. 129836 5. 738199 5. 583722 5. 776737 5. 594332 6. 090699 5. 650017  
4. 354265 5. 220717 4. 263144 4. 493345 4. 317915 4. 650233 4. 966774 4. 882578 4. 956024  
4. 98099 3. 928042 3. 526526 3. 588128 3. 456325 5. 337583 4. 615366 4. 358189 3. 995465  
8. 009475 8. 386143 7. 663128 7. 756977 7. 769208 7. 774531 8. 320587 8. 381788 8. 023074  
2. 963997 2. 709423 2. 934969 4. 177527 2. 821026 3. 336966 3. 944769 2. 876562 2. 578232  
7. 166149 7. 150305 7. 650762 6. 981189 6. 99292 7. 316565 7. 531033 7. 467207 7. 334615  
4. 269628 4. 130543 4. 984164 5. 585338 4. 429464 5. 093133 4. 503849 3. 65412 4. 557254  
5. 055266 5. 65836 5. 281476 4. 789124 6. 071509 4. 776343 5. 390772 5. 666199 5. 443938  
2. 506166 2. 738412 2. 640852 2. 776523 2. 607771 2. 695717 2. 695362 2. 878361 3. 710354  
3. 042944 4. 181262 4. 624178 3. 858689 4. 3308 3. 162606 3. 418202 4. 373717 3. 729813  
6. 348725 6. 674832 6. 758866 7. 122635 6. 956677 7. 117171 6. 756929 6. 72213 7. 141728  
7. 768913 7. 8778 8. 360834 8. 519596 8. 376003 7. 908756 8. 790544 8. 857801 8. 621452  
8. 455 9. 364351 8. 997787 8. 674031 9. 284644 8. 67268 9. 205638 8. 927473 8. 877534  
4. 135237 4. 021586 5. 426625 6. 122998 5. 006838 4. 133826 6. 369567 6. 814459 5. 899162

4. 288437 5. 764497 5. 051076 5. 551951 4. 434725 4. 516561 5. 086888 5. 043948 4. 454129  
3. 732399 4. 123313 3. 589876 3. 328977 3. 825905 4. 023548 3. 859675 3. 59139 3. 445793  
6. 588415 6. 294478 7. 364993 6. 295729 6. 681068 7. 024997 7. 082181 6. 451122 6. 073996  
5. 846282 6. 415117 6. 494507 6. 80972 5. 828781 6. 09222 6. 260585 5. 830554 6. 382404  
4. 958167 5. 064485 5. 043208 4. 810806 5. 173277 4. 456175 4. 171924 4. 834832 4. 840387  
3. 847492 3. 664523 5. 015864 2. 61334 3. 774813 3. 011451 3. 230922 2. 224478 2. 436896  
4. 269607 5. 899299 5. 234243 4. 876308 4. 786969 5. 868761 5. 560906 6. 324269 5. 594476  
3. 677889 3. 28051 4. 036677 2. 939583 3. 683676 3. 284188 2. 966214 2. 917341 3. 441871  
5. 124203 5. 309874 3. 945108 3. 633242 4. 568733 5. 143701 4. 764874 4. 447138 4. 572445  
3. 115788 3. 767022 4. 500864 3. 234292 4. 520447 3. 535603 4. 2112 4. 17627 4. 195517  
4. 681149 4. 780337 4. 381027 3. 807039 4. 567468 5. 398349 4. 780247 4. 912116 4. 294508  
5. 865198 5. 308907 5. 739073 5. 846899 5. 80438 4. 235592 5. 63412 5. 786815 5. 507337  
5. 755312 6. 189846 6. 704782 5. 864181 5. 864898 5. 035741 5. 789881 5. 904297 5. 527011  
4. 213633 2. 979742 3. 470181 2. 9688 3. 027253 3. 659155 4. 067194 3. 206134 3. 17448  
7. 251871 7. 194799 7. 219353 6. 922901 7. 227742 5. 650819 6. 336688 5. 826986 6. 248541  
6. 057694 5. 627802 5. 662169 5. 251378 5. 708436 5. 22076 6. 170986 5. 629587 5. 943872  
4. 687015 5. 05989 4. 73777 4. 771201 5. 244818 4. 498599 4. 372659 4. 731824 4. 856873  
7. 455069 7. 027453 7. 414542 7. 626641 7. 109254 8. 313055 7. 904648 7. 951105 8. 336969  
2. 145749 3. 220851 2. 049834 3. 710269 2. 821727 2. 302422 1. 769278 3. 11208 2. 784403  
4. 170009 5. 077265 4. 568443 5. 706991 5. 01585 5. 34069 5. 062797 4. 279072 5. 36627  
3. 343711 3. 388359 3. 771922 3. 871778 3. 530427 4. 733694 4. 697743 4. 956774 5. 851222  
6. 536146 6. 056978 6. 62149 6. 329759 6. 053462 6. 191665 6. 0326 5. 560108 6. 310228  
5. 173134 4. 506071 5. 675633 6. 500392 5. 250148 5. 598525 6. 080738 6. 606193 6. 44569  
6. 546504 6. 13459 5. 714725 5. 679465 4. 764752 5. 066556 5. 933804 2. 855275 4. 380151  
8. 016154 7. 440083 7. 372576 6. 946369 7. 472002 7. 257913 7. 027644 7. 207055 6. 968449  
6. 033659 6. 389048 6. 303211 6. 136886 7. 16344 4. 585298 6. 519882 5. 857071 5. 780361  
5. 383212 6. 117289 5. 986158 5. 294618 6. 064879 5. 560694 4. 455251 5. 041459 4. 84299  
4. 735341 3. 970754 2. 74152 3. 12335 3. 717909 1. 599571 1. 404252 1. 12402 2. 132815  
6. 874102 6. 355402 6. 198646 4. 91149 5. 322836 5. 65078 5. 642347 5. 661455 5. 210199  
2. 906958 2. 141626 2. 963564 2. 790942 2. 059227 2. 892895 2. 312121 2. 364286 2. 572862  
1. 665389 2. 009541 2. 465895 2. 776946 1. 756623 2. 424956 2. 027417 1. 831243 3. 008669  
4. 991082 4. 368061 5. 215631 6. 162323 5. 897123 5. 854614 5. 146261 6. 314313 6. 521327  
2. 579488 3. 402635 3. 487015 4. 345599 2. 389384 2. 431387 2. 668758 3. 081798 2. 322039  
6. 542546 7. 544978 7. 227973 6. 760008 6. 745495 6. 344248 7. 626888 8. 052111 7. 099128  
7. 123793 7. 014728 6. 488087 6. 892347 7. 033712 6. 289303 7. 196334 6. 98404 6. 510934  
6. 396402 6. 985668 6. 765243 5. 635726 6. 056284 6. 758308 6. 683295 6. 47671 6. 567046  
7. 738975 7. 152146 7. 830853 7. 247961 8. 078869 7. 533065 8. 495756 8. 105656 7. 800848  
3. 939371 4. 78163 5. 041996 5. 36156 5. 785881 3. 522462 3. 974853 5. 278611 3. 366518  
6. 667146 6. 790316 6. 240923 6. 087755 6. 867157 6. 026159 6. 366644 6. 371489 6. 608819  
5. 503497 5. 722764 5. 587004 5. 417781 6. 05154 5. 222015 5. 368809 5. 592265 6. 17882  
3. 095106 2. 18118 4. 233055 4. 818787 3. 385908 4. 738324 3. 732745 3. 249928 3. 399412  
2. 053379 2. 26879 1. 814308 2. 258855 2. 336463 1. 832245 1. 754848 1. 856054 1. 693659  
6. 102914 5. 847686 5. 099172 5. 308258 5. 538596 5. 489722 5. 923185 6. 264199 5. 997041  
5. 674074 4. 841506 5. 424321 5. 003574 4. 101534 5. 015166 5. 545665 5. 370039 4. 94378  
7. 527389 8. 489922 8. 409571 8. 145546 8. 448562 7. 895756 8. 635907 8. 88551 8. 632465  
2. 137561 2. 087867 2. 160642 2. 386414 2. 222509 3. 098562 2. 746164 2. 916517 2. 053742  
5. 29052 5. 899832 5. 114809 6. 595959 6. 222398 5. 964881 6. 492723 5. 068503 5. 392233  
6. 354289 6. 303508 6. 688808 6. 336791 6. 847064 5. 629966 6. 345716 6. 09443 6. 406417  
4. 162702 4. 903483 4. 608209 3. 898368 3. 466062 3. 91479 4. 019462 4. 877339 3. 956745  
7. 066307 7. 508308 6. 941969 6. 357068 6. 240456 6. 862842 6. 991235 7. 105656 6. 874159  
3. 717459 3. 564717 4. 718167 4. 317099 4. 826211 3. 599723 4. 818115 5. 693307 4. 786843

1. 17664 0. 918785 2. 156532 1. 450198 1. 411015 1. 506224 1. 49892 1. 605099 1. 391183  
3. 560754 2. 844861 2. 663047 3. 353124 2. 435645 3. 421576 3. 486028 3. 5575 3. 503968  
1. 570167 2. 043873 2. 157939 3. 096774 3. 295454 2. 901328 3. 04784 3. 109275 3. 57739  
7. 502795 6. 68512 7. 047439 6. 318845 6. 492774 5. 856812 4. 631545 4. 9478 4. 837709  
5. 017702 4. 713716 3. 519704 3. 127668 3. 692312 3. 841994 4. 291639 5. 460711 4. 277446  
4. 376243 4. 620279 3. 452223 4. 69191 3. 21887 4. 192058 5. 017299 4. 673634 4. 769622  
5. 70773 6. 194016 5. 467662 5. 286843 5. 998332 5. 346291 5. 521331 6. 223993 5. 7263  
3. 636742 3. 087441 3. 097149 3. 765915 3. 170751 2. 718326 2. 299456 3. 274042 3. 511923  
3. 543469 4. 425458 3. 20712 3. 954062 3. 949226 4. 141086 4. 535407 4. 094357 3. 100864  
1. 659168 1. 342977 1. 194049 2. 038316 1. 698642 1. 495225 1. 90486 1. 971527 1. 638944  
5. 041817 5. 356623 5. 287061 5. 436926 5. 031056 5. 029233 4. 982803 4. 596361 5. 149886  
2. 316168 2. 094318 2. 34132 3. 216754 4. 36222 2. 276114 2. 21574 3. 225552 3. 253327  
8. 47279 8. 268405 8. 425814 8. 269684 8. 135886 8. 492606 8. 451513 8. 513985 8. 46413  
6. 063712 6. 068669 5. 936041 5. 780833 6. 469126 6. 32728 6. 263289 6. 095261 6. 135651  
5. 862973 6. 450112 5. 966945 5. 780049 6. 463778 6. 164967 6. 349685 5. 488578 6. 053495  
1. 577529 1. 237501 1. 513998 1. 401959 1. 964018 1. 05441 1. 231478 1. 973559 1. 889914  
3. 042979 2. 98939 2. 889793 3. 417147 2. 758453 3. 936894 3. 717735 3. 266305 3. 437581  
4. 654758 6. 343601 6. 008682 5. 207723 6. 33745 6. 602757 6. 871624 6. 271423 6. 544178  
5. 722208 5. 868637 4. 935473 5. 297945 5. 03363 6. 122714 4. 766924 4. 451294 4. 542712  
4. 300105 5. 093026 4. 107771 4. 756025 5. 271126 5. 104029 4. 332753 4. 005716 5. 691344  
7. 0333 6. 730007 7. 39556 7. 607727 7. 257392 5. 728303 8. 097672 8. 266168 8. 099789  
7. 107533 6. 627649 6. 651796 5. 866204 5. 874521 7. 575154 5. 120092 5. 040269 4. 401563  
4. 216925 5. 224729 4. 491024 5. 402261 3. 068308 4. 405027 5. 996882 4. 037652 4. 929209  
6. 266181 6. 767132 7. 286044 6. 291884 6. 013081 5. 425834 6. 677501 7. 219068 6. 86337  
1. 95115 2. 123628 1. 800037 1. 947162 1. 952403 1. 658073 1. 412055 1. 775578 1. 924125  
4. 284217 5. 106112 3. 224467 5. 257655 4. 44118 4. 46834 4. 684688 4. 594407 4. 814792  
4. 926381 4. 155358 4. 776021 4. 933714 4. 842356 3. 734078 4. 576504 4. 120861 4. 224626  
4. 515024 4. 104687 3. 041917 3. 931072 4. 271849 4. 589082 4. 441335 4. 306916 4. 781407  
6. 199598 6. 265558 6. 164115 6. 349842 6. 065454 5. 954433 5. 975005 5. 831775 5. 808724  
7. 946511 8. 335897 8. 48295 7. 978887 8. 281628 6. 372943 7. 297187 7. 012906 7. 196835  
4. 722824 5. 077869 5. 444362 4. 76683 5. 53223 4. 603443 5. 876721 5. 153807 5. 208438  
5. 461915 5. 39167 5. 456773 5. 519762 5. 497484 4. 308101 5. 304567 5. 069698 5. 296168  
7. 51139 7. 789485 7. 487857 6. 531388 7. 586672 6. 574674 6. 930154 6. 716993 6. 830008  
7. 755356 7. 783028 7. 908749 7. 789817 7. 155795 6. 707469 7. 196762 6. 626229 6. 405029  
2. 940674 4. 985397 3. 555775 4. 217477 3. 853192 4. 074835 3. 864086 3. 405042 4. 909865  
4. 122715 3. 060541 4. 978645 5. 206167 4. 03523 3. 630329 5. 627925 5. 017036 4. 007579  
3. 354257 3. 069446 4. 193007 2. 360737 3. 17797 4. 030348 3. 082321 1. 851515 2. 738652  
5. 12949 5. 640999 5. 794455 5. 509046 5. 112387 5. 274271 5. 510178 6. 016437 5. 715289  
2. 454085 2. 845892 2. 80145 3. 968756 3. 107428 2. 850448 3. 404108 2. 434128 3. 506017  
4. 247431 4. 885832 4. 396553 3. 017664 4. 566183 4. 990173 4. 827617 4. 212309 5. 034686  
6. 710214 6. 913825 6. 666025 6. 40534 6. 799928 6. 359605 7. 103492 6. 590512 6. 6009  
4. 29886 2. 474613 1. 988024 3. 212193 2. 010367 2. 682935 2. 791652 1. 625543 1. 981904  
6. 300267 5. 915932 6. 333291 5. 368297 5. 421039 6. 338148 5. 801372 5. 372223 5. 098193  
6. 207439 5. 769351 6. 164993 4. 840268 5. 937109 6. 166988 5. 433216 4. 834751 5. 579596  
2. 516431 1. 368613 2. 744103 2. 31555 2. 200311 1. 726411 2. 890954 4. 976246 3. 702838  
4. 934593 4. 404873 4. 969308 5. 489624 4. 154557 4. 915331 5. 053466 4. 954754 4. 571016  
4. 201506 3. 832585 4. 365358 4. 383714 4. 050061 4. 593862 4. 560609 4. 098269 3. 60646  
2. 719495 1. 968328 2. 145387 2. 630654 1. 428164 2. 501439 1. 975314 1. 712503 1. 458001  
6. 794783 7. 4995 7. 816077 7. 500412 8. 375412 6. 810603 7. 326796 7. 58093 6. 344323  
7. 032396 5. 834569 6. 343921 6. 708641 6. 432743 7. 42464 7. 136675 6. 052488 6. 724635  
6. 242968 6. 383344 5. 814231 6. 411852 6. 02746 5. 43543 6. 593874 6. 062493 6. 50112

5. 247154 4. 377647 5. 025406 3. 742014 4. 513184 2. 339573 3. 542897 3. 861427 3. 188883  
5. 544784 5. 85593 3. 893361 5. 86891 5. 73846 5. 710345 5. 773731 5. 472629 5. 529169  
4. 412311 5. 770584 5. 287261 4. 359092 4. 942053 5. 045113 5. 130318 4. 36602 5. 197644  
6. 494605 6. 362785 6. 880538 6. 232288 6. 697346 5. 449897 6. 551178 7. 059819 6. 717972  
1. 708067 2. 174482 4. 084148 3. 366154 3. 795127 3. 290207 3. 430011 1. 985456 2. 841625  
5. 366991 4. 179698 4. 509707 4. 721451 5. 105872 5. 137298 5. 049776 4. 924646 5. 008386  
1. 007001 1. 601044 1. 607623 1. 621956 1. 215999 1. 571499 1. 452359 1. 384778 1. 535959  
4. 181152 3. 357368 2. 792763 2. 639895 2. 891329 3. 399951 3. 018524 3. 943725 2. 607123  
5. 91929 5. 448124 5. 117518 5. 127525 5. 498694 5. 090238 6. 54366 5. 073365 4. 981457  
1. 695561 1. 689999 1. 863643 2. 302311 1. 376654 1. 931414 1. 710263 2. 012201 1. 857515  
4. 796739 5. 586449 4. 547365 3. 130089 4. 654658 3. 930428 4. 414197 4. 042843 3. 934812  
3. 322165 4. 210751 1. 087533 2. 374491 1. 698806 1. 429255 1. 682453 1. 372434 1. 209317  
4. 02486 2. 542141 3. 660227 3. 493014 2. 097737 3. 269982 1. 928315 1. 91726 2. 909852  
2. 494742 3. 193006 3. 584057 3. 07849 2. 588759 2. 959684 2. 389742 3. 028425 2. 381622  
7. 427285 7. 968515 7. 719036 7. 871876 8. 103658 7. 804916 8. 144622 7. 773954 7. 393493  
5. 840267 5. 837711 5. 718309 5. 908043 5. 136998 6. 398702 6. 219437 6. 047796 5. 71389  
1. 393964 2. 134909 2. 043363 1. 579698 1. 230519 1. 446673 1. 228156 1. 817172 1. 654375  
4. 884602 5. 287411 4. 890902 5. 894428 5. 173206 5. 521174 6. 596534 5. 557102 5. 353316  
2. 985967 2. 197176 3. 626062 4. 011031 2. 522721 3. 871616 5. 677005 4. 543633 4. 389585  
7. 03911 7. 100498 7. 044282 6. 55928 7. 405712 6. 720659 6. 783075 6. 311682 6. 561247  
4. 914514 4. 480733 5. 330833 5. 16013 4. 450023 5. 230643 5. 891013 5. 353918 4. 950874  
4. 786519 5. 42618 5. 477224 4. 528026 4. 664976 4. 203597 4. 691154 5. 054599 4. 572052  
2. 55451 3. 458999 2. 494919 3. 534946 3. 309774 2. 741884 3. 162926 3. 805506 3. 064049  
6. 131165 5. 916884 5. 508797 5. 357382 5. 840881 5. 203549 6. 175765 5. 221822 5. 043188  
7. 556735 8. 873455 8. 474264 7. 975915 8. 736305 6. 919238 7. 478833 7. 269702 7. 658708  
5. 311154 5. 822718 6. 323993 4. 379358 5. 260764 6. 935504 4. 117829 4. 868422 4. 369238  
6. 14077 6. 845175 6. 921961 6. 370905 6. 429676 6. 319679 5. 729835 6. 317602 6. 734709  
5. 865139 6. 066371 6. 497264 4. 286785 6. 534766 5. 270015 6. 636987 5. 665911 6. 524045  
4. 224075 3. 141897 1. 727551 3. 502676 1. 080058 3. 075395 3. 815144 2. 276998 2. 822485  
5. 917994 5. 709524 5. 161588 4. 820253 5. 218623 5. 362737 5. 94863 4. 131757 4. 683424  
3. 743591 4. 584027 4. 057152 2. 75531 4. 202318 1. 818386 1. 986092 4. 781059 2. 174126  
8. 125029 7. 941304 7. 032009 7. 553738 7. 898149 7. 72573 8. 861401 9. 015295 9. 107222  
7. 175375 6. 132244 5. 157636 6. 041868 6. 239906 6. 69793 5. 915446 4. 714227 5. 036552  
4. 9996 5. 749609 6. 917766 4. 232938 5. 373186 5. 643556 6. 690751 6. 778495 6. 100244  
6. 582669 6. 52907 6. 353339 5. 051288 6. 400067 7. 063475 6. 170761 6. 054483 6. 119751  
3. 31609 3. 361101 3. 754986 3. 052371 3. 469012 2. 65034 2. 310443 2. 164484 2. 414161  
4. 2653 5. 050094 4. 7245 4. 439161 4. 548736 4. 783613 4. 850048 5. 160875 4. 534389  
1. 773161 1. 618162 2. 192443 2. 075828 1. 66248 2. 142381 2. 017578 2. 840279 2. 353901  
5. 689085 5. 646116 6. 254005 5. 695088 5. 640068 6. 613725 6. 384822 6. 212167 6. 087561  
4. 902181 4. 239389 4. 418592 5. 044262 5. 263266 6. 126932 5. 282612 4. 932258 5. 099958  
2. 005449 3. 044516 2. 14454 1. 52464 1. 887267 3. 097692 2. 024095 1. 903449 2. 671248  
3. 585029 3. 414254 3. 810582 4. 414842 3. 614122 4. 105175 2. 92358 3. 718949 3. 895143  
4. 039427 4. 206169 3. 754964 3. 408947 2. 892353 2. 784365 3. 871691 4. 145172 2. 840314  
2. 425404 2. 72248 2. 721081 2. 807665 2. 934856 3. 570876 3. 306851 2. 813454 3. 477253  
6. 494822 6. 888989 6. 502063 6. 661481 6. 742451 6. 578969 7. 378935 6. 609567 6. 075814  
5. 438581 4. 66716 6. 331318 6. 455765 6. 340681 7. 758329 6. 05129 6. 186468 7. 104024  
5. 146516 5. 805659 5. 060419 5. 871806 4. 750786 4. 824528 5. 101385 5. 079555 4. 965289  
3. 039644 1. 654727 2. 2179 1. 640511 2. 075086 2. 802731 1. 706005 2. 651712 1. 522414  
6. 552711 6. 38122 6. 6833 6. 1155 6. 024646 5. 616751 6. 424203 6. 084895 6. 23509  
3. 444914 3. 399459 4. 040846 3. 680584 3. 71109 4. 808019 4. 179406 3. 978041 4. 161973  
5. 878124 5. 607924 5. 459314 6. 083988 5. 266278 5. 943454 6. 368318 5. 829789 6. 095988

6.083761 6.285477 6.728924 6.201246 6.803168 6.241026 6.521397 6.140582 6.604527  
5.762975 5.895934 5.766706 4.893233 5.730463 5.504651 4.702082 5.719691 5.378334  
8.742907 9.435889 8.287509 8.065511 9.0869 8.209673 8.98362 8.138086 8.176248  
3.648477 4.667246 3.573755 2.515386 3.241515 3.660455 3.493918 2.853639 2.496279  
4.384952 6.183339 5.100434 4.384181 5.028009 6.306958 5.124277 3.531183 4.846349  
5.904561 6.872981 6.439204 5.662689 7.05191 6.132266 6.227057 5.579908 5.716341  
3.112379 3.32021 3.391527 3.737911 3.487672 4.692656 3.819845 3.413654 3.29265  
4.5616 3.40823 4.098763 3.705736 3.485022 3.845305 4.765401 4.275821 3.808615  
4.93519 4.537256 5.431247 4.3159 3.856123 6.408582 5.847669 4.24958 4.613404  
8.580243 7.976474 8.010052 8.760312 9.123693 8.365484 7.938558 7.916374 8.627017  
6.390191 6.43994 6.320267 6.273804 6.453857 6.504165 6.933293 6.955135 7.055751  
4.386293 2.980926 3.690181 2.418764 3.295127 2.55511 3.735975 3.100123 3.261646  
3.999988 3.600832 3.612471 3.486117 3.459204 4.212387 3.068701 3.72283 4.131164  
4.529847 3.998146 5.575455 4.425177 4.657512 5.88511 4.563825 5.37606 5.343725  
6.581521 7.331991 6.910861 6.829732 7.238316 6.781586 6.478836 6.30994 6.388619  
6.667614 6.816533 6.819095 5.659516 6.924225 5.651345 5.744063 6.525909 6.006466  
5.38483 5.333042 4.897259 5.419104 4.7156 5.457491 5.195589 4.937514 5.456444  
5.332073 5.261368 4.695223 5.496148 5.098257 5.590337 5.436964 5.063569 4.797821  
4.343236 3.732546 3.836603 4.377651 4.239662 4.444508 4.460227 4.647545 5.133218  
2.017018 2.477917 2.525815 2.272949 2.609025 3.032063 2.465353 2.120471 3.371223  
4.24876 2.400743 3.734267 4.156835 2.712219 2.460573 2.148471 2.817497 2.264688  
4.979125 5.352587 5.252672 4.571345 5.541356 3.92512 6.113159 5.79193 5.523305  
6.715117 6.11707 6.034424 6.327848 5.955241 5.787453 5.451464 4.859336 4.355603  
3.945692 2.563204 4.181692 3.504524 3.500992 4.096257 3.261138 2.439923 2.725566  
6.826089 6.644011 7.226748 4.993103 7.163483 6.958072 7.01303 7.603597 6.965338  
2.362661 1.649129 1.652046 1.426543 1.274413 1.770959 1.351331 2.140167 1.745679  
1.623512 1.456733 1.520614 2.038466 2.183056 3.233963 1.528315 1.356626 4.125504  
5.91085 6.566674 5.889024 5.644932 5.656285 6.160512 5.618185 5.597452 5.84179  
6.405475 6.932659 7.064269 7.333921 7.436336 7.657364 7.487506 7.342141 7.046466  
2.481829 2.428938 2.630206 2.298522 2.510048 2.242713 2.066107 2.940273 3.090279  
2.611355 1.73469 2.22799 1.964707 4.093696 1.765542 1.883787 1.529106 2.572887  
3.070587 2.452887 2.994445 3.687143 3.377072 3.627586 2.469535 2.593891 2.942488  
1.341761 1.541068 1.446921 1.436772 1.197529 1.020679 1.625389 1.279418 1.087034  
3.610181 2.523718 2.772004 2.500584 2.449547 2.816517 2.486081 2.601416 3.481215  
4.105978 4.440824 4.976334 2.131882 4.224899 4.89248 5.565607 4.679211 4.721817  
5.372611 4.441292 3.509186 4.125598 4.244314 4.855537 4.145956 4.894992 5.024575  
3.721158 1.323883 1.955059 1.335261 2.465723 1.792275 1.299276 1.83633 2.779471  
7.03602 7.36819 7.366379 7.35916 7.643565 6.945658 7.45518 7.591393 7.355534  
8.795131 7.713696 8.34359 8.579197 7.759125 10.15191 7.81424 7.005056 7.181928  
7.701622 8.194771 8.08225 7.566248 7.89082 7.370576 7.420381 7.271261 7.183482  
2.521153 2.357254 3.339044 4.082614 2.768379 2.148565 2.739363 2.575744 2.221755  
6.701803 6.236865 6.910674 6.582831 6.511597 6.876594 6.926439 7.078107 7.163502  
3.824567 4.507025 3.543134 4.785827 4.447372 1.761378 3.862078 3.647621 1.834251  
3.839495 3.451481 4.082096 4.394975 3.222386 4.392459 1.98649 3.048236 3.861955  
4.608035 4.844374 4.791121 5.248953 5.604788 6.292075 6.334845 5.256148 6.410708  
7.061873 7.702081 7.239273 7.261395 7.403716 6.977678 7.283596 7.381703 6.941592  
1.736629 2.987801 2.580074 4.244759 1.842641 1.782023 1.588462 2.206821 2.057996  
1.927481 2.776719 1.786707 2.805192 3.505791 2.141087 2.631619 2.345614 3.376842  
5.311364 6.756484 6.294941 5.124261 6.528906 6.272023 7.403918 7.330918 6.355648  
1.101551 1.659887 1.128716 1.184799 1.777839 1.368472 1.474808 1.831477 1.532449  
2.746001 2.1833 1.982166 2.224395 2.613272 1.224113 2.570281 1.212691 1.247696

1.105399 4.118099 3.917507 1.064239 0.812357 2.219072 1.19912 1.86193 2.107767  
2.250116 1.882304 2.81766 2.950921 2.025524 1.122194 1.29848 1.619581 1.797191  
1.685833 1.699499 1.148782 1.292613 1.622098 1.68574 1.262371 2.269973 1.240493  
6.109176 6.394249 4.866449 6.020466 6.822577 5.737661 7.394706 6.573886 5.985063  
3.143694 3.090004 2.996045 3.328786 3.005488 1.873478 3.53457 2.897045 3.034477  
1.369171 1.080307 0.930708 1.617191 1.205349 1.247614 1.198968 1.5991 1.104851  
1.620881 1.288578 1.92855 1.271575 1.192081 1.067695 1.059979 1.289823 1.697031  
1.527924 4.387228 1.363502 1.180939 1.722542 1.929758 1.18369 1.208602 1.411005  
0.621543 4.643013 2.210064 1.113705 1.312962 1.00038 1.206481 0.778699 0.903267  
5.58123 5.795798 6.032678 6.461063 6.456424 5.946131 5.630402 5.507448 6.252678  
2.492014 3.186841 3.140578 2.778101 2.940425 3.718607 3.108195 3.371758 3.747559  
5.193255 5.699592 5.408463 4.338682 4.691411 4.764236 3.949622 4.540984 5.208775  
4.569241 4.345009 4.264047 4.277964 4.160029 3.207055 4.136994 3.398005 3.400111  
2.642548 2.9737 2.586456 2.161094 3.363142 2.383604 2.425125 1.531495 3.119919  
3.120226 5.474133 3.440206 3.636585 3.857562 2.324074 4.50078 4.093726 2.944815  
5.221328 6.219052 5.170085 5.806046 5.654256 4.912598 6.114002 5.738864 5.699127  
2.258949 1.610905 1.863048 1.14974 1.106757 1.938992 1.081496 1.910713 1.347852  
0.890982 0.434493 0.683173 0.860566 1.320837 0.678889 2.250462 4.074506 0.724807  
2.736082 3.75659 2.576528 3.405389 4.380015 3.374004 4.806941 2.894794 4.698745  
3.251531 4.106375 3.139198 3.205382 3.169184 3.347624 3.218662 2.573424 2.672722  
5.702919 6.039063 5.172926 5.890812 5.734952 6.091393 4.560563 4.995375 4.582532  
7.353151 6.553093 5.064731 6.729303 6.654504 5.692633 6.197164 5.13415 4.408245  
5.210451 4.315275 3.844405 5.169876 4.016882 4.587628 4.838523 4.823607 4.285853  
1.935555 0.893554 1.058976 0.931528 1.170783 1.35354 1.043057 2.352016 0.673197  
8.663333 7.799999 7.912743 8.747476 7.689183 8.808543 7.401065 6.753288 7.108726  
5.42543 5.91543 6.820469 4.937291 5.761853 5.716895 6.708474 5.294436 6.12128  
0.656991 0.515764 1.83192 1.602177 0.94158 0.678201 1.043766 0.990525 0.601654  
5.102551 5.709742 4.995274 3.762035 4.078551 5.789371 5.128506 5.191399 5.580551  
5.345122 4.770317 4.244789 5.137094 4.347142 5.387214 4.938432 4.945444 5.240779  
4.354399 4.769832 3.581346 3.309929 4.231023 4.314887 4.152172 2.74996 3.787123  
5.253154 4.71963 5.772469 5.017976 5.144861 2.532674 3.415397 3.382907 3.04116  
7.104308 7.46839 7.195014 7.583303 7.239976 7.386166 8.313043 7.727918 8.101706  
6.078818 6.521773 6.169008 6.08454 6.446719 6.075797 6.098054 5.18917 5.730784  
5.402718 4.988829 4.329506 5.376826 5.025871 5.377205 6.030281 6.140704 6.107473  
1.364735 2.604457 2.409522 1.626864 2.579702 1.66935 2.127826 2.226926 2.087943  
6.278479 6.438296 5.564938 6.344723 5.870882 6.451502 5.190613 5.687215 5.17026  
4.67633 4.126819 4.865839 4.333478 4.462452 4.612612 4.677944 4.555343 4.223726  
3.850266 2.761995 3.125482 2.91551 3.448284 2.713684 3.397278 2.581446 4.011007  
1.673129 1.079476 1.894795 2.014691 1.780039 0.922399 0.871823 1.852616 2.183316  
2.312936 3.65822 2.43837 2.850704 2.614441 3.679522 2.799599 2.666654 3.196337  
9.574333 9.230954 9.022219 9.821999 9.231925 9.763255 9.647704 9.678816 9.552013  
3.074226 1.483145 3.83225 4.582793 2.768644 4.853358 4.061822 4.022607 4.472873  
2.369004 1.671172 1.694931 2.338051 1.826626 2.703067 1.740988 2.489421 1.933872  
6.089231 5.048565 4.892914 3.854636 4.731722 5.732974 5.399106 4.595494 3.856417  
2.630224 3.640843 4.129135 4.305247 5.046145 3.904057 2.476499 4.088831 3.660834  
5.020071 5.073598 4.880455 4.243584 5.523021 4.566028 5.34028 5.485626 5.587747  
2.385761 2.170138 1.625885 1.333996 1.631166 2.216845 1.192399 1.880106 1.597753  
1.146887 1.328815 1.436425 1.26299 1.01258 0.602447 1.084394 0.850381 1.192633  
2.533051 2.21549 2.425888 2.788821 1.941036 3.698621 2.020961 2.371312 2.036076  
1.526942 1.440585 1.302372 1.037958 1.295536 1.609942 1.167011 1.436005 1.496139  
2.763793 1.859069 2.159286 2.555305 2.491456 3.530706 2.788466 2.124888 3.946717



4. 878088 5. 128105 5. 630942 3. 711819 4. 993988 3. 690006 5. 055241 4. 2784 6. 217553  
1. 598523 2. 244909 1. 523663 2. 552429 1. 481781 2. 152759 1. 637088 2. 023828 2. 073116  
6. 819721 5. 9476 6. 866995 6. 434228 4. 95708 6. 165877 6. 102854 4. 705581 5. 132727  
3. 435554 2. 447102 4. 350456 5. 631233 4. 621283 4. 862588 5. 532588 5. 023203 5. 146046  
6. 800259 5. 442629 6. 925048 6. 361731 6. 720491 5. 946886 7. 009765 7. 382933 7. 167316  
8. 02558 7. 894755 7. 682511 7. 753585 8. 538556 8. 385847 8. 055364 7. 878234 8. 796394  
2. 381953 1. 797037 1. 638703 1. 504834 1. 803448 1. 666916 1. 664506 3. 034284 1. 403954  
3. 734635 2. 011022 1. 439118 2. 080772 1. 709957 2. 246596 1. 348296 1. 617901 1. 60344  
1. 39349 1. 097854 1. 40999 1. 293433 1. 947382 2. 262965 1. 023124 1. 338941 0. 958027  
5. 069594 4. 681001 3. 712285 6. 001538 5. 464694 4. 857938 5. 501691 5. 598658 4. 880664  
2. 138395 3. 640131 1. 448371 3. 298275 2. 317051 2. 88971 2. 680628 3. 232692 2. 518643  
2. 746192 3. 109406 3. 598471 3. 245675 3. 40484 3. 350075 3. 639309 3. 201289 3. 847688  
1. 10516 1. 507338 1. 910519 1. 462502 1. 073974 1. 714318 1. 652393 1. 829471 1. 528672  
5. 853657 4. 267285 5. 924401 5. 425913 3. 894308 5. 682872 5. 396714 2. 883008 2. 712449  
3. 583196 3. 522887 3. 62854 4. 263362 4. 162868 4. 764131 4. 150566 4. 228452 3. 322889  
1. 824898 1. 812501 1. 068309 1. 317133 1. 182823 1. 746805 2. 906933 3. 094641 1. 403566  
5. 38167 4. 718579 5. 21265 6. 458665 3. 389641 4. 405147 4. 147714 3. 950198 4. 695416  
5. 963391 6. 022453 5. 626707 5. 057856 4. 445864 5. 021927 5. 863751 4. 511723 5. 321413  
2. 360931 1. 953659 2. 497116 2. 587147 2. 304033 2. 335542 1. 771679 3. 293833 2. 235455  
6. 009403 6. 102435 6. 141051 6. 485973 5. 539196 5. 013728 5. 907921 4. 13565 5. 299806  
3. 783991 2. 782481 3. 83213 3. 840207 3. 420315 3. 882308 4. 629325 4. 480566 5. 099447  
2. 79066 3. 70255 2. 604898 2. 87644 2. 445733 3. 018838 3. 275628 3. 076059 3. 831882  
3. 376538 1. 878331 2. 28782 1. 594839 2. 541405 1. 084951 2. 112744 1. 676983 1. 451454  
1. 776009 2. 250854 2. 036549 1. 76965 1. 544142 1. 987418 2. 001506 1. 945015 2. 223572  
2. 603257 2. 882925 3. 122368 2. 454518 2. 336275 3. 304052 2. 967375 1. 896373 2. 647883  
1. 175275 1. 591956 1. 190663 1. 227166 1. 038124 1. 174023 1. 05793 1. 399019 1. 255951  
4. 84346 3. 936467 4. 12226 4. 479382 4. 722315 5. 333626 4. 957383 5. 688271 4. 992691  
7. 192846 7. 164052 7. 26711 6. 954178 7. 228591 7. 466111 6. 489381 7. 47038 6. 590915  
4. 467245 2. 891791 0. 51671 2. 328951 2. 956032 2. 789169 2. 002126 2. 68281 2. 282628  
5. 9462 6. 307299 6. 330835 6. 084029 6. 046718 6. 044223 6. 030427 6. 300256 6. 134231  
1. 769107 2. 236837 1. 679633 1. 758984 1. 521991 2. 059224 1. 742408 1. 809203 2. 053255  
5. 910292 5. 529316 5. 822742 6. 483015 6. 308846 7. 649595 6. 95023 6. 426081 7. 464857  
7. 238893 6. 794271 6. 924202 5. 742997 6. 294112 6. 357554 6. 863562 6. 670866 6. 694216  
4. 854555 5. 169059 3. 635425 5. 549746 5. 700588 4. 82123 6. 057155 4. 170565 4. 562664  
3. 289057 3. 432419 3. 636441 3. 404061 4. 007504 4. 317743 4. 414954 3. 171291 2. 688161  
2. 056755 2. 093386 1. 807047 2. 918707 2. 621886 1. 934311 2. 422354 2. 102011 2. 293947  
6. 888014 6. 417381 7. 316092 7. 247622 7. 293378 6. 635782 7. 46258 7. 608211 7. 208856  
10. 56122 8. 653987 9. 78183 9. 84538 8. 884968 8. 106067 8. 784077 7. 639926 5. 912579  
6. 438204 5. 334437 6. 212424 6. 647521 5. 567454 5. 300044 6. 48092 6. 565182 6. 115435  
6. 000461 6. 889343 5. 958786 6. 260201 5. 449429 6. 955854 6. 544698 6. 313753 5. 802812  
3. 668961 3. 617751 3. 362342 4. 105686 2. 8007 2. 602085 2. 772278 2. 823467 2. 164082  
7. 064262 7. 943636 8. 039455 7. 232476 7. 465671 7. 041875 7. 55514 7. 281171 7. 120163  
2. 843536 3. 153897 3. 400616 2. 130379 2. 694898 0. 786191 2. 00604 1. 527396 1. 316073  
6. 910554 6. 26299 6. 814609 5. 921096 6. 31637 7. 239194 6. 26224 7. 290326 6. 010813  
5. 531335 6. 314094 5. 135304 6. 03328 5. 180731 5. 360061 4. 152064 4. 510004 5. 318639  
7. 240854 7. 60785 7. 483744 6. 943978 7. 33174 6. 096541 5. 638125 5. 675745 5. 084606  
2. 614232 1. 318138 1. 761661 1. 965636 3. 244293 2. 037581 1. 800769 2. 618308 2. 897361  
6. 145117 6. 298404 5. 804097 5. 406132 6. 185792 5. 971214 6. 615372 5. 970967 6. 012861  
5. 292565 5. 77326 5. 99908 5. 606604 5. 340467 4. 527555 5. 967483 5. 828694 5. 519313  
4. 579256 4. 351386 5. 352626 5. 125534 5. 135708 4. 851511 5. 496276 4. 273819 5. 146702  
5. 662772 5. 601878 5. 512795 5. 037448 4. 632167 6. 214668 4. 816582 5. 343571 4. 966514

5. 414538 5. 6391 4. 668793 4. 360363 4. 294988 5. 55221 6. 038974 5. 855925 5. 494737  
5. 604471 5. 350174 5. 199999 4. 238332 5. 359527 6. 222 4. 656844 4. 253806 5. 168533  
6. 613474 6. 7962 6. 66186 5. 794979 7. 122324 5. 268097 5. 546385 4. 942597 5. 473147  
5. 018506 5. 619301 3. 767411 5. 682992 4. 125237 4. 376498 4. 525067 4. 52564 5. 282522  
5. 508463 5. 750382 5. 796396 5. 206369 5. 260816 5. 115504 5. 478637 5. 441107 5. 544728  
5. 901331 5. 290031 6. 040913 5. 82274 5. 555123 6. 131064 5. 619225 5. 873156 5. 848545  
3. 706316 3. 491864 4. 032556 4. 23191 3. 043772 4. 697866 2. 737756 2. 803457 3. 907216  
1. 946259 2. 257001 1. 980011 1. 557305 2. 779325 1. 642241 1. 28644 1. 847607 2. 034394  
5. 632245 6. 011673 6. 268992 5. 959963 6. 458706 5. 215094 5. 868583 4. 555096 5. 295247  
3. 213609 2. 336543 1. 90936 1. 771682 1. 724693 2. 21324 3. 153734 1. 333646 2. 044989  
2. 943743 2. 499955 2. 555903 3. 763975 2. 478644 2. 939205 3. 136253 2. 748643 2. 6869  
5. 565713 4. 97463 5. 390514 5. 335053 5. 750517 4. 576432 4. 738022 5. 091142 4. 422302  
4. 949245 3. 477487 4. 185647 4. 889925 3. 762664 5. 72258 4. 608598 5. 139731 4. 548561  
4. 19032 4. 647366 3. 808135 4. 259088 3. 642487 6. 071035 4. 849343 4. 564889 3. 90187  
2. 833398 2. 844217 2. 487794 3. 48805 2. 748943 4. 170848 3. 429155 3. 526897 3. 450575  
5. 801843 5. 963221 5. 808805 5. 272521 5. 492714 5. 363555 5. 731534 5. 667938 5. 013832  
5. 069767 5. 346853 5. 29389 5. 771804 5. 319408 5. 975987 5. 177945 5. 400241 5. 191145  
5. 967546 5. 482276 5. 978544 5. 850499 6. 117014 5. 554982 6. 136778 7. 000962 6. 28828  
5. 8906 5. 903101 5. 953235 4. 806852 5. 49796 4. 823837 6. 528861 6. 472639 5. 231288  
4. 516229 3. 436876 3. 796532 4. 429367 4. 434816 4. 756913 3. 994283 4. 063421 4. 00143  
5. 837839 5. 508424 6. 180132 4. 770792 5. 097026 4. 472415 5. 36273 4. 781191 4. 852255  
8. 381103 6. 086388 7. 575792 9. 098245 8. 034384 6. 201369 9. 092287 7. 936075 6. 007395  
7. 253288 7. 295023 7. 174132 6. 808374 7. 256659 6. 496943 6. 62989 6. 754902 6. 295028  
3. 652315 2. 580342 3. 424827 3. 627132 3. 486194 4. 096643 3. 49397 2. 469952 2. 54325  
6. 029971 6. 25372 6. 16662 5. 937598 4. 991471 5. 593052 5. 357823 5. 255482 5. 463873  
3. 62688 6. 577911 4. 402686 5. 313517 6. 474615 5. 081418 4. 927659 5. 233717 4. 866509  
4. 482389 4. 856499 4. 333147 3. 148941 3. 269239 3. 131393 4. 137941 3. 792547 3. 83701  
4. 973041 6. 299053 5. 099774 5. 799158 5. 165326 4. 639205 5. 413679 6. 555316 5. 389566  
1. 336344 1. 810019 1. 180355 1. 195386 1. 709789 0. 937516 1. 356179 1. 593566 0. 954802  
5. 494053 5. 397995 5. 571246 5. 559404 6. 274537 4. 838713 6. 072369 4. 993103 4. 968027  
3. 095781 2. 264606 2. 264571 2. 695087 2. 548954 2. 531177 2. 974664 2. 664949 2. 549697  
6. 672361 6. 545343 6. 618486 6. 614587 6. 423429 6. 627286 6. 655165 5. 519365 6. 380526  
2. 482503 3. 54985 2. 360941 2. 6046 2. 561456 3. 144067 2. 409725 2. 66505 3. 473727  
6. 118374 4. 87181 5. 824637 5. 555715 5. 597821 6. 31791 5. 099938 6. 53173 6. 250022  
5. 675746 6. 234016 4. 355082 5. 407884 4. 141337 5. 495619 6. 200778 4. 338822 5. 226874  
2. 962681 4. 585431 3. 135103 3. 293302 3. 675641 3. 223755 4. 981664 3. 91885 4. 254657  
3. 557796 4. 070957 3. 902369 4. 078168 4. 304605 4. 659061 3. 581659 3. 838988 3. 75735  
7. 604207 7. 224896 7. 035696 7. 71026 6. 913004 7. 566317 7. 522416 6. 484167 7. 084432  
4. 250566 3. 897 4. 017428 4. 006209 4. 932275 4. 757046 4. 234361 3. 945876 4. 456742  
7. 488339 7. 936416 8. 360781 8. 603757 7. 893197 9. 706143 8. 619603 8. 400218 8. 415262  
7. 234966 7. 16879 7. 558003 8. 133916 8. 107594 7. 821396 8. 378374 8. 453815 8. 459041  
1. 581913 1. 804315 1. 41936 2. 50663 2. 287202 1. 803839 1. 901542 2. 616186 1. 785876  
6. 425248 5. 675799 6. 58121 6. 867278 5. 763476 7. 687898 6. 971114 7. 408006 7. 704136  
1. 598452 1. 482835 0. 997006 1. 860117 2. 229012 2. 095783 2. 88068 3. 571818 2. 560898  
4. 810382 4. 957958 4. 035194 4. 398582 4. 936894 4. 182714 4. 688874 4. 057627 4. 079762  
2. 563969 4. 210037 4. 070452 2. 369742 1. 905249 2. 752201 2. 771194 2. 947781 3. 356767  
3. 793085 3. 805811 4. 328097 3. 418178 4. 121337 3. 798585 4. 005739 4. 06152 4. 512074  
3. 154283 3. 186469 4. 14042 2. 932208 2. 027446 2. 436102 2. 819469 3. 43393 2. 347429  
5. 253603 6. 111692 5. 371896 5. 15296 5. 43733 4. 969673 5. 66756 6. 301489 4. 79696  
8. 030071 8. 167256 6. 868799 7. 940313 8. 056409 7. 84699 8. 070702 7. 288607 7. 875771  
5. 017423 5. 632397 5. 043741 5. 269076 5. 304167 5. 797518 5. 580808 5. 855338 5. 732534

5. 517508 2. 900312 3. 376199 4. 953409 4. 200001 3. 443323 5. 45241 4. 943102 4. 905447  
2. 722778 3. 291461 2. 364452 1. 880304 2. 875506 3. 209126 2. 7489 3. 579065 3. 795999  
6. 033809 6. 978612 6. 138575 6. 143616 7. 578807 6. 694266 6. 614491 6. 137419 6. 150968  
5. 467688 5. 040367 5. 842552 5. 078643 4. 956125 5. 892287 4. 344805 4. 166053 4. 823907  
5. 374061 5. 287759 4. 942216 5. 362446 5. 38773 5. 977621 6. 262737 4. 782289 5. 60521  
6. 632785 6. 674667 6. 864261 6. 366782 6. 680017 6. 132525 6. 628676 6. 384199 6. 626417  
5. 193923 5. 424775 5. 026742 4. 08631 4. 757311 4. 97958 5. 962611 5. 845497 4. 926837  
7. 009429 6. 961074 6. 410339 5. 829348 6. 198631 6. 873277 6. 328948 5. 290895 6. 191367  
7. 260398 6. 585514 6. 151074 7. 16639 6. 840575 8. 043999 7. 855617 8. 229252 7. 754308  
6. 043084 4. 404032 5. 43369 4. 227727 4. 98653 5. 463474 5. 060632 5. 632814 5. 208554  
6. 511254 6. 893956 7. 276114 6. 551036 5. 737511 6. 988078 6. 83557 6. 265959 6. 542905  
6. 073633 6. 156123 6. 386938 3. 611335 6. 621918 5. 262373 6. 058876 5. 448598 4. 254529  
4. 786517 5. 350346 5. 752418 6. 06922 5. 064404 4. 775852 5. 789209 5. 391413 4. 406394  
6. 185252 7. 057247 7. 014497 7. 25962 5. 632628 7. 525967 6. 489009 6. 738132 7. 139054  
5. 525109 4. 835646 6. 186983 5. 313212 5. 634361 5. 3106 6. 270284 6. 794727 7. 060742  
6. 244015 5. 123795 6. 060676 6. 408003 5. 813635 6. 366238 6. 120116 5. 586352 6. 102802  
6. 117686 6. 783062 6. 71191 6. 956166 6. 492812 5. 511868 6. 605162 6. 43366 6. 414652  
5. 926121 6. 736801 5. 870836 5. 983142 5. 844187 5. 520803 6. 145856 5. 819366 5. 900711  
4. 872716 4. 878826 4. 938643 5. 355105 5. 143181 4. 496001 5. 374165 5. 08631 5. 362934  
4. 573413 3. 974156 4. 763018 5. 611215 4. 250668 5. 430886 5. 102098 5. 115499 5. 156642  
2. 724453 3. 531679 3. 803449 3. 583245 2. 847441 2. 702665 2. 280676 2. 076817 3. 739256  
5. 119931 4. 915689 3. 82209 4. 022388 4. 002617 5. 692649 3. 863652 5. 64544 5. 004466  
5. 219746 5. 235984 5. 286688 4. 922405 4. 936102 4. 917937 6. 203206 5. 634327 5. 884342  
1. 004574 1. 28167 1. 184219 1. 475818 1. 595429 1. 351914 0. 720996 1. 479758 1. 641225  
5. 566758 4. 718357 5. 615355 5. 703284 4. 898597 6. 94668 6. 519194 6. 359482 6. 577531  
5. 643742 4. 365685 4. 726393 4. 07202 4. 097426 4. 612084 4. 987146 5. 028486 5. 134104  
6. 375 6. 20791 6. 370569 5. 29074 6. 467608 4. 228837 3. 786641 4. 815102 5. 037747  
2. 236182 3. 0732 1. 86257 2. 106715 2. 311472 2. 5985 1. 869141 2. 154616 3. 182621  
4. 94747 4. 083541 3. 488464 4. 792668 4. 245819 4. 974109 4. 114196 4. 477344 4. 333938  
5. 428307 6. 537984 6. 877184 6. 10525 5. 921373 6. 004038 6. 219094 5. 966876 5. 825589  
5. 447396 5. 155694 5. 422184 5. 510533 4. 79854 5. 776975 5. 982262 5. 576692 5. 437798  
2. 245241 2. 217246 2. 274285 1. 422311 2. 347376 2. 376404 1. 527776 1. 694278 1. 618657  
6. 996318 7. 286612 6. 142867 6. 853767 6. 427915 7. 040159 6. 617193 6. 487372 6. 353632  
3. 313893 1. 875028 2. 156177 2. 783967 2. 280444 2. 22763 2. 319536 3. 526437 1. 778816  
3. 716382 4. 254667 5. 194466 5. 359766 5. 040856 5. 779478 5. 035556 5. 614078 5. 75864  
4. 194896 4. 173266 4. 36737 4. 580475 4. 164053 3. 980661 5. 101449 4. 015524 4. 539455  
4. 576324 4. 243255 5. 632087 4. 893724 5. 002983 6. 155358 4. 217772 5. 14381 5. 440121  
5. 902954 4. 659917 4. 39564 4. 579549 5. 108137 4. 415139 4. 557288 3. 887622 4. 588171  
6. 233604 6. 141751 5. 56141 6. 019905 5. 629104 5. 429236 6. 032483 6. 07682 5. 886799  
5. 990669 6. 034405 5. 322993 6. 067419 5. 965824 5. 972212 6. 217865 5. 520543 6. 085328  
5. 864318 6. 034956 5. 78106 5. 974615 4. 059615 5. 551558 6. 200634 5. 086175 5. 672073  
6. 343588 5. 4233 5. 880269 6. 279532 6. 28364 6. 554757 6. 808871 7. 296308 7. 284447  
5. 410446 6. 019242 5. 484034 4. 62411 4. 758407 6. 017225 4. 747432 5. 086806 5. 245107  
2. 096493 1. 291581 2. 582938 1. 546911 1. 513697 1. 145241 1. 52215 1. 623951 1. 225999  
4. 122123 4. 236389 3. 773099 4. 236977 5. 003365 4. 925863 4. 150623 4. 322289 4. 00101  
4. 167074 4. 198001 3. 594324 2. 419055 4. 777474 3. 959179 2. 607329 2. 031753 2. 584294  
4. 900499 6. 393715 6. 276359 5. 128916 5. 819524 4. 008976 5. 464715 5. 251392 5. 435843  
4. 795698 4. 755849 3. 946347 4. 610363 3. 858477 6. 033371 5. 128961 4. 08802 5. 337216  
2. 968572 4. 217384 4. 743937 4. 512928 4. 184094 5. 144662 3. 307344 3. 878619 4. 556658  
5. 253173 6. 117168 5. 689122 5. 884987 5. 845635 5. 773078 5. 515388 5. 708336 6. 229907  
3. 428749 4. 057035 4. 657618 4. 344506 4. 654943 4. 898633 4. 786165 4. 338904 4. 377971

5.156043 5.989507 6.018573 5.696799 5.620571 4.567938 5.525683 4.816116 5.30497  
8.386192 7.953049 8.459001 8.992107 7.863681 8.010915 8.038125 8.620682 7.925809  
4.710625 5.141377 5.610572 4.571715 5.649617 5.522446 5.218484 5.770315 5.577967  
2.585672 3.431569 3.639639 3.79307 2.808101 2.435423 3.640002 2.331813 2.603281  
3.040711 3.025223 3.013977 3.339935 3.319847 3.213577 2.844282 2.574128 2.829886  
2.053508 2.633846 1.838673 1.984097 2.079011 4.462302 2.102218 1.15111 2.04664  
6.261799 5.414051 4.832731 5.517264 4.185671 4.079423 5.042525 4.205821 5.244618  
5.208814 4.925939 4.853838 4.466869 4.966855 5.880235 5.5931 4.865144 5.369787  
3.781906 5.183191 5.130404 5.69705 4.698685 4.889325 5.531013 4.270894 4.683213  
7.395203 6.865438 7.382569 7.647508 7.30405 7.812437 7.44211 7.226157 7.052962  
6.338419 5.811081 5.133638 5.409688 5.718147 7.120706 6.167944 6.910892 6.504341  
3.679891 3.420298 4.176052 3.177881 2.601049 2.441306 1.674075 2.461299 3.459254  
2.687764 2.23918 2.861691 2.103822 2.784775 3.856266 3.551181 2.493581 3.683594  
4.598783 4.397848 4.161997 3.366972 4.019929 4.328818 4.837264 4.109061 4.50428  
6.395561 6.077723 6.115886 6.567201 5.754219 6.886305 6.405733 5.634606 6.261839  
7.405653 7.33446 7.053323 7.135273 6.829806 7.67671 7.82802 7.329225 7.14189  
4.157343 3.942276 4.612142 4.472853 4.338703 4.971568 4.26498 4.323958 5.083211  
3.988897 4.903843 4.13662 4.659749 4.765797 4.015385 4.572795 4.522837 4.643987  
9.957699 10.3521 9.991241 9.619085 10.18867 9.970806 10.32345 10.20044 10.36596  
4.685469 4.018349 4.317089 4.908812 4.505375 5.428198 4.47504 4.87261 5.876491  
4.758953 4.612896 4.880664 4.127333 3.59138 4.965798 5.477712 5.580384 4.50161  
8.776993 9.233756 9.052591 8.47966 8.877887 7.550335 9.537198 9.520073 9.23526  
3.032715 4.409719 3.977875 3.363886 4.624949 5.128721 4.359655 4.348885 4.333754  
5.164795 5.915514 5.022481 6.480308 5.672129 5.966683 5.900645 6.552319 5.410483  
6.219852 5.78241 4.941382 5.042178 5.731088 6.312081 5.816229 5.491423 4.521009  
4.819547 6.278831 5.568877 4.506414 4.907182 4.968813 5.622675 4.935042 5.382558  
8.009864 7.290583 7.480351 7.42499 6.945763 7.881748 7.102844 7.028677 6.766687  
7.85752 8.125544 8.282833 7.503665 7.884615 7.79949 7.205257 7.21024 7.251154  
6.70976 6.721223 6.623459 6.22329 6.271313 5.946388 6.338566 6.217867 5.866587  
6.847325 6.122752 6.681671 7.003385 5.887803 5.788521 6.764231 6.779553 6.179076  
8.548992 9.152746 9.407383 8.812834 9.298861 7.397207 9.132022 8.867619 8.962692  
5.695149 5.215858 6.220574 6.817272 5.392268 5.318841 4.960633 4.179324 4.887603  
8.416895 8.463986 8.481652 7.475938 8.339165 7.719163 8.774702 8.464636 8.219841  
5.400808 5.681564 5.788886 5.189725 6.107162 5.243203 5.641971 5.113159 5.357789  
3.860763 4.069657 3.891071 4.230631 4.597913 5.058286 4.254168 4.725143 4.075696  
6.459803 6.57934 6.544748 5.604662 6.117361 5.403028 6.747002 6.69999 6.135637  
5.605558 6.143006 5.049705 5.088537 6.089577 5.809145 6.063816 5.812854 5.183008  
6.587717 5.621915 5.928992 4.779273 5.485224 5.824425 6.142343 6.186242 5.564669  
3.85193 3.248184 3.85193 3.571744 4.692915 4.829996 3.515621 4.392889 3.947464  
5.684016 6.848016 6.119362 6.086458 5.359096 5.942301 6.138277 6.035572 5.725192  
7.418243 7.693544 7.35187 7.219711 7.391382 6.946444 7.452283 7.333931 6.829141  
3.502164 2.154615 2.149403 0.810717 2.237239 1.258294 3.013187 3.419601 3.40949  
7.18973 7.716821 7.203814 7.297426 6.803828 7.040764 7.71918 7.445599 7.482733  
4.638804 4.848596 5.748798 5.626937 4.942538 5.61 5.311074 4.353642 4.899477  
3.971576 4.49854 3.658981 4.905187 4.009923 5.583816 3.431698 3.34071 3.972689  
5.471292 4.808201 5.522371 5.98011 5.302428 4.765151 5.486347 4.928089 5.811653  
6.484422 5.738145 5.966286 5.123128 5.145282 5.656978 5.359959 5.958182 5.029431  
5.367693 5.241852 5.961394 5.656768 4.876639 5.408274 5.9995 3.992165 4.818926  
6.314977 6.224248 6.58521 5.632459 6.449905 6.822799 6.269601 6.123901 6.345009  
6.382612 6.505351 6.545385 5.828361 5.770195 5.875425 6.060575 6.413516 6.412407  
2.438656 1.744043 2.432982 3.518663 3.067896 3.468652 4.280501 3.039884 4.289446

6. 214491 6. 77205 6. 657271 6. 697647 6. 570083 5. 815237 6. 399315 6. 296639 6. 473287  
3. 732276 4. 447821 3. 780515 4. 307415 3. 914757 4. 746465 4. 152975 4. 063254 4. 426485  
4. 995226 4. 879738 4. 431027 4. 977472 4. 360347 4. 946659 4. 656234 3. 798248 4. 238686  
5. 580485 6. 240078 6. 216286 5. 926899 6. 552569 5. 453364 6. 043281 4. 976522 5. 445323  
4. 083791 4. 138527 5. 533945 3. 110348 3. 971691 3. 379438 4. 079116 4. 048458 3. 83835  
3. 648899 3. 830898 3. 618401 3. 273398 3. 402939 1. 891092 1. 862941 1. 965481 2. 599845  
7. 615992 8. 669604 8. 221399 7. 682977 8. 372406 6. 147481 8. 406868 7. 772601 7. 263259  
6. 356023 7. 283524 6. 932226 5. 946986 6. 978834 5. 455168 5. 565105 5. 52848 5. 810084  
5. 13863 4. 898652 4. 727244 5. 305121 5. 292258 4. 350814 5. 136564 5. 056065 4. 99702  
3. 768002 3. 551152 3. 274509 3. 427781 3. 295471 3. 789353 3. 368052 3. 19963 4. 159384  
3. 874495 5. 169893 5. 042636 3. 082545 3. 646765 3. 854017 3. 811763 4. 103374 3. 454821  
5. 115872 4. 892271 4. 364424 4. 867357 4. 665173 5. 834611 5. 436014 6. 279447 5. 838374  
2. 788334 3. 759752 2. 194268 2. 814438 4. 188947 3. 145533 3. 857563 3. 945907 3. 541168  
5. 50877 5. 735319 5. 072451 5. 812575 6. 024631 4. 867785 5. 012824 5. 367121 4. 727628  
8. 357335 8. 272343 8. 182721 8. 421224 8. 229773 8. 164473 8. 459319 8. 416449 8. 229585  
4. 593455 4. 294723 1. 879107 2. 93091 2. 277929 1. 421189 2. 361218 1. 463536 2. 526742  
6. 274295 6. 531375 6. 573456 6. 62735 6. 221814 5. 395856 5. 822856 6. 17685 6. 217609  
2. 013371 1. 757229 3. 280019 1. 741539 1. 61649 2. 203866 2. 256466 1. 977779 2. 253639  
5. 357852 5. 714506 4. 553315 5. 698404 5. 536411 4. 869627 5. 748211 6. 081356 5. 038709  
4. 566314 4. 480782 4. 326976 5. 665374 4. 920926 5. 533458 4. 852428 4. 909432 4. 8804  
3. 901716 3. 355612 3. 428447 3. 908798 3. 131948 3. 909812 3. 791217 4. 050492 4. 297202  
5. 206799 5. 865179 5. 784141 5. 897884 5. 75363 5. 227447 4. 897392 5. 613852 5. 564838  
6. 150178 6. 741723 6. 194778 6. 348868 5. 806091 5. 589146 6. 20057 5. 949158 5. 735861  
2. 457719 1. 878912 1. 452399 1. 9356 1. 58937 2. 518837 1. 599974 2. 302702 1. 740629  
3. 149482 3. 957323 2. 766908 4. 040946 4. 219532 4. 47099 3. 613607 3. 013714 4. 614452  
3. 04814 3. 077913 1. 658766 2. 514117 2. 956671 2. 19425 3. 103964 3. 553896 3. 026886  
1. 313351 0. 984625 0. 584417 0. 918026 0. 737339 2. 054995 0. 915848 0. 822673 0. 885162  
5. 603029 5. 878047 4. 679716 6. 122856 5. 453507 4. 730853 5. 112708 5. 583596 5. 571293  
3. 653038 3. 488028 3. 794075 2. 922374 3. 797326 5. 793059 3. 826492 4. 948353 4. 358566  
4. 266062 5. 354549 4. 994099 3. 307408 3. 949424 2. 516206 3. 699631 5. 103354 3. 882083  
2. 563128 4. 034485 2. 451408 2. 497912 2. 721186 2. 618683 2. 574755 2. 529927 3. 237409  
1. 65786 1. 72308 1. 874017 2. 191214 1. 499397 1. 525488 1. 687093 1. 582387 1. 61267  
3. 376973 3. 107227 2. 326383 3. 127651 3. 011807 4. 244307 3. 088556 3. 491174 4. 190716  
4. 592736 4. 23518 5. 287557 4. 893691 3. 98859 4. 865911 4. 78147 4. 344541 4. 694574  
5. 521659 5. 837007 5. 806106 6. 185116 6. 234529 6. 519858 6. 600736 6. 586865 6. 398958  
1. 361906 1. 282653 1. 437133 1. 832228 1. 102622 1. 500311 1. 292287 1. 411654 1. 200216  
6. 448403 6. 271065 5. 872595 5. 814713 6. 267027 6. 519824 5. 658182 5. 436025 5. 221518  
5. 712602 5. 877987 5. 729892 5. 868154 5. 098402 5. 992211 5. 939514 5. 527435 5. 140797  
6. 528264 6. 827199 7. 024704 5. 845293 7. 109238 5. 775451 6. 67991 6. 682969 6. 276596  
1. 712396 1. 848714 1. 738826 2. 242104 1. 470218 1. 797197 1. 738359 1. 825656 1. 780556  
2. 371936 1. 07932 1. 154383 1. 886604 1. 289086 3. 020789 2. 297231 2. 727778 1. 709034  
5. 922034 5. 820711 6. 00324 5. 838666 5. 256982 6. 073094 5. 327409 6. 292426 5. 974458  
7. 052983 6. 963345 7. 137505 6. 783642 7. 056924 7. 336675 7. 39357 7. 078192 7. 557935  
4. 610504 3. 751307 4. 225106 4. 941558 4. 456845 3. 785687 4. 078424 5. 061581 4. 332878  
2. 17333 1. 846352 1. 871155 1. 922037 2. 034775 1. 183168 2. 165274 2. 081867 1. 982253  
6. 953787 6. 610738 6. 054513 6. 722846 6. 014199 6. 654743 6. 575673 6. 075354 6. 533594  
4. 10305 3. 71611 3. 885387 3. 069596 3. 553425 3. 423752 5. 147787 2. 499522 4. 110602  
6. 155651 5. 42121 6. 310118 5. 062014 5. 357414 6. 302948 5. 211464 4. 535657 4. 087092  
7. 590765 7. 050235 7. 42013 7. 109463 7. 118485 7. 192014 7. 474187 6. 955187 6. 855851  
7. 262413 6. 979694 7. 075615 7. 550192 6. 997214 7. 172648 7. 33636 7. 658921 7. 893224  
1. 667181 1. 835178 1. 496966 2. 38472 1. 390177 1. 890946 2. 244275 2. 59495 1. 887885

7. 371602 7. 422423 6. 879325 7. 894856 7. 048353 6. 876075 7. 610281 7. 647611 7. 242037  
6. 28963 6. 370559 6. 230473 7. 135351 6. 67442 7. 123101 6. 129827 7. 019199 7. 243626  
6. 032325 6. 771122 6. 87024 6. 905501 7. 061404 6. 311346 7. 287659 6. 406948 6. 165593  
8. 031781 8. 173097 7. 987636 7. 801726 7. 796947 7. 344326 7. 692529 7. 636138 7. 657152  
3. 731959 2. 502064 3. 258518 4. 008344 3. 569953 2. 235454 3. 918295 2. 165907 3. 525187  
7. 130724 7. 461294 6. 790189 6. 957124 7. 625532 7. 063355 7. 026196 7. 022745 6. 911777  
3. 97209 4. 381241 3. 115957 3. 349947 2. 958341 2. 956996 3. 280267 2. 92264 2. 956996  
7. 169208 6. 024169 6. 211101 6. 172638 6. 806026 6. 344954 6. 834296 6. 954248 7. 322192  
5. 916054 4. 11748 4. 454929 5. 652725 5. 396558 5. 443231 4. 721536 2. 576371 2. 862227  
4. 688831 4. 278441 4. 809427 4. 020279 4. 458965 4. 626889 4. 683565 5. 138684 5. 323501  
4. 763915 3. 047931 3. 164134 3. 82676 3. 580965 5. 204012 2. 084878 4. 514486 5. 232118  
5. 489298 6. 213587 5. 409331 6. 111922 5. 70697 5. 865489 5. 93668 5. 102957 5. 331068  
8. 98188 8. 674128 8. 357861 8. 858133 9. 379874 8. 737045 8. 999612 8. 634805 8. 503329  
5. 374345 5. 17256 6. 486384 5. 977628 5. 90282 6. 599737 5. 822551 6. 412827 6. 361274  
5. 315887 5. 553752 5. 02684 5. 127716 5. 277962 5. 275556 4. 593669 5. 183788 4. 76968  
5. 761013 5. 601187 4. 850777 4. 088555 4. 945128 5. 413405 5. 29952 5. 173477 4. 632585  
6. 82215 8. 414498 7. 484715 7. 512428 8. 081072 6. 65188 7. 903101 7. 575368 7. 328908  
5. 625827 5. 258786 5. 94629 6. 654089 5. 898685 6. 341406 5. 639292 6. 571232 6. 26216  
4. 42431 5. 06467 3. 584272 4. 766773 5. 052814 4. 442428 4. 779348 5. 687533 4. 917462  
5. 06085 5. 547563 4. 583295 5. 793931 5. 076251 5. 559225 5. 111549 4. 803198 4. 965836  
1. 805645 1. 830916 1. 10186 2. 75818 1. 814885 1. 578897 1. 43555 1. 539202 2. 054751  
7. 778209 7. 822182 7. 555142 7. 501622 7. 870926 7. 90706 7. 827413 7. 737943 7. 938979  
1. 626723 1. 534881 1. 423606 1. 824663 1. 99374 2. 128077 2. 378898 2. 410516 2. 365514  
7. 120288 6. 350376 7. 042549 6. 97923 6. 346794 6. 369521 6. 877258 6. 080445 5. 855309  
5. 967365 6. 0349 6. 060579 6. 634061 6. 616988 5. 195628 4. 448894 6. 163867 5. 876878  
6. 904193 7. 473728 7. 079567 7. 035752 7. 109409 7. 361818 7. 177253 7. 128963 7. 204527  
7. 098325 8. 153534 7. 372844 7. 229041 7. 951782 7. 427598 7. 200982 7. 136581 7. 360509  
4. 747414 5. 135953 5. 77978 5. 172284 6. 067609 6. 281794 6. 246839 6. 41356 6. 835272  
5. 927492 6. 201057 6. 660386 7. 178282 6. 754545 5. 613111 6. 749842 6. 54377 6. 644446  
2. 59755 2. 556109 3. 50038 2. 547437 3. 226087 2. 24369 2. 838753 3. 529933 2. 755221  
6. 698147 6. 330213 6. 071619 6. 537689 6. 079423 6. 569079 6. 809882 5. 802158 5. 671991  
7. 605014 7. 47756 7. 365682 7. 169182 7. 486182 6. 991915 7. 027972 7. 415577 7. 321561  
6. 725534 4. 341348 5. 635106 5. 466035 5. 672598 6. 417734 5. 210678 3. 655945 3. 488736  
4. 925927 5. 722269 4. 737481 4. 758515 4. 628963 4. 28208 4. 891706 4. 696337 4. 05847  
7. 30949 7. 08592 7. 124446 7. 349225 7. 411479 7. 10253 7. 092161 6. 466706 7. 019923  
6. 965613 7. 02744 6. 815669 7. 055466 7. 190864 6. 33596 7. 553863 6. 587753 7. 064264  
2. 246947 1. 392528 1. 454944 2. 306251 2. 385001 1. 264324 2. 317253 2. 323913 2. 100699  
1. 746375 3. 528912 1. 725562 1. 564488 3. 428967 2. 607761 1. 182686 1. 471063 1. 765539  
1. 172857 1. 560023 1. 677913 2. 187416 2. 09559 1. 708827 1. 389205 1. 774251 2. 259638  
5. 278603 6. 416447 5. 849227 5. 718149 6. 177471 5. 325337 6. 272842 6. 801834 6. 625282  
6. 755383 6. 9472 7. 454167 7. 521107 6. 961384 7. 734451 8. 161573 7. 456086 7. 284459  
4. 630114 3. 6002 3. 853371 3. 648373 3. 716307 2. 931805 3. 784146 4. 633411 2. 997611  
3. 224683 3. 100194 2. 652178 3. 449084 3. 745019 2. 94212 2. 890188 2. 601633 3. 654869  
0. 930194 0. 654227 1. 286347 1. 332267 1. 003976 1. 14902 0. 916239 1. 042549 0. 845235  
2. 285635 1. 54164 1. 430689 2. 239177 1. 625216 1. 343974 1. 275008 2. 014135 1. 679975  
4. 703844 4. 519602 3. 500834 4. 151091 3. 670697 5. 594386 4. 330189 4. 055791 4. 054662  
2. 823326 2. 48308 1. 82765 1. 373947 3. 029 1. 117541 1. 513589 1. 536696 1. 489152  
4. 889241 6. 372694 5. 575195 5. 645406 5. 827841 5. 434448 6. 657315 5. 483331 5. 59154  
5. 15574 4. 150018 4. 744822 4. 870677 4. 398861 4. 957663 5. 334942 4. 660006 4. 74545  
2. 116693 2. 302684 4. 171665 3. 140673 3. 59918 4. 54465 3. 220142 3. 513294 3. 484152  
3. 131333 3. 336385 3. 771132 3. 596612 3. 613439 3. 723453 3. 736679 3. 456792 4. 465202

6. 21451 5. 671886 5. 759038 5. 762137 5. 3868 7. 273 6. 787678 7. 310291 6. 766568  
5. 374241 4. 75439 4. 986413 5. 123937 5. 515871 5. 269943 6. 348853 5. 832526 6. 625733  
3. 867893 4. 753556 5. 398277 5. 277673 4. 810306 3. 956564 5. 078694 3. 942739 3. 76913  
3. 140422 2. 202613 1. 491204 2. 228986 2. 362949 2. 693104 2. 544435 4. 186994 2. 371086  
6. 294315 5. 990546 5. 404218 5. 808684 5. 518772 6. 060128 5. 272458 4. 835211 4. 93789  
8. 003611 8. 008067 8. 144707 7. 654651 8. 38498 7. 725195 8. 149106 7. 75595 7. 719062  
7. 491388 7. 030362 7. 781437 7. 478684 7. 009306 7. 17854 7. 429647 7. 400887 6. 906026  
5. 051504 4. 258313 4. 739039 4. 814969 4. 527483 4. 470471 4. 743201 5. 19594 4. 027042  
6. 761149 7. 746727 7. 158042 6. 734535 7. 250024 6. 892728 7. 111942 7. 027003 7. 045894  
3. 030014 2. 372101 3. 633719 3. 210975 3. 018651 3. 072081 2. 603762 2. 937133 2. 468384  
4. 804008 2. 910145 1. 790839 3. 263044 2. 392542 2. 946627 4. 472793 2. 902083 1. 731905  
3. 402086 3. 34098 4. 722694 3. 594921 3. 857355 4. 329426 3. 759198 3. 6367 3. 357875  
1. 733631 2. 996305 2. 5443 1. 837271 2. 561335 2. 694575 2. 222907 3. 146416 3. 602262  
7. 789523 8. 269649 8. 510995 8. 061687 8. 233659 7. 653402 8. 142515 7. 512266 7. 626409  
5. 041656 5. 72142 4. 795161 5. 481626 5. 819665 5. 277704 5. 609982 5. 758373 5. 516753  
4. 378472 4. 663605 4. 104828 4. 371152 4. 344621 3. 851473 4. 471427 4. 040918 3. 748576  
6. 411059 7. 575502 6. 754878 6. 638434 7. 083076 7. 597127 8. 065904 7. 757807 7. 242168  
6. 298344 6. 561746 6. 298344 5. 599943 6. 333012 5. 779665 6. 215746 6. 089035 5. 999018  
4. 630222 5. 443221 5. 49363 5. 148285 5. 48633 6. 408118 5. 857139 6. 340433 6. 64013  
4. 670344 3. 963929 3. 85313 3. 926084 3. 111752 3. 651392 4. 130323 3. 864129 3. 43567  
3. 293299 3. 37648 2. 50471 3. 393988 3. 448392 2. 008985 3. 453296 3. 209895 2. 953134  
4. 482947 4. 60474 4. 554163 4. 43759 5. 652618 4. 788981 4. 879507 4. 658796 5. 078903  
5. 979033 6. 64182 5. 697446 5. 122313 5. 960107 4. 535613 6. 179907 5. 3072 6. 016445  
4. 749319 5. 512662 5. 063805 4. 806849 5. 386168 4. 455302 4. 279406 4. 309795 5. 29239  
9. 350515 7. 594663 7. 940031 8. 893219 7. 775507 7. 195267 7. 72023 6. 730501 5. 019488  
2. 97747 2. 723932 2. 216894 3. 182032 3. 108682 2. 338123 2. 941425 4. 069318 5. 087996  
7. 780311 8. 018993 8. 097537 8. 094601 8. 061226 7. 866773 8. 430619 7. 852763 7. 957605  
4. 716703 4. 363587 3. 384175 5. 944152 3. 744115 4. 666042 5. 300628 4. 300395 4. 638054  
5. 93923 4. 795217 3. 971677 5. 52994 4. 2802 6. 00995 4. 699901 5. 9384 6. 298018  
5. 846352 5. 723883 6. 075927 6. 8135 6. 377482 6. 678192 6. 209183 6. 305947 6. 236654  
7. 36637 7. 74829 8. 303656 8. 364821 8. 838829 8. 114989 8. 689915 8. 331065 8. 938061  
7. 507547 7. 100782 7. 030695 8. 038454 7. 242254 7. 484827 7. 804463 7. 904042 7. 518264  
1. 722387 1. 479917 2. 378939 1. 417216 1. 809822 2. 278003 2. 129576 1. 838429 1. 723073  
4. 94587 4. 153131 4. 571861 2. 593065 4. 407172 4. 757773 4. 634282 6. 021179 6. 207372  
9. 355168 9. 496672 9. 659925 9. 315849 9. 421208 9. 394097 9. 38693 9. 188726 9. 254681  
6. 435979 6. 64953 6. 326982 5. 946578 6. 607496 6. 724533 6. 306882 6. 43971 6. 91312  
2. 864305 0. 550777 1. 53319 3. 285304 1. 545499 1. 619328 2. 171546 2. 333353 2. 147522  
2. 235042 1. 915189 1. 872809 2. 714232 1. 862369 1. 049364 1. 995463 1. 498687 2. 087627  
8. 592113 8. 078794 8. 614253 8. 419574 8. 28463 8. 686694 8. 938188 8. 339672 7. 521203  
6. 077735 4. 851014 4. 259171 5. 510563 4. 268667 5. 901801 4. 743032 5. 273084 4. 628649  
5. 579331 6. 367104 5. 980215 6. 189648 6. 189473 6. 281662 6. 892858 4. 919792 5. 923143  
6. 365848 6. 297089 6. 297906 5. 251532 6. 634602 5. 059047 5. 843024 5. 985168 5. 954256  
6. 692197 5. 662762 5. 781337 6. 298936 5. 999612 7. 1721 6. 476778 6. 627274 6. 435639  
4. 783604 5. 705137 4. 521801 5. 186625 4. 910167 4. 599671 4. 7108 4. 85483 5. 181651  
3. 913858 3. 137363 3. 925331 4. 162008 3. 915527 3. 858865 3. 829531 3. 120002 3. 229369  
4. 264976 4. 731717 4. 502503 4. 464181 4. 886594 4. 916147 5. 592827 5. 415777 5. 477945  
2. 300004 2. 802618 1. 536778 2. 334763 1. 559433 2. 086577 1. 838265 2. 62832 1. 305876  
1. 183587 1. 535117 1. 794854 2. 048119 1. 248829 0. 983436 1. 165521 1. 705123 1. 808346  
5. 034102 5. 481328 4. 519077 6. 607838 5. 268308 4. 379168 3. 93642 6. 086367 4. 533982  
4. 616232 3. 655658 4. 248394 3. 616757 2. 306095 2. 760307 4. 131265 2. 961351 4. 118892  
2. 510375 4. 211076 2. 81416 3. 955029 3. 447556 2. 472783 2. 469561 5. 383532 2. 861544

3. 210816 4. 552184 3. 686063 5. 723147 4. 872069 6. 241389 6. 187623 6. 836046 5. 980472  
5. 15311 4. 469047 4. 3459 4. 454723 4. 246276 5. 384591 4. 380812 5. 63272 5. 493685  
1. 677715 1. 456003 2. 263911 3. 359284 2. 052203 3. 126717 3. 154226 3. 521982 2. 529605  
6. 467774 6. 189935 5. 604989 5. 001621 6. 437006 5. 761417 6. 209166 5. 390316 5. 984178  
4. 015292 4. 967182 4. 437065 4. 573973 4. 223562 2. 916311 3. 337803 3. 29117 3. 483458  
1. 602452 1. 775735 1. 347744 2. 472487 1. 853345 1. 877019 1. 614804 3. 060713 1. 792262  
6. 566652 6. 558455 6. 683215 4. 969975 6. 706081 5. 798057 6. 408869 6. 9 6. 198366  
2. 116512 3. 137331 2. 273683 2. 195225 2. 314899 3. 427718 2. 326827 2. 707879 3. 760119  
4. 715758 4. 683786 5. 103817 4. 042933 4. 367125 5. 675149 4. 507001 5. 519263 5. 588456  
3. 474171 4. 30203 1. 938476 5. 206885 5. 117197 4. 215827 4. 49259 5. 833208 4. 928418  
5. 517636 5. 937144 5. 15029 5. 663383 4. 845195 4. 890378 5. 405863 5. 374466 6. 039715  
2. 433923 2. 376855 2. 262861 1. 066472 1. 328893 1. 58256 2. 126726 1. 449837 2. 613853  
5. 273391 5. 310421 4. 792829 4. 761646 4. 098315 4. 599373 4. 382356 4. 952308 4. 794784  
3. 178858 3. 868297 3. 745954 1. 622992 4. 680986 4. 027356 2. 771015 3. 942008 3. 659749  
5. 657722 5. 035842 4. 789901 5. 212828 5. 611825 5. 622141 5. 467986 3. 758092 5. 577043  
4. 46048 4. 905074 3. 100907 4. 338516 3. 531402 3. 242881 3. 596342 3. 540642 3. 543847  
1. 214654 2. 154058 1. 038123 1. 16895 1. 480007 1. 284166 1. 414788 2. 300029 1. 177052  
1. 644568 1. 400423 1. 433242 1. 131703 0. 764115 1. 048461 1. 258774 1. 888217 1. 758666  
3. 964759 5. 108477 5. 366601 5. 211256 4. 745049 4. 563785 5. 071149 4. 984802 5. 156318  
4. 906896 3. 632704 4. 937486 3. 68676 4. 738166 5. 37771 4. 980295 4. 946744 5. 105808  
2. 586002 4. 318734 2. 380636 3. 34053 3. 715833 3. 533338 2. 185636 4. 787445 3. 761378  
5. 962486 5. 563268 5. 900479 6. 000993 6. 399125 3. 032797 5. 903827 6. 303815 6. 276272  
3. 473757 4. 096561 3. 516704 2. 262079 3. 432263 2. 054144 3. 178318 2. 661797 2. 73317  
2. 924453 2. 634713 3. 688741 2. 862753 4. 837856 3. 063734 3. 129841 2. 724714 3. 116028  
4. 250288 5. 421967 5. 852419 4. 989455 5. 57041 3. 852589 6. 441195 5. 05577 5. 274694  
3. 402203 3. 709795 3. 590074 3. 946108 4. 274056 2. 973264 3. 142463 4. 0728 4. 006286  
3. 565302 4. 994785 4. 256364 3. 296626 4. 29001 2. 726162 5. 041309 4. 717073 5. 852491  
4. 13952 4. 037619 5. 230925 4. 881316 4. 348256 3. 24644 3. 874408 3. 809108 5. 022354  
3. 305479 2. 196206 4. 189256 5. 00266 5. 11077 3. 386964 4. 869107 4. 078097 4. 550847  
3. 254403 3. 985945 3. 605207 2. 602343 3. 643065 3. 042686 4. 031874 4. 212131 4. 721994  
5. 920068 6. 145135 5. 887431 5. 753361 6. 676204 6. 783049 7. 025576 6. 149047 6. 287866  
2. 333354 4. 348254 3. 050593 4. 032173 3. 378612 2. 875727 2. 608599 2. 514309 4. 648556  
3. 321068 2. 999508 2. 23562 2. 031547 3. 062431 2. 908289 4. 216911 2. 782249 3. 302141  
1. 966398 3. 375746 1. 860642 1. 912972 3. 520229 2. 489207 4. 131409 3. 427959 2. 507815  
3. 856431 2. 484108 2. 843914 3. 236533 3. 216187 3. 712674 3. 954531 1. 933278 2. 687049  
1. 818537 1. 364326 1. 384838 2. 211666 1. 860041 1. 350656 3. 126994 1. 814167 2. 226629  
7. 666987 7. 938553 7. 785277 7. 491862 8. 090698 7. 30994 8. 494347 8. 427486 8. 215449  
2. 956468 4. 257886 1. 837684 3. 117073 1. 410392 1. 452502 1. 514067 1. 891501 1. 296237  
3. 068757 3. 74894 3. 974005 2. 874922 4. 761191 4. 194841 3. 878151 4. 2559 2. 951747  
1. 473279 3. 54495 3. 359146 1. 960253 3. 808374 3. 46371 5. 33044 3. 159732 3. 520653  
4. 917017 4. 948121 3. 345148 3. 712362 4. 841336 4. 571824 5. 994926 2. 440201 4. 097458  
4. 294744 4. 41097 3. 362594 5. 4928 5. 453012 5. 050018 5. 0216 4. 522628 4. 423356  
2. 483793 1. 500842 3. 373335 2. 42971 3. 70791 2. 883788 3. 956052 2. 652594 2. 736981  
4. 072606 4. 043566 3. 926982 3. 437566 4. 92794 4. 167454 4. 993427 4. 832645 4. 315184  
3. 513582 4. 540387 5. 162428 3. 910432 4. 151965 3. 373591 5. 864366 4. 172435 4. 280568  
0. 759828 2. 331651 0. 639777 0. 730566 1. 616599 1. 271324 1. 756691 1. 813029 0. 720031  
2. 80033 2. 000218 3. 704231 3. 87942 4. 076027 2. 462763 3. 676373 2. 828094 3. 470777  
3. 458859 2. 137145 1. 933361 1. 822982 4. 100315 2. 978461 4. 345085 1. 236211 3. 032614  
2. 951522 3. 984458 3. 20187 3. 448691 5. 306344 2. 670933 3. 816213 4. 499593 3. 6528  
3. 491274 3. 51872 4. 369564 3. 451392 4. 083655 3. 275391 4. 632519 3. 498759 2. 269094  
4. 54448 3. 488115 3. 491428 4. 453376 3. 414262 2. 907279 4. 824107 3. 309999 3. 848052



2.195053 2.615466 0.756507 2.10487 1.617926 1.408772 1.625514 3.446061 3.138865  
1.86098 1.394754 1.275033 2.039847 2.105984 2.808771 3.070366 3.017737 1.505158  
2.290447 4.244498 1.614564 1.137058 3.074186 1.433676 2.147701 1.879306 1.123603  
3.676429 3.102127 2.680819 2.694172 2.703553 2.19465 3.755074 3.429831 4.440783  
3.909062 2.629101 3.089277 2.754624 2.116953 2.922446 1.855016 2.078589 2.14067  
2.017356 2.192741 1.953054 1.504238 1.223108 3.635589 2.223566 2.398368 1.809849  
2.886154 4.964635 4.163879 2.897872 4.96513 4.551263 4.059835 4.727426 4.375886  
1.931754 2.679544 1.91471 2.741701 2.493032 1.574689 2.179225 1.874036 2.289807  
0.826847 1.519289 1.482055 1.600253 2.372883 1.778303 1.09267 2.26207 1.36563  
1.978063 0.910299 1.034405 1.635181 1.724255 1.741068 1.602973 1.681695 2.668584  
1.911424 2.192847 1.91647 1.864719 2.184515 1.711841 1.347845 2.350105 1.579277  
3.631894 2.612102 1.418566 2.223333 2.442784 2.640439 1.760976 2.107168 3.714954  
4.196345 1.804066 1.763332 2.088467 1.748298 2.586066 3.467889 2.522402 2.440785  
1.826778 1.533916 1.481654 1.224685 1.738768 1.375262 1.487856 1.562031 1.858155  
1.366439 1.431521 2.314652 1.879004 1.907439 2.322857 2.23901 2.912478 1.852238  
1.107893 1.071414 1.380675 1.764585 1.171381 1.066164 1.282309 0.966118 0.982929  
1.86776 1.904381 2.064137 2.071728 2.065749 2.055369 2.267327 2.722392 1.908625  
1.812539 1.921694 1.582924 1.550656 1.399454 1.576385 1.375268 2.097767 1.328467  
2.210819 1.248527 1.33144 1.920536 1.750252 1.513866 2.048056 1.948038 1.397391  
2.253049 1.282136 1.136128 1.119313 1.226356 1.431584 1.009216 1.123692 1.166542  
1.07553 1.353307 1.315372 1.24908 1.821099 1.251363 1.261872 1.374014 1.423923  
4.181567 4.796034 4.546593 3.817503 4.989215 4.586609 5.052019 4.74643 4.795454  
1.336164 1.396236 1.066445 1.437475 1.158679 1.562092 1.152546 1.526829 1.466104  
1.035735 1.224463 1.720075 1.551668 1.227239 1.002215 1.901117 1.569334 1.273344  
2.079981 1.494821 1.436816 1.499947 0.900061 1.150867 1.165222 1.468681 2.118763  
1.402199 1.61189 0.995996 1.499187 1.286575 1.383708 1.610163 1.277795 1.272878  
2.405307 1.662678 2.551932 1.592006 2.018953 4.723525 3.709489 1.325548 2.910161  
2.835994 3.824514 3.686097 2.607197 2.625955 2.403353 1.60438 2.340889 1.979147  
6.372687 6.029258 7.25806 6.515408 7.132141 5.560653 6.824341 6.713443 7.200752  
1.195413 1.126273 1.295627 0.89032 0.908588 1.034261 1.06999 1.315185 1.135912  
3.757019 4.849637 3.155635 4.518832 3.489467 4.822888 4.943629 5.018734 3.762732  
7.323508 7.101158 6.64824 6.882508 7.117553 6.784472 6.929988 6.900189 7.168231  
4.933612 4.783432 5.072192 4.272368 3.258729 2.717251 3.173435 2.194417 1.353967  
1.302726 2.067691 1.667025 1.408698 1.403315 1.276561 1.838873 1.664036 1.604973  
1.866015 1.89401 1.170199 1.400028 1.153601 1.552334 1.356901 1.500344 1.920815  
6.016433 6.142912 6.467187 6.491828 6.334848 6.046356 5.580686 6.300691 6.061799  
2.26167 2.03121 2.938741 1.989802 2.130975 1.820425 2.104201 2.387535 2.270586  
4.602955 4.745831 5.774792 5.398973 4.793051 5.37564 5.28939 5.739525 5.565856  
2.238773 1.600076 1.820839 2.149992 1.469527 3.607157 1.88674 1.020285 2.783696  
7.293415 4.192914 4.643108 5.681809 5.141357 4.969355 5.120585 3.77711 3.21403  
5.486245 3.991033 4.849423 4.757014 5.753905 4.815531 5.190078 3.993283 4.563775  
6.084353 5.589778 5.593451 5.083456 5.194502 5.280816 5.482029 5.911296 5.6703  
2.055239 2.077929 2.150455 1.967468 2.397037 1.713622 1.512944 1.757671 2.021623  
5.186352 4.529246 4.07697 4.137925 4.474384 4.567453 4.828414 3.803435 3.950353  
2.1002 1.936594 1.731426 2.839268 1.529761 2.00994 1.665197 2.430591 1.746933  
3.937311 2.888351 3.445525 3.944077 2.99644 3.43672 3.499517 3.347046 2.949505  
7.054722 7.557384 7.099903 6.573947 7.098599 7.156252 7.419318 7.264471 7.579406  
1.280402 1.420828 1.276711 1.249297 2.037269 1.807914 1.035896 1.400307 2.423332  
5.124579 5.684457 6.211821 6.54657 6.060784 6.355576 6.250679 6.614804 6.098257  
5.917767 6.147577 5.943735 5.881252 6.297942 6.418912 6.225311 6.212881 6.854632  
2.318961 2.325643 1.660297 2.78539 1.844941 2.523928 2.021595 1.180302 2.270361

5.739122 5.411185 5.269721 5.919492 5.056983 5.298875 5.41863 5.472464 4.970269  
4.975596 4.980361 4.746199 5.076523 5.087232 4.560402 5.245192 5.375132 5.457706  
2.305745 1.453529 2.500915 2.131787 2.102261 2.538336 1.684741 1.420114 1.159732  
4.805419 3.016794 5.208573 1.882587 4.980936 4.164936 2.196348 3.167987 1.807165  
6.505886 5.525932 5.304809 5.904081 5.93044 4.909969 5.617162 5.183831 5.358728  
4.424614 3.716724 4.660569 5.048644 4.465743 5.064442 4.897394 5.749117 5.202681  
3.815764 3.494196 4.763458 6.121688 5.340437 4.92509 3.888015 3.997593 5.750804  
5.862671 6.687951 6.454857 6.18701 6.596457 6.230741 5.730767 5.62102 5.948358  
1.562157 1.659861 1.947299 1.659363 1.312127 1.477057 1.393308 1.291487 2.129266  
3.666459 2.465243 2.57064 2.223311 2.982562 2.959914 2.637065 1.910399 2.83324  
6.348917 6.597906 6.121502 5.962836 6.720388 6.247854 7.161751 6.538902 6.559767  
8.097728 8.777364 8.696923 8.694326 8.857165 8.069242 8.69214 8.819637 8.773489  
7.156556 6.972881 6.865267 6.700288 6.451357 7.536504 7.373532 6.447058 7.023439  
1.417863 1.409024 1.505727 1.4039 1.091061 1.248443 1.4172 1.582286 1.40697  
7.732672 8.22739 8.117744 7.45728 7.713152 7.849355 7.963947 8.227296 7.904142  
2.40611 3.840649 2.101093 2.827743 2.224627 3.212331 2.196237 1.878638 3.468756  
1.700471 1.306194 1.500916 1.513563 1.693386 2.272941 1.852076 1.606133 1.598588  
3.749557 3.721256 3.725767 2.609756 3.554735 3.90669 3.370141 4.328364 3.426365  
1.502436 1.347459 2.165476 1.628951 1.378419 1.696739 1.398057 3.192792 2.594039  
1.423179 2.072138 2.266669 2.131526 2.810366 1.66291 1.808431 2.096021 1.854763  
1.40378 1.309703 1.19935 0.91153 1.693274 1.058993 1.028475 1.165956 0.936418  
5.783184 6.603842 6.274354 4.620046 6.020338 5.942559 5.073138 5.275195 5.44864  
6.604048 6.905218 6.692197 6.512875 6.69771 6.171067 6.214623 6.04959 5.924785  
1.46377 1.628692 1.807449 2.484672 1.950215 1.503451 1.531711 2.113589 2.425212  
1.908499 2.012625 1.857738 1.824332 1.408709 1.719705 1.643494 1.298487 1.43605  
5.438395 4.830659 5.584421 5.366989 5.232756 5.085381 5.527855 5.710884 5.333717  
4.251545 4.956625 4.662874 2.974075 5.419398 4.025091 4.551039 5.350469 4.884127  
5.309984 6.144964 5.500369 5.02584 4.448067 4.826812 5.110346 5.246581 4.540691  
4.501882 4.154188 4.395357 4.809782 3.592717 5.63232 3.658916 3.687635 3.466267  
3.4232 2.166981 2.541786 2.618345 1.777364 2.36777 2.488343 2.515892 2.056558  
8.652028 7.831615 8.274137 7.905169 7.454174 7.657173 6.527201 5.728133 5.215186  
2.647828 2.574673 2.177414 2.831961 2.980162 2.668779 2.492998 2.5656 3.985982  
8.761606 8.369834 8.44702 8.421102 7.494201 9.02571 7.313438 7.757982 7.81801  
2.380592 1.965307 2.415191 2.894031 1.957819 2.235914 1.451781 2.943366 2.081469  
4.220061 5.814157 4.17145 5.526529 4.728715 5.47296 4.13454 4.551345 3.98638  
2.37643 1.450791 1.457501 1.351979 1.69561 1.82942 2.001316 2.246473 1.307129  
2.785604 3.413722 3.077976 3.444166 3.224232 2.512446 4.228138 4.305764 2.655725  
6.170179 6.066262 5.746231 6.192749 5.754249 5.618482 6.240891 6.521279 5.995669  
1.623876 1.871969 1.609955 2.279539 2.480417 1.49939 2.043292 1.449577 2.384206  
2.702207 2.405185 3.036655 3.809653 2.148217 2.899467 2.307577 1.835904 2.517059  
2.95772 3.022191 3.270649 2.531117 3.138687 2.768155 2.933562 2.870163 2.211464  
8.177499 8.367182 7.856817 8.77115 8.348439 5.760722 9.809086 10.24747 9.45586  
1.858076 2.101475 1.399334 2.053996 1.753411 1.602024 1.253505 2.248122 1.434181  
5.596886 4.354188 2.746436 3.288016 3.409289 5.976361 3.461996 3.407502 3.020749  
6.326167 4.908333 5.242435 5.628211 5.363984 5.908399 3.762756 4.385918 4.501233  
8.315492 8.332921 7.546694 8.600058 8.2599 7.276621 9.751525 10.07151 9.307879  
1.134853 1.224327 1.292602 1.792919 1.062515 2.100219 1.115684 1.259209 1.026153  
2.907104 2.754914 3.49934 3.366506 2.568402 3.074952 3.743074 2.667108 3.360997  
10.18427 10.57582 10.52076 10.65888 10.55453 8.341961 10.79022 10.74867 10.6872  
2.347186 2.380709 2.39132 2.673862 2.468266 2.533897 2.896531 2.388155 2.184265  
2.360348 1.744957 1.835316 2.149992 1.36823 2.016534 2.567643 2.502908 1.689007

2.666639 2.028575 2.45126 2.779217 2.514461 2.761822 2.892657 4.343752 3.009204  
6.117184 5.937339 5.663364 5.589818 5.366874 6.324267 6.190734 6.686209 5.790434  
3.336932 3.065947 2.814425 2.768502 2.252661 4.633593 3.254872 2.379981 2.250826  
10.01215 10.17745 10.27093 9.935692 10.33386 10.20275 10.38102 10.20689 10.35699  
6.267205 6.06728 5.595258 6.564865 4.695048 5.928556 5.210661 5.798269 6.303597  
3.492149 2.854938 3.539546 3.93241 2.492838 3.08471 2.823678 3.811141 4.201896  
2.121169 3.108285 1.551366 2.162855 2.950333 2.024331 2.060958 1.517124 2.046355  
2.308661 2.159011 2.700091 2.398651 2.684206 2.317778 3.076211 2.455806 2.689094  
5.712819 6.320624 6.540806 7.154127 6.220529 7.054171 6.764262 6.354635 6.269709  
5.661146 7.02718 6.527019 5.910679 6.634886 5.845206 6.259398 5.978987 6.715638  
5.770826 4.629304 6.225044 6.156626 5.24777 6.762386 7.419206 6.995013 6.751962  
2.367071 2.577744 2.89901 3.121315 2.136571 3.069759 2.857015 2.4015 1.978551  
5.408592 5.783716 5.111908 4.766593 5.568305 5.690579 6.029235 5.988286 6.096939  
6.791763 7.452307 7.084509 6.253661 7.65724 6.11134 7.321007 7.03722 7.176834  
1.67523 1.357303 1.240271 2.628013 1.350069 1.447727 1.875613 1.615159 1.690343  
1.991321 3.762407 1.736251 1.920229 2.616403 3.951277 2.826692 2.89797 2.190062  
4.571474 5.332063 5.692645 5.646521 5.273679 5.646422 6.122026 7.036837 6.970125  
6.952495 7.209852 7.102898 7.531652 7.089989 7.299905 7.861595 6.871618 7.654696  
1.506816 2.382998 2.217523 1.358048 1.493977 1.216213 1.701921 2.413681 1.294662  
3.532647 3.141588 2.80351 4.028103 3.730117 2.95256 4.007337 3.989393 3.281306  
2.503205 1.426262 1.343176 3.297251 1.734427 2.026085 2.06904 2.678893 1.392614  
2.690463 3.966464 2.146051 3.298889 2.95559 3.124206 4.615829 2.927484 2.866999  
8.895942 5.016827 6.226507 7.189714 4.718989 2.7729 6.164583 6.570666 6.482417  
2.405079 2.125989 1.401859 2.293918 1.636214 2.049841 1.990379 1.844161 1.606771  
4.25741 2.529819 0.750714 0.551942 0.566456 1.092028 0.88911 0.894094 1.191529  
2.734269 2.439453 1.923565 2.836017 2.528126 2.153667 3.034129 2.458009 2.53042  
6.171317 6.308134 5.157912 5.262434 4.732379 4.403883 4.675715 5.851688 2.351691  
5.290982 2.63533 4.72434 5.074789 3.732883 6.608827 5.610168 2.684498 5.098476  
4.320452 4.619054 4.582043 4.621996 4.277784 4.478714 4.889623 5.283043 5.012801  
2.623586 1.233758 2.12448 1.988486 2.30886 1.545228 1.689794 1.421957 1.644934  
8.563453 8.008915 8.325742 8.720287 8.183641 7.746056 8.618365 9.062846 8.509938  
1.190848 1.726365 1.558661 1.712453 2.242261 1.566568 1.413676 1.439758 1.74242  
4.388902 3.165268 3.569804 1.644632 2.130325 1.810617 1.598382 2.837592 2.818051  
8.547014 8.626525 8.787466 8.680724 8.756587 8.366421 9.012049 8.971621 8.859605  
6.949359 7.506928 7.179369 7.379922 7.44777 7.148871 6.766729 7.140307 7.50123  
1.215564 2.690602 0.660511 0.979154 1.066937 0.901482 1.30909 1.479793 1.071599  
2.601021 3.225258 3.112319 3.068391 2.892757 3.778578 2.946726 2.655155 2.935044  
3.832736 3.479129 4.12782 4.314982 4.010473 3.271587 4.746228 4.523363 4.893103  
1.849302 1.236551 1.576633 1.894359 1.63083 0.945665 1.616827 1.870185 1.634576  
1.324836 1.359498 1.091181 2.121998 2.02981 2.314998 1.538589 1.441416 2.992199  
2.553774 2.381124 2.398709 2.399051 2.251926 2.961048 2.288941 2.219895 2.705276  
2.772768 2.578718 3.717595 2.591581 3.105448 1.833724 2.070654 1.162116 1.546893  
6.862079 5.557119 5.857768 5.694681 5.97662 6.996937 5.827389 5.597686 6.123249  
2.292971 3.492067 2.381548 2.097797 2.929622 3.054048 1.905885 2.472609 2.520753  
0.611184 0.834974 0.991817 1.116491 0.754816 0.978487 0.667199 1.461447 0.591693  
5.628958 6.434193 6.431788 6.851051 6.930436 3.776434 6.89507 5.931957 6.279091  
1.540686 2.169105 1.41697 0.96057 0.85009 1.111498 1.177031 1.810315 0.952323  
11.4553 11.41062 11.37673 10.98811 11.40298 11.15043 11.48442 11.16886 10.99258  
0.970349 0.654738 0.936813 0.88154 0.822612 1.674427 0.746984 1.397858 0.944418  
5.209684 3.085395 5.092586 4.486822 5.232937 4.52232 4.821238 5.260481 4.788293  
6.103312 5.750513 5.972761 5.924682 5.224399 5.422406 6.360285 5.925373 6.432874

5. 809173 6. 873431 6. 333316 6. 19494 6. 523925 6. 193439 6. 054917 5. 892183 6. 225052  
3. 268884 1. 74228 2. 389703 2. 556748 1. 215908 1. 409003 1. 04354 1. 624656 1. 296875  
5. 043789 5. 410129 6. 634645 4. 975949 6. 334822 5. 165767 5. 271949 6. 179946 5. 53356  
4. 293848 4. 565413 4. 640007 4. 19975 3. 733965 5. 325829 4. 824754 4. 968726 3. 874971  
7. 07631 7. 960341 7. 345537 7. 192151 7. 393838 7. 801845 7. 285117 7. 514047 6. 852053  
2. 459968 2. 483009 3. 198047 3. 201772 3. 512884 2. 556801 2. 94826 3. 129926 3. 284938  
5. 507932 6. 210289 6. 185955 4. 528917 6. 161043 4. 402934 6. 143612 5. 977278 6. 516769  
9. 031793 9. 301926 8. 946101 8. 576496 9. 395557 8. 763158 8. 682062 8. 780849 8. 642337  
4. 658568 5. 260806 5. 504162 4. 837709 5. 111705 4. 987683 5. 255728 5. 447198 5. 560481  
8. 558601 9. 126316 9. 207507 9. 066361 8. 635482 9. 417223 9. 295108 9. 309019 9. 250127  
4. 475587 4. 358832 3. 849415 4. 882303 4. 409773 3. 716161 4. 245504 4. 563276 4. 065343  
1. 739732 1. 631003 2. 22767 1. 86419 1. 57244 1. 744004 2. 410491 2. 980369 1. 936606  
7. 27825 8. 213693 7. 475024 7. 642769 7. 958992 7. 939869 8. 050378 7. 687116 7. 785703  
8. 425827 7. 906636 7. 54412 7. 86366 8. 487688 8. 397097 7. 89298 7. 844995 7. 866702  
7. 311299 8. 086691 7. 392683 7. 365986 7. 92956 7. 278005 7. 035948 7. 721549 7. 563381  
6. 132259 5. 209227 5. 128585 4. 599259 6. 327479 7. 933724 7. 103717 6. 55935 7. 156176  
1. 122742 1. 777799 0. 957292 1. 301942 1. 101852 1. 358953 1. 034423 1. 349584 1. 243299  
5. 750649 6. 286188 6. 159263 5. 825162 5. 968257 6. 414039 6. 554931 6. 280328 6. 259698  
6. 414742 7. 237859 7. 386918 6. 834412 7. 581208 6. 421685 6. 445355 6. 999602 6. 311172  
8. 122861 8. 378743 7. 991864 8. 103493 8. 306825 8. 060553 8. 446225 8. 277703 8. 33757  
9. 397144 9. 207087 9. 107206 9. 471317 10. 01834 9. 64163 9. 617836 9. 527868 9. 623185  
4. 254811 4. 677233 4. 917236 3. 74371 4. 915048 3. 865557 3. 437077 4. 235789 4. 041826  
0. 765599 1. 307307 0. 882257 0. 881873 0. 746202 0. 784976 1. 236393 0. 985809 1. 92444  
5. 791629 6. 160396 5. 740207 6. 903971 6. 561442 6. 011416 7. 584844 8. 307953 7. 796929  
3. 227752 1. 967393 2. 107475 2. 090296 4. 326549 4. 638045 2. 725379 4. 72416 4. 68507  
6. 631967 5. 1866 6. 3096 5. 985169 5. 475054 6. 458419 6. 123417 5. 797112 5. 477564  
3. 233368 5. 054884 3. 201071 3. 498334 2. 994046 4. 840654 4. 566926 3. 841499 3. 319226  
1. 402153 1. 446119 1. 142182 1. 463762 1. 351403 1. 911616 1. 500207 1. 856305 1. 555226  
5. 765142 5. 582226 6. 066637 6. 162315 6. 322777 5. 328284 5. 514047 5. 822818 5. 706242  
7. 33406 7. 27642 6. 549824 5. 984223 6. 295407 7. 21511 6. 204006 4. 72636 5. 181181  
3. 918417 2. 775132 4. 080976 3. 119695 3. 715416 2. 094528 2. 155035 2. 384249 2. 701355  
8. 984067 8. 572341 9. 072416 9. 086863 8. 881652 8. 607525 8. 958803 8. 740696 8. 880163  
8. 438027 7. 107224 7. 460092 8. 706058 8. 290057 7. 69003 8. 509075 8. 579149 8. 079974  
5. 62882 4. 322202 4. 337056 5. 944569 5. 073897 4. 311771 6. 196497 5. 893132 6. 05454  
2. 644823 4. 540035 4. 680367 4. 292017 3. 847962 3. 75386 3. 366041 4. 412933 3. 554191  
0. 71473 0. 775959 1. 00145 1. 016359 1. 11925 1. 921674 0. 809736 1. 469402 1. 594183  
4. 423369 5. 01959 5. 602155 5. 279592 5. 514249 5. 236329 4. 499906 4. 972026 5. 497094  
2. 884861 3. 611295 2. 537577 2. 967329 4. 15894 5. 737228 4. 806416 4. 115967 4. 157559  
2. 283105 2. 812496 2. 964451 2. 669012 2. 121817 2. 81596 2. 972763 3. 23857 2. 799143  
6. 315566 7. 11896 6. 847129 6. 939544 7. 300267 6. 061634 7. 374006 7. 244009 7. 344726  
8. 34056 8. 054649 8. 128529 7. 976927 7. 673954 8. 168931 8. 362395 8. 249516 7. 866086  
8. 275497 8. 769826 8. 933956 7. 995751 8. 146575 8. 035707 8. 56296 8. 571017 8. 245174  
1. 645987 1. 842793 3. 403844 1. 873923 2. 591526 4. 124324 4. 20796 2. 407641 2. 282088  
4. 924873 6. 407973 5. 455254 6. 031471 6. 520232 6. 090432 6. 04063 5. 104483 5. 537121  
6. 619906 6. 574602 6. 407029 7. 005346 6. 173592 5. 62072 6. 414337 6. 272671 6. 281024  
1. 457653 1. 750948 2. 082965 1. 72272 1. 446008 1. 049342 1. 107327 1. 087184 1. 29954  
1. 879965 2. 741221 1. 93471 2. 226682 2. 060886 1. 901879 3. 791312 2. 851859 3. 704255  
6. 987611 7. 365707 6. 843436 6. 909544 6. 58638 6. 385023 6. 650881 6. 505043 6. 537522  
1. 90493 1. 147591 2. 265661 2. 696435 1. 666858 1. 990487 1. 694867 1. 622308 2. 219075  
4. 760958 4. 339455 5. 12374 5. 327441 5. 565445 4. 766343 4. 895697 5. 442721 4. 897697  
8. 13516 8. 227737 7. 262808 8. 489231 8. 332061 8. 674432 7. 703366 7. 670145 7. 592273

5. 86642 4. 403364 5. 428707 4. 218691 5. 211216 5. 212973 6. 391689 6. 80875 6. 454631  
6. 517699 6. 628893 6. 850375 6. 374207 6. 058239 6. 02274 6. 323793 5. 876036 4. 694433  
1. 503977 1. 346823 2. 173769 1. 864349 1. 138659 1. 752057 1. 611611 1. 74243 1. 504724  
1. 04447 2. 981808 2. 450335 4. 510194 1. 796597 1. 955106 3. 691528 2. 684069 2. 746356  
5. 193319 5. 992623 5. 991327 6. 116653 6. 11646 6. 497118 6. 124399 6. 570359 5. 876222  
4. 081383 3. 273334 3. 874305 2. 934514 3. 321195 5. 082161 4. 588539 4. 232959 4. 193932  
6. 400367 6. 515584 6. 41821 5. 752744 6. 419583 7. 253056 6. 927323 7. 319852 6. 573217  
4. 729536 2. 588063 3. 518888 3. 262779 2. 905347 4. 149126 3. 716501 4. 212197 3. 942826  
5. 22843 4. 865943 4. 955922 4. 412997 5. 128227 5. 060581 4. 809409 4. 541592 5. 653084  
9. 788761 10. 14286 9. 852537 10. 00739 10. 05432 9. 925728 9. 790018 9. 491684 9. 686487  
3. 337798 3. 177264 3. 196157 3. 32711 2. 499228 3. 962087 3. 762571 3. 899983 3. 062989  
6. 60404 6. 946769 6. 978926 7. 628083 7. 331246 4. 703441 7. 395125 5. 79399 5. 981774  
3. 671475 4. 213924 2. 15563 3. 465013 2. 97506 2. 92387 3. 666044 3. 723645 3. 09851  
2. 214355 1. 915279 1. 550039 2. 299172 1. 366348 1. 415141 0. 875938 1. 196291 1. 725251  
4. 551325 4. 894931 5. 859997 5. 148276 6. 031304 4. 685995 5. 150643 5. 874654 5. 618015  
1. 623546 2. 243026 2. 264917 1. 636841 1. 920334 2. 486716 1. 775773 2. 572118 1. 809698  
7. 345353 7. 182932 7. 506243 6. 760315 7. 406065 7. 586999 7. 35845 7. 417555 7. 626213  
5. 407412 5. 884475 5. 095883 4. 887934 6. 301553 5. 997641 6. 075412 5. 979571 6. 03452  
5. 738164 6. 595123 6. 647727 6. 649804 6. 463073 6. 273563 7. 228909 6. 833649 6. 556708  
8. 214225 8. 252791 7. 677817 8. 076946 7. 123722 7. 389682 7. 542875 7. 596782 7. 696681  
8. 953407 9. 643633 9. 359893 8. 71808 9. 36914 8. 874116 8. 790018 8. 496285 8. 389508  
2. 110019 1. 761545 1. 334022 1. 717829 1. 537603 2. 105671 2. 278954 1. 636905 2. 687791  
7. 364411 7. 965887 7. 620593 6. 984619 7. 901369 7. 410324 7. 499336 7. 180925 7. 472548  
5. 097735 4. 955865 4. 546113 5. 307302 5. 195683 4. 613112 4. 888253 4. 529837 4. 995737  
7. 214184 6. 455935 7. 113908 7. 65523 6. 666516 7. 228357 6. 68835 7. 159548 6. 867476  
4. 770028 4. 878223 4. 332477 5. 793888 4. 361086 5. 087468 4. 196382 4. 394443 4. 224658  
4. 907995 5. 285693 5. 211699 5. 514017 5. 626706 6. 792044 4. 707958 5. 245871 5. 690741  
8. 667205 8. 058477 8. 299398 8. 610916 8. 84175 9. 151783 8. 831428 8. 987121 8. 77032  
6. 571127 5. 853037 6. 298442 6. 707219 5. 060823 7. 259779 5. 843053 6. 40534 6. 107433  
7. 875126 7. 471487 7. 938796 8. 490589 7. 872947 8. 250163 8. 03687 7. 753317 8. 006175  
2. 305429 1. 829753 4. 612779 3. 838 2. 220425 5. 002493 1. 702745 3. 541746 2. 907009  
1. 868295 2. 14992 1. 579062 2. 005554 1. 292943 2. 865769 1. 842474 1. 301303 1. 790182  
7. 785509 7. 545697 7. 513771 7. 317353 7. 10741 7. 750884 6. 662014 6. 081485 6. 781176  
1. 822709 1. 321741 0. 794218 0. 959413 1. 396011 1. 126867 0. 985393 1. 374352 1. 174402  
1. 073186 0. 988522 1. 397965 1. 35896 1. 382954 1. 131486 1. 134296 2. 009389 1. 403078  
4. 36002 4. 295897 4. 632883 4. 88368 4. 453509 4. 310664 4. 644065 5. 086965 4. 476355  
9. 392351 8. 83194 8. 694758 8. 6355 8. 625761 9. 055318 8. 529866 8. 553313 8. 6313  
1. 87983 2. 439239 1. 807218 2. 58569 1. 655539 1. 697343 1. 814401 1. 990176 1. 573244  
2. 03796 2. 70179 3. 326585 1. 193656 2. 827285 2. 178235 3. 043186 3. 533037 3. 115156  
1. 248672 1. 339147 1. 393738 2. 49636 2. 268404 1. 376199 1. 46257 0. 91181 1. 594506  
5. 807303 6. 639675 6. 566533 6. 797889 6. 978687 5. 353717 5. 635576 5. 689653 6. 250406  
2. 848958 3. 383946 3. 08156 3. 669322 3. 353447 2. 869765 3. 449529 3. 646566 3. 750362  
7. 021103 6. 311507 7. 464526 5. 961964 8. 490115 4. 250341 3. 77049 3. 73074 6. 494249  
5. 790242 5. 225839 5. 611374 5. 848666 6. 216491 6. 565291 6. 469443 6. 438729 6. 595724  
4. 338632 4. 1377 4. 480255 4. 389771 4. 847441 5. 067465 4. 986936 3. 507501 4. 83939  
5. 226573 3. 740434 5. 629409 3. 211705 5. 714373 4. 677739 4. 631089 4. 481533 4. 319575  
5. 907316 6. 202716 6. 330335 7. 005786 6. 24794 6. 429895 6. 453601 6. 339325 6. 44784  
3. 087194 3. 177745 2. 840107 3. 534311 4. 080479 5. 556913 3. 728871 3. 23005 3. 723019  
1. 357058 1. 448947 1. 339544 1. 838432 2. 285891 1. 517443 1. 583925 3. 145286 1. 848096  
1. 994503 1. 974255 1. 557896 1. 803537 1. 311708 1. 812901 1. 784511 1. 928531 2. 545616  
4. 137095 2. 54601 3. 389572 3. 398015 3. 563623 2. 940011 2. 854738 3. 071105 3. 293301

3. 148636 2. 63634 3. 178939 2. 740876 3. 399989 2. 802601 3. 256539 2. 476424 3. 729204  
3. 248201 3. 431526 3. 692491 3. 367235 3. 204418 2. 990402 3. 442178 3. 78596 2. 840987  
4. 044257 5. 535817 5. 19772 4. 828202 5. 09804 4. 814782 5. 795986 5. 82777 5. 88702  
7. 090202 6. 692773 6. 159853 7. 105076 6. 497021 6. 970892 7. 011047 6. 509722 7. 334617  
4. 509235 3. 87103 3. 906971 4. 092324 4. 276101 3. 130209 2. 963853 5. 536215 4. 196666  
6. 055801 5. 891138 6. 684237 5. 5561 5. 735839 5. 705264 5. 699163 4. 969786 5. 409336  
6. 380204 6. 737902 6. 532874 6. 366394 6. 771599 6. 339662 7. 106757 6. 680501 6. 844145  
8. 803946 8. 747207 8. 507994 8. 21379 9. 260539 9. 211566 9. 127791 9. 188734 9. 532565  
7. 346072 7. 763783 7. 218315 7. 113465 7. 339315 7. 814941 7. 69181 7. 634381 7. 502326  
2. 328735 2. 436378 1. 522935 1. 601612 1. 768551 1. 442201 1. 555556 2. 390766 1. 758869  
6. 770613 6. 583528 6. 722478 6. 989421 7. 064335 7. 215418 7. 163385 5. 797432 6. 843003  
8. 098915 8. 693371 8. 674251 8. 082373 8. 524343 7. 55457 8. 254178 8. 292609 8. 12848  
7. 059433 7. 50978 7. 68548 7. 544797 7. 95961 7. 582848 7. 820824 7. 399055 7. 611127  
2. 976667 2. 354409 2. 679403 2. 472261 2. 558507 3. 432943 3. 799496 4. 037958 2. 891356  
3. 917583 3. 478505 2. 825898 3. 127191 3. 16624 5. 107413 3. 76184 3. 879828 3. 830215  
4. 915075 5. 032496 5. 142057 5. 322571 5. 9213 5. 047457 5. 811983 5. 689638 6. 510318  
6. 323468 6. 97116 7. 244479 6. 892918 7. 260923 5. 364669 6. 977573 6. 661014 6. 818388  
5. 465721 5. 66455 5. 408044 6. 208897 6. 246955 7. 095389 6. 613171 6. 996095 7. 102083  
2. 400287 2. 423072 2. 124444 1. 268675 1. 298528 1. 228237 1. 750973 1. 417961 1. 885575  
4. 915427 4. 804832 5. 374084 2. 983892 4. 654913 3. 755114 3. 80135 3. 410075 3. 131031  
5. 525314 6. 284968 5. 339644 5. 795537 6. 237605 6. 154747 6. 094644 5. 697454 5. 632356  
5. 603497 5. 6562 5. 946254 5. 716585 5. 701074 5. 22425 5. 300534 4. 892923 5. 375779  
8. 098938 8. 384384 8. 706743 8. 154778 8. 531287 8. 760452 8. 291595 8. 222185 8. 54941  
4. 819929 3. 688429 5. 076655 5. 509124 4. 770294 3. 544321 2. 968002 4. 908957 3. 9736  
2. 44843 2. 174771 2. 842151 2. 51774 2. 850471 2. 360963 1. 961836 2. 618674 2. 650326  
1. 843374 1. 610508 2. 765847 1. 838516 1. 489539 3. 19833 3. 983454 0. 752136 2. 169261  
5. 889799 5. 438211 5. 40715 5. 553845 5. 551192 5. 590486 4. 89223 5. 312791 5. 039262  
7. 148123 7. 566614 6. 70126 6. 011976 7. 420176 5. 01181 5. 802615 5. 670961 5. 546382  
4. 01926 4. 007186 4. 551913 3. 367715 4. 622612 5. 169998 5. 619569 4. 812738 4. 878746  
7. 74775 8. 203146 8. 20139 7. 44317 8. 084172 7. 501211 7. 923954 7. 860263 7. 82259  
7. 529906 7. 38341 7. 150657 7. 026958 7. 191512 7. 498552 6. 925452 7. 22094 7. 390128  
5. 438037 4. 432845 5. 385407 5. 240209 5. 103844 4. 391219 4. 784123 4. 863782 4. 380873  
6. 79102 7. 303009 6. 97762 7. 157722 7. 316567 7. 47948 7. 341698 7. 483213 7. 642331  
1. 793481 1. 772922 1. 82968 3. 11856 1. 975977 1. 391773 1. 802614 2. 33503 3. 26509  
5. 975711 6. 925978 6. 328303 5. 878836 5. 992577 4. 596923 5. 532533 5. 948022 6. 587725  
5. 260745 5. 595836 5. 690463 5. 090748 6. 188149 4. 370146 4. 47126 5. 972057 5. 675264  
6. 532472 7. 377605 6. 878069 6. 774236 6. 806317 6. 722654 6. 664373 7. 109372 7. 116181  
6. 983142 7. 52918 6. 717158 7. 06483 6. 576557 7. 057947 7. 401002 7. 435054 7. 118004  
1. 43944 0. 920694 2. 014639 0. 584938 2. 128037 1. 371284 2. 663207 2. 4114 0. 839852  
6. 743393 6. 932228 6. 676377 7. 175503 7. 228299 7. 274013 6. 970962 7. 041184 6. 727757  
5. 827626 6. 204887 6. 155088 6. 458151 6. 493208 6. 436083 6. 571994 5. 90557 6. 18707  
2. 51083 2. 963036 3. 600238 2. 298608 3. 6179 3. 260699 2. 638046 3. 561728 2. 917055  
2. 971939 2. 525529 1. 988969 2. 01545 2. 610661 2. 263399 2. 920131 2. 437444 2. 48274  
7. 874814 8. 049203 7. 412728 7. 573909 8. 370128 8. 489946 8. 109797 8. 10091 7. 347811  
3. 087754 2. 74557 2. 257917 2. 926233 3. 915181 2. 450243 3. 462428 3. 818008 3. 559098  
1. 848063 3. 684515 2. 693791 2. 170325 2. 976886 1. 77061 2. 979845 2. 349956 1. 863537  
7. 387571 7. 499409 7. 569649 7. 713502 7. 564899 7. 345047 7. 287132 7. 577288 7. 695142  
6. 719123 7. 348085 6. 032765 7. 581293 6. 449672 7. 30701 6. 234887 6. 368925 7. 009287  
7. 733424 8. 495218 8. 504299 7. 828406 8. 050739 7. 932 8. 208398 8. 123457 7. 702829  
3. 755631 3. 156994 2. 822579 1. 998426 3. 085239 2. 126432 2. 790691 2. 092327 1. 958931  
1. 327389 0. 975683 0. 894799 1. 340526 1. 43763 0. 965191 1. 077501 1. 839348 1. 387053

4. 763351 5. 165742 5. 443512 6. 281179 5. 497354 6. 637297 5. 417051 5. 173502 5. 875276  
6. 572986 6. 599075 6. 844158 6. 427839 6. 137383 6. 523472 6. 935251 6. 706265 6. 489637  
5. 179362 4. 738721 4. 466566 3. 830365 4. 512135 4. 453972 4. 913722 5. 068057 3. 820607  
7. 202781 7. 751941 6. 977104 6. 742641 7. 242394 7. 842099 7. 709129 7. 269075 7. 555371  
2. 407941 2. 567269 2. 01216 2. 911642 2. 289237 1. 681583 1. 635919 2. 634871 2. 72361  
8. 782352 9. 233723 8. 991472 9. 235099 9. 216172 8. 736081 8. 809129 8. 851907 8. 55904  
0. 981422 0. 760272 1. 540874 1. 476821 1. 351308 0. 843789 0. 979663 2. 235948 2. 199275  
1. 075309 1. 132673 1. 267271 1. 375523 1. 29549 1. 201879 1. 365544 0. 960155 1. 351037  
6. 175293 5. 106176 5. 336549 5. 966773 4. 830743 4. 842174 4. 67995 4. 25355 5. 478888  
1. 54908 2. 128657 1. 217361 1. 582313 1. 459567 1. 55663 1. 746984 1. 972003 1. 885155  
4. 836889 5. 834724 5. 595238 5. 266329 5. 467294 5. 15976 5. 812909 6. 55209 5. 134003  
4. 765114 5. 251704 4. 034195 5. 403676 4. 654799 4. 560677 4. 733663 5. 335451 4. 654213  
7. 440333 6. 295092 6. 769778 6. 655373 6. 973267 6. 556328 6. 78139 7. 208311 6. 935029  
2. 274703 2. 390039 3. 179009 2. 337365 2. 227503 2. 173805 1. 761148 2. 084569 2. 988139  
1. 26264 1. 286549 2. 014647 0. 999662 1. 331398 1. 78951 1. 256291 2. 339804 1. 346229  
4. 714963 5. 274939 5. 0816 4. 061346 3. 677006 4. 013785 5. 531443 4. 704065 4. 772988  
3. 405807 2. 038979 3. 187304 2. 127838 3. 56628 2. 786759 4. 920207 4. 406668 4. 786889  
5. 271048 3. 924235 5. 84959 5. 034508 5. 474232 6. 433117 5. 726505 6. 585283 5. 894711  
1. 345033 1. 705699 1. 24082 1. 239144 1. 327264 1. 754532 2. 06993 1. 434193 2. 400781  
3. 829597 4. 221676 4. 227904 4. 647499 4. 411909 4. 141242 3. 731998 4. 043141 4. 239025  
3. 778339 4. 564379 4. 122128 3. 393298 4. 617278 4. 492973 5. 286598 4. 124303 4. 122709  
5. 410598 3. 022601 3. 9805 5. 05104 3. 899673 4. 573249 3. 794828 4. 490418 4. 918719  
0. 939361 1. 559828 1. 003055 2. 202926 0. 94896 1. 358227 1. 568994 1. 659619 1. 395247  
5. 625098 3. 514357 2. 336958 4. 537966 3. 409025 5. 601911 2. 642583 2. 818279 4. 671955  
2. 703738 2. 308484 1. 378705 1. 863384 1. 526897 2. 36236 1. 283296 1. 826495 1. 390233  
2. 140433 1. 904704 1. 264583 2. 42022 2. 049565 1. 073982 1. 458381 1. 361524 1. 474347  
1. 40163 1. 775533 1. 543985 1. 981215 1. 406981 1. 553292 1. 635859 1. 4689 1. 003369  
4. 930416 5. 847904 6. 044798 5. 310904 5. 358217 5. 193554 5. 768004 5. 264191 5. 284804  
3. 06558 4. 08608 4. 470365 3. 306613 3. 912104 4. 685533 3. 903378 4. 040368 3. 960974  
2. 680927 4. 824833 3. 011256 2. 23196 5. 002531 4. 157265 4. 867726 4. 10365 4. 598384  
6. 208456 7. 522399 6. 446556 6. 668587 7. 237596 6. 45546 6. 440671 6. 530275 6. 821048  
2. 864792 1. 86642 1. 716681 2. 293251 1. 910012 3. 618827 2. 129372 2. 318412 1. 611536  
5. 350474 6. 112034 5. 17957 4. 734201 5. 004956 5. 158575 5. 604029 4. 419281 4. 936872  
6. 613745 4. 237653 6. 058366 6. 819252 6. 307233 6. 550468 7. 514643 7. 959797 8. 351003  
2. 385955 2. 775848 2. 624731 3. 308116 2. 874567 2. 503799 2. 799193 2. 33729 2. 944308  
1. 501079 2. 196624 2. 132674 1. 669511 1. 830321 1. 696074 1. 58521 2. 012881 2. 215509  
3. 552038 4. 268338 3. 747626 5. 084343 3. 199756 4. 010433 3. 245003 3. 844114 4. 474323  
3. 079789 3. 36376 2. 70953 3. 579851 2. 79393 2. 548098 3. 127443 2. 550912 2. 609257  
7. 988872 7. 999213 7. 663818 7. 713056 7. 589477 8. 092371 7. 325867 7. 310937 7. 62192  
4. 180338 3. 973646 3. 496584 3. 966944 4. 229851 5. 260313 5. 365243 5. 068142 4. 880364  
6. 575331 7. 284673 6. 882524 7. 241614 7. 13718 7. 357395 6. 207392 7. 209737 7. 387065  
2. 260475 2. 15353 2. 330008 1. 93362 1. 944709 3. 214549 2. 145132 1. 557462 3. 092568  
5. 874372 6. 122887 6. 492607 5. 900787 6. 111031 6. 343038 6. 711342 7. 143957 7. 068598  
4. 836117 3. 558797 4. 421117 2. 817318 3. 586002 3. 522911 2. 990318 4. 237927 4. 054254  
7. 986637 8. 247415 7. 693733 8. 217485 8. 218922 7. 976322 7. 445592 7. 530024 7. 882411  
4. 827919 4. 266028 5. 423096 5. 013446 4. 952983 6. 478482 5. 974667 6. 339128 6. 8722  
6. 441337 6. 922548 6. 65751 6. 261628 6. 631468 6. 394272 6. 543758 6. 312605 6. 518743  
3. 000114 3. 056994 2. 737091 3. 282293 3. 192273 2. 981167 2. 884497 2. 767534 2. 773626  
1. 489004 1. 521883 1. 063926 1. 405169 1. 456872 1. 586387 1. 480594 1. 750162 2. 239118  
3. 832049 4. 915536 5. 221261 3. 692861 4. 424301 5. 544108 3. 904077 3. 897827 4. 607576  
5. 711702 5. 811004 4. 927978 4. 591056 5. 733813 4. 59405 4. 948059 4. 911207 4. 703195

6. 700294 6. 826024 6. 997127 6. 512391 6. 863256 6. 375323 6. 927973 7. 394671 7. 111505  
5. 884074 6. 093597 6. 595686 5. 900846 5. 741232 6. 437693 5. 179494 6. 099748 5. 802836  
8. 969498 8. 520868 8. 765865 9. 311352 8. 858974 8. 913097 8. 939631 9. 081222 9. 377591  
5. 061907 5. 982646 5. 288508 5. 514802 6. 959526 5. 685321 6. 632565 3. 709251 4. 858488  
1. 172973 1. 347976 1. 147295 1. 461094 1. 136582 1. 3196 1. 03636 1. 592291 1. 492088  
2. 18112 2. 275096 2. 409879 3. 025715 2. 557945 2. 467752 2. 024024 2. 128493 3. 089263  
8. 67881 9. 186386 9. 574426 9. 200537 9. 216381 8. 387698 9. 778153 9. 929855 9. 655259  
5. 869833 4. 29768 5. 378363 5. 222196 5. 362799 5. 249648 5. 826846 4. 956049 5. 363416  
2. 999194 2. 399548 2. 300186 2. 962103 2. 951855 2. 444804 3. 515029 3. 51076 4. 164042  
5. 335352 5. 644628 5. 232156 5. 612628 5. 539686 4. 361045 4. 532196 6. 024109 5. 341115  
2. 447529 1. 774588 3. 114998 2. 230671 2. 852702 2. 110299 2. 160593 1. 992767 2. 881771  
2. 803517 3. 621283 3. 61566 5. 306914 4. 752682 3. 389864 5. 277056 5. 004926 4. 643364  
4. 988546 4. 74262 6. 006817 5. 662139 5. 270145 5. 825705 5. 609665 5. 375238 5. 778202  
5. 399486 6. 128768 6. 225292 4. 669624 5. 491255 4. 410914 5. 545723 4. 357417 5. 440362  
5. 178221 5. 362122 4. 662622 4. 818979 5. 116491 5. 504208 4. 183344 4. 683638 4. 435932  
1. 915096 2. 236099 2. 91577 3. 575001 2. 29208 2. 310291 3. 244177 2. 223697 1. 899594  
2. 877587 2. 242671 3. 262169 2. 437761 2. 605581 2. 828365 2. 75623 2. 56428 3. 096986  
1. 879746 1. 519626 1. 552237 1. 855847 1. 778142 3. 008669 1. 664079 1. 658026 1. 825812  
6. 114414 5. 606201 5. 672535 5. 431222 6. 406315 6. 339355 6. 836824 7. 057638 7. 229397  
7. 000385 7. 567209 6. 372247 7. 407635 7. 003302 6. 091775 6. 430624 6. 748701 6. 185975  
5. 348392 4. 367069 5. 035644 5. 42419 5. 150125 5. 110664 4. 979859 5. 197213 4. 744837  
6. 326805 4. 033444 4. 527372 4. 74463 4. 500579 3. 813694 5. 160631 5. 122928 5. 354588  
2. 952047 3. 968019 3. 501201 4. 150526 4. 131064 4. 386585 3. 697942 4. 132389 4. 943201  
3. 89673 3. 382308 3. 703029 3. 349938 2. 920538 3. 131679 2. 544786 3. 332876 3. 119548  
6. 929684 5. 768934 6. 362294 6. 025902 6. 070812 7. 148259 7. 113302 7. 218434 7. 013783  
9. 700857 9. 072849 9. 048084 8. 983755 8. 668714 9. 163883 8. 972841 8. 781041 8. 857292  
6. 333435 6. 700656 6. 724269 7. 051932 6. 626004 7. 098209 6. 993595 6. 435652 7. 270639  
4. 10034 2. 628033 5. 438042 2. 813861 3. 620681 5. 071242 3. 983783 4. 390818 4. 022621  
6. 810519 6. 936133 6. 310248 6. 303378 6. 509477 6. 556133 6. 952912 6. 273976 6. 571085  
5. 565961 6. 23509 5. 325154 5. 689497 6. 393954 6. 262015 6. 78103 6. 362945 6. 372695  
2. 005793 2. 346008 2. 450552 2. 140905 2. 1706 2. 539102 3. 061853 2. 848285 3. 601862  
5. 680313 5. 403473 5. 480554 5. 392188 5. 848345 4. 835957 6. 119319 6. 553313 6. 333582  
5. 909446 5. 210028 4. 724823 4. 693465 5. 25115 5. 85073 5. 445637 5. 010591 5. 421346  
7. 038394 6. 75211 7. 265796 6. 073882 7. 23688 6. 520311 6. 546946 5. 532086 6. 331134  
2. 139735 2. 543731 1. 939741 1. 747175 1. 736424 2. 558479 2. 427644 2. 08653 2. 842941  
5. 105434 4. 460579 4. 801582 5. 590017 3. 721845 3. 670343 6. 728787 3. 801505 4. 640211  
7. 851759 8. 356201 7. 672586 7. 896736 7. 936947 7. 736017 7. 661238 8. 412253 7. 685507  
5. 876484 5. 339478 6. 280056 7. 035509 6. 154755 7. 050577 7. 479531 7. 566394 7. 515494  
2. 437875 3. 040853 2. 295376 2. 241739 2. 126874 2. 289596 2. 453487 1. 93293 2. 406319  
4. 89726 3. 808131 5. 002563 5. 37079 5. 027918 6. 773197 5. 477716 5. 730021 5. 951557  
7. 004719 7. 180992 7. 645762 7. 59408 7. 141027 5. 718027 8. 374723 8. 725753 8. 640843  
4. 365701 4. 345697 4. 317376 3. 982013 4. 894312 4. 64759 3. 774628 5. 240453 4. 723506  
7. 017666 7. 190507 6. 750358 7. 287416 7. 121799 7. 288178 7. 225641 7. 603197 7. 819892  
3. 511783 4. 224028 3. 653981 3. 363851 4. 206389 3. 07716 3. 261262 3. 825613 2. 819935  
7. 573508 7. 654256 7. 543345 7. 208741 7. 17823 6. 440624 6. 945472 7. 021965 7. 093412  
3. 416937 3. 994957 4. 000173 2. 510513 2. 971798 2. 451367 3. 599715 2. 92317 2. 208461  
9. 103263 9. 031646 8. 8673 9. 065396 9. 51309 9. 595349 9. 447427 8. 843176 9. 307709  
3. 764204 2. 747212 3. 888157 3. 510094 2. 666483 4. 413768 4. 073015 3. 708932 3. 956835  
6. 167267 6. 22121 6. 050728 5. 637238 5. 773783 6. 294125 6. 145072 4. 966049 4. 857631  
3. 565148 3. 161111 3. 451587 3. 223252 4. 134541 3. 497668 3. 384044 4. 772848 3. 619772  
5. 587216 5. 625057 5. 734965 5. 593322 5. 694361 5. 243122 5. 897888 5. 617672 5. 68469



1. 954153 1. 910065 2. 685913 2. 491988 3. 144744 1. 742895 2. 181079 1. 937035 1. 77302  
3. 235123 3. 494201 3. 128802 4. 435668 3. 919215 4. 257127 4. 067829 4. 562704 4. 706996  
2. 676079 2. 670974 2. 90375 2. 717922 2. 675212 3. 535376 2. 878915 3. 03283 3. 247306  
3. 357682 3. 056903 4. 136373 3. 029721 3. 286439 3. 61991 3. 971336 2. 908683 3. 551003  
4. 836564 4. 707769 4. 754086 4. 559074 4. 606581 5. 584258 4. 811879 4. 355071 4. 707867  
2. 875752 2. 84625 3. 348253 2. 615988 2. 619657 3. 373039 2. 89615 4. 043739 3. 015825  
4. 622049 4. 103319 5. 022979 4. 770086 5. 016485 5. 438623 5. 371131 5. 929891 5. 79345  
6. 81188 6. 634059 5. 849526 6. 103101 6. 584239 6. 524013 6. 479978 5. 574155 5. 861554  
5. 228693 3. 565685 4. 490908 3. 731273 3. 099246 4. 561294 4. 201806 4. 218008 3. 199461  
4. 792134 4. 779864 5. 022097 4. 651345 5. 732955 5. 161035 5. 296512 6. 155722 5. 371856  
4. 303861 4. 534847 5. 027138 5. 494264 3. 642865 5. 895979 4. 369164 5. 833862 5. 714885  
7. 09295 7. 178417 6. 427449 6. 702767 6. 611097 6. 639314 6. 294843 6. 177159 6. 492896  
3. 803157 3. 322827 2. 581892 2. 604604 3. 246146 2. 878678 2. 505009 2. 411485 2. 503887  
4. 561551 4. 564067 4. 39415 4. 855696 5. 252063 5. 258362 5. 594856 4. 456753 4. 274885  
2. 347128 2. 376666 2. 571602 2. 406932 2. 533516 3. 088331 2. 301328 2. 198875 3. 281576  
4. 356149 4. 854177 5. 119606 5. 835138 4. 928323 6. 006787 3. 422723 4. 410396 3. 866842  
7. 384368 6. 458945 7. 299978 7. 67795 7. 054415 7. 930445 7. 445495 7. 852814 7. 657864  
0. 737412 0. 756407 0. 862452 1. 256159 0. 642331 0. 925716 1. 039591 0. 937722 1. 753535  
5. 219239 4. 536516 5. 090527 5. 538574 5. 644779 5. 280137 5. 304378 4. 641704 5. 18058  
1. 16639 1. 200275 1. 206497 1. 217038 1. 144766 1. 053426 1. 126506 1. 146898 1. 165593  
6. 529126 6. 126638 7. 210416 6. 45969 7. 713131 7. 288209 7. 474157 7. 387127 6. 426297  
7. 878097 7. 486033 8. 33591 8. 082323 7. 847269 7. 245378 6. 944483 7. 925068 7. 447086  
2. 277601 1. 997974 1. 43492 2. 11079 2. 253939 1. 662819 1. 489823 1. 463574 1. 972999  
5. 300011 5. 130793 5. 883066 5. 813216 5. 736052 6. 212281 5. 771116 6. 537734 5. 629455  
11. 11872 10. 75973 11. 17869 11. 11875 10. 95832 10. 21247 12. 08926 11. 97796 11. 79234  
5. 521858 2. 324625 3. 878627 2. 918165 2. 411363 4. 264074 4. 316884 2. 964928 3. 154349  
4. 376926 4. 650681 5. 803005 4. 746663 6. 143138 5. 236099 5. 098658 5. 106602 4. 786382  
4. 576922 4. 436263 4. 747277 3. 249828 4. 130539 4. 843143 3. 622674 4. 072928 3. 730054  
3. 451566 3. 396077 3. 252477 3. 206891 3. 278556 2. 942503 4. 043831 3. 324505 3. 925981  
3. 205313 3. 383834 2. 320283 3. 132577 2. 469941 3. 9122 2. 939243 2. 938307 2. 92607  
2. 775319 2. 320503 2. 147169 2. 235452 2. 043011 2. 662675 2. 846431 3. 481481 2. 889949  
4. 04117 5. 105959 4. 657469 4. 084712 6. 075221 4. 954581 5. 234779 4. 544352 5. 603983  
3. 334297 3. 872521 4. 361651 5. 217844 3. 947121 3. 222268 4. 663932 3. 164044 4. 245442  
6. 688379 7. 00371 6. 858697 6. 33331 7. 572899 4. 846524 6. 59996 5. 553932 5. 330546  
3. 136717 2. 557789 1. 61883 1. 446095 1. 762822 1. 877199 2. 130387 1. 633311 1. 938782  
4. 352429 3. 977521 3. 436412 5. 150345 2. 808787 3. 004568 3. 057677 2. 710245 3. 052524  
2. 842058 1. 683758 4. 750581 2. 416221 3. 788117 2. 683171 4. 003607 4. 727568 4. 609653  
3. 285641 1. 361946 3. 123466 2. 218707 1. 671947 3. 338568 2. 066073 2. 905532 1. 782223  
6. 459248 7. 524986 7. 371983 7. 154597 7. 781796 5. 262118 7. 552296 7. 744208 7. 841445  
4. 717694 4. 336352 5. 731954 4. 175893 4. 628673 4. 357728 4. 604557 4. 377793 5. 467952  
1. 070901 1. 536 1. 239629 1. 052741 1. 413812 1. 63377 1. 329041 1. 25744 0. 989361  
4. 038684 2. 08771 1. 518554 2. 756923 1. 023025 2. 099434 1. 165833 2. 307867 1. 82845  
5. 797744 6. 716077 6. 095518 6. 200255 6. 243652 5. 921942 6. 539353 7. 225784 6. 523372  
4. 980225 5. 097477 4. 478349 4. 665913 4. 665045 3. 999458 5. 600631 5. 919402 5. 883787  
3. 372753 2. 753398 2. 487406 2. 982848 3. 061552 4. 291044 4. 015214 3. 014592 3. 967006  
9. 074252 7. 595624 8. 169601 7. 754023 7. 045021 8. 463445 7. 639289 5. 73951 4. 835164  
6. 444761 6. 964894 6. 692756 6. 87461 6. 547905 4. 942915 5. 644486 5. 390583 5. 237402  
2. 115013 3. 053486 2. 632592 2. 63541 3. 109582 3. 288497 2. 151237 2. 657819 3. 053651  
8. 024096 8. 46197 8. 172006 8. 555604 8. 751526 8. 72498 8. 298172 8. 476781 8. 53087  
2. 082153 2. 158986 2. 617602 1. 740045 1. 557616 1. 780669 1. 401128 1. 907615 1. 906211  
1. 282495 1. 386757 1. 141514 1. 517218 1. 237006 1. 262039 1. 525622 1. 728161 1. 728976

3.782293 2.19903 2.343128 1.917604 3.552933 2.075885 2.498375 1.747957 2.093777  
2.862862 1.896339 2.414326 2.107562 2.293154 2.527277 2.517566 2.380505 2.222392  
2.238606 2.179547 2.433892 2.102221 2.349335 2.148345 1.951527 2.085993 2.279892  
0.944422 1.195492 0.794844 2.419883 0.693397 0.957237 1.081146 1.168273 1.476371  
0.603296 1.423181 0.81999 0.73232 0.476822 0.831765 1.072356 1.053392 0.705319  
1.11798 1.011651 0.653778 0.721021 0.709881 0.807482 1.206656 1.587172 1.090832  
1.666147 1.019958 0.905866 1.115594 0.791549 1.088191 0.817616 1.071547 0.742915  
2.87303 3.138415 3.024657 3.841696 3.160793 4.599726 3.050875 3.349388 4.806024  
1.713499 1.80917 1.972334 2.194942 1.361254 2.597211 1.283981 1.959196 1.247803  
8.083038 8.53698 9.089281 7.896126 8.965991 9.083517 8.406562 8.793178 8.802497  
1.622328 2.409832 3.079763 2.731501 5.016888 1.752789 1.582071 1.34907 1.498295  
6.761155 6.782698 7.229894 6.006597 6.757029 6.273492 7.107953 6.740748 6.280322  
1.82571 1.674755 2.58877 3.247286 1.387546 1.706519 1.389291 1.45487 1.678725  
5.33099 5.097827 4.289212 4.850254 4.987658 5.236855 4.549569 5.33693 3.964882  
4.358642 4.05994 3.657479 4.861124 4.774148 4.621094 5.159257 4.424774 4.641632  
2.792674 2.685212 2.507597 2.613358 2.374989 2.915859 2.353825 2.261181 2.740593  
3.273164 4.531575 3.124013 3.063249 4.247712 4.528744 4.285754 3.392701 3.504711  
1.981763 1.821991 6.068107 3.977499 4.343171 3.70599 3.485743 6.834893 6.544524  
5.592228 5.2307 5.513928 5.872494 5.346198 5.657681 5.004982 6.129353 5.895746  
7.920041 7.274642 7.909993 7.896282 7.592302 8.118267 8.090583 8.554296 7.893703  
3.887229 5.616689 4.718126 5.216727 4.662276 4.454304 5.757765 5.192875 5.387109  
5.022352 3.641009 3.756106 4.941784 4.743559 5.122168 3.783255 3.218947 3.840356  
1.69634 1.250046 3.20406 2.225873 3.831248 1.67921 1.775272 3.27841 1.655332  
1.010181 1.601965 0.808384 0.658128 0.740157 0.846806 0.874298 1.427533 0.999745  
3.730859 3.065596 3.424744 3.179896 3.586269 2.927194 4.522721 5.80871 4.974474  
3.843676 3.960067 3.465321 3.342711 3.511751 2.978094 3.090822 3.207171 4.646283  
4.084911 3.435389 5.314814 2.304585 2.979224 2.161309 1.461579 2.135901 2.492838  
3.016259 2.984771 2.84525 2.697562 3.155169 3.221689 3.436539 2.078687 2.715805  
1.624839 1.619863 1.199275 2.942814 1.580274 1.56696 1.555331 3.064213 1.452734  
1.208047 0.908333 1.301298 1.73341 1.359138 1.282595 0.963565 1.078805 1.322221  
0.974542 1.019537 1.096416 1.060521 0.85083 1.43153 1.306624 1.611498 1.247065  
1.255898 1.675463 1.047265 1.4249 1.771018 1.0681 1.526766 1.264565 1.100114  
1.654058 1.368147 1.477809 1.731983 1.175648 1.254972 1.323119 1.664157 1.21235  
1.636264 1.991511 1.123472 1.31174 1.498243 1.855139 1.968719 1.447744 1.856119  
2.995978 4.473316 3.550042 1.807348 3.263365 2.122914 3.208873 3.524364 3.126554  
3.313467 2.766573 3.158372 3.135009 3.185277 3.526137 2.630562 1.955237 3.116696  
0.958905 0.981327 0.892088 1.446739 0.700057 0.928859 1.259152 1.513878 0.880126  
1.035917 0.921881 2.488525 0.756229 0.722966 1.002116 1.198726 1.969693 0.88831  
0.928024 0.622558 1.016282 1.625103 0.866038 0.668321 1.19803 1.304478 1.326386  
1.39497 1.878829 0.930761 1.398801 0.930674 1.004052 1.140286 1.918079 2.769879  
1.131791 1.604406 1.060077 1.219944 1.486007 1.559011 1.256502 1.462108 1.771999  
1.311385 1.330626 1.278887 0.876534 1.192739 1.219649 1.059081 1.553729 1.550177  
1.733322 1.063953 1.450247 3.727443 1.054075 1.116715 1.252796 1.980244 2.061504  
1.086404 1.442019 1.23726 1.641519 0.95061 1.151996 1.542645 1.743843 1.141992  
1.202234 1.17326 1.140187 1.479321 0.88601 1.365431 1.045735 0.936776 0.814618  
0.681093 1.045218 0.899022 0.62783 0.949996 0.947135 0.995763 2.140439 1.204236  
0.820226 0.890559 0.790535 0.77007 1.14772 0.841076 1.004775 0.804048 0.88319  
2.704351 2.355471 3.591438 3.293302 3.169318 2.876275 2.756457 3.479515 4.462133  
1.805522 2.253005 1.121281 1.586253 1.01678 1.327076 1.127892 1.034561 0.833465  
1.081884 1.329844 0.973182 1.142765 1.104202 1.03005 1.440549 1.464493 1.109991  
3.041194 2.850533 3.061696 4.379618 3.557191 3.879097 3.31883 2.931766 3.572159

1. 495911 1. 636229 1. 835701 2. 156098 1. 647867 2. 166711 2. 349041 1. 143138 1. 047956  
2. 912415 3. 390457 3. 133588 3. 274579 3. 778851 2. 958132 2. 854975 3. 349614 2. 924291  
1. 031142 1. 5049 0. 713534 1. 585732 1. 100706 0. 881734 1. 506806 1. 395596 1. 141436  
0. 955497 1. 744656 2. 987852 1. 886735 1. 940088 1. 687129 1. 943882 2. 679936 1. 23291  
0. 825361 0. 917528 0. 855269 0. 639956 0. 632164 1. 108118 0. 606321 0. 970856 0. 546018  
3. 688917 3. 604278 4. 171549 3. 160407 3. 674656 4. 677702 4. 058802 2. 672622 1. 612684  
0. 888347 1. 109908 0. 470035 1. 034689 0. 843299 0. 846166 0. 792794 0. 932644 0. 66716  
1. 280156 1. 256458 1. 106976 1. 292675 1. 10283 1. 470447 0. 985597 0. 835585 2. 950577  
1. 019051 0. 872836 0. 970513 1. 905167 0. 894242 1. 107152 1. 153585 1. 341299 2. 430201  
0. 945153 0. 867797 0. 423731 0. 590309 0. 588823 0. 790854 0. 820066 1. 163819 0. 896125  
5. 666144 5. 67651 6. 153154 5. 541214 6. 073359 5. 356695 5. 99291 5. 925989 5. 728678  
1. 457446 1. 290233 0. 985327 0. 855523 1. 685114 0. 797776 0. 801519 0. 696306 1. 867929  
1. 999715 1. 158186 1. 604603 1. 241188 1. 126415 1. 118099 0. 894051 0. 751438 1. 377037  
1. 376495 0. 846206 1. 07428 1. 274501 0. 726986 1. 246134 0. 727222 0. 912197 0. 680037  
1. 755663 1. 358285 2. 327683 1. 855476 1. 607687 1. 106603 1. 505241 2. 767031 2. 80149  
1. 168633 1. 173254 0. 694949 0. 776416 0. 556477 0. 86845 0. 788162 2. 26178 0. 837152  
1. 047762 0. 916162 1. 419889 1. 434425 0. 771991 0. 908721 0. 982279 0. 929798 0. 862985  
0. 649882 0. 734832 1. 975347 1. 089804 1. 008554 2. 166288 0. 975807 0. 932713 1. 237074  
1. 960225 1. 23607 1. 662394 1. 116912 1. 18539 1. 212808 1. 029238 0. 9978 1. 821431  
2. 702008 1. 616781 1. 487856 2. 347323 1. 084886 1. 382096 1. 738961 1. 624807 1. 30553  
9. 161633 9. 229029 9. 640486 9. 267512 9. 488766 8. 684049 10. 55715 9. 698571 9. 658083  
2. 339809 2. 256716 2. 612084 2. 818409 1. 246543 1. 999271 3. 044325 2. 605941 3. 398979  
0. 852169 1. 083396 1. 695321 2. 441743 1. 564261 1. 52263 1. 298357 1. 507703 0. 782887  
0. 435011 0. 886152 0. 947928 0. 861088 0. 748246 2. 447241 0. 502101 0. 893037 0. 991455  
0. 800003 0. 944199 1. 119417 1. 16638 1. 197549 1. 997291 0. 868396 1. 810116 1. 398361  
1. 638514 2. 290214 1. 438943 1. 549729 1. 005997 1. 221956 1. 627972 1. 330173 1. 789547  
0. 542576 0. 533451 0. 569667 1. 092318 0. 559106 0. 875333 0. 980015 1. 054642 0. 60668  
1. 632743 2. 069081 1. 358542 2. 887725 1. 187408 1. 898143 1. 903912 1. 734776 1. 856984  
6. 439521 7. 048412 6. 759017 6. 293106 6. 889499 6. 295267 6. 321635 6. 057751 6. 418173  
1. 053374 1. 392939 0. 909681 1. 287374 0. 958116 0. 94401 1. 393436 1. 247368 1. 150116  
1. 541181 2. 163481 1. 981917 1. 589317 1. 617156 2. 624358 1. 873443 1. 833332 2. 18749  
1. 241111 1. 234437 0. 675245 0. 795551 0. 441465 0. 555255 0. 86432 1. 010852 0. 802009  
0. 768306 0. 555945 0. 861091 1. 314812 0. 668124 1. 723093 1. 714349 1. 342602 0. 986389  
1. 789356 3. 278523 2. 201904 2. 473239 1. 784189 2. 498295 2. 57416 3. 697612 2. 80204  
0. 985472 1. 192998 0. 992674 2. 072296 1. 193586 0. 81439 1. 018725 0. 890201 1. 685814  
1. 39434 1. 006236 0. 469843 2. 010761 2. 000964 0. 896255 1. 020858 0. 91736 0. 662607  
1. 044208 1. 089895 0. 83158 1. 027114 0. 746701 1. 16336 0. 698521 1. 657283 2. 226244  
3. 207568 3. 473737 2. 160709 0. 498184 1. 02267 1. 727143 0. 889903 1. 273246 1. 464393  
0. 517555 1. 529631 0. 624851 1. 928767 0. 605125 1. 006412 0. 496981 0. 562454 0. 805029  
2. 960332 2. 046303 2. 143028 2. 056679 1. 4663 1. 88526 1. 979449 2. 286583 2. 372646  
3. 296531 3. 370376 4. 727491 3. 16728 4. 007761 2. 567891 3. 909659 3. 294982 3. 780113  
1. 957391 1. 981462 2. 200427 2. 561708 1. 781478 1. 997837 1. 89102 1. 760116 2. 374748  
3. 909997 2. 378761 1. 293417 2. 283657 2. 622649 1. 264312 2. 040661 1. 590253 1. 112056  
2. 528434 2. 089453 2. 019865 4. 685972 2. 942658 2. 404342 2. 38732 1. 636045 2. 338917  
3. 096333 4. 158241 2. 316278 2. 171092 2. 141754 2. 304741 2. 594841 2. 597826 3. 330162  
2. 488208 2. 580305 1. 52581 1. 07539 3. 93911 1. 372766 0. 808405 1. 804394 1. 3771  
2. 262739 2. 371662 6. 544604 5. 267615 4. 405467 3. 034355 1. 979674 1. 875078 2. 431668  
1. 955167 1. 701986 2. 229623 2. 922187 2. 421839 1. 597043 1. 94551 3. 215476 2. 375782  
3. 957447 2. 515226 1. 371873 1. 689351 1. 345256 1. 60507 1. 12264 1. 37395 1. 316947  
4. 343747 3. 604702 4. 740379 3. 262113 3. 926709 3. 318303 3. 505996 3. 388744 3. 147894  
2. 561147 1. 331461 5. 120544 1. 540551 1. 967565 2. 355282 1. 062175 1. 656261 1. 201797

1. 57415 0. 871651 2. 964961 2. 264632 2. 036626 0. 934849 0. 528397 0. 689107 0. 902287  
1. 1373 4. 366712 1. 285467 1. 162142 1. 172106 2. 549317 1. 136906 0. 890265 1. 070802  
0. 945126 1. 19106 1. 034565 1. 25651 0. 953265 0. 62479 1. 181916 1. 307675 0. 792831  
4. 844133 5. 393583 5. 369993 4. 786716 5. 560119 2. 792893 6. 018699 5. 52698 5. 561292  
2. 929001 1. 178665 1. 588412 1. 591829 1. 85627 2. 227444 1. 510751 1. 96727 3. 269379  
1. 791636 1. 4837 1. 424973 2. 761899 1. 283976 1. 014048 1. 150456 1. 661945 1. 344528  
2. 598078 2. 550528 2. 881567 3. 136613 2. 731058 2. 256324 2. 515151 2. 374967 2. 786594  
3. 570012 3. 171436 4. 177734 4. 612543 4. 346285 3. 93207 4. 0399 4. 041163 4. 502212  
6. 411342 6. 737115 6. 806341 6. 802365 6. 625482 6. 485737 6. 344687 6. 354438 6. 573906  
6. 912829 6. 260648 6. 472002 6. 901438 5. 908617 4. 84666 7. 199449 6. 917191 7. 024419  
7. 595035 7. 069392 7. 020908 6. 913264 8. 028914 7. 693699 7. 869556 7. 595073 7. 911054  
8. 522442 8. 592966 8. 766305 8. 605005 8. 261892 7. 832661 9. 056393 8. 930938 8. 487028  
4. 499478 5. 387839 5. 216686 4. 833644 4. 383523 4. 722799 4. 337709 4. 888616 4. 763864  
4. 802359 4. 542047 4. 99621 4. 767892 3. 824499 5. 739592 5. 352429 4. 836788 4. 123329  
4. 616343 5. 008888 4. 624171 5. 380806 4. 684053 4. 871228 5. 783885 6. 149506 4. 903883  
3. 45541 3. 811126 2. 399691 2. 612643 2. 389327 3. 932655 3. 537627 3. 952773 2. 24258  
2. 255325 2. 630711 2. 455712 3. 167948 2. 419857 3. 045597 2. 703156 3. 142477 3. 384889  
7. 157294 6. 791452 7. 12571 7. 254406 7. 165743 7. 274493 7. 646518 6. 863725 6. 970401  
2. 591395 2. 578757 2. 839494 1. 697678 2. 904715 2. 993634 2. 532905 4. 327165 3. 266466  
1. 587377 1. 339748 1. 455194 1. 723478 1. 558392 1. 4017 2. 233224 1. 664657 1. 407642  
2. 630227 2. 109847 2. 172885 2. 736421 2. 264949 3. 188978 1. 830964 2. 008354 2. 316244  
2. 105577 2. 045891 2. 403095 2. 407308 3. 200232 1. 606782 1. 522846 2. 228538 1. 587227  
6. 128063 5. 336986 6. 169468 5. 954156 5. 435087 5. 501209 6. 248614 6. 314037 6. 281341  
1. 342411 1. 460185 1. 291241 1. 975863 0. 962217 1. 436784 1. 269238 2. 442865 1. 284542  
5. 507958 4. 978378 5. 625167 5. 106843 4. 845197 5. 576961 5. 972732 5. 547445 4. 532713  
3. 525279 4. 59358 4. 297675 4. 303687 3. 687421 4. 736569 4. 7089 5. 245431 4. 775812  
5. 135242 4. 06114 3. 929119 2. 078779 3. 848 5. 453281 5. 123612 4. 656463 5. 199278  
2. 692704 2. 068454 3. 028865 2. 609035 2. 372076 2. 235475 2. 082093 2. 613615 2. 533095  
3. 687197 4. 29226 3. 355692 2. 906314 2. 730701 3. 323203 2. 35992 2. 331225 2. 601482  
5. 559948 4. 955019 5. 469619 4. 524681 5. 248848 4. 431506 5. 346184 5. 500983 5. 945935  
5. 922969 5. 522885 5. 705356 4. 557196 5. 38323 4. 656197 6. 236741 5. 433079 5. 883612  
3. 998028 5. 140537 4. 223121 4. 650616 4. 65456 6. 235109 5. 621584 5. 254387 5. 564522  
7. 273192 7. 359677 7. 404467 7. 32579 7. 38284 6. 675073 7. 226869 7. 320753 7. 469752  
4. 909895 5. 394323 5. 859125 4. 302933 5. 60397 5. 70042 5. 507592 5. 422136 6. 083693  
2. 013281 1. 258191 1. 68025 2. 023015 1. 472618 1. 252401 2. 131649 2. 380626 2. 082903  
3. 473385 2. 468946 3. 577027 3. 254129 3. 499304 3. 190099 3. 751892 3. 791214 4. 424707  
4. 40557 4. 991275 5. 126178 4. 29182 4. 792748 3. 114148 5. 234362 4. 213533 4. 259775  
4. 184622 5. 312338 5. 234444 4. 552143 4. 866501 5. 676838 5. 866682 4. 625632 4. 77412  
8. 19927 8. 341813 8. 460915 8. 215383 8. 333158 7. 792125 8. 350888 8. 140217 8. 169317  
6. 579104 5. 921792 6. 206381 5. 487252 6. 435164 5. 743134 5. 10763 5. 818246 5. 083279  
2. 240805 2. 180494 1. 925458 2. 867907 2. 475408 2. 428686 2. 360135 3. 602084 1. 757154  
6. 60854 6. 149216 6. 375437 6. 933848 6. 305336 6. 253622 6. 288234 6. 627543 6. 877441  
8. 192026 7. 750165 8. 453466 7. 569321 8. 258721 7. 60392 9. 156616 9. 431088 9. 194957  
7. 201402 7. 239634 7. 519064 5. 974081 7. 210991 4. 768319 5. 934882 5. 847082 5. 516319  
1. 402173 1. 404942 1. 878074 1. 653329 2. 146256 2. 228748 1. 614849 1. 644052 1. 518422  
5. 353552 5. 715658 5. 708348 5. 288177 6. 650002 6. 16574 5. 522 4. 290278 5. 718138  
1. 38418 1. 925388 1. 368457 1. 916829 1. 5006 1. 316014 2. 197054 1. 533421 1. 738828  
7. 107081 7. 626542 7. 018602 6. 38119 7. 162796 6. 198335 7. 09942 7. 449712 6. 531332  
2. 354819 1. 723594 1. 847606 1. 943616 1. 714051 3. 26157 1. 889777 2. 98275 2. 004653  
1. 724809 3. 301544 2. 060768 2. 877384 2. 009142 2. 08712 2. 246963 1. 969678 2. 618753  
3. 528715 3. 817439 4. 079385 3. 437816 3. 590429 3. 540244 2. 974457 2. 913017 2. 923841

2. 221551 2. 593171 2. 218888 2. 656388 2. 35827 2. 443265 2. 237701 2. 492686 2. 209658  
5. 85611 4. 93488 5. 157192 5. 006021 5. 156423 6. 600581 5. 663138 4. 81223 5. 514706  
5. 088697 6. 030369 5. 155951 5. 650029 5. 817893 5. 246149 5. 314495 5. 5534 6. 193263  
3. 013524 5. 236174 4. 352218 3. 770039 4. 186468 4. 396964 5. 057974 3. 890237 5. 131364  
4. 833878 5. 389294 6. 233225 5. 958764 4. 915618 5. 252432 5. 492857 5. 596813 5. 250717  
5. 637306 6. 761577 5. 507665 5. 735184 5. 978442 6. 641339 5. 769242 5. 708782 6. 404909  
5. 487169 5. 643506 5. 422573 5. 516092 5. 555687 4. 883313 5. 762643 5. 696915 4. 945392  
1. 58976 1. 524711 1. 584565 1. 814231 1. 193531 1. 594643 1. 894283 1. 983985 1. 418445  
4. 007639 3. 492377 5. 043743 4. 486846 4. 709203 5. 176569 5. 583343 5. 988728 6. 334126  
6. 097594 5. 127256 6. 654703 6. 33167 6. 383104 6. 04505 6. 670164 7. 224836 7. 525813  
9. 069206 9. 859418 9. 617926 8. 751645 9. 548148 8. 426644 9. 742242 9. 675117 9. 758412  
4. 325107 3. 00245 3. 207605 3. 008682 4. 389303 3. 181474 3. 246149 3. 75265 3. 352296  
6. 908576 6. 637892 6. 856071 6. 340064 6. 927201 5. 796197 7. 536646 7. 596914 7. 800652  
3. 184875 4. 271745 3. 812558 4. 615036 4. 580983 4. 044954 4. 348187 4. 787375 4. 686021  
7. 335798 7. 168862 7. 39462 7. 240293 7. 687711 3. 570884 7. 765217 7. 448496 7. 501934  
2. 382945 2. 164095 1. 844189 2. 61599 2. 334574 2. 519526 2. 882242 2. 498739 3. 065483  
2. 516238 2. 365114 1. 800879 2. 254186 2. 582587 2. 635913 1. 862161 2. 379736 2. 603937  
1. 354254 1. 617667 1. 827907 2. 60299 1. 743277 2. 326404 1. 750603 2. 108608 2. 248726  
1. 799519 1. 265171 1. 832777 1. 742903 2. 326811 2. 404305 2. 263855 1. 905746 2. 01235  
1. 919843 2. 194509 2. 144301 2. 189755 1. 766517 2. 033724 1. 924043 1. 870676 1. 975834  
3. 077501 1. 871462 2. 055205 2. 086816 2. 616871 3. 953684 2. 169534 1. 856388 2. 501114  
5. 824751 5. 564465 4. 448668 5. 10994 5. 398155 4. 70181 5. 790721 4. 428357 4. 767541  
7. 176966 7. 772607 7. 544494 6. 676543 7. 457639 6. 589028 7. 802536 7. 285873 7. 495637  
6. 227461 5. 879589 6. 110981 5. 996515 5. 865471 6. 217439 5. 880527 5. 778598 5. 95471  
7. 025544 8. 790279 8. 301057 7. 947238 8. 589141 6. 05378 7. 89648 7. 806541 7. 802145  
2. 68573 1. 162557 2. 140881 1. 891056 1. 692648 3. 112314 2. 61098 2. 390149 2. 107417  
4. 697238 5. 597185 5. 647993 5. 732423 5. 262282 4. 589146 5. 536137 5. 248285 4. 430715  
1. 674051 2. 076067 2. 160941 2. 128893 1. 996305 2. 376594 1. 724277 2. 146264 4. 091155  
3. 092895 2. 377659 3. 235973 2. 764249 2. 736481 2. 599903 3. 041952 3. 884426 3. 305748  
5. 073988 6. 212111 5. 859803 5. 221665 5. 883128 5. 567622 5. 501114 5. 279418 5. 157532  
3. 464988 2. 081828 2. 982697 2. 900558 2. 131555 2. 495944 2. 084382 2. 981396 2. 192629  
1. 886085 1. 484166 2. 947945 1. 672086 1. 793185 1. 418939 1. 437485 1. 816563 2. 136228  
4. 670698 5. 141894 5. 458821 4. 743074 5. 095321 5. 003254 5. 383111 4. 210547 4. 76684  
7. 265427 7. 291559 7. 516457 7. 075306 7. 421103 5. 461641 7. 942132 7. 744157 7. 695768  
3. 586439 3. 549054 4. 766356 3. 521093 4. 645422 3. 013121 4. 372866 4. 410449 3. 950042  
6. 172009 6. 19597 5. 608219 5. 02647 6. 15716 5. 561285 6. 104927 4. 714979 4. 941721  
5. 124094 4. 729248 5. 933286 4. 76647 3. 406647 3. 771148 4. 607305 4. 633981 4. 508474  
4. 483582 4. 430512 3. 863462 3. 442469 4. 407499 4. 368767 4. 754574 4. 614492 3. 224758  
2. 82669 2. 471016 3. 129266 3. 060605 2. 54202 2. 13265 2. 098365 1. 886696 2. 687583  
3. 715441 4. 138842 3. 507593 4. 111305 3. 527708 3. 336654 4. 17413 3. 144595 4. 526611  
6. 813764 6. 633966 6. 741116 6. 340911 6. 848785 6. 682734 6. 998976 7. 13463 7. 052227  
5. 642309 5. 005504 5. 249023 4. 4865 5. 182892 5. 893153 5. 075009 4. 459816 4. 851991  
4. 872115 4. 428076 4. 118691 4. 520153 3. 686524 4. 187502 3. 575151 4. 165841 4. 046071  
2. 299589 1. 451357 1. 935004 1. 424848 1. 409342 1. 363468 1. 565472 1. 710703 1. 375483  
2. 283707 3. 17579 3. 389672 3. 475275 3. 007489 4. 340842 3. 90966 3. 076381 3. 028953  
6. 060672 6. 401271 6. 745166 4. 195803 7. 217521 6. 011579 6. 731036 6. 764523 7. 022756  
3. 828479 2. 747605 3. 144916 2. 991296 3. 136678 2. 916852 2. 341734 2. 386747 2. 913019  
3. 413397 4. 355012 3. 371661 1. 750343 2. 037447 3. 757991 2. 022998 2. 449398 3. 10565  
4. 671589 5. 861311 5. 018038 5. 474206 4. 993482 4. 060583 5. 465343 4. 879481 4. 328625  
6. 82523 7. 554525 7. 016788 7. 435405 5. 684299 6. 974414 6. 910592 7. 092568 7. 322935  
4. 217999 4. 737901 4. 804411 4. 907083 4. 186418 4. 75887 5. 951561 5. 27149 5. 312574

5. 640862 6. 278865 6. 357963 5. 15997 6. 541019 5. 414697 5. 152541 5. 316508 5. 646272  
2. 978126 2. 000438 2. 926838 3. 342983 2. 646312 4. 201347 2. 150163 4. 368899 2. 559537  
2. 784223 2. 25586 1. 971309 3. 096451 4. 279086 2. 492373 3. 371919 3. 098555 3. 788482  
5. 484779 5. 638997 5. 878848 5. 930034 5. 938228 4. 546023 4. 888952 4. 174057 5. 351978  
3. 027305 2. 96552 2. 600366 3. 544916 2. 699036 2. 541808 3. 693582 3. 009946 3. 185679  
6. 191978 5. 593316 5. 055774 6. 308993 5. 924538 6. 366587 5. 673126 6. 367783 6. 060627  
6. 244591 6. 490941 6. 081138 6. 540456 4. 908178 5. 955005 5. 734883 5. 47589 4. 751372  
3. 100327 3. 507276 4. 099552 4. 295817 4. 069017 3. 083286 3. 44897 3. 715424 3. 512274  
4. 001299 4. 040246 4. 054483 3. 951745 3. 649452 4. 650165 5. 385067 6. 013078 5. 799877  
1. 514091 3. 468707 3. 146856 1. 264873 3. 411637 1. 946341 2. 680362 1. 957717 3. 098682  
2. 961794 2. 64011 2. 352725 3. 265649 2. 864019 2. 475258 2. 930021 3. 385294 3. 376675  
2. 963967 2. 56088 3. 912553 3. 554916 2. 89528 3. 530387 2. 494045 3. 76148 5. 129944  
3. 372429 2. 846414 2. 773039 3. 301457 3. 055515 2. 243225 3. 218268 3. 516573 3. 086461  
4. 716842 5. 51644 5. 43687 4. 368184 4. 106195 2. 58487 4. 720626 3. 903185 4. 474073  
1. 485098 1. 548411 1. 733573 2. 257109 1. 365718 2. 333399 1. 949339 1. 875276 1. 850093  
6. 543026 6. 450833 5. 808404 5. 799861 5. 758416 5. 723661 5. 624341 5. 365031 4. 836731  
3. 757455 2. 517754 2. 673362 2. 946601 3. 610289 3. 629185 4. 213856 5. 388118 4. 908634  
3. 334434 1. 835198 2. 285569 2. 689231 2. 40746 1. 990721 2. 273696 2. 836486 2. 927075  
5. 084032 5. 595272 5. 375038 5. 867479 5. 513624 5. 413309 5. 301859 6. 593604 5. 782391  
5. 729901 6. 751624 6. 241041 5. 51504 6. 047007 5. 515775 6. 170075 6. 109566 5. 499485  
4. 671555 3. 817587 4. 386818 3. 336072 3. 79318 4. 525248 4. 5687 4. 889283 4. 417116  
2. 963668 2. 227166 2. 025396 4. 103261 2. 529863 1. 81207 2. 407231 2. 452199 3. 026342  
5. 718662 6. 199535 5. 511883 6. 03888 6. 20448 4. 923509 6. 101192 5. 935858 5. 374823  
5. 673864 6. 011081 4. 866787 4. 637466 5. 942509 4. 58497 5. 023997 5. 620516 5. 251412  
4. 571588 4. 500322 5. 316746 3. 781557 5. 596958 4. 989943 6. 575444 5. 737638 5. 547326  
5. 095704 4. 885552 5. 069383 4. 247825 5. 057677 5. 39279 5. 073989 4. 733314 5. 661952  
4. 787838 3. 958351 4. 903386 4. 894591 4. 756189 4. 751478 4. 616387 5. 147141 4. 557197  
2. 751921 3. 842193 4. 065124 3. 575051 3. 352648 3. 921022 3. 488999 4. 316235 5. 016149  
3. 780356 4. 202144 5. 134772 4. 969239 3. 443909 4. 276954 5. 314049 5. 01074 4. 82431  
2. 472965 3. 07101 2. 275284 2. 281804 2. 823916 3. 05194 2. 588153 2. 9053 2. 5176  
2. 442919 2. 766188 3. 270942 2. 147421 1. 985185 1. 713975 1. 768198 2. 850466 2. 113293  
2. 952785 2. 994484 3. 045268 2. 212687 2. 076384 3. 182078 2. 495156 3. 003635 3. 510201  
6. 73796 6. 73483 6. 821625 6. 310756 6. 230085 5. 510194 6. 907737 6. 346613 6. 762162  
1. 687612 2. 246533 2. 255386 1. 55667 2. 470667 2. 243181 2. 28026 3. 07974 1. 898294  
6. 402642 4. 925105 5. 372522 5. 910837 4. 701111 6. 09894 5. 562096 4. 600138 5. 117558  
6. 102952 5. 263763 6. 746566 5. 838342 5. 900522 6. 057617 5. 984601 6. 144938 6. 160797  
1. 98111 2. 386073 2. 254828 1. 567861 2. 623963 2. 354937 1. 764336 1. 900653 1. 841744  
3. 922062 3. 104143 2. 967884 3. 090262 2. 826612 3. 560236 2. 937201 3. 329964 3. 618985  
8. 832849 8. 386405 8. 79821 8. 806818 8. 709582 7. 835366 9. 160904 8. 834044 8. 876321  
5. 646725 4. 167273 5. 533666 4. 984331 5. 582931 6. 726055 7. 338349 7. 67557 7. 629703  
4. 872871 4. 368524 4. 418002 3. 856358 4. 340505 5. 198025 4. 793287 4. 076042 4. 765838  
5. 244723 5. 012 5. 073661 4. 849431 5. 096803 5. 318159 5. 435268 4. 823646 5. 573652  
1. 149172 1. 736187 1. 272042 1. 359828 1. 587384 1. 557879 2. 18643 2. 247151 1. 168306  
2. 316243 3. 563572 2. 146113 2. 217063 2. 609548 2. 943048 3. 787969 3. 085456 3. 095121  
6. 869973 6. 584169 6. 604202 6. 743429 6. 043623 6. 432421 6. 360657 6. 621786 6. 64416  
1. 258925 1. 419645 1. 187783 2. 120421 1. 149071 2. 559519 1. 380404 1. 132495 2. 535981  
4. 645975 6. 115365 6. 480626 5. 801753 6. 827163 3. 635569 5. 987289 6. 675358 6. 427218  
4. 817802 3. 929353 4. 047175 5. 086811 4. 807386 5. 144187 5. 627164 4. 923921 4. 680537  
4. 18877 4. 594978 5. 093664 5. 660103 4. 90022 4. 962687 4. 98436 4. 289158 5. 154315  
6. 829824 7. 059357 5. 915489 6. 044034 6. 141035 6. 192391 6. 148747 6. 518304 7. 182359  
4. 056668 4. 955333 4. 368355 4. 176849 4. 041151 3. 783502 5. 357856 4. 701676 4. 927048

2. 972188 2. 770243 2. 535502 2. 830533 3. 611733 2. 673213 3. 103204 3. 445031 2. 88735  
4. 861669 3. 788324 3. 910265 4. 074414 3. 684939 4. 083416 4. 352711 5. 026893 5. 000334  
1. 503359 1. 654849 1. 19967 1. 72328 1. 351443 1. 833544 1. 156619 1. 699425 1. 711017  
1. 649591 1. 198881 1. 44564 2. 147436 1. 727027 1. 713705 1. 740819 2. 362494 2. 25289  
1. 363469 1. 212205 0. 767258 1. 812876 0. 955735 1. 218748 1. 007187 1. 529201 0. 896337  
6. 405856 6. 622555 6. 897216 7. 099291 7. 398659 6. 210413 7. 158975 6. 589306 6. 784988  
4. 006662 5. 057726 3. 996629 4. 389341 3. 567869 2. 787624 4. 274858 5. 102043 3. 787684  
2. 284342 2. 677767 2. 882958 2. 272453 3. 033267 2. 768225 1. 869533 2. 293152 2. 49686  
4. 73608 4. 034556 4. 907152 3. 871691 5. 253376 5. 931365 5. 395211 4. 870941 5. 043153  
5. 791664 4. 314974 5. 847262 5. 72144 6. 113785 5. 546379 6. 759255 7. 358768 6. 709749  
4. 444137 5. 012665 4. 76301 4. 250585 4. 525564 5. 100649 4. 683901 3. 535874 4. 795229  
9. 439507 9. 596429 9. 025581 9. 372323 9. 615052 9. 730631 9. 423419 9. 743839 9. 997239  
2. 787892 3. 121138 2. 476455 2. 13277 3. 119887 2. 839762 2. 387791 3. 138349 3. 003226  
3. 742987 3. 69427 3. 319802 4. 014187 4. 240479 3. 689379 4. 813427 3. 759588 3. 567254  
2. 649379 2. 214496 1. 520025 2. 219754 1. 818357 1. 450523 1. 597554 1. 64284 1. 523297  
4. 174059 4. 731562 3. 659762 4. 888687 4. 646264 5. 893516 4. 32145 4. 864369 4. 717582  
4. 884414 5. 534103 5. 468495 5. 005649 4. 544994 4. 635548 4. 768488 4. 373504 4. 851559  
2. 689463 2. 762693 2. 595004 2. 767071 3. 035267 3. 402113 2. 372616 2. 240108 2. 873978  
3. 255425 3. 148156 3. 156356 2. 607942 3. 025807 4. 310004 3. 288905 3. 808882 2. 898909  
5. 74996 6. 041409 6. 19042 6. 460033 5. 864203 6. 455122 6. 107688 6. 958385 6. 876242  
5. 650418 5. 378966 4. 901133 6. 842853 5. 009036 5. 882037 6. 252727 5. 672277 7. 031195  
2. 291821 2. 743297 1. 483497 2. 534893 2. 085177 2. 100542 1. 611271 1. 88662 1. 52361  
1. 996811 1. 805513 3. 282211 2. 862357 3. 070601 2. 381505 1. 756366 2. 952836 2. 199405  
3. 650987 3. 334841 2. 714784 4. 221933 4. 349058 5. 19709 4. 624335 4. 638681 5. 29051  
3. 969761 3. 143714 2. 472829 4. 29738 2. 715924 3. 342601 3. 097587 2. 339518 2. 983161  
6. 12275 5. 366255 5. 930213 5. 918669 6. 2026 5. 340281 6. 676542 7. 069209 6. 393814  
7. 261256 5. 18144 7. 075632 6. 662346 6. 497973 6. 98315 7. 840293 7. 664171 7. 136005  
3. 769688 3. 373258 3. 395534 4. 252567 3. 646452 3. 74433 3. 24774 4. 327753 4. 074386  
3. 830978 3. 001503 4. 137408 3. 33269 3. 211592 4. 074149 3. 035062 2. 996377 2. 49483  
1. 196588 1. 141679 1. 894069 1. 474799 1. 124814 1. 695728 1. 655289 2. 309332 1. 671464  
3. 780346 3. 293511 4. 263366 5. 150383 4. 236691 4. 409356 4. 557396 4. 793376 3. 676282  
0. 733391 0. 91226 0. 667295 2. 043359 1. 432051 1. 462111 1. 290747 2. 798609 0. 497412  
2. 802149 2. 810647 3. 272216 3. 474856 3. 26669 3. 622735 3. 592865 3. 292116 3. 279511  
8. 942066 9. 572583 9. 543075 8. 996959 9. 676478 7. 40759 9. 46546 9. 247209 8. 762934  
5. 016832 4. 319396 4. 225595 3. 802188 3. 66987 5. 110269 3. 88038 3. 996536 3. 753939  
2. 051806 1. 383804 2. 340383 2. 6838 2. 016387 3. 109087 2. 225393 2. 365143 3. 045271  
5. 853225 5. 192699 5. 579931 5. 408616 5. 854376 6. 740864 6. 419326 5. 72867 6. 058673  
4. 078849 4. 610452 6. 028162 4. 603217 5. 334803 3. 468739 4. 532197 4. 025382 5. 486833  
3. 10641 4. 957745 3. 740203 3. 648857 3. 108732 3. 865073 3. 601262 4. 84017 2. 990079  
5. 271009 5. 736073 5. 55381 5. 604119 5. 156703 4. 728515 5. 52089 4. 621996 4. 946167  
6. 220322 6. 734074 6. 234329 6. 619868 6. 770812 6. 586085 6. 872566 6. 964717 6. 776378  
5. 8238 5. 837069 5. 172226 5. 303736 4. 645911 4. 354925 5. 252925 5. 084374 5. 011643  
2. 7343 3. 564367 3. 134149 1. 928799 4. 510873 3. 416569 2. 463911 2. 418858 2. 517207  
5. 538492 4. 851281 5. 521469 5. 171295 4. 172671 5. 189981 5. 500768 4. 203371 4. 43522  
3. 073402 3. 414893 2. 712219 2. 877902 4. 142979 3. 035726 3. 291581 3. 575791 3. 487001  
7. 216522 8. 094768 8. 211165 7. 764026 8. 055055 6. 682966 7. 445225 7. 360053 7. 321221  
1. 919389 2. 956053 1. 688584 2. 189583 1. 837349 1. 845564 1. 945455 1. 773945 1. 87467  
5. 477739 4. 972447 5. 099711 3. 670297 5. 22307 6. 183461 6. 031592 6. 016641 6. 568253  
6. 037323 4. 976469 5. 677433 5. 415493 5. 911725 5. 088392 5. 629496 6. 402726 5. 768739  
5. 139925 6. 75053 7 6. 171013 7. 007107 6. 259054 6. 409346 6. 379451 6. 210285  
3. 762084 3. 934611 3. 659758 3. 514792 4. 101304 3. 427163 3. 828495 3. 709884 4. 70304

4. 518119 4. 543351 3. 409053 4. 843819 4. 493856 4. 088129 4. 41414 5. 289255 4. 794229  
4. 207212 5. 162095 4. 983179 5. 301295 4. 857726 3. 646377 4. 199096 4. 369136 3. 968866  
4. 151916 4. 914906 4. 528734 2. 942423 4. 812544 4. 084527 4. 152828 4. 101115 4. 166339  
3. 46457 3. 077223 2. 121945 2. 13355 2. 920428 1. 847421 2. 521283 2. 339486 1. 54857  
6. 400534 7. 275367 6. 472548 6. 43028 6. 821896 7. 303486 7. 046562 6. 028689 6. 781863  
2. 242214 2. 127362 1. 652585 2. 001168 1. 849294 3. 239633 3. 211941 2. 946112 2. 481285  
2. 629278 2. 634342 2. 460875 3. 101669 3. 21525 2. 240584 3. 667076 2. 429577 3. 161463  
5. 906315 6. 326947 6. 406054 6. 270455 5. 806322 5. 90913 6. 27221 5. 85722 5. 773425  
3. 235116 3. 036334 3. 579328 3. 674938 2. 398105 3. 515174 3. 177559 2. 961466 3. 87222  
5. 812816 6. 306003 5. 743252 5. 733671 6. 484758 5. 505297 5. 727367 5. 694052 5. 318364  
5. 15223 4. 910731 3. 940916 4. 506731 4. 787279 4. 665012 5. 175069 5. 13426 4. 631879  
1. 874026 1. 824222 2. 243966 2. 159526 1. 57615 3. 175134 1. 347066 1. 321893 2. 176465  
4. 855894 4. 985686 4. 541643 5. 40255 5. 975842 5. 669413 4. 548522 3. 682076 3. 846697  
3. 346395 2. 953029 3. 712741 3. 646726 3. 919567 2. 828955 3. 709847 3. 855391 3. 629132  
6. 416775 6. 815543 6. 174518 6. 489177 6. 389545 6. 168211 6. 575054 6. 184973 6. 084647  
1. 510052 3. 121592 2. 824987 3. 641671 2. 633832 2. 06744 3. 830364 3. 299541 4. 495947  
6. 450733 7. 440029 6. 503344 6. 787932 6. 706991 6. 904428 6. 984473 6. 117154 6. 727194  
2. 928671 2. 619034 3. 979027 3. 559224 2. 628443 2. 945519 3. 021587 4. 544267 3. 178553  
3. 049033 3. 920237 3. 785275 2. 851723 4. 242389 3. 248067 4. 107839 3. 709889 3. 907969  
5. 463957 6. 511014 7. 101632 5. 782263 6. 964633 4. 990987 5. 468367 5. 489253 5. 028262  
5. 23098 3. 737987 4. 528486 3. 467755 4. 344644 4. 0866 6. 292071 6. 240848 6. 037612  
3. 677058 3. 254474 4. 29761 4. 202019 3. 730298 3. 401872 4. 434694 4. 173336 3. 843912  
4. 476072 3. 97808 3. 782684 4. 16623 3. 934914 3. 146147 5. 087865 4. 08147 3. 595589  
1. 036191 1. 707039 1. 087504 1. 286254 1. 532834 0. 970215 0. 968005 1. 619244 0. 774445  
4. 174004 3. 690166 4. 232429 3. 85685 3. 776494 3. 674592 3. 935262 4. 518825 5. 178726  
5. 82672 4. 865156 5. 273224 5. 98476 4. 203185 5. 257564 6. 231484 4. 92327 5. 008925  
6. 658358 6. 15277 6. 752706 6. 732755 6. 121611 5. 284694 7. 403752 6. 89034 6. 453074  
6. 788224 6. 67063 6. 109089 5. 422215 6. 623936 5. 548553 6. 610957 6. 514003 6. 149713  
1. 805062 1. 227181 2. 109075 1. 665195 1. 130461 1. 84789 1. 230607 2. 127672 1. 736942  
5. 768411 5. 315583 4. 428786 3. 920752 4. 634118 4. 599507 4. 859832 4. 100497 4. 385442  
4. 366874 5. 193666 4. 554395 4. 903654 5. 259567 4. 94159 4. 947233 4. 980774 5. 263645  
5. 637386 5. 770522 5. 490987 6. 009544 5. 386921 4. 887275 5. 828905 4. 651923 4. 982846  
4. 738052 5. 497201 5. 333947 4. 844423 5. 995448 2. 469529 3. 256151 2. 968414 2. 163313  
2. 57972 1. 529401 2. 258245 2. 363505 2. 623572 1. 976848 1. 928619 1. 938319 1. 768028  
1. 811021 2. 602878 1. 976458 1. 856485 1. 862617 2. 039958 1. 523259 2. 775532 1. 519804  
7. 108972 5. 767086 5. 860851 5. 938011 4. 911922 6. 762739 4. 960952 4. 264304 2. 940147  
6. 69817 6. 214466 5. 743013 6. 069936 6. 124439 6. 960129 6. 473089 5. 828907 5. 812608  
1. 568121 2. 283506 2. 26493 1. 949793 2. 340011 2. 275477 1. 791031 2. 019172 1. 060221  
5. 857073 6. 314079 5. 544279 5. 611991 6. 023054 5. 882142 5. 441238 5. 243566 5. 153756  
1. 879679 1. 949723 1. 952069 2. 984765 1. 54121 2. 497691 2. 021494 2. 197422 2. 603583  
4. 615428 5. 821584 5. 155345 4. 738848 5. 498003 4. 650037 4. 715645 4. 101606 3. 5626  
3. 551475 3. 531142 4. 526379 3. 977389 3. 511152 6. 023657 4. 159268 4. 479202 5. 577462  
6. 001895 6. 516231 4. 551223 6. 255804 5. 711303 3. 498847 5. 147472 5. 778517 5. 218419  
4. 497519 3. 475439 4. 48583 4. 229259 4. 084358 4. 964141 4. 712251 5. 058666 4. 294071  
2. 991563 3. 602372 3. 340808 2. 391543 3. 293905 2. 95958 4. 248274 3. 660542 3. 371001  
4. 021105 4. 083231 4. 775047 4. 898234 4. 184447 5. 065402 4. 510945 4. 304315 4. 696832  
2. 636774 3. 241932 1. 969207 1. 342187 1. 653352 2. 095022 2. 070413 1. 720659 1. 797858  
5. 873646 5. 585915 5. 923651 5. 754692 5. 79501 5. 244882 5. 673241 5. 631292 5. 967209  
2. 388588 3. 066845 3. 131927 2. 669246 2. 683203 2. 950877 3. 626411 3. 116317 2. 801465  
3. 007838 2. 690972 2. 016354 2. 083987 1. 996317 2. 258949 1. 835175 2. 191285 2. 401371  
2. 728939 2. 28796 2. 088066 2. 740291 3. 582406 2. 148085 2. 310185 3. 182605 4. 036912



5.616376 4.431245 5.048012 5.812239 5.910656 6.20763 6.50564 6.126743 5.819417  
5.485537 4.765544 5.069735 5.086253 5.561018 5.607195 6.012334 5.755794 5.676746  
5.365569 5.782316 6.511782 5.464387 5.443156 5.881167 5.85251 6.015732 5.473463  
2.787318 3.864477 4.223913 3.081786 3.759519 4.013264 3.091251 3.532121 4.239289  
1.322799 1.68857 1.592147 1.570018 1.05115 1.281095 1.330188 1.101248 1.310942  
7.207257 6.496532 7.689472 7.596738 7.711925 7.751538 7.684352 7.837259 6.835568  
7.420619 8.246198 8.563979 8.26183 7.669788 7.686264 8.173742 8.506419 8.435968  
6.245254 6.453246 6.146035 6.764831 6.105855 6.950819 5.196436 6.455242 5.860886  
3.204823 3.345345 3.424174 3.012924 3.986993 2.91306 3.80351 3.02009 2.563979  
1.663008 2.069314 2.06191 1.271339 2.428793 1.581659 1.867352 2.13736 1.557854  
2.093641 2.539309 2.295703 2.732236 3.161814 6.022952 4.568205 3.796499 4.479647  
2.118505 1.951638 2.221457 2.217165 2.072783 2.485438 1.44355 1.933215 3.191803  
3.688408 4.14246 4.347281 4.226937 3.878623 4.251572 4.447249 4.509385 4.103996  
3.035528 3.018905 2.773691 3.312398 2.750374 3.618345 3.010609 3.262348 3.333958  
1.675252 1.35758 1.665959 1.544891 1.394278 1.966176 1.767759 1.564497 1.207038  
1.410556 1.878294 1.649158 1.403046 1.44535 1.045673 1.172226 1.486394 1.824403  
7.481561 7.779871 7.271472 7.578625 7.813176 7.473271 8.122204 7.960889 7.750949  
2.874801 2.077087 3.690186 5.184987 4.546101 6.785513 3.397618 2.159025 2.380786  
1.332192 2.315852 1.47537 3.737471 3.898317 3.072543 4.548499 2.269141 2.117879  
2.352387 1.73675 3.219157 1.993792 2.945963 1.375579 1.885495 1.802339 1.769898  
7.743471 8.459133 8.235569 8.117343 8.244924 6.381818 8.091611 7.82864 7.817912  
7.363094 8.294806 8.192308 7.77986 8.381848 7.075996 8.66357 8.379337 8.383503  
5.417256 6.374353 5.63954 4.698473 4.736689 5.338629 7.247517 6.583238 5.367656  
2.295561 2.468353 2.817158 2.88023 3.78578 3.08653 4.563375 2.322443 3.373649  
3.720443 3.095368 2.697431 2.094592 2.540552 2.704904 3.002792 2.44867 2.43713  
7.115498 6.960556 6.748109 7.229876 7.08829 6.815324 7.337654 6.938101 7.55669  
7.972967 7.336119 8.072795 7.586061 8.017529 6.16743 8.212057 8.792284 8.960853  
5.105512 4.088269 4.073494 3.506292 5.558067 7.482646 5.054141 4.546746 5.482113  
7.3066 7.849894 7.811364 6.759202 7.527111 6.597737 7.727627 7.233347 6.551667  
4.481075 5.224045 3.562447 4.010013 5.629042 4.903905 4.568951 6.137087 6.694894  
2.355794 3.560485 4.769237 3.98893 5.063916 7.381855 2.012662 3.79369 5.095543  
3.724326 3.863826 3.579319 4.040349 3.077034 3.874148 3.856163 3.993761 4.576974  
5.265232 4.00109 5.63817 4.833675 4.582615 5.853901 5.438523 4.169073 5.411147  
6.717099 6.957604 6.888043 6.050039 7.517496 6.77603 7.893198 7.915082 7.310437  
1.93861 1.660708 1.467943 2.297084 2.86534 2.159038 1.829691 1.767796 1.493528  
6.552803 6.27947 6.450341 6.063077 6.579563 7.632031 6.012361 5.701139 5.789714  
6.333434 6.197516 5.896844 5.075134 4.876045 6.971976 6.220936 6.096414 5.746708  
7.990803 7.646304 7.811583 6.760918 7.821439 7.253819 8.327877 8.35359 8.351085  
2.22039 2.349563 2.074502 2.65732 1.879817 2.161765 1.978749 2.864492 2.535825  
2.195411 2.08065 2.04199 2.70489 2.621425 1.92045 2.475565 2.839085 2.953908  
1.636563 1.680327 1.830558 2.567335 2.154841 1.471894 2.18026 2.312125 1.511439  
9.084935 9.592266 9.548502 9.504874 9.608381 6.9886 10.32558 9.891625 9.966837  
1.35109 2.475019 1.319312 1.709857 1.556704 1.91396 1.338187 1.657405 1.569902  
3.544796 4.437173 4.269072 4.685284 4.995487 5.746257 4.559188 3.820614 4.418183  
1.531219 1.559225 1.189635 1.919133 1.446567 0.899109 1.081084 1.419377 1.247528  
6.987619 7.2581 7.773227 6.669891 7.177938 6.832729 7.705766 7.565226 7.282507  
2.418087 2.316787 2.003799 2.215863 2.402563 2.44829 1.840868 2.251532 3.551258  
4.279603 5.455756 4.862338 2.962873 4.598268 4.283092 4.163512 4.845462 4.36853  
6.022494 5.939397 6.452031 6.92096 4.862794 6.01366 6.947748 6.298007 6.262185  
7.470225 8.115098 7.610802 7.680823 6.953749 7.709614 8.133027 8.442695 7.836083  
5.962877 6.268751 6.050167 5.530795 5.928536 5.916929 6.153843 5.903414 6.05583

5. 808545 5. 847459 5. 729366 4. 765514 5. 634738 4. 92721 5. 211821 4. 547771 3. 771854  
2. 731636 2. 741261 2. 328064 3. 01517 3. 356723 3. 057375 2. 487044 2. 837843 2. 484877  
1. 587174 1. 371385 2. 558648 1. 946969 1. 668077 2. 013611 1. 882794 1. 471013 1. 435763  
1. 028466 2. 143574 1. 281118 1. 342422 1. 980381 3. 480222 1. 144461 1. 847827 1. 006669  
4. 868805 6. 018382 6. 051688 8. 021953 3. 782239 2. 644567 2. 073653 4. 631321 5. 941225  
4. 317406 5. 186012 5. 010394 4. 753847 4. 549111 3. 765658 5. 982161 5. 794613 5. 019132  
4. 709053 4. 489463 4. 776174 5. 050207 4. 057397 5. 222607 5. 669137 5. 900124 6. 189287  
1. 547416 1. 929887 2. 175221 2. 328897 2. 538848 2. 23734 3. 146153 1. 752222 2. 204641  
5. 237298 3. 951026 5. 4679 6. 131862 4. 955217 6. 20351 5. 938905 5. 859992 6. 431947  
3. 771113 3. 44222 4. 260642 6. 346719 5. 318997 7. 606812 5. 333578 5. 110009 6. 373806  
6. 687851 5. 681451 6. 55255 6. 904554 6. 358349 6. 301968 7. 366447 7. 822941 7. 64469  
4. 736539 2. 316182 1. 479796 3. 939133 3. 209544 5. 994137 6. 288544 4. 417889 4. 014933  
2. 595645 3. 519832 1. 653237 3. 484804 0. 830272 1. 759341 1. 87092 0. 828722 1. 359628  
7. 009073 7. 617834 6. 602628 7. 125981 7. 31585 6. 496867 7. 105064 7. 070538 7. 07678  
6. 97239 7. 040401 6. 814659 7. 031334 6. 567448 6. 58159 6. 823299 5. 963906 6. 311325  
5. 219173 5. 713281 5. 702319 4. 78027 4. 678885 5. 712138 4. 515271 4. 602999 5. 13987  
6. 931454 7. 00739 6. 352484 6. 68365 5. 232994 6. 05279 5. 831843 5. 6134 5. 323622  
3. 035966 3. 52515 4. 747493 3. 179331 4. 632991 3. 080525 4. 054477 4. 25314 3. 98275  
4. 730952 4. 263622 4. 864016 4. 375467 4. 61284 5. 123999 4. 084351 4. 82589 4. 740442  
6. 530152 6. 168793 6. 813234 7. 242143 7. 030326 7. 405365 7. 666403 7. 233938 6. 679455  
4. 85905 4. 375569 3. 680641 3. 827982 5. 476837 4. 258626 4. 50733 4. 399611 4. 228912  
3. 167624 2. 403459 2. 983445 3. 314923 3. 422436 2. 615727 3. 064734 3. 40864 3. 258053  
4. 617031 5. 116812 4. 343082 4. 001368 4. 110642 4. 815998 4. 969922 4. 126902 4. 605132  
4. 030505 3. 098534 2. 831646 4. 462403 4. 02083 4. 333279 3. 369885 3. 240558 4. 518615  
4. 092153 4. 152094 4. 154547 5. 291361 4. 336032 5. 212732 5. 686576 4. 919047 4. 825141  
4. 275546 3. 876625 2. 5904 3. 339476 4. 751363 4. 040564 4. 881194 5. 353207 3. 91219  
1. 311261 3. 053278 2. 022435 1. 789693 1. 908697 3. 553431 2. 488341 1. 450328 2. 4534  
6. 009549 6. 353883 5. 517493 5. 482048 5. 646216 5. 681301 5. 92888 5. 449976 5. 871393  
7. 337692 8. 527818 8. 092356 8. 530781 8. 635599 8. 011837 8. 71817 8. 62702 8. 366355  
4. 277278 3. 103341 3. 382659 4. 798318 3. 203579 4. 75889 5. 659275 5. 653854 5. 105496  
5. 076694 2. 756035 2. 006348 4. 468358 1. 948171 4. 803131 3. 944546 5. 285538 5. 983577  
3. 828296 4. 387859 4. 159676 4. 080981 4. 258137 3. 986725 5. 281926 5. 14483 5. 575166  
5. 644452 6. 313147 6. 051417 5. 52661 5. 119115 6. 048839 6. 004866 6. 064499 5. 924378  
5. 976447 6. 999561 6. 308899 5. 754206 5. 866868 5. 709587 6. 674141 7. 255775 6. 389855  
5. 761377 6. 500549 5. 653197 4. 891817 6. 185066 5. 523798 6. 678172 6. 183955 6. 330989  
1. 846946 1. 929252 1. 966972 1. 847615 0. 997603 1. 027572 1. 066275 0. 993016 1. 177082  
0. 964709 1. 645838 0. 911989 1. 148978 1. 212157 1. 305945 2. 006364 0. 779757 1. 184995  
8. 987169 8. 859267 8. 783488 8. 72842 8. 164692 9. 680553 9. 239887 9. 766005 9. 309598  
6. 669557 7. 647153 7. 078033 7. 363284 7. 274187 6. 909217 6. 881441 7. 093289 6. 878789  
5. 645471 5. 684808 5. 952991 4. 565236 6. 010996 4. 16412 4. 573951 4. 494456 4. 445604  
4. 556333 4. 800021 4. 735741 3. 788798 3. 799675 4. 449359 3. 821898 4. 307618 4. 131644  
6. 125884 4. 339455 4. 183995 5. 724373 5. 938069 7. 059828 6. 389632 6. 199249 6. 212038  
5. 72384 5. 164774 4. 311992 4. 907964 3. 28229 5. 168638 5. 471592 4. 903648 5. 846872  
3. 862873 4. 13658 3. 246808 3. 049104 3. 161955 4. 016748 3. 554767 5. 690035 4. 797836  
2. 453834 3. 348033 3. 017857 3. 594853 3. 189891 2. 575399 3. 32006 3. 362922 2. 971537  
7. 881392 6. 756944 6. 374465 5. 119987 6. 428981 6. 827227 6. 709451 6. 45437 6. 587758  
5. 540085 4. 455881 5. 148697 5. 119018 5. 13695 5. 050269 5. 809796 6. 285115 6. 565313  
1. 973526 1. 855285 2. 67357 2. 840269 2. 328483 2. 43903 1. 470592 2. 238399 3. 099917  
4. 549462 4. 650675 4. 916923 4. 273507 4. 59005 2. 873428 2. 279016 3. 21854 2. 160602  
5. 833969 5. 289517 5. 624279 6. 444799 5. 28423 6. 087053 5. 609535 6. 050428 6. 159174  
1. 511683 1. 848046 3. 006483 1. 597257 1. 913638 1. 63376 2. 808427 2. 294906 1. 196695

7. 141177 7. 323467 7. 113431 6. 651682 7. 984823 7. 2312 7. 623948 7. 447349 7. 057979  
4. 858941 4. 644963 4. 226522 5. 625295 4. 936702 3. 909797 4. 64985 4. 17672 4. 863187  
2. 09593 0. 621909 0. 841064 1. 012831 1. 243135 0. 928833 0. 850756 1. 282075 1. 189835  
2. 282273 2. 137697 2. 704058 3. 227775 2. 596834 2. 976094 1. 92766 2. 227798 2. 410165  
9. 5514 9. 557525 8. 478081 9. 043915 9. 61031 9. 152345 9. 068768 9. 438629 8. 875178  
5. 196674 3. 924441 4. 972838 5. 695016 4. 79514 5. 834496 5. 623655 5. 811606 5. 915327  
7. 172525 6. 972921 7. 125642 6. 561504 7. 078109 6. 608244 7. 557609 6. 866246 6. 84666  
3. 408991 3. 0107 3. 3353 3. 535472 3. 429771 3. 943755 2. 925918 4. 326113 3. 422321  
7. 228571 6. 013735 6. 630255 6. 369949 6. 385046 6. 967934 4. 867386 5. 032618 4. 144061  
1. 41275 1. 997061 1. 293494 1. 64503 1. 525471 1. 486729 1. 482685 1. 488314 1. 893462  
1. 208769 1. 598452 1. 107126 1. 89314 1. 956351 2. 30327 1. 772983 1. 580823 1. 730179  
6. 446569 6. 382275 6. 593145 6. 690815 6. 272234 6. 005351 6. 882753 6. 359133 6. 242177  
8. 04557 8. 446093 8. 702052 8. 320169 8. 307081 8. 252571 8. 272874 9. 089823 8. 218446  
7. 254225 7. 537151 7. 204373 7. 235009 7. 519194 6. 512986 6. 480928 6. 447086 6. 530836  
1. 896622 2. 526312 1. 972323 3. 049963 1. 98393 2. 732179 1. 878302 2. 506146 2. 250462  
4. 675275 4. 130371 4. 894479 3. 427624 4. 090032 4. 172342 4. 861404 3. 930596 4. 224251  
4. 846751 4. 735417 5. 159172 4. 630887 4. 464284 4. 631985 5. 825721 4. 309359 5. 181934  
7. 725273 7. 668536 7. 393021 7. 288084 7. 205823 8. 032333 7. 783293 7. 762565 7. 973709  
5. 94785 5. 965748 6. 629685 7. 291023 5. 691579 6. 302707 6. 490811 5. 999847 5. 040582  
2. 626841 4. 504434 4. 842624 4. 099899 3. 598192 1. 789368 5. 163961 5. 150206 3. 335804  
3. 114546 2. 73585 3. 284337 2. 300037 2. 54192 2. 61354 2. 156512 2. 096874 2. 508984  
2. 382303 2. 366477 2. 214655 2. 146889 2. 03932 2. 781929 2. 569994 2. 563574 2. 635916  
7. 638649 6. 967617 7. 345087 7. 448398 7. 436338 7. 482196 7. 674819 7. 54757 7. 393222  
3. 111325 1. 376922 1. 653283 1. 323033 0. 788391 1. 42284 1. 144519 0. 98892 1. 222165  
1. 841714 1. 749048 2. 795049 1. 910383 2. 301497 1. 304232 1. 218452 1. 617728 1. 56999  
5. 955469 5. 945549 6. 018917 6. 195729 5. 908083 7. 245966 6. 194226 5. 685041 6. 474833  
4. 664441 5. 86253 5. 573112 4. 987729 5. 245578 4. 129737 5. 057587 5. 877019 5. 287299  
6. 853808 6. 632502 5. 933659 5. 72514 6. 217551 6. 566755 6. 436731 5. 624294 5. 85435  
9. 349383 9. 662804 9. 433468 9. 027739 9. 545195 9. 370466 9. 530527 9. 508311 9. 081191  
7. 870671 8. 06733 8. 275834 7. 778586 8. 032511 7. 351777 8. 125622 7. 809798 7. 57606  
3. 547363 3. 54532 3. 984658 2. 762706 3. 67948 3. 428767 3. 815925 4. 489918 5. 09997  
4. 635713 3. 384533 3. 947017 3. 35846 3. 641612 3. 769651 3. 603247 4. 171999 4. 13445  
3. 294743 4. 19426 2. 718711 2. 522333 3. 236375 3. 200811 5. 201523 4. 507894 4. 114893  
3. 508858 3. 176381 3. 400701 4. 302604 3. 777118 3. 499679 4. 607062 4. 241033 3. 910814  
6. 463454 6. 493247 7. 006291 6. 693085 6. 800092 6. 151101 6. 339193 6. 509207 6. 515004  
7. 247515 6. 901524 7. 27005 8. 239036 6. 969477 7. 323226 8. 284616 7. 644916 7. 670758  
6. 33298 6. 245855 6. 660292 6. 184313 5. 853125 6. 651182 6. 75395 6. 115501 6. 452868  
1. 9343 3. 324799 2. 223614 2. 248769 2. 131349 2. 624657 3. 465019 2. 620033 2. 923582  
6. 788783 7. 072546 7. 248921 7. 172884 7. 076437 7. 244863 7. 664162 7. 341267 7. 438265  
4. 282198 3. 109586 3. 130858 3. 86925 3. 29301 3. 302484 4. 570995 4. 17901 5. 011146  
6. 233436 4. 174275 5. 472603 5. 891158 5. 548769 6. 231868 6. 003974 6. 41846 6. 356522  
3. 996223 5. 175987 3. 380524 2. 677157 4. 606902 3. 699663 4. 239391 3. 409774 4. 128985  
2. 301021 1. 629667 1. 331325 1. 955728 1. 72888 2. 536909 1. 745787 1. 790139 1. 487782  
4. 763922 4. 59805 5. 646221 5. 96192 4. 53207 5. 332642 5. 46129 5. 618191 5. 120444  
7. 852807 8. 290083 7. 756265 7. 259907 8. 149873 7. 368532 7. 398517 7. 032882 7. 199322  
4. 171844 3. 887011 4. 884864 4. 746865 4. 208527 4. 42234 4. 531122 5. 199071 4. 394699  
8. 813639 7. 314841 8. 234478 8. 537089 8. 441393 8. 618064 8. 853777 8. 775192 8. 614278  
9. 056666 9. 453512 9. 581899 9. 678527 9. 147874 9. 378275 9. 878744 9. 576263 9. 601567  
4. 648572 3. 822549 4. 708011 4. 933142 4. 68218 5. 35355 4. 904755 4. 998341 5. 608451  
4. 631374 2. 623218 4. 86756 3. 888026 4. 101144 7. 5748 5. 637535 3. 406903 5. 845802  
1. 870706 3. 655241 2. 793689 3. 184887 3. 04241 2. 394903 2. 477908 2. 826662 2. 614942

2. 439065 2. 716366 3. 603289 3. 593363 2. 803001 3. 680381 2. 941718 2. 896033 3. 662227  
5. 960249 6. 442832 6. 077175 5. 784227 6. 02014 6. 086311 5. 835625 5. 748837 5. 276  
8. 754451 9. 667734 9. 116619 9. 231835 9. 147632 8. 862947 8. 95919 9. 02992 8. 855147  
5. 951161 5. 063446 6. 376809 5. 988708 5. 215077 5. 745902 6. 138439 6. 951126 6. 518792  
7. 504147 7. 648655 7. 914637 7. 049513 7. 89025 7. 227133 7. 852596 7. 013832 7. 406939  
1. 284563 1. 072767 1. 631524 1. 811562 1. 891496 1. 170607 1. 825139 2. 66875 1. 712445  
5. 779873 5. 606032 6. 581127 7. 114343 5. 543767 5. 704381 6. 689627 4. 894979 6. 389713  
4. 496874 2. 517859 4. 743951 4. 297756 3. 552908 2. 674983 2. 411071 3. 506038 2. 928825  
4. 638021 4. 060588 3. 125128 4. 132243 4. 192192 4. 05849 3. 630051 3. 276297 3. 711182  
3. 168818 3. 264283 2. 143354 3. 534884 4. 234134 2. 450032 3. 464134 3. 010864 3. 693745  
3. 998077 3. 912947 4. 342161 3. 463469 2. 598617 4. 028378 3. 61515 3. 24462 3. 66423  
6. 871984 6. 354094 7. 060717 6. 654095 7. 372886 6. 433865 7. 187824 6. 980923 7. 234492  
1. 629553 2. 322171 2. 835432 2. 082645 3. 019452 3. 76964 2. 382863 2. 315897 1. 496492  
2. 368811 1. 88339 2. 318414 2. 480554 1. 762841 1. 586541 1. 624961 2. 453044 1. 608481  
2. 435755 2. 406266 2. 595771 2. 59335 2. 025568 4. 73255 2. 691248 2. 105841 2. 544903  
4. 608961 4. 786878 5. 088419 4. 945884 4. 755858 6. 609128 5. 655034 6. 075408 6. 265646  
7. 17204 6. 656233 6. 361944 6. 52911 6. 557124 5. 584775 6. 47431 6. 459773 7. 127611  
5. 530967 5. 988867 5. 751895 4. 799316 5. 946756 6. 144134 6. 069432 6. 878108 6. 108884  
3. 063667 1. 957554 2. 69189 2. 928415 2. 550928 3. 087219 1. 987876 2. 605613 2. 163701  
3. 752636 3. 192372 3. 724738 3. 698763 3. 849336 3. 900703 5. 168467 5. 724158 6. 016617  
9. 031127 9. 225682 8. 905803 8. 709664 8. 700057 9. 424884 9. 188006 8. 910327 8. 906192  
2. 725871 3. 222878 3. 467284 4. 261892 3. 037884 3. 80685 3. 035512 2. 315895 3. 123316  
7. 432395 7. 458871 7. 512017 7. 195785 7. 629093 7. 28501 7. 256744 7. 049288 6. 860524  
4. 630276 5. 023525 4. 401396 5. 149595 4. 14392 4. 696487 4. 432354 6. 046068 6. 104185  
1. 493809 1. 163438 0. 894773 1. 017932 1. 103281 1. 099181 1. 149642 1. 431488 0. 985615  
6. 186117 6. 755055 5. 771085 5. 914829 6. 586221 6. 354383 6. 594047 5. 989748 6. 48703  
1. 668525 1. 256955 1. 375606 1. 744785 1. 606452 1. 337523 1. 214351 1. 630982 1. 85663  
6. 152945 5. 454545 5. 181668 7. 279876 5. 651226 6. 326003 6. 346479 6. 997544 6. 216284  
5. 830679 5. 670493 4. 721034 4. 624627 5. 171493 5. 539326 5. 112921 6. 14398 6. 005038  
5. 014966 3. 919599 3. 44688 4. 465491 4. 255973 4. 170162 4. 651838 4. 273038 4. 433391  
2. 372294 1. 836341 4. 398743 1. 9866 1. 210799 5. 31925 1. 202538 1. 265409 1. 467611  
6. 268558 6. 434188 6. 275618 5. 63699 6. 206882 6. 081537 6. 464851 7. 010477 6. 820053  
6. 721629 6. 172107 7. 088736 6. 602607 6. 934625 6. 676651 7. 48913 7. 715782 8. 109696  
4. 257091 4. 214907 4. 128749 4. 25672 4. 314117 4. 494258 5. 154411 4. 396365 3. 435942  
3. 322226 2. 238119 2. 345123 2. 535172 2. 687433 3. 185694 2. 734885 2. 587244 3. 111043  
4. 808242 3. 848167 4. 85118 4. 183885 4. 349219 5. 185055 5. 629723 4. 398047 6. 080138  
6. 97505 6. 654797 7. 08252 5. 657194 6. 62943 5. 36175 6. 598649 6. 668544 6. 690292  
3. 177851 2. 800353 2. 509406 2. 758773 1. 762064 3. 432965 4. 352901 5. 374089 5. 291965  
7. 608915 7. 833658 7. 304661 7. 145432 7. 641584 7. 485796 7. 270643 7. 391542 7. 434971  
1. 803892 2. 417581 2. 467914 1. 490898 1. 726237 4. 097712 2. 37295 1. 820124 2. 27295  
9. 471141 9. 899502 9. 405495 10. 52015 10. 36 9. 252806 10. 11063 10. 39729 10. 50063  
8. 601484 8. 505443 8. 018025 9. 061615 8. 834443 9. 82969 8. 812093 8. 385253 9. 315433  
7. 097022 7. 645873 7. 242681 6. 488776 7. 429345 6. 39841 6. 815053 6. 707544 6. 520652  
4. 140654 5. 518715 5. 046284 4. 267861 4. 903128 4. 654882 4. 739465 4. 917767 3. 928816  
2. 024702 2. 392269 2. 242845 2. 559532 2. 640916 1. 97874 1. 780853 2. 008121 2. 22927  
5. 69901 4. 51914 5. 146685 3. 655196 3. 576771 4. 908753 5. 740783 3. 795388 5. 289152  
6. 974967 6. 785612 6. 733829 6. 243171 6. 417459 6. 812765 7. 286302 7. 155179 6. 709687  
2. 502259 3. 531484 3. 346162 2. 533769 3. 903018 3. 284927 3. 10834 5. 267463 3. 561738  
6. 19965 6. 892115 6. 584213 5. 803455 7. 076982 5. 948497 6. 287752 6. 657296 6. 353672  
4. 306126 5. 283652 5. 318358 5. 097483 4. 493397 4. 887835 5. 517905 4. 563537 5. 86479  
8. 418453 6. 733099 6. 384591 6. 223472 5. 529726 7. 013524 5. 700812 4. 271645 3. 609891

4. 98453 5. 140895 5. 244764 5. 260995 5. 155661 5. 86004 5. 875042 6. 0409 5. 748413  
8. 281722 8. 409945 8. 81397 8. 147048 7. 920875 9. 005241 8. 592217 9. 012954 8. 599485  
6. 697341 7. 323306 7. 05882 4. 845854 7. 504932 7. 134103 6. 896793 6. 873698 6. 883507  
1. 393119 2. 270615 1. 340048 1. 890091 1. 24195 1. 877329 1. 719775 1. 038281 2. 000502  
1. 898973 1. 99832 1. 803777 1. 767902 1. 977015 1. 975843 1. 764045 2. 70549 1. 882958  
2. 216219 1. 814871 2. 135582 1. 468644 2. 013317 1. 37124 1. 598261 1. 38463 2. 207754  
7. 917189 7. 583362 7. 853067 7. 91747 7. 915263 8. 090843 7. 977277 7. 484366 7. 316635  
6. 223393 7. 207325 7. 246358 7. 439682 7. 274958 6. 663122 6. 832613 7. 158056 7. 232196  
5. 243533 5. 29853 5. 173405 5. 670188 5. 44597 5. 797262 5. 512435 5. 393495 4. 457512  
4. 704815 4. 216626 4. 46118 5. 009433 4. 416267 4. 449335 4. 245563 4. 062746 4. 615928  
6. 608122 6. 903731 6. 661666 6. 433911 7. 124687 6. 791064 6. 408221 6. 13367 6. 427781  
7. 362233 8. 051671 8. 316685 6. 902544 7. 963101 7. 575811 7. 445777 7. 710586 7. 497842  
6. 088035 7. 601329 6. 744232 6. 825819 6. 485858 6. 766015 6. 513371 6. 359405 6. 180147  
1. 932643 1. 679466 1. 743768 2. 468412 1. 988532 2. 121655 2. 036854 1. 979109 2. 092995  
1. 652199 1. 103716 1. 386823 1. 34638 1. 226266 1. 158422 1. 417382 1. 828751 1. 109011  
6. 488292 7. 312483 7. 067234 5. 856906 7. 247065 7. 543963 6. 736194 6. 675714 6. 247773  
6. 066998 6. 260231 6. 841092 5. 37161 6. 612026 5. 633563 6. 978973 6. 247393 6. 029484  
3. 527161 3. 360755 3. 928022 4. 062566 3. 580846 3. 48798 3. 193752 4. 023325 4. 315416  
1. 247382 1. 236337 1. 071824 1. 616119 1. 111034 1. 131929 0. 687218 1. 447336 1. 006506  
4. 056725 4. 436858 4. 049971 4. 294713 3. 826023 5. 141691 3. 931737 3. 249628 3. 606627  
5. 339525 6. 418047 5. 835209 5. 909924 6. 187684 6. 157043 6. 879906 6. 701143 6. 867026  
6. 451092 5. 906814 6. 408956 7. 229797 6. 587573 6. 062249 6. 435756 6. 176861 6. 415034  
1. 73884 3. 058079 2. 304287 1. 557072 2. 219669 1. 567308 1. 551379 1. 704465 1. 927881  
4. 669434 4. 007835 2. 92472 3. 504254 4. 317382 3. 701274 4. 264998 5. 477853 4. 849721  
4. 10452 5. 324897 5. 58688 4. 569576 5. 069826 4. 475803 4. 267944 4. 010276 4. 252149  
3. 742411 4. 239343 4. 63146 3. 810139 3. 830385 3. 614617 3. 57964 3. 86878 4. 220638  
5. 983917 6. 674579 6. 677479 5. 947948 5. 955448 5. 506874 6. 4138 6. 038983 6. 55927  
7. 163972 6. 343402 6. 790626 6. 209572 6. 885158 5. 025637 7. 050406 7. 612885 6. 994637  
1. 222821 1. 283873 1. 108705 1. 208114 1. 133974 1. 333601 1. 432125 1. 20701 0. 89645  
0. 916815 1. 721266 1. 261526 2. 332398 1. 228798 1. 243268 1. 712435 1. 223336 2. 267188  
1. 493267 2. 144719 1. 517515 1. 455998 1. 899827 2. 127273 1. 60519 1. 658741 1. 582105  
7. 354791 7. 338223 7. 344378 7. 580331 8. 118962 7. 801421 7. 576965 7. 911004 7. 587817  
6. 537142 5. 453289 7. 512256 7. 659594 6. 160133 4. 948587 5. 977007 4. 951981 6. 199492  
7. 684967 7. 26499 7. 940724 7. 508845 8. 167808 7. 279486 8. 280887 8. 254915 7. 783594  
8. 280222 7. 875849 7. 935619 8. 16579 8. 235485 7. 431109 8. 671026 8. 882702 9. 347128  
5. 837048 4. 750295 4. 525593 6. 478128 5. 074261 6. 032493 6. 249255 5. 352825 5. 639831  
6. 320785 6. 511599 6. 167785 7. 07532 7. 112649 6. 797336 6. 758074 7. 186492 7. 364884  
4. 348059 3. 172575 4. 09848 3. 224231 2. 970203 1. 345116 1. 034456 1. 186195 1. 288284  
6. 022901 3. 560157 3. 384993 4. 175999 5. 114993 2. 613954 2. 408755 4. 019006 2. 825826  
7. 232283 5. 815527 6. 31593 3. 110736 6. 796648 4. 158104 3. 546948 4. 26565 4. 503258  
3. 062778 2. 995194 3. 675401 2. 937734 2. 383664 3. 576167 2. 431673 3. 161321 3. 228212  
1. 72512 1. 1173 1. 656644 1. 131631 0. 974933 1. 085334 1. 017761 1. 209607 1. 500865  
2. 464756 1. 391056 1. 768935 2. 502299 2. 060923 2. 047648 1. 894094 2. 549037 1. 791259  
1. 293649 1. 449312 1. 108208 1. 617619 1. 535497 1. 866909 1. 54085 1. 316202 1. 794565  
1. 654561 2. 911954 3. 049497 1. 876462 2. 2941 2. 152893 1. 631638 2. 180126 1. 953379  
2. 35169 1. 383605 1. 237143 1. 414146 1. 798564 1. 374557 1. 402405 1. 33917 1. 992918  
5. 372259 6. 136474 6. 195186 5. 423476 6. 274518 5. 978014 7. 212108 6. 805843 6. 053587  
4. 037374 4. 359318 2. 372817 3. 228985 1. 348509 1. 391642 1. 604857 1. 509257 1. 296987  
1. 659544 2. 928382 1. 174971 1. 58709 2. 045579 0. 66135 0. 422239 0. 865251 0. 817441  
1. 908898 0. 967153 1. 116522 1. 477108 0. 713049 1. 719362 1. 339121 1. 158957 1. 129633  
8. 19132 6. 758741 9. 008951 7. 635271 6. 687157 5. 525161 5. 066773 6. 520955 4. 106943

0. 947826 4. 256276 4. 002464 2. 976047 0. 953796 0. 861803 0. 912836 1. 758833 1. 016146  
7. 349782 8. 882947 8. 027045 7. 728157 7. 34502 9. 370996 7. 841263 8. 068543 7. 968443  
7. 654915 8. 696029 7. 931507 7. 598682 8. 447842 7. 114592 8. 412575 8. 675549 8. 321258  
2. 278755 2. 514368 2. 569258 2. 047405 2. 317579 2. 717452 2. 53265 2. 946026 2. 36194  
1. 949547 2. 568263 1. 685574 2. 324692 1. 72418 2. 048652 1. 544139 1. 866665 1. 833382  
2. 635315 3. 858161 2. 971433 2. 580048 2. 638286 2. 875306 2. 750045 4. 389235 3. 221879  
7. 538771 6. 071565 7. 261355 6. 681222 6. 968413 7. 767308 8. 822658 8. 824642 9. 100866  
2. 567724 2. 612048 2. 669012 2. 403444 2. 49698 2. 261796 3. 91055 3. 03218 2. 796979  
6. 740513 7. 433564 7. 510705 7. 34443 7. 311513 6. 217334 7. 172717 7. 05675 6. 474616  
6. 101383 6. 206534 5. 794827 5. 084205 5. 96595 5. 588161 5. 873253 5. 100893 5. 211947  
5. 998755 5. 58221 6. 038979 4. 894121 6. 522281 5. 715158 5. 987637 6. 108872 5. 073344  
1. 432916 1. 602913 2. 209772 1. 014338 3. 858997 6. 051424 2. 228481 1. 156134 4. 432528  
3. 57543 3. 592403 3. 613199 4. 135942 3. 755556 4. 034004 4. 180727 4. 735328 4. 200722  
1. 61858 1. 59827 1. 327118 2. 36226 1. 783238 2. 133937 1. 347198 1. 601037 1. 628208  
4. 836327 4. 994444 5. 307119 5. 936842 4. 96208 7. 101661 5. 688787 3. 58736 4. 684493  
6. 165473 5. 95532 6. 079826 6. 634013 6. 621454 6. 648348 6. 704606 7. 443415 7. 99035  
3. 017452 2. 762713 3. 971869 4. 439809 3. 801654 5. 694068 4. 700283 4. 515385 5. 165437  
7. 903079 6. 103169 8. 64217 9. 412096 9. 897166 3. 50424 11. 16285 7. 765202 9. 967361  
6. 175991 2. 945777 1. 96073 2. 038606 2. 887705 4. 670056 2. 365778 2. 440962 2. 803696  
4. 529815 3. 754213 4. 401303 5. 102602 4. 341641 5. 903773 5. 48372 4. 623529 5. 407134  
5. 836689 5. 991072 5. 928237 7. 028595 5. 929489 6. 324964 6. 581584 6. 963195 7. 113663  
7. 267226 7. 754255 7. 295785 7. 385212 7. 638697 7. 842172 8. 099951 7. 34929 7. 468262  
1. 539296 1. 972852 1. 819713 1. 870736 1. 493929 2. 585783 1. 63031 1. 698091 2. 806158  
2. 535094 2. 60199 2. 758758 2. 620978 2. 91623 5. 16349 2. 226179 2. 836732 4. 695126  
5. 689629 6. 119318 5. 7906 4. 377917 5. 957142 4. 814307 5. 608776 4. 37801 5. 039414  
7. 033496 8. 223622 7. 935273 7. 852251 8. 371126 6. 370454 7. 908677 7. 459461 7. 528463  
2. 192817 3. 233666 3. 224605 4. 78759 4. 348518 4. 662951 4. 352208 4. 705948 4. 380761  
4. 532131 4. 392905 4. 608633 3. 938427 4. 531781 4. 822129 4. 43631 3. 437035 4. 020034  
4. 174188 4. 87864 3. 647875 4. 453947 3. 978873 4. 169286 3. 715231 4. 251264 3. 653132  
4. 788332 4. 6632 3. 632289 6. 169332 3. 948232 5. 284375 4. 436786 4. 782102 4. 634405  
3. 618584 3. 992764 2. 833512 3. 297082 3. 973466 4. 589926 4. 452022 4. 203971 3. 868599  
5. 019296 4. 565959 4. 585597 5. 440273 4. 734842 5. 463303 5. 117248 5. 012084 5. 017154  
2. 18176 1. 684273 1. 950862 1. 409082 1. 853474 1. 155809 1. 836095 1. 778207 1. 552561  
3. 504022 3. 184578 3. 324186 3. 828153 3. 810084 4. 201717 3. 919224 4. 14398 4. 587815  
5. 775385 5. 466437 5. 703138 5. 333934 5. 44687 5. 915031 5. 304753 5. 817571 5. 575924  
2. 228027 2. 141294 2. 547736 3. 648539 2. 247638 2. 455087 2. 588397 2. 563503 3. 465998  
5. 087827 5. 040562 4. 953536 5. 04311 4. 358657 4. 230452 5. 370205 4. 178494 3. 694301  
2. 251335 2. 497106 2. 013685 2. 274499 2. 295587 2. 280685 2. 065608 2. 27458 1. 945482  
5. 185172 4. 598717 4. 340566 5. 076225 5. 38278 4. 716546 4. 793275 4. 66104 5. 599208  
3. 495545 2. 872577 3. 854184 4. 13931 3. 316541 2. 361305 2. 822064 3. 251386 3. 184959  
1. 897668 3. 38875 3. 149738 1. 445548 1. 695535 3. 194748 2. 221902 2. 213061 1. 455299  
3. 618697 3. 321225 1. 22487 2. 679455 2. 053818 1. 967005 1. 174822 1. 614003 2. 391052  
8. 942631 8. 987089 7. 901747 8. 482216 7. 369534 7. 400458 6. 594849 7. 719656 8. 711912  
3. 141905 3. 214171 2. 864154 3. 490977 3. 459035 3. 647374 3. 679896 3. 682765 4. 151624  
1. 804142 2. 86863 1. 897494 3. 236788 2. 106199 2. 223369 4. 07568 2. 854137 3. 644022  
3. 064411 4. 030032 2. 644863 3. 507513 4. 197292 4. 182484 4. 644259 4. 699155 4. 78575  
7. 12357 6. 355178 7. 262407 8. 258705 6. 872071 7. 487485 7. 908093 8. 351465 8. 20906  
1. 312579 1. 260952 1. 241317 1. 413163 2. 518056 1. 629592 1. 472856 1. 73577 1. 454916  
6. 605616 7. 387431 7. 633247 7. 868185 7. 803143 7. 027146 7. 244974 6. 9687 7. 474257  
2. 144105 3. 854264 3. 363268 2. 561128 2. 69741 3. 248416 3. 169348 3. 139809 2. 394817  
0. 996895 1. 182896 1. 314147 1. 873236 0. 479948 1. 001015 1. 093979 0. 736335 1. 229178

4. 643853 4. 334369 3. 659411 3. 15486 4. 767364 4. 62442 3. 607567 4. 877492 5. 04592  
2. 048886 1. 441811 1. 31073 1. 709148 1. 454629 1. 671126 1. 608347 2. 279043 1. 037496  
1. 917358 1. 23713 2. 238153 1. 18855 0. 9627 2. 035796 2. 236253 1. 32826 1. 044972  
4. 814809 5. 62555 4. 804662 5. 311727 5. 470202 5. 198898 5. 985767 5. 641445 4. 680071  
1. 872781 2. 014763 1. 626357 2. 832603 1. 98678 1. 607611 2. 357411 1. 984803 2. 077113  
1. 382127 1. 382526 1. 807617 1. 937966 1. 718924 2. 239857 1. 569663 2. 320795 1. 708236  
1. 797086 1. 403957 1. 717742 1. 599191 1. 063788 1. 758641 1. 125385 1. 198909 1. 484439  
2. 198687 2. 805314 1. 873102 2. 387961 1. 982467 2. 221759 2. 192431 2. 337745 2. 007859  
6. 258803 4. 860425 5. 660284 5. 862245 5. 198146 5. 801032 5. 803943 5. 910119 5. 93748  
6. 447809 5. 922819 5. 837691 5. 779923 6. 536637 6. 53054 6. 462214 6. 480773 6. 839557  
1. 203608 1. 299514 1. 691208 1. 416274 1. 786775 0. 935677 1. 421685 1. 242559 2. 340084  
4. 758485 5. 998497 5. 759276 4. 762642 4. 304899 4. 662879 4. 947072 4. 977161 5. 706649  
0. 922248 0. 906676 0. 807965 3. 129451 1. 064342 2. 588977 1. 460703 0. 7259 0. 784096  
10. 97105 10. 2956 10. 62805 10. 52836 10. 75408 11. 02677 10. 35089 10. 04838 10. 04356  
4. 075415 4. 983471 4. 104314 4. 412023 3. 805986 7. 187256 5. 231941 5. 322039 6. 499511  
3. 985431 4. 113754 4. 727588 3. 589626 4. 480419 4. 249859 4. 702975 5. 432699 4. 309714  
7. 603812 7. 733662 7. 820227 7. 511161 7. 830689 7. 638073 7. 83595 7. 323611 7. 696551  
6. 739852 5. 711632 6. 902986 7. 111705 6. 676275 6. 912993 6. 985505 6. 075423 6. 49705  
4. 627328 3. 967432 4. 571866 3. 708394 4. 805399 4. 378924 4. 538807 3. 889737 4. 904721  
8. 14541 7. 725017 7. 974561 8. 289725 8. 38115 8. 29458 8. 90812 9. 438818 9. 093177  
1. 381796 2. 00434 1. 246981 0. 930099 1. 452005 2. 683656 3. 371571 2. 18638 5. 208049  
3. 241709 3. 452071 4. 33473 4. 445948 4. 123461 3. 78744 4. 425106 4. 129724 3. 804679  
1. 474817 0. 839607 0. 819379 0. 890243 0. 844895 1. 115553 4. 021159 1. 582843 1. 151041  
1. 831848 2. 037258 1. 759878 2. 775799 2. 183997 2. 11941 2. 332836 2. 573717 1. 862762  
2. 499068 2. 154204 1. 913732 1. 798873 2. 243436 1. 40071 1. 282027 2. 603491 1. 978116  
7. 594788 8. 067171 8. 772257 6. 847823 7. 474753 8. 215338 8. 179291 7. 568945 7. 314786  
3. 49064 2. 466322 3. 394145 3. 637431 4. 928029 7. 114768 5. 622871 5. 758086 6. 248533  
2. 385309 2. 555179 1. 769106 3. 811482 1. 975955 2. 636884 2. 719673 2. 342977 1. 815837  
6. 968241 6. 693804 6. 451499 6. 049627 6. 95703 6. 341425 5. 653095 6. 647179 6. 474988  
4. 396941 4. 035503 3. 014412 3. 213406 4. 182274 3. 828339 5. 72496 4. 212318 5. 445991  
3. 002732 4. 34107 4. 02102 4. 996521 3. 090466 3. 655867 4. 514043 2. 772202 4. 154388  
2. 072923 1. 815422 1. 998402 2. 501685 2. 399271 1. 928123 1. 884143 2. 534097 2. 034133  
5. 24031 5. 598457 5. 665288 7. 066143 5. 138243 6. 173468 5. 530481 6. 451592 5. 782011  
1. 337222 1. 181639 1. 417346 1. 704495 1. 814914 1. 512897 1. 153132 1. 346277 1. 222543  
3. 291067 2. 650574 3. 505397 2. 589194 4. 11937 2. 708501 2. 134187 3. 523592 2. 99447  
7. 677331 7. 637155 7. 763764 7. 788363 7. 919387 7. 621935 8. 059897 8. 059693 8. 311987  
6. 66304 6. 925747 6. 362406 6. 635615 7. 275816 6. 416824 6. 699982 6. 393914 6. 447574  
7. 86795 7. 145102 7. 184585 7. 679275 7. 601015 7. 141586 8. 021388 7. 653879 7. 6452  
1. 814031 1. 850455 1. 588069 1. 821523 2. 353973 1. 363932 1. 194456 1. 750349 1. 415757  
2. 227511 2. 091784 1. 736347 2. 226367 2. 36135 2. 505277 2. 361574 1. 988604 2. 086778  
6. 773465 7. 413229 6. 988936 6. 685383 6. 701815 7. 005081 7. 524342 7. 103481 7. 133804  
4. 822368 6. 163216 5. 730826 4. 982093 5. 415966 3. 256742 5. 511733 4. 299384 4. 671409  
7. 259813 6. 945338 7. 108235 7. 332934 6. 857817 7. 431911 5. 960912 6. 681391 5. 746733  
5. 295691 5. 491717 4. 928097 4. 557807 6. 017009 5. 769487 4. 972279 4. 893266 5. 73898  
5. 056307 3. 978791 5. 340886 5. 940203 5. 45822 4. 602197 5. 935833 4. 533047 4. 724968  
3. 165861 3. 36706 2. 603267 2. 808935 4. 700422 3. 771756 3. 190166 4. 320417 4. 289187  
6. 9866 7. 032117 6. 81487 7. 332548 6. 976942 6. 652283 6. 885963 6. 201911 6. 940112  
4. 587014 5. 252798 5. 368073 4. 618469 5. 772001 5. 312441 5. 258471 5. 205101 5. 798784  
6. 829649 7. 180766 6. 685196 5. 400404 5. 502773 6. 154361 7. 253093 6. 836538 6. 14781  
1. 856486 2. 314814 2. 368147 1. 713823 3. 445963 1. 782579 1. 307275 1. 920057 2. 303129  
1. 358717 1. 856623 1. 725249 2. 791112 1. 552449 1. 281281 1. 447425 2. 066388 1. 570615

5. 314623 6. 541878 4. 6732 6. 114203 6. 088431 6. 159993 6. 239949 4. 798836 5. 409736  
6. 119526 7. 214184 6. 734567 6. 634698 6. 715045 6. 653156 6. 730191 7. 38432 6. 84037  
4. 268457 4. 139952 5. 019916 4. 688164 4. 203651 5. 802825 4. 532917 4. 742968 4. 9403  
2. 508828 3. 631238 2. 98307 2. 968964 3. 118733 3. 463941 2. 92283 3. 104349 2. 340176  
6. 237345 5. 904059 6. 151385 5. 654046 5. 365811 6. 515425 4. 938833 5. 688999 5. 862081  
5. 679472 5. 517612 5. 619464 6. 316522 5. 93801 6. 834187 6. 246912 6. 282979 6. 360699  
5. 905049 5. 178168 5. 881429 6. 295288 6. 200155 7. 031102 6. 580771 5. 472245 6. 410084  
5. 598448 5. 286377 4. 652482 5. 271181 5. 610694 4. 574441 5. 996703 5. 935992 5. 141241  
5. 849674 5. 204056 5. 764296 4. 746834 4. 335848 6. 250772 5. 945972 5. 690561 5. 638742  
2. 173608 2. 846578 2. 628716 2. 359378 2. 190755 2. 176041 2. 244482 2. 67335 2. 545444  
5. 607482 5. 045697 5. 862544 5. 235421 6. 041496 5. 526146 5. 790732 5. 317086 5. 437085  
7. 5988 7. 837315 7. 646863 7. 597081 7. 768008 7. 402769 8. 110181 8. 082079 7. 60472  
5. 813317 6. 161771 5. 558391 5. 764599 5. 739867 5. 784033 6. 06129 5. 690923 5. 670375  
5. 347364 4. 821417 4. 753068 6. 512797 5. 675894 5. 553752 4. 498115 5. 584053 4. 537108  
7. 075883 7. 531375 7. 357767 6. 564097 7. 441387 7. 073209 7. 397104 7. 274592 6. 870631  
1. 73448 1. 388715 2. 511948 3. 437329 1. 251508 2. 297859 2. 727756 2. 280172 1. 887705  
5. 899521 6. 282864 5. 573531 5. 327105 6. 165938 5. 492103 4. 726528 5. 879881 5. 399491  
5. 119812 3. 994979 4. 658533 6. 43971 4. 053291 5. 319118 4. 733271 4. 422269 4. 885019  
5. 003465 5. 228742 5. 151052 4. 752007 5. 282449 3. 915668 4. 207229 3. 701168 4. 250934  
4. 398117 4. 579842 3. 889418 4. 277776 5. 306868 5. 330813 4. 973315 6. 096646 4. 556218  
1. 881516 1. 878878 2. 722146 2. 62019 1. 803281 1. 916813 1. 856143 2. 094172 1. 913523  
2. 339384 2. 619597 1. 977654 2. 472452 2. 237994 2. 057928 2. 733187 2. 538435 3. 327181  
5. 733772 2. 427449 5. 187111 4. 114669 1. 664556 5. 835048 3. 921173 3. 3085 3. 160207  
3. 620053 4. 330953 4. 075651 5. 404849 2. 831732 3. 294476 3. 958977 3. 724192 3. 934693  
1. 029238 1. 356744 1. 314751 1. 516772 1. 110607 1. 217669 0. 993597 1. 695154 1. 242513  
3. 435975 2. 579476 3. 270853 4. 467919 4. 310941 3. 799081 3. 009485 3. 658962 4. 697095  
3. 518483 4. 088521 4. 601776 4. 786784 4. 793857 5. 749572 4. 779603 4. 877153 4. 76954  
9. 07427 9. 334795 8. 930761 7. 904984 9. 465029 9. 175384 7. 806902 7. 82204 8. 142958  
2. 754406 1. 749449 2. 345309 2. 021464 1. 649707 2. 095987 1. 785855 1. 746927 1. 833464  
3. 440537 2. 445105 3. 079231 2. 845332 2. 248775 5. 229509 3. 724832 1. 788229 2. 674828  
3. 631776 2. 783794 2. 878026 3. 507306 3. 186095 2. 76321 2. 347413 2. 571259 2. 609079  
5. 215895 3. 148877 4. 630371 5. 271309 4. 285439 5. 357266 4. 194013 4. 612516 4. 990943  
3. 244344 2. 865397 3. 026019 3. 757493 3. 029393 2. 60546 2. 806411 2. 82846 2. 973534  
4. 058568 3. 862417 4. 724447 4. 207621 4. 397142 4. 121275 4. 327744 4. 67174 5. 40958  
6. 001153 5. 606182 6. 124185 6. 617208 5. 877212 6. 537539 6. 795472 6. 443123 6. 333776  
6. 219336 6. 868604 6. 639085 5. 931016 5. 885204 5. 99881 6. 504448 6. 09101 6. 34476  
7. 376074 7. 11504 7. 225378 7. 171102 7. 165756 7. 064933 7. 2705 7. 093675 7. 286669  
3. 405842 3. 467049 3. 669103 2. 731612 3. 405487 3. 505413 3. 069528 4. 039069 3. 383664  
0. 91553 1. 398099 1. 083843 1. 169395 1. 236068 1. 016711 0. 906495 0. 755224 2. 498168  
2. 881984 3. 431368 2. 920617 2. 702055 4. 933482 2. 989132 3. 13556 3. 162379 3. 595778  
5. 464134 5. 358375 5. 209748 5. 089241 6. 188186 5. 77471 5. 795023 4. 932073 5. 601883  
2. 133122 1. 772297 2. 041318 1. 634072 1. 745396 2. 002487 2. 204041 1. 094967 0. 953269  
4. 981597 5. 711604 4. 948816 6. 778016 1. 971383 3. 92883 2. 619874 3. 502305 3. 505088  
1. 502762 1. 288462 1. 347682 1. 261674 1. 126693 4. 422856 0. 902546 1. 272508 1. 826971  
6. 468479 6. 952044 6. 730101 6. 741784 6. 495333 5. 68529 7. 497693 7. 293711 7. 295397  
5. 807216 6. 718628 7. 698207 5. 457828 7. 25904 4. 130674 6. 590746 5. 960189 6. 622516  
7. 887171 8. 185827 7. 868837 7. 320361 8. 101678 7. 41311 8. 017744 8. 218811 7. 927039  
2. 067593 1. 875863 1. 485854 2. 225064 1. 737633 1. 895058 3. 037617 2. 045966 2. 507951  
5. 2185 4. 731161 5. 083112 5. 473304 4. 743463 4. 19142 4. 603892 4. 064986 4. 143238  
2. 129819 2. 683864 1. 369508 1. 497639 1. 219425 2. 262255 2. 902736 1. 576092 1. 386169  
4. 606432 4. 134932 4. 600023 5. 020628 3. 730759 3. 358716 5. 733041 3. 900928 3. 470872



1. 657663 1. 834466 1. 774561 1. 636332 1. 167497 1. 742486 1. 821292 1. 89569 1. 677588  
9. 741829 7. 012062 10. 02148 9. 555297 10. 35821 9. 420435 9. 787386 9. 99738 9. 28617  
5. 873908 7. 01546 7. 511264 6. 311415 6. 3269 5. 481664 6. 259788 6. 658038 6. 312193  
1. 846374 1. 990068 1. 257618 1. 851146 1. 183149 1. 683203 1. 391845 1. 341556 1. 245794  
4. 82866 5. 188953 4. 005434 4. 219157 5. 056021 5. 20623 5. 277647 5. 889049 5. 435063  
4. 909048 5. 54992 5. 871023 4. 946826 4. 511221 4. 402463 4. 79673 4. 861363 4. 970023  
1. 007822 0. 895577 1. 542846 1. 803696 1. 329309 1. 369298 1. 225977 1. 122207 1. 8919  
4. 569845 4. 82432 4. 869947 4. 927733 5. 453899 5. 24863 5. 480442 4. 741027 6. 066379  
5. 090339 5. 747499 5. 56724 5. 925878 6. 392904 5. 939315 5. 843036 5. 29339 5. 552334  
7. 908218 6. 956776 6. 459258 6. 862268 7. 033287 7. 14004 6. 577161 7. 054193 6. 369576  
2. 145412 3. 037463 2. 647372 2. 222879 3. 350582 1. 869182 2. 814189 2. 51584 3. 380695  
3. 141653 2. 880655 4. 019675 2. 849802 2. 453862 1. 901097 1. 772675 2. 060841 2. 304004  
1. 117378 1. 192128 1. 546756 1. 26638 1. 426514 1. 354939 1. 379422 2. 065252 1. 625018  
4. 688776 5. 216117 4. 614934 4. 672707 5. 107913 5. 655156 4. 250711 4. 576714 4. 667421  
2. 302467 1. 668765 2. 235072 2. 244515 1. 967261 1. 521896 1. 256722 2. 908375 2. 480347  
10. 49208 10. 26464 10. 32703 10. 92211 10. 26447 10. 61245 10. 05436 9. 915306 10. 47046  
11. 12833 11. 40077 11. 24268 11. 22926 11. 44992 11. 31215 10. 56097 10. 90863 10. 87853  
4. 04921 3. 460706 3. 337553 2. 940704 3. 489781 4. 087226 3. 625296 3. 576246 3. 023319  
1. 908712 0. 954562 3. 1043 1. 723909 1. 524405 2. 464362 2. 267791 1. 080868 1. 09603  
1. 447207 1. 651736 1. 455408 1. 599096 2. 086537 1. 59925 1. 610953 1. 844589 1. 729535  
1. 221269 1. 71376 1. 448333 1. 635989 2. 042742 1. 046543 1. 11289 1. 338019 1. 470245  
2. 560103 2. 158617 2. 301124 2. 429048 2. 467898 2. 383084 2. 065106 2. 257746 3. 319177  
4. 844041 5. 619114 5. 740103 5. 754018 5. 47716 4. 489585 4. 687725 3. 886465 2. 920153  
1. 777802 2. 482278 2. 926281 2. 157971 1. 833544 1. 506817 1. 325947 1. 659964 1. 494808  
10. 87412 10. 61117 10. 81949 10. 81467 10. 77586 11. 44798 10. 5034 10. 54515 10. 81399  
7. 114036 8. 477414 6. 738595 9. 133474 9. 090429 8. 410542 7. 878132 8. 174054 6. 862882  
2. 634656 5. 082927 4. 019972 5. 184551 4. 636929 4. 861051 4. 96714 5. 500746 5. 428295  
10. 98207 10. 71347 10. 71194 11. 26515 11. 13201 11. 14115 10. 71204 10. 6438 10. 65238  
2. 495648 2. 277099 2. 451276 2. 061174 2. 614919 3. 616952 2. 6159 2. 761088 2. 065238  
4. 119683 4. 228566 3. 911421 4. 169302 4. 12434 4. 649755 3. 423555 4. 042016 4. 534529  
5. 55474 6. 088343 7. 401601 7. 144476 7. 221199 6. 867395 6. 811268 6. 092819 6. 725809  
4. 845709 3. 781987 5. 322862 6. 061586 3. 991759 5. 752544 5. 882029 6. 189903 4. 227398  
9. 977087 10. 12869 10. 07977 10. 72424 10. 24001 10. 86601 10. 12167 10. 14134 10. 48694  
4. 938007 5. 438044 4. 157978 5. 063817 2. 858746 4. 282209 3. 064124 4. 106486 5. 762304  
6. 028561 6. 455363 6. 938232 6. 906683 7. 272558 6. 570349 6. 946976 6. 56617 7. 120356  
6. 755954 7. 178049 6. 621304 7. 65952 7. 596007 7. 432083 6. 492084 6. 631037 6. 158991  
5. 934876 5. 01488 5. 33667 6. 336046 5. 839248 6. 073909 6. 051458 5. 680398 6. 024668  
11. 37702 11. 56625 11. 57471 11. 36502 11. 37649 11. 58656 11. 1449 11. 0754 11. 13024  
2. 84251 3. 199863 2. 423299 3. 200101 3. 630791 2. 689686 3. 207505 2. 604341 3. 028802  
11. 80449 11. 77635 11. 59559 11. 7042 11. 78875 11. 95627 11. 42854 11. 45173 11. 38068  
10. 84147 10. 76732 10. 6007 11. 08356 11. 06661 11. 02676 10. 41317 10. 47267 10. 30138  
4. 073886 3. 818252 3. 718041 3. 602583 3. 979915 3. 155741 3. 156811 3. 223186 4. 134532  
2. 987038 2. 484362 2. 895282 3. 035063 3. 347574 3. 534033 3. 16079 3. 571626 3. 745878  
3. 145033 4. 303084 4. 953876 4. 358157 4. 501186 5. 820276 4. 119748 4. 004584 4. 658063  
5. 790701 5. 69161 5. 459792 6. 413928 5. 524193 6. 455887 5. 041864 5. 719546 5. 49117  
2. 24531 4. 153949 4. 323734 2. 990696 2. 359998 2. 538175 3. 170783 3. 283989 2. 148359  
6. 781665 7. 051782 6. 519767 6. 568305 6. 510996 7. 809664 6. 131161 6. 386213 6. 47125  
8. 512081 8. 653279 8. 325864 8. 085723 8. 734026 8. 546307 7. 972594 8. 382713 8. 505362  
8. 522359 9. 150748 8. 777265 9. 240253 9. 400283 9. 400909 9. 061461 8. 859097 8. 651341  
5. 190643 5. 807404 5. 43158 5. 215625 5. 892666 5. 372124 4. 46874 5. 979264 5. 424777  
11. 8566 11. 81779 11. 71582 11. 72046 11. 80873 11. 73795 11. 59994 11. 48081 11. 2477

7. 4269 8. 715782 8. 394848 8. 763177 7. 658137 8. 088212 7. 274017 7. 946168 7. 935096  
4. 475784 1. 22215 2. 640418 2. 216296 2. 488675 1. 049924 0. 876491 1. 967921 1. 04816  
5. 64922 5. 242388 6. 086855 5. 860396 6. 274811 6. 693864 5. 275141 6. 881844 5. 741318  
2. 487422 3. 335017 3. 278524 1. 943028 3. 763992 2. 328444 2. 745674 2. 236558 2. 325991  
4. 8649 4. 365784 5. 756254 6. 685193 5. 597487 6. 242425 6. 144151 6. 412177 5. 604063  
4. 134372 3. 652558 3. 610943 5. 308528 4. 304424 4. 45454 3. 86512 3. 712773 4. 287998  
9. 350357 9. 661399 9. 472585 9. 365884 9. 431355 9. 425067 9. 831247 9. 651796 9. 70173  
8. 834009 8. 581225 8. 812697 9. 080338 8. 718608 8. 912269 9. 265459 9. 404833 9. 108696  
6. 133129 6. 502521 5. 731571 5. 928735 6. 035184 6. 303369 5. 560794 5. 276931 6. 152267  
2. 845245 3. 05403 3. 906708 3. 606378 3. 634548 2. 690631 3. 001769 2. 556616 3. 930558  
4. 452144 3. 799196 3. 913134 3. 765118 3. 551053 3. 237957 3. 737261 4. 443772 4. 148676  
1. 505403 1. 165665 2. 241343 2. 16797 1. 765529 1. 678706 1. 15995 1. 507457 1. 19232  
5. 816434 3. 81051 4. 89599 5. 03294 5. 54899 5. 236926 5. 244513 4. 920141 4. 474241  
2. 339508 1. 507224 1. 638005 2. 589617 1. 859897 1. 699212 1. 726441 2. 274443 1. 319785  
5. 210043 5. 647041 4. 891687 5. 77381 5. 211314 5. 411129 5. 925428 5. 580231 5. 143257  
5. 517385 5. 497984 5. 703832 5. 380648 5. 634155 5. 546409 6. 206832 5. 677645 6. 033806  
2. 119431 8. 298558 7. 998196 1. 748311 0. 683336 8. 573303 7. 746189 2. 002878 7. 546322  
1. 376907 1. 170111 0. 996803 1. 118888 1. 179882 1. 242132 1. 069459 1. 226532 1. 44415  
1. 527256 0. 970973 1. 963692 1. 303495 1. 812438 1. 850277 1. 830625 1. 700795 1. 725245  
2. 356105 1. 725225 1. 467751 2. 811961 2. 097634 2. 805396 1. 500072 2. 392717 1. 672086  
1. 297745 2. 966973 1. 265069 1. 369879 1. 787649 1. 680505 1. 145199 1. 591634 1. 350956  
10. 50086 10. 76647 10. 61117 10. 22199 10. 53599 7. 578108 6. 68074 8. 607871 8. 099957  
10. 10321 9. 871447 10. 17756 10. 44146 10. 32483 11. 01848 9. 935431 10. 22964 10. 81233  
2. 451198 3. 789107 5. 657367 3. 976765 5. 944113 3. 304788 2. 411259 2. 461572 1. 443336  
1. 261375 2. 964988 1. 929993 1. 645565 1. 759241 2. 252174 1. 524995 1. 9118 2. 323624  
1. 451794 0. 728822 1. 578093 1. 165486 0. 802423 1. 276303 1. 337237 2. 024349 1. 964608  
2. 562174 5. 319084 5. 992771 4. 825261 2. 888191 5. 2151 2. 823773 3. 774461 2. 414737  
9. 56793 9. 63678 9. 47981 9. 738103 9. 671624 10. 1008 9. 538173 9. 472531 9. 779305  
6. 201808 5. 592773 4. 55456 6. 566817 4. 017991 3. 556915 3. 113065 4. 437057 4. 221014  
2. 464342 3. 070628 3. 126684 2. 467404 1. 747834 1. 343116 1. 896732 1. 641792 1. 735683  
3. 422104 3. 429216 3. 16508 3. 116421 2. 745815 3. 560459 3. 484915 4. 204254 3. 866606  
4. 160652 3. 721672 4. 179273 3. 045106 4. 437968 3. 740556 4. 272834 4. 67837 4. 995023  
1. 151525 1. 63119 1. 261321 1. 800999 0. 896062 1. 241314 0. 991459 1. 395144 1. 312743  
2. 41183 1. 55164 2. 063439 2. 136066 1. 476121 1. 408659 1. 538786 1. 451909 1. 096478  
3. 808289 3. 476899 2. 728232 5. 139153 1. 868048 3. 115627 2. 095112 1. 980255 1. 679054  
2. 68905 1. 327606 1. 904182 2. 067518 0. 468309 0. 865542 1. 138424 1. 600551 1. 108574  
5. 173537 3. 264476 2. 636096 4. 77073 3. 53848 4. 382602 3. 040715 3. 513582 3. 829174  
4. 597099 3. 67614 2. 631282 6. 093887 5. 695897 1. 180607 1. 596692 1. 282254 1. 23609  
2. 209463 4. 327268 1. 737194 5. 766706 3. 566829 1. 599907 1. 996176 3. 916525 1. 291324  
4. 867474 3. 961599 5. 678722 3. 722856 4. 681987 4. 521422 4. 430103 4. 604394 4. 739078  
4. 421104 3. 16214 1. 508051 3. 262206 0. 951785 1. 457019 1. 047693 2. 042717 1. 486411  
3. 725537 3. 648147 3. 57686 3. 773904 2. 82655 4. 940369 4. 165662 2. 833022 3. 574424  
4. 811829 4. 993559 6. 313745 4. 428748 5. 627607 5. 117933 5. 620801 5. 736814 5. 755677  
5. 854042 6. 353098 5. 673201 5. 234864 6. 02303 6. 377008 6. 367271 6. 642162 6. 525075  
6. 311634 7. 033549 6. 216744 5. 567978 6. 575755 6. 307539 6. 400809 6. 675246 6. 222147  
4. 816409 3. 417331 3. 669948 4. 295753 4. 300622 4. 405642 4. 17088 4. 484642 5. 264807  
5. 200827 5. 672941 4. 934462 4. 675421 5. 743415 6. 317979 5. 214705 4. 860877 5. 069206  
11. 67396 11. 75918 11. 66199 11. 77073 11. 80744 11. 81561 11. 60348 11. 65085 11. 49742  
10. 96934 11. 03475 10. 93815 11. 03078 11. 0748 11. 13142 10. 74864 10. 37673 10. 45531  
4. 265777 3. 622939 3. 631116 4. 071059 4. 21054 4. 322788 3. 756934 3. 926871 3. 630128  
7. 809256 7. 148212 7. 667925 8. 149757 7. 544395 8. 141955 7. 907831 7. 375693 7. 562789

8. 298908 7. 639045 7. 971913 8. 111734 8. 410001 8. 904318 7. 565169 7. 295821 8. 352606  
7. 101408 6. 93647 6. 983141 7. 218246 7. 238431 7. 166142 7. 038353 6. 90107 6. 525373  
10. 31511 9. 948618 10. 04631 10. 63573 10. 38645 11. 25212 10. 28489 10. 05511 10. 18014  
3. 974827 4. 682337 3. 776042 4. 475105 4. 524462 4. 302715 4. 164316 4. 447493 4. 385869  
10. 59748 10. 41597 10. 59891 10. 89392 10. 46287 10. 73602 10. 22537 10. 31967 10. 57527  
5. 953243 6. 266063 6. 787734 6. 611544 7. 156531 7. 358699 6. 403673 6. 215458 6. 586471  
3. 385931 3. 661003 4. 089083 3. 44998 3. 477834 2. 869274 3. 361574 2. 906731 2. 935835  
4. 192266 2. 742305 3. 14464 3. 05929 3. 069159 3. 287621 3. 52138 2. 962465 2. 926863  
4. 65677 3. 983122 1. 10889 4. 635036 2. 535559 4. 550314 4. 078108 4. 596509 4. 294909  
1. 735802 2. 689076 3. 121559 1. 943708 2. 953061 2. 231918 2. 371958 1. 5693 1. 994053  
10. 5454 10. 40358 10. 48252 10. 59177 10. 30056 10. 83845 10. 05973 10. 20604 10. 42677  
2. 36425 2. 865556 2. 213046 3. 47642 2. 425313 4. 32274 2. 944604 2. 840909 3. 058331  
7. 931402 6. 905226 7. 825761 8. 241177 7. 630262 7. 042344 8. 676062 8. 858792 8. 566556  
6. 244186 5. 996109 6. 805369 4. 974459 6. 069938 7. 625414 6. 454029 7. 238014 7. 55989  
7. 320355 6. 434064 7. 622894 7. 162637 6. 092424 7. 018214 6. 501155 6. 434728 6. 725094  
1. 763621 1. 14439 1. 417189 4. 680468 2. 08066 1. 755455 1. 082221 1. 63915 1. 174948  
5. 791137 5. 790078 5. 366056 5. 269516 5. 349258 6. 300581 5. 333577 4. 969866 6. 101816  
2. 473605 1. 788068 1. 512761 1. 743252 1. 959863 2. 17487 4. 203608 2. 569359 3. 144144  
4. 035633 4. 584936 4. 374196 4. 775993 3. 796978 5. 415772 3. 569649 3. 640384 3. 592013  
1. 809596 1. 828696 1. 74457 2. 746504 1. 557719 1. 803981 1. 395978 1. 912654 1. 866409  
8. 164659 7. 398797 7. 357434 6. 585079 5. 852037 6. 786404 7. 826598 6. 985869 7. 541605  
7. 595927 8. 006348 7. 835781 7. 71644 7. 525784 7. 359985 7. 738611 7. 512112 8. 04448  
2. 640709 2. 744186 2. 838884 2. 539252 2. 67094 2. 715955 2. 794672 3. 447125 2. 492725  
8. 521296 9. 269086 8. 465682 8. 317552 9. 049461 9. 344929 8. 860172 9. 387158 9. 205981  
2. 084635 2. 538876 2. 81288 2. 371312 1. 768539 3. 82462 2. 844606 2. 229575 2. 3576  
4. 194057 3. 67932 3. 977864 3. 56015 4. 55324 3. 976745 3. 77664 4. 888473 4. 794815  
5. 627035 3. 93319 6. 397599 5. 873082 5. 388888 6. 473898 6. 139146 6. 307522 5. 92069  
5. 773996 4. 980553 6. 244711 5. 153517 5. 241667 5. 524545 5. 192615 5. 665815 5. 678671  
1. 667703 1. 976854 1. 914856 1. 93789 1. 476867 1. 600412 1. 1486 2. 058146 1. 470749  
7. 269762 6. 870432 6. 773422 7. 042278 6. 800877 6. 0139 6. 945433 6. 680457 6. 347152  
1. 577315 1. 769969 1. 616487 1. 971984 1. 772815 1. 685339 1. 621468 1. 781295 2. 051523  
1. 41969 1. 508267 1. 305134 1. 605479 2. 345776 1. 314953 1. 369401 1. 545659 1. 606006  
3. 993822 4. 157853 5. 104012 3. 861235 5. 221535 2. 04559 2. 921534 2. 278862 2. 442877  
5. 09354 4. 045887 4. 271156 4. 013394 3. 461455 7. 157433 3. 905726 4. 308895 4. 136836  
8. 661701 8. 572703 8. 813548 7. 892497 8. 654574 7. 507769 8. 772312 9. 184253 8. 697779  
6. 310573 6. 444715 5. 205085 6. 593988 6. 060073 7. 891406 6. 437873 6. 079204 6. 322463  
2. 362891 3. 265956 3. 221778 2. 96595 1. 535026 2. 324245 1. 860795 3. 393432 4. 837748  
7. 077662 8. 179173 7. 951462 7. 755601 8. 314583 7. 55718 8. 791118 8. 203151 8. 984271  
1. 076142 2. 426749 1. 744507 1. 893196 1. 805673 1. 913903 1. 516898 4. 040273 2. 379931  
9. 217271 9. 156818 9. 197491 9. 513549 9. 310672 9. 370575 9. 670126 9. 463634 9. 518302  
3. 797771 2. 072924 2. 097752 3. 196243 3. 131124 2. 306762 3. 352295 2. 201839 3. 1485  
8. 241715 5. 148922 8. 945432 7. 895222 9. 23488 8. 785062 6. 181524 7. 113656 7. 175085  
1. 947016 2. 247199 1. 762858 2. 299039 2. 258269 2. 307559 1. 811296 2. 335935 2. 11352  
7. 360373 3. 504061 8. 234691 8. 102185 7. 713053 8. 098725 5. 660762 6. 414442 7. 049704  
8. 742747 9. 093991 8. 871213 9. 440445 8. 581812 10. 0782 9. 94332 9. 434857 9. 319958  
9. 309488 8. 507896 8. 81698 9. 588569 9. 164238 10. 43302 9. 596919 9. 453264 9. 527918  
4. 873673 5. 556015 7. 133632 6. 211568 7. 23777 5. 047963 3. 481229 4. 553667 4. 935384  
4. 17275 4. 53713 4. 356646 4. 865606 4. 976986 4. 774184 4. 975464 4. 786863 4. 731097  
2. 282695 2. 327665 2. 83283 1. 879099 2. 233038 2. 576618 1. 551347 1. 67846 2. 221785  
3. 847588 3. 342858 5. 198874 4. 744542 2. 744737 2. 766029 1. 831316 5. 111443 3. 369894  
1. 140423 1. 305612 3. 827907 4. 508659 1. 653263 7. 112219 2. 231902 1. 628504 1. 216649

1. 729144 1. 827787 1. 443406 0. 623556 3. 612717 0. 829271 0. 989376 1. 217423 1. 140435  
0. 883574 1. 223706 0. 898105 1. 24863 0. 938546 1. 284554 0. 600023 1. 226614 0. 947639  
7. 139774 7. 638371 7. 390115 7. 150461 6. 893099 7. 111927 7. 02902 6. 873135 7. 048604  
6. 803112 7. 168426 7. 164002 7. 145248 7. 470066 7. 000632 6. 748079 6. 67863 7. 027065  
2. 415944 2. 750731 1. 966233 3. 557869 3. 576301 3. 559703 2. 998246 2. 776447 2. 706348  
7. 049238 5. 694245 6. 72925 6. 588824 5. 321693 5. 594035 5. 331964 4. 092256 4. 243902  
3. 322672 3. 823093 3. 429908 4. 593485 3. 921683 3. 272891 3. 904588 3. 49122 3. 293522  
6. 34778 6. 170313 6. 082 6. 235247 6. 090033 7. 552041 5. 393943 5. 228626 5. 003512  
3. 581867 4. 499759 4. 881674 4. 599541 4. 599671 7. 177375 5. 201642 3. 886786 5. 17405  
3. 232732 1. 965596 2. 458919 3. 11939 2. 095374 3. 399208 3. 011702 3. 244269 2. 911694  
6. 231635 6. 969506 6. 504771 5. 968162 6. 913188 7. 013189 7. 195863 6. 491336 6. 649961  
3. 541714 3. 799952 4. 645336 2. 006524 3. 014978 2. 672775 3. 393914 2. 154802 3. 406462  
6. 899955 7. 042175 6. 383242 7. 466333 6. 583254 7. 280654 7. 966639 8. 230432 7. 91415  
2. 667948 2. 799168 2. 045074 3. 059038 2. 645839 3. 854125 2. 538798 2. 989242 4. 090583  
1. 974149 1. 316538 2. 017029 3. 258849 2. 215406 1. 980181 2. 194164 1. 606045 1. 522006  
9. 343501 9. 378095 9. 233432 9. 022079 8. 711346 9. 159959 8. 718159 8. 051053 7. 68569  
5. 666393 6. 0791 5. 782072 5. 745396 5. 948918 6. 346081 5. 948585 6. 655709 6. 848267  
3. 476701 3. 845585 3. 946245 3. 628948 4. 186776 3. 785121 4. 324533 4. 832337 4. 492374  
6. 649004 7. 098102 6. 189415 7. 138462 5. 709607 7. 100788 6. 516107 6. 739294 7. 41883  
6. 85451 7. 386545 6. 734294 6. 812696 7. 144059 6. 396937 6. 434591 6. 181135 6. 717755  
5. 615549 5. 618919 5. 09649 5. 054099 5. 122307 5. 283115 4. 822311 5. 352944 6. 156924  
7. 860618 7. 434478 7. 880765 7. 660315 8. 310244 7. 009606 7. 680008 7. 624077 7. 734809  
6. 25886 6. 972366 6. 480752 7. 117493 6. 635376 6. 154294 6. 668305 6. 766173 6. 540696  
2. 935716 1. 793922 1. 031957 1. 376764 1. 636536 1. 546509 1. 362132 2. 127659 1. 012961  
0. 839475 1. 319732 0. 636514 1. 06052 1. 062347 1. 13044 0. 774995 1. 449117 1. 815523  
1. 287893 1. 555147 1. 049259 1. 607138 0. 793563 0. 690761 1. 065999 1. 956742 2. 493996  
6. 111673 5. 785941 5. 966511 6. 278162 5. 29715 5. 373163 7. 055471 6. 050582 6. 897027  
2. 820937 2. 914146 2. 824149 3. 480845 2. 493559 2. 538177 3. 64157 3. 996361 3. 801464  
4. 445273 3. 859649 4. 710899 4. 0973 3. 98291 4. 36349 4. 268948 4. 140839 4. 159625  
3. 816846 5. 563545 4. 706858 4. 891964 6. 151995 3. 899427 3. 362988 3. 899102 3. 914344  
1. 96873 0. 998579 0. 936216 1. 735945 0. 985432 1. 659702 1. 201772 2. 464075 0. 995718  
1. 723369 1. 756916 2. 185869 2. 468992 1. 772593 2. 684097 2. 37749 1. 745987 1. 850122  
1. 515018 2. 891513 2. 345564 1. 892621 0. 976281 2. 144166 1. 42714 1. 644709 1. 609118  
2. 430329 2. 71852 2. 994892 3. 156764 4. 086 2. 505471 2. 595518 2. 858774 3. 790716  
3. 342448 3. 25447 1. 2079 3. 602568 1. 645948 2. 760066 1. 225918 1. 717244 1. 601601  
2. 932416 3. 340175 2. 186447 2. 382763 1. 982868 2. 011776 2. 281319 2. 23389 2. 87607  
2. 977768 2. 477601 2. 586005 2. 402142 3. 617796 4. 435263 3. 287622 2. 918158 4. 1785  
1. 545548 1. 574968 1. 564068 1. 634437 1. 589132 1. 985356 1. 352112 1. 324204 1. 327588  
4. 12318 5. 621194 4. 6772 5. 242994 5. 858905 2. 567314 5. 581941 4. 769704 3. 880106  
2. 15174 2. 095003 1. 737768 1. 264464 1. 398313 1. 698464 1. 263622 1. 273829 1. 501744  
3. 235372 4. 1107 4. 621524 2. 969774 4. 4554 4. 74158 3. 500597 3. 928996 4. 487591  
1. 608348 1. 892204 1. 893423 2. 124641 2. 761825 1. 311105 1. 688336 1. 853576 1. 98326  
4. 431927 5. 456274 4. 987024 5. 579379 3. 389707 6. 063626 4. 043702 3. 616747 5. 768421  
4. 217713 3. 483733 4. 940366 3. 896557 4. 869928 4. 283589 2. 620197 3. 213747 3. 202669  
2. 786644 3. 071648 3. 209966 2. 858394 3. 814747 3. 128255 2. 878679 3. 089685 2. 583833  
9. 843189 8. 7887 9. 218674 9. 143398 9. 228476 9. 7649 11. 17173 11. 14513 10. 82842  
6. 514358 2. 936877 6. 308862 6. 014363 4. 168133 4. 072655 2. 964253 3. 085298 3. 809737  
5. 881739 5. 248974 6. 816786 6. 23838 5. 701257 5. 389434 5. 998113 6. 668666 5. 750092  
8. 200288 8. 729237 8. 211712 7. 749745 8. 169917 8. 291253 8. 019853 7. 494289 7. 929668  
3. 158033 2. 002387 2. 992158 2. 739995 3. 090136 3. 92836 3. 003788 4. 668252 2. 639728  
2. 107931 2. 586767 1. 852658 2. 493403 2. 014954 2. 307007 2. 085904 1. 304619 2. 028837

3. 623383 1. 902902 1. 224364 1. 87491 2. 238954 4. 394671 1. 927492 2. 043833 2. 53329  
1. 06615 1. 568448 2. 122118 1. 528309 1. 643897 1. 729551 1. 547092 1. 134497 1. 54609  
8. 2959 8. 717081 5. 974834 8. 975225 6. 757544 8. 87637 8. 812912 7. 906133 8. 493598  
1. 922861 2. 03693 1. 896235 1. 700106 2. 289141 3. 048105 1. 911892 1. 80822 1. 932024  
8. 208685 7. 885587 7. 803384 8. 204742 8. 261247 8. 383811 8. 058177 9. 462282 8. 880684  
4. 471475 1. 88915 1. 192815 4. 346403 5. 522645 6. 808973 3. 781412 5. 11305 6. 423822  
7. 480649 3. 857117 4. 461482 5. 838579 6. 373357 8. 109402 6. 098514 6. 641283 7. 77678  
1. 178931 1. 540104 1. 330309 1. 987438 1. 93616 0. 750887 0. 878204 1. 665602 3. 942291  
1. 873373 0. 794565 1. 306533 1. 463805 0. 829363 3. 50329 0. 83563 1. 168386 1. 724654  
0. 678509 1. 232927 1. 649999 0. 914598 1. 543722 0. 909588 0. 981582 2. 082995 2. 30848  
3. 264255 3. 652192 2. 693502 2. 830284 4. 598423 3. 685884 4. 129114 2. 830038 5. 399722  
10. 59997 10. 06421 9. 478423 9. 151265 9. 773652 9. 859532 9. 792355 7. 594007 7. 234647  
2. 09356 1. 663108 1. 316571 1. 895411 1. 912596 1. 436115 1. 370124 1. 648929 1. 69891  
2. 358798 2. 022333 2. 388288 2. 163533 1. 627527 2. 58328 2. 212294 1. 847198 1. 864437  
4. 679855 3. 911952 3. 907523 3. 269555 4. 334858 4. 367084 4. 155032 2. 483584 3. 934539  
3. 048805 4. 154824 3. 61478 2. 947657 2. 692777 8. 448598 3. 439594 2. 741878 6. 391217  
2. 231532 3. 847178 2. 442532 2. 256455 2. 92421 2. 728567 2. 846349 4. 369743 2. 087947  
4. 516357 3. 656688 3. 84762 6. 962708 4. 005105 9. 739833 2. 337775 5. 921225 7. 55376  
1. 498277 1. 637022 1. 869157 2. 715585 1. 530468 3. 892146 1. 849815 1. 211354 2. 691614  
1. 891763 3. 741166 3. 663534 2. 200181 2. 317847 5. 121903 3. 1223 3. 195906 1. 676214  
1. 195537 1. 063404 1. 863512 2. 836127 1. 780654 1. 037432 3. 108128 1. 618587 1. 661982  
5. 820775 5. 044331 5. 622231 5. 343558 5. 747721 5. 200767 5. 017515 6. 083477 5. 085281  
1. 847423 1. 998827 1. 920905 2. 237981 2. 216687 1. 752763 1. 904336 2. 138247 2. 288572  
1. 536797 1. 733187 1. 474396 3. 462788 2. 844984 5. 417287 3. 144637 2. 6628 3. 183714  
2. 056141 4. 873447 5. 205482 4. 293727 5. 03991 3. 742347 2. 845676 5. 06093 6. 527374  
2. 197456 1. 5698 2. 556551 1. 254596 1. 701196 1. 920867 1. 858344 1. 396592 1. 899122  
1. 1662 0. 870967 1. 121848 1. 17896 1. 221447 1. 076786 1. 893663 2. 597476 1. 362645  
6. 915899 5. 568759 6. 835661 6. 19343 5. 809924 7. 272134 6. 601822 7. 800459 8. 10347  
3. 84707 3. 510888 4. 044103 4. 098648 4. 258561 5. 068901 4. 629394 4. 151945 4. 982389  
4. 310745 5. 51939 5. 747147 4. 880759 4. 917061 4. 944928 5. 938215 5. 007464 5. 03849  
2. 265041 1. 939777 1. 955411 2. 819341 2. 518447 2. 501917 1. 812857 2. 142093 2. 004469  
5. 501941 5. 283519 6. 830548 5. 420302 5. 070926 6. 046413 4. 850673 4. 374306 4. 159794  
8. 033743 8. 618932 8. 579271 8. 595124 8. 832095 8. 449604 8. 872628 8. 81959 9. 368747  
9. 418159 8. 438145 9. 481591 10. 154 8. 991679 9. 64464 9. 675901 9. 957574 9. 386841  
5. 937724 6. 385622 6. 316359 6. 554964 7. 6548 7. 101293 7. 155373 7. 001911 6. 167778  
5. 412771 5. 227155 6. 25657 5. 588712 5. 824993 6. 265591 6. 216749 6. 642967 5. 990455  
4. 80651 4. 98709 4. 295421 5. 204712 5. 38671 5. 630919 6. 312603 5. 5373 5. 328253  
5. 069171 3. 74314 3. 549332 3. 571042 4. 600398 4. 258283 4. 442323 4. 3824 4. 903741  
6. 769518 7. 637483 6. 967531 7. 316056 7. 724775 6. 534006 7. 524285 7. 324794 7. 229889  
5. 058958 5. 913839 4. 52263 5. 208527 6. 310958 8. 124414 6. 037825 5. 109363 6. 162007  
6. 287507 6. 335668 6. 147731 5. 701396 6. 223323 7. 312962 6. 662445 7. 121919 7. 157574  
3. 17925 2. 718906 4. 102197 3. 852647 3. 221921 3. 920207 4. 490774 5. 061181 4. 030117  
5. 467697 5. 248015 4. 47831 5. 564274 4. 926934 4. 936667 4. 870382 4. 407154 4. 40192  
3. 697134 3. 276526 3. 487334 3. 91744 3. 547817 4. 549761 3. 873025 4. 192667 4. 159001  
5. 990182 5. 217885 5. 267856 5. 67058 5. 595677 6. 864188 6. 366614 5. 956812 5. 753545  
4. 154845 4. 30747 4. 010147 4. 183922 4. 200159 3. 128791 5. 589437 3. 813331 5. 593079  
5. 806596 5. 473282 5. 761501 4. 822477 5. 33938 5. 033815 5. 094375 5. 333629 5. 931369  
4. 485755 4. 8581 3. 615299 4. 123529 4. 791085 4. 728987 5. 260683 5. 135228 4. 982294  
5. 677736 5. 694633 5. 299213 5. 842289 6. 936269 5. 73445 6. 01436 4. 836164 6. 056641  
2. 039184 2. 668289 2. 304054 1. 36169 2. 468128 2. 334438 1. 890825 1. 646965 1. 76826  
5. 789263 6. 186521 5. 427376 5. 029864 5. 770904 4. 774688 5. 849991 5. 706769 4. 830973

1. 119906 1. 470387 1. 425949 1. 54829 1. 275319 1. 761129 1. 657374 1. 741641 1. 591365  
5. 092481 4. 985957 4. 956375 5. 591436 6. 027979 2. 701497 4. 774501 6. 015755 5. 783126  
4. 02911 3. 778163 3. 807775 4. 057622 3. 635189 3. 442905 3. 781589 4. 610774 3. 523924  
3. 868339 3. 419324 4. 115513 2. 22449 2. 309589 1. 931687 2. 139953 2. 667558 3. 383655  
8. 896956 8. 336897 8. 362886 8. 924232 8. 38324 8. 247931 8. 591959 8. 44797 8. 023792  
1. 878765 2. 777242 2. 22674 2. 084316 2. 397347 2. 641793 2. 524764 2. 503994 2. 517173  
1. 942458 2. 194107 1. 502201 1. 532984 1. 70531 2. 79621 2. 247952 2. 296773 2. 681599  
3. 219092 3. 95005 1. 804787 1. 917773 1. 696688 1. 596372 4. 349033 1. 891283 3. 9063  
4. 993824 6. 384389 6. 165056 5. 22156 6. 413917 5. 408364 6. 142452 6. 462089 6. 660937  
7. 251629 7. 273603 7. 753892 6. 184724 6. 750716 7. 675804 6. 897432 6. 80032 5. 599893  
8. 056143 7. 963664 7. 772599 7. 218623 7. 620214 6. 51531 7. 36157 7. 08234 7. 41442  
3. 302487 4. 367941 4. 43862 4. 114392 4. 381939 3. 160733 4. 776875 3. 725037 3. 847406  
2. 81882 2. 873513 3. 06936 2. 704572 3. 494864 2. 534755 3. 083703 2. 51344 2. 452556  
2. 390787 2. 116166 1. 978779 2. 398163 2. 193991 2. 288984 1. 837948 2. 14977 1. 509063  
2. 830413 1. 357058 2. 056224 1. 182353 1. 955604 1. 776459 1. 411864 2. 50137 2. 198377  
3. 633115 3. 850558 3. 83833 3. 807788 3. 843744 3. 786103 4. 063652 3. 804749 4. 518508  
3. 034628 4. 228445 4. 288383 2. 837765 2. 704332 3. 855513 4. 203489 4. 83589 3. 050984  
2. 75759 1. 301504 1. 61547 1. 770899 1. 59042 1. 368861 1. 845352 1. 255406 1. 453509  
5. 364636 5. 081908 5. 428238 5. 225114 5. 451961 4. 842456 5. 547078 5. 304381 5. 165434  
6. 791648 7. 076004 6. 898751 6. 546163 6. 926231 7. 143572 6. 73209 5. 879634 5. 661582  
3. 373204 2. 303956 2. 961597 2. 769649 2. 630329 1. 746767 1. 883769 2. 487606 3. 74884  
6. 423054 6. 650126 6. 368733 6. 757296 6. 424259 6. 47394 6. 527277 6. 570375 6. 064663  
1. 581843 1. 56452 3. 538489 1. 972877 1. 73119 2. 54386 2. 561333 2. 306718 1. 825544  
6. 994488 6. 724618 6. 962106 6. 107867 6. 379257 6. 607474 6. 556787 6. 493703 5. 836228  
3. 004482 2. 484808 3. 36534 3. 61381 3. 291341 2. 437057 1. 989026 3. 336094 2. 796756  
4. 206774 3. 437955 4. 708711 4. 286949 4. 575513 4. 932672 4. 505781 4. 498941 4. 675792  
3. 927447 4. 616259 4. 316442 4. 474392 4. 930698 4. 281336 4. 57364 3. 725171 4. 457655  
3. 205759 3. 435209 2. 953692 3. 075847 3. 511301 4. 535004 3. 538756 3. 805521 4. 184294  
4. 128923 2. 91912 3. 592677 3. 902149 3. 274042 3. 520335 2. 676532 4. 59172 2. 755928  
2. 380534 2. 226248 2. 270446 2. 69777 2. 545446 3. 007551 3. 041024 3. 538729 3. 203589  
2. 234271 2. 116267 2. 758574 2. 115923 3. 207864 2. 562896 2. 464836 2. 079264 2. 7802  
2. 389001 2. 182722 2. 862202 2. 175085 3. 041143 2. 556888 2. 369627 2. 208159 2. 245906  
1. 102615 1. 037546 1. 531896 1. 510228 1. 266306 1. 131436 1. 045759 1. 710377 1. 625726  
3. 104512 3. 219884 3. 179144 4. 280565 3. 420663 3. 692158 3. 067412 2. 857197 2. 616133  
1. 733802 2. 158348 2. 480274 1. 771575 2. 007241 2. 513638 2. 138189 2. 51445 1. 831608  
6. 844076 6. 812728 7. 214311 7. 493913 7. 29416 7. 401445 7. 2184 7. 751261 7. 342492  
2. 313647 1. 847707 1. 932116 1. 733068 1. 849451 1. 26838 1. 183617 1. 731493 1. 796853  
6. 299312 6. 800174 6. 532547 6. 418716 6. 504176 5. 264541 6. 235703 6. 125243 6. 59019  
1. 957076 1. 668788 1. 69558 2. 014386 2. 057078 2. 0017 1. 737239 2. 292689 1. 871038  
0. 946735 1. 4456 0. 942816 1. 315686 1. 688012 0. 726888 1. 104756 1. 252007 1. 130953  
1. 636087 2. 47488 1. 708709 2. 558342 1. 701737 1. 821408 1. 855151 3. 069539 2. 064737  
2. 009386 1. 499372 2. 00801 2. 63637 2. 947746 3. 419523 1. 965435 2. 997766 2. 793165  
1. 685673 1. 134626 1. 577651 2. 183367 1. 917482 1. 722275 1. 812065 2. 240539 2. 255458  
1. 950227 1. 910171 2. 267111 2. 074188 3. 215417 3. 301914 2. 428555 2. 465059 2. 320532  
7. 816258 6. 861363 7. 989877 7. 218569 7. 749224 6. 913436 8. 169378 7. 834146 7. 837225  
4. 627461 4. 203796 3. 528044 4. 856417 4. 58159 2. 14218 2. 843218 3. 284588 2. 707534  
3. 687184 2. 803897 3. 823283 2. 477394 3. 838086 5. 344928 3. 663922 4. 033204 4. 765555  
2. 664666 2. 70418 3. 832221 4. 133543 4. 420006 4. 02451 4. 974042 2. 555025 3. 117954  
4. 440458 4. 303048 4. 0971 3. 969066 5. 318885 3. 855351 3. 506255 5. 313755 4. 607523  
2. 01856 0. 991076 1. 006341 1. 562988 1. 137655 1. 055506 1. 257488 1. 608568 0. 982386  
2. 165331 1. 683807 1. 788311 1. 496539 2. 340833 4. 172819 1. 863407 2. 007498 2. 928029

7. 359204 7. 658323 7. 362771 7. 335215 7. 739995 6. 887316 7. 887283 8. 018368 7. 574305  
2. 3412 2. 359926 1. 980031 1. 511286 2. 39601 2. 496702 2. 036465 4. 338383 4. 749938  
3. 430908 3. 010371 3. 246791 3. 271747 4. 332066 6. 171972 4. 648374 4. 371002 4. 017786  
1. 433793 2. 778217 3. 831497 2. 139037 1. 856339 2. 889464 1. 821154 3. 190159 2. 838225  
3. 865782 3. 464539 3. 734993 5. 088769 3. 980347 5. 534991 3. 858355 3. 807331 4. 050498  
4. 357793 3. 951758 2. 71646 3. 687692 3. 800786 4. 083131 5. 000479 4. 623672 4. 567572  
5. 620803 6. 613102 6. 799233 5. 08552 6. 720924 4. 323686 4. 518608 5. 271394 4. 653438  
7. 14624 6. 929046 6. 608543 6. 621577 6. 957786 6. 319377 6. 380747 6. 462371 6. 204919  
2. 511513 2. 486215 2. 667647 2. 927136 2. 811639 2. 484345 2. 350767 2. 56298 2. 389985  
0. 940604 3. 248113 1. 052076 1. 816721 0. 574193 1. 335481 1. 128986 2. 850866 0. 829297  
6. 077493 5. 318622 5. 554244 5. 845266 5. 717615 6. 444736 6. 455745 6. 343721 5. 950124  
1. 272836 1. 580939 1. 901907 1. 637072 1. 626172 1. 45474 1. 644448 1. 554355 1. 967564  
5. 222535 6. 475993 6. 166645 6. 144553 6. 212567 2. 636217 4. 237103 5. 445901 5. 6631  
1. 259715 1. 453985 1. 700061 1. 143115 0. 94726 1. 493109 0. 998637 1. 837792 1. 329707  
1. 659916 2. 09643 2. 350979 1. 960309 1. 908199 1. 889275 1. 950011 2. 531538 2. 112047  
6. 96111 4. 31244 5. 171443 7. 361605 4. 180644 7. 617038 5. 747819 5. 539304 6. 86325  
5. 032381 4. 657849 4. 536344 4. 460755 4. 922324 6. 019608 5. 259277 4. 804151 5. 942024  
1. 654015 1. 465204 1. 457607 1. 683515 1. 584801 1. 297557 1. 493723 1. 469686 0. 917384  
1. 050902 1. 930741 1. 283149 1. 287926 1. 990932 1. 274019 1. 506309 1. 62489 1. 299126  
5. 47846 5. 809684 5. 379267 4. 699892 5. 594552 5. 199975 5. 69054 5. 127158 4. 446737  
8. 603283 7. 919275 8. 081107 7. 296482 7. 21688 7. 763775 7. 124077 4. 922557 6. 235348  
7. 393573 8. 06066 7. 319418 7. 318431 7. 587025 7. 644755 7. 785265 7. 756766 7. 11282  
3. 872414 3. 659392 5. 165328 3. 769902 4. 367405 5. 362052 3. 71741 3. 652771 4. 299459  
6. 565758 5. 40841 5. 370174 5. 306437 5. 266362 5. 779839 4. 957114 5. 513569 4. 144567  
2. 816108 4. 003802 3. 751333 3. 495398 4. 322569 2. 708396 3. 860734 2. 803504 4. 419239  
4. 353337 3. 589873 4. 197351 4. 602503 3. 953746 3. 284055 4. 761973 5. 58957 5. 828971  
3. 734651 4. 900821 5. 342461 3. 737228 5. 13766 3. 429791 4. 45876 6. 282526 4. 875697  
2. 425124 2. 296737 3. 232277 2. 895318 2. 616679 2. 361553 2. 931232 2. 105979 1. 805452  
1. 544789 1. 896132 1. 818737 2. 010117 2. 306027 2. 095035 2. 257057 1. 903878 2. 135724  
1. 987616 1. 665397 1. 095371 1. 343925 2. 146586 2. 219081 2. 05108 1. 651743 2. 618815  
2. 411005 1. 803345 2. 264732 1. 759019 1. 993399 1. 826929 2. 86964 2. 073266 2. 136582  
6. 487342 6. 011025 5. 25282 4. 857755 5. 598842 6. 090675 6. 79334 6. 675973 7. 063871  
1. 659763 2. 820255 2. 038314 2. 080828 1. 671607 2. 489208 2. 818618 2. 017784 1. 631675  
2. 483491 2. 378886 2. 636044 2. 445623 2. 304846 3. 165656 2. 310561 2. 092455 2. 403876  
1. 908384 1. 636635 1. 804392 1. 159496 1. 523689 2. 195261 1. 429785 2. 425319 1. 492216  
4. 326951 5. 051655 6. 351169 5. 697217 6. 304352 3. 873312 4. 548694 4. 652932 5. 741436  
3. 038647 2. 312767 1. 45377 1. 720172 3. 460555 5. 269829 2. 712312 1. 683131 1. 616952  
1. 975656 1. 95032 1. 014458 1. 909699 0. 918147 1. 384937 1. 737761 2. 655491 1. 917005  
1. 70118 2. 504443 1. 602158 1. 412685 1. 921612 1. 678187 4. 052468 2. 460374 1. 821212  
3. 691253 4. 088674 3. 668181 4. 595091 4. 869207 4. 148018 5. 427145 4. 270081 5. 098642  
1. 778052 0. 884105 1. 600426 1. 768237 1. 694496 1. 429138 1. 442278 1. 711674 2. 202  
5. 804981 6. 369861 6. 287143 6. 511394 6. 386869 6. 102167 5. 899982 5. 988998 5. 907754  
1. 478026 2. 040867 1. 11818 1. 221662 1. 081182 1. 337185 1. 020809 1. 316017 1. 33138  
5. 512434 4. 708848 4. 372113 4. 397355 4. 507489 5. 223357 3. 379563 5. 673371 4. 482499  
7. 81956 8. 013687 7. 993951 8. 218561 8. 229264 8. 72527 8. 496456 9. 030038 8. 798746  
5. 397252 4. 676524 5. 160205 5. 473227 5. 36043 4. 428451 4. 788853 4. 498217 5. 30037  
4. 542227 3. 547528 4. 237831 5. 058762 2. 973999 4. 942704 3. 548317 3. 458554 3. 663744  
4. 512869 2. 529851 2. 703582 3. 280462 3. 576992 3. 228965 3. 659246 3. 246346 3. 824932  
4. 989325 5. 852536 5. 801537 6. 872696 5. 632492 5. 397019 5. 822631 5. 723377 5. 775856  
7. 346321 6. 153999 7. 381464 6. 201746 6. 43729 8. 024138 6. 528521 5. 79521 5. 722571  
7. 538919 7. 099272 7. 143426 7. 624638 7. 78198 7. 164059 8. 823759 8. 851185 8. 546659

1. 649105 1. 313821 1. 751879 1. 74287 1. 822451 1. 159147 1. 504154 1. 415544 2. 229653  
5. 408437 4. 241209 5. 512875 5. 108368 5. 425278 6. 259402 5. 737346 6. 523654 6. 476561  
5. 455436 5. 343534 5. 058845 5. 991391 4. 9792 5. 015058 4. 838852 5. 5923 5. 359554  
1. 034335 0. 889986 0. 764715 0. 855757 0. 810318 1. 091077 1. 882526 1. 136046 0. 627357  
2. 027324 4. 290604 5. 294253 4. 465072 3. 880683 4. 054615 5. 349209 3. 992395 4. 392342  
3. 354063 2. 705489 4. 063109 4. 534826 4. 33682 4. 77436 4. 07194 3. 908985 3. 929841  
2. 572577 4. 85376 2. 156302 3. 388114 1. 919951 1. 805802 3. 029017 1. 782544 2. 373399  
5. 875165 5. 493589 5. 610398 5. 158135 5. 289928 6. 473706 6. 695343 6. 579869 6. 713276  
1. 267966 1. 517144 1. 20178 1. 433485 0. 988565 1. 235057 1. 500124 1. 789781 1. 33467  
1. 455682 1. 416076 1. 12947 1. 326557 1. 081629 1. 11072 1. 079903 1. 134427 1. 202092  
1. 748884 1. 746506 2. 515918 2. 886463 1. 766087 1. 585904 1. 813723 2. 013152 1. 367544  
1. 254894 3. 536364 1. 488949 1. 2276 0. 954781 1. 652353 1. 375969 1. 261559 2. 005118  
2. 561978 1. 997418 2. 24391 3. 137387 2. 221246 2. 886159 2. 730287 1. 736703 2. 090915  
0. 981528 1. 446521 1. 725453 1. 544933 1. 480623 1. 107856 1. 423455 1. 370966 1. 217571  
1. 501703 2. 041047 2. 08372 2. 45348 2. 558228 2. 114106 1. 564877 2. 307939 1. 837991  
1. 403525 1. 690412 1. 925339 2. 705236 1. 419376 1. 307084 2. 001396 1. 617958 1. 546618  
0. 937213 3. 351556 1. 005373 1. 642464 1. 820687 1. 085437 1. 135772 1. 027001 1. 402164  
4. 228744 4. 245455 3. 655946 3. 137883 4. 101868 4. 245381 4. 168727 4. 292911 4. 153925  
4. 495062 3. 184823 4. 345979 3. 476551 4. 626867 4. 187279 4. 634616 5. 028601 4. 287874  
2. 694349 4. 054705 2. 37532 2. 083723 2. 817682 2. 954264 1. 888177 2. 610493 2. 180432  
2. 706384 2. 413325 2. 096867 2. 240068 2. 516049 3. 24187 2. 310112 2. 502712 1. 724226  
5. 159673 5. 663839 4. 803772 5. 542373 5. 853565 4. 738881 5. 030966 4. 78375 4. 928201  
10. 1689 9. 86178 9. 727218 9. 879042 9. 581917 9. 222375 9. 480305 9. 407156 9. 275324  
2. 468512 2. 864321 1. 953059 2. 77906 2. 10444 1. 34058 1. 59643 2. 41832 0. 987042  
1. 979924 2. 083316 2. 624304 2. 552175 2. 237331 1. 318538 2. 724692 2. 798636 1. 604748  
1. 854299 2. 060171 1. 710363 1. 9452 2. 139205 1. 515251 1. 811437 1. 676115 1. 251109  
1. 40818 1. 866996 2. 43085 2. 383114 1. 364418 1. 337667 2. 004218 1. 766145 2. 125995  
2. 539214 2. 247159 2. 018043 2. 726629 3. 843672 2. 477084 2. 803043 2. 859073 2. 348714  
8. 767741 8. 721962 8. 286477 8. 287413 8. 311758 8. 507743 8. 885811 9. 159164 8. 915221  
9. 759164 9. 709418 9. 722902 10. 06398 10. 33514 9. 609846 9. 341837 9. 073146 9. 259086  
7. 643889 6. 32683 4. 690723 5. 894043 5. 662734 7. 163688 4. 508037 4. 118362 4. 863827  
3. 476772 3. 653139 3. 594268 3. 928459 3. 065567 4. 087634 3. 718006 4. 011913 3. 255548  
2. 813318 4. 664033 3. 600721 3. 142738 2. 560493 2. 4568 3. 379979 2. 454162 2. 164291  
7. 816423 6. 855383 4. 740944 6. 853209 7. 798246 5. 866187 4. 728885 6. 941261 7. 511112  
6. 778998 7. 335888 7. 633567 7. 555587 7. 910198 5. 621668 7. 074707 7. 143252 7. 235612  
3. 727994 4. 936784 3. 263737 2. 833976 4. 288089 3. 593801 3. 794101 3. 034961 4. 193127  
5. 830171 5. 706946 6. 305966 5. 665126 6. 82626 6. 270079 6. 848518 7. 440947 7. 607951  
2. 879513 2. 171224 2. 074184 2. 416955 3. 206254 1. 975674 2. 822246 2. 95323 2. 365756  
4. 343295 4. 583226 4. 733608 3. 464425 4. 092486 3. 289594 3. 348939 3. 986195 3. 756347  
2. 10123 1. 699023 1. 377088 2. 629026 1. 467958 2. 312076 1. 77522 1. 563518 1. 555842  
3. 626104 2. 388962 2. 53629 2. 498759 2. 925258 3. 209936 3. 522629 3. 685072 3. 552773  
5. 47092 5. 554503 5. 844803 5. 935056 5. 600659 5. 213452 5. 750878 6. 032286 6. 071182  
1. 867115 1. 665763 2. 250907 2. 146105 1. 861386 2. 101751 2. 042686 2. 139292 2. 076028  
1. 430026 1. 312748 0. 672175 1. 454575 1. 284827 1. 15917 1. 074767 0. 888128 1. 321715  
5. 418321 4. 791083 5. 246455 5. 232572 5. 757992 6. 25349 4. 517485 5. 33029 5. 678718  
3. 088967 2. 66604 4. 111832 2. 377119 2. 995344 2. 102859 1. 886734 2. 135392 2. 363407  
3. 901546 3. 624075 3. 538078 2. 91754 2. 376691 3. 320434 2. 424786 3. 137057 3. 479506  
1. 22089 2. 636715 1. 567107 2. 092028 1. 562916 1. 611559 1. 144679 1. 484427 1. 367809  
1. 318617 1. 155943 1. 313518 1. 948778 1. 0344 1. 617341 1. 365959 1. 307753 0. 88878  
4. 152551 5. 408022 5. 27302 5. 138591 5. 599354 5. 41889 5. 253757 5. 027788 5. 044609  
1. 893629 1. 385484 2. 189786 1. 70726 1. 641905 1. 345178 1. 617234 1. 621121 1. 82472



4. 355576 4. 924265 4. 381562 4. 873749 4. 179241 5. 039351 4. 662765 4. 738792 4. 638361  
0. 792789 1. 143227 1. 917414 1. 153814 1. 314669 1. 103141 1. 769581 1. 309914 1. 227735  
7. 2948 6. 498615 6. 671308 6. 799612 7. 139517 6. 950885 7. 231451 7. 350144 7. 502417  
4. 596689 4. 820661 5. 833918 4. 98466 4. 149544 4. 826888 4. 372034 5. 128534 3. 639055  
1. 968774 1. 669727 1. 867798 3. 259982 1. 752017 2. 665232 2. 524746 2. 545657 2. 884819  
5. 767279 5. 271537 6. 147722 5. 514324 6. 104531 5. 04242 5. 580744 5. 512022 5. 716461  
7. 269342 7. 605043 7. 810426 6. 369461 7. 474619 6. 056581 6. 301226 5. 963465 6. 159171  
3. 934486 3. 030021 3. 73154 2. 752057 3. 588112 2. 93155 2. 470649 2. 823218 2. 280542  
2. 875481 2. 60728 1. 949309 2. 39763 3. 069662 2. 530074 2. 839443 2. 672137 2. 528781  
3. 374961 3. 201663 3. 82651 3. 539009 4. 907443 4. 187852 4. 355697 3. 970468 4. 228003  
1. 626518 2. 848997 2. 292336 2. 969963 2. 519424 2. 790043 2. 666705 2. 434319 1. 162411  
4. 517341 4. 264353 5. 071653 4. 416252 4. 691026 5. 679806 4. 847597 5. 102214 5. 206558  
7. 399608 6. 369845 7. 441862 7. 671955 7. 74521 7. 218885 7. 051249 7. 539093 7. 394851  
4. 837624 5. 929715 4. 707047 4. 29312 4. 897006 4. 980549 3. 917212 3. 695578 4. 169981  
2. 349665 3. 621333 2. 843718 2. 372963 2. 582466 3. 564273 2. 061125 2. 93288 1. 956788  
1. 907494 1. 998082 3. 262493 3. 348393 2. 790588 1. 954755 2. 674886 2. 75936 1. 729203  
6. 819642 6. 426556 6. 45101 5. 774247 5. 992054 8. 383511 6. 560599 5. 998886 7. 041581  
4. 300624 3. 486692 3. 567229 4. 593373 3. 549118 7. 151989 5. 415023 4. 385735 6. 45482  
1. 267031 1. 895997 1. 323398 1. 530045 1. 390823 1. 348222 1. 006725 2. 059424 1. 614614  
1. 112196 1. 398967 1. 418648 1. 191879 1. 335174 2. 19405 1. 285076 1. 578153 1. 779101  
2. 068749 1. 156053 1. 214407 1. 989293 2. 825012 1. 340641 3. 574161 3. 329601 1. 777573  
1. 367201 1. 397495 1. 205368 1. 720217 1. 697967 1. 80022 1. 04677 1. 505886 1. 48089  
5. 692019 5. 658221 6. 619468 6. 792045 6. 792904 5. 050309 7. 037069 7. 19383 7. 070379  
2. 214073 2. 352377 1. 638739 2. 572036 1. 811931 1. 99484 2. 729705 1. 8448 1. 536987  
1. 951441 3. 514628 2. 566881 2. 267405 2. 296091 4. 027175 5. 628938 3. 772814 5. 938515  
1. 516357 1. 322559 2. 404812 1. 342362 1. 539914 1. 468151 1. 851638 2. 282305 1. 842333  
1. 481619 1. 389359 1. 163626 2. 20853 1. 589537 2. 052611 1. 435603 1. 806469 1. 390575  
0. 684436 0. 939101 0. 711655 1. 607399 0. 96434 1. 185737 0. 91862 1. 244447 0. 765797  
3. 45989 3. 624118 3. 3064 3. 373031 3. 838777 3. 187448 3. 402694 3. 625339 3. 528056  
1. 671219 1. 758982 1. 479885 2. 317725 1. 71351 1. 373587 1. 811669 2. 651633 2. 677531  
2. 124689 1. 844212 2. 620953 1. 194146 2. 257741 1. 620902 2. 590784 3. 061608 4. 65724  
2. 719544 3. 065229 3. 714119 3. 409307 2. 81647 3. 044402 3. 108267 3. 48764 2. 426643  
4. 250757 4. 7208 5. 349098 5. 658491 6. 599159 5. 351488 5. 727199 5. 998054 5. 854528  
2. 590821 1. 389273 1. 53694 1. 050101 1. 652921 1. 309036 1. 330141 1. 48242 1. 903088  
1. 038637 1. 112874 1. 175175 1. 800955 1. 370523 1. 960213 1. 512543 1. 913175 1. 226648  
1. 641867 1. 830024 1. 508794 2. 146555 1. 638455 1. 695527 1. 646926 1. 860783 2. 262629  
1. 045293 1. 804178 1. 034125 2. 072532 1. 472282 1. 333633 1. 190101 1. 478167 1. 194862  
2. 271748 2. 210094 3. 218278 2. 753102 1. 94856 3. 250858 3. 500256 2. 922935 2. 032072  
0. 991537 0. 977389 1. 119503 1. 183325 1. 011684 1. 101186 1. 096331 1. 124319 0. 713041  
4. 864731 3. 582985 3. 726748 4. 374174 4. 51088 2. 654418 2. 373864 2. 760059 2. 483945  
2. 737649 2. 755258 2. 026307 3. 382239 2. 349677 2. 241933 2. 921449 2. 618379 3. 558967  
1. 631025 1. 995187 1. 687546 1. 289137 1. 614696 1. 457656 1. 376796 2. 10182 1. 425332  
5. 786985 6. 763349 7. 117411 6. 268448 6. 755759 6. 3194 6. 594454 6. 427795 5. 932355  
2. 057104 1. 73635 1. 608505 1. 496595 1. 478477 1. 676692 2. 344948 1. 357629 1. 743467  
5. 693656 6. 608425 6. 30977 6. 144146 6. 303162 5. 270392 5. 004398 4. 865104 5. 424756  
3. 704054 4. 145688 2. 163457 3. 838754 4. 192412 2. 999567 1. 384152 3. 281075 4. 275119  
6. 136224 6. 033931 5. 463672 6. 662776 5. 709617 6. 465491 5. 650498 6. 035324 5. 912913  
5. 8306 6. 025013 5. 527688 5. 450313 5. 165332 5. 483308 5. 192223 3. 411914 4. 32229  
2. 248148 2. 046437 2. 285268 1. 928612 1. 84984 2. 37254 2. 952727 2. 440405 2. 662282  
2. 65474 3. 395281 3. 361858 3. 621434 3. 018708 2. 970416 3. 450113 2. 807578 4. 20512  
4. 15132 3. 626731 3. 841723 3. 830371 3. 523534 3. 864338 4. 338091 2. 899455 2. 970068

4. 444232 5. 29929 3. 740942 4. 2664 4. 576137 4. 381865 4. 138614 4. 755274 4. 271659  
2. 93841 2. 492287 3. 483482 4. 078327 3. 052074 3. 752548 3. 086836 3. 110883 2. 640117  
0. 793542 0. 917864 1. 048044 1. 278191 1. 401637 1. 501862 1. 076551 0. 963362 1. 311307  
3. 288924 4. 177851 3. 750325 3. 719545 3. 511596 3. 184705 3. 226666 3. 267312 3. 202763  
8. 280146 8. 532945 8. 796589 8. 143124 8. 494796 8. 1186 7. 99336 8. 072886 8. 122175  
1. 460404 1. 551047 1. 075892 2. 034465 0. 95438 2. 267985 2. 440491 1. 413743 0. 986981  
3. 468771 6. 210645 3. 842986 0. 784059 1. 213455 5. 207988 3. 691123 1. 100519 1. 012903  
2. 797451 2. 720325 1. 5466 2. 6352 2. 528306 1. 570154 1. 917978 1. 812619 2. 072324  
2. 369355 1. 805779 3. 657518 3. 779506 3. 359069 2. 488368 4. 163131 2. 531648 2. 812706  
2. 008362 2. 057106 1. 903519 2. 228426 1. 988213 2. 061758 1. 860399 1. 971556 2. 105584  
2. 01503 4. 74337 4. 420695 4. 075186 4. 926065 1. 239277 2. 425305 2. 847712 1. 948073  
2. 588779 4. 925747 3. 342327 2. 739686 3. 34382 3. 736541 3. 714074 2. 354762 2. 155451  
6. 941934 7. 118839 6. 419948 6. 764521 6. 944366 6. 815099 6. 672334 6. 905774 6. 914731  
6. 244218 6. 19161 6. 691148 5. 708834 6. 083682 7. 064125 6. 4197 6. 237516 6. 253834  
3. 253354 1. 961692 3. 03375 2. 161437 2. 208169 2. 334612 1. 625969 2. 274634 2. 439136  
3. 906989 1. 424788 2. 153573 1. 021318 0. 953666 1. 664381 1. 109513 1. 134219 2. 104225  
1. 596915 1. 271252 6. 254355 1. 732497 1. 437992 3. 348204 2. 855302 1. 046684 1. 126382  
3. 762159 4. 239804 5. 022994 3. 619127 4. 702638 4. 610017 3. 375933 3. 90981 4. 579002  
9. 872831 10. 25848 10. 30106 9. 627078 10. 58383 9. 285404 9. 227903 8. 874981 8. 659212  
6. 448388 7. 372937 6. 738019 6. 356256 7. 197543 6. 310614 7. 362804 7. 917247 7. 214398  
1. 864758 2. 029456 2. 555317 1. 78547 2. 738239 2. 633247 1. 905746 2. 499394 2. 000584  
3. 766515 5. 58795 3. 475217 3. 240858 3. 797544 5. 259894 4. 487569 5. 240298 4. 350793  
2. 428724 3. 691153 1. 520853 2. 034761 1. 527566 1. 763372 2. 235174 2. 219453 2. 122194  
5. 597049 6. 039972 5. 597096 5. 580708 5. 632772 5. 753981 5. 380212 4. 785832 5. 114457  
2. 876958 2. 983875 3. 568625 3. 679764 4. 506037 5. 207565 5. 566008 5. 39176 5. 398971  
6. 483272 7. 412763 6. 969931 6. 123708 6. 497677 6. 184995 6. 43225 6. 149162 5. 42252  
1. 827223 1. 67752 1. 261698 1. 794644 1. 232543 1. 101556 1. 296485 1. 340243 1. 345548  
2. 28197 4. 319559 5. 690553 4. 118483 2. 639816 5. 187694 5. 672259 4. 32541 5. 240475  
3. 314727 2. 695032 2. 664642 2. 246794 2. 019225 1. 983343 2. 155232 2. 291697 2. 119804  
4. 002913 2. 950892 2. 985001 4. 162197 2. 999566 4. 073262 4. 625353 5. 04056 4. 884024  
2. 192928 1. 680877 1. 851945 4. 547103 1. 496729 4. 227178 5. 886146 1. 597641 4. 221924  
1. 345705 1. 841066 2. 230982 1. 267125 1. 328603 1. 65215 2. 097838 1. 271931 1. 722573  
5. 683203 3. 175517 4. 319205 4. 401285 2. 790034 5. 206083 4. 901862 2. 667299 5. 113148  
3. 841394 1. 619606 2. 982867 4. 310964 4. 201367 3. 107898 1. 947087 3. 692716 4. 496406  
6. 140103 6. 259528 6. 352743 5. 803082 6. 355951 6. 159074 6. 428555 5. 927459 5. 796135  
3. 056025 4. 052474 2. 953114 5. 510154 3. 599757 3. 984276 3. 432824 3. 720566 2. 188925  
7. 132872 7. 293604 6. 868882 6. 470484 6. 944329 6. 620557 7. 003627 6. 501795 6. 556036  
5. 689716 6. 010525 5. 483059 5. 19477 5. 649837 5. 85736 5. 605936 5. 413529 5. 179142  
5. 141436 5. 748053 5. 279937 5. 643304 5. 216043 4. 728166 5. 207279 4. 99485 4. 914326  
7. 04676 8. 049835 7. 334023 7. 264456 7. 604311 7. 274477 7. 125588 6. 556387 7. 101088  
2. 601108 2. 614265 2. 981698 2. 443885 3. 82355 3. 585309 1. 649019 2. 77561 4. 170384  
4. 578145 4. 659702 5. 163774 4. 200652 4. 681796 4. 952409 4. 683664 4. 624438 4. 651183  
5. 08125 6. 072163 5. 824822 6. 232728 6. 443483 5. 148594 4. 801375 4. 694004 5. 259414  
2. 160731 3. 079924 2. 590217 2. 489952 2. 530507 2. 432386 5. 682166 3. 085888 1. 364926  
2. 186035 1. 362414 1. 27535 2. 378974 1. 427684 1. 944607 1. 739429 1. 411477 1. 522612  
1. 979897 3. 351236 2. 031268 4. 531445 2. 014501 1. 698795 1. 078061 1. 767985 3. 59261  
2. 539975 1. 899459 2. 635848 1. 996177 2. 2008 4. 037925 2. 229369 3. 12106 2. 814883  
2. 069924 1. 731531 2. 451897 1. 855136 1. 993773 2. 168483 1. 777977 1. 27909 2. 204591  
1. 556243 1. 64562 1. 460219 1. 488194 1. 476638 1. 688883 1. 740104 2. 207667 2. 160158  
2. 455745 2. 828409 3. 830405 1. 74594 2. 910063 1. 431249 1. 78643 1. 399356 1. 513112  
2. 135226 1. 758376 1. 782931 2. 515959 2. 402998 1. 475995 3. 507586 1. 443029 1. 39003

1. 738989 1. 026238 2. 554596 2. 792615 2. 691554 2. 207585 1. 857191 3. 271957 3. 608746  
1. 326196 1. 23373 2. 542942 1. 753006 1. 554988 2. 808731 1. 277438 1. 789917 2. 338315  
5. 688307 5. 82633 5. 821847 5. 996549 6. 555082 5. 780409 5. 512449 5. 526095 6. 00136  
2. 177743 2. 253832 2. 765672 1. 55712 2. 744397 2. 050066 1. 344878 2. 871521 1. 563505  
1. 26515 1. 579409 2. 748341 1. 156037 1. 894939 1. 199412 1. 6141 1. 343366 1. 429747  
1. 140714 0. 862159 1. 414767 1. 783859 0. 946605 1. 5532 1. 293685 2. 431901 1. 439479  
3. 103401 1. 367795 1. 390753 1. 480084 1. 117706 1. 659682 1. 332074 1. 240236 1. 404068  
4. 057079 3. 592905 4. 498214 3. 529137 3. 251471 5. 915833 4. 688421 3. 851975 4. 147478  
3. 30989 2. 646386 3. 513982 2. 622348 2. 707475 2. 002258 1. 598951 1. 921811 2. 070915  
5. 922696 5. 940364 5. 815452 5. 492813 5. 895592 5. 17178 5. 794233 5. 526079 5. 890583  
1. 796635 2. 923441 2. 541533 1. 930432 2. 043052 1. 775198 1. 902178 1. 736062 2. 049796  
2. 155846 1. 765829 3. 033551 2. 3491 4. 277971 2. 435937 3. 894635 2. 250705 3. 360573  
0. 955834 1. 338119 0. 891389 1. 661219 2. 012769 2. 016149 1. 325494 2. 759037 0. 839986  
7. 408629 7. 989459 8. 084698 8. 033537 8. 027829 7. 085556 7. 369635 7. 760368 7. 374416  
1. 126828 1. 440898 1. 207398 1. 200269 1. 877323 1. 074961 1. 871767 1. 771158 1. 464314  
1. 712816 2. 768607 1. 373476 1. 343717 1. 122694 1. 271823 1. 333589 1. 705933 1. 293767  
3. 556726 3. 195984 3. 162612 3. 059877 3. 437847 3. 596771 3. 12095 3. 49322 2. 64459  
2. 577226 2. 69452 3. 708375 3. 104664 2. 892788 3. 018523 3. 804934 4. 375212 4. 453742  
1. 359594 1. 313355 1. 274201 1. 812223 1. 524323 1. 717069 0. 912971 1. 062131 1. 328493  
4. 285965 2. 583463 4. 859051 4. 193182 3. 781003 3. 36341 2. 938243 3. 47709 4. 197648  
0. 635549 1. 031505 0. 607219 1. 446159 0. 637729 0. 765781 1. 204906 0. 568126 1. 374829  
1. 150036 3. 073795 2. 442947 1. 035096 1. 046986 1. 07092 1. 564862 1. 045251 1. 057946  
3. 80194 3. 914103 3. 924318 2. 791423 3. 600752 2. 707075 3. 467578 3. 508813 3. 604762  
1. 011566 1. 141004 0. 671799 1. 106445 0. 740423 1. 285691 0. 73258 1. 372648 1. 032382  
2. 223059 0. 752895 0. 807374 1. 426939 1. 419915 1. 655078 0. 885267 0. 970434 0. 782952  
1. 095205 1. 040664 1. 327325 2. 553249 1. 612727 1. 365649 1. 840265 2. 067055 1. 321157  
2. 74549 2. 182164 2. 787654 2. 155992 2. 488671 2. 591695 3. 925916 2. 837432 3. 889047  
0. 888927 0. 950237 2. 75255 1. 196864 0. 811393 1. 363066 1. 524227 1. 410156 1. 573423  
4. 49842 2. 367371 2. 569418 2. 338665 2. 235215 3. 050554 2. 80476 3. 308191 4. 417209  
3. 769888 3. 487758 4. 283678 4. 010913 3. 804892 2. 184147 3. 644191 4. 24706 3. 687665  
5. 575958 6. 094056 6. 285859 5. 725582 6. 157664 5. 991648 6. 289186 6. 800528 7. 035232  
2. 691131 2. 657733 2. 805543 2. 567555 2. 361844 2. 224292 3. 302824 2. 654668 3. 159713  
1. 573703 1. 528705 1. 521808 2. 271742 1. 738405 2. 311356 1. 427442 1. 687161 1. 696094  
6. 405711 6. 032413 6. 37033 6. 618241 6. 501632 5. 706797 6. 316336 6. 287134 6. 632671  
2. 555974 2. 328969 0. 976522 1. 494753 1. 384436 1. 242031 0. 731646 1. 414355 0. 75432  
1. 802365 2. 392352 1. 879117 2. 669762 2. 184511 2. 267637 2. 591692 2. 685405 1. 955061  
1. 927818 4. 896003 5. 140321 4. 474807 4. 890484 1. 980612 5. 359487 3. 563429 3. 355315  
2. 262756 1. 883664 2. 200156 1. 805662 2. 719765 1. 624373 1. 605884 1. 488066 1. 312176  
2. 307315 1. 197653 0. 787545 1. 854525 1. 065279 2. 186509 0. 964149 1. 173115 0. 978631  
1. 521747 1. 740027 1. 179335 1. 235028 1. 138538 1. 559198 0. 869026 1. 33303 1. 407463  
1. 291999 1. 634063 1. 605476 1. 269524 1. 598407 1. 151099 1. 134317 1. 76151 1. 43233  
5. 262908 6. 647301 6. 668594 6. 244868 5. 756445 5. 76911 5. 554065 5. 939994 6. 123084  
5. 382947 5. 143566 5. 671014 5. 444926 4. 39038 4. 995378 4. 355631 6. 797108 4. 983545  
3. 638247 4. 337079 3. 927844 3. 78876 4. 56645 5. 035676 4. 570755 4. 918308 4. 000442  
2. 910204 2. 152431 3. 291694 3. 085938 3. 677052 2. 711848 2. 214718 2. 23487 1. 853815  
3. 589688 3. 929632 3. 043113 2. 765453 2. 625547 4. 497185 2. 503843 3. 474252 3. 675278  
1. 601242 1. 928706 1. 999227 2. 686801 1. 60029 2. 557486 1. 967434 2. 384454 2. 075861  
1. 864597 1. 584598 1. 648937 1. 696331 1. 834567 1. 440734 1. 673158 1. 606671 1. 713697  
2. 292802 1. 764722 2. 207674 2. 158728 2. 492831 2. 733351 2. 718327 2. 673108 1. 902292  
1. 903387 1. 843606 1. 623515 2. 348226 1. 335816 1. 239256 1. 290135 1. 461956 1. 350195  
3. 252662 3. 734522 4. 591313 4. 305786 3. 505351 3. 562096 3. 664493 3. 352512 4. 745982

1. 85693 1. 85693 1. 712441 1. 873732 1. 999177 2. 043259 1. 600686 1. 645156 2. 04975  
4. 589427 4. 991685 5. 399063 4. 595796 4. 995946 5. 623096 5. 413901 5. 123065 5. 845292  
4. 10001 4. 467046 4. 644355 3. 534475 3. 402259 4. 193569 4. 755321 3. 536997 3. 360887  
0. 995821 1. 461974 1. 32361 0. 917542 1. 506686 1. 177382 1. 212861 1. 859953 1. 034053  
4. 753418 4. 838208 3. 904739 5. 108357 5. 043989 6. 22898 4. 880824 5. 123452 6. 169124  
6. 672855 7. 233999 6. 723495 6. 255343 6. 672598 7. 126191 6. 950066 7. 650129 7. 432903  
2. 734494 2. 498181 2. 960262 2. 386022 3. 022831 3. 50013 2. 914073 3. 285109 3. 139321  
8. 788357 9. 220786 9. 233032 8. 949738 9. 439985 7. 168359 9. 43809 9. 057789 9. 098569  
2. 252403 1. 835801 2. 19415 3. 074673 2. 420994 1. 364233 2. 715347 2. 860436 2. 901043  
2. 762314 2. 683133 2. 112769 2. 33513 2. 286338 1. 40647 2. 376449 1. 919044 1. 975439  
1. 202844 1. 886496 1. 233989 1. 548398 1. 524787 2. 171853 1. 39555 1. 572891 1. 564507  
5. 603489 5. 638666 5. 774464 5. 83252 5. 436801 4. 797018 6. 009977 6. 147813 5. 650124  
3. 176914 2. 715733 2. 922956 2. 753315 4. 431098 4. 133182 3. 716901 3. 701451 4. 029581  
1. 282975 0. 956108 0. 992997 1. 162254 0. 824877 0. 821234 0. 913852 1. 441863 1. 137052  
2. 333225 1. 686009 1. 664512 2. 458568 1. 834206 2. 310055 1. 988484 2. 003222 2. 357845  
1. 93818 1. 574436 1. 900026 2. 064087 1. 387478 1. 619816 2. 354641 1. 681814 1. 447215  
1. 875272 1. 870512 2. 536549 1. 492422 2. 213947 2. 222511 2. 031969 1. 950202 2. 373066  
1. 595216 2. 136278 1. 010267 1. 794685 1. 707408 1. 815264 2. 002487 2. 091316 2. 196815  
3. 246743 1. 732522 1. 602554 1. 348921 2. 508224 5. 120667 1. 706428 4. 018972 2. 785015  
1. 989366 1. 941187 1. 430932 1. 660205 3. 234776 1. 665488 2. 232962 1. 420119 1. 823331  
3. 987359 1. 574686 3. 673026 2. 423459 1. 925148 1. 655068 1. 493822 1. 666678 1. 220423  
2. 171382 2. 453439 2. 6484 2. 538964 2. 425012 2. 60147 2. 045317 3. 072403 3. 121339  
1. 106673 1. 379122 1. 417946 1. 905337 2. 307964 2. 63971 1. 647425 1. 878792 1. 561375  
3. 311652 2. 804742 2. 75595 2. 877663 3. 552744 2. 943892 3. 054245 3. 184401 3. 122723  
1. 155216 1. 273175 0. 666379 1. 047244 1. 266422 1. 281293 1. 171532 1. 133149 0. 992081  
2. 573889 2. 743516 3. 623444 2. 626166 2. 629501 2. 359496 2. 860529 3. 170557 2. 261138  
3. 192812 2. 624541 4. 010579 2. 500869 3. 318949 2. 523735 4. 276395 3. 961671 4. 602443  
3. 590066 3. 641289 2. 008818 2. 765617 2. 712235 3. 114419 3. 608712 2. 770638 2. 558386  
2. 953858 2. 907835 3. 139937 3. 441248 2. 604673 3. 184008 4. 353249 3. 29526 3. 738426  
2. 833647 2. 533264 4. 476006 1. 80275 2. 173007 1. 109731 1. 538452 1. 537433 1. 381177  
1. 957749 2. 005412 2. 454555 2. 42338 3. 126626 1. 936935 1. 898842 2. 50351 2. 45931  
0. 663592 0. 956609 0. 63845 0. 682657 0. 595417 0. 811654 0. 62992 0. 907209 0. 680753  
6. 734176 6. 882084 7. 303713 7. 204406 7. 940941 4. 815263 8. 169151 8. 181767 8. 212058  
2. 761862 2. 367953 2. 442151 1. 042015 1. 838351 3. 142024 3. 2849 1. 056786 2. 008199  
1. 282424 1. 752892 1. 458816 1. 26677 0. 943128 2. 043379 1. 475054 1. 332566 1. 82966  
1. 14794 0. 852313 0. 952764 1. 256502 0. 4798 1. 551306 1. 213796 1. 445569 1. 504542  
3. 612964 2. 476879 3. 810176 4. 199493 2. 799117 3. 488773 4. 433058 3. 389472 2. 762886  
1. 464706 1. 910333 1. 555551 2. 031601 1. 112069 1. 545827 1. 312966 1. 571362 1. 953485  
1. 509687 2. 167225 1. 752492 3. 017104 3. 0881 2. 619473 1. 807683 2. 804544 2. 256101  
5. 056869 5. 820983 6. 206948 5. 41389 5. 616418 4. 694896 4. 281429 4. 379947 5. 767054  
4. 031928 4. 051762 3. 195313 3. 195855 4. 114351 2. 701283 2. 894139 2. 618644 3. 222861  
5. 248564 5. 934087 5. 277874 5. 743397 5. 728456 6. 943832 5. 884181 6. 469532 5. 97507  
3. 013064 2. 289612 2. 962818 4. 34263 2. 03868 2. 039734 2. 465771 2. 902282 3. 782978  
5. 496047 5. 697053 5. 696522 4. 738341 4. 83251 6. 08652 6. 712365 6. 022388 6. 36482  
2. 001984 2. 705502 3. 981042 2. 226361 1. 729259 4. 191445 4. 057609 2. 604706 2. 599039  
8. 014301 8. 040955 7. 747456 8. 123409 8. 148243 7. 788705 8. 096423 7. 781796 7. 923585  
4. 938294 4. 709366 5. 545493 6. 086003 4. 501961 4. 372365 5. 632155 6. 436528 6. 297735  
5. 270929 3. 601551 5. 820176 4. 531609 3. 853948 3. 586329 3. 617677 5. 042209 3. 155637  
4. 117982 4. 175162 5. 30932 6. 191528 3. 769808 4. 578479 4. 849742 3. 546614 5. 22002  
1. 458582 1. 308028 1. 642103 2. 71893 2. 126247 1. 462268 1. 416189 1. 430257 1. 588754  
4. 088015 5. 573688 5. 708416 4. 952801 5. 094997 5. 684299 4. 419322 3. 8075 5. 493123

5. 791391 6. 347926 6. 018497 6. 312728 7. 038606 6. 040514 6. 303598 6. 183656 5. 686889  
2. 493004 1. 921211 1. 910289 2. 148487 2. 202306 2. 844175 1. 49157 2. 465056 2. 25639  
4. 134337 3. 752224 2. 997737 3. 776663 3. 80541 3. 769844 3. 233893 4. 299202 4. 507448  
1. 629451 2. 271542 2. 738657 2. 786367 3. 158701 3. 94498 2. 30408 2. 816024 3. 144012  
9. 501809 9. 998043 9. 938855 9. 592599 10. 15523 7. 220857 9. 914517 9. 423779 9. 481772  
2. 120861 2. 74475 3. 049211 3. 254368 2. 883255 3. 49003 3. 990551 2. 809824 3. 158635  
8. 273291 8. 197045 7. 841231 7. 777287 8. 398758 7. 179331 8. 400087 7. 656644 7. 541954  
1. 321709 1. 290855 2. 169364 2. 349806 1. 882153 2. 290035 1. 62874 1. 41924 1. 740841  
5. 056859 5. 961027 6. 215036 4. 879242 5. 426593 4. 974115 5. 042766 4. 668513 5. 328856  
5. 757158 5. 512601 5. 013694 4. 823029 5. 0336 5. 669219 5. 299978 5. 15391 5. 223449  
1. 619416 1. 555778 1. 38584 2. 018091 1. 911999 1. 624253 1. 057448 1. 276373 1. 990236  
4. 024675 4. 293997 4. 200191 3. 392119 4. 444706 4. 305393 4. 419546 5. 471213 5. 060882  
1. 580649 1. 917755 1. 5032 2. 395237 1. 782476 2. 579022 2. 147048 3. 371068 2. 169967  
9. 033182 9. 725683 9. 009165 8. 699039 9. 061949 8. 427044 9. 568135 9. 47789 9. 512759  
2. 253837 1. 118696 1. 592071 1. 060535 1. 631699 1. 628499 3. 484104 3. 179421 0. 738929  
1. 101243 1. 079296 1. 529385 1. 358571 0. 92967 1. 490031 2. 081835 1. 233896 1. 887601  
1. 81669 2. 494318 2. 371839 2. 429634 2. 058362 1. 940495 1. 832443 2. 252788 2. 429354  
1. 67537 1. 257274 1. 748075 1. 754113 1. 982049 1. 620767 2. 020476 1. 374165 3. 518178  
1. 98487 5. 28996 1. 952894 2. 825772 4. 416086 3. 212108 4. 105834 1. 437672 2. 329981  
1. 446806 0. 916176 1. 503591 1. 178988 1. 613918 1. 586264 1. 007353 1. 611281 1. 422307  
4. 529142 5. 508455 5. 762511 6. 074214 5. 616928 5. 086015 5. 93206 6. 459621 5. 780582  
1. 17934 2. 839222 2. 35095 2. 678383 1. 061672 1. 41333 3. 41343 2. 587054 1. 292216  
1. 71469 1. 18211 2. 036862 1. 314664 1. 18211 2. 725483 1. 768445 0. 941925 3. 466072  
3. 150805 3. 561181 3. 146712 2. 872552 3. 102444 3. 359783 3. 791387 3. 480314 3. 307589  
1. 409681 2. 207608 1. 423196 1. 45593 0. 992132 1. 439632 1. 269019 1. 088212 1. 514878  
1. 568298 1. 124163 1. 125032 1. 006631 0. 721531 1. 278227 1. 489412 1. 35739 1. 333346  
2. 987664 2. 523858 3. 17264 2. 09275 3. 16528 1. 811358 1. 835897 2. 089944 1. 78963  
2. 128049 2. 607771 2. 461087 1. 855934 2. 344535 2. 361097 3. 008966 2. 064102 2. 406746  
3. 801637 5. 877939 5. 39372 3. 344864 5. 64438 4. 682148 5. 378523 4. 632392 3. 426032  
1. 374937 1. 893338 1. 856178 1. 894503 2. 394556 1. 554615 1. 902728 1. 702867 1. 27394  
2. 590383 2. 510732 1. 884344 2. 467998 1. 734034 1. 832259 2. 218327 2. 190719 3. 147925  
2. 885146 1. 901317 2. 240647 1. 433706 2. 309183 2. 086034 1. 875338 1. 488519 2. 256914  
7. 477569 7. 843322 7. 973598 6. 99043 7. 874943 6. 512189 7. 272445 7. 763902 7. 502889  
3. 169496 3. 964353 3. 552422 2. 941324 3. 696872 3. 626435 3. 064914 3. 636462 3. 622759  
1. 115232 0. 93536 1. 656451 1. 307024 0. 979033 1. 196565 0. 732182 2. 088994 2. 363203  
2. 164726 2. 014872 1. 887817 1. 71471 1. 741635 1. 430788 1. 103654 2. 280386 1. 587861  
1. 629156 1. 946349 1. 949238 1. 907804 1. 833462 2. 167507 1. 60263 2. 156758 1. 922588  
3. 221459 4. 599819 4. 542811 2. 420852 2. 894078 3. 030227 4. 31159 2. 997633 3. 545349  
3. 095383 2. 71133 1. 880081 1. 487289 1. 874805 1. 73789 4. 346054 3. 270396 3. 316994  
2. 444167 2. 97478 2. 831687 2. 420922 3. 94517 3. 006665 2. 231002 2. 628012 3. 925994  
1. 733583 2. 104743 2. 901246 0. 768724 1. 744191 1. 54156 2. 155156 3. 553581 2. 127052  
2. 51643 2. 503557 2. 358597 2. 646655 2. 067944 1. 817633 1. 529087 1. 719352 1. 967994  
1. 293853 2. 952949 1. 498351 1. 731282 2. 358456 0. 912276 1. 44034 1. 55025 1. 792804  
5. 228821 4. 965855 5. 066434 4. 652776 3. 890885 5. 385332 4. 974707 5. 020482 5. 121562  
1. 536654 2. 456565 1. 053484 0. 982338 0. 798332 1. 11492 1. 837731 1. 364748 1. 173046  
5. 542921 4. 63654 3. 591306 4. 762456 5. 433646 5. 409412 5. 8556 5. 555075 5. 199451  
2. 973376 2. 537498 2. 263847 3. 026171 2. 390461 1. 958542 3. 425618 1. 927948 2. 916733  
3. 791765 2. 478209 3. 336744 3. 142167 2. 865285 1. 946217 2. 04455 3. 683551 2. 859699  
1. 017564 1. 738307 0. 642347 1. 539592 1. 750975 1. 224949 2. 661208 2. 260655 1. 166056  
1. 340133 1. 420082 1. 607047 2. 064286 1. 317623 2. 080962 1. 550341 1. 531554 1. 677191  
3. 137667 3. 379165 4. 139736 3. 826351 3. 643749 4. 585718 3. 15218 3. 04186 4. 41197

1. 185647 1. 700063 0. 929464 2. 284462 1. 856229 1. 727787 1. 773189 1. 294455 2. 099843  
2. 886903 1. 638558 3. 488971 2. 086295 2. 461887 1. 621605 4. 236545 1. 952425 1. 647266  
1. 402174 4. 265591 0. 962297 1. 263635 1. 703671 2. 152952 3. 459353 3. 930573 5. 02521  
2. 897136 3. 343441 3. 105128 2. 145723 3. 322021 4. 364917 3. 309373 2. 319957 3. 295716  
1. 951445 2. 120931 1. 695233 2. 076894 1. 905368 2. 101138 1. 492458 1. 995226 2. 405858  
1. 962359 1. 639919 2. 105751 2. 224284 1. 648269 5. 675938 1. 951629 2. 032505 3. 892098  
5. 180173 4. 435379 5. 553211 5. 571064 5. 361889 4. 957019 5. 497464 6. 216691 6. 343061  
6. 988875 7. 298776 7. 477918 7. 175011 7. 09889 8. 45307 7. 927708 7. 789169 7. 663784  
2. 612599 2. 677737 1. 215416 2. 757344 2. 885284 1. 358669 2. 329984 1. 941938 1. 348293  
2. 342594 2. 025338 1. 496825 1. 382176 4. 2416 1. 550964 1. 463662 2. 19504 1. 620871  
3. 090892 2. 941575 4. 45818 3. 480708 3. 581692 2. 158985 4. 008262 3. 718167 3. 585976  
1. 838893 1. 084326 2. 056409 1. 738801 2. 488233 2. 159386 1. 237653 2. 280813 1. 507974  
1. 229961 1. 117613 0. 861985 1. 058666 1. 359129 1. 110279 0. 995619 0. 839214 0. 946107  
4. 098281 3. 201169 3. 883169 5. 020767 3. 947723 2. 577504 3. 484578 3. 652182 4. 36475  
2. 19429 1. 986976 2. 37749 2. 436578 1. 69301 2. 3492 2. 373919 2. 268781 2. 176022  
3. 343575 2. 292049 2. 381817 3. 834381 2. 521185 3. 757616 3. 507435 3. 862548 3. 429313  
1. 94333 2. 262863 1. 435733 2. 405355 2. 621534 1. 918319 2. 570926 2. 883215 1. 240771  
0. 370178 0. 779408 1. 136414 0. 81317 1. 043639 0. 637618 0. 586609 0. 656092 1. 176047  
1. 534373 1. 402081 1. 007866 1. 375534 1. 496127 1. 553877 1. 866217 1. 1041 1. 032112  
1. 519328 2. 169954 1. 140594 2. 34369 1. 42575 1. 969237 1. 575054 1. 092909 1. 065626  
2. 527936 2. 752765 2. 535661 2. 123666 2. 050321 2. 884005 2. 17332 2. 262405 2. 268976  
8. 02164 8. 173195 7. 921475 8. 288883 8. 008241 7. 788783 8. 414629 8. 279522 8. 420567  
2. 861372 3. 892283 2. 973211 4. 036486 3. 244848 3. 376127 3. 10134 3. 065591 3. 508468  
4. 341873 5. 826164 5. 676089 5. 688289 4. 802141 5. 293112 5. 235174 5. 735968 5. 490018  
2. 179978 2. 321668 1. 840541 2. 649443 2. 452708 2. 676534 2. 313744 2. 00511 1. 894033  
2. 214373 3. 034661 2. 93063 2. 778706 1. 773382 2. 165834 2. 792478 2. 315118 2. 646764  
2. 382002 3. 570866 2. 203319 2. 287743 2. 367647 2. 878762 2. 155372 2. 114565 2. 650924  
1. 814203 1. 892671 2. 099421 2. 085906 1. 822322 1. 992164 1. 937457 2. 099002 1. 639617  
2. 710679 2. 842666 4. 27041 5. 231556 2. 287164 2. 365822 3. 555227 4. 422482 3. 445858  
1. 781464 2. 191384 1. 921381 1. 835963 1. 659936 2. 290167 1. 910351 2. 046029 2. 478236  
0. 566793 2. 212641 0. 769457 1. 783888 0. 755342 1. 535408 1. 105826 1. 42434 1. 694163  
2. 916832 1. 973075 1. 553001 1. 817067 2. 781455 1. 894207 1. 876447 1. 790181 1. 274028  
2. 064433 1. 593241 2. 309815 4. 116177 3. 613096 2. 040214 2. 942403 3. 498063 4. 287071  
5. 964517 6. 334668 5. 542479 6. 136656 6. 02759 5. 546547 5. 941543 6. 008601 6. 160477  
1. 094494 1. 451194 1. 030526 2. 163837 1. 962149 0. 894663 1. 359527 1. 111684 1. 785828  
1. 218118 0. 990017 1. 31083 1. 941628 1. 650383 1. 90268 1. 064942 0. 915697 2. 256575  
2. 747304 3. 560611 4. 024918 4. 072092 4. 143672 4. 563133 3. 065414 3. 836856 3. 993598  
2. 203343 1. 980229 1. 993981 2. 877548 1. 936449 2. 021628 1. 866936 2. 548387 2. 351453  
1. 249289 1. 121726 1. 570188 1. 629477 1. 544779 1. 814858 0. 834155 1. 702597 1. 613675  
0. 843564 1. 011411 2. 158594 0. 84965 1. 472597 1. 408968 1. 149775 0. 907577 0. 833377  
2. 130145 2. 502208 2. 186159 2. 151004 2. 082257 2. 609262 2. 195568 2. 113949 2. 524986  
6. 144876 6. 117617 6. 839966 4. 753082 6. 574213 4. 057082 4. 996622 3. 873338 4. 136639  
1. 424224 0. 997734 0. 974785 1. 437059 1. 130465 1. 41894 0. 930644 1. 237598 1. 307169  
5. 749656 6. 706871 5. 399939 6. 055628 5. 438239 4. 670188 4. 285341 4. 709678 5. 775334  
1. 826493 0. 730242 1. 345875 3. 207457 2. 875066 1. 643056 1. 73469 1. 085616 3. 155662  
0. 938411 1. 498965 0. 894493 0. 921656 1. 755794 1. 379833 1. 003079 1. 096098 1. 085926  
2. 136057 1. 711334 2. 050831 1. 054687 3. 03971 1. 456894 1. 93735 3. 198048 2. 062457  
3. 340212 3. 380295 2. 752726 3. 805908 2. 060162 4. 117995 3. 167737 4. 66338 2. 953066  
1. 870237 2. 013725 1. 955545 2. 228249 1. 664273 3. 192571 1. 944884 1. 956842 1. 478775  
4. 323485 4. 833118 3. 710264 3. 542655 3. 192186 4. 642523 5. 301341 5. 230096 5. 416823  
2. 378396 3. 363066 2. 946543 3. 364386 2. 856932 2. 449489 2. 87089 1. 928868 2. 872249

4. 540181 4. 513825 4. 665242 4. 037896 4. 997671 5. 773061 3. 637261 4. 592856 4. 385368  
1. 512495 1. 151777 1. 06955 1. 182113 1. 108188 0. 907516 1. 522728 0. 923858 1. 434897  
1. 633079 2. 006031 1. 705287 1. 929833 2. 16874 1. 536113 1. 891974 1. 812223 1. 566577  
3. 928187 3. 128057 2. 005524 2. 980941 2. 453842 4. 06309 1. 979173 4. 230943 1. 612442  
0. 642658 1. 431784 1. 206602 0. 805123 1. 164214 1. 541932 1. 534679 2. 314743 0. 917835  
1. 583175 1. 730085 1. 813241 1. 756005 1. 678722 1. 352361 2. 567545 1. 22472 1. 86072  
5. 231476 4. 480339 4. 795292 3. 261857 3. 870092 5. 037237 2. 053114 1. 923689 2. 106037  
2. 234327 2. 554926 2. 96545 1. 554403 2. 77481 3. 180033 1. 945557 2. 210076 1. 674534  
1. 202296 2. 013113 1. 440831 1. 494916 1. 047404 1. 192066 1. 290876 1. 214091 0. 881463  
2. 209274 1. 754784 1. 522251 1. 951601 1. 718913 1. 329173 1. 633802 2. 48969 2. 162058  
2. 034066 2. 415726 2. 227632 1. 937456 1. 996261 2. 584789 2. 002823 2. 238782 2. 370173  
2. 021382 2. 094139 2. 536975 3. 292986 1. 7466 3. 379733 2. 270655 2. 407531 3. 801047  
3. 997826 4. 149532 4. 601794 3. 801976 4. 146397 4. 483612 3. 795314 4. 263187 3. 487522  
1. 764452 2. 439357 2. 596859 2. 979792 2. 827527 2. 566202 2. 432405 2. 236132 2. 772482  
5. 165918 2. 631309 2. 991275 3. 975626 4. 65771 4. 157202 2. 200498 3. 589425 3. 563472  
4. 37655 5. 005904 3. 813297 2. 385704 4. 242587 1. 865041 1. 857491 2. 245492 2. 772581  
1. 072668 1. 149159 1. 131298 2. 107776 1. 601965 1. 432798 1. 177465 1. 056708 1. 384777  
2. 04954 1. 534359 1. 6822 2. 765383 2. 694469 1. 560175 2. 46769 2. 097809 1. 816704  
2. 149189 2. 304033 1. 577434 1. 913121 1. 907394 1. 802834 2. 09261 2. 133778 3. 052902  
1. 49749 2. 304669 0. 992412 1. 691706 1. 366361 1. 774146 1. 207498 1. 258221 1. 170582  
1. 235363 1. 20213 1. 30758 1. 366475 1. 719725 0. 892773 1. 061987 1. 353688 1. 297934  
1. 378098 1. 819539 1. 518487 1. 232918 2. 282103 1. 625656 0. 84712 1. 52606 1. 301823  
1. 642879 5. 977164 6. 46899 1. 200045 1. 543687 5. 374383 5. 360025 1. 121019 5. 43054  
2. 361616 2. 559117 2. 41063 3. 177058 2. 17425 2. 240879 2. 548173 2. 330118 2. 510678  
2. 358641 1. 640044 1. 061371 1. 437387 1. 349731 0. 773787 1. 477324 0. 989737 1. 317505  
6. 500592 4. 944735 4. 953611 5. 726573 4. 862711 6. 557436 5. 691634 5. 822942 5. 769392  
1. 737516 1. 886206 1. 237734 1. 287261 1. 927425 1. 597617 2. 796468 2. 553537 2. 027916  
2. 900501 3. 103618 3. 396744 2. 289052 2. 845586 3. 904322 1. 865753 3. 70467 2. 461036  
3. 303613 1. 986213 1. 195111 3. 033352 2. 549471 2. 191674 1. 382701 3. 053225 1. 128363  
5. 788175 5. 791198 5. 560912 6. 541592 6. 140158 6. 923303 4. 877684 5. 378748 6. 063321  
3. 810193 2. 708459 3. 209083 4. 357491 3. 334803 2. 708982 2. 462023 4. 676312 2. 63131  
1. 524904 1. 402359 1. 856423 1. 618827 1. 515567 1. 758613 2. 089335 1. 886161 2. 054007  
1. 333494 2. 048209 1. 305679 2. 442442 2. 251009 1. 55722 2. 065901 1. 670123 1. 764789  
3. 18629 4. 184667 3. 597472 3. 668416 3. 815544 3. 842455 3. 697708 4. 526947 4. 190555  
4. 503596 4. 473303 3. 775415 3. 400941 3. 602921 4. 692751 3. 973463 3. 805962 3. 480553  
3. 58288 3. 277004 3. 452615 3. 250569 2. 467497 2. 551754 2. 743759 4. 324361 3. 546051  
1. 150606 0. 863515 0. 911801 0. 713007 1. 144799 1. 603695 1. 448516 1. 283338 0. 902056  
0. 932862 1. 410007 2. 300431 2. 916292 1. 972535 1. 931205 1. 509518 2. 552302 1. 127498  
3. 110636 3. 389741 3. 079635 4. 370862 4. 512512 4. 092805 3. 878154 4. 62678 3. 458803  
0. 74765 2. 452915 0. 829684 3. 417313 0. 97979 0. 895031 0. 831976 1. 305608 1. 006372  
1. 196049 3. 035292 2. 455107 2. 090768 1. 357012 1. 526684 1. 387918 2. 471544 1. 433778  
1. 353945 1. 529547 1. 390415 1. 074593 1. 218392 1. 219474 0. 914864 1. 336699 0. 973015  
3. 008894 3. 817922 2. 850929 3. 107739 3. 418132 2. 707514 3. 463384 3. 448874 2. 947625  
5. 796626 5. 334057 5. 456634 5. 618908 5. 662524 6. 083381 4. 922447 6. 059443 4. 955253  
3. 365154 4. 817806 5. 481148 3. 649876 4. 458876 3. 881756 2. 86163 2. 87061 3. 618399  
2. 200856 2. 065512 3. 94132 2. 567679 2. 126915 1. 75658 1. 780609 1. 711075 3. 740088  
1. 620184 1. 540742 1. 481815 1. 371436 1. 511766 1. 618613 1. 345328 1. 451642 1. 698744  
1. 688441 2. 867631 1. 030191 3. 314387 1. 418901 1. 228735 2. 629644 1. 08764 1. 155051  
1. 912615 2. 675511 1. 841523 2. 615339 2. 192497 2. 788485 2. 16709 1. 929722 3. 152694  
2. 247939 2. 201246 2. 326546 1. 861268 1. 966524 1. 709352 2. 355043 2. 106792 1. 623599  
2. 167616 2. 865304 3. 038257 2. 570109 3. 221463 3. 68689 3. 400514 3. 57093 4. 445399

3. 210458 2. 151257 3. 579063 2. 155556 3. 054329 3. 370281 2. 493508 3. 841393 2. 10781  
3. 613241 2. 430809 3. 063382 3. 758355 2. 808409 3. 387379 2. 199787 2. 559402 3. 057684  
1. 444366 2. 126528 1. 90127 1. 547076 1. 344982 1. 049498 1. 324584 1. 436074 1. 547892  
1. 491652 1. 023314 1. 556803 1. 565608 1. 298662 1. 542642 1. 221982 1. 24155 1. 420321  
2. 716394 2. 80118 2. 716519 2. 197067 3. 457849 1. 941707 1. 788457 1. 869727 1. 723846  
5. 901809 6. 158569 6. 314329 6. 389337 6. 469711 6. 431102 6. 665649 6. 353486 5. 422251  
2. 927262 2. 644294 3. 235707 3. 417906 2. 49471 2. 809586 3. 746258 4. 59048 2. 294732  
1. 058683 1. 880833 1. 659272 2. 005418 1. 428365 1. 789813 1. 566326 1. 685534 1. 46796  
0. 953706 1. 510646 1. 188977 1. 095493 1. 172143 1. 071042 1. 333875 1. 64373 1. 161158  
2. 891503 2. 522906 2. 198758 2. 282146 2. 204393 2. 505336 2. 939567 2. 946444 2. 393366  
2. 571995 2. 593896 2. 348463 2. 826859 1. 942496 2. 727976 2. 540601 2. 712522 2. 004899  
5. 974514 6. 66262 6. 345436 6. 567053 6. 459605 6. 211438 6. 932997 6. 612312 6. 76307  
2. 537096 2. 612538 3. 361189 2. 659049 3. 192976 2. 543773 3. 126789 3. 636644 1. 926237  
0. 872359 0. 678359 1. 305539 1. 179567 1. 217477 1. 324342 0. 937713 1. 312845 1. 321695  
1. 33104 1. 512894 0. 957216 1. 183884 1. 09593 1. 323899 1. 549059 1. 149128 1. 772858  
1. 732967 2. 117836 1. 157488 2. 807008 2. 025194 1. 522269 1. 686541 2. 818176 1. 69419  
7. 208974 6. 208158 7. 531326 7. 035387 6. 998175 7. 773797 7. 734116 7. 87655 7. 930885  
2. 888829 1. 58563 1. 824641 2. 092561 2. 463611 1. 910825 0. 924623 2. 47776 2. 265571  
4. 713803 5. 15434 5. 310918 5. 071114 5. 43291 3. 847549 4. 852872 3. 690279 5. 335708  
4. 606735 4. 444731 5. 031914 5. 130288 4. 851229 2. 814341 3. 663425 3. 516177 3. 467968  
2. 370007 3. 511462 1. 694951 2. 217384 1. 726252 3. 713672 3. 105902 2. 814672 2. 718867  
1. 313602 1. 435011 1. 272556 1. 858747 1. 281125 1. 217739 1. 166647 1. 247692 1. 513521  
1. 498686 1. 851724 1. 605889 2. 215072 1. 062662 1. 794735 0. 966571 0. 848961 1. 605224  
1. 811531 1. 6191 2. 847942 1. 440439 2. 503223 1. 337684 1. 960059 1. 766913 1. 492034  
1. 603246 1. 630515 1. 148666 1. 30881 1. 573499 2. 504385 1. 725456 1. 523401 1. 016575  
1. 408638 2. 23612 2. 185293 3. 049955 1. 995065 3. 417764 1. 539989 1. 780846 2. 439519  
1. 881006 2. 377586 2. 406304 1. 547365 2. 433747 2. 943062 1. 798726 2. 728518 2. 44793  
2. 071854 1. 666015 1. 610211 1. 729078 1. 34714 2. 410545 1. 252552 1. 988801 1. 420861  
1. 778112 1. 87179 1. 982378 2. 05779 1. 431049 1. 494646 1. 811605 2. 20477 2. 932966  
3. 6557 3. 839692 3. 649283 3. 750228 3. 830583 4. 745808 3. 875022 3. 8009 4. 436485  
2. 287972 1. 215281 1. 370465 1. 892115 1. 505322 1. 782535 1. 978637 1. 311775 1. 31303  
1. 002374 1. 618785 1. 543652 1. 711868 0. 94631 1. 055493 1. 392673 1. 676279 1. 23335  
1. 036454 2. 638865 1. 766095 1. 556803 1. 634786 1. 891327 1. 390523 1. 261852 1. 588744  
5. 117277 4. 983746 6. 14764 5. 819439 5. 961983 5. 392651 6. 210673 6. 046439 6. 760177  
2. 877637 1. 863045 2. 737504 2. 587008 1. 602414 2. 058044 1. 668314 2. 599288 1. 49749  
4. 500003 2. 720222 4. 651186 5. 557085 4. 165095 4. 629065 3. 753652 2. 076398 2. 996832  
2. 496007 1. 339528 2. 146314 1. 534471 1. 893211 2. 217078 1. 587769 1. 210396 1. 598295  
3. 062375 2. 772541 2. 950117 2. 968625 2. 889969 2. 460603 3. 169098 1. 999369 2. 17214  
2. 120758 2. 656433 2. 065965 3. 171254 2. 037551 2. 03613 1. 760867 3. 468461 1. 87148  
4. 071734 3. 583419 4. 577328 4. 21575 3. 857999 4. 463926 4. 607319 2. 91036 4. 494518  
5. 251249 5. 106968 5. 227353 5. 444615 5. 51764 5. 644283 6. 40094 6. 46495 5. 835204  
2. 279872 1. 369173 1. 511376 1. 102917 2. 92966 2. 032933 2. 407879 2. 210726 1. 725657  
5. 224196 5. 186597 5. 112169 5. 265967 5. 347617 5. 095881 5. 701193 5. 487605 5. 138805  
1. 244877 1. 215571 1. 920502 2. 069721 2. 195381 1. 161446 2. 334333 1. 459858 1. 616394  
2. 43811 2. 958379 3. 156265 2. 986381 2. 849219 2. 913156 2. 64102 3. 038422 2. 615638  
4. 474698 4. 12139 4. 986834 3. 126626 5. 473133 4. 253987 3. 90024 4. 250333 5. 654978  
1. 134951 1. 775039 1. 440284 1. 636462 1. 843877 1. 426045 1. 156347 1. 787684 1. 607204  
2. 49664 3. 338008 2. 017096 1. 739125 1. 871864 3. 555351 2. 992701 4. 217521 2. 23381  
2. 420497 2. 814578 3. 289712 2. 530802 2. 935986 3. 222793 3. 325301 4. 325473 2. 085166  
1. 385326 1. 622174 1. 43053 1. 116444 1. 106974 1. 114269 1. 271034 1. 232448 1. 040364  
1. 313504 2. 177421 1. 114607 1. 298559 1. 025632 1. 468133 1. 267435 1. 484984 0. 855219



1. 561094 2. 216507 2. 524945 2. 179709 1. 957047 2. 867455 1. 646214 2. 616266 2. 493311  
2. 785845 2. 073279 3. 135363 3. 307083 3. 926871 1. 3505 1. 544816 1. 751371 0. 827054  
1. 922698 1. 928429 1. 572954 2. 24287 2. 560922 3. 093668 1. 571344 2. 447941 1. 443362  
2. 130072 1. 351054 1. 685397 1. 149611 1. 041197 1. 029135 2. 150163 3. 509405 1. 877954  
8. 211902 6. 135865 7. 539612 8. 287733 7. 173936 8. 412996 7. 12081 8. 153482 8. 047157  
5. 806917 4. 906667 5. 384912 5. 509158 5. 593002 5. 199741 5. 85057 6. 087755 5. 455003  
8. 009779 6. 273768 6. 979659 6. 286582 5. 77154 6. 232381 5. 982858 4. 236178 3. 4108  
1. 18862 1. 438976 1. 199829 1. 707582 1. 150213 1. 103347 1. 249033 1. 300402 1. 072353  
9. 032794 9. 100107 9. 181026 9. 135135 9. 188253 8. 503016 8. 980419 8. 699276 8. 933049  
0. 895893 0. 8296 1. 225521 2. 818056 0. 759524 1. 402631 1. 240301 1. 946145 1. 519405  
2. 601343 2. 101211 2. 023651 2. 212576 2. 638987 2. 088922 3. 08413 3. 047247 2. 310906  
1. 965874 2. 219484 2. 570262 2. 496684 2. 682866 2. 261606 2. 299834 2. 842116 2. 784725  
1. 088764 1. 621843 1. 529397 1. 697797 1. 260619 1. 288157 1. 663598 1. 087324 1. 857468  
2. 468663 2. 804058 2. 510786 2. 769012 2. 653259 2. 474588 1. 986151 2. 981114 2. 238741  
3. 305467 1. 954348 3. 456687 2. 611777 2. 876671 2. 964897 2. 954356 2. 8793 2. 511181  
1. 655026 1. 917868 1. 605534 2. 445948 1. 828486 1. 689005 1. 344205 1. 893571 1. 650565  
2. 89949 5. 235891 4. 829921 3. 75142 5. 936632 4. 748064 4. 31733 4. 715872 3. 106141  
1. 871391 2. 328198 1. 412186 1. 533722 2. 002844 1. 731032 1. 344146 1. 882619 1. 924956  
1. 327866 0. 653268 0. 667808 1. 789705 1. 463845 1. 178463 0. 853239 1. 393329 0. 87838  
5. 599188 5. 538992 4. 648006 5. 899682 5. 094814 6. 007186 5. 948852 4. 748307 5. 615398  
2. 031676 2. 703156 1. 596037 1. 209027 2. 017891 5. 778774 1. 642971 2. 657816 1. 804316  
1. 535006 1. 806151 1. 73777 2. 550667 1. 917574 2. 649925 2. 04955 1. 348744 1. 700279  
0. 913233 1. 280259 0. 365108 1. 06771 1. 177773 1. 128999 0. 785916 2. 761823 0. 923665  
1. 343076 1. 032613 0. 821643 1. 444314 1. 200207 1. 088345 0. 79842 1. 047128 0. 894663  
1. 481057 1. 592536 1. 745699 1. 88707 1. 583324 1. 742958 1. 581696 1. 900731 1. 776334  
4. 650054 5. 024859 5. 286023 4. 450903 5. 591358 4. 868921 5. 108109 5. 453737 4. 8578  
4. 830194 4. 705494 5. 35387 5. 522024 5. 246677 5. 169983 4. 760482 4. 953612 5. 685489  
4. 422536 5. 0342 6. 08943 4. 873469 4. 063283 4. 570495 4. 543719 4. 354329 4. 403474  
7. 353349 7. 958063 7. 483892 7. 288091 7. 804849 7. 011025 7. 673536 7. 737963 8. 103004  
7. 154853 7. 51825 6. 931558 6. 86863 7. 57214 7. 204427 7. 82566 8. 071723 7. 765126  
2. 564483 3. 123631 3. 206888 4. 29384 2. 984152 3. 852723 4. 461804 4. 163066 3. 914736  
2. 456892 2. 278989 2. 007457 2. 490364 2. 313818 2. 162743 2. 07876 2. 916329 2. 606633  
6. 827572 6. 339506 6. 116238 6. 005262 6. 171405 5. 580174 6. 740698 6. 761744 6. 157728  
2. 464864 3. 330597 2. 428561 2. 202844 3. 003517 2. 159027 2. 192938 3. 527229 1. 941545  
3. 62009 3. 235455 3. 764183 3. 980797 4. 941622 3. 500019 4. 075692 4. 594707 4. 349869  
5. 446515 4. 460897 5. 244406 5. 781089 5. 113204 5. 166666 6. 008845 5. 151263 5. 107871  
7. 17414 7. 335672 6. 772601 6. 379666 6. 832603 6. 525983 6. 857447 7. 068857 6. 131807  
4. 122005 3. 488512 3. 156961 3. 44071 3. 572371 3. 414212 4. 583685 2. 726987 3. 090947  
2. 045297 2. 583221 1. 959066 2. 209039 2. 469612 2. 809083 2. 231528 2. 777025 1. 642745  
7. 043463 7. 214817 7. 331369 7. 378555 7. 47511 7. 040217 7. 395349 7. 514312 7. 745655  
4. 828444 4. 642957 4. 587809 4. 518744 4. 172308 4. 872776 4. 542531 4. 416468 5. 070641  
5. 253497 5. 046833 4. 663688 4. 42906 4. 198087 5. 922696 5. 31591 5. 836836 5. 459221  
6. 279759 5. 749331 6. 134462 6. 140229 5. 815873 6. 83331 6. 092233 5. 887543 5. 299922  
5. 105262 5. 384222 4. 689456 6. 537369 5. 568799 6. 527538 5. 249481 6. 099617 5. 730827  
6. 682155 6. 265472 6. 301142 6. 744965 6. 920726 5. 734062 7. 859049 7. 578567 7. 504451  
5. 459499 5. 886538 3. 895071 5. 713774 5. 366867 5. 441259 5. 235906 4. 532978 4. 287176  
4. 128349 3. 247676 3. 982219 3. 815235 3. 897073 3. 405261 2. 785685 4. 323171 4. 091105  
6. 027275 5. 926534 5. 850934 7. 093701 6. 282176 5. 99389 6. 823105 6. 493003 6. 569852  
1. 135937 1. 272193 0. 940308 1. 261701 1. 370298 1. 144331 1. 13057 1. 531148 1. 495494  
7. 490133 7. 804583 7. 078243 6. 838645 7. 517374 6. 212949 6. 122036 5. 67568 6. 41825  
6. 38057 6. 054091 6. 340403 6. 148705 6. 863103 6. 90457 6. 865399 7. 320798 6. 990051

2. 956026 2. 649707 3. 302988 2. 028699 3. 602158 2. 605487 2. 586315 2. 655064 3. 265947  
5. 684938 5. 559725 5. 612217 5. 37322 4. 902623 5. 386103 4. 905854 5. 643252 4. 74806  
8. 782489 8. 052272 8. 819971 8. 37777 8. 815016 7. 714276 6. 946137 7. 688006 8. 205946  
4. 311157 3. 476845 5. 050821 4. 51248 4. 661087 4. 319776 3. 922425 3. 835373 4. 320278  
7. 915428 8. 440274 8. 416578 7. 944711 8. 789025 7. 823213 8. 466468 8. 116442 8. 047639  
3. 915413 2. 886674 3. 58471 2. 983036 3. 466935 3. 627923 3. 818389 2. 909557 3. 247999  
4. 194263 5. 04426 4. 516202 4. 875751 5. 570274 4. 411427 4. 500386 4. 532883 4. 567716  
4. 299015 3. 251623 4. 235254 3. 657794 3. 180767 4. 939012 3. 146831 3. 532845 3. 460526  
4. 572527 5. 122625 4. 536359 5. 425116 5. 380378 4. 678676 4. 490142 6. 58573 5. 173721  
2. 508408 2. 582719 2. 955409 3. 16596 3. 284176 2. 762501 3. 355978 2. 925418 2. 875362  
5. 210518 6. 146847 6. 625675 6. 843055 4. 603771 5. 370127 5. 706559 5. 511895 5. 227798  
4. 810325 5. 379766 5. 50717 4. 930943 6. 322509 6. 515636 5. 941982 5. 431532 6. 020556  
3. 640286 3. 532106 5. 607705 2. 276772 2. 279283 4. 084471 3. 041983 3. 315833 2. 811402  
3. 043787 2. 791893 3. 772689 2. 867862 4. 285187 3. 109522 3. 357427 2. 863252 3. 868966  
7. 45185 8. 285919 8. 071699 7. 188135 8. 328252 7. 649208 7. 66828 7. 371249 7. 614597  
5. 876048 4. 236381 4. 893921 4. 24285 4. 306533 5. 857559 4. 493476 4. 5122 4. 306651  
3. 780449 3. 384786 3. 932454 4. 342701 3. 68271 3. 892231 4. 681355 3. 803526 4. 244295  
4. 517678 3. 899088 4. 470813 4. 095127 4. 425893 4. 075238 4. 853047 5. 009421 3. 967872  
5. 567186 5. 007923 5. 806087 5. 643862 5. 540585 5. 150128 5. 588688 5. 501303 4. 51951  
6. 133192 5. 762141 5. 578438 5. 337739 5. 797875 6. 144497 4. 941008 5. 787517 5. 401112  
4. 520334 4. 325373 3. 986467 3. 47627 4. 541274 4. 36262 3. 26766 3. 563996 3. 133316  
1. 217668 1. 309242 1. 123158 1. 949642 1. 160266 0. 90032 1. 308378 1. 237497 1. 207139  
2. 903498 4. 351607 4. 212534 3. 120494 3. 988438 3. 520881 3. 86143 3. 869637 4. 025131  
6. 195094 7. 088965 6. 542765 5. 955807 7. 18228 6. 530151 7. 161691 7. 128414 6. 940672  
7. 875743 8. 624599 8. 162163 7. 542183 8. 44575 7. 915647 8. 432954 8. 122384 7. 363874  
6. 479926 7. 322828 6. 631348 6. 671249 7. 581012 6. 576907 6. 511853 6. 051758 5. 697196  
3. 008581 2. 826467 3. 307682 4. 242944 2. 621918 3. 433367 2. 49101 2. 390476 2. 683971  
4. 004083 3. 683043 2. 706268 3. 358709 3. 260442 3. 307194 3. 119741 2. 76348 2. 677391  
6. 570864 7. 698574 7. 741381 7. 999501 6. 871064 7. 313621 6. 78677 7. 122468 7. 003477  
4. 001423 3. 66372 4. 226335 3. 465998 4. 064985 3. 381413 5. 360016 4. 467715 4. 259038  
3. 195146 3. 302835 3. 526304 3. 366875 2. 959838 3. 141589 3. 017504 3. 893004 2. 768835  
1. 147551 2. 260169 1. 391894 1. 364474 1. 832911 1. 171211 1. 322791 1. 496219 1. 73252  
1. 912105 1. 873922 1. 40985 1. 533177 1. 276845 1. 407004 1. 246076 1. 011562 1. 146891  
7. 203646 6. 815745 6. 552566 6. 67928 7. 862275 7. 562743 8. 117069 7. 893364 7. 529061  
1. 820365 1. 598213 2. 064812 2. 389606 1. 500596 2. 124291 1. 156272 1. 812186 1. 462052  
6. 41109 6. 452909 5. 682259 6. 753244 6. 010646 4. 323537 7. 039503 7. 172895 7. 178512  
7. 127343 6. 858987 7. 497116 7. 408264 7. 19106 7. 886927 7. 822038 8. 021043 7. 908511  
3. 868684 2. 708876 3. 191198 3. 666633 3. 871965 3. 365104 4. 749633 4. 511232 4. 27987  
2. 600433 1. 866631 2. 548103 2. 731396 2. 242971 3. 405238 2. 819129 3. 59693 2. 940266  
5. 78887 6. 430699 5. 936172 6. 479023 5. 841626 4. 917586 5. 989338 6. 044437 5. 99441  
3. 672923 2. 830582 3. 414227 2. 578851 2. 943725 5. 075892 5. 009944 6. 158887 4. 509827  
3. 122238 3. 170794 2. 963147 2. 705092 3. 246778 4. 255893 2. 614632 4. 001027 3. 925276  
7. 583048 5. 709913 7. 519647 5. 91742 6. 375022 6. 393882 6. 322131 5. 848937 6. 536874  
3. 446494 3. 567363 2. 923105 3. 23402 2. 874306 3. 504275 2. 934627 3. 315833 3. 260381  
7. 128608 7. 463571 7. 448829 6. 465646 7. 193081 5. 959038 6. 4954 6. 558593 6. 186986  
4. 794475 3. 858439 2. 455768 4. 499677 4. 305835 5. 396966 5. 163753 3. 310828 4. 819751  
5. 498693 6. 962284 6. 424969 5. 997092 6. 702503 5. 929244 5. 69319 4. 890022 5. 059604  
9. 435452 7. 787855 9. 016143 8. 470573 7. 721845 8. 011203 8. 114001 6. 580573 4. 588744  
4. 780559 4. 233918 5. 09496 5. 851336 4. 736012 4. 211111 4. 091081 5. 480303 6. 091072  
1. 869504 2. 440211 2. 110653 2. 410563 2. 195131 1. 92158 1. 387208 1. 687168 1. 829616  
3. 640327 4. 295149 3. 779085 4. 680372 3. 691136 3. 105381 3. 584491 4. 012735 4. 114378

4. 960557 5. 014044 4. 360966 5. 283177 5. 589709 5. 093164 5. 713889 5. 045844 5. 753986  
5. 637214 6. 163213 6. 600059 6. 749338 6. 127677 4. 737102 6. 775483 6. 709514 6. 304294  
4. 914221 3. 560983 5. 126209 3. 978799 4. 708954 6. 105004 5. 793837 5. 561867 5. 76132  
3. 714761 2. 483501 3. 225044 3. 465207 2. 670314 3. 308135 3. 0589 3. 956729 3. 599468  
3. 545681 2. 86561 3. 664795 3. 310227 3. 174926 3. 197506 4. 377066 4. 431613 4. 411685  
5. 045092 5. 798224 5. 842323 5. 856148 5. 166717 4. 698983 5. 224695 5. 7931 6. 069344  
5. 86087 5. 65243 5. 515192 4. 719178 5. 615497 5. 234104 4. 64408 3. 215129 4. 155857  
4. 852796 5. 38114 4. 394899 3. 675527 5. 031785 3. 380851 4. 493089 4. 445272 4. 022555  
4. 13939 4. 372032 5. 447081 4. 597898 4. 403528 4. 090649 4. 526139 3. 971674 4. 555693  
5. 562439 5. 685874 4. 718764 4. 261674 5. 470273 5. 720116 6. 100971 4. 523416 4. 860991  
2. 466444 3. 465292 2. 33323 2. 612739 2. 35887 3. 346914 2. 430287 2. 551685 2. 904246  
1. 616403 2. 100579 1. 727527 1. 667833 1. 512285 1. 903217 1. 915349 1. 885451 2. 516793  
2. 831269 2. 786098 2. 373591 1. 846864 2. 232803 1. 760221 1. 91737 1. 922821 1. 362268  
1. 729675 2. 215012 2. 199802 2. 675798 2. 660037 2. 67092 2. 122005 2. 671242 2. 452156  
3. 267799 3. 443343 3. 265356 4. 444216 3. 476073 2. 340431 3. 47285 4. 213035 4. 655408  
1. 175534 1. 384327 1. 522666 1. 484326 1. 522501 2. 056084 1. 465988 1. 530837 1. 383863  
2. 285713 3. 014842 2. 41722 1. 669719 2. 094825 3. 663125 2. 225361 3. 129161 2. 164844  
5. 471597 5. 966461 5. 501164 3. 603882 5. 448574 4. 409107 5. 807128 5. 298241 5. 591696  
3. 786973 4. 656944 4. 763323 4. 015804 4. 269696 4. 530892 3. 486764 4. 4138 3. 928605  
4. 813358 5. 887601 4. 877231 4. 122388 5. 68858 6. 312553 4. 441979 6. 996813 5. 83315  
1. 488157 1. 405708 2. 205016 2. 134823 1. 883006 1. 767424 1. 964358 2. 032245 1. 840081  
3. 687645 3. 618438 4. 153868 3. 872784 4. 027689 4. 071064 3. 532822 4. 565258 3. 759856  
3. 935372 3. 152563 4. 14928 3. 213937 3. 965445 2. 778287 2. 746374 2. 422375 3. 018499  
8. 266155 7. 282923 7. 27421 6. 712354 7. 325311 7. 00989 6. 623527 4. 869933 3. 499427  
2. 597756 2. 87953 2. 695591 2. 252063 2. 692798 3. 375008 2. 579982 3. 717097 2. 547054  
2. 330891 1. 713816 1. 921194 2. 01462 2. 109342 2. 01993 2. 212052 2. 200658 1. 255751  
3. 456049 2. 046983 1. 790354 2. 176023 1. 970073 1. 757863 1. 59307 1. 757323 2. 210667  
2. 65543 2. 38996 2. 660267 3. 095958 2. 804068 2. 926553 2. 239799 2. 425199 3. 050351  
2. 042794 2. 152098 2. 120421 2. 256721 2. 041116 3. 775894 1. 937012 2. 308929 3. 163813  
1. 959848 2. 278338 2. 340971 2. 338917 1. 531879 2. 317019 1. 427833 1. 66415 2. 500181  
5. 131851 5. 769227 5. 824526 4. 491299 5. 110166 4. 576505 5. 035955 5. 732693 5. 354371  
7. 930235 5. 604192 5. 397901 6. 593119 5. 137252 6. 454135 5. 556292 2. 605854 2. 584219  
5. 647954 5. 789276 5. 612441 5. 207582 4. 913951 5. 481747 5. 625308 5. 277405 5. 342139  
3. 137706 2. 525392 4. 083216 3. 989801 5. 325504 3. 504389 3. 388455 4. 066448 4. 889067  
1. 273017 1. 637404 1. 552076 1. 201707 1. 092716 1. 290009 1. 287653 1. 17186 2. 40982  
2. 707582 2. 652586 3. 468793 3. 299021 3. 693735 4. 330339 3. 522271 3. 673921 4. 078943  
4. 523924 4. 91893 4. 624615 4. 852658 5. 196447 4. 509918 4. 827619 5. 418058 4. 419107  
7. 179349 6. 991343 6. 343079 6. 724506 7. 423404 7. 822897 7. 26689 6. 411205 6. 562105  
3. 443987 3. 387635 2. 722569 4. 636672 1. 730402 3. 320279 2. 086612 1. 38846 2. 178771  
1. 625064 1. 359654 2. 334359 2. 132273 1. 979462 2. 112896 1. 925362 1. 806053 1. 340629  
2. 992184 2. 513278 2. 946432 2. 527101 2. 557844 2. 486733 2. 117086 2. 416058 2. 592221  
5. 175051 5. 831179 4. 262314 5. 503777 5. 226882 3. 554926 5. 398771 2. 931724 5. 126551  
4. 435783 3. 428726 5. 505433 4. 454502 4. 640546 4. 269175 4. 379612 4. 994673 5. 10695  
5. 617323 6. 501406 6. 016304 6. 928993 6. 947687 6. 009307 6. 638401 6. 432194 7. 073153  
1. 182617 1. 531539 1. 750091 1. 435092 2. 756961 3. 638111 1. 838937 1. 825525 1. 589984  
5. 531732 4. 999658 5. 361137 5. 688616 5. 769423 6. 368155 4. 998825 5. 340613 5. 623099  
4. 574907 4. 68961 3. 654258 4. 159018 4. 811589 4. 883272 4. 717337 5. 379903 5. 288163  
2. 528116 3. 929669 4. 873141 2. 862313 3. 407672 3. 468287 3. 043654 3. 365005 3. 159974  
8. 47183 8. 094287 7. 372051 8. 236812 8. 316632 8. 053149 7. 466299 7. 926133 7. 964299  
7. 208932 6. 83546 6. 358228 6. 72971 6. 608463 7. 028812 6. 832955 7. 194489 7. 319781  
7. 181626 5. 677196 6. 783169 6. 894186 6. 975822 6. 485545 5. 963178 6. 731312 6. 203397

6. 555406 6. 559076 6. 909596 6. 663633 6. 310716 5. 756075 6. 293797 6. 6839 6. 567964  
6. 57464 6. 233118 6. 919445 5. 5517 6. 698148 6. 943444 5. 901095 6. 090619 6. 172715  
2. 771399 2. 41235 1. 371435 3. 086741 1. 939039 2. 272067 2. 500087 2. 338655 1. 444691  
9. 170443 9. 1124 8. 794952 9. 610761 9. 040237 9. 812886 9. 215875 9. 206898 9. 037961  
5. 413626 4. 95365 5. 080838 5. 755326 5. 367749 5. 243337 5. 395124 5. 036565 5. 399661  
5. 799897 4. 756068 5. 653018 5. 652379 5. 892401 6. 784022 5. 527946 6. 215854 6. 598925  
7. 372882 7. 106279 7. 441653 7. 874592 7. 105389 7. 580995 7. 014044 7. 524508 7. 176036  
4. 62412 2. 770095 3. 922381 4. 387736 4. 209023 4. 66359 4. 426084 5. 533735 5. 385632  
6. 034555 5. 332337 5. 602472 6. 652603 5. 549818 6. 112064 6. 096538 6. 424243 6. 411282  
4. 605501 4. 419562 3. 457226 4. 743028 4. 653135 4. 835797 4. 414228 3. 761563 4. 524528  
6. 572883 7. 034295 6. 258959 6. 49589 6. 322706 6. 626326 7. 279042 7. 03305 7. 478502  
4. 029201 5. 388331 3. 990724 5. 115673 5. 55188 3. 010938 3. 115309 2. 859313 3. 729035  
4. 652246 4. 102457 4. 299214 4. 640139 4. 278544 4. 458923 4. 516049 4. 962235 4. 961412  
4. 332499 3. 823246 4. 080623 4. 92936 4. 519828 4. 52339 5. 146709 4. 991139 5. 095824  
6. 071543 6. 581778 5. 962752 6. 980546 7. 066747 7. 544729 7. 041372 7. 112355 6. 509236  
6. 730704 6. 683343 6. 941192 6. 240435 7. 972864 6. 707737 6. 888006 7. 861863 7. 308937  
6. 034021 6. 569695 6. 24593 6. 086936 6. 470648 6. 875048 6. 788321 6. 009552 5. 740619  
2. 86414 1. 98178 2. 727959 2. 615303 2. 371972 2. 757176 2. 258523 2. 153827 2. 025027  
1. 762592 1. 891537 1. 218854 3. 440178 1. 34111 1. 890104 1. 761114 1. 664968 0. 966209  
4. 427695 3. 608667 3. 202294 3. 003515 3. 399426 3. 033947 3. 337699 3. 08025 2. 458779  
1. 604433 2. 028167 1. 061407 2. 657049 1. 591047 1. 074786 1. 230784 1. 417213 1. 850971  
2. 059693 2. 096075 1. 251044 1. 804724 0. 971131 1. 679733 1. 754967 1. 353059 1. 415891  
6. 817043 6. 674835 7. 804313 7. 68959 6. 964463 6. 870941 7. 307971 7. 200714 7. 845162  
3. 009061 2. 577316 0. 93079 0. 887618 1. 087752 1. 056969 1. 159543 1. 631941 1. 046118  
1. 646159 3. 839963 4. 103226 1. 074952 3. 621898 2. 806217 2. 762735 3. 388329 4. 666104  
4. 625954 5. 102918 5. 052151 4. 617718 6. 179497 4. 502626 4. 062063 5. 838847 5. 48646  
2. 927124 1. 927918 2. 516973 3. 18386 2. 702561 1. 989648 2. 293723 2. 458484 2. 33776  
5. 588067 3. 703641 4. 333735 4. 104975 5. 584479 4. 050279 4. 637838 5. 983648 5. 480622  
2. 470787 2. 475766 1. 878992 1. 977696 2. 637998 2. 913028 2. 351985 2. 134577 3. 043114  
2. 891503 2. 33916 1. 522223 1. 975702 1. 346971 2. 068792 3. 106098 2. 749284 1. 803263  
7. 859002 8. 307766 7. 794825 7. 817732 8. 332109 7. 409677 7. 644578 7. 924654 7. 686632  
3. 714099 3. 578908 4. 345005 5. 455128 4. 653769 5. 707403 4. 304586 5. 210877 4. 880105  
6. 929938 5. 812376 6. 180905 5. 16554 6. 409211 6. 401592 7. 125321 7. 091595 7. 306592  
7. 330166 4. 593112 5. 691899 3. 354834 5. 460051 7. 121294 5. 380903 3. 51011 3. 523211  
1. 292448 1. 392249 1. 292448 0. 632511 0. 967841 1. 200722 1. 332295 0. 957658 1. 916047  
1. 479086 1. 855096 1. 818137 2. 153604 1. 996396 1. 417858 2. 688854 3. 193823 1. 736925  
3. 701735 3. 87219 4. 2981 5. 443239 4. 014517 4. 295528 4. 861225 4. 189165 4. 830448  
1. 480234 1. 946744 1. 872854 1. 161167 0. 948506 1. 260182 0. 92752 1. 788815 1. 371113  
6. 890379 7. 189436 6. 747942 6. 663927 6. 838778 5. 526997 6. 90009 6. 654517 6. 665111  
2. 8036 2. 950271 3. 410696 2. 057158 2. 98523 2. 815761 2. 660681 3. 381706 2. 960786  
2. 162946 2. 055095 1. 723716 2. 472703 2. 5624 2. 330836 1. 482834 2. 041388 2. 439677  
2. 542838 2. 801924 3. 50345 2. 107528 3. 528389 2. 206854 1. 824186 2. 62985 2. 764817  
2. 934133 2. 186592 2. 95041 2. 743479 3. 172431 3. 27741 2. 44733 2. 837004 2. 838033  
1. 93307 1. 612733 1. 733168 2. 727671 1. 463099 2. 32849 2. 305835 1. 499057 2. 472976  
4. 530566 5. 4366 5. 549357 4. 484721 4. 761966 5. 703626 4. 888599 4. 90849 5. 436305  
4. 980829 5. 748967 4. 826724 5. 110706 5. 254092 5. 220113 5. 942585 5. 353244 5. 802634  
3. 855989 3. 339695 3. 462344 4. 581827 3. 472059 4. 216785 3. 236626 3. 510306 4. 206521  
4. 931898 4. 514495 5. 558535 5. 056403 4. 474232 3. 945318 4. 835022 4. 492818 3. 84891  
2. 970091 2. 693854 2. 134683 3. 466255 3. 308344 2. 801973 2. 905737 3. 638407 3. 45931  
4. 158941 3. 883356 3. 415053 3. 60299 2. 834979 3. 473061 2. 550673 4. 255983 2. 892068  
4. 276388 2. 461232 4. 227688 2. 406343 4. 298289 4. 602438 3. 992133 3. 679612 4. 412888

4. 099718 3. 435153 3. 921859 3. 727779 4. 121325 3. 311554 3. 892774 4. 716031 4. 33258  
4. 991095 5. 107762 4. 804656 5. 828243 5. 468755 5. 013246 6. 752661 7. 568958 8. 145522  
5. 207641 5. 35008 5. 342429 6. 179032 6. 700541 7. 76338 6. 950626 6. 186393 5. 784054  
3. 143219 3. 348653 3. 175556 3. 157707 3. 80706 3. 257893 3. 521521 3. 330406 2. 799877  
5. 435248 5. 258506 6. 080675 5. 374428 5. 352604 5. 03235 5. 376511 4. 566225 5. 427222  
5. 513929 5. 422689 5. 960677 5. 784197 6. 077574 6. 080035 5. 86797 5. 334553 6. 004168  
8. 27526 8. 793007 8. 660995 9. 085909 8. 376014 8. 210651 8. 055545 7. 957088 8. 857362  
1. 032113 1. 720998 1. 8315 1. 561594 1. 362904 1. 919726 1. 621421 1. 603154 1. 670155  
1. 322213 3. 044183 1. 509908 1. 35868 2. 079107 1. 894964 2. 049699 1. 431174 1. 870734  
7. 305177 6. 774954 7. 29384 7. 133075 7. 982121 6. 659038 6. 817968 6. 83568 7. 235123  
4. 291856 3. 865277 3. 944497 4. 879562 4. 100322 3. 81583 4. 611376 3. 917087 3. 830221  
8. 971434 8. 725346 8. 543133 9. 059642 8. 617959 8. 357027 8. 924761 8. 622707 9. 028932  
1. 817508 2. 053555 1. 248413 2. 298519 1. 680802 2. 226375 1. 687425 1. 881786 1. 692332  
1. 195861 1. 484549 1. 901808 1. 316125 1. 835763 3. 191251 1. 890467 0. 956809 2. 380248  
3. 644533 4. 321523 3. 595693 3. 652141 4. 511844 5. 596345 2. 914645 4. 46319 4. 425649  
3. 718828 1. 418889 1. 234694 1. 884026 1. 16194 1. 648666 1. 623066 1. 949755 1. 086818  
5. 031825 5. 349111 6. 48482 5. 422406 4. 310237 5. 134029 3. 807205 4. 090205 3. 081208  
4. 067441 6. 056484 4. 477356 5. 553025 5. 384006 5. 310873 5. 235856 4. 818723 4. 76458  
4. 337951 3. 741742 3. 876798 2. 684319 3. 979063 5. 125878 3. 441121 3. 213198 3. 55318  
2. 510987 1. 185476 0. 925341 3. 205263 1. 634504 1. 576366 1. 936043 1. 727559 1. 427971  
3. 550317 3. 321698 3. 119604 2. 943645 2. 438948 3. 160349 2. 739116 2. 52964 2. 003849  
9. 832006 8. 580958 8. 016315 8. 924543 7. 907746 9. 68725 8. 373894 6. 763918 5. 886505  
2. 184781 2. 070393 2. 063985 3. 460357 1. 969832 3. 344697 2. 425348 2. 560332 2. 351396  
7. 703146 6. 91072 7. 181548 6. 311452 6. 666942 7. 789734 7. 349586 6. 973775 6. 670903  
1. 49016 1. 906078 1. 925281 1. 679239 1. 58105 1. 300048 1. 485632 1. 550483 1. 632286  
3. 919811 1. 96546 1. 885142 6. 199957 2. 39025 3. 319776 4. 359957 2. 204426 4. 971705  
3. 407331 2. 507163 3. 747728 3. 625229 3. 700069 4. 415048 4. 04881 3. 201619 4. 127895  
4. 14926 4. 004225 3. 866169 3. 139223 3. 618018 4. 490596 4. 374382 3. 927162 3. 968554  
2. 366801 1. 512501 1. 784046 2. 76338 2. 238089 3. 383227 2. 797143 2. 464212 2. 628392  
1. 841714 2. 041451 1. 798399 2. 346873 2. 552699 2. 138318 2. 159815 2. 074037 2. 743529  
1. 279986 2. 151049 1. 025369 1. 369167 2. 377348 2. 691774 2. 138721 1. 115924 1. 791395  
5. 302838 5. 585213 4. 362127 5. 354243 3. 976606 4. 933927 5. 833842 5. 797802 5. 42281  
2. 138507 1. 689312 1. 569524 2. 094637 1. 84712 2. 286174 1. 918495 2. 743704 1. 793087  
5. 623173 4. 320829 4. 270184 4. 73 4. 891845 6. 293216 4. 019579 4. 316393 3. 77335  
6. 447937 6. 260421 5. 86189 5. 719135 6. 543095 4. 988437 5. 705694 5. 597882 5. 08387  
4. 701459 4. 957214 3. 917195 4. 392296 3. 944457 3. 199771 4. 396287 4. 297632 4. 391997  
6. 198944 7. 07227 6. 910016 6. 569949 6. 517241 6. 717713 7. 249106 6. 833306 7. 384572  
3. 666918 2. 747347 3. 913041 2. 654428 3. 072325 3. 46096 3. 542175 4. 106631 3. 748457  
2. 801449 3. 351707 4. 384101 3. 560158 3. 40557 3. 404609 3. 309675 2. 34061 2. 976135  
2. 945693 2. 06324 3. 120095 2. 879699 3. 478143 3. 191581 2. 691391 3. 098917 2. 778516  
7. 321566 6. 602052 7. 307873 7. 366351 7. 49611 7. 417716 7. 321971 7. 533006 7. 514248  
5. 947584 5. 700133 5. 74466 6. 797051 6. 595855 6. 302348 6. 638951 6. 319276 6. 99382  
3. 885236 2. 907802 3. 073117 3. 638614 2. 596238 3. 737563 2. 462716 2. 735072 4. 304349  
3. 274822 3. 349907 2. 36702 2. 727152 3. 844843 1. 76854 3. 033782 1. 463396 2. 503509  
1. 878322 1. 946139 2. 276816 2. 2521 2. 306784 1. 64636 1. 921202 2. 012093 2. 122773  
5. 976628 7. 16727 4. 990651 5. 892855 6. 117863 4. 799828 5. 77631 5. 464455 5. 952252  
2. 343652 1. 765902 1. 764704 1. 887667 2. 131195 1. 699271 2. 143622 2. 577439 2. 97798  
2. 020267 1. 877954 2. 101361 1. 753229 1. 9935 1. 784305 1. 967998 2. 026706 2. 026417  
11. 72412 11. 13321 11. 6421 11. 62828 10. 9299 11. 18703 10. 48755 10. 58185 10. 74113  
6. 952435 2. 844377 5. 076576 7. 575708 2. 13317 5. 614919 3. 151613 3. 520105 3. 570887  
4. 181259 4. 488594 5. 944084 5. 210612 4. 296087 5. 168412 5. 47038 5. 437394 5. 195689

1. 019838 0. 808673 1. 084115 1. 606798 0. 549839 1. 094059 0. 800058 0. 952801 1. 77922  
1. 041552 1. 727637 1. 322764 1. 957494 0. 862233 1. 487678 1. 071375 1. 306887 1. 422026  
1. 838231 1. 652347 2. 873009 1. 426466 1. 610857 1. 026155 2. 648129 2. 553023 1. 654285  
1. 799303 2. 476417 2. 079586 2. 135074 2. 571355 1. 864194 2. 456683 3. 2007 1. 93813  
3. 360203 3. 148012 3. 716936 2. 901031 3. 845088 4. 150971 4. 14649 2. 558676 3. 664963  
3. 82963 3. 518138 1. 983094 2. 618795 3. 239204 1. 401406 2. 31472 3. 865178 2. 198113  
0. 581516 1. 449427 1. 774394 2. 126701 0. 687644 1. 763843 0. 699808 1. 283083 0. 749074  
2. 451524 2. 587503 1. 487285 1. 548239 2. 018697 1. 882762 1. 796332 2. 59788 1. 865124  
2. 317973 2. 300548 2. 720816 3. 831722 2. 978512 2. 685859 2. 373054 2. 611774 2. 33614  
3. 771008 5. 712222 4. 186268 3. 510399 4. 35271 3. 968116 4. 492425 3. 786445 4. 585652  
2. 389934 2. 694505 3. 000706 0. 405543 0. 86122 1. 443068 1. 103401 0. 604381 2. 238918  
1. 337128 2. 850661 3. 590378 2. 918207 2. 359937 1. 331519 2. 42055 1. 675871 2. 161018  
3. 13304 3. 569044 3. 711987 4. 12932 4. 542814 3. 345085 2. 948952 3. 123828 3. 348944  
3. 840647 3. 483 3. 559392 4. 580612 4. 397358 4. 939001 3. 137236 4. 025197 3. 952671  
1. 304177 1. 726522 1. 249805 1. 142521 1. 317247 1. 851591 1. 594772 1. 481677 1. 93074  
2. 066036 1. 917901 2. 092465 2. 091264 2. 512675 1. 852665 1. 679298 1. 971866 3. 53793  
1. 181727 3. 932875 1. 322315 0. 529301 1. 317407 1. 8683 1. 361276 2. 211695 1. 161931  
2. 062831 2. 734758 2. 678288 2. 339755 3. 127035 2. 74015 2. 138778 2. 157093 2. 340983  
1. 886585 2. 612426 0. 972316 1. 366036 2. 339586 1. 722881 1. 314273 1. 841474 1. 138928  
4. 019864 4. 362801 5. 548406 3. 405149 4. 701304 4. 596402 2. 82507 3. 157294 3. 537737  
2. 089903 2. 575801 2. 597058 1. 98337 2. 552233 2. 340798 2. 353296 2. 404947 2. 266554  
2. 625156 2. 109932 3. 532503 2. 601549 2. 948624 1. 755022 2. 197524 3. 140987 2. 757397  
2. 025713 3. 057677 0. 973498 2. 276396 1. 7531 2. 410656 2. 90639 2. 628836 3. 325552  
6. 825723 6. 812239 7. 226216 6. 89762 7. 745452 7. 625372 8. 283781 7. 116896 8. 006871  
3. 51493 3. 65138 4. 05946 3. 953155 4. 093974 4. 622046 3. 192636 4. 454246 4. 267891  
1. 479516 1. 632045 1. 668265 3. 27654 2. 733503 3. 641125 3. 088976 1. 095619 2. 064228  
1. 855256 1. 878233 1. 782455 2. 136471 1. 616354 2. 487592 2. 19714 1. 960832 1. 346  
4. 001852 3. 634774 4. 454785 3. 689261 4. 369846 4. 324275 3. 703435 3. 683314 3. 632989  
3. 345836 4. 323558 3. 554501 3. 611604 2. 97877 3. 490431 3. 032955 2. 279795 2. 792363  
1. 164204 1. 967677 2. 884166 3. 326244 0. 871536 1. 630607 2. 27209 1. 32286 1. 17829  
3. 893282 5. 0041 4. 191302 4. 696704 4. 633522 5. 406666 4. 213556 4. 400838 1. 649526  
2. 286013 3. 068764 2. 524048 1. 021913 1. 141369 2. 3538 1. 048792 1. 428124 1. 838578  
1. 949954 2. 517736 2. 304165 2. 500136 2. 125158 2. 784911 1. 760478 2. 384662 1. 80218  
3. 296926 3. 49285 3. 916795 3. 832257 4. 002433 3. 355436 3. 05873 4. 534295 3. 37481  
1. 562578 1. 762473 0. 835559 2. 403542 1. 143362 1. 531672 2. 595513 1. 479283 1. 987693  
5. 04582 2. 580782 6. 301289 3. 957355 3. 865495 1. 725962 3. 9956 0. 946215 1. 011699  
4. 410468 3. 012234 4. 270299 4. 275115 2. 06591 3. 059312 3. 079535 3. 09627 2. 046582  
1. 646436 1. 345417 1. 841258 1. 512216 1. 985346 1. 776567 1. 494559 1. 999092 1. 986516  
3. 49847 2. 704998 2. 594587 2. 586876 2. 882278 3. 039712 2. 480075 3. 562092 2. 487908  
7. 237254 5. 116961 6. 404656 6. 285144 5. 03632 7. 463967 6. 339314 3. 696814 5. 413508  
1. 028363 1. 033079 0. 282657 0. 716863 0. 4093 2. 446543 0. 38591 1. 004671 0. 703912  
2. 957163 3. 197997 2. 674522 2. 966937 2. 00534 3. 100166 2. 447148 2. 234051 2. 23564  
1. 18505 1. 889805 3. 497434 3. 203248 2. 346264 0. 841901 1. 947509 2. 528674 2. 340162  
2. 947252 3. 241144 3. 679361 2. 798617 3. 866152 3. 586506 4. 052484 2. 628469 2. 204471  
2. 461583 2. 280236 2. 65004 3. 398108 2. 367607 2. 024573 2. 720512 2. 947371 2. 184259  
3. 92415 2. 593231 3. 805019 3. 129329 3. 051861 3. 560169 2. 83408 2. 840348 3. 156636  
1. 893453 1. 526878 2. 042394 2. 182366 2. 201798 1. 576299 2. 012596 1. 753331 1. 997239  
3. 838736 2. 856148 2. 560719 1. 422149 2. 662677 2. 29929 2. 559673 2. 162536 2. 959615  
1. 30339 1. 657235 1. 705963 1. 618049 1. 74319 1. 974109 1. 64398 1. 646457 1. 089137  
5. 716517 2. 277312 3. 010087 5. 45571 4. 781072 3. 165511 5. 822388 3. 398399 2. 623008  
1. 33168 2. 350847 1. 385936 1. 709963 1. 654547 1. 477677 1. 58524 1. 711237 1. 441243

4. 86426 4. 348492 2. 791013 3. 710135 2. 886602 5. 07656 3. 807123 3. 943236 3. 943181  
1. 819302 2. 733911 1. 716489 4. 159421 2. 808559 4. 227341 2. 010984 1. 848344 2. 399926  
4. 771624 4. 304478 4. 267258 4. 79271 4. 42534 4. 355384 3. 175523 3. 166235 2. 232316  
3. 548298 4. 119321 4. 074869 3. 521183 3. 491985 4. 833732 5. 335673 4. 658769 4. 819288  
1. 127457 2. 05423 1. 576568 2. 076006 0. 846359 2. 888444 1. 399266 3. 653108 1. 482131  
1. 11417 2. 604955 1. 706608 1. 923376 1. 8152 1. 178354 1. 074849 1. 571603 2. 309184  
1. 962745 3. 436691 3. 626338 4. 397146 3. 070291 3. 752683 3. 447727 2. 110892 2. 900374  
9. 070947 8. 063561 8. 730166 8. 841499 6. 629872 7. 182904 6. 759402 6. 340945 6. 090706  
3. 918353 3. 696955 4. 28802 3. 692582 5. 815084 3. 299617 2. 710724 3. 428572 2. 664489  
4. 71603 4. 304364 2. 977314 5. 457952 2. 896994 3. 414459 5. 015149 2. 447993 1. 201602  
2. 495629 2. 538317 3. 43296 1. 186197 3. 484276 1. 294791 2. 222965 2. 200879 1. 462568  
2. 137138 2. 260657 3. 704055 3. 532856 2. 730904 3. 901283 3. 827032 2. 046431 2. 265083  
1. 708871 1. 989987 1. 817282 1. 362638 1. 8234 2. 088579 1. 608511 1. 563083 2. 434138  
3. 317762 2. 613402 2. 278599 1. 704681 2. 531401 2. 149011 2. 469553 2. 126936 1. 841268  
5. 673272 6. 802469 6. 162909 5. 317402 4. 732081 4. 489269 6. 390507 5. 248008 4. 547796  
3. 476506 3. 043241 4. 765297 3. 62529 5. 360941 4. 540945 5. 090738 4. 670924 4. 7378  
2. 165253 2. 871147 1. 848989 2. 649451 1. 946224 1. 958355 2. 02868 2. 477924 2. 134815  
3. 623171 4. 881407 3. 287614 5. 106911 5. 442136 2. 039166 2. 429009 2. 056431 1. 970887  
1. 853217 2. 051723 2. 144146 1. 860052 1. 865809 1. 825923 1. 928003 1. 939075 1. 821841  
3. 671678 2. 361677 2. 577138 4. 950629 3. 7926 3. 420779 3. 898441 2. 401814 4. 831745  
1. 823132 2. 323689 2. 212038 2. 699833 2. 567792 2. 166964 1. 863252 2. 092215 2. 336164  
1. 146439 2. 10048 1. 378078 1. 767953 1. 192676 1. 007937 1. 048042 0. 944236 2. 140992  
2. 94123 1. 211039 2. 710275 1. 168455 4. 412295 5. 680874 3. 995253 2. 601365 3. 133281  
1. 875332 1. 976783 1. 748286 0. 697293 1. 721191 1. 614738 1. 293305 1. 615302 1. 184026  
3. 375865 4. 020605 2. 297503 1. 481811 4. 325885 1. 167433 1. 817998 1. 209612 2. 884937  
4. 222982 3. 631266 4. 452753 4. 779907 4. 274198 4. 731713 5. 438825 5. 164934 6. 026271  
2. 799062 1. 9838 2. 245241 2. 565368 1. 863076 2. 090347 1. 180637 2. 432266 1. 98409  
3. 117524 4. 294219 3. 516666 4. 100253 3. 086594 3. 655676 3. 560182 5. 970938 5. 314688  
5. 270287 4. 496224 5. 365793 3. 245536 3. 104866 5. 234424 4. 232615 3. 675492 2. 819048  
2. 20483 1. 748113 1. 957232 2. 459444 2. 481724 1. 747192 2. 120678 2. 377864 1. 611029  
2. 880394 1. 738065 3. 884779 2. 15932 2. 27755 2. 134263 1. 158793 1. 297648 1. 058566  
4. 909929 3. 557474 4. 738451 3. 373577 3. 628864 4. 88043 3. 696214 3. 605277 3. 07983  
2. 315107 2. 052051 2. 185376 2. 143215 2. 85536 2. 678532 2. 582155 3. 549567 2. 647851  
7. 681708 7. 246753 7. 700341 7. 78203 6. 217653 3. 414165 6. 474072 6. 300062 6. 016651  
5. 808765 6. 08425 5. 46947 5. 435617 5. 18447 5. 831765 6. 122332 5. 359419 6. 034315  
7. 65587 7. 043649 6. 091099 7. 653798 6. 118637 6. 582519 6. 366348 4. 570506 7. 826714  
5. 265062 4. 663187 5. 471033 5. 611872 5. 287518 2. 795391 6. 091787 5. 230475 6. 471473  
4. 637181 3. 68731 3. 914467 4. 234666 4. 721125 4. 866284 5. 526861 5. 352051 5. 249133  
8. 808854 6. 791911 7. 521022 7. 454631 6. 912272 8. 407895 7. 244739 5. 480097 4. 182903  
1. 752427 1. 96171 2. 344421 1. 840549 2. 177892 1. 827888 2. 483934 2. 546537 2. 459743  
4. 740783 4. 376253 3. 196194 3. 641635 2. 112179 6. 078084 2. 339762 2. 425533 2. 676569  
2. 329833 3. 360261 1. 330631 3. 12495 2. 234274 1. 809069 1. 957707 1. 72346 1. 188185  
5. 67221 3. 724274 3. 213386 3. 936045 3. 134439 6. 190031 1. 971001 3. 58916 2. 816844  
4. 955218 5. 088875 5. 494002 5. 574153 4. 757989 5. 92109 6. 050019 5. 820239 4. 723553  
7. 977605 7. 306108 6. 850683 7. 241633 5. 833867 7. 772201 6. 818222 4. 013181 3. 563409  
9. 489448 5. 854528 8. 10489 7. 632536 6. 561723 7. 579638 7. 168088 6. 277381 4. 67673  
2. 702458 1. 85006 2. 746687 1. 810324 2. 979061 1. 633726 2. 029292 4. 08719 3. 791616  
1. 445121 1. 1692 1. 323532 1. 716596 1. 548338 1. 368642 1. 153254 1. 399015 1. 428609  
2. 030879 2. 024685 2. 307556 1. 790253 2. 166379 2. 418148 1. 924741 2. 157671 1. 944437  
1. 818294 2. 386647 2. 115141 2. 399983 1. 747417 2. 34781 2. 112628 1. 699069 1. 844612  
2. 584866 2. 089239 2. 638607 3. 94864 2. 57821 3. 498927 3. 090004 4. 034105 2. 45123

5.599872 6.59655 5.262912 2.533297 5.919002 4.163748 4.822649 5.07283 4.562674  
5.002633 5.617548 5.741693 4.164673 5.295661 4.281496 5.282018 5.765571 5.46319  
4.424358 3.923206 4.915505 4.379096 4.153437 5.70032 4.501916 5.677846 4.185183  
8.380742 7.921858 8.813401 8.086426 8.752759 8.900529 9.884224 10.65721 10.27798  
1.430028 2.010548 1.12009 1.801983 2.026847 1.437988 1.539042 1.689493 1.489947  
5.876515 6.386082 6.203806 5.05114 5.50913 6.477008 3.634054 4.735902 4.748369  
3.46845 2.540986 2.570455 2.366263 1.904313 2.222915 2.069373 1.799585 1.74774  
2.32274 2.277968 2.466337 3.760691 2.179783 3.688943 2.580966 2.478205 2.375912  
8.941581 6.866667 8.032219 7.445678 6.649116 8.937307 8.48407 6.530049 6.374486  
2.868669 2.712539 2.144325 1.841886 1.992759 2.696696 1.896781 2.115805 2.454429  
5.569817 5.009439 6.143418 5.083878 4.288 4.897246 4.75282 4.08045 4.412657  
2.697506 2.347521 2.17241 2.589634 3.223795 2.564059 2.728158 2.581116 2.822269  
5.924656 5.051353 4.798004 5.557116 5.823206 6.276909 7.357397 6.708796 6.753007  
1.834554 1.827638 1.39813 2.226517 2.104874 2.497262 1.654283 2.438361 1.42345  
2.267354 2.737686 2.213988 2.875879 1.442082 1.442764 2.494087 2.131959 1.418366  
6.981001 5.878972 6.42728 5.441057 7.836998 8.285064 7.680297 5.670868 6.113598  
8.356597 7.671659 8.208035 8.147676 7.932637 8.129051 8.469473 8.886533 9.601253  
7.969938 8.156368 7.996289 7.747801 7.678854 7.834119 7.895651 8.009473 7.868195  
6.802416 7.219006 7.210339 6.929317 7.187047 7.067865 7.336782 7.532728 7.814208  
6.164967 6.723193 5.960558 5.309473 6.349513 5.906937 6.412135 6.212858 6.068872  
6.062135 6.439829 6.171085 4.832724 6.565918 4.560921 5.659845 5.199252 4.163013  
5.776446 6.939997 6.406492 5.797359 6.810702 5.892385 6.444444 6.446971 6.02033  
8.402585 8.568537 8.866742 8.461966 8.826378 7.523374 9.058798 8.609608 8.811897  
5.466865 4.976921 5.079633 5.656641 5.476695 6.273616 5.591893 6.054995 6.124491  
3.596073 4.441864 4.979358 4.577034 4.35254 3.002736 4.244546 3.617123 4.110048  
4.884532 5.488258 5.444825 5.513062 5.724983 4.142439 5.451236 5.563745 5.238938  
3.127745 3.332799 3.394351 4.068944 3.793687 3.423555 3.674897 3.669378 3.374634  
5.516252 6.341349 5.75131 5.800478 6.167422 4.96582 5.461637 5.084192 4.98747  
3.83867 4.098778 4.92039 5.06526 4.195751 4.476782 4.319863 4.232276 4.86175  
5.708744 6.09342 5.897496 5.580842 5.771361 5.162715 5.522733 5.516226 5.738919  
3.946918 3.594236 3.30018 4.351893 4.068169 3.699606 3.969581 4.395011 3.599868  
3.727622 3.750222 4.386788 3.178022 2.706098 3.548709 3.019554 2.872016 3.392701  
6.316698 5.619815 6.466667 6.831897 6.874889 7.394096 6.687706 6.735389 6.94771  
6.775383 3.94676 5.258737 6.630591 6.257079 6.956387 5.680349 5.992725 5.973741  
7.312522 7.33464 8.089844 7.61518 7.736754 8.932842 7.950466 7.716385 8.115241  
6.476063 6.16716 6.756371 7.310669 6.074308 7.631863 7.201518 7.653279 7.326014  
4.748771 5.04951 5.796306 5.819366 4.76664 5.799629 6.706034 4.572303 5.756753  
5.296034 6.961119 7.685128 7.509282 7.180348 4.873586 7.106465 6.736531 6.692534  
2.928147 3.216864 3.552123 3.418063 2.680398 3.33417 3.515562 3.004686 3.23378  
2.374827 2.802006 3.031025 2.666643 3.151979 3.892225 3.067037 3.541675 2.595635  
7.85826 7.940302 7.93945 7.394534 7.996029 8.271532 7.3061 7.342322 7.436213  
8.098862 7.788914 7.616109 7.413938 8.053803 7.817054 8.757914 9.077828 8.574101  
0.900178 1.774494 1.120233 1.894651 1.580077 1.053651 1.367737 1.150216 1.105601  
2.072805 0.711058 2.175219 2.27641 1.066648 2.511834 1.865283 2.04454 2.86895  
2.517546 1.839096 3.312591 3.414687 2.726997 3.109069 2.888804 4.189986 2.902501  
6.991978 7.18514 7.12356 6.727855 7.473413 7.936041 6.793328 7.320386 7.47234  
7.691377 7.969644 7.789244 7.81803 8.087095 7.239897 7.954018 8.180177 8.148295  
7.467731 7.807199 7.637126 7.643218 7.836183 7.479108 7.716326 7.84517 8.208205  
4.873143 6.086648 7.030544 6.701365 6.169445 5.871372 6.5247 5.843785 6.919212  
3.810582 2.562558 2.580679 3.160377 3.347655 3.976408 3.532178 3.35067 3.004831  
4.094399 4.917929 3.048429 3.96064 4.62111 4.512409 5.587142 5.591297 5.383315



1. 708732 1. 755339 1. 562966 1. 51519 1. 273783 1. 857879 2. 247005 1. 326327 1. 572956  
3. 366941 4. 179949 3. 936381 4. 146365 3. 798414 3. 830537 5. 022945 3. 570889 4. 430361  
4. 169803 4. 728385 4. 230433 4. 850062 4. 820318 4. 093964 4. 737781 4. 524007 6. 041917  
8. 232738 8. 702957 7. 994366 7. 97631 8. 500512 8. 382473 8. 324521 7. 984565 8. 326551  
3. 819001 2. 397779 3. 277157 3. 094836 3. 733407 3. 950744 3. 801787 3. 934148 3. 815065  
6. 398829 4. 779097 5. 946359 6. 173044 5. 230176 6. 742475 6. 388063 6. 767531 6. 38558  
2. 217016 1. 800316 1. 456055 1. 619565 1. 302527 1. 206898 1. 320101 1. 219283 1. 190874  
3. 31367 3. 533642 2. 618568 3. 389824 3. 221008 4. 610054 2. 37192 2. 208669 3. 488732  
4. 368076 3. 951547 4. 288469 3. 981945 3. 418446 4. 812424 3. 195309 2. 904346 3. 363335  
6. 208545 6. 56651 6. 281459 6. 627354 6. 397544 6. 973494 7. 152107 6. 386629 6. 464528  
2. 318229 2. 929139 2. 381017 2. 226038 1. 965855 3. 014301 2. 076907 2. 30194 2. 782801  
3. 179922 2. 567521 2. 37706 3. 369152 2. 731457 3. 346282 3. 903555 4. 797921 4. 499981  
2. 769118 4. 008996 4. 262305 2. 757381 3. 366107 3. 469945 4. 77089 2. 861011 3. 501961  
3. 863952 3. 781803 5. 471937 4. 706463 4. 146878 5. 029786 3. 689084 4. 933948 4. 616612  
2. 533638 2. 597332 3. 172656 3. 002988 2. 119944 4. 748953 3. 664397 2. 748727 3. 422671  
6. 707791 7. 099602 6. 897773 6. 398811 7. 127002 6. 970114 7. 529182 6. 66333 7. 028734  
3. 760554 4. 635119 4. 816966 1. 960052 4. 862324 5. 728682 5. 275378 4. 552819 5. 545984  
2. 146391 1. 649438 1. 614831 1. 92411 2. 510251 1. 667253 1. 701265 1. 686782 2. 78906  
3. 412341 3. 491778 3. 225857 3. 595839 2. 760201 3. 50434 2. 460078 2. 99305 3. 450228  
6. 64538 7. 604717 6. 931182 6. 479586 6. 866082 6. 227661 8. 077123 8. 119962 8. 233095  
4. 370969 3. 374839 4. 329979 4. 257773 4. 197994 3. 437079 5. 249734 4. 66544 6. 30196  
5. 218663 4. 67992 4. 544234 6. 850435 6. 191738 6. 658957 6. 969044 7. 697842 8. 534464  
7. 469356 7. 540276 7. 593862 6. 566349 6. 538886 6. 993361 6. 664467 6. 586241 6. 820439  
7. 203587 6. 675624 7. 432765 7. 492299 7. 204755 8. 093802 7. 200875 7. 454836 7. 836494  
5. 923597 6. 306438 5. 737596 6. 034467 6. 54672 5. 579418 5. 191807 5. 990379 4. 961067  
6. 327292 5. 615249 6. 290083 6. 34557 6. 427506 6. 452179 6. 034092 6. 086544 6. 63673  
7. 752613 7. 513759 8. 198203 8. 269269 7. 626378 7. 679232 7. 943508 7. 217581 6. 985479  
2. 863961 2. 922118 3. 085795 3. 836649 3. 420355 3. 081274 4. 137818 3. 999509 4. 030584  
6. 78082 6. 486041 6. 210937 5. 758033 6. 675122 5. 717614 6. 292197 6. 26951 5. 692185  
6. 266914 6. 928883 5. 746066 6. 179389 7. 150602 6. 787404 6. 621636 6. 393851 6. 410113  
5. 059058 5. 051629 4. 506411 4. 8409 4. 962605 5. 359734 4. 413855 4. 788988 5. 006814  
8. 015096 8. 278557 7. 776575 8. 578702 8. 28054 8. 501351 8. 539779 8. 460171 8. 263897  
5. 498385 4. 765407 4. 376772 5. 547748 3. 93334 3. 85116 1. 912083 4. 80222 5. 485894  
7. 795601 7. 751529 7. 773589 8. 260166 8. 459722 7. 988601 7. 431611 7. 211542 7. 316455  
0. 946666 1. 818334 1. 023418 2. 653266 2. 513324 1. 570038 2. 316011 2. 601369 0. 978764  
6. 741987 7. 158502 6. 65837 6. 713887 6. 824018 6. 317072 7. 194458 6. 867116 6. 772441  
4. 540353 5. 258978 4. 858206 4. 562283 4. 490636 5. 383015 4. 137242 4. 587573 4. 845923  
6. 465874 4. 195928 4. 911739 5. 537154 3. 983049 5. 113983 6. 182048 5. 53124 5. 414552  
6. 971095 7. 13347 6. 636975 6. 458698 6. 727601 7. 027147 7. 262489 7. 212013 6. 839952  
5. 58703 5. 713188 5. 437628 4. 868893 5. 960063 5. 555352 5. 764008 5. 580693 5. 124431  
5. 569722 5. 394081 5. 419903 4. 534134 5. 883878 6. 047918 5. 869638 5. 090902 6. 119039  
3. 121569 2. 714186 3. 14665 4. 11834 3. 819217 3. 398108 2. 933843 2. 952409 3. 89753  
1. 180355 0. 930424 1. 291516 1. 428853 0. 992457 1. 620304 0. 938233 1. 298724 1. 067504  
2. 466161 1. 921061 1. 809164 3. 547692 1. 779904 1. 508783 1. 779781 2. 238262 1. 981802  
2. 746255 2. 963581 3. 207415 3. 668119 2. 404282 3. 495183 3. 63146 1. 894182 3. 786818  
2. 002814 1. 324839 0. 960257 1. 227061 1. 902184 1. 221662 0. 805513 1. 249361 1. 209321  
2. 430115 1. 813382 4. 182467 1. 614802 0. 78421 0. 88208 0. 972462 1. 616849 1. 026129  
1. 908698 2. 968646 2. 465254 1. 762456 2. 294644 1. 520436 2. 521503 1. 946271 1. 360285  
5. 395662 5. 557346 5. 117525 4. 894959 5. 409114 6. 897585 5. 344409 5. 819013 5. 710361  
7. 438926 5. 829193 7. 54333 5. 80998 2. 803373 4. 476956 5. 100278 3. 010828 3. 144205  
10. 66473 10. 89129 10. 7169 10. 60841 10. 88921 10. 9081 10. 55292 10. 35561 10. 14771

10. 0703 10. 19252 10. 17952 9. 983508 10. 29378 10. 02783 10. 01096 9. 819399 10. 01915  
8. 172574 8. 433688 7. 901249 8. 298558 7. 779398 9. 92226 8. 530888 7. 951656 8. 50047  
4. 894892 3. 515972 3. 416221 4. 296176 3. 415609 5. 778302 5. 188398 4. 323606 4. 316023  
8. 322482 7. 221939 7. 406901 8. 055383 8. 069602 7. 511918 7. 103244 7. 373457 6. 869132  
2. 563235 2. 627146 2. 56257 2. 315104 2. 589218 2. 297764 2. 085651 2. 530784 2. 597037  
6. 861624 7. 65739 7. 464752 6. 739716 7. 540114 6. 501995 6. 883638 6. 637153 6. 620303  
7. 189654 4. 946018 6. 466634 6. 269598 5. 510871 4. 931963 5. 063013 4. 089697 3. 257102  
5. 6082 5. 490611 5. 359239 5. 522656 6. 150708 6. 230745 5. 832805 5. 07554 5. 188171  
6. 906155 6. 874891 6. 233491 6. 439729 6. 391063 6. 454133 6. 868056 6. 306942 6. 30904  
6. 869735 7. 538578 6. 941981 6. 535056 7. 028336 5. 977852 6. 560003 7. 084785 6. 958928  
2. 482605 0. 673939 2. 079059 1. 832036 1. 256056 2. 235245 1. 642358 2. 217746 1. 181498  
2. 199467 1. 954243 1. 679785 2. 207479 1. 695809 2. 145644 2. 129883 2. 19126 1. 806858  
2. 001783 1. 387754 1. 261722 1. 832241 1. 884001 1. 697397 1. 871953 1. 732508 1. 681502  
5. 125225 5. 033199 4. 361788 4. 937484 5. 201823 6. 617332 5. 949587 5. 816742 5. 887408  
9. 249731 9. 163864 9. 184479 8. 872832 9. 238988 8. 468642 9. 303379 9. 408622 9. 160361  
4. 234448 2. 035427 3. 47936 3. 173399 3. 32306 2. 326434 3. 343414 3. 149084 4. 261201  
5. 08212 5. 553366 4. 793184 5. 522582 5. 081785 7. 644572 5. 441589 5. 372026 4. 713049  
3. 180637 2. 194779 2. 564856 2. 095505 2. 394446 2. 101456 2. 488101 2. 154212 2. 062214  
1. 346855 1. 925409 2. 098916 1. 481817 1. 128649 1. 806099 1. 657766 1. 04859 1. 475065  
2. 457004 2. 026879 2. 464274 3. 427116 2. 535532 2. 707874 2. 390841 2. 217839 2. 893598  
4. 223891 3. 47485 4. 534384 4. 047017 4. 042993 4. 945699 4. 639071 4. 570163 4. 358173  
5. 910906 6. 473515 7. 031478 6. 374736 6. 240682 6. 768356 7. 03521 6. 316799 6. 780673  
4. 632924 4. 87506 5. 618234 5. 876321 5. 803431 5. 846154 6. 063634 5. 887911 6. 100946  
5. 124903 3. 091378 5. 176536 5. 586101 3. 815535 6. 127659 5. 537436 6. 290171 5. 553183  
4. 43936 4. 82985 4. 124529 4. 562932 4. 394501 4. 659394 4. 517779 5. 509112 4. 705857  
3. 975181 5. 28743 5. 016796 5. 855442 4. 22714 5. 7069 4. 845547 5. 081332 4. 876483  
6. 493681 6. 014568 6. 623523 6. 263082 6. 605785 6. 719045 7. 108464 6. 343618 6. 228482  
4. 323828 4. 991635 3. 826849 3. 891234 4. 172468 5. 013352 3. 170477 3. 780177 4. 073365  
5. 664468 6. 407427 6. 057065 6. 871368 6. 414968 5. 678985 5. 561058 4. 966582 5. 287251  
2. 614128 2. 530366 3. 551025 1. 809667 2. 572991 3. 869483 1. 929618 2. 004129 1. 932866  
0. 891458 0. 922884 0. 934449 1. 457006 0. 971449 1. 042942 1. 208167 0. 777168 0. 941615  
9. 731248 9. 976481 9. 853878 9. 705984 9. 988087 9. 458721 10. 62544 10. 57407 10. 40235  
8. 327948 8. 849268 8. 620791 8. 259689 8. 9078 6. 854644 8. 416184 8. 480506 8. 394195  
5. 73775 5. 897291 5. 785061 4. 144424 5. 751546 5. 784868 5. 690604 6. 440461 5. 908823  
4. 656794 4. 581447 4. 792483 4. 374409 3. 93117 5. 003292 4. 380591 3. 834165 4. 675012  
2. 760836 2. 824438 3. 282294 3. 370301 2. 604935 4. 203395 3. 604096 3. 753134 4. 570222  
2. 56395 2. 275907 2. 435128 2. 638663 2. 737671 5. 956279 2. 478033 2. 52101 3. 223505  
1. 592811 1. 034855 1. 456262 1. 463405 1. 376655 1. 820476 1. 539294 1. 529397 1. 171594  
5. 522146 4. 60616 5. 117468 8. 654401 5. 740241 6. 723247 3. 1769 3. 181941 7. 10607  
1. 75249 1. 500277 2. 044028 2. 453499 1. 343584 2. 190406 1. 30033 1. 027479 1. 599282  
5. 86844 4. 373009 5. 484622 5. 135081 3. 617121 6. 625489 5. 553781 5. 199145 5. 911238  
2. 387948 2. 33256 2. 912889 3. 354453 2. 867176 4. 987923 4. 502147 3. 345642 4. 267231  
1. 280806 1. 363112 1. 67881 1. 594987 0. 827598 1. 053908 1. 16891 1. 058817 0. 924107  
8. 448718 8. 005505 7. 92151 8. 773714 8. 72931 6. 826428 9. 452435 9. 451949 9. 343364  
10. 53536 10. 00215 9. 575195 10. 14313 9. 596076 11. 30289 9. 706069 7. 709657 9. 100382  
5. 302497 4. 896283 4. 76895 4. 304547 4. 645323 6. 602298 5. 46759 5. 452702 4. 7795  
2. 312556 2. 394087 1. 873452 2. 263218 1. 694985 2. 448905 2. 389497 2. 811882 2. 285998  
1. 153735 1. 559979 0. 898903 1. 014746 1. 109591 1. 669334 1. 197693 1. 49486 1. 626026  
5. 154312 5. 13025 5. 450756 4. 952161 5. 12379 4. 705696 5. 211238 5. 438164 5. 620032  
1. 351955 2. 677613 1. 550185 2. 162384 1. 029447 1. 52235 1. 644423 1. 531831 1. 377214  
1. 121653 1. 420504 1. 846595 2. 561322 1. 540022 2. 457874 1. 803292 1. 146184 1. 357005

0. 803801 0. 732153 0. 835296 1. 654159 0. 641433 1. 004174 1. 248208 1. 195114 0. 960691  
1. 46586 1. 258474 0. 873477 1. 850504 0. 968017 1. 902537 1. 510683 2. 167488 1. 199762  
1. 426908 2. 358146 1. 274044 2. 088489 1. 634034 1. 574383 1. 757963 1. 924755 1. 752465  
2. 5144 1. 690783 1. 726802 1. 934825 2. 025307 1. 629648 1. 699754 1. 765077 2. 083821  
1. 368031 1. 656083 1. 563384 1. 482167 1. 437567 1. 731018 1. 7559 1. 342561 1. 665478  
8. 069884 8. 383839 8. 283936 8. 587348 8. 471055 7. 633521 8. 604561 8. 620073 8. 736447  
8. 179565 7. 80767 7. 320545 6. 797189 7. 265367 7. 01172 7. 053895 4. 43228 4. 979758  
4. 450793 4. 680676 4. 300473 4. 944723 5. 220301 3. 096758 5. 71524 5. 234888 5. 069994  
9. 324572 9. 180902 9. 311104 8. 523334 9. 375375 9. 414001 9. 639717 9. 907161 9. 85349  
1. 77902 2. 373635 2. 477028 2. 666598 2. 009999 1. 886249 2. 892862 1. 547042 2. 356761  
5. 108422 6. 742447 5. 693896 5. 818115 6. 534142 6. 39549 7. 001816 6. 61314 7. 387908  
3. 248609 4. 093992 3. 777316 2. 626129 3. 003018 4. 128696 2. 883475 2. 932074 3. 486398  
2. 007797 2. 323062 1. 864311 1. 263866 1. 782538 2. 078717 2. 537381 1. 713408 1. 792841  
1. 121812 0. 865531 1. 769661 1. 354877 1. 620439 1. 259225 1. 170608 1. 274385 1. 614896  
8. 449928 9. 072259 8. 690688 8. 224993 9. 029862 8. 785593 8. 532949 8. 910657 8. 546794  
1. 168858 1. 201871 1. 267048 1. 102743 1. 200318 1. 262983 1. 181947 1. 909632 1. 722745  
1. 019462 1. 007116 0. 712495 2. 25034 1. 742368 1. 64906 1. 247966 1. 084339 1. 907831  
1. 470815 2. 16228 1. 926209 3. 051113 2. 068766 3. 16095 2. 157507 2. 172768 3. 175643  
3. 459033 2. 693103 2. 697309 3. 71243 2. 686192 3. 274954 3. 238233 2. 584057 3. 398596  
5. 175106 4. 901233 4. 844767 5. 878962 5. 451329 5. 688267 5. 849402 5. 877402 6. 172035  
6. 796201 5. 960256 5. 773403 6. 411844 6. 738409 6. 156235 6. 531806 7. 148504 7. 269384  
7. 058607 4. 844441 5. 014841 5. 700243 5. 44217 6. 105198 5. 706157 6. 272907 6. 672248  
2. 683735 2. 011697 2. 409399 2. 28411 2. 352125 2. 440204 1. 947984 2. 550895 2. 017332  
9. 851593 10. 1716 10. 03445 9. 399094 10. 03943 9. 61471 9. 567559 9. 443013 8. 958976  
9. 119436 9. 126567 9. 094877 9. 258501 8. 737512 9. 048012 9. 26142 9. 198944 9. 01575  
4. 591092 4. 898334 6. 6182 3. 759099 4. 497715 4. 901422 4. 580167 4. 558399 5. 095458  
6. 663205 6. 797394 7. 241826 6. 835568 6. 597316 6. 937931 7. 002709 6. 619906 6. 498627  
1. 646249 2. 036983 2. 52864 3. 529095 3. 103904 1. 824222 2. 069549 2. 115147 3. 124602  
6. 629137 6. 884934 6. 689655 6. 064552 7. 178138 6. 438446 7. 13035 6. 666965 6. 627552  
8. 322905 8. 330051 7. 851136 7. 849115 8. 192056 7. 667783 8. 141756 8. 091207 7. 736614  
6. 286417 6. 187142 5. 633647 5. 272753 5. 264375 6. 499789 6. 727687 5. 460786 5. 331926  
5. 12483 5. 488119 5. 720633 5. 428926 6. 077404 5. 08237 6. 036922 5. 285875 5. 461386  
6. 740181 6. 653186 7. 126892 7. 102528 7. 128533 6. 491858 7. 115048 7. 07369 7. 347541  
1. 734557 1. 731436 2. 179867 1. 551116 1. 423306 1. 630152 1. 587702 1. 387101 1. 111258  
4. 981992 3. 975566 4. 115912 4. 972427 4. 633376 4. 805763 4. 633127 4. 691977 5. 428946  
6. 418144 6. 945564 6. 90472 6. 966197 6. 951776 6. 751494 7. 514673 6. 853715 6. 888089  
6. 696523 7. 543779 6. 690609 6. 304782 6. 601656 6. 64275 7. 229382 6. 704049 6. 714898  
9. 30956 9. 639775 9. 428458 9. 497318 10. 08792 9. 183594 9. 124358 9. 468416 9. 210257  
6. 613486 6. 968062 6. 954856 6. 000903 6. 818523 6. 731971 6. 070727 6. 213245 6. 117639  
6. 701235 6. 678658 6. 343774 6. 486683 6. 319182 5. 532271 6. 90732 6. 481131 6. 6892  
8. 160035 8. 686739 8. 483361 7. 957324 8. 688597 8. 413167 8. 248612 8. 107961 8. 246778  
9. 358026 8. 732909 9. 253115 9. 516175 9. 501624 9. 489519 9. 434669 9. 154446 9. 480925  
8. 356588 7. 806084 8. 35992 8. 123845 8. 199321 8. 313618 8. 358517 8. 456455 8. 052019  
9. 716111 9. 543586 9. 603758 9. 673298 9. 5428 10. 29626 9. 803681 10. 01439 10. 02266  
7. 332848 6. 557298 6. 488745 7. 525493 7. 151464 7. 067795 7. 008261 7. 072188 7. 326355  
6. 070169 5. 865605 5. 916044 6. 145964 7. 064171 4. 173342 7. 791633 7. 034849 7. 651876  
2. 005912 1. 564239 1. 706646 2. 480444 1. 714749 2. 483559 2. 043046 2. 32273 2. 746796  
2. 846218 2. 73829 2. 205915 3. 103152 2. 942177 2. 367152 2. 721834 2. 157085 3. 275028  
1. 512572 1. 394811 1. 538483 2. 509524 1. 651481 1. 781412 1. 462778 1. 51514 2. 801347  
2. 19806 1. 910849 2. 279507 1. 732637 2. 188244 1. 541143 2. 076509 2. 378254 2. 651077  
2. 6943 1. 983792 2. 969156 2. 890998 3. 251587 4. 030519 2. 359444 3. 435295 2. 656497

1. 015983 1. 94204 0. 560287 1. 534021 0. 548836 1. 547288 0. 913069 1. 699299 0. 957906  
1. 045601 0. 765077 0. 620382 1. 881155 0. 87465 1. 078301 0. 817502 1. 321956 1. 761934  
2. 354906 1. 659598 2. 628701 1. 547409 1. 724286 2. 077989 2. 547149 1. 775041 1. 820405  
8. 511042 7. 901138 7. 937994 8. 007468 8. 317955 7. 385114 8. 368004 8. 348503 7. 569636  
4. 843514 4. 921442 4. 394399 4. 72692 4. 446789 4. 61047 4. 843555 4. 190194 4. 926285  
6. 407035 7. 051155 6. 307058 5. 973642 6. 660914 6. 560261 6. 118083 6. 254135 6. 370723  
3. 372491 2. 864778 2. 910787 3. 00668 3. 26601 5. 538603 3. 427569 2. 490815 3. 76979  
3. 707181 1. 908546 2. 602671 3. 07923 3. 196648 2. 837095 4. 265663 2. 829561 2. 744232  
1. 316385 1. 118718 0. 800663 1. 43087 1. 430412 0. 98632 1. 219979 1. 188608 1. 697716  
1. 786497 1. 195921 1. 14507 1. 914891 1. 409297 1. 238296 1. 177162 1. 051596 2. 128071  
8. 290161 8. 166038 7. 874304 7. 883509 8. 549084 8. 366957 8. 819105 7. 647718 8. 458914  
5. 313591 5. 584454 5. 255492 5. 289094 5. 018847 5. 232054 6. 289145 5. 644154 5. 764547  
7. 845439 7. 905186 7. 601155 7. 690098 8. 120003 8. 22995 7. 957433 8. 037969 8. 25605  
2. 992343 3. 50512 2. 580322 2. 215367 2. 197316 3. 072608 2. 845812 1. 992833 3. 886198  
5. 092273 4. 591343 7. 188757 6. 376182 5. 972493 2. 420527 5. 140359 3. 654452 4. 427177  
4. 307298 3. 220184 2. 249279 2. 341326 2. 324541 2. 086614 2. 292437 1. 740967 3. 34143  
4. 583609 4. 859892 4. 139271 3. 616903 4. 989931 3. 77499 4. 784934 3. 47766 4. 481483  
3. 142426 2. 842639 3. 140011 2. 490122 3. 152705 2. 382084 2. 943582 3. 04022 3. 353501  
1. 661647 0. 799751 2. 129511 0. 895468 3. 58059 1. 10393 3. 131252 0. 877064 1. 122519  
6. 455674 4. 989307 4. 798189 4. 38159 5. 398724 6. 59933 2. 429955 5. 919775 4. 48906  
7. 83991 8. 030834 6. 208934 8. 24868 7. 350814 7. 81984 6. 23971 5. 608524 4. 943779  
7. 593926 5. 34743 8. 083144 8. 21488 7. 840101 4. 448694 2. 010286 4. 132717 5. 160441  
2. 505968 2. 035958 5. 752364 7. 00384 3. 642942 2. 313169 1. 859261 2. 074929 2. 982641  
6. 253694 4. 986347 6. 152674 4. 734798 2. 488034 3. 303678 3. 944801 7. 764908 3. 440727  
4. 809376 4. 680351 3. 758632 2. 377759 4. 104409 2. 776286 2. 095275 2. 309663 2. 449885  
2. 71496 1. 155574 0. 986178 3. 165133 1. 276643 1. 056613 1. 348328 1. 062131 1. 844269  
3. 697375 1. 862399 2. 985666 4. 529837 2. 835865 2. 192757 1. 853293 1. 311127 2. 392628  
5. 216532 7. 310251 5. 255321 6. 045156 5. 4842 7. 140933 3. 882214 4. 360297 6. 567884  
3. 216973 3. 448853 1. 811457 1. 577708 2. 365216 1. 624004 1. 754952 2. 641849 1. 505175  
6. 596976 6. 541331 5. 45681 4. 922151 6. 913709 7. 003281 5. 114414 4. 282879 4. 54616  
0. 896814 1. 712439 1. 447977 1. 115377 0. 628838 1. 336218 0. 647748 1. 00048 1. 43039  
1. 847917 1. 443802 1. 285106 1. 366897 1. 356398 1. 498729 1. 338202 1. 147707 1. 938159  
3. 500307 1. 178223 1. 162119 6. 671699 1. 302012 1. 968247 2. 165317 2. 107705 1. 821578  
5. 426392 5. 488681 5. 167246 4. 050112 5. 295143 4. 302525 4. 25669 4. 295201 5. 051044  
2. 045774 4. 195525 4. 337981 1. 545729 4. 261007 1. 378688 1. 265276 1. 570161 1. 559067  
1. 547791 2. 386378 2. 474879 1. 180603 3. 03826 0. 840917 0. 937415 1. 662213 1. 188663  
1. 545629 2. 516713 4. 171917 2. 275599 1. 056794 1. 326734 1. 414537 1. 543933 1. 194509  
2. 975393 3. 308948 3. 1919 3. 226037 3. 101267 2. 125912 1. 948873 2. 37198 2. 425452  
4. 34284 4. 239919 4. 99892 4. 240433 4. 898866 3. 917532 3. 236949 4. 485801 3. 748765  
5. 422201 4. 942967 3. 01818 4. 821366 6. 106827 1. 453547 2. 148498 2. 416949 1. 73573  
3. 558285 1. 092599 1. 067049 1. 992397 3. 973063 1. 175086 1. 329646 1. 41136 1. 371978  
8. 692296 5. 267911 7. 845021 7. 289606 6. 788118 4. 306233 5. 024913 4. 639505 5. 991821  
6. 015577 6. 000466 6. 891345 5. 884603 6. 084469 6. 030804 5. 950022 5. 330308 7. 14429  
7. 549755 7. 767589 7. 768625 7. 539154 5. 196771 5. 665244 3. 698485 5. 561716 5. 264734  
7. 407127 6. 195863 7. 382765 6. 688876 3. 496378 3. 208655 5. 405529 4. 717922 3. 53253  
3. 873803 2. 063649 2. 386167 5. 264623 1. 722287 2. 523079 1. 231878 1. 806169 4. 027726  
0. 856587 1. 563059 2. 225619 0. 678795 0. 356929 0. 533249 1. 333662 1. 016362 0. 82401  
5. 708844 6. 643437 6. 671503 5. 890932 7. 25412 2. 424147 5. 387801 2. 057232 2. 652131  
4. 253623 2. 532807 3. 036243 2. 321106 0. 980563 5. 159054 1. 508868 2. 194683 2. 801518  
9. 448443 8. 617772 9. 066929 9. 198934 8. 19556 9. 261988 8. 119671 7. 372634 6. 95925  
6. 596778 6. 75374 5. 76167 4. 601017 3. 377287 3. 693165 2. 616088 2. 813407 2. 745071

9. 637946 8. 14438 8. 784165 9. 098373 7. 12987 8. 57172 7. 688385 7. 097253 7. 380315  
5. 303396 4. 412501 5. 38169 4. 926144 4. 685618 3. 397086 1. 876952 2. 00158 1. 817927  
7. 330749 5. 886597 6. 487722 6. 500076 6. 26355 3. 80552 4. 636519 5. 625457 4. 889617  
1. 474619 1. 358416 1. 236212 1. 985953 3. 404582 1. 118037 1. 296282 1. 584697 1. 056266  
0. 880683 1. 778844 1. 64646 2. 026139 1. 231607 2. 482736 1. 754575 3. 098468 1. 99108  
0. 963063 0. 82223 1. 943532 3. 173052 2. 051446 0. 689405 0. 875577 1. 475742 1. 929997  
2. 177602 1. 858882 1. 096268 2. 20217 1. 116026 1. 237292 1. 278213 1. 631581 1. 067868  
1. 587914 2. 387884 2. 068272 1. 921256 2. 172926 2. 316635 2. 64098 2. 10134 2. 136818  
3. 277699 3. 055183 5. 684691 4. 167144 4. 673311 1. 724541 5. 531539 1. 639822 1. 59542  
4. 525009 2. 199875 4. 060314 1. 699288 2. 718267 1. 695368 4. 142593 1. 411505 1. 122354  
3. 075395 2. 889435 3. 319934 4. 595163 3. 930594 2. 46251 2. 702472 2. 322722 2. 791655  
2. 711113 3. 63884 2. 834227 2. 858941 3. 015137 3. 610417 2. 944642 3. 20385 3. 433487  
6. 709518 4. 691306 4. 950537 3. 789624 3. 113185 5. 779259 3. 186894 3. 129263 2. 415592  
3. 676705 2. 523812 1. 148308 1. 868838 1. 416923 1. 259796 1. 108793 1. 298221 1. 131913  
4. 909898 4. 071742 4. 96072 5. 767074 4. 567224 2. 808929 6. 414282 3. 50325 2. 654955  
4. 32606 2. 870371 4. 322964 2. 068609 1. 912555 2. 28568 1. 682265 1. 247466 2. 040425  
8. 323105 5. 681556 7. 154258 7. 343 6. 280347 7. 569324 5. 082074 5. 919231 6. 14513  
5. 702369 4. 49196 6. 149553 3. 970533 4. 158586 3. 77266 2. 657135 3. 124164 4. 767882  
7. 512586 6. 553345 6. 836245 6. 730954 8. 12592 6. 524182 2. 630003 3. 612711 3. 8848  
4. 438595 4. 476681 4. 708462 3. 330485 3. 293518 1. 465492 4. 553089 2. 969841 2. 443501  
1. 814374 1. 391494 2. 00269 1. 407177 1. 559691 1. 244319 1. 72582 0. 893418 1. 273474  
2. 606561 4. 408729 2. 680478 2. 204285 3. 013634 2. 343492 2. 240204 2. 205358 2. 382995  
1. 190744 3. 332086 1. 3194 1. 837957 1. 292964 0. 872863 0. 755793 0. 855665 1. 305743  
6. 884751 4. 57822 6. 375639 4. 202786 2. 735208 5. 849177 3. 208575 2. 754373 3. 452243  
7. 752616 2. 282689 4. 166035 5. 512288 5. 070468 2. 823895 2. 186765 2. 165352 3. 845426  
4. 326807 4. 08937 5. 108196 3. 418505 4. 4665 6. 078757 4. 75528 5. 449786 5. 19787  
5. 503015 5. 683153 0. 875638 5. 761509 2. 73975 3. 759566 2. 030254 2. 193342 3. 141233  
3. 077866 2. 224489 2. 577329 3. 748625 1. 955173 4. 367463 2. 131505 2. 886576 3. 615694  
0. 713032 1. 512702 1. 048366 0. 713032 0. 485504 1. 353111 0. 579785 0. 84696 0. 890726  
1. 363069 1. 841359 2. 68764 1. 474494 1. 714585 1. 998223 1. 977947 2. 562645 2. 073345  
9. 59417 8. 77316 9. 082025 9. 238819 6. 848172 6. 665256 6. 72296 7. 617358 5. 370982  
4. 761979 4. 612931 5. 137836 5. 8789 2. 22136 2. 253767 2. 535312 2. 045533 3. 677362  
6. 096265 5. 917683 3. 39096 6. 004111 6. 084732 1. 42797 4. 044955 1. 751967 1. 654071  
1. 771911 1. 120476 1. 213403 1. 605894 0. 910512 0. 762469 0. 989202 1. 025907 0. 931801  
1. 667031 1. 719803 0. 576229 2. 240675 1. 272122 2. 251431 1. 198529 1. 70315 0. 946409  
1. 538317 3. 664458 0. 963799 1. 270553 1. 027754 1. 391168 1. 242849 1. 053835 1. 233288  
6. 254598 5. 398499 6. 362314 5. 801503 5. 799617 7. 085957 6. 585824 6. 056357 6. 90633  
0. 975417 1. 487425 1. 106994 0. 850736 0. 767104 1. 080038 0. 79719 0. 580382 0. 477908  
8. 301798 7. 767015 8. 808263 8. 972158 8. 134578 9. 0854 9. 082173 8. 498164 8. 982469  
7. 022899 7. 046221 7. 112101 7. 089832 6. 982265 7. 130481 7. 200578 7. 112548 7. 037604  
4. 624788 2. 844387 2. 380405 2. 74363 2. 96139 3. 762852 2. 591297 2. 555205 3. 154743  
7. 10559 7. 476819 6. 728195 7. 32098 7. 219685 5. 766673 7. 67199 7. 604074 6. 752583  
1. 258603 1. 500427 1. 245361 0. 979331 1. 035153 1. 444639 1. 075703 1. 005844 1. 108608  
4. 377206 6. 162276 5. 163767 5. 593947 6. 085873 2. 606928 6. 033254 5. 73189 5. 38119  
3. 938455 3. 724932 3. 78633 3. 102236 3. 102236 3. 838935 3. 476057 3. 264168 2. 896058  
4. 2584 4. 511579 4. 969949 4. 07172 5. 002651 5. 545382 5. 89267 5. 717407 5. 801956  
5. 904508 5. 584177 5. 984039 5. 950686 6. 278985 5. 690783 6. 438014 5. 85625 5. 633046  
6. 231387 5. 477159 5. 651714 6. 01978 5. 564191 5. 406952 6. 013179 6. 134762 5. 827276  
6. 89674 6. 164076 6. 14272 6. 758741 6. 509853 7. 137873 7. 172924 6. 703573 6. 696584  
6. 711807 5. 425105 6. 607134 7. 261554 7. 026035 6. 843625 6. 283956 6. 578809 6. 691088  
1. 867111 2. 667555 1. 870623 1. 53638 1. 849224 1. 689202 2. 435427 1. 962284 1. 832261

3. 913723 1. 854225 1. 059325 1. 392462 4. 176153 1. 110026 1. 068369 1. 909644 1. 634922  
4. 122523 4. 654817 3. 765596 4. 642313 4. 767379 3. 758536 5. 134851 3. 949048 4. 812089  
3. 176221 3. 553132 2. 418 4. 017001 3. 347772 5. 221759 3. 107243 5. 000669 4. 291877  
3. 945876 4. 168438 4. 483304 3. 376539 4. 231634 4. 656043 4. 702682 4. 680835 3. 191355  
2. 744924 3. 270548 3. 063258 3. 73618 2. 382214 2. 46965 3. 334562 3. 352569 2. 927843  
4. 332793 5. 268787 4. 852236 5. 911307 5. 182967 4. 671447 5. 146087 4. 648943 5. 632388  
5. 706178 6. 367585 5. 873184 6. 171853 5. 936578 5. 769457 5. 614744 6. 183472 5. 620774  
3. 171873 2. 978024 2. 467752 2. 070196 1. 949489 3. 271031 2. 12394 2. 727688 3. 060802  
4. 983793 4. 996598 5. 925339 5. 76061 5. 051105 6. 340168 5. 751424 4. 190299 4. 484349  
0. 862315 1. 207538 1. 129187 1. 581052 1. 379409 1. 224314 1. 12854 1. 271418 1. 794187  
5. 245711 5. 309745 6. 335932 5. 829866 5. 996988 6. 600572 5. 429164 5. 801278 6. 040629  
5. 225048 4. 303312 5. 147099 4. 283032 5. 30688 5. 901953 4. 709516 6. 409289 5. 145468  
7. 134794 6. 729365 6. 911028 6. 769747 6. 743725 7. 040849 7. 690243 7. 977887 7. 470197  
6. 236352 4. 730515 4. 483071 4. 899687 5. 138615 6. 381708 5. 274708 5. 562351 5. 302034  
6. 982953 7. 741983 7. 739631 6. 57305 7. 463727 6. 72626 7. 099247 6. 758715 7. 097334  
6. 693174 6. 235595 6. 483743 5. 818627 6. 824565 6. 184903 6. 369278 7. 194325 6. 835174  
2. 233692 2. 654628 1. 474834 2. 938664 3. 400382 1. 570174 1. 888989 3. 488762 2. 097224  
6. 571681 5. 920752 5. 692395 5. 079444 6. 083015 4. 848771 4. 222342 4. 10642 3. 113844  
2. 121193 3. 659463 3. 078671 3. 12631 2. 64844 2. 475465 2. 336307 2. 417116 2. 561275  
7. 036007 6. 247245 6. 770103 6. 840919 5. 623445 6. 427278 6. 461806 5. 768921 6. 043161  
1. 707873 1. 847635 1. 992493 1. 707873 1. 804572 1. 762886 1. 226756 1. 575838 2. 56461  
9. 082336 9. 132663 9. 07462 9. 240154 8. 855042 8. 791059 8. 624152 8. 692288 9. 011153  
5. 894232 5. 263188 5. 550495 5. 632648 5. 693344 6. 451332 5. 906418 5. 904815 6. 243267  
8. 572524 7. 828934 8. 271571 8. 584402 7. 845467 8. 69742 8. 322941 8. 274601 8. 557353  
6. 472476 6. 528081 6. 213144 6. 056446 6. 935853 6. 671006 6. 360443 6. 583156 6. 92585  
4. 443973 4. 900813 4. 796136 4. 102985 4. 466657 4. 67671 4. 00277 4. 113123 4. 179434  
2. 172574 2. 988759 2. 564882 1. 926224 2. 377948 2. 048784 2. 948189 1. 593269 2. 192739  
7. 073684 6. 808219 7. 015758 7. 559909 6. 804957 7. 802031 6. 791377 6. 63324 7. 080877  
5. 216903 4. 355099 4. 626504 5. 023414 5. 95338 6. 367496 5. 602187 6. 054505 6. 294618  
5. 308279 4. 990844 5. 069177 5. 738367 5. 330041 6. 001625 5. 427802 5. 55023 5. 306597  
4. 136196 2. 627341 3. 810265 4. 159523 4. 528856 5. 619298 3. 857863 4. 234574 3. 480197  
3. 538383 4. 419366 3. 656535 3. 720983 4. 052234 3. 437508 4. 182609 4. 655738 3. 772799  
2. 211931 2. 832255 2. 371923 2. 189857 2. 758911 2. 507177 1. 993977 3. 437046 2. 314788  
6. 466744 7. 084809 6. 669467 7. 126811 5. 864875 5. 585722 6. 668284 6. 689476 6. 288338  
6. 370525 6. 711877 5. 566451 5. 732465 6. 835778 6. 292853 6. 397882 6. 019565 6. 495807  
4. 232356 3. 563223 3. 417132 2. 527651 4. 058386 2. 86804 3. 529185 3. 43105 2. 728065  
7. 158951 7. 352147 7. 770405 7. 169684 8. 107493 7. 126941 7. 917337 8. 373457 8. 304986  
6. 910694 6. 871952 6. 292223 6. 61078 6. 075118 6. 491855 6. 825984 7. 422968 6. 430578  
2. 701756 2. 433125 2. 536907 2. 981157 2. 841632 5. 037238 2. 617312 2. 510355 4. 372023  
1. 244943 1. 423256 1. 295701 0. 872291 1. 114355 1. 470534 0. 904533 1. 352688 1. 299524  
5. 307796 4. 85432 4. 327718 4. 205348 2. 027536 3. 025759 2. 651949 2. 540816 3. 335504  
7. 975021 7. 780867 7. 223523 8. 10219 8. 340679 8. 23976 9. 791774 9. 498243 9. 445173  
2. 946466 2. 652827 3. 166158 2. 857795 2. 455396 4. 639408 3. 254407 2. 669669 2. 651244  
2. 008737 2. 559958 3. 230913 3. 398277 2. 417517 3. 006348 4. 47345 3. 346307 3. 418661  
1. 824336 2. 286462 1. 063901 0. 909148 2. 532516 0. 991226 2. 112231 1. 949221 1. 52161  
2. 463307 2. 751285 3. 670337 3. 081381 2. 213802 3. 770069 3. 579376 4. 371698 3. 192584  
9. 442386 9. 255123 9. 044313 8. 928752 8. 496647 9. 548519 9. 027094 9. 202157 8. 919704  
2. 542161 2. 652331 2. 976714 2. 531247 2. 249197 2. 787116 3. 521761 3. 007482 2. 148002  
4. 743488 4. 149804 3. 734433 5. 018527 4. 082565 1. 88891 3. 741972 3. 867581 3. 87784  
2. 027865 2. 127787 1. 061628 2. 353696 1. 084378 1. 637007 1. 478765 1. 544492 1. 252548  
3. 394378 3. 30894 2. 947745 3. 063451 2. 848003 2. 91544 2. 805808 2. 702215 3. 41944

2. 926974 3. 177308 3. 23027 2. 812371 3. 798938 2. 884985 2. 721658 3. 178329 3. 954489  
1. 078621 1. 020194 0. 679864 3. 82833 1. 146646 4. 166623 1. 115403 2. 399297 1. 267531  
1. 781379 2. 064315 2. 259924 1. 758554 2. 79821 2. 578582 2. 271074 3. 226322 2. 059025  
2. 367786 1. 646657 2. 846437 2. 901181 2. 697721 1. 403207 2. 097188 2. 824199 1. 768322  
8. 293513 8. 704389 8. 377803 7. 30973 8. 028906 7. 712095 7. 71383 8. 029696 8. 423731  
5. 828024 6. 921957 6. 38846 6. 391511 6. 558661 5. 968324 6. 319471 6. 877502 6. 545274  
3. 028511 4. 685321 3. 636173 3. 806888 4. 491247 4. 152829 3. 586549 4. 148919 3. 589871  
2. 576765 3. 012051 2. 293925 2. 364423 2. 111855 2. 585652 2. 74243 3. 034653 3. 007474  
4. 326971 5. 741938 4. 743066 3. 965723 5. 429946 2. 784459 4. 396183 4. 608396 5. 070741  
3. 963407 4. 952673 5. 679076 5. 613476 5. 712405 4. 46302 4. 926854 5. 498024 5. 734795  
3. 164579 3. 969455 2. 637632 4. 036381 3. 17848 3. 476714 4. 504222 3. 238722 2. 943957  
5. 87545 6. 9238 6. 266117 5. 441787 5. 892917 5. 354677 5. 429947 5. 882681 6. 053769  
5. 732271 4. 473736 4. 81901 5. 846866 5. 372449 5. 700975 4. 928444 6. 387786 5. 766855  
2. 99743 3. 384312 3. 020238 3. 433837 3. 239615 2. 993188 2. 73229 3. 988568 3. 089244  
5. 093058 5. 082812 5. 290593 6. 138234 5. 981172 6. 438745 7. 080149 7. 143446 7. 965457  
2. 777299 3. 342542 2. 705561 3. 092198 3. 486552 3. 148461 2. 598659 2. 941345 3. 257695  
4. 838914 4. 766486 5. 359475 6. 399515 4. 483571 5. 628987 4. 852515 5. 670957 5. 994558  
7. 520625 8. 229525 7. 863308 7. 938067 7. 712923 7. 705295 8. 229884 8. 187792 7. 849854  
7. 365289 7. 0074 7. 649331 6. 357646 7. 22872 5. 820461 6. 624022 6. 690252 6. 766219  
6. 794231 7. 756436 7. 605252 7. 797332 7. 534077 7. 542299 6. 666311 6. 592886 7. 097856  
8. 552302 8. 294198 8. 702094 9. 07241 8. 673945 8. 798246 8. 751891 8. 724765 9. 029089  
6. 194968 6. 023889 5. 668254 6. 54603 5. 544469 5. 136187 5. 171274 6. 276023 6. 44495  
6. 141988 5. 128142 4. 903131 5. 969788 4. 557666 5. 880427 5. 598142 5. 066643 5. 646179  
7. 904008 8. 468195 7. 900033 7. 164795 8. 16781 7. 915886 7. 842573 8. 173241 7. 505884  
6. 560901 7. 01909 6. 569581 6. 607892 7. 037511 6. 235442 6. 600382 6. 102705 6. 238268  
3. 013603 4. 007387 3. 655234 1. 962859 3. 811275 2. 946809 3. 254123 3. 146621 3. 072125  
2. 176064 0. 805803 2. 030366 2. 539411 1. 249977 2. 257865 1. 581705 1. 957447 1. 893201  
8. 879897 8. 463268 9. 085541 8. 853029 8. 771086 9. 825373 8. 963046 8. 738824 8. 804542  
3. 725251 4. 32832 4. 942381 4. 356155 3. 699441 4. 516784 3. 5085 3. 782266 3. 701845  
5. 807147 5. 095709 5. 187342 5. 445628 6. 516854 6. 509847 6. 571005 6. 719008 7. 30903  
3. 594297 3. 659515 3. 55113 2. 767492 3. 792195 4. 211965 4. 131633 4. 204067 3. 912638  
7. 556172 7. 265084 7. 621157 7. 534229 7. 954949 8. 691764 8. 873208 8. 591012 8. 758923  
4. 192991 5. 437401 4. 468097 4. 31975 3. 828599 3. 994053 4. 442702 4. 007065 4. 356745  
4. 777211 4. 171319 3. 611025 4. 077508 3. 398992 4. 447674 3. 516603 4. 249385 4. 514978  
6. 544089 7. 009073 6. 385018 6. 845719 6. 563601 6. 852282 6. 692712 6. 613614 6. 52378  
1. 290936 0. 999196 0. 989035 1. 418041 1. 197261 0. 819456 1. 768929 0. 752833 1. 190264  
2. 289615 1. 097428 2. 382854 1. 981995 1. 929976 1. 821905 2. 109242 2. 314547 1. 919121  
5. 556098 5. 238428 5. 214711 5. 825828 5. 567247 5. 961895 5. 594441 5. 449857 5. 763384  
2. 066548 2. 112336 2. 320373 2. 266848 2. 272059 2. 267278 2. 446169 2. 408395 2. 282006  
3. 676 2. 931164 2. 421096 3. 014929 3. 716985 3. 715293 3. 593859 3. 174745 3. 652485  
3. 360644 3. 488801 3. 932425 3. 411407 3. 700197 2. 950165 3. 008058 3. 507594 3. 196549  
4. 62237 4. 436592 4. 647304 5. 26141 4. 21324 4. 460953 5. 378066 5. 21235 4. 440846  
4. 812323 4. 072494 4. 737515 4. 610658 4. 188826 4. 807424 5. 101272 4. 691963 4. 670416  
5. 977343 5. 169524 4. 881447 4. 58817 5. 179052 4. 990806 5. 20954 5. 086866 4. 947005  
1. 592586 1. 27078 2. 614348 1. 588376 2. 157103 2. 10817 1. 005004 1. 301127 1. 573799  
5. 375507 5. 126725 3. 824881 4. 7562 4. 515423 4. 157078 4. 462635 3. 98745 3. 920718  
6. 885632 7. 092417 6. 783061 7. 375309 6. 97956 6. 253825 6. 891232 7. 158055 6. 75385  
3. 009757 3. 027073 4. 37852 3. 401383 3. 139771 3. 767969 3. 663546 3. 793646 4. 617253  
1. 544814 1. 448027 1. 393648 0. 9574 1. 228826 1. 706942 1. 0157 1. 865621 0. 795063  
1. 539053 1. 919548 1. 493827 1. 628994 1. 186507 1. 090554 1. 875012 1. 628617 1. 444883  
1. 790789 1. 345973 2. 655309 2. 462638 1. 824566 2. 791028 2. 42951 2. 076081 2. 993213

1. 771537 1. 483258 1. 790994 1. 964012 1. 752765 1. 8046 1. 370102 1. 560827 1. 684496  
4. 374228 4. 97597 5. 191553 5. 02648 5. 457161 4. 737175 6. 008632 6. 573871 6. 103726  
4. 272719 5. 269334 4. 428488 4. 220449 4. 275071 4. 704747 4. 877855 4. 328619 4. 956094  
3. 609298 4. 451288 4. 184378 4. 131813 4. 156702 3. 505059 3. 717847 3. 957629 3. 495336  
3. 643395 2. 801716 3. 505596 4. 012159 3. 028882 4. 501453 3. 28999 3. 302919 3. 872874  
2. 764837 1. 058356 2. 155723 2. 636219 0. 87628 0. 722395 3. 104 1. 619073 1. 996399  
1. 232619 1. 922052 1. 335011 1. 318235 0. 692397 1. 178569 1. 13713 1. 163351 1. 179101  
1. 844279 1. 925083 3. 830391 3. 86137 2. 190177 3. 071539 1. 442485 1. 855997 1. 820659  
9. 383257 7. 669858 8. 112647 9. 05896 8. 648994 7. 277172 4. 442016 6. 445495 6. 545698  
7. 382015 7. 279935 7. 74251 6. 385372 7. 193645 6. 79825 4. 216223 5. 787777 5. 996146  
3. 413122 1. 320503 1. 702985 2. 79411 3. 407118 3. 263729 2. 756142 2. 920689 2. 717502  
5. 258577 5. 035151 4. 775175 1. 360218 3. 407657 4. 404103 4. 397171 1. 486398 1. 718476  
2. 805967 1. 955081 5. 133407 1. 646917 3. 539769 1. 870182 1. 802719 1. 980851 1. 687509  
11. 3342 11. 3603 11. 56965 11. 41869 10. 08282 11. 25218 10. 17306 10. 54385 10. 48223  
1. 443564 6. 102436 5. 543592 3. 453802 4. 49056 3. 106732 2. 199883 1. 871221 2. 44305  
8. 25252 6. 329315 8. 278248 7. 123164 6. 444631 8. 492706 5. 931209 7. 004874 5. 915926  
3. 012019 2. 727956 1. 338804 4. 674463 2. 782404 4. 335683 1. 550858 1. 856659 1. 1344  
5. 170488 6. 352192 6. 682223 5. 964328 5. 961257 2. 362348 3. 229771 2. 46082 2. 246972  
1. 162893 1. 383325 1. 484704 0. 930378 1. 515917 0. 811532 0. 942951 0. 767742 0. 852497  
1. 774427 3. 245494 4. 24052 5. 380085 1. 884248 0. 694261 1. 276212 1. 519265 0. 813736  
1. 638077 1. 392362 1. 195762 1. 732854 1. 64396 3. 123195 1. 696963 1. 416608 2. 316836  
1. 896276 1. 044579 1. 887213 2. 453561 2. 266335 1. 429336 1. 613267 2. 111773 1. 771311  
5. 3648 4. 367868 4. 661815 6. 023115 5. 242832 6. 419112 5. 765927 5. 750202 5. 510418  
1. 170231 3. 780515 4. 532288 2. 300855 2. 541763 2. 542358 2. 195714 3. 711033 1. 517706  
7. 533403 6. 202101 7. 607674 7. 505898 5. 962593 6. 725116 5. 96219 5. 758536 5. 827562  
1. 145599 2. 446589 2. 989756 2. 525281 1. 094128 1. 452548 0. 966582 1. 680341 0. 938744  
3. 69714 3. 907418 2. 9924 3. 300797 3. 419184 1. 938411 3. 281647 2. 486331 2. 108036  
7. 190864 6. 999834 7. 803109 6. 883998 5. 098257 7. 042792 7. 190844 3. 29553 4. 93248  
3. 488088 6. 336664 4. 865282 5. 540965 5. 780532 2. 113872 3. 081009 4. 902428 2. 908967  
1. 924115 0. 890995 3. 641641 1. 146602 1. 70672 1. 600641 1. 4506 1. 3006 1. 752861  
6. 810619 4. 781816 4. 257505 6. 328434 5. 64525 4. 897382 1. 939123 2. 112285 1. 751892  
8. 583268 7. 578652 7. 548033 7. 691999 6. 859427 9. 566514 6. 21554 6. 118415 6. 230199  
1. 038599 1. 557957 3. 247504 1. 431232 1. 378647 5. 692825 1. 44286 1. 681196 1. 550135  
4. 111635 2. 815634 1. 397165 4. 360097 3. 650219 2. 114283 4. 488054 2. 122787 2. 212583  
1. 940674 1. 787456 2. 914872 5. 730722 6. 695324 1. 280719 1. 734098 1. 97883 1. 578278  
4. 205145 5. 535736 5. 379116 4. 910573 5. 13326 5. 223858 2. 446674 3. 709989 4. 551264  
3. 574338 0. 819587 0. 870658 1. 98284 0. 67402 0. 989189 0. 548227 0. 979643 1. 254661  
6. 544466 4. 966771 5. 634341 4. 867117 4. 689718 2. 746143 1. 96739 3. 173087 2. 951091  
2. 006872 2. 81279 3. 453648 2. 5299 2. 819344 2. 341577 1. 781933 2. 701107 2. 674169  
3. 732879 1. 041973 1. 335447 1. 789511 2. 880238 1. 525599 0. 828193 1. 292211 1. 553866  
2. 787961 4. 218151 4. 048306 4. 01537 5. 059847 4. 100017 2. 908484 3. 390716 3. 250167  
4. 686605 3. 145313 4. 418 3. 784168 3. 245832 2. 56845 2. 944903 3. 805716 2. 345141  
3. 462923 4. 247916 4. 416903 4. 309844 4. 286729 3. 481555 3. 613399 3. 691097 4. 592767  
10. 37523 9. 991942 9. 298152 10. 2029 7. 219074 8. 331906 6. 956905 10. 75516 7. 784151  
1. 094033 1. 098403 2. 15499 4. 32478 0. 881696 1. 309412 0. 91351 4. 030131 1. 053381  
3. 372541 3. 512151 3. 031523 2. 199996 3. 401582 3. 510908 2. 160732 3. 823954 3. 689987  
1. 020358 1. 448355 4. 863927 1. 37685 0. 987381 1. 802518 1. 053 1. 003962 1. 939454  
3. 154675 4. 643694 1. 359766 2. 078115 3. 82472 1. 972077 1. 039332 2. 050852 1. 215771  
1. 22031 0. 866799 0. 626332 4. 238164 0. 559097 0. 960952 0. 802604 0. 844976 2. 000489  
1. 863698 3. 805902 2. 516169 2. 142825 4. 762439 1. 880393 1. 231772 1. 287778 0. 960251  
4. 415171 5. 629055 1. 136762 1. 555294 4. 704038 0. 662943 0. 822676 1. 299581 1. 314492



6. 58384 5. 287633 5. 59412 7. 3708 0. 559057 3. 419305 3. 691342 2. 486601 3. 534791  
4. 621202 3. 925509 5. 242704 1. 323997 0. 738401 1. 609469 1. 477637 0. 896616 1. 477983  
3. 138418 1. 342992 1. 436402 0. 987542 2. 265434 1. 448118 1. 137535 1. 481433 1. 875504  
5. 439892 5. 611754 4. 965248 3. 501265 5. 564575 2. 458529 1. 996329 2. 144073 1. 997085  
5. 955596 7. 304544 5. 904067 6. 816649 6. 718331 7. 086801 6. 051716 6. 626427 6. 712607  
6. 63472 6. 850317 6. 391641 7. 617028 5. 271964 7. 629059 2. 062548 4. 520894 6. 243812  
3. 13468 2. 492112 3. 006632 1. 963127 0. 931544 2. 07996 1. 461259 3. 03592 1. 722036  
5. 550177 6. 17037 5. 434203 4. 26366 4. 169085 1. 359637 4. 637531 3. 997142 3. 981882  
1. 664514 1. 65434 1. 330342 1. 507762 2. 579363 1. 974381 1. 602819 1. 897291 1. 460753  
3. 694745 1. 738328 2. 906743 1. 384067 1. 528566 1. 535358 1. 574582 4. 658707 2. 801075  
7. 967717 7. 622162 8. 112381 8. 360612 7. 702767 8. 092387 7. 932698 8. 204751 8. 166512  
4. 004254 4. 501011 3. 949435 4. 006406 4. 926621 4. 941286 4. 778693 4. 633959 4. 75539  
6. 188687 4. 944353 5. 063091 5. 359892 5. 767068 5. 101314 5. 606257 6. 554404 5. 903982  
5. 316308 4. 887908 5. 095734 4. 282016 5. 451702 5. 119856 6. 477563 7. 240216 6. 86366  
5. 104239 3. 561806 3. 037975 3. 247012 4. 418051 5. 416687 3. 37125 3. 016245 3. 057918  
6. 676152 4. 834533 4. 839035 6. 533147 5. 090451 7. 282045 6. 157671 6. 03485 6. 039359  
4. 567793 3. 561666 3. 998729 4. 594419 4. 573064 5. 178719 4. 093855 4. 161769 4. 778875  
3. 182686 3. 030333 3. 117528 3. 392198 2. 588727 4. 061947 3. 44838 2. 473171 2. 634646  
1. 015183 0. 797224 0. 550746 0. 792 3. 720704 1. 765687 0. 859413 1. 087721 0. 729902  
4. 94132 6. 189446 6. 264611 5. 503022 6. 073577 2. 575699 3. 152576 4. 549672 3. 184356  
4. 494763 5. 515381 4. 750081 4. 196315 4. 617105 4. 387428 4. 105396 4. 498551 5. 365793  
0. 726982 1. 085914 0. 609697 0. 470884 1. 509724 1. 378666 0. 36808 0. 422144 2. 1649  
2. 097459 3. 145033 1. 659088 1. 324312 2. 944988 1. 666629 3. 379859 1. 732773 0. 977433  
2. 416509 4. 862458 2. 595227 1. 417854 1. 896057 1. 29193 3. 240579 1. 788214 1. 272927  
3. 062461 0. 972405 2. 902493 1. 729557 0. 723456 1. 968281 1. 311176 2. 435819 1. 165493  
0. 340751 0. 745472 0. 695683 4. 495414 3. 039632 0. 771073 0. 987951 0. 773781 0. 952165  
1. 421058 1. 204886 1. 282104 1. 901268 3. 072367 1. 044682 1. 186462 1. 12994 2. 075661  
0. 687535 1. 294682 0. 96717 0. 503345 1. 029016 1. 052024 0. 822601 0. 789078 1. 008214  
3. 029598 2. 824839 1. 311026 2. 047363 1. 045904 0. 030735 3. 385071 1. 876894 3. 215847  
2. 342684 1. 991832 2. 00967 1. 643938 2. 262912 2. 214028 2. 174621 2. 686941 1. 877192  
2. 349045 2. 633009 2. 21541 3. 16072 2. 423576 2. 27147 2. 576827 2. 421323 3. 112135  
2. 943126 2. 956197 3. 150117 3. 380645 2. 757373 3. 100239 3. 080961 3. 210671 2. 07153  
1. 673748 1. 13775 2. 618889 2. 233432 1. 482827 1. 207079 1. 356737 1. 923277 1. 053449  
1. 408288 2. 300093 2. 064539 1. 397078 3. 13974 2. 01923 1. 756214 1. 640664 2. 043588  
0. 777707 1. 507277 1. 62423 1. 216086 1. 152194 1. 337389 1. 840759 1. 091502 1. 646206  
0. 749206 0. 83719 0. 780053 0. 495598 0. 600022 1. 593391 1. 026851 1. 873231 0. 926368  
1. 092843 0. 877424 0. 524086 0. 973204 0. 637157 1. 117864 0. 627115 0. 918126 0. 82274  
3. 295581 3. 138826 3. 001585 3. 385017 3. 906542 2. 865014 3. 919608 1. 858729 2. 62192  
1. 610937 3. 690111 4. 247381 1. 683776 4. 650887 1. 556436 1. 76106 1. 344719 1. 294036  
0. 77881 0. 839195 0. 677988 1. 580947 0. 62129 1. 754414 0. 869383 1. 657359 0. 894067  
0. 592791 0. 928657 2. 162564 0. 809212 1. 086592 1. 321582 0. 908519 0. 762971 0. 716894  
1. 840409 1. 16273 0. 801506 0. 941337 0. 770037 0. 89627 1. 552618 0. 730658 0. 563814  
3. 178607 4. 215626 3. 033047 2. 788335 4. 490715 3. 413721 2. 614919 2. 779305 3. 838115  
4. 59169 4. 591093 4. 619409 5. 191074 4. 915187 4. 831138 5. 241972 4. 354575 2. 032016  
0. 844109 1. 273765 1. 194676 1. 01628 1. 820148 0. 780869 0. 996223 0. 893426 0. 785997  
0. 745711 0. 989913 0. 696596 0. 966261 1. 197122 0. 860803 0. 725175 0. 912489 0. 774291  
7. 01749 7. 077636 5. 283181 6. 143951 5. 44339 2. 972428 3. 220392 5. 031226 3. 481115  
4. 484321 4. 473119 3. 344988 2. 196476 3. 66325 2. 435306 3. 269947 2. 762007 3. 338315  
4. 339572 1. 641788 3. 653927 1. 560404 2. 920395 1. 545424 2. 82408 1. 636044 1. 96438  
5. 481985 5. 710664 6. 211571 5. 046191 5. 490911 5. 851802 5. 155371 5. 602748 6. 342537  
1. 634512 2. 174963 1. 848755 2. 315918 2. 499985 1. 823446 1. 811562 2. 377247 1. 358697

0.856692 1.106992 2.128335 1.315854 0.68968 0.826494 1.011656 0.940739 0.880712  
1.040024 1.271791 0.982405 0.796444 0.812365 1.128754 0.728507 1.370024 0.899907  
0.915555 2.481433 1.066484 0.913729 0.822426 1.908922 0.883981 0.996437 1.007649  
0.890665 1.054519 0.682091 1.035869 1.17286 1.477359 0.536262 0.967839 0.962627  
1.936685 5.333584 3.290714 1.385797 4.130831 0.985078 1.313565 0.869097 0.984353  
1.144365 1.74662 1.594865 2.406212 2.465883 1.28544 1.166828 1.509472 1.47365  
2.602691 1.203704 0.940523 1.213398 0.760792 1.282237 0.944576 2.133683 1.309483  
1.515492 0.657547 0.946708 1.394486 1.231541 1.744808 1.077269 1.166952 1.092457  
2.059858 2.162073 2.62255 2.675229 2.488883 2.755097 3.390683 3.370535 2.770623  
2.434133 2.319712 2.078441 2.342552 2.840427 2.998779 2.233686 2.401595 2.324928  
1.503198 1.534876 0.99727 1.158427 1.018041 1.647741 1.139315 1.109499 1.516825  
3.59566 4.21905 5.694868 3.431015 3.104784 2.457631 3.254663 2.055134 2.269556  
0.957197 0.957197 0.664584 1.181006 1.003137 1.130202 0.686699 0.960205 0.984661  
2.570278 3.397565 2.483565 2.492889 3.474291 3.367846 3.027248 3.023157 2.04723  
1.174846 1.761168 3.968812 1.648324 1.27761 1.586766 1.268503 1.042398 0.8018  
1.122311 0.942916 1.549633 1.372951 0.941228 0.912144 1.23907 1.366306 0.804761  
1.535327 1.430392 2.155888 1.85087 1.153548 1.649862 0.944098 2.131797 1.240153  
3.889532 4.461164 4.349295 4.029051 4.648571 4.07797 3.773103 3.982252 3.828575  
1.154974 1.359141 1.97231 1.718077 1.517505 1.293463 1.16994 2.017267 1.374883  
1.115485 2.489352 3.020288 4.074631 2.754689 2.940835 2.192827 1.677611 2.994088  
2.853834 2.473651 2.085964 1.523377 1.904544 3.637555 1.800225 1.28216 3.386932  
1.891638 1.84673 1.709186 1.802718 4.856574 1.984588 1.519571 1.774174 1.399892  
1.824522 3.669601 1.398194 1.237336 2.081414 2.2106 1.281769 0.85691 1.255943  
1.924738 1.857042 2.101821 1.123123 1.715996 1.228527 1.57659 3.977841 0.806242  
2.694896 1.505766 3.329921 1.294771 1.889377 1.987118 1.328444 1.80343 1.536973  
1.624447 1.878506 2.949442 1.938794 2.347522 2.428245 2.429493 1.735366 2.77985  
5.176383 3.507008 4.899955 2.782045 6.623107 2.402667 4.916039 4.546205 5.476032  
3.198705 1.352044 1.310457 1.061209 0.869441 1.262093 0.865211 0.746394 1.360914  
5.814925 3.727929 6.147043 3.313668 6.166121 4.188892 3.432997 3.005863 2.895074  
0.716613 1.128284 0.797323 1.106124 0.681342 0.713432 1.103364 1.198437 0.938002  
2.065212 2.13819 2.017899 2.271352 2.028343 1.835545 1.336133 2.064539 1.351593  
1.21206 1.476158 1.241781 2.181646 1.655221 1.444584 1.284713 1.900419 2.258561  
1.436408 1.104139 1.370766 1.687227 1.692654 1.480191 1.16045 1.665632 0.92932  
8.385253 8.020545 6.926655 6.840842 6.482196 5.180007 6.49432 2.441996 4.7559  
1.196573 1.661485 1.02926 2.332875 0.810404 2.20118 1.736857 1.349958 1.643423  
6.603232 6.750446 6.905199 7.304874 7.518827 6.258691 9.036474 7.719399 7.433536  
1.768652 1.493897 1.090479 2.586665 1.119056 2.340612 1.770754 1.769089 1.441582  
0.968584 1.364987 1.991877 1.045238 1.336287 1.240704 0.986226 1.628736 0.880862  
1.306274 2.316242 1.131198 1.991471 1.215035 1.927767 1.381426 1.988774 1.864814  
1.098857 1.609685 0.888604 2.080836 1.00891 1.115921 1.183122 1.471014 1.83943  
5.105933 3.922642 3.556086 2.864826 4.52204 1.947964 3.095222 2.759354 1.784416  
0.749593 0.484074 1.12149 1.2196 0.328014 1.264514 0.920384 0.589563 0.403422  
2.230473 2.237018 3.559358 2.71712 1.54398 4.236923 2.496653 2.105529 1.786951  
1.140572 1.534032 1.594601 1.210285 2.281021 1.483408 0.833505 1.516253 1.291709  
1.36494 1.314186 1.659073 2.016057 4.576385 0.789747 0.763823 0.974594 0.519964  
0.891572 0.941275 0.621159 0.776511 0.605369 1.014757 1.098448 0.999037 1.046371  
2.048288 2.162003 1.367623 1.159108 0.660804 0.869162 1.51468 0.847097 0.884813  
1.007339 0.941021 0.921951 0.971943 0.750544 0.971286 1.093192 1.087751 0.767613  
2.431872 1.279115 1.407361 2.006668 1.478389 1.234298 1.531131 1.263331 1.361535  
1.871388 2.389647 2.387777 0.911241 0.896719 1.268832 2.341285 1.646374 1.441519  
2.499937 2.495851 3.439419 3.286138 2.245948 2.428412 2.304149 2.517178 2.124733

1. 463686 1. 598885 1. 324867 1. 951023 2. 264129 2. 224386 0. 990275 1. 064488 1. 281074  
0. 906131 0. 741641 0. 789399 1. 513433 0. 619298 0. 983605 0. 9744 1. 046064 1. 282362  
1. 091991 2. 697384 2. 226099 2. 241243 1. 485968 1. 453098 2. 515413 1. 438965 0. 78104  
2. 117749 3. 185541 3. 326584 2. 180438 2. 167651 5. 746003 3. 584828 2. 642833 2. 475941  
3. 016281 4. 762662 3. 597549 3. 778512 2. 68819 3. 118492 2. 367738 2. 834303 2. 728223  
1. 049423 3. 555462 1. 371667 1. 307711 3. 461581 2. 30051 0. 960427 1. 822364 1. 816405  
1. 870542 2. 830521 1. 038793 1. 487085 1. 327497 1. 361815 1. 185503 1. 484156 1. 031845  
3. 552096 4. 163291 3. 073318 3. 512847 3. 412442 2. 963528 2. 433709 3. 145417 4. 276787  
3. 304756 1. 122364 0. 593369 1. 416014 0. 714609 1. 237516 1. 593725 2. 088489 0. 958213  
5. 698172 6. 441238 5. 582313 1. 244558 7. 031466 3. 77743 1. 559691 1. 953523 3. 499152  
4. 857582 2. 680711 4. 708904 3. 417883 2. 088991 2. 530629 3. 225573 2. 22325 1. 314268  
3. 998653 1. 724628 4. 360652 4. 960463 3. 777232 2. 434691 1. 715359 2. 688359 1. 950407  
5. 365539 4. 879367 5. 493266 4. 153059 5. 704932 4. 066495 5. 520276 5. 350938 6. 025879  
1. 871747 1. 997844 2. 355329 2. 200902 2. 227342 2. 132712 2. 086664 1. 920927 1. 699303  
0. 890245 0. 784726 0. 878752 0. 964631 0. 901564 1. 395598 0. 780126 0. 716033 0. 811539  
3. 28148 4. 346698 4. 198505 4. 938064 4. 453646 4. 462192 3. 555908 4. 484194 5. 068277  
2. 069711 1. 845112 2. 234129 2. 531992 2. 22621 3. 679558 1. 653313 1. 351753 1. 888421  
6. 947639 5. 990597 6. 478033 5. 864093 6. 467125 6. 12507 6. 324213 5. 919454 6. 578205  
7. 019001 7. 318073 7. 051059 6. 656388 7. 113973 6. 242479 7. 051275 7. 27455 7. 681673  
5. 310408 5. 070465 5. 148058 5. 165785 5. 473629 5. 69385 5. 611873 5. 283666 5. 04195  
7. 434154 7. 126179 7. 14797 6. 763271 7. 635413 6. 634542 7. 574274 7. 00855 6. 954826  
2. 598407 3. 151138 2. 358591 2. 700071 2. 453154 3. 595883 2. 808162 5. 287606 4. 89912  
5. 701489 6. 658281 5. 40555 6. 470149 5. 688651 6. 480648 5. 502971 6. 257528 5. 449291  
3. 15763 1. 82501 3. 066003 1. 404768 3. 169903 2. 254961 2. 516984 2. 29489 2. 64487  
6. 022132 5. 671212 5. 317214 6. 347408 5. 072001 7. 294943 5. 958168 6. 692384 5. 886678  
8. 88246 8. 98828 8. 924776 9. 230311 9. 359939 6. 734092 10. 05405 10. 17642 10. 22809  
4. 231528 5. 136093 4. 757361 5. 110746 6. 176233 5. 384884 5. 080872 5. 724867 5. 600757  
6. 193761 5. 05771 5. 808453 6. 985649 5. 977352 6. 635399 6. 61678 5. 98861 6. 378201  
1. 142225 1. 61721 1. 489336 1. 437786 1. 677585 1. 258839 1. 4122 1. 348512 1. 041688  
7. 785395 4. 459401 7. 615966 6. 233955 6. 56112 7. 376341 6. 639343 5. 107382 5. 90572  
4. 704236 4. 155272 4. 769913 4. 235426 4. 546192 4. 398932 4. 007608 3. 985697 4. 06869  
6. 725757 5. 373569 5. 746918 6. 141329 6. 386573 6. 021291 5. 382704 5. 578781 6. 32751  
8. 364406 8. 704765 7. 99864 8. 233157 7. 551932 8. 62142 8. 412734 8. 035362 8. 454576  
2. 33641 2. 262191 1. 542457 2. 404547 1. 678745 1. 998308 1. 600428 1. 870099 1. 107368  
0. 979424 1. 316417 0. 862109 2. 454097 0. 87754 3. 280661 0. 73339 0. 91405 2. 415453  
2. 278663 2. 168301 2. 510546 2. 14847 2. 814367 4. 776336 2. 545787 3. 400207 2. 718287  
1. 021043 1. 117778 0. 635326 1. 367915 0. 568594 2. 380989 1. 137233 0. 829475 1. 764497  
1. 616871 1. 220165 1. 565866 1. 260169 1. 176329 1. 264144 1. 344065 1. 652259 1. 456911  
1. 255945 1. 430272 0. 761747 1. 110267 0. 583236 1. 730438 1. 134204 0. 869142 1. 084338  
0. 723709 1. 141685 0. 600802 2. 493408 1. 333924 0. 999229 0. 93549 0. 761907 1. 068307  
1. 543932 2. 160888 1. 944383 1. 780587 1. 817722 1. 901876 1. 810563 2. 556977 2. 120088  
1. 666195 1. 354007 0. 585705 1. 162205 0. 961607 3. 974057 1. 067507 1. 525931 1. 440385  
2. 238438 1. 831628 2. 201865 1. 472721 1. 404805 2. 557199 2. 529674 2. 479087 1. 653788  
1. 984256 1. 630891 1. 992519 1. 633899 0. 967158 1. 025831 2. 198307 2. 654747 2. 105319  
2. 721604 3. 030838 2. 305573 2. 207311 2. 085282 3. 503886 2. 47186 1. 850474 3. 513062  
7. 569968 5. 637708 6. 404848 7. 292583 5. 857128 8. 483607 7. 946122 6. 770257 6. 805704  
7. 652579 8. 39523 8. 110505 7. 678996 7. 971757 7. 295627 7. 984303 8. 224688 7. 912781  
1. 032373 0. 999211 1. 372897 0. 870316 0. 894153 0. 987364 1. 155729 1. 422802 1. 158917  
6. 88395 7. 089716 6. 90169 5. 824895 6. 642733 7. 440047 7. 003071 6. 846706 6. 354238  
8. 180044 8. 873384 8. 297738 8. 579493 8. 871176 8. 607332 8. 265558 8. 59949 8. 604812  
4. 364652 5. 119094 5. 878977 4. 255827 5. 43916 5. 692382 5. 230992 4. 448855 3. 809068

1. 183649 1. 189178 0. 696554 1. 24019 1. 280383 1. 582755 1. 383355 1. 716802 1. 445018  
0. 92779 1. 790767 1. 351566 2. 217278 1. 147419 1. 934227 1. 473093 1. 089945 1. 637372  
1. 589111 1. 596017 1. 614822 1. 515893 1. 319869 1. 954027 2. 736719 1. 372119 1. 781092  
9. 534204 8. 475146 8. 944081 9. 685764 8. 990525 9. 657785 8. 446501 8. 770518 8. 772059  
7. 612875 7. 591825 8. 068507 7. 100279 7. 670275 6. 719419 7. 722369 7. 574435 7. 717549  
5. 497512 4. 05017 4. 432999 4. 470568 4. 493363 4. 868935 4. 780888 6. 078133 5. 100532  
3. 382231 3. 593296 3. 386254 5. 395646 3. 150023 4. 036869 5. 200686 5. 28527 5. 233763  
3. 710294 4. 13228 2. 789786 4. 160501 4. 112217 3. 701356 4. 311895 2. 494528 3. 902068  
1. 886507 1. 696419 2. 13973 2. 295042 2. 006609 1. 929074 1. 481207 1. 796958 1. 900394  
4. 902735 5. 107803 5. 082248 4. 91263 5. 100594 3. 939476 5. 749928 4. 34966 5. 329304  
10. 15303 9. 264781 9. 829204 9. 27523 9. 424257 9. 824848 9. 688435 9. 303827 8. 983024  
7. 208604 7. 132121 7. 549127 6. 16855 6. 876472 5. 972426 7. 924432 8. 328666 8. 345051  
2. 812256 3. 382144 3. 227493 3. 215722 3. 441344 3. 283345 3. 053036 2. 430882 3. 640933  
4. 576064 4. 059984 5. 191914 3. 866823 4. 515451 5. 435906 3. 692554 4. 02456 4. 273555  
5. 487847 6. 53428 6. 174062 6. 244551 6. 436493 5. 802886 6. 370173 6. 562863 5. 745906  
5. 346316 5. 620935 5. 471046 6. 385456 6. 284885 6. 083713 5. 473398 6. 427969 5. 688732  
3. 021006 2. 263013 1. 969931 2. 614072 2. 51283 2. 39808 1. 877104 3. 510515 2. 765478  
6. 15949 6. 083982 6. 201295 6. 764232 6. 013762 7. 550133 7. 064115 7. 033509 6. 873325  
2. 359668 2. 409545 1. 869289 1. 968715 2. 924807 1. 444154 1. 192299 2. 297533 1. 477082  
5. 141236 4. 921078 5. 310541 4. 943505 5. 111376 5. 174335 4. 862233 4. 781251 4. 545588  
1. 633735 1. 729496 1. 522191 1. 938518 1. 863363 1. 836275 1. 727853 1. 405784 2. 388944  
3. 058866 3. 339012 3. 120404 4. 58469 3. 08681 4. 797073 3. 880002 2. 622029 4. 775629  
2. 4691 2. 048594 2. 884343 3. 22654 2. 333425 2. 203123 1. 87705 2. 495032 1. 656333  
1. 848625 3. 113533 1. 590663 1. 774702 1. 545851 1. 420495 1. 622642 2. 397905 1. 917527  
2. 654905 3. 082788 2. 723673 4. 140151 2. 41828 3. 869501 3. 205392 2. 896037 4. 307119  
5. 996552 6. 459343 5. 745228 5. 515705 6. 33721 5. 815408 5. 395738 5. 96518 5. 504585  
6. 145508 6. 106965 6. 782713 7. 335807 6. 795712 6. 684269 6. 436104 6. 672018 6. 875499  
5. 820479 4. 777735 6. 430703 5. 301579 5. 729781 6. 20717 6. 310405 6. 013961 6. 552207  
8. 045385 7. 857953 7. 489814 7. 605603 7. 738287 7. 217229 8. 32981 7. 596426 8. 075308  
7. 54592 7. 807989 7. 152124 7. 464487 8. 085115 6. 978474 7. 607985 6. 744716 7. 222415  
4. 768773 4. 989683 5. 165141 5. 176226 4. 568604 3. 955121 5. 384075 5. 742064 5. 844781  
2. 664904 2. 047411 2. 708576 2. 630722 2. 509753 2. 338817 1. 819273 1. 564885 1. 788857  
1. 83882 1. 864773 1. 663161 1. 456228 1. 747409 1. 534474 2. 305844 1. 876462 1. 468688  
4. 377437 4. 646758 4. 228952 4. 860367 4. 107683 5. 356501 4. 881531 4. 605205 4. 145512  
7. 675424 8. 079635 7. 830283 7. 484105 7. 240103 8. 375548 7. 972771 7. 61829 7. 750745  
1. 540823 1. 856015 2. 166758 1. 748329 1. 746548 1. 769504 1. 400438 2. 872858 2. 05077  
5. 582241 4. 835562 4. 812684 5. 749447 4. 986028 5. 641989 4. 586062 3. 480481 2. 491556  
3. 074053 2. 383939 3. 261089 3. 04614 2. 176639 2. 19229 2. 355777 2. 899077 2. 654264  
3. 042862 3. 072292 3. 151986 2. 644885 2. 746555 3. 342253 2. 737254 2. 984902 3. 029694  
4. 766741 3. 633722 5. 05059 6. 039961 5. 419848 7. 00174 6. 790734 6. 937449 7. 193933  
5. 026266 4. 532124 5. 030736 5. 57 5. 469053 5. 797792 6. 043659 5. 304034 6. 812349  
5. 372852 5. 022252 5. 431424 5. 546623 4. 269137 6. 159525 6. 598006 5. 267577 5. 697816  
3. 692839 4. 188904 2. 743558 2. 89546 2. 872084 4. 304044 4. 528581 3. 279554 3. 498974  
2. 535719 2. 789807 2. 020489 3. 935657 2. 951846 3. 411518 2. 864279 3. 135024 3. 587227  
5. 142325 3. 594263 2. 877522 3. 694401 3. 614507 4. 905003 3. 781707 3. 181288 6. 306599  
5. 906176 5. 673149 5. 86914 6. 689329 4. 333441 5. 867109 6. 280391 5. 470702 5. 254013  
3. 114691 2. 077348 1. 705056 2. 365348 2. 319565 2. 000897 2. 2555 2. 483711 2. 1402  
8. 797401 8. 435862 9. 133855 8. 354839 9. 155417 7. 80827 9. 387618 9. 879284 9. 810915  
8. 452489 8. 605888 8. 783429 8. 136677 8. 854286 6. 500766 8. 959419 8. 833048 8. 576625  
3. 874251 4. 644566 4. 150959 4. 467502 4. 443512 5. 218341 4. 138656 3. 889263 4. 184253  
2. 276217 3. 165196 2. 670938 2. 695233 2. 72316 2. 300886 1. 999006 2. 324459 2. 981774

5. 37398 4. 740802 5. 786869 5. 885718 5. 865379 6. 514274 6. 776102 7. 108345 7. 416191  
2. 439413 1. 84866 2. 921769 2. 031233 2. 10664 2. 139551 2. 314071 2. 098471 2. 118215  
3. 383524 2. 891338 3. 062051 3. 278341 2. 145581 2. 898617 2. 740556 2. 266203 2. 824996  
3. 785692 3. 567975 3. 214846 2. 685153 3. 313803 4. 47305 5. 235012 4. 203511 4. 855397  
8. 556948 8. 505483 8. 484957 9. 085898 9. 093463 9. 28859 8. 725036 8. 83199 8. 237496  
1. 889564 3. 382263 2. 37874 2. 405151 3. 136301 4. 874391 2. 831796 2. 680434 3. 542292  
3. 076621 2. 728836 2. 986125 3. 499916 3. 169322 2. 658664 2. 983539 3. 864576 3. 01503  
4. 649639 3. 649121 3. 207769 2. 19637 3. 55068 4. 075623 3. 528757 2. 766751 2. 92939  
2. 670211 2. 222638 2. 111094 2. 459603 3. 244828 1. 356613 3. 235004 3. 376424 1. 800408  
1. 050693 1. 526568 1. 39854 1. 237956 1. 000544 1. 121914 1. 361116 1. 654214 1. 263828  
3. 409104 3. 858551 2. 784962 3. 26598 2. 941123 3. 983735 2. 563933 3. 901938 3. 726684  
3. 798816 3. 689847 3. 084721 3. 113607 2. 843078 3. 545831 3. 003931 3. 117962 3. 076143  
5. 656213 5. 591126 5. 659648 4. 851977 6. 022161 6. 478456 6. 435353 6. 318522 6. 303709  
5. 277566 4. 535218 4. 581852 3. 540351 4. 550562 4. 755387 5. 462799 4. 691379 4. 952247  
1. 448507 2. 408287 2. 704248 2. 090617 2. 088286 3. 581195 1. 491021 1. 510214 1. 788658  
6. 089969 5. 519905 5. 898102 6. 459048 5. 449391 7. 071521 6. 706978 6. 641529 6. 809206  
9. 255534 7. 484798 8. 604954 9. 060372 7. 333045 7. 563868 8. 816215 7. 741903 8. 154254  
6. 640769 7. 198923 6. 591018 7. 410745 6. 930643 6. 09307 6. 834942 6. 945018 6. 971553  
6. 953208 7. 162677 7. 324982 6. 625805 7. 117855 4. 738398 5. 352136 4. 292662 5. 538072  
7. 304027 8. 083454 6. 989394 7. 627415 7. 111707 6. 6501 6. 951429 7. 054377 7. 179489  
3. 85451 3. 472123 3. 140762 3. 158544 3. 788047 2. 97732 4. 140196 3. 507437 3. 556861  
3. 228509 2. 661092 3. 058983 3. 789667 3. 983994 4. 494099 4. 17514 5. 109931 4. 523753  
8. 418241 7. 991182 8. 179486 8. 587442 8. 015578 8. 697194 9. 728478 9. 531001 9. 526609  
6. 480779 6. 520566 7. 133873 6. 747559 6. 665758 6. 240381 7. 446921 7. 181854 7. 953144  
9. 308302 9. 202498 9. 606045 9. 617665 9. 829774 8. 95731 9. 376973 10. 27512 9. 983764  
2. 387683 3. 458635 4. 119267 2. 238781 2. 400219 2. 481773 2. 240596 3. 950701 3. 535645  
1. 803464 1. 871965 1. 788099 1. 558382 1. 812973 1. 74552 1. 737983 1. 941478 2. 082839  
4. 942376 5. 362065 5. 569894 5. 203846 5. 53917 4. 281259 5. 290091 5. 40709 5. 133077  
2. 935005 1. 611994 2. 712422 3. 409934 3. 737214 2. 508375 3. 981019 3. 549462 3. 278644  
5. 035421 6. 029577 5. 662817 4. 777201 5. 403644 6. 220559 6. 135342 5. 365189 5. 241653  
5. 904996 5. 785529 5. 426581 5. 7583 5. 76047 7. 594941 6. 079008 6. 741687 6. 440338  
1. 748188 1. 992175 1. 958447 1. 855833 2. 007394 2. 344153 1. 667547 2. 744435 2. 030858  
2. 749075 3. 413226 3. 555169 5. 372047 4. 737552 4. 282966 3. 668467 2. 986421 4. 718868  
4. 598571 3. 910806 3. 773448 4. 817237 3. 470931 5. 058099 4. 850239 5. 472507 5. 783192  
7. 528463 7. 464659 7. 402195 8. 316522 7. 715075 7. 976328 7. 146455 6. 888801 7. 329481  
5. 031815 4. 177599 4. 045969 4. 753002 5. 363595 5. 698481 4. 945728 5. 015991 6. 121514  
6. 511088 5. 836241 6. 637099 6. 058135 6. 644582 4. 763056 6. 309869 6. 158189 6. 713324  
3. 010371 1. 834795 2. 340954 2. 847043 2. 477873 3. 422615 2. 782096 2. 301561 2. 559954  
1. 369442 0. 987432 1. 023707 1. 201083 1. 667113 1. 264145 1. 233687 1. 549693 1. 081021  
6. 474189 6. 441204 6. 82434 7. 115704 6. 799459 6. 949623 7. 41049 7. 674446 7. 693697  
8. 955944 9. 090997 8. 940757 8. 75798 9. 066962 8. 815277 9. 109574 9. 014843 8. 843559  
3. 267942 3. 029486 2. 652071 2. 392579 2. 865081 4. 791869 2. 882993 3. 984688 3. 617089  
2. 976009 2. 452243 2. 968371 2. 510288 2. 337782 3. 264679 2. 71747 2. 498488 3. 539561  
6. 410268 6. 610675 6. 818237 7. 163963 6. 571983 6. 606399 7. 114721 6. 960793 7. 077334  
8. 020456 7. 744261 7. 774925 7. 226432 7. 373798 7. 792575 8. 478639 8. 153519 8. 409415  
0. 701116 1. 123497 2. 65429 2. 29947 1. 113141 2. 266994 2. 00378 0. 386731 0. 823363  
2. 056852 2. 194404 2. 694424 4. 075603 3. 438975 2. 860029 2. 169495 3. 049509 2. 9761  
1. 026054 1. 679071 1. 536015 1. 673381 1. 772382 1. 26488 1. 214036 1. 651052 1. 316312  
8. 219413 7. 974196 8. 186313 8. 356897 8. 307972 8. 004607 9. 003803 9. 326149 9. 311588  
4. 255627 6. 169426 4. 886647 4. 264548 6. 22724 3. 034017 3. 456618 3. 069381 4. 309301  
2. 091002 2. 722454 1. 250235 4. 177171 2. 016802 4. 48338 3. 753204 1. 352427 2. 338474

6. 97577 6. 828409 6. 338063 6. 801131 6. 636923 7. 669594 7. 251053 6. 940378 7. 244486  
5. 214621 4. 779497 5. 395042 5. 181555 5. 096246 5. 560235 5. 668814 6. 680865 6. 014336  
8. 174816 7. 573093 7. 962332 7. 377228 6. 206134 7. 363363 7. 182154 6. 304464 5. 53855  
4. 749868 4. 373803 4. 95976 5. 245295 4. 706591 6. 007155 5. 887632 4. 312657 4. 964226  
6. 020965 6. 338466 7. 463355 5. 872767 7. 240683 5. 497447 7. 166275 6. 703809 6. 95775  
9. 012219 8. 691268 9. 395769 9. 103966 9. 146589 10. 40992 9. 685739 9. 047126 9. 55424  
7. 363176 7. 635682 7. 12575 7. 248944 7. 33103 6. 934004 7. 649071 7. 000212 7. 358546  
7. 628775 6. 960303 7. 278832 6. 764615 7. 300507 7. 141974 8. 661712 8. 798633 9. 412631  
5. 502243 4. 86134 4. 989057 3. 991195 5. 699759 5. 822389 5. 17895 4. 733133 5. 559546  
3. 132814 3. 516456 1. 533997 3. 157164 2. 046917 2. 808594 2. 482839 1. 638526 2. 387119  
11. 11129 11. 08148 11. 14153 11. 19771 11. 13975 10. 89635 11. 24009 11. 22584 11. 65634  
1. 416541 1. 366804 1. 919505 2. 066701 1. 152894 1. 612847 1. 513094 1. 228355 1. 490911  
2. 130195 2. 403999 3. 433881 3. 289262 3. 316493 2. 362798 3. 353713 3. 772466 3. 490029  
7. 499463 6. 927162 7. 727945 8. 048773 7. 636644 7. 56842 7. 742587 8. 675834 8. 868765  
3. 192126 3. 753741 2. 894969 2. 958376 3. 461392 5. 508639 4. 354343 4. 746624 5. 447909  
4. 47106 2. 697637 2. 687021 5. 311071 3. 594772 4. 990832 4. 048093 6. 439823 4. 200859  
5. 946789 7. 062357 5. 804444 6. 443103 6. 927971 6. 406617 7. 536967 8. 004564 7. 354751  
3. 905615 2. 873016 2. 32161 3. 557959 4. 41312 5. 562885 3. 659553 3. 930411 4. 33753  
5. 006033 4. 131544 4. 313866 4. 200885 4. 931859 3. 826298 3. 741663 4. 37388 4. 707133  
2. 415496 2. 761907 1. 23711 2. 430706 1. 619493 4. 514644 2. 143048 2. 469092 3. 009886  
1. 877004 1. 247124 1. 477725 1. 452922 2. 495095 4. 580995 1. 382776 1. 743421 1. 702402  
7. 407285 7. 001381 7. 363287 7. 573163 7. 551656 8. 226775 7. 678698 8. 108287 7. 899485  
2. 914613 2. 465723 3. 007256 2. 962247 3. 021772 4. 125387 3. 54628 4. 037641 4. 239782  
7. 447307 7. 743138 8. 140228 6. 876691 7. 509144 5. 227024 7. 375197 8. 240323 8. 359338  
5. 761093 5. 815564 5. 490377 5. 850119 6. 576914 4. 58294 5. 969705 6. 877958 6. 472804  
1. 769511 2. 14347 2. 477003 2. 044654 2. 705494 2. 376175 1. 935977 1. 990142 2. 391185  
1. 596975 1. 13335 1. 441498 1. 855298 1. 5089 1. 725751 2. 042778 1. 890047 1. 473051  
1. 856741 1. 378269 1. 506301 1. 848793 2. 146978 3. 52466 1. 725285 2. 031935 2. 652299  
8. 194513 8. 250045 8. 284063 8. 159934 8. 620551 5. 936603 8. 526732 8. 699504 8. 105524  
3. 637412 1. 887796 2. 497247 4. 091565 3. 549245 5. 986538 4. 113474 4. 072396 5. 009416  
2. 966971 2. 890903 2. 421482 3. 069225 3. 507058 3. 990695 3. 340351 2. 22661 2. 44294  
1. 990592 1. 802667 2. 164763 3. 266525 1. 941286 1. 964453 2. 249174 1. 837037 2. 792439  
1. 451984 1. 375651 1. 323701 1. 582582 1. 589368 1. 694782 1. 428401 1. 370208 1. 271713  
1. 702205 1. 634944 1. 450504 1. 688414 1. 695242 1. 670418 1. 997147 1. 342529 1. 591918  
7. 555863 6. 279208 6. 978721 6. 867481 7. 065598 8. 07538 7. 825698 8. 123221 8. 107946  
2. 114995 1. 494699 4. 460022 0. 193117 2. 731505 3. 678297 2. 585646 3. 279388 3. 224214  
2. 27466 1. 805546 2. 232464 2. 516015 2. 434869 2. 716625 2. 313487 2. 442306 2. 84942  
3. 180198 2. 432382 2. 808626 3. 411923 2. 369256 7. 03402 5. 310425 3. 607325 6. 398419  
6. 651545 7. 598433 6. 860919 7. 362755 6. 938764 7. 076635 6. 927452 6. 387035 6. 724064  
1. 854579 3. 115061 2. 741123 2. 191487 1. 654128 1. 745553 1. 870613 1. 434246 1. 726877  
1. 34877 1. 387521 1. 184395 1. 509651 1. 096209 1. 233018 1. 268318 1. 639124 1. 672554  
1. 885416 1. 907515 2. 534613 2. 106323 2. 553565 3. 461835 3. 020491 2. 24649 3. 032706  
7. 531959 8. 374158 7. 619959 7. 24901 8. 21961 7. 634855 7. 761747 7. 337329 7. 564605  
2. 949475 3. 651963 4. 425181 1. 928758 4. 032985 3. 787495 4. 085189 3. 415112 4. 308972  
4. 028365 3. 42001 4. 725648 4. 08569 5. 010109 7. 194061 5. 284402 5. 932382 5. 054313  
5. 886757 5. 208685 5. 372904 5. 960924 6. 110483 5. 83887 6. 145965 5. 238863 5. 554072  
5. 73622 6. 434555 6. 282774 5. 551183 6. 319068 6. 113105 6. 223069 5. 700828 6. 185477  
6. 792346 7. 252855 6. 437791 6. 670669 7. 305798 7. 035394 7. 900354 7. 685964 8. 403315  
1. 392709 1. 402419 1. 452935 1. 057343 1. 740354 1. 565822 1. 237527 1. 56562 1. 904115  
1. 929437 2. 121817 3. 105687 2. 634804 2. 729582 2. 998083 2. 140051 2. 641913 2. 659225  
6. 514593 7. 075889 6. 876136 6. 69448 6. 765952 6. 16628 6. 909744 7. 042695 6. 62417

3.011929 3.470309 4.292954 5.646368 2.805498 5.559388 2.443818 3.39208 4.887241  
6.755348 6.768192 6.473041 6.244683 6.889538 7.519826 7.219684 7.772337 7.492004  
1.395142 0.891619 0.94549 0.885038 1.291052 0.887663 0.911067 1.542075 1.034925  
2.899764 2.646463 3.54806 2.790426 3.858939 3.027752 2.657873 4.697995 3.075347  
5.879003 6.316686 6.434458 5.867477 5.432588 5.871221 5.264677 5.87895 5.74757  
7.565312 8.066891 7.950407 7.799784 8.410252 6.258383 7.73036 8.315052 8.265783  
5.612206 6.400043 5.179781 5.621661 5.166147 6.076589 6.263822 6.401558 5.975602  
1.784823 1.371807 1.350527 2.168495 1.205783 1.355131 1.977886 1.365824 2.585566  
8.706681 8.313297 8.536343 8.428814 8.768768 8.553629 8.925231 8.981163 8.995487  
6.90668 6.585767 6.253763 5.773293 6.820443 7.32621 7.017119 5.594864 5.176844  
2.210656 2.422719 1.859163 1.626224 1.547785 1.793269 1.811506 2.704688 2.980642  
6.818264 6.937017 6.274937 6.370197 5.73705 6.226181 6.387166 6.048183 6.216339  
7.83698 8.288058 7.647208 7.748035 8.280129 7.834993 7.798206 7.66114 8.06548  
7.952804 7.596326 7.110916 6.468671 6.55966 5.896961 5.176472 4.092773 4.364167  
2.074602 2.118143 1.827453 1.858298 2.070377 1.960154 2.200563 1.966521 1.846158  
2.75037 2.560563 2.954463 2.814409 3.182564 5.590252 4.586683 3.651695 3.593621  
0.830725 1.880868 1.167767 1.344189 0.879605 1.50997 1.144562 1.126655 1.103264  
5.27734 5.312451 5.451331 5.606003 5.686468 5.026458 4.653636 4.934376 4.783875  
6.198537 6.035948 6.674108 6.928959 6.621283 6.911051 6.643692 6.926458 6.450629  
10.95331 10.96444 10.99338 10.78333 11.00371 10.90331 11.27196 10.97958 10.71633  
2.254724 1.695492 1.732471 3.135085 2.669512 3.220772 1.863755 2.699067 1.459102  
3.336308 2.651708 3.489603 2.722993 2.495819 2.989017 3.02621 2.589145 3.318189  
5.229777 6.122785 5.096764 4.457213 5.273996 6.302221 6.466442 6.205996 6.002302  
5.055913 6.089936 5.457109 4.906043 6.365941 4.597085 5.952662 4.942297 6.398384  
5.940255 6.590691 6.175702 5.771136 6.332159 6.880249 6.644034 5.95306 6.585236  
4.95839 3.904456 3.009832 3.935913 4.260646 8.153052 6.176626 4.743128 6.328259  
2.559764 1.204611 1.295816 1.947178 2.409392 4.723351 5.337282 2.826892 5.333873  
9.732319 9.606503 9.875657 9.512669 9.830484 9.999928 9.94952 9.733262 9.59057  
2.688194 1.961331 2.636877 2.427132 2.773616 2.49878 1.942554 3.07543 2.863072  
3.033534 1.939434 1.227354 0.860675 1.16698 1.389656 1.105525 1.165113 1.407085  
8.088049 8.068936 7.227196 7.092352 8.014642 8.393589 7.728231 7.56475 7.869082  
4.67572 5.220766 5.566691 5.26828 5.456794 5.911119 6.287385 5.448733 5.338699  
5.635657 6.061356 5.196568 5.773023 5.478486 6.29014 5.572027 5.548709 5.457647  
3.170495 3.45304 2.902002 3.907116 2.711936 3.051725 3.612322 2.910516 2.893701  
5.075057 6.534723 5.229586 4.515021 6.186325 4.623608 5.245914 4.649701 5.118054  
1.619619 1.77818 1.666291 2.153179 1.889694 1.540484 1.581755 1.967829 2.325281  
1.977339 1.763482 1.605827 2.080355 1.38337 1.289529 1.848558 1.406069 1.731515  
2.769441 3.478697 3.568007 2.36874 1.628862 2.256738 1.036646 1.965303 2.631183  
1.613732 1.48458 2.311376 1.5099 2.4814 1.403376 1.251992 1.587162 1.265117  
4.776314 5.700912 5.572604 5.024881 6.207417 2.828352 7.030613 6.724791 6.851318  
2.40592 1.606156 2.155095 2.292904 1.753497 2.50115 1.89664 2.282127 2.108183  
6.761285 5.737713 5.658698 5.546334 5.585683 5.522018 5.101291 5.487871 4.753065  
1.320264 1.488663 1.57139 1.752815 1.713979 1.265155 1.028241 1.966452 1.221345  
0.691267 0.785756 0.877408 1.042719 0.681366 0.961118 0.837526 1.390609 0.751333  
1.188128 2.109079 2.718491 2.509156 1.42761 1.661317 1.617466 1.308609 2.285112  
4.773184 3.749464 4.845891 4.837916 3.091534 5.082443 4.516496 4.789665 4.72341  
1.188216 1.845132 3.155589 1.357621 1.451392 1.113238 1.510725 1.130728 3.874574  
1.843317 1.613874 0.991519 1.823018 1.601265 1.131913 1.633063 0.984765 0.952176  
1.214997 1.412128 1.102939 0.979132 0.982843 1.018235 1.295301 1.081125 1.029089  
1.880606 3.543524 3.051599 2.288017 2.039859 1.695133 1.921749 1.655125 1.703247  
1.607899 1.343488 0.885608 1.512443 0.707437 1.933823 0.763094 1.793142 0.928059

1. 788606 1. 370082 1. 85408 1. 611556 1. 457995 1. 892798 1. 623517 1. 530418 1. 819611  
4. 364234 4. 895133 3. 780936 4. 193259 5. 007944 3. 727684 3. 201681 4. 266454 5. 503897  
1. 290087 1. 472345 1. 481552 3. 350539 1. 631941 1. 860688 3. 142086 1. 299917 1. 505033  
1. 99073 2. 19937 1. 538042 1. 87159 2. 224433 1. 540946 1. 271748 1. 398722 1. 740744  
4. 183064 3. 293582 4. 755162 4. 118911 4. 121224 3. 677932 3. 462858 4. 973192 3. 454827  
3. 678012 3. 291068 3. 306002 3. 790102 2. 78114 3. 595634 3. 505357 3. 890793 3. 996746  
1. 167018 1. 424982 1. 326419 2. 563571 1. 4258 5. 176818 1. 754725 1. 501838 1. 797277  
1. 38098 1. 093934 0. 852657 1. 016671 2. 219376 0. 824471 0. 838686 3. 221954 1. 101383  
7. 472288 6. 561869 6. 729736 6. 632759 7. 060681 6. 791592 6. 926981 7. 294072 7. 07587  
6. 808067 6. 61363 6. 197645 6. 023873 6. 521252 5. 513449 6. 275784 6. 086894 6. 255906  
5. 693969 4. 818153 5. 796287 5. 528447 5. 525425 5. 722222 5. 543671 6. 17189 5. 557703  
8. 210469 8. 154843 8. 419659 8. 170573 8. 290527 8. 4171 8. 159819 8. 198505 7. 821665  
3. 584306 1. 33337 3. 512306 2. 561745 3. 732277 2. 61198 4. 212939 3. 052564 4. 693914  
1. 34807 1. 987822 1. 499741 1. 629889 1. 615918 1. 351322 1. 968109 1. 816786 1. 32627  
7. 507624 7. 444462 7. 719278 7. 122239 6. 502775 6. 61538 7. 089851 6. 950945 6. 772209  
6. 736052 6. 689412 6. 589424 6. 999741 6. 102803 6. 435794 6. 673668 7. 008336 6. 75943  
2. 279091 1. 884192 1. 48898 1. 159273 1. 926498 1. 508209 1. 25727 1. 953505 1. 136593  
5. 491969 4. 683255 5. 000088 5. 902355 4. 351707 4. 669937 4. 625026 5. 53163 4. 462065  
4. 694179 3. 959427 3. 539779 4. 629919 4. 951832 4. 592411 4. 051962 4. 554103 5. 538291  
7. 920395 7. 113249 7. 936225 7. 494262 7. 010569 8. 63791 7. 058785 7. 797368 7. 267088  
3. 574593 4. 559075 3. 914402 2. 718745 3. 443308 5. 351807 4. 779921 4. 441136 3. 746897  
6. 852968 7. 765049 6. 777421 7. 653049 7. 367646 7. 35592 7. 286944 7. 054046 7. 045616  
8. 118086 7. 856646 7. 585455 8. 238175 8. 212204 8. 116745 8. 008122 7. 713817 7. 92405  
7. 041861 7. 381676 7. 22508 7. 169101 7. 343316 6. 98748 6. 722751 6. 895296 6. 869395  
3. 935831 4. 445368 4. 093659 3. 861961 5. 157892 4. 344581 4. 238402 4. 339902 4. 534882  
3. 058669 3. 763983 2. 963951 4. 559625 3. 426922 4. 107861 4. 144902 2. 847429 3. 140861  
1. 580894 1. 133815 1. 671448 1. 458915 1. 365391 1. 56552 1. 583141 2. 178344 1. 938512  
2. 741121 2. 770155 3. 006395 2. 332195 2. 925314 2. 114709 2. 014445 1. 809534 2. 28124  
2. 962631 3. 08372 1. 632139 1. 953718 1. 622483 1. 747815 2. 358598 1. 767288 1. 643904  
4. 267852 3. 758764 4. 955483 3. 507854 4. 047183 3. 608645 3. 749677 3. 801257 3. 899048  
1. 261176 1. 530906 1. 570618 2. 052399 1. 654105 1. 579296 1. 952311 1. 590162 1. 314258  
2. 348964 1. 911764 1. 417192 1. 355501 1. 889534 1. 641606 1. 246999 1. 14846 1. 869439  
3. 108383 2. 22168 2. 571571 2. 635901 2. 953872 2. 438548 2. 658018 2. 537154 2. 826418  
7. 685699 8. 105864 7. 081152 8. 160797 6. 999418 6. 522324 6. 13028 7. 875313 8. 604346  
2. 550934 2. 771519 2. 797038 2. 783728 2. 684775 2. 862454 2. 196994 3. 098399 2. 609662  
0. 851621 0. 77076 1. 126033 1. 222076 1. 013089 1. 234936 0. 902831 0. 546949 0. 860718  
5. 835964 4. 989648 5. 132489 5. 088249 5. 300586 5. 952177 4. 948579 5. 870202 5. 133746  
1. 797178 1. 32389 2. 00874 2. 385291 1. 790476 2. 487694 1. 868883 2. 037796 1. 815155  
2. 024772 1. 172828 2. 940656 3. 533038 2. 867065 2. 719079 1. 964607 3. 030626 1. 560223  
1. 361612 1. 245604 0. 995191 1. 711016 1. 061477 0. 710842 1. 05447 1. 448598 2. 216429  
6. 721148 6. 867326 6. 527049 8. 034074 5. 418614 6. 245858 6. 30909 6. 644596 6. 371212  
2. 410264 2. 141463 2. 274788 2. 899414 2. 225958 2. 370724 2. 013888 2. 404998 1. 864215  
2. 188775 2. 07657 2. 831156 1. 84924 2. 682569 2. 669388 1. 850834 2. 247094 2. 915732  
2. 970912 3. 044964 2. 252117 2. 990708 3. 260653 3. 247301 3. 547804 3. 562276 3. 011105  
2. 739814 1. 941247 2. 242024 3. 227484 2. 962261 2. 908525 3. 946833 3. 357644 3. 477022  
5. 856831 3. 348234 5. 045495 5. 654454 4. 273849 1. 867205 1. 348203 2. 420512 1. 581094  
4. 158674 3. 824354 4. 807008 3. 950667 3. 727866 3. 847114 4. 131515 4. 454107 4. 119174  
1. 969998 2. 186725 1. 958583 2. 078575 1. 356665 2. 147842 1. 757085 2. 460547 1. 879848  
3. 233188 2. 699091 5. 299716 4. 909911 3. 689153 3. 014771 4. 828988 3. 067999 4. 427236  
4. 142559 4. 30601 5. 027871 4. 245969 4. 688669 5. 585704 4. 917946 2. 53623 3. 125787  
1. 793555 3. 810999 1. 845356 2. 093258 1. 865944 2. 125989 2. 559692 1. 379352 1. 976164



4. 442085 4. 934597 5. 144167 5. 550565 4. 845344 2. 176511 2. 821375 5. 194608 3. 061154  
2. 14094 3. 404552 3. 065397 2. 654778 3. 585362 3. 48818 2. 364341 2. 892501 2. 677538  
5. 671294 5. 859035 4. 56614 1. 786888 1. 716285 2. 445103 4. 257924 1. 71565 1. 694139  
3. 510425 2. 898906 4. 079906 4. 110682 3. 772217 4. 537823 3. 374592 4. 263393 3. 79471  
0. 944121 1. 226617 1. 21446 1. 055299 0. 649031 1. 176969 0. 842066 1. 005677 1. 115875  
0. 806838 1. 07829 1. 221648 1. 09703 1. 069812 1. 494254 1. 509734 1. 97965 0. 966179  
1. 919027 2. 461484 2. 345701 1. 585618 1. 555021 1. 706878 1. 510368 1. 906922 1. 546186  
9. 527962 9. 862596 10. 06651 9. 588709 10. 10791 9. 510139 10. 33291 10. 1175 10. 09641  
1. 077645 1. 156114 0. 899224 1. 456025 1. 322821 1. 269474 0. 956263 1. 28191 1. 477864  
2. 244319 1. 653021 1. 717408 1. 3974 2. 269365 1. 741222 2. 672384 1. 847679 2. 186167  
4. 782067 4. 417505 6. 001193 3. 448672 4. 63049 4. 988323 4. 500237 4. 66817 4. 884681  
1. 664687 1. 129376 1. 931462 1. 672161 1. 912776 1. 568038 1. 340961 1. 661024 1. 261607  
2. 480059 1. 584207 2. 07519 2. 120518 1. 957244 2. 367677 2. 236036 2. 071308 2. 301867  
2. 191813 1. 415563 0. 77656 2. 976314 0. 844099 1. 22546 1. 43302 3. 702634 1. 742842  
1. 74792 2. 267241 2. 65699 2. 326324 1. 708959 1. 640181 1. 991546 1. 638197 1. 656826  
2. 833922 3. 872767 3. 944397 2. 996434 3. 579639 3. 408059 2. 883614 3. 678438 3. 499341  
0. 915788 1. 975893 0. 901241 1. 104463 2. 018462 1. 085699 1. 207779 1. 705988 1. 169692  
2. 556468 2. 853381 2. 34174 3. 424185 2. 076922 1. 538794 1. 906532 2. 794684 2. 059535  
1. 379195 1. 659893 1. 281607 1. 824423 1. 479018 1. 32506 1. 460892 1. 640509 1. 955595  
1. 284408 1. 006485 0. 983051 1. 011806 2. 327054 1. 211457 0. 899329 0. 544869 1. 257978  
2. 468124 2. 452745 3. 686484 2. 903924 4. 235497 3. 803749 2. 485964 3. 139199 3. 113978  
2. 146524 1. 087606 1. 601417 2. 622847 1. 826076 2. 120076 1. 346973 1. 800203 1. 755064  
1. 175139 1. 169695 1. 653403 1. 896531 0. 927147 2. 175232 1. 507832 1. 604061 2. 61938  
5. 113295 4. 782216 3. 260926 4. 286994 2. 672232 4. 868451 3. 92313 1. 390406 1. 119623  
5. 193236 3. 52295 3. 060779 4. 249779 3. 928181 3. 282209 4. 288915 3. 272594 3. 351688  
1. 533668 0. 846618 1. 25777 1. 070174 1. 236246 1. 475185 1. 151708 0. 99285 1. 308108  
1. 347244 1. 749637 2. 133377 0. 732652 1. 026189 0. 789017 0. 609683 1. 749943 0. 533152  
2. 366147 1. 581427 1. 619531 1. 838282 1. 192326 2. 552976 1. 324262 1. 145774 1. 704185  
7. 831726 7. 525614 5. 262757 7. 314801 8. 232692 6. 156098 6. 678873 6. 660682 6. 638736  
3. 057983 2. 231936 4. 504726 4. 235933 5. 00034 4. 690103 3. 045245 4. 328015 4. 729708  
1. 065974 1. 150011 0. 9195 1. 255185 1. 003626 0. 9855 0. 791839 1. 020725 1. 16039  
2. 114683 2. 221652 1. 677254 1. 642433 1. 811361 1. 581999 2. 008796 1. 768516 1. 375091  
1. 0781 1. 921007 1. 307766 2. 669802 0. 279478 0. 658997 1. 250142 1. 511291 0. 626182  
3. 303193 4. 150506 2. 827663 3. 296065 4. 287798 3. 003573 2. 934329 2. 924805 2. 450648  
4. 677244 4. 37306 6. 754592 5. 935963 6. 335991 4. 407713 6. 536014 6. 034026 6. 073717  
6. 586 5. 993486 6. 085767 6. 827434 5. 96154 6. 338123 5. 723596 6. 749949 6. 92171  
2. 012261 2. 342537 1. 935371 1. 657776 1. 715639 1. 88806 2. 101128 1. 273577 1. 418802  
6. 481765 6. 924427 6. 218376 5. 658695 6. 198193 5. 071577 5. 12247 4. 62782 5. 703153  
0. 969833 2. 98526 1. 42102 2. 399456 1. 712335 2. 377287 1. 636139 2. 375531 1. 66269  
2. 592228 4. 462583 4. 708988 3. 731559 4. 951981 2. 826141 3. 911489 3. 493389 2. 892202  
2. 107585 2. 99439 1. 715317 2. 507999 2. 447649 2. 156138 2. 339313 2. 209098 2. 243391  
2. 559722 5. 212413 4. 308949 2. 890225 5. 289013 4. 905129 2. 459608 1. 681471 2. 009191  
5. 673329 5. 623055 5. 564184 5. 268934 5. 685933 1. 786858 4. 088247 3. 562128 3. 879406  
1. 673712 1. 620057 1. 770378 1. 86909 2. 315275 1. 955391 1. 451682 2. 598626 1. 521946  
1. 299273 1. 395191 2. 890781 2. 483613 1. 622112 1. 038495 1. 419078 0. 79504 1. 802169  
4. 021878 3. 507029 4. 217024 3. 518273 3. 168008 4. 700996 4. 169304 3. 761438 3. 933426  
3. 533619 3. 607302 5. 221871 5. 035511 3. 584004 5. 809383 4. 807637 6. 161077 4. 706381  
1. 76129 1. 447645 3. 128645 3. 503272 2. 979136 2. 045587 1. 946906 4. 318764 1. 188006  
6. 674607 6. 667324 6. 175297 7. 140491 6. 462998 7. 816866 6. 53595 7. 227182 6. 889072  
2. 520345 2. 072553 3. 925123 2. 154511 2. 223467 1. 951219 2. 165645 2. 443487 2. 345684  
3. 59894 4. 439749 3. 519915 5. 140644 3. 571557 4. 031733 4. 431931 4. 755806 4. 469241

2. 020991 1. 708934 2. 477023 1. 830213 1. 669037 1. 855443 1. 727138 2. 202216 3. 111093  
3. 086675 4. 679984 4. 791383 3. 941699 4. 868076 5. 104843 5. 01554 4. 249129 4. 029681  
4. 429976 5. 375406 4. 340663 3. 520348 4. 482975 4. 955464 4. 697962 4. 741316 2. 332104  
1. 265991 2. 110948 2. 336769 1. 537496 1. 270621 1. 531562 1. 68914 2. 032533 1. 866412  
1. 675781 1. 358488 1. 27035 1. 642509 1. 581469 1. 657101 1. 742269 1. 566191 1. 393274  
2. 876408 2. 744316 1. 649067 3. 985159 1. 870488 1. 831259 1. 626262 1. 847929 2. 006395  
1. 309938 1. 505506 1. 593988 1. 322208 1. 311802 1. 463685 1. 663039 1. 433712 1. 47447  
1. 495293 1. 192874 0. 986287 1. 914755 1. 057527 1. 18376 1. 244736 1. 756145 0. 972239  
4. 02481 2. 988938 3. 302266 5. 831334 4. 086529 5. 23247 3. 815529 3. 825565 3. 142228  
5. 90921 5. 652351 5. 465935 5. 400715 5. 40469 4. 360648 4. 469495 3. 368542 4. 744818  
1. 882857 1. 583853 1. 135326 2. 68962 1. 894712 2. 100283 1. 161575 3. 257585 1. 696439  
4. 051934 4. 301483 2. 336852 3. 576427 3. 795903 4. 862196 3. 649259 3. 570338 2. 805539  
1. 368093 2. 139832 1. 303131 1. 675536 1. 354823 1. 343536 1. 775606 2. 254251 1. 322622  
2. 021934 3. 89091 1. 821646 5. 073934 2. 479696 1. 492572 1. 642857 2. 729714 2. 865431  
1. 240574 2. 267791 0. 962393 1. 911888 1. 148333 1. 151203 0. 848259 1. 881968 1. 446945  
3. 459741 4. 639884 3. 319195 2. 55854 2. 699873 2. 377474 1. 724317 2. 406687 3. 032122  
2. 013277 1. 784293 2. 231291 1. 473769 1. 559884 1. 253824 1. 244619 1. 478005 1. 117615  
5. 530223 2. 467086 3. 12573 3. 309383 5. 015732 4. 096435 5. 084519 3. 594098 4. 899389  
2. 132758 2. 311324 1. 632881 2. 533607 1. 353123 2. 459671 1. 43089 1. 39829 1. 479969  
3. 530427 4. 166916 3. 899829 3. 725373 4. 224063 4. 830054 3. 822463 3. 82351 3. 323726  
3. 400369 4. 852689 4. 155129 3. 491739 3. 609316 4. 242061 3. 450435 3. 555828 4. 13888  
3. 57104 5. 967971 4. 599026 2. 625231 5. 657472 2. 879646 4. 834194 2. 847111 2. 998708  
2. 027677 1. 893251 1. 458328 2. 591588 1. 687963 2. 254798 2. 304184 1. 744239 1. 415291  
7. 372696 6. 282862 6. 801931 5. 401582 6. 644448 6. 385627 6. 929061 5. 955644 5. 932125  
6. 150724 5. 561048 6. 40153 7. 157308 4. 878896 6. 137313 5. 812516 6. 222701 6. 134258  
1. 179794 2. 173418 1. 760885 3. 259065 0. 83031 1. 487563 1. 669538 1. 597196 2. 560854  
5. 475145 6. 841091 5. 467376 6. 157643 6. 711504 5. 802464 5. 674429 5. 618899 4. 793205  
2. 953504 2. 227339 3. 271546 4. 626043 3. 666625 3. 882666 3. 457732 3. 525235 3. 499841  
2. 92 3. 771844 2. 544607 3. 305758 2. 249485 3. 359819 2. 281793 1. 610889 1. 87218  
3. 392705 3. 326467 4. 512034 2. 670191 2. 370025 3. 772407 3. 14968 3. 177274 2. 91494  
0. 858612 0. 831491 0. 754584 1. 3042 0. 965398 1. 54266 2. 12978 0. 966828 1. 259164  
1. 086155 1. 228806 1. 340637 2. 00813 1. 364209 0. 932765 1. 306868 1. 147347 1. 264973  
2. 537377 2. 0104 2. 427693 2. 135355 2. 28048 2. 288954 2. 551128 2. 188208 2. 128042  
2. 325314 2. 830299 3. 84485 2. 215405 3. 157802 3. 149602 4. 028475 3. 458153 2. 879412  
1. 896643 2. 218927 1. 698446 1. 868449 2. 520073 1. 969697 1. 889377 2. 634113 3. 07423  
2. 037273 2. 962056 2. 379751 1. 449641 1. 380966 3. 00783 1. 656041 1. 510015 1. 627769  
2. 742773 2. 379594 2. 185786 1. 871451 2. 299016 1. 835742 2. 656312 2. 160231 2. 603487  
1. 532866 2. 134684 1. 7446 1. 87504 1. 191433 2. 087657 2. 11184 1. 68498 1. 593576  
2. 183429 3. 062925 3. 699893 3. 451932 3. 310625 2. 585253 4. 219188 5. 340527 2. 951548  
0. 451154 1. 445221 4. 532691 4. 207954 4. 60864 3. 18031 3. 915232 4. 615244 4. 704889  
3. 054822 1. 592104 3. 504028 1. 657043 2. 635551 0. 86711 1. 589202 2. 490286 1. 420389  
9. 077652 8. 314328 8. 664124 8. 512632 8. 588099 8. 204757 8. 400639 7. 579274 7. 261176  
1. 745911 2. 574143 1. 288251 2. 518125 1. 7142 1. 606413 1. 823968 1. 415955 1. 942795  
0. 972454 3. 573352 4. 020251 2. 310506 4. 329909 1. 690003 3. 965807 1. 986471 2. 785556  
1. 420658 1. 299146 1. 307449 3. 545741 1. 20243 1. 275227 1. 363112 0. 53214 0. 506182  
3. 417759 3. 540485 2. 248302 2. 543295 2. 971208 1. 452233 1. 384935 1. 855963 2. 44656  
4. 063378 3. 665955 3. 206918 2. 625693 3. 858562 3. 479416 3. 800912 2. 692706 4. 113257  
2. 267745 3. 118161 2. 33757 5. 355982 3. 427812 2. 681347 3. 936424 3. 156046 3. 823919  
2. 941486 2. 979599 3. 016058 3. 065669 2. 850174 2. 513822 3. 627009 2. 428981 2. 901277  
6. 242231 5. 892497 5. 364342 6. 318132 4. 926274 5. 338807 5. 993906 5. 898669 5. 582916  
2. 264208 3. 357002 1. 95975 3. 074481 2. 250088 5. 569408 3. 184301 4. 078452 4. 427538

7.150027 6.119071 5.702913 6.382168 6.356286 6.530849 6.55018 5.92298 6.796867  
0.969381 1.361762 1.032069 2.03847 1.259516 1.817611 0.962718 2.263936 0.781205  
1.62383 1.389563 1.353525 1.302664 1.392091 1.322673 1.68454 1.318178 1.180131  
1.461869 1.870361 2.558504 1.383239 1.443699 1.549415 1.215046 1.962035 1.871861  
2.544175 2.556214 2.20006 1.751904 2.627784 2.134228 1.931009 2.116959 1.789865  
2.178071 2.365256 1.603771 1.753724 2.659245 3.486116 2.103556 2.37565 2.268543  
0.579051 0.931526 0.686897 0.369903 0.365089 0.872354 0.617863 0.69638 0.298512  
8.181798 8.146803 8.089499 7.475208 8.725159 7.782688 7.958787 8.14978 8.193082  
1.480589 1.702426 1.5295 1.906505 1.869059 1.743823 2.804853 1.65208 2.787499  
1.920342 2.004961 1.994647 2.736031 2.40703 2.24344 1.852413 2.280955 2.350744  
4.247741 3.08865 4.506276 2.708288 3.532348 3.41888 4.506225 3.553315 3.436747  
2.30863 1.406391 3.888659 1.162152 2.724095 1.400661 0.989279 2.258554 1.10676  
4.169366 4.303443 4.656357 2.522629 3.913066 4.140385 4.778469 3.957256 5.25932  
1.418257 1.865361 1.316916 1.124578 1.267707 1.101757 1.099022 1.774817 1.922855  
4.868034 5.223457 5.269044 5.747513 5.608101 5.922632 5.429439 5.159053 5.23991  
1.863183 3.291985 2.091561 2.311465 2.584008 3.30705 2.280731 2.331174 2.868993  
2.547014 2.079805 2.236447 1.221192 2.936555 2.213175 2.762788 2.101726 1.640561  
1.186587 1.054868 1.363537 0.853429 0.87116 0.904285 1.044469 1.2031 1.152898  
2.189197 2.189424 1.742123 2.688378 1.999939 2.173046 2.17015 2.932564 1.42813  
1.308201 1.837842 0.980463 1.898763 1.40507 1.854764 1.69047 1.3993 1.212603  
2.879107 3.748797 3.530074 1.754758 4.69609 3.364851 2.83131 3.650677 3.273173  
1.213961 1.158655 0.999301 1.16595 1.178103 1.164577 1.155221 1.379428 1.371931  
2.108131 1.994835 2.843556 2.55427 1.255411 2.445381 2.543796 2.585429 1.953958  
5.011657 2.606906 4.401552 5.411369 4.177657 3.58252 4.032921 2.60884 3.627818  
3.855353 3.411365 4.177211 2.174209 4.245469 1.814859 1.737441 2.056448 2.744902  
3.365178 3.562126 3.703081 1.809039 4.161823 1.872152 3.644102 3.255827 1.959792  
1.214433 1.770657 0.996422 1.491045 1.747811 1.004847 1.251648 1.329574 1.336109  
1.949551 2.522585 1.999709 2.225079 2.375388 3.086351 2.002097 2.072665 3.557473  
4.888796 4.338373 4.235005 4.523219 4.703748 4.060731 5.136201 4.755849 4.503482  
1.70077 2.254545 2.39619 1.70077 1.83946 1.835098 0.857602 3.138617 0.597367  
4.398184 4.625021 4.554758 3.631467 5.408533 4.276144 2.971088 3.799156 3.14341  
1.427658 1.59645 1.577673 1.277066 1.376381 1.436534 1.430313 1.8676 1.35165  
1.521868 1.989193 1.931489 2.130535 2.616051 1.758345 2.170507 2.147228 1.722554  
1.229788 1.703682 0.966382 2.049255 0.887894 0.905905 1.159836 1.008657 1.388504  
2.142735 1.826817 2.409025 2.273609 1.994626 2.17019 2.497754 1.854684 2.144195  
1.972563 2.632466 1.276135 1.862887 2.861336 2.013808 1.822277 1.902887 1.385515  
2.284329 2.799974 1.510557 2.282101 1.3053 1.680328 2.035008 2.071958 1.774467  
3.434175 3.519199 4.342483 3.442723 3.980135 2.897157 2.969056 3.534076 3.504073  
3.390612 3.790876 2.205625 3.212037 2.48644 2.229063 2.798251 2.233513 2.700205  
1.545861 2.03418 2.57444 2.492503 2.552821 2.450965 2.71125 2.106819 2.959163  
1.393677 0.943073 1.824906 0.814553 1.002816 1.830307 0.896716 1.475454 1.32666  
3.777839 4.41376 4.961674 4.237065 4.695629 6.175166 5.481454 4.432343 5.218434  
2.905829 4.096781 2.858192 4.440336 2.954316 3.956689 3.536875 3.362634 2.878768  
1.447473 1.446607 1.847823 2.364794 1.9999 2.348274 2.34856 2.440898 1.993099  
2.185652 2.270918 1.355318 1.75938 1.239955 1.133437 1.316647 1.548728 1.817391  
3.125658 2.718394 1.589837 3.957853 3.353578 3.163741 3.178358 3.480898 3.778117  
1.133834 1.044367 1.372086 1.610548 1.401003 1.339581 1.363343 0.909419 1.12717  
2.769711 2.39785 1.703192 1.578088 1.599978 1.750583 1.986687 1.619334 2.219479  
2.094352 1.771444 1.562871 1.888755 1.611476 1.721149 1.973981 1.58619 2.101959  
5.145348 5.396401 4.794326 4.296751 4.405028 6.316085 5.398473 5.625671 5.531005  
1.46955 1.76428 1.719091 2.396039 2.163628 2.285554 1.625632 2.131502 2.29178

1. 76104 2. 20052 2. 568503 3. 643689 2. 33248 1. 478547 0. 994718 1. 914811 1. 521974  
1. 260379 2. 044559 1. 392123 2. 776632 2. 574433 1. 840308 2. 121759 2. 091762 2. 08357  
10. 14133 9. 985258 9. 868214 9. 670946 9. 969661 10. 03578 9. 750508 9. 117558 9. 280411  
3. 0911 3. 376045 3. 274976 2. 541375 2. 778786 1. 914267 2. 948169 2. 599829 3. 041301  
1. 028527 1. 569842 1. 857296 1. 759169 1. 147455 1. 156854 1. 148993 1. 7113 1. 01451  
3. 076736 2. 952721 3. 795371 3. 165418 3. 352414 2. 368691 2. 509778 3. 124181 4. 214075  
1. 135802 1. 375017 1. 148599 1. 618043 1. 27951 1. 177586 2. 160895 1. 228585 1. 335775  
2. 595 2. 051534 3. 13218 1. 921666 3. 029111 2. 710651 1. 942384 2. 158507 1. 248439  
3. 374112 1. 755903 2. 636052 1. 795358 2. 229231 1. 633219 1. 774999 1. 561939 1. 685041  
1. 79305 1. 834847 2. 045393 1. 989902 2. 707657 1. 817301 2. 09758 2. 249583 2. 366351  
1. 464541 1. 450486 1. 601791 1. 399292 1. 614293 2. 120062 1. 983308 1. 115769 1. 887966  
4. 9356 4. 015185 3. 996339 3. 678303 4. 357906 4. 437178 4. 5197 4. 683302 5. 442508  
6. 510382 6. 589766 6. 378605 5. 292047 6. 616771 5. 96889 7. 137704 6. 536997 6. 678142  
2. 586587 2. 52944 1. 501327 2. 323958 2. 399379 1. 763052 1. 042896 1. 142012 2. 792695  
5. 404102 3. 002207 5. 609905 3. 639267 4. 185832 4. 701773 4. 939485 2. 963128 5. 331498  
4. 099796 1. 621428 2. 390392 2. 996448 3. 025834 1. 968846 2. 049002 4. 095335 2. 368319  
1. 710933 2. 511411 1. 913477 2. 087972 1. 11163 2. 139669 1. 597625 2. 318945 2. 294056  
1. 883229 1. 918349 2. 058312 3. 01926 2. 644846 2. 869769 1. 496439 3. 390679 1. 500756  
0. 928305 1. 434273 2. 189207 1. 540571 1. 022066 1. 473788 1. 449327 2. 225567 0. 941448  
1. 376932 2. 034863 1. 301926 1. 590739 1. 790624 2. 005184 1. 768248 1. 466512 2. 100155  
3. 405277 4. 761702 4. 243976 3. 30652 2. 659166 2. 757119 2. 547068 2. 260329 2. 070132  
3. 14673 2. 958959 3. 925336 3. 187794 3. 171513 3. 982458 3. 286305 4. 363907 4. 43449  
1. 729096 2. 486429 1. 485006 1. 746802 1. 351433 2. 286787 1. 5041 2. 148732 2. 448251  
2. 53021 0. 971596 3. 078132 1. 301982 2. 215595 1. 830938 1. 365005 2. 688206 1. 630129  
3. 973122 4. 228743 3. 926799 2. 72722 3. 848282 4. 198545 3. 649868 2. 664859 2. 525667  
5. 659288 5. 327951 5. 327938 6. 202557 5. 520167 5. 614318 5. 424585 5. 946525 5. 783028  
2. 436714 1. 603314 1. 47713 2. 136128 1. 382766 1. 185961 1. 546265 1. 785737 1. 921287  
1. 511962 2. 771713 3. 352779 1. 771884 1. 152215 1. 949675 1. 741198 3. 317191 2. 922235  
1. 940061 2. 28054 1. 793644 2. 626267 1. 982109 1. 827739 2. 732962 2. 37522 2. 169158  
6. 120627 4. 470438 4. 273402 3. 164623 4. 0773 5. 627467 4. 736105 2. 656049 4. 25309  
1. 368479 1. 491681 2. 085337 1. 352339 1. 414247 1. 243141 1. 284507 1. 863907 1. 668426  
3. 182744 4. 369675 3. 678291 3. 694192 3. 569016 3. 803471 3. 624406 3. 162254 3. 121429  
1. 52953 2. 275445 1. 271549 0. 914183 1. 159292 1. 11076 1. 271501 1. 520585 2. 223785  
2. 296772 1. 436663 1. 753542 1. 681296 2. 302483 2. 742176 1. 663628 2. 564761 1. 441591  
1. 98159 2. 294228 2. 197895 1. 62165 2. 183035 2. 199042 2. 088813 2. 106138 2. 445684  
7. 014531 7. 262051 7. 219563 8. 115289 7. 252031 7. 925075 7. 314051 7. 202848 6. 709971  
5. 144952 5. 89809 6. 788967 5. 450211 6. 317872 5. 676291 6. 519985 6. 342023 5. 190776  
1. 532356 2. 809182 2. 250645 3. 301484 1. 458628 2. 807515 1. 618656 1. 265807 1. 593088  
2. 936734 2. 630139 2. 668505 1. 781909 1. 869417 2. 765128 3. 5588 2. 353166 2. 512919  
1. 615304 1. 73481 1. 579354 1. 650396 1. 089298 1. 448342 1. 582917 2. 298152 1. 864888  
3. 338018 4. 198038 3. 315248 3. 823962 3. 401409 3. 437896 3. 997749 4. 262809 2. 138942  
2. 538605 2. 971094 2. 640604 2. 818758 2. 835621 3. 481209 2. 576057 2. 5044 2. 588706  
2. 110574 2. 091728 1. 849246 2. 354523 2. 295979 1. 416186 1. 77767 1. 681827 2. 843425  
1. 891091 4. 367742 2. 786649 1. 703941 2. 078547 3. 023793 2. 121845 2. 21661 1. 924429  
1. 291938 0. 739998 0. 952459 0. 88113 1. 452091 0. 507433 1. 186572 0. 959921 0. 851588  
2. 033026 2. 200026 1. 874779 2. 810931 2. 269928 2. 327476 2. 43597 2. 221434 2. 211782  
7. 319223 6. 107287 6. 963326 8. 114314 5. 286831 7. 06386 5. 934775 5. 40371 3. 086908  
5. 165653 4. 240187 5. 029461 3. 005775 4. 506375 4. 25447 3. 724658 3. 302945 2. 286443  
1. 28002 0. 715621 3. 437887 2. 301472 2. 073409 1. 196538 0. 807375 1. 18002 1. 673435  
1. 693834 2. 50803 3. 954931 3. 877596 2. 994626 2. 595011 4. 214751 3. 689309 2. 174623  
4. 267739 4. 66251 4. 900752 5. 082665 4. 514624 3. 814846 5. 982687 4. 877537 5. 926666

0.8569 0.947449 0.994371 1.573098 1.341999 1.142993 0.859155 2.128826 1.003176  
4.86871 5.832381 4.969461 5.513264 5.230172 3.907037 6.353518 5.687158 5.237589  
5.225845 4.963075 5.413596 5.027479 4.182518 4.017175 4.503656 4.661439 4.638149  
1.881623 2.947821 2.373989 2.04468 1.594315 3.08647 2.062655 3.122054 1.985771  
3.435241 3.082949 3.086814 4.338792 2.577351 2.650326 3.090593 4.20618 3.749995  
2.245956 1.737792 1.642464 1.442022 1.636668 2.106963 1.589488 1.266213 1.990295  
1.942125 2.329295 1.327965 1.755831 1.565979 1.258206 1.532801 1.457416 1.922162  
0.97152 1.34088 0.867101 1.573333 0.978036 1.115388 1.207045 0.843118 0.898135  
4.75786 3.741421 3.419588 4.713648 4.330194 2.913078 3.691213 3.690932 4.616602  
1.492666 1.598804 2.121366 1.35614 1.219081 1.40433 1.550449 1.235645 2.245232  
5.941188 6.618017 6.955812 7.297501 6.945034 5.713088 7.146468 7.83555 7.41108  
1.740809 1.940842 1.775602 2.531951 2.243131 2.009309 1.758441 2.272278 2.503069  
1.940322 2.191777 1.436068 1.950637 2.139954 1.38545 1.578148 1.759036 1.681039  
1.603243 1.299573 1.116438 2.590078 0.946709 1.249762 1.306741 1.581467 1.013996  
1.827431 1.350869 3.358077 1.536489 1.257339 1.624862 1.409723 1.170099 1.478441  
1.974957 1.619334 1.538823 0.989597 1.246777 3.014169 1.780464 1.203903 0.782788  
5.839949 4.472556 4.46738 6.856371 6.519819 8.92433 7.438614 7.20519 9.088496  
1.432289 1.780311 1.250321 1.48435 1.843246 1.213573 1.41823 1.771457 2.389182  
4.156468 1.576044 3.358003 3.245664 2.306485 1.738401 1.355207 1.725052 1.300719  
2.102869 1.62695 1.8596 1.633156 1.243868 1.609154 1.411039 1.078419 1.330324  
3.034773 2.026198 2.087077 2.423288 2.662135 1.951076 1.895966 2.964516 1.627653  
1.943233 1.979282 1.659805 3.453476 3.183301 1.901088 1.243593 3.18276 1.818053  
7.74885 7.860545 6.280043 7.826276 6.930073 8.452898 7.039723 5.692486 7.871608  
1.722218 1.316679 1.785734 1.143135 1.977968 1.618233 1.174063 2.691007 2.341592  
10.89405 10.89781 10.80382 10.77986 10.94939 11.13973 10.83329 10.86655 10.62473  
1.876845 2.330887 1.876845 2.590303 2.034712 1.943022 1.973543 2.868673 2.638149  
3.569494 1.993859 1.659537 1.892937 2.761409 2.57892 1.62493 1.671069 1.651298  
3.776333 2.971122 3.692459 2.483446 3.227446 1.916561 3.36348 1.754254 1.207194  
2.13656 1.292479 2.250143 1.878328 2.826063 2.098857 2.253022 1.292017 2.233636  
2.864992 2.646565 1.982677 1.535318 3.299688 2.283421 2.158165 1.688982 2.310241  
2.0009 1.733481 2.807103 1.858601 1.804443 2.127887 2.062863 1.594445 1.771155  
2.573013 2.058063 2.349561 4.50439 2.943894 4.718435 2.208009 3.806725 3.295137  
1.236155 2.111065 1.71859 2.025345 1.853391 1.739129 1.242682 1.94072 1.23118  
1.706445 1.401676 1.202601 1.342191 1.638835 1.965096 2.087884 2.795192 2.334483  
7.719771 7.572203 7.629634 7.748125 7.760143 7.940339 8.231266 8.130284 8.352634  
4.621935 4.160451 4.312985 4.084901 4.74879 4.757046 5.251683 4.858655 5.022494  
6.29003 5.087724 5.934363 5.865179 6.233588 6.345008 6.57055 6.727891 6.486579  
1.498448 1.313059 1.522214 2.024121 1.549258 1.819398 1.498008 2.183859 1.734357  
7.444084 8.021556 8.005234 8.147125 8.085111 8.058728 7.746412 7.806335 7.978909  
6.377713 5.82758 6.436462 6.98635 6.851246 6.700752 6.328828 7.226136 6.830598  
1.62985 0.79563 1.845185 1.986001 1.26095 1.062322 2.036602 2.074735 2.167068  
1.52272 1.957974 1.698371 1.465376 1.528757 1.541819 1.943424 1.724783 1.322222  
6.764026 7.237424 6.710355 6.73942 6.78738 7.684748 7.256633 7.081589 6.972206  
6.32706 6.536327 6.587677 6.353808 6.592505 6.223207 6.318478 6.593438 6.216531  
4.243513 4.243531 4.5203 4.496165 4.171021 3.694603 4.349765 4.315294 3.487539  
6.273775 6.625785 6.58962 6.099989 6.21343 7.29997 6.574342 6.821873 6.688489  
6.370516 6.634677 6.881066 6.898584 6.455804 7.524984 7.115491 7.290405 6.772383  
7.238641 7.262308 7.109957 6.308161 6.178977 6.50944 7.336504 6.152287 7.104834  
7.336486 6.923084 6.716106 7.230725 7.342472 7.893475 7.86913 7.801582 7.886641  
5.518174 5.426298 5.50395 5.69275 5.423189 5.887873 5.194716 5.957986 5.713575  
1.417335 1.384117 1.288014 1.365724 1.255217 1.146913 0.935444 1.036499 1.20653

4. 337173 3. 910733 4. 515003 3. 853673 4. 098393 4. 22988 3. 922995 3. 807184 4. 054894  
2. 61291 4. 809136 2. 099951 3. 49056 3. 307524 2. 064587 3. 119013 3. 018108 2. 459886  
5. 947136 6. 432505 5. 529896 5. 541069 6. 540857 5. 587205 6. 232508 6. 698023 6. 276611  
6. 56758 6. 561264 7. 174905 6. 81495 6. 747569 6. 612695 6. 862412 6. 60521 6. 660022  
2. 672797 1. 995871 3. 171915 2. 656123 2. 565233 2. 812523 2. 480773 3. 115158 2. 601685  
6. 409165 7. 191138 7. 759062 7. 071899 6. 834898 6. 480146 7. 507101 5. 534309 5. 466814  
6. 658543 6. 532357 7. 007589 6. 405078 6. 517075 6. 189176 7. 111405 6. 723266 7. 000956  
6. 172244 6. 377962 6. 121381 6. 694327 6. 844053 6. 735493 7. 089161 7. 34075 7. 202556  
7. 988186 6. 937443 7. 591017 6. 440691 6. 800105 8. 673055 9. 038483 9. 095673 9. 0842  
6. 146214 6. 083952 6. 108179 6. 697728 4. 659849 6. 961521 6. 629665 6. 053424 5. 466758  
6. 009736 4. 804767 3. 420772 3. 781684 3. 667675 5. 240341 5. 106766 1. 832003 4. 644485  
4. 082461 1. 946996 2. 90624 1. 872238 1. 752519 2. 787544 2. 874527 2. 247893 1. 697309  
4. 869518 5. 917653 5. 206885 4. 686589 4. 824912 4. 646496 4. 917289 3. 933849 3. 723381  
2. 013843 2. 115669 1. 581332 1. 373787 1. 513 1. 878647 1. 669327 1. 785526 1. 504311  
3. 396553 3. 094528 3. 371543 3. 978725 4. 123016 6. 98533 3. 654128 4. 619502 5. 767012  
2. 787982 1. 459649 1. 308665 2. 113341 1. 217672 1. 083483 1. 058426 1. 313614 1. 199398  
7. 629929 7. 069151 7. 258888 8. 279572 7. 453091 7. 728319 8. 097582 8. 043282 7. 883698  
7. 223658 7. 387166 7. 294282 7. 093971 7. 489206 6. 719539 7. 414919 7. 116704 7. 50729  
4. 099767 3. 724449 5. 213496 5. 117793 4. 763191 5. 296572 5. 387724 5. 11933 4. 973967  
2. 557297 2. 923696 3. 210535 2. 381885 2. 800251 3. 237157 3. 391008 3. 43057 3. 093759  
6. 612188 7. 56693 7. 07263 6. 988592 7. 22032 7. 363752 7. 704465 7. 450589 7. 334468  
7. 598983 7. 792479 7. 121132 6. 992832 7. 176116 7. 354893 7. 615294 6. 867815 7. 224318  
3. 282966 2. 431569 1. 365119 1. 379415 0. 949083 1. 074942 0. 967149 1. 335743 1. 441308  
7. 384442 7. 202536 6. 925843 7. 199059 7. 296346 6. 816789 6. 996751 7. 312581 6. 661569  
0. 797438 1. 337327 1. 392577 0. 898891 0. 420596 0. 858274 0. 576769 2. 049414 2. 551119  
8. 361228 5. 219469 8. 056629 7. 945798 7. 236539 8. 369779 5. 577833 5. 607642 5. 809788  
3. 598133 3. 508898 3. 230234 3. 870902 2. 943412 2. 853282 3. 105728 2. 656614 1. 654626  
0. 354139 0. 976764 0. 552295 0. 276286 0. 24279 0. 309084 0. 564913 0. 796934 0. 5893  
2. 30379 0. 98335 0. 853362 0. 731201 0. 852362 1. 203446 1. 071243 0. 939788 2. 218255  
5. 425226 5. 752812 3. 884517 3. 963765 4. 100367 5. 916057 6. 973443 6. 446266 5. 441491  
9. 185678 8. 649502 9. 384211 9. 305525 7. 143804 5. 441905 6. 613025 8. 667438 6. 882414  
4. 516024 3. 746421 2. 888395 3. 168642 4. 31186 4. 848749 4. 645404 4. 607773 3. 963236  
4. 956319 5. 448512 3. 766048 4. 175776 5. 055317 5. 324044 5. 264634 4. 708345 4. 899968  
3. 930983 3. 800668 3. 188291 4. 646997 3. 159499 3. 041886 3. 61442 2. 522685 4. 570739  
5. 391509 5. 854808 6. 314104 5. 520298 5. 887036 5. 779751 6. 127218 6. 039458 6. 420986  
6. 980803 6. 712486 6. 589232 6. 645034 7. 012752 6. 751749 6. 813251 6. 615284 5. 903504  
5. 020422 4. 978968 4. 192288 5. 443315 4. 195175 4. 862947 5. 899924 6. 046051 5. 640596  
2. 365439 2. 051333 2. 955095 2. 149209 2. 876109 2. 035936 2. 332155 2. 569211 2. 967642  
2. 23498 1. 426236 2. 972734 1. 697886 1. 441093 3. 337563 2. 448061 2. 081334 1. 406082  
1. 701678 1. 858738 1. 978859 2. 204445 1. 849425 3. 04994 1. 997204 2. 20559 1. 894115  
3. 668932 3. 923093 5. 365244 4. 019853 3. 417472 3. 430012 3. 22005 4. 236534 3. 955363  
7. 453182 6. 679822 7. 051306 7. 138839 6. 819496 7. 383971 7. 233075 6. 828469 6. 705778  
8. 888621 8. 905702 8. 519567 8. 539236 8. 669314 8. 777242 8. 302676 8. 21144 8. 233055  
3. 982523 4. 244508 4. 187945 4. 434618 4. 029229 4. 684757 4. 193538 3. 552334 4. 179217  
6. 705842 7. 639366 7. 353519 7. 319219 6. 530435 7. 679945 6. 564065 6. 431818 5. 787277  
6. 356272 6. 665504 6. 384558 6. 791824 6. 917368 7. 343342 6. 632137 6. 671551 6. 582869  
3. 565199 3. 305755 3. 901235 4. 207122 3. 754726 4. 231404 3. 537877 5. 01163 4. 155012  
4. 028532 3. 800134 4. 811153 3. 154062 3. 598582 4. 448355 4. 071534 4. 815339 3. 287597  
3. 730854 4. 125917 4. 993821 5. 003417 3. 99944 5. 287512 4. 228483 4. 866588 4. 702506  
5. 947083 5. 828286 6. 192162 6. 262814 6. 842381 6. 695944 6. 121209 6. 454739 6. 833437  
5. 484761 5. 970078 6. 820695 6. 009616 6. 190621 5. 307822 6. 116001 6. 184113 6. 144119

1. 647012 1. 372164 1. 566029 1. 265011 1. 477274 1. 333443 1. 409058 1. 554672 1. 590239  
2. 376507 1. 262048 1. 907521 2. 106945 1. 136499 1. 376032 1. 242383 1. 351944 1. 919791  
8. 102681 8. 639808 8. 643618 7. 976041 8. 776786 7. 218629 8. 559196 8. 450141 8. 56614  
6. 099221 5. 423458 4. 758509 5. 960971 5. 988793 3. 972597 4. 980618 5. 318874 4. 940969  
1. 029631 6. 835367 6. 419611 2. 008885 1. 391477 4. 630385 5. 602282 2. 097144 4. 628444  
6. 627763 6. 99526 7. 026523 6. 222634 5. 925512 5. 797858 5. 704293 6. 652675 6. 76631  
3. 831979 3. 373612 3. 267913 3. 812001 3. 752366 4. 060926 3. 758638 4. 028488 3. 722011  
4. 02816 3. 770795 4. 774281 4. 423042 3. 785245 4. 985076 4. 065292 4. 183264 5. 286518  
1. 461501 1. 143542 1. 873208 2. 207563 1. 790882 4. 231371 2. 866795 1. 510041 1. 790857  
4. 767366 4. 585048 4. 249342 5. 126264 4. 050556 4. 997009 4. 159274 4. 389064 4. 633483  
4. 837297 4. 864972 5. 07616 3. 845083 4. 854497 4. 536087 5. 809008 5. 890548 5. 386102  
5. 59375 6. 261537 5. 950084 6. 390095 6. 225431 6. 158884 6. 444326 6. 240813 6. 462638  
7. 529204 7. 580949 6. 457689 7. 743388 7. 327974 8. 999906 8. 058194 6. 904791 7. 654905  
7. 645006 7. 714422 7. 760103 7. 495391 7. 639286 7. 318341 7. 493714 7. 706526 7. 723548  
6. 668223 7. 168645 7. 088839 6. 179247 7. 381484 7. 66178 7. 975132 7. 33322 7. 470496  
3. 359296 3. 636697 3. 673658 3. 450947 2. 217668 2. 684963 2. 714928 2. 641237 2. 544857  
4. 167779 4. 689885 4. 144199 3. 91953 3. 683383 3. 777854 4. 111609 3. 592306 3. 301963  
7. 176865 7. 691439 7. 467056 7. 546371 7. 18828 7. 496013 7. 527076 6. 968506 7. 540421  
3. 100378 2. 614568 3. 744759 3. 715749 4. 007884 3. 439657 3. 251833 3. 764649 3. 293862  
5. 226155 5. 21994 5. 138745 4. 355177 3. 529874 5. 919341 4. 063893 3. 501339 4. 515329  
9. 139646 9. 117244 9. 417764 9. 578405 9. 568299 7. 043614 9. 515221 9. 459227 9. 60904  
5. 813186 4. 200277 5. 904766 5. 202756 4. 071829 5. 88796 4. 722635 4. 602314 5. 17838  
4. 108333 4. 459782 5. 136334 5. 292067 4. 055985 5. 306595 6. 062028 5. 992025 6. 653248  
3. 373477 2. 337645 2. 520838 2. 898414 2. 644057 2. 257568 2. 892313 2. 745409 3. 716337  
2. 745918 2. 634165 3. 503995 3. 092057 2. 158224 4. 368046 3. 475307 4. 0563 2. 816555  
4. 613007 4. 142426 3. 764541 3. 606203 2. 242699 4. 513106 4. 347769 3. 179999 1. 547659  
8. 577637 8. 5646 8. 75231 8. 65097 8. 861655 9. 20875 8. 741346 8. 619395 8. 652488  
9. 272555 9. 163383 9. 199996 9. 169637 8. 927027 9. 238909 9. 602549 9. 855889 9. 614554  
1. 931633 1. 593567 1. 20696 1. 72602 1. 351321 1. 370528 1. 500858 2. 450509 1. 581252  
4. 467226 4. 705856 4. 666621 3. 330251 4. 049804 3. 493553 3. 650945 4. 60902 4. 776102  
1. 959705 2. 278897 2. 094205 2. 958677 2. 318356 2. 373362 2. 382315 2. 158598 2. 469258  
5. 329755 5. 997926 4. 63051 4. 876644 5. 296121 5. 504926 5. 20994 5. 423055 5. 926023  
1. 74947 2. 00786 1. 70962 2. 590893 1. 589144 2. 073525 2. 288988 1. 990936 2. 042306  
2. 638088 3. 046822 1. 723301 1. 951954 2. 651841 1. 635064 1. 26709 1. 622602 1. 482468  
1. 906626 1. 614565 2. 723728 1. 641441 1. 781796 2. 090564 1. 649953 1. 708649 1. 810603  
4. 593377 5. 549454 5. 048367 5. 176585 5. 538981 4. 840662 4. 588791 4. 56195 5. 130413  
4. 087248 4. 82222 4. 749409 4. 391477 4. 316062 3. 909052 4. 149705 3. 72448 4. 424097  
3. 228745 2. 724834 2. 375742 2. 213003 2. 503707 3. 094159 2. 05694 1. 237431 1. 897554  
3. 009701 3. 20889 2. 674194 3. 023311 3. 644278 3. 322964 2. 737205 1. 798526 2. 536205  
3. 766484 3. 524415 2. 780097 2. 777571 3. 908082 4. 582291 4. 31564 4. 295309 4. 066289  
2. 391027 2. 067982 2. 41623 2. 430956 2. 157683 6. 039169 2. 001538 2. 659779 3. 407232  
7. 199257 6. 706483 7. 018966 7. 024099 7. 042581 6. 586809 8. 262819 7. 421718 7. 96293  
3. 0381 1. 577025 2. 731043 2. 760888 3. 98054 3. 58877 3. 401071 3. 58085 5. 090461  
1. 854614 1. 84715 1. 962609 2. 028834 2. 39832 1. 779902 2. 065982 1. 792214 2. 026394  
5. 983689 4. 840789 5. 329446 5. 210128 5. 525375 7. 173606 5. 931187 5. 426214 7. 049689  
6. 376772 6. 338532 6. 371916 5. 399092 6. 785817 6. 108418 5. 680227 6. 35976 6. 19101  
3. 802209 3. 718366 3. 144229 3. 789746 3. 273979 4. 684065 4. 595677 3. 16015 3. 495524  
3. 491773 3. 095606 2. 890959 3. 825563 3. 806006 3. 668269 3. 713357 4. 140386 4. 577881  
2. 771628 2. 723989 2. 734278 2. 617477 2. 887386 2. 76718 2. 416548 2. 275226 2. 420097  
3. 090564 2. 598848 2. 313277 3. 252203 3. 065924 3. 330933 3. 258196 2. 618703 3. 580633  
6. 27743 7. 024481 6. 401143 5. 917763 7. 222963 5. 854923 5. 990786 5. 536116 5. 635001

3. 979347 4. 443964 5. 082359 5. 174991 4. 626819 4. 076187 6. 030831 6. 623625 6. 501442  
3. 389783 4. 433864 4. 988211 3. 628692 4. 403323 4. 625696 4. 078095 4. 206987 4. 59007  
5. 175149 4. 674719 4. 214818 4. 600946 5. 488186 4. 864221 4. 874179 4. 904803 5. 528985  
10. 26496 10. 15193 10. 41952 10. 34001 9. 843499 10. 27257 10. 1174 10. 58404 10. 17491  
2. 669192 2. 141982 3. 017182 2. 51219 2. 830513 3. 018757 2. 456784 2. 85419 2. 514502  
1. 733207 1. 890015 1. 575744 2. 142295 2. 061509 1. 100037 1. 558495 1. 791665 2. 174681  
3. 324646 2. 1428 2. 717345 3. 970155 3. 089119 2. 720877 2. 644294 3. 061207 3. 312694  
2. 751076 3. 4182 3. 234786 3. 812988 3. 683049 3. 478655 3. 108249 2. 717538 3. 257959  
2. 126673 2. 242277 1. 873613 2. 570001 2. 183436 3. 210317 2. 118204 2. 488738 3. 191863  
1. 923584 2. 215676 2. 653018 2. 020167 1. 881279 1. 8118 3. 23397 1. 865917 2. 525402  
1. 84985 2. 195857 1. 585189 2. 534204 1. 870874 1. 991771 2. 631933 1. 562376 2. 063191  
1. 838731 1. 258652 2. 764491 1. 116885 1. 703278 1. 942266 1. 898601 1. 316712 1. 948696  
3. 55678 2. 432075 2. 832456 2. 348086 3. 879037 2. 619572 4. 70681 4. 273198 4. 466117  
2. 76839 2. 100745 2. 9211 3. 892726 2. 189358 2. 633821 3. 370494 3. 092119 2. 25179  
2. 582052 2. 979742 2. 42303 2. 42303 2. 47466 2. 232285 2. 133108 2. 698524 2. 587849  
2. 47722 2. 168704 2. 425976 2. 742891 2. 544147 2. 530048 2. 917479 3. 15191 3. 509589  
2. 951125 2. 100728 2. 585407 2. 121353 3. 144784 3. 836342 3. 084899 2. 769559 3. 552288  
2. 538761 3. 123417 2. 961521 4. 07058 3. 481198 2. 606849 3. 665548 3. 197887 2. 947775  
2. 502539 1. 895279 2. 389241 2. 130169 2. 49869 2. 257244 1. 841654 2. 468224 2. 036917  
6. 344446 7. 111272 6. 994198 6. 372065 6. 233478 6. 36993 6. 212035 6. 59028 6. 073974  
4. 727173 6. 4975 6. 006606 4. 44075 6. 327491 4. 539902 5. 275855 5. 035237 5. 280731  
9. 211092 8. 704778 9. 310908 9. 707213 9. 674764 6. 498378 10. 15148 9. 949476 9. 551796  
6. 69614 6. 807794 6. 743446 7. 147812 6. 465102 7. 69512 7. 400525 7. 50778 7. 289813  
1. 931666 1. 945891 1. 932102 2. 208993 2. 102532 1. 745062 2. 132408 1. 803309 1. 868872  
3. 422377 3. 521008 2. 620084 2. 387766 4. 443027 2. 853299 2. 003648 4. 226577 3. 213497  
9. 333508 1. 765709 1. 332703 8. 428278 9. 331735 1. 890147 1. 246177 8. 201352 1. 386855  
2. 072177 2. 65533 2. 253756 1. 748882 3. 28563 2. 985011 2. 193314 1. 774093 3. 240065  
5. 268533 5. 175405 5. 547302 4. 004399 5. 203986 4. 550241 4. 892086 4. 448286 4. 573927  
5. 236792 5. 830575 5. 935802 5. 194231 5. 603362 6. 396492 6. 197357 5. 868851 5. 910436  
1. 489608 1. 964868 1. 158688 1. 397422 2. 715901 3. 625182 1. 708477 2. 119901 2. 096554  
3. 533238 2. 44955 2. 900751 2. 307943 3. 113393 3. 341751 2. 079311 2. 150097 2. 887745  
4. 415854 5. 723219 6. 04362 4. 76726 6. 109532 6. 114978 6. 147208 5. 458557 5. 747856  
8. 439121 6. 690678 7. 453377 7. 50811 6. 747279 6. 234877 7. 143855 5. 999381 3. 136779  
7. 035602 7. 058738 7. 125364 7. 348166 6. 624664 5. 954739 7. 059207 6. 68305 6. 512101  
5. 527577 5. 444453 5. 446681 5. 498062 5. 852235 5. 985299 5. 4546 5. 644268 5. 976884  
1. 224463 1. 819198 1. 745197 2. 474053 2. 338818 2. 122401 0. 982613 2. 168594 1. 09598  
2. 47584 1. 933882 3. 793565 2. 670352 2. 079986 2. 688414 2. 489029 2. 22609 3. 173145  
3. 207977 3. 66129 3. 006528 1. 555355 5. 063213 1. 432307 1. 420334 1. 429413 0. 982724  
3. 644931 5. 108368 3. 299495 4. 159181 3. 570057 3. 712187 3. 925862 4. 952518 3. 971895  
4. 477552 3. 290639 3. 79083 3. 295765 3. 794711 4. 301398 3. 977508 4. 714226 3. 461977  
9. 197431 9. 323776 9. 027425 9. 390036 9. 219636 9. 508198 9. 253388 9. 008947 8. 951654  
7. 862239 8. 128808 7. 748262 7. 637045 7. 906876 7. 678065 7. 857474 7. 819901 7. 847584  
5. 774394 6. 139202 6. 154925 6. 934585 6. 395057 6. 075343 6. 165164 6. 012317 6. 498653  
8. 492333 8. 043939 8. 558932 8. 876091 8. 601736 8. 94574 8. 784879 8. 859188 8. 867223  
2. 470088 3. 863182 2. 194317 2. 223122 2. 56969 4. 26496 2. 480403 3. 017515 3. 387617  
9. 290084 9. 084149 9. 176951 9. 195309 9. 57033 8. 772543 9. 167481 8. 662718 8. 460037  
6. 835648 7. 079145 7. 288189 7. 358957 7. 472294 7. 707132 7. 521376 8. 49653 7. 666306  
9. 194779 8. 763868 8. 449914 9. 320864 9. 165945 9. 931546 9. 723403 10. 04867 9. 531855  
4. 961708 4. 031703 3. 474283 3. 959026 3. 758538 4. 902809 3. 928896 3. 548632 4. 790698  
2. 330695 2. 815304 2. 716719 1. 996213 2. 512753 2. 522444 2. 178816 3. 129183 2. 703201  
7. 152657 6. 843948 6. 94266 6. 914884 6. 823842 7. 39162 7. 429119 7. 144404 7. 125503



8. 164212 8. 467142 8. 795948 8. 232093 8. 940966 8. 288786 7. 84994 7. 680391 8. 026038  
4. 343883 3. 968958 3. 775599 4. 052646 2. 944551 3. 829613 4. 543202 3. 748728 4. 449144  
3. 055852 1. 789149 2. 671776 1. 802155 3. 191922 2. 131852 3. 486761 2. 804127 3. 351293  
4. 395095 4. 662538 5. 017368 4. 404474 4. 638923 4. 444401 4. 189004 4. 73768 4. 796869  
5. 260996 4. 286412 5. 757158 5. 925732 5. 678321 5. 940536 4. 931469 5. 836756 5. 690943  
5. 696971 4. 926683 5. 036573 5. 077164 6. 129823 5. 161943 5. 742489 5. 741112 5. 111765  
2. 498424 4. 380616 4. 80253 2. 43734 1. 942579 4. 571244 4. 543779 2. 450878 4. 310724  
3. 543473 3. 615235 1. 966424 3. 101078 2. 074323 1. 752027 1. 796557 2. 251533 2. 331389  
2. 20236 1. 902253 2. 361402 2. 046707 1. 563811 2. 165597 1. 675168 2. 231802 1. 310416  
2. 543899 1. 490641 2. 185781 2. 362293 1. 714647 1. 079592 2. 051365 1. 724605 2. 96517  
3. 525872 3. 335174 2. 514586 2. 253541 2. 007812 2. 879806 2. 873616 2. 948948 3. 325756  
7. 992155 7. 98674 8. 488069 8. 320389 7. 969633 8. 367479 8. 453712 8. 650154 8. 681705  
5. 540687 4. 36191 5. 411355 5. 125851 5. 196735 5. 629349 4. 45763 4. 342658 4. 637099  
4. 774907 3. 013613 2. 926294 4. 458921 3. 305219 2. 541573 2. 99812 3. 344399 2. 796299  
3. 557649 4. 197887 4. 430765 3. 136022 3. 521078 4. 08138 3. 109045 4. 261497 4. 480853  
4. 539757 3. 728991 4. 742394 3. 660917 2. 8184 5. 640738 5. 52847 3. 820679 3. 8221  
8. 935344 8. 788885 8. 972466 8. 916954 9. 006497 8. 912902 8. 593579 8. 700675 8. 997185  
5. 222593 4. 67111 4. 257492 2. 454445 2. 516785 1. 988333 4. 199981 4. 172967 3. 428191  
5. 65906 6. 399653 5. 199004 6. 491582 5. 271355 4. 476152 5. 30283 5. 401595 5. 422763  
4. 496567 4. 847564 4. 573224 4. 784699 4. 648264 4. 72131 5. 318484 4. 290622 4. 833783  
4. 601935 4. 567766 3. 512505 4. 616982 4. 175595 5. 201782 4. 01397 3. 919972 4. 627228  
3. 855331 3. 255951 3. 69261 2. 84025 3. 451484 2. 594082 2. 056922 1. 209127 2. 542726  
2. 942432 3. 526312 3. 528233 4. 488676 3. 717135 3. 893195 3. 14909 4. 231241 4. 254299  
1. 926439 3. 551386 1. 614341 1. 545734 2. 49151 2. 397195 2. 714993 1. 655164 2. 119988  
2. 050155 3. 101138 2. 237237 1. 385924 2. 315664 1. 904666 2. 056033 2. 440857 2. 50025  
3. 594275 3. 640739 2. 955298 2. 452609 3. 295972 2. 915356 3. 098754 3. 157339 2. 843125  
4. 57643 5. 101913 4. 640696 4. 592788 4. 324616 3. 532926 6. 055199 5. 574972 5. 095681  
5. 498451 5. 051909 5. 072795 5. 104797 5. 051909 4. 402301 5. 043161 5. 126494 4. 872361  
1. 95265 3. 142217 1. 948096 1. 685112 2. 304619 1. 812354 1. 888852 1. 993767 2. 608818  
6. 48897 6. 505575 6. 58902 5. 814826 6. 910138 5. 96578 6. 544814 5. 926211 5. 416842  
3. 224234 2. 731389 3. 091103 2. 821459 3. 27502 2. 748133 2. 720478 3. 599589 2. 321633  
3. 036156 3. 322501 2. 460752 2. 475947 2. 49364 2. 670042 2. 307112 2. 931759 2. 754402  
6. 809277 6. 645017 6. 919924 6. 413115 6. 878479 6. 429067 6. 447022 6. 155374 6. 583513  
4. 515536 5. 086381 4. 606179 5. 840827 4. 320067 4. 529856 5. 359772 5. 126791 5. 091021  
5. 143353 5. 741418 4. 971208 6. 28291 5. 746306 5. 424762 5. 69639 4. 177297 5. 393089  
5. 783758 6. 120076 5. 521628 4. 275462 5. 546469 7. 347432 5. 080196 5. 910326 2. 862547  
3. 590075 3. 668667 2. 988457 3. 244871 3. 669352 3. 758906 3. 430406 2. 926177 2. 668095  
6. 051845 6. 157004 6. 246487 6. 291072 6. 582677 6. 266944 6. 612815 7. 308516 7. 118395  
3. 321287 3. 198459 3. 325966 3. 409582 3. 649794 2. 550573 3. 505917 3. 68495 4. 709706  
3. 973435 3. 843322 3. 692457 5. 078477 3. 713775 4. 084338 4. 519429 4. 357549 4. 087166  
1. 588403 1. 71173 1. 859852 1. 137425 1. 346022 0. 972674 1. 697277 2. 685176 1. 244259  
2. 753894 2. 768985 2. 475203 2. 874951 3. 713892 2. 749924 2. 552483 2. 845546 2. 436566  
2. 183655 2. 644123 2. 1069 2. 62696 2. 779135 3. 276261 2. 108185 1. 83541 2. 449313  
5. 918066 4. 652689 5. 162124 4. 357198 5. 446531 5. 058739 4. 929121 2. 649434 3. 825218  
2. 735835 4. 075628 3. 01804 4. 083329 3. 365765 2. 967438 3. 178187 2. 898759 3. 159961  
4. 921751 6. 005963 5. 50999 5. 589144 5. 32583 6. 269523 5. 616504 5. 191342 5. 472475  
1. 980274 2. 344387 0. 979442 1. 759542 2. 362349 1. 375132 1. 22309 1. 653884 1. 347249  
8. 863138 8. 26625 7. 705132 8. 513567 7. 860236 8. 38692 7. 697139 7. 18638 7. 706131  
2. 794392 2. 917944 2. 097827 2. 114546 2. 179125 2. 614898 1. 929561 2. 452259 1. 476782  
2. 884 2. 698809 2. 961876 2. 052826 3. 467253 3. 195881 3. 221063 2. 39731 2. 454584  
3. 44475 3. 719632 4. 347292 2. 740976 3. 49148 4. 474893 2. 379022 3. 385401 3. 533486

2. 437316 2. 457651 2. 306795 3. 373745 2. 088161 2. 517363 2. 032838 2. 532552 2. 970749  
2. 499197 2. 750277 3. 341122 3. 47562 3. 254557 1. 860563 2. 809279 2. 869059 4. 061739  
4. 447217 5. 443515 5. 123777 4. 767632 6. 226994 4. 675097 5. 401348 4. 97298 4. 546461  
3. 897397 4. 606801 4. 177578 4. 133028 4. 388895 4. 608059 4. 410131 4. 532998 4. 542386  
5. 87546 3. 602858 5. 19127 6. 125806 4. 206971 4. 808836 5. 058727 3. 552916 4. 082157  
2. 266574 3. 046336 3. 70604 3. 972846 2. 582805 2. 072732 2. 437825 2. 464424 2. 178379  
1. 118972 1. 207997 1. 368434 1. 804308 2. 338311 1. 821732 1. 51994 1. 700992 1. 636023  
4. 799922 3. 146803 4. 541066 3. 662467 4. 714854 4. 340789 4. 180283 4. 029962 3. 898207  
1. 534102 2. 364016 2. 992629 1. 942724 2. 201995 2. 210263 1. 566241 1. 675094 2. 676218  
5. 076219 4. 690456 5. 057222 4. 194711 4. 98529 3. 81277 5. 405682 3. 906904 4. 640707  
2. 073667 0. 648911 1. 243294 1. 606507 1. 43479 2. 525662 1. 150692 1. 554219 2. 164527  
2. 148739 2. 852672 2. 000701 2. 534045 3. 003688 2. 463231 2. 053665 1. 4611 3. 173581  
4. 072422 4. 471925 4. 955913 4. 121971 4. 208096 3. 190639 4. 464842 4. 76403 3. 297318  
1. 356247 0. 77842 1. 384105 2. 143023 0. 776302 0. 807122 1. 164579 1. 436187 0. 932605  
1. 339936 1. 595765 0. 981832 1. 897614 1. 6391 3. 297747 1. 412144 1. 211038 1. 158529  
1. 157361 1. 323507 1. 15601 0. 891334 1. 644961 1. 050939 0. 967868 0. 84394 1. 211226  
1. 450046 3. 026237 3. 767118 3. 368865 2. 006879 1. 827879 2. 18266 3. 618558 2. 163058  
0. 848623 1. 325043 1. 646975 0. 764194 0. 54519 1. 291238 0. 616312 1. 4797 1. 193309  
1. 284129 0. 782168 0. 525507 0. 900409 1. 553287 0. 803925 0. 809143 1. 174188 0. 65761  
1. 546678 5. 389605 2. 718406 1. 39547 4. 569893 1. 307363 0. 878087 3. 193432 2. 388891  
3. 008503 1. 075057 0. 732065 1. 304656 0. 946892 0. 803659 0. 85084 2. 393933 1. 414423  
1. 49725 1. 870442 4. 700164 1. 310749 2. 100207 1. 52317 1. 33779 1. 248231 1. 974503  
0. 705763 1. 204312 0. 654718 0. 681038 0. 545197 0. 836389 0. 868384 0. 84831 0. 801034  
1. 205666 1. 446241 1. 125755 1. 269171 2. 260334 1. 920043 0. 962101 1. 522968 2. 05554  
1. 209773 1. 357307 1. 886469 1. 165921 3. 884393 1. 626434 1. 952444 1. 376946 0. 385221  
3. 229829 3. 479002 1. 043206 1. 095511 1. 498695 1. 926672 0. 660068 1. 39363 1. 504397  
1. 600995 1. 743273 4. 318617 3. 536175 4. 542246 1. 996574 0. 814458 0. 939713 0. 642611  
0. 967351 1. 373704 1. 623857 0. 712796 2. 687542 0. 744634 0. 870286 1. 669197 0. 781075  
2. 961368 4. 610756 0. 976775 1. 302279 1. 422073 1. 018332 1. 321423 1. 15836 1. 87806  
1. 78907 1. 398555 2. 249178 3. 077247 1. 612569 0. 797739 0. 931817 0. 761094 1. 35373  
2. 046572 1. 398934 0. 848073 1. 876765 0. 301426 1. 470567 0. 794903 0. 931968 0. 718035  
1. 213226 0. 683566 0. 724856 1. 023166 1. 397616 0. 653461 1. 761854 0. 825594 0. 866387  
1. 132866 4. 524007 2. 991614 1. 278582 0. 794469 0. 697595 1. 27276 0. 946922 0. 866083  
1. 465231 1. 516627 0. 778206 0. 700211 0. 713683 2. 079533 0. 425713 1. 106904 0. 94431  
1. 368928 0. 676753 1. 009093 0. 964587 0. 551938 1. 010988 0. 965852 1. 698717 0. 769161  
0. 93926 1. 003173 0. 817756 1. 273607 2. 23399 0. 528189 0. 687961 1. 201608 1. 236314  
3. 198379 1. 407633 0. 896541 1. 012651 2. 720441 1. 705766 1. 074688 0. 886571 1. 690193  
1. 28085 1. 896202 2. 44052 1. 030863 0. 874598 0. 978571 0. 944629 0. 78716 0. 844275  
3. 38708 1. 655378 3. 540728 2. 432032 4. 025478 1. 55944 1. 12132 0. 981711 2. 548153  
5. 304742 1. 448245 2. 655422 2. 109667 2. 47772 1. 861903 2. 453788 2. 992621 1. 437691  
2. 055176 3. 50793 2. 674747 0. 986754 1. 4126 1. 01156 0. 986141 1. 000729 1. 549177  
1. 943677 3. 172621 2. 503069 2. 441979 3. 119682 2. 352697 1. 466653 1. 825947 2. 657004  
1. 505504 1. 736036 3. 860164 1. 130095 1. 445094 1. 566377 1. 527291 1. 383471 1. 019985  
1. 177593 1. 171257 0. 854275 0. 873911 1. 029216 0. 984213 1. 804608 0. 747147 0. 797638  
4. 40384 3. 935777 5. 226247 1. 126054 2. 305452 1. 387674 0. 998946 1. 293747 0. 864465  
1. 178335 0. 879853 1. 207062 1. 058231 1. 062662 0. 469916 1. 349418 1. 933659 0. 903122  
1. 586694 3. 536597 1. 386039 1. 385131 1. 937427 1. 668742 1. 12574 1. 114489 1. 855758  
5. 828757 6. 348569 5. 408828 5. 380203 6. 348522 5. 916517 6. 428926 5. 840731 5. 928417  
0. 691861 2. 550847 1. 083113 0. 999093 2. 058124 1. 929101 1. 388996 1. 05526 0. 951193  
1. 047946 3. 411045 0. 776313 0. 780116 0. 615498 1. 129087 0. 557436 1. 493459 0. 506704  
3. 337684 3. 617743 3. 02387 2. 081394 0. 810985 0. 723523 1. 47025 1. 527943 0. 793492

3.097921 1.533293 0.758178 1.465628 1.071865 1.329138 1.651716 1.405383 1.121803  
1.24673 1.519365 1.335557 0.836183 0.829121 0.996948 1.082345 2.68853 0.748693  
4.721226 2.989467 2.291099 2.398005 2.914718 2.887944 3.27444 3.715184 4.563534  
1.790694 1.932592 1.829693 0.484946 0.488141 0.570086 1.185519 1.70205 0.976946  
0.941604 0.971061 1.479051 1.158423 0.660261 0.865021 0.955327 2.066427 0.605671  
1.668102 4.890966 0.989637 0.914071 3.512617 1.252435 1.335074 1.023593 3.375999  
1.947782 2.615803 1.81502 1.752089 0.771096 1.080882 0.633424 1.117849 0.706962  
1.67514 3.088335 1.498416 1.203362 1.744487 2.072494 1.531238 1.381479 1.619622  
5.069067 6.182232 5.754041 5.694242 6.362359 4.697893 5.266377 6.031228 5.208881  
3.413939 4.606009 4.407289 4.864467 3.626471 3.262011 3.388595 3.744383 4.683623  
1.514999 1.978505 2.498637 1.864769 2.027537 1.891097 1.962571 1.803643 2.021333  
2.250758 1.859935 1.969996 2.761382 2.004372 2.033743 1.821292 2.023432 1.772475  
1.555565 3.509206 1.810183 1.534035 1.42398 1.616756 1.357357 1.749721 1.508511  
1.942913 2.246625 2.683114 2.308613 2.646483 2.174256 2.813761 3.153979 3.879343  
5.356188 5.758186 6.02746 5.963706 6.272377 5.604819 5.772407 5.954374 6.293963  
1.853227 1.777307 2.233464 2.550253 1.930976 2.458959 2.344533 2.027985 3.123535  
1.178373 1.506948 1.500428 1.521625 0.911157 1.465324 1.350249 1.62152 1.353208  
2.415307 1.58001 1.380133 2.332942 1.79104 1.768789 1.870065 1.587285 1.226076  
1.451299 1.123077 1.929881 1.878462 1.36836 1.345155 1.312246 1.305691 1.42791  
1.51307 1.524731 1.568289 1.913468 1.554473 1.496068 1.517334 1.885936 1.983378  
1.845363 2.014381 2.418727 1.574505 2.411569 2.145361 1.044582 1.46549 1.699341  
1.618214 1.113225 1.426555 1.299429 1.269073 1.235235 1.812816 1.244888 0.617085  
3.72834 1.892711 3.457554 3.832917 1.626775 2.171186 1.985584 1.681553 1.782819  
2.39504 2.86174 2.430352 2.179263 2.530277 2.360522 2.291894 2.236231 2.882223  
1.559674 2.915246 1.850607 1.520722 1.631428 1.547033 1.514976 2.412421 1.475857  
2.276398 2.275378 2.703731 2.529313 2.200846 3.166327 1.858675 1.540304 1.756725  
5.257981 5.890232 4.920695 4.689926 4.019089 5.3813 5.62723 5.6236 4.397169  
2.953439 3.767181 3.299558 4.783987 3.15895 2.469275 3.463791 3.94511 2.615482  
1.83266 2.527544 2.280549 2.886793 4.271604 1.772196 1.728425 2.021425 2.03425  
4.684875 4.957323 4.341938 4.630954 5.463417 4.316138 4.418338 5.548591 4.673562  
4.650466 4.287555 4.052249 4.849415 4.166153 4.20892 4.860897 5.052206 5.314409  
5.54733 4.674834 4.73225 5.556447 5.190836 5.309511 4.621185 6.016334 5.492641  
1.829823 3.455502 2.627691 3.216786 2.230203 1.916992 3.535421 2.366605 2.593892  
1.401058 3.499599 1.799088 2.464195 3.536782 2.027149 2.421257 1.395295 1.441386  
4.409548 2.832018 4.046641 4.840799 2.495988 3.165553 3.487422 2.454658 3.264874  
3.99749 4.814965 4.05704 4.41808 4.783848 3.138759 4.465866 4.035472 3.537553  
4.600844 4.087579 4.21734 4.508012 3.98121 4.401445 5.584544 4.7467 4.74983  
5.080907 5.32789 4.578532 4.583997 4.599648 4.495309 4.459657 4.915576 5.785599  
7.100622 6.830878 7.088174 7.076719 6.874333 7.633362 7.633324 7.775491 7.630298  
6.052488 5.966028 6.388161 4.09643 5.849503 4.033834 5.444092 3.457895 5.826557  
4.993212 5.478069 5.137828 5.405163 5.648446 5.677996 4.571614 5.249539 4.910903  
6.502555 6.096494 4.993127 6.794192 6.492601 7.230734 6.685028 6.375094 7.330769  
6.81672 7.534504 7.276657 5.877397 7.596156 6.605918 7.410491 6.926657 7.026208  
3.799852 4.113683 3.32723 4.000101 3.695004 3.455603 4.217464 3.981945 4.247988  
5.807592 5.594272 7.454999 7.102821 6.643375 5.944523 7.369202 6.808484 7.578623  
4.804982 4.917707 5.566339 3.483241 5.324174 4.157924 4.508047 4.849648 5.208695  
2.056791 2.513298 2.434909 2.758937 3.466052 2.422187 2.167536 2.257161 2.167152  
1.490238 1.442476 1.966227 1.312723 1.850582 1.063666 2.068569 1.517476 1.576206  
6.909301 7.202662 7.104616 7.408637 7.451522 7.102852 7.304502 7.565183 7.746531  
2.333076 3.730158 2.741845 2.562171 1.938635 2.664887 2.13317 1.781469 2.138435  
7.558165 7.353497 7.459881 8.745283 6.544613 8.116783 6.791828 5.998344 7.284765

4. 164115 3. 680304 3. 854153 4. 496144 5. 143496 4. 555008 4. 928268 4. 566056 4. 387008  
3. 788907 4. 248186 4. 765038 4. 548465 4. 886498 4. 382367 5. 147952 5. 051013 4. 208485  
4. 790086 4. 7742 4. 365562 4. 646012 5. 085091 5. 678042 4. 450475 3. 326153 5. 315608  
2. 363104 3. 202025 2. 3417 2. 618171 2. 932658 1. 946138 2. 433485 3. 345819 2. 508113  
3. 184977 4. 016374 3. 279319 3. 683009 4. 524718 4. 091515 5. 305448 3. 923628 3. 585211  
4. 087899 3. 454814 3. 741014 4. 636442 5. 064385 5. 699135 4. 047983 4. 770742 4. 267246  
4. 678048 4. 933747 5. 04437 3. 462514 3. 576744 4. 322757 5. 389898 5. 2182 4. 62232  
3. 857852 4. 823671 5. 790805 4. 617065 4. 699982 3. 667476 6. 426853 6. 06939 6. 036963  
1. 159506 1. 294382 1. 047003 1. 448671 1. 33883 1. 260185 1. 787181 2. 006042 1. 358572  
4. 628123 4. 855372 5. 198636 5. 169857 5. 128731 4. 090221 4. 127899 4. 299343 4. 599953  
4. 930002 5. 845148 6. 38715 5. 277963 6. 180721 5. 105102 4. 358354 3. 720882 3. 820082  
3. 524466 5. 797373 5. 563474 4. 742218 4. 83175 4. 395416 4. 162774 4. 753903 4. 316357  
2. 93053 3. 534032 3. 102779 2. 583375 3. 783947 3. 051302 3. 766707 2. 915574 3. 691583  
3. 266785 2. 903064 3. 281085 4. 089323 3. 546294 3. 523649 3. 218048 2. 559357 2. 476908  
1. 848418 1. 637112 1. 632204 2. 427529 2. 240959 1. 822542 1. 877501 1. 968424 1. 653228  
7. 588765 7. 938128 7. 248408 7. 055148 7. 510084 6. 523311 6. 918072 6. 831592 7. 003026  
3. 535214 4. 14355 3. 327237 3. 865145 3. 470307 3. 623002 4. 817829 3. 651226 3. 404787  
3. 085656 2. 867246 3. 582354 4. 164172 2. 91355 3. 274436 2. 963644 2. 6459 3. 169767  
5. 529045 3. 881739 3. 290518 6. 011073 5. 25635 3. 79191 5. 151302 5. 697031 4. 37426  
3. 775568 3. 063642 3. 211553 3. 407709 2. 92506 3. 420247 3. 079975 3. 21529 3. 344183  
7. 500923 8. 222763 7. 985703 8. 21732 8. 308858 7. 830812 7. 593869 7. 601975 7. 497793  
3. 717538 3. 77612 4. 273169 3. 270812 1. 203361 3. 205807 3. 421143 3. 305689 2. 018606  
2. 857911 3. 574118 2. 994986 2. 37865 3. 693897 2. 716171 3. 251805 4. 488419 3. 98699  
2. 834064 2. 539795 2. 827223 3. 330532 3. 463616 3. 09 2. 965049 2. 925836 3. 868135  
3. 113135 3. 368761 2. 884088 2. 450135 3. 26749 3. 181696 3. 464222 1. 942295 1. 793563  
2. 524437 3. 403447 1. 460384 2. 982452 2. 829945 2. 768944 1. 673856 2. 220589 2. 398032  
7. 960102 7. 946623 7. 611008 7. 216954 7. 728778 6. 949053 6. 831251 7. 092834 6. 992069  
4. 673729 5. 328871 5. 493796 4. 727069 5. 633093 5. 534516 5. 143632 4. 866948 4. 930846  
2. 284148 2. 442068 2. 744286 2. 524683 4. 593307 3. 436857 3. 651866 2. 903192 3. 091259  
2. 770976 4. 402904 2. 69906 3. 38187 2. 088807 2. 345815 3. 045063 3. 080888 3. 595519  
1. 924264 3. 517983 1. 753803 2. 762218 1. 756976 2. 720938 1. 766618 1. 969964 2. 383551  
4. 517056 4. 931798 4. 345849 4. 133586 5. 008022 4. 128025 4. 176904 3. 381336 4. 507219  
2. 471498 2. 874762 1. 681035 2. 726308 2. 190838 1. 881592 1. 824443 1. 647305 1. 80199  
5. 121909 5. 637965 5. 52776 6. 088976 5. 122082 4. 158571 4. 827308 5. 230225 5. 021083  
4. 163162 5. 488844 4. 812941 4. 51675 5. 123385 4. 520783 5. 645737 4. 509901 3. 946712  
3. 183546 3. 451905 3. 998472 3. 189792 2. 514601 2. 289513 3. 203812 2. 966511 1. 771495  
2. 318217 1. 684455 1. 189211 2. 415143 4. 092119 1. 637599 1. 778346 2. 120048 2. 2787  
4. 588333 5. 102971 3. 879998 4. 647212 3. 539085 2. 918265 3. 057869 4. 553461 3. 547405  
4. 842418 4. 695601 4. 489512 4. 504591 4. 574837 3. 019795 4. 094798 4. 949971 4. 554138  
6. 091532 6. 725128 6. 068603 6. 076575 7. 05142 6. 860314 6. 106567 7. 356859 6. 51735  
1. 961172 1. 754599 2. 431582 2. 729957 1. 424124 1. 535062 1. 398338 1. 529706 1. 563192  
3. 867285 2. 910018 3. 279294 1. 900896 2. 453808 4. 268092 2. 069085 1. 739265 1. 881136  
1. 427471 2. 567614 1. 702335 1. 854688 2. 203391 2. 150147 1. 603574 1. 733612 1. 632019  
4. 105637 4. 051118 5. 266875 3. 517795 4. 79552 4. 796038 4. 674961 4. 455057 4. 881964  
1. 298227 1. 801023 1. 829499 1. 196147 1. 426265 1. 296238 1. 144981 1. 624544 1. 057449  
2. 06957 4. 569337 1. 943472 2. 266125 3. 47567 2. 441403 3. 19133 1. 754122 2. 013318  
4. 977863 4. 772803 4. 809137 5. 610523 5. 158749 4. 383244 4. 415336 5. 932039 5. 37424  
5. 165529 4. 821807 4. 721522 4. 04481 5. 445413 5. 039444 5. 50027 4. 275272 5. 391568  
1. 493524 1. 82935 1. 834309 2. 123297 1. 956772 1. 612311 1. 592619 1. 654094 1. 776163  
5. 178823 3. 575625 5. 139008 4. 452885 5. 385964 6. 735028 6. 628584 6. 265377 6. 599528  
5. 945706 6. 206614 6. 399393 5. 57866 6. 401779 6. 646814 7. 589542 6. 783682 7. 075038

4. 33893 4. 129981 4. 275334 4. 475682 3. 865649 4. 687229 4. 213751 4. 131838 4. 689771  
2. 460615 2. 754246 2. 710822 2. 582165 2. 35791 2. 102175 4. 255774 4. 29548 2. 732699  
5. 556601 5. 042816 5. 856186 6. 17208 6. 232093 6. 584296 6. 603806 4. 786401 5. 85707  
6. 788782 7. 526174 7. 059814 6. 778587 5. 950594 6. 978336 6. 937271 6. 307553 6. 290035  
3. 271643 3. 163305 3. 217553 2. 842397 3. 763249 3. 04417 3. 69846 3. 71791 3. 562057  
6. 234956 5. 35766 5. 864102 6. 345868 6. 716275 9. 410019 6. 993296 7. 764588 8. 112215  
2. 424225 2. 263914 1. 951165 2. 33195 2. 33939 2. 037939 1. 41458 1. 744314 2. 359742  
7. 53311 5. 513678 5. 987163 5. 467264 8. 650298 5. 724373 5. 48575 4. 741255 4. 133092  
2. 572928 1. 508175 1. 773046 2. 660147 2. 576395 1. 174737 1. 384576 1. 710404 0. 862907  
1. 661972 1. 475004 1. 208226 1. 493803 2. 319553 1. 371793 1. 912761 1. 418606 2. 403994  
4. 139686 4. 330373 4. 320304 4. 217562 4. 8368 5. 398033 4. 887402 4. 985696 4. 503202  
9. 920266 10. 09832 9. 845468 9. 893483 10. 03277 9. 179972 9. 900817 9. 6739 9. 82081  
7. 108945 7. 48933 6. 966872 6. 334405 7. 549842 6. 778389 7. 238514 7. 479301 6. 779669  
6. 547638 6. 88622 6. 375716 6. 295139 6. 752807 7. 796867 6. 162296 6. 880918 7. 468999  
5. 18641 5. 276915 5. 21097 4. 84816 5. 861337 4. 355683 5. 476993 5. 772104 5. 207393  
10. 33805 10. 5131 10. 61787 10. 31535 10. 35778 9. 451415 11. 5916 11. 57103 11. 0234  
4. 317567 3. 463396 3. 402118 4. 15543 3. 458931 3. 47294 3. 972868 4. 013214 3. 91433  
7. 768952 7. 630961 8. 420373 7. 744747 7. 85586 7. 674821 7. 316178 7. 387924 7. 554061  
5. 824626 3. 796893 5. 11478 4. 368991 4. 717599 6. 722507 6. 421915 6. 14524 6. 217071  
5. 268983 5. 6768 5. 806964 5. 545367 6. 601404 3. 332985 5. 51347 5. 4634 5. 515973  
7. 20907 6. 265151 6. 289447 6. 229166 6. 047303 5. 755908 5. 214906 5. 513429 5. 792492  
2. 103104 3. 001266 3. 634594 3. 822298 3. 611219 3. 591985 2. 993187 3. 342498 3. 966888  
5. 184612 5. 448094 4. 583852 4. 90451 5. 410007 5. 25717 5. 663116 5. 192462 5. 356326  
4. 253183 3. 952581 4. 594751 4. 181244 5. 184919 4. 714131 4. 336656 4. 618827 4. 680083  
7. 951471 6. 757188 7. 360633 6. 347788 6. 468528 8. 097642 7. 453064 6. 056941 6. 055826  
3. 876243 3. 682648 2. 963301 3. 832732 4. 116853 3. 457208 3. 575395 3. 374211 3. 807419  
3. 771094 3. 407075 2. 459762 2. 239307 3. 196895 2. 999771 2. 370934 2. 775093 3. 04163  
4. 39135 3. 339103 3. 766853 3. 704865 4. 828303 4. 168501 3. 418224 5. 060685 4. 791207  
6. 180174 4. 502369 5. 345093 4. 960833 5. 610882 7. 021444 4. 882182 6. 011978 6. 881955  
3. 992176 4. 006576 4. 729588 3. 830681 4. 175304 4. 381415 4. 062542 3. 479625 4. 161454  
2. 01056 1. 793189 1. 368478 2. 052129 2. 44725 1. 963831 2. 551869 2. 10698 1. 976576  
1. 620015 2. 711462 1. 907806 1. 819563 1. 35822 1. 206507 2. 4849 1. 768032 2. 183142  
3. 768714 4. 333194 3. 272966 4. 055624 3. 271594 4. 756294 5. 179287 4. 503532 4. 863993  
2. 775491 2. 492449 1. 958502 3. 167813 2. 260037 4. 601586 3. 562471 3. 440549 3. 350751  
5. 255774 4. 900005 5. 752118 4. 996291 4. 59642 4. 00358 5. 249681 4. 929367 4. 959962  
5. 972742 5. 332416 6. 330326 5. 80387 5. 986725 4. 437696 5. 960666 7. 18839 7. 050319  
2. 331333 1. 722924 1. 558234 2. 403748 1. 903566 1. 634896 2. 023124 2. 273083 2. 108418  
7. 097346 7. 288252 6. 689222 6. 554275 6. 535304 6. 334993 7. 378251 7. 147307 7. 115904  
7. 876704 7. 970133 7. 525314 7. 808714 7. 674193 7. 506393 8. 370389 8. 771749 8. 596257  
7. 258422 7. 777264 7. 660298 7. 436441 7. 50603 7. 155345 7. 475875 7. 594248 7. 378639  
9. 159518 9. 403524 9. 271993 9. 042486 9. 49862 9. 650206 9. 484562 9. 362304 9. 523462  
2. 039059 2. 652112 3. 213006 2. 964771 2. 653717 2. 28357 3. 005518 2. 280074 2. 180676  
7. 556246 6. 918454 7. 372149 7. 42249 6. 775683 7. 449557 7. 264504 7. 622489 7. 747536  
4. 442456 5. 424174 4. 523359 3. 766045 4. 623219 4. 525876 4. 65018 4. 926377 3. 815086  
2. 30685 3. 452305 2. 876233 2. 973029 3. 294089 2. 937654 2. 743097 3. 198685 3. 110294  
4. 866724 4. 753118 4. 933917 3. 800502 5. 22021 5. 371579 6. 267263 6. 296873 6. 153279  
6. 683013 6. 31767 6. 768533 6. 892475 6. 402534 6. 84174 6. 727882 6. 76507 6. 438003  
4. 558351 3. 607412 4. 757886 4. 101484 3. 892572 2. 880081 3. 957394 3. 502468 2. 347628  
3. 530523 1. 949746 2. 186771 2. 090295 1. 432399 4. 175416 2. 54062 3. 446628 2. 879767  
4. 543111 4. 272444 4. 480417 5. 289755 3. 922926 4. 422739 5. 270749 5. 152196 5. 479153  
6. 878946 5. 77648 5. 180247 7. 028144 6. 542486 7. 261294 6. 433014 7. 830494 7. 677526

5. 784424 5. 830925 6. 084475 6. 98926 6. 284098 7. 023156 6. 805845 7. 132978 6. 543129  
3. 534514 2. 426564 2. 532615 2. 10279 2. 756403 2. 229328 2. 367195 2. 048174 2. 729153  
5. 903022 5. 078069 5. 820271 5. 694984 5. 088246 6. 567574 5. 480209 6. 089 6. 019162  
1. 863488 1. 706706 1. 73837 2. 15791 2. 544224 1. 391356 1. 792714 1. 891192 1. 709139  
3. 766077 3. 405125 3. 396418 3. 073036 3. 652375 3. 336265 3. 260815 2. 74415 2. 689461  
4. 179652 3. 94648 4. 742671 5. 345185 4. 387083 4. 271542 5. 192796 5. 113742 5. 026172  
3. 264974 3. 724854 3. 489316 4. 347647 3. 658919 2. 737317 3. 531205 4. 117688 3. 557354  
8. 079725 7. 744678 8. 177063 8. 465509 7. 792408 7. 840441 8. 216094 8. 534111 8. 350231  
8. 43031 8. 159726 8. 091348 8. 509646 8. 936485 9. 231859 8. 172107 9. 098523 8. 690026  
7. 344933 6. 499132 6. 303232 7. 594196 6. 536846 5. 068878 7. 176246 7. 055161 6. 491657  
5. 382382 5. 679847 6. 149355 5. 756372 5. 834663 6. 834901 5. 37483 6. 144937 6. 1226  
3. 424989 3. 255955 2. 916001 4. 356006 3. 432607 5. 91887 3. 558143 3. 592305 4. 793101  
7. 683504 6. 294375 7. 619456 8. 231465 6. 988454 7. 959306 8. 001787 7. 983739 7. 682959  
2. 598586 2. 441543 3. 157349 2. 339429 2. 584991 4. 035808 2. 711767 2. 262632 2. 632784  
6. 890543 6. 597432 6. 41971 6. 693332 6. 983046 6. 656007 6. 404814 6. 23919 6. 641978  
1. 810768 1. 5856 0. 94891 1. 247596 2. 073836 1. 465595 1. 185236 1. 356699 1. 260086  
1. 843313 0. 851082 2. 560565 1. 338426 1. 03846 0. 829404 2. 943423 1. 128467 1. 030796  
7. 435948 5. 262885 7. 404703 6. 528138 7. 1001 6. 818833 7. 540718 8. 497922 7. 860417  
5. 723665 6. 409944 6. 050871 6. 540612 5. 612264 5. 878735 6. 052805 6. 025606 5. 514891  
3. 702936 4. 274 3. 373224 4. 83531 4. 18802 3. 873062 4. 26256 3. 823198 4. 760884  
2. 576036 3. 223397 3. 110175 4. 125844 2. 779333 2. 453208 2. 516376 2. 868952 3. 916792  
6. 401016 5. 38458 4. 518356 4. 892976 5. 829811 4. 520694 5. 360146 5. 758336 5. 764541  
6. 018084 6. 208351 6. 35727 6. 731313 6. 818191 6. 691339 6. 320732 6. 59792 6. 671686  
6. 018367 6. 159966 5. 824889 5. 351231 6. 078688 6. 540533 6. 315099 5. 656334 5. 081245  
4. 208138 2. 892697 2. 783262 2. 586212 3. 236809 2. 378405 2. 349682 2. 226251 2. 008861  
2. 045623 2. 55533 2. 799596 2. 187024 2. 910678 1. 610353 2. 335034 2. 974589 2. 435215  
7. 067977 6. 751681 7. 907739 6. 770886 7. 767395 7. 326015 7. 884621 7. 425963 7. 467853  
4. 333531 4. 403172 4. 708415 4. 171093 4. 09068 3. 663957 3. 959484 4. 467544 3. 742907  
3. 340066 4. 434263 4. 295711 3. 817447 2. 470686 3. 350029 2. 64475 3. 041186 3. 794358  
5. 938863 5. 047172 6. 122223 5. 554446 6. 131228 6. 017836 6. 146711 5. 409513 5. 554883  
4. 606464 5. 709293 5. 864762 5. 396097 5. 394601 5. 377585 5. 718347 6. 067831 5. 861456  
6. 590226 5. 948911 7. 058637 6. 081326 6. 077792 6. 759856 6. 111737 5. 793854 6. 93972  
5. 430911 5. 767881 5. 047188 6. 339078 6. 741317 6. 076539 5. 130486 5. 979063 6. 460689  
5. 47383 4. 521069 3. 699656 3. 597176 3. 178573 3. 399668 2. 072985 2. 272859 3. 605003  
5. 022198 4. 518276 5. 303837 6. 136077 5. 813924 6. 068054 5. 910565 5. 805252 5. 731755  
4. 990438 4. 593044 4. 838141 3. 71211 4. 688252 5. 969667 4. 526434 4. 856388 5. 864542  
4. 244139 3. 212903 2. 836224 3. 003216 4. 242938 4. 514863 4. 863126 4. 410678 4. 051218  
2. 175811 2. 60872 2. 920726 3. 274741 2. 905935 3. 113004 3. 400389 2. 909159 2. 54601  
3. 893898 4. 364372 4. 273798 4. 19759 3. 773728 4. 521592 4. 414982 4. 083077 4. 007328  
2. 418429 3. 224419 1. 997454 3. 489233 3. 249585 3. 750854 2. 584487 4. 747772 4. 275305  
6. 101698 6. 608024 6. 393807 6. 756144 6. 352154 5. 973712 6. 070733 6. 284521 5. 649603  
4. 202285 3. 727305 4. 07044 4. 396395 4. 619095 5. 010846 3. 75118 4. 026246 4. 25021  
5. 90859 6. 355314 7. 453419 6. 84788 5. 812197 7. 384341 6. 517149 7. 174416 6. 096541  
0. 992638 1. 025748 1. 266486 1. 672105 1. 025959 1. 120325 1. 26602 1. 292745 1. 059575  
5. 376024 4. 373419 5. 08881 1. 873742 2. 978866 4. 812125 4. 693837 4. 855224 5. 937339  
1. 273123 1. 358926 1. 984603 0. 954742 3. 579558 1. 984549 1. 31528 1. 621266 2. 808042  
3. 586814 3. 65419 3. 940191 4. 190813 3. 70216 4. 582593 3. 428704 4. 254019 3. 647561  
9. 434108 9. 553312 9. 123995 9. 489549 8. 823097 9. 265917 9. 769844 9. 55472 9. 091868  
5. 724348 5. 568681 6. 80356 7. 123798 6. 92893 7. 185955 6. 8497 6. 503969 6. 732177  
5. 836635 5. 053048 6. 917531 6. 630823 6. 476561 7. 301975 6. 280397 6. 947225 6. 934875  
4. 339425 4. 78085 4. 584172 5. 217531 5. 138053 4. 058951 3. 818262 5. 064509 4. 426922

7. 599702 7. 88357 8. 234103 7. 490978 7. 755991 8. 342021 8. 436004 8. 025114 8. 202919  
3. 127207 4. 719647 3. 592993 4. 471634 3. 867807 4. 898196 5. 353489 5. 554761 5. 094866  
3. 706278 4. 517473 3. 352926 3. 34119 1. 946039 3. 920676 2. 711941 3. 795301 4. 949772  
3. 603371 4. 569903 4. 806533 5. 177655 4. 739244 4. 122366 3. 856076 3. 462642 4. 066151  
6. 032623 6. 231744 6. 950077 6. 986553 6. 734461 7. 481934 7. 142188 7. 694428 7. 809047  
4. 809476 4. 40557 4. 752327 5. 365632 4. 615091 4. 343691 5. 309038 4. 536211 4. 745564  
1. 801649 2. 655058 1. 753889 2. 49888 1. 869921 1. 811379 2. 20169 2. 287335 1. 782495  
4. 938884 6. 212712 5. 814105 7. 365249 5. 663412 6. 72832 5. 518957 5. 564402 6. 235  
3. 978177 5. 164816 4. 966856 5. 904519 3. 797218 4. 930041 5. 15616 6. 508859 5. 57862  
3. 60479 3. 264946 2. 871009 4. 188944 3. 679185 3. 935831 3. 751435 3. 595334 3. 698899  
2. 494923 2. 292687 1. 900953 2. 165881 3. 952291 3. 378421 3. 574622 3. 014534 1. 850238  
2. 589507 3. 29204 2. 555362 2. 592895 2. 934171 2. 793779 1. 687611 1. 745625 3. 169007  
3. 972733 4. 394518 3. 431575 3. 932289 4. 29247 5. 437687 5. 19524 4. 622541 4. 174766  
5. 089781 5. 276259 5. 392354 5. 278224 4. 686141 5. 585562 5. 34677 4. 894325 5. 401178  
4. 836722 3. 450403 5. 631882 5. 100152 5. 569963 5. 25358 4. 820819 4. 505259 5. 361691  
5. 040299 4. 020288 5. 492825 5. 061562 5. 63764 5. 622421 5. 846927 4. 992065 5. 560501  
3. 605664 5. 918472 5. 594214 4. 825795 4. 700535 5. 719897 5. 582624 5. 407829 5. 331499  
4. 123943 4. 908851 4. 981263 4. 555637 4. 958213 5. 264376 4. 665074 5. 282687 5. 361684  
5. 515168 5. 691634 4. 813468 4. 766596 5. 318603 6. 272565 5. 557015 5. 866222 4. 625606  
4. 580461 4. 430727 4. 01523 4. 507732 4. 257286 3. 608176 4. 647486 4. 263772 4. 854385  
2. 023925 2. 661982 2. 069095 2. 341052 1. 850809 2. 742679 1. 847243 2. 75778 1. 870991  
3. 044314 1. 905649 2. 529185 3. 037023 2. 375335 3. 049341 2. 163741 2. 188017 2. 430554  
2. 113526 2. 325297 2. 246428 1. 96135 2. 737063 2. 3754 2. 966974 2. 295356 1. 665815  
3. 070133 3. 21019 3. 333735 4. 305883 4. 036629 3. 871784 4. 387298 4. 582244 3. 663868  
6. 176528 5. 494634 4. 993151 5. 289978 4. 587962 6. 755523 6. 57352 6. 332865 6. 291442  
4. 738068 4. 810437 4. 619013 5. 495831 5. 303875 5. 694193 6. 086227 5. 212109 5. 653767  
0. 86262 1. 088032 1. 272538 2. 714484 2. 426629 1. 90637 2. 321234 1. 017198 2. 855604  
2. 655833 2. 591234 2. 457264 1. 89294 2. 513069 2. 810749 2. 293236 3. 548236 2. 979717  
3. 403368 3. 807591 3. 544323 2. 861467 2. 98416 3. 467707 2. 999174 3. 371091 3. 316667  
1. 699269 1. 65972 1. 590788 2. 008997 1. 677002 1. 623835 1. 362036 1. 221736 1. 568703  
7. 82553 7. 604875 7. 802888 6. 507849 8. 412289 7. 300706 6. 596405 5. 500644 5. 770669  
5. 581547 4. 523947 5. 37528 5. 721685 5. 59581 6. 448685 5. 747349 6. 207055 5. 895864  
2. 093528 2. 832496 2. 080738 2. 252351 2. 715932 1. 828275 1. 866898 3. 47191 2. 897158  
8. 140684 7. 434841 8. 267672 7. 628187 8. 154072 7. 392137 8. 028221 7. 993807 8. 194885  
0. 823758 1. 917624 1. 33401 2. 433571 1. 866346 1. 582809 1. 261886 0. 608973 0. 851416  
3. 910699 2. 509195 3. 663739 3. 220989 3. 680641 3. 560651 3. 476017 3. 268426 3. 653655  
4. 130082 4. 085496 3. 660066 3. 170545 4. 194794 3. 013789 3. 24053 3. 185694 2. 827931  
2. 617784 2. 935653 3. 068733 3. 354737 3. 470306 3. 006831 3. 753104 3. 895463 3. 893991  
6. 176383 6. 162769 6. 274227 6. 618489 5. 636694 5. 400378 6. 248863 6. 608118 5. 613585  
2. 241915 2. 951172 2. 797212 2. 579211 2. 387452 2. 559666 3. 007126 3. 306841 2. 71341  
5. 625023 3. 85344 5. 186578 5. 313357 5. 752041 5. 346075 5. 887322 5. 832527 5. 41705  
7. 47404 7. 270973 7. 193104 7. 119363 7. 066831 7. 408191 7. 978653 7. 592416 7. 431539  
7. 310945 8. 344141 7. 914958 8. 167655 8. 773658 7. 864101 7. 904636 7. 570825 7. 486826  
4. 400178 3. 965365 3. 23603 4. 502658 3. 969792 4. 486144 3. 758148 4. 426063 3. 850943  
4. 951585 4. 234969 3. 976775 4. 299165 4. 603833 5. 349086 4. 779271 4. 855743 5. 107906  
4. 050007 3. 239312 4. 29899 5. 18182 4. 857709 5. 143294 5. 890809 5. 218904 5. 647618  
9. 26181 8. 281683 9. 806545 9. 529866 9. 492631 11. 07448 10. 06195 10. 51791 10. 4676  
6. 145595 6. 343122 5. 714414 6. 182487 6. 45584 5. 790501 6. 290709 6. 35703 6. 028684  
4. 004473 3. 689978 4. 775078 5. 272813 3. 867066 4. 379734 4. 718414 5. 046841 3. 857022  
3. 015628 4. 560622 3. 599248 4. 353398 3. 96906 2. 486558 4. 684471 4. 664997 4. 017078  
2. 325153 2. 105133 3. 132916 2. 035374 1. 52389 1. 045276 1. 710599 2. 023861 1. 812743

2. 172975 2. 206554 2. 328475 3. 310876 2. 575295 3. 217917 2. 575267 1. 975178 2. 696074  
5. 829471 3. 787907 3. 55216 4. 653607 2. 478713 4. 206974 4. 214947 3. 100033 2. 239712  
4. 409738 4. 953154 3. 91425 4. 399205 3. 907549 4. 407567 3. 430413 3. 8017 3. 715275  
6. 180198 6. 311408 6. 260478 5. 928208 5. 845962 6. 350238 6. 281074 6. 429813 7. 151325  
1. 380448 1. 923974 2. 024492 2. 282899 2. 120752 2. 501675 2. 46057 3. 188938 1. 957799  
4. 048474 4. 042011 4. 465017 4. 710955 4. 337602 3. 463746 3. 717146 3. 832123 4. 116701  
7. 519187 7. 935894 7. 82739 7. 738653 7. 757267 7. 120255 8. 311369 8. 326931 8. 451083  
5. 134013 4. 713005 5. 623064 4. 520325 5. 980029 5. 562343 5. 853041 5. 909445 5. 554583  
4. 801035 4. 789076 4. 843094 4. 38783 5. 805589 5. 201727 4. 175152 4. 307338 3. 724336  
6. 156311 6. 002389 6. 60317 6. 46199 6. 426107 6. 530958 6. 431019 5. 026484 6. 013878  
4. 312537 4. 357231 4. 604376 4. 24499 5. 597381 5. 521317 4. 839888 6. 660423 6. 385117  
1. 219969 1. 064957 0. 54557 3. 216062 1. 181626 1. 300136 2. 420116 1. 777599 1. 190587  
4. 150209 4. 249073 4. 304512 4. 185964 4. 100164 4. 275254 3. 720158 4. 76566 4. 349446  
6. 706176 6. 297396 6. 923324 7. 077282 6. 820869 7. 550829 7. 658681 7. 52465 7. 620365  
4. 535921 3. 730807 4. 538194 4. 496293 3. 457443 3. 4715 2. 509346 2. 262888 3. 920147  
4. 495091 4. 760125 4. 317386 4. 270663 4. 949623 5. 413472 4. 289308 5. 419935 4. 722178  
4. 779053 3. 933647 4. 295898 5. 351003 4. 22749 4. 968021 4. 301317 5. 380623 3. 971734  
2. 122191 2. 801288 2. 780945 2. 839232 3. 133229 1. 980911 2. 298962 2. 80969 2. 2949  
3. 911378 4. 327576 2. 012793 4. 452976 3. 371926 4. 071477 4. 803883 5. 36139 4. 740715  
3. 346862 4. 120505 3. 061916 3. 257934 3. 72935 2. 986849 3. 947679 3. 651818 3. 423058  
2. 805424 2. 042845 1. 915664 2. 217846 2. 513219 2. 598716 1. 974412 2. 317913 2. 505288  
3. 316773 3. 926104 3. 573592 4. 523097 4. 266659 4. 493041 4. 647552 4. 750087 4. 158229  
3. 863628 4. 32575 4. 682949 3. 961258 3. 275767 4. 405464 4. 094273 3. 89345 4. 559651  
5. 775503 6. 407717 6. 100333 6. 789453 6. 81944 7. 334467 6. 809078 7. 280999 6. 949184  
4. 987629 5. 273864 4. 05705 5. 307642 4. 490064 6. 950752 6. 410776 5. 490279 6. 045666  
5. 093915 3. 895218 3. 294955 3. 373741 3. 801871 3. 898743 3. 262385 2. 611164 2. 978523  
6. 329641 4. 962605 5. 781003 4. 269782 5. 313451 5. 395801 6. 237528 4. 980006 5. 474331  
1. 855238 2. 594918 1. 979475 3. 014936 2. 289139 2. 17137 2. 204577 2. 251502 1. 783594  
5. 243836 4. 598775 5. 831441 7. 00293 6. 710885 6. 880268 6. 88111 6. 769277 6. 463868  
2. 813499 2. 812316 2. 801468 3. 488115 2. 17159 2. 935989 2. 725863 3. 41371 3. 047667  
2. 60876 1. 438974 2. 537353 1. 900356 2. 02508 2. 202549 2. 231431 1. 81961 1. 742895  
3. 698201 3. 041695 3. 927692 4. 43321 3. 484093 4. 625098 3. 676441 3. 537034 4. 282585  
3. 418926 2. 288589 3. 134479 2. 4041 2. 587697 2. 63556 2. 25295 3. 011175 3. 365488  
1. 14597 1. 383131 1. 062759 1. 806041 2. 613926 1. 304586 1. 835413 2. 003974 1. 200758  
4. 963755 4. 243768 4. 656636 4. 565573 4. 773376 4. 893082 4. 773358 5. 014719 4. 830981  
3. 651655 4. 38033 4. 288978 4. 651426 4. 064069 4. 832575 4. 293541 3. 96148 4. 877426  
5. 41365 5. 150902 4. 970637 4. 743869 5. 524218 5. 451296 6. 02238 5. 587233 5. 533902  
5. 201869 3. 873083 3. 715943 1. 441663 3. 824032 3. 793035 2. 909737 2. 856091 3. 104003  
5. 55837 5. 891148 5. 92443 6. 338784 5. 304139 5. 682402 5. 71661 5. 533331 5. 569081  
2. 702438 2. 532615 2. 464779 2. 340283 3. 324504 3. 031273 3. 520636 2. 942738 3. 068431  
6. 230602 6. 083593 6. 753507 5. 123813 4. 888447 5. 834667 5. 662566 5. 388048 5. 915626  
1. 713465 1. 387786 1. 76531 1. 917434 1. 996003 2. 405283 1. 442368 1. 658907 1. 086648  
1. 638587 0. 680729 0. 827455 0. 710615 0. 852935 1. 135594 0. 774626 1. 697977 1. 151075  
0. 946698 0. 95156 0. 581393 1. 029039 1. 551057 0. 983567 0. 756534 0. 554578 1. 328309  
4. 32541 2. 212432 3. 664241 1. 308537 2. 879616 1. 425724 1. 383143 1. 480709 2. 290646  
0. 752129 2. 504155 1. 225256 1. 619444 1. 806466 2. 511503 2. 352915 1. 418173 0. 903805  
1. 779784 2. 192972 2. 402094 2. 14917 1. 664167 1. 701338 3. 053355 1. 857079 2. 744888  
1. 488751 1. 392902 1. 225042 2. 049333 1. 905803 2. 411923 1. 279685 1. 402434 2. 103493  
1. 35463 1. 001934 1. 791821 1. 885966 1. 263447 1. 328169 1. 072936 1. 137456 2. 275046  
1. 865971 2. 379279 1. 724389 1. 797749 2. 18987 2. 025535 1. 607737 1. 635063 2. 460217  
1. 22046 1. 659913 1. 05512 2. 13736 1. 097712 0. 953466 1. 136419 1. 236137 0. 834964



2. 319958 1. 832572 2. 206502 2. 857308 2. 204956 2. 631802 3. 420951 1. 980862 3. 610214  
6. 207209 6. 013465 5. 835453 5. 200557 5. 06794 5. 184825 5. 517245 4. 749693 5. 177966  
4. 732283 4. 717994 5. 416209 5. 093241 5. 231436 6. 622556 6. 317376 5. 309576 4. 168227  
4. 986743 5. 952496 5. 625158 5. 759572 6. 230904 5. 40792 6. 316296 5. 478891 5. 560472  
1. 333653 0. 782943 0. 629565 1. 340273 1. 125821 2. 063086 0. 967577 2. 354158 0. 867895  
1. 309011 1. 872708 3. 425168 1. 274032 1. 202724 1. 387592 1. 431988 1. 240746 1. 007838  
6. 133423 6. 62482 6. 303029 6. 707228 6. 719441 6. 904489 6. 626187 6. 824479 7. 088261  
2. 018565 2. 057287 2. 587948 1. 814351 2. 121151 1. 270952 1. 406862 1. 702051 1. 655716  
8. 79479 8. 483739 6. 699168 8. 874958 7. 060513 5. 981638 6. 36355 6. 178902 8. 825018  
1. 997765 2. 288767 2. 114562 2. 175383 1. 899199 2. 139215 1. 895837 2. 187588 1. 822322  
5. 383466 3. 283769 3. 659098 3. 534484 5. 758336 6. 873228 6. 184284 5. 744519 7. 242316  
5. 616124 3. 517547 3. 992517 4. 236457 4. 148179 4. 630599 4. 47483 4. 428191 4. 364037  
2. 272486 2. 347644 2. 816005 3. 082612 2. 816005 2. 778228 2. 322334 2. 635349 2. 78462  
2. 816751 3. 264836 2. 659259 2. 218407 3. 513296 2. 329189 3. 963373 2. 172288 2. 015389  
3. 603793 3. 599489 4. 49152 5. 275028 4. 196381 5. 662597 5. 818294 4. 853052 5. 708343  
3. 984287 3. 374095 4. 476415 4. 862571 4. 014021 4. 876478 3. 414389 4. 246245 4. 279959  
1. 632272 2. 003626 2. 433754 1. 054046 1. 617424 3. 852583 1. 414633 2. 098334 3. 423693  
2. 074621 1. 844301 2. 367168 2. 666501 2. 042621 3. 165216 2. 353437 2. 165574 3. 626409  
4. 895267 4. 312703 3. 995111 3. 589188 3. 736903 3. 365685 3. 584053 4. 058491 3. 450593  
5. 131788 7. 181242 7. 723637 7. 296763 7. 669168 4. 544441 7. 615593 7. 394952 7. 62941  
4. 862949 5. 078649 5. 492377 6. 148011 5. 287476 5. 282539 5. 490289 5. 674397 5. 886645  
3. 39186 2. 742575 3. 724557 2. 774685 3. 844392 3. 743796 2. 916954 2. 982855 2. 709065  
3. 921337 3. 592846 3. 845328 4. 368965 3. 381391 3. 872561 4. 665438 2. 717077 3. 776642  
4. 031239 3. 896175 3. 485142 3. 938661 3. 5834 3. 887096 3. 173176 3. 655579 3. 283418  
1. 816295 1. 182323 2. 536412 1. 560361 2. 482631 2. 600983 1. 646676 2. 028078 1. 459338  
2. 302895 2. 740617 2. 061993 0. 701161 1. 513134 1. 115065 1. 039513 1. 36322 1. 137992  
2. 167195 1. 541554 4. 763602 1. 484669 1. 558998 1. 251657 1. 203048 2. 045064 1. 183565  
1. 165453 2. 545994 1. 81424 1. 419939 1. 432254 2. 031442 1. 689894 1. 415681 1. 502681  
1. 391153 2. 471782 1. 830914 0. 999285 1. 55508 2. 282407 1. 033737 1. 17252 1. 784877  
1. 130951 1. 965871 1. 850288 1. 096747 2. 007686 1. 979541 1. 278194 2. 829122 3. 724455  
0. 924843 1. 353705 1. 276561 0. 874444 0. 669418 1. 045832 1. 548352 0. 773246 0. 830709  
3. 520855 2. 877642 2. 087191 2. 838303 2. 959211 1. 688556 1. 706139 3. 097825 1. 431148  
6. 706899 6. 106428 7. 32439 7. 224944 7. 345223 6. 792758 8. 566542 8. 95921 8. 795631  
7. 322412 6. 578439 7. 967956 7. 109376 6. 86891 7. 663201 7. 015376 6. 54934 6. 486263  
2. 05088 3. 761373 2. 113194 2. 806368 2. 062469 2. 548941 3. 152609 2. 191622 1. 578909  
3. 946586 4. 934218 4. 799801 5. 278532 4. 742693 4. 982561 5. 033001 4. 449972 4. 920742  
6. 855945 7. 483881 7. 527322 6. 856202 7. 304212 7. 380503 7. 769742 7. 126527 7. 278311  
4. 218515 4. 992155 4. 310941 4. 357443 5. 043207 3. 522121 4. 147661 4. 777063 4. 118297  
2. 873278 1. 299103 2. 24187 2. 8786 2. 136155 2. 19834 2. 214831 2. 028951 1. 997364  
3. 076478 3. 095349 3. 012054 3. 517992 2. 640428 4. 109593 2. 798619 3. 086024 3. 808177  
5. 122117 5. 804142 4. 833528 5. 995113 4. 83088 5. 736329 6. 112885 5. 466729 5. 920799  
7. 440699 7. 749701 7. 776363 6. 967448 8. 123597 6. 941046 8. 041122 7. 654615 7. 368577  
3. 611661 3. 875491 3. 450872 3. 17365 4. 163398 3. 866626 3. 977024 3. 527591 3. 136096  
2. 975472 3. 369978 4. 057513 4. 099769 3. 578251 3. 700905 2. 785746 3. 704469 4. 062297  
5. 970468 6. 69988 6. 55157 5. 23286 6. 846206 6. 319297 6. 430308 5. 748217 5. 765001  
3. 167889 4. 347281 2. 639601 2. 841819 2. 923942 3. 843654 3. 180508 3. 823383 4. 112295  
4. 17109 3. 276627 4. 149182 4. 347677 4. 280267 3. 814339 4. 660071 4. 482431 4. 658844  
4. 088376 4. 052385 3. 515899 4. 374815 4. 420855 4. 836819 3. 712446 4. 169845 4. 642332  
2. 259099 3. 058912 3. 189133 2. 452947 2. 401827 3. 815211 2. 549809 1. 835141 2. 890965  
5. 797459 6. 547035 6. 055093 5. 757405 6. 000935 7. 058268 6. 500112 6. 135838 6. 48127  
4. 843406 5. 907824 5. 235413 4. 716881 5. 60845 6. 334557 5. 503481 5. 393152 5. 456267

3. 219708 3. 538487 3. 482842 4. 182206 3. 731893 4. 04226 4. 458964 5. 211175 4. 171054  
7. 000666 6. 617501 7. 083645 7. 318943 6. 884542 6. 896364 7. 194885 7. 046526 7. 527125  
6. 43269 7. 008104 6. 855693 6. 908618 7. 025212 5. 825034 7. 254512 6. 725856 6. 463744  
3. 397147 4. 383271 4. 273943 3. 138731 5. 243476 4. 167435 4. 489394 4. 570947 4. 297589  
2. 144443 0. 930228 1. 246148 1. 212743 1. 121614 1. 296939 1. 124081 1. 122986 0. 974475  
5. 753543 5. 7888 5. 505841 5. 986389 5. 615239 6. 196957 7. 051235 6. 400361 6. 275806  
4. 613154 5. 325433 5. 820558 4. 59136 5. 514483 5. 320813 5. 242031 5. 294435 5. 431897  
3. 733955 3. 389021 3. 906665 3. 350126 3. 297927 4. 356456 3. 871355 3. 559788 4. 279772  
1. 85714 1. 947167 2. 033894 1. 411807 1. 618174 2. 274948 2. 199675 1. 551361 2. 251642  
5. 986156 5. 780679 5. 462472 3. 739368 5. 503145 5. 063481 6. 118857 5. 99323 6. 384992  
4. 840326 5. 919361 5. 697515 5. 221252 5. 68997 3. 872991 3. 927662 4. 617721 4. 584816  
1. 24544 3. 401627 2. 756491 1. 518532 2. 001416 1. 854033 2. 576372 1. 809852 1. 26428  
6. 906122 5. 736212 5. 674087 5. 848479 6. 00441 6. 001393 5. 345416 4. 004046 3. 187852  
5. 038163 5. 247041 5. 133914 5. 065654 5. 315655 4. 197744 4. 86156 4. 059042 4. 621266  
3. 738185 4. 863414 4. 410937 3. 508803 4. 699305 4. 249523 3. 409356 3. 971203 3. 478123  
4. 178174 3. 562423 4. 075428 5. 882373 3. 98845 4. 744028 3. 889292 4. 063662 4. 878245  
7. 218782 7. 555036 7. 452185 6. 377837 7. 713549 6. 511478 7. 672662 7. 378712 7. 298945  
5. 184017 5. 817273 5. 046431 5. 795732 5. 760858 5. 339344 5. 327973 5. 176816 4. 931106  
5. 842587 6. 011941 4. 666299 6. 516441 6. 202834 7. 188496 5. 536745 6. 826263 6. 056793  
7. 092024 6. 149681 6. 935264 6. 58367 5. 495092 8. 142017 7. 198547 5. 676113 5. 623267  
5. 433022 5. 450116 5. 244734 4. 896286 5. 921765 5. 464105 5. 05667 5. 033365 4. 135705  
10. 31567 10. 51511 10. 52711 10. 06558 10. 68824 8. 966134 11. 28437 10. 57738 10. 38909  
2. 728511 1. 904841 2. 410728 3. 571955 3. 437287 3. 550493 2. 747889 3. 54127 5. 567065  
7. 290523 7. 362053 7. 292223 7. 231951 7. 307516 6. 230832 6. 948602 6. 136911 6. 37152  
1. 813077 1. 522097 1. 91723 1. 914585 1. 401427 1. 841127 1. 642347 1. 914786 1. 973096  
4. 888295 5. 180785 5. 292266 5. 961953 4. 908272 6. 177145 5. 221732 5. 606513 5. 850631  
7. 867627 8. 109391 7. 94477 7. 947939 8. 351177 7. 633114 7. 655668 8. 267272 8. 680026  
5. 062897 5. 105989 5. 644538 5. 696506 4. 513427 6. 40331 5. 852226 4. 906067 4. 536956  
3. 225873 4. 007197 2. 39963 3. 052496 2. 611914 3. 505145 3. 575582 3. 185763 3. 058759  
4. 860644 4. 83855 5. 625983 4. 035615 5. 673466 4. 316345 5. 256771 5. 374444 4. 616309  
4. 739426 4. 300531 4. 901489 4. 625754 4. 16986 4. 566764 5. 123119 5. 126319 4. 779828  
3. 157053 3. 576171 4. 440681 4. 015527 4. 268995 3. 842933 4. 532722 3. 07271 3. 544152  
2. 635893 1. 947772 3. 077259 2. 57105 2. 78722 3. 456135 2. 612079 3. 415752 3. 932196  
5. 156978 5. 167511 5. 094286 4. 654475 4. 270879 5. 443256 4. 653837 5. 391419 4. 278541  
3. 268207 4. 151864 3. 915622 3. 412195 4. 088861 2. 991018 5. 318687 4. 20253 3. 568789  
4. 118119 5. 093043 5. 245207 4. 806386 3. 688832 4. 109668 4. 311015 4. 565969 5. 237787  
1. 857306 2. 470667 1. 569845 2. 957282 2. 405356 3. 001747 2. 076309 1. 706989 1. 980616  
3. 19916 3. 618554 3. 110133 3. 496453 3. 251511 4. 532615 4. 234756 4. 160725 3. 361135  
4. 283306 4. 212813 3. 549728 4. 018536 4. 193201 3. 565148 4. 747642 5. 261299 5. 073733  
1. 446809 3. 041443 1. 159032 2. 103676 1. 767818 1. 637476 1. 052588 2. 264275 1. 285745  
7. 039657 6. 901045 6. 653553 6. 774761 6. 852244 6. 70884 7. 557648 6. 074135 6. 641346  
7. 089559 6. 794228 6. 989854 6. 20183 6. 564037 5. 897948 7. 151004 6. 669586 6. 850242  
5. 673008 5. 962181 5. 624656 6. 196444 6. 349325 4. 169476 5. 740943 5. 7359 5. 340175  
5. 271278 5. 937261 5. 248491 5. 878969 6. 009249 6. 349193 5. 832363 5. 551897 5. 974857  
4. 052451 4. 07732 4. 738562 4. 569296 3. 804421 5. 851673 4. 761378 5. 200901 5. 329898  
2. 338015 2. 324106 2. 770011 3. 137562 2. 667433 3. 155704 2. 483498 3. 04522 3. 695134  
5. 930682 6. 37117 6. 572331 6. 428409 6. 148041 5. 471108 6. 945173 7. 012579 7. 133095  
4. 100933 3. 866717 2. 266129 4. 551306 3. 288594 4. 614193 3. 552575 4. 878853 4. 271386  
2. 426736 2. 725299 2. 370098 1. 981972 3. 13204 2. 969539 2. 202778 2. 991735 3. 046237  
6. 614685 6. 501296 6. 398967 6. 502126 6. 560758 5. 968565 6. 972643 5. 780675 6. 323411  
4. 969367 5. 848514 6. 055917 5. 482486 4. 396338 5. 1102 3. 729374 3. 531167 3. 629301

5. 962923 6. 640247 6. 239196 5. 714309 6. 280643 4. 842119 5. 33527 4. 982889 5. 199267  
7. 413435 7. 555476 7. 438057 7. 232985 7. 502698 7. 525518 7. 086878 6. 462 7. 269337  
3. 785715 4. 676835 4. 709313 5. 648376 4. 811829 4. 713685 5. 363056 5. 211708 5. 023714  
2. 676558 2. 891972 2. 658676 2. 357302 2. 348613 2. 626633 2. 312552 2. 858599 2. 458376  
3. 542928 3. 915157 4. 15299 4. 007165 4. 163914 3. 05513 4. 063324 3. 562431 3. 757748  
7. 053851 7. 423865 7. 486553 7. 084612 7. 978494 7. 143801 7. 039926 6. 148056 6. 936271  
6. 331214 6. 458459 6. 221511 5. 707731 5. 670415 6. 341652 6. 352404 6. 322109 5. 615303  
6. 414138 5. 539214 5. 693987 6. 043223 6. 311057 6. 130108 6. 562238 6. 870861 5. 751726  
2. 19274 2. 127422 1. 832706 2. 212573 2. 812381 1. 8684 2. 004388 2. 176801 1. 830318  
5. 603888 5. 577442 5. 30963 4. 713404 6. 311365 6. 300821 4. 980608 5. 675085 5. 63242  
2. 390569 4. 753219 2. 556854 3. 639327 2. 640511 3. 432215 2. 727322 3. 3236 3. 549215  
6. 005491 6. 465123 6. 764321 6. 017411 6. 761021 6. 040541 6. 589336 6. 468096 6. 325822  
3. 82578 2. 934667 3. 547687 3. 404155 4. 116502 4. 301217 4. 558278 4. 31939 3. 883003  
5. 794211 4. 949843 4. 823677 3. 961611 5. 331415 4. 739927 4. 787055 4. 721469 4. 766826  
5. 387613 5. 934413 5. 429425 5. 087224 5. 998939 4. 773504 5. 293604 6. 167143 4. 39196  
5. 155672 4. 934687 5. 538259 5. 288444 4. 278232 3. 963533 4. 838661 5. 02302 3. 835016  
5. 290301 5. 881552 4. 04905 4. 582781 4. 917783 4. 375009 3. 883991 4. 803097 3. 907745  
4. 099708 4. 331197 3. 899397 3. 714756 3. 374282 3. 99437 3. 959428 4. 317156 3. 788592  
5. 937277 5. 814896 5. 56668 5. 181073 5. 352271 5. 935196 5. 540897 4. 388013 4. 94505  
1. 528731 1. 533713 1. 330145 2. 078841 1. 64876 4. 116662 1. 546553 0. 616223 1. 255912  
3. 166292 3. 137908 5. 024583 4. 092013 3. 149051 4. 214803 4. 514454 4. 348923 4. 156504  
2. 870474 2. 32716 2. 779183 2. 877088 3. 906334 2. 876021 2. 408691 2. 512812 3. 201991  
4. 1993 4. 985088 4. 440592 3. 587958 4. 252321 4. 4729 4. 764073 4. 191512 4. 457883  
4. 046245 4. 766029 4. 815004 5. 317629 4. 733464 5. 0598 4. 275835 5. 113431 4. 918595  
5. 703031 5. 207595 6. 112532 6. 414913 6. 667625 6. 313374 6. 511618 5. 765921 6. 085084  
3. 441905 3. 020161 2. 938868 3. 1591 2. 507819 3. 562763 4. 406759 3. 283088 3. 05186  
2. 531831 2. 461544 2. 693867 2. 987448 2. 692938 3. 286375 5. 828687 7. 198171 5. 214901  
2. 096768 3. 819936 2. 681211 2. 714963 2. 380428 3. 449549 2. 1237 2. 930786 3. 094466  
4. 474971 5. 274103 5. 664078 4. 489593 5. 686451 5. 619658 4. 923836 5. 60154 5. 374567  
4. 103479 5. 446382 5. 660348 4. 665799 5. 724254 4. 145346 4. 911707 5. 537374 4. 538489  
5. 397793 5. 563866 4. 522747 5. 91897 4. 237772 5. 10417 5. 363807 5. 565733 5. 219767  
6. 706715 7. 260955 6. 509449 7. 261431 7. 846145 6. 847635 7. 592309 7. 479074 6. 995083  
2. 98103 2. 397906 2. 476776 2. 945397 2. 910418 2. 828642 3. 666669 2. 810282 2. 69093  
2. 461978 3. 481167 2. 783452 2. 04404 2. 668909 2. 594188 2. 804356 2. 673096 2. 576899  
2. 749514 2. 944061 3. 710404 3. 064846 3. 536756 4. 396331 3. 754938 2. 990296 3. 362984  
2. 101883 2. 198788 1. 680432 2. 301536 1. 646816 1. 838106 1. 884735 1. 619591 2. 188865  
6. 759431 6. 391028 7. 162997 6. 878741 6. 7933 5. 93493 7. 306156 7. 049319 7. 280009  
1. 288976 2. 538296 2. 484031 3. 398761 1. 127122 1. 499437 1. 673665 1. 804305 3. 275668  
4. 023955 3. 960183 4. 415975 4. 795421 5. 436492 5. 096857 5. 418904 5. 41148 5. 299944  
3. 416122 3. 122006 3. 748027 3. 224184 4. 880079 3. 349927 4. 644381 4. 149766 3. 566637  
2. 868029 2. 962781 3. 670717 2. 968323 3. 016252 3. 948908 2. 938169 2. 906046 3. 108716  
5. 136884 5. 089738 4. 778322 5. 690767 5. 77813 4. 44409 5. 214703 5. 284209 4. 917592  
4. 451775 3. 488017 4. 058353 4. 945479 4. 740698 5. 503509 3. 656223 5. 980499 5. 39082  
4. 134766 5. 109764 3. 944577 3. 928598 4. 529175 5. 066145 5. 034091 4. 266956 4. 494381  
5. 054237 4. 049881 4. 425728 4. 329866 4. 374124 5. 95218 3. 990154 4. 09792 4. 38321  
5. 062844 6. 416918 5. 995723 5. 163653 5. 323203 5. 228113 5. 831852 5. 903414 6. 209586  
3. 931035 3. 685376 3. 396898 3. 947004 4. 535855 4. 665917 3. 717281 4. 14427 4. 566568  
2. 683681 2. 746687 2. 609013 2. 996588 2. 725891 3. 464924 2. 555805 2. 356517 3. 192572  
4. 08511 0. 57305 4. 165248 1. 708846 0. 695858 1. 675656 1. 227324 1. 691429 1. 862519  
5. 741299 6. 440952 5. 711039 6. 125246 6. 084311 6. 080415 6. 166519 6. 019922 6. 753478  
6. 513366 7. 352972 7. 066756 6. 010867 7. 19 7. 193222 7. 13512 6. 228421 6. 804071

4. 631089 4. 774972 5. 647236 5. 225707 5. 638524 4. 622682 6. 005774 5. 480571 5. 665386  
2. 299759 3. 269164 3. 894333 2. 912691 3. 777169 5. 149403 3. 720422 4. 500261 4. 035501  
2. 727764 2. 775998 2. 222394 1. 716295 1. 88432 1. 450299 1. 769894 2. 448614 1. 976771  
3. 021128 3. 008252 3. 044816 3. 376717 3. 132985 3. 222168 2. 948243 3. 035673 3. 226824  
3. 321149 3. 510721 2. 839142 3. 584166 3. 76668 3. 452295 4. 484926 2. 982761 4. 527092  
4. 32681 4. 224517 4. 232129 2. 111699 3. 172144 2. 308895 2. 600143 3. 119794 2. 081253  
6. 149717 5. 072477 4. 878793 4. 575351 5. 655962 5. 122877 5. 596461 5. 864685 5. 26743  
2. 182615 1. 579386 2. 14399 2. 207935 2. 196028 1. 604718 1. 972652 1. 855158 2. 01853  
4. 484974 4. 889123 3. 915652 4. 612408 3. 795066 4. 176837 4. 915189 3. 717548 3. 699737  
4. 382823 3. 020071 4. 943374 3. 839845 5. 142028 3. 686806 5. 025516 4. 891622 4. 850807  
3. 406057 2. 307091 2. 884176 2. 811548 2. 290162 3. 539263 2. 511731 4. 086889 2. 482941  
4. 961241 3. 578597 3. 94877 4. 191163 4. 358421 4. 703723 4. 141287 3. 441297 3. 535055  
2. 107246 1. 661497 2. 154157 1. 895208 2. 355628 2. 842996 1. 869953 1. 421236 2. 168759  
2. 671268 3. 319919 3. 616799 3. 015622 3. 98139 3. 127234 4. 526989 3. 568495 4. 258062  
5. 096812 5. 128553 6. 068057 5. 218234 5. 760258 5. 94831 6. 043809 5. 804442 6. 449639  
4. 741534 5. 478858 5. 52017 4. 717038 4. 832148 5. 830253 5. 932457 4. 831862 4. 059956  
3. 983713 5. 024309 3. 831434 4. 094671 4. 011023 4. 323385 3. 578181 3. 925418 3. 560637  
4. 423856 4. 877888 4. 29837 4. 846474 5. 445258 4. 004988 5. 111564 3. 812483 3. 676164  
1. 152259 1. 427028 0. 925958 1. 341758 0. 870712 1. 145712 1. 106334 0. 93024 1. 187869  
3. 356962 4. 403923 4. 297527 3. 612253 3. 901305 3. 280898 2. 660668 2. 765708 2. 687596  
3. 109077 1. 748083 2. 419252 2. 295645 2. 524017 3. 571267 3. 602689 2. 96068 2. 257912  
2. 614462 2. 927858 3. 293823 2. 581626 3. 2606 2. 272281 3. 349648 3. 343011 2. 515952  
7. 437337 8. 036675 7. 708489 7. 353576 6. 965702 5. 702047 7. 138048 7. 173989 6. 912035  
4. 965036 4. 124169 4. 883974 3. 428034 3. 736151 3. 804036 2. 911318 3. 192352 3. 352195  
1. 41269 1. 239481 1. 331978 1. 731133 1. 168392 1. 038877 1. 088061 1. 775613 1. 24733  
1. 677196 1. 768401 1. 478685 1. 971499 1. 849781 1. 432006 1. 577999 1. 732611 1. 499728  
1. 137033 1. 257866 1. 548287 2. 060934 0. 977363 1. 327775 1. 489694 1. 456671 1. 470466  
2. 764803 1. 982044 2. 845851 3. 082168 3. 233631 3. 04147 2. 68369 3. 222312 3. 271819  
5. 359455 6. 22371 5. 242372 5. 260026 5. 735925 5. 419957 5. 443157 5. 112652 5. 066495  
6. 155543 5. 783377 5. 924531 6. 475311 6. 615013 6. 605582 6. 216067 6. 366986 6. 359931  
6. 45936 4. 994094 5. 601481 5. 695862 4. 738591 6. 426432 4. 732077 6. 025375 4. 657471  
1. 479087 1. 957397 1. 597611 1. 795789 2. 23688 1. 963001 1. 770019 1. 982647 1. 722246  
4. 045587 5. 120056 4. 92558 4. 659188 4. 327273 3. 906691 4. 494797 4. 698079 4. 459262  
2. 479434 2. 317733 2. 566743 2. 272441 2. 929929 2. 161329 2. 83459 2. 634115 2. 418295  
3. 556329 2. 487092 3. 136344 3. 10192 3. 279373 2. 698897 3. 981606 4. 109135 3. 809613  
2. 246616 4. 039983 2. 743399 3. 628476 3. 242395 3. 949385 3. 002619 3. 599127 3. 279735  
6. 747384 6. 959354 7. 71112 7. 83672 8. 184259 6. 405624 7. 902064 8. 383403 7. 219116  
7. 680283 5. 347975 6. 771737 7. 078461 6. 292276 7. 747268 6. 463048 6. 35087 5. 987584  
2. 599259 2. 62861 2. 368547 2. 912041 2. 431586 4. 122528 2. 236458 2. 542538 3. 074181  
1. 078903 0. 582178 2. 996566 2. 594845 1. 523521 4. 070545 0. 753939 0. 727313 0. 972257  
2. 97631 3. 388423 1. 492624 2. 365514 2. 406268 3. 751659 3. 211382 2. 541535 2. 705285  
8. 002788 8. 10671 8. 32751 8. 304902 8. 067371 7. 586946 8. 21869 8. 735337 8. 295733  
1. 499416 2. 417934 3. 190144 2. 18346 1. 739349 3. 271793 3. 732418 1. 497625 1. 913221  
3. 873799 3. 426396 3. 760817 3. 220467 3. 1773 3. 953994 3. 694631 2. 694011 2. 780407  
2. 547712 1. 664027 1. 518451 1. 599344 2. 011858 1. 761134 1. 606189 2. 176564 1. 6982  
2. 861792 2. 570247 3. 972087 3. 506276 3. 791101 2. 770514 3. 482187 2. 277622 3. 489822  
3. 386476 2. 19594 2. 841777 1. 923428 2. 452486 2. 405925 2. 125315 2. 573776 2. 683346  
6. 597599 6. 448717 6. 280406 5. 721447 6. 321018 5. 967442 6. 325192 6. 500334 6. 055282  
3. 66382 5. 093242 4. 697939 2. 578955 3. 509826 5. 254519 3. 632863 2. 97485 3. 370794  
1. 670159 1. 453788 1. 7538 2. 584045 2. 237943 2. 150146 1. 98397 1. 731091 1. 382358  
6. 632545 5. 371172 4. 992036 4. 179598 4. 733574 5. 618735 4. 664056 3. 327119 1. 772834

3. 521248 2. 378576 3. 572228 3. 097196 2. 518439 3. 310125 3. 937034 3. 204211 3. 901062  
2. 526568 3. 670039 2. 915508 3. 697051 1. 545943 1. 513727 2. 988206 3. 118199 3. 226255  
3. 720658 2. 126544 3. 595734 3. 886124 4. 164796 4. 430364 4. 981061 4. 34095 3. 94337  
1. 743913 2. 375375 2. 489495 2. 662437 1. 519313 1. 490604 1. 723144 1. 334841 1. 32301  
6. 35218 6. 239281 5. 670765 6. 866587 3. 685695 6. 319639 4. 870216 3. 955275 4. 505787  
6. 073104 5. 192294 4. 439437 5. 152543 5. 307319 2. 892534 4. 450962 4. 493029 3. 844874  
3. 539268 2. 403518 3. 974322 4. 837956 2. 473776 3. 931982 3. 535846 3. 955948 3. 452085  
4. 590165 2. 248168 4. 054728 4. 399303 4. 503169 5. 341921 4. 304478 4. 418983 5. 028768  
6. 774949 7. 209386 4. 349904 4. 769959 5. 715428 6. 605474 5. 800444 6. 45923 6. 31972  
5. 1362 4. 446621 5. 050416 5. 828923 4. 159943 5. 910705 5. 171375 4. 094933 4. 552939  
1. 352579 1. 824084 1. 733851 2. 764969 1. 283436 1. 925007 1. 437151 2. 319633 2. 469178  
2. 321005 2. 760174 2. 587028 2. 314396 2. 932186 2. 923366 3. 016125 2. 195513 2. 271904  
7. 083182 6. 22472 6. 317312 6. 262982 5. 021963 6. 886732 4. 692454 4. 538934 4. 294672  
10. 37037 10. 9072 10. 59795 10. 1777 10. 96671 10. 68191 10. 49126 10. 19204 10. 44473  
1. 461768 2. 202658 1. 947309 1. 485238 3. 003029 1. 926642 2. 708905 2. 179198 2. 163525  
5. 42601 5. 822138 5. 585975 6. 227573 6. 362834 4. 170439 5. 261054 5. 344022 4. 652597  
1. 494189 1. 232975 1. 483597 1. 290187 1. 061085 1. 242148 1. 977144 1. 967012 1. 703318  
1. 089243 1. 807386 1. 616964 3. 109795 1. 696344 1. 665744 1. 20411 2. 58104 1. 879734  
4. 997852 5. 612149 5. 226394 5. 753637 5. 46664 5. 831377 5. 704586 5. 614195 5. 771263  
1. 477233 1. 482752 1. 956749 1. 844604 1. 347107 1. 684987 1. 773575 2. 636405 1. 554225  
2. 035662 2. 782641 3. 000485 3. 741217 3. 304055 2. 773127 2. 008263 3. 086971 2. 079634  
4. 923043 6. 084213 5. 81444 4. 773464 5. 732479 3. 870014 5. 036645 5. 270235 4. 059098  
6. 271225 5. 359016 5. 901394 4. 258202 5. 774365 4. 124299 6. 039494 5. 057778 4. 711393  
5. 382087 6. 187197 6. 21286 6. 213778 6. 681763 6. 627764 6. 590534 6. 182398 6. 238623  
4. 655837 4. 96289 4. 513149 4. 105821 5. 174987 3. 793852 4. 881388 4. 51981 4. 409877  
7. 798971 8. 441323 7. 899419 7. 705333 8. 183169 7. 42955 7. 913297 7. 454697 7. 531467  
3. 539073 2. 732022 3. 046717 4. 301298 3. 843522 3. 913526 4. 397356 4. 387657 4. 802756  
4. 099534 4. 139679 4. 051913 3. 932138 4. 59106 2. 614703 4. 339211 5. 016293 4. 383607  
8. 396367 7. 369392 7. 967508 6. 810449 6. 863688 6. 934912 6. 819186 4. 641857 3. 53918  
5. 316714 4. 659973 4. 634268 4. 986656 4. 361288 5. 129473 6. 117946 6. 463178 5. 426766  
2. 286087 2. 101656 2. 417665 1. 865544 2. 559933 1. 868364 1. 792938 1. 899229 2. 2351  
5. 849693 3. 676317 5. 107246 4. 567413 3. 332975 3. 038946 4. 289903 3. 494171 3. 826665  
3. 164336 1. 250157 3. 926503 1. 225375 4. 320264 2. 233885 1. 32508 1. 748353 1. 575594  
5. 98587 5. 768927 6. 24146 5. 793718 5. 903254 5. 303649 5. 937465 5. 542465 4. 951424  
1. 22503 1. 469198 1. 60397 1. 162296 1. 205444 0. 945637 1. 100746 1. 431221 1. 534087  
8. 028562 8. 507126 8. 400662 8. 351827 8. 564766 5. 473779 9. 18462 9. 420011 9. 186039  
4. 932622 6. 129926 4. 57735 3. 412634 3. 840175 1. 426912 4. 017489 5. 281289 5. 338599  
3. 266745 3. 442975 2. 994092 3. 076686 2. 512792 2. 79821 2. 525494 3. 06865 2. 685331  
3. 303943 3. 81626 4. 393743 3. 041898 3. 215896 2. 115634 2. 559837 2. 812711 2. 149799  
4. 299701 6. 150162 5. 673514 5. 021298 4. 293149 5. 252195 3. 783219 5. 344819 5. 022599  
3. 410971 3. 544152 5. 353176 4. 28891 5. 349265 5. 576571 5. 25931 5. 00262 4. 666552  
5. 900647 6. 651066 6. 969968 6. 665613 5. 76183 6. 88155 6. 884455 5. 401505 6. 562378  
4. 97651 5. 311522 4. 732536 3. 913064 3. 795968 4. 703201 5. 122303 5. 213894 4. 757909  
2. 958776 3. 400856 2. 748047 3. 553998 2. 636684 2. 994511 2. 6983 2. 392243 3. 088823  
6. 55575 5. 993458 6. 467338 6. 733407 6. 560267 6. 518244 6. 407749 6. 579069 5. 713212  
6. 624225 5. 494322 5. 770959 6. 360306 5. 522991 5. 490476 4. 648027 6. 416138 5. 392855  
6. 807948 6. 408546 6. 136187 5. 404812 6. 842277 5. 73612 7. 127951 7. 523785 6. 898867  
3. 983542 4. 935715 4. 373944 4. 241437 3. 685496 2. 727311 3. 946008 3. 468189 3. 488614  
6. 325931 5. 404302 4. 872936 5. 854216 5. 449057 6. 42928 5. 729752 5. 71183 6. 047563  
1. 135369 1. 147633 1. 597399 1. 52352 1. 215097 2. 296504 1. 548185 1. 715645 1. 581887  
3. 761093 3. 080891 2. 753417 1. 982052 3. 534203 2. 979619 3. 721842 2. 965405 3. 349318

3. 921195 3. 597276 4. 266375 3. 860745 3. 304706 6. 070921 3. 991594 4. 290796 2. 816109  
1. 715507 2. 561639 1. 744665 1. 564576 1. 411511 1. 738681 2. 765949 1. 502857 1. 423505  
3. 682833 2. 966674 4. 406951 3. 311225 4. 115947 4. 501333 3. 008047 2. 915804 3. 677127  
1. 851369 3. 035402 1. 135593 2. 405031 1. 458576 1. 721416 1. 860379 1. 548266 1. 292914  
3. 78474 2. 300077 2. 484901 2. 893266 2. 841035 1. 500955 1. 895186 1. 651182 2. 172159  
2. 027313 2. 117861 1. 713404 2. 036811 2. 072307 4. 198476 2. 308245 2. 643088 3. 628942  
3. 634725 5. 226753 4. 611521 3. 463022 4. 581919 2. 480647 3. 410189 4. 549708 3. 225807  
2. 802424 2. 834491 3. 150462 3. 381545 3. 148906 4. 175086 3. 959816 2. 741588 4. 081777  
6. 68851 7. 439167 6. 821726 6. 249786 7. 048122 5. 925474 6. 255406 6. 104235 5. 806193  
2. 975151 3. 073289 3. 277919 3. 588108 2. 802147 2. 420927 2. 070828 2. 736052 2. 45916  
4. 556464 4. 220058 2. 824824 4. 463603 4. 390479 5. 112561 5. 108883 3. 828393 4. 222757  
4. 260347 4. 42634 4. 630849 4. 051604 3. 796706 5. 524688 5. 584732 3. 570202 5. 460227  
2. 22128 2. 382645 1. 858988 2. 452225 2. 356249 2. 727743 2. 260024 2. 677192 1. 925948  
0. 909917 0. 775445 1. 361139 1. 453119 1. 132483 1. 305754 1. 126935 0. 985075 1. 029521  
1. 048328 1. 05178 2. 150177 1. 105777 3. 303057 0. 984845 0. 911542 1. 027849 1. 147299  
3. 575536 3. 325701 3. 85771 3. 253092 3. 249836 3. 145119 3. 023154 3. 030693 2. 61026  
3. 579646 2. 345295 2. 401333 2. 849223 2. 375054 2. 451617 2. 225721 2. 771054 3. 257687  
4. 513591 5. 098413 4. 783641 5. 289293 4. 997473 5. 120981 4. 610696 4. 490065 5. 409004  
2. 791809 2. 449977 2. 170979 1. 778969 2. 177677 1. 860402 2. 307006 1. 931608 1. 449001  
3. 718575 4. 329467 4. 557337 3. 733904 3. 403481 4. 799477 4. 222699 3. 291635 4. 163669  
3. 759763 2. 645941 3. 525756 3. 448245 3. 72943 3. 039239 4. 003836 3. 437694 2. 762289  
5. 65119 6. 493653 6. 075784 5. 42291 6. 317411 5. 352556 6. 029772 6. 721839 6. 158414  
1. 64407 2. 113365 1. 24508 1. 359918 1. 454914 3. 110939 1. 584896 1. 190711 2. 479197  
2. 743746 4. 07307 3. 230301 2. 789255 3. 261288 3. 51055 3. 194012 3. 453328 2. 784697  
5. 974809 6. 091509 6. 937489 6. 654268 6. 779444 4. 961334 6. 954225 6. 566439 6. 372107  
5. 309822 6. 014404 5. 533976 5. 324783 5. 942639 4. 433805 5. 082583 4. 756389 5. 284614  
5. 22377 5. 021292 6. 290747 5. 749419 5. 974678 6. 291812 6. 559545 5. 662311 6. 482985  
1. 811654 2. 749383 1. 950085 2. 455259 2. 64059 3. 23284 0. 926407 1. 534563 3. 123773  
5. 725362 5. 372143 5. 749063 5. 066392 5. 772623 4. 931875 4. 960748 4. 649191 5. 188083  
6. 469383 6. 326527 7. 066658 6. 650836 6. 422384 6. 73882 6. 43347 6. 103919 6. 218828  
3. 090326 2. 009698 2. 525677 2. 636078 2. 504441 2. 279417 2. 623358 2. 072646 2. 487339  
2. 784828 1. 95738 3. 268829 3. 135374 3. 181449 2. 62351 3. 097706 3. 364586 3. 087886  
2. 694776 2. 697247 2. 4529 2. 785119 3. 058475 2. 971698 3. 261577 3. 017482 3. 346131  
6. 729509 6. 524299 5. 888047 5. 857182 6. 673917 6. 554347 5. 622923 6. 270483 6. 478243  
5. 102152 5. 732318 5. 352676 5. 584886 5. 323905 5. 568091 6. 428411 6. 098931 6. 271456  
2. 751499 2. 752564 2. 170119 3. 056767 2. 837066 3. 431743 3. 068262 3. 42989 2. 993101  
7. 483224 8. 042782 8. 137253 7. 629195 7. 784302 6. 841194 7. 450358 7. 295257 7. 200056  
2. 966186 2. 861685 2. 735914 2. 892092 3. 384094 3. 057008 2. 476965 3. 575938 2. 915374  
6. 023238 6. 560547 6. 104038 5. 686987 6. 078055 5. 805489 7. 024365 6. 228318 5. 78093  
4. 764858 4. 082769 3. 279494 2. 871543 2. 284903 3. 687521 3. 324592 4. 163636 2. 190403  
4. 804633 5. 154066 4. 887168 3. 887976 4. 22893 4. 466026 3. 985126 4. 387955 4. 400828  
6. 595041 6. 469177 6. 695702 7. 50996 6. 883781 5. 327676 7. 21332 7. 550048 7. 413703  
5. 269169 5. 110735 5. 483116 5. 259177 5. 120843 5. 437854 5. 978122 5. 864387 6. 241804  
2. 58055 3. 469442 3. 615182 3. 014261 2. 309652 4. 190344 3. 857969 3. 895802 4. 17717  
4. 659184 4. 293882 6. 003987 4. 668414 5. 051678 5. 668089 5. 537068 5. 588981 5. 997915  
4. 181093 4. 264745 4. 446039 4. 335927 4. 959293 5. 02309 6. 138179 4. 418622 5. 110866  
6. 562391 6. 174304 6. 560655 6. 557048 6. 144341 5. 921541 6. 184541 6. 190142 6. 54816  
7. 39305 7. 356108 7. 035973 7. 297324 7. 797775 7. 697867 7. 27736 7. 097617 7. 448857  
4. 293472 4. 24029 4. 579296 5. 651608 4. 645652 3. 96834 4. 315941 4. 64929 4. 628404  
3. 235422 1. 985228 1. 397491 2. 001632 1. 900107 2. 193941 1. 309774 1. 380584 1. 798542  
3. 309819 4. 440275 3. 411916 3. 703305 3. 452996 2. 779944 2. 631522 3. 207923 3. 699435

5. 249712 4. 672128 5. 597928 5. 530373 4. 817498 5. 812305 6. 468815 5. 551641 5. 018849  
4. 107237 4. 168286 4. 5161 5. 344298 3. 325964 5. 087112 4. 819912 4. 028303 4. 759032  
1. 556845 0. 898964 1. 384264 1. 891644 1. 49234 2. 012896 1. 604653 1. 54022 2. 538701  
6. 480676 5. 869105 6. 548823 6. 849675 5. 233107 6. 32939 6. 874154 6. 368846 6. 613271  
5. 006727 5. 564816 5. 883984 4. 990833 5. 541926 5. 918854 5. 662034 5. 048527 5. 427275  
7. 692783 7. 18405 7. 213348 7. 394753 7. 123355 7. 636788 7. 856146 7. 711395 7. 539508  
1. 477169 1. 896309 1. 15818 1. 565302 1. 808351 2. 132731 2. 145189 1. 744003 1. 326349  
2. 444711 2. 586545 3. 32474 3. 181613 2. 777414 2. 684443 2. 511843 2. 424218 2. 344467  
2. 227942 2. 730692 2. 029414 2. 373283 2. 063282 2. 702299 2. 33069 2. 386686 2. 978444  
5. 313486 6. 842276 5. 746949 5. 736345 5. 483824 5. 211317 5. 917243 4. 597847 5. 306523  
2. 748511 3. 418276 3. 426116 3. 424617 2. 391704 3. 577121 3. 098979 2. 697087 3. 394648  
4. 002832 3. 181812 4. 578672 2. 70625 3. 282933 3. 05079 2. 95822 2. 278678 3. 372349  
2. 679704 1. 938686 2. 310041 2. 92734 2. 398032 2. 800393 2. 817412 2. 923478 2. 88289  
2. 703392 2. 410378 3. 782845 2. 40023 2. 776313 3. 532781 2. 913111 3. 486254 2. 572968  
3. 008126 2. 725517 4. 445919 2. 777272 1. 919788 2. 415074 2. 271785 2. 571356 2. 287609  
7. 027681 7. 742656 7. 547669 7. 818044 7. 966275 7. 472798 7. 539628 7. 598312 7. 340897  
4. 699391 5. 021017 4. 352678 4. 723668 4. 426236 4. 259912 4. 876613 4. 52554 4. 743311  
2. 005864 1. 670776 2. 034018 1. 835765 2. 358479 1. 956242 1. 876415 1. 894934 1. 958988  
0. 535759 1. 415001 0. 815595 2. 770743 3. 135323 1. 898005 3. 943808 3. 942038 0. 749271  
1. 97271 2. 408546 2. 050541 2. 113674 1. 964353 3. 64954 1. 605739 1. 829361 2. 528549  
3. 146569 3. 27755 3. 42809 2. 40991 2. 584443 2. 807179 2. 525286 2. 788031 3. 125342  
2. 975506 3. 320563 3. 291462 2. 7046 3. 73414 3. 674663 3. 945961 4. 060221 3. 393085  
2. 732882 1. 63561 1. 759148 2. 925122 1. 477877 2. 928365 2. 136373 2. 794365 2. 53971  
2. 164975 2. 910073 2. 479975 2. 582689 2. 306319 2. 70037 2. 838628 2. 851599 3. 252899  
1. 363524 1. 472145 1. 102909 2. 274518 1. 204732 1. 417384 1. 238556 2. 406558 1. 010558  
7. 586574 7. 289686 7. 505598 7. 41816 7. 396555 7. 048102 7. 852169 7. 635994 7. 666101  
1. 766323 1. 195131 1. 543591 1. 520156 1. 810377 2. 00134 1. 924726 1. 430933 1. 820995  
2. 53891 2. 307818 3. 531384 2. 984536 2. 557174 4. 511895 3. 770169 3. 800504 2. 709103  
1. 845772 1. 837607 2. 261831 3. 068771 2. 734863 2. 426543 2. 326923 2. 830725 2. 867439  
2. 24015 3. 206847 3. 398072 2. 967451 2. 813645 2. 957964 2. 545659 2. 977631 3. 214318  
6. 554786 5. 44861 6. 13343 6. 643675 5. 298524 6. 487619 6. 447225 6. 363621 6. 908173  
3. 94873 4. 923478 4. 581305 5. 842935 4. 587545 4. 66595 4. 121184 4. 829041 5. 790645  
7. 749831 7. 372992 7. 140967 6. 766935 7. 197582 4. 953675 5. 738506 4. 626543 5. 017715  
1. 954695 1. 457113 2. 747597 1. 553959 1. 423839 1. 792328 1. 963214 3. 011533 3. 270052  
4. 967783 3. 987631 3. 518577 4. 124989 4. 168242 3. 366646 2. 922947 3. 538924 2. 635072  
2. 352526 2. 755166 3. 520337 3. 63661 3. 218567 3. 337227 2. 648323 3. 341033 2. 840662  
4. 656946 5. 435817 5. 095633 4. 876844 6. 017933 4. 825933 5. 373466 3. 858994 4. 561851  
2. 178251 1. 229845 2. 036458 2. 536632 1. 952034 2. 034893 1. 217249 2. 509472 2. 387721  
1. 179791 1. 617134 1. 023887 1. 355938 0. 98943 1. 158155 0. 92532 1. 040818 1. 171184  
6. 600203 6. 712456 7. 050475 5. 925837 6. 110444 5. 538616 6. 374667 6. 248269 6. 602673  
3. 046301 2. 389362 1. 924339 2. 608957 2. 258443 3. 229414 2. 137686 2. 086986 3. 060366  
6. 186535 6. 462185 5. 824583 5. 634442 4. 226711 5. 527818 5. 510448 5. 235209 5. 833785  
1. 822094 1. 718764 1. 750196 2. 75315 2. 127824 1. 91529 3. 195113 3. 357077 2. 474422  
5. 420342 5. 526053 6. 312795 5. 875395 5. 839215 5. 073366 6. 255876 6. 12818 6. 476595  
4. 077896 3. 830189 4. 598917 3. 686567 3. 511392 3. 42017 3. 229478 3. 742621 3. 753431  
4. 010102 2. 6605 3. 27054 2. 925583 2. 26485 4. 419938 2. 735572 3. 04669 3. 921282  
2. 420633 3. 433061 3. 70422 3. 447734 4. 024588 3. 654374 4. 052549 3. 034866 4. 119469  
7. 437055 6. 748276 7. 464377 6. 576263 6. 719267 6. 097688 6. 345663 6. 361854 6. 269443  
3. 79471 3. 029216 2. 411614 4. 042916 3. 473369 5. 097959 3. 11348 2. 556458 3. 461109  
3. 014859 3. 360685 2. 534775 2. 92433 2. 750495 3. 747163 2. 856459 1. 560104 2. 346701  
6. 300782 6. 216399 6. 425008 6. 33048 6. 423674 6. 370348 6. 864495 7. 062789 7. 241544

3. 444039 4. 046976 5. 892975 3. 295963 4. 781188 4. 980727 4. 466787 3. 377765 4. 507058  
3. 136043 4. 354591 3. 593247 3. 959456 3. 511075 3. 101056 3. 267252 2. 796435 3. 183506  
5. 41275 3. 920712 4. 824775 5. 174915 5. 082767 5. 797705 3. 710406 3. 265062 4. 195014  
7. 456364 7. 555228 7. 248013 7. 025346 6. 927911 8. 784471 6. 977691 6. 633565 7. 211628  
3. 217947 6. 193155 3. 954549 3. 188022 4. 729891 3. 006449 3. 141496 3. 587634 2. 77998  
4. 827513 6. 173782 6. 154782 4. 480397 5. 847519 4. 191732 4. 391864 6. 612324 5. 614926  
3. 601457 2. 620329 2. 219627 3. 582587 2. 076585 2. 857079 2. 245731 2. 075931 2. 699327  
4. 099974 4. 864006 4. 172692 2. 540434 4. 244751 4. 297724 4. 46736 4. 317062 3. 882287  
3. 806164 3. 534223 3. 590498 3. 349146 2. 355094 2. 243671 3. 344541 2. 190385 2. 750045  
3. 699093 3. 264797 4. 544755 5. 230399 3. 961402 3. 102781 4. 492452 3. 815957 5. 057682  
6. 19443 7. 177869 7. 235741 6. 288836 6. 511009 5. 7839 6. 693505 6. 088959 6. 938447  
1. 213195 1. 71685 1. 098249 1. 369868 0. 991145 1. 435341 1. 159407 1. 106393 1. 14851  
2. 848953 2. 998965 4. 487289 3. 441636 1. 71701 3. 109441 2. 100115 2. 081315 2. 142787  
2. 429017 1. 712929 1. 502382 2. 090961 1. 465242 3. 944555 2. 601985 1. 672982 2. 77335  
3. 443236 4. 355586 3. 893948 4. 646112 3. 815187 2. 834443 3. 698873 3. 375338 3. 294653  
3. 080674 3. 016701 3. 334651 2. 80819 3. 115763 3. 032748 2. 616478 3. 367745 2. 638974  
5. 882351 6. 554242 6. 440462 6. 282171 7. 188657 5. 907096 7. 550432 8. 66526 8. 346674  
2. 089447 2. 184883 2. 89711 1. 729158 3. 022257 3. 653807 1. 87689 2. 667299 2. 117282  
3. 410136 2. 406425 2. 044034 3. 29984 2. 296205 4. 340368 2. 420267 2. 75776 2. 465026  
3. 320447 2. 266105 2. 446566 2. 244616 2. 355004 2. 56741 2. 675113 2. 673829 2. 344396  
2. 368049 2. 97267 2. 271714 2. 339753 2. 523501 1. 487103 1. 574942 1. 906167 1. 722229  
2. 14001 2. 304805 2. 060327 1. 66583 1. 793784 1. 505188 1. 50628 1. 553952 1. 504935  
3. 563703 4. 631681 3. 955246 4. 503786 4. 28883 4. 110456 4. 195161 3. 77813 3. 316553  
4. 16627 3. 600107 4. 24036 1. 979591 3. 51693 2. 651962 3. 218511 2. 652285 2. 598952  
6. 592199 7. 605268 7. 766461 5. 986957 7. 404543 4. 447509 7. 154933 7. 344131 6. 822303  
4. 956973 5. 219365 5. 115941 5. 171838 5. 032644 5. 245652 5. 788054 4. 7411 4. 337018  
6. 257559 6. 116497 3. 922338 5. 94165 5. 192783 4. 000012 4. 775086 4. 748724 4. 217921  
1. 12714 1. 034759 1. 837183 1. 341867 1. 060671 1. 822776 1. 070931 0. 852037 1. 357525  
2. 403445 1. 871706 2. 272662 3. 362276 1. 985744 3. 055616 2. 355784 1. 74919 2. 294909  
4. 586694 3. 850111 4. 165105 4. 980316 4. 029356 3. 727051 4. 394242 3. 858267 4. 359631  
6. 735944 7. 968851 7. 927336 7. 288725 7. 779572 7. 74342 7. 555925 7. 725208 7. 762176  
7. 126315 7. 039642 7. 301948 7. 123504 7. 2935 6. 540247 7. 442996 6. 706819 7. 23001  
5. 47967 6. 111115 5. 98825 5. 362281 6. 097575 4. 790927 5. 986168 5. 621492 5. 865734  
6. 775807 6. 92714 6. 69073 7. 030917 6. 797315 5. 751466 7. 172448 6. 525081 6. 652555  
4. 960447 4. 73964 5. 061155 5. 924714 4. 318021 5. 075172 4. 862124 4. 027179 5. 101285  
5. 555812 5. 957263 5. 853358 3. 407624 6. 080092 5. 067273 4. 466651 4. 310765 4. 364173  
2. 467039 2. 218362 2. 629744 3. 413469 2. 17269 2. 177672 2. 433173 2. 605043 2. 167163  
1. 937371 1. 885408 1. 380555 2. 04501 0. 988561 1. 805252 1. 598031 2. 773041 2. 16793  
4. 819723 3. 282385 3. 768966 3. 642838 3. 22951 4. 090078 2. 837961 4. 067421 3. 290099  
4. 702402 5. 513633 4. 523586 4. 999649 4. 363219 5. 050514 5. 55058 4. 814283 4. 302993  
3. 628939 2. 887923 3. 27068 3. 63964 3. 415093 3. 60483 3. 362363 3. 472959 3. 039282  
4. 870274 4. 471333 5. 361966 4. 809856 4. 972628 5. 444066 5. 207368 5. 77252 4. 470785  
4. 171284 3. 977589 3. 968835 3. 274937 3. 686364 6. 030965 5. 310596 4. 933799 5. 254361  
4. 539439 4. 863155 4. 840234 4. 514998 5. 451978 4. 630869 4. 742229 4. 892685 5. 091251  
1. 891497 3. 523899 2. 693079 3. 188333 1. 927829 2. 528515 1. 955211 3. 041031 2. 849064  
5. 652666 6. 083918 6. 34577 6. 502371 7. 018394 4. 255179 5. 715222 5. 272277 5. 285634  
2. 652124 2. 674613 2. 522266 2. 377468 1. 928755 2. 634811 2. 702526 3. 297453 2. 213316  
3. 758486 3. 085856 2. 709086 3. 178529 3. 120636 1. 796879 3. 882151 2. 458917 2. 435017  
3. 365758 2. 087323 2. 88002 2. 480399 2. 817636 2. 652011 2. 130119 2. 920365 2. 484935  
6. 094405 4. 746683 4. 818402 4. 646226 4. 491582 3. 224924 4. 240232 4. 182502 3. 331674  
3. 491488 4. 023182 3. 596935 2. 574255 3. 490457 2. 684503 4. 21119 3. 366432 3. 292702



2. 057431 1. 69858 2. 127331 1. 552154 2. 278508 1. 517356 1. 549557 2. 251758 2. 666861  
4. 187826 4. 865587 4. 573413 4. 549533 4. 585857 3. 445658 4. 105353 4. 492198 3. 864817  
1. 539063 1. 722958 1. 553227 1. 728776 1. 864026 1. 95823 1. 066974 1. 868011 1. 580039  
5. 387554 5. 715868 5. 280502 4. 106801 5. 111345 4. 252841 5. 22551 5. 326209 4. 753205  
4. 643837 4. 236543 3. 354411 5. 405047 4. 315424 4. 247567 4. 769533 4. 170151 3. 3706  
1. 331441 1. 336425 1. 388841 1. 492196 1. 685662 1. 421526 1. 782858 1. 586205 2. 461883  
1. 183924 1. 519128 1. 460131 1. 468527 1. 105722 0. 890344 1. 050923 0. 967655 1. 813348  
2. 103194 2. 502567 1. 387973 1. 684568 3. 047855 1. 662378 1. 615743 1. 402313 2. 073317  
2. 414367 1. 361158 1. 50559 1. 745277 1. 605955 1. 252737 1. 267119 1. 454576 2. 001495  
3. 360343 2. 687291 2. 393895 2. 861322 2. 757031 3. 454191 1. 496818 3. 346351 1. 385791  
3. 147202 1. 876905 2. 055603 2. 059067 1. 472928 3. 094304 2. 607966 1. 891523 2. 578356  
3. 8657 4. 912886 5. 166952 4. 51697 5. 081877 5. 340407 5. 052811 4. 231775 5. 061521  
5. 057088 4. 979932 3. 088031 4. 915402 4. 066965 4. 178445 4. 464915 3. 835091 4. 377963  
0. 698856 1. 144472 1. 117728 1. 324543 1. 054716 1. 052957 1. 305075 0. 731773 0. 777742  
9. 073904 8. 782813 8. 693012 8. 742542 8. 757784 8. 64148 8. 971281 9. 362229 9. 660219  
3. 151098 3. 973674 5. 087531 3. 090315 3. 299 4. 030651 3. 006565 3. 905393 2. 857147  
5. 576679 5. 380343 4. 910141 5. 364227 5. 797207 4. 579971 5. 029289 5. 585803 4. 911527  
3. 519392 2. 397902 3. 587601 2. 425468 2. 554367 2. 248852 3. 286451 4. 049989 2. 898308  
7. 452015 7. 215418 5. 811308 6. 997126 5. 85531 8. 187028 7. 0202 5. 386494 6. 665731  
3. 682219 3. 540803 4. 294508 3. 404875 3. 353677 4. 54433 3. 140707 4. 143767 2. 777084  
1. 758922 1. 822236 1. 505868 1. 310193 1. 400665 2. 141411 1. 627248 1. 323341 1. 653621  
2. 492585 3. 606691 2. 079185 2. 326337 2. 306321 2. 331049 2. 606374 1. 653197 1. 7351  
1. 098087 1. 641298 1. 27391 2. 993608 1. 055251 1. 459199 1. 49807 1. 233704 1. 569356  
5. 015915 4. 65569 5. 037393 3. 685316 5. 528384 5. 161797 4. 648686 4. 568284 5. 319646  
1. 678742 1. 135569 1. 651434 1. 457852 1. 455501 2. 378465 1. 777002 1. 239219 1. 119422  
2. 899222 4. 205451 4. 168467 2. 829606 3. 179382 3. 465879 3. 754273 2. 907915 3. 083702  
1. 455284 1. 670984 1. 380681 1. 790972 1. 865803 1. 449021 1. 367016 2. 080197 1. 825547  
2. 310252 2. 165523 2. 338722 2. 172798 2. 016454 1. 913334 2. 790655 2. 326881 2. 540419  
3. 007591 3. 42907 1. 879405 2. 810201 2. 716228 3. 511489 2. 760828 2. 646462 3. 040933  
1. 997979 0. 944157 0. 993912 1. 359286 0. 831727 1. 720934 1. 036231 0. 928471 1. 14895  
6. 438262 7. 142731 6. 397266 7. 624444 6. 814504 6. 083818 6. 625453 6. 995173 6. 57596  
3. 561525 2. 63721 2. 550279 3. 534044 3. 293718 3. 462834 3. 917153 4. 080779 4. 558486  
2. 506417 3. 885512 2. 558685 3. 104723 2. 343466 2. 384294 1. 938051 4. 455858 2. 885727  
2. 92898 2. 634037 3. 127332 3. 059693 2. 727023 2. 921106 2. 950461 2. 773826 3. 015444  
4. 657869 5. 273794 4. 580043 4. 817478 5. 066921 5. 281094 4. 148367 4. 173011 4. 697578  
5. 320165 5. 197735 6. 420437 4. 88301 5. 912519 5. 294684 4. 192131 4. 23526 4. 008677  
7. 917683 8. 057216 7. 66863 7. 796848 7. 98146 7. 637765 7. 529919 7. 633786 7. 677261  
6. 981396 6. 664647 6. 343975 7. 105452 6. 764854 6. 99927 7. 108593 7. 329893 7. 013248  
3. 770883 3. 968959 4. 540196 4. 527083 2. 789285 3. 350834 3. 071585 3. 396192 2. 289038  
2. 783678 1. 987078 2. 893559 3. 397121 2. 936954 2. 77344 3. 404151 3. 151212 4. 015885  
3. 76429 3. 985753 5. 381398 3. 739807 4. 991022 5. 543402 4. 226427 3. 089335 3. 784656  
3. 039749 3. 270811 4. 217836 3. 8645 4. 083373 3. 751577 3. 228897 3. 59471 3. 781886  
4. 558966 3. 903424 4. 216671 4. 512483 4. 235997 5. 205296 4. 625762 3. 844451 4. 85351  
6. 289952 6. 785917 6. 079688 5. 938676 6. 652964 6. 008731 6. 454435 6. 29477 6. 24324  
2. 620204 3. 217992 1. 562011 2. 692808 2. 631029 3. 027552 1. 85132 1. 743165 1. 830339  
3. 156825 2. 870586 3. 523477 2. 601828 3. 518946 3. 148188 3. 156054 2. 873754 3. 7781  
2. 160041 2. 540655 2. 331212 3. 384888 2. 68344 3. 104985 2. 552959 2. 644322 3. 221027  
3. 201336 2. 301016 2. 412472 2. 858012 3. 597515 3. 861102 3. 169526 3. 523697 3. 12583  
5. 462596 5. 692379 5. 930512 4. 335685 5. 520808 4. 97756 4. 709485 4. 404854 4. 278624  
1. 844287 2. 284087 1. 737445 1. 485007 2. 09351 1. 473738 1. 75509 1. 285579 1. 60294  
3. 869812 4. 180462 4. 388172 4. 760156 4. 189456 4. 825772 4. 78449 4. 217274 5. 065254

6.182598 6.276607 5.814237 5.55708 6.209635 5.869201 5.836693 5.289625 6.115255  
2.682468 1.880248 2.734466 1.921161 1.647194 2.133283 2.321835 2.45958 2.295461  
5.248874 5.963319 5.802824 4.623447 4.84825 4.706596 4.648043 4.395004 5.19896  
7.576369 7.381408 7.804637 7.425383 7.333158 6.811017 8.102513 8.65622 8.211868  
1.993507 2.037887 1.552134 2.223785 1.950753 1.699675 1.440611 2.248182 1.590912  
3.388408 4.048948 5.08248 3.754016 3.560616 3.447185 4.202347 3.382319 3.019254  
1.777847 2.777842 1.643273 1.224391 1.175376 2.43011 2.005985 1.328169 1.690768  
6.169484 6.38785 5.993809 5.666732 6.000877 4.677499 6.504002 5.557784 5.683862  
4.222388 4.871561 4.470439 5.033862 4.928154 5.001785 5.759507 4.451039 4.238292  
4.783763 3.742413 4.882675 5.131368 5.203884 4.403592 4.447367 5.562799 5.178842  
4.296894 2.31651 3.132091 3.34758 2.62368 3.695359 3.256181 3.509449 3.174973  
5.848797 5.980347 6.078519 5.24274 6.119089 6.583997 5.90664 6.120363 6.599467  
4.8529 5.199426 4.964441 4.769606 5.093788 5.732307 5.008199 4.988079 5.222728  
4.276291 3.058948 4.325495 4.533984 3.457778 4.825263 4.340807 5.183396 4.272203  
5.473618 4.27102 4.926491 4.604388 5.638972 5.802546 5.456945 5.162425 5.467223  
8.325543 8.316801 8.312011 8.16318 7.819859 8.174483 8.263373 8.470304 8.555554  
4.250902 3.272895 3.300689 3.747915 3.325311 6.199612 4.710734 4.499604 2.014204  
7.21975 7.820442 7.159667 6.376653 7.609985 7.250893 7.532657 6.893468 7.403307  
7.665267 7.651202 7.22953 7.220618 7.350245 6.527686 7.183083 7.072866 7.166878  
5.746497 4.751731 5.759691 4.532293 5.137655 6.642367 5.54721 3.991477 4.807789  
3.498388 3.558432 3.577075 3.533381 3.334285 3.54552 4.185217 4.089854 3.892274  
6.710948 6.526089 6.608348 5.910815 6.581875 6.945736 6.320703 6.828312 6.30106  
5.296441 6.41813 6.48326 5.859491 6.752304 6.55039 6.587591 6.053949 5.558924  
4.340799 4.036941 3.195353 2.497654 2.35239 4.398848 4.281492 3.377236 4.131724  
3.996803 4.643507 4.578779 4.056091 3.670148 3.643627 5.109364 4.452926 4.325603  
6.58657 6.881026 7.343637 6.414473 6.693834 6.402989 7.259743 6.496563 6.569673  
1.882402 1.887486 1.62442 1.525111 1.733963 1.940402 1.391882 2.092127 1.564861  
4.69848 4.396168 5.053978 3.919954 5.469074 4.151463 4.903391 4.184037 3.037122  
2.927579 2.976044 2.296676 3.467492 1.666782 1.516826 2.174565 1.595238 1.462701  
8.100945 8.30138 8.067103 7.809364 7.388157 8.01062 7.42409 7.692772 7.755092  
6.446287 7.103047 6.394729 6.499513 6.669077 6.572689 7.433814 6.763056 6.541785  
7.178871 6.4518 6.627357 6.996943 7.31028 6.942711 6.872072 5.942259 6.395243  
6.743033 5.65917 5.912036 5.969066 6.15063 5.746257 5.416329 3.775318 3.412438  
3.517783 2.714944 3.742196 2.972881 3.93984 4.112489 4.37786 3.999873 3.393037  
4.689051 4.835344 5.093245 4.95635 4.153016 3.999728 4.750224 4.941447 4.907529  
4.218921 5.883794 5.066281 4.410363 4.94396 4.287319 4.843773 4.160248 4.521849  
4.805258 5.741305 5.113484 5.141483 4.993274 5.812232 5.175039 4.998718 4.557393  
3.747713 2.143651 3.85449 2.570544 2.830462 5.142102 6.144987 5.278058 3.32382  
1.500472 2.133051 2.543175 1.882402 2.562996 2.178102 2.284643 1.613326 2.395768  
6.127012 5.832337 5.254089 5.649027 6.015634 6.544821 6.175439 6.205137 5.887447  
1.357079 1.597353 1.573308 1.525674 0.980989 3.858253 1.677884 1.228683 2.005412  
8.003994 8.500781 8.391952 7.841063 8.503295 7.825974 8.60007 8.238054 8.301533  
2.47652 2.706922 2.627782 2.662798 2.818141 2.862656 2.761571 2.846412 2.340263  
2.782524 2.820499 2.979381 3.257682 3.103935 3.169487 3.293037 3.914232 3.842834  
2.573762 2.495845 2.090377 2.698402 2.133437 2.420918 2.609378 2.678209 2.800477  
6.291554 6.327786 6.159551 4.787251 6.841381 5.450157 6.551475 6.980345 6.778947  
5.205097 5.26039 5.22415 5.714849 5.261845 4.924268 5.739882 5.644724 5.103922  
7.345687 7.76201 7.792885 7.752873 7.72254 8.15751 8.148287 7.692799 7.561207  
4.827427 4.677354 4.092901 4.508057 3.944101 4.282349 4.729829 4.35072 5.235082  
0.907035 1.813032 2.074434 1.591372 1.081677 1.884558 1.42297 1.708526 1.97227  
6.187047 5.85599 6.162305 6.073785 5.129459 5.399605 6.279227 6.105811 5.801626

3. 032419 2. 345754 2. 260857 1. 729861 1. 465833 2. 21416 1. 402194 2. 051594 1. 657367  
4. 268516 2. 535128 5. 10155 4. 600164 4. 600164 3. 05445 3. 358838 2. 516406 3. 129972  
5. 833249 6. 545915 6. 209041 5. 137647 5. 515746 5. 369854 6. 385149 6. 654487 6. 124166  
3. 982617 2. 54189 2. 777422 2. 142224 3. 017615 3. 027613 2. 555699 3. 010237 2. 840116  
2. 21098 1. 27721 2. 247483 3. 23804 2. 502453 2. 42285 2. 042764 3. 019199 2. 995903  
6. 50311 6. 830298 6. 554978 6. 366515 6. 763627 5. 626176 6. 862841 6. 486121 6. 030616  
3. 136911 1. 980978 3. 232172 1. 884053 3. 165692 2. 562312 3. 796854 4. 218991 4. 839057  
5. 336914 4. 987442 5. 297538 4. 096033 5. 406383 4. 973642 4. 702681 4. 388036 4. 714731  
5. 556775 6. 887965 6. 436673 6. 612651 6. 392196 6. 261825 6. 155888 6. 499375 6. 614527  
5. 493475 5. 319868 5. 690354 5. 215135 6. 218067 4. 770396 5. 260677 5. 161241 5. 062391  
2. 510848 3. 636526 3. 737593 4. 107323 3. 853703 2. 654097 2. 982706 3. 665694 2. 742351  
10. 08107 8. 915473 9. 422544 9. 032274 8. 791087 8. 475978 8. 147955 7. 089812 5. 427931  
5. 190531 4. 395815 4. 58466 5. 45084 5. 119905 5. 540955 5. 452752 5. 969591 6. 027606  
6. 41426 6. 357216 6. 160772 6. 531298 5. 518632 6. 367464 6. 776581 7. 448993 7. 432972  
3. 018322 4. 077391 3. 458474 2. 913822 3. 895187 3. 872885 4. 121726 3. 891845 4. 352992  
3. 228373 3. 73986 4. 028868 3. 584911 3. 185373 4. 702926 4. 468019 4. 037065 4. 424569  
4. 757367 6. 38286 6. 157898 5. 629187 6. 416081 6. 713731 6. 832266 6. 225209 6. 795095  
1. 572644 1. 674074 2. 426808 1. 924071 2. 330962 1. 571436 2. 247118 2. 456174 2. 282415  
3. 158708 3. 802147 4. 225765 4. 133627 3. 254383 4. 22678 3. 522902 4. 161058 3. 870072  
2. 004764 2. 102793 2. 260527 2. 73466 1. 718324 1. 624273 1. 639912 2. 16235 1. 962279  
7. 758556 8. 220788 8. 344721 7. 693988 8. 386528 8. 163123 7. 908388 7. 607375 7. 830328  
5. 882508 6. 493532 5. 960247 5. 282334 5. 144247 5. 59204 6. 191359 7. 661544 7. 435811  
3. 506671 4. 404636 3. 780974 3. 861776 4. 158143 4. 253329 3. 854665 3. 292821 4. 218938  
3. 745862 3. 734091 4. 907782 4. 080807 4. 713546 3. 852977 3. 37355 2. 856932 3. 385542  
2. 597968 4. 229576 3. 684839 4. 10118 3. 255155 3. 462568 3. 805541 3. 445938 3. 469094  
6. 475875 6. 125454 6. 261981 5. 940103 6. 381479 5. 80647 6. 067635 5. 387577 5. 775488  
7. 563927 7. 788594 7. 834675 7. 829036 7. 870023 6. 256969 8. 188604 7. 793954 7. 434132  
1. 21948 2. 293294 1. 425178 1. 536342 1. 230101 1. 505158 1. 623689 1. 888532 1. 904591  
4. 63879 4. 602222 4. 148466 4. 145239 4. 702406 4. 008529 3. 143242 4. 707181 5. 257162  
3. 425077 5. 413178 4. 600768 3. 424518 5. 752885 3. 829589 3. 558226 4. 36029 4. 563079  
3. 406399 3. 566628 4. 529039 3. 126186 2. 926245 2. 386187 2. 459679 2. 529005 3. 069088  
7. 826813 7. 230058 7. 327042 7. 490035 7. 223308 7. 283149 7. 147306 6. 623271 7. 069476  
1. 891858 1. 585582 1. 929975 1. 942266 2. 314651 1. 784005 1. 504871 2. 282285 2. 84729  
5. 386009 6. 720913 5. 854482 5. 572666 4. 512239 4. 62655 5. 509772 4. 150593 5. 174026  
4. 002066 4. 405866 5. 490125 3. 723047 4. 365645 3. 422012 3. 901581 4. 535353 4. 367525  
3. 360529 2. 921072 2. 746418 3. 106517 2. 801525 3. 434424 2. 898118 2. 537822 3. 810351  
3. 539856 2. 958652 2. 343635 3. 719099 2. 228296 3. 952435 2. 328524 2. 889928 2. 618883  
2. 344239 3. 515612 2. 726197 2. 040794 1. 9219 3. 430532 2. 879513 2. 255586 3. 52742  
3. 257282 2. 551286 3. 323734 4. 228544 3. 535684 2. 546753 3. 606598 3. 211728 3. 142347  
0. 736703 0. 482008 0. 723 2. 384292 0. 285503 1. 964051 4. 240382 0. 622783 1. 55908  
5. 183774 5. 542663 6. 281959 4. 695408 5. 929104 5. 201289 5. 874091 6. 112697 6. 592255  
3. 740726 3. 576603 3. 115507 2. 731521 3. 250537 3. 646988 3. 443871 3. 571738 4. 135089  
1. 891693 1. 927852 1. 333706 1. 863062 1. 380187 1. 959901 1. 339433 1. 623277 1. 559654  
6. 348827 6. 297346 6. 253048 6. 438177 7. 280559 6. 641676 6. 935497 6. 893156 7. 025613  
4. 481587 3. 888635 3. 681015 2. 36485 3. 766793 2. 753625 2. 690439 3. 074491 3. 25724  
1. 459712 1. 813413 1. 651271 1. 712755 2. 018114 2. 626311 2. 272194 1. 405405 1. 165731  
2. 789601 3. 104202 2. 939213 2. 98699 2. 851298 2. 595177 2. 404215 3. 080757 3. 520794  
3. 992618 3. 031771 3. 374126 3. 390467 3. 477978 4. 163109 3. 284617 3. 479266 4. 066717  
1. 157843 1. 816321 1. 215839 1. 99744 1. 717103 1. 314086 1. 096622 1. 263984 1. 183649  
4. 446016 4. 871508 5. 478377 5. 832465 4. 053265 5. 55084 5. 256502 5. 327622 5. 015128  
3. 508201 2. 813375 2. 3672 2. 688514 4. 037801 1. 635835 1. 760381 2. 745408 1. 810985

2.150411 3.422982 3.141227 2.426604 3.101155 3.594115 3.805495 2.781806 4.028117  
5.458253 5.408062 5.138352 5.499435 5.818131 5.701604 5.666696 5.178055 5.482141  
7.808721 7.367698 7.309598 7.360234 7.889946 7.123464 7.064426 7.175364 6.779447  
6.15755 5.900586 6.224604 5.903341 4.617162 5.300486 3.773024 4.608828 4.745753  
1.784775 0.886606 0.562738 1.396862 0.743065 0.892275 1.137349 2.12927 1.455792  
7.09861 7.857681 7.726317 7.368402 7.177319 6.510197 7.373579 7.435653 7.230606  
2.700915 2.987862 2.348262 3.217747 2.985713 3.13749 3.1797 2.92214 3.589473  
8.291087 8.46553 8.227137 7.967173 8.026156 7.695668 7.824817 8.242144 8.226711  
5.674861 4.826247 4.320763 5.051255 6.122173 3.724502 4.272896 6.137274 5.902231  
5.042166 5.750551 5.27556 5.314443 5.042065 6.03548 4.722917 5.414152 4.890323  
3.884889 2.284007 2.016357 2.922899 3.248039 3.86101 4.333336 3.205216 4.795641  
3.090648 2.750918 3.044291 2.897599 3.098798 2.695726 2.742874 2.689985 2.266152  
1.119353 1.528876 1.200366 1.325445 1.230404 1.210666 1.128793 1.309936 0.822841  
6.578784 6.179707 6.65319 6.546236 6.115895 5.666991 6.250647 6.57164 6.366595  
9.82051 9.830121 10.09393 9.4801 10.15904 9.644531 9.890343 9.398557 9.143755  
2.364677 3.064193 2.403498 2.971659 2.858077 2.413358 2.357203 2.601959 2.579115  
6.655521 6.825746 6.651454 6.560013 6.862837 6.25399 6.591919 6.240958 5.888741  
6.551735 5.469253 6.381023 6.582927 5.570262 7.082058 5.697643 6.369417 6.770464  
3.542717 2.686082 2.729802 2.96352 3.542971 3.875332 2.136143 2.379353 2.721087  
4.379495 3.574135 1.995937 2.379416 3.03315 2.607449 3.048721 1.867978 2.367969  
2.765107 2.708376 3.325397 3.116743 3.398363 3.5786 3.027922 3.010302 2.925473  
1.251769 1.483067 1.539304 1.72146 1.294817 1.461916 1.791048 1.309456 1.369872  
2.071391 2.502311 2.478659 2.535368 2.467151 2.818086 1.921253 2.92994 2.369113  
3.242712 1.645357 2.507762 2.104044 2.791695 2.911821 2.750412 2.560282 1.989581  
4.094558 4.238102 4.298834 3.424499 3.923683 4.127469 2.234306 3.181009 3.38195  
2.146387 2.37316 2.134505 1.873702 2.561197 2.135842 2.061815 2.39534 1.996857  
3.844495 3.06246 3.886164 3.843496 3.6865 3.11437 2.702727 2.623734 3.48518  
5.909601 5.213983 5.01775 6.638162 5.049651 7.51418 6.31078 5.407113 5.388854  
1.625072 1.396281 2.198025 3.03804 1.97342 1.833046 1.946642 1.447957 1.830944  
1.603012 2.06831 1.474025 1.851678 1.844924 1.401101 1.445255 1.873403 1.772959  
6.913136 5.563388 4.981882 4.979879 4.86247 7.638303 4.449142 4.067763 4.068052  
3.277301 2.939536 3.326386 4.019133 3.088117 2.85511 3.915665 3.967298 3.74918  
1.87959 1.843342 1.634216 1.814062 2.167199 2.157069 2.306958 2.341656 2.327604  
4.549042 4.379637 4.142047 4.234125 4.313062 4.727787 4.220756 4.350871 3.765963  
2.409017 3.621685 3.095876 2.412338 3.125013 2.720836 2.507974 2.571603 4.001635  
2.599861 2.465012 3.391951 2.497014 3.290665 2.394866 2.325521 2.33994 3.345574  
5.065402 4.476329 3.958778 4.809724 4.676001 4.244636 5.090705 3.694734 4.373876  
4.190207 4.448202 4.395519 4.153151 4.315378 3.496582 2.058194 3.100931 2.568406  
5.551286 5.18086 3.970398 3.836844 3.487809 4.58801 4.998224 4.167685 4.125779  
2.050248 1.893945 1.848006 1.953961 2.334655 2.378847 2.006527 2.258193 1.42567  
1.551435 2.154818 2.950467 2.111133 1.716043 2.051689 1.962969 1.734748 1.517792  
3.648358 3.459137 4.585799 3.206963 3.453555 4.117683 4.35073 4.216411 3.223937  
2.360825 2.306323 2.22393 2.492355 1.968619 2.487035 3.273388 2.131684 2.558153  
8.017364 8.751172 8.799385 8.019396 8.483931 6.41148 9.09415 7.904045 7.405707  
3.689072 3.173906 3.60623 3.670621 3.034063 3.284126 4.874482 2.917485 3.011315  
7.096424 7.533948 7.184342 7.271543 7.616587 7.79415 7.733877 8.036288 7.544509  
5.29264 3.700504 3.959966 3.789147 3.724868 6.483884 4.096998 4.437647 2.799009  
5.393701 5.518973 4.753705 6.649475 5.090998 5.854487 5.25367 7.553777 5.960034  
2.13599 2.497329 2.030525 2.597957 2.403897 3.937748 1.685907 2.82636 2.549752  
1.370653 1.480857 1.801894 2.796693 1.683195 2.231442 1.519719 1.362485 1.838921  
3.054305 2.166607 2.239054 3.644681 2.003473 2.292333 2.530209 2.940919 2.536953

4. 66245 3. 950612 4. 366184 5. 121428 5. 093692 6. 537786 4. 821079 5. 146949 6. 061298  
3. 013653 3. 432312 4. 452372 4. 717703 2. 845078 3. 66307 3. 640519 3. 834411 2. 999993  
3. 685433 3. 408955 4. 086524 3. 891964 3. 59135 4. 47098 3. 495625 4. 253135 3. 426414  
7. 868877 8. 443812 8. 027398 8. 238263 8. 581266 7. 786714 8. 19158 8. 492008 8. 404573  
2. 368146 4. 136635 3. 305662 4. 236686 3. 654035 4. 232042 3. 58155 2. 53481 2. 377461  
3. 852305 2. 465541 3. 852258 4. 125758 3. 166078 5. 318079 3. 183175 3. 686326 3. 534744  
5. 896939 4. 70937 5. 079565 6. 47238 4. 456705 5. 312291 4. 659459 6. 867475 5. 846589  
3. 615277 4. 474015 4. 751962 4. 783558 4. 576036 5. 406796 4. 702306 4. 498116 5. 665093  
6. 486881 4. 861168 4. 632553 6. 015463 5. 816422 6. 086692 5. 69353 6. 758805 6. 815374  
6. 300394 5. 321233 5. 179239 7. 056312 6. 086624 6. 723159 6. 117195 5. 523111 5. 611271  
2. 5018 1. 823841 1. 844155 1. 833606 2. 418358 2. 828033 1. 941264 1. 451521 1. 89271  
4. 196039 4. 014005 4. 718608 5. 923034 4. 754145 4. 994353 3. 846693 4. 285365 3. 783358  
4. 226404 4. 297307 3. 85554 5. 444812 3. 704746 3. 915423 5. 162847 4. 661591 4. 621873  
3. 249781 2. 701865 2. 963733 2. 996015 2. 610034 3. 016045 3. 226838 3. 496104 2. 238396  
5. 091478 5. 163853 4. 933855 5. 103338 5. 577435 5. 264238 4. 890624 5. 185163 5. 263086  
3. 194083 2. 230065 2. 563069 2. 217385 2. 581991 2. 711854 3. 012378 2. 665028 3. 040571  
6. 907707 6. 940788 6. 367725 6. 584416 6. 314264 5. 494494 6. 480118 7. 378818 6. 665711  
7. 10549 7. 134243 6. 496726 7. 12687 7. 5346 6. 603136 7. 257001 7. 301338 6. 830232  
5. 795059 6. 051062 5. 223933 5. 330006 6. 297094 6. 680232 5. 363771 6. 452459 6. 175724  
4. 923618 5. 691099 5. 50917 3. 930372 6. 443373 6. 964083 6. 225149 6. 185069 6. 099922  
1. 403315 1. 681846 0. 922498 1. 247553 0. 846932 0. 891404 0. 990265 0. 682877 1. 042119  
3. 602039 1. 977639 2. 411645 2. 438413 2. 318662 3. 916728 2. 178459 3. 122916 3. 44558  
2. 445796 2. 527919 1. 493315 1. 788964 2. 25069 1. 898838 2. 232163 1. 920761 2. 893613  
2. 002449 2. 092133 1. 965911 1. 836767 1. 686255 2. 341985 2. 300878 1. 500584 1. 476971  
2. 125121 2. 113612 2. 014329 1. 883838 1. 890336 1. 901019 1. 890896 1. 88427 1. 828615  
3. 049157 3. 039736 3. 568933 3. 228254 2. 76727 4. 025542 3. 11207 3. 481344 4. 386328  
1. 595987 1. 577976 2. 14885 1. 836986 1. 776254 1. 815682 2. 339975 2. 26501 2. 585409  
5. 294812 5. 452502 5. 827439 5. 647457 6. 151088 4. 796473 5. 396379 4. 470484 5. 253382  
6. 198707 7. 132743 6. 914174 6. 732569 6. 88019 6. 06682 7. 691027 7. 376264 7. 606933  
5. 230756 5. 827001 4. 788838 5. 24891 6. 358029 5. 506029 5. 873351 4. 89132 5. 06506  
4. 021046 3. 941595 4. 762234 4. 905441 4. 295056 5. 020842 5. 263683 5. 51711 5. 948725  
3. 407984 3. 622047 4. 441152 3. 390597 3. 81197 3. 002512 2. 507018 2. 800854 3. 229876  
3. 789804 2. 852439 3. 092766 3. 332137 2. 967297 3. 158796 3. 249285 3. 47384 4. 28321  
2. 084984 2. 266522 2. 383492 1. 436196 2. 293706 1. 453089 1. 988493 1. 508522 1. 743185  
6. 804279 5. 350546 5. 315979 6. 531393 6. 277136 7. 401702 5. 627504 7. 582685 6. 905437  
8. 396796 8. 773814 8. 179913 8. 789616 8. 470962 8. 084962 8. 431355 7. 968956 8. 127856  
5. 355949 5. 928417 5. 912214 5. 792941 5. 919591 6. 205734 5. 657154 5. 91251 6. 852436  
6. 563598 5. 870337 5. 708933 5. 073093 4. 914428 6. 232191 5. 540356 4. 100822 4. 058196  
5. 484189 6. 443369 6. 363337 5. 733195 4. 987982 5. 986303 5. 720723 5. 876684 4. 863831  
9. 000453 9. 294241 9. 235721 8. 681093 9. 086595 9. 491078 8. 88334 9. 375639 9. 248916  
2. 47883 1. 827161 2. 496512 2. 200315 2. 199938 2. 087145 1. 91863 2. 31773 1. 725817  
1. 609772 1. 639588 1. 120614 1. 236247 1. 503714 0. 915302 1. 222311 1. 992914 1. 602453  
1. 596775 1. 511903 2. 632364 1. 666021 1. 673263 2. 047975 1. 630779 1. 910815 2. 861985  
5. 782018 5. 670952 6. 087681 6. 10547 6. 089823 6. 472925 6. 490493 6. 843555 6. 628967  
5. 955433 6. 836446 6. 367717 5. 533946 5. 46442 6. 083362 5. 354761 5. 163066 5. 273762  
2. 445692 2. 396011 2. 22185 2. 61711 4. 388587 2. 073051 2. 737134 2. 40859 1. 912009  
2. 697478 3. 57892 2. 79334 3. 870178 3. 758859 3. 475863 4. 113447 3. 22877 3. 014822  
1. 602498 1. 669942 1. 914263 1. 815073 1. 41246 2. 328844 1. 632749 2. 279077 2. 387408  
3. 291039 3. 470353 5. 465851 4. 255047 4. 826645 4. 403085 5. 127795 5. 218301 5. 40679  
4. 113206 3. 060307 3. 029262 2. 862361 3. 284617 1. 940967 2. 61971 2. 55164 1. 806542  
5. 857428 5. 188607 5. 024488 5. 030844 5. 998142 5. 281468 5. 084983 5. 479116 4. 286088

2.178687 1.471162 1.235076 1.931051 0.869022 2.536573 5.112329 7.354347 7.271303  
6.850484 6.520913 6.399979 5.660006 5.723078 7.088767 6.57814 6.665478 6.529425  
1.056255 0.83538 1.620474 1.095638 1.055015 1.024923 0.863095 1.607589 0.94688  
1.21994 1.145251 1.000472 0.701463 1.844073 0.873299 0.996985 0.643111 0.788444  
4.753493 4.639161 4.912417 3.988187 5.422755 3.398487 3.36775 3.243893 3.269369  
2.709727 2.662522 2.087208 2.552213 3.320338 3.102977 2.587764 2.319559 3.080631  
1.823817 3.310322 3.088551 2.472559 2.540104 1.906944 3.482954 2.386391 2.254057  
2.206042 1.765248 1.193036 2.060316 0.887068 0.969189 1.119591 1.094814 1.556449  
1.96154 2.177072 1.960818 2.352258 1.966481 3.770797 1.685834 1.938932 2.053212  
0.959697 1.116267 1.079868 1.328029 1.070128 1.369441 1.178719 1.38472 1.282515  
10.43116 10.38158 10.34285 10.50312 10.57876 10.46691 10.75596 10.76127 10.68039  
2.350903 2.232131 2.362646 2.890266 2.366026 2.949201 2.728967 2.913997 2.158264  
7.907 8.590855 7.768643 6.437481 8.001009 7.130277 7.40343 7.543574 7.394116  
7.744422 7.142723 8.039201 8.407261 7.40361 8.358103 7.547594 7.679687 7.519056  
2.146603 2.688521 2.154625 2.038059 2.171985 1.333844 2.321562 2.218706 1.425738  
1.356211 2.268348 1.637572 1.545991 1.870833 2.078122 6.165799 6.183942 4.154896  
1.805628 2.533276 3.176172 3.200924 2.929728 2.483944 2.204671 2.571858 2.709029  
1.204466 1.188568 1.671966 1.399412 1.135089 0.827755 1.080636 1.348659 1.209019  
0.80894 0.978981 0.955334 0.649683 1.263031 0.720161 1.087784 1.669056 2.039893  
0.841675 1.064661 1.695935 2.514018 1.29279 1.20083 1.130055 1.328877 1.189737  
3.753675 4.729217 4.142648 5.029258 4.691059 5.005063 5.092064 5.210369 5.201188  
1.176937 0.821304 0.68049 1.075605 1.561926 1.412256 0.899453 1.124538 0.353307  
1.306462 1.586631 1.46006 1.63399 1.746131 1.670155 1.399243 1.089852 1.903153  
1.395907 1.54138 1.171344 2.011113 1.541249 1.722672 1.645766 1.098575 1.346803  
2.10006 2.825086 2.333958 3.551055 2.227805 3.008229 1.5851 2.503804 2.460551  
3.083576 2.515735 3.154944 2.634274 2.86095 2.840032 3.487257 2.440975 2.699497  
3.205005 4.667074 4.088195 3.041276 3.081829 3.236425 2.988873 3.989317 3.311418  
7.098867 7.793213 6.825045 7.076011 7.685858 7.044494 7.537288 7.93067 7.896773  
2.924525 2.5073 4.246442 3.397753 2.867445 4.784639 3.495121 2.331538 3.911583  
1.879545 1.201337 1.528915 1.234196 1.71817 1.282107 0.87115 2.646566 1.324112  
2.178736 2.497604 3.285818 3.608116 1.591862 2.948682 2.296766 2.964527 3.024945  
4.184956 0.855108 1.391576 1.553778 0.918702 1.303011 1.810588 1.54629 2.127973  
0.947862 1.343823 1.044198 1.683397 1.773866 1.117876 1.652045 1.633 1.187716  
1.985626 1.779698 1.119207 1.225788 1.666345 2.471852 1.252402 1.787147 1.839924  
0.943021 1.625934 1.254586 1.411859 1.055798 1.182221 1.000029 1.210365 1.466613  
8.407987 8.815213 8.557447 7.986484 8.452396 8.225782 8.652046 8.817162 8.048385  
4.256697 4.639334 4.155454 4.405456 4.841758 4.257845 4.602042 3.864371 5.37236  
3.771515 3.113086 2.416085 2.259415 2.106352 1.264854 4.717829 4.358196 2.687304  
2.282561 2.314657 2.368345 2.453009 2.034811 3.057539 2.189787 2.632167 1.974138  
4.35691 4.384442 4.729316 3.727927 4.183009 4.710679 4.146145 3.751014 4.713834  
1.172663 1.318873 1.231383 1.728255 1.552189 1.636925 1.216367 1.831501 1.583071  
1.777098 1.581987 1.598531 1.934432 1.440571 2.494558 1.837594 1.737976 1.59957  
2.906957 1.55004 1.315602 0.980265 1.169345 1.931701 1.089928 0.984274 0.890306  
5.792277 5.655986 5.36039 5.838045 5.820435 6.673718 6.089944 6.199625 6.577574  
2.223403 2.288107 1.693323 2.860757 2.394312 3.598589 2.405754 2.917275 2.987392  
7.872054 7.896008 8.340756 8.108314 8.433024 7.401907 8.952166 8.847536 8.722792  
6.001129 4.822279 5.738392 5.580543 4.755964 6.02073 5.972759 5.965829 5.168787  
6.403562 4.79515 5.363224 6.097879 4.667514 6.951175 5.206218 3.419292 4.876809  
1.956131 1.51966 2.416305 2.072805 3.669773 1.710064 2.395088 1.793925 1.685778  
7.410916 7.71669 7.042391 6.111557 7.519068 7.394169 7.459834 7.654146 6.943098  
1.653345 2.62275 2.093199 2.039037 2.423067 3.038698 2.377523 2.531594 2.359878

2. 959598 1. 442072 2. 751529 3. 322447 2. 133252 3. 258447 2. 842594 2. 938598 2. 099918  
6. 374054 6. 478731 6. 400407 5. 306681 6. 157076 5. 648557 5. 491494 5. 978136 6. 213841  
7. 046022 7. 321984 6. 485221 6. 663701 7. 031813 6. 495611 5. 475378 6. 220072 6. 332833  
1. 975366 2. 975923 2. 628159 2. 491517 1. 946 1. 958769 1. 854028 1. 802288 2. 174523  
4. 127852 4. 420879 3. 726285 2. 693417 4. 021826 3. 3975 3. 907544 3. 446755 2. 705762  
3. 268153 1. 344514 2. 270813 3. 495894 3. 063165 2. 580062 2. 192607 3. 939173 2. 262916  
4. 49624 5. 522615 5. 132998 5. 288282 4. 669409 5. 70519 5. 134625 5. 492612 5. 52432  
7. 687456 8. 743387 8. 436612 7. 511629 8. 045724 7. 731792 8. 398993 7. 9718 8. 227858  
5. 656907 6. 415593 5. 646556 6. 290525 5. 956275 5. 206712 6. 053869 5. 97975 6. 146594  
4. 347486 3. 437928 3. 452794 4. 159619 4. 247244 4. 263426 4. 090079 3. 235464 3. 811215  
1. 938963 1. 82526 1. 957317 2. 436636 3. 254994 3. 623536 2. 224897 2. 748034 2. 221673  
1. 756431 3. 202777 3. 517052 2. 16706 2. 942782 2. 960865 3. 252857 2. 143736 2. 774803  
7. 476248 9. 201673 8. 689219 9. 085566 7. 889504 6. 468509 7. 800466 7. 950751 8. 581272  
7. 09942 7. 39509 7. 265604 6. 36891 7. 795923 5. 386077 6. 820626 7. 088205 7. 261677  
3. 776275 4. 250341 4. 827622 4. 555407 4. 314109 3. 237704 5. 155506 4. 265541 3. 328811  
1. 972901 1. 500421 1. 647272 1. 847622 1. 706167 1. 534705 2. 024507 1. 545882 1. 123423  
3. 586483 4. 529906 3. 847094 3. 80884 4. 415176 4. 941296 4. 610049 3. 161102 4. 158588  
2. 820766 3. 048229 1. 476515 2. 602316 2. 107386 3. 622455 2. 257777 2. 252329 2. 592068  
4. 777292 3. 302857 3. 983095 4. 834669 3. 682646 3. 648918 6. 076841 4. 732354 5. 128251  
6. 684237 6. 546462 6. 09423 6. 505695 6. 062043 5. 474082 6. 839642 6. 180313 6. 17582  
3. 325057 3. 680439 4. 041003 3. 036099 4. 052686 2. 661114 2. 41869 3. 024235 3. 55302  
5. 601948 3. 798631 3. 136012 4. 106657 4. 651193 4. 222496 4. 585164 4. 602008 4. 393956  
2. 808778 2. 705618 3. 438127 2. 17075 3. 338786 2. 810868 4. 518912 5. 023579 4. 258969  
2. 572367 1. 700596 2. 314155 2. 685263 2. 14335 2. 410963 1. 718264 2. 943134 2. 724271  
5. 575944 5. 233261 4. 768229 5. 315989 5. 443151 5. 043009 4. 710591 5. 323555 5. 496865  
2. 800659 3. 647757 4. 002053 3. 348443 3. 62547 3. 217831 3. 067042 4. 037006 4. 061266  
3. 663024 5. 11378 4. 298982 4. 730857 5. 157603 4. 472354 4. 448569 4. 500227 5. 102293  
6. 999319 5. 830076 7. 200932 7. 524351 5. 610067 7. 11248 7. 277349 7. 508691 7. 584723  
5. 448901 5. 07129 5. 4086 4. 293498 4. 166096 4. 299962 4. 548604 4. 303874 4. 645486  
6. 672431 6. 182703 6. 465509 6. 838956 7. 030434 6. 522215 8. 51899 8. 445065 7. 828232  
2. 321737 2. 66476 2. 213922 2. 863756 2. 499794 2. 652068 2. 101535 2. 273894 1. 812904  
7. 621077 7. 340588 7. 554365 8. 218771 7. 421158 7. 20652 7. 689994 7. 572161 7. 212899  
7. 22247 7. 858886 7. 181398 6. 83845 7. 565097 7. 648973 7. 703238 7. 299457 7. 744911  
2. 467629 2. 217571 2. 662458 2. 134161 2. 652193 1. 982049 1. 909918 1. 333656 2. 36242  
7. 689174 8. 53228 7. 946432 8. 001463 8. 399247 7. 827048 7. 935586 7. 680313 8. 014621  
4. 045457 4. 608554 4. 823261 3. 878586 3. 331518 4. 071708 4. 459326 4. 335734 4. 356758  
2. 337156 2. 518482 4. 039329 2. 111794 2. 229888 2. 786985 4. 878632 4. 524347 2. 7689  
1. 387892 2. 323609 1. 396689 1. 635314 1. 849468 1. 210673 1. 463624 2. 091785 2. 102124  
4. 53813 5. 206367 4. 715975 4. 451541 4. 031534 3. 203091 5. 569952 4. 611493 3. 946409  
5. 167134 4. 572472 6. 09178 4. 689162 5. 331109 6. 654375 4. 814065 5. 944007 6. 244689  
5. 709358 4. 899985 6. 428995 5. 258834 5. 072987 5. 875614 6. 946346 6. 822904 6. 36186  
4. 455094 4. 771505 4. 502784 3. 820115 4. 31132 5. 034415 5. 21559 4. 360722 4. 827283  
2. 883471 2. 442288 3. 270122 2. 933552 3. 173876 3. 90535 2. 876263 3. 088495 2. 258706  
2. 450109 1. 853807 1. 889837 2. 677906 1. 943362 2. 348741 2. 444279 1. 836954 2. 210397  
5. 138417 4. 65012 2. 919585 4. 660321 4. 007939 5. 92083 5. 723676 5. 820872 5. 739348  
1. 44068 1. 689403 1. 519444 4. 605385 1. 684656 1. 64977 1. 707993 1. 868986 2. 630366  
1. 81976 2. 347549 2. 005704 1. 998923 2. 131308 2. 2634 1. 927224 1. 725076 2. 362477  
0. 98207 1. 699897 0. 779475 1. 445848 0. 932863 1. 522895 1. 144802 1. 805597 0. 830395  
5. 322802 6. 1155 5. 126847 4. 892209 5. 399286 5. 232055 5. 814542 4. 899397 4. 848965  
3. 188928 3. 056051 2. 573661 3. 183223 3. 362257 3. 875629 3. 074432 3. 104798 2. 761478  
2. 69956 1. 816797 2. 283466 2. 885861 2. 907263 2. 658486 1. 430204 1. 601706 1. 832172

3. 376179 4. 657653 3. 92465 3. 382483 4. 500594 3. 150115 4. 421525 4. 73445 4. 223652  
4. 279412 4. 666425 4. 599399 3. 916981 4. 513729 4. 758307 4. 834053 4. 284108 4. 08023  
6. 949109 6. 795371 6. 626818 6. 107041 6. 643331 6. 094536 6. 521037 6. 120803 5. 852882  
7. 671822 8. 016757 7. 597005 7. 176906 8. 055854 7. 222154 7. 358691 7. 230287 7. 356253  
6. 278052 6. 877521 7. 112037 5. 933176 6. 573982 6. 489099 7. 268762 6. 729144 6. 84012  
6. 052373 4. 463669 5. 673842 5. 901768 5. 323755 6. 097046 5. 921926 5. 446218 5. 767371  
3. 486649 3. 982609 3. 356531 2. 559728 2. 303239 2. 871694 2. 197844 2. 947966 2. 707779  
4. 336023 1. 830886 3. 590639 2. 619933 2. 526425 4. 853346 3. 059234 2. 377735 1. 862717  
1. 521576 1. 566794 1. 418853 1. 895411 1. 200916 1. 296707 1. 302471 0. 97869 1. 506086  
1. 069148 1. 000775 0. 98029 1. 39439 1. 078789 0. 964237 1. 022246 1. 503915 1. 561458  
2. 015709 1. 421203 2. 268469 1. 191534 2. 902379 1. 367486 1. 293216 1. 079493 1. 624  
2. 91406 3. 370754 3. 154181 3. 436856 4. 087804 3. 582906 3. 414006 3. 51684 3. 962014  
5. 708355 3. 7453 4. 355418 3. 934828 4. 346502 5. 346585 4. 750816 5. 268363 5. 782439  
1. 886479 3. 099273 2. 020156 2. 412755 1. 756063 2. 746179 1. 633455 1. 448121 1. 506717  
1. 446722 1. 65385 1. 605481 1. 941735 2. 015447 2. 335962 1. 514011 1. 774308 1. 683569  
1. 916448 2. 784582 1. 470455 3. 258881 1. 74847 2. 823165 2. 363547 2. 094178 2. 727947  
5. 614923 5. 690015 5. 113006 5. 104861 5. 140553 7. 303438 5. 819169 6. 824578 6. 396448  
2. 801731 1. 725797 1. 715348 1. 887879 1. 593181 2. 372216 1. 589173 2. 748408 1. 737967  
5. 300884 4. 51593 4. 959348 6. 188881 5. 113984 7. 202913 6. 774606 5. 118463 5. 30208  
4. 605135 4. 109272 4. 786659 2. 418099 3. 603539 2. 821286 3. 848572 4. 358846 3. 431089  
4. 235341 2. 43976 3. 324297 2. 770316 2. 956937 2. 831377 4. 094687 3. 606444 2. 706407  
5. 551688 5. 485156 6. 201722 5. 945449 5. 698963 5. 191538 6. 131758 5. 70821 5. 467248  
1. 370752 1. 696298 1. 624385 1. 223596 1. 779101 2. 621686 1. 282454 1. 096571 1. 860645  
1. 293764 1. 7369 1. 468614 1. 540753 1. 353796 2. 579299 1. 226375 1. 581586 1. 503635  
2. 753025 3. 63538 2. 324094 2. 661547 2. 670343 2. 54077 2. 634366 2. 88092 2. 630541  
1. 541687 1. 254476 1. 513078 1. 467654 1. 202518 1. 284185 1. 273322 0. 985794 1. 484164  
1. 026422 1. 713992 0. 894555 1. 424524 1. 144797 0. 96817 0. 948475 0. 859054 1. 205485  
5. 263735 6. 058667 5. 585539 4. 806942 4. 85794 5. 734628 5. 849088 6. 148507 5. 758295  
3. 635488 3. 065349 3. 057809 2. 891677 3. 266628 3. 209424 3. 429844 4. 390408 4. 212647  
1. 625466 2. 182104 1. 625329 2. 702956 2. 043184 1. 378225 1. 660819 2. 161702 2. 088588  
1. 170914 1. 034562 1. 212334 1. 84139 1. 163195 1. 01699 0. 944797 1. 404596 1. 88344  
5. 038171 4. 099372 4. 742677 4. 323059 4. 463115 4. 913466 4. 761318 6. 052283 4. 80821  
5. 386041 5. 180745 5. 352289 5. 242112 5. 54319 5. 610791 6. 596793 5. 965647 6. 279683  
6. 956875 7. 222666 7. 089162 7. 089641 7. 624817 6. 394387 7. 195779 6. 95888 6. 787922  
6. 506965 6. 80072 6. 945338 5. 881053 6. 64093 5. 758255 6. 049067 5. 916085 5. 933771  
5. 115534 3. 991195 5. 578183 5. 056214 5. 736787 5. 294548 6. 36205 6. 248218 7. 156275  
1. 414747 1. 180846 1. 722467 1. 73609 1. 563727 1. 54314 1. 329106 2. 200285 1. 500041  
1. 679545 1. 645489 1. 441086 2. 206455 2. 543157 1. 667821 2. 183485 2. 708747 2. 398877  
1. 921157 1. 535025 1. 522631 1. 775033 1. 106247 2. 479454 1. 534814 1. 652274 2. 785825  
3. 786677 3. 390505 3. 947448 3. 428936 3. 306337 3. 948999 3. 538011 3. 166321 3. 363727  
3. 806222 2. 247305 2. 036744 2. 477458 4. 135101 2. 318305 2. 1555 2. 268472 2. 241236  
5. 285602 4. 844173 5. 168538 5. 458574 4. 584689 5. 107339 5. 714886 6. 69443 5. 595544  
4. 654 5. 010699 4. 605113 4. 876472 4. 201544 4. 921371 4. 328264 3. 945877 3. 804094  
3. 729797 2. 479963 3. 871778 3. 532922 2. 957567 4. 287725 3. 270453 5. 022342 4. 068748  
4. 733801 4. 494963 4. 425679 4. 39505 4. 383152 4. 533519 4. 794296 4. 991732 4. 817016  
0. 827764 1. 326593 0. 591259 1. 652143 0. 37661 2. 257972 0. 61449 0. 77169 2. 088982  
1. 312089 1. 773453 1. 229339 1. 53006 1. 029584 1. 412776 1. 383448 1. 408881 1. 398639  
1. 556511 1. 02779 1. 004594 1. 427955 2. 222949 1. 699322 1. 053318 1. 268761 0. 96996  
5. 390246 5. 520759 5. 627523 5. 63527 5. 176641 6. 394822 5. 807482 5. 574666 5. 568537  
6. 457649 5. 856903 5. 397794 6. 364951 6. 599787 6. 889763 7. 005885 5. 726237 6. 189822  
6. 390613 5. 0996 6. 348171 6. 349176 7. 061084 7. 44057 7. 751891 7. 750074 7. 542958



1. 701551 1. 742865 2. 245462 2. 664993 2. 003951 2. 087129 2. 324149 2. 432056 1. 840487  
5. 391824 5. 729693 5. 442485 5. 758581 5. 91673 6. 281649 5. 466134 5. 508938 5. 397055  
5. 531737 4. 868978 5. 77254 6. 134152 5. 502076 6. 485532 4. 563994 5. 566349 5. 61898  
5. 396421 5. 644638 4. 93658 3. 676376 5. 083692 5. 092155 5. 695827 4. 672006 3. 799346  
4. 04882 4. 072576 4. 740591 4. 98015 4. 291993 5. 448196 5. 250373 3. 908386 5. 338501  
8. 524056 8. 814608 8. 509817 8. 61453 9. 31306 8. 926448 8. 26851 8. 144562 7. 848178  
5. 06565 4. 055509 4. 861271 4. 746091 5. 072301 4. 826368 5. 001057 4. 276951 4. 157241  
3. 208614 3. 5989 3. 502957 3. 527108 3. 612988 3. 067312 3. 542473 2. 77752 3. 131484  
5. 145018 4. 913859 4. 877145 5. 007656 5. 145018 4. 913606 4. 515881 4. 711738 4. 890887  
5. 69667 5. 499028 5. 86773 5. 082987 4. 810889 4. 802634 5. 895004 5. 040877 4. 661718  
3. 878813 2. 40323 3. 926174 4. 003712 3. 339281 3. 75545 2. 868801 3. 905042 3. 453463  
3. 569269 2. 2106 2. 937719 3. 098331 3. 20644 3. 054708 2. 833974 3. 912754 3. 032069  
6. 142535 6. 587366 6. 329722 5. 773459 6. 21504 6. 277495 6. 190435 6. 257338 6. 096911  
6. 481958 5. 821447 6. 419902 7. 031078 6. 153394 7. 217842 6. 374789 6. 361322 6. 94825  
1. 547711 2. 180179 1. 553371 1. 652634 1. 566817 1. 268265 2. 317882 1. 751682 1. 956684  
3. 956518 4. 800522 5. 160047 6. 262423 2. 575076 5. 236401 3. 693213 2. 841231 2. 559739  
5. 456571 5. 113928 5. 26015 5. 17537 4. 330528 4. 810503 4. 116803 4. 161654 3. 981244  
1. 595867 2. 81918 2. 471943 2. 188454 3. 019841 3. 363805 2. 37711 2. 696218 2. 336699  
6. 098915 6. 902474 6. 51378 6. 914231 6. 08056 5. 698094 6. 086251 6. 49773 5. 941712  
6. 29446 7. 080575 6. 451925 7. 065379 7. 100119 7. 292047 6. 857398 6. 834623 6. 914344  
9. 925185 9. 49899 10. 25298 10. 30381 10. 17296 9. 477484 10. 32158 10. 6084 10. 65617  
2. 002044 2. 408203 2. 139164 2. 197031 2. 371632 2. 222548 1. 608843 2. 536309 2. 449804  
6. 653583 6. 764103 6. 783709 6. 619156 6. 948838 6. 760091 6. 784908 6. 544527 6. 838513  
8. 046621 8. 613906 8. 907848 7. 591811 8. 432396 7. 273122 8. 265163 8. 305365 7. 744712  
2. 539221 3. 049577 2. 114244 2. 485753 2. 513137 2. 205418 2. 383957 3. 063498 2. 471247  
3. 574686 2. 839371 3. 158891 2. 497161 3. 810808 2. 510591 2. 162979 2. 948069 3. 723681  
1. 16358 1. 014987 0. 582162 0. 90749 0. 679207 0. 45778 0. 682661 0. 489938 1. 433753  
3. 966517 4. 344668 3. 771156 3. 66866 4. 058074 2. 966848 4. 232461 5. 161337 4. 952249  
1. 939981 2. 296142 1. 545076 2. 034571 3. 115028 2. 660143 2. 32408 1. 840863 2. 321219  
10. 16921 10. 23275 10. 03712 9. 610871 10. 16364 9. 905066 10. 23749 9. 787793 9. 803042  
3. 069929 2. 648063 2. 35298 3. 024798 2. 775507 3. 827137 3. 458935 2. 530471 3. 378251  
2. 455906 1. 385206 2. 677931 2. 95465 2. 296982 1. 992169 3. 130237 1. 57363 1. 819626  
4. 408285 3. 256263 3. 727225 4. 070721 3. 228076 4. 656911 3. 763671 4. 068696 3. 577125  
5. 27594 5. 280062 5. 036813 4. 744436 5. 916469 5. 47832 4. 852248 4. 850796 5. 025369  
3. 311154 4. 242835 4. 062363 3. 907695 2. 893995 4. 403584 3. 279905 5. 057047 3. 028664  
6. 556742 5. 327377 5. 612243 5. 949187 5. 865156 6. 43668 6. 009598 6. 04312 5. 500004  
4. 107913 2. 05242 3. 497828 5. 219637 4. 049605 5. 305338 4. 078627 2. 990418 4. 027216  
6. 174964 6. 465425 5. 166408 5. 471092 6. 365353 6. 325213 5. 824452 6. 3867 5. 838927  
5. 954902 6. 401719 6. 525095 6. 541355 6. 89288 6. 331399 6. 455248 6. 452057 6. 860476  
7. 691431 7. 372853 7. 462439 7. 50899 7. 457334 7. 011622 7. 724845 7. 604416 7. 30183  
5. 212712 5. 077097 5. 095171 5. 457016 5. 205633 7. 067473 6. 409209 6. 405876 5. 942919  
4. 814205 5. 358366 4. 582864 5. 651038 5. 341824 5. 144276 5. 427449 5. 850947 5. 59417  
5. 615627 5. 479908 5. 542859 5. 207391 5. 715656 6. 205936 5. 816889 5. 574127 5. 956522  
5. 949772 6. 21013 5. 786897 6. 130792 6. 412319 6. 555103 6. 155394 5. 991047 6. 577767  
8. 988577 9. 59444 9. 426751 9. 640174 9. 762663 8. 517026 10. 09065 10. 06939 10. 1956  
4. 705396 3. 199703 5. 1608 1. 307583 3. 276233 2. 880689 2. 541932 2. 223153 1. 950723  
5. 811794 6. 275707 6. 148253 6. 798073 6. 371027 6. 099049 6. 436314 6. 383195 6. 675717  
9. 728308 9. 656306 9. 590162 9. 28038 9. 447165 9. 485933 9. 435079 9. 170451 9. 911198  
3. 390386 3. 474714 3. 863092 3. 588423 3. 974659 3. 786701 3. 659552 5. 182803 3. 035295  
3. 579845 3. 313538 3. 864308 3. 377064 4. 2501 4. 507044 4. 144317 2. 834935 3. 788103  
9. 71767 9. 516703 9. 738673 9. 732916 9. 807095 10. 22745 10. 13163 10. 26412 10. 03369

2. 707461 3. 172991 1. 87629 1. 720101 2. 377053 2. 986181 3. 258141 2. 778943 2. 88215  
4. 474655 4. 817398 5. 17824 5. 078312 4. 900455 4. 905492 5. 458453 5. 38232 5. 349816  
2. 061205 3. 399127 2. 530702 2. 631321 2. 858289 2. 865854 2. 163572 2. 323826 2. 208936  
2. 370548 2. 866636 2. 062517 2. 947469 2. 717444 3. 690714 2. 523924 2. 923558 2. 404723  
1. 806947 4. 708957 4. 530462 1. 609948 1. 739235 5. 229236 3. 63238 2. 97372 4. 299477  
2. 131521 5. 480889 5. 710669 1. 807891 1. 359366 4. 940799 5. 58691 1. 321575 4. 833965  
1. 633735 2. 030544 1. 598122 1. 597416 1. 250958 1. 458168 1. 507418 1. 903785 2. 387716  
4. 402534 4. 203099 5. 571015 4. 973001 4. 64248 5. 271455 5. 334753 5. 573984 5. 77783  
2. 787334 2. 330244 2. 349772 2. 190518 3. 079732 3. 386611 2. 778259 2. 045465 2. 570481  
1. 185936 0. 906606 1. 03388 1. 320121 0. 749156 1. 511377 1. 203868 1. 749997 2. 249041  
4. 426947 3. 948177 4. 741658 4. 397625 5. 011959 4. 913377 5. 963507 6. 086938 5. 968813  
3. 467529 3. 651687 3. 244304 2. 13951 2. 445648 3. 922468 3. 696578 3. 149164 2. 116534  
5. 92431 5. 588159 5. 531357 5. 671368 5. 971546 4. 998682 5. 615911 5. 155346 5. 360028  
8. 075137 8. 095695 7. 564918 6. 661629 7. 78422 7. 568386 7. 997619 7. 680416 7. 218821  
9. 3615 9. 656375 9. 481616 9. 228629 9. 613658 8. 970037 9. 375151 9. 179783 8. 641578  
3. 153441 2. 959938 3. 168271 2. 422136 4. 234819 3. 563834 3. 964118 3. 795452 4. 31314  
6. 695567 6. 139669 5. 372572 6. 843457 5. 297935 5. 253186 6. 250723 5. 16443 4. 750446  
7. 789955 7. 845725 7. 653056 7. 624532 7. 904819 7. 558007 7. 98879 7. 866602 7. 709081  
4. 394591 4. 15733 4. 525496 4. 388796 3. 40642 3. 94412 3. 772297 5. 792247 4. 335164  
3. 248373 3. 637216 3. 181584 3. 838847 2. 063884 3. 95322 3. 205911 3. 326623 2. 806253  
4. 098214 3. 836765 3. 579847 3. 574376 4. 957493 3. 505039 2. 469006 4. 03075 3. 557017  
5. 923465 4. 68168 5. 613584 4. 023377 5. 677611 4. 703964 5. 249779 5. 248879 6. 285664  
6. 217933 6. 30753 6. 19123 5. 543126 6. 218206 6. 573783 6. 533165 5. 968489 6. 61192  
1. 981459 2. 998678 2. 644242 2. 57564 4. 125556 2. 286486 2. 252461 3. 279703 1. 886279  
2. 494392 1. 991297 2. 46412 3. 319507 2. 714944 2. 625755 2. 123729 2. 79046 3. 215179  
8. 30835 8. 61161 8. 32407 8. 267035 8. 435312 7. 686851 8. 440892 8. 11789 8. 423192  
2. 09216 2. 09216 1. 551844 1. 922539 2. 123206 2. 80102 1. 906168 2. 097981 1. 956342  
2. 890134 2. 783484 2. 913952 2. 976402 2. 762446 4. 096138 3. 515605 3. 023005 3. 588748  
6. 340932 6. 261129 6. 236056 5. 357625 6. 471491 6. 104198 5. 953273 6. 070141 6. 479461  
4. 686461 6. 453668 6. 808785 5. 720734 6. 805274 6. 731323 5. 795674 5. 564509 5. 594135  
2. 970046 5. 009265 4. 626813 4. 686304 5. 206439 5. 601452 4. 527646 3. 76338 4. 5357  
1. 818126 1. 253115 2. 255394 1. 517689 1. 218467 1. 299138 1. 783425 1. 309952 1. 149081  
5. 207217 5. 422335 6. 11978 4. 762475 5. 501331 4. 719307 4. 867826 5. 273045 5. 567204  
2. 497144 2. 918525 2. 340867 1. 971283 3. 970225 3. 573577 2. 259503 3. 11701 2. 890384  
4. 036909 3. 378916 2. 970422 3. 165175 3. 451533 3. 597488 3. 466716 3. 343 3. 931132  
2. 364106 2. 20445 0. 955359 3. 116353 1. 816598 3. 756946 2. 804046 2. 382119 3. 000295  
6. 545952 6. 775777 7. 29843 7. 813248 7. 226794 7. 439739 7. 281802 7. 366896 7. 612805  
3. 818343 1. 276019 3. 43423 5. 794849 2. 75273 3. 937676 1. 592354 3. 063814 3. 784735  
1. 422172 2. 644738 1. 741778 1. 725205 1. 918468 2. 145066 1. 657386 3. 396935 2. 519523  
10. 09583 10. 46638 9. 90079 10. 75381 9. 592039 10. 77072 9. 802712 10. 03666 9. 956085  
1. 615111 2. 061476 1. 360553 0. 986815 1. 16628 1. 04406 1. 69608 1. 58479 0. 975632  
1. 782339 2. 701387 0. 56562 4. 783985 3. 358335 5. 607478 7. 122936 2. 166811 3. 977862  
10. 85203 10. 68821 10. 57141 11. 27719 10. 52589 10. 65633 10. 62835 10. 48289 10. 84833  
2. 847086 3. 756298 4. 639238 4. 114173 4. 595279 2. 8635 4. 793506 6. 016492 5. 041471  
1. 59956 1. 264604 0. 784733 1. 381569 1. 747427 1. 412205 1. 548276 2. 03213 1. 427289  
5. 111169 4. 974978 5. 632008 5. 739148 5. 020131 5. 643155 6. 298322 6. 102227 5. 170933  
1. 422944 1. 13436 1. 747698 1. 4154 1. 612938 2. 077021 1. 554412 1. 651808 1. 594377  
2. 885214 3. 462301 2. 288881 3. 144883 2. 118185 3. 431014 2. 149986 2. 703955 3. 085501  
0. 778312 1. 035407 1. 158474 2. 807521 1. 050691 1. 119796 1. 270489 1. 890069 0. 970876  
2. 421623 1. 606687 1. 626357 0. 971592 1. 17634 1. 660642 1. 67757 1. 407194 1. 436993  
4. 385078 4. 769126 5. 278053 4. 680131 3. 280582 5. 820983 3. 685414 6. 527207 5. 651375

3. 825829 2. 484653 3. 000102 2. 219871 2. 525169 6. 747463 2. 261452 3. 30665 4. 361553  
5. 13495 5. 188696 5. 605098 5. 897473 6. 882108 5. 185421 6. 892012 6. 496783 6. 322682  
4. 289042 5. 059698 5. 24629 4. 840272 4. 287907 4. 751144 4. 68023 4. 842542 4. 794945  
9. 370612 8. 316892 9. 076669 9. 47424 9. 107184 10. 30428 9. 76814 10. 24615 9. 961157  
7. 45203 7. 674687 7. 639181 7. 70756 7. 672492 8. 312904 7. 687856 8. 351906 7. 879497  
1. 206067 1. 195388 1. 53676 1. 430162 1. 241977 1. 688474 1. 120398 2. 839785 1. 330418  
2. 371045 1. 666225 1. 797627 1. 374474 1. 293793 1. 63549 1. 605373 1. 45167 1. 711338  
1. 488432 1. 978581 1. 125263 2. 098039 1. 476344 1. 478598 1. 730579 1. 74026 1. 26829  
4. 66909 5. 024261 5. 045899 4. 709638 5. 071428 4. 748647 5. 970112 3. 912245 3. 898682  
1. 291783 1. 675076 1. 048171 1. 484996 1. 665424 1. 811712 1. 588389 1. 585595 1. 289085  
1. 011154 1. 120361 0. 787012 1. 417384 1. 556403 1. 06461 1. 422543 0. 92838 2. 403975  
2. 942945 3. 515436 3. 279582 4. 943727 4. 036442 3. 1244 4. 666397 3. 144138 3. 081088  
3. 62792 3. 513624 3. 384001 4. 369463 3. 592874 4. 256233 4. 188003 2. 975174 3. 400893  
4. 101713 5. 321231 6. 164655 4. 49723 5. 148158 5. 184396 5. 785798 5. 41291 5. 600065  
6. 651354 7. 357259 7. 058088 7. 169183 8. 622861 7. 428305 6. 728551 7. 159638 6. 204846  
5. 251928 4. 686853 5. 231134 5. 436997 5. 71036 6. 024175 5. 992946 5. 419462 5. 811725  
4. 196931 3. 904519 3. 060445 3. 698407 3. 352713 4. 112012 3. 470663 2. 84569 2. 310915  
3. 490978 1. 899391 2. 682728 3. 688925 1. 973274 2. 105738 1. 972908 1. 913934 1. 959999  
4. 720841 4. 603661 5. 760627 4. 916295 4. 927626 4. 481342 4. 913243 5. 154034 3. 75967  
4. 857331 4. 643027 3. 911608 4. 202455 4. 56734 3. 009209 3. 858547 5. 375143 5. 326519  
1. 562633 1. 300568 1. 336417 1. 77002 1. 3296 2. 57051 1. 018945 1. 846404 1. 907182  
3. 691756 3. 608407 3. 062818 3. 290175 3. 376203 2. 806713 3. 837641 3. 039557 2. 951512  
2. 128731 2. 204016 2. 318305 2. 777981 2. 184336 2. 320493 2. 897387 2. 84735 3. 133272  
6. 478374 6. 338059 7. 109773 6. 39076 6. 640077 6. 205551 6. 543376 5. 758723 5. 743504  
5. 040344 4. 78772 4. 274083 3. 301683 3. 899291 4. 19846 5. 11949 4. 689415 4. 388361  
3. 506139 3. 849181 3. 278084 3. 270538 3. 039668 3. 867356 3. 815808 3. 238001 3. 198678  
2. 781806 2. 518475 3. 295629 2. 123139 2. 817633 3. 211789 2. 061145 2. 074996 2. 10835  
1. 600727 1. 380038 1. 008209 2. 262413 1. 217586 1. 463837 1. 280179 1. 563567 2. 17393  
4. 316189 2. 499464 2. 439875 2. 929516 2. 228855 4. 943699 4. 025299 2. 422889 3. 284527  
2. 879115 2. 335269 2. 969128 2. 843996 2. 858596 2. 717829 2. 417361 2. 773624 3. 014539  
6. 801533 6. 280193 5. 560765 6. 151898 5. 449709 5. 809817 7. 228211 6. 285134 7. 261143  
4. 54308 4. 274178 3. 792905 3. 053922 5. 553183 6. 014332 5. 175315 5. 764895 5. 710797  
0. 850251 0. 946116 1. 446975 3. 506945 0. 981338 1. 48171 1. 597947 1. 354713 1. 021025  
4. 113169 5. 050204 4. 10577 3. 471164 7. 829477 4. 338898 2. 919474 5. 948767 4. 113872  
2. 274008 0. 990894 0. 965963 2. 154892 1. 608907 1. 824397 1. 900069 3. 253209 1. 02562  
2. 253107 1. 62612 2. 559575 1. 840861 1. 708259 2. 156616 2. 603663 1. 955321 1. 684313  
3. 080936 2. 06787 1. 877067 2. 120775 2. 447294 3. 562189 3. 299478 1. 92198 2. 03016  
3. 91419 2. 053561 0. 941477 3. 987281 3. 363951 5. 054551 2. 308854 6. 124516 2. 778415  
1. 370392 3. 629234 1. 526325 2. 455178 2. 246237 1. 376204 2. 088287 2. 343663 2. 236153  
3. 101112 4. 373543 5. 591749 4. 520082 6. 140946 6. 030584 6. 947948 7. 047376 6. 054705  
7. 977062 8. 332794 8. 812008 8. 509856 9. 01582 8. 558151 8. 782969 8. 600779 8. 612829  
5. 211218 4. 633737 5. 13811 5. 047294 5. 520409 4. 575436 5. 229293 5. 584441 4. 561502  
2. 239513 2. 326025 1. 936083 2. 817302 2. 385081 2. 563353 2. 110315 2. 299359 2. 664509  
2. 653071 3. 282868 3. 746044 2. 652988 3. 024631 3. 202266 2. 622623 3. 882852 3. 635064  
6. 246554 6. 114996 6. 335368 5. 890686 5. 954794 4. 701801 6. 132388 5. 409916 5. 641732  
4. 287086 5. 251809 4. 181462 4. 017431 3. 690315 4. 808006 4. 013142 3. 704678 4. 856917  
3. 077577 4. 217373 5. 529186 5. 446911 6. 280217 6. 903544 3. 964081 5. 215391 6. 470497  
2. 700819 2. 558665 2. 176288 2. 432578 1. 966206 3. 320842 2. 682702 3. 070993 2. 228653  
1. 073586 2. 342149 1. 18902 1. 668753 1. 471325 1. 435386 1. 363118 1. 31255 2. 783773  
0. 785414 1. 09822 1. 227717 1. 501744 2. 923399 1. 012333 0. 920562 1. 210239 1. 688727  
1. 258332 0. 655254 1. 295039 2. 292944 1. 375923 0. 737409 0. 693737 1. 237158 2. 463544

1. 282813 2. 178758 1. 347485 3. 356051 3. 880432 2. 473614 1. 046859 1. 947527 1. 944303  
0. 883338 0. 889635 0. 713166 1. 788334 0. 688382 1. 911222 0. 873855 1. 032963 2. 13001  
4. 820753 3. 747519 3. 55055 4. 170558 3. 714888 5. 035411 4. 045616 4. 705224 4. 10292  
5. 978865 4. 912965 4. 953021 4. 267111 5. 682851 6. 043559 4. 239859 4. 410636 4. 65919  
3. 854245 3. 20662 3. 523308 3. 839791 3. 632257 2. 243593 3. 1808 4. 077408 4. 086788  
3. 535642 3. 923239 4. 282271 4. 072192 4. 753699 4. 8188 4. 766841 3. 990202 3. 95975  
6. 120743 5. 184673 5. 764744 5. 48431 4. 092942 4. 807992 5. 290423 5. 025703 4. 471874  
3. 424805 2. 793551 2. 60759 1. 82007 3. 368467 3. 545437 4. 193579 4. 5965 4. 071717  
3. 98757 4. 242272 4. 684431 4. 48093 5. 170541 5. 630368 4. 403426 3. 816441 5. 427357  
1. 837122 2. 229381 1. 463099 1. 448308 2. 156682 1. 870031 2. 99847 1. 949203 1. 15313  
3. 028078 3. 281139 3. 662064 3. 349024 3. 536649 2. 466943 2. 075184 2. 398519 2. 135702  
1. 522465 2. 148093 0. 678537 1. 768435 3. 176314 1. 058899 1. 389414 1. 295417 1. 336429  
4. 802757 5. 592999 5. 161073 3. 487336 3. 886956 5. 155027 5. 142733 5. 334786 5. 461112  
8. 223948 8. 679405 9. 281257 8. 763642 8. 282841 8. 711301 9. 788693 9. 050762 9. 049355  
3. 01628 3. 011963 3. 352286 3. 618914 4. 074996 3. 340447 5. 055707 4. 036987 4. 615754  
4. 666481 4. 318503 4. 734655 5. 137803 4. 91874 5. 668869 4. 750787 4. 540617 5. 115586  
5. 344629 4. 965601 5. 816586 6. 313764 5. 716051 6. 019391 6. 709774 6. 077794 6. 238392  
5. 243097 5. 349151 5. 330143 5. 369096 5. 276565 5. 248586 6. 062451 5. 429993 5. 102638  
3. 323206 1. 094187 1. 632369 4. 55057 1. 322393 4. 886423 1. 617454 2. 017791 2. 676257  
2. 158433 1. 990261 1. 697012 1. 940664 3. 404519 2. 138485 1. 318918 1. 861111 4. 601938  
2. 889198 2. 889413 2. 894194 2. 964452 2. 723702 3. 547568 3. 194601 3. 457695 3. 199644  
4. 646065 4. 562843 5. 17339 4. 745207 5. 684548 5. 273032 5. 495889 5. 917961 5. 616543  
5. 195381 5. 409504 6. 177147 5. 877671 5. 689276 5. 459202 7. 068891 6. 151964 6. 971847  
1. 4542 1. 502275 1. 309161 1. 29555 0. 956107 1. 069381 1. 002049 1. 482321 1. 082491  
1. 962172 1. 64684 2. 372952 2. 079512 1. 930537 2. 570316 2. 258828 1. 700708 4. 961971  
7. 050041 7. 674528 7. 340257 6. 756453 7. 59253 5. 977991 6. 971821 6. 345446 6. 797984  
3. 818302 3. 946663 2. 512921 3. 909014 2. 619717 3. 358751 2. 283434 2. 479551 2. 884106  
4. 407716 3. 477732 3. 711624 3. 720323 3. 482977 4. 280371 3. 567081 4. 301091 4. 186897  
1. 574204 1. 101115 1. 428425 2. 251352 1. 578184 1. 46126 1. 41802 1. 864044 2. 120892  
1. 714251 3. 056389 1. 286789 1. 772236 1. 69241 1. 716999 1. 374428 2. 160587 2. 828591  
10. 11118 10. 17537 9. 786269 10. 71789 9. 235237 10. 64667 8. 870246 8. 416811 9. 554734  
2. 18899 1. 893117 2. 096177 2. 137068 2. 44198 1. 617953 1. 697188 1. 649752 1. 344103  
2. 296451 1. 646784 2. 502937 1. 384263 2. 181387 2. 100466 1. 994171 1. 819364 1. 523067  
4. 283554 3. 236756 4. 119217 2. 373501 4. 780652 5. 021119 2. 687322 2. 328853 2. 9614  
6. 533885 6. 712501 6. 321968 6. 787556 6. 943922 6. 606513 6. 860474 6. 958661 6. 849811  
2. 203649 1. 111818 1. 700017 1. 745411 1. 900799 1. 783065 1. 838391 2. 024174 1. 652504  
4. 091641 3. 415283 3. 704164 4. 011366 3. 39248 3. 92073 3. 61661 3. 663753 3. 181736  
2. 87997 2. 45699 2. 578087 3. 091009 3. 697391 5. 215988 2. 876658 3. 014246 3. 462424  
5. 655957 5. 710267 5. 858316 5. 691243 6. 099555 5. 944816 6. 61912 5. 891716 6. 482421  
3. 534812 3. 266574 2. 813822 2. 310538 3. 278497 4. 588581 4. 06804 2. 070839 3. 820107  
4. 755001 1. 855149 1. 16287 2. 555046 2. 554513 3. 643401 1. 56564 2. 663906 3. 138436  
9. 111475 9. 447674 8. 0254 8. 033171 7. 90919 9. 306097 7. 544704 7. 971929 8. 210884  
0. 543364 1. 718563 0. 304874 3. 230663 1. 572112 2. 479926 1. 472487 2. 279037 4. 223438  
1. 544946 1. 389282 1. 318641 1. 933815 1. 16018 2. 134034 1. 482833 1. 884084 1. 339697  
5. 103807 5. 675826 5. 43891 5. 895551 4. 917899 6. 411006 6. 149735 7. 072721 6. 723495  
3. 077532 4. 953618 4. 642188 4. 41487 3. 801527 3. 25224 4. 576159 2. 741545 4. 034184  
2. 482042 1. 285451 2. 062569 1. 795284 1. 950345 2. 454491 2. 291941 3. 700244 2. 714968  
5. 244759 3. 8774 4. 138227 3. 990323 3. 722886 4. 043458 3. 92721 4. 149929 3. 764365  
5. 818284 6. 241125 5. 233218 5. 702933 6. 232584 5. 639958 5. 465067 5. 215608 5. 904819  
2. 085448 1. 598988 3. 407875 3. 309697 1. 986164 1. 675569 2. 10956 2. 285331 2. 518748  
1. 522381 1. 363166 2. 204115 1. 506208 1. 788433 2. 032675 1. 332678 1. 352861 1. 199305

8. 378095 7. 982981 8. 860162 8. 581961 8. 259261 7. 357407 9. 02857 8. 62085 8. 499148  
0. 969382 0. 926131 1. 475 0. 87138 1. 126107 1. 362267 1. 801105 1. 563902 2. 331417  
4. 157761 5. 730264 5. 342971 3. 949023 6. 056705 4. 934866 6. 214335 4. 781094 4. 949416  
6. 074744 6. 675989 6. 225747 5. 579101 5. 928838 4. 931487 7. 12386 7. 003155 7. 35327  
2. 976996 1. 411571 2. 263335 2. 264581 1. 511874 2. 546915 2. 94801 3. 641473 3. 211966  
6. 038512 5. 869393 7. 007445 6. 692631 5. 414513 6. 446998 5. 927467 5. 793257 6. 130665  
4. 692994 4. 91059 5. 508168 7. 000104 6. 387642 4. 031267 6. 985799 7. 211042 7. 491838  
4. 256376 2. 620417 4. 409757 3. 788812 4. 907138 2. 870028 4. 224533 3. 527511 2. 974926  
2. 460901 2. 459527 2. 638431 3. 169875 3. 560594 4. 535899 3. 594836 3. 337937 3. 184616  
6. 422787 5. 927296 6. 238103 6. 184675 6. 59508 7. 296662 6. 50963 6. 298862 6. 662831  
2. 158518 3. 074043 2. 037604 3. 044226 3. 004464 2. 639759 1. 791263 2. 466103 2. 815035  
1. 887198 2. 332653 2. 731076 2. 26068 2. 182728 1. 975626 2. 137924 2. 261439 2. 364015  
2. 205595 2. 037203 2. 05134 3. 303141 2. 778946 4. 298917 2. 027737 2. 70817 3. 504472  
5. 277751 6. 366373 5. 572683 5. 262122 5. 773715 5. 988352 6. 44929 6. 119401 5. 896243  
2. 470933 4. 014195 4. 154043 2. 838449 4. 204943 2. 289019 3. 062002 2. 451289 2. 184692  
3. 743693 5. 154198 4. 368909 3. 830029 5. 285994 3. 062643 3. 350671 2. 89487 4. 842713  
7. 427813 7. 340774 6. 731819 7. 591023 7. 496029 6. 859117 7. 479036 6. 933737 7. 297174  
1. 874937 1. 431993 1. 341947 1. 271379 1. 175292 1. 179882 1. 434438 1. 457246 1. 815283  
3. 91835 4. 080842 4. 977607 5. 060411 4. 115817 4. 45175 5. 331254 5. 454468 5. 930869  
3. 081158 3. 446145 3. 477257 2. 665339 2. 528261 3. 518757 3. 567524 3. 813449 3. 855239  
5. 420018 6. 121522 5. 986529 3. 383588 6. 548616 4. 139201 5. 050201 6. 169011 5. 154813  
3. 118871 3. 147856 3. 165856 3. 740766 3. 468752 3. 754676 2. 546402 4. 2776 4. 894134  
2. 349509 0. 840581 1. 938861 1. 898482 2. 330277 1. 337142 1. 301954 1. 864658 2. 716461  
7. 078451 7. 056765 6. 823566 7. 131607 7. 518855 6. 950721 7. 328022 6. 937755 6. 910428  
1. 007935 1. 188147 1. 232138 1. 411713 0. 991299 1. 202831 1. 214018 1. 007374 0. 630525  
3. 112166 2. 758427 3. 332411 2. 589784 3. 571891 2. 555489 2. 931831 2. 576727 2. 628137  
9. 904099 8. 685231 8. 714892 9. 287503 9. 141204 9. 62623 8. 840887 7. 461422 6. 324617  
4. 846542 4. 184552 5. 813983 4. 511618 5. 533484 3. 407698 5. 259926 4. 176055 5. 288294  
2. 747009 3. 077269 1. 983061 4. 389166 3. 185727 2. 44122 3. 565619 3. 302948 2. 853175  
5. 323261 5. 771103 6. 24512 5. 476131 5. 280193 4. 598313 5. 451608 4. 852168 4. 765269  
1. 783718 2. 907474 2. 844715 1. 461296 1. 860318 2. 350715 2. 090268 2. 615205 2. 166556  
4. 413056 4. 129718 4. 323213 4. 155366 4. 449847 3. 830926 4. 357027 4. 568147 4. 407116  
8. 166575 7. 826959 7. 074858 7. 802846 7. 948948 7. 395 8. 065389 7. 926106 8. 251589  
3. 978317 5. 313951 6. 462918 6. 478518 5. 025679 6. 272149 6. 162166 4. 822655 5. 711396  
1. 478345 1. 469904 1. 972763 1. 862551 1. 522837 2. 607004 2. 369204 1. 395325 2. 628142  
1. 362419 1. 391546 0. 98987 1. 846946 0. 712008 0. 91913 1. 101871 1. 508825 0. 977453  
2. 049624 2. 53306 1. 696011 1. 500104 1. 800519 1. 720982 1. 376954 1. 757112 1. 300917  
1. 522252 1. 942735 1. 437171 1. 477205 1. 287194 1. 561753 1. 510259 1. 965753 2. 135503  
4. 566748 4. 759316 5. 337264 5. 588665 5. 596382 4. 03867 4. 784677 4. 865573 4. 955757  
1. 808544 2. 311551 1. 689244 2. 229872 2. 558532 2. 799736 2. 719703 3. 288984 2. 800196  
3. 730486 3. 91714 3. 646382 3. 722916 4. 145044 4. 205261 3. 589031 3. 951059 4. 364433  
3. 561801 3. 264245 4. 042458 3. 718519 3. 489569 3. 865663 4. 0633 4. 08269 4. 453812  
3. 623624 4. 459746 2. 521991 2. 870138 3. 906077 2. 630311 2. 718312 2. 468538 2. 538035  
6. 563915 6. 828418 7. 180313 6. 179886 6. 744792 5. 794093 7. 462004 7. 859748 7. 950186  
2. 536667 2. 766708 2. 20893 3. 926667 2. 108984 0. 992446 2. 344837 2. 531612 2. 458482  
5. 715389 5. 029905 5. 605916 5. 715722 5. 588615 5. 396456 5. 901674 5. 649966 5. 231105  
5. 102572 6. 040413 5. 894145 5. 125323 6. 29008 4. 951424 6. 738613 6. 737148 6. 331241  
6. 686057 5. 375535 6. 096712 6. 266505 6. 082938 6. 836839 6. 29722 6. 300796 6. 011547  
1. 673738 2. 131153 1. 908027 1. 824778 1. 771432 1. 790516 1. 651835 2. 023435 1. 863665  
1. 310467 2. 143325 1. 219718 0. 926217 0. 979116 1. 108717 1. 413523 1. 184942 1. 431068  
1. 263133 1. 200275 1. 087274 1. 053571 0. 887145 1. 117967 1. 02087 1. 347153 1. 200436

1. 201913 1. 442766 2. 490488 1. 103972 1. 265991 2. 568079 1. 643818 1. 37098 2. 036918  
3. 669475 2. 344059 3. 495099 2. 767193 3. 215354 3. 756437 3. 333543 2. 534499 4. 809992  
0. 731386 0. 743869 0. 960397 0. 716121 1. 229358 1. 479382 2. 375622 1. 371236 1. 109955  
6. 110133 6. 584345 6. 010768 5. 926568 6. 800227 6. 605947 6. 210165 6. 465962 6. 706439  
1. 953191 1. 947346 1. 764165 2. 446253 1. 660104 1. 96731 1. 632215 1. 701202 1. 798031  
2. 36277 3. 222757 1. 817783 2. 558131 2. 300828 1. 890011 1. 548726 2. 131197 3. 16193  
3. 513755 2. 688628 4. 832495 4. 151954 3. 889538 4. 200846 4. 579797 4. 934819 3. 068563  
1. 879102 2. 430263 3. 224829 2. 020773 1. 396465 1. 81771 2. 450681 2. 102573 2. 546157  
5. 829235 5. 450265 4. 515119 6. 010176 2. 686473 2. 74496 2. 786179 3. 726992 2. 74149  
5. 251508 5. 414597 5. 764451 4. 901146 5. 356031 5. 788808 5. 698416 5. 212003 5. 158007  
3. 358795 3. 320881 3. 706408 2. 544686 2. 657186 2. 833043 3. 631094 4. 133821 4. 269305  
2. 152652 1. 738179 1. 992581 1. 403337 1. 727682 1. 441171 2. 27599 1. 897875 2. 053899  
1. 271251 0. 884795 1. 664309 2. 394937 1. 341123 2. 082099 1. 557249 1. 95592 1. 331794  
1. 667671 2. 214389 1. 715848 1. 587893 1. 554071 2. 209465 1. 248448 1. 850682 2. 07624  
2. 873656 2. 954366 2. 333447 2. 567893 2. 105071 2. 747395 1. 844033 2. 37332 2. 284178  
1. 821398 1. 80092 1. 597356 1. 462626 1. 697985 1. 980527 2. 480992 2. 886033 1. 355381  
2. 07035 1. 659688 2. 047285 1. 728452 1. 762079 2. 735872 2. 025801 2. 494062 2. 172189  
1. 645771 1. 123104 0. 906601 1. 319788 1. 143444 1. 669202 1. 064599 1. 736434 1. 69686  
4. 317917 2. 261589 2. 230352 3. 797328 3. 340462 3. 522046 2. 619254 2. 541557 4. 103691  
2. 15386 0. 95404 1. 333201 1. 347371 1. 534717 1. 379113 1. 100744 1. 357363 1. 190367  
1. 944994 2. 138105 2. 503409 1. 843527 2. 091654 1. 786499 2. 465393 3. 592233 3. 026298  
1. 36196 1. 620674 1. 946135 1. 265471 1. 846066 1. 304301 1. 303758 1. 910287 1. 573295  
7. 573967 7. 626185 6. 645842 6. 385994 7. 233927 4. 964503 8. 172262 8. 408085 8. 085996  
5. 819778 5. 00082 5. 637504 5. 187922 6. 021222 4. 521073 6. 381781 5. 82341 6. 144212  
1. 397317 1. 952649 1. 306557 2. 60143 1. 525067 1. 421031 1. 33322 1. 126301 1. 508809  
0. 969828 1. 632988 1. 968187 1. 641407 0. 890775 1. 003068 1. 283957 1. 16737 0. 982051  
1. 726383 1. 859336 1. 901744 1. 972066 2. 579654 1. 254491 1. 285752 2. 075547 1. 570706  
1. 8365 1. 642389 1. 618601 1. 748767 1. 119682 1. 038236 1. 568277 1. 962137 1. 572386  
0. 930467 1. 528099 1. 570786 1. 609759 1. 280061 1. 36197 1. 517885 1. 405538 1. 78912  
1. 202163 1. 447853 1. 007905 1. 963022 1. 874621 1. 594219 2. 01653 1. 526462 1. 332213  
1. 470204 1. 167461 1. 776778 1. 302808 1. 306207 0. 940802 1. 111373 1. 198585 1. 254866  
2. 223696 1. 99143 1. 893599 2. 435837 2. 00023 2. 718243 2. 586295 2. 484289 2. 49171  
2. 146942 2. 277808 1. 860122 1. 818359 2. 536194 2. 390191 2. 254104 2. 248851 2. 24435  
1. 457485 2. 244752 2. 019863 1. 192032 1. 764288 1. 863732 1. 059688 1. 588964 1. 889548  
2. 152816 2. 207864 1. 729471 2. 509231 1. 204284 1. 734297 1. 713638 2. 288241 2. 002384  
1. 737414 2. 403742 1. 818583 2. 284218 2. 314498 1. 133404 1. 188282 1. 803335 1. 943857  
6. 072747 5. 954644 6. 297929 5. 546024 6. 154508 5. 264067 5. 952139 6. 361351 5. 543208  
4. 18834 3. 587181 4. 454233 4. 026442 4. 438878 5. 234295 5. 009289 5. 248021 5. 029575  
4. 771306 5. 090785 4. 291249 4. 124501 4. 57536 4. 075398 5. 518524 4. 664374 4. 560482  
3. 585099 3. 032267 4. 035748 3. 531278 2. 85799 3. 890274 3. 302879 3. 440696 3. 57225  
5. 390449 4. 974596 4. 228405 4. 814106 4. 678394 3. 94147 5. 335663 5. 142498 4. 061346  
6. 804793 5. 460408 6. 686317 4. 804971 5. 423469 6. 208462 5. 162411 5. 538607 5. 32819  
5. 769318 5. 64981 5. 648669 5. 371905 6. 457382 5. 003375 5. 217315 4. 421425 4. 332414  
7. 450048 6. 701552 7. 395418 7. 592208 6. 990347 7. 114983 6. 748277 7. 048766 6. 592948  
7. 498413 7. 934193 6. 799544 6. 498232 7. 404408 6. 753179 5. 751252 5. 814082 5. 760545  
7. 124139 6. 489089 7. 377435 7. 62296 6. 212569 6. 598953 7. 67854 7. 663338 7. 116846  
1. 619648 1. 361015 2. 228036 1. 17139 1. 088834 1. 492542 1. 269604 1. 342968 1. 497409  
3. 719724 3. 898229 4. 926632 4. 711345 4. 935854 3. 975745 4. 019042 3. 999474 3. 02324  
3. 117508 3. 286895 2. 106093 3. 075279 3. 729976 2. 774699 2. 562173 3. 085729 1. 597019  
5. 715941 4. 277177 5. 498077 5. 182295 3. 925456 6. 602464 5. 216654 2. 694589 2. 788156  
2. 693937 2. 250481 2. 508246 2. 40432 1. 772188 1. 80298 1. 556085 2. 092396 1. 462758

1. 668387 1. 783338 1. 028669 1. 137529 1. 815587 2. 381358 1. 811098 2. 006773 1. 198718  
2. 911449 3. 042507 3. 042507 3. 10966 3. 604873 2. 248858 2. 95547 3. 609302 2. 544201  
7. 397012 6. 257118 6. 193784 6. 5403 5. 813148 3. 93254 7. 1777 6. 442529 5. 411377  
6. 079095 5. 147788 4. 369994 4. 832401 4. 996821 5. 137753 5. 527804 4. 564157 6. 117604  
6. 129851 5. 267255 5. 83038 6. 46126 5. 511163 6. 23088 6. 260268 6. 855236 6. 276462  
9. 372363 8. 649955 9. 215333 9. 717591 8. 688847 9. 517533 9. 835079 9. 712257 9. 233463  
1. 397072 1. 705351 1. 374597 2. 475737 2. 014971 1. 667617 2. 301545 2. 251585 3. 835242  
5. 310433 4. 651258 5. 037785 4. 741428 4. 406871 6. 186354 4. 988053 5. 852904 5. 296685  
4. 956168 5. 267195 5. 642479 6. 62812 5. 157529 5. 847355 6. 223101 7. 556562 7. 522797  
3. 242743 3. 006459 3. 782754 3. 403051 3. 820809 3. 354792 3. 477608 3. 141453 3. 764823  
2. 53888 2. 259365 2. 675773 1. 445515 2. 995999 1. 55095 2. 084956 1. 906957 2. 630547  
6. 523233 6. 551281 6. 711221 6. 508883 6. 679813 5. 42752 6. 072847 6. 411854 6. 143296  
3. 437577 3. 351097 2. 478522 2. 635439 2. 765571 3. 070188 2. 418618 2. 550672 2. 377172  
1. 472061 1. 390519 1. 331352 1. 621014 1. 390241 1. 172217 0. 884772 1. 205278 1. 215641  
6. 234994 6. 343406 7. 084277 5. 814161 6. 784868 4. 945836 6. 296816 5. 484799 6. 23757  
1. 088916 1. 473966 1. 349868 1. 785054 0. 852476 1. 139282 1. 049896 1. 138378 1. 177351  
3. 848358 4. 205587 4. 468429 5. 145922 4. 659806 4. 07866 5. 378062 4. 680415 5. 331186  
1. 623442 1. 364822 1. 048875 2. 913441 2. 754945 2. 513742 2. 396436 2. 611046 1. 702805  
5. 083027 4. 236325 3. 648299 5. 311459 5. 618441 5. 929777 4. 876964 4. 652767 4. 385973  
1. 802041 1. 330883 1. 419468 1. 717612 1. 38133 1. 53317 1. 442269 2. 054472 2. 250064  
3. 038414 4. 534725 2. 532023 2. 408159 3. 539589 3. 193958 3. 27333 2. 279497 2. 072783  
6. 647859 6. 082231 6. 005985 6. 969672 6. 769637 7. 291729 6. 395455 6. 704001 6. 853457  
2. 676682 2. 619253 2. 447686 2. 701308 2. 505552 2. 877743 2. 884632 2. 609965 2. 645228  
2. 126017 2. 932285 1. 879255 3. 718726 3. 03992 2. 333629 2. 499268 2. 471758 2. 496368  
1. 360274 1. 139114 1. 712653 1. 9775 1. 445014 1. 695678 1. 602503 1. 557819 1. 62066  
5. 455281 5. 600248 6. 480392 5. 783631 4. 921534 7. 618474 6. 355567 5. 482512 5. 894704  
1. 439122 1. 471787 1. 656407 1. 088399 1. 345095 2. 227307 1. 796219 1. 237759 1. 75804  
4. 891578 5. 284428 4. 781225 5. 158529 5. 139391 4. 882377 5. 507171 4. 265812 5. 266311  
1. 580911 1. 031202 1. 613805 1. 687612 1. 579218 1. 963797 3. 501005 2. 501186 1. 572931  
5. 79908 5. 511136 5. 6866 5. 81841 5. 831391 6. 44472 5. 673797 6. 090291 5. 962949  
1. 741994 1. 957484 1. 86029 2. 32922 2. 17724 1. 403394 1. 596654 1. 731276 1. 335657  
6. 745498 7. 319015 7. 33878 7. 71485 7. 113207 7. 262954 7. 486498 7. 171814 7. 477027  
4. 075677 4. 479255 4. 537707 4. 167936 4. 261814 4. 274079 4. 702902 4. 80881 4. 546568  
7. 203598 7. 884323 7. 473743 7. 000874 7. 832942 7. 027934 8. 312412 8. 0278 7. 658449  
5. 346997 4. 963314 4. 88242 5. 311371 5. 160392 5. 976751 5. 256563 4. 712801 4. 185118  
2. 505353 2. 198899 2. 914054 3. 033243 3. 59796 2. 438697 3. 112029 3. 404371 2. 886522  
5. 963491 7. 317813 7. 115631 6. 878658 6. 83887 6. 744554 7. 322172 6. 958771 6. 983941  
4. 254645 3. 512344 3. 418533 3. 670793 4. 3837 3. 11208 4. 376017 4. 434327 4. 563364  
1. 488702 0. 775674 1. 57565 1. 914302 2. 269631 2. 3037 2. 159004 1. 006043 2. 690168  
3. 938797 3. 446497 4. 143665 3. 804467 4. 214906 2. 931976 4. 221554 3. 790101 3. 422649  
3. 929517 4. 375989 4. 722234 4. 264531 3. 325432 3. 341043 3. 19267 3. 518356 3. 576817  
2. 259063 2. 300155 2. 139229 2. 793455 2. 334405 2. 470058 2. 235886 1. 87489 3. 095825  
2. 417665 3. 298401 2. 560376 2. 100066 1. 39919 2. 775771 3. 003269 3. 091623 3. 448303  
2. 626154 2. 133904 1. 349658 1. 452384 1. 478535 1. 719063 2. 610174 1. 736951 2. 254088  
2. 891342 3. 480939 2. 295182 2. 828488 1. 964821 3. 054047 1. 816682 2. 395398 2. 208124  
1. 193339 1. 439573 1. 249865 1. 875269 1. 691282 0. 92234 0. 902071 1. 274884 1. 023483  
1. 035601 1. 890499 2. 015143 1. 882171 1. 734286 1. 668265 1. 302758 1. 544496 1. 504123  
3. 11393 2. 937732 2. 719387 2. 823199 2. 542924 2. 595891 2. 497692 2. 938186 2. 11331  
1. 251158 1. 30906 0. 956566 1. 322261 1. 018282 1. 470788 1. 613944 1. 088977 1. 071088  
1. 186425 0. 913634 1. 526151 1. 423728 1. 067288 1. 383591 1. 289811 1. 512952 1. 246666  
1. 326448 1. 966807 2. 049645 1. 92594 2. 158888 1. 996276 1. 638374 1. 883265 1. 997275

3. 609506 4. 596442 4. 104741 4. 082048 5. 045004 2. 343725 4. 617272 4. 196668 4. 017916  
4. 95621 5. 046882 4. 984984 5. 891313 5. 159978 4. 993157 5. 433713 4. 316106 5. 255064  
5. 439812 5. 456197 4. 947583 5. 746127 5. 512024 6. 44844 6. 067748 6. 549553 6. 6205  
3. 393659 3. 999811 2. 476186 3. 081421 3. 414963 5. 334962 3. 883377 3. 36911 3. 715632  
6. 923384 7. 494261 6. 82684 6. 425745 7. 569089 6. 197333 7. 260436 7. 304833 7. 168394  
2. 751558 1. 753375 2. 161052 1. 904383 2. 198414 2. 463518 2. 656958 1. 318919 2. 504047  
1. 676099 2. 682341 1. 595658 1. 642118 2. 743105 2. 304539 1. 548424 3. 571835 2. 003335  
5. 36658 6. 627183 6. 102547 5. 306081 5. 845728 5. 213871 5. 882757 5. 171431 5. 36264  
4. 754967 4. 329163 4. 928077 4. 0993 4. 535826 4. 582883 4. 008725 4. 461604 4. 912797  
0. 910244 0. 451214 0. 754785 2. 536229 0. 47343 1. 886909 1. 111444 0. 773974 1. 642691  
7. 402446 7. 641453 7. 40749 7. 938035 6. 792304 7. 808065 7. 155176 7. 191473 7. 251529  
4. 501041 4. 778868 4. 186513 4. 725117 4. 910746 4. 339822 4. 9184 4. 874114 5. 177139  
4. 553746 4. 960187 4. 019317 5. 271312 4. 570654 3. 791403 4. 43974 4. 658009 4. 525646  
1. 499227 1. 504 2. 276956 1. 477569 1. 063186 1. 876668 1. 585854 1. 864952 1. 639007  
3. 579408 3. 906782 4. 196869 4. 543662 3. 46937 4. 348676 4. 775158 2. 776981 3. 561492  
1. 561951 0. 645139 1. 581766 1. 593878 1. 410688 1. 785359 0. 983788 1. 365882 1. 547373  
3. 826875 3. 118467 3. 976215 4. 096066 5. 054343 3. 899228 4. 662499 4. 835818 3. 735329  
1. 889341 3. 090755 2. 725014 1. 517429 4. 113923 4. 780325 3. 273802 2. 904171 4. 093855  
1. 72116 1. 455164 1. 080677 1. 484134 1. 534263 1. 157891 1. 284881 1. 508367 1. 25924  
3. 42322 3. 563789 4. 024517 3. 308902 2. 706025 2. 80292 2. 454366 3. 042221 2. 107017  
1. 582125 1. 468395 1. 705679 1. 366895 1. 459057 4. 054414 1. 605377 1. 272354 1. 467744  
7. 220006 7. 431984 7. 064183 6. 459784 6. 767492 6. 561417 7. 458419 7. 41509 7. 429838  
3. 352159 4. 148907 3. 960283 4. 377732 4. 190182 4. 743268 4. 481807 3. 890033 4. 564817  
1. 241276 3. 822572 2. 874 2. 264952 2. 303507 2. 178676 2. 003556 1. 991926 2. 333283  
3. 00929 3. 807728 2. 619157 3. 709821 2. 275801 2. 767276 4. 086772 2. 323217 3. 612846  
5. 601682 6. 627316 5. 980262 5. 780373 5. 97287 5. 392384 5. 654994 4. 824169 5. 513851  
5. 371193 5. 311821 5. 475916 4. 94918 6. 439897 4. 009124 5. 533011 5. 202946 5. 794872  
3. 57457 4. 882103 4. 412772 4. 653108 4. 154536 5. 057394 5. 125787 4. 176114 4. 767577  
3. 7322 4. 484032 3. 305381 4. 878464 3. 977211 3. 925226 4. 055625 3. 700549 4. 133578  
5. 397469 5. 636587 6. 122212 6. 59236 6. 768023 4. 768044 5. 97317 6. 743178 6. 579913  
3. 821951 2. 265645 3. 583676 2. 639051 3. 715942 3. 44263 3. 401176 5. 300616 4. 081821  
3. 648726 4. 486231 3. 104228 2. 4932 4. 374609 4. 086038 3. 996573 3. 181632 3. 652471  
5. 109937 3. 928297 4. 626369 5. 691772 5. 083795 5. 613683 5. 090909 5. 259661 6. 016983  
3. 695419 1. 636615 4. 463496 2. 549775 3. 062824 3. 507114 2. 61773 2. 96089 3. 312427  
4. 626018 5. 57139 5. 170108 3. 586565 3. 668942 5. 942811 2. 618069 3. 264592 2. 300337  
5. 110542 5. 25813 5. 156382 5. 107083 6. 295207 5. 037745 5. 908239 5. 247787 4. 196408  
5. 685194 5. 774517 5. 573185 5. 89452 5. 460095 5. 082112 6. 574456 6. 471578 5. 483013  
6. 489578 6. 630551 6. 589459 6. 155606 6. 7731 6. 447473 6. 065954 6. 155361 6. 085122  
5. 274923 5. 465539 5. 207761 6. 171203 5. 371757 5. 135167 5. 153616 6. 205167 5. 474787  
2. 637018 2. 349443 3. 156372 3. 098662 2. 832639 2. 740788 2. 482923 2. 591254 3. 804443  
7. 847279 7. 521152 7. 897849 8. 529636 7. 747419 8. 491398 8. 156354 8. 132589 8. 13798  
5. 857352 6. 680626 6. 62537 5. 876662 6. 770164 6. 473925 5. 371656 5. 719591 6. 042932  
6. 751658 6. 99506 5. 806353 6. 418026 6. 44821 6. 580638 6. 519503 6. 217545 6. 299894  
6. 892202 6. 732732 6. 603794 6. 417659 6. 877554 6. 252998 6. 558827 6. 118199 6. 428943  
4. 061886 4. 310906 5. 153873 5. 178458 4. 64338 4. 585657 4. 484783 4. 772556 5. 465931  
2. 79216 2. 389535 2. 47489 2. 332201 3. 024281 4. 074362 3. 231707 3. 528967 3. 597084  
3. 441331 1. 91336 3. 171533 2. 157314 1. 990259 3. 358596 3. 362839 2. 640884 2. 802063  
5. 956554 5. 733964 6. 004262 5. 969511 6. 768965 6. 891963 7. 494625 7. 380924 7. 711034  
5. 098844 4. 959628 4. 419763 4. 927775 3. 597963 5. 085465 5. 030887 3. 777864 4. 126948  
3. 485433 3. 701517 3. 44602 3. 936113 3. 550951 3. 757623 4. 536203 4. 63114 4. 07018  
3. 085075 4. 702737 3. 504319 3. 411854 3. 842938 2. 706198 3. 917835 3. 696945 3. 508243



2. 954562 4. 113712 3. 134177 2. 006556 3. 685839 3. 256629 3. 419436 4. 613015 3. 182191  
1. 831628 1. 880878 1. 955895 2. 703591 1. 737213 1. 945864 1. 985107 2. 247779 2. 732506  
1. 681545 1. 435373 1. 419232 2. 191509 1. 67658 1. 838828 1. 398445 1. 59102 1. 630793  
3. 185799 2. 932296 3. 103619 3. 271066 2. 652231 3. 517335 3. 02091 3. 277164 3. 260817  
8. 708821 9. 056191 8. 884272 8. 735471 9. 147677 8. 278587 8. 987434 8. 695208 8. 402268  
5. 387047 6. 499103 6. 208073 5. 959164 6. 270599 5. 487665 6. 372177 6. 214069 5. 855726  
7. 692557 7. 976257 7. 337699 8. 416762 7. 799875 7. 200848 7. 099521 6. 987936 6. 793298  
3. 480622 4. 710766 4. 175513 3. 037142 4. 778031 4. 600783 4. 251125 3. 603707 4. 959295  
6. 659946 6. 840712 6. 64808 5. 394546 6. 18915 5. 261945 6. 143843 5. 340138 6. 373874  
0. 806051 1. 192159 1. 207265 1. 026378 1. 006304 1. 364179 1. 376701 1. 078078 1. 201217  
7. 277755 7. 652761 8. 055827 8. 151955 8. 156572 6. 044437 8. 001785 6. 994027 7. 68357  
5. 585683 5. 609917 5. 75609 5. 787393 6. 107979 5. 900597 5. 339595 4. 886491 5. 36836  
5. 51463 5. 254148 5. 07418 6. 234798 5. 549331 6. 296569 5. 502672 4. 708855 4. 841608  
7. 805588 7. 905807 7. 097274 7. 593889 6. 803272 7. 603149 6. 687745 6. 996702 6. 878405  
6. 178151 6. 921219 6. 0687 5. 780299 6. 458746 6. 62669 5. 774266 5. 998301 6. 448239  
3. 313147 4. 45023 4. 086112 4. 573633 5. 85801 4. 433066 5. 044355 3. 809902 4. 658074  
2. 425711 1. 583351 1. 696705 3. 726476 1. 375118 1. 974841 2. 287644 1. 476567 1. 669531  
3. 511105 2. 672978 2. 803083 1. 757417 3. 811904 3. 198951 3. 155848 2. 992558 2. 481011  
1. 828358 2. 479343 1. 552055 1. 524197 1. 440563 2. 483136 1. 347158 1. 326502 1. 518246  
1. 583192 2. 910203 2. 977072 2. 06553 1. 493615 2. 176123 2. 007693 2. 431859 2. 477944  
3. 319508 4. 858448 3. 016933 4. 126083 3. 766975 3. 670601 4. 87382 3. 261573 3. 507834  
2. 445468 2. 33331 2. 019938 1. 874548 3. 14547 1. 922148 1. 387105 2. 657391 2. 439557  
1. 889783 1. 66974 1. 543139 1. 34024 1. 67253 2. 22114 2. 451831 1. 49221 1. 524809  
3. 704444 2. 805097 1. 49678 2. 831838 3. 391616 4. 184627 4. 574169 3. 262141 3. 441738  
3. 190195 3. 738073 4. 572071 4. 080173 2. 569811 3. 436221 2. 906099 3. 220758 2. 720081  
3. 883444 3. 507099 3. 482551 2. 896143 3. 170103 4. 033996 4. 124767 2. 966511 2. 962981  
2. 884955 1. 808623 2. 603532 2. 459547 1. 810181 3. 779601 2. 718114 2. 445697 2. 720884  
4. 480215 5. 405001 4. 909921 3. 685875 4. 722869 4. 08094 4. 681065 5. 031196 4. 834864  
3. 650336 2. 422606 2. 38344 3. 428764 2. 536787 3. 361484 3. 639031 2. 928854 3. 030666  
2. 481714 3. 121897 2. 299908 2. 2758 2. 219289 3. 275512 2. 655954 2. 498728 2. 466797  
1. 222953 0. 967567 1. 224755 1. 166475 1. 380539 1. 252352 1. 404122 1. 380379 1. 628906  
1. 816474 1. 765043 1. 845781 1. 556873 2. 205063 2. 132562 1. 859026 1. 658494 2. 015583  
5. 055285 4. 296093 4. 127754 5. 270687 5. 077348 5. 507668 5. 867793 5. 669409 5. 912822  
4. 660274 4. 134063 4. 030602 4. 663934 3. 566732 5. 471723 4. 861417 5. 120372 4. 189842  
6. 562002 5. 669222 7. 417901 7. 168833 6. 569189 7. 43488 6. 857536 7. 03542 7. 044402  
6. 865052 6. 787726 7. 261986 6. 947161 7. 219898 6. 722 6. 451224 7. 303851 7. 05446  
3. 900472 4. 264593 4. 295436 2. 887499 4. 241862 3. 535444 3. 900867 3. 943542 3. 814208  
1. 711104 1. 750769 1. 098541 1. 460272 1. 373001 1. 350995 1. 411839 2. 020799 1. 18123  
6. 220274 7. 136797 6. 819945 6. 639329 7. 232556 6. 483555 6. 983627 6. 871852 6. 828889  
5. 299008 4. 644801 5. 149021 4. 92304 5. 095479 5. 17319 5. 733182 6. 075397 5. 611674  
4. 174711 3. 962784 3. 871327 4. 275915 3. 095561 4. 393701 3. 802745 3. 616325 4. 488777  
7. 202249 7. 324206 7. 083251 7. 444575 7. 792744 7. 367015 7. 24018 7. 808647 6. 947221  
4. 189044 3. 418461 4. 092925 3. 313081 2. 975075 4. 278653 4. 11975 5. 171468 3. 775308  
6. 903138 6. 87189 6. 686257 7. 56912 7. 105219 6. 918948 6. 765935 6. 939299 7. 163055  
2. 499543 1. 629954 1. 955768 2. 721156 3. 457342 2. 429316 2. 152397 2. 142148 2. 003644  
8. 904831 8. 084746 8. 387552 7. 891547 7. 238516 8. 839988 7. 974605 6. 197911 5. 327232  
3. 042475 5. 238844 4. 228209 3. 477895 3. 945992 2. 882004 3. 562835 4. 114938 3. 508432  
7. 119143 7. 143779 6. 006871 5. 846696 7. 087458 4. 141703 6. 360815 5. 790112 6. 033523  
2. 644539 3. 291558 3. 119197 2. 679885 2. 629739 2. 68733 1. 815961 2. 601013 3. 029078  
1. 316979 2. 141744 2. 275262 2. 827996 2. 133468 2. 008361 1. 980765 2. 037342 2. 44969  
4. 449162 5. 089313 5. 28845 3. 820553 3. 430645 4. 991992 4. 824638 4. 161539 5. 122887

3. 770429 2. 99573 3. 376818 3. 156212 3. 149027 3. 016252 3. 136956 4. 446352 3. 54469  
2. 030509 2. 030509 1. 615649 2. 286172 1. 613879 2. 009077 1. 618322 1. 530455 2. 350332  
6. 198187 5. 871389 6. 04703 5. 428499 6. 447141 5. 315332 6. 563068 5. 303207 5. 6898  
3. 45512 3. 042153 4. 89422 4. 188595 4. 442184 4. 47277 5. 429534 4. 940751 5. 217667  
3. 866675 3. 604141 3. 99349 2. 298975 3. 877793 3. 152451 3. 794785 4. 427231 3. 152382  
2. 597127 2. 65573 3. 135044 2. 780016 3. 308283 3. 267869 2. 942615 3. 30348 2. 578566  
5. 489231 5. 371665 5. 078343 7. 319155 6. 023228 6. 786885 4. 871637 5. 926944 5. 988835  
7. 211711 7. 275465 7. 10723 6. 814267 6. 666594 6. 853667 7. 104249 6. 409943 6. 275481  
1. 857857 2. 577983 2. 533336 2. 15262 2. 188824 3. 040984 2. 200806 2. 352 2. 431173  
5. 846501 6. 169029 6. 227061 5. 822017 6. 137527 5. 805672 6. 570071 6. 390582 6. 539536  
6. 103582 4. 909409 5. 882516 6. 716905 5. 916657 6. 793445 6. 160979 6. 188438 5. 629371  
4. 261363 4. 039364 4. 310113 4. 320816 3. 370021 5. 021869 3. 417976 4. 278373 3. 792099  
5. 139976 4. 755088 4. 183248 5. 342395 5. 727252 4. 93726 4. 596175 5. 024894 4. 23729  
6. 48563 4. 823906 4. 555551 6. 932389 5. 729801 7. 213241 7. 060754 5. 838878 6. 213875  
4. 128679 4. 115643 4. 677345 4. 952448 5. 201372 4. 923804 4. 888893 4. 891767 4. 798164  
6. 875374 6. 105113 6. 605171 7. 903785 7. 517925 7. 372121 7. 877792 6. 962157 7. 063097  
5. 461049 6. 259127 6. 15524 4. 776628 6. 596114 5. 902031 5. 998965 5. 488177 6. 435492  
5. 208113 5. 509788 6. 26246 5. 774035 5. 259841 6. 005681 5. 2463 4. 648515 5. 238026  
6. 105862 7. 031488 6. 285209 6. 514092 6. 023476 6. 35154 6. 780229 7. 056473 6. 224083  
5. 626557 6. 765321 5. 417637 5. 121364 6. 133202 3. 392811 5. 290849 5. 434683 4. 901014  
5. 433424 6. 745868 6. 594731 5. 840126 5. 508032 6. 40445 5. 038729 6. 335533 6. 085421  
4. 718049 3. 548048 5. 018131 3. 964368 5. 12347 5. 115702 4. 014432 4. 182379 4. 295156  
4. 381798 1. 827721 1. 908144 3. 072724 3. 356414 4. 499677 3. 56986 4. 313832 3. 676465  
1. 80532 2. 552035 3. 599442 2. 35234 2. 037122 3. 469211 2. 100279 1. 991897 2. 990454  
4. 180873 4. 72148 3. 411881 4. 613805 4. 674456 3. 97321 4. 615269 5. 340907 5. 221274  
4. 445482 4. 54587 5. 150881 4. 498041 4. 710329 3. 742996 3. 974584 3. 989801 4. 089323  
3. 790361 3. 676824 4. 391418 4. 400992 4. 866045 2. 82344 4. 857309 4. 159893 3. 745187  
3. 082905 3. 242628 3. 341675 2. 16476 2. 634455 1. 989906 2. 201159 3. 093035 3. 653523  
5. 560377 6. 203411 5. 622426 5. 464639 5. 882982 5. 551101 5. 650939 5. 970696 6. 588689  
5. 646853 4. 087113 4. 667265 4. 936303 5. 480458 3. 990717 4. 864088 5. 251329 5. 416836  
4. 332557 4. 371633 5. 016042 5. 421301 5. 439345 5. 195394 5. 062166 5. 839404 5. 665678  
5. 15149 4. 525356 3. 765198 5. 570938 4. 543409 5. 481117 4. 56853 4. 540463 4. 487034  
3. 467209 5. 204557 3. 756503 4. 220155 4. 458551 3. 281175 4. 465647 3. 579373 3. 866064  
2. 987761 3. 605943 3. 071448 3. 546516 4. 046144 2. 751107 3. 549272 3. 757998 4. 198186  
5. 190133 4. 926043 4. 945543 5. 323466 4. 741088 5. 188589 4. 862473 4. 540085 4. 531374  
1. 067714 2. 442981 1. 583058 1. 364342 1. 277091 1. 056515 1. 16319 1. 092414 1. 057196  
4. 133967 3. 112583 3. 504003 2. 520425 3. 571342 4. 030784 3. 599385 3. 851849 4. 411098  
5. 218017 4. 921306 4. 914939 4. 726201 5. 022356 5. 208954 4. 990441 4. 555978 4. 386966  
5. 42283 5. 760796 5. 03235 5. 174048 4. 221 5. 717121 5. 466826 4. 332976 5. 316885  
5. 003907 5. 357857 4. 965044 4. 7889 5. 379088 4. 286177 5. 185528 5. 469737 5. 306879  
1. 592697 1. 300052 1. 375322 1. 959172 1. 152334 1. 713512 1. 177286 1. 167784 3. 067819  
5. 935756 6. 387313 5. 391858 5. 601592 5. 669646 6. 272127 5. 890108 6. 933144 5. 224631  
6. 011829 5. 995468 6. 418212 5. 885486 5. 702089 6. 018001 6. 038223 6. 809749 6. 023359  
5. 062433 3. 622191 4. 634363 3. 919233 5. 204936 5. 144853 5. 001917 3. 967361 4. 567103  
8. 303752 8. 156988 7. 994059 8. 688145 7. 731414 8. 542479 8. 736094 8. 590954 8. 403966  
5. 682734 5. 726559 6. 554778 4. 743622 6. 212578 5. 135641 5. 399373 5. 198986 5. 903145  
4. 563704 5. 554773 4. 514003 5. 233577 4. 652993 5. 521278 5. 687841 5. 727822 5. 437725  
5. 749788 5. 60421 6. 428818 6. 954354 5. 754745 5. 743643 6. 253847 6. 18823 6. 103588  
5. 009738 4. 945818 5. 407316 5. 866623 4. 839115 6. 181342 5. 808741 4. 840681 5. 541727  
5. 378644 4. 930875 3. 978396 7. 038864 5. 42304 4. 701551 5. 590054 5. 436239 5. 214794  
4. 248528 4. 242564 3. 476076 4. 934698 5. 475017 5. 848771 4. 345263 5. 365197 5. 076281

4. 055426 4. 769058 5. 075862 5. 845479 5. 399897 4. 18708 6. 464416 5. 405153 5. 023636  
5. 580873 5. 014616 4. 450706 5. 048882 4. 62405 5. 305099 5. 396537 5. 485439 5. 061585  
2. 752815 2. 387979 3. 032422 2. 63417 2. 709133 2. 64514 3. 199631 3. 036072 2. 565726  
6. 423365 6. 155557 5. 885083 6. 537364 5. 71767 6. 966308 5. 815184 5. 097987 5. 9202  
4. 34376 5. 384346 4. 327241 4. 668007 3. 459932 4. 600944 5. 409493 3. 487788 4. 766005  
6. 011551 6. 940868 7. 129879 6. 08967 6. 794856 7. 635694 6. 400001 6. 907843 6. 742979  
4. 676881 4. 428462 5. 31967 5. 828826 6. 357127 5. 181379 5. 055413 6. 648281 5. 094867  
3. 130595 3. 182057 2. 196664 3. 665323 2. 86043 2. 723768 3. 703565 3. 884013 3. 595779  
8. 453162 8. 117299 8. 27574 8. 796035 8. 418391 8. 487209 8. 5363 8. 55417 8. 865959  
3. 432435 2. 933032 3. 01031 2. 538077 3. 066833 2. 942746 3. 430822 3. 693327 3. 294414  
3. 837843 4. 602798 3. 832437 3. 420635 3. 494781 4. 673734 3. 825526 3. 080038 3. 907461  
5. 85362 5. 655557 5. 270232 5. 744762 5. 088946 5. 384134 5. 587726 4. 97797 5. 649977  
3. 416574 2. 236154 2. 714323 3. 548712 2. 333117 2. 658566 2. 708728 2. 302189 2. 094703  
5. 41716 7. 724417 7. 075091 7. 166237 7. 086535 7. 019583 5. 947502 6. 693468 6. 496489  
1. 629704 1. 48029 2. 057763 1. 11081 1. 257985 1. 486714 1. 913675 1. 51203 1. 332617  
6. 781579 7. 960383 6. 851809 6. 906069 7. 432327 6. 742052 7. 618273 7. 015834 7. 521704  
7. 507991 6. 678782 7. 440621 8. 190277 6. 92822 7. 60843 6. 667478 7. 288947 7. 487168  
2. 475047 2. 67507 5. 220893 5. 404539 3. 992639 3. 911597 1. 918357 4. 323698 4. 24604  
7. 164213 6. 392705 7. 136174 7. 433251 6. 30178 6. 344753 7. 254065 6. 307399 6. 966347  
4. 073767 4. 26926 4. 001226 5. 218074 5. 768461 5. 581577 4. 33096 5. 914672 5. 152713  
4. 435443 4. 460403 4. 022675 5. 908021 5. 255142 5. 014442 4. 833071 5. 144271 5. 660183  
4. 62671 3. 558661 3. 684818 3. 977491 3. 373734 4. 104953 3. 540326 4. 279609 2. 62295  
1. 093545 1. 584397 1. 225803 1. 228784 1. 272381 1. 442992 0. 979463 1. 235278 1. 869024  
6. 655492 6. 230073 6. 484757 5. 936064 6. 084599 6. 070056 6. 394718 5. 949241 5. 484003  
6. 717153 6. 24215 6. 313974 7. 13356 6. 661534 6. 19726 6. 516424 6. 168014 6. 457077  
3. 900818 3. 812288 4. 621351 3. 122132 4. 064874 4. 354326 4. 1174 4. 224642 3. 908348  
3. 514758 3. 128906 3. 206143 3. 172565 3. 43935 4. 3746 3. 784845 3. 387647 3. 405024  
5. 29896 4. 682743 4. 783272 5. 240557 5. 277132 5. 929386 5. 249965 4. 948847 5. 503661  
2. 144427 1. 883765 2. 001112 2. 63438 2. 004079 1. 992464 1. 876209 1. 96481 2. 086011  
6. 421204 7. 147982 6. 508299 6. 520924 5. 97259 5. 729815 5. 776691 6. 316588 6. 515368  
3. 715803 3. 048628 3. 222129 4. 301839 3. 258042 4. 537245 3. 063433 4. 296303 3. 988582  
6. 581938 6. 191659 6. 189283 6. 458749 5. 908961 5. 631279 6. 216636 6. 483724 6. 561509  
6. 354381 6. 153468 6. 067692 6. 454845 6. 443185 3. 996731 7. 197283 7. 31335 6. 965918  
2. 864201 2. 868244 2. 512743 1. 507269 2. 328867 2. 450141 1. 645446 3. 374513 2. 100133  
4. 975491 4. 322062 4. 358199 3. 410544 4. 282963 3. 76423 4. 738733 4. 141324 4. 703997  
6. 838987 7. 551935 6. 362254 6. 351549 6. 568839 6. 425105 6. 036397 6. 137074 6. 204923  
1. 48656 1. 038804 1. 73547 1. 709731 1. 598337 1. 797016 1. 857284 1. 285185 1. 858956  
6. 408649 6. 110033 6. 01513 5. 552282 6. 281013 4. 874118 5. 698319 6. 167765 6. 110824  
6. 424875 7. 244482 6. 672166 6. 722914 7. 152871 6. 175447 6. 661979 7. 080234 6. 948139  
3. 528967 2. 893086 2. 635262 2. 380991 2. 714599 3. 849257 2. 771628 3. 012268 2. 568668  
2. 132809 2. 880873 2. 298425 1. 76385 1. 969299 3. 416639 1. 572164 2. 624493 2. 283254  
5. 36565 5. 336427 5. 036724 5. 284749 6. 053554 4. 560649 5. 364946 5. 092748 5. 382152  
4. 442008 3. 670412 3. 056804 3. 117143 3. 313097 4. 256514 3. 065894 4. 522233 4. 516173  
5. 592919 5. 786461 6. 339696 5. 817523 4. 70813 6. 036623 6. 385605 6. 828933 6. 203939  
4. 434326 5. 58803 2. 8757 5. 993989 5. 715059 6. 511364 5. 347141 6. 609179 6. 895141  
9. 728569 9. 384413 9. 668823 9. 700696 9. 983074 10. 16909 9. 884701 9. 916924 9. 602482  
1. 831626 2. 116 1. 669708 1. 587145 1. 330256 3. 296291 1. 167288 1. 548445 1. 705621  
2. 64057 3. 124184 3. 298144 3. 317868 2. 284126 2. 815789 1. 883863 1. 722155 2. 154074  
2. 312034 2. 181064 2. 108616 1. 803425 1. 920145 3. 144063 2. 212453 2. 012113 1. 64303  
2. 174139 2. 071701 2. 056718 2. 374113 2. 472766 2. 13145 2. 459381 2. 510945 2. 351862  
3. 810742 4. 561414 6. 267187 5. 566672 5. 072093 5. 161728 4. 715493 4. 120599 5. 633112

5. 542993 5. 834084 5. 036953 4. 120732 5. 580369 5. 662368 5. 51262 5. 637678 4. 703914  
1. 555741 1. 404869 1. 981197 2. 255696 1. 805083 1. 968823 1. 426223 2. 431605 2. 008962  
6. 243815 7. 064666 6. 544926 7. 097275 6. 757508 6. 107359 6. 797795 6. 252299 6. 278186  
4. 634274 4. 316023 4. 368815 4. 755467 3. 708607 4. 119536 3. 81088 4. 136423 3. 20856  
6. 97907 6. 743173 6. 71938 6. 316105 6. 922017 6. 327261 6. 955064 6. 681759 6. 802345  
1. 215108 1. 389922 1. 38033 1. 309632 1. 177302 2. 395528 0. 938469 1. 12793 0. 853572  
4. 318842 5. 313694 4. 804352 5. 185628 4. 195372 5. 218007 4. 508465 4. 917869 4. 972788  
4. 672118 4. 360399 4. 790509 4. 994297 4. 671578 4. 790753 4. 850368 5. 155026 5. 07889  
2. 966008 2. 295819 2. 300396 2. 953532 2. 185688 2. 412778 2. 282304 2. 699359 2. 645079  
6. 949586 6. 51142 7. 261493 6. 801447 7. 181263 8. 064654 7. 654718 7. 880527 7. 836133  
4. 849953 5. 528775 4. 943582 5. 893007 6. 154889 4. 128233 5. 289937 5. 45212 5. 979094  
2. 253611 3. 365462 3. 316811 2. 993973 3. 049191 2. 324384 3. 746179 3. 550155 3. 967833  
3. 02825 3. 800127 2. 767969 3. 598695 2. 905422 3. 454665 3. 413283 3. 987247 3. 177777  
5. 014037 5. 631346 5. 551337 6. 029408 5. 78118 4. 188118 6. 178026 5. 906093 5. 625349  
4. 45613 2. 906829 3. 862357 4. 825425 3. 619331 4. 654485 3. 86338 2. 561583 4. 471299  
5. 387312 5. 177324 5. 36254 5. 761325 5. 219796 4. 152225 5. 14873 4. 741584 4. 704729  
6. 816892 6. 682135 6. 541516 5. 032306 6. 009605 5. 02278 5. 446575 5. 824645 6. 240586  
5. 569494 4. 419549 4. 33956 4. 110513 3. 834421 5. 235406 3. 064439 2. 731632 2. 347371  
6. 89679 7. 299033 6. 644664 5. 543247 5. 722522 6. 679895 5. 945509 5. 682031 6. 062683  
4. 162931 3. 881687 3. 468219 1. 65813 3. 677961 5. 485184 4. 297448 2. 663441 4. 362042  
4. 324371 4. 843028 4. 821941 4. 578977 5. 136789 2. 448772 3. 152517 2. 938462 2. 288348  
2. 480072 3. 219839 2. 463235 2. 354741 3. 044922 2. 96719 2. 595603 3. 533471 2. 467956  
2. 509101 2. 25834 2. 888133 2. 461762 3. 172247 2. 476873 3. 038338 2. 797483 2. 845347  
2. 267936 3. 121683 2. 328917 1. 611882 1. 946476 3. 209741 2. 276828 2. 256714 2. 304288  
2. 535623 2. 841048 2. 873532 2. 830227 2. 568663 2. 53001 2. 142261 2. 599777 2. 66944  
1. 938794 2. 503916 1. 813378 2. 163709 2. 269245 1. 993093 2. 236583 2. 275746 2. 293674  
7. 511344 7. 099882 7. 372637 7. 292649 7. 31893 6. 997163 6. 820607 6. 826478 6. 920008  
1. 303866 3. 333224 4. 11539 1. 785024 3. 080975 3. 303022 4. 453046 4. 998198 4. 613272  
1. 578857 1. 655096 1. 829838 2. 248332 1. 45495 1. 669244 1. 691691 2. 003975 2. 386773  
5. 687867 6. 007643 5. 982918 5. 641911 5. 927901 5. 862716 5. 533661 6. 297957 6. 004479  
4. 412534 4. 688167 4. 646356 4. 854013 5. 110052 4. 06427 4. 600933 4. 593185 4. 756664  
1. 444229 3. 005232 1. 740995 2. 142074 3. 276858 2. 150031 1. 905642 1. 802116 1. 454931  
3. 588823 2. 950363 2. 873033 2. 843964 3. 151133 2. 483374 2. 552064 2. 600855 2. 812892  
2. 583232 2. 238892 3. 073871 3. 227996 2. 55523 3. 71054 3. 724117 3. 544498 2. 594489  
2. 006201 4. 909262 4. 127226 3. 803397 2. 878122 3. 428757 3. 660025 3. 960056 4. 239834  
2. 716992 2. 996326 2. 980712 3. 591146 2. 808701 3. 473032 3. 37859 2. 573217 3. 093743  
7. 03596 7. 703946 6. 403744 7. 02123 7. 200112 7. 020486 7. 259517 7. 103095 7. 272689  
5. 878773 5. 527965 5. 124341 6. 066375 5. 287548 6. 186481 5. 559933 5. 591282 5. 613768  
2. 359767 3. 441639 3. 713497 4. 176897 2. 890749 4. 66663 3. 821699 3. 279305 3. 556136  
2. 304472 4. 073368 2. 929514 4. 092913 3. 244256 2. 457271 2. 753755 2. 917102 3. 128414  
6. 131524 7. 219625 7. 230882 5. 809176 7. 748434 6. 699238 7. 025605 8. 382646 6. 829175  
2. 13675 1. 842823 1. 56503 3. 118037 1. 706958 2. 342957 2. 535722 3. 028914 1. 314879  
2. 852834 3. 418044 3. 117224 3. 678386 3. 304952 4. 402396 2. 26146 4. 255113 3. 777411  
2. 851114 2. 299147 4. 059925 2. 444081 2. 209009 2. 968889 2. 059986 3. 483428 3. 070609  
6. 409471 6. 669047 6. 116472 6. 070383 6. 032469 6. 379227 6. 304423 5. 59298 6. 422299  
3. 398541 3. 735095 3. 299583 3. 49918 3. 599267 3. 54849 3. 351274 3. 925614 4. 242232  
5. 171609 5. 357989 5. 478924 5. 246311 5. 222796 5. 677375 5. 884292 5. 213254 5. 41362  
5. 540135 4. 90383 4. 724155 4. 987603 4. 342263 5. 458687 5. 184105 3. 928675 5. 260197  
1. 363773 1. 985671 1. 151774 2. 380844 1. 646497 1. 39546 1. 988178 2. 397349 2. 314525  
4. 778785 5. 443458 5. 572708 5. 179658 5. 238067 4. 650055 5. 326509 4. 856604 4. 890246  
5. 141131 4. 517219 5. 087757 4. 688513 4. 388487 4. 536628 6. 0897 5. 079313 4. 914946

7.023193 7.448877 6.924202 6.92645 6.730973 6.881806 6.998914 7.01797 7.004987  
2.567605 2.421398 2.53594 2.746751 2.594784 2.401298 2.369173 2.973672 2.469398  
2.558793 3.369144 3.136632 3.748577 2.482004 2.702529 2.301284 2.286038 3.41189  
3.074891 2.747509 2.252905 2.602295 2.811156 2.263733 3.247595 3.536969 3.38777  
1.396303 0.952625 1.117851 1.836957 1.544939 1.208256 1.25284 1.755758 1.376875  
6.363898 6.022929 6.27422 6.341818 6.196806 6.036279 6.289433 5.323171 5.960178  
0.814377 2.422251 1.074197 1.785217 1.198502 3.138007 1.622591 1.669566 2.726737  
4.077748 3.573753 3.521239 2.901747 4.678976 2.561523 4.568146 4.86582 3.624463  
6.862198 6.512451 7.349367 7.729321 6.867245 7.200695 7.318063 7.554101 7.105049  
2.437484 4.378077 3.330959 4.309288 4.377222 4.408486 1.865619 3.160577 2.91007  
4.213116 4.190708 3.690641 3.512449 4.260777 3.29017 4.056939 3.831679 3.952029  
3.15807 3.975696 4.892009 5.2317 5.349046 3.838725 4.586444 4.261277 5.172807  
6.057265 5.931002 4.043871 5.788387 5.286855 5.291792 5.184801 5.237497 5.371309  
6.505368 6.88809 6.433146 7.31625 6.870399 6.195733 6.475421 6.130391 6.812378  
5.643814 5.327447 6.80335 6.976419 6.972187 4.439859 6.599039 5.613361 6.362141  
1.477303 1.874026 0.821635 1.475232 1.222183 1.738788 0.891766 1.101711 1.156647  
4.374719 3.816742 2.665837 3.692475 3.933601 4.999217 4.468638 4.98042 4.913689  
6.35993 5.884696 6.167315 6.380333 6.27357 5.409199 6.801137 6.336519 6.903114  
3.215043 3.336069 3.825492 3.619556 3.475693 3.307735 3.15714 3.381831 2.676858  
1.188997 3.666637 2.646396 1.829748 1.745393 2.356092 1.606342 3.07403 2.197415  
1.202107 1.286097 1.001415 1.161594 1.358637 1.124729 0.735744 2.637506 1.318455  
2.257531 3.023179 2.330144 2.192151 2.394756 2.409859 1.964813 2.459961 2.552993  
3.438964 3.073364 3.115023 3.695854 3.257544 2.877867 3.131608 3.862596 2.711751  
6.529332 6.39245 6.62163 6.642273 7.240707 8.505585 7.168702 8.164188 8.06946  
3.396328 3.383652 4.1432 1.346363 3.224456 3.844097 3.767836 3.964028 4.171805  
3.695127 3.434721 3.310195 3.878599 3.8461 2.229074 3.053212 3.232277 3.774511  
2.652321 2.129418 2.304788 3.202681 1.649592 1.260597 1.698852 1.809487 1.563001  
6.054644 5.867432 3.543258 5.20196 5.483383 4.577761 5.88612 3.730451 5.510904  
8.062963 7.920089 8.097747 7.69074 8.071871 7.052369 7.053545 5.717973 6.22576  
4.745892 4.903148 4.224211 4.664095 4.426745 4.842247 4.880589 3.644999 4.457828  
1.142668 1.812968 1.200688 1.379013 1.585399 1.012196 1.434707 1.825415 2.033245  
4.005714 5.202388 5.321347 4.918493 4.312069 4.565697 6.259293 5.876277 6.188334  
1.441134 1.233316 2.331212 2.007179 1.562276 3.70291 1.419488 1.834819 2.47767  
4.790022 3.795664 4.1392 3.057066 4.497519 6.290106 4.64653 5.027506 3.987698  
1.598767 2.667086 2.395319 1.756972 2.380807 1.855723 1.824549 2.877122 1.668892  
3.477088 3.81047 4.181235 3.105127 3.999213 2.246593 4.026349 2.082964 4.260119  
3.080415 3.194501 1.982231 2.46385 3.627559 2.700221 3.108844 2.910214 3.792674  
2.159795 1.231427 1.197319 1.666843 1.779655 1.426035 1.508383 1.178276 1.312257  
1.45402 1.637047 2.618904 2.697481 2.30127 1.826934 1.974124 2.339236 2.971749  
2.673016 2.088864 2.866362 3.049643 2.579234 2.012208 3.590244 3.046264 3.432723  
2.382896 3.59497 2.690763 2.293037 2.111606 2.243672 2.389095 2.392414 1.713769  
2.972042 2.916491 3.380358 3.200021 3.017356 4.632081 4.563077 3.911354 4.875704  
6.197094 6.596987 7.198586 7.029673 6.960608 6.000234 6.7405 7.442156 7.538856  
2.500682 2.49955 2.911844 2.90054 2.745992 3.016317 2.676823 2.492964 2.565328  
3.033799 3.356769 4.348502 3.904881 4.704123 3.186522 4.523393 4.882268 3.768061  
6.578232 5.662992 6.228054 6.961441 6.622003 4.881044 6.925752 7.180437 6.985145  
2.136376 2.382575 2.223565 2.01035 3.241305 2.210649 2.893492 3.203387 2.317142  
1.949038 2.420551 0.925473 0.964359 1.502366 1.617132 1.129684 1.442596 1.259384  
2.43907 1.855873 2.191799 2.724911 2.360884 2.374678 1.856329 2.203095 2.529237  
5.027408 5.006721 6.204544 4.941787 5.774674 4.938054 5.7178 5.568185 6.209146  
5.573306 6.383389 6.332714 5.683036 6.548514 5.746178 5.798125 5.852798 5.613376

5. 269454 5. 764233 5. 430576 5. 780015 6. 670914 4. 553312 5. 800787 6. 20614 5. 456347  
2. 590307 2. 726235 1. 992956 2. 287108 2. 470587 2. 562711 2. 198892 2. 89513 2. 662895  
3. 089192 2. 756099 2. 752782 2. 514994 3. 687111 3. 012023 2. 874532 2. 763409 1. 631696  
5. 000921 5. 880172 5. 140697 4. 133736 3. 415067 5. 669287 5. 405456 3. 396044 3. 638121  
1. 312353 1. 562233 1. 067558 1. 54407 1. 597119 2. 672492 2. 471422 1. 662929 1. 416269  
2. 636426 2. 665789 2. 640253 3. 143649 2. 14283 2. 434077 2. 133746 2. 894642 2. 113223  
4. 127123 4. 388499 5. 19935 2. 329422 4. 272752 5. 209225 4. 259838 2. 35438 3. 951525  
6. 072596 5. 068511 4. 903375 5. 651525 5. 905384 5. 645038 5. 11587 5. 662477 5. 512412  
1. 0715 0. 924272 0. 813197 1. 434366 0. 993242 1. 118604 1. 128308 0. 925826 0. 888085  
1. 444099 1. 578599 1. 69653 1. 930534 2. 122194 1. 462841 1. 307261 1. 761697 1. 72515  
6. 351926 6. 909482 6. 736877 7. 328662 6. 641944 7. 254445 7. 607079 7. 195445 7. 425495  
4. 621751 2. 323091 2. 874835 2. 106855 4. 017898 2. 972118 2. 745762 2. 468891 3. 19078  
1. 070061 1. 983215 1. 106593 1. 206966 1. 686684 2. 538902 1. 386761 1. 523212 1. 797091  
2. 639882 2. 089268 2. 118293 3. 197032 3. 145145 2. 611856 2. 617568 2. 06908 2. 900373  
1. 641628 1. 572632 1. 410267 1. 626247 1. 413691 1. 719646 1. 301297 1. 478073 1. 584774  
7. 44399 7. 531093 7. 680066 7. 767843 7. 799446 7. 650463 7. 753519 7. 928808 7. 446923  
5. 607065 5. 315832 6. 080326 5. 428895 4. 70374 7. 412145 6. 283993 6. 462117 6. 393673  
1. 078334 1. 478563 1. 907626 1. 422805 1. 507787 1. 540726 1. 487562 1. 27807 1. 446103  
1. 516729 1. 897013 1. 45669 0. 974897 1. 231458 1. 621712 1. 032466 1. 204115 1. 513755  
1. 677266 1. 132455 1. 213233 2. 687785 1. 347087 1. 661865 0. 973904 1. 607594 1. 381677  
5. 21001 6. 349428 5. 780116 5. 373409 5. 676701 4. 707961 6. 618064 5. 80667 5. 856385  
5. 823687 6. 195655 6. 941411 6. 571909 6. 43652 6. 349412 6. 059212 6. 60594 5. 844998  
2. 932952 4. 281978 3. 964616 2. 608957 4. 642557 3. 911572 3. 850969 3. 584393 4. 64193  
4. 515175 5. 233205 4. 409564 3. 414517 5. 090032 4. 671757 4. 925029 5. 801179 5. 795529  
2. 550461 2. 966054 2. 164758 1. 809082 2. 360079 1. 400587 1. 436656 1. 497458 2. 198619  
2. 008505 2. 811688 1. 791254 2. 764993 1. 796323 1. 819213 1. 932363 1. 966611 2. 345496  
1. 050837 1. 832661 1. 268051 2. 518693 0. 827528 1. 161529 1. 072291 5. 099982 2. 033802  
4. 735268 4. 580987 3. 618468 3. 68576 3. 386918 3. 583993 4. 045159 3. 855978 4. 162194  
3. 163389 2. 88624 3. 438 3. 266778 3. 414228 3. 179747 2. 511531 2. 790773 2. 584314  
8. 286751 8. 280411 8. 222882 7. 791368 7. 994714 8. 247055 8. 325603 8. 114327 8. 476962  
3. 663938 2. 771664 3. 815784 2. 499144 2. 631951 3. 771025 3. 120189 2. 858191 2. 637518  
8. 068449 7. 62478 8. 001923 8. 387596 7. 428298 7. 516637 7. 193722 6. 879259 7. 898379  
2. 00542 1. 744796 1. 237679 1. 675523 1. 619072 1. 369516 1. 445658 1. 799287 1. 544595  
3. 94519 3. 656507 4. 456473 4. 599357 5. 194649 6. 046384 5. 345975 5. 731043 5. 479456  
3. 881036 2. 791625 3. 10634 3. 638692 3. 316432 2. 718483 2. 723435 2. 889928 2. 372517  
1. 234033 1. 536824 1. 910307 2. 07559 1. 974415 1. 694045 1. 336205 1. 603308 2. 429065  
1. 386909 1. 203394 1. 418803 1. 606237 1. 425586 1. 13966 1. 073584 1. 561763 1. 589031  
0. 877361 1. 595902 1. 080727 0. 889867 1. 165451 1. 133448 1. 126364 1. 351642 1. 005509  
2. 071424 1. 843952 1. 618805 1. 832215 1. 898964 1. 44704 1. 796247 2. 037591 1. 597014  
1. 487764 1. 403539 0. 741053 1. 996742 1. 117769 1. 523572 1. 011744 1. 845117 0. 942094  
5. 660663 6. 150409 5. 745688 5. 849393 5. 458981 5. 482744 5. 55181 5. 481525 5. 845386  
1. 535849 1. 162603 1. 815053 1. 537725 1. 809502 1. 647251 1. 927252 1. 387152 2. 059858  
2. 947747 3. 97624 3. 478093 4. 014889 3. 46024 3. 316767 3. 960376 3. 897624 3. 523918  
2. 633646 2. 05645 1. 749577 3. 063623 2. 160383 2. 441035 1. 938066 1. 956114 1. 918746  
3. 818669 3. 827331 4. 739614 3. 317897 3. 131082 2. 290075 3. 745855 2. 956582 3. 013322  
1. 365598 2. 126062 2. 100835 1. 755407 2. 710971 2. 363218 2. 285695 1. 437824 2. 240281  
2. 936692 2. 915026 3. 357846 3. 206469 3. 020051 3. 325063 2. 677689 2. 897675 2. 528141  
2. 20682 1. 749914 1. 87606 2. 006239 2. 224189 1. 790735 1. 701404 2. 685922 2. 631914  
4. 278237 2. 243985 4. 175434 2. 77518 4. 372343 5. 150768 2. 805266 5. 370399 3. 787241  
2. 828902 3. 075232 2. 603674 2. 491271 2. 647488 3. 114496 2. 563583 2. 396776 2. 419073  
2. 694973 3. 162362 2. 89955 3. 741427 2. 489042 3. 18281 2. 545314 2. 643866 2. 699079

5. 802127 6. 266047 6. 263674 5. 910202 6. 756006 6. 226012 6. 57647 5. 511934 5. 588025  
3. 707724 3. 826937 3. 455887 2. 937031 2. 769032 2. 946448 2. 963017 2. 871045 3. 592991  
2. 490209 2. 877188 2. 645487 2. 510784 1. 920596 3. 473993 2. 676046 2. 224458 2. 076894  
5. 457802 4. 911208 5. 081054 5. 041884 4. 734754 5. 647535 5. 302713 5. 350578 5. 179423  
3. 970407 3. 925235 4. 773296 5. 018944 4. 971337 5. 200842 5. 106196 4. 397783 5. 346963  
2. 862315 1. 552553 1. 201036 1. 596764 1. 148124 1. 823761 1. 288817 1. 355584 1. 384871  
4. 411939 4. 229669 5. 57148 5. 124887 4. 496652 5. 045159 4. 626697 5. 466714 5. 733443  
3. 330226 2. 551517 2. 176458 2. 199548 2. 753678 3. 3863 2. 420317 2. 637049 2. 649972  
3. 061544 1. 710552 1. 669563 2. 955315 2. 118739 3. 059152 2. 452724 2. 315434 1. 7077  
6. 655208 6. 213303 6. 283127 6. 57932 6. 862125 6. 846792 7. 143066 7. 088439 7. 348698  
3. 18015 3. 01269 3. 592428 3. 903015 3. 58554 3. 153905 2. 899238 2. 473367 2. 883181  
3. 134988 2. 260361 2. 076323 2. 750799 2. 21368 3. 036668 2. 283388 2. 687197 2. 878126  
3. 920259 3. 479903 4. 212929 3. 208946 2. 296456 4. 833926 5. 706885 6. 024922 6. 136188  
2. 392993 2. 002401 2. 800474 2. 792019 2. 314787 3. 765893 1. 463515 1. 99535 1. 900363  
7. 654922 7. 92954 7. 875633 7. 615577 7. 596115 6. 546291 6. 472598 6. 324465 6. 533152  
1. 659875 3. 008875 3. 267045 1. 789864 2. 270839 2. 285435 2. 154149 1. 881704 1. 792819  
5. 119836 6. 421827 5. 497219 6. 020132 5. 501228 6. 805124 5. 482217 5. 660685 4. 948092  
5. 717007 6. 447361 6. 237073 6. 407775 6. 271357 6. 047895 5. 641581 5. 818352 5. 699639  
4. 993932 5. 784954 4. 313182 5. 208064 4. 695113 4. 920458 4. 794108 6. 057443 5. 235105  
3. 623905 3. 390035 3. 366643 3. 832961 3. 544646 3. 955588 4. 605791 3. 430142 4. 590706  
5. 851079 5. 211142 5. 504983 6. 830373 5. 803586 5. 513927 5. 810363 6. 757562 6. 084933  
4. 616733 5. 033576 4. 659794 5. 087469 4. 81861 3. 934191 3. 746214 4. 38693 4. 271646  
2. 00122 2. 323131 1. 664783 2. 543463 1. 824763 1. 293705 2. 216647 2. 424902 1. 729961  
5. 550649 4. 588726 5. 646631 6. 362318 5. 580474 6. 898371 6. 078392 5. 87507 6. 063532  
7. 890829 7. 89058 7. 753688 7. 28988 7. 791376 7. 155404 7. 911887 8. 011288 7. 718137  
1. 922076 1. 184727 1. 487911 1. 419023 1. 887885 1. 8507 1. 650018 1. 19499 1. 99353  
4. 336084 3. 948603 3. 44142 3. 755313 4. 134897 3. 277306 3. 964202 3. 381296 4. 417202  
0. 996101 1. 543372 2. 532636 1. 716034 1. 485029 2. 124411 1. 412385 3. 757786 1. 4042  
2. 391495 2. 466851 2. 078855 2. 292718 2. 356856 3. 339537 3. 31422 3. 079634 2. 855028  
3. 58919 2. 210297 2. 017563 1. 539923 2. 227719 1. 967996 2. 819481 3. 080603 2. 079589  
1. 040178 2. 092431 1. 167251 1. 529942 1. 692282 1. 273133 0. 808654 1. 2681 1. 486803  
9. 600197 9. 466362 9. 283582 8. 470467 9. 465518 9. 806003 9. 290559 8. 586971 8. 828565  
4. 641292 4. 990317 5. 61626 5. 470991 5. 149119 3. 554142 5. 454579 3. 476159 4. 714487  
6. 020283 5. 654883 4. 022972 4. 137149 7. 430247 4. 610025 6. 065613 6. 455559 6. 580306  
3. 953617 4. 016148 3. 483595 4. 385391 3. 732818 3. 030402 3. 882181 4. 212424 4. 473576  
3. 320539 3. 417439 3. 891657 4. 089969 4. 110733 4. 226518 4. 316502 4. 883585 4. 388044  
2. 653874 3. 533332 4. 257064 2. 88464 3. 534514 3. 170243 2. 801296 2. 341873 3. 384624  
4. 151332 3. 899041 4. 58926 3. 845947 4. 460859 4. 530076 4. 929336 4. 349768 4. 257124  
9. 014908 8. 29033 7. 943993 8. 111568 8. 134882 8. 563426 8. 291181 7. 351551 7. 509724  
5. 930015 5. 609639 5. 178841 4. 903812 4. 296153 4. 435934 4. 604289 4. 141102 3. 944909  
4. 263248 4. 889084 3. 039882 3. 745157 2. 991965 3. 850413 6. 189086 3. 373415 3. 152084  
2. 887686 2. 961812 2. 411292 3. 270557 2. 872809 2. 008608 3. 108522 2. 824711 2. 750242  
2. 126008 2. 74375 3. 097357 3. 091054 2. 014966 2. 689147 2. 687192 1. 946402 2. 818071  
5. 843541 4. 928321 4. 707371 5. 70997 5. 243125 5. 1768 4. 703302 5. 383572 6. 027927  
4. 349112 5. 90385 5. 517023 5. 205164 5. 066135 5. 416015 5. 760805 5. 46501 5. 018284  
4. 799425 5. 221077 5. 056578 5. 552752 5. 325872 5. 318775 4. 03859 4. 616482 5. 313011  
1. 810108 3. 79957 2. 249978 3. 210162 2. 276883 2. 525341 3. 017738 3. 06097 2. 892767  
2. 638366 2. 820524 2. 116213 2. 970985 2. 616076 2. 612772 2. 762534 4. 041802 1. 865372  
3. 350289 3. 339092 3. 743841 3. 442866 4. 228801 2. 858442 3. 029885 3. 697756 3. 152353  
4. 28882 4. 011267 5. 499313 4. 424422 4. 069891 5. 38905 5. 288167 4. 076178 3. 378517  
8. 21891 7. 894202 7. 985243 7. 554989 7. 967216 8. 196535 8. 209016 7. 649359 7. 486251

4. 130386 3. 094266 3. 425734 3. 452714 3. 055174 3. 506686 3. 438898 3. 08398 3. 73698  
5. 556702 6. 18859 5. 760218 5. 544111 6. 693062 5. 475229 5. 066076 4. 610469 5. 862434  
4. 906289 2. 011926 2. 737544 3. 049231 4. 371886 3. 609401 2. 756095 4. 135656 3. 574359  
3. 134485 4. 110647 4. 244998 4. 009222 4. 091234 3. 997119 4. 167486 4. 330021 4. 694814  
1. 891135 3. 319417 2. 373009 2. 371814 2. 206249 2. 42093 2. 012666 2. 571509 3. 171182  
4. 620344 3. 383861 4. 010565 3. 355178 4. 220491 4. 373964 4. 026184 4. 577997 3. 922684  
3. 485524 2. 545464 3. 010772 2. 906711 3. 073739 3. 940791 4. 627076 5. 12477 5. 534006  
2. 173576 1. 871108 2. 042579 3. 496194 2. 106951 1. 882225 2. 117438 1. 638543 2. 319511  
6. 273904 6. 683198 6. 822937 6. 226804 6. 69062 7. 338635 6. 921329 6. 353268 6. 298236  
10. 1971 10. 18401 9. 960904 9. 936612 9. 844783 9. 9178 10. 0223 9. 981025 9. 491926  
6. 584051 4. 598065 5. 376696 6. 524336 5. 501761 6. 973028 6. 457155 6. 737108 5. 736202  
4. 234492 4. 845012 4. 974337 5. 394429 4. 240559 3. 980935 6. 06215 4. 135229 4. 728477  
4. 095392 4. 029191 4. 497504 3. 953817 4. 439761 3. 831459 4. 252865 4. 081482 4. 622405  
2. 459298 2. 388091 2. 544863 2. 775047 2. 56941 2. 235722 2. 603946 3. 227786 2. 43754  
2. 022141 1. 651308 1. 864223 2. 134786 1. 995434 1. 990891 2. 233648 2. 100402 2. 003235  
2. 694039 2. 727297 2. 461883 2. 763293 2. 736575 2. 794711 2. 67314 2. 990702 2. 783055  
4. 573047 4. 302123 4. 335343 4. 140291 4. 335343 4. 737557 3. 70362 5. 697122 3. 425659  
2. 340591 2. 25622 2. 355745 2. 732869 2. 854348 2. 52071 2. 50152 2. 962202 2. 808105  
5. 698839 6. 37136 6. 707312 6. 581967 6. 309682 3. 670265 7. 01447 6. 480028 7. 50683  
2. 262342 4. 371522 3. 731014 2. 001511 2. 925055 3. 389942 2. 906828 1. 774148 2. 761197  
3. 029433 2. 374321 1. 49454 2. 8202 3. 223176 2. 524825 2. 641139 2. 2729 2. 433714  
2. 190159 3. 829147 2. 260999 2. 270552 2. 298461 1. 833804 3. 457573 2. 772798 2. 23939  
4. 310186 6. 086177 5. 330041 4. 975064 5. 011396 3. 784335 4. 35169 4. 821775 5. 01915  
4. 284128 4. 483114 3. 937175 3. 862888 4. 629835 3. 971162 3. 783589 3. 279163 3. 860626  
8. 590316 8. 417571 8. 895498 9. 038994 8. 517346 5. 198507 9. 437332 9. 696844 9. 430334  
4. 680438 3. 650464 5. 350216 5. 629958 5. 089806 5. 245064 4. 520923 4. 839965 5. 319754  
6. 297153 6. 091816 6. 151075 6. 794902 6. 887969 6. 31747 6. 590716 6. 349318 6. 75811  
3. 001288 2. 771163 2. 721195 2. 79668 2. 548995 3. 013846 2. 567558 2. 714014 3. 473017  
4. 961565 5. 614859 5. 403321 4. 523058 5. 630166 4. 591307 5. 831324 5. 439328 5. 757113  
3. 422586 3. 307689 3. 455927 2. 701429 3. 310885 3. 859368 3. 293003 2. 975821 2. 791692  
6. 092826 5. 695646 5. 374408 5. 197553 4. 912815 6. 046842 4. 70025 5. 168859 5. 135324  
2. 180679 2. 35297 2. 028336 2. 393047 2. 121011 2. 420969 1. 753353 2. 139618 2. 014332  
5. 409664 4. 10707 4. 04058 3. 598603 4. 497183 7. 3282 3. 909845 3. 830759 4. 641413  
7. 569944 8. 229449 7. 711473 7. 119123 8. 063907 7. 645095 7. 874577 7. 206744 6. 538136  
1. 82471 2. 305118 2. 749264 2. 381216 2. 376185 2. 486592 2. 245483 1. 738088 1. 585051  
3. 111326 2. 487407 1. 757843 2. 649631 1. 9237 2. 709264 2. 154242 2. 656001 2. 641403  
3. 57287 4. 340669 2. 601191 5. 74661 5. 350911 5. 476928 5. 039746 2. 942477 4. 638517  
1. 10852 1. 200304 1. 252986 1. 501697 1. 273293 1. 199695 1. 373057 1. 539863 1. 042597  
2. 955752 4. 107613 4. 230671 2. 28614 2. 873019 2. 128272 3. 480641 2. 549228 3. 501449  
4. 007979 4. 072095 4. 093908 3. 347266 2. 672578 4. 439242 2. 880211 3. 820081 2. 880959  
4. 529272 3. 706397 3. 699963 3. 997647 3. 175977 6. 360459 4. 447164 5. 646026 5. 409431  
5. 43179 4. 884827 5. 289744 5. 995478 5. 141865 6. 847995 4. 904211 4. 815389 5. 697042  
3. 339937 6. 210462 4. 022062 1. 554694 4. 337323 3. 69156 5. 278247 5. 175118 5. 445793  
1. 837459 2. 524828 1. 281063 2. 361571 3. 010409 2. 660188 1. 45665 1. 980723 2. 458001  
3. 846809 3. 653839 3. 834716 4. 376952 3. 555689 4. 998988 3. 446666 4. 900914 3. 955904  
3. 848532 3. 094286 4. 201704 2. 757591 2. 641372 4. 031888 3. 503882 2. 933553 4. 117259  
4. 793057 5. 114826 4. 394795 4. 996194 4. 598472 5. 560494 4. 951862 5. 296736 5. 895445  
4. 749101 4. 431031 4. 342358 4. 184738 3. 922928 4. 69568 5. 559157 5. 610158 5. 513078  
7. 348093 7. 468339 7. 681112 7. 511943 7. 355098 7. 352316 7. 66444 7. 5494 7. 546961  
1. 623266 2. 337841 1. 442766 1. 491631 1. 457425 1. 844242 1. 376393 1. 49493 1. 858635  
3. 172832 3. 759796 3. 003888 3. 038267 3. 094675 3. 563551 3. 873091 3. 844064 3. 980897



2. 781276 2. 878236 2. 643879 2. 843344 2. 538141 2. 698555 2. 355471 2. 955207 2. 188282  
4. 957485 2. 916933 3. 909536 4. 072266 4. 171603 4. 635993 3. 906026 4. 15384 4. 509767  
5. 202376 5. 419599 5. 919751 5. 372913 5. 898582 5. 745136 6. 0665 5. 995908 6. 234086  
4. 362997 4. 348799 4. 704847 4. 819351 3. 71235 3. 60522 4. 375776 5. 355315 4. 461562  
1. 841637 2. 139845 1. 554957 3. 169956 2. 856252 2. 306195 2. 416225 3. 639506 2. 747087  
7. 618048 7. 667344 7. 555376 7. 628463 7. 688635 6. 851509 7. 373034 7. 601192 7. 06505  
5. 352462 5. 785317 6. 112661 4. 696684 6. 061371 5. 457016 5. 540288 5. 299853 5. 343137  
7. 286923 7. 08862 6. 954509 6. 717407 7. 145585 7. 424924 7. 656682 7. 901906 8. 124935  
5. 151093 4. 209136 4. 419134 4. 560862 4. 062673 3. 446901 4. 666818 3. 762581 4. 438422  
2. 841378 3. 159361 3. 123612 2. 4201 3. 350729 3. 343025 3. 311491 3. 515475 3. 490322  
4. 373826 4. 244164 4. 088357 4. 78911 3. 61381 3. 749437 4. 409445 4. 486699 4. 528894  
4. 315355 5. 719341 5. 000534 4. 396634 5. 109157 5. 728187 5. 535715 5. 790014 5. 243417  
3. 189439 2. 28933 3. 02174 3. 41812 2. 784544 2. 887211 2. 6093 2. 684101 2. 503838  
3. 655262 3. 008396 3. 726271 3. 025286 4. 290413 3. 524438 3. 214351 4. 454117 4. 146615  
5. 555811 6. 07677 4. 596158 5. 791778 6. 309722 6. 068735 5. 938964 5. 025903 5. 007154  
3. 599016 3. 947518 4. 028509 4. 025744 3. 037402 1. 902836 2. 559623 3. 072448 3. 185811  
4. 967126 4. 633964 4. 523423 4. 335358 4. 983135 5. 692218 6. 413981 4. 9688 5. 705138  
5. 366365 6. 473912 6. 69559 4. 887276 5. 999645 5. 140004 6. 46748 5. 987885 5. 993139  
5. 383592 4. 149707 4. 821657 4. 24765 4. 379728 5. 107764 4. 45933 5. 097936 4. 455209  
5. 885236 5. 611816 5. 339995 5. 301594 4. 342906 5. 329537 6. 145346 5. 166104 4. 895225  
3. 097049 3. 426674 3. 217181 2. 73663 4. 292573 2. 412964 2. 040892 2. 674874 2. 541115  
3. 392992 4. 104352 2. 181683 3. 117135 3. 705952 3. 34603 3. 007928 2. 030034 2. 843135  
4. 221866 4. 488051 3. 338869 5. 008777 3. 564342 3. 607417 2. 966105 3. 125655 4. 660342  
7. 064375 6. 718262 6. 662086 6. 809434 6. 889083 7. 298508 6. 27112 6. 21565 5. 584579  
6. 13551 6. 565518 6. 46672 6. 7924 7. 045181 5. 958412 6. 421994 7. 105929 6. 89811  
6. 930385 7. 051377 6. 888429 6. 57534 6. 141005 6. 727435 6. 581198 5. 902211 6. 294143  
6. 887266 6. 996139 6. 136984 6. 026562 7. 042027 5. 963958 6. 402154 5. 626952 5. 799028  
4. 900445 3. 941677 5. 425288 4. 259974 5. 973847 3. 43193 4. 318021 4. 47648 4. 189476  
2. 808247 2. 373224 2. 109483 3. 73565 3. 032596 3. 321321 2. 644207 3. 264814 2. 410064  
4. 29417 5. 456062 5. 633316 4. 86596 5. 210204 5. 575086 5. 625717 5. 442411 5. 488175  
1. 838521 1. 747118 2. 706232 1. 799653 2. 106613 2. 383757 1. 924641 2. 41654 1. 719042  
6. 142157 6. 306977 6. 460182 5. 781565 6. 164554 6. 675382 6. 886596 6. 409133 6. 084081  
2. 891218 3. 691738 3. 990593 4. 228839 4. 389098 3. 808662 4. 445378 4. 731758 5. 213125  
6. 217762 5. 997918 6. 011522 5. 924272 6. 052377 5. 967669 6. 624885 6. 339377 5. 900943  
2. 044611 2. 237051 1. 741359 2. 006778 2. 060757 1. 760324 1. 796851 2. 376444 3. 141402  
3. 298865 1. 723635 1. 65565 2. 609674 1. 87943 2. 32116 1. 527377 1. 961958 1. 567824  
5. 406743 4. 843508 2. 798225 4. 440186 5. 462841 3. 190382 3. 982478 4. 085907 3. 681512  
1. 34071 0. 845833 1. 893993 1. 524394 2. 140092 0. 904023 1. 055145 1. 347105 1. 406691  
6. 020925 6. 296178 6. 445812 6. 552037 6. 43462 5. 374282 6. 337171 5. 361262 6. 33637  
5. 165502 4. 974939 4. 825502 3. 941763 5. 080348 4. 689841 5. 44645 3. 816559 5. 031617  
4. 435209 3. 336509 4. 717131 4. 538992 3. 410535 4. 905872 3. 975926 4. 049844 4. 260164  
1. 717225 1. 647749 1. 709991 2. 847258 2. 095583 2. 600881 2. 401529 1. 873425 2. 917226  
3. 031692 3. 764701 3. 286473 3. 919313 3. 653834 4. 115762 3. 969061 3. 972976 4. 156875  
4. 10936 5. 000858 5. 677216 4. 733855 5. 667302 5. 489007 5. 858105 5. 229794 5. 863265  
4. 359656 4. 652699 4. 404596 4. 606724 4. 263972 5. 231312 3. 783586 3. 800331 4. 032989  
4. 246972 5. 021732 4. 24635 5. 16358 4. 698051 3. 386156 5. 238252 4. 709343 4. 659854  
4. 826902 4. 45066 4. 39999 4. 642331 3. 753991 4. 741958 4. 831785 4. 634447 4. 890683  
2. 404264 2. 377135 1. 241588 1. 815067 1. 677928 2. 008204 2. 127864 2. 068482 1. 655676  
2. 66691 2. 265235 2. 322872 2. 648777 2. 801285 3. 867806 2. 831161 2. 573562 2. 76732  
5. 2595 4. 397766 4. 794256 4. 74068 4. 721968 3. 788193 4. 395675 4. 287874 4. 269275  
3. 636723 4. 876737 3. 007067 3. 17787 3. 292684 3. 27539 4. 075325 2. 691125 3. 678045

5. 613676 5. 961309 6. 072269 6. 239524 5. 693735 4. 862635 6. 403822 5. 722445 6. 053232  
5. 031616 6. 993327 5. 497135 6. 023225 6. 089996 5. 875821 6. 347219 5. 657411 5. 735221  
3. 617606 3. 701722 3. 318117 4. 062 4. 491978 3. 933599 4. 198238 3. 215088 4. 432153  
4. 311777 4. 122699 4. 204229 4. 442572 4. 619856 5. 51181 4. 931259 4. 806867 4. 116804  
6. 475683 6. 002246 6. 800295 5. 870039 6. 70772 6. 091729 6. 432814 5. 590216 5. 891053  
2. 361787 2. 892017 2. 003491 3. 50776 2. 112427 2. 16489 2. 320293 2. 320653 3. 10553  
8. 75337 8. 642592 8. 480176 8. 805979 8. 482528 8. 400584 9. 195408 9. 141973 8. 885785  
1. 932018 2. 189064 1. 706428 1. 730099 2. 207516 1. 917151 2. 070799 1. 9448 2. 502678  
3. 68139 1. 986995 3. 715307 2. 961075 2. 317757 4. 698556 3. 47358 3. 849774 3. 171491  
5. 168242 6. 40715 6. 499368 5. 959875 6. 283272 4. 3513 5. 627918 5. 036816 5. 332533  
2. 21783 2. 22294 2. 705996 2. 403445 2. 247266 2. 136275 2. 285638 1. 972778 2. 034319  
2. 999508 3. 594093 2. 677396 3. 257548 2. 232327 2. 433727 2. 921104 3. 048519 2. 719238  
3. 431056 4. 094282 3. 530957 3. 181236 3. 588554 4. 226423 5. 409719 3. 215359 3. 335185  
3. 984666 4. 70387 4. 027831 4. 301426 4. 894681 4. 936051 4. 909724 4. 431642 4. 488733  
2. 004376 2. 751636 2. 716083 3. 065609 2. 737219 2. 570225 1. 905502 2. 014916 3. 083915  
6. 910767 6. 449069 6. 515691 5. 227404 6. 345904 6. 519744 6. 896434 6. 127615 6. 730154  
6. 269837 5. 547072 6. 396635 6. 440073 5. 855472 6. 248944 6. 010103 6. 574041 5. 985131  
5. 370108 3. 900662 5. 990246 6. 153984 5. 289177 5. 064125 5. 769137 5. 166997 6. 31682  
1. 698878 1. 733736 2. 114844 2. 333973 1. 494365 2. 279213 1. 501939 1. 746688 3. 451458  
6. 18133 6. 702018 6. 130538 5. 93452 6. 396812 6. 162764 6. 899749 6. 746308 6. 610179  
4. 126066 3. 504628 3. 634152 3. 199304 3. 565895 3. 466519 3. 796459 4. 6547 4. 630438  
7. 100285 7. 481488 7. 46049 6. 821091 7. 669263 8. 135357 7. 69694 7. 307595 8. 008379  
1. 452109 1. 174555 1. 112765 1. 881796 1. 697303 2. 111011 1. 377762 1. 385188 1. 600989  
4. 508472 3. 309201 4. 166315 3. 557062 3. 969938 4. 34216 3. 730714 4. 110399 4. 485795  
4. 318595 1. 088014 3. 054736 2. 45952 2. 81961 2. 14672 1. 903732 2. 61406 2. 361676  
4. 287353 4. 336624 4. 561876 3. 984011 4. 209325 4. 864417 4. 693248 4. 302882 4. 1509  
5. 199293 4. 921834 5. 602967 4. 830292 5. 304612 4. 014418 4. 390515 5. 61376 5. 291495  
1. 862199 2. 810726 2. 150208 1. 294378 1. 674621 1. 539497 3. 143032 1. 326589 2. 928253  
4. 035367 3. 358717 3. 597877 3. 943999 3. 892393 3. 184038 3. 818526 3. 582535 4. 142834  
5. 292088 4. 834905 5. 241669 5. 325834 4. 734213 4. 496481 5. 015446 5. 50885 5. 941173  
2. 361267 1. 814215 1. 254415 1. 725219 1. 584459 0. 989151 1. 084261 1. 881634 2. 044777  
3. 091 4. 073467 3. 431808 3. 258346 1. 059119 4. 231712 4. 278974 4. 597836 4. 89794  
1. 981569 1. 896457 1. 916709 2. 561257 1. 816135 1. 680529 1. 560996 2. 089147 1. 608983  
5. 06334 4. 740458 5. 357234 5. 507959 5. 137589 5. 22374 5. 232378 5. 37968 5. 243493  
4. 322719 3. 04708 3. 858222 4. 188764 3. 499662 3. 707082 3. 459059 3. 333019 3. 107363  
2. 327705 1. 813422 3. 717815 3. 016131 3. 276819 3. 137092 2. 76693 3. 291117 2. 330528  
5. 597316 5. 392457 5. 553259 5. 737212 5. 981189 5. 87129 6. 327891 6. 097342 6. 683026  
6. 497997 6. 249202 6. 112638 6. 590635 7. 161599 6. 252509 6. 645922 6. 750069 6. 742669  
6. 77312 6. 505811 5. 993058 7. 727076 6. 322845 6. 832745 7. 028102 6. 651249 7. 138644  
4. 384216 4. 2179 4. 569827 5. 140956 3. 370056 3. 624591 4. 709122 3. 354779 3. 738611  
1. 522402 1. 342224 1. 671539 1. 568843 1. 863392 1. 539157 1. 863452 2. 006128 1. 620362  
1. 951962 2. 270652 1. 968406 2. 552373 1. 972636 2. 486187 2. 314062 2. 588599 2. 220643  
1. 293394 2. 380712 1. 872269 1. 222371 1. 569604 1. 422617 1. 125897 1. 752978 0. 987191  
8. 629678 8. 636451 8. 670979 8. 2098 8. 560705 7. 997262 9. 401375 9. 096594 9. 317128  
3. 743642 3. 039088 3. 263746 2. 346307 3. 508846 3. 347063 3. 176596 3. 274286 3. 232514  
1. 508805 1. 719857 1. 337784 1. 413852 1. 823393 1. 456081 1. 172224 1. 637053 1. 118283  
6. 61885 6. 666763 6. 305292 6. 05656 6. 265369 5. 871586 6. 363539 6. 542251 6. 738738  
4. 208832 3. 021708 3. 923356 3. 07775 2. 43872 1. 958259 3. 904074 3. 472046 3. 37398  
6. 121979 4. 424206 5. 111255 6. 439796 5. 440163 6. 704643 5. 772994 6. 163147 6. 324646  
5. 400132 5. 212088 5. 493421 4. 227078 5. 126426 4. 477207 4. 028177 4. 586688 4. 615276  
4. 118306 3. 282966 4. 447664 3. 439462 2. 719566 3. 095136 5. 314646 3. 103626 3. 802019

4. 27345 4. 984223 4. 757886 3. 950475 3. 88876 4. 109128 4. 853019 4. 426578 3. 311025  
3. 654141 3. 228901 3. 878595 2. 151223 3. 756183 3. 131736 3. 455918 4. 75832 3. 786325  
7. 189997 6. 834212 7. 289939 7. 107759 6. 987212 6. 740068 6. 836947 7. 061992 6. 853267  
8. 456337 8. 19075 7. 523249 8. 754759 7. 780051 7. 73616 8. 066278 8. 167122 7. 990585  
3. 284664 3. 486521 3. 084723 3. 529135 3. 752697 3. 166793 3. 50666 3. 970775 3. 574816  
3. 535269 4. 706931 4. 404723 2. 103085 3. 455697 2. 646003 2. 658644 3. 252139 2. 606417  
5. 503783 5. 581937 5. 120158 4. 401624 6. 549709 4. 224016 4. 559341 4. 374269 5. 302961  
7. 926513 8. 387605 8. 063179 8. 315226 8. 207789 7. 61728 7. 580562 8. 185351 8. 090883  
5. 810744 7. 55009 7. 125376 6. 24623 6. 6456 6. 909268 8. 209489 8. 132348 8. 0683  
5. 669251 5. 539125 5. 487131 6. 736197 6. 191684 5. 817945 5. 863559 5. 232141 5. 178501  
5. 225681 5. 294484 4. 387137 2. 94024 4. 808164 6. 030336 4. 290968 4. 920084 4. 426832  
1. 192729 2. 486478 1. 583372 1. 562839 2. 680778 1. 55085 1. 407892 1. 585891 3. 680319  
2. 854416 2. 605257 2. 958868 3. 379204 2. 634874 3. 357525 4. 677642 4. 367897 5. 75682  
6. 555355 5. 848406 5. 870608 6. 644195 5. 223854 5. 730674 5. 515835 4. 133483 5. 444547  
5. 128969 5. 091541 5. 522481 5. 746003 5. 06758 6. 882835 6. 043474 6. 037949 5. 637571  
2. 401217 2. 448507 3. 242362 2. 839107 4. 519985 4. 26463 3. 276968 3. 079083 3. 954864  
1. 527394 1. 431009 1. 132511 1. 594976 1. 256909 1. 735876 1. 179232 1. 398625 1. 385329  
3. 632434 3. 680219 3. 158399 2. 824399 3. 510436 3. 506197 3. 079126 3. 741263 2. 177904  
2. 324226 2. 592039 1. 779336 2. 177876 2. 636737 1. 923383 2. 187579 1. 909586 2. 325502  
7. 544854 6. 522849 6. 66687 6. 040672 6. 84641 5. 409374 6. 917957 8. 23719 8. 077652  
2. 295909 1. 904027 1. 486201 1. 487414 1. 857461 2. 119268 1. 930557 1. 338593 1. 573877  
5. 0279 5. 934666 5. 718392 6. 014509 5. 678822 5. 348328 5. 65932 5. 269051 5. 253335  
9. 95469 9. 473463 9. 002796 9. 934284 10. 0121 10. 34335 10. 50516 9. 773751 9. 983421  
6. 720525 6. 994425 6. 294641 7. 030498 7. 150273 5. 882243 6. 370303 6. 40168 6. 225097  
1. 141604 1. 140873 1. 51088 2. 176538 1. 656738 1. 384443 1. 267544 1. 676999 1. 130664  
3. 476335 2. 23604 3. 151806 3. 3283 2. 84706 3. 114773 3. 717233 2. 613633 3. 726666  
1. 173643 1. 681458 0. 865838 1. 136319 1. 14026 1. 779575 0. 919736 1. 074267 1. 143295  
7. 44322 7. 860398 7. 090512 8. 00297 7. 569699 6. 769489 8. 972591 8. 229448 8. 507888  
4. 01342 3. 237468 4. 900976 3. 944604 3. 514058 4. 028544 4. 334289 4. 459331 5. 101456  
5. 492832 5. 744856 5. 609033 3. 958519 4. 963708 3. 955793 5. 043786 5. 739276 4. 628816  
3. 747728 4. 764128 4. 451448 4. 204757 3. 79339 3. 959113 4. 602768 3. 386114 4. 563823  
1. 346672 1. 763716 2. 206922 2. 039512 1. 764544 1. 685186 2. 773421 2. 181078 1. 748615  
2. 723908 2. 819225 1. 75875 2. 849723 2. 750547 1. 87593 2. 209283 2. 194669 2. 496519  
0. 861492 0. 789273 0. 688443 1. 034311 1. 477529 1. 243541 0. 927477 1. 019599 1. 932742  
3. 288345 3. 13774 3. 72294 2. 215798 3. 504571 2. 988763 2. 245907 3. 074164 1. 944376  
1. 92532 1. 280981 1. 662053 1. 74857 1. 331739 1. 664745 2. 156377 1. 216431 1. 623073  
1. 828404 2. 237562 1. 502604 1. 666479 1. 230359 1. 533486 1. 623522 1. 338032 2. 464498  
0. 913578 1. 586035 1. 254246 1. 089555 1. 807175 1. 199077 1. 433235 1. 186115 1. 24975  
0. 984701 1. 021399 1. 765541 1. 173051 0. 912116 1. 291129 1. 34035 1. 280966 1. 072413  
2. 811894 4. 156893 4. 64757 4. 009045 3. 322696 4. 537332 2. 934103 2. 185347 1. 99898  
1. 625676 2. 420772 1. 861919 2. 380819 1. 973415 1. 839076 1. 615224 2. 462013 1. 892858  
2. 270298 2. 239089 3. 341391 2. 724765 2. 038776 2. 407583 1. 75139 3. 119558 2. 350126  
2. 945959 2. 435438 3. 523064 2. 418759 2. 926593 2. 674711 2. 676511 2. 626442 2. 794193  
4. 711883 3. 191212 3. 127915 4. 473538 4. 697311 7. 215673 4. 983608 5. 409147 6. 507321  
6. 322386 6. 624823 6. 23365 5. 857381 6. 192915 5. 758609 6. 586708 6. 474471 6. 046892  
4. 357374 2. 689702 4. 280719 5. 469986 4. 276195 4. 163785 5. 288292 5. 718871 4. 577663  
1. 766491 2. 370664 3. 227482 1. 849003 1. 745575 2. 288593 2. 03355 1. 890564 2. 077263  
1. 47059 1. 333339 1. 573459 1. 180697 1. 639025 1. 12058 2. 370303 1. 438295 1. 829396  
2. 291851 2. 26207 2. 195806 3. 751637 3. 276152 3. 360807 2. 552432 3. 727696 3. 676873  
5. 894003 6. 512503 6. 399409 7. 551257 6. 695595 6. 657383 7. 189524 6. 526146 6. 609793  
4. 804782 4. 624147 5. 242771 4. 084429 5. 427102 3. 589559 6. 001148 5. 648771 5. 022997

1. 641254 2. 506124 2. 335802 1. 851185 2. 906303 2. 266733 1. 876829 2. 671847 1. 982205  
4. 569572 2. 854673 3. 360087 3. 669627 2. 632962 4. 440472 5. 054862 6. 26789 5. 662039  
3. 464587 2. 516479 3. 597536 4. 125443 2. 61208 3. 920459 3. 221768 3. 608993 3. 331996  
2. 660015 2. 963247 2. 749388 3. 062466 3. 500759 4. 254123 3. 312278 3. 815783 2. 775245  
4. 351515 4. 512791 5. 141555 5. 009495 4. 598366 4. 769289 5. 307706 5. 2035 5. 717513  
5. 189813 5. 833064 4. 892642 4. 784127 4. 826422 5. 240814 6. 077163 5. 106564 5. 850121  
3. 726585 4. 022112 5. 227053 5. 07495 4. 911231 4. 405644 4. 176259 4. 793126 4. 524508  
5. 802587 6. 087512 6. 105022 5. 935559 6. 184153 6. 46944 6. 392828 6. 524685 6. 435414  
1. 806813 1. 810955 1. 561539 1. 520579 2. 023874 1. 591943 1. 497984 1. 968549 1. 879556  
3. 273817 4. 387568 4. 04582 3. 85459 3. 878084 4. 359898 4. 504418 4. 188302 4. 337569  
5. 140104 4. 968743 4. 876674 5. 367443 4. 393833 5. 79373 5. 622925 5. 010145 6. 223444  
2. 334403 1. 462605 1. 99098 2. 999188 1. 798453 1. 439247 1. 424133 1. 475871 1. 439247  
4. 308801 3. 306931 3. 770841 2. 621717 3. 732467 2. 298224 3. 169573 3. 462029 3. 239545  
3. 38884 2. 754991 4. 010975 3. 012531 3. 275611 4. 636278 3. 812774 4. 493323 3. 837826  
3. 663974 2. 919609 4. 357215 4. 292354 3. 597318 3. 92049 4. 402107 4. 088364 4. 749214  
5. 113845 4. 099301 4. 325351 4. 991705 4. 836772 4. 241748 5. 850152 5. 627891 4. 976208  
1. 909721 2. 431061 2. 066135 2. 346342 2. 200059 2. 04398 1. 986238 2. 404539 1. 711276  
4. 098018 3. 60658 7. 365837 2. 182732 1. 869597 1. 763185 1. 60701 1. 852453 2. 084501  
6. 054912 2. 298926 2. 507226 1. 32631 5. 339492 4. 76156 1. 947777 3. 007659 3. 138966  
2. 127404 1. 951634 2. 170118 4. 129879 1. 421626 2. 027524 2. 201743 1. 843362 2. 320385  
5. 230723 5. 362761 1. 931229 2. 695837 5. 054627 1. 45069 1. 238707 1. 426496 2. 025052  
2. 654477 2. 24301 2. 910837 2. 895689 2. 005252 3. 825499 2. 900135 3. 905236 3. 423346  
2. 119767 2. 933193 2. 483563 2. 543879 2. 634145 2. 491718 2. 917126 2. 277531 2. 231857  
7. 645145 8. 288777 7. 685932 7. 628694 7. 560772 7. 604449 7. 834151 7. 095614 7. 596907  
5. 864079 6. 208389 6. 108461 7. 072209 6. 366053 6. 875671 7. 175473 7. 829427 6. 441145  
5. 237761 5. 724817 6. 040266 4. 87697 5. 66369 5. 688877 6. 091193 6. 088966 5. 827509  
5. 256738 4. 644333 5. 698069 5. 432711 5. 305368 3. 336616 5. 919763 6. 30212 5. 65842  
2. 912388 3. 07663 2. 452569 2. 826392 2. 200352 3. 190024 2. 508396 3. 090009 3. 018758  
5. 880673 6. 093889 5. 746543 4. 44949 6. 112671 6. 351675 6. 755855 5. 198596 5. 372792  
1. 095541 1. 818386 1. 319123 2. 140024 1. 023731 2. 113743 1. 279864 1. 466682 1. 815956  
2. 394542 2. 158858 2. 280109 2. 317305 2. 645055 2. 208468 2. 046581 1. 921485 2. 20739  
4. 391132 5. 120165 3. 787596 4. 21136 4. 807944 5. 871348 4. 290585 2. 774151 3. 825288  
2. 80442 2. 807873 3. 709276 2. 886688 3. 029543 2. 705066 3. 034157 2. 283745 2. 945103  
2. 377014 2. 684997 2. 348443 2. 215421 2. 040903 1. 585662 2. 569116 2. 86989 1. 362402  
2. 323726 2. 132406 1. 808835 1. 688863 2. 453117 1. 90481 1. 777599 1. 850809 2. 292158  
4. 313969 6. 220094 5. 525296 5. 608167 5. 237418 4. 609416 7. 268305 7. 010524 7. 158441  
7. 499424 7. 622164 7. 916736 7. 543249 7. 6142 6. 317044 8. 100642 7. 64002 7. 100198  
1. 062188 1. 368383 0. 99374 0. 844502 1. 510222 1. 16891 0. 74027 2. 078017 0. 801003  
5. 483851 6. 255639 7. 35545 6. 671143 6. 10073 6. 192862 7. 550517 6. 569924 6. 545727  
5. 049515 5. 183579 5. 61247 5. 413984 5. 535166 4. 634489 5. 218702 5. 355854 5. 430904  
5. 787724 6. 16616 5. 84933 5. 111387 5. 930376 4. 862183 5. 914945 5. 668355 5. 037807  
2. 687638 3. 093046 2. 245962 2. 146325 2. 674825 2. 805174 4. 593054 2. 766114 2. 758523  
1. 629586 1. 581791 2. 464998 2. 381538 2. 260865 2. 809707 1. 560838 2. 344625 2. 311666  
1. 358131 1. 470192 1. 40632 1. 444062 1. 049591 1. 189301 1. 370372 1. 513349 1. 17753  
4. 986637 5. 592001 3. 762367 4. 855102 5. 44397 4. 121821 5. 26476 3. 466218 4. 796267  
1. 616517 1. 932335 1. 351991 1. 645849 1. 163759 1. 668552 1. 114563 1. 169845 1. 237973  
3. 880356 4. 616691 5. 327629 5. 025667 4. 787506 3. 907211 5. 771502 5. 249576 5. 708043  
1. 903131 2. 795556 1. 583239 2. 542993 2. 838996 3. 110325 2. 270484 2. 124697 2. 358826  
4. 1359 4. 70461 5. 163266 4. 620333 5. 542932 3. 816447 4. 750173 4. 555221 4. 842135  
3. 921082 3. 023787 3. 951364 4. 820035 3. 887769 4. 000915 4. 062795 4. 941055 5. 222734  
1. 946668 2. 614648 1. 521141 2. 010459 1. 594707 1. 682587 1. 652596 1. 682007 1. 567452

4. 642667 5. 293357 5. 163898 4. 900877 5. 100603 4. 789589 5. 05314 4. 563391 4. 683336  
2. 266062 2. 311939 2. 254043 3. 101427 2. 699338 2. 731826 2. 994457 3. 339431 2. 805348  
5. 28772 4. 076611 5. 761754 5. 996357 5. 338821 5. 980318 5. 992453 5. 971251 6. 560192  
4. 618776 5. 660409 5. 163792 4. 367338 5. 30961 4. 93957 5. 21741 5. 149641 5. 094209  
4. 693033 4. 741793 4. 74457 4. 2051 4. 663967 4. 906099 3. 883127 3. 724402 5. 168702  
5. 140371 5. 528814 5. 537778 5. 411466 5. 715009 5. 246097 4. 451978 4. 220796 4. 791528  
7. 54702 6. 831104 7. 301908 6. 7232 6. 837114 6. 428379 7. 505184 6. 981949 6. 871487  
6. 651223 6. 235285 6. 841117 7. 495367 6. 976653 6. 205527 6. 998116 6. 571381 6. 575177  
6. 657219 6. 534007 7. 03655 6. 8024 7. 113598 5. 029489 6. 737291 6. 523566 6. 805956  
1. 70675 1. 407206 2. 749552 1. 381998 1. 425937 1. 686795 1. 778787 1. 307939 1. 506504  
4. 675063 5. 449174 6. 080063 3. 987455 5. 617218 5. 059476 5. 338988 5. 604351 4. 817614  
4. 666441 4. 484938 4. 825024 4. 35011 3. 974273 5. 371641 4. 954191 5. 064675 4. 990456  
5. 414095 5. 901309 5. 847198 5. 392693 4. 167093 5. 747579 5. 635113 5. 627026 5. 179632  
6. 497215 6. 697382 6. 26288 6. 306982 5. 817677 6. 098069 6. 11335 5. 504681 6. 34529  
1. 967016 1. 787046 1. 963466 2. 055933 2. 38825 2. 064931 1. 723514 2. 334685 2. 199415  
7. 450407 6. 985957 7. 141869 5. 708565 5. 83547 7. 001669 6. 193528 6. 327942 6. 238442  
5. 924333 4. 598817 4. 813919 5. 435586 4. 101761 6. 688038 4. 132743 3. 274558 5. 297611  
1. 432173 1. 244044 2. 014031 1. 856252 3. 470128 2. 998738 1. 202242 1. 904431 1. 906347  
1. 818501 1. 646492 1. 28756 1. 976384 1. 68425 1. 915602 1. 899821 1. 757994 1. 590437  
4. 497513 5. 935612 5. 645956 6. 414228 5. 130349 5. 100161 5. 745022 8. 38711 7. 563446  
1. 611669 1. 415289 2. 41949 1. 812613 2. 02337 1. 721187 1. 518619 1. 747792 1. 981083  
2. 235695 2. 055988 4. 020142 2. 646184 3. 781364 2. 404535 2. 365546 2. 882095 2. 627434  
6. 132229 7. 103973 6. 675422 6. 694391 6. 259139 7. 066899 6. 681285 6. 29118 6. 049322  
11. 5905 11. 45703 11. 53385 11. 74961 11. 26133 11. 07675 10. 83405 10. 85887 10. 83305  
3. 821715 2. 710531 2. 471597 1. 643207 2. 077434 1. 721573 1. 624438 2. 022868 2. 575657  
2. 203448 1. 941461 1. 749019 2. 054917 2. 466363 2. 371805 1. 589637 2. 217356 2. 119507  
0. 996719 1. 304801 0. 910688 0. 943066 0. 600032 0. 757189 1. 055633 0. 64187 0. 933509  
5. 657951 6. 323647 6. 847919 5. 916777 5. 952589 5. 970801 6. 274159 5. 84528 5. 550607  
4. 279044 4. 957792 4. 842956 3. 428379 4. 10958 4. 055584 5. 758766 5. 462159 4. 400689  
2. 858951 1. 933688 2. 944235 3. 732346 6. 573791 2. 764178 2. 688265 2. 498448 3. 180475  
6. 88622 8. 443842 6. 57541 7. 497553 6. 741908 7. 313638 7. 357054 6. 672805 7. 237528  
7. 83455 8. 019089 7. 894529 7. 832716 7. 409805 6. 554027 7. 489795 7. 487114 7. 579884  
3. 156177 2. 583142 1. 760393 1. 562104 2. 123687 1. 903743 2. 381523 1. 370999 1. 505456  
1. 811685 1. 563129 1. 470496 1. 840365 1. 311351 1. 699511 1. 747104 1. 254102 1. 885625  
8. 129595 8. 421363 8. 74848 8. 545473 8. 628605 6. 399895 8. 579573 9. 14371 8. 550504  
1. 822654 4. 462826 4. 324772 3. 791879 3. 487723 2. 31087 3. 475184 5. 023822 2. 677504  
3. 594262 3. 454506 3. 056096 1. 622531 2. 045387 4. 146757 4. 016138 3. 270706 3. 813409  
6. 164892 6. 322023 5. 757128 5. 567019 6. 102537 5. 69678 6. 394308 5. 771018 5. 942644  
6. 36534 5. 994221 6. 268503 7. 159081 5. 50927 7. 431708 7. 221815 6. 831894 6. 703936  
7. 262794 7. 299151 7. 342282 6. 632189 6. 77725 7. 541653 7. 538292 7. 128659 7. 393334  
4. 680037 4. 651969 4. 649596 5. 082615 5. 503605 5. 509074 5. 615276 5. 140045 5. 364509  
5. 603528 4. 864861 4. 089268 4. 534428 2. 850234 3. 690067 4. 980463 4. 356393 3. 269006  
5. 373293 6. 457196 5. 52322 6. 05061 7. 1008 5. 726544 6. 305778 5. 261014 5. 318838  
6. 610796 6. 817635 6. 450224 6. 69405 6. 381246 7. 311327 6. 820712 6. 411796 6. 790664  
5. 227635 5. 103095 5. 459181 4. 639466 4. 911793 5. 091321 4. 950114 5. 504135 5. 454743  
3. 840128 2. 913519 3. 599691 3. 688979 3. 983677 3. 858631 3. 017382 3. 66616 3. 696  
3. 091306 3. 640275 4. 370409 2. 584973 2. 973236 4. 197459 3. 9095 3. 824761 2. 456895  
3. 525524 3. 100946 4. 740487 4. 005617 3. 943645 5. 149994 3. 71497 4. 08874 4. 425005  
4. 029121 4. 373606 5. 035827 4. 22424 3. 644008 4. 95158 5. 143538 4. 899067 6. 127437  
5. 500192 5. 57172 5. 689477 5. 337493 5. 785764 6. 279478 5. 596368 6. 20396 5. 892768  
4. 775725 3. 600818 4. 1186 4. 298708 3. 128036 4. 736219 3. 109717 2. 858776 3. 812315

4. 872637 5. 301422 5. 358213 4. 621683 4. 532303 4. 875769 4. 902294 4. 929465 5. 163201  
4. 08756 4. 202787 3. 303816 2. 809288 4. 114107 3. 235699 3. 093057 2. 104512 3. 299244  
3. 17482 2. 956016 3. 749626 2. 805574 4. 103986 4. 716302 4. 240594 5. 31743 5. 089262  
4. 070706 4. 385012 4. 321067 6. 156974 4. 834833 5. 029692 4. 59093 4. 778089 4. 980346  
1. 676323 1. 88112 2. 199042 1. 834634 1. 25211 1. 946468 1. 770653 1. 491576 1. 608566  
6. 301816 7. 116889 6. 496458 6. 174239 6. 48771 7. 223309 6. 814383 5. 816939 6. 157541  
1. 35121 1. 979707 3. 334035 1. 390165 1. 331029 1. 353764 1. 131428 1. 328629 2. 161026  
5. 297325 5. 992999 5. 445761 6. 405305 5. 316425 5. 56067 6. 105698 5. 761117 6. 351933  
1. 662839 1. 081166 1. 059653 1. 65154 1. 092891 0. 939158 1. 567409 1. 02221 1. 712332  
1. 936181 1. 417108 1. 851718 1. 209491 2. 380461 1. 695334 1. 887843 2. 727633 1. 896774  
1. 978156 1. 789474 1. 440756 1. 674675 1. 492874 2. 205609 1. 519641 2. 416637 1. 431841  
1. 614447 2. 484857 1. 988366 1. 466356 2. 741518 2. 29496 1. 63395 2. 038692 1. 899232  
3. 933782 4. 554808 4. 166176 4. 591844 5. 068209 4. 997323 4. 027384 4. 272582 4. 157786  
4. 483998 4. 155335 5. 295259 4. 851932 4. 725531 5. 291967 4. 984547 4. 819551 5. 307569  
5. 973864 6. 370696 6. 551268 6. 041564 5. 868468 4. 684783 6. 175046 6. 306391 6. 071845  
3. 233283 2. 95662 3. 46261 3. 997744 5. 00277 4. 423424 4. 538531 4. 680259 4. 356148  
6. 071118 5. 9868 5. 630644 5. 38975 6. 229949 6. 851524 6. 004011 6. 148105 6. 068356  
1. 410762 1. 982184 1. 349013 1. 79985 2. 268852 1. 620148 1. 664434 1. 715304 2. 049953  
7. 659758 7. 507794 8. 152902 7. 261759 8. 013361 6. 821239 8. 141731 7. 826081 7. 804917  
4. 076963 2. 228615 1. 637242 3. 462022 3. 489454 2. 512873 2. 271004 2. 213165 2. 906709  
9. 435779 9. 051284 9. 44334 9. 126175 9. 386214 8. 369522 9. 916864 10. 20186 9. 78897  
2. 612697 3. 093101 3. 097341 3. 238959 2. 770229 4. 562052 2. 773552 3. 546004 3. 693428  
9. 088374 8. 24236 8. 928354 8. 471973 8. 834372 7. 960338 9. 4643 10. 26816 9. 770698  
2. 442411 2. 561085 1. 815212 2. 51242 2. 85086 2. 061482 2. 260807 2. 241598 1. 618373  
8. 086519 8. 385659 8. 289916 8. 314142 8. 753487 8. 179016 8. 354275 8. 709685 8. 441486  
1. 491811 1. 373361 1. 06741 1. 859976 2. 009066 1. 674327 1. 17788 1. 330464 1. 265266  
3. 440946 4. 02888 3. 211766 3. 635287 3. 680927 5. 564581 4. 963267 4. 773037 4. 530882  
2. 941436 2. 73503 3. 596366 4. 62678 4. 649322 3. 518405 3. 471401 3. 245054 1. 873534  
6. 063809 5. 804794 6. 058435 5. 35338 5. 648414 5. 042907 5. 837997 5. 47239 5. 366013  
4. 611681 4. 417596 1. 943493 3. 962506 2. 871673 2. 229578 2. 345136 4. 322789 4. 071618  
3. 92268 4. 859856 5. 751418 5. 960964 5. 273968 5. 398097 5. 292637 5. 811277 5. 306877  
6. 282917 6. 513227 6. 569382 6. 322643 7. 181048 7. 025781 6. 481728 6. 504361 6. 429118  
5. 876937 5. 11089 5. 560686 6. 404646 5. 316807 6. 04993 5. 502958 5. 979166 6. 325944  
3. 438094 3. 251581 2. 76025 2. 497732 4. 090476 2. 351041 4. 16356 3. 723747 4. 038168  
2. 585999 3. 417986 4. 083939 3. 199013 4. 400895 3. 661152 3. 667559 4. 434163 4. 071547  
3. 678365 2. 219557 3. 399612 3. 104885 3. 326822 3. 612506 4. 070335 4. 874023 4. 069328  
0. 989553 1. 298997 1. 74092 1. 075422 1. 963407 1. 06079 1. 316071 0. 96245 2. 074701  
3. 133227 5. 118422 3. 241726 2. 883401 4. 148987 4. 64297 4. 065863 4. 014553 4. 668121  
1. 651868 1. 459436 1. 534747 1. 749705 1. 413462 1. 799966 1. 53723 1. 370052 1. 74207  
5. 058256 5. 160275 5. 733489 4. 462647 5. 275879 3. 140925 5. 55805 5. 453615 5. 298908  
6. 82875 7. 397191 6. 289805 5. 862558 6. 847824 6. 254348 6. 762727 6. 586377 6. 363449  
6. 166044 5. 065241 6. 477842 5. 577706 5. 119292 6. 428362 5. 824477 6. 437088 6. 581652  
5. 646642 5. 424284 5. 499723 5. 973784 5. 538133 6. 711976 6. 044059 6. 542295 6. 682794  
3. 095745 0. 719434 1. 384818 1. 913422 1. 812971 3. 902975 3. 205511 1. 984926 1. 979767  
2. 720985 3. 530728 3. 171423 3. 011235 2. 297141 2. 57802 3. 969019 3. 027716 2. 324194  
3. 192244 2. 315006 2. 946475 3. 520933 3. 287506 3. 388374 2. 526547 2. 754491 2. 89641  
3. 202469 1. 87318 2. 332436 3. 952069 3. 066861 3. 245505 2. 134254 2. 34881 2. 931793  
4. 108894 3. 499484 4. 330848 5. 136627 3. 830064 4. 029191 4. 529742 3. 557335 5. 132285  
3. 554915 2. 572585 3. 924393 2. 969992 3. 318399 2. 516439 4. 949393 5. 052442 5. 224649  
1. 778332 2. 364408 3. 027088 2. 082156 2. 861959 2. 104947 2. 246536 2. 214429 2. 197924  
7. 184696 7. 38565 7. 037792 6. 786885 6. 098212 7. 88384 6. 560212 4. 716669 6. 046315

5.049695 4.069412 6.07672 3.335297 4.126511 3.702367 3.380813 2.606369 3.761264  
3.899909 2.729213 3.449908 3.11531 3.059586 3.339671 3.191107 2.703061 3.18689  
1.855724 1.482151 1.519197 1.13921 1.460003 1.561547 1.296161 1.421794 1.472072  
7.656208 7.111894 7.756041 7.580698 7.426722 7.389602 7.511647 7.382231 7.251553  
6.815113 7.583748 6.86695 6.337464 7.060761 6.696076 6.868656 6.843979 6.472174  
1.959418 2.329577 2.297857 3.158206 2.33899 2.804037 3.561725 2.089053 2.553683  
9.085364 9.047027 8.852808 8.192865 9.326306 8.495609 8.960743 8.989243 8.998188  
3.062971 2.673507 3.157531 3.381004 3.683617 4.376225 2.028238 3.746076 3.277662  
1.711006 7.050186 7.119973 3.515721 3.808427 5.489938 7.036329 2.180825 6.505604  
5.277275 3.463414 3.533345 2.826373 4.251563 4.122493 2.913954 3.20304 4.257522  
10.58488 10.11323 9.910676 9.642397 10.29719 9.800162 10.2616 10.14789 9.401879  
5.745402 5.931594 5.575674 5.661762 6.498189 5.077682 6.582732 5.373708 6.327204  
6.723761 6.021724 6.707983 6.72188 6.646349 7.12625 6.059244 5.12991 4.94174  
4.76439 5.771601 5.953344 5.702822 5.479911 6.003621 5.740791 6.580728 6.245696  
4.441414 4.915285 4.659665 4.283435 4.496373 4.881404 4.18578 4.216557 4.115912  
8.207548 8.341531 8.390426 7.94154 8.371496 8.47191 8.492157 8.128037 8.024284  
6.380636 6.011138 6.103176 5.85053 6.720566 6.682986 6.42082 6.324892 5.826067  
8.565396 8.49561 7.985701 9.172834 8.976618 9.671092 8.648416 8.528927 8.830065  
8.972832 8.370934 8.590132 9.168966 8.880914 9.871825 8.992998 9.152683 9.158942  
7.617906 7.401196 7.384209 8.074723 7.311944 8.615047 7.599871 7.930282 8.175264  
10.13746 10.08955 9.857682 10.34611 9.762194 10.14985 9.648239 9.895126 10.25214  
8.234697 7.189586 7.861394 7.676337 7.550009 8.532408 7.709578 7.931039 8.248161  
5.909527 6.606896 6.456195 6.451163 5.731028 6.407422 6.31919 5.889199 5.845215  
6.296397 5.538711 4.84064 5.279074 4.859991 3.318943 4.987913 3.845736 3.31953  
8.4242 7.791763 7.911993 7.34324 7.181232 7.666369 7.583256 5.54829 4.081924  
6.912137 6.603377 7.019463 6.577676 7.027236 6.986063 7.105684 7.450941 7.307348  
9.087127 9.155628 9.401395 9.143279 8.358722 9.693347 8.950784 8.691666 9.12869  
5.447144 4.577355 5.794518 5.465453 5.673095 4.851729 6.656177 5.97959 5.62336  
2.649187 3.377695 3.927872 2.583734 3.441819 2.983899 4.390109 2.466458 3.81289  
5.122017 4.129375 4.091341 4.639716 4.930582 5.298083 5.047388 5.476908 5.036378  
5.484964 5.92548 5.527524 6.113895 5.991206 6.694181 5.949415 5.54335 6.238785  
5.836288 5.651627 5.719964 5.357071 5.747472 5.658692 6.841918 6.35049 6.650947  
8.259958 8.38113 8.663378 8.263454 8.636993 8.059827 9.305125 9.728537 9.282932  
9.376743 9.598805 9.465837 8.666112 9.575079 9.180163 8.993903 9.246028 8.634902  
1.808044 1.808044 2.3243 2.681639 2.4964 1.347565 1.483405 2.109761 1.38215  
2.315679 2.936904 2.438054 2.883054 2.468626 2.574006 2.181231 2.957753 1.767577  
2.77277 2.186212 1.650244 1.280632 2.457947 1.942254 1.747627 2.43915 1.735303  
2.707985 3.158998 2.767228 2.309384 3.391572 2.089747 2.444302 2.43287 3.783518  
7.702668 8.138556 8.488307 7.903536 8.589444 6.11159 7.958712 7.609945 7.545734  
4.732642 5.334154 5.517421 5.757955 5.903819 4.989444 5.634594 5.342955 5.551783  
3.186415 2.505834 3.570151 3.194822 3.434353 3.429195 3.730353 4.187853 3.647147  
5.133171 3.149341 5.31879 5.056374 3.734162 5.760749 5.929519 6.264139 5.971818  
5.629295 4.633319 6.354715 5.343419 5.761061 6.114428 6.941058 6.539014 6.40008  
5.431923 5.901985 5.58617 6.328013 6.465276 6.000151 6.277964 5.206566 6.495219  
3.754854 1.53762 4.200762 4.062129 3.153616 6.139001 2.697551 4.868322 5.429336  
2.132769 1.44834 2.215179 1.429145 2.189132 1.877473 1.590027 2.947927 2.236848  
6.774234 6.325366 5.804076 6.076785 6.294098 6.68479 6.512823 6.288569 6.610299  
2.162119 1.526656 1.500577 1.462527 1.315481 1.471079 1.363657 1.32495 1.3305  
4.729581 5.150222 5.672636 4.508146 5.068082 5.070355 5.416388 4.420448 4.133198  
4.952365 4.491574 4.779566 5.74631 5.209798 5.60618 4.983175 5.935107 5.737559  
5.896569 5.601657 5.525389 5.722513 5.394333 4.893247 5.849814 5.535408 6.186788

4. 767703 4. 474594 4. 957507 4. 712647 5. 503196 4. 315317 5. 416294 6. 122318 5. 233303  
4. 725067 3. 873302 4. 905844 4. 081998 3. 938583 3. 440919 4. 455458 4. 834696 5. 403771  
6. 487556 7. 984072 6. 836066 6. 525188 6. 669611 4. 511529 6. 712754 6. 906217 7. 290622  
2. 026088 2. 02954 2. 005423 2. 178031 2. 589871 1. 607728 1. 795026 1. 963729 1. 870075  
1. 803715 1. 291048 1. 137028 1. 594273 1. 148665 1. 181605 1. 291296 1. 387142 1. 400179  
2. 810581 3. 218599 3. 247544 3. 664494 2. 661636 3. 711315 2. 685343 2. 880825 3. 283348  
2. 625183 2. 518415 1. 675883 2. 957872 1. 930821 2. 072866 1. 506084 1. 895192 1. 507277  
4. 12122 3. 53989 3. 569756 3. 159888 3. 512344 6. 437106 4. 775523 3. 088346 4. 205917  
0. 890789 1. 029091 1. 114397 1. 67851 1. 171259 1. 174944 1. 377983 1. 538839 1. 254881  
5. 151096 6. 009283 5. 885749 5. 528442 5. 957593 5. 745898 5. 145087 4. 729015 5. 112061  
2. 473155 2. 283294 2. 41911 2. 194954 2. 811885 3. 404733 2. 696493 3. 140689 2. 515241  
4. 250315 4. 604237 4. 775613 4. 184342 4. 998389 4. 110897 4. 348113 5. 08175 4. 977485  
4. 836686 3. 741166 4. 321793 4. 314288 4. 579942 5. 060864 5. 158421 6. 059674 5. 679204  
6. 237539 6. 674988 6. 611295 6. 749272 6. 304381 5. 973404 6. 426275 6. 692142 6. 492055  
10. 12861 9. 66421 9. 893671 10. 20952 10. 11436 10. 59587 9. 845686 10. 31244 10. 2796  
3. 937128 4. 970491 4. 089695 4. 478996 4. 848996 5. 709485 4. 921219 5. 405488 4. 705874  
6. 185379 7. 144462 6. 414265 5. 786795 6. 445858 6. 013959 6. 551392 6. 122927 5. 305996  
8. 097256 7. 594925 7. 715732 8. 059743 8. 019624 8. 529528 8. 297584 8. 038071 8. 103207  
6. 524313 6. 987878 6. 652154 6. 805747 6. 843365 6. 408624 6. 639139 6. 556618 6. 693347  
6. 910369 8. 017327 7. 691669 6. 785738 6. 248594 7. 089197 6. 850667 6. 4993 7. 626958  
6. 527785 7. 492489 6. 999076 7. 248884 7. 498126 6. 16048 6. 92875 7. 29948 7. 397743  
3. 877934 3. 517006 2. 736366 3. 489033 2. 97552 4. 710533 2. 81873 3. 522881 3. 909432  
6. 444851 6. 141651 6. 31391 6. 644326 6. 360257 6. 839747 7. 203913 6. 432961 6. 465023  
3. 790925 4. 624466 4. 068416 3. 343851 4. 611461 4. 196884 4. 123034 4. 897975 4. 204722  
5. 021822 5. 264852 5. 027827 5. 076478 5. 67363 4. 882074 5. 75792 4. 458425 4. 946347  
4. 958642 5. 285775 5. 741 6. 002092 5. 039107 5. 321669 5. 121826 5. 624552 5. 674894  
1. 070871 1. 050429 2. 660326 1. 444201 1. 424148 1. 095836 1. 265994 1. 599209 1. 495908  
4. 084208 3. 355628 2. 649704 2. 863611 2. 274562 3. 060817 2. 002511 4. 765179 2. 893914  
6. 989379 7. 329072 6. 739792 7. 302533 7. 304385 7. 061523 7. 150869 6. 715355 7. 254386  
4. 013997 4. 211188 3. 767645 3. 981063 4. 494848 4. 598868 3. 84182 3. 934562 4. 153923  
2. 472873 3. 470631 2. 347026 2. 435973 2. 161173 1. 755481 2. 46656 2. 497853 2. 526058  
5. 253488 5. 236972 4. 835161 5. 535638 5. 14123 5. 392766 5. 280078 5. 55459 5. 32762  
1. 902765 2. 583363 2. 607396 2. 905208 3. 106929 2. 942728 2. 512069 2. 879347 3. 396286  
5. 40145 4. 379371 2. 69621 1. 25449 3. 910048 4. 374234 3. 042911 3. 761641 4. 534935  
5. 630981 5. 100427 5. 928213 5. 627446 5. 616318 6. 133393 6. 191213 6. 583406 7. 198741  
8. 031972 7. 01962 6. 81542 7. 395658 7. 715656 9. 755516 8. 485037 8. 402643 8. 954723  
1. 52338 1. 636332 1. 505897 1. 652378 2. 363486 3. 076486 2. 003506 1. 841304 2. 937309  
1. 738761 2. 118218 1. 609043 1. 33749 1. 173557 1. 528175 0. 965756 2. 0915 1. 327892  
2. 117544 1. 95369 1. 398185 1. 884715 1. 552397 2. 051176 1. 590411 1. 338848 1. 287539  
2. 146262 2. 354044 2. 408636 1. 267506 1. 241612 1. 563333 1. 143789 1. 139116 1. 216704  
1. 26371 1. 106255 2. 265895 1. 019574 1. 351564 1. 252133 1. 60093 1. 490691 1. 486577  
3. 588003 2. 305501 2. 355407 2. 86258 2. 440681 3. 543775 3. 363092 3. 70212 4. 430998  
3. 42732 4. 206035 4. 810703 4. 772013 5. 115216 5. 233414 5. 905603 6. 01524 5. 552482  
7. 800933 8. 025271 7. 925864 7. 201986 7. 933895 8. 199831 8. 184147 8. 115993 8. 061537  
2. 568305 1. 801767 1. 358884 1. 804575 2. 339519 1. 765316 2. 070771 2. 659714 1. 582404  
1. 679914 1. 735659 2. 023563 1. 544983 1. 71675 1. 776366 1. 313967 1. 606442 2. 208628  
3. 996062 5. 003234 2. 900826 3. 474519 3. 301024 2. 777201 2. 41493 2. 670334 3. 813227  
6. 869466 7. 260177 7. 483011 7. 204434 7. 328086 6. 349104 6. 988208 7. 199905 6. 588796  
5. 570039 5. 403423 6. 333662 5. 677965 5. 272717 6. 81788 5. 841697 5. 467436 5. 788358  
10. 29554 10. 03076 10. 10661 10. 2113 9. 844728 10. 14216 10. 05292 9. 68978 9. 449071  
4. 524941 3. 629632 4. 697892 3. 862398 3. 361247 4. 790546 4. 392429 4. 301447 5. 294708



8. 171045 8. 714064 8. 234771 8. 307003 8. 272907 8. 785999 8. 642746 8. 553116 8. 429856  
5. 691105 5. 708009 6. 371615 5. 906128 4. 614289 5. 800938 5. 701616 4. 250146 4. 985675  
4. 246669 4. 023737 3. 479533 4. 369861 4. 489044 4. 726012 4. 233343 5. 07553 4. 600168  
7. 122505 6. 456515 7. 237858 6. 656771 7. 090029 6. 989032 6. 931589 6. 902411 6. 747745  
6. 87066 7. 028486 6. 9335 5. 998617 6. 701172 6. 856627 6. 542196 6. 773465 6. 755193  
6. 71878 6. 327975 7. 04139 6. 790983 7. 066299 7. 21501 7. 020761 7. 255722 6. 892754  
5. 362059 4. 357951 4. 705403 3. 811403 3. 126881 3. 652605 3. 608845 2. 983319 2. 780725  
4. 093955 4. 226313 5. 286258 3. 97767 4. 483241 4. 213715 4. 299901 5. 069095 4. 639756  
5. 651384 6. 718024 6. 436446 5. 765016 6. 68578 5. 639087 6. 89905 6. 85767 6. 416791  
2. 096654 1. 583562 2. 014457 1. 416775 2. 001456 3. 520774 1. 639916 4. 212468 2. 798394  
7. 38328 7. 343645 7. 19272 7. 216644 7. 302639 7. 542436 7. 478965 7. 749626 7. 225274  
2. 369318 2. 37304 3. 438984 2. 427254 3. 669375 2. 409726 3. 833099 2. 835888 2. 644701  
2. 011359 1. 506854 1. 948817 1. 514805 2. 259812 1. 780443 1. 876683 1. 571886 2. 210251  
2. 170164 2. 364844 2. 978494 1. 934965 1. 91444 2. 900313 2. 907712 2. 751854 3. 251342  
3. 301442 3. 222414 4. 613232 4. 161063 4. 316116 3. 391779 4. 773046 4. 882836 4. 937611  
2. 033081 1. 972698 2. 023208 3. 047689 2. 059143 3. 606606 1. 719328 1. 057269 1. 635116  
2. 30012 2. 169829 1. 353113 1. 858996 1. 715222 1. 731825 1. 242803 1. 277777 2. 175405  
6. 500256 5. 349838 4. 963204 5. 959179 6. 331172 4. 999535 4. 738921 6. 285809 5. 796755  
1. 605384 1. 669818 1. 974665 1. 659835 1. 976624 1. 74534 1. 202866 2. 64703 2. 150365  
3. 733682 3. 572758 3. 249663 2. 789962 2. 139381 3. 647103 3. 86387 3. 095608 4. 786633  
4. 763829 2. 141346 4. 256416 4. 12467 3. 630814 6. 087598 5. 611606 4. 718503 5. 213129  
3. 54823 3. 216675 3. 345413 3. 521764 2. 910223 4. 3317 3. 162493 2. 578735 4. 195054  
1. 254381 1. 04135 1. 19191 1. 275588 0. 649687 1. 850801 0. 907797 1. 943714 1. 347679  
3. 689491 3. 380281 3. 155662 2. 52188 3. 610834 4. 34382 3. 52793 3. 05891 3. 498437  
1. 577912 1. 724448 1. 527152 2. 319125 2. 506199 2. 276333 1. 448114 2. 177869 1. 741012  
6. 353401 6. 275534 6. 143728 6. 730902 5. 914578 6. 508962 5. 994394 6. 895395 6. 460158  
3. 307633 5. 070682 4. 265696 4. 48651 4. 677045 6. 016089 5. 053811 5. 629134 6. 380441  
3. 314368 3. 979699 4. 887008 4. 883924 3. 646919 3. 574527 5. 334946 1. 888393 3. 998712  
6. 435939 6. 572773 6. 135154 6. 549904 6. 242392 6. 607795 6. 11329 5. 470927 5. 797112  
8. 537231 8. 321501 8. 431542 8. 227533 7. 678396 7. 829381 7. 51884 7. 24068 7. 343109  
7. 031429 7. 266828 6. 541618 5. 893205 6. 43755 6. 411553 6. 360496 6. 093414 6. 9776  
6. 516898 6. 509291 6. 206388 6. 272196 6. 157174 6. 678374 6. 204465 6. 426874 5. 638289  
5. 758089 6. 300684 6. 951965 6. 066352 5. 815284 6. 97158 7. 314274 6. 908014 6. 948969  
0. 867916 1. 156184 1. 620217 1. 727992 2. 256742 1. 620057 1. 234093 1. 135116 1. 514762  
1. 612221 1. 617186 1. 608439 1. 526972 1. 540593 1. 600203 1. 557145 1. 418294 1. 433839  
4. 949239 5. 066199 3. 706343 2. 259322 4. 464898 4. 031079 4. 104246 4. 077846 4. 640908  
2. 576382 2. 277377 3. 057982 2. 612368 2. 271203 2. 937037 1. 855653 2. 034927 2. 296948  
6. 445066 6. 825215 7. 201174 5. 640685 6. 630978 6. 892948 6. 599993 6. 359473 6. 502559  
7. 513078 7. 853712 7. 529112 7. 566347 8. 036864 7. 479531 7. 509494 7. 412243 7. 43764  
5. 381705 5. 646291 5. 304819 4. 756347 4. 70029 4. 426065 5. 222426 4. 590938 4. 899213  
7. 621508 6. 458541 7. 751673 7. 221766 6. 968446 7. 70531 7. 392901 7. 984834 7. 568906  
5. 15884 4. 956288 5. 138279 4. 159749 5. 923981 5. 426432 5. 180691 5. 260544 5. 220634  
1. 649549 1. 442935 1. 549159 2. 30568 1. 740611 1. 737125 1. 769871 2. 395758 1. 461347  
6. 853944 7. 067223 6. 464935 6. 995605 6. 000204 7. 059853 7. 635638 7. 186967 7. 838491  
3. 747266 4. 008705 3. 458037 4. 814713 4. 582463 4. 639403 4. 424047 4. 131649 3. 851016  
1. 939587 1. 687373 2. 104694 1. 738679 1. 781673 1. 573278 1. 803788 1. 646493 2. 07262  
1. 360569 0. 946178 1. 406384 1. 458064 2. 790285 1. 001153 1. 279291 1. 32406 1. 50724  
3. 646309 4. 042033 3. 273934 3. 444282 3. 502895 4. 292658 3. 714816 3. 566761 4. 345638  
1. 800274 1. 934625 2. 563277 1. 894916 2. 224505 1. 69268 1. 671493 1. 628929 1. 889939  
1. 430074 0. 895349 0. 668406 1. 707287 0. 626345 2. 125771 1. 258936 1. 139878 0. 758794  
6. 502779 5. 222229 5. 656645 5. 525059 5. 389822 5. 026345 5. 010352 4. 639574 4. 604242

4. 901276 4. 481741 3. 429794 3. 525038 4. 131798 4. 90357 4. 451919 2. 974757 3. 587105  
7. 910819 8. 288508 8. 041412 8. 412578 7. 977359 8. 144647 8. 651424 8. 647753 8. 472119  
3. 830177 3. 170024 3. 312983 4. 424293 3. 41624 4. 835409 5. 168532 4. 598111 3. 602874  
8. 247245 7. 980718 7. 884908 7. 483747 8. 081871 8. 934136 8. 191585 8. 413718 8. 465363  
4. 17442 4. 45438 4. 573926 3. 0125 4. 308352 4. 816385 4. 847033 5. 213158 4. 215931  
2. 353578 2. 523029 1. 296243 2. 274275 1. 893974 4. 07585 1. 744255 1. 67849 2. 586272  
5. 816022 5. 992819 6. 081378 5. 885543 6. 5348 6. 219049 5. 940508 6. 228095 5. 986778  
3. 652634 4. 829979 4. 914632 3. 569665 4. 490543 3. 400079 4. 106407 4. 409828 4. 022182  
3. 571302 3. 490402 4. 217294 4. 465155 4. 270683 3. 455605 2. 84559 3. 54799 3. 408788  
8. 095812 7. 645526 7. 63514 7. 197291 7. 016237 7. 904686 7. 045204 5. 503475 5. 708142  
7. 383452 7. 05234 7. 287422 6. 262134 7. 523235 6. 114498 7. 046601 7. 216989 7. 402419  
3. 184742 5. 197234 5. 737243 4. 64941 5. 895905 3. 334038 4. 944548 4. 73141 5. 192011  
3. 880003 4. 318973 4. 933742 4. 089118 4. 127567 4. 90079 3. 975487 4. 847144 3. 475435  
3. 395319 3. 362093 4. 357378 3. 503704 3. 94003 2. 720724 4. 568132 3. 508699 3. 715743  
4. 551011 2. 433188 3. 404692 3. 522432 3. 787283 3. 183818 4. 803984 4. 178452 5. 625825  
5. 022373 5. 337526 6. 00628 4. 353984 4. 118163 6. 467839 6. 019611 5. 282668 4. 651439  
5. 268938 5. 928745 4. 07604 4. 293865 4. 748483 7. 629293 6. 288472 4. 763265 4. 653394  
2. 741514 2. 158106 2. 362695 3. 714344 2. 591795 2. 885172 3. 424714 2. 118166 2. 918306  
4. 139808 3. 566406 3. 29687 4. 511325 3. 873846 4. 236372 3. 603283 4. 280431 4. 696736  
5. 66445 6. 794629 6. 251024 6. 222476 6. 519599 6. 50499 5. 738265 5. 642875 6. 356885  
4. 061198 3. 446837 3. 108797 3. 138405 4. 646559 2. 979039 3. 655207 3. 369467 3. 164187  
3. 898113 2. 909806 2. 880649 3. 272438 3. 33328 3. 573329 4. 068331 2. 614098 3. 316744  
6. 282984 6. 299197 6. 310162 6. 364939 6. 757042 6. 118629 6. 417414 6. 308376 6. 239355  
7. 116098 7. 386811 7. 824131 6. 821736 7. 02091 6. 241184 7. 537509 7. 544563 7. 474524  
1. 700271 1. 846741 1. 747274 2. 446535 2. 246676 1. 917525 1. 704805 2. 258441 2. 204529  
1. 912467 2. 107761 2. 208269 2. 147969 1. 680071 1. 69925 1. 637752 2. 145492 2. 120278  
5. 469496 5. 48041 5. 634438 5. 877909 5. 610702 6. 30866 6. 342102 6. 796602 6. 401567  
5. 377394 4. 54278 5. 002826 5. 421216 5. 239322 3. 849199 5. 213666 4. 778272 4. 918465  
1. 521452 1. 933306 2. 208677 2. 231172 1. 281603 1. 998219 1. 539805 1. 838808 2. 074265  
3. 376316 1. 576105 3. 15146 2. 078547 2. 269212 2. 682226 2. 314614 1. 887894 3. 346012  
2. 741748 4. 230953 3. 155266 2. 354829 3. 589271 2. 913758 3. 750545 2. 063039 2. 621716  
2. 150081 2. 442276 3. 417982 2. 693073 2. 572416 3. 344172 3. 428725 2. 82822 3. 09571  
1. 7739 1. 518212 1. 660519 2. 000276 1. 795834 1. 81733 1. 751159 2. 074668 2. 019011  
6. 280507 6. 116084 6. 912967 6. 51186 6. 591267 5. 729187 6. 59064 6. 804798 6. 814335  
6. 747557 5. 696227 6. 544722 6. 665262 6. 280613 5. 281802 7. 088039 6. 680704 6. 599588  
6. 022674 6. 498267 6. 702776 6. 293934 6. 025187 5. 809974 6. 700342 4. 569401 7. 104438  
3. 328365 4. 337597 4. 728768 5. 059531 5. 370723 3. 565767 4. 552949 4. 245334 5. 594914  
4. 687728 5. 025228 4. 921655 4. 952968 5. 459075 4. 76256 5. 35841 5. 187341 5. 567869  
2. 520772 2. 534076 2. 091782 2. 063333 2. 801015 2. 281184 1. 832113 2. 581339 2. 056414  
1. 842645 1. 171773 1. 515938 1. 658225 1. 888753 1. 133013 2. 214379 1. 171607 1. 756862  
5. 46144 5. 598348 4. 983429 5. 925184 5. 570038 6. 676914 6. 534588 7. 075579 6. 602904  
4. 012156 4. 587982 3. 36334 4. 446934 5. 017823 2. 705718 4. 810769 4. 735966 3. 996187  
8. 228162 8. 199792 8. 247701 7. 686323 7. 824772 8. 201395 8. 010697 8. 025139 8. 116758  
5. 280954 5. 179012 6. 934429 6. 943163 6. 946567 6. 587208 6. 028963 5. 862586 5. 963951  
6. 228435 6. 004514 5. 839904 5. 441694 6. 204819 5. 335523 5. 851618 4. 727538 5. 78326  
3. 921732 2. 324275 2. 53303 3. 86169 4. 260465 3. 323654 2. 696144 3. 052799 2. 654243  
5. 171334 5. 103352 4. 435458 5. 376379 6. 822522 6. 357504 3. 413725 3. 468466 2. 363641  
2. 514942 2. 741194 2. 724828 2. 374552 2. 487164 3. 95145 3. 141804 2. 827198 3. 008952  
6. 38527 6. 259985 6. 665123 6. 500757 6. 610437 7. 186136 7. 037812 6. 901503 7. 024244  
5. 972576 5. 880873 6. 753875 5. 891658 5. 961327 6. 802455 6. 595243 6. 376427 6. 289105  
2. 464072 2. 986211 1. 996222 2. 425492 1. 961757 1. 991011 1. 875645 2. 209431 2. 363915

8.160477 8.576413 8.096308 8.109903 8.121313 7.784531 7.924593 7.848226 7.886426  
7.45259 7.318126 6.74219 6.639259 7.087873 6.456601 6.726215 6.219663 6.577061  
5.272274 5.281472 5.484038 4.899314 4.975606 5.486493 5.403162 5.397496 5.148835  
6.013855 6.448525 5.707592 6.08103 6.091055 5.672564 5.556999 5.54941 5.858415  
3.145609 3.026448 2.836676 3.214362 2.086238 4.10966 2.978434 2.805812 2.926376  
7.502019 7.63914 6.753949 7.237779 7.325571 6.860086 7.728498 7.368932 6.902851  
8.750667 9.084615 8.620118 8.381558 8.888369 8.230092 8.795104 8.722495 8.652703  
3.926998 4.902734 4.809912 3.715117 4.801372 4.813931 5.036984 4.330277 4.48  
5.563835 5.138933 5.886573 5.261087 4.970686 6.426133 4.999666 6.137549 5.773936  
5.508537 7.069061 5.650809 5.283656 5.797226 5.227502 6.160501 5.860115 6.254998  
6.270665 5.191949 5.318474 5.309241 4.967218 5.915017 6.223756 5.83841 5.444355  
5.241439 6.231597 6.08158 5.694941 6.124517 6.202844 6.074089 5.991785 5.221429  
4.94004 5.443326 4.993838 5.623159 5.677738 5.875751 5.686202 4.770736 5.813283  
8.057898 8.333192 8.142708 7.831375 7.821026 7.812263 7.542743 7.674288 7.976455  
7.449338 7.800204 7.291889 7.547534 7.291644 7.762794 7.266279 7.711936 8.110575  
6.681315 6.760139 6.173564 6.537248 6.996464 6.003376 6.988141 6.608448 6.511621  
5.718717 6.023881 6.082223 5.165911 6.286293 5.997385 6.238106 6.087376 6.304327  
6.046309 6.722344 6.496301 6.498026 6.489285 5.660439 5.873346 5.949599 5.720721  
7.292613 6.802022 6.813497 6.841554 6.71572 6.555905 6.576178 6.868872 7.068714  
0.842524 1.861678 2.113066 1.79845 1.265422 1.315551 1.499405 2.032113 1.089868  
1.811934 1.460276 1.178305 1.51718 1.251584 1.391981 1.401604 1.841762 1.492314  
6.364029 5.994349 6.333357 7.267242 6.080468 7.178677 5.509803 7.015658 6.800378  
4.774109 5.043593 5.064908 4.701817 5.281591 4.599074 4.568531 4.982947 5.229828  
4.180573 3.58331 4.74975 4.032578 5.355109 5.154887 3.392663 3.746579 4.115326  
4.12609 3.568674 3.838323 4.777256 4.249495 4.908845 4.885166 4.731625 4.7453  
2.133323 2.856711 4.066924 2.990467 3.511506 2.77312 4.010782 2.17771 3.744367  
1.944767 1.783858 1.599682 1.824483 2.160519 1.758408 1.886819 1.640425 0.911021  
1.92105 2.629082 2.495608 2.822824 3.686865 2.396724 3.251831 2.87421 3.231755  
6.037166 6.816829 7.050715 6.79396 7.496558 5.921181 6.756411 6.828769 6.888977  
2.287319 1.801446 2.19675 1.932381 1.750072 1.902993 1.690417 2.728879 2.429066  
5.603406 5.32295 4.498091 5.746984 5.011916 5.750441 5.399969 5.087507 5.379615  
3.672346 3.068192 2.996006 3.803662 3.167397 2.725416 4.056449 3.989035 2.975804  
2.160664 1.939711 1.32168 1.856044 2.151771 1.641799 1.386604 1.236944 1.591774  
2.698142 2.754028 2.50867 2.69458 2.751602 2.87229 2.94326 3.324689 3.856007  
6.327514 6.11603 6.152992 5.012392 6.254297 6.492982 6.180461 6.695552 6.611037  
5.554293 5.707567 5.734545 5.385867 5.792772 5.102939 4.887259 5.286455 5.156429  
3.013719 4.600437 2.426292 3.613896 4.636044 4.54485 3.514 3.656525 3.311622  
5.006 4.969939 4.93038 4.497289 4.155998 4.37275 5.45949 4.454726 4.766142  
6.277536 6.068629 5.941495 5.520295 5.738463 5.395328 5.988073 5.567516 6.306296  
1.945426 2.196344 2.859744 2.093144 3.138995 2.076097 2.43135 2.726115 2.282927  
3.933808 3.812004 4.201322 3.822272 3.854084 3.717458 4.179034 3.885919 2.956013  
2.547121 1.861239 1.50088 2.576934 2.430151 2.269069 2.266168 2.658949 2.450954  
4.959678 6.185769 5.19517 5.450728 6.029375 5.326957 5.823915 5.220002 4.691858  
6.230265 6.751968 6.448598 6.248641 6.698538 6.014457 6.555211 6.723192 5.892017  
7.465517 7.663663 7.481663 7.776245 7.963464 7.113502 7.428134 7.550301 7.884276  
2.464693 2.467178 2.611369 2.682157 2.819464 2.999007 3.666567 3.402094 3.070384  
5.457237 4.494512 4.181847 4.381155 3.868496 5.390157 4.582485 3.342008 3.956051  
7.093533 6.965134 7.629805 6.447118 6.943773 7.406411 7.571814 7.185983 7.09535  
4.0711 3.340043 4.241693 3.862461 3.200796 4.141903 4.078816 3.813777 3.925668  
2.917858 2.975094 3.317677 2.511905 2.600086 2.812435 2.715748 4.035381 3.126946  
6.263693 6.722561 6.805232 7.023571 6.735504 6.516183 6.765066 6.446742 6.806688

3. 20018 3. 304244 4. 118445 2. 920352 3. 136878 3. 333186 3. 970717 2. 495041 3. 480742  
2. 895716 2. 527228 2. 79923 2. 404894 3. 041251 3. 481525 2. 578957 2. 434875 2. 418635  
5. 226354 4. 114264 3. 218091 3. 497799 2. 952342 4. 668661 3. 203031 2. 505245 2. 474183  
5. 76726 5. 497416 5. 162935 6. 019474 5. 360409 5. 925843 5. 721397 6. 068398 5. 913259  
5. 833214 6. 180692 6. 848314 6. 24563 6. 486197 5. 330575 5. 868113 6. 55035 6. 017098  
4. 612134 4. 362922 4. 233318 4. 251371 3. 689748 4. 279454 6. 272888 6. 20487 4. 78227  
2. 687289 2. 462282 4. 330406 5. 79827 2. 422561 7. 09091 3. 685591 2. 516034 4. 226481  
3. 844889 2. 900991 4. 167397 4. 140309 3. 460911 3. 442783 4. 186665 4. 328295 4. 573379  
1. 184236 1. 23077 1. 403603 4. 056429 0. 708058 2. 648415 1. 657795 2. 915374 2. 066842  
6. 419198 5. 377654 6. 573342 6. 13123 6. 205876 6. 72672 6. 866378 6. 957185 7. 441248  
7. 150313 5. 879634 6. 075558 5. 650111 5. 047925 4. 352135 5. 546298 2. 672477 2. 220958  
0. 993534 2. 253018 1. 532478 1. 161551 1. 119423 1. 339168 1. 495869 1. 426675 2. 018092  
6. 425802 6. 218162 6. 246504 6. 912868 6. 141256 5. 346629 6. 543951 6. 595783 5. 988488  
1. 194936 1. 194927 0. 994981 1. 501142 0. 819843 0. 875182 0. 744941 1. 55699 0. 803841  
4. 32347 3. 538138 4. 410825 2. 770288 4. 819562 4. 490246 4. 435044 5. 194576 4. 802365  
3. 320279 4. 40578 4. 11683 3. 936856 1. 921057 4. 971925 2. 327829 2. 514932 2. 945395  
1. 886941 1. 697272 1. 986896 1. 554086 2. 358574 1. 967331 2. 261996 1. 843129 1. 824664  
8. 365899 8. 92129 9. 205636 8. 993068 9. 216809 8. 222295 9. 073936 9. 076919 9. 05829  
1. 28006 1. 245784 1. 144692 1. 066478 1. 401146 0. 903436 1. 472919 1. 612469 1. 017061  
1. 117729 2. 180501 1. 024405 1. 203416 0. 868235 1. 27674 1. 178964 1. 008514 1. 665926  
2. 053783 2. 127133 2. 302516 2. 210015 2. 534601 2. 119164 1. 959533 2. 254862 2. 509979  
3. 777453 4. 497479 4. 01672 3. 134602 3. 959069 3. 590121 3. 857437 4. 371045 3. 284819  
3. 667823 4. 528404 3. 640344 2. 445999 3. 490467 3. 919913 4. 283688 3. 203603 3. 544096  
2. 496024 2. 683869 2. 979619 2. 75319 2. 810348 5. 091408 3. 530782 3. 533826 5. 525526  
3. 122123 2. 831252 3. 40205 3. 867895 3. 166158 2. 967418 4. 645782 4. 640515 3. 049633  
2. 369949 2. 967115 1. 51774 1. 56695 1. 572612 1. 383895 1. 544581 2. 01546 1. 342671  
4. 828452 3. 646757 5. 082364 3. 844205 4. 820497 4. 101229 5. 209636 5. 455274 5. 199853  
4. 454665 4. 236577 4. 734775 4. 629208 4. 650603 4. 272104 3. 939861 4. 336331 4. 58845  
3. 882559 2. 919438 3. 217355 3. 765096 2. 891856 3. 494355 4. 084412 3. 602123 3. 53655  
1. 716358 2. 670404 2. 284735 1. 720556 2. 367809 2. 630094 1. 811941 1. 942673 2. 123289  
2. 844613 2. 061144 4. 574577 1. 980843 2. 563616 2. 420993 3. 776701 1. 664288 1. 526079  
1. 529798 1. 242648 2. 271813 1. 027281 1. 558457 1. 07597 1. 236185 1. 582267 1. 44259  
3. 584407 3. 542605 3. 881905 3. 98782 4. 160452 4. 149242 4. 015971 3. 816838 3. 552635  
2. 826775 1. 782188 1. 614779 1. 638783 2. 438328 2. 238617 2. 656318 2. 249443 2. 601787  
2. 354971 2. 623284 3. 220626 2. 684186 4. 012379 2. 869489 1. 954761 3. 247306 2. 563875  
3. 55132 1. 903625 2. 901035 2. 74934 3. 100948 2. 12222 2. 019736 2. 228932 3. 83763  
4. 026747 2. 775657 3. 755102 3. 601187 3. 717941 4. 425328 4. 183727 4. 351971 4. 424218  
2. 594587 2. 411701 2. 394627 3. 087626 2. 86289 3. 430893 2. 603974 3. 147121 3. 772144  
2. 202717 1. 981378 2. 272108 2. 865388 2. 452408 2. 09355 2. 077525 2. 153815 2. 28224  
5. 901743 5. 37633 5. 982984 6. 160807 4. 832342 6. 564636 6. 966346 6. 998604 7. 084721  
2. 559472 2. 519499 2. 191065 2. 548951 1. 904053 1. 813843 2. 218466 2. 114792 2. 057384  
1. 334264 1. 254417 1. 787351 2. 533681 0. 770262 1. 252134 0. 810175 1. 54897 1. 158936  
2. 050506 2. 692201 2. 270491 2. 731266 1. 790172 1. 715741 2. 078785 2. 896647 2. 279031  
3. 963241 3. 427927 3. 553552 3. 221577 3. 38973 3. 484709 3. 538412 3. 343211 3. 222153  
2. 039438 2. 452081 3. 230931 2. 133041 2. 404339 2. 353366 1. 899318 1. 776821 2. 16863  
3. 268769 2. 910349 2. 861352 3. 87549 2. 488124 2. 253395 2. 721472 2. 477053 2. 355796  
4. 429206 4. 687641 4. 610611 3. 074176 3. 723065 3. 857468 3. 332565 2. 843178 3. 558936  
2. 524086 4. 012257 2. 449923 4. 014894 2. 902878 2. 946567 3. 306589 3. 913155 2. 010089  
1. 03658 1. 179797 1. 084192 1. 284197 1. 241049 1. 240066 1. 430268 1. 37757 1. 319521  
1. 581689 2. 387611 1. 6848 2. 752519 2. 014387 1. 787559 2. 59217 1. 656444 2. 087044  
2. 110755 1. 575903 2. 701358 1. 33386 1. 954144 1. 508464 1. 264045 1. 229666 1. 120298

1. 861948 1. 979684 2. 45633 1. 703838 3. 006832 2. 071038 2. 222515 2. 013302 2. 046156  
2. 223104 2. 219103 2. 324866 2. 135682 2. 674358 1. 140186 2. 110053 1. 739982 1. 585815  
4. 741424 3. 446731 3. 343596 3. 675044 3. 833075 4. 006661 4. 006405 3. 886269 2. 867659  
1. 722961 1. 950434 1. 560039 1. 575712 1. 994819 1. 881067 1. 438059 2. 318374 2. 40376  
4. 553408 3. 933571 4. 520366 3. 293728 3. 287577 3. 968583 3. 708877 3. 745218 3. 9617  
3. 59221 4. 0006 4. 13006 3. 637625 3. 595669 4. 414148 3. 316883 3. 525466 3. 858339  
3. 497516 4. 54604 4. 805727 4. 906909 4. 725569 3. 728727 3. 448491 3. 33712 4. 538347  
1. 812948 1. 39062 1. 636637 2. 367582 1. 361982 2. 055076 3. 035044 2. 03833 1. 984398  
1. 847541 1. 978864 1. 418361 1. 889484 2. 468696 1. 703651 2. 894407 1. 869813 1. 653204  
6. 184695 6. 470458 6. 639714 5. 986933 6. 192107 6. 555533 6. 519188 6. 334128 6. 55279  
5. 919587 4. 29888 5. 047312 4. 912853 5. 409154 4. 894399 5. 344215 4. 621716 5. 100617  
5. 012475 4. 822779 5. 267239 5. 280394 5. 22042 3. 933879 5. 041436 5. 085647 5. 63736  
9. 529486 9. 381378 9. 232472 9. 34433 9. 14443 9. 80374 9. 962806 10. 07091 9. 467662  
3. 427961 3. 421302 2. 932918 3. 074928 2. 898424 4. 924586 4. 067021 3. 703828 3. 3762  
2. 020564 2. 196104 1. 967853 2. 319311 2. 397684 2. 9589 2. 348175 2. 086596 3. 026285  
5. 577 5. 052281 5. 622056 4. 856908 4. 856908 5. 488515 4. 393195 4. 639864 5. 154821  
6. 642765 4. 638445 5. 248328 5. 564234 6. 149609 6. 036104 5. 609509 4. 148324 4. 430961  
3. 411421 3. 396838 3. 975966 2. 676068 2. 303666 4. 336771 4. 76111 4. 602277 3. 437896  
3. 93455 3. 732294 3. 195394 4. 653496 4. 344949 4. 410175 2. 757225 4. 708488 3. 57258  
2. 167652 3. 274102 1. 991316 2. 472688 2. 538348 3. 166978 2. 39961 2. 315926 2. 016749  
0. 448437 0. 965875 1. 036951 1. 459725 0. 912454 1. 415293 2. 168174 0. 896675 1. 796255  
4. 113391 3. 787167 3. 677095 3. 360337 3. 890515 2. 938517 3. 989375 3. 098836 3. 425381  
5. 617211 5. 856197 5. 619041 5. 738076 5. 391268 5. 772103 5. 556468 5. 670911 5. 12216  
3. 258308 4. 679591 3. 603224 3. 425943 5. 102174 2. 484053 2. 982481 3. 052331 2. 459921  
3. 396213 3. 53347 3. 200032 2. 096272 3. 111315 3. 575661 2. 607109 3. 741912 3. 654232  
4. 458243 4. 216718 4. 056662 4. 315486 4. 982008 4. 558538 2. 480826 3. 337159 3. 334648  
2. 849506 2. 933889 2. 558328 2. 436695 2. 294635 2. 928026 2. 443236 2. 518051 2. 750204  
2. 501768 2. 883999 2. 027003 2. 052866 2. 717372 1. 931944 2. 685422 2. 140097 1. 749261  
3. 974908 4. 29201 3. 922524 3. 704345 3. 942777 5. 281259 4. 134127 4. 597256 4. 225371  
2. 880671 2. 274415 3. 01071 2. 02964 2. 905049 2. 652822 1. 582625 2. 805357 2. 762366  
1. 749969 2. 029385 2. 662214 1. 693211 2. 420765 2. 140876 1. 832902 2. 084764 1. 543259  
1. 813208 1. 80672 1. 657101 2. 055727 2. 153764 2. 999317 2. 179927 2. 491143 1. 698726  
4. 918981 3. 747127 4. 242309 4. 29188 4. 176511 4. 391954 5. 560241 4. 912177 5. 122955  
3. 248834 2. 678 2. 006856 2. 63756 3. 206128 4. 987553 2. 022555 2. 102338 2. 784467  
2. 504932 3. 06924 2. 772047 2. 916078 3. 557203 3. 290107 2. 588293 3. 126919 4. 257133  
1. 292032 1. 816433 1. 010171 1. 352723 1. 859261 1. 729258 0. 86647 1. 260248 1. 271657  
3. 010755 3. 218466 2. 995762 3. 321728 3. 491614 3. 434679 3. 215973 2. 744305 3. 764241  
3. 174643 2. 298408 2. 722009 2. 815638 2. 477467 2. 043626 2. 412678 2. 383857 3. 344287  
2. 299475 2. 41192 2. 382109 2. 625859 2. 605818 2. 645762 2. 498271 2. 257524 2. 878992  
7. 991781 7. 452245 7. 313668 7. 451467 7. 140893 7. 692197 7. 037806 7. 011143 6. 608394  
7. 20793 7. 238632 7. 228337 6. 9469 7. 33422 6. 501894 7. 038011 7. 051813 7. 204953  
2. 997636 2. 692207 1. 759395 3. 326815 2. 609591 2. 754778 2. 629581 2. 775329 2. 874039  
3. 992747 3. 47121 3. 298518 3. 820927 3. 273958 3. 972105 3. 686886 4. 813396 4. 62806  
6. 411455 6. 141152 6. 07625 5. 889137 6. 324671 7. 015757 7. 795215 7. 269016 7. 098958  
2. 186552 1. 79332 1. 207629 1. 857269 1. 88293 1. 83318 1. 690688 1. 875783 1. 316312  
3. 726482 3. 93678 4. 312702 4. 525228 3. 389672 3. 670991 4. 106647 4. 280009 3. 886022  
5. 950204 4. 623205 5. 342557 4. 68829 4. 571745 8. 175065 5. 636162 6. 681312 6. 607247  
2. 431055 2. 846367 3. 251113 2. 581814 3. 203744 2. 932513 3. 422249 2. 580977 3. 279973  
4. 242792 3. 319449 4. 484573 4. 568893 3. 28195 3. 634243 3. 612961 3. 465023 3. 511463  
6. 707078 6. 252645 5. 6018 5. 110556 5. 826918 5. 1616 5. 751587 5. 283678 5. 361155  
2. 230727 3. 26988 2. 786137 3. 305216 1. 530433 2. 561495 2. 720839 1. 792042 2. 041926

4. 600356 2. 639269 2. 464738 2. 154424 2. 445766 3. 003263 1. 815835 2. 71399 3. 35539  
2. 284852 1. 856899 1. 297044 1. 642893 1. 129104 1. 293983 0. 938245 1. 359009 1. 231042  
3. 037298 4. 276826 3. 691848 4. 800827 3. 782708 3. 679316 3. 804726 3. 776349 3. 50473  
2. 811894 2. 744715 2. 567297 3. 182417 2. 419685 2. 189782 2. 542535 2. 347978 2. 408517  
5. 008799 5. 155558 5. 570582 4. 951749 5. 322993 6. 076208 5. 566969 5. 961507 5. 397925  
1. 233532 1. 613371 1. 207946 1. 495942 2. 188976 1. 454309 1. 518538 1. 752152 1. 32418  
6. 400096 6. 288721 6. 521558 6. 338574 6. 243946 7. 065331 7. 224731 7. 468186 7. 394127  
7. 320918 6. 812548 6. 197464 6. 989483 5. 882319 7. 086448 6. 475037 6. 168196 7. 041703  
4. 818938 3. 742423 5. 030581 4. 491986 5. 21475 5. 116848 3. 760277 5. 158676 4. 72026  
5. 270124 4. 43184 4. 452748 3. 697597 4. 20096 3. 546127 4. 491884 4. 010688 4. 156656  
3. 064176 2. 204649 2. 055777 2. 453998 2. 589701 3. 707932 2. 572751 2. 418608 3. 016942  
3. 42555 4. 43964 3. 052267 4. 276796 3. 890557 3. 605114 4. 336391 4. 711266 4. 718169  
1. 774948 1. 573898 2. 362234 2. 389617 1. 739741 1. 871669 1. 7895 1. 974875 2. 575355  
2. 600499 1. 980636 2. 987049 2. 566535 2. 914869 4. 389906 4. 377214 4. 861347 5. 545476  
5. 143138 5. 363365 5. 722966 4. 809583 4. 942811 5. 872585 5. 412712 5. 789007 4. 917741  
3. 126775 3. 728534 3. 589144 3. 781065 3. 828489 2. 964181 3. 217396 3. 769099 3. 753243  
1. 774075 1. 298657 1. 7585 2. 104557 1. 384491 2. 328496 1. 52216 1. 887489 1. 740058  
2. 858704 2. 235054 2. 435192 3. 176049 3. 902907 2. 605287 2. 479249 2. 712899 3. 014651  
2. 260058 2. 634472 2. 341642 3. 265973 2. 790748 2. 81611 2. 348946 2. 770824 2. 829624  
3. 111066 3. 033803 2. 662424 2. 752937 2. 569587 2. 336318 2. 752462 2. 540991 2. 922948  
5. 710922 6. 364616 6. 088164 5. 45506 6. 798466 6. 100568 5. 878235 6. 141244 6. 264555  
5. 575223 5. 209901 5. 787392 5. 201881 5. 27397 5. 821893 5. 363027 4. 866716 5. 605538  
3. 921114 3. 330131 4. 091561 4. 46613 3. 406698 4. 560693 4. 182765 3. 140307 3. 877162  
7. 395251 5. 621216 5. 43168 7. 348489 7. 458406 3. 29023 6. 751041 6. 465401 6. 596322  
1. 570461 1. 673907 1. 09271 1. 654605 1. 389328 1. 741447 1. 011365 1. 891462 1. 376499  
5. 840406 5. 578645 4. 975204 5. 39116 5. 362475 6. 161391 5. 425437 3. 232104 4. 031786  
2. 810738 1. 514749 1. 542662 2. 055906 1. 80318 1. 78535 1. 684946 1. 658294 1. 395461  
2. 594798 2. 231365 2. 504285 2. 361404 2. 860286 2. 622302 2. 486981 2. 46906 2. 959871  
3. 108242 2. 499804 1. 637004 2. 062236 2. 596842 4. 188783 2. 90472 2. 665769 2. 689048  
6. 59253 7. 072974 6. 645578 6. 758341 6. 833169 6. 407612 6. 124526 5. 893502 5. 759398  
2. 170007 2. 107391 2. 743394 2. 761279 2. 077968 3. 016303 2. 482743 2. 806396 2. 716538  
3. 149633 3. 294051 2. 595937 2. 565174 2. 517679 2. 726088 2. 384635 3. 611237 3. 020342  
7. 48914 7. 312515 7. 378891 7. 339773 7. 943257 7. 131833 7. 622736 7. 407938 7. 932176  
4. 491798 6. 496915 4. 527677 5. 103251 4. 911489 5. 243664 6. 265086 5. 201331 5. 235862  
3. 502572 3. 117231 3. 54839 3. 964114 3. 324429 5. 148827 3. 651929 4. 354542 4. 738448  
3. 361687 3. 229996 3. 107031 2. 995517 3. 202411 3. 105081 2. 568374 2. 833019 3. 458015  
7. 243692 5. 701907 5. 633928 7. 417717 5. 525407 5. 90477 6. 591813 2. 794521 3. 765701  
3. 805505 2. 73272 2. 584346 2. 285836 3. 082051 4. 413675 4. 877242 5. 313178 4. 860368  
5. 559579 6. 418188 4. 639981 4. 807285 5. 262389 4. 86047 5. 09707 5. 300078 6. 079815  
5. 745234 6. 142245 6. 20797 5. 650065 4. 500146 5. 504485 6. 879098 6. 696522 6. 50839  
2. 440481 2. 154254 2. 443744 2. 983646 3. 332513 2. 770019 3. 356075 3. 398264 2. 423219  
2. 099083 1. 7571 2. 081231 2. 133001 1. 636774 1. 960564 2. 044368 2. 124441 2. 278772  
3. 657689 2. 202078 2. 274699 2. 194251 2. 565445 2. 89522 3. 400371 4. 684749 3. 277224  
2. 031487 1. 799222 3. 373831 2. 860876 2. 581987 2. 149211 1. 971408 2. 178438 2. 153621  
4. 336208 4. 840262 4. 77518 4. 309853 3. 933404 2. 518618 5. 166551 4. 955456 4. 00078  
3. 170633 3. 153463 2. 944088 3. 743475 2. 606571 4. 761981 3. 521492 3. 194698 3. 996091  
3. 928689 3. 864923 4. 364152 4. 497822 4. 119896 4. 138044 4. 983268 4. 20338 4. 573577  
4. 786508 3. 577095 3. 775717 2. 478576 4. 109724 4. 88043 4. 934958 4. 730995 4. 753652  
8. 397445 8. 343628 8. 870912 8. 657769 8. 835723 6. 99166 9. 316358 9. 187461 8. 811171  
1. 872983 2. 822697 2. 39871 2. 463718 1. 699572 3. 097011 1. 847202 1. 425461 1. 644863  
1. 248807 0. 784568 1. 620855 1. 672813 1. 549483 1. 258976 0. 949545 1. 136189 1. 748079

5. 683253 4. 374085 5. 268612 5. 768727 4. 79633 5. 673267 5. 419065 5. 074961 5. 463316  
7. 016095 7. 29994 7. 026137 6. 296608 7. 954924 6. 777738 7. 462345 6. 872403 7. 287135  
6. 730952 5. 531503 7. 406544 5. 783786 6. 047104 6. 763592 5. 946791 6. 243862 6. 412793  
2. 123693 2. 447916 2. 509421 2. 508971 1. 770389 1. 166529 2. 19065 2. 20754 1. 435402  
7. 020304 7. 25479 7. 193394 7. 084549 7. 257749 6. 482863 7. 162914 7. 457519 7. 543558  
5. 305819 5. 739055 5. 851087 5. 75129 5. 91454 5. 424619 6. 540415 6. 249725 5. 927099  
5. 09952 5. 37694 4. 807005 3. 522552 6. 388695 4. 980264 5. 098674 6. 202648 5. 946267  
3. 190111 3. 214508 3. 10216 4. 293678 3. 06735 3. 247774 2. 57281 3. 195961 2. 894665  
2. 726536 2. 313235 4. 551704 3. 414304 3. 602137 3. 111098 3. 379868 4. 001158 2. 4272  
3. 090273 3. 165078 2. 935072 2. 720817 3. 077715 3. 964204 2. 718128 4. 030362 3. 904043  
7. 127176 7. 502546 7. 242437 6. 474682 7. 346838 6. 666364 7. 33325 7. 37208 7. 272574  
5. 539054 5. 899049 5. 073552 5. 459427 5. 702423 6. 73535 5. 06679 5. 407609 6. 342191  
5. 934714 6. 456276 6. 571912 5. 884935 6. 266703 5. 635988 5. 234744 5. 121982 5. 613389  
4. 243799 3. 341274 3. 834606 4. 427062 4. 563509 3. 968224 4. 101337 3. 812513 4. 474125  
6. 691885 6. 576716 6. 092141 6. 425722 6. 695807 6. 706489 6. 580212 6. 028285 5. 981849  
3. 313101 3. 118165 3. 260192 3. 625878 3. 333513 3. 273927 2. 990625 3. 180149 4. 764238  
3. 238929 3. 182862 3. 009821 2. 736814 2. 40507 3. 402048 2. 466036 2. 430803 3. 197709  
7. 583946 7. 161221 7. 429173 7. 854265 6. 758961 8. 364594 7. 411929 7. 949765 7. 509876  
1. 674006 2. 205758 1. 599569 2. 12113 1. 843133 2. 138213 2. 315409 3. 957102 2. 220549  
6. 107879 6. 727267 5. 705961 7. 085174 6. 493929 6. 077628 6. 93636 6. 446376 6. 642081  
3. 440597 1. 653653 1. 850916 1. 683402 2. 308226 2. 27307 2. 097072 2. 075866 2. 239343  
1. 968897 1. 444679 1. 283234 3. 082242 1. 710233 1. 022317 1. 655604 2. 683639 1. 803372  
5. 556766 5. 85464 5. 559096 6. 46209 5. 443915 6. 340449 5. 990476 6. 524463 6. 624908  
6. 433458 7. 209885 6. 331791 6. 230104 6. 804083 6. 216049 6. 406079 5. 943332 6. 347871  
1. 294174 2. 108666 1. 263057 2. 712929 1. 536466 2. 738243 1. 818617 1. 258277 1. 282293  
4. 388596 3. 898755 4. 84053 5. 032719 4. 129697 4. 358962 3. 974893 4. 008833 4. 101191  
2. 357382 1. 637038 2. 334201 2. 533582 1. 996605 3. 923389 2. 015468 3. 318073 2. 955057  
2. 137211 2. 149577 1. 742641 1. 921963 1. 390824 2. 605561 1. 450027 1. 423494 1. 86419  
4. 761842 3. 312526 5. 572066 5. 130131 3. 797392 6. 241328 4. 905233 5. 49183 5. 824949  
1. 872868 1. 669586 1. 741898 1. 669586 1. 451692 2. 627763 1. 725162 1. 961172 1. 37533  
1. 84651 2. 642685 2. 768611 2. 588419 2. 896381 2. 377722 2. 854196 2. 521889 3. 225064  
2. 353788 1. 954005 1. 997694 1. 888117 2. 17968 1. 532983 1. 964039 1. 846503 1. 517233  
3. 601937 5. 28385 4. 463733 4. 617206 4. 972874 5. 277732 4. 69407 5. 576523 4. 738824  
8. 152873 8. 226143 7. 292657 7. 773692 8. 59673 6. 052671 8. 789453 8. 521751 7. 997778  
4. 693968 4. 434755 3. 556519 4. 701857 4. 175428 4. 94737 3. 663321 3. 387223 3. 14702  
6. 683104 5. 380571 6. 27278 5. 840498 5. 362436 6. 450907 7. 002187 5. 287148 6. 335738  
5. 904712 6. 367537 6. 533592 6. 522495 6. 416514 6. 012004 5. 681816 5. 981615 5. 605638  
3. 780872 4. 152445 5. 078911 3. 662047 3. 419756 3. 682705 4. 789797 1. 859205 4. 173044  
8. 167462 6. 936453 7. 468051 7. 420137 6. 792685 7. 660391 6. 23912 6. 702556 5. 406913  
4. 346595 3. 709987 4. 043362 2. 707166 2. 877979 3. 743242 3. 198761 3. 311613 3. 890255  
3. 030966 2. 503043 3. 37048 3. 446571 3. 260198 3. 864157 3. 816759 4. 600683 3. 44676  
1. 070999 1. 425527 1. 232798 2. 355849 1. 28915 0. 944722 1. 63227 2. 418556 1. 601342  
4. 223953 2. 900687 2. 503676 4. 162385 5. 314499 6. 472981 4. 567548 6. 472128 3. 89319  
6. 785342 5. 439059 6. 096629 6. 145151 5. 548478 4. 210579 3. 295336 4. 553789 2. 909937  
3. 82678 4. 399565 3. 818035 4. 977552 4. 160441 4. 706279 4. 05954 3. 083121 3. 898918  
4. 098855 5. 314848 4. 954938 4. 743871 5. 074591 3. 036406 5. 11135 4. 63628 3. 508381  
5. 862043 5. 63062 6. 095863 6. 07904 6. 391597 5. 694988 5. 628039 5. 620258 5. 821683  
5. 094131 4. 909474 4. 363155 3. 709162 3. 205731 5. 713459 5. 075012 4. 493474 5. 512549  
5. 686063 7. 175752 7. 164304 6. 619154 6. 997463 6. 141057 6. 895838 6. 281347 6. 588154  
5. 777736 6. 574676 6. 065334 5. 645713 6. 139232 5. 656455 6. 363224 5. 691234 5. 897745  
4. 145285 4. 308959 3. 974886 3. 765635 3. 975797 3. 080272 3. 803048 3. 853341 3. 360381

3. 44562 4. 165235 4. 851891 3. 730663 4. 667797 2. 787703 2. 694916 2. 891747 2. 618632  
3. 520832 4. 132402 4. 416342 4. 479752 4. 229141 3. 62284 3. 938913 3. 024014 4. 266266  
6. 662809 6. 788804 7. 09025 6. 913965 7. 605957 5. 97701 7. 835427 7. 712974 7. 791578  
3. 94894 3. 848046 3. 197504 3. 394722 3. 576494 3. 824256 3. 831039 4. 360472 3. 699666  
5. 938032 6. 346918 6. 840096 6. 451221 5. 844571 5. 548524 5. 837424 6. 113428 5. 606492  
4. 062878 4. 483986 4. 015697 4. 046312 3. 73618 5. 418421 4. 838586 3. 88611 5. 126849  
4. 600058 3. 400961 3. 758236 3. 535891 3. 5887 3. 704092 3. 702052 5. 052442 4. 925884  
1. 099033 1. 07274 1. 939838 1. 273627 1. 09148 1. 596414 1. 391695 1. 583304 1. 4588  
1. 107535 1. 720255 1. 2943 1. 676167 1. 090327 1. 239672 1. 134425 1. 596409 0. 805522  
2. 13337 1. 794735 2. 269426 2. 327345 2. 687225 2. 813828 2. 294157 2. 878959 2. 012472  
2. 146133 2. 278078 1. 916839 1. 988516 2. 881566 1. 792855 2. 1107 2. 524638 1. 918643  
5. 039814 5. 205922 5. 436565 4. 315724 4. 637769 4. 666427 4. 98636 4. 57697 4. 997747  
2. 972638 2. 316098 2. 558011 3. 417121 3. 132601 3. 043203 3. 162503 3. 861824 3. 026231  
4. 591986 5. 381635 4. 529246 4. 720792 4. 522111 3. 752125 4. 266835 3. 554587 2. 724665  
5. 530206 6. 119925 5. 376913 6. 123767 5. 537445 4. 295185 4. 916376 5. 593869 5. 342556  
7. 335214 7. 466478 6. 889545 6. 058252 6. 645805 7. 119809 7. 014006 7. 084726 7. 037472  
8. 124307 8. 08823 8. 126679 8. 342013 8. 701196 8. 50606 8. 499974 8. 272709 8. 17586  
6. 170959 6. 111071 6. 643872 5. 858734 6. 459939 5. 930609 6. 011336 6. 295285 6. 092553  
6. 741088 6. 031308 5. 284688 5. 895343 4. 942915 6. 388029 5. 908835 4. 941437 4. 494113  
5. 97364 5. 096832 5. 895486 5. 743242 5. 945233 6. 245868 5. 579221 5. 287672 5. 241944  
2. 820893 3. 175428 2. 04352 3. 438468 2. 118341 2. 497684 2. 128465 2. 182415 2. 839774  
4. 81736 3. 994722 3. 284366 5. 564752 3. 195113 4. 446132 2. 589789 1. 609121 4. 036067  
1. 79912 2. 139114 3. 727937 1. 401923 2. 295819 1. 71764 1. 963349 2. 652741 2. 569747  
5. 175895 5. 986947 5. 3275 4. 89461 5. 469617 5. 697433 6. 572165 4. 506906 4. 966577  
3. 175846 2. 699606 4. 215434 2. 891626 4. 648604 2. 451296 3. 61598 2. 486174 2. 889722  
4. 727044 6. 876672 6. 363603 6. 021832 5. 603167 7. 860154 7. 514215 6. 869682 6. 2486  
2. 369756 1. 516431 1. 24334 1. 712016 2. 438823 2. 555696 2. 02757 1. 590793 3. 324044  
3. 885917 2. 904165 3. 735606 4. 1214 4. 526739 5. 331496 3. 83397 4. 863944 5. 091947  
2. 782405 4. 22321 3. 729158 2. 544072 3. 115319 3. 485584 3. 448998 3. 327339 3. 263292  
6. 494123 6. 875613 7. 00449 6. 492326 6. 934631 5. 32091 5. 357914 4. 9145 5. 629074  
8. 343569 7. 636722 8. 13664 7. 961769 8. 323447 7. 019445 8. 402231 9. 328121 9. 005112  
5. 382749 5. 029463 5. 127413 5. 408119 5. 083993 4. 036478 4. 278167 4. 094601 5. 087866  
4. 498342 3. 475369 4. 61876 5. 118855 5. 742553 4. 914727 4. 532753 5. 153801 4. 980057  
1. 896352 2. 281218 3. 274516 2. 28542 3. 163314 1. 928844 2. 405798 2. 123948 3. 126352  
4. 581023 5. 224295 4. 309305 4. 080728 4. 387676 3. 453746 3. 497199 4. 904815 3. 014868  
1. 135282 1. 00288 1. 052451 2. 563577 1. 868176 2. 719523 1. 171793 1. 474715 0. 551547  
1. 518927 1. 798387 2. 04214 1. 361352 1. 969459 1. 955582 1. 45842 1. 120266 2. 159421  
1. 300451 2. 522573 2. 860437 3. 175311 2. 939766 2. 397812 2. 653246 1. 8344 2. 181481  
7. 257352 7. 571273 7. 122333 7. 26809 7. 18227 7. 146834 7. 705195 7. 225151 7. 95631  
3. 244179 2. 62253 3. 724792 3. 066756 3. 625535 3. 694549 4. 185713 3. 717542 3. 942373  
2. 544807 2. 194808 2. 680657 1. 936559 2. 69635 2. 308359 2. 30186 2. 111989 2. 067454  
6. 466578 6. 059367 6. 197967 7. 107185 6. 192812 6. 790276 6. 185158 6. 077789 6. 041082  
3. 970302 3. 516654 3. 415569 3. 794261 3. 762293 4. 433466 3. 884251 4. 129691 2. 961466  
1. 556902 1. 733497 2. 055111 2. 249933 1. 193925 1. 590551 1. 28941 1. 623971 2. 819112  
2. 268732 9. 009241 9. 040949 1. 60971 1. 30587 7. 9814 8. 212792 2. 644711 8. 471742  
7. 857282 7. 527857 7. 343995 8. 584985 8. 133074 7. 710986 8. 009804 7. 661103 7. 425547  
3. 815778 2. 855375 2. 592675 2. 654368 3. 485667 3. 422319 3. 205913 3. 421652 3. 353773  
1. 592766 2. 703444 2. 345597 2. 111536 1. 430667 2. 850783 3. 288004 1. 616356 3. 404752  
2. 352105 2. 282744 2. 809084 2. 312835 2. 418918 3. 100519 2. 801902 2. 343187 2. 985657  
7. 358891 7. 864986 7. 189941 7. 053618 7. 056816 7. 756654 7. 755542 7. 345874 8. 427665  
5. 525833 4. 086473 5. 972475 5. 782595 4. 871971 6. 899846 5. 481378 5. 560385 5. 643101



4. 392326 5. 199348 4. 567058 4. 796835 4. 695555 5. 752718 5. 091143 5. 382636 5. 939641  
4. 614749 4. 582027 4. 255866 4. 777399 3. 856634 4. 466198 4. 997857 4. 189699 4. 720779  
4. 389429 4. 608387 3. 848758 4. 508181 4. 22524 4. 576788 3. 87592 4. 18654 4. 983426  
5. 496057 4. 70563 6. 331118 5. 851573 5. 969476 5. 668293 6. 377262 6. 304596 6. 331548  
5. 914672 5. 258634 6. 027747 4. 582037 5. 446566 5. 882583 6. 636702 7. 524576 7. 851297  
2. 894907 4. 372918 3. 977048 4. 938438 3. 727048 4. 625468 4. 869882 5. 298239 5. 860661  
3. 480686 4. 617181 3. 475156 2. 933594 4. 210266 4. 840697 4. 462304 3. 279664 3. 81361  
1. 622053 2. 163469 2. 692039 3. 313825 2. 617607 2. 092596 1. 834713 2. 618175 2. 099647  
1. 983865 1. 998148 1. 658916 2. 081789 2. 263858 2. 684925 2. 097336 2. 033744 2. 138814  
5. 850831 6. 238998 6. 024726 5. 377076 6. 270158 6. 226186 6. 533194 6. 111905 6. 665131  
3. 98335 4. 634999 3. 370545 3. 334223 4. 600645 3. 419527 3. 505826 4. 055346 3. 779414  
1. 257667 1. 664507 0. 732908 2. 895514 1. 449253 2. 515896 1. 354669 3. 630347 1. 621539  
2. 516057 2. 193611 2. 677135 1. 85027 2. 273537 2. 485646 2. 394532 2. 18865 2. 093747  
2. 101199 2. 18482 2. 291646 2. 706143 1. 961991 3. 047278 2. 117745 1. 676988 3. 903169  
5. 876753 5. 557879 5. 933537 5. 30325 4. 438191 3. 367747 4. 419816 3. 469457 3. 744072  
2. 300891 1. 759209 1. 976505 2. 414404 2. 162743 2. 37288 1. 698525 1. 832274 2. 218547  
4. 349389 4. 570972 4. 901028 4. 431251 5. 157178 5. 766103 5. 086323 4. 79577 4. 355646  
7. 021618 6. 227304 7. 160391 6. 805057 6. 119493 7. 380719 6. 406413 6. 275454 5. 688657  
4. 867384 4. 286148 5. 023834 5. 635512 5. 677161 5. 725177 5. 927993 6. 332389 6. 543396  
4. 527226 4. 11699 4. 445053 3. 074995 2. 762557 4. 310463 4. 442105 3. 925966 3. 922893  
6. 945739 6. 920612 7. 483692 6. 832495 7. 250329 6. 570494 7. 534016 7. 114509 6. 938902  
4. 756616 3. 4308 3. 840911 3. 177532 3. 549374 4. 843656 3. 213711 4. 782599 4. 627215  
5. 182114 5. 799124 5. 928717 5. 140835 5. 564446 6. 082006 5. 314244 4. 858356 4. 223487  
3. 864606 3. 570066 4. 590995 2. 487078 3. 289497 3. 807805 4. 457116 4. 727051 3. 585117  
3. 28008 2. 324542 2. 962392 3. 531395 3. 082009 3. 019405 3. 189281 2. 841445 3. 432605  
3. 568826 4. 638139 3. 431801 3. 341332 3. 895299 3. 1623 3. 6943 3. 241856 3. 803103  
1. 854759 1. 22968 0. 606713 1. 206234 1. 566948 0. 810057 0. 973122 1. 178334 0. 850506  
5. 545947 6. 322652 6. 322312 6. 37801 6. 350445 5. 724509 6. 246002 6. 561536 6. 361218  
2. 42485 3. 252681 2. 202231 2. 060096 1. 322774 1. 439371 1. 734548 1. 468481 1. 374172  
1. 139869 1. 237133 1. 263638 2. 06813 1. 344195 1. 502993 1. 367707 2. 074745 1. 967055  
4. 442927 4. 940639 4. 937704 4. 944045 3. 770885 5. 573909 4. 505849 5. 945716 5. 259967  
5. 11623 4. 895385 4. 275679 3. 556286 5. 147823 4. 552936 4. 824271 5. 018535 4. 949192  
5. 690039 5. 452669 5. 119006 5. 427094 5. 145252 7. 130821 6. 010956 5. 715292 6. 251429  
3. 091986 3. 603281 2. 105094 3. 068828 3. 264654 2. 337574 1. 694832 2. 329417 2. 379271  
3. 951626 4. 103761 5. 173284 4. 587101 4. 935455 5. 495415 4. 752491 5. 873698 5. 344314  
4. 575958 5. 1025 4. 078602 3. 708785 4. 994797 4. 586293 2. 916788 4. 404724 3. 648643  
6. 351495 6. 445405 6. 051453 6. 261382 6. 16555 6. 2725 6. 747633 6. 530348 5. 913645  
5. 674436 6. 277878 5. 645548 5. 870033 6. 754202 5. 950459 6. 701355 6. 044739 5. 83358  
2. 770114 3. 96619 3. 582161 4. 527442 4. 170475 2. 863617 3. 66595 3. 724294 3. 460564  
1. 351998 1. 786503 1. 96937 1. 520801 1. 104513 1. 199695 1. 392191 1. 394728 1. 197667  
7. 382839 6. 343111 7. 449405 7. 120923 7. 357874 7. 950505 7. 906386 7. 745635 7. 923177  
3. 966369 4. 384181 3. 650892 3. 383562 4. 361077 2. 908638 3. 860303 3. 479889 4. 276669  
1. 98751 2. 247527 1. 695033 1. 60811 2. 037848 1. 523057 2. 375912 1. 682107 1. 957694  
2. 23067 2. 719172 2. 057197 2. 340288 2. 142296 2. 800296 2. 61847 3. 274174 2. 54585  
5. 977919 6. 217942 6. 213025 5. 567617 5. 407943 5. 731325 6. 114578 6. 096136 6. 274541  
1. 944999 1. 417197 1. 357239 1. 251106 1. 145944 1. 466792 1. 571705 1. 16621 1. 635747  
1. 83517 2. 050283 1. 628778 1. 779502 2. 027826 2. 542842 1. 836974 2. 223569 2. 230943  
1. 603847 1. 858705 1. 176308 2. 693229 1. 905156 1. 184608 1. 998086 1. 714721 2. 467415  
2. 805589 2. 727906 2. 140444 1. 516996 2. 302829 4. 919219 2. 190236 2. 756823 2. 99365  
3. 720451 2. 04102 1. 623691 1. 578839 1. 210198 2. 34204 1. 609963 1. 412761 1. 351819  
3. 904308 4. 14016 3. 817587 4. 330323 3. 426951 3. 49012 4. 061235 3. 906071 4. 077094

5. 94508 4. 250657 5. 182685 4. 498259 4. 456638 5. 206184 5. 188715 3. 56976 2. 073959  
9. 156989 8. 706164 9. 051444 8. 138794 8. 183674 9. 549439 8. 477821 7. 871274 7. 846128  
2. 579943 2. 539242 3. 884773 1. 859563 3. 221112 3. 430131 3. 128765 3. 675451 3. 009822  
8. 033464 7. 706646 7. 99536 8. 070431 8. 024672 9. 172199 8. 474933 8. 631953 9. 048752  
4. 248103 3. 701509 4. 841707 4. 604676 4. 822452 4. 611194 4. 541288 5. 511618 5. 013571  
6. 345312 6. 127405 6. 837226 6. 629883 6. 824153 6. 787986 6. 583714 6. 141086 6. 486536  
7. 451821 8. 371687 7. 781836 7. 830025 7. 847881 7. 671575 7. 574246 7. 446086 7. 850918  
4. 48645 5. 468781 5. 363078 5. 184315 4. 48791 4. 770678 5. 219051 4. 667099 4. 78049  
3. 002225 3. 202194 3. 100163 2. 406305 3. 309139 2. 852593 3. 011984 3. 147931 2. 874446  
4. 019315 4. 946297 4. 96696 4. 037582 4. 696055 5. 151801 4. 968292 3. 690979 4. 547598  
4. 5648 3. 909749 4. 081256 3. 903503 3. 932099 4. 870596 5. 187809 6. 050209 4. 47942  
4. 896733 6. 161107 5. 955093 4. 373614 5. 595747 4. 896486 4. 750593 5. 001461 5. 531104  
5. 810609 6. 133753 6. 42185 7. 095726 6. 546931 5. 392672 5. 364487 6. 237742 6. 982139  
6. 575016 6. 426679 6. 202352 5. 505079 6. 722737 5. 11009 5. 636349 5. 848979 6. 531213  
1. 905227 1. 614772 1. 372047 1. 651476 1. 679478 1. 910886 1. 59676 1. 983357 2. 00707  
3. 399997 3. 019362 3. 206578 3. 816054 3. 483925 3. 772193 4. 596433 4. 093337 3. 915441  
6. 259535 6. 666807 6. 946162 6. 869297 6. 642053 6. 681917 7. 204372 7. 331149 7. 704776  
7. 009954 7. 676992 6. 664509 7. 44967 7. 596655 8. 535042 8. 015378 8. 241422 8. 433307  
5. 594021 3. 426697 3. 232487 2. 741033 3. 039396 2. 27599 2. 563957 2. 109431 2. 794072  
2. 61918 3. 677045 2. 592372 3. 043711 3. 389086 5. 579813 2. 487291 3. 634717 3. 919424  
7. 583855 6. 440211 6. 731878 6. 250959 6. 721706 7. 974721 6. 987262 5. 893788 5. 794781  
1. 486431 2. 315647 2. 452538 2. 237771 1. 745747 2. 323653 2. 291859 1. 91971 2. 238091  
4. 839225 4. 817061 3. 634777 2. 480435 4. 051404 3. 008339 3. 30665 4. 984165 4. 531807  
2. 60765 2. 247452 2. 190945 2. 239657 2. 243583 2. 245831 2. 008919 1. 753763 2. 551472  
4. 02308 3. 540677 3. 20896 4. 415279 3. 571381 4. 423207 3. 887031 3. 751566 3. 715561  
1. 83217 4. 810675 5. 228726 3. 147966 3. 392921 4. 702119 5. 84414 3. 31429 1. 402305  
2. 847122 1. 759433 2. 278754 1. 639847 2. 088819 2. 693187 1. 793722 1. 897781 1. 993689  
7. 043404 7. 601595 7. 303472 6. 798439 7. 437457 7. 097821 7. 414558 7. 452504 7. 37813  
7. 595557 5. 969817 7. 671966 7. 509215 6. 858337 7. 275077 8. 101503 7. 107179 6. 916623  
6. 900966 7. 3178 7. 24716 6. 971027 7. 584809 6. 632274 8. 294823 8. 330033 7. 787965  
3. 947425 2. 801951 3. 557701 4. 026487 4. 096982 4. 364585 3. 146986 3. 526854 3. 13602  
2. 293878 2. 915391 2. 117258 2. 604461 2. 034859 3. 118244 2. 700661 2. 926317 3. 036803  
4. 165854 3. 662237 4. 235053 3. 531578 4. 180514 4. 707013 3. 778544 3. 597627 4. 432782  
2. 993959 1. 789452 2. 174666 1. 47472 3. 389501 1. 863687 2. 485296 2. 309868 1. 148964  
4. 840935 4. 640358 4. 240488 4. 876966 4. 753667 4. 672725 4. 449297 4. 039723 4. 472274  
2. 246033 1. 726752 1. 748605 1. 952049 1. 769398 3. 250935 1. 779812 2. 516289 2. 050871  
6. 679595 6. 692048 6. 693653 6. 291165 6. 355362 7. 19811 7. 159013 5. 634055 6. 580661  
6. 153146 5. 80164 6. 229224 5. 870931 6. 263708 4. 716158 6. 133069 6. 768148 5. 109891  
1. 932892 3. 568768 2. 529006 1. 4729 3. 636026 2. 066329 3. 048758 4. 076342 3. 053451  
4. 831793 4. 133753 4. 358035 5. 792614 4. 484207 3. 825605 4. 430061 4. 785334 5. 032581  
3. 334606 3. 486098 2. 549879 2. 190857 3. 105506 2. 367684 3. 011409 2. 853512 2. 652171  
4. 894294 4. 055944 3. 796935 3. 980515 3. 051155 3. 063755 3. 265551 2. 692518 2. 529402  
1. 108532 2. 150068 1. 462842 1. 687953 1. 064334 1. 080619 0. 992132 1. 778044 1. 49761  
1. 958336 2. 641168 2. 979146 2. 752372 2. 39202 3. 244935 2. 735474 1. 891747 3. 059405  
2. 500751 2. 363588 1. 815684 2. 453112 1. 982501 2. 753444 2. 100389 2. 389695 3. 003933  
1. 539909 2. 027045 2. 526782 1. 889325 1. 943201 2. 142071 1. 835145 2. 295446 2. 013918  
4. 241457 5. 256774 5. 463527 4. 310663 4. 745737 4. 932915 5. 189024 4. 562202 5. 226627  
8. 168417 6. 844407 8. 038797 8. 930794 8. 200177 9. 096512 8. 677666 9. 042909 8. 829774  
2. 352563 1. 857295 4. 051484 2. 070702 3. 308685 2. 545165 1. 829979 2. 68105 3. 388224  
6. 450009 6. 655442 6. 576166 6. 369203 6. 536144 6. 904668 6. 858267 6. 849055 7. 131696  
3. 722152 3. 314176 3. 655313 4. 369485 3. 105052 4. 28219 4. 373005 3. 377278 3. 970041

4. 564326 3. 737547 3. 489494 4. 048075 3. 311477 3. 596748 3. 688879 4. 322553 4. 570899  
2. 576903 1. 304278 2. 588903 2. 024237 2. 329308 1. 359668 1. 796475 2. 215532 2. 216849  
4. 21056 3. 80049 4. 348381 4. 653098 5. 203328 4. 701541 4. 292001 4. 574565 5. 222159  
7. 463019 7. 952421 6. 913514 7. 153146 7. 968217 6. 637675 7. 445276 7. 135787 7. 31033  
3. 245073 3. 017732 3. 317647 2. 714916 3. 448874 3. 635785 2. 993435 3. 881122 3. 190577  
4. 9567 4. 398367 4. 365981 4. 058562 4. 279123 4. 456261 5. 487377 5. 63792 5. 279347  
2. 636686 2. 028749 2. 007331 1. 691154 2. 583336 5. 581426 2. 055198 2. 519921 3. 974679  
3. 24649 3. 502442 2. 886341 3. 723929 3. 226369 3. 929113 2. 772198 3. 955537 3. 809551  
4. 106144 3. 901475 3. 46684 3. 924191 3. 291299 4. 205885 3. 368102 3. 406911 3. 512495  
3. 948695 3. 764922 4. 830623 3. 671315 4. 690809 4. 034367 4. 153424 4. 180439 3. 956048  
5. 639063 5. 63031 6. 16479 4. 39873 5. 890107 4. 280709 4. 796003 4. 876744 5. 020402  
1. 177603 1. 464413 1. 711772 1. 741557 1. 575852 1. 101551 1. 153961 1. 795214 1. 34681  
3. 433766 3. 83228 3. 033728 2. 576559 3. 660854 2. 751559 2. 073057 2. 844429 1. 546391  
3. 324115 4. 15765 3. 943846 1. 66911 4. 719441 4. 039718 5. 937945 4. 054338 5. 075043  
1. 624924 3. 550204 1. 762375 2. 933363 4. 947215 2. 085055 2. 294389 3. 175509 2. 988413  
1. 924811 1. 099184 1. 66754 0. 975171 1. 429073 1. 117523 2. 064541 2. 335669 1. 629607  
5. 346069 1. 951706 4. 081812 2. 955743 3. 18546 4. 31671 2. 524253 1. 716605 2. 868862  
1. 576443 1. 417599 1. 405085 2. 133519 1. 707409 1. 866725 1. 427695 1. 627152 1. 707302  
4. 239405 4. 658202 5. 217709 3. 946691 4. 433418 4. 965243 4. 663252 5. 252836 4. 179981  
6. 128581 6. 018974 5. 849871 5. 969167 5. 419357 6. 239681 6. 696215 6. 65751 6. 34074  
3. 191328 2. 792237 3. 495592 3. 554082 3. 484922 2. 520477 2. 937697 3. 061617 2. 800529  
7. 030114 7. 110138 6. 348839 7. 223704 7. 349199 7. 880649 6. 812521 6. 987255 7. 38684  
3. 891794 3. 775744 3. 927722 3. 655521 4. 431026 4. 933617 3. 826565 4. 809806 3. 998408  
3. 586063 2. 35019 2. 504235 1. 297641 2. 429976 6. 434754 2. 238705 2. 071382 3. 337187  
4. 23106 6. 28117 5. 514039 4. 732703 5. 04776 6. 089557 5. 520597 5. 215762 5. 411385  
2. 258091 2. 88164 3. 183783 2. 442516 3. 133573 3. 648068 4. 990585 4. 534751 4. 307547  
2. 315822 3. 3175 2. 383445 2. 411723 2. 533106 3. 281039 2. 70891 2. 007701 2. 79376  
5. 121226 5. 175303 3. 62042 2. 478997 4. 271072 3. 084544 2. 64725 2. 641327 1. 875605  
5. 069681 6. 582976 5. 565092 3. 674197 5. 823548 4. 857823 5. 124815 4. 834106 5. 564907  
1. 44954 1. 262146 1. 591285 1. 573724 1. 561296 1. 705144 1. 398237 1. 109549 1. 439398  
2. 640604 1. 255293 1. 918211 1. 918945 1. 762412 1. 318964 1. 709131 1. 998274 1. 677738  
5. 450713 5. 107341 5. 252384 4. 364443 4. 28538 6. 023472 4. 880358 5. 666641 5. 291182  
3. 984086 3. 285625 3. 855571 2. 995991 3. 803074 4. 128795 4. 543723 5. 377666 5. 358778  
4. 363396 3. 323602 4. 40783 5. 067589 4. 064758 4. 429005 4. 564886 4. 564092 4. 654112  
2. 250007 1. 922 2. 066986 2. 338524 2. 029199 1. 712354 1. 815583 2. 652267 2. 549649  
6. 850527 6. 870076 7. 339089 7. 498729 6. 906563 6. 897411 7. 749109 8. 036182 8. 041728  
5. 250704 4. 265607 4. 025265 5. 256896 4. 612196 5. 182296 5. 395827 4. 903319 4. 493123  
6. 869244 7. 666435 6. 670061 6. 403761 6. 973964 6. 763191 7. 066386 6. 6452 6. 872252  
8. 999911 8. 217341 9. 146024 9. 536089 8. 406704 8. 716078 8. 144307 8. 794549 8. 947841  
1. 755582 2. 95809 2. 851779 1. 885099 2. 329788 1. 964829 1. 696632 2. 102126 2. 089342  
4. 108382 3. 214742 3. 589932 3. 217227 3. 20038 3. 489188 4. 345626 3. 658632 3. 91383  
8. 589859 8. 26477 8. 585801 8. 370999 7. 857221 8. 607632 8. 282596 8. 756457 8. 076899  
10. 18821 10. 49351 10. 23878 10. 42162 10. 55128 10. 88422 10. 73089 10. 71304 11. 03517  
5. 437618 6. 836816 6. 754934 6. 351452 5. 743006 5. 15699 5. 282326 3. 766414 5. 815967  
1. 345651 0. 934954 2. 038437 1. 535912 2. 230816 2. 461884 1. 915742 1. 788911 2. 440573  
6. 837207 7. 177419 7. 178155 7. 020073 7. 237873 6. 927655 7. 590687 7. 257522 6. 978614  
1. 08352 1. 817434 1. 922507 2. 165709 0. 959576 5. 571406 1. 32848 1. 813125 2. 552392  
7. 069941 4. 440025 5. 365725 4. 997581 4. 810415 6. 356876 4. 742539 3. 808113 3. 15913  
3. 500489 2. 964116 3. 518141 3. 918807 3. 501588 4. 701918 4. 023544 3. 522989 2. 562402  
2. 125507 2. 985938 2. 319332 2. 367476 1. 50268 3. 217881 2. 164585 1. 885105 1. 981921  
1. 599152 1. 953119 2. 464501 1. 902504 1. 792842 2. 220437 1. 480614 2. 848979 2. 379257

8. 267039 8. 43823 7. 411943 7. 643721 8. 176967 5. 474364 7. 709907 8. 692152 8. 155159  
7. 188533 7. 265578 7. 418718 7. 238195 7. 482603 6. 605471 7. 234261 6. 681024 6. 846728  
3. 183213 4. 216349 3. 688925 4. 013125 4. 54074 3. 19125 3. 915164 4. 754096 4. 496142  
7. 024313 7. 397555 6. 315526 6. 934409 5. 796406 6. 543574 6. 144271 5. 80122 5. 293121  
5. 810118 6. 373366 4. 616688 3. 803907 3. 500788 3. 092508 3. 925532 3. 389334 3. 085358  
4. 728389 5. 31417 5. 24314 5. 643088 5. 098679 3. 017905 6. 825415 7. 300013 6. 096639  
4. 833899 5. 645293 5. 600602 5. 241822 5. 528794 4. 957145 5. 7358 4. 272191 4. 951469  
5. 647864 5. 998115 4. 500014 5. 033554 4. 605006 5. 165145 5. 296071 5. 192342 3. 80739  
6. 221932 6. 125716 7. 20911 6. 291512 6. 859856 6. 786913 6. 471094 6. 058977 6. 098052  
4. 553988 4. 726832 3. 445931 3. 999698 4. 623037 3. 873817 4. 986087 3. 561307 4. 89881  
1. 180378 1. 501703 1. 473122 1. 864083 1. 462707 1. 86011 0. 912925 1. 59016 1. 519451  
4. 484104 4. 669781 4. 313055 4. 59615 3. 932975 5. 117141 4. 522821 4. 387042 4. 371846  
3. 922614 4. 214513 2. 953767 0. 939883 1. 474269 4. 709383 4. 305425 3. 44359 4. 218148  
2. 102156 2. 329024 2. 205759 2. 264572 3. 345263 3. 535691 2. 199224 2. 528441 2. 949602  
4. 29122 4. 939843 4. 837249 3. 49407 5. 374638 4. 383885 4. 978388 5. 018796 4. 239593  
5. 528054 5. 447485 3. 801563 4. 550111 5. 040623 4. 449235 6. 89694 6. 575109 6. 402899  
5. 436647 6. 216646 6. 005163 5. 37429 5. 919844 6. 176219 6. 10368 5. 47882 5. 746473  
4. 36567 3. 493527 3. 179206 3. 439723 3. 398522 4. 712903 3. 869981 3. 979071 4. 024319  
2. 091143 1. 736798 2. 947865 2. 795805 2. 536264 2. 934482 2. 164436 3. 266893 2. 212653  
3. 197801 2. 759321 2. 382402 3. 864728 3. 510568 4. 802649 4. 334311 3. 691338 3. 739695  
3. 938649 3. 867723 2. 568209 3. 36299 3. 882026 3. 542436 4. 429172 2. 175651 3. 531484  
4. 562167 4. 903011 3. 985218 4. 161988 4. 11771 4. 993637 3. 95825 4. 298166 3. 830565  
7. 171369 7. 406478 7. 208843 7. 256035 8. 108945 7. 578901 7. 215552 7. 451959 7. 088024  
7. 094026 7. 154089 6. 122947 6. 676241 6. 852258 5. 636363 6. 320152 7. 764046 7. 093488  
6. 316189 5. 595819 2. 904936 5. 502625 4. 91208 5. 630269 4. 626046 3. 725022 4. 587519  
6. 098222 7. 185029 6. 922638 4. 594474 5. 880622 6. 721951 5. 855758 4. 758084 4. 494481  
4. 425508 2. 486571 2. 420004 2. 418 1. 919335 3. 215611 2. 916395 1. 401224 2. 084802  
5. 177126 6. 390151 4. 537427 4. 62184 5. 307602 5. 521744 5. 388817 5. 058014 5. 662705  
3. 951401 5. 343539 3. 145791 5. 456132 5. 040388 5. 004725 5. 954617 6. 082349 4. 638669  
3. 553757 2. 651717 4. 509207 3. 444701 3. 930886 4. 421558 3. 698697 4. 985024 4. 110595  
5. 32953 6. 642176 5. 785612 6. 132681 4. 935317 6. 243949 6. 470094 6. 132745 6. 296376  
1. 996933 2. 382092 2. 091864 1. 548084 1. 469608 2. 520722 1. 993181 1. 398755 1. 827218  
2. 156069 2. 100056 2. 305667 2. 94017 3. 279392 3. 235502 3. 888816 3. 176559 2. 918588  
4. 20764 4. 854549 4. 539007 5. 263763 5. 114762 4. 972788 5. 039586 4. 732031 5. 103781  
2. 085295 1. 495053 1. 329943 1. 736115 1. 347453 4. 089162 1. 061445 1. 353708 2. 000159  
6. 941052 7. 051117 7. 002858 6. 529757 6. 949088 5. 821024 6. 567587 6. 891166 5. 179653  
8. 21221 9. 037537 8. 735022 9. 230912 8. 974967 6. 289453 9. 02409 9. 334314 9. 748526  
1. 331434 1. 071494 1. 215576 1. 926087 0. 972697 0. 859131 1. 053596 1. 20537 1. 20374  
5. 617832 5. 96556 6. 885822 6. 043039 6. 502783 6. 141868 6. 011267 5. 713365 6. 252703  
3. 361385 3. 232939 3. 268625 4. 328377 3. 525271 3. 058237 3. 254911 3. 363227 2. 628181  
1. 733548 1. 887773 1. 948731 1. 748712 1. 900334 1. 894101 1. 959555 1. 648275 2. 088025  
3. 257183 2. 730068 3. 305223 3. 227812 4. 395366 3. 632426 3. 406725 2. 19309 3. 098928  
2. 660494 3. 347694 2. 955933 3. 481782 3. 850605 3. 667557 3. 214842 2. 819652 4. 580141  
2. 877193 1. 998622 2. 205706 2. 518186 2. 354516 4. 32204 3. 07391 2. 555352 2. 202106  
6. 107302 7. 351622 6. 421824 6. 808467 6. 373497 6. 197881 6. 834752 6. 543488 6. 31164  
2. 288187 2. 54174 1. 761916 1. 891977 2. 444118 2. 547881 2. 168083 2. 202204 4. 037335  
4. 957724 4. 359809 5. 367787 4. 855424 4. 534359 5. 169327 5. 101041 4. 2765 4. 361643  
2. 589557 3. 802423 4. 417756 3. 638706 2. 577168 3. 539569 3. 092851 3. 592975 4. 03602  
2. 170658 4. 383339 4. 013014 3. 078504 4. 445987 5. 463037 3. 693767 3. 97365 3. 851186  
4. 328538 3. 644104 5. 114897 5. 102558 5. 028541 4. 783497 4. 975415 5. 1026 3. 344684  
6. 677868 6. 885775 6. 766247 6. 811432 7. 079654 7. 313213 5. 978449 6. 032328 6. 58989

1. 361166 1. 470546 2. 115838 2. 030115 1. 532945 1. 956708 1. 326236 1. 136412 3. 024891  
7. 319529 7. 77335 7. 369022 7. 514828 7. 738848 7. 051431 7. 835541 7. 545792 6. 998105  
4. 927982 4. 892254 5. 628524 4. 927078 4. 864845 6. 042712 4. 683077 4. 455674 5. 431551  
6. 816357 6. 948124 6. 96023 5. 664524 6. 901893 6. 34798 7. 150647 6. 498569 6. 547236  
3. 590842 3. 784103 3. 852683 3. 553297 3. 753138 4. 03762 2. 790561 3. 545336 2. 916805  
3. 479042 3. 123932 3. 327015 3. 308278 3. 540898 4. 288891 3. 628533 3. 534126 3. 414761  
1. 990401 2. 638573 2. 087309 3. 048049 2. 86251 2. 421758 2. 715929 2. 732806 2. 468078  
5. 177512 6. 106637 5. 63417 5. 524484 5. 987525 4. 98854 6. 190085 5. 96579 6. 140196  
5. 401452 3. 69348 4. 790278 4. 167912 4. 825459 4. 463365 5. 181905 5. 766494 5. 312606  
6. 054269 6. 163108 5. 696855 4. 973522 5. 813939 5. 236674 5. 682766 5. 877476 5. 821726  
5. 908712 4. 933859 4. 132296 5. 649222 5. 427476 6. 238165 6. 630421 5. 808792 6. 786336  
4. 157098 5. 828244 3. 570962 4. 524423 3. 769704 3. 355288 5. 296233 4. 395698 4. 120728  
4. 372218 4. 760921 4. 71523 6. 125153 3. 679408 4. 616333 4. 675906 4. 649363 4. 095746  
5. 77384 5. 500337 5. 750461 5. 972393 4. 897033 4. 843157 4. 182781 5. 732093 4. 610565  
1. 64938 1. 681279 1. 992625 2. 059399 1. 898535 1. 805924 2. 358595 1. 608044 2. 357231  
2. 258898 1. 977022 1. 631793 2. 095238 2. 026559 2. 564699 1. 797532 1. 786489 2. 072345  
5. 051507 4. 635398 3. 945991 3. 840213 3. 374563 4. 489534 4. 546193 4. 29414 3. 597622  
4. 265553 5. 141458 5. 652101 6. 562989 4. 74287 3. 659211 6. 987575 3. 757654 5. 841564  
2. 243769 2. 120616 2. 205436 2. 444587 3. 198806 3. 797666 2. 751081 1. 996419 2. 613515  
7. 07354 7. 127138 7. 119047 6. 179032 6. 58719 6. 943357 7. 151622 6. 624695 6. 461944  
8. 237839 7. 882301 7. 804011 8. 207314 7. 835198 8. 273958 8. 532059 8. 166644 8. 184844  
2. 524778 2. 706917 1. 900734 2. 974791 2. 430369 6. 118057 2. 512455 3. 491078 3. 32615  
6. 155045 4. 658843 6. 320137 6. 114221 5. 843922 5. 520835 7. 32648 7. 506776 6. 924102  
6. 266861 6. 291295 6. 129272 6. 673949 5. 971474 5. 308084 6. 908796 7. 316204 6. 408097  
7. 208536 5. 583955 7. 545805 7. 301452 6. 616841 7. 443477 8. 575777 8. 697404 8. 655506  
5. 051638 5. 443123 5. 869876 5. 72443 5. 270624 5. 795257 5. 395041 4. 661669 5. 617336  
7. 095463 6. 557907 7. 281469 6. 370817 6. 601358 7. 204169 6. 959828 7. 35129 6. 688615  
4. 715696 3. 951612 3. 684722 4. 071984 3. 859006 5. 106969 4. 173076 3. 14893 4. 796069  
7. 631913 7. 68934 8. 02202 7. 956323 8. 159894 7. 479614 7. 903057 7. 517973 7. 053665  
6. 820719 7. 416028 3. 310864 8. 058482 6. 430008 2. 928564 8. 642134 7. 544943 7. 507201  
5. 729292 6. 594677 6. 334225 5. 321843 5. 762544 6. 271978 5. 865249 6. 026803 6. 271752  
2. 504652 2. 402334 2. 976799 2. 775433 3. 211783 4. 328266 3. 101442 2. 856168 3. 640143  
0. 377981 2. 14287 1. 471263 1. 664858 1. 998761 1. 60201 1. 55366 3. 08205 1. 60201  
2. 434137 2. 534474 2. 911037 3. 154359 2. 436258 2. 35457 3. 334304 2. 739923 2. 855984  
5. 396309 6. 106655 5. 634593 5. 484372 5. 368437 5. 859612 5. 465569 5. 734585 5. 355505  
2. 086017 1. 337251 1. 694578 1. 00541 1. 623975 1. 285638 1. 602791 1. 35487 2. 195519  
4. 92565 4. 287251 4. 081268 5. 378517 3. 86968 5. 539208 4. 227064 4. 561973 4. 715921  
2. 189385 3. 024036 3. 309009 3. 405065 3. 308912 2. 157835 2. 424566 4. 588379 5. 001824  
6. 233109 6. 09426 6. 672388 7. 502817 6. 216715 6. 942591 6. 69238 6. 3157 5. 472627  
6. 348242 6. 171717 6. 240041 5. 005242 5. 384574 4. 185017 6. 038391 5. 535937 5. 481281  
6. 033666 6. 169937 6. 000856 6. 479739 5. 853262 6. 508725 6. 512279 5. 492745 5. 552296  
4. 597087 5. 225516 6. 551208 7. 476912 4. 864551 4. 150978 5. 06774 4. 484351 3. 951695  
1. 698073 1. 923481 1. 397081 2. 154343 1. 060721 3. 029219 2. 496182 1. 185111 1. 333168  
3. 942295 3. 466173 4. 033912 3. 855587 3. 601675 4. 422015 3. 909978 4. 506368 4. 014415  
5. 69357 6. 761098 5. 480405 6. 003474 5. 082295 4. 70753 5. 700443 5. 238237 5. 302984  
1. 026197 1. 639166 2. 088966 2. 57473 1. 100684 1. 721212 1. 241747 1. 627742 1. 311764  
3. 219509 2. 593758 2. 643439 2. 08331 2. 429085 2. 057371 2. 549727 2. 056159 1. 888498  
8. 228165 7. 075978 6. 998866 7. 702849 6. 078173 6. 604832 5. 905508 4. 404872 3. 602211  
1. 913302 2. 2701 1. 737961 2. 013457 2. 331814 2. 097196 2. 084343 2. 112889 2. 997898  
2. 477504 1. 751902 1. 424019 1. 876388 3. 253756 4. 833562 1. 92882 1. 837751 1. 840616  
1. 996378 2. 596638 1. 682268 1. 63333 2. 20526 2. 558837 1. 793584 1. 965277 2. 163529

3. 878384 3. 668714 3. 70595 5. 915997 6. 250635 6. 469733 5. 480934 4. 516601 6. 265011  
3. 514375 3. 13401 4. 084041 3. 931309 3. 914725 3. 989101 3. 648097 3. 231536 3. 883673  
6. 754769 7. 056808 7. 205776 7. 551381 6. 940234 7. 462623 7. 996221 7. 805766 7. 994048  
2. 61945 3. 420979 2. 161224 2. 633826 2. 695351 3. 591949 3. 219941 3. 034517 2. 99798  
5. 141496 6. 58718 6. 152363 6. 23264 6. 747763 5. 424408 5. 657415 5. 735209 6. 14742  
2. 054475 2. 077253 3. 088068 2. 527367 1. 236506 1. 978869 1. 659094 1. 957818 3. 507235  
3. 156079 4. 235532 4. 066747 3. 843917 4. 165486 4. 739623 3. 361835 3. 847364 3. 802911  
3. 236243 4. 021704 2. 141761 3. 196787 3. 088044 2. 895834 5. 200858 3. 638426 3. 373168  
5. 684271 6. 691464 5. 86155 6. 650818 7. 34041 6. 583132 6. 493589 5. 092736 5. 349568  
3. 651559 5. 066203 4. 206712 3. 14695 3. 693141 3. 574035 4. 204857 2. 879593 3. 282507  
5. 653866 6. 181349 6. 319738 5. 810216 5. 770212 5. 26559 5. 913517 5. 395523 5. 773988  
2. 253723 1. 867029 2. 540447 2. 690945 1. 411389 1. 965396 1. 630132 1. 986592 1. 37795  
4. 044428 3. 221352 3. 818904 5. 441036 3. 110102 4. 493174 4. 364719 2. 889416 3. 867205  
4. 874276 4. 708313 4. 289961 4. 486634 4. 547914 6. 689421 5. 502123 4. 853445 5. 549436  
1. 594002 2. 063744 3. 550233 2. 458919 2. 114158 2. 494572 3. 21775 2. 799041 2. 188075  
5. 369845 5. 353012 5. 116455 6. 230017 4. 844743 3. 833863 7. 013764 5. 61858 6. 698748  
3. 554864 3. 080047 2. 970891 3. 969986 2. 492032 3. 032764 2. 817395 3. 806008 2. 482116  
4. 646912 4. 07377 5. 59271 6. 391937 4. 990168 6. 170913 5. 422676 3. 435426 5. 035982  
1. 731372 3. 793077 1. 913134 1. 59667 1. 725537 1. 608162 1. 587858 1. 977941 2. 297491  
2. 365173 2. 369956 2. 188132 2. 367847 1. 802414 2. 483157 2. 090173 3. 45224 1. 710652  
5. 813996 6. 098252 5. 038367 6. 504962 6. 023026 5. 552604 5. 816673 6. 981701 6. 204961  
5. 569984 6. 460147 6. 467581 6. 578261 6. 567829 6. 180694 6. 922211 6. 611307 6. 384566  
2. 465344 1. 924552 2. 041871 2. 261712 1. 947483 2. 381707 2. 297584 2. 184218 2. 389259  
6. 396192 6. 511795 6. 168321 5. 791102 6. 619041 6. 534647 6. 58364 6. 206213 7. 20932  
3. 313293 1. 977724 2. 998144 3. 131325 2. 439743 4. 930028 4. 797008 4. 185707 3. 914113  
2. 335335 2. 532715 1. 94342 1. 674709 2. 669702 2. 550371 2. 178267 1. 752831 1. 809335  
2. 573139 3. 208379 2. 627278 2. 621595 2. 25036 4. 516837 2. 670665 3. 147346 2. 934527  
8. 006386 7. 128856 7. 464041 8. 092678 8. 119155 7. 989651 8. 140508 7. 584121 8. 318757  
1. 540541 1. 9131 1. 529767 1. 791755 2. 355998 1. 343578 1. 609488 2. 199121 1. 776555  
4. 466941 4. 423737 3. 957695 5. 286576 4. 003625 4. 024388 4. 588641 4. 339228 4. 067328  
3. 903512 3. 862857 2. 166612 2. 583822 4. 733131 1. 636581 2. 270205 2. 542466 3. 152058  
3. 261026 3. 648438 2. 203794 1. 51095 2. 314218 2. 105836 1. 897559 2. 451296 2. 163684  
8. 848993 8. 613622 9. 320337 8. 918974 9. 186311 8. 880173 8. 639441 9. 158686 9. 130612  
3. 150331 3. 188698 2. 767478 2. 481608 3. 543141 5. 123257 2. 608108 3. 007418 3. 074588  
5. 504828 4. 799548 5. 061883 5. 614876 4. 493269 5. 276623 5. 893113 5. 690077 5. 754964  
3. 282282 4. 666515 3. 679788 2. 894261 3. 462133 3. 998322 3. 169915 2. 880967 2. 969816  
3. 04823 2. 372032 3. 48633 3. 278229 4. 036937 3. 243098 4. 529918 4. 032271 4. 597056  
2. 190967 2. 16907 2. 609824 3. 02923 2. 075137 2. 538489 2. 225329 3. 100319 2. 623659  
1. 185007 1. 213818 1. 399592 1. 235815 1. 033214 0. 970133 1. 0638 1. 082158 0. 806294  
4. 940158 3. 205903 4. 638574 4. 014056 4. 790852 4. 713215 3. 529543 3. 230113 3. 401528  
6. 377142 7. 157616 7. 506622 6. 744364 6. 533945 7. 225649 7. 102276 6. 849368 6. 282159  
4. 008632 4. 557676 4. 120276 4. 252318 3. 952151 4. 49626 3. 544008 4. 201003 4. 73938  
2. 742831 2. 077151 3. 415069 2. 841403 2. 972731 2. 081376 2. 549259 2. 718155 2. 104903  
6. 314209 6. 142259 6. 445476 5. 976916 6. 415995 7. 702411 7. 152373 7. 221937 6. 73992  
5. 193021 5. 825488 4. 814902 4. 729683 4. 144425 6. 308313 4. 9572 5. 618391 4. 940011  
2. 97038 3. 186683 3. 664933 3. 507616 3. 307429 2. 653682 2. 86448 4. 488832 4. 201628  
3. 20907 4. 562916 2. 643622 3. 371796 3. 38737 4. 079878 3. 940744 3. 403064 3. 768846  
6. 41001 5. 663693 5. 594537 6. 136672 5. 792368 5. 719879 6. 259631 5. 717378 5. 631444  
2. 586271 2. 540133 3. 342514 2. 640081 3. 174606 2. 779272 2. 628421 2. 101684 2. 901395  
4. 897601 5. 48435 5. 281395 6. 160836 5. 727712 6. 309206 5. 43077 6. 083926 5. 627755  
4. 967114 4. 845315 4. 780728 5. 244589 5. 0685 5. 253969 4. 913778 5. 962195 5. 304184

2.692162 3.586209 3.160856 3.028611 2.771307 4.670962 3.683245 3.751945 4.489964  
7.627429 7.201663 7.213785 7.574339 7.323455 7.496225 7.018086 7.111227 7.726998  
7.049852 5.730126 5.347323 5.516837 5.940064 6.928834 5.150974 7.059605 6.859537  
3.356898 4.400136 4.013239 2.516048 2.509287 3.812061 4.996791 3.614953 2.965968  
1.959267 1.824479 2.951002 1.834874 2.154165 2.38977 2.376015 2.50588 1.900099  
5.333371 3.242974 5.468316 5.039433 4.07716 4.733908 4.261948 5.03091 5.604328  
5.302517 6.045924 5.977677 5.656364 5.716025 5.217561 5.425181 4.744171 5.424746  
2.446553 1.885388 2.71706 2.266638 1.974606 2.037343 1.747081 2.515011 2.220896  
5.591805 6.435 6.161121 6.012652 6.728093 6.628729 6.292112 6.636591 6.570111  
5.25837 5.515618 5.611805 5.110381 5.73605 5.982267 5.585951 5.028023 5.491603  
6.939298 7.087942 7.014475 6.650072 6.617797 6.176453 7.839311 7.864307 7.992495  
1.857166 1.475614 1.320148 2.366402 1.262613 1.532457 1.818166 1.674412 1.037345  
2.005933 1.494359 1.553678 1.390051 1.577034 2.682147 1.507102 2.033495 1.252457  
4.25143 4.2521 3.848939 4.539281 4.464203 3.063662 4.352121 3.864403 3.489352  
5.546562 6.194161 5.888376 5.881683 5.330648 6.142355 6.453191 6.567657 6.729081  
5.379678 4.270852 5.20836 5.193249 4.983398 5.677921 4.881502 5.088891 5.145627  
2.443807 3.162356 3.04456 2.969047 3.266054 3.132041 2.841387 4.218296 2.887163  
0.958481 1.062607 0.888009 1.089088 1.192826 1.266158 1.381426 1.555838 1.218229  
2.442935 2.430297 2.568175 2.182302 2.362913 2.353476 2.538686 2.899589 3.325326  
2.359358 2.023089 2.456565 2.839118 2.090686 3.291757 1.675827 2.26654 1.509433  
1.365954 1.668442 1.825272 1.77227 2.277327 1.6717 1.441884 1.614859 2.740635  
1.381954 1.527509 1.507858 2.343331 1.349055 1.130047 1.450147 2.520664 1.033322  
1.872604 1.421284 1.362521 1.773019 1.548902 1.573932 1.630034 2.242364 1.618631  
4.022988 2.784268 4.327114 4.095858 3.561082 4.106399 4.694027 4.612857 3.924364  
5.340349 6.107512 4.995875 5.376127 4.833756 6.343795 6.551528 6.973532 6.733071  
8.213729 9.070989 8.257968 8.153979 8.772289 8.559566 8.697059 8.498944 8.398171  
4.550455 4.890278 4.128185 5.25513 4.564386 5.202752 4.062142 4.69107 4.694584  
4.035255 4.21715 4.743077 4.88797 4.717062 4.762846 5.175857 4.470956 4.884479  
3.592643 4.03216 3.581798 2.729945 3.006922 3.134483 3.322288 3.551978 3.2015  
5.053975 4.317391 4.059914 3.82775 4.09236 5.839415 5.11785 5.539198 4.819539  
3.36237 4.703695 4.3517 3.427124 3.342967 3.887988 4.456226 3.191683 5.314726  
1.167952 1.265455 0.68503 1.01039 0.724962 1.311092 1.846106 1.641417 0.775557  
3.407876 2.689563 3.02979 4.205711 2.651261 2.979844 3.087599 3.946066 4.156336  
6.923481 7.205332 7.214565 6.575939 6.884128 6.640744 6.812773 6.856197 6.453999  
1.935117 2.295433 2.470412 3.1549 2.793675 2.308875 2.6942 2.704448 1.894052  
6.187393 4.481173 4.145873 5.268487 4.694056 4.869963 3.647592 3.685319 3.517721  
6.358907 6.592537 5.648088 6.197821 7.489235 7.825245 6.525911 6.529463 7.007896  
1.440065 1.593344 1.347724 1.853527 1.740267 1.529535 1.530354 1.289675 1.989645  
1.774506 3.163884 1.896194 2.360481 1.938591 2.196848 1.868961 2.00486 1.410715  
7.260721 5.513751 5.929302 6.74806 6.479436 9.000266 7.295143 6.296299 6.582246  
8.918968 8.748583 9.104263 8.740212 8.925895 8.773998 9.197993 9.37891 9.257466  
4.683392 5.833799 4.645324 5.697131 5.433856 4.337819 5.695244 5.626314 4.75717  
0.956546 1.746179 1.358663 2.471687 1.417178 1.924076 0.992725 1.456949 1.540832  
3.925335 6.137174 5.438415 5.444147 5.983418 4.971893 5.905631 6.917202 5.34736  
3.425339 2.442688 3.3902 2.916195 2.680231 3.649997 3.009593 2.895094 3.631127  
3.700398 2.584778 2.426885 2.964944 3.124898 3.537015 2.922103 2.540904 3.455015  
2.235358 3.077557 2.296487 1.822076 2.652657 1.226569 1.584569 2.319724 1.2021  
2.582945 2.25535 2.307833 2.164833 2.118333 2.656681 2.328152 2.223817 2.057966  
2.791528 3.026407 3.011976 2.895994 3.08095 3.986049 3.774611 3.971348 4.144022  
7.634925 7.286819 7.546968 7.27796 7.406364 6.502723 6.695191 6.352249 7.101943  
4.357577 4.594719 3.912985 3.549916 3.852493 4.051071 3.71725 3.37834 4.125766

6. 725873 6. 532745 6. 545034 7. 266097 7. 139357 7. 234459 6. 790801 6. 89893 6. 976004  
2. 251646 2. 066017 1. 796775 2. 851659 1. 742285 2. 685788 2. 142561 2. 204502 2. 002696  
4. 314525 4. 232343 3. 728547 4. 395027 4. 080153 4. 463941 4. 073158 5. 306201 3. 704199  
5. 690653 4. 28338 5. 365668 7. 687596 4. 997482 4. 860371 1. 866819 1. 76891 2. 016501  
1. 179502 1. 967374 1. 236483 0. 994728 1. 179502 0. 896166 0. 68872 0. 974058 0. 964424  
3. 609559 3. 142249 3. 162958 3. 726583 3. 694323 2. 945216 4. 440165 4. 21734 4. 081906  
1. 643225 4. 685418 5. 409004 1. 241883 7. 238712 1. 855836 3. 106406 1. 53445 2. 177936  
1. 830528 2. 536491 2. 407582 4. 208741 2. 387868 3. 731295 3. 367685 4. 338572 3. 620273  
6. 286753 6. 240493 5. 847972 5. 498716 6. 500232 5. 845408 6. 034595 5. 329927 5. 648982  
4. 306655 4. 46703 3. 381506 1. 299303 5. 445736 1. 247845 1. 720781 1. 694288 1. 092564  
2. 430453 2. 310446 2. 502477 2. 579915 2. 211815 2. 789837 3. 136049 4. 582604 3. 617626  
0. 848272 1. 353647 0. 972549 1. 618381 2. 882626 0. 763947 0. 746814 1. 258751 1. 029143  
1. 207219 2. 968683 4. 109241 2. 388272 3. 117915 1. 247727 1. 289756 0. 986629 1. 285019  
2. 452881 1. 559088 3. 745686 2. 071953 1. 419243 1. 288551 3. 384018 1. 000414 0. 839671  
1. 895855 2. 041107 3. 533942 2. 001944 1. 674164 2. 084435 1. 213249 1. 545271 1. 627225  
1. 873327 1. 906263 2. 865284 1. 865543 3. 160113 2. 120418 1. 800592 1. 531274 1. 830293  
4. 014524 3. 566898 4. 987331 4. 599718 4. 067967 3. 354139 3. 542959 4. 308842 3. 612287  
4. 676996 6. 14856 5. 468034 5. 061903 5. 564907 5. 465033 5. 215991 5. 469071 5. 401812  
3. 241062 3. 311469 2. 628769 3. 516747 2. 312332 3. 448743 3. 239941 3. 056164 2. 94558  
2. 293039 3. 128535 2. 120333 3. 127932 2. 207458 2. 601309 2. 286754 2. 010073 2. 22099  
4. 36763 4. 306092 4. 413152 4. 810605 4. 265508 3. 689809 4. 295074 4. 076507 4. 298246  
4. 923703 4. 39887 4. 496022 5. 366665 5. 032756 6. 467727 4. 657883 4. 620076 4. 798317  
2. 486946 2. 255847 2. 50086 2. 241289 2. 712192 3. 2339 2. 889729 2. 168147 2. 511369  
5. 265271 4. 022056 4. 527791 6. 147991 4. 103426 5. 044803 4. 318992 4. 89205 4. 238723  
1. 856671 2. 141255 2. 111464 2. 888301 2. 11734 2. 073032 1. 553466 2. 687834 2. 58296  
2. 643482 3. 639554 4. 229102 3. 203507 4. 227965 4. 200088 3. 478665 4. 120091 3. 998344  
3. 743811 3. 919206 3. 439274 3. 581676 3. 770069 3. 053517 3. 139403 2. 993855 3. 351499  
1. 802618 2. 310475 2. 446361 2. 317375 2. 275275 2. 474078 1. 857089 2. 411103 1. 442396  
3. 291913 3. 554775 3. 711624 3. 37446 3. 919449 3. 665069 4. 36953 3. 949484 4. 236742  
1. 768287 1. 104398 1. 208301 1. 243384 1. 395407 1. 184397 1. 286626 1. 447214 1. 359761  
3. 310844 4. 043435 5. 469692 4. 329319 4. 505364 3. 81463 4. 220894 3. 680542 4. 635792  
2. 644852 2. 368966 1. 602843 1. 700377 2. 528177 2. 061976 2. 088017 1. 604662 2. 274104  
2. 172089 1. 325782 2. 687087 1. 44589 1. 103848 2. 054523 1. 935653 1. 982949 2. 156581  
3. 680227 3. 3175 3. 767275 3. 761713 4. 271578 4. 131604 2. 994527 3. 509434 3. 788851  
3. 126481 3. 380719 3. 12478 3. 122281 3. 559945 2. 591076 2. 682091 2. 840603 3. 537594  
3. 075317 2. 14666 1. 741744 1. 444264 1. 038018 2. 005739 1. 559972 1. 556258 1. 890018  
2. 124529 2. 445878 1. 754146 2. 32976 1. 791762 2. 009697 2. 032946 1. 663353 2. 657741  
7. 318893 5. 4999 6. 392019 5. 240016 5. 322185 6. 232224 5. 779104 5. 129494 5. 448097  
4. 325669 4. 574809 3. 891753 4. 694574 5. 285209 5. 156692 5. 910587 5. 168543 4. 853073  
3. 444081 3. 665744 4. 274286 4. 717809 4. 237673 4. 522695 4. 440841 4. 627819 4. 734487  
7. 405965 7. 698216 7. 46034 7. 056977 7. 150704 7. 261009 7. 300518 6. 954285 7. 260916  
1. 226838 1. 242479 1. 547502 1. 645134 2. 740651 1. 31422 1. 298421 1. 120226 1. 13385  
2. 592621 2. 931123 2. 539549 2. 17492 2. 543297 2. 381665 2. 348008 2. 814417 2. 782355  
2. 379764 1. 20397 1. 173485 2. 130065 0. 80898 5. 74414 1. 307277 1. 288483 1. 24007  
7. 772522 8. 168844 7. 598492 7. 258243 7. 563341 7. 574511 7. 499145 7. 777646 7. 58839  
5. 561909 4. 878672 5. 503555 6. 106747 5. 423286 6. 304474 6. 783649 6. 969366 5. 420091  
6. 940644 7. 379842 6. 626825 6. 499503 6. 790333 6. 8628 6. 467611 6. 702843 6. 737161  
5. 916822 5. 652928 5. 595937 5. 872337 5. 745482 5. 607813 5. 390053 6. 466752 6. 176294  
1. 479093 2. 569138 2. 013088 2. 201554 2. 106932 2. 287322 1. 946026 2. 315147 2. 135147  
8. 099854 7. 921073 8. 261291 7. 959922 8. 017465 7. 73895 8. 012582 7. 997067 8. 412262  
6. 680404 6. 621218 5. 608412 5. 402467 5. 820649 6. 295455 5. 666615 5. 903765 6. 135597



6. 154304 5. 605398 5. 760742 5. 726031 6. 260984 5. 168187 5. 509486 5. 658669 6. 684251  
1. 634182 1. 786375 1. 715984 1. 798373 1. 854301 3. 648 1. 581253 1. 726184 1. 863822  
5. 279993 4. 774757 4. 680383 5. 637099 5. 496912 5. 229857 5. 363514 5. 569555 5. 913719  
5. 476812 6. 460781 6. 516371 6. 472469 5. 871672 5. 596117 6. 441201 6. 696189 5. 807574  
1. 301793 1. 853199 1. 722486 3. 210948 1. 412784 2. 07804 1. 343791 2. 031349 2. 382126  
5. 698703 6. 540817 7. 072667 6. 108227 6. 789632 6. 289942 6. 86943 6. 506249 6. 433372  
3. 27814 3. 407165 4. 028029 4. 135038 1. 981253 3. 964454 3. 237705 4. 044138 3. 575872  
4. 11415 3. 507484 3. 642947 4. 595746 3. 990327 3. 878076 2. 283786 4. 528838 3. 922624  
2. 129983 2. 14212 1. 360562 1. 773779 2. 531565 4. 818111 1. 935325 1. 582687 3. 037737  
1. 488757 1. 796221 1. 750004 1. 0383 1. 193899 0. 938923 1. 017997 1. 250787 1. 351597  
5. 045392 4. 496199 4. 06873 5. 917462 4. 818695 4. 643023 5. 447166 5. 670268 5. 758027  
0. 461544 3. 130226 4. 042487 3. 146536 4. 22611 5. 227506 5. 595376 3. 605177 5. 8082  
6. 392798 6. 334462 6. 37206 6. 312701 5. 585901 8. 105892 7. 583244 7. 345372 7. 661967  
2. 388415 3. 463596 2. 434477 2. 804725 2. 930002 3. 016905 2. 57941 2. 506773 1. 991725  
5. 560887 5. 197456 5. 48859 5. 426356 5. 250028 5. 347537 4. 999922 6. 031077 5. 967059  
6. 72602 6. 580491 6. 867779 6. 796969 6. 210165 7. 217576 6. 775455 6. 636952 6. 857732  
7. 179165 7. 539846 7. 511999 7. 618263 7. 022827 6. 673314 7. 792296 6. 826381 6. 809325  
1. 918789 1. 98278 1. 497012 1. 870918 1. 42754 4. 023172 1. 710804 1. 991253 1. 69375  
2. 475391 2. 667005 2. 329433 2. 801204 2. 620094 2. 277937 2. 126809 2. 237366 3. 563282  
1. 480565 1. 584755 1. 354509 2. 134419 1. 518536 2. 013285 1. 184467 1. 743173 1. 435707  
9. 337044 9. 389263 9. 566658 8. 983772 9. 60418 9. 317139 9. 921479 9. 759818 9. 654695  
1. 730636 2. 375956 2. 102296 2. 39025 2. 040524 1. 549463 1. 828034 2. 617296 1. 859928  
1. 99692 2. 172098 1. 00075 2. 167989 1. 795814 2. 781114 1. 802005 0. 774291 2. 462452  
6. 679247 6. 920871 5. 843433 6. 803454 6. 906622 6. 796524 7. 293949 6. 795481 7. 544688  
1. 545311 2. 009422 1. 370782 1. 339899 1. 072788 1. 143679 1. 927464 1. 672446 1. 517494  
2. 770663 2. 626556 2. 494611 2. 57953 2. 344437 3. 122953 2. 808007 1. 957631 3. 624477  
5. 069872 5. 887423 5. 938471 6. 179958 5. 410668 6. 463473 4. 745337 5. 664224 5. 579265  
5. 031902 4. 776299 5. 192096 5. 288378 5. 373323 4. 844403 5. 660002 5. 971183 5. 814232  
1. 90307 1. 346083 2. 063369 1. 443464 1. 7046 1. 97224 1. 38033 2. 035629 1. 865494  
1. 465356 3. 433271 1. 686553 4. 034915 3. 825005 4. 714196 1. 986382 2. 113609 1. 946717  
9. 097802 8. 152991 8. 288822 8. 810361 8. 723521 9. 096194 9. 007942 9. 437033 8. 810016  
1. 401614 1. 69079 1. 22859 1. 624248 1. 624248 1. 445368 1. 558406 1. 919088 2. 252665  
3. 572958 3. 59192 3. 305996 3. 255374 2. 66354 2. 664868 2. 998338 3. 94545 3. 69566  
11. 02587 10. 35302 10. 69434 10. 39479 10. 77153 10. 63791 10. 60157 10. 23522 10. 18193  
1. 150098 1. 860656 2. 123863 1. 927021 1. 210364 1. 182438 1. 495485 1. 023434 1. 744225  
4. 259415 4. 624753 4. 546509 6. 147859 5. 773334 3. 700411 6. 0463 5. 601861 5. 110313  
6. 708887 6. 525789 7. 379615 7. 060282 7. 371247 7. 299896 8. 516165 9. 157825 8. 709738  
8. 074145 8. 184528 8. 000093 7. 805803 7. 998866 8. 009884 8. 171281 8. 080258 8. 274455  
6. 298904 5. 023203 4. 897297 5. 935588 4. 496845 4. 472746 5. 161532 3. 061154 3. 703261  
7. 261316 6. 822417 7. 699196 6. 603138 7. 33824 6. 65057 7. 283541 6. 652546 6. 793791  
4. 503063 4. 139762 4. 112747 4. 002825 4. 163848 4. 24419 3. 73774 4. 329884 4. 465929  
1. 641508 1. 91665 2. 964134 1. 73367 1. 509099 1. 844421 1. 401086 1. 488484 2. 045764  
2. 614311 2. 126937 1. 921371 2. 369181 2. 84955 2. 574212 2. 026588 2. 351111 2. 704976  
8. 757047 5. 734231 7. 673809 7. 846538 7. 196855 7. 306873 6. 886342 6. 142589 4. 585041  
3. 2395 2. 863547 3. 18826 4. 676067 3. 35403 3. 679837 2. 651562 2. 926429 3. 03644  
1. 513203 1. 855827 1. 196187 0. 952176 1. 783496 2. 353895 1. 551714 1. 377353 1. 202169  
4. 691799 5. 656865 5. 335909 3. 71026 4. 479595 4. 549435 4. 122196 4. 606152 4. 922423  
3. 989107 3. 958322 4. 294646 3. 868282 4. 438102 4. 186305 3. 456022 3. 964559 3. 778686  
7. 949026 8. 655478 8. 560314 8. 015763 8. 108705 7. 515179 8. 273846 7. 905265 7. 915775  
3. 747891 2. 935939 3. 103602 3. 666845 2. 557548 4. 251142 3. 566826 3. 647331 3. 134455  
5. 252552 4. 621383 4. 309379 4. 360071 4. 76656 5. 415823 4. 112172 4. 794525 4. 599901

7. 530266 7. 534994 7. 623052 8. 094953 7. 879373 7. 655983 6. 978569 7. 357282 7. 397658  
1. 957426 2. 506139 2. 310523 1. 762117 1. 85957 3. 065676 1. 549646 2. 43746 2. 376312  
4. 124637 4. 161294 4. 185662 4. 686196 4. 497708 4. 144526 5. 104898 4. 565779 4. 926269  
6. 870599 6. 612035 6. 801588 6. 315357 6. 67913 6. 166126 5. 913368 5. 955692 4. 874338  
2. 581805 2. 845428 3. 483486 2. 199534 4. 482105 2. 64977 3. 165479 2. 271039 2. 065298  
1. 959446 2. 434166 3. 239278 3. 436558 2. 466159 3. 188468 2. 253618 2. 282133 3. 288913  
4. 903379 4. 349581 4. 351321 3. 771745 4. 487828 4. 845159 4. 672568 4. 517705 4. 425155  
2. 309201 1. 691816 2. 843544 2. 31065 1. 412241 1. 741952 2. 017047 2. 579054 2. 13369  
4. 29365 5. 486918 4. 5176 3. 782677 4. 94178 4. 728978 4. 551506 4. 453047 3. 946147  
3. 104718 2. 57642 2. 550056 2. 176978 3. 222801 2. 906471 2. 901345 2. 965646 3. 168336  
3. 971879 3. 806397 3. 723376 3. 907376 3. 228553 2. 479758 2. 374334 3. 118759 3. 29821  
2. 169977 1. 992301 2. 144376 2. 251959 1. 954948 2. 197756 1. 160418 1. 825001 1. 44928  
3. 707938 4. 031491 3. 506471 3. 798422 4. 069083 4. 687389 3. 197685 3. 140429 4. 094951  
8. 174381 7. 429316 7. 69151 7. 676867 6. 812145 7. 360019 7. 653188 6. 173376 7. 495448  
1. 540701 0. 9974 0. 886802 1. 220386 0. 957362 0. 815606 1. 087784 0. 977485 1. 463466  
7. 220139 7. 437345 7. 208489 7. 241702 6. 970179 6. 485251 6. 952555 6. 300011 6. 906935  
5. 24458 5. 867782 5. 929712 5. 784834 5. 607456 5. 360692 5. 877487 5. 777534 6. 278289  
1. 140907 0. 952598 0. 94348 1. 359439 0. 756025 1. 220568 1. 290002 1. 362438 1. 779453  
1. 225639 1. 729086 1. 799977 2. 244709 0. 924121 1. 334943 1. 041364 1. 178484 1. 600347  
5. 432503 5. 738394 5. 670835 4. 575108 5. 082297 4. 619079 5. 670514 5. 104418 5. 340332  
7. 845369 6. 858049 8. 132304 7. 825994 7. 552468 8. 285477 7. 78383 7. 620526 6. 611254  
2. 26712 2. 847868 1. 598402 2. 496071 2. 335175 2. 12333 2. 956648 2. 282341 2. 688798  
1. 280937 1. 255623 1. 982876 1. 492274 1. 417757 1. 296942 1. 326243 1. 327921 1. 938583  
5. 784015 6. 686395 6. 529781 7. 070664 6. 896928 7. 11762 7. 37274 7. 44402 7. 37765  
6. 087701 6. 526511 6. 225229 5. 871227 5. 971971 5. 034399 7. 424259 6. 212971 6. 762194  
6. 738023 7. 295501 6. 750856 5. 595425 6. 717638 6. 193264 7. 939601 7. 418117 7. 395902  
3. 798399 5. 525935 4. 490512 4. 361825 4. 250081 3. 99932 5. 213919 4. 848752 3. 794071  
9. 05308 9. 196661 9. 185889 8. 942725 9. 238561 9. 044539 9. 394616 9. 092396 9. 042178  
9. 757223 8. 333528 9. 228209 8. 639472 8. 334174 8. 746276 8. 654847 6. 951649 4. 731072  
9. 874012 9. 914634 9. 790932 9. 825077 9. 492838 10. 08489 9. 566608 9. 551686 9. 470406  
2. 33637 1. 844118 1. 240287 1. 712117 1. 225007 1. 157466 1. 415416 1. 56313 1. 247096  
3. 166065 2. 094537 2. 31641 2. 703688 2. 287773 3. 699912 3. 009685 2. 15284 4. 600367  
8. 481096 7. 468149 8. 421566 8. 959703 8. 087124 8. 605623 8. 20925 8. 427244 8. 114641  
2. 27455 1. 734865 2. 012261 1. 700571 2. 012261 2. 224233 2. 034581 1. 747471 1. 870247  
6. 712393 7. 232466 7. 251846 6. 928606 7. 09144 7. 191439 6. 376257 7. 334792 7. 188635  
8. 754974 2. 269102 1. 771871 7. 867557 8. 750231 2. 76821 2. 490797 7. 914 1. 4786  
2. 700187 2. 200731 1. 965604 2. 664762 1. 778415 4. 243296 3. 134434 2. 106159 1. 804569  
2. 007132 2. 221324 2. 463094 2. 038756 1. 586085 2. 127008 1. 902533 2. 462106 1. 831405  
5. 238638 2. 334514 4. 276969 1. 951782 2. 209262 1. 849845 2. 805256 1. 754145 2. 015876  
6. 140462 5. 228736 5. 313636 3. 400304 4. 76595 5. 182056 5. 640435 5. 751959 5. 377442  
4. 957889 5. 416738 6. 042037 6. 6798 5. 577918 6. 050738 6. 269358 5. 920032 5. 505451  
3. 742852 0. 643753 2. 512543 2. 29614 2. 888191 4. 089481 1. 610064 2. 426248 0. 900346  
2. 146243 2. 084113 2. 320474 1. 279593 1. 91568 1. 602834 1. 717988 2. 276562 1. 421156  
5. 361715 6. 168926 5. 183883 4. 46474 5. 419758 5. 398701 5. 356305 5. 317233 5. 171919  
6. 902376 6. 895228 6. 989927 6. 838079 7. 229374 6. 552673 6. 860089 6. 531584 6. 37722  
1. 659623 1. 348563 1. 715389 1. 652547 1. 552599 1. 970545 1. 26239 1. 588492 1. 519676  
1. 941231 2. 034715 1. 247027 1. 675436 1. 447328 1. 677337 1. 787942 1. 388627 1. 561572  
5. 321893 5. 829014 5. 890394 5. 771555 5. 784571 6. 363953 5. 75814 6. 491418 5. 793231  
1. 428607 3. 425534 1. 656845 1. 868211 2. 156288 1. 58458 1. 355163 2. 225508 1. 686691  
1. 798419 2. 406625 1. 755343 3. 363571 3. 117634 2. 114019 1. 473628 2. 045947 2. 153623  
2. 801427 2. 836317 1. 985192 2. 122947 1. 943671 3. 043181 2. 392338 2. 093273 2. 523975

3.162479 3.013013 2.930229 3.597635 2.328608 5.005527 2.422326 2.442225 3.188525  
4.648158 3.363215 3.100737 2.851395 3.751509 3.665111 3.927896 3.895468 4.984209  
8.227882 7.961225 8.122455 8.077577 7.790401 7.712904 8.303705 8.711243 8.561944  
1.540126 2.133554 2.777898 1.403097 2.454217 2.446475 1.663815 1.999046 2.485707  
2.4573 2.342171 3.146237 3.364844 2.682687 2.14767 3.335441 2.823078 3.690029  
3.126396 3.277378 3.042783 3.702749 3.316868 2.923771 2.569614 4.158772 4.094038  
1.884109 1.565832 1.95007 2.341011 2.365489 1.797919 2.173141 1.663705 2.315663  
3.436294 1.68831 4.837708 3.110464 1.079271 1.357429 2.995889 2.828964 2.999052  
2.490979 3.023491 2.412641 2.759545 2.81972 2.174326 2.430329 2.417303 2.49427  
1.018343 2.105731 0.970701 2.030804 3.295854 1.708392 1.591141 1.518268 1.551491  
0.925629 1.386304 1.120378 1.385582 1.207383 1.410844 1.227342 1.320687 1.566077  
1.958401 3.407251 2.190611 2.362433 2.365134 3.236322 2.187385 2.236534 2.869049  
2.109121 1.758448 1.367632 1.757377 2.025822 2.301734 2.518698 2.38166 2.1038  
2.488101 2.883005 2.188918 2.561499 2.88006 2.027928 2.595251 3.073798 4.280469  
2.70173 2.40993 3.068806 2.609893 2.198269 2.485019 2.925488 3.345755 2.872282  
1.121655 1.610165 1.470749 2.495845 1.670301 1.930692 1.492751 1.807078 1.523287  
2.527107 3.842095 4.232034 6.769506 4.35636 6.032245 4.536418 5.233058 5.496633  
8.95272 9.669189 8.759235 8.857961 9.660344 9.35105 9.438847 9.350217 9.424155  
3.793985 2.585308 3.855611 2.299497 3.162268 3.491366 2.96328 3.107913 4.404192  
6.88924 6.826834 6.346891 6.833737 6.124913 6.573329 7.101715 7.126881 6.641684  
5.353929 5.269141 6.373056 5.432923 5.290642 4.88269 4.899655 4.135142 5.296471  
8.172326 8.870517 8.924438 7.840866 8.617468 7.34248 7.462142 7.453162 7.565169  
2.965691 3.596293 3.200146 2.547019 2.236391 2.332307 2.464391 2.924398 1.839842  
6.563049 4.794578 6.253386 6.350155 5.624008 5.017211 6.017676 4.47341 4.638908  
1.997248 1.242672 1.193438 1.848968 1.617053 1.782105 1.678735 1.233621 1.526196  
4.985818 5.230505 4.509081 3.982242 4.287019 5.495126 3.827772 3.460925 2.732792  
4.599737 4.378197 4.84224 5.607946 5.226426 5.788872 5.235059 5.010331 5.843299  
1.553557 1.440343 1.338273 1.791553 1.596181 2.650102 1.539135 1.609756 1.671637  
6.600134 6.989069 7.067753 7.060322 6.607533 6.01076 6.309912 7.526558 6.447617  
6.795813 6.44375 6.340657 7.284813 6.569729 6.6737 6.717203 7.284924 6.611664  
5.059522 5.546382 5.875403 4.697789 5.707949 4.295643 3.868038 3.755254 4.238826  
5.235351 5.123825 5.410426 5.27741 5.183205 4.348366 4.767024 5.303722 5.505087  
4.521078 5.556873 5.637037 6.325301 6.116427 5.883423 5.15157 6.685075 6.015368  
3.784789 3.390855 4.076028 3.422376 3.511654 2.974829 3.845666 5.360483 4.039392  
8.3563 8.487695 7.997095 8.3733 8.870176 7.347657 8.832021 8.477075 8.529068  
3.199179 3.190126 2.603524 3.217619 3.1557 3.396382 3.039252 2.955232 2.534639  
5.402392 6.061697 5.081364 6.408883 5.612487 4.819325 6.040668 4.818016 5.782138  
3.168817 3.481575 1.970021 2.347306 2.149903 2.217874 1.882502 2.082312 2.263642  
8.430475 8.671886 8.655311 8.346104 8.146497 7.680198 8.385527 8.303843 8.655684  
7.294598 7.008491 6.852236 6.367039 7.287321 6.364841 6.448183 6.813168 6.735164  
1.926554 1.738132 2.476848 2.662021 2.685834 2.518314 2.13938 2.022954 1.871503  
4.199266 2.752161 3.478502 4.800331 4.132723 3.360054 4.579236 5.184888 5.541372  
5.73308 5.911585 5.749439 5.306381 5.860835 6.742109 5.736601 5.746417 5.743442  
1.095747 1.089059 0.838935 1.098719 0.936707 1.843216 1.047067 1.422294 0.972602  
6.336434 4.616324 4.399511 4.630886 5.514989 5.487782 7.205409 6.287392 6.686333  
1.21031 1.398196 0.907788 0.943842 0.963786 1.30281 1.093708 1.54148 1.387717  
10.57561 10.67965 10.61977 10.73415 8.199617 10.19053 9.708942 8.47973 9.792245  
2.228602 1.433107 3.71878 1.91348 3.05162 1.133968 1.762774 1.243055 0.898745  
3.792115 4.679911 1.64809 1.210995 0.832981 1.751034 0.457322 3.630931 1.183292  
5.589678 5.039356 4.930674 4.452428 6.192623 5.565729 5.484756 5.529775 6.005316  
7.353354 7.130009 6.9667 7.517499 7.321515 7.066373 6.952604 7.14007 6.969847

2. 015166 2. 367508 1. 787993 1. 729689 1. 731468 1. 970956 1. 862918 2. 710217 2. 440589  
4. 513643 5. 116341 4. 36785 5. 738868 4. 384198 5. 118823 4. 415019 4. 664238 4. 264126  
1. 455345 1. 930587 2. 049281 2. 095609 2. 666348 1. 972613 2. 385091 1. 643485 2. 652306  
4. 796628 4. 951172 5. 717918 5. 146099 5. 596568 5. 684567 5. 922878 5. 303102 4. 869395  
1. 98219 1. 820572 2. 600791 1. 615276 2. 105105 2. 055587 1. 848379 2. 606214 1. 855128  
2. 254859 2. 864177 1. 974157 2. 400405 2. 176744 4. 130767 2. 096805 1. 75055 2. 643925  
3. 188538 2. 642649 2. 070831 3. 113335 3. 571826 4. 089033 2. 223216 3. 73601 2. 430338  
1. 041119 1. 172601 1. 524672 1. 749068 2. 087036 1. 501106 1. 01572 1. 339905 1. 221128  
7. 057943 7. 458779 7. 122711 7. 11179 7. 54664 6. 803666 7. 65072 7. 587664 7. 109287  
1. 779822 2. 019057 1. 266038 3. 200705 1. 97619 2. 131436 2. 343673 1. 780607 2. 57807  
4. 761037 5. 000817 4. 127277 4. 314532 4. 533101 6. 078526 6. 126493 5. 086139 5. 259244  
5. 567089 6. 645976 6. 355846 5. 952329 6. 488577 6. 560512 6. 806872 5. 750557 6. 270372  
3. 594883 3. 587832 3. 373798 4. 199021 3. 58876 4. 717683 3. 57184 4. 725522 4. 255437  
4. 823868 5. 113212 4. 602138 4. 893892 5. 382351 5. 002539 4. 746235 4. 977744 5. 200065  
6. 004793 5. 090439 4. 980014 5. 147996 5. 875323 6. 243051 6. 227625 6. 884835 6. 980062  
2. 342033 3. 319383 2. 491488 2. 298525 3. 134183 2. 78535 2. 193135 2. 685034 3. 838386  
4. 292369 3. 936585 4. 036199 1. 883606 2. 413095 3. 339266 2. 134406 3. 229441 2. 58647  
1. 572744 2. 491133 2. 288058 2. 447846 2. 811349 4. 753881 2. 048502 3. 408151 3. 266836  
3. 456521 3. 203326 4. 53849 4. 318976 4. 218827 3. 031324 4. 202918 4. 202157 4. 101261  
3. 161979 3. 689687 3. 978869 3. 112905 3. 45112 3. 593323 3. 26351 3. 338849 3. 513053  
1. 906934 1. 795694 1. 923413 2. 657984 1. 766288 1. 667106 1. 922815 2. 08184 2. 190333  
5. 536555 6. 146273 5. 475248 5. 743917 5. 75038 5. 805371 5. 915904 5. 552749 5. 626622  
2. 9306 2. 282997 3. 045132 2. 798985 1. 903628 2. 259767 2. 105889 2. 752317 4. 16301  
4. 982316 5. 74757 5. 341202 6. 589327 5. 214285 5. 500198 5. 570134 5. 822392 5. 54944  
2. 58675 1. 710096 2. 200275 3. 921337 2. 062067 3. 059509 3. 474303 2. 792481 3. 212129  
1. 17279 0. 508834 2. 511497 0. 930738 3. 935936 1. 009596 1. 442182 1. 317492 2. 670835  
5. 42182 6. 468384 5. 846789 6. 213326 5. 511114 5. 049731 5. 876486 6. 349457 5. 81667  
7. 771611 8. 597941 8. 283523 7. 626443 8. 38507 6. 982914 8. 447128 8. 520054 8. 339863  
11. 31345 10. 99077 11. 1237 10. 9668 11. 17877 10. 96655 11. 4794 11. 14124 10. 84967  
6. 077134 6. 529831 6. 03917 5. 57082 6. 720843 6. 586433 6. 399164 6. 507206 5. 938371  
1. 884749 1. 747367 1. 857603 1. 441258 0. 988225 3. 290996 1. 646525 1. 403926 1. 990171  
5. 942229 6. 16793 6. 43194 5. 665907 6. 094722 6. 757272 7. 314762 7. 089575 7. 483664  
1. 527697 1. 027824 1. 983021 1. 636538 2. 927886 1. 732419 1. 410052 1. 83739 2. 830034  
3. 685505 1. 946806 1. 897596 3. 440035 3. 377493 5. 532355 2. 808319 3. 358238 3. 96779  
4. 479204 5. 341673 4. 908134 4. 580758 4. 535502 3. 476325 4. 510893 4. 48657 4. 601217  
5. 761499 7. 112047 6. 417464 6. 011049 6. 63555 6. 054737 6. 195248 7. 868778 7. 009754  
5. 820145 7. 188516 6. 881148 6. 459543 6. 567275 6. 51943 7. 376374 6. 432508 6. 938465  
3. 391186 2. 862162 3. 914129 3. 77414 3. 237934 5. 256706 3. 624748 4. 429995 4. 223662  
3. 13619 2. 64348 2. 432415 2. 71277 4. 58303 2. 432079 2. 863209 2. 966624 3. 988491  
5. 948088 6. 911747 5. 736831 6. 855649 5. 015064 4. 818934 6. 038656 6. 456543 5. 23767  
3. 260484 4. 048194 3. 341563 3. 782473 3. 234285 3. 658238 3. 204117 4. 189384 4. 081897  
6. 502298 6. 602349 6. 029837 6. 099428 5. 482653 5. 859275 5. 500337 6. 31424 6. 837723  
2. 721519 2. 691815 4. 180945 3. 485719 4. 08846 4. 372315 2. 643382 3. 127489 4. 173589  
5. 116219 6. 60556 5. 892259 5. 84261 6. 564636 6. 134404 6. 024103 6. 141994 6. 37669  
3. 832899 3. 071792 3. 608328 3. 809912 3. 730253 5. 016171 3. 85972 4. 218993 3. 798196  
1. 999044 1. 835506 2. 665169 2. 996357 2. 086714 3. 003217 2. 385033 2. 960068 3. 374358  
3. 39307 3. 464207 3. 514688 2. 918203 3. 234918 3. 78228 3. 698626 3. 64737 3. 185114  
3. 325421 2. 528272 2. 873287 2. 681928 3. 009679 3. 422045 3. 336452 3. 552405 3. 11636  
6. 857017 6. 957361 6. 900727 6. 713373 6. 652679 6. 399908 6. 790787 7. 73104 7. 24388  
4. 514689 2. 782212 3. 293066 2. 786337 3. 750038 2. 898605 3. 705323 3. 699936 3. 936984  
2. 775898 2. 613212 3. 686901 3. 300665 4. 107126 4. 03785 3. 76087 4. 560378 4. 210003

1. 464959 2. 707453 1. 973417 3. 243447 2. 841733 2. 5133 1. 613093 1. 839474 2. 230802  
7. 282701 6. 444262 6. 490995 6. 913726 7. 043254 7. 216909 7. 430007 7. 124567 6. 975805  
4. 27863 4. 357957 1. 605094 3. 557995 3. 282566 2. 789746 3. 09337 2. 720902 3. 035694  
3. 298985 3. 33707 3. 767367 4. 257525 3. 990612 4. 065639 3. 50449 3. 841872 4. 890827  
6. 035275 6. 301239 4. 997287 4. 962802 5. 897225 5. 542132 5. 915995 6. 241671 5. 723088  
7. 817458 7. 937547 7. 62335 7. 348402 8. 069738 7. 133757 7. 992432 7. 741907 7. 811554  
7. 226618 6. 648756 6. 46236 5. 609384 4. 787892 6. 785334 5. 124435 3. 51165 4. 120134  
3. 67117 4. 655394 4. 016463 4. 794009 3. 860843 4. 752483 5. 18365 4. 145302 5. 05039  
1. 48932 2. 245334 1. 960298 1. 533412 2. 344121 2. 034524 1. 373055 1. 824156 1. 985835  
0. 962634 1. 591817 0. 596194 1. 044589 1. 802186 2. 337766 1. 561513 1. 174411 0. 697287  
8. 016904 7. 71797 8. 707161 8. 419866 8. 820063 8. 758074 9. 936749 9. 634724 10. 03699  
2. 204464 1. 489735 2. 379937 2. 609355 2. 178435 1. 510119 1. 730531 1. 782448 2. 168702  
4. 465698 4. 290942 5. 159314 3. 250605 3. 878907 1. 694811 3. 339029 1. 448125 3. 185453  
6. 653914 6. 487296 6. 775353 7. 117667 6. 646672 5. 974594 6. 135361 6. 466343 6. 538793  
3. 139227 3. 300282 3. 572767 3. 844519 3. 254574 3. 313782 3. 093122 4. 11141 2. 766132  
4. 321011 2. 992833 2. 936463 2. 905902 3. 691482 3. 553264 2. 398824 2. 614589 2. 241239  
5. 578592 6. 108279 6. 09114 4. 923917 5. 943506 5. 624944 5. 373398 5. 704889 5. 068413  
4. 433894 3. 50716 4. 331045 4. 700586 4. 779758 4. 261552 3. 459181 4. 960323 4. 618114  
1. 014102 1. 27236 1. 373708 1. 739375 1. 844847 1. 81452 1. 931557 2. 626308 2. 236542  
6. 347882 6. 328067 6. 23082 6. 308062 6. 006221 6. 551908 7. 113295 6. 778511 6. 865636  
3. 796586 3. 550613 2. 149885 2. 510361 2. 360024 3. 376205 2. 300302 2. 042391 2. 926447  
3. 327868 2. 277216 3. 102232 4. 257573 1. 200451 3. 098429 4. 038087 3. 373814 2. 504489  
2. 337637 2. 818292 2. 742346 2. 913134 2. 807698 2. 22356 2. 205089 2. 548499 2. 266587  
4. 025172 5. 40763 3. 920566 4. 153579 3. 89284 3. 282448 3. 723332 2. 866882 3. 553109  
1. 361449 1. 427311 2. 15735 1. 499638 1. 566575 1. 128243 2. 253139 1. 860471 1. 597149  
1. 544486 1. 40023 2. 396456 2. 726856 2. 093306 1. 263902 1. 494101 1. 822191 1. 088867  
4. 617852 4. 450308 4. 338611 4. 737286 3. 425816 5. 232054 3. 929425 4. 152105 5. 029067  
5. 203626 4. 938368 5. 881181 4. 409945 5. 279239 5. 410529 5. 910371 6. 799562 5. 939236  
7. 279382 6. 853425 7. 362803 7. 450749 7. 463812 8. 366276 7. 137599 7. 328186 7. 541628  
2. 949046 2. 67052 2. 724891 3. 721732 3. 154847 3. 916575 3. 944777 4. 235454 4. 312401  
5. 20463 2. 177877 3. 925599 3. 781139 1. 907424 2. 400501 4. 322171 6. 400138 5. 040084  
1. 317258 2. 192565 1. 105467 1. 647444 1. 238443 1. 324759 1. 235291 1. 951453 1. 21093  
1. 860705 2. 04545 2. 069212 1. 46849 2. 53573 1. 808415 2. 295989 3. 676638 2. 675554  
2. 247641 2. 586607 1. 791444 1. 810009 1. 873087 1. 908384 3. 127396 3. 292149 1. 974178  
2. 516445 1. 881412 2. 502161 1. 980546 3. 534096 3. 122177 2. 569097 2. 685471 3. 722919  
8. 299439 8. 547391 8. 336686 8. 057894 8. 643933 8. 252553 8. 87401 8. 854456 8. 54956  
4. 297638 5. 812536 5. 579621 5. 006677 5. 129731 5. 762647 6. 512775 5. 641836 6. 407988  
7. 55591 7. 557591 7. 652522 7. 175979 7. 275495 6. 701924 6. 677805 6. 02063 6. 681831  
5. 174316 4. 022963 5. 459801 5. 127042 4. 942944 4. 519155 5. 368011 4. 913403 5. 4934  
4. 093206 4. 191988 3. 816554 5. 252679 3. 54568 3. 262211 3. 546552 3. 000405 1. 875436  
1. 517393 1. 201195 1. 287078 1. 583915 1. 562356 1. 359844 1. 386367 1. 657138 0. 82591  
5. 687168 6. 139797 5. 808496 7. 059898 6. 354178 7. 058925 6. 916055 6. 984357 6. 172587  
6. 927215 6. 923294 6. 4871 6. 849227 7. 146544 7. 50531 7. 03297 7. 407957 7. 41414  
5. 488716 4. 984923 4. 079979 5. 285587 4. 303917 6. 536693 3. 699159 3. 895483 4. 755707  
6. 457027 6. 225268 6. 586847 6. 205545 5. 561818 5. 001896 5. 865219 6. 390985 5. 848656  
4. 935745 3. 580921 3. 668347 3. 528354 5. 700515 8. 794079 4. 149654 4. 615575 6. 630157  
6. 375176 7. 126543 6. 373455 6. 839339 6. 711327 6. 926773 7. 438794 6. 423447 6. 516908  
8. 813946 7. 786036 8. 511519 8. 461612 7. 924122 7. 566836 8. 020805 8. 218567 8. 02147  
8. 12743 7. 50572 8. 329206 7. 958048 6. 987769 8. 757347 8. 187841 8. 106618 7. 500064  
7. 795295 8. 017758 7. 882304 7. 591545 7. 709798 7. 756035 7. 963336 7. 286967 7. 907849  
7. 282141 6. 51602 7. 684385 6. 972547 5. 94019 8. 102276 5. 040055 7. 529175 6. 935554

6. 833645 7. 864847 6. 819455 6. 868714 7. 161441 7. 390713 7. 15483 6. 917391 7. 000485  
9. 680213 9. 524524 9. 588041 9. 564843 9. 652702 9. 419962 9. 853417 9. 883376 9. 951693  
4. 155304 4. 793043 4. 689855 4. 56425 4. 476208 4. 681701 4. 77695 4. 578829 4. 633852  
2. 183374 2. 792221 3. 329787 3. 096031 2. 410081 3. 571564 3. 356183 4. 035672 2. 505918  
5. 093375 4. 388601 4. 212201 5. 066038 4. 481612 5. 186105 5. 241174 4. 770517 5. 23492  
7. 327699 5. 677099 5. 981409 6. 139867 5. 491026 6. 739728 6. 514261 6. 70235 6. 845551  
3. 650508 3. 707712 2. 936884 3. 205975 3. 600848 3. 304407 4. 582588 4. 61991 3. 892565  
5. 911132 6. 502495 5. 407878 5. 73756 5. 514287 6. 114677 6. 285534 5. 987062 5. 807521  
6. 522773 5. 96145 5. 555263 6. 246215 6. 047633 5. 194901 5. 271218 5. 786635 5. 427383  
8. 886104 8. 298032 8. 718185 8. 944311 9. 242959 8. 592659 8. 733418 9. 675021 9. 553542  
2. 522249 2. 87111 2. 390607 3. 364991 3. 119008 4. 594414 3. 054226 2. 448985 3. 823535  
4. 903537 4. 287027 4. 844636 5. 131115 5. 152397 4. 511489 5. 60559 6. 736441 6. 158021  
7. 038682 7. 642314 7. 225945 6. 763334 7. 195084 7. 171341 6. 646913 6. 53078 6. 926788  
2. 912368 2. 696558 3. 09728 2. 130124 4. 415462 4. 288559 3. 749938 3. 888524 3. 165074  
5. 529953 5. 72655 5. 370168 5. 706016 5. 293334 5. 628932 5. 82676 5. 707795 5. 381358  
5. 820004 6. 143403 6. 234492 5. 822396 6. 577676 6. 430173 4. 903966 5. 898667 6. 060413  
2. 395917 2. 199939 1. 867416 2. 446474 2. 244269 3. 563423 2. 543391 2. 537181 2. 929806  
2. 498132 2. 168866 3. 013425 2. 720604 2. 685347 2. 428065 2. 610994 2. 072398 2. 078905  
4. 035749 3. 452614 4. 090331 3. 016398 4. 606095 5. 176004 4. 433991 5. 629801 5. 189041  
3. 009295 2. 909403 2. 48615 3. 105632 3. 095263 3. 715264 3. 298779 2. 555754 3. 99004  
9. 466677 8. 665542 9. 202278 9. 576454 8. 460149 9. 867586 8. 588538 7. 856456 7. 231031  
2. 645858 2. 968913 2. 425292 3. 213961 2. 952655 4. 925949 2. 386608 2. 193702 1. 862245  
6. 794593 6. 25918 7. 074833 6. 951307 6. 80951 6. 761581 7. 09515 7. 178658 7. 146481  
10. 74527 10. 03937 10. 68393 10. 69343 10. 44907 10. 70802 10. 47426 10. 22027 10. 3855  
5. 941061 5. 449234 5. 52298 6. 325528 6. 613815 6. 35963 6. 428619 6. 263224 6. 25196  
9. 191602 9. 537734 9. 286044 9. 054104 8. 835668 9. 288092 9. 14281 9. 165611 9. 337798  
7. 541727 7. 577288 6. 827692 6. 330553 7. 379756 6. 545817 7. 383472 7. 193586 6. 935193  
6. 259276 5. 953711 6. 837341 6. 787021 6. 897357 6. 852637 6. 296102 6. 981419 7. 376266  
9. 433322 9. 135284 9. 382322 9. 093236 9. 565135 9. 547814 9. 153692 9. 390767 9. 055061  
5. 021371 5. 149953 5. 754524 5. 910727 5. 723792 5. 251833 5. 184733 5. 290247 5. 326244  
7. 749768 8. 211509 7. 808266 7. 695786 7. 748339 7. 551363 7. 898594 7. 637146 7. 570927  
2. 832325 3. 0999 4. 297197 3. 061162 3. 851847 3. 582408 3. 020781 3. 199144 2. 820507  
3. 102466 2. 079595 4. 054021 4. 29674 4. 100681 5. 208697 4. 597305 2. 97625 6. 868755  
5. 26531 4. 236736 4. 311172 5. 768791 4. 5549 5. 363792 5. 803162 5. 320029 5. 289138  
4. 198343 3. 914048 3. 929442 4. 236252 4. 630139 5. 176308 4. 940339 4. 705258 4. 213742  
3. 788683 3. 538485 3. 786031 4. 042329 3. 795716 4. 193079 4. 235182 4. 403221 4. 831078  
5. 731934 6. 017327 5. 670171 5. 800876 6. 396357 5. 613723 6. 352105 6. 299171 6. 244904  
4. 043005 4. 993138 4. 070373 3. 386074 4. 762311 5. 457517 4. 810014 4. 992208 5. 337783  
2. 222912 2. 651091 2. 07732 1. 973639 1. 966816 2. 11978 2. 117223 2. 42957 2. 266506  
3. 956592 3. 11063 3. 107322 3. 976565 4. 230798 3. 926333 3. 218137 3. 763245 3. 931976  
2. 270618 3. 098629 2. 467737 2. 161814 3. 377809 1. 741047 1. 973463 2. 127824 2. 442369  
5. 563687 5. 802167 4. 836927 5. 669424 5. 898476 4. 782586 5. 84479 6. 451046 5. 461264  
3. 579938 3. 243434 4. 100975 3. 461566 4. 220559 6. 830366 6. 552158 4. 69883 6. 231821  
1. 163899 1. 561198 1. 067618 1. 614713 1. 25355 1. 35808 1. 262352 1. 307782 1. 410814  
6. 564212 6. 809085 6. 53152 6. 239266 7. 237818 5. 481935 6. 979629 6. 862746 6. 264819  
2. 344086 1. 044741 1. 313784 2. 408935 1. 427669 2. 957457 1. 232675 1. 352446 1. 769053  
6. 767667 6. 944861 6. 475826 6. 902439 6. 051403 6. 90163 6. 325352 6. 144912 6. 175283  
6. 329004 5. 873396 6. 540471 6. 021272 6. 618926 6. 889544 7. 016386 7. 208132 7. 001752  
6. 746974 7. 102962 6. 375017 5. 842687 5. 83807 5. 829863 6. 326673 5. 763065 4. 899063  
4. 156207 3. 728137 4. 982863 3. 764785 3. 748036 5. 064704 4. 907132 5. 401053 5. 357841  
7. 617757 7. 887204 7. 986008 8. 409249 7. 89251 7. 563099 7. 935395 7. 680793 7. 34271

6. 704447 7. 270163 7. 44148 7. 05889 6. 401441 5. 989509 7. 402195 7. 525855 7. 523802  
9. 054497 9. 431661 8. 911597 8. 827492 9. 400791 7. 988461 8. 100566 8. 078841 8. 327271  
3. 446391 4. 588491 3. 013057 2. 735961 4. 153555 3. 477321 3. 906706 2. 878006 3. 349721  
4. 180684 3. 228854 3. 257477 3. 79636 1. 948445 5. 361172 3. 028051 3. 206097 3. 387046  
5. 731995 5. 818442 5. 9928 6. 122767 5. 779653 6. 680675 5. 703208 6. 132444 6. 05146  
9. 83441 10. 03327 9. 826556 9. 62925 10. 03832 9. 717439 9. 871985 9. 542515 9. 24442  
6. 18818 6. 225185 6. 713923 6. 403921 6. 04887 5. 721537 6. 474664 6. 02795 5. 397479  
5. 514462 5. 024603 4. 470817 5. 332718 4. 011892 5. 352078 5. 859256 5. 695993 5. 315178  
3. 689787 5. 728036 4. 855841 4. 943823 5. 26546 6. 340272 5. 866382 5. 98332 6. 156059  
5. 554578 5. 857319 4. 439946 5. 578089 5. 342831 5. 952463 5. 650543 5. 763532 6. 568907  
5. 517716 2. 893939 1. 822944 2. 867009 3. 139362 4. 60813 2. 366047 3. 450302 5. 222419  
3. 961309 4. 973038 4. 334039 2. 917131 4. 188102 3. 493966 5. 643204 2. 220758 3. 698585  
1. 241972 1. 289971 1. 589147 1. 054009 1. 209286 2. 137646 1. 260938 0. 909589 1. 316807  
4. 035984 3. 393108 3. 225886 4. 070158 2. 902217 4. 784354 3. 931775 4. 503399 4. 310584  
6. 852347 6. 750523 5. 357495 7. 084469 6. 045332 7. 874636 7. 14002 7. 279576 6. 298527  
5. 602043 5. 945271 5. 848493 6. 024265 6. 038334 5. 192609 5. 693578 5. 519382 6. 321324  
5. 959754 6. 484088 6. 422337 6. 435127 6. 309108 6. 019042 6. 406407 6. 264521 6. 473238  
3. 425525 2. 46493 1. 860682 2. 618552 2. 765223 2. 603588 2. 44098 3. 564783 2. 571363  
1. 800448 1. 351761 1. 568312 1. 948356 2. 036403 1. 882109 1. 684824 2. 055812 1. 896113  
3. 660735 4. 232996 3. 515192 2. 89839 3. 175068 4. 031169 4. 228497 2. 532424 3. 260214  
5. 383858 5. 868873 5. 2984 5. 645017 5. 904085 7. 646242 5. 829976 5. 575908 6. 841185  
3. 801548 3. 050486 3. 645422 3. 896144 3. 637717 4. 184144 3. 249118 3. 19147 3. 994615  
7. 121967 6. 940499 7. 112882 6. 659543 6. 956301 7. 027568 6. 893693 6. 533539 6. 982915  
5. 030354 4. 843787 5. 612615 5. 749519 5. 47526 6. 337429 6. 283821 6. 436746 6. 952736  
6. 443712 4. 753018 5. 679758 4. 9604 3. 875882 7. 417322 5. 618153 4. 97516 4. 726971  
7. 035329 7. 91034 7. 612627 7. 926147 7. 713645 7. 816752 7. 640629 7. 35575 7. 839709  
5. 484526 5. 019506 4. 573923 5. 231949 4. 727101 3. 915668 4. 684152 4. 753937 4. 280597  
5. 305685 4. 431806 5. 331774 4. 865471 4. 674825 4. 60939 3. 468467 4. 26288 4. 766707  
3. 234396 2. 495235 3. 11887 2. 82945 3. 665576 3. 970093 2. 895423 3. 507938 4. 444175  
7. 497695 8. 003633 7. 5584 7. 619593 7. 765744 6. 810738 8. 202624 8. 208842 7. 935196  
2. 794015 2. 460632 4. 284547 3. 738617 2. 004978 3. 648161 3. 788078 2. 350298 1. 983554  
1. 64202 2. 013018 1. 803712 1. 521848 2. 212676 1. 69846 1. 691846 1. 818145 2. 076369  
0. 96519 1. 438848 2. 296343 2. 606538 1. 438848 1. 009217 2. 305868 1. 257573 1. 010224  
3. 134959 3. 177523 2. 258914 3. 035822 3. 507997 2. 771469 2. 766981 3. 315101 2. 774763  
1. 754691 1. 609868 1. 100376 1. 665878 1. 160255 1. 30795 1. 694435 1. 502885 1. 534725  
2. 333602 3. 424555 2. 412369 2. 605471 3. 658854 2. 787444 2. 189887 2. 335913 2. 945664  
1. 404951 1. 570152 1. 558158 2. 376987 1. 879504 1. 417788 1. 406813 2. 393438 1. 874143  
1. 183928 1. 435036 1. 426467 2. 26315 1. 482907 1. 891451 1. 287768 1. 743344 1. 337641  
2. 997271 1. 733361 2. 901714 3. 051601 3. 894252 7. 593001 1. 682715 3. 691112 4. 67512  
4. 608336 4. 575275 4. 083283 3. 834098 4. 216626 3. 393365 4. 235514 4. 73962 5. 365122  
5. 218587 5. 78051 5. 322118 5. 720643 5. 221127 5. 210095 5. 914283 5. 369467 5. 417782  
5. 446698 4. 871184 5. 92816 5. 278051 5. 026941 5. 616796 6. 32331 5. 274883 5. 636603  
2. 092853 2. 335142 1. 904484 3. 035904 2. 206371 2. 685664 1. 641557 1. 979394 1. 628527  
1. 024597 1. 153098 1. 444889 1. 124492 1. 339493 1. 673864 0. 825884 1. 61483 1. 157406  
7. 033193 6. 350568 6. 309722 7. 282628 7. 259559 8. 305837 8. 883961 8. 108447 8. 152659  
7. 160937 7. 924866 7. 416315 7. 609058 7. 614088 6. 713232 7. 762294 6. 956249 7. 432328  
4. 242629 3. 633409 3. 680299 4. 776718 3. 88874 3. 84723 4. 999979 5. 621856 4. 935243  
5. 004499 6. 081494 5. 80146 5. 905379 6. 370734 5. 450728 6. 137742 6. 633781 6. 30903  
4. 858383 3. 339892 3. 75147 4. 720001 4. 283908 7. 68777 5. 445151 4. 648487 6. 668993  
5. 646399 5. 511916 5. 585471 5. 674363 5. 543386 6. 226168 6. 308505 6. 072479 6. 734671  
1. 84616 2. 110572 2. 322716 2. 376642 2. 746439 3. 284912 1. 918326 1. 997705 3. 126524

7. 936088 7. 45765 7. 529931 8. 051769 8. 081625 6. 676235 8. 100342 8. 018293 7. 129257  
2. 683545 3. 312859 2. 638698 4. 448041 2. 022336 3. 383174 3. 15442 2. 562398 4. 046206  
6. 124085 6. 535089 6. 70733 6. 40806 6. 290247 5. 818649 6. 593889 6. 099615 6. 680468  
5. 984982 5. 691685 6. 519965 5. 584679 5. 599457 5. 422202 6. 207958 6. 352969 6. 056434  
5. 907379 6. 554664 5. 767205 6. 794538 6. 315447 5. 85505 6. 806238 6. 378285 6. 249271  
3. 855134 4. 120531 2. 993301 2. 138668 3. 752752 4. 119129 4. 958116 4. 617175 5. 544449  
7. 274549 7. 272617 7. 091385 7. 342932 7. 241814 7. 144977 7. 078578 7. 051895 6. 883539  
3. 160485 3. 550978 3. 306033 3. 726325 2. 48229 2. 511198 2. 917989 2. 803437 3. 026758  
6. 468907 6. 055544 6. 490257 5. 287403 5. 886633 6. 255927 5. 976367 4. 700406 5. 044791  
2. 8915 4. 195839 3. 902295 2. 790332 3. 947327 3. 945341 2. 809443 4. 525093 3. 912452  
7. 110285 7. 644166 7. 340808 7. 052539 6. 969995 6. 548363 7. 13198 6. 858242 7. 128975  
6. 919083 7. 410733 6. 235853 7. 222557 6. 766619 6. 720682 6. 640454 6. 341424 7. 029337  
4. 145909 3. 152401 4. 971246 2. 989762 3. 987389 5. 337502 5. 00784 3. 292658 4. 676018  
4. 906833 5. 062972 5. 075838 5. 090409 5. 448811 4. 948884 5. 145857 5. 066652 4. 843965  
4. 885511 4. 687275 5. 224806 4. 478792 5. 253546 4. 310276 4. 367773 4. 339877 4. 795401  
5. 176472 5. 468845 5. 127185 4. 096074 4. 728024 4. 595013 3. 370529 3. 32293 3. 653942  
3. 552964 3. 925379 3. 390725 4. 622572 4. 689131 2. 809229 3. 719123 3. 645479 4. 15232  
2. 217828 2. 856558 2. 721073 3. 104842 2. 058192 2. 682639 1. 986967 1. 71379 2. 782552  
8. 616777 8. 779291 8. 837034 8. 457039 8. 710659 7. 252661 8. 879353 8. 900249 8. 245798  
5. 672281 4. 592287 6. 182675 5. 577194 5. 805614 4. 587788 5. 438212 5. 689372 5. 691554  
2. 472791 1. 255649 3. 677677 1. 49807 2. 948269 3. 594254 1. 79556 1. 953723 1. 562129  
4. 419078 6. 007215 5. 586965 3. 36743 4. 495989 5. 229529 5. 311135 4. 972741 4. 488195  
6. 355501 5. 596555 5. 738931 6. 390248 5. 812062 6. 10575 6. 008466 5. 243974 5. 554058  
7. 127552 7. 069942 7. 107048 6. 636465 7. 01864 6. 799308 7. 350267 6. 960083 6. 875808  
5. 861755 6. 420371 5. 87074 5. 985989 6. 436534 5. 865463 5. 375435 5. 582549 4. 8408  
7. 332223 7. 763543 7. 453654 7. 397056 7. 321938 7. 73087 6. 791085 7. 273864 7. 470758  
5. 220162 6. 501046 6. 040261 6. 936758 5. 136737 6. 648108 5. 62317 5. 937535 5. 561974  
7. 197783 7. 639608 7. 350877 7. 139607 8. 082496 7. 172742 7. 782607 7. 344966 7. 210448  
8. 787627 8. 670967 8. 657062 8. 769016 8. 957723 8. 902041 8. 622921 8. 723836 8. 684233  
5. 209468 5. 276919 5. 919222 5. 724332 5. 228007 6. 042575 6. 532968 6. 065674 5. 244268  
3. 151463 2. 54043 2. 351634 3. 220806 2. 462854 1. 887746 4. 1716 3. 301035 3. 373934  
5. 903763 4. 126399 4. 378697 5. 640659 4. 245764 5. 984381 7. 350567 7. 563293 7. 169474  
4. 423797 4. 684196 5. 518183 3. 315891 4. 106043 5. 166584 5. 297966 4. 555477 4. 735504  
7. 086365 6. 84743 6. 792759 7. 254986 7. 511751 6. 511697 9. 100528 9. 330469 8. 629593  
5. 173316 3. 752745 4. 72178 4. 089251 4. 955811 5. 724613 5. 325648 5. 374427 5. 038649  
5. 47453 5. 870114 6. 075465 5. 866764 6. 337382 6. 322526 5. 892381 5. 881794 5. 703417  
5. 668044 4. 829708 6. 902074 5. 840255 5. 481661 6. 287223 5. 874368 5. 119304 5. 15978  
6. 172288 5. 824938 5. 72104 5. 510024 6. 148391 5. 665849 5. 207357 6. 019341 5. 600849  
4. 499427 3. 660991 3. 77633 3. 93977 4. 241643 4. 454448 4. 516535 4. 445874 4. 454754  
9. 660968 9. 953669 9. 911389 9. 676372 10. 09748 10. 20348 10. 15495 10. 06086 9. 804767  
4. 227154 4. 071163 3. 632029 4. 352947 4. 611389 3. 664916 4. 333801 4. 044574 4. 123478  
4. 812096 4. 865847 5. 332433 5. 296865 4. 693305 4. 883502 5. 343024 4. 342659 5. 445162  
5. 417558 4. 700556 5. 389863 4. 498608 6. 002062 5. 810521 4. 818696 6. 182313 4. 713069  
3. 516884 2. 701753 4. 074458 3. 650277 3. 563071 3. 343688 3. 569509 3. 83462 3. 934346  
8. 397137 8. 498401 8. 124838 7. 979212 7. 931675 7. 791073 7. 757364 7. 557783 7. 94792  
4. 923492 6. 152001 6. 086037 5. 575193 5. 925709 5. 766437 6. 271987 6. 68526 6. 275848  
2. 672873 1. 887916 2. 77346 1. 968601 2. 245531 1. 178116 1. 168471 2. 147713 1. 627525  
5. 804643 5. 159065 4. 258342 5. 963142 5. 407997 5. 795289 5. 329737 5. 084582 5. 626488  
3. 358987 4. 538852 4. 683118 3. 648048 4. 163265 4. 027753 4. 784871 3. 742361 3. 730774  
8. 415906 7. 460194 6. 886928 7. 616281 7. 186256 9. 069117 7. 179273 7. 449185 8. 697364  
6. 165565 5. 988721 6. 61863 6. 210294 6. 513111 6. 056246 6. 464134 6. 771227 6. 626588



6.195964 6.282945 5.439917 6.02406 6.148421 6.388125 5.172455 6.24586 5.657899  
6.977112 6.821912 6.093001 6.449857 5.894077 6.126945 6.89795 6.844049 6.234471  
6.468473 6.496714 6.763899 6.25096 6.902267 5.771534 6.882317 6.249134 6.280426  
3.598984 4.725596 4.27387 3.765751 4.139012 4.436944 4.256923 3.023015 3.859901  
2.952463 2.666416 2.50731 4.151258 2.667258 3.638196 2.386087 3.336052 3.795891  
8.46942 7.58498 8.132804 8.641243 8.052712 7.156374 9.192374 9.035881 9.01217  
6.975207 6.744979 7.087529 6.372861 7.152315 7.027107 6.756973 6.908551 6.851044  
2.037093 1.375978 1.471719 2.829519 1.224786 1.375365 1.394591 1.92759 1.713515  
3.052122 1.753401 4.617884 2.97936 4.012288 3.703313 2.059257 1.541482 2.130864  
2.894423 2.00705 2.574422 3.150143 1.876804 2.103169 1.801336 3.013299 1.854229  
4.456903 4.461572 4.105621 3.794478 3.958087 3.911547 4.188521 3.662678 4.94821  
6.618001 6.270521 6.719704 6.945769 6.286949 6.386041 6.756324 5.981661 6.936231  
7.369477 6.65838 7.016672 6.820079 6.689057 7.539573 7.367133 7.40291 7.343515  
2.329006 2.355358 2.61162 2.937363 2.320629 2.540141 3.171155 1.624737 3.386805  
1.878336 1.811333 1.456255 1.728616 1.602588 1.419506 1.601542 1.44963 1.621065  
5.150599 5.487569 5.959566 5.537857 4.630081 5.707925 5.56548 4.644678 5.428823  
3.578622 4.522575 3.427062 2.9452 3.068142 2.461185 2.951723 2.59618 2.836471  
8.239945 7.9325 8.048956 7.516545 8.41982 7.793926 8.309589 8.083902 8.23762  
2.811346 2.702376 2.202432 3.1504 2.652584 2.918934 4.033545 3.618449 3.27732  
5.804376 5.503451 6.096545 5.622198 6.224602 6.186701 6.477674 7.521997 7.325158  
5.010843 4.399139 4.090848 4.301554 3.947096 4.626035 5.406913 5.21945 4.80006  
4.222037 4.753265 5.275418 5.450616 4.681786 4.404721 4.742284 4.396291 5.140008  
1.475241 2.12579 1.256972 2.488379 2.114769 4.040844 1.740743 1.648688 2.711274  
6.563959 6.853755 6.618967 6.661489 6.852838 6.682246 7.021948 6.268976 6.567484  
1.57678 1.91447 2.09626 2.313046 2.277033 2.308416 1.731867 1.666807 2.690118  
2.510883 2.351375 1.921838 2.446977 1.502841 3.130412 1.928543 2.422018 2.217992  
2.84946 2.929629 3.63003 3.040706 3.265456 3.015466 2.886682 3.434943 3.193293  
2.973932 2.251362 2.864987 3.49302 3.877094 3.261341 2.653532 2.927297 3.630457  
1.86491 3.061624 1.917814 2.977543 2.651728 3.098678 2.272552 2.845047 2.449816  
3.433093 4.134867 4.536384 4.182036 4.608561 4.118158 3.9685 4.413689 4.737892  
0.96646 1.347364 2.069765 2.076826 1.513738 1.419568 2.075609 1.734907 2.369064  
6.294269 6.277771 6.944655 6.329199 6.192369 7.420713 6.43499 5.744489 6.369719  
4.302746 2.123108 4.476329 2.830261 2.873105 2.743228 4.346206 2.790427 4.381212  
5.197855 4.734102 5.760023 5.069874 5.674081 5.16441 4.217672 4.50006 4.836451  
7.34972 7.929454 7.829444 7.278467 6.832546 7.177179 7.449148 6.950906 7.191412  
9.95012 8.872896 9.679629 9.578855 9.958686 10.67976 10.46158 10.63644 10.86925  
4.914831 5.479037 5.377058 4.394906 5.139354 5.497661 5.734926 5.763648 5.097546  
6.670182 6.373982 6.596308 5.881034 6.60434 6.556637 6.986667 6.715947 6.67804  
6.339177 6.728178 6.333785 5.644902 6.266331 4.974863 6.59819 6.225645 6.875196  
6.225595 6.954475 6.476108 5.305928 6.811583 6.464285 6.353645 6.540021 6.664832  
3.289892 3.690803 2.743008 3.790341 2.88727 3.732921 4.057972 3.302284 3.600734  
3.890893 3.095412 3.212275 3.150875 3.210951 2.443244 3.430234 2.571638 2.685605  
7.471195 7.513863 7.425331 6.878489 7.413832 6.928953 7.127216 6.795995 6.861574  
3.811507 6.146171 5.45256 4.646341 5.229934 4.231558 4.797541 4.460757 5.384321  
5.643658 5.817848 5.211912 3.732855 5.160269 4.536238 4.771137 5.144105 5.969349  
4.330011 4.030343 3.661149 4.506503 3.744694 4.478738 4.008231 3.31596 4.510943  
2.032555 2.673312 3.028737 2.655549 2.0499 6.378276 2.651006 2.398279 2.596535  
10.52805 10.33464 10.36235 10.0351 10.39329 10.65344 10.29192 10.34453 10.13319  
3.798888 2.997414 3.564046 3.797501 3.412132 4.031626 4.141708 3.465774 3.559628  
4.676738 5.084751 4.559191 4.701765 3.878579 5.066567 5.455836 3.601046 3.940698  
2.05172 2.139851 2.179867 3.22012 2.61184 2.562489 1.765753 2.282592 2.206907

1. 86414 1. 643464 1. 462667 2. 098866 1. 241205 1. 469387 1. 578862 1. 331376 1. 845136  
5. 807592 4. 9475 5. 069585 5. 357611 4. 988249 7. 110943 5. 485175 5. 333632 5. 237974  
3. 278094 3. 321103 2. 500191 2. 204393 3. 393358 2. 871379 4. 166527 2. 859589 3. 457429  
8. 961441 9. 823942 9. 286765 9. 026117 9. 660167 8. 190094 9. 850257 9. 821891 9. 708251  
7. 169637 7. 464967 7. 199372 7. 07411 7. 56399 7. 077687 7. 572159 7. 931233 8. 106142  
3. 298292 2. 692345 2. 692416 3. 416003 2. 618361 5. 204578 4. 368073 3. 235361 4. 309789  
4. 445488 5. 055855 5. 390978 4. 301762 5. 116215 5. 640229 4. 117088 3. 879696 4. 727368  
4. 175516 3. 171712 2. 950071 3. 539494 3. 393799 3. 99082 3. 560349 5. 017847 4. 372769  
2. 82615 1. 860166 2. 027663 1. 956135 1. 678502 2. 874812 1. 736514 2. 068557 2. 010628  
2. 943421 1. 694431 2. 525115 1. 721736 2. 22978 2. 009671 2. 011211 2. 117446 1. 904686  
4. 266894 3. 936632 3. 656039 4. 814018 3. 844232 2. 080933 4. 133275 4. 115179 4. 026503  
3. 06073 2. 428205 2. 929276 2. 093435 2. 716502 2. 629518 3. 103189 2. 509837 3. 732775  
3. 366699 2. 564205 3. 467059 3. 099769 3. 291213 3. 199857 3. 62638 3. 394398 4. 311585  
1. 426289 1. 202573 1. 661903 1. 515904 1. 48802 1. 30225 1. 340488 1. 408525 1. 304204  
3. 616772 2. 683225 3. 895967 2. 609344 3. 075175 3. 639211 3. 349113 4. 927144 3. 686933  
9. 853727 10. 05592 10. 41905 10. 41869 10. 51762 10. 07906 10. 85969 11. 20103 11. 12205  
3. 471453 3. 179168 3. 521888 4. 158822 3. 744734 6. 510203 3. 12295 3. 282434 3. 612341  
8. 033034 7. 929928 7. 884896 7. 862176 8. 277739 8. 166734 8. 549854 8. 360481 8. 387798  
3. 373205 2. 547461 3. 794597 3. 735358 3. 204272 2. 929429 3. 231174 3. 225913 2. 711727  
3. 200165 2. 231436 3. 695696 2. 958236 2. 378538 3. 298143 3. 504802 4. 220265 3. 630227  
6. 190695 5. 799043 5. 215824 5. 893048 5. 891403 5. 086752 5. 627808 5. 859784 5. 201254  
5. 653385 5. 586433 6. 281696 5. 638265 6. 654335 5. 860548 5. 827361 6. 180336 6. 060608  
4. 825439 4. 503726 4. 599544 5. 106372 5. 006282 5. 403529 5. 31087 6. 432341 5. 435699  
3. 278085 3. 212523 2. 628276 3. 302758 3. 104183 3. 61359 2. 661525 2. 095678 2. 538324  
5. 995557 5. 140121 5. 749167 5. 633333 6. 024565 8. 053611 7. 770605 7. 606021 8. 367652  
3. 971178 2. 918646 2. 445551 2. 870098 3. 956164 4. 231689 4. 494116 5. 064263 4. 590622  
6. 089862 5. 752652 5. 254859 5. 520889 4. 96931 4. 774617 5. 737568 6. 04033 5. 919608  
4. 676049 4. 049169 4. 564912 5. 461266 4. 918454 4. 989056 5. 793564 5. 729526 5. 76869  
6. 800587 7. 647716 6. 859957 7. 188135 7. 915052 6. 61588 7. 134291 6. 152277 5. 639473  
5. 746615 4. 753042 5. 576826 5. 747205 5. 397996 6. 131569 5. 429031 6. 042592 5. 925238  
5. 496178 5. 849804 5. 093504 5. 848324 5. 5207 5. 725735 6. 024471 5. 407307 4. 906764  
5. 842861 5. 681955 6. 437325 6. 711138 5. 956243 6. 065739 6. 627464 6. 54842 7. 112167  
5. 088015 6. 969973 6. 074904 5. 717881 5. 283996 4. 10095 5. 498443 5. 821073 5. 373381  
6. 391547 6. 741056 6. 104101 6. 410115 6. 857615 5. 295054 6. 908803 6. 315367 6. 735609  
6. 787119 6. 645599 7. 642482 8. 240208 7. 595258 8. 269869 8. 951676 9. 099104 8. 828327  
5. 092168 3. 993812 5. 403161 5. 054493 5. 333479 5. 431457 5. 42742 6. 202059 6. 26079  
5. 884806 5. 348773 5. 536031 4. 524105 6. 062559 5. 359761 6. 002734 5. 414848 6. 358871  
8. 614791 9. 143059 8. 65726 8. 813203 8. 518041 8. 638798 8. 509794 8. 246342 8. 720366  
3. 018943 3. 207442 3. 497239 3. 183641 3. 55205 2. 889496 3. 997802 3. 119573 2. 977968  
4. 932735 4. 844922 5. 462166 5. 568738 4. 836694 5. 561959 5. 127103 5. 901812 6. 067243  
4. 362169 4. 722536 4. 963215 4. 633665 5. 415179 5. 498064 5. 093241 4. 984711 5. 324068  
5. 440447 6. 024573 5. 216069 5. 565284 4. 989835 4. 948699 5. 227001 5. 555449 5. 449231  
1. 67761 1. 90481 1. 744592 2. 025681 1. 925177 2. 347479 1. 604531 1. 391647 1. 622511  
7. 966885 8. 18836 8. 396709 8. 24528 8. 826773 6. 409868 8. 594374 8. 431422 8. 812517  
4. 811215 5. 405435 5. 282431 4. 475818 4. 30596 3. 91594 6. 14615 5. 45838 5. 324096  
5. 386013 6. 888885 4. 782998 4. 38805 3. 951716 4. 156438 5. 759502 5. 477619 6. 152494  
5. 736725 6. 183582 6. 448584 6. 179005 6. 032174 6. 088354 6. 351883 5. 732114 5. 954768  
4. 261943 3. 648395 4. 125286 4. 216261 3. 351512 4. 13224 4. 251423 4. 313569 4. 119916  
5. 816352 6. 396764 6. 328891 6. 286867 5. 760384 5. 394875 6. 231245 6. 033919 6. 00365  
5. 490199 4. 376265 5. 080146 5. 394607 5. 706051 5. 205792 5. 653586 5. 5769 5. 93416  
2. 840499 2. 834438 2. 690234 3. 228025 2. 859582 2. 413881 2. 668728 3. 123917 2. 641721

4. 193374 4. 075386 4. 294767 4. 652714 4. 647373 4. 120362 4. 804076 4. 406875 5. 320087  
8. 202288 8. 301214 7. 880786 8. 508388 8. 35479 8. 241819 8. 781168 8. 307903 8. 607345  
3. 643809 3. 998586 4. 682739 3. 354426 3. 476838 3. 903873 4. 34092 3. 96764 3. 676878  
6. 142037 4. 882154 6. 149645 6. 358557 5. 845833 5. 829622 6. 138087 5. 970547 5. 252436  
9. 324016 8. 638445 8. 885239 9. 117125 8. 797272 8. 952509 9. 17141 9. 1223 8. 934382  
9. 229958 9. 5624 9. 212594 9. 084807 9. 138931 9. 508361 8. 923493 9. 282579 9. 255234  
6. 425013 7. 092033 6. 951036 6. 781305 6. 58341 7. 243658 6. 777594 7. 175286 7. 022907  
7. 460075 8. 323283 8. 622338 8. 02953 7. 76695 6. 491764 9. 008255 9. 088964 9. 303055  
4. 686339 3. 732426 3. 97368 4. 893943 5. 446257 4. 47244 5. 09084 5. 100458 5. 829913  
1. 636039 1. 412526 2. 041081 1. 626699 1. 694577 2. 378745 3. 419952 1. 524316 1. 833158  
2. 752132 3. 527539 3. 812852 3. 768692 3. 276471 5. 08102 3. 698439 4. 823821 4. 754177  
3. 519025 4. 107518 3. 4359 3. 358643 4. 255257 4. 092381 4. 551416 5. 073465 4. 965076  
4. 764878 3. 716519 4. 405278 5. 479348 4. 570936 4. 767965 5. 743842 4. 605362 4. 442691  
8. 604438 8. 914728 8. 505408 8. 532465 8. 171328 8. 323294 9. 168947 8. 583577 8. 716993  
4. 230414 3. 15634 3. 347271 3. 531727 4. 547996 3. 573036 3. 457659 3. 303029 3. 204471  
6. 179478 6. 29297 6. 313213 5. 80541 6. 066169 6. 65242 7. 124147 6. 609908 6. 674732  
2. 258147 2. 124914 2. 737259 2. 29076 1. 836539 2. 588695 2. 552742 2. 682834 2. 1743  
3. 988565 4. 618178 4. 671385 5. 046756 4. 126268 5. 103285 5. 358478 5. 97793 5. 482448  
6. 07834 6. 726714 6. 585826 5. 859033 6. 514702 7. 126574 6. 655901 6. 107756 6. 170105  
6. 220389 5. 803693 5. 364995 6. 608349 5. 767784 5. 880964 5. 618281 6. 359397 6. 724385  
4. 464912 4. 048017 3. 599268 4. 787018 4. 084298 4. 432843 4. 692855 4. 630126 4. 948086  
6. 740602 7. 85641 6. 760453 6. 707889 6. 81035 5. 930606 6. 90421 7. 008723 6. 939478  
5. 753292 5. 042048 5. 494289 6. 40345 5. 120481 5. 112452 6. 26995 5. 243332 6. 116811  
1. 199496 2. 198403 1. 396906 4. 123578 2. 017177 2. 182964 2. 48989 3. 333757 2. 489846  
1. 882454 3. 106474 2. 570695 2. 450174 1. 921356 1. 901789 2. 067567 1. 722907 1. 923444  
5. 346044 4. 898519 5. 186577 4. 452444 5. 567102 5. 201435 5. 161971 5. 584526 5. 377352  
4. 574239 4. 194852 4. 968818 4. 481587 5. 062371 4. 886249 5. 805908 4. 227743 5. 262325  
4. 974561 5. 078867 4. 681497 6. 156756 5. 280854 4. 766806 6. 320768 6. 390602 5. 745288  
5. 930947 4. 805266 4. 796862 4. 659922 4. 245991 5. 655302 6. 224572 6. 002033 6. 071136  
4. 923297 4. 327053 4. 367388 4. 127301 4. 314123 5. 721526 4. 282794 4. 038519 3. 833857  
3. 566187 3. 597242 3. 929856 3. 357088 4. 10825 3. 968791 3. 766751 3. 871053 3. 842639  
2. 923243 4. 79703 3. 166272 2. 873029 5. 086786 2. 487245 5. 727734 5. 742327 5. 677259  
1. 431773 2. 377867 2. 426719 1. 917813 1. 574906 1. 739009 1. 52218 1. 551373 1. 730195  
2. 164892 0. 637571 1. 20596 0. 705343 1. 034697 4. 194274 1. 824853 1. 001424 1. 245321  
3. 700409 4. 966907 4. 525065 4. 231977 4. 757275 3. 603883 3. 80317 4. 556854 4. 617278  
2. 402188 3. 896467 2. 050367 1. 773805 2. 65826 2. 177866 1. 445586 1. 617812 3. 761789  
8. 346877 8. 176643 7. 618398 7. 915729 7. 878369 7. 586216 8. 423469 7. 919942 8. 87513  
1. 8434 1. 281906 2. 243543 2. 892646 2. 363873 2. 183516 1. 457427 1. 529966 2. 477583  
2. 599824 1. 879095 2. 521711 1. 778954 2. 594997 3. 764124 2. 554036 1. 977923 2. 37676  
4. 00429 4. 610184 4. 37445 3. 95733 3. 713025 4. 909578 4. 127645 4. 504129 5. 348728  
5. 995005 6. 15603 7. 295026 7. 40988 7. 704848 7. 897675 7. 595402 7. 557024 7. 358632  
3. 468543 3. 045294 3. 102563 3. 045904 3. 061977 3. 584713 4. 101145 3. 288833 2. 938914  
5. 150979 5. 317226 5. 238831 5. 642219 5. 304108 4. 763728 5. 032341 5. 535488 5. 531111  
5. 245061 4. 501261 4. 639713 5. 171128 5. 623863 5. 499459 6. 107204 5. 535891 5. 768584  
6. 659147 6. 532135 6. 65263 6. 418051 6. 465977 6. 193828 6. 092465 6. 269614 6. 183237  
4. 690956 2. 61028 2. 42335 3. 182774 2. 267059 4. 411225 2. 633284 1. 928792 2. 529194  
4. 089624 3. 272265 3. 866663 3. 575982 3. 490227 2. 429714 3. 589715 4. 052792 3. 487025  
5. 509714 6. 069005 5. 043449 5. 047099 4. 903703 3. 980517 4. 114786 4. 912822 4. 106569  
5. 84003 5. 683581 6. 040937 5. 411715 5. 323085 4. 991213 5. 403015 4. 314303 4. 929208  
5. 830733 5. 135547 5. 141348 6. 192005 5. 239432 6. 540326 6. 75354 7. 581194 7. 332112  
3. 400605 3. 139532 2. 993534 2. 671721 3. 705215 3. 364922 3. 528763 4. 790791 4. 37993

5. 486887 5. 224077 5. 421521 5. 318552 5. 659 5. 328931 5. 777416 5. 800175 6. 07266  
1. 598042 1. 792127 2. 356048 2. 005807 1. 863313 1. 511005 1. 885182 1. 700688 1. 829167  
6. 736362 6. 432265 6. 576627 5. 673878 5. 957596 5. 875709 6. 360686 5. 813196 6. 361922  
2. 998077 2. 886502 3. 451673 3. 169724 3. 688242 3. 292685 2. 996301 2. 844794 4. 043043  
5. 378579 5. 490176 6. 090075 3. 978266 5. 229327 4. 857099 5. 26495 5. 677363 5. 879966  
5. 310749 5. 956794 5. 735166 5. 354755 5. 639926 5. 577203 5. 626636 5. 519833 4. 719394  
6. 329012 6. 741861 6. 488281 7. 113235 6. 928834 6. 60822 6. 592663 6. 091584 6. 584856  
5. 308663 4. 433078 4. 196153 5. 546055 5. 454662 5. 748155 6. 470208 4. 773628 5. 451073  
8. 336267 8. 612844 8. 825362 8. 622541 8. 810994 6. 155128 8. 24307 8. 427591 8. 389819  
2. 462275 2. 079207 1. 420275 2. 89579 1. 692108 2. 799211 1. 728928 2. 196164 2. 069433  
3. 063192 2. 604383 3. 038178 2. 381399 3. 011462 2. 066061 3. 074401 2. 512308 3. 112527  
8. 619962 9. 37626 8. 948124 8. 621311 8. 664103 8. 009072 8. 997045 8. 836575 8. 616469  
7. 114817 6. 476544 6. 898434 6. 007119 6. 567451 6. 574076 6. 870986 6. 677957 6. 080369  
5. 12502 4. 416286 4. 874154 5. 081509 5. 941576 5. 057722 5. 404233 4. 106985 5. 168008  
5. 523362 7. 017542 6. 35081 6. 145672 6. 129157 6. 411346 6. 966228 6. 330399 6. 616905  
5. 929089 5. 175923 5. 99338 5. 75021 5. 336966 4. 713742 6. 974248 6. 446372 6. 697836  
7. 614497 7. 693119 7. 405197 6. 468827 8. 143232 7. 706404 8. 315667 8. 021321 8. 15853  
6. 702334 6. 303908 6. 835764 6. 513957 7. 373476 6. 174943 6. 60026 6. 465236 5. 998749  
3. 346996 3. 040963 3. 517233 2. 673438 3. 106456 3. 061481 3. 522766 3. 119612 3. 184157  
6. 834147 7. 026063 6. 873761 6. 31406 7. 289333 6. 360007 6. 581666 6. 416807 6. 325065  
7. 240488 7. 727278 7. 581298 7. 57002 7. 450696 7. 388484 7. 983473 7. 453889 7. 793724  
6. 247834 6. 522197 6. 34753 6. 072325 6. 487073 6. 411735 6. 452607 6. 220989 6. 533707  
7. 177373 6. 847128 6. 747787 6. 372557 6. 328821 6. 689062 6. 953156 6. 002866 6. 607946  
3. 877638 4. 944386 4. 492461 2. 675474 3. 244766 4. 245356 5. 379898 5. 08827 5. 142924  
4. 549663 3. 131859 4. 823042 3. 241854 4. 909572 5. 278521 3. 041158 3. 157326 5. 312519  
5. 507309 6. 338898 4. 603693 5. 690367 5. 318615 5. 8064 4. 346133 4. 627576 4. 965363  
5. 233934 6. 095569 5. 689121 5. 963286 5. 863136 5. 294734 6. 259148 6. 055726 5. 787952  
6. 226399 5. 861537 5. 839014 5. 434806 5. 193103 5. 692809 5. 291707 5. 575761 5. 775683  
6. 583886 5. 760236 6. 514681 6. 586113 5. 801929 6. 641574 6. 467172 6. 603328 5. 903558  
3. 817779 3. 410885 3. 123839 4. 134674 3. 05566 3. 543535 3. 348432 4. 010525 3. 809904  
6. 587665 7. 441553 6. 479548 7. 405777 6. 262494 6. 698083 7. 117487 6. 693035 6. 973262  
1. 916723 1. 476848 1. 723088 1. 763891 2. 35382 2. 212738 2. 944885 2. 035083 1. 653392  
3. 704378 2. 573963 3. 066323 3. 709484 3. 257991 3. 341939 3. 173477 3. 065192 3. 445566  
1. 370235 1. 502334 1. 591968 1. 764083 1. 512764 1. 696782 1. 280924 1. 946597 1. 861695  
2. 520797 1. 804703 2. 564852 3. 056946 3. 688404 2. 578116 2. 478748 2. 890549 2. 397401  
4. 106586 4. 106604 4. 446115 3. 892726 3. 888055 4. 233261 4. 623911 4. 215248 4. 745426  
4. 680794 5. 028406 4. 915112 4. 488751 4. 827647 5. 033613 5. 365118 5. 669091 5. 119118  
6. 668199 6. 667278 6. 307764 7. 159871 6. 544069 6. 754422 6. 502365 7. 164757 6. 348724  
6. 937355 7. 288219 7. 580826 7. 130723 7. 245401 7. 634181 7. 365541 7. 493831 7. 399603  
2. 439163 2. 490083 2. 071781 2. 065696 2. 122911 3. 284157 1. 748515 3. 867153 3. 782384  
8. 382328 9. 195693 8. 738647 7. 559066 8. 257749 7. 544827 7. 910197 8. 174441 8. 957118  
6. 005702 5. 93904 5. 499822 5. 815622 6. 540332 5. 775012 7. 013239 6. 995076 6. 762908  
4. 359834 3. 012668 2. 211459 2. 952127 3. 405421 2. 787912 5. 100271 2. 938304 3. 011987  
2. 836861 2. 615084 3. 010832 3. 331061 2. 582487 2. 461365 3. 228723 2. 90337 2. 852198  
4. 078096 3. 821257 4. 214289 4. 413497 3. 289667 3. 246229 5. 814849 5. 014317 6. 268273  
3. 813889 3. 607308 3. 317509 2. 819939 3. 177159 3. 309189 2. 968979 3. 766645 3. 721908  
2. 683948 2. 94416 3. 129119 3. 333281 2. 547473 3. 225904 2. 849632 3. 658064 3. 349437  
2. 345281 2. 375643 3. 53273 2. 402852 2. 610174 2. 882195 3. 176347 2. 981804 3. 999259  
3. 329579 3. 254647 2. 980382 3. 537979 4. 408273 4. 671295 4. 437227 2. 979955 4. 717376  
4. 142757 3. 310836 4. 333549 3. 808453 4. 709886 3. 06031 3. 658996 4. 400858 4. 443719  
6. 815613 7. 197783 6. 996497 6. 766885 6. 994737 6. 711534 7. 255223 7. 387891 7. 175278

4. 752132 3. 726571 4. 082532 3. 328449 3. 048364 4. 325821 3. 790738 4. 312579 4. 444432  
1. 760836 2. 01333 1. 52006 1. 827793 1. 610062 0. 902393 1. 529191 2. 243227 2. 376981  
6. 026472 5. 925315 6. 176046 5. 580413 6. 628473 4. 96757 5. 755206 6. 006137 5. 954838  
2. 238648 2. 415242 2. 475049 2. 234266 3. 032076 1. 912973 2. 149201 2. 773962 3. 076904  
3. 459524 3. 322426 4. 033275 2. 169869 4. 033147 3. 729125 2. 65998 4. 125419 4. 084727  
6. 187853 5. 92396 6. 350943 6. 413033 5. 642709 6. 112247 6. 490025 6. 107311 5. 924664  
1. 599139 1. 867194 1. 963902 1. 976428 2. 115293 2. 269639 1. 965897 1. 999306 1. 474613  
3. 317937 3. 728691 4. 427784 4. 131051 3. 170156 3. 520152 3. 507842 3. 371576 4. 166926  
6. 687678 7. 028059 7. 842278 7. 27698 8. 12456 6. 542637 7. 686055 7. 982196 7. 940287  
3. 666514 4. 35443 4. 388041 5. 640156 4. 332035 4. 574002 4. 703942 4. 358227 4. 233508  
5. 400015 5. 473221 5. 259879 5. 58899 4. 959907 5. 824906 5. 925978 5. 665821 6. 070827  
4. 020864 3. 178301 2. 005548 3. 390633 2. 777182 4. 471415 3. 059786 1. 975706 2. 432997  
4. 058832 4. 848835 4. 181215 4. 031411 5. 127247 3. 6671 3. 861877 4. 442519 4. 020813  
5. 794571 6. 105337 6. 292405 6. 307895 6. 150759 6. 459819 6. 328813 6. 651716 6. 837055  
6. 524964 5. 674331 6. 960493 6. 674453 6. 692168 6. 87785 7. 435497 7. 695264 7. 795397  
4. 783926 4. 893735 4. 63239 3. 922908 4. 007215 4. 22661 5. 786498 4. 628966 4. 838344  
6. 010942 5. 102471 5. 224828 4. 491906 5. 331388 4. 153215 4. 943657 4. 523048 4. 256653  
3. 266376 3. 949484 3. 834121 3. 347156 3. 900962 4. 11859 3. 638493 4. 048679 3. 62704  
4. 932613 6. 344536 6. 374906 5. 68164 6. 298814 6. 506865 6. 66954 6. 549376 6. 066195  
6. 949618 6. 864355 7. 155421 7. 102042 7. 246166 6. 806765 6. 89782 7. 350225 7. 356252  
1. 700954 1. 397474 1. 273572 1. 893467 1. 296732 1. 612989 1. 758094 1. 344633 1. 334001  
5. 245145 6. 281486 6. 415013 5. 439937 5. 773913 5. 949616 4. 856095 6. 26589 5. 804508  
6. 761366 6. 953331 6. 426749 5. 888819 6. 435462 6. 187471 6. 685882 6. 124708 6. 424609  
6. 084065 6. 443601 4. 983973 4. 858482 4. 570094 6. 723393 5. 635259 4. 616462 4. 872096  
2. 316059 2. 72366 2. 472479 3. 492216 2. 891677 4. 105936 2. 113427 2. 568074 2. 433102  
5. 357731 5. 437485 7. 086646 7. 430557 6. 59417 5. 614136 8. 187291 7. 278577 7. 464813  
5. 191979 4. 370952 3. 611378 3. 902783 3. 210285 3. 701072 4. 065333 4. 324285 3. 672393  
5. 413964 4. 394168 4. 575611 4. 303549 4. 711633 5. 640029 5. 447113 5. 738345 6. 245313  
6. 129983 6. 945821 7. 061241 6. 454414 7. 024407 6. 719529 7. 308001 6. 177283 7. 188368  
2. 12913 2. 489641 2. 245119 2. 349985 1. 796081 1. 733687 2. 474886 2. 27048 2. 552875  
1. 997526 1. 630814 2. 548382 2. 040413 1. 435273 1. 858005 1. 306406 1. 834027 2. 096987  
4. 930042 4. 589876 5. 225689 3. 833968 3. 665434 3. 872222 4. 339114 4. 517891 4. 269466  
4. 77398 5. 11926 4. 251605 3. 979867 4. 443524 4. 837658 4. 54384 3. 473261 2. 832176  
6. 092395 7. 034058 6. 92262 6. 977977 5. 945846 5. 604253 6. 49335 6. 638432 6. 677616  
2. 222723 1. 875693 2. 143184 2. 345913 1. 385621 3. 116774 1. 960419 1. 846377 1. 499057  
6. 529759 7. 484235 6. 875254 7. 245311 7. 556171 6. 092563 6. 355869 6. 475808 6. 759742  
1. 821175 2. 094346 2. 262924 1. 750561 1. 956157 2. 205731 1. 595932 2. 292305 1. 339125  
7. 154977 6. 817112 6. 283122 6. 995206 7. 83034 7. 932485 7. 103028 7. 614784 7. 522815  
4. 510667 3. 439537 3. 959435 3. 692648 4. 263926 3. 929009 3. 982908 5. 175296 3. 790871  
4. 287611 3. 732966 3. 89846 4. 583225 4. 264694 4. 305573 4. 723853 4. 857442 4. 905944  
6. 327963 6. 968907 7. 074288 6. 824794 6. 979109 6. 89397 6. 861063 6. 812125 6. 767944  
2. 361755 2. 224632 1. 71852 2. 505201 2. 248183 2. 020438 2. 598811 1. 952108 2. 222179  
6. 154644 6. 594991 6. 070843 5. 980694 7. 338243 5. 564222 7. 643762 8. 024975 6. 941689  
4. 020638 4. 690045 4. 126273 4. 299882 4. 309044 4. 383425 4. 702696 5. 155557 3. 864915  
1. 790049 1. 561187 1. 505525 1. 03432 1. 479445 4. 051934 3. 122692 2. 358911 1. 476718  
3. 496541 3. 2827 1. 892344 2. 071317 2. 321602 4. 368905 2. 897184 1. 903882 4. 012876  
6. 65373 6. 807663 6. 882118 6. 342354 6. 747015 6. 763607 6. 192048 5. 967964 5. 830701  
1. 470215 1. 254088 1. 005655 1. 79976 1. 361299 1. 601818 0. 980549 1. 362702 1. 518909  
6. 38563 6. 521151 6. 415388 7. 147468 6. 328535 7. 104115 6. 865846 6. 591493 6. 461951  
4. 848329 3. 755289 4. 987468 5. 46461 4. 622787 6. 498032 5. 337025 5. 34968 5. 270682  
5. 178632 4. 996861 5. 461418 5. 599474 5. 623585 4. 543764 6. 605585 4. 927979 5. 436445

8. 371811 5. 329554 6. 221229 5. 998239 5. 037792 5. 459733 4. 702785 4. 175778 3. 31886  
1. 56617 1. 755109 1. 496747 1. 479443 1. 319435 1. 511736 2. 158689 1. 449006 1. 825516  
3. 135978 2. 861792 3. 249182 4. 101882 2. 853658 5. 630884 4. 431781 3. 169888 3. 106725  
7. 960895 7. 997542 8. 193288 8. 011982 7. 835083 8. 010804 8. 107235 7. 828593 7. 957087  
5. 023457 5. 335369 5. 698828 5. 612229 5. 411415 6. 199609 5. 84634 5. 402429 6. 049104  
7. 019965 6. 997161 7. 088243 7. 146838 7. 379724 7. 123535 7. 472692 6. 785664 6. 753579  
8. 056424 7. 076422 7. 283691 7. 728089 7. 738749 7. 081055 7. 641695 7. 805352 7. 35999  
4. 207389 2. 3699 2. 982205 1. 728418 1. 96351 1. 921165 2. 178856 2. 76355 2. 030586  
4. 335728 3. 030265 2. 449845 4. 396068 2. 396405 4. 760413 4. 19053 2. 690291 2. 512461  
6. 754295 6. 894377 6. 659387 6. 411008 6. 523627 6. 327153 6. 13325 6. 613848 6. 31408  
4. 968819 4. 154359 4. 886115 4. 97693 4. 667544 5. 395458 4. 621902 4. 031613 4. 582013  
5. 624725 6. 727441 5. 894342 6. 345597 6. 22997 4. 94153 6. 48886 5. 307751 5. 63674  
6. 371046 7. 678921 6. 409302 7. 66735 7. 578819 6. 300542 6. 957343 6. 651256 7. 817466  
7. 818389 8. 206529 7. 977401 7. 896211 7. 957975 7. 73302 8. 089407 8. 060074 7. 976749  
5. 038418 3. 611684 3. 49455 4. 466843 4. 460863 4. 836195 3. 944861 4. 277458 4. 563019  
3. 167967 2. 9286 3. 004133 4. 132824 3. 809794 4. 251509 4. 662213 3. 158367 4. 512587  
1. 504491 1. 451189 1. 502238 1. 021628 1. 208099 1. 583652 1. 477786 1. 154898 2. 060549  
5. 175917 5. 660806 4. 837861 5. 38232 4. 157331 4. 517957 5. 226414 4. 309328 4. 752915  
2. 422881 2. 942758 3. 175515 3. 129156 2. 314089 3. 293367 2. 650902 2. 372149 2. 300732  
3. 585454 4. 440685 4. 640462 5. 632654 3. 624458 4. 747415 4. 375559 6. 147274 6. 400833  
9. 350907 10. 06361 9. 897859 9. 537276 9. 855839 9. 030968 8. 716782 8. 876469 8. 982425  
7. 450711 7. 807819 7. 307579 6. 367589 7. 707235 6. 097828 6. 840398 6. 086914 6. 152765  
5. 484583 6. 582362 5. 808524 5. 90737 6. 124316 5. 522245 6. 316216 5. 700584 6. 096262  
4. 734013 4. 835509 4. 813081 4. 8642 4. 709893 4. 622927 4. 732594 4. 857782 5. 011025  
6. 394026 6. 192663 6. 243893 5. 549646 5. 92244 5. 816176 6. 080189 5. 948409 5. 337255  
9. 524099 9. 5242 10. 02232 9. 806236 9. 854776 9. 035109 9. 864892 9. 335545 9. 45369  
2. 258297 2. 085899 1. 632705 1. 577956 1. 835932 2. 038174 1. 820049 1. 86104 1. 957266  
4. 3768 4. 162968 4. 908666 5. 588167 5. 261809 4. 908154 4. 860742 5. 083365 5. 579938  
5. 735141 5. 80148 5. 573732 4. 536787 6. 09598 4. 432324 5. 739579 5. 717426 5. 223497  
5. 042204 4. 086183 4. 228094 5. 056997 4. 724171 5. 774293 4. 846318 5. 337854 6. 008843  
6. 824066 6. 731327 6. 235975 6. 982818 6. 041246 7. 04444 7. 408797 5. 810839 6. 58697  
2. 424958 2. 619694 2. 533167 3. 140944 2. 531502 2. 210764 2. 948432 2. 453871 2. 891573

GSM604466GSM604466GSM604466GSM604467GSM604467GSM604467GSM604468GSM604468GSM604468

|          |          |          |          |          |          |          |          |          |
|----------|----------|----------|----------|----------|----------|----------|----------|----------|
| 2.271152 | 2.022422 | 1.42399  | 1.409364 | 2.267357 | 1.675704 | 2.316462 | 1.639458 | 1.367982 |
| 3.413309 | 3.592521 | 4.371251 | 3.3642   | 4.507655 | 3.711683 | 3.397413 | 3.579772 | 3.607965 |
| 8.371338 | 8.486842 | 8.59977  | 8.417695 | 8.543231 | 8.579173 | 8.495561 | 8.588259 | 8.380834 |
| 5.382414 | 5.700743 | 5.658634 | 6.512751 | 6.735083 | 6.104564 | 6.029173 | 5.989373 | 6.127497 |
| 2.466355 | 1.37132  | 1.28656  | 2.077258 | 2.758458 | 2.334293 | 1.64498  | 2.21832  | 1.542742 |
| 1.466676 | 4.930108 | 1.573996 | 1.934006 | 1.796337 | 1.10468  | 1.762418 | 4.628895 | 1.202262 |
| 2.277203 | 1.339119 | 1.130319 | 1.528964 | 1.441465 | 1.646398 | 1.592964 | 1.962346 | 1.581026 |
| 0.841401 | 0.976787 | 0.814771 | 1.194985 | 1.007733 | 1.328428 | 0.925737 | 1.335642 | 2.183763 |
| 2.559634 | 1.442368 | 1.017133 | 2.878265 | 1.125512 | 1.47698  | 2.680273 | 1.765059 | 2.246076 |
| 0.794407 | 0.587723 | 0.920628 | 1.093434 | 0.637576 | 0.923898 | 0.809595 | 0.601897 | 1.08014  |
| 7.380326 | 4.763348 | 3.519331 | 4.701747 | 4.260261 | 4.911277 | 4.67876  | 2.79032  | 4.072391 |
| 7.832099 | 6.837885 | 7.404633 | 7.084226 | 6.193885 | 6.782808 | 7.265874 | 5.716365 | 7.119311 |
| 5.076979 | 1.117585 | 1.168551 | 1.590905 | 1.285888 | 1.557014 | 3.209079 | 0.690645 | 1.301139 |
| 1.62084  | 1.005955 | 0.653491 | 1.166852 | 0.963467 | 1.323249 | 1.468306 | 1.430431 | 0.717092 |
| 4.124489 | 3.816818 | 4.040161 | 3.473884 | 3.187301 | 3.613234 | 3.839317 | 2.865617 | 5.00394  |
| 6.875155 | 4.176049 | 6.080248 | 5.955978 | 3.021557 | 3.095941 | 6.15978  | 2.578197 | 4.614575 |
| 1.491581 | 1.372263 | 1.513566 | 1.827935 | 1.704536 | 1.686483 | 1.501115 | 1.184973 | 1.15561  |
| 1.712268 | 1.505965 | 4.53946  | 1.587943 | 1.380756 | 1.227317 | 1.148182 | 2.526475 | 1.367628 |
| 1.707872 | 0.994182 | 0.950045 | 1.019949 | 1.060562 | 1.628397 | 1.177543 | 1.560145 | 1.100957 |
| 0.557283 | 0.431961 | 0.832231 | 0.906081 | 0.673769 | 0.518091 | 0.623653 | 0.777487 | 1.221385 |
| 1.505505 | 0.923337 | 1.155062 | 1.566151 | 1.91332  | 2.735705 | 1.965618 | 1.474126 | 1.264524 |
| 2.020512 | 2.505631 | 1.376144 | 2.116536 | 2.625348 | 1.157525 | 1.84446  | 2.412228 | 1.762589 |
| 0.784692 | 1.156638 | 0.718342 | 0.688458 | 0.577194 | 0.686624 | 0.714217 | 0.864492 | 0.485788 |
| 0.909288 | 1.444334 | 0.551476 | 1.155467 | 0.971321 | 0.863169 | 0.746709 | 1.054846 | 0.804006 |
| 0.763681 | 0.74054  | 0.557769 | 0.826742 | 0.687195 | 0.501359 | 0.825153 | 0.952523 | 1.161228 |
| 1.870135 | 1.168993 | 1.220618 | 1.931632 | 0.408236 | 0.6866   | 1.434398 | 0.786718 | 0.96035  |
| 0.83015  | 0.612529 | 0.62841  | 0.750314 | 0.54849  | 0.7925   | 0.592098 | 0.785387 | 0.909318 |
| 1.118075 | 0.722506 | 0.884909 | 1.279542 | 0.860292 | 1.260323 | 1.086303 | 0.867225 | 1.061201 |
| 0.883556 | 0.731522 | 0.546969 | 0.878064 | 0.747801 | 0.679629 | 0.83704  | 1.006427 | 1.16891  |
| 1.052049 | 0.535167 | 0.552792 | 0.728362 | 0.696665 | 0.842363 | 1.331282 | 0.74776  | 0.956856 |
| 0.637413 | 0.78662  | 0.673262 | 0.799894 | 0.534798 | 0.888296 | 0.821053 | 0.695694 | 0.712906 |
| 0.934275 | 0.720877 | 0.662064 | 0.958059 | 0.870259 | 1.369915 | 0.687338 | 1.134468 | 1.415629 |
| 1.988252 | 1.248837 | 1.030884 | 1.86806  | 0.946433 | 1.126458 | 1.451128 | 1.289069 | 1.968209 |
| 0.923295 | 1.182746 | 0.743784 | 0.899355 | 0.645564 | 1.131601 | 0.609329 | 0.655584 | 1.631059 |
| 1.558082 | 0.713203 | 0.715064 | 1.158262 | 1.03154  | 1.022406 | 0.74137  | 0.803564 | 0.754883 |
| 0.889972 | 1.036002 | 0.612279 | 0.965859 | 1.068892 | 0.934472 | 0.561424 | 0.557426 | 0.779732 |
| 0.556408 | 0.743288 | 0.605897 | 0.648045 | 0.823919 | 1.153491 | 0.814986 | 0.621475 | 0.967084 |
| 1.424759 | 1.913662 | 0.702063 | 1.155962 | 0.623052 | 0.734012 | 0.753642 | 0.85439  | 0.922716 |
| 0.824715 | 0.485378 | 0.561924 | 0.652278 | 1.10618  | 1.218968 | 1.158461 | 0.974809 | 2.685179 |
| 0.682593 | 0.71471  | 0.436254 | 1.013326 | 0.689045 | 0.70443  | 0.542944 | 0.87161  | 0.645599 |
| 0.756563 | 0.739285 | 0.668488 | 0.686294 | 0.560795 | 1.106098 | 0.740773 | 1.168952 | 0.911188 |
| 1.727352 | 1.487917 | 1.29006  | 1.544555 | 1.457527 | 1.37069  | 1.312702 | 1.421598 | 2.706293 |
| 0.916273 | 1.163556 | 1.308049 | 1.084864 | 1.342084 | 1.081093 | 2.832073 | 0.920298 | 1.243816 |
| 0.548891 | 0.564515 | 0.602741 | 0.651516 | 1.102575 | 0.873957 | 0.627009 | 0.767978 | 0.73073  |
| 1.102043 | 0.718136 | 1.457879 | 2.469416 | 0.921736 | 2.811959 | 1.953331 | 3.575825 | 2.645462 |
| 1.465031 | 1.255739 | 0.734348 | 1.217124 | 1.544222 | 0.859824 | 2.358287 | 1.249368 | 0.984569 |
| 0.770339 | 0.494442 | 0.352143 | 0.733507 | 1.242204 | 0.663145 | 1.188403 | 0.860709 | 0.848924 |
| 0.887731 | 0.919855 | 0.630448 | 0.9731   | 0.893431 | 0.858975 | 1.010757 | 0.673927 | 1.057387 |
| 5.049754 | 4.944198 | 4.696208 | 4.798895 | 3.838688 | 3.939896 | 4.080608 | 4.225299 | 4.16147  |
| 1.604416 | 2.529399 | 1.934844 | 2.687921 | 2.265304 | 1.636744 | 2.580171 | 1.825113 | 1.801088 |

3. 578956 3. 271456 3. 652829 2. 133151 2. 265437 1. 598618 2. 102621 1. 189861 1. 959161  
1. 32307 1. 254386 1. 217561 1. 210064 1. 48067 1. 656347 1. 609822 1. 368186 1. 533717  
4. 148331 4. 78699 4. 780167 4. 505506 3. 508193 6. 581886 6. 081818 4. 413305 3. 281177  
3. 450241 4. 072952 3. 00866 3. 739094 3. 391284 3. 368029 3. 306688 3. 633805 3. 741035  
5. 291268 6. 180606 5. 676754 5. 445479 5. 97332 5. 964833 5. 649632 6. 118621 6. 260532  
8. 400462 8. 883467 8. 879386 8. 681532 8. 457707 8. 564063 7. 984817 8. 943428 8. 34485  
1. 152836 1. 019569 1. 126747 1. 524316 1. 461798 1. 418665 1. 03691 1. 090734 1. 221748  
5. 332909 4. 342151 4. 484132 5. 5294 4. 569869 4. 425125 4. 129539 4. 722513 5. 12771  
4. 880793 4. 48861 4. 107645 3. 235237 2. 789663 3. 721117 2. 340111 4. 639225 5. 01467  
9. 17316 8. 877225 8. 868062 8. 915286 8. 353732 8. 41429 9. 109172 9. 032732 8. 288567  
1. 598344 1. 605768 1. 281168 1. 611257 1. 356277 1. 628796 1. 279701 1. 352883 1. 925133  
4. 556387 4. 790585 4. 923756 5. 814252 5. 330978 5. 374156 5. 015863 4. 659943 4. 842304  
5. 690343 4. 36215 5. 236451 4. 669849 5. 026231 5. 323479 6. 289982 5. 288367 6. 36369  
1. 585059 4. 059842 1. 324447 4. 932114 3. 440447 2. 19492 3. 028804 3. 125791 1. 991246  
2. 921993 3. 647222 3. 117049 4. 219188 4. 226281 3. 388646 2. 90989 4. 045769 3. 432073  
3. 554921 4. 442109 3. 879028 3. 273704 3. 779422 2. 628671 3. 367411 3. 06783 2. 980483  
1. 45569 1. 006027 1. 006336 1. 034452 1. 144926 0. 973697 1. 176227 0. 795712 1. 190373  
5. 232197 5. 164171 5. 346534 5. 259053 4. 787577 5. 096309 5. 204279 5. 530979 5. 03082  
0. 897058 0. 814215 0. 590271 0. 992218 0. 667356 0. 9015 1. 103884 0. 667298 1. 498249  
0. 490011 0. 550274 0. 478027 0. 991368 0. 658082 0. 783133 0. 480172 0. 631241 0. 731211  
1. 182187 1. 650775 1. 108415 1. 168232 1. 361186 3. 915428 1. 068626 1. 122699 1. 111877  
3. 023346 1. 825763 3. 843171 3. 164103 4. 533239 2. 815426 4. 446748 2. 494046 2. 740703  
1. 082612 1. 975873 1. 203215 1. 485837 2. 05091 1. 437278 1. 639513 1. 411284 1. 614975  
2. 756237 3. 919442 4. 122132 3. 997884 4. 07711 3. 885333 3. 167225 4. 007472 4. 301423  
2. 360823 0. 648201 1. 215693 0. 908591 0. 981161 0. 9083 1. 165449 0. 891286 1. 136868  
1. 394672 1. 047154 0. 747664 1. 042401 1. 568347 1. 16581 2. 193709 1. 075164 1. 354266  
1. 764768 0. 610396 0. 551469 1. 1755 0. 90421 0. 815186 0. 935411 1. 151558 0. 945212  
1. 095873 0. 568359 0. 700426 0. 560525 0. 791718 0. 893545 0. 976291 0. 724471 0. 748322  
0. 972966 1. 02259 0. 812741 0. 881344 0. 381839 1. 086412 1. 375296 0. 783456 0. 867659  
2. 522392 1. 79131 1. 485983 1. 576391 1. 793454 2. 57637 2. 268711 1. 8701 1. 830156  
1. 257508 1. 002212 0. 753504 1. 093492 1. 058352 0. 835178 1. 759062 1. 075522 0. 860832  
3. 780704 5. 371209 5. 138888 3. 349923 4. 063177 4. 028929 3. 215536 3. 612027 3. 932528  
4. 790296 4. 681157 3. 682689 4. 618978 4. 670147 5. 449484 4. 51824 4. 412527 5. 086839  
3. 255693 2. 646872 3. 571893 3. 261513 2. 973224 2. 646707 2. 930255 3. 175544 3. 234202  
1. 063427 0. 98159 2. 453447 1. 464378 1. 070427 1. 682538 1. 258003 0. 636121 1. 362556  
3. 126117 3. 027554 3. 41863 4. 727879 2. 793832 1. 852128 1. 619088 3. 742717 2. 244456  
1. 227389 1. 214365 2. 941816 1. 483451 1. 815392 1. 471885 2. 021601 1. 188022 1. 32457  
1. 161849 1. 052165 1. 807281 1. 124677 0. 883691 0. 95182 1. 074859 1. 272767 0. 943631  
3. 974569 2. 425723 1. 814021 1. 181528 2. 717061 3. 41716 3. 415943 1. 848118 1. 631025  
2. 061078 1. 613443 1. 604138 2. 131043 1. 291919 1. 823261 2. 111091 1. 322932 2. 034644  
1. 07592 0. 650562 0. 704031 0. 907199 0. 355244 0. 709313 0. 936721 1. 089504 1. 056599  
4. 48788 3. 16297 3. 166128 3. 21998 4. 446476 3. 665472 4. 376252 4. 261042 3. 245471  
1. 21494 0. 819409 1. 197019 1. 613803 2. 05478 1. 250152 0. 870037 0. 884358 1. 729454  
1. 696511 1. 045551 1. 068189 2. 2586 2. 274261 1. 601594 1. 579649 1. 487875 0. 898112  
2. 595174 2. 310092 2. 328556 1. 92285 2. 608835 2. 38789 2. 998494 2. 639226 2. 596143  
2. 208807 1. 041879 0. 896778 1. 972856 3. 059067 1. 019146 1. 08898 0. 950846 1. 538994  
2. 465368 2. 069305 2. 995362 2. 150439 1. 898697 2. 475603 3. 194686 2. 002672 2. 605189  
2. 347422 2. 67347 2. 787663 3. 497139 3. 242877 2. 820852 3. 603959 3. 390061 2. 567261  
0. 952122 0. 602733 0. 903007 1. 135038 1. 589619 0. 643083 1. 018488 0. 747408 1. 324699  
2. 367487 4. 121951 5. 321081 3. 319862 2. 896048 1. 855191 4. 222255 2. 450988 2. 1222  
0. 81102 1. 576279 0. 846992 1. 189675 0. 764722 0. 816167 0. 884085 1. 408758 0. 815257



1.462981 1.478321 0.845384 1.140419 0.968403 2.404924 1.800663 1.098826 1.271065  
1.184811 0.81538 0.782736 0.790035 0.908311 1.264657 1.194507 0.636831 1.135204  
1.0304 1.555226 1.044049 1.469444 0.771574 1.163364 1.140257 1.695703 1.126892  
0.58008 0.924449 0.885247 0.734398 1.311283 0.926758 1.397294 1.383104 0.9543  
3.903235 2.248965 3.231034 2.947368 3.453466 3.278465 3.577394 3.233257 2.81689  
1.488263 0.850738 1.159491 1.292869 1.376242 1.302592 2.279031 3.377841 1.105147  
1.677498 1.4392 1.419641 1.295363 1.172879 1.338493 1.76399 1.324165 1.280347  
1.459325 1.947144 1.750737 1.638212 1.968764 1.910123 3.562242 1.441529 1.192185  
2.735258 2.901256 1.953937 2.890743 2.815987 1.379546 2.952508 4.251639 2.413862  
1.741939 1.952875 2.215682 2.53815 2.341087 1.727198 1.810546 1.971959 2.936674  
0.879712 0.702307 0.955188 1.366711 1.44986 1.071657 1.508943 1.325586 1.716097  
1.101843 0.548414 1.672922 0.923209 0.921573 1.323499 1.046407 0.840719 1.972559  
1.141197 1.044768 1.549548 1.146541 1.359301 1.087621 1.269135 1.878341 1.405588  
1.190592 1.276086 1.385051 1.438345 1.938262 1.454898 1.790816 1.649115 1.902391  
2.520056 1.242336 1.176431 1.690851 1.431158 1.608319 1.229771 2.089845 0.681762  
1.175013 1.723079 1.628019 1.061833 2.485537 1.096993 2.440719 1.39769 1.130233  
1.107804 1.247161 0.944897 0.779239 0.83164 0.76888 0.729016 1.336987 1.022164  
2.007035 2.390481 1.645924 2.232886 1.119763 3.270067 1.949672 2.140933 3.752747  
1.139268 2.081409 1.201408 1.173979 1.350762 1.494724 0.856526 1.671739 1.4284  
4.041942 4.332223 4.299274 5.356085 4.458795 4.112363 3.190939 3.935762 4.164269  
1.386826 1.108407 1.296628 1.635556 1.232226 1.778647 1.266752 1.249032 1.186897  
5.283061 4.651416 5.987945 4.573741 5.150378 4.3321 5.570769 5.211835 5.083115  
1.609026 1.421141 1.242526 1.436659 1.514796 1.335406 1.248567 1.188622 2.046583  
1.136868 2.182918 1.71411 1.761566 1.455345 1.343616 1.721908 1.408312 2.051438  
1.171919 1.047205 1.145514 0.877247 1.50989 1.071105 1.829797 0.739838 1.152118  
0.857835 0.790653 0.72823 0.897079 0.91444 0.94692 1.199855 0.745155 1.024336  
1.423808 2.188382 5.470286 2.334234 1.363141 1.169602 1.900049 1.420668 1.25283  
1.501528 0.91592 0.705749 0.967963 1.096051 1.327093 0.797782 0.905916 1.102453  
2.626541 1.153083 3.287658 1.717312 1.782567 2.260697 2.882172 2.421885 2.909893  
1.114242 0.974444 0.72665 0.847592 1.012206 1.386496 1.5297 0.921331 1.172147  
1.14045 1.277874 0.941892 1.326759 1.505257 0.966377 1.246619 1.205124 1.753773  
0.800126 0.838177 0.842598 1.121367 1.029022 1.017905 1.237941 0.93928 0.980677  
0.8909 1.149139 1.50257 1.164491 0.994197 1.191201 1.509594 0.94134 1.145392  
1.123401 0.82626 0.910007 1.345044 1.255436 0.782215 1.292883 0.895435 2.059569  
2.630875 1.44555 1.982569 2.261401 2.31171 2.066835 2.015326 2.195811 1.828357  
1.292675 1.606673 1.540552 1.730694 1.008685 1.430163 1.345563 2.241647 1.312504  
3.001996 4.085121 2.985502 3.424303 2.866784 2.022272 3.272304 3.554074 3.430229  
1.320228 1.599962 1.925404 2.031915 1.376418 1.861069 3.106303 1.578616 1.805857  
4.305907 3.401426 4.488412 2.746148 1.593126 3.349503 3.232269 2.838391 1.926532  
1.268812 0.933255 1.049775 1.776695 1.099231 1.172452 1.163064 1.062934 1.158906  
1.943903 1.748363 1.791512 1.898889 1.415736 1.632767 1.576723 2.007548 1.854923  
3.830907 3.910039 3.5684 4.010069 3.529346 4.128776 4.255864 3.122083 3.251611  
4.84827 2.718475 4.604659 3.204495 1.921214 2.311727 2.501795 2.973243 3.030139  
2.730975 1.858699 1.540406 2.754407 1.949162 1.632736 2.267861 1.799565 2.368076  
2.280627 3.333926 2.248392 2.800918 2.083025 2.391491 2.766242 2.628819 1.795986  
2.184817 1.81721 2.038133 1.720084 1.500576 1.894442 1.958905 1.738291 1.723391  
1.279746 2.514718 2.049334 1.723024 2.062184 1.833237 0.977055 1.407147 1.385159  
2.004509 1.547103 1.928893 2.757824 1.736697 1.966313 1.654331 1.789861 1.919053  
1.149819 0.939136 0.688968 0.98847 1.425278 0.904694 0.928321 0.901798 0.972619  
0.96832 0.917904 0.846802 1.811661 1.334527 1.069721 1.13888 1.634356 0.948321  
2.780177 1.653761 2.535106 1.705651 1.762294 1.560516 2.091162 1.42921 1.81472

2.705609 5.1128 3.550858 4.538835 3.71651 3.925548 4.962293 3.331429 4.114575  
2.661111 3.987408 3.415317 2.63534 2.095933 2.63545 1.273128 2.388258 2.550219  
1.631774 1.96838 2.575781 1.701316 0.957466 1.912632 1.732415 0.773741 1.559151  
2.360525 1.581244 1.346314 1.676883 1.318348 1.453053 1.8395 1.301042 1.749086  
2.118006 2.754333 4.28818 2.418654 2.232539 2.339526 1.873929 1.841486 1.983916  
3.284074 3.286575 3.362454 3.122738 3.192569 3.194089 4.070243 3.462724 3.37255  
5.035469 4.447155 4.994153 3.911346 3.810649 3.541296 4.135061 3.62095 3.810224  
1.065669 1.270026 1.253991 2.174385 1.672522 1.454429 2.372659 1.24312 2.559756  
1.748128 2.250148 2.463794 1.972055 1.89795 2.801009 2.775239 2.441304 2.876006  
1.602208 0.942469 1.187723 1.654028 1.750227 0.992266 1.225794 1.332386 1.25266  
6.306708 5.754713 5.743033 3.689274 2.464943 2.297464 1.954932 4.879332 2.540518  
1.469136 1.788473 1.998215 1.797843 1.968719 1.44553 1.988816 1.958735 1.120934  
1.671005 2.257105 2.063479 1.854334 2.12276 1.764125 3.084134 2.047178 2.969101  
5.753157 4.656897 3.07343 3.19922 2.939778 3.591953 3.911873 3.271487 3.659972  
1.646358 1.645195 1.534822 1.449728 1.916261 1.212141 2.287838 1.01061 1.435034  
1.6987 1.920734 0.855977 1.560428 1.087985 1.366836 1.782818 1.152234 1.218136  
1.729496 1.580881 1.695535 1.789534 1.018894 1.633269 2.206596 1.53899 1.192855  
5.197029 3.832826 4.472816 4.235887 3.967912 4.376823 3.928173 3.969963 4.778958  
1.428444 1.309282 1.552708 1.306293 2.164316 1.366157 1.516051 1.086408 1.267927  
3.499335 2.418606 2.490312 2.880982 3.004107 2.872842 2.988235 2.414989 2.486575  
5.858797 7.76576 7.451722 7.119237 7.672256 7.427224 7.27788 7.362501 7.126212  
1.649301 1.255369 1.495547 1.568981 1.649325 1.169307 1.936929 1.35602 1.494173  
3.971112 5.85795 3.628602 3.712117 4.759752 3.947058 3.845636 5.753436 4.539628  
2.804075 4.153086 2.702517 4.426206 4.624741 3.112463 3.421692 2.62457 2.749846  
2.572655 1.720448 2.084149 2.193551 1.890621 2.342512 2.0371 1.78822 2.402681  
1.450973 1.157772 1.238912 1.079757 1.408663 0.917082 1.454258 1.115659 1.458133  
4.181939 2.266843 2.856826 3.64457 2.354203 3.018002 2.478865 2.840647 3.557076  
2.372066 2.310256 1.501212 2.753778 2.384481 3.04655 1.921424 1.958912 2.012499  
4.810941 4.498756 4.793856 3.981237 3.8982 3.932683 4.677572 4.798066 4.523557  
1.192975 2.224493 1.522298 1.327137 1.582865 1.888709 2.584317 1.92654 1.565524  
3.700286 3.400844 3.046749 3.416463 3.837151 2.837457 3.147359 3.252092 3.852224  
3.499857 3.262902 3.410143 2.827498 2.804098 3.000373 4.863885 2.987768 4.722592  
1.465191 1.696845 1.61489 1.92857 1.764751 1.33124 1.385004 2.353558 2.024239  
2.413193 1.304691 1.795138 1.545171 1.352963 1.525284 1.729035 1.314625 1.51683  
8.265736 6.535214 5.76842 2.959182 5.995527 2.181491 5.588244 4.977065 4.211293  
1.860959 0.823042 1.1978 1.308601 1.843856 1.683678 3.245531 1.797687 1.46985  
4.936739 5.384143 5.290242 5.174874 4.90711 5.183689 5.604348 4.799952 5.284691  
1.648738 1.044771 1.525401 0.951045 1.51198 1.016176 1.390662 1.05965 0.767972  
1.243236 1.266012 1.031113 1.259004 1.245671 1.145808 1.312877 1.111411 1.212385  
4.669067 3.83867 4.629684 4.347916 4.243465 3.137766 3.312114 5.648839 3.939806  
3.68111 2.722745 2.960363 3.852246 2.894591 2.939495 3.725422 2.788389 3.304995  
1.453693 1.622576 1.247336 1.775931 1.599879 1.1207 1.4113 1.509097 1.629851  
1.637576 2.311689 1.828079 2.38327 1.999011 1.751644 1.413012 1.726581 1.617512  
4.035687 4.130282 2.626784 4.151095 4.512559 4.388783 3.491423 3.035825 3.917999  
2.551669 4.26525 1.799425 1.863208 2.174093 2.839121 1.738462 2.431184 2.117115  
1.347519 1.461783 1.854336 1.190454 1.202888 1.245666 1.181672 1.277752 1.175342  
2.606713 1.74103 1.628187 1.448917 2.503507 3.082948 1.524521 1.837595 2.011219  
2.191291 1.973195 1.815706 2.077414 2.336475 2.014772 2.432346 2.39108 2.723873  
1.997275 2.234908 1.74145 3.545642 4.044456 2.70657 2.831524 3.356196 1.806282  
1.785537 0.982469 2.040058 1.976214 1.371184 1.796777 1.76155 1.692534 1.73038  
2.34608 1.528398 2.509071 1.873152 2.146645 1.730418 1.371581 2.553941 1.306926

2. 400512 1. 571962 1. 280892 1. 645156 1. 919626 1. 88727 2. 848654 2. 28007 1. 603699  
9. 84522 9. 887507 9. 76422 9. 864403 9. 593672 9. 730315 9. 960369 9. 773745 9. 762051  
3. 545133 3. 116764 4. 144337 2. 620553 2. 651632 2. 269076 3. 653067 3. 800445 3. 306519  
1. 433901 1. 269092 1. 387899 1. 167836 1. 535001 1. 199499 1. 707948 1. 941935 0. 958251  
4. 216499 2. 944782 3. 734465 2. 103889 3. 667354 2. 530669 2. 672231 2. 821873 1. 996003  
1. 724535 1. 494376 1. 645214 2. 110429 1. 702637 1. 04973 1. 936925 2. 109787 1. 527897  
1. 983878 1. 674013 2. 124078 2. 542883 1. 675911 2. 956564 1. 278182 2. 48963 1. 961063  
2. 989429 2. 153888 2. 172552 2. 025574 2. 285718 2. 721507 2. 413934 2. 402113 2. 264993  
3. 414042 3. 003301 2. 529296 2. 959024 2. 230559 2. 267626 3. 614994 2. 813813 3. 023723  
4. 298953 4. 325117 5. 385304 4. 514498 4. 175503 4. 419694 5. 158859 3. 14662 3. 781336  
2. 224514 2. 187246 1. 954894 1. 820158 1. 497783 2. 253468 1. 424183 1. 636909 2. 04784  
2. 232912 2. 319733 2. 000931 2. 083635 2. 47008 2. 424689 3. 624584 1. 988524 2. 618796  
1. 560141 1. 74322 1. 39468 1. 240561 1. 612742 1. 550517 1. 580667 1. 679586 1. 120864  
4. 011781 1. 711115 2. 299182 2. 862194 2. 713813 3. 20051 2. 077607 2. 355528 3. 943593  
2. 09787 1. 430265 1. 208754 1. 798955 1. 293022 1. 469897 1. 848305 1. 90256 1. 610421  
2. 23479 2. 829122 1. 612833 1. 853789 2. 607722 2. 140922 1. 743943 2. 834653 2. 076261  
2. 339596 2. 758464 1. 730866 2. 609694 2. 164765 2. 418471 2. 591804 2. 309584 2. 353038  
1. 671917 1. 684527 1. 762066 2. 31047 2. 535729 2. 894675 2. 681503 4. 58414 3. 021459  
2. 787199 2. 559877 2. 263351 2. 233055 2. 061986 2. 338336 2. 764476 2. 691994 2. 684585  
1. 043226 1. 427235 2. 109585 1. 017703 1. 381553 1. 706618 1. 915326 1. 135857 1. 580388  
1. 23908 1. 038107 0. 862898 1. 585897 1. 258716 1. 176642 1. 088071 1. 106575 1. 150287  
2. 894626 2. 917526 2. 803112 3. 171902 3. 156264 3. 413587 2. 537794 2. 453874 2. 481314  
2. 638572 4. 239816 3. 621047 3. 345086 2. 996687 4. 343429 3. 333817 4. 018684 3. 809715  
4. 664648 4. 232246 3. 325654 3. 822593 3. 99195 3. 459777 3. 878404 3. 726091 3. 916442  
5. 730784 4. 776534 4. 727735 4. 918157 4. 015859 6. 103305 5. 256354 5. 390035 6. 319268  
4. 551364 2. 786043 2. 377089 3. 105279 2. 526563 3. 282273 3. 520716 2. 534539 3. 324387  
1. 118707 1. 243045 0. 772565 1. 284691 0. 823683 1. 260144 1. 17609 0. 706593 1. 122687  
2. 350532 1. 458747 2. 108531 1. 63831 2. 522246 1. 535133 1. 801858 1. 843895 2. 128174  
1. 580424 1. 843037 2. 29954 1. 794762 1. 817945 2. 207484 1. 958608 1. 335615 1. 492023  
3. 409052 1. 64284 3. 277701 3. 203671 3. 066733 2. 086713 4. 183555 1. 616446 2. 471506  
2. 043411 1. 598461 2. 477576 1. 840707 2. 083211 2. 281867 2. 086578 1. 325828 3. 16989  
2. 477103 2. 346472 2. 033443 2. 078393 1. 786804 1. 962952 2. 947659 2. 532059 2. 608711  
4. 180687 2. 446697 3. 003367 2. 241285 3. 008914 2. 611408 2. 241336 1. 701112 1. 806956  
1. 54444 1. 791281 2. 737504 2. 403243 2. 110813 1. 404447 2. 400634 2. 081325 1. 42975  
6. 73417 7. 243771 6. 942599 7. 271476 7. 027494 7. 05018 7. 449162 7. 569566 6. 721016  
1. 496757 1. 361491 1. 52934 1. 161533 1. 305066 1. 009433 1. 54176 1. 422031 1. 144578  
3. 572711 4. 655738 3. 593524 3. 849827 3. 795746 4. 343242 3. 351946 4. 338866 3. 320388  
2. 481465 2. 552392 2. 424194 2. 561596 2. 42583 1. 904791 3. 392433 2. 46026 2. 567355  
1. 62906 1. 370044 1. 803614 1. 815123 2. 461894 2. 031613 1. 653206 2. 130241 1. 837207  
1. 444798 1. 187495 1. 326757 1. 373983 1. 169054 1. 664419 1. 555974 1. 430332 2. 20311  
2. 424295 1. 454403 1. 994746 2. 439312 2. 89152 2. 249189 1. 627627 2. 506296 2. 681978  
1. 670148 1. 553242 1. 161585 1. 201373 1. 769385 2. 295925 1. 698627 1. 889033 1. 475848  
4. 706261 4. 503991 5. 091924 4. 662843 4. 376416 4. 364167 4. 369443 4. 174111 3. 964461  
1. 654184 1. 309928 1. 943774 1. 131072 0. 803335 1. 560829 1. 552783 1. 466998 1. 896486  
3. 157529 2. 784105 2. 237305 1. 554188 2. 072208 1. 566776 2. 702823 1. 796626 1. 867327  
0. 891151 0. 747214 1. 329771 0. 833337 0. 567227 1. 082565 1. 222813 0. 680993 0. 84554  
2. 46771 1. 935424 1. 891619 1. 967648 2. 401907 2. 035788 2. 33128 1. 722343 1. 856442  
0. 735994 1. 006037 0. 985054 0. 885234 2. 44482 0. 977405 1. 070635 1. 407359 0. 81422  
3. 21956 2. 366581 1. 786729 2. 093421 2. 257377 1. 694676 1. 799809 2. 266655 2. 232874  
6. 655462 7. 046467 7. 186793 7. 020967 6. 77709 6. 875969 6. 180075 7. 397812 7. 140875  
1. 382399 1. 127751 1. 060809 1. 380708 3. 251813 0. 76643 1. 455919 1. 307381 1. 444305

3. 541182 3. 494462 4. 709954 4. 520368 5. 410476 4. 851664 4. 223793 4. 246428 4. 023327  
1. 245459 1. 18731 1. 63624 4. 57745 2. 622428 1. 674552 1. 650192 1. 631623 1. 631623  
3. 246882 2. 003963 2. 516553 3. 409696 2. 449066 2. 088722 2. 335526 2. 906296 2. 160055  
3. 248535 3. 542091 2. 902654 2. 576759 2. 95343 2. 836266 2. 925777 3. 04918 3. 613494  
2. 434291 2. 167992 2. 549497 2. 248899 2. 840276 2. 215531 1. 609573 2. 013723 2. 249969  
2. 961772 3. 404659 2. 977821 2. 74304 3. 254154 3. 285107 3. 147433 2. 709177 2. 382299  
2. 486208 2. 476541 2. 681583 3. 781194 2. 488173 3. 235999 1. 997115 2. 373484 2. 179523  
2. 623432 1. 186643 1. 002209 1. 121695 1. 713814 1. 544057 2. 160232 1. 268364 2. 886661  
1. 811575 1. 88504 1. 908788 1. 958452 1. 706827 2. 226165 2. 951771 1. 654439 1. 843804  
3. 722011 2. 726378 2. 761387 2. 694981 3. 670384 2. 746677 3. 584074 2. 588431 2. 279522  
1. 169982 1. 332936 1. 920162 1. 710575 1. 435573 1. 411137 1. 473215 1. 437973 1. 263336  
4. 578992 5. 369453 5. 332288 5. 386735 4. 504216 5. 401543 4. 802007 5. 522762 5. 514632  
2. 791765 2. 014893 2. 919911 2. 49607 2. 485846 2. 261812 2. 941939 2. 115296 1. 853814  
4. 043358 2. 132224 4. 178465 3. 559611 3. 150116 2. 69265 2. 319649 4. 097746 2. 54348  
3. 058471 2. 92922 1. 750209 4. 407768 1. 731571 1. 949336 1. 454646 0. 831078 0. 939411  
1. 474515 0. 782047 1. 163481 1. 099509 1. 224564 1. 621861 1. 845846 1. 225426 1. 425299  
3. 263894 2. 241059 2. 276341 2. 614098 2. 867694 1. 933558 3. 009994 3. 319035 2. 230906  
2. 551328 1. 550229 1. 982106 1. 681218 1. 674196 1. 681149 1. 50707 1. 550354 1. 492954  
4. 054089 5. 526963 5. 168799 5. 038372 4. 997676 4. 678303 4. 223823 4. 797288 5. 124655  
2. 989313 4. 412788 3. 614419 4. 045434 3. 377789 3. 297958 2. 944102 4. 221838 2. 936588  
1. 263138 0. 850962 1. 298407 1. 50869 1. 315336 1. 002441 1. 114501 1. 367677 1. 034935  
1. 368876 1. 217168 1. 966109 1. 672208 1. 373551 1. 622578 1. 864972 1. 549767 1. 42568  
2. 526263 3. 117919 1. 843464 1. 910465 2. 006602 2. 499472 2. 397728 2. 316419 2. 900376  
1. 338988 1. 313946 1. 455313 1. 471634 1. 295464 1. 249509 1. 943692 0. 981517 2. 081557  
1. 587474 1. 311979 1. 476357 1. 467663 1. 778284 1. 817588 1. 740645 1. 405156 1. 321662  
2. 569469 2. 658643 3. 855951 2. 93727 3. 144303 2. 893764 3. 827852 2. 768089 2. 808462  
2. 02733 2. 485228 1. 842887 1. 980443 1. 997811 1. 827574 2. 078535 1. 64806 2. 055167  
2. 606477 1. 679101 4. 449095 1. 249093 1. 111779 2. 333051 1. 340979 1. 117948 1. 635802  
0. 882871 1. 309451 0. 708604 1. 055847 1. 147349 0. 766088 1. 1174 1. 034708 1. 414968  
3. 102079 2. 403192 3. 325732 4. 734984 3. 770556 4. 993727 2. 716388 2. 403224 3. 821034  
2. 129517 1. 742149 2. 718685 3. 167193 2. 097436 2. 175181 2. 961274 2. 316661 2. 083545  
3. 350687 2. 060195 2. 961793 2. 013801 1. 907042 2. 778642 2. 283673 2. 847138 2. 663463  
1. 585545 1. 542418 1. 462268 1. 435537 1. 4955 1. 333398 1. 627457 1. 320993 1. 871835  
4. 775492 3. 181616 3. 60286 2. 692434 3. 374555 2. 55645 2. 354566 3. 177559 3. 098507  
1. 689874 2. 298694 1. 917469 2. 63485 2. 244986 2. 402431 1. 984834 1. 810359 2. 604307  
3. 404934 3. 423385 3. 469315 3. 382639 3. 696529 2. 68424 2. 493164 2. 795168 2. 635698  
0. 91315 1. 772012 1. 152205 0. 986716 1. 411762 1. 686415 0. 860533 2. 049694 0. 837975  
2. 101534 2. 795792 2. 311599 2. 101495 1. 778109 1. 690613 2. 447686 1. 645502 1. 901968  
2. 312496 2. 113932 1. 439223 1. 865236 1. 988036 1. 36715 2. 518484 1. 981124 1. 97181  
3. 759615 5. 648845 5. 241873 5. 200245 5. 006618 5. 535313 2. 807381 3. 729705 4. 635918  
1. 77413 1. 720374 2. 717818 1. 772126 1. 835673 1. 644629 2. 171573 1. 888541 1. 674698  
2. 236411 2. 786271 2. 196375 2. 165282 2. 076732 2. 330681 2. 025016 4. 485303 1. 950661  
1. 806819 1. 719203 2. 414227 2. 973545 1. 849002 2. 433245 2. 949213 2. 123647 1. 829231  
2. 167558 1. 961283 2. 36434 2. 257562 1. 848662 2. 328182 1. 918197 2. 22124 2. 209531  
3. 280844 3. 265055 2. 878797 2. 998358 3. 084676 2. 968117 3. 098129 2. 483576 2. 818647  
1. 636215 1. 073487 0. 910123 1. 212483 1. 061308 1. 642492 1. 837964 1. 127458 0. 725115  
1. 376276 1. 594971 1. 976973 1. 767845 2. 642933 1. 605535 2. 381127 2. 213478 1. 477103  
4. 208871 4. 626068 5. 433834 4. 315554 3. 708319 3. 93966 4. 194487 3. 153611 3. 726433  
2. 480484 2. 319613 2. 643565 2. 289676 2. 228063 2. 106436 2. 816407 2. 386707 2. 310149  
4. 234905 3. 727541 4. 571447 3. 611279 3. 86787 4. 161962 4. 509683 4. 82559 3. 99978  
1. 362617 1. 296919 0. 861347 1. 32938 1. 474597 1. 47297 1. 488347 1. 253001 0. 923936

2.190395 1.804938 2.256113 1.433236 2.393176 1.95472 2.027797 2.070026 1.500175  
4.172513 3.982061 4.105117 3.69351 3.419019 5.123927 3.318779 4.057523 4.148882  
1.422631 1.866108 2.440958 2.04262 1.51542 1.513341 1.832814 1.502409 1.920606  
1.746902 0.977615 1.618066 1.663131 1.252333 1.541114 1.511985 1.777111 1.150319  
2.051875 1.789448 2.856015 2.495525 2.438741 1.784747 2.050467 2.510194 2.182126  
1.629895 0.895684 1.690136 1.659555 1.385762 1.057368 1.108556 1.66179 1.321738  
1.031092 1.159005 0.952202 1.263761 1.298287 1.617898 1.473305 1.324678 1.587331  
1.422236 2.511232 2.463288 0.731699 1.726724 1.61941 0.990919 0.996361 1.679808  
2.530559 1.866219 1.521251 1.918253 1.222395 1.629953 1.576965 1.717993 1.386961  
1.259887 1.952576 1.249288 2.132454 1.906696 1.689229 2.8643 1.46345 1.741293  
1.577613 2.136681 1.603121 1.422292 2.022731 1.676452 1.891598 1.780664 1.511364  
2.504524 2.645656 2.496591 1.594456 1.861976 2.470387 1.719576 1.604457 2.11907  
1.308102 1.063021 1.542193 2.205185 1.623571 1.17176 0.957392 1.365912 1.55263  
4.668977 4.31901 4.701955 4.035891 3.560324 3.924458 3.510368 4.244593 4.636222  
1.081684 1.129516 1.246881 2.47972 1.757485 3.200057 1.123912 1.584595 1.508311  
1.19174 1.25413 1.023338 2.109735 1.122812 1.481046 1.003843 1.13934 1.638504  
2.223469 1.228517 2.030046 1.160827 1.199148 1.368526 2.266202 2.150158 1.41771  
3.026942 2.493989 3.096143 3.492322 2.624802 3.029535 2.448476 2.43799 3.040564  
2.38322 1.72095 1.851525 1.792771 1.707502 1.802747 2.105935 1.844052 1.67932  
0.943953 0.758339 1.151485 1.240072 1.369659 1.08184 2.330902 1.93493 1.483101  
2.038885 1.201666 1.705066 1.445006 1.79586 1.709568 1.542139 2.085561 1.491938  
1.762322 1.13429 1.737748 1.443746 0.956617 1.901143 2.279666 1.602727 1.139558  
3.095668 3.36217 3.185535 2.725458 2.694467 3.367019 2.541528 3.285688 3.496541  
2.22731 2.082447 2.716464 2.14283 1.462713 2.328667 1.611581 1.203368 1.818281  
2.133497 1.411359 1.985336 1.263759 1.478532 0.968453 2.596327 0.936883 1.999892  
1.533134 2.163436 1.32183 2.240619 2.117722 1.703132 1.142874 1.343966 1.62366  
1.986766 2.045579 3.009349 3.504679 2.176667 2.458593 3.424976 3.007519 2.527215  
1.461699 1.572565 1.464436 1.638128 1.692128 1.582601 1.965986 1.664322 1.404457  
2.668434 1.167612 2.153924 2.889291 3.395906 1.131738 2.685948 0.58891 1.611566  
1.939138 1.360319 1.150311 1.259577 1.363473 1.313478 1.274784 1.269576 1.324531  
0.994968 1.21175 1.144393 1.173861 0.908111 0.770398 1.100089 1.078887 1.391238  
1.481258 1.424852 1.015734 0.767843 1.188329 1.477939 1.52353 1.540167 0.938316  
2.740973 1.647946 1.797473 1.539892 2.137645 1.428303 2.03177 2.571675 1.505453  
2.633977 1.942799 1.867851 2.84224 2.64995 1.56225 2.601247 1.65746 1.670359  
3.60492 2.070017 2.635359 3.811199 2.391763 1.648872 2.156182 2.443234 2.321623  
2.033035 1.706717 3.294134 1.776748 2.376519 3.165305 2.038 3.633678 2.973769  
4.247061 3.886273 4.051972 2.945818 2.985504 4.581085 3.730932 4.278959 4.095003  
2.369524 1.659044 1.892194 1.593626 1.954331 1.592548 1.638348 1.562242 1.316919  
2.308494 2.020628 2.295472 1.53152 1.540977 1.432216 1.659308 1.988496 1.61562  
3.037251 2.787948 1.970357 2.882279 1.907557 3.226647 2.49359 2.403779 1.816549  
3.411601 2.492355 2.520088 2.567967 2.613921 2.52988 2.67308 2.343619 2.528915  
3.579173 1.360198 2.076011 1.747899 1.935876 1.494108 2.056677 1.733088 1.88788  
1.39746 1.572995 1.383401 1.77109 1.238731 1.363528 1.820928 1.735401 2.045376  
1.513121 1.564477 1.186438 1.433503 1.316929 1.436863 1.532012 0.958015 1.195819  
2.964359 2.92022 3.617881 3.009967 4.548984 3.350315 2.214843 3.374731 3.889911  
1.314234 2.196934 1.741092 1.710391 1.453464 1.675533 2.065307 1.61218 1.342646  
3.181316 2.940485 3.778713 2.974184 3.262922 3.254394 3.721302 3.657273 3.083343  
2.073944 1.760573 1.528905 2.13422 1.66046 1.822292 1.529614 1.782141 1.659162  
2.251737 2.279635 2.286482 2.344793 2.317615 2.871138 2.084378 1.954601 2.21778  
4.592543 6.107436 5.822585 5.565521 5.754818 5.70246 5.358715 4.915479 5.824816  
0.940501 1.311281 0.83815 0.967945 2.487056 1.152166 1.311398 1.593268 1.184419

1. 605168 0. 954314 1. 51335 1. 061051 1. 48024 0. 881724 0. 792394 2. 107264 1. 13673  
4. 38299 3. 351086 3. 154165 2. 963625 4. 925498 3. 268891 3. 599566 4. 536995 3. 92408  
3. 405618 3. 845801 2. 99472 2. 910872 3. 242017 4. 275218 4. 003726 3. 339605 3. 543925  
2. 373117 3. 183924 2. 925805 2. 371533 2. 8551 1. 646027 2. 344409 1. 727955 2. 991809  
2. 103088 1. 845947 1. 595997 1. 2188 2. 293936 1. 916121 2. 028808 1. 595955 1. 83301  
4. 652048 2. 371633 2. 319806 2. 381559 2. 836899 2. 97395 3. 274891 3. 197342 2. 807812  
1. 681216 1. 278004 1. 445944 1. 794217 2. 067728 1. 45997 1. 378321 1. 446213 2. 090841  
1. 918725 1. 998779 1. 918269 2. 101357 2. 416869 1. 651102 2. 006195 2. 256533 2. 635503  
1. 553684 1. 35485 1. 417978 1. 519551 2. 121525 1. 770277 2. 282051 1. 37225 1. 558697  
5. 594412 5. 860517 5. 093057 5. 659586 5. 002769 3. 505799 5. 054981 5. 546428 5. 509054  
3. 217151 3. 144606 4. 115307 3. 13422 5. 149337 3. 723661 3. 556009 3. 235635 3. 453328  
3. 127438 2. 921151 3. 33118 1. 982922 1. 62832 2. 073131 2. 244084 2. 433303 2. 172974  
3. 195138 2. 90185 3. 209047 3. 058125 3. 452055 3. 342483 2. 939859 3. 885688 3. 826126  
1. 83817 1. 230343 0. 903749 1. 146884 0. 852851 0. 718888 0. 988204 0. 958544 1. 212144  
1. 567536 0. 674808 1. 519085 3. 557852 1. 269133 2. 105762 2. 267683 1. 332292 0. 983826  
1. 58342 2. 549571 3. 643887 2. 313525 1. 541079 2. 402134 2. 155975 2. 723735 2. 170251  
1. 88956 2. 466145 2. 456347 2. 508556 1. 720342 2. 969443 1. 950658 1. 644907 2. 726277  
1. 482678 1. 297217 1. 520248 1. 285562 1. 480314 1. 807498 1. 612807 1. 787139 1. 476149  
1. 423763 2. 303415 1. 101902 1. 403258 1. 306751 1. 716881 1. 250674 1. 14949 1. 455931  
1. 033239 0. 995067 1. 258274 1. 570706 1. 211755 1. 282911 1. 501524 1. 276239 0. 991583  
1. 490081 1. 545495 1. 38027 1. 490827 1. 628998 1. 708712 1. 275501 1. 559924 1. 542201  
3. 398347 2. 971769 2. 984221 2. 470257 3. 147017 2. 208454 3. 116822 4. 080735 3. 070221  
2. 089322 1. 441051 1. 938136 1. 310724 1. 322714 1. 400051 1. 521039 1. 366891 1. 297965  
2. 331067 2. 130095 1. 726647 1. 667711 1. 592963 2. 550779 2. 527643 3. 01863 2. 520788  
2. 848637 2. 79643 3. 260468 2. 743437 3. 008097 2. 730353 2. 956832 2. 936849 2. 824398  
1. 409667 1. 433141 0. 985772 1. 857637 1. 729498 1. 697317 1. 650594 1. 7587 1. 045989  
2. 144093 3. 832212 2. 342234 2. 517216 2. 917525 2. 707476 2. 132353 2. 244256 2. 452632  
3. 391448 4. 653876 3. 589461 3. 765174 4. 075578 3. 087495 3. 837391 3. 914337 4. 008369  
1. 554422 1. 538683 2. 163461 1. 660004 1. 528217 1. 246378 1. 712109 1. 375093 2. 225117  
2. 531473 2. 368804 3. 151229 2. 171442 2. 377044 2. 73738 2. 682509 2. 984395 2. 647779  
3. 210004 3. 980004 2. 864607 4. 591573 3. 771338 5. 137301 3. 732091 3. 984518 5. 113089  
3. 633233 1. 746905 2. 320244 4. 203975 2. 583792 2. 408948 2. 157607 2. 021444 2. 279347  
2. 108687 2. 424967 1. 858045 2. 718735 1. 922146 2. 281673 1. 932356 1. 876518 2. 161249  
1. 754686 1. 631394 1. 145717 1. 392002 1. 364728 1. 687275 1. 690978 2. 206931 1. 59159  
3. 805014 2. 453424 3. 00071 1. 50644 2. 695482 2. 317008 2. 374043 1. 140523 1. 713116  
3. 636586 2. 883841 3. 52252 3. 616741 4. 871012 2. 746133 3. 932378 2. 909891 3. 169194  
7. 791311 7. 133555 7. 631133 6. 362594 6. 046327 6. 365783 6. 523863 6. 967874 7. 015812  
2. 326474 2. 106917 2. 066278 1. 794548 2. 49129 2. 308331 2. 118696 2. 057301 2. 412702  
8. 28449 8. 037936 8. 331308 8. 157058 7. 303732 7. 965179 8. 364987 7. 243091 8. 082987  
2. 573914 2. 03946 1. 932286 1. 14966 1. 771673 1. 741391 2. 080697 1. 728786 3. 638101  
3. 748026 4. 053319 3. 553515 3. 50028 3. 69371 3. 535792 3. 98423 3. 59722 4. 340094  
2. 310753 2. 232502 2. 212514 2. 050146 2. 035652 2. 256765 2. 133687 1. 971651 2. 274294  
2. 139585 2. 230124 2. 489564 2. 817563 1. 657005 2. 233738 2. 966755 1. 566049 2. 492721  
3. 812581 3. 372635 3. 874061 4. 001939 2. 908075 3. 420476 4. 054293 4. 50987 3. 011499  
1. 169001 1. 455793 1. 397572 1. 839405 1. 445703 1. 645092 1. 564878 1. 702257 2. 322917  
2. 161897 2. 081074 3. 061402 2. 984816 1. 756629 2. 323083 4. 25685 1. 390496 2. 507157  
2. 374784 2. 09652 2. 653377 2. 834376 1. 433437 2. 523695 2. 761814 2. 855085 3. 292911  
2. 974825 3. 870561 4. 182786 3. 28879 3. 683772 3. 707726 2. 640665 2. 817801 3. 223575  
4. 200038 1. 407584 1. 784686 2. 201488 2. 829953 4. 578718 1. 121375 3. 378838 1. 266961  
1. 947616 1. 537042 2. 360666 1. 50128 1. 311236 1. 203072 2. 145211 1. 609547 1. 423284  
1. 355246 1. 152186 0. 824887 1. 290076 1. 048689 1. 034707 1. 078568 1. 662429 1. 479516

2.765325 1.766709 2.123781 1.774959 1.899489 1.86918 3.06353 2.006467 2.025466  
2.965555 3.475257 2.45624 2.989505 3.855408 2.814695 3.213229 3.836331 3.187162  
3.935729 3.222831 2.179467 1.878035 2.958572 1.844717 3.665002 2.863758 3.256619  
2.578051 2.178827 2.440806 2.193559 2.443273 2.295844 1.592353 2.020682 2.337676  
2.084246 4.340615 1.757746 3.834393 1.72512 1.970515 2.790149 2.439447 1.82715  
1.187757 1.478825 1.373232 2.239318 0.978096 1.779317 1.50448 0.885544 1.851419  
1.584927 1.753209 1.070515 1.466139 1.438832 1.146764 2.222937 1.79871 2.276077  
2.445306 2.035426 2.232529 2.222624 2.325099 2.375174 2.13555 2.382716 1.732233  
1.740843 2.641037 2.033312 2.150746 1.120624 1.405383 1.776895 1.531178 2.433489  
1.247472 2.126384 1.745244 1.736131 2.351954 3.022925 2.765559 2.545144 2.448535  
2.864821 1.646292 1.646292 1.671045 1.960113 1.416538 1.725814 1.738095 1.318061  
2.895311 2.935586 3.318025 2.778447 2.731093 2.822165 3.3741 2.78346 2.979221  
2.269378 1.290296 2.288481 2.395976 1.783736 2.118876 2.750914 2.112046 0.937569  
2.310731 1.701924 2.057148 2.069035 3.88005 1.601809 2.107014 2.476855 2.175102  
2.103748 4.772113 4.42114 3.879464 2.881675 4.100635 3.16028 3.459233 3.50763  
1.162566 0.891779 0.951316 1.36679 0.865399 1.469346 1.065962 1.787802 2.141831  
3.950649 3.490965 3.649583 2.495846 3.742804 3.532556 3.242792 3.14408 2.643077  
2.629557 2.478627 3.277526 2.933799 2.204383 2.960226 1.748444 2.700228 3.050536  
2.816971 2.176729 2.784113 2.760072 2.310551 2.68923 2.359315 2.257187 1.900845  
1.504046 1.631833 2.221387 1.97646 3.411819 2.453095 2.301869 2.314532 1.947344  
2.203229 2.79894 2.237637 2.618933 2.291421 2.365868 2.488151 2.305887 2.307342  
6.233343 5.780857 6.850957 5.295352 6.3875 5.158664 5.406307 6.404801 6.153013  
3.018485 5.719989 3.566069 4.288632 5.232565 4.503554 3.887099 3.928465 3.824772  
1.512274 1.625935 1.16895 1.650791 1.229772 1.773236 1.707881 1.164826 1.453421  
2.982878 3.57944 2.754237 3.237635 3.459151 3.601939 5.60755 4.569501 2.666278  
6.552311 4.01833 4.821629 4.039195 5.852952 4.639122 4.996479 4.315112 5.278334  
3.555849 4.256675 3.074494 5.885881 2.628176 2.697056 3.940916 3.931966 3.64233  
1.736492 1.789882 1.135801 1.281591 1.15605 1.762955 1.321837 1.751803 1.970613  
1.190009 1.089333 1.352259 0.150047 1.739478 2.122316 1.233546 1.843662 1.302821  
2.440274 3.135558 3.186616 4.306989 4.030251 4.404745 3.828522 3.295775 3.235842  
3.157486 3.782202 3.636972 2.841262 3.982421 3.260313 4.61752 2.864875 3.854562  
1.371333 1.490307 0.984437 2.046298 1.106495 2.176502 1.673615 0.862534 2.564646  
1.480531 0.991213 1.206017 1.5779 1.318635 1.473788 1.366925 1.286047 1.469658  
2.48516 2.281634 2.401156 3.583606 2.02015 2.757829 1.286902 2.536751 2.513152  
1.831073 2.356998 2.200472 2.418385 2.487737 2.359794 1.950658 2.551329 1.842599  
1.68956 2.136314 1.8904 2.715084 2.030228 3.253104 1.967782 1.433886 1.339493  
4.910319 5.31326 5.628887 4.718996 4.964661 5.164591 4.483026 4.82939 3.901026  
5.389205 3.601484 4.446073 5.06185 4.247045 3.277531 3.585522 5.07141 3.745324  
1.475663 1.377815 1.200012 1.666492 1.931846 1.387033 1.77983 2.006855 1.732538  
2.444307 2.387397 2.386814 1.825219 2.300778 2.475218 2.014315 2.157376 2.746117  
3.657462 1.029255 2.361623 1.099885 3.099866 3.169212 1.04301 1.032012 2.609843  
1.967144 2.178745 2.589608 1.864684 1.996009 3.203815 2.875908 2.533319 3.706654  
3.170721 1.848475 2.860862 3.415913 3.08439 2.740931 2.999301 2.748954 1.971557  
2.930868 3.214493 2.787239 3.36026 2.558103 2.659598 2.955814 2.490764 2.864036  
6.84904 7.032993 6.67845 6.839892 5.799755 5.802623 5.88132 6.135528 6.87029  
2.678481 1.085607 2.543311 2.524722 1.507462 1.955988 2.158386 2.390324 2.984144  
2.015336 3.05013 3.567191 2.330619 2.971897 2.314856 2.921007 2.57885 2.681047  
1.864292 1.875346 1.136511 1.893511 1.93717 1.594528 1.646331 1.405948 1.121733  
2.084399 3.432055 4.305582 2.440306 3.772358 5.563617 2.954537 3.145478 3.210732  
1.365917 1.482334 1.44136 1.828077 1.630655 1.405062 1.454913 1.436203 1.085916  
4.190775 3.299525 4.536851 5.01821 4.74445 4.466515 3.211842 3.551411 3.788733

0.699242 1.130391 1.464367 1.414181 1.299453 0.803437 1.205605 1.371016 0.923972  
1.819965 1.892518 1.746467 2.274598 1.875341 2.547953 2.455946 1.999132 1.962514  
1.387061 1.62364 1.804094 2.471817 2.240635 2.127931 1.339992 1.901709 1.066398  
2.817451 3.339375 3.037288 2.713714 2.236345 4.593482 2.973579 2.52117 2.381449  
0.711258 0.662561 0.591126 0.965746 2.164849 0.992377 0.561731 0.997006 1.385494  
2.473964 1.857763 2.786959 1.721971 1.806785 1.745051 2.175886 2.650744 1.471567  
1.480615 0.896449 1.583737 1.249887 1.105123 1.316734 2.057411 1.329251 1.682983  
5.741029 6.656724 5.977423 6.131079 6.129906 6.941625 6.129165 5.954548 6.770016  
1.218968 1.439778 2.039244 1.444723 2.903552 0.883942 0.841756 1.533947 1.054212  
1.734902 1.684422 2.178931 1.986957 1.050364 1.392357 1.689282 1.339149 1.844652  
1.843923 3.042388 2.071401 1.619364 1.920861 2.255937 1.983011 1.442319 1.341457  
1.151423 1.861448 1.261936 1.667774 1.353748 1.094467 1.621727 1.102626 1.544258  
2.717244 2.16303 2.439099 2.66099 2.259582 2.698729 1.055441 2.697869 1.569468  
1.619209 2.302758 2.599109 1.447551 1.718428 2.605857 1.209775 2.030459 1.748756  
3.123483 1.984608 2.389612 3.55526 2.276005 2.338291 2.171241 2.309225 2.581792  
3.87049 4.376246 3.910889 3.796332 3.182483 3.530573 4.68277 5.062014 3.983917  
1.468541 1.362311 1.372081 1.736726 1.758833 1.758779 1.864504 1.608913 1.537924  
4.153208 3.309802 3.670088 2.534339 2.996114 3.079908 3.336696 4.608309 3.081691  
1.95679 2.472785 2.463605 3.044669 3.282724 3.452255 1.874254 3.176472 2.477369  
1.656644 1.494545 2.451538 1.637202 1.265338 2.338269 1.756706 1.470894 1.529399  
1.910861 1.66782 1.241941 1.675717 1.750312 1.566936 1.25012 1.830615 1.294255  
2.713457 2.857536 2.721316 2.601306 3.063312 3.019001 3.035283 2.450522 3.327264  
2.437631 1.882837 2.314829 1.718144 1.790765 1.930257 2.781787 1.843251 1.916634  
1.040383 1.004928 1.317468 1.027969 2.089998 0.680618 0.793131 1.252051 1.086178  
2.037517 1.951805 2.095941 2.107249 1.706377 1.486871 1.928438 1.456687 1.806637  
1.419578 1.61395 1.076402 1.838992 1.522722 1.778924 0.935528 1.077998 1.201936  
3.191615 4.041319 4.196525 4.261951 3.033859 3.440177 3.163666 4.275519 3.689862  
0.747257 1.327268 0.927551 0.623238 1.551785 1.106821 1.658944 1.583682 1.243151  
2.820168 4.54219 4.897349 4.554727 2.449581 4.292103 2.433599 5.828907 2.46934  
1.808248 3.168958 3.415183 2.845855 3.120204 2.814271 3.209949 2.448204 3.228316  
2.335775 1.432006 1.047348 1.805331 0.950486 1.801362 1.357405 1.301521 1.378768  
1.259031 1.025513 1.156825 1.438184 2.507893 1.485435 2.50402 1.264803 1.514631  
0.715004 1.081867 1.258823 1.005554 3.045474 0.576013 0.910198 0.733972 1.507438  
1.698888 2.320316 2.004925 1.743792 1.505071 2.781932 1.824882 1.848441 2.449887  
2.593403 3.303671 3.012952 2.724664 2.023584 2.80702 2.80223 1.943779 2.564319  
6.719104 7.710828 7.231758 7.332228 6.67567 6.576325 7.362106 6.297834 6.541951  
3.68557 2.227001 1.84325 2.16239 2.899332 2.674364 2.095268 2.692722 3.001608  
2.073168 2.804611 1.608743 1.178276 1.887053 2.330759 1.981315 1.506878 1.955994  
4.146664 3.185961 3.144438 1.736688 2.612778 2.878189 2.670732 2.20848 3.850509  
2.265082 2.088528 2.025352 2.11651 1.851216 1.672055 2.89198 1.972344 1.664723  
2.591258 1.784959 1.968762 2.364841 1.612667 2.230668 1.65101 2.067689 3.515719  
1.957775 1.237715 2.160485 1.86123 2.385539 3.428096 2.035566 1.424964 1.563287  
3.199214 3.471717 2.610067 3.28828 2.439917 2.585177 3.209345 3.16457 2.732613  
2.548281 2.288463 4.227923 2.36217 2.32723 1.864943 2.26113 2.006029 4.159069  
3.179922 2.555078 2.648677 2.847059 2.781537 3.455101 2.730447 2.338959 3.611183  
3.055296 2.384171 3.131495 2.476673 2.824523 2.329978 3.533607 2.516162 2.185232  
0.817046 1.342744 0.92296 1.130213 1.604155 2.012976 3.16055 1.600318 3.401889  
2.430569 2.631409 2.292734 2.610623 2.22874 2.966814 2.092847 1.892391 2.350491  
3.422895 1.575864 1.651549 1.824405 2.3626 3.469564 1.289948 1.801114 1.230385  
1.873354 1.44308 1.470099 1.516712 2.002578 1.453664 2.725933 1.574562 1.925013  
1.347033 1.523901 2.296104 1.917237 1.86633 1.757978 2.199393 1.520916 1.482935



2.766819 2.580643 2.404049 2.688211 2.688037 1.962855 2.487625 2.107377 2.842603  
1.528522 4.876199 1.728159 2.028322 3.258245 0.931493 2.742717 2.350244 1.533789  
5.121098 4.77948 5.332874 4.675891 4.764715 4.832505 4.734793 5.707022 5.030006  
2.564904 2.398744 2.681712 2.582484 3.061376 2.7089 2.335813 3.040193 2.844449  
1.054551 0.955631 1.07395 1.493886 1.09937 1.254305 1.384542 1.465454 0.8871  
1.739913 1.171983 1.677893 1.455887 1.612417 1.607144 3.872914 1.021327 1.768728  
1.717918 1.57142 1.801613 1.829294 1.34002 1.61617 1.580542 1.512636 2.691301  
1.922373 2.430406 2.038571 2.424455 2.394191 1.967812 3.670272 2.135053 1.78859  
2.493336 2.907719 3.459065 3.310487 3.22369 3.20573 3.724452 3.989323 4.050509  
1.166323 1.085438 1.059353 1.849067 1.048967 2.747039 1.564951 1.024043 0.794514  
1.740073 1.92383 1.974962 2.05885 2.590266 1.983423 2.004985 1.694696 1.625298  
1.646063 2.327297 1.845154 2.470001 2.014598 1.651748 2.107459 1.655114 1.028789  
5.45537 5.948402 5.933174 6.58849 6.380095 6.830909 6.260906 6.629378 6.569148  
2.214953 2.359091 1.950999 2.01952 2.440557 1.61921 2.952837 2.128085 2.076108  
1.395056 1.418028 1.530414 1.305644 2.731517 2.028957 2.769758 1.643836 1.322654  
1.734139 2.482032 2.710282 2.037223 5.856306 2.438795 6.354814 1.55018 4.462088  
6.694624 7.294647 6.660562 6.982205 7.016212 7.375329 6.794533 7.376486 6.690723  
1.585148 2.029754 1.857682 1.739764 2.061597 1.420391 1.636591 1.486149 1.673603  
1.587513 0.70969 1.956246 1.717666 1.093093 1.081683 1.372081 1.236834 1.375229  
3.595448 5.101635 5.81085 4.230924 4.996432 4.837918 5.06744 4.98222 3.904054  
0.981826 1.399833 0.834101 1.654261 1.344161 0.939206 0.986058 1.269394 1.980377  
7.157292 8.128984 6.687182 6.742602 7.764412 7.440443 7.12387 7.329168 7.412834  
4.70446 3.540827 4.512596 3.822545 2.956266 4.439389 3.596562 3.588764 3.440587  
1.687233 1.112381 0.855892 2.071504 1.614312 2.267271 0.601411 1.158942 0.901174  
2.43831 2.717362 2.918695 3.023967 2.248269 1.991181 3.123492 1.824256 2.386873  
3.010955 2.989222 4.220188 3.767622 2.702602 3.223894 3.979996 3.089304 3.485307  
3.475194 4.010985 3.399645 2.93448 2.723903 2.458047 2.361825 2.35663 4.372229  
2.115271 1.47479 2.490769 2.635137 2.439978 1.917291 2.174356 2.345799 2.119567  
2.859292 1.44252 1.412166 2.209076 1.892511 2.082707 1.520373 1.506957 1.415184  
2.054612 1.786657 1.822663 2.668012 1.980659 2.820711 3.580235 1.500535 2.253371  
8.218563 8.540704 8.507395 8.505545 8.443618 8.318317 8.296399 8.334244 8.464065  
2.392915 2.165973 2.196679 2.102088 2.041679 1.709842 2.3373 2.456513 2.150057  
1.190229 1.336302 1.502772 1.407419 1.362171 1.786167 2.123601 2.105855 2.156316  
2.594702 2.385163 2.796336 2.168243 1.9556 1.538159 1.716986 2.65142 2.323394  
1.942031 1.8882 2.535311 1.965038 1.591648 1.347352 2.19492 1.981471 1.228557  
3.251185 4.056715 3.866711 5.050486 4.060026 3.537935 3.481162 3.419161 3.970289  
1.104152 2.127634 0.618095 1.154745 1.384851 0.866304 1.106569 1.047541 0.943087  
3.529048 2.56509 2.628725 3.225532 2.518965 2.868465 3.403557 2.694392 2.317641  
4.258183 2.847708 3.327084 5.104143 3.238969 3.787855 3.561754 3.127433 3.541261  
5.579613 6.180787 6.231658 6.48964 4.651441 6.237116 6.334996 5.066671 4.763819  
2.974723 1.290239 1.581173 1.662154 1.30582 0.585284 2.006954 1.448575 2.07001  
1.667003 1.765667 1.416656 1.358656 1.228204 1.538613 1.402367 1.255018 1.242077  
2.500463 3.192275 3.54879 2.182496 2.423469 3.310289 2.945507 2.761056 2.934602  
3.218178 2.74215 3.064569 2.746963 2.965282 2.859269 3.746333 3.068691 2.979442  
1.31894 1.328716 1.14572 1.082473 2.716897 1.420279 1.082396 1.24646 2.585294  
1.864163 0.994265 1.423364 1.677239 1.606647 1.488376 1.393767 0.802441 1.323029  
3.415292 2.460958 2.130291 2.214605 2.129729 2.020704 3.265346 2.632473 2.420307  
1.091457 1.243086 2.121985 1.291472 1.564665 1.82108 1.230484 1.182645 1.37836  
2.564979 2.273386 3.38857 2.974454 2.231185 2.673325 2.245993 2.980473 2.604411  
5.301708 4.372708 3.605466 5.842281 4.670747 5.856436 4.445215 4.360451 4.53336  
2.919266 1.906804 2.257491 2.617657 2.489508 3.11373 1.916478 2.357544 2.445072

3.953588 5.404808 5.417039 4.828274 5.533288 5.315077 4.467482 5.165956 5.199093  
2.685952 1.583133 2.051959 2.090736 1.351678 1.615909 1.263094 1.553428 2.459332  
3.767213 2.594758 3.462069 3.028363 1.458057 1.929666 2.708577 3.194102 1.291837  
6.151676 3.765773 2.92071 3.110507 3.368624 3.748436 2.255094 3.176432 2.763523  
2.346116 2.421667 2.494164 2.0086 2.936147 3.120191 2.566503 2.583251 2.447818  
3.859749 3.45692 2.84576 3.030209 3.396431 3.669209 3.349288 3.320521 3.392474  
2.387294 0.967842 0.947645 0.993079 1.580197 1.492327 1.011032 1.372723 1.256749  
1.757037 1.736542 1.844581 1.509959 2.063653 2.061018 2.020309 2.135198 1.46548  
3.563412 3.208368 4.534759 3.435868 3.681495 2.771116 4.090698 4.134566 3.761891  
1.775795 1.525645 1.477384 0.835649 1.653781 1.68548 3.177514 2.24483 1.8168  
1.927607 3.721638 2.229263 4.112895 2.403875 3.707445 1.606543 5.55148 3.557306  
5.812066 6.478152 6.30308 5.763306 6.204347 2.742433 5.486008 6.055318 5.913656  
2.244545 1.612583 2.228937 2.403055 2.098633 1.222523 1.846923 1.872816 1.573873  
5.740767 5.305223 5.304318 5.543393 5.308659 5.929704 5.628188 4.974185 5.666562  
2.408953 1.553868 1.902877 1.486114 1.336787 3.007266 2.066591 2.478882 1.750771  
7.107645 7.728663 7.719265 7.878859 7.968201 7.260814 7.502691 7.609709 7.856492  
2.109848 1.716311 2.299943 2.509095 2.047904 1.912128 1.581527 1.575662 2.83771  
1.723177 2.061556 1.031696 1.913044 2.580579 2.135225 2.674313 2.086691 2.032674  
3.974535 3.900791 4.924391 2.616167 3.578797 3.050671 2.893893 4.375124 2.904418  
2.808139 3.257744 2.863659 2.77188 2.615528 2.598518 2.156775 3.908456 2.339374  
1.637468 1.389939 1.292556 1.586795 2.527677 2.429082 1.864219 1.694557 1.725062  
1.773558 3.061325 1.543802 2.293304 1.566288 1.68053 2.612541 2.295382 1.566288  
2.43454 1.82274 2.346963 1.973007 2.602088 5.14984 1.657358 1.657617 2.212033  
1.960723 1.578993 1.235809 1.516075 2.053243 2.392434 1.703135 2.239586 1.229639  
4.765875 3.323927 2.570717 2.674442 3.033206 5.907415 3.409881 2.058822 4.723882  
1.514895 1.606189 1.441229 1.617411 1.764517 1.450249 1.531228 1.319145 1.601803  
2.965253 4.574115 2.419237 4.329588 3.049296 2.433486 3.190651 2.05781 2.536126  
7.75622 8.092099 7.384737 8.175704 6.893752 6.918453 7.679209 7.868452 7.483931  
1.412457 1.482292 1.243229 1.066005 1.552448 1.266293 2.641639 1.342379 1.771028  
2.318044 2.650834 2.57545 1.861515 1.8183 2.095316 2.231371 2.192625 1.886963  
3.608362 2.03396 2.636431 3.168396 4.260958 2.62311 2.181711 2.59885 1.923188  
2.058233 1.84928 1.209335 1.476013 2.207047 1.696136 1.344209 1.673278 1.490703  
3.241413 2.522633 3.048945 2.779887 2.283863 2.494297 3.122264 3.225735 2.50977  
1.779425 1.528321 2.005024 1.348972 1.581841 1.591726 1.951308 1.295837 0.737843  
1.154296 0.928219 1.070133 1.806224 1.087669 1.140303 0.986818 1.408277 1.334249  
3.096293 3.580707 4.93221 3.937465 4.187462 3.677309 4.077074 3.794955 3.846202  
2.67837 3.442574 2.535181 2.682056 3.435746 1.983418 1.586558 4.002447 1.372168  
2.101124 2.257681 2.201669 1.768867 1.674075 2.282686 2.593208 2.351817 2.561942  
2.508351 2.994182 3.091001 1.978632 3.89287 3.215212 3.207589 2.620746 3.408758  
1.677672 0.991466 1.026345 1.379219 1.289372 1.285936 2.121116 0.970717 1.324984  
0.864851 1.163752 1.238251 1.242849 1.250686 1.176865 1.28576 1.313212 1.282994  
4.339596 4.461834 3.550444 3.360425 3.089393 3.363817 3.242506 3.342056 3.258231  
1.927615 1.82031 1.532313 2.089486 1.882531 2.212438 2.08887 1.689467 2.305853  
2.005629 2.1542 2.783017 3.013748 3.160489 2.492712 2.821862 2.368539 2.563819  
4.20609 3.172968 3.559855 3.29629 3.310999 3.984278 2.736666 2.396513 3.429579  
5.068811 7.647151 6.875605 6.100745 5.984714 6.999922 4.680682 6.785436 4.728641  
1.853279 1.87978 1.973445 1.975445 1.630835 1.65471 2.161081 2.168098 1.527527  
2.28514 2.174502 2.557273 2.282694 2.119885 1.459888 2.794113 2.136557 2.118804  
2.34574 2.163993 1.783869 1.977546 2.284112 2.076158 1.924007 2.466023 1.799576  
2.542373 1.835717 1.458486 1.436628 1.562573 1.114116 1.519811 1.578699 1.070986  
1.272882 0.866987 1.112265 1.243893 0.820339 0.894125 1.767332 1.541735 1.128902

1. 789378 1. 750875 1. 57361 1. 726768 1. 850001 2. 05345 2. 002512 2. 029038 1. 818851  
3. 634535 3. 587409 3. 249287 2. 624638 3. 133655 3. 469109 2. 267949 4. 630509 2. 908886  
1. 702665 2. 599314 2. 14329 1. 275538 2. 105849 1. 937084 2. 444308 2. 537612 1. 95861  
2. 224067 2. 082052 2. 112449 1. 549723 2. 237935 2. 694016 2. 184916 2. 352694 2. 211304  
3. 14843 1. 523645 2. 134951 1. 34744 2. 270371 1. 249286 2. 111678 2. 169732 1. 82614  
3. 006661 2. 500401 2. 720028 2. 225283 2. 273642 1. 941013 2. 512755 2. 544722 2. 762554  
2. 05505 1. 546795 1. 846015 2. 271638 2. 364521 2. 131347 2. 52993 2. 24595 2. 203939  
1. 639367 1. 602923 1. 623774 1. 732713 2. 329121 1. 305059 1. 688069 2. 630522 2. 513423  
2. 549456 1. 903801 2. 041427 1. 965316 1. 972955 1. 882822 2. 354389 1. 866986 1. 901332  
2. 310874 1. 793843 1. 679897 2. 503304 2. 086391 2. 391282 1. 883706 1. 966494 2. 473781  
1. 845396 1. 545738 1. 232846 1. 417714 1. 568002 1. 338963 1. 150166 1. 412972 1. 280953  
1. 924565 1. 970628 1. 746206 2. 413214 2. 189424 1. 896417 2. 014793 2. 244831 2. 080358  
2. 520267 2. 13159 2. 411086 2. 400277 2. 122435 1. 629733 1. 145012 2. 184177 1. 628231  
3. 134868 3. 370456 3. 553332 3. 292044 3. 900136 3. 518955 3. 551991 4. 473338 3. 321927  
0. 938491 0. 950702 0. 699038 1. 106657 0. 9559 0. 896891 0. 86615 1. 03025 0. 834195  
1. 630106 1. 560729 1. 513564 1. 624271 1. 279905 1. 109447 1. 777225 1. 499074 2. 565112  
1. 07915 1. 152409 1. 088169 0. 923013 1. 136974 1. 024572 1. 087608 1. 146634 1. 231952  
1. 505211 1. 383876 1. 06711 1. 242798 0. 956478 1. 753733 1. 705308 1. 87671 1. 346636  
2. 21548 1. 472201 1. 485777 2. 385667 1. 535037 1. 687663 2. 108575 1. 847189 1. 98619  
2. 672664 3. 203203 2. 771252 2. 892259 2. 624587 3. 163348 2. 894947 3. 454124 2. 729017  
1. 608563 1. 472868 1. 323888 1. 318737 1. 232536 1. 279159 2. 168084 1. 009107 1. 410641  
2. 067412 2. 48892 2. 074511 1. 963677 1. 999895 2. 961846 2. 20319 1. 648384 2. 244341  
2. 031376 2. 181504 1. 904563 2. 131572 2. 889969 1. 984347 1. 898417 1. 918404 1. 730135  
3. 005765 1. 294288 0. 77332 1. 896126 1. 28225 2. 057044 1. 075935 1. 374879 1. 427001  
3. 05259 4. 500552 4. 885307 4. 201464 5. 337416 4. 132528 2. 992659 3. 580805 4. 551393  
1. 364598 1. 442014 1. 207482 2. 414166 2. 108126 1. 260328 1. 790547 1. 366427 1. 074646  
2. 033151 1. 854334 1. 862465 1. 588127 2. 023972 2. 308428 1. 931332 2. 156685 1. 569799  
6. 312275 4. 546639 5. 612041 5. 152826 5. 508797 4. 434755 5. 510692 4. 397301 5. 189272  
3. 027542 2. 674505 2. 326737 3. 479854 2. 946795 3. 387656 3. 242997 2. 395902 2. 038047  
4. 491774 3. 899707 4. 13516 3. 150592 3. 725487 4. 258727 3. 127526 3. 449723 3. 477442  
7. 6543 7. 39256 7. 67748 7. 603581 7. 715857 7. 124275 7. 579536 7. 579592 7. 480287  
4. 100519 2. 919216 3. 713696 5. 06536 4. 367729 4. 448223 3. 885741 3. 236976 3. 380627  
1. 294982 1. 65501 0. 968615 1. 12932 1. 150758 1. 757902 1. 349848 1. 914983 2. 047558  
1. 864655 2. 386566 2. 151656 1. 854309 1. 328111 2. 182925 1. 522692 1. 634846 1. 579578  
3. 561086 5. 078522 3. 198879 3. 282095 1. 310923 3. 985064 3. 068516 1. 242207 3. 6779  
2. 550313 3. 786765 3. 825648 3. 073848 3. 156532 2. 898692 3. 020937 3. 015471 3. 135904  
1. 227313 0. 895119 0. 847655 0. 713642 0. 577511 0. 901699 0. 827435 0. 884709 0. 804052  
4. 311522 4. 502656 4. 858613 5. 650068 2. 426119 4. 721306 4. 029753 4. 58819 3. 91913  
3. 210116 2. 260816 2. 578805 2. 741309 2. 591424 2. 259963 2. 753254 2. 592615 2. 772206  
2. 388847 3. 23567 2. 866894 2. 860581 2. 942229 2. 993837 3. 214063 3. 413148 2. 36133  
3. 166019 4. 409395 3. 315266 3. 061735 2. 278265 3. 095578 1. 893104 2. 625059 2. 376117  
2. 310049 1. 971831 3. 288603 2. 194962 1. 772106 3. 233724 2. 179468 2. 255188 2. 685757  
1. 997246 1. 910518 1. 83413 2. 13365 1. 499436 1. 604751 2. 184849 2. 114432 2. 459348  
3. 722356 4. 098905 3. 014212 3. 507411 3. 709591 3. 076859 2. 541808 3. 251051 3. 352917  
1. 434444 1. 583669 1. 223598 0. 998635 0. 984147 1. 078945 1. 613551 0. 959673 0. 915771  
1. 129362 1. 05261 1. 092295 0. 839813 1. 117552 1. 180748 1. 572723 1. 183494 1. 193121  
2. 287761 2. 676018 2. 001156 2. 770118 2. 741883 2. 79437 1. 973613 2. 538094 2. 792551  
3. 600362 4. 837463 5. 359909 5. 143723 4. 683336 4. 51489 2. 604286 3. 703861 3. 787003  
2. 858525 3. 011246 2. 050264 1. 60272 2. 322943 3. 276513 2. 907961 1. 326335 2. 666071  
3. 923553 3. 417768 3. 572872 3. 04954 4. 700144 3. 006681 3. 36006 4. 372228 3. 794511  
2. 154614 1. 107339 1. 994551 1. 976594 1. 291825 1. 885023 1. 060169 1. 320328 1. 348276

3.008595 3.276881 1.867754 3.963608 3.277829 2.450087 4.016704 3.627915 2.495354  
4.224612 3.062812 3.505707 3.070812 3.391541 3.435261 3.679009 3.709625 3.298849  
1.821115 1.357871 2.603511 1.286604 1.356464 1.303957 1.242499 1.838094 1.330123  
1.592755 0.990572 1.01809 0.591254 1.744385 1.743728 0.761109 1.699696 2.188517  
2.795155 4.382133 3.886623 3.70868 3.522682 4.044896 3.443458 4.14628 3.664395  
1.112668 1.23431 1.32489 1.351382 0.906881 1.392628 0.969942 0.904647 1.038849  
2.406927 6.084859 6.303259 6.613012 5.032737 7.327767 6.541817 7.313726 5.557562  
2.572776 3.356365 2.484039 2.473588 2.950222 3.107832 2.633177 2.803312 2.664275  
2.139665 1.976931 2.270185 1.928746 3.092839 1.823535 3.427651 3.48784 2.86862  
3.540817 2.110025 2.267136 1.688474 1.86644 1.771813 1.563086 1.587786 2.80455  
1.807191 1.641867 1.82831 1.713006 1.948779 2.269254 1.374188 1.519427 2.450929  
2.341016 1.982008 1.279532 2.113389 1.489682 1.780721 1.881854 1.497381 1.327181  
2.942649 1.75466 1.577581 2.55843 1.507599 1.552009 4.332424 2.464885 1.835211  
2.175058 2.81418 2.463117 2.138066 2.461684 2.067398 3.377512 1.710051 2.377479  
2.059109 2.10409 1.748227 1.991182 1.684355 2.128483 2.409475 2.061805 1.897537  
7.489991 7.108929 7.025895 7.163305 7.219078 6.787897 7.24708 6.945989 6.969528  
0.74204 0.60019 1.418498 1.413038 0.97168 1.229745 0.924461 0.822885 0.877984  
1.330005 1.687571 1.264213 1.584502 1.418246 2.06848 2.290466 1.263056 0.985068  
2.271227 3.267313 2.618385 2.204152 1.712816 2.527229 2.040839 3.156091 2.76221  
1.95926 1.752138 2.527637 2.037015 2.769483 2.360626 2.277451 2.288514 2.510528  
3.450303 2.385273 2.94224 2.437253 2.531624 3.556267 2.508619 2.664264 2.276617  
5.527268 5.666445 5.403848 4.089851 2.217757 5.293614 5.961303 5.013415 4.462166  
3.474928 3.763284 2.55886 3.496252 3.454105 2.99014 3.310226 3.096689 3.249772  
2.185906 3.426047 2.503431 1.483808 2.200289 2.505875 2.089037 2.253527 2.757011  
1.488522 1.205065 2.054127 1.632529 1.331817 1.315416 1.163308 1.447875 1.459119  
2.65038 3.481283 3.200173 2.67278 2.630147 2.976933 2.519712 3.447801 1.842343  
1.538133 1.498519 1.628197 2.701217 1.769605 2.018826 2.376706 2.010702 1.612196  
3.30013 3.765485 3.243125 3.917957 3.043332 3.649298 4.26991 4.583813 3.55807  
4.480748 4.985982 5.33601 2.617697 3.833776 4.583487 3.630049 6.789988 4.683159  
4.709844 3.838221 3.883722 3.730093 2.826686 3.517338 2.807245 2.080741 2.681749  
3.940812 4.699587 4.66383 3.426855 5.608232 3.809544 5.511728 3.820632 5.101908  
3.714729 2.082598 2.409932 1.483852 2.191569 2.890665 2.863447 1.746217 2.864367  
1.517589 2.4609 2.723726 3.553573 4.225455 2.543908 1.262958 1.315855 4.373753  
3.092834 2.194881 2.304662 1.791337 2.359222 1.938312 1.783347 3.27043 2.280543  
2.494158 2.201589 2.024092 2.576752 1.454896 2.818337 3.199618 3.272109 2.14024  
2.260503 1.687736 2.013421 2.019212 1.465789 2.227264 1.457881 1.297224 3.673697  
1.951837 1.547543 1.85147 1.663182 1.667915 1.426753 2.661754 2.028245 1.487027  
2.416876 2.502521 3.867522 2.461865 3.0907 2.501383 2.64707 2.717713 3.251564  
2.776671 1.768488 2.555883 1.585426 1.883874 1.533834 2.231049 1.52927 2.018738  
2.867664 2.923375 3.125487 2.97779 2.777525 3.089859 3.30339 2.900393 3.132957  
3.197596 3.600736 2.757266 2.717278 3.077673 2.870019 2.538183 2.380888 2.944936  
4.209687 6.052422 4.670933 5.896413 3.818759 4.53991 4.362693 6.272128 5.156318  
0.927579 1.581679 0.852765 0.887505 1.178014 0.855982 0.95372 1.782696 1.564919  
1.203435 1.446824 1.272753 1.751595 1.323755 1.521471 1.887417 1.220377 1.625746  
2.270029 1.122878 2.281802 1.632337 2.007208 1.559583 1.807517 1.666538 1.607987  
2.592326 2.330451 1.892543 2.367153 2.38076 1.886945 1.997278 2.212501 2.063855  
2.294417 1.326747 1.758236 2.415703 1.68447 2.180069 1.989668 2.503398 2.45565  
3.589748 4.174053 5.023289 4.36472 4.593906 3.726552 3.032251 3.779089 3.977548  
1.451174 1.433518 1.72692 1.09973 1.379175 1.759996 0.970237 1.103288 1.296828  
2.30148 3.148543 4.488637 2.730212 1.699654 3.650235 3.370999 3.935595 4.20212  
3.970915 4.916789 5.16989 4.968475 4.150476 4.467401 4.3764 4.484063 4.873786

2.247247 2.775256 2.264618 2.88835 2.669042 2.930213 2.967661 2.908992 2.670335  
2.031311 1.75909 1.936524 2.303654 2.183447 1.904819 1.619882 1.975038 2.251894  
2.275924 2.167039 2.013858 2.138296 2.242069 1.842285 2.161451 2.15722 1.756094  
0.758018 1.888722 1.238275 0.777368 1.861589 0.80326 2.420643 1.154242 0.760664  
2.105638 1.811541 3.414979 2.921337 1.941458 2.007651 1.534243 1.549923 2.412466  
1.41926 1.191143 2.000948 1.689094 1.265359 1.144971 1.445423 1.603404 1.159774  
3.278336 1.758043 1.911286 1.331994 1.907928 1.799271 2.598826 1.923793 1.553082  
0.947921 0.840205 0.991854 0.669158 0.693538 0.940534 0.967884 0.847791 0.685735  
0.942577 2.085158 0.96722 1.715405 1.593198 1.612985 1.232196 1.113675 1.614213  
2.70396 1.766073 2.185905 2.46359 1.795829 1.992629 2.020904 1.771031 2.398404  
6.598481 5.408707 5.71657 5.591659 5.459625 5.221535 5.792798 4.724479 4.687252  
0.755583 1.30991 1.115813 1.300896 1.314833 1.548381 1.8242 1.099911 1.400696  
0.987611 1.229291 1.290815 1.144407 0.874902 1.361417 1.459989 1.638544 1.015721  
0.965464 0.464647 1.203424 1.193195 1.013046 1.38178 0.699273 1.639426 0.812019  
1.302497 1.027097 1.692418 1.362848 1.133344 1.307765 1.188033 1.287115 1.025874  
1.175379 0.901769 0.734679 1.060367 1.004336 1.241374 2.339153 1.73894 1.020413  
1.05178 1.634694 1.01889 1.300585 0.863185 1.624277 1.787192 0.908696 1.497491  
0.874441 0.996422 0.903838 1.427594 0.897646 0.746139 1.502962 1.098764 1.076945  
0.787959 0.967875 1.051388 0.763757 1.243551 0.997748 1.651069 1.072383 0.8499  
0.785164 0.922631 0.966906 0.888802 0.92393 0.568882 0.522363 1.184674 0.838895  
1.238864 0.682367 0.997459 0.814331 1.407837 0.871046 0.79947 0.659973 1.368031  
2.316107 2.616758 1.963483 2.386715 3.202825 1.792812 4.987983 2.986128 2.064968  
1.13554 0.984313 0.490208 1.630196 0.993754 0.917777 0.538707 1.030242 1.472731  
1.213039 2.195319 1.185421 1.055933 1.284995 2.043294 1.091977 1.997329 1.487754  
2.116662 0.860408 3.100663 3.113786 2.151495 1.53643 3.120883 1.222647 0.462519  
0.617384 2.185904 0.514939 0.695487 0.734252 0.908382 1.261565 1.181427 1.543871  
1.946977 1.567649 1.846877 1.914572 1.792333 1.639838 2.318887 3.229844 2.151384  
3.5387 4.008777 4.015215 3.435023 3.413927 3.565446 2.194085 3.84008 2.465138  
2.783343 1.279578 2.298104 2.088043 1.91475 1.422507 1.207167 1.961731 1.782162  
1.889912 1.09411 1.608296 1.465666 1.328824 1.233603 1.416056 1.43285 1.738464  
3.214591 4.174855 3.841948 4.077504 3.568754 2.962519 4.605062 4.391739 5.21512  
1.054512 0.72683 0.62552 0.738195 0.806066 0.741207 1.229189 1.29966 0.798274  
1.413175 2.013261 1.296831 1.108144 0.64792 0.937696 0.955344 1.022638 0.671741  
1.29633 1.016655 1.268597 1.648677 0.944249 1.42107 0.85603 1.194032 1.536525  
2.324267 3.986157 2.095609 1.435786 2.927548 1.859033 2.086499 3.265952 2.761302  
3.012 2.470362 2.69644 2.827547 2.459894 2.20652 2.272009 2.919237 2.825043  
2.243236 1.563074 1.478866 1.528051 1.839537 1.943681 1.293368 1.079076 2.101782  
1.218661 1.276854 0.641237 1.039644 0.552106 1.725892 0.890383 1.111064 0.817435  
4.43779 3.548817 4.045003 2.938946 5.067427 3.032232 2.84218 5.015882 3.90626  
0.869144 0.883209 0.701503 0.878426 0.827873 0.764752 0.983976 0.970347 0.933781  
4.214323 2.03839 3.967956 3.520314 3.468578 3.314269 4.366362 2.532808 3.024225  
0.877289 1.214461 1.780184 1.287535 0.589651 0.90326 1.124176 0.926416 0.681954  
3.617457 2.59162 4.376856 2.273375 2.759952 3.275826 2.318382 3.295973 2.219468  
1.500086 1.481771 1.765934 1.503022 2.93931 1.491856 1.558196 1.907759 1.236674  
3.131687 2.827592 2.514118 2.67192 2.501439 2.606958 2.889943 3.237384 3.282455  
1.77189 1.412066 0.555064 1.372088 0.768218 1.11224 1.003065 1.116871 0.972613  
1.27642 0.828583 0.522846 0.912999 1.100555 0.912115 1.067734 0.584997 1.097301  
0.958836 0.959328 1.92551 1.619117 0.650719 0.762413 0.72283 0.668925 1.29727  
3.011111 2.21895 1.522859 1.744404 1.772309 1.334206 1.67803 1.716243 1.852168  
1.201747 0.688487 1.579877 1.24351 0.571149 0.635505 1.316931 1.382432 0.727167  
1.959017 1.294207 1.354298 0.958851 1.018907 1.813006 1.20809 1.267194 1.408147

|          |          |          |          |          |          |          |          |          |
|----------|----------|----------|----------|----------|----------|----------|----------|----------|
| 2.974595 | 2.119315 | 2.144255 | 2.453663 | 3.02014  | 3.139713 | 2.975667 | 2.968332 | 2.579406 |
| 1.49804  | 1.341358 | 1.434165 | 1.370521 | 1.46738  | 1.128008 | 1.466453 | 1.310925 | 1.280074 |
| 1.569962 | 1.257014 | 2.222008 | 1.36811  | 1.508073 | 1.867678 | 1.593618 | 1.189227 | 1.636635 |
| 2.496021 | 2.901867 | 2.200008 | 1.638484 | 1.949523 | 1.988466 | 1.879927 | 1.872233 | 2.026116 |
| 0.828609 | 0.908211 | 0.668035 | 0.929999 | 0.823207 | 0.87833  | 0.968732 | 1.063134 | 0.945266 |
| 1.230281 | 1.296332 | 0.725308 | 1.712785 | 1.181425 | 1.18631  | 1.019163 | 1.228346 | 1.242434 |
| 0.675334 | 0.81418  | 0.711943 | 0.794847 | 0.722419 | 0.924101 | 0.696204 | 0.714066 | 0.868676 |
| 1.407787 | 0.723676 | 1.927168 | 0.972633 | 1.009381 | 2.024236 | 1.007331 | 1.237034 | 1.092267 |
| 1.228459 | 0.744048 | 0.703173 | 1.113912 | 1.050048 | 0.775652 | 0.976833 | 0.86754  | 1.356795 |
| 2.289915 | 1.061895 | 1.305947 | 1.695402 | 2.329008 | 1.10117  | 1.181593 | 1.58503  | 1.807245 |
| 5.671594 | 5.405044 | 5.385146 | 5.465527 | 5.237852 | 4.856208 | 5.836339 | 5.584846 | 5.512907 |
| 0.668799 | 0.796491 | 0.921198 | 1.195738 | 1.339416 | 1.431905 | 1.28033  | 1.101497 | 0.793919 |
| 0.759168 | 1.012548 | 1.044896 | 1.085648 | 0.923917 | 0.902435 | 1.393698 | 0.659186 | 0.833697 |
| 1.634544 | 1.820875 | 1.001289 | 1.393885 | 1.049484 | 1.776893 | 1.610164 | 1.118145 | 1.085022 |
| 1.169868 | 1.095627 | 0.742821 | 0.733197 | 1.089691 | 1.013687 | 0.904336 | 0.906421 | 1.438796 |
| 1.939811 | 1.223535 | 1.037318 | 1.067727 | 1.694034 | 1.481997 | 1.639329 | 2.107864 | 1.832741 |
| 1.436716 | 1.173319 | 0.776731 | 1.869635 | 1.337564 | 1.002449 | 1.041055 | 1.3026   | 2.131352 |
| 1.307672 | 3.675925 | 1.507104 | 1.934887 | 2.333318 | 2.082516 | 3.778541 | 2.662493 | 1.546379 |
| 1.747865 | 1.247301 | 0.531114 | 0.907638 | 1.600915 | 1.351349 | 1.469476 | 1.662098 | 1.752743 |
| 1.394631 | 1.311849 | 0.959404 | 1.670854 | 1.277008 | 1.368051 | 1.296387 | 1.356095 | 1.460897 |
| 0.955565 | 1.264908 | 0.925662 | 0.651818 | 0.850572 | 0.839101 | 0.773236 | 0.874256 | 0.640003 |
| 1.914879 | 0.989092 | 1.144859 | 1.465942 | 1.74596  | 1.117837 | 2.89696  | 0.90586  | 0.955429 |
| 1.347855 | 0.518566 | 0.814157 | 0.803332 | 1.879896 | 0.73785  | 0.803982 | 0.75066  | 0.757429 |
| 1.099553 | 1.163404 | 0.691685 | 1.488503 | 1.686901 | 1.200899 | 0.797521 | 0.97474  | 1.225938 |
| 0.66104  | 0.82089  | 0.580856 | 1.078492 | 1.251095 | 0.693475 | 1.046303 | 1.004061 | 1.014842 |
| 2.011986 | 1.745548 | 2.515237 | 2.920174 | 1.515978 | 1.346202 | 0.998226 | 0.961628 | 1.755377 |
| 2.475949 | 2.350638 | 2.715884 | 2.26157  | 2.62784  | 2.626063 | 2.773384 | 2.883276 | 1.772183 |
| 0.687414 | 1.098576 | 0.796579 | 0.833597 | 0.80876  | 1.086233 | 1.085223 | 0.865099 | 0.855028 |
| 0.74384  | 0.977265 | 0.697617 | 1.069005 | 1.567213 | 1.102887 | 0.964996 | 1.539003 | 0.919055 |
| 5.935624 | 4.790461 | 4.533182 | 5.419626 | 3.499072 | 4.842945 | 4.499968 | 4.50052  | 5.634552 |
| 0.491918 | 1.203079 | 0.508484 | 0.723401 | 1.565576 | 0.617543 | 0.9678   | 1.833922 | 0.981978 |
| 1.327499 | 0.734284 | 1.390695 | 2.010333 | 1.017005 | 0.934743 | 1.260228 | 0.714505 | 0.73189  |
| 3.358192 | 3.589425 | 3.66395  | 2.739712 | 4.950434 | 4.071259 | 3.116049 | 3.603055 | 4.145798 |
| 3.041417 | 3.099553 | 2.518118 | 2.916642 | 2.94956  | 2.083149 | 2.616652 | 3.345955 | 3.454939 |
| 1.789508 | 0.613132 | 1.435262 | 1.287112 | 0.835172 | 1.365502 | 1.56948  | 1.540578 | 1.26903  |
| 1.973289 | 1.460752 | 2.862858 | 1.971863 | 0.952912 | 1.265732 | 3.484364 | 2.140838 | 1.457039 |
| 1.893533 | 1.672221 | 1.401126 | 1.753522 | 1.39525  | 1.670533 | 2.044427 | 1.097166 | 2.133645 |
| 3.022466 | 4.593354 | 3.388249 | 2.461374 | 3.268826 | 3.581107 | 2.69872  | 2.988522 | 2.748064 |
| 2.282025 | 2.60375  | 3.102675 | 1.752729 | 1.418408 | 1.984763 | 1.962877 | 1.75302  | 1.2147   |
| 2.97359  | 3.754598 | 4.438846 | 3.036357 | 3.336676 | 3.279665 | 2.540732 | 2.861229 | 3.02971  |
| 1.691705 | 1.375919 | 1.514917 | 1.493072 | 1.235834 | 1.713172 | 1.499852 | 2.024436 | 1.394614 |
| 1.247486 | 0.853513 | 0.676553 | 0.597874 | 0.769398 | 0.907693 | 0.799914 | 0.935301 | 1.340059 |
| 9.301264 | 9.11021  | 9.287706 | 8.917846 | 8.73296  | 8.968755 | 9.586155 | 8.687741 | 9.327087 |
| 1.023207 | 1.135355 | 1.083148 | 1.034851 | 1.412029 | 1.174882 | 0.804063 | 0.983486 | 0.962171 |
| 1.33258  | 1.945385 | 2.050626 | 1.899568 | 1.769683 | 3.312048 | 1.709173 | 2.532993 | 2.245503 |
| 1.653775 | 1.774129 | 1.22947  | 1.820064 | 2.033297 | 1.062061 | 2.837282 | 1.765293 | 1.729252 |
| 3.507913 | 3.057107 | 4.261977 | 3.154966 | 3.353691 | 2.660112 | 3.526854 | 2.380325 | 2.914259 |
| 6.521927 | 6.44939  | 7.316438 | 7.002044 | 6.247783 | 6.825907 | 6.895095 | 5.900382 | 6.260354 |
| 4.416203 | 4.282935 | 4.607547 | 3.273381 | 4.375516 | 4.090395 | 5.402281 | 4.805951 | 3.611766 |
| 1.234072 | 1.126168 | 0.770165 | 1.548361 | 1.120849 | 0.75475  | 0.487048 | 0.838989 | 1.370086 |
| 5.370238 | 1.272398 | 1.051178 | 2.004738 | 1.228935 | 1.313689 | 1.073065 | 1.015757 | 1.618772 |

5.236953 4.397293 5.18515 4.922663 2.184917 4.827044 4.882952 4.800208 2.559282  
3.780835 1.375028 2.327299 2.309572 2.743469 1.773251 2.564467 1.80598 3.195488  
0.861407 0.774949 0.51419 1.030151 1.208627 2.428378 1.210769 0.906339 0.721434  
1.295712 1.258022 1.636143 1.322679 1.678498 0.732381 0.744773 1.14756 0.903383  
2.208391 1.726177 4.280182 2.864197 2.399324 3.614203 3.84207 3.078018 3.605041  
1.22711 0.735819 1.00908 1.125558 0.922123 0.845037 0.642947 1.090984 1.521604  
3.923621 2.697361 2.497841 3.704929 4.091567 2.984377 2.811011 3.30929 3.447938  
1.75224 2.036752 1.635708 1.712342 1.678793 1.606758 1.791476 1.32913 1.450905  
2.749523 5.388582 4.506954 5.41559 5.620682 4.751061 4.83236 6.392533 4.827753  
4.300582 3.445434 4.227728 2.50536 2.616432 4.070644 3.592048 2.909074 4.300582  
1.758254 1.191597 0.82759 1.291823 1.527071 1.294066 1.209531 0.851939 1.420168  
2.071011 1.4136 1.914109 2.006667 1.746655 1.696509 3.389313 1.869288 1.903081  
2.194287 2.20944 3.418656 1.909899 2.216982 2.373626 3.023714 1.612903 2.426943  
2.429701 3.360287 2.970483 3.976046 4.435175 2.859203 4.047586 1.244347 1.824751  
1.854243 3.286903 2.418785 3.096223 1.467605 1.54401 2.159528 1.666215 1.556931  
1.868177 1.578784 1.861287 1.908874 2.026271 1.817244 3.183869 1.845852 1.249896  
6.394885 4.715944 4.341916 5.959283 5.156677 4.072213 4.372449 4.954009 4.457014  
4.485149 5.614346 5.117516 4.763285 5.05054 4.957628 5.698668 5.039357 5.595598  
1.163502 1.17873 1.299515 1.374401 1.798585 1.76293 2.308655 1.242051 1.631256  
3.557384 3.662462 3.879953 3.565669 4.314031 3.136728 3.789281 4.15449 3.979444  
5.107352 5.708536 5.54329 6.739323 6.303186 5.202843 6.999254 4.629194 6.226483  
2.691806 2.389955 2.47117 1.707462 1.741915 1.520955 2.647072 2.260641 2.394046  
4.503319 2.382232 1.592401 3.942929 2.342596 2.288292 1.840168 3.000787 2.107488  
4.15166 4.545692 5.617901 5.261856 5.556126 4.550457 3.853298 5.614695 5.454975  
5.203287 6.200911 5.731995 5.840765 5.037043 5.538972 5.492879 6.351951 5.674217  
0.924878 1.104574 1.046509 1.09736 1.562871 1.024267 0.772322 0.797913 0.428329  
1.14316 1.340241 0.777973 0.435335 1.416247 1.234226 2.009451 1.327779 1.357724  
2.339651 2.482944 1.566119 1.754358 2.278139 1.882473 1.531253 1.605141 1.972669  
0.645088 1.108444 0.488578 0.665281 1.291787 0.671376 1.134791 0.691155 1.128498  
1.320793 1.092793 1.158183 0.821172 1.361593 1.293342 2.243447 1.128023 1.369261  
0.822727 1.7967 1.199314 5.722498 1.66188 0.295021 1.179314 2.194347 1.66188  
1.781026 1.330277 1.587117 1.74903 1.453068 1.260981 1.843434 1.314647 1.456846  
1.49678 0.991688 0.763461 0.823547 0.839814 0.953313 1.352577 1.134251 1.354964  
1.474605 1.145026 0.929013 0.881819 1.056961 0.9981 1.302302 1.291557 1.202339  
0.836653 1.017195 0.913036 0.928854 0.782104 0.803289 0.853118 0.922748 1.459386  
2.63273 2.018986 2.304138 2.045066 2.947203 2.472452 2.03979 1.579868 1.325565  
2.12761 3.331179 2.243256 3.311998 3.153139 2.5767 3.318465 2.129797 2.093923  
1.095861 0.779882 0.897613 1.620828 1.69845 1.105621 1.173949 1.063796 0.880909  
4.907638 4.642731 5.152085 4.491749 4.666901 3.695704 4.62051 5.237678 3.142038  
1.50703 0.929669 0.812634 0.981906 1.292466 1.362064 1.62291 1.044466 1.485771  
1.08633 1.368032 1.835004 1.836391 1.302729 1.116018 1.291934 4.542909 1.201793  
1.598013 1.142006 1.430073 1.618159 1.370332 1.21234 1.615629 1.028877 1.96932  
1.578606 0.930484 1.35331 1.147909 1.827695 0.888903 1.239181 1.308827 1.093428  
0.965896 0.801628 0.782932 0.704072 1.13529 1.057683 0.766607 0.822858 1.021415  
1.126895 1.514997 1.181335 1.451875 1.392457 2.138464 2.391765 0.724757 1.401611  
3.602954 1.972072 2.148447 2.653557 3.418298 2.380134 1.434796 2.425949 2.655566  
2.437112 2.168328 2.925603 1.749931 1.99586 2.087167 2.466174 3.108892 1.973017  
1.368097 1.437084 1.203548 1.427083 2.03846 1.269178 2.55911 2.702415 2.109981  
1.86236 1.097447 1.005788 1.972894 0.750235 1.04481 1.253675 1.075799 1.219994  
2.742248 1.42513 0.662446 1.978883 1.297917 3.082443 2.116069 1.582692 2.070968  
0.818057 1.014471 0.694671 0.847131 1.298683 1.461099 0.853181 1.087767 1.68205

0. 52288 0. 761683 1. 023549 1. 532463 0. 724198 0. 625774 1. 045108 1. 705472 1. 480532  
1. 667972 1. 617524 2. 542712 1. 666003 1. 625049 1. 901878 2. 959853 2. 109971 1. 66614  
1. 132126 0. 670643 0. 803465 1. 348854 0. 785646 0. 865127 0. 918412 0. 524782 1. 589629  
2. 6336 1. 72087 1. 509115 2. 153607 1. 675022 1. 972253 1. 477503 1. 011303 0. 926407  
3. 346614 3. 453204 3. 502951 3. 354921 2. 457743 2. 600015 3. 994713 2. 962162 3. 015301  
6. 582713 5. 280532 5. 709893 5. 636514 4. 796741 5. 123049 5. 20096 5. 311534 4. 212388  
2. 036723 0. 881958 1. 082778 1. 161043 1. 013546 1. 027727 1. 469128 1. 255 0. 940759  
1. 297443 1. 221647 1. 271399 1. 905504 1. 364193 1. 125489 1. 117764 1. 5219 1. 452224  
1. 313399 1. 324778 3. 145158 1. 319631 1. 874403 0. 730105 1. 512473 0. 815229 0. 787282  
1. 213819 0. 989576 0. 843954 1. 2667 1. 257706 1. 090009 0. 941785 0. 859917 1. 404215  
1. 528164 1. 363784 1. 353659 1. 330495 1. 141775 1. 621184 1. 523478 1. 616969 1. 622036  
3. 275392 3. 404956 2. 676252 3. 907413 2. 895659 4. 026155 3. 135497 3. 164145 3. 10693  
5. 565966 4. 477149 4. 801494 4. 247866 4. 00032 3. 981228 4. 785537 4. 646174 3. 170039  
2. 327526 1. 139224 2. 382842 3. 356081 1. 261131 1. 62479 2. 261897 1. 576736 1. 757635  
1. 831448 1. 401499 1. 51225 1. 339814 1. 097734 0. 964602 1. 3123 1. 395755 1. 6539  
1. 529217 0. 911121 0. 819716 0. 925083 0. 93707 1. 064658 1. 259535 1. 097379 0. 917989  
3. 324546 3. 231164 2. 099659 3. 665819 2. 720406 2. 247798 2. 461962 2. 861882 3. 297667  
4. 735862 2. 943967 3. 173156 3. 074804 4. 008254 3. 731473 2. 771066 3. 290765 1. 206924  
1. 249272 1. 538034 1. 749193 1. 368979 1. 555935 0. 777476 0. 882725 0. 847465 1. 747059  
1. 402691 1. 588091 1. 49802 2. 309734 1. 647333 1. 130944 1. 13508 1. 903661 1. 688661  
1. 522647 2. 31853 1. 51757 1. 932067 1. 514795 2. 061025 1. 665066 1. 570912 2. 263023  
8. 488007 6. 966458 6. 118657 6. 735683 6. 749961 6. 341236 6. 442925 6. 988603 6. 360611  
1. 643092 2. 387709 1. 500139 1. 965056 2. 034049 1. 629011 1. 458891 1. 969358 2. 017488  
6. 795669 6. 945377 7. 125032 7. 251837 7. 000281 7. 099336 6. 772161 6. 50892 6. 659095  
6. 206948 6. 57774 6. 468437 5. 596697 6. 079134 5. 920882 6. 233188 6. 346398 5. 959209  
4. 981821 5. 199904 5. 99305 5. 37511 5. 541542 5. 442955 4. 684403 4. 96205 5. 20199  
7. 394851 7. 499527 7. 2252 8. 77877 8. 287701 8. 463026 7. 744234 7. 205377 8. 060102  
7. 119835 7. 268893 7. 277995 6. 273772 6. 962732 6. 764855 7. 284374 7. 183139 7. 411027  
6. 21114 4. 929726 4. 880555 2. 996615 5. 115162 4. 701384 3. 518957 3. 948524 4. 355562  
1. 920179 1. 120092 1. 445963 1. 42559 1. 334525 1. 419968 1. 276104 1. 26191 1. 857641  
2. 577814 2. 026543 1. 930262 1. 300028 2. 434472 1. 615173 2. 075095 1. 848907 1. 875131  
2. 827447 3. 00962 1. 75651 2. 27077 1. 543406 2. 332306 1. 865145 1. 7345 1. 81205  
3. 090972 2. 548507 1. 750551 1. 026198 2. 512288 1. 517765 2. 939256 1. 39307 1. 122446  
1. 175427 0. 706604 0. 998804 1. 227407 0. 986002 1. 251214 2. 281421 0. 851872 1. 506949  
1. 319199 1. 32937 1. 444131 1. 654139 2. 138533 1. 91053 1. 799982 1. 606243 0. 954615  
2. 463281 1. 339286 2. 22146 1. 565205 1. 456566 2. 428304 2. 563108 1. 994085 1. 697282  
1. 566926 0. 533579 1. 69755 1. 451099 1. 152017 1. 585167 1. 187415 1. 099962 0. 848858  
1. 90576 1. 540412 1. 228957 1. 658724 1. 586267 1. 387548 1. 422 1. 478214 1. 813783  
1. 325283 1. 245566 0. 828995 0. 988769 1. 090978 0. 902706 1. 278481 0. 840479 1. 04818  
1. 217069 0. 920946 1. 072065 1. 407658 1. 487304 0. 907975 0. 906878 0. 693321 1. 024544  
0. 939371 0. 8141 0. 742229 0. 706612 0. 875237 0. 934295 0. 82707 0. 916573 0. 999771  
1. 397452 1. 338887 1. 415517 0. 897401 1. 13457 1. 1409 3. 571006 0. 857513 1. 210284  
0. 990076 2. 336059 0. 666449 1. 947773 1. 287363 1. 292899 0. 771886 3. 14222 0. 96779  
2. 853088 2. 435997 2. 776437 3. 018602 3. 328878 2. 870699 2. 964911 2. 451139 2. 60944  
1. 725928 1. 086464 0. 723553 1. 578187 0. 940288 1. 276377 1. 004765 1. 010668 1. 139007  
1. 427107 1. 182671 1. 032761 1. 060649 1. 341421 1. 044836 1. 299269 0. 891402 0. 943317  
1. 526869 1. 003175 1. 051242 0. 774139 0. 634171 2. 83275 0. 381546 1. 153022 0. 768684  
2. 114563 1. 389927 1. 567527 2. 293723 1. 707918 3. 567634 1. 912741 1. 667226 2. 561748  
3. 861943 3. 652483 4. 308931 3. 816588 4. 260017 3. 594301 5. 350237 4. 919342 4. 054479  
3. 215414 2. 289314 2. 926184 3. 499838 3. 255947 2. 945664 3. 18703 2. 790777 2. 404216  
1. 737518 1. 931717 2. 029355 3. 620044 1. 654155 1. 861728 2. 082952 1. 850751 1. 823781



1. 333886 1. 130788 0. 758158 0. 653738 0. 934966 1. 612145 2. 286663 0. 641947 1. 510788  
1. 292359 1. 462984 1. 26905 2. 229994 2. 108047 0. 930008 2. 119571 1. 314863 1. 515543  
0. 596073 0. 648607 0. 815946 0. 671881 1. 487078 1. 146519 1. 000121 0. 730873 2. 037555  
1. 23523 0. 850047 1. 039473 1. 66171 0. 931411 0. 9755 1. 886136 1. 565076 0. 880125  
1. 979793 1. 300055 2. 985612 1. 366982 1. 115795 1. 831837 1. 746505 1. 058124 1. 316354  
2. 667118 2. 903151 1. 989034 1. 796815 2. 136353 1. 747553 3. 057406 1. 855508 2. 500452  
1. 371801 1. 106011 0. 826502 1. 472917 0. 982512 0. 875848 0. 78609 0. 869175 1. 256704  
1. 686132 1. 476863 1. 179598 1. 127492 1. 881026 1. 036579 0. 980145 0. 890489 0. 845804  
1. 68818 2. 071858 0. 945326 1. 160903 0. 723307 1. 725927 0. 688301 0. 639508 1. 376469  
0. 731192 0. 854969 0. 726764 0. 88676 0. 83604 0. 777349 0. 884182 0. 429232 0. 858823  
1. 070028 1. 101321 1. 259198 0. 849838 1. 334006 0. 991855 0. 852526 1. 131912 1. 117813  
1. 111102 1. 074578 1. 630168 1. 557205 0. 626287 1. 15922 0. 766967 1. 162072 1. 994385  
1. 304836 2. 170636 2. 573263 0. 798748 3. 259671 0. 812377 1. 010564 2. 698257 2. 658819  
0. 924257 1. 144054 0. 836057 1. 232498 1. 21709 0. 77382 1. 086104 1. 264116 1. 36687  
0. 964327 1. 02358 0. 916692 1. 038373 0. 771729 0. 854511 0. 689309 0. 81294 1. 224918  
2. 507396 2. 434119 2. 577389 3. 008702 2. 265532 3. 151779 3. 616214 2. 557452 2. 930977  
2. 922911 2. 171205 2. 66551 6. 17216 2. 774912 1. 841177 2. 777089 3. 111613 4. 01352  
2. 456837 1. 951599 2. 908966 3. 013299 2. 60657 2. 548597 2. 076373 3. 386759 2. 428306  
1. 73769 1. 222643 1. 426519 1. 171935 1. 246554 1. 330005 1. 560075 1. 279795 1. 204297  
1. 356103 1. 040385 0. 857272 1. 062778 1. 362741 1. 595708 1. 108999 0. 823874 1. 007673  
3. 349512 2. 089278 2. 568137 1. 929078 1. 299139 1. 848044 2. 380433 2. 545158 1. 79093  
1. 733475 1. 072905 0. 70088 1. 269444 1. 580539 1. 871157 2. 30693 1. 288272 0. 780836  
7. 331548 1. 417398 2. 396208 1. 663439 1. 251898 1. 441093 1. 572994 1. 343431 0. 800901  
1. 148888 1. 487689 0. 836417 0. 895132 0. 824933 1. 678444 1. 967482 0. 999126 1. 019665  
6. 684024 3. 781179 2. 770479 2. 759753 5. 370161 4. 759298 3. 242544 2. 343778 2. 926255  
2. 167702 0. 996282 1. 067041 1. 473339 1. 047528 1. 528562 1. 766358 0. 945062 1. 087161  
1. 217829 0. 722508 0. 559933 0. 903673 1. 368549 0. 785369 1. 303887 0. 80315 0. 817827  
1. 479807 1. 514296 0. 630556 0. 719336 0. 871406 0. 796193 0. 977511 0. 956544 0. 831268  
2. 644353 2. 346219 1. 771147 4. 073299 2. 27112 1. 562143 3. 292916 1. 940363 2. 155307  
0. 931196 1. 541691 0. 710306 1. 197708 1. 63344 1. 12759 1. 257189 0. 700179 0. 908294  
1. 638491 1. 145312 0. 937583 1. 674283 0. 795731 1. 165943 1. 369685 1. 213812 1. 233917  
3. 538094 2. 356376 3. 611207 2. 642102 2. 53372 2. 383591 2. 78882 1. 741605 3. 032124  
3. 477321 2. 520726 2. 792069 2. 71226 2. 121373 2. 54524 2. 706935 2. 160788 2. 620738  
1. 939029 0. 941204 0. 771078 1. 494043 1. 266599 0. 7909 1. 297933 0. 635519 1. 450227  
0. 914599 1. 034571 0. 572854 1. 393982 0. 508375 0. 828994 1. 087423 0. 57464 0. 836773  
1. 535893 0. 91953 1. 685264 2. 608412 1. 316037 1. 51525 1. 410593 1. 650108 1. 264989  
3. 210035 3. 83095 3. 182775 3. 23951 3. 051105 2. 419513 2. 968263 2. 582323 3. 375864  
0. 728965 0. 546347 0. 698212 0. 665758 0. 946145 0. 863244 0. 658828 1. 059809 0. 699537  
3. 27235 1. 48172 3. 29681 4. 010425 1. 203811 1. 929068 5. 179479 1. 422476 2. 151874  
1. 498241 1. 739963 1. 495295 2. 467204 0. 86406 1. 459697 1. 254771 0. 84341 0. 916403  
3. 854192 3. 637968 4. 289282 3. 675954 3. 589726 3. 063193 3. 514329 2. 736891 3. 924489  
1. 901492 1. 670943 1. 74243 2. 710224 2. 606849 1. 989478 2. 154517 2. 054432 2. 449489  
1. 60881 1. 687814 1. 334423 2. 330859 1. 700692 1. 63482 1. 599798 1. 985754 2. 077655  
1. 441245 1. 939144 1. 540091 1. 444161 1. 294476 1. 3971 1. 731226 1. 534879 1. 531267  
1. 39425 2. 205506 1. 335891 5. 804438 2. 343715 2. 622546 1. 769022 1. 473581 1. 763624  
1. 463858 1. 601546 1. 068079 1. 051042 2. 046772 1. 337881 3. 460047 1. 296044 1. 965659  
2. 929047 2. 464883 2. 472498 2. 055319 2. 252739 1. 724547 2. 69401 2. 151965 1. 759746  
1. 59941 1. 421464 0. 92041 1. 532306 1. 526683 1. 291023 1. 849544 1. 639964 1. 197785  
2. 725884 1. 470449 1. 323835 2. 011072 1. 447065 1. 584996 2. 874006 1. 415272 2. 025328  
2. 531768 1. 341093 1. 709498 1. 526546 1. 469233 1. 313459 0. 932166 1. 022367 2. 952694  
3. 582002 2. 085603 3. 071003 3. 133383 3. 049456 3. 471561 2. 333724 2. 834854 2. 980343

0.746564 0.673046 0.830453 0.748973 0.969882 0.704934 1.336843 0.797728 0.760439  
0.969697 0.87124 0.682753 1.211498 0.691394 0.876959 1.007574 0.717743 1.945365  
1.716418 0.674139 0.886086 1.04217 0.561085 0.61122 1.341471 0.969437 0.693818  
1.77346 1.256241 0.944725 1.597158 0.970078 1.601501 0.966196 0.869945 1.141925  
2.960559 1.476604 1.237029 1.030232 1.728885 1.855506 1.366104 1.136561 1.313533  
4.50037 1.192896 3.354794 1.605907 2.523045 2.904307 5.192452 2.705355 2.837464  
0.709709 1.579285 1.57488 2.389658 0.971885 3.414726 1.936902 2.131904 1.164298  
1.268875 1.113182 0.960827 1.050681 1.215784 0.80813 1.066201 1.231478 0.748861  
2.568619 2.688812 2.625098 1.711274 1.807701 2.308557 1.695092 1.718779 1.571531  
5.742732 4.804118 4.413258 5.097641 4.854809 4.933663 4.509714 3.668828 3.872558  
1.590152 1.722892 2.212892 2.147194 1.27166 1.262716 1.726003 1.331208 1.045011  
3.384842 2.879683 3.382738 3.714211 2.146632 3.507041 1.664175 2.678518 2.984064  
2.978462 4.226852 2.529005 4.520153 5.809448 3.51118 3.021045 3.785424 3.663764  
1.266955 1.35908 0.588583 1.144917 0.894364 0.692198 0.890373 0.932034 0.747828  
0.913873 1.211889 0.562706 1.149844 1.242357 1.21835 1.337716 0.973581 1.298701  
1.75171 1.403628 1.181628 1.798614 1.127437 2.020582 1.339792 1.039441 1.994338  
2.053901 1.620244 1.690222 1.976087 1.655536 1.752161 2.068838 1.701717 2.459507  
2.053875 0.991903 1.179349 2.15131 2.242247 1.167001 3.06448 2.253592 1.587435  
1.783953 1.571989 1.423399 1.479045 2.434598 2.150157 2.066589 1.81548 2.813918  
1.114791 1.369362 1.120271 1.437725 0.984206 1.05722 1.091415 1.544415 1.812557  
1.608442 1.299538 0.68559 1.355067 0.792333 1.592169 1.174817 1.169954 1.579997  
1.19767 1.175335 1.141134 1.724674 1.853908 1.409301 2.224611 1.259016 1.190124  
2.523222 2.428839 2.20699 1.388963 1.59351 1.594762 1.457044 1.723993 1.671637  
4.152789 2.208361 4.03184 5.88579 3.318931 3.216708 3.418913 3.95 4.421432  
2.789132 3.533938 3.153206 1.987984 2.280335 2.347478 2.487792 4.118639 3.908999  
3.407557 2.41453 2.574305 3.135496 2.306337 3.19972 2.968745 2.966758 2.391139  
1.69708 3.055068 2.622223 1.894796 2.632525 2.068979 1.860791 3.459006 2.426776  
4.701416 3.18242 1.940667 1.153561 1.616715 2.536404 1.65126 4.731884 1.43377  
2.027482 1.866166 1.905739 1.196537 1.899756 1.171239 1.48968 1.539748 1.698146  
0.981406 0.788978 0.86453 0.986868 0.82394 1.202891 0.644773 0.744649 1.02237  
1.541752 0.923385 1.095514 0.739088 0.969862 1.531788 3.236355 1.043239 1.755295  
3.76444 2.251973 2.176416 2.471586 2.054181 2.313404 3.346185 3.122529 2.089524  
1.738476 1.946339 3.154487 4.256313 2.333006 2.189289 3.720258 2.001164 1.818204  
0.955917 0.874954 0.857522 0.93483 1.606472 0.907894 1.449141 0.901531 1.614922  
4.466393 4.545296 3.947392 4.912853 4.722151 4.506148 4.184791 4.425339 3.646546  
1.291037 1.508655 3.000567 2.048475 2.570054 1.92364 2.190098 2.335556 1.696013  
1.412991 4.195179 3.929896 1.795262 3.381749 2.166159 3.225397 1.746324 2.373781  
5.023306 4.037127 4.941009 3.081312 3.862994 4.895936 4.7693 2.270348 2.299004  
0.788968 0.773863 0.70085 0.885885 0.63641 1.085244 0.557144 0.663492 1.540325  
0.903393 0.783241 0.710855 0.956777 0.852241 1.374757 0.930372 0.892486 1.167656  
2.697202 2.821752 3.420532 2.927514 2.221911 3.165201 2.700619 2.954038 3.188144  
1.125331 0.988277 0.465394 0.94076 0.598415 1.002502 0.749333 0.779116 1.071174  
4.361381 3.142255 3.999155 2.676614 2.964804 3.035739 3.344809 3.716902 2.816045  
0.779125 0.941379 0.627946 0.631784 1.442906 0.744766 0.955183 0.822392 0.778828  
0.679222 0.703984 0.402469 1.304876 0.947666 0.55953 0.75778 0.518981 0.64914  
5.029858 4.11204 3.715201 2.794913 4.199052 3.933479 4.297539 3.379561 3.363832  
1.097789 0.997175 1.620462 1.102455 1.015993 1.854621 2.605702 0.584612 1.521812  
4.369108 4.926318 3.137779 5.027547 4.050464 2.350843 2.863586 3.823281 3.472952  
4.259213 3.891439 4.091196 3.842987 4.449028 3.243746 4.306121 3.356645 3.792922  
1.794179 1.250134 1.828094 1.762887 1.69173 1.730403 1.655902 1.800861 1.946853  
3.240595 2.747531 2.707302 3.421321 2.528248 2.910997 4.017826 1.537466 1.046645

2. 715687 3. 160146 2. 748038 2. 014515 2. 809896 2. 121177 2. 832072 2. 206242 3. 821972  
3. 082975 2. 36305 2. 886571 2. 979639 1. 612962 3. 780101 3. 93409 2. 644279 2. 999985  
0. 890276 0. 987039 0. 531265 0. 916876 1. 028193 0. 845373 0. 808059 1. 317887 1. 947676  
0. 895031 1. 070836 1. 072923 0. 837764 1. 656021 0. 8928 0. 975421 1. 480093 0. 626632  
4. 341271 3. 903776 4. 071176 4. 3306 1. 665558 2. 582929 3. 96153 2. 55602 2. 498045  
0. 99761 0. 594884 0. 704635 0. 993381 0. 674298 0. 955306 1. 049908 0. 920951 1. 230893  
1. 906376 2. 641835 3. 00955 3. 443777 1. 643211 2. 348279 2. 049554 1. 827778 1. 475542  
0. 839955 0. 600122 1. 231483 0. 926391 2. 560376 0. 567723 1. 156995 0. 616059 1. 562385  
0. 672649 0. 568973 0. 994029 0. 999058 1. 321875 1. 174153 1. 311497 0. 955011 0. 784309  
0. 868758 1. 442676 0. 850905 1. 547747 1. 127134 0. 818044 0. 741645 0. 721011 1. 046853  
1. 056407 1. 453387 1. 166535 1. 168066 1. 809977 1. 173905 2. 466419 1. 24998 1. 222471  
1. 133457 1. 488021 1. 178459 1. 39743 1. 183847 1. 154637 1. 245147 1. 734078 1. 18788  
1. 342789 1. 661005 1. 565704 1. 425616 1. 875223 2. 319961 1. 088427 1. 038669 1. 210306  
3. 762395 4. 418314 2. 866139 2. 82789 3. 494641 2. 856722 1. 848166 1. 964049 2. 496326  
2. 999696 2. 931769 4. 336626 4. 334514 3. 142119 2. 394319 4. 640638 4. 856285 4. 012091  
1. 040417 1. 554204 0. 839621 4. 01429 1. 412416 1. 300432 1. 087594 1. 261024 1. 085043  
1. 30975 1. 812911 6. 627421 1. 040259 0. 966503 1. 580442 0. 817891 1. 911162 1. 293281  
3. 520298 2. 062679 2. 676172 3. 843692 2. 56877 1. 972107 2. 439494 2. 222416 1. 941965  
2. 954873 3. 643307 3. 192075 3. 508283 2. 928439 3. 903213 2. 642322 4. 090867 3. 565326  
2. 936731 1. 718303 2. 205628 1. 691873 3. 057866 2. 160009 1. 769642 1. 604044 1. 900587  
1. 019664 1. 189473 0. 917719 0. 997598 1. 455877 0. 817423 1. 105703 0. 786634 1. 027672  
3. 352816 2. 74386 3. 120768 2. 994291 2. 754977 3. 211438 2. 393576 3. 175809 3. 454586  
2. 383162 3. 127902 2. 462566 2. 044404 3. 177777 2. 596796 2. 677817 3. 821285 2. 744561  
1. 362235 1. 475314 1. 260298 1. 895022 1. 447717 1. 975359 1. 406611 1. 704047 1. 49929  
1. 318793 1. 01756 0. 70807 1. 196051 1. 193107 1. 323506 1. 140852 1. 221793 1. 424304  
0. 936759 1. 089027 0. 903366 1. 131265 1. 197672 1. 539476 1. 537053 1. 247761 1. 222848  
2. 045409 1. 367214 0. 837104 1. 236731 1. 225119 1. 376 1. 119585 1. 115916 1. 18536  
1. 177442 1. 80747 2. 718447 3. 298933 1. 479307 1. 756055 2. 192655 1. 572254 2. 061259  
4. 010465 3. 370476 3. 061742 3. 495318 2. 820623 2. 876222 1. 887132 2. 95461 2. 40002  
1. 738791 1. 520512 1. 274726 1. 745451 1. 847313 1. 141587 1. 453156 1. 283358 1. 725643  
3. 313678 1. 728821 3. 999283 3. 274091 2. 171629 2. 801299 2. 310928 2. 666276 2. 426015  
1. 566883 1. 010161 1. 113892 1. 136957 0. 88843 1. 482302 1. 034241 0. 907495 0. 583262  
3. 47162 2. 743006 1. 513396 1. 173021 1. 113234 2. 591883 1. 184977 1. 623578 1. 315421  
3. 431386 1. 563927 2. 600389 3. 140066 1. 573183 3. 193325 2. 223979 2. 554114 2. 737939  
6. 118124 6. 322203 6. 278051 5. 836651 6. 268967 6. 019449 5. 961139 6. 326176 5. 790268  
0. 89901 0. 937874 0. 954182 0. 910579 1. 036577 0. 722387 0. 873431 0. 892751 1. 401482  
6. 588446 5. 667424 5. 862944 5. 734136 6. 330943 5. 561246 6. 473767 5. 422712 5. 760937  
4. 060114 5. 383637 4. 636144 5. 372501 4. 731124 5. 542142 4. 881923 4. 645556 5. 030784  
3. 732466 2. 413072 3. 057666 3. 379026 2. 180646 2. 247581 3. 186135 2. 768384 3. 144465  
3. 454689 2. 863623 2. 317853 2. 696049 1. 725232 1. 951193 2. 104716 3. 453585 2. 518803  
1. 448173 1. 069353 0. 867567 0. 738469 0. 859118 0. 943679 0. 95242 0. 954851 1. 442051  
1. 67685 1. 649131 3. 921616 2. 948368 1. 543782 3. 771375 2. 681472 2. 599746 1. 739314  
1. 878661 1. 927163 1. 750564 1. 712955 2. 468575 2. 009035 2. 401457 1. 500332 2. 419927  
1. 509718 1. 804156 1. 289524 1. 27124 1. 334906 1. 77813 1. 49791 2. 07053 1. 09647  
1. 709422 1. 629228 0. 940323 0. 866366 1. 318202 0. 76454 0. 933168 0. 933715 1. 081694  
1. 884646 1. 337781 2. 797747 2. 058237 2. 298854 2. 278219 1. 269368 3. 166208 2. 298854  
3. 254961 3. 640108 4. 611581 3. 527531 3. 381532 3. 169602 3. 729796 3. 329674 2. 47687  
0. 964742 0. 809705 0. 693854 0. 894657 1. 183207 1. 818783 1. 027288 2. 004747 1. 192098  
1. 972159 0. 64606 0. 941033 0. 612472 1. 26317 0. 849404 2. 023981 1. 596392 0. 618637  
2. 851558 3. 390043 3. 183298 3. 622808 3. 324563 3. 907427 2. 972369 3. 330505 3. 587813  
2. 188495 1. 363685 1. 606148 2. 235258 1. 616058 1. 825292 1. 819165 1. 238505 1. 369759

6.739466 7.211793 7.115052 7.187062 7.248098 7.245237 6.609102 7.032697 7.048358  
1.034007 1.361131 0.919132 1.458833 0.658273 1.068642 1.105996 1.408895 0.652519  
1.912297 1.425457 1.400777 1.201653 1.610087 1.877356 1.098399 1.854358 1.166136  
1.870206 4.301465 3.354419 2.477412 2.278017 3.422635 2.094541 5.009055 2.376159  
2.043996 1.414603 1.734348 3.863408 2.931868 3.201923 1.988026 2.231694 1.869116  
2.149249 1.280861 2.763943 1.827523 1.835167 1.584738 2.207286 1.270089 1.539049  
3.492774 3.147314 3.351456 3.735794 2.961238 2.76502 2.626613 3.212442 3.730298  
3.1052 4.621365 3.870503 4.228455 3.557303 4.482269 4.050082 2.680427 3.246691  
5.941591 6.007033 5.827929 5.979083 5.94037 5.857268 5.767605 5.712757 5.802663  
2.520892 1.966133 2.351217 2.360948 1.955987 3.01288 3.577445 3.115081 2.604842  
1.374196 2.131765 1.344741 1.345135 3.687399 2.238468 3.523522 0.944595 1.318993  
4.303904 4.526393 3.644052 4.171287 4.205636 3.293063 4.166182 4.253892 3.990672  
5.466428 5.859028 6.377547 6.587189 6.520721 5.793809 5.987448 6.416627 6.330533  
5.173144 5.105834 5.474443 6.056692 4.984477 6.208183 7.661406 6.271488 6.204771  
1.809414 0.931347 1.082658 1.51937 1.470826 1.412479 1.663879 1.596403 1.051752  
1.075619 1.387117 1.177282 1.026331 1.389469 1.400575 1.305147 1.358234 0.968787  
2.253053 2.179523 1.850498 3.184441 1.125479 3.074422 2.035928 2.542117 2.464924  
1.055406 1.22255 0.729358 1.334693 1.375709 1.211789 1.042144 0.693983 1.573329  
1.397122 1.800465 1.789975 2.314693 1.377439 1.755929 1.48716 1.357268 1.820536  
1.170567 1.330814 1.114183 1.893716 0.705028 0.711209 0.713174 0.484658 1.173287  
1.288962 0.989964 1.205059 1.630195 1.145701 1.445097 1.450119 1.39318 1.531949  
4.05131 3.274906 3.409363 4.419081 2.408471 3.395417 3.578709 3.940827 3.7571  
4.311697 3.978375 5.160379 2.541797 2.153625 3.590966 5.181997 4.506795 1.841635  
2.053827 3.017053 1.85525 2.085018 2.318968 2.008686 1.65624 1.739193 2.067864  
0.979236 0.868099 0.648122 1.554165 0.836508 1.160349 1.460503 0.865812 1.043052  
1.054752 1.153092 1.050817 1.242283 1.275642 1.519116 1.085075 0.778554 2.00811  
0.841195 1.187512 0.72277 0.992469 1.14122 1.794071 0.832502 1.108201 1.933499  
1.032348 0.969051 1.231174 1.047363 0.883974 1.577523 1.306144 1.116174 1.326079  
1.094721 0.747278 0.864361 0.745212 1.303575 0.820157 1.084429 1.014691 1.233587  
0.772951 1.463195 0.920873 3.395748 0.776336 0.941735 1.003631 1.344269 1.178227  
1.034733 0.815054 0.621508 0.794723 0.715784 0.690575 1.033544 1.081013 0.784129  
3.044235 1.660672 1.502639 1.192371 1.691994 1.929827 1.623157 1.117357 1.528934  
0.804918 0.861076 0.561684 0.826453 1.182844 1.153109 0.780057 0.949907 0.912159  
7.116587 5.367648 4.207031 4.181719 4.692188 3.04466 5.445943 4.795104 4.577246  
0.957989 0.802851 0.798771 1.017413 1.102648 1.033552 0.815732 0.80256 1.763617  
1.421902 1.075745 1.117088 1.385605 1.05101 1.608878 2.143366 1.072221 1.388155  
5.094113 3.965189 4.601619 4.323298 3.399248 4.105333 3.49456 4.456624 3.673591  
0.639336 2.153814 1.042745 0.880594 0.70937 1.624008 0.782042 1.150089 1.179301  
1.494817 0.816553 0.979626 1.161282 1.913437 1.230565 1.160937 1.738609 0.980127  
1.419166 1.100913 0.815167 0.911947 1.557704 0.869228 1.017891 0.978138 0.963125  
1.009607 1.098135 1.149983 1.631767 0.823549 0.99186 0.997955 1.053354 1.12642  
6.568221 5.858162 6.786448 6.323933 5.495682 5.583759 5.652274 6.280053 6.720624  
0.83375 0.715948 0.578627 0.692244 1.167741 0.935445 1.213093 0.98069 0.93643  
2.112787 1.39719 2.503757 0.991074 1.716287 1.198139 1.813612 2.150121 1.427665  
1.156439 1.260617 0.756619 1.428259 0.912947 1.188277 0.959374 1.760063 1.06851  
1.847003 1.292376 1.754402 1.714638 1.704858 1.263834 1.970299 1.367633 1.376072  
2.705168 1.318326 3.717547 2.245557 1.477648 2.041035 1.893177 3.645696 3.375572  
1.024247 1.1133 1.043432 1.000849 1.675001 0.952074 1.069683 1.296563 1.860449  
2.093962 1.462722 1.665331 2.182431 2.342766 1.206641 2.83582 2.434474 1.959342  
2.986124 2.544293 3.889407 2.514915 2.436162 3.597592 4.104904 4.403272 2.877927  
1.153369 2.765349 0.986827 1.032095 1.611042 1.314093 1.229247 0.887942 1.111414

3. 85925 4. 985674 4. 573808 2. 100905 3. 434987 4. 504752 3. 06533 3. 954751 4. 080333  
2. 846568 2. 120521 1. 868257 1. 919293 1. 56391 1. 642663 1. 908167 1. 822581 2. 352365  
5. 514766 3. 008841 3. 641318 1. 97732 1. 84445 2. 809825 2. 540549 2. 144338 1. 963946  
1. 102455 0. 371995 1. 013737 0. 782041 0. 501058 0. 576973 0. 820561 0. 783445 0. 761818  
1. 658982 2. 372178 2. 243902 2. 829512 1. 944283 2. 1269 1. 782011 2. 005033 2. 237751  
3. 280723 3. 681077 3. 233602 4. 4112 4. 362545 3. 457402 4. 805363 3. 78111 2. 552213  
1. 202377 0. 845212 0. 769197 0. 885093 1. 11118 0. 971687 0. 885638 0. 922289 1. 001256  
3. 698626 2. 544996 2. 476621 3. 321382 2. 738073 3. 168227 2. 65697 2. 040865 2. 400801  
2. 981887 2. 244505 3. 117686 2. 0137 3. 302666 3. 81696 2. 122076 2. 827483 2. 162024  
1. 119856 0. 970263 1. 092603 1. 677531 1. 076613 1. 318119 0. 968548 1. 375681 0. 930038  
1. 20742 0. 635537 0. 613411 1. 414205 1. 028637 0. 814801 0. 794823 1. 05371 0. 786024  
1. 768711 1. 874178 1. 532519 1. 219255 0. 835117 1. 642488 0. 971114 1. 281854 0. 715  
0. 67081 0. 902834 0. 694083 1. 007464 0. 85181 0. 945797 0. 967537 0. 706518 1. 003142  
1. 677623 1. 838451 2. 401133 2. 712561 1. 801291 1. 294125 1. 719984 2. 706068 1. 511229  
4. 273994 3. 841217 4. 202665 4. 279423 4. 253877 3. 176572 4. 196273 3. 388077 3. 239047  
2. 596721 5. 637484 2. 449953 2. 422146 1. 5819 2. 541007 1. 973211 1. 395198 1. 221623  
1. 308385 1. 930045 2. 753114 1. 996438 2. 17393 3. 815425 1. 617639 1. 438532 3. 296368  
0. 958236 0. 977934 1. 34769 1. 182888 1. 666684 1. 388115 1. 229783 1. 448795 1. 172148  
2. 29877 2. 281936 2. 625001 1. 111725 3. 186159 3. 003245 1. 720624 1. 101539 0. 980444  
0. 711613 1. 190656 0. 504538 1. 026787 0. 882628 0. 928947 0. 889581 0. 568754 1. 113861  
1. 031449 0. 861717 0. 600489 0. 711563 1. 051223 0. 788466 1. 049766 0. 820948 0. 931784  
1. 752276 1. 136695 1. 139688 1. 438991 1. 148472 1. 318391 1. 076994 0. 832344 0. 618434  
0. 683167 0. 879986 0. 620308 0. 786127 0. 717015 0. 800677 0. 746879 0. 9348 1. 031172  
4. 293245 2. 299658 3. 846433 3. 664952 4. 264299 3. 021015 4. 085952 3. 775909 3. 15674  
1. 234465 1. 13837 2. 178186 2. 089147 1. 859978 1. 16246 1. 482039 2. 458077 0. 929  
1. 42322 2. 066077 2. 402484 3. 328485 1. 184251 1. 652038 2. 121285 1. 00818 1. 834516  
4. 731744 1. 801526 1. 55408 3. 315989 3. 26414 2. 013421 2. 590286 2. 421351 1. 872771  
1. 169623 0. 986495 0. 931256 1. 484949 1. 644248 0. 947449 1. 556441 1. 518721 1. 215614  
0. 998141 1. 621408 1. 229013 1. 253378 1. 924486 0. 844527 1. 383777 1. 200206 1. 600122  
4. 521019 4. 188127 3. 824044 3. 056129 4. 698595 3. 155785 5. 019002 4. 783719 4. 057875  
2. 499333 1. 85028 2. 828265 2. 11406 2. 455266 2. 38747 2. 541906 2. 97027 2. 070202  
5. 121154 4. 632606 4. 59743 4. 790924 4. 784844 4. 914841 4. 792026 4. 671524 5. 368471  
1. 608811 1. 017708 1. 404183 1. 401645 1. 376133 1. 318908 2. 311372 1. 716344 1. 330555  
2. 128875 1. 675445 1. 677971 1. 519246 1. 841212 2. 018069 2. 754951 1. 523562 2. 132052  
0. 82607 0. 890488 0. 716692 1. 124214 1. 408165 1. 198801 0. 826337 0. 843887 1. 058644  
2. 385692 1. 178187 0. 91592 1. 422694 1. 389317 1. 304222 1. 664581 1. 980512 0. 980238  
1. 467649 2. 081265 1. 047717 1. 49853 1. 353896 1. 38342 1. 059737 2. 543507 2. 075188  
2. 681452 2. 107605 3. 253579 2. 868189 2. 652591 3. 409112 2. 838725 3. 24663 2. 645903  
4. 1044 2. 62687 2. 408606 2. 539709 3. 606909 1. 642507 2. 952469 3. 406511 2. 085139  
1. 238757 0. 805251 0. 546901 1. 174587 0. 821477 0. 821401 0. 94986 0. 707831 0. 842939  
2. 56108 1. 398214 0. 958455 1. 547656 1. 155104 2. 322575 1. 65332 1. 589888 1. 13808  
1. 01928 0. 874494 1. 211186 1. 19967 1. 301591 1. 195607 1. 101923 0. 951239 1. 246849  
7. 912673 7. 578133 7. 758627 7. 82077 8. 465619 7. 337016 7. 375648 7. 413221 7. 522565  
0. 871409 1. 499502 0. 792774 0. 945034 1. 002367 0. 641482 1. 165075 1. 537026 0. 65073  
3. 516675 3. 461051 3. 474256 2. 873086 2. 660247 2. 851242 4. 252635 3. 043872 2. 640692  
1. 499311 2. 805311 1. 013572 1. 468464 0. 81349 1. 063597 2. 210655 1. 165008 3. 393174  
1. 267367 1. 204738 1. 016124 1. 508836 0. 848597 1. 526187 1. 806445 1. 239927 1. 287993  
0. 945065 1. 00088 2. 86101 2. 545408 1. 228513 1. 38463 1. 153095 1. 170508 1. 74173  
0. 865146 0. 985792 0. 68756 1. 556331 1. 113984 1. 038201 0. 881886 1. 179821 1. 111685  
1. 352881 1. 159165 1. 251013 0. 906458 1. 357506 1. 445241 1. 934482 1. 428658 1. 190969  
1. 180622 0. 898517 1. 148623 1. 222465 1. 203146 1. 070816 1. 277678 0. 996899 1. 157257

2. 830592 3. 067104 2. 732797 2. 761742 3. 000281 2. 945023 2. 452316 2. 50108 3. 400078  
2. 409062 1. 924516 2. 247514 1. 598003 1. 428644 2. 449301 2. 275454 1. 2673 1. 94538  
4. 499342 3. 461206 3. 646935 4. 621923 4. 159509 4. 164519 4. 367561 4. 881537 4. 165869  
2. 624163 3. 802067 3. 417715 3. 369549 3. 994308 3. 650546 3. 661506 3. 685149 2. 828493  
3. 496085 1. 515114 2. 882917 2. 524304 1. 811509 1. 838088 1. 633307 2. 033559 1. 935349  
0. 208427 0. 53861 0. 681553 0. 666258 2. 066271 1. 060813 0. 969018 0. 515056 1. 810218  
1. 493333 1. 451299 1. 343527 1. 634097 1. 937307 1. 579466 2. 06899 1. 971561 1. 673637  
2. 511197 1. 390362 1. 689998 1. 305135 1. 132121 1. 417699 2. 434003 1. 784394 2. 343252  
1. 098835 1. 242856 1. 231123 1. 265382 1. 150569 1. 466147 1. 399875 1. 247736 1. 302423  
1. 753707 1. 503685 1. 909851 1. 841496 2. 238603 1. 636157 1. 689451 1. 53987 1. 692312  
2. 325602 2. 427666 1. 902704 2. 385155 1. 455138 2. 299189 1. 267983 1. 345712 1. 513387  
1. 393174 1. 153826 1. 215289 1. 549228 1. 778605 1. 081113 1. 182002 1. 390209 1. 120121  
2. 249606 1. 968585 1. 687544 2. 06589 2. 348046 2. 228105 2. 115777 1. 91378 2. 584416  
3. 41869 2. 392238 3. 106282 2. 379909 3. 234076 2. 098426 2. 648784 3. 068882 2. 72537  
1. 886614 1. 853522 1. 43233 1. 113539 2. 027256 1. 536806 2. 071038 1. 614968 2. 078684  
1. 690799 1. 453848 1. 265604 1. 895189 1. 710105 1. 933946 1. 525134 1. 814779 1. 579405  
0. 910431 1. 506272 1. 219253 1. 451157 2. 46316 0. 876028 2. 614484 1. 400885 2. 263833  
2. 392749 2. 872618 2. 459928 2. 787708 2. 623651 2. 517355 1. 782156 2. 142452 3. 026189  
3. 583328 3. 20872 3. 387815 2. 721137 3. 538089 2. 992271 3. 560954 3. 074349 2. 325488  
1. 492842 1. 427903 1. 508231 1. 455327 2. 46866 1. 856158 1. 743768 1. 249273 1. 980494  
2. 989669 2. 778595 2. 988586 3. 453003 3. 018183 3. 39409 2. 978469 3. 001968 3. 05609  
1. 275921 1. 234488 1. 732089 0. 996336 0. 856035 1. 620823 0. 950424 0. 970417 1. 343767  
4. 407499 1. 86729 4. 109954 2. 766761 2. 431957 4. 002717 5. 185249 3. 838834 2. 355391  
4. 805753 6. 68233 6. 998036 6. 944247 6. 886774 6. 931182 6. 487814 6. 738983 6. 384186  
3. 47566 4. 28413 2. 929776 3. 023839 2. 878044 3. 524946 4. 225344 3. 094203 3. 978348  
1. 724129 1. 560491 2. 652778 2. 186505 1. 876355 1. 819308 1. 968525 1. 712938 1. 596877  
2. 750051 1. 96183 2. 250777 2. 004705 1. 875179 1. 517108 2. 67614 1. 732541 2. 090244  
3. 717655 1. 627214 1. 80112 2. 036195 2. 725973 2. 376529 2. 661229 2. 133001 2. 02634  
3. 252083 2. 804246 1. 854363 2. 831321 2. 426365 2. 571954 3. 583048 2. 990631 2. 94143  
1. 339974 1. 074575 0. 986261 1. 090884 0. 998797 0. 916747 1. 640646 0. 745711 0. 872938  
1. 728922 2. 073825 4. 42781 2. 381622 1. 56569 1. 002576 2. 483116 1. 223402 1. 598209  
0. 755913 0. 634244 0. 460813 0. 660653 0. 503707 0. 677115 1. 587951 0. 796357 0. 50133  
2. 685696 3. 971377 4. 838188 3. 589454 4. 578239 5. 03345 3. 256655 5. 355563 4. 040576  
1. 373342 0. 903549 1. 250206 1. 46491 1. 576287 1. 392988 1. 357228 1. 885282 1. 164894  
2. 480134 2. 002489 3. 340611 2. 301189 1. 801174 2. 293198 1. 431162 5. 114425 2. 765797  
6. 137824 4. 773027 5. 161376 4. 719121 5. 291905 4. 279187 4. 886259 4. 787012 5. 106521  
1. 134766 0. 879971 2. 115416 1. 40569 1. 63327 1. 021519 1. 809983 1. 382505 1. 112524  
2. 653642 0. 92156 2. 219348 1. 618781 1. 686001 1. 483796 2. 479333 1. 248908 1. 308446  
2. 151535 2. 84628 2. 147005 3. 335735 2. 585279 2. 639862 2. 891679 3. 036592 3. 73723  
1. 972212 3. 969092 1. 971188 2. 972931 2. 538651 3. 723857 2. 712059 1. 971938 1. 960242  
7. 632091 7. 884492 7. 871203 7. 551829 7. 640868 7. 648198 7. 413069 7. 781521 7. 599979  
2. 964373 3. 317256 3. 596558 2. 899538 3. 854575 2. 525285 2. 268243 4. 489354 2. 612477  
1. 491639 3. 224772 4. 387751 5. 297497 3. 450399 5. 180837 5. 923566 5. 549611 1. 858085  
1. 347945 1. 008391 0. 734374 1. 565822 1. 101946 1. 106741 1. 23705 1. 398529 1. 062254  
1. 62828 1. 427947 1. 352167 1. 782498 1. 250712 1. 377111 0. 9279 1. 390959 1. 90906  
1. 174679 1. 024127 0. 797815 1. 508981 1. 477175 1. 06467 1. 526048 0. 824758 1. 090773  
8. 793678 9. 253619 7. 497264 7. 924396 8. 112612 4. 634917 7. 276116 8. 901906 8. 385554  
1. 827866 2. 485498 2. 820573 1. 969654 1. 424963 1. 704755 2. 081575 1. 895994 2. 15491  
1. 292751 1. 019582 1. 418035 1. 47122 1. 62947 1. 173747 1. 239927 1. 878106 1. 359732  
3. 009415 3. 574533 3. 216871 4. 033779 2. 71645 3. 455671 3. 470597 3. 138641 2. 915221  
3. 939952 4. 063723 4. 611505 3. 869641 4. 273094 3. 826811 3. 925659 3. 60492 4. 922109

2.627517 2.86466 2.968999 2.350316 3.102518 2.484919 2.7429 1.647996 3.496537  
1.778485 1.452644 1.402521 1.806095 1.083554 1.715024 1.377679 0.99263 2.347929  
3.340021 3.991602 3.960515 3.679637 4.114865 3.891129 3.53156 3.536982 4.264853  
1.702289 1.707096 1.543743 1.178751 1.606947 1.230705 2.009349 1.730151 1.369065  
4.358399 3.127406 3.09932 3.353051 3.350775 2.98745 3.222506 3.994914 2.932701  
1.428782 1.54027 1.160436 1.59611 1.382435 1.348248 2.407289 1.420019 1.437905  
1.750536 1.431005 1.625496 1.845787 2.934837 2.101669 2.705877 1.427317 3.464295  
1.670264 2.086487 1.66078 2.211578 1.90744 1.820077 1.926591 2.387221 1.978325  
1.333291 1.318318 1.603878 1.393269 2.478779 0.584319 1.440945 2.444109 1.44621  
2.414555 2.387581 2.124654 2.083061 1.68883 2.449834 2.66973 2.477321 2.786585  
1.486983 1.273452 1.140125 1.984649 1.426923 2.189974 1.700266 1.446279 1.562329  
1.406925 2.237305 1.92229 1.904587 1.573809 1.801632 2.274604 1.828423 1.540873  
2.034768 1.394966 1.637188 2.093962 1.75925 1.978799 2.276424 1.570672 1.719039  
5.445874 4.674848 3.68692 2.900345 3.12495 4.126909 5.474934 5.112489 4.072542  
1.843019 1.261932 1.605926 1.336487 1.310237 0.745582 1.250151 2.595054 2.088601  
1.530034 1.282489 1.584918 1.421148 1.898768 1.422219 1.168651 0.863316 1.509983  
1.729312 2.34095 3.106461 2.047604 1.576051 1.957743 3.383976 3.081239 2.145899  
2.764895 1.854523 2.294405 2.391763 2.490869 2.194746 2.692824 1.495819 2.35991  
6.698462 4.933102 5.766881 5.073849 5.070135 4.56582 5.127589 5.668014 3.750451  
1.841124 3.810872 2.31299 2.755925 3.47611 1.719487 2.82356 2.382567 2.114628  
0.988915 0.9941 0.76822 1.316276 1.045304 1.366941 1.977672 1.151898 1.228782  
3.386772 3.538265 3.991794 4.452218 4.894792 3.620666 4.266722 4.145931 3.94513  
1.455992 1.645099 1.029855 1.591036 1.989441 1.183813 2.521912 1.096877 1.722086  
1.165498 0.874561 0.982619 1.442016 1.164622 1.905699 1.604403 1.234899 1.436189  
2.856095 3.454527 2.349069 2.267449 3.404005 2.264588 2.740283 2.156324 2.04908  
3.617409 4.560339 3.637782 3.33052 4.133277 4.326797 4.105043 4.093669 3.474583  
0.972066 0.919512 0.976542 2.168161 0.624408 0.878956 0.788773 0.859993 1.244352  
1.666852 1.422279 1.763789 1.948987 1.676652 1.995723 1.710332 1.628435 2.157377  
1.100726 2.647626 0.672357 1.179158 0.899571 2.684649 2.155191 0.997859 1.524021  
3.006171 2.205811 3.603959 2.842625 2.380111 3.815027 4.216448 1.468638 2.981014  
6.098883 6.088395 6.389018 5.815028 5.847656 6.174232 6.873349 6.161706 6.468114  
0.925136 1.132298 0.747306 1.197508 1.665116 1.485043 2.096204 1.221341 1.150152  
1.420424 2.835455 1.900421 2.460049 3.021573 1.956037 2.099896 2.037859 1.953421  
1.185588 1.271133 1.311085 1.208903 1.394582 1.661894 1.695515 1.178417 1.162283  
2.259726 2.385241 2.053536 1.897016 2.300751 2.70492 2.262421 2.093765 2.805306  
1.588715 1.456426 1.787188 1.464452 2.17216 1.347104 2.974582 1.120859 1.761887  
1.068299 0.721027 0.844333 1.038569 1.248199 0.993641 0.774729 1.476829 0.843944  
1.302293 1.304258 1.812748 1.811401 1.866245 1.754469 1.572589 1.121434 1.227671  
1.273821 2.06962 1.535836 1.732634 1.619455 1.462354 2.688035 1.506831 1.512299  
1.083426 1.349397 1.063609 1.828888 1.316056 1.374542 1.065501 1.359048 0.960023  
1.328679 1.23816 1.381467 1.359612 1.148003 1.054866 1.60385 1.294858 1.306374  
1.960832 1.385986 1.170022 1.06573 0.818345 1.089089 0.898313 1.442329 1.316673  
1.663472 1.763777 1.763048 1.363946 1.432836 1.25074 1.359804 1.804738 1.355856  
5.086186 5.747823 4.870119 5.29056 4.283446 4.002232 4.870104 6.078169 5.398699  
3.268654 3.81235 5.08859 3.168574 3.348437 3.476389 3.582371 4.314425 2.926815  
1.90891 1.607761 1.697316 2.378959 2.858004 1.832563 1.618054 2.982134 2.067065  
2.143588 2.618458 2.100802 2.988024 2.920347 2.351456 2.71806 3.711856 2.846219  
6.874538 7.413296 7.326445 7.097748 7.079019 6.940159 6.789443 7.489214 6.934936  
1.195347 1.29583 1.512215 2.070606 1.065405 1.289008 1.518253 0.958838 1.418727  
1.431245 1.041179 0.868148 0.886451 0.975433 0.893236 1.461126 1.203343 2.147951  
1.598265 0.775804 1.486049 1.971948 1.124555 0.974493 1.184089 1.143811 1.349993

8.403847 9.193319 9.23359 8.662707 8.843506 8.678503 8.285317 9.293247 8.614677  
1.352637 1.282753 1.246341 0.917376 1.613025 1.250887 1.587356 1.083214 1.219526  
2.093978 1.872013 1.974087 2.574031 1.567882 2.100479 2.487242 2.509754 2.919138  
1.293306 1.42365 1.823934 1.635232 2.014741 1.728745 1.839893 2.053027 1.644289  
3.744563 4.010975 3.907312 4.175796 3.199384 3.588956 4.154304 3.814802 3.797747  
1.52569 1.471057 2.139971 1.356531 1.431605 1.694846 2.418854 1.847038 2.685315  
2.471514 1.763946 1.966243 1.770099 1.272551 1.840379 1.957178 1.371487 1.545113  
1.794388 1.567954 1.319697 1.425407 1.487954 1.341012 2.299772 1.346719 1.67899  
2.49335 1.180682 1.925223 1.851891 1.369937 2.796986 1.327163 2.218182 1.159128  
2.529029 2.770644 2.929727 2.401381 3.091583 3.172957 2.756072 4.445447 3.903291  
1.148879 1.367383 1.101886 1.480339 1.040179 1.288806 2.332131 1.106063 1.435632  
3.972474 3.500135 3.723713 3.877237 3.807624 3.313701 3.365184 4.017059 3.87293  
2.918027 4.387835 0.962614 2.959478 4.008444 4.323361 2.682231 3.621019 3.152607  
1.716217 2.501181 2.360757 3.292502 1.680027 2.249275 2.926226 3.442128 3.492437  
3.442046 3.214577 2.711308 3.259226 3.494452 3.755958 3.074573 2.615399 3.121402  
0.841494 1.193016 1.218837 1.602594 2.095374 1.1006 1.376587 1.567961 1.620116  
1.705421 1.187903 1.407321 1.921665 1.567121 1.447209 1.616376 1.151618 1.618969  
1.769613 1.546535 1.138188 1.265156 1.198732 1.175971 1.521563 1.408152 1.575464  
1.965216 1.539987 1.697672 2.237439 1.600967 1.394676 1.715204 1.453267 1.954456  
6.190706 5.325787 3.570553 2.397094 3.859828 1.563911 2.379437 1.956126 5.421851  
1.608531 0.912905 1.133027 1.505811 1.64016 1.469023 1.573886 1.930571 1.437672  
2.704347 2.009634 2.935743 1.7041 1.021798 2.065481 3.026553 1.256214 2.065986  
1.080216 1.307753 0.88421 2.35769 1.21308 1.764764 3.478211 1.209838 1.438272  
1.536486 1.576657 1.46863 1.128864 2.125722 1.558416 2.037313 1.176129 1.520982  
3.491246 1.713681 2.807115 1.969368 3.806891 2.840433 2.820319 1.921007 3.488735  
1.709679 1.398598 2.040002 1.685516 1.804149 2.851575 3.013968 1.877538 2.127501  
1.758889 1.309516 1.227885 1.322192 1.466877 1.581868 1.78343 1.5996 1.507056  
3.191476 3.814276 3.871362 4.138745 4.51357 3.695761 3.227113 4.481698 4.233221  
1.554068 1.261597 2.074014 1.45632 1.34886 1.319588 1.68149 1.987168 2.204654  
2.708989 2.732245 2.475695 2.727906 2.967165 2.985071 2.509235 2.533386 3.078239  
1.596152 2.212868 3.426833 3.251032 2.295565 1.960783 3.050446 2.609924 2.740332  
1.157569 1.377625 1.551037 1.677845 1.867184 1.724602 1.534337 1.097364 1.799687  
4.720111 5.124127 5.319087 5.521231 5.460517 5.213704 3.965812 4.990072 5.307175  
1.633459 1.898783 2.051416 1.347331 1.580751 1.944338 1.125481 1.590425 1.566712  
2.505033 4.052206 4.848998 2.172068 2.084167 1.946394 1.860208 2.56903 2.884814  
2.718064 5.037082 5.399328 5.575157 5.175608 2.405344 4.033088 2.593242 4.897755  
2.65182 3.398714 3.308244 2.739746 3.518122 2.676998 4.692858 3.048007 3.91221  
1.194362 1.121634 0.869681 1.251595 0.84988 1.998982 0.891446 1.052065 1.795606  
3.309378 2.831555 2.423259 3.091018 2.527054 2.79936 3.576685 2.97964 2.18285  
3.191504 3.98363 2.575813 3.86984 3.307858 3.626964 3.209391 3.819514 3.158573  
1.298941 1.309723 1.65105 1.415569 1.462756 1.187678 1.355484 1.377095 1.450631  
1.526456 1.302016 1.632637 1.731269 1.936 1.083391 1.849041 2.184641 1.707588  
1.849891 1.240217 0.808688 1.237861 1.176974 1.632734 1.283639 1.076825 1.353629  
1.872216 1.69475 1.936476 2.270678 2.33429 1.464641 1.696806 1.835502 1.290958  
1.16932 1.247004 0.736071 1.236888 0.904517 0.736832 0.987043 0.763123 1.059613  
2.180139 3.010686 2.762205 2.86044 2.507794 3.01251 2.486157 3.32538 2.991728  
3.122547 1.731776 2.522938 1.742965 1.792412 1.490186 1.583698 1.710745 1.698709  
2.386448 1.761763 1.604703 2.230664 1.528814 2.998923 1.67559 2.206213 2.165447  
4.42476 4.166485 3.359996 3.432139 5.171435 5.332484 4.602818 2.62608 4.191036  
1.040234 0.859071 0.933145 1.324844 1.387918 1.529674 1.925781 1.111636 1.305419  
2.373688 2.142658 1.843918 2.106995 1.909501 2.404022 2.024676 2.280263 2.287579



1. 398861 2. 501473 1. 536522 2. 911828 1. 1879 1. 966571 0. 844216 1. 330779 2. 873602  
2. 594644 1. 204057 1. 761887 1. 381942 2. 356941 2. 17473 1. 989763 2. 309373 1. 903159  
5. 039675 4. 269519 4. 979138 4. 939624 4. 051197 5. 131167 4. 291587 4. 093153 4. 725643  
2. 982913 2. 511573 2. 455366 1. 921399 1. 895423 3. 75 2. 419374 2. 778025 1. 90064  
1. 061828 1. 000725 0. 857196 0. 80921 0. 747819 1. 06818 1. 047187 1. 004215 0. 924826  
1. 964781 1. 187493 1. 791636 1. 558326 1. 531934 1. 931114 0. 960999 1. 264675 1. 305075  
1. 635589 1. 711968 2. 452259 0. 78589 2. 672578 1. 220697 1. 277099 1. 881193 1. 249304  
1. 833517 1. 395237 1. 463565 1. 544084 1. 34538 1. 172141 1. 516274 2. 279537 1. 631085  
3. 549096 3. 881127 3. 751485 3. 145798 4. 211619 3. 355517 3. 114052 3. 701223 4. 649139  
1. 9425 1. 783371 1. 556339 1. 696335 1. 874106 1. 827381 1. 336882 1. 968233 1. 658427  
0. 985886 1. 201184 1. 697097 2. 808694 1. 691618 1. 035427 1. 605954 2. 099324 1. 902685  
3. 12751 2. 459014 3. 43672 2. 71026 2. 688645 2. 123516 3. 35479 3. 306839 2. 986837  
7. 496042 8. 093596 7. 956734 7. 451975 8. 101631 7. 291723 7. 885047 7. 635642 7. 223348  
2. 283996 3. 241759 3. 534455 1. 466944 2. 766497 1. 275626 3. 249083 2. 350936 1. 994961  
1. 296051 1. 059392 1. 692143 1. 429105 0. 842733 1. 492835 1. 68391 1. 471011 1. 703293  
2. 810896 2. 540804 2. 248977 2. 460167 3. 266581 2. 282975 3. 23231 2. 021741 3. 34766  
1. 257323 1. 236698 1. 382748 1. 746969 1. 106444 1. 449154 1. 709946 1. 289552 1. 284185  
1. 913318 2. 148967 1. 772455 1. 892824 2. 915779 1. 699567 2. 14373 2. 243991 2. 009421  
2. 319238 1. 020835 2. 083115 2. 763603 0. 85655 1. 392775 2. 118752 1. 38849 1. 410098  
1. 827903 1. 866997 1. 249958 1. 017263 1. 281201 1. 232032 1. 421435 1. 080169 1. 315911  
4. 710193 4. 704099 4. 367376 5. 906611 5. 037935 4. 272314 4. 414288 4. 577635 4. 372982  
1. 670464 1. 281659 1. 824983 1. 273185 1. 05155 1. 391404 1. 381668 1. 356914 1. 104384  
2. 351259 3. 632662 2. 877709 2. 94956 1. 887726 2. 401974 3. 131719 2. 217095 2. 593672  
2. 266138 2. 516486 2. 784001 2. 520911 2. 17954 2. 146963 2. 260445 2. 114012 2. 052476  
2. 389428 1. 395416 2. 232358 1. 500023 2. 226314 3. 244136 1. 236706 2. 599984 2. 177803  
2. 454175 1. 531819 1. 395697 2. 015298 2. 015259 1. 932935 1. 995186 2. 290844 2. 135563  
5. 180039 7. 02234 6. 564682 6. 758566 6. 374709 6. 173098 6. 427575 6. 73351 6. 424811  
1. 798876 2. 044762 2. 213439 3. 156871 2. 001843 1. 808358 1. 71268 2. 712518 1. 576492  
1. 126042 1. 408863 1. 211386 2. 376495 0. 942594 1. 300326 1. 323181 1. 179499 1. 121608  
1. 872546 1. 146895 1. 399063 1. 077478 1. 456072 1. 105296 1. 177196 1. 305381 1. 074253  
1. 28162 1. 195634 1. 072068 1. 794478 1. 497593 1. 171116 2. 019127 1. 464758 1. 404211  
2. 234049 3. 768954 3. 069317 2. 448494 4. 423492 2. 511828 3. 418608 1. 780589 3. 425071  
2. 748724 2. 271982 2. 376127 4. 073777 1. 47774 4. 490557 1. 048306 2. 781764 2. 02833  
1. 224682 1. 370634 0. 873896 1. 768784 1. 141722 0. 960356 0. 949443 1. 036522 2. 375522  
2. 90692 1. 843573 1. 893144 1. 75209 2. 110219 1. 795414 1. 781995 1. 792534 2. 01177  
1. 452208 1. 343668 1. 322201 1. 164984 1. 805956 1. 485913 1. 346684 1. 686539 1. 967574  
2. 100921 1. 478808 1. 401756 1. 556048 1. 508236 1. 670227 1. 300932 1. 603048 1. 218994  
4. 027625 3. 393616 3. 699195 3. 977103 3. 689668 3. 24742 4. 417673 3. 190622 3. 401136  
3. 166546 5. 719663 2. 838227 2. 939733 3. 977592 4. 768647 5. 10301 2. 980516 1. 861753  
1. 67604 1. 417046 1. 314248 1. 250514 1. 857059 1. 733595 1. 678395 1. 564444 1. 301987  
1. 81605 1. 804772 1. 524077 2. 158748 1. 737067 1. 791909 1. 791909 1. 508814 1. 607659  
2. 152826 3. 043416 2. 620923 1. 775636 2. 110391 3. 957947 1. 651361 1. 451275 1. 614103  
5. 360676 4. 496358 5. 242031 4. 993555 5. 125389 4. 223271 4. 803463 4. 342975 5. 616036  
3. 713239 3. 052395 3. 939918 4. 755221 3. 090334 3. 371808 3. 980293 5. 020344 4. 830585  
2. 993833 3. 807966 4. 363733 3. 95884 4. 418112 3. 474349 3. 300751 3. 982979 3. 538472  
2. 215317 2. 215317 1. 878949 1. 920465 2. 286472 2. 088597 2. 857362 3. 941251 2. 333674  
3. 133291 1. 899053 2. 936828 1. 855787 1. 055424 2. 147039 1. 834702 1. 891206 1. 523417  
1. 886354 1. 942456 2. 158651 1. 378601 2. 070808 2. 725267 1. 913099 1. 483516 1. 692912  
2. 211645 2. 372521 2. 722271 3. 349612 2. 577453 1. 941839 1. 66366 2. 934073 2. 278426  
1. 495625 1. 560289 1. 324422 2. 166139 1. 3766 1. 534784 1. 785011 1. 173932 1. 108748  
2. 382351 1. 784734 1. 584395 1. 715197 1. 233428 1. 587763 1. 364315 1. 912024 1. 41458

1. 376511 1. 974178 2. 310775 1. 383151 2. 381674 1. 488153 1. 699951 1. 461789 1. 323772  
2. 154124 3. 651246 3. 186834 4. 178454 3. 922963 3. 914512 3. 227657 4. 487359 4. 885696  
3. 202641 2. 903218 3. 459316 3. 961507 3. 301719 3. 20451 3. 521259 3. 025694 3. 000011  
1. 686663 2. 810441 1. 429126 1. 307953 1. 389783 2. 788677 1. 658196 0. 835864 1. 068381  
3. 976192 3. 419175 3. 108779 3. 669334 3. 26503 3. 386811 3. 856573 2. 782827 3. 269283  
7. 151815 7. 430321 8. 092627 7. 92348 7. 773864 7. 645644 7. 618564 7. 344645 7. 606126  
2. 482107 2. 419714 2. 897472 2. 756506 3. 133634 4. 165741 2. 952848 2. 65993 4. 339657  
2. 442596 1. 823044 2. 176547 2. 029188 2. 257446 2. 285269 3. 071404 2. 02847 2. 600938  
2. 09828 2. 058519 2. 583794 1. 444465 2. 008381 1. 815564 2. 650491 1. 327207 1. 544304  
1. 780119 2. 112796 1. 316576 1. 341847 1. 485804 1. 888046 1. 66122 1. 535134 1. 725896  
1. 925324 2. 113057 1. 686791 1. 986946 2. 004841 1. 647837 1. 815907 1. 650317 2. 204217  
3. 166575 4. 193873 4. 204447 4. 510288 4. 407676 3. 744869 4. 00966 5. 090037 4. 322701  
2. 093848 1. 329586 2. 413529 1. 962192 1. 752338 1. 632797 2. 342215 1. 704591 1. 960801  
1. 758548 1. 601262 2. 098526 1. 932589 2. 362218 1. 882078 2. 555652 2. 150448 2. 435839  
4. 056368 2. 926539 5. 055041 3. 934989 5. 547416 4. 797571 5. 280311 4. 797572 4. 779516  
2. 100674 2. 76897 2. 462928 3. 071883 2. 136676 2. 355575 3. 196917 2. 105946 2. 674182  
1. 797024 2. 499925 1. 591139 1. 824724 2. 022217 1. 742796 1. 876979 1. 715829 2. 807918  
1. 968992 2. 756131 2. 590481 1. 97819 3. 110689 2. 693227 2. 209871 2. 506447 2. 564685  
1. 557596 2. 002623 1. 26178 1. 263465 1. 357171 1. 349019 1. 285938 1. 36577 1. 33797  
2. 979784 1. 122778 1. 764871 1. 634686 1. 245072 1. 807849 2. 020005 2. 150517 1. 319876  
1. 173784 1. 648194 1. 175846 1. 196103 0. 853494 1. 011735 1. 352748 0. 764067 1. 063644  
1. 171919 1. 397221 0. 930266 1. 070003 1. 364451 1. 048327 1. 113257 1. 28147 0. 864086  
2. 41006 3. 020217 3. 89889 2. 737863 3. 406213 3. 368804 1. 841396 1. 869367 1. 999024  
1. 373744 0. 79624 1. 127703 0. 830229 1. 477782 1. 171674 0. 814234 1. 084758 1. 213621  
1. 918791 1. 898671 1. 475354 2. 305057 1. 711359 1. 746801 2. 0898 1. 563493 1. 691476  
2. 525851 2. 348254 2. 548311 2. 493117 5. 192184 2. 946373 2. 55044 3. 525192 3. 309149  
1. 769946 1. 187486 1. 511233 1. 402955 1. 43751 1. 090466 1. 533937 1. 177087 1. 419378  
2. 604687 3. 784862 2. 786916 3. 219505 3. 762373 2. 384969 3. 391309 2. 082719 3. 034546  
1. 408946 1. 072365 1. 846289 1. 663232 1. 174684 1. 151328 1. 229178 1. 233318 1. 233073  
2. 27274 3. 810013 2. 47281 1. 429433 3. 483578 2. 335058 3. 810357 3. 635897 2. 251017  
3. 134512 2. 691963 3. 910538 3. 545261 1. 399111 2. 423787 2. 963082 2. 4999 2. 229136  
2. 171449 1. 605887 0. 975048 1. 43213 1. 838529 1. 611775 1. 057733 1. 154232 1. 502151  
1. 800824 1. 158467 1. 505533 1. 414278 1. 709151 1. 568449 1. 23308 1. 258847 1. 102425  
5. 392918 6. 647034 6. 476391 6. 024874 5. 909884 4. 997892 5. 485108 6. 425587 5. 398697  
5. 510214 4. 791233 5. 659848 4. 126438 5. 029387 5. 161672 4. 874127 5. 12751 4. 623353  
1. 941089 2. 067571 1. 435238 1. 557721 2. 361903 1. 10035 1. 413397 1. 454057 1. 478338  
1. 383444 2. 476906 1. 384466 1. 442133 1. 21851 2. 262518 1. 958571 2. 020553 1. 245911  
2. 511614 2. 369765 2. 255887 2. 058148 2. 297458 2. 302677 2. 785384 1. 726735 2. 273924  
3. 938887 2. 799105 2. 764673 3. 179615 4. 655059 3. 227562 2. 760348 2. 165182 2. 83739  
1. 984596 1. 367869 1. 294292 1. 374027 2. 138559 1. 41627 1. 13204 1. 7081 2. 797386  
0. 96645 1. 50606 1. 860293 2. 962036 1. 759769 2. 547258 1. 666107 1. 207924 1. 609239  
2. 090611 2. 51778 1. 844442 1. 780641 1. 993699 1. 891327 1. 934557 2. 199147 1. 655627  
2. 463068 4. 021463 2. 619147 4. 577095 3. 216588 3. 599261 1. 850804 2. 54047 3. 374545  
0. 880237 1. 158025 0. 923586 1. 729879 0. 81814 0. 718043 1. 161081 1. 555131 1. 091667  
2. 391129 4. 87058 3. 281322 3. 897892 2. 398586 2. 720378 4. 262351 3. 237816 2. 973808  
1. 449698 1. 101712 1. 187919 1. 068578 0. 868756 1. 528811 1. 176762 1. 194766 1. 206391  
2. 090503 1. 49804 1. 277862 1. 347502 2. 070543 1. 715043 1. 536273 1. 925527 1. 357052  
1. 256677 1. 859238 1. 225596 1. 29411 1. 419138 1. 345627 1. 864166 1. 700021 1. 624012  
1. 430392 1. 136332 1. 256395 1. 453146 1. 184373 1. 272078 1. 497956 1. 152584 1. 405948  
5. 364553 1. 31715 0. 874825 1. 124105 1. 459545 1. 213391 3. 174026 1. 390381 1. 272692  
1. 771359 1. 449247 2. 10325 1. 639952 2. 424061 2. 699096 1. 17213 2. 042732 1. 594426

3. 948252 3. 056456 3. 209259 2. 858532 4. 15636 4. 636206 2. 975663 3. 346235 3. 165634  
1. 106439 1. 470433 2. 818482 1. 596863 1. 831268 1. 962768 1. 496516 1. 687257 2. 259689  
5. 30639 6. 000015 5. 514953 4. 997436 6. 187879 4. 140628 5. 543074 5. 65991 5. 860634  
1. 411052 1. 260557 1. 009107 2. 082634 1. 98989 1. 897528 1. 784667 2. 006086 1. 711924  
2. 235484 2. 238078 2. 035441 1. 82477 1. 181092 1. 375526 1. 851903 1. 360887 1. 499457  
1. 575674 0. 82296 0. 932869 1. 416344 0. 91471 0. 97025 1. 014382 1. 16643 1. 42897  
2. 146056 1. 230394 1. 308478 1. 526726 1. 683152 0. 926437 1. 157624 1. 586038 1. 230185  
2. 173343 1. 338049 1. 585109 1. 681788 1. 657096 1. 565088 2. 145425 2. 248351 1. 321777  
2. 225307 3. 113001 2. 588062 1. 635147 2. 926125 2. 898125 3. 107723 2. 609499 2. 277421  
1. 928395 2. 42416 2. 923246 2. 55749 2. 791949 2. 394375 1. 893448 3. 170308 3. 057097  
4. 953563 5. 796494 6. 082621 6. 337776 6. 586454 6. 17745 6. 231933 6. 231443 5. 617793  
3. 783501 1. 525712 1. 353642 1. 846036 2. 367165 1. 536988 2. 097241 1. 986216 2. 086243  
1. 434969 1. 876319 1. 125659 1. 052225 1. 776322 1. 227219 1. 459656 1. 220586 1. 850608  
2. 636945 2. 173078 2. 116252 1. 822148 2. 587637 2. 197343 2. 40969 2. 464298 2. 498786  
2. 481385 1. 81329 2. 078186 2. 101297 1. 660531 1. 978389 1. 55351 1. 764734 1. 777749  
0. 966595 0. 639073 1. 479549 0. 950107 1. 242017 1. 338387 0. 787933 1. 370829 1. 108604  
2. 323477 1. 718175 1. 788763 1. 463034 1. 957764 2. 054859 2. 56955 1. 371791 2. 291919  
2. 1655 1. 623406 2. 511212 2. 328454 2. 410588 2. 3597 1. 428561 1. 956862 1. 660915  
2. 988203 3. 10143 3. 394269 3. 269192 3. 140307 4. 043363 2. 949517 4. 123875 2. 97004  
2. 758482 2. 127456 1. 702929 1. 587788 1. 947031 1. 654128 1. 525868 3. 427319 1. 798772  
2. 109244 2. 073286 2. 789818 2. 134591 3. 116254 2. 362682 2. 186404 2. 231825 2. 060941  
3. 316843 3. 312129 3. 35122 3. 66438 3. 495807 3. 663044 3. 501341 3. 817877 3. 330478  
1. 441343 1. 282204 1. 132534 1. 507945 1. 154386 1. 306833 1. 964648 1. 474073 1. 333368  
1. 09652 1. 805941 1. 062244 1. 630922 2. 069747 1. 298345 1. 250323 1. 364166 1. 191149  
1. 735578 2. 03989 2. 271487 1. 541071 1. 403065 2. 03116 2. 097394 1. 751786 1. 866125  
3. 736759 3. 443939 3. 972481 3. 511253 3. 883157 4. 139077 2. 383613 3. 106348 3. 758794  
1. 423044 1. 058521 1. 713043 1. 26065 1. 18012 1. 238743 1. 327648 2. 080212 2. 491885  
2. 262909 3. 948991 3. 209738 3. 265485 3. 292262 3. 293474 2. 911259 2. 498483 2. 650544  
2. 500533 4. 29128 3. 901118 2. 968569 4. 945721 3. 794959 4. 787377 3. 19936 3. 50968  
1. 208572 1. 002953 0. 873079 1. 133257 1. 284547 1. 06372 1. 435013 1. 205693 1. 145079  
2. 734372 1. 639018 2. 048067 1. 703345 1. 964044 2. 988051 2. 40569 2. 040095 2. 351359  
2. 696998 3. 065938 3. 08812 2. 973835 2. 894943 3. 088243 2. 726932 4. 209004 4. 257379  
2. 691157 1. 794421 2. 826031 2. 222331 1. 883982 2. 301735 2. 273395 2. 150136 2. 574337  
1. 454092 1. 590976 2. 122932 1. 200687 1. 340651 2. 075548 0. 923809 2. 759614 4. 059087  
4. 838966 5. 09106 5. 644484 5. 319673 4. 80195 4. 987998 4. 765584 4. 95214 5. 292384  
5. 375971 5. 711091 4. 435527 2. 642253 5. 115819 4. 929438 2. 869851 6. 283351 4. 496292  
1. 071248 1. 800865 1. 110093 1. 030979 1. 033465 1. 839012 1. 047201 1. 448442 1. 01317  
1. 35161 1. 486368 1. 125339 1. 772956 1. 38876 1. 229936 1. 379794 1. 492004 1. 778484  
2. 736579 2. 166117 2. 16991 2. 590292 2. 271981 2. 194506 2. 419008 2. 192514 2. 363614  
2. 283284 1. 745288 2. 120659 1. 682082 1. 624103 1. 833758 1. 661095 1. 893214 2. 486325  
1. 906684 2. 010867 1. 67148 1. 227399 1. 457692 1. 964076 1. 229007 1. 511845 1. 978067  
1. 184049 1. 491103 1. 497396 1. 693845 1. 887111 1. 339472 1. 340855 1. 497158 1. 69381  
2. 995421 3. 960956 3. 343666 3. 206253 3. 290093 3. 071882 3. 210321 2. 854522 3. 150744  
6. 128446 6. 476452 7. 170989 5. 094014 5. 663707 5. 218806 4. 05158 5. 802393 5. 248475  
3. 104494 4. 815014 4. 982644 3. 026062 3. 56211 3. 2699 3. 842688 4. 693279 4. 48582  
4. 332369 4. 390414 5. 191955 3. 416721 3. 57284 4. 463784 5. 219565 5. 696576 4. 11383  
2. 021019 1. 580418 1. 455231 2. 299649 1. 479777 2. 277574 1. 443541 1. 232959 1. 404739  
1. 137098 0. 826963 1. 02313 1. 07624 0. 966603 0. 960587 0. 913018 0. 931753 1. 026389  
6. 509336 6. 754852 6. 582992 5. 984585 6. 195907 6. 569946 4. 790025 6. 344982 5. 24588  
2. 7637 2. 27213 2. 056954 2. 455052 2. 457386 4. 261315 5. 246315 2. 433218 3. 777369  
3. 390682 2. 810504 2. 827389 2. 817153 2. 582083 2. 234833 2. 479828 3. 503677 3. 171006

1. 233356 2. 114498 0. 880214 1. 991089 1. 659918 1. 19704 1. 338268 1. 246425 0. 903695  
3. 127467 4. 793903 5. 526397 4. 462109 3. 760173 2. 981735 2. 047599 3. 208588 2. 803792  
4. 172019 3. 446239 4. 461138 4. 117153 4. 215227 2. 792645 3. 54193 4. 25842 4. 070337  
1. 851729 1. 488194 1. 904459 2. 40916 1. 82147 1. 313519 1. 270722 2. 006053 2. 101157  
1. 309669 1. 670791 1. 675082 1. 382049 1. 113444 1. 374001 1. 13305 1. 74219 1. 601891  
1. 50547 2. 807225 1. 580274 1. 652785 3. 379343 2. 596457 1. 149349 2. 191471 1. 749969  
1. 248208 1. 59954 1. 952541 1. 354904 2. 591439 2. 9267 2. 87774 1. 972154 1. 86193  
1. 172904 1. 734959 1. 339125 1. 574128 1. 584657 1. 476696 2. 749879 1. 457067 2. 019161  
4. 262792 4. 934878 5. 502139 4. 806535 4. 292204 4. 602038 4. 674579 5. 265848 4. 981059  
1. 599614 1. 750856 1. 335748 1. 340601 1. 636131 1. 594156 1. 705015 1. 447306 1. 302729  
1. 388856 1. 313416 1. 923742 1. 92623 1. 818366 0. 993211 2. 090757 1. 021549 1. 221029  
3. 43565 2. 853058 4. 018397 4. 894817 3. 467481 2. 864661 3. 90932 4. 271777 2. 744477  
4. 234913 6. 172069 4. 6229 8. 031946 6. 946891 6. 490876 6. 82671 6. 270806 7. 217056  
1. 323471 1. 732869 1. 14374 1. 487471 1. 50129 1. 466693 1. 335788 1. 952731 1. 550874  
1. 176311 1. 389239 1. 569207 1. 229342 1. 601927 1. 06748 1. 050772 1. 124762 0. 90433  
1. 038548 0. 958036 1. 206744 1. 416804 1. 127901 0. 762724 1. 953081 1. 608145 1. 460036  
2. 492037 2. 028725 2. 132149 1. 838419 2. 821086 1. 742675 3. 640931 1. 985723 2. 053328  
1. 296456 1. 119442 1. 838482 1. 676865 2. 671686 1. 557303 2. 083507 2. 507079 1. 635916  
2. 368478 2. 078204 2. 547157 2. 90476 2. 120841 2. 377079 2. 154804 2. 423383 2. 008161  
5. 28613 4. 269827 3. 79942 4. 0513 3. 073168 4. 304963 5. 388895 3. 92557 4. 007214  
0. 92878 0. 835558 0. 963415 1. 668602 1. 548509 1. 142027 1. 851314 0. 833698 1. 660152  
1. 571283 1. 206617 0. 928115 1. 00006 0. 839383 0. 830485 2. 812043 0. 957472 1. 601511  
2. 030702 1. 354423 1. 522401 1. 459635 1. 641912 2. 679794 1. 309736 1. 309971 1. 400654  
1. 218416 1. 441697 1. 265956 1. 245367 1. 064657 1. 370527 1. 239912 1. 142693 1. 641603  
3. 230981 1. 251932 1. 111784 1. 89303 1. 374616 2. 244129 1. 959451 2. 476284 1. 897112  
2. 393346 2. 079814 2. 968945 1. 98008 2. 974157 2. 406122 3. 149422 2. 221706 2. 570115  
2. 719865 1. 682302 2. 204391 2. 903211 1. 656053 1. 727928 1. 166081 1. 29507 1. 759103  
1. 511701 1. 384355 1. 633425 1. 738024 1. 639494 1. 523643 1. 200607 0. 881114 1. 358121  
4. 792495 4. 548599 4. 034418 4. 087598 4. 668885 4. 55725 4. 574981 4. 553609 3. 560183  
1. 860127 1. 323836 2. 062085 2. 037122 2. 255908 1. 543284 2. 62633 1. 796282 1. 853883  
2. 287816 1. 545648 1. 291069 1. 765506 2. 317676 1. 578358 2. 541247 2. 108832 2. 639948  
1. 524136 1. 504252 1. 344352 2. 076727 1. 155933 1. 400494 1. 855591 1. 178235 1. 991538  
1. 581091 1. 572556 1. 201842 1. 49693 1. 581665 1. 774093 1. 455466 2. 01737 1. 430862  
6. 386708 6. 782871 7. 2249 6. 479841 7. 204074 6. 423316 5. 486276 6. 227175 6. 692822  
2. 348498 1. 981554 4. 691438 1. 638486 2. 0043 2. 241396 2. 182892 2. 064414 1. 699726  
2. 254993 1. 266055 1. 357657 1. 331548 1. 255724 1. 089539 1. 869481 1. 341772 2. 42418  
1. 648755 4. 033906 1. 751894 3. 097682 2. 362706 2. 802511 1. 859653 2. 867044 2. 659672  
5. 78356 2. 931355 3. 546548 3. 236293 1. 771426 3. 437878 3. 628705 4. 470495 2. 737204  
2. 225166 2. 338106 2. 490388 2. 813774 2. 542826 3. 300002 3. 385454 2. 385126 2. 006973  
1. 537931 1. 63621 2. 195069 1. 319134 1. 397305 0. 929478 1. 087145 1. 275223 1. 03262  
1. 813605 2. 33436 1. 564897 2. 025414 1. 72219 2. 769138 2. 251904 2. 113321 2. 03054  
2. 107585 2. 184847 1. 531663 1. 492445 1. 778905 1. 903172 2. 118463 1. 282728 1. 464434  
1. 961614 1. 80172 1. 812693 2. 096224 3. 24698 1. 628458 1. 452435 3. 662045 3. 349278  
1. 489912 1. 637328 1. 739102 1. 758009 1. 33021 1. 174963 2. 216128 1. 303097 1. 61356  
2. 24359 2. 7826 1. 021805 2. 009265 1. 570314 1. 421156 2. 067212 2. 992724 1. 515801  
2. 355309 2. 757976 1. 843537 3. 381278 2. 834374 3. 05995 2. 056628 3. 105699 2. 362273  
1. 855293 1. 537498 1. 191377 1. 137444 1. 299486 1. 352295 1. 419851 1. 261064 1. 418378  
3. 868503 4. 020185 5. 07885 3. 626088 4. 047045 4. 881663 4. 906252 3. 813093 4. 083476  
3. 736459 2. 691115 3. 399704 2. 380798 3. 169327 2. 679939 4. 124487 3. 370152 2. 517258  
2. 096004 2. 444337 1. 716097 1. 452223 1. 844243 1. 571624 2. 136824 1. 17946 2. 076691  
2. 504336 1. 597153 3. 439403 2. 800244 1. 6624 2. 467285 4. 053165 2. 852626 2. 480043

3. 26302 5. 78778 5. 554369 5. 540977 3. 990125 5. 548409 6. 242364 4. 264407 4. 946298  
6. 677934 3. 347617 4. 456533 2. 880155 4. 30839 4. 234306 2. 353002 4. 847195 2. 883052  
1. 186843 0. 977305 1. 306488 1. 72186 1. 283145 1. 409288 1. 08439 1. 2182 1. 481509  
3. 916261 4. 115196 3. 734029 3. 460559 3. 683521 3. 514726 4. 93009 3. 126369 3. 764101  
1. 424211 1. 092347 0. 826722 1. 676979 1. 321315 1. 768566 0. 884256 0. 996387 1. 416695  
1. 801638 1. 889903 1. 010767 0. 998285 1. 875193 1. 811633 1. 154685 1. 138828 1. 139184  
0. 963482 2. 126761 1. 185002 1. 900316 1. 401557 1. 188845 1. 479481 2. 155773 1. 819125  
4. 350611 4. 769544 4. 790748 3. 780623 4. 14396 4. 29519 3. 275636 5. 746089 4. 012516  
1. 737576 2. 374633 2. 369946 2. 396624 2. 94487 1. 987094 1. 938192 2. 61169 1. 859437  
3. 773763 3. 692382 3. 946313 2. 764353 3. 113796 2. 496873 3. 515735 3. 970955 3. 440325  
1. 542417 1. 524849 2. 080693 1. 284831 1. 247564 1. 872139 1. 626538 2. 057317 2. 317183  
2. 813177 2. 502713 1. 768979 2. 960129 2. 376052 1. 953849 3. 519981 2. 955723 1. 926723  
2. 776164 2. 33087 4. 5208 3. 311448 2. 817114 4. 758746 2. 875394 2. 136478 3. 655167  
3. 046365 2. 012182 1. 979123 2. 516409 2. 284785 2. 028165 1. 99817 1. 567935 1. 837383  
1. 638007 1. 612798 1. 772405 1. 479752 1. 620967 1. 579851 1. 679439 1. 297057 1. 52191  
1. 141571 4. 336881 1. 009085 1. 556812 0. 898359 1. 240457 0. 818887 0. 615035 0. 540501  
1. 77709 1. 154307 1. 111581 1. 093393 1. 399987 1. 35878 2. 523434 0. 891635 1. 540162  
2. 30262 6. 333932 3. 87605 2. 418319 2. 742181 2. 253256 3. 278953 3. 612822 7. 419179  
2. 468824 1. 963129 3. 129942 2. 829763 2. 997694 3. 069216 1. 798422 2. 03851 1. 493211  
1. 671864 1. 424283 1. 5348 3. 381803 1. 79154 1. 908872 1. 173777 1. 691798 2. 124562  
3. 1362 2. 086612 2. 610808 2. 498688 1. 997373 2. 867203 3. 160723 1. 663801 2. 342221  
2. 11091 1. 751083 1. 677954 1. 738327 1. 7908 1. 557992 1. 63521 2. 311021 1. 700555  
2. 566116 2. 359167 2. 919214 2. 651769 2. 786996 2. 328065 2. 115609 3. 046074 2. 637319  
1. 50619 1. 670871 1. 751137 1. 530489 1. 674267 2. 126165 1. 997676 1. 763989 1. 123447  
3. 088026 2. 296113 2. 321708 3. 433566 2. 131779 3. 151587 3. 108667 1. 778842 3. 648134  
2. 866583 2. 35742 1. 778656 2. 35571 0. 920432 1. 788713 1. 734771 2. 813546 2. 255716  
1. 961589 1. 729677 2. 046522 1. 583011 1. 959849 1. 780664 0. 626411 2. 175661 3. 775533  
2. 381394 3. 030673 3. 211389 3. 128248 2. 969759 3. 437257 3. 118345 3. 12525 2. 762564  
3. 600342 1. 125551 2. 892154 1. 992391 1. 902606 1. 038703 1. 015645 1. 293481 1. 393167  
1. 577791 1. 234754 1. 249105 1. 690709 1. 402829 2. 097749 1. 74161 1. 316202 0. 806782  
3. 627453 4. 036762 3. 820896 4. 086611 3. 015519 4. 613348 2. 653727 3. 139877 3. 973254  
1. 540535 1. 075684 1. 121211 1. 339114 1. 070891 1. 283246 2. 220996 1. 429593 0. 93179  
4. 004755 2. 347171 4. 271057 2. 504561 2. 132701 2. 455044 3. 031223 2. 797422 1. 921185  
2. 268185 1. 639323 2. 048529 2. 024687 2. 298662 2. 097831 2. 064504 1. 754916 1. 568152  
1. 494214 1. 620427 1. 161804 1. 504357 1. 474487 1. 027016 1. 783222 1. 515969 1. 213568  
1. 648358 2. 562449 2. 475386 1. 233093 1. 600518 1. 890939 2. 177321 2. 013228 1. 585514  
2. 930051 2. 034851 1. 980734 2. 175412 2. 732319 1. 648848 2. 256038 1. 905728 1. 747385  
1. 767476 1. 671826 2. 020322 2. 674066 1. 345795 1. 723562 1. 382902 1. 92536 1. 896413  
2. 086958 2. 156176 1. 83991 1. 971932 1. 916469 2. 310638 1. 705208 1. 77815 1. 527525  
8. 050427 6. 027109 7. 461685 5. 471309 7. 173121 6. 174321 5. 019387 5. 873641 5. 456499  
3. 272673 5. 081224 4. 963843 4. 115694 4. 936431 3. 684939 3. 60796 4. 642135 4. 954914  
2. 149744 2. 423837 1. 850962 1. 22921 1. 479825 1. 47967 1. 653329 1. 228826 1. 496487  
4. 027745 2. 346312 3. 059005 1. 865947 3. 168243 2. 853619 2. 227479 1. 754221 2. 035483  
1. 676968 1. 116016 1. 19486 1. 540556 2. 089008 1. 324615 1. 480521 1. 117886 1. 361105  
2. 223256 1. 646442 1. 463012 1. 675156 1. 183871 1. 3679 1. 776571 1. 791733 1. 217915  
2. 07417 2. 035051 1. 07641 2. 849582 1. 61125 2. 189834 2. 75668 2. 137529 1. 144615  
2. 200703 2. 297381 2. 540417 3. 023968 3. 668663 3. 228988 4. 44013 4. 139896 3. 959158  
2. 881409 2. 396871 2. 811385 2. 065526 3. 174695 3. 246742 2. 632764 2. 852233 2. 690792  
1. 618594 3. 652126 2. 344055 1. 673149 1. 284163 1. 687264 1. 153915 1. 703496 1. 190688  
1. 994609 1. 576483 1. 52615 1. 693406 1. 840923 2. 154367 1. 611113 1. 233844 1. 608775  
1. 530544 1. 240843 0. 932104 1. 079794 1. 183946 1. 011822 1. 34135 1. 036972 1. 10288

3. 167745 3. 708358 3. 332225 3. 289905 2. 813199 2. 339601 2. 584141 3. 093334 3. 01279  
3. 716835 3. 389507 2. 788998 3. 094641 3. 041431 3. 360306 2. 939878 3. 203573 3. 221057  
1. 433944 0. 924407 1. 192434 1. 331335 2. 032324 1. 265607 1. 81493 1. 226074 1. 008724  
1. 290468 3. 926166 1. 7686 2. 695966 1. 32682 2. 500962 2. 334232 2. 295288 2. 878662  
5. 263754 4. 408835 3. 396595 4. 558016 3. 4172 3. 087709 3. 899177 2. 967104 4. 825431  
2. 672247 2. 149691 1. 182368 1. 304303 1. 283976 1. 720046 1. 433691 1. 169927 1. 266342  
1. 581666 0. 766374 1. 149815 1. 464303 1. 418272 1. 264878 1. 569368 1. 852388 0. 839967  
2. 194914 1. 911633 2. 167313 2. 389312 1. 682945 2. 073862 1. 98483 2. 211756 2. 159705  
1. 04534 1. 926829 2. 964132 1. 087039 1. 530265 3. 243159 2. 171318 1. 955339 1. 967831  
1. 241274 2. 203257 1. 900433 1. 299469 1. 810775 1. 34425 1. 741694 1. 477756 1. 495654  
3. 72293 2. 05794 2. 402321 2. 439564 2. 904527 3. 309901 2. 070373 1. 905086 1. 665477  
1. 248859 1. 928702 0. 906939 1. 977664 1. 198188 1. 300396 1. 687092 1. 115715 1. 149119  
2. 418298 2. 930437 4. 174549 2. 050595 2. 204159 2. 4923 2. 529829 2. 216752 3. 142769  
0. 754918 1. 548829 1. 060302 1. 009115 2. 09254 0. 823617 0. 85972 0. 678529 0. 894178  
1. 260731 1. 346152 1. 563495 1. 246233 1. 135052 1. 510444 1. 582312 1. 586703 1. 116043  
1. 535519 1. 264872 1. 279795 1. 505116 1. 246398 1. 576846 1. 100046 1. 210574 1. 110185  
2. 246822 1. 100059 3. 099086 1. 772486 1. 273407 1. 72545 1. 932422 1. 83946 1. 90101  
6. 440731 6. 508255 6. 631949 6. 110154 5. 713191 4. 958638 5. 973767 5. 777192 5. 733804  
2. 573816 2. 415977 2. 400054 2. 205108 1. 897776 2. 095011 1. 831375 2. 344493 2. 666824  
2. 188844 1. 178733 0. 691747 0. 902491 1. 402247 0. 852119 2. 219944 0. 884063 0. 676689  
1. 156396 1. 35482 1. 412618 1. 432216 1. 283684 1. 055201 1. 198679 1. 273464 1. 161855  
1. 155524 1. 538553 1. 730947 2. 416715 1. 580858 2. 24045 1. 349625 1. 142526 1. 382692  
2. 027525 1. 588483 1. 385468 1. 430908 1. 967866 1. 32862 1. 560792 2. 004977 1. 406169  
7. 603464 7. 588913 7. 240829 7. 837339 7. 458299 7. 20592 8. 196959 7. 278723 8. 001734  
1. 922904 1. 490356 1. 738493 3. 211347 2. 451466 2. 519237 2. 336745 1. 442098 1. 708803  
1. 118261 0. 842211 1. 570287 2. 265203 1. 288407 1. 115755 1. 733937 0. 769047 1. 240829  
1. 734606 1. 51878 1. 934758 1. 524789 1. 473069 1. 314922 1. 93888 1. 528185 1. 811234  
4. 434155 3. 379681 3. 074629 2. 067026 1. 860141 1. 792396 2. 262052 2. 957061 4. 484172  
2. 41547 0. 957599 1. 398212 1. 623929 1. 143418 1. 43989 1. 481379 0. 969524 1. 549932  
3. 472724 3. 992141 3. 916428 4. 8766 4. 386945 2. 952326 3. 949699 3. 203652 3. 864172  
2. 015321 1. 522786 2. 249928 1. 454329 2. 115343 1. 357571 1. 846811 1. 720366 1. 320946  
1. 435498 1. 260047 0. 850676 0. 908242 0. 772243 1. 325059 1. 287614 1. 491383 1. 384649  
1. 261216 2. 001512 1. 519924 1. 343443 1. 47511 1. 521154 1. 657081 1. 419237 1. 657619  
4. 018031 5. 172958 3. 726372 3. 255893 5. 102845 4. 900414 2. 926553 3. 989235 3. 750979  
3. 355766 2. 410028 2. 83362 3. 193543 2. 193677 2. 972722 2. 576173 2. 769045 2. 617937  
3. 723756 6. 4442 5. 69655 5. 98371 4. 534431 4. 228552 4. 749655 5. 921361 4. 642328  
4. 98523 3. 380817 3. 393441 2. 35849 2. 402647 3. 532742 2. 504693 3. 235682 3. 527163  
2. 925719 3. 68449 2. 117367 4. 3668 3. 408828 2. 78657 2. 571493 3. 356583 3. 057042  
1. 461262 1. 72416 1. 239349 1. 556181 1. 470106 1. 551708 1. 304171 1. 519439 1. 171175  
9. 173102 7. 550625 7. 870515 7. 004628 6. 406668 6. 79494 7. 622658 6. 892552 7. 044214  
5. 301203 6. 563294 6. 636476 5. 190524 4. 055595 4. 948768 3. 277838 4. 955237 4. 848392  
3. 294569 5. 320759 5. 153327 2. 964652 4. 514302 3. 447927 3. 824383 5. 129659 3. 416886  
2. 00663 2. 711551 4. 084726 2. 094951 2. 135323 2. 725131 1. 66363 2. 451424 3. 199344  
4. 525269 5. 551626 5. 429943 5. 703008 5. 64863 5. 944765 5. 142638 5. 651613 5. 471277  
1. 384396 4. 375052 1. 840199 3. 057929 1. 455761 2. 47707 3. 215457 3. 290142 2. 992793  
1. 355594 1. 542812 1. 375712 1. 358142 1. 832458 1. 522836 1. 403313 1. 327477 1. 350493  
1. 865637 1. 770469 1. 366494 1. 596233 1. 523477 1. 891907 1. 367632 1. 604824 1. 549727  
3. 748803 3. 691809 3. 855087 3. 816341 4. 278659 3. 788993 3. 946464 3. 766925 3. 826698  
3. 825508 4. 07104 4. 124985 4. 275764 4. 340234 4. 354413 4. 531434 4. 462228 4. 417953  
2. 354239 2. 097343 3. 020622 1. 089084 3. 638805 2. 415448 1. 925642 2. 999323 3. 018013  
1. 273893 1. 167574 0. 797257 1. 237703 1. 179785 0. 928602 1. 869528 0. 805697 0. 902658

2. 273948 1. 253539 1. 975344 1. 695949 1. 581623 1. 578802 1. 466264 1. 586345 1. 670464  
3. 566964 3. 422735 5. 047561 3. 67888 2. 859992 3. 651084 4. 892877 4. 604312 3. 081928  
5. 041241 4. 550106 5. 208019 5. 262688 4. 789132 4. 808242 4. 614766 4. 859018 4. 114418  
1. 555393 1. 335076 1. 276739 1. 053116 1. 390798 1. 45835 1. 619113 1. 533987 2. 246735  
1. 268555 1. 427172 1. 088849 1. 811051 1. 011413 1. 50948 1. 226211 1. 837162 1. 095046  
2. 378061 1. 293278 1. 116922 1. 300258 1. 59585 1. 12174 2. 92692 1. 446539 1. 096919  
1. 2058 3. 483571 2. 808858 2. 220694 4. 657333 1. 923344 1. 839205 5. 490612 1. 488583  
2. 726233 1. 896775 1. 945214 1. 583969 1. 912092 2. 085651 1. 323201 2. 118911 1. 520933  
1. 46367 1. 947242 1. 676562 1. 748585 2. 073092 1. 836178 2. 653562 1. 977703 2. 049854  
1. 466778 1. 24078 1. 414103 1. 295697 1. 264104 1. 402919 0. 890365 1. 423149 1. 563673  
2. 385161 2. 248965 2. 702283 3. 105792 3. 18388 2. 185964 3. 5284 2. 516126 2. 412234  
2. 363317 4. 372561 4. 997752 2. 034434 2. 274846 2. 43355 2. 869719 3. 616458 3. 136574  
3. 176788 1. 574104 1. 617837 1. 380323 2. 405114 1. 545611 2. 098414 2. 061954 1. 426045  
1. 131733 2. 243895 1. 078706 2. 010699 1. 710234 2. 922858 1. 501123 1. 779107 2. 386485  
1. 494343 1. 391469 1. 97338 1. 731087 2. 108359 2. 486578 1. 766659 1. 191469 1. 41421  
2. 41297 2. 619947 2. 216437 2. 544701 2. 93616 3. 063415 2. 37381 2. 036147 1. 924175  
2. 103241 2. 427347 1. 60688 1. 840558 1. 878489 2. 066806 2. 312993 2. 091909 1. 827004  
2. 978942 2. 969113 3. 180151 3. 321959 2. 785799 3. 791215 2. 669914 3. 096392 2. 56187  
1. 661936 1. 352302 1. 234153 1. 940607 1. 477473 1. 843231 1. 645529 1. 140704 1. 991701  
1. 300488 3. 269785 3. 204164 2. 63761 2. 106763 2. 653317 2. 452457 2. 920659 2. 23616  
2. 506188 1. 26855 0. 708034 1. 352834 0. 876954 1. 551858 0. 988988 1. 499697 1. 071615  
2. 227147 2. 282661 2. 313663 2. 608174 2. 228514 2. 078331 2. 335118 2. 404965 2. 616164  
1. 565007 1. 686307 1. 844982 1. 39434 1. 420946 2. 748769 1. 858277 1. 0503 1. 72774  
1. 777447 1. 664392 1. 878965 3. 456798 1. 838383 1. 633002 1. 777447 2. 464761 1. 694908  
5. 474986 5. 634453 5. 467867 5. 836244 5. 271708 5. 265952 5. 117733 5. 229227 5. 370831  
3. 594752 4. 814068 3. 470447 3. 956251 2. 988187 3. 501376 3. 367385 3. 829367 3. 040647  
1. 797817 1. 517108 1. 640464 1. 68637 1. 75404 1. 625792 1. 860825 1. 209349 1. 934849  
3. 016198 3. 120437 4. 061395 3. 084756 5. 261147 3. 052878 3. 814123 4. 834943 2. 686866  
3. 380485 4. 715144 4. 234653 4. 698152 3. 788294 4. 818252 3. 792172 4. 312006 3. 291187  
1. 417086 1. 277996 1. 289226 1. 516201 2. 38946 1. 105002 1. 357966 1. 063068 1. 208607  
0. 84845 1. 02566 1. 056906 0. 986862 0. 841777 0. 892101 0. 88787 1. 08263 0. 951384  
1. 990577 3. 200193 2. 99161 3. 377026 1. 951449 3. 049705 2. 094878 2. 01657 2. 821705  
4. 477211 4. 892334 5. 197642 4. 904115 4. 83397 5. 816971 4. 980722 4. 479987 4. 922659  
1. 054894 1. 039086 0. 959106 1. 116069 1. 429811 1. 179609 1. 322512 0. 898427 1. 653865  
3. 41877 1. 293191 3. 260248 1. 328233 1. 968233 1. 79152 1. 234341 1. 40912 1. 809672  
2. 258447 1. 407311 4. 603919 1. 535036 1. 907761 1. 932501 2. 309351 2. 787933 1. 557822  
1. 733509 2. 309679 1. 332453 1. 636121 2. 014797 1. 31682 1. 850767 1. 72267 1. 998727  
1. 594931 1. 252158 2. 68621 1. 285401 2. 307661 1. 252958 2. 039095 1. 802104 2. 144026  
4. 072382 2. 361375 4. 292884 2. 144189 3. 384225 3. 288472 3. 439243 1. 907817 2. 366182  
0. 761202 1. 679772 0. 717477 1. 301426 0. 962377 2. 812488 0. 769913 1. 327147 0. 976455  
1. 530291 1. 151335 0. 959133 1. 477003 1. 345826 1. 030722 0. 998693 1. 414012 1. 868593  
1. 505828 1. 378249 1. 223361 1. 580472 1. 956674 1. 599468 1. 333571 1. 653883 1. 802777  
1. 632839 1. 43938 1. 221952 1. 434053 1. 485498 1. 358955 1. 102228 2. 013977 1. 245668  
2. 417485 4. 131747 2. 835805 3. 143167 3. 340246 2. 16474 3. 205 3. 645206 3. 171711  
1. 091706 1. 580539 1. 253002 1. 59182 1. 89548 1. 530318 1. 61155 1. 351431 1. 854177  
2. 447021 2. 169465 2. 512458 1. 800904 1. 958096 2. 271068 1. 87892 1. 821405 1. 840265  
1. 367008 1. 686101 1. 115829 1. 291133 1. 16134 0. 759407 1. 741891 2. 043126 1. 200912  
3. 209923 2. 991887 2. 45604 2. 738694 3. 220112 3. 282284 3. 340058 4. 062392 3. 230831  
1. 897348 1. 552278 1. 197253 1. 935967 1. 26682 1. 620071 1. 516155 1. 198775 0. 912145  
2. 941561 4. 565166 3. 916305 3. 242289 2. 607237 2. 718332 2. 782148 2. 393192 2. 736412  
1. 863721 1. 420323 1. 849782 1. 26771 1. 681034 1. 747141 1. 917982 1. 808774 1. 798221

2. 238525 4. 965492 5. 930117 3. 259504 4. 765818 5. 564049 1. 969474 3. 80159 4. 090689  
1. 633903 1. 415033 1. 174092 0. 883965 1. 135653 1. 188256 1. 43521 1. 323716 1. 047096  
0. 850736 0. 61798 1. 017472 0. 801296 1. 192947 1. 074615 0. 762108 0. 788233 0. 855245  
3. 055746 1. 962113 2. 191947 2. 086368 2. 041255 1. 975315 2. 20098 2. 657304 2. 706455  
1. 995136 1. 921067 1. 966653 1. 718245 2. 897905 1. 961728 1. 909228 1. 678451 1. 989895  
1. 504967 1. 99291 1. 163073 1. 640044 1. 683371 1. 414652 2. 063638 1. 647566 1. 775182  
1. 425196 2. 217797 2. 709309 1. 583452 1. 251594 2. 343518 2. 186934 3. 299452 3. 10728  
2. 192741 3. 069324 2. 647906 2. 440861 1. 891627 1. 54419 2. 225978 3. 634384 2. 715617  
3. 810431 3. 207577 4. 169281 4. 074758 3. 082384 3. 260663 3. 375144 4. 130607 3. 543146  
2. 088775 1. 632755 2. 384779 2. 329467 1. 450823 3. 527675 3. 209551 2. 476558 2. 269919  
3. 357266 2. 402852 2. 582272 2. 217529 1. 483856 2. 094154 2. 57877 2. 30937 2. 693673  
3. 098511 4. 150299 4. 604161 2. 62763 3. 346389 2. 749285 3. 443617 4. 12064 3. 433419  
1. 403604 1. 80821 1. 098736 1. 320627 1. 838806 1. 767423 1. 895644 1. 428232 1. 103637  
2. 231999 1. 367533 2. 395465 1. 401428 1. 084641 2. 182773 1. 413658 1. 431624 1. 664998  
2. 742032 3. 367207 3. 203488 2. 753632 4. 43651 3. 50271 5. 736212 3. 968998 4. 423492  
5. 80098 5. 37617 5. 743745 5. 225419 5. 168331 4. 76887 5. 181683 4. 940172 4. 982373  
5. 059579 5. 964258 5. 513234 4. 850199 4. 837675 4. 841914 4. 954516 4. 820315 5. 531362  
1. 125847 1. 390311 1. 443337 1. 929845 1. 232726 1. 198167 1. 152327 0. 978266 1. 74709  
2. 023999 1. 738706 1. 685005 2. 230374 2. 125068 2. 516201 2. 742263 1. 729692 2. 163767  
3. 899707 2. 640648 4. 832547 2. 696266 2. 71018 2. 714961 3. 673989 4. 059724 3. 897501  
1. 264982 1. 14217 1. 709028 1. 381318 1. 253605 1. 342441 1. 971779 1. 114319 0. 956729  
4. 490445 3. 22118 3. 338496 2. 918423 4. 133792 2. 886688 3. 221772 2. 76827 3. 283189  
1. 720663 1. 103345 1. 018225 1. 210418 1. 126474 1. 75327 1. 409212 1. 019815 1. 363384  
6. 36307 6. 099869 5. 445759 5. 138538 5. 558367 5. 272465 6. 458909 5. 320158 4. 533646  
2. 015338 1. 865583 1. 570618 1. 917654 2. 460803 1. 379283 1. 754124 2. 78021 1. 978346  
2. 58198 3. 101263 2. 417861 2. 66531 2. 917078 2. 630938 3. 32157 2. 274104 2. 714647  
2. 58772 1. 934491 1. 965337 2. 046923 1. 873776 2. 023532 2. 276145 1. 814088 2. 122012  
1. 034622 1. 469738 1. 209937 1. 068031 0. 858353 1. 510845 1. 192427 1. 170307 1. 159186  
3. 418979 3. 001712 3. 39875 3. 55196 3. 172679 3. 256232 4. 540381 3. 478265 3. 522946  
3. 627494 2. 714687 2. 891427 3. 391877 3. 578577 3. 2016 3. 042268 2. 578959 2. 827399  
1. 949352 1. 713515 2. 105886 1. 22463 2. 677687 1. 984637 2. 69122 1. 86299 3. 734806  
2. 72239 1. 183959 1. 81456 1. 371866 1. 953425 1. 207501 2. 976024 1. 887321 1. 359127  
3. 166808 3. 490117 3. 257336 2. 142267 2. 241038 1. 943928 2. 304792 1. 813371 5. 379563  
3. 094935 1. 956447 1. 60046 1. 3078 2. 354605 1. 3061 1. 373265 2. 613693 1. 602424  
1. 948836 1. 804356 1. 533726 1. 607043 1. 565436 2. 026545 1. 943102 1. 34965 1. 619161  
1. 753511 1. 371154 1. 146583 1. 119629 1. 150798 1. 089895 2. 083404 1. 376631 1. 595362  
0. 954405 0. 692158 0. 869003 1. 123774 1. 413792 1. 338405 1. 299452 1. 154264 1. 109451  
3. 486117 3. 121922 3. 756512 4. 214024 2. 770819 2. 267559 2. 587498 4. 576031 3. 222771  
0. 791994 2. 577721 2. 515284 1. 493343 1. 165058 2. 50216 2. 033652 1. 468428 1. 212396  
2. 612354 2. 305147 2. 296789 2. 63778 2. 491763 2. 226055 2. 540446 2. 084628 2. 200515  
2. 527571 2. 72698 3. 396163 2. 51272 2. 505685 4. 193897 4. 438876 3. 088418 3. 175427  
2. 087317 1. 415905 2. 163685 0. 99944 1. 943755 1. 432898 2. 737563 1. 077921 1. 400361  
2. 960254 3. 683879 2. 559589 3. 174683 3. 904734 2. 66333 3. 560886 3. 440363 3. 076916  
1. 294101 1. 325426 1. 526364 1. 359573 1. 309349 1. 293658 1. 928686 1. 329158 2. 068948  
1. 777952 1. 448935 1. 386697 2. 800874 2. 063418 1. 81236 1. 514004 1. 934245 1. 186986  
1. 49469 1. 086636 1. 112157 1. 550752 2. 433709 1. 121663 1. 637183 1. 455088 1. 799323  
1. 942452 1. 649808 2. 337391 2. 144189 1. 481856 1. 650722 2. 57835 1. 809245 2. 084822  
5. 321014 6. 212159 5. 933806 6. 222626 6. 133281 6. 074324 6. 331402 5. 438583 5. 898652  
3. 966477 3. 550576 3. 752888 2. 946101 2. 813636 3. 156544 3. 513615 3. 251416 2. 993378  
4. 103745 4. 751576 5. 084277 4. 232487 3. 623556 3. 156897 4. 364825 2. 782234 3. 951564  
3. 006698 0. 973736 4. 522151 4. 902326 2. 029691 1. 835995 2. 50118 2. 219697 1. 520096



2.641345 1.5265 1.730916 1.411105 2.947669 0.64173 2.025421 1.485895 2.272227  
2.764239 1.625754 2.066739 0.973527 2.618205 1.413222 2.826427 3.503442 2.638227  
3.889023 2.649114 3.89991 4.698521 4.327082 3.898024 3.664432 2.94464 3.017588  
1.46846 1.37244 1.061815 1.180734 0.75633 1.380027 2.723217 1.753447 2.249727  
2.867431 2.069017 2.090094 2.607305 2.535069 2.62441 2.264109 1.859107 2.128752  
1.182256 1.449536 1.373676 1.349659 1.04627 1.601958 1.349439 1.661673 0.928239  
3.104038 2.892431 2.452068 2.604099 2.07284 2.044129 3.210793 1.805714 2.441961  
1.616405 2.899377 2.097442 1.308082 1.028885 1.354085 1.388228 0.446948 3.597958  
3.53413 1.909965 3.086522 3.156681 2.358481 3.329743 3.503582 4.027566 2.88634  
3.452567 3.200751 3.210555 3.318291 3.153793 3.905021 3.251196 3.670873 3.33335  
6.73943 7.455225 6.987542 7.834957 7.461309 7.417626 6.921672 6.511179 6.730663  
1.388514 1.590322 1.844894 1.200802 2.481403 1.682834 1.740568 1.455627 1.580035  
2.847029 2.716412 3.146681 3.062886 2.266905 2.616253 2.300876 2.54609 2.901732  
5.824511 6.381907 6.56621 6.751257 6.049204 6.078019 6.227533 6.441847 6.161878  
2.883351 2.807908 2.463877 3.36325 2.887624 3.404413 2.245907 2.958587 2.511885  
3.626588 3.549766 3.926626 3.636986 3.633533 2.775223 3.96167 2.683822 3.667299  
7.290501 7.137954 6.730465 6.724719 6.576459 6.320686 5.586562 6.618254 7.106294  
2.23512 1.703982 1.347632 2.236143 1.848497 1.707215 2.242989 1.643123 1.921959  
2.727225 1.807086 1.641668 1.751227 2.596728 2.29627 2.979863 1.687642 1.788743  
0.92717 1.302832 0.462818 1.075368 1.400643 1.112408 1.254423 0.73585 0.966313  
2.163075 1.970854 2.581581 1.859309 2.095324 1.588839 3.546345 2.275346 1.938787  
2.44288 2.606666 2.369068 2.119475 2.394283 1.831205 2.213357 2.404563 2.580234  
1.025654 1.239956 2.217854 0.861516 0.872386 0.822885 0.76414 0.820298 1.401904  
1.622347 2.060345 3.266674 1.89791 1.932866 0.927968 2.416757 2.085024 2.176003  
2.481583 1.331452 0.985657 3.368619 0.947518 1.082384 1.632444 0.96866 1.204509  
1.488242 1.713776 1.530583 1.444239 1.63679 2.052097 1.415889 2.099242 1.8126  
2.959003 1.499861 1.506039 2.406152 1.223817 1.126353 1.873703 1.915733 1.498238  
3.545907 1.854214 1.675225 2.052068 2.788629 2.557485 2.127063 2.289241 2.732295  
2.801841 3.688069 3.488835 3.453614 2.483231 2.799701 3.594344 2.346975 2.572718  
0.642845 0.93323 1.254741 0.666036 0.709845 0.884704 0.60241 0.907137 1.403696  
3.79991 2.312399 3.751803 2.940517 2.18539 2.82873 2.802323 3.256055 3.308295  
4.94271 4.302313 4.534948 4.107277 3.602908 3.905733 5.991853 3.271891 4.176798  
0.998118 0.615455 1.377262 0.880828 1.153425 0.882413 1.042773 0.625491 0.899382  
0.625162 1.174123 0.79203 1.670387 1.139954 0.995021 1.131472 0.896292 1.33792  
5.836763 4.582878 5.180395 6.203551 4.476095 5.553907 5.119862 4.2758 3.984744  
0.940896 1.133892 0.909901 0.755874 1.062749 0.836881 0.797957 0.954276 0.884274  
2.242062 1.15334 2.403827 3.888946 1.86629 2.020141 0.786473 2.38886 2.132989  
4.316329 4.003036 3.603384 2.521222 3.832211 3.053401 4.627086 3.714712 3.435439  
0.636375 1.204878 0.65146 0.996078 1.325169 0.698716 1.124503 0.906059 0.551547  
0.971321 1.54445 0.525034 1.110133 1.286309 1.287653 1.166016 0.91755 1.16685  
1.029802 1.045423 1.015717 0.836747 1.178347 1.333246 1.249015 2.038637 1.241377  
2.40354 1.156248 1.873546 1.107321 1.986398 1.157122 2.445907 1.398505 1.295172  
0.57377 0.92469 0.780527 0.635669 0.618296 0.925503 0.816289 0.734617 0.801092  
1.441155 1.774547 1.557051 1.554764 1.707274 2.591576 2.253548 2.850238 1.928172  
2.227031 1.504596 1.570436 2.135587 1.988833 1.12002 1.590599 1.250109 2.199547  
2.554565 2.088886 2.042439 1.58228 2.387996 2.209491 2.989922 2.467525 2.335376  
1.555424 1.343139 1.583989 1.575196 2.133962 1.961728 1.374488 1.156165 1.546249  
3.421398 1.712462 2.582134 4.348963 3.418315 1.941329 3.998196 4.04015 1.612247  
0.803007 1.35275 0.51601 0.810382 1.357459 1.13348 0.778713 1.067191 1.079299  
3.752121 2.676628 3.758573 2.530887 3.216563 2.048034 3.195488 2.50743 3.060481  
0.907878 2.088521 1.039192 0.94187 1.136861 1.248077 1.18096 1.040596 1.539714



0.761889 0.957691 0.915209 0.753437 0.688728 2.036096 0.503821 0.435174 0.514371  
1.69305 1.855951 2.460269 0.864553 1.708102 1.666602 1.792671 1.810942 1.745414  
4.79369 3.370103 4.229666 4.030014 4.432876 3.23241 3.910349 5.025732 5.01513  
1.219254 0.602377 1.016066 0.749945 1.12659 1.210886 0.78025 0.910746 1.174248  
0.964956 1.406593 0.825027 1.122196 0.812813 0.973604 0.709831 1.732601 0.653742  
1.546852 1.263532 1.794967 1.138156 1.477397 1.448968 1.045739 1.162079 1.671093  
2.007995 1.566047 1.346846 1.707035 1.374285 1.860522 1.860857 1.508366 1.635295  
4.261923 3.32189 3.574804 2.612351 4.745486 3.750262 4.685291 3.702888 3.743196  
1.132747 1.041132 0.815686 1.155847 0.807905 1.314028 0.866348 1.289511 0.783924  
3.125674 2.164669 2.019203 1.9788 3.005006 3.55098 2.329939 1.950418 2.607483  
1.020976 0.909735 1.040606 0.986515 0.915142 1.122112 0.975332 1.297185 2.108967  
0.863962 0.999275 0.720141 1.141705 0.563452 0.564043 0.885153 0.953611 1.115731  
0.991062 0.99204 0.816044 1.577226 1.186805 0.90038 1.197051 1.168703 1.174152  
3.539824 3.602309 4.218249 3.970265 4.244235 3.633252 4.701003 4.736324 2.328222  
3.372954 2.336482 4.123127 3.975585 2.308904 3.85917 3.755817 3.14111 3.86315  
1.11778 1.062968 1.687497 0.831197 1.37808 0.842096 1.077778 0.710564 0.889433  
1.961141 0.831384 0.880632 1.105535 0.792251 0.975166 1.174791 1.024365 1.125989  
0.859809 0.804834 0.925007 1.312442 1.141568 1.658747 0.695529 1.137203 0.685919  
2.877826 1.832264 1.73703 2.314822 2.546621 4.632356 2.430838 2.578169 2.497547  
1.279209 1.503593 1.728754 1.264657 1.772844 1.359497 1.436975 1.302752 1.311296  
1.116191 1.321202 0.934105 1.838471 1.467318 1.318448 2.089943 2.059638 1.493234  
2.148363 0.830673 0.62139 0.839468 0.849393 0.762203 1.232167 0.719415 0.799224  
3.657392 2.642342 3.204932 2.924085 3.101159 2.432393 3.42357 3.415781 2.830872  
1.42574 0.979404 0.967528 1.474794 1.38689 1.316061 1.729441 1.295789 1.299171  
0.930167 0.711742 0.710229 1.059132 1.185203 0.959912 0.995523 1.011891 1.032293  
4.585667 3.392072 3.949909 4.43393 4.006053 3.921027 4.344513 3.054523 4.069482  
1.452175 1.775065 1.921539 1.107087 1.053428 1.301023 4.048965 1.542533 1.630582  
0.97446 1.482869 1.595675 1.217306 1.895941 0.984553 2.648564 1.372122 1.06718  
0.972471 1.189534 0.597016 0.770912 1.052274 1.040396 1.562223 1.57385 1.137483  
2.004626 1.543109 1.712313 1.836883 2.34861 1.635135 2.002247 1.660573 1.461083  
0.707251 1.20779 0.732631 0.845418 1.957393 0.703848 1.125973 0.906621 0.983538  
1.105968 0.813395 0.987571 1.10892 1.10811 0.893476 1.189235 1.040322 1.01769  
5.193582 5.111894 5.859384 4.59813 4.63694 4.515286 4.77241 4.442751 2.702124  
1.010294 0.950857 0.834693 0.812036 1.110252 0.912806 0.781886 0.806417 0.643613  
1.019094 1.575271 0.855088 1.063144 0.821866 1.732857 0.832749 0.846368 0.924794  
0.436628 0.70106 0.622542 1.186267 0.590028 1.158402 0.653976 0.674274 0.672799  
0.766858 1.3505 1.129384 0.877231 0.571377 0.79776 1.208428 0.827194 0.920175  
1.501826 1.304971 1.096507 1.057761 1.360089 1.042881 0.971462 0.835213 1.032731  
0.984871 1.249901 0.840386 1.798322 1.535634 1.430186 2.35589 1.115 0.952934  
0.996413 0.67796 0.670707 0.829174 0.647791 0.841264 0.93735 0.784473 1.180422  
2.962444 1.428688 1.526999 1.867122 2.131649 1.368629 1.47802 1.66011 1.237677  
1.418598 0.985328 1.156656 1.755813 1.50398 1.017913 0.988837 1.419444 1.810425  
1.133619 0.714816 0.995358 0.765857 0.859318 0.889313 1.087304 1.248819 0.907903  
4.12331 3.712667 4.190656 3.692074 3.257581 3.276078 4.112019 2.157054 4.142691  
3.647408 3.654157 4.408376 3.867338 4.39433 3.969215 3.925384 3.317989 3.93796  
2.127573 0.968693 0.959064 1.446515 1.267215 0.560646 0.888553 1.101078 0.75646  
0.866264 1.139322 0.78732 1.299904 0.775254 0.823912 1.169786 1.064986 1.079097  
1.321517 0.845719 0.766879 0.732437 0.6598 1.283714 1.351159 0.648224 1.444806  
3.302761 1.964206 2.417104 1.054119 2.058946 1.569996 2.084312 2.060803 0.919407  
2.341104 1.79275 1.072142 1.142019 1.019472 1.070599 1.145809 1.463809 1.420998  
1.585329 1.402711 1.113968 1.108953 1.214805 1.096578 1.997751 1.130948 1.620454



6. 862716 6. 908714 7. 136378 6. 871557 6. 665446 6. 962753 7. 306729 6. 757745 6. 766494  
2. 155747 2. 027767 1. 738011 2. 454737 2. 246058 1. 936327 2. 286952 2. 276637 2. 197538  
0. 827623 0. 729149 0. 836014 0. 823362 0. 580426 1. 859626 0. 873297 0. 644995 0. 583984  
0. 637579 0. 888489 1. 358991 1. 459808 0. 451522 0. 921646 0. 827054 1. 388769 0. 736273  
1. 087679 0. 907501 1. 325265 1. 220986 1. 0301 1. 002109 0. 982396 1. 25825 0. 938461  
1. 602804 0. 994442 1. 519331 1. 031317 1. 072894 0. 940556 1. 369118 1. 647447 1. 319952  
1. 704939 0. 738326 0. 897282 1. 402562 2. 106655 1. 117231 1. 408904 1. 736183 1. 283268  
1. 351622 1. 032115 0. 45134 0. 796933 0. 457425 0. 745134 0. 735855 0. 76998 0. 736705  
4. 377415 1. 379084 2. 990731 2. 632719 1. 431643 1. 920757 1. 419154 1. 763258 1. 67693  
1. 754373 1. 14879 0. 81057 1. 355702 0. 844358 0. 862245 2. 074895 1. 133163 2. 218396  
1. 075006 0. 98811 0. 964692 0. 806262 1. 600343 1. 582691 1. 085724 0. 947842 1. 476147  
0. 780707 1. 154765 0. 917917 1. 642571 1. 032265 1. 18693 0. 61338 0. 481567 0. 699469  
3. 452989 2. 732715 3. 522096 1. 805004 2. 536331 2. 369846 4. 1252 2. 712718 2. 872426  
4. 164854 3. 608328 3. 955464 3. 914547 3. 99574 3. 831276 4. 851398 3. 956964 3. 41245  
1. 638878 1. 048583 1. 833749 0. 955716 0. 860355 1. 092923 1. 122147 0. 892473 1. 536036  
4. 993462 4. 81272 7. 139694 3. 986833 4. 40923 6. 983261 5. 50833 6. 912134 4. 965935  
2. 056397 1. 293239 1. 292505 1. 66078 2. 016742 1. 356616 1. 368546 1. 180669 0. 984088  
3. 247224 1. 971385 2. 295576 2. 726346 1. 97707 1. 819997 2. 628227 2. 742793 2. 051975  
2. 506753 3. 394758 2. 157119 1. 300524 0. 579827 1. 450801 2. 162459 2. 014898 1. 887942  
1. 646669 2. 322481 1. 937703 1. 844257 1. 025133 2. 590577 1. 426899 1. 15232 1. 652643  
1. 069592 1. 443633 1. 94225 1. 539081 1. 238465 1. 700469 1. 898031 1. 295181 1. 137449  
2. 184508 0. 647009 0. 603403 1. 453335 2. 060798 1. 189801 2. 193816 1. 13369 1. 192  
3. 576504 3. 862106 3. 569678 3. 659338 3. 350095 3. 495291 3. 913813 3. 470669 3. 377189  
1. 951407 1. 326928 1. 868239 1. 273939 1. 037736 1. 402886 0. 918015 1. 044438 0. 867327  
1. 176488 1. 290032 0. 941508 1. 671307 1. 103481 1. 053707 1. 526939 0. 924864 1. 23756  
3. 982343 3. 362885 3. 650607 3. 918799 4. 502134 2. 704486 3. 703451 4. 004483 5. 007388  
1. 573155 1. 161037 0. 984852 1. 439195 1. 350573 1. 834482 1. 341917 0. 991166 1. 157577  
3. 743086 3. 520825 4. 929561 4. 459923 5. 088803 3. 376578 5. 144433 5. 212495 3. 093226  
1. 306748 0. 793041 1. 04413 1. 155592 1. 588017 1. 251928 0. 844864 0. 874413 0. 696617  
0. 552971 0. 792622 0. 479693 0. 5304 0. 806983 0. 66209 0. 788756 2. 788514 1. 637264  
0. 97122 1. 247385 1. 056807 0. 906758 1. 409071 1. 09322 0. 920903 1. 328959 1. 010973  
3. 15612 2. 24696 3. 428898 1. 2297 1. 729728 1. 279368 1. 136592 1. 536704 2. 711265  
0. 967588 1. 069306 1. 135553 0. 926387 0. 89551 0. 770278 1. 276562 0. 645003 0. 85444  
1. 209928 0. 667813 0. 824407 0. 903488 1. 081591 1. 226332 1. 742209 1. 083487 1. 143445  
2. 573038 1. 732675 1. 406622 1. 463353 1. 569301 1. 018639 1. 371256 1. 439729 1. 309009  
2. 41353 1. 283082 1. 437888 1. 096048 1. 732577 0. 850108 0. 972025 1. 12567 0. 963883  
3. 294176 1. 804971 1. 947763 0. 99248 3. 473113 1. 600135 3. 049694 2. 443267 2. 454278  
1. 294235 1. 46752 0. 847748 1. 320771 1. 377411 1. 246068 0. 919408 1. 563525 1. 57352  
3. 485359 2. 259428 3. 226845 2. 725778 2. 475495 2. 795115 3. 666857 2. 340827 2. 289685  
3. 296553 3. 707271 3. 068383 3. 562922 3. 025749 3. 481095 2. 701026 3. 139312 3. 518033  
3. 308872 2. 130449 3. 325984 2. 035901 3. 175232 2. 844374 3. 638883 2. 243865 3. 061684  
0. 814742 0. 820072 0. 969729 1. 006066 0. 611999 1. 169518 0. 959746 1. 225826 1. 617908  
1. 252526 1. 230596 1. 545298 0. 90163 1. 555941 1. 324184 1. 205183 1. 52649 1. 533773  
4. 304992 1. 795231 2. 463386 2. 608185 2. 50786 1. 590953 2. 602158 3. 151384 3. 551454  
3. 588274 2. 426783 3. 473953 1. 79847 2. 633587 3. 379071 2. 227001 2. 62614 1. 787762  
2. 253971 0. 736898 0. 711345 0. 654639 0. 511433 0. 706919 0. 602604 1. 063752 0. 91996  
1. 554917 0. 734925 1. 248813 0. 91256 1. 059007 1. 001222 1. 298351 1. 154526 1. 056695  
2. 907446 1. 913292 2. 72418 2. 235498 4. 175046 2. 916581 3. 236935 2. 359624 2. 824788  
0. 875285 1. 79269 0. 524831 1. 473344 0. 834219 0. 970893 0. 613244 1. 072574 1. 75841  
5. 214837 2. 705469 3. 123201 3. 408486 2. 831711 3. 316741 2. 723836 2. 703173 3. 024789  
2. 20903 1. 843264 1. 964934 1. 407742 1. 703927 1. 777079 2. 389902 2. 299759 1. 631379

1. 142087 1. 343256 1. 073662 1. 542505 2. 217024 1. 384284 1. 369054 1. 247188 1. 704312  
2. 44154 1. 371567 1. 636912 1. 476393 1. 360594 1. 766167 1. 302423 1. 986475 1. 972151  
1. 304584 1. 115971 1. 109968 1. 363036 1. 671825 1. 525331 2. 146654 1. 310147 1. 231822  
2. 11103 1. 749007 2. 635129 2. 9652 1. 782387 1. 837246 1. 764208 1. 416894 2. 459322  
1. 0946 0. 88814 1. 020502 0. 916508 1. 448926 0. 985025 1. 39832 1. 182222 1. 124755  
2. 373776 2. 558236 2. 001322 1. 790598 2. 564953 2. 208279 1. 918671 1. 940614 1. 458238  
7. 243096 6. 734442 7. 374734 6. 927607 6. 82912 7. 015085 7. 122367 6. 905615 6. 410321  
2. 380955 2. 066363 2. 70108 2. 081736 1. 333832 1. 976233 2. 154374 1. 702487 1. 048353  
3. 36843 2. 49087 3. 032606 5. 054431 2. 804989 3. 66642 2. 129894 2. 023346 2. 945468  
0. 9377 0. 677613 0. 949309 0. 99349 0. 961032 1. 012731 0. 924919 0. 929317 1. 334591  
3. 725235 1. 783067 2. 750802 3. 622563 3. 08409 2. 477101 3. 948087 3. 680755 1. 382424  
2. 286749 1. 82762 1. 92961 1. 118392 1. 442864 1. 751495 1. 066734 2. 023762 1. 154369  
1. 947103 0. 852506 0. 583351 1. 185289 0. 992695 0. 639499 1. 223419 0. 998648 1. 089221  
2. 548414 3. 325318 2. 682415 2. 401968 2. 780313 2. 432684 3. 010554 2. 607124 2. 739095  
0. 799988 0. 797266 1. 012515 0. 734488 1. 072243 1. 487903 1. 34309 0. 941236 1. 090797  
0. 385619 1. 284345 0. 591352 0. 692442 0. 435344 0. 861705 0. 579102 1. 042438 3. 522773  
2. 908877 3. 324727 3. 829169 3. 028175 3. 598526 2. 642569 4. 167225 2. 990262 2. 928587  
1. 369562 1. 324973 0. 864756 1. 547636 1. 600912 1. 051594 2. 114984 0. 999239 1. 54465  
3. 090154 3. 260277 3. 140113 1. 627081 1. 955241 2. 279783 2. 398344 2. 911902 1. 523782  
1. 111439 0. 973704 1. 281283 1. 61829 1. 57503 0. 886459 1. 079001 1. 07951 0. 793996  
1. 312845 1. 471935 1. 031292 1. 271728 0. 76237 1. 191257 2. 34264 0. 991626 1. 262759  
3. 955498 3. 495493 4. 505622 3. 384558 4. 124153 4. 003665 3. 281305 3. 045734 4. 489485  
1. 754468 2. 632149 2. 109067 3. 695837 2. 399705 2. 626458 3. 951763 2. 036055 3. 370777  
1. 041863 1. 394308 1. 145886 1. 374633 1. 211065 2. 111102 1. 75968 1. 498912 1. 676866  
1. 505197 1. 513799 2. 171977 0. 743542 2. 063567 3. 950816 0. 997864 3. 401148 2. 582391  
5. 51082 5. 317459 5. 293175 4. 977067 5. 343036 5. 412705 5. 478297 5. 177478 5. 45008  
1. 563308 0. 935653 1. 734601 1. 472708 1. 460898 1. 18562 1. 060856 1. 316725 1. 369828  
3. 748917 3. 889506 4. 802087 4. 642213 3. 706274 3. 072698 4. 400348 3. 079729 4. 094357  
3. 118513 3. 939019 3. 40749 4. 572041 2. 671515 3. 398331 3. 198852 3. 819327 3. 742513  
3. 072475 3. 090042 3. 392175 2. 211034 5. 096337 2. 739328 2. 975721 2. 838484 2. 283768  
1. 429158 1. 000542 1. 283995 1. 109365 1. 649752 1. 265407 1. 428581 1. 044413 1. 345292  
9. 641134 9. 741529 10. 00378 9. 727707 9. 946457 9. 559372 9. 401695 10. 09958 10. 10812  
1. 614562 1. 58585 1. 487178 1. 307835 1. 645291 1. 533691 1. 924675 1. 719535 2. 051498  
2. 131964 3. 277825 2. 620964 2. 436254 1. 758355 1. 972212 2. 181713 1. 672495 2. 07622  
2. 742906 1. 423153 1. 7214 2. 180807 1. 6052 2. 282072 2. 436025 1. 721802 1. 869774  
2. 45544 1. 623515 2. 241191 2. 146403 1. 950323 1. 402161 2. 703976 1. 68968 1. 750067  
4. 557197 3. 143051 4. 454499 4. 560887 4. 533667 5. 564675 4. 700191 3. 547641 1. 468201  
1. 086143 1. 424882 1. 009048 1. 247044 1. 848291 2. 22926 1. 658581 1. 550817 1. 745674  
2. 336125 2. 813662 3. 05594 1. 895501 3. 883438 2. 248022 2. 2397 2. 269293 1. 927389  
4. 259376 4. 29194 4. 399092 4. 020134 4. 01234 3. 935101 4. 139108 4. 43012 3. 80045  
4. 435427 4. 314336 4. 560936 4. 325436 4. 065578 4. 53852 4. 277661 4. 189754 4. 109876  
2. 4274 3. 046867 2. 106897 2. 531125 2. 499185 2. 764478 2. 442789 2. 508172 2. 454355  
5. 333516 5. 889352 5. 234913 5. 459716 5. 20939 6. 674205 5. 402108 5. 215617 6. 029409  
2. 575677 2. 362383 0. 789507 1. 033593 0. 692513 1. 243301 1. 027725 0. 438001 1. 47135  
1. 311305 1. 428561 1. 536101 1. 666355 1. 590807 1. 919489 1. 056141 1. 428587 1. 631581  
2. 246477 1. 353305 2. 928039 2. 408484 2. 166478 2. 029588 2. 053134 2. 017914 1. 682378  
1. 213601 2. 049019 1. 521765 2. 135833 1. 371825 1. 643986 1. 815955 1. 509569 1. 805274  
2. 876107 2. 680229 2. 327443 3. 523268 2. 084043 2. 064668 3. 452575 1. 877534 1. 92558  
6. 300762 4. 690067 5. 152119 5. 678449 3. 796471 3. 757214 3. 331586 5. 200384 4. 027543  
1. 874227 1. 207051 0. 918248 0. 798978 1. 330364 1. 353005 2. 036691 1. 823305 0. 792666  
1. 194414 0. 898711 0. 72672 1. 509865 1. 079463 1. 30563 1. 163824 0. 899108 1. 751138

2. 250573 2. 254405 1. 812362 2. 426435 1. 928973 2. 107541 2. 211708 2. 260227 1. 996115  
4. 758787 4. 899371 4. 683553 5. 626405 4. 403908 3. 452298 3. 876506 4. 120466 4. 460507  
3. 591596 1. 675599 2. 3205 2. 139181 2. 582991 2. 605692 3. 155989 4. 399231 2. 371831  
1. 450322 0. 882459 0. 825775 1. 327852 1. 063673 0. 963142 0. 679345 0. 768978 0. 796234  
2. 42596 1. 933755 1. 50344 2. 003473 2. 413284 1. 392943 1. 996479 1. 671113 1. 942028  
1. 697627 1. 542976 1. 598962 2. 554895 2. 749463 1. 439438 2. 079985 2. 436235 1. 656324  
1. 729703 1. 902053 2. 395804 2. 751072 1. 925556 2. 003615 3. 016215 2. 422292 1. 707974  
1. 211872 1. 032007 1. 206638 1. 088863 1. 36546 0. 998356 1. 73215 1. 485468 2. 91954  
0. 57641 0. 500618 0. 481998 0. 738688 2. 32388 1. 553865 1. 641919 0. 407898 0. 498365  
1. 141786 1. 495827 1. 16581 1. 27183 0. 983405 1. 860945 1. 073064 3. 305276 0. 935786  
7. 11813 6. 845299 7. 242615 6. 978279 6. 825206 7. 495131 6. 682027 7. 120441 6. 945912  
1. 362488 2. 429558 2. 364362 2. 690102 0. 997097 2. 54541 3. 663379 1. 330786 2. 219219  
3. 035093 2. 711507 2. 563564 2. 577421 3. 151838 2. 39317 3. 141344 2. 393177 2. 865603  
1. 875553 2. 01434 2. 214808 1. 975135 1. 678593 2. 178498 2. 411188 2. 295749 1. 829987  
8. 615893 8. 251272 8. 376214 8. 29046 8. 516635 8. 298916 7. 701288 8. 564073 8. 446114  
6. 692554 6. 750442 6. 750673 7. 015081 6. 923719 6. 497245 6. 763651 7. 026894 7. 189199  
1. 380125 1. 312413 1. 331415 1. 066532 1. 298503 1. 188009 1. 584889 1. 101545 1. 591421  
4. 617706 4. 565645 4. 525145 5. 246225 4. 738699 4. 662154 4. 284603 4. 078117 4. 539314  
6. 714583 6. 431453 6. 606845 5. 938498 5. 764647 4. 977276 6. 23588 5. 696854 5. 794482  
1. 949203 1. 348695 1. 249409 1. 436751 1. 176131 1. 61844 2. 121789 1. 251621 1. 402504  
1. 173919 1. 341594 1. 300114 1. 136362 1. 169068 1. 239806 1. 427175 1. 668205 1. 708363  
4. 330791 3. 151615 2. 448424 2. 390464 2. 981491 2. 723243 2. 814078 3. 797283 3. 373159  
6. 497036 6. 249812 6. 590956 5. 750301 6. 326782 6. 434164 5. 920598 6. 277007 6. 382782  
1. 678579 0. 929768 2. 274907 2. 027476 1. 021264 1. 618904 1. 565151 2. 430016 2. 108081  
2. 467295 2. 569398 2. 34288 3. 310893 3. 230168 2. 321623 2. 276135 2. 801954 2. 388272  
6. 254532 6. 710779 6. 405254 6. 297543 6. 776387 6. 591201 6. 732211 6. 59717 6. 514214  
1. 612211 1. 702049 1. 836936 1. 721138 2. 778892 2. 635568 1. 661545 1. 65208 2. 513624  
2. 230474 2. 566428 2. 752365 2. 799441 2. 524048 2. 108855 2. 529141 1. 961438 2. 276289  
7. 787768 7. 712447 7. 760297 8. 050259 7. 997896 7. 879696 8. 011666 7. 699729 7. 847148  
3. 186188 3. 430113 2. 507963 3. 575412 2. 77324 3. 131696 2. 329255 2. 596717 3. 149887  
1. 685287 1. 187678 1. 741648 1. 647449 1. 450391 1. 337114 1. 622784 2. 30797 1. 374403  
3. 513374 5. 423897 4. 204325 4. 720671 3. 143932 3. 979576 3. 808247 4. 582638 4. 7203  
3. 505502 3. 393859 3. 249772 3. 693475 3. 51665 3. 238165 3. 67859 3. 032773 2. 982501  
3. 972249 4. 637735 3. 803136 3. 859242 4. 045449 4. 047979 4. 234619 4. 613159 4. 370211  
5. 889824 6. 76368 6. 576089 6. 572459 6. 7237 6. 711456 6. 266863 6. 341221 6. 907896  
4. 547999 1. 874711 2. 264061 1. 591157 1. 551235 1. 837097 3. 270658 1. 949564 2. 679912  
4. 061656 3. 628172 3. 591447 3. 245305 3. 829861 3. 4172 3. 60964 2. 920385 2. 948375  
1. 469923 0. 937209 0. 922657 1. 347438 1. 096917 1. 088822 1. 179651 1. 362179 1. 213383  
5. 133112 7. 114122 6. 75164 7. 323552 6. 409763 7. 381602 7. 222516 7. 333722 7. 502687  
4. 676739 3. 38709 3. 902738 3. 300157 2. 866711 3. 177725 3. 424886 3. 547928 4. 432391  
0. 993159 1. 265341 1. 644971 1. 679696 1. 259974 1. 21546 1. 339931 1. 385021 1. 366159  
6. 849715 7. 125315 6. 688169 7. 038159 7. 297708 6. 613356 6. 958303 7. 023866 6. 980309  
0. 856328 0. 933798 1. 245997 1. 053001 1. 190704 1. 275462 1. 309421 0. 932653 1. 10253  
1. 745178 1. 071194 1. 766132 1. 123829 1. 522597 1. 705451 1. 783581 1. 121542 1. 125296  
1. 420642 2. 867781 1. 583463 1. 48668 1. 449829 1. 609195 2. 099741 2. 382425 1. 624465  
2. 813182 2. 158734 1. 754817 1. 25671 1. 570792 2. 813182 0. 916717 1. 188206 1. 696275  
2. 079176 2. 363101 2. 149913 2. 692364 1. 900442 2. 055111 2. 86688 1. 64122 1. 592329  
7. 005107 7. 711213 7. 560336 7. 818371 8. 195744 7. 87959 7. 477505 7. 269939 7. 489638  
6. 191645 6. 626776 6. 169238 6. 815379 5. 950451 6. 897448 7. 266733 5. 674874 6. 470325  
7. 467694 8. 032366 7. 927583 7. 736018 7. 800111 7. 774314 7. 289527 8. 130288 7. 909716  
1. 320059 1. 090146 1. 255371 1. 217565 1. 358519 1. 253541 1. 37299 1. 547297 1. 329754





1. 616643 1. 311931 1. 202186 1. 506836 1. 94333 1. 343935 1. 912815 1. 693552 1. 642383  
3. 437987 4. 079277 3. 612791 3. 49408 4. 668919 3. 416922 3. 765132 4. 26767 3. 748805  
1. 863194 1. 095541 1. 502345 1. 275941 1. 185636 1. 299737 0. 982594 1. 270497 1. 132095  
1. 315917 1. 010666 1. 024643 1. 504168 1. 030786 1. 211079 1. 399596 1. 46662 1. 658002  
4. 119244 3. 935711 3. 624914 5. 513026 4. 278023 4. 371196 3. 054463 4. 212679 3. 799436  
7. 153235 7. 332489 7. 266879 7. 713793 7. 450887 8. 428501 6. 462225 7. 184773 7. 482223  
1. 799957 0. 981639 1. 86346 1. 916746 1. 391204 1. 367784 1. 629504 1. 179459 1. 843793  
4. 808946 3. 55952 5. 166385 1. 802403 2. 887644 3. 449418 4. 991567 3. 546293 2. 691859  
6. 52155 7. 328735 7. 704352 6. 381687 7. 261087 7. 047449 6. 759126 6. 836474 6. 714115  
1. 383064 1. 314194 1. 205507 2. 199406 1. 049113 1. 324094 1. 204429 0. 707578 1. 359266  
1. 024379 0. 820272 0. 79836 1. 060314 1. 272492 1. 083778 1. 465228 1. 725936 0. 749376  
1. 52406 0. 869479 0. 810772 1. 353439 0. 994977 1. 304015 1. 244905 1. 545845 1. 228225  
2. 017722 1. 825637 1. 801671 3. 356867 2. 155115 2. 117965 2. 899254 2. 418347 1. 913729  
1. 865514 1. 254932 1. 087558 1. 377271 1. 406522 0. 962437 1. 435605 1. 634211 1. 200129  
2. 081695 1. 427798 2. 092306 1. 637993 2. 733757 1. 819359 2. 058373 1. 732339 2. 275747  
2. 209972 4. 691381 2. 335041 6. 222303 2. 593788 2. 809203 6. 147653 2. 83705 4. 132707  
4. 331276 1. 962602 2. 177859 2. 500083 2. 913494 1. 930807 2. 685465 2. 891756 3. 418694  
1. 338966 1. 707869 1. 973288 1. 224608 1. 029561 1. 027822 1. 491316 1. 461628 1. 470843  
1. 877563 2. 080303 1. 760922 1. 700276 1. 65277 1. 671743 1. 748425 1. 330799 1. 794188  
2. 20862 1. 744425 1. 552791 2. 051861 1. 351839 1. 887349 1. 443705 1. 916176 1. 809392  
1. 597528 1. 003302 1. 274835 1. 298977 0. 906254 1. 493252 1. 197405 1. 157195 0. 966896  
1. 021452 1. 197003 0. 980011 1. 982636 0. 812345 0. 978691 1. 181539 1. 345964 1. 43118  
1. 886888 5. 115624 4. 426258 2. 10335 3. 515211 3. 555386 3. 891538 1. 950946 3. 485245  
3. 647267 2. 358565 2. 243753 2. 740072 2. 871615 2. 655739 3. 059645 1. 897502 2. 695454  
1. 989042 1. 677051 1. 367255 2. 351288 1. 668926 1. 76638 1. 920283 1. 622808 1. 540332  
1. 369707 1. 547157 1. 117107 0. 831371 1. 281865 1. 150113 1. 311106 1. 342882 1. 276734  
1. 379554 1. 654816 1. 382678 1. 252198 1. 767674 1. 134059 1. 524154 1. 502807 1. 464143  
1. 005284 1. 035158 1. 167073 0. 799059 1. 122697 1. 250766 1. 490887 1. 346995 1. 150586  
2. 038804 1. 05479 2. 387108 1. 856221 1. 318913 1. 574253 1. 362663 1. 888209 1. 60616  
1. 432608 1. 819715 0. 92337 1. 657747 1. 708418 1. 593142 1. 518578 1. 240961 1. 658631  
1. 74389 1. 547025 1. 948454 1. 791319 1. 399186 1. 362321 1. 4037 1. 85873 1. 92189  
2. 608699 1. 934931 1. 99956 2. 067217 2. 515814 1. 861772 2. 343287 3. 392941 2. 547942  
3. 115715 1. 696456 2. 491245 2. 175311 1. 783969 1. 831476 2. 461791 1. 539924 2. 214332  
1. 985317 1. 328 1. 954297 2. 629485 2. 028327 1. 381536 1. 697283 1. 310595 1. 558185  
2. 965589 3. 213498 3. 151712 2. 500046 1. 941066 2. 573865 3. 66541 2. 603435 3. 159817  
1. 619609 1. 635528 1. 546726 1. 743811 1. 894943 1. 56246 1. 874681 1. 582811 1. 750598  
2. 010332 1. 768049 1. 778601 1. 953005 1. 78174 1. 916949 1. 685009 2. 338299 1. 664808  
1. 324771 1. 216597 0. 716741 1. 109481 1. 33916 0. 787058 1. 53329 1. 172442 0. 884722  
1. 184162 1. 445948 1. 07626 1. 463802 0. 978702 1. 839865 1. 202402 1. 166147 1. 004584  
1. 270658 0. 888482 1. 008225 1. 378178 1. 3217 1. 229152 1. 322669 1. 13611 1. 456954  
1. 812712 2. 31245 3. 589012 2. 197957 1. 667365 1. 814264 1. 697348 1. 613132 1. 831656  
1. 808023 2. 055678 2. 521986 1. 2505 2. 234992 4. 679506 3. 206743 3. 286746 3. 65828  
1. 440301 1. 272863 1. 343336 1. 760874 1. 016239 1. 759738 1. 425702 1. 263834 1. 425403  
1. 477903 2. 058874 1. 620234 1. 432027 1. 713945 1. 80223 1. 478292 2. 156269 1. 422665  
1. 913843 1. 224765 1. 529622 1. 011431 1. 775369 1. 538264 1. 712319 1. 888431 1. 186793  
1. 785641 2. 367815 2. 000299 1. 784848 1. 731418 1. 633577 1. 399467 1. 740643 1. 558247  
1. 82711 1. 63398 1. 764565 1. 8883 1. 935004 1. 811494 1. 489935 1. 755799 1. 935004  
2. 133607 1. 817179 2. 163518 2. 969765 2. 180708 2. 047245 1. 521128 2. 254675 2. 197175  
1. 307515 1. 176447 1. 318662 1. 912293 2. 026086 1. 183217 2. 302509 1. 729322 0. 954988  
4. 131569 2. 647841 2. 85921 2. 093729 3. 701011 2. 11485 2. 477023 2. 933445 2. 696497  
4. 433922 5. 184688 4. 844111 5. 111421 4. 921835 5. 198527 4. 937822 4. 120026 4. 044093

2.009848 1.480167 1.14805 1.735278 1.486469 1.27938 1.595571 1.331144 1.397498  
1.24491 1.151602 1.301696 1.361504 1.390302 1.26882 1.399881 1.380122 1.730946  
1.536033 2.049722 2.976302 1.276728 1.973787 1.78388 2.320383 1.446357 2.290572  
1.297071 1.09459 0.829046 1.378309 0.746945 0.984556 1.085386 0.991758 0.847655  
2.973203 1.474468 3.225412 1.852887 2.621926 2.210019 2.611185 2.258928 2.963301  
1.732288 1.113337 1.427032 0.932351 1.121153 1.261274 1.08881 1.454981 1.176324  
1.166443 1.488136 1.5793 1.2493 1.652005 1.075537 1.29695 1.308621 1.584796  
1.458811 1.409957 1.143608 2.026597 1.451502 1.511716 1.234698 1.32712 1.310635  
1.183221 0.918543 0.983526 1.015059 0.908169 1.010046 1.182305 0.818089 0.949469  
1.436569 1.102911 1.251381 1.016478 1.433376 1.004586 1.802318 1.125366 1.086287  
0.948645 1.31838 1.379287 1.173525 1.335611 1.291945 1.018636 1.088501 0.923547  
1.91503 1.213799 2.331576 1.285686 2.356047 1.028543 1.316 1.814103 1.027113  
1.911649 1.198499 1.080814 1.010034 1.460356 0.778566 2.59282 1.562434 1.054949  
1.159758 1.327096 1.540355 1.684572 1.043214 1.391064 1.674046 1.032249 1.199867  
1.266517 1.184635 1.547578 1.214243 1.392715 1.304156 1.274482 1.414416 1.24145  
2.246439 0.919554 1.531277 0.97823 1.591568 1.222629 1.161488 1.390527 1.442605  
2.199176 1.815263 1.383838 1.633572 1.618047 1.879141 2.429192 2.046985 1.763293  
1.489475 1.425419 1.533427 1.340607 1.771647 1.322473 1.491879 1.971083 1.451101  
2.869892 1.810284 2.843246 2.520128 2.477588 2.261797 3.003086 1.877073 2.728691  
1.815004 1.149799 2.079132 1.602682 1.611497 1.891162 2.214196 1.65973 1.978952  
1.970245 1.800632 1.872319 1.59845 1.99353 1.918126 2.309357 1.886418 1.969986  
2.469603 0.733494 1.053072 1.542422 0.846828 1.756634 0.984651 1.721488 1.078784  
1.751667 0.822108 1.167078 1.149259 1.361388 1.290489 1.229503 1.148901 1.71163  
1.028736 1.067171 0.725889 1.056559 1.003805 1.280733 0.905114 1.08556 0.961933  
1.936244 0.642414 1.191381 0.890265 0.908951 1.474056 0.990175 1.804193 0.889538  
1.049066 1.098807 1.854353 1.286927 1.007562 1.18857 1.470958 1.088037 1.052404  
1.126285 0.763923 0.80897 0.807419 2.478006 1.681679 0.845904 0.920127 1.036882  
2.129738 1.64419 1.657345 1.682403 2.041345 2.03103 2.683637 2.270237 1.755203  
1.057142 0.816135 0.619355 0.99489 1.154879 2.059967 0.711844 0.976704 0.911166  
1.08723 1.569279 1.239308 1.142938 1.048435 1.066577 1.304785 1.126013 1.002826  
1.923167 1.409211 1.526309 1.531813 1.068156 1.298482 1.309624 1.1902 1.059658  
0.602591 1.080107 0.70062 1.12365 1.722344 0.847142 1.186657 0.842293 1.588788  
1.710407 1.759429 2.107515 2.477726 2.284683 2.286411 2.046856 2.307324 2.263426  
1.584082 1.348251 1.434678 1.611 1.237154 1.490646 1.455316 1.937154 1.622986  
1.396694 1.125684 0.707499 2.593589 0.719684 1.131734 1.427356 1.391696 1.317849  
1.417315 3.88521 2.141639 3.203256 5.296603 2.885913 2.293409 2.055591 2.123835  
1.69026 1.114016 0.656311 0.860703 1.111996 0.849598 1.276368 1.006993 1.858755  
1.688905 0.935213 1.263543 1.222066 2.070563 1.387669 1.502076 1.578901 2.618088  
1.157219 1.913244 1.583807 1.50482 1.41982 1.707897 1.583034 2.378138 1.219473  
4.401572 2.094875 1.965473 3.819172 1.690221 1.390344 3.195172 2.419543 2.23914  
2.04235 1.934193 2.053439 1.331676 2.053778 1.52207 1.965814 1.619526 1.224066  
1.382897 0.747052 1.662761 1.062108 1.587335 1.224662 1.489747 1.159781 1.634045  
1.533683 1.584787 0.885391 0.887801 1.0975 0.880985 1.321765 1.430962 1.222248  
1.832992 0.649665 1.208592 0.866578 0.894239 0.961499 0.964415 0.741746 0.611481  
1.263383 1.546956 1.057137 1.176442 1.766467 1.205551 1.338787 1.46842 1.608802  
2.73563 2.267962 1.365342 1.587495 1.878468 2.14226 1.669994 2.220207 1.659833  
1.611892 1.962003 1.350714 1.478547 2.339023 1.731117 1.713742 1.49862 1.557119  
2.681864 1.527186 2.113708 1.937025 1.838855 1.643493 1.923253 1.702098 1.923743  
2.520761 2.204977 2.746446 1.901589 1.80022 2.414192 1.985521 3.218267 1.744323  
2.00832 1.784962 1.274067 2.142002 2.002914 1.347 1.561185 1.685425 1.253062  
1.192597 1.186747 1.078551 1.646968 1.468449 1.372397 1.63259 2.022196 1.168549

3. 675165 2. 884786 2. 957484 2. 353265 2. 541063 1. 443537 2. 672236 1. 845048 2. 584743  
1. 911056 2. 639509 2. 321772 1. 881348 1. 721703 2. 720149 2. 279355 1. 821426 1. 566775  
1. 640893 2. 671047 2. 949915 1. 516374 3. 207895 3. 004648 3. 202562 1. 954772 1. 160037  
3. 261642 3. 142919 2. 226107 3. 434476 0. 924337 1. 675121 2. 385126 3. 175291 2. 733063  
1. 037139 1. 427133 1. 295715 1. 747145 1. 161121 0. 950045 0. 888644 1. 110977 1. 034656  
1. 594906 2. 077436 1. 674113 1. 86894 2. 39484 1. 633632 1. 897159 2. 515758 2. 260049  
3. 53651 3. 009395 3. 617414 3. 007604 3. 028104 3. 194196 3. 932319 3. 842156 3. 917607  
1. 759576 1. 589468 1. 286973 1. 198519 1. 968194 1. 264704 1. 599429 1. 820702 1. 266455  
2. 844581 2. 247471 2. 030906 3. 268745 3. 961475 1. 726927 2. 389789 1. 879098 1. 655916  
1. 445338 1. 383507 1. 393633 1. 653018 2. 462433 1. 491859 1. 723403 1. 462945 1. 930112  
1. 657492 2. 437471 2. 119622 1. 76429 2. 395686 1. 620608 2. 222852 1. 588187 2. 118243  
2. 308685 1. 774443 1. 999809 2. 2264 2. 687878 2. 076884 2. 278236 2. 122114 2. 211055  
1. 751777 1. 507168 2. 364074 1. 83868 1. 864305 2. 07126 2. 554143 2. 041233 1. 850092  
2. 057386 2. 092636 3. 937211 1. 647436 2. 078758 1. 974917 2. 182543 2. 167491 2. 458134  
1. 406881 1. 452245 1. 272251 1. 309366 1. 22576 1. 345502 1. 065642 1. 289252 1. 314361  
1. 671499 1. 445918 1. 678625 2. 130698 1. 553756 1. 423485 1. 374422 2. 087437 1. 706039  
1. 403911 1. 454532 1. 203062 1. 732106 2. 004286 1. 480031 1. 451205 3. 003061 1. 363362  
1. 899 1. 697856 1. 582611 1. 783673 2. 261594 1. 501145 2. 131491 2. 10337 1. 493593  
1. 729263 5. 974938 6. 317183 3. 329781 3. 198077 4. 24231 3. 43048 3. 416918 5. 633502  
1. 43897 1. 129912 1. 21796 1. 438063 1. 409093 1. 191691 1. 75631 1. 226487 1. 323139  
5. 301951 4. 721605 4. 475884 4. 146616 4. 134116 2. 256435 2. 921702 4. 428074 4. 485864  
1. 874135 1. 486304 1. 487936 1. 494712 1. 152205 1. 341105 1. 212096 1. 484137 1. 377152  
1. 574696 2. 07187 1. 293509 1. 210849 1. 441195 1. 804527 3. 835637 1. 631462 1. 869777  
2. 284031 1. 59177 1. 276086 1. 586307 1. 063504 1. 69933 1. 515266 1. 822981 1. 574595  
0. 719583 1. 051352 1. 058793 1. 075409 1. 298188 1. 07598 1. 064547 0. 976407 0. 692424  
1. 175591 1. 148845 1. 308192 1. 501742 1. 190447 1. 062818 1. 514229 0. 952967 1. 417822  
3. 333526 2. 170886 2. 639082 1. 719485 2. 647681 3. 032478 1. 855092 1. 7526 2. 054669  
1. 307041 0. 883103 0. 703088 1. 237658 1. 175339 1. 627558 1. 271899 1. 407622 1. 162239  
0. 801627 0. 725685 1. 583921 1. 53036 1. 6785 1. 534384 1. 307587 0. 989478 2. 412552  
1. 832549 1. 621587 1. 390336 2. 758198 2. 461876 2. 125385 1. 879474 1. 646293 2. 030407  
2. 096664 1. 839004 2. 385363 2. 486659 2. 330082 1. 479196 1. 8506 2. 231473 1. 869239  
1. 95742 1. 442241 0. 966812 1. 367222 0. 902818 1. 131173 1. 44549 1. 036322 1. 352557  
2. 021941 1. 834223 1. 543031 1. 933202 2. 633505 2. 047705 1. 632995 2. 372228 2. 551318  
2. 322302 2. 397413 1. 603797 2. 227132 1. 654838 1. 602246 2. 563743 2. 500511 1. 917498  
1. 168242 1. 223903 0. 985768 2. 161415 1. 632165 1. 24918 1. 866284 1. 27846 1. 043867  
4. 915216 5. 503133 5. 291542 5. 49785 6. 086988 5. 283706 5. 3012 6. 182459 6. 316819  
1. 265987 1. 681603 1. 150272 1. 292872 1. 079439 1. 491818 2. 454544 1. 679965 1. 591779  
2. 544082 2. 93355 2. 636145 2. 237939 2. 795836 3. 453592 2. 267425 2. 886015 2. 265353  
2. 724999 2. 037752 2. 208091 2. 201263 2. 24609 2. 418166 2. 205388 2. 011845 1. 825922  
1. 560627 1. 024142 1. 034638 2. 50543 1. 022321 1. 219089 1. 573406 1. 272032 1. 295218  
2. 26061 1. 745278 2. 136451 1. 910556 2. 304907 2. 150514 1. 843714 1. 493799 2. 237365  
1. 530513 1. 186615 0. 951189 1. 532066 1. 245857 1. 058292 0. 930484 1. 041373 1. 237169  
3. 742242 5. 261104 4. 681638 3. 279211 2. 837599 3. 021007 4. 911772 2. 884681 4. 053273  
4. 809324 5. 02556 4. 505229 4. 05276 4. 707395 3. 562978 4. 701668 3. 882935 4. 62595  
2. 884205 3. 98806 3. 741959 3. 499746 4. 124776 3. 805248 3. 494176 3. 619312 4. 182893  
1. 911161 1. 842148 2. 744407 1. 103826 1. 321262 1. 373073 1. 959847 1. 705195 1. 970714  
3. 050399 2. 877702 2. 803833 2. 796634 2. 488715 2. 581652 2. 722204 3. 265514 2. 722413  
1. 570585 1. 065135 1. 352494 2. 121317 1. 806262 1. 266832 1. 321206 4. 053886 1. 312593  
1. 291537 1. 434434 1. 368813 1. 312494 1. 616653 1. 491549 1. 875598 1. 41862 1. 918197  
1. 608138 1. 62489 1. 300031 1. 88525 1. 788902 1. 85071 1. 802403 2. 267735 1. 600044  
1. 719982 1. 57152 1. 139166 1. 332658 1. 859472 1. 303741 1. 764826 2. 192254 1. 31566

2. 146922 2. 066744 2. 355619 2. 163555 2. 075386 2. 070886 2. 309389 1. 83234 1. 673113  
1. 44175 1. 290549 1. 391519 1. 203837 1. 642976 1. 366116 2. 710889 2. 114697 1. 199327  
4. 615039 4. 457964 4. 13519 4. 111204 3. 644782 4. 892395 4. 444133 4. 641891 3. 712395  
1. 055039 1. 160441 1. 168813 2. 034805 0. 974343 1. 326856 1. 451422 0. 984411 1. 177513  
5. 968156 6. 604063 6. 580804 5. 860317 6. 721132 5. 713338 6. 414779 6. 337206 6. 134869  
2. 964337 1. 308591 1. 067139 1. 060156 1. 725805 1. 348149 0. 935149 1. 178656 0. 734335  
3. 942312 2. 785465 3. 628173 3. 437846 3. 324826 3. 801669 2. 977348 3. 201287 3. 154746  
2. 602766 2. 325808 2. 701812 3. 024926 2. 659546 2. 337082 2. 23981 3. 004325 1. 966773  
2. 690496 1. 733155 1. 341697 1. 342045 2. 016505 1. 509982 1. 271694 1. 548996 2. 024138  
1. 229037 1. 450643 2. 067764 1. 77069 1. 306598 1. 565932 2. 485821 1. 881111 0. 930588  
1. 802651 1. 314128 1. 167934 1. 618 1. 741319 1. 701863 1. 681938 1. 56911 1. 295202  
0. 637891 0. 733046 0. 799463 0. 848879 1. 026015 0. 933491 1. 663237 1. 149029 1. 107605  
1. 727489 1. 126039 0. 915858 1. 272003 2. 016486 1. 299955 1. 351121 1. 950042 1. 224914  
1. 113055 1. 532224 1. 14789 1. 463889 1. 367868 1. 374974 0. 746887 1. 309334 1. 093733  
1. 786723 2. 193101 1. 636228 1. 364764 2. 093787 1. 52509 1. 661254 2. 785853 1. 75206  
1. 386213 1. 009796 0. 884226 1. 301012 2. 392789 1. 578494 0. 991669 1. 565265 0. 796518  
1. 936429 1. 360993 1. 245792 1. 560229 1. 383047 1. 2587 1. 657773 1. 237631 1. 681616  
3. 000213 2. 671269 2. 781205 2. 411825 2. 574463 2. 342972 2. 864828 3. 019889 2. 906592  
1. 791728 1. 164782 1. 852595 1. 423717 1. 60223 1. 508375 1. 619831 1. 270885 2. 145778  
1. 50664 1. 748489 2. 027191 1. 793777 1. 828696 1. 310309 1. 86506 1. 748709 2. 038704  
3. 421656 2. 96121 2. 680568 2. 776266 2. 601782 3. 051888 3. 176951 2. 863878 2. 931593  
3. 054975 2. 776954 2. 87349 2. 143215 2. 448201 3. 935237 2. 519153 5. 136305 3. 455  
3. 334264 2. 511123 3. 431515 3. 162224 2. 663948 2. 864635 2. 908492 2. 538574 3. 005269  
8. 556517 9. 19894 9. 290155 8. 997634 9. 305568 9. 062192 9. 035634 9. 515744 8. 791105  
8. 565954 8. 570815 8. 573985 8. 697989 8. 856039 8. 3513 9. 060302 9. 073371 8. 95229  
9. 188596 9. 205789 8. 999748 9. 229794 9. 455467 9. 416535 9. 672952 9. 017806 9. 468163  
4. 986565 6. 150087 5. 728185 6. 274343 6. 750753 6. 186827 6. 33598 6. 870123 6. 066415  
8. 84567 8. 714168 9. 012955 8. 854915 8. 898877 8. 779434 8. 816328 9. 109665 9. 039196  
9. 250285 9. 273361 9. 350359 9. 440251 9. 372894 9. 592133 9. 283632 9. 408643 9. 37433  
5. 872989 5. 406885 6. 139866 4. 882624 5. 361023 6. 015231 6. 267268 6. 906007 6. 109341  
2. 392384 2. 454354 2. 304571 2. 524954 3. 026968 2. 128705 2. 830119 3. 369015 2. 863374  
1. 341149 0. 823589 1. 07146 1. 061992 1. 034298 1. 206736 1. 762682 0. 634609 1. 28114  
1. 990699 2. 051764 2. 662524 2. 469049 1. 733683 1. 814853 2. 297019 3. 74831 2. 276915  
5. 571023 5. 3188 5. 560309 4. 33608 4. 321659 5. 004031 5. 263624 4. 528424 4. 916886  
6. 875359 3. 1605 4. 86036 1. 814559 2. 255723 3. 534102 4. 02356 1. 693296 4. 335056  
2. 067703 2. 523476 2. 798802 2. 925078 2. 155148 1. 749496 2. 293973 2. 266745 2. 979752  
1. 439421 1. 935788 1. 867826 2. 120232 1. 469884 1. 860619 1. 586464 1. 627411 1. 969023  
1. 175535 0. 793994 0. 99247 1. 202471 1. 180639 0. 764173 1. 114682 1. 543879 0. 913563  
1. 736325 2. 0403 1. 975025 2. 47356 1. 392796 1. 996462 1. 929212 2. 303074 1. 61963  
2. 215376 1. 07919 1. 070088 1. 126124 1. 274176 1. 019362 1. 544079 1. 252788 1. 651089  
2. 68335 1. 721975 2. 335446 1. 73444 2. 099889 2. 461305 2. 76912 2. 267358 1. 828623  
2. 291453 1. 546101 1. 541613 2. 319641 1. 725871 1. 563917 1. 813058 1. 367557 1. 610411  
3. 080013 2. 12811 2. 182904 2. 098167 1. 951881 1. 330078 1. 754678 2. 153548 2. 034607  
3. 734161 4. 247001 3. 887659 3. 796693 3. 92291 3. 967245 4. 15949 4. 173516 4. 082414  
2. 630444 0. 227185 0. 546646 1. 210117 2. 081828 0. 562491 2. 194801 0. 951176 1. 877408  
1. 869335 1. 684354 2. 228692 2. 049861 1. 846592 2. 593165 2. 379379 1. 935386 2. 559426  
2. 89253 1. 974711 2. 425317 1. 664025 1. 407751 1. 660058 2. 389736 1. 660051 2. 524711  
1. 154488 1. 524767 1. 65179 1. 358372 1. 042947 0. 845005 1. 957958 1. 679459 1. 316423  
2. 094644 2. 468785 2. 130942 1. 713463 1. 770564 1. 836309 2. 001667 2. 380866 2. 202734  
1. 662606 2. 434291 1. 380287 2. 032252 1. 398264 1. 503645 1. 797831 1. 294735 1. 829858  
2. 37992 4. 017549 2. 953197 2. 480359 3. 937905 2. 895452 3. 5862 2. 096555 2. 715772

0. 541554 1. 135807 1. 488606 2. 33557 1. 442419 1. 217772 2. 861332 2. 097117 1. 078109  
3. 170463 3. 003 3. 287255 4. 214293 3. 23534 4. 517529 4. 618839 3. 984597 3. 911365  
5. 059557 4. 771209 4. 994979 5. 306685 2. 90316 3. 146319 3. 095302 5. 431152 3. 806943  
2. 093652 1. 030639 2. 626411 1. 773123 1. 862819 2. 147243 2. 693538 1. 721927 0. 913711  
3. 638111 3. 92489 3. 891354 4. 257934 4. 317382 3. 576245 4. 135781 3. 650589 4. 226583  
1. 148685 0. 703271 1. 34863 1. 291893 1. 746486 1. 775365 2. 879881 1. 458564 2. 630511  
3. 550075 3. 235354 4. 788892 2. 071037 2. 236271 2. 088632 3. 504133 2. 586015 2. 621814  
1. 490041 1. 31467 1. 375968 1. 222608 1. 429967 1. 828901 1. 743522 1. 689285 1. 535189  
1. 809196 1. 831183 3. 056535 1. 825026 1. 242488 2. 041596 1. 696557 1. 552376 1. 49946  
2. 341446 4. 001311 3. 870218 2. 656928 3. 643801 4. 061265 3. 258268 3. 85842 3. 11089  
1. 484919 1. 973835 1. 955853 1. 445538 1. 500291 1. 034343 1. 259976 1. 669347 1. 674032  
3. 653281 3. 282706 3. 863679 2. 837069 2. 714906 2. 897678 3. 25593 2. 235021 2. 616129  
1. 388371 1. 703913 0. 967584 0. 959521 1. 106107 1. 583493 1. 358901 1. 047851 1. 277783  
1. 98614 2. 691375 1. 497038 1. 710786 1. 507556 1. 717521 2. 268821 1. 874028 2. 039159  
1. 956489 2. 055009 1. 707924 2. 570067 1. 801136 1. 580315 1. 71757 2. 994102 2. 432078  
0. 976708 3. 140196 1. 853129 3. 827524 2. 066288 3. 233188 2. 480032 1. 753754 1. 531513  
1. 955934 1. 715288 1. 723324 2. 778125 2. 063806 1. 825997 2. 13014 2. 008044 2. 613546  
2. 837133 3. 047584 3. 150593 3. 012993 2. 663684 2. 784983 3. 437601 2. 950792 2. 219858  
1. 238409 1. 356673 1. 277214 1. 467013 1. 357537 1. 349463 1. 161163 1. 287956 1. 537175  
1. 632021 1. 339207 1. 474921 1. 49705 1. 549194 1. 428988 1. 641096 1. 387232 1. 551197  
1. 905871 1. 256248 1. 252479 1. 800272 1. 016551 1. 055492 2. 325606 1. 398064 1. 897091  
2. 069938 2. 056675 1. 482109 2. 563038 2. 342659 1. 296421 2. 742249 1. 997644 1. 590726  
1. 566043 1. 55729 1. 957479 1. 477262 1. 546749 1. 027072 1. 766321 1. 334194 1. 500996  
1. 53318 2. 091277 1. 121706 1. 439298 1. 508784 1. 793159 1. 531248 2. 194988 1. 490716  
1. 56434 1. 445567 1. 57269 1. 603797 2. 299687 1. 319312 0. 983741 1. 60608 1. 519183  
2. 073702 1. 918539 2. 155478 2. 061573 2. 031367 1. 780476 2. 781722 1. 889667 1. 826032  
1. 000983 0. 994791 1. 121296 1. 293869 1. 589162 1. 054324 1. 060776 1. 378209 1. 484848  
1. 28807 1. 652397 1. 145558 1. 503231 1. 10798 1. 706169 3. 272509 2. 2262 1. 892967  
1. 567249 1. 755535 1. 96072 1. 817004 1. 540021 1. 695494 1. 839536 1. 902514 1. 932888  
1. 57953 1. 597529 1. 266114 1. 511093 1. 059453 0. 776998 1. 631669 1. 217278 1. 375622  
2. 523156 1. 528501 0. 826552 1. 549864 2. 791536 1. 637903 1. 705229 1. 851119 2. 767336  
1. 039394 0. 938382 1. 70071 1. 380605 0. 994819 1. 134296 0. 536398 0. 957066 2. 212997  
1. 524424 3. 031757 2. 418452 1. 037227 0. 841539 1. 693851 1. 661518 1. 93123 1. 745958  
1. 123727 1. 005743 1. 145496 0. 808278 0. 744689 1. 103699 1. 415034 1. 196669 0. 915705  
1. 816139 1. 640584 1. 710322 2. 222658 1. 328377 1. 432271 1. 623196 1. 903012 1. 501213  
2. 654832 2. 252788 3. 062794 3. 765676 3. 557664 2. 105386 2. 389355 2. 853481 2. 090933  
4. 424257 4. 33346 3. 392371 2. 731051 3. 455086 4. 035052 2. 785976 4. 046164 3. 473579  
3. 175643 2. 21145 2. 604873 2. 346854 2. 478918 2. 213577 2. 111381 2. 165068 2. 153684  
3. 500039 2. 126682 2. 029037 2. 620456 2. 387134 2. 202036 3. 669455 1. 682698 1. 966287  
1. 787823 1. 455391 1. 760688 2. 61373 1. 820982 1. 721065 1. 890265 1. 679266 2. 009445  
1. 904954 2. 0143 1. 220618 1. 646065 1. 179075 1. 72438 1. 597913 2. 083204 1. 469791  
1. 074047 1. 506616 2. 242689 2. 561021 2. 756038 1. 521713 1. 583966 2. 057039 1. 494244  
1. 92331 1. 784231 2. 192304 2. 634392 1. 420627 1. 315647 1. 731256 2. 468766 2. 037767  
1. 98485 3. 329015 2. 291404 3. 389063 3. 605242 2. 611492 2. 03221 2. 076656 1. 97812  
2. 30381 1. 724297 1. 495944 1. 660454 1. 518522 1. 346184 1. 977442 1. 38575 1. 614745  
1. 229611 1. 035215 1. 42502 0. 942501 1. 675721 1. 835461 1. 31891 1. 273682 1. 577454  
1. 987523 1. 848888 1. 989788 2. 748875 1. 996461 2. 414273 1. 796158 2. 780805 2. 143974  
1. 975058 3. 918012 3. 056922 2. 454137 4. 014597 3. 358954 4. 714589 2. 050984 3. 487902  
0. 940521 1. 159935 1. 219127 1. 420145 0. 926763 0. 521189 0. 769681 0. 607241 1. 588218  
1. 493239 1. 328853 0. 977127 1. 360605 1. 873778 1. 336513 1. 317487 1. 543665 1. 570233  
1. 272189 2. 007011 1. 448891 1. 623688 1. 614998 1. 57554 1. 817151 2. 000267 1. 631379

2. 418409 2. 202779 1. 721192 2. 326658 2. 311918 2. 628334 1. 682618 1. 691354 2. 446883  
6. 354289 4. 458381 5. 550775 2. 933661 2. 4381 2. 711033 6. 172822 6. 127751 4. 898197  
1. 471039 1. 37572 1. 09979 1. 833801 1. 160436 1. 016022 1. 376108 1. 300548 1. 148271  
6. 94582 7. 362963 7. 494236 7. 537542 7. 549065 7. 805988 7. 026685 7. 626504 7. 491493  
4. 890196 4. 413778 3. 988972 5. 199068 5. 458014 5. 168231 5. 064806 4. 690742 5. 421505  
3. 471731 3. 819547 3. 253268 3. 489961 4. 610193 4. 04661 4. 447975 3. 037395 3. 71825  
8. 989309 8. 503528 8. 865388 8. 661581 9. 250836 8. 474235 8. 876721 9. 357761 8. 691356  
4. 126743 4. 055829 4. 502404 4. 386482 4. 092358 4. 216841 4. 815531 5. 591195 3. 782253  
5. 491837 4. 440373 4. 601579 4. 915755 4. 442132 4. 768968 5. 272387 5. 523234 4. 801291  
8. 401511 6. 413482 7. 501326 6. 083753 6. 691118 7. 011321 6. 760543 6. 783726 8. 78253  
3. 593774 3. 484052 3. 267162 4. 357765 3. 551835 3. 355243 4. 326434 4. 404015 3. 62352  
2. 524646 1. 799967 2. 000477 2. 69239 2. 325196 2. 835333 2. 968799 1. 641856 2. 152264  
3. 770147 5. 657853 3. 840801 5. 007792 3. 943125 3. 829004 2. 460793 5. 633798 3. 857434  
1. 824446 1. 140119 2. 010673 1. 542609 0. 991019 1. 440432 0. 82227 1. 052056 2. 160587  
2. 120549 1. 615578 1. 741791 1. 873637 1. 752173 1. 795702 0. 645716 1. 778389 1. 486194  
1. 613263 1. 336593 1. 946073 1. 74903 1. 303807 1. 909569 1. 489769 1. 636416 2. 091445  
4. 722329 4. 819059 5. 447295 2. 548966 3. 144321 3. 3242 4. 010867 5. 149074 4. 933754  
1. 384262 0. 970475 1. 517683 1. 802541 2. 065247 1. 671089 1. 617345 1. 519189 1. 079966  
1. 025081 1. 015143 0. 75771 1. 091724 1. 643041 1. 242846 1. 434522 0. 75741 0. 954904  
1. 194823 1. 114928 1. 320265 0. 967286 0. 97228 2. 027961 1. 167745 1. 164657 1. 21174  
1. 518842 1. 629606 1. 477619 3. 251153 1. 483537 1. 221539 1. 160756 1. 174467 1. 353772  
1. 375 1. 386932 1. 444658 1. 268209 1. 316138 1. 761592 2. 134281 1. 388707 1. 907238  
0. 923724 1. 699681 2. 100058 1. 670131 1. 545682 1. 122917 1. 470077 1. 296673 1. 623736  
1. 453055 1. 491806 1. 160173 1. 811896 2. 382473 1. 394056 1. 739756 2. 037138 1. 256506  
3. 707637 3. 526237 3. 367069 4. 262733 3. 170867 2. 903515 2. 810255 3. 220117 2. 882593  
2. 047644 2. 280849 3. 110314 2. 702862 2. 626537 2. 200642 2. 400315 2. 800135 3. 218463  
2. 822085 2. 974933 3. 185565 1. 942921 4. 488047 2. 14637 1. 516094 2. 827535 2. 920144  
2. 684455 1. 602188 2. 02394 2. 142511 2. 43229 1. 972413 1. 772364 2. 213129 1. 880998  
2. 411886 2. 541388 2. 864173 2. 158191 2. 464278 2. 231892 2. 367194 1. 737055 3. 047366  
3. 450394 2. 197604 3. 142784 2. 347022 3. 235518 2. 870189 2. 230072 4. 037766 2. 336898  
1. 574177 1. 329301 1. 39244 1. 029252 1. 647957 1. 401305 1. 589189 1. 089223 1. 330915  
1. 337958 1. 922001 2. 029887 1. 998315 1. 459224 1. 926437 2. 386012 1. 842304 2. 420954  
2. 026821 1. 59616 2. 167729 1. 643986 1. 422908 2. 334293 1. 858874 1. 609408 1. 838808  
0. 957909 1. 176915 1. 096426 1. 393071 1. 55139 1. 25341 2. 037713 1. 31658 0. 922373  
3. 910365 5. 710295 4. 183776 4. 930475 4. 628833 4. 908642 2. 67423 5. 347323 4. 673838  
7. 363494 7. 263162 7. 70077 8. 005059 7. 661945 7. 796632 7. 21369 7. 372453 7. 523184  
2. 092473 2. 226659 1. 978367 2. 644547 1. 974757 1. 950741 1. 813153 1. 638553 2. 416892  
9. 462596 9. 762486 9. 645973 10. 00894 10. 22618 9. 886263 9. 713244 9. 686451 9. 693505  
2. 624416 3. 026058 2. 433249 4. 140638 3. 456634 3. 008358 3. 3054 3. 19417 2. 703463  
1. 125065 1. 679671 1. 904217 2. 263164 1. 372576 1. 601783 1. 616255 1. 328184 1. 921289  
1. 279569 1. 258809 1. 171892 1. 436761 1. 302224 1. 305556 1. 009371 0. 876126 1. 159571  
3. 545458 3. 845082 3. 586026 2. 720756 3. 126113 3. 31308 2. 910379 2. 907771 4. 436427  
7. 095977 7. 334544 7. 095834 7. 147476 7. 219009 7. 379294 7. 280173 7. 610659 7. 164614  
2. 081864 2. 295902 1. 458116 1. 681053 2. 226656 2. 537662 2. 145668 1. 956124 1. 367802  
6. 36657 6. 207751 5. 864133 6. 087303 5. 393756 6. 148112 4. 580748 6. 39977 6. 271109  
8. 362559 8. 783551 8. 691158 8. 945122 8. 971248 8. 82921 8. 433235 8. 678623 8. 559851  
3. 218903 2. 445465 1. 451646 2. 372947 3. 191529 3. 352541 2. 95485 2. 612478 2. 688859  
5. 833534 5. 725395 6. 364739 5. 94403 6. 158418 5. 82358 5. 571203 6. 011145 5. 576961  
2. 64164 2. 649672 2. 56676 2. 125826 2. 414636 2. 370171 2. 478479 2. 735045 3. 092487  
4. 232877 5. 692984 5. 67817 6. 290812 4. 515624 5. 1345 4. 639621 5. 883245 5. 387936  
6. 102261 7. 04665 6. 419506 7. 315661 7. 049383 6. 793667 6. 801326 6. 409302 7. 164062

3.02228 3.704045 3.374772 4.088321 4.313322 3.914117 4.81777 5.374671 3.354277  
1.816768 1.642484 1.677406 1.869799 1.608958 1.751214 2.181077 1.645167 1.703486  
2.46899 2.82891 3.131239 2.637684 3.987853 2.422864 3.129661 2.713656 2.914864  
3.993975 3.985847 2.290675 3.054053 2.509919 2.863611 3.316327 2.833854 2.261712  
4.898641 4.559552 5.051544 4.499592 5.21603 4.693773 4.784654 3.456424 3.865643  
2.851546 3.683065 3.02182 2.172342 3.361144 3.083682 2.618095 2.640276 3.171791  
7.145012 6.688429 6.728842 6.391027 6.753919 6.667739 6.793249 6.585632 6.986617  
8.043085 8.958675 8.737203 8.554986 8.455491 8.491882 8.200852 8.648625 8.607585  
7.083609 6.760573 6.04306 6.960579 7.269616 6.021226 6.748096 6.038213 6.957518  
5.058681 5.68041 5.453483 5.058776 5.630807 5.578562 5.497072 5.800415 5.729117  
6.621466 4.959749 5.270013 5.82854 5.564087 5.578871 6.27925 5.754611 6.005898  
8.279727 8.648409 8.464104 8.255362 8.728919 8.48321 8.705115 8.651894 8.431133  
1.997589 4.438326 1.084442 1.298926 1.445461 1.149067 2.11021 1.730651 1.163104  
6.040328 5.639875 5.621321 5.82511 5.359101 5.751102 5.583243 6.232783 6.161926  
6.128901 6.146158 6.417981 5.868108 5.334375 6.303479 6.58359 6.09359 6.353548  
1.48335 1.441774 1.062215 1.304378 0.998285 1.561881 1.039096 2.628476 0.63129  
5.55555 6.519489 5.943493 5.950468 6.56703 6.091908 6.155516 5.88957 6.138356  
3.123779 3.790904 3.186801 3.667455 4.032534 4.169906 3.939368 3.884198 3.566554  
3.924868 3.164741 3.617462 3.174848 4.151262 4.91002 4.81993 4.318322 3.79111  
2.09581 2.069136 1.862118 1.711683 2.157231 2.200341 2.024616 1.813795 2.939576  
1.810877 1.077509 0.756833 1.220106 1.007815 1.134254 1.580366 1.034222 1.365652  
1.955375 1.718623 1.655512 1.525302 1.80906 1.482902 1.877326 1.565821 1.762085  
2.873326 1.802572 1.872491 1.375464 1.215363 1.599874 2.240909 1.471873 2.091806  
4.049872 4.231616 5.610074 3.749219 3.757375 3.236778 4.051871 4.133041 3.43346  
3.801679 3.108872 3.531335 3.115266 3.584944 3.063276 3.202507 3.566378 3.19269  
6.4218 6.248317 6.71191 6.333996 6.236905 5.803899 5.449678 6.885003 6.422558  
3.349606 2.07241 2.488191 1.567067 2.267183 3.566141 1.834319 1.317761 2.464614  
1.33039 1.14369 1.851945 2.178292 1.305426 1.282548 1.123197 1.191338 1.60901  
7.805574 7.526973 6.908462 7.679762 7.343748 7.013632 7.493261 7.65775 7.615461  
1.916485 1.744365 2.11008 2.705308 1.609043 2.008472 1.929576 1.867259 1.94516  
1.406924 1.17633 1.270522 1.081353 1.127364 0.787979 1.658656 1.352989 0.923957  
1.285856 1.329461 1.728006 1.014602 1.130112 1.748258 1.33436 1.566551 1.455505  
1.344906 1.463617 1.165918 1.361982 1.523827 1.400668 1.025341 1.566438 1.302143  
1.311691 1.309459 1.117568 1.53627 1.696939 1.326775 1.59679 1.052336 1.000531  
1.434017 0.895811 1.417173 1.254436 1.185892 1.368565 1.440277 0.970864 1.795211  
1.750188 1.981155 1.930857 1.290663 1.27165 0.958916 2.110065 2.467727 1.958393  
6.276293 6.813375 6.617492 6.680073 6.903288 6.525283 6.249208 6.608381 6.293818  
1.435654 1.360219 2.423438 1.646182 1.733887 1.115934 2.223991 1.174399 1.358699  
6.434777 5.577133 5.724914 4.904909 4.597596 5.460262 4.594498 5.978101 5.50365  
7.082067 7.304758 7.515903 7.121102 7.505344 7.33222 6.905982 7.354366 7.36069  
4.290167 4.599188 5.051266 4.637076 4.595336 4.378102 4.458233 4.745177 4.668389  
3.791232 1.711484 2.40699 2.18231 2.291748 2.163224 2.164393 2.354497 2.229299  
2.511988 1.828711 2.372917 1.607863 1.539094 1.975868 2.062918 1.396323 1.737325  
6.58432 4.142968 5.325629 4.069237 4.84298 4.803669 4.972795 4.702701 5.965146  
8.130934 8.796044 8.462674 8.902262 8.395871 9.031868 8.126125 8.632774 8.653557  
2.077427 2.082025 1.860396 2.636758 1.800545 2.274841 2.286407 2.375828 2.562577  
1.557576 1.097221 1.179798 1.470578 1.376484 0.736484 2.114467 1.806674 1.236408  
7.414947 7.981584 7.849347 8.075977 7.930144 8.08893 7.526864 7.239785 7.591926  
6.837796 7.345511 7.002426 6.980742 7.303869 6.805346 7.081929 7.219158 7.097066  
3.791427 5.442702 4.746981 4.388351 4.568276 4.7667 5.11014 3.725181 4.947358  
4.814716 1.713887 1.581304 1.58705 1.911313 1.645445 2.656061 2.661084 1.980921

5.843693 5.583856 5.854155 5.685962 5.760349 6.746253 6.239207 5.840738 5.79996  
5.535571 6.52766 6.463108 6.13876 5.834842 6.247095 5.120206 5.920434 5.652986  
10.58519 9.952432 10.25656 9.588247 9.826126 9.20369 9.837722 9.769129 10.43901  
8.446001 7.964201 7.788778 7.992092 7.963865 7.931949 7.750356 7.770087 7.914248  
2.153441 1.961647 2.390201 2.71107 2.117714 1.722496 2.119955 2.370591 2.730739  
6.46839 6.176913 6.427049 5.865403 6.153217 6.208338 6.177748 6.24136 6.553339  
6.106325 6.68404 6.459786 7.470953 6.593852 7.223782 6.982658 6.340526 6.126457  
8.327524 8.218785 8.455272 8.297642 8.131808 8.317759 7.903159 8.327708 8.474955  
8.669324 9.826246 9.711227 9.720223 9.62991 9.783152 9.006665 9.443753 9.388241  
1.678004 1.522835 1.942678 2.1696 1.606986 1.681304 1.36921 1.805871 1.68144  
6.142886 5.215737 5.4385 4.449492 5.34565 4.732035 4.869714 5.038766 5.854102  
1.23028 2.433178 1.305186 1.591146 0.491316 2.610559 0.736747 0.224994 4.358639  
2.473179 2.650839 3.52944 2.432798 2.573977 3.308034 4.115202 2.029034 3.069297  
1.154056 0.841118 1.041972 1.3293 1.519285 1.056869 0.945542 0.863244 1.256454  
4.692335 3.481495 3.214978 3.392078 3.895931 2.511654 2.221853 3.590315 3.680418  
5.408161 5.083074 5.290655 5.041675 5.683635 4.574469 4.502385 4.782829 4.609089  
6.587761 6.695138 6.531737 6.052419 6.510859 6.03076 6.594027 6.608921 6.299553  
2.092147 1.639858 1.281745 1.390548 1.154787 0.969625 1.552159 1.60383 1.673044  
1.690009 0.972113 0.955243 1.086824 0.919723 1.007969 1.87368 1.314068 1.383688  
5.288829 5.500782 5.448349 5.159401 5.573646 4.820456 5.205118 5.791573 4.817623  
2.708677 5.182399 4.757927 5.52044 5.002585 4.745295 4.499543 4.894171 5.347319  
5.754838 5.576138 5.662273 5.85293 5.23161 5.285693 4.864102 5.469677 4.832626  
4.02137 4.330981 5.022477 5.712329 3.708728 4.088757 5.046482 3.335504 3.258854  
7.413908 6.838574 6.518404 7.20757 6.708917 7.315197 6.42114 7.022727 6.945144  
2.850421 2.284593 2.508819 2.690168 2.236871 2.06454 1.84816 2.148506 2.697949  
5.428883 6.537818 6.194954 5.294703 5.712129 6.191965 4.353885 5.846539 5.420632  
5.544007 7.165358 5.943854 6.713092 6.934342 6.283854 5.919351 7.966623 7.000038  
1.330684 1.126423 1.509869 1.50025 1.56133 1.68817 1.530656 1.127253 1.202368  
1.707848 0.977188 1.951752 1.127005 1.206449 1.048541 1.232529 1.315174 1.841667  
5.489217 5.713449 5.971251 6.133911 5.770256 6.20711 5.859046 5.888388 5.774467  
5.900126 6.269309 6.453189 6.155221 6.281347 6.359264 6.845832 5.921743 6.24394  
2.914186 2.492654 2.345446 3.741399 3.817023 3.277332 1.974707 2.557245 3.225189  
5.660395 6.687649 5.883182 6.830417 6.670455 5.676757 6.137819 6.172855 6.507117  
3.66055 3.277323 3.654285 3.626404 3.875493 3.812904 3.007004 2.90575 3.208785  
4.18898 5.038146 4.823232 4.444986 4.603222 5.146308 5.030662 5.018395 5.115838  
4.060897 5.43473 5.33303 4.957826 5.923185 5.164587 5.987071 5.7944 4.965483  
1.841677 2.084111 3.72415 2.408883 4.130742 2.969554 2.986955 2.155092 2.659238  
3.464165 3.928237 3.145392 2.646403 3.18091 3.040158 4.126445 3.29787 2.740981  
2.392341 1.790469 1.937202 1.9132 1.630649 1.245291 3.209928 1.167844 1.58117  
0.81531 1.051384 1.256475 1.127624 1.279421 1.240314 0.792082 1.112601 1.32607  
1.694183 2.208378 3.399313 2.177487 1.495485 3.349037 1.753485 1.088444 1.355368  
2.638139 2.866414 2.295466 2.708234 2.751061 2.428456 3.510553 2.992594 2.749602  
1.57907 1.359473 1.454406 1.119196 0.768921 1.923166 1.660872 1.62055 1.536178  
2.921891 1.602105 2.69103 2.242442 1.889732 2.596039 3.350701 2.388196 3.193938  
1.835393 2.200625 1.646075 2.062289 2.081867 2.496635 1.536924 1.915327 1.862949  
1.332188 1.439037 1.141851 1.292488 1.203153 1.172316 1.925119 1.549329 1.313533  
1.018904 0.93725 1.131826 1.092439 1.156027 1.198347 1.11508 0.902264 1.279015  
3.502685 2.456414 2.801235 2.587788 1.824283 2.174667 4.621208 2.037603 3.731828  
1.769079 1.181812 1.582554 1.211474 1.273483 1.090809 1.232098 1.03182 1.574881  
2.005179 1.74473 1.424857 1.962704 2.281293 1.09564 1.55387 1.648633 1.280375  
1.537326 1.286036 1.27195 0.976344 1.281222 1.620281 1.106101 1.308084 1.281222



2.176339 2.740886 1.270962 3.498045 1.99694 1.851379 2.432386 1.589228 2.924981  
1.575779 1.497307 1.47935 1.393748 1.290307 1.13242 1.512234 1.763779 1.347024  
1.839854 1.966351 1.571944 2.293451 1.689801 1.82522 2.44647 1.420954 2.247758  
1.150807 1.226364 1.858872 1.465934 1.243844 1.369839 2.082411 1.133006 1.130433  
1.387825 1.416171 1.117775 1.976728 1.284986 1.620788 1.27264 1.608438 1.351967  
3.354992 2.671955 2.232531 2.047224 2.156636 2.021455 2.730626 1.469141 2.69217  
1.854952 1.422414 2.019595 1.797116 3.159833 1.757809 1.7756 2.439083 1.669263  
1.855634 1.509292 0.844664 1.165085 1.662253 1.312611 1.798148 1.419576 1.479242  
3.783659 3.012115 3.012268 2.697538 3.759771 2.903083 3.303797 3.424477 3.103656  
1.526076 3.683008 1.966956 1.757221 3.335205 2.863901 2.219477 2.304217 3.37298  
1.775527 2.09528 1.815773 2.835355 2.297508 2.354268 2.107153 1.461626 2.171386  
1.612071 1.260471 1.194781 1.37353 1.057654 1.853716 1.168226 1.493715 0.840196  
4.547352 3.612451 4.207897 3.603296 4.044403 4.249712 4.118346 3.649391 3.54913  
1.498261 1.184577 1.062559 1.042699 1.300916 1.567027 1.457067 1.070129 1.590435  
2.14714 1.40582 1.327544 2.132579 1.423042 1.55169 1.832393 1.584664 1.540106  
2.117034 1.947666 2.131466 3.590137 2.686789 1.648727 2.16344 2.179488 2.614136  
1.338675 0.754627 1.673748 1.803998 1.305764 0.974987 1.560587 1.378827 1.684811  
1.372666 1.776031 1.083649 1.509579 1.931923 1.501 2.835803 1.162692 1.826956  
1.145948 0.768038 0.362183 1.07314 0.593027 0.955142 0.76148 0.620353 1.046167  
3.032731 2.949215 1.550238 1.932606 1.09435 1.245515 1.905161 1.816493 2.437536  
3.000939 2.994055 4.004252 3.908397 3.291658 3.717507 2.663448 3.737941 2.929735  
1.548652 1.950338 1.478171 1.870763 1.396753 1.928367 2.91352 1.478171 1.997308  
0.931318 1.564917 0.801754 0.917072 1.45569 1.49858 1.28555 1.519949 0.930041  
4.914558 1.444966 0.819766 1.463524 2.247889 1.093272 1.971494 1.712215 1.242569  
1.893251 2.508451 1.88804 1.540509 1.900233 2.240421 1.204402 2.293532 1.872767  
2.640234 2.648202 2.668319 2.52522 2.267702 2.875751 3.7143 2.236091 2.613372  
0.835073 0.797512 0.882974 1.015424 0.869531 0.984296 0.930287 0.862612 1.929303  
2.13756 2.319889 1.923378 2.091887 1.666282 2.144361 2.246186 1.964879 2.297322  
3.85891 1.167082 0.935625 0.779072 1.529703 1.370672 0.998379 1.021938 0.944367  
1.462824 1.224117 0.995243 1.438199 0.941861 1.191803 1.235933 1.046996 1.310238  
2.340586 2.546433 2.023706 1.999741 2.804724 2.663591 2.454233 2.294101 2.283402  
1.112434 1.152605 0.84099 1.158039 1.506703 1.114872 0.98033 1.068291 1.08296  
1.042522 0.996039 1.122946 1.50386 1.146424 2.001954 1.641536 0.941635 1.117101  
2.088366 1.604634 1.420472 3.501513 1.473092 1.047832 2.055208 2.214325 1.34408  
2.756279 3.200892 2.359657 1.081436 3.20747 2.112354 2.716659 3.11089 2.687856  
1.431988 1.779463 1.506482 2.401099 1.939202 1.324397 1.9033 4.099203 1.370619  
2.174678 3.002959 2.756906 3.958772 1.749329 2.863549 2.581738 1.648586 1.988925  
2.380417 2.739321 2.154082 3.102374 3.07748 1.919371 2.051032 2.75189 1.829804  
3.274757 0.809176 1.269883 1.684873 1.925227 2.276724 1.029301 1.124298 1.005858  
2.122408 1.328141 1.689263 1.316699 1.554127 1.894044 1.480861 1.910698 1.64167  
3.263315 3.087386 2.941453 2.510801 3.348923 3.598157 2.331499 2.628984 2.64862  
5.144874 3.2967 3.480289 2.047329 1.583509 1.874046 2.120513 1.779906 4.37396  
2.640109 1.903362 1.107058 1.817821 3.625046 1.721124 1.595211 3.590136 1.501718  
3.988056 0.871942 0.959137 1.071951 1.277429 0.985084 1.101441 1.148845 1.112579  
3.35669 3.942124 2.613133 2.570441 3.476933 3.483038 4.700412 2.101798 3.424713  
1.977955 1.198799 0.94157 2.694562 1.515282 1.861499 1.141487 1.229376 1.884049  
1.770685 1.205785 0.929376 0.919592 1.319674 1.156312 1.182243 1.173723 1.475165  
1.341291 1.437608 1.747003 1.517316 2.264264 1.452971 1.598769 1.549546 1.504854  
2.300004 3.88794 3.059847 3.605446 3.709628 4.260116 3.22211 3.718245 3.466903  
5.108436 5.431696 5.549488 5.433222 4.666568 5.674868 4.554309 5.501608 4.89458  
1.874454 2.142524 1.87847 1.370784 1.856099 1.729422 2.532502 1.875763 1.828754

0. 949001 1. 031345 1. 126942 1. 275234 0. 830309 0. 428289 1. 298695 0. 512199 2. 014709  
1. 329762 1. 042958 1. 042198 1. 483795 1. 46766 1. 162007 1. 731943 1. 315365 1. 180815  
2. 667268 2. 468552 2. 236245 2. 365614 2. 657488 2. 453909 2. 949378 2. 988659 2. 629246  
1. 238366 0. 760652 0. 780623 0. 833778 1. 333758 0. 991424 1. 146071 0. 60166 0. 602565  
1. 792967 0. 861024 1. 555143 1. 34795 1. 384551 1. 547543 2. 338037 1. 234383 0. 962819  
2. 11506 1. 360563 1. 782688 1. 580709 2. 804401 1. 749171 1. 712718 2. 627101 2. 010374  
1. 602385 1. 239927 0. 933314 0. 948636 1. 227746 1. 568976 1. 013333 1. 173075 1. 150907  
1. 360047 1. 371462 1. 630058 1. 269784 1. 408512 1. 174664 1. 301141 1. 087363 0. 895391  
2. 546953 2. 253029 3. 114455 3. 405637 2. 45957 2. 01027 2. 439189 2. 12909 2. 727126  
4. 869098 5. 243448 2. 902581 4. 472087 4. 648807 4. 589115 4. 039789 4. 37449 3. 872133  
1. 922702 1. 51621 1. 565304 1. 492219 2. 056658 1. 28642 1. 731509 1. 036767 1. 53872  
3. 039543 2. 540244 2. 179705 3. 065591 1. 895892 4. 822384 2. 592004 2. 270616 3. 790103  
2. 382206 1. 338435 1. 917904 2. 409039 2. 131273 1. 691552 1. 157581 2. 390956 1. 652712  
1. 616164 1. 771239 1. 846933 2. 234456 2. 029708 2. 466737 1. 444848 2. 184364 2. 186674  
1. 302163 1. 993153 0. 82566 0. 841475 1. 849939 1. 447724 1. 056681 1. 034689 2. 05906  
2. 433057 2. 671284 2. 53443 2. 409419 2. 256182 1. 900215 2. 611038 2. 419315 2. 471547  
1. 186923 1. 390171 0. 961408 1. 412515 1. 512182 2. 006199 1. 184831 1. 283478 1. 352894  
1. 103762 1. 250725 0. 811879 1. 884044 1. 441804 1. 063033 1. 863744 1. 064361 1. 779588  
1. 386273 1. 244179 1. 595506 1. 209051 1. 741083 1. 4974 1. 571999 0. 982333 1. 318763  
4. 801775 5. 780978 4. 189006 3. 626244 4. 776355 4. 338831 4. 347108 3. 920445 4. 351039  
5. 005711 1. 85479 4. 374725 3. 458193 2. 32434 1. 508891 3. 313261 2. 988977 4. 754469  
2. 048712 1. 421487 1. 825888 2. 048968 1. 295421 1. 686079 2. 541441 2. 281068 1. 232725  
0. 940713 1. 277122 1. 300781 0. 891514 1. 660406 1. 207002 1. 362784 2. 000396 3. 23487  
1. 266525 1. 581041 2. 050631 2. 357851 2. 035569 1. 870069 1. 106186 1. 454457 1. 507368  
0. 54367 0. 831103 0. 579775 1. 755782 1. 647283 0. 9034 0. 910057 1. 512878 1. 503319  
2. 37175 1. 019718 1. 406418 1. 438142 1. 28571 1. 504564 1. 315172 1. 793576 1. 371578  
1. 723819 0. 949705 1. 235603 0. 981018 1. 009498 1. 112784 1. 08366 1. 078817 1. 269306  
0. 846663 1. 267934 0. 753931 0. 57533 1. 035872 0. 475738 2. 282106 1. 368834 1. 165193  
1. 327989 1. 249909 1. 024084 1. 246663 1. 195467 1. 786884 1. 741231 1. 359222 0. 997757  
1. 168969 0. 721089 0. 820127 1. 410686 0. 730327 0. 784947 1. 046456 0. 854708 0. 775697  
2. 873645 1. 621942 1. 965659 2. 707315 1. 567935 1. 747291 1. 898199 1. 460134 2. 257035  
1. 773859 1. 564819 1. 90047 1. 635186 1. 522643 1. 319481 2. 322543 1. 934745 1. 189805  
2. 13692 2. 05948 1. 268325 1. 673177 2. 014404 1. 45675 2. 175015 1. 941403 1. 50766  
1. 875462 1. 964792 1. 461786 3. 810036 2. 319689 2. 316177 3. 302847 2. 092395 2. 89465  
2. 46771 1. 717336 2. 030888 3. 087566 3. 277226 3. 011083 2. 34393 2. 174338 3. 446496  
1. 788805 1. 50787 1. 861731 1. 802424 1. 837605 1. 744945 3. 007392 1. 957152 1. 929126  
1. 989071 2. 111181 1. 976942 2. 70614 1. 68994 2. 364709 2. 989272 2. 804091 2. 117511  
2. 011539 1. 033235 1. 951059 2. 229528 1. 70479 0. 570126 1. 35379 2. 032058 1. 458862  
3. 340657 4. 652184 1. 980425 2. 616741 3. 749525 2. 816484 3. 785758 2. 354463 2. 834985  
3. 43798 1. 700059 2. 580781 3. 055548 1. 550787 4. 175797 3. 145626 1. 075681 4. 332869  
1. 058201 1. 031722 0. 704066 0. 993003 1. 297161 1. 035534 1. 720293 1. 184108 0. 970545  
3. 654718 1. 601308 2. 6338 4. 232423 1. 645883 3. 335632 3. 191438 1. 757086 2. 259985  
1. 980011 3. 126514 2. 893723 2. 450973 1. 8944 2. 520754 2. 424129 3. 727809 3. 428344  
1. 94763 1. 087253 1. 505106 0. 954839 1. 719408 1. 859152 1. 934988 1. 063109 1. 272959  
0. 646056 0. 751766 1. 396597 1. 126475 1. 449539 0. 649074 1. 721109 0. 823876 1. 658527  
1. 607645 2. 348568 1. 325452 1. 298368 1. 686551 3. 033869 1. 304974 5. 279897 2. 433876  
2. 565313 3. 35478 2. 223758 2. 613577 1. 923278 2. 471823 2. 959807 2. 598071 2. 013409  
0. 945311 1. 135656 0. 883206 0. 903654 0. 990035 0. 661536 1. 256747 1. 526601 0. 863763  
1. 552756 0. 713544 1. 006049 1. 449269 0. 864603 1. 177301 1. 619186 1. 024511 0. 565131  
1. 748711 1. 250459 1. 775872 1. 912327 1. 572736 1. 194736 1. 15543 1. 324777 1. 483786  
0. 954227 0. 910096 1. 591611 0. 83443 1. 010399 1. 605301 1. 016614 0. 917473 2. 79841

|          |          |          |          |          |          |          |          |          |
|----------|----------|----------|----------|----------|----------|----------|----------|----------|
| 1.768211 | 3.112784 | 1.378463 | 1.839832 | 1.340894 | 1.422502 | 3.053291 | 1.909411 | 1.660984 |
| 2.419864 | 2.394243 | 2.615627 | 1.485004 | 3.376107 | 2.575878 | 2.582353 | 2.73051  | 2.79311  |
| 2.036007 | 2.009974 | 1.258655 | 3.545899 | 2.050643 | 1.542398 | 2.234511 | 2.207391 | 1.583823 |
| 1.92206  | 1.737811 | 1.809758 | 1.790418 | 2.127422 | 1.531773 | 2.249508 | 2.327231 | 1.815627 |
| 1.723693 | 1.53158  | 1.698849 | 1.847679 | 1.980835 | 3.630691 | 1.600656 | 1.918874 | 2.013227 |
| 1.83902  | 1.215637 | 1.017936 | 1.396046 | 1.583971 | 1.096191 | 1.742165 | 1.263659 | 1.761642 |
| 2.373119 | 1.913987 | 4.205732 | 1.764386 | 1.580735 | 0.907849 | 2.082262 | 1.924113 | 1.160461 |
| 1.654162 | 1.091122 | 1.165271 | 1.168681 | 0.95198  | 1.290315 | 1.514609 | 0.913525 | 1.181938 |
| 2.788024 | 1.016879 | 2.083911 | 1.769855 | 2.164151 | 1.680972 | 1.686711 | 1.711111 | 1.353254 |
| 0.751064 | 1.115395 | 0.824711 | 0.848051 | 1.098935 | 1.300744 | 1.125275 | 1.185843 | 0.793389 |
| 1.817174 | 1.343561 | 1.675391 | 1.177356 | 1.426597 | 1.525778 | 2.45979  | 1.69717  | 1.331573 |
| 0.935696 | 1.400223 | 1.455718 | 1.574498 | 3.696071 | 1.65368  | 1.184771 | 0.791904 | 1.217342 |
| 3.567134 | 2.803943 | 2.791145 | 2.604724 | 2.144825 | 3.063357 | 3.486277 | 4.645842 | 3.504178 |
| 1.335985 | 0.662954 | 1.431923 | 1.11324  | 0.907567 | 0.887537 | 0.498744 | 0.673185 | 0.824143 |
| 2.305766 | 2.112123 | 2.709045 | 2.863238 | 2.579806 | 2.417689 | 2.642878 | 2.334795 | 2.529379 |
| 2.080783 | 2.203467 | 2.411457 | 2.154659 | 2.790467 | 2.296399 | 1.796153 | 1.918025 | 1.991941 |
| 2.326881 | 2.025369 | 1.409877 | 2.049996 | 1.566125 | 1.984183 | 2.224145 | 1.577569 | 1.946518 |
| 0.814657 | 1.179941 | 0.432964 | 0.686122 | 0.821329 | 1.164544 | 0.946488 | 0.824246 | 1.448236 |
| 1.710179 | 1.457276 | 1.514722 | 1.135555 | 1.215203 | 1.188599 | 1.487138 | 0.930901 | 1.020304 |
| 2.022519 | 2.861681 | 1.842477 | 2.68382  | 2.423834 | 1.521961 | 2.006197 | 1.590618 | 1.972034 |
| 1.922325 | 1.699639 | 1.502293 | 1.61645  | 1.845202 | 1.725115 | 1.596548 | 1.542812 | 1.987752 |
| 2.071883 | 2.304693 | 2.108818 | 2.369165 | 2.388709 | 2.160011 | 3.093719 | 2.028651 | 1.814408 |
| 1.748493 | 1.498625 | 1.461843 | 1.739094 | 1.206762 | 1.453024 | 1.723105 | 1.443469 | 1.548123 |
| 3.186086 | 3.864337 | 3.530265 | 3.749523 | 2.849544 | 2.564494 | 3.694843 | 3.40196  | 2.802051 |
| 4.211456 | 4.370113 | 4.411508 | 4.419094 | 4.353005 | 4.489062 | 4.581266 | 4.200703 | 4.580225 |
| 1.707508 | 1.695494 | 2.627668 | 2.453799 | 2.581989 | 1.921087 | 2.239754 | 2.160861 | 1.856309 |
| 1.410534 | 1.406745 | 1.843172 | 2.647795 | 1.222029 | 1.129329 | 1.274893 | 1.355406 | 1.276949 |
| 1.396205 | 1.310438 | 1.561605 | 1.668464 | 1.797757 | 1.437167 | 1.488104 | 1.670302 | 1.860034 |
| 1.423631 | 0.792486 | 0.752558 | 0.823595 | 1.008507 | 1.590903 | 1.538735 | 0.787836 | 0.87832  |
| 0.940889 | 1.326035 | 0.696264 | 0.863372 | 0.811881 | 1.11652  | 1.190432 | 1.094549 | 0.886745 |
| 5.069132 | 4.562757 | 3.909102 | 4.042834 | 4.211925 | 3.705241 | 3.835176 | 4.523747 | 3.410909 |
| 1.902648 | 2.182055 | 2.957863 | 2.45888  | 2.388866 | 2.028531 | 1.419606 | 1.550035 | 2.005661 |
| 3.781496 | 2.155986 | 1.662206 | 1.854317 | 1.921997 | 2.521293 | 2.265376 | 1.908094 | 1.748929 |
| 1.778796 | 2.047747 | 1.821062 | 1.618772 | 1.618678 | 1.575284 | 1.370535 | 2.072869 | 1.259929 |
| 0.887745 | 1.044738 | 0.856067 | 1.370696 | 0.934511 | 1.794496 | 1.217208 | 1.033397 | 0.911782 |
| 4.333569 | 5.080262 | 5.082352 | 5.358653 | 5.692101 | 4.434419 | 6.028494 | 4.594746 | 5.692101 |
| 2.248401 | 1.889497 | 2.565239 | 2.251363 | 2.695079 | 2.054361 | 2.574191 | 2.30295  | 3.320998 |
| 1.934437 | 1.690034 | 1.900474 | 2.85731  | 2.045459 | 2.033118 | 2.157184 | 2.744588 | 2.281628 |
| 1.916146 | 1.570776 | 1.688819 | 1.451622 | 1.813085 | 1.310426 | 1.580055 | 1.281039 | 1.278669 |
| 2.272506 | 2.220061 | 1.505996 | 1.796276 | 1.837174 | 1.842088 | 1.158181 | 2.13098  | 1.254557 |
| 0.932253 | 1.220008 | 1.000345 | 0.962664 | 1.124611 | 1.12623  | 1.159468 | 0.964516 | 2.72922  |
| 1.962252 | 2.358205 | 1.89184  | 2.292797 | 2.14441  | 1.15804  | 2.120458 | 1.824008 | 2.03293  |
| 1.575001 | 1.147441 | 1.050348 | 1.1804   | 1.645963 | 1.898058 | 3.854879 | 1.694697 | 1.713427 |
| 4.901956 | 5.005777 | 4.779465 | 3.902997 | 3.82375  | 4.840451 | 4.008809 | 3.36562  | 3.62654  |
| 1.136049 | 2.093812 | 3.243146 | 1.582008 | 5.556348 | 1.755242 | 1.471144 | 2.702111 | 1.568259 |
| 1.773988 | 1.48798  | 1.773988 | 1.590864 | 2.282553 | 1.690666 | 1.643498 | 2.3633   | 1.344863 |
| 2.549679 | 1.653779 | 1.774621 | 1.712875 | 2.461172 | 1.688451 | 2.008296 | 2.419258 | 1.79436  |
| 1.652585 | 1.963636 | 1.311828 | 2.508416 | 2.179322 | 1.206243 | 0.950302 | 1.413128 | 1.32529  |
| 1.001095 | 1.667864 | 0.631645 | 0.794291 | 1.077317 | 1.284288 | 0.852926 | 1.816018 | 0.807582 |
| 0.682499 | 1.474657 | 0.482482 | 1.04693  | 2.562088 | 1.086109 | 1.343044 | 0.935585 | 1.045833 |
| 1.861771 | 1.404382 | 1.916883 | 3.162748 | 2.746144 | 1.497599 | 1.303895 | 1.779947 | 1.01374  |

5.935171 2.170548 2.724819 1.563882 1.453879 2.037136 1.711678 1.633078 2.473367  
2.014012 1.417663 1.90858 1.828402 1.4111 1.552899 1.968693 1.109111 1.408353  
0.853734 0.975451 1.095842 1.084117 1.355527 1.153511 1.004848 0.849522 0.930748  
3.254579 3.40497 4.046133 3.819574 3.51617 2.892005 3.450601 3.35776 3.274823  
2.194741 2.617975 1.692939 1.944515 2.148417 2.925498 2.741994 1.610684 2.269494  
2.118627 2.020084 1.965106 1.890104 2.278342 2.112829 2.893766 2.29628 1.621015  
3.024154 3.573096 4.054217 3.28735 2.247496 4.439174 3.633809 1.908587 3.112935  
1.918838 1.346796 1.440065 1.267968 1.731499 1.442943 1.531026 1.029331 1.650069  
1.201857 1.696379 1.201517 1.193212 1.344832 1.434357 1.493525 1.396807 1.485435  
0.888575 2.322095 1.680588 1.500805 1.446138 1.303629 1.470584 1.464095 1.24844  
1.979793 1.29793 1.017584 1.758058 1.213598 1.345793 1.080561 1.071155 1.072177  
1.185738 0.955096 2.254135 0.816711 1.312025 1.595421 1.218565 1.778243 1.930641  
1.413075 1.072339 1.119508 1.863914 0.67014 1.245583 1.291369 0.859244 0.588931  
2.437623 2.427768 2.631252 2.571053 2.65908 2.80923 2.675577 2.203198 2.648354  
1.355495 0.792809 0.923551 1.011182 1.257228 1.266643 1.104393 0.949628 1.044153  
2.701568 2.497878 3.418157 2.953496 3.941837 2.769782 1.72005 2.661955 2.604337  
1.948452 2.00599 2.047082 1.886302 2.467437 1.485576 2.187778 2.086965 2.128284  
1.743885 1.349944 2.076162 1.820818 2.096152 3.520632 1.344253 3.020535 1.103498  
1.69738 1.29506 1.602534 1.684409 1.837976 1.644925 1.906673 1.704302 1.610065  
1.606177 1.534764 1.774973 1.765322 1.323851 1.550284 1.617355 1.757542 1.857075  
1.261228 1.630126 2.564126 1.328255 2.850041 1.476164 2.661216 1.999295 1.967666  
1.825614 1.678367 3.107441 1.787598 1.657794 1.754526 1.82245 3.223811 1.675906  
3.124958 1.476386 3.740957 1.310219 1.21808 2.375427 2.606782 5.645112 1.474723  
1.779718 1.336734 1.232292 1.700933 1.414624 1.293108 1.566856 2.374322 1.674919  
1.176348 0.917108 0.84122 1.159258 1.219458 1.289262 1.084901 0.97881 0.82269  
2.936159 2.794592 2.02922 2.247778 1.965167 1.986995 2.685933 2.280153 1.772373  
1.524728 1.103863 1.045148 1.634922 1.451784 1.264781 2.454144 1.401395 1.227171  
3.16361 1.698306 1.433519 1.065168 2.194055 1.398347 1.185773 1.66585 1.196233  
3.945856 3.533751 3.217422 3.650764 2.774113 2.477188 2.419895 1.696636 3.038697  
0.880973 1.878069 0.957997 1.560612 0.783602 1.022639 1.139769 0.820678 1.289402  
1.261606 1.045757 1.449002 1.81403 1.450583 1.711546 1.946912 1.08981 1.434832  
2.64833 2.274515 0.888417 2.738933 1.000872 2.028403 1.090597 2.20969 1.516017  
1.076315 1.307206 1.164071 2.071537 2.058258 1.107043 1.538387 1.065914 1.210267  
1.487321 1.788309 1.370378 1.721484 1.344991 1.380989 1.302723 1.258887 1.685999  
3.061175 3.900037 4.91783 3.204618 2.540278 2.599384 3.380333 5.066663 3.883746  
1.322024 1.854678 1.251074 1.141039 1.656989 1.875419 2.604467 1.492223 1.359056  
1.461228 1.355529 0.779268 1.222218 0.918941 1.21651 1.715254 1.193617 1.186259  
2.374913 2.345283 0.7741 1.692166 0.946287 1.301709 2.096709 1.20113 0.865947  
2.47534 2.140272 2.647936 2.634997 2.76608 1.651725 2.383591 2.767481 2.155751  
1.262365 1.046179 1.359955 1.632612 1.048932 1.541748 0.959806 0.810827 0.800419  
2.509431 0.427412 0.692668 1.723715 0.468704 1.674935 0.71429 1.150469 1.264083  
1.185659 1.10267 0.791953 1.315808 0.820591 1.071718 1.285358 1.129957 1.070956  
1.241621 1.56909 0.907197 1.972869 1.10133 1.731642 1.463064 1.313453 1.161912  
0.980651 1.320402 1.1583 0.9085 1.10615 0.87059 1.211068 0.944759 0.602105  
3.725061 1.723171 1.86398 2.450964 2.400178 1.397442 2.577878 1.994773 2.170655  
1.03035 0.747327 1.235097 1.168266 1.460724 1.420751 1.570132 0.804491 1.005325  
1.523775 1.402994 1.761896 2.028336 1.695287 1.462648 2.18342 1.653171 2.079342  
2.948073 2.342004 2.347495 1.809722 2.020395 2.555085 2.636591 1.756517 3.319249  
1.287364 1.384879 0.91742 1.290638 1.799062 1.4256 1.41446 1.742471 1.625564  
1.051563 0.870389 1.291359 1.389028 0.879997 0.829947 1.554602 1.793569 1.042997  
1.327674 0.931569 1.189495 1.568038 1.855525 1.53787 2.56795 1.509974 1.219758

1. 865826 1. 19989 2. 299018 2. 299481 1. 134408 1. 479432 1. 57324 1. 864912 0. 802415  
1. 219149 3. 521097 3. 718566 5. 955613 4. 203281 1. 282018 3. 173778 2. 96518 4. 784799  
1. 034908 1. 227128 1. 329777 2. 513984 1. 581845 1. 402405 0. 87733 1. 414755 1. 198041  
0. 719367 0. 949885 0. 692108 1. 160635 1. 25318 1. 860798 0. 803697 0. 79937 1. 16232  
3. 168 2. 891511 3. 064057 3. 045612 2. 282423 2. 533595 2. 899446 3. 077245 2. 622676  
3. 160448 1. 575477 4. 100545 7. 476009 5. 651936 5. 772799 2. 363563 2. 248056 5. 12766  
2. 118642 1. 549087 1. 651011 1. 51817 2. 087753 2. 200583 1. 655708 1. 85115 1. 657981  
0. 901006 0. 933661 0. 840601 1. 134918 0. 689161 0. 932389 0. 91515 1. 000042 0. 888549  
2. 434422 0. 973191 2. 140437 1. 320182 1. 197627 2. 274651 1. 463776 1. 691428 1. 382822  
1. 5353 1. 115002 0. 949927 1. 167416 1. 362708 1. 392404 0. 874871 1. 132306 1. 888992  
0. 950014 0. 710028 0. 946575 1. 5985 0. 916479 0. 845223 1. 319847 0. 854736 1. 061559  
1. 776211 1. 736394 1. 542949 1. 715671 1. 462701 2. 826331 1. 560839 1. 447606 0. 811028  
3. 062837 1. 996125 2. 978244 2. 538393 2. 523374 2. 591041 2. 59181 3. 30149 2. 230803  
1. 563739 1. 42765 1. 442378 1. 838096 1. 706885 2. 146459 1. 079578 1. 738281 2. 07514  
1. 390519 1. 439242 0. 954872 1. 418495 1. 250096 1. 596308 1. 978023 1. 550019 1. 102618  
0. 976088 1. 074472 0. 856302 1. 137025 0. 820178 0. 832721 1. 122743 1. 1604 0. 989243  
0. 984646 1. 635969 1. 308658 1. 563594 1. 150061 1. 267242 1. 012461 0. 940624 0. 938745  
0. 94733 0. 650457 1. 026031 0. 784801 0. 818447 1. 202152 0. 887909 0. 603966 1. 278377  
1. 898834 1. 113743 1. 440079 1. 579731 0. 943885 1. 579607 1. 338947 1. 388206 1. 218538  
1. 980507 1. 359761 1. 681312 1. 862008 1. 78561 1. 844836 2. 002728 1. 627954 1. 651489  
1. 503134 0. 981029 0. 800603 0. 739331 0. 895951 0. 966707 1. 036529 0. 957607 0. 925553  
2. 236321 2. 558355 1. 758773 2. 080544 2. 567097 3. 413818 2. 135508 1. 467062 1. 391067  
3. 551834 3. 228741 2. 476519 2. 801038 2. 9789 2. 750303 2. 429374 3. 398571 2. 926348  
1. 693963 2. 547001 2. 252302 1. 939 2. 287392 1. 951672 1. 94554 1. 765618 2. 077485  
0. 905239 0. 692201 1. 091326 0. 924612 0. 752858 0. 821145 0. 884319 0. 862886 0. 983734  
2. 959761 0. 961001 1. 472155 1. 412115 1. 020851 1. 796864 1. 368015 2. 568899 1. 062764  
2. 937288 3. 870572 3. 817257 1. 616794 2. 722971 3. 198204 4. 297448 2. 833976 3. 434274  
1. 639793 1. 332532 1. 294585 0. 920033 1. 004519 1. 043602 1. 219516 0. 637709 0. 941144  
1. 867152 1. 305947 1. 924585 1. 212098 1. 240057 1. 765577 1. 540061 1. 218973 1. 936717  
1. 35166 1. 519763 1. 340957 2. 02949 1. 393177 1. 174742 1. 411723 1. 379074 1. 555511  
2. 357233 1. 353708 1. 894863 1. 610886 1. 708746 2. 183301 1. 913532 2. 613867 1. 917131  
1. 058934 1. 307861 0. 810167 1. 65493 1. 203735 0. 750077 0. 584685 1. 447183 0. 934423  
0. 86513 1. 443546 1. 024713 1. 230717 2. 146936 1. 358042 1. 904179 0. 637924 0. 814572  
1. 543516 1. 09841 1. 101327 1. 490488 1. 273615 1. 117004 1. 476175 1. 441978 1. 304793  
1. 770945 1. 784645 1. 403693 1. 93998 2. 440218 2. 396845 2. 498692 1. 28195 1. 749391  
1. 177627 1. 33763 1. 049234 0. 960114 0. 942613 1. 200498 1. 505059 0. 962494 0. 735516  
4. 434036 1. 387675 3. 845852 0. 797251 1. 819343 0. 9454 2. 302723 2. 100312 2. 445437  
2. 044034 1. 156697 1. 472935 2. 179982 1. 103032 1. 505342 2. 806493 0. 962976 1. 139307  
2. 046519 1. 784665 1. 559224 1. 877675 1. 824255 2. 145855 1. 750532 1. 753743 1. 404791  
1. 348754 0. 85141 0. 783018 0. 872894 1. 454583 1. 080703 0. 829512 1. 13591 1. 056112  
1. 503432 1. 384867 0. 989847 1. 382559 0. 994 1. 114276 1. 388775 1. 070319 1. 828407  
1. 909849 2. 15637 1. 894928 1. 972725 1. 218432 2. 986976 3. 473598 3. 844909 3. 713111  
0. 97535 1. 108423 0. 818343 0. 440158 0. 883903 0. 595312 0. 622112 0. 689804 0. 578769  
2. 366434 2. 069624 2. 317152 1. 719056 1. 445846 3. 005657 2. 608336 1. 507882 2. 966605  
2. 702489 2. 131803 2. 454342 1. 508501 1. 71695 1. 790063 1. 677635 1. 38144 1. 537218  
1. 949772 1. 630692 1. 983309 1. 841655 2. 944574 1. 948659 2. 341315 2. 248712 1. 412156  
0. 96774 1. 247048 1. 253572 1. 161911 0. 864622 1. 145966 0. 875463 0. 951681 1. 038195  
1. 906147 1. 672858 1. 204339 1. 920876 1. 441051 1. 982419 2. 540005 2. 097551 1. 500998  
2. 568931 1. 536958 2. 674113 1. 795472 1. 984429 1. 627696 2. 008518 1. 621333 1. 519295  
3. 756344 3. 661367 3. 418932 4. 685212 3. 223979 3. 986964 2. 39941 2. 166616 3. 147586  
1. 014928 0. 920794 0. 954658 2. 008308 0. 725143 1. 632338 1. 081585 1. 492178 0. 991232

1. 242754 1. 687067 1. 095657 1. 400236 1. 438427 1. 493843 2. 000154 1. 043126 1. 525849  
1. 503115 1. 081105 1. 647656 1. 857642 1. 494962 1. 923322 2. 590019 1. 424574 1. 449104  
1. 708945 1. 543983 2. 592481 1. 531918 1. 513242 2. 325624 1. 873294 1. 964418 1. 093357  
1. 463809 1. 379134 1. 279728 1. 507625 1. 725896 1. 569951 1. 617079 1. 23161 1. 404612  
1. 442649 1. 198919 1. 263813 2. 185123 1. 325808 1. 346817 1. 457703 1. 468428 1. 612358  
1. 49497 1. 117653 1. 443819 1. 241605 1. 500022 1. 298002 1. 817608 1. 09705 1. 392629  
1. 42707 1. 107254 0. 963709 1. 32843 1. 861732 0. 997282 0. 980278 5. 125847 1. 802459  
1. 496647 2. 174883 1. 686279 1. 608009 2. 446011 2. 546801 2. 342569 1. 874997 2. 280892  
2. 567117 0. 959463 1. 350688 0. 967385 2. 661408 1. 2546 1. 03193 2. 297921 1. 219829  
1. 127299 1. 570957 1. 584251 1. 472834 1. 54978 1. 257103 1. 110402 1. 130277 1. 46155  
1. 83163 1. 944455 1. 342274 2. 439051 1. 559319 2. 02484 1. 377129 1. 698764 1. 610029  
0. 866621 1. 158011 0. 926326 1. 356292 1. 156131 1. 028225 1. 805363 0. 989512 1. 134262  
2. 120867 1. 563956 0. 781928 1. 489629 1. 492808 1. 445782 1. 121696 1. 343973 1. 677288  
1. 833062 1. 660203 1. 412149 2. 178675 1. 549945 2. 146225 1. 781788 2. 625582 3. 669083  
1. 395084 0. 641124 0. 860366 0. 947656 1. 075945 0. 98955 3. 45017 0. 693935 1. 303671  
2. 238217 1. 600122 1. 282714 1. 180673 1. 470048 1. 823378 1. 443648 1. 258951 1. 346158  
2. 095148 1. 514432 1. 584912 1. 420531 1. 537371 1. 425904 2. 569937 1. 38786 2. 210186  
0. 978125 0. 942494 2. 661467 1. 39882 1. 566946 1. 020111 0. 942494 1. 100509 0. 846656  
2. 571374 1. 200798 1. 511724 1. 454051 1. 507115 4. 182806 1. 739349 2. 41869 2. 464087  
2. 228805 2. 82215 2. 220112 2. 145096 1. 978243 3. 619831 2. 848721 2. 6666 1. 900714  
3. 435619 1. 835977 1. 575321 3. 022959 2. 499738 2. 849189 2. 62607 1. 966533 2. 005335  
1. 030301 2. 644297 1. 186038 1. 263654 0. 658002 2. 579167 0. 840561 1. 639932 1. 471267  
2. 369033 2. 776643 2. 164431 4. 490641 3. 036044 2. 161766 2. 994085 3. 807743 3. 159674  
3. 274179 2. 894776 3. 429915 3. 80982 2. 871762 2. 621082 3. 421589 4. 33625 2. 44329  
1. 366775 1. 373979 1. 136315 1. 691234 1. 383406 1. 949021 1. 344876 1. 04778 1. 65268  
2. 650034 2. 213902 2. 058366 2. 197908 2. 536869 2. 090826 2. 450138 2. 379998 1. 858025  
1. 819576 1. 329789 0. 898463 0. 885477 1. 857011 1. 198363 1. 181409 1. 086053 1. 071871  
2. 396271 1. 880343 1. 982745 2. 364492 3. 418774 2. 856621 2. 339633 2. 356483 1. 465543  
2. 569795 2. 121569 1. 250684 1. 144658 1. 74816 0. 998424 1. 79626 1. 317483 2. 169131  
2. 013671 1. 418701 1. 120356 1. 27109 0. 739471 1. 437243 1. 433698 1. 329578 1. 370289  
2. 619253 0. 959489 1. 20492 0. 740796 1. 034688 1. 15071 0. 87983 1. 421431 2. 222201  
1. 792619 1. 723403 1. 561032 2. 802862 1. 519363 1. 46375 1. 314215 0. 988348 1. 17592  
1. 747657 1. 110073 2. 033501 1. 343719 1. 165136 1. 707725 1. 597407 1. 389243 1. 479148  
2. 039328 0. 978786 0. 991261 1. 693453 1. 553774 2. 156465 1. 580196 1. 538656 2. 704301  
2. 636444 3. 609129 2. 273955 1. 46515 3. 132855 2. 425953 3. 663068 2. 633502 2. 455031  
0. 5917 2. 267492 0. 809958 0. 64757 0. 690887 1. 069684 1. 64595 1. 10997 3. 468776  
1. 241974 1. 166191 0. 956222 1. 019132 2. 043303 1. 75153 1. 58046 1. 200399 1. 588394  
2. 243904 1. 960639 1. 686981 1. 819033 2. 078968 2. 615837 2. 680254 1. 931203 2. 101778  
3. 221277 3. 478466 4. 659303 4. 461343 3. 19755 3. 315111 3. 200283 3. 4472 3. 562474  
1. 322622 0. 808812 1. 039148 1. 522233 1. 161507 1. 40722 1. 260991 1. 117135 0. 880249  
1. 807002 1. 298118 1. 209277 0. 95877 1. 109711 1. 464551 1. 991771 1. 360622 1. 528911  
1. 288662 0. 99875 0. 855295 1. 234374 1. 157284 1. 224167 1. 971972 1. 241362 1. 071904  
2. 705171 2. 15991 1. 86973 2. 470715 2. 262371 1. 533058 2. 662368 2. 969387 2. 250124  
3. 33522 2. 048247 3. 129857 2. 824544 2. 262156 2. 310445 3. 880548 1. 815468 2. 171368  
1. 052293 0. 860177 1. 465981 0. 925739 1. 845243 1. 480875 2. 106973 1. 199999 1. 719132  
2. 379514 1. 763441 2. 616751 1. 980206 2. 82967 3. 043345 3. 185108 2. 542153 2. 479027  
1. 355962 1. 701619 1. 363126 2. 555582 1. 007907 1. 841828 1. 138488 1. 510473 1. 074514  
1. 778382 1. 533705 1. 331656 2. 091602 1. 550542 1. 724979 1. 715233 2. 147658 1. 60333  
1. 072032 0. 801444 0. 902653 1. 108078 0. 646614 1. 043042 0. 770469 0. 761229 1. 027167  
2. 613694 1. 156107 1. 582527 1. 592422 2. 76019 1. 468943 1. 386174 1. 668132 1. 30004  
1. 341541 0. 858703 1. 39599 1. 061678 1. 23796 1. 051253 1. 013634 1. 432099 1. 674523

|          |          |          |          |          |          |          |          |          |
|----------|----------|----------|----------|----------|----------|----------|----------|----------|
| 1.328111 | 1.103155 | 1.000894 | 0.856825 | 0.954027 | 1.080324 | 0.966492 | 0.716163 | 0.996649 |
| 2.613647 | 1.872837 | 1.219988 | 2.354602 | 1.606063 | 3.348127 | 2.367553 | 2.666947 | 1.041761 |
| 2.536042 | 1.636891 | 1.642771 | 1.357933 | 1.077251 | 2.451778 | 1.811853 | 1.576682 | 1.578908 |
| 1.187336 | 1.139443 | 1.260748 | 0.983645 | 1.111613 | 1.104068 | 0.747584 | 0.839548 | 1.355015 |
| 0.941096 | 1.390752 | 1.250767 | 1.969443 | 1.057737 | 1.660103 | 0.959379 | 1.177992 | 1.260625 |
| 2.47874  | 2.305163 | 2.158605 | 2.19271  | 2.314168 | 3.019736 | 2.377864 | 2.625961 | 2.942773 |
| 1.115228 | 1.060903 | 0.827679 | 0.945122 | 1.190984 | 1.006234 | 0.740091 | 0.771252 | 0.906316 |
| 1.972813 | 1.474785 | 1.993462 | 1.510056 | 2.035985 | 2.213291 | 2.319611 | 1.990979 | 1.729218 |
| 1.47845  | 2.172971 | 1.83703  | 2.32047  | 2.184889 | 3.018422 | 2.162584 | 1.783147 | 2.224938 |
| 1.255179 | 0.713166 | 0.525171 | 0.724549 | 1.019008 | 0.467384 | 1.981823 | 0.998576 | 1.017269 |
| 2.597914 | 2.305706 | 2.319668 | 2.995638 | 2.898353 | 2.618962 | 2.248189 | 2.301279 | 2.301198 |
| 1.311973 | 1.625991 | 1.038976 | 1.584184 | 1.354667 | 1.316584 | 1.280309 | 1.606554 | 1.264557 |
| 1.311071 | 0.817183 | 1.51416  | 0.810725 | 0.82904  | 1.898669 | 0.807502 | 1.141324 | 1.271462 |
| 1.981168 | 2.53727  | 2.232926 | 3.430957 | 2.02988  | 2.28706  | 2.026856 | 2.281222 | 2.36889  |
| 2.293693 | 1.703764 | 1.810133 | 1.515497 | 1.673109 | 1.836316 | 2.272169 | 1.237428 | 1.438931 |
| 1.337589 | 3.132788 | 3.522079 | 0.981005 | 1.87459  | 3.577162 | 1.566744 | 2.379747 | 1.954846 |
| 2.252143 | 1.792554 | 1.748113 | 1.855832 | 1.580662 | 1.585859 | 1.858873 | 1.631249 | 1.527548 |
| 1.834533 | 1.369758 | 1.054622 | 2.533778 | 1.154656 | 1.73352  | 2.126948 | 0.905324 | 1.43509  |
| 2.0144   | 1.725956 | 1.823216 | 1.821009 | 1.866383 | 2.089532 | 1.628596 | 2.116781 | 1.842381 |
| 1.219492 | 2.298291 | 1.191093 | 0.971954 | 2.62303  | 1.100389 | 1.228753 | 2.17966  | 1.381871 |
| 1.415072 | 1.287769 | 1.128396 | 1.605386 | 1.366441 | 0.844649 | 1.015133 | 1.028655 | 1.367806 |
| 1.619377 | 0.862886 | 1.519129 | 1.326393 | 1.373591 | 1.149369 | 1.233193 | 1.041315 | 2.130573 |
| 1.242414 | 1.991249 | 2.536962 | 2.257874 | 2.066488 | 2.245529 | 1.944807 | 1.370472 | 1.520322 |
| 1.386604 | 1.02751  | 1.171422 | 1.673347 | 2.278789 | 1.456903 | 1.16634  | 1.18751  | 1.303709 |
| 1.158744 | 0.973992 | 0.964595 | 1.435095 | 0.827654 | 1.033748 | 1.013884 | 1.185088 | 1.27699  |
| 0.790307 | 1.069306 | 0.895556 | 0.760202 | 0.995065 | 1.13331  | 0.863065 | 1.303247 | 2.222382 |
| 2.348661 | 1.994243 | 2.276416 | 2.026445 | 2.193973 | 1.875827 | 2.864432 | 2.213278 | 1.78034  |
| 2.27987  | 1.053899 | 1.656752 | 1.971333 | 1.880171 | 1.648298 | 2.0663   | 1.158168 | 1.020755 |
| 1.365363 | 2.221773 | 2.152699 | 1.98024  | 1.711239 | 1.615371 | 1.365363 | 1.522529 | 1.312395 |
| 1.739123 | 0.879929 | 1.217405 | 0.920568 | 2.290746 | 1.758972 | 1.148525 | 1.087321 | 1.137802 |
| 1.288524 | 1.53257  | 1.056701 | 1.343582 | 1.610221 | 1.466465 | 1.438444 | 1.397726 | 1.097614 |
| 1.719575 | 2.19933  | 1.794927 | 1.573385 | 1.411116 | 1.751996 | 1.192016 | 1.704766 | 1.767285 |
| 3.017945 | 2.798097 | 3.539233 | 2.744816 | 2.881022 | 3.076713 | 4.169828 | 4.058442 | 3.198897 |
| 0.978303 | 0.987951 | 1.188972 | 1.387608 | 1.111724 | 0.891098 | 0.826955 | 1.177535 | 2.224069 |
| 5.755272 | 3.187814 | 3.116687 | 3.577776 | 3.801621 | 3.184826 | 3.510348 | 4.837888 | 3.994508 |
| 1.964126 | 1.902847 | 2.182644 | 1.979756 | 1.792282 | 2.154095 | 2.219246 | 1.801653 | 2.518178 |
| 1.75795  | 0.944364 | 1.024324 | 1.481245 | 1.598261 | 1.499254 | 1.975576 | 0.842415 | 0.85263  |
| 1.362087 | 1.370551 | 1.323967 | 1.73128  | 2.168795 | 2.053004 | 1.578793 | 2.176021 | 1.936651 |
| 1.931577 | 2.59369  | 1.370077 | 3.27239  | 2.354938 | 4.25132  | 2.72388  | 1.798777 | 1.469445 |
| 1.58219  | 1.031795 | 1.451398 | 2.226317 | 1.488649 | 1.430714 | 1.989823 | 1.056154 | 1.210243 |
| 1.749309 | 1.663003 | 1.493069 | 1.587359 | 1.917718 | 2.248444 | 2.273227 | 1.594282 | 1.605565 |
| 1.374735 | 1.232807 | 1.304294 | 1.419857 | 1.300543 | 0.93757  | 1.388227 | 1.319688 | 1.280497 |
| 1.474978 | 1.614652 | 1.691253 | 1.508538 | 1.340748 | 1.557474 | 2.181087 | 2.052431 | 1.167118 |
| 3.380105 | 2.497788 | 1.931827 | 5.017119 | 1.014795 | 1.752109 | 1.276978 | 1.317335 | 2.534685 |
| 1.293966 | 1.210579 | 1.992819 | 1.575212 | 1.894353 | 1.109485 | 1.275101 | 1.534189 | 1.238972 |
| 2.099163 | 0.976736 | 1.18509  | 1.056583 | 1.971328 | 1.438535 | 1.174957 | 1.408891 | 1.265494 |
| 1.829069 | 2.094602 | 3.238921 | 1.761584 | 2.026622 | 2.919703 | 3.601916 | 2.530649 | 1.883575 |
| 1.776874 | 0.868617 | 1.073921 | 1.515044 | 0.925345 | 1.251437 | 1.728661 | 1.396376 | 0.96253  |
| 2.015189 | 2.018277 | 1.059087 | 1.919967 | 1.759308 | 1.762058 | 2.170595 | 1.232484 | 2.59571  |
| 1.273916 | 0.992116 | 1.322137 | 1.098075 | 1.395542 | 1.823864 | 1.627757 | 1.653708 | 1.584712 |
| 3.83711  | 4.476038 | 3.78315  | 4.768255 | 4.422325 | 3.404105 | 3.960555 | 4.728651 | 4.66131  |

|          |          |          |          |          |          |          |          |          |
|----------|----------|----------|----------|----------|----------|----------|----------|----------|
| 1.178744 | 1.438405 | 1.103289 | 1.942168 | 1.18582  | 0.98193  | 1.562844 | 1.355672 | 1.472108 |
| 2.033658 | 1.188275 | 1.362555 | 1.650173 | 1.296654 | 1.502594 | 1.726189 | 1.082171 | 1.360911 |
| 1.877817 | 3.355865 | 0.583075 | 1.272645 | 0.654629 | 1.169074 | 1.080071 | 1.284933 | 1.019583 |
| 1.598302 | 0.915745 | 1.120833 | 1.057481 | 0.841741 | 1.389845 | 1.695792 | 2.237675 | 0.88818  |
| 0.894475 | 1.224905 | 0.933994 | 0.967847 | 0.940028 | 0.774802 | 1.212892 | 1.375426 | 1.179212 |
| 1.65747  | 1.389608 | 1.434124 | 1.488219 | 1.597115 | 1.278519 | 1.613786 | 1.682165 | 1.327412 |
| 2.522522 | 2.534716 | 2.879566 | 3.090627 | 1.717332 | 1.606203 | 1.397461 | 2.018126 | 1.58453  |
| 1.988163 | 1.19438  | 1.701992 | 1.095476 | 1.068443 | 1.515944 | 1.510442 | 1.690609 | 1.434628 |
| 3.206544 | 2.232012 | 3.256093 | 2.524754 | 2.505203 | 1.937661 | 3.503556 | 2.367929 | 2.484531 |
| 1.350905 | 2.26422  | 1.014241 | 0.973608 | 1.095451 | 0.849566 | 0.776152 | 0.894663 | 1.337437 |
| 1.421777 | 1.372738 | 1.477538 | 1.332349 | 1.341452 | 0.927379 | 1.366979 | 1.563062 | 1.170071 |
| 1.413438 | 1.79881  | 1.106495 | 1.59802  | 1.152066 | 1.415492 | 1.64557  | 1.419    | 1.229986 |
| 2.504056 | 1.853608 | 1.549463 | 1.578556 | 2.401151 | 2.171302 | 2.324401 | 1.997269 | 1.880231 |
| 2.223092 | 1.611875 | 1.869953 | 1.635726 | 1.845667 | 1.996592 | 2.950712 | 1.843151 | 1.901644 |
| 1.020645 | 0.841542 | 1.061024 | 1.233901 | 1.126489 | 1.310932 | 1.434636 | 1.109602 | 1.087298 |
| 1.286845 | 1.435645 | 1.898305 | 1.32432  | 1.268214 | 1.539485 | 1.656932 | 1.702715 | 1.615776 |
| 2.332906 | 2.871578 | 3.703641 | 3.241976 | 2.277853 | 2.290019 | 2.638014 | 2.339766 | 2.090742 |
| 1.202799 | 1.741841 | 1.600475 | 1.380882 | 1.498865 | 1.937414 | 1.383554 | 1.805137 | 1.237974 |
| 1.866129 | 1.974428 | 1.536782 | 2.356308 | 2.038381 | 1.77708  | 1.852777 | 1.638048 | 2.320384 |
| 0.881745 | 0.7629   | 0.739992 | 0.548215 | 1.924377 | 0.670229 | 0.640438 | 0.96569  | 0.913673 |
| 1.300322 | 1.557852 | 0.955701 | 1.137431 | 1.918952 | 1.734441 | 2.233477 | 0.953878 | 0.764412 |
| 1.549693 | 1.087206 | 1.314794 | 1.529986 | 1.412055 | 1.090642 | 2.377511 | 1.780982 | 1.035121 |
| 2.590496 | 2.083899 | 1.724868 | 1.540694 | 1.842474 | 1.599225 | 2.628614 | 2.071064 | 1.959791 |
| 1.747884 | 1.483262 | 1.481223 | 1.690854 | 1.049322 | 2.244389 | 2.643742 | 1.284914 | 1.230661 |
| 1.393446 | 2.503795 | 2.190362 | 3.441616 | 1.598816 | 1.778214 | 4.268277 | 5.510331 | 1.292349 |
| 2.247794 | 1.37979  | 1.214801 | 2.313684 | 1.746667 | 1.750636 | 1.570782 | 1.504453 | 2.092072 |
| 1.872814 | 1.424613 | 1.525013 | 1.275436 | 2.032928 | 1.846936 | 1.644599 | 1.329223 | 0.991559 |
| 2.331911 | 1.184588 | 2.178532 | 1.827404 | 1.599634 | 1.116086 | 2.157082 | 1.354888 | 1.463187 |
| 2.362424 | 1.980971 | 1.513358 | 2.255307 | 1.566409 | 1.964903 | 1.826285 | 1.453628 | 1.845465 |
| 1.687885 | 1.906959 | 1.674227 | 2.033661 | 2.021458 | 2.209575 | 2.102919 | 1.721757 | 2.121211 |
| 2.441541 | 1.570665 | 1.346412 | 2.834284 | 2.195303 | 1.466665 | 2.058172 | 1.967065 | 1.797757 |
| 2.231356 | 2.608612 | 2.359276 | 1.363778 | 2.282394 | 2.013908 | 0.827092 | 2.376581 | 3.508463 |
| 1.166138 | 1.325366 | 0.956929 | 1.43486  | 1.120839 | 1.379308 | 0.98178  | 0.806257 | 1.594728 |
| 0.961334 | 1.095283 | 1.197026 | 1.237328 | 1.51045  | 0.917088 | 0.851377 | 1.326868 | 1.569596 |
| 2.229307 | 1.1165   | 1.681767 | 1.465016 | 1.569788 | 1.378812 | 1.689311 | 1.932992 | 3.145802 |
| 6.646506 | 8.504237 | 8.988154 | 8.211387 | 8.326578 | 8.351649 | 7.439425 | 8.485785 | 7.71898  |
| 1.83621  | 1.605042 | 1.732623 | 1.842107 | 2.047255 | 2.206854 | 1.951153 | 1.232102 | 2.318758 |
| 5.172237 | 2.516034 | 2.974213 | 2.570969 | 2.060049 | 2.819046 | 3.720775 | 3.220137 | 3.06283  |
| 1.344747 | 1.051035 | 1.480529 | 1.718583 | 1.300669 | 1.639572 | 1.562678 | 1.209745 | 1.512903 |
| 2.50775  | 1.280449 | 1.19096  | 1.642872 | 1.279558 | 1.51792  | 1.833056 | 1.821318 | 1.424199 |
| 1.482708 | 1.239646 | 1.185894 | 1.16703  | 1.241979 | 1.655339 | 1.233116 | 1.867693 | 2.060587 |
| 2.200642 | 2.172345 | 2.625914 | 2.633401 | 2.307037 | 2.793348 | 3.075522 | 2.727425 | 2.11212  |
| 1.655596 | 1.171852 | 1.239508 | 1.062818 | 0.97712  | 1.061803 | 1.281691 | 1.088718 | 0.980764 |
| 0.998246 | 0.829667 | 0.940689 | 1.231793 | 0.973219 | 1.198177 | 1.34564  | 1.240392 | 1.047379 |
| 2.985673 | 3.114899 | 2.546416 | 2.210683 | 3.841328 | 3.164211 | 3.662433 | 3.070341 | 2.550958 |
| 1.547185 | 0.897232 | 1.140717 | 1.890632 | 1.341975 | 1.146888 | 1.149385 | 0.944766 | 1.427608 |
| 2.792118 | 3.09072  | 3.143975 | 3.07978  | 3.391964 | 2.904859 | 3.026058 | 3.396548 | 3.476775 |
| 1.599338 | 1.437404 | 1.185641 | 1.507004 | 2.232715 | 1.488352 | 1.73021  | 1.420063 | 1.096406 |
| 1.992722 | 1.405971 | 1.408731 | 1.11064  | 1.606175 | 1.294659 | 1.603946 | 1.715918 | 2.565942 |
| 2.397672 | 2.323985 | 2.354024 | 1.803809 | 2.708391 | 1.634649 | 1.766181 | 2.526299 | 1.605297 |
| 2.066035 | 1.474279 | 2.767537 | 1.272582 | 1.367927 | 1.191137 | 2.269353 | 0.807199 | 1.092312 |



2. 73217 2. 377054 2. 446544 2. 799795 1. 608845 2. 238753 2. 579635 2. 100054 1. 89219  
2. 273419 1. 405708 1. 122234 1. 568808 1. 315842 1. 388692 1. 13752 1. 338469 1. 465191  
1. 770777 1. 737922 1. 789361 2. 004252 1. 544913 1. 341596 2. 107667 1. 332609 1. 944639  
1. 176454 1. 583004 0. 963838 1. 584002 1. 211449 2. 844332 1. 305801 2. 390219 2. 422644  
1. 416359 2. 021466 2. 238016 3. 795749 1. 644329 3. 157256 3. 171954 1. 928397 1. 118201  
0. 774847 1. 612265 1. 293794 1. 269443 0. 608678 0. 537538 3. 500402 1. 311493 2. 199324  
6. 848814 7. 054794 7. 32174 7. 208227 7. 029096 6. 375981 7. 415743 6. 579696 7. 470284  
2. 464143 2. 320831 4. 188455 3. 765568 2. 982633 4. 017988 3. 512694 3. 791439 3. 10335  
1. 307355 0. 591376 0. 771349 1. 051167 0. 81384 0. 740388 0. 76616 1. 613182 1. 109414  
3. 508398 3. 717667 3. 655474 3. 136903 3. 267761 3. 059286 4. 467636 3. 105592 4. 27219  
3. 845126 3. 339017 3. 218397 3. 23397 2. 801231 3. 21531 3. 175657 3. 345883 2. 874239  
2. 946527 3. 029934 3. 415884 3. 014186 3. 552213 3. 264653 3. 054625 3. 912271 3. 200848  
1. 217959 1. 919956 1. 129562 1. 639047 1. 449107 1. 395946 1. 212608 1. 443392 1. 659573  
2. 006983 3. 619227 3. 007765 3. 017497 1. 921595 2. 891697 3. 759918 3. 297258 2. 302698  
1. 86383 1. 799105 1. 956386 1. 480485 1. 63708 1. 440394 1. 85647 2. 298998 1. 881656  
1. 16979 1. 223667 3. 504299 2. 921996 2. 115335 2. 619791 3. 159548 1. 577709 2. 575778  
1. 051536 2. 564357 0. 879709 1. 178179 1. 963766 1. 202537 2. 957238 2. 788453 1. 989449  
1. 592672 1. 082012 1. 086128 1. 313627 1. 411773 1. 458105 2. 027853 1. 116478 1. 40578  
3. 229546 1. 849309 2. 175026 1. 83093 1. 657952 2. 585614 1. 689198 2. 651336 1. 751089  
2. 173006 2. 096317 1. 702138 2. 659779 2. 625098 1. 776487 2. 288383 1. 769009 1. 735121  
2. 10122 1. 646961 1. 221784 1. 349099 1. 273927 2. 612587 1. 532883 1. 361286 2. 88635  
1. 686857 2. 233857 2. 43921 3. 335471 2. 111348 2. 033829 1. 724297 1. 676302 1. 796901  
1. 067332 0. 529178 0. 811268 0. 781912 2. 415041 1. 947297 1. 557049 0. 814152 1. 951017  
2. 408345 1. 328201 2. 47669 2. 553656 1. 524516 1. 464523 2. 254481 1. 934155 1. 321917  
1. 614546 1. 523406 1. 477775 1. 746156 1. 858332 1. 54023 1. 68221 1. 504927 1. 496521  
4. 458464 1. 070056 0. 989408 1. 954573 1. 183054 0. 974046 0. 983083 1. 208332 1. 099283  
3. 111536 2. 892019 2. 409026 2. 176812 2. 555874 2. 218888 3. 317092 2. 203521 2. 203818  
3. 068268 2. 670502 2. 802436 3. 325459 2. 90399 2. 879573 3. 088575 4. 025053 2. 957072  
1. 584802 2. 16659 1. 809989 0. 744186 1. 254925 1. 116803 1. 25002 1. 956483 1. 585913  
2. 544138 2. 513953 2. 170091 2. 597962 2. 247867 2. 154974 2. 260708 2. 517982 1. 588751  
1. 637925 1. 30086 1. 533735 1. 418881 1. 407161 1. 283099 1. 515069 1. 245021 1. 486053  
0. 898272 1. 272108 1. 689213 1. 239777 1. 64776 0. 980034 0. 909935 1. 147853 1. 458182  
1. 887981 1. 629811 1. 625316 0. 879403 1. 400727 1. 75461 2. 139935 1. 392088 1. 074855  
1. 338534 1. 220823 1. 238532 1. 032897 1. 706898 1. 412362 1. 09855 1. 148158 1. 302742  
1. 510281 1. 329037 1. 628457 1. 515826 1. 506741 1. 393038 2. 689876 2. 175765 1. 391494  
1. 170209 1. 779068 0. 496817 0. 959587 1. 791692 1. 15492 1. 033385 1. 145591 1. 005342  
1. 861935 1. 632607 1. 746961 2. 654565 1. 976327 1. 883972 1. 468138 1. 351519 1. 319579  
1. 948671 1. 352852 1. 419893 1. 455091 1. 615405 1. 562341 1. 617513 1. 705738 1. 925652  
1. 206416 1. 276453 1. 41762 1. 17575 1. 297107 1. 268214 1. 365403 1. 618487 1. 333635  
0. 884624 0. 750119 0. 692594 0. 958571 0. 60593 1. 143741 1. 05848 0. 761037 1. 117792  
2. 123242 1. 489244 1. 692125 1. 321194 1. 557279 1. 959899 1. 5184 1. 34477 1. 053556  
2. 31405 1. 298084 3. 799547 1. 55155 3. 12045 3. 734484 1. 659041 2. 310973 1. 843719  
4. 390678 4. 425536 5. 243549 4. 701774 4. 242438 3. 262036 4. 021534 4. 913584 4. 50628  
0. 954915 1. 121648 0. 977206 1. 680803 1. 174057 1. 428477 1. 175246 1. 384386 1. 005561  
1. 510871 1. 563623 1. 960373 1. 204387 1. 481207 1. 509152 1. 439816 1. 263813 1. 814437  
1. 597785 1. 583144 1. 55603 1. 554879 2. 339256 1. 342533 1. 507369 1. 29856 1. 733726  
1. 439361 2. 044853 3. 086414 1. 654996 2. 343775 3. 548706 3. 870242 1. 72048 3. 478219  
3. 122805 2. 639406 2. 967817 2. 633129 2. 71502 3. 204152 3. 710691 3. 096887 3. 746253  
1. 751227 0. 90429 1. 06199 1. 810582 1. 700257 1. 772312 1. 256523 1. 248215 1. 436199  
1. 262343 1. 382509 1. 545697 1. 529215 1. 753464 1. 637647 1. 571853 1. 393889 1. 841271  
1. 168085 1. 663826 1. 095051 1. 280293 1. 01286 1. 000967 1. 589815 1. 24433 1. 321911

2.866263 1.832255 2.071912 1.632602 3.601732 1.527265 3.592274 1.744698 3.395402  
0.468316 2.154571 1.620914 1.077574 1.134724 1.180588 0.93757 1.208618 1.141553  
1.914151 1.368536 1.324049 1.529617 1.557344 2.443849 1.996401 1.11631 2.091865  
0.9518 1.061094 0.823297 1.126306 0.794056 0.870112 1.496975 1.719955 1.919554  
3.001341 0.883269 2.46628 2.189027 2.023971 2.806265 2.712765 1.540958 1.146941  
1.440338 1.350528 1.109425 1.276382 1.901109 1.29101 1.485449 0.936929 0.940817  
1.679772 2.420647 1.248802 1.960688 1.037528 2.63735 3.096583 1.300058 2.188465  
1.476007 1.965508 1.831087 1.742014 1.863756 1.130956 2.383257 2.300934 1.841678  
1.535573 1.100903 2.160197 2.068408 1.966406 1.019613 1.230356 1.910664 2.196654  
1.983012 1.700442 1.749089 1.995436 1.85542 1.850175 2.580353 1.774266 2.361627  
1.80427 1.298273 0.916734 1.582336 1.867351 1.548049 1.423611 1.761209 1.686466  
2.321436 1.180822 1.521959 1.557349 1.950019 1.95296 1.500989 2.128713 1.512403  
1.263855 1.507714 1.618912 1.566025 1.505956 0.965604 1.659954 1.318382 1.891553  
0.984369 0.885388 1.162535 0.911562 1.984943 1.730219 1.105716 0.991282 0.85135  
2.21825 1.658732 1.059402 1.082747 1.516485 1.694847 1.294306 1.33697 1.015144  
1.124039 1.549738 1.542145 1.019098 1.282399 1.220186 1.880446 1.499735 1.198917  
1.182997 1.167384 1.238187 1.506761 1.248412 1.241886 1.616174 1.329242 1.661848  
1.713682 3.406174 4.484834 4.009597 3.551647 2.489474 1.834103 3.673567 2.317982  
1.84694 2.264277 1.657795 1.338031 1.759442 1.489552 2.116838 1.069068 1.623031  
2.449018 3.387534 1.759094 2.244905 0.545092 1.975439 2.8261 1.590403 1.648756  
1.831332 1.875055 2.52241 3.019545 1.354213 1.619375 1.349352 1.987036 1.988687  
4.368015 1.707887 3.507938 1.59583 1.664694 2.135977 2.160746 1.622819 3.520966  
1.952313 0.976058 1.238552 1.354381 0.927271 1.024815 3.288143 1.033123 1.125487  
0.887646 1.20027 0.904522 1.275482 0.948374 1.31249 1.103946 1.611889 1.383927  
1.422788 0.783265 1.172374 1.745525 2.344293 1.469891 0.891085 1.308083 0.9394  
1.419298 1.309899 1.12424 1.142621 1.136935 1.081659 1.660916 1.237211 0.970588  
1.832581 1.036301 1.099062 1.252183 1.348773 1.332878 1.31001 1.210963 1.162857  
0.898999 1.052923 1.029041 0.966323 1.923481 0.904293 0.990112 1.076805 1.062996  
1.446456 1.472622 1.860477 2.384501 1.734641 1.696985 2.064519 1.60659 1.399064  
1.454705 1.707854 1.396311 1.329787 2.129791 2.501372 2.672302 1.642489 1.87521  
3.080722 2.662452 1.176388 3.986031 0.618145 1.997709 1.369465 1.181841 0.839343  
1.854009 1.557597 1.961501 1.664915 2.117385 1.275029 2.030978 1.835707 1.487477  
1.525576 1.41581 1.250378 1.214806 1.2241 1.206437 0.83019 1.279528 0.960985  
2.05168 1.696419 2.581361 1.355093 1.82563 1.578286 1.2752 1.449014 1.286775  
1.220225 0.978131 0.99894 0.771825 0.850675 1.894184 1.215442 1.256471 1.036498  
1.947866 2.186033 2.520054 2.328089 2.348853 2.127931 2.215488 2.311095 2.220451  
1.079687 1.248825 1.330514 1.392105 1.778829 1.1162 1.293099 2.612196 1.577143  
3.900297 2.982094 2.48993 3.248356 2.165512 4.580073 2.98285 4.035145 2.074925  
2.762513 2.06618 3.278194 2.463569 2.822112 1.910822 2.212435 2.465574 1.974608  
1.517818 1.688062 1.188567 1.798328 1.041452 1.085847 1.696615 1.285082 1.365387  
2.737768 1.660788 1.609722 2.21116 1.413068 2.215647 1.576971 1.328818 2.411098  
3.63559 4.161519 2.786704 3.576144 3.460044 2.906286 3.42045 6.617592 3.333639  
3.003883 2.729503 2.237206 2.871029 1.786877 2.337209 1.056632 1.205939 2.469214  
1.936414 1.404545 1.073035 1.260827 1.326304 1.13629 1.579444 1.359481 1.417951  
1.626009 1.436069 1.247625 1.429623 1.395035 1.318222 1.84183 1.458281 1.906245  
2.353069 1.56928 1.474016 1.174369 2.511853 2.055939 1.945085 1.628415 1.518003  
1.506108 1.635972 2.095086 2.790223 2.753704 2.222065 3.889712 1.973495 1.966141  
1.382884 1.274495 1.66929 1.499766 1.586369 1.347263 2.105739 1.094685 2.200772  
1.70529 0.760813 0.72503 1.09443 1.0939 1.605921 0.966235 1.252567 0.570256  
1.086573 0.689184 0.584918 0.872762 1.040918 0.908951 0.810414 0.646197 1.386169  
1.292342 1.228053 1.414617 1.454461 1.28834 1.918808 1.015676 1.336283 1.287676

4. 530788 4. 473641 5. 151294 4. 643012 3. 993414 3. 036842 3. 476788 1. 344294 2. 911495  
1. 726972 1. 178933 1. 180371 1. 760577 1. 074736 1. 744026 1. 548925 1. 421833 1. 617684  
1. 464066 1. 879826 1. 761887 1. 28144 1. 646385 2. 171573 1. 696263 1. 769206 1. 470112  
2. 356043 1. 538074 1. 468032 1. 730997 1. 654714 1. 612054 2. 485423 1. 504931 1. 624693  
1. 10549 1. 573564 1. 824615 2. 024678 1. 745417 1. 27905 1. 190476 1. 226361 2. 077449  
2. 125259 1. 495669 1. 726217 1. 796531 2. 176608 1. 304804 1. 49801 1. 462831 1. 145789  
1. 122193 1. 411579 1. 041435 1. 293428 1. 276424 1. 572308 1. 732674 1. 406068 1. 298785  
2. 448938 1. 125524 1. 683467 2. 605446 1. 743122 2. 930384 1. 120582 0. 957754 1. 087802  
2. 762078 2. 496155 2. 128896 2. 503699 1. 615598 1. 900032 2. 404539 2. 452775 1. 855009  
1. 931356 1. 182837 1. 272169 1. 325736 1. 021213 1. 131382 1. 191004 1. 174651 1. 543722  
3. 359058 3. 244955 2. 85981 2. 583584 3. 776752 2. 878386 3. 400767 3. 721916 3. 183537  
2. 005214 1. 207436 2. 484865 2. 398167 1. 038066 3. 048995 1. 741097 1. 018916 0. 722031  
1. 140479 1. 847499 1. 472446 1. 503973 1. 571191 2. 619591 1. 418268 3. 001812 2. 347712  
0. 351968 1. 255098 1. 962388 1. 436005 1. 474277 1. 845368 1. 567295 1. 443099 0. 865024  
2. 164325 1. 310982 1. 567257 1. 859633 1. 483781 1. 097674 1. 421857 2. 018774 1. 256548  
0. 770572 1. 103453 0. 890108 0. 951906 1. 076831 1. 672543 1. 922045 0. 695478 1. 615419  
1. 036963 1. 313112 0. 921774 1. 703408 0. 999957 1. 081504 1. 171348 1. 229196 1. 219184  
2. 971918 1. 84881 3. 147211 3. 394197 1. 807648 2. 001333 2. 676945 3. 454195 1. 85404  
4. 258145 4. 026919 3. 769639 4. 213417 3. 721374 3. 879104 4. 782932 5. 920314 5. 349894  
1. 368853 1. 427807 1. 020869 1. 738424 1. 965901 0. 863218 1. 276175 2. 254489 1. 508625  
1. 591476 1. 753166 1. 509202 1. 401698 1. 578377 1. 638804 1. 834068 1. 403334 1. 749048  
1. 992496 2. 406438 1. 343733 1. 886919 1. 97913 2. 771093 3. 79279 2. 689625 1. 588075  
2. 118087 2. 544422 2. 123395 1. 966217 2. 097867 2. 9882 1. 887498 1. 91422 1. 749864  
3. 012081 2. 528726 2. 448871 2. 742334 2. 696311 2. 762665 2. 526521 2. 47682 2. 680394  
1. 636189 1. 362925 1. 759119 2. 89847 1. 564783 1. 900583 1. 759362 1. 639404 1. 65694  
2. 464853 2. 142368 1. 942031 1. 641534 2. 521574 2. 727083 1. 718437 2. 330324 2. 047317  
5. 479496 3. 389902 1. 167871 2. 028646 2. 383745 4. 302112 3. 155989 4. 383843 2. 842026  
8. 197477 5. 45513 5. 529727 4. 874986 3. 555002 4. 14615 6. 083035 5. 203006 6. 234309  
2. 528332 3. 564252 3. 793195 3. 285444 2. 697067 3. 704083 2. 848319 4. 545223 2. 98275  
2. 901936 1. 003988 1. 535095 1. 878271 1. 30471 1. 303124 1. 63614 2. 115961 1. 858477  
0. 736327 1. 36705 0. 997361 0. 842188 1. 05607 1. 087786 0. 534085 0. 713318 1. 215009  
1. 202766 1. 094106 1. 494843 1. 342384 1. 954445 1. 058793 1. 598871 1. 13692 1. 226373  
1. 340706 1. 271577 1. 658121 1. 608774 1. 559611 1. 103246 1. 57487 2. 21802 1. 793986  
1. 223622 0. 609205 1. 145485 3. 291173 0. 861756 0. 552016 1. 167641 1. 42873 2. 963678  
2. 921225 2. 829115 3. 41817 2. 37502 3. 023349 3. 024714 3. 738671 4. 27754 2. 375193  
2. 658647 2. 426836 2. 302004 2. 215746 2. 731927 2. 310498 2. 310604 2. 467813 2. 529905  
2. 55216 2. 838001 3. 015095 2. 757631 2. 471621 2. 404738 2. 238094 2. 228028 1. 760736  
1. 970164 1. 551547 1. 377168 1. 104411 1. 443646 1. 539136 1. 726412 1. 560249 1. 572455  
1. 528932 1. 339381 0. 940081 1. 377189 1. 030358 1. 696812 0. 948492 1. 760099 1. 477389  
1. 945998 1. 460436 1. 410933 1. 996888 1. 114972 1. 082816 1. 577359 1. 591231 1. 017496  
1. 032336 1. 802962 0. 8566 1. 171457 1. 566263 1. 440966 1. 360994 1. 394274 1. 075651  
2. 536363 4. 560799 6. 146611 3. 613335 3. 457108 4. 538458 2. 227827 4. 018006 5. 18708  
1. 993997 1. 545787 1. 325973 2. 065669 1. 237953 1. 42952 1. 363477 1. 441628 1. 575208  
2. 731206 2. 768057 2. 524921 2. 183734 3. 528812 2. 38822 2. 817027 2. 84545 2. 720131  
1. 158565 0. 78217 1. 247366 1. 031687 1. 670207 2. 44865 0. 799674 1. 107552 0. 78123  
3. 333307 5. 040108 2. 461496 3. 549515 4. 056445 3. 219941 3. 398078 5. 62281 3. 61491  
3. 709056 6. 125767 5. 382015 5. 575319 4. 376916 6. 779536 5. 344846 5. 794558 6. 011682  
4. 02239 4. 653612 4. 624424 4. 064454 2. 962537 2. 584577 3. 590305 2. 248912 3. 199902  
1. 273516 1. 24988 2. 151112 1. 755799 2. 015863 2. 739414 1. 379732 1. 039685 1. 66149  
3. 568168 4. 810296 4. 363086 2. 21686 3. 795028 4. 418537 3. 264482 5. 261304 3. 201843  
1. 464929 2. 469226 0. 999539 0. 693876 3. 146561 2. 577393 0. 962884 1. 673303 1. 862148

0.784131 0.871018 1.66029 1.410462 0.879225 0.685928 1.030474 1.081851 1.506578  
2.284763 1.379008 1.712355 1.711782 1.336546 1.177991 1.464624 1.381897 1.760324  
1.409177 1.193515 1.077578 1.515986 2.012248 2.978515 2.368939 1.259256 1.523339  
1.367425 1.225065 0.940714 1.496024 1.421899 1.277666 1.30542 1.023355 2.132814  
1.451916 1.732181 1.312413 2.544865 1.596342 1.964319 2.408466 1.878509 1.876979  
1.485114 1.537809 1.395162 1.530293 2.034383 1.887081 1.635357 1.739199 1.966298  
2.85608 2.032981 2.357401 1.962425 2.858331 2.273378 3.554461 2.666082 1.976767  
2.134832 3.335559 2.045998 3.312961 2.077737 3.425827 1.829476 3.929276 2.692062  
2.096472 1.156924 0.809356 1.875589 1.233021 0.570658 1.576995 1.019889 1.217968  
1.590343 1.077222 1.065576 1.831486 1.084351 1.245947 1.340449 1.041507 1.246413  
2.187866 1.207551 0.704869 1.248403 1.318396 1.712401 0.777238 1.308787 1.313302  
4.413856 5.653444 4.50911 2.62577 5.120653 4.474063 5.471953 3.36108 4.20743  
1.086197 1.673059 1.073578 1.113198 1.715938 1.153683 1.24431 1.152986 0.953443  
0.9782 1.085403 0.963112 1.001634 0.756377 1.006944 1.472804 0.834822 0.914485  
1.704192 1.403348 0.73876 1.3405 1.344353 1.03181 1.325243 1.66987 1.975936  
3.432316 3.826669 2.533649 1.923393 2.677912 2.788023 3.587662 2.985014 3.055842  
1.549909 1.138018 1.185267 1.139206 1.143151 1.182384 1.271806 1.099598 1.078541  
3.897221 2.845861 2.937341 2.703657 2.432533 2.381821 3.339367 1.984212 2.874297  
2.738022 2.437977 2.433317 2.442945 2.189497 1.656611 2.197714 2.13003 1.280836  
1.973714 1.710905 1.438544 1.446181 1.321801 2.235682 1.678423 0.956182 1.351632  
1.049471 1.647143 1.477544 1.335764 1.231376 1.499868 2.066683 1.360121 1.529766  
2.296515 2.289667 3.191059 1.795494 2.880511 2.87838 2.455175 2.043797 2.66143  
0.848827 1.034305 0.952466 1.345029 1.104211 0.650635 1.144804 1.06793 0.820739  
2.079434 1.797811 2.356678 1.57795 1.774079 1.271689 1.216625 1.338317 1.771954  
2.288152 1.127171 1.600247 1.071677 1.389794 1.971401 1.749978 2.714206 1.531606  
2.166292 3.148387 0.916581 1.253945 1.82836 6.043415 3.709121 1.162685 1.369408  
3.76642 1.724915 1.378326 1.112519 1.345788 1.761808 1.907939 2.194394 1.043353  
1.216542 1.268705 1.253008 1.623855 2.098159 1.091843 1.930656 1.401966 1.829542  
1.409112 1.716728 2.023948 1.596579 1.75441 1.330624 2.097241 1.567135 1.3725  
1.731595 2.752912 2.146137 2.33015 2.220947 2.438454 1.974635 2.048665 1.5941  
3.197994 2.522215 1.641398 1.812092 1.19105 1.366999 5.46406 1.775444 2.453558  
1.886934 1.879652 1.478695 1.04439 1.496119 1.308983 1.362645 3.208989 1.037417  
4.688569 5.694637 5.625047 3.827814 5.212703 4.550063 3.433582 5.122451 5.111252  
1.068576 1.214352 1.309656 1.061167 1.209621 1.188454 0.783564 1.288322 1.130506  
4.290559 3.068963 3.559476 3.308119 3.685439 3.297739 3.007039 4.507251 3.576917  
0.942494 1.799172 1.108857 1.425209 1.932473 1.320443 1.134247 1.880747 1.08273  
4.38654 4.213 4.434169 4.322409 3.87166 5.214271 3.778148 3.970216 5.166727  
1.899816 1.416431 1.46039 0.979893 1.722131 0.937802 1.628239 1.410939 1.515212  
3.321956 3.114039 2.842481 1.757007 2.161838 2.478928 2.330123 3.020119 2.460819  
0.89659 1.662793 0.886567 0.917289 1.710226 0.879083 1.252924 1.069754 1.388425  
3.309431 1.985829 1.777523 1.707753 2.586755 2.332313 2.569618 2.465416 1.978555  
1.251408 1.25308 1.500651 1.282088 1.67852 1.541162 2.021673 1.291301 1.490646  
1.252102 0.960055 1.959328 1.572289 1.605171 1.338777 2.427201 1.354013 1.638682  
5.589914 4.392274 4.527008 6.230248 3.650203 2.299749 4.787816 5.111455 5.085888  
1.826139 1.455893 1.46675 1.073892 1.456857 1.077423 1.45265 1.472121 1.345363  
1.238182 1.114333 1.584083 0.96798 1.398285 1.98404 3.201878 1.032947 1.270278  
1.011274 1.325858 1.072046 0.901955 1.026114 1.239991 1.08718 1.388733 0.72682  
2.019991 1.485003 0.904864 1.532248 0.896706 1.120668 2.828831 1.544842 1.024525  
2.129995 2.268321 2.320657 1.722762 2.539764 1.687013 1.78068 1.828399 1.738807  
2.533264 1.928264 1.732597 1.825118 1.752808 1.535125 2.616533 1.345528 1.709555  
3.455467 2.696819 3.015092 2.623374 2.861993 2.785017 3.961218 2.570254 2.485665

2. 717937 1. 837958 2. 101443 0. 943258 2. 144922 1. 99667 1. 389978 1. 938177 2. 455463  
3. 88874 5. 287368 5. 107876 3. 385996 3. 567176 3. 637736 5. 12821 3. 28351 3. 499316  
1. 016543 1. 765877 1. 116521 1. 323674 1. 14104 1. 363396 1. 715969 1. 410021 1. 060685  
0. 897041 0. 90426 1. 519666 1. 309548 1. 642069 1. 298877 0. 633695 0. 974584 0. 798394  
1. 711927 1. 681574 1. 391237 1. 482125 0. 740465 1. 329167 1. 194074 2. 231605 1. 307361  
2. 088119 1. 121504 1. 612009 1. 21143 1. 530074 1. 449925 2. 163936 1. 645269 1. 836799  
2. 787375 2. 103925 2. 199482 1. 932836 3. 103314 1. 65541 2. 142955 1. 87804 2. 141613  
2. 036512 2. 429512 2. 936527 2. 372552 1. 927623 2. 23656 2. 31173 2. 262551 2. 027291  
3. 787694 5. 553613 4. 690744 4. 718946 5. 442298 4. 420352 4. 363709 5. 408514 4. 082383  
3. 017124 2. 41505 2. 43985 3. 027312 1. 660057 3. 156338 3. 160093 2. 028103 1. 686106  
2. 424361 1. 303204 2. 719713 1. 583586 1. 790391 1. 496838 2. 201968 1. 416454 0. 770879  
1. 210825 1. 593121 1. 549328 1. 612326 2. 196237 1. 501416 2. 17814 1. 83781 1. 638625  
1. 17354 1. 447147 0. 925466 1. 750179 1. 993233 1. 401154 0. 988979 0. 987672 0. 973723  
2. 521058 1. 592503 1. 624002 1. 81057 1. 616458 1. 785588 1. 996826 1. 978302 1. 629853  
3. 699021 2. 294495 2. 793649 1. 742179 2. 928699 2. 086316 2. 248572 3. 225037 1. 907531  
1. 792255 1. 245418 0. 905065 1. 243891 1. 239354 1. 447442 1. 655189 1. 483281 1. 006406  
2. 380222 2. 422233 2. 771096 3. 573151 3. 028608 3. 566676 2. 729275 2. 564124 3. 437662  
1. 863343 1. 178026 1. 470524 1. 21302 0. 880964 0. 909292 1. 549216 1. 495653 0. 951066  
0. 944062 0. 968174 1. 143233 1. 04765 1. 024282 1. 206365 1. 292968 1. 009043 1. 20785  
4. 729947 2. 756758 4. 606436 2. 445458 2. 717239 3. 731882 2. 879614 3. 961495 5. 23564  
1. 309846 1. 03755 0. 973612 0. 990302 1. 227509 1. 075704 2. 069786 0. 918381 1. 017613  
2. 43102 1. 430382 2. 660394 0. 995149 1. 018908 1. 539805 1. 325118 0. 86704 1. 629179  
1. 591322 0. 986352 0. 867325 0. 990911 1. 14846 1. 19143 1. 050315 0. 817 0. 897893  
1. 555847 1. 368567 0. 939652 1. 971926 1. 001755 1. 104888 1. 338106 1. 552237 1. 007433  
2. 139351 2. 782839 1. 186113 1. 33092 1. 876316 1. 322596 1. 188191 1. 687122 2. 165381  
4. 394478 1. 42834 2. 600488 1. 59485 1. 483774 1. 855213 4. 254383 2. 388909 2. 064713  
1. 294034 1. 295068 1. 110613 1. 163715 1. 301792 0. 959533 0. 976892 1. 538827 0. 945446  
1. 901683 1. 278315 1. 084373 1. 108729 1. 651097 1. 153798 1. 50891 1. 336492 1. 025283  
3. 715337 2. 478039 2. 325815 2. 186225 2. 076747 2. 811304 1. 779369 2. 755213 2. 472808  
2. 166499 2. 846974 2. 391119 2. 839988 2. 043946 2. 465404 2. 918169 2. 288117 3. 333362  
1. 280539 1. 854387 1. 038851 1. 313845 1. 032444 1. 249104 1. 23555 1. 189751 0. 959935  
1. 284986 1. 828433 1. 099268 1. 345344 1. 204444 0. 99654 1. 148545 1. 10477 1. 31818  
1. 542693 1. 201134 0. 834394 1. 539592 1. 188023 2. 915744 1. 545793 1. 487382 1. 487382  
1. 162886 0. 880722 0. 787737 1. 372106 0. 885929 0. 828196 1. 411502 0. 950111 1. 394757  
2. 244843 2. 276265 2. 849072 2. 321408 1. 69148 1. 770635 3. 393458 1. 511586 2. 235467  
0. 867996 2. 260294 1. 721308 1. 764184 2. 871424 1. 021283 1. 723578 1. 120153 0. 82074  
3. 539138 1. 94827 4. 165252 3. 278912 3. 043464 3. 212169 3. 777529 4. 309389 3. 602374  
2. 873217 2. 359474 3. 274657 0. 898247 0. 451386 0. 682627 2. 199367 3. 721615 2. 143431  
2. 106575 1. 055876 1. 739732 1. 823636 1. 7234 1. 588607 1. 220491 2. 007694 1. 59633  
2. 297702 1. 181484 1. 781964 1. 835711 1. 837544 1. 352627 1. 785488 1. 669334 1. 311522  
2. 271513 1. 033996 0. 891675 0. 92159 1. 003813 1. 130982 1. 12302 0. 91639 1. 574514  
1. 224797 0. 978739 0. 721544 0. 813915 1. 515614 1. 299963 1. 12279 1. 367202 1. 054  
1. 364817 0. 774584 0. 88132 1. 300156 1. 292968 1. 130328 1. 591476 0. 985997 1. 07781  
6. 151628 8. 146033 7. 551032 7. 499524 7. 774499 7. 815912 7. 440368 7. 832161 7. 822748  
2. 168538 2. 795026 3. 467525 3. 762014 1. 942166 1. 017278 2. 535767 2. 903963 2. 082037  
1. 601762 1. 849497 0. 954955 1. 190864 1. 408024 1. 59569 1. 674719 1. 175365 0. 846446  
3. 910083 2. 606357 2. 893654 2. 42444 3. 178754 3. 015631 2. 969822 2. 946908 3. 513806  
2. 220862 2. 917035 1. 473461 2. 160294 1. 592495 0. 892115 2. 01086 1. 18531 1. 447219  
2. 995788 2. 136142 0. 643335 3. 601157 2. 725558 1. 53341 1. 649953 1. 908532 3. 262496  
1. 900588 2. 399631 1. 463885 1. 661638 1. 612604 1. 747353 2. 081363 1. 375494 1. 375494  
1. 067516 1. 387073 1. 214555 1. 284647 1. 178595 1. 734778 1. 072819 0. 972705 2. 833124

1. 360309 1. 282266 1. 275101 1. 067283 1. 208588 0. 89527 1. 610681 0. 987733 1. 651145  
5. 369433 4. 986511 2. 073901 3. 540024 2. 833271 2. 237432 4. 187511 2. 924217 4. 26697  
0. 937053 1. 131477 1. 001956 1. 325178 1. 273752 1. 096124 0. 918854 1. 340302 1. 416578  
2. 05337 1. 620123 1. 42291 2. 555631 1. 805965 1. 384521 2. 400573 2. 575522 1. 868916  
2. 134906 3. 024676 3. 430032 2. 310518 2. 547495 2. 738836 2. 574819 2. 307291 1. 737671  
0. 949794 1. 044503 1. 417164 0. 831753 1. 848754 0. 952366 1. 016908 1. 039271 0. 625579  
1. 314622 1. 136608 0. 659019 1. 277552 0. 710793 1. 464744 1. 142332 2. 909612 2. 905173  
2. 204947 1. 4297 1. 594762 1. 483779 2. 134383 2. 233331 2. 390647 2. 080661 2. 072672  
1. 770381 1. 095617 1. 748552 1. 40781 1. 524633 1. 284868 1. 496106 1. 354263 1. 445047  
0. 520748 0. 985572 0. 901398 0. 667932 0. 666124 1. 733079 0. 668258 0. 929479 0. 775357  
3. 062417 1. 271387 1. 664319 2. 334898 1. 950447 1. 586338 2. 799229 6. 028095 2. 829255  
1. 422737 1. 708759 1. 17352 1. 00117 1. 485688 1. 201338 1. 826123 1. 698743 2. 951629  
1. 907691 1. 85927 1. 333604 1. 65338 1. 795334 2. 571706 1. 379595 2. 390427 1. 313027  
3. 703187 2. 043348 1. 920028 2. 043489 1. 77861 2. 2879 2. 555808 2. 464628 3. 132614  
2. 891693 1. 119372 1. 484542 1. 643993 1. 537936 4. 461294 1. 150075 5. 018126 1. 214537  
2. 196585 2. 075003 2. 068891 1. 842093 2. 697424 1. 43125 1. 842055 4. 92 1. 460027  
0. 60363 0. 797878 2. 126034 1. 764145 0. 943419 1. 101303 0. 877366 1. 801792 2. 203537  
1. 803253 1. 574288 1. 597945 1. 6026 1. 948029 1. 840676 2. 321218 1. 963139 1. 654392  
2. 340732 1. 588833 1. 203461 1. 111411 1. 015814 1. 513642 2. 851751 1. 678386 1. 446894  
1. 060124 0. 823832 1. 401595 0. 80945 1. 789467 0. 629541 1. 114061 0. 935781 0. 888613  
1. 354 0. 227133 1. 479729 3. 439559 2. 59092 0. 549312 1. 108013 1. 392753 1. 726046  
1. 342377 1. 368028 1. 513526 1. 170266 1. 428367 1. 621092 1. 870379 1. 438804 1. 374736  
2. 593107 2. 723211 1. 999559 2. 266682 1. 906186 1. 823475 2. 046337 2. 139603 1. 954649  
4. 153433 2. 657446 1. 905237 2. 859505 2. 71275 2. 935431 2. 971026 2. 349848 3. 368917  
1. 610599 1. 752601 4. 092309 3. 317831 1. 400106 1. 716376 1. 733309 1. 238166 1. 723545  
1. 515058 0. 863536 1. 323124 1. 691147 1. 020042 1. 259365 1. 594162 1. 378952 2. 270887  
4. 000774 5. 379126 4. 514142 4. 678312 3. 788698 3. 120324 3. 779909 5. 060484 4. 211082  
2. 306488 2. 202316 3. 023147 2. 58758 1. 857837 2. 725406 3. 598933 3. 030037 2. 261919  
1. 53702 1. 133977 1. 022257 1. 296552 1. 67198 1. 445286 1. 383663 1. 474803 1. 053395  
1. 849922 1. 902043 1. 933074 2. 29782 2. 185852 1. 77967 1. 816108 1. 856087 1. 673168  
2. 607088 1. 82674 1. 799921 1. 610309 1. 937614 1. 77667 2. 268421 1. 847863 1. 824652  
2. 032149 1. 271083 0. 835715 1. 200583 1. 930947 1. 857962 1. 66342 1. 063484 1. 308634  
2. 819457 2. 236826 2. 69613 1. 524559 1. 793297 2. 156504 2. 446339 2. 613611 2. 558967  
1. 049887 4. 144228 2. 343541 3. 279864 2. 775256 5. 510993 1. 916566 2. 864028 3. 119826  
2. 735839 3. 644502 3. 071992 2. 260397 2. 537999 3. 175344 4. 122353 3. 566452 2. 687626  
0. 892643 0. 881494 0. 845362 0. 74263 1. 521284 0. 62881 0. 511441 1. 06596 1. 250324  
1. 274231 0. 85625 1. 008105 1. 000412 1. 238754 1. 204613 1. 938103 1. 294523 1. 344216  
1. 749135 1. 354659 1. 135983 1. 007669 1. 220416 1. 347127 2. 123387 1. 250105 1. 464592  
2. 108121 2. 155696 1. 972291 1. 670897 1. 531276 2. 298191 2. 214864 1. 379152 1. 456716  
0. 733672 0. 576808 1. 307535 0. 897798 0. 524534 2. 017553 0. 655248 0. 635536 1. 165995  
3. 043308 1. 23837 1. 20956 1. 37776 1. 444535 1. 525828 1. 134928 1. 571253 1. 286778  
1. 631196 1. 234979 1. 045385 1. 911606 0. 996496 1. 450737 1. 188705 1. 337911 1. 063531  
1. 06512 1. 160695 1. 049645 1. 24045 1. 283551 0. 95236 0. 731805 1. 188145 1. 475961  
0. 70544 1. 140555 0. 817715 1. 879796 1. 1329 0. 416694 0. 75169 1. 688542 1. 783883  
0. 903498 1. 027494 0. 532272 0. 339596 2. 458398 0. 996569 0. 547683 2. 326982 0. 820314  
0. 982075 1. 182719 1. 026718 1. 380824 0. 827162 1. 02637 1. 174464 1. 068277 1. 26496  
1. 343058 0. 950051 1. 092317 0. 809221 1. 567603 1. 266204 1. 474474 1. 180987 1. 05754  
1. 741993 1. 441391 1. 314221 1. 195471 1. 5823 1. 720127 1. 810031 0. 997992 1. 282504  
3. 320415 2. 751765 2. 701379 2. 587196 3. 22413 2. 635637 2. 994931 2. 296482 2. 50003  
0. 939836 1. 29808 1. 008143 0. 90855 0. 865652 1. 156219 1. 266767 2. 343181 1. 147234  
0. 872547 1. 409911 1. 035598 1. 493627 1. 406466 1. 00248 1. 72737 1. 025685 2. 064953

1. 458237 1. 629135 1. 839348 1. 745436 1. 782552 2. 546745 2. 63367 1. 52087 1. 777571  
1. 006591 1. 182375 1. 001704 1. 183937 1. 129944 0. 788011 1. 433366 1. 551692 1. 4257  
1. 882462 1. 054118 0. 8918 1. 094738 1. 415323 1. 027981 1. 233517 0. 936648 1. 027509  
1. 645403 2. 003548 1. 640717 2. 617416 2. 368218 2. 275221 2. 411284 1. 969922 2. 099007  
2. 269269 2. 117958 1. 765196 1. 88825 2. 372415 2. 042934 1. 920509 3. 091945 2. 057514  
1. 62215 1. 099699 1. 209003 1. 409147 1. 312519 1. 52019 1. 332074 1. 323874 1. 202639  
4. 143547 3. 213148 3. 00032 2. 857077 2. 79484 3. 405827 2. 971238 3. 293645 3. 238053  
4. 983426 4. 87207 5. 60521 2. 574643 5. 124855 5. 337699 4. 793684 3. 544706 3. 620022  
2. 529953 1. 73501 2. 547849 1. 290161 1. 648262 1. 39341 1. 59165 1. 39602 2. 085966  
0. 689567 0. 890841 0. 932409 1. 007333 1. 226199 0. 989615 1. 00966 1. 198491 1. 166258  
2. 320406 2. 815947 2. 330817 2. 492863 2. 521705 2. 372167 2. 329382 3. 004086 2. 235431  
3. 650095 3. 374382 3. 40797 2. 614861 1. 912539 0. 662104 2. 262868 2. 27007 3. 072843  
3. 392295 4. 330251 3. 837248 3. 488554 5. 523047 3. 341241 2. 928369 3. 469909 4. 163708  
1. 520323 0. 750556 0. 992543 1. 031468 1. 484232 1. 156792 2. 223213 0. 804957 2. 373129  
1. 194295 1. 696285 0. 973608 1. 340062 1. 458476 1. 457891 1. 064669 0. 954778 1. 659791  
0. 840003 1. 048833 0. 983282 1. 271192 0. 875567 1. 132092 1. 672367 1. 145044 1. 515014  
1. 819929 0. 929572 0. 723081 1. 148832 1. 281653 1. 43842 1. 490136 1. 423183 1. 222638  
1. 891402 2. 453936 2. 229066 1. 599212 1. 814875 3. 859932 1. 402128 2. 628961 1. 310586  
3. 36526 3. 554232 3. 191075 3. 520972 4. 541698 3. 278537 3. 456392 3. 528138 2. 502242  
1. 90483 1. 821326 2. 262905 1. 503119 3. 934409 1. 985068 3. 535184 3. 15806 2. 108845  
1. 734982 2. 068007 1. 606007 1. 24336 2. 261641 1. 475901 2. 619759 2. 082229 2. 130985  
2. 233676 1. 653388 1. 179184 1. 447865 1. 047923 1. 227338 1. 336857 1. 308912 1. 266555  
1. 351817 1. 540258 1. 060167 1. 164365 1. 477005 1. 082782 1. 279243 1. 329164 1. 58754  
0. 929292 2. 302006 2. 461955 1. 48656 1. 483908 1. 481722 1. 433582 2. 214977 1. 77128  
2. 205586 1. 822104 1. 524455 1. 404986 1. 494447 1. 57082 2. 545275 1. 535215 1. 643601  
0. 799356 0. 882101 0. 627582 1. 059577 0. 893485 0. 801734 0. 952353 0. 62608 0. 737807  
2. 073678 1. 614704 1. 957859 1. 594684 1. 958026 1. 371502 1. 617557 1. 402662 1. 806534  
2. 099456 1. 386477 2. 597204 1. 13185 1. 748892 1. 733459 1. 751168 2. 530399 1. 401528  
1. 494422 1. 210438 1. 133248 1. 031894 1. 165176 1. 696684 0. 848273 1. 000956 1. 143624  
0. 799897 1. 241413 0. 794072 2. 321069 1. 2007 0. 866119 1. 071087 1. 267777 1. 367929  
1. 90609 2. 297334 3. 082497 1. 946862 2. 226014 3. 068015 2. 686875 2. 209054 2. 487622  
1. 621137 1. 463258 1. 442815 1. 575188 1. 705311 1. 393934 1. 402902 1. 911593 1. 336462  
2. 139373 1. 852442 1. 220367 4. 94433 2. 124941 1. 666562 2. 848843 1. 768706 2. 636107  
1. 442804 2. 310577 2. 13499 2. 385957 4. 387893 2. 031306 1. 829829 0. 96753 1. 499559  
0. 858714 0. 770536 0. 880608 1. 112981 0. 805807 0. 875447 0. 882072 1. 176029 1. 750103  
1. 724023 1. 390339 1. 53765 2. 029373 1. 518134 1. 842484 1. 46265 1. 281495 1. 737848  
1. 746305 1. 202159 0. 705581 0. 765566 0. 807379 1. 504883 1. 18416 0. 928062 1. 291525  
1. 612327 1. 689113 1. 30255 1. 648484 1. 960914 1. 570751 1. 896565 1. 594687 2. 12758  
3. 415313 2. 543041 2. 486405 3. 086883 2. 948198 3. 390768 2. 679438 3. 454469 2. 777264  
1. 350348 2. 86893 1. 251597 1. 290493 2. 717596 1. 10142 3. 395442 2. 401389 2. 320358  
1. 801912 1. 101327 1. 087931 1. 486398 1. 945236 1. 277472 1. 06203 1. 921178 1. 388102  
3. 966723 3. 328934 3. 091877 3. 31325 3. 815848 3. 291805 3. 524162 3. 158553 2. 859907  
2. 023056 1. 990113 1. 56129 1. 521392 2. 095862 1. 168362 2. 059598 1. 666747 1. 768518  
1. 8272 1. 75718 1. 743284 2. 404554 2. 359205 1. 983917 2. 464805 1. 778568 2. 077891  
1. 204939 0. 894375 1. 692481 1. 330201 1. 968541 1. 721089 2. 272199 1. 509628 1. 394173  
1. 551521 1. 410123 1. 558514 2. 00023 1. 497139 1. 981728 1. 669627 1. 569886 1. 000748  
1. 964798 0. 813759 0. 90776 1. 228484 0. 95387 0. 797128 1. 148842 1. 082479 1. 394723  
1. 205033 0. 93368 0. 941744 1. 114842 1. 326749 1. 434942 2. 400628 1. 265459 1. 678822  
1. 730283 2. 792906 2. 042897 1. 661722 2. 440975 1. 570706 1. 433077 1. 58312 1. 737273  
2. 27303 2. 214145 2. 063554 2. 576308 3. 102955 2. 440211 2. 560262 3. 91969 2. 296272  
0. 991829 0. 890709 0. 985319 1. 716413 1. 260056 2. 000845 1. 449889 1. 175061 1. 201504

1. 279605 1. 050598 1. 327592 1. 219039 1. 170103 1. 300062 1. 973137 1. 699149 1. 552648  
1. 634032 0. 830789 1. 343924 1. 295436 0. 926268 1. 538959 1. 909292 0. 92379 1. 931795  
0. 775767 0. 689471 0. 946637 1. 117093 1. 01202 1. 4493 0. 897971 1. 213732 0. 920511  
2. 244202 1. 498914 2. 174884 1. 489843 2. 206362 1. 244968 1. 464045 1. 58488 1. 642327  
2. 399523 2. 849348 2. 244618 2. 324654 2. 408519 2. 652842 1. 846407 2. 725934 2. 450678  
1. 651945 1. 177044 1. 946384 1. 610221 1. 638905 0. 92963 1. 09443 1. 219603 0. 904933  
2. 352487 5. 530204 2. 305822 2. 334719 1. 138761 2. 173557 2. 24964 1. 758516 2. 014775  
2. 47827 3. 048231 3. 378514 2. 12923 3. 737156 3. 272904 3. 902329 3. 259681 3. 049912  
1. 599139 1. 562972 1. 416837 1. 733872 1. 538848 1. 423384 1. 721721 1. 331626 1. 866142  
1. 823991 1. 076578 0. 95964 1. 237746 1. 257449 1. 330252 1. 610329 0. 831581 1. 511703  
2. 416201 2. 106339 3. 18612 2. 080752 1. 763172 1. 587791 2. 244853 1. 771198 1. 726448  
2. 43488 1. 052989 0. 756971 2. 10183 1. 173578 0. 889982 1. 321621 1. 012995 0. 945622  
1. 896162 1. 087978 1. 060364 1. 229001 1. 10543 1. 644045 1. 288426 1. 142117 1. 224819  
0. 895051 1. 730511 1. 542107 2. 003018 2. 036302 2. 460561 2. 120436 1. 656757 1. 522208  
2. 291746 2. 017026 2. 174393 2. 247728 1. 48023 2. 102263 1. 773086 1. 739276 1. 727131  
1. 270156 1. 535464 1. 491036 1. 590109 1. 706406 1. 449832 1. 40395 1. 317851 1. 448506  
2. 891411 2. 34745 1. 987505 1. 961027 1. 747857 3. 043171 1. 723969 1. 559265 2. 224738  
1. 101874 0. 900823 1. 20691 2. 513775 1. 330281 1. 267708 1. 348123 0. 887248 1. 281861  
2. 907907 2. 493782 1. 627402 1. 868289 1. 519791 1. 333936 1. 892114 2. 238246 2. 639565  
1. 964442 1. 649123 2. 420799 2. 246655 1. 52929 1. 798941 1. 945002 1. 950171 2. 213087  
2. 655905 1. 464388 1. 40947 1. 302639 2. 345982 2. 158605 2. 369424 1. 097625 1. 282635  
0. 842398 0. 925993 1. 302592 1. 601992 1. 566379 1. 982184 1. 399742 1. 098917 3. 472893  
1. 639865 1. 322334 1. 966313 1. 037395 1. 321968 1. 763648 1. 286546 1. 316853 1. 625895  
1. 824032 1. 615929 2. 193013 2. 695906 2. 032823 1. 266217 1. 60458 1. 772811 1. 768067  
1. 151686 0. 88436 0. 879889 0. 69048 1. 071803 0. 696539 1. 294443 0. 951301 1. 037455  
1. 026608 1. 104347 1. 00941 1. 755951 1. 402977 1. 29686 1. 49918 1. 324785 1. 241583  
2. 24985 1. 015889 1. 730616 1. 251754 0. 894294 1. 256499 0. 769842 1. 065635 0. 80249  
1. 523814 1. 456255 1. 761546 1. 450349 1. 024482 1. 315643 1. 883762 1. 453356 1. 575802  
2. 266172 1. 260595 1. 57477 1. 835855 2. 275299 1. 442607 1. 622069 2. 960283 1. 609805  
1. 167518 1. 720637 1. 46024 1. 740301 1. 214121 1. 254771 1. 495879 1. 788247 1. 227507  
1. 922616 1. 410563 1. 030181 1. 007213 0. 9544 1. 72273 0. 809397 1. 058934 1. 069655  
1. 97586 1. 524758 1. 499048 1. 999829 2. 411448 1. 425304 2. 00273 2. 199539 2. 020759  
2. 768189 2. 314697 2. 511059 2. 484633 2. 075022 2. 767932 3. 107747 3. 263591 2. 48119  
1. 483587 1. 203591 1. 939576 1. 548362 1. 503702 1. 796535 1. 810104 2. 166242 1. 736768  
3. 04543 1. 858465 1. 342706 1. 777605 1. 895249 1. 975656 1. 777063 1. 630383 1. 410692  
2. 060273 1. 209756 1. 504193 2. 333178 1. 094741 1. 263159 1. 690227 1. 169469 1. 40593  
5. 72936 5. 973144 5. 733174 5. 403629 5. 830755 5. 100988 5. 552893 4. 898158 4. 865848  
6. 019371 6. 19597 5. 873952 6. 415725 6. 113369 6. 227945 6. 499867 6. 370759 5. 507914  
2. 536304 2. 022823 1. 333494 2. 070742 1. 892935 1. 731447 1. 803755 2. 260362 1. 688137  
1. 096693 1. 014146 0. 887238 1. 185841 0. 790409 1. 160243 1. 030152 0. 638261 0. 72087  
2. 018719 1. 793912 1. 93995 2. 085897 1. 946531 1. 834928 1. 494419 1. 417921 1. 24036  
1. 666536 2. 00583 1. 855283 2. 172717 1. 837393 1. 314732 1. 866154 1. 327609 2. 047796  
2. 267515 2. 923117 3. 291816 2. 785313 3. 117148 3. 253334 2. 913753 1. 768753 2. 308418  
0. 853371 1. 795632 1. 515939 1. 065495 0. 741184 3. 797898 2. 13203 1. 61809 1. 056023  
7. 53359 3. 243715 5. 406551 3. 994009 5. 191726 2. 473412 4. 296404 3. 690056 2. 975397  
1. 638979 1. 753127 1. 20917 1. 61417 1. 788585 1. 431286 1. 176537 1. 390556 1. 199691  
1. 3303 5. 132418 4. 375481 2. 6185 3. 917689 3. 651247 1. 696811 2. 597205 2. 545146  
1. 67556 1. 148035 1. 076496 1. 398751 0. 870372 1. 383957 1. 481783 1. 128378 0. 942674  
1. 108117 1. 342305 0. 780006 1. 240546 0. 759593 0. 95793 1. 136097 1. 612803 1. 238932  
1. 419691 0. 996011 1. 099783 1. 121619 1. 280582 1. 059276 1. 425028 1. 409518 1. 107663  
1. 357797 2. 071559 1. 346286 1. 031958 1. 547513 1. 281913 0. 600751 0. 775731 2. 038942



2. 223582 2. 371814 2. 120743 2. 37346 2. 008178 2. 210322 2. 233248 2. 328838 2. 052617  
1. 643399 0. 897782 0. 900865 0. 842392 0. 875093 1. 450991 0. 700979 1. 180853 0. 621795  
3. 568886 2. 368942 2. 614693 2. 667687 2. 866957 2. 927225 3. 023582 2. 427535 2. 597719  
1. 701635 0. 975081 1. 430136 1. 074739 1. 285988 1. 579975 1. 472771 2. 066542 1. 152499  
1. 71289 0. 786269 0. 895926 0. 973211 1. 137131 0. 948382 2. 182229 1. 235296 1. 134151  
1. 313231 1. 058083 0. 941044 1. 208884 1. 068462 0. 968118 1. 106303 1. 087715 1. 065186  
2. 307563 2. 006302 0. 771131 1. 106099 1. 369715 2. 274187 1. 760172 1. 835683 1. 726675  
3. 693871 2. 389229 2. 35786 1. 950993 1. 594052 2. 090267 2. 008942 2. 802902 2. 862351  
2. 026343 2. 149176 1. 497861 1. 413705 1. 565627 1. 352292 2. 02869 1. 15597 2. 010104  
1. 731958 2. 186226 1. 689578 2. 230666 1. 790727 1. 619919 1. 697398 1. 398556 1. 883263  
1. 080331 0. 896091 1. 138729 1. 053665 0. 966479 1. 107517 1. 060189 1. 30506 1. 132331  
3. 322373 4. 226213 4. 833328 3. 670987 3. 58126 4. 304385 4. 255403 5. 055073 4. 076144  
1. 501423 1. 438613 1. 140287 1. 491079 1. 381689 1. 310294 1. 474814 2. 675084 1. 849891  
0. 945464 0. 873959 1. 314969 1. 054021 1. 280994 0. 947568 0. 680726 1. 142177 1. 338417  
2. 17233 1. 987546 2. 734954 1. 814982 2. 084602 2. 494136 2. 505296 2. 46825 2. 162912  
1. 549194 2. 074232 2. 119451 2. 333289 3. 069815 1. 672657 3. 297919 1. 618676 0. 976739  
3. 544496 2. 721386 2. 147835 2. 142856 3. 556109 2. 064107 2. 94689 2. 264202 2. 173489  
7. 388378 6. 670564 7. 093082 6. 042618 6. 357956 5. 99991 6. 517884 6. 891204 6. 812638  
5. 627038 5. 938951 6. 334897 5. 572965 5. 555645 5. 460599 5. 350404 6. 57941 5. 058015  
0. 866589 0. 944321 0. 993351 0. 8216 1. 019993 0. 999584 0. 537206 0. 855459 1. 240178  
1. 703591 1. 700311 1. 970355 2. 082202 2. 079977 1. 96201 2. 098228 2. 101297 1. 804199  
1. 088449 1. 366147 1. 675668 1. 70133 1. 667777 1. 217186 1. 272102 0. 946075 1. 39645  
1. 37213 1. 045039 1. 031672 1. 652973 0. 902334 1. 238909 1. 35997 1. 360577 1. 072136  
1. 568107 1. 422542 1. 100673 2. 022529 1. 909309 1. 620797 1. 94982 1. 008351 1. 096847  
1. 463051 0. 834275 1. 126598 1. 011041 0. 995648 1. 585205 1. 429313 1. 187153 1. 707622  
0. 895673 1. 292745 1. 217206 1. 309212 1. 178415 1. 261817 1. 28985 1. 39822 1. 101759  
2. 172406 4. 263493 3. 991776 2. 390026 4. 083234 3. 625844 3. 391885 2. 84103 2. 305308  
1. 259231 2. 64207 2. 745858 2. 557169 1. 597636 2. 104823 1. 95608 3. 334294 1. 912333  
1. 276851 1. 55471 1. 212826 0. 839275 1. 334575 1. 684799 2. 169394 1. 124943 0. 824916  
1. 408231 1. 479248 2. 051567 1. 517004 2. 62663 1. 700161 3. 156509 1. 954712 1. 433047  
2. 339105 1. 180329 1. 044671 1. 574512 1. 737861 1. 135135 1. 09167 0. 972896 1. 673451  
1. 407789 1. 360395 0. 959227 1. 528251 1. 564241 1. 358575 1. 596983 1. 72884 1. 367581  
2. 537128 1. 532912 2. 131138 1. 619137 1. 498841 2. 635664 1. 975921 1. 532172 2. 241465  
1. 907387 1. 610313 1. 979295 4. 151258 2. 51612 2. 763891 3. 487577 3. 214452 2. 045493  
1. 328516 1. 099631 0. 958917 1. 16565 1. 139148 1. 58484 1. 816299 1. 279914 1. 321421  
1. 855706 1. 637694 2. 284211 1. 604617 1. 751484 1. 939934 2. 386422 1. 616401 1. 460826  
1. 208247 1. 051913 0. 561298 1. 056487 0. 656053 0. 672645 0. 581209 1. 300729 0. 502185  
3. 516221 2. 761018 2. 557586 4. 033568 3. 554426 4. 529312 3. 600114 3. 916962 4. 158264  
1. 066926 1. 000724 0. 915917 1. 120406 0. 929397 1. 213375 1. 402951 0. 773737 1. 031458  
2. 594065 3. 041521 1. 796541 2. 288944 2. 532913 1. 990938 2. 393686 2. 502935 1. 92328  
5. 723007 5. 380834 4. 514611 4. 919871 4. 798781 5. 236465 2. 162895 3. 359221 5. 017978  
3. 109236 6. 115253 4. 605131 4. 435364 5. 058357 4. 754898 4. 67974 4. 759684 5. 371611  
2. 580317 2. 550626 3. 119643 2. 760292 3. 057268 2. 891211 2. 43285 3. 259372 2. 124297  
2. 201065 1. 200149 1. 94606 1. 769234 2. 081628 1. 799262 1. 877589 2. 10736 1. 57071  
1. 124111 1. 194918 1. 193873 1. 255476 1. 344849 1. 234077 1. 369682 1. 158719 1. 19239  
2. 321953 2. 070869 1. 274018 2. 358317 1. 240054 1. 972173 1. 90125 2. 284948 2. 307918  
1. 473555 1. 134647 1. 590768 1. 325095 1. 99174 2. 146535 0. 679256 1. 404685 0. 962907  
1. 596521 0. 947689 1. 02258 1. 309746 1. 186806 1. 392283 1. 015105 1. 53459 1. 15714  
1. 858205 5. 339933 0. 820407 0. 645756 2. 506673 1. 559066 0. 971209 1. 185847 1. 002402  
2. 923884 2. 773834 1. 832242 2. 567507 2. 836889 2. 229956 2. 09674 1. 813623 2. 510345  
1. 315651 1. 090386 1. 092376 1. 545563 2. 003209 1. 622264 0. 849049 1. 261139 1. 429887

|           |           |           |           |           |           |           |           |           |
|-----------|-----------|-----------|-----------|-----------|-----------|-----------|-----------|-----------|
| 1. 338861 | 1. 310858 | 2. 007093 | 1. 73686  | 1. 418712 | 1. 201346 | 1. 733029 | 1. 899341 | 1. 187188 |
| 2. 175657 | 1. 053859 | 3. 417568 | 5. 652243 | 2. 797633 | 1. 406137 | 1. 609459 | 0. 912818 | 2. 293662 |
| 2. 502254 | 0. 631342 | 2. 023457 | 1. 3525   | 1. 135038 | 2. 410178 | 1. 023511 | 1. 507589 | 1. 772003 |
| 1. 38777  | 2. 440255 | 1. 426611 | 2. 544602 | 1. 735441 | 1. 23474  | 3. 550232 | 2. 31711  | 3. 141297 |
| 1. 678967 | 1. 039983 | 1. 476245 | 1. 44373  | 1. 328285 | 1. 491943 | 1. 087173 | 1. 219096 | 1. 211695 |
| 3. 793293 | 2. 537923 | 2. 582181 | 2. 541976 | 2. 654699 | 2. 636353 | 2. 758317 | 2. 049384 | 1. 425222 |
| 1. 308684 | 1. 249847 | 2. 679563 | 2. 281891 | 1. 47468  | 1. 259607 | 2. 148005 | 1. 075996 | 2. 080168 |
| 2. 006197 | 1. 667024 | 1. 660423 | 1. 383512 | 2. 110038 | 1. 775258 | 1. 582167 | 2. 065577 | 1. 285541 |
| 4. 571543 | 4. 969848 | 4. 91811  | 5. 391559 | 6. 008874 | 4. 137507 | 4. 865904 | 4. 757005 | 5. 281679 |
| 0. 89116  | 0. 642738 | 1. 154171 | 1. 263    | 1. 219203 | 1. 160969 | 0. 7071   | 0. 797737 | 1. 247932 |
| 1. 465563 | 1. 900476 | 1. 31599  | 2. 610893 | 1. 354044 | 1. 485477 | 1. 408717 | 1. 768771 | 1. 609601 |
| 2. 0474   | 3. 263068 | 1. 858216 | 3. 64922  | 1. 774141 | 7. 008512 | 2. 593703 | 5. 804353 | 2. 78761  |
| 1. 113929 | 1. 253749 | 1. 576685 | 1. 311238 | 1. 250181 | 1. 054061 | 2. 116391 | 1. 059351 | 1. 26832  |
| 0. 907035 | 1. 264813 | 1. 478296 | 1. 695065 | 1. 557926 | 1. 241706 | 1. 656208 | 1. 491368 | 1. 299134 |
| 1. 189193 | 0. 81203  | 1. 133773 | 1. 537424 | 1. 007892 | 1. 039143 | 1. 060734 | 1. 290998 | 0. 859422 |
| 0. 735283 | 1. 299006 | 0. 718825 | 1. 820523 | 0. 698771 | 1. 325308 | 1. 616343 | 1. 117913 | 1. 011683 |
| 1. 218863 | 1. 159469 | 0. 931084 | 1. 176814 | 1. 652492 | 1. 631973 | 1. 551062 | 1. 076401 | 1. 305802 |
| 1. 372315 | 1. 360505 | 1. 182312 | 1. 875043 | 1. 71802  | 1. 64723  | 2. 203852 | 1. 096486 | 1. 561057 |
| 1. 018807 | 1. 241173 | 1. 592378 | 1. 073006 | 1. 65477  | 1. 617281 | 2. 605789 | 1. 578779 | 1. 65477  |
| 1. 444835 | 2. 459438 | 1. 723053 | 2. 063313 | 1. 109263 | 3. 129655 | 1. 657652 | 2. 717955 | 1. 748161 |
| 0. 714007 | 0. 886265 | 1. 647732 | 0. 82672  | 1. 013982 | 0. 960415 | 2. 060663 | 4. 021587 | 1. 81516  |
| 3. 099973 | 2. 406261 | 2. 366428 | 2. 646294 | 2. 327421 | 3. 892655 | 2. 598491 | 3. 297578 | 3. 500822 |
| 0. 577859 | 0. 861165 | 0. 825005 | 1. 1      | 0. 945985 | 0. 81306  | 1. 13786  | 1. 032208 | 0. 890037 |
| 3. 245005 | 3. 844382 | 5. 447185 | 3. 375242 | 3. 574992 | 4. 431562 | 3. 124023 | 3. 567423 | 4. 886037 |
| 1. 44146  | 1. 134746 | 1. 378902 | 1. 678878 | 1. 230766 | 1. 62146  | 1. 59037  | 1. 466125 | 1. 432668 |
| 1. 4534   | 2. 083933 | 1. 580834 | 2. 247401 | 1. 886983 | 0. 946455 | 2. 420714 | 1. 748852 | 3. 241485 |
| 1. 302992 | 0. 831309 | 1. 267627 | 2. 125454 | 1. 853164 | 1. 158038 | 1. 112092 | 1. 48874  | 1. 156745 |
| 8. 424969 | 9. 593723 | 9. 721335 | 8. 595388 | 9. 076638 | 8. 928075 | 7. 684434 | 9. 123612 | 8. 951279 |
| 4. 708371 | 3. 694039 | 3. 839124 | 3. 182421 | 3. 389179 | 3. 98956  | 4. 473284 | 4. 900979 | 3. 651445 |
| 1. 855251 | 1. 584891 | 2. 05078  | 1. 957539 | 1. 469374 | 2. 656556 | 1. 820549 | 1. 414472 | 2. 389108 |
| 1. 330394 | 0. 746263 | 1. 056995 | 1. 095581 | 1. 288597 | 0. 561937 | 1. 082294 | 0. 965472 | 1. 52731  |
| 1. 039863 | 0. 68107  | 0. 874436 | 0. 962242 | 0. 991137 | 0. 703611 | 0. 710636 | 0. 780037 | 1. 548062 |
| 1. 743451 | 1. 343473 | 1. 487558 | 1. 339138 | 1. 07824  | 1. 753274 | 1. 049099 | 1. 45764  | 1. 462539 |
| 3. 513312 | 2. 389636 | 3. 369676 | 1. 250808 | 3. 171028 | 1. 758406 | 3. 610841 | 3. 469205 | 1. 661206 |
| 2. 224558 | 1. 225144 | 1. 327632 | 1. 514416 | 1. 501664 | 1. 471897 | 1. 901588 | 1. 728001 | 1. 15019  |
| 2. 665728 | 1. 482552 | 1. 859506 | 1. 744105 | 2. 016993 | 2. 372111 | 1. 302439 | 2. 453525 | 1. 780411 |
| 1. 292    | 2. 114922 | 2. 741213 | 2. 224999 | 1. 746168 | 2. 300076 | 1. 791908 | 2. 785474 | 1. 064062 |
| 1. 39121  | 1. 733526 | 1. 041133 | 1. 086926 | 1. 251553 | 1. 199876 | 1. 573765 | 0. 958142 | 0. 988246 |
| 1. 651834 | 1. 266267 | 1. 289027 | 1. 329289 | 1. 240247 | 1. 633904 | 1. 320373 | 1. 422308 | 1. 42319  |
| 2. 165454 | 1. 710945 | 1. 987123 | 1. 707512 | 2. 238453 | 2. 32669  | 2. 093495 | 2. 294268 | 2. 061312 |
| 1. 309179 | 1. 768443 | 1. 239829 | 1. 707251 | 1. 257049 | 1. 377456 | 1. 693695 | 1. 322769 | 1. 793444 |
| 1. 297604 | 1. 252696 | 1. 799491 | 2. 447316 | 1. 223751 | 2. 378437 | 1. 607121 | 1. 670041 | 1. 036475 |
| 1. 588575 | 1. 020722 | 1. 659756 | 1. 00958  | 0. 773746 | 0. 928732 | 0. 997362 | 1. 13145  | 2. 684128 |
| 1. 245112 | 1. 481731 | 1. 408464 | 1. 235128 | 1. 315182 | 1. 149747 | 1. 199504 | 1. 765054 | 2. 135576 |
| 1. 431562 | 0. 483759 | 0. 629878 | 0. 623119 | 1. 499563 | 1. 745303 | 1. 115017 | 1. 43832  | 1. 231286 |
| 1. 639038 | 1. 453905 | 1. 526785 | 1. 132603 | 1. 089129 | 1. 643502 | 0. 961746 | 0. 944382 | 1. 237254 |
| 1. 434126 | 1. 536611 | 1. 084828 | 1. 32529  | 1. 502047 | 0. 913304 | 1. 295274 | 1. 679296 | 1. 798293 |
| 1. 991431 | 1. 869942 | 1. 831964 | 2. 458055 | 1. 914203 | 1. 910561 | 1. 165136 | 1. 973727 | 1. 416937 |
| 1. 870131 | 2. 570788 | 2. 625987 | 2. 587057 | 1. 8593   | 1. 696572 | 2. 221411 | 2. 555475 | 2. 010018 |
| 1. 791941 | 1. 149335 | 0. 733901 | 2. 336072 | 1. 615962 | 2. 795268 | 1. 409914 | 0. 91104  | 1. 452181 |
| 4. 94347  | 4. 256657 | 4. 764552 | 2. 252009 | 2. 897703 | 4. 2727   | 3. 560941 | 3. 21916  | 2. 475363 |

1. 94887 3. 263522 1. 148519 1. 234836 2. 037587 1. 694727 1. 475113 1. 881256 1. 377619  
1. 976306 2. 162087 1. 968507 1. 899756 1. 915052 2. 157003 2. 09578 1. 749275 2. 47405  
1. 16014 1. 66188 0. 897432 0. 815606 0. 629802 1. 032052 0. 802112 3. 043293 0. 379669  
0. 810301 1. 150942 1. 448414 1. 40228 0. 991715 1. 013104 1. 042909 0. 819194 0. 901749  
1. 599416 2. 44596 1. 973224 1. 592865 1. 440983 2. 070209 2. 315771 2. 188714 2. 334084  
1. 600458 1. 784788 1. 618599 1. 979104 1. 319039 1. 987059 1. 901305 1. 634925 1. 575543  
3. 222837 2. 255078 2. 516826 2. 310189 2. 335653 1. 926962 3. 032544 2. 218439 1. 907264  
2. 620181 1. 731027 2. 097443 2. 148724 1. 948713 1. 424649 1. 726134 1. 901386 1. 751702  
1. 399345 1. 534698 1. 59682 2. 621054 1. 621132 2. 174865 1. 66694 2. 053726 1. 691639  
1. 309022 0. 713943 1. 115895 1. 256379 1. 947671 1. 197852 1. 422074 0. 999956 0. 943628  
4. 650239 1. 052125 1. 191032 3. 337397 3. 074501 5. 161228 3. 402056 1. 625566 3. 134248  
2. 22711 1. 5725 1. 74205 1. 638452 2. 835002 1. 820652 2. 062212 1. 975077 2. 042263  
1. 384959 1. 665265 2. 278609 1. 05666 1. 679931 1. 275029 1. 456641 1. 554733 1. 449045  
1. 492476 1. 177151 1. 163165 1. 765819 1. 915678 1. 353145 1. 106343 1. 54716 1. 721486  
2. 490562 2. 11323 1. 163695 2. 2403 1. 684812 1. 337194 1. 926582 1. 561224 1. 231362  
1. 141948 1. 876499 1. 385445 1. 583387 2. 22757 1. 2217 1. 604444 1. 546783 1. 814504  
1. 58174 1. 008217 1. 603369 1. 648819 1. 82427 1. 252537 1. 365157 1. 309855 1. 381345  
2. 533127 1. 802828 2. 242473 2. 373199 1. 932952 1. 746874 2. 043351 2. 123381 3. 438159  
3. 859444 3. 731357 3. 402896 2. 847697 3. 444422 3. 429769 3. 197331 2. 870822 4. 06718  
1. 753936 1. 370585 0. 736849 0. 916542 1. 061047 3. 901496 2. 247594 0. 974505 1. 14515  
0. 925802 1. 373114 1. 107935 1. 04906 1. 099371 1. 135701 1. 306659 1. 149082 0. 878364  
1. 979143 1. 977187 1. 13583 3. 169173 4. 212425 1. 086587 1. 614573 2. 92578 2. 364843  
1. 489343 1. 300577 1. 161236 1. 570551 1. 151998 0. 845374 1. 255632 1. 392759 1. 537469  
1. 575278 1. 431676 1. 549187 1. 474492 0. 995612 1. 401785 1. 634679 1. 306297 1. 627292  
1. 182389 1. 232141 0. 697847 1. 120005 2. 081167 0. 980856 0. 854153 1. 091058 0. 940873  
1. 867083 1. 867236 1. 95023 1. 61987 1. 694808 1. 46689 1. 809524 1. 593252 1. 769534  
1. 718506 1. 605428 2. 200841 1. 549844 1. 50232 2. 23295 1. 679631 1. 835734 1. 591774  
1. 920605 1. 637302 1. 9771 1. 587565 1. 957827 1. 779183 1. 897703 1. 946384 1. 511721  
1. 656222 1. 229511 2. 754696 1. 915328 1. 536354 1. 173836 1. 645538 0. 968626 2. 296785  
0. 686765 1. 205517 0. 465448 0. 951924 1. 074839 0. 592589 0. 68989 0. 613368 1. 203281  
1. 790301 2. 20657 1. 826688 2. 008053 1. 840609 2. 310274 2. 083035 2. 364765 2. 677954  
1. 506446 2. 941488 3. 056762 1. 84682 4. 250309 1. 455542 3. 766304 1. 885776 1. 584991  
1. 377828 0. 941157 0. 969062 1. 668348 1. 080685 0. 97631 1. 448677 0. 732968 1. 087405  
1. 251867 0. 808564 0. 749711 1. 022343 1. 13141 1. 007119 1. 285277 1. 031642 0. 833819  
2. 09424 1. 874218 0. 904294 1. 141321 0. 9663 0. 99778 0. 831452 0. 927063 0. 921123  
2. 26092 1. 508613 1. 709561 1. 339994 1. 79995 1. 559014 1. 350577 1. 368143 1. 301849  
0. 463287 1. 048015 0. 910867 1. 79613 1. 872306 1. 409242 0. 936257 0. 764157 1. 100104  
1. 406084 1. 3339 1. 395028 2. 10482 0. 895444 1. 305322 1. 419392 1. 595163 1. 265369  
1. 724191 1. 564554 1. 971075 1. 421739 1. 375172 1. 273764 2. 309217 2. 106777 1. 093057  
1. 348117 1. 009184 0. 825747 0. 901278 1. 429035 1. 750734 1. 123649 0. 875367 0. 854543  
2. 451729 2. 767357 2. 883167 2. 656414 2. 622651 2. 253997 2. 690628 2. 148767 2. 31713  
1. 436831 1. 733992 1. 565564 1. 72381 2. 155336 1. 706135 1. 468914 1. 104184 1. 601681  
1. 694064 1. 310495 1. 784462 2. 010065 2. 070309 1. 554977 1. 14681 1. 524284 1. 436119  
1. 878134 1. 728568 2. 089792 1. 620465 1. 860298 1. 613585 1. 70395 1. 915162 2. 038203  
5. 217484 2. 301661 2. 527015 2. 528424 2. 328043 1. 854517 3. 585116 3. 186756 1. 766137  
2. 646711 2. 520198 2. 255447 2. 23775 2. 508425 2. 209356 2. 47123 2. 140784 1. 763213  
1. 695648 1. 102976 1. 21411 1. 349703 1. 339529 1. 01775 2. 069088 1. 286734 1. 280399  
3. 291303 2. 431131 1. 732679 2. 377945 1. 221003 1. 337458 1. 524603 1. 366828 1. 115426  
1. 065941 1. 263306 1. 506825 1. 222071 1. 10282 1. 021968 1. 613721 1. 044638 1. 279451  
1. 395562 0. 997831 1. 106564 1. 020707 0. 915272 1. 005511 0. 878825 1. 181897 1. 493994  
1. 962217 2. 860242 1. 864339 1. 975835 2. 622754 1. 965703 3. 06988 3. 706217 2. 115613

2.193617 1.998689 2.03479 4.512945 1.9568 2.184681 1.811897 1.343752 1.90417  
0.822301 0.905999 0.943568 2.037021 1.091219 1.067231 1.035578 1.312123 1.144332  
2.141787 2.476636 2.775967 2.600667 2.36832 2.177491 2.127627 2.926731 2.320238  
1.5312 1.499161 1.465328 1.249928 1.611659 1.259984 1.724581 1.246517 1.657547  
1.151771 2.009143 2.170851 1.335131 1.882175 1.799639 4.233747 0.756616 1.731908  
6.333088 3.409212 5.73931 3.191199 3.157022 5.737566 3.8039 4.302777 3.021442  
1.995092 1.468096 1.887861 1.430149 1.930206 1.307717 1.259472 1.767333 1.478745  
1.347692 1.190867 1.653014 1.264686 1.06707 1.453519 1.424452 1.012368 1.031342  
1.250546 2.819718 1.461306 1.954086 1.45243 1.912793 1.772628 1.276325 1.815382  
1.987322 2.549454 4.540618 2.826372 2.411942 3.25938 2.348169 1.378376 3.439127  
1.784651 1.310613 2.03934 2.613985 2.52877 1.240783 1.596788 1.383399 1.728021  
2.31689 2.673225 2.05237 2.762558 2.559242 2.875258 1.694429 1.767079 2.420301  
1.657661 1.405462 1.711281 1.520817 1.06915 1.784723 1.718715 1.855959 2.180436  
5.910585 2.886398 1.779007 3.02727 2.129503 1.723753 2.258171 2.305308 2.452475  
0.798735 1.690292 1.310765 1.301447 1.112882 1.353789 1.137832 1.536204 1.063449  
1.068021 0.68643 2.048804 2.693036 1.689112 1.352217 1.145518 0.794641 2.30678  
1.235622 1.77018 0.997786 2.409697 2.374541 1.966295 1.759516 0.754667 2.075926  
1.460044 1.889859 1.343895 1.749578 2.013968 1.246081 1.579143 0.765623 2.515002  
2.314378 4.438027 3.91225 2.707089 3.397112 4.698894 1.811397 2.838875 2.611049  
1.419449 1.006317 0.966335 1.58562 1.158008 1.597365 2.70704 1.310934 1.828024  
0.923782 1.05155 1.349005 1.311634 1.622969 0.957464 1.111868 1.304348 1.44974  
1.787439 1.518841 1.271705 1.465064 1.288366 1.408543 1.45763 1.780284 1.463204  
3.213967 1.075075 1.536854 2.15553 1.294696 1.135147 1.08019 1.063194 1.963593  
1.554584 1.247739 1.453215 1.39152 1.447993 0.801137 1.513931 1.029032 1.449254  
2.081206 2.602066 2.583387 3.139754 2.04681 3.003382 3.645598 2.413761 2.2741  
3.049817 2.404283 1.94199 3.496724 5.080903 3.039856 2.567955 1.485317 2.638905  
4.033096 3.231388 3.179793 3.211232 3.119608 3.096629 3.604874 3.314644 3.043764  
1.394284 2.109011 2.130629 1.530113 1.534337 1.684363 1.501863 1.577908 1.992752  
2.10294 1.985446 2.317752 2.591929 2.440347 2.090039 2.012514 2.094533 1.982243  
1.280396 1.026321 1.456903 1.969395 1.392791 1.203762 1.745615 0.942695 1.148693  
2.006251 1.916377 1.971192 2.170128 2.75402 2.261651 2.177516 2.402694 2.642507  
2.143432 1.463671 1.583245 1.459275 2.288019 1.544302 2.044022 1.098833 1.720772  
1.998222 1.488895 2.003472 1.974002 1.415866 1.510575 1.839029 1.257827 1.507778  
1.462648 1.158198 2.292264 0.785121 1.339899 2.911884 1.252736 1.683729 2.044568  
2.887031 1.745621 0.921193 1.675345 1.295711 2.538066 3.18422 0.797494 1.938975  
0.929121 1.552676 1.135192 1.163517 0.963788 1.049685 1.014963 1.231741 1.565717  
3.965572 2.135348 2.369329 1.937148 2.046201 2.291471 2.240713 2.361 2.614818  
1.947764 1.713309 1.646221 1.675925 1.575198 1.735459 1.933847 1.64652 1.964076  
1.193929 3.499024 0.950287 1.521381 0.899106 1.87129 4.157689 2.532621 1.071662  
2.038439 2.436124 2.945074 2.615707 3.231933 2.692206 2.717776 2.381423 2.380593  
1.804824 1.760446 1.305609 1.693225 1.747195 1.735181 2.686399 1.781915 1.825628  
0.94942 0.677206 0.850528 0.973216 1.445369 0.877734 1.036103 0.9088 1.095006  
1.50628 1.706949 1.456505 2.707653 2.946785 1.482668 1.153845 2.53983 1.474189  
1.806248 1.807083 2.59124 2.246101 1.278329 2.130712 2.869624 1.727965 1.567604  
4.383683 4.355276 5.239214 3.920568 5.317219 4.462912 6.025808 5.687704 4.264163  
0.725498 0.741768 0.976496 1.070662 1.677343 0.99497 0.667181 0.935131 1.584562  
1.588215 1.191661 1.077089 1.142625 1.211144 1.190534 1.004791 1.206874 1.173107  
1.532366 2.064301 0.94944 1.263461 1.55647 1.40892 1.190091 1.908554 1.179524  
2.925356 3.163342 2.779653 2.29501 5.335505 2.28686 2.652178 4.308218 4.08895  
2.149692 1.524288 1.842107 2.126825 1.120777 1.544286 2.656182 0.975499 1.743922  
1.002822 1.084524 0.979488 0.82116 1.074411 1.184999 1.115494 1.259137 1.089886

3.093688 1.921081 2.732078 2.026664 2.158627 2.65805 2.595227 2.399185 2.884597  
0.806195 0.979048 0.891646 1.4214 1.073304 0.739906 1.230191 1.157296 1.170096  
3.529406 2.030323 3.203874 2.87281 1.960915 2.044686 2.329174 1.804289 2.307675  
2.37754 2.456538 2.205779 2.478329 2.815499 2.812466 2.67156 3.323079 2.632898  
1.584909 1.219633 0.946978 0.731652 0.840698 1.397307 0.840346 1.035995 1.683304  
1.080828 1.524418 0.727536 1.155208 1.533188 1.086432 1.139376 0.954912 1.144767  
2.31509 1.54685 1.341408 1.675697 1.831658 1.713282 2.130384 1.93989 1.967493  
2.069802 1.388573 1.434698 1.642445 1.678763 1.4814 1.133392 1.739779 2.361398  
1.161787 1.172164 1.412468 1.026664 1.07388 0.748672 0.938437 0.906562 1.424721  
4.205462 4.222626 2.10459 4.637475 1.093493 3.149428 1.746431 1.718879 2.978426  
1.80014 2.620198 4.058454 3.703326 4.013546 3.092653 2.212066 2.609466 2.567066  
2.232899 1.560722 0.633841 1.397822 1.199321 1.269638 1.179887 2.297089 1.366263  
1.739262 2.195117 3.069507 1.740761 1.794784 2.703138 2.587356 3.258453 2.773436  
1.041498 1.060163 1.220123 1.126731 2.236008 0.857244 1.040918 1.071582 1.328243  
3.457739 3.343326 3.437117 3.172174 2.294706 3.320845 3.167302 5.251558 4.35576  
1.415423 1.262243 1.654296 1.563475 0.993255 1.763318 2.524927 1.346434 2.114978  
3.419979 2.448955 2.44032 2.523801 4.040026 2.225702 2.469195 2.689639 3.630263  
1.175482 0.760898 1.552504 1.888904 1.030866 2.036651 1.406473 0.952293 1.070528  
0.929656 1.020751 1.208787 0.625308 1.127664 1.270161 1.48395 1.128645 0.869687  
7.978534 7.685519 7.096774 5.660021 6.805213 6.622172 5.723924 6.976767 7.168429  
0.968945 1.378515 1.330819 1.255551 1.351982 0.751796 1.980103 1.193503 2.411172  
0.940201 0.855439 0.672473 0.876955 1.447569 1.216778 0.709592 1.439575 1.002548  
1.016639 1.451786 1.183038 1.173004 1.567745 0.786633 1.435172 0.88964 1.588098  
1.374916 0.898314 0.828995 0.882291 1.186774 0.916279 0.97337 1.006086 1.107354  
1.383056 1.129276 0.760399 1.534102 1.097868 0.992193 0.89677 0.995356 1.012517  
1.877848 2.554421 2.435576 2.7561 2.567533 1.379507 2.34052 2.675959 2.197739  
1.153821 1.155748 1.178342 0.983069 0.948956 1.203243 1.498168 1.296853 0.829974  
1.12125 1.215454 1.396461 1.631626 1.18511 1.337385 0.986076 2.030355 1.09848  
1.138765 1.667833 1.864025 1.118746 1.030956 1.569736 1.482926 1.542946 1.705626  
1.969309 2.399201 3.902945 2.787605 2.388479 1.824324 4.525445 3.243876 1.181933  
1.232761 1.477162 0.816059 1.278272 1.362864 1.2582 1.662832 1.293302 1.688153  
3.912088 4.251234 3.053943 3.568031 2.789188 3.377039 4.630288 2.644453 3.266656  
1.383891 0.510198 0.562567 0.520969 1.319073 1.641341 0.601572 1.331912 1.389507  
1.607447 3.473635 1.606536 1.93513 2.041193 1.533691 1.520723 1.833513 2.191352  
1.265854 1.097187 0.697001 1.485455 1.182867 2.0321 1.982563 1.162339 0.93739  
2.713376 1.916432 3.018447 2.52516 2.752308 1.476883 2.0953 2.927027 2.049029  
0.686517 1.000169 0.661802 1.140494 0.81844 1.574584 0.802211 0.985152 0.714453  
1.904842 1.298446 1.053935 1.875783 1.560729 0.974779 1.655048 1.311369 1.343338  
1.871828 1.996174 3.20165 1.89488 1.657419 1.629213 2.133937 2.5541 2.012495  
1.77636 2.313158 1.805333 2.280123 1.676634 1.742489 2.398008 1.861091 1.80908  
1.730108 1.472293 1.27795 1.674037 1.093073 0.860194 1.006085 0.972048 1.260327  
1.636896 1.326412 1.85555 1.485726 0.936476 1.909282 1.521013 1.314013 1.821279  
2.170181 0.987065 1.485528 1.489008 1.640443 1.287304 2.572852 1.918769 1.984334  
1.620177 1.448479 1.141398 1.753403 1.297764 1.294835 1.342387 1.390976 1.402815  
2.399671 1.745465 1.735228 1.635768 1.728329 1.680383 2.077871 1.709855 1.773943  
0.942554 0.900827 0.844002 1.475495 0.863879 0.834104 0.986788 0.875077 1.090409  
1.37946 1.241512 1.26351 1.352942 1.201697 1.314174 2.557274 1.307629 1.481892  
1.42529 1.474209 1.125257 1.734254 1.777657 1.956079 1.463766 2.078409 1.605209  
1.579735 2.925463 1.327342 1.525948 2.683541 1.675111 2.312043 1.538032 1.833965  
1.936521 1.086848 0.743986 1.968666 1.559896 1.130605 2.029759 1.139272 0.743668  
2.370703 2.762302 2.296651 3.032861 1.510071 3.28259 3.977435 3.466289 3.313824

1. 498095 1. 876763 1. 90283 1. 439701 1. 737449 2. 528793 1. 198168 1. 554278 1. 163632  
2. 12101 2. 708441 2. 986787 2. 02818 2. 6894 3. 004574 1. 818068 2. 115847 3. 336698  
3. 424994 1. 978508 2. 039008 2. 2895 2. 800071 2. 734082 2. 180423 2. 668537 2. 253403  
0. 850973 0. 82079 0. 825204 0. 889589 0. 911977 1. 109545 0. 914169 0. 862031 1. 257193  
0. 808424 0. 986474 0. 894581 1. 299488 1. 221614 1. 176944 1. 0972 1. 179201 0. 971526  
4. 366721 3. 970493 4. 731729 3. 984308 3. 431622 3. 867648 3. 391704 3. 915579 4. 133254  
1. 219614 0. 985959 0. 977454 1. 314136 1. 058143 1. 389095 1. 247112 1. 287283 1. 578401  
1. 908843 1. 515403 1. 779507 2. 135392 1. 479842 2. 269468 2. 135938 1. 222154 1. 183683  
1. 256698 0. 976953 1. 137881 1. 276101 1. 261203 1. 047007 1. 066701 1. 223657 1. 736465  
1. 836715 0. 950582 1. 072118 1. 196279 1. 513138 1. 692712 1. 691723 0. 791725 1. 421638  
3. 592903 2. 57444 2. 879379 2. 375153 2. 813785 2. 496744 2. 863802 2. 376776 2. 254664  
1. 586635 0. 78277 1. 411342 1. 544649 1. 272102 1. 559281 1. 343225 1. 890044 1. 710701  
2. 048311 3. 163062 2. 754037 1. 874421 2. 822122 1. 706699 2. 724594 3. 819407 2. 192294  
1. 138667 1. 433697 0. 909325 0. 909438 0. 881931 0. 993097 1. 208017 2. 237206 0. 879615  
1. 517478 1. 819857 1. 688428 1. 522626 1. 476666 1. 941736 2. 361849 2. 146501 1. 922733  
1. 743388 1. 876581 1. 4112 1. 225812 1. 654521 1. 840648 1. 169034 1. 325181 1. 609576  
0. 86507 1. 307377 1. 343276 0. 792677 0. 87196 0. 758141 0. 563205 0. 834985 0. 902147  
5. 088961 4. 841596 3. 940416 5. 06048 4. 415695 4. 630519 4. 891271 3. 859905 5. 059988  
1. 008457 1. 169406 1. 138075 1. 30414 1. 562411 1. 507259 2. 302406 1. 742932 1. 669407  
0. 798712 1. 17096 0. 69731 0. 864248 1. 063715 0. 69673 0. 566973 0. 77161 0. 849907  
1. 871063 1. 203917 1. 483955 0. 999765 2. 398541 1. 226744 2. 032892 1. 467203 1. 50288  
1. 111758 1. 096498 1. 022281 1. 877332 1. 540718 1. 534583 1. 261172 1. 329618 1. 201676  
1. 320217 0. 985285 1. 618846 1. 886256 1. 072362 1. 563431 2. 12042 1. 328434 1. 728964  
1. 3522 1. 494082 1. 353833 1. 343363 2. 077799 1. 061133 1. 100484 1. 23805 1. 461289  
2. 724861 2. 064447 2. 039441 1. 940513 2. 416753 2. 086721 2. 273385 2. 049376 2. 472555  
3. 723047 4. 531766 1. 689609 2. 775125 1. 593802 2. 950335 2. 421073 4. 016406 3. 74383  
0. 960948 1. 239814 1. 13254 2. 655044 1. 039872 1. 247581 2. 163352 1. 303946 0. 943412  
1. 803488 1. 264988 1. 947464 1. 317491 1. 531422 1. 526124 1. 976448 1. 288311 1. 504454  
2. 004661 4. 450971 2. 711619 2. 400877 3. 431557 3. 629125 1. 718265 1. 597761 2. 69843  
2. 035539 1. 353069 1. 594262 1. 645074 1. 290067 1. 700185 1. 526974 1. 801061 1. 446254  
3. 213445 1. 849667 3. 173452 1. 648261 3. 197135 2. 028428 1. 941765 1. 727927 3. 040458  
2. 012686 1. 832481 2. 481044 2. 065497 2. 099869 2. 317968 1. 938927 3. 396758 1. 958492  
3. 123523 1. 563592 2. 740874 2. 303986 2. 464778 1. 993891 3. 554233 2. 376639 2. 492279  
1. 445062 2. 036527 1. 087903 2. 113581 1. 671871 1. 58596 1. 455678 2. 041594 1. 668804  
1. 882791 1. 537095 1. 533388 1. 434882 1. 984748 1. 585098 2. 125019 1. 990686 1. 898449  
2. 369062 1. 675289 1. 813787 2. 749195 2. 008495 2. 555619 1. 838186 1. 831205 1. 936413  
1. 222034 1. 882477 1. 700329 2. 551031 2. 845141 2. 029948 1. 973214 2. 272876 2. 499228  
2. 543072 3. 452414 3. 508747 4. 832529 1. 137764 2. 081401 2. 629209 0. 892476 1. 724399  
3. 480522 3. 219927 3. 100117 3. 203888 2. 883486 3. 104685 3. 07496 2. 893955 3. 644295  
1. 197158 1. 739514 0. 965602 2. 053325 0. 826918 1. 313459 1. 698227 0. 888115 0. 941441  
1. 728864 1. 796534 2. 872361 1. 910035 2. 153287 2. 192062 1. 755912 1. 859052 2. 301039  
1. 311935 0. 912419 1. 240567 1. 035408 1. 111656 1. 976152 1. 936483 1. 047187 1. 257581  
1. 904888 1. 39237 1. 966578 1. 689054 1. 394452 2. 046012 1. 896749 1. 393068 1. 397305  
1. 586125 1. 402952 1. 73315 1. 159897 1. 28379 1. 644187 1. 938385 1. 403992 1. 386449  
2. 551817 2. 737232 1. 701192 2. 204893 2. 633104 2. 308771 2. 966629 2. 29065 2. 444948  
4. 683802 4. 685429 5. 288093 1. 666406 1. 317291 3. 325759 3. 90169 3. 710089 4. 79713  
3. 242432 2. 56958 3. 119954 3. 206648 2. 406666 2. 428764 2. 23596 2. 38724 2. 837363  
3. 841177 2. 614607 3. 746224 3. 050271 2. 708328 3. 174007 3. 226375 3. 379007 3. 501613  
1. 402025 1. 826693 1. 928501 2. 015104 1. 227045 1. 582633 2. 205188 1. 974562 1. 486936  
1. 581174 1. 484603 1. 412094 1. 51277 1. 719748 2. 140985 2. 149482 1. 407539 1. 85622  
1. 055315 0. 952538 2. 809324 1. 35846 1. 15977 1. 128812 1. 184675 1. 141015 1. 073191

2.568533 1.31643 1.857086 1.813745 1.376335 1.309441 1.718417 1.109488 1.243943  
1.649446 1.435081 1.283475 1.163791 2.400601 0.74722 2.135715 1.315067 1.622876  
1.642413 1.476284 1.901822 2.210622 1.632931 1.718205 1.212142 1.704854 2.941055  
0.86899 1.047703 0.745812 1.442922 0.847623 2.79509 2.511891 1.13277 1.084407  
1.176409 1.113485 1.247561 1.032756 0.73488 1.107316 1.342452 1.886884 0.848783  
5.354703 5.231104 5.212857 4.501411 4.597314 2.957827 2.844866 3.478228 4.276269  
2.058856 2.414753 2.570811 3.859693 2.554593 1.942354 4.255597 2.451834 2.773831  
0.99074 0.711468 0.494713 1.107373 1.457139 1.004717 1.155932 0.756328 0.9218  
1.65343 2.280146 2.163925 2.265174 1.801234 1.560061 1.691596 1.690506 1.628828  
2.368312 3.052498 1.98672 2.405118 2.560308 1.617564 2.357707 2.177788 1.560579  
1.090214 1.489487 1.088897 1.704561 0.959732 1.080198 1.625635 0.988149 2.338653  
1.071069 1.150204 1.200693 1.165075 0.607326 1.412921 1.407392 1.32089 1.861825  
1.471064 1.642725 1.57785 1.459941 2.24749 1.347372 1.84201 1.803943 1.394631  
2.26011 1.378639 1.41686 1.373627 2.371797 1.826689 2.40523 1.920955 1.626375  
2.805944 2.412685 2.915938 3.786897 2.087269 3.264446 2.311582 2.318852 1.920544  
1.270179 0.975584 1.009498 1.16826 2.29843 1.309897 1.66938 0.897678 1.214944  
1.188861 2.081457 1.044759 1.098858 2.647753 2.348989 0.777455 1.19993 1.022501  
2.041434 1.321767 1.690983 1.627913 1.277711 1.150737 1.732181 1.141999 1.83619  
1.609685 2.359785 1.129388 1.801626 1.383983 2.957728 2.008152 1.806099 1.720788  
2.552941 1.932695 1.780941 1.485659 1.260318 2.294433 2.137324 2.115449 2.311655  
2.142095 2.056068 1.750633 2.216933 1.795107 2.267625 2.45724 1.609443 1.682439  
4.600254 5.708027 5.887906 3.97724 5.319977 4.613654 4.801443 5.267252 4.04235  
2.102886 1.106596 1.150341 1.269759 0.978125 0.615451 1.338394 2.322806 0.974451  
2.341731 2.360217 1.637322 2.916071 3.212183 2.67913 2.392786 1.953746 2.176599  
2.247192 2.378266 1.69606 2.080184 2.093797 1.491936 2.314621 1.350734 1.86138  
1.892972 0.883114 0.672151 1.639192 0.961783 1.323403 0.904759 1.019128 0.645276  
1.850095 1.671743 1.991084 1.768498 2.128263 1.759144 2.826174 1.758421 1.936841  
2.012148 2.897448 2.63668 2.555788 2.184836 2.540729 3.840177 1.579924 1.948677  
1.201835 0.84566 1.227527 1.154683 1.453396 1.269028 1.784298 1.723096 1.3564  
2.004557 1.731156 1.739959 1.246697 2.468794 1.736553 1.998329 2.332729 1.229013  
6.473073 5.994085 5.541906 6.174945 6.945544 6.458646 6.813888 4.034627 6.439645  
2.970306 2.071031 2.85779 2.804381 2.202837 2.68315 2.304027 2.389906 2.416059  
1.227903 1.0139 1.040092 1.111322 1.282372 0.912381 1.552664 1.165038 1.279662  
5.834178 2.985388 3.88506 2.437299 3.040348 2.755675 3.62071 3.169425 3.387721  
2.161657 0.643406 1.304516 1.636678 2.323429 2.214618 1.962977 1.849136 0.694906  
2.036654 1.65281 1.801959 1.736772 1.604024 2.059643 1.967024 1.566654 1.600906  
3.229149 1.642491 1.376156 1.501314 1.764217 1.848127 2.262884 2.177297 1.489582  
1.252677 1.298121 1.578572 1.512463 1.35118 1.966588 1.543783 1.207835 1.7176  
1.396337 1.587967 1.10501 1.766693 1.19484 1.370076 1.526313 1.048988 1.959911  
2.454017 2.007795 1.595933 1.492672 1.144847 1.840198 2.975249 1.703244 1.862777  
2.721239 2.042703 2.623749 1.404643 1.872476 3.104272 1.109876 1.658583 2.052341  
1.707281 1.98029 1.934988 1.870339 1.481895 2.066241 1.942876 2.165559 2.125671  
1.810068 1.578569 1.713256 1.009361 2.185444 1.560425 1.633923 1.210296 1.296505  
1.604232 1.811383 2.058726 2.048473 1.810348 2.359093 2.051775 1.949922 1.915606  
1.854306 1.514645 1.610274 2.097369 1.605239 1.981798 2.144023 1.479933 2.033431  
1.169187 1.918424 3.56803 2.389022 2.230207 2.134015 1.361003 1.673923 1.399789  
1.390024 1.26351 0.860465 0.849544 1.188596 0.97732 1.006598 1.166612 1.037964  
2.59754 2.555221 2.571272 2.520778 2.384561 2.464322 2.37223 2.274632 3.448542  
2.135263 1.233708 1.330186 1.36025 1.409675 1.13987 1.5299 1.743667 1.435336  
1.495242 0.960315 0.95307 1.17835 1.129805 1.72927 1.529761 1.135588 1.288704  
2.011038 2.28284 2.561077 1.348383 1.756736 1.909925 2.227058 2.117785 1.930344

6.008538 6.724126 6.161555 5.787851 6.358246 5.549537 6.854239 6.067439 6.358951  
0.915348 1.051841 1.189681 1.763964 1.018337 1.065289 0.897423 2.041977 1.184871  
1.462934 1.220544 1.103108 1.157294 1.20339 1.206115 2.200934 1.236827 1.142132  
1.188754 1.372809 2.087637 0.971829 1.343799 1.797281 2.058973 2.707992 1.527855  
2.710248 2.517692 2.400049 3.080401 1.748402 2.776282 2.26574 0.973195 2.662548  
2.216966 1.378478 1.773958 2.281763 2.21154 2.248254 2.098553 2.163737 1.31861  
1.021458 1.253893 1.220732 1.133319 1.092652 1.200677 1.360748 1.090931 1.339451  
3.087713 2.104925 1.547074 2.011214 1.718038 1.85954 2.463357 1.90701 1.990471  
2.082906 2.021279 1.976767 1.734433 1.523626 1.66107 1.353941 1.724901 1.945496  
1.551648 1.587001 0.898648 1.580667 1.280189 1.305238 1.498647 1.333524 1.315168  
2.190046 1.8116 2.247978 1.929942 2.357651 2.573331 2.187649 2.533849 2.149999  
1.201122 2.023536 1.260667 1.608458 1.607555 1.304803 1.445086 1.335553 1.251687  
4.209033 4.264177 3.682458 2.882481 4.299531 4.778785 3.469264 5.556212 4.540375  
1.721405 2.478482 2.4652 1.621096 2.029857 2.546449 3.759499 2.440933 2.476867  
0.980477 1.270741 1.077903 1.837297 1.544359 1.624062 1.557331 0.797074 1.16169  
1.413504 0.963108 1.088029 1.066848 1.250917 1.715289 1.490319 1.730717 1.599938  
1.987017 3.352484 2.324786 2.490767 2.944903 1.878832 5.352966 5.94351 3.428197  
1.901514 2.047047 2.04747 2.232563 3.130274 2.262843 2.369967 2.147837 2.166584  
0.982923 0.684306 0.810419 0.73827 2.888633 0.973011 0.843794 1.835508 2.444456  
2.647644 2.140049 2.037546 3.59346 3.49286 2.392269 2.762841 2.873837 2.600619  
1.282449 2.684517 2.233252 1.455354 1.369467 2.027799 1.550198 1.1964 2.086079  
2.1587 2.031789 1.678928 1.418524 1.268143 1.38237 1.827065 1.900265 1.058563  
1.937459 1.553278 2.533377 1.020819 2.572359 1.758163 2.865945 2.017417 2.274029  
2.141795 1.59612 1.707344 2.058828 1.139654 1.333361 1.251908 1.285513 1.336785  
1.926423 1.896343 1.845044 1.950729 1.23829 2.072496 1.475178 2.439308 1.94218  
1.874921 1.136841 1.276921 1.272731 1.376344 1.334037 1.247937 1.895258 1.566349  
1.151376 0.885081 1.040227 1.201077 0.981697 0.992691 0.845899 1.47676 1.113518  
1.439965 1.867668 1.213742 1.405584 1.91803 1.78469 1.759835 1.249368 1.37943  
1.792218 1.228045 1.233812 1.240485 1.219986 1.142551 1.798959 1.213195 1.550941  
1.282755 1.543589 0.948957 1.416154 1.140617 1.21136 1.370348 1.248972 0.934324  
1.716195 0.891966 0.946976 1.41687 0.942266 1.900396 1.835273 1.099528 1.308323  
1.440252 1.294345 1.283181 1.255945 2.104594 1.355892 1.903036 1.665892 2.525681  
2.303993 2.666787 2.158758 2.153306 2.437246 2.306565 3.319285 2.349629 2.511969  
1.484088 1.450755 1.657336 1.529642 1.233443 2.151376 1.374712 1.65795 1.710785  
3.538356 3.827754 4.450427 5.094426 4.655998 5.0981 2.591904 4.940188 3.733646  
8.598326 8.467329 8.179645 8.439235 8.72952 8.365584 8.095646 8.220905 8.878035  
1.607767 1.464903 1.686254 1.211652 1.3624 1.743986 1.726364 2.551751 1.841804  
1.5133 1.428807 1.278887 2.670852 1.640451 1.902997 1.372204 1.466078 2.207338  
2.642268 3.771253 1.911352 4.512302 2.813525 3.133771 2.83399 2.485988 2.128587  
1.397871 1.351477 1.558232 1.983751 2.111044 1.623713 2.378602 1.714502 1.484534  
1.642379 0.526059 1.170062 0.396677 1.073638 1.189699 0.877986 2.266833 0.836511  
0.530417 0.536909 0.58721 0.728695 0.623199 0.568838 0.895875 0.418139 2.670265  
1.538705 0.674534 0.984384 0.933846 1.152102 1.040498 0.984661 0.686222 1.258613  
1.801924 1.393194 1.51207 1.52674 1.212251 1.603259 1.735234 1.582587 1.463022  
1.438721 1.692289 1.50587 2.089798 0.73898 1.691956 1.751677 1.737087 1.21518  
1.097073 0.524537 0.641054 1.390886 0.475034 1.066025 0.750762 0.743482 1.23261  
1.729693 1.103107 1.553324 1.61157 1.65272 1.136686 1.835645 1.277821 1.527786  
1.558467 2.662421 1.562036 1.739858 1.791972 1.314671 2.204215 1.261919 1.912787  
1.925067 2.023427 2.360417 2.051325 2.44907 2.093945 2.581903 2.774883 2.025418  
1.763582 1.320737 0.964556 0.937849 1.175103 1.173607 1.423473 0.81664 1.176845  
1.953196 2.864417 3.517926 1.301393 1.697423 3.10079 1.169087 1.172516 1.896447



4. 487699 3. 353453 4. 418787 2. 956362 4. 451256 5. 082894 4. 734619 4. 261779 4. 580666  
2. 047065 1. 660884 2. 389892 1. 368608 2. 504546 1. 72604 2. 001287 2. 254483 1. 999258  
3. 707574 2. 596935 3. 442923 3. 178609 2. 588039 3. 007384 2. 911574 2. 483441 3. 35543  
1. 291941 1. 567992 1. 072397 1. 004489 1. 414029 1. 565966 1. 47966 1. 254221 1. 506831  
1. 878436 2. 544384 0. 919418 2. 105634 2. 060917 1. 078377 1. 207252 2. 381044 1. 883758  
0. 932382 1. 563619 1. 215371 1. 602303 2. 157793 1. 042325 1. 120129 1. 094398 0. 806965  
2. 26934 2. 104042 2. 149253 2. 562337 2. 021006 2. 633782 2. 03935 2. 32449 2. 329784  
1. 470163 1. 043293 1. 749249 1. 11733 1. 600166 0. 983323 1. 809711 1. 22992 0. 936736  
2. 87503 1. 949873 2. 108991 2. 046449 2. 3534 2. 015255 1. 692355 2. 176585 1. 710664  
2. 117043 1. 386471 1. 349839 1. 209409 1. 304464 1. 393862 1. 320231 1. 449636 1. 16911  
2. 951842 6. 217148 4. 339579 4. 623304 4. 759662 3. 873334 3. 547304 3. 009513 3. 952189  
2. 72361 1. 296227 1. 186475 0. 902636 0. 830416 0. 797655 1. 12111 1. 589603 1. 259192  
1. 711981 1. 319528 1. 549354 1. 340761 1. 413964 1. 012988 1. 124958 1. 222541 1. 758698  
1. 182891 1. 013865 0. 984314 0. 935895 0. 958836 1. 13411 1. 253529 0. 850452 1. 408479  
1. 31334 0. 973226 1. 430274 1. 450855 1. 206713 1. 310848 1. 734478 1. 124515 1. 672196  
2. 069713 1. 936031 0. 892871 1. 163759 2. 218365 3. 717232 2. 44154 0. 538807 2. 899236  
2. 929345 1. 543503 2. 49337 2. 664193 2. 278377 1. 802613 2. 822802 2. 317451 2. 097209  
1. 829676 1. 23753 1. 90562 1. 71596 2. 022853 1. 530195 2. 019265 1. 327755 1. 54269  
2. 746399 2. 438107 2. 109476 3. 345145 2. 50494 1. 924466 3. 43148 2. 077586 2. 708371  
2. 419496 1. 44726 1. 630274 2. 187916 1. 820855 2. 134484 2. 578897 3. 925092 2. 338843  
0. 942293 0. 951906 0. 544304 1. 173373 0. 720958 1. 07176 0. 701431 1. 146655 1. 107819  
1. 93638 1. 208021 1. 540847 1. 688542 1. 292068 1. 899114 1. 901166 1. 207917 1. 102504  
1. 660154 1. 266531 0. 913996 2. 084392 1. 567542 1. 453832 1. 549993 1. 646767 1. 36705  
3. 378188 1. 920501 2. 6167 1. 3389 2. 109735 2. 343462 3. 950562 2. 168366 2. 745903  
1. 409248 2. 301333 0. 654693 1. 021859 1. 093885 1. 333742 1. 89135 1. 387708 1. 660449  
1. 237248 0. 953693 0. 938626 1. 109342 1. 258187 0. 9963 1. 014811 1. 408252 1. 860134  
2. 411396 1. 296141 1. 52485 1. 419126 2. 212709 2. 251969 1. 481904 1. 659936 1. 467088  
6. 709885 6. 471795 6. 135604 6. 121457 4. 624433 6. 079663 5. 81657 4. 94787 5. 708202  
1. 569486 1. 856893 1. 600937 1. 870822 1. 661609 1. 343222 1. 654692 1. 562791 1. 523591  
2. 382428 1. 848104 1. 906652 2. 450439 1. 768961 1. 502163 1. 76055 1. 635231 1. 408568  
2. 411594 2. 259687 2. 038969 1. 259516 1. 973035 1. 921139 2. 874199 1. 49924 1. 142131  
1. 569882 1. 980992 1. 407511 2. 20567 1. 469902 1. 932929 3. 233005 2. 169374 1. 489581  
1. 931886 1. 440019 1. 886363 1. 765189 2. 942655 1. 266007 2. 03921 1. 936429 1. 136053  
1. 06116 0. 819839 0. 976267 0. 86939 1. 065638 0. 971502 1. 405694 1. 133508 0. 735299  
1. 631254 0. 780153 0. 860184 0. 751598 1. 933562 1. 106432 1. 196313 0. 866206 0. 728272  
1. 570701 0. 969804 0. 912225 1. 16319 1. 121311 1. 288038 1. 180577 0. 838047 1. 735137  
2. 193017 2. 077608 2. 161663 2. 97532 2. 137344 1. 744989 1. 523678 2. 406002 1. 3396  
1. 222617 0. 918905 1. 291746 1. 624505 2. 316856 1. 636466 1. 491912 1. 953504 1. 093212  
3. 610937 5. 355853 5. 080043 3. 608035 6. 564204 5. 802401 3. 548861 4. 805726 5. 199697  
1. 879611 1. 430523 1. 032443 1. 572113 1. 306089 1. 504699 1. 146387 1. 377568 1. 948932  
1. 4567 1. 558556 1. 770656 1. 581604 1. 107823 1. 253287 1. 525647 1. 51248 1. 233342  
1. 89195 1. 478997 1. 933809 1. 807679 1. 957494 1. 60641 2. 413268 1. 993561 1. 693727  
1. 987216 1. 895239 2. 063361 1. 694925 0. 737959 1. 948106 2. 92163 1. 57939 1. 965261  
1. 997884 0. 989542 0. 937527 0. 901234 0. 477292 0. 802344 3. 472707 1. 144248 0. 783221  
1. 216317 1. 232593 1. 59516 1. 57037 0. 964836 0. 631521 1. 068644 1. 249657 1. 070791  
0. 761103 1. 051309 0. 470653 2. 250604 0. 654175 1. 342683 1. 449982 1. 186754 1. 104233  
1. 014646 0. 775586 1. 058389 1. 333338 1. 112395 1. 114337 1. 228347 1. 026154 1. 371746  
2. 4528 2. 432877 2. 568113 3. 090062 2. 096438 2. 653915 2. 131778 2. 124735 1. 727319  
1. 477396 1. 325607 1. 087745 1. 597883 1. 361862 1. 303765 1. 312922 0. 884489 1. 158809  
1. 309964 1. 084121 1. 218486 1. 062054 1. 055014 1. 130665 1. 300348 1. 209861 1. 298847  
1. 699384 1. 03993 1. 086944 1. 588119 1. 473584 1. 806926 1. 139167 1. 042897 1. 310406

1. 78734 2. 000177 1. 655081 2. 581553 2. 366436 1. 218579 1. 411389 2. 864702 1. 26391  
1. 495843 1. 753781 1. 595217 0. 923731 1. 232395 1. 208165 2. 439164 1. 973148 1. 06918  
1. 38096 1. 18745 1. 182075 1. 312464 1. 667874 1. 297535 1. 434918 1. 517607 1. 034803  
1. 674969 1. 270357 1. 531582 0. 806136 1. 120621 0. 724992 1. 481253 0. 998144 1. 073347  
1. 134757 1. 180093 1. 000735 1. 469867 1. 308539 1. 340869 1. 037561 1. 453731 3. 002685  
2. 75473 1. 367243 1. 769151 1. 184206 2. 139706 1. 469907 1. 724481 1. 805635 1. 315124  
1. 714055 1. 64306 1. 848375 1. 744937 2. 126098 1. 799976 1. 933757 1. 450159 1. 665617  
1. 231214 2. 405803 1. 22201 1. 722391 1. 033351 1. 831193 1. 116448 0. 974903 1. 744455  
1. 239686 1. 126542 0. 956561 1. 599105 1. 032191 0. 803838 1. 006232 0. 880635 1. 869011  
7. 133821 7. 077783 6. 454899 6. 596228 7. 231429 5. 946113 6. 313267 7. 726742 6. 399856  
1. 877454 1. 367932 1. 114969 0. 898513 1. 899503 0. 928668 4. 115908 1. 260183 1. 567726  
2. 229731 0. 946596 0. 698685 1. 127669 0. 851998 0. 893787 1. 413961 0. 818357 1. 355423  
3. 825147 5. 303904 5. 200832 1. 58159 6. 629756 4. 262973 3. 207007 5. 210009 5. 937111  
2. 261217 1. 977811 1. 395958 1. 59596 1. 925032 2. 299559 2. 228808 1. 306301 2. 164925  
1. 943501 1. 626056 1. 334815 1. 698769 1. 270445 0. 894588 1. 631591 1. 390385 1. 357998  
1. 796167 1. 113678 1. 785246 1. 968546 2. 113683 1. 393691 1. 558539 1. 3064 1. 693633  
1. 971325 1. 4398 0. 780746 0. 972639 1. 052558 1. 240394 1. 09397 0. 901495 1. 653181  
0. 741855 2. 913998 0. 847367 2. 644049 1. 055636 1. 055562 1. 057897 1. 103827 0. 866117  
1. 956404 1. 927804 1. 855783 1. 752871 1. 835412 1. 828834 1. 571168 1. 692232 1. 422567  
1. 538055 1. 27202 1. 480281 1. 500531 1. 074113 1. 118885 1. 562561 1. 130953 1. 916117  
0. 705874 1. 186535 0. 790209 1. 181801 0. 856975 1. 602056 0. 77147 0. 611405 1. 019089  
2. 703097 2. 845174 3. 341097 3. 119568 3. 384775 2. 417679 2. 891926 3. 683218 2. 84362  
2. 663593 2. 57126 3. 182434 2. 438252 3. 067641 2. 667282 1. 927842 3. 299572 2. 647865  
1. 881618 1. 493163 1. 614591 2. 42308 1. 576608 1. 819591 1. 831204 2. 419772 1. 593428  
1. 34371 0. 950952 1. 19748 1. 737319 1. 445946 1. 30314 1. 100209 1. 668291 1. 199656  
3. 558847 2. 899131 1. 797973 1. 770786 1. 568687 1. 52359 1. 884248 2. 784499 1. 930023  
2. 178704 1. 344995 1. 260426 1. 377236 1. 060116 1. 31347 0. 887747 1. 150193 1. 33545  
1. 79259 4. 018146 3. 22683 2. 771481 4. 39505 3. 574432 3. 380719 1. 681385 3. 711249  
1. 626908 0. 863532 2. 024581 1. 277496 1. 086204 1. 432897 1. 313637 1. 02891 1. 604813  
3. 234348 2. 353244 1. 798227 2. 219163 2. 244356 2. 774899 1. 726194 2. 831687 2. 458478  
2. 393481 1. 427411 0. 825249 1. 360706 0. 927394 2. 477886 1. 357767 1. 351737 2. 106829  
2. 781072 1. 985099 1. 96812 2. 133646 2. 176539 1. 735479 2. 096068 2. 31517 1. 802019  
2. 40707 1. 568722 1. 664582 2. 226959 2. 252049 2. 599048 2. 485075 1. 828402 2. 620059  
6. 462183 7. 063217 7. 023367 7. 616447 5. 88039 6. 2345 6. 650397 6. 376423 6. 382453  
1. 580714 2. 372964 1. 455562 1. 213933 2. 848601 1. 616643 2. 330623 1. 852119 1. 521044  
1. 598463 1. 314351 1. 444302 1. 594017 1. 39264 1. 692061 1. 426839 1. 604247 1. 216348  
2. 938084 1. 29928 0. 792403 1. 157662 0. 743637 0. 947969 1. 080242 1. 374394 2. 237396  
1. 567136 1. 344875 1. 005 1. 132758 0. 946645 1. 370363 1. 069694 1. 312659 1. 348364  
2. 070909 3. 223322 2. 766668 2. 330678 2. 02592 2. 003334 2. 300833 1. 806859 1. 871163  
2. 168724 2. 70991 2. 19533 2. 250354 2. 391957 2. 26084 2. 784897 2. 038409 2. 133918  
1. 256985 1. 093785 1. 193194 1. 274515 1. 190713 0. 799677 0. 876927 1. 307471 1. 302936  
0. 965933 1. 227989 1. 195817 1. 490637 1. 304036 1. 208278 1. 665904 2. 398628 1. 214879  
1. 380821 1. 073173 0. 872205 0. 947519 1. 585976 1. 080791 1. 049627 0. 778192 1. 385931  
1. 777807 0. 97974 1. 571181 1. 698306 1. 281291 1. 448081 1. 536839 1. 059395 1. 117069  
4. 342304 5. 806747 6. 895879 6. 249184 6. 549452 6. 145779 5. 999851 5. 929965 5. 174628  
1. 391153 2. 684783 1. 944412 1. 462297 1. 2415 1. 07404 2. 167076 1. 297186 1. 42975  
1. 725389 1. 605123 2. 334345 1. 166877 2. 325112 1. 781949 2. 779649 1. 285187 1. 856545  
1. 150716 1. 067731 0. 984026 1. 34688 1. 072109 1. 064637 1. 420797 1. 351905 1. 034003  
1. 222162 1. 460659 0. 791987 0. 930336 0. 673487 1. 176423 0. 805301 0. 910911 0. 965679  
1. 767155 1. 726033 1. 577934 1. 157634 1. 263141 2. 776993 2. 418077 1. 639755 1. 59626  
2. 380107 2. 2712 2. 577978 2. 430536 2. 401597 1. 957092 2. 927246 2. 123792 1. 996414

1. 604624 1. 221545 1. 533259 1. 225761 1. 328996 1. 075464 1. 466412 1. 489834 1. 187009  
3. 015705 1. 977386 2. 047855 2. 318054 1. 871074 2. 837031 2. 095816 2. 532478 1. 750446  
1. 121718 1. 579746 1. 378786 1. 498181 1. 39115 1. 635388 1. 098772 1. 038392 1. 021521  
1. 005334 0. 999071 1. 256163 1. 124836 0. 947958 1. 517117 0. 852678 1. 302806 1. 354897  
1. 160099 1. 262533 0. 729681 1. 183185 0. 884725 1. 070436 1. 190001 0. 880895 1. 296876  
2. 067955 1. 988647 1. 994819 2. 340169 2. 258362 2. 362767 2. 508774 1. 909073 2. 003588  
2. 910563 2. 951134 2. 168075 2. 47913 2. 004785 2. 49164 2. 466543 2. 316762 2. 452174  
0. 94105 0. 779921 1. 425382 1. 481262 1. 59599 1. 163839 1. 522152 1. 48742 1. 429526  
3. 17825 2. 778427 3. 413005 2. 949715 1. 376099 3. 170058 2. 105802 2. 181877 2. 122896  
1. 298676 1. 319856 1. 518153 1. 323421 1. 873926 1. 543703 2. 571158 1. 284155 1. 50063  
1. 412301 1. 584373 1. 412929 1. 335944 1. 927871 1. 306007 1. 442658 2. 044013 2. 220307  
1. 675292 2. 137319 1. 407831 1. 720898 1. 170364 1. 435196 1. 026492 1. 037647 1. 291639  
1. 080769 0. 567842 0. 480137 0. 666169 0. 66198 1. 920135 0. 905792 0. 724604 0. 672402  
2. 327648 2. 181573 1. 854055 2. 348995 2. 979328 1. 692812 2. 454552 2. 407799 2. 001786  
1. 486624 2. 696178 2. 723459 1. 903852 2. 264468 2. 473881 2. 996512 1. 726208 1. 348574  
2. 277227 1. 773233 3. 626219 1. 997719 1. 871738 2. 261517 2. 228726 1. 529245 4. 309995  
1. 270056 2. 757398 2. 905296 1. 662685 2. 395596 1. 580511 1. 991273 1. 933985 2. 555871  
1. 837284 2. 106056 1. 200241 2. 292561 1. 35408 1. 757495 1. 476157 1. 385518 1. 498231  
1. 849081 1. 538379 1. 522055 1. 25111 2. 947708 1. 586645 1. 928524 1. 449695 1. 684069  
2. 081684 1. 328749 1. 532321 1. 435269 1. 690155 1. 451969 1. 820784 1. 110192 1. 281744  
2. 587244 2. 755379 1. 892693 1. 989583 2. 964799 1. 811453 2. 474303 1. 870055 2. 539433  
1. 655158 1. 091771 1. 370247 1. 715156 1. 599475 1. 876336 2. 431995 2. 29436 1. 66633  
1. 6132 1. 528829 1. 485441 1. 376655 1. 518404 1. 677761 1. 979797 1. 344769 1. 610902  
1. 57508 1. 586334 1. 415789 1. 721304 1. 360642 2. 136275 1. 265081 1. 596422 1. 316134  
1. 240278 1. 208079 1. 140643 1. 413141 1. 081093 1. 231561 1. 377198 1. 367197 1. 619646  
2. 397929 1. 262658 0. 9461 0. 877317 1. 086603 0. 734378 1. 389213 0. 661102 1. 262249  
1. 05894 2. 967911 1. 597581 1. 73685 1. 709566 1. 743693 1. 14396 0. 973977 2. 39226  
1. 005614 1. 114123 0. 865839 1. 592089 0. 915119 1. 427915 1. 085487 1. 632675 1. 127302  
4. 290575 4. 930588 2. 161576 2. 404066 6. 366497 4. 223444 2. 797288 2. 330513 2. 580496  
3. 135947 2. 392046 3. 960766 3. 732547 2. 495371 3. 268135 3. 113554 3. 168155 2. 113967  
3. 085432 2. 532885 2. 850431 2. 853048 3. 016197 2. 638783 3. 806377 2. 927213 2. 488985  
1. 168569 0. 48354 0. 518043 1. 687828 1. 020301 1. 541809 1. 694705 1. 799704 1. 049775  
2. 509698 3. 708284 3. 098128 2. 996332 2. 750372 2. 493428 2. 229996 3. 571708 3. 54304  
3. 750127 1. 906922 1. 791887 0. 882303 1. 768187 0. 993885 1. 01293 1. 092229 1. 538611  
1. 176787 1. 347302 1. 082142 1. 270471 1. 449166 1. 282168 1. 181907 1. 04906 1. 207276  
1. 896336 1. 446195 1. 521 2. 043892 1. 182878 1. 150821 1. 304643 1. 91607 1. 545107  
2. 197692 2. 329948 1. 48387 2. 864671 1. 83111 2. 258804 1. 960491 1. 358066 2. 053782  
1. 374642 1. 57447 1. 290879 0. 991606 1. 043551 1. 144856 2. 163393 1. 187406 1. 603649  
1. 217612 1. 61197 1. 144078 1. 370366 1. 246935 1. 315446 1. 952018 1. 384937 0. 948644  
1. 87769 1. 630989 0. 976713 0. 93636 0. 165851 2. 254921 0. 902843 1. 889471 1. 695963  
1. 664557 1. 425072 1. 587794 1. 200284 1. 732359 1. 448355 1. 504802 0. 787436 1. 38521  
1. 522118 1. 610202 1. 26312 1. 313834 1. 698229 1. 054894 1. 072772 1. 328825 1. 628862  
1. 428492 1. 413528 0. 725059 1. 634906 1. 435361 1. 914827 1. 578143 1. 13373 0. 673874  
1. 37836 1. 121404 0. 989587 0. 931759 1. 55989 1. 548769 1. 124151 0. 966805 0. 646529  
2. 358506 1. 778266 3. 952878 2. 342446 3. 164549 2. 671116 1. 679033 2. 75411 2. 167741  
3. 271033 2. 211551 2. 711147 2. 106681 1. 728482 2. 192112 3. 564069 2. 445888 3. 017318  
5. 407738 3. 653537 5. 759186 3. 682338 3. 600853 3. 476953 4. 422994 3. 5981 4. 572733  
1. 171056 2. 885205 1. 251101 1. 46375 1. 377341 3. 122431 2. 928862 1. 934362 1. 450611  
1. 270208 1. 021082 1. 273887 1. 439804 0. 721993 1. 945308 1. 164855 1. 287601 1. 320026  
1. 55015 1. 346709 1. 272287 2. 053578 1. 384945 1. 322112 2. 167073 1. 184839 2. 016536  
2. 626225 3. 186848 2. 051786 2. 573832 2. 156206 2. 039328 1. 869237 2. 326484 3. 165828

0. 971342 1. 070049 1. 622601 1. 306263 1. 309288 1. 237192 1. 567114 1. 627358 1. 327703  
1. 774711 1. 426163 1. 288108 1. 482711 1. 422328 1. 731088 1. 626501 2. 043611 2. 041386  
1. 235458 1. 077537 1. 64767 1. 759639 1. 644129 1. 443891 1. 344076 1. 448352 1. 332117  
1. 272889 1. 073431 0. 931178 1. 034339 1. 303076 1. 19048 1. 999222 1. 309466 1. 637285  
2. 467832 3. 458192 1. 535688 1. 990169 2. 549482 1. 231979 1. 534547 2. 454322 2. 63537  
1. 985504 1. 443933 1. 452547 1. 473769 1. 310869 1. 673611 1. 680782 1. 815752 1. 509702  
0. 97916 0. 788214 0. 905467 0. 793399 1. 623934 0. 764092 1. 652698 1. 032416 1. 32284  
1. 42287 1. 173733 1. 251517 1. 054535 1. 83642 1. 387032 1. 08631 0. 624744 1. 397029  
5. 07741 1. 402421 2. 268759 1. 421622 0. 870598 1. 027868 1. 932231 0. 971275 2. 327564  
1. 492607 1. 707464 0. 882045 1. 469036 1. 103661 1. 601902 1. 606434 0. 602371 0. 940618  
1. 862382 1. 68272 1. 431599 0. 890051 1. 353553 1. 183539 1. 809902 1. 61798 1. 674608  
4. 351057 2. 513834 4. 762287 3. 422427 2. 621739 3. 180437 3. 978644 2. 697193 3. 445346  
2. 187619 1. 260097 1. 545827 1. 431316 0. 897686 1. 665141 2. 329385 1. 132359 1. 232724  
2. 571144 3. 260472 3. 112259 1. 497675 3. 381915 3. 053879 2. 959544 3. 203095 2. 436074  
0. 891022 1. 114971 1. 936016 1. 09452 1. 309925 1. 720617 1. 172043 1. 140216 2. 049437  
1. 154101 1. 198305 1. 198743 1. 742153 1. 853177 1. 097407 1. 127845 0. 85733 0. 952819  
2. 818364 3. 093952 2. 679074 2. 741626 1. 988233 3. 389265 2. 15804 2. 038254 1. 65208  
1. 265086 0. 947366 0. 804667 1. 322278 1. 952102 0. 902301 2. 209567 1. 090953 0. 929768  
2. 130277 1. 675163 2. 22951 1. 531086 1. 730605 1. 960511 1. 565811 1. 67157 1. 584394  
4. 170152 4. 352222 4. 038995 4. 273561 4. 195017 5. 129147 4. 147457 4. 0969 4. 305979  
2. 659614 3. 47735 3. 594826 1. 955122 1. 487385 2. 254552 2. 446906 2. 213224 1. 161421  
1. 391908 1. 225334 0. 918645 1. 157517 1. 252735 1. 031027 0. 908233 1. 17606 1. 221406  
2. 987879 1. 712022 2. 306854 2. 211702 1. 737946 1. 969864 1. 843089 1. 98007 1. 935605  
2. 372677 0. 57877 1. 606279 2. 018602 3. 477743 3. 090493 1. 070096 1. 856717 0. 441754  
2. 534136 2. 442656 2. 094145 2. 35663 2. 672942 1. 971418 2. 090575 2. 293677 2. 493512  
1. 376329 1. 074259 1. 107199 0. 993824 0. 93894 2. 097248 1. 299421 1. 621076 1. 397093  
2. 332756 1. 553654 1. 939038 2. 815933 2. 256352 1. 966311 2. 02346 2. 037217 2. 687425  
1. 040951 1. 198362 1. 079681 1. 285066 1. 268497 1. 452496 1. 201935 1. 583349 1. 115976  
2. 009018 3. 406729 1. 662632 2. 745502 2. 653149 1. 324318 2. 357122 2. 178285 2. 228658  
1. 435064 1. 181816 1. 193403 1. 541449 0. 935617 1. 52464 1. 394228 1. 330544 1. 186934  
0. 999867 0. 998221 1. 241479 0. 893855 1. 756484 1. 183676 2. 163638 1. 368918 1. 719542  
0. 856475 0. 947631 0. 724434 0. 731864 1. 990983 1. 16217 0. 794844 1. 555346 0. 724726  
1. 745081 0. 834414 1. 863189 1. 224237 1. 356562 1. 011862 1. 436018 1. 214801 1. 417425  
4. 773613 4. 920178 6. 143894 2. 530154 3. 527393 4. 722197 5. 268627 6. 996044 2. 516064  
2. 727359 2. 73649 2. 020108 2. 093261 2. 049361 2. 607468 2. 480511 2. 419677 2. 202467  
2. 043534 3. 667801 3. 366152 2. 24999 2. 360972 2. 717596 3. 497412 3. 556926 1. 896833  
6. 046136 4. 241039 3. 63011 3. 868977 4. 550685 4. 775307 6. 025858 5. 050677 4. 962308  
2. 599561 2. 823055 2. 63838 2. 485007 2. 072102 2. 68886 2. 587657 2. 856851 2. 598176  
1. 863686 1. 0282 0. 97943 1. 384277 1. 323932 1. 180934 1. 153966 1. 119377 1. 239864  
2. 004482 1. 92741 1. 684703 1. 936413 1. 670863 1. 551555 2. 335156 2. 096506 1. 373521  
2. 433331 3. 097673 4. 960137 4. 460171 4. 575284 2. 555897 4. 085523 3. 510924 4. 597743  
1. 662186 3. 168064 0. 84603 2. 346184 0. 694228 4. 995925 1. 35627 2. 532604 1. 29753  
2. 671228 2. 11933 2. 298835 3. 338475 2. 017953 3. 383929 3. 096269 2. 266555 2. 494202  
2. 011546 1. 337749 2. 109807 1. 805487 1. 649323 1. 586462 2. 016241 1. 953797 1. 010007  
2. 121947 1. 694148 2. 017088 2. 217386 1. 915354 0. 904659 3. 114878 1. 646147 1. 977369  
2. 29748 2. 117229 1. 55288 1. 644776 1. 25883 2. 195184 1. 833247 1. 838397 1. 700857  
4. 086201 1. 372394 1. 427844 1. 403503 1. 25427 1. 559996 1. 498964 1. 744678 1. 3508  
2. 472659 1. 446535 1. 709274 1. 656671 1. 359142 1. 640371 1. 275104 2. 380805 1. 203032  
3. 827408 0. 767455 1. 037819 2. 125377 0. 728813 1. 586513 0. 846745 1. 5613 1. 060774  
2. 328404 2. 601584 2. 01242 2. 63996 1. 894204 2. 498407 3. 600995 1. 855472 2. 060046  
1. 788739 2. 405835 1. 892599 3. 298128 2. 000867 1. 664239 2. 363653 2. 36883 1. 8362

1. 679413 1. 214257 2. 879835 1. 45566 0. 823739 1. 419048 1. 110914 6. 324683 1. 625535  
4. 397175 2. 902008 1. 360129 2. 178471 1. 516737 2. 699115 2. 229495 1. 922168 1. 938978  
2. 277114 2. 130561 1. 735367 2. 152436 1. 773988 2. 233791 2. 76796 1. 658845 2. 875164  
1. 807776 3. 444664 1. 555534 4. 105125 4. 144517 2. 374722 3. 200843 2. 631062 5. 622664  
2. 077768 2. 376501 1. 835214 2. 173441 1. 843955 2. 333898 2. 099054 2. 185731 2. 118419  
1. 701596 1. 391158 0. 616794 0. 926785 1. 209474 1. 523001 1. 01819 2. 28535 1. 707777  
1. 753278 1. 867345 1. 262033 1. 715962 2. 308636 1. 545018 2. 74189 2. 768164 1. 289118  
1. 797813 1. 845873 1. 831831 1. 386668 1. 668802 1. 91547 1. 234841 2. 260941 1. 642281  
3. 637645 3. 545467 3. 837861 4. 273464 2. 736523 3. 48495 2. 976156 3. 243163 2. 814731  
1. 342944 1. 476846 2. 116414 1. 393179 1. 366003 1. 892347 2. 115283 1. 466563 1. 185962  
1. 002663 1. 183192 1. 587106 1. 30986 4. 230286 1. 431535 1. 256533 1. 162749 1. 013356  
1. 155716 1. 266777 1. 592649 1. 016548 2. 120996 1. 117171 1. 93484 1. 677668 1. 322463  
7. 800034 6. 012647 6. 316279 5. 465922 3. 808242 5. 454356 6. 422191 5. 302936 5. 741584  
1. 126077 1. 156228 1. 848836 1. 413893 1. 774531 2. 228602 1. 870502 1. 684791 1. 386152  
0. 809733 1. 121614 1. 098828 0. 612397 1. 639431 0. 696952 1. 341518 0. 878905 1. 389798  
1. 656982 1. 067544 0. 868489 1. 21167 1. 312963 1. 035193 1. 476445 1. 082325 0. 955964  
3. 327938 3. 60688 5. 318589 3. 523733 4. 265629 3. 520861 4. 129198 3. 911348 3. 405375  
4. 390716 4. 190907 3. 939162 3. 045681 3. 478981 4. 294736 3. 678283 4. 502194 4. 139255  
4. 309292 3. 812515 4. 391713 4. 668141 4. 242377 3. 841517 3. 566135 4. 548605 3. 916433  
2. 656908 1. 584265 3. 32496 2. 425028 3. 216241 3. 87112 2. 833854 1. 213659 1. 235453  
3. 072061 1. 330259 1. 597381 2. 302533 2. 846683 2. 242783 3. 349316 2. 26042 1. 928327  
1. 512959 2. 296082 1. 328446 3. 062034 1. 633626 2. 332496 1. 577369 0. 809866 2. 558756  
2. 037155 2. 362612 2. 926105 1. 929407 1. 812598 2. 417403 2. 016788 2. 023104 1. 958586  
1. 380538 1. 686072 1. 11403 1. 538188 2. 592051 1. 835911 1. 71325 1. 555099 1. 292634  
1. 777379 1. 201136 1. 819257 1. 952532 1. 837237 1. 859522 1. 828789 1. 432279 1. 87924  
2. 076161 1. 259187 0. 608264 0. 75602 0. 998018 1. 573144 0. 844558 0. 847573 2. 015266  
2. 914983 4. 015046 2. 273569 1. 977416 1. 972614 2. 190224 2. 240376 3. 749488 1. 864645  
0. 670096 2. 370244 0. 681553 2. 10313 0. 697303 0. 72227 0. 798948 3. 298085 1. 994464  
1. 531481 1. 125398 1. 997465 1. 530742 1. 869903 1. 256557 1. 12183 1. 3518 1. 219388  
1. 315144 0. 83257 1. 073631 0. 838791 1. 290934 1. 225125 1. 202194 1. 123016 0. 931457  
2. 450433 1. 886002 2. 838039 1. 88199 1. 939172 1. 904587 2. 052677 2. 733131 2. 223131  
2. 162115 1. 571141 1. 500658 1. 826203 1. 602011 1. 526107 1. 967347 1. 264397 1. 208582  
4. 972615 5. 427883 5. 498694 5. 351804 4. 874986 5. 240015 4. 354335 5. 179378 5. 353536  
7. 826303 7. 604743 8. 084909 7. 158596 7. 194711 7. 857065 6. 783382 7. 297146 7. 12437  
0. 980561 1. 036934 0. 88284 0. 986667 1. 207003 0. 874834 0. 998643 1. 183394 1. 243028  
2. 026275 0. 905254 1. 634868 1. 838144 1. 291238 1. 081867 1. 50022 1. 068943 0. 976248  
0. 95282 1. 722838 0. 795193 1. 702976 1. 964228 1. 216966 1. 320921 1. 351063 1. 869618  
1. 678914 0. 847693 0. 948344 1. 256212 1. 263283 1. 320109 1. 64357 0. 95736 1. 540029  
0. 731673 0. 539044 0. 56401 1. 033342 0. 6093 0. 86535 0. 670259 0. 965314 0. 971879  
2. 011402 3. 767332 2. 610251 1. 233271 1. 388407 1. 583387 1. 239275 1. 339201 1. 337688  
0. 720359 1. 334427 1. 197087 1. 204319 1. 044092 1. 308758 1. 876865 1. 217896 1. 273207  
1. 609694 1. 063517 1. 142936 1. 065353 1. 097309 1. 018107 1. 100806 1. 222181 1. 300485  
5. 233277 5. 179986 5. 143003 5. 268267 5. 608888 5. 646933 5. 520502 5. 243094 5. 521821  
4. 13638 4. 782838 3. 969867 3. 508216 4. 545689 4. 638421 4. 591676 4. 608414 4. 358763  
2. 147543 1. 650192 2. 162485 2. 146464 2. 010393 2. 053803 1. 760222 1. 979142 2. 151915  
0. 980431 0. 956908 2. 839158 1. 547837 1. 883417 1. 909139 2. 27392 1. 596165 1. 826139  
5. 890166 6. 462988 6. 154469 6. 513991 7. 238517 6. 183189 6. 213911 6. 097608 6. 202666  
3. 883849 3. 860982 4. 375858 2. 805233 3. 26599 3. 605486 3. 774822 3. 792933 3. 903681  
5. 67801 6. 551967 6. 040212 5. 535257 6. 656584 6. 088205 6. 491808 6. 366914 6. 000669  
7. 090638 6. 715002 6. 728077 6. 712984 7. 183078 6. 355201 7. 357321 7. 330709 7. 331194  
3. 303758 3. 083004 2. 781328 3. 281255 2. 213768 3. 056375 2. 619067 2. 015046 1. 86548

5.244656 5.506758 6.33211 4.279977 5.49472 5.38451 5.066877 4.868967 5.669856  
2.849171 3.086873 3.322926 4.183034 4.160486 2.64636 3.334465 4.106444 3.433488  
2.218839 2.49323 3.534406 3.538983 3.267647 3.096942 2.962514 3.948788 1.861538  
1.920953 2.999808 1.988017 2.286453 2.055753 2.170051 2.48637 2.417253 2.274862  
7.273149 7.930234 7.684931 8.121926 7.749944 8.080344 7.524762 7.131046 7.674376  
4.17374 5.62081 5.937388 5.515826 6.507045 4.04531 5.076321 5.664658 5.351512  
5.2484 3.41231 4.480319 5.586181 5.107959 5.307101 4.176806 4.085522 4.366153  
2.058437 2.034307 1.848108 1.965142 2.169099 2.062998 2.46123 2.711239 2.03548  
4.575673 4.991257 4.868457 4.514833 5.510816 5.175019 5.145894 5.574154 4.659129  
7.052369 6.259668 6.213297 5.767693 6.440169 5.920546 5.806292 5.99432 6.640376  
5.404815 4.915645 5.545689 5.512936 5.603641 5.292996 5.202257 5.328381 5.269517  
10.17626 10.5103 10.44537 10.36209 10.04783 10.20289 10.3425 10.65467 10.41548  
4.646153 5.439325 5.067803 5.296498 5.214312 5.651266 5.59471 5.694083 5.758387  
4.904369 6.134713 6.616803 6.004223 6.728274 6.346679 6.195934 5.993294 6.136032  
6.970362 7.37474 7.371368 7.517837 7.272622 7.6752 7.631588 7.712798 7.509001  
4.965331 5.60273 4.904548 6.087516 6.48064 5.895467 5.720377 6.175337 5.921983  
7.233378 7.823931 7.894068 7.226152 7.600264 7.349797 7.609423 7.953004 7.790537  
0.886548 0.686434 0.600265 0.502255 0.628143 1.128797 0.550988 0.579888 0.750928  
1.890244 0.951899 1.068162 1.16434 1.568539 1.547634 1.133388 1.231634 1.338489  
8.45272 7.932402 8.097809 8.213792 7.832174 7.035388 8.303522 8.10027 7.109605  
1.586062 1.935205 2.06903 2.603596 2.494991 1.663203 3.30673 1.674034 1.797487  
2.125092 2.186521 2.071319 2.355425 2.397683 3.142321 2.000725 2.717991 2.029571  
8.37864 9.206887 9.188249 8.900417 9.397292 9.140828 8.893671 8.944849 9.21816  
1.863067 1.616988 2.046557 1.468873 1.824256 2.166773 2.407308 1.721644 1.868635  
3.610771 2.19379 3.478582 2.37007 1.607918 1.86462 1.906883 1.640385 1.487142  
6.082337 6.53246 6.019401 6.671967 6.948719 5.975491 6.615015 6.641653 6.5402  
4.314256 4.638869 4.265173 5.236937 4.750134 4.464008 4.428412 4.981244 4.425407  
1.506663 1.715244 2.67413 3.490374 1.885693 1.836562 3.373296 1.250252 1.925878  
1.162516 1.297072 1.384086 1.069493 1.073228 1.445709 1.775693 1.253189 1.241354  
3.438689 2.406302 3.368657 2.341005 3.145062 2.99421 2.954626 3.131987 2.705445  
1.610147 1.580215 1.455912 1.946836 1.807447 2.444307 1.538392 1.909985 1.658374  
2.210632 1.413381 2.183543 2.209218 1.502809 2.022677 2.107606 1.612881 1.892461  
2.406729 3.064189 2.768075 3.263911 2.004323 3.256916 3.259306 2.905584 3.881571  
2.062268 1.485507 2.026744 3.005571 1.664596 2.697262 3.174722 1.718087 2.067063  
3.496151 3.973302 4.450909 3.879544 5.162794 3.445339 4.166655 3.930343 4.265854  
4.619392 4.433161 4.856097 5.071793 5.505531 4.925702 5.568559 5.823805 5.421594  
4.736158 4.278861 4.25175 5.318823 4.708974 5.014858 4.066097 4.949297 5.02833  
5.994702 5.8804 5.225749 5.853128 6.194866 5.266818 5.953186 5.780853 6.005274  
7.223424 6.570167 5.845138 5.328983 5.431229 6.144569 6.778937 6.104508 6.296238  
4.830544 4.800644 4.778235 3.853644 3.886098 5.696088 3.021322 4.974979 4.472733  
6.40895 6.358405 6.76633 6.658599 6.243298 6.784044 6.680614 6.154538 6.164939  
5.22685 5.870178 4.222753 5.396549 4.841054 6.26073 5.677028 4.880357 5.404104  
3.166114 4.667103 4.283345 5.011414 3.819497 3.388432 3.82737 3.478483 4.54866  
2.628222 1.940395 2.350553 2.067001 1.71082 1.793265 2.531465 1.650207 1.544992  
2.98352 3.873601 3.082322 3.243137 3.722207 3.862514 2.924687 2.601101 3.182948  
7.097473 7.330142 6.905096 7.416928 7.036688 7.438938 6.665981 7.132637 6.976825  
7.686333 7.459763 7.618892 7.758356 7.857094 7.5122 7.874308 7.522902 7.828481  
7.318533 7.08778 6.703793 7.005394 6.737171 7.145054 6.529003 6.754847 6.907993  
6.171835 7.203724 6.992826 6.059016 7.141837 6.972769 6.813611 5.847743 6.778356  
7.751196 8.205265 8.096548 8.369669 7.447308 8.500783 7.981309 7.804113 8.452352  
5.060948 5.54189 5.036803 3.475046 4.102218 5.245931 6.037165 5.945414 4.447531

6.975816 7.913269 7.426938 7.383427 8.053871 6.810869 6.875969 7.257257 7.718569  
3.106934 3.661086 3.581764 3.76024 3.218363 3.739158 2.974765 3.814613 4.311776  
4.362229 4.362167 4.26542 3.988042 3.409382 3.595966 4.330278 4.314693 4.294114  
4.071875 2.842593 2.29277 1.664808 1.134501 1.352319 2.67313 1.903722 1.377432  
1.0618 1.062092 0.888359 1.140925 1.134682 1.255111 1.110079 0.942443 1.529857  
1.585555 1.479548 1.614175 1.414966 1.497008 1.97748 1.563423 1.158546 1.801178  
1.219262 1.381712 1.818673 1.064212 1.036015 1.208154 1.73579 0.930231 0.911341  
1.973205 2.278971 1.785133 1.923332 1.994326 2.071253 2.206826 2.325998 2.214529  
1.416882 1.100954 0.840894 1.38359 1.28616 1.139666 1.614967 1.018262 2.307449  
0.9973 1.104048 0.672109 0.952776 0.988927 0.752428 1.000061 0.765351 0.722061  
1.885043 1.053758 0.961848 1.300034 0.842203 1.390338 1.417619 1.744507 1.199667  
1.502943 1.326953 1.194388 0.933446 1.212748 1.413107 1.910237 1.517258 1.498192  
1.575855 2.149325 1.155152 3.877851 2.34182 3.874583 3.852754 3.137777 2.737994  
1.462003 1.492666 1.396311 1.914333 1.646141 1.742023 1.59745 1.170223 1.304384  
2.145793 2.380276 2.458615 2.636339 3.028256 1.421295 2.041427 1.860763 2.395516  
0.962083 1.44551 0.940161 1.730784 1.7461 1.191307 1.221896 1.178065 1.396804  
1.422242 1.11835 0.931593 2.285829 1.730556 0.99223 1.562857 0.667562 1.023789  
3.210963 3.318258 2.07084 3.348653 1.536902 3.590055 1.93624 3.186638 2.318559  
1.494511 1.32102 1.779836 1.389731 0.909414 0.960842 0.742453 1.128409 1.596335  
2.141207 1.320433 1.644696 1.44103 2.34802 1.720695 1.860552 1.397729 1.725182  
1.291391 1.348349 2.682126 1.296929 1.565111 1.403388 0.651249 0.755505 1.813112  
1.364177 0.921507 0.817982 1.175074 1.36571 0.971689 1.587681 0.888864 1.136691  
0.811692 0.823873 0.742191 1.009081 0.866873 1.350089 1.236428 0.913925 1.278364  
0.961744 0.726503 0.862493 0.624674 1.56177 1.301097 0.925111 1.100663 1.087184  
1.40451 1.300671 1.631633 2.012843 2.657921 2.250609 1.599651 1.863975 2.036268  
2.539871 2.195004 1.64646 1.625608 1.813922 1.984183 1.502823 1.498198 2.448371  
7.575802 6.110516 7.047484 4.626625 5.911461 4.69662 5.520946 5.650789 7.021877  
5.428734 6.287805 6.501478 5.861784 5.809554 6.192782 6.232408 6.265008 6.41131  
9.155682 7.299086 8.227622 6.592087 6.480224 6.052092 7.060252 7.077077 8.497351  
4.63001 6.006618 5.660449 5.532905 5.611254 5.576197 5.647084 5.286006 6.164021  
0.819423 1.168637 0.513547 0.665084 1.122855 1.169079 0.818397 1.530918 0.916634  
1.102819 1.14736 0.909479 0.940602 1.234194 2.069084 1.563909 1.320342 1.70512  
8.515141 9.064162 9.110435 9.054882 9.208777 9.102503 8.888154 8.994244 8.842451  
4.566472 4.940023 2.998239 5.461495 4.436061 4.817963 4.732509 4.161046 4.677823  
1.417482 1.477846 1.63921 0.923324 0.936506 1.223101 1.206103 1.186356 0.913111  
6.80822 6.656325 6.431732 7.076424 7.180013 6.894949 6.66757 6.310191 6.796165  
6.039166 5.393142 5.631328 5.619599 6.277262 6.509679 5.190483 6.255747 5.474444  
1.390002 0.924962 1.098533 1.739374 1.442953 2.426605 1.621818 1.391728 1.615269  
1.278517 0.837824 0.731336 1.074336 0.71182 0.818595 0.837161 1.499155 1.052145  
1.401728 1.215896 0.952065 1.463466 1.056944 1.133073 0.939789 1.163481 1.25036  
1.38581 1.792964 1.110145 1.624879 1.577511 1.577415 1.93677 1.969672 1.662476  
0.993751 0.989984 0.622925 1.105243 0.941703 1.016129 1.147384 1.100804 0.861789  
1.46417 1.047351 1.184353 2.168173 1.104958 1.063686 1.828573 1.019567 0.937267  
1.694047 1.395338 1.6586 1.547063 1.700095 1.260809 1.879996 1.16598 1.83195  
7.038364 7.875163 7.664826 7.899887 8.320581 7.92172 7.660277 8.265982 7.90259  
1.242704 0.980248 1.110652 1.185508 1.607036 1.413806 1.574344 0.959003 0.916309  
3.025244 2.939908 3.262096 2.770878 2.622425 3.363614 2.957099 2.960877 3.037967  
1.108475 2.830979 3.026238 1.914633 2.091456 2.018429 1.195347 2.675274 1.393915  
2.633247 2.096826 2.570106 2.425605 2.10624 3.04988 3.113735 2.317613 2.535648  
1.676939 1.846367 1.499145 1.708854 1.88812 1.287647 1.742215 1.653699 1.842745  
6.27699 4.512714 4.001788 4.585104 4.377139 4.349269 4.16253 4.616095 4.779681

6.100007 6.764211 6.656801 6.615184 6.674049 6.568412 6.69152 6.187284 6.214738  
0.826807 0.926929 1.396295 1.066973 0.784927 1.210036 1.528049 1.194727 0.667012  
2.475243 3.154925 2.225029 3.0106 4.041717 3.139507 2.540499 2.28908 1.989576  
1.665218 1.426374 1.054374 1.437762 2.374506 1.909322 1.835278 1.271955 1.16871  
5.936732 6.287311 5.829919 6.076416 6.329137 6.107863 6.103949 5.625381 6.059267  
3.271737 4.577156 3.690887 4.369499 3.951207 4.712297 5.350489 3.192494 3.716583  
7.313273 7.09526 7.601156 7.753032 7.819853 7.383268 8.12862 7.282245 7.135429  
3.690293 3.186465 3.998625 3.365724 4.187831 4.427284 3.225285 4.842892 3.783953  
1.670931 1.112817 1.132281 1.388855 1.278526 1.090486 1.554598 1.346757 1.032436  
1.759516 2.015645 3.128948 1.983917 2.195853 1.371481 1.977748 2.588824 2.654895  
10.67974 10.55898 10.07509 10.99476 10.82151 10.7351 10.35148 10.4245 10.55061  
3.674592 4.318962 4.253604 3.208682 3.308817 4.199093 2.729084 5.176931 4.890027  
7.964563 7.873879 7.467143 7.356612 7.658241 7.670974 7.546032 7.389128 7.35328  
5.795676 6.93629 6.71795 7.280379 7.33765 6.887784 6.879527 7.178938 7.125735  
4.282619 4.83588 4.863362 4.599885 4.931269 5.358335 4.182127 5.144468 4.581897  
4.873031 5.634941 5.274505 5.755639 5.873499 5.386931 5.165179 5.585829 4.975972  
2.050694 1.922338 4.541838 3.596598 2.85066 1.201043 3.024998 1.823432 2.668203  
2.222645 2.839205 2.442143 2.126323 1.850352 2.651264 1.85994 2.172463 2.044171  
2.046221 2.118766 1.50609 1.611685 1.72623 1.644659 2.317251 1.222253 1.252771  
1.163508 0.993129 1.826208 1.003145 0.873891 0.951747 1.849698 0.759521 0.843752  
1.425157 1.840549 1.444007 1.270064 2.520242 0.949823 1.245746 1.608934 1.090107  
2.578411 2.476986 1.662947 1.80056 1.159859 2.476825 1.779252 2.111971 1.621304  
2.518329 1.582711 1.691374 1.86166 2.201357 2.130657 0.928639 2.181435 1.638654  
1.284117 1.44165 1.782306 1.973884 1.609984 1.794838 1.327329 1.774594 1.483644  
1.157978 1.07818 1.339595 1.539089 1.353872 1.137152 1.417818 1.688091 0.983725  
1.733916 2.378172 1.772308 1.727868 1.791162 3.18243 2.926402 2.072829 2.946636  
3.667287 3.637762 3.03815 1.289315 3.180219 1.903872 2.847014 2.774924 2.542506  
1.568449 1.133986 0.775471 0.903248 1.340595 1.500508 1.143681 1.100547 0.938584  
3.384616 1.546878 1.458238 2.383727 2.02404 1.827439 3.049354 2.136927 1.95585  
4.071101 3.097795 3.548932 3.510123 3.668733 3.546423 3.573463 2.783076 3.589185  
1.370104 0.775224 0.899513 0.853296 1.000663 0.866503 0.832392 1.450846 1.382195  
1.13047 0.937884 0.988244 0.893023 1.110509 0.712313 0.553466 0.964462 1.036812  
0.509929 0.560235 0.576183 0.462616 0.570984 1.05115 1.416977 1.186454 2.20834  
1.717066 1.780707 2.015435 2.35582 1.095663 2.148471 1.890024 1.212153 1.924817  
3.160249 1.765828 2.488721 2.176158 2.055024 2.923419 2.05709 2.418977 2.042196  
2.586139 2.932757 2.414427 1.968843 1.624094 1.791901 3.27892 1.989951 3.897453  
2.694052 1.844458 2.709726 1.422018 3.838978 3.899746 1.523164 1.156202 3.307878  
1.745834 4.212051 2.222488 3.677734 3.22235 3.690779 2.251357 5.108906 3.083944  
1.180963 1.156365 1.688884 0.962407 0.716052 2.284624 1.117698 1.499986 3.415663  
0.650452 1.241997 0.883429 0.687234 0.855011 0.918633 1.376427 0.818686 0.758498  
1.800921 1.505753 1.62067 1.460768 1.836556 2.403464 2.094769 1.352458 2.812275  
2.688414 1.298996 3.580609 1.373055 1.063563 1.085467 1.568849 1.456985 2.088368  
1.238498 1.656166 0.700209 1.233628 1.54397 1.78477 1.331171 0.805312 1.267034  
2.075155 0.922614 1.143704 1.913631 2.292079 1.458726 1.077348 1.060996 2.091163  
2.342456 4.267129 3.316586 5.616247 3.495541 4.266365 3.911994 2.345186 5.75725  
1.874966 2.322084 1.676465 1.659606 1.660869 2.176948 2.64271 1.403976 2.562406  
1.209472 1.250788 1.329355 1.170412 1.204746 1.644708 1.842837 1.065588 1.455218  
1.601935 1.550946 1.367848 1.555016 1.3136 0.915245 1.976854 1.131643 1.106237  
2.260893 2.403782 1.990697 1.556353 2.224957 1.315551 2.165265 2.036229 1.19208  
1.380442 1.411355 2.413019 1.514627 1.256154 1.358434 2.177548 1.522025 1.374447  
0.893085 1.336945 1.340705 1.145841 1.792419 1.400746 1.403456 1.563901 1.219514



4. 138304 1. 253207 1. 201038 1. 786333 1. 753916 1. 926359 2. 275212 1. 641128 1. 476228  
1. 666152 2. 81236 3. 218005 2. 084479 1. 790026 2. 425157 2. 369601 2. 912578 3. 551793  
0. 691694 2. 372426 1. 357392 0. 807366 0. 819895 4. 20355 2. 82846 0. 897019 0. 793021  
3. 975579 2. 600553 1. 343287 1. 53161 3. 109959 2. 065624 1. 208718 2. 045982 0. 854218  
1. 931729 1. 236774 1. 309014 1. 330029 0. 852776 1. 915905 0. 808865 1. 88089 0. 775609  
1. 31665 1. 328127 1. 511314 1. 253085 1. 606982 1. 421364 1. 819582 1. 428265 1. 565643  
0. 912386 1. 220223 1. 196609 1. 989226 2. 415624 0. 774264 1. 236878 1. 89744 1. 006722  
2. 135616 1. 303628 2. 306724 2. 097282 1. 891725 2. 124325 2. 633809 2. 053228 2. 423625  
1. 741432 1. 442665 1. 246731 1. 146863 1. 436328 0. 976274 1. 005288 1. 25236 1. 778744  
3. 884811 4. 118788 3. 664705 2. 736133 2. 865514 2. 615437 2. 038591 2. 403951 2. 527756  
2. 120925 1. 254776 1. 028705 1. 299358 0. 541025 2. 700268 1. 690661 0. 845412 0. 923612  
1. 160089 0. 77928 0. 936647 1. 264239 1. 878467 0. 771624 1. 472261 1. 310019 1. 045982  
1. 529108 2. 876073 1. 418289 3. 189865 1. 08815 1. 44067 3. 46121 1. 332896 3. 140866  
1. 401362 1. 965673 1. 22695 1. 873933 1. 589107 0. 987617 1. 502671 1. 129143 1. 378576  
1. 202125 1. 697756 1. 509593 2. 545307 1. 998071 2. 166674 2. 17606 1. 822046 3. 201706  
4. 931774 3. 113566 3. 619575 2. 99931 4. 653246 4. 004528 3. 682966 3. 628734 3. 619503  
0. 77372 2. 672626 1. 110763 0. 779201 0. 780695 0. 576555 1. 476254 1. 147629 1. 248998  
2. 330169 2. 097967 1. 681692 1. 873018 1. 875048 2. 045423 2. 260742 1. 866503 1. 928297  
2. 272231 2. 197919 2. 949618 2. 69448 2. 279638 3. 719543 3. 2636 3. 216275 2. 811478  
1. 646453 2. 203046 1. 997085 1. 646888 1. 745741 1. 686017 2. 741208 1. 58002 1. 251159  
2. 304998 2. 432135 2. 54824 2. 689383 3. 268784 2. 247444 3. 112746 2. 592244 2. 245373  
0. 828279 0. 46676 0. 962496 0. 934239 0. 964493 0. 872812 1. 199302 0. 869538 0. 934129  
1. 782835 1. 234801 1. 093243 1. 880334 1. 141449 1. 921511 1. 34857 2. 067895 1. 724316  
1. 11591 1. 635165 2. 523176 0. 824865 0. 85237 0. 976741 2. 587149 1. 478269 1. 337709  
3. 575208 2. 156793 3. 279292 2. 85727 2. 819215 2. 305542 2. 951306 2. 873392 2. 918201  
6. 43731 4. 777982 4. 988913 3. 516267 4. 822301 1. 690884 3. 206593 2. 934456 5. 635498  
3. 113337 3. 219479 3. 296488 2. 544228 4. 094551 2. 965724 1. 879223 3. 001496 1. 822317  
1. 693147 1. 023011 1. 177245 1. 406047 0. 957629 0. 67484 2. 289787 0. 568259 0. 788393  
1. 580839 2. 085942 1. 823903 2. 223924 2. 437339 2. 526999 1. 928459 1. 825689 2. 472091  
1. 772227 1. 157564 0. 837035 1. 091484 1. 132568 1. 292382 2. 039439 1. 054161 0. 649632  
1. 3128 1. 780202 1. 051183 1. 495997 2. 074842 1. 523448 1. 501778 1. 767515 1. 671262  
2. 87489 2. 542418 1. 596223 1. 890549 2. 499209 2. 464041 2. 219565 2. 254926 2. 204779  
1. 266477 1. 095034 0. 955462 1. 036859 1. 710265 1. 943083 1. 23057 0. 979684 1. 534265  
1. 167495 1. 741115 1. 293532 1. 028356 1. 276656 1. 27989 1. 201247 1. 173011 1. 341484  
7. 433827 8. 008158 7. 816568 7. 789764 7. 787434 7. 701568 7. 659093 7. 32724 7. 825253  
0. 880297 0. 73612 1. 031136 1. 178655 0. 886996 1. 257198 1. 352585 1. 36237 1. 205879  
2. 159353 1. 260243 1. 58199 2. 102716 2. 089485 1. 489942 1. 631144 1. 775234 1. 345437  
2. 123497 2. 023982 2. 47034 2. 105253 1. 887818 0. 989216 1. 480477 1. 942925 0. 839708  
1. 652179 1. 893814 1. 966652 1. 633083 2. 249233 2. 617546 2. 613652 3. 05477 4. 346495  
2. 442777 2. 585987 3. 206897 2. 165344 3. 141642 3. 469803 3. 992619 2. 58364 2. 178278  
1. 963268 0. 887323 0. 963764 1. 113397 0. 736705 1. 040163 1. 74134 1. 313184 1. 392917  
2. 43882 1. 953843 2. 692816 2. 549402 1. 781883 2. 473646 3. 298117 1. 932986 2. 499119  
4. 603471 2. 716234 3. 312577 2. 868875 3. 348537 3. 010211 3. 87903 4. 697886 3. 519115  
3. 630399 2. 826157 2. 851413 1. 958328 3. 168192 4. 197254 3. 163485 2. 545004 2. 579468  
2. 003801 2. 916864 1. 779905 2. 009382 2. 116337 3. 055225 3. 83698 2. 207558 2. 229733  
1. 076115 1. 7398 2. 623487 1. 337758 2. 51241 3. 649267 4. 675213 0. 899863 3. 092897  
4. 193769 2. 605913 3. 973554 1. 689038 4. 564776 3. 823416 1. 133329 4. 190189 3. 649186  
1. 275957 1. 719112 1. 205495 1. 161159 1. 891045 0. 856243 1. 291263 1. 1426 1. 305971  
3. 060499 3. 97248 1. 845752 2. 58025 3. 153904 2. 503805 2. 428292 2. 619626 3. 150139  
2. 251474 3. 051332 2. 036188 1. 791532 1. 917659 1. 66988 1. 791532 2. 380259 1. 767417  
1. 754117 2. 184077 2. 384091 1. 505995 2. 926326 2. 033062 2. 704781 1. 673132 3. 310002

0.83663 1.041421 0.891781 1.050553 0.813278 1.323546 0.717367 0.862974 1.070359  
2.108858 1.198858 0.892709 1.114691 1.790095 1.03751 1.112344 2.773721 1.112302  
0.995747 0.938585 0.570341 1.144023 1.061057 0.578539 0.73748 0.792667 0.669188  
3.869925 3.68662 3.868604 2.536859 3.948066 4.56199 3.96883 4.680873 5.617491  
1.765437 1.72857 1.269148 1.011989 1.689262 1.534861 1.481481 1.1046 1.919258  
1.91066 1.473034 1.417907 1.731053 1.988628 1.64562 1.446967 1.546439 1.204509  
2.118048 1.986856 1.740088 2.391999 1.470987 1.914825 2.065647 2.206154 1.501653  
1.966007 1.377079 1.605637 1.609615 2.105459 2.575729 1.584288 4.356437 2.256892  
1.421749 0.969805 1.268425 1.82741 1.697138 1.363749 2.074424 1.589915 1.427385  
0.879296 1.352378 0.610633 1.304248 2.00411 1.280684 1.06074 0.899307 1.502316  
1.388383 1.491287 0.985633 2.860449 1.864753 1.798072 1.736124 2.133447 1.515389  
1.155998 1.553692 2.278677 0.821518 1.291628 2.348846 3.197123 2.429403 2.13972  
1.805048 1.272566 1.534592 1.495737 2.498647 1.204389 2.086347 1.178473 1.576611  
1.565359 1.427325 1.211608 1.711113 1.451085 1.439844 1.579301 2.014772 2.332128  
2.503486 2.283434 2.28293 2.652343 2.333779 2.581037 2.657611 2.210995 2.203533  
1.733324 1.074635 1.306932 1.726216 1.703567 1.878592 1.864132 1.522979 1.483406  
1.342983 5.072413 5.147747 3.571194 4.570257 3.909579 3.644696 1.672249 2.353042  
1.979531 2.254866 1.472582 1.340514 1.735524 1.640392 2.639285 2.169667 1.804592  
2.682443 1.981613 2.130188 2.738194 3.096724 2.900067 1.980838 2.809348 2.419915  
1.970862 1.443258 1.096424 2.059502 1.459477 0.947621 1.161187 0.551773 2.393348  
3.975462 2.941972 4.851381 3.677427 2.843213 2.376743 4.009777 2.496055 2.86079  
1.867463 1.786353 1.437496 1.894776 1.914858 1.591074 1.770834 0.701538 1.308284  
1.415274 1.505542 1.246183 1.325991 1.181878 1.880632 2.031049 1.46359 1.712119  
6.239217 3.450191 2.906626 5.095481 7.99981 5.547692 4.602378 3.140105 5.432597  
2.11183 3.975113 1.739759 4.585142 1.851609 2.76947 1.777879 2.169699 2.040067  
1.42964 1.053154 1.68503 1.148924 1.073173 1.022988 1.409633 1.506147 1.462357  
0.511845 1.519086 0.999971 0.575174 1.891944 3.014138 0.892822 1.735794 0.797866  
2.756556 1.347944 2.494646 2.036475 1.106811 1.487834 2.074533 1.227946 1.636532  
1.369333 1.39172 1.26755 1.541993 1.574563 1.273469 1.171075 1.063987 1.465923  
2.279268 0.802323 1.208966 1.496442 1.277563 1.449115 1.229276 0.941478 0.876285  
1.832059 0.901602 1.029528 1.234436 1.30305 0.819868 2.019047 1.181914 0.929142  
2.03281 2.315869 2.90745 3.221842 4.157344 3.894218 4.873377 4.802002 2.665408  
2.532797 1.282568 4.129759 3.850053 1.831102 2.013961 2.541219 1.189731 2.711804  
2.28601 1.305232 3.459522 3.276297 1.320311 3.677994 1.982749 2.780769 2.159934  
0.749914 0.892383 1.108348 1.931858 0.497177 0.856993 1.672126 2.48745 1.711953  
1.957731 1.667842 1.524226 1.32396 1.735237 1.164911 1.501571 1.678739 1.53478  
1.124355 2.636404 1.462485 2.014952 2.138744 2.897688 4.036774 2.701511 1.702786  
2.462297 2.324691 2.226501 2.295595 2.004176 2.321083 2.746625 2.424708 2.755124  
1.766094 1.54303 3.413365 1.083692 3.182179 3.435482 2.243409 1.24107 4.182273  
0.894702 1.346564 0.945709 0.637291 0.889861 1.105779 1.035736 1.617727 0.93378  
1.156407 1.453732 0.982674 0.906735 0.946047 0.917295 0.695103 0.83163 1.318106  
1.283332 0.856234 2.065148 1.496989 1.064043 1.414917 1.61852 1.040446 1.810245  
3.680798 4.414815 3.843011 4.734211 5.096854 2.176556 4.041011 6.090801 5.114642  
1.18306 1.23718 1.202213 1.178534 1.249464 1.196728 1.07915 1.173882 1.292027  
2.047992 1.105648 1.214135 1.069847 1.339712 1.57782 1.348734 1.313431 1.785442  
0.622898 0.785345 1.629823 0.227172 0.512564 1.717037 0.375278 0.471719 0.283517  
2.092562 2.483572 3.343114 2.88969 2.035371 2.430405 3.975348 4.644062 2.580073  
2.966815 2.014507 2.17696 1.963424 2.347704 3.137552 1.893115 2.188321 2.014827  
1.899111 1.277871 0.611928 0.911027 1.308963 0.761749 1.551283 1.056455 1.412872  
0.879347 2.374094 1.352689 2.44432 1.619641 1.897059 3.423522 1.127404 2.795168  
3.064215 3.012174 3.866732 3.382374 1.946599 2.303071 1.85736 3.376527 2.434667

1. 346178 1. 09835 1. 834713 1. 476704 1. 067562 0. 917014 1. 389481 0. 933583 0. 885934  
1. 646329 1. 495163 1. 492382 1. 905659 1. 869271 1. 42168 1. 63492 1. 648742 1. 843266  
1. 323367 2. 126387 1. 278811 1. 390181 1. 31678 0. 892617 1. 483475 1. 359838 1. 20665  
2. 860448 2. 544509 2. 398297 2. 772514 2. 219254 1. 689268 2. 875691 1. 978936 2. 2478  
2. 488289 1. 564491 1. 326583 2. 419211 2. 683658 1. 386563 1. 704677 2. 38559 2. 614746  
1. 14049 0. 609838 1. 05527 1. 24265 1. 153383 1. 809918 0. 817235 1. 156617 0. 58323  
2. 216185 1. 422425 1. 893639 1. 447263 1. 339698 1. 867562 2. 389932 1. 740493 1. 571874  
0. 455248 1. 19387 1. 276208 0. 887437 1. 33837 1. 491377 1. 22666 1. 128533 1. 661738  
2. 2828 2. 483859 1. 733287 1. 727932 1. 404228 1. 928248 1. 453018 1. 311447 1. 791452  
2. 258035 2. 249535 1. 090029 1. 021407 1. 49662 0. 595572 1. 136558 1. 159461 1. 404747  
3. 100818 2. 914676 2. 641974 2. 941419 2. 767166 2. 788545 2. 577567 2. 976517 2. 948933  
1. 32738 1. 378467 1. 757471 1. 587057 1. 734048 1. 809215 3. 072125 0. 619199 1. 56048  
3. 381204 4. 555263 4. 662318 4. 379298 3. 273671 4. 150373 2. 010996 4. 153008 4. 343882  
1. 568494 2. 394506 1. 10017 1. 87937 2. 463898 1. 152707 1. 078072 1. 338005 3. 060221  
3. 995702 1. 861657 2. 181297 2. 759777 2. 720769 1. 794355 2. 330642 1. 709282 3. 285102  
1. 851704 1. 678373 1. 903355 2. 165911 2. 216324 1. 626875 1. 60906 2. 074033 2. 184133  
1. 366303 2. 02216 2. 166137 0. 730087 2. 337616 1. 069074 1. 675242 2. 595374 1. 07822  
1. 138179 0. 678005 1. 000431 0. 98686 0. 926501 1. 626276 1. 753908 1. 042034 0. 558004  
1. 652851 2. 714512 1. 542617 1. 803992 1. 309803 2. 487208 2. 348135 1. 35418 2. 362225  
1. 514635 3. 897169 2. 859521 3. 228906 1. 092354 1. 536166 2. 938831 0. 765949 2. 639466  
2. 350966 1. 905975 1. 230245 1. 564242 1. 998295 2. 120518 1. 122958 2. 595944 1. 715136  
3. 144512 3. 273629 3. 811851 3. 679546 3. 977316 3. 105815 4. 639069 4. 389611 4. 024886  
2. 862623 2. 552085 3. 707817 4. 383156 2. 469965 2. 215028 3. 426232 1. 800413 3. 096196  
2. 573259 2. 640603 2. 470129 2. 553973 2. 737386 2. 40235 3. 128325 2. 163948 2. 360962  
3. 386916 3. 459603 3. 334207 3. 128922 3. 169531 3. 198279 3. 465208 3. 373903 3. 115841  
2. 547333 1. 727224 1. 101963 2. 152852 1. 588582 1. 263119 2. 059068 2. 310057 1. 312981  
2. 245599 2. 062735 2. 217779 2. 919948 1. 792009 2. 371543 3. 249679 1. 931556 2. 905204  
2. 169486 2. 920149 2. 162587 1. 349663 1. 445666 1. 518437 2. 644574 2. 506544 2. 456829  
1. 106921 1. 678431 0. 45979 0. 854301 0. 631688 1. 190989 1. 260658 0. 762631 1. 218286  
1. 343589 2. 15817 2. 179631 1. 34971 1. 332475 1. 791911 1. 804699 1. 434857 1. 625864  
2. 796767 1. 197167 1. 031773 1. 154291 1. 372783 1. 83061 0. 930285 1. 08262 1. 423001  
0. 937862 1. 669099 1. 780501 2. 556632 3. 238874 4. 242218 0. 937862 0. 852423 1. 073295  
2. 930818 2. 253399 1. 836585 1. 80263 2. 546515 1. 737384 3. 430985 1. 946704 1. 686897  
2. 602594 2. 661935 2. 483887 2. 474653 3. 129758 2. 586222 2. 281937 2. 764231 2. 450999  
0. 774852 0. 730947 0. 728569 0. 804731 0. 952676 1. 293698 1. 413831 0. 692486 0. 934188  
2. 399674 0. 639083 0. 638971 0. 178807 0. 754944 1. 666106 3. 819459 0. 620926 2. 295503  
1. 322311 1. 071589 1. 207579 1. 614618 1. 295949 1. 054079 1. 310068 0. 994168 0. 981756  
1. 227615 1. 121139 1. 228081 0. 884533 1. 592657 1. 390986 2. 979827 0. 954304 1. 068251  
1. 755695 2. 636369 1. 606723 1. 417141 1. 768603 2. 163004 2. 435175 1. 985212 1. 325093  
0. 798622 0. 592396 1. 246031 1. 045756 1. 493029 1. 009432 1. 396863 2. 622462 0. 896198  
3. 749746 3. 611723 3. 808696 3. 948863 4. 101071 4. 076529 3. 721839 3. 406129 3. 132807  
1. 609144 1. 216774 0. 901788 2. 746334 1. 122498 0. 877225 0. 914154 1. 028258 0. 64807  
0. 904378 1. 08089 0. 655429 2. 719603 1. 115573 1. 188471 1. 40702 5. 523354 1. 222923  
1. 555059 1. 061218 0. 922022 1. 807057 1. 006545 0. 7442 0. 876919 1. 18398 1. 405297  
3. 12824 1. 383748 1. 878282 2. 511329 0. 869298 1. 206801 0. 765627 1. 490778 1. 407651  
4. 38847 3. 885175 4. 529921 2. 333986 5. 946087 3. 59254 2. 823448 3. 39146 2. 818417  
1. 000326 0. 600083 0. 989494 1. 150038 0. 692991 1. 203718 1. 24587 1. 160428 0. 960838  
2. 563978 1. 373735 0. 782137 1. 841965 0. 743706 0. 837813 1. 049239 1. 350547 1. 325567  
1. 614397 1. 313234 2. 24805 1. 888277 1. 845949 1. 510064 2. 932591 1. 423526 1. 658679  
1. 576276 1. 97496 2. 906044 3. 487982 1. 472922 1. 652766 1. 64882 1. 805381 1. 542021  
1. 808429 1. 316188 1. 949315 1. 874119 1. 317395 1. 946994 1. 872369 1. 708409 1. 653756

2. 917256 3. 519762 2. 586938 2. 695518 2. 625266 3. 355356 3. 58263 4. 538129 3. 635326  
2. 291637 2. 873822 1. 804764 2. 949924 2. 474514 2. 244705 2. 270019 2. 025726 1. 881413  
1. 157975 0. 782257 1. 057477 1. 128286 2. 017146 1. 83494 1. 973308 1. 546879 0. 790193  
1. 652126 1. 134181 1. 174939 1. 682525 1. 257638 1. 346925 1. 998406 1. 542162 1. 486956  
1. 000191 2. 499961 3. 421814 3. 71269 3. 661347 1. 577716 1. 049924 1. 116074 1. 933086  
2. 391759 2. 39054 2. 959061 2. 388812 1. 75498 2. 368347 2. 096664 2. 61186 2. 054553  
2. 165283 1. 771277 1. 407717 1. 662448 2. 245631 1. 981984 1. 745077 1. 669833 1. 404898  
2. 240753 4. 336929 5. 293344 4. 627235 2. 598207 2. 282806 5. 48615 4. 26634 3. 234789  
1. 509157 1. 218831 2. 316123 1. 438378 1. 786159 2. 157847 1. 124144 1. 041208 1. 836103  
1. 450352 2. 134979 1. 279471 2. 694111 2. 408078 1. 628679 2. 20901 2. 473025 1. 152082  
1. 67789 1. 297794 1. 199373 1. 293618 1. 178832 1. 611034 1. 875245 1. 141716 1. 321924  
5. 915395 6. 376941 7. 169144 6. 805169 7. 257646 6. 309766 6. 434547 6. 375752 6. 391679  
1. 260426 1. 335357 1. 122387 0. 961147 1. 09352 0. 710374 1. 291287 1. 316724 0. 859539  
1. 189983 1. 459074 2. 118713 1. 236168 1. 654421 0. 925869 1. 468051 1. 313635 1. 165809  
2. 017977 0. 985146 1. 562336 1. 577763 0. 841696 1. 664328 1. 24733 2. 119681 1. 479182  
1. 565431 1. 361701 1. 342667 2. 294986 3. 308544 1. 639082 2. 792574 2. 574686 1. 164882  
3. 478869 4. 340292 6. 133728 5. 362876 5. 397061 5. 502945 4. 858862 4. 585964 4. 477094  
2. 471868 1. 628768 1. 998819 2. 163422 1. 760392 1. 703815 2. 311648 1. 824357 1. 778299  
1. 653347 3. 668863 6. 421836 4. 921554 4. 108282 6. 364018 2. 693052 4. 154184 1. 92762  
2. 287744 2. 554445 1. 547125 2. 384455 1. 641631 2. 948444 3. 123914 1. 887973 1. 389947  
1. 466789 1. 880676 1. 243691 1. 872694 0. 953297 1. 361209 2. 011432 1. 784344 1. 485609  
1. 451004 2. 040999 1. 188955 2. 831558 1. 872039 1. 171771 2. 969333 1. 859814 1. 200613  
1. 670124 2. 245085 1. 538142 2. 210694 3. 20883 1. 277684 2. 357049 1. 023698 1. 620155  
1. 841275 1. 24156 1. 752258 1. 253454 1. 949099 2. 200553 1. 31137 0. 921756 1. 610413  
3. 895989 2. 104525 2. 384136 2. 94718 1. 752137 3. 231718 2. 828442 1. 316699 3. 288036  
1. 656893 1. 416582 2. 523954 2. 005616 1. 514024 1. 932616 2. 30475 1. 662333 1. 675443  
2. 792447 2. 652148 2. 698733 4. 173792 2. 195219 3. 063543 2. 521521 2. 277798 2. 221795  
2. 221202 2. 279109 1. 834077 2. 396987 2. 432277 2. 247996 2. 64229 2. 08905 2. 096035  
2. 104823 1. 410501 1. 707744 2. 248363 1. 396441 1. 186793 1. 993171 2. 119796 1. 614691  
1. 497186 1. 216431 1. 477339 2. 013519 1. 44004 1. 300075 1. 273636 1. 173805 1. 117875  
3. 146898 2. 182543 2. 477087 3. 215523 2. 194432 2. 139933 3. 893491 1. 878206 1. 745824  
1. 331691 0. 940912 0. 955302 1. 15806 1. 152757 1. 121492 1. 425329 1. 328065 1. 117359  
1. 616965 1. 455474 2. 337802 1. 396184 2. 839889 2. 115465 1. 871265 1. 717903 2. 773331  
6. 009047 4. 937846 3. 84754 4. 297372 5. 44201 3. 865894 4. 267061 4. 585432 3. 162663  
4. 691554 6. 230883 6. 221654 5. 821237 5. 696675 6. 423647 7. 030105 7. 266127 6. 5894  
1. 704252 2. 443 2. 047006 2. 861104 1. 958733 2. 589059 2. 727117 1. 68498 3. 726816  
1. 026335 1. 144142 1. 14931 1. 393392 1. 094761 1. 910738 1. 239249 1. 163351 1. 11329  
4. 923256 4. 221481 4. 182213 5. 449906 4. 240654 4. 765399 3. 677587 4. 995945 5. 153927  
2. 153356 6. 606851 6. 928931 2. 588523 2. 336429 2. 943949 3. 578254 6. 245954 4. 919862  
2. 326866 2. 041342 2. 418921 3. 193106 2. 589473 2. 397135 2. 368467 2. 362865 2. 623198  
2. 592324 0. 894111 1. 720525 0. 799924 0. 480727 1. 003645 1. 577796 1. 438874 0. 786329  
4. 464464 5. 247233 5. 618036 4. 954738 4. 886076 4. 446371 4. 441644 5. 100484 4. 871863  
2. 087035 2. 02558 1. 619632 1. 247546 1. 553612 1. 757466 1. 518226 1. 212989 0. 974123  
3. 833714 1. 883277 2. 898721 3. 053596 2. 682948 1. 864863 3. 293784 2. 534702 2. 871456  
4. 936904 3. 88089 5. 260133 4. 075799 3. 179858 3. 879875 4. 257682 2. 541861 3. 428078  
1. 211631 1. 727374 1. 633656 1. 419331 1. 180176 1. 582824 2. 229577 1. 949164 1. 675222  
2. 000579 1. 405164 3. 768881 1. 63529 2. 335253 3. 439547 3. 462842 1. 837992 3. 18711  
2. 43593 1. 962859 3. 101231 1. 687896 2. 501384 2. 807834 1. 385806 2. 176969 2. 922887  
2. 831308 1. 435568 1. 133419 1. 727105 1. 937285 1. 555249 1. 760795 1. 313822 0. 924007  
1. 700134 2. 776054 0. 936482 3. 119554 1. 426726 4. 787394 0. 843262 1. 648777 1. 140513  
1. 707533 1. 830412 1. 494469 1. 150485 1. 790468 1. 71519 2. 103698 1. 517229 1. 361827

2. 461325 2. 924175 1. 841328 2. 737907 3. 312337 1. 73486 2. 075828 2. 345589 4. 096236  
1. 275502 0. 737097 1. 01823 0. 820805 1. 194929 1. 021221 1. 422715 1. 07331 1. 089136  
1. 081054 1. 123259 1. 45813 2. 42249 0. 980559 1. 821778 0. 585369 1. 030932 1. 821067  
1. 576896 1. 895556 1. 184629 2. 559077 1. 454688 1. 262699 1. 565202 1. 681838 1. 458165  
4. 159357 1. 11831 0. 844865 1. 01206 1. 913375 1. 542319 1. 088283 0. 613817 2. 533407  
1. 600176 1. 283036 1. 153001 1. 814321 1. 483501 1. 30077 1. 914612 1. 542709 1. 600479  
4. 333774 4. 688069 4. 547591 4. 290314 3. 771471 4. 926273 4. 455314 3. 168927 4. 601977  
1. 762809 0. 894452 1. 417366 1. 008478 0. 790535 1. 047129 1. 011917 1. 108028 1. 114913  
2. 91394 3. 695749 2. 974948 2. 421668 3. 732767 4. 018479 3. 456864 6. 340784 2. 756565  
1. 298754 0. 764741 0. 948321 1. 663628 2. 33013 1. 477513 1. 075222 1. 840426 1. 40375  
0. 629566 0. 314789 0. 654988 1. 091858 0. 3083 0. 147671 3. 039702 1. 103649 2. 013386  
0. 966422 1. 448429 0. 608631 1. 394529 1. 016447 1. 473482 0. 933627 0. 8139 0. 838764  
1. 640611 0. 752862 1. 084577 1. 491274 0. 834985 1. 109502 1. 248249 0. 806526 0. 872734  
3. 298705 3. 213069 2. 968349 4. 808921 4. 308604 4. 291206 4. 019675 5. 124499 3. 600772  
1. 516648 1. 378639 0. 968121 1. 223157 1. 703884 0. 940853 1. 149942 1. 043938 1. 554999  
3. 425674 3. 796685 4. 349907 3. 582288 3. 05762 3. 437912 3. 057253 4. 110581 3. 267911  
1. 709011 1. 270167 0. 771209 1. 200419 1. 155262 1. 257177 1. 335587 1. 128555 1. 274169  
2. 174035 2. 901716 2. 484185 1. 839063 2. 198904 2. 215206 4. 00541 1. 826431 2. 880989  
1. 593846 1. 725641 0. 823661 1. 036788 1. 00046 1. 57384 0. 994901 1. 056229 1. 229149  
1. 908385 0. 914699 1. 701385 1. 38598 1. 170556 0. 885946 0. 931362 0. 987286 1. 583916  
1. 508887 1. 62718 1. 338712 1. 555224 1. 396203 1. 592542 1. 484701 1. 322339 2. 018958  
2. 628544 4. 133884 4. 384818 2. 61705 3. 307512 2. 518903 3. 247945 3. 353494 5. 089378  
1. 767383 1. 652096 1. 522985 1. 980974 1. 592941 1. 517076 2. 070897 1. 298376 1. 501762  
2. 442276 1. 528129 2. 169798 3. 524968 2. 62242 2. 241751 2. 21972 2. 68068 2. 14639  
2. 544905 1. 809 1. 132282 1. 80743 1. 443175 1. 684998 1. 377038 1. 646406 1. 554791  
2. 245987 2. 756693 0. 884567 2. 216489 1. 501933 2. 527805 2. 509164 1. 290064 2. 402705  
3. 361448 4. 009863 3. 331117 2. 73663 3. 174726 4. 979093 3. 750282 5. 746266 1. 947198  
0. 75582 1. 618191 1. 442642 1. 195389 1. 454788 1. 82258 2. 588553 1. 037327 1. 294114  
2. 53961 1. 580176 1. 785457 2. 142473 1. 65646 2. 239917 1. 626484 1. 413421 1. 237356  
1. 607266 1. 451116 1. 00801 1. 281661 1. 507839 1. 749509 1. 498076 1. 453566 1. 663954  
4. 112884 4. 822916 4. 195051 2. 258289 4. 369664 4. 958248 4. 466467 5. 131558 4. 483257  
3. 163709 1. 728234 1. 972926 2. 890409 2. 18839 1. 699787 1. 918077 2. 481349 4. 007745  
3. 171212 2. 722096 2. 413192 2. 821159 2. 837083 1. 66149 2. 670192 2. 305287 3. 114687  
0. 839673 0. 799985 0. 805684 1. 525821 2. 09685 1. 338588 0. 890117 3. 134148 1. 062558  
1. 628039 2. 264081 1. 748408 3. 572633 4. 131876 2. 059632 1. 240402 1. 755038 0. 982865  
1. 721089 2. 026785 2. 403704 1. 616958 2. 757462 1. 831157 1. 517914 1. 92045 2. 083625  
10. 30421 10. 20273 10. 33244 10. 51935 10. 37125 10. 33647 10. 2888 10. 28551 10. 27317  
7. 852878 5. 047858 4. 393967 3. 845731 2. 28419 3. 535614 3. 551485 4. 426764 3. 953828  
7. 268823 7. 431028 7. 631214 6. 907799 6. 807957 6. 357042 7. 154973 7. 54373 6. 742651  
3. 24769 3. 314169 1. 770673 3. 242917 4. 289026 2. 852694 1. 819249 4. 380131 2. 38382  
1. 945702 1. 790313 1. 637152 1. 851554 2. 147615 1. 227292 1. 737013 2. 453257 1. 623672  
1. 233694 1. 103579 0. 823133 1. 663941 1. 183329 1. 126506 1. 230829 1. 344834 1. 442445  
3. 536441 2. 477691 2. 322756 1. 987544 2. 985065 2. 26528 2. 980818 2. 85224 1. 969842  
4. 567859 4. 132314 3. 23807 3. 401846 4. 072013 3. 110389 3. 257324 3. 904998 5. 055592  
2. 955729 1. 554653 2. 059949 0. 718247 1. 539857 1. 114415 1. 156414 0. 725582 1. 777466  
1. 069376 0. 837319 0. 78861 1. 311125 0. 727646 1. 195747 3. 346855 1. 436903 1. 139582  
2. 363146 1. 008762 1. 964967 2. 205177 1. 682021 1. 24305 1. 314008 1. 939062 0. 964618  
2. 347274 2. 595667 2. 725294 2. 09417 2. 421834 1. 988982 2. 100495 2. 237949 2. 930121  
3. 026443 2. 703504 2. 509902 2. 70189 2. 644525 3. 124974 3. 063465 2. 912918 2. 885456  
1. 131575 1. 949529 2. 761874 1. 552518 1. 525268 1. 01631 3. 816694 1. 827201 1. 860384  
5. 302775 5. 711182 5. 388848 5. 727046 7. 141492 5. 063427 5. 196337 5. 124852 6. 054854

1. 938245 3. 678328 2. 53886 0. 795594 2. 579869 1. 249267 2. 294684 1. 650539 2. 513566  
1. 095178 0. 77929 1. 183825 1. 13959 0. 99743 0. 956108 1. 082695 1. 345681 0. 911821  
2. 597956 1. 567743 1. 327696 1. 329271 1. 499424 1. 574204 2. 39272 1. 910834 1. 27413  
1. 092911 1. 121555 0. 585681 1. 232663 0. 793599 1. 015191 0. 767181 0. 758839 1. 047032  
0. 864685 1. 084417 0. 875826 0. 785345 1. 743419 1. 177258 0. 827078 1. 428652 1. 564415  
0. 621471 1. 403591 3. 010463 2. 867519 1. 006074 1. 137646 1. 102202 1. 636579 1. 472504  
2. 11262 4. 378365 4. 794342 1. 244745 4. 541137 4. 86307 1. 125581 1. 229516 1. 098861  
1. 812736 3. 333744 1. 64837 2. 583325 2. 517555 2. 059119 1. 877179 2. 169332 1. 278123  
1. 240143 1. 102104 0. 86161 0. 735194 1. 408331 0. 833904 1. 035054 1. 10598 0. 936783  
1. 419967 1. 541299 1. 205813 1. 361313 2. 337361 1. 378201 0. 878769 1. 038696 1. 184194  
1. 45546 1. 02389 0. 956585 1. 048009 1. 389867 0. 994278 1. 186243 1. 284559 0. 959348  
0. 861985 1. 332207 1. 178297 1. 619759 1. 11972 1. 192201 1. 470114 1. 045911 1. 480632  
1. 330226 0. 931442 0. 896904 0. 944436 0. 918913 0. 596095 0. 883009 1. 015922 0. 96034  
2. 089206 1. 617619 3. 095119 2. 489522 2. 14395 2. 017058 1. 797544 2. 230332 1. 964181  
1. 968973 2. 851899 2. 069489 2. 312569 2. 62747 3. 315768 3. 148917 2. 779928 2. 846875  
1. 647693 1. 101817 1. 097885 1. 420519 1. 378987 0. 869108 1. 343988 1. 293108 0. 655157  
0. 8283 1. 322959 0. 86181 0. 933971 0. 833922 1. 603759 1. 545347 1. 009388 1. 070989  
1. 698883 1. 653039 1. 435673 2. 353954 1. 51974 1. 446067 1. 830269 1. 197661 2. 32759  
1. 085315 2. 201836 1. 271487 1. 269636 2. 830784 0. 627797 0. 615921 0. 999572 1. 06707  
3. 847759 3. 539604 4. 419186 3. 421759 4. 079622 5. 217932 3. 773646 4. 21421 3. 475432  
4. 149141 3. 087591 3. 247211 3. 022071 4. 305305 3. 141481 3. 007086 3. 90205 2. 660578  
5. 287994 5. 290372 2. 701381 6. 88723 2. 261423 5. 239489 1. 9236 5. 469482 4. 380697  
1. 80504 1. 986979 1. 84231 1. 686325 1. 013865 1. 916278 1. 091436 1. 464031 1. 129192  
0. 846132 0. 705803 1. 072432 1. 636949 1. 611338 1. 06044 0. 858226 1. 072432 2. 822094  
1. 931259 0. 967843 1. 512967 1. 240527 1. 320478 1. 127664 1. 25268 0. 976126 1. 90739  
1. 088623 1. 800429 0. 839581 1. 177274 0. 981203 2. 414426 1. 593713 1. 29827 1. 325408  
3. 090437 2. 648424 1. 603716 1. 945585 1. 936383 1. 78127 2. 237089 2. 313035 4. 228156  
1. 458473 2. 114068 1. 333154 0. 881013 4. 30116 2. 774016 3. 679031 1. 173574 1. 436499  
1. 658754 1. 123106 1. 981718 1. 72963 1. 077129 1. 259477 1. 124886 1. 298915 1. 068688  
2. 849781 2. 677122 3. 022082 3. 119171 3. 302765 2. 216759 2. 834587 3. 079901 3. 000468  
1. 777966 2. 155937 1. 149088 2. 249804 1. 393634 2. 604769 1. 739887 1. 625267 2. 192456  
1. 660678 1. 01208 2. 43733 0. 714916 1. 458105 1. 525195 3. 896836 2. 4098 0. 714081  
2. 759965 1. 082349 0. 796141 0. 851581 2. 528899 1. 004762 3. 243592 3. 424279 0. 69773  
1. 669885 0. 944041 1. 313149 2. 073506 1. 481288 2. 0629 1. 168731 2. 230901 1. 046745  
2. 008968 1. 826565 1. 231467 1. 458072 1. 778743 1. 3607 1. 952901 1. 748777 1. 348481  
1. 872571 1. 369059 1. 60888 2. 128501 1. 45165 1. 165655 1. 056395 1. 583906 1. 71593  
1. 799679 1. 105687 1. 01445 1. 167945 1. 163113 0. 940943 1. 379379 1. 459589 1. 881435  
1. 435241 1. 193212 1. 134848 0. 871572 2. 053193 1. 375877 1. 734865 1. 215081 1. 596879  
1. 214811 1. 522548 1. 42551 1. 659734 1. 429568 1. 918076 1. 83094 1. 381659 2. 417985  
3. 702086 3. 41905 4. 33122 3. 840898 3. 944393 4. 202666 3. 290598 3. 328587 3. 65814  
0. 911011 1. 148118 1. 175151 1. 015089 0. 937584 1. 142718 1. 31199 1. 048872 1. 433252  
3. 192699 3. 518398 3. 333126 3. 061126 3. 832543 3. 38403 2. 522635 2. 876846 2. 894718  
6. 074341 5. 968687 6. 537164 5. 716778 5. 949875 5. 936586 6. 185426 7. 012578 6. 176179  
1. 086703 0. 976799 1. 143689 1. 147383 1. 251652 1. 235889 1. 083033 1. 238317 1. 709314  
1. 382507 1. 292208 1. 70603 1. 14646 2. 505802 1. 810373 1. 053852 1. 432567 1. 421537  
0. 771758 2. 506713 0. 931942 1. 339832 2. 128473 0. 932965 0. 832878 1. 003215 0. 935177  
3. 342832 5. 26903 4. 299404 3. 633905 2. 701295 3. 017327 3. 198899 4. 29424 3. 952564  
2. 181543 1. 931005 2. 034859 2. 122449 1. 343983 2. 084288 1. 566369 1. 438069 1. 793524  
3. 292241 1. 543416 2. 166808 2. 666401 1. 779995 1. 351693 2. 080693 2. 99337 2. 542273  
2. 62003 2. 735157 2. 271146 1. 998944 1. 299517 2. 569805 2. 496507 1. 83188 2. 055997  
2. 724899 1. 700671 3. 112511 1. 182798 2. 847911 1. 639536 2. 476975 3. 376346 1. 252519

1. 206538 2. 019723 2. 688929 2. 63401 2. 680972 4. 538502 1. 547294 3. 822002 2. 746754  
1. 657726 1. 708134 1. 553457 1. 156416 1. 332059 0. 894675 0. 964541 1. 128931 2. 696533  
0. 843701 1. 159106 5. 976373 1. 860307 1. 22447 0. 88587 0. 843701 1. 288328 2. 262812  
1. 53273 1. 279389 1. 155205 1. 601056 1. 278258 1. 106318 1. 125037 1. 036333 1. 576715  
1. 692087 0. 852431 1. 928643 0. 722328 0. 995409 0. 648187 1. 354382 1. 587903 1. 166454  
4. 224045 4. 149682 4. 466389 3. 980986 4. 984031 4. 913159 5. 052118 3. 941967 3. 412877  
2. 101068 2. 119425 1. 986945 2. 594135 2. 512295 2. 307563 2. 274586 2. 339198 1. 950764  
1. 478631 1. 821425 0. 996255 1. 059534 1. 321544 0. 743962 0. 856582 1. 285536 2. 138996  
0. 849446 0. 768074 0. 637783 0. 955171 1. 221704 1. 181607 1. 52147 0. 825419 2. 448995  
1. 195617 1. 648127 1. 555011 0. 875736 1. 052272 1. 672171 1. 607063 1. 176858 2. 473451  
1. 396197 1. 85357 1. 285062 1. 961504 1. 470405 1. 422301 3. 248618 1. 419377 1. 44973  
2. 457767 1. 442165 2. 346992 2. 046816 2. 63008 2. 54751 1. 795418 3. 064606 3. 22007  
1. 807572 0. 620649 2. 472731 0. 471256 0. 746039 3. 429838 1. 15299 0. 809609 1. 515731  
3. 124152 1. 900296 2. 346258 3. 038348 2. 297102 2. 637127 3. 216755 2. 50474 3. 363281  
1. 097482 0. 598995 1. 307751 0. 42684 2. 465105 0. 961115 1. 726772 1. 085895 0. 701892  
2. 395299 2. 224066 1. 617746 1. 857226 1. 256009 1. 393467 1. 021218 1. 768455 0. 981277  
1. 604818 2. 045413 1. 555512 1. 982687 0. 936466 2. 190216 1. 904506 1. 005878 1. 930378  
3. 873779 5. 427563 4. 942633 5. 477131 3. 804971 5. 006346 3. 220843 3. 460776 5. 175845  
1. 021802 2. 291232 1. 406464 1. 528081 1. 756598 1. 937567 1. 663964 1. 737949 1. 772347  
1. 351038 1. 44902 1. 719737 1. 065833 1. 103776 1. 44902 2. 346818 1. 62404 1. 326043  
1. 425821 1. 330734 3. 563532 1. 633357 1. 70386 1. 429887 2. 513486 1. 779489 2. 435799  
0. 865636 0. 933717 1. 267443 0. 961821 1. 022891 1. 019898 1. 099593 1. 977356 1. 165019  
3. 618007 2. 270952 2. 583342 1. 39194 1. 881233 1. 571042 1. 942629 4. 427237 1. 397783  
3. 224343 2. 519893 3. 233679 1. 602106 2. 677562 3. 637736 3. 236655 3. 015644 2. 520692  
1. 642519 2. 83974 1. 605051 2. 058484 1. 835028 1. 701352 1. 444364 1. 604901 2. 439846  
2. 100019 1. 340661 0. 778692 0. 847386 1. 127989 1. 67711 1. 315291 1. 10299 1. 485742  
2. 418149 2. 133163 2. 521744 2. 781162 2. 649315 2. 60399 2. 436247 2. 381991 2. 842204  
0. 723616 1. 552095 1. 164831 1. 599786 1. 071784 0. 828437 2. 483169 1. 814231 1. 193065  
2. 758736 1. 300439 2. 054534 2. 018729 1. 955802 2. 414742 3. 547306 1. 965826 0. 957257  
1. 959851 1. 253143 1. 07846 1. 820265 3. 178748 1. 210131 3. 138873 1. 320554 1. 100682  
3. 374542 5. 134715 4. 937841 5. 002443 4. 736218 3. 732164 4. 9159 4. 791526 4. 54619  
2. 014393 1. 323172 2. 464027 2. 283459 1. 368515 2. 961656 1. 639696 2. 167764 3. 607443  
1. 657109 1. 613667 1. 369349 2. 568673 0. 944845 1. 085071 0. 974541 0. 988588 1. 612072  
1. 165633 1. 089276 1. 345789 1. 09538 1. 168216 1. 450153 1. 253607 1. 066513 1. 179313  
5. 459719 4. 894821 5. 505269 5. 724127 4. 342348 3. 464284 5. 227673 5. 146078 5. 802895  
1. 011112 1. 528862 0. 834909 1. 163036 0. 888731 1. 049022 1. 027961 0. 991046 1. 116443  
3. 471012 1. 116217 2. 681809 3. 610075 1. 32634 2. 302478 1. 938142 0. 425957 1. 947605  
2. 88594 2. 567438 2. 387153 2. 09171 2. 717817 2. 660132 1. 390381 3. 079238 1. 841965  
1. 01242 0. 563449 0. 910037 0. 824267 0. 95957 1. 118661 1. 829357 1. 067052 0. 736217  
2. 897744 2. 702713 2. 944051 2. 31233 2. 874787 2. 524272 2. 831807 2. 353694 2. 279824  
0. 972613 1. 100212 0. 955276 0. 967575 1. 064587 0. 786217 0. 569461 0. 956356 0. 711543  
2. 007185 1. 657685 1. 869643 1. 920755 1. 480849 2. 09011 1. 626421 2. 256627 2. 141543  
1. 932212 1. 856139 2. 205327 2. 716011 1. 830054 2. 350508 1. 533864 2. 02813 2. 169797  
2. 63811 1. 188248 1. 558928 1. 578176 1. 519881 1. 135725 2. 844417 1. 339316 2. 188465  
2. 778585 2. 142852 2. 253599 1. 627138 2. 067329 2. 20118 2. 95588 1. 906684 2. 230518  
1. 4206 1. 812424 1. 321469 1. 399229 1. 279989 1. 798984 1. 49309 1. 85301 1. 818868  
1. 521914 1. 209264 1. 497185 2. 200251 3. 274802 2. 494483 2. 693102 2. 201179 2. 14352  
2. 311086 2. 48494 1. 710365 2. 429447 2. 687558 2. 764449 2. 612355 3. 067133 3. 471705  
2. 697582 4. 461331 2. 94121 2. 97662 2. 297061 1. 8246 2. 969183 2. 610456 3. 865988  
3. 553222 1. 269018 1. 33336 1. 65346 1. 815752 2. 033445 1. 363122 1. 359306 1. 532985  
1. 120711 1. 025006 1. 412695 1. 786909 1. 726246 2. 043458 2. 190966 2. 143504 2. 139206

2.062122 3.04281 5.407072 1.754882 2.116995 1.895276 0.972575 2.225805 1.794513  
0.967254 1.073318 0.824778 1.270773 1.5187 1.128641 1.474815 0.98797 1.052531  
3.719365 3.385979 2.462527 2.062629 4.654027 3.231218 3.826249 3.942317 3.299569  
0.814055 0.961017 0.769132 0.909806 1.142074 0.735937 1.100567 0.848914 0.823851  
1.949255 1.365026 1.876466 1.404345 1.678999 1.743223 2.416159 1.842561 1.659694  
1.040219 1.372217 1.386496 1.856058 1.852031 1.427367 1.392417 1.229217 1.381114  
1.698232 1.452019 1.295543 1.772465 1.570736 1.543047 1.619253 1.294903 1.987308  
1.884989 2.676587 1.708443 3.8648 1.03104 1.768121 1.014394 5.957345 3.294092  
2.153928 1.635799 1.588203 1.767465 1.50977 1.28271 1.445832 1.805344 2.068857  
5.470893 6.238237 6.028937 6.603068 6.283753 5.507066 7.205741 6.243436 5.138731  
2.120432 1.737392 1.537752 1.487403 1.262572 1.270738 2.475209 2.18882 1.48661  
1.909527 2.027555 2.582455 2.122742 1.36696 2.437822 1.85872 2.144093 3.05108  
4.556986 5.089825 5.657043 2.562474 4.322681 4.157457 4.691545 4.436483 5.569039  
2.783962 2.464472 3.615255 4.118231 2.562626 1.593408 1.96835 1.986277 2.247244  
2.818912 2.110079 4.247589 3.09325 3.181337 2.13866 2.828019 2.202162 3.079067  
1.836522 1.393397 1.745344 1.403802 2.086658 2.001285 1.720876 1.30826 1.895995  
1.259083 1.193647 1.178324 2.108632 2.168086 1.331414 1.236192 1.443317 1.173873  
1.100902 1.155028 0.865716 1.010933 1.109077 1.333788 1.393796 1.069756 1.536114  
0.952353 2.024617 0.916892 1.277985 0.972882 1.008976 1.593774 1.118379 1.601553  
2.157995 1.734704 1.692507 3.64574 1.489541 2.376172 2.264778 2.121745 3.041225  
3.122949 2.292899 4.131813 3.229654 2.265923 1.381812 2.707001 3.363061 2.587693  
2.445746 1.787398 2.281546 2.599573 1.877747 2.585798 2.248233 2.060601 1.939507  
1.565533 3.104193 2.442303 1.952026 3.09965 3.160299 1.88449 2.294827 1.855639  
3.555037 1.825383 4.933361 1.347164 1.893807 1.455551 2.914559 2.015934 1.955311  
2.100161 1.700268 1.310112 1.644226 3.497168 1.221465 1.425789 1.596319 1.380774  
1.382389 0.82342 1.356197 1.337405 1.105333 1.335184 4.393786 2.09807 1.124568  
0.586118 0.330102 2.441568 1.023217 0.715017 0.414797 0.871373 1.618683 1.183932  
0.987562 2.019925 0.952378 2.731256 1.961079 0.751367 0.956676 1.641008 0.818419  
1.330334 0.916757 1.059616 1.352939 2.149192 0.964685 1.124077 1.071577 1.706211  
0.484243 0.413315 2.06765 1.225966 0.702042 0.797299 0.952243 1.843512 1.196829  
0.655679 1.119908 1.464153 1.750861 0.781813 1.287928 1.179372 1.062308 1.123319  
1.751784 1.312297 1.607259 1.859393 0.972775 1.337474 1.591574 1.589469 1.459333  
1.362384 1.26047 1.375725 1.724109 2.47648 1.247905 1.381443 1.533078 1.198361  
1.52666 1.036544 1.23044 1.617628 1.319348 1.27322 1.187972 1.013683 1.085367  
2.109069 2.329624 1.743856 1.459758 2.20704 1.159524 1.953373 1.887893 1.616987  
2.650703 1.498654 1.643988 0.854424 2.01937 1.970141 1.9522 2.603542 1.558505  
2.465164 1.557054 2.578532 4.472885 2.696345 2.169104 1.649262 3.16244 2.527882  
2.281229 3.279967 5.060653 4.939724 3.74123 2.668652 1.961192 3.214558 4.042908  
1.404262 1.50657 0.798438 1.822017 1.349468 0.971924 1.130973 1.298548 1.372002  
1.198563 1.42965 1.341531 1.35807 0.697737 0.922359 1.049361 0.855089 1.540369  
1.314085 2.434345 1.942819 2.82618 1.319894 1.332147 1.321009 1.907081 1.294175  
3.047903 1.757995 2.103467 2.714701 3.210099 3.58394 3.024442 1.702273 2.378233  
5.02775 5.799549 4.222219 3.143376 3.562147 5.878372 5.466108 5.718061 5.400565  
2.684943 4.685029 2.986193 2.086215 1.701588 1.241361 2.528007 1.244881 2.091991  
1.124789 0.940787 1.795585 2.002016 1.131236 1.328796 1.11989 1.014347 1.138673  
2.106284 2.635008 3.025536 1.027613 3.411005 1.504603 1.838972 1.597405 1.246745  
1.500563 1.23179 1.468607 1.860347 1.546971 1.385283 1.276444 1.353863 1.229107  
1.680824 2.465515 0.767122 1.031049 2.105123 0.795221 1.431469 1.082939 1.282798  
1.255398 1.361889 1.713525 1.237269 1.47702 1.03995 1.564752 2.112743 2.037114  
2.800089 2.181293 2.097369 0.663344 1.803446 1.478544 1.423059 1.365194 2.80979  
2.44992 1.096166 0.99495 0.964971 1.069606 1.121119 1.267915 0.862906 1.17209



1. 170898 0. 772435 0. 467293 1. 533169 0. 38344 2. 073774 1. 105074 1. 759111 0. 94878  
1. 661695 1. 245697 1. 674342 1. 051134 1. 902684 1. 269556 1. 368109 2. 00253 1. 640984  
2. 590347 1. 912664 2. 026568 1. 675231 1. 252772 1. 898031 1. 883252 1. 668017 1. 69932  
2. 618691 2. 127251 2. 326172 3. 448068 2. 190414 2. 679596 3. 02621 2. 978936 2. 346335  
1. 13602 1. 781947 0. 733395 0. 932476 1. 515417 1. 149385 2. 265448 0. 716176 1. 25233  
2. 242703 1. 668897 2. 171013 2. 396186 2. 372136 2. 31063 2. 004201 1. 762473 2. 134712  
5. 09784 4. 031913 4. 626024 3. 799914 3. 893572 2. 752939 3. 447074 4. 69328 3. 645464  
1. 42737 0. 974267 1. 399367 1. 801102 1. 090533 0. 92851 0. 875725 1. 484707 1. 842305  
0. 640073 0. 775517 0. 531201 1. 023325 1. 933145 0. 762765 0. 449212 2. 321773 2. 251778  
2. 257996 3. 007958 2. 668639 3. 334178 1. 135712 1. 069268 0. 938321 2. 777291 0. 415414  
1. 179237 1. 207484 0. 773481 1. 049244 1. 03925 0. 966934 1. 221895 1. 351858 1. 683783  
2. 470627 1. 005249 0. 974715 1. 608852 2. 267649 1. 355079 0. 843185 0. 829982 1. 302615  
1. 639251 1. 515157 0. 737876 1. 192907 1. 84148 2. 677606 1. 465105 3. 78179 1. 835268  
1. 81097 0. 768551 0. 964631 0. 955874 1. 19603 0. 918649 1. 227299 0. 923772 2. 223807  
2. 174126 1. 972495 1. 625466 2. 702447 2. 637458 1. 483669 2. 314858 2. 145079 1. 887095  
2. 673413 2. 465851 4. 33407 2. 145766 1. 759984 4. 254806 2. 770791 2. 798479 3. 389801  
2. 380019 1. 78603 2. 055276 2. 129188 2. 335278 1. 922509 2. 290881 1. 826767 2. 546353  
3. 87514 3. 357882 3. 035435 3. 717732 3. 83936 3. 923535 3. 925008 3. 786577 3. 023281  
0. 893944 1. 087647 0. 992666 2. 256553 0. 58591 0. 559688 1. 014078 1. 097861 0. 245343  
1. 043116 1. 055102 1. 311912 1. 250123 1. 196209 0. 837636 1. 381717 0. 884053 0. 897913  
1. 397382 0. 980109 2. 326792 1. 525007 1. 834086 1. 105217 1. 059471 1. 455953 1. 520625  
1. 599009 1. 019596 1. 832554 3. 347403 1. 529499 1. 095585 1. 676146 2. 036185 0. 933185  
3. 315324 2. 882476 3. 282513 2. 90221 2. 097205 2. 283129 3. 059041 3. 254522 3. 183074  
0. 993384 0. 650779 0. 736768 0. 745967 2. 173769 0. 579538 0. 805745 1. 462597 1. 049611  
1. 075617 0. 89988 1. 158665 0. 858297 0. 729701 0. 85596 1. 013802 0. 699176 0. 801554  
3. 17519 2. 05348 3. 003086 3. 0864 2. 747045 2. 290314 2. 59163 2. 883045 2. 107519  
0. 995098 1. 589734 2. 016847 1. 82656 1. 92306 2. 097498 1. 053079 2. 979341 1. 651077  
1. 450889 1. 749266 1. 364151 1. 10072 1. 374051 1. 740879 0. 971205 1. 569543 0. 934804  
3. 875141 3. 522631 4. 724752 3. 069905 3. 515983 3. 615776 3. 872608 3. 880196 3. 660412  
1. 508501 1. 611782 1. 52799 1. 332283 1. 172244 1. 559132 1. 693774 1. 914225 1. 642149  
3. 102988 1. 588529 2. 222803 2. 046557 2. 502805 1. 644185 1. 7978 1. 501437 1. 370654  
2. 794154 1. 099549 1. 285183 1. 240302 1. 820176 1. 494799 1. 028213 1. 60695 0. 74548  
1. 110256 1. 518694 0. 951471 0. 648937 1. 087281 0. 847717 0. 777978 0. 798177 0. 734192  
2. 519736 3. 336301 3. 268891 3. 471476 4. 270584 2. 542612 3. 264236 3. 541179 3. 322244  
1. 086223 0. 685576 0. 509347 0. 804057 1. 223077 0. 899292 1. 348062 0. 657956 0. 83932  
2. 916678 2. 116068 1. 801653 1. 328033 1. 745602 1. 083273 1. 414003 2. 05259 1. 372781  
1. 72006 2. 073922 2. 381423 1. 191098 1. 603377 1. 353318 1. 953233 2. 375953 1. 159905  
2. 264876 1. 67762 1. 757403 1. 375055 1. 228583 1. 847928 1. 250369 1. 503536 1. 395852  
1. 192735 2. 136829 1. 674599 1. 416078 2. 225164 1. 898717 1. 533027 2. 056238 2. 232244  
1. 48427 1. 253628 1. 455226 1. 202572 1. 585643 1. 631854 1. 381264 1. 391559 2. 054382  
0. 670746 1. 638083 1. 410537 1. 713849 2. 075312 1. 097063 2. 316405 1. 037635 1. 245964  
0. 881235 2. 527234 0. 813652 1. 586523 1. 164595 1. 061181 1. 566268 0. 977028 1. 275412  
3. 211175 2. 646673 3. 04821 2. 49035 2. 017182 2. 384959 3. 077841 2. 715046 3. 209565  
3. 597838 1. 247626 1. 137558 1. 544356 2. 566701 1. 070669 1. 590732 0. 940134 1. 863194  
0. 987199 0. 893072 1. 000574 1. 168449 1. 145465 0. 703485 1. 052159 1. 356611 1. 225913  
1. 159665 1. 406125 0. 986992 1. 203854 1. 372164 1. 382951 1. 456377 2. 441053 0. 678306  
2. 30881 2. 12187 1. 731344 2. 354612 2. 403413 1. 73687 1. 470942 1. 968334 1. 767603  
1. 404798 0. 958825 0. 899784 0. 980101 1. 061462 1. 013292 0. 826172 1. 051159 1. 031054  
1. 40351 1. 167292 2. 731392 2. 560983 1. 33942 1. 161984 1. 517368 1. 643737 1. 965441  
1. 234731 1. 176525 2. 088887 1. 329524 2. 571647 3. 37685 1. 539756 0. 89437 1. 045457  
2. 708205 2. 530655 2. 503191 2. 738962 2. 838083 2. 802664 2. 947 2. 013829 2. 491706

2.424868 1.923289 1.738104 1.998494 2.359955 2.51589 2.363341 2.376535 2.778441  
2.731192 3.093428 3.013357 3.080983 2.277896 2.989182 1.024992 3.505001 2.899159  
0.807782 0.922163 0.743786 0.967836 0.691994 1.251631 1.62566 1.050727 1.118343  
1.58126 1.157599 1.560734 1.314487 1.509933 2.548957 1.297903 1.582443 1.558581  
1.182948 1.188157 1.147971 2.008944 2.537601 1.202306 1.201736 1.062135 1.78503  
1.25077 1.099357 1.181066 1.977496 1.462258 1.457765 1.592971 1.842523 1.430975  
1.828637 1.382131 1.655327 1.481463 1.655868 1.688997 0.899195 1.150798 1.954751  
1.173146 1.169221 1.027547 1.21593 1.277803 2.822467 1.506373 0.957601 1.394512  
2.572695 1.947052 1.305294 1.327492 1.790921 2.170893 1.512777 1.510121 1.522492  
3.432611 3.673139 3.558763 2.272872 3.122605 2.600673 2.321483 3.000344 2.35837  
3.687256 3.844033 3.323555 2.817495 2.74872 2.591279 3.629302 1.871239 1.174302  
2.359859 1.041673 0.60055 1.181127 0.573676 1.041119 1.231008 0.726843 0.535003  
1.613255 0.543703 1.865788 1.205408 1.216747 0.88066 1.056147 0.879722 1.942167  
1.389488 2.008144 3.498034 2.590417 2.618128 1.695746 1.460366 3.188413 2.145166  
3.569005 2.780573 2.004666 1.749218 2.530623 3.325388 2.43817 2.602415 1.424817  
2.137839 1.861768 3.24614 3.587601 2.729359 3.527994 2.337763 4.357734 1.424875  
0.876131 1.41306 0.551694 0.847498 0.883389 0.890951 1.291926 0.805317 1.132034  
1.01433 0.741297 1.183409 0.957963 1.574854 1.102211 1.059206 1.160287 0.844824  
1.711322 1.247528 1.620461 1.891875 2.922546 1.350665 1.422258 1.819625 2.129434  
1.247187 0.948033 0.903004 0.567582 1.393961 0.624022 0.699041 0.986053 0.812898  
1.16348 0.692975 0.862762 0.743121 0.849922 0.816742 0.764206 1.6712 1.18321  
1.092366 1.183809 0.657795 0.791748 1.525602 1.286107 1.275107 0.934514 1.376293  
2.235371 1.586573 0.67043 1.285407 1.268851 0.808105 1.676281 1.862128 0.950905  
2.172742 2.797253 3.081489 2.378353 1.974294 1.928925 3.039692 1.93779 3.316173  
1.535995 2.521287 1.289503 1.792123 2.85446 1.293551 3.581527 1.123396 1.301013  
2.525555 2.923441 2.81979 3.03678 2.778692 2.335078 3.587672 2.849093 2.532854  
7.46457 5.446768 4.54765 5.063848 4.212159 5.06811 2.694122 2.398989 4.950098  
0.984844 1.129987 2.30839 0.377702 0.411238 0.485773 2.169643 2.912108 0.737643  
2.021238 1.743199 2.745075 2.557298 2.003889 1.950001 1.874337 1.749462 2.430908  
1.653408 1.993148 2.694625 2.62327 2.417633 2.364439 3.792879 2.556953 3.192617  
1.877199 3.95389 3.817207 2.860154 1.975664 2.306596 3.01757 2.508934 2.51546  
1.784135 2.040829 1.002617 2.332846 0.744216 0.880777 1.362331 0.822009 1.15133  
4.639726 6.670071 6.141505 5.757823 5.94118 5.472527 6.047462 6.738259 6.200215  
1.172275 0.93172 0.471569 1.507955 0.442627 1.13737 2.031992 0.903096 1.121173  
1.144065 0.659076 0.734333 2.304983 0.86926 2.370681 0.800574 0.930772 1.39364  
1.247667 0.77957 0.770285 1.54323 1.240054 1.587399 1.113506 1.097141 0.884089  
1.474029 0.713335 1.110258 1.22698 1.147901 1.243702 1.02262 0.992143 1.335518  
1.315346 1.205673 1.307728 3.119908 1.391367 2.345095 4.043475 1.294626 2.726272  
1.50429 2.106126 2.768221 1.558119 1.503524 1.754065 1.5779 2.740689 3.060424  
1.441709 1.453095 0.914687 1.149471 1.271144 0.847299 0.695965 1.374962 0.957979  
0.942501 3.926083 0.762593 1.282807 2.712304 1.834585 1.618446 0.331151 0.932281  
1.209195 1.552898 1.546027 1.451488 1.052911 1.438139 1.604459 1.14481 1.213043  
2.450748 2.276992 2.559585 2.804074 3.32883 1.862097 1.678716 2.706833 1.454819  
2.255025 1.094211 1.44518 2.02455 1.50522 1.951744 2.154326 1.506918 1.41554  
1.449143 1.389245 1.646873 1.686306 2.112814 1.571775 1.646959 1.672764 1.329582  
1.418986 0.721947 1.01608 2.067193 2.660772 1.038482 1.1672 0.927136 1.109775  
2.700018 1.894647 2.559516 2.027527 2.307223 1.918766 2.616763 1.68733 1.983909  
1.723781 1.101998 2.288026 0.848916 1.345134 2.99184 1.081356 1.12252 1.500064  
2.147788 3.632752 3.423295 2.75616 1.611093 1.681917 1.949372 1.515262 1.270168  
1.30026 1.340372 1.676612 1.460926 0.982018 1.132126 3.022457 0.950901 0.665574  
1.531781 1.077688 0.737263 0.882684 0.798205 1.45567 1.222106 1.241386 1.623035

1. 325179 0. 945283 1. 421249 1. 288625 0. 971334 1. 072653 1. 060426 1. 240411 1. 098354  
2. 058552 1. 471247 1. 026322 1. 245068 1. 199342 0. 864273 1. 52381 1. 495148 2. 494875  
1. 464362 0. 861107 2. 1334 3. 372224 1. 84962 1. 886449 1. 551551 1. 311561 2. 349985  
1. 419154 0. 871885 1. 410896 1. 507258 1. 044179 0. 920483 3. 277725 0. 941825 2. 629501  
2. 837284 1. 889366 1. 629445 2. 013739 2. 012931 1. 517986 1. 539207 3. 00075 1. 013078  
0. 943577 0. 904033 4. 62442 1. 225206 2. 834896 2. 080555 1. 84963 1. 025863 1. 875816  
2. 032699 1. 553747 2. 282918 1. 995325 1. 950771 1. 708702 1. 964163 1. 459745 3. 461324  
3. 15117 1. 411031 3. 142158 1. 033482 2. 171499 1. 100997 1. 046627 2. 533302 1. 968982  
4. 320886 5. 238788 4. 662748 5. 000196 3. 596671 3. 753991 3. 672231 4. 995406 4. 264334  
2. 40746 2. 564292 2. 028866 2. 554147 3. 70633 2. 372979 2. 156694 1. 94296 2. 388956  
1. 564944 1. 589443 1. 812702 1. 854937 1. 584343 1. 810764 1. 716571 2. 06946 1. 725904  
1. 506716 1. 729671 1. 382634 1. 766643 1. 30615 2. 057118 2. 65589 1. 452259 1. 708668  
3. 601711 3. 7107 4. 286216 4. 274422 4. 11367 3. 807108 5. 31734 4. 886265 4. 282655  
6. 869499 7. 499374 7. 4373 7. 160142 7. 402748 7. 107612 7. 050879 7. 51722 7. 446982  
4. 994292 5. 601378 5. 41983 5. 589966 5. 359671 5. 536756 5. 369946 5. 983569 5. 027614  
7. 822199 7. 124034 7. 604512 7. 795881 7. 464809 7. 119533 7. 568028 7. 116788 7. 34512  
6. 688118 6. 879055 6. 874504 6. 833036 6. 920858 6. 652982 7. 222671 6. 587193 6. 995378  
3. 111092 3. 274181 2. 9901 2. 328597 2. 598715 2. 89201 2. 487941 2. 417466 3. 372681  
1. 99865 2. 153357 2. 630239 1. 532941 1. 41727 1. 813661 1. 757118 1. 72146 1. 472693  
9. 111505 9. 318894 9. 437819 9. 347393 9. 574307 9. 185069 8. 532352 9. 274953 8. 903422  
6. 51237 5. 703099 5. 64971 5. 408735 5. 911883 6. 306504 5. 361786 5. 492739 5. 784654  
2. 347815 3. 057694 1. 977246 1. 821381 2. 395602 1. 866334 2. 232292 2. 159658 2. 486135  
1. 690979 1. 937651 2. 255408 2. 604334 2. 828891 1. 549155 2. 377817 1. 99433 1. 525595  
6. 243288 6. 525935 6. 397399 5. 943099 6. 325397 6. 036448 6. 324446 6. 27237 6. 037871  
9. 350848 9. 370974 9. 617914 9. 470996 9. 622636 9. 178667 9. 432286 9. 691248 9. 57792  
5. 888957 6. 361431 6. 566955 6. 586666 6. 205854 6. 010295 5. 868851 6. 238572 6. 118051  
7. 125091 7. 275167 7. 044651 7. 182405 7. 276158 7. 358304 7. 374975 7. 033213 7. 028843  
2. 84648 4. 028439 2. 582279 3. 809587 2. 741225 2. 846334 2. 903328 2. 787229 3. 030086  
3. 437684 4. 196683 3. 799684 3. 608122 3. 572134 4. 455202 3. 171131 3. 285626 5. 150807  
7. 618316 8. 232822 8. 196061 7. 770523 8. 165892 8. 038749 8. 025405 7. 235459 8. 381239  
7. 13089 8. 824505 8. 144128 8. 464255 8. 437933 7. 989734 7. 954947 8. 990623 9. 145806  
1. 738923 1. 41729 1. 729034 2. 142875 1. 542125 1. 49843 1. 936289 1. 737142 1. 88266  
7. 286009 7. 084035 7. 218197 6. 865544 6. 831039 7. 178279 7. 013246 6. 831 7. 16254  
1. 86761 2. 102558 1. 892297 1. 765877 2. 345069 2. 712746 3. 251258 1. 993366 3. 295092  
7. 709343 7. 725945 7. 520282 7. 521969 7. 475477 7. 453286 7. 932716 7. 801044 7. 34024  
6. 112079 5. 789209 5. 511181 4. 818931 6. 242829 5. 430607 5. 639949 5. 316487 6. 200946  
5. 204376 6. 233433 6. 036257 5. 889126 6. 573178 5. 929613 5. 759436 5. 633277 5. 984624  
1. 874548 2. 799035 2. 526961 2. 393751 2. 056262 3. 035815 1. 906348 1. 84457 1. 995705  
2. 491049 3. 202593 3. 296571 3. 679094 2. 688431 3. 568975 3. 209185 3. 357849 3. 022963  
8. 12615 7. 989546 8. 228872 7. 9267 8. 053243 7. 749396 7. 777956 8. 290963 7. 989094  
1. 487659 1. 694112 1. 452077 1. 183917 1. 327354 1. 479836 1. 509374 1. 456259 1. 465643  
7. 22793 7. 626777 7. 706229 7. 406288 7. 344744 8. 125247 8. 06592 7. 808675 7. 57682  
4. 097249 4. 94592 4. 463574 5. 021372 4. 434919 5. 529421 4. 748066 4. 92082 4. 904941  
3. 211348 1. 347565 2. 564454 1. 119918 1. 205443 1. 694435 1. 647285 1. 63733 1. 961447  
4. 171575 5. 372575 5. 45549 5. 523646 5. 916038 5. 222366 4. 647886 5. 762345 5. 222366  
1. 828267 1. 989435 2. 322199 3. 243192 2. 712459 2. 702812 2. 762371 2. 604564 2. 580971  
4. 47864 5. 529731 5. 301556 5. 562083 4. 772165 5. 50121 4. 358924 4. 841625 4. 898708  
2. 079285 1. 685763 1. 686183 1. 467992 1. 668883 1. 549099 1. 940727 1. 708877 1. 742798  
2. 281775 2. 226912 1. 771447 1. 946541 2. 211574 2. 034399 2. 095874 2. 022775 2. 186786  
6. 868463 6. 977141 6. 739754 7. 5081 7. 295333 6. 872859 7. 33742 7. 188138 7. 335448  
5. 346181 5. 144408 5. 186804 5. 413914 4. 753116 5. 469227 6. 184909 5. 727507 5. 374719

7. 018406 7. 055021 7. 022055 7. 318282 6. 986843 7. 095714 7. 098036 6. 885818 7. 049901  
6. 590043 6. 529426 6. 695073 6. 079503 6. 319745 6. 104193 5. 997257 6. 441764 6. 23297  
3. 630941 3. 353928 4. 297732 4. 272367 3. 662461 4. 529649 3. 998481 3. 000041 3. 800497  
2. 283746 1. 644359 1. 43213 1. 894482 1. 844657 1. 487927 2. 067165 2. 191252 1. 498312  
6. 739654 6. 542702 6. 240174 6. 626734 6. 333566 7. 022541 6. 846046 6. 940937 6. 820175  
2. 621307 2. 192674 2. 546579 2. 154646 1. 63729 1. 730609 2. 408591 2. 196372 2. 086998  
2. 431287 3. 866776 3. 968881 3. 981834 2. 921477 3. 690068 4. 12934 4. 410443 3. 731328  
2. 66846 2. 548976 2. 993417 3. 497917 3. 971906 3. 831181 3. 62441 2. 672777 3. 216089  
1. 677457 1. 421559 2. 794561 1. 120502 1. 245963 1. 264908 2. 546358 1. 233775 2. 0457  
3. 842557 3. 46507 3. 421688 3. 379561 3. 645368 3. 056969 2. 911384 2. 971013 3. 578687  
2. 184814 1. 449144 1. 209989 1. 473765 1. 81471 1. 364086 1. 679892 1. 842745 2. 197486  
4. 550844 5. 945672 5. 799818 5. 155336 5. 925053 5. 653984 5. 561533 5. 373958 5. 618102  
2. 216148 2. 967665 2. 161739 3. 536625 2. 713029 3. 242031 2. 690542 2. 547649 1. 868121  
8. 071276 6. 942537 7. 724994 6. 661074 6. 86315 6. 928454 7. 30946 7. 220796 7. 983211  
5. 89358 5. 774183 5. 361954 5. 1292 6. 545649 5. 792037 5. 839622 5. 776695 5. 862496  
4. 738271 5. 280946 5. 018131 4. 54864 4. 979851 4. 131227 4. 417132 5. 493366 4. 743958  
2. 668037 3. 959124 4. 160455 3. 864551 4. 367986 2. 906488 3. 396099 4. 062705 3. 541813  
9. 318078 9. 058287 9. 003517 8. 739481 8. 832247 8. 945273 9. 268052 9. 528023 9. 212767  
1. 376019 1. 514073 1. 548255 1. 330848 1. 345739 1. 391619 2. 41861 1. 896357 1. 293868  
1. 17686 1. 007164 1. 026826 1. 437161 1. 247917 1. 361971 2. 535982 2. 271095 0. 935733  
1. 821179 1. 018731 1. 658079 1. 678972 1. 685796 1. 731485 2. 13897 1. 762726 2. 087203  
6. 162901 6. 520386 6. 569224 6. 855716 6. 500742 6. 387916 6. 206392 5. 701298 6. 116439  
4. 074225 4. 76466 4. 441436 4. 418223 3. 8531 4. 659111 4. 250293 4. 110231 4. 394878  
2. 541622 2. 48675 1. 258568 3. 249403 2. 65055 2. 641167 2. 414732 1. 969022 3. 494617  
7. 830729 7. 783102 7. 921329 7. 744143 7. 60522 7. 912612 7. 559068 8. 030031 7. 417357  
3. 283881 1. 321131 1. 918994 2. 05076 1. 471034 2. 104403 1. 580082 1. 775705 1. 962866  
1. 676719 1. 840638 1. 947276 1. 860619 2. 416575 1. 976168 2. 155512 2. 469887 2. 436863  
1. 278075 1. 550332 1. 606839 1. 820043 2. 048053 1. 712561 1. 726499 1. 456166 1. 082139  
4. 719425 6. 020886 4. 247296 5. 843156 5. 15231 6. 101943 5. 63842 5. 538517 5. 367597  
2. 790332 2. 435979 3. 360514 2. 811232 2. 680576 2. 751293 2. 586327 2. 975166 2. 546678  
1. 045901 1. 068808 1. 501168 1. 08057 1. 687221 0. 685644 1. 581741 1. 109119 1. 124403  
2. 126333 1. 693277 1. 29071 1. 174405 1. 26568 1. 592379 1. 516891 1. 504685 1. 364454  
2. 203839 1. 357927 1. 599336 1. 05093 1. 352754 1. 78537 1. 804341 2. 435763 1. 758199  
3. 932953 4. 346281 5. 158898 4. 717243 4. 603383 4. 101709 4. 97483 4. 972529 5. 185109  
2. 969082 3. 624539 2. 366814 2. 969315 3. 091467 2. 774244 3. 49629 2. 685696 2. 72633  
4. 092651 3. 396517 2. 8602 2. 502961 1. 934171 3. 102123 2. 776895 2. 42465 2. 634486  
4. 721048 5. 058742 4. 736754 5. 421007 5. 114642 5. 19076 5. 397383 5. 2427 5. 131999  
5. 261846 6. 345977 5. 375277 5. 59929 6. 139251 6. 241619 5. 947015 5. 924757 5. 989537  
6. 907844 7. 270762 6. 519226 7. 295235 6. 623575 7. 703917 6. 362461 6. 7387 7. 214472  
6. 650288 6. 530957 6. 244833 5. 978928 5. 831313 6. 043442 5. 608614 5. 7184 6. 715206  
2. 751879 2. 268422 2. 392817 3. 096389 2. 102297 2. 447905 2. 627142 1. 882576 2. 421816  
1. 205293 0. 609546 0. 98297 1. 469894 0. 922606 1. 397382 1. 253709 1. 004765 1. 156849  
3. 659486 2. 590623 2. 842066 3. 494702 3. 202443 3. 771446 3. 036403 3. 023634 2. 941615  
8. 276909 8. 791369 8. 399469 8. 434336 8. 729743 8. 679564 8. 16407 8. 893475 8. 989762  
3. 632802 2. 329359 2. 324463 2. 314081 3. 961012 1. 910027 2. 880234 2. 637386 3. 650302  
8. 251182 8. 735857 8. 502798 8. 918484 9. 269264 7. 02801 7. 837308 8. 844795 7. 834061  
7. 110336 7. 149863 7. 362364 7. 168105 7. 477926 8. 363522 6. 90624 7. 996928 6. 949668  
4. 452608 5. 43215 4. 660688 5. 186254 5. 03475 5. 211274 5. 11997 5. 54224 5. 37926  
3. 618756 2. 548223 4. 557603 4. 338627 3. 741236 4. 26723 4. 965138 4. 423664 4. 505484  
11. 36379 11. 14481 11. 27445 10. 99094 10. 8276 11. 3221 10. 79237 11. 07794 11. 12012  
4. 893852 5. 580298 3. 276896 4. 341977 4. 494367 4. 805516 4. 336798 4. 649115 4. 800341

2. 174897 2. 504565 2. 529339 2. 276125 1. 97073 2. 330401 2. 369178 1. 570936 1. 95643  
1. 736858 2. 095947 1. 698918 1. 701645 2. 150477 2. 077698 1. 780638 1. 587151 2. 354279  
8. 49289 6. 602383 7. 498017 5. 622828 7. 442229 6. 098486 8. 137524 6. 158644 8. 017053  
5. 694649 5. 934351 5. 711009 5. 901792 6. 051431 5. 665806 5. 238881 6. 09983 5. 909401  
4. 369522 3. 886787 3. 871462 3. 636655 3. 821875 3. 02696 3. 671458 3. 648022 4. 171689  
6. 832499 7. 01852 6. 516113 6. 797199 7. 098518 6. 227824 6. 58387 7. 305301 6. 830505  
3. 745291 4. 724087 4. 718467 4. 383869 5. 000251 4. 61635 4. 802004 4. 02357 3. 998014  
2. 743304 4. 092354 2. 481785 2. 404494 3. 472807 2. 551202 2. 756846 3. 043394 3. 043394  
1. 367411 1. 451397 1. 588779 1. 514262 1. 792919 1. 860225 1. 528185 1. 438759 1. 442251  
4. 38924 5. 198666 4. 883511 5. 356769 4. 982557 5. 281315 4. 875181 5. 198411 5. 062717  
4. 302099 4. 492604 5. 025097 2. 858251 3. 178414 3. 691806 3. 62308 4. 389148 4. 157496  
9. 448584 9. 557469 9. 929821 9. 359324 9. 933625 9. 591637 9. 564382 9. 863075 9. 65301  
10. 99573 11. 23314 11. 23195 11. 41667 11. 277 11. 31673 11. 16613 11. 40708 11. 44403  
10. 28858 10. 28479 10. 40675 10. 30983 10. 2988 10. 16008 10. 61254 10. 02904 10. 29781  
6. 834236 6. 897106 6. 482087 6. 713314 7. 463488 7. 598176 6. 552032 6. 782781 7. 083865  
6. 528063 6. 565562 6. 808754 7. 128797 6. 898031 7. 612171 6. 692245 7. 191162 6. 848792  
4. 488842 5. 324447 5. 06283 5. 066938 5. 094 4. 552383 6. 003184 5. 368986 5. 4494  
5. 162635 5. 988697 6. 249587 6. 305711 6. 441405 6. 571622 5. 776211 6. 157551 6. 310462  
5. 677929 5. 989063 6. 481161 5. 642901 6. 160604 5. 596065 5. 019978 6. 429443 5. 979781  
2. 278971 2. 305154 1. 840705 2. 389983 1. 759995 1. 997814 4. 045338 1. 820564 3. 182382  
6. 703651 7. 9648 7. 473202 7. 301326 7. 200683 8. 061369 7. 501424 7. 647097 7. 618987  
7. 406446 6. 447195 7. 284059 7. 742926 7. 905511 8. 055572 9. 015323 7. 942748 7. 086751  
1. 213159 0. 961553 1. 228977 1. 398336 1. 570969 1. 161158 1. 07383 1. 51458 1. 287412  
1. 632046 1. 052312 0. 913729 1. 639997 1. 199241 1. 364555 1. 510984 0. 584164 1. 664577  
5. 080351 4. 375787 5. 690351 4. 929305 5. 959206 6. 642891 4. 548722 5. 493921 5. 312315  
4. 648718 6. 23986 5. 926077 4. 974513 5. 195389 5. 962751 4. 70636 5. 372005 5. 686357  
11. 90999 11. 88709 12. 01391 12. 16048 11. 80625 12. 18186 11. 9553 12. 06583 11. 96552  
5. 24718 5. 004257 5. 208568 5. 471832 5. 281772 5. 518682 5. 023237 5. 600736 5. 401591  
7. 847934 7. 375315 7. 572312 7. 900528 7. 12759 7. 694258 7. 940019 7. 230387 7. 869653  
7. 23395 7. 810927 7. 771933 8. 068168 7. 797605 8. 195739 7. 736825 7. 55333 7. 759107  
3. 235078 3. 52172 4. 321032 3. 729538 4. 724987 4. 306155 4. 649923 5. 4208 4. 610711  
2. 252789 1. 673458 1. 984541 2. 256745 1. 679275 2. 635052 2. 379078 2. 057798 2. 47027  
5. 126172 5. 205935 5. 359303 4. 8024 5. 174927 5. 088549 4. 991547 5. 465792 5. 137836  
2. 671802 2. 165046 2. 589222 2. 176086 2. 409773 2. 65347 3. 075655 1. 990703 2. 46178  
2. 50753 3. 751491 2. 849836 2. 992183 3. 082671 3. 780654 3. 547841 2. 104597 4. 897909  
5. 851035 5. 677899 5. 948336 5. 483687 6. 428727 5. 556586 6. 09916 6. 049132 5. 857756  
5. 616594 5. 877351 5. 73325 6. 499696 6. 413368 5. 474025 6. 0571 6. 535764 5. 308465  
7. 443704 7. 465468 7. 497255 7. 794028 7. 01464 7. 208344 7. 31397 7. 078614 7. 70146  
7. 003251 6. 622397 6. 268158 6. 452142 6. 607848 6. 600434 6. 026242 6. 077066 6. 661175  
5. 775409 6. 559623 5. 366139 5. 739257 5. 810847 5. 988329 5. 470989 6. 528427 6. 059279  
4. 172364 5. 194352 4. 510308 4. 307513 4. 724757 5. 163328 4. 687997 4. 451755 4. 720918  
7. 892864 8. 159738 8. 098507 8. 342711 7. 815019 8. 20438 7. 731773 7. 925434 8. 1056  
7. 138046 7. 039725 6. 875131 6. 344234 7. 294295 6. 776712 6. 89274 6. 997783 6. 992285  
8. 025206 7. 288233 8. 024885 7. 667243 7. 427828 7. 442391 7. 59216 7. 42659 7. 768931  
4. 010935 4. 836592 4. 469508 4. 484859 3. 410829 4. 409265 3. 717031 4. 466696 4. 390138  
6. 271034 6. 590887 5. 955672 5. 870419 5. 860041 6. 630643 6. 104819 6. 162876 6. 179539  
6. 797643 6. 974127 6. 858345 6. 490546 6. 427963 6. 983598 5. 984943 7. 40165 7. 069842  
6. 293254 5. 747681 5. 313175 6. 085747 6. 437392 5. 452948 5. 722622 5. 453882 5. 900807  
6. 723784 7. 27778 7. 699823 7. 785098 7. 037362 8. 157642 7. 350743 7. 55074 8. 085361  
3. 591933 3. 801135 3. 153678 2. 363893 3. 587252 3. 258243 3. 57079 3. 280996 2. 964843  
8. 225814 8. 491398 7. 67921 6. 821108 7. 585224 8. 082549 8. 243778 6. 909632 6. 006986

6.661802 7.289038 6.874236 6.953699 6.825679 6.857543 6.683958 7.216445 6.680461  
6.780618 6.639746 6.276624 6.280292 6.549369 6.112077 5.590767 5.945492 6.044331  
5.850046 5.905116 5.677642 5.433887 5.979243 6.06491 5.640757 4.98865 5.982184  
5.61331 4.954393 5.297151 5.176073 5.09013 4.989715 4.821959 5.392793 4.837971  
4.501445 3.989662 5.036246 4.246794 4.208039 4.925525 4.457217 5.185068 4.280464  
9.601019 9.748536 9.322523 9.923829 9.650566 9.812682 9.431232 9.956104 9.588867  
8.953722 7.155223 8.047716 6.427706 7.637982 6.738091 7.331625 7.299081 8.41752  
2.790658 2.218543 2.823556 2.903522 2.915552 2.124731 3.337643 2.900552 2.668709  
5.631795 6.05218 6.029043 5.77236 6.22266 5.840985 6.76963 6.709481 6.082695  
6.030743 4.852091 4.064466 5.235006 5.076444 4.596215 3.823141 4.38979 4.54335  
6.84312 4.616339 5.720186 4.419569 5.934155 4.918018 3.668119 5.007407 4.35821  
3.692448 4.474785 4.44678 3.950641 4.794671 5.128516 4.20859 3.355419 4.820546  
8.721177 7.762019 8.328053 7.211666 7.973458 7.420779 7.747609 7.929967 8.304372  
7.059533 7.501221 7.243001 7.396639 7.438305 7.475726 7.578841 7.408966 7.329483  
7.480581 8.361043 6.232122 7.358576 7.9431 8.415751 8.253997 7.086252 8.042119  
6.065198 5.705029 5.958945 5.619121 6.161735 6.09505 5.521244 6.388172 6.47011  
5.050218 5.494171 4.978064 5.55725 4.977197 5.579518 5.788596 6.114538 5.388881  
2.127858 2.241412 2.299862 3.04667 2.695173 2.288348 1.747576 1.800729 3.576405  
3.322775 3.671259 2.827574 3.672222 3.147775 2.870959 2.832389 3.317739 3.527528  
4.930678 4.448065 3.746334 5.966921 5.010053 4.641756 4.068965 5.043106 4.707583  
1.71974 2.543008 1.449706 1.881228 2.25381 1.604119 2.434931 1.554141 1.877372  
7.289944 7.439474 7.436591 7.105981 7.264742 7.393625 7.196794 7.296852 7.580656  
5.364671 5.85008 5.792462 5.420104 5.739454 5.284026 6.190129 5.536166 5.699015  
4.782678 5.974074 5.562714 5.981243 6.380348 5.397006 5.292563 6.001877 5.62846  
5.797199 6.595447 6.223777 5.839074 6.700314 6.14293 5.980528 6.63476 6.033828  
6.198433 6.493827 6.685606 6.821123 6.879973 6.108759 7.281241 6.61822 7.275011  
1.655142 2.106746 1.947062 1.843048 1.648893 2.557032 2.300162 1.886473 2.19611  
4.511989 2.966527 3.542347 3.682225 4.152801 4.500153 3.672833 4.72067 4.120932  
1.454256 1.201462 1.425945 1.155481 2.295313 1.400402 1.39291 0.905629 1.33439  
6.416079 6.14929 6.965213 6.454241 6.108848 6.304374 6.95687 6.090208 6.434468  
3.959775 4.813419 5.006785 4.467916 3.72696 4.098356 3.562592 4.465688 4.246029  
5.620548 6.320418 6.175651 7.010619 6.566985 6.334862 6.738619 6.699108 6.485971  
5.551368 5.088155 5.171153 4.730979 5.327278 5.4765 5.586793 5.278383 5.510649  
6.016302 5.884248 5.224911 6.26941 5.820897 6.590084 5.81652 5.789901 5.612253  
7.185514 6.420274 6.508862 6.872117 7.24671 6.357174 7.116571 6.695817 7.506752  
3.854655 4.188475 3.996951 5.16593 4.215618 3.92007 3.809751 4.373357 3.84734  
5.639864 5.229825 5.568414 5.074166 5.782312 4.954102 5.268578 6.483922 5.974145  
5.749664 5.614988 5.385867 4.610929 5.69702 5.597609 4.700959 5.934587 5.138769  
1.64265 1.80437 1.962146 1.423998 1.928356 2.245995 1.720306 1.513067 1.946414  
8.852584 9.323154 9.657795 9.043831 9.552215 9.06047 9.260188 9.535806 9.183656  
1.793623 1.587515 2.240088 1.357785 2.074983 1.217779 1.617662 1.632653 2.194811  
5.214075 5.789088 5.775909 6.198521 6.324789 6.65829 5.833377 5.764819 6.290712  
6.10446 6.311988 6.760038 6.085758 6.279459 6.094837 6.306201 6.441684 6.52284  
4.790589 5.847763 5.573648 5.753996 5.911516 6.410499 6.328614 5.391566 5.618128  
1.792602 1.491882 2.202332 1.937542 1.586399 1.526702 1.672374 1.389171 1.588954  
4.755602 7.171312 6.076439 6.40685 7.118569 6.968219 6.127976 6.620659 6.379395  
8.412203 8.763199 8.712024 8.82213 9.066477 8.801779 8.685527 8.798782 8.839598  
6.28075 6.563447 6.174206 6.352882 6.404891 6.237059 6.75141 6.989584 6.157648  
6.885458 7.192066 6.853327 6.949774 6.786832 7.225735 6.908495 6.893447 7.307038  
1.02173 1.42064 1.895429 1.805483 1.735026 1.282463 1.909088 2.074605 1.248238  
7.806515 8.339152 8.309357 8.283444 8.559192 7.570661 8.344392 8.357001 8.20453

6. 491992 7. 541216 7. 083173 7. 660045 7. 313659 7. 785035 8. 031899 6. 864547 7. 685033  
7. 616303 8. 096956 7. 847552 8. 135233 7. 910243 7. 883086 8. 136682 8. 118667 7. 939953  
4. 670419 5. 355271 4. 85449 5. 257819 5. 268911 5. 126601 5. 137095 5. 382794 4. 982931  
6. 56435 5. 931608 6. 087211 6. 415695 5. 88636 6. 540631 6. 420069 6. 30892 6. 538938  
4. 070752 5. 626952 5. 190174 5. 215933 5. 274092 5. 480006 5. 633042 5. 43538 4. 610313  
5. 96786 6. 661193 6. 529452 6. 179265 5. 95072 6. 234896 5. 867172 6. 470014 6. 548772  
5. 381704 5. 486534 6. 090019 5. 111028 5. 602191 6. 179571 4. 793804 5. 171544 5. 695376  
7. 701801 7. 070115 6. 685251 7. 266942 7. 078463 6. 830556 6. 745881 7. 035086 7. 124077  
3. 254007 4. 417351 4. 620538 4. 596194 5. 396363 5. 422474 4. 478437 4. 493584 4. 551003  
2. 898262 2. 937505 2. 230675 2. 643834 2. 951583 2. 879788 2. 441621 2. 898038 2. 777493  
3. 542966 2. 137043 1. 84449 2. 909623 2. 67765 2. 301001 2. 27024 2. 870881 3. 186543  
3. 469169 3. 1698 2. 638973 2. 390168 2. 073891 3. 28311 2. 533624 2. 426481 3. 362864  
3. 45093 4. 168135 4. 292246 3. 998263 3. 98112 4. 447892 3. 74361 4. 389322 4. 024501  
4. 68945 3. 365931 3. 84606 3. 796896 3. 700784 4. 028966 4. 061985 4. 24263 3. 030985  
3. 715528 2. 614611 2. 15055 2. 636861 2. 928605 2. 267993 2. 85641 2. 565816 3. 035531  
4. 34447 5. 245788 6. 480214 5. 451926 4. 412699 5. 907074 4. 670034 4. 963515 4. 893449  
6. 616078 7. 25399 7. 395114 6. 439894 6. 547349 6. 862592 6. 043085 7. 07987 6. 914165  
4. 274241 5. 104353 4. 745202 5. 306961 4. 781689 5. 114945 3. 856411 4. 806891 4. 502724  
6. 9052 4. 539625 5. 332339 5. 195972 5. 722409 6. 584385 6. 371616 5. 092943 6. 196608  
1. 51916 1. 3243 2. 155191 1. 13649 1. 089876 1. 488322 1. 347205 0. 814629 1. 16769  
3. 164446 3. 973918 2. 942065 3. 062275 2. 979201 3. 111992 4. 639345 4. 608016 3. 402711  
6. 710145 6. 892615 6. 822586 5. 436688 6. 420671 5. 930348 6. 937798 6. 740775 6. 882344  
3. 298853 3. 663632 3. 514152 3. 694458 3. 299723 4. 019052 3. 796602 3. 773595 3. 479331  
2. 205518 3. 878034 3. 217301 2. 817423 3. 54319 3. 151323 4. 028916 3. 879965 3. 026488  
8. 6316 8. 619905 8. 520414 8. 532754 8. 34807 8. 385167 7. 760466 8. 519124 8. 561698  
5. 850675 5. 631014 5. 387463 5. 188385 5. 455827 5. 439347 4. 792114 5. 003714 5. 084317  
6. 732004 6. 085089 6. 042649 5. 838773 6. 009498 6. 301194 5. 683415 6. 403466 5. 52791  
7. 182914 7. 170562 7. 096247 6. 365694 7. 446302 6. 8244 7. 208535 6. 961687 6. 77825  
6. 249827 6. 660068 6. 60001 6. 963785 7. 079774 7. 154422 6. 966973 7. 193293 6. 748461  
6. 264192 6. 419879 6. 528037 6. 198304 6. 232925 6. 618884 6. 608891 6. 183504 6. 691639  
7. 17791 7. 187923 7. 385767 7. 589565 7. 291339 7. 12351 6. 868916 7. 426868 7. 492502  
5. 866813 6. 201923 6. 541791 6. 721674 6. 855068 6. 700044 6. 288279 6. 526007 6. 23718  
5. 138936 5. 885647 5. 896277 5. 640689 5. 180059 5. 284006 4. 789472 5. 690725 4. 828989  
5. 731799 6. 168209 6. 026103 5. 18657 4. 505311 6. 14798 5. 340918 6. 065809 5. 616225  
6. 319981 6. 333901 6. 164315 5. 993399 5. 840724 6. 289956 6. 370254 6. 126076 6. 738638  
3. 939566 4. 684441 4. 622683 3. 972414 5. 118121 4. 842702 5. 30167 4. 384931 4. 528866  
3. 171011 6. 455679 6. 026908 6. 297843 6. 528577 5. 887986 5. 531755 5. 94889 6. 044866  
5. 055013 4. 996114 4. 435836 4. 825029 4. 509706 4. 23853 5. 078229 5. 122283 5. 250073  
2. 410611 3. 156163 3. 548446 3. 16555 3. 511285 2. 311578 3. 286338 3. 070224 2. 623906  
4. 779792 5. 616124 4. 988321 4. 284833 4. 3945 4. 265984 5. 219874 4. 599059 4. 779977  
2. 973047 4. 239606 2. 834941 3. 508432 3. 196802 2. 543978 4. 12123 2. 574518 3. 117754  
5. 737658 5. 879588 5. 725843 5. 979395 6. 348804 6. 375872 6. 180455 6. 397938 6. 36691  
1. 879801 1. 60287 1. 080068 2. 109012 1. 799945 1. 316426 1. 544997 1. 624969 1. 696798  
7. 594174 8. 107626 8. 018164 7. 798621 8. 449166 8. 194923 8. 2759 7. 901913 7. 857583  
6. 138077 6. 572023 6. 308368 6. 730063 6. 606672 6. 155277 6. 657164 6. 733452 6. 475976  
9. 436405 9. 23711 9. 158867 8. 774219 9. 162419 8. 21337 8. 884395 9. 065292 9. 309852  
4. 50257 5. 07369 4. 267564 5. 399986 4. 731947 4. 867688 5. 859364 4. 791523 4. 443529  
6. 568685 6. 766023 6. 885894 6. 581227 6. 847597 7. 080279 7. 115986 7. 10791 6. 890005  
6. 302829 6. 307285 6. 193702 6. 77949 6. 664822 6. 337392 6. 863294 6. 531149 5. 994817  
5. 568335 4. 654136 4. 449148 4. 961023 5. 19068 4. 985586 4. 263089 4. 490733 4. 670643  
9. 342066 9. 337526 9. 148473 9. 094281 9. 333215 9. 12236 8. 867803 8. 793705 9. 170109

3. 836104 3. 165898 4. 080627 2. 844015 4. 247491 2. 346601 6. 395694 5. 595498 2. 952843  
8. 032948 8. 357911 7. 957559 8. 396722 8. 471747 8. 769047 8. 533281 8. 779636 8. 441695  
4. 478924 5. 490566 4. 66285 5. 533212 5. 585696 5. 333413 5. 405637 5. 704381 5. 154104  
6. 637861 6. 975518 6. 815309 6. 720381 6. 718657 6. 977535 6. 631142 6. 683375 6. 952915  
4. 873896 4. 100527 4. 564406 4. 086911 3. 970417 5. 043138 4. 214955 4. 454161 4. 073598  
5. 615885 6. 084872 5. 690452 6. 701566 5. 676146 6. 166714 5. 776385 6. 340405 6. 230817  
5. 245133 5. 399526 5. 867527 4. 720039 5. 734995 5. 415282 4. 539039 5. 359211 4. 875059  
6. 321379 6. 934827 6. 959121 6. 789345 7. 033944 6. 379961 7. 338149 6. 659519 6. 80888  
5. 30545 5. 034 4. 069593 4. 523462 5. 124047 4. 951312 5. 252844 5. 132545 4. 693881  
5. 136727 4. 052989 3. 802256 3. 099891 3. 164821 2. 941478 3. 720612 4. 501859 3. 594888  
5. 51631 6. 54223 5. 891929 5. 950256 5. 647013 6. 89577 5. 820115 6. 626907 4. 705961  
2. 181504 1. 449992 1. 436653 2. 853998 1. 689713 1. 869312 1. 890075 1. 853403 1. 930596  
1. 953549 1. 464409 2. 120185 1. 929702 1. 728561 1. 24197 1. 613498 1. 266485 1. 092406  
6. 057795 5. 995422 6. 004509 6. 222435 6. 098193 6. 403504 5. 191981 5. 582216 6. 081327  
6. 459176 6. 810657 6. 830955 6. 324876 6. 679465 6. 38359 6. 549208 6. 62153 6. 443035  
2. 082317 2. 012069 2. 367909 2. 407824 2. 015691 2. 452229 1. 693806 2. 24662 1. 726365  
9. 23924 9. 218997 9. 027289 9. 297522 9. 587392 9. 131465 9. 470009 9. 298872 9. 400478  
2. 419189 1. 818677 1. 893539 2. 46688 3. 539325 3. 038748 4. 051136 2. 889926 2. 150012  
6. 575903 6. 730058 6. 390848 7. 170601 6. 845325 6. 424733 6. 428602 6. 669877 6. 475709  
4. 007423 1. 364815 4. 741962 1. 745654 2. 232153 2. 413414 3. 478927 2. 202211 2. 538773  
2. 652173 2. 225025 2. 801112 2. 126256 1. 867272 2. 608952 2. 136663 2. 269677 2. 152766  
7. 22289 7. 761628 7. 427324 7. 391344 7. 163989 7. 132946 8. 061288 7. 222224 7. 085182  
6. 385561 5. 187802 5. 838084 5. 438713 6. 179698 5. 918738 5. 485866 6. 261237 5. 895241  
7. 266269 7. 347331 7. 460166 7. 506144 7. 511541 7. 401763 7. 674939 7. 484678 7. 419995  
6. 349393 6. 380909 6. 360886 5. 85501 6. 425409 6. 357238 6. 31253 6. 261346 6. 461169  
7. 557387 7. 579081 8. 125732 7. 568678 8. 171379 7. 592361 7. 82362 7. 916609 7. 919992  
10. 09046 10. 09513 10. 09603 10. 21456 10. 16535 10. 05491 10. 2427 10. 09716 10. 38007  
2. 818363 5. 869851 4. 300909 4. 530322 5. 372099 4. 180418 5. 455716 4. 251666 3. 952569  
6. 885065 7. 377524 7. 647075 7. 371247 7. 452428 7. 369553 6. 552486 7. 833228 7. 393692  
1. 504163 1. 357526 1. 302211 1. 891506 1. 798373 1. 033296 1. 057563 1. 216828 1. 570675  
5. 181069 5. 449496 5. 572855 5. 616228 5. 624 6. 180262 5. 583561 4. 869863 5. 858061  
9. 801266 9. 877061 10. 06372 10. 26488 10. 08354 10. 1023 10. 10111 9. 721204 10. 04749  
1. 942284 1. 181684 1. 356265 1. 798831 1. 217717 1. 671127 1. 514295 2. 248174 1. 293591  
4. 513949 4. 321936 4. 70127 4. 195759 4. 691921 4. 7572 4. 564732 4. 980098 3. 977807  
2. 294293 1. 9679 1. 388891 1. 496793 1. 617123 1. 627752 1. 938998 1. 444816 1. 763612  
4. 48209 4. 105112 4. 144511 3. 798068 4. 263631 3. 454654 3. 948909 3. 600098 4. 724486  
5. 365635 5. 579449 4. 328657 3. 213377 4. 990118 5. 079744 3. 549823 5. 062602 4. 892435  
5. 972769 5. 498994 5. 778474 5. 118055 6. 030626 4. 555808 5. 313411 5. 588765 5. 689403  
4. 314327 2. 969113 3. 239855 3. 186423 3. 369876 3. 416455 2. 61716 3. 335356 2. 837895  
2. 780527 1. 631385 1. 506438 1. 890395 2. 143731 2. 348924 2. 348128 2. 000169 1. 746615  
6. 937629 5. 627188 5. 98844 4. 62679 5. 054603 5. 413117 5. 604319 5. 958059 6. 205187  
6. 171275 5. 812101 5. 683677 5. 501598 6. 161411 5. 654337 6. 041297 5. 914748 5. 546154  
7. 939899 7. 937891 8. 098828 8. 347103 8. 185857 8. 306844 8. 186121 7. 954064 8. 030112  
3. 761616 3. 234099 3. 415551 2. 96445 2. 525926 2. 394929 3. 24953 3. 300967 2. 638356  
8. 003229 8. 421654 8. 618654 8. 058039 8. 372056 8. 234014 8. 521356 8. 235195 8. 224107  
7. 698442 7. 212615 7. 369218 7. 232285 7. 677937 7. 544295 7. 239861 7. 653523 7. 97555  
1. 097315 1. 173022 1. 311214 2. 550714 1. 894013 1. 47229 2. 73172 1. 556581 1. 171055  
5. 764906 5. 481944 6. 117736 5. 587155 5. 929071 6. 114358 6. 214775 6. 452723 5. 444403  
2. 235575 1. 617538 1. 876412 2. 842631 2. 00308 2. 49423 2. 104284 2. 380134 2. 410567  
6. 359946 7. 149812 6. 731964 6. 626128 6. 713302 6. 602508 6. 385366 6. 782193 6. 183869  
8. 16342 8. 514195 8. 630575 8. 488106 8. 546862 8. 444557 7. 867479 8. 74209 8. 06014



3. 64549 3. 828545 2. 984126 3. 303877 2. 292115 2. 946778 3. 369844 3. 057866 3. 596834  
4. 071876 4. 395374 4. 317037 4. 121364 4. 371183 5. 088381 3. 604785 4. 866804 4. 584561  
2. 881585 3. 028926 2. 065723 2. 521007 2. 867039 2. 594 2. 77035 2. 685959 2. 798529  
4. 174693 3. 986765 4. 623825 3. 796556 4. 069478 4. 118853 4. 731001 4. 200432 4. 136554  
6. 939683 7. 236616 6. 355109 7. 118097 6. 702186 6. 781035 6. 52318 7. 007792 6. 67707  
4. 278056 3. 675888 4. 390682 4. 008315 3. 904251 4. 096706 4. 399005 3. 825939 4. 742726  
6. 618953 6. 660489 7. 392723 6. 340499 6. 735119 6. 84127 6. 808796 5. 906127 6. 214803  
5. 644466 5. 490579 6. 683383 5. 254827 6. 019689 4. 86688 4. 435195 5. 666797 5. 55907  
7. 534346 7. 607483 7. 939008 8. 028821 7. 93192 8. 079095 7. 573617 8. 256523 7. 73192  
2. 473655 2. 057299 2. 739866 3. 108976 3. 403069 2. 966919 2. 839049 3. 164147 3. 129897  
7. 086142 7. 248527 6. 59553 6. 799023 7. 388874 7. 213414 6. 375328 6. 653491 6. 986262  
7. 30878 7. 614055 7. 725181 7. 3467 7. 506842 7. 105385 7. 36298 7. 705836 7. 375159  
4. 278899 3. 311388 3. 13378 2. 247963 2. 142838 2. 707475 2. 201301 1. 860706 2. 576046  
4. 939269 5. 576481 5. 569436 5. 52669 5. 241891 6. 047126 5. 701624 5. 877502 5. 134136  
5. 334266 5. 592562 4. 792233 4. 916942 4. 761315 5. 323037 4. 877748 5. 594216 5. 53761  
8. 28107 8. 193108 8. 468533 8. 341058 8. 275726 8. 463275 7. 709793 8. 140397 8. 334839  
1. 819986 3. 710325 5. 096146 3. 067023 3. 469285 3. 32113 3. 667811 1. 821 3. 334119  
4. 649066 4. 743338 4. 774268 4. 20323 6. 480929 5. 308494 5. 096717 3. 235014 4. 602044  
2. 545986 3. 894585 2. 245999 2. 436012 3. 05654 3. 680777 3. 282999 4. 402466 2. 559259  
5. 540098 6. 195716 6. 075634 5. 813093 5. 982798 5. 59657 6. 132949 6. 362284 6. 161988  
7. 082636 6. 371462 7. 257922 6. 678538 6. 57471 6. 831784 6. 849857 6. 642693 7. 149984  
4. 324428 4. 930107 4. 779784 5. 022581 4. 791825 5. 469587 4. 956064 5. 082083 4. 846914  
10. 24067 10. 32064 10. 44176 10. 46704 10. 48118 10. 16244 10. 38295 10. 16351 10. 09851  
4. 002739 3. 087823 4. 56954 2. 500056 3. 864453 3. 890877 3. 397073 3. 727527 3. 677447  
1. 885909 2. 016796 2. 064935 2. 656578 2. 567473 1. 861818 2. 035915 2. 650499 1. 939642  
5. 897434 6. 828031 5. 615011 5. 223414 7. 162207 5. 872097 6. 713174 6. 291658 6. 266183  
9. 002831 8. 026339 6. 711406 10. 53862 9. 513643 8. 854359 9. 849613 8. 490755 9. 544976  
4. 627381 4. 307621 4. 72171 3. 761814 4. 202273 3. 787584 4. 989619 4. 617725 4. 407599  
2. 782385 2. 326479 2. 477723 1. 982783 1. 878729 1. 623171 2. 266674 1. 994528 2. 126948  
3. 726754 4. 016372 3. 795517 4. 775812 3. 873198 4. 759928 3. 534433 3. 819727 3. 188857  
1. 59928 1. 890899 1. 329596 1. 887677 1. 75522 2. 601917 1. 256747 1. 791278 1. 465734  
2. 991594 3. 079816 2. 645571 2. 869756 2. 805757 3. 008164 4. 40668 3. 390769 3. 082116  
3. 294744 3. 794368 3. 861175 2. 823211 3. 764846 3. 478357 3. 492838 1. 913952 2. 809405  
2. 615777 1. 769839 1. 863981 2. 588246 1. 877201 2. 212672 2. 114319 2. 850909 2. 630307  
7. 146434 7. 656836 7. 224686 7. 900442 7. 481216 7. 809856 7. 104307 6. 960431 7. 1374  
4. 729455 5. 405847 4. 738858 5. 576099 4. 377524 4. 969625 5. 416818 5. 085014 4. 679629  
2. 630452 2. 54077 2. 166044 2. 207406 2. 267798 1. 865727 3. 00989 2. 507223 2. 052149  
3. 271543 2. 883955 2. 082286 2. 919014 2. 671543 3. 016937 3. 236915 3. 04566 3. 27866  
5. 013098 4. 604437 4. 929664 4. 519701 4. 204011 4. 640425 4. 313496 4. 774467 4. 684022  
6. 707359 6. 370023 6. 123927 6. 559131 6. 34622 6. 575475 6. 043785 6. 183173 6. 03351  
6. 056001 3. 51118 2. 040985 1. 762333 3. 680686 2. 33797 1. 925056 3. 547799 2. 230305  
1. 334491 0. 99519 0. 88915 1. 042633 1. 160628 1. 16983 1. 100066 0. 791525 1. 964623  
2. 268646 2. 03579 2. 314922 2. 164849 5. 335001 2. 197159 1. 816971 2. 667468 2. 035415  
5. 246166 6. 031757 6. 214581 5. 361134 5. 723096 5. 526342 4. 462527 6. 458289 6. 142412  
5. 048706 5. 358126 5. 287725 5. 393789 5. 763177 6. 468488 5. 517012 5. 12894 5. 967346  
8. 244376 7. 827432 8. 466332 7. 904577 7. 659858 8. 323384 8. 027559 8. 295292 8. 0427  
5. 047655 4. 863265 4. 468564 4. 88927 5. 791277 4. 816645 5. 049011 5. 461466 5. 46963  
1. 3751 2. 045927 2. 56195 1. 58332 1. 751688 2. 300368 1. 623565 2. 248031 1. 459657  
5. 810115 5. 45686 5. 421809 5. 622652 5. 3772 5. 354405 4. 686563 5. 54882 4. 999579  
7. 189969 7. 365044 6. 944746 7. 084239 7. 123023 7. 490101 6. 922626 7. 448852 6. 748062  
5. 2243 4. 96368 5. 375519 5. 499165 4. 487612 5. 361876 4. 764543 5. 106795 5. 158297

4. 918918 3. 699595 3. 792048 4. 03081 4. 294086 3. 822513 3. 53917 3. 560881 3. 335672  
1. 654434 2. 070875 1. 084164 1. 220192 1. 489971 1. 350458 1. 37593 1. 760908 1. 121955  
2. 227734 2. 648833 2. 291574 2. 613115 2. 013589 2. 013339 2. 601133 2. 338585 2. 383438  
2. 606472 1. 557714 2. 828693 3. 04752 2. 060639 1. 866428 2. 889019 2. 189564 2. 418374  
6. 80187 6. 755991 6. 803728 7. 704012 7. 392349 7. 028104 7. 226377 7. 091718 6. 883219  
1. 30318 1. 029074 1. 25046 1. 308792 1. 082326 1. 608242 1. 335316 1. 301552 1. 500463  
3. 520289 2. 065547 1. 545404 2. 04084 2. 964262 3. 041476 2. 411524 2. 109079 2. 784191  
4. 091358 5. 122369 5. 385527 5. 009284 4. 881612 5. 036416 4. 901533 4. 617991 4. 761515  
5. 084333 6. 7365 5. 74375 5. 802592 5. 787076 6. 739306 5. 980278 5. 471302 6. 019066  
3. 329168 2. 023508 3. 029407 2. 064913 2. 181265 2. 176616 2. 041581 2. 449271 1. 955296  
3. 186586 4. 105746 3. 939206 3. 009405 4. 121132 2. 318503 2. 952169 3. 889762 2. 553758  
7. 867224 7. 90976 8. 313137 8. 06124 8. 394458 7. 888812 8. 061806 8. 369585 8. 097482  
8. 227649 8. 859953 8. 781469 8. 317476 8. 899944 8. 311529 8. 578399 8. 777689 8. 539905  
5. 847504 6. 362998 6. 255333 6. 595475 6. 659401 6. 352033 6. 119508 6. 414481 6. 058441  
2. 283777 2. 947896 2. 358806 3. 294244 2. 826629 4. 27492 3. 975389 4. 189497 4. 632552  
2. 456793 1. 723091 2. 93277 2. 360627 2. 470364 2. 825167 1. 966469 3. 016689 2. 65681  
3. 347695 2. 871048 2. 170005 2. 518874 2. 712088 3. 267592 3. 032407 3. 223431 3. 161276  
5. 970797 5. 812597 5. 894064 6. 357109 6. 464753 6. 957973 6. 099453 5. 832327 6. 394839  
5. 59174 5. 284428 4. 948168 4. 894135 5. 298111 4. 538946 4. 592364 5. 977235 5. 059554  
8. 697434 7. 493135 8. 460035 7. 324399 8. 143795 7. 454666 8. 044176 7. 984414 8. 476743  
1. 333684 1. 205532 1. 850263 1. 201496 1. 429218 1. 806168 1. 803782 1. 210186 1. 770796  
5. 855664 4. 031145 4. 613372 4. 489988 4. 316306 3. 882133 5. 319974 4. 620479 4. 000173  
4. 673987 6. 596903 6. 630419 6. 210783 6. 588426 6. 879567 5. 459067 6. 703344 6. 347061  
1. 97722 1. 592988 2. 111784 2. 315507 1. 934825 2. 12594 2. 364402 2. 023014 2. 064031  
1. 857896 1. 213879 1. 949875 2. 048117 1. 990111 2. 397782 2. 9349 1. 811954 2. 067051  
3. 584903 4. 80788 6. 029419 5. 734942 5. 849801 5. 867372 6. 306057 5. 76255 5. 600542  
1. 643821 1. 98553 0. 996361 1. 713233 2. 646188 1. 514903 1. 587349 1. 531434 2. 237271  
2. 842818 2. 17324 2. 398143 2. 130926 2. 080421 2. 033552 1. 970952 2. 356741 2. 941541  
7. 090131 7. 085114 7. 212061 7. 030846 7. 090384 7. 189758 6. 970611 7. 331996 7. 182463  
6. 875484 6. 006849 5. 867608 5. 948678 5. 921576 5. 95441 6. 089744 5. 718323 6. 165027  
2. 693565 2. 6985 2. 362967 2. 209761 2. 539351 2. 101814 1. 843745 2. 665166 1. 967728  
7. 912261 7. 900532 8. 095171 7. 589669 8. 112267 7. 509155 8. 146749 8. 179014 8. 070346  
6. 070237 6. 219323 6. 081884 6. 830861 5. 82949 5. 822575 6. 07949 6. 453631 5. 173679  
5. 708117 5. 390446 5. 641396 6. 444302 5. 77508 6. 333951 5. 87419 5. 779023 6. 355064  
4. 26025 5. 328796 5. 442946 5. 673527 4. 722069 4. 496313 4. 264935 5. 489881 5. 326851  
6. 655012 7. 366502 7. 089812 6. 741149 7. 179822 6. 458738 6. 14052 6. 801928 7. 024076  
1. 148548 1. 099945 1. 42368 1. 226369 1. 605252 1. 686269 1. 268971 1. 032198 1. 131898  
4. 116447 4. 087963 5. 094144 3. 923981 4. 949591 4. 880583 4. 396934 3. 790798 3. 737451  
3. 451526 3. 189988 5. 04967 4. 288303 2. 555248 3. 288403 3. 915622 3. 278589 4. 080295  
6. 662809 5. 495448 5. 336144 6. 297805 6. 314517 7. 422374 3. 269184 5. 958334 6. 45596  
1. 274725 1. 325727 1. 510895 1. 271601 1. 616359 0. 927542 1. 588937 1. 050662 1. 799982  
5. 30329 2. 581492 4. 642237 3. 731829 4. 086852 3. 495393 2. 679597 3. 707186 3. 296586  
7. 2858 6. 895486 7. 364796 6. 661919 6. 981228 6. 899615 7. 163845 6. 868054 6. 611462  
6. 849826 6. 591355 6. 90913 7. 21275 6. 689562 7. 092913 6. 634027 6. 729751 6. 358551  
6. 964062 6. 874721 7. 048898 7. 142055 7. 410897 7. 373236 7. 40484 7. 432086 7. 077561  
7. 718687 7. 679463 7. 330902 7. 621881 7. 929018 7. 13524 7. 296947 7. 578107 7. 511872  
8. 381194 8. 416954 8. 49003 8. 793213 8. 759116 8. 741544 8. 731941 8. 764449 8. 998994  
8. 608565 8. 51061 8. 467062 8. 448273 8. 303433 8. 517429 8. 54148 8. 343727 8. 497523  
3. 542335 3. 401697 4. 040227 3. 745322 4. 363518 4. 67869 4. 063194 4. 54619 4. 598806  
1. 434036 1. 694178 1. 656067 2. 456192 1. 731433 2. 791635 1. 327454 1. 445618 1. 406121  
2. 428525 2. 206406 2. 463628 2. 619562 2. 35964 2. 57197 1. 899354 3. 425686 3. 067076

5.89265 5.71164 6.009105 5.68645 5.618344 5.894635 5.275945 5.585844 5.674456  
3.824681 4.357081 4.188382 4.601068 2.998237 3.676685 3.258265 3.651621 5.046332  
2.684192 1.162113 1.545729 2.276408 2.009118 1.327915 1.669175 1.240541 1.235775  
0.817324 0.965899 0.747112 1.122574 0.985371 1.150735 0.907717 0.833547 0.608476  
2.116947 2.481971 2.368518 2.000727 1.246129 2.197913 3.239479 2.353569 1.680232  
7.298358 7.126847 7.200212 7.507871 7.067351 6.798873 6.967212 7.103093 7.067153  
1.934826 0.884409 1.377473 1.07333 1.622076 1.442896 1.548435 0.872261 1.379884  
5.130869 5.283655 5.828543 5.768046 5.718615 5.469701 5.499645 5.960025 5.520348  
4.822305 5.937236 6.057977 5.688415 4.83787 6.33202 5.528453 5.665156 5.634326  
4.916708 5.485283 5.251578 5.611578 5.415408 5.420021 4.749591 5.563334 5.38529  
2.422041 2.113905 3.245313 2.343581 1.914075 2.071742 2.090586 1.677996 2.414241  
5.241661 6.235666 5.82574 5.831075 6.221314 5.805614 5.488977 6.547726 5.988051  
5.132368 5.670776 5.28194 5.170641 5.749441 6.061161 5.551496 5.820388 4.989741  
1.996907 2.530163 2.04285 2.068227 2.784264 1.941294 2.3113 2.23349 2.137728  
1.624638 2.421059 1.483865 2.013216 1.375661 1.721701 2.013758 2.317525 1.787913  
6.574901 6.567383 6.555258 6.954188 6.644811 7.031336 6.696092 6.132824 6.621759  
3.27183 2.94111 3.112086 4.044019 4.661515 3.438228 4.209138 3.158801 3.880251  
2.927857 2.500076 2.518727 3.118101 2.570979 2.984385 1.925093 2.336152 4.212697  
2.033372 1.933005 1.770566 2.162007 2.375681 1.680254 1.862733 1.490965 1.610131  
4.476302 4.508942 3.774357 3.911272 3.383311 4.392984 4.160908 4.030901 4.491123  
5.006612 4.922099 4.280036 4.477918 5.533176 4.625679 5.541769 4.617157 4.376711  
7.455827 6.154816 6.859103 6.367785 6.930791 6.722902 7.180842 7.535396 7.243634  
1.850212 2.242236 1.565394 2.113801 2.113035 2.325196 2.473621 1.587474 1.250629  
4.902307 5.844992 5.751999 6.351631 6.109225 5.898595 6.099292 5.630729 6.553763  
9.479203 9.627689 9.587354 9.759903 9.855712 9.820512 9.478509 10.14804 9.871261  
4.883562 6.231771 5.962255 6.919759 6.643444 6.439266 6.943711 6.554419 6.573778  
5.278098 5.191585 4.312444 4.916784 4.885545 4.709934 4.460329 5.02631 5.131772  
6.044436 6.425841 6.162038 6.453128 6.685236 6.21671 5.961995 6.369778 6.326286  
7.26511 7.535379 7.722052 7.50594 7.58768 7.712964 7.59551 7.700698 7.646622  
5.304978 6.968755 6.601798 7.457998 6.387896 7.611474 6.680507 6.504527 6.915546  
6.749025 7.630044 7.773501 7.82852 7.597858 7.577852 7.190762 7.167598 7.584258  
5.062982 5.483052 6.028303 5.778554 6.212502 5.184723 5.299308 5.980274 4.808864  
5.328985 5.605728 6.265001 5.645517 6.00189 5.977623 5.294807 5.58885 5.343642  
4.938158 6.286859 6.289706 6.583669 5.723661 5.653692 6.127725 5.869081 6.155189  
7.864126 8.159076 7.578657 8.211794 8.14729 7.562083 7.812745 8.068076 7.960669  
1.652018 1.65809 1.594249 2.038433 1.46467 1.641501 2.155799 1.678045 1.960275  
4.395563 5.433306 5.763915 5.333797 5.418416 5.14629 4.740396 5.674356 5.17415  
4.353586 5.344606 5.774144 4.716413 4.178816 4.649839 3.755989 5.667143 5.248527  
3.720635 4.213265 2.848404 4.577754 3.421146 4.493123 3.749115 4.287295 4.125637  
3.809235 4.110336 4.325765 3.164848 3.694605 3.211533 3.143798 4.073548 4.136423  
3.558485 3.460013 3.455786 3.171796 4.303659 3.899709 3.171861 3.091971 3.830459  
2.175833 1.528298 2.445036 1.51924 1.618524 1.601311 1.99167 1.894783 2.602308  
3.945135 4.789204 6.180789 5.157272 5.384774 4.096161 4.386073 4.958809 7.632958  
8.378231 8.911719 8.744541 8.920802 8.671626 9.00439 8.325912 8.617473 8.906237  
8.853494 9.493837 9.146894 9.145122 9.348461 9.16328 8.716481 9.21325 9.034914  
9.466094 10.09955 9.767485 9.933179 10.25993 10.16858 10.01852 10.27608 9.952355  
1.539315 2.09563 1.44427 3.638042 1.969444 2.472288 1.617947 1.730952 1.460747  
5.853933 5.267375 5.617209 5.918673 5.83455 5.338532 5.525663 5.732126 4.827838  
3.516133 4.350195 4.177411 4.443472 3.892252 4.61566 5.403667 4.27715 4.42143  
5.438908 6.376672 6.38108 6.653391 6.069391 5.372387 5.096489 5.824602 5.798256  
1.293783 0.955672 1.735858 1.551228 1.485028 1.091249 1.218719 1.157873 0.99771

3.056041 2.943053 2.43243 2.472101 1.77241 1.820504 1.873434 1.777574 2.290246  
4.048418 4.014084 5.808807 4.949512 3.468238 4.355233 3.234368 3.507916 2.89557  
3.804087 4.563157 1.73644 5.207243 5.020171 3.986427 3.546015 3.671965 3.698514  
6.664949 6.792612 6.41659 7.064761 6.418348 7.109066 6.642043 6.072541 6.880709  
6.252875 6.495558 5.942344 6.284336 5.577155 6.341665 6.304918 6.350505 6.151689  
2.120906 1.960428 1.667938 2.4479 2.046187 2.044404 2.231041 2.008028 1.524345  
2.390818 2.218732 1.774494 2.216418 2.330567 2.028509 2.202564 2.601716 2.396702  
6.353334 5.997886 5.957966 6.191813 6.287808 5.643374 6.115911 5.937336 5.891375  
5.231191 4.105464 4.224167 3.669353 3.512724 4.030741 4.139889 4.119425 4.611505  
7.249112 6.829729 6.605243 6.760348 7.052544 7.20174 6.847781 7.128797 7.064823  
4.348308 4.964436 3.923087 4.654948 4.629331 4.759906 4.737018 4.14103 3.956586  
1.030422 1.126948 1.44803 1.748221 0.889449 1.1422 1.499026 1.151262 1.635884  
6.133276 5.75034 6.889698 6.810729 6.288452 6.347252 5.415327 7.600527 6.299488  
4.00498 4.013317 2.901362 3.31597 2.703852 3.217244 2.601005 3.267187 2.898833  
3.451958 3.118269 2.897907 3.025904 3.777838 2.68799 4.098999 3.757972 3.048225  
3.113291 2.807902 3.773542 4.081109 2.446882 2.777405 3.326982 2.627969 2.635025  
3.228032 2.977015 3.828857 3.253014 3.632047 2.228172 3.878181 4.993512 3.112343  
0.885063 1.23886 1.134982 1.128916 1.19645 0.724718 1.103763 0.990759 1.117367  
3.912365 4.18321 3.911754 3.97414 4.116022 3.78116 3.132759 3.473611 2.906646  
6.816371 6.774357 7.866789 6.739119 6.574036 7.418189 6.709432 6.973943 7.252717  
2.10115 2.175534 2.586258 2.335764 2.817568 3.510425 2.107898 2.595798 3.850033  
1.840697 1.228633 1.160822 5.818637 3.665105 2.116723 2.580081 1.685517 1.602665  
1.93449 2.046606 1.587662 1.444033 1.564335 1.704291 2.034802 1.246378 1.680317  
2.20088 2.111513 2.9563 2.539126 1.812358 2.532017 2.578501 3.259893 2.090901  
7.976982 7.880566 8.215894 8.30356 8.356066 8.378568 8.165868 8.498744 8.395834  
5.325873 5.914648 5.323 5.079807 5.336801 4.82806 5.511802 5.578446 5.030984  
5.039829 2.716444 2.958825 3.84283 3.848237 1.618064 4.245043 1.357153 2.909535  
5.55435 5.100792 5.234838 4.576875 4.596256 4.823296 5.095864 4.707195 4.960419  
4.013549 3.744471 4.743577 3.286806 4.115222 3.304421 3.526332 3.691204 5.93718  
5.186366 4.973758 5.290982 4.072094 3.59333 2.450016 4.37338 3.752854 4.926733  
1.317196 1.577381 1.885787 2.074363 1.617002 1.507149 1.707504 1.267315 1.675936  
6.94688 6.889357 6.930871 6.379116 5.936974 7.18329 7.272651 6.467618 6.890612  
6.554992 7.283369 7.226318 6.759334 7.233945 6.893347 6.906685 6.573706 7.016469  
5.321317 4.209692 4.739807 6.076683 5.481237 4.313935 4.460987 4.937985 4.391691  
6.160448 6.069908 5.947937 5.622289 6.022789 6.289807 5.318968 6.131701 6.119967  
3.743207 2.706888 2.841643 2.766913 3.654416 4.163471 4.074762 3.551542 3.163486  
3.124802 3.411733 3.466571 3.545587 3.679689 3.539951 3.637532 3.555158 4.036788  
1.966653 1.935812 1.983644 2.197806 1.470772 3.27399 3.011947 3.20315 1.944692  
3.447889 4.206597 3.617264 2.502451 2.264514 2.244159 5.165398 0.97863 2.848163  
1.587616 2.278384 1.36366 1.860501 1.058995 2.095903 1.463149 1.901095 1.696488  
6.316278 6.610241 6.585869 6.889058 6.427842 6.779033 6.826684 6.815101 6.849962  
6.668125 6.518722 6.838384 6.378595 6.64177 6.480626 6.778783 6.586301 7.125353  
2.524813 2.940688 3.347883 3.128927 3.419453 2.73615 3.782 2.753515 3.028954  
2.107506 3.563711 2.590999 3.280919 1.71437 2.403518 2.13135 2.090355 3.61076  
1.563978 1.162841 2.89498 2.133357 1.374493 1.241136 1.708117 1.600393 1.840191  
4.308547 5.388735 2.261992 3.908523 5.4076 2.717157 4.10772 3.848206 3.795833  
5.583209 1.657285 2.432255 2.089312 2.061856 1.234652 1.650856 1.691512 4.196182  
2.573097 3.199721 2.927479 2.827299 3.154577 2.925264 2.975123 2.825433 3.127722  
5.133444 6.301915 5.343406 5.781012 6.063307 6.466876 5.589275 6.200645 5.823839  
5.43954 5.805018 5.518937 6.015362 5.873181 6.086938 5.591422 5.253837 6.130811  
2.710142 3.334609 3.855955 3.184638 3.584949 4.275713 3.035305 2.38763 3.57316

3. 992181 4. 503097 3. 670327 3. 405978 4. 02101 4. 406141 4. 004967 4. 558544 4. 50734  
6. 70354 6. 293748 5. 871269 5. 708482 6. 284222 6. 79222 6. 453336 5. 7281 5. 254157  
3. 498728 3. 414534 3. 952307 4. 323177 3. 074233 3. 498717 3. 853932 3. 06682 3. 113416  
2. 541663 3. 942125 4. 199967 4. 172834 3. 210893 4. 212634 3. 560306 3. 350724 3. 2653  
2. 613735 2. 68111 2. 277742 2. 542376 2. 416993 2. 480606 3. 438205 2. 314274 2. 568401  
7. 157776 8. 459587 8. 121606 8. 989583 8. 04556 9. 221176 8. 258844 7. 808732 7. 380362  
0. 499387 0. 787762 0. 827772 1. 282249 1. 193686 0. 965349 0. 958467 1. 302858 1. 134309  
1. 173745 0. 904696 0. 913673 0. 751113 1. 464404 0. 975149 1. 08112 1. 142801 1. 411497  
1. 162865 0. 805464 1. 180319 1. 476728 0. 866354 0. 927323 1. 131029 1. 362015 1. 140305  
1. 079067 0. 605721 1. 361658 0. 856428 1. 04081 1. 072758 1. 384853 1. 354361 1. 962164  
1. 801707 1. 014233 0. 896289 1. 942103 1. 041251 1. 559806 0. 97742 1. 076453 1. 595855  
2. 486973 2. 51407 2. 080656 2. 010752 1. 452069 1. 871051 3. 360462 1. 541493 1. 786408  
1. 646682 1. 733728 1. 468407 1. 41504 1. 634164 1. 805674 1. 433349 1. 545457 1. 793608  
4. 108054 5. 093758 5. 186081 5. 279793 5. 129831 3. 936806 5. 009107 4. 381829 5. 276426  
7. 353665 7. 310263 7. 328949 7. 61155 7. 178938 7. 138201 6. 929342 7. 780039 7. 318426  
3. 844011 4. 186409 3. 966021 3. 636679 4. 615798 3. 94648 4. 057115 4. 477961 3. 625466  
0. 945614 0. 905349 1. 585855 1. 19374 1. 250705 1. 054258 1. 422826 1. 129548 1. 120152  
2. 999901 2. 428943 2. 58749 2. 826721 2. 232454 2. 946509 3. 947834 2. 539764 3. 425903  
2. 345439 2. 035945 1. 616774 1. 593322 1. 587004 1. 966568 1. 791304 1. 775776 1. 721008  
1. 197381 1. 118041 1. 337505 1. 451492 1. 415237 2. 034871 1. 891443 1. 187283 1. 311849  
8. 747508 8. 332949 8. 390987 8. 530034 8. 291709 8. 083913 8. 2615 8. 258159 8. 329601  
7. 450442 4. 432305 6. 055223 5. 003395 4. 690989 5. 176485 4. 089446 4. 911292 6. 160348  
4. 33816 4. 79125 4. 468699 5. 312341 4. 674359 4. 386139 4. 748634 4. 988048 5. 076559  
3. 052041 4. 237246 2. 575298 3. 842538 3. 599719 3. 367483 2. 970478 3. 876429 5. 088198  
5. 746253 5. 020359 4. 910091 6. 463484 4. 833501 4. 572621 4. 044253 3. 959273 4. 463635  
1. 822478 1. 947818 1. 562848 1. 650738 1. 316351 1. 502969 1. 84359 1. 565906 1. 247208  
1. 497693 2. 170498 1. 797113 1. 380308 1. 128953 1. 50088 1. 778998 1. 404204 1. 594339  
7. 087214 6. 647295 6. 854792 7. 069989 6. 663675 7. 034352 7. 346132 6. 252903 6. 706202  
3. 287483 3. 514838 1. 899219 3. 975145 2. 816597 2. 542014 2. 056685 4. 384418 3. 530464  
5. 796315 6. 505782 6. 073033 5. 835351 6. 151766 6. 305368 6. 536551 6. 594749 5. 839896  
1. 522503 1. 077449 1. 025213 2. 770563 1. 443822 1. 372098 1. 663651 2. 030882 1. 293907  
2. 462578 1. 49209 1. 686069 1. 72538 1. 657715 2. 331886 1. 534361 1. 429565 2. 135873  
2. 781939 1. 986669 2. 693636 1. 807316 1. 746697 1. 753308 2. 676965 2. 016506 2. 517703  
4. 522017 4. 619729 3. 863664 4. 650482 4. 535092 3. 576476 3. 971553 5. 195323 5. 217232  
4. 895337 5. 000942 5. 253221 5. 254022 4. 985069 5. 175346 4. 764912 4. 876089 4. 896246  
3. 768708 3. 180669 4. 220974 2. 862244 3. 956921 3. 522414 3. 874083 3. 359304 4. 5039  
2. 762209 2. 952355 3. 055954 2. 744175 3. 436472 3. 079268 2. 848856 3. 098734 2. 863367  
7. 420991 8. 215499 8. 264731 8. 046986 8. 157602 7. 844426 7. 314997 8. 012252 7. 917004  
4. 782198 6. 251772 6. 090577 6. 123489 6. 109862 6. 505322 5. 433925 6. 417759 6. 131172  
7. 202908 7. 982387 7. 423256 7. 527304 7. 669077 7. 046125 7. 59468 7. 529761 7. 789898  
4. 083176 4. 730764 4. 793883 5. 147484 4. 723903 4. 816954 5. 093457 4. 177327 4. 973159  
6. 747077 6. 831349 7. 343327 6. 963803 7. 267981 6. 951594 7. 024059 7. 298243 7. 09507  
0. 991374 1. 677531 1. 373096 0. 900541 0. 856713 0. 971836 1. 088491 1. 09172 1. 284481  
3. 488404 2. 70868 3. 158574 2. 758567 3. 549966 2. 681388 3. 146002 3. 204848 2. 833374  
2. 507374 1. 975838 1. 458105 1. 774496 1. 591976 1. 627504 1. 560385 2. 006664 1. 554058  
6. 306683 6. 573775 6. 680406 6. 665977 7. 254489 6. 458882 6. 211798 7. 178816 6. 275483  
5. 622758 5. 882849 5. 889564 5. 684089 5. 905367 5. 925293 5. 450982 6. 27166 5. 742143  
7. 256207 7. 201084 7. 937644 8. 032224 7. 841101 7. 68238 7. 835821 7. 940634 7. 790726  
1. 208581 1. 128514 1. 744729 1. 19503 1. 354465 1. 352701 2. 163404 2. 309981 1. 476421  
4. 069146 4. 3296 4. 535918 4. 416253 5. 120771 4. 984135 4. 631029 4. 943396 4. 420729  
7. 280673 7. 156812 7. 459728 7. 152845 6. 989926 7. 398704 6. 927778 7. 151455 6. 952064

6.996184 7.186668 7.251302 7.407516 7.252477 7.342179 6.621766 7.625753 7.084543  
4.031463 4.564843 4.941931 4.185352 4.799307 4.997757 4.430253 4.297469 4.547491  
9.04339 9.081362 9.175956 9.344639 9.155962 8.851614 9.084077 9.093966 8.779848  
6.278352 4.963796 6.038547 4.979585 5.175289 5.389129 5.275341 5.742842 5.630245  
1.59418 1.963962 1.582982 1.758279 1.863057 1.129116 1.934987 1.569979 1.44718  
6.825119 7.391947 7.367119 6.416199 7.628164 7.095231 6.239978 6.952835 7.151235  
7.027179 7.328787 7.160177 6.986842 7.083471 7.161344 6.535388 7.114142 7.024749  
6.740472 7.028136 7.148859 6.980097 6.714328 7.411581 6.49906 7.221198 6.602136  
2.043279 2.098333 1.835982 2.037437 1.908892 1.475604 2.050953 1.936697 1.816305  
5.024778 4.743284 4.850904 4.675682 4.681652 4.770997 4.827511 4.699758 4.649356  
8.659425 8.825849 8.568802 8.042661 8.499783 8.481226 8.492775 8.295928 8.858008  
2.598319 2.190934 3.711132 2.051323 3.056277 2.086262 2.531252 2.830978 2.163234  
3.423241 3.589688 2.859575 3.470007 2.684083 3.556764 3.122439 2.841131 3.325034  
6.38987 6.07998 6.641046 5.575106 6.00029 5.86402 6.121527 5.895476 6.142516  
2.418945 2.440227 3.066946 2.040485 2.165806 2.238104 1.861452 2.228149 2.597529  
3.490782 1.057644 2.216674 1.17626 2.385464 0.934262 2.634838 1.110753 1.342964  
2.002236 1.226467 1.542389 1.322255 2.515827 1.617771 1.17199 1.963577 1.78257  
1.952761 2.747991 3.371852 3.811605 2.8364 3.863876 3.282323 3.530816 3.308757  
7.986516 7.734579 7.769899 7.900842 8.041998 8.081783 8.093911 7.64464 7.809984  
8.613794 8.15131 8.237104 8.789755 8.067219 8.060043 8.213719 8.406114 8.411777  
6.488061 7.217455 6.954502 7.243914 7.497458 7.736311 6.344863 6.984199 7.324899  
6.776565 5.341044 5.481123 5.64577 6.107108 5.485162 6.131977 5.409039 5.225243  
4.699168 5.043958 4.665285 5.670096 4.432267 4.980524 5.210599 5.24291 5.112934  
6.563373 5.868276 5.584396 6.056639 5.988342 5.622244 6.279836 5.819926 5.702638  
6.233283 7.62856 6.835649 6.468117 7.171802 7.053405 6.194509 7.249773 6.569018  
6.58658 6.441011 6.55994 6.042996 6.618903 6.739699 6.884091 6.69635 6.47856  
8.581493 8.728303 8.958209 8.55441 9.028508 8.110862 8.730896 8.797189 8.871977  
6.199176 5.394117 5.542128 5.775718 4.979886 5.422147 5.077397 6.500251 5.614218  
6.207679 6.984685 6.278875 6.472058 7.637613 6.868434 6.698028 6.712867 6.557107  
9.880214 10.05049 9.808904 10.11044 9.99772 10.21821 9.683949 9.914185 10.02421  
8.282874 8.330008 8.289509 8.33585 8.422021 8.593185 8.303766 8.595744 8.498191  
9.061389 9.088902 9.137086 9.339073 8.92408 8.874642 9.096731 8.866796 8.808034  
9.732506 9.786968 9.663877 9.769469 9.524148 9.540238 9.438447 9.608738 9.732634  
8.354731 8.162869 8.132793 8.123481 8.336375 8.240144 8.337842 8.613345 8.632791  
7.396793 7.402755 7.019919 7.634895 7.4924 7.223503 7.768632 7.112028 7.447007  
3.2475 3.403739 3.94675 3.351562 4.62262 4.938391 4.785217 4.520852 4.083373  
6.812327 7.034051 7.014192 6.718187 6.796329 7.372483 6.91183 7.355319 6.960696  
5.020157 5.294715 4.696687 5.914829 5.358717 8.005316 5.556703 7.183631 5.753345  
5.94527 4.78887 4.303121 4.214233 5.87305 4.057931 2.826915 4.789828 5.704159  
2.995078 4.438554 4.68465 2.980089 3.843929 4.328847 3.950723 3.663341 3.551615  
6.386263 6.376907 5.7877 6.553412 6.07894 6.103342 6.157686 6.61308 6.633741  
5.712887 5.981244 5.84305 5.568157 5.752581 6.168309 5.577179 5.330606 6.015853  
9.035101 9.107118 9.271787 9.309448 9.192621 9.528146 9.117555 9.035564 9.102852  
8.012639 8.546688 8.548618 9.003775 8.586604 9.000439 8.333869 9.118051 8.829936  
5.483677 5.771016 5.666793 6.12002 6.118639 5.462592 5.360006 5.97591 5.747481  
8.605754 9.279347 9.034269 9.58243 9.375016 8.379195 9.106617 8.719942 8.773884  
9.029528 8.876563 8.909374 8.761985 8.957594 8.555564 9.438044 8.896167 9.194459  
3.910247 4.974311 4.2705 5.709254 4.962278 5.589424 4.711754 6.311699 5.129294  
8.955038 9.515198 9.231404 9.361308 9.230157 9.289426 9.147847 9.155822 9.258488  
7.647825 7.942371 7.682519 7.838721 8.088258 7.490912 7.838487 8.236353 7.916959  
5.308673 4.954588 4.828865 3.827782 4.785532 3.878535 5.598525 4.612566 5.158387

7.068897 7.751833 7.6236 7.87455 7.60268 7.493833 7.396877 7.246672 7.53328  
9.905554 9.872384 9.855121 9.924251 9.733716 10.18389 9.601755 9.636319 9.711935  
3.260939 4.092573 3.487217 4.188499 3.729638 3.980293 3.027434 2.728573 2.967452  
5.258366 5.118241 5.283795 5.103848 5.454946 5.679094 5.183947 5.626386 5.252811  
6.652385 6.581888 6.200281 5.965609 6.14291 5.442511 5.827862 6.11434 6.226765  
7.835196 8.166156 7.996865 8.243471 7.876083 7.950213 7.857873 7.916224 7.77486  
7.775353 7.341925 7.544831 7.206901 7.512903 7.343272 7.391994 7.099889 7.708994  
1.498383 1.504253 1.964451 2.179817 2.018584 1.475103 1.732372 2.659574 1.834175  
3.705914 2.062507 3.716106 2.735882 2.757323 2.186899 2.971474 2.569304 3.940559  
8.057758 8.004132 7.98002 8.052093 8.320189 7.831834 8.013464 8.163284 8.227015  
1.93875 2.133389 2.190551 2.255567 1.870866 2.821423 2.472413 1.963596 1.378161  
6.02155 4.957774 5.635619 5.57199 5.324977 5.162757 6.234914 5.599747 5.198099  
3.265288 3.493228 3.142605 2.900222 4.384942 2.892332 3.892818 3.535354 3.816599  
4.329616 2.867007 4.035914 3.538731 4.296443 3.684161 4.015118 3.470785 3.809363  
3.583281 4.529189 3.852894 5.465177 4.976103 4.831602 4.46243 4.228163 5.028794  
1.275678 1.084789 2.841784 1.074614 0.988317 2.631429 1.269325 1.307517 1.598535  
3.906107 4.654108 4.53111 5.36354 5.189032 4.940694 4.303 4.781029 5.244468  
8.239583 5.320008 5.834187 5.953072 5.210415 3.898273 5.339112 5.851942 7.914859  
1.67012 1.503023 1.426294 1.366179 1.187595 2.074241 1.381741 2.227063 1.409924  
2.023009 1.253133 1.227371 1.742165 1.65872 1.473721 1.310928 1.764346 1.863498  
3.403119 3.30237 2.774689 3.099334 3.413193 3.611896 3.362148 3.497062 3.312009  
2.962251 3.909637 3.159581 3.921675 3.843516 3.768075 4.04079 3.799326 3.399975  
1.193944 1.45219 1.643014 1.557969 1.722904 1.179616 1.598453 1.33327 1.691062  
3.934332 5.671114 5.312841 5.28613 5.791791 5.420844 6.305814 5.21767 5.345623  
6.328697 6.187997 6.837887 6.101586 6.281245 6.26178 5.877392 6.326073 6.32803  
3.165825 2.408326 3.036965 2.565068 2.986554 3.076719 3.099702 3.017363 3.209444  
6.822597 6.601911 4.848712 5.202115 6.789035 6.300551 7.225144 7.091043 7.447895  
9.428215 9.15974 9.074271 9.322656 9.163799 9.225697 8.900612 9.340728 9.1466  
4.280829 6.331844 5.819321 5.993781 6.405336 6.442322 5.733771 7.286418 6.752689  
6.599749 6.053005 6.065843 6.428594 6.011381 6.322853 6.068842 6.012147 5.913438  
6.574304 6.685505 6.658576 6.974068 6.892405 6.72077 6.494511 6.844668 6.930947  
3.545545 3.666804 4.022756 3.48236 3.953012 2.967104 3.567088 4.798193 3.763978  
5.788301 5.165142 5.479127 4.286999 5.031322 4.666513 4.988844 4.576874 5.197123  
2.123043 2.007096 2.087953 1.417827 1.691006 2.044012 1.752841 2.945414 2.345955  
4.829922 5.146747 4.513018 4.0538 4.448857 4.651789 4.278527 5.344775 4.781343  
5.76524 6.131275 5.810592 6.340581 6.241213 6.710185 4.997489 7.064204 5.967648  
3.43078 4.209177 4.9353 3.641284 4.747659 4.272445 2.869171 4.141834 3.430756  
1.719662 1.441549 1.600357 1.778014 2.121238 1.615503 1.911087 1.448694 1.059205  
2.229575 2.73403 2.536638 3.37079 2.80826 3.352749 3.532542 2.238804 3.892553  
2.318762 4.02584 2.396496 2.990696 2.470264 2.49339 1.910709 2.517235 2.382643  
1.623972 2.163987 1.845501 1.529423 2.465129 1.826044 2.937983 3.461989 2.214097  
5.358234 5.334829 4.859173 3.970612 5.848052 4.713842 5.324047 4.921226 5.274926  
8.615975 8.734792 8.757071 8.860525 8.690561 9.05465 8.44326 8.862703 8.679594  
7.474735 7.359721 7.07452 7.537315 7.448289 7.364188 7.155172 7.832284 7.427051  
2.680499 1.679389 2.007018 1.82041 2.693806 3.6349 1.943723 3.116999 1.17344  
6.949586 7.645538 7.700993 6.8386 6.443352 7.781325 7.141017 7.299649 6.741654  
1.971524 1.47189 1.81827 1.317453 1.482112 1.803302 3.150609 1.293885 1.883751  
7.669816 7.876162 7.867831 7.618128 7.676487 7.211535 7.696293 7.55404 7.479818  
2.060381 1.63706 1.983222 2.027404 1.216862 1.432056 2.038825 1.528832 1.869997  
3.148168 3.172306 3.817165 2.398376 3.256268 3.745081 3.906165 2.3329 2.984348  
5.833546 6.131306 6.149299 5.448749 6.396066 5.978653 5.614363 5.820946 6.258603

6. 273136 6. 889014 5. 978092 6. 216558 6. 222724 6. 801378 6. 498629 5. 838792 6. 148688  
4. 43965 5. 253563 4. 849172 5. 335051 5. 536572 5. 694012 4. 847479 4. 449862 5. 421233  
2. 466896 1. 965125 2. 191554 2. 965483 2. 795262 2. 726542 3. 067146 2. 585936 3. 790827  
6. 095845 6. 026286 5. 501249 6. 210373 5. 316695 5. 670053 5. 053781 5. 211838 5. 773921  
6. 536419 6. 756918 6. 675609 6. 979318 6. 975102 7. 00555 6. 695477 7. 119587 6. 767624  
2. 452605 1. 980349 1. 489452 1. 224347 2. 818066 1. 21516 1. 70709 2. 196652 2. 136814  
8. 300856 8. 458844 8. 583302 8. 524914 8. 32168 8. 405175 8. 560522 8. 165026 8. 193939  
6. 845625 6. 606545 6. 88913 6. 605945 6. 565157 6. 947077 5. 565588 6. 355152 6. 16281  
3. 606132 3. 92364 4. 191197 5. 395406 3. 924742 5. 573094 5. 112963 4. 540923 3. 955881  
1. 950712 2. 134107 1. 325579 1. 878641 1. 802422 2. 0079 1. 440254 1. 650936 2. 136272  
6. 931749 6. 562859 6. 562767 7. 012665 5. 961468 6. 459546 6. 49937 6. 253229 6. 487289  
5. 370941 5. 079029 5. 40478 5. 654914 5. 212648 5. 489885 5. 373538 5. 575703 5. 335984  
8. 204858 8. 337093 7. 898425 8. 010184 8. 359238 7. 78381 7. 393453 7. 481277 7. 454037  
5. 180902 6. 023486 6. 087859 6. 44385 6. 430437 6. 111729 5. 57422 6. 025969 5. 531346  
6. 917685 6. 373901 5. 744809 6. 486833 6. 394293 6. 514833 5. 882037 6. 193965 5. 686692  
1. 772983 1. 782941 1. 614447 1. 518582 1. 662495 1. 278747 1. 755688 1. 386793 1. 149388  
4. 358025 3. 919849 3. 074051 4. 48311 3. 980153 3. 311244 3. 35063 4. 163126 3. 700904  
2. 471158 1. 513283 1. 839803 1. 379076 2. 604568 1. 796757 2. 222829 2. 122321 1. 90603  
3. 188466 5. 091015 4. 70883 4. 841877 4. 562239 4. 635587 4. 472388 4. 231199 3. 975346  
5. 244315 2. 994771 3. 319219 3. 655346 3. 41408 3. 829879 5. 228661 3. 56511 2. 974261  
5. 861988 5. 767475 5. 010794 5. 292997 5. 486336 5. 278257 5. 380042 5. 775638 5. 247133  
4. 973378 5. 274352 4. 639087 5. 938119 4. 559608 6. 257338 4. 542374 5. 253175 5. 285856  
3. 240875 4. 656782 3. 540005 4. 969506 4. 191724 3. 316105 2. 48453 3. 74948 3. 767004  
5. 79787 7. 060863 5. 978036 6. 824965 6. 745546 7. 025789 6. 44094 6. 285204 6. 723754  
6. 507377 6. 985296 6. 84662 7. 442844 7. 479709 7. 009665 6. 894746 7. 1513 6. 998785  
4. 574952 5. 73311 5. 095928 5. 421186 5. 501574 5. 240757 4. 978923 5. 761179 5. 268419  
3. 86411 5. 525182 5. 75503 5. 144518 5. 966256 5. 242163 5. 17863 6. 286178 6. 673514  
4. 721198 5. 696389 6. 257748 5. 573752 5. 541823 5. 466793 5. 366627 6. 046369 5. 906839  
2. 29718 1. 421622 1. 499488 1. 363556 1. 48429 1. 460109 1. 315143 1. 52888 1. 474661  
3. 024466 2. 121479 2. 127727 1. 909581 2. 294846 2. 44702 3. 51323 3. 056489 2. 809006  
2. 958562 3. 369103 4. 035272 3. 024008 2. 626524 3. 589275 2. 42016 3. 321631 4. 528413  
2. 030746 1. 782627 1. 586828 1. 440016 2. 871578 1. 615205 1. 620803 1. 344856 1. 43709  
3. 905912 4. 079547 3. 805628 3. 748496 4. 096027 4. 465582 4. 640046 4. 335335 3. 895005  
7. 122579 7. 434321 8. 020451 7. 961082 7. 534138 7. 339005 7. 717701 7. 646427 7. 326981  
6. 677125 7. 597149 7. 346635 7. 893554 8. 15504 7. 946211 7. 85828 7. 936972 7. 713517  
6. 675171 5. 656882 5. 659925 5. 76665 5. 509064 5. 348972 5. 084473 6. 812408 5. 927088  
1. 557556 0. 913484 1. 155446 1. 204436 1. 193724 1. 199389 1. 368966 1. 186169 1. 226861  
5. 868537 6. 629813 4. 838678 7. 223501 6. 344573 6. 5265 7. 08943 5. 768916 5. 98219  
6. 256922 6. 225629 6. 03199 5. 891902 6. 277993 6. 41678 5. 4793 6. 435521 5. 844706  
1. 463031 1. 099869 1. 441997 0. 961478 1. 318271 1. 901442 1. 336785 1. 833621 1. 339436  
2. 038004 1. 00354 1. 324578 1. 63941 1. 424016 1. 234262 1. 058986 1. 578084 1. 039324  
7. 427308 7. 723726 7. 619343 7. 534251 7. 930295 7. 627502 7. 615619 7. 689069 7. 279614  
3. 357094 4. 198819 4. 613204 4. 59427 5. 077454 4. 752275 4. 837278 4. 462765 4. 758519  
5. 751093 6. 5675 5. 342255 6. 328345 6. 377601 6. 594206 6. 29686 6. 69709 6. 591156  
3. 690831 2. 442673 3. 368744 2. 891239 2. 630738 3. 108301 2. 767541 2. 314355 2. 790444  
3. 389524 2. 358975 2. 730007 1. 757255 2. 118405 3. 297386 2. 628012 2. 342726 2. 173188  
3. 117807 3. 619582 2. 713718 2. 644508 2. 726769 3. 460641 2. 431181 3. 002299 3. 355901  
6. 222053 6. 138095 5. 494773 6. 100704 6. 483131 5. 302466 6. 397272 5. 329511 5. 808341  
4. 821692 4. 947402 5. 392533 5. 112131 5. 429712 4. 985903 4. 384286 4. 609395 5. 386818  
5. 922781 6. 287844 6. 61253 6. 55463 6. 066858 7. 837621 7. 86395 7. 150883 6. 873763  
7. 123568 7. 34936 7. 415157 6. 998725 7. 760638 6. 807563 7. 166209 7. 355395 6. 694562



1. 074944 1. 16032 0. 930991 1. 20237 1. 23122 0. 942196 1. 600607 1. 437684 0. 91381  
7. 331395 7. 701919 7. 588114 8. 03771 7. 954748 7. 591066 7. 449978 7. 720348 7. 747298  
4. 718151 4. 748428 4. 921044 5. 162161 5. 270807 4. 793962 5. 125437 4. 680873 4. 703428  
5. 401384 4. 691308 4. 961151 4. 749835 4. 757479 4. 700115 4. 610335 4. 53588 4. 680746  
7. 340814 6. 656033 6. 784041 6. 579476 6. 993398 6. 639234 6. 162836 6. 763056 6. 426475  
5. 599264 5. 721789 5. 890074 5. 772194 5. 904142 6. 440335 5. 290914 6. 061722 5. 826502  
2. 461881 1. 264578 1. 301709 1. 441163 1. 943054 1. 723631 2. 998343 1. 366164 1. 65532  
5. 437162 6. 914114 6. 535396 5. 886351 6. 988693 5. 971783 5. 951197 5. 441153 5. 781748  
6. 658906 6. 999883 7. 340347 7. 289522 7. 108252 7. 377025 6. 672658 7. 03004 6. 78856  
7. 371768 6. 828881 7. 062291 6. 664322 6. 700612 6. 626102 6. 326412 6. 300197 6. 62746  
2. 595449 1. 670572 1. 954239 2. 164723 2. 392323 1. 793701 1. 719473 2. 128446 2. 335853  
3. 750968 4. 005882 4. 881997 3. 570935 4. 369497 4. 275257 4. 326387 5. 352627 5. 420855  
3. 297123 3. 115436 3. 070226 3. 499063 2. 791508 2. 633218 2. 927522 3. 556571 3. 066616  
4. 468302 5. 80192 5. 004722 4. 776359 6. 48903 5. 846278 4. 622653 5. 353149 4. 988193  
5. 228252 7. 083332 5. 564053 6. 970713 6. 071766 5. 782634 4. 470639 6. 271598 6. 367684  
2. 886791 2. 378761 2. 189272 2. 859297 3. 016683 2. 749192 2. 376556 2. 157364 2. 638781  
4. 861795 6. 109095 4. 772307 4. 833965 5. 150811 5. 174036 5. 283721 5. 265148 5. 135576  
2. 441977 1. 770389 1. 521316 1. 663659 1. 518792 1. 284836 1. 88057 1. 716227 1. 88458  
4. 839095 5. 803834 6. 419363 5. 838237 5. 737306 6. 326847 5. 001694 6. 130723 5. 549305  
5. 306399 5. 763932 6. 069367 5. 610734 5. 641933 6. 004498 5. 072979 5. 934325 6. 258089  
2. 287469 2. 326882 1. 639886 2. 341537 2. 119434 1. 549899 2. 917828 2. 183408 1. 79843  
4. 872061 5. 076726 4. 949392 4. 789128 5. 667761 5. 07479 5. 073434 5. 343714 5. 36372  
4. 082985 4. 690221 4. 387605 4. 439285 4. 950934 4. 254424 3. 609578 4. 547435 4. 709375  
3. 558461 4. 218563 4. 30447 2. 85622 3. 973296 4. 790608 4. 014465 3. 176429 3. 75848  
6. 758283 6. 367959 6. 586589 6. 450653 6. 995942 6. 877382 6. 584732 6. 306611 7. 003921  
1. 584228 1. 736121 2. 107444 1. 892766 2. 266662 1. 58288 1. 744739 2. 652764 1. 626076  
2. 015929 2. 186856 1. 492273 0. 990216 1. 279401 1. 641625 1. 278927 0. 857905 1. 502146  
1. 889517 1. 644225 2. 303218 1. 898929 2. 204754 2. 53406 1. 665198 2. 207391 2. 48259  
2. 483747 2. 138157 2. 854877 3. 295476 2. 263402 2. 655206 2. 725919 2. 009981 2. 334659  
5. 000796 5. 346253 5. 309341 6. 369745 5. 439824 5. 903648 5. 755044 5. 848439 5. 268697  
6. 704501 4. 849377 5. 498217 4. 841626 4. 639776 3. 604719 5. 280376 4. 844337 7. 064759  
7. 518418 7. 179858 6. 986769 7. 209619 7. 488653 6. 79646 7. 246264 7. 340137 7. 415523  
3. 941285 5. 662598 4. 619847 5. 41884 4. 614352 5. 5861 4. 891528 5. 16575 4. 978027  
1. 566559 1. 916698 2. 05831 2. 541141 5. 198279 2. 029163 6. 794519 2. 351148 3. 562656  
7. 894509 8. 346603 8. 356834 8. 37279 8. 54069 8. 796465 8. 2639 8. 492945 8. 495769  
1. 245524 0. 930455 0. 935871 1. 424229 1. 053712 1. 443119 1. 768958 1. 172735 0. 992627  
6. 042721 6. 612612 6. 289788 5. 98181 7. 065744 6. 216233 6. 704415 6. 518953 6. 290043  
6. 482181 6. 286384 6. 579754 6. 385692 6. 313133 6. 270368 5. 929754 6. 606011 5. 892805  
2. 055309 1. 772054 1. 058879 1. 244817 1. 535778 1. 316353 1. 293795 1. 242622 1. 751438  
7. 07104 7. 929984 7. 541355 7. 769046 7. 693651 7. 185354 7. 621801 7. 633753 7. 925934  
2. 412968 3. 431896 2. 666015 3. 52152 3. 094845 3. 334014 2. 666925 2. 257392 3. 104302  
4. 285317 4. 366961 5. 22055 3. 507758 4. 566517 5. 084052 5. 397589 4. 777831 4. 457353  
1. 659609 1. 225766 1. 148366 1. 824014 2. 032092 1. 796432 1. 496626 1. 592446 2. 477993  
1. 781816 1. 860146 1. 535991 1. 926999 1. 604207 2. 774415 1. 623292 1. 184784 1. 802497  
1. 662282 3. 049978 1. 933778 0. 995797 1. 599814 3. 592948 4. 159654 1. 805566 2. 762435  
2. 986044 4. 493975 4. 178428 3. 420045 4. 655938 5. 009272 4. 726144 4. 36991 4. 194969  
5. 568808 5. 3776 5. 317113 5. 536468 5. 467135 5. 26164 5. 614284 5. 589796 5. 807885  
4. 927109 4. 451701 4. 245754 4. 260567 5. 127483 5. 133264 3. 916073 5. 602769 5. 983392  
4. 062077 3. 426673 4. 197458 2. 417591 3. 2368 2. 719786 3. 476446 2. 846507 2. 860881  
1. 665341 1. 687549 3. 066392 1. 549747 2. 280025 1. 890424 3. 231085 2. 740499 1. 507441  
5. 68596 5. 488389 6. 499897 6. 447869 7. 049258 6. 387787 6. 191029 6. 549841 5. 890745

7. 067166 6. 642098 7. 131724 5. 928924 7. 177502 6. 521341 6. 560883 6. 664723 6. 595451  
2. 737887 2. 243439 2. 569574 1. 956017 7. 430945 5. 452974 6. 467317 4. 513773 5. 021728  
5. 793317 5. 682675 5. 162535 5. 831362 5. 294861 4. 672045 5. 513917 5. 770282 5. 516943  
5. 726017 6. 041622 6. 264546 5. 851916 5. 531263 5. 94614 5. 821154 6. 071171 5. 800761  
8. 403992 8. 856807 8. 88032 8. 76477 9. 42666 8. 687587 9. 051019 8. 807558 8. 867461  
4. 91565 5. 015896 4. 100131 3. 649804 4. 772023 4. 603151 4. 466741 3. 938422 4. 518823  
1. 056853 2. 005705 2. 986006 1. 694755 1. 62487 2. 544729 1. 316525 1. 105994 2. 6817  
6. 039523 6. 864792 6. 699257 6. 213584 7. 15568 6. 881253 6. 078627 6. 800196 6. 953846  
2. 212831 1. 845775 2. 391932 2. 562974 2. 513455 2. 112811 2. 518519 2. 405296 2. 259089  
8. 317788 8. 506162 8. 734395 8. 797968 9. 006445 8. 923384 8. 766575 8. 377091 9. 070679  
7. 002611 7. 700246 7. 380418 7. 66565 7. 739596 7. 402572 7. 459812 7. 567053 7. 257983  
2. 95462 3. 858872 4. 140333 3. 910893 3. 358578 3. 996084 2. 713492 4. 082316 3. 368855  
8. 162875 8. 827258 8. 208314 8. 901833 9. 561403 7. 199878 8. 302369 7. 725096 8. 376667  
3. 069475 3. 500973 4. 857775 3. 719759 3. 549097 3. 698872 3. 922766 3. 452917 3. 817074  
7. 015923 7. 478657 7. 077884 7. 215942 7. 457729 7. 015904 6. 949676 7. 456199 7. 280757  
1. 065255 0. 970856 1. 316531 1. 007688 1. 482963 1. 07033 0. 871915 0. 742007 0. 988139  
3. 547558 1. 553957 3. 471145 2. 51467 2. 212069 3. 781362 2. 588496 1. 786995 1. 619479  
2. 7693 3. 190604 2. 514577 2. 731616 3. 033167 3. 369639 4. 134746 2. 823814 2. 706755  
5. 322241 5. 945434 5. 504774 6. 202772 5. 609401 6. 447638 6. 070795 5. 839816 5. 629434  
4. 176971 5. 418879 4. 896224 4. 871096 5. 063692 5. 451833 4. 719104 5. 020597 4. 298961  
4. 025703 3. 343396 3. 767451 3. 937385 2. 963339 2. 720423 4. 162674 3. 285089 2. 929066  
6. 099576 6. 68487 6. 772729 6. 279078 6. 499148 6. 6072 5. 847772 6. 562665 6. 459256  
1. 517392 1. 635124 1. 235421 0. 988735 1. 019069 1. 155981 1. 775412 1. 736257 1. 385854  
4. 214864 4. 178599 4. 889325 3. 996235 5. 179733 4. 054542 3. 411146 4. 087156 3. 565539  
5. 276307 2. 25005 3. 538206 2. 387717 2. 267077 1. 843316 2. 412347 2. 325148 3. 369403  
3. 840903 2. 879754 3. 272981 2. 956026 3. 909969 2. 647737 3. 734491 3. 732413 2. 405869  
6. 268609 7. 094763 6. 827625 7. 127846 7. 235394 7. 203741 6. 70386 6. 721771 6. 65999  
1. 671762 1. 795721 1. 175423 2. 053668 2. 143042 2. 342077 1. 579654 1. 346437 1. 013795  
6. 853041 6. 500317 5. 769733 8. 056158 7. 398536 6. 805687 7. 409138 6. 063298 7. 33035  
2. 57986 3. 344349 3. 552671 4. 379109 3. 171833 3. 380238 4. 294373 3. 635585 3. 390381  
1. 942375 1. 900309 2. 160639 2. 178038 1. 948859 2. 829791 2. 44184 2. 38185 1. 53711  
5. 30969 6. 263081 6. 336821 6. 281778 5. 656038 6. 423753 5. 571466 5. 815387 5. 766003  
2. 272568 2. 421978 2. 012105 1. 846648 2. 276271 1. 623993 2. 096846 2. 362602 2. 001198  
2. 202325 2. 931919 1. 547196 2. 130199 1. 997678 2. 285387 1. 457085 2. 156542 1. 416108  
2. 175582 2. 354421 2. 355577 2. 040103 2. 609903 3. 6136 2. 478342 2. 450887 2. 894487  
1. 509949 1. 795865 1. 342804 2. 041121 2. 424041 1. 447244 1. 558019 1. 221099 1. 52222  
5. 170783 5. 448432 6. 130198 5. 139303 5. 457176 5. 942759 5. 348936 5. 877134 5. 421664  
3. 016317 1. 818894 2. 375206 2. 034191 1. 166052 1. 782705 1. 859301 1. 895545 3. 188377  
5. 587721 5. 46154 5. 380927 5. 953246 5. 635962 5. 972937 5. 971742 5. 114664 5. 806315  
1. 847006 1. 543661 1. 564247 2. 578913 1. 444812 1. 311332 1. 706596 1. 076465 1. 166152  
7. 314569 7. 390644 7. 257604 7. 010448 7. 075514 7. 281997 7. 259763 7. 171166 6. 770695  
1. 481753 1. 233884 0. 998493 1. 635163 1. 526112 1. 229564 1. 080578 1. 792216 1. 668509  
2. 962529 2. 796515 2. 074108 2. 933749 2. 678825 3. 340033 3. 20498 3. 531483 3. 139373  
2. 487277 3. 744589 3. 143291 2. 828957 2. 765815 4. 161992 3. 464006 2. 854927 3. 249785  
1. 555177 1. 338278 1. 349497 2. 111032 2. 307265 3. 273673 1. 89675 1. 569215 1. 878409  
7. 11371 7. 052531 7. 303806 6. 221871 6. 946146 6. 590537 6. 033426 6. 440463 6. 749793  
3. 550408 4. 373743 4. 230666 4. 080859 2. 404784 4. 48513 4. 061256 4. 083769 4. 519831  
3. 548381 2. 837466 3. 822881 3. 207822 3. 200815 2. 818842 4. 734661 3. 280095 3. 475674  
2. 449606 2. 908763 2. 379076 1. 926146 2. 899561 2. 384763 3. 212962 2. 615474 3. 386019  
6. 379253 6. 166967 6. 34121 6. 018778 6. 840736 6. 038295 5. 693438 6. 995335 6. 679396  
6. 157551 6. 447242 6. 771116 6. 661515 5. 378008 5. 984168 5. 541027 5. 754189 5. 626771

6. 1668 6. 209852 6. 483513 6. 488109 6. 746018 6. 246212 5. 701253 6. 291485 6. 190451  
5. 584827 5. 910737 6. 325819 6. 666973 5. 866421 6. 175192 5. 89403 5. 801657 6. 047839  
5. 604473 6. 276726 6. 027678 5. 451136 5. 798221 5. 841217 5. 19383 5. 689443 5. 804391  
2. 956905 3. 128993 3. 671075 3. 865005 3. 169081 4. 374403 3. 391306 3. 218286 3. 218599  
2. 997598 1. 3345 1. 616488 2. 335853 1. 149542 1. 694856 1. 966332 2. 030613 1. 524988  
5. 836334 5. 706193 5. 483998 5. 694755 5. 652549 5. 933685 5. 662526 5. 645893 5. 652306  
3. 778349 4. 802303 6. 030717 5. 878543 4. 66602 5. 385814 4. 623367 5. 64768 4. 424681  
6. 902818 6. 287375 6. 975788 6. 070979 6. 163176 6. 215676 6. 259308 6. 841101 6. 292997  
2. 52612 3. 265836 3. 127725 2. 814688 2. 232435 3. 396132 3. 013883 2. 993657 4. 094966  
11. 31268 11. 30462 11. 37387 11. 29758 11. 10926 11. 16872 11. 56859 11. 33649 11. 27296  
2. 972721 3. 243944 3. 25111 3. 041556 3. 152732 3. 301754 3. 011188 3. 239347 3. 483754  
1. 790446 1. 504655 2. 066612 1. 27011 2. 012286 2. 284596 2. 405976 2. 364335 1. 790888  
7. 416542 7. 974407 7. 858755 7. 626506 8. 001466 7. 859758 7. 229375 7. 509757 7. 573064  
4. 355016 5. 281143 5. 492745 4. 708747 5. 198589 4. 836114 4. 27174 5. 417801 4. 445133  
6. 155166 6. 533396 6. 59072 6. 726602 6. 946224 6. 956618 7. 400592 6. 829568 6. 623384  
7. 364062 7. 96902 7. 855689 8. 752662 7. 835592 8. 189594 7. 871367 8. 132292 7. 92646  
1. 639923 3. 759561 3. 269956 2. 593206 2. 689735 1. 594538 1. 896141 2. 448257 2. 530308  
5. 686744 7. 393992 7. 250061 6. 698777 7. 10411 6. 212387 6. 691235 5. 923908 6. 420308  
5. 532201 6. 28495 6. 014358 5. 455337 6. 302707 5. 557335 6. 051422 6. 070255 5. 500137  
5. 961402 6. 220812 6. 345277 6. 560724 6. 799176 6. 232663 6. 453307 6. 208399 6. 494484  
4. 207572 4. 66919 5. 400126 4. 851367 5. 275782 5. 352331 6. 315914 5. 253827 5. 201163  
4. 567336 5. 261767 5. 344657 5. 75457 6. 159044 5. 260455 5. 999714 5. 612453 5. 711749  
2. 65642 1. 180107 3. 98494 1. 059351 2. 785553 1. 285809 4. 738392 2. 011715 1. 725942  
4. 121578 4. 873624 4. 779133 4. 301504 3. 983267 4. 729429 5. 048311 4. 19149 3. 692739  
2. 243512 1. 837085 2. 294576 2. 195215 2. 204084 2. 009141 2. 539038 2. 333591 1. 676231  
2. 627265 2. 648393 2. 252151 2. 570282 2. 410203 2. 159773 2. 000293 2. 991884 1. 840479  
6. 01522 6. 579914 6. 455863 6. 487663 6. 802048 6. 522102 6. 23701 5. 806834 6. 326168  
2. 20573 2. 857137 3. 488892 3. 087968 2. 449101 2. 994348 3. 648023 2. 98377 2. 630919  
5. 577101 4. 958631 4. 670269 5. 227737 4. 750492 4. 645798 6. 030598 5. 154096 4. 577795  
2. 233108 2. 825493 3. 590177 1. 569703 1. 697925 1. 832136 2. 945263 1. 931644 1. 711017  
3. 547486 4. 365495 4. 154927 4. 576833 4. 076151 3. 54669 3. 546007 4. 176692 3. 716382  
2. 364884 1. 798813 1. 494921 1. 797362 3. 084204 2. 144363 1. 796712 2. 352568 2. 538699  
8. 074177 7. 060277 7. 365412 7. 118768 6. 948181 5. 717561 7. 301207 6. 765996 7. 751376  
4. 352601 5. 759364 5. 885262 5. 14154 5. 950447 5. 02844 5. 567012 4. 99469 6. 022607  
2. 28523 3. 371606 3. 363377 3. 991267 4. 183357 3. 81651 3. 216406 3. 003131 3. 45599  
6. 174618 6. 178059 5. 70154 5. 599503 6. 850343 6. 332128 5. 802021 6. 494674 5. 886155  
5. 706006 4. 189602 5. 907232 3. 136411 4. 161129 3. 468504 2. 666985 2. 753296 3. 340186  
5. 053712 4. 344814 3. 785326 3. 925848 4. 053496 3. 796659 4. 306486 3. 733359 4. 548  
1. 992706 1. 149927 2. 223542 1. 778726 1. 609261 2. 291021 2. 260428 2. 216552 1. 940176  
4. 251998 3. 816565 3. 931856 4. 464191 3. 939214 4. 043966 5. 302651 4. 034773 4. 777604  
5. 923979 5. 98768 6. 214522 6. 661566 6. 249847 5. 90305 6. 194589 5. 610736 6. 46126  
4. 952823 4. 88989 4. 537424 5. 431916 5. 145547 4. 942135 5. 244188 5. 231087 5. 821025  
1. 509037 1. 953542 1. 436423 1. 906857 2. 027848 1. 734309 1. 879443 2. 246077 2. 274305  
2. 628892 2. 032249 2. 249917 2. 355852 2. 547164 2. 632035 3. 34275 2. 582473 2. 600413  
3. 769249 4. 185475 3. 569357 4. 599177 4. 116567 4. 166755 3. 81926 4. 227525 4. 438328  
6. 920133 6. 06196 6. 591158 5. 336951 6. 054241 6. 230231 6. 445585 5. 668516 6. 482719  
6. 773975 6. 90401 6. 745452 7. 115754 7. 049828 6. 853135 7. 216782 6. 951535 7. 223439  
3. 726367 3. 745915 3. 36639 4. 83754 4. 261011 3. 779737 4. 740733 3. 967039 3. 606807  
2. 168603 1. 552749 2. 183872 2. 279824 2. 161527 1. 70243 2. 358145 1. 667841 1. 990426  
6. 138131 7. 384712 6. 796254 6. 637075 6. 928902 6. 876331 7. 084349 6. 65316 6. 765394  
2. 971192 3. 881991 2. 829812 2. 948424 2. 263837 3. 676846 3. 902312 3. 259653 3. 174384

5.728022 5.425667 4.810514 5.657058 5.095958 6.382914 5.515832 5.949777 6.379832  
8.250579 8.497592 8.149816 8.158228 8.268569 7.74091 8.39544 8.050271 8.939353  
1.388536 1.811276 1.19867 1.556906 2.228967 1.76021 1.292763 1.014428 1.689326  
5.373239 5.474362 5.324572 6.002409 6.115146 5.624901 5.386356 4.697592 5.716301  
4.925092 5.455365 5.384637 5.058792 5.335242 5.158533 5.053221 5.665615 5.869487  
8.418097 8.280593 7.681013 7.88051 8.00077 7.323734 7.690744 8.456437 8.048609  
6.588302 6.300156 6.175067 6.047175 6.021544 6.080198 6.93882 6.72635 5.938382  
2.621933 3.60658 3.797254 2.853576 2.926548 2.814172 4.147164 3.116388 4.283523  
4.122527 4.423436 4.418168 4.366702 5.10147 4.396586 4.586584 4.541203 4.280923  
2.258965 1.983585 1.823841 2.206997 1.640481 2.05957 1.369152 1.640162 1.426776  
2.638305 2.395867 2.873294 3.357566 3.176709 2.619614 3.544458 2.509912 3.290694  
3.796191 3.256568 4.114199 1.503793 3.109519 3.022005 1.868197 3.140985 2.085218  
6.497503 6.972632 6.750936 7.067977 7.217024 7.095962 6.676702 7.025809 6.962461  
2.591254 2.323005 2.333574 2.205407 2.798992 2.173917 2.384159 1.699939 2.220738  
6.246295 4.373504 3.540624 4.367741 3.791035 5.99242 3.51564 4.939142 3.485878  
5.00948 5.093417 4.906916 5.29923 5.371995 5.165327 5.747454 5.118082 5.620055  
3.278807 1.675414 2.485373 2.383571 2.178885 1.666169 2.896886 2.024621 2.417527  
4.643455 6.046437 5.596605 5.075157 5.583318 6.17068 5.462077 5.84728 5.154591  
6.730579 6.354237 6.968119 6.564833 6.450748 6.357124 5.652506 6.177341 6.917611  
7.029775 6.801033 7.12629 6.998521 7.217133 7.227183 7.248791 7.229376 7.74436  
5.031953 4.232442 4.193173 4.248825 4.160612 4.308549 4.274719 4.084474 4.381342  
5.368554 6.136449 5.200105 5.632487 5.804232 5.700577 5.043226 5.907875 5.472659  
2.939588 4.284107 4.430005 4.603797 3.87822 4.335983 3.201308 4.150208 3.293635  
2.130183 1.40288 1.29607 1.332829 1.710284 2.058822 1.399729 1.807796 1.227239  
1.626292 1.896424 1.845395 1.694101 1.520512 1.514527 1.863954 1.168363 1.359445  
5.756782 5.896126 5.91901 6.291835 6.201233 6.618879 5.710255 5.858769 6.423175  
6.864688 4.483111 5.262614 3.927855 3.821 4.636374 4.376528 4.442821 5.694945  
2.987952 2.692772 1.814389 2.794048 2.44253 3.044363 3.104422 2.76154 3.309467  
7.558198 7.48884 7.171819 6.825864 7.523469 7.47936 6.869651 7.452438 7.299841  
2.618161 2.036808 2.432947 1.492754 1.820242 2.137198 1.497806 2.069937 1.459206  
4.492971 3.910636 4.333627 4.139217 3.837417 3.292346 3.932816 3.832438 3.581601  
3.459569 3.93977 3.654387 4.975959 3.959854 3.793941 3.79553 4.906518 3.816378  
4.63538 4.426989 4.165808 4.290701 4.211871 5.307109 4.234359 4.606557 4.520451  
3.659091 3.664722 4.270326 4.205172 4.585189 3.922748 4.101633 3.035761 3.819216  
4.64962 4.654538 4.079092 4.687387 5.890051 5.378099 4.476117 5.108047 4.792057  
3.678353 4.93465 4.516136 5.237831 4.568212 4.459853 4.731064 4.256132 4.898504  
3.031062 3.585792 2.959806 2.724648 3.527438 3.183882 3.498173 4.338576 2.608546  
4.24106 3.357735 4.237457 4.170553 3.579047 4.203092 2.797128 3.030951 3.819524  
6.512568 5.975343 7.188469 6.365443 5.740109 5.743289 6.089586 5.900266 6.005467  
2.190331 1.681293 1.400987 2.11994 2.220963 1.204233 2.018605 1.676315 2.150294  
5.577867 5.28838 5.403774 5.559694 6.021564 6.206969 5.333823 5.597505 5.960787  
6.559199 6.938187 7.235171 6.377401 6.713454 7.005874 7.209075 6.952949 6.642429  
4.20612 5.108544 4.760912 5.169855 4.874578 4.552803 4.464376 4.630907 5.087693  
1.52572 1.273558 1.193291 1.960038 2.095945 1.238995 1.579201 1.416686 2.098476  
4.347581 4.152532 3.792888 4.626907 4.806532 5.114922 4.210002 4.205691 4.126081  
2.228592 2.55972 2.241017 2.098039 1.898324 2.31129 1.998732 2.424976 2.153204  
6.580281 6.571572 6.281108 6.341086 6.38761 6.847639 6.319886 7.304826 6.385788  
3.270592 1.891016 2.373466 2.651336 2.766951 1.850919 2.772934 2.621716 2.343481  
4.740227 3.181808 2.452951 3.364093 2.395659 3.378802 3.864977 3.219018 1.630184  
3.909808 4.591911 4.248829 4.112568 4.50594 4.615297 4.343047 4.140626 4.199488  
1.026869 1.77774 0.985636 1.034662 2.070745 1.096626 1.285983 1.447244 1.471015

5. 621589 6. 541299 6. 696253 6. 233077 6. 430134 6. 487065 6. 113942 6. 654302 6. 384722  
4. 185223 2. 877884 3. 041423 2. 60087 3. 93113 3. 411933 3. 569617 2. 702808 3. 232895  
1. 892288 2. 128087 1. 814296 2. 057414 1. 702162 1. 845305 2. 676324 1. 573753 1. 717153  
2. 238024 3. 557809 3. 337009 3. 667311 3. 701844 3. 10917 2. 355756 2. 890378 3. 098146  
2. 44187 1. 732545 1. 718343 2. 188697 1. 893796 1. 70045 1. 947835 1. 889089 1. 481406  
9. 652454 9. 800969 9. 592071 9. 706441 9. 940125 9. 753619 9. 805008 9. 96552 9. 659712  
5. 440453 5. 164474 5. 568228 5. 245075 5. 514711 5. 211318 5. 799259 5. 56989 5. 125666  
3. 057153 4. 311967 3. 148201 3. 661443 3. 739118 3. 61776 3. 642375 3. 371082 3. 861542  
4. 116588 2. 795482 4. 048677 3. 58111 2. 663957 3. 042109 2. 927905 2. 634268 2. 157749  
6. 181906 4. 991567 4. 175661 5. 307856 4. 172776 4. 117182 4. 32851 5. 200829 4. 620799  
2. 970963 2. 462748 2. 66751 2. 113065 1. 952589 2. 661575 2. 136923 2. 26136 2. 065451  
4. 046011 5. 049743 4. 964747 4. 52064 4. 986849 5. 087588 4. 47987 5. 141727 5. 099833  
3. 477918 2. 71433 3. 00469 3. 477918 2. 814477 3. 783042 3. 070012 1. 860076 1. 274619  
6. 093074 6. 584217 6. 763143 6. 691138 7. 077883 6. 312605 6. 38497 7. 09618 6. 835277  
4. 276488 4. 451027 3. 514605 4. 876213 4. 3324 5. 382503 3. 890561 3. 293007 4. 303284  
8. 265429 8. 44166 8. 629888 8. 621263 8. 583314 8. 605475 8. 53673 8. 489894 8. 441161  
5. 697398 6. 255874 6. 602728 5. 674953 6. 038219 6. 833533 5. 98828 6. 232083 7. 130619  
5. 691365 6. 538864 6. 474653 6. 329888 6. 046085 6. 739313 6. 639355 6. 369464 5. 958891  
3. 295403 4. 52642 4. 630708 3. 622984 3. 167972 3. 898721 3. 644454 4. 016129 3. 870882  
2. 613097 2. 796364 3. 19353 3. 354004 3. 202828 3. 320615 3. 014872 2. 528329 2. 523094  
3. 812878 2. 491719 2. 893916 2. 916747 3. 610919 2. 270453 2. 239755 2. 558016 2. 976297  
4. 166072 4. 097027 3. 327262 3. 11957 4. 03696 2. 967666 3. 109061 4. 621526 4. 355538  
8. 676623 9. 400779 8. 889603 9. 31714 9. 638894 8. 731859 9. 943607 9. 336201 9. 145011  
7. 304013 6. 452651 6. 37352 6. 138976 6. 597874 6. 8559 5. 897191 6. 066143 7. 002303  
6. 646697 7. 384124 7. 0687 6. 873077 7. 189341 7. 288051 6. 798275 7. 264917 6. 871477  
4. 53898 5. 327865 5. 187905 4. 552179 5. 428229 6. 313064 4. 890741 5. 364192 5. 217666  
2. 419456 2. 310605 3. 272399 3. 423872 1. 891298 3. 855814 3. 609222 2. 8716 3. 323695  
7. 199839 6. 567804 6. 908915 6. 345444 5. 895071 5. 312722 5. 781381 5. 803948 6. 636512  
4. 106288 2. 838448 2. 78884 3. 754967 2. 961877 3. 446709 3. 070603 3. 248581 2. 589842  
7. 109915 7. 023955 7. 25119 7. 111903 7. 321266 7. 272007 7. 227021 6. 98743 6. 899616  
5. 607023 7. 138967 6. 782381 6. 62999 6. 741693 7. 058493 6. 304133 6. 384189 7. 05863  
3. 311055 1. 659706 1. 593717 1. 868683 2. 142252 1. 777953 1. 805953 1. 912738 2. 69048  
3. 168656 1. 944035 2. 716025 2. 557502 2. 129726 2. 031639 2. 508837 2. 779635 1. 646161  
7. 19703 7. 868947 7. 341986 7. 713908 7. 604205 7. 844503 7. 820297 7. 592693 7. 619163  
4. 561194 3. 856218 3. 702922 3. 785235 3. 804443 4. 054545 3. 968213 4. 039879 4. 399089  
3. 180106 4. 827982 4. 548039 4. 609141 4. 77194 5. 047806 4. 658104 4. 842292 3. 785061  
5. 339556 5. 343883 4. 836879 4. 546741 5. 106581 4. 657235 5. 117394 4. 530223 5. 659472  
7. 346549 6. 629392 7. 060538 6. 6549 6. 514715 6. 750704 6. 520715 6. 988521 6. 932229  
5. 931484 6. 189682 5. 828489 6. 077662 6. 202095 6. 158395 5. 834088 5. 790816 5. 765771  
10. 30724 10. 387 10. 39875 10. 49062 10. 19161 10. 55715 10. 49272 10. 32348 10. 50574  
4. 943027 5. 37716 5. 547619 5. 277315 6. 15379 6. 275723 5. 062378 5. 596269 5. 269316  
1. 480961 1. 642019 1. 012414 1. 380905 1. 301347 1. 189667 1. 608935 1. 119596 1. 039693  
1. 042582 1. 680718 1. 110036 1. 928151 1. 86914 1. 903666 1. 431743 1. 111387 1. 422422  
5. 382025 6. 957111 7. 163425 5. 905452 6. 486841 6. 513337 6. 616439 6. 884453 6. 782139  
4. 047543 5. 429231 5. 519712 4. 199441 5. 228571 5. 162185 5. 040586 5. 115574 4. 692835  
7. 22058 6. 888461 7. 107787 7. 241358 6. 599962 7. 424269 6. 97248 7. 212487 7. 116137  
1. 711194 2. 14563 1. 571161 1. 221732 1. 915277 1. 57597 1. 603056 1. 40617 1. 450773  
7. 790451 8. 433021 7. 945393 7. 730296 8. 174282 8. 056897 7. 807764 7. 430533 7. 613624  
6. 287204 6. 538209 6. 288748 7. 366494 6. 802095 6. 191132 6. 836164 6. 860301 7. 270188  
4. 336956 3. 96316 3. 971099 4. 440642 3. 634581 3. 999441 3. 695764 4. 083887 4. 528963  
5. 780848 5. 216568 4. 669178 6. 175644 5. 771409 5. 162376 5. 282412 5. 641374 5. 193811

2. 585434 2. 840691 3. 865152 3. 103318 2. 535791 2. 252386 3. 287044 2. 47888 2. 878287  
3. 650336 5. 431927 4. 770902 5. 145463 6. 142612 5. 919813 6. 43407 5. 335264 6. 000105  
3. 754567 2. 589509 3. 090147 3. 167847 2. 3025 2. 45189 2. 931705 1. 930557 4. 952979  
8. 271037 8. 514496 8. 540003 8. 203538 8. 400143 8. 159451 8. 117558 8. 196941 8. 583715  
7. 878598 8. 283104 8. 253494 8. 051396 8. 057506 8. 067392 7. 729053 8. 382841 7. 813843  
2. 564022 2. 404903 2. 271684 2. 52743 1. 588515 2. 516354 2. 603198 1. 623783 1. 828938  
3. 764927 4. 298942 4. 315853 3. 263974 3. 568809 4. 539517 4. 286754 4. 252749 4. 358616  
3. 321537 3. 430886 2. 315954 3. 904859 4. 030739 3. 957087 3. 2368 3. 370016 3. 061141  
1. 891715 2. 116293 1. 552772 2. 800598 1. 647972 1. 111998 1. 968049 1. 49377 2. 116213  
6. 249963 6. 330306 6. 632254 5. 785376 6. 364423 5. 997658 6. 507883 6. 210424 6. 224887  
3. 779746 2. 982 3. 11333 2. 439713 3. 260983 2. 520737 2. 595407 2. 54501 2. 453825  
4. 922658 3. 922472 4. 32061 3. 906865 4. 301406 3. 969118 4. 997633 4. 481026 4. 873621  
4. 46386 3. 304335 3. 73217 3. 701118 3. 911064 3. 578448 3. 867999 4. 418481 4. 020494  
1. 761716 2. 187641 2. 711562 2. 199774 2. 152294 1. 857963 1. 831016 2. 643907 1. 780539  
1. 749542 1. 858605 1. 793785 1. 577633 1. 340596 1. 561925 1. 541847 1. 594444 1. 527612  
2. 659851 2. 153038 1. 79468 1. 863387 1. 990569 2. 108658 1. 369812 2. 324995 2. 217117  
2. 959026 1. 286843 2. 234093 2. 238262 2. 083535 2. 463356 2. 436763 1. 852572 2. 309185  
3. 00647 2. 708884 2. 826827 3. 477396 2. 608383 2. 708966 2. 690136 2. 6138 3. 229575  
4. 542019 5. 181807 3. 529973 4. 584782 5. 216692 3. 714043 4. 434204 4. 253736 5. 21807  
1. 507029 1. 117891 1. 199207 2. 286575 1. 213884 2. 536051 0. 893274 1. 077171 0. 983136  
1. 582496 1. 892516 1. 292531 1. 443155 1. 275727 1. 959257 1. 53837 1. 298581 1. 51463  
3. 046589 3. 270429 2. 435056 2. 076161 1. 247745 2. 323052 3. 082421 1. 354553 1. 643811  
7. 650856 7. 096712 7. 386989 7. 309432 7. 080499 7. 535797 6. 596093 7. 457919 7. 508094  
2. 441487 3. 152967 3. 248758 2. 287701 2. 275222 2. 510983 2. 801292 3. 669995 2. 511292  
4. 417932 4. 596305 3. 039839 3. 128333 4. 157503 3. 679205 5. 387684 3. 628468 4. 639338  
1. 400117 1. 710622 1. 332296 1. 591857 1. 636961 1. 782275 1. 109872 1. 843348 2. 184817  
1. 254775 1. 192383 0. 951734 1. 348025 1. 495838 2. 587506 3. 171051 1. 10548 1. 175085  
2. 462707 2. 508428 2. 651886 3. 021487 2. 244175 3. 697371 3. 332243 2. 609793 3. 629629  
0. 826629 1. 032524 1. 452971 1. 036751 1. 643603 1. 122194 1. 557798 0. 911056 1. 198898  
4. 27429 3. 365636 4. 254002 3. 736899 4. 128139 3. 14308 4. 29813 3. 655511 4. 440462  
2. 011772 1. 027325 1. 113086 0. 763266 1. 960507 1. 871106 1. 207134 0. 944022 1. 557906  
1. 677819 1. 73748 1. 225597 2. 04896 1. 302805 1. 341336 1. 466335 2. 121825 1. 683687  
1. 601564 1. 008355 1. 956466 1. 662546 1. 117871 1. 389047 1. 638614 1. 756491 2. 538341  
4. 842753 5. 960994 5. 212885 5. 454897 6. 565508 4. 512952 5. 763626 6. 615043 5. 913315  
6. 196759 5. 678121 5. 647401 6. 353369 5. 797096 5. 358422 5. 718978 6. 327072 5. 94845  
2. 250688 2. 439018 1. 188258 2. 706611 2. 216068 2. 348635 2. 082905 1. 381787 1. 711248  
4. 624717 4. 994231 5. 250165 4. 361859 4. 317171 4. 702079 5. 192373 5. 032629 5. 067975  
2. 679366 2. 779291 4. 26347 2. 292157 3. 315217 3. 86568 3. 626233 4. 623392 4. 082753  
3. 429961 2. 144382 2. 464515 1. 918163 2. 594208 2. 55892 2. 354274 2. 300773 2. 646262  
2. 475326 1. 844478 2. 258358 2. 091447 1. 729104 1. 376266 1. 470721 1. 869422 2. 557023  
5. 353188 7. 383927 7. 164672 6. 523727 6. 416069 6. 759225 6. 290183 7. 038743 6. 93151  
1. 91161 1. 899127 1. 845934 1. 97341 1. 814312 2. 235605 1. 945286 2. 135053 1. 934347  
4. 832195 4. 647825 5. 257234 5. 082122 4. 834156 5. 269952 5. 605145 4. 637043 5. 469494  
3. 695406 4. 189251 1. 696947 2. 009232 4. 654699 1. 902229 3. 005042 1. 54592 2. 623376  
1. 99039 1. 572894 1. 614934 1. 616946 2. 233266 1. 892451 2. 085603 1. 720425 1. 496999  
5. 968077 4. 99693 4. 779018 4. 11542 5. 063345 3. 791138 3. 510366 4. 166646 3. 58438  
2. 151935 1. 485028 3. 769082 1. 741949 3. 641443 3. 724296 3. 838311 3. 353451 1. 264942  
0. 948231 0. 957456 0. 751338 1. 058263 1. 892281 1. 379735 1. 931898 1. 567638 1. 048569  
3. 437744 3. 502023 3. 349329 3. 415865 3. 232728 3. 908963 3. 505208 3. 175761 4. 06698  
2. 217013 1. 790356 2. 875905 2. 707987 1. 88525 1. 76032 2. 271941 2. 411441 1. 793735  
2. 141555 2. 218911 3. 107057 4. 029078 1. 948824 2. 428136 2. 555263 2. 005148 2. 171347

10. 20396 10. 3054 10. 30059 9. 76468 10. 14982 10. 07514 9. 948785 10. 13484 9. 895251  
2. 931697 1. 987157 1. 992198 2. 644693 2. 186255 2. 132639 3. 046275 2. 430995 1. 966246  
3. 499817 2. 706006 2. 913297 2. 732176 2. 665099 2. 82816 2. 747383 2. 160939 2. 546504  
2. 481925 2. 921763 2. 78499 3. 409711 2. 895945 3. 458584 3. 434449 2. 515178 3. 163859  
3. 756721 4. 960269 4. 477351 3. 838989 3. 723056 5. 555028 5. 285154 4. 179979 4. 578298  
2. 079485 2. 306862 3. 418946 3. 23418 2. 433146 2. 622603 4. 826421 3. 514285 2. 121938  
4. 328586 4. 334801 4. 47866 3. 164961 3. 588245 4. 599039 4. 101493 4. 337911 4. 488007  
3. 373149 2. 93604 2. 322274 4. 877438 2. 385378 4. 442536 3. 192497 3. 532767 3. 802697  
1. 763307 1. 81815 2. 062836 1. 799816 1. 95122 1. 420858 1. 553123 1. 847276 1. 82851  
4. 012911 4. 33568 3. 564715 3. 92774 4. 624817 3. 907052 4. 115666 3. 56719 4. 262653  
2. 998675 4. 901259 3. 881647 4. 652317 5. 326468 4. 856863 4. 409377 4. 47524 3. 431311  
2. 055559 1. 432741 1. 604709 2. 121804 1. 8938 1. 485687 2. 243632 1. 62298 1. 657143  
2. 865103 1. 729989 1. 657193 1. 558818 2. 00158 1. 914228 1. 658307 1. 914807 2. 501179  
2. 151737 1. 728896 2. 130425 1. 705213 1. 573086 2. 097403 1. 869227 2. 009418 1. 671301  
5. 159037 4. 661329 5. 257928 5. 504921 5. 334976 5. 068907 4. 620257 4. 905151 5. 099898  
3. 25362 2. 96553 2. 450353 2. 430425 2. 498526 2. 848605 2. 868762 2. 707223 2. 72878  
2. 036469 2. 013356 2. 339593 2. 739091 1. 928788 1. 976752 2. 382237 2. 529658 2. 237573  
5. 170663 5. 476745 4. 968018 4. 486591 5. 343462 5. 423395 4. 650349 4. 592761 4. 760787  
3. 546204 3. 949612 4. 94077 4. 1493 3. 528365 4. 392521 2. 707848 3. 349086 3. 677111  
2. 462925 2. 000614 1. 953009 2. 276034 1. 786128 1. 990465 2. 263719 2. 605853 1. 739479  
1. 446506 1. 193231 1. 719046 1. 425883 1. 449372 1. 35731 1. 517369 1. 261229 1. 453924  
2. 330521 2. 536665 2. 169236 2. 139369 1. 858019 2. 430252 2. 760817 1. 917798 2. 221281  
2. 627253 2. 151713 2. 269613 3. 212678 3. 400681 2. 621575 2. 999177 2. 45953 2. 163912  
4. 097696 4. 888155 5. 768225 4. 764242 4. 861096 4. 762668 4. 172686 4. 072417 4. 858802  
1. 929766 1. 20117 1. 526234 1. 778644 1. 474844 1. 828304 1. 59673 2. 66428 1. 440678  
7. 04505 7. 037119 6. 946839 6. 829909 7. 204323 6. 66933 6. 454285 7. 143704 6. 303734  
3. 824361 2. 330529 2. 281024 3. 148296 3. 20828 2. 08385 2. 766569 3. 211771 3. 392228  
2. 660177 1. 520491 1. 875573 2. 293842 1. 997937 2. 752368 2. 673894 2. 274419 1. 868608  
5. 117525 3. 293929 2. 832809 2. 564422 2. 430532 3. 686777 2. 824777 2. 482928 2. 44958  
1. 596448 1. 399355 1. 256609 1. 691122 1. 878145 1. 364718 1. 60002 1. 796486 1. 280583  
6. 558965 5. 735687 6. 071484 5. 357888 5. 59725 5. 882593 5. 570221 5. 671577 5. 389766  
4. 555441 5. 589173 5. 377205 5. 408204 5. 299574 5. 317344 4. 642228 5. 074216 5. 263511  
2. 651121 2. 565362 2. 899578 3. 075431 2. 694901 2. 354382 3. 284694 2. 681051 2. 567763  
4. 187662 4. 625418 4. 557702 5. 364299 5. 101558 4. 200009 4. 896129 4. 062326 4. 962101  
3. 830115 5. 356059 5. 415236 5. 047738 5. 560307 5. 238466 4. 673405 5. 790591 4. 269434  
3. 694087 3. 847534 4. 026454 3. 00364 3. 399717 4. 118088 3. 583474 5. 117145 4. 920893  
0. 939525 1. 251684 0. 76808 1. 488585 1. 132784 2. 03559 2. 763519 2. 257475 1. 161363  
4. 693763 4. 281611 4. 682297 4. 237696 4. 989305 4. 596339 4. 586208 4. 648857 4. 399805  
1. 503228 1. 939908 2. 444859 1. 775244 1. 831793 1. 493409 1. 617925 1. 635172 2. 185183  
4. 520787 5. 785169 5. 279403 5. 401537 5. 767877 5. 443368 4. 355486 5. 818187 4. 828964  
1. 686968 1. 839371 2. 199502 1. 840429 1. 339433 1. 627886 2. 412063 1. 788029 1. 605398  
1. 974016 2. 375048 2. 136031 2. 283522 2. 280151 2. 099147 1. 979603 2. 563073 2. 52028  
2. 520532 2. 272396 2. 366762 2. 949819 2. 632126 1. 8269 2. 555761 1. 477101 2. 014897  
5. 903615 6. 40232 6. 436168 5. 770008 6. 015193 6. 282047 5. 726263 5. 819084 5. 128442  
3. 128196 2. 754111 2. 502113 2. 360778 2. 754677 2. 815767 2. 787755 3. 134014 2. 701538  
4. 701539 4. 871428 5. 933233 5. 378236 4. 077166 4. 878676 4. 31957 5. 56183 4. 496677  
2. 964903 3. 737375 4. 125618 3. 954895 4. 002973 3. 699821 3. 849638 3. 518119 3. 315078  
3. 039007 2. 247034 2. 754934 2. 186136 2. 000261 2. 398971 2. 140906 2. 421572 2. 469804  
1. 682319 2. 392653 1. 738835 1. 921822 2. 162587 2. 959619 3. 076732 2. 251096 1. 669096  
4. 593776 5. 647842 5. 414348 5. 70476 5. 23471 5. 554559 5. 40458 4. 744746 5. 416635  
3. 401486 3. 124298 3. 591375 3. 523472 4. 020654 4. 085885 4. 270179 4. 044704 3. 600889

3. 46847 2. 037459 2. 355824 2. 418623 2. 311972 2. 283132 2. 289421 2. 268016 2. 323807  
2. 494867 2. 662262 2. 690282 3. 057724 1. 989867 2. 181293 2. 752698 1. 56429 2. 407974  
7. 233552 7. 01574 7. 546306 7. 144993 7. 224929 7. 222334 7. 198479 7. 143101 7. 521621  
7. 22742 7. 230675 7. 278945 6. 327894 6. 981297 6. 905588 6. 697172 6. 66397 6. 882732  
5. 136715 5. 540826 4. 638156 5. 630646 4. 743186 5. 615944 5. 431328 5. 818464 5. 024712  
3. 67931 5. 155445 4. 798151 4. 861328 4. 49278 4. 990899 4. 643134 5. 069132 4. 518599  
3. 839508 4. 049134 3. 999369 5. 069656 3. 433055 4. 846625 4. 230543 5. 057466 3. 866613  
2. 502438 2. 178356 2. 247742 2. 232717 1. 860108 1. 864018 1. 761805 1. 626868 3. 014932  
2. 315499 4. 131888 3. 000366 4. 506856 3. 285775 1. 135857 3. 192793 4. 644642 2. 470497  
2. 108286 2. 334207 2. 20249 2. 471811 2. 387547 2. 417147 2. 308921 2. 154733 1. 900956  
3. 88923 3. 247247 3. 791107 4. 691392 3. 622894 3. 462703 3. 665023 4. 381374 3. 701808  
2. 607406 3. 584176 3. 400611 2. 574906 2. 457472 2. 748338 2. 601539 4. 652678 3. 229483  
2. 585336 4. 668376 3. 645189 4. 520613 4. 161125 4. 159076 4. 599916 4. 116539 4. 431603  
8. 170875 8. 325922 8. 610523 8. 152993 8. 102602 8. 688515 8. 543519 7. 964047 8. 223606  
6. 225278 6. 527054 6. 590554 7. 008396 5. 824805 6. 453174 6. 406697 5. 939175 6. 096424  
6. 777547 7. 114056 6. 643527 6. 365315 7. 412777 6. 244923 6. 978299 6. 788774 7. 015798  
6. 804812 6. 561776 6. 850351 6. 417299 6. 993828 6. 305278 6. 429593 6. 684303 6. 544454  
1. 611513 1. 292135 1. 130646 1. 455783 1. 747095 1. 362063 1. 211283 1. 168503 1. 449569  
5. 673067 6. 595406 6. 857046 6. 299269 7. 089676 5. 936027 6. 190034 6. 341835 6. 691194  
5. 89121 6. 46878 6. 34915 6. 271841 6. 058859 5. 879589 5. 903986 6. 690418 5. 677133  
4. 578716 3. 815921 3. 530307 3. 715855 3. 70375 3. 828949 3. 786467 3. 690037 4. 681959  
7. 374991 7. 336504 7. 40495 7. 34941 7. 738466 7. 259916 7. 029919 7. 725937 7. 067538  
5. 101569 4. 213752 4. 904445 5. 302721 4. 697198 4. 955071 4. 811582 4. 629673 4. 526797  
2. 466815 1. 616721 2. 159729 1. 741879 2. 092583 1. 733191 1. 395436 1. 523366 1. 604831  
1. 417561 1. 208238 1. 734856 1. 351435 1. 206305 1. 778002 1. 426261 1. 140861 1. 389081  
2. 275237 2. 514379 2. 92821 3. 273309 3. 354214 2. 771342 2. 872782 2. 539033 3. 164524  
2. 328734 1. 345628 1. 179003 1. 714094 1. 687247 1. 612226 1. 631222 1. 296675 1. 196748  
5. 699697 5. 953761 5. 767277 6. 394597 5. 394119 5. 629717 6. 575849 6. 707073 6. 529282  
5. 312249 5. 190559 4. 91624 5. 154832 5. 265572 5. 430292 5. 531668 6. 518796 5. 501927  
3. 691404 5. 749495 4. 992223 5. 172042 5. 462779 5. 58958 5. 38037 5. 278994 5. 481461  
1. 436644 1. 3571 1. 060723 0. 987333 1. 160665 0. 857814 1. 511551 1. 092319 1. 086886  
2. 997936 3. 627156 1. 741483 2. 315382 3. 092541 2. 518474 3. 330742 3. 212597 2. 044114  
3. 419771 2. 944109 2. 847187 2. 938069 2. 710224 3. 234266 3. 830852 2. 760876 2. 406668  
4. 120623 6. 002364 5. 790305 5. 235596 5. 169735 4. 721141 3. 532029 5. 301068 5. 318223  
6. 672027 7. 321237 7. 559268 7. 662199 7. 37408 6. 609172 7. 454162 7. 763124 7. 09934  
4. 899417 4. 800435 4. 677068 4. 508222 4. 476671 3. 523003 4. 285138 4. 547292 4. 219643  
4. 76617 5. 830272 6. 523444 5. 472739 5. 894838 5. 671752 3. 859171 5. 891626 4. 91404  
0. 746546 1. 553117 1. 554175 0. 8383 1. 408807 0. 928032 2. 080209 1. 264933 1. 497435  
5. 960373 6. 620185 6. 39374 6. 64825 6. 292782 5. 612417 5. 72815 5. 848174 6. 019389  
6. 63373 6. 765725 6. 437973 6. 27426 6. 726556 6. 481011 5. 732189 6. 850336 6. 457645  
7. 241197 8. 032332 7. 835352 7. 122563 7. 823921 6. 837436 7. 389606 7. 514764 7. 387485  
5. 455461 5. 907312 5. 965536 5. 024427 6. 004658 4. 850571 5. 481799 6. 650591 5. 604419  
3. 560979 3. 571301 3. 239098 4. 004615 3. 300471 3. 781331 3. 000096 3. 108179 3. 239891  
1. 699315 1. 491172 1. 312659 1. 173786 1. 208175 1. 532051 1. 314463 1. 456596 1. 689602  
2. 682305 2. 248191 1. 492178 1. 689047 2. 203163 2. 178048 1. 440422 1. 582375 1. 978386  
4. 776165 5. 625416 5. 94804 4. 763974 5. 975098 5. 843141 5. 503388 6. 266765 5. 905154  
7. 601063 7. 807713 8. 349309 8. 587941 8. 199649 7. 769338 7. 838364 7. 026317 7. 365678  
2. 84534 4. 439994 4. 102267 3. 674272 4. 195379 4. 514421 3. 994234 2. 928842 2. 616952  
3. 088513 3. 225044 2. 987436 3. 062532 3. 379619 3. 407016 2. 829573 3. 121393 3. 245298  
8. 582745 8. 711363 8. 646352 8. 739587 8. 65732 8. 093691 8. 314619 8. 321764 8. 609105  
8. 195343 8. 775112 8. 459885 8. 46712 8. 799777 8. 106929 8. 492143 8. 408175 8. 255382



3. 758795 5. 252693 3. 902402 3. 699804 4. 594852 4. 705378 4. 249567 4. 762034 4. 007677  
4. 021312 3. 682461 4. 17309 3. 817655 2. 438937 4. 122688 3. 322807 3. 785627 3. 291462  
1. 938295 2. 506837 1. 77875 2. 459634 3. 762365 1. 917106 3. 565869 2. 388561 2. 626354  
6. 060922 5. 57533 5. 456578 5. 326771 5. 066135 5. 526503 5. 97045 5. 328346 5. 449069  
3. 655154 5. 12878 4. 83843 4. 61926 4. 663381 5. 21191 4. 404398 4. 136985 4. 159317  
4. 389641 3. 100137 4. 543538 2. 506228 2. 900603 4. 581384 2. 814515 2. 773637 3. 240916  
3. 809074 2. 70934 2. 813953 2. 695109 2. 43905 2. 5228 2. 556091 3. 291441 2. 554658  
4. 872949 1. 843707 2. 603861 1. 866403 1. 760651 1. 791943 1. 945024 2. 093139 1. 994964  
7. 766035 8. 24531 8. 018377 8. 100023 8. 221425 7. 903449 8. 096493 8. 235584 8. 171707  
2. 785544 1. 870217 1. 78655 2. 135413 1. 647529 2. 311785 1. 772852 1. 86864 2. 443274  
3. 734737 4. 035504 3. 216445 4. 148701 2. 562861 3. 507952 4. 029618 2. 471052 3. 88793  
8. 358134 9. 038957 8. 025036 8. 908883 8. 218957 8. 709441 8. 611486 7. 877368 8. 124208  
3. 57349 2. 96476 2. 167817 3. 438551 2. 593846 2. 978409 3. 510624 3. 053864 3. 3607  
1. 638206 1. 571194 2. 121216 1. 801819 2. 176703 1. 952504 1. 761503 1. 57324 1. 431884  
3. 368937 3. 126418 4. 165767 3. 711121 3. 098274 3. 761041 3. 44368 3. 481371 3. 526641  
3. 100344 1. 523381 1. 930159 1. 919309 1. 664634 1. 968836 1. 865202 2. 104004 1. 141308  
2. 934988 2. 510732 2. 728727 2. 738717 2. 956507 2. 445554 2. 383779 2. 693455 2. 340527  
2. 434326 3. 60451 2. 871644 2. 899885 2. 249856 3. 021521 2. 303603 3. 758245 2. 870676  
3. 632496 5. 005914 4. 60566 4. 190677 4. 221465 4. 691328 4. 28669 4. 23089 4. 261244  
2. 272138 1. 306808 0. 950103 1. 796093 1. 223743 1. 396144 1. 642799 2. 229415 1. 194874  
1. 464652 1. 623294 2. 050229 1. 616737 1. 689926 2. 266834 2. 964338 1. 399954 1. 625682  
2. 45862 1. 962583 2. 144205 2. 784422 3. 078966 2. 079051 2. 008537 2. 585805 2. 700206  
4. 465355 4. 793608 5. 52076 4. 956471 5. 343966 5. 701331 5. 525191 5. 637454 5. 281457  
3. 092346 4. 245665 2. 890191 3. 316698 4. 055972 3. 346862 3. 354755 3. 263263 4. 041082  
1. 850611 1. 447758 1. 340342 1. 704736 2. 04725 1. 7712 2. 249162 1. 846595 1. 15428  
3. 168459 2. 116467 3. 075288 3. 71651 3. 226552 2. 215733 3. 271996 2. 491596 1. 859044  
2. 457197 1. 110283 2. 422101 1. 537134 2. 127992 2. 407046 3. 541439 2. 336896 1. 648699  
2. 824192 2. 873739 2. 464407 2. 304001 2. 245218 3. 069403 3. 930057 2. 667847 3. 214775  
6. 005383 6. 124107 6. 194306 5. 972157 5. 842491 6. 097277 6. 028714 6. 240114 6. 292271  
2. 5945 2. 772615 2. 501311 2. 445611 2. 458574 1. 987006 2. 395678 2. 033365 2. 019837  
3. 358825 3. 172831 2. 495287 2. 705826 2. 594467 3. 633196 2. 576452 3. 177773 2. 840168  
4. 567191 5. 222598 4. 721044 5. 09202 4. 655924 5. 196239 5. 41519 5. 27132 4. 974994  
5. 560591 4. 443863 4. 390125 5. 526471 4. 312612 5. 014057 5. 404253 5. 016669 4. 870382  
3. 061038 3. 70308 2. 532945 4. 778005 4. 071054 4. 162349 3. 225225 3. 63592 3. 735738  
1. 540861 1. 188892 1. 780952 2. 087399 2. 165468 1. 683526 1. 980372 1. 33055 1. 891955  
6. 581428 5. 79327 5. 300935 5. 889563 5. 791717 5. 810601 5. 934761 6. 163891 5. 762261  
5. 034794 6. 15293 6. 55585 5. 983159 5. 787652 6. 051425 5. 472969 5. 714799 5. 760163  
6. 627939 5. 629222 5. 226596 5. 039954 4. 839984 5. 998372 5. 06876 5. 480066 3. 913494  
5. 808432 3. 258776 3. 513435 3. 514812 3. 954964 3. 517315 3. 573384 3. 788145 4. 954061  
5. 337436 5. 92715 5. 380417 5. 138012 6. 219581 6. 253629 5. 585409 5. 958078 5. 515457  
0. 932752 1. 168334 1. 342833 0. 996081 0. 770751 0. 799401 1. 172384 0. 635295 1. 022475  
4. 261303 3. 005198 3. 001714 3. 448246 4. 162122 3. 253883 3. 336714 2. 383342 2. 933284  
5. 663155 4. 913793 5. 355961 4. 253445 4. 512612 5. 44677 4. 232203 5. 877923 5. 229142  
4. 024675 4. 43536 5. 986064 6. 122403 4. 776578 5. 209842 4. 773206 4. 512585 4. 088949  
0. 862642 0. 878006 0. 88462 0. 935153 0. 932178 1. 70677 0. 888091 0. 997043 1. 19793  
1. 314539 1. 580307 1. 415213 1. 533705 1. 659563 2. 326741 1. 646992 1. 472893 1. 395591  
5. 016496 5. 607755 5. 334212 5. 193501 4. 938418 5. 394325 5. 478557 5. 271248 5. 445541  
4. 811758 5. 034053 5. 195698 4. 598519 5. 391772 3. 72366 4. 120172 4. 92477 4. 59183  
5. 906133 6. 828711 7. 273358 6. 44234 6. 442367 6. 85669 6. 187116 6. 865218 6. 481823  
5. 750799 6. 399474 6. 335341 6. 646288 6. 833443 6. 846086 6. 709442 6. 438809 6. 709815  
3. 119752 4. 131392 4. 056411 3. 281362 3. 155374 2. 921018 3. 635831 4. 536619 3. 400273

7. 347647 6. 86517 7. 226954 7. 618994 7. 581385 7. 762222 7. 812032 7. 271151 7. 595981  
2. 676871 1. 773408 2. 120345 1. 174972 1. 833375 1. 723664 2. 041347 1. 988935 2. 371415  
1. 505977 1. 324091 1. 399505 1. 798184 1. 668128 1. 422545 1. 368178 1. 465269 2. 31539  
4. 249047 4. 455324 4. 096869 4. 17138 4. 575385 4. 509357 4. 668177 3. 615889 4. 359401  
5. 53706 5. 358604 5. 938769 5. 740993 5. 776718 5. 36591 4. 862837 5. 547847 5. 463646  
5. 508651 4. 450095 3. 820735 3. 62731 4. 164624 4. 508893 4. 892017 4. 187129 4. 318954  
8. 051394 8. 276826 8. 26361 7. 815043 8. 305751 7. 797215 8. 132468 8. 488384 7. 862114  
4. 852147 4. 726802 4. 356271 3. 838137 4. 355554 4. 571993 3. 530461 4. 599099 5. 257707  
3. 157933 3. 035438 3. 386977 4. 30506 3. 044603 2. 895429 3. 153132 3. 591864 3. 121425  
8. 84548 8. 874123 8. 698223 8. 854919 8. 351963 8. 620423 8. 479895 8. 632344 8. 638423  
1. 589533 1. 263151 1. 508799 1. 227225 1. 833317 1. 148325 1. 322247 0. 862286 1. 602215  
1. 632503 1. 474624 1. 210666 1. 668077 1. 501003 1. 132209 1. 857566 1. 752524 1. 937177  
1. 258354 1. 043279 1. 411022 1. 123399 1. 277077 1. 434144 1. 787236 1. 270435 1. 460513  
1. 722029 1. 475706 2. 189255 1. 826048 1. 660646 2. 031818 2. 068049 1. 992077 1. 899201  
2. 745218 3. 118022 3. 11231 2. 852108 2. 958639 3. 812901 3. 334174 3. 401312 3. 205187  
7. 801697 7. 823193 7. 491152 8. 189014 8. 359796 7. 20521 8. 672227 7. 743249 8. 231579  
1. 988322 1. 705213 1. 00799 1. 241585 1. 537933 1. 442112 2. 023976 0. 961872 1. 089774  
2. 691814 2. 532263 2. 705124 2. 655115 2. 764739 4. 559472 6. 12048 4. 154672 3. 502674  
1. 532362 1. 302836 1. 360814 1. 167901 1. 610377 1. 150644 1. 232756 1. 566024 0. 994622  
3. 035218 1. 586853 1. 260497 0. 756519 1. 057929 1. 314139 3. 061742 2. 823209 3. 667826  
2. 329667 2. 592292 3. 135628 1. 693679 2. 455098 2. 217549 2. 505003 3. 406792 2. 793339  
1. 383546 2. 025669 1. 944192 1. 206525 0. 629199 2. 309408 1. 148946 1. 32902 1. 853884  
6. 653419 7. 182046 6. 071471 7. 457459 7. 264775 7. 130654 7. 655924 6. 816133 7. 394045  
2. 285243 2. 691163 3. 003536 4. 505889 2. 54038 2. 397502 3. 976617 4. 113404 2. 041611  
1. 683426 1. 96741 1. 824005 2. 137074 3. 353388 1. 602517 2. 597074 1. 807011 2. 103314  
3. 196413 3. 072501 2. 719487 3. 301682 3. 020279 3. 313424 3. 620946 2. 355124 3. 065376  
2. 662064 2. 586137 2. 570453 2. 766298 2. 329982 3. 818651 2. 729856 3. 362126 1. 983378  
2. 490102 2. 297278 2. 666193 2. 320027 2. 405337 1. 688018 2. 581263 2. 71966 2. 467639  
1. 912032 2. 018688 1. 646133 1. 661941 1. 762754 2. 27445 1. 975094 2. 122608 1. 539003  
5. 604623 5. 882076 5. 31421 5. 542364 5. 054367 5. 908482 5. 49803 6. 170801 5. 577596  
4. 682153 5. 047455 4. 223662 5. 217511 4. 991846 5. 099052 5. 602782 4. 745605 4. 096728  
4. 66619 5. 368344 4. 848826 4. 998569 4. 743898 4. 79824 5. 516719 5. 700471 5. 905603  
1. 161302 1. 270032 1. 818292 1. 529581 1. 332506 1. 449223 1. 476519 1. 475634 1. 475634  
2. 756492 3. 073805 2. 794105 2. 64408 3. 017152 2. 707051 2. 797009 2. 57408 3. 202308  
3. 381886 2. 971603 2. 898511 3. 694361 2. 990314 3. 08666 3. 156027 2. 950406 3. 625599  
3. 980403 2. 931672 3. 648707 3. 124033 2. 822143 3. 613367 3. 034658 2. 584931 3. 346999  
7. 381636 7. 5919 7. 124305 6. 487624 7. 948381 7. 533373 6. 53776 8. 122173 8. 09569  
6. 824604 7. 413342 7. 329625 7. 139534 7. 363383 7. 681432 8. 067104 7. 409081 7. 958513  
6. 519337 7. 452534 7. 326503 7. 095422 7. 116361 7. 012462 7. 716488 7. 426145 7. 383177  
2. 547353 1. 930257 1. 79811 1. 439668 2. 267311 1. 651833 2. 007715 1. 556496 1. 358347  
2. 256926 2. 601887 1. 788867 2. 354382 3. 059697 3. 088765 3. 766604 3. 161633 2. 630157  
6. 451819 5. 34216 5. 319285 3. 508241 6. 21283 4. 142099 5. 457463 6. 239982 5. 448457  
3. 022071 4. 055867 3. 889456 4. 396671 3. 687372 4. 51778 3. 974597 4. 342623 3. 858281  
5. 310637 5. 284039 5. 341643 4. 780054 4. 876726 4. 649139 4. 828459 5. 151788 5. 359869  
4. 483325 4. 86391 4. 396932 4. 143353 4. 917264 4. 405749 4. 82396 4. 843961 4. 406742  
3. 176562 4. 624785 3. 551015 3. 214385 2. 586462 2. 420205 3. 615942 5. 294639 3. 76769  
4. 030547 5. 13566 4. 406499 5. 753823 5. 054801 4. 313216 4. 475737 4. 07281 4. 653938  
3. 037852 2. 819176 3. 169033 3. 785892 3. 829157 3. 501062 3. 389543 2. 913679 3. 340663  
1. 631701 1. 587606 2. 064133 1. 903158 1. 853646 1. 54168 1. 979522 1. 472611 2. 013718  
1. 451826 1. 1431 1. 492694 1. 444598 1. 867358 1. 453262 1. 679662 1. 360006 1. 90015  
1. 019402 1. 248118 1. 114048 1. 171834 1. 528126 0. 802809 1. 414231 1. 022424 1. 2011

2. 92676 4. 86086 4. 384303 2. 899404 2. 957071 3. 609567 4. 327086 2. 786117 3. 410861  
2. 743915 3. 031532 3. 862513 3. 304495 2. 956678 3. 164531 3. 426366 3. 362211 3. 218546  
1. 591112 1. 365823 2. 101133 1. 553582 2. 364358 1. 769526 1. 749817 2. 189549 1. 73201  
2. 688031 1. 970152 2. 024747 2. 706928 2. 519909 2. 407899 3. 230409 2. 88101 3. 374452  
4. 671852 4. 775944 5. 099609 4. 172772 4. 869059 5. 898202 3. 449559 5. 408102 4. 818765  
3. 172455 4. 382125 4. 301624 4. 1428 4. 031623 4. 327836 4. 500156 4. 201518 4. 084778  
2. 758569 2. 476846 2. 0152 2. 203096 1. 982379 3. 008861 2. 615325 2. 090236 2. 590768  
2. 975856 2. 899939 3. 27289 2. 849512 3. 612827 2. 92168 2. 756037 3. 048226 4. 088156  
3. 07541 4. 390599 3. 461168 3. 985593 4. 518488 4. 323061 4. 006314 4. 337556 4. 227179  
2. 379023 2. 595227 2. 282961 3. 644039 3. 788054 2. 566229 3. 858489 2. 817933 2. 752106  
4. 330799 4. 957215 4. 736834 4. 234398 4. 617609 4. 642351 4. 987716 4. 492005 4. 600977  
1. 917892 1. 702452 1. 713018 2. 007113 2. 244601 1. 834422 2. 037486 1. 642657 1. 787506  
2. 81595 3. 02399 3. 589923 2. 959336 2. 677424 1. 889278 2. 243891 3. 189905 2. 470579  
4. 968427 2. 974949 4. 045385 3. 032241 2. 885604 3. 612994 4. 014966 2. 960763 4. 116585  
2. 905176 4. 533854 4. 148276 4. 453679 4. 800068 5. 545598 3. 156682 3. 77592 3. 842863  
2. 883141 1. 903217 2. 303654 2. 020628 1. 69356 1. 294586 1. 501595 1. 909356 1. 943611  
1. 187743 1. 360743 1. 172719 1. 133344 1. 050171 1. 350924 1. 648255 2. 239669 1. 586023  
1. 316089 2. 215206 2. 377711 2. 339512 1. 606391 1. 864549 1. 857223 1. 937255 1. 68303  
1. 441779 0. 894941 1. 122679 1. 084867 1. 115786 1. 160937 1. 23944 1. 318995 0. 860212  
3. 252244 3. 645869 4. 931262 3. 765461 3. 541264 3. 19385 3. 393506 3. 959404 3. 391834  
6. 041182 5. 319337 5. 954802 5. 33058 5. 702323 5. 674272 5. 49427 5. 571413 5. 788651  
3. 674103 3. 523901 3. 687061 4. 078867 4. 083394 3. 112769 3. 201547 3. 265495 3. 097976  
2. 753191 2. 05069 2. 780126 2. 169052 1. 749433 1. 603231 2. 461068 1. 829785 2. 306849  
1. 045842 1. 494066 1. 274291 1. 099799 1. 010192 1. 30463 1. 117225 1. 274291 0. 853751  
1. 23163 1. 755651 1. 77862 1. 41766 0. 764606 1. 575717 1. 888075 2. 271974 2. 027612  
2. 341631 2. 168662 1. 931801 2. 077354 1. 495116 2. 01403 1. 862776 2. 029028 2. 258069  
5. 405813 5. 5549 5. 816648 5. 832667 6. 180701 5. 132755 5. 505078 4. 944455 5. 269644  
5. 695572 6. 250094 6. 257687 5. 510846 6. 448917 5. 744307 6. 120891 6. 185184 6. 00143  
2. 376459 4. 325376 5. 115183 3. 464495 4. 897738 2. 854334 3. 914135 2. 877613 4. 301109  
3. 492623 5. 452993 4. 530894 3. 638519 3. 688005 2. 672635 2. 617774 4. 767783 3. 390041  
1. 966552 1. 788471 1. 404906 1. 683305 1. 147521 2. 052399 1. 860708 1. 528792 1. 603631  
1. 389382 1. 985245 2. 19946 1. 325958 1. 73008 2. 14602 1. 856552 1. 837981 1. 45176  
3. 009295 3. 267827 3. 299398 2. 659295 2. 443828 2. 443294 2. 398437 2. 590977 2. 177104  
6. 972306 7. 827675 7. 993245 7. 811543 7. 970597 8. 203156 7. 753527 7. 671382 7. 856728  
5. 821302 4. 991779 5. 024444 5. 115313 5. 921477 5. 052088 4. 927861 5. 868253 5. 664286  
1. 971463 2. 595543 2. 557748 2. 435931 3. 284128 2. 732895 3. 476613 4. 385785 3. 798802  
1. 944949 1. 927182 1. 953422 2. 208086 1. 712104 1. 667662 2. 026978 1. 769489 2. 209094  
2. 990636 2. 234509 2. 223918 2. 181852 1. 550192 1. 893669 2. 603248 2. 839817 2. 348569  
1. 591566 1. 43812 1. 470817 1. 256677 1. 719239 2. 517863 1. 616493 1. 922644 0. 990318  
7. 027906 7. 501834 7. 752129 7. 56422 7. 859005 7. 522639 7. 009858 7. 578788 7. 135847  
3. 524982 3. 5917 4. 201917 4. 359943 5. 128545 2. 785398 3. 873248 5. 809804 4. 180694  
7. 776107 7. 347904 7. 526651 7. 643964 7. 768314 7. 572501 8. 357907 7. 815505 7. 872111  
2. 600637 2. 354828 3. 884277 1. 620507 2. 206425 2. 349313 3. 556431 1. 800019 2. 512313  
3. 430485 3. 983476 4. 282354 3. 991259 4. 04017 4. 309707 5. 047556 3. 633241 3. 626886  
7. 861062 5. 167706 6. 531677 3. 792324 5. 429297 4. 110846 3. 629423 5. 596405 6. 267082  
4. 629127 2. 660749 1. 983755 2. 846877 3. 611461 1. 564767 1. 78877 2. 358332 1. 872528  
1. 780926 1. 264789 1. 382475 1. 279114 1. 361287 1. 183519 1. 399786 1. 187282 1. 277133  
2. 757663 2. 027079 1. 748703 2. 978128 2. 094634 1. 905762 2. 525661 2. 225167 2. 35774  
1. 978664 1. 499861 1. 16971 1. 364787 1. 831839 1. 359675 1. 389925 1. 187348 1. 491972  
3. 1015 1. 838732 3. 366349 2. 591859 2. 228597 2. 301868 2. 36668 2. 567555 2. 565442  
6. 579678 6. 061444 5. 818616 6. 391534 6. 726032 6. 127119 6. 389544 6. 536666 5. 644359

4. 115796 2. 903169 3. 925941 4. 720891 2. 777352 3. 6465 3. 76752 4. 129344 3. 627529  
1. 076424 1. 213113 0. 677514 1. 001796 1. 978108 0. 816699 1. 629075 1. 324183 1. 09541  
4. 639372 3. 755926 4. 069105 4. 226671 4. 002042 4. 504272 4. 149114 3. 890628 3. 89509  
0. 950671 1. 617542 0. 998322 1. 015944 1. 216136 1. 927405 1. 218504 0. 950008 1. 522034  
4. 34501 5. 096984 4. 56949 5. 831651 3. 260413 4. 565192 4. 174128 4. 679318 4. 599346  
2. 721075 1. 652325 2. 060861 1. 931666 2. 115262 1. 916132 3. 038412 1. 904242 2. 051968  
6. 776511 7. 362478 6. 798452 7. 538819 7. 347265 7. 338483 7. 244083 7. 423819 7. 771238  
1. 529784 1. 729018 1. 759664 1. 851279 2. 087827 1. 454911 1. 966459 1. 864637 1. 510863  
5. 154206 6. 368847 4. 619121 6. 120365 4. 74275 5. 950955 4. 544542 4. 476154 5. 487693  
1. 868011 4. 844704 1. 295158 4. 253605 3. 000683 3. 711463 1. 315119 1. 7933 1. 132838  
2. 632683 2. 401309 2. 160291 2. 145393 2. 39996 2. 347257 2. 30733 2. 479402 2. 158286  
4. 45826 4. 327903 4. 037251 4. 28292 5. 068348 3. 678397 3. 78549 4. 272838 4. 040117  
1. 746526 1. 953791 2. 357659 1. 923613 1. 334606 1. 383111 1. 825032 2. 487075 1. 908217  
7. 715493 5. 748061 6. 838223 5. 634859 6. 470431 5. 656908 6. 533403 6. 225919 7. 833318  
5. 559139 5. 528925 5. 085729 4. 555494 5. 593904 5. 330184 4. 97263 5. 186377 5. 436462  
5. 399401 5. 798337 5. 89591 5. 00327 6. 360471 5. 159621 5. 477369 5. 792891 5. 720641  
2. 503033 1. 848202 2. 590378 2. 288311 2. 211181 2. 24862 1. 942108 1. 710012 2. 265478  
2. 518598 1. 937925 1. 862778 1. 947901 2. 583682 1. 300026 1. 869465 1. 625597 1. 593211  
5. 264702 3. 199597 4. 157487 3. 991109 4. 016161 3. 619932 3. 222196 3. 843282 4. 796465  
4. 73834 3. 646263 4. 824101 3. 740038 3. 9901 4. 760382 3. 765201 4. 607336 5. 057445  
1. 35759 1. 445239 1. 222341 1. 089855 1. 263109 1. 300969 1. 24422 1. 142977 1. 877968  
1. 324716 2. 038663 1. 891004 1. 533029 3. 147633 1. 578715 1. 667661 1. 941403 1. 689199  
1. 688807 2. 391393 1. 452954 1. 622927 1. 541141 1. 265224 1. 462782 1. 565421 1. 293541  
3. 313279 2. 356452 3. 761936 3. 285902 2. 622763 3. 004036 3. 045117 3. 549708 3. 079137  
4. 444094 5. 328138 5. 226286 5. 019611 4. 470702 4. 990357 4. 619819 5. 470642 5. 107886  
2. 726682 2. 184441 3. 357393 1. 90882 2. 543315 2. 826214 1. 474773 1. 589898 2. 114807  
3. 969368 5. 032392 4. 552238 5. 019804 4. 979206 5. 27921 4. 978425 5. 55361 4. 817004  
5. 870927 1. 952337 1. 819552 2. 552627 2. 116477 4. 83451 4. 421445 2. 489933 2. 374271  
2. 534215 3. 349159 3. 471395 2. 11655 3. 059828 3. 449045 2. 95699 4. 381122 3. 616263  
3. 899428 4. 208618 3. 581115 4. 238818 3. 046945 3. 955257 4. 506565 4. 404712 4. 225945  
2. 111504 1. 575797 1. 549716 1. 876313 2. 471008 1. 591112 2. 298041 1. 701112 1. 518912  
5. 646167 5. 001092 4. 908015 4. 997811 4. 766042 5. 155714 5. 05042 5. 131921 4. 88253  
4. 260726 2. 943933 4. 836323 3. 473633 4. 190228 3. 128233 4. 344028 3. 480136 3. 838968  
6. 763436 6. 929896 7. 191379 7. 079103 6. 500768 6. 108648 7. 116435 7. 417779 6. 866208  
1. 132065 1. 365162 0. 919738 1. 070161 1. 539655 1. 0554 1. 292693 1. 089143 1. 114614  
5. 341169 5. 398911 6. 199886 5. 00137 4. 48444 3. 689806 4. 05372 5. 862737 6. 608989  
6. 151665 5. 989807 6. 025688 6. 124328 5. 786528 6. 027638 5. 243251 5. 792418 6. 013883  
7. 133429 6. 930758 6. 822773 7. 397145 7. 05326 7. 548447 7. 137952 6. 881112 7. 087344  
7. 532071 7. 817291 7. 766116 7. 311678 8. 201551 7. 339577 7. 301448 7. 282384 7. 678227  
6. 454532 6. 498588 6. 748853 6. 634325 6. 300431 6. 888706 7. 508061 7. 419173 7. 494889  
8. 18334 8. 248472 8. 282313 8. 314628 8. 441145 8. 250991 8. 210217 8. 568739 8. 362101  
1. 044654 1. 445751 0. 895229 1. 702565 1. 57405 1. 076292 2. 646104 1. 478531 1. 097305  
2. 106205 3. 227551 1. 479398 2. 364204 2. 045647 3. 648562 2. 393269 2. 375286 1. 61036  
4. 563014 4. 89077 4. 492505 3. 321795 5. 024705 2. 912224 4. 639467 4. 924216 3. 877615  
3. 967852 4. 588446 4. 264381 4. 067019 4. 545312 3. 835147 4. 642224 4. 428597 2. 98777  
2. 175188 1. 678163 1. 50771 1. 783438 2. 111695 1. 592659 1. 472571 1. 653676 1. 964679  
6. 250435 6. 372459 7. 087222 6. 960214 7. 048785 7. 262555 6. 373342 6. 14263 6. 217177  
1. 211554 0. 964358 0. 974071 1. 174853 1. 465105 1. 131468 1. 527584 1. 002955 1. 486379  
6. 907816 3. 381568 5. 818737 3. 604305 3. 936938 3. 246263 4. 037246 3. 547488 6. 224392  
7. 756023 8. 148997 8. 243074 7. 762951 8. 132041 7. 914201 7. 667411 8. 218403 7. 679192  
1. 197495 1. 038264 0. 943654 0. 998894 1. 140849 1. 364588 1. 153868 1. 451721 1. 56668

4. 100797 4. 093258 2. 773886 3. 032502 3. 024694 2. 946159 3. 48522 2. 927772 3. 765268  
3. 257316 2. 813339 3. 121745 1. 755189 2. 136301 1. 933256 3. 190037 2. 925133 2. 597164  
6. 169144 7. 108413 6. 374015 6. 434822 6. 319866 5. 896713 5. 476951 6. 325784 6. 023303  
1. 651421 1. 311815 1. 288673 1. 288721 1. 61817 1. 567718 3. 018855 1. 183811 1. 690172  
1. 640896 1. 153859 2. 051833 1. 506272 1. 65482 1. 412537 1. 386847 1. 609216 1. 435639  
0. 974898 1. 037816 1. 002435 1. 967888 0. 879421 1. 336775 1. 614329 1. 379932 1. 212934  
1. 494136 0. 83348 1. 26031 1. 021811 1. 38078 1. 126404 1. 717939 1. 381768 0. 955756  
2. 694974 1. 635269 2. 655164 1. 619476 1. 920465 1. 6863 2. 097087 3. 190691 2. 493635  
2. 059651 3. 113397 2. 384323 3. 431266 2. 510205 2. 184864 2. 543701 1. 835349 2. 449083  
2. 549532 1. 915608 2. 915562 2. 767538 2. 45028 1. 563818 2. 360629 2. 564797 2. 554966  
4. 513353 4. 4228 4. 511585 5. 030948 4. 711819 4. 354377 3. 781688 3. 625312 4. 423583  
4. 811203 4. 4299 4. 099329 3. 933284 4. 512864 4. 97749 4. 216421 4. 576636 4. 186258  
1. 445241 0. 986586 1. 934506 1. 450408 1. 845153 2. 139859 1. 449897 0. 915885 1. 937629  
1. 628651 2. 42452 1. 610699 1. 72513 3. 093519 2. 536059 3. 260374 3. 056624 1. 975561  
1. 020612 1. 031691 0. 899065 1. 073981 1. 026993 1. 46198 1. 905974 0. 924543 1. 248885  
1. 566249 1. 192478 1. 83766 1. 327945 2. 475411 1. 527276 1. 16392 1. 192485 1. 244841  
1. 789977 0. 817329 0. 937247 1. 727127 0. 625251 0. 958817 0. 80822 2. 353224 1. 039367  
3. 27619 2. 721606 3. 659429 3. 997874 3. 019204 2. 729921 3. 455037 3. 982164 2. 477967  
5. 369545 4. 756423 4. 640857 5. 290821 5. 564772 5. 19832 5. 333252 5. 669528 5. 737229  
2. 012995 1. 318132 1. 850649 1. 23934 1. 683796 1. 769909 1. 867033 1. 669628 1. 16641  
0. 65515 1. 69444 1. 114905 1. 816793 1. 53095 1. 927375 2. 557377 2. 417682 2. 018839  
1. 312888 1. 172722 0. 931716 0. 986289 1. 540441 1. 409699 1. 59767 1. 485049 1. 340776  
3. 694341 3. 200279 3. 325111 2. 971165 2. 786992 3. 538684 3. 138063 3. 353034 3. 455113  
8. 365821 8. 231764 8. 342884 8. 291488 7. 991185 8. 640627 8. 17882 8. 119984 8. 590412  
3. 752 3. 843738 3. 722653 3. 565781 4. 047838 3. 06262 2. 857736 3. 415034 3. 689991  
1. 461042 1. 445297 1. 178681 1. 385567 1. 696812 1. 683632 1. 503168 1. 391106 1. 673672  
2. 110179 1. 082306 1. 043564 1. 498038 0. 937995 0. 400922 1. 007806 0. 804818 1. 717184  
5. 908839 6. 477511 5. 199564 6. 100811 5. 752383 6. 54904 6. 527356 5. 692355 6. 005683  
4. 250339 3. 44889 3. 074498 2. 675855 4. 7095 3. 367398 4. 044091 4. 124644 3. 33312  
2. 519119 3. 873277 2. 337922 2. 131712 2. 651767 2. 267344 4. 030659 2. 329659 2. 950752  
1. 568044 1. 44879 1. 611831 1. 663937 2. 289459 2. 02675 1. 664648 2. 187622 1. 803111  
3. 247854 3. 613149 3. 40316 2. 661909 2. 757487 3. 024525 2. 751567 2. 575641 2. 967756  
4. 145798 3. 519516 4. 648332 3. 097022 3. 32281 4. 020173 3. 423904 3. 175551 3. 048267  
7. 03549 7. 195571 7. 06213 7. 116824 7. 180355 6. 85825 7. 001339 7. 510873 7. 02495  
0. 811981 0. 845024 2. 822163 1. 258695 1. 032962 1. 112073 1. 140598 1. 190722 1. 307975  
0. 581429 1. 13174 3. 247004 1. 463718 1. 177765 1. 1535 1. 225736 1. 432793 2. 311203  
2. 832406 2. 758319 2. 387931 2. 064501 2. 668808 2. 899562 2. 468739 2. 544798 2. 738852  
5. 799843 6. 616996 6. 692559 5. 389992 6. 515349 5. 896294 5. 729165 5. 910688 6. 011994  
6. 949247 7. 396962 7. 178859 6. 796992 6. 804805 7. 083456 7. 046329 7. 461105 6. 919915  
1. 37764 1. 1602 1. 064831 1. 944042 0. 940607 1. 039512 2. 018941 2. 240393 1. 357818  
0. 745579 0. 492682 1. 092562 1. 174491 1. 644057 0. 640881 1. 383739 1. 915538 0. 619525  
3. 515343 0. 895288 1. 829479 1. 252668 1. 271427 2. 140274 1. 561891 1. 133434 1. 690884  
2. 468617 1. 571537 2. 117359 1. 918403 1. 814593 2. 658274 2. 049929 2. 609036 2. 244851  
2. 087646 1. 988826 3. 613715 2. 286281 2. 045168 1. 383499 1. 685932 2. 175292 2. 923405  
1. 469922 1. 557616 0. 925552 1. 331473 1. 2131 1. 327568 1. 192408 1. 20312 1. 278584  
6. 138868 6. 623156 6. 084213 5. 727186 6. 349443 6. 375013 6. 838857 6. 121474 5. 991006  
2. 13927 1. 154378 1. 16597 1. 037409 1. 087187 1. 111147 1. 34603 1. 327907 1. 288899  
5. 987193 5. 244973 4. 750501 4. 479222 4. 704058 4. 598462 4. 668529 5. 1238 4. 853865  
2. 692953 1. 556988 1. 768616 1. 966918 2. 030557 1. 749475 2. 327278 2. 145838 1. 59046  
2. 369537 1. 459493 1. 270898 1. 225252 2. 164536 1. 899943 1. 052912 1. 55544 1. 363821  
5. 300657 4. 412306 6. 357871 3. 1277 6. 32383 4. 132623 5. 523521 4. 33047 6. 68348

|          |          |          |          |          |          |          |          |          |
|----------|----------|----------|----------|----------|----------|----------|----------|----------|
| 8.532711 | 8.40102  | 8.241857 | 8.660959 | 8.474973 | 8.608838 | 8.410915 | 8.477256 | 8.987691 |
| 7.959121 | 7.908085 | 7.715139 | 7.567521 | 8.027911 | 7.970957 | 7.681491 | 8.056925 | 7.982545 |
| 1.210946 | 1.27156  | 1.091624 | 1.888461 | 1.098183 | 1.146119 | 1.091007 | 1.177458 | 1.512942 |
| 4.256864 | 6.042207 | 5.028447 | 5.329405 | 5.10179  | 3.942135 | 5.787062 | 5.424229 | 4.807697 |
| 0.974012 | 1.514053 | 0.643089 | 1.375557 | 2.022435 | 0.951594 | 1.147601 | 1.029081 | 0.90226  |
| 2.574064 | 1.973894 | 2.398242 | 2.097145 | 1.214825 | 2.50246  | 2.131793 | 1.832311 | 2.902855 |
| 7.533487 | 7.287898 | 7.491121 | 7.578145 | 7.532093 | 7.207188 | 7.47417  | 7.924558 | 7.788857 |
| 2.645414 | 1.866024 | 1.871099 | 1.803321 | 2.478705 | 2.302383 | 2.473983 | 2.224436 | 2.86871  |
| 4.446313 | 4.421559 | 5.630524 | 5.188889 | 4.944854 | 5.17947  | 5.168454 | 4.741571 | 4.462855 |
| 2.48287  | 1.509323 | 1.378043 | 1.346202 | 1.365062 | 1.246675 | 1.582165 | 1.358622 | 2.115448 |
| 6.338825 | 6.593021 | 6.730752 | 6.060423 | 6.625666 | 6.689589 | 6.101886 | 6.617306 | 6.804175 |
| 1.658713 | 2.291238 | 2.211441 | 1.336594 | 1.506542 | 1.600692 | 1.622671 | 1.876601 | 1.623723 |
| 1.852432 | 1.154482 | 1.65172  | 2.234823 | 1.545005 | 1.218402 | 1.502773 | 3.69421  | 1.578064 |
| 4.297478 | 4.072788 | 3.95893  | 3.558324 | 3.815199 | 4.504399 | 4.682559 | 3.718551 | 3.407052 |
| 1.593697 | 2.000028 | 1.901848 | 2.686153 | 2.138652 | 2.258981 | 1.540179 | 2.379465 | 2.597212 |
| 2.272771 | 1.994339 | 1.230607 | 1.833144 | 1.59093  | 2.058399 | 1.063343 | 1.546288 | 1.878171 |
| 6.544225 | 7.005828 | 7.072679 | 7.265911 | 7.318965 | 7.042827 | 6.760632 | 7.486938 | 7.0232   |
| 1.668924 | 1.915475 | 2.324486 | 2.03488  | 2.312543 | 2.330418 | 1.965704 | 2.489219 | 1.346876 |
| 4.51243  | 1.349687 | 1.787888 | 1.140556 | 1.62495  | 1.493269 | 1.247386 | 1.04986  | 1.021406 |
| 1.192394 | 1.528999 | 0.636371 | 1.239333 | 1.118452 | 1.314994 | 1.64179  | 1.23764  | 1.13905  |
| 2.186024 | 1.66516  | 1.819245 | 1.990929 | 2.809749 | 1.668767 | 3.447906 | 1.312764 | 1.758878 |
| 8.706294 | 8.834125 | 8.695353 | 8.875962 | 8.785008 | 8.864304 | 8.94907  | 8.948878 | 9.014471 |
| 5.133664 | 5.811868 | 5.928448 | 5.497662 | 5.016953 | 6.114373 | 5.14194  | 5.667641 | 5.426123 |
| 3.133223 | 5.684743 | 4.890498 | 4.188954 | 5.358003 | 4.286083 | 3.688536 | 4.834125 | 5.257871 |
| 4.751163 | 5.848521 | 4.946823 | 5.011247 | 5.568369 | 5.891565 | 6.04316  | 5.280916 | 5.623843 |
| 8.688243 | 6.438799 | 6.2702   | 6.37865  | 5.383335 | 7.430599 | 7.172779 | 6.243406 | 7.368486 |
| 5.066812 | 6.31037  | 6.955804 | 5.991399 | 5.028153 | 6.291954 | 7.148542 | 6.727519 | 5.593427 |
| 5.185883 | 5.021947 | 5.18289  | 5.392116 | 5.519174 | 5.225748 | 5.568297 | 5.536633 | 5.799866 |
| 6.826521 | 6.543542 | 6.795039 | 6.314088 | 6.689384 | 6.481904 | 6.501412 | 6.4221   | 6.209144 |
| 2.017419 | 1.497321 | 1.423978 | 1.322693 | 1.860089 | 1.85402  | 1.932666 | 1.540394 | 1.595187 |
| 2.294341 | 2.253969 | 2.082927 | 1.800512 | 1.531219 | 2.209229 | 1.915647 | 1.609064 | 1.47784  |
| 0.502904 | 0.759508 | 0.855504 | 1.3505   | 0.750018 | 0.893677 | 1.221744 | 1.136224 | 1.323154 |
| 2.292821 | 1.672199 | 2.508487 | 2.245124 | 2.212268 | 2.663699 | 2.334765 | 2.268348 | 2.250877 |
| 0.999814 | 1.512032 | 2.494407 | 1.803025 | 1.451296 | 2.037798 | 1.570405 | 1.474024 | 1.221951 |
| 1.88464  | 4.066723 | 4.056007 | 3.210341 | 3.917392 | 4.154933 | 3.153952 | 3.635439 | 4.429464 |
| 3.293175 | 3.516376 | 2.927115 | 3.216812 | 3.194197 | 2.700988 | 2.726317 | 3.787108 | 2.474444 |
| 7.202286 | 6.896438 | 7.360385 | 7.090897 | 6.691113 | 7.295965 | 6.526359 | 6.865274 | 7.191423 |
| 1.953592 | 1.661491 | 2.169679 | 1.463914 | 2.728132 | 1.165164 | 1.825616 | 1.536319 | 1.957529 |
| 1.465502 | 1.872842 | 0.928259 | 1.520791 | 1.650751 | 0.911531 | 1.111132 | 1.351265 | 1.343254 |
| 2.254242 | 1.58     | 1.887322 | 0.894484 | 1.622516 | 1.128664 | 2.17841  | 2.379874 | 0.919612 |
| 3.856359 | 2.441907 | 2.680418 | 2.447655 | 3.19514  | 2.713931 | 3.721531 | 3.387905 | 3.105293 |
| 1.10858  | 1.043617 | 0.868231 | 1.171925 | 1.221308 | 1.061443 | 1.434278 | 1.700995 | 1.464128 |
| 1.474149 | 1.042714 | 0.766015 | 1.116623 | 0.937752 | 1.048352 | 1.354054 | 1.257268 | 1.357002 |
| 2.941203 | 3.806702 | 2.835335 | 3.112491 | 2.682082 | 2.486586 | 3.537892 | 2.963408 | 3.845032 |
| 1.709394 | 1.519146 | 1.736807 | 1.643073 | 1.676349 | 2.124298 | 1.287037 | 1.814389 | 1.720553 |
| 2.747626 | 1.734983 | 2.012775 | 2.124192 | 1.857308 | 2.157999 | 1.927269 | 2.045323 | 2.7823   |
| 3.169225 | 2.410489 | 2.476822 | 2.143967 | 2.262005 | 2.089198 | 3.042416 | 1.865514 | 1.931182 |
| 2.962721 | 2.142051 | 2.899974 | 2.321295 | 2.007738 | 2.210493 | 2.452032 | 2.414048 | 2.4501   |
| 6.65129  | 6.651576 | 5.816168 | 6.334495 | 5.909481 | 5.335351 | 6.09079  | 6.268856 | 5.671357 |
| 3.566605 | 3.475375 | 2.488432 | 3.864441 | 3.178151 | 2.652124 | 2.762667 | 2.71517  | 2.95924  |
| 7.041071 | 7.496007 | 7.04996  | 6.993465 | 7.466847 | 6.573277 | 6.681421 | 7.329465 | 7.021101 |

3. 355177 2. 903255 2. 5525 3. 152116 2. 774266 3. 401321 3. 165467 3. 168063 2. 955341  
2. 36244 2. 073079 2. 361862 2. 107271 1. 748172 2. 037405 2. 059819 1. 120396 1. 552009  
5. 741992 4. 011366 5. 059029 4. 622036 4. 33618 2. 333845 3. 595561 3. 982649 5. 240392  
0. 956815 1. 447047 2. 141079 1. 854676 1. 021267 1. 295248 1. 409789 1. 697293 2. 133369  
4. 779055 4. 535899 3. 174723 3. 060943 3. 504991 3. 829062 3. 16653 4. 62794 2. 73712  
2. 440445 1. 101944 1. 615889 1. 599334 1. 813255 1. 032465 1. 630833 1. 270892 2. 498982  
5. 89483 5. 982649 5. 79341 5. 097434 5. 920555 6. 024276 6. 32721 6. 39688 6. 078916  
1. 554355 1. 705941 1. 260829 1. 546173 1. 523635 1. 529657 2. 182388 1. 749534 1. 444149  
1. 585611 1. 197844 1. 294257 0. 996402 1. 519794 1. 168717 2. 362864 1. 865255 1. 008986  
1. 096235 1. 226125 0. 926069 1. 275764 2. 074288 1. 149771 1. 252436 1. 578844 1. 648531  
2. 574828 1. 023646 1. 331484 2. 463778 3. 714564 1. 214018 3. 041446 1. 983961 1. 425369  
2. 380264 3. 558155 3. 335689 2. 474816 2. 992835 3. 577255 3. 196686 4. 023108 3. 15519  
3. 721084 5. 899499 5. 064218 5. 4143 5. 534041 5. 469924 5. 93498 5. 36324 5. 234784  
5. 162662 4. 220238 4. 511814 4. 965138 4. 685941 4. 359182 4. 434228 3. 994202 4. 355987  
6. 616534 7. 05199 6. 83804 6. 853384 6. 845483 7. 004859 6. 470647 6. 925973 6. 81105  
5. 65253 6. 02958 5. 88681 6. 453699 6. 924392 6. 254101 5. 763204 6. 208388 5. 785174  
1. 33878 1. 002923 1. 382785 1. 19317 0. 926013 1. 40829 1. 233568 0. 960383 1. 151636  
1. 708102 1. 540004 2. 412312 1. 954111 2. 54846 2. 45022 3. 373911 2. 160984 1. 626027  
3. 311263 4. 089574 4. 045657 4. 257361 3. 636235 3. 264531 3. 469876 4. 133901 3. 946789  
5. 786015 5. 835699 6. 15411 5. 834364 5. 840957 5. 657724 5. 519169 6. 178179 5. 974144  
1. 896932 3. 453581 2. 439058 1. 151631 1. 834083 1. 21498 3. 135976 1. 488071 2. 426417  
4. 924084 3. 867298 3. 981384 3. 112234 3. 658594 3. 988403 3. 986298 3. 144263 3. 588375  
2. 418153 4. 132828 4. 430428 3. 981889 3. 25919 4. 320465 4. 221001 3. 876607 3. 438651  
1. 97247 1. 616175 2. 46567 1. 799791 1. 479286 1. 435177 1. 55707 2. 184535 1. 396428  
4. 495904 3. 155563 3. 825728 3. 935915 3. 764393 3. 535017 3. 846712 3. 461885 3. 222373  
2. 684009 2. 788204 3. 616731 3. 369818 2. 808869 3. 452083 3. 373455 4. 13076 3. 373064  
2. 604075 2. 385861 3. 31821 4. 247976 2. 999233 3. 293302 3. 270873 3. 645296 3. 821484  
2. 203389 1. 956113 2. 039775 2. 25605 2. 207294 1. 986103 2. 112111 2. 10097 2. 138253  
6. 831204 6. 955582 7. 113189 6. 578519 6. 623119 6. 480076 6. 578185 6. 739206 6. 556412  
5. 279301 5. 521736 5. 32708 7. 045248 5. 32219 4. 644995 5. 016768 5. 155273 5. 532528  
2. 274729 2. 999919 2. 495763 2. 390108 2. 373275 3. 514745 3. 199303 2. 694379 2. 967834  
5. 12408 6. 143318 5. 404562 5. 817756 5. 21491 6. 121631 5. 042037 5. 200142 5. 332166  
4. 80279 3. 868666 4. 231095 2. 283932 3. 367434 2. 724364 3. 367091 2. 989047 4. 656132  
4. 931732 5. 016645 5. 207026 3. 607892 4. 190416 5. 936629 4. 397206 4. 619108 4. 100686  
1. 406232 0. 77127 0. 935239 1. 127702 0. 70814 1. 096147 1. 942009 0. 656449 1. 071067  
1. 439617 1. 220488 1. 272459 1. 775637 1. 42048 1. 548511 1. 725843 2. 210375 1. 235208  
4. 451535 4. 409237 4. 218223 4. 791245 5. 409521 4. 570144 4. 751274 4. 217627 5. 089975  
1. 893244 1. 159366 2. 274756 2. 98626 1. 22937 3. 757632 1. 502285 1. 296337 1. 492013  
2. 120825 1. 488676 1. 574932 1. 802717 1. 69081 1. 657709 1. 957275 1. 418358 1. 58697  
5. 818676 5. 13004 5. 479324 4. 871951 6. 36024 5. 257965 4. 409845 5. 86413 4. 873532  
1. 505356 1. 741315 2. 435846 1. 64004 1. 865132 1. 93262 2. 684268 2. 080955 1. 833267  
3. 892387 4. 993508 5. 038005 4. 7293 4. 436001 4. 757934 4. 223721 4. 66217 4. 963815  
1. 716979 1. 448833 1. 796352 1. 528736 2. 031121 1. 501115 1. 964998 1. 892998 1. 361322  
4. 595692 4. 147793 4. 260943 4. 633756 3. 430822 3. 458842 3. 756803 3. 969057 4. 17817  
3. 881225 2. 952689 3. 12239 2. 746632 2. 631107 3. 706569 4. 333306 2. 904647 3. 053149  
3. 554461 4. 533509 3. 835304 3. 348145 3. 440244 4. 806443 4. 917426 4. 381763 4. 404567  
2. 683687 2. 08398 2. 247591 1. 8145 1. 406392 2. 107091 2. 329252 1. 453025 1. 6185  
1. 871998 1. 35848 2. 047892 1. 803119 1. 424623 1. 582119 1. 449024 1. 782387 1. 486444  
2. 104063 2. 203282 2. 129932 2. 259024 1. 914495 2. 463571 1. 52012 3. 245827 3. 222213  
1. 643131 1. 486001 1. 430738 1. 653401 1. 529669 1. 765454 1. 473456 1. 558125 1. 402532  
5. 504364 6. 997582 6. 640061 6. 864673 6. 754336 7. 509065 6. 061907 6. 378512 6. 631281

6. 469837 7. 456089 7. 617977 7. 401213 7. 134969 7. 054944 7. 276772 7. 748908 6. 877163  
2. 217113 1. 844603 2. 337125 1. 633414 1. 457308 1. 51105 1. 81109 1. 727474 1. 567866  
6. 836033 5. 457241 6. 582291 5. 903124 6. 332512 5. 816753 6. 274796 6. 636469 7. 599799  
5. 058121 3. 727563 4. 211678 5. 03313 2. 984904 4. 094984 4. 576653 4. 160125 5. 103572  
3. 241722 1. 975439 2. 841988 1. 592501 2. 390403 2. 214563 2. 214092 1. 87422 2. 491853  
2. 850888 2. 118298 2. 844765 2. 390023 2. 361555 2. 405218 2. 315706 2. 671118 2. 273807  
6. 6945 5. 649112 5. 124312 5. 664954 5. 50093 5. 440541 4. 975986 5. 492445 5. 257074  
1. 523559 1. 476282 1. 339603 1. 272837 1. 301913 1. 663099 2. 676465 2. 385529 1. 386484  
7. 698981 7. 19933 6. 968505 7. 336836 7. 38498 7. 20918 7. 273777 7. 196992 7. 627168  
4. 374307 3. 7156 3. 372386 3. 761786 3. 357718 4. 191613 3. 735313 3. 957896 3. 642642  
4. 792518 2. 598438 3. 158359 3. 180367 2. 161646 3. 332404 4. 230055 3. 292271 3. 057011  
2. 370476 1. 912146 2. 250402 1. 844094 2. 292295 2. 667344 3. 160944 2. 55566 2. 025847  
2. 260726 1. 918453 2. 367609 1. 891196 2. 713072 1. 806458 2. 331151 2. 721337 2. 761091  
4. 969257 4. 596123 4. 430948 5. 596742 5. 184259 5. 292695 4. 18069 5. 243828 5. 544716  
1. 141662 1. 344002 1. 282584 1. 123583 1. 018668 1. 405715 1. 123655 1. 150178 1. 112375  
4. 773272 5. 131735 4. 519748 4. 980457 5. 183878 5. 288078 4. 589482 5. 008094 4. 741944  
2. 060283 1. 721804 2. 766661 1. 685123 1. 797638 1. 5726 2. 153087 1. 734119 1. 392907  
3. 272575 2. 988967 4. 47076 5. 015183 4. 679239 4. 996725 5. 585497 4. 19797 4. 635125  
2. 094835 2. 14861 1. 898063 3. 245969 1. 819768 2. 402334 1. 962775 1. 858826 2. 214024  
4. 368948 3. 53934 3. 724368 2. 40826 3. 087556 3. 616695 3. 413187 2. 927229 3. 838379  
5. 203437 5. 685207 5. 824774 5. 905006 5. 867283 6. 085529 5. 320859 5. 463247 5. 470228  
2. 577063 1. 734188 2. 447655 2. 313052 1. 652169 1. 944757 1. 943936 1. 775969 1. 987344  
2. 611526 2. 524832 2. 921979 3. 320186 4. 062322 3. 052894 4. 323638 3. 331546 3. 527418  
3. 892427 3. 984742 2. 933788 4. 523131 3. 862199 4. 140627 3. 200421 3. 650298 3. 923073  
4. 814383 5. 255843 5. 864146 5. 511118 6. 100204 5. 757824 5. 794424 6. 613385 6. 033072  
2. 701824 2. 579596 2. 048648 2. 259047 2. 572901 2. 544971 2. 955937 2. 626246 2. 391226  
9. 705032 9. 949714 9. 516318 9. 759734 9. 750527 9. 716685 10. 0308 9. 660775 9. 598835  
4. 111914 3. 675369 4. 356624 3. 446986 3. 971967 3. 028462 3. 976445 3. 478412 3. 521059  
2. 334767 1. 796902 1. 590242 1. 947146 1. 348347 1. 994947 2. 006069 1. 710628 1. 375233  
6. 761884 6. 462015 5. 847089 6. 085477 5. 490896 5. 614814 4. 396375 6. 648665 6. 234645  
3. 565835 3. 440621 4. 175433 1. 878557 2. 238864 3. 306365 3. 202286 3. 805379 4. 569788  
5. 22066 4. 916949 4. 947379 4. 707127 5. 403987 4. 834915 4. 313775 5. 565432 4. 442512  
1. 922714 1. 44697 1. 589562 1. 879902 2. 302186 1. 802843 2. 610686 1. 329267 1. 246692  
1. 071093 1. 044266 1. 384154 1. 37619 1. 424365 0. 792653 1. 675414 1. 129464 1. 342601  
7. 258812 7. 438514 7. 520077 7. 411046 7. 822362 7. 459483 6. 66494 7. 801343 7. 245652  
5. 370512 5. 294041 5. 007704 5. 483085 5. 223944 5. 987615 5. 878963 5. 024929 5. 610456  
4. 667027 4. 927319 5. 192268 4. 477115 4. 315994 4. 562947 4. 101019 5. 134375 4. 71042  
3. 662958 2. 767591 2. 680689 2. 760929 2. 5192 2. 332356 2. 248736 2. 515695 2. 492948  
2. 05981 2. 156163 1. 872056 1. 542987 1. 700617 2. 102405 1. 678778 2. 018627 1. 319609  
2. 857015 2. 799522 2. 55638 3. 191919 2. 479103 2. 72438 2. 338741 2. 675887 2. 666871  
1. 447278 0. 996417 1. 319104 2. 03241 1. 331027 1. 219663 1. 372497 1. 425893 1. 645378  
3. 96861 4. 682489 4. 926421 5. 462552 5. 126582 4. 178889 4. 61052 4. 481389 4. 945574  
1. 107733 3. 200709 1. 517582 0. 79888 2. 820815 2. 12234 2. 213655 2. 289306 2. 773812  
2. 528656 1. 733275 1. 775248 1. 565024 1. 63068 3. 076523 1. 501001 2. 08182 2. 164152  
5. 081822 4. 144385 4. 70387 4. 544816 4. 598808 4. 665551 4. 145616 4. 907011 3. 925038  
1. 918787 2. 238831 1. 720705 2. 026314 2. 108959 2. 087459 1. 827066 1. 820967 1. 962447  
1. 982223 1. 660198 1. 267449 2. 077314 1. 659511 1. 652107 2. 329247 2. 165015 1. 805081  
5. 555049 4. 095877 3. 466659 4. 247824 4. 407285 3. 952316 3. 888264 3. 680225 4. 252043  
2. 421088 2. 293318 2. 363488 2. 892696 2. 090524 3. 106962 2. 058542 2. 581726 1. 978275  
5. 316581 5. 960852 6. 717212 5. 727133 6. 494773 5. 898366 6. 007176 6. 525467 5. 806683  
2. 383788 1. 777153 1. 30884 1. 55012 2. 681514 1. 657883 1. 646424 1. 58814 1. 780052



2. 890609 1. 940088 3. 116727 2. 42266 2. 637814 2. 637417 2. 752885 2. 418072 2. 36978  
1. 950068 2. 561472 2. 138722 2. 17302 2. 550664 2. 492946 3. 008146 1. 751635 2. 01639  
2. 224901 1. 816787 1. 402437 1. 554411 1. 607887 1. 255688 1. 965279 1. 4647 1. 660377  
1. 68262 1. 555026 2. 081465 2. 545746 2. 170051 2. 036084 2. 342934 1. 660742 1. 96246  
1. 355893 2. 695047 2. 711345 1. 683526 2. 13483 1. 674025 1. 357559 2. 497443 2. 072952  
4. 955461 1. 258245 1. 170081 1. 07703 1. 391939 1. 895438 1. 571265 2. 177159 1. 775346  
1. 392241 1. 412842 2. 210673 2. 047681 1. 398365 1. 781665 2. 754808 1. 520434 1. 140052  
2. 39078 2. 694811 1. 963246 2. 252008 2. 696964 2. 364368 2. 927955 2. 988262 2. 844912  
4. 996921 4. 857939 5. 508514 5. 288546 4. 800597 5. 611647 4. 615281 5. 683165 6. 571308  
5. 559197 5. 908482 5. 787269 5. 490055 6. 002091 5. 876144 5. 190665 5. 290621 5. 811004  
5. 246207 5. 519985 5. 891261 5. 309274 5. 181161 4. 956488 5. 167345 5. 643547 5. 02508  
4. 315155 3. 512669 4. 792803 3. 678462 3. 32432 3. 540967 3. 65998 3. 411997 5. 317509  
4. 686383 4. 451671 4. 275106 4. 544445 4. 094541 4. 357918 3. 919496 4. 739645 5. 679951  
5. 384286 6. 040628 6. 292082 5. 398656 6. 040879 5. 604588 6. 131179 5. 815834 6. 079266  
5. 129152 4. 864663 4. 561411 5. 49881 4. 893528 5. 102024 4. 85656 5. 350018 5. 039615  
3. 374338 2. 455573 2. 98414 3. 175682 2. 570005 2. 958379 2. 902253 3. 742159 3. 15679  
1. 027806 0. 84802 0. 970387 0. 872967 1. 033509 1. 174362 1. 543525 0. 963007 0. 743629  
2. 882223 2. 775848 2. 937447 3. 308245 2. 853794 3. 170363 3. 793781 3. 243882 3. 32833  
4. 232368 3. 853113 3. 82406 3. 212163 4. 19544 4. 743763 4. 187132 3. 54494 4. 497707  
4. 541415 5. 401929 5. 22188 6. 352127 4. 385838 6. 264377 5. 364547 4. 541033 4. 106835  
1. 637086 2. 087395 2. 681233 1. 729404 1. 436045 2. 276365 1. 847272 2. 54722 3. 063623  
1. 215247 0. 890445 0. 941487 1. 058509 1. 161278 1. 576905 1. 674407 0. 930429 1. 479852  
5. 158672 5. 289287 4. 86763 4. 467526 4. 69497 4. 571471 5. 572748 4. 987511 4. 985549  
7. 091468 6. 871405 6. 52155 6. 253059 6. 914828 4. 657689 6. 331081 6. 095968 6. 081829  
3. 088496 3. 077067 3. 435152 2. 88152 2. 38313 2. 707107 3. 60325 2. 815464 3. 32774  
5. 929286 3. 834451 4. 307917 3. 73722 4. 273611 3. 796975 4. 032131 3. 92349 5. 178598  
5. 212346 4. 029054 4. 911314 4. 564056 4. 033057 4. 304398 3. 674907 4. 627611 4. 095037  
1. 603534 1. 178906 1. 720383 1. 62563 1. 65479 1. 897337 1. 385771 1. 406047 1. 741692  
4. 997202 5. 722853 6. 035601 4. 969948 5. 52385 5. 415218 5. 077851 5. 220303 5. 011247  
2. 244724 2. 781502 2. 886061 2. 743587 2. 98353 2. 919996 2. 83819 2. 938951 2. 628348  
2. 021104 1. 530387 1. 937759 2. 24843 2. 011652 1. 826572 2. 669606 1. 408575 1. 785041  
3. 865433 6. 033341 5. 828592 4. 619875 4. 17337 4. 073714 5. 06943 6. 007921 4. 869334  
3. 227462 1. 99484 3. 249428 3. 07154 1. 884867 3. 526584 2. 985823 4. 282438 3. 464148  
1. 989695 1. 856072 2. 247519 1. 956404 1. 935217 1. 876178 2. 1688 2. 26107 2. 124744  
3. 684168 5. 298648 4. 663188 4. 841149 5. 214281 4. 642941 3. 990768 5. 166069 4. 362794  
2. 143941 1. 452875 1. 581463 1. 704046 2. 290711 1. 996713 2. 420009 1. 391835 1. 645856  
4. 943975 4. 635482 4. 793773 4. 890956 4. 799205 5. 181514 3. 899353 5. 28903 5. 014553  
2. 825996 1. 629747 3. 471297 1. 237245 1. 174145 2. 490285 3. 335071 1. 612679 2. 643111  
2. 451054 1. 504659 2. 05887 1. 440953 1. 61263 1. 297402 1. 4457 1. 293131 1. 453816  
2. 55302 1. 410739 1. 54841 1. 386918 1. 96245 1. 42189 2. 001539 2. 346765 1. 357434  
1. 69206 1. 608906 1. 705112 1. 81759 2. 114202 2. 336332 2. 406405 1. 769092 2. 040507  
1. 496073 1. 077786 1. 392515 1. 123284 1. 388201 1. 379354 1. 393754 1. 360389 1. 395299  
1. 529802 2. 690667 2. 176594 1. 823566 2. 223672 1. 951597 2. 009095 1. 680251 1. 977921  
7. 045775 7. 295615 7. 678894 7. 269017 7. 311624 7. 241607 7. 733589 7. 365463 7. 688789  
2. 621248 2. 03264 3. 779856 1. 843798 4. 452981 1. 768766 3. 638749 3. 839799 2. 308605  
2. 95847 3. 828499 1. 981915 4. 868992 3. 296192 3. 056604 3. 120719 2. 955125 2. 686433  
1. 629751 1. 232004 1. 046215 0. 95905 1. 042003 1. 314592 1. 320344 0. 979507 0. 999208  
8. 334244 7. 90092 8. 012033 7. 611751 8. 002888 7. 778153 8. 319478 7. 806467 7. 832746  
2. 13466 1. 884332 1. 97725 2. 008605 1. 820595 1. 672744 1. 631556 1. 882512 2. 181919  
2. 475106 2. 766428 2. 651654 2. 994283 2. 419497 2. 022019 2. 246498 2. 481197 2. 030324  
3. 763461 3. 763085 3. 510291 4. 795216 3. 279237 3. 821781 3. 810873 3. 507729 3. 608577

2.769452 2.528191 1.955885 3.07798 1.689162 1.996523 3.528836 2.775862 2.283532  
2.822804 4.331516 4.527862 2.859836 4.094083 4.698317 3.225228 3.91652 3.341704  
3.609992 4.31021 4.467616 4.322117 4.594602 4.361142 2.821746 3.690287 4.547956  
2.820035 3.284165 2.428696 4.131691 3.225121 2.79914 3.188228 3.130179 3.274794  
1.868869 1.281617 1.382806 1.548086 2.277131 1.474198 2.003187 2.451846 1.309533  
5.029959 4.68249 5.085348 4.451387 4.416052 4.425957 4.994777 5.066675 4.886694  
2.146924 1.115049 1.70074 1.572388 1.352919 1.497165 1.483931 1.634885 1.45303  
3.173734 2.730644 3.930252 3.727832 3.35585 3.555595 4.163045 3.27887 2.878223  
3.368573 2.503869 2.265657 2.401459 2.400338 2.052836 1.97942 3.179735 2.595846  
1.996917 1.238335 2.088702 1.520149 1.52025 2.176078 1.657629 1.59616 2.158069  
1.969765 1.846765 1.784136 2.874709 2.745647 1.875931 2.436629 1.944863 1.558456  
1.612125 1.587244 1.68136 1.473156 1.814802 1.685529 2.019632 1.797392 1.594689  
1.991504 1.645464 2.223666 1.778084 1.614287 1.651772 2.440105 1.282008 2.136238  
1.603649 1.665486 1.663756 1.747279 1.376017 1.406284 1.780612 1.501582 1.385749  
4.251281 4.831014 4.861447 4.381869 4.876886 4.727796 4.163521 5.086977 5.177413  
3.953286 3.044694 3.74345 2.523738 3.674764 3.328621 4.523616 3.400871 2.434799  
1.463338 1.609129 2.563384 1.259799 1.639593 2.035238 1.565201 1.368621 1.62329  
2.851202 2.083653 2.118081 1.869929 2.187027 2.452377 2.472365 2.043343 1.868479  
1.761647 1.901076 2.198729 2.779858 1.510167 1.736349 1.799026 2.254184 1.515589  
4.089694 3.097681 2.915681 4.079526 2.566514 3.434869 2.8657 3.434869 3.622495  
4.844154 4.217411 4.419735 2.905139 4.3169 4.194555 3.483771 4.00221 4.169401  
2.934702 3.133941 3.321396 3.125531 2.870454 3.081859 3.152281 2.799058 3.490249  
3.965291 4.946219 4.843461 4.520688 4.474284 4.124576 4.48335 4.741268 4.263145  
2.202856 1.259627 1.492057 1.477734 1.137915 1.92222 1.828125 2.192439 1.516425  
3.419472 3.891444 3.437162 3.962164 2.715011 3.372221 3.695209 4.00461 3.62093  
4.952118 5.990065 6.068432 6.728007 6.146789 5.980681 6.33551 6.545063 6.872398  
3.910683 3.449624 4.15555 4.110284 3.479029 5.068033 4.833296 5.133358 4.850281  
6.022012 3.460298 4.679517 5.287159 4.097584 4.513535 3.18379 3.246679 4.205749  
8.64822 8.361717 8.368021 7.907427 7.96001 8.176253 8.615535 8.189872 8.552946  
3.79573 2.464482 2.22458 2.253403 3.146363 2.346521 3.178969 4.092528 3.930641  
3.959992 1.836752 2.301883 2.573228 2.668907 2.202332 3.440033 2.12525 2.544065  
2.882972 1.608335 2.351531 1.922306 1.775976 2.814508 2.90783 1.895484 2.347248  
4.114862 6.146854 5.479252 5.258256 4.660536 4.837747 5.12783 5.24655 6.057175  
3.318103 4.277897 4.719035 4.781192 4.72463 4.400896 4.95599 4.445177 3.839499  
4.974366 5.042337 4.803412 5.054601 4.706318 3.563394 5.739867 5.173964 4.257816  
4.723288 3.013107 3.347713 5.154246 4.763537 4.013228 5.173625 4.724261 4.763491  
2.571709 3.773751 3.676574 3.265184 3.9953 3.760963 2.432143 4.198827 3.328699  
1.149512 1.302028 1.033018 1.491279 1.432236 1.635936 2.358773 1.486515 1.253595  
2.408404 1.838416 1.999108 1.816764 1.791457 1.585989 1.819802 1.894974 1.214297  
1.873336 2.179997 3.097609 1.874795 1.617425 1.878047 2.669692 1.912522 2.189713  
4.667931 5.243087 5.261346 5.000132 4.388366 4.796506 4.135556 5.706991 4.977114  
2.868599 1.759522 2.725381 2.64891 3.474279 2.373373 3.039735 3.323841 2.215375  
2.169929 1.654007 0.960278 1.415381 1.369519 0.765847 1.432686 1.622442 2.278472  
3.630787 3.074047 3.901025 3.965745 4.004479 3.834455 3.372526 3.443321 3.52895  
1.903759 2.015512 1.469596 2.050497 2.757285 1.708523 2.673116 1.959863 2.008738  
2.531305 1.876406 1.58489 2.263173 2.176525 2.003915 2.61333 2.717187 1.938395  
3.042741 3.024025 3.256455 3.349449 2.607402 3.270462 3.171784 3.460397 3.112054  
2.378018 1.959539 2.838096 2.513473 2.3568 2.227335 2.469666 2.631438 2.315625  
8.830006 8.767093 8.464192 8.598257 8.92888 8.982478 8.649481 8.276469 8.832717  
5.423023 6.710823 6.123162 6.136225 6.305194 6.126125 5.975234 6.085965 6.237459  
2.051066 1.64394 1.954575 1.854351 1.856901 1.681664 1.484677 1.953152 1.57241

2.238539 1.44525 1.819547 1.196895 1.459646 1.629519 2.062508 1.521782 2.167455  
2.319004 1.799162 2.685687 2.903868 1.664589 1.420157 2.616572 1.781741 1.616857  
1.611621 2.374103 1.991406 1.337421 1.857577 2.070842 1.769413 2.067012 1.936402  
4.661006 5.464533 5.183423 6.350766 6.08189 6.020464 4.945016 5.629749 5.583706  
3.087837 2.284848 2.413673 2.391341 3.009114 2.146071 2.895413 2.5735 2.56923  
7.556598 8.28873 8.266735 8.227349 8.033535 8.179938 8.082314 8.080406 8.357132  
3.858257 4.58634 3.892316 5.050162 4.687398 4.834552 2.567693 4.679002 3.779627  
1.470707 1.501732 1.389924 1.991274 3.014523 1.42969 2.961475 2.363847 0.970726  
2.002205 2.000689 2.50903 1.976462 1.805961 1.632127 1.554473 1.822103 2.076511  
3.48056 3.882955 4.530832 3.967481 4.244371 4.892445 4.893871 4.586633 4.41038  
5.269152 5.120645 5.519221 5.26416 5.170753 5.126928 5.354535 5.372735 5.773563  
4.204919 4.568352 4.511568 4.027445 4.529431 4.93252 4.117071 4.022238 4.593472  
2.048622 1.722589 2.83755 1.810987 2.814114 1.967843 2.049058 2.011132 2.165487  
3.133479 4.286849 4.438099 3.205855 4.416746 3.153656 2.977846 4.692854 3.985785  
2.641151 1.86193 1.800593 2.024691 2.703705 1.779969 2.623251 2.463326 1.286881  
1.656692 1.52781 1.522614 1.664803 1.246913 1.340973 1.355866 1.101907 1.120079  
1.055558 1.272259 1.840683 1.347949 1.423714 1.589619 1.734874 1.178534 1.044649  
4.555129 5.440573 4.863113 4.672395 5.72446 5.113424 5.391368 5.130957 5.337765  
5.480277 4.412125 4.998524 3.01423 4.435344 4.977593 5.63662 4.706919 5.828949  
1.853615 1.177025 0.988936 2.114081 2.088036 1.693493 1.328754 1.348967 1.383579  
5.112097 3.335238 3.638918 3.779644 3.263946 3.069854 2.320993 1.933725 2.179832  
3.825259 3.985086 3.647524 3.665236 3.585577 3.357178 3.850114 3.331742 3.782154  
2.513605 2.862483 2.749021 1.896658 2.028514 2.928226 2.42845 2.842636 2.474019  
5.463584 5.765996 5.728958 5.215876 5.630574 4.849589 4.637101 4.979668 5.659245  
1.245455 1.109204 1.860332 1.499907 1.444106 1.519389 1.593826 1.742062 1.227302  
3.562516 3.504767 4.790744 2.338293 3.970656 2.644074 3.860288 3.757485 3.226081  
1.843246 1.541002 3.036845 2.325537 1.311735 2.257335 1.481962 1.571036 1.111704  
6.716926 3.759342 4.822618 3.973857 4.656626 4.548661 5.465445 4.077286 3.856042  
3.037867 1.117797 2.029672 1.179666 1.531027 0.837671 0.808711 1.023765 1.258148  
1.910675 2.423862 2.641898 1.971782 1.655281 1.503832 1.890581 2.327045 1.533164  
1.697089 3.184109 2.124374 2.371363 1.494659 1.994083 2.11967 1.737947 2.871852  
3.104104 4.216618 4.670984 4.679055 3.772745 3.687711 2.581456 3.057274 3.628784  
2.40002 1.082449 1.340764 1.129675 1.711377 1.104798 1.104458 1.119421 0.793817  
6.789046 7.168115 7.686765 6.888647 6.985325 6.703469 6.283037 6.799173 7.142892  
1.467095 1.010346 1.108854 1.152044 1.174157 1.024604 1.127329 1.394622 1.292156  
1.84917 1.690603 0.748172 1.217422 1.547549 1.400736 1.399141 1.218709 1.181697  
7.62398 6.898116 7.28531 7.507513 7.246567 7.76292 7.074465 6.76769 7.090619  
3.816627 3.180046 2.470659 3.499845 3.605372 3.944917 3.022226 4.272021 3.234333  
4.297116 3.289977 3.126588 2.460326 3.726013 3.482264 3.131697 3.568915 4.160774  
5.84791 6.247241 6.591716 6.210439 6.227331 6.245437 6.103071 6.915779 6.163387  
1.923526 1.709306 1.928982 2.260386 2.025554 2.077568 1.944818 2.135289 2.149093  
0.792811 0.526166 0.971779 1.071617 1.080912 0.878839 1.307799 0.670819 1.247314  
1.298236 0.90943 1.835247 1.163371 1.633713 0.829009 1.196282 0.826969 1.199984  
4.864313 5.041927 5.671861 4.429084 3.64726 3.844555 4.006968 4.701024 5.054942  
4.631319 4.003429 4.396842 4.730346 5.206574 4.173201 4.573646 3.664332 4.187033  
2.294918 2.114091 2.775437 3.449947 2.2938 2.925083 2.862508 1.717578 3.044152  
1.560723 1.846201 1.781637 1.00669 1.240737 1.535149 1.334183 1.546535 1.537428  
1.484091 1.264211 1.653955 1.556679 1.959933 1.186153 1.541307 1.88177 1.563531  
1.717214 1.869168 1.952234 2.579617 1.874514 2.183089 1.765337 1.872178 1.515441  
6.380577 6.226115 6.671043 5.683474 6.272571 6.642653 5.121944 6.490375 6.048313  
2.491366 2.874432 2.67618 2.175701 2.547351 2.006007 2.265716 2.411046 3.098535

1. 704526 1. 611259 1. 644432 1. 58947 1. 538163 1. 379361 1. 812068 1. 751049 2. 018862  
1. 870133 1. 830041 3. 136742 1. 84012 1. 28572 2. 881971 2. 145483 1. 661829 1. 922982  
2. 231174 1. 558196 1. 746918 1. 487696 1. 969423 2. 613235 2. 368383 1. 729547 1. 818709  
1. 412057 1. 124762 1. 608459 1. 279117 1. 317906 1. 380863 1. 530125 2. 254923 1. 90019  
4. 993987 5. 667602 5. 685642 5. 428113 5. 424096 5. 386942 5. 407311 5. 449298 5. 622123  
5. 710608 5. 071376 4. 491255 4. 369845 5. 196027 4. 147632 4. 713937 4. 59061 4. 676977  
2. 750678 3. 264223 2. 040189 2. 189857 3. 590886 3. 668964 2. 549309 3. 619875 3. 125605  
2. 875134 2. 831603 2. 921488 3. 333427 2. 537541 2. 582219 3. 144732 3. 527316 2. 520769  
1. 888651 2. 636842 1. 979463 1. 326661 2. 406618 1. 878364 2. 096669 1. 892029 2. 524564  
2. 918642 2. 783442 2. 555793 3. 366745 2. 210272 2. 555961 2. 625367 2. 495502 2. 745174  
2. 27703 1. 460306 1. 730442 1. 789063 1. 559597 1. 410046 2. 809951 1. 643312 1. 753407  
3. 514453 3. 224129 2. 787866 3. 007708 3. 052252 3. 963482 6. 330097 3. 210538 4. 380537  
5. 905718 7. 19842 6. 765287 7. 63195 6. 485744 7. 908275 6. 928998 7. 280748 7. 478975  
2. 656667 1. 937311 2. 853421 2. 406574 2. 132726 3. 082317 1. 695891 3. 104073 2. 472805  
2. 163569 1. 829434 1. 371441 1. 880942 1. 64159 1. 646069 2. 434021 1. 672493 1. 305376  
3. 464695 2. 584725 2. 878679 3. 430657 3. 028789 3. 046183 3. 947836 2. 84781 4. 847835  
4. 124804 3. 903513 3. 767788 4. 608529 4. 306199 3. 97776 5. 969911 4. 325915 4. 173112  
7. 587474 7. 317668 7. 652 7. 419013 7. 570507 7. 268834 7. 260737 7. 476188 7. 636825  
2. 701372 2. 662526 2. 485624 2. 31514 2. 591652 2. 452727 2. 555012 3. 231417 2. 696506  
1. 904535 1. 552084 1. 501754 1. 220473 1. 270637 1. 749223 1. 608169 1. 539622 1. 350585  
1. 342553 1. 067655 1. 162736 1. 430943 1. 550675 1. 23458 1. 546259 1. 1305 1. 160082  
5. 717594 5. 556535 5. 547899 6. 317292 5. 305201 5. 528415 5. 421425 5. 225541 5. 186147  
5. 107452 5. 68812 5. 042479 5. 27038 5. 930164 5. 363286 4. 490851 5. 72689 5. 586702  
2. 256623 1. 66701 1. 842334 2. 389659 2. 057337 1. 681619 2. 355462 1. 658819 1. 505712  
2. 046377 2. 226449 2. 283601 3. 26196 2. 096135 2. 678079 2. 250345 2. 862911 2. 267766  
3. 349965 2. 620127 4. 622239 2. 356394 1. 93697 2. 676832 2. 303352 3. 044907 2. 686795  
1. 867595 2. 383763 2. 037154 3. 353657 1. 912034 3. 225591 5. 000203 2. 268337 2. 533636  
4. 584924 4. 561994 4. 261457 5. 212927 5. 324239 5. 391728 6. 361467 5. 201775 4. 892938  
1. 958121 1. 676155 1. 854471 1. 550882 1. 319818 1. 443984 1. 613551 1. 610892 1. 317433  
4. 780945 2. 912976 3. 737537 3. 779357 3. 056135 3. 828086 3. 936219 3. 055636 3. 266595  
1. 270927 1. 199819 1. 248414 1. 933158 1. 639238 0. 853628 1. 655402 1. 475368 1. 697287  
1. 725575 1. 891327 1. 527534 1. 489041 1. 880482 1. 731605 2. 347838 1. 458434 1. 935629  
7. 662693 7. 948178 8. 196752 7. 266092 8. 190703 7. 594444 8. 017385 8. 186281 8. 140078  
2. 426964 2. 296945 2. 933307 2. 846894 2. 173342 2. 331515 2. 160262 2. 081028 2. 913844  
6. 602073 5. 914295 5. 65112 7. 23264 6. 879889 6. 792235 6. 970698 6. 562838 6. 546907  
3. 977495 5. 061875 4. 987861 4. 9655 4. 893187 5. 014783 5. 3326 4. 818433 5. 338227  
2. 224363 3. 552833 3. 846004 3. 815638 2. 8295 2. 222133 1. 843713 3. 04276 2. 739447  
6. 34859 6. 225992 5. 702651 6. 101418 5. 799165 6. 238023 5. 649908 5. 836344 6. 121129  
2. 848117 4. 178695 4. 886741 4. 797163 3. 035716 4. 702382 4. 021631 2. 892594 4. 332052  
5. 069683 5. 698803 5. 203668 4. 83586 4. 923378 5. 642022 5. 082966 5. 911831 4. 219912  
1. 77761 1. 018176 1. 066747 0. 843692 1. 719693 0. 988807 2. 257474 1. 120653 1. 360347  
1. 646512 1. 75427 1. 957513 2. 268161 2. 047735 1. 451836 1. 508744 1. 856751 1. 463047  
2. 197248 1. 510386 1. 810038 1. 534533 2. 131223 1. 510868 1. 467557 1. 552553 1. 239268  
2. 237663 1. 208456 2. 080444 1. 669497 1. 82469 2. 144542 1. 455167 1. 392417 0. 927721  
2. 254007 2. 00347 1. 117833 1. 495328 1. 092957 1. 105151 2. 77058 1. 779054 1. 135713  
1. 434369 1. 7142 1. 897721 0. 830691 1. 726062 0. 782153 1. 361937 1. 213032 1. 016344  
5. 490731 4. 858745 3. 651364 5. 186543 4. 825584 4. 476349 4. 60494 4. 382654 3. 776474  
1. 872851 1. 390078 2. 707132 2. 006819 1. 63231 1. 79469 2. 776366 2. 440449 1. 840005  
2. 157059 2. 16971 2. 290944 3. 705367 1. 886475 2. 077833 2. 510181 2. 898049 3. 209894  
3. 181025 2. 576039 2. 739356 2. 788447 3. 071038 3. 423598 4. 036602 2. 631588 2. 730803  
4. 183574 4. 018841 4. 273706 3. 661203 3. 337387 4. 312086 3. 796645 3. 074115 4. 289927

3.953348 6.323427 6.020988 6.311182 6.39119 6.015174 5.82964 6.677307 6.89602  
2.674283 2.213251 2.059171 2.112769 2.317971 2.116609 2.201412 1.866858 2.033661  
3.421776 3.270142 2.413104 1.983838 2.893769 2.705281 3.466175 3.310461 3.609692  
5.98439 6.247151 5.713477 7.099749 7.033481 6.537839 7.054473 6.523162 6.525909  
1.859201 1.846221 2.16101 1.924953 2.186811 1.672186 1.869417 2.080284 1.48531  
3.680046 3.672933 3.390367 4.245926 3.206134 3.907539 5.062194 3.577944 3.500432  
6.854629 7.578192 7.595271 7.907241 7.640693 7.434691 6.577724 7.75104 7.200313  
1.84753 2.292797 1.727703 2.361351 1.615731 1.916042 3.09328 1.784177 2.390938  
2.32448 2.129748 1.546488 1.761198 2.383627 2.180386 2.081971 2.768451 1.862686  
6.609896 7.003559 6.754102 6.93346 7.215375 7.469958 5.977533 6.109016 6.941218  
2.836968 1.887033 1.792523 2.266523 1.739056 1.847787 3.08051 1.597682 1.842251  
3.642324 2.313029 3.217891 2.887732 3.104157 3.579885 3.181488 3.680234 3.17999  
3.326911 2.053563 1.895578 1.936927 2.460988 1.948546 2.038606 1.604119 1.93229  
3.789479 4.714979 4.447777 4.424752 4.594822 4.17949 4.788307 5.314583 4.397721  
3.002763 3.92187 4.856962 3.714064 4.724025 3.373981 2.89098 2.221103 4.035819  
3.766054 4.45906 4.865219 4.068321 4.372515 3.574234 3.969871 4.696319 4.278083  
1.236216 1.538249 1.430347 1.481243 1.144245 1.141281 1.470477 1.339288 1.493887  
1.485078 2.058621 1.602781 2.652355 2.239789 2.159686 2.286673 1.451333 1.569741  
1.470994 1.713652 1.779242 1.396428 2.159371 1.951061 1.666307 1.45625 1.162226  
2.979662 2.998593 3.057403 3.221418 3.393633 3.20282 3.829648 3.268981 2.943597  
4.815073 4.213145 4.917399 5.116753 4.491094 4.74871 4.586999 4.607802 4.9161  
3.836507 3.492227 2.821644 3.196414 3.0826 3.927493 3.297431 3.416145 3.984857  
1.797817 2.793071 1.858627 1.564577 2.033471 1.648701 1.909997 2.51878 2.190558  
2.146895 1.877694 1.853361 2.605558 2.00016 1.44032 2.015021 2.142716 2.073096  
2.917806 2.65627 2.193029 3.016506 2.031011 1.958006 3.148522 2.697932 2.460929  
8.650536 9.042048 8.717062 8.603901 9.106649 8.868521 8.6947 8.800013 8.70344  
6.311343 6.10851 6.000434 5.603923 6.380661 6.732177 6.532867 6.020965 6.283218  
1.370883 1.260963 2.478578 2.397184 1.349934 1.230857 1.988804 1.211281 1.407372  
2.274215 1.980282 1.535322 1.833806 1.894142 2.000258 2.395636 1.728963 1.977989  
2.735898 2.132358 2.306337 2.023521 2.193978 2.574736 1.916447 2.396152 2.212444  
2.764306 1.67754 2.508366 1.849265 1.991171 2.056098 2.641131 2.170311 1.92591  
4.947698 4.857189 3.972655 4.945586 4.717489 4.262223 4.801828 4.415087 4.568445  
4.12125 3.12122 4.007462 3.451963 4.045709 4.076739 3.439325 2.995268 4.092216  
3.011001 1.950087 2.296526 2.49151 1.927344 2.71852 3.080322 2.277613 2.301467  
8.681064 8.431262 8.724009 7.973266 8.386588 7.65675 8.244072 8.856666 8.579516  
1.459155 1.370268 1.676189 1.323521 1.525394 1.29404 1.782768 0.822079 1.139825  
2.277597 2.862511 2.622828 3.385013 2.550725 2.725038 2.001428 2.716715 3.50701  
3.56452 4.073559 4.265184 3.485423 4.37047 4.634828 3.927815 3.10335 3.922587  
1.988179 1.7963 1.890716 3.229214 1.954162 2.365602 3.347481 2.458679 2.887393  
4.597393 4.107432 3.481551 4.518522 4.093934 3.219444 3.559282 3.5994 4.070734  
5.429773 5.350339 5.500197 5.816255 5.573311 6.082064 6.298796 5.885835 5.750257  
6.724885 6.251941 6.37607 5.570023 6.159528 6.195695 5.636074 6.164485 6.433015  
3.413604 2.435513 2.758176 2.847599 2.472871 3.611384 2.690897 2.60982 2.272207  
3.948812 4.962707 4.438208 5.098713 4.668914 4.441569 6.303368 4.596827 5.694614  
6.686567 5.284202 5.325517 4.744166 4.719736 5.102906 5.414296 5.256111 6.070421  
2.277778 2.872134 2.750764 3.590895 2.834096 3.17587 5.405886 3.400829 3.174456  
3.972985 4.138842 3.876931 4.529684 4.106784 4.315652 4.772537 4.81917 4.381026  
1.491864 1.798716 1.25151 1.768697 1.530196 1.662186 2.268814 1.602993 1.735263  
5.611093 3.549515 5.304077 6.076059 4.367821 4.418159 4.223008 3.465051 4.040057  
2.231365 2.190742 1.954005 1.926884 1.718211 2.109113 1.967596 2.174206 2.413424  
1.990515 1.783304 1.685129 1.871395 1.478962 1.49473 1.4874 1.795158 1.869172

5. 34139 3. 676582 2. 857667 3. 020943 3. 085342 2. 554601 2. 954844 2. 877371 2. 860714  
6. 474583 6. 984427 6. 449163 6. 122313 6. 53339 5. 043134 5. 997526 5. 872867 5. 654726  
3. 23198 4. 480403 4. 889886 4. 351571 5. 278689 5. 112586 4. 356381 4. 512592 4. 667903  
3. 150829 3. 790372 3. 547127 4. 184113 4. 756908 5. 794163 6. 874202 5. 58726 4. 664511  
4. 782429 4. 769389 4. 345715 5. 32319 4. 488823 6. 215447 4. 29518 4. 118565 3. 949363  
6. 852393 7. 040978 7. 456325 6. 177894 6. 976833 6. 910492 6. 964049 7. 003175 6. 711956  
1. 095293 1. 604616 2. 089881 1. 26527 1. 09933 1. 189221 1. 249447 1. 075323 1. 211998  
5. 965138 6. 118503 5. 750595 5. 614833 5. 104728 6. 536424 5. 709862 5. 500974 6. 254089  
1. 549616 1. 80558 2. 036903 2. 013423 2. 140007 2. 214866 1. 802327 1. 962811 2. 19742  
6. 973646 6. 840292 7. 339651 7. 097844 5. 862127 6. 226517 7. 254175 6. 54759 7. 755611  
3. 879255 1. 930841 2. 358143 2. 40049 4. 594781 1. 932305 1. 494837 3. 131943 2. 839974  
2. 141346 2. 300911 2. 92186 2. 951522 1. 752078 2. 666175 2. 518214 2. 521241 1. 859097  
1. 911413 2. 002396 2. 721767 2. 647011 1. 860927 1. 591248 1. 777822 1. 608312 2. 134638  
4. 649309 2. 261925 2. 047041 2. 664564 1. 437042 2. 069663 1. 717551 1. 835365 2. 238965  
3. 722023 3. 926122 3. 297713 2. 987584 2. 868115 4. 119317 2. 289047 3. 844037 3. 160833  
1. 405518 1. 646512 1. 478466 1. 412277 1. 08196 1. 050522 1. 41428 1. 619908 1. 333827  
1. 547665 0. 701478 0. 561598 2. 115544 1. 197014 1. 360428 2. 122265 0. 929269 0. 703033  
5. 932268 5. 247524 4. 772397 3. 65904 4. 877255 4. 800391 3. 994073 6. 274929 3. 857487  
1. 921692 1. 336062 1. 713204 1. 854731 1. 696261 2. 407084 1. 412086 1. 233189 2. 19776  
2. 353317 2. 497735 2. 576422 2. 991498 2. 590293 2. 437992 2. 132988 2. 397866 2. 814375  
2. 178304 1. 897106 2. 584189 2. 486585 1. 855803 2. 648808 2. 800272 2. 138533 2. 209992  
1. 872915 1. 261055 1. 201394 1. 9196 2. 920023 3. 480334 4. 447863 1. 337979 2. 400743  
7. 063732 5. 236296 5. 774025 4. 300521 4. 855365 4. 177642 5. 396009 5. 235305 6. 581533  
3. 447112 3. 782339 4. 429275 3. 421555 3. 473074 3. 615328 3. 769411 4. 25857 3. 552282  
7. 520738 7. 744069 7. 576081 8. 201065 7. 65135 7. 826135 7. 370637 7. 466914 7. 33307  
0. 902093 2. 385685 0. 666247 1. 140755 0. 806279 1. 664942 3. 204511 2. 251863 1. 739409  
1. 638674 2. 475497 1. 880514 2. 274971 2. 480833 1. 967921 2. 924292 2. 12493 2. 046961  
1. 228876 1. 398515 1. 222909 0. 967328 1. 574443 1. 533165 1. 410455 1. 19463 1. 67186  
3. 172289 1. 609008 1. 380595 1. 348166 1. 871611 1. 42175 3. 661744 1. 540991 1. 950645  
5. 198256 5. 6001 5. 250448 6. 397763 5. 221117 6. 419307 5. 348771 5. 314323 5. 977378  
1. 326032 1. 613629 1. 64824 1. 769957 2. 948912 2. 036042 2. 194521 1. 6106 1. 594898  
2. 500016 2. 121079 2. 031896 2. 477829 2. 711558 1. 846208 3. 197546 2. 271104 2. 16178  
5. 032473 6. 047719 5. 782193 5. 240481 4. 830455 5. 976607 5. 075883 5. 026385 5. 439139  
3. 637884 2. 923826 2. 975768 3. 609554 3. 32247 2. 989279 3. 584182 3. 137453 3. 486278  
2. 727034 4. 334998 3. 429818 3. 797904 4. 143186 4. 742133 2. 756777 4. 460524 4. 251485  
5. 501541 5. 440013 5. 320558 4. 97983 5. 016695 4. 372233 4. 844823 5. 446091 4. 462833  
2. 847066 3. 048369 3. 73092 3. 432825 3. 720961 3. 877181 3. 850873 3. 634879 3. 604524  
1. 856835 1. 6622 1. 636036 1. 451889 1. 469609 1. 355771 1. 576398 1. 91654 1. 370961  
5. 576643 6. 328247 5. 859591 7. 208702 6. 483915 6. 386251 6. 747052 6. 550076 6. 164559  
4. 072638 2. 675012 4. 84488 4. 277178 3. 262999 2. 998636 4. 222265 3. 293732 2. 941092  
4. 522717 3. 618072 4. 361123 2. 527842 2. 605173 3. 275726 2. 523563 4. 075345 3. 334161  
6. 507744 6. 642557 6. 862709 7. 045264 6. 692118 6. 705841 6. 465587 6. 156103 6. 879708  
5. 065867 4. 903811 4. 512575 5. 305197 5. 067512 5. 275188 4. 4733 5. 175266 4. 146834  
2. 535516 2. 523037 1. 929946 1. 899601 2. 158732 2. 962135 2. 304309 3. 514199 2. 198224  
4. 321716 4. 134556 3. 032784 4. 372159 3. 378032 3. 352428 3. 410682 3. 622782 3. 186256  
1. 812865 1. 279093 1. 425044 1. 896824 1. 181283 1. 30304 1. 162018 1. 079741 1. 253551  
2. 381012 2. 130181 2. 631224 2. 468664 1. 649394 3. 145581 3. 526749 1. 95021 2. 159916  
2. 511753 2. 24861 1. 685827 2. 505408 1. 565407 1. 548034 2. 521857 1. 770935 1. 331272  
6. 18139 5. 286073 4. 115115 5. 866454 4. 618747 4. 521388 4. 183119 5. 038389 6. 014999  
2. 038792 2. 299734 1. 783128 2. 840067 2. 2066 1. 227576 1. 906291 1. 881605 2. 236335  
2. 674139 1. 754189 1. 966673 2. 127797 1. 883234 2. 635504 3. 321832 2. 047482 2. 271377

6. 320558 6. 574549 6. 603526 6. 317333 6. 210259 6. 516262 6. 103087 6. 569781 5. 749842  
2. 964662 3. 097265 2. 73236 4. 70059 4. 240044 3. 065398 3. 91462 3. 593204 2. 848492  
6. 849589 7. 458806 7. 642165 5. 927951 7. 804505 7. 007776 6. 781303 6. 586017 6. 317369  
2. 570966 1. 342295 2. 333081 1. 2747 2. 018901 1. 425426 1. 534363 1. 6149 1. 564788  
1. 48976 1. 32349 2. 992278 1. 648297 1. 445606 1. 389999 2. 039375 1. 37607 1. 323914  
2. 746654 2. 465614 2. 746012 2. 843862 2. 034531 2. 766658 3. 332021 3. 017263 2. 389121  
2. 591535 2. 209402 2. 368212 2. 014234 2. 353187 2. 866368 2. 025747 1. 674361 2. 043755  
5. 73436 5. 975073 6. 209115 6. 014194 6. 53516 5. 782703 6. 319228 6. 122528 6. 458734  
2. 204023 2. 521861 2. 517825 1. 898625 2. 55333 2. 177553 2. 105691 1. 891885 2. 826235  
3. 185745 5. 399491 4. 735538 4. 077568 3. 424456 3. 116293 3. 118774 2. 975776 3. 354642  
4. 928524 5. 075931 4. 976293 4. 667736 4. 616209 5. 844091 3. 611398 4. 213487 4. 923262  
2. 483536 2. 178907 2. 244755 2. 169974 2. 471572 2. 154043 2. 01505 2. 063912 2. 414757  
4. 245905 4. 206605 4. 488028 4. 574122 4. 792541 4. 495171 4. 177123 3. 2469 3. 69823  
5. 303913 4. 892355 5. 778171 4. 934936 5. 752153 4. 695708 5. 063158 4. 936647 5. 177886  
1. 127669 0. 96361 1. 270129 1. 645285 1. 460369 1. 244854 1. 953131 1. 469805 1. 476457  
4. 991838 2. 020035 3. 222017 2. 922452 3. 621481 2. 155518 2. 4684 1. 486789 4. 519347  
4. 559505 5. 496333 4. 318905 5. 080275 5. 403426 4. 422476 3. 631545 4. 978001 3. 979657  
7. 456037 7. 123792 7. 392792 6. 578048 6. 562304 6. 188194 6. 775036 6. 80188 7. 26361  
1. 021171 1. 230686 1. 201761 0. 929581 1. 299165 0. 892962 1. 478656 1. 369549 1. 701542  
3. 454854 1. 821971 1. 64825 1. 763167 2. 022446 1. 932455 1. 989202 1. 850997 2. 064315  
7. 255834 8. 21098 8. 176169 7. 601242 8. 21826 7. 229075 7. 961915 7. 87076 8. 013868  
1. 989371 1. 485133 2. 02569 1. 288288 1. 629791 1. 430038 1. 59044 1. 610001 1. 813731  
2. 707551 2. 664156 3. 038804 2. 927171 2. 404219 2. 2252 2. 967252 2. 41161 2. 572066  
2. 611446 1. 909646 1. 622876 2. 951535 2. 43399 1. 989012 4. 250087 2. 746606 1. 908796  
5. 497635 5. 832022 5. 672735 5. 726396 5. 957319 5. 762309 5. 747928 5. 838359 6. 087799  
1. 665484 1. 466943 1. 266124 1. 555525 1. 707082 1. 638083 1. 416067 1. 822571 1. 448934  
1. 147906 2. 490566 1. 667785 1. 059302 1. 430353 1. 180611 2. 187754 0. 93523 1. 598649  
2. 322452 1. 653249 2. 004379 1. 772408 1. 870767 1. 953568 2. 417451 1. 927378 1. 649247  
2. 029037 1. 797564 2. 364975 1. 963849 1. 674877 1. 897746 2. 541594 1. 091828 1. 792684  
3. 736771 3. 599242 3. 289064 3. 619309 3. 974207 3. 804382 4. 025259 3. 266927 3. 226213  
1. 934257 1. 166604 1. 134966 1. 99353 1. 108275 1. 329846 1. 302483 1. 218082 1. 302934  
4. 148075 3. 941305 2. 938104 2. 889717 2. 686797 3. 167782 4. 340922 3. 466853 3. 900404  
7. 054239 7. 171124 7. 119163 7. 019971 7. 134553 7. 012919 6. 908638 7. 232965 7. 290226  
3. 370413 2. 770586 3. 755861 3. 536092 3. 640176 3. 36321 4. 096666 3. 043093 3. 046531  
3. 434894 5. 048669 4. 806162 5. 320843 4. 82657 5. 442205 4. 987867 5. 190925 5. 101003  
7. 318941 8. 320563 8. 140141 7. 560705 8. 01211 8. 01472 7. 470535 8. 067579 7. 57995  
1. 118811 1. 47801 1. 811754 2. 574781 2. 141912 1. 797665 2. 218797 1. 658644 1. 726574  
6. 287091 6. 815061 6. 432346 6. 358818 6. 674628 6. 613292 5. 742902 7. 167045 6. 205198  
7. 710166 7. 876003 7. 666367 8. 084266 7. 808171 7. 671217 7. 996768 7. 961883 7. 912017  
4. 763213 4. 644354 4. 525518 5. 302552 4. 623129 5. 282032 3. 686747 4. 323676 4. 61818  
5. 327103 5. 874489 6. 019669 4. 573889 5. 84802 5. 424407 5. 940763 5. 770091 5. 562835  
2. 540737 2. 171143 2. 180184 1. 986056 1. 681002 1. 805634 1. 688479 1. 763178 2. 062623  
5. 583735 6. 671534 6. 311049 6. 457815 5. 995019 6. 522998 6. 003692 6. 119526 5. 902363  
7. 78374 6. 486983 7. 084035 6. 69295 6. 284771 5. 996956 5. 364228 6. 355872 6. 973226  
2. 801405 1. 678948 1. 18782 1. 149189 1. 403379 1. 415481 1. 670731 0. 990149 1. 142816  
4. 861393 5. 245009 4. 927162 4. 631328 4. 050618 5. 145662 5. 444321 5. 587415 4. 843292  
2. 51938 1. 606592 1. 87136 1. 892644 2. 299347 1. 640301 2. 010158 2. 397647 1. 988952  
2. 133092 2. 181311 1. 953256 2. 08731 2. 419409 1. 893503 2. 117637 1. 810797 2. 482215  
6. 014749 6. 702118 7. 173013 6. 39566 6. 208553 6. 816944 4. 916986 7. 076337 7. 004557  
1. 324211 1. 505972 1. 229814 1. 523313 0. 889806 1. 192326 1. 434365 1. 740098 1. 339297  
4. 390318 3. 607181 1. 765888 2. 167992 1. 398408 2. 06212 3. 739813 2. 029506 1. 340176

4. 583241 4. 62956 4. 266765 3. 814263 5. 071694 3. 870039 4. 434602 4. 605116 3. 93849  
1. 034904 1. 053416 1. 11151 1. 327132 1. 014165 1. 221362 0. 659548 1. 115458 1. 250559  
5. 523733 4. 756222 3. 778522 4. 640778 4. 046859 4. 67231 3. 650107 5. 149442 4. 628377  
5. 739693 4. 831005 4. 723698 5. 15269 4. 481115 4. 807179 4. 265976 4. 576549 4. 676251  
1. 331788 1. 141812 1. 223357 1. 372242 2. 155118 1. 306197 1. 307533 1. 531821 1. 319217  
0. 788528 0. 90215 1. 040482 0. 772341 1. 062372 1. 620752 2. 160818 0. 957838 1. 76055  
4. 770974 2. 854543 2. 874157 2. 597814 2. 858086 2. 089806 3. 452502 2. 539938 3. 314439  
3. 936769 4. 698936 5. 681067 4. 759738 5. 085522 4. 509126 4. 795857 5. 949782 4. 707043  
2. 414757 2. 210135 2. 90877 2. 225179 2. 283203 2. 408354 2. 596374 2. 817937 2. 357509  
1. 473664 1. 682436 1. 203051 1. 348364 1. 956454 2. 159689 1. 429758 1. 594003 1. 539821  
1. 312943 1. 115144 0. 849968 1. 25189 1. 101545 0. 94931 1. 235206 1. 062958 1. 140296  
3. 014431 2. 622943 1. 826266 1. 786613 2. 149665 1. 953858 2. 288232 2. 597042 2. 137234  
2. 534182 3. 708339 2. 622529 2. 961523 3. 042095 3. 781702 2. 704695 2. 58711 3. 204022  
2. 769282 2. 703648 3. 052381 3. 163658 3. 115904 2. 605954 2. 411776 2. 824316 2. 807097  
8. 564593 8. 209004 8. 312454 6. 874931 7. 605842 6. 97284 7. 809429 7. 707791 8. 540983  
5. 241949 5. 380304 5. 364312 5. 068434 6. 025868 4. 99294 6. 35565 5. 070106 4. 901352  
3. 554234 4. 258333 5. 073528 3. 432339 4. 279946 3. 945633 4. 397991 4. 659446 2. 572978  
1. 437158 1. 113542 1. 32772 1. 583667 1. 359013 0. 971634 1. 332662 1. 075648 1. 514523  
1. 223095 1. 492524 1. 322828 2. 772085 2. 053311 2. 021639 0. 681897 0. 969652 1. 660935  
3. 222779 2. 273249 0. 837629 3. 454729 1. 666266 1. 561578 2. 107954 1. 987086 1. 619711  
1. 605151 1. 472356 1. 286352 1. 848101 1. 269945 1. 550641 1. 607507 1. 175085 1. 043013  
1. 830056 2. 446802 1. 340267 1. 206926 1. 32982 1. 533653 1. 17105 1. 454409 1. 5647  
5. 288905 5. 306658 5. 295062 5. 272925 5. 615166 4. 924053 4. 680303 5. 576344 4. 912212  
4. 733716 6. 804048 7. 132387 6. 484949 6. 822661 6. 27916 5. 909372 6. 103111 6. 471574  
4. 944808 3. 85968 3. 155994 3. 744776 4. 293093 3. 91155 3. 376065 4. 616047 3. 942749  
6. 821352 7. 336081 6. 652012 7. 509799 7. 195567 7. 019747 7. 185813 6. 617162 6. 542842  
2. 304482 1. 257596 1. 249083 1. 019622 1. 610998 1. 581705 1. 996005 1. 29087 1. 339459  
3. 629854 5. 492305 4. 921959 5. 131154 5. 091989 5. 107597 4. 888179 4. 386208 5. 093893  
10. 11772 9. 90083 10. 11622 9. 699685 9. 810984 9. 678134 10. 36976 9. 89413 10. 06762  
1. 499599 1. 036752 2. 773053 1. 666245 2. 067219 1. 437246 1. 11366 0. 7695 1. 826007  
5. 75961 5. 576806 5. 539675 5. 072125 5. 816554 5. 716109 5. 606751 5. 242937 5. 52576  
2. 438368 3. 454382 3. 427016 2. 17439 1. 570779 2. 051412 2. 790944 1. 845893 1. 8542  
2. 004161 1. 273018 0. 54883 1. 006068 0. 578998 0. 829139 1. 234486 1. 025121 1. 000818  
5. 290072 5. 987005 5. 462258 5. 567027 4. 953237 5. 061238 5. 290638 6. 055683 5. 115581  
1. 450124 0. 787568 0. 973765 1. 507353 1. 572025 1. 435251 1. 012545 0. 892987 0. 82879  
1. 802915 2. 722137 1. 915944 2. 088348 1. 833738 2. 342779 1. 688051 1. 494231 2. 969447  
10. 02783 9. 16751 9. 597548 8. 821608 9. 350066 8. 483089 9. 486584 9. 575212 9. 470845  
5. 167825 6. 376085 6. 221204 5. 383187 6. 244251 5. 829035 5. 919335 6. 241835 6. 012438  
3. 952552 4. 316333 4. 242487 3. 826688 3. 676266 3. 040939 2. 973896 4. 766469 3. 269293  
6. 044775 5. 940976 5. 50287 4. 616784 5. 68414 5. 30954 4. 629568 5. 929129 5. 112001  
1. 807854 1. 746132 1. 711872 1. 701139 1. 84985 2. 187107 1. 65581 2. 070052 1. 905198  
6. 206242 3. 291722 4. 728653 2. 843471 3. 053696 2. 399192 2. 483709 2. 673043 4. 776754  
3. 456891 4. 800913 4. 288635 4. 246616 5. 109045 4. 641739 5. 462242 4. 292602 4. 725252  
2. 470017 4. 016403 3. 551504 2. 712781 3. 606626 3. 006791 2. 84095 3. 760033 3. 116684  
1. 76801 1. 510808 1. 265707 1. 860999 1. 756183 1. 829544 1. 942363 1. 821108 1. 70659  
3. 073306 3. 92118 5. 808802 5. 3797 5. 430729 4. 703711 3. 602832 3. 736532 5. 009834  
1. 186786 0. 989956 1. 384105 0. 834777 0. 925998 1. 316394 0. 981024 1. 370678 1. 55686  
2. 096519 1. 50938 1. 972521 1. 344546 1. 775046 1. 556421 2. 313221 1. 795631 1. 321266  
3. 333321 3. 385229 3. 654831 3. 764519 4. 138251 4. 767722 3. 139314 3. 563403 3. 799471  
1. 181864 1. 49916 1. 219305 1. 700503 1. 64922 1. 483158 1. 588589 1. 545387 1. 185127  
2. 527573 2. 359445 2. 488131 1. 741825 2. 595847 1. 918305 2. 918097 2. 146071 1. 849653



8.12212 7.067931 7.66783 7.264402 7.35364 7.03774 7.269425 7.485025 7.373357  
6.972976 7.068174 6.44037 5.941274 6.666209 6.882686 5.859201 6.731552 7.00377  
2.36478 2.439176 2.31089 1.913461 3.047719 2.680229 2.914155 2.096813 3.086658  
1.245638 1.475811 1.202052 1.964568 1.941811 1.403779 1.812384 1.394996 1.388112  
6.737044 6.783805 7.041965 6.52955 6.534003 6.880003 6.328905 6.809062 6.708871  
0.472273 1.051467 0.854084 0.955593 2.122829 1.482795 1.191384 1.026488 1.527538  
1.506659 1.528755 1.732143 1.837903 1.563135 1.176237 2.16647 2.021083 1.653836  
6.155808 5.857549 5.978327 5.61048 5.926615 6.423038 6.44194 6.18755 6.177314  
7.329819 3.249526 3.682572 1.688148 3.824125 1.437298 3.760174 2.41969 4.396911  
4.749339 4.775658 4.193944 6.074237 5.565907 4.804545 5.932938 6.367333 6.782544  
0.756177 1.101038 1.223638 1.362033 2.777892 0.938571 3.240467 1.0803 3.262376  
9.708356 9.604332 9.353657 9.55827 9.839197 9.267577 9.94093 9.53202 9.688421  
2.027579 1.894607 1.673777 1.601727 2.097963 1.460363 2.20384 2.071587 2.120583  
1.842557 2.620482 3.844714 2.633631 2.10439 2.659729 2.359577 3.894335 3.666071  
4.832185 4.903647 4.732614 4.142517 5.129338 4.807421 5.149111 3.962966 4.624641  
7.979691 6.817748 7.588904 6.725664 6.804249 5.728402 6.479902 6.625751 8.28504  
2.040181 1.236666 2.367679 1.42608 1.575651 1.027624 1.840305 1.582755 1.575651  
6.684289 7.386848 7.115836 7.580388 7.567328 7.065433 7.191712 7.490438 7.218909  
2.857476 4.035378 3.131106 5.046511 4.492218 4.112257 3.759415 3.935463 3.927038  
4.160528 4.551014 5.254384 5.256675 5.712091 4.199465 4.945674 5.205618 4.737441  
4.966117 3.851645 3.944881 3.383426 3.911189 3.372905 3.693449 5.908956 2.984064  
8.446712 5.701398 7.085789 5.580154 5.004369 4.628783 4.401282 5.947617 7.94703  
2.120979 3.478262 1.284543 2.235219 1.830989 2.216643 2.883284 2.752667 2.17895  
3.958788 4.444654 4.052796 3.493376 4.511413 4.163855 4.61276 4.575761 3.183196  
1.710975 1.691348 1.057961 1.252489 1.181804 1.608224 1.998381 0.930282 1.232722  
3.727344 5.224445 5.439817 4.123641 4.738048 4.762294 5.079237 6.295823 4.749783  
5.690957 5.025065 6.506476 5.354561 5.993151 6.234974 5.259775 5.594538 6.129855  
2.708513 2.249599 2.706747 2.255689 2.71236 1.993275 2.657729 1.670371 2.350591  
5.842928 6.787962 6.433652 6.18743 6.58597 6.347362 6.481956 7.078227 6.167316  
6.727559 6.903134 6.57511 6.951218 7.332821 6.890577 6.722193 6.910104 6.745963  
1.650252 1.356884 1.18965 1.142823 1.639806 1.49298 1.626162 1.715839 1.767094  
1.96046 2.702956 2.856616 2.02637 2.120598 1.666625 1.50557 2.342094 1.877438  
5.404321 3.693965 4.338166 4.143515 5.051541 2.940747 4.350078 2.921239 3.069618  
5.266407 5.212801 5.060366 4.994592 5.208424 4.777171 4.934591 5.282692 4.902269  
7.198673 7.188916 7.537182 7.411256 8.256329 6.645764 7.558298 7.296866 7.416225  
2.884883 2.575602 2.55627 3.33904 2.706033 2.823897 3.010992 2.485295 2.629422  
10.47479 10.44497 10.29266 10.46455 10.17496 9.927222 10.75058 10.2858 10.36277  
3.274077 2.035457 2.329427 1.843313 2.261995 2.596352 2.636269 2.529748 1.660922  
5.180453 4.990086 5.59299 4.046476 4.599035 5.50338 4.775289 5.068232 4.405865  
7.084313 7.164123 7.11556 6.634062 7.307764 6.074517 7.311975 7.291667 7.161056  
1.582178 0.94213 0.996836 1.196297 1.245508 1.025747 1.168093 1.175364 0.922982  
1.178028 0.602441 0.963891 0.951704 1.024945 0.830526 0.975597 1.305236 1.291698  
2.184014 1.612622 1.919958 1.016058 1.714586 1.366221 1.364249 1.150444 1.152526  
3.521514 4.253237 4.069218 4.130611 4.217466 3.638045 3.976963 3.82893 4.10998  
10.68064 10.65032 10.75945 10.13112 10.32289 10.10679 10.48564 10.40913 10.79583  
5.208802 5.705332 5.844456 6.115488 6.064685 6.186168 5.406068 6.082303 6.701961  
10.2958 10.257 10.38323 10.40631 10.16978 10.38512 10.25449 10.16885 10.4085  
6.366614 6.149701 6.126355 6.545852 6.174597 6.533006 6.13929 5.580078 6.471993  
4.759976 6.796603 5.600291 6.040094 6.031744 5.748157 4.47341 6.03067 5.211446  
3.141199 3.349689 4.437706 2.948536 3.23373 3.565202 4.217322 4.810097 3.564719  
3.27785 3.79606 3.480517 4.434306 3.837125 3.56872 4.065056 3.735463 3.490396

5. 153827 6. 039568 4. 112603 3. 693265 5. 322893 5. 364096 5. 156416 3. 798326 6. 165824  
9. 759283 9. 602932 9. 608545 9. 407312 9. 522299 9. 127889 9. 697462 9. 786477 10. 12803  
4. 997216 4. 760457 4. 200689 6. 797859 5. 513115 4. 774091 6. 001296 4. 892394 4. 684198  
6. 636909 7. 381469 7. 729429 5. 897595 5. 998172 6. 204271 4. 957869 5. 625101 6. 910012  
4. 115412 4. 891968 4. 195417 4. 410787 4. 622253 4. 244152 5. 159625 5. 343086 4. 590861  
2. 391119 2. 798114 1. 571544 1. 711778 2. 166754 2. 043399 2. 378756 1. 928822 1. 98443  
5. 294731 4. 630362 5. 287488 3. 847204 4. 829298 4. 556457 4. 257501 4. 826118 4. 958104  
1. 497509 1. 41097 1. 795367 1. 913194 1. 600517 1. 619824 1. 559082 1. 34533 1. 663016  
5. 9943 5. 918072 5. 761204 5. 451842 5. 604478 5. 401294 5. 319226 5. 443526 5. 876168  
1. 241463 0. 782113 1. 539975 1. 188023 0. 799146 1. 074359 1. 128167 1. 41669 0. 982006  
6. 29321 5. 508756 5. 758765 5. 470209 5. 696084 5. 592848 5. 978445 5. 805698 5. 756046  
2. 997371 2. 301938 2. 360706 3. 208989 2. 376468 2. 667066 2. 733384 2. 668804 2. 8687  
2. 537484 2. 660207 2. 691047 2. 178945 2. 370882 2. 419503 2. 66161 2. 267706 2. 417686  
2. 293218 1. 588471 2. 13695 1. 489468 1. 701309 2. 835775 3. 094458 1. 942483 3. 145996  
2. 195824 1. 663143 1. 573848 2. 420545 2. 445504 1. 448131 3. 337854 2. 215075 1. 988996  
1. 635683 1. 592224 1. 323796 1. 859168 1. 554855 1. 462983 1. 75693 1. 293922 1. 252566  
1. 455205 1. 514391 1. 435712 2. 261956 3. 018351 2. 0842 1. 738018 2. 12803 2. 337821  
1. 117795 1. 533544 1. 178421 1. 386957 1. 328207 1. 590634 2. 251556 1. 526075 1. 410437  
1. 439774 2. 715415 0. 917719 2. 020079 0. 993057 2. 672478 1. 445074 1. 670955 1. 801073  
3. 140339 2. 014516 1. 812929 1. 811441 1. 491738 2. 793029 1. 667308 2. 515546 2. 138603  
5. 669534 5. 325241 4. 60766 3. 720929 5. 365846 4. 059892 4. 751147 4. 243291 5. 729169  
1. 675532 1. 456569 1. 248532 1. 705404 1. 350584 1. 800245 1. 826823 1. 39162 1. 337484  
1. 525952 1. 709196 1. 439608 1. 05216 1. 714076 1. 133164 1. 130908 3. 114819 1. 039243  
1. 28923 1. 900824 2. 952297 1. 545889 1. 551722 2. 444966 1. 966857 0. 947822 1. 202602  
2. 909103 2. 095117 2. 566965 2. 494753 2. 93438 1. 751795 2. 069966 2. 293228 2. 576022  
1. 58378 1. 525786 0. 894304 1. 498957 1. 192682 1. 330761 1. 432143 1. 520697 1. 492534  
1. 403949 1. 994172 3. 189035 1. 251469 1. 239706 1. 852106 2. 076048 2. 406843 2. 400802  
2. 216665 1. 176122 1. 473827 1. 461478 1. 585877 1. 185459 1. 96487 1. 699982 1. 874835  
1. 371352 1. 259548 1. 219527 1. 42652 1. 082328 1. 206909 1. 148053 1. 964659 1. 365325  
1. 772596 1. 271432 1. 194046 1. 392232 1. 031397 1. 187508 2. 156838 1. 518769 0. 998648  
3. 255842 4. 337446 3. 517589 2. 985511 3. 520792 3. 470722 4. 148955 4. 588605 4. 413394  
2. 348186 1. 313358 1. 285073 1. 579175 1. 858844 1. 341345 1. 559823 1. 536874 1. 800753  
1. 600762 1. 88747 2. 137972 1. 855169 2. 066129 1. 851834 1. 569638 1. 281048 1. 354054  
1. 012471 0. 788544 0. 736001 1. 323914 0. 985892 0. 966577 1. 147836 0. 946999 1. 78395  
1. 630927 1. 51757 1. 867059 1. 601737 1. 505446 1. 817871 1. 795723 1. 336712 1. 806345  
7. 400942 7. 433118 7. 259004 7. 372344 7. 757235 7. 130547 7. 21881 7. 41806 7. 299476  
1. 202575 1. 169405 1. 520547 1. 417561 1. 503483 1. 462107 1. 649094 2. 050814 1. 202994  
2. 575108 2. 149412 1. 608878 2. 179815 2. 476583 2. 050471 1. 726253 2. 118662 1. 868532  
2. 054572 1. 815862 2. 970558 2. 299721 2. 26832 2. 105142 2. 765596 2. 393296 2. 58994  
5. 537787 4. 043996 4. 078318 4. 184825 4. 712208 3. 330392 5. 605226 5. 292538 4. 863109  
3. 238775 1. 705339 2. 821024 2. 643113 1. 850612 3. 238564 2. 522815 5. 362356 5. 053204  
1. 647078 1. 0573 0. 935545 1. 690171 1. 340989 0. 913216 1. 644271 0. 900848 1. 089439  
6. 216906 5. 817442 6. 294395 5. 141478 5. 956424 5. 632588 6. 267273 6. 739139 5. 758285  
5. 640095 6. 737508 6. 434886 5. 585614 6. 360947 6. 139601 6. 49 5. 803293 6. 464526  
3. 545357 3. 642298 4. 271617 4. 40005 4. 610843 3. 850086 4. 925684 3. 942678 4. 488414  
2. 239487 1. 919748 2. 181887 1. 631808 1. 935096 2. 106644 2. 167083 2. 105226 2. 106476  
3. 096037 4. 282537 3. 743283 4. 652657 5. 272568 4. 233982 3. 775448 4. 644931 5. 19683  
6. 130663 6. 850083 6. 423623 7. 449714 5. 501586 6. 249626 5. 904789 6. 666343 6. 958887  
0. 740742 0. 821752 0. 863978 0. 873771 0. 842101 0. 966061 0. 868276 0. 955446 1. 094152  
2. 004692 1. 568529 1. 651819 1. 591794 1. 673547 1. 698882 1. 610402 1. 468074 1. 429255  
3. 96942 3. 520508 3. 486433 3. 351202 3. 232989 3. 362258 4. 389757 3. 302289 3. 644871

3.952288 2.933695 3.129705 2.561934 2.387833 2.420202 2.892743 3.335979 2.825425  
4.741937 4.298107 3.677558 4.065314 3.33029 3.4723 4.083719 4.044751 3.659387  
4.444644 3.74104 3.045572 2.497011 3.345343 3.936847 3.094425 3.581573 3.199321  
4.183204 2.343064 3.29369 2.228183 1.638273 1.705716 1.799927 5.277813 2.590595  
1.427457 1.25511 1.356809 1.934085 1.446632 1.141499 2.181466 1.549839 1.330043  
2.374565 2.682107 2.764804 2.781553 4.076095 2.188808 2.655035 3.501057 2.944624  
6.322751 6.945311 7.581518 7.10901 7.030475 7.882988 6.711866 7.370383 6.977873  
7.402745 6.740029 6.436101 6.219886 6.789065 5.809909 6.645541 6.549317 6.44757  
2.855004 3.928901 4.052948 2.476381 2.482078 5.438783 2.360999 3.302632 3.261836  
4.340951 4.616692 4.853311 4.370436 4.24735 5.273597 3.645037 4.401511 4.982588  
5.791429 4.908316 4.918554 5.287067 5.388191 4.857648 4.758061 5.185158 5.288609  
2.390202 1.542435 1.89634 1.870472 1.960753 1.699572 2.257383 1.69053 2.079643  
2.8851 2.759134 4.240115 2.324151 3.071704 3.28161 3.181733 2.960101 3.169805  
1.890393 1.65076 1.690905 2.26263 1.706588 1.76014 1.507156 1.637783 1.887061  
1.489082 1.000084 1.204505 1.261417 1.505345 1.58511 2.770038 1.020031 1.442663  
1.26801 1.256054 1.578888 1.286988 1.159224 1.379545 1.008411 1.478163 1.548599  
4.936984 5.846694 5.539042 3.863496 3.405616 3.401736 4.207808 5.075086 4.467892  
4.166016 4.871482 4.285902 2.91993 4.119077 4.378596 3.779615 4.974712 3.580428  
6.712291 8.36431 8.300106 7.129847 7.928519 7.959962 6.500442 7.917208 7.335732  
1.870982 1.921623 2.033531 2.171149 2.372867 2.10522 2.450296 2.055224 2.888552  
6.210422 5.953683 5.633034 5.68022 6.281529 5.758863 5.287974 6.019678 6.307647  
4.163753 4.712398 5.02062 3.795775 3.902589 5.418078 2.865666 5.16602 2.609166  
2.771225 3.069293 3.464662 2.562256 2.371335 2.882614 2.854551 2.290639 2.596816  
2.291244 1.631377 1.345816 1.525787 2.662028 1.309942 1.846716 1.996954 0.773074  
2.074443 2.111022 1.846886 1.238862 1.703239 1.586165 2.127045 2.292662 1.794132  
2.305083 3.182633 2.505224 2.109898 2.042459 2.614226 2.115403 1.938001 2.247509  
6.126007 6.437706 6.407889 5.678716 6.573531 6.669177 6.316405 6.413309 6.340099  
3.760774 4.423398 4.514121 4.161724 3.275766 2.830682 3.690868 3.258879 4.690785  
3.238261 2.767597 3.926609 3.510853 2.584845 2.10597 2.618615 2.537077 4.426448  
4.844613 5.388608 5.648124 6.063918 6.662468 5.452951 5.562986 5.588645 5.753251  
4.002508 4.439659 5.063198 2.811304 3.748949 3.407798 3.590288 3.812782 4.369206  
5.123681 5.015408 4.575059 4.109402 5.28722 5.023961 4.9603 5.236327 5.553943  
2.777794 2.600791 3.857824 2.281363 2.142001 1.528319 1.694627 2.201452 3.570812  
1.144113 0.990518 0.993075 1.435441 1.235125 1.352079 2.305578 1.527304 1.149455  
5.850247 6.321318 5.613683 5.474669 6.078984 6.22776 5.570508 5.803415 5.397628  
1.376723 1.899404 1.492328 1.024701 1.245559 1.794698 2.917584 2.106273 1.861391  
2.031588 1.607103 1.775328 1.282087 1.355096 1.95532 1.774025 1.725228 1.444776  
2.965163 1.593557 1.530492 1.633983 1.847204 2.180364 1.356654 1.995975 1.53401  
2.908707 2.722451 2.598345 3.406954 4.075775 3.649533 3.3483 3.319169 3.401436  
7.088807 6.22066 5.897257 5.939329 5.863418 4.859082 6.74717 6.384152 6.462786  
2.143176 1.912159 2.378479 1.992353 1.616315 1.96699 2.621655 1.610131 1.633137  
1.77934 2.40013 1.405937 2.356689 2.724029 2.092617 1.56377 1.542537 1.806656  
5.871297 5.841582 5.774051 4.888242 5.4109 5.283425 5.218295 5.36693 5.854183  
7.813996 8.018406 8.752179 7.977506 8.140383 8.416372 7.977284 8.023965 7.947708  
4.26543 3.407171 3.930201 4.858714 5.315113 3.838488 4.707234 4.174254 4.228583  
5.724627 5.803723 5.930583 5.787275 4.768995 6.359226 5.131536 6.358267 5.626942  
7.653233 7.430584 7.75807 7.602166 7.640341 7.357829 7.242409 7.156321 7.604585  
1.23568 1.288198 1.509897 1.231602 2.51714 1.242019 2.130132 1.4479 1.512491  
4.263204 5.124207 5.126967 5.06454 5.286763 4.9249 5.276568 4.800842 5.319639  
1.872801 2.083438 1.862333 1.942499 1.550377 1.541558 1.856246 1.66034 3.373095  
7.938285 8.016906 8.13272 8.509941 7.824764 8.153327 7.53511 7.935125 8.025696

1. 931199 1. 190689 1. 151922 1. 699625 1. 713152 1. 601638 1. 384529 0. 968554 1. 361752  
1. 173995 1. 021564 1. 769738 1. 823989 1. 220986 2. 097039 0. 682246 1. 431712 1. 523637  
1. 455455 1. 041485 2. 119259 0. 904043 1. 064225 1. 16489 1. 359393 1. 781906 1. 500297  
1. 320375 0. 744189 0. 705845 1. 284203 1. 111192 0. 983063 0. 870148 1. 389296 1. 103673  
1. 196207 2. 753109 1. 461628 0. 928452 0. 64233 2. 359268 0. 992042 1. 530143 2. 475869  
3. 064146 1. 285837 1. 405424 2. 501242 1. 813339 1. 290712 1. 528326 2. 112773 2. 298195  
1. 603877 1. 627961 1. 988148 1. 708778 2. 442832 1. 559886 2. 577704 2. 171658 1. 682331  
7. 315835 7. 573248 6. 973775 7. 273897 7. 186326 7. 821713 7. 042525 6. 659441 7. 12422  
2. 18049 1. 414843 1. 919045 1. 615574 2. 377833 1. 566917 2. 819147 1. 89479 2. 199017  
7. 112765 7. 323135 7. 211742 7. 195615 7. 556822 7. 176885 6. 869155 7. 287225 7. 618259  
1. 829211 1. 768992 2. 268934 1. 836049 2. 10558 1. 489685 1. 836767 2. 419722 2. 842449  
1. 753613 1. 043966 0. 976368 1. 157833 1. 286896 1. 257079 1. 005507 0. 971469 1. 303451  
1. 790723 1. 573254 2. 351122 1. 469812 1. 986123 1. 331452 1. 612503 2. 598824 1. 517603  
4. 434474 4. 292441 4. 133984 3. 472332 4. 926735 4. 04448 3. 850061 4. 598397 4. 017718  
1. 604055 1. 65734 1. 400979 1. 539832 1. 567777 1. 330702 1. 489466 1. 558684 1. 274689  
1. 307464 1. 058716 1. 00773 0. 748218 1. 222688 1. 152459 1. 087994 0. 944563 1. 086228  
3. 409268 2. 485292 2. 755526 1. 988131 2. 146933 1. 494336 1. 934242 2. 649362 2. 265458  
2. 813063 1. 783705 2. 550335 1. 842681 2. 656346 2. 340716 2. 856319 2. 374828 2. 29355  
1. 42378 0. 897099 1. 535246 1. 555282 2. 042759 1. 448349 1. 182324 1. 416264 1. 239468  
1. 520787 1. 367085 1. 550497 1. 82903 1. 869795 1. 438612 1. 585035 1. 201045 1. 111012  
2. 382108 1. 9715 2. 175281 1. 964885 2. 162435 1. 804103 1. 555216 1. 838259 1. 869596  
5. 885467 5. 927443 6. 409935 6. 20887 6. 34217 5. 865829 5. 517194 6. 593222 6. 100746  
3. 215106 3. 386233 2. 464773 3. 688654 3. 035446 3. 938313 2. 164462 3. 806723 4. 25144  
2. 032852 1. 050302 1. 249339 1. 133701 1. 257212 1. 298336 1. 047824 0. 963902 1. 200028  
8. 2936 7. 920917 8. 262066 7. 923877 7. 77915 8. 027903 8. 327871 8. 423912 8. 232196  
3. 780434 3. 375294 2. 841369 3. 788928 3. 212163 4. 058044 3. 350197 2. 865568 3. 16961  
6. 67165 6. 529616 6. 430202 5. 809569 5. 856014 5. 627679 4. 879282 5. 787747 5. 840592  
2. 0501 1. 841951 1. 428848 2. 000378 1. 865933 1. 264391 1. 549129 1. 32031 1. 757177  
10. 40971 10. 6109 10. 53526 11. 15753 10. 59145 10. 18331 10. 56404 9. 735271 10. 61182  
2. 504483 2. 252284 2. 345532 2. 008983 1. 45418 1. 905253 2. 264133 1. 205194 2. 247228  
1. 980793 1. 524704 1. 228036 1. 645446 1. 131182 1. 340706 2. 314578 1. 680396 1. 083984  
1. 50821 1. 179035 1. 276924 1. 751971 0. 979654 1. 924394 1. 005145 1. 124933 1. 087807  
1. 204172 1. 019273 1. 090568 1. 509048 1. 925214 1. 664997 1. 329717 1. 321997 1. 389228  
1. 950127 1. 868007 2. 461424 2. 56809 2. 294346 2. 410125 2. 439498 1. 834161 2. 244155  
0. 764453 0. 81303 0. 799285 0. 823438 1. 111527 0. 71498 0. 68127 0. 710122 1. 091561  
2. 671214 2. 010825 2. 089354 1. 761391 2. 282285 1. 782463 1. 80757 1. 774635 1. 442864  
4. 100343 5. 358386 5. 068063 4. 990602 4. 541719 4. 973513 4. 534967 4. 859027 5. 361324  
1. 573907 1. 212604 1. 836151 1. 87633 1. 431727 1. 729479 1. 595978 1. 266483 1. 585413  
3. 038312 2. 230842 2. 205761 2. 203344 1. 871963 2. 316334 2. 358618 2. 498732 2. 513486  
1. 712087 1. 712516 2. 021291 1. 810685 2. 266826 2. 577653 2. 34699 1. 807004 2. 084539  
1. 441727 1. 551894 1. 177894 1. 362397 1. 47275 1. 244324 2. 284094 1. 867319 1. 581227  
2. 429138 2. 157024 2. 453551 2. 986623 2. 348252 1. 118696 1. 800513 1. 650514 1. 762349  
6. 941646 8. 93682 8. 717703 8. 969245 8. 915846 9. 454154 9. 730457 8. 649774 8. 430947  
2. 118999 4. 824679 2. 746788 4. 062257 3. 070769 2. 950736 2. 64728 2. 086162 2. 393691  
2. 380624 1. 265023 3. 033684 1. 895781 1. 8496 1. 865875 2. 419006 1. 94028 2. 008858  
1. 61857 1. 249682 1. 059187 1. 405795 1. 613807 2. 052422 1. 55959 1. 201268 1. 865779  
1. 858253 1. 436386 1. 586387 1. 653427 1. 303474 1. 629552 1. 854398 1. 360382 1. 721817  
1. 251669 1. 45327 1. 116572 1. 115224 1. 211639 2. 060514 1. 009143 1. 047556 1. 606955  
1. 414706 1. 204868 1. 417395 1. 71361 1. 776526 0. 822056 1. 183228 1. 821185 1. 455784  
5. 585595 5. 903806 5. 881476 6. 201578 6. 289991 6. 005902 6. 083538 6. 072316 6. 139357  
2. 175749 1. 732371 2. 046613 2. 122182 2. 332898 2. 470816 2. 327859 2. 122348 2. 109175

3. 715851 4. 778602 3. 995572 5. 033247 3. 989501 4. 525053 5. 56569 5. 244234 4. 370893  
4. 301621 4. 138908 4. 590202 3. 570355 3. 281914 5. 030677 3. 664523 4. 025788 2. 978674  
6. 40056 6. 741516 6. 321341 6. 898625 6. 656467 6. 706358 6. 434974 6. 600064 6. 421155  
6. 121128 6. 884026 6. 557165 6. 94234 6. 522528 7. 3146 6. 321728 7. 037946 6. 626579  
1. 319414 1. 155252 0. 984032 1. 402771 1. 101871 1. 056254 1. 429234 0. 789579 1. 447881  
0. 761099 1. 396503 0. 954271 1. 015071 0. 933171 0. 818197 1. 140657 1. 35171 0. 889086  
1. 621081 1. 837199 1. 73778 1. 646052 1. 672853 1. 427271 1. 746877 1. 904184 1. 343902  
2. 295762 1. 708781 2. 154918 2. 58243 2. 426524 2. 021694 2. 236746 2. 1028 2. 1104  
1. 985159 2. 087877 1. 503862 1. 620978 1. 726633 1. 450973 1. 702515 1. 502032 1. 41219  
1. 738915 2. 594071 1. 813998 1. 770244 1. 9051 2. 487265 1. 378843 2. 694428 2. 207668  
3. 663146 2. 315897 2. 503891 2. 530548 2. 753871 2. 584401 2. 087904 2. 079887 2. 412393  
1. 907667 1. 263913 1. 385088 1. 197259 1. 486716 1. 288802 1. 278557 1. 808934 1. 182969  
1. 516002 1. 366493 1. 342154 1. 299932 1. 192434 1. 367347 1. 352577 1. 889944 1. 452809  
1. 111976 1. 30143 1. 037102 1. 091039 0. 955917 1. 018286 1. 077822 1. 217243 1. 23365  
3. 406695 4. 288466 4. 009648 4. 707183 3. 495566 3. 964617 3. 759267 4. 625505 3. 534682  
5. 490162 4. 383353 5. 609295 5. 209063 5. 662459 4. 860234 4. 357853 5. 478175 5. 929126  
6. 645377 6. 709267 7. 511218 6. 845139 6. 72916 6. 752268 6. 013934 6. 346628 7. 069073  
3. 448826 4. 095425 4. 009253 4. 363961 4. 323989 3. 683863 4. 406205 2. 89326 3. 382717  
1. 625781 1. 235112 1. 136698 1. 313223 1. 468439 1. 365015 1. 833312 1. 419784 1. 746036  
6. 580767 6. 185514 6. 279919 5. 993507 6. 118301 6. 13373 6. 379345 6. 451055 5. 98088  
7. 461168 7. 33741 6. 853207 7. 503751 7. 592075 8. 049604 7. 72633 6. 997575 7. 430554  
2. 686329 1. 392653 1. 505174 1. 886358 1. 550958 1. 429811 1. 642376 1. 707396 1. 558997  
1. 169189 1. 212166 1. 151544 0. 837882 1. 002291 2. 079731 1. 065214 1. 010525 1. 400739  
3. 258979 2. 761426 3. 252613 3. 302454 3. 008049 2. 656354 2. 701456 2. 906881 2. 413763  
4. 859871 4. 176471 3. 514152 4. 483927 4. 448425 5. 626071 4. 257476 4. 02208 3. 789632  
6. 283965 7. 175662 6. 920794 7. 033234 6. 645029 6. 855676 7. 164933 7. 10614 7. 09221  
3. 085016 3. 531309 2. 474857 5. 866692 3. 38937 3. 535064 2. 501339 2. 50102 4. 306537  
9. 146235 9. 939171 10. 04477 9. 561011 9. 562331 9. 631954 9. 566245 9. 61163 8. 952523  
6. 343715 7. 323693 6. 818055 7. 258336 7. 575464 6. 641353 7. 442263 7. 167568 7. 283033  
7. 414364 7. 74585 7. 855391 7. 608912 7. 597273 7. 721228 7. 655568 7. 742618 7. 575774  
3. 323499 5. 408851 5. 393153 4. 133712 3. 800412 4. 15376 5. 008479 5. 13876 3. 91139  
1. 637607 1. 294361 1. 301359 1. 553537 1. 547114 1. 546712 1. 337518 1. 416934 1. 784143  
5. 319113 5. 664156 5. 370875 5. 898535 5. 599797 5. 501574 4. 864377 4. 88899 5. 349446  
1. 265254 2. 489242 1. 39997 1. 81099 2. 400688 0. 936703 1. 308314 2. 411926 1. 584216  
2. 331585 1. 668696 2. 866484 3. 927402 2. 246575 2. 087979 2. 830534 2. 853321 2. 487977  
3. 128724 3. 898718 3. 094992 2. 363154 2. 358493 2. 620391 3. 83915 3. 51636 3. 082583  
2. 234317 1. 941787 2. 077918 1. 750071 2. 487257 1. 661146 2. 755424 2. 904226 2. 208524  
4. 677699 4. 434229 4. 512921 4. 964279 4. 547514 5. 133095 4. 45594 3. 898943 4. 461654  
1. 9438 2. 481893 1. 896229 2. 849349 1. 828302 1. 808125 3. 073057 2. 70063 2. 294284  
1. 102839 1. 175762 1. 32594 1. 20664 1. 673774 1. 388646 1. 858784 1. 178938 1. 877446  
3. 857874 3. 848297 4. 113669 3. 995188 3. 393814 4. 67237 3. 602087 3. 814942 4. 181082  
1. 882149 1. 68226 1. 108074 0. 966464 1. 33543 1. 467514 1. 024643 1. 363969 1. 595889  
2. 008267 1. 436144 1. 822034 1. 681253 1. 467144 1. 785092 2. 008267 1. 783477 2. 312541  
2. 075977 2. 166841 2. 183627 3. 480205 2. 235082 2. 382621 2. 158584 3. 016712 3. 195421  
2. 404469 3. 13545 2. 905859 3. 315171 2. 611133 2. 793486 2. 469339 3. 244802 2. 869175  
1. 434471 1. 885686 1. 481726 2. 40846 1. 851652 1. 995498 2. 598759 1. 510149 1. 874359  
3. 06815 3. 243197 3. 782478 2. 791645 1. 804013 2. 281111 4. 425433 2. 482213 2. 987628  
2. 751908 3. 109001 3. 193906 3. 405052 2. 86951 3. 180143 2. 519868 2. 778929 3. 352962  
3. 391682 3. 664951 4. 130235 3. 423142 4. 116674 4. 532551 4. 639669 3. 539969 3. 076412  
4. 277004 4. 531232 4. 362283 4. 90865 4. 497183 4. 626982 4. 266033 4. 902945 4. 751527  
4. 129906 4. 015985 4. 028191 4. 619647 4. 288276 4. 82711 4. 349784 3. 510722 5. 154212

1. 531676 2. 11058 2. 370516 1. 742666 1. 246466 2. 074719 1. 901907 1. 223339 1. 679281  
2. 233817 2. 274132 2. 468286 2. 139919 2. 936945 2. 073114 3. 109936 1. 770531 1. 917993  
1. 636368 0. 862362 1. 144426 1. 690146 1. 186578 1. 543324 1. 605233 1. 07085 1. 31038  
2. 351009 1. 839209 1. 447215 1. 286706 1. 709428 1. 150156 2. 392601 2. 058181 1. 886843  
2. 66006 5. 562299 4. 860243 4. 371733 5. 013548 4. 4103 3. 902522 5. 835122 2. 716905  
6. 724275 7. 585066 7. 132625 7. 564441 6. 777474 7. 623931 6. 650077 7. 729911 7. 604308  
6. 724745 5. 275038 6. 033884 6. 107512 5. 499614 5. 743163 6. 074884 5. 876323 6. 54627  
1. 346479 1. 306011 2. 49979 2. 443713 1. 980229 0. 947703 1. 220036 1. 710459 1. 343527  
2. 83205 2. 538291 2. 382361 2. 486529 2. 711409 3. 042317 2. 788593 2. 348327 2. 538913  
2. 193925 2. 949044 2. 046971 1. 727231 3. 100745 1. 962059 2. 708656 2. 705078 2. 611115  
2. 83288 2. 69784 2. 225888 1. 617417 2. 400413 2. 092737 1. 468865 1. 832885 1. 945596  
4. 568416 5. 070497 5. 310818 5. 22049 5. 653229 5. 927511 4. 890592 5. 125423 5. 845214  
3. 205415 2. 305685 2. 658862 2. 491053 2. 012998 2. 84188 2. 761905 2. 752436 2. 06882  
4. 98099 5. 924888 5. 554859 5. 583337 6. 133659 5. 341985 4. 896576 6. 008674 5. 246441  
2. 112108 0. 912172 1. 103635 1. 285693 1. 789567 0. 856178 2. 163027 1. 482768 1. 046895  
1. 863369 2. 015904 1. 667868 2. 016634 1. 762169 1. 692716 1. 558459 2. 020603 2. 403667  
0. 885556 1. 143947 0. 868798 1. 70392 1. 347512 0. 95448 1. 717393 1. 192359 0. 950675  
4. 848779 4. 766758 4. 859518 4. 247816 4. 737654 5. 400761 4. 292803 5. 102581 4. 503897  
9. 079814 9. 502529 9. 494809 9. 372784 9. 369963 9. 218854 9. 948654 9. 422087 9. 532117  
3. 021568 2. 901117 3. 486076 3. 312793 2. 687934 3. 450203 2. 898591 2. 848331 2. 929506  
1. 228569 1. 265607 1. 171332 1. 73137 1. 438616 0. 817026 1. 145388 0. 904892 1. 035212  
3. 300066 2. 295543 2. 932117 4. 380509 1. 858589 1. 549197 2. 969945 2. 186677 3. 994868  
2. 386398 1. 911293 1. 924295 1. 727281 1. 675635 2. 066276 2. 528177 1. 728981 1. 761716  
2. 054028 1. 227899 1. 079784 1. 512676 1. 096609 1. 085078 0. 844165 1. 330829 1. 456069  
1. 595875 1. 192237 1. 659727 1. 157965 1. 651369 1. 686511 1. 570088 1. 757228 1. 707481  
4. 400323 3. 690125 2. 793055 4. 422726 4. 472688 3. 543432 2. 470688 4. 018854 3. 478068  
1. 674863 1. 76608 2. 104016 1. 71823 3. 232368 2. 411965 3. 126239 1. 786701 1. 512113  
1. 418646 1. 209875 1. 213924 1. 395364 0. 84622 0. 976988 1. 181119 1. 371015 1. 19144  
1. 972415 1. 26252 1. 067703 1. 166761 0. 960634 0. 960634 1. 194458 1. 023717 1. 084052  
1. 319821 1. 137868 0. 914021 1. 499747 0. 94939 1. 383247 1. 764138 1. 197962 1. 202692  
3. 008263 3. 022019 4. 788587 2. 732289 3. 077575 4. 881073 4. 064888 5. 2443 3. 41714  
1. 240558 0. 944597 2. 010603 0. 882443 1. 134512 1. 207915 1. 787139 1. 617427 1. 767138  
1. 772965 1. 802208 2. 132752 1. 780845 1. 841138 1. 010112 1. 637113 1. 8967 2. 453204  
2. 406276 2. 202875 1. 703226 1. 631313 1. 694238 1. 747502 2. 54002 2. 139771 1. 509717  
2. 182212 1. 975133 1. 986439 2. 724222 1. 316119 1. 604465 2. 787087 1. 836231 1. 816261  
1. 464308 0. 966553 1. 070024 2. 904036 0. 880348 1. 001997 1. 486961 1. 257429 1. 136763  
0. 941561 1. 451254 0. 932795 1. 291055 1. 009835 1. 004264 1. 091828 0. 865548 0. 991384  
2. 319283 1. 867128 2. 759782 2. 284841 2. 052687 2. 515216 2. 233826 2. 748488 2. 142381  
8. 501363 8. 780684 8. 822766 7. 995744 8. 2905 7. 940984 7. 817318 8. 052329 7. 733277  
2. 425592 2. 449467 2. 893444 2. 250058 2. 296375 2. 455416 2. 099883 2. 804835 3. 009642  
5. 550055 6. 286409 5. 872321 5. 710725 6. 002918 5. 430057 6. 059136 6. 282172 5. 871341  
2. 223233 1. 602833 1. 838749 1. 85702 1. 821567 2. 516322 3. 014511 2. 69082 2. 597516  
2. 17054 1. 609484 1. 544609 2. 250021 1. 371506 1. 2974 1. 122547 1. 265224 2. 171796  
4. 791498 4. 463662 4. 784537 4. 668674 4. 34599 3. 903822 4. 318896 3. 395638 5. 358026  
3. 576948 4. 824065 4. 150717 4. 096602 4. 525557 4. 371326 3. 782324 4. 565236 4. 112774  
2. 565125 1. 325648 1. 767445 1. 800071 1. 679549 1. 557711 1. 316642 1. 102616 1. 931203  
1. 985188 1. 505102 2. 502947 1. 744571 2. 052595 2. 042721 2. 367641 2. 344332 2. 163915  
2. 608923 2. 107104 2. 626041 2. 201545 2. 194574 2. 552101 2. 804015 1. 789121 2. 583956  
10. 79597 10. 56163 10. 44153 10. 38066 10. 4853 10. 31988 10. 55689 10. 9308 10. 50637  
1. 623311 2. 34364 1. 2583 1. 453351 1. 925927 1. 34318 1. 28074 1. 525326 1. 617632  
1. 846397 1. 86375 1. 624929 1. 404767 2. 957559 1. 73117 2. 570027 1. 805661 1. 18325

2. 665531 2. 259366 2. 020606 2. 343966 2. 168384 2. 315094 1. 876999 2. 546896 2. 662472  
1. 611514 1. 127071 1. 183198 2. 831995 2. 208433 2. 115192 2. 881067 1. 267587 3. 337239  
3. 013123 3. 440811 3. 978958 2. 606353 3. 288692 3. 651449 2. 987527 3. 29098 3. 287919  
4. 500393 3. 952561 4. 980882 4. 313271 4. 501507 5. 622124 4. 659004 4. 953974 4. 658986  
5. 070176 3. 474263 4. 505468 3. 541651 2. 554928 3. 515906 4. 482144 4. 091961 3. 672968  
2. 337819 2. 107565 2. 278752 2. 358229 2. 082987 1. 827849 3. 288701 2. 246153 1. 866844  
1. 397347 1. 783695 1. 354209 1. 493372 2. 366915 1. 137895 1. 090681 1. 598145 1. 724427  
3. 86081 5. 176606 5. 611427 5. 769484 4. 622661 5. 612243 5. 061706 5. 182843 4. 498959  
2. 182779 1. 672544 1. 621742 2. 131278 2. 097198 2. 466052 3. 172865 1. 508158 1. 775518  
3. 006283 1. 825434 2. 354141 1. 773881 2. 301681 2. 114979 3. 043818 1. 829651 2. 369883  
3. 685564 3. 507143 3. 014491 3. 126134 3. 136374 3. 656597 3. 628473 3. 468638 3. 314606  
3. 99509 3. 603907 3. 471699 4. 218486 5. 703112 3. 405547 3. 29868 3. 74676 4. 23925  
2. 779829 2. 974794 3. 50311 2. 239481 1. 798239 2. 115968 2. 022824 1. 933155 3. 302184  
1. 397161 1. 683041 1. 608162 1. 860297 1. 88467 3. 286074 1. 25075 1. 815389 1. 714677  
1. 291817 2. 138716 0. 889158 2. 086404 1. 497108 1. 383325 1. 550492 1. 577451 1. 469717  
1. 794246 2. 817559 2. 276782 1. 849491 2. 011672 1. 415495 1. 529065 1. 319334 2. 602807  
1. 562026 2. 141862 1. 641139 1. 850269 1. 439848 1. 733074 1. 661344 1. 755715 1. 843841  
2. 107221 1. 92953 1. 365006 1. 869752 1. 961321 1. 762629 1. 875208 2. 330649 1. 746929  
2. 119482 3. 059317 2. 802924 2. 912708 2. 306718 2. 089995 2. 306804 2. 09946 2. 009866  
1. 496274 1. 656649 1. 685463 1. 458952 0. 986592 1. 458573 1. 437646 1. 272383 1. 776155  
4. 438137 6. 081605 5. 574196 6. 708655 5. 869076 6. 492981 5. 827434 6. 483811 6. 029417  
5. 328871 3. 914638 5. 237982 3. 503755 3. 006751 2. 51766 3. 293493 3. 563689 4. 045638  
1. 384299 0. 812834 0. 807991 0. 969517 1. 484469 0. 78296 1. 049494 1. 214252 0. 933761  
2. 235604 2. 756319 2. 873319 2. 13093 2. 863987 2. 531026 3. 109277 2. 575836 3. 171182  
3. 985206 5. 02755 4. 833324 4. 912905 4. 300885 4. 898725 5. 570459 5. 32711 4. 830603  
8. 232332 7. 279439 6. 877227 6. 322098 6. 799282 6. 595214 7. 124841 6. 921142 7. 400785  
6. 127009 6. 366465 6. 228419 6. 261649 6. 72452 6. 562384 5. 933027 6. 153984 6. 485748  
3. 633401 3. 175664 3. 69825 3. 488073 3. 925964 3. 623801 2. 832562 3. 016313 3. 748277  
1. 514688 1. 184608 1. 848879 1. 729892 1. 326657 1. 694535 1. 513413 2. 354547 2. 554955  
6. 365964 7. 02978 7. 319543 7. 022669 6. 907777 6. 867878 6. 208709 7. 145415 6. 7146  
7. 225587 7. 059915 7. 314411 7. 490146 7. 14723 7. 177768 6. 822177 7. 003813 7. 169655  
1. 480412 1. 341706 0. 950291 1. 326806 1. 021478 1. 288056 1. 092702 1. 125305 1. 017176  
2. 735714 2. 227735 2. 421687 3. 210886 2. 869663 3. 10613 3. 288094 1. 684787 2. 868825  
3. 422369 4. 680244 5. 080188 4. 769026 4. 241738 4. 936388 4. 242729 4. 758292 4. 174947  
2. 080808 2. 141013 2. 260263 3. 223233 2. 87716 2. 464288 2. 8562 1. 883112 1. 771225  
5. 60991 5. 863194 5. 422677 5. 469406 5. 679287 5. 851643 6. 030194 5. 809822 5. 51682  
4. 622356 5. 689135 4. 713159 4. 972068 6. 68694 3. 091863 5. 667031 4. 631183 5. 8159  
7. 058954 6. 540783 6. 694719 6. 14751 6. 142422 6. 65144 6. 194911 6. 473708 6. 925114  
3. 788095 4. 514392 5. 084053 3. 184506 4. 86086 4. 61035 2. 805884 4. 459306 4. 205139  
3. 128708 2. 650752 3. 19917 2. 900669 2. 713304 2. 537167 2. 626632 2. 746999 1. 903433  
1. 629678 1. 34495 1. 118706 1. 366173 1. 18161 1. 081665 1. 763719 1. 206747 1. 415113  
0. 998814 1. 254942 1. 113723 1. 129247 0. 807993 1. 181966 1. 413059 1. 054252 1. 23817  
7. 561617 7. 812145 7. 747428 7. 693823 7. 739584 7. 752512 7. 692213 7. 794016 7. 933624  
2. 582415 1. 883353 2. 185286 2. 348101 1. 970776 2. 078981 2. 415445 2. 25187 2. 767374  
0. 910549 1. 027455 0. 723562 1. 102288 1. 582405 0. 795969 1. 120281 0. 782214 0. 837061  
1. 810404 4. 986385 9. 556499 4. 332801 1. 705569 2. 119238 6. 888228 2. 094069 8. 929994  
3. 208852 4. 301738 3. 841293 2. 894051 3. 086465 4. 569394 2. 840984 3. 30052 3. 84835  
4. 940682 5. 054502 4. 614794 6. 03744 4. 712146 5. 495888 4. 98925 4. 029379 4. 631266  
2. 329735 1. 405264 2. 748217 1. 084788 1. 570159 1. 925764 1. 724057 2. 66743 1. 799138  
5. 720097 1. 787033 4. 789798 3. 05029 3. 858935 1. 834163 3. 970952 1. 979262 1. 732732  
3. 186866 4. 592151 3. 997545 2. 830459 3. 223632 4. 005602 2. 651863 2. 693295 3. 363045

2. 650995 1. 851537 2. 431734 2. 238318 2. 510141 2. 10423 2. 317159 2. 28167 1. 638465  
3. 39501 3. 407099 4. 295001 3. 317541 3. 274696 3. 296208 3. 250151 4. 282284 4. 245413  
5. 235118 5. 432485 5. 848696 4. 784425 5. 73081 5. 329747 4. 827781 5. 343276 5. 656006  
1. 756003 1. 334896 2. 034779 1. 765218 2. 028493 1. 667468 1. 38384 1. 169618 1. 418231  
4. 228719 5. 533486 5. 53937 6. 250921 5. 253698 5. 799917 6. 74086 5. 360613 6. 024665  
1. 40016 0. 996531 1. 097851 1. 149308 0. 912332 1. 465431 1. 1934 0. 89132 1. 251563  
5. 784537 4. 893679 4. 957456 5. 632649 5. 302641 5. 541627 4. 348833 6. 135065 4. 655872  
4. 822696 5. 184954 4. 917779 4. 974443 4. 546936 4. 068309 4. 311056 4. 929834 4. 786188  
5. 529973 6. 169835 6. 039959 5. 841794 5. 988859 6. 087401 5. 690102 5. 881032 6. 025462  
6. 720249 7. 230389 6. 904037 6. 652711 6. 627713 6. 836066 7. 262093 6. 838285 6. 963981  
2. 013621 2. 47336 1. 745431 3. 371652 2. 440136 2. 635957 3. 013953 1. 733519 2. 402775  
4. 337027 3. 815258 3. 544558 4. 860436 3. 709919 4. 2168 4. 48029 3. 809503 3. 354032  
3. 894159 2. 601704 3. 852615 1. 875773 1. 911502 2. 949551 2. 548924 2. 554544 4. 056672  
3. 193168 4. 456317 4. 490034 6. 240299 4. 329141 3. 592571 5. 928924 4. 158839 4. 874616  
7. 6555 7. 233462 7. 262951 7. 077409 7. 242874 7. 222394 7. 453317 7. 162091 7. 061698  
2. 610721 3. 688194 3. 228666 3. 287528 4. 74919 2. 954761 4. 098574 3. 650613 3. 878778  
2. 667116 1. 772352 1. 975505 2. 983959 1. 851053 1. 444477 2. 098519 2. 405295 2. 043447  
4. 079912 3. 853467 5. 21217 3. 75792 2. 902287 3. 553714 3. 730839 4. 559886 4. 311593  
5. 613277 5. 651317 5. 520709 6. 468503 5. 665674 5. 74323 5. 799359 6. 302006 5. 942467  
5. 838255 5. 938125 5. 571102 5. 042527 4. 200117 5. 831348 4. 885696 5. 214873 5. 809861  
1. 865646 2. 409919 0. 914476 1. 027281 3. 357962 1. 07183 3. 317359 3. 146943 1. 503655  
2. 432877 2. 068885 0. 824172 1. 33044 0. 833925 1. 747526 2. 213823 1. 071719 0. 893384  
2. 351021 2. 11517 2. 318615 2. 097099 2. 048535 2. 01011 2. 241618 2. 119827 1. 787565  
6. 270666 7. 261965 7. 591966 6. 470192 6. 874264 7. 648218 6. 33889 6. 924701 7. 195054  
4. 024272 2. 913693 1. 983767 2. 376037 1. 901319 1. 656912 2. 385546 1. 82699 3. 238656  
1. 253208 1. 610722 1. 185397 1. 040687 0. 843347 0. 91795 0. 801753 2. 043844 2. 353009  
2. 5899 3. 417711 2. 982242 2. 265383 3. 890501 3. 0588 1. 577688 2. 574787 2. 635962  
3. 36556 3. 159365 2. 537335 3. 20008 3. 084539 3. 203331 2. 894531 3. 521319 3. 884256  
3. 670567 4. 338447 5. 789785 5. 093163 4. 268339 4. 21959 4. 254889 5. 204292 3. 159748  
3. 751388 4. 590847 4. 073971 3. 574443 4. 763171 3. 395628 3. 053345 3. 955015 2. 977195  
0. 904551 0. 945439 0. 744339 0. 970165 0. 807257 1. 372281 0. 73521 0. 608131 2. 284479  
3. 717567 3. 773087 4. 078698 3. 891111 3. 465618 3. 350414 3. 759621 4. 035824 3. 593994  
3. 93051 1. 997051 2. 630518 1. 97709 2. 998582 2. 197466 3. 190019 2. 120231 2. 827007  
8. 167112 8. 139327 8. 149998 7. 821624 7. 942457 8. 348386 6. 887982 7. 856442 7. 621065  
3. 470036 2. 509311 3. 488614 2. 886771 2. 382625 3. 223217 3. 729852 4. 26123 3. 952107  
3. 010314 4. 303276 4. 178084 3. 015831 3. 584999 4. 366855 3. 678098 4. 675138 3. 855337  
3. 122817 1. 376212 2. 061452 2. 157565 1. 608286 1. 701874 1. 702312 1. 740881 2. 120331  
1. 241628 1. 071881 1. 102681 0. 984621 1. 049754 1. 131011 1. 315799 0. 705043 1. 045861  
2. 156205 2. 249848 1. 806991 1. 907188 1. 616357 1. 369839 2. 083709 1. 910969 1. 503362  
1. 482151 2. 518337 1. 74034 1. 953512 1. 43664 1. 639869 1. 614024 1. 980316 1. 937342  
1. 410009 2. 381862 3. 175911 2. 276557 2. 07801 1. 736138 1. 127806 2. 784347 1. 954292  
1. 17832 1. 324088 1. 043471 1. 31276 1. 432792 1. 259683 2. 035374 1. 658556 1. 753446  
1. 29801 1. 121332 1. 019841 1. 335197 1. 897506 1. 109211 1. 470569 1. 682935 1. 412029  
1. 693402 1. 807032 1. 329747 1. 030023 1. 891836 2. 316468 0. 992551 1. 844915 2. 19917  
1. 592039 1. 129813 1. 835031 1. 604064 1. 172014 1. 515225 1. 565556 1. 365548 1. 428571  
1. 834052 1. 187265 1. 345259 1. 457306 1. 204645 1. 288707 1. 587644 1. 553963 1. 630751  
5. 950197 4. 328921 4. 691368 4. 160884 4. 02891 4. 764204 4. 919608 5. 792948 3. 80854  
2. 773825 2. 456388 3. 374027 4. 202216 2. 438394 3. 034973 2. 797008 3. 355551 2. 280132  
2. 825752 4. 522004 4. 104303 4. 33531 3. 606611 4. 792483 4. 46089 3. 255879 3. 996291  
3. 664267 3. 440176 3. 603438 4. 254701 3. 706697 3. 340287 3. 117855 2. 496568 3. 416468  
4. 129624 4. 792694 5. 347542 5. 226369 4. 318127 5. 132746 4. 283883 3. 373038 4. 26052



1. 211563 0. 883931 1. 159126 0. 983719 1. 168502 0. 91866 1. 036252 1. 050632 1. 379769  
1. 545286 1. 663311 1. 368904 1. 211394 1. 161385 1. 05092 1. 376135 1. 251197 1. 285056  
3. 89987 3. 47515 2. 533452 3. 761832 3. 162354 3. 051926 3. 288218 3. 442515 3. 095046  
1. 159915 1. 292303 1. 135571 1. 178599 1. 253353 0. 963849 2. 088732 0. 899309 0. 852548  
1. 329751 1. 125445 0. 871116 1. 135491 1. 202953 1. 94942 0. 863749 1. 228847 1. 875435  
1. 090947 1. 088545 1. 349057 1. 295981 1. 201981 1. 33479 1. 822111 0. 95975 1. 94193  
2. 07117 1. 333864 1. 217005 1. 452817 2. 007179 1. 683719 1. 498487 1. 890587 1. 333387  
2. 652734 3. 456097 2. 33922 3. 240366 3. 873839 3. 046189 2. 92288 3. 234669 3. 447944  
0. 935032 1. 448803 1. 47012 1. 423735 1. 273765 1. 257984 0. 957267 1. 565252 1. 971657  
1. 885317 1. 696603 1. 51783 2. 213312 2. 470692 1. 69063 1. 862993 1. 817737 1. 895235  
1. 436769 1. 113025 0. 983584 2. 053449 0. 785499 0. 679042 0. 876449 1. 455551 1. 108905  
1. 824934 2. 539921 3. 902777 2. 647188 4. 022849 3. 049748 1. 357381 1. 963004 2. 069537  
2. 161442 1. 310852 1. 385602 1. 53623 1. 843372 1. 278853 1. 541793 1. 736276 1. 308467  
3. 136944 3. 21528 3. 370753 3. 029978 3. 015429 3. 550269 3. 515545 4. 252277 3. 656291  
1. 499509 2. 635341 2. 058499 2. 365224 1. 639592 1. 253868 1. 91375 1. 495444 1. 17451  
2. 542531 3. 02244 2. 288745 2. 811954 2. 683295 1. 523787 2. 806389 1. 962116 2. 332336  
4. 415814 1. 559707 3. 134727 1. 93413 1. 466322 0. 782804 1. 945898 2. 42716 2. 680863  
0. 990685 1. 184016 1. 684622 0. 799 0. 679724 0. 945329 1. 180947 1. 163795 1. 328372  
2. 653972 1. 837486 2. 032717 1. 984582 2. 563297 2. 305595 2. 510189 2. 215032 1. 902328  
1. 987231 1. 256089 1. 071526 1. 683678 1. 720427 1. 384862 2. 502204 1. 728168 1. 724954  
1. 944424 1. 511731 1. 639534 2. 370641 1. 650963 1. 718579 2. 267311 1. 888365 1. 675146  
3. 185829 3. 710451 3. 302413 4. 133603 3. 130004 4. 289887 4. 63538 2. 914155 4. 006661  
6. 44757 6. 418327 6. 971274 6. 262974 6. 590068 6. 039333 6. 481094 6. 866061 6. 737351  
0. 9375 1. 110509 1. 091595 1. 237258 1. 489479 1. 473147 1. 325889 1. 236326 1. 297533  
5. 356465 4. 956849 5. 518379 3. 911023 5. 092561 5. 486657 4. 483882 5. 484195 5. 05295  
6. 353854 7. 205796 7. 23503 7. 380942 7. 197866 7. 913137 7. 029123 7. 267791 7. 384562  
10. 24808 10. 63584 10. 16715 10. 6115 10. 6151 10. 36841 10. 18959 10. 23588 10. 54358  
2. 66982 2. 472496 2. 757413 2. 004768 1. 807192 2. 463905 3. 537784 2. 005513 1. 993322  
4. 023656 4. 536571 4. 860199 5. 444599 5. 4561 5. 253414 4. 479102 4. 144533 5. 294815  
1. 120316 1. 277622 1. 174042 1. 39653 1. 328757 1. 498216 1. 108636 1. 505246 1. 243653  
4. 689052 6. 044079 5. 821091 4. 34258 5. 576498 4. 631208 4. 678975 5. 475681 4. 702192  
2. 253608 4. 375535 3. 20097 3. 620785 3. 626183 4. 087161 2. 804995 3. 933599 3. 301571  
2. 226399 1. 790629 1. 680257 1. 790386 1. 660101 2. 100837 1. 56876 1. 669146 2. 19745  
6. 162451 6. 880832 7. 272599 7. 28124 7. 000947 6. 875162 6. 371246 6. 826268 6. 337275  
3. 033223 2. 211986 2. 95883 3. 660132 2. 979014 2. 996688 2. 675849 2. 855789 2. 985295  
2. 896348 3. 962912 3. 141365 3. 468697 4. 352413 3. 890181 4. 621566 4. 539253 3. 78159  
3. 558297 4. 074087 3. 167627 3. 842757 4. 1442 2. 890043 4. 290086 4. 666874 4. 206824  
5. 258414 5. 274537 4. 575146 4. 939663 5. 417863 6. 033065 4. 926791 4. 877848 4. 988471  
1. 997547 3. 10891 3. 887939 3. 916968 2. 985224 3. 152174 4. 034652 3. 939853 3. 262506  
4. 67567 5. 308447 4. 481848 5. 76325 4. 899483 6. 063103 4. 63579 5. 780508 5. 228766  
2. 000552 1. 536169 1. 909489 2. 402082 2. 038011 1. 622486 1. 752887 2. 273204 1. 783208  
1. 54976 1. 201955 1. 328522 1. 69789 1. 473371 1. 304671 1. 461162 1. 139743 1. 659625  
1. 218107 1. 399304 1. 31935 1. 29269 1. 411348 1. 091407 1. 647199 1. 360491 1. 168757  
7. 402253 6. 871847 6. 456423 6. 325088 6. 775491 6. 50995 6. 350296 6. 835005 6. 506139  
3. 595589 2. 427096 2. 809683 2. 749005 2. 563674 2. 985694 3. 287594 3. 237999 2. 524896  
1. 191225 1. 984484 2. 805589 2. 420055 2. 848805 2. 608641 2. 794189 2. 377558 2. 236368  
2. 676722 2. 313211 2. 618746 2. 497285 2. 17958 2. 643576 1. 652258 1. 934737 2. 590706  
6. 389373 6. 189525 6. 380481 5. 102884 5. 517009 5. 846487 6. 36439 6. 411152 6. 352778  
1. 477711 1. 844303 1. 184179 2. 232148 1. 244412 0. 690875 2. 329408 1. 046139 1. 264071  
3. 680643 4. 988405 4. 617415 4. 866843 4. 487678 4. 169876 4. 5925 3. 692044 4. 044714  
4. 834837 4. 752393 4. 915953 5. 240395 5. 448392 5. 388397 4. 929303 4. 837791 5. 086729

4. 925547 4. 681114 5. 116037 5. 82746 4. 735397 4. 49691 4. 735397 4. 646289 5. 248663  
1. 89965 1. 361653 1. 481713 1. 813604 2. 097288 1. 494752 1. 939516 1. 811699 1. 491824  
3. 249292 2. 595361 2. 972441 2. 170293 2. 281324 2. 072109 3. 323108 2. 779613 2. 664951  
5. 366275 3. 845725 3. 294065 2. 365969 1. 678469 2. 337639 2. 711258 3. 669788 4. 082441  
2. 224958 1. 24532 1. 602821 1. 757978 2. 254763 1. 574922 1. 887529 1. 47744 1. 053211  
5. 891693 6. 587938 6. 530958 5. 164165 5. 517258 5. 384582 5. 046805 5. 590093 5. 740919  
1. 992096 1. 577421 1. 314199 1. 399194 1. 31825 1. 857611 1. 421464 1. 043797 1. 907952  
2. 120988 1. 72513 2. 644085 1. 973352 2. 858516 2. 279362 3. 493637 1. 965519 1. 837041  
2. 10901 1. 91634 2. 194458 2. 139479 2. 278916 2. 037538 2. 497227 2. 365037 2. 713468  
1. 173156 1. 274261 1. 317186 1. 628398 1. 915235 1. 141933 1. 51377 1. 334138 0. 980079  
2. 325498 1. 359583 1. 438342 1. 676193 1. 616481 1. 592051 2. 17271 1. 545764 2. 281226  
3. 697032 3. 393559 3. 37268 4. 355458 3. 539758 3. 847975 3. 712558 4. 26605 4. 151582  
3. 381833 4. 847051 4. 119626 4. 062884 5. 160128 3. 43419 2. 610948 2. 484478 4. 812102  
7. 763076 7. 240414 7. 067927 7. 358136 7. 686035 7. 073128 7. 341607 7. 994953 7. 406086  
3. 217404 4. 583453 5. 029628 4. 543189 4. 638786 3. 447193 4. 901182 4. 287839 4. 508822  
4. 269425 5. 113038 5. 304303 4. 868514 4. 55642 4. 750926 4. 499403 5. 733956 5. 200556  
2. 523807 3. 392758 2. 73686 2. 865031 3. 749292 3. 034114 2. 567977 2. 306073 2. 960662  
8. 96788 9. 263018 9. 452396 9. 190539 8. 89686 9. 142132 8. 906756 9. 376683 9. 291139  
2. 166443 1. 715579 2. 321402 2. 033374 2. 660459 2. 05539 2. 375075 1. 93097 2. 266765  
2. 317648 1. 851803 2. 779916 2. 114949 1. 629718 1. 916052 2. 523539 2. 547177 1. 638648  
1. 610964 1. 862436 0. 770006 2. 64235 0. 925098 1. 448685 1. 963134 1. 282369 1. 193126  
4. 445098 4. 912053 5. 146123 4. 952588 4. 204269 5. 296457 5. 045593 5. 048674 4. 354367  
2. 203009 2. 134942 1. 779782 2. 046482 2. 0837 2. 149673 2. 708721 2. 432244 2. 614379  
2. 781094 2. 245133 1. 691171 2. 328977 2. 937694 1. 759983 1. 619531 2. 20972 1. 324308  
5. 804922 5. 821743 6. 397708 5. 484525 6. 305347 5. 503169 6. 208743 5. 692673 6. 194657  
2. 471539 2. 551746 2. 709762 2. 192771 3. 262117 1. 744665 3. 338671 2. 744745 2. 744745  
3. 100315 2. 270137 3. 721085 3. 322781 3. 270966 2. 642726 2. 762606 3. 187503 3. 662073  
1. 352072 1. 408275 1. 753621 1. 210125 1. 331486 1. 952154 2. 128351 1. 433018 1. 131881  
2. 764184 4. 019013 4. 027629 4. 478308 4. 403175 4. 896253 6. 465112 5. 244684 5. 54906  
2. 968249 2. 405853 2. 158158 2. 438631 2. 27226 2. 379865 2. 845613 2. 278507 2. 620205  
3. 113005 2. 960107 3. 59545 3. 305312 3. 207637 2. 792256 2. 982841 2. 886191 2. 411159  
2. 100205 2. 146314 1. 704263 1. 454776 1. 621179 1. 872829 1. 946688 2. 035518 2. 482594  
2. 078231 1. 616958 1. 523898 2. 327007 1. 435171 1. 609979 1. 509805 1. 737611 1. 347767  
2. 28501 1. 398362 2. 019851 1. 646545 1. 872747 1. 796045 1. 723228 2. 227043 2. 01753  
3. 625451 2. 341326 3. 149559 2. 022288 2. 118111 2. 666212 2. 286505 2. 122468 2. 869193  
1. 51373 1. 993319 1. 504865 1. 515611 1. 34813 1. 779026 1. 913484 2. 005344 1. 93623  
2. 68218 1. 968481 3. 044415 2. 768186 2. 057123 1. 970014 2. 890794 1. 643581 2. 149941  
3. 55603 3. 75099 3. 899336 3. 121729 3. 245569 3. 225895 3. 157203 3. 412668 4. 151413  
5. 704229 4. 229366 3. 964486 4. 022921 6. 040611 5. 314499 4. 64895 3. 86751 4. 048175  
2. 663863 2. 374185 2. 87168 2. 864671 3. 009462 2. 607634 2. 556445 2. 616796 2. 54709  
3. 808725 2. 858121 3. 804751 3. 068367 3. 938831 2. 368869 3. 417927 4. 938804 5. 356645  
2. 341314 1. 673056 1. 820538 1. 178963 0. 833436 1. 381834 2. 066435 0. 923426 0. 986681  
3. 414234 3. 732738 3. 69259 2. 968727 2. 86041 3. 028938 4. 252651 3. 731934 2. 87302  
2. 693361 1. 950275 2. 638999 2. 424911 2. 228462 2. 203307 2. 208977 2. 212266 2. 09386  
2. 398994 2. 294577 2. 507554 2. 489266 1. 873404 2. 13018 2. 149292 1. 85557 2. 327162  
3. 183004 4. 434024 3. 58596 3. 201129 3. 134 3. 18147 3. 676304 2. 593032 2. 590172  
4. 905481 4. 516812 4. 496807 4. 355358 4. 163674 4. 591266 4. 937564 5. 099018 4. 106977  
2. 102834 1. 538371 1. 462454 1. 545781 2. 151792 1. 819652 1. 912942 2. 079818 1. 796867  
3. 09741 2. 675633 3. 502753 4. 044048 2. 937519 2. 717756 3. 262992 2. 318877 2. 663252  
2. 449427 2. 151502 2. 275762 1. 870514 2. 083591 1. 955489 2. 489074 2. 612947 1. 987396  
7. 77058 8. 310809 8. 352726 8. 490682 8. 537121 8. 345861 8. 440636 8. 468497 8. 616455

2.009082 1.814495 1.628526 2.468607 1.666965 1.996537 1.938662 2.054203 1.824985  
7.542694 7.624291 7.62488 7.734987 8.40288 7.897378 7.377838 8.130261 7.62957  
3.181804 3.823338 2.980002 4.529276 4.325405 3.187919 3.534524 3.964954 4.486553  
2.976166 2.584044 3.152078 3.402634 3.299357 3.515414 2.815518 2.663454 3.260325  
2.946465 2.513703 2.566668 2.755225 2.460317 2.76319 3.330284 3.20949 2.623466  
2.396122 2.302509 2.070765 2.051427 2.499685 2.124628 2.294408 2.409219 2.499685  
2.015405 2.095195 1.621229 2.563242 2.645021 2.409954 2.595734 3.547054 2.134766  
1.542333 1.565051 1.769934 1.437448 1.974762 1.642697 1.389211 1.384897 1.661412  
1.772162 1.951306 1.724298 1.876751 1.866255 1.749694 1.395581 1.836378 1.685298  
2.92075 2.157654 2.84529 4.003485 3.43137 4.229189 3.082935 2.231087 2.854629  
2.116824 1.353658 1.159678 1.283653 1.613469 1.267255 1.884219 2.022554 1.124383  
1.191118 0.848267 1.830346 1.328176 1.287688 1.260445 1.200871 1.207832 0.768232  
6.667325 3.555534 5.296835 4.036381 4.223669 3.749461 4.202514 4.698588 5.959667  
1.63742 1.507315 1.648768 1.632075 1.603895 0.902508 1.558617 1.751036 1.334094  
2.035273 1.647535 1.632513 1.305462 1.247749 1.44794 2.867715 1.859827 1.778864  
2.572602 1.912605 1.989335 1.925385 1.933764 1.94973 2.766024 1.917687 1.659198  
1.683607 1.507964 1.86183 1.599091 1.229173 1.743179 1.576565 1.265223 2.229614  
3.368603 3.230528 3.174376 3.607737 3.148242 2.780388 3.007324 3.174515 3.00394  
1.917373 1.982732 1.251085 1.390592 1.820196 1.402908 1.374783 1.969353 1.465543  
1.799925 1.348691 1.130564 1.753568 1.270725 1.924102 1.619692 1.258863 1.222748  
1.491129 1.184136 2.126111 1.494067 1.091707 1.354821 1.703704 1.563673 1.523551  
1.58386 1.37519 1.491113 1.686177 3.338355 2.456833 1.297473 1.399524 2.439362  
2.87111 3.377503 3.466534 3.335631 2.923897 3.268313 3.162943 2.877001 3.811907  
5.937739 4.818539 4.536134 4.033429 4.185771 3.362383 4.127641 3.49714 5.457907  
1.965895 1.839469 2.497921 2.888929 2.248222 2.229412 3.044982 2.794234 2.179435  
4.358615 4.796553 4.402395 4.82669 5.066483 4.525062 4.745308 5.161369 4.361761  
2.678533 1.973228 2.102792 2.003291 1.956039 2.396087 2.589025 1.855666 2.738115  
1.928979 1.28027 2.615831 2.095682 2.879167 2.496727 1.460728 0.896343 3.023818  
2.563512 2.831591 2.541963 2.331617 2.655746 2.973223 2.789596 3.114546 3.028108  
6.613249 5.815082 6.348241 5.541012 6.365244 6.513084 6.371561 5.935665 6.49596  
2.181254 1.561295 1.73344 2.230005 1.543994 1.764385 2.059676 2.152381 2.016512  
2.505248 2.376825 3.797566 2.850365 2.358339 2.603959 2.614799 2.16571 2.472935  
4.426265 4.363123 4.68433 5.317176 4.683306 4.446851 4.810017 4.721979 4.158164  
3.685862 4.403601 2.02203 2.900278 3.064537 3.343041 2.482224 2.798571 3.102635  
1.889456 2.047041 1.576041 2.324077 2.074361 1.201089 1.837286 1.769652 1.923382  
3.77997 2.152127 2.068875 2.293172 2.293075 2.588935 2.349008 1.762395 2.346504  
3.144808 1.741678 2.04321 1.579422 0.943092 2.410665 1.84054 1.497561 3.151933  
2.163399 1.976911 1.922994 2.544665 2.019648 1.847836 2.961907 2.371056 1.964399  
2.072399 2.908548 2.860698 3.336812 2.399649 1.725556 2.926642 3.471423 2.114118  
4.315437 4.38079 4.111045 4.603554 5.142678 3.990178 4.439952 4.394989 4.729488  
5.696853 6.045287 6.23752 6.248391 5.947628 5.460315 4.936817 6.10898 6.357566  
1.159257 1.291153 1.387178 1.007947 1.574258 0.887157 1.252635 0.748459 1.554212  
4.665027 4.024901 3.546054 3.750597 5.305031 3.765334 4.371351 3.995368 3.936029  
7.931194 7.771013 7.764683 7.936035 7.958082 7.961318 7.99182 8.292043 7.843041  
3.356621 1.926784 3.401736 2.890345 2.577346 2.68622 3.375492 2.231584 2.661998  
1.08603 1.918411 0.706761 1.532442 2.024119 0.797624 1.343644 1.133985 2.271879  
3.72817 4.304453 4.688074 4.21676 5.233311 5.097928 4.390206 5.187428 4.415747  
6.908505 6.841723 6.668284 5.565898 6.536692 6.944786 5.11777 7.058825 6.125156  
3.197484 2.320868 3.048531 2.996276 2.679965 2.595895 2.918222 2.577557 2.660509  
1.575552 1.229321 1.21394 1.226969 1.032532 1.886704 1.450988 1.939527 1.719354  
1.940866 1.771068 1.552078 1.785156 2.645482 1.493198 0.823492 1.51031 1.66949

1. 909591 1. 336146 1. 184541 1. 451143 1. 148285 2. 00393 1. 292847 1. 186771 1. 34713  
1. 158661 1. 129127 0. 636502 0. 942356 0. 974876 0. 90122 1. 766471 0. 736492 0. 649876  
2. 390536 1. 857633 2. 470323 2. 468086 2. 522226 2. 333986 2. 606556 1. 681683 2. 365815  
2. 172035 2. 737685 2. 69336 2. 354879 2. 583557 2. 123486 3. 174197 2. 672776 3. 361159  
3. 706667 2. 906008 3. 269126 4. 944883 3. 980308 3. 318162 7. 185602 4. 360349 4. 810894  
2. 13827 2. 55572 2. 864187 2. 329529 2. 642745 2. 128942 2. 221921 1. 859044 1. 807273  
5. 707637 5. 412888 4. 675276 4. 560174 4. 726076 4. 096651 5. 992821 5. 840435 5. 11381  
3. 285988 2. 883397 2. 826224 2. 450621 3. 196897 2. 990633 3. 467308 2. 709057 3. 214759  
1. 888664 1. 547781 0. 959576 1. 266839 1. 154411 1. 208781 1. 209074 1. 040877 0. 999169  
3. 859023 4. 706399 4. 098217 3. 366894 4. 324964 3. 823562 4. 307209 5. 003734 3. 836804  
4. 555257 6. 164364 5. 503042 5. 19754 5. 707509 6. 872065 6. 032394 5. 917536 5. 548506  
3. 844395 3. 839279 3. 673858 3. 682062 4. 572358 3. 710988 3. 614373 3. 44202 3. 732107  
4. 608532 4. 669393 4. 98529 3. 523919 5. 661158 3. 056448 1. 936686 3. 919004 3. 298665  
1. 333506 1. 656225 1. 410244 1. 293998 1. 053179 1. 788277 1. 417825 1. 76453 1. 653825  
1. 761988 2. 11804 2. 074968 1. 975518 2. 195276 2. 389489 2. 828753 2. 081271 1. 937233  
2. 833554 2. 911652 2. 540291 2. 760793 2. 610694 3. 348136 3. 290161 2. 921468 2. 812192  
1. 51097 3. 518226 2. 628077 2. 438834 2. 230012 2. 715046 3. 209438 2. 994058 2. 797246  
6. 800561 5. 823315 5. 097354 3. 564374 6. 253733 6. 326237 5. 209615 5. 831665 5. 899765  
5. 114173 4. 141184 4. 992106 4. 990887 5. 821549 5. 682754 5. 841247 5. 053745 5. 227493  
1. 816758 2. 18002 1. 581545 2. 046769 1. 934918 2. 800051 2. 283091 1. 670183 2. 260764  
9. 804228 10. 12118 10. 16856 10. 06567 9. 852178 10. 16985 9. 672037 10. 20005 10. 22101  
3. 052076 2. 111774 2. 544842 2. 771332 2. 89893 3. 226713 2. 650211 3. 041496 2. 96687  
2. 828306 2. 02155 1. 833779 1. 835942 1. 823298 3. 265971 3. 341763 2. 413351 2. 125739  
1. 545059 1. 536288 1. 458345 1. 475613 1. 967027 1. 647529 1. 666463 1. 29876 1. 300016  
4. 105323 3. 750699 5. 067478 5. 363765 4. 356609 3. 998619 3. 236903 3. 667914 3. 271983  
2. 321329 0. 97837 1. 327041 1. 967123 1. 76385 1. 815769 1. 658012 0. 937801 1. 657617  
2. 387485 1. 964213 1. 926852 2. 149666 1. 843313 2. 289955 2. 145961 1. 84119 1. 394169  
2. 713394 1. 712837 2. 104855 1. 729649 1. 687898 1. 590193 1. 807668 1. 749497 1. 786337  
3. 722006 2. 51154 3. 802338 3. 296437 3. 407913 2. 682491 2. 059616 3. 348431 4. 195987  
4. 404748 4. 832343 5. 372526 5. 681258 4. 582574 5. 200978 5. 23837 4. 643987 5. 017274  
4. 436802 4. 279561 4. 636902 4. 974669 5. 438178 4. 653618 5. 455952 5. 756006 5. 145931  
5. 099715 4. 521964 5. 198814 4. 569514 4. 875337 3. 711838 4. 362835 4. 23876 4. 675873  
2. 190439 2. 650785 2. 550078 2. 040472 1. 686711 2. 375041 1. 51468 3. 695135 3. 782302  
2. 740343 2. 22833 1. 789455 1. 817247 1. 823083 1. 825344 1. 745492 1. 882571 2. 338729  
2. 942235 2. 093641 2. 137946 2. 865049 1. 590103 2. 227099 2. 604245 1. 839208 1. 873734  
3. 346671 4. 292152 4. 32154 3. 466762 5. 057619 4. 196279 4. 066748 5. 354297 3. 128296  
2. 826102 3. 35446 2. 942697 3. 731833 3. 50736 3. 782043 4. 456605 3. 490255 3. 766841  
3. 195576 2. 992716 3. 020941 3. 139987 2. 873204 3. 744525 3. 169195 3. 210525 2. 965819  
2. 111433 1. 513357 2. 106992 2. 806335 1. 556258 2. 619527 3. 070529 1. 601712 2. 460155  
4. 460063 5. 429114 4. 265591 5. 788302 5. 303051 4. 532166 4. 389312 5. 758082 5. 391773  
2. 171515 2. 433502 2. 186973 3. 107794 1. 749627 3. 474582 2. 954113 1. 938199 2. 121654  
1. 467881 1. 18777 1. 175281 1. 159192 1. 427905 1. 617897 1. 093194 1. 469568 1. 174648  
3. 116668 2. 830488 2. 445695 3. 185706 2. 739008 2. 948018 2. 658015 2. 864126 2. 40465  
1. 85097 3. 919115 1. 927691 2. 874544 3. 333015 2. 279097 3. 261269 2. 068714 3. 519717  
4. 945601 5. 244443 5. 011592 4. 983216 5. 386574 5. 706731 4. 770355 4. 92937 5. 164508  
4. 559124 5. 15192 5. 310308 4. 571197 5. 497197 4. 548121 4. 630832 4. 879064 4. 966547  
2. 116659 2. 309006 2. 434691 2. 442467 2. 062386 2. 717048 2. 103818 2. 177336 1. 707103  
4. 279742 5. 859124 5. 630286 5. 202368 5. 895942 5. 96546 5. 260796 5. 894095 5. 164458  
5. 430471 6. 10003 6. 236897 5. 252926 5. 504327 5. 343325 5. 869849 6. 344763 5. 556303  
3. 539292 2. 941232 4. 177159 3. 049671 3. 479179 2. 828969 4. 127985 2. 646796 3. 219091  
1. 633434 1. 605962 1. 072487 1. 575912 1. 729956 1. 220452 1. 530156 1. 550714 1. 221925

1. 291287 1. 308599 1. 490154 1. 52888 1. 628837 1. 673328 1. 294867 1. 487258 1. 016741  
3. 938038 4. 282387 4. 430709 4. 404871 3. 839868 4. 214663 3. 726932 4. 859287 4. 035925  
2. 451607 1. 589596 1. 797462 1. 579676 1. 764992 1. 716974 2. 323369 2. 177783 1. 027776  
2. 568494 1. 776934 2. 971804 2. 503519 2. 560691 2. 523557 2. 44723 2. 050737 2. 445451  
3. 754579 1. 507185 1. 511885 1. 37088 2. 4986 2. 45087 1. 034819 1. 867276 2. 573146  
2. 182483 2. 875234 1. 886788 2. 037868 1. 859326 2. 500576 2. 012239 2. 179017 2. 041544  
2. 605529 2. 110698 2. 806881 3. 227762 2. 066733 2. 982814 2. 800548 2. 645122 2. 029623  
4. 59128 4. 992209 3. 77054 4. 833678 5. 472681 5. 684415 3. 731908 4. 806827 4. 91549  
0. 720208 1. 178876 1. 5107 1. 676473 1. 039373 0. 855143 2. 33158 0. 992352 1. 116636  
2. 636416 3. 465554 3. 037155 2. 897753 3. 71958 2. 931173 3. 482765 3. 581953 2. 723255  
3. 753056 4. 927396 4. 713796 4. 875876 4. 783967 5. 367658 6. 105066 5. 26753 5. 163164  
3. 5761 3. 179977 2. 771116 2. 019841 3. 496229 2. 539594 3. 900698 3. 206354 3. 764608  
3. 826217 3. 142318 3. 218347 3. 644646 3. 453776 2. 773753 3. 968794 3. 752889 3. 981225  
3. 183628 3. 88846 3. 617694 3. 146879 2. 57284 4. 736712 3. 238156 3. 869985 4. 383373  
2. 047075 1. 326492 1. 837713 1. 622986 1. 060792 1. 400687 1. 484423 1. 389581 1. 349799  
1. 778629 2. 852626 2. 555709 2. 675431 3. 678397 2. 292833 3. 860376 2. 772377 2. 187452  
4. 579328 3. 237169 3. 937155 4. 151667 4. 29857 3. 637999 3. 362158 3. 982882 3. 999795  
2. 090666 1. 83417 1. 561335 2. 059788 1. 779267 2. 453025 2. 186993 1. 781585 2. 232629  
1. 9148 1. 961245 2. 556975 2. 541398 1. 611621 2. 794103 2. 595103 1. 91726 2. 107329  
3. 308895 3. 055608 2. 684203 3. 088715 3. 089501 3. 624823 3. 215836 2. 812719 3. 111559  
5. 367723 5. 048311 4. 735089 4. 444685 3. 622276 4. 773768 4. 203125 3. 336268 4. 115601  
2. 777706 2. 118695 3. 863594 3. 660373 3. 134994 3. 423292 2. 949271 2. 592513 2. 759573  
3. 569795 4. 686606 4. 446693 4. 463973 4. 567682 4. 533772 3. 940091 5. 170935 4. 203842  
2. 634689 1. 683366 1. 345396 2. 044304 1. 193582 1. 48122 1. 950364 1. 771839 1. 538283  
2. 02175 1. 894602 2. 20818 1. 666556 2. 045047 1. 903202 3. 119505 1. 956743 1. 64094  
1. 75397 1. 503797 2. 604618 1. 68353 1. 348616 2. 017816 2. 066013 1. 902138 2. 061151  
2. 903039 3. 186988 2. 765641 3. 457459 2. 961423 2. 749905 2. 26504 2. 864079 3. 023184  
1. 74472 0. 990771 1. 521727 1. 754292 1. 585607 1. 342528 1. 940041 1. 73709 1. 866744  
7. 414349 7. 609085 6. 919816 7. 426944 7. 358824 7. 843482 6. 961314 7. 076477 7. 26093  
2. 727637 3. 452355 3. 639775 2. 716669 2. 703339 2. 904759 4. 046126 3. 150991 3. 115181  
3. 339705 3. 849715 4. 003622 3. 081835 3. 870247 3. 896568 3. 370603 4. 497618 3. 582205  
2. 849392 1. 3449 1. 625797 1. 552545 1. 525486 1. 779012 3. 015114 1. 218883 1. 112181  
6. 607704 6. 193737 5. 426797 5. 72108 5. 25099 5. 381098 5. 216317 5. 068802 5. 303416  
3. 833802 3. 671564 4. 153439 3. 636819 3. 492756 4. 280609 3. 837802 3. 74452 2. 97751  
3. 2269 5. 468939 3. 054428 3. 309105 3. 175499 4. 205729 3. 270132 3. 13817 3. 65435  
5. 483413 5. 72932 3. 760779 4. 293366 5. 199055 5. 123659 4. 127065 5. 094637 5. 669975  
1. 238652 1. 746572 1. 778104 1. 866646 1. 178391 1. 408495 3. 246661 2. 090558 1. 769623  
1. 417057 1. 017808 1. 042427 1. 134168 1. 458364 0. 9801 2. 270938 1. 043863 0. 992306  
3. 528544 2. 496408 2. 319096 3. 064169 2. 685145 2. 229031 2. 708659 2. 620915 2. 344817  
1. 894347 1. 636053 1. 931696 1. 493505 1. 934572 1. 603513 1. 618474 1. 912481 1. 612037  
2. 400628 2. 91537 2. 497543 2. 566741 1. 961452 1. 519405 2. 660597 1. 724397 2. 309478  
7. 324245 6. 968053 6. 860315 6. 873293 7. 054561 7. 086564 6. 458654 7. 155506 7. 509402  
3. 344366 1. 630541 3. 051743 1. 215289 1. 495199 1. 808064 1. 858236 1. 278986 2. 735999  
2. 455673 2. 165665 2. 482084 1. 75395 1. 975082 2. 166465 1. 871214 2. 073724 1. 869553  
2. 489932 1. 732752 1. 8042 1. 662988 1. 4924 2. 128801 1. 78245 3. 106741 1. 23155  
1. 749751 1. 709828 2. 158388 1. 280151 1. 60378 1. 501904 1. 746974 2. 116506 1. 386064  
1. 789321 1. 625437 1. 635026 1. 352407 1. 459318 1. 800907 1. 902203 1. 656101 1. 687564  
4. 664651 5. 824878 4. 625635 5. 654192 5. 906778 5. 668992 5. 52804 5. 35999 5. 230558  
5. 165059 6. 581371 6. 032946 5. 759254 5. 528427 5. 473077 5. 613601 6. 347763 6. 020294  
5. 014629 2. 841286 4. 439878 4. 484524 4. 085616 2. 965728 2. 445633 3. 705716 4. 361947  
3. 551117 2. 568766 2. 132474 3. 117102 1. 512382 1. 727153 2. 621866 2. 390254 2. 887592

1. 516141 1. 17492 1. 114926 1. 344643 0. 871035 1. 30822 0. 800194 1. 093108 1. 469881  
2. 820315 3. 871988 2. 336293 2. 043036 2. 380146 1. 712578 2. 336146 4. 373502 2. 838493  
4. 988948 5. 264582 5. 091736 5. 243901 5. 077939 5. 451976 4. 7247 5. 217662 5. 300618  
1. 734978 3. 141583 1. 788527 1. 799094 1. 76747 2. 003834 1. 522481 1. 926674 2. 173884  
3. 362965 2. 381427 3. 527041 2. 681287 3. 147045 2. 456059 2. 752597 2. 373632 2. 311862  
3. 13548 4. 350607 3. 769591 4. 444292 4. 297403 3. 939677 3. 237429 4. 164526 3. 820201  
1. 697678 2. 165956 1. 893568 2. 560646 1. 991235 2. 192098 2. 564947 2. 084058 1. 730839  
2. 62624 3. 026443 2. 652343 2. 548791 2. 6225 3. 189042 2. 468424 2. 737943 2. 591853  
4. 749309 3. 026445 2. 9095 2. 981721 2. 593457 2. 9618 2. 749395 3. 142134 3. 701388  
6. 414957 4. 07333 5. 493987 4. 274248 6. 501883 5. 838749 5. 635381 4. 178684 4. 80374  
1. 725757 1. 300229 1. 229458 1. 542289 1. 391359 1. 394186 2. 16749 1. 059282 1. 023776  
5. 498747 5. 881713 5. 538387 4. 951667 4. 425343 4. 287702 5. 289016 4. 810711 4. 826424  
1. 359909 1. 790052 1. 951226 1. 561757 1. 672821 1. 804659 1. 631525 1. 87957 1. 855605  
6. 795508 6. 801785 6. 843943 6. 998453 6. 932597 7. 109337 5. 974585 6. 621586 6. 913919  
1. 337786 1. 56962 1. 094678 1. 128357 1. 523735 0. 937877 1. 228351 2. 097327 1. 544325  
2. 13263 1. 685818 1. 941886 2. 052867 1. 358464 2. 789325 1. 979983 1. 612276 1. 617811  
6. 585868 6. 625269 6. 773476 7. 231317 6. 941554 7. 217824 6. 644322 6. 279886 6. 209169  
2. 542959 1. 958599 2. 611955 2. 837368 2. 189112 2. 740412 2. 774019 1. 997765 2. 090579  
2. 558071 1. 884318 2. 619057 2. 317073 1. 821691 2. 199767 2. 308876 2. 572642 2. 087508  
10. 48521 10. 99596 10. 82501 11. 26069 10. 93689 10. 92954 10. 71311 10. 84367 11. 27442  
2. 519783 2. 909451 2. 581022 2. 936928 2. 792478 2. 049161 2. 94336 2. 829723 2. 679915  
2. 021224 1. 153371 1. 1497 2. 120393 1. 86491 1. 611314 0. 732109 1. 20878 0. 676857  
4. 152347 3. 009011 2. 749918 2. 762618 3. 353913 2. 667026 3. 391552 3. 273952 3. 89832  
2. 706201 2. 517847 3. 37846 2. 07019 1. 786159 2. 05122 1. 51889 1. 862042 3. 84502  
0. 681499 1. 310377 1. 139053 1. 29554 0. 994449 1. 18147 1. 356215 0. 855253 1. 343417  
1. 543764 1. 359939 1. 228556 1. 708984 1. 608269 1. 587018 3. 037873 1. 545748 2. 26675  
2. 568968 2. 954199 3. 070254 3. 839271 1. 905559 2. 995078 3. 127876 1. 820752 2. 169506  
4. 903283 4. 871954 5. 294304 4. 540196 4. 919903 5. 67 5. 798275 5. 924155 5. 210297  
2. 646743 2. 975628 2. 067555 3. 304099 2. 054721 1. 8869 1. 193266 3. 037613 1. 851554  
5. 178831 6. 033648 5. 895202 6. 206204 6. 051426 6. 002362 4. 810336 6. 041835 5. 848269  
2. 844907 2. 765401 3. 027787 2. 550641 2. 176961 2. 450526 2. 305549 2. 104196 1. 943415  
1. 171296 1. 374858 1. 36843 1. 59121 1. 390234 1. 803286 1. 850502 1. 768492 1. 472738  
3. 192562 3. 715711 3. 690541 3. 685199 3. 545113 3. 760621 3. 038046 3. 608362 2. 939453  
3. 058668 1. 993342 2. 078927 2. 180695 1. 857232 2. 271736 2. 785052 2. 856758 2. 167426  
4. 766945 3. 129395 3. 961986 3. 323207 4. 178468 3. 29445 3. 887991 3. 698045 3. 822475  
2. 960853 1. 685 2. 511957 2. 378357 2. 124719 1. 805782 2. 341177 2. 039565 2. 017728  
2. 059977 1. 937695 2. 268216 1. 617062 1. 703676 1. 356881 1. 451483 2. 253836 2. 420144  
3. 377079 2. 787795 3. 24656 1. 511059 2. 448047 2. 941681 2. 659014 2. 821262 2. 379549  
2. 781365 3. 2416 2. 666309 3. 077846 3. 688668 3. 168445 3. 497022 4. 06651 3. 336431  
2. 171713 1. 915203 2. 166008 1. 862121 1. 736594 2. 132947 1. 443249 1. 179952 1. 521876  
3. 293322 2. 303577 1. 81027 1. 982584 2. 073791 2. 134288 2. 560865 2. 285587 2. 008746  
1. 624366 1. 661884 1. 389345 1. 409367 1. 405761 1. 310798 1. 847054 1. 723296 1. 690042  
8. 783206 8. 844789 8. 7534 8. 534326 8. 92112 9. 020852 9. 022936 8. 786246 8. 816032  
6. 866827 6. 221895 6. 591951 6. 062038 6. 434142 6. 744055 6. 068813 7. 029113 6. 404962  
1. 39517 1. 634178 1. 3853 1. 320198 1. 278149 1. 57455 1. 570722 1. 040278 1. 395795  
1. 691564 2. 24895 1. 880895 2. 114268 2. 314285 1. 733337 2. 774508 1. 876593 2. 112133  
1. 329371 2. 472232 0. 956614 1. 713175 0. 929977 1. 377149 1. 088125 1. 645113 1. 468279  
2. 690624 1. 818772 2. 275571 1. 975157 1. 30081 1. 509182 1. 68263 1. 775975 2. 020021  
3. 26541 2. 336362 1. 954191 2. 700572 2. 876059 2. 305043 2. 384649 3. 014632 2. 408993  
1. 588489 1. 729786 1. 334568 1. 558308 1. 8492 1. 589806 1. 557893 1. 46164 1. 349719  
1. 621129 1. 654075 1. 276846 1. 782371 1. 559857 1. 585371 1. 349799 1. 247962 1. 755079

1. 922985 1. 858658 1. 839468 1. 43297 1. 858736 1. 784986 1. 718069 1. 934438 2. 400721  
1. 494987 2. 600074 1. 577085 1. 95841 1. 714974 1. 188583 1. 895904 1. 466412 1. 108896  
2. 378378 1. 527864 1. 813341 1. 688094 1. 611328 1. 697499 2. 44228 2. 384949 2. 058922  
5. 329115 4. 224598 4. 299651 4. 304095 3. 964053 4. 467554 3. 96003 4. 573951 4. 255095  
1. 634912 1. 396633 1. 096122 1. 109638 1. 340174 1. 144002 1. 726514 1. 39946 1. 40019  
2. 358896 3. 107893 2. 612659 2. 268314 3. 893321 2. 350261 2. 370677 4. 448294 3. 274756  
4. 004549 4. 297432 3. 506083 3. 543531 5. 710017 4. 935138 5. 687758 4. 745607 3. 687067  
0. 814721 0. 929217 0. 525116 0. 252065 0. 473609 0. 683767 0. 698312 0. 409722 1. 047433  
2. 078761 1. 750941 1. 537538 2. 068476 1. 470541 1. 391637 1. 781203 1. 431907 1. 698509  
8. 006264 7. 786944 8. 052865 7. 590926 7. 689663 7. 315372 7. 971176 7. 279232 7. 74945  
1. 893425 1. 783609 1. 691623 2. 102252 2. 576967 1. 381248 1. 636082 2. 01813 1. 272994  
5. 329221 4. 605848 4. 496983 4. 867859 4. 72741 5. 481098 4. 67519 4. 732046 4. 581159  
1. 610885 1. 194268 1. 146389 1. 22654 1. 126512 1. 128841 1. 155302 0. 658962 1. 032425  
8. 495062 8. 499254 8. 639861 8. 57489 8. 508073 8. 512434 8. 607027 8. 169703 8. 492171  
4. 091625 5. 063975 4. 44872 4. 562951 5. 130676 4. 780524 3. 331721 5. 387743 5. 140407  
1. 836857 2. 625288 1. 421392 1. 330666 1. 344177 1. 737912 2. 2781 2. 214216 1. 684222  
2. 285434 2. 026124 1. 770183 1. 890117 1. 672628 1. 765389 2. 206859 1. 947163 1. 565484  
1. 803551 2. 159915 2. 125384 2. 452114 2. 322889 2. 024167 2. 127473 2. 149923 2. 342091  
1. 473717 1. 630367 1. 343119 1. 462532 1. 130792 2. 111493 1. 520955 1. 463121 1. 809588  
6. 858481 5. 982693 5. 951977 5. 747872 6. 596239 3. 087614 6. 155845 6. 302527 4. 756205  
1. 828345 2. 318821 2. 785342 1. 837135 1. 304907 2. 222137 1. 759491 2. 000199 1. 67564  
1. 528989 1. 312921 1. 170653 1. 243912 1. 497539 1. 075635 1. 327472 2. 363642 1. 968674  
2. 72445 2. 621167 3. 54242 2. 350154 2. 27347 2. 666257 2. 219425 2. 526199 2. 558904  
1. 640445 2. 346534 1. 375065 0. 99382 1. 832042 0. 959335 1. 114465 1. 231326 1. 685402  
1. 036344 1. 817834 1. 705913 1. 079764 1. 605581 2. 657574 2. 492209 1. 129164 1. 330987  
1. 486247 1. 574021 1. 271448 1. 957825 1. 217816 1. 33658 1. 48635 1. 094429 1. 316789  
1. 79533 1. 515213 2. 047469 2. 373039 1. 920806 1. 95072 2. 449895 2. 346613 1. 886524  
2. 25875 1. 791826 3. 184254 2. 224059 3. 178044 1. 611375 2. 519964 2. 669797 2. 670871  
2. 028495 1. 787116 1. 648532 2. 110238 1. 747684 2. 173516 2. 057234 1. 958202 2. 326748  
2. 835039 1. 501729 1. 464203 2. 299207 1. 441905 1. 671621 1. 81992 1. 941915 1. 565088  
4. 827022 4. 345473 4. 326412 4. 031803 3. 741569 3. 504558 3. 873506 3. 637601 3. 621773  
1. 8767 2. 157831 2. 248579 1. 966863 2. 091724 2. 055832 2. 504748 1. 944434 2. 03114  
2. 313729 2. 147426 2. 240669 2. 168991 1. 652092 3. 405612 1. 901689 1. 754472 2. 48879  
3. 649475 4. 529253 3. 930327 4. 39591 4. 685398 4. 25559 4. 675328 3. 997856 4. 508817  
7. 38605 6. 71885 6. 554878 5. 944573 6. 937847 6. 457037 6. 605329 7. 027001 6. 863506  
1. 741276 0. 934955 0. 844455 1. 449479 1. 269172 1. 469034 0. 961089 1. 298816 1. 091593  
4. 198426 5. 368932 4. 950106 5. 3573 4. 327865 5. 206224 4. 86501 5. 202858 4. 738046  
4. 824067 3. 682978 3. 752432 4. 014971 4. 335592 3. 470508 3. 472481 3. 81676 3. 995537  
1. 875841 1. 756173 2. 627447 2. 041006 2. 507811 1. 759854 3. 078716 1. 742941 2. 347093  
1. 148935 0. 693896 0. 897718 1. 006021 1. 485107 1. 003879 1. 09249 2. 103504 1. 064662  
2. 229955 1. 966887 1. 911317 0. 838997 1. 306645 1. 634344 1. 56328 3. 308342 1. 467871  
3. 596317 2. 673979 3. 391714 2. 865187 3. 362811 2. 990562 3. 948163 3. 643403 3. 149482  
2. 081092 1. 602937 1. 481221 1. 835766 3. 368444 1. 967508 3. 054457 1. 733712 1. 899982  
3. 468736 2. 670028 2. 539674 2. 996558 2. 399904 3. 511571 3. 99289 2. 4079 2. 646619  
2. 652396 2. 171035 4. 425269 3. 6781 3. 769628 2. 531802 2. 943479 3. 558608 2. 352839  
1. 81047 1. 308983 1. 598394 1. 879254 1. 569413 1. 207734 1. 483791 1. 337386 1. 374937  
2. 898133 3. 919363 3. 621458 3. 276823 3. 456277 4. 17477 3. 629826 3. 778955 3. 354429  
3. 022596 4. 020439 2. 141096 2. 48026 5. 23389 2. 964887 1. 930105 3. 028077 3. 391421  
2. 07881 1. 84386 1. 670584 1. 507942 1. 761236 2. 139034 2. 29466 1. 345096 1. 646476  
4. 472593 4. 334648 4. 127806 4. 236895 3. 425047 3. 846371 2. 890197 4. 434766 3. 513513  
5. 396529 5. 500542 5. 010637 4. 167737 4. 899796 5. 426569 5. 174402 5. 636492 5. 237022

1. 49223 2. 86995 1. 156467 1. 758327 1. 775348 1. 168216 1. 484254 1. 813413 1. 85302  
2. 001798 2. 267115 2. 135677 2. 339182 2. 813215 1. 535494 1. 973226 1. 890877 2. 161835  
3. 367183 1. 953652 3. 363066 2. 813687 2. 1812 2. 25154 3. 172652 1. 219482 2. 453779  
1. 143003 0. 920678 0. 837268 1. 290979 1. 439627 1. 619368 1. 127744 1. 078603 1. 020889  
0. 895954 1. 587487 1. 297527 1. 866111 1. 882584 0. 835469 1. 862102 1. 212584 1. 46333  
1. 657272 1. 625186 1. 350646 1. 664462 1. 525265 1. 901386 1. 31053 1. 283578 1. 661245  
2. 095 1. 381844 1. 924571 1. 828743 1. 8115 1. 414028 2. 00747 1. 930939 1. 754911  
1. 502249 2. 956104 4. 266775 2. 474938 2. 157168 2. 828579 2. 787684 2. 81916 2. 50241  
1. 572865 1. 236526 1. 189555 1. 229132 1. 342661 1. 200867 1. 232994 1. 168846 1. 318898  
1. 711226 1. 169568 1. 7222 2. 223459 2. 755237 1. 822059 1. 808684 2. 268018 1. 718568  
6. 290087 6. 564042 6. 703779 6. 703856 6. 741215 6. 746256 7. 08224 6. 120087 6. 710567  
1. 117835 0. 972538 1. 167454 2. 252011 1. 091037 0. 970831 1. 470223 1. 432251 1. 349878  
9. 335507 9. 06747 8. 889826 8. 43343 7. 913295 8. 365716 8. 547461 8. 898132 9. 023613  
3. 760166 2. 956729 2. 861439 3. 066744 2. 995624 2. 610199 2. 858228 3. 069637 2. 849414  
2. 519772 3. 019977 2. 461083 2. 588628 2. 924489 3. 11675 2. 829147 2. 354355 2. 774492  
2. 44045 3. 752054 2. 56321 3. 602018 3. 317031 3. 864804 2. 396532 2. 693178 2. 807115  
2. 782513 1. 97341 2. 792983 2. 045373 2. 071087 1. 860125 2. 467736 2. 198168 1. 856629  
4. 774125 5. 078133 5. 03418 3. 988095 4. 4491 2. 629577 3. 077003 3. 230921 3. 410443  
2. 138602 2. 57362 4. 042236 3. 50416 2. 421654 3. 216616 2. 145012 1. 438861 3. 11054  
2. 585487 2. 115325 2. 069122 3. 19838 1. 574543 1. 815673 2. 846053 2. 10706 1. 905751  
3. 720714 3. 889846 4. 134313 3. 727663 3. 611103 3. 290938 3. 611785 3. 687065 3. 603515  
2. 126398 1. 196124 0. 926352 1. 847449 0. 873087 0. 957641 0. 818753 0. 469453 0. 613344  
5. 991185 6. 166472 7. 048483 6. 074096 6. 075475 6. 207779 6. 730632 6. 277526 6. 28172  
9. 125558 8. 383304 9. 154598 8. 649648 8. 46685 8. 355724 9. 103848 8. 217481 9. 68501  
2. 513348 4. 023994 2. 289753 1. 834121 1. 316999 3. 359206 2. 184685 2. 21271 1. 5621  
1. 622368 1. 392116 1. 615676 2. 066679 2. 510946 1. 535348 2. 265505 1. 415122 1. 732927  
2. 46843 1. 9298 1. 892499 2. 0402 1. 908657 1. 604093 3. 071452 1. 839588 2. 176097  
2. 801423 3. 042831 2. 483778 3. 073311 2. 52359 2. 716359 3. 409227 2. 451561 3. 086772  
5. 860109 5. 809593 4. 569331 5. 507979 6. 449574 4. 558871 5. 514916 5. 695325 4. 942011  
1. 378112 1. 079104 1. 292913 1. 757909 1. 515917 1. 100558 1. 106207 1. 093807 1. 261319  
8. 925459 9. 254697 9. 250036 9. 37545 9. 080122 9. 445161 9. 140154 9. 222241 9. 428193  
1. 463453 1. 352049 1. 569024 2. 221985 1. 59782 1. 542055 1. 462873 1. 854689 2. 232662  
6. 963082 7. 303968 6. 959912 7. 150396 7. 216896 6. 474887 7. 193744 7. 755024 6. 805924  
5. 720407 5. 944613 6. 45956 5. 649007 5. 407041 6. 005444 5. 625237 5. 69291 6. 130498  
2. 362549 2. 223487 1. 998236 2. 106342 2. 23377 2. 078296 2. 247666 2. 48945 2. 165772  
1. 642242 2. 011399 2. 980529 2. 200576 2. 535103 1. 933823 2. 146943 1. 86516 1. 681035  
1. 098918 1. 098741 1. 136444 0. 919618 1. 595317 1. 072403 1. 000054 1. 066421 1. 254878  
1. 936921 1. 891221 1. 753388 1. 613633 1. 490948 1. 746224 1. 87744 1. 654918 1. 694125  
3. 439749 2. 684407 3. 231124 3. 236057 3. 196375 3. 3586 3. 892099 4. 20332 2. 873039  
1. 968929 1. 828917 2. 651022 1. 675727 2. 326419 1. 846288 1. 701457 1. 463547 3. 053266  
1. 449799 2. 475665 1. 990249 2. 749965 2. 532192 1. 741027 2. 22114 1. 62188 1. 446494  
1. 797702 2. 060153 1. 734947 3. 682906 1. 579987 1. 839849 2. 452906 1. 908345 2. 048674  
3. 494875 3. 816658 3. 653879 3. 772973 3. 877587 3. 501906 4. 68156 3. 969963 3. 951914  
3. 583966 2. 674383 3. 233327 2. 820492 3. 055278 3. 073841 2. 799657 3. 342545 3. 760664  
6. 407703 7. 390122 6. 696866 7. 132327 7. 265211 7. 345538 6. 881795 7. 458767 6. 828748  
3. 070412 2. 202042 1. 57676 2. 336473 3. 028016 1. 518626 1. 592526 1. 891617 2. 205716  
1. 656049 1. 006789 0. 987308 1. 256903 0. 927162 2. 161358 1. 407658 1. 646617 2. 021346  
2. 831742 2. 566457 1. 742846 2. 226929 1. 757825 2. 043526 2. 425016 3. 396281 3. 228857  
2. 501965 3. 023073 2. 192807 4. 000556 3. 433302 3. 091807 3. 089307 2. 760706 3. 547965  
1. 33425 1. 63044 1. 313766 1. 302464 1. 689313 1. 530927 2. 248481 1. 239113 2. 717985  
2. 664929 1. 490977 1. 249766 1. 511384 1. 639941 1. 401707 1. 161569 1. 12505 1. 390541



2. 56085 1. 882545 1. 290143 1. 497375 1. 633211 1. 314706 1. 867927 1. 549271 1. 552374  
7. 202701 3. 174714 3. 727632 2. 351631 3. 634722 2. 877033 1. 726799 3. 030756 3. 609543  
6. 914005 5. 474949 6. 169039 4. 699408 5. 205161 5. 062149 6. 104079 5. 197069 7. 433282  
1. 767763 1. 163833 1. 875018 1. 347012 1. 867007 1. 037021 1. 142045 1. 109791 1. 607479  
3. 457044 4. 223116 4. 158148 4. 53556 3. 405508 3. 993801 4. 438442 4. 61637 2. 975866  
2. 395586 2. 109023 1. 588477 1. 894858 1. 924099 2. 082265 1. 237256 2. 55273 1. 646627  
3. 841824 2. 593631 3. 202651 3. 046796 4. 596288 2. 645737 2. 998506 2. 83536 2. 199472  
3. 003599 4. 475594 4. 286209 4. 518887 4. 305011 4. 044173 4. 551808 3. 922572 4. 266894  
2. 128002 3. 873232 2. 941525 4. 029002 3. 043021 3. 714442 4. 984632 3. 500487 4. 217193  
2. 858185 2. 555333 2. 485129 2. 311078 2. 703617 2. 257228 3. 547132 2. 869256 3. 233842  
1. 443066 1. 183506 1. 438671 1. 808175 2. 081079 1. 578318 2. 022953 1. 375979 1. 152771  
1. 203756 0. 742835 1. 321296 0. 92803 1. 412995 0. 856009 1. 4157 1. 306321 1. 327135  
2. 340961 1. 674297 2. 063618 2. 141282 1. 972922 1. 533309 1. 716034 1. 41139 2. 065068  
2. 767605 2. 304036 1. 989574 2. 961814 2. 055544 2. 711958 1. 85753 2. 988884 2. 410611  
7. 910647 8. 391791 8. 022999 7. 681324 8. 079833 7. 223006 7. 345051 8. 171401 8. 584148  
2. 481593 1. 911156 2. 714334 2. 525783 2. 834596 4. 273982 2. 802223 2. 245263 2. 477536  
3. 628737 2. 362751 3. 117632 3. 790154 2. 536934 2. 445473 3. 587946 3. 561524 2. 832987  
5. 651344 5. 372992 5. 001304 5. 146989 5. 908943 5. 13337 3. 92092 5. 622107 5. 58431  
5. 939438 3. 484659 3. 145181 2. 450883 3. 59916 2. 275258 2. 521945 3. 817891 3. 60992  
2. 31351 2. 709946 1. 988561 2. 590186 2. 129166 1. 780092 1. 767152 2. 672778 2. 128421  
5. 9084 4. 923382 4. 992161 3. 868048 4. 353909 4. 635464 4. 993422 4. 088333 5. 745425  
5. 909869 6. 997724 5. 943243 5. 174997 7. 470038 4. 654215 4. 636238 5. 576879 5. 993473  
5. 89634 6. 691049 6. 046679 5. 275424 5. 187657 4. 885743 4. 759843 6. 129897 5. 909058  
7. 11951 7. 241486 6. 337168 7. 548632 7. 072241 8. 390685 6. 985582 7. 30478 6. 713425  
1. 719845 1. 502162 1. 272903 1. 655735 1. 272139 1. 618186 1. 757107 1. 702111 1. 491205  
1. 07796 1. 33384 1. 221578 1. 981683 1. 685532 1. 36868 1. 291008 1. 546424 1. 555408  
1. 349689 1. 694166 1. 078757 1. 185437 1. 482493 0. 810484 1. 842461 1. 65496 1. 48689  
1. 525434 1. 389831 2. 157861 1. 850114 1. 647986 1. 472822 2. 250724 2. 403165 0. 998012  
1. 8701 1. 69648 1. 269852 1. 620654 1. 767398 1. 594139 1. 378355 1. 002568 1. 411017  
3. 740398 4. 615115 4. 018466 2. 635842 4. 108031 3. 629088 3. 341654 4. 269136 2. 945954  
2. 441589 2. 443377 2. 00618 1. 680369 1. 960651 1. 450923 2. 112956 1. 828977 2. 502748  
6. 3843 4. 982458 5. 727676 5. 21028 5. 905805 5. 202369 4. 805528 5. 603183 4. 346961  
3. 203977 4. 798403 4. 707844 4. 817021 5. 21443 2. 049165 3. 643072 4. 792119 5. 086862  
3. 588805 5. 158134 4. 344828 3. 492487 3. 706089 4. 825155 3. 904658 3. 517558 3. 180617  
1. 558621 1. 482029 2. 382263 1. 617353 1. 702711 2. 122218 2. 048067 2. 624297 1. 728478  
2. 362121 1. 408631 1. 452752 1. 274388 1. 11081 2. 609338 1. 753966 1. 784319 1. 983654  
3. 193472 2. 318543 2. 094487 1. 863011 2. 066267 1. 299486 2. 1566 2. 024168 1. 569982  
7. 350456 6. 442872 6. 361115 7. 805614 7. 713522 6. 449704 7. 913869 6. 837108 6. 851563  
1. 74818 1. 244572 2. 19249 1. 288396 1. 674514 1. 499388 1. 920287 1. 76552 1. 517566  
1. 053255 0. 630397 0. 874352 0. 544553 0. 880442 0. 721828 0. 776437 0. 888142 0. 666475  
5. 970517 6. 410622 6. 298512 6. 139708 6. 663412 6. 37193 5. 621128 6. 590243 6. 386064  
4. 739947 4. 042931 4. 510329 4. 277854 4. 165381 4. 570846 4. 20826 4. 467957 4. 245209  
6. 314348 5. 218285 5. 273698 5. 65243 5. 351765 5. 318485 5. 468038 5. 103283 5. 395977  
6. 581615 6. 88636 6. 679971 6. 449988 6. 337963 7. 02299 6. 321788 7. 064113 6. 623804  
4. 359504 4. 449812 4. 34054 6. 465551 5. 130834 4. 646188 4. 0925 3. 77063 5. 354099  
1. 886613 2. 833685 2. 345374 2. 856296 2. 421908 2. 741942 2. 551098 2. 237212 2. 472817  
8. 01669 8. 391273 8. 44833 8. 266533 8. 30671 8. 436059 8. 003578 8. 353467 8. 307458  
4. 785058 5. 011406 5. 019737 5. 405584 5. 323135 5. 707446 4. 908021 5. 166798 5. 827941  
1. 36334 1. 203712 0. 905519 1. 222924 1. 551148 0. 580112 1. 572425 0. 969369 1. 190056  
2. 027812 3. 326385 3. 236068 2. 33222 2. 022981 3. 289489 2. 468836 2. 774429 1. 999884  
2. 421974 1. 886308 1. 836876 1. 939629 2. 054855 1. 722623 1. 628485 1. 648484 2. 397756

|           |           |           |           |           |           |           |           |           |
|-----------|-----------|-----------|-----------|-----------|-----------|-----------|-----------|-----------|
| 1. 120943 | 1. 204691 | 1. 10481  | 1. 233855 | 1. 243844 | 1. 108156 | 0. 695884 | 1. 216734 | 1. 217382 |
| 3. 257256 | 3. 375165 | 4. 375463 | 3. 920527 | 2. 958168 | 3. 098438 | 3. 25982  | 3. 152692 | 2. 467662 |
| 6. 474551 | 7. 311573 | 6. 378621 | 6. 975401 | 6. 983197 | 7. 749119 | 7. 470158 | 6. 057666 | 6. 766519 |
| 5. 370057 | 5. 103763 | 4. 502828 | 4. 796434 | 5. 120264 | 4. 142207 | 4. 466482 | 5. 117986 | 4. 490186 |
| 1. 383303 | 1. 307264 | 1. 511981 | 1. 45366  | 1. 523649 | 1. 41381  | 2. 073071 | 1. 401851 | 1. 216239 |
| 1. 544287 | 1. 223735 | 1. 76521  | 2. 506257 | 1. 986176 | 2. 338676 | 1. 515016 | 1. 768315 | 1. 64413  |
| 6. 779828 | 7. 231219 | 7. 418717 | 7. 551292 | 7. 011549 | 7. 414332 | 7. 111623 | 6. 912668 | 6. 940188 |
| 1. 806034 | 1. 690697 | 1. 40448  | 1. 648568 | 1. 552799 | 1. 664073 | 2. 318422 | 1. 435682 | 2. 009255 |
| 4. 460547 | 4. 658134 | 4. 575071 | 4. 579515 | 4. 653231 | 3. 645397 | 4. 425265 | 3. 842847 | 4. 053039 |
| 5. 709299 | 7. 298039 | 6. 689351 | 7. 336297 | 6. 813085 | 6. 762363 | 6. 628431 | 6. 27582  | 7. 00361  |
| 3. 661273 | 3. 243294 | 3. 703959 | 3. 808902 | 3. 734436 | 3. 807125 | 3. 788006 | 3. 354389 | 3. 50649  |
| 3. 184198 | 4. 74911  | 3. 399129 | 4. 243544 | 3. 062528 | 2. 876508 | 3. 631608 | 2. 914674 | 3. 431928 |
| 2. 936028 | 2. 741454 | 3. 017754 | 2. 010408 | 2. 990365 | 2. 523398 | 2. 462573 | 2. 857973 | 2. 453283 |
| 4. 487981 | 5. 058722 | 5. 383726 | 4. 839319 | 4. 684255 | 4. 642556 | 3. 799052 | 5. 187692 | 4. 837123 |
| 1. 023789 | 0. 878513 | 0. 756544 | 1. 590108 | 1. 139882 | 0. 796348 | 0. 885062 | 1. 064052 | 0. 834332 |
| 5. 999671 | 6. 257868 | 6. 00612  | 6. 999483 | 6. 341542 | 7. 286322 | 6. 165482 | 5. 874461 | 5. 457552 |
| 5. 949324 | 6. 225923 | 6. 184208 | 5. 794289 | 6. 234577 | 6. 463306 | 6. 636303 | 6. 333968 | 5. 701882 |
| 5. 107315 | 5. 451389 | 5. 585122 | 6. 34482  | 6. 883579 | 5. 85577  | 5. 564843 | 5. 869361 | 6. 074858 |
| 3. 029476 | 5. 999168 | 3. 156203 | 3. 112157 | 5. 686989 | 3. 065407 | 4. 76121  | 5. 205467 | 3. 059123 |
| 6. 919451 | 6. 864784 | 6. 959623 | 6. 922637 | 6. 969356 | 6. 909519 | 6. 985085 | 6. 810459 | 6. 951525 |
| 3. 987493 | 3. 732131 | 3. 85952  | 2. 871789 | 2. 960233 | 3. 012125 | 2. 909975 | 3. 031369 | 4. 739883 |
| 2. 010501 | 1. 453401 | 1. 262688 | 2. 078907 | 1. 861443 | 1. 476474 | 1. 598619 | 1. 663371 | 2. 692023 |
| 5. 518948 | 4. 560371 | 5. 678682 | 6. 216646 | 4. 835067 | 5. 470407 | 4. 968836 | 4. 094612 | 5. 24079  |
| 3. 020505 | 2. 49204  | 2. 873947 | 3. 219579 | 2. 932155 | 4. 268107 | 3. 481106 | 3. 432136 | 2. 753298 |
| 6. 229586 | 6. 07005  | 5. 253526 | 6. 099242 | 6. 287189 | 6. 241754 | 6. 060211 | 5. 904588 | 5. 738949 |
| 4. 985272 | 4. 18896  | 3. 610269 | 3. 933895 | 4. 387599 | 4. 764237 | 4. 1846   | 4. 926466 | 4. 562597 |
| 1. 407667 | 0. 999177 | 1. 271779 | 1. 159411 | 3. 047763 | 1. 308103 | 1. 708274 | 0. 828563 | 1. 249876 |
| 4. 798947 | 4. 167992 | 4. 4915   | 4. 219469 | 4. 705011 | 4. 340129 | 3. 424209 | 4. 34866  | 3. 656689 |
| 5. 560283 | 6. 336525 | 7. 121304 | 5. 074622 | 5. 50457  | 5. 749231 | 6. 222171 | 6. 6404   | 5. 662558 |
| 0. 949102 | 0. 813203 | 1. 007885 | 0. 965855 | 0. 801468 | 1. 653264 | 1. 210803 | 1. 108652 | 0. 850091 |
| 4. 720295 | 5. 370596 | 5. 212144 | 4. 947405 | 5. 711765 | 4. 745923 | 4. 706269 | 4. 469328 | 5. 49613  |
| 1. 173397 | 1. 566265 | 1. 514233 | 1. 574917 | 1. 16536  | 1. 237788 | 1. 023443 | 0. 933875 | 0. 742586 |
| 2. 748777 | 2. 610493 | 4. 46471  | 2. 769654 | 1. 944981 | 3. 413963 | 2. 196027 | 3. 432158 | 2. 49172  |
| 1. 856231 | 2. 793753 | 1. 684127 | 1. 839697 | 1. 662814 | 1. 800859 | 2. 006633 | 2. 36628  | 1. 703466 |
| 5. 134817 | 5. 364132 | 5. 999802 | 4. 360168 | 6. 505278 | 5. 882786 | 4. 334572 | 4. 078976 | 5. 306006 |
| 1. 598963 | 1. 478606 | 0. 914312 | 1. 267936 | 1. 122425 | 1. 400456 | 1. 582158 | 1. 517558 | 1. 461608 |
| 3. 355242 | 3. 132669 | 2. 197996 | 2. 37403  | 2. 052819 | 2. 642857 | 2. 316267 | 2. 537429 | 2. 233646 |
| 1. 96369  | 1. 436095 | 1. 989513 | 1. 52438  | 1. 746462 | 1. 718502 | 2. 874589 | 2. 056022 | 1. 258091 |
| 4. 831515 | 5. 100547 | 5. 240021 | 4. 797889 | 3. 891547 | 4. 136715 | 3. 7235   | 3. 389026 | 5. 394131 |
| 5. 218634 | 5. 762244 | 5. 390674 | 4. 056565 | 5. 181506 | 4. 383792 | 3. 252676 | 5. 484592 | 5. 364335 |
| 1. 364272 | 1. 18203  | 1. 457465 | 1. 204262 | 1. 715527 | 1. 250344 | 1. 616015 | 1. 708029 | 1. 307949 |
| 1. 359502 | 1. 243594 | 1. 266745 | 1. 285006 | 1. 632922 | 1. 724047 | 1. 888411 | 1. 159068 | 1. 483673 |
| 2. 632843 | 2. 146104 | 2. 433016 | 1. 813118 | 1. 875749 | 1. 833346 | 2. 072081 | 2. 151977 | 1. 405929 |
| 10. 56924 | 10. 37625 | 10. 67157 | 9. 562455 | 10. 13662 | 9. 788207 | 9. 805979 | 9. 826294 | 10. 51797 |
| 4. 759215 | 4. 517978 | 5. 293187 | 3. 932645 | 4. 024389 | 5. 003644 | 4. 485402 | 4. 767854 | 4. 571834 |
| 0. 873794 | 1. 418693 | 0. 972094 | 1. 162181 | 1. 336543 | 1. 04233  | 1. 315246 | 1. 476465 | 1. 234135 |
| 3. 382503 | 4. 872919 | 3. 595415 | 3. 041089 | 3. 754621 | 3. 031407 | 2. 650238 | 3. 724688 | 2. 679647 |
| 3. 18258  | 2. 894278 | 3. 003385 | 1. 98059  | 2. 820964 | 3. 424658 | 3. 003352 | 2. 21366  | 2. 848658 |
| 6. 573003 | 7. 370416 | 7. 54395  | 7. 873032 | 7. 104939 | 8. 460789 | 7. 948925 | 6. 964141 | 7. 57574  |
| 5. 41881  | 5. 729001 | 5. 780753 | 5. 598181 | 6. 227825 | 6. 289501 | 5. 975725 | 5. 621279 | 5. 81208  |
| 3. 973326 | 4. 207509 | 3. 899092 | 4. 097658 | 4. 006908 | 4. 103072 | 3. 738101 | 3. 476434 | 3. 560801 |

0.749158 1.054451 0.94743 1.016072 0.997013 0.913237 0.884629 0.987355 1.004613  
6.225913 6.310575 7.113303 5.328561 5.080334 4.820533 6.642975 5.89971 8.194548  
1.454827 0.889474 0.901329 0.888821 0.882223 1.132895 0.829392 0.588451 0.973686  
6.582362 6.125015 5.977855 5.975051 6.029452 5.936765 5.900606 5.669758 5.774632  
5.894927 6.189271 5.994264 6.510413 5.860047 6.172058 5.924604 5.756012 6.014306  
3.269592 2.775996 2.805863 2.712417 1.561867 2.045834 1.627791 1.741678 2.530521  
4.933883 5.926376 4.596705 6.203061 6.101608 5.014326 3.386371 5.297443 5.355194  
4.366625 4.372292 4.671289 4.980863 4.207073 4.445918 4.107726 4.046801 4.313372  
4.088284 4.306717 4.127062 4.138713 3.938468 4.309601 4.573159 4.989773 3.917481  
6.227569 6.666854 6.296254 6.079933 6.887704 5.581764 6.11774 6.532 6.128669  
2.10999 3.168436 2.621956 2.681016 2.564844 2.5002 1.874504 3.164733 2.697827  
2.652383 2.368707 2.387277 2.816631 2.119756 2.26376 1.852752 2.024176 2.215276  
2.912228 3.712085 3.703883 2.885663 3.903823 4.06227 3.375416 3.454293 3.556123  
7.272786 7.185296 7.416438 7.018488 7.329811 6.896503 7.241631 7.542693 7.284739  
5.114414 4.058045 4.982181 4.385795 4.176362 4.59912 4.887445 4.311817 4.641627  
2.968329 1.146102 2.365158 2.396538 1.983554 1.901666 1.482757 2.090411 1.442593  
4.242261 2.525176 2.606127 2.466172 4.048156 2.320448 3.117889 3.119137 2.142471  
3.970444 4.004895 5.174576 3.309274 3.738356 4.318877 4.309401 3.59376 4.152737  
6.402621 6.113632 6.318386 6.210764 6.495536 6.120517 6.122382 6.42271 6.208005  
5.430713 5.633847 4.382677 5.486647 5.770749 5.70254 5.294369 5.491395 4.853228  
1.899262 2.38724 2.85081 2.749806 2.1343 2.60221 2.950695 1.654254 2.137148  
2.197457 1.660924 2.765115 1.40395 1.174004 1.474697 1.274338 1.254747 1.48113  
1.589899 1.275882 1.506013 2.603457 1.788775 2.594795 1.171003 1.256665 1.807059  
4.980004 5.967825 6.286384 5.438654 5.294144 7.003994 6.55953 4.456327 6.036747  
3.699251 3.350373 4.158172 3.501182 3.438967 3.840333 3.594388 4.085604 3.222075  
1.446699 1.228842 2.225615 1.448271 1.533812 1.298007 2.443674 1.476375 0.909773  
1.64599 1.715822 1.633318 2.098933 2.686957 1.66257 1.42245 1.970353 1.944374  
1.678656 3.201098 3.591924 3.867882 2.166479 2.490584 3.717297 3.52398 2.941149  
3.67912 3.694043 4.519168 3.831449 2.867259 4.1005 3.839192 3.563515 3.233947  
1.574511 1.683327 0.773668 1.156879 1.987515 1.939765 1.641739 1.680958 1.681421  
8.099189 7.732295 7.94953 6.504224 7.873871 7.335616 8.325461 7.83152 7.709753  
6.248393 6.43191 5.685166 5.835833 6.01691 5.870999 5.372528 6.040723 5.648401  
1.267395 0.882194 1.056227 1.002012 0.954312 1.032734 1.063083 1.492148 1.368944  
2.014352 2.242978 2.259617 2.723837 1.769836 1.661419 2.131267 1.874943 1.600775  
1.676498 1.23033 1.576054 2.08834 1.769935 1.186944 2.276716 2.513697 1.921067  
0.980053 1.225607 1.039208 1.658746 1.532091 1.155127 1.127602 1.553738 1.241146  
3.102127 3.439567 2.956151 3.184339 3.858116 3.405439 3.166214 4.147125 3.42708  
4.70284 4.59583 5.37519 4.224799 4.646137 4.847583 4.86268 5.01722 4.720097  
6.720707 6.487042 6.220699 6.382119 6.178459 5.653351 6.510508 6.714495 6.752626  
1.692017 1.585537 1.418718 0.920338 2.271165 1.068492 1.293419 2.208396 1.717457  
2.658002 2.72505 3.040916 2.061606 2.622898 3.028453 3.252173 2.179315 2.198089  
1.920662 3.261537 2.356757 2.554202 2.21974 2.264138 2.153158 3.538717 1.910472  
5.557051 7.650789 7.02663 7.005814 7.497457 7.775455 6.447293 7.417146 7.234459  
2.046639 2.084154 1.597713 1.809103 2.173729 1.843936 1.947605 1.884948 1.911175  
6.225076 6.451788 6.280506 6.900848 6.976547 6.775131 6.305631 6.833605 6.92808  
3.22497 5.745056 4.871401 5.065495 5.596538 6.223199 5.538507 5.453479 4.923415  
2.18584 2.070441 2.449352 1.710481 2.288751 1.748033 2.268697 2.083331 1.672549  
1.289243 1.203297 1.812987 1.468292 1.419381 1.446997 1.311548 1.443389 1.295683  
2.459302 3.61526 3.042935 3.819764 3.067776 3.030429 4.106594 3.799411 3.887697  
0.835805 1.974448 1.895675 2.589681 1.845671 1.727354 0.951485 1.574126 1.915084  
2.76381 1.871024 2.254833 2.386704 1.974887 2.037808 2.599081 2.128765 2.282248

2. 461782 2. 184798 1. 362175 1. 613002 2. 165327 2. 130663 1. 436913 2. 8092 1. 909256  
2. 218783 2. 104274 2. 837172 2. 217288 1. 930273 2. 462002 1. 991738 1. 434275 1. 96632  
1. 596774 1. 549924 1. 286524 1. 035175 1. 437665 1. 961527 1. 146572 1. 708699 1. 570962  
1. 795837 1. 185307 1. 263126 1. 574525 1. 843727 1. 440268 1. 72726 1. 501255 1. 337057  
2. 844544 2. 403544 3. 328782 2. 006035 2. 590727 1. 909882 3. 289576 2. 310969 2. 695144  
4. 015829 5. 308989 4. 905675 5. 234786 5. 200678 5. 705542 5. 692607 5. 388845 5. 497575  
1. 585442 1. 328396 2. 066343 1. 661489 1. 391452 1. 100241 1. 765381 1. 794415 1. 737132  
5. 640991 6. 882231 6. 291239 6. 968763 6. 224978 6. 319558 7. 485634 7. 184183 6. 752103  
2. 406598 1. 730558 1. 193346 1. 634997 1. 673153 1. 77536 1. 790128 1. 787522 3. 455229  
1. 370393 1. 550198 1. 230258 1. 55918 1. 38674 1. 729308 1. 612606 1. 429309 1. 593103  
5. 94994 6. 147001 5. 36833 5. 361499 4. 971006 5. 700701 5. 506233 5. 925252 5. 888142  
3. 954918 3. 280541 3. 729198 4. 431985 4. 126949 3. 365849 6. 035598 4. 587071 1. 320165  
1. 920006 1. 828203 1. 737182 2. 134561 2. 028081 1. 768775 2. 203426 1. 511655 1. 600891  
7. 810716 7. 28006 7. 436795 6. 738181 7. 049625 6. 448048 6. 625747 7. 799149 7. 328148  
7. 163895 7. 68757 5. 870848 8. 093547 8. 215447 7. 054352 6. 366661 6. 951403 7. 460232  
7. 025061 7. 624031 7. 057138 7. 869394 7. 33437 6. 951581 6. 773587 6. 6515 7. 07529  
6. 551334 6. 750597 6. 643204 7. 264161 7. 370028 7. 440981 7. 43382 6. 508899 6. 679945  
1. 224965 1. 06629 1. 354481 1. 771323 1. 090606 2. 375112 2. 265781 2. 071269 1. 814204  
1. 605962 1. 163303 1. 26805 1. 68604 1. 11351 1. 666049 1. 291441 1. 04882 1. 549027  
3. 186733 2. 322636 2. 26167 2. 390619 1. 909213 2. 41249 2. 882492 2. 891277 2. 682924  
1. 046792 0. 733829 1. 105866 0. 923934 1. 565451 1. 304339 0. 867535 1. 515564 1. 21346  
4. 380333 4. 474471 4. 839548 4. 888332 4. 412935 4. 31731 4. 676674 4. 168159 4. 367463  
2. 017567 1. 863837 1. 475921 1. 417431 1. 667743 1. 807288 1. 415511 2. 309458 1. 61645  
1. 566242 1. 338267 1. 894188 1. 768237 1. 156316 0. 977406 1. 598431 1. 03352 1. 571584  
4. 213835 3. 112452 3. 490272 3. 676866 2. 877217 3. 143136 4. 214082 3. 614062 2. 987954  
2. 808129 2. 459326 3. 442138 2. 067105 2. 463268 1. 511352 3. 775201 2. 127899 1. 89517  
3. 448483 3. 20334 3. 924344 2. 955187 3. 25464 2. 57306 2. 523281 2. 64074 4. 214517  
7. 579943 8. 214684 7. 695205 8. 601433 7. 753036 8. 314157 7. 49444 6. 606469 7. 922324  
3. 12681 2. 22805 2. 346808 2. 790334 2. 539139 2. 132607 2. 118731 1. 972961 3. 108591  
4. 794926 4. 027598 5. 128038 2. 734237 5. 075208 3. 715396 4. 939267 4. 342388 4. 328811  
2. 410176 2. 602015 2. 038143 2. 3615 2. 00753 2. 440447 2. 523716 2. 094773 1. 843426  
3. 309328 4. 959681 5. 37108 4. 931258 5. 055029 5. 14736 4. 168953 4. 165897 5. 177966  
4. 992695 4. 800757 5. 072192 5. 236755 4. 6685 4. 420099 4. 921552 4. 859557 5. 195532  
2. 21964 1. 620527 2. 147159 1. 816724 2. 345398 2. 094516 2. 100407 1. 845176 2. 173521  
2. 534761 1. 920296 2. 310156 2. 483176 1. 794747 1. 884903 2. 584049 2. 185361 2. 298603  
4. 565967 4. 243574 3. 660907 2. 888523 3. 960705 5. 568954 2. 882518 4. 627901 4. 727688  
2. 220723 3. 664091 3. 189018 3. 435336 3. 923683 3. 042571 3. 851079 3. 324151 2. 669302  
2. 728069 2. 273438 2. 707955 2. 396844 2. 916596 2. 535595 2. 487162 3. 202355 2. 544985  
1. 100971 1. 184316 2. 003578 0. 980937 1. 262211 1. 33437 0. 931868 1. 196903 1. 551782  
2. 623223 1. 700429 2. 905704 3. 006033 4. 852159 2. 380595 2. 715359 2. 92788 2. 755631  
3. 833705 5. 052468 4. 51231 5. 023123 4. 754098 5. 283415 4. 650617 4. 363337 4. 723432  
1. 037888 0. 957297 0. 868678 0. 996751 1. 687241 0. 920589 0. 86814 0. 727349 1. 017964  
1. 431313 4. 806791 1. 68867 3. 068307 2. 252574 2. 325119 1. 711445 4. 763512 5. 119292  
1. 262357 1. 092823 1. 372131 1. 879146 2. 249787 1. 587541 2. 196707 2. 200253 1. 200255  
0. 974556 0. 456212 1. 19248 1. 155746 0. 769285 0. 852406 0. 949969 1. 434313 0. 389854  
1. 657672 1. 815798 1. 373543 0. 774222 1. 366274 2. 146358 1. 504371 1. 187494 1. 116245  
1. 628443 2. 146855 1. 805449 2. 877456 1. 943583 2. 501369 3. 041883 1. 807246 2. 294965  
1. 342009 0. 929973 1. 497708 1. 186023 1. 672154 1. 30678 1. 009527 0. 957757 0. 840035  
2. 79983 1. 547008 3. 023545 2. 565286 2. 266941 2. 836231 2. 70204 2. 212421 1. 535245  
4. 075207 3. 762106 3. 840149 3. 129835 3. 600558 3. 152689 4. 394505 3. 082182 4. 453505  
4. 405206 4. 981516 4. 160313 4. 68696 4. 098557 5. 612271 3. 316009 4. 008769 5. 431292

2.964927 2.421642 1.923299 1.33309 1.766388 2.003497 1.7849 2.132851 1.603291  
5.330495 5.138715 5.395209 5.409596 5.93566 5.338743 3.988262 5.99789 5.338315  
2.348626 1.549531 1.820424 2.283139 2.347711 1.747043 2.199885 1.779156 1.837021  
3.234702 4.232454 3.258116 4.193132 3.514883 3.759002 3.462635 3.353689 3.920676  
2.69889 2.15579 2.152551 1.907954 2.211856 2.423907 2.606713 2.488299 2.379028  
3.045805 5.573611 4.461989 4.54075 5.39571 5.145986 4.475579 5.406886 4.377083  
1.183085 1.969668 1.338912 1.615345 1.838401 1.19669 1.297087 1.152484 1.56568  
1.417089 1.363126 1.466373 1.210611 1.447098 1.563926 1.318006 1.305733 1.382087  
3.255827 5.634181 5.266114 4.755214 4.739029 5.670246 4.054914 5.554965 4.645664  
1.26055 1.8937 1.300888 1.793635 1.594074 1.33795 1.087338 2.804852 1.932388  
2.752404 1.317796 2.476022 2.217565 1.073788 2.086262 1.57572 2.04329 3.006172  
6.468261 5.780166 5.877722 4.847283 5.14595 5.011023 4.266192 4.777046 5.28668  
1.496041 1.458904 2.717625 1.71155 1.957111 1.354119 2.386169 1.109763 1.247318  
4.893729 3.986894 4.401961 4.162974 4.120857 4.070482 3.862033 4.208292 4.107929  
1.182831 1.298062 0.917255 1.151079 1.216606 1.062361 1.499788 1.502619 1.748885  
3.909609 4.937991 3.76128 3.276579 4.357199 3.751467 4.113953 4.754116 4.392748  
1.362973 1.206303 1.170989 1.675221 1.405388 1.377226 1.666606 0.946192 1.27728  
2.663859 3.509661 3.906831 3.221154 3.957793 3.627955 3.994636 3.080551 3.433931  
2.137626 2.100375 1.574303 2.82685 2.909066 2.59529 2.072252 2.196081 2.084121  
5.610596 5.588871 5.500343 5.617212 6.001269 5.736956 5.885429 5.389614 5.570916  
1.892934 1.375639 1.577859 1.947054 1.681902 1.82279 1.690679 1.873088 1.911851  
4.832255 4.767925 4.492583 5.031144 4.855279 4.28023 4.385419 4.299067 4.617832  
6.362181 6.615522 6.240337 6.525218 6.089776 6.252175 6.001314 6.087536 6.454053  
2.250555 0.903567 1.72603 1.43334 1.494732 0.85555 1.027128 1.978289 0.808275  
7.492131 3.135963 1.060184 1.542506 2.028051 1.439586 1.57589 1.513102 1.363344  
1.405343 1.136585 1.069604 1.720506 1.20199 1.551192 1.811244 0.91294 1.130031  
2.315521 1.65471 1.659268 1.355242 1.370154 1.85391 1.157336 0.984547 1.957215  
5.891903 6.046154 6.559819 6.591755 5.947157 6.191047 5.829764 6.307467 5.604465  
4.698101 3.464446 4.199494 1.943867 2.190646 2.611468 3.68775 5.269203 2.426948  
1.143693 1.688402 1.205744 1.243001 1.100089 1.04742 0.957382 1.228294 1.617848  
2.686236 2.609819 3.651895 2.704055 3.372131 3.693411 2.420695 3.567843 3.591263  
1.796389 1.90275 1.806279 1.642192 2.223029 1.988807 1.850803 2.006143 1.611116  
1.32829 1.990738 1.775221 1.694645 1.383825 1.507024 1.52272 1.830897 1.867481  
1.061952 1.423391 1.263908 1.397009 1.274633 1.530992 1.386035 1.115047 1.202813  
8.099471 7.903058 8.75152 8.102049 7.010308 9.553733 7.705935 8.229666 7.707523  
5.127985 5.302636 4.85991 5.094234 5.097268 6.041445 5.424656 4.638528 5.761065  
2.500512 2.597473 2.743365 2.68592 2.241219 2.247957 2.264098 1.812219 2.175033  
4.166379 4.112804 4.909562 3.786301 3.851213 3.648482 3.219991 3.756447 5.694299  
9.798315 6.316702 8.238473 6.411287 5.888696 3.09349 6.79664 5.291678 8.149848  
6.243733 6.179958 7.16469 5.691947 6.336316 6.150436 6.020502 6.95012 5.768214  
1.911473 1.327921 1.565613 1.554468 1.938516 1.372968 1.669847 1.457273 1.197996  
1.301283 1.545669 2.400185 1.817592 1.650082 1.957055 1.676377 1.624171 1.717334  
1.88903 1.288225 2.629142 1.86698 1.944191 2.509943 2.250893 1.382536 2.448415  
2.340533 2.201686 2.446985 2.401439 1.391909 1.992837 2.133358 2.396546 2.599531  
2.645643 2.485278 3.306538 2.467326 2.253434 2.780868 2.216323 2.759276 2.479123  
2.528387 3.115155 2.577239 3.388654 2.20106 3.083024 2.442783 2.958802 2.457976  
3.490886 3.989709 3.566769 3.050322 2.871907 2.976964 3.17412 3.502374 2.51779  
3.239114 4.76048 3.935797 2.171643 3.574409 2.31066 3.443643 3.270007 4.653494  
0.765969 0.881897 0.630305 1.879788 1.390377 0.799002 1.171671 0.873222 1.352039  
3.040647 3.597266 4.014812 3.101413 3.567781 3.497069 3.1906 3.03724 3.475169  
4.468347 3.199851 3.039927 2.11709 2.691396 2.393225 2.232251 2.864449 2.916071

2. 410484 3. 589131 3. 320626 2. 22949 2. 681702 2. 157777 2. 227055 3. 30265 2. 955617  
1. 559974 1. 245953 1. 97562 1. 274543 1. 439845 1. 855464 1. 360803 1. 298104 1. 331307  
4. 811324 5. 02907 5. 928155 4. 444098 4. 195056 5. 307197 5. 450528 5. 951206 5. 916185  
4. 330039 3. 138408 4. 056596 4. 347191 3. 835414 3. 756885 3. 755229 3. 688076 3. 536526  
5. 708116 5. 353149 4. 647997 5. 113082 4. 728584 4. 109162 4. 519221 4. 275216 4. 02836  
3. 546649 2. 081091 2. 481424 2. 42022 2. 026982 2. 090279 3. 310356 2. 318023 2. 197398  
2. 18733 3. 537825 2. 278769 2. 537349 2. 154563 2. 72498 2. 466667 2. 684756 1. 868354  
5. 72571 6. 875679 6. 290224 6. 706168 6. 369479 6. 246336 6. 230139 6. 79578 6. 248422  
2. 190448 2. 870949 1. 90384 2. 33906 1. 933952 1. 838658 2. 410188 1. 461239 1. 415893  
4. 544967 2. 259392 2. 303224 2. 102209 1. 483762 2. 157874 1. 896225 2. 403714 3. 370201  
1. 577307 0. 721104 0. 404933 1. 452787 1. 129701 0. 902418 3. 357504 1. 195751 0. 718599  
3. 752735 2. 565005 2. 745712 3. 443832 3. 413014 2. 59657 3. 146844 3. 137202 3. 379975  
6. 402372 6. 725104 6. 520214 6. 825627 6. 581254 6. 188823 6. 428215 6. 552601 6. 687539  
5. 931206 6. 105158 6. 229264 6. 796207 6. 056023 6. 326464 6. 058088 6. 144696 6. 568216  
1. 779699 1. 751473 1. 936796 1. 498361 1. 556272 1. 709265 1. 655038 1. 485041 2. 061235  
4. 522425 5. 231732 4. 762835 4. 70075 5. 016946 4. 257178 4. 283247 5. 608546 4. 273886  
1. 552583 1. 88851 1. 515981 1. 750729 1. 686696 2. 163496 2. 098785 1. 758124 1. 638446  
2. 417238 1. 603765 1. 673291 1. 903371 1. 356715 2. 140786 1. 874558 1. 34776 2. 259767  
3. 912238 3. 383479 2. 685338 3. 000562 2. 724871 3. 184016 2. 218157 3. 406432 3. 376987  
3. 916168 4. 513399 3. 760021 4. 577948 4. 967604 4. 505285 4. 327068 3. 653778 5. 024675  
2. 130653 2. 306676 2. 381672 2. 224052 2. 304515 2. 634257 3. 254859 2. 63078 1. 824525  
2. 553222 1. 861338 1. 887395 2. 195988 1. 778149 1. 940055 2. 082769 2. 004856 2. 070326  
4. 979897 4. 821639 4. 772941 4. 356225 3. 816779 5. 521124 4. 794346 4. 981357 4. 851011  
3. 576361 2. 74636 3. 449704 2. 512771 2. 756042 2. 87916 2. 933424 3. 239963 3. 328208  
1. 428261 1. 088347 0. 898181 1. 192724 1. 065968 1. 129262 1. 465639 1. 125344 1. 074433  
3. 167933 2. 438641 2. 257331 1. 429989 2. 560116 1. 896358 2. 03802 1. 909046 2. 670449  
1. 762896 1. 602108 1. 591483 2. 31268 1. 780175 1. 672393 1. 935467 2. 310888 1. 846213  
1. 925938 1. 404893 1. 661923 1. 349052 1. 728465 2. 152385 1. 404193 1. 455522 1. 449554  
3. 906945 2. 004327 2. 57409 3. 106782 2. 811724 2. 40929 2. 257146 3. 604415 2. 335009  
6. 529826 6. 280086 6. 601661 5. 754786 6. 173019 5. 558242 5. 478222 6. 187443 5. 357299  
1. 593686 2. 703608 2. 168483 1. 422331 1. 311104 1. 784465 1. 428027 1. 59873 1. 425957  
1. 271438 0. 975273 1. 447992 1. 399799 1. 204865 1. 657156 1. 323252 1. 496258 0. 956452  
6. 555766 3. 558396 3. 510613 4. 414068 3. 817197 3. 817527 4. 751448 5. 70547 4. 226036  
3. 344954 2. 476235 2. 093025 2. 200684 1. 99801 2. 148388 1. 887401 1. 87448 2. 327356  
5. 183552 5. 426581 5. 787265 5. 429187 5. 650775 5. 286574 5. 002641 4. 979884 5. 715891  
1. 991736 1. 945226 2. 007925 2. 104525 2. 012521 1. 752358 1. 959334 1. 775849 1. 745882  
2. 122368 2. 006668 1. 980924 2. 020517 2. 157361 1. 895764 2. 286263 2. 30297 1. 963658  
1. 19143 1. 263511 0. 644871 1. 397636 0. 962873 1. 259563 1. 298251 0. 944722 1. 579322  
1. 667186 1. 05816 1. 035527 1. 831723 1. 391399 1. 681665 1. 226165 1. 017327 1. 377119  
4. 460674 2. 496531 2. 794512 1. 383385 1. 379385 1. 491803 2. 217841 1. 262013 1. 392578  
2. 83992 1. 471523 1. 39741 2. 454779 2. 241351 2. 928725 2. 122708 3. 151764 1. 7342  
1. 597805 1. 772618 2. 51608 1. 968408 1. 174516 2. 016318 1. 492514 1. 446886 1. 734499  
1. 866964 1. 433869 1. 262531 1. 707094 1. 433007 1. 692367 1. 722751 1. 469131 1. 073398  
1. 83369 1. 061661 1. 980145 1. 989907 1. 836672 1. 05372 1. 154329 1. 077407 1. 524008  
1. 97885 1. 750971 1. 709343 2. 026806 1. 32493 1. 663657 2. 002161 1. 530239 1. 596986  
4. 245705 4. 114154 3. 837996 4. 210896 4. 413272 3. 797867 4. 328396 4. 400499 3. 845521  
5. 911542 4. 867864 4. 807079 3. 536259 4. 204754 3. 832356 4. 142011 3. 919957 4. 635089  
2. 387535 1. 930767 1. 866183 2. 332226 1. 533641 2. 035237 2. 145206 1. 750788 2. 104745  
1. 534919 3. 162513 2. 812349 2. 466437 3. 280307 3. 38608 2. 000578 4. 571424 1. 994037  
1. 462117 1. 670237 1. 634408 1. 895799 2. 458 1. 321797 1. 865812 2. 124765 1. 760762  
2. 062135 1. 787433 1. 84752 3. 04745 2. 31038 3. 105018 2. 430024 1. 986315 1. 947239

5. 767783 4. 481442 4. 992953 5. 32293 5. 13276 5. 127264 5. 831408 5. 521611 5. 522809  
2. 898995 4. 618031 3. 865242 5. 345014 5. 521115 4. 242497 3. 277518 5. 015189 4. 374169  
5. 65041 5. 577133 6. 072361 5. 76645 5. 583488 5. 834749 5. 124185 5. 128533 5. 556269  
2. 473966 2. 450961 2. 762897 2. 858684 2. 69011 2. 694829 2. 881382 4. 133925 2. 827887  
3. 074746 2. 704418 3. 561085 2. 553704 2. 210492 3. 129557 2. 541389 3. 361077 3. 13956  
1. 688278 1. 036746 1. 136479 1. 028877 1. 606503 2. 136177 1. 098015 1. 811091 1. 36616  
0. 97595 1. 175029 1. 147483 1. 957599 1. 378797 1. 371393 0. 938231 1. 097396 1. 219488  
3. 720006 5. 13165 4. 822402 4. 561925 3. 998418 4. 125184 3. 055108 4. 303186 4. 158068  
3. 73371 2. 256299 1. 603689 3. 899876 3. 826158 1. 685211 2. 951169 2. 574388 5. 370662  
0. 959472 1. 312741 1. 455988 0. 884744 1. 566309 1. 266188 1. 207545 1. 43473 1. 693592  
1. 967355 0. 892999 2. 094485 1. 980209 1. 950054 1. 626797 1. 751419 1. 480873 2. 053755  
2. 876843 2. 566432 2. 844772 2. 849259 3. 036971 2. 921717 2. 128083 3. 525601 3. 404846  
6. 270967 5. 165552 6. 033167 5. 027643 5. 270321 4. 001343 4. 933523 6. 203255 5. 090179  
2. 707337 3. 225759 4. 969716 1. 813739 2. 132184 1. 955851 2. 160153 1. 597726 3. 279997  
6. 133353 6. 496261 6. 479272 6. 541102 6. 825529 6. 208873 6. 204906 6. 388947 6. 362153  
2. 123113 2. 15059 1. 913581 2. 096778 1. 939221 1. 79914 1. 82848 2. 087494 1. 776005  
8. 184426 6. 711663 8. 164916 6. 402454 6. 783696 5. 472692 6. 934472 6. 863335 8. 534464  
1. 323217 1. 322271 0. 711206 1. 147475 1. 271764 1. 230949 1. 657082 1. 583218 1. 560778  
6. 370133 6. 662435 6. 109437 6. 033523 6. 372644 6. 19429 5. 63649 6. 329864 6. 421675  
2. 074083 1. 380272 2. 096883 1. 914505 1. 653168 2. 347575 2. 209955 2. 155992 2. 053176  
1. 666876 1. 703805 1. 846978 1. 910589 1. 75031 1. 520591 2. 477867 1. 743804 1. 865758  
1. 684953 1. 455505 1. 786092 1. 817097 1. 660717 3. 786703 2. 255147 2. 131896 1. 539591  
0. 977207 1. 756991 1. 721903 1. 38694 1. 189965 1. 428203 1. 357055 1. 056162 1. 841377  
9. 296784 8. 965622 8. 840036 9. 114587 8. 854677 8. 821516 8. 113522 8. 892564 9. 19465  
1. 654037 1. 695942 2. 671619 1. 468907 1. 716179 2. 195474 3. 02697 1. 654651 2. 053718  
1. 239224 1. 888204 1. 271276 1. 609145 4. 112956 1. 089271 1. 367474 1. 137708 1. 47295  
9. 110314 9. 449751 9. 425264 8. 564342 9. 19304 9. 298418 8. 228428 9. 277115 8. 752862  
3. 274006 1. 853517 2. 91243 2. 887363 1. 622128 1. 641003 3. 649535 1. 473937 1. 348502  
3. 284728 2. 846935 2. 691309 3. 422988 3. 352926 2. 802751 3. 014765 2. 77878 2. 724224  
1. 288035 1. 478328 1. 820072 1. 306271 1. 688071 1. 445569 2. 920485 3. 360843 1. 249423  
1. 261203 1. 359548 1. 350479 0. 907789 1. 171088 1. 087147 2. 09537 1. 205017 1. 427688  
10. 22395 10. 51087 10. 27177 10. 35825 10. 11012 10. 11215 10. 24528 10. 25012 10. 55965  
6. 966812 6. 859026 7. 02468 7. 054953 7. 250459 6. 675051 6. 668652 7. 131734 7. 235486  
0. 928592 1. 391082 0. 755468 0. 91027 1. 09194 1. 000246 0. 927409 0. 803496 0. 951216  
1. 737673 1. 625631 1. 281645 1. 898594 2. 162176 1. 631726 1. 209111 1. 118964 2. 568463  
1. 320872 1. 218143 1. 395809 1. 726497 1. 237942 1. 013968 1. 21765 1. 453564 1. 003712  
7. 802285 8. 902845 8. 992136 8. 667695 8. 94326 8. 886218 8. 690743 9. 375905 8. 719456  
6. 082545 6. 071963 5. 948105 5. 225174 5. 264001 6. 218419 5. 429159 5. 943607 5. 945884  
5. 851637 6. 279843 5. 743818 6. 30881 6. 597061 5. 164276 5. 927113 6. 419481 5. 965647  
2. 410637 2. 17318 2. 148135 3. 432699 2. 697475 3. 278133 3. 532416 2. 564684 2. 428119  
3. 295954 3. 415205 3. 085395 2. 809983 3. 11442 3. 026754 2. 686539 3. 392152 3. 080482  
4. 399097 2. 009833 1. 273835 1. 323846 1. 300208 1. 15294 1. 449476 2. 962634 1. 625902  
4. 599419 5. 69677 5. 441872 5. 075708 5. 557134 4. 952209 4. 611195 4. 720393 5. 560984  
1. 730179 1. 770481 1. 766374 1. 578399 1. 595382 2. 174525 2. 245914 1. 321767 1. 696338  
1. 773382 2. 840568 1. 996285 2. 364713 1. 703238 1. 768794 1. 981855 2. 158366 1. 957147  
1. 09461 1. 228455 1. 772932 1. 084698 1. 576444 1. 434318 1. 470541 1. 925812 1. 830619  
3. 486908 3. 317061 3. 504218 4. 495499 5. 077786 3. 779683 4. 163246 4. 329393 3. 436506  
4. 495124 4. 738587 3. 596845 4. 407177 4. 423319 4. 798998 3. 702379 6. 030236 3. 313242  
3. 183047 3. 3789 3. 295646 2. 983194 3. 747937 3. 645058 3. 027535 4. 144033 2. 788423  
2. 634471 3. 021159 2. 405476 3. 882119 2. 645213 2. 844677 3. 368713 2. 261612 2. 34963  
3. 255672 2. 294676 3. 113163 3. 492425 2. 57869 2. 901905 2. 909792 3. 038949 2. 416935

4. 984152 6. 281143 5. 814234 6. 567586 5. 891695 5. 860767 5. 583411 5. 227834 5. 481259  
2. 165524 1. 867221 1. 481486 1. 914032 1. 589938 1. 443424 2. 018111 1. 996984 1. 949183  
7. 7565 5. 918116 6. 823503 5. 088871 5. 395341 4. 760697 6. 208202 5. 687062 7. 572419  
1. 872812 1. 852801 1. 998876 1. 784721 2. 72907 1. 561746 1. 970836 1. 849139 1. 452148  
2. 780745 2. 614584 2. 107092 2. 91669 3. 519536 2. 797409 2. 605459 1. 824016 2. 762707  
1. 959914 1. 727696 2. 05933 2. 06454 1. 666917 1. 554819 1. 444133 1. 108395 1. 41206  
2. 634006 3. 338464 3. 32289 3. 790485 3. 168795 3. 569687 2. 801058 3. 251101 2. 542555  
5. 120972 4. 988305 5. 682653 5. 867333 5. 769979 5. 982234 5. 913027 6. 025092 5. 507732  
7. 566836 7. 331104 6. 91205 7. 470131 7. 221492 7. 908271 7. 572489 7. 627193 7. 71461  
1. 930516 3. 279867 3. 368658 1. 783691 2. 521587 1. 46283 2. 55247 1. 676355 2. 933827  
2. 491752 1. 880325 2. 302623 2. 010271 2. 264651 1. 967587 2. 353649 2. 393005 2. 39931  
2. 475431 1. 93745 2. 10801 2. 421117 2. 105385 2. 576218 2. 689111 1. 735332 2. 321767  
6. 89555 7. 325652 7. 309823 6. 799784 7. 191732 7. 636434 6. 777255 6. 94346 7. 672292  
1. 33721 1. 177321 1. 614442 1. 415612 1. 615993 1. 29933 1. 712632 1. 732651 2. 11739  
2. 240422 1. 543168 2. 472683 1. 919501 1. 877225 3. 037715 3. 095014 1. 892844 3. 290745  
3. 208936 3. 522615 2. 890855 3. 693527 2. 865188 3. 062244 3. 111584 3. 837282 2. 996126  
3. 895354 4. 131874 4. 257319 3. 637788 2. 778207 4. 252291 3. 586494 3. 67115 3. 544488  
1. 231396 2. 061383 1. 617512 1. 719623 1. 490947 1. 452562 2. 805953 1. 454211 1. 506496  
4. 184324 4. 203948 3. 227323 2. 661578 3. 968545 2. 514602 2. 303524 2. 698197 3. 975398  
1. 965041 2. 361746 1. 449681 1. 216574 1. 315419 1. 977074 1. 815172 1. 170277 2. 008601  
2. 226986 1. 524496 1. 329304 1. 148517 1. 401427 1. 088721 1. 458941 1. 42014 1. 977255  
4. 169304 5. 485765 7. 056802 5. 209452 4. 401033 4. 826689 5. 330379 5. 38815 4. 659742  
7. 627336 7. 412567 7. 493497 7. 159205 7. 545057 7. 144006 7. 354144 7. 041465 7. 254082  
1. 722865 1. 846407 2. 560416 1. 924848 2. 587493 2. 055504 2. 544526 1. 786824 2. 803911  
5. 37165 5. 718021 5. 360325 5. 496157 5. 411409 6. 272138 5. 49828 6. 12861 5. 257596  
1. 449577 1. 680761 2. 579947 1. 146692 1. 448185 2. 5209 1. 041163 1. 851829 1. 699738  
6. 585551 6. 73718 6. 660812 7. 536983 7. 8501 7. 045324 6. 834222 6. 675823 6. 848286  
2. 290889 2. 401211 2. 725137 1. 894086 2. 133097 2. 727208 2. 673557 2. 205922 2. 159653  
2. 155373 2. 188553 1. 936476 2. 25625 2. 725699 2. 214957 2. 652917 2. 494828 2. 78438  
3. 62037 4. 510603 4. 385989 3. 598364 4. 911262 4. 377916 3. 017193 4. 79801 4. 58651  
1. 953343 1. 591218 1. 983333 1. 565219 1. 857194 1. 52299 1. 590709 1. 603071 1. 327357  
2. 173573 2. 462352 3. 018235 1. 939393 2. 098492 2. 350877 3. 179409 3. 002635 2. 789139  
4. 120981 3. 85474 3. 881303 4. 075525 3. 945917 4. 256937 4. 309662 3. 134683 3. 423239  
2. 472706 1. 867558 1. 34419 1. 564817 1. 847269 2. 083 2. 502204 1. 33815 1. 635121  
3. 29321 2. 715456 2. 70836 2. 8329 2. 942646 2. 708992 2. 671805 2. 244834 2. 489724  
6. 629304 6. 558707 6. 292219 6. 846408 6. 38268 6. 683117 6. 788503 6. 602397 6. 623149  
4. 264477 4. 844902 4. 827483 5. 080296 5. 177204 5. 080801 4. 795262 4. 769922 4. 764401  
1. 579421 1. 496061 1. 691043 1. 963048 1. 613267 2. 628438 1. 7468 1. 600009 2. 035124  
3. 718266 2. 743519 1. 376965 1. 84111 1. 925162 2. 043824 1. 303105 1. 858909 1. 522212  
2. 946602 2. 046771 2. 061077 1. 951989 1. 944211 2. 758689 2. 425006 1. 752782 2. 204433  
4. 610085 5. 600648 4. 106939 5. 398748 4. 857347 5. 471026 5. 182109 5. 58333 4. 830175  
1. 281963 1. 221093 1. 01164 1. 294443 1. 081553 1. 162249 1. 158172 1. 308711 1. 252364  
7. 109558 7. 057196 7. 095526 6. 673336 7. 157445 6. 709617 6. 883042 6. 956771 7. 270555  
1. 951881 2. 041911 1. 798712 1. 780516 1. 597936 1. 784476 1. 939817 2. 088747 1. 719368  
2. 399826 3. 866276 3. 499625 2. 405372 3. 186146 2. 75991 3. 61533 3. 635542 2. 303799  
8. 189555 6. 845164 7. 204651 8. 521751 8. 044983 8. 803048 7. 785504 7. 177171 7. 614397  
4. 068607 3. 05791 3. 958529 3. 367853 2. 940744 2. 814035 3. 409523 3. 965557 3. 766969  
5. 238481 5. 773536 5. 592269 5. 789774 5. 800689 5. 176933 5. 614652 6. 65435 5. 886875  
2. 584488 2. 36539 3. 040183 2. 307448 2. 865936 2. 281456 2. 009346 2. 160077 2. 519289  
2. 821475 3. 525176 2. 720563 3. 386139 2. 814462 2. 612893 4. 09816 2. 017288 3. 264713  
2. 027973 1. 963871 2. 64425 1. 524878 1. 609868 2. 07757 1. 727192 3. 226535 1. 498162



2.750561 1.690859 2.223637 2.582436 1.996895 1.847107 2.967933 1.612494 1.678046  
2.814658 2.8463 2.741947 2.40319 2.325902 2.475653 2.573629 3.075595 2.410436  
2.997806 2.192836 1.951342 2.181548 2.238565 2.521 2.5873 2.133818 2.597136  
2.656183 2.158306 2.416935 2.404696 2.222008 1.887518 2.099818 2.048158 1.992806  
1.443774 1.53246 1.591462 1.69093 1.678888 1.692247 1.669382 1.389374 1.566098  
1.727876 1.454331 1.753436 1.880946 1.495966 1.433173 1.642039 1.858138 1.491194  
3.562358 4.354782 3.707514 4.470929 4.428649 4.889011 3.373325 4.510203 3.910398  
5.264107 6.101706 5.832017 6.501213 5.984809 7.185834 6.114679 5.991874 6.084928  
6.004214 6.105855 4.888263 4.549094 4.451203 5.134682 4.033218 4.815653 4.859408  
3.251296 3.804837 4.658548 2.795282 3.472157 4.620914 3.691169 3.353397 3.80481  
3.356246 2.937195 3.747368 4.211249 3.359495 4.029775 5.12735 3.188396 4.057249  
3.262279 2.074527 2.682777 3.533107 2.767651 2.502942 1.884713 1.86581 3.714204  
4.148922 5.734543 4.539963 2.503255 4.642396 4.366179 3.655009 5.009694 4.194494  
3.188604 3.05611 1.972518 3.118868 2.173635 1.63726 2.686915 2.713046 3.161501  
3.891613 2.665714 3.77008 2.261945 3.106375 2.935454 2.565036 2.565227 1.976212  
2.622517 3.406991 4.286093 2.788639 3.452331 2.676618 3.755207 4.082668 3.107874  
3.82496 3.491375 3.749646 3.964247 3.662138 3.294808 3.342398 3.323256 3.466075  
3.220556 3.288066 3.615585 2.768308 3.630073 2.405346 4.096928 5.294778 3.608676  
2.238083 1.395763 0.859126 1.292816 1.591666 1.721205 1.216691 1.742861 2.108085  
6.103317 5.757798 6.110033 5.699345 5.566185 5.288528 4.80175 5.604205 6.030465  
6.859305 6.516313 6.740026 6.606424 6.132983 7.005772 6.256086 6.160769 6.38796  
3.967074 3.899804 4.111734 4.714687 4.418975 3.590986 4.337401 4.779433 4.336152  
4.651528 5.301176 6.150733 6.229038 5.711794 5.277836 5.776601 5.853482 5.934408  
6.033099 6.022461 5.845368 5.326208 6.581157 5.331996 5.226327 6.391717 5.978716  
3.316967 4.05281 3.655054 4.721242 4.924447 3.052757 3.869152 3.301243 4.145661  
2.743829 3.05901 2.261429 3.056865 2.762276 2.537544 2.977857 2.513888 3.005649  
2.976619 3.386377 2.539755 4.079602 3.618744 2.82107 3.110023 2.927569 3.210048  
2.817714 3.484912 3.879929 3.970883 2.786762 3.487669 4.016693 3.121473 3.036788  
3.722309 4.321039 4.517667 5.680559 3.9494 4.245223 5.311629 4.572894 4.965631  
2.636104 2.172347 2.07609 2.567539 2.417982 2.510853 2.632161 2.602936 2.310543  
2.597655 3.315466 2.772273 2.199883 1.64497 3.510697 2.366048 1.783367 2.609246  
3.627262 4.098066 4.94173 4.314352 3.988045 4.21633 3.954222 4.436489 3.419242  
4.215401 4.848893 4.83271 3.91828 5.445376 6.327686 5.742741 5.238576 5.054414  
3.216786 1.601502 2.251521 2.024587 1.610293 2.423317 3.104448 2.129141 3.058386  
3.634081 3.547461 3.700192 2.992416 3.922399 2.433565 3.804559 3.760208 3.805877  
2.588555 1.903963 1.628626 2.639136 1.850238 1.974489 2.183559 2.248638 3.135853  
1.225181 2.886542 1.478112 3.129723 2.260265 2.847862 2.138772 1.704031 1.121047  
3.840931 5.311854 4.230897 3.564786 3.019913 3.916736 2.165901 4.610646 4.20245  
4.497563 3.981449 4.113576 2.967286 2.362186 5.079751 3.780779 1.988009 1.961147  
2.61512 3.423824 3.32714 4.213126 4.478613 3.518294 3.507885 2.53017 2.489745  
6.314631 5.699554 6.012332 5.20898 5.957606 6.00963 6.000806 5.745814 6.291791  
1.479368 1.791374 1.509175 1.114144 1.635217 1.092007 2.233379 1.644339 1.880922  
4.139225 6.413035 6.626651 6.232408 6.371903 6.072279 6.756151 6.378855 6.535297  
1.176218 0.981762 1.068404 1.453338 1.193874 1.252453 1.280786 1.00128 1.153724  
2.001913 1.663799 1.548441 1.162068 0.955901 2.156182 1.144776 1.315091 1.761833  
3.721622 4.276669 3.658629 3.970191 3.609535 3.914032 4.267524 3.921445 4.032245  
10.6501 11.02743 11.01956 10.5478 10.66496 11.08242 10.18228 10.74009 10.33607  
3.303196 3.925028 4.002655 3.433549 2.976714 2.954039 2.627477 3.426407 3.353888  
6.622928 6.579726 6.725318 6.876814 6.793274 6.638884 6.455418 6.581159 6.398677  
6.702644 6.639087 6.14713 6.030758 6.954813 5.917064 5.808978 6.579848 6.37065  
2.722159 2.388247 2.523306 2.597294 2.476679 2.235353 2.933921 2.299822 2.247338

4. 507745 1. 878179 3. 814939 2. 33123 3. 54421 2. 126479 2. 325704 2. 837456 3. 760246  
4. 467407 2. 886308 2. 73972 2. 895213 2. 370283 2. 178098 2. 350068 2. 442847 3. 164404  
3. 556528 3. 453794 4. 143123 4. 396359 3. 868871 3. 960984 3. 570477 3. 695736 3. 459967  
1. 391651 1. 485465 1. 982343 1. 445085 0. 963915 1. 432899 1. 19187 1. 332928 1. 398076  
1. 375948 1. 337972 1. 914155 2. 051086 1. 436126 1. 759054 1. 325786 1. 472757 1. 887653  
3. 332767 2. 634886 3. 040698 2. 875654 3. 376624 3. 116657 2. 843615 3. 081177 2. 747108  
2. 739823 2. 512047 2. 915343 2. 561562 2. 353854 2. 07261 2. 35133 1. 592695 2. 206233  
4. 017493 3. 465234 3. 199793 3. 287331 3. 387623 3. 285776 2. 745769 3. 724654 3. 424085  
5. 646438 6. 64047 6. 410063 6. 730495 6. 906688 6. 182992 6. 005493 6. 034135 5. 881958  
4. 46037 5. 010105 5. 177375 5. 366082 4. 605703 5. 448218 3. 574498 4. 941956 4. 5901  
1. 259018 1. 362372 1. 221003 1. 509427 1. 129075 1. 727559 2. 091551 2. 034564 2. 179369  
1. 482559 1. 674425 1. 995548 2. 362078 2. 007488 1. 395092 2. 414328 1. 983301 2. 742508  
6. 668391 6. 844894 6. 507685 7. 075357 7. 008798 7. 591479 6. 71565 6. 718382 7. 259075  
8. 376494 8. 696653 8. 417079 8. 494954 8. 588828 8. 838912 8. 571689 8. 484013 8. 574552  
2. 05468 3. 764318 3. 721103 2. 675241 2. 354531 2. 582057 2. 9182 1. 839574 2. 904842  
7. 670108 7. 905058 8. 246257 7. 781393 7. 593842 8. 202227 7. 254764 8. 707631 8. 584155  
3. 293089 2. 227923 2. 497275 2. 655813 2. 072315 1. 826446 2. 384574 2. 009806 2. 131103  
1. 916108 1. 739088 2. 146572 1. 660786 1. 927307 1. 262876 1. 66811 1. 307055 1. 332387  
3. 59473 3. 3304 3. 66102 3. 760695 3. 391791 2. 768519 3. 32819 3. 124893 3. 712729  
2. 512966 2. 69806 2. 527235 2. 341238 1. 787795 2. 453892 1. 533672 1. 797346 1. 848124  
3. 32466 3. 132135 3. 783638 2. 801481 2. 855092 2. 757387 3. 164233 2. 346378 3. 482515  
3. 194302 2. 555583 3. 412399 3. 253297 3. 052865 2. 566521 2. 396652 2. 309119 2. 071907  
6. 722565 6. 800285 6. 931362 6. 964065 7. 012982 6. 946245 7. 063005 6. 910222 7. 119171  
2. 727052 3. 709974 3. 410591 2. 770969 2. 777767 3. 979847 3. 630161 4. 294705 3. 786005  
1. 975731 1. 727811 1. 580226 2. 568184 1. 585472 1. 733357 2. 319574 2. 264639 2. 053828  
2. 046264 1. 482571 1. 473317 2. 365149 1. 602125 1. 620796 1. 586274 1. 735709 1. 485654  
3. 973051 4. 985941 5. 370144 6. 039212 5. 072445 4. 952415 5. 56885 5. 302954 4. 698246  
7. 746378 5. 71787 6. 729894 5. 500452 5. 918857 5. 007264 5. 357567 5. 476713 7. 09903  
3. 021823 1. 834549 1. 803482 2. 727526 2. 160754 2. 75137 1. 646232 2. 220663 1. 783292  
1. 940383 1. 672089 1. 558853 2. 544171 2. 35567 2. 000955 1. 732953 2. 209636 3. 218663  
1. 654141 1. 752229 2. 052705 2. 130613 1. 208801 2. 043317 2. 152364 1. 63251 2. 042887  
2. 638201 2. 009438 1. 591905 2. 421255 2. 255761 1. 252156 1. 913171 3. 418772 1. 529903  
2. 000505 2. 071995 2. 98761 2. 186439 1. 84274 1. 922661 1. 965521 1. 37645 1. 862065  
1. 66399 2. 237845 1. 199426 1. 460813 1. 664514 1. 466606 1. 491675 2. 391917 1. 302192  
2. 517272 1. 955185 1. 903754 2. 546531 1. 723892 3. 112813 2. 80743 2. 211566 2. 183168  
1. 349531 1. 336385 1. 750453 1. 766569 1. 290264 1. 741889 1. 391639 1. 478392 1. 610981  
8. 566102 8. 813658 8. 72651 8. 752436 9. 178099 8. 702631 8. 598116 9. 970407 8. 798654  
2. 049073 2. 781548 2. 780018 2. 915685 2. 755264 2. 93235 2. 912403 3. 04658 2. 902292  
2. 198363 2. 976903 2. 696832 2. 45355 3. 682786 3. 963152 2. 805833 3. 692937 3. 162987  
7. 067984 7. 987107 8. 046366 8. 000948 8. 235127 8. 038934 7. 428255 8. 233338 8. 205557  
1. 985156 1. 537574 1. 869206 1. 874549 1. 698997 1. 799252 1. 622149 1. 735026 1. 815558  
3. 429013 1. 826233 2. 449748 1. 893433 1. 943134 2. 019634 2. 052545 2. 009395 1. 78902  
7. 952169 7. 706229 7. 708536 7. 954427 8. 32177 7. 717613 7. 659068 7. 602565 7. 967824  
1. 867758 1. 635049 2. 211134 2. 05548 1. 613834 1. 813048 1. 705573 1. 193172 2. 356877  
6. 612561 4. 443537 5. 765316 4. 300149 4. 329677 5. 825657 4. 47287 4. 427023 5. 857543  
2. 848607 2. 954127 2. 660008 2. 109187 3. 565839 2. 793963 3. 000439 2. 712101 3. 081766  
5. 452414 6. 027316 5. 873576 5. 195268 5. 472508 5. 858288 5. 099105 5. 839274 5. 381311  
2. 479554 1. 148178 1. 045779 1. 885776 1. 427157 1. 281958 1. 207822 1. 431574 1. 617282  
10. 23397 9. 730196 10. 04526 9. 624312 9. 576675 9. 216459 9. 8987 9. 436846 10. 04702  
5. 353401 5. 562925 5. 588693 5. 683286 5. 652032 5. 897362 4. 376616 6. 305809 5. 628544  
7. 688909 7. 972252 7. 859936 7. 563291 7. 872397 7. 655609 7. 770763 7. 403227 7. 721979

7.02155 7.683344 8.101567 8.228601 8.604865 7.644807 7.796574 7.529668 8.333555  
2.199397 1.758301 1.983163 2.112218 2.117673 1.63723 1.64524 1.425855 2.142202  
2.304069 2.231977 2.423574 1.407305 1.682662 1.677487 1.669228 1.476735 1.899697  
6.70926 7.753688 7.361107 7.406915 7.091252 6.990078 7.003778 7.236234 6.801472  
1.282522 1.459856 1.122954 1.058372 1.171038 1.325066 1.830322 1.324376 1.500364  
1.360552 2.598958 1.221091 0.89467 1.813004 2.347626 1.115623 1.09091 1.579352  
8.105574 8.024943 8.077693 8.136134 8.283363 8.239815 8.052198 8.035622 8.115637  
1.856349 2.27122 2.049276 2.291474 1.95394 2.043818 2.31844 1.539999 2.748661  
6.386325 6.548384 6.607788 6.446361 6.741864 6.445467 6.241947 5.959055 6.895747  
1.477101 1.057612 1.297592 1.375164 1.717581 1.19413 2.432871 1.584829 1.219893  
2.173094 1.57922 2.454726 1.48606 1.517615 1.914983 2.709909 1.679391 1.982035  
6.544366 6.686141 6.717259 7.148659 7.253999 6.990879 6.660817 6.950187 6.968695  
4.733174 5.905685 5.37556 5.724487 5.659227 5.0691 5.305723 5.5744 5.351489  
4.847339 5.113295 5.801855 6.298667 5.679736 6.093737 7.218922 6.026531 6.459439  
2.509042 2.312089 2.130116 2.464747 2.249182 2.093206 2.05893 1.838552 2.201242  
6.169338 7.060711 7.151103 7.286375 7.231249 7.49695 7.165761 6.860006 7.151473  
4.996801 4.52918 4.875032 5.113009 4.070602 5.12546 5.009584 5.452217 4.824169  
4.482688 4.955726 5.027882 5.403413 4.612334 4.325691 3.854004 4.942361 4.453326  
1.509806 1.195371 1.249066 1.186789 0.937667 1.038578 0.956099 0.993828 1.275851  
4.292989 4.272846 4.184558 4.837584 4.350549 4.363333 4.329983 5.524255 4.557708  
3.466883 3.81703 4.221271 3.11322 4.265449 3.134174 3.099504 3.332063 3.6623  
3.823024 1.072859 3.362814 1.311001 1.461299 1.565039 5.663216 2.066487 1.461299  
6.640947 7.311366 6.933898 7.505305 7.465738 6.980394 7.124523 6.976153 7.079572  
4.79242 3.578954 3.702357 3.996042 3.387347 4.741998 3.693703 3.510595 3.605558  
5.317035 5.946497 5.466815 5.334691 5.362585 4.9155 5.05897 5.883727 4.813686  
1.070703 1.02257 1.159041 1.495222 1.100027 1.382265 1.26501 1.096052 1.050064  
8.708304 8.039553 8.313273 7.578274 8.175242 8.064049 8.148791 8.073618 8.502407  
1.281625 1.450358 1.223566 1.498454 2.09325 1.691703 1.330188 1.551045 1.55166  
5.182805 5.406862 5.667637 4.579245 4.737878 4.742763 4.252566 4.216077 5.122118  
2.810443 3.178021 3.02404 2.934013 3.637259 2.506158 2.176589 2.281553 2.944665  
3.742897 2.718687 3.479829 3.263261 3.188858 2.267072 2.058924 3.48844 2.354778  
1.104403 1.469253 1.700423 0.986448 1.9365 0.984825 1.042229 0.997918 1.318267  
1.060881 1.002131 1.129277 1.518599 0.952172 1.614099 1.231157 0.880277 1.011301  
0.700089 5.513465 0.685228 1.394443 5.520334 1.193214 4.902208 1.086179 0.549504  
4.394749 3.850796 4.630502 3.811907 4.640671 4.672169 4.907129 4.900775 5.501455  
4.951629 5.110256 5.719528 5.833984 5.940014 5.263846 4.953946 5.9274 5.587589  
2.034681 1.748039 1.806768 1.741042 1.653106 2.112089 2.489417 1.49585 1.679285  
2.248666 3.874131 1.92527 1.967136 2.910906 1.50992 2.159625 2.657073 1.620891  
7.290876 7.261398 7.365027 7.91417 8.138675 7.647859 7.700142 7.740246 7.500256  
1.436344 1.619347 1.484498 1.299264 1.570079 1.507546 1.233548 1.771032 1.559336  
2.115583 1.553933 1.46762 1.583254 1.505708 1.214705 2.788907 1.424552 3.682368  
6.573205 7.305547 6.948568 6.903203 6.641207 7.210171 6.975566 6.864412 7.031434  
1.155845 1.996525 1.089359 1.49238 1.257172 1.418641 1.768464 2.007173 2.57795  
6.304662 5.929357 5.910915 6.277335 6.295902 5.981768 5.965282 5.906531 6.3142  
9.631786 8.808658 10.44881 9.338596 8.161364 8.769385 8.79641 8.322233 10.15964  
1.675354 1.317003 1.738285 1.805156 1.364476 1.682484 1.56069 1.470748 2.032098  
2.202813 1.320063 2.064271 1.284013 1.720383 0.869591 0.779742 0.558217 2.325355  
3.532816 4.443625 5.085714 3.300738 2.89747 4.386927 5.855739 3.41519 4.074796  
7.014011 6.421867 5.733964 6.798682 6.279845 6.623508 6.235889 5.835966 6.290686  
2.24472 1.883158 2.19551 2.11093 2.278409 1.753778 1.807621 1.749054 2.217712  
2.181726 3.597648 3.662876 3.091063 4.305244 4.835599 3.022735 4.066133 3.779349

4. 205099 3. 62134 4. 822382 3. 411496 3. 443925 3. 83972 4. 528764 4. 164746 4. 006873  
1. 633851 1. 89885 1. 888512 1. 822817 1. 12627 2. 72295 1. 233853 1. 68353 2. 391949  
4. 06642 6. 004119 6. 040241 5. 385449 5. 827341 6. 414138 5. 023121 6. 501699 4. 681417  
5. 297553 5. 100191 4. 658683 4. 999586 5. 211783 4. 783544 5. 057258 5. 056817 4. 871116  
3. 038738 3. 614574 2. 789232 3. 071234 2. 6879 2. 01151 2. 995125 1. 126773 3. 651552  
1. 914601 1. 61553 1. 372008 1. 460793 1. 58942 1. 646701 2. 375398 1. 635839 2. 169295  
2. 338211 2. 169233 1. 799572 2. 486416 2. 33748 2. 345747 2. 177474 3. 889538 2. 501057  
5. 339967 3. 777642 4. 810608 3. 049772 4. 268533 2. 767746 3. 548713 3. 59493 4. 018461  
1. 758814 1. 244547 0. 850361 1. 099546 0. 855591 1. 148302 1. 128002 1. 168763 1. 05349  
2. 97216 1. 90815 2. 459346 1. 415393 2. 582791 2. 156301 1. 706516 2. 056897 2. 267836  
1. 373923 1. 081054 1. 087274 1. 37435 1. 242566 1. 772347 1. 057993 1. 028471 1. 020818  
2. 654153 4. 78814 4. 256267 3. 237562 4. 126403 5. 475948 3. 663588 4. 329113 3. 06658  
1. 422855 1. 318094 1. 093496 1. 141993 1. 343223 1. 384344 1. 009891 1. 585527 1. 096519  
1. 000147 1. 021462 0. 777966 1. 269695 0. 999104 1. 051367 1. 540345 1. 19491 1. 121919  
1. 373128 1. 36246 1. 576777 2. 0913 1. 839123 2. 023672 1. 379706 1. 382441 1. 780126  
0. 697655 0. 802042 0. 93323 1. 096734 0. 939019 1. 110328 1. 719187 0. 791918 1. 09837  
2. 917766 0. 923208 1. 195245 0. 964385 2. 010676 1. 375055 1. 106739 1. 230567 1. 010418  
6. 682142 6. 488849 6. 07599 7. 138504 6. 607223 6. 571822 5. 544293 6. 57161 6. 634381  
4. 682442 5. 436848 4. 41697 4. 585549 4. 314362 4. 175659 3. 859595 4. 696684 4. 419995  
2. 000727 1. 604652 1. 316822 1. 663145 1. 548886 1. 481253 1. 941532 1. 161416 1. 597649  
6. 752821 8. 18461 8. 159308 8. 100108 7. 687708 8. 25131 8. 372527 7. 132134 7. 313893  
4. 842472 4. 810662 4. 836231 4. 276669 4. 830776 4. 508337 4. 317009 5. 046551 4. 667627  
2. 244592 2. 816134 2. 726208 2. 498525 2. 149356 3. 548408 3. 412264 3. 029157 3. 450789  
3. 765558 2. 9006 2. 796595 2. 579239 2. 722983 3. 919238 3. 225924 3. 580843 3. 094047  
1. 248103 1. 057046 0. 970218 0. 949684 1. 343198 0. 821651 1. 037235 1. 65789 1. 4186  
2. 664959 2. 379062 2. 880653 2. 188962 3. 108507 2. 900118 2. 531883 3. 803702 2. 254419  
5. 912385 5. 777112 5. 750064 5. 840152 5. 734585 5. 790749 6. 046813 5. 861922 5. 521466  
1. 100077 1. 29066 1. 348502 0. 968597 1. 743995 0. 861014 1. 420077 1. 136344 1. 520449  
4. 568118 1. 036218 2. 592209 1. 389644 2. 300631 1. 22054 1. 7038 1. 113506 1. 146395  
1. 706348 1. 656191 1. 722173 1. 861289 1. 567712 1. 751825 1. 941425 1. 742428 1. 869823  
2. 402953 2. 24732 2. 010214 2. 227769 2. 335401 2. 049194 2. 342958 1. 771603 2. 233957  
1. 01227 1. 245236 1. 033226 1. 16883 1. 134703 1. 098422 1. 147384 1. 149688 0. 934492  
7. 37818 7. 206912 7. 411835 7. 174017 7. 077994 7. 546807 7. 156562 7. 494373 6. 73962  
3. 907639 6. 088725 5. 530603 3. 963674 3. 389775 3. 740024 3. 876659 4. 161501 4. 194777  
1. 4863 0. 719976 1. 301287 1. 527954 2. 033605 0. 97369 0. 855688 1. 240846 1. 169937  
2. 448591 2. 103711 1. 775699 2. 645824 2. 347279 2. 814812 2. 180816 2. 707206 1. 819039  
2. 009802 2. 305503 2. 13491 1. 87407 2. 74289 2. 775518 2. 002145 2. 291434 2. 263136  
6. 363095 5. 728377 7. 086805 6. 649594 6. 509322 7. 138322 6. 172935 7. 116926 6. 337371  
2. 859437 2. 809327 2. 60777 2. 123909 2. 176149 2. 136941 2. 034552 3. 106723 4. 508612  
2. 115893 4. 656722 4. 0942 3. 233383 3. 884217 3. 094973 2. 69491 3. 618702 4. 333294  
5. 14439 5. 136445 5. 424047 4. 629786 3. 948348 4. 620957 5. 545769 4. 626305 4. 264519  
3. 191788 4. 34434 2. 494097 2. 527296 1. 906717 2. 741519 3. 387456 3. 014479 2. 513145  
1. 393404 1. 517335 1. 788594 1. 659162 1. 796749 1. 853094 2. 885105 1. 877431 1. 940449  
1. 265563 0. 845543 0. 798688 1. 273364 1. 172039 0. 986554 1. 311669 1. 011587 0. 909646  
2. 454303 3. 556886 3. 071287 2. 890195 4. 152385 2. 734149 3. 372316 3. 817817 2. 208469  
6. 735672 6. 660037 6. 962208 6. 820558 7. 456287 7. 689029 6. 775119 7. 230557 7. 394245  
1. 447311 1. 087707 1. 459251 1. 151951 1. 445709 0. 851749 1. 015244 1. 850966 2. 677832  
1. 511781 1. 41674 1. 450651 1. 453079 1. 142426 1. 328785 1. 515586 1. 469245 1. 215667  
1. 490495 1. 050817 1. 081892 1. 495685 1. 470112 1. 575195 1. 278053 1. 507676 1. 289413  
2. 33112 2. 286341 1. 858621 4. 207027 3. 139185 3. 297197 3. 786751 3. 409392 3. 509878  
2. 079008 1. 121682 1. 359324 1. 188177 1. 837382 1. 063121 2. 369178 2. 159059 2. 565906

2. 983928 2. 943885 2. 440524 2. 633891 2. 873287 2. 549608 3. 758515 2. 513935 3. 131996  
3. 092237 2. 14624 2. 18194 1. 483681 1. 559096 2. 187793 2. 15334 1. 69369 2. 112712  
5. 043247 2. 516856 2. 486411 2. 339087 2. 35549 2. 154901 2. 251069 2. 168118 2. 185039  
4. 634055 4. 953741 4. 752289 5. 840671 5. 301108 5. 566737 5. 662777 5. 728053 4. 907324  
1. 97866 1. 60615 1. 750101 1. 522802 1. 718205 2. 124942 1. 371918 1. 509991 2. 314936  
1. 09589 0. 644271 1. 47603 1. 766835 1. 17906 1. 849249 0. 995569 1. 419478 0. 953387  
3. 425921 2. 671819 2. 400459 3. 374418 3. 025981 3. 266816 2. 716414 2. 561132 3. 095729  
1. 081126 1. 456198 1. 417729 1. 229685 0. 857823 1. 269977 1. 642195 1. 405174 1. 317401  
3. 448941 4. 586224 4. 374344 4. 105918 3. 934054 4. 836267 4. 122136 3. 988097 3. 869033  
1. 748743 1. 129109 1. 574113 1. 45741 1. 969537 1. 337848 1. 025124 1. 92942 1. 409973  
1. 595541 1. 886462 1. 944333 1. 980672 1. 215932 1. 795634 1. 806975 2. 24857 1. 690854  
7. 488252 7. 54944 7. 390382 7. 302641 7. 555195 7. 351179 6. 996338 7. 701981 6. 927753  
2. 113432 1. 41628 2. 014242 2. 367419 1. 460119 2. 530901 1. 526615 1. 85483 1. 808837  
4. 670272 6. 482674 5. 706875 6. 723476 5. 820172 6. 941332 5. 88542 2. 731858 6. 147579  
3. 618019 2. 284183 2. 184768 3. 234527 2. 309108 2. 60506 2. 530054 2. 378571 2. 474501  
3. 355733 3. 177751 3. 274138 2. 505509 3. 00271 3. 112881 3. 248169 2. 975132 3. 366999  
5. 514301 5. 496646 5. 256616 5. 56993 5. 558819 5. 374748 6. 270346 5. 79167 5. 311902  
0. 824203 2. 411324 2. 176829 1. 407741 1. 611918 2. 152213 2. 253385 1. 745949 1. 574368  
1. 016307 1. 380653 1. 214112 1. 952638 1. 518329 1. 176151 1. 055078 1. 581805 1. 50848  
2. 426454 2. 565028 2. 701679 3. 224647 2. 635707 4. 101413 3. 49369 2. 693224 2. 863563  
3. 103035 2. 481054 2. 539537 2. 518833 2. 876839 2. 577994 2. 215181 2. 035486 2. 463247  
3. 932482 4. 601115 3. 521894 4. 517998 5. 175405 3. 649754 4. 39513 3. 98968 3. 970156  
2. 467197 2. 959373 2. 264392 3. 382743 2. 44385 2. 599654 3. 21322 2. 875006 2. 835061  
2. 055263 2. 103559 2. 815424 2. 770368 2. 614864 4. 266883 3. 614795 3. 563123 2. 81036  
2. 43181 1. 343403 1. 343261 1. 554581 1. 544495 1. 586764 2. 484754 1. 789763 1. 723102  
1. 531517 1. 722525 1. 37451 1. 634789 2. 081662 1. 766082 2. 535602 1. 614226 1. 226297  
1. 882946 0. 871951 0. 892271 1. 158269 1. 338378 1. 707181 1. 324903 2. 29627 1. 281946  
2. 959176 3. 112899 3. 184233 2. 379595 2. 673757 2. 711623 2. 783282 3. 410998 2. 961541  
2. 124119 1. 711289 1. 291801 1. 480963 1. 554635 1. 402434 2. 050541 1. 46988 2. 22853  
6. 328309 6. 402692 5. 598139 6. 782647 6. 224744 6. 819523 6. 330773 5. 923484 5. 964636  
0. 733474 2. 698173 3. 08919 5. 46289 2. 516234 4. 095168 3. 115923 5. 619323 1. 142604  
4. 070806 3. 788134 4. 212262 3. 575918 3. 213546 4. 573551 3. 227838 3. 721612 3. 769564  
3. 161044 5. 780027 5. 44216 4. 82558 4. 883777 5. 183116 4. 081804 5. 325994 5. 197424  
1. 688817 1. 992042 2. 327727 1. 93013 1. 746723 1. 552477 2. 368165 1. 609536 1. 547156  
6. 459853 6. 834688 6. 979237 6. 776431 6. 755651 7. 048922 6. 447409 6. 683423 6. 135596  
4. 757526 5. 756157 5. 915138 5. 142022 6. 099393 5. 673339 3. 289133 5. 926427 5. 441809  
2. 263771 1. 769948 2. 050284 2. 254225 1. 686261 1. 64756 1. 910969 1. 783803 2. 336291  
3. 684193 3. 605058 3. 558938 3. 979557 4. 015379 4. 310176 4. 780982 4. 370175 4. 010045  
4. 179389 3. 768565 3. 660297 4. 799231 5. 243577 5. 092293 4. 532089 4. 215459 4. 751186  
2. 312261 1. 770033 2. 112771 1. 500344 1. 475811 1. 56571 2. 116729 1. 47269 1. 640487  
1. 948609 1. 443031 1. 938282 1. 582103 1. 561843 1. 373663 1. 991412 1. 689423 1. 29904  
3. 103985 5. 069673 3. 84456 3. 598776 3. 031985 5. 203631 5. 326151 4. 900542 4. 420631  
2. 525019 1. 935067 1. 35431 2. 069966 1. 347403 1. 746606 1. 575727 1. 011309 2. 15822  
3. 066276 3. 313727 3. 719392 3. 137535 1. 629078 4. 02533 3. 373242 2. 292011 2. 529221  
2. 569992 2. 393765 3. 873561 3. 100673 3. 77566 2. 585953 2. 408942 2. 767609 2. 181419  
5. 661256 6. 102452 6. 908264 6. 121609 6. 140802 6. 387379 4. 658871 6. 009702 5. 260146  
4. 933837 3. 830422 3. 992646 4. 112987 4. 600075 4. 060942 3. 877914 3. 994003 4. 45328  
1. 936948 0. 739573 1. 22397 1. 087809 1. 735694 1. 191246 1. 287392 1. 324854 1. 694977  
1. 810589 1. 293946 1. 758565 1. 348635 1. 204101 1. 403407 1. 71392 0. 957323 1. 31581  
2. 845192 3. 367083 3. 144424 3. 048095 2. 432211 2. 979993 3. 224654 3. 07247 3. 210134  
7. 503295 6. 746271 6. 319026 6. 019022 6. 760575 5. 835663 5. 614089 6. 258377 6. 037516

3. 523514 3. 198714 4. 154658 3. 785832 3. 381538 3. 743964 4. 123159 4. 049138 3. 449618  
5. 092807 4. 500654 5. 676537 3. 794525 4. 864607 4. 846398 4. 453707 5. 505284 4. 790461  
6. 113223 5. 149188 5. 034611 4. 868947 5. 194317 4. 521785 4. 752121 5. 916994 4. 937072  
5. 941188 6. 643342 5. 988402 6. 64407 6. 687971 6. 514279 7. 031814 6. 5692 6. 513486  
5. 999739 6. 479754 4. 911285 6. 126842 6. 006017 6. 748024 6. 365351 6. 060292 5. 695176  
4. 519098 6. 478845 6. 215154 6. 487379 5. 958985 6. 646652 6. 759844 6. 010378 6. 766884  
4. 346247 2. 576572 2. 409954 2. 760199 3. 175998 3. 273689 3. 149649 3. 61035 3. 186534  
1. 405699 1. 191361 0. 876326 0. 99613 1. 358893 1. 09047 1. 392813 1. 537483 1. 565334  
2. 685232 3. 608106 3. 264515 3. 538407 3. 587809 3. 401048 2. 642684 3. 377979 2. 852441  
6. 092865 6. 3562 5. 944299 6. 252964 6. 700165 6. 25661 6. 17539 6. 046569 6. 048544  
8. 616809 8. 979183 8. 804347 9. 350436 9. 276956 9. 106732 8. 812136 9. 393987 9. 396627  
7. 337839 8. 382514 8. 33401 7. 951867 7. 855496 7. 433302 7. 51555 7. 969249 7. 833771  
6. 032436 6. 351877 6. 323412 6. 427784 7. 140627 6. 945917 6. 70904 6. 62304 6. 466738  
3. 673974 2. 733164 3. 235165 2. 346215 3. 476257 3. 519593 3. 14697 3. 462757 3. 044604  
6. 241064 6. 29629 5. 540109 6. 232301 5. 577957 5. 771045 5. 75615 6. 265788 5. 925822  
4. 228075 3. 644309 3. 696737 4. 349607 3. 64452 4. 438997 4. 405914 3. 011486 3. 196583  
6. 597874 3. 745154 4. 880349 3. 950309 3. 519934 3. 723149 3. 001847 4. 322587 6. 540765  
1. 648239 0. 939371 0. 900786 1. 356763 1. 673841 1. 432601 1. 003871 1. 005817 1. 432334  
2. 034515 2. 137347 2. 774239 2. 196284 1. 465535 1. 681427 2. 0369 2. 576951 1. 608616  
4. 566283 5. 221253 5. 115882 4. 803596 5. 325147 4. 336176 4. 839725 5. 434673 4. 861116  
5. 788663 6. 96725 6. 364671 6. 378268 6. 641377 6. 84137 5. 619029 6. 141226 6. 664466  
7. 784194 7. 272751 7. 530847 6. 994202 7. 629882 7. 033275 6. 35612 7. 540557 7. 645744  
6. 727389 6. 367355 6. 38574 6. 349117 6. 43176 6. 281731 6. 461187 5. 802039 6. 086339  
6. 54353 5. 17202 6. 731344 4. 994896 5. 130197 2. 644351 4. 899056 4. 930085 6. 571765  
5. 244415 6. 0081 5. 304437 4. 972281 4. 711942 5. 30704 4. 496301 6. 245426 5. 333585  
4. 319002 3. 643119 3. 600509 4. 121218 3. 929747 4. 061746 4. 581266 4. 390978 3. 92019  
4. 258216 3. 647888 3. 854475 4. 56654 4. 208412 3. 28846 4. 469411 3. 469617 4. 343583  
6. 346789 5. 326368 5. 931217 5. 527144 4. 925136 6. 089663 5. 834453 5. 216234 5. 745732  
3. 297726 3. 157288 2. 535143 2. 557431 2. 738564 2. 492958 3. 237764 2. 968633 2. 88978  
2. 574617 2. 146591 2. 440634 2. 423533 1. 994099 2. 255113 2. 511678 2. 41997 2. 876652  
1. 50966 1. 466666 1. 697664 2. 052184 2. 304381 1. 062699 1. 594144 1. 447001 1. 669694  
2. 360954 2. 074621 2. 448994 1. 9799 2. 09493 1. 910772 2. 458194 2. 318116 2. 177768  
1. 792489 2. 150427 2. 0747 1. 825853 1. 972834 2. 098133 1. 830581 3. 147434 2. 288882  
2. 828853 1. 88003 1. 67812 1. 898122 1. 623562 1. 259962 1. 230965 1. 918659 1. 615792  
3. 586241 2. 448395 2. 325423 2. 278124 2. 072604 3. 256832 4. 106296 2. 111495 3. 437276  
1. 939187 1. 610206 2. 044754 1. 596375 2. 215099 1. 651243 1. 440558 1. 757575 1. 245859  
2. 63365 3. 193067 2. 446754 2. 64024 2. 359215 2. 703335 2. 305325 2. 402595 2. 612261  
3. 447643 2. 277088 4. 03769 3. 091591 3. 305846 2. 54527 3. 153689 2. 807072 3. 523869  
0. 713279 0. 951612 0. 688179 1. 314336 0. 537557 1. 034984 1. 002895 0. 742973 0. 924937  
3. 120292 3. 718864 4. 754564 3. 00647 3. 200674 3. 721785 4. 98379 4. 487491 4. 527185  
4. 777519 5. 838175 5. 788179 4. 441978 6. 392667 5. 438423 5. 797715 5. 602714 5. 918146  
3. 228452 3. 383873 3. 310239 3. 133823 2. 651008 3. 052977 3. 472606 2. 996494 2. 946663  
3. 266419 1. 811088 1. 906077 2. 036174 1. 670404 2. 650543 2. 807446 2. 270541 2. 176  
5. 161255 5. 281784 4. 439231 5. 080407 4. 8533 5. 690602 4. 914638 5. 583805 4. 814039  
1. 699204 1. 877921 1. 634778 1. 561836 1. 379551 1. 920082 1. 433763 1. 8222 1. 823893  
2. 395871 1. 554958 2. 059205 2. 329672 1. 769673 1. 996914 2. 207472 2. 108714 1. 935536  
1. 460756 2. 402308 1. 486226 1. 911005 1. 660801 1. 659998 1. 826441 1. 441766 1. 98596  
1. 28816 1. 071599 1. 133946 1. 33756 1. 172536 1. 380888 1. 343453 1. 280388 1. 169566  
1. 447476 1. 521634 0. 999005 2. 222734 1. 604838 1. 067798 2. 395387 1. 523663 1. 091685  
2. 412039 2. 907521 2. 960895 2. 41003 2. 502593 2. 513042 3. 047356 2. 191225 2. 280165  
4. 342809 2. 517521 3. 304636 3. 850321 2. 820495 2. 015724 3. 030441 2. 321705 2. 779239

4. 107564 4. 498503 5. 384706 4. 951217 4. 769832 5. 561428 5. 167917 4. 675933 5. 288209  
3. 469443 2. 363042 2. 811766 2. 991218 3. 025269 3. 087043 3. 361908 2. 629651 2. 932102  
4. 978647 5. 448238 5. 882625 3. 847432 5. 563441 6. 585424 4. 753809 2. 216508 5. 348856  
3. 824138 5. 880158 6. 180434 5. 785434 6. 685961 5. 953795 5. 943483 5. 764936 5. 684259  
7. 200947 7. 232565 7. 17231 7. 91041 7. 668102 7. 485568 7. 678391 7. 392701 7. 365576  
2. 989876 3. 117418 3. 014615 2. 859743 3. 210332 2. 557304 2. 733915 2. 268765 2. 433714  
3. 88403 4. 536963 5. 105929 5. 040208 5. 000304 4. 348637 3. 950038 4. 84723 4. 063917  
5. 710866 6. 219614 6. 291767 6. 345246 6. 472946 5. 987067 6. 185316 6. 452947 6. 478637  
7. 978168 7. 952479 7. 503342 7. 95664 7. 816272 7. 99453 7. 537105 8. 04833 7. 779851  
6. 613548 6. 287094 6. 378329 6. 374834 6. 512504 6. 739156 6. 630773 6. 318253 6. 801422  
5. 06634 4. 657898 4. 407808 4. 857106 5. 246473 5. 316393 5. 610126 5. 091718 5. 235334  
3. 064799 3. 791548 3. 162215 2. 722262 3. 081697 3. 235917 3. 318991 3. 070218 3. 402767  
3. 102051 3. 327844 2. 528238 3. 372925 3. 015111 4. 272543 2. 60886 3. 311867 3. 681092  
1. 951588 2. 666484 2. 208421 2. 292525 2. 390249 2. 275368 2. 412886 2. 854264 2. 449584  
4. 876427 4. 72256 4. 730945 4. 747233 5. 006581 5. 077291 4. 758755 4. 515642 4. 866971  
1. 926959 1. 455026 1. 601977 2. 044998 1. 648157 2. 116187 1. 381259 1. 633693 1. 378667  
7. 258411 7. 3242 7. 334069 7. 309823 7. 699167 7. 232888 7. 200946 7. 448689 7. 046962  
2. 18978 3. 195371 2. 457988 3. 088769 3. 047807 3. 448846 2. 882776 2. 571191 2. 40607  
2. 477422 2. 329164 2. 102174 2. 462758 2. 672257 2. 598539 2. 568492 2. 14352 2. 770891  
3. 111852 3. 431332 2. 695355 2. 418129 2. 583558 3. 690494 3. 274209 5. 347237 3. 004335  
3. 974219 4. 143095 3. 253779 4. 849246 3. 427547 4. 938742 4. 184795 2. 667539 3. 879998  
6. 935013 6. 726942 7. 094485 6. 869149 6. 860155 7. 103783 6. 804223 7. 193272 7. 338347  
4. 576782 4. 346981 6. 286398 4. 032416 4. 309316 4. 118698 4. 989449 4. 22668 7. 172421  
5. 150575 4. 780353 5. 780735 4. 887601 3. 553291 5. 013907 4. 099558 3. 447406 4. 529983  
3. 457943 2. 603003 3. 508657 2. 756512 2. 648073 3. 066941 2. 527002 3. 726295 2. 297563  
7. 129585 6. 478377 7. 173382 7. 318488 7. 196416 6. 744454 7. 849237 6. 307319 8. 705329  
8. 523296 9. 030258 8. 923908 8. 250072 8. 561996 8. 403387 7. 595289 8. 282157 8. 109081  
1. 220408 1. 653852 1. 467778 1. 538404 5. 173341 1. 837928 1. 483032 2. 075796 1. 772224  
5. 157027 6. 767975 6. 036527 6. 488449 6. 268133 6. 442614 6. 17719 6. 571342 5. 778085  
7. 826955 6. 336899 7. 288587 5. 488145 6. 037298 5. 065575 5. 85527 5. 816282 7. 506032  
8. 099383 8. 308464 8. 144296 8. 151238 8. 560784 8. 130488 7. 973579 7. 924057 8. 130905  
4. 785762 6. 177071 6. 125183 5. 799727 6. 326055 6. 815187 6. 401107 6. 552613 5. 862213  
6. 803193 7. 47986 7. 446015 7. 562778 7. 876615 7. 714301 7. 409505 7. 822219 7. 621794  
1. 554357 1. 088697 1. 163755 1. 597993 0. 974744 0. 757546 1. 091543 1. 421356 1. 24327  
1. 084003 1. 630707 1. 622289 2. 270708 1. 830917 1. 305032 2. 114074 1. 479788 1. 389213  
2. 702243 2. 36611 1. 658315 3. 077513 1. 49767 1. 986084 2. 478375 1. 820712 3. 207008  
2. 413826 2. 530735 2. 239586 2. 071035 2. 03367 2. 26807 2. 923726 2. 086177 1. 70823  
3. 129786 4. 462766 4. 562943 4. 029368 2. 870417 3. 856839 3. 125718 5. 709372 3. 126262  
3. 647999 3. 075317 2. 892404 2. 972109 2. 85757 3. 024631 3. 753815 2. 946611 3. 75959  
5. 234852 5. 754617 5. 366387 5. 981624 5. 477543 5. 558177 5. 961399 5. 93705 5. 761182  
2. 219132 1. 440353 1. 621942 1. 644166 1. 629611 1. 577651 2. 31927 2. 430969 1. 578023  
3. 958381 3. 960831 2. 812 3. 290477 3. 725328 4. 103206 3. 728291 3. 557494 4. 088442  
3. 063646 1. 374015 1. 798934 1. 975419 1. 092393 1. 429987 1. 562238 1. 820329 2. 466333  
6. 680265 6. 827123 7. 074308 7. 201459 7. 105003 7. 417861 6. 665364 6. 872219 6. 484345  
1. 512448 2. 202978 2. 391384 1. 769883 1. 776565 1. 888717 1. 821241 2. 492901 1. 680619  
6. 874325 7. 165632 7. 480812 6. 683539 7. 083388 7. 33446 7. 132177 7. 679523 6. 936457  
1. 287522 1. 373431 1. 167413 1. 151507 1. 413096 1. 076027 1. 163844 1. 431468 1. 827693  
1. 725983 1. 915792 1. 198817 1. 331483 1. 55043 1. 437838 1. 87932 2. 015159 1. 410659  
3. 973891 4. 281704 3. 257615 4. 182623 4. 332957 3. 377342 4. 662309 4. 631182 4. 85389  
1. 776332 0. 950877 0. 989122 1. 167095 0. 753497 0. 891054 1. 481396 0. 786535 1. 069357  
6. 059462 6. 819213 6. 901425 6. 136732 6. 569592 6. 62172 6. 220342 6. 972624 6. 215293

3. 785583 5. 021858 4. 238954 5. 74221 5. 507373 5. 768485 5. 612899 5. 958963 5. 145163  
1. 372103 1. 091523 1. 130957 1. 276739 1. 372468 1. 348458 1. 406435 1. 170797 0. 955004  
5. 813444 6. 280742 6. 20983 5. 950965 5. 97026 5. 860817 5. 194197 6. 505327 6. 318267  
5. 020188 4. 44078 5. 398392 4. 65386 4. 033549 5. 048379 5. 998956 4. 949547 5. 508327  
1. 348327 1. 306596 1. 341557 1. 322038 1. 632966 1. 741841 1. 848685 1. 44822 1. 690169  
2. 088731 1. 39441 1. 135373 1. 334521 1. 48135 2. 181648 1. 339289 1. 116528 1. 767596  
5. 000979 5. 210589 5. 780574 5. 439381 5. 971174 6. 322476 5. 343558 5. 805622 5. 375268  
4. 372157 4. 496701 5. 928738 4. 671721 4. 861287 5. 217455 4. 227171 4. 658727 4. 156764  
3. 855158 5. 05385 4. 28803 4. 44067 4. 144563 4. 565728 3. 715698 3. 65239 4. 797298  
5. 535144 5. 677816 5. 602792 6. 443927 6. 338169 6. 644431 6. 092079 6. 993161 6. 737181  
4. 576595 2. 912659 5. 326123 3. 744246 4. 503134 3. 075997 4. 382396 4. 424251 5. 669438  
4. 264039 3. 309372 3. 906701 3. 188213 4. 29134 4. 48191 4. 367154 4. 219074 3. 509187  
5. 745422 4. 473836 4. 199621 5. 22625 4. 934166 4. 064038 4. 776298 5. 34178 5. 046224  
6. 965259 7. 503747 7. 605567 7. 601784 7. 275835 7. 618326 6. 829166 6. 22741 6. 823791  
4. 813371 5. 677348 5. 368217 5. 527965 6. 610624 6. 345488 4. 872195 6. 596624 6. 849296  
3. 68851 3. 80359 5. 028133 4. 055912 3. 659378 3. 887107 3. 923011 4. 156833 4. 0518  
7. 649956 8. 024448 7. 810773 7. 684281 8. 230566 8. 124094 7. 945869 8. 515182 8. 163288  
3. 038627 2. 309801 2. 588188 2. 04629 2. 197659 1. 885749 1. 96399 2. 263306 2. 248592  
2. 232421 2. 140748 3. 352696 3. 275902 3. 394641 3. 818181 3. 430505 3. 460057 2. 95803  
5. 397213 5. 99829 5. 030221 5. 562925 4. 987012 5. 377594 5. 589948 6. 216954 5. 239031  
7. 346089 8. 442654 7. 529418 8. 270387 8. 221274 7. 996285 7. 738186 7. 706443 7. 765214  
2. 856937 4. 223137 2. 653939 3. 326258 3. 892068 3. 326736 2. 8401 3. 502337 4. 098531  
5. 183364 3. 123086 4. 706635 2. 971526 3. 48672 3. 469535 3. 989899 3. 581054 3. 831454  
3. 782612 2. 823802 3. 108299 2. 246317 3. 152215 2. 220794 1. 94104 3. 066961 2. 005876  
3. 622912 4. 113588 4. 948667 4. 706877 3. 785315 4. 61315 4. 115798 4. 702315 3. 80397  
2. 497873 3. 313832 3. 839995 4. 163118 4. 349914 3. 776065 4. 122491 4. 359306 2. 855229  
5. 865731 6. 77884 6. 588905 6. 54846 6. 68389 6. 951195 6. 354876 6. 793487 6. 73063  
5. 729002 6. 38193 6. 39067 6. 078512 6. 204072 6. 424858 6. 134738 6. 173469 6. 009883  
7. 659797 7. 923373 7. 154577 8. 731212 8. 381388 7. 226233 7. 362507 7. 7251 7. 774831  
6. 885733 7. 445781 6. 721843 7. 29902 7. 363063 8. 019248 6. 715065 6. 607998 7. 396001  
1. 928888 1. 012752 2. 141089 1. 621673 2. 131267 1. 620343 1. 529685 1. 912229 1. 583586  
0. 952072 1. 007674 0. 951142 1. 144327 1. 774719 1. 148881 2. 043701 0. 97376 1. 330101  
2. 235494 1. 874525 2. 060121 2. 320018 2. 354308 2. 226705 2. 150934 2. 607143 2. 450436  
2. 978357 2. 388569 3. 800998 3. 75864 3. 086397 3. 427388 3. 334257 3. 259159 3. 723491  
5. 401803 5. 284127 5. 105789 5. 410679 6. 182013 5. 557423 4. 832579 4. 349077 5. 185974  
3. 865652 4. 442396 4. 693888 3. 714668 4. 199128 4. 488294 4. 369233 3. 643892 3. 752972  
2. 912746 4. 200615 4. 332102 3. 270534 2. 343607 4. 83777 2. 712648 2. 811361 2. 012287  
3. 294828 2. 747504 3. 00258 2. 950137 2. 679616 2. 841605 2. 866757 2. 660123 3. 578032  
7. 013905 7. 379397 6. 733768 8. 113584 7. 411481 6. 472125 6. 927199 6. 296276 6. 921396  
9. 407117 8. 542451 7. 960172 9. 262542 9. 551167 9. 333915 9. 218112 8. 416626 8. 922341  
2. 160283 2. 22493 2. 430231 2. 207173 2. 752258 3. 537141 3. 949324 2. 24987 2. 73931  
6. 758265 7. 085724 7. 360299 7. 908498 7. 44231 7. 745385 7. 154203 7. 408445 7. 295135  
4. 834643 3. 816419 4. 489762 4. 561139 4. 336933 5. 326393 4. 530968 4. 546914 3. 930751  
8. 294895 7. 833327 8. 232831 7. 764411 8. 074217 7. 573951 7. 860272 7. 975251 8. 129492  
8. 342051 7. 200691 7. 718775 6. 974495 7. 26518 6. 746201 7. 176721 7. 047481 8. 034333  
8. 545076 9. 435574 7. 727601 10. 37434 10. 12828 9. 757109 10. 86542 10. 18992 10. 05355  
2. 882086 3. 480013 2. 631763 2. 874577 3. 108105 2. 755005 3. 171331 2. 656532 3. 18985  
3. 110608 2. 171785 2. 611296 2. 346091 2. 064188 2. 738676 3. 007674 2. 7038 2. 33411  
5. 007648 3. 256897 3. 441503 1. 917025 3. 044727 2. 228115 3. 637852 3. 302404 2. 10574  
7. 042398 5. 580496 5. 667451 4. 916746 5. 584815 4. 863781 5. 71989 5. 297962 6. 642378  
6. 727165 7. 457016 7. 187933 8. 207515 7. 959062 7. 911053 7. 590733 7. 207926 7. 315072



3. 18509 2. 332299 2. 463375 2. 442952 2. 305847 2. 876199 3. 639242 3. 988981 2. 898377  
5. 013104 5. 760683 5. 028897 6. 528808 5. 919251 6. 741375 6. 101239 5. 310856 6. 370766  
3. 494886 2. 600872 2. 639702 3. 210511 4. 139087 3. 394763 4. 843204 3. 17818 3. 769587  
1. 852948 2. 370128 2. 290413 2. 337619 2. 020245 2. 924197 1. 756126 2. 257863 2. 512093  
3. 458186 3. 093902 3. 631293 3. 355864 3. 278034 3. 470145 3. 954231 2. 671475 3. 175535  
4. 159773 4. 957803 5. 341736 5. 38806 4. 533976 4. 82005 6. 266571 4. 35465 4. 350732  
2. 113575 2. 077401 2. 610647 2. 43347 1. 94657 1. 594134 2. 346154 1. 506525 1. 832717  
4. 725404 6. 706805 5. 174303 6. 870071 5. 074129 6. 188347 5. 711942 6. 172059 5. 681089  
6. 926903 6. 600611 7. 941 7. 33668 6. 535408 6. 657273 5. 233376 6. 500038 6. 263671  
2. 937143 3. 102251 3. 713447 2. 967268 3. 222728 3. 778036 3. 025881 2. 426002 4. 011012  
1. 223134 0. 743293 1. 003242 1. 499175 1. 325067 1. 285389 1. 50424 0. 874369 1. 608099  
2. 36635 2. 987375 3. 09612 3. 091616 2. 77302 3. 031005 3. 352223 3. 152956 3. 213786  
6. 849165 5. 43352 5. 442368 5. 363348 5. 944365 4. 288539 6. 214611 6. 023597 6. 224607  
3. 364791 4. 560023 3. 779327 4. 213623 4. 192063 4. 817887 3. 023169 3. 1716 3. 4078  
2. 727618 2. 185707 3. 679338 1. 979662 3. 048774 2. 754525 2. 222608 2. 491406 2. 478026  
8. 963359 8. 8874 8. 629972 8. 492024 8. 399548 7. 969989 8. 728247 8. 991767 8. 977395  
1. 142101 0. 809821 0. 994789 1. 536691 1. 05334 1. 592589 1. 53211 1. 367993 1. 560426  
6. 191569 4. 972901 5. 116088 4. 903947 5. 011039 4. 925106 4. 242 4. 879115 5. 422776  
3. 987355 5. 551 5. 379731 4. 600758 5. 529088 5. 330382 5. 174947 5. 632942 4. 839176  
5. 11757 5. 01661 4. 619573 4. 834595 5. 015074 4. 780813 4. 538715 3. 308721 4. 865433  
5. 265543 4. 022028 3. 34822 4. 018581 2. 177345 3. 056664 4. 007072 4. 705269 4. 684331  
5. 690735 6. 209673 6. 230003 5. 441465 6. 032911 4. 916257 6. 861263 5. 559812 5. 630819  
1. 394509 1. 276277 0. 961179 1. 232323 1. 275045 1. 253421 1. 750395 1. 031614 1. 457694  
3. 037242 3. 165757 2. 790217 2. 883334 3. 019675 2. 623886 3. 504722 2. 072383 1. 898116  
10. 09733 9. 644709 9. 936971 10. 01994 10. 18735 9. 812185 10. 56285 10. 00015 10. 22623  
9. 580148 9. 115666 9. 202179 9. 352016 9. 100687 9. 224442 9. 590634 9. 083876 9. 321258  
5. 331231 6. 079716 6. 206582 5. 356043 5. 500969 6. 678524 6. 376852 6. 17481 6. 186528  
6. 017905 5. 628197 5. 697993 6. 221403 6. 521593 6. 780924 6. 539266 6. 14715 5. 757381  
1. 966149 2. 286719 1. 78271 2. 747227 2. 693165 2. 393231 2. 49541 2. 122566 2. 438943  
2. 626801 1. 743211 2. 046812 2. 509516 1. 560333 1. 527171 1. 984502 2. 308698 1. 523915  
2. 527702 2. 631627 2. 806728 2. 436562 4. 150231 2. 302128 3. 234328 3. 312053 2. 605162  
3. 684642 4. 510213 5. 627628 4. 007374 4. 77419 4. 827844 5. 669752 4. 885748 4. 80591  
7. 086317 8. 079368 7. 826302 8. 202108 8. 184526 8. 284759 7. 941079 8. 413994 7. 631901  
8. 34905 8. 426622 8. 141289 8. 752967 8. 336197 8. 695496 8. 276101 8. 122301 7. 571227  
3. 127695 3. 354061 3. 823228 2. 748407 2. 917225 3. 641222 4. 321238 2. 634975 2. 897385  
5. 522211 4. 013983 3. 781877 2. 752761 2. 261483 1. 654104 2. 645025 2. 954476 5. 299391  
2. 044201 2. 349446 2. 528754 2. 234281 2. 08151 1. 971805 1. 786971 2. 343924 2. 721077  
4. 79311 5. 467792 5. 699866 5. 933303 4. 809095 5. 814331 5. 255743 6. 255692 5. 35049  
1. 78491 2. 696392 1. 737611 1. 952318 2. 35606 1. 940762 2. 063794 2. 276978 2. 232621  
3. 96729 3. 850985 4. 053787 4. 319295 4. 224718 3. 768827 3. 540341 4. 090933 3. 7144  
7. 576885 8. 355839 8. 281846 8. 211712 8. 427773 8. 126258 7. 440705 8. 600326 8. 149372  
4. 795522 5. 664751 6. 05072 5. 865352 5. 550763 6. 129285 5. 867022 6. 063568 6. 047612  
1. 614308 1. 181051 1. 968687 1. 825341 1. 878203 1. 499669 1. 528853 2. 477025 1. 909229  
2. 577835 4. 931099 4. 681119 5. 091302 5. 786414 5. 408417 4. 406932 5. 52988 4. 681119  
2. 703466 2. 307297 2. 486407 3. 234879 3. 269032 3. 60697 2. 760339 2. 378295 2. 276759  
5. 305604 5. 860508 6. 299007 6. 978075 6. 004798 7. 380259 6. 839268 7. 342725 7. 081855  
2. 397884 1. 478472 1. 635972 1. 963437 1. 790391 1. 257323 2. 322779 2. 177868 1. 741987  
3. 910363 3. 662946 2. 850859 3. 545243 4. 173896 3. 893846 4. 033652 4. 518268 3. 659187  
5. 625996 4. 544754 5. 030798 4. 197044 3. 605147 5. 200367 4. 321925 4. 267502 5. 394777  
5. 998885 2. 960976 3. 338421 2. 797225 2. 913846 3. 763048 2. 803592 2. 678408 3. 532519  
4. 409401 3. 42297 2. 630203 3. 296113 3. 105607 2. 670086 3. 258967 2. 755794 4. 116159

2. 977516 2. 349263 2. 765508 3. 037031 3. 725821 3. 879776 3. 467099 4. 161463 5. 017035  
2. 178627 1. 82727 2. 204116 2. 794963 1. 831874 1. 956619 2. 417646 2. 291157 1. 903828  
2. 348146 3. 684944 2. 557027 3. 162322 2. 902652 2. 128103 2. 798456 2. 669129 2. 394508  
1. 79922 2. 142031 4. 390735 2. 355162 2. 071851 1. 576818 1. 640108 2. 397374 2. 694594  
6. 719654 5. 381414 6. 660526 5. 985901 4. 890036 4. 662627 5. 483552 5. 777423 6. 805234  
2. 066549 1. 029539 2. 786694 2. 01922 1. 812333 1. 135458 1. 84639 1. 02367 2. 064796  
1. 961548 1. 702453 1. 980064 1. 853011 1. 985426 2. 235585 2. 075019 2. 289049 2. 064721  
7. 056552 7. 498718 6. 907693 7. 877224 6. 916622 6. 945684 7. 21495 6. 756237 6. 836561  
1. 989487 1. 733756 2. 071269 2. 581728 2. 195444 1. 982199 2. 206954 2. 089983 2. 282023  
5. 351375 5. 783734 6. 149914 5. 504566 4. 964684 5. 288251 5. 674728 5. 23517 5. 692989  
3. 030622 5. 158514 3. 224893 3. 786722 4. 411377 5. 779674 3. 951702 6. 275886 4. 571847  
6. 707438 4. 98484 6. 09649 5. 21676 5. 56863 5. 903208 5. 245118 5. 692576 7. 195565  
1. 882764 1. 242762 1. 526966 1. 686239 1. 746992 1. 641712 3. 078695 2. 116023 1. 700173  
5. 859654 6. 180371 6. 168965 5. 616897 5. 707114 5. 475833 5. 243713 5. 8409 5. 648175  
2. 087799 1. 319962 1. 734514 1. 479005 1. 519707 2. 338159 1. 423424 1. 235236 1. 484469  
5. 397164 6. 204671 5. 635883 6. 326411 6. 255418 6. 550954 6. 257646 6. 324029 6. 578271  
1. 06638 1. 475198 1. 586406 1. 13313 0. 897855 1. 420593 1. 126074 0. 752307 1. 350655  
5. 150141 4. 125062 5. 364597 2. 180938 4. 722348 3. 833593 4. 155957 3. 763679 5. 408549  
1. 48303 0. 994312 1. 621225 1. 473896 1. 403289 1. 707124 1. 887898 1. 819576 1. 040608  
5. 095545 5. 062616 4. 389815 3. 710371 4. 836005 5. 49971 5. 352755 4. 682374 5. 150581  
7. 040269 7. 935396 8. 255875 6. 874888 8. 12683 8. 197858 7. 767681 8. 315489 8. 226016  
2. 780856 1. 641791 2. 096109 2. 774211 1. 736241 1. 936356 2. 279079 1. 697265 2. 584382  
4. 180891 6. 170208 6. 230483 7. 152587 6. 501954 6. 261095 5. 963323 5. 859185 5. 628501  
8. 158437 8. 180806 7. 83987 8. 546219 8. 1598 8. 3397 7. 529069 7. 627982 8. 221719  
5. 3933 6. 833504 6. 547971 6. 512437 6. 365111 7. 003869 5. 721258 6. 320419 6. 411523  
1. 083548 1. 041079 1. 197663 1. 72326 1. 440772 1. 67102 0. 910899 1. 560284 1. 684104  
5. 789518 6. 927746 5. 763636 6. 808693 6. 174271 5. 207036 4. 762383 5. 851626 5. 103542  
6. 922669 7. 137314 6. 579215 7. 290314 6. 978116 6. 46061 6. 96738 7. 094791 7. 179038  
5. 114615 4. 437095 5. 717821 5. 66249 4. 698464 4. 434144 4. 654882 4. 36009 5. 468232  
4. 627183 3. 071836 3. 528241 2. 707131 3. 061986 3. 13014 2. 945394 3. 627905 2. 919999  
1. 762299 4. 798183 3. 855189 2. 866613 3. 500356 3. 130096 3. 777017 2. 817585 3. 600111  
6. 457436 6. 337137 6. 318606 5. 602114 6. 462994 5. 071889 6. 13244 7. 021126 5. 810365  
2. 024031 1. 877005 1. 664604 2. 018473 2. 286321 2. 181124 3. 182868 2. 306916 2. 442546  
3. 247293 4. 174263 4. 012065 4. 919188 4. 420728 4. 771781 4. 355284 4. 086024 4. 247406  
9. 297729 9. 390603 9. 29116 9. 425749 9. 339318 9. 217756 9. 409227 9. 090292 9. 612709  
3. 600695 2. 524715 2. 731392 2. 309019 2. 177867 2. 476427 2. 386655 2. 579596 2. 988274  
2. 73292 2. 975464 3. 740143 2. 680036 3. 080274 3. 625253 2. 421271 3. 630578 3. 104639  
2. 373021 2. 262875 2. 004994 2. 02143 2. 379094 1. 151689 0. 926749 1. 656856 1. 596895  
1. 857603 1. 612255 2. 178225 1. 839227 1. 610508 2. 062011 2. 444041 1. 616007 2. 314466  
2. 717906 2. 97128 2. 953235 2. 871994 3. 15408 2. 620688 3. 607091 2. 786981 2. 172703  
3. 008322 3. 715377 3. 459793 3. 326695 4. 1001 3. 884429 3. 061218 3. 606449 3. 971477  
7. 198285 7. 65449 7. 118721 8. 000827 6. 949934 8. 231008 7. 779121 7. 129358 7. 597765  
2. 082052 1. 696912 1. 542093 1. 259495 1. 827112 1. 698905 1. 793144 1. 307749 1. 51913  
1. 202394 1. 169583 1. 258437 1. 116598 1. 615065 1. 23316 1. 307846 1. 470362 1. 507918  
6. 385425 5. 983075 5. 625767 6. 594542 6. 291943 5. 904692 6. 143228 6. 048129 6. 1411  
1. 94371 2. 403239 1. 456887 2. 21646 1. 564408 1. 606437 2. 655751 2. 018092 1. 542597  
3. 439038 3. 17702 3. 015197 3. 473895 2. 34224 3. 596037 2. 610396 3. 607291 2. 284169  
1. 142096 1. 039839 1. 013945 1. 243086 1. 262162 1. 041351 1. 396891 1. 191265 1. 16039  
4. 778166 3. 943268 3. 172102 2. 784995 2. 783344 2. 381921 3. 113371 2. 839755 3. 854197  
2. 333987 2. 962356 2. 403241 2. 875972 3. 361509 3. 287332 3. 116407 3. 877694 2. 860103  
3. 515507 4. 782711 4. 060166 4. 975992 3. 978877 4. 585645 4. 063977 3. 473363 3. 798975

3. 225783 1. 715142 2. 244266 2. 021968 1. 914824 2. 05432 2. 195182 2. 822444 2. 568944  
3. 528938 3. 792402 3. 132471 3. 969515 3. 54389 3. 977239 3. 139417 4. 200276 3. 895998  
3. 712204 3. 111615 2. 999969 2. 938508 2. 594028 3. 164834 2. 938554 2. 653839 2. 842858  
4. 171821 4. 308122 3. 261917 3. 48686 3. 117855 3. 7313 2. 493004 3. 504164 3. 810708  
2. 394242 2. 510409 2. 441428 2. 714152 2. 594804 3. 095019 3. 371201 2. 799348 2. 831674  
1. 80498 2. 188612 1. 990218 2. 865497 2. 256446 2. 28124 1. 638497 1. 863872 1. 16335  
7. 717365 7. 091789 7. 355717 7. 505101 7. 852155 6. 881214 7. 432652 7. 745774 7. 537288  
3. 294468 2. 412633 2. 765196 3. 203377 3. 038466 2. 847951 2. 858456 2. 97646 2. 160025  
9. 139855 9. 253987 9. 420197 9. 16697 9. 6254 9. 196818 9. 294448 9. 385754 9. 313063  
6. 637374 7. 241999 8. 396614 7. 265779 7. 192577 7. 031469 7. 695732 6. 987109 8. 253026  
3. 578106 3. 272074 4. 501469 3. 616698 4. 221564 3. 227231 3. 576544 4. 088399 4. 128335  
4. 05523 4. 646502 4. 554464 4. 771036 4. 470464 5. 213911 4. 320736 5. 192539 4. 738209  
10. 01545 9. 379237 9. 591683 9. 600819 9. 555976 8. 872847 9. 353589 9. 356915 9. 625611  
3. 043655 2. 415393 2. 008262 2. 177067 2. 202443 1. 80947 2. 276185 1. 691451 2. 283708  
6. 263307 6. 563633 6. 353391 6. 911765 6. 728031 6. 813196 6. 217604 6. 671548 6. 858989  
9. 241993 9. 595723 9. 382513 9. 589375 9. 513186 9. 69343 9. 344076 9. 506197 9. 48682  
7. 690721 7. 928781 8. 078637 7. 88334 7. 69754 7. 569295 7. 25901 7. 757612 7. 788394  
2. 094226 2. 533246 1. 737581 2. 093457 2. 473797 1. 646343 2. 629482 1. 955272 2. 554695  
4. 3682 3. 642685 4. 289584 3. 645257 3. 163678 5. 144826 3. 050399 3. 359841 3. 777669  
1. 983109 1. 693739 1. 45924 1. 959629 2. 261221 1. 96788 1. 938296 1. 984071 1. 926424  
3. 071013 2. 205836 2. 815558 2. 153349 2. 244507 2. 472048 3. 177154 2. 81848 2. 48168  
2. 477863 2. 736712 2. 546503 2. 388802 2. 757249 2. 269473 3. 144114 2. 360338 2. 405644  
2. 346816 3. 10058 2. 291308 1. 927344 2. 077728 2. 624136 2. 078905 1. 64539 2. 143262  
6. 176227 7. 597971 7. 039722 7. 045708 7. 090888 6. 996537 6. 807625 7. 047368 6. 847164  
1. 217014 1. 202913 1. 037811 1. 72572 1. 781882 1. 59549 1. 23408 1. 004479 1. 209015  
6. 935718 6. 443306 6. 340217 6. 884331 6. 932482 6. 645757 5. 691799 6. 768537 6. 325791  
1. 711576 1. 603605 1. 730416 1. 289232 1. 591998 1. 24419 2. 403963 1. 106985 2. 010119  
1. 631169 1. 907909 1. 458773 1. 464103 1. 814057 1. 689893 1. 431229 1. 086915 1. 691484  
3. 80702 3. 331595 3. 707056 3. 937569 4. 202219 4. 185437 3. 956955 4. 686439 3. 595438  
2. 792467 1. 806931 1. 941335 1. 943794 2. 404006 1. 757735 2. 189547 2. 623728 2. 115763  
2. 770122 1. 650492 1. 266874 1. 713443 1. 285733 2. 028502 1. 388089 1. 361104 1. 436903  
6. 219571 5. 906929 5. 40358 5. 765605 5. 590357 4. 858203 5. 683808 4. 564566 5. 07967  
1. 756696 1. 32633 1. 159316 1. 952718 1. 822516 1. 386922 1. 489047 1. 334096 1. 395252  
2. 187976 1. 78994 2. 062344 1. 778622 2. 029095 1. 93705 2. 429667 1. 927321 2. 141409  
4. 23983 5. 290184 5. 388414 3. 846436 5. 768608 5. 300933 5. 103324 5. 467046 5. 549766  
4. 022521 3. 843158 3. 914785 3. 622887 3. 745535 4. 082364 4. 240419 4. 373647 3. 857688  
4. 559606 5. 267796 4. 426174 4. 331117 5. 246628 4. 385918 4. 804522 4. 674668 4. 257571  
4. 554812 5. 465122 4. 855739 4. 829754 5. 127492 4. 459412 4. 34686 4. 63647 5. 036374  
2. 301877 2. 411757 2. 340328 1. 923154 2. 146556 1. 71418 2. 721198 1. 784826 1. 92469  
7. 641813 8. 21731 7. 904136 7. 520828 8. 262329 7. 770809 7. 312128 7. 978318 7. 763777  
2. 920323 2. 705843 2. 512074 3. 314534 2. 916269 2. 795192 3. 12631 2. 590995 2. 602634  
2. 824545 1. 861796 2. 615015 3. 318084 2. 447533 2. 203323 3. 400263 3. 526866 3. 557905  
7. 083692 6. 755912 6. 480336 6. 737685 7. 009342 5. 823619 6. 14868 6. 8161 7. 315525  
1. 612202 2. 926725 3. 740647 2. 924752 3. 998897 3. 373964 3. 075076 3. 512248 3. 209433  
1. 907852 1. 194757 1. 20233 0. 881224 1. 773317 2. 059111 1. 313719 1. 356549 1. 377397  
5. 427072 6. 225024 6. 181743 5. 976684 5. 784201 6. 107466 5. 70115 6. 383937 5. 685442  
1. 333461 1. 525936 1. 392556 2. 9065 1. 46148 1. 664 1. 805253 1. 717534 1. 169414  
2. 939003 2. 928078 2. 194211 1. 641906 3. 384472 4. 12355 2. 275464 3. 699814 2. 488013  
3. 397579 2. 938258 2. 880897 2. 909683 2. 820516 2. 251911 2. 928814 4. 264586 2. 600425  
3. 764762 0. 57114 1. 377491 2. 248741 2. 115291 1. 593385 2. 99012 2. 495532 2. 936059  
4. 656271 5. 040603 5. 114085 5. 194309 4. 644902 4. 489251 4. 376316 5. 591134 5. 402007

2. 38707 2. 303075 2. 946103 2. 58091 2. 229765 3. 508145 2. 905066 3. 459865 3. 099749  
9. 133111 9. 806895 9. 697235 9. 203484 9. 560072 9. 453237 9. 225657 9. 552238 9. 341153  
5. 218296 3. 171332 4. 605953 4. 899474 4. 812994 4. 794854 3. 905052 4. 450246 4. 38852  
3. 147347 3. 476049 3. 062394 2. 510796 2. 803927 3. 085994 3. 268876 2. 921522 2. 826506  
2. 323251 2. 225923 1. 859001 1. 995088 1. 761529 1. 579121 3. 003276 1. 771326 1. 889449  
3. 816237 2. 39289 3. 699505 2. 302957 1. 895327 1. 750118 3. 132123 2. 277636 2. 443649  
4. 350528 4. 71268 5. 031666 4. 46587 5. 05319 4. 899705 4. 59663 5. 035638 5. 118745  
2. 069414 3. 536634 1. 958772 3. 449868 2. 744527 2. 853752 2. 791814 2. 377008 3. 378563  
1. 505686 3. 098642 3. 749952 3. 952526 3. 639446 2. 839233 3. 290992 3. 410353 3. 787914  
6. 933804 6. 647206 6. 273289 6. 591902 6. 405684 6. 956724 6. 63532 6. 829697 6. 776002  
5. 261177 5. 111616 5. 366515 5. 339186 5. 01286 5. 752532 5. 372228 4. 923967 4. 171047  
1. 365524 1. 183681 1. 669193 2. 30006 1. 150168 1. 400285 1. 137899 1. 192734 0. 89906  
2. 049886 2. 776184 1. 854193 1. 788443 1. 523943 2. 271926 2. 567627 1. 428978 1. 735875  
2. 032089 1. 312623 1. 067183 1. 239789 1. 288764 1. 21604 1. 560442 1. 778287 1. 431685  
1. 98241 1. 919834 1. 367512 1. 768129 2. 197544 2. 112734 1. 776915 1. 521158 1. 56954  
1. 767493 2. 099567 1. 703757 2. 643278 2. 419699 2. 235017 2. 564239 2. 033905 1. 93546  
9. 867955 9. 446669 9. 679391 9. 478875 9. 514482 9. 435533 9. 669505 9. 496081 9. 486455  
7. 325444 6. 846017 6. 667345 7. 194883 6. 502643 6. 551128 6. 502933 6. 790684 7. 050857  
1. 453137 1. 337758 2. 269392 1. 638699 1. 795652 1. 452398 1. 810752 1. 919117 2. 034135  
1. 658662 1. 233457 1. 666208 1. 812148 1. 904938 1. 873783 1. 833103 1. 480999 1. 679986  
3. 41597 2. 770619 2. 942187 2. 837856 2. 810242 2. 916978 3. 150354 3. 130407 2. 866728  
1. 487836 2. 614564 0. 997468 1. 212096 0. 882209 1. 762047 0. 772678 1. 209464 2. 198122  
1. 476412 1. 375741 1. 428932 1. 719629 1. 361436 1. 745221 1. 630929 2. 039878 1. 591396  
2. 109856 1. 968552 2. 782156 1. 731098 1. 895203 1. 782002 1. 917386 2. 144386 1. 751949  
5. 003046 6. 015689 5. 358965 5. 61373 3. 855146 4. 733039 4. 393949 5. 402498 4. 773079  
2. 391325 2. 659055 2. 802782 3. 320893 2. 8246 2. 349902 2. 317004 3. 162283 2. 092786  
1. 572924 2. 587065 2. 267403 1. 475024 2. 164866 3. 490082 2. 434072 1. 924878 2. 948686  
3. 671233 4. 208614 5. 964957 5. 779958 5. 640472 4. 802671 5. 115319 5. 659334 3. 609553  
2. 317508 2. 214586 1. 706302 2. 551377 2. 12415 1. 533673 2. 027156 1. 780767 2. 610387  
3. 47804 3. 333337 3. 822673 3. 758225 3. 536655 3. 209181 4. 17431 2. 76015 3. 482311  
1. 35476 1. 129161 1. 386546 1. 25497 1. 717945 1. 104748 1. 610707 1. 480773 1. 267907  
1. 524457 2. 291264 1. 552181 1. 999372 1. 535674 1. 948757 2. 389987 2. 064313 1. 084876  
2. 335862 2. 567222 2. 52743 3. 35876 2. 610128 2. 133538 2. 596373 2. 807753 2. 596373  
3. 291708 2. 556633 2. 722733 2. 08894 2. 614278 2. 370685 2. 277201 2. 965595 2. 127203  
7. 624344 7. 226821 6. 766092 7. 423622 7. 024139 7. 763583 6. 797298 7. 05945 7. 095035  
1. 374114 1. 771746 1. 10774 0. 964145 0. 90169 1. 003141 0. 877864 0. 927035 1. 490234  
1. 191283 1. 816224 1. 313133 1. 11547 1. 532729 1. 715649 1. 414168 1. 332431 1. 412979  
2. 257656 3. 904019 2. 839792 2. 245308 2. 054787 3. 323855 3. 29961 2. 591132 2. 243545  
5. 500147 4. 940982 5. 232247 4. 844695 5. 333273 5. 2298 5. 985192 4. 748252 5. 169736  
6. 132067 5. 978839 6. 51215 6. 125278 6. 241934 5. 999223 6. 067086 6. 364567 6. 336808  
4. 814975 4. 904093 4. 507109 5. 030996 4. 856616 5. 652415 4. 467084 4. 226168 4. 558383  
3. 925009 2. 767441 3. 3351 2. 996452 2. 784826 2. 952404 4. 266035 2. 836578 2. 952887  
2. 188457 2. 469243 2. 186176 2. 883158 2. 433206 2. 324412 2. 926372 2. 636491 2. 282643  
1. 304051 1. 217639 1. 393303 1. 117396 1. 103271 1. 318158 1. 281854 1. 395919 1. 28007  
2. 31428 4. 670212 3. 621806 3. 449796 4. 768201 4. 363902 3. 806829 4. 856435 5. 031849  
6. 918565 7. 332715 7. 09677 7. 307497 7. 600423 7. 306344 7. 392106 7. 35995 7. 442157  
3. 118218 2. 767533 2. 299626 1. 782695 3. 634052 2. 295985 3. 787551 2. 091607 2. 507682  
2. 049927 1. 712538 2. 378355 1. 713085 1. 726236 2. 30564 1. 848896 2. 005244 1. 540677  
1. 891865 2. 386111 2. 780021 2. 773627 2. 680296 1. 939769 2. 527381 1. 261222 1. 411552  
2. 085971 1. 929895 1. 974581 2. 453451 2. 189691 1. 949607 1. 480231 2. 724913 2. 68792  
2. 44453 2. 303668 2. 636215 2. 229393 1. 677635 2. 201115 2. 368936 2. 611035 2. 118957

2.666805 2.925024 2.107383 1.88565 2.559486 1.535884 1.663612 2.02939 1.6852  
6.451086 7.046573 6.818025 6.370094 6.707532 6.744665 6.223234 6.468058 6.586703  
3.903939 5.277949 4.424297 4.956825 3.750696 4.505733 4.072313 4.76845 4.749657  
1.37702 1.296118 0.933215 2.108442 1.824106 1.357628 1.398201 1.469954 1.108642  
4.012988 4.968595 4.557174 4.264742 4.372189 4.110943 4.319979 5.164522 4.257115  
4.073541 3.435096 3.848616 2.990685 2.774778 1.509817 2.705553 2.64873 4.793454  
3.379409 3.176718 3.664482 3.29519 2.489371 2.85239 2.312314 3.352423 2.432277  
3.380934 3.477856 3.997195 3.286649 4.278337 3.124188 3.406147 3.520906 4.095543  
5.379741 4.33113 5.921356 3.328588 2.801966 5.214003 5.467945 4.654107 6.162683  
1.485681 1.274335 1.20248 1.503731 1.510032 1.172977 0.86379 0.907273 2.153073  
6.942749 7.262322 6.584179 7.352631 6.749296 7.244151 6.69966 6.23773 7.035481  
7.391389 6.833867 5.940093 6.053793 6.028923 6.924551 6.876196 6.663659 6.286442  
4.734191 5.950223 5.208236 5.355616 6.430726 5.624003 5.836778 5.883751 5.455413  
2.58728 2.076619 1.519994 2.017191 2.411757 1.812981 2.045915 2.202948 1.877806  
1.731107 3.83976 4.362966 2.586966 3.243854 1.87296 2.253739 2.84144 2.026008  
2.868731 3.790252 2.998903 4.304099 4.375519 2.752737 4.514891 4.712608 5.031584  
4.905362 3.793663 4.509991 4.149162 4.773701 4.494164 4.441265 4.50728 4.85181  
3.147512 3.397446 2.460567 2.364307 3.110663 2.573558 2.778237 2.863132 3.930551  
3.321901 3.504142 3.27962 3.037169 2.871662 3.622641 3.489086 2.876683 3.066096  
3.265943 3.09441 2.979812 3.102562 2.863549 3.072128 2.900793 2.965521 2.862783  
4.392981 4.787636 4.089304 5.538316 4.824064 4.161395 3.868717 4.140176 3.981617  
4.390743 4.822774 5.26517 4.862536 4.406401 5.584391 4.570703 4.670365 4.68234  
2.397836 3.132488 2.766278 2.388088 2.866068 1.921557 3.658393 2.545402 2.359591  
6.824888 4.135883 4.684979 4.616758 4.596553 4.85084 4.153708 3.308083 5.650851  
1.24159 1.374923 1.641066 1.437097 1.954657 1.829872 1.504126 1.534548 1.54881  
6.499817 5.960339 5.438241 5.525685 5.658396 5.084393 5.757121 6.032313 5.183458  
2.948057 2.812627 2.578028 2.631127 2.882879 2.521602 3.033982 3.574701 3.356029  
4.617912 3.929141 4.235142 4.410225 4.918245 4.384569 3.344685 5.659764 5.448216  
1.558416 3.612973 2.88862 0.966547 2.631688 1.027865 1.417475 2.167688 2.698196  
4.088161 3.594842 3.691002 3.275804 3.935078 4.843717 3.829553 3.660281 4.705935  
3.503397 2.924574 2.951374 4.116211 2.901289 3.528443 3.315484 3.049751 3.051685  
2.225459 1.200274 1.232251 1.576544 1.312431 2.283252 1.820513 1.113028 1.14152  
5.653984 6.601244 6.291291 7.563289 7.404947 7.383658 7.279085 6.434384 7.211354  
2.961197 2.198176 2.80848 2.285354 2.879264 2.853173 2.352517 2.307168 3.338854  
8.161042 8.764105 8.640224 9.549644 8.138456 8.71681 8.736024 7.528591 8.380707  
3.160557 1.576401 4.048327 2.355188 1.707067 1.537964 1.398915 2.913125 1.75435  
6.815922 7.168044 6.755857 7.266811 7.269739 7.478832 6.960356 7.370538 6.835193  
1.212553 1.453807 1.633142 1.419151 0.949923 1.994887 1.271817 1.454629 1.631263  
8.233702 8.854046 8.65471 9.294747 9.264131 9.187231 9.216007 9.006637 8.806769  
3.553711 4.331236 4.135428 3.867524 3.547868 4.804115 4.103719 4.677431 4.385671  
4.542121 3.635231 4.142848 3.328925 3.625392 2.420251 3.392561 4.387623 3.803989  
1.194618 1.522706 1.073071 0.856729 2.025797 1.352603 1.827889 1.121288 1.353888  
7.449184 7.184989 7.620421 7.31124 6.952299 6.844685 6.062079 7.046016 7.564906  
6.267479 7.311928 7.109358 7.106073 7.164361 7.112926 6.719729 7.250559 7.12986  
2.139081 2.242076 2.30636 1.450774 2.017768 2.439682 2.140558 2.070109 1.715162  
1.701031 1.54718 1.249353 1.353086 1.364412 1.595466 1.427369 1.568563 1.934214  
1.096034 0.871843 1.14431 1.236384 1.32232 1.263483 1.048218 1.154823 1.287842  
5.155573 4.993206 4.914859 4.673587 4.710755 4.350594 4.853621 5.01937 4.85347  
6.009492 6.554663 6.948421 6.494764 6.842667 6.266604 6.028904 6.482239 6.133303  
1.1586 2.223844 3.144435 1.463984 1.971527 1.843397 1.477601 1.013591 1.844101  
0.90324 1.225635 0.915041 0.8056 1.40979 0.681472 0.756807 1.196417 1.276111

3. 130682 2. 75264 2. 916743 2. 60266 3. 175947 2. 995006 4. 470578 3. 742541 3. 109008  
4. 036499 4. 233935 4. 303796 3. 310058 3. 976153 4. 386496 2. 978859 4. 215431 3. 893571  
1. 59393 1. 335046 1. 219933 1. 411248 2. 031942 1. 253851 1. 233026 1. 256409 1. 383037  
1. 434482 1. 264186 1. 458313 1. 470246 1. 276156 2. 39497 1. 309286 1. 078018 1. 40523  
3. 307974 2. 950245 3. 546666 2. 215272 2. 733914 3. 537255 2. 414611 2. 849814 2. 894348  
7. 849149 8. 641188 8. 334543 8. 785861 8. 744752 8. 314583 8. 162029 8. 661631 8. 849616  
7. 919698 7. 530813 8. 043926 7. 178022 7. 32502 7. 709798 7. 915866 7. 526284 7. 676901  
6. 404386 5. 527686 6. 217686 4. 503859 5. 300324 5. 50095 4. 612759 4. 967684 6. 112602  
5. 52224 5. 983094 6. 739082 5. 824015 5. 579339 6. 025949 5. 079273 5. 516322 5. 794337  
4. 222136 2. 504059 3. 299277 4. 416185 3. 911507 2. 729673 3. 49486 3. 007491 3. 281115  
4. 690605 4. 642103 4. 185908 4. 498033 4. 566983 3. 645546 3. 563148 5. 739876 3. 922813  
1. 959945 1. 61177 1. 833874 2. 058889 2. 053997 2. 315172 2. 213896 1. 975939 1. 395481  
5. 030858 6. 078064 5. 532126 5. 21474 5. 058432 5. 587044 5. 516453 5. 38862 5. 683802  
4. 74355 4. 400668 4. 662898 4. 591533 4. 285705 4. 766296 4. 673561 4. 445561 4. 487698  
4. 209876 3. 965933 3. 297749 2. 412785 2. 657586 3. 054719 1. 87376 2. 149206 2. 525088  
2. 997287 3. 381147 3. 035594 3. 397897 3. 862776 3. 167354 2. 742618 3. 836951 4. 066369  
2. 457963 2. 022942 1. 64238 1. 868881 1. 882491 2. 01101 2. 596674 1. 597702 1. 999467  
5. 843196 3. 28832 3. 059765 4. 061565 3. 491246 3. 150341 2. 574748 3. 009927 2. 690772  
2. 800812 4. 486434 4. 070165 4. 705813 5. 271115 4. 477347 2. 585312 6. 295946 3. 788587  
6. 647166 6. 325594 6. 706583 6. 144226 6. 306941 6. 667121 6. 214665 6. 226369 6. 242632  
5. 434998 5. 473816 5. 657857 5. 21396 5. 782 4. 705311 4. 871684 5. 742771 4. 448016  
2. 031387 1. 467768 1. 413029 1. 993884 1. 90438 1. 141814 2. 058987 2. 928796 1. 71185  
9. 473688 9. 339495 8. 857122 10. 13706 9. 662287 9. 87826 9. 378878 8. 580664 9. 49571  
2. 439235 1. 902747 1. 948971 2. 84889 1. 600249 2. 502967 2. 484318 2. 604219 3. 511996  
5. 748524 6. 307835 5. 598639 5. 145545 4. 967608 5. 684887 4. 794945 6. 33602 4. 862665  
2. 350194 1. 40362 2. 091211 1. 983853 1. 456042 2. 299322 2. 111049 2. 161864 3. 174559  
6. 139552 6. 122765 5. 878334 5. 676798 6. 246208 5. 52146 6. 023293 6. 119741 6. 137773  
1. 587494 2. 368802 1. 395285 2. 653617 2. 058839 1. 603635 1. 082116 1. 134672 1. 545458  
1. 485006 1. 544272 1. 835767 1. 376392 1. 145619 1. 614884 1. 154042 1. 197274 1. 65971  
1. 839532 1. 129752 1. 255041 1. 329705 2. 065296 1. 497652 1. 596406 1. 447991 1. 517909  
2. 2773 2. 26692 2. 170258 1. 703994 4. 291915 2. 984098 2. 398012 2. 414629 2. 198293  
3. 284194 3. 174567 3. 247285 3. 282216 2. 795753 3. 132029 2. 777709 3. 444306 2. 818756  
1. 896743 2. 539522 2. 323965 3. 315804 3. 032053 2. 254882 1. 994212 5. 181187 3. 119738  
2. 48667 0. 949242 1. 714439 2. 083509 1. 678911 1. 283188 1. 365327 1. 099896 2. 032857  
9. 866289 10. 03059 10. 32022 9. 418215 9. 949905 10. 05266 9. 589315 10. 34264 9. 870506  
4. 533469 3. 097948 3. 464795 3. 07332 3. 072544 3. 385186 2. 854504 2. 561765 2. 977541  
6. 433729 6. 757741 6. 625892 6. 617782 6. 995135 6. 468301 6. 465818 7. 029244 6. 623773  
6. 157415 5. 271622 4. 125227 3. 86948 4. 965012 4. 960426 5. 178296 5. 449238 4. 674954  
2. 506758 2. 304315 3. 696569 2. 390494 2. 609631 3. 065695 3. 118515 2. 64404 2. 104835  
2. 497311 2. 842572 2. 313905 2. 901718 2. 982535 2. 44211 2. 777813 2. 438587 2. 340318  
9. 522133 9. 266495 9. 164748 9. 543386 9. 491124 9. 429091 9. 647535 9. 273424 9. 266155  
4. 834729 5. 590328 5. 700378 5. 79378 5. 734996 5. 623734 5. 594278 5. 742051 5. 881135  
1. 795089 1. 389042 1. 780309 1. 826609 1. 840694 1. 606835 2. 003255 1. 927877 2. 612521  
4. 709391 3. 718874 3. 31514 5. 128658 2. 153385 4. 566731 3. 677201 3. 204408 3. 288181  
5. 092052 5. 979581 5. 975992 5. 62165 6. 477421 6. 06172 6. 433017 6. 546848 6. 471933  
2. 646245 1. 788662 2. 258965 2. 268626 1. 596005 1. 728658 2. 222336 2. 879654 1. 935506  
2. 230863 2. 367 2. 779838 2. 568209 2. 959066 2. 314005 4. 289509 2. 249114 3. 195015  
2. 706445 3. 729023 3. 369843 2. 953196 3. 529094 3. 01067 2. 731406 3. 885925 3. 233197  
2. 872646 2. 576651 3. 306505 2. 605145 1. 803483 2. 426867 2. 929773 2. 543211 3. 417837  
3. 938256 2. 526957 3. 130494 3. 788581 2. 73836 3. 339559 2. 99922 2. 974058 3. 161012  
3. 617685 3. 679765 4. 415261 4. 697497 4. 469518 3. 981059 3. 758017 3. 620554 4. 317854

2. 332806 3. 479954 1. 968794 3. 571987 2. 074059 2. 394152 2. 419366 3. 065502 2. 776139  
4. 059225 4. 061193 4. 013542 4. 161867 3. 528011 4. 036223 3. 716387 4. 379385 4. 309614  
4. 472656 7. 04577 6. 415839 6. 020014 7. 224821 6. 749435 6. 202069 7. 271728 6. 310335  
4. 312645 6. 13791 5. 0416 5. 410985 6. 025832 5. 423048 6. 193884 6. 207451 5. 691938  
3. 909084 3. 844053 3. 839212 3. 851926 3. 233976 3. 869589 4. 53083 4. 418744 3. 744694  
4. 289302 3. 916665 3. 770128 2. 91856 3. 247874 4. 14249 3. 691075 4. 268659 4. 844197  
7. 746156 7. 900746 7. 798701 8. 184032 7. 62185 8. 079821 7. 584786 7. 808124 7. 6366  
3. 281309 1. 684563 2. 395731 2. 006478 3. 519392 2. 226922 2. 091666 2. 553664 1. 736922  
4. 573371 4. 893524 4. 394207 4. 574552 3. 91098 4. 708896 4. 293535 4. 614388 4. 615138  
2. 724589 1. 818934 2. 079865 2. 150373 2. 617468 2. 147404 1. 791918 2. 428494 1. 811748  
3. 146325 2. 052796 2. 4579 2. 378256 1. 99323 1. 712628 2. 762634 1. 888099 1. 784371  
10. 56694 10. 56505 10. 96658 11. 39326 10. 84215 10. 81637 10. 79772 10. 24349 10. 60508  
2. 249224 3. 069812 2. 445857 2. 054354 2. 193516 2. 696553 3. 059472 2. 668862 2. 704684  
4. 236998 5. 597251 4. 060503 5. 080476 4. 52784 4. 948953 5. 500337 3. 963658 4. 697517  
4. 716781 3. 784513 4. 001344 3. 65795 3. 658392 4. 223565 4. 000143 4. 252533 3. 976313  
1. 78294 3. 020031 1. 792985 2. 983865 2. 177892 2. 445686 1. 520136 2. 255862 2. 545263  
2. 318924 2. 468211 0. 339512 0. 927837 2. 443814 0. 98487 3. 49307 2. 044608 1. 239387  
5. 59606 5. 711197 5. 038817 5. 598983 5. 776649 5. 336243 5. 211822 5. 348311 5. 426424  
4. 910113 4. 573381 4. 376301 4. 587489 3. 826883 4. 268126 2. 838279 4. 017031 3. 606869  
6. 092209 5. 594175 5. 768163 5. 474059 5. 195278 5. 933229 5. 72843 5. 247733 6. 225041  
6. 821921 6. 681404 5. 87334 7. 222334 6. 962309 7. 030333 7. 183351 6. 594046 6. 839706  
3. 323556 4. 36065 4. 131755 3. 869783 4. 102852 4. 62238 3. 957605 4. 417645 4. 147266  
2. 508539 2. 521026 2. 341933 2. 213182 2. 012401 1. 756857 2. 573936 2. 132049 3. 358008  
5. 887676 5. 366299 5. 007345 5. 561043 4. 375866 5. 542314 5. 203951 4. 302437 5. 730737  
6. 011594 6. 358374 6. 440421 6. 637153 6. 667152 6. 033202 6. 536807 6. 70803 6. 698232  
2. 424553 2. 860703 2. 490569 3. 338497 2. 861188 1. 650518 2. 052039 1. 96947 2. 214986  
7. 874134 7. 651175 7. 012729 7. 83408 7. 667682 7. 898971 7. 473464 7. 877362 8. 033016  
2. 25608 2. 254758 2. 472096 2. 292251 2. 243197 2. 636514 2. 695843 1. 689515 2. 549129  
1. 303914 1. 456262 1. 960274 1. 292134 1. 477867 1. 414726 1. 173897 1. 171059 1. 475562  
2. 519527 2. 579758 2. 092118 2. 193608 2. 1525 3. 073539 3. 30015 2. 260148 3. 105043  
5. 783443 6. 063085 6. 123791 5. 794603 5. 989713 6. 02312 5. 710384 5. 067008 5. 20304  
1. 709309 1. 41725 1. 328872 1. 882428 1. 579907 1. 398714 1. 987916 1. 811201 2. 122877  
2. 108922 1. 42582 1. 60819 1. 565283 1. 549324 1. 550339 1. 873045 1. 424048 1. 999187  
5. 023644 5. 362477 4. 710597 5. 204822 5. 068724 4. 099591 4. 367306 4. 542267 4. 842939  
1. 687518 1. 471655 1. 587607 1. 607526 1. 853266 1. 82247 2. 294069 1. 86418 1. 627477  
2. 340154 1. 570841 2. 193402 1. 334395 2. 249137 2. 772097 1. 578039 1. 414778 2. 885587  
1. 518466 1. 592768 1. 30923 1. 437417 1. 322258 1. 431969 1. 400059 1. 662786 1. 52008  
7. 327318 7. 598467 7. 339563 8. 001615 7. 631022 7. 644821 7. 232427 7. 631528 7. 673718  
2. 162803 1. 500453 2. 713929 3. 165738 2. 609601 2. 854216 3. 77183 2. 17968 3. 442487  
2. 145544 2. 209202 2. 278985 2. 034317 1. 415837 2. 392754 1. 962915 2. 09831 1. 540793  
1. 860558 1. 216034 1. 970035 2. 319083 2. 531252 2. 580771 2. 556545 1. 74941 2. 71501  
7. 178365 6. 369874 6. 405901 6. 174322 6. 364206 6. 495829 6. 095278 6. 394489 6. 362863  
5. 382282 5. 752881 5. 326008 6. 51714 6. 060422 6. 260478 5. 69693 5. 453644 5. 956314  
1. 773119 1. 765389 1. 925294 1. 809904 1. 423277 1. 996509 1. 507334 2. 081932 1. 436165  
3. 009775 3. 340354 2. 6935 2. 803597 3. 25126 2. 921823 2. 500103 3. 187302 3. 249236  
1. 721452 2. 062507 1. 878303 1. 91743 1. 590794 1. 644118 2. 272292 1. 703669 2. 021123  
7. 782544 7. 502722 7. 763559 7. 717694 7. 264663 8. 128816 7. 337685 8. 036365 7. 975686  
2. 887554 3. 318474 3. 14259 3. 43777 3. 232079 3. 375351 3. 195566 3. 441973 3. 246544  
7. 082295 5. 226188 5. 67355 4. 696917 5. 266866 4. 905249 4. 650689 5. 555225 5. 97666  
5. 909356 5. 934066 6. 508079 5. 262979 5. 146003 5. 790437 5. 41217 6. 248753 6. 067272  
5. 112694 6. 843896 7. 176401 6. 225576 5. 928588 6. 606828 5. 509431 5. 920092 6. 081758

5. 770205 6. 004089 6. 455218 5. 623989 6. 041001 5. 631529 5. 129831 5. 863777 5. 42834  
3. 484684 4. 003712 4. 727518 4. 911831 3. 897068 4. 51308 3. 691388 4. 713714 4. 298809  
3. 67653 2. 0066 1. 952733 2. 009764 2. 417716 2. 527698 2. 585786 2. 220632 2. 310718  
5. 953775 5. 777622 5. 989049 5. 517096 6. 177347 5. 642125 5. 128615 5. 961273 5. 463378  
3. 985245 2. 961178 3. 266022 3. 099856 3. 599873 2. 640217 3. 069257 3. 180652 3. 114558  
1. 084252 1. 202343 1. 229764 2. 103129 0. 994619 1. 895586 1. 530877 1. 118236 1. 896265  
7. 037566 7. 159568 7. 088087 7. 137292 7. 385234 7. 293505 7. 199286 6. 759592 7. 28363  
7. 072835 5. 783833 5. 865984 6. 87569 5. 643 5. 876723 5. 906117 5. 577486 6. 316029  
4. 962615 5. 280398 5. 678051 4. 28904 4. 505361 4. 656262 4. 268294 5. 107319 5. 787502  
7. 308712 7. 503907 7. 493114 7. 313135 7. 288472 7. 412937 6. 695656 7. 014593 7. 037662  
1. 307953 1. 489589 1. 179344 1. 887426 1. 74475 1. 349787 2. 813502 2. 13776 1. 510839  
5. 378595 4. 618017 4. 54051 5. 068176 5. 388298 5. 090292 4. 177833 4. 850442 4. 503318  
4. 697258 4. 410284 4. 039533 3. 246627 4. 137307 3. 763351 2. 999772 4. 831018 3. 533475  
1. 730413 1. 13905 1. 053314 1. 509029 1. 220598 1. 815312 1. 543011 1. 657001 1. 555896  
1. 36093 1. 55516 1. 105744 2. 144482 2. 457679 2. 263326 2. 086 2. 813182 1. 616774  
5. 870725 5. 462272 5. 549473 5. 264295 5. 210533 5. 68988 6. 125323 5. 170609 6. 001093  
6. 155816 5. 419094 4. 690743 4. 442787 5. 178497 5. 549165 3. 85787 5. 342427 5. 290209  
5. 613446 6. 505959 6. 24791 6. 58339 6. 094197 5. 709492 5. 811844 6. 587128 5. 811246  
5. 639906 6. 608544 5. 687186 6. 294028 6. 423896 6. 040144 6. 484593 6. 389845 6. 584928  
5. 344255 5. 395228 5. 470029 5. 994907 4. 905449 5. 341472 5. 548827 4. 910376 5. 450308  
1. 651884 1. 18926 1. 374903 1. 651177 1. 310937 1. 625456 1. 623963 1. 269938 1. 507302  
6. 573992 6. 326537 6. 733559 6. 286182 5. 075493 5. 74887 5. 493449 5. 917037 5. 53616  
3. 181531 2. 973293 2. 629043 3. 282884 2. 889834 2. 884588 3. 119547 2. 868161 3. 092472  
1. 446518 0. 703164 0. 572266 1. 354517 1. 217536 0. 85339 0. 970292 1. 488488 1. 045201  
1. 475095 1. 44543 1. 437208 1. 560272 1. 548114 1. 80869 1. 340199 1. 164016 1. 516672  
5. 158294 6. 167453 5. 432001 5. 716885 6. 265397 5. 512373 5. 449012 5. 813105 6. 265684  
4. 180503 3. 805117 3. 895551 4. 759434 4. 297244 4. 82401 4. 155094 4. 647204 4. 476246  
5. 020517 5. 376118 3. 83054 5. 180955 6. 184911 4. 466689 4. 797975 4. 625138 5. 636755  
7. 273641 6. 971396 6. 907051 7. 125913 6. 742441 6. 720937 5. 884798 6. 80468 6. 588046  
6. 952789 7. 083116 6. 817285 7. 457067 6. 696809 7. 33719 7. 588992 6. 501735 6. 686991  
8. 197837 8. 734076 8. 381776 8. 3476 8. 172084 8. 035507 8. 44688 7. 613527 8. 089803  
6. 011301 5. 512545 5. 399738 5. 677074 5. 169888 6. 01307 5. 654214 5. 690542 6. 165725  
2. 775261 3. 487762 3. 262299 3. 689401 3. 318297 4. 115273 3. 811946 3. 744218 3. 763871  
4. 338019 5. 096523 5. 347949 4. 658589 5. 082539 4. 679066 6. 256824 3. 877123 3. 742502  
5. 35616 6. 478813 6. 552862 6. 256905 6. 273308 6. 537584 6. 419437 6. 682125 5. 749905  
7. 886572 7. 580942 7. 827393 7. 654501 8. 094116 7. 394303 8. 584352 8. 051948 7. 912498  
9. 230317 9. 102291 9. 200715 9. 122573 8. 764732 9. 091376 9. 118861 8. 739213 8. 817343  
1. 85346 1. 358916 1. 45699 2. 063711 2. 434169 1. 438197 1. 912022 0. 945817 1. 470752  
4. 512405 4. 304351 4. 577905 4. 195637 4. 340709 5. 032689 4. 225236 4. 14312 4. 142113  
1. 804469 1. 571117 2. 048561 2. 342945 2. 226029 1. 366008 2. 133166 1. 508112 1. 987107  
1. 948163 2. 381476 2. 225266 2. 433387 2. 026947 1. 381312 2. 156506 1. 997765 2. 267441  
2. 495337 2. 236668 3. 202402 2. 771824 3. 055853 2. 686941 2. 273121 2. 753751 3. 398572  
5. 154693 3. 729177 3. 545247 3. 061575 2. 919012 2. 611759 3. 547895 2. 798026 4. 158349  
6. 034239 6. 621869 6. 551068 6. 562351 7. 029387 6. 817261 6. 507858 6. 753465 6. 84607  
8. 288746 8. 142031 8. 439982 7. 91533 8. 121634 6. 930666 8. 12453 8. 067974 8. 268739  
7. 964505 6. 840204 7. 109214 6. 868924 7. 126914 6. 282072 7. 312782 6. 956333 7. 29805  
6. 719657 5. 575029 5. 810006 5. 449611 5. 250074 5. 473222 5. 504469 5. 509207 6. 571176  
5. 773042 5. 807802 6. 43175 5. 949771 5. 799966 5. 803377 5. 830339 6. 509192 6. 52268  
8. 021153 8. 145808 7. 922399 8. 911274 8. 292 8. 533577 8. 220688 7. 642835 8. 360254  
8. 979547 9. 384988 9. 359452 9. 716934 8. 931423 9. 448486 8. 844676 8. 443913 8. 941462  
3. 433097 1. 980501 1. 683351 3. 409676 2. 509293 2. 351494 2. 743606 2. 583136 3. 302306



2.545502 1.917472 2.514217 2.085171 2.102707 2.739007 2.441533 2.10336 2.538879  
6.065125 6.628233 6.517411 6.835571 6.64871 6.642013 6.807471 6.364307 6.748318  
2.345528 2.311691 2.141171 2.20887 2.414342 2.944795 2.34646 2.186074 2.907329  
3.756511 5.49205 4.034305 5.888483 4.529945 4.60631 5.940317 5.364517 5.024475  
6.172147 6.224713 6.310467 6.303046 6.542949 6.345807 6.354974 5.972592 6.503442  
6.212203 5.198578 5.815774 5.759627 6.190565 6.263685 5.329508 5.563208 5.345319  
3.959964 5.13152 5.09678 4.642837 4.664249 5.091648 4.282658 4.43825 4.99095  
5.80433 5.290578 5.41575 6.801525 6.373856 5.56857 6.345418 5.471645 6.079514  
4.063697 2.344534 2.069605 3.343883 2.200046 2.144176 3.248875 1.794806 2.263167  
3.398729 4.194159 3.259615 3.425832 4.017648 4.395474 4.606724 3.52752 4.051734  
3.691559 2.685142 3.168358 3.517462 3.818308 3.280337 3.618176 3.764735 3.596472  
2.120021 1.857625 1.898447 2.694228 2.698821 2.004307 1.960898 1.982365 2.044447  
2.04544 2.23444 3.45703 2.323215 3.472442 2.214293 2.9541 1.539945 1.582679  
7.902082 8.332408 7.95327 7.883675 8.080108 7.82708 7.859948 7.981687 7.741294  
5.676438 6.648606 6.388843 6.663625 6.588847 6.382574 7.188934 6.604263 6.374514  
7.502281 7.870232 7.389556 7.731003 7.524838 7.785834 7.410542 7.392163 7.807948  
2.502389 2.512062 1.973549 3.812663 2.920603 1.808518 2.088971 1.924504 2.580816  
4.644516 4.825081 4.735627 4.26225 4.633372 4.306873 3.87967 3.726748 4.034828  
4.949192 5.057824 5.289141 5.134628 5.682029 5.559149 5.223606 5.978676 4.428551  
2.153167 1.422465 1.431917 1.805771 2.670529 1.735357 2.640537 1.416284 1.685079  
3.325395 5.535875 6.340616 4.044621 4.65987 5.493408 4.815344 5.08087 4.384406  
3.707825 5.851522 6.271096 4.860832 4.77667 4.637536 5.706949 5.047358 6.564764  
6.552646 6.30723 6.841131 6.234685 6.70477 6.528327 6.027757 6.879535 6.147719  
6.562366 7.318046 7.002669 6.95832 7.006825 7.215553 7.034476 6.494769 6.622074  
2.097021 1.537333 2.138547 1.864099 1.753778 2.904086 1.814298 2.083087 2.351794  
2.124074 1.996897 1.778236 2.193879 1.730783 2.14807 1.747826 1.473406 1.539717  
9.035178 9.472309 9.715196 9.671772 9.34148 9.897117 8.921639 9.744703 9.314246  
6.015269 5.651737 6.288121 5.193447 5.33076 5.770806 5.10734 5.659452 5.284971  
4.911088 2.612536 3.421359 2.366668 1.969438 3.23032 3.185488 2.049155 3.063321  
2.797902 3.661616 4.224802 3.191487 2.951968 2.863393 3.6993 4.905352 3.552675  
8.12919 8.62552 8.60971 8.075144 8.41988 8.627079 7.644025 8.669506 8.246979  
6.317871 8.133767 7.833165 7.25475 8.218491 8.498308 7.357739 8.238852 7.27582  
2.933159 2.013428 2.723032 1.921679 1.883579 1.895639 2.57462 1.991137 2.669597  
7.025343 7.145378 7.343068 8.318256 6.890324 8.226949 7.82859 7.218316 7.394386  
0.806136 0.865326 1.138039 1.09779 1.061311 1.333941 1.134725 0.968775 1.08471  
2.423691 2.07757 2.061886 2.036407 1.505555 2.203123 3.336176 1.691305 1.877245  
2.457091 2.715121 2.64546 2.481388 2.751379 3.734251 3.006139 2.439314 2.729256  
4.001868 2.305716 3.759813 1.721817 2.85021 2.58631 2.04222 2.728761 3.111133  
2.463826 1.718636 1.274118 2.055795 1.87463 1.593612 1.709362 1.695735 1.712169  
2.785681 3.057229 3.857809 2.423059 3.537948 3.329722 4.196215 4.237515 5.400808  
1.178928 0.928919 0.887383 0.55048 0.689591 1.168446 1.216417 0.955326 1.250983  
3.485906 3.294114 3.57283 3.392616 4.20254 3.537901 3.377217 4.320815 4.008688  
6.393172 7.396346 6.5963 8.077213 8.005776 6.021593 7.647929 6.399207 6.373614  
8.784379 8.273153 9.166085 6.996997 7.939842 6.034609 8.042896 8.315349 9.499848  
0.698362 1.003666 0.792031 1.131416 1.417995 0.989626 1.214451 1.283594 1.023612  
8.027844 6.727865 7.05759 7.582071 7.229377 6.198335 7.416363 6.758862 7.345408  
7.607337 6.442451 6.073464 6.798396 6.358804 6.624221 6.692733 5.773971 7.97444  
1.747311 1.527081 1.523279 1.745212 1.355204 1.734501 2.632643 2.076424 1.854182  
0.925957 0.868736 0.859332 1.310483 1.397087 1.030455 1.302706 1.218965 0.862102  
2.674525 2.306523 2.267295 2.423091 2.552883 2.414886 2.017271 2.433486 2.154912  
4.032293 2.935536 4.07119 3.5911 4.621485 4.100325 2.909332 4.381645 2.57424

2.798716 2.346673 2.047158 1.833239 2.281432 2.701174 2.237907 2.471538 3.020304  
1.852102 3.286389 2.04118 2.785803 1.811746 2.537979 1.683362 1.521106 1.502552  
8.085659 6.451059 7.432236 6.402466 6.578893 6.790993 7.038828 6.668132 8.081345  
6.559348 6.011668 6.840832 5.612944 5.859201 5.845084 5.946594 5.582243 6.746032  
6.785411 7.363954 7.376496 7.507817 7.554874 7.532487 7.283607 7.352299 7.324923  
6.436224 7.191165 7.01217 7.330109 7.43627 7.18103 7.364671 7.205298 6.93037  
6.118182 5.848654 6.70367 6.003931 5.590283 5.7862 6.402438 6.120733 7.292999  
4.540991 4.850147 4.817843 4.557128 3.954438 4.726884 4.586401 4.808349 5.185842  
7.222833 7.755263 7.689869 7.976246 7.776276 7.736041 7.82297 7.457646 7.634075  
1.317808 1.179194 1.871786 2.22921 1.791975 1.951411 1.797558 3.462409 1.479732  
3.262462 4.595663 4.465233 4.516747 4.075892 4.629313 4.348365 4.420408 4.391043  
3.783246 3.379323 2.6397 3.391209 2.82383 3.623168 3.437673 3.493726 3.454594  
2.445758 1.788317 2.001302 3.264612 1.395028 2.28171 2.028843 2.20928 2.253358  
1.596823 1.656587 1.219032 1.483917 1.768532 2.152607 4.004743 1.704794 2.073853  
5.46392 5.71049 5.346059 6.005956 5.698637 6.21003 5.931433 5.767394 5.086152  
1.811536 1.842129 1.920559 2.285449 1.653684 1.873569 2.120949 2.052954 1.986948  
1.714426 1.29308 1.353055 1.657393 1.203768 1.547584 2.323486 2.165322 1.203804  
3.288472 3.006231 2.590503 3.10741 3.124124 3.633162 3.785069 3.736636 3.117876  
6.226802 5.744612 6.751923 5.927913 5.945873 6.160925 6.05466 5.676711 5.866874  
1.254314 0.958308 1.483792 1.534274 1.923094 1.531634 1.557728 1.53174 1.383432  
6.542978 6.674277 5.664273 7.702335 6.662623 6.055749 8.372147 5.540082 6.267883  
5.921094 6.565875 6.175365 6.217866 6.272698 6.803586 7.148455 6.537647 6.685653  
5.090778 5.86053 5.888356 5.640383 5.786952 5.638078 5.616747 5.598757 5.954208  
2.463356 2.142963 3.297299 2.181152 2.235465 2.229429 2.934583 2.279775 2.171881  
1.239669 1.574435 1.574435 1.83465 1.389863 1.495833 1.473414 1.000235 1.305736  
1.272869 1.137644 1.059119 0.990512 1.465816 0.913315 1.545009 1.08322 0.977041  
0.669275 0.973496 0.638817 0.846844 1.01414 0.744995 0.948443 0.699246 1.208747  
2.100835 1.453095 1.412042 1.807078 1.229838 1.082151 0.933399 1.007466 1.123105  
1.604933 1.114863 0.927823 1.384178 2.786837 1.426481 3.278228 3.135874 2.559262  
1.381955 0.822589 0.979759 1.754806 1.289245 1.897703 1.625746 0.808177 1.084886  
0.990648 0.895451 1.002844 0.978656 1.628495 1.208871 2.177902 1.970578 1.317791  
3.451477 3.210802 3.442602 2.762909 2.694119 2.610353 2.568252 3.65807 4.433629  
1.300477 1.681319 1.454958 1.669787 1.209774 1.507176 1.717291 1.563738 1.206984  
2.246822 1.527815 1.27966 0.860783 1.576844 1.042673 1.624165 1.433619 1.151272  
0.761366 1.188061 0.864165 1.674584 1.227299 0.917027 2.616586 0.899931 0.979803  
1.8824 1.512994 2.432993 2.237996 1.492428 2.304242 1.392156 1.113369 1.497897  
1.447053 1.871839 1.50876 1.162626 0.906963 1.194136 2.183713 1.97546 1.335412  
1.443473 1.429151 0.573436 1.245116 0.924824 1.459583 1.016602 0.79929 1.146358  
1.212315 1.168067 1.746857 2.372378 1.675246 1.18884 1.187104 1.595161 2.164557  
0.95365 0.609783 0.734953 1.251609 0.941505 2.040552 1.096719 0.754682 0.699966  
2.6105 2.363658 2.667204 1.506097 1.4712 2.985594 2.778387 3.205212 1.241289  
1.954389 1.590954 2.488273 2.048386 2.102887 2.675832 2.665738 1.561194 2.193076  
2.056014 1.918059 1.747302 1.911519 3.200715 2.10722 1.846964 1.643707 1.819364  
3.489489 3.659987 4.006703 3.489933 3.747824 4.194188 3.395785 3.21793 3.786587  
2.1688 1.813262 1.394785 2.020862 2.417692 1.766254 2.338184 1.919016 2.070399  
5.098848 5.024656 4.423809 3.34601 5.983455 5.357658 3.556149 8.155708 5.496405  
2.320934 2.493542 2.735011 2.999471 1.690483 2.714556 2.597055 1.711056 2.211346  
2.097286 3.515516 1.98774 2.427652 2.31121 2.746781 2.039605 1.727141 2.770564  
3.872902 5.396197 5.084931 4.524699 4.470439 4.451169 4.48202 4.857252 5.03138  
0.905991 1.014268 0.862791 1.378085 1.223028 1.23546 1.334943 0.92801 1.244976  
3.094469 1.827792 1.940769 2.448468 1.977346 1.899313 2.58514 2.572742 3.191562

3. 35724 3. 004065 1. 550159 1. 148068 2. 742467 2. 391383 1. 630768 1. 855265 3. 29666  
8. 577356 9. 253827 8. 950624 9. 246763 9. 196453 9. 028154 9. 198705 9. 447639 9. 049636  
3. 181258 5. 186206 5. 095333 3. 103463 3. 116217 2. 501816 4. 929896 5. 699396 3. 531143  
4. 157575 5. 037212 3. 991991 4. 922132 4. 934839 5. 402101 3. 83311 3. 328142 4. 977899  
5. 020258 4. 38792 4. 67432 4. 702124 4. 480078 4. 90772 5. 083152 3. 736916 4. 674553  
1. 593346 1. 474832 1. 683746 0. 981888 1. 03145 1. 229953 1. 178487 1. 571651 1. 042764  
1. 383071 1. 142893 1. 041641 1. 117194 0. 886342 1. 906092 1. 337778 1. 093328 1. 375503  
6. 296479 6. 231128 5. 915435 7. 971092 6. 590644 7. 707613 6. 899961 5. 900659 7. 087588  
1. 806778 2. 471639 2. 495711 2. 080382 2. 182471 1. 629483 2. 158986 1. 630214 1. 736949  
1. 428429 1. 856184 1. 891549 1. 965001 1. 595019 1. 257596 1. 297364 1. 690219 2. 096183  
1. 333315 1. 460257 0. 740048 1. 23014 1. 322487 1. 464788 0. 971446 0. 822047 1. 698141  
2. 489768 3. 032067 2. 298433 2. 759196 3. 21329 3. 38718 3. 006583 3. 310102 3. 031019  
5. 498914 3. 982071 4. 112063 3. 909203 4. 657451 4. 19188 4. 10196 3. 293417 4. 175937  
4. 690996 7. 615468 6. 580001 5. 92113 7. 779488 6. 866682 6. 78526 7. 536582 6. 305936  
1. 676826 2. 912492 1. 621936 1. 689675 1. 793655 2. 279786 2. 386011 1. 597448 1. 594857  
6. 508532 6. 360094 6. 166815 6. 660926 6. 871559 6. 943488 6. 587774 6. 066285 6. 554456  
1. 239414 1. 021833 1. 025441 1. 292659 0. 836465 1. 061359 1. 201015 0. 961968 1. 174615  
2. 125004 1. 646483 2. 013762 1. 705897 1. 32023 1. 574614 1. 715986 1. 937619 1. 343792  
2. 149816 1. 629303 2. 050318 2. 179823 4. 181161 1. 860148 1. 912496 2. 106284 1. 828595  
4. 969648 4. 285182 4. 236151 4. 598237 4. 24875 4. 353016 3. 441811 3. 838698 3. 809125  
5. 172184 5. 049503 4. 452306 4. 203548 4. 090092 3. 405798 3. 863013 4. 687143 4. 292851  
2. 105085 2. 383187 2. 068231 2. 456184 2. 100564 2. 267545 3. 215114 1. 876087 2. 710642  
2. 445296 2. 036474 2. 326767 1. 78695 2. 072785 2. 322845 3. 03316 2. 424611 2. 408441  
1. 010899 1. 295133 1. 058436 1. 37358 1. 093664 1. 368797 1. 375224 0. 889423 0. 997616  
1. 997039 1. 723127 2. 623976 1. 812583 1. 636676 1. 48372 2. 899564 1. 947324 2. 966471  
3. 52508 2. 26004 2. 801237 2. 462044 3. 289536 2. 867875 2. 465446 2. 174164 1. 759008  
2. 777462 2. 321389 2. 713222 2. 628067 2. 363437 2. 800138 2. 536212 3. 123616 3. 747822  
1. 201568 1. 749882 1. 772204 0. 962944 1. 634716 1. 702677 0. 934799 1. 811998 1. 451824  
4. 284745 2. 437264 2. 913543 2. 398825 3. 067702 2. 558211 3. 116795 3. 229828 1. 497659  
6. 723083 6. 710973 6. 732663 6. 787278 6. 177279 6. 787329 7. 038685 6. 78084 6. 732016  
2. 803408 4. 74656 4. 359547 4. 349494 4. 269712 4. 414605 4. 418407 4. 641067 4. 610061  
7. 070184 7. 773932 8. 10108 7. 22306 7. 456122 6. 977248 7. 504126 7. 731419 7. 106689  
3. 829093 3. 494285 3. 477704 3. 685855 3. 292686 3. 749132 3. 476703 3. 534702 4. 299316  
2. 150636 1. 458331 1. 949548 1. 736915 1. 621117 1. 734283 2. 615198 2. 105642 1. 979105  
1. 475378 1. 909115 1. 670381 1. 88831 1. 510205 2. 300311 1. 902123 2. 163814 1. 585525  
2. 691791 1. 836007 1. 636868 1. 818697 2. 489821 2. 323922 3. 689676 1. 761359 1. 673031  
1. 281539 1. 224316 1. 03156 2. 220493 1. 474042 1. 095136 1. 591301 1. 180251 1. 460494  
1. 041004 1. 304548 1. 088359 1. 383938 1. 100329 1. 468558 1. 301725 1. 35861 1. 749565  
2. 038372 2. 331588 2. 019596 2. 475881 2. 571198 2. 771887 2. 800421 2. 261597 2. 420656  
1. 428435 1. 334112 1. 532351 1. 603849 1. 847955 0. 507186 1. 456586 1. 028056 1. 592116  
2. 205775 1. 543525 1. 942499 1. 870587 2. 252743 1. 503919 1. 574423 1. 411925 1. 238084  
1. 044822 1. 466903 1. 166055 1. 629864 1. 069904 1. 912585 1. 381907 1. 081066 2. 064021  
1. 851359 1. 37116 1. 311378 1. 921706 1. 272448 1. 153021 1. 208394 1. 441923 2. 083499  
1. 085834 0. 585769 0. 763273 1. 377423 0. 871284 1. 113052 1. 572423 0. 959578 1. 689647  
3. 631684 4. 171063 4. 213343 4. 103141 4. 802957 4. 11746 4. 61954 4. 056741 5. 19843  
0. 963517 2. 221928 2. 309978 2. 252732 2. 000859 2. 643008 1. 94936 2. 224476 2. 946961  
2. 656273 2. 14723 1. 35935 1. 671403 1. 75277 1. 528306 3. 039713 1. 635765 1. 903839  
2. 838164 2. 245084 2. 633109 2. 92899 2. 570874 2. 091538 3. 837464 1. 765621 2. 033593  
1. 318214 1. 376242 1. 183978 1. 111553 1. 944181 1. 024034 2. 06935 1. 075545 1. 063146  
7. 323445 7. 138953 7. 160716 7. 221151 6. 833901 7. 714309 6. 848492 6. 996656 7. 09575  
2. 628674 1. 326703 0. 940977 1. 178275 1. 92696 1. 541314 0. 894857 2. 587639 1. 676773

2. 278441 2. 179371 2. 279816 2. 792742 1. 844365 2. 671184 1. 881917 1. 930724 1. 962623  
2. 567502 1. 721984 1. 819585 1. 896598 2. 935706 2. 263877 2. 221584 1. 720875 2. 252986  
5. 708445 4. 468132 5. 257547 4. 090934 5. 228946 4. 084944 4. 709096 4. 420567 5. 544268  
4. 15407 5. 378932 5. 310462 5. 317085 5. 530918 5. 419481 5. 17812 5. 611173 5. 1578  
2. 887863 2. 036353 3. 602257 2. 459788 3. 117003 2. 673048 3. 077647 3. 032216 3. 002478  
3. 481903 3. 618937 3. 950942 3. 605547 3. 345712 3. 278574 3. 45726 4. 351743 3. 484894  
2. 285772 2. 43103 4. 002095 2. 761499 3. 375177 2. 657434 2. 156677 3. 27435 3. 522407  
1. 282141 1. 130139 1. 500634 1. 499735 1. 503832 1. 194468 1. 64251 1. 421257 1. 228725  
1. 402994 1. 524693 1. 701414 1. 907204 1. 600259 1. 198131 0. 824837 1. 159819 1. 620434  
1. 154636 1. 183948 1. 084536 1. 094175 1. 682399 1. 099507 1. 230175 1. 320772 1. 247062  
4. 801259 4. 640863 4. 943898 5. 026307 4. 868398 4. 232101 4. 878349 4. 542327 4. 958809  
2. 395269 1. 911056 1. 915063 1. 983422 2. 088698 2. 271735 1. 945337 2. 269273 1. 944855  
3. 565889 3. 947484 4. 007141 3. 036961 2. 656433 3. 497441 2. 566341 2. 593391 3. 148215  
1. 604997 0. 913408 1. 054575 1. 290345 1. 599146 0. 985279 1. 311701 0. 862079 0. 879261  
1. 292282 1. 073824 0. 900822 1. 055513 1. 611029 0. 837279 1. 285496 1. 336791 1. 123085  
3. 796049 4. 165687 4. 129192 5. 608517 4. 619021 4. 656999 5. 713568 4. 914455 4. 774272  
1. 775576 1. 402252 1. 639418 1. 632022 1. 738694 1. 663731 1. 009808 2. 439989 1. 314644  
2. 722974 3. 028168 2. 65443 2. 83781 2. 379618 3. 653494 2. 881323 2. 239405 2. 809552  
1. 171928 1. 289843 0. 706183 1. 334988 1. 157061 1. 398245 1. 986743 0. 932172 1. 755417  
1. 047169 1. 323648 1. 06402 1. 653679 1. 479502 1. 022644 1. 686205 1. 355172 1. 306681  
2. 411558 2. 548761 1. 931074 2. 7871 2. 67884 2. 524165 2. 139881 3. 766397 3. 086813  
1. 095021 1. 330443 1. 058394 1. 975638 0. 883864 1. 468063 1. 066487 1. 245175 1. 906816  
2. 909031 2. 325963 2. 409973 3. 157247 2. 479773 4. 102788 1. 660711 2. 461306 2. 716137  
1. 569053 2. 165007 1. 576275 1. 667699 2. 095338 1. 450764 1. 879686 1. 701137 1. 918121  
1. 53483 1. 41155 1. 833146 1. 362753 1. 236607 0. 938691 1. 217501 0. 974186 1. 400557  
4. 787744 5. 313108 5. 089971 4. 709899 4. 817169 5. 085977 4. 462137 4. 885931 5. 010646  
1. 783644 1. 871205 1. 926377 1. 865024 1. 313077 1. 676582 1. 981999 1. 719604 1. 569607  
9. 867429 9. 737366 9. 70333 9. 73885 9. 484648 9. 727885 9. 380403 9. 20638 10. 15672  
5. 475242 4. 59612 5. 172648 3. 254765 3. 650284 4. 43158 3. 964338 4. 456217 5. 198024  
2. 216566 1. 827791 2. 061619 1. 824827 2. 448363 1. 346761 1. 869129 2. 234375 1. 649677  
2. 364522 3. 019305 2. 95609 2. 345546 2. 709157 2. 771395 2. 478652 2. 298419 2. 3609  
2. 563897 3. 653144 3. 544087 3. 905938 3. 84583 3. 763581 3. 085395 4. 335979 3. 567615  
8. 188069 6. 853692 7. 714007 5. 861679 6. 40126 4. 795514 6. 774268 5. 958117 8. 163485  
1. 403198 1. 164861 1. 077776 1. 475364 1. 640115 1. 905507 1. 340938 1. 527264 1. 344556  
1. 157073 2. 082086 0. 731861 0. 79816 0. 849551 0. 72596 0. 754885 0. 586933 0. 743414  
6. 399804 4. 592321 5. 151344 4. 276466 5. 035122 2. 929503 4. 165485 4. 922469 6. 519872  
1. 737344 2. 377524 1. 418005 1. 496001 1. 896968 1. 955597 1. 64362 1. 825184 1. 992217  
2. 029345 2. 005436 1. 739308 2. 362508 2. 72811 1. 504387 1. 703846 1. 522548 1. 943267  
3. 255401 2. 835084 2. 277331 3. 198014 2. 119128 2. 535465 3. 832266 2. 941112 2. 8521  
1. 148377 1. 77355 0. 650635 1. 035721 0. 76061 1. 282755 1. 091373 1. 166392 1. 077195  
1. 892985 5. 030536 5. 124982 4. 683645 2. 714181 5. 195893 4. 440792 3. 916242 3. 538856  
6. 574271 7. 961648 8. 386823 8. 00247 6. 875924 7. 930867 8. 436781 8. 281751 7. 959228  
2. 024758 2. 019424 2. 007135 1. 805505 2. 561764 2. 173219 1. 764368 1. 40391 1. 787786  
1. 627961 1. 522067 1. 400433 1. 331176 2. 03499 1. 683897 2. 933865 2. 034292 1. 879004  
3. 843024 4. 34872 4. 494763 4. 47996 5. 27815 3. 986671 4. 870356 4. 347326 4. 351355  
4. 745321 5. 382596 5. 045093 5. 75053 5. 479699 4. 879339 4. 403904 4. 220165 4. 726449  
5. 825316 5. 157554 5. 048199 6. 309831 5. 983735 4. 970215 4. 893792 4. 220218 4. 493855  
8. 274539 6. 472928 7. 107558 6. 113589 6. 740202 4. 86448 6. 307435 7. 088001 8. 537135  
2. 016282 2. 273971 2. 026831 1. 672282 2. 413201 2. 407306 3. 513307 1. 9523 2. 154741  
4. 882663 5. 144327 5. 095937 6. 057287 5. 560149 6. 090756 5. 352425 4. 28486 5. 325575  
5. 510599 5. 360681 4. 393396 5. 383384 5. 692134 5. 751898 4. 516689 5. 554588 5. 020987

2.466481 1.754457 1.543085 1.496038 2.321437 1.619592 1.866971 1.895417 1.47275  
8.148937 7.685131 6.894996 6.834593 7.90523 6.190963 7.203112 6.953851 7.717286  
2.041268 1.588046 2.509487 1.349192 2.594054 1.909331 1.239448 1.319839 1.832538  
1.966598 2.656621 1.874124 3.01563 2.1233 2.463631 2.256056 1.593466 2.007798  
4.110805 2.700423 2.618844 2.322088 2.660215 3.260894 3.290292 2.568948 3.091554  
7.09608 7.882452 7.144948 7.951146 7.534887 7.85833 7.628815 6.891938 7.867852  
6.042523 6.021384 6.495465 6.286106 6.150792 6.366554 5.835413 6.408623 5.988442  
2.217645 2.249651 1.889315 2.264225 1.286978 1.35409 1.318879 2.05227 1.939481  
1.349498 1.494211 1.772111 1.545909 1.335576 1.745075 0.934231 1.438617 1.134155  
3.639812 4.204645 4.237052 3.954391 3.829294 5.073896 4.156925 3.326715 4.566156  
1.67744 1.303049 1.500018 1.618782 1.809726 1.789987 1.401616 2.030966 1.385731  
4.37173 3.574909 3.20466 4.315354 3.256166 3.710899 2.994107 3.528394 4.042109  
4.133399 5.814773 5.822652 6.136766 4.980421 5.447038 4.674872 5.787807 5.595862  
2.516718 3.175207 2.808304 2.398034 2.760767 2.135528 2.555658 3.340095 3.630615  
0.733041 0.673988 0.570398 0.897976 1.924039 1.01527 0.910905 2.43289 2.578381  
3.491189 5.492898 5.180994 4.998919 5.818209 4.336205 5.917176 5.109108 4.865189  
2.774481 1.419447 1.660319 1.691011 2.31681 2.475744 1.288274 1.319972 2.084741  
5.833776 5.936295 5.960815 6.516903 5.935083 5.894593 5.06305 6.340702 5.870591  
1.630299 1.532865 1.905017 1.658728 2.292053 1.934052 1.877848 1.863993 2.362594  
5.49628 5.413112 5.401081 5.489447 5.548062 5.423672 4.786154 5.032314 5.123313  
5.218643 5.769184 5.211624 5.3568 6.042872 5.977458 5.168776 5.942656 5.744748  
6.017661 7.343081 7.034712 7.476896 7.433446 8.030344 7.246849 5.994637 7.022888  
2.035913 2.385736 2.50451 2.571662 2.369126 2.057844 2.846204 2.375685 2.177767  
2.982501 1.884271 2.019438 2.371638 2.435172 1.584311 2.376635 1.61552 2.060011  
1.856412 1.646069 2.042546 1.344934 1.632323 1.577249 1.479332 1.401791 1.011992  
1.224118 1.198161 1.340103 1.075094 1.56778 1.744379 1.319087 1.729864 1.218484  
2.56515 1.220292 1.249268 1.718688 1.29266 1.57828 2.401759 2.021429 1.089968  
2.746525 4.150289 3.843265 2.901556 3.207062 3.270581 3.363791 3.862123 2.927743  
6.357238 6.295648 5.869219 5.996503 6.132774 5.972544 5.682435 6.174892 6.260227  
3.191793 3.69285 2.920641 2.990472 4.032233 3.202929 3.018573 2.838256 3.048323  
5.029169 4.301177 2.711076 3.354803 3.66793 2.793114 2.943572 4.462377 3.972626  
3.969671 3.147603 3.958344 3.789792 3.552915 3.492038 2.561025 3.339245 3.588053  
5.750733 6.299932 5.107534 6.304516 5.422479 5.342746 6.080455 5.052606 5.050238  
2.483145 2.222783 3.125112 2.49173 2.156665 2.565951 2.435631 2.939565 1.635789  
2.405389 4.139913 3.404128 3.357572 2.849601 4.833429 3.104487 4.239298 3.221104  
4.723967 5.421857 4.651183 4.217436 4.464898 4.50844 3.976258 3.804142 3.655898  
1.357301 1.677865 1.848115 1.944426 2.456333 2.06166 1.709371 1.576857 1.664874  
1.26068 1.14276 1.163907 1.497855 1.317718 1.283689 1.378235 1.094789 1.095582  
9.255972 9.582347 9.466856 10.32579 9.266386 9.977265 9.509272 8.759145 9.611732  
2.163941 3.221365 1.119426 3.236778 3.51541 0.997519 1.776402 2.874415 3.528975  
1.537308 1.794006 2.262693 1.5799 1.58902 1.519894 1.721453 1.027742 1.942333  
1.727903 1.764237 2.076467 1.71455 1.389767 1.343905 2.958376 2.176627 1.932881  
2.338163 2.322479 3.187575 2.043546 2.13263 2.217305 2.64675 2.096832 2.35625  
2.832079 4.130637 5.041605 2.953458 3.470098 2.76806 3.171523 4.632077 3.874758  
3.625741 2.570367 3.743464 2.82759 4.086571 3.050496 3.110474 3.064751 3.820842  
3.388105 1.273579 1.777308 2.091553 2.162387 1.964337 2.301996 1.20839 1.681512  
2.497343 1.658036 2.543478 1.906261 1.760945 1.875089 1.994749 1.836072 2.240216  
7.308073 7.560686 7.795776 6.647102 6.962062 7.505771 7.468451 6.957598 6.965529  
1.68692 1.550367 1.136303 1.729959 2.873065 2.305035 1.539978 1.312555 1.486873  
1.87313 1.356568 1.802256 1.546386 2.058208 1.486385 3.165853 1.924901 1.760498  
2.35072 2.516863 3.38412 2.802522 2.527473 3.352086 2.967837 2.652652 2.393516

2. 697829 2. 965574 3. 246631 3. 855404 3. 764623 4. 69195 5. 084488 5. 324803 4. 038822  
5. 485145 6. 293985 6. 197405 5. 822777 6. 459969 6. 31551 6. 369969 5. 642792 5. 906863  
1. 948892 1. 944418 2. 008192 1. 78677 1. 923347 1. 786726 2. 977199 2. 091741 1. 473704  
4. 085722 4. 586354 4. 032015 4. 61496 3. 835684 4. 454397 4. 347213 4. 115416 4. 260321  
4. 671892 5. 412081 4. 333221 4. 168131 4. 60954 3. 875726 4. 0278 4. 948036 4. 840941  
1. 958733 2. 625115 2. 328361 1. 996381 3. 232223 1. 978462 1. 475454 1. 747554 2. 371981  
3. 587372 3. 483154 3. 490002 3. 087628 2. 854434 3. 185762 3. 834648 2. 857216 3. 998465  
2. 492274 1. 534383 2. 861659 1. 998654 1. 415304 1. 379698 3. 91035 1. 678766 3. 305452  
4. 642749 5. 887823 5. 388621 5. 183688 5. 398805 4. 46796 5. 055285 5. 114604 5. 149565  
2. 918196 3. 944433 2. 413323 2. 641118 2. 636918 3. 060996 2. 612068 2. 911871 2. 841011  
1. 69025 1. 526667 2. 450481 1. 770863 3. 895495 3. 436346 2. 959526 2. 256787 1. 16725  
2. 545839 1. 835112 2. 661953 2. 001469 2. 125667 1. 28972 2. 274964 1. 136913 1. 191683  
4. 882714 4. 833177 4. 009233 4. 224197 4. 659392 4. 129129 4. 552037 3. 785536 3. 81324  
1. 063098 1. 470114 1. 121281 1. 330108 1. 081974 1. 254295 1. 275352 1. 962025 1. 515933  
1. 997401 2. 671489 1. 653172 1. 784522 1. 480576 1. 807194 1. 76436 1. 755552 1. 669483  
2. 093071 2. 143209 1. 704552 2. 309949 1. 837364 2. 087375 2. 653964 1. 774561 2. 805532  
4. 687243 4. 900107 5. 410222 4. 836018 5. 268331 5. 076071 5. 032834 5. 20015 4. 76217  
2. 408479 2. 804253 2. 255677 1. 86552 2. 164551 2. 096232 2. 425304 1. 919843 1. 979226  
2. 538764 1. 399165 1. 837803 2. 627971 1. 61768 1. 989323 1. 979871 1. 373684 1. 711525  
5. 766021 6. 929196 6. 381384 6. 126563 6. 785828 6. 533482 7. 06059 6. 578182 6. 880531  
1. 409975 4. 418586 2. 504376 4. 976002 2. 856778 4. 875086 4. 141924 2. 625996 4. 475564  
3. 26851 3. 243773 2. 590981 3. 281631 3. 615498 2. 807202 3. 184332 3. 849103 2. 588743  
3. 115457 2. 798728 3. 941922 3. 116289 3. 802171 4. 026612 3. 091405 2. 931754 3. 802592  
6. 034963 6. 067493 5. 838105 5. 758311 5. 734388 5. 638915 6. 017054 5. 993955 6. 174845  
2. 341439 1. 63468 1. 739975 1. 336814 1. 538901 2. 396086 1. 512225 1. 435516 1. 254211  
1. 206672 1. 142528 1. 249244 1. 391271 1. 1974 1. 294489 1. 325347 1. 090252 1. 47753  
6. 223713 6. 164794 6. 004328 5. 042442 6. 295512 6. 160799 5. 491565 6. 729097 6. 05477  
0. 875366 1. 012168 0. 996149 2. 122438 1. 564353 1. 040837 1. 443483 1. 356729 1. 49639  
2. 528106 2. 547255 3. 481739 3. 870855 1. 885839 3. 871492 3. 794121 3. 429569 3. 910841  
5. 408989 6. 609236 6. 940153 6. 069336 5. 935571 7. 258173 5. 354216 6. 49692 6. 815272  
3. 145705 5. 325593 4. 995155 4. 522742 5. 555933 4. 931614 5. 282874 5. 295478 5. 180044  
5. 355891 6. 065111 5. 929913 5. 531218 4. 936575 5. 846709 6. 286867 5. 784669 5. 529423  
3. 252389 1. 929464 2. 497286 2. 454309 1. 793248 2. 152127 2. 411616 1. 600525 1. 774938  
4. 294667 3. 211834 3. 614661 3. 349059 3. 534143 3. 389846 3. 632686 3. 323346 3. 416702  
2. 429858 2. 58672 2. 358328 1. 817196 2. 093676 2. 335858 3. 460347 2. 605716 2. 354903  
6. 447995 6. 129436 6. 49931 6. 579934 6. 219 6. 195736 5. 985343 6. 184948 6. 396735  
2. 00404 1. 425675 1. 58016 1. 694485 1. 652359 1. 875967 1. 810875 1. 772587 1. 899121  
3. 084696 3. 259279 3. 519631 2. 48778 3. 91258 4. 838348 3. 031798 2. 504426 4. 685168  
8. 057325 8. 949153 8. 934106 8. 374863 8. 541873 8. 72613 7. 713878 8. 552042 8. 23851  
3. 843849 5. 038902 4. 791493 3. 55935 5. 393231 5. 288874 4. 024473 4. 036782 3. 611837  
5. 650837 5. 665031 5. 527408 5. 304721 5. 106685 4. 571201 4. 722392 5. 45006 5. 18226  
1. 684362 1. 960387 1. 218567 1. 693292 1. 708191 1. 673087 1. 514173 1. 838026 1. 926779  
2. 087228 1. 986602 2. 240433 2. 002829 1. 590069 2. 097915 1. 788461 1. 734395 2. 167788  
7. 932317 8. 09975 8. 402181 7. 982816 8. 086765 7. 935717 7. 644902 8. 182119 8. 795452  
0. 933843 1. 227826 1. 690238 1. 240078 1. 347083 1. 023871 2. 086074 1. 854145 1. 444336  
5. 469801 5. 935655 6. 247933 5. 469218 6. 035052 6. 01847 5. 196368 5. 566753 5. 565779  
5. 822305 4. 568056 5. 647312 5. 909224 6. 657896 4. 948743 5. 859476 5. 421517 5. 721158  
2. 560599 2. 292652 1. 844041 2. 547842 2. 486784 2. 477214 2. 543505 2. 12316 2. 247811  
2. 57113 2. 99603 2. 478358 2. 912808 2. 464012 2. 17365 2. 874996 2. 604454 3. 099401  
5. 79694 6. 485861 6. 232125 6. 174986 6. 537757 6. 567468 6. 635677 6. 390817 6. 322248  
4. 608526 5. 659665 4. 765547 5. 973924 5. 460397 4. 010728 4. 48394 5. 124233 4. 446686

3. 740528 3. 759644 4. 069698 4. 294581 3. 248243 4. 03809 3. 781545 2. 844423 4. 245687  
2. 964186 4. 59887 4. 551072 3. 011682 3. 777408 2. 703234 3. 441125 3. 556466 3. 811028  
2. 099576 1. 706655 2. 368145 2. 621887 2. 107401 1. 214725 2. 104945 1. 455806 1. 951266  
6. 77152 7. 073564 6. 487318 6. 485759 6. 75479 6. 316276 5. 819647 6. 688145 6. 894115  
5. 329154 4. 551935 4. 316742 3. 874438 3. 93171 4. 04137 3. 958661 4. 098803 4. 921461  
1. 890251 1. 922811 2. 150752 1. 562914 1. 750509 1. 613145 1. 602548 1. 614554 1. 861389  
5. 326572 5. 327908 5. 341354 5. 282799 5. 154325 5. 582594 5. 380103 5. 671082 5. 077976  
3. 581841 5. 093332 4. 894156 5. 686797 4. 412466 4. 391533 4. 18424 4. 067013 4. 871752  
4. 509782 6. 608199 5. 771723 5. 798578 6. 146656 5. 674876 4. 759915 5. 978222 6. 475405  
2. 195971 2. 47435 2. 344073 2. 924172 2. 664433 2. 347258 1. 590274 2. 306605 2. 271541  
4. 604443 4. 675607 4. 77307 4. 913311 5. 207783 4. 325293 4. 386537 3. 853603 4. 581368  
1. 336541 0. 748348 1. 327894 1. 329452 1. 351419 1. 535989 1. 125414 1. 861547 0. 96319  
0. 957915 1. 61539 1. 360906 1. 255711 1. 217241 0. 799297 1. 243357 1. 428075 1. 027778  
1. 601835 1. 510796 1. 588139 1. 462338 1. 165756 1. 186987 1. 868642 1. 093259 1. 262899  
1. 851382 1. 595011 1. 752361 2. 239554 2. 072217 2. 021293 1. 92675 1. 773315 2. 314331  
1. 996171 1. 159804 2. 101146 2. 655975 1. 913349 1. 736083 2. 463128 1. 98607 2. 530865  
2. 191781 1. 036707 1. 534051 1. 52385 1. 827867 1. 277918 1. 372798 2. 591347 2. 190654  
1. 207854 1. 889464 1. 780929 1. 476452 1. 862064 1. 662763 1. 31832 1. 837136 1. 813478  
3. 777479 2. 574903 3. 094488 3. 02965 3. 707237 2. 642183 2. 989531 2. 78994 4. 30576  
5. 067358 5. 64175 5. 571908 4. 963431 5. 87711 5. 084229 5. 056131 5. 4442 5. 870591  
1. 023491 1. 498424 1. 139207 1. 291031 1. 283864 1. 026237 1. 251041 1. 078327 1. 854824  
2. 15584 1. 611596 3. 984451 1. 648644 2. 159101 1. 6449 2. 078244 2. 023687 2. 786702  
3. 266918 2. 30933 3. 339216 2. 877781 2. 552848 4. 259279 3. 247428 2. 917986 3. 162808  
2. 177495 2. 535673 1. 947274 1. 612138 1. 755398 2. 831362 2. 211643 2. 316555 2. 555927  
3. 581744 3. 2211 3. 630905 3. 329164 2. 80941 3. 017585 3. 830448 3. 510456 2. 76331  
4. 061158 4. 961767 4. 598249 3. 974962 4. 851212 3. 183289 5. 36179 4. 696326 4. 313205  
0. 972164 1. 429076 1. 539219 1. 137326 1. 324087 1. 099144 1. 054241 1. 410792 0. 900147  
5. 486138 5. 755921 5. 822377 6. 878652 6. 31089 5. 887716 7. 200983 6. 314693 7. 201741  
2. 502774 1. 946115 2. 315501 2. 587888 2. 523817 2. 027136 2. 933735 2. 32303 2. 147656  
2. 440672 1. 349867 1. 479403 1. 385865 2. 5128 1. 559295 1. 803734 1. 548521 1. 671012  
2. 123917 2. 55674 2. 365196 2. 414157 1. 986109 2. 049486 3. 059226 2. 345016 2. 448462  
2. 148717 2. 236238 2. 279016 3. 045564 2. 423513 1. 951969 2. 605208 3. 803172 2. 510983  
1. 763867 0. 928446 1. 65404 0. 931027 2. 149755 1. 585137 2. 547663 3. 654437 0. 676685  
3. 587879 2. 295387 3. 247382 2. 318219 2. 344535 2. 3589 2. 661939 2. 379111 2. 864312  
2. 604377 1. 797021 2. 122279 2. 443952 2. 066234 2. 411992 1. 58564 1. 825729 2. 35684  
5. 330813 6. 330486 4. 333196 5. 692146 5. 516356 6. 027905 5. 681186 3. 912196 5. 398327  
6. 006088 6. 080437 5. 871486 5. 128223 5. 789856 5. 280698 5. 627446 5. 312269 5. 650522  
2. 455633 1. 876038 2. 107729 2. 922595 1. 65244 1. 693759 2. 060133 1. 388831 2. 603085  
3. 252057 2. 765846 2. 883157 3. 132468 3. 089832 3. 379283 3. 036577 3. 469015 2. 329702  
5. 329525 5. 329843 5. 016364 3. 914652 4. 651457 4. 759473 4. 732441 4. 984963 5. 937235  
3. 895352 3. 927993 3. 241487 3. 863804 3. 905119 3. 596799 4. 127944 3. 901848 3. 703968  
6. 036227 6. 744702 7. 516791 6. 460924 6. 24522 7. 337583 7. 120739 7. 263326 6. 660179  
8. 255985 6. 890841 7. 36208 6. 935764 7. 209528 7. 171221 6. 836974 7. 483797 7. 679111  
6. 385186 6. 66062 6. 000127 6. 962712 6. 763822 6. 776413 6. 907511 6. 555856 6. 535104  
4. 20559 3. 555914 3. 053603 2. 871799 3. 558279 4. 007733 3. 591194 3. 496118 3. 179362  
2. 691012 2. 318156 2. 281409 2. 279907 4. 026364 2. 69058 3. 570982 5. 350104 2. 501109  
1. 735804 1. 997448 2. 303799 3. 639054 4. 90141 2. 742976 2. 905817 6. 411037 2. 394932  
3. 621148 3. 392893 3. 900059 4. 764159 4. 689823 4. 491229 3. 957097 3. 961597 3. 570559  
7. 824062 8. 26917 8. 31671 8. 38367 8. 577847 8. 332327 7. 809827 8. 652117 8. 111902  
4. 786851 5. 21113 4. 474325 6. 078545 5. 126392 5. 009585 5. 524264 5. 23167 5. 360016  
2. 320856 1. 301753 2. 172683 1. 85757 1. 751957 1. 757389 1. 4844 1. 858962 1. 414354

2.618757 1.875861 1.971047 2.301983 2.301596 2.061164 2.155503 1.85302 1.708545  
6.599141 6.576058 6.59445 6.373462 6.518519 5.869907 6.032178 5.946887 6.916022  
1.874196 2.335319 1.337555 1.44793 1.824454 1.36229 1.801444 2.008084 1.972346  
1.46591 1.031182 1.231148 0.798284 1.04805 1.3327 1.814627 1.615545 1.520045  
4.322305 1.57473 1.855781 1.604199 1.599779 3.723975 2.593341 1.426242 1.818793  
1.841952 1.506758 1.608206 2.234205 1.764571 1.398548 1.700747 2.37329 2.813518  
6.041327 6.12337 6.850276 5.23403 5.044522 5.521134 4.472592 5.502734 5.333487  
1.384177 1.474301 1.268429 2.118857 1.343946 1.70809 1.277854 1.200269 1.129545  
2.955311 2.983892 4.873472 2.516468 2.321886 3.260464 2.960187 2.727214 2.938791  
1.711618 1.894727 2.03184 1.623152 2.137855 1.659604 2.45516 1.918959 1.764591  
2.477407 2.416684 2.425461 2.910187 4.05638 4.58695 3.509456 2.459466 4.042343  
4.376378 4.051532 4.571932 4.563493 4.168162 5.265215 3.732086 4.138832 4.286159  
1.524551 1.564031 1.315266 1.420821 1.960461 1.78014 1.443505 2.279645 1.204898  
1.264037 1.454751 1.280457 1.230187 0.937042 1.110945 2.014351 0.865538 1.567378  
6.179961 6.851904 6.411089 6.476774 6.758828 7.042043 6.32222 6.22214 6.54612  
2.804863 2.68506 3.654383 3.215971 3.373442 3.822 3.339325 3.741187 3.480076  
2.297201 2.396308 1.627097 1.686383 2.088856 2.039257 1.958959 1.949426 2.309174  
5.052801 5.568193 5.388825 4.288169 5.778932 5.52473 4.447987 5.447877 4.577658  
5.201305 5.338459 5.268685 5.162732 5.411053 5.237181 4.486891 5.916661 6.125208  
1.525876 1.207552 1.050114 1.341567 2.087448 1.036156 0.993367 1.406471 1.189955  
0.951168 1.344137 0.771754 1.006315 1.046613 0.7143 1.143329 1.262032 1.012658  
3.240304 3.969602 3.550904 3.576318 4.233029 3.465147 4.304214 4.650575 4.192519  
8.356559 8.016112 8.028248 8.120009 8.284727 8.123151 8.20045 8.245223 8.239711  
6.584341 6.837355 6.464758 6.31464 6.375414 6.37176 6.142963 6.20211 6.688092  
4.156797 3.587585 3.481133 2.388299 3.792741 4.673052 3.790112 4.630397 4.904753  
1.867618 1.972061 2.38342 1.797082 2.260386 2.627292 2.137298 1.949956 1.512915  
5.015027 5.427681 5.525667 5.728468 5.439564 5.661663 6.266564 5.102776 5.220859  
3.209605 3.854814 4.807557 6.608762 5.592252 5.285921 5.207064 5.25809 5.529106  
7.526751 8.123632 8.133916 8.063529 7.861433 8.293187 7.591822 8.142088 7.849391  
4.626099 5.41316 4.589595 6.451981 5.57535 6.57601 7.074292 6.246586 5.675149  
6.279226 5.549223 5.045158 5.853296 5.414548 6.264838 5.5263 5.60436 5.417443  
4.518834 2.565514 3.556429 2.581326 1.818403 2.181027 2.336943 2.901885 4.189107  
1.566229 1.670838 1.551289 1.557498 2.355741 2.146614 1.877074 1.833603 1.691427  
2.501151 2.293978 3.173109 1.663262 4.128803 3.573588 3.335779 3.915068 2.389773  
4.265774 4.708898 4.150117 5.5878 4.687307 5.646138 6.488854 4.575346 5.595166  
1.146815 1.110975 1.612733 1.650693 1.427424 1.524204 1.229631 1.170148 1.392199  
6.392938 6.64299 5.804494 6.487894 6.55884 6.242663 6.636684 6.520932 6.261869  
2.36496 3.057303 2.366093 2.440238 2.101161 3.079657 2.555772 2.444822 2.210329  
3.024212 4.922809 4.781623 4.835513 3.915699 4.633034 3.46495 3.983613 3.964495  
2.620443 3.327383 2.688423 3.445437 2.566399 3.381993 3.190472 2.655486 3.345755  
5.499179 5.619973 5.440859 5.042406 5.403698 5.139949 5.597643 5.866322 4.572816  
6.463168 7.712592 7.824133 7.404055 7.594834 7.326864 7.105132 7.206802 7.636967  
5.111372 5.819741 4.640796 6.162895 5.974704 4.662276 5.944869 5.423679 4.517246  
7.518824 7.78218 7.787395 7.944864 7.950727 7.85856 7.788155 7.972274 7.822473  
3.453272 4.630493 4.049321 5.025054 5.515771 3.782851 4.812983 3.220307 4.075572  
5.382363 5.272581 6.017534 5.840162 5.747007 6.352186 5.3011 6.481628 6.192042  
4.792788 5.239493 5.821596 4.85354 5.324534 4.898578 5.184546 5.650839 5.223893  
4.771763 3.440482 3.627937 4.114991 4.950391 4.239654 3.219071 5.037629 5.541673  
5.629979 6.544426 5.223896 6.027338 6.857421 6.008803 6.065968 5.974398 5.509335  
5.775397 7.170381 6.889999 6.3062 7.363615 7.146602 7.214715 7.605118 6.631903  
7.25605 7.44048 7.354894 7.205199 7.485778 7.561302 7.072736 7.200259 7.489618



1. 820797 3. 700983 1. 309339 3. 643816 1. 539045 1. 269019 2. 099274 2. 898636 2. 260233  
1. 439421 2. 409923 3. 034415 2. 199892 2. 826495 2. 248746 3. 068849 1. 846574 1. 823906  
3. 317435 3. 680278 4. 452408 3. 736184 4. 240559 4. 052436 4. 09754 4. 378685 2. 998356  
6. 492414 6. 701288 6. 38729 6. 739642 6. 314087 6. 755749 6. 169227 6. 170852 6. 367648  
3. 896582 5. 285123 5. 007359 6. 388241 5. 345706 4. 396756 4. 711173 3. 997177 4. 222708  
4. 720381 6. 507479 6. 646986 6. 671964 6. 577674 5. 540593 6. 181902 6. 421186 6. 571684  
7. 029204 6. 084914 6. 732235 5. 288355 5. 261777 6. 355009 6. 281089 5. 922325 6. 788012  
5. 154481 5. 793444 5. 823873 5. 716723 6. 213413 5. 176564 5. 388343 5. 882871 5. 634767  
7. 22593 6. 792654 7. 31659 7. 20193 7. 291737 7. 431786 6. 843154 7. 371539 6. 865351  
7. 024941 7. 376077 7. 254784 7. 189699 6. 945785 7. 492121 7. 183174 7. 125096 7. 033437  
1. 947062 1. 4294 1. 169134 1. 704047 1. 489535 1. 226711 1. 48144 2. 333416 1. 143445  
2. 157565 1. 481748 1. 31879 1. 573174 2. 130851 1. 261154 2. 202392 1. 511209 1. 547881  
4. 556039 4. 938444 5. 147109 5. 707227 5. 057592 5. 619313 4. 612054 4. 878961 4. 564864  
3. 733959 3. 726008 3. 818717 4. 477003 4. 279894 3. 864519 4. 138249 4. 307133 4. 176397  
4. 856044 5. 962733 5. 850239 6. 200801 6. 384793 6. 086023 5. 681801 5. 741409 5. 216372  
5. 61851 5. 716522 5. 682237 5. 698711 5. 885754 6. 042859 5. 542373 5. 073171 5. 956363  
2. 988171 3. 548655 2. 331153 2. 717285 2. 875151 2. 991707 3. 129197 3. 254743 3. 499128  
2. 718324 4. 018936 3. 425075 5. 197484 3. 742947 3. 698516 4. 825345 4. 388161 4. 259271  
3. 798443 4. 896104 5. 105954 5. 088745 5. 53499 4. 7789 4. 274642 5. 249703 4. 879863  
5. 361647 4. 94494 4. 878145 6. 042674 5. 164897 5. 437895 4. 996016 5. 802644 5. 499339  
8. 249396 9. 525077 9. 297746 8. 975858 9. 225071 9. 211065 8. 488019 9. 85963 8. 662308  
6. 032569 5. 819187 6. 018711 5. 180831 6. 028617 6. 71498 5. 583092 6. 374611 6. 150176  
6. 076812 5. 624659 4. 923611 5. 28188 5. 165129 5. 530281 4. 721455 4. 937284 5. 195576  
5. 280814 5. 173992 5. 175662 6. 01931 5. 795882 5. 680869 5. 437017 5. 926369 5. 583575  
2. 799441 4. 317492 3. 669772 3. 104394 3. 937657 3. 68115 3. 392504 3. 041787 3. 900841  
8. 048937 7. 556787 7. 710841 7. 777518 7. 533882 7. 90835 7. 994791 7. 834988 7. 74412  
6. 299031 5. 045529 5. 988628 4. 650637 5. 125945 5. 77741 5. 122092 5. 040257 5. 438332  
6. 735465 7. 684281 7. 253529 7. 232666 7. 460201 7. 416722 6. 947425 7. 506163 7. 266037  
2. 571745 1. 677027 1. 353577 3. 064139 1. 521165 1. 234307 3. 503857 2. 247406 1. 69491  
2. 92973 1. 674819 1. 879653 2. 761618 1. 7318 2. 328272 2. 963821 1. 866368 2. 151965  
4. 867562 5. 253589 4. 772302 5. 084573 4. 684204 4. 764545 4. 888898 4. 659286 4. 86928  
5. 134384 5. 469374 5. 459816 5. 070442 5. 499716 5. 560377 5. 155914 6. 156244 5. 130735  
10. 19791 9. 79813 9. 810456 9. 848792 10. 03715 9. 895168 9. 948204 10. 07004 9. 982205  
5. 749921 5. 56357 6. 119987 5. 945993 6. 566141 6. 12521 6. 039206 5. 80074 6. 109278  
3. 039835 1. 724189 3. 264597 1. 875488 1. 79883 1. 85409 2. 034279 1. 694858 2. 605488  
8. 232552 8. 303123 8. 607207 8. 532521 8. 378922 8. 563888 8. 468347 8. 348953 8. 640982  
5. 306862 5. 088865 5. 031922 5. 620077 4. 996073 4. 906956 5. 763232 5. 468803 5. 640234  
4. 844089 4. 040345 4. 526914 4. 307766 3. 753858 4. 801231 4. 642958 4. 329387 5. 025728  
6. 045201 6. 674826 6. 401184 6. 819407 6. 967629 6. 989711 6. 194751 6. 722786 6. 688484  
6. 19802 5. 143833 5. 349876 5. 423129 6. 068631 6. 271417 5. 354409 5. 961062 5. 858464  
6. 313454 6. 998887 6. 901431 7. 385534 7. 435395 7. 530001 6. 803975 7. 102785 7. 181485  
5. 576945 6. 046097 5. 803514 5. 948836 5. 668295 6. 520364 5. 180778 6. 091052 5. 347132  
4. 431097 3. 537531 3. 620554 3. 897029 4. 844985 4. 554922 3. 929572 4. 650379 3. 746425  
6. 712294 7. 23663 7. 309286 7. 155771 7. 316931 6. 809137 7. 446835 7. 410021 6. 950991  
5. 156117 5. 546171 5. 409474 5. 446603 5. 715963 5. 841028 5. 227295 5. 547308 5. 734314  
2. 697052 3. 754477 2. 532004 4. 139859 2. 756385 2. 922806 3. 060699 5. 27996 3. 075824  
4. 360127 4. 617491 4. 848157 4. 624969 4. 597066 4. 803881 4. 488216 4. 821275 5. 08295  
7. 564535 7. 714056 7. 694007 7. 661567 7. 914325 7. 954347 7. 337016 7. 640651 7. 573002  
3. 95949 4. 862368 5. 004476 5. 646965 6. 316507 4. 322125 4. 624609 5. 2028 5. 035619  
3. 998484 3. 644914 3. 976066 4. 730807 4. 433232 4. 730016 5. 245577 3. 786834 5. 34216  
6. 267881 7. 122141 7. 660375 7. 423698 6. 884972 7. 105771 6. 980946 7. 365075 6. 913461

3. 788975 4. 908887 5. 046143 4. 40382 3. 936611 3. 154133 5. 3234 4. 257439 3. 395019  
5. 729669 6. 255731 5. 339854 4. 791919 5. 493263 6. 38687 6. 060384 5. 480026 5. 701226  
6. 785601 6. 268006 6. 423096 6. 505965 6. 293379 6. 380246 6. 30753 6. 370362 6. 743222  
4. 246929 5. 242171 5. 005102 5. 109202 5. 12874 4. 783323 5. 035638 4. 79957 4. 746458  
2. 081491 1. 859262 1. 544848 1. 578193 1. 705954 1. 583616 1. 615028 1. 184228 1. 815436  
3. 571623 4. 278059 4. 086317 5. 260561 5. 480305 4. 833429 4. 62081 3. 709841 4. 482885  
7. 365305 7. 288 7. 62875 6. 994944 6. 813587 6. 852966 7. 124273 6. 914274 6. 758844  
2. 178927 2. 584715 1. 767715 2. 387404 1. 935129 2. 648092 2. 248193 2. 024019 2. 031741  
5. 026958 4. 391198 4. 523463 4. 060531 3. 968217 4. 037361 4. 327567 5. 007561 4. 480223  
2. 597904 4. 612444 4. 227787 3. 648427 4. 853679 4. 566491 4. 777694 4. 042255 4. 774765  
7. 198414 6. 458001 6. 924127 7. 694513 7. 370474 7. 254971 6. 73954 6. 506177 7. 056212  
5. 505236 8. 487935 7. 627542 7. 984682 7. 11829 7. 34121 6. 705273 8. 087886 7. 997569  
4. 109587 4. 511858 4. 473191 4. 935216 5. 235612 4. 466541 4. 447209 4. 851147 4. 332029  
3. 155522 2. 326317 3. 61098 2. 465541 4. 721069 3. 039454 2. 548357 2. 71001 2. 733795  
5. 50503 5. 685839 5. 542729 4. 91689 5. 453137 5. 932425 4. 599127 5. 786037 5. 545489  
6. 411783 6. 89674 6. 7223 7. 54344 5. 951883 6. 097117 6. 31741 5. 604837 5. 962998  
2. 956625 2. 86526 2. 919961 2. 974104 2. 97155 2. 574061 2. 48815 3. 829514 3. 104748  
5. 809988 6. 427648 6. 688832 6. 738899 6. 330639 6. 391024 5. 768332 6. 358173 6. 172202  
5. 81924 5. 271466 5. 513458 5. 124898 5. 336084 5. 700478 4. 939642 5. 222612 5. 585413  
5. 19214 5. 679584 4. 87936 5. 538693 5. 216651 5. 519004 4. 906271 5. 059599 5. 413308  
5. 989535 6. 239664 6. 850705 6. 205037 6. 39992 6. 289492 6. 048378 6. 543674 6. 244756  
3. 664524 3. 832427 4. 808857 2. 660706 3. 680836 2. 913673 3. 827343 3. 798311 3. 59081  
2. 472302 2. 036415 2. 65418 2. 223728 2. 712094 2. 298077 1. 872695 2. 638753 1. 801765  
4. 926365 5. 60793 5. 054923 5. 300353 4. 184882 5. 76462 3. 602666 4. 054299 4. 313793  
6. 385898 6. 822465 6. 418375 7. 358841 6. 671087 7. 123396 6. 846257 6. 751511 6. 681847  
1. 282946 1. 083354 2. 238274 1. 081631 1. 175676 1. 394252 2. 653711 1. 870681 1. 649427  
5. 457046 5. 904813 5. 502289 5. 699054 5. 466784 5. 917607 5. 387758 5. 454791 5. 646857  
1. 941845 1. 803066 1. 927303 1. 620786 1. 674446 1. 828316 1. 777713 1. 677817 1. 829029  
4. 684515 5. 064399 5. 057316 6. 545821 6. 148984 5. 430558 6. 262253 5. 941044 4. 712749  
7. 633916 7. 923782 8. 139199 8. 464596 8. 195714 7. 867325 8. 163102 8. 05515 7. 965442  
6. 58785 7. 240301 7. 055262 6. 875546 7. 063179 6. 349324 7. 040859 7. 198865 7. 142145  
7. 099916 7. 177084 7. 207402 6. 653973 6. 311715 7. 054728 6. 474793 7. 321407 6. 808682  
4. 310964 6. 164989 5. 562021 5. 256761 5. 214686 5. 771404 5. 128468 6. 224823 5. 762868  
9. 53843 10. 17257 10. 20087 9. 813182 10. 1832 10. 03737 9. 789525 10. 17911 9. 406008  
7. 332487 7. 992836 7. 678435 7. 87794 8. 050207 8. 235042 7. 880414 7. 958093 7. 994859  
6. 76908 7. 797421 7. 264454 7. 155344 7. 572573 7. 19411 7. 105119 7. 467185 7. 490684  
6. 354278 5. 635587 5. 45597 5. 345527 5. 615575 5. 100621 5. 605009 5. 504526 6. 192131  
7. 06846 7. 249257 7. 118995 6. 865426 6. 843411 6. 978664 7. 172779 7. 276833 8. 208678  
7. 547532 7. 161653 6. 758834 7. 118723 7. 017501 7. 358147 7. 132485 6. 867442 7. 241987  
7. 35983 7. 796674 8. 0544 7. 723937 7. 560591 7. 470376 7. 210043 7. 81007 7. 258239  
4. 979323 5. 92822 5. 735504 4. 869989 5. 074684 6. 352334 5. 921273 4. 946632 5. 305371  
5. 444653 5. 918864 5. 798707 5. 590676 6. 097459 6. 311689 5. 682656 5. 623272 6. 222046  
4. 108356 3. 750877 3. 353632 3. 484835 4. 207764 3. 243811 3. 888202 3. 826336 3. 297361  
7. 957682 8. 267763 7. 74105 8. 023924 8. 11914 7. 639627 7. 395461 7. 556164 8. 263277  
5. 991009 6. 226643 6. 288093 6. 220881 6. 207828 6. 548069 5. 875463 6. 412769 6. 431323  
5. 605474 6. 240555 6. 184188 5. 874811 5. 863487 6. 749522 6. 110009 6. 009355 5. 976176  
3. 404483 3. 486133 4. 264059 3. 465483 2. 892872 3. 845716 3. 787241 2. 900753 3. 134016  
1. 242036 1. 506804 1. 25383 1. 206846 2. 900335 1. 556274 1. 368837 1. 265929 1. 775997  
4. 573167 4. 429084 3. 871382 5. 061561 5. 431534 5. 070466 4. 771981 5. 159679 4. 443663  
7. 136463 7. 617869 7. 164535 7. 077429 8. 11456 7. 198671 7. 85134 7. 889545 7. 852271  
8. 26109 7. 696388 7. 82147 7. 487347 7. 573227 6. 345498 8. 114401 7. 894532 7. 927601

3. 277052 3. 351009 3. 527454 3. 545585 3. 7924 3. 939186 3. 877864 3. 995582 3. 256206  
5. 115349 5. 708619 5. 280396 6. 062743 5. 607032 5. 534465 5. 686999 5. 872432 5. 474244  
1. 47242 1. 966183 1. 995482 1. 224385 1. 496628 1. 357483 3. 358266 1. 47493 1. 733962  
2. 438216 1. 877104 2. 581765 2. 375602 2. 662573 2. 435092 2. 172434 2. 466928 2. 339214  
4. 160187 4. 39067 4. 591722 4. 60911 5. 395906 4. 390361 4. 838544 4. 301565 4. 649258  
6. 175569 6. 040431 5. 997921 6. 835156 6. 505543 6. 483501 6. 204622 5. 944731 6. 066546  
1. 583582 1. 623412 1. 831819 1. 536592 1. 68235 1. 284499 1. 7512 1. 783881 1. 38058  
9. 434461 9. 965339 9. 948664 9. 643944 9. 839278 10. 30734 9. 104023 10. 03989 9. 306922  
1. 375175 1. 929709 1. 903229 1. 906653 2. 31325 2. 003753 2. 504613 2. 615862 3. 263244  
1. 520111 1. 330285 2. 119348 2. 415582 2. 574571 2. 177811 2. 387371 1. 905688 1. 92373  
4. 122283 4. 679541 4. 840536 4. 859242 4. 860164 4. 583109 4. 401812 4. 88289 4. 637454  
7. 233833 5. 917485 6. 68686 4. 08366 6. 402977 4. 089209 5. 995637 4. 952961 6. 657824  
6. 09902 6. 565907 6. 684639 6. 345417 6. 821009 6. 440636 6. 073741 6. 195661 6. 065068  
2. 519088 2. 449146 2. 465702 2. 345307 2. 316937 2. 946157 2. 63247 3. 08034 2. 793896  
5. 127908 5. 18564 4. 591847 4. 678469 5. 093402 5. 390128 4. 848007 4. 83397 4. 92696  
6. 335451 6. 843625 6. 804471 6. 807045 6. 754543 7. 30023 7. 00062 7. 190209 6. 877088  
3. 601833 4. 090278 4. 270706 3. 027739 3. 547186 3. 40724 1. 771914 3. 92575 3. 38032  
4. 949081 4. 647064 4. 943931 5. 065394 5. 592866 4. 784884 4. 056639 5. 914548 5. 628136  
1. 566059 1. 910643 2. 040397 1. 631731 2. 969654 2. 057375 1. 935347 1. 730914 1. 282104  
3. 827807 4. 736051 4. 859274 4. 6662 5. 246672 4. 664075 4. 448484 4. 431528 4. 866414  
5. 970545 5. 416375 5. 135518 4. 821721 5. 576552 5. 517939 5. 33513 5. 634578 5. 021252  
1. 567759 1. 473887 1. 208057 1. 525412 1. 099756 1. 520129 2. 053707 1. 089593 1. 524385  
1. 686483 1. 166455 1. 643699 1. 409038 1. 26269 1. 038216 1. 32904 0. 921118 1. 083778  
1. 729276 1. 294116 1. 363863 1. 645653 1. 768342 1. 632328 2. 083056 1. 143245 1. 460066  
5. 144254 3. 741225 3. 683372 3. 902645 3. 128589 4. 457225 4. 122604 5. 191692 3. 679658  
6. 262248 6. 792781 6. 560206 6. 847764 6. 443695 6. 438348 5. 902841 6. 319346 6. 482096  
6. 704158 6. 948057 6. 463768 6. 744558 6. 607218 7. 086444 6. 534585 6. 504238 6. 735675  
4. 043426 4. 650065 4. 043717 4. 734633 3. 950495 5. 101228 4. 54006 3. 715634 4. 855972  
4. 081745 3. 528386 3. 410466 3. 707169 3. 108158 4. 008046 4. 542655 3. 750828 4. 253721  
2. 424871 3. 160002 2. 147155 1. 803502 2. 00874 2. 351327 2. 741389 2. 314666 2. 305476  
2. 36306 2. 626495 3. 496673 2. 889733 1. 935112 2. 813862 4. 141944 3. 85418 3. 91445  
2. 185683 2. 359795 2. 800143 2. 221707 2. 230802 2. 611139 2. 264222 2. 685917 2. 586781  
6. 721641 7. 003808 6. 618067 7. 491511 6. 968557 7. 211763 6. 926495 6. 268401 7. 212128  
1. 373997 1. 220134 1. 687142 1. 667835 1. 3221 1. 734161 1. 801084 0. 966994 2. 061303  
2. 374549 2. 840062 2. 610709 1. 752898 1. 823484 2. 868608 2. 180772 2. 521945 3. 739291  
10. 96517 10. 12594 10. 76214 9. 622216 9. 92335 8. 9202 9. 928744 9. 685435 10. 80658  
5. 37259 5. 388676 5. 936512 4. 954556 5. 271426 4. 873527 5. 468519 4. 938082 4. 908979  
6. 789871 6. 282357 6. 44943 6. 201355 6. 428468 6. 529117 6. 202537 6. 404127 6. 574043  
4. 913928 5. 070723 4. 563755 5. 901992 4. 989995 5. 427593 5. 898572 5. 791888 5. 399851  
3. 576819 3. 592776 3. 592002 3. 039361 3. 28678 3. 699176 2. 470001 2. 703468 3. 879905  
1. 736644 1. 695375 1. 850274 2. 671906 2. 916104 1. 477648 1. 832669 1. 954261 1. 684373  
7. 812497 7. 568716 7. 593875 7. 199344 7. 273683 7. 408219 7. 196345 7. 46055 7. 549504  
2. 250399 2. 879517 2. 853896 2. 816072 2. 891487 2. 760501 3. 151081 3. 32373 3. 488591  
8. 129546 7. 618262 7. 887886 8. 361351 8. 050261 7. 897176 7. 027891 8. 116879 7. 958713  
5. 600231 6. 452569 6. 266796 6. 185526 6. 392167 5. 42582 6. 237596 6. 789072 5. 70756  
6. 324871 6. 207478 6. 798675 6. 869362 6. 619493 6. 809372 5. 726979 6. 60797 6. 134939  
7. 426017 7. 379163 7. 786434 7. 779286 7. 253804 7. 079093 6. 622879 7. 486332 7. 591702  
3. 028151 4. 092031 4. 730375 2. 713907 2. 470319 2. 762508 4. 333899 2. 931162 4. 583926  
5. 345416 6. 199434 6. 497051 5. 37162 6. 338291 5. 793844 5. 694328 6. 080299 5. 586566  
3. 162288 2. 049793 2. 427919 1. 443489 1. 93849 1. 807289 2. 284643 3. 072481 2. 078552  
7. 583216 7. 77875 7. 980797 7. 878387 7. 876168 7. 989677 7. 773358 7. 802226 7. 735634

4. 301149 3. 096063 3. 146378 2. 595005 2. 974697 2. 803654 2. 569573 4. 80321 2. 905396  
7. 487891 7. 230543 7. 091924 7. 226102 7. 313088 7. 292021 7. 476604 7. 161723 7. 273864  
7. 206546 7. 424991 7. 092968 6. 977832 7. 114265 7. 520463 7. 262586 7. 67336 7. 159492  
4. 556405 4. 771735 5. 276751 5. 386412 5. 454246 5. 164239 4. 409848 4. 986679 4. 83906  
2. 670984 2. 218823 2. 389302 3. 077996 1. 498017 2. 667556 2. 798457 3. 224193 4. 210014  
2. 637013 2. 234282 2. 589893 2. 541817 2. 658653 2. 486447 2. 845962 2. 877492 2. 38227  
1. 879478 1. 067795 1. 7235 1. 569343 1. 410306 1. 24415 1. 731764 1. 250794 1. 557896  
6. 878018 6. 792452 6. 887787 6. 937958 6. 965335 6. 784898 7. 109283 6. 689206 6. 825472  
8. 096736 7. 775265 7. 796096 7. 319624 7. 636567 7. 584893 7. 300922 7. 991014 7. 577496  
2. 354173 2. 161916 2. 499182 2. 387107 2. 425509 2. 668248 2. 675405 1. 913601 2. 292271  
3. 636752 4. 346461 4. 976556 4. 597257 4. 115511 4. 569813 3. 4291 4. 975953 4. 957411  
5. 012087 3. 931058 4. 464063 5. 158174 5. 058085 4. 848078 5. 224607 4. 881933 5. 461606  
5. 948687 6. 754996 6. 640716 6. 505961 6. 590486 6. 692799 5. 660614 6. 515984 6. 435041  
5. 363662 4. 982955 4. 444501 4. 666023 5. 266156 5. 11055 4. 385073 4. 217508 4. 338707  
4. 203407 5. 644372 5. 791633 4. 315422 5. 770414 5. 952365 5. 892995 6. 058932 5. 859252  
3. 432504 4. 517206 3. 617979 3. 251245 3. 893095 4. 992122 4. 151749 4. 314154 4. 41629  
5. 539709 6. 188589 6. 286683 5. 731278 6. 104329 6. 573634 6. 06996 5. 581095 6. 011961  
5. 37121 4. 892435 4. 889483 4. 640942 4. 612739 4. 973354 4. 70336 4. 70525 5. 368831  
5. 520906 6. 102551 5. 889225 5. 703279 5. 897907 6. 014234 5. 388724 5. 830092 5. 769754  
7. 720155 6. 851119 6. 703633 6. 946318 7. 236342 6. 911536 6. 824032 6. 864238 6. 870567  
5. 906995 4. 669298 5. 487942 5. 195804 4. 430264 5. 949006 4. 386748 5. 637868 5. 150785  
2. 566409 1. 850004 2. 255072 1. 904482 1. 767753 2. 011293 2. 35577 1. 673919 2. 393095  
5. 393084 5. 736746 5. 578463 5. 378848 5. 771997 5. 924858 4. 993774 5. 620522 5. 432447  
6. 028547 5. 785402 6. 479576 6. 166223 6. 110934 5. 546957 5. 933801 5. 29128 6. 087191  
4. 758646 3. 066649 4. 148055 3. 821119 5. 283154 4. 30241 4. 161157 4. 550453 4. 563099  
2. 024965 1. 68832 2. 003151 1. 813122 2. 227086 2. 274437 2. 310742 2. 391912 2. 164595  
6. 775472 7. 082478 7. 11857 7. 460168 7. 237341 7. 123997 7. 340899 6. 911856 6. 84311  
8. 237527 8. 854604 8. 9735 9. 009475 8. 666539 9. 230629 8. 47053 8. 390428 8. 477478  
4. 610629 5. 574278 5. 537073 5. 337036 5. 47931 5. 200863 5. 081993 5. 440383 5. 031986  
2. 399224 2. 546824 2. 687977 2. 529978 2. 498478 2. 002301 2. 411054 2. 306643 2. 729404  
5. 647795 4. 714926 4. 154186 4. 302065 4. 176947 4. 218923 4. 438845 4. 56254 4. 594512  
6. 424583 6. 213587 6. 184289 6. 238889 6. 406878 5. 955558 6. 180685 6. 518693 6. 145237  
5. 863406 5. 770517 5. 339633 6. 183925 6. 089547 6. 462492 5. 492255 5. 638783 6. 10215  
5. 334183 6. 20217 5. 521618 5. 513124 5. 612239 5. 632119 4. 932651 5. 337376 5. 442974  
2. 042349 2. 291142 1. 627434 2. 348233 2. 502285 2. 01283 3. 639273 2. 067997 3. 026955  
6. 968728 7. 133253 7. 670627 6. 65348 7. 492835 7. 372836 6. 588406 7. 424163 7. 239008  
1. 986959 1. 932358 2. 709724 2. 014105 2. 083967 2. 275596 2. 396556 1. 81327 2. 291986  
6. 75345 7. 133952 7. 398239 7. 260704 6. 660796 7. 690818 6. 168143 6. 940789 7. 026684  
5. 025028 6. 179047 5. 608029 5. 406268 5. 668427 5. 839211 5. 994026 6. 013329 6. 016454  
5. 804868 5. 599484 5. 91833 5. 691034 5. 512769 5. 613286 4. 770367 4. 812496 5. 709806  
7. 100389 7. 365569 7. 235203 7. 533178 7. 495399 7. 388175 7. 042566 7. 417622 7. 140757  
6. 955241 7. 137294 7. 050013 7. 439335 7. 53504 7. 335867 7. 203513 7. 57065 7. 262024  
5. 40438 5. 7592 5. 348928 5. 766729 6. 063131 5. 612211 5. 355803 5. 677059 5. 966492  
4. 942134 5. 518216 5. 727201 4. 316407 5. 768217 5. 152445 4. 947927 6. 184982 4. 054645  
4. 204429 6. 059602 5. 396281 5. 651115 5. 516354 5. 285091 4. 881368 5. 937088 5. 650956  
3. 804409 5. 085421 4. 939414 5. 160772 5. 346735 4. 949939 4. 833288 5. 508451 4. 769981  
5. 311313 5. 135307 5. 195133 5. 325679 5. 368035 5. 870282 4. 52891 5. 895403 5. 115273  
7. 765808 7. 621986 7. 666604 7. 724657 7. 602295 7. 763967 7. 906659 7. 789503 7. 680531  
4. 197007 2. 994337 3. 485582 3. 146763 2. 404485 2. 093417 2. 342293 2. 085985 3. 318206  
5. 917583 5. 572929 5. 853495 5. 34581 6. 029544 5. 472861 4. 673692 6. 154947 5. 829185  
7. 749152 7. 859293 7. 502265 8. 252335 8. 08099 7. 794957 8. 040669 7. 2981 7. 790207

3. 592493 4. 372809 3. 825142 4. 826319 3. 726546 5. 315309 3. 864004 4. 089192 3. 770783  
6. 521335 6. 308102 6. 246166 6. 902079 6. 574152 6. 705122 6. 53141 6. 393934 6. 246325  
6. 142409 5. 015897 5. 285306 4. 767249 5. 223038 4. 914614 4. 5563 5. 384883 5. 488951  
3. 934069 4. 840768 5. 169218 6. 10688 5. 353984 4. 291982 6. 17578 4. 811138 5. 42093  
5. 310852 4. 926281 4. 839523 5. 096577 4. 790355 5. 252919 4. 456709 4. 913532 5. 207123  
4. 812118 5. 167608 4. 617618 4. 44621 4. 721765 4. 163359 4. 760332 4. 31965 4. 321267  
4. 463244 5. 28293 4. 604675 4. 909717 5. 355667 5. 032066 5. 039143 5. 241485 5. 254718  
7. 447183 7. 785832 7. 794031 7. 818169 7. 791626 8. 019365 7. 869433 7. 977972 7. 736529  
7. 26545 8. 122358 7. 519593 7. 656713 7. 507384 7. 304551 6. 574798 6. 911217 6. 801196  
3. 023797 4. 547547 3. 585217 3. 580586 3. 816898 4. 47408 3. 879517 4. 683548 4. 746581  
5. 050229 5. 102196 6. 027332 4. 864508 4. 954631 5. 059812 5. 655079 5. 728126 5. 068819  
5. 211491 5. 419713 5. 218452 6. 285368 5. 158242 5. 763426 5. 412728 4. 842782 6. 022308  
3. 962177 5. 154943 4. 648248 5. 21308 5. 257548 5. 006725 4. 336999 4. 79605 4. 341185  
6. 729381 7. 289858 7. 359217 7. 47991 7. 568587 7. 447796 7. 516706 7. 332003 7. 174011  
4. 414772 4. 52363 5. 553009 5. 465862 5. 323291 5. 332752 4. 684135 4. 187996 5. 032425  
5. 160863 5. 893455 5. 675708 6. 102914 5. 792311 6. 201513 5. 519313 5. 373497 6. 190011  
6. 303541 4. 721926 5. 328889 5. 59412 5. 225717 5. 64107 5. 324682 4. 834334 4. 866738  
7. 06496 6. 796067 6. 674927 6. 845304 7. 077424 7. 248437 6. 734145 6. 978175 6. 915892  
4. 914726 4. 502707 4. 788031 4. 505455 4. 754673 4. 793209 4. 95532 4. 649255 5. 226512  
5. 580143 5. 978968 5. 98362 6. 485508 5. 896369 5. 950104 6. 11692 5. 584558 5. 857884  
2. 440753 2. 689465 3. 043458 2. 449759 2. 716518 2. 165608 3. 078109 2. 189805 2. 978769  
4. 53783 4. 261264 4. 222419 3. 453467 4. 635827 4. 513236 2. 953647 4. 022047 4. 116418  
3. 36458 2. 945435 1. 994682 2. 36805 3. 280021 2. 315686 2. 098017 3. 143989 2. 037208  
4. 794917 5. 465966 5. 747154 5. 272104 5. 676755 5. 788028 5. 330657 4. 978027 5. 200985  
1. 771083 3. 637436 1. 76639 2. 33909 2. 031644 2. 622983 2. 888892 2. 822054 1. 607389  
5. 690826 5. 999374 5. 56418 5. 948279 6. 049065 5. 871149 5. 528573 5. 648519 5. 673505  
1. 906227 2. 476451 2. 551734 1. 698637 2. 250834 1. 984191 1. 466203 1. 29649 3. 418202  
5. 843538 6. 284853 5. 831752 5. 625536 5. 932762 6. 079348 5. 63793 6. 248067 5. 994604  
1. 916462 2. 025394 2. 336565 2. 51326 2. 880149 2. 233217 2. 632395 2. 120008 3. 157771  
5. 329574 6. 152022 5. 700906 6. 236368 5. 904481 6. 012859 5. 266442 6. 961311 6. 733762  
5. 300479 5. 766132 5. 71345 5. 764992 5. 507076 5. 719417 5. 638169 5. 753845 5. 947879  
6. 58073 6. 312517 5. 460834 6. 435363 6. 08388 6. 295869 6. 339723 5. 897457 5. 737261  
3. 999709 3. 569276 3. 500506 3. 544916 3. 08746 3. 259982 2. 570795 2. 780741 3. 523365  
8. 436762 9. 112129 8. 372665 9. 14555 9. 103634 8. 878032 8. 663482 8. 554267 9. 179883  
4. 780687 5. 803561 5. 012452 5. 580537 5. 467108 5. 504869 5. 181394 4. 975553 5. 058144  
7. 462751 7. 587851 7. 495596 7. 739283 7. 25297 7. 732897 7. 22616 7. 326122 6. 995932  
2. 855905 2. 510983 3. 605838 3. 733419 3. 354724 3. 099087 3. 102441 1. 728761 3. 3369  
1. 715025 1. 476191 1. 113932 1. 380208 1. 521608 1. 245329 1. 826724 1. 772158 1. 66463  
5. 640616 6. 35442 5. 973489 6. 339783 6. 160574 6. 105487 5. 862371 5. 959346 6. 212903  
6. 359733 6. 387263 6. 158498 6. 57662 6. 515377 6. 222164 5. 654009 5. 834393 6. 47771  
6. 337505 6. 751601 6. 422774 6. 864382 6. 860583 6. 507434 6. 567084 6. 315372 6. 391302  
4. 744909 5. 390989 4. 887841 5. 331219 5. 800514 5. 749712 5. 75035 5. 095032 5. 719135  
6. 17283 6. 813225 6. 386293 7. 777291 6. 974389 7. 323077 6. 777694 6. 604055 6. 781833  
2. 196072 2. 562348 2. 086625 2. 286876 3. 646022 2. 700154 2. 16901 2. 543485 3. 235569  
3. 567568 3. 839551 3. 757721 4. 206245 4. 259988 4. 681231 3. 967513 4. 29808 3. 626519  
4. 380543 6. 521785 6. 091263 6. 406364 7. 241114 5. 977713 6. 467137 6. 209572 6. 395848  
5. 200238 6. 03668 6. 115462 6. 09556 5. 954851 6. 274948 5. 729822 5. 981311 5. 990189  
5. 207553 4. 892561 4. 878767 5. 044998 4. 61809 5. 440304 4. 515038 4. 899414 4. 49223  
4. 657498 5. 067997 4. 165208 5. 194203 5. 441633 5. 579968 4. 549401 4. 656878 4. 814507  
5. 143421 4. 478485 4. 520221 3. 978673 4. 180299 4. 530862 4. 429988 4. 122119 5. 641894  
5. 562937 6. 654335 6. 358591 6. 551945 5. 981334 6. 674095 6. 570464 6. 340481 6. 524219

3. 242554 1. 877354 2. 516362 2. 0481 1. 851745 1. 331224 2. 28838 1. 400231 2. 506027  
4. 021292 4. 715022 4. 743063 4. 077205 5. 039522 4. 196313 3. 724797 4. 906167 4. 641736  
5. 249934 5. 657725 5. 340624 6. 662574 6. 192044 5. 873772 5. 122383 5. 050015 6. 035769  
4. 653915 5. 575624 4. 970635 5. 817296 5. 770253 5. 820327 5. 459873 5. 460559 5. 842801  
5. 785694 6. 358944 5. 781957 5. 476662 5. 518375 6. 151507 6. 159641 5. 700791 5. 708599  
6. 197912 6. 467505 6. 143959 5. 799588 5. 659422 6. 305699 6. 549901 6. 246075 5. 912307  
6. 424802 6. 723466 6. 232702 6. 995784 6. 5585 6. 983096 7. 171606 6. 323873 6. 64969  
5. 026783 4. 626403 5. 250365 5. 442773 4. 625565 5. 205046 4. 666358 4. 9017 4. 453339  
2. 777548 1. 911673 2. 728913 2. 691571 2. 468956 2. 219279 2. 467467 2. 270203 1. 968324  
4. 612665 4. 723222 4. 651366 3. 834793 4. 587656 5. 388074 3. 75775 5. 645241 4. 449916  
2. 158002 2. 527158 2. 424772 2. 591236 2. 645145 3. 096172 2. 986535 2. 7744 3. 790705  
6. 538908 6. 698 6. 749587 6. 913835 6. 996341 7. 060737 7. 556666 7. 090595 6. 83613  
4. 260372 3. 801531 4. 172167 5. 056639 3. 979455 4. 805439 4. 483484 3. 806737 4. 362542  
3. 387059 2. 551973 2. 438254 3. 036385 3. 306838 3. 500148 2. 886911 2. 760953 3. 337047  
4. 506965 4. 025233 4. 213418 4. 705035 4. 261718 4. 810194 4. 135235 4. 600455 4. 388325  
5. 038879 5. 115555 4. 964691 5. 850538 5. 380765 5. 76803 5. 216985 5. 250028 4. 866149  
4. 483779 5. 713787 5. 894348 5. 955019 6. 154178 5. 795753 5. 596741 5. 781816 6. 152498  
2. 821576 3. 443887 4. 094628 3. 538986 3. 425938 4. 248142 4. 117038 2. 905806 3. 469072  
5. 336209 6. 436016 6. 530367 6. 150457 5. 974958 6. 53339 6. 00772 6. 226426 6. 040922  
3. 222359 3. 370645 1. 701795 3. 185749 1. 099175 1. 855152 4. 198545 2. 73211 2. 24803  
5. 640875 6. 688526 6. 176699 6. 399221 6. 14905 5. 713224 6. 11628 6. 120341 5. 85246  
6. 779445 6. 956366 6. 487591 6. 688535 6. 208423 6. 904568 5. 90347 6. 513316 6. 08047  
3. 154157 3. 213715 3. 211909 2. 739011 2. 839149 2. 21427 3. 620407 2. 889487 2. 446527  
4. 13686 5. 175703 5. 452005 4. 93266 4. 366086 4. 532622 3. 521524 5. 077183 4. 856364  
6. 704377 6. 808279 6. 842832 6. 864338 6. 925215 7. 415108 6. 853834 6. 647349 6. 765913  
4. 747281 5. 178609 4. 723727 5. 271704 6. 0342 5. 56813 5. 076245 5. 45139 4. 666998  
3. 309897 3. 34568 2. 940967 3. 94294 3. 557062 3. 894354 4. 275668 2. 92733 2. 961638  
7. 444089 7. 344767 7. 30223 7. 289668 7. 130999 7. 53159 6. 712465 7. 460237 7. 596358  
6. 894725 7. 202466 6. 977197 7. 174214 6. 964748 7. 152091 6. 858183 7. 106961 7. 022102  
4. 225338 4. 343447 4. 631553 4. 385425 4. 233347 4. 26805 4. 247772 3. 871712 4. 44805  
6. 721402 7. 166634 7. 274726 7. 458831 7. 709858 7. 904249 7. 810087 7. 632245 7. 380623  
5. 722045 5. 373203 5. 342149 4. 448059 4. 194625 5. 201189 5. 182264 4. 824388 5. 231153  
6. 090737 6. 436205 6. 497203 6. 407068 6. 59202 6. 054257 6. 132996 5. 836439 6. 658646  
4. 11315 6. 532527 6. 393209 6. 275501 6. 348505 6. 437369 6. 213874 6. 083043 6. 197592  
7. 240652 7. 284941 7. 218313 6. 76618 7. 386 6. 761595 6. 7506 7. 358237 6. 761378  
5. 54054 6. 18046 5. 473182 6. 157505 6. 015302 6. 074192 5. 753496 6. 021445 5. 983544  
4. 734159 5. 19563 4. 232336 4. 746979 4. 767434 4. 311054 4. 602438 3. 814238 4. 667163  
5. 670336 5. 769023 5. 670739 6. 172598 5. 729262 5. 256006 6. 009583 5. 868399 5. 753153  
4. 685477 4. 855803 5. 46312 4. 522015 4. 647177 4. 995747 5. 273253 5. 31751 4. 55961  
2. 251649 1. 904926 1. 741238 1. 929873 1. 623321 2. 090432 2. 149476 1. 919343 2. 094427  
7. 589041 7. 720464 7. 198242 8. 026083 8. 128155 7. 952361 7. 889274 6. 710006 7. 927971  
4. 859691 5. 067294 5. 066479 5. 64702 5. 423284 5. 88218 6. 123695 5. 466633 5. 359426  
5. 967906 6. 030686 5. 332491 6. 872957 6. 524405 5. 607678 6. 682956 5. 252375 6. 429413  
4. 720097 4. 301817 4. 501666 4. 530037 4. 07626 4. 511105 4. 850206 3. 826635 4. 103668  
7. 943423 7. 603011 7. 629774 7. 653737 7. 788775 7. 757451 7. 763954 7. 677985 7. 816792  
5. 598701 5. 965841 5. 046249 5. 492688 5. 409123 5. 700982 4. 885133 5. 691017 5. 730011  
5. 440505 5. 448579 4. 84732 5. 467309 4. 735993 5. 739304 5. 141183 5. 137689 5. 296325  
3. 978831 3. 78686 3. 48636 3. 574777 4. 14025 4. 288717 4. 271701 4. 676628 4. 136561  
6. 954427 7. 556134 7. 113988 6. 389977 7. 717085 7. 411027 6. 373437 7. 545863 7. 343294  
4. 168442 4. 371485 4. 323053 4. 27318 4. 491372 4. 694785 5. 094745 5. 141772 4. 562918  
7. 069555 7. 607052 7. 693352 7. 64988 7. 514911 7. 522292 6. 958631 7. 786488 7. 365062

6. 009042 6. 833704 6. 478556 7. 257009 7. 086856 7. 117083 6. 758899 6. 321197 6. 640113  
2. 813969 3. 83702 3. 094302 3. 742716 4. 153008 3. 050962 3. 975163 3. 990635 3. 734499  
6. 878782 7. 27503 7. 262999 7. 549585 7. 234536 7. 218335 7. 05943 7. 15309 7. 22702  
4. 359934 5. 631831 4. 96446 5. 524316 5. 442352 5. 977159 4. 526785 5. 17893 5. 40956  
3. 590751 4. 132123 3. 86157 4. 063528 4. 101344 4. 146325 4. 47634 3. 592324 3. 823908  
6. 636028 6. 607935 6. 945437 7. 061906 6. 885799 6. 856696 6. 503913 6. 748628 6. 804112  
5. 551565 6. 233318 6. 571193 6. 945047 6. 890984 6. 042547 5. 972813 6. 84555 6. 181508  
4. 943738 4. 690264 4. 461651 5. 073907 5. 245295 5. 429043 4. 551418 5. 011632 5. 22056  
3. 235674 3. 122765 3. 384296 3. 133894 3. 288471 3. 636283 2. 846125 3. 142451 2. 790352  
6. 048211 5. 972879 4. 870044 6. 096033 6. 080777 6. 041803 5. 521386 6. 266073 5. 601103  
6. 557175 6. 611568 6. 329239 7. 368772 6. 983596 6. 771006 6. 581392 6. 476984 6. 614724  
7. 003542 6. 946031 7. 063886 7. 273551 7. 389024 6. 960048 6. 786293 6. 514741 7. 050953  
7. 016874 7. 545888 7. 470233 7. 752903 7. 068641 8. 04083 6. 926244 6. 573204 7. 199394  
4. 167858 4. 005761 4. 714129 4. 196964 5. 190126 4. 255357 4. 706547 4. 210646 4. 799509  
8. 672651 8. 618486 8. 443154 8. 808246 8. 769722 8. 67357 8. 160195 8. 800708 8. 749605  
2. 157749 1. 864137 1. 49584 1. 222146 1. 55341 1. 384202 1. 968378 1. 945163 1. 528452  
5. 923018 6. 298484 6. 420676 5. 887543 6. 176012 6. 233196 5. 986162 5. 678153 6. 248354  
5. 551168 6. 871063 4. 925907 7. 573806 6. 33814 6. 522296 5. 489997 5. 386445 6. 883549  
2. 527435 1. 828948 2. 310502 2. 05024 2. 386785 1. 920632 2. 519487 2. 343356 2. 530633  
3. 849485 4. 580635 3. 79459 3. 724588 4. 168752 4. 74192 3. 676232 2. 609979 3. 817891  
5. 429843 5. 907384 5. 382866 5. 871118 5. 907081 5. 645556 5. 801354 5. 683282 5. 350132  
2. 636772 2. 942342 3. 382174 2. 598777 3. 252189 2. 064377 2. 601504 2. 428904 3. 263533  
9. 276272 9. 642159 9. 540579 9. 263019 9. 392506 9. 846264 9. 482594 9. 52738 9. 612436  
6. 346719 7. 293225 6. 691655 6. 943972 7. 281247 7. 27196 7. 016346 6. 842526 7. 083067  
8. 257616 8. 232391 8. 527288 8. 635012 8. 392882 8. 522731 8. 518441 8. 230819 8. 186822  
7. 461481 7. 507035 7. 353011 7. 445727 7. 596983 7. 248537 7. 185376 7. 36471 7. 236929  
1. 827863 1. 659047 1. 832085 1. 802829 2. 112032 1. 712102 1. 945491 1. 840401 2. 003402  
2. 868519 2. 897404 3. 099883 3. 175804 3. 25212 3. 490327 3. 795173 3. 242781 3. 355298  
7. 410819 6. 638347 6. 721894 6. 877794 6. 230885 6. 869556 6. 060605 5. 615378 6. 780748  
8. 062264 8. 284467 8. 115407 8. 96168 8. 226859 8. 916009 8. 356794 7. 553441 8. 152684  
5. 939298 6. 433614 6. 279558 5. 877566 6. 903949 6. 637697 5. 504255 6. 314233 6. 634656  
5. 837327 6. 571762 5. 825475 5. 722296 6. 156747 6. 212199 5. 791602 6. 394738 6. 22938  
2. 882192 3. 274462 2. 238856 3. 370927 3. 323758 4. 145843 2. 878468 3. 10792 3. 979635  
7. 713191 7. 704115 7. 801463 8. 327377 7. 70869 8. 055299 7. 976333 7. 618584 7. 29736  
3. 988684 2. 65106 3. 198854 3. 71852 3. 743521 4. 339073 3. 656202 4. 124507 3. 788076  
4. 57791 4. 396982 4. 682071 4. 351552 3. 617237 4. 332367 3. 783502 5. 199519 4. 989676  
5. 771759 6. 05475 5. 248437 5. 43069 6. 343924 5. 153376 5. 706769 5. 520061 5. 75831  
2. 20823 2. 117612 3. 14845 1. 86763 1. 402275 1. 979865 1. 935819 1. 338532 3. 386471  
5. 858054 5. 591255 5. 884943 5. 879964 5. 882908 5. 449538 5. 874443 5. 702396 5. 838088  
3. 439873 2. 63996 1. 873754 3. 361282 2. 530683 2. 578996 2. 937845 2. 73118 3. 739455  
3. 168086 3. 96494 4. 100041 4. 413737 3. 739755 3. 851096 4. 244515 3. 939776 3. 796264  
4. 981995 5. 702147 5. 910104 5. 726544 5. 556716 6. 794794 4. 393764 5. 303887 5. 578008  
1. 509893 2. 340419 2. 246562 1. 534458 2. 965395 1. 180447 3. 245867 3. 34257 3. 43596  
5. 707525 6. 070138 6. 18327 5. 784477 6. 257784 6. 267595 6. 269516 6. 418201 7. 009694  
3. 524066 4. 579128 4. 303572 4. 913048 4. 458392 4. 588445 4. 463901 5. 108376 4. 633048  
2. 63685 2. 205695 2. 691846 2. 479928 2. 222681 2. 049719 1. 986981 2. 488096 2. 880514  
5. 209168 5. 931076 6. 393437 6. 44991 6. 195061 6. 298591 6. 156131 6. 133311 6. 027497  
4. 65637 4. 700964 3. 627579 4. 952253 4. 716033 4. 999708 5. 331306 4. 384276 5. 132252  
4. 42333 4. 020705 4. 674281 4. 852318 5. 084718 4. 601909 4. 936779 4. 298203 4. 565213  
4. 907783 4. 865472 5. 027971 5. 381524 5. 014291 5. 778576 5. 038814 4. 735182 5. 194725  
3. 408817 4. 997263 3. 983656 4. 109184 3. 364622 4. 414286 4. 601078 4. 35917 4. 784595

5. 584829 5. 90199 5. 830002 4. 520352 5. 551035 5. 914116 5. 370542 5. 808687 5. 40809  
6. 11593 5. 785479 6. 317561 6. 242145 6. 190524 6. 673821 6. 339265 6. 399186 6. 27701  
2. 500894 2. 26517 2. 711096 3. 19463 2. 554768 2. 147943 2. 689044 2. 170145 2. 810832  
3. 69836 3. 724249 3. 908035 3. 582367 3. 702643 4. 216955 3. 757699 4. 436773 3. 968896  
4. 288897 5. 092712 4. 582126 4. 102893 5. 168135 5. 609091 4. 910374 4. 560553 4. 821659  
7. 361913 7. 359735 7. 501755 7. 820666 7. 627511 7. 498439 7. 174502 7. 000106 7. 460826  
5. 451743 5. 368086 5. 94395 6. 621918 6. 384653 6. 828718 5. 887862 5. 574957 5. 127575  
6. 809922 6. 268833 6. 093474 5. 879992 6. 593216 6. 629506 6. 326544 6. 696183 6. 388816  
2. 483403 3. 240154 3. 560417 2. 363838 2. 662022 3. 26149 2. 326233 2. 677014 3. 377013  
3. 625444 3. 441351 3. 758125 3. 319681 3. 601487 3. 713648 3. 938454 4. 356354 3. 609079  
6. 982377 7. 405611 7. 766138 7. 23797 7. 692522 7. 473706 7. 167145 7. 796203 7. 564897  
1. 822331 1. 965057 2. 400175 2. 151678 2. 329655 2. 343073 2. 928955 1. 86655 1. 955739  
3. 394307 2. 758236 2. 885857 2. 733772 3. 150539 2. 82814 2. 748393 2. 181604 2. 368554  
7. 163746 7. 194151 6. 916853 6. 424062 7. 20624 7. 096073 6. 856122 6. 874968 6. 905701  
5. 594683 6. 923019 6. 719408 6. 118342 6. 756826 7. 062163 6. 229473 6. 424531 6. 364059  
5. 578416 6. 082945 5. 482385 6. 188669 6. 023437 5. 928089 5. 78464 5. 67753 5. 773959  
5. 344803 5. 58625 5. 54838 4. 892949 5. 488925 5. 112798 5. 586609 5. 503458 5. 484891  
5. 692764 6. 132548 6. 178095 6. 032983 5. 9341 6. 143861 5. 546331 6. 212751 5. 541382  
4. 211251 3. 394344 3. 412494 3. 323542 3. 722253 3. 369226 2. 816052 3. 509412 2. 823684  
7. 220897 7. 1002 7. 230428 7. 054188 7. 338233 7. 520621 6. 746874 7. 206104 6. 848212  
6. 778654 7. 546062 6. 541079 7. 178962 6. 879857 7. 280982 6. 675627 6. 973523 6. 865047  
6. 055983 6. 595443 6. 384381 7. 333312 7. 221438 6. 954706 6. 060457 6. 027789 6. 658616  
5. 125252 4. 826941 4. 744883 5. 328055 5. 002909 5. 101064 4. 619226 4. 868389 5. 324387  
6. 349499 6. 624134 6. 464356 6. 75543 6. 947144 6. 879345 6. 839122 6. 452961 6. 604636  
8. 56604 5. 913558 6. 855353 5. 266581 6. 296547 5. 53838 6. 581949 5. 975048 7. 779072  
5. 639377 5. 013487 5. 170835 4. 26324 5. 57132 5. 147932 4. 419557 4. 821456 4. 245149  
7. 097279 8. 256591 8. 095281 8. 15082 8. 169158 7. 944692 7. 875383 7. 823353 7. 886459  
5. 978578 6. 29543 6. 531858 6. 410577 6. 447169 6. 175202 5. 596563 6. 274803 6. 373991  
6. 468875 5. 800764 6. 535731 5. 906115 6. 283197 5. 99858 5. 692095 5. 946798 6. 086425  
2. 794392 3. 42307 3. 376937 2. 884541 4. 147641 4. 138336 3. 59229 3. 560191 4. 01276  
4. 544651 3. 463067 3. 730294 4. 323025 3. 495322 4. 056845 3. 032806 2. 901211 3. 534897  
4. 827155 4. 020501 5. 123938 4. 565244 5. 017727 4. 665756 5. 21104 3. 964682 4. 62643  
5. 71057 5. 244404 5. 257973 5. 356499 5. 354368 5. 089103 5. 53295 5. 531824 5. 064768  
4. 257052 3. 704406 3. 234008 8. 57146 5. 688107 5. 148823 5. 517252 6. 033724 6. 721959  
1. 97568 1. 532791 1. 587742 2. 009016 1. 799975 1. 478424 1. 563659 1. 794255 1. 770144  
4. 42454 4. 596121 4. 890932 4. 997485 5. 306001 5. 714883 5. 126729 4. 906005 4. 707473  
1. 679766 1. 511898 1. 419846 1. 307468 1. 801093 1. 785807 2. 485168 1. 480704 1. 351609  
2. 149765 4. 481531 3. 792856 4. 105076 3. 425128 3. 669 2. 715678 3. 451497 4. 368868  
4. 675309 4. 112299 3. 670842 3. 488619 3. 838067 4. 534931 4. 279311 4. 304725 4. 574554  
5. 308084 5. 432931 5. 663277 5. 237476 6. 25356 5. 045412 4. 859247 5. 870879 5. 487491  
4. 583569 5. 29007 4. 268211 4. 409995 4. 660009 4. 899843 4. 497898 4. 742597 5. 086299  
2. 299229 1. 813776 2. 0702 4. 222196 2. 995638 2. 770377 4. 369258 3. 805994 3. 54904  
7. 184719 6. 377831 6. 51383 5. 605981 6. 147672 6. 022837 6. 130619 6. 631247 5. 929997  
5. 138393 4. 705521 5. 086742 4. 854736 5. 297669 5. 295639 4. 177563 4. 53431 4. 6886  
5. 768912 6. 687032 6. 748153 6. 752882 6. 779449 6. 904495 5. 735308 6. 178215 6. 941065  
5. 736242 6. 078459 6. 804314 6. 212185 5. 56803 6. 298753 6. 65346 6. 023454 6. 355498  
4. 418441 5. 085867 4. 42694 4. 764456 4. 861362 5. 083942 5. 634751 4. 842419 3. 718644  
6. 846877 5. 928177 5. 205135 5. 237348 5. 974123 5. 312806 5. 696017 5. 141297 7. 340897  
5. 390458 5. 75897 5. 671362 5. 925157 5. 664899 5. 634154 4. 771689 6. 292778 5. 890229  
6. 398192 6. 19704 6. 390947 6. 104545 6. 04453 6. 423107 5. 920937 6. 068754 5. 628306  
2. 412093 2. 729904 2. 15029 3. 237722 2. 906909 2. 265275 2. 978876 2. 493716 3. 571316



6. 251261 5. 758878 5. 347714 6. 251077 5. 610723 5. 825946 5. 168805 5. 232987 5. 917144  
6. 578998 6. 805779 6. 410336 6. 863775 6. 883553 6. 917839 6. 752621 6. 427527 6. 573629  
1. 831206 1. 81097 1. 878136 2. 005782 1. 404729 1. 733265 2. 705104 2. 335846 1. 907512  
4. 595463 4. 234267 4. 487865 3. 601435 3. 719601 3. 937463 2. 970543 3. 903188 4. 260817  
5. 449616 6. 766715 6. 166361 7. 146356 6. 408045 5. 999446 6. 45673 6. 657782 6. 417459  
4. 181269 4. 65819 3. 435634 4. 161949 4. 300205 4. 546726 3. 895509 4. 146575 4. 621293  
6. 075484 4. 31819 3. 790059 2. 655984 3. 886591 3. 005252 3. 71529 3. 674298 4. 540188  
3. 235896 4. 847517 4. 344493 4. 590656 5. 048463 4. 275863 3. 835029 4. 447189 4. 452442  
5. 86491 5. 933422 5. 913813 5. 747734 5. 730152 5. 432052 5. 64398 5. 542016 5. 840968  
4. 939604 4. 847688 4. 66242 3. 79676 4. 801096 5. 183392 4. 68111 2. 748406 5. 185148  
5. 377115 2. 545865 2. 96746 3. 575248 2. 97351 2. 757004 2. 885231 2. 259469 3. 464044  
5. 8987 5. 825876 5. 710934 5. 06332 5. 450486 5. 769292 5. 678711 5. 385814 5. 970843  
2. 075858 1. 673409 1. 901708 2. 401222 1. 887184 1. 867463 1. 529618 1. 250893 1. 499785  
6. 153871 6. 142762 6. 063563 6. 011996 6. 072355 6. 289682 6. 135089 6. 406195 6. 204887  
6. 130459 6. 603287 6. 507833 5. 797021 6. 162003 6. 24213 6. 325969 6. 387655 5. 979502  
3. 02241 3. 143495 2. 642327 4. 410198 4. 02409 3. 983861 4. 782816 3. 666626 3. 46953  
5. 408079 5. 11102 5. 322624 6. 177088 4. 967663 5. 475501 5. 215873 5. 62702 5. 013385  
2. 787659 3. 661546 3. 319941 2. 728055 2. 862018 4. 489796 3. 540519 3. 121431 3. 509351  
5. 938524 7. 030744 7. 094873 6. 63033 6. 17258 6. 713821 6. 833819 6. 296852 6. 474463  
7. 148543 6. 827499 6. 934495 7. 020402 6. 442901 6. 802038 6. 670004 6. 688999 6. 874516  
7. 759209 8. 020422 8. 021544 7. 95771 7. 675423 8. 002522 7. 727121 8. 213736 7. 866009  
6. 347061 6. 209339 6. 386185 6. 131638 6. 181392 5. 844182 6. 140817 6. 317287 6. 476659  
7. 373451 8. 063663 8. 332692 8. 330444 7. 911937 8. 331304 7. 446154 7. 723232 7. 452506  
2. 68161 2. 413334 3. 242744 3. 284734 4. 059981 2. 818002 3. 004545 2. 926531 2. 595129  
6. 187156 6. 635517 6. 528328 6. 405255 6. 438534 6. 141952 6. 662931 6. 093858 6. 407922  
5. 116188 5. 529461 5. 482083 5. 690177 5. 607211 5. 643374 5. 720269 5. 643615 6. 004246  
6. 411038 6. 397207 6. 637385 6. 382505 6. 358327 6. 574842 6. 25312 6. 353867 6. 790764  
1. 723096 2. 157917 1. 604397 2. 913527 2. 138292 3. 530289 2. 156198 2. 204401 1. 525894  
3. 59058 3. 866731 3. 414053 3. 795914 3. 811362 4. 108525 3. 525676 3. 673709 3. 457111  
6. 582093 6. 307005 6. 57298 6. 751032 6. 736356 6. 79373 6. 417505 6. 357073 6. 738485  
4. 045142 4. 881619 3. 941194 5. 07086 5. 785714 4. 466444 5. 812163 5. 365959 4. 754292  
3. 144226 4. 486439 3. 660095 4. 170772 4. 22791 4. 60948 3. 780238 4. 142678 3. 792643  
6. 994993 7. 224733 6. 886284 6. 732623 7. 16461 6. 982655 6. 55059 6. 675191 7. 418024  
6. 01835 5. 449685 5. 583818 5. 966204 5. 534977 5. 43851 5. 252501 5. 360162 6. 430624  
6. 324443 7. 018833 7. 086987 7. 261297 7. 718103 7. 101801 6. 956523 7. 567796 7. 084342  
7. 500883 7. 855211 8. 449079 8. 528246 8. 112589 8. 276854 8. 551168 7. 945135 7. 599542  
6. 394104 6. 440653 6. 606201 6. 48847 6. 763317 6. 875194 6. 545854 6. 580684 6. 292603  
5. 426961 6. 385296 6. 239748 7. 137181 6. 485429 6. 564139 6. 102992 6. 06082 6. 387081  
2. 253469 2. 071706 1. 832163 2. 3125 2. 286561 2. 100681 1. 653206 2. 06287 1. 68209  
2. 084604 1. 783951 2. 222543 2. 501171 2. 277728 3. 121052 3. 079657 2. 088276 2. 32755  
7. 031663 7. 269134 7. 314772 6. 965578 7. 480236 7. 168558 6. 90355 6. 67909 6. 440075  
4. 508713 3. 930907 3. 691816 3. 363902 4. 000269 3. 625325 3. 904262 3. 900569 3. 626688  
6. 334108 6. 624089 6. 307669 7. 032657 6. 682774 6. 48016 6. 731559 6. 543726 6. 519652  
6. 705937 7. 048933 6. 894312 6. 915977 6. 602931 6. 973083 7. 064771 6. 873462 6. 501108  
2. 34386 2. 086549 2. 486326 2. 066292 2. 307816 2. 349191 3. 185891 2. 593157 2. 490851  
4. 170999 4. 555384 4. 261615 4. 486689 5. 360468 4. 915327 3. 999754 4. 464317 4. 924125  
4. 360034 3. 837387 3. 937237 2. 814326 3. 421877 3. 044379 3. 657117 3. 401264 3. 211374  
5. 424136 5. 810762 6. 001546 5. 682816 5. 771326 5. 939619 5. 586579 5. 438046 5. 41182  
2. 572214 2. 668222 3. 276599 3. 626381 2. 960912 1. 807602 2. 701099 3. 774337 3. 542407  
6. 325601 5. 913867 5. 723035 8. 349324 7. 534686 6. 877481 9. 282108 7. 341449 7. 714795  
5. 086603 5. 660388 5. 529668 5. 587405 4. 629912 5. 74204 5. 066732 5. 58224 5. 064707

4. 464596 5. 230266 5. 246942 5. 203569 4. 801729 5. 051903 4. 446703 5. 774368 4. 768724  
6. 034722 5. 791208 5. 429798 5. 04253 4. 782531 5. 514964 5. 355829 5. 817041 4. 976073  
3. 767513 2. 921739 3. 079784 2. 968627 2. 514397 2. 233876 3. 062855 3. 058351 2. 768623  
9. 995482 10. 44826 10. 33245 10. 24608 10. 32367 10. 49999 10. 06835 10. 47206 10. 28005  
3. 557459 4. 477274 4. 233573 2. 792094 3. 736959 3. 906028 3. 690478 4. 179216 3. 715115  
7. 976058 8. 02769 7. 961721 8. 175246 7. 724708 8. 124281 7. 54771 8. 397783 8. 090173  
6. 418658 5. 738952 5. 772449 6. 304331 6. 55851 6. 14158 5. 720532 6. 029924 5. 806733  
6. 950587 6. 841781 6. 997875 6. 716609 6. 899137 6. 816726 6. 549866 6. 579315 6. 624901  
2. 952474 3. 38463 3. 581094 3. 108411 3. 242532 3. 271826 2. 817476 3. 055859 3. 202997  
8. 916713 9. 275411 9. 512624 9. 318063 9. 203412 9. 537042 8. 798008 9. 322438 8. 985454  
4. 211483 4. 649245 4. 741756 4. 758792 4. 176707 5. 30751 4. 350581 5. 288665 4. 648723  
6. 459663 6. 960621 6. 472737 6. 554973 6. 512163 6. 377898 5. 537555 6. 467813 6. 12983  
5. 955606 5. 381922 5. 571982 4. 876047 5. 321553 5. 111234 4. 667641 5. 5429 4. 978526  
4. 625687 6. 14733 5. 885378 5. 509045 5. 950291 5. 955004 5. 438671 5. 564065 5. 043581  
8. 430354 8. 680242 8. 571384 8. 540926 8. 459388 8. 25917 8. 156578 8. 501393 8. 352323  
5. 559536 5. 212782 5. 779704 6. 432756 5. 503798 6. 22219 5. 208023 5. 458198 5. 478059  
5. 189846 5. 395044 6. 049453 6. 014117 6. 156875 4. 867197 5. 809601 5. 529568 5. 877455  
4. 742665 5. 572702 5. 409705 5. 644542 4. 823516 6. 001202 4. 631837 5. 376365 5. 79524  
2. 303591 2. 842727 2. 17247 2. 958898 2. 92716 3. 128638 2. 558566 2. 348842 2. 959034  
8. 325284 8. 729171 8. 894362 8. 524821 8. 589252 8. 972992 8. 423538 8. 697643 8. 84877  
4. 087775 4. 340386 3. 711838 2. 644908 4. 941733 5. 206867 3. 910594 3. 550581 3. 828958  
6. 693339 7. 089357 6. 982736 6. 711509 6. 618745 7. 330316 6. 002694 6. 946844 6. 657899  
6. 272472 6. 763012 6. 515734 6. 863202 6. 513942 6. 994999 6. 508991 6. 684702 6. 37082  
5. 606498 5. 730936 5. 069504 6. 086309 6. 197057 5. 95 5. 867936 5. 316727 5. 962656  
5. 529365 6. 231256 6. 249922 6. 435883 6. 12512 6. 321108 5. 730807 6. 280982 6. 128629  
6. 028884 7. 461709 7. 359316 7. 128529 7. 476419 7. 409785 6. 931384 6. 93068 6. 704642  
4. 288466 3. 616002 4. 098185 4. 718667 4. 497994 5. 214596 3. 275186 3. 571177 4. 367601  
3. 99961 3. 930907 3. 292345 3. 641981 3. 953754 4. 978894 3. 496524 3. 978823 4. 14995  
1. 596386 1. 432531 1. 494154 2. 530081 1. 418006 1. 825343 1. 368455 1. 753635 1. 759518  
5. 722674 6. 904566 6. 667516 6. 306541 6. 752127 6. 558998 6. 06588 5. 917277 6. 247188  
6. 643868 6. 35566 6. 331366 7. 199009 7. 370731 6. 439556 6. 247836 6. 617335 6. 601423  
7. 224389 7. 535433 7. 505722 7. 038138 7. 607132 7. 577472 7. 318892 7. 377247 7. 078549  
5. 576586 5. 983272 5. 897059 5. 881965 5. 939327 6. 196729 5. 622892 5. 927847 5. 928661  
4. 41419 4. 410746 4. 743182 3. 522136 2. 810126 3. 067619 3. 685183 3. 460653 4. 001728  
4. 914122 4. 929586 5. 824345 4. 509612 4. 866384 4. 770185 4. 368719 5. 161376 5. 349443  
4. 29514 5. 454274 4. 83957 5. 028725 5. 10723 4. 474196 3. 828375 4. 095603 5. 303707  
7. 436746 7. 702092 7. 977552 7. 640062 7. 615531 7. 473841 7. 609893 7. 260515 7. 627802  
7. 249767 6. 408751 7. 120539 7. 116268 6. 739222 6. 746474 6. 577995 7. 10834 7. 478674  
5. 466183 5. 189427 5. 368219 5. 56144 4. 380821 4. 947411 5. 126941 5. 057646 5. 346738  
1. 895646 2. 708625 2. 88057 2. 733166 2. 835903 1. 909592 1. 642927 2. 798487 2. 636033  
5. 46183 3. 101695 3. 729356 2. 855033 3. 290977 3. 983493 3. 377079 3. 596349 3. 58999  
5. 489646 6. 229827 5. 97992 5. 920855 6. 349387 5. 9103 5. 720545 5. 265151 5. 354083  
7. 717922 8. 362947 7. 943115 7. 381171 7. 755032 7. 509833 8. 216758 8. 35322 8. 464462  
4. 88016 4. 275404 4. 140877 4. 310172 4. 658375 3. 952743 3. 376606 3. 992043 4. 813821  
2. 955039 4. 413983 4. 019606 5. 122521 3. 584846 3. 096179 4. 786778 5. 111435 3. 142453  
1. 991181 1. 598176 1. 876527 1. 568121 1. 844353 1. 386995 1. 896696 2. 181661 2. 019526  
2. 456145 2. 699606 2. 149572 1. 934008 2. 356998 3. 474421 2. 125326 2. 167147 2. 220349  
4. 174706 4. 193254 5. 126051 4. 435483 4. 25172 3. 944112 3. 407225 4. 23762 4. 300105  
1. 986339 1. 424239 1. 770497 1. 788076 1. 286076 1. 063069 1. 783414 1. 17642 1. 322326  
7. 670125 7. 586865 7. 960671 8. 138808 7. 771054 8. 000021 8. 22602 7. 938896 7. 94668  
4. 572305 6. 055701 5. 328354 4. 421973 5. 015891 5. 045552 5. 611014 3. 947122 5. 455147

5. 672053 6. 385971 6. 121062 5. 401446 6. 097058 5. 781763 6. 10017 5. 583943 5. 818099  
5. 079447 6. 842964 6. 825915 6. 545289 6. 826935 6. 424324 5. 744611 6. 594256 6. 280898  
2. 906106 2. 212516 1. 837879 1. 976411 2. 503164 1. 951915 2. 947278 1. 846767 2. 674995  
7. 884877 7. 722866 8. 515291 7. 644658 7. 88341 7. 690172 7. 726702 8. 408854 8. 926746  
7. 412803 7. 673924 7. 144632 8. 264831 7. 780908 7. 922362 7. 109342 7. 469052 7. 514457  
2. 967228 2. 069085 2. 192555 2. 337292 2. 986953 2. 792085 1. 788814 2. 281062 2. 066651  
4. 422731 5. 218057 4. 4972 5. 522797 4. 359848 5. 530322 4. 700588 4. 996283 4. 412871  
3. 07891 2. 813961 2. 72665 3. 01563 3. 057471 2. 801232 2. 623608 2. 466229 3. 053966  
2. 403213 1. 541636 2. 296002 2. 191609 1. 874713 1. 912953 1. 903592 1. 983575 1. 853809  
6. 398543 7. 224994 6. 973391 6. 545922 7. 11275 6. 448101 6. 762966 6. 835057 6. 666354  
3. 795815 4. 67579 4. 790491 5. 034033 5. 591697 4. 424643 5. 093495 5. 757377 5. 427321  
1. 823382 1. 689225 2. 119679 1. 734618 2. 357317 1. 783488 2. 237068 2. 020791 1. 788069  
3. 781899 3. 3058 4. 028752 3. 812063 2. 999942 3. 126276 2. 925528 3. 169419 3. 258466  
4. 888611 4. 088586 3. 700123 3. 348475 3. 926608 4. 075975 3. 326386 2. 695618 4. 538225  
7. 271261 7. 78659 7. 539771 7. 483839 7. 497462 7. 975862 7. 333514 7. 000637 7. 172672  
6. 967653 6. 980952 6. 757009 7. 249162 7. 224245 6. 74781 6. 802631 6. 402642 6. 944603  
7. 943662 8. 355409 8. 362787 8. 36597 8. 174427 8. 308277 8. 518295 8. 143119 8. 011834  
3. 435891 4. 439797 4. 428312 4. 951613 4. 645253 3. 824943 4. 8433 5. 035763 5. 176583  
5. 759006 5. 347609 4. 316046 3. 909166 4. 606325 3. 851423 4. 341475 4. 972829 4. 200566  
3. 139005 2. 186153 2. 836799 2. 224677 2. 174129 2. 460674 3. 037881 3. 241781 2. 506571  
1. 609707 0. 910691 1. 36366 1. 099081 1. 23111 2. 155146 1. 259991 1. 27181 1. 136001  
4. 430119 3. 942952 4. 300169 4. 071238 4. 766955 4. 025396 3. 339597 3. 632687 3. 223545  
4. 87274 4. 636099 3. 525269 5. 729063 4. 013763 4. 373144 4. 938852 5. 019126 4. 124242  
5. 394217 6. 060674 6. 073565 6. 518254 6. 202087 5. 454082 5. 706749 6. 184484 6. 35451  
5. 569612 3. 37999 4. 369273 3. 659712 3. 928094 3. 297324 2. 957016 3. 14203 3. 62711  
5. 832705 5. 134127 5. 440487 6. 050921 6. 631728 6. 2234 5. 513237 6. 376686 6. 179962  
2. 903469 1. 69098 2. 23283 2. 283713 1. 724827 2. 220962 2. 432195 2. 382549 2. 134155  
7. 266084 6. 958666 7. 672859 7. 867029 7. 711053 7. 451674 7. 458514 7. 427059 7. 304124  
7. 377345 7. 731817 7. 819931 7. 949003 7. 291009 7. 82019 7. 618879 7. 357088 7. 380205  
4. 27112 4. 669646 3. 127632 3. 976837 3. 267354 2. 101105 4. 947172 2. 50127 6. 381511  
8. 781901 8. 830021 8. 900602 8. 985605 8. 65627 8. 917719 8. 858139 8. 743991 8. 580027  
6. 214485 5. 917673 5. 945658 6. 367236 5. 841036 6. 26352 5. 89158 5. 98766 6. 05979  
7. 940715 7. 930591 7. 585168 7. 483588 8. 05056 8. 077926 8. 174057 7. 713108 8. 214231  
8. 302372 7. 363763 7. 590292 6. 712641 7. 294414 7. 298549 7. 210727 6. 839621 8. 022686  
6. 039645 6. 400646 6. 438182 6. 500994 6. 155616 6. 155396 5. 873189 6. 51611 6. 097243  
6. 968918 6. 986848 6. 821274 6. 759004 6. 796151 6. 369372 7. 159743 6. 654676 6. 776141  
3. 652827 3. 394911 3. 123068 3. 012773 3. 948169 4. 154277 3. 476713 3. 681595 3. 885787  
9. 535672 9. 561371 9. 560816 9. 4589 9. 534898 9. 193477 9. 700187 9. 615134 9. 441671  
4. 480633 5. 169049 5. 193537 4. 633002 5. 239965 4. 923596 4. 927624 4. 55601 4. 683475  
2. 360713 5. 251107 4. 764932 5. 506133 4. 808978 4. 606369 4. 711371 4. 617591 4. 66151  
6. 195128 6. 138137 5. 813404 6. 218456 6. 894125 6. 54028 7. 206743 6. 286035 6. 779617  
8. 286009 6. 576886 7. 431992 6. 896731 6. 999869 6. 325914 7. 172515 6. 639062 8. 382165  
3. 919987 2. 834365 2. 799188 2. 487037 2. 984516 2. 238495 2. 952493 2. 582279 4. 075715  
5. 135978 5. 674718 4. 242916 5. 305145 6. 126438 4. 906741 5. 100331 5. 70255 4. 857649  
3. 068868 2. 539298 3. 462913 2. 81232 3. 380769 3. 296986 2. 327397 2. 956802 4. 184799  
3. 849104 2. 242597 3. 432667 3. 457167 2. 765067 2. 748092 3. 481989 3. 200761 3. 514131  
5. 337725 4. 276572 4. 662204 4. 969023 5. 102384 4. 144656 3. 944742 3. 921917 5. 277466  
6. 926043 7. 316824 7. 012431 7. 722417 7. 549284 7. 408513 7. 484398 7. 401453 7. 238065  
5. 536107 6. 507061 5. 798335 6. 561963 6. 921802 6. 827765 6. 482289 6. 401315 6. 557804  
3. 867852 4. 254941 4. 210025 4. 433555 5. 177574 4. 433428 3. 695001 4. 984456 3. 808115  
2. 373469 1. 78501 1. 581705 1. 901031 1. 649336 1. 726963 2. 113793 1. 592766 1. 42948

7. 567176 7. 634774 7. 317157 7. 820756 7. 58418 7. 355007 7. 53933 7. 065895 7. 553085  
5. 318707 5. 730953 5. 669799 5. 404308 5. 283278 5. 906348 5. 190884 4. 690621 4. 95704  
3. 460725 4. 610203 4. 477682 4. 747933 3. 833906 4. 088271 3. 340698 4. 22225 4. 55506  
2. 255404 3. 125897 3. 341452 3. 413652 3. 02501 4. 135104 2. 609776 3. 421184 3. 304456  
4. 588415 5. 421067 5. 782797 5. 739512 5. 670243 5. 195636 4. 855405 5. 419284 4. 641062  
1. 7416 2. 263201 1. 826637 2. 366588 2. 243861 2. 348491 3. 097747 1. 732376 2. 069509  
4. 622279 5. 707527 6. 458681 6. 099459 5. 985401 5. 507642 5. 365381 5. 685359 5. 349999  
4. 89344 4. 977154 4. 930818 5. 735827 5. 502715 5. 816481 6. 072122 5. 21741 5. 343712  
6. 495151 6. 572683 6. 563504 6. 765916 6. 30788 6. 741121 6. 017038 6. 468108 6. 477417  
4. 156704 3. 297893 3. 754509 3. 798366 3. 492198 4. 175955 3. 839299 3. 710187 3. 717285  
4. 70483 4. 330263 5. 206198 4. 268086 5. 384353 5. 739097 5. 724873 4. 858163 4. 792885  
4. 769344 6. 168394 4. 76298 5. 324687 5. 046052 6. 069439 4. 457839 5. 043034 4. 802949  
3. 889718 4. 486707 4. 596162 4. 138788 4. 900999 5. 100027 3. 877868 5. 649335 4. 60011  
6. 31175 6. 399288 6. 648991 6. 630587 6. 348986 6. 620935 6. 633583 6. 462887 5. 979749  
5. 743409 6. 298456 6. 163891 6. 677719 6. 415618 6. 020369 6. 259546 6. 221814 6. 476245  
0. 890615 2. 007165 0. 633513 1. 410742 0. 995723 1. 09481 2. 247338 1. 560923 1. 30668  
1. 264385 0. 71654 0. 71701 1. 088315 0. 799426 0. 747521 0. 86036 0. 885493 0. 981976  
2. 887376 2. 634701 2. 982711 2. 73221 2. 824865 3. 348681 3. 474814 2. 731556 2. 759569  
6. 335491 6. 496982 6. 191713 6. 536219 6. 072236 6. 525479 6. 646848 6. 867082 5. 783554  
4. 298187 5. 036813 4. 851406 4. 52434 4. 886661 4. 920561 5. 021849 4. 569438 4. 832149  
7. 900941 8. 160763 8. 094145 8. 579502 8. 014331 8. 415279 7. 815825 8. 159725 8. 019907  
3. 670267 3. 913539 2. 896617 2. 770379 3. 321949 3. 765316 3. 052788 3. 224507 2. 91072  
6. 35249 6. 776805 6. 418794 6. 525855 6. 528932 6. 679589 5. 835614 6. 252395 6. 307092  
4. 841659 4. 3268 4. 759578 4. 963521 3. 916521 4. 719174 3. 804606 4. 240818 4. 659398  
3. 664463 4. 032583 4. 134823 3. 972034 4. 345909 4. 373637 4. 170408 4. 890067 4. 255604  
2. 138526 3. 670674 2. 437924 1. 805774 1. 478767 1. 771082 1. 823418 2. 553305 2. 112215  
6. 655564 6. 263194 6. 62242 6. 060478 5. 969953 6. 294692 5. 878689 6. 376118 6. 812079  
2. 448049 3. 538693 4. 160293 2. 714694 3. 192013 4. 518538 2. 5212 2. 348243 2. 946126  
2. 542995 1. 396819 1. 776128 1. 275409 2. 305402 1. 495593 2. 548491 1. 36198 2. 035266  
2. 76396 2. 680227 2. 269533 3. 089743 2. 037551 2. 887274 2. 37377 2. 54518 2. 292993  
6. 810641 7. 291279 7. 158355 6. 570521 7. 200499 7. 10565 6. 914495 6. 644691 6. 969979  
4. 044175 4. 553796 4. 765053 4. 110579 4. 319662 4. 333284 4. 894057 4. 59687 4. 443133  
2. 431592 2. 468711 1. 678004 2. 418319 2. 248834 2. 784437 2. 404918 1. 61291 1. 792415  
3. 273252 2. 130882 1. 9757 2. 619545 2. 732287 2. 360653 3. 618174 2. 083556 2. 822886  
3. 420169 4. 1438 4. 4262 6. 369403 5. 628352 6. 073506 6. 378565 6. 984154 7. 606523  
2. 649663 1. 834999 2. 232464 2. 128861 1. 663035 1. 120929 2. 269912 1. 395659 1. 237315  
2. 954629 1. 916342 1. 972771 1. 929577 2. 62709 1. 829131 2. 949534 1. 841426 2. 762616  
5. 785632 6. 408033 6. 883445 6. 673105 6. 650248 6. 335263 6. 544498 6. 671292 6. 193137  
1. 642333 2. 011152 1. 5247 2. 299378 1. 660637 1. 737375 1. 270952 1. 748509 1. 567152  
3. 062659 4. 739691 3. 989491 3. 896704 5. 272458 4. 48274 3. 172512 4. 391035 4. 406362  
3. 879467 2. 695725 2. 261608 2. 074107 2. 702805 2. 149937 1. 984667 2. 450131 1. 891431  
1. 734966 1. 473407 2. 282576 1. 231524 2. 394617 2. 748892 2. 286561 2. 150951 1. 219522  
4. 926401 5. 393857 5. 440709 4. 608967 4. 925776 5. 566871 4. 170232 5. 214846 5. 248719  
5. 046747 5. 529689 5. 35619 5. 490343 5. 540637 5. 877654 5. 684843 5. 483677 5. 911442  
3. 028006 3. 085029 3. 040072 3. 194944 3. 038544 3. 241686 2. 801515 3. 233852 3. 197377  
3. 084583 4. 694791 2. 819276 3. 671537 2. 574278 2. 66073 2. 334016 2. 369711 3. 31906  
2. 140857 3. 108546 2. 087792 2. 106595 2. 504708 1. 497534 1. 34828 1. 991018 2. 318681  
4. 05928 4. 410919 4. 203647 4. 351425 3. 486817 3. 924936 3. 348704 3. 760363 4. 114693  
0. 833559 1. 063952 1. 149924 1. 345554 1. 170576 1. 235976 1. 204096 1. 363609 1. 402757  
7. 090588 6. 779403 7. 554721 6. 985559 6. 780485 6. 507512 6. 910447 7. 573054 7. 044972  
4. 922588 6. 639965 6. 155416 6. 473638 6. 465787 6. 840409 6. 095092 5. 12637 5. 818714

3. 963828 4. 816993 5. 356394 4. 31763 3. 699092 4. 835364 4. 433717 3. 898364 4. 657639  
7. 52942 7. 332463 7. 271733 7. 837408 6. 890783 6. 929578 7. 145867 7. 68602 7. 499736  
7. 413281 7. 849049 7. 667369 7. 610877 8. 277948 8. 284744 7. 554346 7. 779542 7. 927577  
4. 980481 4. 829254 4. 271203 5. 295786 4. 893152 5. 417646 4. 041573 5. 099851 5. 080294  
5. 815817 6. 216031 5. 974866 6. 154991 6. 019103 6. 181645 5. 510082 5. 790024 5. 932882  
3. 385539 2. 084671 2. 698712 1. 752315 2. 754284 2. 399659 2. 894962 1. 900884 2. 187658  
1. 929113 1. 469564 1. 738954 1. 619867 1. 688781 1. 657539 3. 11145 1. 551016 2. 700931  
6. 57845 6. 987392 6. 644187 6. 635018 7. 197095 6. 577715 6. 864842 6. 739307 6. 595409  
2. 222016 2. 14428 1. 985758 1. 547717 3. 680354 1. 942007 2. 164897 2. 27446 1. 74519  
4. 469432 4. 906804 5. 862196 4. 858826 4. 500411 3. 753639 4. 328892 5. 45114 4. 102586  
6. 933741 6. 632391 6. 849582 6. 78536 7. 157951 7. 141961 6. 451299 6. 256199 6. 889439  
2. 117687 1. 994729 1. 79198 1. 941778 2. 347925 2. 014844 2. 234081 2. 664017 1. 561691  
3. 648214 4. 073329 4. 394688 4. 06876 3. 883716 4. 192012 3. 402623 5. 099749 2. 634653  
1. 626864 1. 247737 1. 454689 1. 429868 1. 566198 1. 48324 0. 849688 1. 156866 1. 186962  
7. 480184 6. 269078 7. 056843 6. 573975 6. 866251 6. 107425 7. 044787 5. 891614 7. 908119  
5. 882486 4. 780808 6. 604946 5. 232522 5. 610438 5. 417525 5. 967834 5. 489277 3. 938622  
4. 653059 5. 589841 5. 745015 5. 852766 5. 556409 5. 593674 5. 120069 5. 14539 5. 402462  
1. 772582 1. 639136 1. 52001 1. 497709 1. 237943 1. 48371 1. 434183 1. 585585 1. 788999  
6. 811488 6. 995231 6. 946704 6. 902607 7. 601629 7. 755004 6. 973626 7. 145354 7. 323587  
3. 376725 3. 877114 3. 8406 4. 07493 4. 198955 4. 345566 3. 956864 4. 962391 4. 775296  
3. 161625 3. 991972 3. 529771 2. 988229 3. 821896 4. 467503 3. 902118 3. 975934 3. 723507  
8. 172415 8. 729714 8. 732642 8. 780003 8. 694174 8. 244831 8. 762105 8. 490619 8. 577349  
6. 112433 6. 884488 6. 55086 7. 030421 6. 618481 7. 997637 7. 076334 7. 193498 6. 285283  
6. 347811 5. 114059 5. 085854 5. 038155 5. 205332 5. 002748 5. 398176 5. 140587 5. 494382  
6. 972801 7. 77442 7. 999514 7. 433145 7. 461505 6. 995685 7. 278052 7. 611545 7. 511747  
6. 118741 6. 672577 6. 180004 5. 724148 7. 049252 6. 75303 6. 363664 6. 478842 6. 23433  
1. 946898 1. 604568 1. 614645 1. 536299 1. 571168 1. 269189 2. 055923 1. 708062 1. 784375  
3. 005203 2. 912208 2. 522664 2. 200488 2. 356856 3. 147975 2. 693616 3. 475846 2. 50883  
3. 210711 2. 825038 3. 050923 3. 174101 2. 429422 2. 619743 2. 220186 2. 229422 2. 57274  
6. 208614 6. 519262 6. 917969 6. 665323 6. 623919 6. 488022 6. 494471 7. 133324 6. 45313  
6. 556238 7. 188083 7. 337473 7. 105252 7. 097233 5. 428357 7. 586688 7. 221216 6. 745977  
3. 63209 3. 951423 3. 433884 4. 503185 4. 989669 3. 306507 3. 899238 3. 72288 3. 277333  
5. 75442 6. 781209 5. 310121 5. 935629 6. 022922 6. 946217 5. 963914 5. 770255 6. 02502  
5. 246749 5. 452558 5. 1287 4. 311719 5. 046216 5. 960393 5. 344524 5. 920308 5. 527775  
3. 655345 5. 316368 5. 298122 5. 45137 5. 507908 5. 323548 4. 821398 4. 687096 4. 810542  
5. 088843 4. 762221 5. 005752 4. 535662 4. 683601 4. 76872 5. 037192 4. 413625 5. 351627  
1. 663766 3. 167457 2. 386658 3. 272784 2. 706584 3. 164999 3. 12173 2. 559009 2. 938404  
1. 446008 1. 445916 1. 02517 1. 494253 1. 057173 1. 70104 1. 596318 1. 31685 2. 173165  
5. 443106 6. 321342 6. 328961 6. 652994 7. 08565 7. 266056 6. 803198 7. 133681 6. 676415  
3. 216415 4. 362602 2. 869207 4. 967764 4. 428339 3. 946654 2. 33922 3. 407309 5. 413089  
8. 654504 9. 082146 8. 837489 8. 835891 9. 137756 8. 883039 8. 715546 9. 010139 8. 755552  
3. 500857 5. 84694 5. 833274 5. 754749 4. 823349 5. 035099 5. 702601 5. 509407 5. 209585  
5. 466151 5. 678603 6. 053436 5. 943872 5. 774822 5. 717626 5. 369562 6. 174682 5. 641104  
4. 389863 3. 722785 4. 042281 4. 596314 4. 510887 4. 053913 4. 370568 3. 682359 3. 521379  
5. 535455 5. 584806 5. 825487 5. 824205 5. 246217 5. 196335 5. 314837 6. 13562 5. 409454  
2. 543938 1. 521655 2. 046805 1. 390497 1. 349652 1. 586639 1. 158349 1. 373577 1. 333122  
3. 232817 3. 131865 3. 238644 2. 913731 3. 403104 2. 471984 3. 605273 3. 072505 3. 034852  
3. 274487 2. 641677 3. 145804 2. 452962 2. 507966 3. 996592 3. 723364 2. 931208 3. 491933  
1. 508138 1. 857157 2. 5888 2. 208041 1. 700411 1. 426822 1. 294985 2. 169635 1. 224702  
2. 431131 1. 327096 3. 388294 4. 042884 1. 197694 0. 617659 1. 702362 1. 441349 0. 890186  
1. 933009 1. 543655 1. 695471 1. 108849 1. 94538 1. 288008 1. 8599 1. 286889 1. 580365

7. 237018 7. 753517 7. 901154 8. 089342 7. 957975 7. 454849 7. 563091 7. 864453 7. 399294  
3. 482568 3. 710619 3. 481038 4. 413096 3. 666084 4. 354416 3. 561276 3. 975556 3. 9363  
1. 879645 1. 456235 2. 416392 2. 172671 2. 023398 2. 149747 2. 092852 2. 912155 2. 805479  
6. 186938 6. 2809 5. 558292 6. 663463 5. 771995 6. 623372 6. 406756 6. 76281 6. 035866  
1. 04464 1. 607679 1. 137891 1. 630305 1. 043187 1. 15164 0. 942343 1. 489792 1. 180445  
1. 734995 2. 364314 1. 48426 1. 975326 1. 596532 1. 525487 1. 699762 1. 323184 2. 150619  
1. 405667 1. 534237 1. 831821 1. 632033 1. 471801 2. 229353 0. 866824 1. 151431 1. 601213  
2. 818083 2. 945328 2. 425206 3. 000851 2. 58351 3. 016326 2. 452447 3. 017149 3. 104643  
1. 452527 1. 918732 1. 629188 2. 088449 1. 776319 1. 784731 1. 859354 1. 389819 1. 295871  
6. 35086 6. 703432 6. 526074 7. 038127 6. 606257 6. 772403 6. 284258 7. 030085 6. 756502  
5. 779298 6. 410181 6. 714967 6. 02368 6. 907528 7. 382596 6. 568317 6. 65806 5. 791867  
4. 987388 4. 920928 5. 549835 5. 974527 5. 148815 5. 140003 5. 016305 5. 574259 5. 526657  
6. 300994 7. 273745 6. 874817 6. 984146 7. 454116 7. 222972 6. 490094 7. 275773 7. 104343  
6. 235326 6. 722893 6. 253335 4. 936838 6. 386455 6. 175801 5. 493426 6. 712735 5. 547145  
4. 67107 4. 12261 5. 038966 4. 130033 4. 480639 4. 637833 5. 075987 4. 240397 4. 608434  
5. 909521 6. 309957 4. 66692 5. 309964 6. 203527 5. 639856 5. 092733 6. 083134 6. 19399  
4. 524903 4. 476125 3. 57236 5. 106544 4. 113303 4. 604951 5. 167199 4. 100723 3. 723923  
3. 913862 4. 36386 4. 510264 4. 146529 4. 557138 4. 180407 3. 975487 4. 389011 4. 601665  
5. 572961 5. 936366 6. 465596 6. 377039 6. 187515 6. 231434 5. 856679 6. 680893 6. 271576  
7. 918829 8. 527944 8. 137116 8. 697179 8. 262737 8. 574431 8. 785576 8. 491536 8. 610923  
4. 460259 4. 953684 4. 919166 4. 793459 4. 68423 4. 874898 4. 64149 5. 138874 4. 473735  
7. 000636 7. 336609 7. 446194 7. 433279 7. 00296 7. 454672 6. 855772 7. 235861 6. 976242  
4. 258675 5. 463014 4. 492285 4. 506224 4. 630439 4. 375602 5. 12035 5. 070917 4. 726825  
1. 785495 2. 044124 1. 593323 1. 639545 1. 530113 1. 918601 1. 721846 1. 84007 1. 343244  
7. 15018 7. 419363 7. 199851 7. 54998 7. 281055 7. 53836 7. 522584 7. 410701 7. 243886  
2. 090433 1. 534874 1. 545656 1. 515449 1. 229812 1. 367522 1. 704558 1. 417053 1. 131144  
4. 145259 3. 439259 4. 272238 3. 686441 4. 372572 3. 864279 2. 616415 3. 872101 3. 608926  
6. 816806 5. 927576 6. 318122 5. 282328 5. 655996 6. 422349 5. 965959 6. 108714 6. 667502  
3. 66228 3. 760022 3. 643288 2. 61364 4. 22667 3. 632475 3. 089131 4. 177806 4. 489161  
6. 229815 6. 711225 5. 922734 5. 777375 6. 543741 6. 399253 6. 226412 6. 792394 6. 272282  
1. 585371 1. 567942 1. 855316 1. 562555 2. 091617 1. 785313 3. 322775 2. 110183 2. 233514  
7. 875863 8. 070494 7. 899978 8. 395072 8. 200692 7. 920696 7. 843195 7. 867634 8. 18617  
1. 158031 1. 42353 0. 999655 1. 074333 1. 505763 1. 122695 1. 445432 1. 035514 1. 108533  
5. 075464 5. 162119 5. 042113 5. 41548 5. 262349 5. 909421 5. 725189 5. 442926 5. 313964  
2. 972155 2. 720361 2. 400363 3. 450546 3. 428219 2. 997437 3. 439426 2. 442542 2. 225731  
6. 379902 6. 003837 6. 034168 5. 97284 5. 661307 6. 340751 5. 467885 5. 799765 5. 832174  
2. 839599 3. 469825 3. 948543 4. 296616 3. 596797 3. 445979 3. 230278 3. 38051 4. 054808  
4. 994653 5. 842283 7. 601718 5. 260752 5. 927596 6. 089028 5. 363944 6. 945982 6. 469637  
4. 720906 5. 368451 4. 866026 5. 246746 4. 619178 4. 305271 4. 11688 4. 75016 4. 102555  
2. 19137 2. 890544 1. 914377 2. 064609 2. 499674 1. 743825 1. 825234 2. 5422 3. 385413  
4. 697758 4. 240994 4. 922291 4. 953349 3. 543371 4. 039966 3. 486691 3. 74091 4. 515172  
8. 4048 8. 728149 8. 591715 8. 523755 8. 472823 8. 534625 7. 954251 7. 961782 8. 391115  
2. 141836 1. 816457 2. 098519 1. 678531 3. 112872 1. 905132 1. 592195 1. 868064 2. 568309  
8. 626414 8. 724253 8. 733737 8. 938827 9. 127308 8. 725112 8. 667228 8. 994036 8. 492736  
1. 822732 1. 920962 2. 622291 2. 21292 1. 494351 1. 895398 2. 020651 1. 892302 2. 182796  
9. 395636 7. 738527 8. 14384 7. 488476 6. 66784 6. 472666 7. 823292 7. 753323 8. 902326  
2. 247858 2. 52647 2. 765945 2. 379907 1. 999424 2. 650493 2. 199008 2. 025245 2. 245574  
5. 930187 5. 500838 5. 296182 5. 693103 5. 500373 5. 729033 5. 65304 6. 637592 5. 631198  
4. 75553 5. 657764 6. 030253 5. 945782 6. 019551 5. 466719 5. 888485 5. 210498 5. 778756  
8. 482653 8. 33217 8. 331729 8. 457956 8. 532543 8. 620529 8. 507384 8. 380876 8. 161371  
2. 863782 3. 901098 3. 829429 3. 344878 3. 175949 4. 400213 4. 377843 4. 581559 3. 177439

3. 033491 3. 119843 2. 507739 3. 050301 2. 694565 2. 871029 2. 536607 2. 666148 3. 268534  
2. 676215 2. 582681 2. 496865 2. 697173 2. 118516 2. 596096 2. 825283 2. 816474 2. 560136  
5. 862421 6. 25343 6. 358667 6. 926488 5. 898273 6. 707521 5. 798941 6. 886671 5. 925985  
1. 309656 1. 827452 1. 293625 1. 851746 1. 936865 2. 273647 1. 342346 1. 844082 1. 43647  
7. 973577 8. 923947 8. 747266 7. 889188 8. 71822 8. 406434 7. 588207 8. 789952 8. 145689  
5. 131479 5. 171965 5. 300431 5. 107978 5. 400544 5. 346788 4. 775381 5. 105522 4. 871739  
3. 363593 2. 990883 2. 852894 2. 541746 3. 386556 2. 816512 2. 842165 3. 915388 2. 669255  
5. 138138 6. 11457 5. 796513 5. 689855 6. 404268 6. 036095 5. 720214 6. 315792 6. 362881  
4. 540912 4. 548941 4. 245574 4. 980979 4. 55133 4. 701925 3. 749938 4. 296672 3. 887952  
2. 220768 4. 053332 4. 247866 2. 803272 4. 13616 4. 063491 2. 866782 2. 863835 3. 859962  
3. 92472 3. 527392 3. 52149 3. 801002 3. 980817 3. 637404 4. 020107 3. 103515 3. 45999  
0. 868768 2. 091019 2. 407925 1. 271563 0. 681405 1. 059266 1. 149618 0. 907962 0. 807069  
4. 138241 1. 543277 1. 47426 1. 475166 1. 549173 1. 68032 3. 426575 1. 248938 1. 690992  
5. 106594 5. 52753 5. 58166 4. 666311 5. 162812 5. 520307 4. 76689 5. 567033 4. 892955  
7. 042477 7. 569626 7. 565449 7. 204281 7. 263994 7. 700772 7. 445219 7. 374957 7. 329733  
8. 73139 8. 362136 8. 359659 7. 758353 7. 989871 8. 018992 8. 103783 8. 339995 8. 480493  
3. 413589 2. 231916 2. 059998 2. 307941 3. 00418 2. 682745 2. 559402 2. 386547 1. 965962  
4. 505534 4. 566861 3. 978636 3. 48217 4. 369621 5. 103763 3. 908098 3. 606253 3. 416347  
3. 042188 1. 753577 1. 942904 1. 915496 1. 641921 2. 270836 1. 963159 1. 409586 2. 112589  
6. 216336 6. 803658 6. 614451 6. 790326 6. 875946 6. 80604 6. 784548 7. 181103 6. 754479  
3. 1757 3. 142088 2. 759279 2. 182348 2. 525075 2. 843152 3. 769499 2. 553642 3. 241339  
2. 980916 2. 183126 2. 495151 3. 884988 2. 388948 3. 523732 2. 519763 3. 409701 1. 244815  
6. 240958 5. 986548 6. 08369 5. 918571 5. 90592 7. 18717 6. 321718 6. 424819 6. 016583  
3. 238643 3. 439505 3. 576443 3. 957811 4. 005202 3. 48304 3. 827425 4. 500245 3. 64173  
4. 47348 5. 162961 4. 306677 4. 985436 5. 714532 5. 325996 4. 907946 4. 503633 5. 314071  
2. 145759 2. 13405 3. 308359 2. 931249 3. 220925 4. 182757 4. 785009 3. 890017 2. 959127  
2. 864874 4. 87586 5. 470021 5. 03064 3. 935867 4. 450672 4. 392577 4. 827449 4. 454189  
5. 326075 5. 613912 5. 082729 5. 831723 5. 493756 5. 491542 5. 73253 5. 522084 5. 954967  
4. 839572 5. 381474 5. 422439 4. 817679 5. 9521 4. 478682 4. 46467 5. 077071 5. 000127  
3. 75874 3. 526995 2. 894958 3. 929777 2. 967182 3. 431764 3. 006902 3. 671649 3. 076124  
3. 435696 4. 097708 3. 01419 4. 514734 3. 231116 4. 282214 3. 462779 2. 938476 3. 377158  
6. 224714 6. 199779 6. 199438 5. 929564 6. 37514 6. 094333 6. 575675 6. 605436 6. 06302  
4. 457993 5. 832539 5. 930691 5. 452139 5. 607034 5. 021671 5. 452215 5. 550671 5. 376456  
4. 634087 4. 380649 5. 73527 4. 318621 5. 286861 3. 238687 6. 603482 3. 814363 4. 523612  
1. 400704 1. 23662 1. 713818 1. 630381 1. 328274 2. 147697 1. 652335 1. 44142 1. 529886  
6. 023417 5. 220378 5. 812478 4. 066131 5. 240419 5. 024376 5. 119337 5. 41965 6. 241501  
1. 753846 1. 77462 1. 993197 2. 408891 1. 760657 1. 638698 2. 379499 1. 894037 1. 558073  
1. 572776 1. 046214 1. 278543 0. 664851 1. 431283 1. 203142 1. 49678 1. 090747 1. 166533  
3. 017254 2. 64083 3. 085834 2. 97646 2. 843012 3. 331843 3. 467993 2. 981334 2. 95021  
6. 135697 5. 518061 4. 78283 5. 929609 6. 157269 5. 774913 3. 85569 6. 299679 4. 971625  
6. 102759 4. 515153 5. 359952 3. 878971 4. 54587 3. 860724 4. 226604 4. 516271 4. 026016  
1. 305946 0. 925123 1. 139804 1. 575006 0. 810489 1. 461715 1. 808855 1. 077538 0. 932489  
1. 531485 1. 118988 1. 28415 0. 947008 1. 407046 1. 481211 1. 127513 1. 279009 2. 410219  
2. 542955 2. 184455 2. 655317 2. 718055 1. 868342 2. 800245 1. 868616 1. 87606 1. 850639  
1. 291312 1. 119772 0. 948649 1. 284975 0. 847686 0. 909651 1. 033185 1. 042315 0. 982883  
2. 823587 1. 759802 2. 106856 2. 20229 1. 823397 1. 756514 1. 692813 2. 452756 2. 255912  
1. 807647 1. 852662 1. 609309 2. 835157 1. 6077 1. 961151 2. 878256 1. 643733 2. 063727  
1. 121881 1. 623005 1. 214044 1. 147408 1. 128814 1. 232435 1. 49927 1. 411767 1. 724531  
1. 337009 1. 064002 1. 333626 1. 191928 1. 520171 1. 825154 1. 680256 1. 612946 1. 62003  
1. 171741 1. 317794 1. 552097 1. 446704 1. 4311 1. 346145 1. 25174 2. 36914 1. 923411  
1. 938374 1. 648017 1. 69509 2. 172599 2. 135297 1. 86989 1. 816732 1. 74132 1. 710421

3. 678742 3. 4526 3. 200768 3. 56688 2. 425776 3. 635893 3. 537482 3. 371009 3. 166037  
1. 359965 1. 079618 1. 006851 1. 216877 1. 657554 1. 260381 1. 626087 1. 189603 1. 3892  
1. 5472 1. 176781 1. 3372 0. 790134 1. 02989 1. 826421 2. 012448 0. 829795 1. 643307  
3. 861469 4. 54481 5. 306076 1. 971712 3. 200554 4. 626474 3. 87423 2. 394234 5. 556799  
1. 821001 2. 020688 2. 340171 2. 01397 2. 117201 2. 14254 1. 936473 1. 636961 1. 835061  
1. 609674 1. 337913 1. 441514 1. 366931 1. 73665 1. 325624 1. 49692 1. 953569 1. 494559  
2. 618108 1. 999147 2. 014334 2. 23618 1. 964274 3. 651491 2. 170191 1. 956009 1. 672438  
4. 133043 4. 041425 4. 533734 2. 924355 1. 873133 4. 209575 2. 691523 4. 314049 2. 071794  
7. 063813 6. 9158 7. 022365 6. 059798 7. 14173 6. 613279 6. 310642 6. 204532 6. 703145  
2. 145596 2. 097671 1. 769538 2. 493118 1. 723741 2. 068981 1. 958876 2. 02638 1. 779524  
3. 571115 3. 321429 2. 391579 2. 204801 2. 157589 2. 476394 2. 178187 2. 093776 3. 51809  
3. 342147 1. 796366 1. 868766 2. 052322 2. 194315 1. 884491 2. 085251 2. 307545 1. 80525  
5. 660239 6. 094037 6. 460723 5. 780464 5. 004124 5. 321617 5. 368132 4. 666247 5. 433761  
1. 654363 1. 772811 2. 082704 1. 566166 1. 838406 1. 887535 1. 254254 1. 621773 1. 90012  
5. 882257 6. 008338 6. 068871 6. 776296 6. 08615 5. 546837 5. 431641 5. 609489 5. 812289  
3. 151324 3. 749592 3. 882873 3. 23188 3. 597689 3. 90158 4. 569862 2. 572619 3. 225801  
1. 013682 0. 795506 1. 48525 1. 07664 1. 009172 0. 847834 1. 312517 1. 651235 1. 680587  
2. 035142 1. 798101 1. 506093 1. 678098 1. 735001 1. 82962 2. 775596 1. 739218 1. 877609  
4. 231815 3. 456267 3. 170265 2. 742269 2. 91814 3. 039563 4. 387129 3. 633862 3. 521518  
1. 54614 1. 374379 1. 505488 1. 72094 1. 289061 1. 801026 1. 291097 1. 732461 1. 009354  
2. 747054 2. 332213 2. 082636 2. 226023 1. 870689 1. 496808 1. 749716 1. 549323 2. 087814  
1. 758565 1. 661651 3. 447325 2. 530598 1. 537602 2. 465112 2. 122975 2. 47438 1. 442926  
3. 276456 4. 708722 4. 381732 4. 997989 3. 531136 3. 281454 2. 41128 3. 875489 4. 76511  
2. 632304 2. 654899 2. 22366 2. 955603 2. 154272 3. 08554 2. 733081 2. 194882 2. 341644  
2. 050738 1. 949761 1. 836347 1. 972432 1. 627012 2. 322809 2. 499839 2. 575296 2. 12288  
5. 973039 6. 221231 5. 931044 6. 21985 6. 429088 6. 507366 6. 387072 6. 181895 6. 264225  
2. 362954 1. 444633 1. 997616 1. 676178 1. 504602 1. 2335 1. 15187 1. 320314 2. 173291  
8. 135462 8. 071079 8. 053515 9. 145276 8. 049961 7. 961478 8. 245298 8. 039792 6. 547216  
7. 515769 8. 774555 6. 701433 9. 288158 8. 303072 8. 041293 8. 940294 8. 275303 8. 513523  
2. 262876 1. 715143 1. 829322 2. 122569 1. 996322 1. 607995 2. 415719 1. 774119 1. 737495  
4. 061836 1. 980285 2. 758824 2. 672574 2. 738951 2. 106899 2. 935695 1. 631636 2. 62544  
1. 761547 1. 774756 1. 383021 1. 291122 1. 224112 1. 886835 1. 868938 1. 195791 1. 086177  
2. 204616 1. 750011 1. 850951 1. 490022 1. 510088 1. 729955 2. 48193 1. 455518 1. 475348  
2. 374203 2. 660581 2. 742415 3. 070593 2. 98446 2. 49302 2. 37267 2. 184911 2. 314639  
5. 597217 4. 965694 5. 282483 5. 147698 5. 418557 5. 017894 5. 675218 5. 076069 4. 972484  
4. 976316 4. 275225 4. 706487 4. 328102 3. 478282 3. 876597 3. 625021 4. 091673 3. 088923  
6. 401531 4. 095137 5. 841188 3. 256231 4. 069015 3. 463262 4. 402595 4. 457574 4. 835617  
1. 727757 1. 604343 1. 454679 1. 737014 1. 630386 1. 327231 1. 592323 1. 891541 2. 084975  
2. 411086 2. 501969 1. 988947 1. 727924 2. 333012 1. 95051 2. 385271 1. 610146 2. 881606  
11. 57646 11. 29197 11. 2801 11. 03869 11. 17154 10. 85111 11. 33233 11. 04694 11. 42106  
1. 307264 0. 819873 0. 861741 1. 519835 0. 655929 0. 830893 0. 808755 1. 167035 1. 039853  
1. 859988 1. 551255 1. 848306 1. 562485 2. 41586 2. 349585 1. 698074 2. 650514 2. 261451  
6. 832429 6. 772933 7. 295249 6. 496367 6. 672574 7. 242415 7. 036115 6. 284667 7. 10783  
6. 965896 6. 892653 6. 721153 6. 644519 7. 2269 7. 033503 7. 273959 7. 045276 7. 406744  
2. 916968 1. 437187 2. 207976 3. 091224 1. 530575 1. 989246 1. 799188 1. 783589 1. 400804  
3. 507092 2. 915775 2. 814868 3. 025891 1. 981415 1. 878966 2. 956895 2. 100691 1. 728683  
7. 699572 7. 238434 7. 824317 7. 535258 7. 526974 7. 45628 6. 993448 7. 595736 7. 42189  
2. 769183 3. 914704 3. 304826 3. 357551 3. 695458 3. 036249 2. 996969 3. 844699 2. 45569  
2. 09974 2. 170656 2. 028418 2. 096588 1. 952831 1. 979184 2. 257093 2. 614441 2. 400313  
2. 108899 1. 90982 2. 172997 2. 371774 1. 733849 1. 403203 1. 466385 1. 387226 2. 055674  
3. 44719 2. 27055 2. 689586 2. 605741 2. 672138 3. 040079 3. 057262 2. 952639 3. 065049



2. 158081 3. 307994 3. 099999 1. 741473 2. 30216 2. 382493 1. 82211 2. 002347 1. 502592  
5. 208432 4. 061103 3. 888231 3. 286592 4. 144915 4. 581514 4. 435104 3. 977613 4. 717629  
2. 15562 2. 686794 2. 267082 2. 336205 2. 805637 2. 212021 2. 093846 3. 071358 2. 214809  
6. 864033 3. 670624 5. 476097 4. 589113 3. 838059 3. 625621 5. 234644 3. 860376 5. 705538  
1. 827868 1. 720071 1. 537009 1. 643052 1. 419894 1. 301963 1. 473284 0. 969456 1. 112187  
2. 78732 1. 039786 1. 76957 1. 512891 1. 539337 1. 418357 1. 597683 1. 60699 1. 411102  
2. 830843 2. 532765 1. 887605 1. 783909 1. 479845 2. 245282 1. 665127 1. 863103 1. 981016  
1. 219775 1. 187401 1. 476843 1. 101067 1. 107262 1. 198214 1. 239752 1. 176838 1. 435191  
2. 910696 1. 622418 2. 268052 2. 490295 1. 745024 1. 832668 2. 444169 1. 73984 2. 257427  
2. 692119 3. 927765 3. 279405 3. 476409 2. 605415 3. 358538 3. 650694 3. 389314 3. 06372  
5. 092787 4. 695932 4. 605526 4. 019895 4. 076038 4. 608237 3. 495575 4. 924909 3. 555974  
1. 885978 2. 964387 2. 458569 2. 762749 1. 859644 2. 458482 1. 99481 3. 510511 2. 468588  
2. 773624 1. 38486 1. 619592 1. 29314 1. 410465 1. 660353 2. 147086 1. 481477 3. 147901  
1. 253619 1. 365494 2. 416914 1. 190996 1. 463566 2. 217038 1. 263708 1. 348065 1. 912453  
1. 423488 1. 022198 1. 459935 1. 290142 1. 266957 1. 049099 1. 293723 1. 102956 0. 858154  
1. 879237 1. 956275 2. 42634 2. 815223 2. 368869 2. 532925 2. 712508 2. 416833 2. 715295  
2. 079268 4. 227284 4. 491774 3. 510629 4. 23519 4. 21221 3. 630097 2. 126855 5. 616264  
2. 110714 1. 498175 1. 893463 1. 339263 1. 378862 1. 068493 1. 454658 2. 018905 1. 330076  
5. 442582 6. 933482 6. 268265 6. 012914 5. 990529 6. 682043 6. 144358 6. 657744 6. 210638  
1. 060823 2. 083325 1. 83577 1. 594988 1. 292729 0. 818093 0. 896995 1. 898424 1. 241154  
4. 76165 5. 007133 4. 823503 4. 903041 5. 318246 4. 727935 4. 946408 5. 247349 5. 633348  
1. 380926 1. 186659 1. 425225 1. 24647 1. 214792 1. 493246 1. 382031 0. 757273 1. 150615  
0. 813064 1. 381186 1. 078406 2. 117195 1. 339529 2. 516579 1. 359156 0. 980107 3. 182907  
6. 167915 6. 477648 6. 390449 6. 446238 6. 351186 6. 063882 5. 498643 5. 643398 6. 540687  
5. 162163 5. 766183 5. 426125 5. 502545 5. 678504 5. 483497 5. 855602 5. 060051 5. 632829  
4. 555478 5. 329557 3. 795377 5. 196356 4. 210748 4. 795442 4. 785781 4. 556441 3. 448318  
3. 282808 2. 683397 2. 6751 2. 027031 2. 086096 2. 734299 4. 148965 2. 661616 2. 234232  
3. 152605 3. 021158 3. 222496 3. 216454 3. 251148 2. 620154 2. 906356 2. 541873 3. 563842  
5. 415491 4. 837761 4. 405194 5. 053124 4. 110891 5. 237906 4. 240393 4. 308264 4. 490646  
5. 673733 5. 278412 5. 143411 6. 084182 6. 160558 5. 618104 4. 784861 5. 270863 5. 355828  
3. 946538 5. 182552 5. 420359 4. 903557 5. 751801 5. 278583 4. 725841 5. 187214 5. 048424  
6. 635313 7. 825619 7. 505643 7. 696173 7. 813713 8. 150175 7. 283914 7. 895296 7. 678031  
7. 485197 6. 79342 7. 248066 7. 380884 7. 287296 6. 766966 7. 46709 7. 205242 7. 252418  
5. 967277 5. 525907 5. 413292 4. 211438 4. 833956 5. 273608 4. 828512 4. 489239 6. 037979  
1. 52284 1. 670753 1. 193002 2. 436533 2. 888706 2. 483015 1. 285683 2. 967176 1. 877668  
1. 596103 1. 559605 1. 933906 1. 369727 1. 236065 1. 930142 1. 592385 1. 862453 1. 293122  
2. 503829 2. 173955 5. 249686 3. 068277 3. 291594 2. 45731 1. 929926 3. 834126 3. 442354  
5. 625989 6. 131776 6. 046434 4. 688784 5. 632704 5. 041213 3. 989558 5. 090979 4. 187693  
5. 323385 6. 230152 5. 151953 5. 976391 5. 268697 5. 154366 5. 61585 5. 603446 5. 632426  
4. 060915 3. 214438 3. 236885 2. 906341 3. 568287 2. 662113 3. 735785 4. 199532 2. 632515  
2. 390196 3. 00317 2. 753914 2. 385082 1. 836841 1. 863684 2. 768304 1. 534542 2. 92994  
2. 627688 2. 299933 3. 223707 2. 552415 3. 069891 3. 051382 3. 776185 2. 568884 2. 865489  
1. 587162 1. 506897 1. 217043 1. 581815 1. 529699 1. 577281 1. 670627 1. 445912 1. 060428  
5. 384373 7. 39486 6. 95798 6. 524854 6. 572409 7. 194556 6. 494967 7. 256735 6. 430776  
1. 919971 1. 47186 1. 305045 1. 641495 1. 522343 1. 431139 2. 339645 1. 157658 1. 378197  
3. 269894 2. 900747 3. 369341 2. 301492 2. 56765 2. 846912 2. 205998 3. 112651 2. 19258  
8. 981161 9. 338594 9. 359131 9. 149794 9. 049755 9. 393529 8. 662209 9. 013234 9. 064224  
7. 021379 7. 981748 6. 530407 7. 226234 7. 125685 9. 044863 7. 050342 9. 229871 6. 770283  
6. 847707 6. 510071 6. 782347 6. 910307 6. 626528 6. 451296 6. 42006 7. 042198 6. 861217  
5. 660091 5. 328982 5. 827608 6. 622384 5. 797971 6. 071919 5. 849183 4. 842505 5. 40602  
4. 055596 2. 96887 3. 494648 3. 130666 3. 349341 3. 335737 3. 384625 3. 299603 3. 143782

7. 961269 5. 491822 7. 648984 5. 432289 6. 041895 5. 206226 6. 195804 5. 996079 7. 301174  
1. 067389 1. 061862 1. 049104 0. 934055 0. 926235 1. 14293 0. 850481 0. 904579 0. 940138  
6. 695334 6. 29103 6. 178888 6. 602479 6. 626569 5. 336691 5. 419301 6. 541311 6. 43484  
5. 800224 5. 391244 6. 536077 5. 809952 5. 962374 6. 156298 6. 176159 6. 031411 5. 902909  
3. 664737 3. 434085 2. 70149 3. 194846 3. 165946 2. 207747 3. 561957 2. 658034 3. 144475  
1. 158918 0. 950207 1. 246719 1. 745712 1. 228057 1. 480206 1. 318429 2. 117128 1. 31288  
3. 381358 5. 483899 5. 327375 5. 530393 4. 617957 5. 759802 5. 45428 5. 653632 4. 937648  
3. 536094 4. 798099 4. 526573 3. 857196 3. 615643 4. 559177 3. 652352 4. 032915 4. 098797  
4. 977141 4. 808993 4. 506338 4. 28193 5. 444534 5. 462376 4. 143156 4. 892811 4. 8216  
3. 530721 3. 172119 2. 553236 3. 117104 3. 088874 3. 334834 3. 640885 3. 643659 3. 439572  
0. 89873 0. 856273 1. 413709 0. 781911 0. 698541 0. 924645 1. 879419 1. 116493 1. 146746  
2. 603469 1. 958355 1. 570032 2. 989095 2. 708726 1. 775287 1. 625306 2. 092301 1. 787376  
5. 298041 5. 156486 5. 777875 5. 426136 5. 552953 5. 4073 5. 339125 5. 172292 5. 351755  
3. 387753 2. 401605 3. 149957 2. 044103 2. 048347 1. 695431 2. 068541 1. 722614 2. 653754  
4. 661913 5. 080798 4. 689962 4. 946022 5. 128798 4. 797326 4. 292959 5. 230091 4. 642363  
2. 141533 2. 70233 2. 262486 2. 221981 2. 344719 2. 337395 2. 145628 2. 33 2. 056528  
3. 252893 3. 208252 4. 086399 3. 3755 2. 603076 3. 017146 2. 55749 2. 606398 2. 95117  
2. 39396 3. 886334 2. 450829 3. 648235 2. 721919 2. 910838 2. 223191 3. 23381 2. 624981  
2. 15278 2. 144277 1. 722237 2. 272673 2. 27966 2. 840811 2. 366847 1. 766846 1. 618645  
5. 094264 4. 753422 4. 871617 4. 302827 4. 5311 4. 348771 4. 444786 5. 003574 4. 606739  
1. 156511 1. 243317 1. 258959 2. 302425 1. 401301 1. 511864 1. 502813 1. 421315 1. 620038  
6. 092356 5. 747418 4. 741292 4. 812276 6. 206324 5. 655165 4. 753228 5. 317563 4. 656226  
2. 640394 2. 422522 2. 369371 2. 244604 2. 699344 2. 696145 2. 051704 2. 264979 2. 921725  
2. 505725 2. 019207 2. 701864 3. 465281 2. 355394 3. 050393 2. 032276 2. 633346 2. 631352  
5. 414298 5. 612797 5. 148902 5. 344442 6. 265681 5. 345461 5. 449792 5. 60313 5. 754548  
8. 914591 8. 849124 8. 335992 8. 714001 9. 188484 8. 170533 9. 059661 9. 066615 8. 705793  
1. 497737 1. 558338 1. 512186 1. 753357 1. 498881 1. 490899 2. 00211 1. 552345 1. 721558  
3. 365534 4. 376987 4. 477422 4. 081658 3. 501627 3. 778767 4. 515096 4. 442545 4. 716344  
1. 86488 1. 164539 2. 462239 2. 875592 1. 604982 1. 589874 2. 667111 2. 79741 1. 525222  
1. 490371 1. 272996 1. 221989 1. 776265 1. 689932 1. 68444 1. 32937 1. 440806 1. 407805  
4. 571994 3. 691658 5. 342818 2. 955017 3. 708695 3. 733977 3. 678914 4. 328997 5. 654862  
5. 744689 4. 833049 5. 723496 4. 647896 5. 074034 3. 728873 4. 534369 5. 04724 5. 791047  
1. 26973 0. 943437 1. 565745 1. 486813 1. 194366 1. 914544 1. 248562 1. 7049 2. 015664  
4. 14649 4. 263353 4. 225642 3. 738953 4. 17947 4. 586968 3. 991423 4. 115652 3. 231393  
3. 675741 4. 189033 4. 347228 3. 971701 4. 133664 3. 582048 4. 276359 4. 660064 3. 849617  
1. 126315 0. 952277 0. 578433 1. 317323 1. 055696 1. 523605 2. 742559 1. 518583 1. 218811  
3. 532948 3. 290983 3. 364778 4. 167052 3. 081995 3. 553288 3. 360745 4. 534092 3. 510433  
5. 265934 6. 470169 5. 941831 5. 956347 5. 532709 6. 023107 5. 812295 5. 184271 5. 855899  
2. 541602 1. 49461 1. 980536 1. 744159 1. 752742 2. 065503 3. 489117 1. 925526 1. 695133  
1. 093032 1. 256014 0. 868078 1. 213624 1. 603134 1. 512137 1. 601529 1. 174811 1. 224167  
4. 106756 4. 854098 5. 086658 4. 877923 5. 528849 5. 147963 4. 193138 5. 098632 4. 867189  
6. 83301 4. 914342 4. 991555 4. 965302 4. 237904 5. 117007 4. 476983 4. 493848 5. 185858  
3. 499768 1. 733237 2. 892983 2. 089224 2. 039528 1. 821726 3. 494385 1. 957312 1. 435706  
2. 059568 1. 678626 1. 568866 2. 040557 1. 705056 1. 711978 1. 824745 1. 437616 1. 663431  
0. 956742 1. 824234 1. 811269 1. 764061 1. 723285 1. 454629 1. 381731 2. 915081 1. 198672  
1. 471013 1. 063355 2. 709375 1. 670098 1. 194046 2. 248408 2. 124622 1. 417901 1. 225205  
1. 899426 1. 040854 1. 720119 1. 398048 1. 26165 1. 54307 1. 898839 1. 636222 1. 872925  
6. 435597 5. 54827 5. 942668 5. 839088 6. 490193 5. 652055 6. 000212 5. 749326 5. 788848  
4. 125062 4. 967536 3. 523481 4. 141732 4. 973255 5. 140302 4. 99732 4. 139194 3. 656549  
3. 655046 2. 32404 4. 113642 2. 602153 2. 727886 2. 564999 2. 863342 2. 269659 2. 594024  
1. 873767 1. 619087 2. 334985 1. 986048 2. 240734 1. 678972 2. 971407 2. 403152 2. 04142

3. 514539 2. 360379 3. 276924 3. 459382 2. 677048 2. 290077 4. 174138 3. 219029 2. 974362  
5. 144733 5. 429766 5. 062171 5. 30848 5. 648589 5. 887168 5. 58668 5. 947319 5. 017941  
1. 281153 1. 439816 1. 618719 1. 167492 1. 243642 0. 910961 1. 520106 1. 205901 1. 348724  
0. 832413 1. 14704 0. 925878 1. 056159 1. 420792 1. 362115 1. 142265 1. 603872 1. 041866  
1. 15768 1. 021027 1. 164305 1. 221011 0. 932546 1. 659613 2. 537634 2. 118612 1. 432739  
1. 290615 1. 936211 1. 671539 1. 237641 1. 450339 0. 647666 2. 339032 1. 299433 1. 222187  
1. 528321 0. 779108 0. 669298 0. 812535 1. 597141 2. 154864 0. 903249 1. 052689 1. 172059  
6. 292296 6. 150589 6. 386855 6. 022011 6. 1131 7. 682363 5. 917831 5. 615677 5. 629901  
2. 744153 1. 720887 1. 926634 1. 491594 2. 086491 1. 776157 1. 665897 2. 015829 2. 162288  
1. 038644 0. 952444 0. 835109 1. 054691 1. 503164 1. 322401 0. 989701 1. 11674 0. 979404  
4. 660435 4. 159274 4. 148727 4. 358202 3. 7361 2. 597877 3. 121185 3. 013394 4. 785395  
2. 095427 3. 193792 2. 641334 3. 063256 3. 50575 4. 112192 1. 533319 2. 166522 2. 19779  
3. 225078 3. 073487 3. 111529 3. 157321 2. 979123 2. 748457 3. 690899 3. 422627 2. 715581  
3. 254257 1. 995565 1. 920038 2. 796743 2. 193524 2. 337083 2. 554038 1. 915126 2. 064042  
1. 710452 2. 793713 2. 871688 2. 495152 4. 017515 3. 167998 2. 444237 4. 092068 4. 131773  
1. 879559 2. 703499 3. 094725 3. 722466 2. 318069 3. 996828 2. 51985 4. 062584 1. 848928  
3. 102918 3. 34642 4. 00392 3. 543332 3. 69827 3. 234585 2. 765665 2. 789387 2. 922152  
2. 075934 2. 103144 2. 221234 2. 110954 1. 917347 2. 415031 2. 626331 2. 452233 2. 096817  
3. 754485 3. 110923 2. 3713 2. 374191 1. 739654 2. 324409 2. 155895 2. 439512 1. 91684  
1. 874719 0. 997153 1. 068111 3. 005866 1. 510884 1. 323422 0. 717267 1. 21879 1. 717714  
2. 183596 1. 557324 2. 337438 2. 32153 2. 43105 1. 9193 2. 364403 2. 922648 2. 303165  
1. 564895 1. 984197 2. 013233 1. 460405 2. 567771 1. 652679 1. 797196 1. 600418 2. 342833  
1. 129142 1. 067846 0. 997161 0. 829854 1. 196515 1. 062874 1. 158973 0. 90997 0. 771114  
2. 771187 2. 211278 2. 084991 2. 547424 2. 469954 2. 061242 1. 520685 1. 80791 1. 652877  
1. 458255 1. 50801 1. 087521 1. 190849 1. 895195 1. 818877 1. 764267 1. 530457 1. 695909  
2. 281656 1. 603715 2. 161904 2. 131962 1. 989143 2. 058036 2. 243251 1. 668751 1. 222357  
2. 62496 2. 634938 2. 147372 2. 061885 2. 123585 2. 179978 3. 011872 3. 053555 2. 757942  
5. 815211 6. 142532 5. 055499 6. 603611 6. 083854 6. 447418 5. 806918 5. 406942 5. 779208  
1. 839398 1. 141619 1. 915502 1. 169043 1. 612129 1. 089923 1. 58338 1. 162622 1. 061573  
2. 083828 1. 721279 1. 460162 2. 052684 1. 12742 1. 681378 1. 453884 1. 638169 1. 822212  
2. 65098 2. 944719 2. 237045 2. 579388 2. 092156 2. 163462 2. 722184 2. 534562 2. 676029  
5. 717958 5. 565818 5. 891996 5. 791218 6. 220584 5. 792736 5. 874835 5. 498487 6. 366182  
2. 167174 2. 140662 2. 440806 2. 760834 2. 198925 1. 963489 2. 22289 2. 16059 1. 701721  
1. 242306 1. 067741 1. 253621 1. 221008 1. 551273 2. 263782 2. 509921 1. 757844 2. 014658  
1. 135258 1. 248359 1. 390841 0. 868323 1. 113181 0. 960868 1. 176331 0. 985381 1. 578283  
2. 181988 1. 717807 2. 583285 1. 846984 1. 618393 2. 429361 3. 350526 1. 907667 2. 219759  
1. 987951 1. 919532 1. 981028 2. 893928 2. 304289 1. 906774 1. 746544 2. 77858 2. 022543  
5. 011727 5. 931956 6. 009496 5. 839674 6. 061844 6. 037097 5. 776211 4. 768194 5. 988927  
4. 844587 4. 981328 4. 504539 4. 48371 4. 571947 4. 922785 4. 382087 4. 629006 4. 151287  
4. 328095 3. 632217 4. 277057 4. 830355 3. 397553 3. 263928 5. 284237 4. 695208 3. 526622  
1. 506309 1. 057257 1. 443864 1. 279832 1. 219439 1. 083493 1. 330364 0. 864045 1. 707407  
2. 230732 2. 346543 2. 038942 2. 218339 2. 102184 2. 418371 2. 342749 1. 800414 2. 778251  
1. 790342 1. 468153 1. 27067 1. 361047 0. 907376 1. 89915 1. 546427 1. 295111 1. 916357  
4. 901546 6. 421726 5. 892118 6. 240865 6. 807128 6. 720384 6. 81465 6. 362428 6. 501344  
1. 8212 1. 377353 1. 47504 1. 901231 1. 022323 1. 07266 1. 742054 1. 138736 1. 156033  
4. 250607 3. 724721 4. 953842 4. 447976 3. 56403 3. 807627 3. 877664 5. 298879 4. 766986  
4. 448291 4. 842963 6. 101419 4. 781692 5. 251724 4. 506097 4. 541483 5. 149412 5. 489449  
3. 384308 4. 347185 2. 414436 4. 324087 4. 227504 3. 619161 3. 828246 2. 36291 3. 258642  
0. 865692 1. 168904 1. 223925 1. 680918 1. 52431 0. 932601 1. 008243 1. 265467 1. 849786  
2. 058552 1. 228786 1. 381547 1. 859501 1. 665071 1. 944495 1. 990235 1. 541302 1. 848562  
1. 412797 1. 527682 0. 895239 1. 371904 1. 141163 1. 53166 0. 798586 1. 130711 1. 501075

2. 368121 2. 67946 1. 699393 2. 287349 2. 640263 2. 56295 1. 878624 2. 905038 1. 907884  
1. 475328 1. 571085 1. 214043 1. 485464 1. 131949 1. 786167 1. 033595 1. 184598 1. 844055  
1. 974546 1. 487473 1. 841717 2. 263079 1. 570123 2. 077605 2. 605397 2. 095643 2. 161133  
2. 606991 1. 514232 1. 735943 1. 945264 1. 806686 2. 111845 1. 769337 1. 836178 2. 252138  
10. 02008 10. 45485 10. 48354 10. 37577 10. 42131 10. 27181 9. 824557 10. 21888 10. 06095  
7. 148581 7. 261687 6. 510804 5. 281744 6. 493246 5. 26324 6. 574664 6. 414717 4. 883071  
2. 765337 1. 994076 1. 865677 2. 398463 2. 003874 1. 49136 1. 866587 1. 938449 1. 938449  
2. 959776 2. 318473 3. 445358 2. 566807 2. 229068 3. 364151 2. 577517 4. 296722 3. 899325  
2. 208834 1. 732082 1. 978109 1. 473749 2. 062055 1. 444896 1. 838586 1. 818412 2. 003818  
1. 644706 1. 55063 1. 25798 1. 598378 1. 990838 0. 937495 1. 272797 1. 319929 1. 754567  
2. 373155 2. 737994 3. 856273 4. 056889 2. 983323 4. 047737 3. 903781 2. 573455 3. 073148  
6. 609158 6. 341271 6. 284726 7. 582175 7. 002532 6. 743213 6. 543254 6. 632079 6. 837475  
2. 791049 2. 518954 2. 411058 2. 184116 2. 786259 2. 159938 2. 097235 2. 07289 2. 282588  
4. 017725 4. 984401 5. 302779 5. 462028 5. 179109 5. 335626 4. 52169 5. 927229 4. 707014  
1. 330519 1. 198537 1. 100731 1. 115961 1. 273345 0. 968597 1. 15712 1. 699924 1. 102734  
1. 352753 1. 37342 0. 947984 0. 829215 2. 64362 1. 771222 2. 224708 1. 333496 1. 672874  
5. 93607 6. 317046 6. 594892 6. 223401 6. 472524 6. 370344 6. 104329 6. 313189 5. 961066  
1. 895731 1. 215918 1. 179189 1. 042896 1. 015525 0. 880046 1. 827394 1. 001361 1. 327284  
1. 214777 1. 367832 1. 185908 1. 119248 0. 98381 1. 128237 1. 471721 1. 043403 1. 309249  
1. 136704 1. 001155 1. 493359 2. 467123 1. 439168 0. 857564 1. 02105 0. 948043 0. 763356  
2. 526079 3. 064329 2. 910944 3. 422017 2. 502344 2. 920283 3. 06412 3. 513486 3. 525535  
1. 315938 1. 302389 1. 993699 1. 095488 1. 172923 1. 32246 1. 707398 1. 400224 1. 379934  
1. 496651 1. 654389 1. 31814 1. 443037 1. 134504 1. 533857 1. 675877 1. 443846 2. 315407  
1. 903485 1. 775262 3. 246519 1. 672342 1. 76811 1. 94799 2. 084102 1. 931517 2. 027789  
2. 541235 1. 539313 1. 753985 1. 487133 1. 588824 1. 691824 2. 464118 1. 725025 1. 810798  
3. 265603 1. 385756 1. 910673 0. 648697 1. 632659 0. 718135 2. 263387 2. 877122 0. 972117  
1. 480304 0. 897467 1. 726926 0. 885655 1. 18823 1. 057067 0. 91299 0. 844895 0. 881862  
2. 449977 1. 752651 2. 078555 2. 792868 1. 844415 1. 708633 2. 393746 2. 1892 2. 023692  
2. 947177 1. 898401 2. 259987 2. 476814 2. 911596 1. 794813 2. 464654 1. 526354 2. 439835  
1. 714468 1. 393235 0. 683284 1. 287479 1. 091797 1. 339849 1. 640633 0. 891941 0. 964057  
3. 729174 3. 018765 3. 378813 2. 328095 2. 647572 2. 557426 3. 561338 2. 252183 2. 837009  
6. 517114 3. 813627 3. 28372 4. 42628 4. 888208 5. 142836 4. 844791 2. 558851 3. 102334  
3. 714607 3. 229755 3. 00402 3. 101183 3. 402528 3. 547484 3. 511362 3. 056268 3. 618413  
1. 60434 1. 93242 1. 381146 1. 475361 1. 426359 2. 04002 1. 703442 1. 66378 1. 547655  
1. 030062 1. 579947 2. 310726 0. 969462 2. 624049 1. 426131 2. 616904 1. 425118 1. 784153  
4. 222686 4. 942369 4. 41973 4. 604732 3. 779957 4. 352979 3. 875748 6. 018227 4. 606619  
1. 992958 2. 518354 2. 639802 3. 789767 1. 677184 2. 218647 1. 66084 2. 372746 3. 251366  
3. 251377 3. 236807 2. 99928 2. 999172 2. 302527 2. 799945 2. 953203 2. 954151 2. 223286  
3. 185317 3. 74675 3. 795917 3. 797117 3. 557488 3. 363187 3. 619094 4. 028699 3. 517699  
2. 828836 3. 952539 3. 2584 3. 073208 3. 97917 1. 967977 3. 302826 5. 083405 3. 265088  
4. 293823 4. 773525 5. 053166 4. 970534 5. 477237 4. 425903 4. 566218 4. 335462 4. 976356  
1. 375381 1. 411391 2. 145853 2. 334086 1. 084053 1. 794131 2. 590687 1. 809331 1. 715222  
1. 524792 1. 593978 1. 313075 1. 629504 2. 298053 1. 111775 2. 153288 1. 420376 1. 195605  
1. 772192 1. 383403 1. 314115 1. 717311 1. 737575 1. 776597 1. 346158 1. 778809 1. 746446  
3. 262944 2. 548076 2. 479608 2. 146547 1. 875403 2. 921762 2. 569226 2. 358426 3. 394871  
8. 237756 8. 494052 8. 161094 8. 288158 8. 11661 8. 107606 8. 051613 7. 920664 7. 97332  
3. 685721 4. 166362 4. 195913 3. 313677 4. 939951 3. 72341 3. 585487 3. 763617 3. 708515  
2. 379301 1. 572631 1. 74166 1. 954801 1. 591002 1. 741865 2. 429535 2. 584129 1. 341326  
1. 816047 2. 173072 1. 581721 2. 72478 3. 184899 1. 486609 2. 386049 1. 093962 2. 64585  
1. 947987 1. 363321 1. 442115 1. 375731 1. 530018 1. 576031 2. 227852 2. 86008 1. 432955  
3. 755082 4. 380433 3. 915142 3. 535802 3. 602774 3. 82603 4. 162729 4. 775132 3. 560894

0.896362 1.193027 1.23571 0.966514 1.070836 1.250335 1.333139 1.266393 1.224606  
4.415467 5.07043 5.588594 4.400252 5.545505 4.800515 5.388272 5.185028 4.913497  
1.61398 1.428267 1.535751 1.424985 1.280578 1.153307 2.375769 1.805688 1.427209  
2.562883 2.504471 3.169486 3.858635 2.31161 3.623545 4.601579 3.518432 3.088388  
1.533544 1.351585 1.415136 1.175322 1.105936 0.9201 1.62797 2.016356 1.409872  
2.722779 2.310836 2.292794 3.030834 1.946355 2.340665 1.953621 2.297526 2.639483  
3.193015 2.282815 1.835785 2.267318 2.663029 2.629813 2.21732 2.22161 2.494426  
7.138641 5.648887 6.943971 4.982903 5.314103 4.994887 4.512438 5.681254 7.519266  
1.637255 0.910856 1.178727 1.349147 1.439787 1.088554 1.352375 1.417129 0.695134  
2.012735 0.898249 2.514856 2.571626 1.526685 1.688272 1.868331 2.175825 1.537106  
1.412458 1.349198 1.192518 1.021001 1.036512 1.57201 1.936137 1.918197 1.191043  
1.778762 1.605685 1.098283 1.429361 1.511026 1.650394 2.196438 1.676646 1.777928  
1.764758 1.821182 2.087718 2.1112 1.681221 1.406726 1.786954 1.835059 1.540729  
1.940971 2.262569 1.985965 3.796139 2.133416 3.032445 2.651211 2.274423 2.516991  
6.481684 6.669758 6.575603 6.517952 5.742626 6.42841 6.970061 6.069391 6.070268  
1.790241 1.335387 1.269637 2.079443 1.428789 1.590866 1.756773 1.291218 1.427635  
1.117022 1.245126 0.909965 1.598474 1.153699 1.807659 1.140495 0.986896 1.367264  
7.238363 6.990144 7.282321 6.69374 6.978694 6.827946 7.003007 7.271419 7.654283  
1.629056 1.607862 1.28367 1.905257 3.536558 2.439861 3.114642 2.409111 2.848292  
2.466202 1.716155 1.348898 2.096453 1.826285 1.520293 1.285099 1.724278 2.029564  
7.039048 7.684779 7.654872 7.229199 7.496452 7.431829 6.66453 6.969467 7.212505  
1.59988 2.23464 2.603463 2.919414 2.978119 2.218004 2.149612 2.583614 2.114248  
1.443979 1.325116 1.616773 1.270883 1.184128 1.680434 1.803352 1.418183 1.646548  
2.566685 3.086311 1.675686 3.089818 1.923164 1.761121 3.156901 2.425483 1.800706  
3.512718 3.960204 4.133376 3.587489 3.618928 3.614915 3.34646 4.056895 3.734414  
1.928776 2.183621 2.063034 1.854195 1.602199 2.234208 2.030375 2.224296 2.314344  
2.665314 2.362581 2.574957 1.943663 2.756121 3.440523 3.941054 2.46264 2.117868  
1.853986 3.396739 1.902334 2.994792 2.257227 1.827063 2.236085 2.302899 2.052042  
6.081831 6.356131 6.210917 7.029013 6.129886 6.279278 5.696129 6.392308 6.344894  
1.405054 1.567188 1.106107 1.704464 1.632292 1.834784 1.384938 1.001936 1.271462  
6.124794 6.113343 6.554538 4.289522 6.140588 6.59736 4.801849 5.193972 6.290429  
2.747763 2.407797 1.759628 3.406283 1.709473 1.599219 2.628204 2.651127 2.041455  
2.279424 1.062608 1.822962 1.803131 1.824015 1.496161 1.453368 1.317018 1.281023  
2.588974 2.350857 2.63822 1.897257 2.505029 2.175883 3.056439 3.058257 1.800137  
1.848714 1.161106 1.320745 2.086651 1.635923 1.886733 2.169516 1.208602 1.651592  
5.871338 5.676805 5.671963 5.54265 5.596179 5.204232 5.280673 5.233001 4.997162  
2.053578 2.121904 3.223113 2.138342 1.706463 1.788222 3.167151 2.769529 1.994207  
1.67532 1.559613 1.722597 1.94 1.64401 1.963205 1.686459 1.465734 2.283897  
2.305741 1.777034 1.812762 1.753391 1.494229 1.584699 1.737065 1.543545 1.602192  
3.921618 1.483064 1.113636 1.751231 1.312167 1.121447 1.460461 1.466413 0.933962  
3.184895 3.480994 2.33389 2.386177 2.820052 2.650778 1.938455 1.92302 1.740849  
0.966558 1.004608 1.304817 1.501374 1.123192 1.525727 1.25073 1.298459 1.399065  
4.885827 5.097828 4.943395 5.023724 4.889144 4.466866 4.723731 5.009895 4.937535  
2.784068 3.747145 2.117226 3.655279 3.795705 4.28049 3.369832 3.796247 3.713123  
5.005075 5.415791 5.617145 5.068646 5.610332 5.456341 5.183626 5.358863 5.397196  
3.782892 3.279521 3.80084 2.938722 2.34452 3.319045 2.906778 3.27005 2.438393  
4.545227 3.896349 3.936359 3.318816 4.070167 3.409192 3.492044 3.361764 3.451373  
2.254833 1.598533 2.258389 1.837388 1.582992 2.036277 1.905152 1.908332 1.887162  
3.664636 3.486162 2.91619 3.260206 4.173988 4.020043 2.904015 3.529514 3.463601  
3.807955 3.822679 3.16906 2.396593 3.15849 1.866071 1.810403 2.34704 5.294482  
1.214364 1.545522 1.284383 2.44651 1.59675 1.441422 1.241911 1.408701 1.813197

4. 551468 5. 128748 3. 934809 4. 788463 5. 329648 5. 408273 4. 875108 4. 115969 5. 06691  
1. 437069 1. 090721 0. 97454 1. 567808 0. 920775 1. 049459 1. 243364 1. 163144 1. 340104  
2. 814563 1. 689111 2. 365002 1. 432163 1. 541636 1. 334081 1. 578168 1. 596639 2. 293022  
6. 586201 6. 291166 6. 069638 6. 258917 7. 164946 6. 152206 6. 756915 5. 779293 6. 477266  
1. 640379 1. 751153 3. 174168 1. 555403 2. 134134 1. 98848 2. 059109 1. 832636 1. 893228  
6. 73031 6. 996617 6. 825359 6. 6917 7. 654275 6. 130252 6. 468126 7. 15805 6. 950028  
5. 050296 5. 241945 6. 025839 6. 311152 5. 650067 5. 951326 5. 405023 5. 347671 5. 736799  
5. 048329 5. 087734 5. 935343 6. 035392 5. 768624 5. 880416 5. 308076 5. 783184 5. 324642  
7. 963679 8. 09506 7. 707486 8. 086699 7. 783278 8. 192512 7. 654391 6. 998024 7. 920328  
5. 937593 6. 599221 6. 457571 6. 693719 6. 877133 6. 457428 6. 443568 7. 257121 6. 64852  
3. 286469 3. 429554 3. 451207 3. 813366 3. 842796 3. 881858 3. 484372 2. 932926 3. 069995  
2. 871665 1. 171307 1. 547078 2. 614901 1. 691645 1. 13271 2. 010557 2. 381237 1. 729115  
2. 211506 2. 469135 2. 57338 2. 071554 2. 762326 2. 272345 3. 813841 2. 685207 2. 512031  
2. 506111 2. 607124 2. 755419 2. 696832 2. 6977 2. 378561 3. 232971 2. 484029 2. 617812  
3. 681284 3. 879246 3. 359117 2. 920375 3. 395497 2. 884315 3. 488057 2. 850354 3. 279046  
3. 1524 3. 347078 2. 974634 2. 495189 1. 907141 1. 93713 2. 001097 3. 464191 3. 414656  
6. 996521 7. 155206 7. 136082 7. 16763 7. 231905 7. 460237 7. 264618 7. 37082 7. 121973  
8. 305139 8. 284992 8. 328455 8. 183464 8. 427973 8. 342268 8. 009394 8. 020854 8. 236903  
2. 132474 2. 080904 2. 230461 2. 664348 2. 110612 2. 493538 2. 285528 2. 411689 2. 748434  
6. 679935 6. 876484 6. 402815 7. 198089 7. 034664 7. 037492 7. 647245 7. 379787 7. 106101  
5. 365673 6. 105774 5. 034154 5. 801836 5. 240481 5. 782536 6. 023027 5. 852967 5. 673954  
4. 598166 4. 86856 4. 818033 4. 36716 4. 465707 4. 394546 4. 272156 5. 162556 5. 1068  
2. 613338 2. 811151 2. 625914 2. 547786 1. 407109 2. 462714 1. 674531 2. 43688 2. 52674  
1. 553654 2. 886637 1. 531054 4. 267568 2. 602429 2. 384453 1. 944351 1. 749347 1. 087741  
7. 440555 8. 091263 8. 010642 8. 052782 7. 921045 7. 729457 7. 731741 7. 753689 7. 813748  
6. 580852 6. 443424 7. 512606 6. 699819 6. 499355 6. 460294 5. 978143 6. 599681 6. 448083  
3. 612112 4. 630198 4. 256968 4. 150622 4. 33935 4. 643834 3. 590689 4. 527218 5. 047602  
3. 24133 4. 129608 4. 941926 5. 502562 3. 917774 4. 466417 5. 371495 5. 193594 5. 571103  
2. 831318 2. 379105 2. 632174 2. 741137 2. 795574 2. 364417 3. 133029 1. 708824 2. 617277  
5. 940979 5. 520548 5. 376771 5. 43354 6. 283647 5. 147643 5. 810802 5. 783296 6. 082534  
7. 715845 7. 544182 6. 133907 7. 530346 8. 395406 8. 15614 7. 710925 8. 465138 8. 164519  
3. 663579 3. 076218 3. 546412 3. 496275 3. 103607 2. 944135 3. 276443 3. 076097 3. 087035  
3. 01529 4. 470172 4. 365769 3. 448857 4. 254057 3. 342417 5. 18895 4. 002551 3. 537055  
5. 679875 4. 763411 4. 392421 5. 02027 4. 181544 4. 945879 3. 987263 3. 732197 4. 072482  
5. 551567 5. 59881 5. 595784 5. 376758 5. 751366 5. 423854 5. 207879 4. 726933 5. 525337  
3. 441384 3. 00951 2. 568867 2. 821444 2. 619415 3. 426513 2. 267782 2. 370264 2. 385229  
6. 384791 6. 081876 6. 21836 5. 249915 6. 150795 6. 043961 6. 162659 5. 843978 6. 080269  
8. 096744 8. 484454 8. 467665 7. 826779 8. 528881 8. 229673 7. 742482 8. 441594 8. 062511  
1. 534065 1. 560178 3. 407804 3. 226648 2. 01334 1. 351581 2. 102444 2. 122932 1. 556648  
2. 529414 2. 315606 2. 701435 1. 724284 2. 350711 1. 982516 2. 093657 1. 606867 1. 438658  
3. 91991 4. 156385 5. 373643 4. 831628 4. 104539 5. 15175 6. 633173 5. 385491 5. 065686  
3. 39782 2. 786369 3. 944673 2. 71496 2. 928347 3. 755275 3. 227567 4. 468215 3. 708024  
6. 790948 7. 516587 7. 206061 7. 178052 7. 400352 7. 134942 6. 80516 7. 174434 7. 302616  
6. 062424 7. 055362 6. 903191 6. 980967 7. 008437 7. 009085 6. 960543 6. 940299 6. 726738  
6. 257825 5. 512678 5. 708136 5. 158292 6. 259188 5. 729209 4. 993946 5. 514073 6. 077445  
3. 508057 3. 503965 3. 191689 4. 410281 5. 186993 3. 899237 4. 228224 4. 401729 4. 090564  
2. 273099 2. 316242 2. 821248 2. 45632 2. 447089 2. 547866 3. 352611 2. 015772 2. 675257  
9. 68864 9. 323655 9. 54417 9. 216267 9. 62271 9. 222265 9. 632977 9. 710826 9. 637208  
5. 378997 4. 773431 5. 320131 4. 721441 4. 94648 5. 226504 5. 397629 4. 931394 4. 521134  
1. 341433 1. 819813 1. 913682 1. 639292 0. 863715 2. 472465 1. 812595 1. 191563 0. 999683  
6. 958047 6. 281693 6. 71407 6. 364897 6. 702427 5. 721036 5. 506845 6. 906527 6. 272368

6. 418476 5. 548818 6. 185754 5. 279379 5. 669629 4. 964366 6. 165749 5. 567822 5. 392021  
6. 925681 8. 273895 7. 375657 8. 759841 7. 951457 8. 682188 8. 147641 8. 137597 8. 147702  
2. 909564 3. 53162 2. 387691 2. 11137 1. 914241 1. 85664 3. 676867 2. 822761 3. 444768  
1. 890625 1. 329394 1. 449876 2. 034211 1. 653834 1. 524908 2. 693392 1. 432189 1. 554749  
7. 208874 7. 330581 7. 263017 7. 392683 7. 535646 7. 277783 7. 212048 7. 393099 7. 268184  
2. 147559 1. 572481 2. 212839 1. 790564 1. 433651 2. 312098 1. 875962 1. 412358 2. 195248  
1. 65073 1. 159853 0. 902135 1. 074007 1. 335995 1. 120628 1. 873961 1. 36844 1. 486201  
7. 393588 7. 484431 7. 580853 7. 64872 7. 522345 7. 507061 7. 150341 7. 388136 7. 113396  
3. 274987 2. 62953 3. 140197 2. 65505 2. 861328 2. 882783 3. 54915 2. 946742 2. 425454  
5. 396772 6. 114399 6. 784312 5. 906735 6. 183223 5. 363595 5. 799618 5. 787897 5. 691964  
3. 259563 2. 416929 2. 991521 3. 357951 2. 802104 3. 929134 2. 123616 2. 912425 2. 928163  
7. 288913 5. 536673 6. 400442 6. 252925 5. 925123 5. 208614 5. 847136 5. 796077 7. 393298  
3. 201457 3. 359729 2. 246041 2. 091852 2. 945718 2. 783123 3. 130466 2. 783303 2. 297801  
6. 665885 7. 741353 7. 048485 7. 444223 7. 549671 7. 168691 7. 709174 7. 476897 7. 602884  
6. 559342 7. 07692 6. 82956 7. 179045 7. 572375 7. 545603 7. 003945 7. 336147 7. 256173  
8. 740364 7. 720785 8. 697086 7. 464148 7. 531602 7. 709134 7. 265102 7. 74945 8. 356713  
7. 559193 7. 351805 7. 53784 7. 332251 6. 879387 7. 382369 7. 347281 7. 277312 7. 812221  
7. 319646 6. 850861 7. 595038 7. 857773 6. 485425 7. 6895 7. 075212 6. 499001 7. 799972  
5. 932491 5. 291794 4. 914749 5. 142045 4. 384401 4. 477446 5. 135983 5. 070195 5. 197511  
2. 179192 3. 46825 2. 380622 2. 91551 2. 242877 2. 251148 2. 750615 2. 466333 1. 825479  
3. 075384 3. 659351 2. 673513 3. 763901 3. 530736 3. 124429 3. 581877 2. 792247 3. 557324  
5. 246671 5. 799286 5. 695762 5. 700264 5. 953041 6. 300202 5. 894579 6. 04366 5. 877302  
5. 974534 5. 635483 5. 803553 5. 855963 5. 22641 5. 946626 5. 791495 5. 85456 5. 997932  
4. 201606 4. 288213 5. 323489 5. 044919 3. 876885 4. 593044 5. 098429 5. 634523 4. 627277  
5. 235028 4. 747287 4. 787898 4. 854495 5. 278507 5. 357259 4. 895818 5. 564021 5. 693932  
1. 920697 1. 748486 2. 029425 2. 170688 1. 266795 1. 917156 2. 23071 1. 890992 1. 541858  
1. 942351 1. 461331 1. 746245 1. 614336 1. 953901 1. 339472 1. 860276 2. 64084 2. 291995  
5. 54199 4. 199722 4. 892747 4. 319014 5. 153798 4. 388405 4. 539884 4. 278632 4. 918097  
2. 458671 1. 968395 2. 947045 2. 100319 2. 395951 2. 852478 2. 527834 2. 75121 2. 052546  
1. 920983 2. 562147 1. 975285 1. 643871 1. 740733 1. 779987 1. 954838 2. 021376 1. 584523  
8. 747317 6. 869871 6. 978763 5. 756108 6. 472952 7. 155399 7. 192709 6. 578987 7. 038891  
6. 061859 6. 344073 6. 044757 6. 833896 6. 729897 6. 751863 6. 269027 6. 463568 6. 409773  
5. 945654 6. 755026 6. 514915 7. 471025 6. 809556 6. 372385 5. 931305 7. 347559 7. 374273  
6. 397883 6. 893036 6. 820463 7. 070046 7. 306627 6. 673037 6. 557844 6. 862892 6. 921377  
5. 707191 5. 291244 5. 188323 5. 334914 4. 671415 5. 380306 5. 413906 5. 151427 5. 299543  
8. 440073 7. 675487 7. 559307 7. 338182 7. 175816 7. 633712 7. 026451 7. 638456 7. 683532  
6. 299577 6. 062762 5. 403202 5. 067093 5. 768519 5. 777715 5. 14696 5. 510135 5. 21176  
1. 517405 1. 998847 1. 566333 1. 847008 1. 169488 1. 021016 1. 834313 2. 344591 1. 532497  
2. 950895 2. 502787 3. 223607 4. 040339 3. 212029 3. 67975 3. 947574 3. 445679 3. 816561  
3. 472727 4. 091379 3. 704509 4. 156656 4. 936796 3. 128823 3. 801349 4. 166205 4. 340035  
1. 822459 0. 6644 1. 299049 1. 257733 1. 33639 1. 665762 0. 908341 1. 574424 0. 870946  
4. 173016 4. 419352 4. 429709 3. 935081 4. 624298 4. 200731 3. 678287 4. 594547 4. 663029  
3. 27583 3. 011467 3. 319191 3. 440852 2. 91789 2. 978344 3. 27228 3. 02062 2. 794978  
4. 207389 4. 172528 4. 579405 4. 788703 5. 13046 4. 311446 4. 555589 4. 493331 4. 623222  
2. 293625 2. 28568 3. 30677 3. 523103 2. 466601 1. 971634 3. 087488 3. 304168 2. 506628  
3. 226565 2. 753522 4. 404572 2. 534348 3. 483469 2. 91465 3. 320225 3. 283661 3. 148496  
5. 647578 5. 095816 4. 10214 4. 279057 5. 157335 4. 766003 4. 545274 5. 87196 5. 022213  
4. 413273 4. 912753 4. 837646 5. 006041 4. 862924 5. 500989 6. 636662 5. 274595 4. 99046  
3. 251956 5. 831525 4. 577262 3. 934609 3. 31095 4. 351119 3. 313427 5. 295527 2. 760006  
3. 671391 3. 554263 4. 227365 3. 519773 3. 54537 2. 839793 3. 447715 2. 731721 2. 731721  
1. 105867 1. 148743 2. 279066 2. 256292 2. 434528 1. 914437 2. 358521 2. 384536 1. 89204

3. 357569 3. 846737 4. 068956 4. 041968 4. 722676 4. 1119 3. 27195 3. 341237 4. 127546  
3. 625529 4. 510919 4. 484005 4. 220674 4. 468965 4. 290744 3. 685086 4. 489885 4. 04586  
7. 182077 7. 175082 6. 99556 7. 248507 7. 249519 6. 704152 6. 762486 7. 061224 6. 312189  
5. 540034 5. 510168 5. 464184 4. 943898 5. 469748 5. 069943 5. 011146 5. 46873 5. 406264  
5. 060395 5. 812395 6. 182814 5. 738787 6. 460806 6. 639888 6. 266342 6. 477979 6. 115242  
1. 614802 1. 396437 1. 992616 1. 419082 2. 259645 1. 555059 1. 566198 1. 846546 1. 49992  
2. 855058 2. 632954 3. 505262 2. 406533 3. 465276 2. 70494 3. 116474 2. 612282 3. 44361  
6. 630983 6. 484521 5. 868082 6. 15527 5. 401512 5. 281556 5. 578822 6. 322621 6. 253954  
2. 832965 3. 3999 2. 706264 4. 154197 3. 299796 3. 741568 3. 754715 4. 510623 3. 602263  
3. 531812 3. 11436 3. 172716 4. 375732 4. 249019 3. 384253 5. 086538 4. 513089 2. 956701  
5. 229101 5. 074977 5. 853951 4. 580497 5. 168032 5. 051715 4. 541301 4. 994382 5. 042318  
5. 135941 5. 049012 5. 481997 4. 642326 5. 764237 4. 503755 5. 170095 5. 359819 4. 95961  
3. 370887 1. 580149 2. 262745 2. 427184 1. 730047 2. 532691 2. 997415 3. 357504 2. 173757  
5. 288152 5. 530479 5. 854869 5. 462238 5. 505453 5. 606059 4. 890106 5. 788813 5. 53889  
5. 538316 5. 315737 5. 414647 6. 400314 5. 824894 6. 059754 4. 906881 5. 313517 5. 967852  
6. 761972 5. 68459 6. 583776 6. 170151 6. 059165 6. 499439 5. 891226 6. 470097 6. 363229  
9. 579471 9. 513032 9. 632571 9. 468367 9. 476406 9. 595923 9. 358335 9. 552218 9. 79887  
6. 232935 6. 2379 5. 745909 5. 86445 5. 482903 5. 33711 5. 102286 5. 926293 5. 034686  
4. 120779 4. 483467 4. 603346 3. 777972 3. 682826 3. 929137 4. 109698 3. 580933 4. 107515  
6. 99015 6. 870338 6. 847277 7. 08341 6. 678503 6. 617623 6. 613345 7. 268614 7. 035638  
3. 968391 5. 913728 5. 721799 5. 619686 5. 066692 5. 682575 4. 498449 5. 839487 4. 531617  
6. 07269 6. 629417 6. 469373 6. 41068 5. 743967 6. 373029 6. 323822 6. 909676 6. 19612  
2. 535283 2. 939552 2. 141085 2. 312028 3. 115666 2. 942802 2. 630178 2. 934401 3. 338998  
1. 278186 1. 472603 1. 590925 1. 539467 1. 084597 2. 290104 2. 320285 1. 332486 1. 967298  
5. 703749 5. 088146 5. 487689 5. 148174 4. 811338 5. 409033 4. 371521 5. 216785 4. 706294  
2. 996847 2. 555314 2. 659988 2. 384987 2. 227249 2. 44785 2. 875912 2. 508341 2. 457265  
6. 202065 7. 046322 6. 317711 5. 496368 6. 116716 6. 640449 5. 597408 6. 650155 6. 381136  
5. 760491 7. 029794 6. 811834 7. 109045 7. 08084 6. 923333 7. 052128 6. 767727 6. 972676  
6. 738399 7. 175195 6. 426268 6. 823921 7. 176452 7. 140969 6. 498222 7. 298529 7. 220565  
2. 865681 4. 469878 3. 566254 4. 59778 3. 965921 3. 518634 3. 619228 2. 815245 4. 500163  
2. 385063 1. 561027 1. 862668 1. 738287 1. 203221 1. 617742 1. 430846 1. 244289 1. 674351  
2. 611501 4. 619265 5. 573262 3. 951541 4. 293534 4. 79079 4. 309268 5. 605591 3. 758967  
1. 373046 0. 933557 0. 960738 0. 989979 1. 252126 1. 13499 1. 330243 1. 195288 1. 372704  
5. 57272 6. 712918 6. 882889 7. 043221 7. 036744 6. 794743 6. 920677 6. 52324 6. 810876  
1. 388457 0. 903237 1. 518396 1. 598552 1. 225647 0. 781715 1. 037023 1. 498041 0. 785472  
2. 91011 3. 017727 3. 06197 2. 620918 3. 907817 3. 238295 4. 190531 3. 374926 3. 568125  
3. 688519 2. 191713 4. 139717 2. 909949 1. 883583 2. 388443 2. 322926 2. 442473 2. 525539  
4. 976889 5. 067647 4. 756683 4. 506732 5. 19229 4. 181583 4. 948369 4. 586943 2. 837064  
1. 730572 1. 805533 2. 052962 2. 082652 2. 122006 1. 670822 1. 890368 1. 836173 2. 068886  
4. 432101 5. 39228 5. 813126 5. 090775 5. 366932 5. 928944 5. 047026 4. 870951 5. 694142  
5. 188928 5. 495301 4. 655423 4. 432307 5. 013451 4. 626797 4. 492588 4. 218499 4. 841419  
6. 262798 6. 929389 7. 008948 6. 818038 7. 203313 6. 825937 6. 70378 7. 048432 6. 318994  
2. 988819 3. 014691 2. 303769 1. 786134 2. 976627 2. 019483 1. 982207 2. 151458 2. 581764  
1. 259462 1. 150083 1. 046448 1. 381615 1. 056707 1. 082978 1. 037099 1. 131318 1. 648864  
1. 182071 1. 307586 1. 4599 0. 905134 1. 658959 1. 730128 1. 876828 1. 892537 1. 338957  
1. 369386 1. 642125 1. 937178 1. 488108 1. 531172 1. 80374 2. 064351 1. 332426 1. 532093  
0. 858413 0. 691193 0. 436766 0. 946649 1. 916075 1. 271418 1. 129903 0. 824379 0. 57077  
5. 869011 6. 00359 4. 836926 4. 887152 7. 720461 4. 561159 5. 637724 5. 828607 5. 897316  
1. 287794 1. 176478 1. 053659 2. 123484 1. 616331 1. 497924 1. 463008 1. 433528 1. 829046  
1. 112587 1. 126823 0. 853538 1. 889276 0. 869525 1. 231786 1. 401912 1. 362564 2. 65231  
1. 257845 1. 702416 0. 680559 1. 434598 2. 534184 2. 17451 2. 216781 2. 623583 1. 5621



1. 020495 0. 743124 0. 658137 0. 772832 1. 011147 1. 088128 0. 646206 0. 988002 1. 082629  
1. 215092 0. 879461 1. 10384 1. 511687 1. 193132 0. 955018 0. 99271 1. 273146 0. 640119  
3. 904465 4. 549267 4. 210478 4. 959995 3. 790043 4. 840274 3. 793851 3. 795471 4. 997402  
7. 087144 6. 544749 6. 386248 5. 524706 6. 300597 6. 237224 5. 585164 6. 586544 6. 345764  
2. 730751 1. 944599 2. 360092 2. 558968 2. 254286 2. 567896 3. 387083 2. 931793 2. 492428  
2. 487175 2. 060467 1. 664525 2. 221383 2. 418921 2. 451083 2. 499573 2. 23669 1. 938994  
4. 429567 5. 71853 5. 69589 5. 857365 4. 630713 5. 976471 5. 008623 5. 789942 5. 650772  
9. 442884 8. 562644 8. 8222 8. 83101 8. 783849 8. 774389 8. 882109 8. 60359 8. 931727  
6. 450622 6. 944827 5. 938039 5. 525124 6. 381526 6. 113596 6. 157962 6. 583393 6. 573733  
6. 567889 6. 320184 6. 092697 5. 986999 5. 779288 7. 134528 5. 535688 6. 44091 5. 758672  
8. 770095 8. 619942 8. 616569 8. 806856 8. 485938 8. 746559 8. 368968 8. 237281 8. 256033  
4. 966127 4. 85956 5. 434757 5. 020022 5. 40973 4. 63218 5. 156035 4. 563331 4. 86667  
6. 602713 7. 532386 7. 076259 8. 292889 7. 024848 8. 551798 7. 286221 7. 020217 7. 187368  
6. 058482 4. 944031 5. 53053 4. 42439 5. 53909 4. 657588 5. 712042 4. 663364 4. 80913  
6. 756481 7. 592221 7. 841952 7. 184683 7. 442264 7. 477713 7. 256043 6. 935252 7. 346695  
7. 430592 7. 982104 7. 370919 7. 839062 7. 746357 7. 936136 8. 165004 7. 885715 8. 139872  
6. 315182 6. 842046 7. 185791 6. 57807 6. 677759 6. 907568 6. 010431 6. 074868 6. 608851  
6. 49728 6. 922468 6. 289267 7. 302124 6. 92169 6. 15254 6. 914038 6. 88089 6. 752296  
5. 918315 5. 849959 6. 506486 6. 847443 6. 880886 6. 318626 6. 333426 6. 405382 7. 058128  
4. 89916 4. 122043 4. 866386 3. 394235 2. 635827 4. 239202 3. 641165 3. 918893 3. 488562  
5. 792177 6. 218302 5. 067833 6. 217295 6. 247276 6. 28269 5. 503272 5. 368241 5. 816571  
8. 353537 8. 610748 8. 438382 8. 867612 8. 471555 8. 575709 8. 137144 8. 609989 8. 278936  
2. 681249 5. 344988 4. 451163 4. 501423 5. 236313 4. 648508 4. 14116 4. 313803 4. 050649  
5. 212534 5. 227903 5. 401638 4. 769874 5. 0574 5. 560635 5. 194555 5. 377606 5. 642839  
2. 955939 2. 919806 3. 104414 2. 501058 3. 232917 2. 525161 2. 595452 2. 693611 2. 130326  
7. 439027 8. 195414 7. 752575 7. 519821 7. 712375 7. 551754 7. 572808 7. 538324 7. 248764  
6. 152983 6. 905264 7. 031141 6. 768033 6. 49578 7. 205287 6. 657568 6. 916984 6. 056404  
4. 45302 4. 848429 3. 465679 5. 080812 3. 885579 4. 387201 3. 64092 4. 331782 3. 834596  
3. 748402 4. 675836 4. 401492 5. 796055 5. 820752 5. 170354 5. 291925 5. 108272 4. 684121  
3. 760441 3. 506606 2. 785707 2. 697431 3. 452502 2. 808226 3. 441322 3. 418256 2. 507437  
5. 221063 6. 418319 5. 418839 6. 246417 6. 26656 6. 098273 5. 569115 5. 907399 5. 882019  
6. 535158 7. 297031 7. 102355 7. 109458 7. 060994 7. 257496 6. 899373 7. 235342 6. 878924  
4. 538769 5. 177123 5. 241096 5. 175944 5. 782191 5. 433328 4. 400081 5. 022317 4. 875536  
2. 430002 1. 740976 2. 074744 1. 811551 1. 796235 1. 307056 2. 029574 1. 591243 1. 634543  
2. 934541 3. 779251 3. 444227 3. 10602 3. 177456 4. 016454 4. 700311 3. 276959 3. 472908  
8. 40172 8. 60746 8. 636248 8. 275187 8. 647888 7. 687459 8. 132333 8. 588302 8. 137636  
3. 635103 3. 055657 4. 469432 3. 732987 4. 17053 3. 095477 3. 847699 3. 387585 3. 091253  
2. 073486 1. 793148 3. 156209 2. 674933 2. 808625 1. 773199 1. 848256 1. 950525 2. 671711  
1. 813355 2. 10734 2. 411336 2. 350382 1. 222157 3. 129907 1. 74159 2. 63943 2. 27261  
6. 710739 7. 244856 6. 537907 6. 774945 7. 185869 6. 77567 6. 478828 6. 913757 7. 11822  
7. 016858 7. 296462 7. 253197 6. 209534 7. 369548 6. 978176 7. 00346 6. 831287 7. 24953  
5. 139488 6. 489502 6. 087183 6. 195304 6. 492612 5. 863353 5. 676446 6. 054538 5. 940894  
5. 837964 5. 665758 5. 515979 4. 757988 5. 094746 4. 965803 5. 762303 5. 30013 5. 555887  
11. 03954 9. 679811 9. 691211 10. 32573 9. 558194 10. 31779 10. 18502 10. 35588 10. 57756  
5. 677169 6. 227132 6. 009249 6. 503759 5. 642353 6. 07352 5. 575472 6. 285133 5. 562339  
2. 922515 2. 445711 2. 406957 2. 155317 1. 906534 2. 252366 2. 224198 2. 247472 2. 064998  
5. 111725 5. 968691 5. 442037 5. 837559 5. 839116 5. 608482 6. 229539 5. 838903 5. 46493  
1. 972121 2. 441197 2. 426971 2. 48445 3. 26699 2. 720755 3. 305231 5. 436301 2. 250703  
5. 450614 5. 910154 6. 072562 5. 186944 4. 935858 5. 298384 5. 631082 5. 282869 6. 428214  
5. 662334 4. 763686 3. 613129 5. 074737 4. 933255 4. 815792 4. 755742 4. 670981 5. 153392  
2. 191042 2. 849067 2. 133269 2. 051211 2. 567781 2. 417846 3. 06171 2. 69097 2. 248823

4. 452145 5. 137259 4. 515145 5. 355208 5. 171833 5. 610424 4. 812349 4. 749235 4. 852936  
8. 395909 8. 576891 8. 863042 8. 114463 8. 431621 8. 236094 8. 444403 8. 316123 8. 464542  
7. 985831 7. 08498 7. 383838 6. 962261 7. 621174 6. 559649 6. 886924 7. 280881 7. 278937  
5. 951861 6. 528973 6. 670872 6. 54244 6. 535269 6. 022453 5. 754549 6. 003321 6. 364734  
6. 235629 7. 383394 7. 383551 6. 834521 7. 04181 7. 353682 6. 918614 7. 640229 7. 133411  
1. 695648 1. 733676 2. 105575 1. 914819 1. 520265 2. 106955 2. 460294 2. 467132 2. 744566  
5. 450622 5. 558508 6. 173729 5. 693569 5. 564304 5. 981505 4. 686319 5. 799533 5. 402429  
3. 927328 4. 008283 3. 7132 3. 386839 3. 093982 3. 623024 4. 181153 3. 710525 3. 259795  
6. 070847 6. 490461 6. 958121 6. 558625 7. 165896 6. 728496 5. 830272 6. 655967 7. 034028  
1. 446907 2. 649554 1. 959763 2. 772366 2. 93926 4. 158378 3. 825791 3. 465494 4. 228722  
7. 327816 7. 296729 7. 467881 7. 488866 7. 510055 7. 308305 7. 30863 7. 649848 7. 473132  
4. 661707 5. 688083 5. 494666 5. 471422 5. 083134 5. 697731 5. 039881 5. 387399 5. 367224  
5. 065124 3. 167861 4. 170212 3. 610011 3. 915106 3. 040063 4. 34212 3. 520784 3. 79865  
7. 285457 6. 581004 6. 195905 6. 497476 6. 410874 6. 848617 5. 976627 5. 97726 5. 848667  
5. 843629 5. 822563 5. 946159 5. 284728 5. 598212 6. 060886 5. 402161 5. 6702 5. 906403  
2. 24091 1. 931216 2. 42296 2. 20727 1. 945724 1. 801579 2. 348609 2. 098457 1. 674476  
3. 915146 4. 93212 5. 033931 4. 857785 4. 515305 5. 411276 4. 313814 5. 472265 5. 038573  
3. 376219 2. 87079 3. 316169 3. 188663 2. 889621 3. 3059 2. 928798 2. 691751 3. 094136  
4. 24399 4. 255248 4. 745044 5. 053009 5. 124938 4. 54864 4. 717791 5. 357344 4. 626557  
7. 381874 7. 641041 7. 324054 7. 585828 7. 618241 7. 791447 7. 652134 7. 76447 7. 831298  
4. 327027 5. 006251 4. 684194 5. 338734 5. 265296 5. 733295 4. 88127 5. 492727 5. 304094  
5. 280431 5. 886378 6. 010835 5. 680185 6. 253865 6. 048116 5. 792168 5. 350616 5. 340525  
7. 872216 8. 286336 8. 153632 8. 184695 8. 010471 8. 370388 7. 758027 8. 386968 8. 179771  
6. 027795 6. 022757 5. 803129 5. 46175 5. 495681 6. 027123 5. 801974 6. 39591 6. 303469  
1. 941525 4. 122154 4. 448705 3. 611846 3. 068609 4. 758502 4. 194051 4. 500201 4. 396658  
5. 314247 2. 828092 2. 794989 3. 457253 2. 676348 3. 496012 2. 568281 3. 174429 4. 288009  
3. 702679 3. 576095 2. 940969 5. 292731 3. 118951 2. 949574 3. 362319 3. 129306 2. 805007  
2. 569675 2. 709923 1. 589855 2. 55494 0. 839018 2. 169444 3. 404478 4. 038254 1. 486307  
4. 545506 4. 904956 4. 362255 4. 225208 4. 607948 5. 34198 4. 463171 5. 402609 4. 948261  
4. 22448 4. 074063 3. 476799 4. 090936 4. 217919 4. 23164 3. 784806 3. 422626 3. 774559  
2. 094622 2. 112206 1. 71442 1. 841507 1. 867367 1. 703637 1. 870926 2. 084313 1. 73735  
3. 976367 3. 220695 4. 306458 4. 35071 4. 22807 4. 839559 5. 239816 4. 024717 4. 206704  
2. 958616 1. 668662 1. 538731 1. 982793 1. 435416 2. 311051 1. 750167 1. 666791 1. 565594  
3. 390206 2. 146577 1. 885614 1. 731501 1. 761132 2. 242459 2. 055854 1. 805071 2. 817931  
5. 170256 5. 121765 4. 896915 4. 594569 5. 586927 4. 486469 4. 765283 5. 759924 4. 865999  
5. 243435 5. 825292 5. 2481 5. 434726 4. 919715 5. 534988 4. 648818 5. 141066 4. 473614  
5. 682355 5. 772654 5. 530014 5. 551327 5. 811514 6. 062829 4. 705408 5. 725064 5. 519646  
1. 837278 1. 834596 1. 596191 1. 645285 1. 478563 2. 144653 1. 730459 2. 11792 2. 069763  
3. 846297 4. 473132 3. 614025 3. 004678 4. 091653 3. 198682 3. 681551 3. 56381 3. 950346  
3. 525366 3. 549021 3. 779582 3. 469575 3. 083841 3. 332432 3. 39406 3. 755969 3. 75575  
4. 37774 4. 26104 4. 584879 3. 613095 4. 750881 3. 396186 4. 473881 4. 008484 4. 977965  
2. 254089 2. 304892 1. 864742 1. 875498 2. 223048 2. 055016 3. 14926 1. 82257 3. 209913  
1. 682479 2. 140763 2. 016542 1. 93785 1. 910447 2. 197288 2. 459293 1. 752145 2. 049819  
1. 012564 1. 144046 1. 12392 0. 941654 1. 158042 0. 879968 0. 843999 1. 184194 1. 020876  
4. 71917 5. 809564 5. 861134 5. 499276 5. 347409 5. 976903 5. 401568 5. 407625 6. 380874  
1. 353164 1. 534562 1. 85716 2. 007736 1. 517986 1. 752114 1. 596178 1. 551512 1. 246359  
5. 299294 5. 717626 5. 843668 5. 690419 5. 704307 5. 887118 5. 29348 5. 78512 5. 130839  
1. 712335 2. 173145 2. 01425 2. 600463 1. 990744 2. 1949 1. 762831 1. 885444 2. 081864  
2. 844034 3. 230297 2. 671994 3. 239246 2. 388094 3. 216223 3. 108065 3. 157787 3. 388749  
2. 745072 4. 087208 3. 787205 3. 904142 4. 291909 4. 385378 3. 847265 4. 205431 3. 477075  
1. 545145 2. 00591 1. 932179 1. 654052 1. 75351 1. 426829 1. 317183 2. 818642 1. 987752

3. 301448 3. 930399 2. 99624 3. 912689 4. 525422 2. 973768 3. 91109 2. 674243 3. 864055  
3. 314311 5. 129984 3. 908931 4. 973371 4. 612743 5. 468658 4. 077954 4. 501389 3. 735035  
3. 985051 3. 795936 2. 987759 3. 228678 3. 10179 3. 522373 2. 496748 3. 212695 3. 247368  
6. 91198 7. 473292 7. 179477 7. 067799 7. 052988 7. 36038 6. 566034 6. 868528 6. 912492  
5. 760403 4. 857048 4. 595263 3. 780809 4. 082491 5. 331302 3. 937132 4. 22655 4. 60871  
7. 086596 7. 363501 7. 295757 7. 473361 7. 512215 7. 423988 7. 180598 7. 385859 7. 187002  
6. 457067 6. 63654 6. 537431 6. 60277 6. 754038 6. 81648 6. 668503 6. 440316 6. 599646  
2. 780909 2. 640379 2. 461066 2. 745364 3. 37614 3. 533908 3. 021999 2. 545685 2. 944993  
7. 895417 7. 370117 7. 759577 7. 712785 7. 866759 7. 670317 7. 421684 7. 773269 7. 198267  
6. 496591 4. 868251 5. 074037 4. 502582 4. 9915 5. 087334 5. 437218 4. 219783 4. 588448  
1. 57688 0. 720964 0. 71035 1. 420926 0. 884343 1. 339719 1. 58387 0. 79862 1. 142497  
6. 249629 4. 746314 5. 883501 4. 576814 4. 334283 4. 280513 4. 993554 5. 192512 5. 661728  
6. 84237 7. 502328 7. 198434 7. 339599 7. 414695 7. 654439 6. 934067 6. 941049 6. 85891  
8. 258806 8. 487111 8. 623942 8. 493203 8. 306209 8. 414578 8. 339569 8. 591151 8. 282  
2. 097588 2. 646369 1. 508341 1. 403284 0. 892452 1. 318951 1. 562653 1. 35798 1. 628304  
4. 951046 5. 10288 5. 623105 5. 975988 5. 566117 5. 660178 5. 037006 5. 453515 5. 13206  
7. 174729 7. 28214 8. 171229 7. 161345 7. 63848 7. 317173 6. 948155 7. 430572 7. 509437  
1. 817282 1. 776857 1. 778909 1. 999747 2. 590069 1. 916442 1. 549411 1. 54178 2. 19345  
1. 680682 1. 360004 1. 711583 1. 993852 1. 606431 1. 550266 1. 83221 1. 532067 1. 647193  
1. 556592 0. 753922 0. 734153 0. 794199 1. 005892 0. 63723 1. 39935 0. 849457 2. 396186  
1. 040938 1. 228891 0. 927918 1. 249986 0. 664429 1. 938315 1. 621069 1. 92258 1. 635565  
2. 555972 2. 432413 2. 028393 1. 920835 3. 569689 1. 954175 2. 102254 2. 357436 1. 824375  
6. 206189 7. 353499 7. 303976 6. 785485 7. 1413 6. 606787 5. 652779 6. 989908 6. 559581  
1. 742846 1. 826637 1. 38543 1. 878636 1. 514528 1. 118564 2. 287374 1. 363105 1. 677789  
3. 866531 4. 146325 4. 467064 4. 024138 4. 069418 3. 892228 3. 975182 4. 762617 4. 436851  
2. 537994 3. 260915 2. 953739 2. 780921 3. 534071 3. 487023 3. 213449 3. 568594 3. 121028  
5. 13147 5. 079059 5. 609913 5. 247632 5. 078994 5. 445923 5. 211374 5. 768875 5. 472978  
5. 047794 5. 686446 5. 047749 5. 000202 5. 81605 5. 193761 5. 162341 5. 11612 5. 211159  
7. 687145 8. 098214 8. 037106 8. 238733 7. 766518 8. 310664 7. 592049 7. 558735 7. 8401  
4. 389997 3. 004939 4. 521736 3. 61641 3. 8638 3. 507949 3. 138161 3. 890157 3. 860601  
2. 665706 2. 262627 2. 356531 1. 262525 2. 697068 1. 646463 2. 283152 2. 33064 2. 360685  
5. 248517 5. 608866 5. 650605 5. 784681 6. 226425 5. 543367 5. 251352 5. 873605 5. 813747  
3. 245202 5. 009548 4. 458399 3. 750671 4. 4544 4. 48525 3. 91452 3. 778988 4. 278267  
6. 494687 6. 79434 6. 88777 7. 195974 7. 032012 7. 114444 6. 961544 6. 906342 7. 235581  
7. 339979 7. 480579 6. 883582 6. 617921 6. 831032 6. 977992 6. 666173 6. 698969 7. 206183  
2. 693853 2. 731777 2. 731307 2. 664984 1. 575861 2. 831272 2. 921412 1. 663894 2. 252387  
1. 834053 1. 650682 1. 703321 1. 505842 1. 949744 1. 880842 1. 33272 1. 34853 1. 650778  
2. 94439 4. 068437 4. 409258 3. 944692 4. 496957 3. 358051 3. 536985 4. 866566 2. 838825  
4. 627713 5. 555875 5. 684409 5. 946047 5. 074981 5. 477191 5. 561866 4. 281157 5. 068908  
2. 849255 5. 023008 3. 962493 5. 614574 3. 528413 4. 961515 4. 861912 4. 148696 4. 69732  
7. 675485 7. 644121 7. 125544 6. 898149 6. 202535 6. 396829 7. 073562 5. 961649 6. 317667  
3. 766856 4. 248731 3. 620886 5. 476855 4. 527088 5. 789486 4. 342434 4. 142346 4. 130987  
3. 746254 5. 109206 5. 017941 5. 251946 5. 365683 4. 848696 5. 127353 5. 268692 4. 841095  
6. 712736 7. 06381 7. 449854 7. 124595 6. 930707 7. 282053 6. 579608 7. 184008 6. 739679  
6. 658303 7. 437263 7. 504463 7. 54606 7. 496608 7. 278854 7. 378762 7. 237101 7. 688037  
5. 967032 5. 768683 6. 369787 5. 816081 6. 12863 6. 023294 5. 898048 5. 317252 5. 80515  
5. 822058 6. 519613 6. 009422 6. 185015 6. 401811 5. 951128 6. 553283 6. 224646 6. 246465  
5. 499426 5. 840534 5. 746794 5. 82674 6. 183628 6. 010964 5. 884881 5. 840809 5. 842806  
5. 752537 6. 427214 5. 598749 6. 179827 6. 291546 6. 032068 5. 656357 6. 209511 6. 240994  
7. 994714 8. 103928 8. 054882 8. 097144 8. 687422 8. 927431 8. 099127 8. 530461 8. 364801  
5. 021835 5. 075547 4. 951874 5. 794439 5. 726841 4. 99532 5. 721364 5. 256945 5. 744738

6. 390048 6. 771498 7. 279811 7. 119136 6. 938622 7. 08943 6. 835534 6. 941966 6. 82039  
0. 861488 2. 24314 1. 41384 1. 41395 1. 577925 1. 223599 1. 239642 1. 259688 1. 689761  
3. 56108 4. 001829 4. 011495 3. 18658 3. 896292 4. 427504 1. 658298 3. 341012 3. 789255  
5. 258531 5. 216285 4. 82367 4. 535746 4. 94796 4. 594437 4. 438898 5. 450391 5. 110156  
5. 723331 6. 08716 6. 242334 6. 050547 6. 180726 6. 421559 5. 875904 6. 201889 5. 872839  
3. 742183 4. 100054 2. 786325 3. 476575 2. 808966 4. 488307 4. 520711 4. 531761 4. 087588  
4. 623035 4. 264533 4. 506486 4. 025323 5. 145234 4. 699756 4. 834033 3. 816014 4. 670709  
1. 405631 1. 660589 1. 333226 1. 59748 1. 287777 1. 569292 2. 207423 2. 291131 1. 813885  
2. 586518 3. 256911 2. 549967 3. 340284 2. 902802 3. 070753 3. 511507 2. 400817 2. 34375  
3. 969151 4. 758411 4. 690141 4. 368096 4. 54852 4. 251372 4. 547441 3. 819156 5. 048009  
3. 074946 2. 738069 2. 865477 3. 414437 2. 452519 2. 975349 2. 698718 2. 359265 2. 845183  
1. 252719 1. 495074 1. 045552 1. 211204 1. 377073 1. 258239 1. 414497 1. 178491 1. 285572  
2. 25705 1. 100148 2. 426416 0. 65512 2. 70994 1. 754614 1. 119717 2. 245922 0. 884935  
6. 568934 7. 294684 7. 175099 7. 006033 7. 38765 7. 542769 7. 148582 7. 091674 6. 885906  
5. 427258 7. 058683 6. 628651 7. 42026 6. 848232 6. 237921 6. 362002 6. 184274 5. 804556  
6. 435466 7. 27989 7. 625494 8. 772124 7. 748306 8. 324737 7. 755611 7. 703815 7. 815201  
3. 970929 3. 810226 3. 523599 3. 914994 4. 367119 4. 638923 3. 803418 4. 413859 4. 112609  
3. 782317 3. 637172 4. 210474 3. 225874 4. 59387 4. 843566 3. 738068 3. 706701 3. 939183  
1. 404758 0. 990113 2. 111962 1. 465003 1. 329023 1. 18173 1. 363711 1. 377929 1. 364961  
4. 658903 5. 763024 4. 769581 6. 804357 5. 468101 5. 12931 5. 819514 6. 657161 5. 058765  
6. 718842 7. 214684 7. 017347 6. 813346 7. 024078 6. 864532 6. 613724 6. 912412 6. 890077  
3. 869796 1. 647164 3. 218916 3. 013635 2. 215901 2. 344426 2. 66352 2. 265394 3. 773227  
3. 221625 3. 264175 3. 305581 2. 871531 2. 700412 3. 00904 2. 798044 2. 904689 2. 637516  
4. 749093 4. 87498 4. 819085 4. 538585 5. 311131 5. 128397 4. 998289 5. 733853 4. 818961  
4. 459448 4. 656557 5. 142188 4. 790565 4. 848295 5. 198422 4. 330493 5. 009156 5. 119993  
5. 318431 5. 739414 5. 838705 6. 208088 6. 019438 6. 270579 6. 241365 6. 239833 6. 210728  
1. 545736 1. 333835 1. 040535 1. 900767 1. 370847 1. 125268 1. 00811 1. 057388 1. 187899  
2. 165254 1. 024326 1. 413214 1. 383708 2. 430912 2. 454459 1. 22202 2. 136318 1. 176835  
2. 357166 2. 765254 1. 932769 2. 122787 2. 259069 3. 325924 2. 130991 2. 040082 2. 565295  
4. 669854 5. 336115 4. 960797 5. 422885 5. 168431 5. 357624 5. 712063 5. 062048 4. 696378  
5. 342995 6. 171384 5. 493233 5. 172186 5. 985925 5. 595601 5. 372418 6. 120975 5. 342402  
1. 365511 2. 009437 1. 711616 1. 451985 2. 558356 1. 517954 1. 445774 1. 404818 1. 909358  
4. 267445 4. 948784 5. 09841 4. 436307 4. 814644 4. 840115 4. 595251 5. 723077 4. 433729  
4. 563606 4. 703152 4. 038039 4. 770716 4. 078256 4. 736408 3. 948021 5. 650866 4. 686631  
2. 517717 2. 366736 2. 397467 1. 760568 2. 236518 2. 110693 3. 356173 2. 328882 1. 934941  
6. 738051 6. 608602 6. 926059 7. 122064 6. 802963 6. 376714 6. 836473 6. 597775 6. 201732  
5. 297046 5. 925135 5. 488929 6. 204674 5. 584068 6. 105015 5. 981561 4. 476555 6. 217923  
1. 301369 1. 189108 1. 360197 1. 420153 1. 325283 0. 218955 1. 381588 1. 666266 0. 996408  
1. 39395 1. 66592 1. 296458 1. 593919 1. 513052 0. 730001 1. 318721 2. 059453 0. 934831  
1. 09458 1. 072093 0. 81382 1. 713415 0. 895345 0. 901824 0. 791511 1. 105948 0. 871195  
5. 178557 5. 720661 5. 693292 5. 370919 5. 00538 5. 785453 5. 470415 5. 011282 4. 630366  
1. 98506 1. 850741 1. 726792 1. 828909 1. 79639 1. 646091 1. 682438 1. 767688 2. 215828  
1. 106082 1. 126351 1. 357499 1. 050511 1. 60686 0. 961319 1. 693092 1. 703798 1. 472079  
1. 241234 1. 184109 1. 022101 1. 205807 1. 277843 1. 061436 1. 053574 1. 434742 1. 349715  
7. 28977 7. 752877 7. 436309 7. 795854 7. 731413 7. 587304 7. 653552 7. 697527 7. 583503  
3. 546679 4. 529178 4. 714328 5. 335765 5. 272843 5. 196423 3. 820141 4. 483647 5. 074237  
1. 90147 1. 841255 1. 805394 2. 885704 1. 508269 2. 279559 2. 402558 1. 868248 1. 956275  
4. 693579 4. 649456 5. 134694 3. 732976 3. 052769 4. 09042 4. 909762 4. 278995 3. 749284  
1. 113287 1. 247465 1. 172944 0. 914148 0. 980343 1. 088537 1. 038563 0. 923584 1. 035975  
2. 9517 3. 133492 3. 304578 3. 404487 2. 968102 3. 054332 2. 968356 2. 38641 3. 596498  
3. 439512 3. 870806 3. 908758 2. 647741 4. 101341 4. 432901 3. 469078 5. 073821 4. 294073

1. 894217 2. 230527 1. 899052 2. 081129 3. 108898 2. 475918 2. 215487 2. 609065 3. 094409  
3. 171295 3. 070128 3. 299102 3. 961944 2. 523041 3. 762117 2. 236611 3. 423784 3. 401812  
5. 495727 5. 087459 5. 250632 5. 941548 6. 465749 5. 264426 5. 161853 6. 129302 6. 212448  
2. 595068 3. 030653 2. 150485 3. 49368 3. 026371 2. 492987 2. 336543 4. 055408 3. 029721  
7. 540649 8. 053123 7. 698518 7. 202903 7. 548387 7. 328833 7. 633293 7. 558853 8. 103349  
5. 351406 6. 265054 5. 915607 5. 605168 5. 277137 5. 927132 5. 194583 5. 487409 6. 170182  
1. 442946 4. 284182 1. 664909 2. 555297 2. 072795 1. 805171 1. 756045 1. 792541 4. 488312  
1. 9951 0. 663497 1. 470813 1. 130439 1. 454977 0. 564991 1. 323083 1. 464495 0. 855173  
3. 756307 2. 984249 3. 837202 3. 260313 3. 634232 2. 315696 3. 491645 3. 053072 2. 884757  
3. 903123 4. 616303 3. 974382 3. 257804 4. 005854 4. 280804 3. 741726 5. 033062 3. 976486  
1. 91949 2. 562075 2. 257497 2. 254277 1. 588305 1. 901594 1. 731784 1. 558732 1. 440796  
1. 248118 1. 552902 1. 079789 1. 715729 1. 939231 1. 837319 1. 809062 1. 410123 1. 260801  
5. 902501 4. 986902 5. 297017 4. 22776 5. 195932 4. 914905 5. 603664 5. 045067 4. 671943  
1. 719146 2. 199192 2. 166787 1. 880895 1. 962902 1. 652504 2. 001572 2. 258199 1. 835063  
3. 607602 3. 124025 2. 697234 2. 988946 2. 597182 2. 43279 2. 625643 4. 487785 4. 87307  
4. 235111 4. 233126 4. 058943 4. 859906 4. 571425 3. 958236 4. 237471 4. 823721 3. 881489  
2. 764887 2. 254386 3. 211317 2. 673954 1. 99213 2. 586744 2. 783868 2. 414255 2. 234185  
2. 273614 2. 058943 2. 23124 1. 708106 3. 339492 2. 256026 1. 717458 3. 165082 2. 358032  
3. 334145 2. 174135 2. 755366 2. 161352 2. 187016 2. 811517 2. 711612 2. 238979 2. 34049  
1. 894603 1. 888112 2. 210762 1. 584544 2. 718482 1. 914737 1. 53242 2. 800376 1. 759522  
3. 680984 3. 994866 3. 09075 3. 824356 3. 432203 3. 177411 2. 744847 3. 102406 3. 161201  
2. 702289 1. 589664 1. 67824 2. 129818 1. 730336 1. 650012 1. 467352 2. 287348 1. 621583  
5. 85391 6. 34818 6. 554058 5. 953177 6. 32945 6. 512539 5. 863457 6. 452124 6. 390549  
5. 271697 5. 019572 4. 935895 4. 822438 4. 085167 4. 806046 4. 739254 4. 595205 5. 002861  
6. 638937 6. 942835 6. 194401 8. 639714 7. 455788 7. 180754 7. 566978 6. 710179 7. 938975  
6. 356338 7. 021271 6. 255712 7. 028731 6. 549473 6. 790258 6. 111368 7. 100972 7. 195047  
2. 92671 2. 19814 2. 245281 1. 609435 1. 867758 1. 931013 2. 165446 1. 976209 1. 976004  
4. 844892 4. 656025 4. 847419 5. 074215 5. 158817 4. 772946 4. 087625 5. 08997 5. 206375  
4. 664468 4. 00888 4. 652632 4. 754115 4. 405406 4. 825463 4. 773008 4. 457965 5. 131971  
1. 611748 3. 210778 1. 938223 2. 463966 3. 055164 2. 483645 2. 480158 2. 712755 2. 423458  
4. 23135 4. 320232 4. 59607 4. 074601 3. 352233 4. 954661 4. 413841 4. 766381 5. 199645  
7. 422768 8. 007808 7. 884349 7. 021272 7. 708006 7. 750792 7. 193808 7. 50572 7. 724965  
7. 010901 7. 133847 6. 221458 6. 669788 6. 424795 6. 630389 6. 72464 6. 760853 6. 685451  
2. 531159 1. 343329 1. 637753 1. 701354 2. 971518 2. 01577 1. 786577 1. 58558 1. 764838  
3. 445532 2. 335333 3. 394481 3. 345339 3. 593822 3. 638872 2. 736432 2. 901043 4. 121677  
3. 59088 4. 907504 3. 46769 3. 914973 4. 526958 3. 873454 3. 767368 4. 409162 3. 946339  
2. 994357 4. 153786 4. 334462 3. 619601 4. 740883 3. 876984 5. 157865 4. 06711 3. 570301  
6. 454948 6. 597622 6. 317514 6. 287568 6. 217365 6. 064882 6. 036466 6. 438364 6. 089218  
8. 247671 6. 907526 7. 302836 6. 882349 7. 102229 5. 795184 6. 347697 7. 080998 7. 73749  
3. 869179 5. 910708 3. 961964 5. 188257 6. 081295 4. 146087 5. 845199 4. 297647 4. 973079  
7. 257372 7. 173061 6. 881322 6. 854876 7. 034583 6. 520375 6. 969169 6. 226892 6. 516763  
2. 748074 2. 952012 3. 465799 3. 007541 2. 296683 3. 10093 2. 937109 3. 863775 3. 076075  
1. 99263 1. 29883 1. 651805 1. 271407 1. 782267 1. 7717 1. 535085 2. 038169 1. 96964  
3. 281284 2. 386944 2. 682441 3. 150081 2. 095605 3. 272455 3. 030917 2. 895687 2. 5935  
2. 126888 1. 483258 1. 17025 1. 094691 0. 696284 1. 312879 1. 547258 1. 330331 1. 628009  
1. 835484 1. 313702 1. 629345 1. 328289 1. 926736 1. 076513 1. 420695 1. 180759 1. 700059  
5. 42646 5. 521224 4. 727695 5. 24809 5. 283093 5. 704134 5. 465236 5. 531485 4. 484262  
1. 438344 1. 270556 1. 229941 1. 431519 1. 377576 1. 311806 1. 076125 2. 188622 1. 569556  
6. 177815 6. 124802 5. 856037 6. 443071 6. 294617 5. 906669 5. 255787 6. 25824 5. 795894  
3. 13859 2. 657987 2. 780491 2. 703329 2. 994739 2. 618977 3. 470991 3. 233865 3. 166852  
3. 520509 5. 137604 3. 783675 6. 070192 5. 067159 5. 266226 4. 453143 4. 380352 4. 111388

9. 551749 8. 368834 9. 244021 7. 778335 7. 941629 7. 571202 7. 850771 8. 019476 9. 331631  
2. 157773 2. 791248 2. 113909 1. 7583 2. 149498 3. 574216 2. 20872 2. 05074 1. 565393  
1. 985504 1. 909477 1. 670285 1. 758269 1. 655238 1. 922639 3. 084152 1. 763426 1. 857231  
6. 738317 5. 035791 6. 082768 4. 490781 6. 504231 5. 672221 5. 809467 5. 961535 5. 725697  
3. 681071 3. 313198 3. 278426 1. 50191 2. 734747 2. 625644 3. 176473 2. 264074 2. 971504  
7. 308665 6. 924968 7. 186074 6. 405941 7. 80175 7. 706145 6. 837308 7. 119654 7. 335975  
5. 282544 5. 829576 5. 961354 5. 406288 6. 108519 6. 41412 5. 948446 5. 832093 6. 366432  
3. 55981 2. 597221 3. 009617 3. 858019 2. 444842 3. 827795 3. 463697 3. 247054 3. 14851  
3. 568635 2. 815988 2. 159568 2. 238747 3. 56375 2. 417131 4. 181654 3. 878735 3. 686491  
6. 580873 6. 55992 6. 623567 6. 041433 7. 004374 6. 247554 7. 152787 6. 878393 6. 784834  
6. 309591 6. 911886 6. 121844 6. 681107 6. 802524 6. 817772 6. 056762 7. 23676 7. 018223  
2. 080721 2. 266711 3. 026519 2. 608416 2. 396725 2. 497808 2. 247735 2. 536228 2. 520856  
2. 938569 1. 224677 0. 81991 1. 271966 0. 926344 1. 494318 0. 696694 1. 942863 2. 425522  
3. 022742 1. 075612 1. 920098 2. 708984 1. 559105 1. 381353 1. 439442 1. 73497 2. 783898  
6. 107675 6. 867956 7. 54634 6. 867234 6. 051102 7. 524443 6. 821284 6. 220542 6. 001452  
1. 255289 0. 932326 1. 337597 0. 969516 1. 323224 0. 905827 1. 590497 0. 953255 1. 536801  
1. 640656 1. 227332 1. 315128 2. 290354 1. 929021 1. 207744 1. 526321 1. 682148 1. 35831  
4. 073218 6. 219426 5. 899737 5. 977301 4. 830964 7. 381962 5. 835511 5. 036295 4. 840338  
6. 968256 6. 88202 7. 13737 6. 677621 6. 954283 6. 604739 6. 646717 7. 401822 7. 113848  
5. 457063 6. 492085 6. 227803 5. 810935 6. 790644 6. 232046 6. 099654 6. 707811 5. 98569  
7. 199868 7. 516225 7. 421364 6. 919512 7. 384755 6. 900268 7. 410829 7. 331478 7. 719565  
5. 072527 3. 953155 5. 605331 6. 039472 6. 059862 5. 242927 6. 360418 6. 408934 5. 608151  
2. 277626 1. 641847 1. 737527 2. 030636 1. 132863 1. 816279 2. 823822 0. 983881 2. 027416  
2. 975544 2. 483624 3. 196741 2. 975544 2. 431118 2. 731522 2. 077284 2. 420944 1. 923556  
2. 084883 1. 329197 1. 613196 1. 895585 1. 533478 1. 829702 2. 195503 1. 362931 1. 445303  
4. 737197 3. 33463 3. 90183 3. 2177 2. 671954 3. 078047 3. 312708 3. 678453 4. 35572  
1. 505102 1. 054541 1. 426284 1. 046679 1. 464711 1. 377012 2. 010526 1. 441581 1. 524531  
3. 517952 3. 208299 3. 126859 2. 871696 3. 649213 2. 301867 2. 799221 2. 84283 2. 77022  
4. 809464 4. 676335 5. 312075 4. 971791 4. 401147 4. 9825 5. 06701 4. 0779 4. 723003  
7. 185291 5. 237515 5. 794443 4. 340863 4. 214278 6. 004807 5. 563656 6. 334039 6. 440409  
1. 928956 1. 940597 2. 554011 1. 855969 2. 38994 1. 780431 1. 96963 1. 846227 2. 015121  
2. 509032 1. 753422 2. 024341 2. 328633 1. 8844 1. 778043 2. 688436 2. 378583 2. 263744  
5. 803209 5. 337164 4. 673375 4. 64501 5. 493272 4. 377184 3. 496535 4. 165108 5. 31847  
1. 657941 1. 756414 1. 112839 1. 772605 1. 500342 1. 886163 2. 329134 1. 122365 2. 155349  
4. 543429 5. 594503 5. 250316 6. 129569 5. 3753 5. 833784 5. 122268 6. 028171 5. 370942  
6. 815065 8. 279175 7. 453892 7. 969913 8. 531707 7. 945725 7. 622672 8. 115521 7. 811109  
1. 600012 1. 61847 1. 017549 1. 671742 1. 188252 1. 842434 1. 256702 1. 569552 1. 586416  
4. 691916 4. 934431 4. 937182 3. 900593 4. 834193 4. 651199 4. 999688 5. 382447 5. 164457  
3. 545925 4. 678223 3. 766659 2. 772243 3. 15454 3. 90742 2. 883714 3. 817221 3. 673114  
1. 591436 1. 115002 2. 147039 1. 316478 1. 234315 2. 359089 1. 362948 1. 255628 1. 570231  
2. 343922 2. 299063 1. 919213 1. 947069 2. 076427 1. 655534 2. 25512 1. 85091 1. 275655  
2. 238807 1. 671676 1. 554099 1. 420294 1. 414483 1. 285151 1. 968625 1. 418847 1. 301333  
2. 412216 1. 71145 2. 330461 2. 555423 2. 978323 1. 637511 2. 257088 2. 977955 4. 103901  
2. 151911 4. 576238 3. 321429 2. 348252 3. 149496 2. 876766 3. 421257 2. 839335 3. 491659  
1. 636622 1. 330461 2. 455936 2. 249585 1. 158832 1. 244292 2. 229829 1. 394674 1. 38392  
4. 950628 5. 618555 5. 546063 5. 320616 5. 806975 6. 203736 5. 839676 5. 483773 5. 770664  
8. 140883 8. 082262 8. 424721 7. 470405 8. 154918 8. 097037 7. 757749 8. 198073 7. 640541  
3. 639696 3. 659521 3. 390516 4. 245255 3. 617273 3. 944964 2. 908416 4. 226513 4. 630496  
5. 184592 5. 466521 5. 202735 5. 225332 5. 467505 5. 303373 5. 851784 5. 42304 4. 88347  
2. 41794 1. 836875 1. 678524 2. 010438 2. 101781 1. 726646 2. 630345 1. 979576 1. 484835  
2. 752304 3. 754978 3. 738007 5. 208728 4. 728177 4. 86748 4. 28934 4. 590446 3. 837947

6. 275412 7. 311897 7. 287629 6. 894449 7. 211416 7. 825879 8. 133129 8. 093903 7. 467399  
2. 914478 3. 428711 4. 095297 3. 64601 3. 479478 3. 790265 3. 781094 3. 838013 3. 008087  
7. 208754 7. 052142 6. 514726 6. 887213 6. 146118 6. 732957 5. 813365 6. 483932 6. 619988  
3. 515382 4. 340937 3. 745327 4. 250782 5. 147905 4. 664673 4. 202504 4. 418648 4. 114588  
6. 463482 6. 843349 6. 238891 6. 734693 6. 461865 6. 049226 6. 214824 6. 311837 6. 173207  
8. 283067 8. 023973 7. 852445 7. 583908 7. 981174 7. 545903 8. 000421 8. 165582 8. 211788  
7. 385342 7. 316403 7. 036794 6. 601491 7. 388647 5. 91608 7. 618045 6. 865246 7. 589168  
3. 045868 2. 696418 2. 649801 2. 549935 3. 363368 3. 020071 2. 537047 2. 740388 3. 454444  
6. 379725 6. 52864 6. 281737 6. 984169 6. 33272 6. 399374 6. 683141 6. 006413 6. 627071  
6. 480993 6. 352657 6. 344374 5. 881628 6. 35959 5. 891563 6. 773448 5. 989163 6. 217894  
3. 208607 4. 922386 5. 019774 4. 860911 4. 515604 5. 694344 4. 318693 3. 967482 4. 680033  
5. 920235 6. 749508 6. 386421 6. 769987 6. 798214 6. 401976 5. 67881 6. 329326 6. 055358  
1. 873797 1. 697493 1. 342436 1. 336496 1. 742116 1. 482136 2. 799567 2. 213351 1. 834397  
2. 472533 1. 496412 1. 059576 1. 522981 1. 608994 1. 237144 1. 489567 1. 470382 1. 676661  
3. 602106 3. 935775 4. 845175 4. 276841 4. 075403 4. 440361 4. 474668 4. 252825 4. 647837  
1. 458521 1. 04697 0. 961733 1. 216677 1. 131012 1. 47892 1. 429355 1. 047849 1. 095243  
0. 961931 1. 227216 0. 972844 1. 255783 1. 356205 1. 188183 1. 119994 1. 236039 1. 378849  
2. 100456 1. 728308 1. 411758 1. 397951 1. 694985 1. 789674 2. 809515 2. 079604 0. 946081  
1. 708824 1. 263512 1. 723938 0. 857038 0. 983547 1. 242968 1. 934522 2. 344424 1. 30663  
3. 855796 3. 602986 4. 407644 3. 223379 2. 117137 4. 325286 4. 292374 2. 720482 1. 86618  
1. 184949 0. 801099 1. 574645 1. 291086 1. 462789 1. 043427 2. 355676 1. 58564 1. 422729  
1. 616159 1. 200525 1. 120586 1. 410401 1. 487099 1. 597558 1. 872569 1. 647074 1. 277229  
2. 048906 3. 008832 3. 357446 1. 972373 2. 217584 1. 906706 2. 807783 2. 052495 3. 0805  
1. 959145 1. 697566 1. 898091 2. 515178 2. 0968 1. 95895 2. 433848 1. 751786 2. 419893  
6. 157507 6. 553067 5. 931833 6. 281212 6. 699649 6. 560217 6. 714272 6. 904728 6. 885086  
2. 736884 2. 228713 2. 875927 1. 966702 2. 396056 2. 505986 2. 013212 2. 32275 2. 246312  
2. 510698 1. 585897 2. 626804 1. 675536 1. 587858 1. 635733 2. 968601 1. 935669 2. 017838  
10. 52819 10. 81196 10. 77738 10. 16109 10. 59915 10. 21375 9. 867396 10. 32317 10. 32983  
7. 587112 7. 832224 7. 802328 7. 327209 7. 656529 7. 223214 6. 992525 7. 168808 7. 325666  
1. 762273 2. 920675 2. 051224 1. 576116 0. 918068 1. 326989 2. 42754 1. 816255 1. 432642  
3. 504742 2. 358673 2. 701277 4. 096135 1. 384039 3. 049147 1. 950802 2. 540549 4. 242396  
2. 553102 2. 215163 1. 965994 1. 89562 1. 659089 1. 794228 3. 377428 2. 271105 2. 126695  
4. 994409 5. 256541 5. 01215 4. 980248 5. 245294 5. 283696 4. 684443 5. 245359 5. 518985  
5. 816174 6. 212297 6. 200251 5. 570044 6. 354779 5. 789308 6. 465623 6. 27332 6. 01106  
3. 112528 2. 307067 1. 877668 2. 487149 2. 343288 2. 204767 1. 94943 3. 043301 2. 694598  
1. 202058 0. 926751 0. 938569 1. 046481 1. 00472 0. 905806 1. 402296 1. 254803 0. 954279  
1. 533411 1. 351023 2. 01684 1. 347534 1. 18872 0. 996662 1. 191676 1. 26847 1. 217078  
3. 997617 3. 437789 2. 997042 3. 540966 3. 868691 4. 03291 4. 025391 4. 046376 2. 926761  
0. 709491 1. 02532 0. 625838 1. 115244 1. 309501 1. 057366 0. 86264 1. 633997 0. 979404  
1. 84029 2. 138562 1. 602282 2. 464729 1. 683372 1. 145501 1. 851963 1. 556354 1. 56782  
6. 687391 6. 050442 6. 221379 6. 455311 6. 24661 5. 540261 6. 104962 6. 01137 5. 884117  
1. 293163 1. 943325 1. 083037 1. 059377 1. 491949 1. 98702 1. 456075 1. 122571 1. 107876  
2. 900698 1. 902884 2. 244892 1. 733474 2. 193056 2. 232926 2. 484557 2. 635167 2. 364184  
7. 538186 7. 876254 7. 774598 7. 894582 8. 042917 8. 001658 7. 869467 8. 372046 7. 730069  
1. 291299 1. 051964 0. 959267 0. 881641 1. 412478 0. 923625 2. 331343 0. 591469 0. 810319  
2. 350888 1. 807065 1. 877272 2. 295639 1. 466941 2. 049113 2. 443402 2. 45947 1. 716785  
1. 01979 1. 355328 1. 176453 1. 118022 0. 994366 0. 963469 1. 028042 0. 850788 1. 974044  
8. 213131 8. 351374 8. 230549 8. 492935 8. 27091 8. 371468 8. 671694 7. 979205 8. 407222  
1. 820906 1. 643157 1. 419488 1. 799698 1. 463935 2. 090289 1. 564302 1. 715348 1. 51875  
1. 265093 2. 427308 1. 172062 1. 282004 0. 888501 1. 804703 1. 82794 1. 237276 0. 72534  
5. 208771 5. 317671 4. 933417 5. 017749 5. 075504 5. 062324 5. 457904 5. 576425 5. 117859

1.844507 1.461869 1.889875 1.979136 2.068394 1.166972 1.52034 1.911986 1.845987  
2.027103 0.994543 1.519384 1.237053 0.921604 1.686928 1.229848 1.157024 2.100783  
1.818495 1.158613 1.839576 1.473663 1.44772 1.484692 1.245756 1.516273 1.767457  
2.085692 1.721328 1.703362 2.253756 1.839704 1.664604 2.018207 2.456464 1.718773  
1.601963 1.693687 1.042569 1.21621 1.512159 1.388457 1.835541 1.516474 1.414773  
2.225707 1.809911 2.463908 2.434365 1.979625 2.760714 3.315113 1.449657 1.656429  
6.598294 6.330954 5.938777 6.271177 6.283444 7.170818 6.470103 7.339128 6.170127  
1.913524 1.366831 1.611139 2.267033 1.211867 1.565527 1.798311 1.25747 1.704466  
1.598418 1.514544 0.826914 1.274913 1.108015 0.977313 1.53755 1.064771 1.436371  
2.525363 1.39468 1.744871 1.945662 1.897001 2.019167 2.29276 1.677212 1.653616  
1.267875 1.122559 1.254536 1.146041 1.377428 1.236878 1.926973 2.194521 1.2869  
1.420575 1.522 0.694328 1.453588 1.394111 1.135124 0.978573 1.353816 1.514239  
2.151763 1.558205 1.890831 1.258944 1.833812 1.462675 1.352445 1.192348 1.321488  
2.337396 1.105883 1.441674 1.223276 1.010355 2.730245 1.403594 0.94498 0.867728  
1.140398 1.01542 1.202126 1.227494 1.446735 1.340654 1.444071 1.189028 1.382355  
0.780977 1.135776 1.138076 3.803462 1.605168 0.996583 1.819186 0.822721 1.07524  
2.903357 2.092819 2.816066 2.380722 2.428654 2.596796 3.168112 2.720344 2.667419  
4.468489 5.283416 3.450413 5.930747 4.651813 5.462419 5.279865 4.240355 5.48574  
2.055096 1.643371 1.456549 2.573373 1.974132 1.703844 1.575119 1.56814 2.338441  
2.398037 2.969258 3.275564 2.967073 2.70375 3.020442 2.949803 2.324969 2.300239  
3.811813 3.644575 4.108105 3.986758 4.038687 4.861681 5.144132 4.093352 1.853601  
0.829404 1.194298 0.888707 1.318464 1.091458 1.379809 1.892945 0.839612 1.392934  
1.977924 1.83447 1.905321 1.864563 1.683852 2.720521 2.040391 2.112292 1.919742  
0.952365 1.077645 1.182409 0.870666 0.929628 0.98287 1.178657 1.595213 0.986221  
2.372626 2.118005 2.149761 1.686527 2.075474 2.187091 2.920718 2.170642 2.421492  
1.577016 1.773316 1.996472 1.87078 1.888263 1.198441 2.082561 1.270392 1.866781  
4.120795 4.531294 4.02486 3.882403 5.142692 4.702552 4.873392 3.697366 4.481956  
2.04252 2.319327 1.443032 2.038974 1.684528 1.664057 2.481682 1.853744 1.849219  
0.183421 1.044207 1.099119 0.839497 1.583523 4.015348 1.214258 0.815811 1.928247  
2.192592 1.938162 1.468723 2.352287 2.696862 2.149857 1.607002 1.128178 1.239169  
6.883926 6.986608 7.046437 7.125971 7.233344 6.786974 7.015126 7.475354 7.087377  
1.268447 1.482669 1.667705 0.985246 1.598529 1.177494 1.05747 1.687542 1.230723  
3.243749 4.190338 3.65827 3.472737 4.09192 4.907056 3.752229 3.538377 3.395896  
3.480793 3.111281 3.042125 2.785238 3.020943 4.382642 3.59513 4.15277 3.712561  
4.480194 5.039488 5.019463 5.302083 4.587211 4.950731 5.087563 4.83488 5.095045  
4.065413 4.788594 4.970754 3.892966 4.048679 3.766631 3.951413 4.314418 4.566574  
3.316743 1.890075 1.791227 2.351958 1.707489 2.258871 1.688437 1.547287 2.0072  
3.210727 2.046941 1.483879 1.465097 2.07051 1.9042 2.415379 2.104659 1.934984  
0.956616 0.41273 0.811358 1.211697 0.867536 1.383532 1.251797 0.822107 0.745838  
1.456031 1.823472 0.993649 1.36737 1.468416 2.188102 1.23319 2.033819 1.312089  
3.247013 2.3146 2.437176 3.617848 2.721412 2.143873 2.800649 1.950762 2.819217  
6.340822 5.983856 6.958996 5.584438 5.278443 5.182318 7.062873 6.728809 5.753336  
2.718861 1.397947 1.979837 1.731357 1.973868 1.915183 1.955003 1.331104 2.223263  
1.332664 2.181823 1.700213 1.250339 1.863032 3.466705 1.607612 1.901879 1.982398  
2.71479 3.746989 3.240095 2.579679 3.634742 3.064799 3.027794 3.489536 3.649216  
1.672938 2.313665 1.704022 2.325021 1.6089 3.622098 1.878609 3.653508 1.433033  
1.627346 1.650172 1.362529 2.491239 1.922107 1.320313 1.797788 1.226006 1.37935  
2.044105 4.78155 3.259094 2.033903 3.213596 3.761447 2.848533 3.411218 3.388384  
1.220081 1.238214 1.329918 1.154025 0.953376 1.595546 1.854925 1.298242 1.45128  
1.104999 3.873198 1.400663 1.700243 1.560002 1.374636 1.257736 1.91933 1.758063  
3.483729 3.258936 3.954838 4.456982 3.449187 3.910329 3.048378 4.005485 2.689905



2.233624 1.662557 1.938223 3.766974 1.934847 1.044164 1.318593 3.086864 2.011782  
0.843738 0.572923 0.937709 0.902689 1.327724 1.247025 1.453425 0.910979 1.471757  
6.051094 6.77596 6.756374 7.376063 6.838178 6.816024 6.783255 7.371621 7.393168  
1.966153 3.718036 5.022358 2.329536 2.608841 4.365406 5.73238 4.962103 4.185284  
2.46707 1.384932 1.307743 1.732944 1.31447 2.284866 1.656959 2.689057 1.35994  
1.951098 2.044048 2.440372 1.880624 1.433116 1.34987 2.396711 3.313165 1.71613  
3.837512 3.31505 3.385266 4.058612 2.79765 4.053329 3.5241 2.610989 4.883664  
1.930861 1.379147 1.720237 2.547578 2.827392 1.34365 2.718823 2.244189 1.973851  
2.194439 4.060541 3.027457 1.592716 4.148324 1.585157 3.101924 1.820106 2.647888  
3.309097 1.640797 1.302109 1.934103 1.915045 1.537795 1.811535 1.589686 2.356905  
1.300312 0.7282 0.882353 1.365898 0.623018 1.028807 0.944472 0.758295 0.852301  
1.128321 0.834358 0.86664 1.409164 0.721206 0.840574 2.619908 0.721046 1.327491  
1.074501 1.120512 2.056261 1.345287 1.353916 3.423413 2.00823 4.702004 1.352418  
2.117961 2.734577 3.628954 2.503104 2.163126 4.396424 2.398343 2.413193 4.019496  
1.114533 0.913844 1.122753 1.408715 1.345983 1.335562 0.952601 1.41565 1.031394  
1.150009 1.397936 0.830527 0.810145 0.971695 1.36181 1.753883 0.755718 1.187498  
5.362814 4.885522 4.77213 4.26044 3.963187 4.776441 5.155358 4.97654 4.881954  
1.811226 2.393347 1.961459 1.929529 1.804766 1.88137 1.933612 2.773199 1.541403  
2.216871 2.201346 1.91436 2.272149 1.624677 1.391364 1.64242 2.144804 1.45896  
4.565333 4.188026 5.253373 2.980315 4.408079 4.676438 5.991784 3.826187 5.591723  
6.641965 7.535413 7.455087 7.24859 6.986579 7.351565 7.648593 7.576889 7.69353  
2.124977 2.393846 1.20655 2.128709 1.749684 1.697555 1.458906 2.006448 1.691927  
7.747192 6.281488 7.80192 5.738407 6.884076 6.874462 8.314962 7.214521 7.309475  
5.648184 5.43626 3.213844 5.16544 3.177834 3.55753 4.567346 5.899808 3.873304  
0.928823 1.37234 0.511253 0.982908 0.950188 1.033856 2.802411 0.865918 0.730712  
1.033256 1.118599 1.031503 0.95389 1.404493 0.862186 0.818446 2.406869 0.998026  
0.827365 1.035656 0.774299 2.551936 0.842214 0.860617 0.875872 0.711871 1.175576  
2.863665 2.48023 3.94651 3.761411 2.679527 2.780976 5.127657 3.419183 2.883598  
1.593136 2.180966 1.597828 1.117673 1.152452 1.726167 1.239172 1.843117 1.54932  
1.722331 1.87262 1.474289 2.139441 1.247731 1.416935 1.343604 1.410676 1.784875  
1.273518 1.46544 1.216536 2.547875 1.176303 1.351112 2.021938 1.233883 1.53708  
2.069986 1.260582 1.730868 2.536235 2.957654 1.36326 1.636275 1.063838 2.413979  
1.987204 1.475606 1.833538 2.457414 1.719446 2.541131 3.232713 2.520405 1.626602  
0.82596 1.166993 1.673293 2.149306 0.75501 1.339764 3.007792 0.779921 1.363612  
0.957951 1.466338 1.038201 1.25616 1.003425 1.312776 1.273013 4.69453 1.174789  
1.418936 1.659031 1.545793 1.703644 1.082479 1.017892 2.178229 0.723441 0.917119  
8.568796 1.701552 1.869143 1.570297 1.432044 2.097266 2.21596 1.511865 2.056389  
1.518415 1.792652 1.308437 1.394861 1.928044 1.813336 1.803693 1.083818 1.160156  
2.859162 3.03231 2.835192 3.950861 3.638185 5.828816 4.695063 5.172958 3.254365  
2.117461 5.003818 5.95904 2.321479 5.447028 4.069687 3.734645 3.563511 3.670072  
1.838337 1.314024 1.680739 1.37216 1.235138 1.714209 2.156074 1.166254 2.92367  
1.849468 2.015862 2.509667 2.216812 1.857674 2.43705 2.913118 2.198128 2.276659  
1.109131 1.277259 1.322897 2.627876 1.383179 1.398166 1.611247 1.26393 1.215472  
1.805611 2.969725 1.571059 3.391315 1.643585 1.892858 1.801846 1.667219 1.823909  
5.643023 4.493934 5.232405 4.096789 4.253933 4.415908 7.42671 5.691523 4.743861  
0.970477 2.062754 0.889448 0.827121 1.626424 1.623513 1.322379 0.753752 1.031605  
4.117456 3.394908 4.429616 3.499499 2.795276 3.087963 5.564077 3.452265 3.155333  
5.34939 2.983829 3.200262 2.844412 3.477052 2.298072 2.935604 3.515159 3.129924  
7.596614 7.150749 7.150445 7.434962 7.803457 7.601784 7.341857 7.727711 7.438787  
3.001983 4.498046 3.348947 3.089017 3.455057 3.932786 3.737916 3.193565 3.356401  
4.160225 1.626519 3.818931 1.013578 2.922744 1.244863 2.513096 -0.17636 4.094023

3.002315 2.547796 2.644265 2.948862 2.162139 2.54306 1.849166 1.956277 2.546549  
3.532047 3.437636 3.340407 4.621474 3.952018 3.533468 4.316867 3.343449 3.604733  
2.764905 2.455764 1.30076 1.925567 2.312087 2.028302 2.357559 2.404777 2.295271  
1.67283 1.342709 1.536658 1.85479 1.528721 1.843786 1.926976 3.186313 1.808719  
3.028153 3.018198 2.691387 2.866602 2.743759 2.755347 2.406584 3.363215 2.434654  
3.771176 4.405932 4.557043 3.729834 4.190156 4.602467 2.466619 4.216768 3.236711  
2.222327 1.974376 2.256982 2.198592 1.942257 2.075588 2.9849 2.452186 2.433748  
2.643575 3.004465 2.875844 2.918056 2.479398 2.872932 3.296068 2.508994 3.181357  
2.31151 1.710682 1.632925 2.169739 2.176459 1.618984 2.33378 1.372455 2.026903  
1.050706 0.747819 0.881976 1.239665 1.054822 1.213181 1.085572 0.901233 1.831737  
1.957267 1.252833 1.729983 1.552141 2.435591 1.294774 2.452837 1.215872 1.059055  
5.044669 4.709752 5.582062 5.256246 5.312523 5.482422 5.250432 5.707044 5.765931  
4.827064 5.820506 5.189826 5.310829 4.863599 4.679647 5.685241 5.011736 5.172605  
4.540568 5.294713 4.940949 4.739883 5.282297 5.035436 5.17641 4.74397 4.929676  
1.97141 1.625729 1.670989 2.588275 1.977829 2.01005 1.765325 1.862894 2.441355  
5.09437 5.304267 4.91206 5.55871 5.412275 4.828813 4.671937 5.373052 4.827818  
2.51882 1.944401 1.788395 1.748722 2.036607 1.918681 2.344857 2.231591 1.682301  
3.605996 3.041212 4.088452 3.835804 2.785766 4.124318 4.088254 3.22644 3.141884  
2.246044 3.009115 3.2506 2.592906 2.576903 3.311143 2.490126 3.199956 2.952987  
7.559507 8.4345 8.140945 8.099808 8.428953 8.017718 7.994318 8.276089 7.628525  
3.822064 4.871094 4.143241 4.257292 4.35791 4.18834 4.270569 3.975449 4.863972  
6.053827 7.720148 7.452381 7.760982 7.175041 7.015854 6.719561 7.278302 7.385362  
6.129263 6.121517 6.093936 6.668391 6.006805 6.135924 5.546564 6.621327 6.007321  
7.793564 8.72132 8.108759 8.57584 8.562109 8.122232 8.359776 8.432289 8.553735  
3.956329 5.321773 6.054845 5.466009 5.573068 4.74105 5.004117 5.652875 5.538856  
5.430198 3.829199 4.373468 4.326204 4.1967 4.457536 4.216036 3.667397 4.504981  
1.075769 1.223173 1.104898 1.032234 0.884638 0.997547 1.509048 1.349957 0.930472  
8.155903 6.431723 7.216794 5.985917 6.043002 6.071772 6.414623 6.144665 6.694714  
1.512481 1.830864 1.436037 1.215514 1.657336 1.561438 1.483226 1.480276 1.273782  
5.784265 4.420756 6.186572 4.472403 3.551323 3.682792 4.349741 4.053544 6.233667  
6.055128 5.872005 5.999652 5.67255 6.326368 5.602704 5.56759 6.220834 5.643145  
3.45491 2.762907 2.085994 2.939023 2.127845 2.530055 2.167756 2.506308 2.380207  
3.376463 5.289751 5.168536 5.040682 5.358072 5.501319 4.504179 5.752228 4.704444  
2.509005 1.692156 2.036822 2.147906 0.857738 1.407161 3.142939 1.513458 1.300735  
4.354503 4.900924 5.11726 4.077047 5.54399 4.831391 3.869695 5.459455 5.161216  
3.511422 4.437198 4.264923 5.79774 4.195166 4.012425 4.368365 4.759791 3.549253  
1.598695 1.36998 1.86791 1.965436 1.766671 1.586608 2.420296 1.15639 1.651467  
4.935788 5.001989 4.524833 4.555756 4.870374 4.577256 4.805679 4.062684 5.023329  
4.790926 4.554647 4.539218 4.54275 4.467635 3.850743 4.605557 4.445737 4.734722  
2.582158 1.830742 1.791887 1.591113 2.401072 2.270101 1.95482 1.837775 1.405516  
4.525854 5.42074 5.150862 6.232941 5.440958 4.941221 5.235221 5.638406 4.954885  
8.827558 8.507724 8.535723 8.389082 8.512621 8.643932 8.193386 8.481732 8.287526  
2.311373 1.648505 1.458222 1.489055 1.795186 1.59315 1.293223 1.61827 1.499919  
1.381756 1.910475 1.010139 2.205082 1.483926 1.431987 0.943383 0.840764 0.857125  
7.954384 8.071384 7.167449 8.476114 8.443193 8.269008 8.223241 8.229353 8.02872  
3.957174 3.487446 3.485423 4.872049 4.650516 3.363694 2.984025 4.25385 3.540799  
6.161243 6.455728 6.381641 6.306751 6.74334 6.256238 6.33022 6.382466 6.212939  
1.637977 1.794024 2.241235 2.0206 1.79001 1.712476 1.926013 2.657634 2.194656  
4.797124 4.242332 3.356921 3.951223 3.259425 3.367549 2.588266 3.137073 4.907065  
1.7112 1.276032 1.46049 1.585861 1.224951 1.427539 1.437176 1.518551 1.405458  
2.592784 2.807716 1.914473 3.577819 2.48748 3.189593 2.034203 2.260662 3.209799

2. 58757 3. 666264 2. 427063 2. 976897 3. 425939 3. 359442 3. 376276 3. 202295 3. 603743  
1. 06652 1. 415501 1. 362871 1. 240658 1. 585545 1. 291573 1. 493042 1. 521242 1. 600331  
1. 108117 0. 846725 0. 960647 1. 068452 1. 617669 1. 043426 2. 085843 1. 278228 1. 111769  
3. 21246 3. 975078 3. 820597 4. 733228 3. 482865 3. 956025 3. 094874 3. 155479 2. 991836  
3. 320973 4. 820131 4. 274782 4. 16763 5. 176302 4. 491997 3. 978967 3. 369077 4. 138852  
4. 622193 4. 510654 3. 647505 3. 366887 4. 454262 4. 436979 4. 305757 4. 289481 3. 148134  
7. 081956 6. 734154 6. 533854 6. 687661 6. 997623 6. 828965 7. 670805 7. 417967 6. 89312  
6. 010461 2. 793098 4. 612414 3. 156015 3. 05347 2. 866738 3. 31479 3. 474265 5. 165966  
1. 661666 1. 751525 1. 604905 2. 020818 3. 525032 1. 988753 1. 870176 1. 999184 1. 648683  
4. 057597 4. 462109 3. 332171 3. 512246 3. 528943 3. 579395 3. 871688 3. 35406 3. 941986  
5. 809896 6. 377772 5. 969752 6. 229805 6. 314312 5. 945254 5. 658416 6. 413556 6. 337058  
5. 917698 6. 406997 6. 21896 6. 230823 6. 259532 6. 632528 5. 901458 6. 66837 6. 608146  
8. 144852 8. 017126 8. 238371 7. 859002 8. 016665 7. 615731 8. 029638 8. 120218 8. 436446  
4. 467458 4. 254576 5. 307145 3. 114262 3. 566374 4. 315898 5. 361325 4. 942065 5. 694703  
1. 5133 1. 417892 1. 643442 2. 250849 2. 1264 2. 114829 2. 555625 1. 595853 2. 488503  
6. 617256 7. 340466 6. 774414 7. 248579 7. 529616 7. 120784 7. 353445 7. 153147 7. 62698  
2. 399258 2. 262964 1. 86991 2. 749725 2. 753343 3. 005927 2. 571791 1. 950433 2. 154983  
4. 667925 4. 434412 3. 362194 6. 801658 4. 092208 3. 632174 4. 073458 3. 920319 3. 579087  
3. 154865 3. 960798 3. 179489 3. 071819 3. 78584 3. 012603 3. 880249 3. 595941 3. 017176  
5. 443612 5. 472228 6. 245135 4. 771072 5. 995127 5. 209584 4. 851828 6. 156001 5. 769075  
4. 556324 4. 171089 4. 608895 3. 56551 3. 970575 4. 780722 4. 604712 3. 942872 3. 989069  
2. 627265 1. 983588 1. 945697 2. 174536 1. 844202 1. 478564 2. 449899 1. 643036 2. 012144  
2. 833722 2. 480098 2. 331429 2. 182908 2. 931124 2. 269406 3. 495563 1. 991318 3. 437781  
4. 138528 4. 50755 4. 381674 4. 155472 4. 253198 4. 726423 4. 575798 4. 186471 4. 252901  
2. 030329 2. 061598 2. 361746 2. 525883 1. 91149 2. 502942 3. 221949 3. 008327 2. 153205  
8. 476662 8. 365613 8. 0841 8. 199792 8. 085043 7. 771101 8. 434017 8. 119897 8. 488699  
6. 102535 5. 340519 4. 45925 5. 016974 4. 904475 5. 437816 5. 790289 4. 74186 6. 104955  
2. 280357 1. 255281 2. 120056 1. 852412 1. 669799 1. 886672 1. 727043 2. 115728 1. 788762  
2. 052273 1. 456632 2. 273185 2. 377303 2. 079627 2. 735598 2. 561053 2. 343721 3. 557342  
2. 196417 2. 350287 2. 613523 2. 817544 2. 400053 3. 138136 3. 149543 2. 932282 2. 808407  
7. 751052 7. 704527 7. 949296 6. 57285 7. 831186 7. 48356 7. 946123 7. 646687 7. 675624  
3. 004169 5. 153574 5. 420872 4. 500097 5. 930294 4. 953844 5. 06025 5. 172522 5. 100876  
2. 469393 3. 878622 2. 987476 2. 530459 2. 799652 2. 056822 3. 437874 1. 975826 1. 672642  
2. 00625 1. 504543 2. 025794 3. 574548 1. 322262 1. 526159 1. 971398 1. 744286 1. 714892  
3. 275335 2. 120546 1. 927136 2. 281085 1. 996114 2. 058403 2. 405868 2. 042137 2. 70158  
1. 553448 1. 274436 1. 202109 1. 255534 1. 371212 1. 459685 1. 866167 1. 625499 1. 329237  
6. 215967 6. 198187 6. 343609 6. 239905 6. 266142 6. 098995 6. 014316 6. 499644 6. 465951  
6. 908459 6. 765881 6. 902106 6. 458335 7. 034784 6. 747163 6. 120547 7. 261889 6. 822698  
3. 459065 4. 86176 3. 507828 3. 543054 3. 313219 2. 866335 3. 420795 4. 123639 3. 357505  
5. 621235 5. 820666 5. 574381 5. 875048 5. 556319 5. 539742 5. 538291 5. 409861 5. 35807  
3. 353613 4. 087592 3. 536337 3. 211927 4. 030836 3. 697584 4. 110989 3. 50978 3. 831543  
2. 240411 2. 301285 2. 083241 2. 636613 2. 443746 2. 83175 2. 301285 2. 154219 2. 510799  
2. 18954 2. 356794 2. 132837 2. 148758 1. 960671 2. 396781 2. 38067 2. 352187 2. 570854  
7. 754168 8. 74984 8. 928706 8. 72222 8. 829912 8. 308101 8. 10351 8. 559334 8. 43749  
2. 118738 2. 935303 2. 228799 2. 564958 1. 788447 1. 924008 2. 39254 1. 833768 2. 38758  
1. 293935 1. 304068 1. 636728 1. 411521 1. 031337 1. 487932 1. 171481 1. 633096 1. 86865  
3. 742087 4. 999561 3. 769021 5. 535688 3. 754773 3. 718958 3. 796406 4. 190777 3. 048444  
3. 608675 2. 327759 2. 525619 2. 527652 5. 417447 2. 121769 2. 419482 2. 689235 2. 321452  
3. 152717 2. 849066 2. 456139 2. 512265 1. 426814 2. 697984 2. 402194 2. 14709 3. 549155  
7. 912098 8. 247275 8. 104374 8. 38538 8. 299579 8. 531211 7. 955424 8. 403732 8. 045272  
1. 291117 1. 012674 0. 9393 1. 191933 2. 077775 1. 543333 1. 13878 1. 827013 1. 867316

2.968106 2.955136 3.484071 2.603566 3.722539 2.964331 3.164527 2.521394 2.646805  
4.249153 2.01716 2.568604 2.209729 5.201472 3.796296 4.378351 1.925219 4.471317  
1.458954 1.125163 1.228975 1.266271 1.291078 0.931413 1.079853 1.288917 1.182604  
4.481712 4.315333 4.919651 4.08193 3.997947 4.449731 3.624639 4.524987 4.634027  
7.195878 7.305502 7.287047 7.231228 6.888993 7.160918 6.811187 6.702941 7.213877  
1.930923 1.852673 1.89128 2.463694 1.598055 1.989097 2.321757 1.759205 1.672329  
1.895616 1.366966 1.535339 1.571765 1.004729 1.554397 1.171259 1.4442 1.386015  
3.518991 2.936457 2.651441 3.248414 3.551716 2.716167 2.893447 3.17046 2.516298  
1.957912 1.394515 1.622229 1.631254 2.17136 1.330549 1.479759 1.643321 1.496227  
1.254339 1.356795 2.359538 0.7721 1.095378 0.939355 1.359012 1.110615 2.129766  
6.111843 5.784342 5.934808 5.074649 5.63002 5.82912 5.747484 5.844153 5.536949  
2.471529 2.454467 2.410764 2.584513 2.278897 2.690627 2.725277 2.445118 2.005112  
3.182333 5.050549 3.498393 6.453308 5.346313 4.899247 5.697307 4.8591 4.441914  
4.636756 4.995904 4.123274 4.42185 4.845814 4.49852 4.572786 4.480329 5.247695  
2.270741 2.028708 2.052422 1.719822 2.090861 2.475542 2.114223 1.663169 2.15617  
3.937728 3.836591 4.154398 2.846387 3.611043 4.247545 3.043135 3.669705 3.222337  
3.193101 3.18918 3.273124 4.440176 3.82434 3.21702 3.855573 2.536823 2.594664  
4.345908 4.871964 4.48229 4.521227 4.29713 3.880333 3.257424 4.890148 3.82333  
3.350988 4.822773 3.766199 4.044926 4.774116 4.339276 4.335028 4.526176 3.951009  
5.394523 4.474252 5.089093 4.856223 4.862671 5.081574 4.871331 4.8498 5.159723  
2.897537 2.891086 2.079989 1.423048 1.874486 2.854386 2.651417 1.716178 2.274123  
3.422301 4.314784 4.123143 3.750439 4.036024 3.520714 4.134626 4.61073 3.622272  
1.010991 1.459457 1.788858 1.612353 0.95324 1.324967 2.673403 2.151335 1.084922  
2.307797 1.721474 1.198515 1.261668 2.841441 1.579102 2.693067 2.03622 2.03822  
5.692832 6.506997 6.797141 6.675097 6.061169 6.903808 5.685092 5.935796 6.396828  
5.014911 5.660378 5.383046 6.407439 6.746758 6.421868 6.703629 5.400786 6.078004  
1.707478 1.444499 1.74393 1.725059 1.534859 1.637631 1.872726 1.175778 1.691108  
2.996677 1.978353 3.277961 2.718229 2.92897 2.514882 2.835955 2.478212 2.002001  
9.015114 8.192844 8.367902 8.470506 8.45581 8.693344 8.711833 9.062039 8.469806  
2.84961 3.375101 2.433576 2.135399 2.669794 2.273069 2.65038 2.657066 2.997882  
6.91434 6.907603 6.666055 6.38643 6.816762 6.917456 6.357935 7.384836 6.967456  
1.415986 1.484599 1.391541 1.222124 1.74417 1.804734 1.864855 1.631285 1.001498  
1.620735 1.167478 0.958119 1.231108 0.797695 1.133534 1.859806 1.509813 1.204891  
2.072851 1.575493 1.932617 1.755091 1.572424 1.434878 2.600262 1.986834 2.032258  
5.742235 4.899751 4.801155 5.448994 5.385127 5.194688 5.095798 4.89143 5.028352  
2.849908 1.583922 2.636832 3.121201 1.902966 3.037956 2.610198 2.960736 4.044151  
1.941491 1.380497 1.317331 1.742594 1.794886 1.756231 2.388067 3.239892 2.604138  
5.237021 5.993488 6.189606 6.00262 6.493744 6.200677 5.840035 6.662398 6.079394  
1.852202 2.207934 1.631378 1.648048 1.564967 1.485443 1.835229 1.690128 3.213524  
2.51406 1.746202 1.738832 1.260864 2.036464 2.311421 2.297655 1.238485 2.867714  
2.762512 2.711374 2.080787 1.464239 2.131201 1.711192 1.465749 1.884396 1.832435  
2.175382 1.780938 3.015929 1.788557 2.690182 2.370413 3.063626 2.63084 1.923181  
0.891906 1.865179 1.269075 1.76544 1.191564 1.346857 1.57926 1.224653 1.078443  
2.941917 1.910561 3.457166 4.439562 2.377442 3.097698 3.486932 2.87922 4.204801  
1.66438 1.204606 2.11459 1.871639 1.235887 1.840761 1.337262 1.378998 1.762789  
4.911525 4.876209 5.218001 5.211003 4.063963 5.126953 5.483184 5.541755 6.981465  
3.133844 4.389132 3.385311 4.084598 3.921093 3.984234 4.545493 3.917131 3.589784  
2.173932 2.100569 1.823119 2.343787 2.33264 2.263934 2.119312 2.481604 2.322913  
1.635929 2.031919 2.803207 2.917164 2.114468 2.982623 3.192723 1.860054 1.787978  
7.066248 5.541689 6.544439 6.192588 6.206925 6.581216 7.086068 6.055659 7.146649  
4.410002 4.737506 5.13047 5.48429 5.367463 5.347178 4.646954 3.863035 4.975745

7. 585744 8. 415224 7. 944642 7. 958191 8. 471102 7. 825013 7. 942977 8. 050567 8. 304712  
2. 213648 2. 087103 3. 106022 2. 59745 2. 414566 2. 086437 2. 036761 2. 467045 2. 247551  
2. 876613 1. 79922 2. 117332 1. 662067 1. 694948 1. 780903 1. 773557 1. 519446 1. 339268  
5. 158291 5. 043429 5. 550684 4. 711869 4. 459486 4. 999595 5. 537754 4. 895336 4. 816404  
3. 511088 3. 713719 3. 034687 3. 448634 2. 617396 3. 076137 3. 936024 4. 252627 3. 735589  
6. 579549 6. 867994 7. 393262 6. 347176 6. 764812 6. 896483 6. 835945 6. 561377 6. 599081  
3. 495515 3. 451271 3. 811606 3. 606048 3. 161035 3. 560738 3. 183502 3. 235173 3. 127452  
5. 577813 5. 74371 5. 690078 6. 065057 6. 428033 5. 681792 5. 956083 5. 445817 5. 025638  
1. 39501 1. 599719 1. 971094 1. 695617 2. 267693 1. 913706 2. 585227 1. 975916 2. 302743  
3. 40424 2. 046249 2. 869109 1. 906754 2. 595479 2. 991859 3. 19119 2. 23737 1. 606667  
6. 142581 5. 850139 5. 469854 5. 382523 5. 508507 5. 548622 5. 559046 6. 136776 5. 749375  
7. 306581 6. 588605 5. 870437 7. 993218 8. 475633 6. 2736 8. 126442 8. 224768 7. 968319  
7. 720204 7. 71177 7. 689238 7. 790258 7. 956581 7. 621291 7. 994799 7. 821183 8. 050212  
4. 985841 5. 342853 4. 961877 5. 527612 5. 429863 5. 17438 5. 939872 5. 378314 5. 667251  
4. 341548 5. 279817 5. 301847 4. 924396 5. 072935 5. 293823 3. 9931 5. 255886 5. 28961  
6. 81415 6. 964284 6. 222462 6. 01594 6. 855165 6. 524361 6. 830544 6. 960872 7. 064699  
5. 960667 5. 979291 6. 319729 5. 5097 6. 313394 6. 185871 6. 367822 6. 267863 6. 348856  
7. 107662 7. 998121 7. 869904 7. 781699 7. 604368 7. 894484 7. 496505 7. 679944 7. 61411  
7. 102053 7. 170535 7. 179079 6. 734404 6. 459115 7. 004284 6. 790417 6. 884815 6. 861774  
6. 689812 7. 577836 7. 275755 7. 764965 7. 571857 7. 442974 7. 188407 6. 258678 7. 238627  
4. 856015 5. 217934 4. 743439 5. 352368 5. 615545 5. 259747 4. 623067 5. 924791 5. 457544  
6. 210244 4. 930201 5. 540963 6. 028895 6. 407466 5. 242577 5. 516171 4. 589146 5. 936528  
6. 94441 4. 96518 6. 317272 4. 129091 6. 95325 6. 538927 5. 820026 6. 539416 6. 202548  
1. 728159 1. 472714 1. 261066 1. 781201 1. 575049 1. 188565 2. 074713 1. 381306 2. 180665  
5. 21734 5. 76848 5. 077312 5. 540686 5. 657558 5. 349099 4. 904756 5. 966302 5. 673045  
4. 500111 5. 577523 5. 266561 4. 581451 5. 137586 4. 304222 5. 100746 4. 966985 6. 264919  
6. 53756 5. 147113 6. 288676 4. 71123 3. 889664 4. 367321 5. 371596 4. 446311 6. 718582  
1. 240816 1. 598565 0. 849223 0. 982177 1. 210575 1. 422493 1. 561778 0. 889439 1. 184808  
1. 974748 1. 589298 2. 730293 1. 594114 1. 901448 2. 313972 1. 653369 2. 273182 1. 565471  
2. 492915 2. 879494 2. 231527 2. 616419 2. 63784 3. 54311 3. 768675 3. 431935 2. 683114  
2. 273917 2. 016399 2. 100776 1. 329418 1. 374384 1. 968472 1. 243778 1. 808657 2. 37256  
0. 997718 1. 916374 1. 346716 1. 290534 2. 062628 1. 374449 1. 827658 1. 309877 1. 278076  
2. 303767 1. 855886 2. 146278 3. 191325 2. 019022 3. 518132 2. 808339 3. 787092 2. 689936  
3. 254675 2. 039025 2. 366074 2. 889153 3. 639476 2. 614046 2. 236486 2. 823728 2. 692697  
4. 396005 4. 892648 4. 972305 4. 73416 5. 323786 4. 929194 3. 932802 4. 574914 4. 239686  
4. 953528 5. 345423 5. 2507 4. 81871 5. 141422 5. 271579 5. 710763 4. 968226 4. 664393  
2. 827265 1. 209012 1. 730969 1. 436793 1. 79934 1. 453877 2. 065712 1. 718733 1. 834453  
4. 095183 3. 233231 4. 540784 2. 84993 3. 160019 2. 240085 4. 012411 3. 881148 5. 049525  
4. 118871 4. 332524 4. 296814 4. 287761 3. 008105 5. 134025 4. 044046 4. 956118 4. 133096  
1. 630466 1. 563606 1. 313923 2. 714861 1. 521928 2. 663515 3. 589206 1. 379223 1. 752293  
7. 469507 6. 457379 5. 937688 5. 988641 6. 372472 5. 907902 6. 936157 6. 512416 6. 011131  
1. 349222 1. 514922 1. 728195 1. 693667 1. 487104 2. 522311 2. 160784 1. 545347 1. 528668  
3. 711376 5. 461562 5. 192466 4. 556326 3. 882609 4. 702113 3. 691696 5. 08592 5. 057712  
2. 786406 4. 270848 3. 431792 2. 750429 3. 834092 3. 232169 3. 933498 2. 674665 3. 053199  
2. 99791 5. 009094 4. 307496 4. 391537 4. 200842 4. 840871 5. 336119 3. 441348 4. 351433  
2. 835629 3. 408984 3. 079578 5. 329019 2. 877401 3. 373268 3. 099032 3. 566519 3. 190434  
1. 639181 1. 594475 1. 378672 1. 707795 1. 216486 1. 14208 2. 23387 1. 393913 2. 051326  
7. 143108 7. 080984 6. 260363 7. 944853 7. 226531 7. 537714 6. 951998 7. 256469 7. 019647  
3. 059938 4. 42407 4. 038655 4. 191433 4. 788662 4. 10095 4. 204631 4. 246486 4. 316889  
1. 766607 1. 386309 1. 054726 1. 848289 1. 575195 1. 843843 2. 370635 1. 173922 1. 530362  
7. 019539 5. 896416 5. 95421 5. 686628 6. 673958 5. 906212 6. 730243 5. 515636 5. 81319

4. 46028 4. 497502 4. 253897 3. 28539 4. 451239 4. 424725 3. 902851 5. 411839 5. 089185  
4. 957407 5. 865417 5. 802013 4. 92534 4. 999258 4. 964908 5. 280541 5. 518844 4. 825348  
5. 318825 4. 487122 4. 44685 4. 648908 3. 850757 4. 823889 4. 960093 4. 282076 3. 479766  
5. 785061 5. 286718 4. 703549 5. 280137 5. 089948 4. 330172 5. 424442 4. 644367 4. 419289  
1. 547081 1. 167382 1. 173523 1. 104356 1. 020831 1. 209587 1. 529186 1. 310422 1. 404329  
4. 287659 2. 732002 3. 433169 3. 047497 4. 639194 2. 846079 4. 064006 2. 923887 4. 090689  
3. 503383 2. 677467 2. 850907 2. 441463 1. 854528 2. 569355 2. 8842 2. 603258 2. 91402  
6. 359039 6. 175744 6. 258603 6. 26595 5. 81091 6. 432826 5. 958601 5. 715448 5. 645099  
1. 408919 1. 316296 1. 293731 1. 127819 0. 823698 1. 295041 1. 559838 1. 666683 0. 890764  
5. 493471 4. 935508 5. 959171 3. 986664 4. 663038 2. 775885 3. 776628 4. 265373 5. 560993  
5. 862847 5. 261351 6. 507819 4. 441249 5. 680591 5. 881983 4. 519058 5. 82426 4. 980295  
7. 213388 7. 5261 7. 604375 7. 215947 7. 684177 7. 661671 7. 845014 7. 480745 7. 404258  
9. 577385 9. 768836 9. 742758 9. 528504 9. 753824 9. 903857 9. 395618 9. 811102 9. 47887  
2. 073394 1. 758526 2. 59941 1. 870344 1. 713774 1. 596826 1. 571376 2. 086842 0. 953112  
9. 703236 9. 383529 9. 590005 9. 6433 9. 701082 8. 962297 10. 02785 9. 461113 9. 66654  
7. 074921 7. 358026 7. 43146 7. 360352 7. 775716 7. 102091 7. 448997 7. 765977 7. 237369  
1. 258241 1. 226062 2. 563064 3. 512955 1. 557498 1. 163599 2. 816085 1. 178423 3. 158435  
5. 58713 6. 127953 5. 631219 6. 13115 6. 07641 7. 05836 5. 936589 6. 711816 5. 898558  
4. 174647 4. 812516 4. 949394 5. 716556 4. 619789 5. 040512 5. 125794 4. 938373 4. 802103  
4. 086344 4. 867712 4. 985878 5. 164914 5. 049086 4. 869134 4. 844269 5. 08336 4. 489277  
4. 717676 5. 975282 3. 88151 5. 001784 3. 491312 1. 529983 4. 733177 6. 749782 4. 268638  
4. 797949 5. 422243 4. 97108 5. 645205 5. 729281 4. 906706 4. 912513 5. 733583 5. 275884  
2. 615898 2. 934642 2. 777327 3. 714537 2. 61271 3. 192708 3. 470537 3. 241526 3. 349839  
7. 184992 6. 771933 7. 631116 6. 218623 7. 237688 6. 0073 7. 715858 7. 210646 8. 3826  
4. 895306 4. 450792 4. 491112 4. 372465 4. 204632 4. 429011 4. 058876 4. 365184 4. 549792  
5. 266043 5. 043813 5. 509479 4. 28323 4. 705078 5. 225262 4. 489839 5. 639547 5. 399055  
4. 410965 5. 107228 5. 139271 5. 233131 5. 432972 5. 103876 4. 208544 5. 247376 5. 476581  
5. 535449 6. 02235 5. 802377 6. 235758 5. 725175 5. 47357 5. 433987 5. 950083 5. 924129  
6. 067421 5. 147981 5. 8295 5. 251852 5. 145087 4. 878748 5. 100985 4. 792042 5. 651028  
7. 751428 7. 947413 7. 663137 8. 112371 8. 158313 7. 93256 7. 611877 7. 647756 7. 833395  
6. 377541 7. 408364 7. 413453 7. 042107 6. 586824 7. 212889 6. 528282 6. 669326 6. 075612  
4. 950663 5. 600941 4. 897376 5. 525201 5. 529595 6. 030201 4. 767566 5. 479244 5. 564309  
3. 646966 2. 994801 4. 292949 2. 428948 3. 637384 2. 697243 4. 130508 3. 78602 4. 02546  
2. 623487 2. 01038 1. 379737 1. 964003 2. 166407 2. 315503 2. 153277 1. 593671 2. 146704  
3. 538972 2. 563805 3. 055119 3. 3813 3. 1851 3. 822666 3. 658642 3. 821533 2. 610741  
5. 035821 5. 639689 5. 097534 4. 325184 5. 043794 5. 632128 5. 268533 4. 881445 4. 860142  
3. 723449 5. 05787 3. 3939 3. 548235 2. 004747 2. 939628 3. 245372 3. 403197 2. 556647  
7. 729715 7. 665203 7. 765928 7. 623601 7. 50598 7. 751543 7. 515834 7. 304835 7. 37556  
1. 865105 2. 551832 1. 835922 2. 24842 2. 829145 1. 536377 2. 011534 2. 318397 2. 413095  
1. 332037 1. 639473 1. 403864 1. 745798 1. 283338 1. 367729 1. 564019 1. 186999 1. 430623  
1. 78076 1. 588709 1. 515133 1. 409303 1. 336615 1. 804153 1. 461324 1. 296017 1. 623116  
5. 346663 5. 972523 5. 787277 5. 912807 5. 99896 6. 110536 6. 2357 6. 300669 5. 161491  
1. 8071 1. 564466 1. 324653 1. 979542 1. 860016 1. 292069 1. 240787 1. 324653 1. 199634  
7. 187069 7. 908889 7. 591542 7. 488922 7. 874243 7. 670364 7. 569582 7. 450743 7. 837914  
2. 618184 2. 97311 3. 643451 3. 000871 3. 858837 4. 219241 2. 770864 3. 642953 3. 348367  
3. 136074 2. 886177 3. 619732 2. 477939 3. 626157 2. 954046 3. 419229 3. 651833 3. 440515  
6. 636244 7. 26204 7. 195253 7. 007166 7. 182822 6. 773287 6. 723098 6. 988934 6. 657273  
1. 518713 1. 243315 1. 223511 1. 314728 1. 328963 1. 399536 1. 26523 1. 515065 1. 464442  
3. 958609 3. 239218 3. 977125 3. 138708 2. 817395 3. 87761 2. 762795 3. 924909 3. 993907  
1. 800454 1. 661706 2. 464489 1. 45843 2. 157225 1. 89854 1. 775196 1. 705475 2. 457358  
3. 318484 3. 188212 3. 282273 2. 874866 3. 821599 3. 710372 3. 573317 3. 238176 3. 161957

1. 535334 1. 239207 1. 008008 1. 191319 0. 943262 1. 409895 1. 717639 1. 732934 1. 484401  
2. 745759 3. 553928 3. 809198 3. 010479 2. 931289 3. 849705 3. 063264 4. 597424 2. 498751  
3. 132261 2. 07227 1. 975256 1. 731065 3. 212905 2. 862422 2. 027372 2. 038605 2. 431918  
7. 806336 7. 645102 7. 963303 7. 275671 7. 774997 7. 396675 7. 1532 7. 58168 7. 80906  
3. 580584 2. 272386 4. 48709 2. 98395 2. 605617 3. 25868 3. 597913 2. 770142 3. 00827  
2. 988225 2. 649223 3. 055083 2. 80876 2. 986331 2. 49133 2. 484752 2. 222908 1. 523521  
5. 604433 6. 282524 6. 00797 5. 352692 5. 913735 5. 689506 6. 040483 5. 777472 6. 640905  
5. 319861 5. 660583 6. 120965 4. 993004 5. 028842 5. 964881 4. 843589 5. 549786 5. 631407  
5. 061984 4. 230409 4. 826022 3. 985981 4. 275537 4. 676861 3. 195825 3. 800051 4. 13557  
6. 755425 7. 450839 7. 197148 8. 363423 7. 468163 7. 282632 7. 631251 6. 684439 7. 527771  
4. 022421 5. 836661 6. 172207 6. 125226 6. 325986 6. 018491 5. 76222 6. 808468 5. 81494  
8. 349606 9. 020226 9. 064688 8. 711769 8. 435097 7. 964844 8. 21178 9. 079814 8. 500317  
1. 923386 0. 801047 1. 897821 2. 051315 1. 394244 1. 524804 0. 969346 1. 16734 1. 405636  
4. 501925 2. 958835 3. 111109 4. 044952 3. 369963 3. 430797 3. 415749 3. 99001 4. 304553  
7. 35036 7. 367938 6. 841263 6. 764849 7. 019725 7. 689356 6. 885627 6. 878608 6. 831231  
4. 261139 2. 894125 3. 015819 2. 992481 3. 702889 3. 064403 2. 902158 2. 716318 2. 751504  
2. 607535 1. 880737 1. 851407 1. 950334 2. 501571 2. 822073 2. 215296 2. 345502 1. 761047  
5. 932245 6. 036253 5. 9322 6. 487819 6. 169607 6. 210845 6. 124927 6. 241165 5. 537814  
7. 519145 7. 864195 7. 654883 8. 030145 8. 040217 7. 879991 7. 321468 7. 573081 7. 767885  
7. 689432 7. 371105 6. 884623 7. 227572 7. 370361 7. 224547 7. 170058 6. 936202 7. 242798  
3. 298142 3. 553344 2. 688199 2. 417711 2. 29664 2. 033133 3. 134599 2. 670168 2. 333081  
4. 019514 4. 694229 4. 735021 5. 735878 4. 938673 5. 148188 4. 804564 6. 864456 5. 506748  
6. 281446 8. 187868 7. 585096 8. 230193 8. 252065 8. 421199 8. 081429 8. 179635 7. 657002  
8. 54809 8. 755359 8. 900772 8. 984309 9. 208491 8. 988441 8. 766277 9. 253839 8. 980388  
2. 089601 1. 719742 1. 986861 2. 37427 1. 832704 1. 420895 2. 721179 1. 799247 2. 254079  
1. 997131 2. 261378 2. 514286 3. 389378 3. 83534 2. 549584 1. 861855 2. 106824 3. 783985  
5. 029973 4. 706752 4. 853159 5. 792434 4. 329742 4. 103233 4. 04397 4. 582273 4. 299178  
10. 22187 10. 56578 10. 47825 10. 78441 10. 58254 10. 73896 10. 21915 10. 28618 10. 36072  
4. 998325 6. 428638 6. 528622 5. 372925 6. 340249 6. 544873 6. 33179 5. 722182 6. 869988  
2. 788813 2. 140228 2. 65689 2. 470938 1. 64099 2. 046302 2. 566062 2. 209041 2. 82453  
3. 442995 2. 425819 2. 925875 2. 155779 1. 994257 2. 607913 2. 443292 2. 219888 2. 688717  
2. 089808 2. 642115 2. 297958 2. 745458 1. 970199 2. 626467 2. 523028 2. 417661 2. 789051  
1. 959022 4. 076836 2. 921508 4. 728481 4. 650148 3. 895971 4. 041547 4. 694223 2. 095148  
7. 812276 7. 311681 7. 654092 7. 279665 6. 227045 7. 881845 5. 987778 7. 030255 7. 460436  
9. 050635 9. 278181 8. 99791 9. 173951 9. 120263 9. 427554 9. 25579 8. 984498 8. 822185  
0. 74631 1. 214433 1. 225645 2. 410342 1. 229624 2. 054851 0. 919055 0. 993351 1. 078779  
3. 047239 2. 352529 3. 200087 2. 276537 3. 444328 2. 242603 3. 265756 2. 845595 1. 967187  
4. 537262 4. 539743 4. 552532 4. 571065 5. 191581 4. 921407 4. 575274 5. 185203 4. 295721  
2. 236602 2. 37264 2. 085317 2. 42018 2. 14389 3. 051663 2. 225202 2. 287502 1. 989377  
3. 089779 3. 350297 3. 350297 4. 591835 4. 170335 3. 968098 3. 472152 3. 092489 3. 030422  
1. 582871 1. 434036 1. 553254 2. 200638 2. 220269 1. 716254 2. 329005 1. 815012 1. 674284  
8. 270847 7. 933768 8. 012657 8. 285933 8. 006711 8. 241607 8. 167128 8. 191784 8. 543401  
1. 963099 1. 266279 1. 317718 2. 172313 1. 614178 1. 364044 1. 176075 2. 052642 1. 066524  
2. 673635 4. 05972 3. 907792 3. 698791 3. 531354 4. 270505 4. 257619 5. 027209 3. 846243  
4. 951948 5. 046159 4. 899639 5. 008722 5. 177099 5. 384767 4. 990161 4. 639006 4. 903521  
6. 827689 7. 518905 6. 742765 7. 548778 6. 610288 7. 636956 7. 103503 6. 824693 6. 97123  
5. 132778 5. 565191 4. 869914 5. 744433 5. 467593 5. 670579 4. 878552 5. 715485 5. 369874  
6. 835991 6. 809913 6. 822639 6. 565226 7. 169162 6. 886919 6. 414068 6. 844935 6. 275031  
7. 264191 7. 709966 7. 615063 7. 201886 7. 480352 7. 666422 7. 390546 7. 827505 7. 110316  
6. 693947 6. 249945 6. 908042 6. 432638 6. 338934 6. 011979 5. 649873 5. 338211 6. 893852  
6. 028578 6. 862704 6. 205477 6. 617871 6. 748693 6. 130104 7. 345489 6. 800304 6. 648926

1. 885525 1. 109837 1. 227436 3. 368637 1. 71789 1. 598251 1. 034108 0. 734875 0. 863855  
3. 41916 0. 941693 2. 412787 1. 288331 2. 253876 0. 712108 2. 093626 1. 422047 1. 647795  
3. 592971 2. 731377 3. 274838 2. 540365 3. 963411 3. 053708 4. 970402 2. 540736 4. 120912  
1. 265919 0. 941511 0. 790761 2. 409117 1. 285816 1. 804871 1. 324637 1. 176755 1. 319967  
1. 699953 1. 638038 1. 675705 1. 948616 3. 475258 2. 636593 2. 446204 1. 456043 2. 008928  
6. 049687 5. 692045 5. 9288 5. 874224 6. 97488 6. 203696 5. 895868 6. 01382 6. 238711  
1. 98832 2. 026336 2. 832189 1. 730293 2. 624496 1. 719194 2. 589621 2. 249436 1. 697472  
3. 622482 2. 38772 2. 925228 2. 632253 2. 458817 1. 896213 2. 07987 2. 196494 2. 664543  
3. 712596 1. 736977 2. 975375 3. 010664 2. 406072 1. 809883 2. 439044 2. 063642 2. 397849  
2. 496445 1. 40471 1. 840647 1. 73696 1. 686589 2. 6486 1. 799474 1. 699414 2. 032159  
2. 853669 1. 860771 2. 075276 2. 70505 2. 887967 1. 669598 2. 778712 2. 52377 2. 253474  
4. 249874 5. 606319 5. 429018 5. 023243 4. 389499 4. 648293 4. 877701 5. 564397 4. 930568  
5. 641489 4. 622069 4. 848249 4. 52569 4. 285575 3. 45918 2. 723593 5. 618665 5. 831766  
4. 022392 4. 834932 4. 911886 6. 087783 5. 64139 4. 126191 3. 798716 5. 157196 5. 363866  
7. 573368 6. 960435 6. 637624 6. 697916 7. 064501 7. 438362 7. 345659 7. 019176 7. 46132  
2. 274739 2. 631169 3. 124583 3. 136624 2. 337203 2. 126272 2. 041673 2. 259007 2. 535524  
2. 193306 3. 04858 2. 558071 2. 637943 2. 982734 2. 26945 3. 339577 2. 243141 2. 977131  
2. 746584 2. 279945 2. 901241 2. 651348 2. 680018 2. 531571 2. 867545 2. 818311 2. 452246  
5. 994447 6. 132004 5. 623727 6. 70767 6. 302454 6. 785668 5. 997123 5. 54598 5. 884173  
1. 240661 1. 145114 1. 341557 0. 920848 0. 888498 1. 487686 0. 622535 1. 00841 1. 301462  
3. 970638 2. 256898 2. 205935 1. 611603 1. 540375 1. 513866 2. 012894 1. 545105 2. 117752  
4. 233519 4. 064404 3. 84641 4. 682058 4. 569304 3. 763724 4. 151712 4. 516706 4. 583189  
1. 642063 4. 314722 4. 524641 1. 264323 5. 018746 4. 15283 3. 728338 5. 032667 3. 426236  
2. 097421 2. 254449 1. 918015 1. 661536 2. 088396 2. 604229 1. 919029 1. 948837 1. 822857  
4. 124591 3. 98497 4. 460442 4. 289572 4. 135292 3. 962852 5. 55603 4. 383073 4. 262018  
4. 880069 3. 442025 3. 469285 2. 966129 3. 215721 2. 580562 4. 208199 3. 445164 3. 814359  
1. 841378 1. 701941 1. 185437 1. 936057 1. 649697 1. 572113 1. 478523 1. 332642 1. 390642  
4. 954024 4. 807236 4. 686281 3. 981333 3. 170591 4. 259814 4. 240824 3. 709373 5. 164483  
1. 488326 2. 203572 1. 891305 2. 337613 2. 888139 1. 660151 2. 521275 2. 526606 1. 91559  
1. 30958 1. 609124 1. 540306 1. 035863 1. 269304 1. 450637 2. 023729 1. 618631 1. 738398  
1. 487764 1. 023527 1. 219981 1. 468945 1. 640617 0. 979812 0. 93577 1. 148016 1. 412996  
0. 645819 0. 653549 1. 576707 1. 113905 1. 161622 0. 83285 1. 291424 0. 829356 1. 411715  
1. 346676 1. 523837 0. 756036 0. 974912 1. 077648 0. 917006 0. 738734 0. 720823 1. 277183  
2. 524678 2. 346076 2. 390178 3. 207937 2. 628789 2. 949756 3. 040514 2. 611828 3. 07047  
0. 971579 0. 958617 0. 569767 1. 130775 0. 58708 0. 7846 2. 242924 1. 651643 0. 896393  
3. 818656 4. 885884 4. 53387 4. 469083 4. 200476 5. 043981 3. 603927 4. 226893 4. 538119  
2. 132765 2. 513793 2. 624664 2. 663637 3. 249666 3. 51095 2. 440525 2. 519715 2. 310702  
5. 503432 6. 163877 5. 883453 7. 038693 6. 444965 6. 866921 6. 52958 5. 961323 6. 159626  
1. 334069 1. 446413 0. 92122 1. 977039 1. 447419 1. 399515 2. 14029 1. 468349 1. 731496  
8. 288906 7. 296891 7. 710041 6. 981066 7. 609769 6. 947586 7. 787494 7. 477087 7. 242954  
2. 09337 1. 687776 1. 732443 2. 353339 1. 409729 1. 901455 2. 478519 1. 580315 2. 438533  
4. 097713 3. 050007 3. 352723 3. 762656 4. 782346 3. 072842 4. 463268 2. 87674 3. 260912  
2. 242492 2. 379104 2. 076554 2. 184882 2. 082964 2. 20371 3. 069797 2. 542758 2. 206602  
5. 074338 6. 230099 6. 025454 5. 461316 6. 282276 5. 446743 5. 719278 5. 99467 5. 969983  
2. 307279 1. 500564 2. 059805 1. 475766 1. 207575 1. 323062 1. 484725 1. 681796 1. 732627  
2. 106014 2. 70363 3. 180914 2. 679066 1. 740737 1. 248668 2. 017139 2. 033143 1. 810668  
0. 859347 0. 626451 0. 67227 1. 071043 1. 139637 6. 738194 0. 786004 0. 854906 1. 571529  
4. 112093 3. 246235 2. 537878 4. 031432 4. 176471 3. 934724 3. 192716 3. 138049 2. 349315  
2. 522538 1. 774618 1. 566057 1. 878729 2. 03605 1. 324349 2. 727226 2. 391549 2. 656526  
0. 656793 1. 19999 1. 521925 1. 032243 0. 782207 0. 995182 1. 105173 1. 155832 1. 092372  
2. 392189 2. 074456 1. 771791 1. 858751 1. 169888 1. 778637 1. 609181 1. 868204 1. 299359



1. 451808 1. 558022 1. 927455 2. 364599 1. 539269 1. 477223 1. 541221 1. 293187 1. 534188  
1. 573674 1. 451914 1. 234885 1. 45799 1. 41459 1. 130106 1. 322919 1. 090663 1. 703751  
1. 825857 3. 663205 3. 381948 1. 932721 2. 220522 2. 617779 3. 030145 3. 294373 2. 266152  
1. 409459 1. 318149 1. 228218 1. 311524 1. 325943 1. 524759 1. 290503 1. 361569 1. 259269  
2. 083646 1. 481896 0. 9797 1. 151863 1. 310856 1. 170762 1. 765562 1. 546096 1. 221177  
1. 746794 1. 242286 2. 145868 1. 055734 1. 450572 1. 1065 1. 123511 1. 644132 1. 623983  
0. 811557 1. 147451 0. 979825 0. 953818 0. 532806 0. 831305 0. 942104 1. 07113 0. 948602  
2. 098254 1. 415635 2. 827854 1. 717762 1. 300694 1. 361008 1. 841134 1. 396068 2. 102698  
3. 311834 2. 551811 2. 957917 3. 355098 2. 526117 3. 216967 3. 418351 2. 5477 2. 62052  
3. 710009 1. 730201 1. 757098 2. 327822 2. 466616 1. 852909 2. 260717 2. 004028 1. 701875  
4. 303867 5. 222656 5. 042121 4. 769182 4. 044079 4. 851866 4. 688853 5. 427362 5. 091018  
5. 588336 3. 978759 4. 055229 3. 520687 3. 710129 4. 818117 3. 226704 3. 368707 4. 001131  
1. 90036 0. 884857 1. 135084 1. 221938 1. 339568 1. 090073 1. 281426 1. 136423 1. 90548  
0. 968661 0. 815633 0. 626447 1. 419411 1. 408147 2. 083548 1. 44305 1. 192489 1. 074415  
8. 415605 8. 646681 8. 057117 7. 757941 8. 02825 9. 508027 8. 56596 8. 126788 8. 057584  
2. 433718 1. 989355 1. 762058 1. 271923 2. 496815 1. 429941 2. 123756 2. 414681 2. 013192  
4. 03473 2. 773024 2. 822061 3. 190286 3. 406656 3. 256507 3. 030262 2. 700841 3. 051937  
8. 760553 9. 228285 9. 59881 9. 314914 8. 48884 8. 87415 8. 543955 9. 208085 8. 163744  
1. 573834 2. 933176 3. 322432 2. 228876 2. 51153 2. 888582 2. 985845 2. 123132 2. 668554  
5. 127899 5. 593682 5. 378415 6. 15358 5. 811393 6. 020117 5. 349099 5. 773427 5. 776756  
2. 213261 1. 805471 1. 72046 1. 864869 1. 565839 2. 502358 2. 378548 1. 535003 2. 313779  
3. 73694 2. 501942 3. 836505 3. 445192 3. 519239 4. 408314 3. 593603 2. 799891 3. 352912  
2. 000638 1. 705437 1. 660195 2. 859808 2. 669714 1. 737599 3. 446526 2. 506817 3. 167428  
2. 155517 2. 064556 1. 131855 1. 255338 1. 731144 1. 565952 1. 808391 1. 198379 1. 94945  
1. 87238 1. 168187 1. 244964 1. 115995 1. 091421 1. 707409 1. 25288 2. 301735 0. 857528  
2. 807275 2. 003507 2. 406812 2. 231264 2. 070586 1. 894849 2. 009836 1. 922782 2. 191885  
2. 815385 1. 919143 1. 800481 1. 603723 1. 837747 2. 187285 1. 705232 1. 702812 2. 422994  
1. 419403 1. 562516 1. 527396 1. 554083 1. 414583 1. 625646 1. 304169 1. 137867 1. 395508  
2. 154482 1. 676442 1. 804664 1. 912766 2. 016855 1. 608809 2. 286689 1. 651253 2. 018531  
3. 025257 2. 050404 3. 060515 2. 088155 2. 161334 1. 695557 2. 746844 2. 16063 3. 676781  
1. 277949 1. 357722 1. 749294 1. 462393 1. 8462 1. 665544 2. 294595 1. 733294 1. 447936  
2. 225793 0. 874285 0. 771396 0. 867998 1. 100032 1. 270659 0. 947832 1. 159553 0. 815175  
1. 792051 1. 558634 1. 07234 1. 19071 1. 556085 0. 946891 1. 101023 1. 083061 1. 845394  
2. 133037 1. 404839 1. 782972 1. 274801 1. 50421 1. 854687 2. 536913 2. 458812 1. 100112  
1. 535904 1. 397674 1. 140535 1. 423797 1. 853238 1. 447055 1. 945903 1. 022197 1. 192732  
3. 519067 4. 67481 4. 162931 3. 995992 5. 242759 3. 553364 3. 693419 4. 332161 4. 508425  
2. 387379 2. 378738 2. 239453 2. 189747 1. 957099 1. 655742 2. 360788 2. 484696 2. 226901  
1. 989328 1. 343694 1. 152385 1. 29261 1. 713912 2. 55833 1. 196813 1. 886369 1. 098003  
3. 960347 5. 384787 5. 001069 4. 789685 4. 366139 5. 248825 4. 461157 5. 400201 4. 563139  
2. 451161 2. 447073 2. 369282 1. 892373 2. 93017 2. 432816 2. 660418 2. 64837 2. 199968  
4. 48896 5. 110235 4. 900905 4. 966967 4. 351395 4. 461893 4. 466772 5. 130107 4. 884687  
2. 029641 1. 623087 2. 476962 1. 027426 2. 146472 2. 127789 1. 743237 2. 297695 1. 915977  
5. 40752 5. 791172 5. 36547 6. 321671 6. 093627 6. 413183 5. 743059 6. 020877 6. 150533  
3. 086033 1. 323908 1. 497914 1. 329744 2. 158261 1. 635 1. 73155 2. 900437 1. 488632  
3. 366283 2. 602217 2. 773097 2. 984148 3. 26419 3. 453705 3. 302553 3. 145024 2. 957316  
4. 474382 3. 569205 3. 975659 2. 73392 3. 94033 2. 950767 2. 376257 2. 806706 2. 952594  
7. 549156 6. 203145 4. 757314 5. 580792 3. 627115 6. 152682 4. 420956 5. 464842 4. 016468  
1. 63867 1. 787484 1. 787484 2. 22811 1. 431528 1. 690969 1. 593553 1. 712191 1. 724832  
2. 060594 1. 361561 1. 286144 2. 073423 0. 927819 1. 614898 2. 115781 1. 383331 1. 458299  
5. 43288 5. 58908 5. 340686 5. 83278 5. 584065 5. 572352 4. 328503 5. 610709 4. 209606  
1. 439672 1. 433633 1. 434075 1. 874825 1. 146241 1. 895666 1. 501805 1. 171192 1. 856999

2.082401 1.883639 2.192454 1.993322 2.089879 1.305331 1.868724 1.751169 1.509406  
2.51471 1.550907 2.071933 2.312751 2.960931 1.308806 2.213017 1.504691 1.872444  
1.460001 1.801947 1.630398 1.606369 1.908104 1.413769 1.799338 1.489014 2.881955  
1.727526 2.188426 1.949245 2.035989 1.963804 1.339513 1.707927 2.561195 2.567712  
1.552986 1.244015 1.320276 1.785251 2.065609 1.607742 1.818546 1.770184 1.932405  
1.274686 1.216472 0.944614 1.718172 1.501474 0.917403 1.626133 2.040877 1.917234  
5.473056 6.0469 6.312708 6.400034 6.176312 6.617049 6.232745 6.651163 5.975989  
5.029404 5.526849 5.053998 5.026053 4.492539 5.437116 3.607774 4.845384 4.932717  
3.723621 4.469791 5.012784 3.985641 4.519589 4.222441 5.546016 3.685995 4.266703  
4.529435 5.623287 5.351307 5.647239 5.867434 5.736574 5.633768 5.323714 5.579605  
0.875914 0.973011 1.69675 0.874956 1.003695 2.212503 1.97323 1.112066 1.273085  
2.104874 2.320753 1.931402 1.596936 2.100681 2.041373 1.919494 1.993502 2.879501  
1.294579 0.951349 0.909941 1.234953 1.184705 0.876883 1.021146 1.758477 0.98718  
3.913323 5.12415 5.126067 5.582332 4.683915 5.304066 5.164842 4.959616 5.434648  
6.591428 3.97653 4.817515 3.44249 4.128951 3.330185 4.411681 4.690744 5.921404  
5.254049 4.244984 4.917735 4.539885 4.579103 3.746369 4.70919 4.416866 5.056705  
2.916845 4.985239 4.432642 4.852528 4.760583 4.762142 4.020703 5.507765 5.866113  
2.247569 3.256511 2.24498 1.540878 2.991356 2.117238 2.292739 2.224043 2.850908  
1.534996 1.238611 1.750253 1.538365 1.435729 1.95915 2.8349 1.504019 1.312438  
4.803014 1.992001 2.29475 2.376827 3.31982 2.933939 3.519324 2.183233 2.356359  
1.28782 1.593155 1.617261 1.817918 1.941525 1.759076 1.786132 2.556712 2.396583  
1.773672 2.075093 2.256274 2.194371 1.908852 1.998925 2.589703 1.932482 2.417175  
1.628037 1.759176 1.812585 2.127896 2.070033 1.876977 2.384111 1.173172 1.951968  
1.913854 1.982534 2.507589 1.588102 2.304787 1.720104 1.923033 2.73442 1.881445  
2.207646 5.032108 3.749032 4.080485 1.7133 4.33998 3.709927 4.514938 3.219782  
2.061611 1.496201 1.498602 1.476521 3.463749 1.576116 1.943974 2.237484 1.230201  
4.287172 2.99673 5.119063 3.366429 2.439869 3.663714 2.78103 2.196534 3.668451  
2.308219 1.620521 2.003921 1.978463 2.144038 1.591196 2.258801 1.830597 2.39596  
2.333389 1.441818 2.37661 2.231159 2.290008 2.276878 2.644865 1.607521 1.712598  
2.461199 1.27504 1.320674 1.324615 1.933053 1.245515 1.304491 1.182038 1.280804  
1.429085 1.470198 1.284717 1.250773 1.25087 1.295472 1.41493 1.381633 1.813796  
5.747812 5.435198 5.381128 5.806257 5.685884 5.316034 5.335231 5.488195 5.302778  
1.409589 1.88271 1.76796 2.07198 1.702524 1.263647 2.471182 1.714532 2.070509  
4.848132 6.002116 5.884189 6.409394 5.613292 5.24405 5.788982 6.556958 5.314591  
5.202981 3.37562 3.493943 2.001409 1.778648 2.356993 3.722377 4.212099 3.148684  
1.296986 1.184089 0.825786 0.791595 1.275285 1.200391 1.09552 1.307174 1.218193  
1.627221 1.399545 1.226752 1.44645 1.302151 1.270458 1.415019 1.251735 1.630143  
5.047083 5.836541 5.631931 5.447826 5.217288 5.901554 4.864138 6.006819 5.385817  
1.258888 1.302159 0.842806 1.240487 0.904488 1.392347 1.319196 1.001637 1.179892  
2.076179 2.148885 1.651347 1.988721 1.562409 1.596 2.177217 1.844066 1.548331  
6.004785 6.259588 6.176621 3.203291 4.93973 5.204204 5.783867 6.50924 4.859924  
1.976099 2.726595 1.531166 3.835628 2.282441 1.943785 2.460066 1.828121 2.082324  
2.392966 1.924575 2.305731 1.743183 2.544963 3.655513 1.56763 3.129586 2.460184  
4.317219 4.176362 4.44462 4.935433 4.715965 4.073052 4.570896 4.875152 4.222822  
2.574142 1.598216 0.701547 1.475246 0.920412 1.220546 1.135283 1.725939 1.121298  
2.3092 2.085438 1.885813 1.821637 2.428439 2.015816 2.806588 2.335365 2.024887  
2.212162 4.577029 2.098216 1.936659 1.824223 2.152905 2.629919 1.347813 1.23137  
3.303081 1.786388 2.384529 1.797961 1.739008 1.337189 1.702695 1.681243 1.727533  
2.736063 3.034063 3.198573 2.053901 2.310354 3.264342 2.739191 3.756079 2.686754  
2.43098 2.628359 2.609244 2.60364 2.456217 2.485915 3.082435 2.575217 2.995325  
5.695044 6.990635 6.686087 6.933832 6.264578 6.61679 6.360944 7.037802 6.962791

1. 815746 1. 739764 1. 553325 1. 863584 1. 641869 1. 645603 1. 576874 1. 847359 1. 68275  
2. 915645 3. 292556 2. 520385 2. 684733 2. 487507 3. 554908 2. 501283 2. 737583 2. 226195  
1. 259577 2. 486425 1. 373355 0. 952581 2. 08313 1. 859762 1. 682749 0. 989598 1. 550035  
1. 235619 2. 387748 1. 132688 1. 367148 2. 432561 1. 660103 1. 519408 2. 04983 2. 517499  
2. 893613 2. 312054 1. 871605 2. 260744 2. 113023 2. 589609 2. 628133 1. 846753 2. 178732  
1. 81003 2. 19524 1. 932968 2. 10452 1. 350635 1. 529077 2. 837098 1. 747045 1. 299224  
1. 975756 1. 803148 1. 466565 1. 474983 1. 518829 1. 698736 1. 507912 1. 455049 2. 309607  
3. 060378 2. 716376 3. 111503 3. 679975 4. 12209 3. 003163 2. 990013 2. 885819 3. 797861  
2. 416997 2. 088563 0. 952425 2. 561706 1. 284213 1. 426418 4. 108279 0. 948018 1. 09418  
1. 153448 0. 847688 1. 115473 1. 08134 1. 160404 1. 414742 1. 036167 0. 831202 1. 313293  
2. 49263 2. 267856 2. 418492 2. 287325 2. 461283 2. 077473 1. 531099 2. 229582 1. 672164  
3. 384195 3. 734791 3. 293955 2. 863636 3. 603409 3. 251042 4. 266919 2. 778033 3. 593057  
1. 432984 1. 494542 1. 968895 1. 680862 1. 191156 1. 820948 1. 810782 1. 294954 2. 142888  
2. 484015 1. 748429 1. 887278 1. 436295 1. 953613 2. 600277 2. 303015 1. 766029 2. 335831  
2. 999121 2. 356639 2. 998116 2. 922187 2. 685049 2. 226424 3. 255488 3. 168768 2. 405324  
2. 179677 1. 777573 1. 585785 1. 726669 2. 954951 1. 901439 2. 803694 2. 240217 1. 140832  
4. 736535 4. 972579 4. 378 4. 697097 5. 673313 4. 086949 2. 796328 3. 282594 5. 274525  
2. 152449 2. 695533 3. 445099 2. 451814 3. 703151 3. 688802 2. 299744 3. 250691 2. 841817  
5. 889521 6. 145461 5. 933775 6. 001644 6. 342024 6. 197185 5. 55361 5. 813787 6. 018914  
4. 886473 4. 795353 4. 773154 5. 130468 4. 456758 5. 193208 5. 234539 4. 74827 4. 545213  
2. 888249 2. 268651 2. 277366 2. 470767 2. 664567 2. 147422 2. 123787 2. 580728 2. 004047  
2. 956054 2. 48207 2. 419638 1. 154349 3. 417121 1. 457586 1. 702781 2. 357476 2. 336745  
3. 275799 3. 622257 3. 997427 3. 209378 3. 095153 3. 006471 4. 154932 3. 45349 3. 717344  
2. 812104 2. 905795 2. 203359 3. 022372 2. 911677 2. 207218 2. 567968 2. 255958 2. 928291  
2. 187351 1. 374894 2. 028053 2. 057694 1. 86346 1. 39623 1. 543476 2. 199872 1. 61913  
1. 572196 1. 610677 1. 587252 1. 795284 1. 609703 1. 681815 1. 582535 1. 753391 1. 227663  
1. 768388 1. 267066 1. 388443 2. 000605 1. 207206 1. 356505 1. 208024 1. 338516 1. 056659  
2. 724749 1. 263177 1. 333084 1. 332324 0. 830048 0. 969437 0. 891084 0. 728313 0. 692348  
4. 414509 5. 560148 2. 496395 2. 474122 5. 350338 4. 391033 3. 013768 5. 388793 2. 787813  
2. 255431 2. 47397 3. 525254 1. 852969 3. 314891 2. 10234 1. 704807 2. 411823 2. 901585  
3. 502047 3. 810427 4. 106158 3. 20017 3. 495054 2. 513692 3. 646152 3. 387369 3. 67311  
1. 382727 1. 515519 2. 324009 1. 447564 1. 268357 1. 156385 2. 023197 1. 75173 2. 514989  
1. 235137 1. 66661 1. 028977 1. 213294 0. 994667 1. 377458 1. 327724 1. 2539 2. 061305  
2. 807001 1. 914926 3. 000895 2. 786953 2. 83187 2. 867471 2. 374598 2. 495 3. 611853  
1. 700521 0. 808964 1. 192969 2. 458551 1. 411323 1. 967454 1. 79467 0. 88503 1. 719423  
1. 384851 1. 473842 1. 993214 1. 335926 1. 306144 1. 456284 1. 766298 1. 413727 1. 718093  
1. 941049 1. 868084 2. 198979 1. 608762 2. 43412 1. 689269 1. 786004 1. 831959 1. 963667  
2. 24022 1. 121163 1. 636538 1. 549304 1. 052568 1. 173141 1. 562568 1. 358456 1. 533245  
5. 959537 5. 334613 6. 534125 6. 749094 6. 362599 6. 019015 6. 007939 5. 380307 5. 99044  
2. 575251 2. 102361 2. 219173 2. 679999 2. 608412 2. 083117 2. 023043 2. 311394 2. 783847  
5. 930671 5. 865537 5. 80001 5. 11589 5. 701649 5. 380596 5. 051933 5. 356685 6. 175557  
2. 886434 1. 802393 3. 109245 2. 650564 2. 028005 2. 670532 3. 10922 2. 079174 1. 744264  
1. 593324 1. 254693 1. 123989 2. 072191 1. 910634 1. 340798 1. 08686 1. 284588 1. 410292  
1. 502073 2. 061235 2. 861407 2. 000773 1. 928803 1. 748268 2. 780857 1. 342242 3. 519931  
2. 05891 1. 899483 1. 977986 1. 552004 1. 166607 1. 345704 2. 287405 2. 495835 2. 432982  
2. 002404 1. 618797 1. 142305 1. 604961 1. 264996 2. 305644 2. 818962 1. 302864 1. 237829  
1. 334841 1. 321842 0. 913938 1. 658158 0. 946488 1. 202361 1. 081578 0. 969249 1. 56833  
1. 755925 1. 589435 2. 083624 1. 76046 1. 563742 1. 202055 1. 852798 1. 592804 3. 0432  
3. 683769 4. 953701 4. 001517 4. 831449 4. 681846 4. 803069 4. 458326 4. 039014 4. 314728  
2. 377515 1. 255902 1. 07725 1. 277335 0. 784552 1. 048902 0. 986133 0. 848408 1. 967073  
1. 836777 2. 183395 2. 045078 1. 935248 2. 22099 2. 024414 1. 983896 2. 678576 1. 863204

1. 479954 2. 096438 1. 131551 1. 587004 1. 868284 1. 479076 2. 396796 1. 500105 1. 108288  
2. 142179 1. 972698 1. 890909 2. 506547 1. 367478 1. 908408 1. 62627 1. 872661 2. 021524  
1. 073878 1. 160998 1. 366732 1. 087069 1. 409669 1. 161041 2. 088119 1. 411008 2. 61312  
4. 474853 3. 835139 4. 66895 3. 93831 4. 566257 4. 836406 3. 893447 4. 317082 3. 772161  
4. 124906 4. 190253 4. 742315 3. 931989 4. 487437 3. 756398 4. 696969 3. 878493 4. 081538  
4. 743047 5. 968435 4. 752947 5. 950902 5. 542899 5. 845852 5. 682827 5. 737318 5. 370157  
2. 477015 1. 896262 2. 458021 2. 347529 2. 529458 1. 7745 3. 163111 2. 361211 1. 983532  
2. 10704 4. 026247 3. 270765 2. 910517 3. 719519 2. 470946 2. 967332 3. 45437 2. 490051  
2. 814094 2. 069685 3. 075607 2. 478537 3. 289707 1. 631415 1. 637785 1. 937538 3. 147195  
3. 201022 2. 085126 2. 079543 2. 214871 2. 399868 2. 227637 2. 358732 2. 040667 2. 482325  
1. 25911 1. 794046 0. 729184 1. 264283 0. 827772 0. 645081 0. 788972 1. 539284 1. 079108  
2. 918806 2. 633738 4. 381997 2. 645244 3. 722765 4. 139585 2. 603087 3. 595847 3. 509239  
4. 45268 4. 373173 4. 592906 4. 353603 3. 894636 4. 507893 4. 606938 4. 23974 3. 833097  
1. 128349 0. 794315 1. 003431 0. 81913 1. 25272 1. 03605 1. 190564 1. 134249 1. 482807  
3. 131602 1. 895532 2. 217393 2. 36948 2. 080416 2. 131668 3. 06846 2. 159291 2. 243453  
1. 526773 1. 497017 1. 326662 1. 716137 1. 730012 1. 622593 1. 542692 1. 507586 1. 440879  
3. 088741 3. 277231 3. 888221 2. 99508 3. 367688 3. 923982 2. 69107 3. 542631 2. 118431  
3. 205232 4. 136926 3. 525007 3. 439474 3. 191743 3. 719739 3. 025508 3. 441423 3. 759255  
2. 550282 3. 657556 3. 09187 3. 660466 3. 153985 4. 458532 2. 826592 4. 856805 3. 512351  
1. 749469 1. 800031 1. 62505 2. 039544 1. 937285 2. 563342 2. 572744 1. 078118 1. 728572  
2. 368573 2. 113632 2. 599716 2. 314834 2. 352079 1. 775424 2. 668623 2. 223342 1. 927993  
5. 400694 4. 751462 4. 252998 5. 212832 4. 47608 5. 392117 4. 457268 5. 070374 4. 448505  
6. 99761 6. 633288 5. 855337 5. 956676 6. 689872 5. 197928 6. 890106 6. 62713 6. 094053  
1. 50814 1. 10929 2. 617577 2. 41106 1. 429893 1. 522289 1. 852695 1. 205658 2. 499268  
4. 041889 2. 643412 3. 351959 3. 321423 3. 553676 4. 586609 3. 881616 4. 242472 2. 485825  
1. 88701 1. 818573 1. 142377 1. 619815 1. 298013 1. 196538 1. 714812 1. 176342 1. 394747  
1. 837943 1. 986455 1. 879172 2. 675349 2. 041797 1. 93145 2. 800319 3. 139544 4. 787826  
1. 231779 1. 414756 1. 539495 1. 84064 1. 998646 1. 300889 1. 847723 2. 285117 1. 428754  
1. 883904 1. 540714 1. 444728 1. 539368 1. 184598 1. 187 1. 461853 0. 815669 1. 705263  
3. 030755 1. 554342 2. 11385 3. 052888 1. 695199 2. 10724 2. 735607 2. 250618 2. 886064  
5. 974721 6. 759327 6. 482938 7. 090215 6. 839279 7. 337652 7. 005448 5. 875077 6. 610737  
4. 169781 3. 24711 3. 029011 3. 188806 3. 472056 3. 651021 3. 513578 3. 741719 3. 392681  
7. 654552 7. 343635 6. 705939 7. 318453 7. 26478 8. 325326 6. 786381 7. 335201 7. 028205  
2. 598614 2. 416311 2. 637593 2. 356386 1. 932997 1. 907288 1. 963383 2. 662739 2. 889324  
6. 7896 6. 695936 4. 731699 4. 686223 6. 489861 6. 215807 5. 378531 6. 260127 6. 723076  
2. 860019 2. 833257 2. 437706 4. 270744 3. 34114 2. 796061 3. 503289 3. 243698 3. 363899  
3. 697251 3. 256259 3. 174905 2. 71258 2. 649394 2. 783168 2. 84939 3. 240113 3. 503181  
1. 980453 1. 582151 2. 398488 1. 962255 2. 20194 1. 387857 1. 484544 1. 871573 1. 753456  
1. 787929 2. 080535 1. 381052 1. 28502 1. 270751 1. 105259 2. 187062 1. 455767 1. 797612  
2. 971255 3. 262413 2. 866971 4. 737379 2. 727221 3. 274612 3. 87061 4. 428259 3. 501893  
1. 287953 2. 523277 2. 704966 3. 047733 2. 71594 2. 086578 2. 854477 3. 493889 2. 852943  
2. 308979 1. 694496 1. 661072 2. 045433 1. 465639 2. 718954 2. 376948 4. 531996 2. 557321  
4. 341469 3. 878744 3. 833162 3. 739836 3. 920689 2. 757345 2. 841055 4. 074183 4. 105393  
3. 357856 2. 304066 2. 930334 2. 341424 2. 908888 2. 268363 2. 266877 2. 151955 2. 854034  
2. 194986 1. 557776 1. 287166 2. 347771 1. 517862 2. 356899 1. 737831 1. 669144 2. 748827  
2. 131331 2. 440469 2. 197847 1. 805171 2. 59795 2. 266855 2. 958719 2. 71509 1. 765471  
5. 01712 5. 563826 5. 933622 5. 643343 6. 094349 5. 851373 4. 666936 5. 21526 5. 398536  
1. 336789 1. 294427 1. 202341 1. 961365 1. 498122 2. 121591 1. 671473 1. 888729 1. 248874  
1. 987017 1. 997632 2. 23685 2. 394391 2. 064466 2. 034383 2. 562796 2. 910354 1. 8505  
1. 725003 2. 074701 1. 476148 1. 391149 1. 468027 1. 289854 1. 642624 1. 576715 1. 68434  
2. 995546 2. 549831 2. 408514 2. 553783 1. 629719 1. 870539 2. 828339 2. 015086 2. 816711

3. 414645 4. 874541 4. 784486 3. 45809 4. 008998 4. 986777 3. 867755 3. 718915 3. 451975  
1. 313714 1. 707852 1. 095225 1. 764263 1. 30194 1. 344619 1. 282971 1. 092833 1. 020204  
2. 71998 2. 21677 2. 137572 2. 636097 2. 995126 2. 724316 2. 135231 2. 445944 1. 686753  
3. 200634 3. 30478 3. 792106 3. 256346 3. 064796 3. 33343 2. 617736 2. 977397 3. 354679  
2. 753186 2. 338306 2. 543653 3. 343644 1. 98859 2. 597373 3. 469357 2. 568025 3. 106811  
1. 244174 1. 437375 2. 485985 1. 915519 1. 288794 1. 038093 2. 092638 1. 4446 0. 959536  
2. 748621 2. 705565 1. 454199 1. 83043 1. 22054 1. 669212 1. 362763 0. 883732 1. 783341  
1. 516041 2. 047012 1. 876323 1. 486422 2. 20824 2. 259404 2. 565935 2. 184074 1. 671252  
1. 56561 1. 243204 1. 379625 1. 026728 0. 918713 1. 380204 1. 145982 1. 598704 1. 780402  
7. 369616 6. 878579 6. 578455 6. 320951 6. 618773 6. 250214 7. 10027 6. 804843 6. 884172  
0. 833279 0. 674453 1. 302048 0. 940003 1. 189955 4. 18936 1. 104816 1. 832107 0. 873951  
3. 822277 3. 226619 3. 874699 4. 055716 3. 858624 3. 802149 4. 379159 4. 524871 3. 267964  
2. 287159 2. 943005 2. 247995 1. 722746 1. 954314 2. 015043 2. 164075 1. 912643 2. 2981  
2. 01598 1. 857537 2. 586739 2. 387859 2. 036749 1. 906683 2. 046026 2. 209925 2. 418172  
1. 936579 2. 06464 2. 705115 1. 657705 1. 656317 1. 768967 3. 081381 2. 227847 1. 607101  
6. 4485 6. 394927 5. 839396 6. 899937 7. 272825 6. 596953 6. 896623 6. 427637 6. 653213  
3. 184487 1. 720991 2. 56815 3. 472901 1. 574136 2. 361664 4. 1466 3. 157273 2. 539144  
1. 39744 1. 413125 2. 175192 1. 665582 1. 56504 1. 222904 1. 786851 1. 538864 1. 187888  
3. 596683 4. 312487 3. 926021 3. 735714 4. 044625 3. 883344 4. 05366 4. 342872 3. 753089  
2. 889255 2. 636198 2. 776554 1. 586001 2. 653907 2. 15479 1. 361041 2. 100535 2. 549641  
3. 775498 2. 149231 3. 272799 2. 517724 2. 820916 2. 475978 2. 306176 1. 852922 2. 762971  
8. 691675 8. 507159 8. 118668 7. 981043 8. 222728 8. 205605 8. 855522 8. 687947 8. 277361  
3. 383968 1. 996933 2. 905462 2. 624316 2. 684346 3. 590178 3. 169582 2. 668464 2. 750616  
2. 965519 2. 25117 1. 915145 2. 490008 2. 166226 2. 110146 2. 359483 2. 310324 2. 484847  
3. 89347 3. 481069 3. 323339 3. 620474 3. 091624 3. 556409 3. 665032 3. 506772 3. 437709  
1. 989497 3. 107479 1. 873352 3. 147847 2. 721258 3. 628409 2. 179295 2. 463118 3. 499332  
3. 655739 4. 026311 3. 987321 4. 10397 4. 474154 5. 210926 4. 546064 4. 687055 4. 458342  
1. 189164 1. 966483 1. 181828 1. 298027 1. 353418 1. 408634 1. 495198 1. 434879 1. 466316  
2. 632064 1. 689963 1. 868603 1. 910352 2. 016372 1. 632858 2. 316763 1. 996576 2. 512306  
1. 938648 1. 19503 1. 066104 1. 467895 1. 4978 1. 230005 1. 55995 1. 91404 1. 016133  
2. 010248 1. 236047 1. 072011 2. 010405 1. 294511 0. 864539 1. 181033 0. 65799 1. 105929  
0. 583531 0. 687218 0. 922616 1. 593325 0. 546512 0. 744639 1. 232962 1. 380656 1. 461469  
1. 78334 2. 591993 1. 56546 1. 63361 2. 961188 1. 802217 3. 262005 1. 677743 2. 289656  
2. 501613 2. 239333 1. 800035 2. 737915 1. 985223 1. 870141 2. 163454 1. 751899 1. 767355  
2. 487299 2. 554402 3. 213326 3. 45587 3. 178271 2. 897378 3. 626311 3. 35254 2. 606987  
1. 873903 1. 157603 1. 110466 1. 11449 0. 887742 1. 508666 1. 313828 2. 082049 0. 991244  
2. 046362 1. 556979 1. 217387 1. 380056 1. 289959 1. 22289 1. 837185 1. 168287 2. 127159  
2. 439014 1. 810735 1. 665874 1. 568479 1. 97099 2. 36543 2. 900638 2. 691501 2. 452647  
0. 865585 0. 97726 0. 619213 2. 378817 0. 686926 1. 601276 2. 476187 0. 498096 2. 263782  
5. 477288 6. 263377 6. 490071 5. 681406 6. 344109 6. 193485 5. 453537 6. 233524 6. 350744  
1. 262405 1. 087753 1. 561641 1. 12113 1. 53128 0. 937054 1. 534088 1. 26474 0. 856943  
2. 397635 1. 402038 2. 770821 2. 058864 2. 649852 2. 888948 1. 691234 2. 138184 2. 161737  
1. 600168 0. 946915 1. 052455 1. 300176 1. 021123 1. 063831 0. 955119 1. 484793 1. 056324  
0. 755834 1. 052753 1. 016585 0. 856509 1. 097438 0. 939523 1. 600515 1. 111903 1. 592959  
3. 981399 5. 028089 4. 214448 4. 760406 4. 975233 4. 46049 5. 120851 4. 362947 4. 24186  
1. 007226 1. 218626 1. 022123 1. 333305 2. 588764 0. 711999 1. 157498 1. 953904 1. 600303  
2. 628147 1. 725703 1. 995165 2. 291191 1. 889331 1. 883475 1. 870746 1. 969677 1. 452786  
3. 336026 3. 035135 3. 531356 2. 973873 4. 147909 2. 625428 2. 634087 4. 421804 2. 911547  
3. 824014 3. 311894 4. 350994 2. 925841 3. 929877 4. 046025 3. 654774 4. 366106 3. 740995  
3. 984299 4. 672667 4. 713299 4. 899818 4. 442875 4. 91605 4. 009277 5. 199711 3. 917078  
3. 372786 2. 972965 3. 346957 3. 580514 2. 420573 3. 128293 2. 568526 3. 413531 3. 203893

4. 184545 4. 345066 4. 637978 3. 944802 5. 169212 4. 880399 4. 293457 4. 936489 3. 93174  
3. 946113 2. 614643 2. 893143 2. 345127 2. 929089 3. 520926 2. 778314 2. 025364 2. 356532  
1. 877765 1. 143782 0. 902713 1. 350528 2. 221811 1. 218125 1. 3003 0. 807515 1. 293852  
1. 799015 1. 684088 1. 659812 2. 055758 1. 553078 2. 232613 2. 312535 2. 746374 2. 150071  
2. 078931 2. 074987 2. 592818 2. 332039 3. 412048 2. 868985 3. 075165 2. 843202 2. 497061  
2. 454914 2. 468704 2. 614375 2. 038815 2. 502186 2. 155204 2. 217414 2. 051198 2. 324315  
1. 655192 1. 612774 1. 429985 1. 461259 1. 570178 1. 629221 2. 0993 1. 925921 1. 968878  
4. 775658 3. 357101 3. 808712 3. 253943 4. 286804 3. 672523 2. 4597 4. 253026 4. 402306  
3. 311396 3. 345483 3. 602871 3. 573295 4. 052431 3. 702348 3. 46194 3. 349934 3. 054456  
3. 72996 3. 70454 4. 059237 5. 798072 4. 280128 4. 710277 3. 612845 5. 073324 3. 788398  
3. 298832 3. 153278 3. 056961 3. 442795 2. 721184 5. 614012 3. 400462 2. 967711 2. 414062  
4. 865882 3. 998008 4. 677258 4. 454736 4. 104662 4. 911811 3. 492129 5. 182858 4. 418764  
2. 943486 2. 361942 2. 150922 2. 61005 1. 839073 1. 998925 2. 325528 1. 708854 2. 676795  
1. 54592 2. 695782 2. 365731 2. 538339 2. 712368 1. 874058 3. 455407 1. 778259 1. 517091  
2. 789417 2. 384888 4. 264177 2. 188873 2. 480202 2. 143594 2. 046343 2. 245803 2. 335037  
1. 679797 0. 876844 1. 397004 1. 527691 1. 729265 1. 068588 1. 463553 1. 721914 1. 353022  
4. 967007 5. 703734 6. 077553 5. 485517 5. 813033 5. 170337 5. 70847 5. 639888 5. 303539  
3. 50853 3. 476305 3. 416322 3. 494958 3. 108847 3. 661053 3. 681371 3. 80562 3. 585909  
1. 974034 1. 956213 2. 032582 2. 164481 2. 451212 2. 089358 2. 908671 1. 966301 1. 986239  
0. 900032 0. 966048 0. 835856 1. 241603 1. 124326 1. 08114 1. 96049 1. 614316 1. 033977  
1. 780517 1. 762785 2. 02167 1. 559575 1. 624785 2. 510842 1. 771218 1. 574662 1. 791133  
2. 967588 4. 281268 3. 354691 3. 713008 4. 45505 3. 471299 3. 882395 2. 656467 4. 018197  
3. 847857 5. 661211 5. 70763 5. 042334 5. 573266 5. 571607 5. 91714 4. 984196 4. 603756  
1. 56389 1. 697162 1. 690069 1. 853009 1. 205737 1. 351906 1. 771211 1. 661695 1. 845252  
2. 36374 1. 41188 2. 214116 2. 14954 1. 697556 2. 050924 2. 162226 1. 792932 1. 606028  
2. 699959 1. 328352 1. 697311 2. 200145 1. 551404 2. 092708 1. 693868 1. 242352 1. 641299  
1. 744954 3. 064747 5. 048749 3. 571733 3. 832347 2. 616526 2. 540566 4. 032988 4. 341798  
2. 795532 2. 808734 2. 376673 1. 411945 1. 569814 2. 61696 0. 903842 2. 407626 1. 734697  
4. 330944 4. 715666 6. 018326 4. 121431 5. 289989 4. 776612 4. 711429 4. 830391 5. 123118  
1. 56916 1. 897149 1. 377774 1. 612356 1. 410323 1. 706821 1. 921395 1. 649741 1. 8589  
1. 847799 1. 382118 2. 227036 2. 791695 1. 271647 1. 952103 1. 041794 1. 015215 1. 300744  
2. 670617 2. 428254 2. 548302 2. 337756 2. 490643 1. 946968 2. 540209 2. 058676 2. 325243  
1. 965853 1. 62252 1. 580398 1. 740229 2. 575464 1. 424852 2. 464148 1. 74452 1. 899337  
4. 062895 3. 417754 3. 678166 3. 499409 3. 364961 3. 225409 2. 640596 3. 096144 3. 439977  
3. 682391 3. 337714 3. 494389 3. 410798 4. 747908 3. 374812 3. 479008 4. 147179 3. 50025  
5. 024656 3. 502368 4. 186963 4. 163135 3. 13647 3. 434198 3. 347182 3. 655097 4. 540048  
0. 571989 1. 417327 1. 068783 1. 477603 1. 326077 1. 579909 0. 751991 1. 429942 1. 272114  
1. 474745 1. 188552 1. 189172 2. 132407 2. 06431 1. 986814 2. 527089 1. 942614 2. 066106  
1. 915292 1. 595123 2. 264969 2. 299646 1. 363115 1. 690994 2. 069893 1. 79748 1. 931083  
2. 883888 2. 216818 2. 122153 2. 252773 1. 934876 2. 712088 2. 559241 2. 215038 1. 837872  
9. 974724 7. 839373 8. 786956 7. 235905 7. 658228 6. 736749 8. 153563 7. 762868 9. 473808  
2. 184363 1. 607213 2. 112071 2. 302005 1. 456295 1. 690044 2. 325196 1. 613946 2. 148119  
2. 342088 1. 357544 1. 381195 1. 503195 1. 219753 1. 657303 1. 479828 1. 45859 1. 877248  
1. 785097 1. 571967 1. 8398 1. 269238 1. 535991 1. 589121 1. 140131 1. 108106 1. 3358  
1. 72032 1. 379851 1. 459005 1. 489022 2. 767702 2. 055344 1. 496709 0. 927451 1. 371446  
1. 233728 1. 160284 1. 687469 2. 104465 1. 547017 1. 274424 1. 532401 1. 085681 1. 881096  
4. 844048 3. 43243 3. 88415 4. 363332 3. 634259 3. 751296 4. 375076 3. 983715 4. 226593  
2. 136148 2. 805457 2. 926484 2. 405828 3. 075502 2. 132148 2. 326153 1. 870331 3. 532337  
3. 957614 4. 268558 4. 416487 4. 052009 3. 032462 4. 959693 2. 131032 3. 867608 1. 944608  
2. 930867 2. 604836 2. 535576 2. 578444 2. 266668 2. 905371 2. 198039 2. 268967 2. 578714  
2. 987885 4. 331078 3. 25501 3. 135658 3. 263563 3. 262847 3. 913181 3. 388344 2. 961336

3.450479 3.948167 3.041489 3.692799 3.217967 4.24412 3.765822 3.442853 4.440635  
1.085827 0.520425 0.594451 1.132638 1.510559 1.409898 1.299 0.65922 1.368987  
1.140609 1.517691 1.328253 1.356996 1.225991 1.547652 1.150742 1.146139 1.645235  
4.269463 4.601647 4.096716 3.637962 2.800851 3.479812 4.512133 2.366577 3.286816  
2.281242 5.242164 4.702837 3.690362 2.905707 2.390699 3.7206 3.752929 3.537382  
2.207575 2.059311 2.755748 2.8069 2.408977 2.624544 2.311948 2.112754 1.983762  
3.822455 3.396424 1.894152 3.056868 3.851196 4.42269 3.16685 3.310756 3.560237  
2.915677 2.140245 2.594458 2.259525 2.048819 3.297129 2.564631 2.07544 2.54898  
2.412039 1.431995 1.461689 1.801094 1.394301 2.001319 1.93523 2.441163 1.736398  
2.491486 2.928477 3.986269 2.476283 2.604164 1.61099 3.132637 3.514986 2.70503  
1.321749 1.712783 1.477222 2.048982 1.571508 1.177252 1.276511 1.596716 1.933491  
1.257745 1.095583 0.954061 1.42782 1.188523 1.010183 2.143411 1.248677 1.389417  
1.222141 0.971868 0.902098 1.26709 0.634142 3.670869 0.546436 1.213154 0.854566  
1.363886 1.476127 1.466499 2.231925 1.31836 1.374066 1.703401 1.524344 1.209057  
1.72011 0.921912 5.661556 1.825858 1.432869 2.953793 1.565168 2.407155 3.6126  
1.312421 1.926764 1.612553 1.87361 1.541349 1.725822 1.96753 2.565984 1.312984  
1.807233 1.675394 1.824316 1.691463 1.889905 1.690951 1.909672 1.873112 1.949323  
0.999478 1.751122 1.932825 1.328836 0.96734 1.084971 1.319735 1.183333 0.44133  
1.775638 0.965094 1.333245 1.347695 0.981397 1.176038 1.620152 0.972824 1.050915  
5.093701 5.463282 5.756607 5.709392 5.122671 5.217919 6.386284 5.306811 5.570579  
1.94646 1.38672 1.714012 2.072897 2.389728 2.991348 1.885229 1.735892 1.527426  
1.353268 1.375798 1.11981 1.638721 1.482887 1.447339 1.310228 1.375384 1.870515  
1.998085 1.645717 1.876226 1.561573 1.442342 2.132999 1.774124 2.789525 1.92318  
4.823163 2.01867 4.817138 2.734079 3.179039 2.479891 2.442343 1.602421 2.275495  
1.044971 1.193713 1.108911 2.900407 0.973775 0.785692 1.030354 1.144166 0.895578  
1.399831 2.173141 1.860291 1.941443 2.290104 1.530161 2.137976 1.389104 1.311943  
2.213763 2.753548 2.63416 2.014635 2.415659 2.438366 2.45316 2.830672 2.061911  
3.68855 2.926757 2.536605 3.39316 4.384939 3.615285 4.052567 3.176795 3.351589  
4.091135 3.551887 4.376977 2.652159 3.431666 4.472446 3.963919 4.530679 3.138286  
3.963403 4.459517 3.751162 2.069755 3.4733 3.850224 3.806655 3.86653 4.19971  
2.815727 1.977751 2.236229 2.324406 2.122542 2.565389 2.249318 2.569252 2.481278  
3.021355 2.844949 3.507562 3.212444 3.842873 3.265748 3.066645 2.727056 2.6652  
2.159109 1.995795 3.002459 1.96223 1.541882 3.838007 2.345658 2.334644 2.775177  
1.338079 1.503024 2.168547 2.343394 1.609938 1.674767 2.394789 1.623356 1.83023  
1.968209 1.165326 1.367096 1.389936 1.61515 1.681172 1.080778 1.156146 1.347941  
1.633647 2.636663 1.122201 1.59924 1.080449 1.381379 3.7603 1.297984 1.453558  
2.976832 2.2508 2.356019 2.358577 2.475504 3.028064 3.383137 2.266961 2.00838  
2.067421 1.527816 1.455101 1.830253 1.695924 1.404208 1.534287 1.345348 1.818471  
3.414664 2.052208 2.196227 0.971723 2.19196 4.455861 2.472247 2.635005 1.93389  
1.515083 1.158427 1.572866 1.319862 0.904596 1.047667 2.014046 0.784627 0.907158  
1.867905 0.99804 1.568247 1.388327 1.285594 1.145668 1.603749 1.264446 1.863083  
4.868399 5.821457 5.073332 4.256904 5.182939 5.942559 4.60377 6.203235 5.603576  
2.234252 3.578186 1.681738 2.748127 3.020211 2.042145 3.405993 2.700025 3.747964  
2.624371 3.128933 2.535682 2.384058 2.915765 2.645936 2.698562 3.15319 2.561976  
0.87044 1.288149 1.478658 1.299255 1.253313 1.691333 1.496035 0.928517 1.688499  
3.02411 1.701512 0.715018 1.159771 0.873291 6.290544 1.825861 1.24172 1.328075  
5.177759 5.705068 5.796659 6.030507 5.673798 4.962086 5.521252 5.999377 5.606778  
1.631 1.699615 2.268576 2.657794 1.510733 1.912014 2.029545 1.732584 1.266732  
1.385381 1.522961 0.896409 1.829721 1.4876 2.088591 1.56362 1.463462 1.296052  
3.402043 4.958311 5.506344 4.273511 2.306905 3.8579 3.37887 2.622625 4.289711  
1.736011 1.243659 1.648232 1.576713 1.344373 3.248437 2.922081 2.401542 2.191922

2. 221383 1. 948333 2. 723243 2. 584114 2. 067891 2. 03891 1. 875696 1. 968875 2. 210946  
4. 711837 2. 939573 3. 395515 3. 212542 3. 357542 2. 786257 3. 403626 3. 202839 3. 030793  
3. 116129 1. 657309 2. 418197 1. 782181 2. 242132 2. 066557 3. 214787 2. 129085 2. 058372  
2. 732552 0. 963486 1. 577721 1. 330534 1. 95226 1. 778509 2. 008858 2. 684777 0. 993298  
1. 746943 1. 992769 1. 09561 1. 715965 1. 330182 1. 280069 1. 166493 2. 543805 0. 924718  
4. 278049 2. 462831 0. 932651 3. 482918 1. 446688 4. 149458 2. 918046 1. 0272 1. 747848  
2. 049112 3. 058923 2. 475004 2. 728992 2. 106508 1. 911801 2. 450471 3. 341507 3. 195065  
3. 435635 2. 889767 3. 402898 2. 897714 3. 288253 2. 691626 3. 090041 3. 281974 2. 894699  
2. 387313 1. 683962 1. 625878 1. 721447 1. 093624 1. 336105 1. 598721 1. 790053 1. 255365  
2. 194061 2. 092368 1. 795312 3. 041102 2. 255588 2. 896656 2. 221703 1. 792732 2. 307799  
0. 976442 2. 271425 0. 646177 1. 108849 1. 599572 1. 063286 1. 282365 0. 611354 0. 980772  
1. 196169 0. 868064 0. 98779 1. 129821 1. 499708 1. 162364 1. 699631 1. 105377 0. 811032  
2. 147276 1. 521893 2. 443468 2. 32867 1. 567747 1. 374773 1. 805983 1. 796751 1. 677991  
5. 511962 1. 599544 4. 966431 2. 719463 2. 375033 6. 94613 6. 922086 2. 021186 1. 930056  
2. 37898 2. 283594 2. 40574 1. 917234 2. 323456 2. 407607 2. 956305 2. 365261 1. 650195  
1. 42643 1. 607359 4. 40135 1. 835786 2. 741311 1. 630074 1. 5536 1. 978221 3. 223654  
2. 764904 3. 03651 1. 964816 1. 467444 0. 47056 1. 444082 0. 789874 1. 661316 1. 833313  
1. 541436 1. 352922 0. 92426 1. 434727 1. 634476 1. 316828 1. 496466 1. 388217 1. 442131  
2. 66591 2. 79752 2. 879578 2. 418214 2. 181706 5. 117584 2. 276615 2. 672648 3. 136839  
6. 934912 4. 705674 4. 534667 3. 575881 3. 654514 4. 425226 4. 023706 6. 433317 6. 029143  
1. 376141 0. 942898 1. 092552 1. 732404 1. 733042 0. 950858 2. 096301 1. 682153 1. 015235  
0. 786422 0. 600162 0. 836991 1. 466609 1. 153608 0. 782462 0. 965046 0. 873953 0. 973475  
1. 93635 1. 670799 2. 106108 1. 550495 1. 626922 1. 352443 1. 66316 1. 657319 2. 16482  
4. 687409 4. 705464 4. 035922 5. 148533 3. 913607 4. 609295 4. 498682 4. 142961 4. 884333  
1. 896602 2. 078053 1. 880958 2. 108929 2. 963546 1. 889736 2. 236963 1. 977166 2. 161706  
2. 249995 1. 854613 2. 336216 2. 895097 2. 084551 3. 06078 2. 574787 2. 183463 1. 693524  
1. 638121 1. 520085 1. 503752 1. 158698 1. 199792 1. 380177 1. 356461 1. 349953 1. 350059  
2. 565634 1. 957786 2. 296096 2. 203457 1. 80925 1. 732265 1. 709028 1. 612029 1. 628969  
3. 245632 2. 994774 3. 899579 2. 974427 3. 927508 3. 741855 3. 184892 3. 535125 3. 776249  
2. 19518 1. 871981 2. 226209 3. 035345 2. 470853 2. 320591 2. 314621 1. 980982 1. 869619  
1. 850696 1. 432834 1. 161163 1. 72121 1. 559626 0. 994858 2. 120812 1. 634265 1. 330654  
2. 97131 2. 238176 2. 410432 1. 999146 2. 437153 2. 492927 2. 611251 2. 549053 2. 551139  
5. 297843 4. 210559 4. 936844 5. 079325 5. 264457 5. 219248 4. 82919 4. 958068 4. 710482  
3. 103176 2. 711746 2. 878036 3. 104191 2. 017626 3. 050055 2. 684177 2. 386039 2. 838777  
1. 865372 2. 194482 1. 414863 1. 93873 1. 828895 1. 657662 1. 789114 1. 639883 1. 23838  
1. 523114 1. 343174 1. 433756 1. 144908 1. 568545 1. 646904 1. 762478 2. 109708 2. 004828  
2. 382551 4. 557632 3. 014118 2. 631683 4. 397115 3. 864625 3. 00145 4. 063779 3. 462125  
1. 528354 1. 113221 1. 102965 1. 225716 0. 945503 1. 041669 1. 005483 1. 170422 1. 663208  
2. 63914 1. 786663 1. 603185 2. 409051 2. 068584 1. 757097 1. 812348 1. 904927 1. 892153  
4. 683114 5. 347088 3. 991134 5. 838195 5. 804434 4. 889805 5. 781577 4. 594111 5. 0616  
1. 914933 1. 307702 1. 304544 1. 384384 1. 685456 1. 277752 2. 164586 1. 25739 1. 609661  
0. 790247 1. 366433 0. 921253 0. 973009 1. 389849 1. 105527 1. 013996 0. 680967 0. 870447  
3. 721206 3. 591439 4. 187553 3. 769201 3. 401939 2. 988207 3. 583448 3. 413291 3. 680017  
1. 885797 1. 241957 1. 67829 1. 234156 1. 398279 1. 687191 1. 755373 1. 467241 2. 092842  
5. 138928 4. 11552 5. 375964 4. 648438 5. 054975 4. 593432 5. 472501 4. 459883 2. 812208  
3. 089544 3. 526039 2. 498894 2. 580123 3. 538686 2. 750979 4. 787272 4. 393858 4. 008881  
4. 734611 3. 799814 4. 748417 3. 90366 3. 840476 3. 483663 4. 217391 4. 151947 2. 687631  
2. 427765 3. 460623 3. 18577 2. 2238 1. 399738 2. 663931 2. 567817 1. 867119 2. 308236  
1. 597334 0. 921953 0. 961904 0. 96725 1. 206778 0. 955987 1. 579777 1. 405135 1. 005778  
1. 145971 1. 587503 0. 926995 0. 695879 0. 46776 1. 161192 1. 263495 0. 789958 0. 75267  
2. 24223 2. 778434 2. 878126 2. 055349 1. 926925 2. 094988 3. 12186 2. 196368 2. 922906



4. 244097 3. 974795 4. 306653 5. 37628 3. 913812 4. 783866 3. 481151 5. 530179 3. 169697  
1. 336733 1. 093228 1. 531758 1. 422936 1. 212205 1. 665862 1. 324163 1. 219355 1. 20972  
3. 836478 4. 201762 4. 910713 4. 062935 4. 286852 4. 283057 4. 960688 4. 202249 4. 246965  
2. 463814 1. 569998 2. 189301 1. 554707 1. 581114 1. 465822 2. 388638 1. 313946 2. 903029  
1. 8656 0. 920155 2. 417485 1. 168925 1. 493678 2. 196264 1. 974348 0. 882998 1. 083864  
4. 087778 4. 473155 4. 164022 4. 830949 4. 355456 4. 548963 4. 511139 4. 30862 3. 617037  
4. 0553 2. 624623 2. 52759 3. 719306 1. 928442 3. 32785 2. 40913 2. 253252 1. 755507  
4. 853095 4. 243435 4. 349478 4. 044463 4. 537706 4. 540169 3. 869541 4. 468449 4. 684003  
1. 461763 1. 23298 2. 081719 1. 238599 1. 633276 1. 390707 1. 725955 1. 36695 1. 379682  
4. 165582 4. 597723 4. 107893 5. 080772 3. 513629 5. 069473 3. 655927 5. 476892 4. 174925  
1. 269432 0. 814247 1. 776771 1. 011266 1. 351005 0. 993104 1. 093866 1. 129478 1. 09919  
1. 760806 2. 507948 1. 42217 1. 69113 2. 191222 2. 741076 1. 462782 1. 834852 1. 775105  
3. 981243 5. 152161 5. 09291 4. 69225 4. 992724 4. 810479 4. 980532 4. 956751 5. 160184  
2. 984327 2. 525875 3. 538872 3. 456662 3. 10715 3. 968249 2. 420738 2. 235761 3. 090414  
1. 005248 0. 994917 2. 217345 1. 18829 1. 553811 1. 530459 2. 225919 1. 279742 1. 304354  
1. 68007 1. 04524 1. 296962 2. 063777 2. 346608 1. 872611 1. 000419 2. 616682 1. 006066  
0. 703451 0. 847072 0. 69941 0. 987622 1. 239367 1. 500054 1. 452441 1. 09688 1. 206325  
5. 664132 5. 505325 5. 704102 5. 572092 5. 940779 5. 669516 5. 590896 5. 201919 5. 542264  
2. 088791 2. 857233 1. 984211 1. 979948 2. 143266 1. 761359 1. 936163 1. 705035 2. 173588  
1. 771197 1. 910458 1. 954307 1. 522233 2. 010496 1. 232184 2. 138487 1. 22924 1. 451233  
1. 579453 1. 563464 2. 088801 1. 57655 1. 096801 2. 609982 2. 605134 1. 132913 2. 626499  
5. 363772 3. 342673 5. 413802 3. 069553 3. 149452 3. 13986 2. 591925 3. 087488 4. 553761  
1. 063501 0. 889441 1. 576327 2. 0926 0. 904905 4. 58991 2. 612649 1. 4878 1. 333418  
1. 652049 2. 1867 1. 330141 2. 730643 1. 524181 2. 460229 1. 898188 1. 730498 1. 637441  
1. 1757 2. 002746 1. 499543 1. 656158 1. 761935 1. 849156 1. 667495 1. 833034 1. 573321  
4. 143605 4. 513548 3. 567575 3. 669758 3. 289381 3. 572363 4. 308343 4. 160573 3. 992974  
1. 06044 1. 215617 0. 992808 0. 904626 1. 165011 1. 620606 1. 180821 0. 92311 1. 384613  
4. 220255 5. 943252 4. 964836 5. 509514 5. 175931 5. 978412 4. 815198 4. 724367 5. 829116  
0. 803782 0. 435335 0. 455851 1. 08464 0. 589206 0. 83609 0. 992925 0. 600674 0. 562197  
5. 026195 6. 075919 5. 217035 5. 516143 5. 496245 5. 44933 5. 847195 4. 966072 5. 441752  
2. 021051 1. 601658 1. 778383 1. 61213 2. 190013 1. 567364 2. 115985 2. 066061 2. 14157  
3. 741299 2. 104 1. 957122 2. 029106 2. 633808 2. 384513 1. 85939 1. 695564 2. 320974  
1. 215125 1. 836221 1. 005179 1. 46059 1. 568188 4. 439304 1. 209408 1. 508821 2. 137178  
1. 913607 1. 827514 2. 132766 1. 811366 1. 476634 2. 394497 1. 808722 1. 577691 1. 688328  
2. 106798 2. 187771 2. 212384 2. 1695 2. 407791 1. 905049 2. 782554 1. 981659 2. 328379  
2. 74114 3. 913799 4. 088654 2. 384112 5. 066555 3. 631854 4. 190686 3. 250816 2. 061153  
1. 823391 1. 266441 1. 196232 1. 263305 1. 208004 1. 291452 1. 318984 1. 430491 2. 017387  
7. 08477 6. 73852 6. 256495 6. 357831 6. 362005 6. 399921 6. 245178 6. 33428 6. 274012  
1. 49918 1. 187935 1. 295461 1. 161494 1. 326908 1. 546129 1. 731297 1. 287798 0. 837511  
4. 488177 3. 27581 2. 228792 3. 519702 2. 476076 2. 095472 3. 20023 2. 726365 2. 642404  
3. 186791 2. 507291 4. 029712 3. 404909 2. 071171 2. 429416 2. 417554 3. 692873 3. 326633  
5. 567552 4. 521234 4. 995976 4. 859771 5. 480484 5. 141546 5. 004943 5. 458087 5. 787264  
2. 132121 5. 116135 1. 971997 3. 729813 4. 281663 5. 713531 3. 47375 3. 572594 2. 15434  
6. 504095 6. 853269 6. 373072 6. 390907 6. 282296 6. 482444 6. 213118 6. 592464 6. 469053  
1. 675637 1. 303621 1. 158219 1. 51652 1. 158888 1. 452412 1. 318531 1. 323801 1. 343998  
5. 609326 5. 502844 4. 58186 5. 45786 5. 702912 5. 819609 4. 589651 4. 899949 5. 829341  
1. 557779 1. 447011 1. 755995 1. 295609 1. 584768 1. 817165 2. 247073 1. 480793 2. 125148  
3. 029642 2. 211128 2. 111319 2. 28757 2. 047112 2. 415442 2. 3848 1. 921485 2. 638985  
3. 016561 2. 569762 2. 779897 3. 478025 2. 224853 2. 335993 3. 028861 2. 804026 2. 752591  
1. 231228 0. 889428 0. 570398 1. 067381 1. 165207 0. 908831 1. 747187 0. 75914 0. 897185  
3. 613033 4. 255834 4. 51 3. 93905 4. 48839 3. 909668 4. 315124 3. 496295 3. 766793

1.168632 0.82144 0.826933 0.728496 1.269478 1.254095 0.979956 1.122043 0.992296  
5.40659 6.520021 6.304653 6.294574 6.027728 6.221236 5.644336 6.007977 6.639422  
4.713944 1.840589 3.735407 3.385271 4.504643 4.196318 2.808351 3.258102 3.682273  
4.018663 4.401848 5.01887 5.30236 4.855253 4.791257 4.706104 5.032479 4.627827  
3.131485 1.380956 1.836942 1.876114 2.136903 2.214682 1.211872 1.203392 1.500134  
6.533723 5.923212 5.874972 6.533126 6.428578 6.790727 5.487638 6.030384 6.203427  
4.572015 5.445443 5.221979 6.240993 4.00956 4.346882 5.95885 5.527375 4.82394  
3.967967 4.817875 5.432746 3.860275 3.443517 3.934222 4.075534 4.292553 3.211067  
2.178234 1.981674 2.505341 3.234213 2.159008 2.256602 1.527455 1.542576 1.704402  
2.152217 2.88894 2.548114 1.860011 2.024146 2.100921 2.022746 2.461916 1.744714  
6.055425 6.883501 6.824318 7.732798 7.754212 7.544954 7.016451 7.061181 7.528147  
6.345547 6.294517 6.668389 7.242286 7.05455 7.065437 6.857282 5.700966 5.989504  
2.768745 1.899585 2.001182 2.215681 1.867677 1.582359 2.119827 1.867247 1.800265  
1.557025 1.238426 1.361768 1.537153 1.355023 1.508435 2.013777 1.701673 1.542439  
2.888877 3.717816 1.891762 3.306036 2.133002 2.172946 1.835746 3.384009 3.130501  
0.546199 0.924438 1.251216 1.505615 0.657203 0.945205 1.269877 1.403332 0.892294  
4.95904 2.82607 3.249235 3.531282 3.428233 3.537818 3.220295 3.957674 4.173745  
1.484245 0.985525 1.869489 0.771664 2.216261 1.267758 0.882985 1.139536 0.928684  
1.144201 1.199661 1.077461 1.238114 1.120689 0.919666 1.323938 1.187472 1.030791  
1.403318 1.487728 1.122174 1.363998 1.584161 1.354613 1.390318 1.461804 1.98969  
7.598695 6.851951 7.487316 6.830138 6.730252 5.869221 6.448808 6.374129 6.762443  
3.468188 1.811596 3.542521 1.601187 2.092137 2.612909 2.083342 2.422572 1.765306  
1.489688 3.481603 2.461812 1.10448 2.52179 2.200031 2.351246 2.210554 2.771988  
3.51618 3.312408 3.291994 3.971665 3.342299 2.876242 3.862246 3.506514 3.361726  
5.615762 5.772335 5.328797 7.27542 6.747514 5.259476 5.945119 5.994997 5.521637  
2.399577 2.279009 2.116594 2.280406 1.774012 2.017204 1.976593 2.094832 2.005119  
3.775761 2.353834 3.250654 3.00943 2.737966 3.727959 2.954976 3.396155 2.536881  
3.360942 1.782037 2.311425 2.753298 1.582487 1.810249 1.972701 2.245814 1.909916  
3.5031 2.29768 2.488248 2.218522 2.993395 3.199774 3.112089 3.371918 2.475848  
2.186763 1.821954 1.344637 1.467615 1.774332 2.342593 2.387808 1.681409 1.873096  
1.513739 0.971433 1.224706 1.214042 1.054835 1.173273 1.241684 1.204531 0.790598  
2.855597 3.184734 2.471186 2.311625 2.504186 3.017977 2.2899 2.181191 2.652149  
3.682862 3.87596 3.728761 5.153196 4.146692 3.167277 3.215767 3.003033 3.907648  
5.502502 4.004156 4.256362 3.879589 3.872541 4.0703 4.046775 5.41756 4.257177  
2.578402 2.264404 2.92518 1.853228 2.329098 1.811119 2.001578 1.725674 3.052096  
5.423445 6.100105 5.98089 6.183875 6.271129 6.267249 5.875996 6.185763 5.915532  
1.198597 1.307055 1.403985 2.022447 1.709264 1.405426 2.00128 1.877995 0.956511  
1.749541 4.596162 4.38174 1.678126 1.649933 3.335868 2.55823 3.056505 2.808494  
2.818056 1.615309 2.284213 2.815817 2.325138 1.916022 2.731829 2.116707 2.319512  
1.914726 1.183292 1.385846 1.277901 1.75212 0.764667 1.89899 2.048886 1.789466  
6.444937 6.746395 6.895521 5.648483 6.358706 6.380833 6.275432 6.188162 6.320974  
2.661122 1.799679 1.502105 2.183142 2.694069 1.563619 1.550597 2.560114 2.285788  
2.205942 1.946047 1.560086 2.039654 1.733572 2.13663 2.171067 1.592888 1.383123  
2.342405 1.937038 1.929645 2.032451 1.85946 2.768928 2.412599 2.105809 2.34894  
1.346839 1.658468 0.762236 1.174627 1.98885 1.649419 1.351027 1.484651 1.775791  
1.023542 0.724897 0.624066 0.989832 0.795323 0.808101 0.779708 1.136163 1.021683  
1.289413 0.815165 3.952169 1.203697 0.891029 1.699987 2.682765 2.320346 1.657067  
2.840354 2.310796 2.445676 3.090557 3.378879 3.457858 3.082608 3.566267 2.725463  
2.213207 1.752189 2.68484 1.271515 1.371369 1.096516 1.181823 1.573205 1.206054  
1.585212 1.69692 2.680394 1.532663 3.033591 1.776032 1.296444 2.695871 2.071151  
1.071137 1.52584 0.949145 1.710326 1.395333 1.59837 1.227433 1.498871 1.036264

4. 56251 3. 883224 4. 08739 3. 803717 4. 690502 4. 29293 4. 500104 3. 99336 3. 709603  
3. 747103 2. 071841 2. 599597 2. 166737 2. 118826 1. 718974 1. 757263 1. 677066 1. 565927  
5. 182913 4. 949138 4. 230292 5. 146936 5. 065624 6. 189686 5. 885897 5. 873015 5. 20792  
2. 069824 2. 437205 2. 704805 3. 381283 1. 739837 1. 832029 2. 659744 2. 148434 1. 713586  
3. 220451 2. 899195 3. 513301 3. 094691 2. 510007 2. 888317 2. 624179 2. 83382 2. 570516  
1. 511344 1. 312023 0. 752665 1. 028668 1. 12843 1. 057292 1. 185729 0. 931787 0. 887361  
1. 592809 1. 255494 1. 169857 1. 535366 1. 414662 1. 351255 1. 595511 1. 641836 1. 345144  
1. 719 0. 974778 1. 241867 1. 644559 1. 336635 1. 293622 1. 452752 1. 404954 1. 240825  
2. 416326 1. 537543 1. 902902 1. 994534 2. 114872 2. 061181 1. 841411 2. 144796 1. 672063  
0. 984279 0. 983009 0. 95115 1. 589535 1. 007579 1. 074554 2. 031832 0. 950302 1. 056783  
4. 509882 6. 251277 4. 816401 5. 961881 5. 057865 6. 007607 4. 852677 5. 715372 5. 183641  
1. 923799 1. 539279 1. 851417 2. 485135 1. 789436 1. 869785 1. 752226 1. 461067 1. 642242  
2. 82869 1. 459463 2. 255592 1. 239833 2. 395011 0. 854554 1. 922642 1. 045677 1. 863092  
2. 084439 2. 14168 1. 282703 1. 243078 2. 916804 2. 006357 1. 450292 1. 149844 1. 363804  
4. 942298 4. 195894 4. 949358 4. 484407 5. 034104 4. 625315 4. 807657 4. 354436 4. 46366  
1. 444364 1. 826458 0. 851322 1. 608945 1. 258138 1. 450891 1. 386009 1. 705693 1. 331921  
2. 184204 1. 365907 1. 681823 1. 155058 1. 474791 0. 975318 1. 627271 1. 804004 1. 25262  
5. 437194 5. 411442 4. 225275 5. 025281 5. 702348 4. 906888 4. 960891 4. 907654 5. 368694  
5. 970596 5. 320362 5. 690332 5. 067522 5. 76654 5. 555278 5. 242194 5. 408759 4. 229961  
2. 605083 1. 992223 1. 788646 3. 380804 1. 725536 2. 304633 2. 637381 2. 497043 1. 880933  
1. 339649 1. 158052 1. 002701 1. 191238 1. 662046 1. 178868 1. 268901 0. 819568 1. 487221  
2. 896089 2. 182424 1. 849174 2. 454186 3. 079879 1. 632234 2. 843387 2. 100614 2. 578547  
2. 139369 2. 176762 2. 486157 1. 874911 2. 4335 2. 049079 2. 47217 2. 252534 1. 810502  
1. 794148 2. 247769 1. 928496 1. 376533 1. 215282 1. 682235 1. 513605 1. 110479 1. 377391  
1. 370355 1. 398317 2. 077179 1. 985856 1. 603662 1. 825193 1. 339634 1. 369525 2. 050875  
1. 557553 1. 51642 0. 999302 1. 062473 1. 192656 1. 617678 1. 641463 1. 41645 1. 251823  
4. 358893 3. 460995 4. 378953 4. 103261 3. 027252 3. 752649 3. 873817 4. 014341 4. 047639  
1. 540239 1. 166377 0. 839474 1. 18632 0. 88534 1. 044436 1. 297698 1. 074745 1. 453534  
1. 055655 0. 983758 1. 395998 1. 520957 0. 929981 1. 016886 0. 867857 1. 101275 1. 014003  
1. 341341 0. 972785 1. 035983 1. 156302 1. 277378 0. 914878 1. 625563 1. 858632 0. 800273  
3. 481495 4. 119478 4. 40736 3. 832558 4. 062057 3. 346281 4. 912904 4. 315094 3. 806225  
3. 923223 3. 481847 2. 457348 2. 700435 2. 392158 3. 62498 2. 663438 3. 875045 3. 76845  
1. 488945 0. 840091 1. 194572 1. 384587 0. 935759 1. 062511 1. 093296 0. 896131 0. 980963  
1. 511505 1. 087112 1. 439797 1. 115853 1. 252902 1. 738352 1. 134327 1. 381182 2. 003392  
2. 323992 4. 189916 4. 222611 4. 040833 3. 034352 4. 087063 3. 899401 4. 078466 3. 537553  
1. 105778 1. 00879 0. 831902 0. 959327 0. 777748 0. 926221 1. 069803 0. 950803 1. 227803  
1. 260053 1. 418798 2. 506281 1. 475887 2. 008698 1. 794087 1. 002999 1. 508352 1. 734122  
1. 491772 2. 232926 1. 625621 2. 28829 2. 017176 1. 810008 1. 552019 1. 681106 2. 958616  
1. 468138 1. 098733 1. 036167 1. 20949 0. 739713 1. 088691 1. 003496 0. 706238 1. 150667  
1. 592224 1. 593288 1. 369094 1. 687621 1. 343944 1. 591997 1. 354991 1. 482008 1. 375023  
1. 635371 3. 207349 1. 645568 2. 052888 1. 99455 4. 710391 2. 647658 1. 766088 1. 445923  
2. 785639 2. 474514 2. 454829 2. 591785 2. 317673 2. 656077 3. 036536 2. 68688 1. 995323  
1. 702031 1. 029465 1. 183929 2. 13588 1. 33838 1. 583536 1. 294035 2. 044488 1. 797825  
1. 225094 1. 448921 2. 588243 1. 702294 1. 6091 1. 982732 3. 166723 2. 394279 1. 789472  
5. 153094 4. 170832 4. 132633 3. 900062 3. 859557 3. 753121 5. 11038 3. 404332 4. 49465  
3. 992173 4. 728991 5. 055408 3. 590358 3. 868556 4. 286622 4. 068084 4. 429374 3. 309372  
2. 408651 2. 246023 1. 926155 1. 716367 2. 308966 1. 923991 2. 594105 2. 113615 1. 949302  
2. 15181 2. 570649 2. 205063 1. 380055 1. 417611 1. 818283 1. 796509 1. 785944 1. 696153  
3. 78553 2. 790072 1. 794043 2. 528019 1. 862601 2. 255297 2. 549267 2. 33319 3. 077714  
1. 587709 1. 408517 1. 355067 1. 440886 1. 514991 1. 833712 3. 09786 1. 488426 2. 274611  
2. 713219 1. 340191 2. 647627 1. 998647 1. 971504 1. 592869 1. 26405 2. 292628 1. 834462

4. 292231 6. 051751 5. 437945 5. 765154 6. 203368 5. 589086 4. 193761 4. 968733 4. 899621  
2. 224458 0. 765699 0. 683045 1. 433546 0. 719546 0. 334536 3. 465296 1. 105083 0. 766673  
0. 939019 0. 940084 2. 044715 1. 34086 1. 514497 1. 879634 2. 119079 1. 020537 3. 374388  
2. 413114 1. 962151 2. 188488 1. 753923 2. 362134 2. 108998 2. 180943 2. 445347 2. 485234  
1. 977605 2. 518502 1. 203887 2. 999848 1. 024305 0. 979062 1. 434221 1. 366499 1. 172568  
1. 371384 0. 957599 1. 462931 1. 482015 1. 36159 1. 075719 1. 208641 1. 457503 1. 436018  
2. 92965 2. 492441 3. 156836 2. 936315 2. 174659 2. 881077 2. 834027 1. 906082 2. 308916  
2. 477503 1. 075113 1. 230485 0. 772238 1. 706606 0. 954728 0. 78175 1. 076093 0. 728038  
1. 13401 1. 313889 2. 163217 2. 404657 1. 157076 1. 524954 1. 143013 1. 212249 1. 04878  
2. 943699 1. 424476 2. 918126 0. 616623 2. 830825 2. 025186 3. 151545 2. 981947 1. 145914  
1. 882541 0. 771505 1. 011941 1. 146562 1. 0602 1. 482946 1. 344897 1. 198471 0. 813197  
2. 005004 0. 930746 0. 454957 1. 651278 3. 197147 1. 772093 1. 0584 2. 424051 1. 945314  
1. 757138 1. 219472 1. 383424 1. 748879 1. 489223 1. 442365 2. 957358 1. 729115 1. 483648  
4. 121047 4. 412181 3. 759849 3. 774716 3. 667869 2. 39257 4. 029236 3. 989447 4. 579346  
1. 215234 1. 420308 0. 871129 2. 095307 1. 89554 1. 009696 2. 639335 1. 468574 2. 497891  
2. 117142 1. 674271 1. 316174 1. 377413 1. 902405 1. 742402 1. 634986 1. 855093 1. 48865  
4. 067015 2. 507332 2. 645469 3. 31211 3. 726273 3. 40932 2. 861882 3. 213732 3. 507307  
5. 695075 4. 925953 4. 832544 4. 268899 4. 41697 5. 184531 4. 773552 3. 417337 5. 315835  
1. 69268 1. 97187 1. 964838 1. 952653 1. 500491 1. 555824 2. 61861 1. 693071 1. 468564  
1. 092145 1. 400878 1. 229228 1. 49163 1. 990169 0. 898432 0. 967771 1. 187577 1. 648204  
1. 187768 1. 290915 1. 440405 1. 497972 1. 163986 1. 299233 1. 934847 1. 476326 2. 03344  
3. 685255 2. 889497 4. 290004 3. 776064 2. 075802 2. 146641 2. 761029 2. 354247 3. 595254  
2. 955463 3. 97894 3. 621419 3. 82293 3. 643522 3. 648629 3. 484057 4. 365804 4. 285766  
2. 222686 1. 520789 1. 743109 1. 936969 1. 677401 1. 615308 2. 957293 1. 66801 1. 713685  
2. 356182 1. 946584 2. 137194 2. 120624 1. 949497 2. 365006 1. 918276 1. 918199 2. 160355  
1. 169112 1. 041386 1. 142082 1. 120673 1. 16461 0. 742716 0. 868701 0. 822935 1. 441645  
3. 057639 2. 595289 3. 284644 2. 565036 2. 479488 2. 624648 3. 152276 3. 02937 2. 710461  
0. 920058 0. 811234 0. 519094 1. 468141 1. 172466 0. 589285 1. 096022 1. 134216 1. 228964  
3. 1984 2. 006666 2. 724572 2. 342224 2. 45256 2. 18833 2. 988025 2. 667142 2. 755492  
2. 870589 3. 542122 2. 602573 4. 859698 3. 543145 3. 502631 3. 298372 4. 386764 3. 849293  
1. 450328 1. 057157 1. 069384 1. 2663 0. 851461 1. 193406 2. 089275 1. 645554 1. 190061  
2. 444261 2. 41835 3. 966057 1. 600891 1. 978046 1. 952449 2. 958678 2. 668046 2. 223552  
2. 571536 2. 820714 3. 551968 3. 171006 1. 765508 3. 031373 2. 649872 3. 221712 2. 753449  
2. 492123 1. 298843 1. 932493 1. 74842 1. 438424 1. 60891 1. 667089 1. 593743 1. 623965  
1. 319636 1. 616065 1. 50334 1. 551262 1. 103013 1. 78321 2. 145669 1. 272398 2. 542769  
4. 899987 4. 401282 5. 232455 4. 567475 4. 782489 5. 022099 2. 995494 4. 755635 4. 127657  
1. 547763 1. 295613 1. 259099 1. 202199 1. 412749 4. 249737 2. 064775 1. 842028 1. 76294  
4. 247468 3. 451459 3. 496684 3. 458195 3. 721952 3. 493264 3. 852829 3. 3611 3. 015562  
3. 48613 2. 621342 2. 73706 2. 962855 2. 163102 2. 352036 2. 872688 2. 052854 2. 821594  
6. 477552 6. 649498 5. 78305 6. 276892 5. 944245 5. 548697 6. 061236 5. 932185 5. 753794  
2. 108306 1. 85535 1. 947079 2. 484231 1. 627182 2. 208758 1. 882266 1. 442081 2. 114035  
0. 627724 1. 591133 1. 1472 0. 591029 1. 1924 1. 133597 2. 030748 1. 141324 1. 211072  
1. 292836 1. 450228 2. 158955 3. 008416 1. 236009 2. 207407 1. 472983 1. 128773 2. 418575  
3. 00486 2. 263002 2. 31892 2. 237909 1. 944294 2. 654812 3. 21939 2. 689717 1. 191558  
4. 686947 3. 593561 4. 152435 4. 029498 4. 375676 4. 17142 3. 244461 3. 717814 3. 992958  
2. 345448 1. 841487 1. 319378 2. 558991 1. 741171 1. 734521 1. 798093 1. 561723 1. 860782  
1. 171491 1. 398466 1. 104933 2. 629299 2. 229847 1. 408666 2. 501968 1. 433038 1. 336187  
1. 03491 1. 002731 0. 794603 1. 323273 1. 200213 1. 001912 1. 326846 1. 113201 1. 372438  
3. 976848 3. 951676 2. 824481 3. 470433 3. 281199 4. 561215 3. 767586 3. 165742 3. 58084  
4. 069769 1. 287524 1. 441591 2. 162871 1. 507289 2. 538959 2. 163502 1. 006521 3. 021898  
5. 699545 4. 630545 5. 354209 5. 655148 5. 657382 5. 233504 4. 952239 5. 199224 5. 21673

1. 908954 3. 253361 2. 407086 2. 099847 2. 638218 2. 13893 3. 026339 3. 149906 2. 50371  
2. 055962 1. 990297 2. 825883 2. 169442 2. 067238 1. 570302 3. 176646 1. 640063 2. 019612  
3. 914022 1. 947309 2. 613355 1. 9868 1. 860027 3. 059522 3. 328216 3. 019959 3. 175309  
2. 056055 1. 749768 1. 797658 1. 565868 1. 44925 1. 391382 1. 064817 1. 530716 1. 566171  
2. 055406 2. 5644 2. 451804 2. 417425 2. 421182 1. 946811 2. 196825 1. 617442 2. 316437  
3. 17111 3. 357249 2. 994919 1. 988011 4. 039164 2. 77838 2. 921395 2. 754642 2. 657354  
1. 766341 1. 704258 1. 653934 2. 661453 1. 96065 1. 981398 1. 573723 1. 866325 1. 793329  
2. 164427 1. 725728 2. 404519 2. 485198 2. 24444 1. 564472 1. 839656 2. 656923 1. 969064  
4. 327634 2. 883404 3. 407844 2. 720361 4. 132542 3. 19477 2. 783476 3. 383806 2. 655495  
6. 736658 6. 547278 6. 18612 6. 302735 5. 721668 5. 827218 5. 990197 5. 553177 5. 949547  
5. 510103 6. 160938 6. 409873 6. 55043 5. 833807 6. 242211 5. 741746 5. 74323 5. 832229  
1. 643948 1. 249741 1. 274716 1. 425714 1. 088107 1. 014632 1. 404623 1. 139069 1. 066185  
1. 388509 1. 401608 1. 006197 1. 022123 1. 479364 1. 318482 2. 568072 1. 951212 1. 584409  
2. 366294 1. 057323 1. 667829 1. 490009 0. 987694 1. 817606 1. 284768 1. 213713 0. 902965  
2. 119099 2. 130695 1. 762788 2. 34294 2. 920786 1. 991584 2. 547264 2. 533494 1. 727408  
2. 370591 1. 129259 0. 882659 1. 752996 1. 525852 1. 066546 1. 707685 1. 541036 2. 239125  
2. 332722 2. 435008 2. 22553 2. 178225 1. 778423 2. 405945 1. 926574 2. 074957 1. 8622  
1. 163137 1. 193966 1. 406642 1. 453674 1. 679466 0. 97992 1. 910161 1. 499493 1. 17706  
2. 330022 2. 41412 2. 063974 2. 404163 2. 007903 2. 327696 2. 057284 2. 374474 1. 873035  
0. 899018 1. 460033 0. 927434 0. 62329 1. 087907 0. 758232 1. 191272 1. 326072 0. 938733  
1. 230519 0. 899541 1. 516379 1. 344582 1. 004708 1. 144269 2. 917172 1. 276356 1. 345205  
0. 986367 1. 205019 1. 865789 1. 705509 1. 644077 1. 068788 1. 430644 0. 995521 1. 786602  
1. 524522 1. 574271 1. 070579 1. 502739 1. 238542 1. 66012 1. 258721 1. 540942 1. 350633  
1. 629489 1. 217096 1. 626477 1. 629544 2. 067117 1. 741115 2. 063643 1. 939836 2. 466616  
5. 474992 5. 371813 5. 743133 5. 664412 5. 343711 6. 403414 5. 536798 5. 790779 6. 12287  
2. 349594 4. 293367 2. 646739 3. 746332 3. 356539 4. 458799 3. 360561 2. 071855 2. 962522  
2. 276291 1. 741523 2. 205652 1. 763731 2. 157807 2. 809257 2. 114087 2. 761689 2. 157878  
1. 457646 1. 044004 1. 127999 1. 114032 1. 439682 1. 123262 1. 239681 2. 720633 1. 831746  
3. 19581 2. 314177 2. 556944 2. 76314 2. 54961 2. 10229 2. 121865 2. 76679 3. 25088  
2. 670446 2. 046784 2. 827712 3. 676467 2. 394818 2. 335516 2. 617091 3. 630458 3. 744675  
2. 926945 2. 067638 1. 61541 2. 49932 2. 096547 2. 746044 2. 609432 2. 383763 1. 532903  
3. 240477 1. 476349 2. 441835 2. 406093 2. 472165 2. 054223 2. 846189 1. 712295 2. 84742  
2. 958178 2. 720045 1. 890538 2. 478436 1. 110129 1. 300846 2. 670103 1. 3129 2. 291331  
2. 68796 1. 797065 2. 09942 2. 622202 1. 67566 2. 030965 2. 648067 2. 158564 2. 62696  
3. 55175 2. 267169 2. 620996 2. 224954 3. 220743 1. 972569 3. 478804 3. 245738 2. 457778  
7. 033932 7. 553679 7. 986231 7. 140471 7. 384607 7. 407581 7. 543547 7. 520266 7. 199661  
1. 408905 1. 080787 0. 742912 0. 51235 0. 766104 1. 206366 0. 54388 2. 136922 0. 541281  
2. 312594 3. 128389 3. 193601 3. 639615 3. 879618 2. 976754 3. 36955 2. 630501 2. 330454  
5. 151713 4. 829932 5. 088586 5. 224499 4. 414177 5. 080142 5. 559428 5. 94986 4. 750827  
2. 392568 2. 265453 2. 087411 2. 519148 3. 703877 2. 147347 2. 269694 1. 84065 3. 040453  
4. 485584 3. 896927 4. 621719 4. 323563 5. 015089 4. 777424 4. 04385 3. 452948 4. 459317  
1. 809141 1. 772222 1. 396634 1. 597496 1. 845832 2. 521884 1. 714249 2. 497839 1. 478802  
4. 036837 4. 270823 4. 731693 4. 262627 3. 156423 4. 090777 4. 645744 4. 923123 3. 987476  
2. 609735 1. 864441 2. 560076 1. 765867 1. 999921 2. 165557 3. 785953 1. 770712 2. 151296  
3. 313651 4. 569529 3. 184443 3. 429967 3. 120104 4. 486487 2. 716196 2. 750987 4. 201073  
2. 707833 2. 657608 1. 576844 1. 932459 2. 61957 2. 807913 2. 708356 2. 56715 2. 329028  
1. 991931 1. 458396 1. 393112 1. 810786 1. 569854 2. 024138 2. 413777 1. 401973 1. 44169  
0. 965923 0. 673127 0. 681086 1. 168928 1. 249317 1. 178469 1. 255009 0. 8136 1. 326171  
3. 09602 1. 456143 2. 165192 1. 248983 1. 222686 2. 882444 1. 416827 1. 939976 1. 021088  
1. 8335 1. 663752 1. 957429 2. 04383 1. 57711 1. 948354 1. 593381 1. 45276 1. 83914  
4. 645212 4. 995425 5. 586112 2. 909863 6. 138305 3. 778651 6. 917513 6. 069697 5. 363892

5.846891 5.613971 6.201576 5.747203 6.932648 6.800307 6.30996 5.101522 5.684267  
2.543833 2.458584 2.513066 1.619131 2.673904 2.930526 4.238358 2.713346 2.991933  
2.042576 0.801073 1.583565 2.556607 1.248782 1.661305 2.062225 1.433255 1.343398  
6.45835 7.046464 6.542126 7.327154 6.451185 6.985911 6.415895 6.564921 6.663593  
1.347502 1.052559 0.838125 1.346565 1.0853 1.249313 1.467299 1.495725 1.670614  
1.346643 1.128034 1.061557 1.130451 1.324444 1.313641 2.195206 1.201445 1.799415  
3.537658 6.480942 3.73413 5.889241 4.444508 6.289894 5.330035 4.020524 5.03791  
1.425942 1.409298 1.289872 1.221799 1.135525 1.043712 1.508298 1.445752 0.931806  
3.035036 5.645757 5.843018 5.832346 5.884021 5.551729 4.892542 5.73551 5.085003  
5.129935 4.052834 5.269386 3.983715 5.355433 5.319249 3.630535 3.475667 4.930208  
1.782526 1.522515 1.423889 2.240017 1.718272 1.483608 2.233318 1.483153 1.37217  
4.435725 3.483873 3.713091 1.946113 2.612428 3.673689 3.465047 3.797929 3.154154  
6.906508 7.387887 7.399621 6.39671 7.413177 7.52161 6.11614 7.862664 7.247972  
1.671593 1.064549 1.256615 1.386286 0.947461 1.657314 1.419069 1.355278 1.609664  
1.778183 1.193313 1.213526 1.382776 1.344241 1.400787 1.730883 1.294218 1.569396  
1.011694 1.162708 0.994703 1.286193 1.022282 1.292588 1.06492 1.081364 1.175166  
1.009722 1.486568 1.008468 0.99263 1.1518 1.225624 0.762463 1.710344 1.529631  
1.00108 0.894735 0.90532 1.479895 1.065964 1.281776 1.133141 1.123305 1.116581  
3.339098 4.251757 3.587538 3.43241 4.060972 4.173254 3.804583 3.559641 5.056708  
1.956863 1.166075 1.577796 1.758374 1.405321 2.08163 1.226222 1.450824 1.778689  
2.334019 1.884741 2.792814 2.647704 2.052841 2.345703 2.425254 2.94717 2.410738  
2.196142 1.369218 1.571985 1.005315 1.122338 1.815627 1.523216 1.520945 1.33198  
1.668354 2.190167 2.591976 1.819681 2.43577 1.970434 1.80728 2.905383 1.930238  
2.49019 2.471786 2.166088 2.380756 2.773477 2.190884 2.129751 1.892782 2.068347  
2.24006 1.349111 0.742977 1.076874 2.277965 0.859623 1.651296 2.016543 0.868849  
1.598621 1.875629 2.465179 1.518089 1.844495 1.96446 1.953136 1.428984 1.870388  
0.971435 0.845791 1.008822 1.392984 1.206854 1.594867 1.462994 0.853207 1.029132  
1.825675 1.340677 1.085678 1.386359 1.055574 1.43197 2.347662 1.296921 1.437378  
1.062803 0.847871 1.260621 1.116504 1.011978 1.053408 0.935269 0.765527 1.058645  
2.052321 0.998824 1.232172 1.460949 1.036642 1.175591 1.096759 1.386961 1.296861  
1.610814 1.015396 1.159785 1.228876 1.286847 1.275548 1.431946 0.842988 1.943705  
1.659934 0.976037 0.910479 1.365315 0.803635 0.870192 0.902003 0.765411 0.812501  
2.555766 2.946781 3.306442 2.603197 1.305664 2.265945 2.634928 2.932896 2.343914  
0.82476 0.709563 0.5924 0.742392 1.766282 0.530455 1.572821 0.569591 0.975181  
2.326315 1.692017 1.978158 2.054716 1.3822 1.66041 1.574268 1.571141 1.531977  
2.332034 1.335915 1.63722 1.768204 1.784808 1.522936 1.577817 1.667309 1.680065  
1.525569 2.033281 1.070058 2.207972 1.042281 1.562862 1.156593 0.91807 0.860662  
2.140466 1.754504 2.615354 1.940544 1.374362 1.989305 3.634928 2.235956 2.282177  
1.79891 0.945145 0.785408 1.220186 1.187862 1.502725 1.839252 1.866065 2.034465  
1.843192 1.515217 2.609723 2.192455 2.292871 2.437125 2.532251 1.634467 1.822521  
2.725639 2.118999 2.617325 2.762037 2.588644 2.649112 3.640106 2.078488 3.031645  
1.459273 1.169955 1.192557 1.691054 1.382754 1.188652 2.32882 1.347672 1.596027  
1.293515 2.236564 1.177005 1.786751 1.16359 1.341802 1.495206 0.817202 2.078437  
2.281032 1.494725 1.678041 2.014281 1.456709 1.078418 1.185583 1.783881 1.858597  
1.747119 2.065953 1.686977 2.258055 1.931051 3.372452 1.968692 2.24283 2.068577  
2.044035 1.385501 2.147377 1.896668 2.488369 2.408758 1.57087 3.038418 2.443535  
1.758908 1.622601 1.429417 2.171865 1.903251 3.143467 2.542719 1.550207 1.489593  
1.150062 1.069297 1.561804 0.401102 2.365048 0.600586 4.417941 1.416242 2.898614  
2.16506 1.638756 2.234294 1.99071 2.765293 2.450502 2.433959 2.031416 1.60025  
2.685439 2.535184 2.490477 2.238197 2.273851 2.430164 2.242358 2.266256 2.446841  
1.976198 1.160386 1.2735 1.609595 1.213704 1.410931 1.085875 1.198257 1.29982

0.746386 0.844074 0.600431 0.911064 1.191456 1.051108 0.993283 0.721861 0.953471  
1.961581 1.561641 1.297502 1.451055 1.920003 1.375016 1.209024 1.384377 1.411755  
3.50277 2.524453 3.004133 1.833084 1.974796 2.871567 2.468347 2.826365 2.117334  
1.439853 1.53047 1.358558 1.127448 0.99854 1.636727 2.355459 0.927899 0.95368  
1.931358 2.794772 2.654201 1.174988 3.06686 1.548429 3.511477 2.190882 1.521737  
3.478599 2.829345 3.129677 3.240537 3.224367 3.087389 4.148337 3.261393 2.739699  
2.881914 2.450694 3.643703 3.787171 3.555205 2.944618 3.782113 3.17375 3.778094  
1.303022 0.665687 0.767431 0.817238 0.93155 1.26437 0.976706 0.971889 0.996901  
2.032466 1.817188 1.356851 2.088283 1.696664 1.787392 2.310624 1.935792 2.717401  
6.218478 2.678505 2.275922 2.067043 1.98625 2.050876 1.779998 4.069064 1.114668  
2.166297 1.388909 1.034362 1.36681 1.926988 1.317464 1.513755 1.433673 1.538615  
0.88009 1.239342 0.854205 0.846425 0.735135 1.121462 0.724986 0.821723 1.830121  
0.633275 0.584314 0.550751 0.483862 1.914051 0.908039 2.910418 0.745544 4.2549  
1.436823 1.014202 1.577143 1.5327 1.21974 1.755886 1.609058 0.812464 1.582823  
3.59713 1.975861 4.05511 2.829449 2.758514 4.039257 2.816724 3.646856 2.898747  
2.222826 2.362544 3.077313 1.944297 2.493352 2.082747 2.490613 2.240683 2.096995  
1.841856 1.543254 1.676468 1.152103 2.382497 2.01524 1.626646 1.344162 1.697369  
3.15717 1.656709 1.677902 1.995717 1.920198 2.509904 1.826422 2.19302 2.661528  
1.749692 1.893513 2.044115 2.001217 1.552396 1.738807 1.401593 1.914171 1.654577  
2.875245 2.513572 2.043542 2.30155 3.094765 1.684056 1.967536 1.545437 2.09394  
1.014851 1.724314 0.629658 0.689191 0.898192 1.823282 1.330071 0.874733 1.070561  
1.250081 0.422507 0.768379 1.255958 1.228381 1.136567 0.892136 1.806847 1.803578  
1.687237 1.073353 1.055995 1.516517 1.364384 2.140142 1.064005 0.93467 1.110922  
0.980145 0.89605 1.32123 1.734105 0.723614 1.410122 0.631266 0.785862 2.191149  
1.027045 0.953065 0.683933 0.658561 0.735116 0.623135 0.943818 0.910948 1.017016  
5.926802 6.444793 6.092411 6.027917 6.352883 6.749205 5.397175 6.832719 5.714218  
3.291513 3.903813 3.088677 3.105905 3.661699 3.119883 3.723473 3.437703 3.514215  
1.322878 1.276883 1.016335 0.993507 2.078847 0.825061 1.012628 1.435992 1.047145  
2.843808 2.360945 2.694282 3.175902 2.459595 3.076066 2.464592 2.334226 1.807481  
1.087845 0.795426 0.799345 0.636546 1.9831 1.526034 0.82734 2.022401 0.832389  
0.727563 0.8821 0.630744 0.805637 1.35494 0.651939 0.49849 0.69327 1.348334  
1.146247 1.522859 1.075576 1.592557 0.959324 1.204601 1.282276 1.094065 0.934064  
2.365201 2.995658 1.055357 1.396745 1.410363 1.416899 2.039465 2.063294 0.876418  
2.201006 2.789542 5.460179 2.671648 3.385748 1.998282 2.19323 2.181501 2.567859  
1.175527 0.97625 1.144525 1.373013 1.104059 1.000049 1.330224 1.255909 1.690072  
0.927801 1.521496 3.194314 1.698718 2.362551 1.786287 2.717547 1.663845 1.803525  
2.906966 3.064557 3.110276 3.069695 3.400605 3.976507 2.706068 3.31775 3.412069  
1.782524 0.899049 2.871178 1.228214 0.763277 2.360301 2.323565 1.950805 1.099451  
1.78755 1.589606 1.33427 1.398706 1.72835 1.764928 2.146935 1.802387 1.810104  
1.832132 1.454627 2.195545 1.466 2.308753 3.322029 1.114136 1.690685 2.59629  
0.989922 1.449161 0.955475 1.117138 1.101191 1.66597 1.159767 1.334415 1.049006  
2.010278 2.592249 2.126638 3.159586 2.300821 2.477739 3.156434 2.967305 2.347437  
0.964172 0.681183 0.884515 0.890915 4.136816 0.999981 1.413151 0.900939 0.92455  
2.299594 2.764426 2.475254 1.66824 1.982719 2.224671 3.807591 2.028226 1.444088  
1.130549 0.78417 0.723436 1.428808 0.693261 2.979227 0.741195 1.237813 1.141825  
2.993277 2.08033 3.177092 2.412661 1.859224 1.976978 1.620351 1.956061 1.580224  
1.797564 2.280592 1.890772 2.311987 3.162604 2.665922 1.955111 2.21506 2.403141  
6.940069 7.244169 4.999764 7.691646 8.802801 6.423673 6.210244 6.696186 7.524317  
1.375399 1.716349 1.021431 1.601334 2.355772 1.771185 2.08362 1.611852 1.40788  
1.431152 0.942441 0.999696 1.133311 1.076963 1.162682 0.990186 0.832412 1.413872  
4.617628 4.157516 5.653653 4.319828 2.786303 3.307528 2.75109 3.813602 2.221255

1.133231 0.946728 1.105541 1.677646 1.231453 1.132193 1.064826 1.261891 3.493875  
1.660197 1.102399 1.54793 1.812424 2.1174 1.282747 1.418233 1.152943 1.341065  
0.784041 1.380874 0.852538 0.977949 0.829203 0.856146 1.387208 4.327421 1.821579  
2.521757 2.085959 1.897029 2.633552 1.472713 1.919178 1.893103 2.091992 2.210682  
1.868001 4.67572 2.602764 4.049474 6.390401 2.514084 1.745166 6.057177 4.599034  
2.022239 1.497857 1.471877 1.416446 1.621013 1.023336 1.849759 1.383317 1.522472  
5.918899 6.445657 6.37801 6.067884 6.391322 6.407747 6.165406 6.79988 6.541717  
1.000596 1.145822 0.849253 1.244086 0.971184 1.155151 1.423042 1.052482 0.891959  
4.77883 3.102728 2.686053 2.872751 3.62918 3.105242 3.834532 3.943408 3.032885  
1.13208 2.483597 0.978783 0.956414 1.585623 3.05521 1.188768 1.126541 1.753259  
1.416712 4.043659 1.21392 1.774779 1.124002 1.631898 1.547493 4.801772 1.391348  
1.138196 1.255158 0.872539 2.466148 3.199493 1.946095 1.842531 1.06401 1.481695  
1.960383 2.391817 2.445151 2.474906 2.019158 2.603549 2.01226 1.877674 2.021025  
0.877008 0.857086 1.188908 1.388689 1.467359 1.618579 0.807512 0.938498 1.832812  
1.363923 1.345995 1.579873 1.842903 1.921079 1.234974 1.149492 1.489908 2.539904  
1.053058 0.950365 1.111693 0.889099 1.073173 0.629502 1.941648 1.03156 0.866475  
2.007104 1.693624 1.167467 2.6294 1.055793 1.70186 1.473051 1.203397 2.10367  
7.287767 6.982831 7.22123 6.563472 6.890798 6.913348 6.884343 6.770913 7.470227  
0.818273 2.885453 1.004016 1.304652 1.697323 1.124998 1.01838 1.404322 1.040861  
0.850068 1.095778 1.071487 1.437493 1.712727 1.400647 1.581136 2.322863 1.523485  
2.166337 1.279738 0.925663 1.375682 1.10782 1.306524 1.176277 1.328442 0.803966  
3.321553 3.854574 3.214452 3.232382 3.27554 2.787751 3.902374 3.245018 2.878288  
2.989588 2.525941 3.052835 1.981669 1.59054 3.397242 1.492524 2.786928 3.803627  
2.035359 1.240101 1.215838 1.488592 1.530643 1.617065 1.21077 1.401194 1.765568  
5.402407 5.289599 5.384204 4.999709 5.28415 4.642355 5.625909 4.59258 5.193151  
1.222498 1.618817 0.998155 0.878382 1.30113 1.402348 1.122491 1.226135 1.084803  
1.227857 1.056992 0.965123 1.177394 2.219797 1.596429 0.964565 1.211887 0.915468  
7.321953 7.907514 7.615115 7.552679 7.59047 7.844537 7.674898 8.159766 7.661978  
1.891427 1.475472 1.440008 1.70486 3.017939 1.454063 2.386597 1.334886 1.701689  
1.714105 1.442877 1.148592 2.341153 1.680511 2.33499 2.029687 2.647648 1.685872  
1.173232 1.100485 0.714701 1.133805 1.045385 0.941901 1.263536 1.090817 1.180053  
0.84382 0.730382 0.592407 0.99913 1.233592 0.827595 0.929351 0.917669 1.078724  
1.641034 1.760557 1.482647 1.813244 2.221224 1.889841 2.132049 1.319326 1.487819  
7.496894 7.888448 7.561291 8.310387 8.764365 8.058007 8.281453 7.285871 8.368371  
4.552535 2.30482 2.145815 2.156087 2.046194 3.143385 2.541854 2.575214 2.473882  
4.912253 4.906515 4.532993 4.788793 4.887264 4.902579 5.739332 4.918326 4.933064  
1.333342 1.211041 1.209026 1.843653 1.237961 0.841448 1.312646 1.510658 1.557981  
3.464217 2.535256 3.125131 2.747469 3.371866 3.454685 2.838496 3.597354 3.03927  
1.251341 1.381367 1.33677 1.568775 1.145536 6.947812 1.660766 1.163457 1.767287  
1.580739 1.098997 1.22008 1.369181 1.95529 1.472821 1.411655 1.422899 1.375072  
1.031436 0.712268 1.308237 1.452566 2.090983 2.084488 1.236995 1.888906 1.481519  
2.970319 2.643475 1.549729 2.021293 2.443132 7.345904 2.000439 2.2088 1.910818  
1.340705 0.630559 1.274338 2.463031 0.965261 4.511866 1.199958 0.758002 1.960648  
1.749715 1.60801 1.659638 1.824569 1.76097 2.534072 1.628384 2.062824 2.663023  
1.256006 1.622361 0.790418 1.133364 1.215687 1.145912 1.271889 1.662267 1.092861  
1.684718 1.210956 0.780812 1.185041 1.528993 1.632974 1.262186 1.536678 1.165564  
4.073198 1.676861 2.787563 2.83254 2.491189 5.074462 4.482033 3.162758 3.53118  
2.281997 1.376118 1.618576 1.734632 1.658829 2.093598 2.237366 1.589184 2.510719  
2.001149 2.305164 1.343437 2.185937 1.93014 1.656707 2.597334 1.261945 2.140309  
1.319628 1.18843 1.098496 1.220528 1.697812 1.105895 1.968747 1.7247 0.652769  
10.9138 10.79081 11.11797 10.77947 10.67592 10.62591 10.71979 10.46912 11.37924



2.194518 2.258231 1.846622 2.112286 3.15756 2.482304 2.316126 2.639251 2.181987  
3.077482 2.558775 2.519954 2.802889 2.875429 3.343162 1.944957 1.864853 2.088971  
2.635613 2.033344 2.807991 2.395743 2.385106 2.043747 1.892389 2.125703 2.133294  
2.920859 2.452819 2.873528 2.322487 3.796085 4.401681 3.619242 2.815296 2.954197  
2.040328 1.573783 1.271189 1.897248 1.958007 1.518456 2.219753 1.733291 1.722907  
2.65737 3.018149 2.775977 1.620104 1.177305 3.130624 2.659052 3.401723 3.855958  
7.562301 7.245277 6.908626 6.803251 6.939699 6.613515 7.426503 7.043171 7.62441  
5.111177 5.28856 4.951366 4.658299 4.642321 5.071322 5.08322 5.20514 6.270601  
1.466328 2.683748 1.995325 1.429184 1.455283 1.843916 3.05157 1.507781 1.878778  
2.135552 2.867468 2.434617 2.351323 2.899697 2.370099 3.470053 2.365072 2.307423  
4.587684 3.849963 4.388668 3.632944 3.223216 3.848742 3.129017 2.744359 4.026983  
3.488636 1.542319 2.944816 1.696605 4.606204 4.062309 3.933935 4.821682 2.708906  
1.869047 1.849715 2.753794 2.11761 1.792287 1.869274 1.600532 1.919812 1.67285  
1.260738 1.012961 0.769982 1.271019 0.870102 0.914278 1.073334 1.346318 0.850341  
4.426593 3.083104 1.941937 2.041599 1.682828 2.879471 2.29838 1.582708 2.880348  
8.681601 8.642205 8.498867 8.578216 9.36141 8.518489 9.121753 8.96984 8.526612  
2.432182 0.783028 1.948608 1.700086 1.235038 1.707537 1.215733 1.290964 0.757162  
1.606806 0.981415 0.65528 0.750061 0.623789 0.967431 0.669006 0.687661 0.970399  
0.575863 1.153285 0.468724 0.392037 0.571511 5.181344 0.542204 0.566366 1.412118  
5.54659 2.775876 3.029248 3.350756 3.348714 2.717703 3.721014 3.501191 3.238433  
4.93216 4.307471 4.624821 4.022585 3.524102 4.856565 4.320056 4.564248 4.271746  
6.244934 4.809918 6.097528 5.463039 5.24856 6.006693 5.494748 4.996293 6.37145  
4.769426 5.839039 6.332983 5.131736 6.521232 4.576038 5.002261 6.165795 4.970716  
3.797418 3.005582 2.95209 2.957966 2.616664 4.031108 2.521114 1.841292 2.897892  
4.967785 2.419247 0.979397 1.867749 1.174482 4.916713 0.848395 0.662187 1.978777  
7.793207 7.34081 7.496216 7.505299 7.513012 7.518445 7.103485 7.77442 7.854801  
1.954099 1.630539 1.600607 2.652242 1.504544 1.60964 1.646369 1.99002 1.329817  
3.141103 3.312917 3.103392 2.541394 2.945415 3.129362 3.916791 3.737196 3.475145  
4.644293 4.757746 5.202311 5.786948 5.025778 5.843023 4.67709 4.939934 5.141679  
1.031822 1.220364 0.800678 0.895219 0.78481 0.685538 0.71823 0.657327 1.650969  
2.198871 2.255469 2.1824 2.142094 2.026504 2.692025 2.340874 1.898988 2.182095  
3.146863 0.713917 1.069636 0.768901 1.66335 1.059967 1.60601 1.491312 1.121677  
3.411168 4.285505 4.228236 2.684203 3.431091 3.760733 2.99604 3.115126 4.588963  
1.373984 1.815181 0.911304 0.981813 0.448789 1.890329 1.115427 0.508984 1.506655  
1.526545 0.966307 0.685435 1.28046 0.731667 0.96113 0.891767 0.765221 0.774106  
6.060051 6.417048 6.31555 5.914379 6.453867 7.043716 5.966513 6.170502 5.897465  
5.973693 6.104756 5.907677 5.882201 5.753074 5.267015 5.941721 5.395266 6.354256  
5.979981 2.792681 4.9752 4.059566 3.512885 6.611502 5.132382 5.332888 4.202587  
2.263191 1.781208 0.880153 0.79401 0.897162 1.981902 0.640097 2.085222 1.243138  
1.1406 1.330468 1.795299 1.217696 1.335062 1.475976 2.071034 1.590628 1.756108  
2.354312 1.690179 1.76137 1.617172 2.269447 1.929991 2.185082 1.955443 2.733162  
2.774479 2.66241 2.268668 3.305737 3.619928 2.094231 3.788468 2.495807 1.673557  
3.664843 1.206456 1.771448 1.646893 1.940103 3.464463 3.176655 1.62329 1.292655  
1.708356 1.045078 2.126569 1.939874 1.291423 1.630828 1.976502 1.187636 2.248644  
6.401085 4.643505 5.74401 4.96488 5.005609 7.124142 5.070936 3.345335 4.159536  
6.468221 5.078893 2.96825 3.218623 2.934502 6.779438 2.130242 1.662868 2.472114  
3.487492 1.507477 1.107636 0.730387 3.411813 3.82354 6.030078 1.192239 1.480238  
5.658331 4.565813 4.532033 3.68969 4.173528 5.080021 4.822695 3.800533 4.558597  
1.780316 1.669426 1.17468 1.056935 1.197329 1.204251 2.70716 1.10928 1.534431  
2.684352 1.454784 2.540085 1.6825 1.821827 1.98283 3.284006 1.961934 2.607036  
1.869611 0.985427 1.32328 1.709425 1.190308 1.021753 1.513868 1.287318 2.605967

2. 267358 1. 792318 1. 285192 1. 324145 2. 225646 2. 19016 2. 32725 1. 817587 1. 777783  
2. 033073 2. 706419 2. 800828 1. 348447 2. 461789 6. 198699 4. 504418 2. 497336 3. 366418  
4. 845956 1. 921118 2. 97652 3. 052143 3. 09385 7. 109337 3. 981013 3. 303503 3. 801147  
1. 200264 0. 889779 1. 179101 1. 470134 1. 916447 1. 607797 1. 388066 1. 646611 1. 379963  
0. 793413 0. 776832 1. 575728 0. 801951 2. 462754 1. 524374 2. 794997 1. 100604 2. 176927  
3. 335992 1. 356728 1. 193933 1. 399085 1. 930956 3. 927469 2. 431445 1. 627839 1. 412926  
6. 911557 1. 05156 1. 744062 1. 614848 1. 143774 7. 214747 5. 031252 1. 562238 2. 333115  
4. 3652 0. 621369 1. 710776 0. 897459 0. 584231 7. 099774 7. 457516 0. 656606 1. 090245  
2. 615136 1. 90107 1. 666626 1. 549944 1. 227176 1. 88598 1. 694009 1. 558764 2. 002274  
8. 621934 8. 719806 8. 736779 8. 997213 8. 895729 8. 538983 8. 115022 8. 697559 8. 898621  
5. 191057 4. 721359 4. 679091 3. 848449 5. 715345 4. 927465 5. 528352 5. 697991 4. 999348  
3. 397923 2. 699846 2. 603692 2. 359747 2. 255664 2. 661505 2. 6114 2. 319804 2. 559524  
6. 048603 6. 678895 7. 307612 6. 907546 6. 49609 7. 552817 6. 273052 8. 051024 7. 422254  
6. 25405 7. 250988 7. 116195 6. 923138 7. 788636 7. 5336 7. 409207 7. 005936 7. 591775  
7. 221228 7. 493942 7. 430691 7. 286611 6. 829664 6. 830055 7. 869468 7. 962078 7. 392035  
8. 915134 8. 117076 8. 327963 7. 518652 8. 002159 8. 01672 8. 433016 8. 185976 8. 502524  
7. 521174 5. 106948 6. 007235 5. 621131 5. 978514 5. 286803 6. 103827 6. 440298 7. 697132  
1. 393277 1. 297438 0. 997207 0. 889746 0. 785775 0. 953994 0. 968017 0. 845474 1. 165805  
4. 517774 5. 324835 5. 20315 5. 851169 5. 779131 5. 326266 5. 131036 5. 468415 4. 955612  
6. 469914 7. 348602 7. 407625 7. 474186 7. 389902 7. 441404 7. 08775 7. 5083 7. 702769  
5. 059836 5. 867143 5. 600386 6. 225469 6. 297262 5. 899763 5. 902624 6. 31003 5. 871743  
1. 312832 0. 876603 1. 39084 1. 694411 1. 26812 1. 157753 1. 282806 1. 109389 0. 89955  
4. 751776 4. 1817 5. 003227 5. 044325 4. 753223 4. 893116 4. 292175 5. 238905 4. 423874  
4. 569697 4. 11616 4. 235851 4. 818131 4. 851176 4. 758952 3. 508106 3. 074849 4. 190903  
4. 248739 4. 445207 4. 295023 3. 905375 4. 61745 4. 497266 3. 66936 4. 320855 3. 771153  
8. 722191 7. 840049 8. 114593 8. 892916 8. 265888 8. 967618 8. 240607 8. 51385 8. 572248  
9. 277229 8. 280369 8. 573333 6. 895938 8. 162841 7. 324246 7. 707495 7. 656626 8. 717988  
6. 633995 6. 796275 7. 347073 7. 403363 7. 543717 5. 786357 7. 709698 7. 081944 6. 97296  
9. 713378 9. 915222 9. 965359 9. 829701 9. 546712 9. 673711 9. 390449 9. 909356 10. 029  
8. 329527 7. 968616 7. 893227 7. 799191 7. 862549 7. 829763 8. 30171 8. 122354 7. 85498  
9. 240909 9. 436101 9. 25682 9. 407758 9. 542162 8. 999558 9. 858025 9. 285036 9. 544235  
5. 401696 5. 377717 5. 503202 5. 70592 5. 576978 5. 513357 5. 115101 5. 563036 5. 506563  
6. 228846 6. 704955 7. 025778 6. 134709 6. 499648 6. 407348 6. 114664 6. 47183 6. 715478  
7. 46299 7. 845491 7. 883483 7. 449833 7. 385041 7. 39484 7. 452698 8. 363998 7. 726616  
2. 454491 2. 121971 2. 063864 2. 314305 2. 945564 1. 76947 2. 263043 2. 803219 2. 051422  
4. 579813 5. 388793 4. 455181 4. 850641 5. 099875 4. 883513 4. 810497 6. 245698 4. 397733  
4. 58953 4. 885164 4. 944669 4. 083855 3. 923887 3. 791881 4. 043966 3. 059624 4. 11512  
1. 47485 1. 501958 1. 252975 1. 366784 1. 346121 1. 644056 1. 471514 1. 294611 1. 674135  
3. 844811 3. 789006 4. 175732 4. 544859 4. 892516 2. 846236 3. 190699 3. 699697 4. 3759  
2. 984808 4. 342533 4. 28468 3. 154207 3. 704974 4. 616837 3. 310492 4. 684385 4. 80011  
7. 060175 7. 282621 6. 935683 6. 596892 6. 910358 7. 042979 6. 890069 7. 185096 6. 80311  
6. 141542 6. 772897 7. 111185 6. 59272 6. 900621 6. 766059 6. 700232 7. 2157 6. 61463  
4. 932551 5. 110236 4. 701534 5. 200495 6. 039496 5. 580578 4. 84954 6. 595379 5. 62398  
4. 032212 5. 134787 4. 92515 4. 457514 5. 760299 4. 98529 5. 043262 5. 256075 5. 07146  
3. 446569 5. 89351 5. 479562 6. 043279 5. 802329 6. 16695 5. 704348 5. 934951 5. 815187  
4. 358139 3. 507741 3. 763825 3. 146609 4. 401593 3. 585796 3. 559637 3. 77001 3. 728348  
3. 142211 3. 352768 3. 303104 3. 334601 3. 245913 4. 010678 3. 263965 3. 248927 3. 5352  
4. 315848 3. 754598 4. 877085 3. 665664 4. 128918 3. 322046 4. 385848 3. 385446 4. 377253  
10. 18308 10. 10798 10. 29236 10. 28575 10. 23177 10. 12751 10. 0245 9. 956323 9. 98356  
7. 230184 7. 312502 6. 847462 6. 349779 7. 014657 6. 717374 7. 160734 6. 713761 7. 024607  
2. 541963 2. 426086 1. 909587 2. 064088 1. 690682 2. 594131 1. 714306 1. 517965 2. 006785

2. 118683 1. 706814 2. 010914 1. 21548 1. 8233 1. 632293 2. 115686 1. 738567 1. 592302  
3. 630342 2. 0245 3. 094441 2. 556488 1. 627109 3. 498614 2. 082439 1. 774255 3. 118785  
2. 264522 3. 122525 2. 382987 2. 738667 2. 465974 2. 276727 2. 970733 3. 269849 3. 123257  
5. 629937 5. 275799 4. 746848 6. 434749 6. 258433 6. 289719 6. 919673 5. 192802 5. 618732  
1. 687637 1. 132029 1. 23546 1. 563605 1. 748802 1. 412965 1. 583088 1. 769125 1. 448142  
4. 806003 4. 897401 4. 888404 5. 170713 4. 377123 4. 849047 4. 041502 4. 91322 4. 068369  
2. 873718 3. 995153 3. 29452 3. 954408 3. 718308 2. 862781 3. 796709 3. 577558 3. 701213  
1. 821852 1. 611733 1. 834081 1. 563194 1. 140285 1. 550708 2. 199241 1. 689199 1. 528036  
1. 265937 1. 469579 1. 007681 0. 908096 1. 806691 1. 059777 1. 151457 1. 541338 0. 986657  
7. 028232 7. 783426 7. 514377 7. 990779 7. 519003 8. 262007 7. 522227 7. 528511 7. 64218  
2. 144487 2. 165186 2. 521146 2. 227227 2. 019725 3. 017007 2. 378105 2. 203713 2. 467229  
1. 655651 1. 510823 1. 67277 2. 000015 1. 594942 2. 262823 1. 951892 2. 6016 2. 102189  
3. 721945 0. 991193 0. 953583 1. 969295 1. 016494 1. 522207 1. 143529 1. 695908 2. 240911  
6. 018285 6. 478186 5. 648515 5. 642476 6. 043049 5. 928745 6. 235111 5. 814326 6. 602452  
2. 183948 2. 030248 1. 842134 2. 039007 2. 152378 1. 842669 2. 440261 1. 533493 2. 43304  
4. 28432 4. 56862 4. 390607 4. 892166 5. 045582 4. 666235 4. 441532 4. 922442 5. 407619  
2. 921469 3. 886003 3. 528833 2. 992584 3. 252423 2. 883686 3. 041812 3. 109864 2. 877347  
1. 454132 1. 949961 2. 127742 2. 279566 2. 061493 1. 549263 1. 490384 2. 794135 2. 081736  
6. 623623 6. 764312 6. 912776 6. 649157 6. 319603 6. 170568 6. 65991 6. 590302 6. 617553  
7. 837902 6. 956296 7. 587274 6. 889423 6. 984398 7. 137126 7. 123533 7. 312049 7. 071807  
2. 478951 1. 903439 2. 687025 2. 268955 2. 810199 2. 963555 2. 286367 2. 52667 2. 801994  
2. 935028 3. 069251 4. 672542 5. 174912 2. 258238 3. 867402 4. 291678 3. 932285 4. 15565  
5. 785427 5. 99129 6. 063035 5. 101495 5. 263093 5. 490001 5. 868936 6. 002405 5. 460273  
7. 027611 7. 87633 7. 63487 7. 622294 7. 514167 7. 649817 7. 356157 7. 025416 7. 169837  
7. 280879 6. 845813 6. 96117 6. 388168 6. 870852 6. 552744 6. 7194 7. 161554 6. 848276  
1. 663327 1. 975926 1. 571658 1. 380054 1. 568977 1. 543623 1. 69335 1. 423321 1. 547858  
4. 575289 4. 869024 4. 150451 3. 967539 5. 239713 4. 39031 4. 549151 5. 668937 6. 04503  
7. 43548 7. 775951 7. 726618 6. 641786 7. 715535 7. 469294 7. 098091 7. 382467 6. 709925  
6. 678076 6. 260902 6. 34882 6. 914333 6. 114043 6. 688531 6. 42759 6. 242289 7. 087882  
7. 70947 7. 689393 7. 461489 6. 748599 7. 249667 7. 228119 7. 458169 7. 492069 7. 24564  
6. 651753 7. 223996 6. 770549 6. 291973 7. 173683 6. 750186 6. 705647 7. 17018 6. 550286  
6. 858995 6. 973502 7. 229776 6. 784763 7. 743602 5. 939716 7. 200603 7. 332625 6. 86239  
4. 755828 5. 832192 6. 049656 5. 170182 6. 009253 6. 069246 5. 886653 5. 957407 5. 342538  
5. 002493 5. 902696 5. 676917 5. 488649 5. 487286 5. 215961 6. 100764 5. 695231 6. 006839  
5. 828651 6. 993686 6. 430532 6. 215011 6. 99983 6. 152588 6. 700374 6. 199342 6. 698917  
5. 953053 5. 854458 6. 254337 5. 697072 5. 971065 5. 82469 5. 799626 5. 918127 5. 981361  
5. 402494 5. 123055 5. 270536 4. 892113 5. 603719 5. 900207 5. 283818 6. 044003 5. 982597  
3. 995183 4. 366976 3. 58922 2. 208611 3. 688104 1. 916422 4. 129772 3. 685979 4. 617786  
7. 406524 6. 847871 7. 248856 7. 101369 7. 190709 7. 714105 7. 468651 7. 412203 6. 796959  
6. 588764 6. 480303 6. 156687 6. 391823 6. 300658 6. 296703 6. 240472 6. 778726 6. 426993  
3. 066785 2. 482841 3. 196673 2. 821325 1. 697844 3. 088905 2. 187555 2. 33354 3. 325654  
3. 040637 3. 519622 2. 612934 5. 141832 3. 297941 2. 889519 3. 109421 3. 927876 3. 248533  
4. 847711 6. 479522 6. 455959 5. 804485 6. 376621 5. 87106 6. 131051 6. 929946 6. 324486  
7. 10648 6. 783859 6. 932752 7. 856212 6. 865242 7. 024675 7. 833238 6. 577469 6. 893998  
7. 55252 8. 350536 7. 912722 8. 505017 8. 228173 8. 540318 8. 472451 8. 302798 8. 292828  
6. 881397 7. 352933 7. 59346 7. 084672 7. 287008 6. 770071 7. 367797 7. 332204 6. 975032  
4. 856457 5. 950321 5. 632783 4. 956978 5. 943499 5. 189187 5. 386401 5. 890134 5. 713505  
6. 738636 5. 90013 6. 686464 6. 007677 5. 958943 6. 609006 6. 498661 6. 06763 6. 252838  
7. 810322 8. 056823 7. 802724 8. 211298 8. 184395 7. 911473 7. 631392 7. 862875 7. 862569  
9. 757052 7. 625654 8. 412255 7. 931338 7. 690167 7. 694273 8. 062261 7. 666065 9. 311092  
6. 64634 6. 630074 6. 546481 6. 419882 6. 48648 5. 780987 7. 150027 6. 973788 7. 003093

7. 136533 7. 337897 6. 838472 6. 563653 7. 580058 7. 082332 6. 568262 6. 811 7. 325867  
6. 042476 6. 000676 6. 345297 6. 093561 6. 512483 6. 218101 6. 146085 6. 039933 6. 058895  
9. 526472 9. 534631 9. 523536 9. 63143 9. 258473 8. 856865 9. 46466 9. 528196 9. 480131  
5. 149252 4. 68008 3. 476094 5. 005389 3. 862332 3. 872466 3. 55705 4. 340819 3. 856908  
7. 274934 7. 393431 7. 15904 6. 161961 6. 69413 6. 792744 6. 700934 7. 378621 7. 076326  
1. 939395 1. 915049 1. 590052 1. 802186 2. 093998 1. 505843 1. 379162 2. 939668 1. 357689  
3. 618158 4. 068278 4. 083468 4. 044231 3. 624096 3. 695643 4. 460204 4. 834578 3. 956847  
7. 334187 6. 402433 5. 797346 6. 694395 6. 606999 6. 61114 7. 740599 6. 866954 6. 533576  
2. 91772 3. 279834 3. 228682 3. 657849 3. 227399 3. 844443 3. 471666 3. 729371 3. 515987  
4. 756257 5. 786332 5. 871045 5. 530281 6. 04848 5. 941352 5. 753097 6. 158363 5. 106778  
3. 920295 2. 97882 3. 664986 3. 444914 3. 112221 3. 414428 3. 436013 3. 471392 3. 130667  
1. 627887 2. 379052 2. 654296 2. 901875 2. 357096 2. 535196 3. 491617 3. 418482 2. 823136  
5. 658593 6. 657182 6. 529273 6. 904067 6. 842307 6. 239699 6. 735263 6. 761784 6. 18193  
8. 527273 8. 522245 8. 607944 8. 362715 8. 745965 8. 495425 8. 222905 8. 401745 8. 23321  
6. 921952 7. 809739 7. 081928 7. 101752 7. 197689 7. 093132 5. 904474 7. 932475 7. 187102  
1. 490662 1. 571184 1. 630587 1. 877529 1. 372966 1. 866601 1. 429303 1. 887919 2. 13863  
4. 564179 3. 30491 2. 7461 1. 82372 1. 950878 2. 570262 2. 104083 2. 124086 2. 474384  
2. 228901 1. 495749 2. 195588 2. 736864 1. 24448 1. 943779 2. 592654 1. 941639 1. 793332  
1. 874117 2. 513346 2. 352968 2. 469842 1. 997425 3. 275504 2. 312914 1. 498562 1. 673919  
3. 21527 3. 93343 4. 188956 2. 939496 4. 012948 3. 285043 3. 840522 2. 991922 2. 898476  
6. 75065 6. 2734 6. 016323 5. 600932 6. 656176 6. 429233 6. 317485 6. 257644 6. 095375  
1. 132052 1. 682784 0. 691993 0. 993748 1. 614741 1. 276347 0. 886768 1. 883261 2. 181408  
2. 452766 2. 640772 2. 306637 2. 131656 2. 748914 1. 567364 3. 10307 3. 059509 2. 329942  
3. 005388 4. 272312 5. 619606 3. 903574 3. 449361 5. 099166 4. 783372 3. 391574 4. 901163  
1. 384789 1. 984461 2. 131677 1. 102293 2. 362786 1. 640009 1. 307534 2. 404022 1. 707403  
1. 529357 1. 399267 2. 018142 1. 820685 2. 132809 1. 155107 2. 482018 1. 439682 1. 805853  
1. 468555 1. 36799 1. 520025 1. 84593 1. 175797 1. 524564 2. 22595 2. 305015 1. 751163  
2. 37363 1. 486857 1. 330078 1. 835045 2. 581001 2. 79411 1. 534528 2. 278357 1. 670476  
3. 652977 2. 897074 3. 404759 2. 776722 2. 988151 2. 585298 2. 822428 3. 118562 2. 645619  
2. 444395 2. 707639 1. 879277 2. 602841 1. 850038 1. 60813 3. 211751 2. 671105 2. 002983  
2. 020792 1. 311845 2. 480893 2. 871437 2. 974721 2. 50499 2. 386561 2. 197908 2. 876522  
1. 410197 1. 424021 1. 487455 1. 978753 2. 041286 1. 218641 2. 334103 2. 453298 1. 182095  
1. 543923 1. 13067 1. 559128 1. 915791 1. 477092 2. 260071 1. 635004 1. 783562 2. 066267  
0. 954077 3. 667111 3. 360883 1. 583258 3. 752897 2. 842334 5. 164927 4. 18934 2. 816874  
6. 45719 6. 513222 6. 279751 6. 10365 6. 816637 6. 560318 6. 620588 6. 185385 6. 818237  
2. 416611 3. 36059 2. 442504 1. 570746 3. 213237 4. 245147 2. 995285 2. 133343 1. 526604  
3. 549327 2. 148372 3. 001091 2. 063593 2. 941333 1. 998324 3. 900258 3. 211183 2. 835379  
2. 319972 2. 302585 3. 29303 2. 760383 2. 702485 2. 054392 2. 114442 2. 334281 2. 430233  
2. 218241 2. 591127 1. 698559 2. 217073 1. 963409 1. 7797 2. 811269 1. 468147 2. 043367  
6. 691641 6. 87935 7. 035213 6. 951014 7. 216285 6. 833341 6. 548674 7. 051831 6. 787841  
1. 627381 1. 569827 1. 770121 1. 731657 1. 06801 1. 971446 2. 271627 1. 556453 1. 361976  
7. 340816 6. 648909 7. 066166 7. 604077 6. 369552 6. 172517 6. 625992 7. 035494 7. 409317  
6. 849684 7. 30856 6. 765132 7. 0927 7. 06377 6. 960225 6. 437185 7. 196398 6. 6151  
6. 796892 7. 469866 7. 139694 8. 165841 7. 560325 7. 724211 7. 341593 7. 174362 7. 85235  
6. 345773 6. 877281 6. 698343 6. 459084 6. 995376 6. 944919 6. 819621 6. 560158 6. 631639  
5. 211733 5. 551922 5. 007731 5. 672449 5. 065989 5. 319408 4. 964375 5. 907974 5. 398285  
7. 121966 7. 236925 7. 283007 7. 107243 7. 084303 6. 762845 6. 56877 7. 514106 7. 522449  
6. 164663 6. 120893 6. 562331 5. 680313 5. 749546 5. 766708 6. 51695 6. 074485 6. 394576  
10. 22242 9. 036659 10. 08504 8. 542843 8. 891513 6. 046045 9. 394814 8. 682668 9. 732268  
7. 799718 6. 889069 8. 355526 5. 869292 5. 815223 3. 525385 6. 184035 4. 243923 8. 411822  
9. 889861 9. 686693 9. 711727 9. 775363 9. 586735 9. 474793 10. 01937 9. 757963 9. 769467

1. 681916 1. 627366 3. 307324 1. 598931 1. 129767 1. 627327 3. 13589 1. 745217 2. 068416  
7. 208893 7. 190829 7. 241968 6. 694227 6. 709257 6. 73056 6. 305768 6. 27899 6. 743798  
6. 084106 4. 539107 2. 48258 4. 571501 2. 986187 3. 601005 3. 276716 1. 870541 3. 490239  
7. 209658 6. 590346 7. 000701 7. 643996 7. 067171 6. 522295 7. 135716 6. 065064 7. 506393  
6. 185918 6. 030819 6. 053327 6. 103057 4. 829308 6. 297408 5. 273162 4. 107578 6. 349237  
3. 219972 3. 433233 3. 921298 7. 957786 4. 124963 1. 943561 3. 853782 3. 00164 4. 712027  
9. 453141 9. 300076 9. 516712 9. 38257 9. 588893 9. 27949 10. 201 9. 555248 9. 509473  
3. 141382 3. 877004 3. 588273 4. 223302 3. 823512 3. 645892 4. 300284 3. 855165 3. 467206  
6. 636447 6. 432622 6. 922038 6. 332709 6. 829615 6. 453685 6. 759858 6. 868732 6. 414901  
8. 449097 8. 366556 8. 311884 8. 609821 8. 631491 7. 861682 8. 411162 8. 265689 8. 373131  
5. 240552 5. 818732 5. 04314 5. 139359 5. 744929 5. 168859 5. 189405 5. 476678 5. 469604  
7. 127458 6. 875535 7. 077483 6. 947953 7. 061409 6. 089122 7. 040222 7. 035418 7. 04648  
4. 239678 5. 230465 4. 943725 4. 452081 5. 130577 5. 096655 4. 668097 5. 344301 4. 976715  
5. 383732 6. 265212 6. 1618 6. 58104 5. 494045 6. 185298 6. 334375 6. 107194 6. 189238  
6. 911857 6. 845054 6. 381261 6. 856808 6. 697311 6. 882099 6. 884529 7. 105081 6. 741698  
5. 722635 6. 357136 5. 339803 6. 00434 6. 455784 6. 319552 5. 775185 6. 096075 5. 946948  
5. 542978 6. 188468 6. 447038 6. 004223 5. 886204 6. 619599 5. 544878 5. 516833 5. 941831  
2. 926793 4. 678181 3. 563506 4. 580061 4. 536897 4. 632475 4. 345402 5. 323833 4. 652705  
3. 253961 4. 181209 4. 378418 4. 001137 4. 124459 4. 367621 4. 252104 3. 868117 4. 085288  
6. 76552 7. 089284 7. 144826 6. 414676 7. 336675 6. 882165 6. 812938 7. 362363 7. 013864  
7. 747672 7. 631454 7. 068658 7. 249366 7. 532841 7. 018629 7. 680306 7. 41073 7. 445106  
4. 040767 3. 969883 3. 856491 3. 752908 3. 81839 4. 070032 4. 442368 3. 85864 3. 760895  
1. 562052 1. 795624 1. 698432 1. 832867 1. 540523 1. 872273 1. 527083 1. 671711 2. 488885  
6. 110711 6. 24688 5. 727807 5. 617453 5. 986948 5. 994384 5. 748918 5. 38733 6. 027979  
3. 404523 3. 712369 3. 662751 3. 106359 4. 441133 4. 533883 4. 301187 3. 247883 4. 058488  
6. 435649 7. 123905 7. 098994 7. 067867 7. 075963 6. 883618 6. 293078 6. 727437 5. 983904  
2. 886002 3. 4715 4. 463222 4. 045557 2. 820049 3. 56774 4. 031085 4. 028022 3. 17434  
1. 744441 2. 591488 2. 069825 1. 798423 2. 469296 2. 149666 1. 662815 2. 32292 1. 825132  
8. 548372 9. 168616 9. 157217 8. 781004 9. 141387 9. 109421 9. 092527 8. 787354 8. 806194  
5. 869001 6. 374419 6. 181077 6. 232534 5. 956753 6. 397975 5. 787186 6. 624139 6. 586626  
6. 074907 5. 767811 5. 688984 5. 652507 5. 949378 5. 985908 5. 686172 5. 709077 5. 651822  
1. 265407 1. 417689 0. 933389 1. 680307 1. 062548 1. 058482 0. 844079 1. 244818 1. 616446  
4. 549794 4. 092266 4. 1074 4. 147701 4. 62908 4. 358513 3. 074801 4. 704375 4. 071395  
4. 480136 4. 829282 4. 275517 4. 446384 4. 424768 4. 823389 3. 917185 4. 808936 3. 845258  
2. 7043 1. 689413 3. 008335 2. 891891 3. 256969 3. 376897 2. 939564 3. 317891 4. 241004  
3. 674 3. 849182 3. 994705 4. 31703 3. 887245 4. 061586 4. 259859 3. 607157 3. 307628  
2. 990778 3. 216843 3. 466213 3. 20612 3. 248947 3. 43156 3. 454862 2. 516604 3. 63874  
2. 322592 2. 782857 2. 758651 3. 894433 2. 765716 2. 754046 4. 249484 2. 810631 3. 102901  
5. 404821 5. 464009 6. 249511 5. 370908 5. 324508 5. 361108 5. 544165 5. 768324 6. 011365  
1. 806806 1. 799294 2. 690382 1. 571634 1. 736823 2. 321224 1. 701841 1. 819449 2. 568878  
9. 999351 10. 06539 10. 14665 9. 772927 9. 692463 9. 813761 9. 966829 10. 4262 10. 21108  
6. 615801 5. 19089 4. 94642 5. 787997 4. 509535 4. 338448 5. 363536 5. 31489 5. 986482  
2. 393276 2. 986809 3. 012169 1. 796338 3. 378091 3. 092071 2. 341199 3. 585177 2. 863006  
2. 033295 1. 846841 1. 191084 1. 487286 2. 084633 2. 026682 1. 814567 2. 808033 1. 717138  
5. 874784 5. 653406 4. 995637 5. 369779 5. 525919 5. 289047 5. 433046 5. 772555 5. 279794  
4. 298472 4. 733089 4. 469765 4. 287668 4. 060182 5. 2148 4. 885187 4. 767732 5. 039474  
1. 955186 1. 429305 1. 393609 1. 966452 1. 264507 1. 655478 1. 383841 1. 712137 1. 473309  
4. 567688 4. 837435 4. 563131 4. 481182 4. 228192 4. 306316 4. 131524 4. 503375 4. 318389  
3. 378339 3. 333257 3. 169892 3. 19799 2. 461742 3. 129897 3. 319138 3. 651315 2. 765175  
1. 728045 1. 632897 2. 098202 2. 052677 1. 772565 1. 634411 2. 808581 1. 647787 2. 556095  
5. 7002 6. 215632 4. 728977 7. 134136 5. 996544 5. 902289 6. 883645 5. 58934 5. 795513

6. 399224 7. 277614 7. 097208 7. 365038 7. 503157 7. 355739 7. 596974 7. 054079 7. 290701  
1. 967632 2. 606508 2. 972936 1. 980305 3. 340744 3. 43875 3. 05066 3. 716306 2. 699958  
4. 697232 4. 240211 4. 58067 5. 084148 5. 530249 4. 047823 4. 19256 4. 028891 6. 225552  
4. 831316 6. 352724 6. 025178 5. 79463 6. 033675 5. 950457 5. 583172 5. 650224 6. 009082  
5. 345664 5. 300965 5. 274381 5. 6212 6. 073445 5. 941294 5. 22532 5. 834294 5. 442045  
1. 268678 1. 252557 1. 260005 0. 99627 1. 382806 1. 448654 1. 479187 1. 830856 1. 096947  
2. 558519 2. 661072 2. 69318 2. 175597 2. 301921 2. 271344 2. 209747 2. 215147 1. 930067  
1. 649343 1. 274355 1. 351216 1. 080497 1. 086267 1. 134443 1. 004577 0. 873551 0. 923603  
3. 354716 4. 727588 4. 104357 4. 077093 4. 640318 4. 926151 4. 055502 4. 708137 4. 283041  
1. 446684 1. 427578 1. 216065 1. 132447 1. 138954 1. 405609 1. 342464 1. 371314 1. 556399  
7. 62776 8. 158989 8. 248477 8. 008275 8. 311227 7. 94864 8. 863785 8. 189083 7. 850277  
6. 072229 6. 939112 6. 848941 6. 446527 6. 583026 6. 235041 6. 874399 7. 486236 6. 750354  
2. 017046 1. 586503 1. 945999 1. 480524 1. 238203 1. 367662 2. 001158 1. 223755 1. 238614  
3. 133822 3. 501374 3. 090404 3. 040463 2. 864137 3. 361008 3. 89269 3. 125377 3. 432399  
4. 691321 5. 587195 5. 163566 5. 216234 5. 575727 4. 429649 4. 622486 5. 58023 4. 72905  
4. 365983 4. 872722 4. 768573 4. 916207 3. 91992 5. 266574 5. 139601 5. 113262 4. 44057  
4. 01968 4. 313106 5. 061606 4. 359534 4. 286547 3. 853302 3. 553429 4. 348487 4. 810694  
3. 932621 4. 967448 4. 08301 4. 102219 4. 78006 5. 712343 4. 574764 4. 642259 4. 657745  
5. 819773 6. 196981 5. 61605 5. 558421 5. 836478 6. 440023 5. 977872 6. 432049 5. 939925  
4. 637814 4. 087882 4. 556801 3. 789418 4. 420361 4. 789562 4. 478547 4. 466777 4. 513788  
4. 717498 4. 266865 4. 204051 4. 447869 4. 459558 4. 227606 4. 014058 4. 627664 4. 446944  
4. 498463 4. 268009 4. 691879 3. 840601 4. 650924 4. 260848 4. 417813 4. 785953 3. 856391  
4. 237651 4. 762928 4. 196379 4. 235932 3. 43257 3. 919623 3. 210918 3. 86475 3. 746338  
6. 597322 7. 36352 7. 490659 7. 226329 7. 472292 6. 621738 7. 46603 7. 004208 7. 170175  
1. 471166 1. 433494 2. 006949 1. 514261 2. 686153 1. 886963 1. 642253 1. 864179 1. 705813  
2. 458617 2. 318528 2. 188545 2. 7325 2. 455115 2. 000292 2. 675543 2. 431242 1. 756261  
4. 035459 4. 209739 4. 161531 3. 832674 3. 387588 3. 200829 3. 822667 4. 109644 4. 103191  
3. 025222 2. 614652 3. 4233 2. 982773 2. 271873 2. 580668 3. 582315 3. 198614 3. 009833  
4. 11813 3. 510873 3. 093532 4. 10738 3. 326829 4. 691271 3. 983697 3. 9873 3. 96424  
2. 151604 1. 823788 2. 480441 1. 73367 1. 896212 2. 214394 1. 946407 2. 625882 2. 094148  
2. 04422 1. 970511 1. 371131 2. 09404 2. 500478 1. 643994 1. 958429 1. 81348 1. 845695  
6. 273572 6. 050422 5. 84714 5. 836901 6. 460433 5. 74322 6. 484201 6. 054137 6. 206848  
2. 269151 2. 52821 2. 944032 2. 787495 2. 538697 2. 406325 3. 028535 3. 765846 3. 212358  
4. 325015 5. 192308 5. 150017 4. 808634 4. 739473 5. 545789 5. 086621 4. 988404 4. 419007  
5. 869104 6. 590761 5. 950531 6. 633195 6. 451402 6. 452702 6. 171889 5. 791836 6. 143314  
5. 203438 5. 390631 3. 845674 4. 517698 4. 744844 4. 881644 5. 617464 4. 284957 4. 64165  
5. 629429 5. 853387 5. 740356 6. 132738 4. 720176 5. 829716 4. 928555 5. 867727 5. 920321  
5. 579381 5. 314837 5. 232131 5. 180603 5. 485071 5. 316552 4. 630416 5. 447656 4. 647344  
5. 945467 6. 206376 6. 092695 6. 29007 6. 049234 6. 505375 5. 967043 6. 779668 6. 076313  
3. 686892 4. 674085 5. 286678 4. 782053 3. 334912 4. 590884 4. 118022 3. 644364 4. 293809  
5. 199254 4. 637821 5. 411741 4. 901711 4. 775811 5. 980532 5. 395131 5. 216188 5. 155303  
3. 773876 3. 360119 3. 775748 2. 469825 3. 405871 3. 189302 4. 461659 3. 452175 3. 225878  
5. 076518 6. 012844 5. 496893 5. 363994 5. 621221 5. 716293 6. 102888 5. 834927 5. 776265  
8. 390839 8. 58573 8. 437948 8. 578464 8. 904513 8. 672232 8. 241014 8. 527641 8. 577081  
5. 368688 6. 23923 5. 42569 5. 695744 5. 646314 5. 487321 4. 405587 5. 723674 5. 634801  
4. 568382 5. 050824 5. 429653 4. 490724 5. 497923 5. 215514 4. 056292 5. 073153 4. 867882  
5. 706186 6. 731114 5. 568371 5. 119228 5. 895071 5. 783592 5. 705604 4. 961115 5. 375163  
1. 124642 1. 15675 1. 088545 1. 21829 1. 090876 1. 053241 0. 81275 1. 177237 1. 108011  
1. 764746 3. 148878 1. 603163 1. 295515 1. 623997 2. 384266 1. 857544 1. 553312 2. 071443  
1. 264083 1. 127895 1. 836034 1. 512894 1. 857664 1. 205359 2. 14096 1. 292397 1. 713177  
7. 075848 7. 621735 7. 487869 7. 349658 7. 530954 6. 997272 7. 347169 7. 203665 7. 370835

1. 237204 1. 177711 1. 291745 1. 269929 0. 978263 1. 940985 1. 091565 1. 328354 1. 522857  
8. 785895 8. 918041 9. 060278 8. 890552 8. 574287 8. 578811 8. 969401 9. 0848 8. 679583  
1. 468237 1. 088358 0. 869631 0. 989787 1. 499348 1. 54509 1. 473253 0. 878578 2. 99853  
5. 329026 6. 079549 6. 152367 5. 764854 6. 61215 6. 469691 5. 990821 6. 178922 5. 38795  
3. 543441 2. 256182 3. 008546 3. 757443 3. 512193 2. 943456 2. 951292 3. 602344 2. 988021  
3. 17261 2. 035969 3. 207119 2. 460572 2. 567674 2. 460087 3. 100722 2. 651676 2. 136928  
1. 687098 1. 442642 1. 52832 2. 140071 1. 541736 1. 804267 1. 822166 1. 905699 2. 51936  
3. 307244 3. 307256 2. 806507 3. 227361 3. 099059 2. 872916 2. 706885 2. 89697 3. 754858  
4. 143338 4. 079492 4. 2803 4. 104532 4. 161091 4. 112953 3. 611681 4. 145069 3. 951296  
4. 330601 4. 835543 4. 450754 4. 915244 4. 811702 4. 494751 4. 29107 4. 397215 4. 713131  
2. 042648 1. 932173 1. 772865 2. 076864 1. 934634 1. 464251 1. 28924 1. 392372 1. 080514  
5. 609673 5. 356457 3. 744831 4. 409686 4. 745865 4. 094594 4. 422786 4. 747813 4. 555832  
2. 317123 1. 859555 2. 299682 1. 496111 1. 947723 2. 114823 1. 522476 1. 674412 1. 610699  
1. 860479 1. 970581 1. 562738 1. 591993 1. 939087 1. 51173 2. 927476 1. 130136 1. 76917  
4. 45417 5. 300824 5. 00355 5. 24142 5. 070245 4. 504291 5. 192039 5. 448659 4. 781512  
1. 161124 1. 170935 1. 041582 1. 307186 1. 105746 1. 409433 1. 085024 0. 92616 1. 045693  
6. 023755 5. 81514 5. 377504 5. 82321 5. 759291 5. 469502 6. 271727 6. 200207 5. 715763  
3. 62076 2. 400534 2. 482457 2. 120041 2. 273925 4. 833874 4. 243226 4. 124549 4. 656653  
5. 283784 5. 854569 5. 481459 4. 969338 5. 340968 5. 535394 5. 471056 5. 70057 5. 338444  
8. 405191 8. 27763 8. 367896 8. 210292 7. 988723 8. 359625 7. 863028 8. 107625 8. 442133  
5. 622318 5. 895579 5. 409136 6. 147075 5. 371072 5. 531965 5. 420721 5. 248239 5. 398732  
6. 270118 4. 155562 5. 143259 4. 230255 4. 550887 3. 057312 4. 414144 3. 735647 5. 636987  
7. 74242 7. 655175 7. 741632 7. 379003 7. 944513 7. 971254 7. 267748 7. 399853 7. 493935  
5. 572594 6. 329014 5. 565556 6. 634238 5. 716559 6. 078984 6. 637222 6. 157619 5. 889279  
4. 01971 5. 584801 6. 170686 5. 217936 5. 874774 5. 642305 5. 241389 5. 297643 5. 960991  
2. 681179 2. 156016 1. 957115 3. 081251 1. 990805 2. 723844 2. 073506 1. 225731 2. 831452  
5. 444093 3. 886493 5. 485227 3. 413171 3. 975866 4. 580723 3. 939796 4. 173732 4. 679126  
6. 40132 7. 050539 7. 132674 6. 279929 7. 245071 7. 267665 6. 79613 6. 971665 7. 079339  
4. 848492 4. 958927 5. 735241 4. 845919 5. 805789 5. 491172 4. 991071 4. 176883 4. 978424  
6. 30519 5. 33693 7. 062506 4. 791712 6. 152082 5. 873101 5. 795345 6. 04753 8. 047729  
4. 390605 5. 181963 5. 060279 4. 97845 5. 486136 4. 382276 4. 812493 4. 840046 5. 381153  
2. 481783 1. 296879 1. 143118 2. 458749 3. 533753 2. 692364 0. 83916 3. 004939 1. 130451  
1. 863401 2. 858771 4. 520354 1. 835301 1. 867224 2. 541565 2. 175197 4. 592877 3. 062259  
6. 580067 4. 052153 3. 611081 3. 307429 5. 094429 3. 039403 2. 983986 3. 222834 4. 848305  
6. 061468 6. 365691 6. 562876 6. 481521 6. 483292 6. 659195 6. 152362 6. 860807 6. 189669  
8. 251425 8. 352361 8. 457184 8. 489258 8. 484658 8. 735925 8. 42495 8. 260512 8. 471268  
3. 225152 3. 855829 4. 123026 4. 574981 3. 443542 4. 296091 2. 899031 4. 39324 4. 005363  
3. 010649 3. 946243 3. 293041 3. 277628 2. 506686 2. 556153 2. 50868 3. 168473 2. 824434  
5. 326314 6. 119871 6. 255545 5. 476625 5. 664667 5. 450136 4. 734922 5. 791821 5. 825369  
3. 649071 3. 7035 4. 08787 4. 344019 4. 86497 4. 324753 4. 274253 4. 158629 3. 687464  
2. 752258 3. 581859 3. 313877 3. 840352 3. 625738 3. 641812 2. 226964 4. 707094 3. 436023  
1. 455829 1. 961996 1. 891423 1. 800292 2. 816807 1. 956523 2. 192052 1. 728423 2. 227286  
4. 234068 4. 378066 3. 576918 4. 560018 4. 7058 4. 472006 4. 549726 4. 134755 3. 797125  
1. 585427 1. 324564 1. 635648 1. 507089 1. 58152 4. 574054 1. 643956 1. 600828 1. 302021  
1. 881177 1. 628386 1. 821459 1. 640285 1. 583149 1. 643058 1. 818662 1. 686642 1. 631039  
2. 043934 2. 523091 2. 126519 2. 681371 2. 390255 2. 398619 3. 27169 2. 288148 1. 211098  
4. 213983 4. 376905 5. 076284 4. 669887 4. 904481 6. 457703 4. 992211 5. 058784 4. 616132  
1. 887879 2. 603686 2. 157247 1. 685897 2. 627482 2. 779991 2. 502168 1. 957425 2. 94699  
6. 281031 6. 793414 6. 899691 6. 420239 6. 496232 6. 492198 6. 836774 6. 651261 6. 479567  
4. 975152 5. 630293 5. 453032 6. 302743 5. 861934 5. 889371 5. 448777 6. 27034 5. 557719  
8. 447845 8. 366781 8. 345478 8. 292052 8. 394815 8. 383361 8. 842979 8. 382198 8. 044475

3.058077 2.733925 3.560219 3.182688 3.708879 4.043571 3.301391 3.468389 3.578439  
2.557712 2.866672 1.927343 2.058253 1.838744 1.968461 2.399122 2.070738 1.802491  
3.862217 4.397185 3.619213 3.598524 5.550927 5.54016 4.838049 3.835006 2.696748  
6.059245 5.916731 5.776365 6.125825 5.656442 6.474809 6.012402 5.685677 5.727902  
10.29601 10.16367 9.58026 11.0049 10.47234 10.75613 10.64596 10.15412 10.44715  
6.544097 6.368067 6.783313 6.584243 6.739158 6.374149 6.556683 6.735677 6.805014  
5.716289 7.378047 7.232816 7.089033 6.833671 7.234331 7.243273 7.172932 7.436494  
7.225743 7.754066 7.947854 7.511712 7.548458 7.580673 7.670827 7.608769 7.608798  
2.766966 3.236288 2.308113 2.486258 3.007118 2.407524 2.959875 3.057745 2.909626  
2.905716 2.118325 2.415876 2.580504 2.163338 1.970383 3.122758 2.249282 1.871792  
2.626044 3.042054 2.129097 3.045877 2.460826 2.235389 2.980259 2.800619 1.855517  
7.063554 7.301134 6.814375 7.880693 7.550541 7.265388 7.530247 7.145268 7.328644  
3.258107 1.808693 2.359504 2.340206 2.988531 2.345603 3.360444 2.410214 2.328579  
5.658091 5.669802 6.083701 4.081793 5.458747 5.233331 6.433285 4.720765 4.189851  
3.909671 5.942811 4.784462 5.679748 6.231241 5.248401 5.764458 6.187858 2.391686  
2.093871 1.486589 1.467875 3.172172 1.313294 2.260846 2.668546 1.385315 2.725342  
3.885296 3.959479 4.435252 3.485403 4.074303 4.641966 5.000728 3.687124 3.288087  
8.800903 8.260267 8.644926 8.393655 8.281611 8.915158 8.211777 9.143036 8.661897  
7.172531 7.272803 7.091625 7.630819 6.732674 7.59521 7.373138 6.637217 6.719409  
2.70162 1.709132 2.98997 2.97438 1.89671 2.47271 2.182162 1.618514 2.379218  
8.388883 8.500046 7.993366 8.318078 8.107713 7.853802 9.008802 7.890348 8.634299  
3.660411 4.646908 4.632983 4.361879 4.96031 3.38653 4.998733 5.834427 4.945505  
8.888511 8.743351 9.283084 8.644114 8.62112 8.45094 9.086191 8.456784 9.142988  
3.766449 0.969015 0.524835 1.266574 1.301281 0.919624 3.229444 0.813044 1.193142  
0.826455 0.823941 0.90546 0.824905 1.05475 1.111411 0.910672 1.095748 0.8527  
4.148475 3.340062 5.864672 6.055806 5.402125 4.68207 6.104374 4.711615 5.415225  
0.915313 0.942822 1.35924 0.775354 0.709195 0.890688 1.452354 0.609373 0.985644  
5.103317 5.161204 4.860637 5.41313 5.268304 5.469119 5.057704 4.955528 5.367479  
8.319892 8.266287 8.043006 8.375894 8.666854 8.495682 8.142222 8.242297 8.221926  
7.630639 7.541509 7.888742 8.355028 7.536156 7.847152 7.934188 7.951558 8.354615  
2.852953 2.666862 2.640886 2.876253 3.489007 2.351745 3.589666 3.306437 3.181861  
7.578304 9.153446 8.374864 9.13721 9.316746 9.011096 9.212467 8.914052 9.017956  
8.53128 9.296731 10.00115 9.504469 9.520036 9.384731 9.458961 9.246489 9.104194  
4.496659 2.360878 2.530634 4.061268 2.393162 2.431213 3.759179 3.219368 3.748428  
3.462772 2.660325 4.062706 2.723243 4.289361 3.982811 2.749964 2.050991 4.469215  
6.322112 6.279888 7.006154 6.333398 6.586822 6.296349 7.49138 7.010315 6.965317  
7.578021 7.996164 7.45916 6.723262 7.563017 7.385436 7.573944 7.61965 7.436503  
5.847657 6.564 6.448575 6.229447 7.006043 7.02988 7.537112 6.278483 6.115819  
9.211811 8.831502 9.228028 9.261187 9.04584 8.905361 9.21135 8.555042 9.302043  
8.44669 7.648359 7.650919 7.765645 7.814159 7.634558 7.869338 7.972161 8.070473  
7.361192 5.999506 6.825671 5.969225 6.011883 6.003778 6.684581 6.106151 6.927036  
1.20983 1.338865 1.249624 1.068044 1.344454 1.304001 1.257758 1.450584 1.303225  
4.442058 4.804606 5.104537 4.76027 5.88495 5.030264 4.983243 5.068101 5.487629  
1.553792 1.49513 2.255884 1.287852 1.87035 1.891009 2.011589 2.259298 1.213873  
1.413974 1.474507 1.942157 1.769985 1.588725 1.905705 2.113916 1.801223 1.743706  
3.674716 3.234659 2.766042 3.1105 2.719123 3.01276 3.135837 3.272755 2.979766  
10.75052 10.50788 12.01701 10.02818 10.54124 10.6792 11.28614 10.04858 10.25204  
2.802183 2.802425 3.134126 2.62724 2.302889 2.493959 2.57684 2.004582 2.721048  
12.00616 11.81811 12.29913 11.43059 11.85973 11.45267 12.16416 10.83852 11.81797  
3.754846 2.935587 2.952376 2.941734 2.787932 3.286819 3.586292 2.899171 3.264469  
10.7609 10.72501 11.73148 10.74682 10.83699 10.63666 11.27316 9.598639 10.59969



1.132398 1.197327 1.050233 0.816118 1.31515 1.147847 1.370123 2.10084 1.861134  
1.796788 1.258208 1.102588 1.217873 0.874188 1.500118 1.737058 1.355109 1.44867  
2.835188 1.840643 2.614076 1.693343 2.68645 2.155185 2.812728 1.928597 2.286648  
3.258907 2.774338 4.185878 1.784916 2.62746 1.941049 3.291485 2.684104 2.481711  
8.81963 9.104931 8.761372 9.121078 8.247648 8.924195 8.733623 8.656436 9.088301  
1.366675 1.233217 3.325743 1.316517 2.102555 1.432218 1.916562 1.328605 2.21925  
5.30849 5.731126 5.193236 5.467479 6.005409 5.104912 4.958169 5.688538 5.692378  
3.54706 3.877453 3.421704 2.081459 3.796403 3.444964 2.43465 4.136741 2.556516  
6.144133 6.077471 6.104485 6.769782 6.685967 7.143513 5.975926 6.886973 6.308474  
4.664552 4.162699 4.030933 3.730261 3.57643 3.740441 3.775358 4.195959 4.396232  
4.876236 5.837872 6.127326 5.935371 6.26674 5.76897 6.480158 5.453327 5.411142  
2.722821 1.646542 2.024014 1.574289 2.60338 1.983538 1.576225 2.905356 1.880537  
3.613261 2.541792 2.774829 3.251372 2.516796 2.906328 2.840956 3.250809 3.259298  
1.542407 1.869146 1.786228 1.265103 1.63446 1.68827 2.606975 2.039008 2.112507  
1.940438 1.781091 1.952964 2.342727 1.609571 1.554422 2.073661 1.943153 1.849515  
5.811184 6.036716 4.994382 5.802663 6.218395 5.91287 6.001978 5.885917 6.311443  
6.867632 6.980567 6.791464 6.802217 6.579875 7.080744 6.113483 6.722297 6.750475  
7.351513 7.365176 7.436082 7.148503 7.63556 7.68248 7.600447 7.246269 7.182892  
1.587532 1.821996 1.334192 1.564124 1.452207 1.82371 2.967619 1.766204 1.877991  
5.480841 5.126868 5.08586 5.143944 5.190662 6.043096 5.596662 5.468408 5.26913  
7.872445 8.102149 7.987564 8.069418 8.252691 8.409397 8.030501 8.439588 8.250782  
4.556338 3.417766 3.781222 3.17009 3.481703 4.299439 5.194094 5.701122 3.402866  
1.326365 1.940066 1.549209 2.432614 1.767372 0.982515 2.174734 1.831572 1.540014  
3.715932 4.781913 4.091198 4.350629 3.769268 5.133707 4.217436 3.970112 4.01734  
8.647069 8.310672 7.816955 8.543391 8.726671 8.210093 8.079142 7.643684 8.343151  
8.178379 8.060019 7.920919 7.934405 7.840922 7.666328 7.687927 7.801109 7.843389  
6.231342 6.806037 8.197602 7.067785 6.712775 7.335536 8.200777 7.967991 7.344148  
2.669406 3.601531 3.789714 3.219728 3.239834 2.992942 3.934939 5.193722 3.546584  
6.933682 7.336566 7.103511 6.632369 6.809711 6.415535 6.74937 7.533125 7.419643  
1.101686 0.916075 1.097763 1.142099 0.728623 1.611271 0.526929 0.897556 1.068357  
1.7981 2.862028 2.843622 2.210951 2.275976 2.693628 3.534761 1.882561 2.542447  
2.836128 2.644545 3.550869 2.433426 2.366166 2.032393 3.420288 2.333256 2.622466  
1.926177 1.272247 1.316572 1.410479 0.835203 0.739771 2.09958 0.996656 1.125599  
2.424293 1.982254 2.15601 1.808981 1.813315 1.691418 1.954471 1.70799 1.852589  
5.67409 6.827396 6.601277 6.690735 6.931699 6.906707 6.16659 6.38781 6.47383  
1.961017 1.663845 1.268124 1.609409 1.810344 2.0262 1.947096 2.104581 1.371568  
1.362775 3.566924 2.586285 3.247204 2.687827 3.705662 4.292349 3.089314 4.502126  
2.585675 4.286368 4.005251 3.676781 2.96572 3.122952 3.496134 4.483219 3.945674  
2.482315 2.150286 2.991166 1.500247 1.276546 2.124829 2.208191 2.124206 2.464358  
7.780992 5.405474 6.335437 4.835777 4.423723 3.887282 4.530667 5.069336 6.807646  
2.504476 3.147646 2.224958 2.074012 3.928257 4.675905 3.099894 2.179158 3.770796  
3.043782 4.321083 4.200168 4.338291 4.445269 4.413102 3.776821 4.437441 4.29379  
2.04804 1.848026 2.194779 1.759127 1.290852 2.066918 2.328757 1.615684 1.645057  
3.218592 4.556352 4.525422 4.561018 4.125121 5.130847 4.255552 4.908205 3.609804  
4.355469 4.879437 4.670821 4.659992 4.862048 3.79487 4.343035 4.909543 4.375377  
5.752042 6.062739 5.57264 5.329768 5.125359 5.452271 5.777016 5.560213 5.656685  
1.357975 1.176911 1.442543 3.167258 1.800695 1.198751 3.407243 1.108118 1.587226  
6.535069 7.019377 6.748144 7.061221 6.545193 6.486323 7.153186 6.794514 6.736299  
5.560769 6.577741 5.835078 5.439309 6.011754 6.83282 6.220017 6.994467 6.480371  
2.8228 1.993867 2.088687 2.079516 2.224333 1.659088 1.54591 1.800385 1.77589  
6.797434 6.995412 5.932151 6.874956 7.092123 6.600223 6.696474 7.699158 6.741586

8.003479 7.940234 7.731568 8.466546 7.794317 8.776891 7.188811 7.80816 8.256014  
5.939809 6.807948 6.984188 7.506971 6.62887 6.873051 6.707386 7.024325 6.680698  
4.63811 4.090365 3.871358 4.164276 4.168517 4.122849 4.265552 4.492171 4.833085  
5.868677 6.266403 5.918713 5.997781 5.876651 6.223355 6.185998 5.647238 6.026767  
2.785389 2.587987 1.919309 1.936137 1.806326 2.433683 2.546834 3.513314 2.411708  
3.812989 3.63845 3.67381 4.038635 3.719384 3.927372 3.850288 4.157689 3.844309  
5.162147 4.931429 5.730896 6.13732 5.616762 6.016665 5.804454 5.181497 5.672128  
9.735272 9.685645 9.652162 9.900328 9.814429 9.726171 10.07866 9.792794 9.934179  
2.11851 1.439125 1.882253 1.764687 1.995436 1.827095 1.662074 2.197891 1.244518  
7.269614 7.998438 7.893952 7.785792 8.022307 7.945622 8.037481 7.753277 7.917158  
5.184329 6.202326 5.564926 7.089842 6.776569 6.708227 6.345723 6.023991 6.000208  
8.108497 8.325389 8.50406 8.803684 8.81311 8.319548 8.835938 8.517554 8.478787  
9.640823 9.348013 9.525265 9.499335 9.32749 9.255293 9.54688 9.663898 9.477295  
6.79607 6.736306 6.766969 6.510919 7.084015 6.78226 6.56735 6.676468 7.092105  
5.336139 6.42323 7.098776 6.957348 6.935898 6.810253 6.836152 6.773628 6.585947  
6.337614 6.908707 6.64395 7.304912 7.373425 7.06062 6.516 7.173364 7.006818  
5.705002 5.881715 6.058494 6.563698 6.239348 6.655351 6.353394 5.831426 5.884229  
4.194679 4.37044 4.149743 4.405586 3.933714 3.875038 4.211149 6.009602 4.79226  
6.965699 6.617488 5.763091 7.249077 6.75147 6.63965 7.042341 6.587735 7.416575  
5.926917 4.911453 5.349605 4.350918 5.141711 4.093164 4.9273 4.921668 5.254537  
1.555791 1.661257 1.780845 1.788619 1.507415 1.835897 1.55985 1.436912 1.588335  
4.980215 3.683018 4.567571 3.78501 3.722815 4.630033 4.358981 3.716524 4.301347  
7.281012 8.121331 7.825164 7.58182 7.440173 8.08892 7.945766 8.082076 7.794365  
8.022579 7.836361 7.993391 8.255182 7.887266 7.944762 8.166298 8.18617 7.50133  
9.447396 9.638949 9.238328 9.196344 9.916456 9.303377 8.976774 9.587448 9.017164  
8.575912 8.184159 7.710949 8.728099 7.827151 8.248267 8.595622 7.058119 7.906532  
5.710998 7.551152 6.857925 7.100205 6.629376 7.781323 6.941092 6.870364 6.243011  
8.592212 9.018634 8.927567 8.67941 9.094962 8.604386 8.919662 8.899801 8.849884  
3.395318 3.138622 3.208025 2.560021 3.350152 2.328307 2.852485 3.396384 2.87904  
5.77644 6.536962 5.634514 7.202215 5.829434 6.83938 6.143287 5.250493 5.494233  
2.033905 1.836577 1.738477 2.169149 1.432286 1.886298 1.918163 1.685948 1.846567  
9.408644 9.833101 8.725972 10.11157 9.765149 9.889021 10.32006 8.896743 9.102944  
7.030281 6.722862 6.744147 7.76499 7.45673 7.749457 8.046294 6.585449 6.072601  
2.916404 3.107571 2.137946 3.01808 2.353067 3.278106 2.910858 2.497356 3.420469  
9.144816 9.393245 7.106898 9.218452 8.301274 9.274394 9.862491 7.649372 8.144618  
4.7963 4.342556 3.07116 4.736815 3.316285 4.234694 4.931848 3.130699 3.729156  
5.068027 5.813705 4.629178 6.13652 5.483479 6.970597 6.862592 5.615489 5.622672  
5.579005 5.69162 5.491981 5.692378 5.842791 6.126732 5.798251 5.942986 5.616539  
3.491736 3.267334 3.052097 3.011816 2.954723 3.705726 3.07948 3.003714 2.866349  
9.811736 10.24002 9.371725 10.36567 9.980237 10.3696 10.39578 9.504655 9.892445  
7.463387 6.384508 6.049765 7.98666 5.766788 7.45586 7.60501 5.813835 6.292578  
7.887908 1.648974 1.275027 7.015197 1.450051 7.257973 7.404746 1.504217 2.914997  
4.125194 3.056137 3.269127 3.056479 1.973168 2.916285 2.716434 2.46289 3.587359  
4.227319 1.93304 1.541235 1.704788 2.874635 3.126763 1.723425 3.25682 3.046452  
6.76156 5.58643 6.016226 4.114754 5.142117 4.118295 3.97824 5.14024 5.473322  
9.006704 9.423479 9.271257 9.686417 9.276761 9.778532 9.195222 9.035849 9.125447  
6.98139 7.671006 7.092131 7.49026 7.325138 7.110704 7.323837 7.183508 6.91389  
3.792749 3.229732 3.778095 3.2102 3.020467 3.649294 3.31052 3.111876 3.264156  
5.485672 5.02346 4.948663 5.312825 3.525436 5.591222 5.304001 4.11464 4.165595  
1.391047 1.667367 1.434873 2.101778 1.37067 1.772358 2.010626 1.794661 1.870786  
2.960997 3.177375 3.072414 3.393856 2.257029 3.334493 3.025186 3.013517 2.944251

1. 5762 3. 304128 2. 242438 2. 464637 3. 446452 3. 660186 3. 153695 2. 33531 2. 199326  
5. 693759 6. 109687 6. 149021 5. 837996 5. 607379 6. 228216 4. 98564 5. 592603 5. 865677  
3. 356502 4. 707155 4. 45983 3. 845006 3. 204465 3. 958999 3. 53764 4. 099999 4. 302823  
4. 137555 4. 789655 4. 78964 6. 353891 5. 340153 6. 564485 5. 484065 5. 374628 5. 988993  
2. 082899 1. 813246 3. 355306 2. 782034 2. 427548 2. 89511 2. 363458 3. 125079 3. 44889  
4. 373333 5. 199696 5. 237567 5. 029899 3. 737661 5. 152061 3. 551298 4. 661994 4. 957145  
5. 729081 6. 382888 6. 219511 6. 448243 6. 335244 5. 795145 5. 714895 5. 765368 5. 747906  
3. 191607 3. 63478 3. 046374 3. 051316 3. 235192 2. 885499 3. 059747 2. 453699 3. 091808  
1. 828979 1. 798481 1. 542718 1. 353365 1. 444873 2. 249379 1. 835378 1. 37384 2. 637832  
3. 271222 5. 503825 4. 7913 3. 038229 3. 870002 2. 91178 2. 678297 4. 244676 4. 902668  
6. 220395 5. 063212 5. 652754 5. 149558 4. 988271 4. 975565 5. 516729 5. 391667 6. 00102  
5. 520448 5. 498047 4. 778932 6. 093328 5. 32158 6. 141616 5. 51034 5. 198604 5. 304308  
6. 523751 6. 545365 6. 649078 5. 563797 6. 241482 6. 679541 6. 446125 6. 432442 6. 140576  
3. 891016 2. 930372 4. 3208 2. 396893 2. 819085 2. 252493 2. 578218 2. 718008 2. 708154  
4. 29975 4. 155208 4. 247085 3. 514665 4. 178979 4. 845707 4. 237406 4. 707203 5. 101034  
2. 253841 1. 926731 1. 848194 1. 727924 2. 206132 2. 731565 1. 820575 2. 742621 2. 229501  
7. 35569 6. 392528 7. 125506 5. 853612 5. 844279 5. 844582 5. 82031 6. 25052 7. 606336  
5. 891764 6. 213133 5. 677121 5. 925187 5. 675392 5. 953478 5. 643759 6. 195502 6. 015517  
3. 793781 3. 539646 3. 525848 3. 852913 4. 143818 4. 0578 3. 811273 5. 321244 4. 908341  
2. 991365 2. 443068 2. 765952 2. 017704 2. 178344 2. 666681 3. 257772 2. 589925 2. 802819  
1. 899159 1. 371338 1. 893574 1. 56359 1. 835245 1. 780205 1. 729248 1. 333997 1. 915872  
1. 555727 1. 494844 1. 801516 2. 943385 1. 668668 1. 870683 2. 898999 2. 182463 2. 741818  
6. 286259 4. 99105 4. 966616 3. 585127 4. 659662 3. 844848 3. 356788 4. 29349 4. 86872  
2. 763113 2. 425041 2. 789109 2. 616482 2. 446696 2. 601837 2. 869178 2. 536304 2. 276231  
2. 421289 2. 498406 2. 359636 2. 842258 2. 361754 2. 112498 2. 927535 2. 795912 2. 83037  
5. 20192 4. 152693 5. 32078 4. 534122 3. 973095 3. 780098 4. 079355 4. 543532 5. 671743  
6. 818037 3. 181496 4. 826368 2. 843835 3. 046722 1. 692188 2. 84197 2. 815507 4. 535373  
1. 781094 1. 320941 1. 482354 1. 140422 1. 318432 1. 582619 1. 168562 1. 318999 1. 418417  
3. 378526 3. 790102 3. 493717 2. 929345 3. 656222 3. 554943 3. 488637 4. 570101 3. 815835  
6. 098953 5. 323479 4. 68147 5. 649265 4. 884178 5. 671405 4. 771361 4. 834669 5. 491214  
5. 828509 6. 198814 5. 862872 6. 18089 5. 84961 5. 871271 5. 947014 6. 051748 5. 609991  
1. 914232 1. 204347 1. 402752 3. 077205 1. 117303 2. 352138 0. 855609 2. 050065 1. 793752  
7. 314228 6. 291642 6. 659519 6. 253685 6. 748579 4. 576642 6. 298093 5. 695373 7. 162857  
1. 319871 1. 55323 1. 218985 1. 741209 1. 481957 1. 321423 1. 669293 2. 028882 1. 079765  
1. 782839 0. 851273 1. 048616 1. 248678 0. 87484 0. 602852 1. 324055 0. 641 1. 22322  
1. 400523 1. 07838 1. 22976 1. 69202 1. 205098 1. 552187 1. 586415 1. 456996 1. 113001  
1. 609118 1. 471157 1. 641269 1. 738264 1. 417456 1. 52247 2. 144222 1. 598484 1. 275677  
1. 789633 1. 728535 1. 450601 1. 282356 2. 223695 2. 037714 1. 37073 1. 591388 1. 596384  
2. 703426 1. 883315 1. 430803 1. 189484 2. 185308 1. 670743 1. 857019 1. 337473 1. 701114  
3. 636226 3. 999655 2. 790203 2. 894651 2. 960234 2. 178459 2. 495316 3. 534823 4. 481562  
1. 978606 1. 919075 1. 419733 1. 640122 1. 70105 1. 384627 1. 831207 1. 773227 1. 524966  
1. 37344 0. 982915 1. 10739 1. 294241 0. 948728 1. 085365 1. 121053 0. 795214 1. 012828  
4. 720822 5. 941925 4. 824621 5. 365169 5. 312046 5. 395325 5. 593902 5. 822707 4. 823521  
8. 311832 8. 660535 8. 531979 8. 18157 7. 399555 8. 394359 8. 518448 8. 239815 7. 88843  
2. 532727 2. 501429 2. 770761 3. 524676 3. 616073 2. 853264 3. 08755 2. 99907 2. 637895  
3. 800332 3. 115606 2. 672964 3. 522095 2. 203549 3. 820751 2. 80837 2. 791268 2. 230595  
7. 993121 7. 394901 8. 16275 7. 08149 7. 448894 7. 647442 6. 990877 8. 220757 7. 766173  
4. 119658 4. 434558 4. 119526 4. 485332 4. 156697 4. 501458 3. 482771 4. 501503 3. 897464  
9. 134866 9. 450734 9. 230398 9. 270727 9. 15007 9. 299304 9. 060814 9. 072316 9. 165414  
7. 774126 7. 510701 7. 70056 7. 429152 8. 008607 7. 709594 7. 758899 8. 21622 7. 664058  
6. 373106 7. 11849 7. 395909 5. 921906 6. 61291 7. 173464 7. 094818 7. 169017 6. 975505

9. 202656 9. 205284 9. 381417 9. 571137 9. 491271 9. 234537 9. 292852 9. 227455 8. 975102  
6. 3618 6. 166553 6. 103567 6. 410615 6. 141839 6. 223208 6. 623456 6. 111954 6. 178816  
8. 097363 8. 563157 8. 524165 8. 406198 8. 702831 8. 710503 8. 349279 9. 022103 8. 477102  
9. 535456 9. 538369 9. 686782 9. 637611 9. 787782 9. 638114 9. 435442 9. 728087 9. 65887  
3. 169306 3. 777951 4. 89724 3. 84791 4. 165788 4. 208513 3. 891639 4. 455206 4. 471839  
1. 845407 1. 54562 2. 292067 1. 997678 1. 21782 1. 231006 1. 866432 1. 702765 2. 038729  
1. 455375 1. 597899 1. 351459 1. 828589 1. 339333 1. 246295 1. 690075 1. 008988 1. 525991  
10. 32364 10. 23724 10. 38275 10. 22874 10. 00245 10. 04102 10. 13161 10. 39621 10. 28338  
1. 318589 1. 106587 1. 084601 1. 14471 1. 133445 1. 393629 0. 800941 1. 179616 0. 887536  
1. 734414 1. 328673 1. 666519 1. 125282 1. 52953 1. 354232 2. 505285 1. 297214 1. 48559  
2. 755527 1. 995082 2. 80473 1. 132482 3. 422254 2. 020731 1. 214698 2. 916095 3. 397505  
1. 464978 1. 52248 1. 289973 1. 004321 1. 291545 1. 70544 1. 70854 1. 645339 1. 181912  
7. 804085 7. 899679 7. 621627 7. 793172 7. 675226 7. 816017 7. 589057 8. 013081 7. 570175  
8. 918528 8. 770966 8. 734134 9. 091939 8. 887694 9. 02993 8. 831961 8. 983775 8. 766953  
1. 668646 1. 321109 1. 099457 0. 88342 2. 366755 1. 148361 2. 481985 1. 761877 1. 648128  
1. 629521 1. 253435 3. 086435 2. 757653 1. 49369 2. 159224 2. 798595 2. 60439 2. 841998  
2. 578472 5. 23502 2. 88373 2. 533745 3. 394353 4. 810837 3. 606254 5. 755821 3. 559799  
2. 239951 2. 464796 2. 621081 2. 932227 2. 321606 3. 836609 3. 386798 3. 148283 3. 000241  
2. 570753 2. 17159 2. 285364 2. 580314 2. 168061 1. 704454 2. 314955 2. 251096 2. 255977  
4. 884491 4. 963957 5. 190072 5. 252493 5. 261016 5. 329655 4. 54748 5. 18769 4. 983719  
2. 716815 3. 00569 2. 846107 2. 294505 3. 204541 3. 582783 2. 00873 2. 839323 2. 491157  
5. 159269 5. 663194 5. 575824 5. 443493 5. 560684 5. 061572 4. 677312 5. 583781 5. 245588  
6. 328235 6. 379829 6. 753315 6. 284464 6. 237021 5. 637832 5. 548353 6. 117766 6. 032094  
3. 156797 3. 305157 3. 898773 3. 042089 3. 79711 2. 703438 3. 93033 3. 33541 3. 421342  
6. 77241 7. 293888 6. 788521 6. 787982 7. 420752 6. 754982 7. 010206 7. 368929 6. 945386  
3. 479211 3. 452154 3. 203367 5. 634685 4. 702886 4. 178834 3. 493792 4. 727719 3. 856519  
5. 448382 5. 965544 5. 852151 5. 984345 6. 355846 5. 925555 6. 049581 6. 340464 5. 900466  
2. 218693 2. 973806 2. 381579 3. 583132 3. 337359 2. 947958 3. 328015 2. 189491 3. 577551  
2. 036207 4. 134413 1. 17381 2. 761316 1. 307293 1. 536041 2. 993746 1. 374662 1. 575885  
1. 900337 2. 499229 3. 081092 2. 775581 2. 634724 2. 496613 3. 798846 3. 319951 2. 377243  
4. 984349 6. 457882 6. 454172 5. 890034 5. 63567 6. 833117 5. 210271 6. 050864 5. 844385  
2. 518753 2. 520353 2. 533407 3. 239117 2. 103877 3. 327154 3. 629407 2. 597944 2. 588422  
7. 209624 7. 491254 7. 553106 7. 487787 7. 272799 7. 795635 7. 935643 7. 500726 7. 672387  
3. 409014 2. 886682 4. 387211 3. 917343 3. 350542 3. 250528 3. 637914 3. 46391 2. 447398  
2. 40975 2. 720558 2. 3257 2. 813784 3. 197642 3. 385168 2. 624262 3. 396205 3. 708096  
3. 264694 3. 836766 3. 628935 5. 105452 3. 403491 4. 365233 3. 851792 3. 539233 3. 463983  
2. 923569 4. 397948 3. 715126 4. 294373 3. 763306 3. 720025 3. 968029 3. 0961 4. 049244  
6. 89384 6. 576122 6. 116976 6. 978566 6. 505777 6. 417567 6. 378787 6. 470834 6. 157854  
4. 340124 3. 674834 3. 714583 3. 452317 4. 320479 3. 709764 4. 174751 3. 441643 3. 589182  
3. 20996 2. 765288 3. 563661 3. 38309 3. 071868 3. 434032 3. 470566 3. 30207 3. 719297  
2. 875104 2. 554134 2. 553746 1. 917327 1. 311849 2. 461589 1. 718333 1. 658566 1. 852694  
4. 690463 6. 332445 6. 580023 5. 125902 5. 934482 5. 481224 5. 136427 5. 917777 5. 216932  
4. 332959 3. 005068 3. 86251 4. 666688 3. 705616 3. 182367 3. 183731 3. 635275 3. 619712  
5. 264993 7. 550326 6. 186215 7. 510605 7. 170143 7. 109056 7. 198181 7. 518875 6. 964808  
1. 870441 2. 703542 3. 241092 2. 109917 5. 433118 3. 046629 3. 310777 2. 510155 3. 314336  
4. 285003 4. 273694 4. 264555 5. 272943 4. 793737 3. 209863 4. 550196 4. 139743 4. 52586  
4. 04589 5. 363619 5. 40448 4. 599882 4. 847394 5. 529962 4. 947354 4. 269465 5. 433166  
1. 660186 1. 860694 2. 4523 4. 083312 2. 435188 1. 989592 3. 53363 3. 02312 2. 26087  
2. 602533 0. 922969 1. 860174 1. 192674 1. 66557 1. 69211 3. 52968 1. 286093 1. 249621  
2. 020095 2. 21412 1. 856915 2. 048697 2. 012315 1. 994723 2. 421825 2. 554562 2. 100819  
3. 761091 4. 572987 4. 998357 4. 164413 4. 629776 4. 1996 4. 05107 4. 899069 4. 015346

3. 568443 3. 528732 4. 616088 3. 814444 5. 11642 3. 820357 3. 126123 4. 309843 3. 880954  
2. 663562 4. 227098 3. 793578 2. 412227 3. 944087 2. 562181 2. 955964 4. 398478 3. 193785  
3. 038995 3. 653722 2. 806332 3. 441385 2. 35006 3. 430299 3. 333746 3. 876655 3. 475674  
3. 8364 3. 804849 3. 846607 3. 05834 3. 873642 3. 937169 3. 767201 4. 147864 3. 792645  
4. 452709 3. 524939 4. 754598 3. 946611 3. 831082 3. 138488 3. 68068 3. 377693 3. 91124  
4. 402371 4. 120707 4. 583472 3. 210291 4. 726199 5. 635551 3. 999608 3. 751084 4. 393288  
3. 593456 3. 484973 4. 08096 3. 850726 2. 815536 3. 534654 4. 099522 3. 233147 3. 665145  
2. 895125 2. 325225 1. 707709 2. 856814 2. 029692 1. 489492 2. 66623 2. 202628 1. 293853  
1. 76133 2. 035939 1. 175853 1. 116723 1. 011106 1. 601518 1. 521961 0. 859912 1. 150071  
7. 399227 8. 293955 7. 960861 8. 628468 8. 561567 8. 440589 8. 192114 7. 931218 8. 059442  
1. 358287 0. 833994 1. 828922 1. 464618 1. 576917 1. 405909 0. 542472 0. 916344 1. 491999  
3. 940685 4. 166573 3. 663785 4. 497993 3. 932276 4. 49842 4. 280938 3. 740941 4. 500926  
7. 376907 7. 294274 8. 058158 6. 636059 7. 151748 5. 594382 6. 9465 7. 437158 8. 535228  
8. 510193 9. 332759 8. 921232 8. 322189 9. 178592 7. 686309 9. 6689 8. 976639 9. 868716  
4. 842544 3. 846421 4. 635569 4. 144381 3. 690503 4. 322667 3. 47014 4. 36101 5. 625316  
4. 27444 5. 674591 5. 441042 4. 982454 5. 155438 5. 68767 4. 759722 4. 96443 4. 753189  
2. 624208 0. 921604 1. 78901 1. 329789 1. 037754 1. 022362 1. 65322 0. 725181 0. 912788  
5. 354402 6. 102215 6. 226453 5. 430806 5. 910858 5. 549052 6. 042238 6. 240629 5. 614044  
4. 590787 3. 961209 4. 669766 4. 004951 4. 106042 4. 387228 4. 493028 4. 886477 4. 754567  
1. 454122 2. 107488 1. 623682 1. 626558 2. 218763 2. 160062 1. 561761 1. 38558 1. 194562  
1. 87764 1. 381656 0. 988551 1. 871998 1. 238402 1. 293762 1. 561484 1. 22043 1. 463799  
2. 370556 1. 42626 1. 793095 1. 467941 2. 043933 1. 371339 1. 750378 1. 387552 0. 904184  
2. 221505 1. 341195 1. 798731 1. 602191 1. 307337 1. 85116 1. 742614 1. 277397 1. 672451  
2. 273621 4. 41551 3. 842294 3. 517763 2. 789183 4. 204415 3. 281704 3. 832319 2. 646888  
1. 622728 1. 982041 1. 690502 1. 819079 2. 017367 2. 0192 2. 486917 1. 876517 1. 774622  
5. 930007 6. 017561 5. 789794 6. 403303 6. 745707 6. 084369 6. 642016 7. 43425 6. 597253  
3. 178423 2. 892286 2. 306523 2. 632664 3. 057436 2. 866687 2. 343109 3. 231291 2. 358677  
7. 069556 5. 802412 6. 155853 5. 978521 5. 59857 5. 311287 6. 244959 5. 569916 6. 2619  
1. 732977 1. 503145 2. 345675 2. 118251 1. 816109 2. 056368 2. 262089 1. 675362 2. 139387  
6. 275685 6. 990129 7. 424214 7. 035145 7. 046664 7. 327418 7. 252962 7. 381804 7. 33646  
4. 256602 4. 855964 5. 530042 5. 81929 4. 744424 6. 233185 5. 04002 5. 03257 5. 741556  
2. 333894 2. 354559 2. 897335 3. 394865 2. 988129 2. 499503 2. 071205 3. 300782 2. 247485  
2. 858629 2. 446582 2. 821292 2. 298614 2. 083809 1. 934038 2. 448802 2. 218499 2. 578745  
3. 943106 4. 761853 4. 343164 4. 207577 4. 496541 3. 476009 4. 477163 3. 316012 3. 778168  
3. 826267 1. 392795 2. 130564 2. 175391 3. 45084 1. 068305 2. 107322 3. 393908 4. 177964  
2. 523548 1. 786232 1. 763548 2. 093589 2. 800648 2. 579395 2. 528615 2. 79004 2. 207302  
6. 350629 7. 627148 7. 002979 6. 54867 7. 591225 6. 831713 6. 321577 6. 973811 6. 680927  
1. 79076 1. 352843 2. 145547 1. 664746 1. 615631 1. 448818 1. 767124 1. 502026 1. 624019  
5. 968307 6. 340015 5. 737024 5. 355653 6. 16652 5. 439175 5. 736685 6. 36351 5. 588343  
6. 754037 6. 507453 6. 471338 5. 97287 7. 018411 6. 825537 6. 151539 6. 698071 6. 895673  
7. 187547 7. 535051 6. 876262 7. 917641 7. 473926 7. 175924 7. 148423 7. 621424 7. 24559  
9. 266325 9. 376324 9. 487692 9. 512099 9. 46475 9. 586729 9. 69546 9. 646736 9. 523246  
1. 688057 2. 283647 1. 647834 1. 118252 0. 815238 1. 936319 1. 178426 1. 70525 2. 017522  
0. 991999 1. 388696 1. 195196 2. 151084 1. 019966 1. 353162 1. 370186 0. 871249 1. 303047  
7. 072501 6. 973769 6. 641977 6. 725352 6. 716205 6. 846877 6. 820859 6. 741429 6. 85595  
3. 43425 2. 718461 2. 671056 2. 888941 2. 666304 2. 323639 3. 508269 2. 321377 2. 250706  
6. 778966 5. 108337 6. 108862 4. 821807 4. 541006 5. 388826 5. 392447 3. 525257 6. 089827  
2. 778115 3. 743791 2. 959692 2. 667077 3. 853072 3. 275255 3. 787569 4. 118645 3. 886812  
1. 986599 1. 52541 1. 54483 1. 915378 2. 014489 1. 63892 2. 069993 1. 71069 1. 476404  
2. 277803 1. 443408 2. 02615 3. 477901 3. 24673 1. 720872 1. 812037 1. 959835 1. 864524  
7. 934794 7. 854237 8. 013967 8. 35292 8. 395982 8. 028271 8. 223328 8. 043716 8. 037578

4. 75568 5. 380762 4. 557251 5. 786327 6. 276901 5. 923747 5. 509395 4. 914395 5. 581303  
4. 344645 5. 378703 4. 903678 4. 645389 4. 819324 5. 346449 4. 559031 5. 213488 4. 422602  
2. 991194 2. 761305 1. 644472 2. 597383 2. 564392 3. 238701 3. 556897 2. 514107 2. 719488  
5. 708171 6. 276846 5. 934247 5. 599555 5. 95794 5. 838035 5. 63024 6. 061593 5. 536836  
4. 092207 4. 786009 4. 733315 5. 119007 4. 467517 4. 271945 4. 813652 4. 707489 4. 45331  
3. 828772 4. 20781 4. 7035 4. 15655 3. 712085 4. 62732 5. 007733 4. 694048 4. 936742  
8. 415766 8. 848627 8. 564183 8. 780522 9. 009555 8. 849718 8. 815379 8. 781827 8. 648206  
9. 647945 9. 213718 8. 999778 9. 234899 9. 095955 9. 472918 9. 611269 9. 490134 9. 331665  
9. 728472 9. 897986 9. 906621 9. 676669 9. 719835 9. 876678 9. 7147 10. 31126 9. 99605  
3. 786577 3. 647407 3. 46984 3. 100446 3. 855336 3. 13328 3. 513965 2. 611756 3. 341787  
5. 33642 5. 971994 6. 17196 5. 972225 4. 588586 6. 083339 6. 128346 6. 267459 7. 135843  
6. 891548 7. 205384 7. 226092 7. 242877 7. 479889 7. 168013 7. 415331 7. 274487 7. 208406  
9. 319613 9. 305212 9. 338308 9. 601143 9. 839069 9. 670164 9. 594045 10. 02322 9. 836289  
4. 437044 4. 82638 5. 055286 4. 710233 5. 100376 5. 153821 5. 085266 5. 46069 4. 411163  
3. 913568 3. 026036 3. 355716 3. 390117 3. 528513 2. 848016 4. 255878 3. 847595 3. 470875  
1. 400651 1. 497142 1. 821619 1. 745263 2. 410648 3. 262824 1. 409703 1. 579691 1. 789002  
10. 79289 10. 54009 10. 33085 10. 61852 10. 53913 10. 76371 10. 67545 10. 5299 10. 80293  
9. 01507 8. 424222 8. 731043 8. 414099 8. 885595 8. 659717 8. 72303 8. 753012 8. 995602  
8. 713983 8. 39695 8. 025812 8. 694753 8. 717221 8. 706644 8. 000368 8. 952508 8. 782543  
5. 740102 6. 406773 5. 955491 5. 188687 6. 321419 6. 427087 6. 53896 7. 112169 5. 521916  
5. 216222 4. 287751 4. 52496 4. 87792 4. 794916 4. 481817 4. 111221 5. 316557 5. 033507  
6. 020227 5. 818995 5. 760746 5. 866502 6. 0227 6. 124416 5. 810441 5. 844224 5. 920256  
4. 008872 3. 427332 3. 285479 3. 590653 3. 90776 3. 672954 3. 618089 3. 562261 3. 665678  
10. 53424 10. 53882 10. 4113 10. 78133 10. 41711 10. 63132 10. 74459 10. 41141 10. 53228  
8. 873559 7. 692825 8. 412292 7. 629481 7. 772828 7. 415789 7. 421603 7. 790943 8. 638154  
3. 716841 2. 430449 2. 374631 2. 282936 1. 806592 1. 94938 3. 11716 2. 433083 1. 86554  
5. 028378 5. 111842 4. 786576 4. 859255 5. 014052 5. 596926 4. 837687 4. 881286 5. 7063  
6. 987939 7. 172293 7. 105709 7. 333144 6. 821596 6. 887532 7. 029074 7. 00327 7. 346843  
2. 946914 2. 316911 2. 923136 3. 941739 1. 734384 1. 713929 2. 890553 2. 086334 3. 113042  
3. 110257 2. 803518 2. 889069 2. 685649 2. 627073 2. 644363 2. 442849 2. 903068 2. 544  
5. 189937 3. 912649 4. 716339 6. 361691 5. 708427 5. 168634 7. 047253 4. 813787 5. 570628  
3. 946032 4. 611548 4. 658643 4. 863205 4. 376215 4. 807063 4. 74072 4. 917219 5. 258266  
5. 623295 5. 836393 5. 105554 5. 551376 5. 316775 6. 450764 5. 255715 5. 522663 5. 682316  
5. 444426 7. 036138 6. 391993 6. 996282 6. 615778 6. 291227 6. 182557 5. 770499 6. 606925  
1. 42435 0. 979701 0. 445382 0. 670803 1. 2186 0. 908726 1. 050519 0. 620704 0. 528072  
1. 051316 1. 059794 1. 44571 0. 835921 0. 895669 0. 929742 1. 377226 0. 939827 1. 787732  
9. 989885 9. 859934 10. 22569 10. 02767 10. 15149 10. 22016 9. 821085 10. 03213 9. 976878  
2. 955584 1. 110335 1. 795549 1. 865759 1. 423169 1. 748457 1. 685591 1. 986436 2. 035788  
2. 130202 1. 386 2. 243758 1. 838027 1. 540875 1. 467704 2. 227957 2. 913184 2. 765181  
1. 962461 1. 159064 1. 556341 1. 104096 1. 066614 0. 953646 1. 131921 1. 329036 1. 002149  
1. 535994 1. 421534 1. 952717 1. 315658 0. 95315 1. 212471 1. 565693 1. 680588 1. 258106  
1. 610265 1. 147161 1. 318153 1. 912062 1. 055806 1. 710978 2. 171861 1. 288761 1. 348401  
1. 773576 1. 53631 0. 860667 1. 672025 2. 034724 1. 022131 1. 796255 1. 227992 1. 40194  
4. 520203 3. 643461 4. 239114 4. 233204 5. 017016 5. 143622 4. 923405 3. 82452 4. 382748  
1. 4043 1. 072056 0. 964128 1. 816153 1. 668464 1. 323063 1. 275163 1. 237853 1. 784196  
1. 734918 1. 872203 1. 623424 2. 092138 1. 413046 1. 23831 2. 351892 1. 458792 1. 310168  
2. 456537 1. 953684 3. 526556 1. 79989 1. 825769 3. 112677 2. 760533 2. 08823 2. 336793  
2. 050297 1. 369709 2. 47685 1. 565809 1. 609534 1. 889282 1. 799223 2. 054125 2. 384428  
1. 6492 1. 564888 1. 024106 1. 258998 1. 354978 1. 769593 1. 2736 1. 461823 1. 695643  
2. 004745 1. 174836 1. 557907 2. 420266 1. 346822 1. 514414 2. 951884 1. 29488 1. 3928  
2. 265287 1. 970477 1. 819814 1. 703485 2. 2587 2. 498965 1. 901452 2. 69395 1. 564347

5. 112769 6. 375834 5. 749169 6. 71498 6. 468571 6. 123456 6. 276441 5. 763899 6. 786205  
2. 148395 3. 41795 1. 94029 1. 728681 1. 983142 2. 409042 3. 109061 2. 027968 2. 362522  
6. 189216 6. 207479 5. 518879 7. 64172 6. 511951 6. 56474 7. 816699 6. 509041 6. 369661  
4. 592397 3. 992637 5. 313897 4. 099758 5. 261958 4. 250557 5. 251916 3. 742013 4. 821654  
1. 273305 1. 409891 1. 648455 1. 421928 1. 293694 1. 606594 1. 299311 1. 390394 1. 497454  
7. 060464 7. 572741 7. 23905 7. 316806 7. 58006 7. 871011 7. 489813 7. 763662 7. 32516  
4. 911303 5. 065717 5. 145318 4. 412339 5. 0469 5. 350636 5. 176824 5. 107605 5. 521189  
3. 981236 3. 371024 2. 373214 2. 05392 2. 681851 2. 552672 3. 15766 2. 076053 1. 681923  
6. 821566 6. 37163 4. 611164 6. 778087 6. 628249 5. 688566 6. 340426 6. 581678 6. 645401  
1. 960984 2. 431838 1. 723777 2. 362414 1. 746158 2. 399494 2. 275757 1. 960099 1. 426216  
1. 769791 1. 503819 1. 339602 0. 92675 1. 480881 1. 657193 1. 312843 1. 355999 0. 872489  
1. 606172 1. 347626 1. 247128 1. 754712 1. 372877 1. 520725 1. 647964 1. 628866 1. 624133  
1. 98759 2. 221729 1. 868177 2. 046555 1. 834137 2. 008384 2. 42167 1. 666886 2. 598451  
1. 391212 1. 274083 1. 000509 1. 23738 1. 122749 0. 938114 1. 099102 0. 636302 1. 532406  
3. 244201 1. 303654 1. 651421 1. 615553 2. 058726 2. 753855 2. 330422 1. 502681 1. 697963  
1. 402646 1. 766445 2. 106847 1. 945198 2. 029729 1. 813201 2. 303274 2. 099628 1. 767392  
2. 235774 3. 227364 2. 279363 3. 020372 1. 785913 2. 485989 2. 423136 3. 301409 2. 773838  
0. 739134 1. 280079 1. 171372 2. 151703 1. 437112 1. 423556 1. 85548 1. 236473 1. 826667  
0. 602759 1. 146578 1. 639503 0. 8587 0. 563533 0. 770442 1. 500766 0. 938388 0. 92073  
1. 224392 1. 315145 0. 630984 1. 207751 1. 256532 0. 849127 1. 240481 0. 85911 0. 648258  
0. 856946 0. 851096 1. 110621 1. 143958 1. 391352 1. 344961 1. 476676 0. 757748 1. 383855  
1. 944126 1. 214991 2. 140326 3. 249951 1. 646605 2. 093625 4. 74662 2. 209331 3. 770378  
1. 216329 0. 832468 0. 998427 1. 259734 0. 965666 1. 05514 1. 205186 0. 987496 0. 867395  
2. 084432 0. 807098 0. 990258 1. 815581 0. 990819 1. 855953 2. 717013 1. 493754 1. 777285  
3. 117181 2. 319532 4. 629457 3. 135942 3. 051789 3. 304601 2. 852939 4. 184639 1. 917415  
3. 848534 2. 210283 3. 164275 0. 40813 2. 078701 3. 078101 4. 049657 2. 656241 1. 925038  
1. 078159 1. 62324 0. 842025 1. 013171 3. 127327 1. 731902 2. 633781 0. 758303 0. 77636  
1. 072743 0. 827589 1. 140286 1. 149455 0. 650278 1. 038876 2. 113442 0. 809129 0. 802328  
1. 395087 0. 844954 1. 182203 1. 527628 1. 315321 1. 502375 1. 855837 0. 97047 1. 385367  
1. 444667 1. 221589 2. 183247 1. 415469 1. 434793 1. 440858 1. 829793 1. 474817 1. 576498  
2. 080512 3. 093966 2. 258784 2. 556642 1. 929674 2. 405834 2. 175491 2. 429966 2. 247469  
1. 200909 1. 019843 1. 259736 1. 507549 1. 59496 1. 974828 1. 101759 1. 439262 1. 560821  
2. 835514 1. 457132 1. 952077 3. 038632 1. 731498 1. 726329 1. 94956 1. 952077 2. 179699  
6. 531139 6. 348625 7. 302813 5. 365411 6. 02708 5. 808768 5. 818825 6. 302141 8. 102748  
1. 19933 1. 361112 1. 368855 1. 080603 1. 156654 1. 114037 1. 280064 1. 418622 1. 568725  
5. 258322 5. 885131 4. 978221 4. 281463 4. 40668 4. 295345 5. 50611 4. 969008 5. 112604  
1. 190818 1. 425613 1. 619015 1. 813671 1. 217599 1. 481645 1. 857662 1. 932644 1. 479779  
1. 305782 0. 850309 1. 779489 1. 512979 0. 909571 1. 322419 2. 180522 0. 847892 1. 461471  
2. 121991 1. 242227 1. 335533 1. 3067 1. 426555 1. 04806 1. 045442 1. 459097 1. 18116  
2. 466124 1. 473527 2. 351333 2. 92023 4. 121984 1. 418488 2. 854867 2. 484872 1. 499173  
3. 55317 3. 304814 3. 212796 4. 618786 2. 887739 3. 485279 4. 421942 4. 445486 3. 611376  
1. 18014 1. 279679 1. 260229 1. 230163 1. 383506 1. 421465 1. 185537 1. 202489 1. 623799  
1. 324577 0. 98413 1. 135309 1. 010858 1. 159959 1. 130276 1. 031788 1. 256207 1. 024231  
3. 165089 2. 505738 2. 534374 2. 43113 2. 2017 2. 623063 2. 122309 3. 095251 3. 455983  
2. 251795 1. 385305 1. 484401 1. 530282 2. 495858 1. 754327 2. 134455 1. 996586 1. 582467  
4. 400429 5. 449182 5. 717435 5. 738312 4. 659559 6. 049324 5. 330695 5. 278918 4. 88313  
2. 128067 2. 138361 1. 759551 1. 808384 2. 418683 2. 161362 1. 910602 1. 426327 1. 613719  
2. 329873 1. 502827 1. 640202 1. 906545 1. 247311 2. 3878 1. 679227 2. 502924 1. 319644  
1. 134572 0. 493384 1. 474744 1. 302657 1. 889089 0. 994124 1. 412767 1. 695386 2. 714825  
7. 008927 7. 393773 6. 995136 8. 179347 7. 817872 7. 655566 8. 192508 7. 339341 7. 388981  
1. 515421 2. 100105 1. 705859 1. 820993 2. 008533 1. 60133 1. 323278 1. 921312 1. 042812

2. 142584 1. 807776 1. 837493 1. 792541 2. 178781 1. 963558 2. 133056 1. 364628 2. 053376  
1. 520733 1. 067909 0. 84342 1. 561686 1. 548826 1. 541854 1. 838794 1. 157216 1. 475053  
1. 467401 1. 149148 1. 389493 1. 760375 1. 434603 1. 810607 2. 6251 1. 568594 1. 837804  
4. 506124 4. 388172 1. 373315 3. 994098 4. 199249 2. 590275 1. 567967 2. 525375 2. 736429  
1. 883814 1. 238945 1. 89204 1. 748359 2. 581813 1. 752537 1. 597463 1. 943087 1. 694843  
3. 838755 3. 374622 3. 927667 3. 436538 3. 764694 3. 508607 4. 444427 2. 954219 3. 697813  
1. 308466 1. 100438 1. 320301 1. 539701 1. 674564 1. 30507 1. 404634 1. 005033 1. 819791  
3. 477269 1. 783989 2. 337106 2. 086427 2. 452094 3. 56906 1. 959536 2. 014982 1. 683365  
4. 545472 5. 147552 5. 263734 4. 683976 4. 614053 5. 029252 4. 263265 5. 613098 4. 01816  
1. 455868 1. 135619 1. 276701 1. 115499 0. 838185 0. 836877 1. 401415 1. 010639 1. 367443  
2. 52566 1. 105597 1. 154559 2. 162262 1. 365471 1. 506984 1. 660676 0. 871447 1. 532889  
2. 942954 2. 617023 2. 54792 2. 010237 2. 145456 2. 09743 2. 192463 2. 467234 2. 076505  
1. 102097 1. 171388 1. 049297 1. 509994 1. 470382 1. 191334 1. 252026 1. 619401 2. 216905  
2. 037459 0. 847548 1. 188892 1. 089134 1. 962492 1. 581205 2. 064906 1. 376619 0. 982654  
4. 325324 3. 263988 3. 729004 3. 317247 3. 838059 3. 703605 3. 830368 4. 210227 4. 36055  
4. 102731 4. 186587 4. 748696 3. 673022 4. 784919 4. 296511 4. 550558 5. 834441 4. 488032  
2. 242305 3. 398547 3. 642368 2. 919508 2. 151891 2. 660203 1. 887696 2. 341534 3. 267139  
2. 380833 2. 267612 2. 092166 2. 22716 2. 064544 2. 172505 2. 023655 2. 283376 2. 348847  
1. 695273 1. 468787 1. 462005 1. 540898 1. 019232 0. 955667 1. 225635 1. 295478 1. 290984  
1. 310421 1. 857201 1. 351489 1. 388604 0. 857809 1. 280112 1. 370819 1. 245724 1. 083278  
2. 006321 1. 640001 1. 261329 1. 105019 1. 704522 1. 209666 1. 699966 1. 748827 1. 469198  
3. 322503 3. 494459 4. 736992 4. 460236 4. 072962 4. 852696 3. 693599 3. 938688 3. 31931  
2. 379388 2. 090254 2. 466708 2. 390811 1. 617501 2. 693357 1. 78608 2. 341976 2. 350686  
2. 022147 1. 916945 1. 536177 1. 572319 1. 926879 1. 752356 2. 587765 2. 95088 1. 750561  
2. 28693 1. 545863 1. 707567 1. 663042 1. 506294 1. 139073 1. 788112 1. 029765 1. 416777  
1. 98127 2. 409678 2. 458317 2. 145656 2. 01981 2. 473155 2. 864974 2. 394205 1. 737086  
3. 730068 4. 800407 4. 750491 3. 332482 2. 94984 2. 949366 3. 529235 3. 919692 3. 510227  
1. 555883 1. 499105 1. 33238 1. 558115 1. 621947 2. 143985 1. 945765 1. 734776 1. 344926  
0. 973996 2. 442815 1. 163156 1. 28756 1. 971668 2. 171242 3. 194675 2. 240586 4. 808155  
2. 562579 2. 443077 3. 61049 3. 007336 2. 203974 2. 818828 2. 577547 3. 341434 4. 062697  
1. 211233 0. 946699 0. 94547 0. 860918 0. 96785 0. 900415 1. 775323 1. 637344 1. 574025  
1. 719286 1. 107748 1. 173455 1. 494549 1. 132585 1. 226113 1. 149469 1. 092721 1. 150441  
0. 996481 1. 138871 0. 851843 0. 889754 1. 372542 0. 912008 1. 299072 1. 103764 1. 043221  
1. 191055 0. 915971 2. 138203 1. 119065 5. 122577 3. 35333 0. 554031 2. 331646 2. 417097  
1. 769498 1. 119651 1. 74864 1. 270924 1. 375558 1. 496065 1. 378453 2. 217455 1. 578702  
2. 310064 1. 371362 1. 518075 1. 89727 2. 106736 2. 234649 2. 668908 2. 245323 2. 587937  
0. 825509 1. 218158 1. 348375 1. 03099 1. 636493 1. 276754 1. 031462 1. 800196 1. 595033  
1. 966392 1. 528488 1. 812942 1. 559845 1. 727224 1. 91827 2. 772761 1. 662834 2. 458696  
2. 145761 2. 226072 1. 931532 2. 15742 2. 296631 1. 734822 2. 178908 1. 95526 1. 730543  
2. 182156 3. 441441 2. 274484 2. 424189 2. 022463 2. 632787 2. 652144 2. 078787 2. 667411  
2. 557814 2. 298398 2. 19906 2. 637795 2. 813523 2. 762501 2. 489445 2. 624429 2. 704901  
2. 329953 3. 054226 2. 562578 3. 582402 2. 180204 2. 034085 2. 185564 3. 125251 2. 234905  
6. 305029 7. 401388 7. 642973 7. 647207 7. 0924 7. 452198 6. 853108 7. 265213 7. 441932  
2. 53891 2. 522705 2. 126397 1. 961907 1. 500948 1. 481247 1. 886944 1. 919326 1. 98977  
2. 628677 1. 55135 2. 320766 2. 088106 2. 607084 2. 072143 2. 236025 1. 543359 1. 473027  
1. 675632 1. 272975 2. 176337 1. 549775 1. 443465 1. 617533 2. 114129 1. 85297 1. 588111  
4. 198211 3. 9152 5. 024945 6. 406537 5. 929417 4. 277072 5. 285606 4. 153659 4. 923285  
1. 893841 2. 260044 2. 57664 2. 017436 2. 217394 1. 780804 1. 967374 1. 323207 1. 328408  
5. 638498 4. 52497 4. 043526 4. 983963 4. 711265 4. 534737 4. 736236 5. 571985 4. 962038  
2. 096959 2. 37251 1. 851751 1. 964759 2. 945309 2. 31775 2. 048161 2. 619958 2. 574257  
4. 141167 1. 992165 2. 356845 2. 615036 2. 673455 2. 383263 2. 321854 1. 714034 3. 076891



4. 10938 6. 036424 5. 536577 5. 114844 5. 550778 5. 607351 6. 360309 5. 313861 5. 563714  
3. 547119 4. 375129 3. 540703 4. 359899 4. 018798 3. 496743 3. 002165 4. 250942 4. 056062  
5. 076146 4. 499211 4. 345392 4. 298291 4. 239295 4. 274205 4. 413127 3. 774108 4. 412107  
1. 295485 2. 323365 1. 632366 2. 424037 2. 116553 1. 545317 1. 863529 1. 551208 0. 910581  
2. 69479 1. 622505 2. 057866 2. 361417 1. 558081 2. 25148 1. 909196 2. 373345 2. 036621  
3. 254153 5. 007712 3. 03036 3. 724807 4. 005074 4. 344971 4. 205626 5. 547628 4. 809829  
5. 776669 6. 187845 5. 394078 5. 809591 5. 880002 6. 034533 5. 282362 4. 754773 5. 190109  
4. 702759 5. 712718 4. 70041 2. 5159 5. 648156 4. 20913 3. 169485 4. 932698 4. 403991  
2. 733294 2. 870445 2. 52135 2. 886221 3. 511118 2. 774049 2. 438586 2. 799349 3. 010929  
1. 133702 1. 425843 1. 232033 0. 835553 1. 678722 1. 249352 1. 069728 1. 48715 1. 270083  
1. 48457 1. 262693 0. 613673 1. 413795 0. 901222 1. 457431 1. 180057 0. 992017 0. 980005  
4. 775661 3. 526941 4. 409526 3. 611584 3. 997597 3. 678229 3. 667078 3. 698 4. 115324  
6. 93904 6. 59413 6. 606031 6. 179361 6. 473477 7. 193314 6. 549155 6. 267099 6. 440658  
2. 339568 4. 141794 2. 226923 2. 203257 3. 585977 3. 49934 2. 719332 2. 047496 3. 225139  
4. 979174 4. 664637 3. 536276 3. 623335 3. 611137 3. 554102 4. 422525 4. 079841 3. 84466  
2. 244928 1. 842456 1. 778809 2. 631376 1. 986672 1. 928264 2. 498022 2. 048979 2. 211821  
2. 96532 2. 116353 3. 078413 2. 419589 2. 893716 2. 629444 3. 047961 2. 554055 2. 394043  
2. 178975 1. 754322 2. 275609 2. 018731 2. 291598 1. 411021 1. 891797 2. 185466 2. 97207  
2. 612911 2. 237741 2. 833348 2. 377652 1. 905063 2. 351327 1. 991883 2. 55077 2. 491824  
2. 004734 2. 123064 1. 961381 2. 086876 2. 557333 2. 491482 2. 727168 1. 266903 2. 471324  
3. 836873 2. 126232 3. 026963 3. 248951 2. 517509 2. 232624 2. 772493 2. 687167 2. 466781  
3. 15499 2. 412951 2. 191829 3. 129565 1. 974085 3. 28159 2. 510182 2. 614404 2. 362413  
1. 995951 1. 267545 1. 155424 1. 543847 0. 980989 1. 043054 1. 314986 0. 932698 1. 623555  
3. 947229 4. 493536 5. 01253 4. 55913 4. 797187 5. 514642 3. 841058 4. 18137 5. 018004  
3. 492816 2. 925939 3. 206041 2. 975993 3. 094655 3. 05473 3. 058712 2. 982147 2. 815506  
1. 764482 2. 26647 1. 978226 1. 772521 3. 274287 3. 061112 2. 195101 1. 898832 1. 370512  
1. 572485 2. 630286 3. 685912 2. 629728 2. 185792 5. 031074 2. 412844 3. 318971 4. 061823  
0. 933431 0. 972993 0. 696882 0. 858837 1. 114995 1. 095887 2. 177383 0. 866508 0. 781178  
1. 884505 1. 727722 1. 660435 1. 913813 1. 981186 2. 126133 1. 807117 1. 751195 1. 544794  
2. 424437 3. 619289 2. 476431 3. 120162 1. 560858 2. 951233 2. 611499 2. 037224 1. 58441  
4. 152175 4. 132754 3. 750822 3. 309351 3. 855566 4. 25883 4. 73559 3. 690961 3. 888112  
2. 913385 2. 61155 3. 195027 3. 523836 3. 120545 2. 844443 2. 994157 2. 251703 2. 74602  
2. 0542 2. 55468 2. 002849 4. 178222 2. 433499 3. 184933 3. 066586 3. 202124 1. 809401  
4. 503468 4. 724724 4. 70875 4. 803573 4. 900187 4. 740645 3. 524455 5. 016539 3. 873692  
2. 078318 2. 024617 2. 068922 1. 78172 1. 282305 1. 577232 2. 020915 1. 574193 2. 000708  
1. 7188 1. 971102 1. 227091 2. 216392 1. 673411 1. 220238 1. 400058 1. 334696 1. 712891  
1. 595989 1. 281303 1. 260455 1. 380908 2. 876843 1. 624915 1. 423707 1. 342457 1. 255488  
2. 183659 1. 865828 1. 710991 1. 357432 1. 635884 1. 439646 1. 34406 1. 088117 1. 594081  
1. 409619 0. 970424 1. 452414 1. 554145 1. 36579 1. 201718 1. 623653 1. 552307 1. 020364  
4. 147452 5. 528426 6. 235047 4. 747786 5. 509001 4. 743665 5. 787024 5. 816821 6. 924427  
2. 288816 2. 476254 3. 009292 2. 236083 2. 273096 2. 156203 2. 252666 2. 27023 2. 657911  
1. 743989 2. 113121 1. 354331 2. 044181 2. 101572 1. 797006 1. 802048 1. 677231 3. 188179  
3. 337502 3. 566555 2. 618577 3. 318849 4. 180028 3. 780155 2. 688327 3. 302737 2. 872646  
1. 469209 1. 045461 1. 484021 1. 423017 1. 867457 0. 995768 1. 103383 1. 505325 1. 222923  
0. 953974 0. 740849 0. 778177 0. 853646 0. 776814 0. 912487 0. 898445 0. 808622 1. 324656  
1. 627421 1. 203543 0. 942835 1. 084384 1. 149077 1. 57878 1. 134734 1. 017868 1. 579882  
1. 916706 2. 315585 2. 028017 2. 911396 2. 36445 3. 079836 1. 537 1. 291445 2. 879676  
2. 356454 1. 786473 1. 969208 1. 533904 1. 356155 1. 970949 2. 206532 1. 62681 1. 868707  
2. 320233 2. 128618 2. 142642 2. 21908 2. 046041 1. 790723 2. 046592 2. 288745 1. 750129  
2. 151169 2. 42255 2. 094084 3. 549145 2. 593435 2. 374932 3. 058644 2. 098816 2. 755888  
7. 363442 7. 57974 7. 317915 7. 937805 7. 696638 8. 138431 7. 620174 7. 236505 7. 623451

5. 713171 6. 316774 6. 432665 6. 190686 6. 655283 6. 483492 5. 277332 6. 631643 6. 192479  
2. 194648 1. 496744 1. 556462 1. 493337 1. 414164 1. 41052 1. 550613 2. 023249 0. 999901  
2. 091846 1. 690106 2. 047924 1. 993548 2. 399577 2. 152036 2. 052904 1. 651806 2. 316264  
1. 892261 1. 707931 1. 855094 1. 819885 1. 92072 1. 726522 1. 751035 1. 742685 1. 836897  
1. 661468 1. 617659 1. 956184 1. 261242 1. 76663 2. 143371 1. 530003 2. 313799 2. 514972  
2. 520214 1. 609736 1. 954518 1. 97181 2. 452658 1. 289218 1. 756393 1. 857607 1. 123319  
1. 968823 2. 018529 2. 01615 1. 647613 2. 034465 1. 985759 2. 056293 1. 719768 2. 046812  
0. 933363 1. 690033 1. 063249 1. 241505 1. 089032 0. 76798 0. 874865 1. 253759 0. 380754  
1. 952965 1. 768867 1. 019532 1. 51376 1. 224277 1. 770635 1. 733864 1. 726611 1. 222411  
7. 908239 8. 203885 8. 05628 8. 337282 8. 688894 7. 968223 7. 746237 7. 410673 8. 343126  
5. 324388 5. 427951 6. 42372 6. 169622 5. 935993 6. 104787 4. 454349 5. 619749 5. 837389  
6. 485436 6. 798158 7. 196762 6. 27148 6. 672915 6. 532867 7. 337361 6. 259066 5. 918813  
2. 204284 2. 380367 1. 568481 2. 271204 1. 405283 1. 844085 1. 211733 1. 405191 1. 063685  
2. 049403 1. 617904 2. 058124 1. 495057 1. 459772 1. 26157 1. 181934 1. 50648 1. 506781  
1. 647383 1. 510198 1. 564151 1. 529077 2. 719456 1. 39977 1. 387664 1. 569158 1. 951463  
1. 997179 2. 113543 2. 088593 3. 055864 1. 799758 2. 07644 3. 373967 1. 82057 2. 229313  
2. 667265 2. 078804 2. 82023 2. 499126 2. 675835 2. 212605 2. 588398 2. 845554 2. 540917  
2. 196903 1. 631954 1. 242477 1. 961649 1. 187417 2. 205816 2. 620151 2. 683469 1. 394721  
1. 612005 2. 431556 1. 552149 1. 624843 1. 615058 1. 976182 1. 586085 1. 691803 1. 530762  
1. 409226 1. 085721 1. 258093 1. 164529 1. 212398 0. 85198 1. 193074 1. 928089 1. 767735  
2. 963032 2. 732817 2. 345346 2. 301946 2. 143752 2. 463991 2. 593297 2. 19325 3. 189621  
2. 593182 2. 305125 2. 09193 2. 591501 3. 128103 2. 529686 3. 200526 2. 150464 1. 916196  
2. 348314 1. 257393 1. 631649 1. 792645 1. 480717 2. 090647 2. 733256 1. 973381 2. 176232  
4. 970433 5. 612543 4. 807482 5. 016295 4. 347198 5. 139552 4. 699944 5. 626701 4. 54425  
3. 560684 3. 494382 2. 882898 2. 764576 3. 619953 3. 335569 4. 405075 4. 089323 2. 985517  
1. 807668 1. 595381 1. 666752 1. 603439 1. 692346 1. 751392 1. 633737 1. 917255 1. 381372  
1. 458664 1. 418854 1. 549962 1. 146421 1. 131591 1. 471001 1. 708751 1. 297244 1. 515757  
2. 182898 1. 027525 1. 392474 0. 958104 1. 102177 1. 580307 1. 705449 1. 789043 1. 13266  
1. 899915 1. 657107 1. 499593 1. 83132 2. 03883 1. 289457 2. 557039 1. 541878 1. 896607  
2. 058867 1. 498527 1. 501762 1. 593828 1. 416004 1. 479761 1. 418343 1. 529618 1. 376703  
2. 323864 2. 504079 2. 628539 2. 328867 2. 363267 1. 710765 2. 110413 2. 13757 1. 844059  
2. 47234 1. 787705 2. 407475 1. 927151 2. 05745 1. 711134 2. 023362 2. 130704 2. 569358  
1. 647029 1. 895842 1. 731429 1. 598093 2. 380441 2. 593407 2. 177213 1. 408987 1. 584681  
5. 938517 6. 742545 6. 427191 7. 301242 6. 952251 6. 539418 6. 742872 6. 521899 6. 720994  
1. 206955 0. 958111 1. 030573 1. 214749 1. 465722 1. 308957 1. 003247 1. 103397 1. 265769  
2. 875315 2. 306442 2. 722 1. 503641 1. 212665 1. 441185 1. 637922 1. 53776 2. 777515  
1. 519751 1. 206351 1. 355385 1. 097576 1. 41787 1. 38167 1. 391508 0. 993934 1. 523418  
6. 935296 4. 827989 5. 864039 5. 300359 4. 715685 4. 266808 5. 95029 6. 462874 7. 019284  
2. 82352 2. 557539 1. 935071 3. 684908 2. 498508 1. 921546 2. 648235 2. 875144 2. 708245  
6. 31324 6. 545989 6. 127309 7. 56015 7. 129585 6. 881023 6. 840848 5. 452805 6. 496653  
2. 845754 1. 350347 1. 3815 2. 062082 1. 74835 1. 611448 2. 465626 1. 82477 2. 428724  
2. 263259 1. 406244 2. 36358 2. 749027 1. 99007 1. 551922 2. 02084 2. 085864 1. 452625  
1. 748366 1. 960096 1. 808182 1. 214517 1. 190732 1. 167047 1. 473859 1. 441275 1. 408435  
2. 587879 2. 250091 3. 213194 2. 960241 2. 787147 2. 006364 2. 695474 2. 855866 2. 67048  
3. 190912 1. 846512 2. 321044 2. 204892 1. 903994 2. 780547 1. 780461 2. 027869 2. 25159  
4. 519096 4. 473395 5. 448437 5. 504329 5. 21579 5. 384131 5. 043987 5. 065313 5. 365552  
0. 985731 0. 798058 0. 786189 0. 813757 0. 891561 0. 877397 1. 185438 1. 138223 0. 817411  
1. 531169 1. 446863 1. 959136 2. 097704 1. 342981 1. 450829 1. 595839 1. 44491 1. 313205  
1. 153381 1. 485619 1. 235794 1. 602491 1. 435321 1. 784704 1. 432652 1. 71985 1. 683456  
3. 089239 2. 193335 3. 488128 2. 986193 2. 592723 2. 22907 2. 39313 2. 593552 2. 082339  
2. 326148 1. 663685 1. 576545 2. 247802 2. 426953 2. 159802 2. 067086 1. 663368 1. 848997

3. 015732 2. 659861 2. 510094 2. 72999 2. 505755 2. 229439 2. 581467 1. 985967 2. 932132  
1. 60602 1. 983094 1. 718008 1. 873143 2. 130506 1. 416516 2. 362456 1. 939606 2. 302983  
4. 286979 4. 011668 3. 944097 4. 591102 3. 31176 4. 350989 4. 085254 3. 614671 4. 100935  
2. 532847 1. 40525 1. 541078 1. 712557 1. 14139 2. 119372 2. 042375 1. 396037 2. 762881  
2. 462178 3. 411282 2. 31883 2. 394101 2. 250473 2. 66052 2. 661486 1. 890292 2. 881941  
4. 02809 3. 365202 4. 540985 3. 953797 4. 374063 4. 413515 4. 807196 3. 93326 4. 070267  
1. 661892 3. 05113 2. 343856 2. 778212 2. 571331 1. 870181 1. 141724 2. 506093 2. 586321  
2. 370598 2. 12887 3. 012964 3. 497774 2. 638456 2. 993874 3. 702226 2. 152138 2. 583052  
1. 46775 1. 057537 1. 523897 1. 599923 1. 820069 1. 571257 1. 589204 2. 740722 1. 424119  
2. 515736 1. 959509 2. 226175 2. 218957 1. 828095 1. 839313 2. 015275 1. 936287 1. 795953  
2. 766379 2. 642071 1. 749243 3. 112511 1. 382675 3. 036745 2. 442151 3. 477193 2. 284999  
1. 80856 1. 239906 1. 46447 1. 296364 1. 490021 1. 803681 1. 600716 1. 587586 1. 770632  
6. 371779 6. 675292 6. 307097 5. 720759 6. 721635 6. 60204 6. 302675 6. 048932 7. 315999  
3. 08915 2. 246664 1. 757073 1. 767379 1. 400699 1. 481844 2. 590455 1. 560179 1. 609122  
1. 338812 1. 453813 1. 565004 2. 022548 1. 108355 1. 862042 1. 610308 1. 491083 1. 471291  
1. 067427 0. 963397 1. 473533 1. 482335 1. 194362 1. 153155 0. 73061 1. 17772 1. 804773  
2. 713503 3. 60702 3. 79756 4. 245899 4. 125471 4. 188238 3. 165393 3. 12605 2. 327134  
2. 265132 2. 240743 2. 551076 1. 959359 2. 170819 2. 22743 2. 019563 3. 272652 2. 433897  
1. 994287 1. 809348 1. 989283 2. 563329 2. 242402 2. 490292 2. 304806 2. 246711 2. 129902  
2. 540785 1. 730753 3. 345717 2. 460976 2. 170408 2. 590469 2. 374614 2. 190128 2. 612677  
2. 293497 1. 311389 2. 011528 1. 337107 1. 384621 1. 201826 1. 403083 1. 10756 2. 10735  
0. 634726 1. 104237 0. 491729 1. 081959 0. 983484 0. 878438 0. 727749 0. 666226 0. 923746  
4. 732801 4. 912369 4. 779621 4. 577908 3. 803061 4. 385178 3. 875147 4. 618233 4. 729065  
4. 071388 4. 165922 3. 935999 4. 250469 3. 270448 3. 834082 4. 079857 4. 687929 4. 313942  
1. 449967 0. 951903 3. 061369 0. 92864 1. 064936 1. 346786 1. 500792 1. 649304 1. 436929  
2. 018961 1. 835908 1. 152355 2. 968815 0. 749737 1. 203775 2. 216489 2. 213519 0. 988501  
1. 722815 2. 595162 2. 192522 1. 201023 1. 603024 1. 941896 2. 364027 1. 509105 2. 002631  
3. 740069 3. 290198 4. 125829 3. 535061 3. 540604 3. 085922 3. 190002 3. 661243 2. 839698  
4. 573008 4. 195826 4. 235341 4. 831429 4. 568357 5. 321859 4. 935146 4. 067676 4. 309062  
1. 408308 0. 646286 1. 013984 1. 428479 2. 122128 1. 528794 1. 127536 1. 219464 1. 448866  
2. 16014 3. 15418 3. 880482 2. 384297 2. 495806 3. 754699 3. 378371 2. 304655 2. 189372  
8. 156232 8. 061536 8. 45861 8. 590138 8. 648269 8. 125301 9. 016301 8. 232742 7. 838437  
2. 275152 1. 66999 2. 487502 2. 180272 1. 716031 2. 207271 2. 391341 2. 117126 1. 79953  
2. 711033 1. 480681 1. 585694 2. 325646 1. 852304 2. 238363 2. 132542 2. 027781 1. 544912  
1. 362041 0. 927696 1. 62669 1. 65714 1. 761802 1. 323812 1. 413988 2. 167784 1. 503148  
4. 208418 2. 492173 2. 423953 3. 361141 3. 397543 3. 377756 2. 801424 4. 043378 2. 55435  
3. 184752 3. 481912 3. 55023 2. 95407 3. 007547 2. 97072 3. 05892 3. 021973 2. 83317  
1. 408569 2. 124764 3. 30419 1. 824596 1. 863583 1. 909904 1. 957386 2. 142825 2. 151235  
1. 224918 0. 916891 0. 885413 1. 308377 1. 531556 1. 31487 1. 170534 0. 857781 2. 182267  
4. 383274 4. 285023 3. 903777 4. 420373 4. 432604 5. 688075 4. 000259 5. 744715 5. 368155  
1. 884091 2. 343048 2. 073871 1. 77986 1. 551589 1. 587013 1. 539403 1. 596777 2. 477259  
1. 685862 1. 505298 2. 190838 1. 839699 2. 911456 1. 786257 1. 696476 2. 114148 2. 005886  
2. 067854 1. 702463 2. 463352 2. 008207 2. 228022 1. 192778 2. 125268 2. 149808 1. 870187  
1. 609198 1. 63622 1. 399945 1. 517866 1. 382102 1. 327541 1. 590268 1. 425892 2. 008957  
1. 9984 1. 339035 1. 864949 1. 77355 1. 650063 1. 911754 1. 50431 1. 110553 1. 082566  
2. 858079 1. 99887 1. 922266 1. 550172 2. 129382 1. 641249 2. 320042 2. 813199 2. 514912  
3. 852515 3. 367082 3. 775674 3. 434861 4. 071368 3. 333658 3. 437412 3. 382308 3. 600364  
2. 75783 1. 70062 1. 40203 1. 516958 1. 014045 1. 219885 1. 66107 0. 938211 1. 25901  
4. 306496 2. 844663 3. 550714 4. 025536 3. 102779 3. 062035 3. 730712 3. 178916 3. 690322  
1. 966158 1. 241898 1. 64676 1. 691046 1. 128799 1. 224609 1. 397738 1. 033771 1. 129203  
1. 407758 1. 40578 1. 343112 1. 444226 1. 607569 1. 383137 1. 518332 1. 452971 1. 282881

1.707623 0.98898 1.253555 2.053936 1.406042 1.340502 2.227934 1.75272 1.011705  
1.527288 1.271611 1.745736 2.787949 1.388195 2.326544 1.687574 1.651601 1.849806  
2.352525 1.918328 2.177993 1.765719 2.162614 1.986841 2.365022 2.162758 1.974846  
1.173995 1.682783 1.359366 1.347549 1.258364 1.601977 2.16068 1.759971 1.796907  
2.446806 2.295442 1.909744 1.676052 2.060192 1.444735 2.11548 1.570469 2.258182  
2.010518 1.584029 1.596827 1.699222 2.147504 1.205208 2.330845 1.627453 1.911076  
1.973709 2.001121 1.767148 1.675939 1.6772 1.645264 2.148935 1.607455 1.493807  
0.808168 2.593314 2.193234 0.727168 3.313961 1.495828 1.43822 0.677276 0.840023  
1.647 1.721331 1.754754 1.486115 1.608349 1.732797 1.928413 2.033447 1.661044  
2.306891 1.294728 0.969507 1.884195 2.00039 2.994552 1.868845 2.339472 1.664659  
2.445487 1.513835 1.312607 1.790686 1.505606 1.145463 1.221998 1.677829 1.758275  
1.437715 1.028923 1.102965 1.761516 1.37608 1.202398 1.124516 1.389478 1.211269  
1.548055 1.184908 1.125334 1.368591 1.0305 1.402838 1.668281 1.489715 1.089157  
2.429723 2.028425 2.712981 2.211996 1.896537 2.266753 2.291649 1.919486 2.589069  
1.892525 2.228617 2.599638 1.664526 2.525245 2.189904 2.459928 2.162209 1.95677  
1.95422 2.145911 2.351643 2.041727 1.609735 1.27322 1.499865 1.689385 1.902808  
1.405925 1.361879 2.009546 1.344864 1.540448 1.353885 1.463082 1.223775 1.232477  
1.459441 2.087606 1.771099 1.885697 2.085189 2.048701 1.838014 2.504984 1.680124  
2.089464 1.711796 1.189413 1.873065 2.004694 1.182738 1.571322 1.634833 1.850749  
2.502852 1.924616 2.851329 3.362178 2.832887 3.07266 2.773172 3.197716 2.83726  
5.137618 3.912993 4.133687 3.030464 3.205933 3.699919 3.133206 3.609391 4.509632  
1.508645 1.577516 2.252733 2.010352 2.416815 1.601193 1.585154 1.809145 1.67526  
6.093499 5.815748 6.30469 6.073669 5.835305 6.239808 6.385313 6.1902 6.351359  
1.306178 1.409888 2.689937 1.616232 1.806531 1.367133 1.283136 1.515903 1.473148  
6.400049 6.036068 6.243343 6.131438 5.861528 5.617442 6.125867 5.513873 6.868958  
2.959098 2.331494 1.97316 1.774952 3.356706 2.000145 2.204002 2.536595 1.924411  
0.954796 0.942557 1.209768 1.041181 0.832836 0.973951 1.28896 0.987464 1.156875  
6.527277 5.577583 6.285039 5.767306 5.942851 6.216022 6.307838 5.597844 6.898578  
1.861919 1.968408 1.498717 1.331592 1.815986 1.746307 1.414834 1.55195 1.668157  
5.593122 7.029072 6.505021 5.875243 6.496332 6.34226 6.58498 6.227657 6.080189  
4.697092 4.268671 4.086632 6.310778 3.586466 4.80353 6.580556 4.201066 5.854607  
2.320783 2.070421 2.131174 1.954165 2.920853 2.671872 1.986635 2.062342 2.255285  
3.197021 1.854438 1.927938 2.726617 2.378398 2.935572 4.06691 1.277983 1.767741  
6.112267 6.789697 7.130087 6.674149 7.012118 6.306228 6.538906 6.49833 6.635579  
2.512403 2.093765 1.668055 2.197927 2.001859 1.59183 2.1851 2.146166 1.715861  
3.766734 2.876658 3.531678 2.889107 2.598684 1.764988 1.906669 2.256838 2.147248  
1.707757 2.034852 1.7173 2.327751 1.574501 1.952278 2.03867 1.693507 1.994844  
7.332937 7.384296 7.325869 7.190106 7.105746 7.039202 7.71016 7.02915 7.092775  
2.121964 3.56747 3.630396 2.932697 3.834553 2.960605 3.145715 3.716768 3.726317  
1.544261 1.40839 2.074654 1.518355 1.196641 1.391705 1.186219 2.028114 1.340966  
3.375962 3.60985 3.443014 3.517937 3.573385 3.826729 3.027929 4.161834 3.453326  
6.022993 5.535053 5.938986 6.536901 6.780203 6.326308 5.934264 5.779069 5.840162  
1.428742 1.385452 1.441658 1.421831 1.308266 1.733163 1.412031 1.779263 1.335454  
7.705703 7.714263 7.777361 8.022804 7.528587 7.935253 7.862447 7.944361 7.513709  
2.64724 2.112754 1.95086 1.991135 2.134551 1.678455 1.78725 3.031477 2.966231  
3.308813 2.95625 4.038434 2.549766 2.569918 3.069896 3.917707 3.318461 2.680017  
2.803204 2.362273 2.10436 2.296769 2.369213 3.109935 2.886894 2.870794 2.055287  
1.357759 1.821124 2.63994 1.637304 1.551802 1.641799 1.594084 1.704224 1.625038  
5.05318 3.632773 4.043908 3.967946 3.280489 4.228458 3.855297 4.386613 3.30518  
1.932628 1.387027 1.715265 1.837381 1.773434 1.391221 2.339034 1.616801 2.271619  
2.108274 1.191214 1.369055 1.461531 1.588771 1.907761 1.734049 1.893242 1.893242

2.948428 2.75124 2.692176 2.431956 2.49319 2.539587 2.503075 2.655726 2.205368  
6.92979 5.517825 6.649769 4.64399 6.016455 5.802126 6.750062 6.273316 7.040136  
1.901587 0.794493 0.654033 1.163894 1.20885 0.944385 0.966204 1.593256 1.52288  
1.959061 1.59844 1.890179 1.549835 1.90783 2.144829 1.919995 1.346295 1.488043  
2.558932 2.093026 2.644825 3.215803 1.88725 2.767386 2.721908 2.543316 3.148142  
3.607049 3.061152 3.236922 2.92226 3.057355 3.801923 4.083881 3.08545 2.976468  
1.541037 1.391435 1.892357 1.788569 2.110995 1.422622 1.72298 1.457731 1.228455  
6.863889 7.835338 7.845092 7.881749 7.602566 8.40361 7.989423 7.833975 7.262446  
2.143288 1.94263 2.161251 2.420847 1.958895 2.296358 2.212286 1.678171 2.3139  
2.242535 3.585114 3.732302 3.968272 4.296846 5.359724 3.191469 4.909436 2.537943  
2.118405 3.038896 3.760258 2.102531 2.064408 2.44008 1.687533 3.285407 1.73357  
2.187326 2.026359 1.668775 1.831485 3.962498 2.166426 2.626512 2.756484 3.202153  
3.106492 3.34977 3.831473 3.060587 4.372093 3.795376 3.389673 4.760611 4.242009  
1.477427 1.409302 0.861285 1.34125 1.079746 0.954968 1.405561 2.023806 1.064033  
4.099469 3.62754 2.758272 2.381422 3.105831 2.459972 3.595226 2.372189 2.799713  
4.178507 3.117759 2.958167 3.199228 3.533299 3.185582 3.481986 3.260654 3.306594  
2.024758 1.801977 1.915689 2.67973 2.250842 2.783449 1.835261 2.151109 1.847509  
9.540692 9.649558 9.193897 9.838172 9.656007 9.99134 9.882193 9.951533 9.51136  
2.059312 1.526181 1.731077 2.527136 1.880042 1.799251 1.666537 1.591759 2.501433  
1.83313 2.056064 1.585401 1.767143 2.011271 1.009034 0.944704 1.41668 1.388659  
1.328677 2.734072 1.826001 3.094283 2.717248 2.939781 2.24159 2.07564 1.964797  
0.993395 1.926077 1.062705 1.200268 1.25372 1.187381 1.669167 1.076472 1.633104  
3.295095 1.665847 2.186993 2.689767 1.827571 2.507563 2.233895 2.278958 4.058116  
2.294763 1.888931 1.968566 2.193411 2.096988 1.547375 2.025624 1.786947 1.984903  
5.947655 6.467431 6.150372 6.259131 6.972102 7.68116 6.370146 7.38292 6.536423  
2.724758 2.265972 1.286227 1.295778 1.76437 2.096816 0.915392 1.293366 2.084206  
3.546639 2.821015 3.725693 2.884777 2.552335 3.266806 2.987701 3.08427 3.361439  
0.842225 0.74839 1.060589 0.933538 1.542583 1.173873 0.556324 0.813854 1.471133  
2.397356 3.289772 3.942926 2.431813 3.795194 3.084552 3.319981 3.052657 2.411504  
4.971165 5.846275 5.924972 5.693805 5.574246 6.918959 5.518176 6.505335 6.207995  
1.393688 2.396093 1.83217 1.466948 1.807793 1.682629 2.284515 2.552486 1.894314  
3.831671 4.011253 4.640117 4.969207 5.039057 5.512045 4.307489 5.206786 4.47204  
1.923466 1.135929 1.799681 1.256484 1.296302 1.150338 1.198381 1.760663 1.214843  
2.204777 1.411116 1.523687 1.339296 2.305233 2.128434 0.804008 1.177723 1.48307  
2.099772 2.847907 3.750774 2.282236 2.194093 2.901339 2.76081 3.038707 1.898921  
2.527075 1.827426 2.058834 1.976827 2.368324 1.748644 2.64414 2.188347 1.695907  
6.528888 6.945367 6.537263 6.517577 6.731231 8.119826 6.361896 7.950989 7.113483  
1.630752 1.564106 0.868375 0.907083 1.418857 0.918128 0.889565 1.131231 1.130619  
2.750705 2.927881 2.677458 3.407714 3.188215 3.840733 2.864545 3.122227 3.561206  
0.991678 0.739104 1.235251 1.9088 1.756138 0.686047 0.944052 0.766835 1.802908  
2.084889 1.672811 2.033491 2.26872 1.905835 2.102498 2.074162 2.332571 1.749914  
2.547177 2.757266 2.208236 2.087655 3.00572 2.05141 3.023379 3.083401 1.617301  
2.695401 2.077513 2.330249 2.917444 1.899788 1.664842 1.93785 2.725599 1.409549  
1.196145 1.398678 1.200387 1.072027 1.15492 1.473025 1.267874 1.593613 0.910782  
6.273453 6.774153 6.565897 7.081874 6.979689 7.852142 6.727026 7.747245 6.40861  
1.710494 2.113136 1.805995 1.991636 1.899068 1.592628 1.918946 1.676006 1.398916  
3.120757 2.913247 2.66871 3.092452 2.768515 2.694166 2.778208 2.271783 2.992725  
2.517173 1.531932 2.0529 1.542904 1.614198 2.670042 1.752379 2.255563 1.70082  
1.143594 1.159439 1.221226 1.135207 1.140591 1.311656 2.19535 0.988122 1.508523  
2.07846 1.667833 2.667553 1.556484 1.379377 1.721769 2.376695 1.562147 1.436515  
2.37679 1.267363 1.175142 1.198987 2.365052 1.744014 1.820795 1.299356 1.395712

5.165229 5.032923 4.097603 4.671563 4.026507 3.742316 3.910231 3.404914 4.283062  
2.007907 1.919436 1.845527 1.521915 1.713568 1.687451 1.485109 1.904025 1.786522  
3.063959 3.18341 3.094613 3.271702 2.361421 2.868756 2.769168 2.908247 2.578893  
0.761211 1.396859 0.714509 0.908171 0.594048 1.856029 0.63039 1.098596 1.218353  
3.134756 2.778516 2.02839 3.362676 1.626266 3.532032 3.933213 1.832444 1.593207  
0.946551 1.005252 0.778943 1.050333 1.45396 0.746229 0.623321 0.975605 1.112473  
1.871137 3.437067 3.036745 3.047939 1.516686 4.690755 2.397673 2.050822 2.051547  
1.55472 1.47742 1.440596 1.484153 1.793153 1.624813 1.729982 1.524758 1.655811  
1.21246 1.012741 0.711727 1.134461 0.736083 1.496201 1.29898 0.900512 1.063439  
3.425354 4.183888 3.4929 3.374769 3.508568 3.358499 3.14223 2.017404 3.014972  
1.431569 1.016862 1.776209 1.151367 1.986086 1.566191 2.383273 2.232315 1.698375  
3.116145 3.491634 3.173871 3.714654 3.319175 2.874565 3.706222 3.356196 3.325852  
1.948022 0.830512 0.96308 1.261396 0.863033 1.195666 1.370612 1.059765 1.196497  
1.749101 1.27499 1.200077 1.142952 1.403367 1.31534 1.389286 1.164189 1.340347  
1.136859 1.109723 1.511629 1.563149 1.166487 1.444609 1.633134 1.25171 1.676723  
1.137259 0.869939 0.788935 0.964034 0.548505 0.77017 0.656276 1.012453 1.364003  
1.594052 1.665166 1.184503 1.665851 1.875549 1.240211 1.509063 1.290575 2.045123  
1.680979 1.14758 1.52654 1.616294 1.675158 1.872556 1.772681 1.515797 1.592625  
3.189225 3.804853 4.203994 3.062258 3.909689 3.598127 3.017233 3.139141 3.477016  
1.313176 1.073777 1.138426 1.224065 2.114304 1.57547 2.445998 1.996338 1.172046  
2.396907 1.860761 2.119559 1.930737 1.761162 1.999431 1.865518 2.1587 1.325443  
1.447127 1.084714 1.02574 1.400395 1.757161 1.291456 1.607913 1.174173 1.779664  
1.135639 0.579523 1.877924 1.487257 0.851949 2.518817 2.014119 1.579242 1.311274  
1.823531 1.274833 1.49437 1.407358 1.190089 1.675468 1.308328 1.172916 1.212407  
2.080475 0.853137 1.538552 1.28049 1.512927 1.190291 1.713427 1.369468 1.539772  
1.652922 1.642277 1.686285 1.836915 1.687729 1.561243 2.467236 1.750251 1.707313  
4.717604 3.675906 3.354482 3.525242 2.791397 3.676408 3.902837 3.498234 3.346669  
1.582811 0.994014 0.931722 0.862796 0.968682 1.177173 1.021002 0.673995 1.039286  
1.457981 1.641363 2.034408 1.24864 1.983116 1.462958 1.931425 1.825409 1.864527  
1.712765 1.686105 1.557633 1.390956 1.923091 1.390927 2.167229 1.672376 1.80592  
1.375848 1.096549 1.681315 1.169542 1.280504 0.690567 1.407887 1.267319 1.094484  
1.73263 1.760736 1.99514 1.757884 1.654873 1.714122 1.390877 1.646467 1.33379  
2.266902 2.190098 2.386606 2.089108 2.418388 2.037979 2.337972 2.506068 2.211084  
2.385215 1.630537 3.026179 2.0861 2.015811 2.028137 1.72629 1.59066 2.768162  
1.476457 1.418641 0.972672 2.218262 1.391127 1.555924 1.105659 1.257579 1.767959  
0.774937 0.739211 0.786769 1.224976 1.818279 1.39434 0.972202 0.897278 1.56069  
1.75437 1.493858 1.449885 2.279318 1.505744 1.4343 1.125748 2.004875 1.762146  
1.67541 1.014675 0.810521 1.412753 1.412396 1.460722 1.426016 0.996239 1.618988  
0.863753 1.026177 1.196577 0.828059 1.654341 1.191098 1.636576 1.096803 1.5243  
0.669967 1.137086 1.239974 1.079705 1.018987 0.831727 0.735127 0.749281 0.670376  
1.359483 1.156999 0.921973 1.147963 0.842141 1.739769 1.957009 1.886897 0.980615  
2.509864 1.954414 2.748087 2.424571 2.299589 1.560101 2.010461 2.570793 2.553771  
4.183911 3.096523 3.172256 2.983391 4.184484 3.319038 2.678666 3.486012 3.320586  
7.805889 8.101754 7.842194 8.363459 8.168864 8.476697 7.854942 8.334313 7.827591  
3.67446 2.813274 2.842154 4.698552 2.590503 3.030147 2.919125 3.361528 3.828743  
4.914993 5.821147 6.00143 6.50749 5.439711 6.039469 5.112524 5.354234 6.048062  
1.450553 0.965793 1.233809 1.166698 0.898326 1.036021 2.036845 1.825854 0.744703  
2.126857 2.298557 1.908196 1.873074 1.837339 2.134875 2.926753 2.957763 2.528228  
1.482272 2.121441 1.73081 2.077618 1.468928 1.660652 1.887083 1.498562 1.556896  
1.646615 1.317403 1.192148 1.234399 1.373998 1.550154 1.508421 1.354329 1.168547  
0.876168 0.893828 1.085092 1.448756 1.565969 0.888652 0.8649 1.32471 1.164027

5. 288837 5. 757131 5. 802755 5. 850891 5. 960803 4. 888356 5. 446217 5. 823826 5. 57207  
6. 523963 6. 511014 7. 075814 6. 443499 6. 929253 6. 836103 6. 191992 6. 498324 6. 410243  
1. 409544 2. 066874 1. 972732 2. 392476 1. 764312 2. 741427 2. 38005 2. 630095 1. 84223  
1. 061085 1. 004012 0. 990761 0. 811712 1. 885082 1. 517142 1. 347898 1. 09494 0. 992519  
1. 429625 1. 591667 1. 784987 1. 825947 1. 422587 1. 695037 1. 084275 1. 552506 1. 222381  
6. 952898 7. 489694 7. 187258 7. 037526 7. 249762 7. 18964 7. 188934 7. 212654 6. 635718  
5. 130845 4. 165023 4. 99746 3. 40156 4. 348846 3. 521302 5. 033417 6. 008229 6. 149511  
1. 412975 1. 412705 1. 135023 1. 928468 0. 852433 1. 621714 1. 19913 1. 897158 1. 404007  
6. 291298 6. 301698 6. 763044 6. 379859 6. 866706 6. 847143 6. 246482 6. 490183 6. 065871  
3. 02682 4. 412595 2. 733339 3. 665562 3. 424524 3. 549543 2. 928437 3. 019186 3. 230837  
1. 670915 1. 729577 1. 960325 1. 94442 1. 862392 1. 691493 1. 874322 1. 637084 1. 832856  
1. 422003 1. 54355 1. 018787 1. 096728 1. 737672 1. 767792 1. 108139 1. 203015 1. 892373  
5. 18784 2. 560412 3. 392122 3. 582313 4. 519222 3. 097865 2. 27364 2. 625379 3. 392992  
1. 637963 2. 04682 2. 470255 2. 162578 2. 172374 1. 585746 3. 036519 1. 272731 2. 778588  
1. 516376 1. 042828 0. 750197 1. 361358 1. 318739 2. 077851 1. 174457 0. 834659 1. 383074  
4. 784617 2. 041581 4. 596233 4. 36096 1. 904468 3. 543035 1. 480095 2. 41469 2. 338929  
1. 806861 1. 71387 1. 10757 2. 922652 1. 370735 1. 17758 1. 614975 1. 807118 1. 280414  
3. 381862 1. 901102 2. 452348 2. 585169 2. 116179 1. 893109 2. 57889 2. 334002 2. 285933  
2. 115764 1. 405981 1. 217712 0. 99293 1. 442233 1. 643665 1. 832173 1. 865113 1. 324144  
1. 46241 1. 43037 1. 483848 1. 246679 1. 134124 1. 757095 1. 098414 1. 321988 2. 007406  
2. 336835 2. 373161 2. 054124 2. 552986 2. 124594 2. 957192 2. 901648 2. 002834 2. 282281  
0. 958222 1. 326804 1. 465627 1. 207166 1. 227408 1. 210136 1. 102141 1. 013594 1. 053152  
4. 026491 2. 624759 3. 655532 2. 281932 2. 972785 2. 780736 2. 318621 1. 91524 3. 506686  
2. 900553 2. 000683 2. 567887 1. 877831 1. 789836 2. 41111 2. 935461 1. 82091 1. 774127  
1. 473203 1. 054712 1. 542355 1. 647994 2. 257558 1. 277061 1. 998232 1. 728767 1. 446503  
3. 256602 3. 371435 3. 540572 2. 553945 2. 375593 2. 788204 2. 620428 3. 295493 2. 5142  
1. 953921 1. 739444 1. 242425 1. 223839 1. 28859 1. 428833 1. 73069 0. 761316 1. 964798  
2. 078133 0. 88165 1. 664021 1. 235053 1. 737693 1. 585139 0. 832762 1. 349195 0. 915286  
1. 777085 2. 434594 2. 612723 1. 65066 2. 428349 1. 533723 1. 950287 1. 929817 2. 1681  
2. 064005 2. 495951 1. 764482 1. 269768 1. 884238 2. 165201 2. 414574 1. 639942 1. 975856  
1. 393888 1. 755525 1. 604263 2. 209127 1. 759395 1. 847142 2. 232116 1. 552948 1. 957801  
3. 440825 3. 883261 4. 067295 3. 546567 4. 608906 4. 787281 5. 076566 3. 808874 3. 860753  
2. 009826 1. 592659 1. 639858 2. 019854 1. 398102 1. 601008 1. 305457 1. 408144 1. 300554  
1. 170811 1. 124659 1. 441243 1. 153016 1. 281579 1. 958928 2. 069353 1. 607601 1. 322769  
1. 60999 2. 078469 1. 381883 1. 777827 1. 793426 1. 794317 1. 739241 1. 907516 1. 549289  
2. 367398 2. 40803 2. 306777 2. 701496 3. 280009 2. 39002 2. 653277 1. 862815 2. 166212  
1. 854989 1. 421636 1. 651781 1. 418913 1. 676571 1. 912396 1. 833176 1. 635095 1. 603563  
1. 645384 1. 724318 1. 102183 1. 759595 1. 538283 1. 600213 2. 053481 1. 483103 1. 627514  
3. 099365 3. 101412 3. 842684 2. 641308 3. 052292 2. 330664 2. 325594 2. 762359 2. 466329  
1. 534904 0. 713978 1. 026455 0. 958219 0. 998395 1. 207059 1. 451997 0. 838851 1. 51727  
1. 947009 1. 376344 1. 249739 1. 27875 1. 370156 1. 841666 1. 563784 1. 379397 1. 324241  
2. 08642 2. 608326 1. 721706 1. 839212 1. 864453 2. 348612 2. 30249 1. 589268 1. 614544  
1. 915967 2. 57388 1. 553757 1. 75866 1. 263307 1. 368002 2. 317918 0. 763178 2. 591444  
1. 56207 1. 360823 1. 98052 1. 357651 2. 196192 1. 806505 1. 520222 1. 220165 0. 94795  
3. 886911 4. 879037 4. 466661 4. 040858 4. 317663 4. 495134 3. 846599 3. 955835 4. 432108  
1. 838681 2. 365665 1. 369876 3. 748071 4. 016454 1. 973363 2. 496285 1. 748611 3. 7999  
1. 856012 1. 560362 1. 578142 1. 064014 1. 049446 1. 873257 1. 052453 1. 230623 1. 254621  
4. 859823 5. 239832 6. 240177 4. 71401 5. 084131 4. 989236 5. 207316 4. 715643 4. 604859  
2. 558683 1. 362587 1. 241967 1. 501634 1. 675649 2. 701056 1. 035634 1. 519252 1. 701132  
3. 735236 2. 090759 2. 172181 1. 95225 1. 954001 1. 430742 2. 326 2. 025595 2. 52296  
2. 898927 2. 583158 2. 699699 3. 193819 2. 070378 2. 144031 3. 655331 2. 211799 2. 23782

5. 111925 4. 047412 5. 092081 4. 454501 3. 299131 3. 967137 5. 302208 4. 655675 4. 853915  
5. 161627 5. 14235 5. 84019 5. 529106 5. 188914 5. 171643 4. 998581 6. 080963 5. 497873  
6. 130743 4. 454468 5. 280629 5. 101383 4. 224068 4. 507004 5. 075274 4. 952497 5. 690336  
2. 39012 1. 84869 1. 943736 2. 059046 1. 684878 1. 762872 2. 260718 1. 885203 1. 697822  
3. 281326 1. 943079 2. 014211 2. 824811 1. 885595 1. 945362 1. 737077 1. 986958 2. 458167  
2. 975583 2. 943474 2. 454468 1. 900535 3. 148469 2. 348758 1. 467424 1. 346294 1. 7641  
1. 839226 1. 40318 1. 486198 1. 402515 1. 507868 1. 629889 1. 700624 1. 231679 1. 236831  
5. 430296 4. 709004 5. 547863 3. 804178 5. 450693 3. 427667 4. 81451 4. 480024 4. 770936  
3. 098143 2. 925094 3. 305179 3. 052731 2. 304048 2. 677565 3. 338288 2. 323336 2. 487326  
5. 178285 6. 098973 5. 392392 4. 946396 5. 224067 4. 539604 5. 346475 5. 264657 4. 815553  
6. 660598 7. 830637 7. 30966 7. 425104 7. 611874 7. 234104 7. 382762 7. 357438 6. 640883  
2. 623237 2. 363373 2. 536201 2. 76012 1. 988854 2. 843819 1. 67403 2. 481923 2. 081997  
7. 134404 5. 754164 6. 941291 3. 999646 6. 696482 5. 802737 4. 878868 6. 402548 3. 123346  
10. 60417 10. 78735 10. 82311 11. 00447 10. 66836 10. 4791 10. 36413 10. 72791 10. 6318  
4. 921688 4. 252841 3. 620554 5. 616725 4. 339865 4. 552333 4. 474585 4. 14791 5. 15767  
1. 815702 1. 103792 1. 362488 0. 707402 1. 531087 1. 309145 2. 246874 1. 346085 1. 81959  
6. 322442 5. 563609 5. 711444 6. 267159 5. 661974 5. 795832 5. 835442 5. 816983 7. 011814  
3. 044609 3. 173366 3. 11592 2. 74367 3. 535605 3. 183009 4. 471191 3. 856981 3. 546219  
7. 525098 7. 264291 7. 771125 7. 404868 7. 597656 7. 255908 6. 941695 7. 530418 7. 196647  
6. 932914 7. 121833 7. 364063 7. 196506 6. 83623 7. 507136 7. 185362 6. 790286 6. 952304  
1. 073748 1. 231984 0. 880918 1. 150102 0. 861863 1. 566471 1. 880616 1. 024547 1. 262259  
7. 129314 6. 198556 6. 670424 6. 080926 6. 076573 5. 391442 6. 701309 6. 123159 7. 388884  
4. 492574 1. 448979 3. 3214 1. 461705 1. 647874 2. 380633 2. 549789 2. 437743 3. 334812  
2. 579937 3. 008407 3. 731006 2. 592473 3. 376336 3. 548728 3. 062944 2. 76956 2. 879535  
2. 586087 2. 250082 1. 690697 4. 21241 1. 763709 2. 018436 2. 384512 2. 579331 2. 588332  
5. 371492 5. 313306 5. 910122 5. 576889 6. 520531 6. 081646 5. 817511 6. 55073 5. 795555  
2. 721564 2. 141757 2. 447112 2. 119867 1. 851226 2. 715436 2. 56431 1. 84035 1. 93937  
5. 425416 5. 789241 5. 712153 5. 564478 5. 898673 5. 830188 7. 036403 5. 968983 5. 84694  
6. 05554 6. 418783 6. 257306 6. 865846 7. 000922 6. 501894 6. 690683 6. 717338 6. 540513  
2. 265022 1. 458217 1. 940117 1. 552125 2. 041458 1. 540787 2. 432769 2. 06896 2. 11326  
2. 477339 3. 199559 2. 494306 3. 648138 2. 189105 2. 394928 2. 982579 2. 328295 2. 928452  
3. 004801 2. 362898 2. 717927 1. 852444 3. 16726 2. 833426 3. 738424 3. 279103 2. 909659  
2. 783432 2. 417561 2. 712162 2. 693125 2. 949513 2. 421898 3. 036287 2. 732629 2. 359089  
3. 553335 2. 113348 1. 897133 2. 925826 2. 329689 2. 197016 4. 252396 3. 552928 2. 587219  
2. 037379 2. 099147 2. 614879 2. 191447 2. 739078 3. 89382 2. 940987 2. 605272 3. 825981  
8. 726695 9. 66247 9. 657948 9. 389818 9. 6224 9. 379254 9. 287101 9. 700926 9. 324631  
2. 381111 2. 911943 2. 856632 3. 291015 2. 138918 2. 071722 2. 393678 2. 106338 2. 089096  
2. 753606 2. 83858 2. 998806 3. 604264 2. 777981 1. 909915 3. 595357 4. 082622 3. 500695  
5. 851042 2. 860567 5. 057047 4. 591265 5. 322159 5. 689572 5. 5123 5. 648291 6. 050624  
2. 196684 2. 108685 2. 453684 2. 544234 2. 785812 2. 408946 2. 705922 1. 95283 2. 595893  
3. 122341 2. 912378 3. 08967 2. 682996 2. 684498 3. 239672 3. 81683 2. 930442 3. 391295  
1. 472622 1. 189249 1. 486699 2. 29751 1. 636061 1. 828982 2. 620357 1. 911346 1. 767598  
4. 786192 4. 094703 4. 021221 3. 90677 4. 169546 4. 056013 3. 999113 4. 240619 4. 122227  
8. 877876 8. 270458 8. 561936 8. 829331 8. 837631 8. 93255 8. 605207 8. 630627 8. 938844  
3. 744371 3. 175456 4. 507193 3. 925867 4. 068328 3. 326434 3. 704295 4. 429333 3. 249306  
2. 313549 1. 731369 2. 244349 2. 151992 1. 360582 1. 687868 2. 027908 1. 807242 3. 062287  
2. 49526 2. 263832 1. 300261 1. 44539 1. 582441 1. 551639 1. 118981 1. 608167 1. 416077  
3. 685532 2. 289112 2. 29747 1. 453729 1. 131842 1. 665767 1. 295142 2. 063067 1. 020453  
0. 904763 0. 994805 0. 951521 1. 076462 0. 586955 0. 806434 1. 525315 1. 346303 0. 990699  
11. 87761 11. 74614 11. 52107 12. 00381 12. 02892 12. 04444 11. 79516 11. 65371 11. 71446  
1. 954662 2. 379646 2. 644014 2. 115954 2. 421005 2. 263615 1. 885899 2. 009722 2. 7855



6. 215464 3. 395701 3. 618217 3. 026613 4. 099041 2. 554684 2. 651527 3. 224864 3. 312824  
1. 86493 1. 768973 1. 969842 1. 667934 1. 741742 2. 115924 3. 68046 1. 600723 1. 841012  
1. 979473 1. 372346 1. 540154 1. 446896 1. 178887 1. 058229 2. 06001 1. 558233 1. 120771  
5. 111726 5. 394651 4. 926328 5. 111988 5. 098187 4. 675463 5. 136646 5. 137533 4. 937492  
5. 200704 5. 333434 5. 078094 7. 061947 5. 826104 5. 880931 6. 973352 6. 74789 6. 590329  
8. 204891 6. 066776 7. 530444 7. 434492 6. 809684 6. 295194 7. 179885 6. 46069 8. 340184  
3. 476102 4. 570325 3. 650683 4. 187094 2. 143387 2. 648033 2. 586259 3. 891886 2. 603889  
10. 77676 11. 23428 11. 22814 11. 23777 11. 26186 11. 04778 11. 4095 11. 20787 11. 13634  
3. 539235 4. 808322 4. 878834 2. 785685 4. 897126 4. 017756 3. 680121 2. 533228 4. 411922  
3. 152484 3. 086274 3. 089151 2. 776797 3. 744829 3. 384501 3. 195938 3. 081909 3. 035366  
4. 272558 2. 200628 3. 252647 2. 604173 1. 974836 3. 941835 1. 866487 1. 649645 2. 933051  
2. 193241 2. 161291 1. 884819 2. 925623 3. 203023 2. 011075 1. 926042 2. 834939 2. 189758  
0. 947033 1. 67545 0. 619996 1. 322359 0. 786086 0. 974559 1. 430458 0. 945168 0. 689302  
5. 013151 5. 569844 5. 619905 6. 08845 5. 655536 5. 500942 6. 079591 6. 412874 6. 39312  
7. 676892 3. 59651 4. 005208 2. 361854 4. 768801 6. 395219 4. 952989 2. 91057 3. 741007  
1. 481371 1. 126569 1. 317193 1. 249511 1. 983218 1. 276659 1. 294182 1. 544058 0. 927878  
5. 592799 3. 723957 3. 832009 3. 317683 4. 106267 4. 136709 5. 147102 2. 636394 3. 826328  
2. 739673 4. 118846 3. 134134 3. 039152 2. 813965 2. 895763 3. 402684 3. 022527 3. 557311  
2. 20055 1. 986683 1. 899554 2. 93058 1. 66884 1. 974786 2. 63976 1. 959741 3. 158973  
1. 687351 1. 430977 1. 375093 1. 368569 1. 762501 1. 716894 1. 4727 0. 922489 0. 879334  
2. 200377 2. 60635 2. 22007 2. 86345 2. 086397 3. 746372 2. 245778 1. 973385 3. 238297  
3. 814811 2. 197042 2. 688948 1. 776885 3. 242755 2. 902742 3. 33942 3. 481784 2. 823369  
8. 874482 8. 152957 8. 503733 7. 211044 8. 076876 7. 846693 7. 399933 7. 926837 8. 327088  
8. 602155 4. 765593 5. 139957 2. 69294 4. 645639 2. 923269 6. 059015 8. 242089 7. 288476  
7. 082423 2. 020073 3. 720719 1. 832009 3. 504032 9. 371472 3. 376564 3. 147597 3. 237254  
2. 654688 1. 778115 2. 693795 2. 649422 2. 250986 2. 504295 2. 189703 1. 918894 1. 954731  
4. 118356 2. 266469 2. 654982 1. 615369 2. 76371 5. 270715 4. 780937 3. 049534 4. 075071  
6. 697156 4. 315502 2. 949877 3. 063932 3. 847335 6. 896311 3. 59435 4. 309098 3. 648525  
2. 401876 2. 931985 3. 301907 2. 137044 2. 098023 2. 925316 1. 818265 2. 723447 2. 537752  
1. 744907 3. 273137 3. 00884 3. 449086 3. 05941 1. 859779 4. 40131 3. 41151 4. 107056  
5. 619801 3. 651307 2. 407126 1. 87 3. 115333 6. 744337 4. 023856 2. 048956 1. 702075  
9. 076952 6. 120424 7. 155292 4. 128703 4. 692755 10. 51264 8. 720751 7. 031887 7. 079146  
7. 343209 7. 043536 7. 013218 7. 197824 7. 037344 7. 072002 6. 892438 7. 324778 7. 246529  
10. 10284 10. 08798 10. 29058 10. 51664 10. 28122 10. 50962 10. 11205 10. 10422 10. 38134  
3. 035372 0. 362703 0. 830959 0. 867111 2. 054091 1. 023637 1. 370527 1. 556198 0. 926835  
2. 865616 2. 605681 2. 891771 2. 764737 2. 178847 2. 528727 2. 644587 2. 392568 2. 716955  
4. 36446 5. 38937 4. 314916 4. 303495 4. 288682 4. 207555 3. 903532 4. 891228 4. 832512  
4. 038975 4. 391502 3. 166048 4. 524373 4. 371798 3. 332028 3. 243854 3. 906767 2. 970944  
1. 368585 1. 310608 1. 647538 1. 353569 1. 023234 1. 676954 1. 432517 0. 794625 1. 023234  
4. 745217 4. 820334 5. 959604 5. 297879 4. 738859 4. 194923 2. 808664 4. 21151 4. 537066  
2. 473804 4. 020173 2. 563219 1. 976862 3. 01345 3. 993455 3. 776984 2. 864291 3. 023719  
4. 87555 5. 51957 4. 918657 4. 545576 5. 449153 5. 248115 4. 640193 5. 572554 5. 214289  
2. 826922 2. 302359 2. 559873 1. 699975 2. 153495 1. 162008 1. 532167 2. 498381 2. 079971  
1. 801671 1. 494757 1. 444591 1. 502052 1. 418332 2. 28657 1. 992772 1. 186751 1. 461614  
5. 011248 1. 502002 2. 455317 1. 880619 2. 552949 1. 434648 1. 844208 1. 599918 2. 177704  
2. 206813 1. 892578 1. 786928 2. 52256 1. 00236 2. 225585 3. 011905 1. 798099 1. 466411  
1. 537057 1. 188011 1. 278841 1. 137817 1. 115294 1. 374398 2. 060979 1. 051668 1. 697567  
3. 601689 3. 79108 3. 563186 2. 735388 3. 46701 3. 827194 3. 225589 3. 845689 3. 048692  
0. 882694 1. 967477 1. 381415 1. 488773 1. 090798 0. 976082 1. 877531 1. 658304 1. 007043  
2. 683685 0. 599321 0. 55001 1. 130986 0. 772506 0. 531303 0. 792332 1. 603364 0. 743989  
3. 37181 2. 541292 4. 069633 4. 427179 3. 363509 3. 269912 2. 849151 3. 627176 3. 228518

5. 255046 3. 759308 4. 660329 3. 326972 4. 297884 3. 776513 4. 403197 4. 200251 3. 600358  
2. 927294 1. 84675 2. 443845 1. 857022 1. 971541 1. 538783 2. 341048 1. 931684 2. 528827  
1. 214324 0. 847184 0. 908722 1. 179988 0. 484266 1. 2348 0. 935694 0. 950945 0. 530491  
2. 986084 2. 082863 1. 399046 1. 461522 2. 29425 2. 01966 1. 380747 2. 382324 2. 406158  
0. 95378 1. 019527 1. 07584 1. 456962 1. 352694 1. 725948 1. 965297 0. 885521 0. 771691  
4. 925474 4. 919933 4. 401183 4. 97244 4. 287479 5. 243276 4. 758338 4. 996207 5. 145749  
6. 370908 4. 207083 5. 068409 4. 345371 3. 844674 3. 393696 4. 911251 4. 167942 6. 011018  
5. 572281 5. 275513 5. 236951 4. 649446 3. 977676 5. 081917 5. 723384 6. 100773 5. 275315  
2. 245695 1. 641759 1. 992534 1. 769009 2. 238356 1. 985551 2. 284456 1. 395111 1. 629836  
5. 0031 5. 27513 4. 482284 4. 806012 4. 381059 4. 17449 5. 641103 5. 326197 4. 681967  
0. 718786 0. 856594 0. 655856 0. 79957 0. 949591 1. 188188 0. 694306 0. 889793 0. 980198  
0. 897855 1. 418427 0. 917264 1. 041675 0. 88368 1. 049286 1. 386235 1. 458528 0. 954891  
4. 822924 6. 685326 6. 665714 6. 838676 6. 188301 5. 747945 6. 512889 6. 108289 6. 610181  
1. 520917 1. 230932 2. 014392 2. 234909 1. 728196 1. 639537 1. 742775 1. 753165 1. 549818  
2. 557862 1. 714619 1. 954413 1. 268538 1. 933562 1. 97938 2. 702345 2. 352934 1. 625129  
1. 178772 1. 182049 0. 837759 1. 22801 1. 162625 0. 936148 0. 936855 1. 049089 1. 125227  
2. 841257 2. 615211 3. 530912 2. 055672 2. 753547 3. 411902 2. 29494 3. 061908 2. 779328  
1. 853538 2. 225768 1. 758035 2. 163268 1. 88438 2. 216634 2. 198305 2. 00323 1. 545216  
1. 753368 3. 025448 3. 139471 1. 372696 1. 943033 2. 153453 1. 326205 3. 215658 2. 287003  
2. 26562 1. 822978 2. 500643 1. 465009 1. 925901 2. 337683 2. 035215 1. 824329 2. 473266  
5. 055222 5. 026412 5. 181396 5. 08591 4. 835271 3. 999481 3. 900857 4. 850265 3. 741054  
1. 27366 2. 447549 3. 34462 2. 025112 1. 840785 2. 238544 3. 406403 2. 108311 2. 229106  
8. 659241 5. 102979 2. 468796 2. 505575 3. 761542 7. 694358 4. 842631 3. 192688 4. 421081  
7. 218255 6. 786289 6. 582865 6. 607331 6. 992678 5. 832446 7. 120643 6. 927284 7. 06218  
1. 184445 1. 615006 2. 120706 1. 828544 2. 326049 1. 951465 2. 258519 1. 511993 1. 860613  
1. 926495 1. 720341 2. 015641 2. 386372 1. 734496 1. 659878 2. 318624 1. 514218 1. 691175  
1. 892025 1. 303541 1. 971515 2. 310103 1. 452281 1. 623278 1. 64889 1. 644976 2. 884076  
2. 708328 1. 82732 2. 910625 2. 605537 2. 694541 2. 659235 3. 155117 2. 921794 2. 20852  
7. 820013 8. 386958 7. 737149 8. 08485 8. 493892 8. 003778 7. 981698 7. 901131 7. 769028  
2. 479964 4. 493519 5. 054238 5. 090938 4. 783816 5. 192716 3. 237154 5. 324304 4. 291236  
1. 643746 1. 238395 1. 092893 1. 177998 1. 274183 1. 061604 1. 312484 1. 652404 1. 073189  
1. 074048 1. 900161 2. 827798 2. 416299 1. 561756 3. 050626 1. 895289 1. 485012 3. 230572  
6. 038425 6. 88976 6. 656307 6. 72037 6. 885753 6. 989248 6. 938716 6. 393832 6. 518879  
4. 939386 6. 206768 5. 479196 4. 811394 5. 4371 6. 195743 5. 342527 6. 556854 4. 709607  
1. 915769 2. 327042 2. 436645 1. 900133 2. 210328 3. 33591 2. 483522 3. 865445 2. 151439  
0. 726902 1. 287526 0. 707229 1. 357316 0. 791199 0. 914852 0. 738868 0. 567202 0. 962861  
2. 472552 2. 165001 2. 287126 2. 04298 1. 965819 2. 368789 2. 619758 2. 511983 1. 878188  
4. 211636 4. 172245 2. 885442 3. 729164 3. 992521 4. 800718 3. 88519 3. 500768 4. 056819  
3. 039369 4. 802699 2. 91446 6. 076865 4. 838566 3. 51874 4. 36143 4. 680971 3. 185584  
2. 919016 4. 979429 3. 450279 3. 465919 4. 428662 5. 337231 4. 688313 5. 236873 2. 523093  
1. 329201 1. 457411 1. 401818 1. 307881 0. 94843 1. 160178 1. 114204 1. 11903 1. 381026  
5. 76477 5. 480404 5. 341017 5. 266024 5. 172313 5. 418871 5. 855443 5. 008353 5. 22823  
1. 339302 0. 888152 0. 945044 1. 202007 1. 529766 1. 023089 0. 930917 1. 239328 1. 047889  
5. 885862 5. 571405 6. 153085 6. 555287 5. 424732 6. 504884 6. 097475 5. 979387 6. 156608  
1. 808398 1. 462142 1. 537412 1. 11372 1. 581905 1. 710639 1. 669953 1. 230313 1. 400223  
2. 232955 3. 597752 3. 677444 2. 570719 2. 203897 2. 595125 2. 494402 3. 159367 2. 38721  
2. 037799 2. 468775 1. 918306 2. 257652 1. 55243 2. 598126 2. 592099 1. 379059 1. 271699  
2. 21221 2. 209625 1. 332739 2. 175913 1. 497378 2. 08488 2. 646467 1. 31452 1. 20057  
4. 079122 4. 167346 4. 945062 4. 618248 4. 467125 4. 627222 3. 955696 4. 947964 5. 376002  
9. 311052 9. 549937 9. 324125 10. 09168 9. 433055 9. 887939 9. 387948 8. 839206 9. 279794  
2. 232206 4. 25351 3. 035215 2. 488389 1. 650874 2. 413293 2. 293426 3. 038821 1. 988059

2. 410182 2. 658714 3. 273413 2. 366078 3. 530247 3. 197555 2. 430742 2. 270079 3. 985603  
1. 539608 1. 999465 2. 130786 2. 566434 2. 161233 2. 461897 3. 233166 2. 471363 2. 254181  
1. 536978 3. 380983 1. 678812 1. 757979 1. 981825 1. 959152 3. 397315 2. 821671 2. 039724  
1. 608151 1. 578804 1. 460873 1. 560909 2. 295824 2. 122981 1. 958337 1. 616096 2. 00706  
1. 096354 1. 753425 2. 291069 1. 64693 1. 265387 1. 746746 2. 368914 1. 787165 1. 120038  
3. 9814 3. 683572 3. 188155 3. 564537 4. 047182 4. 287569 3. 284391 3. 40751 3. 499939  
1. 694351 2. 416601 1. 563086 2. 020452 1. 666277 1. 873984 1. 308259 1. 608153 1. 384192  
2. 579419 2. 440351 2. 939639 2. 430121 1. 746543 1. 9962 2. 993176 1. 963751 2. 225328  
1. 540433 1. 417505 1. 480093 2. 121336 1. 490321 1. 673555 1. 508275 1. 656233 2. 110194  
3. 459711 4. 082144 4. 354926 4. 163605 3. 869703 5. 718694 4. 029658 3. 920404 3. 855131  
6. 83988 7. 082638 6. 545146 7. 062061 7. 085052 7. 229499 7. 193886 6. 549601 6. 518959  
2. 26779 1. 564016 1. 777879 1. 937574 1. 541482 1. 825488 1. 593674 1. 508383 1. 883432  
8. 71468 8. 106879 8. 762207 8. 681772 7. 951463 8. 538758 8. 960679 7. 9774 8. 783241  
3. 823022 4. 771703 4. 974962 4. 703973 4. 470373 5. 02046 4. 640784 4. 206998 4. 234401  
2. 433844 2. 277187 2. 290134 2. 252486 2. 661231 1. 987668 1. 60986 1. 758479 1. 841935  
1. 188264 1. 255812 1. 083822 1. 532642 1. 568542 1. 290383 1. 763542 1. 160297 1. 376632  
2. 440369 1. 444883 1. 406636 1. 938466 1. 9947 1. 40386 2. 98226 1. 330736 2. 053406  
1. 163472 1. 048932 1. 031395 1. 442512 1. 495889 1. 52531 1. 201703 1. 042363 1. 261572  
1. 588722 1. 338903 1. 311763 1. 727555 1. 755565 2. 053289 1. 784924 2. 039741 1. 848116  
2. 168343 2. 611793 2. 428522 2. 702674 2. 205994 1. 875865 1. 865864 1. 809646 2. 631915  
8. 45019 8. 358203 8. 463383 8. 647667 8. 52844 8. 706049 8. 173693 7. 674093 8. 147073  
0. 772666 0. 945097 0. 718763 0. 751531 1. 057222 1. 254673 1. 028414 1. 010643 0. 82368  
1. 695419 1. 30107 3. 380831 1. 38095 1. 164221 1. 144473 1. 456022 1. 464787 2. 521254  
1. 523116 1. 283856 1. 597327 1. 268152 1. 518963 2. 000792 1. 312758 1. 576452 1. 622253  
5. 999605 7. 239578 6. 179291 7. 532883 7. 884813 7. 028838 7. 32526 6. 75938 6. 905823  
7. 241198 8. 43511 5. 407877 9. 183422 8. 294611 7. 263294 7. 230616 8. 141126 7. 736572  
6. 830514 6. 824988 6. 982507 7. 252531 6. 460173 6. 255032 6. 487792 6. 529356 6. 795626  
6. 434268 3. 950177 4. 053445 1. 972481 2. 73209 3. 893745 3. 274036 2. 319197 3. 420958  
4. 422725 2. 46899 3. 632385 3. 179502 3. 915152 3. 542031 3. 061412 3. 257416 4. 154909  
4. 302533 5. 049695 5. 322938 5. 582957 5. 102012 5. 005016 5. 150579 6. 034784 4. 879386  
1. 011752 0. 728201 1. 370546 1. 16601 1. 353877 1. 284297 1. 975211 1. 437276 0. 924552  
2. 708394 2. 642852 3. 81005 1. 588313 3. 415985 1. 873226 2. 078455 3. 264484 1. 673291  
1. 447969 2. 017019 1. 902977 1. 418067 2. 572857 1. 781787 1. 937539 1. 619189 1. 653289  
1. 925792 1. 296575 2. 107844 1. 714946 0. 927446 1. 056318 1. 19757 2. 295773 1. 108171  
5. 874746 6. 871111 5. 959136 7. 406659 6. 555566 7. 134326 5. 942909 6. 70261 6. 101563  
2. 887376 2. 082778 1. 93352 2. 353688 2. 177674 2. 010706 2. 45344 2. 041442 2. 415489  
1. 463071 1. 365056 1. 607071 1. 842356 1. 644089 2. 37902 1. 963948 1. 801947 1. 132161  
1. 891382 2. 050714 1. 568394 1. 914533 1. 029592 1. 73129 1. 692169 1. 267862 1. 343044  
1. 925008 1. 579458 1. 807798 1. 339103 1. 274494 1. 715671 2. 718405 1. 869618 1. 037177  
3. 325139 3. 621643 2. 63661 3. 920535 2. 715187 4. 210597 2. 852995 2. 896118 3. 043166  
2. 33881 1. 75796 2. 648539 2. 326012 1. 855657 2. 936466 2. 16534 1. 775118 1. 77654  
1. 599649 1. 453022 1. 261195 1. 46261 2. 014995 1. 563852 2. 036588 1. 903556 1. 738824  
3. 394706 2. 917933 3. 105196 2. 268307 2. 338214 4. 125605 5. 197488 4. 784197 2. 713819  
5. 759951 6. 639808 6. 577531 7. 541176 5. 808852 6. 80204 5. 912019 5. 824916 5. 827209  
8. 260451 8. 270445 8. 289478 8. 529725 8. 745149 8. 090137 8. 112429 8. 545719 8. 373478  
6. 396404 6. 868057 7. 015857 6. 383536 7. 037582 6. 935291 6. 950603 6. 918354 6. 78223  
8. 045486 7. 136734 7. 029989 6. 393822 6. 207446 7. 57043 6. 651545 7. 115544 7. 394131  
8. 560027 8. 697023 8. 337203 8. 989182 8. 581485 8. 402234 9. 332477 8. 910134 8. 872016  
3. 846893 4. 441285 3. 842013 4. 924912 4. 838621 3. 823491 3. 769121 3. 754769 4. 31001  
7. 536956 5. 863723 6. 429036 5. 856806 5. 144018 5. 313207 6. 031957 5. 876948 6. 986116  
4. 805846 4. 763416 4. 947324 4. 565875 4. 753902 5. 240387 5. 638892 5. 801255 5. 019056

5. 489085 6. 276689 5. 654448 5. 212962 6. 265538 6. 704999 6. 818364 6. 816884 6. 240216  
1. 357391 1. 25493 1. 496712 1. 515018 1. 819481 1. 680712 1. 523133 1. 210945 1. 537165  
2. 942989 3. 770219 3. 329831 3. 627175 4. 024947 4. 523364 3. 596674 3. 623221 4. 127061  
1. 538669 1. 276388 1. 158661 1. 696984 1. 25749 1. 268982 1. 064729 0. 919308 1. 442595  
2. 31683 4. 478889 4. 006501 4. 186306 5. 688249 2. 976485 4. 358026 3. 38047 2. 724328  
1. 731177 1. 455523 2. 151776 1. 413446 2. 098245 1. 854995 1. 619144 1. 987668 2. 317708  
4. 970559 5. 834803 4. 9961 5. 242412 5. 377606 5. 43708 4. 471302 5. 156158 4. 57067  
2. 307858 1. 663691 1. 702872 1. 910097 2. 367052 1. 555405 2. 079302 1. 926867 1. 641971  
1. 752897 1. 418684 1. 284374 1. 862543 2. 08425 1. 970009 2. 657778 1. 724273 1. 575038  
2. 528288 2. 467131 2. 515015 2. 630979 1. 927339 2. 239284 3. 288282 1. 872008 2. 515536  
1. 191902 1. 408959 2. 053868 1. 287907 1. 322058 1. 341563 1. 119999 1. 182934 2. 649632  
5. 632296 8. 336772 8. 199651 7. 584743 5. 998161 7. 279149 8. 418791 6. 784775 5. 033143  
4. 661097 4. 806115 4. 335801 4. 955499 4. 526022 4. 962469 4. 739067 4. 416973 4. 792032  
2. 908574 2. 905389 2. 173639 2. 287855 2. 091939 2. 487083 2. 60281 2. 484547 3. 097905  
1. 754207 1. 521605 1. 251163 1. 858874 2. 229287 2. 084934 2. 201699 1. 533858 2. 040234  
3. 859134 5. 042344 5. 208253 4. 458484 5. 455611 5. 456932 4. 931816 4. 816306 4. 588622  
4. 37253 6. 376658 5. 510775 6. 507917 6. 812444 6. 087147 5. 696674 6. 398804 5. 707079  
4. 287912 4. 711038 4. 865185 4. 421406 5. 08144 5. 213884 4. 520757 5. 117688 4. 519572  
3. 327815 3. 874697 3. 624799 2. 894261 3. 97005 5. 044648 3. 31497 4. 187684 3. 642306  
5. 976131 6. 388317 6. 003636 5. 887271 6. 138023 6. 094914 6. 682179 6. 455179 6. 187387  
4. 882492 5. 906624 5. 49342 5. 5361 5. 35074 5. 667772 4. 488518 5. 71694 4. 941871  
2. 207386 2. 097306 1. 49687 1. 517273 1. 474217 2. 732793 2. 141695 1. 431164 1. 698495  
3. 341764 2. 895567 3. 666986 3. 2969 2. 631405 3. 401453 3. 586713 3. 294821 3. 336284  
2. 540301 2. 949757 3. 407866 4. 240196 2. 754649 2. 694163 4. 195684 3. 805766 3. 51219  
3. 423621 2. 050647 2. 422342 2. 27909 2. 196772 2. 294367 2. 651188 2. 871282 2. 317536  
6. 593758 6. 130284 6. 161613 6. 13017 5. 942833 6. 147235 5. 825338 5. 498821 6. 266713  
2. 80745 1. 876829 1. 96393 2. 421236 2. 078266 2. 111923 2. 28861 2. 084194 1. 756616  
8. 760529 9. 012541 8. 662274 8. 767894 8. 585761 8. 650773 9. 192848 8. 579983 8. 803016  
2. 784906 2. 770714 5. 610177 2. 447902 3. 642178 0. 695698 2. 550329 3. 220436 3. 414194  
2. 152973 3. 21699 2. 419033 1. 864258 1. 995862 2. 336068 2. 804342 2. 372519 1. 884912  
4. 467311 5. 255147 5. 883004 5. 039292 5. 202665 4. 426515 3. 627797 5. 598039 4. 968485  
4. 066717 3. 927014 3. 926664 4. 075113 4. 353979 3. 356346 3. 222391 3. 872034 3. 531388  
2. 133557 3. 455294 3. 264602 3. 397502 3. 576202 3. 525758 3. 484306 3. 457318 3. 971362  
7. 401568 7. 057273 7. 102765 7. 096898 7. 732335 6. 782279 7. 208819 6. 463961 7. 628479  
3. 201262 3. 157165 3. 933907 5. 121328 3. 842186 4. 352099 4. 899777 3. 385832 3. 134577  
5. 54059 6. 419569 6. 308864 5. 751043 6. 363331 5. 323435 5. 634433 6. 185545 5. 86053  
6. 111614 6. 239128 7. 027756 7. 419138 6. 111425 7. 829813 6. 780176 6. 453843 6. 418332  
6. 71864 7. 126154 7. 205609 7. 24606 7. 153468 7. 329209 6. 766794 6. 23082 6. 830086  
4. 056852 5. 313563 4. 731207 4. 445769 4. 125777 5. 235325 4. 529278 4. 780037 4. 23108  
2. 040149 1. 802497 1. 5138 2. 209257 1. 442848 1. 498208 1. 818304 2. 058209 1. 724632  
2. 698888 2. 665937 2. 610329 4. 007993 3. 19752 2. 532303 2. 173152 2. 648288 3. 107199  
4. 34322 3. 554183 3. 913491 5. 079627 5. 24518 3. 828249 5. 071159 3. 287669 4. 588504  
2. 618548 3. 219758 3. 425956 4. 071217 2. 773854 4. 1599 3. 716677 3. 762694 3. 28834  
3. 709938 3. 410351 2. 835353 3. 856779 3. 773775 3. 705011 4. 455298 4. 209621 4. 018699  
2. 36983 3. 406189 4. 1132 3. 699179 4. 340804 4. 224689 3. 779835 4. 402733 2. 544463  
1. 861993 3. 145083 3. 4489 1. 710913 2. 258729 1. 962563 1. 690359 2. 163003 1. 653973  
2. 759704 1. 323706 2. 027742 2. 358803 1. 232858 1. 296878 1. 945988 1. 673311 1. 944141  
2. 042509 1. 266655 1. 749451 1. 938234 2. 597614 2. 68813 4. 486781 2. 27921 2. 014441  
7. 271476 8. 148528 7. 864773 8. 377187 8. 437406 8. 86224 8. 742055 7. 735499 7. 9411  
4. 018563 4. 111456 3. 566602 4. 568959 3. 556061 3. 352918 5. 151915 3. 187124 4. 355842  
1. 978396 1. 833623 1. 187257 1. 513313 1. 086045 1. 874334 1. 592506 1. 609015 2. 369899

10. 0785 10. 46279 10. 48586 10. 74695 10. 74272 10. 66879 10. 34248 10. 43385 10. 40073  
2. 792978 3. 332043 4. 148032 3. 786608 3. 357524 4. 163037 4. 656029 3. 405101 4. 181774  
4. 452544 5. 412596 4. 410886 6. 256242 5. 753121 6. 299781 5. 198263 4. 247052 5. 107347  
2. 562431 2. 183368 3. 151434 2. 886355 2. 628344 2. 662544 2. 049264 2. 012967 2. 545823  
4. 558668 4. 402448 4. 946207 5. 108659 5. 674697 5. 071289 4. 705737 4. 340597 4. 597745  
4. 298529 5. 343185 5. 209544 5. 618917 4. 850904 6. 290445 4. 943847 4. 816954 4. 306704  
2. 020932 1. 767533 1. 830164 2. 174496 2. 136206 1. 657486 2. 296022 1. 902043 1. 961219  
1. 990302 1. 916591 1. 942489 1. 885539 2. 440682 2. 003729 1. 491065 2. 474106 1. 540921  
2. 429095 3. 187051 3. 076679 3. 635095 3. 916381 4. 287016 3. 541815 3. 711363 3. 053911  
2. 016909 1. 998406 2. 425239 2. 018174 2. 277057 1. 69347 1. 960514 1. 481765 2. 193114  
9. 627214 9. 936608 9. 597829 9. 800582 10. 10802 9. 462031 9. 778655 9. 752015 9. 718413  
2. 356215 2. 445698 2. 628041 2. 157721 2. 321014 4. 10936 2. 669212 2. 963302 1. 882319  
8. 980201 9. 393048 9. 026246 9. 574141 9. 006779 9. 446985 9. 134925 8. 802887 9. 339195  
3. 99897 4. 551591 4. 254261 3. 694683 3. 809256 5. 385105 4. 854559 4. 196637 4. 727046  
3. 870934 3. 215204 4. 09346 3. 034069 3. 745776 3. 153611 3. 779083 3. 353728 4. 01136  
7. 36549 8. 389004 8. 830434 8. 248029 8. 103145 8. 786728 8. 270458 8. 899863 8. 705707  
3. 032905 2. 072367 2. 523754 2. 420638 2. 574069 2. 428385 2. 337298 1. 928488 2. 166388  
5. 376497 5. 523237 5. 485003 5. 064391 5. 692797 5. 388319 5. 935536 6. 178066 5. 99006  
7. 008364 6. 967005 7. 416444 6. 944407 6. 630391 7. 496683 7. 224108 7. 123432 7. 066467  
2. 193869 2. 582024 3. 120274 2. 585134 2. 716166 5. 080434 5. 960061 4. 425068 3. 146357  
2. 180389 2. 430513 2. 660051 2. 909944 2. 388138 3. 715944 2. 226902 1. 984917 1. 89829  
9. 284328 10. 13917 9. 791177 9. 999444 9. 965539 9. 891611 9. 742091 9. 951024 9. 90061  
3. 400275 1. 062146 1. 857267 2. 529771 1. 869116 1. 601495 1. 57556 1. 8323 1. 619144  
2. 339455 2. 750145 2. 024633 2. 723193 4. 7729 2. 404568 4. 956738 3. 340243 2. 348624  
2. 391396 2. 116773 2. 253191 2. 732081 2. 166781 2. 423859 3. 488185 1. 942765 2. 386856  
6. 699891 6. 838232 6. 589196 6. 504899 6. 718759 7. 17249 6. 486899 6. 728416 6. 800539  
7. 558751 6. 110276 7. 250727 5. 856172 6. 048249 5. 452403 5. 821409 5. 941503 7. 388161  
2. 325272 1. 717982 1. 950563 2. 439759 1. 612927 1. 70329 1. 22879 1. 973185 1. 654299  
1. 503584 2. 312465 1. 389766 1. 503356 1. 508609 1. 218558 1. 35581 1. 342345 2. 364277  
7. 507742 8. 169394 7. 747188 8. 024388 8. 090291 7. 833674 8. 054216 8. 30131 7. 983625  
6. 586672 5. 903506 5. 540961 6. 32978 6. 162906 6. 111858 6. 392715 5. 801745 6. 588709  
5. 044496 4. 296546 4. 833835 5. 191734 5. 134201 5. 463604 4. 931984 4. 943587 5. 360234  
3. 200735 2. 610477 2. 328081 2. 752844 2. 692862 2. 555042 2. 587093 3. 053702 2. 879702  
3. 344093 4. 772193 5. 020493 5. 401632 5. 286988 5. 451361 4. 751716 4. 732191 4. 912429  
5. 25718 4. 971604 5. 386663 6. 117987 6. 088293 5. 158706 5. 705531 5. 094308 5. 818303  
5. 801118 4. 758147 4. 748713 4. 553214 4. 82114 4. 444841 4. 901972 4. 823104 5. 54166  
3. 136487 3. 186254 3. 693004 3. 677396 4. 005076 3. 669561 4. 17774 3. 174205 3. 303697  
6. 365322 5. 498504 5. 868549 5. 604364 5. 720095 5. 561431 4. 80087 5. 423198 5. 775694  
3. 229672 1. 940337 1. 947263 1. 690833 1. 776563 1. 850573 3. 298392 1. 98245 2. 100081  
3. 868163 2. 540348 3. 077247 4. 203297 4. 219836 3. 394577 2. 923731 2. 554779 3. 189417  
8. 318443 8. 20956 8. 210694 8. 854664 8. 180977 8. 3586 8. 768671 8. 35084 8. 14291  
5. 500338 6. 182766 6. 190272 5. 966541 5. 504887 5. 795501 6. 132909 5. 416119 5. 363574  
3. 299284 3. 37581 3. 314116 3. 540482 3. 66599 4. 425904 3. 873082 3. 113454 2. 938284  
4. 760064 5. 684732 5. 990946 5. 594118 6. 020619 5. 259979 4. 27273 5. 684498 5. 107864  
5. 079787 6. 231748 6. 059861 6. 36861 6. 390241 6. 031208 5. 777439 6. 523098 5. 975599  
5. 870176 6. 580796 6. 138052 6. 511253 6. 424722 6. 560301 7. 093954 7. 181794 6. 51934  
7. 134246 7. 268645 7. 240723 7. 215886 6. 974026 7. 691879 7. 002264 7. 46418 7. 11511  
7. 26073 7. 628668 7. 497548 8. 029098 7. 803754 7. 84345 7. 675137 8. 31857 7. 706929  
8. 151367 8. 475716 8. 109748 8. 483798 8. 645537 8. 051933 8. 082192 8. 44969 8. 404078  
2. 646522 2. 803584 3. 065925 2. 801346 3. 078856 2. 627202 3. 198481 3. 157537 2. 680124  
8. 4477 8. 147535 8. 037812 7. 79167 7. 84683 7. 933055 7. 756275 7. 998702 8. 3681

2. 822769 2. 706948 3. 337975 3. 785328 2. 554742 3. 406377 4. 204086 2. 261965 2. 508139  
2. 643183 1. 719828 1. 538487 1. 1805 2. 645762 1. 862793 2. 282794 2. 208132 2. 003315  
7. 176352 7. 325065 7. 642971 7. 459656 7. 696794 7. 54769 7. 776921 7. 213309 7. 412759  
2. 926076 2. 973827 2. 261539 2. 669513 3. 201275 1. 976559 2. 221245 3. 864381 2. 555948  
1. 521034 1. 595882 1. 382661 1. 840465 1. 657089 1. 417111 1. 394511 1. 385614 1. 593315  
2. 564371 1. 769458 1. 891708 1. 920102 1. 999912 1. 796363 2. 989795 2. 409927 1. 676623  
3. 448184 3. 289395 3. 718127 3. 382779 4. 098678 2. 725416 3. 847978 2. 709824 3. 552237  
2. 201064 2. 67704 2. 518381 2. 583275 2. 603096 2. 995227 2. 801303 3. 28133 2. 584917  
3. 74509 4. 551186 4. 041982 5. 022089 5. 553026 3. 354421 3. 218995 4. 957097 3. 133229  
5. 337265 5. 715679 5. 562772 5. 288039 6. 144092 5. 228648 5. 635446 5. 789242 5. 763741  
3. 405465 2. 047859 2. 567408 2. 588953 3. 86252 2. 720921 2. 534864 3. 413954 2. 920508  
6. 320446 5. 543957 5. 805181 5. 142145 5. 340096 5. 35642 6. 313267 6. 122558 6. 187762  
2. 062826 2. 177121 1. 188132 1. 571349 1. 502032 2. 554815 1. 668238 1. 959331 1. 933686  
1. 824287 1. 347913 1. 003004 0. 956229 0. 698954 0. 972881 0. 888375 1. 0245 1. 250492  
5. 502666 7. 142361 6. 907893 6. 58855 7. 251089 6. 692479 6. 376852 6. 917836 6. 871432  
1. 2912 1. 350427 1. 40812 1. 328608 1. 541055 1. 26986 1. 174218 0. 938367 1. 498253  
5. 240307 3. 892711 2. 829943 3. 092732 2. 956312 2. 822709 2. 910748 3. 222935 2. 88733  
4. 616317 3. 062041 4. 071043 2. 545581 2. 697762 3. 085508 2. 441458 3. 308409 2. 44738  
3. 905817 4. 077107 4. 610388 3. 141693 3. 532818 3. 272498 3. 753853 3. 819086 3. 570226  
1. 46287 1. 42322 1. 339782 1. 299459 1. 656656 1. 241433 1. 357748 3. 708224 2. 211303  
8. 028807 7. 803466 7. 306221 7. 788791 7. 500768 7. 891901 7. 905831 7. 264989 7. 68395  
1. 238363 0. 851401 1. 792838 1. 220604 1. 060704 1. 246367 1. 454937 0. 956584 0. 925201  
3. 394227 2. 696674 2. 872441 3. 232123 3. 011456 2. 726436 2. 939671 3. 375948 2. 992576  
2. 056365 1. 973561 1. 54917 2. 325684 1. 960078 2. 664104 1. 556179 1. 829368 1. 393131  
2. 460698 4. 040611 2. 851792 4. 614659 5. 255518 3. 411983 2. 871724 3. 297731 2. 456292  
1. 215798 1. 237912 1. 951039 1. 983621 1. 338302 2. 026074 2. 373804 1. 684852 2. 058303  
7. 531411 7. 700385 8. 225572 7. 845751 7. 964936 7. 878072 6. 628035 8. 001383 7. 536551  
2. 534633 2. 138094 1. 680098 1. 977903 2. 181476 2. 21925 1. 723551 1. 627861 1. 626275  
1. 42143 5. 008661 1. 244152 1. 702892 2. 647428 1. 087907 2. 468675 1. 164173 1. 262666  
2. 197035 2. 144129 2. 502435 1. 873067 2. 183992 2. 717915 1. 943009 2. 019058 2. 021733  
2. 985668 2. 614944 3. 470762 2. 974939 2. 843545 3. 041518 3. 81486 2. 854682 2. 979057  
2. 097146 2. 683344 1. 984005 2. 62161 1. 942868 2. 395092 2. 155197 2. 220115 3. 072102  
5. 641049 5. 495284 5. 469866 5. 333843 5. 008297 5. 675264 4. 747139 4. 588956 4. 979556  
2. 414198 2. 409574 2. 195265 2. 75235 2. 313159 2. 781678 2. 562416 3. 046657 2. 46892  
2. 744196 2. 121818 3. 078542 2. 977262 2. 781482 3. 357848 3. 382596 3. 593363 2. 878378  
4. 79356 4. 529846 3. 789841 3. 527706 4. 642984 2. 364171 4. 715824 4. 37714 3. 768823  
3. 064051 3. 535308 2. 622878 2. 826477 3. 353339 2. 637885 2. 66696 3. 731219 3. 671032  
2. 585374 2. 053515 1. 325166 1. 678101 1. 539242 1. 389078 2. 025201 1. 640969 2. 100028  
3. 467708 2. 558918 2. 443084 2. 87188 2. 567783 2. 516529 2. 717994 2. 630222 2. 259932  
1. 428919 1. 355292 1. 972735 1. 76805 1. 6789 1. 620878 1. 917669 1. 735109 2. 052146  
1. 146921 1. 06745 1. 11617 1. 206278 1. 430596 1. 072592 1. 322983 1. 078628 1. 783634  
1. 365812 1. 047213 1. 528678 1. 431428 1. 29773 1. 353714 1. 16577 1. 256737 1. 767261  
3. 150317 3. 990034 3. 799766 2. 449641 3. 271607 2. 850344 3. 338748 2. 427037 2. 445164  
1. 003638 0. 761631 1. 114246 1. 639359 0. 95217 1. 828 2. 14327 0. 929554 1. 492233  
1. 501596 1. 186454 1. 131246 1. 225398 1. 617986 1. 208569 1. 591713 1. 242879 1. 209889  
3. 354987 4. 074006 4. 305167 3. 859063 4. 304037 5. 014381 3. 729331 4. 421739 4. 770407  
3. 567504 2. 297602 3. 015529 3. 143514 3. 549925 3. 501303 3. 331453 3. 673552 3. 369685  
3. 562986 3. 737851 4. 019616 3. 453239 3. 287801 3. 011502 3. 865044 3. 662705 3. 321456  
2. 668099 1. 151871 1. 53946 1. 654406 1. 628011 1. 837736 2. 015335 1. 939514 1. 242793  
4. 040235 4. 095296 2. 766303 4. 020581 4. 073683 3. 559078 3. 137993 4. 054393 3. 17656  
8. 487018 7. 453043 7. 838889 7. 576114 7. 571299 7. 774505 7. 835525 7. 853763 7. 937852

3. 124743 3. 939308 3. 407462 4. 203399 3. 618838 3. 886084 3. 553414 4. 359579 4. 377945  
1. 712141 2. 994858 1. 903473 1. 607653 1. 213115 0. 983647 1. 445405 1. 149113 1. 53389  
3. 491266 2. 629849 3. 174049 2. 151082 2. 588412 2. 061052 2. 818724 2. 398436 2. 635651  
2. 394029 3. 939681 3. 919293 4. 652455 4. 334387 3. 336119 2. 381536 3. 839064 3. 339573  
4. 223487 5. 035893 5. 703996 4. 725479 3. 834262 4. 026216 3. 93112 3. 878102 4. 805678  
4. 114959 4. 155926 5. 041269 4. 200461 4. 365738 3. 969282 5. 029982 5. 70113 4. 784395  
1. 832722 3. 57242 3. 229426 2. 213336 2. 486063 2. 455534 2. 245463 1. 744392 3. 198384  
2. 004137 3. 190977 1. 509908 5. 330965 5. 770165 4. 196365 4. 800569 2. 69473 3. 783359  
4. 293103 3. 818433 4. 921839 4. 29504 4. 764072 4. 464219 4. 976087 4. 885132 3. 904978  
3. 174172 3. 0528 4. 779962 3. 536775 4. 174499 3. 582236 3. 201025 5. 073473 3. 652406  
1. 870296 2. 184581 1. 897887 1. 403257 1. 469687 2. 854864 2. 675933 2. 273166 1. 87339  
3. 721118 2. 63966 2. 677135 2. 66083 3. 444464 2. 956191 2. 17629 3. 181784 2. 371351  
4. 448321 5. 792519 6. 128107 5. 386833 5. 61812 5. 68709 5. 310764 6. 045389 5. 007484  
2. 306771 2. 439449 1. 992841 2. 508059 2. 303289 3. 01545 2. 264264 3. 608659 1. 436706  
6. 579149 6. 016272 6. 565957 6. 012359 6. 39315 5. 492108 6. 245019 5. 827381 6. 054823  
1. 152861 1. 093567 1. 694987 1. 181966 1. 705181 0. 851343 1. 320542 1. 600019 1. 395727  
5. 601183 4. 802604 3. 780409 4. 525579 5. 459411 4. 98343 4. 177395 4. 192935 4. 29962  
2. 139621 3. 762455 2. 237932 2. 063398 2. 444417 4. 561246 2. 247533 2. 674822 1. 88627  
3. 192639 2. 535543 3. 538561 4. 133105 2. 714494 3. 969864 2. 122095 3. 479466 2. 322312  
7. 445066 6. 925205 7. 028995 6. 672194 7. 597185 5. 684098 7. 783434 7. 354235 7. 255371  
6. 83284 7. 218787 6. 55292 7. 002763 6. 877657 7. 116835 7. 128835 7. 124763 7. 138721  
3. 661642 2. 32369 3. 179545 3. 303156 2. 839913 2. 685548 3. 505084 2. 86896 2. 85646  
5. 911443 6. 376135 5. 956332 5. 762191 5. 885818 5. 847273 5. 250522 5. 96187 6. 57245  
3. 258021 3. 166411 2. 433468 3. 87133 2. 189947 2. 680871 2. 517545 2. 344221 3. 329569  
2. 300712 2. 669001 1. 639202 2. 314164 2. 411554 2. 882902 2. 312278 2. 609539 2. 550776  
3. 662962 4. 340961 3. 211838 4. 135934 3. 227315 3. 311563 4. 448444 3. 655529 4. 260735  
3. 99288 1. 887637 2. 215627 2. 600799 2. 430038 2. 322518 3. 221376 3. 327046 2. 451733  
1. 46467 1. 503997 1. 392301 1. 636382 2. 79206 1. 390874 1. 438053 1. 433281 1. 955413  
4. 253012 5. 70809 5. 65814 4. 95223 4. 562028 5. 348857 3. 938483 5. 041887 5. 148867  
5. 002116 6. 162628 6. 130637 6. 269145 5. 447704 5. 413123 5. 905841 5. 586006 5. 429529  
3. 423642 3. 38475 2. 441055 3. 338115 3. 551743 2. 436958 3. 999513 3. 372866 4. 252373  
1. 988049 1. 768879 2. 091695 1. 41987 2. 048045 1. 168738 2. 495806 1. 707488 2. 201059  
5. 811772 6. 90741 6. 285067 5. 773025 7. 092799 6. 657853 5. 902496 7. 085951 6. 363612  
3. 927274 3. 308932 3. 819932 3. 362998 4. 397306 4. 506611 3. 495022 4. 349661 3. 325268  
1. 453607 1. 477907 1. 933759 1. 760352 1. 496676 1. 731054 1. 759307 2. 017466 1. 496013  
3. 129815 3. 846212 3. 43571 1. 702244 3. 644286 2. 532414 3. 689158 3. 370402 3. 139001  
2. 500785 3. 221293 2. 81276 2. 751531 1. 895962 2. 910799 2. 909721 2. 072868 2. 156829  
1. 070897 1. 131947 1. 306764 1. 296553 0. 967579 0. 9759 0. 932517 1. 04164 1. 08346  
4. 161681 4. 325862 2. 648019 4. 081373 2. 928352 3. 867499 2. 818514 3. 313699 3. 267884  
4. 659263 5. 120602 6. 340255 7. 135314 5. 162724 6. 663318 5. 785312 4. 059512 5. 090152  
1. 929606 1. 174028 2. 581728 2. 410982 4. 135117 2. 50245 1. 760136 4. 115308 2. 038462  
1. 531633 1. 344126 1. 078865 1. 357065 1. 031884 1. 038848 1. 569302 1. 081681 1. 324812  
5. 273145 4. 659851 5. 394108 5. 314747 4. 745581 5. 005454 4. 761234 3. 916313 4. 85199  
4. 929622 5. 10538 5. 756055 3. 166238 4. 095978 4. 879771 5. 101628 5. 321009 5. 469478  
3. 597647 3. 3829 3. 734354 4. 107866 3. 59903 3. 528666 3. 667872 3. 483424 3. 050523  
1. 698676 0. 850457 1. 941777 1. 447404 1. 084042 1. 306921 1. 202235 1. 031782 1. 413094  
1. 440779 1. 048533 1. 116712 1. 780447 1. 813263 1. 3242 1. 247824 1. 359754 1. 173362  
1. 835014 1. 352827 1. 507616 2. 056663 1. 637701 1. 69658 1. 663482 1. 893613 1. 836333  
1. 437827 1. 107523 1. 503394 1. 051795 1. 335159 1. 804449 1. 55564 1. 622937 1. 333372  
1. 168021 1. 276823 0. 778282 1. 183664 1. 166194 1. 060518 1. 284382 1. 073255 1. 46447  
1. 565576 1. 45168 1. 490299 1. 396032 1. 334857 1. 437067 0. 843708 1. 557568 1. 362781

3. 31998 2. 762501 2. 953351 3. 208566 2. 823208 3. 611425 3. 498317 2. 660051 2. 996404  
3. 677118 1. 954436 2. 541404 2. 633171 2. 763584 1. 818422 2. 118914 2. 841958 1. 878491  
1. 471977 1. 555783 1. 404496 1. 553948 1. 760741 1. 557949 1. 637176 1. 40029 1. 865758  
2. 571225 2. 640386 2. 083497 1. 864601 1. 839943 1. 971972 2. 73122 2. 11865 2. 181109  
3. 757501 2. 692702 2. 708602 3. 323034 3. 235682 2. 498966 2. 119682 2. 861386 2. 763715  
5. 421172 5. 969883 5. 749279 6. 265582 6. 795818 6. 482799 6. 006509 6. 594004 5. 505847  
4. 809078 5. 297927 4. 969595 5. 197174 5. 310134 4. 691539 5. 201259 4. 352942 4. 396388  
5. 443731 5. 732979 5. 573888 5. 819397 5. 721158 6. 277842 5. 054914 5. 714346 5. 809016  
2. 554095 2. 626447 2. 523616 2. 195018 1. 757118 2. 090289 2. 225284 1. 989652 2. 078533  
2. 343392 2. 01867 2. 126923 3. 168586 2. 229162 2. 17108 1. 868666 2. 572758 2. 472998  
5. 015355 5. 567112 5. 847292 5. 986976 6. 088304 6. 004912 5. 692204 6. 205939 5. 869938  
3. 243318 2. 507949 3. 212519 2. 924992 3. 514481 2. 897188 3. 011988 3. 26136 2. 873851  
2. 750027 2. 601585 3. 786585 3. 737413 3. 180317 3. 297731 3. 356934 4. 292834 3. 557664  
3. 314406 2. 660842 2. 622891 3. 600549 3. 33226 2. 784225 3. 173576 2. 774776 2. 861989  
2. 329864 1. 500172 1. 838818 1. 856423 2. 176449 1. 471904 2. 249644 1. 665593 1. 748487  
3. 253731 3. 653746 3. 983064 3. 417976 3. 32155 4. 900605 3. 435465 3. 419304 2. 913289  
10. 59711 10. 76007 10. 68728 10. 48462 10. 71043 10. 73633 10. 38904 10. 73447 10. 74509  
4. 319558 3. 533742 3. 670752 4. 5241 2. 513904 2. 352741 2. 818847 2. 159924 4. 92063  
2. 614002 1. 395444 1. 977822 2. 464819 2. 399403 1. 737493 1. 973558 1. 575203 2. 180988  
3. 566743 2. 679953 3. 511372 2. 802792 3. 25365 2. 666564 2. 911247 3. 540273 3. 452181  
3. 138303 3. 400765 3. 476901 2. 620465 3. 004999 4. 26261 2. 972629 3. 430488 2. 63741  
2. 784439 3. 411962 1. 750674 1. 564941 2. 859542 2. 231201 3. 044855 3. 641504 2. 156101  
1. 944584 1. 507732 1. 416309 1. 369875 0. 9551 1. 366439 2. 445175 1. 377849 1. 463052  
2. 226157 2. 04755 1. 771186 1. 553006 1. 739928 1. 990382 2. 02746 1. 607316 2. 185134  
4. 105846 4. 440528 3. 736363 4. 59662 3. 447789 4. 518191 4. 244506 4. 290125 4. 216521  
2. 173055 1. 904454 1. 926639 1. 801757 3. 175504 1. 49769 2. 320816 1. 674618 1. 93387  
2. 509722 1. 745946 3. 589735 2. 167298 2. 046878 2. 384747 2. 089459 2. 778402 2. 355786  
6. 720682 6. 328037 2. 917711 5. 086293 3. 494412 5. 256739 2. 670709 3. 36871 5. 582706  
5. 360587 3. 187992 3. 700615 2. 642807 2. 90049 2. 109757 4. 028542 2. 782039 4. 867781  
2. 442374 1. 690635 1. 70545 1. 365853 1. 956388 1. 804438 2. 169965 1. 998939 2. 227246  
1. 406381 1. 552847 2. 048381 0. 937884 1. 22348 1. 241143 1. 696495 2. 183673 0. 966726  
2. 783507 2. 461712 2. 538039 3. 715779 3. 621666 3. 415907 3. 003077 3. 188516 3. 145564  
6. 027444 6. 240557 6. 301039 6. 207582 5. 907943 5. 953518 6. 703793 5. 922562 5. 822288  
2. 95119 2. 365931 3. 185042 3. 091345 2. 133251 2. 845866 3. 368239 2. 720107 3. 074325  
2. 225046 2. 200337 2. 84376 2. 376785 2. 063524 2. 730692 2. 060425 2. 745468 2. 647692  
1. 724455 1. 296835 2. 05697 1. 153443 0. 686005 1. 706781 1. 31068 1. 091339 2. 031959  
2. 092521 1. 483583 2. 46472 2. 15513 1. 773011 2. 787509 2. 863018 2. 377922 2. 765564  
8. 753975 7. 281061 7. 590884 6. 309658 6. 477181 6. 491531 7. 207421 6. 702368 9. 028847  
7. 362822 5. 707927 6. 504849 5. 684275 6. 584357 5. 564341 7. 165199 6. 252652 6. 903354  
4. 052379 2. 424844 3. 011761 2. 438083 3. 808118 3. 390317 4. 10454 3. 873241 3. 595095  
3. 114058 3. 70775 3. 18523 3. 938494 3. 096295 1. 976518 2. 093605 2. 445677 3. 635744  
2. 304391 1. 872549 2. 223625 2. 489835 2. 072864 2. 156974 2. 381429 2. 431158 2. 310581  
3. 328496 3. 057647 3. 366706 3. 797785 3. 114713 3. 239625 2. 800114 3. 2453 3. 203276  
1. 945505 2. 085976 3. 026715 2. 063995 2. 26694 2. 522196 2. 371406 2. 615655 2. 776775  
1. 985058 2. 076371 1. 952488 2. 098706 2. 327921 2. 326988 2. 011975 2. 287311 2. 060452  
2. 677688 4. 75586 4. 168227 4. 820551 4. 281209 3. 879858 3. 971389 4. 467801 3. 667326  
6. 810358 7. 325548 6. 836599 7. 280833 7. 454909 7. 4097 6. 787641 7. 30218 7. 133605  
2. 120145 1. 624701 1. 751361 2. 558399 1. 575584 2. 531804 1. 576301 1. 43076 2. 04548  
2. 795434 2. 082631 3. 662379 3. 892233 3. 96385 2. 047182 2. 536108 2. 798554 4. 172211  
2. 087575 1. 912307 3. 045325 2. 949414 2. 973993 2. 089748 2. 485174 1. 820482 2. 712459  
3. 23281 2. 888391 3. 056528 3. 874247 4. 476306 4. 066998 2. 987376 2. 976727 2. 705837



3. 323011 1. 984974 1. 935349 1. 839196 1. 732147 1. 191386 1. 895501 2. 029688 2. 298819  
4. 865408 4. 28638 4. 788954 3. 959199 4. 332732 5. 152238 4. 897053 4. 113921 4. 077589  
2. 022794 1. 585478 1. 399851 1. 783137 1. 802939 1. 717992 1. 80842 1. 445281 1. 807057  
1. 724077 1. 460714 1. 30764 2. 138559 1. 278805 2. 070188 2. 221254 2. 043695 1. 64576  
1. 873262 1. 901487 1. 935245 2. 151052 1. 909341 2. 168028 1. 79466 1. 992612 2. 510183  
3. 032749 4. 204234 2. 635174 2. 281477 4. 052285 3. 165372 2. 311279 3. 240981 3. 895999  
2. 385105 1. 646334 1. 810319 1. 720439 1. 854949 1. 336594 1. 450078 1. 486329 2. 032851  
2. 255869 1. 84943 1. 830098 1. 814548 2. 071577 1. 54033 1. 267037 2. 145105 2. 403864  
1. 343192 1. 05836 1. 786162 1. 599092 1. 481348 1. 300084 1. 779538 1. 220538 1. 300019  
3. 188255 1. 940996 2. 517277 2. 258984 2. 141616 2. 840767 2. 515392 2. 493078 2. 254419  
1. 608993 1. 711011 1. 304844 1. 459498 1. 837386 1. 663133 1. 82955 1. 306932 1. 502432  
3. 840757 3. 798869 4. 089634 3. 684705 2. 754949 3. 361633 3. 672939 3. 975008 3. 492796  
2. 074729 1. 295239 1. 186899 2. 110764 0. 82111 1. 834088 2. 037314 1. 461341 2. 093876  
1. 214459 1. 248238 1. 057451 2. 418944 1. 017321 1. 353539 2. 385946 0. 985833 1. 329348  
10. 41863 10. 71965 10. 56019 10. 62636 10. 20445 10. 39999 9. 814767 10. 5155 10. 15426  
7. 415126 7. 999201 7. 579369 8. 091421 7. 685947 7. 748798 7. 537416 7. 684597 7. 999269  
1. 685206 1. 615046 1. 962746 2. 13015 1. 817108 1. 591829 2. 008913 1. 575306 1. 347766  
5. 531207 5. 80353 5. 014576 5. 382792 5. 493446 5. 553284 5. 675243 4. 726859 5. 340764  
1. 605848 0. 709441 1. 206511 1. 709649 1. 450876 1. 31445 0. 93344 1. 268092 1. 142884  
2. 927868 1. 753262 2. 76174 1. 569834 2. 320272 3. 178311 2. 131533 2. 103063 2. 512886  
9. 111043 8. 887881 9. 21464 9. 832194 9. 262598 9. 945982 9. 268418 8. 243961 8. 787712  
2. 861882 2. 206628 2. 107935 2. 332239 2. 457131 2. 289793 2. 215398 2. 662266 2. 438557  
6. 2384 4. 448846 4. 813593 4. 059132 4. 652024 3. 372217 3. 958091 4. 45191 6. 240615  
7. 205666 7. 529021 7. 274553 7. 159056 7. 484617 7. 085835 7. 543119 7. 377602 7. 453117  
3. 349229 3. 585907 3. 349212 3. 853857 3. 565143 3. 633637 3. 882654 4. 617923 3. 86209  
1. 508545 1. 622378 1. 796229 1. 411539 1. 273837 1. 77251 2. 534155 1. 955952 1. 583946  
8. 999249 9. 336378 9. 036929 9. 223503 9. 287148 9. 164255 9. 10067 9. 25875 9. 130882  
4. 150637 4. 13747 3. 385765 4. 824702 4. 223238 3. 73294 3. 321771 5. 1618 5. 112916  
7. 518729 7. 077971 7. 446473 7. 028652 7. 254532 7. 241566 7. 09162 7. 438045 7. 469742  
1. 097462 1. 492507 1. 362323 1. 395855 1. 771964 1. 730959 1. 469339 1. 185988 2. 142365  
2. 942828 3. 131767 2. 762365 2. 17337 2. 205296 3. 463488 3. 117359 2. 909657 3. 146195  
2. 396779 1. 562041 2. 523158 2. 980532 1. 736209 1. 630516 1. 425644 2. 161079 1. 963382  
3. 909719 2. 288199 3. 061179 3. 265452 2. 613484 3. 010517 4. 308001 2. 880287 3. 499508  
2. 260062 2. 423405 3. 241464 1. 796104 2. 015119 2. 575405 2. 274952 2. 387674 2. 676302  
2. 450011 1. 992278 2. 448338 1. 722657 2. 599683 2. 146415 2. 382535 1. 821993 2. 338931  
1. 355378 1. 503054 2. 968875 1. 757145 1. 808274 2. 087673 2. 03359 2. 192001 1. 640357  
1. 330167 1. 67799 3. 758714 1. 883193 1. 739436 3. 186866 2. 555574 2. 731879 1. 993368  
3. 905181 3. 602549 3. 01823 3. 160752 2. 936543 2. 227058 3. 244293 3. 328023 2. 808866  
4. 388366 2. 459465 2. 264095 3. 254031 2. 656523 1. 867166 2. 373438 1. 724989 2. 180766  
2. 807366 4. 037623 4. 002344 3. 61094 3. 208435 2. 674072 5. 023587 2. 557846 3. 457449  
2. 783853 3. 175255 2. 281609 2. 82504 2. 499855 3. 239422 2. 524633 2. 485152 2. 515296  
3. 760082 1. 730476 2. 55245 1. 69446 1. 886175 2. 828185 1. 994825 3. 838653 2. 505138  
4. 710173 4. 638231 4. 728885 3. 985944 4. 728952 4. 083171 5. 400529 5. 549279 3. 914354  
3. 631747 5. 122724 4. 894302 3. 988578 4. 216338 3. 450531 5. 920365 4. 102934 2. 74276  
0. 95952 0. 682584 2. 969594 1. 110562 1. 673316 1. 09589 2. 48157 0. 856686 1. 015481  
0. 555664 0. 456371 0. 76468 1. 90491 0. 748364 1. 079775 0. 909175 2. 612743 1. 152071  
0. 758492 0. 936511 0. 582324 1. 302372 0. 820999 1. 428578 0. 743365 0. 956357 0. 706703  
2. 97247 3. 345695 3. 417356 4. 225777 2. 050945 3. 646783 3. 123938 2. 598259 2. 159032  
8. 24212 6. 814991 7. 895462 6. 622242 7. 164691 5. 068627 7. 460669 6. 113277 7. 550222  
8. 688572 8. 976496 9. 077546 8. 567648 8. 928721 8. 53379 8. 387223 8. 840672 8. 720446  
7. 370069 8. 218016 7. 554708 7. 73246 8. 480374 7. 75973 8. 122868 7. 866923 7. 93474

1. 872528 2. 103495 2. 111206 1. 791085 2. 579634 2. 592272 2. 428868 2. 519935 2. 287115  
2. 671881 2. 255912 2. 495269 2. 827602 2. 716055 2. 758883 2. 373741 2. 395599 2. 903287  
1. 612375 1. 605722 1. 628303 1. 932661 1. 549026 1. 364549 1. 552964 1. 41098 1. 562002  
4. 902032 4. 440171 4. 330421 4. 60921 3. 82265 4. 674986 4. 580232 4. 441462 4. 569876  
4. 994416 5. 497419 5. 568066 5. 392129 5. 215732 5. 519889 4. 780768 5. 464567 5. 368883  
7. 391864 7. 935459 7. 929157 7. 596592 7. 799742 7. 854217 7. 816265 7. 869073 7. 591241  
5. 400046 5. 81487 5. 976175 6. 2521 6. 697416 6. 51408 6. 944121 6. 291374 6. 679199  
5. 84761 6. 722429 5. 698455 6. 166666 6. 671788 6. 704718 5. 65355 6. 601578 6. 468387  
1. 785772 1. 530529 1. 771373 1. 836172 2. 220751 1. 723679 1. 987082 2. 130109 2. 106531  
7. 142099 7. 037392 6. 4441 7. 122843 6. 64217 7. 550496 6. 224124 6. 914884 6. 98142  
6. 131958 5. 938881 5. 865922 5. 352456 6. 189166 5. 763847 5. 466855 6. 040701 5. 105858  
7. 564088 7. 960746 7. 764359 7. 850093 7. 980971 7. 840024 7. 962765 7. 940163 7. 915649  
6. 848987 6. 65691 6. 105359 6. 576127 6. 764082 6. 223798 7. 208428 6. 826549 6. 339431  
5. 567355 6. 238168 6. 126947 6. 258733 6. 708423 6. 288904 6. 280145 6. 394051 5. 59757  
2. 075766 2. 283879 1. 704124 1. 75687 1. 789223 1. 236915 1. 997122 1. 576258 1. 636932  
2. 522261 1. 696979 1. 781468 2. 674827 2. 118615 2. 132226 2. 157034 1. 377878 1. 768785  
2. 147972 2. 2844 1. 61416 2. 914137 2. 834434 2. 39224 1. 665249 2. 178057 1. 605003  
5. 520338 4. 682475 4. 832795 3. 803511 4. 449583 5. 197356 5. 130066 5. 570124 5. 584342  
1. 921792 2. 720545 1. 64211 2. 134995 2. 026438 2. 96114 1. 930749 2. 719792 1. 906733  
2. 579526 1. 996877 1. 688011 1. 661399 1. 673613 2. 443461 1. 876928 2. 229539 1. 648419  
2. 101951 1. 081523 1. 512013 1. 632324 1. 948223 1. 539687 1. 833021 1. 212942 1. 110299  
1. 605117 2. 741973 0. 995066 0. 992049 2. 452849 2. 069061 1. 584103 1. 239287 1. 493059  
2. 528256 2. 669848 1. 82989 3. 472119 1. 154237 1. 542563 1. 722664 2. 102259 2. 898688  
4. 75639 5. 712591 4. 020208 2. 589008 5. 116519 5. 249842 6. 387564 5. 230631 4. 909729  
2. 52249 4. 235054 2. 329684 1. 380876 3. 21282 2. 445371 1. 099915 4. 638624 3. 659383  
1. 102652 1. 600779 1. 101752 1. 488923 1. 307047 1. 723322 1. 459966 1. 835966 1. 266051  
2. 823524 2. 535499 2. 600247 2. 974733 2. 819243 3. 283676 3. 196147 3. 040233 2. 883386  
1. 744056 1. 221151 1. 46007 1. 363026 0. 959421 1. 501522 1. 228155 1. 252993 1. 422053  
2. 092915 2. 433603 2. 286409 2. 872059 1. 898828 2. 009576 2. 334152 2. 131088 2. 239685  
0. 652314 1. 551916 1. 557106 1. 896488 2. 241682 1. 251962 1. 674087 3. 040679 0. 874138  
1. 430066 1. 401603 1. 573547 1. 896435 1. 66326 1. 568177 2. 62844 1. 358354 1. 428426  
2. 276001 1. 155726 2. 224084 1. 940379 3. 255332 2. 097994 1. 617678 1. 573119 2. 099335  
1. 759034 1. 500912 1. 082331 1. 696806 1. 198462 1. 268578 1. 421005 1. 285903 1. 768944  
2. 669944 2. 559232 3. 054862 3. 340621 3. 404868 2. 803739 3. 885762 2. 659423 2. 540412  
1. 713044 1. 27051 1. 396601 1. 179295 1. 620321 1. 136727 1. 31525 1. 658764 1. 528254  
1. 068255 1. 350934 1. 924058 1. 75742 1. 254383 1. 294909 1. 33727 1. 03407 1. 504929  
4. 479166 2. 766674 3. 127669 3. 499873 3. 435244 3. 837015 2. 837807 2. 80976 3. 042174  
1. 689527 2. 472833 2. 846501 2. 913696 2. 526549 2. 983973 3. 496523 2. 242344 1. 846518  
5. 021842 3. 901079 4. 220316 3. 82404 5. 93638 2. 963146 3. 708124 3. 839276 3. 317549  
2. 64041 2. 177725 1. 557218 1. 506 1. 238431 2. 20686 1. 887648 1. 869718 2. 102607  
2. 612306 2. 315063 2. 105111 3. 407814 2. 891805 2. 772434 2. 012915 1. 826666 2. 895349  
2. 114416 1. 84667 2. 592018 2. 093305 2. 086497 2. 280135 2. 563457 2. 177982 2. 278827  
2. 557431 1. 450889 0. 973901 2. 311864 3. 669909 2. 732655 2. 860866 2. 614135 2. 033131  
1. 961338 1. 504634 1. 171563 1. 366824 1. 912507 1. 175116 1. 863558 2. 114866 1. 784884  
3. 132323 2. 333941 2. 912125 2. 087363 3. 18919 2. 080497 2. 670892 2. 78264 2. 128698  
3. 334111 2. 952403 3. 150054 2. 162118 2. 742439 2. 587995 3. 769291 3. 174663 2. 410746  
4. 94379 3. 724152 4. 888489 2. 600365 3. 592335 3. 937096 4. 058175 3. 854386 3. 026728  
1. 814132 1. 725634 1. 639984 1. 844466 1. 773244 1. 367252 1. 98364 1. 762137 1. 74408  
2. 35599 3. 150792 2. 741185 2. 288902 2. 376079 3. 345301 1. 998271 3. 10404 2. 885477  
2. 848052 2. 793367 2. 199502 2. 896002 2. 113927 2. 05907 2. 627413 2. 683644 2. 063994  
3. 787425 3. 928171 4. 327662 3. 079451 3. 660437 3. 675647 3. 971031 3. 052073 4. 621347

2.033773 4.317867 3.515004 3.056951 3.563522 2.693549 3.03226 2.852534 2.941346  
1.440384 1.454452 1.22628 2.260584 1.531397 1.479701 2.288956 2.039018 1.168273  
3.601838 4.164521 3.872029 4.442749 4.757091 4.75447 3.84054 4.373054 3.582978  
1.92225 3.707236 3.259903 1.845404 1.708882 3.387443 1.800451 1.876123 2.546439  
2.84135 1.701535 2.268208 1.796455 1.85587 1.579966 1.93148 2.18415 1.679311  
7.255673 6.856822 7.215984 7.312144 7.569014 6.954736 8.683923 7.464939 7.144073  
1.944808 2.88854 2.379523 3.273954 3.145177 2.16628 3.136341 2.639687 2.913495  
2.707221 3.504512 2.869361 2.061625 2.603747 1.717518 2.668845 3.020861 3.039911  
2.480093 2.466253 2.595576 3.38143 2.085715 2.029464 3.121306 3.732474 2.9062  
2.336522 3.463709 2.929057 2.908226 1.893797 3.039008 1.816909 2.463904 1.467568  
1.488141 1.037557 1.336086 1.108977 1.224417 1.684902 1.584015 1.126863 1.682045  
1.852365 2.52676 2.666704 2.019794 2.50221 2.263894 1.901171 2.039544 1.986555  
1.749267 1.393535 1.469665 1.509632 1.228645 1.682744 1.491541 1.102347 1.128158  
2.638926 2.730143 2.873916 1.835857 2.207111 2.85824 2.260507 2.544255 2.642741  
5.290065 5.865984 6.00692 4.20621 5.648473 5.967395 5.57705 5.284848 5.819402  
5.839471 4.74823 5.350216 4.754783 4.884004 5.039125 5.829334 4.897529 4.700261  
1.167088 1.963262 1.946595 2.212633 1.014354 2.046288 1.016451 1.705046 1.384885  
1.115622 0.850657 1.44055 2.857441 1.363884 0.924185 1.07557 1.260898 1.982388  
2.01734 1.638019 2.213152 1.497704 3.358104 1.214442 1.999494 2.305641 1.735716  
4.169282 3.629736 3.274486 2.655919 3.257499 4.247473 4.344693 3.291166 3.927264  
0.997274 0.947691 0.981749 1.07605 0.894485 0.816821 1.033367 0.677892 1.203468  
2.233163 1.682376 1.712659 2.037096 1.913556 1.460474 2.094554 1.708791 1.809734  
1.360305 0.991363 1.401898 1.651359 1.56562 1.278509 1.500736 1.019716 1.389887  
4.589142 4.47337 4.919113 5.136187 4.758341 5.285826 4.178932 4.776273 4.929077  
1.747555 1.046601 2.118665 1.371895 1.712761 1.738875 1.650456 1.762413 1.821977  
2.584099 1.44213 1.728034 2.346147 2.195289 0.96067 1.678113 1.671347 1.807393  
5.66887 6.313531 6.554091 5.563508 6.083858 5.655764 6.412064 7.010894 6.177398  
3.645079 3.264881 3.510867 3.556996 3.20481 4.552091 4.063411 4.068244 3.317558  
2.643678 3.926673 4.054062 4.759253 4.220693 2.806019 4.734374 4.76374 4.51367  
5.939372 6.499378 6.239231 5.072103 6.508591 6.305856 4.605386 6.754638 6.236073  
5.298098 5.431777 5.093882 5.205795 6.524535 6.057689 6.670868 6.752456 5.872883  
1.443349 1.687506 1.890015 1.789004 1.818182 1.99644 2.010256 1.220361 1.785022  
2.072092 1.388409 0.708053 1.290775 0.75268 0.888441 1.185077 1.087336 0.760712  
2.51298 2.252342 2.777455 2.771481 2.578109 2.056991 2.253644 2.925055 2.403927  
1.718825 1.954362 1.152599 1.805641 1.732452 1.794252 2.006945 1.870318 1.131932  
3.193976 3.80991 3.33638 2.705299 3.740339 2.918138 2.511691 2.130129 3.250821  
1.899707 2.094473 2.563487 2.26996 1.989835 3.164333 3.104996 3.473027 3.306089  
6.601644 7.455237 6.661703 7.55979 6.559282 7.188847 6.77256 7.170575 7.231792  
5.516632 6.382083 6.296976 7.124502 7.009947 6.941059 7.113562 6.699726 6.515944  
2.110599 1.527275 1.375785 1.428076 1.560861 1.620279 1.748126 1.746906 1.609838  
2.91225 2.427478 2.948394 2.747427 2.75276 2.880522 2.903434 2.330503 2.329585  
6.508923 2.487286 5.237891 3.611958 1.708899 1.806745 3.878494 3.954207 4.7536  
1.574305 1.382666 1.073353 1.544193 1.089366 1.340563 1.515331 1.620541 1.311143  
2.106271 2.108756 2.147996 2.311829 1.761148 2.051895 2.114738 1.769763 1.848031  
2.511933 1.80549 2.617696 3.042431 1.786402 2.167587 1.895791 2.432562 2.74443  
1.625075 1.501911 1.252028 1.434463 1.428698 1.684567 1.783281 1.305801 1.646794  
2.110033 1.422346 1.228917 1.881238 1.127305 1.078415 2.423646 1.47952 1.932167  
2.832302 3.357518 2.878583 3.041843 2.78132 2.034988 2.455057 2.244921 2.440866  
2.19322 1.509841 2.134579 1.410793 1.456031 1.363157 1.626251 2.361291 1.768288  
2.867511 3.131998 2.170755 3.047149 2.346673 2.616417 2.676417 2.163903 2.122781  
1.970742 1.137733 1.71054 1.520582 1.565468 1.483673 2.154786 1.224233 0.832714

4. 538028 4. 606635 5. 082487 5. 857097 4. 537248 5. 43058 4. 363372 3. 600563 4. 56553  
2. 398902 2. 154578 3. 204499 1. 804912 1. 873025 1. 399114 1. 713701 1. 855474 1. 910711  
4. 549524 3. 344438 3. 157892 4. 55964 4. 816765 2. 750474 4. 064905 3. 469354 3. 290144  
3. 548636 3. 850767 3. 557982 4. 208624 3. 836128 4. 795157 3. 901021 4. 364332 3. 468182  
1. 060704 0. 992017 1. 018471 1. 573982 1. 396497 0. 987148 1. 154275 1. 437413 1. 516275  
2. 410665 2. 027931 2. 116041 2. 598698 3. 180341 1. 997848 2. 470231 2. 15896 2. 77885  
3. 327732 3. 330544 4. 566435 2. 936987 2. 699833 3. 205402 3. 03139 2. 591073 2. 52294  
2. 932525 2. 767059 5. 670819 1. 867674 2. 267003 2. 366947 2. 720968 2. 477701 3. 949344  
2. 553779 2. 066568 2. 315831 2. 2438 2. 531351 2. 417332 1. 709817 1. 923394 1. 976638  
1. 507212 1. 391049 1. 025335 1. 402883 1. 264454 1. 341951 0. 969394 1. 468233 1. 129647  
2. 195814 1. 127972 0. 753868 1. 484409 1. 276495 1. 48978 1. 213017 1. 354787 1. 257572  
7. 502642 7. 396533 7. 13142 7. 622683 6. 62723 7. 346193 7. 376085 6. 690451 7. 444127  
1. 573202 1. 823643 1. 548016 1. 747057 1. 652935 2. 150494 2. 184768 2. 392926 1. 692996  
3. 280029 3. 54029 3. 097626 3. 667592 3. 298685 3. 163186 2. 986674 3. 166119 3. 269875  
6. 894369 6. 468066 7. 266146 4. 871705 5. 489655 6. 383655 6. 484474 6. 220917 6. 773882  
1. 608194 1. 879125 1. 732124 1. 330718 1. 978124 1. 561046 1. 773683 1. 67931 1. 756035  
2. 758661 2. 483543 2. 278452 2. 993225 3. 204017 2. 636854 2. 435559 2. 18126 2. 675707  
4. 513768 6. 121102 5. 594897 5. 274827 6. 053274 6. 270465 4. 916611 5. 09529 5. 58351  
3. 351409 2. 280627 1. 682818 3. 334639 2. 730514 1. 613041 1. 856938 1. 461057 1. 563563  
0. 660787 1. 036303 0. 546147 0. 599219 1. 616085 0. 570496 0. 924479 0. 568307 0. 645568  
5. 148537 5. 180922 5. 496641 4. 630599 4. 631155 4. 692039 4. 374949 5. 426142 4. 800605  
5. 701869 6. 368302 6. 419208 5. 805932 6. 50922 5. 861148 5. 570764 6. 368302 6. 258621  
1. 81406 2. 463046 3. 080323 2. 148463 2. 979607 3. 091651 2. 852621 1. 900011 3. 100815  
2. 041248 1. 783775 1. 103245 1. 735829 1. 897181 1. 474101 1. 405107 1. 500694 1. 723022  
4. 207737 2. 735549 2. 843933 3. 499615 2. 287283 2. 996605 2. 451768 2. 739467 2. 590386  
10. 44497 10. 69305 10. 69956 10. 7893 10. 82951 10. 67286 10. 62935 10. 67953 10. 77188  
2. 733538 2. 471803 2. 366654 2. 263739 2. 039483 2. 122092 2. 051043 1. 539619 1. 739777  
4. 284602 2. 832128 2. 495239 5. 870959 1. 77465 3. 11914 4. 548727 2. 653062 4. 17365  
2. 344974 2. 049681 2. 019491 2. 097788 1. 753096 1. 828024 2. 734819 1. 633658 2. 319959  
2. 194168 2. 100043 1. 980367 2. 259931 2. 515088 1. 972441 2. 289869 2. 622878 2. 288086  
5. 563666 5. 458115 6. 113995 5. 665881 5. 164159 6. 228058 7. 966579 6. 974537 6. 783821  
3. 456407 3. 768282 3. 562331 4. 032928 3. 890986 4. 702335 4. 496895 3. 819139 4. 473451  
1. 792595 1. 130186 1. 531214 2. 017242 2. 255635 2. 112223 2. 25606 1. 833671 1. 439361  
2. 514507 2. 111444 2. 635178 2. 724605 2. 532835 1. 820769 1. 934018 2. 561987 2. 937745  
7. 348404 7. 691489 7. 449984 6. 822817 6. 98763 7. 922809 5. 979372 7. 760405 6. 584995  
0. 895763 1. 313245 1. 157129 1. 180842 1. 402071 1. 084526 1. 554093 1. 085831 1. 580485  
1. 825276 1. 599077 2. 027729 1. 951976 1. 152356 1. 506585 1. 876105 1. 785076 1. 316637  
3. 28739 3. 062753 3. 363618 2. 535776 3. 515108 3. 760988 3. 162507 2. 916818 3. 230498  
2. 770703 3. 40557 3. 271188 1. 445527 2. 470262 1. 819552 2. 16916 1. 573457 2. 789896  
2. 812142 2. 771098 3. 166115 2. 627462 2. 881757 2. 650435 2. 475483 2. 690131 2. 638059  
2. 618991 2. 517119 2. 597724 2. 731848 2. 687523 2. 409061 2. 625946 2. 792753 2. 536609  
4. 135953 2. 762981 3. 10821 3. 203784 2. 995712 3. 673177 1. 869948 2. 165781 2. 471688  
5. 431806 4. 684831 3. 475731 4. 295867 5. 106702 4. 542591 3. 952346 6. 12139 5. 124144  
1. 637761 1. 588485 1. 525568 1. 099077 1. 094012 1. 245127 1. 215489 0. 868941 1. 84401  
2. 062984 1. 852268 2. 467351 1. 716487 2. 095861 2. 425963 2. 587489 1. 824216 2. 204324  
2. 736473 1. 468168 2. 805586 3. 268294 1. 914159 1. 556787 2. 332193 2. 22267 2. 169149  
2. 168225 2. 098925 2. 323042 2. 904286 2. 318721 2. 302431 1. 868318 2. 300895 1. 870498  
1. 927056 0. 919069 1. 537367 1. 334738 1. 317484 2. 215577 1. 52605 1. 239675 1. 096776  
3. 988477 1. 805502 2. 6454 2. 275935 2. 412933 1. 743543 2. 608207 2. 624882 2. 381604  
2. 647684 2. 876707 2. 090195 2. 428668 2. 878976 2. 496904 3. 134172 3. 638055 2. 843592  
5. 177823 5. 014628 3. 830138 4. 902532 3. 616928 4. 255235 5. 123406 5. 111892 4. 13458

3. 21725 2. 672406 3. 180246 3. 022764 3. 423909 3. 683219 3. 350633 2. 814691 3. 584138  
1. 401767 1. 370084 1. 245057 3. 089075 2. 768238 1. 428591 1. 430698 2. 220171 1. 668471  
4. 566908 5. 608439 4. 097249 4. 680401 4. 652336 4. 326769 5. 21452 5. 173396 4. 592333  
3. 58489 2. 878937 2. 450424 2. 984578 3. 15382 2. 697138 3. 39771 2. 486542 3. 50519  
1. 806429 2. 217856 2. 096018 2. 049906 2. 870136 1. 985324 1. 724865 1. 994385 1. 56524  
1. 606804 1. 96369 1. 851728 1. 433745 0. 981022 1. 136492 2. 187018 1. 157722 1. 8601  
1. 842197 1. 278213 1. 763854 1. 818251 1. 493448 1. 46644 1. 650291 1. 885872 1. 888934  
6. 691931 4. 921217 5. 206796 4. 042774 4. 072382 3. 276904 2. 987944 3. 335469 5. 01142  
2. 055733 1. 953004 2. 719552 1. 417726 2. 666119 1. 941718 2. 222762 3. 09739 2. 002398  
2. 396115 3. 916443 1. 773516 4. 644704 1. 665247 3. 250761 3. 143035 2. 357376 2. 996715  
0. 985992 0. 750669 2. 016704 1. 40819 1. 374519 1. 869198 1. 785879 0. 711748 1. 370448  
5. 898788 5. 846237 5. 782278 6. 249677 6. 541501 6. 222516 5. 66577 5. 210479 5. 918049  
2. 511401 2. 745566 3. 474997 3. 250611 2. 459394 2. 594009 3. 086556 2. 959323 2. 356305  
1. 624848 2. 21948 1. 701317 2. 812785 2. 823976 2. 119233 2. 704203 1. 923705 2. 159449  
2. 03622 1. 986937 2. 412757 1. 67092 2. 156708 2. 086632 3. 260346 1. 81236 1. 868507  
2. 86441 1. 392896 2. 090623 1. 439643 1. 509236 1. 921248 2. 542566 1. 254614 1. 140298  
3. 13247 1. 656774 2. 882912 2. 347072 2. 608065 1. 776181 2. 933404 2. 692898 2. 048331  
1. 958843 2. 351528 2. 445803 2. 066182 1. 763703 2. 193834 2. 557796 1. 752597 1. 990218  
3. 045613 3. 784569 3. 88155 4. 164059 4. 178578 2. 897966 4. 030893 3. 596581 3. 548631  
1. 786819 1. 911278 1. 646437 2. 380063 1. 275154 1. 894195 1. 392972 1. 383607 2. 366312  
1. 328004 1. 131058 1. 744475 1. 978405 1. 276388 1. 37471 2. 109864 1. 37715 2. 386559  
1. 766553 1. 717765 1. 690133 1. 34391 1. 446196 1. 818909 1. 276301 2. 069963 1. 379395  
3. 865017 1. 606205 2. 764286 1. 942147 2. 005721 1. 866663 3. 131725 2. 55715 2. 031231  
1. 832425 1. 813349 2. 065467 1. 598193 1. 683635 1. 591731 1. 864685 1. 734174 2. 416825  
2. 65203 2. 423149 2. 079184 2. 065326 2. 378795 2. 790096 2. 953217 2. 513954 1. 960916  
3. 757839 3. 975571 4. 07479 4. 162745 3. 946047 3. 809552 3. 660326 4. 311535 4. 100046  
2. 507604 1. 578024 1. 787594 2. 069575 1. 962665 1. 411019 2. 289837 1. 603597 1. 792007  
1. 846153 2. 879437 2. 591521 2. 478425 2. 644084 1. 811179 2. 401685 1. 732165 1. 613861  
4. 365285 3. 101559 3. 454515 3. 360226 3. 314504 3. 469074 3. 075706 3. 889722 3. 494364  
1. 679416 1. 299742 2. 056092 1. 902282 1. 740771 2. 110147 1. 746177 1. 507549 1. 768861  
2. 233439 1. 039394 1. 312468 1. 390783 1. 314276 1. 319402 1. 940757 1. 475409 1. 250538  
4. 378638 4. 240084 4. 653376 4. 51244 5. 94639 4. 249366 5. 770469 5. 628191 5. 364627  
2. 890998 3. 890126 3. 944764 2. 210409 5. 286572 3. 141117 2. 061059 3. 155134 4. 40293  
4. 674069 2. 695197 4. 310173 3. 70228 2. 64513 4. 159899 5. 017518 4. 073997 3. 234471  
2. 516733 4. 252443 4. 679502 2. 695458 4. 352906 4. 496205 3. 991719 5. 306797 4. 129436  
2. 015379 1. 644981 1. 218325 1. 137416 1. 342595 1. 662459 1. 830387 1. 680348 1. 72336  
3. 674072 4. 08945 2. 973913 3. 888489 2. 837318 3. 850895 3. 680561 3. 300642 4. 182969  
5. 095068 4. 906711 5. 088821 4. 167008 3. 989434 4. 740162 4. 099693 4. 469085 3. 700264  
1. 891434 1. 154224 1. 142129 1. 516869 1. 412815 1. 813392 1. 298348 1. 518297 2. 304732  
1. 894008 3. 181679 2. 209241 2. 328064 1. 74312 3. 242332 2. 358569 4. 430662 1. 798874  
3. 707643 3. 370609 2. 907858 3. 207305 2. 515992 4. 494313 3. 619273 3. 676112 2. 737035  
3. 294185 2. 043662 2. 916266 1. 81937 2. 11119 1. 775755 2. 983378 1. 767623 3. 791025  
0. 748245 2. 25471 1. 040787 1. 095263 1. 559464 1. 547258 1. 941372 1. 279543 1. 253437  
3. 307396 3. 2264 3. 849815 3. 675594 3. 578029 4. 043223 4. 585933 4. 326145 3. 441975  
3. 461129 1. 524755 2. 456226 1. 864598 2. 121388 2. 459575 2. 277472 2. 544585 2. 928524  
4. 114546 3. 586001 4. 200393 3. 810514 4. 037024 3. 938681 3. 475798 3. 794819 4. 240244  
3. 630648 3. 229028 3. 706301 3. 171717 3. 147343 3. 184973 3. 70907 3. 608354 3. 326346  
1. 080449 2. 010619 1. 210383 1. 8393 1. 374838 1. 868305 1. 213718 1. 901578 1. 597687  
0. 919897 1. 079329 0. 783701 0. 954926 1. 043207 1. 93 0. 925322 0. 585328 0. 939463  
3. 165607 3. 320076 2. 877405 3. 514827 2. 982844 3. 106378 3. 224334 2. 628372 3. 208059  
2. 389737 2. 352085 3. 038519 2. 021317 2. 458117 2. 276552 2. 31342 2. 132306 2. 643333

1. 556264 1. 050493 0. 930509 1. 198787 1. 039716 1. 36096 1. 529115 1. 494438 1. 221026  
4. 493794 4. 869359 3. 948599 4. 900321 4. 649117 4. 83335 6. 150794 4. 983125 4. 71888  
2. 875366 3. 284871 3. 81369 3. 300603 3. 465514 3. 688046 2. 743442 3. 909223 4. 045972  
1. 340509 1. 068611 1. 615058 2. 16486 1. 850928 1. 78522 2. 176283 1. 484712 1. 257916  
1. 062698 1. 246337 1. 354116 1. 275545 1. 217189 1. 194596 1. 135538 1. 314844 1. 102382  
1. 324804 1. 231623 2. 010275 0. 76215 1. 809366 1. 131218 1. 980325 1. 542475 2. 172017  
1. 440319 1. 487524 2. 077705 1. 608456 1. 537673 1. 36519 1. 601011 1. 446293 1. 933252  
1. 227745 1. 263654 2. 111824 2. 300061 2. 166997 1. 493694 1. 662346 2. 458601 1. 819342  
1. 203814 1. 139597 0. 891395 1. 155801 0. 793896 1. 091818 1. 637887 0. 756375 1. 450682  
2. 541423 2. 374042 2. 565274 1. 931156 2. 202319 2. 472883 1. 904277 3. 573187 4. 066266  
4. 129354 2. 619429 3. 378821 3. 59038 4. 146296 2. 644943 2. 049849 2. 900093 2. 820336  
2. 333496 2. 596986 3. 342882 2. 771646 2. 620826 2. 232301 3. 416391 2. 757439 2. 136198  
5. 739537 5. 366558 4. 765522 4. 843316 4. 240765 4. 550659 4. 939184 4. 989557 5. 360075  
3. 442517 4. 041037 3. 178583 3. 813437 2. 48265 2. 451052 3. 488569 3. 122728 3. 001815  
2. 459716 2. 273319 2. 320282 0. 913544 2. 220416 3. 261903 2. 627598 1. 757152 1. 995701  
2. 624591 4. 764531 4. 69832 3. 615187 2. 357348 3. 31116 4. 30808 2. 145403 3. 103471  
8. 238556 8. 274104 8. 149105 8. 457618 8. 224632 8. 095622 8. 694361 8. 655836 8. 859227  
4. 050279 2. 044725 1. 764703 2. 93253 2. 675291 1. 743809 1. 436223 1. 514656 1. 832233  
4. 754863 4. 305382 3. 810163 4. 204708 4. 40239 4. 986309 4. 324911 5. 233551 3. 790905  
2. 003518 2. 708166 1. 802768 1. 63747 2. 647058 1. 828837 1. 796096 1. 915282 1. 772706  
2. 106946 2. 372268 2. 25833 2. 310311 1. 5721 2. 161134 2. 227508 2. 241483 2. 483529  
2. 320074 1. 927582 2. 70638 2. 588897 2. 411556 1. 791675 2. 335189 1. 708574 1. 85794  
2. 336602 2. 447352 2. 149895 2. 044124 2. 650558 1. 836068 1. 743195 2. 005417 2. 078622  
1. 537317 1. 69923 1. 338095 1. 083457 1. 664155 1. 255182 1. 602329 1. 489599 1. 450542  
3. 02974 2. 987707 2. 824261 2. 791293 2. 857711 3. 337826 2. 639079 3. 662365 2. 447571  
4. 161652 3. 209976 2. 47336 2. 091076 1. 837853 3. 21213 2. 919339 2. 238657 3. 508629  
1. 189341 1. 299986 0. 946398 1. 309369 1. 261393 1. 419347 1. 169951 1. 682891 1. 331284  
3. 252955 3. 154468 3. 557953 3. 789575 2. 649629 3. 302182 3. 389244 2. 92617 4. 538077  
2. 06559 1. 888542 2. 514789 2. 281582 1. 902101 2. 037807 1. 71909 1. 922103 1. 916809  
1. 871912 1. 923886 2. 195138 1. 941073 2. 555914 1. 738039 2. 128799 1. 631252 1. 755605  
1. 147485 1. 173807 1. 388949 0. 792897 1. 414803 1. 525442 0. 82161 1. 431628 1. 412873  
2. 042056 1. 593493 1. 917606 1. 995439 2. 34129 1. 369372 1. 472214 1. 586506 2. 312661  
2. 814122 3. 935718 3. 182043 2. 815243 3. 260208 2. 521771 3. 312642 4. 476131 3. 557987  
1. 107425 1. 45281 1. 530194 1. 887423 1. 573376 1. 2267 1. 596975 2. 380651 1. 65773  
1. 708611 1. 107629 1. 626502 1. 612297 1. 791752 1. 3225 0. 923471 1. 134709 1. 496072  
2. 340356 2. 519154 1. 905117 2. 999775 1. 981038 3. 027279 1. 683033 1. 901912 2. 209694  
2. 335736 1. 658908 1. 62412 1. 503517 1. 62822 2. 255824 1. 734045 1. 573471 1. 798127  
2. 463955 2. 216153 2. 675699 1. 997906 2. 633265 2. 263902 1. 718103 2. 174436 2. 825405  
5. 745647 7. 66355 6. 222938 6. 667365 6. 366087 6. 833298 7. 204665 6. 157557 6. 423091  
2. 40987 3. 617048 4. 535458 3. 77884 3. 298353 2. 946739 3. 600182 4. 1391 3. 83141  
1. 360626 0. 970324 1. 506112 1. 573997 1. 602132 1. 143821 2. 422448 1. 261241 0. 954766  
6. 574511 5. 424632 5. 695094 5. 988435 4. 229316 4. 429808 5. 043874 3. 477074 5. 45039  
1. 406686 1. 419479 1. 553837 1. 626063 2. 426426 1. 977052 2. 040616 1. 90207 2. 097034  
6. 455889 6. 839129 6. 716129 7. 619142 7. 185461 7. 368429 7. 090812 6. 98424 7. 11139  
2. 295183 1. 035434 2. 489563 2. 010513 1. 244636 1. 424839 1. 885256 0. 982736 1. 709388  
2. 135162 1. 776252 1. 74962 1. 562311 1. 456045 1. 773315 1. 905216 2. 302041 1. 705861  
1. 390212 1. 738811 1. 921167 2. 887579 2. 054719 2. 71277 1. 899647 1. 261054 3. 437845  
1. 109265 1. 378661 1. 211764 1. 446206 1. 403828 1. 465061 1. 498728 1. 543887 1. 473277  
2. 935734 2. 629086 2. 016289 3. 037512 1. 738939 2. 829799 3. 080368 2. 48149 2. 794847  
3. 096595 3. 502418 4. 061189 3. 421314 3. 239373 3. 778269 3. 428515 2. 818267 3. 96187  
1. 627967 1. 511981 1. 20168 1. 929351 1. 362649 1. 592319 1. 57395 1. 770384 1. 837547

1. 374337 1. 119069 1. 364365 2. 055893 1. 668877 1. 138009 1. 683364 1. 123954 2. 100986  
3. 378837 2. 511891 3. 21241 2. 062591 2. 20773 3. 031119 2. 748387 2. 623975 2. 723474  
1. 421678 1. 159923 1. 566394 2. 07199 1. 414553 1. 612959 3. 018544 1. 294949 1. 572814  
1. 807755 1. 433699 1. 567618 1. 235515 2. 037114 1. 248146 1. 399941 1. 606804 1. 345242  
2. 761185 1. 878189 1. 501567 1. 724204 2. 156559 1. 572241 2. 190625 2. 599248 1. 706458  
3. 373766 3. 317022 3. 652853 2. 021569 1. 967071 2. 348414 2. 749714 3. 832173 2. 125857  
1. 479842 1. 318145 1. 474533 1. 496048 1. 600759 1. 10947 1. 987758 1. 329207 1. 094043  
1. 845161 3. 121308 2. 215447 3. 021094 2. 426754 2. 942056 2. 637933 2. 805094 2. 898834  
1. 065781 1. 397344 0. 917492 1. 576686 0. 672825 1. 569613 1. 231513 1. 204454 0. 994547  
1. 010829 1. 457605 1. 291865 1. 329023 1. 846726 2. 09872 1. 484487 1. 825879 1. 123325  
3. 185471 3. 637066 4. 299121 4. 281313 2. 418198 3. 313525 2. 678769 3. 99365 3. 874504  
1. 84413 1. 826635 3. 374114 2. 996837 2. 174238 2. 672226 2. 901656 1. 668842 1. 753817  
1. 43584 0. 824202 0. 799927 1. 561175 1. 121484 1. 07123 1. 294244 1. 039715 0. 842599  
1. 320659 1. 201031 1. 442396 2. 075381 1. 60161 1. 025142 0. 999194 1. 696004 1. 100547  
0. 944779 0. 987909 0. 863373 0. 99909 1. 417395 1. 390612 1. 301298 1. 424532 0. 993693  
1. 430507 1. 029865 1. 531629 1. 435987 0. 947711 0. 857029 1. 351528 1. 321799 0. 977502  
2. 269117 1. 521229 2. 719888 1. 9143 1. 407498 2. 167851 1. 450628 1. 761861 1. 59018  
2. 815628 1. 431047 1. 059026 1. 113514 2. 007654 1. 527358 3. 507841 1. 19068 1. 589992  
2. 178489 1. 873718 2. 200501 2. 243351 1. 510967 2. 139652 1. 958692 2. 218021 2. 416008  
2. 6943 1. 969917 2. 670636 2. 827812 2. 425755 2. 11934 2. 809298 2. 29702 2. 423145  
3. 313035 2. 389747 2. 863809 3. 173417 2. 695792 3. 260318 2. 381211 2. 582934 2. 611992  
6. 370422 5. 084192 5. 1053 5. 208185 5. 520547 5. 537305 5. 009368 5. 848618 5. 846854  
2. 223598 1. 65002 2. 093078 1. 920515 2. 47406 1. 763256 2. 566051 2. 207047 1. 859098  
1. 143912 1. 672624 1. 182979 1. 790502 1. 465235 1. 57858 1. 750098 1. 280826 1. 45481  
0. 892931 1. 01464 0. 921015 1. 042938 0. 887079 1. 314571 0. 959279 1. 150396 1. 112783  
1. 591884 0. 951272 1. 819702 1. 280539 1. 309826 1. 771784 1. 327879 1. 069551 1. 427323  
3. 356836 1. 704256 3. 272841 2. 707843 2. 333457 2. 1577 2. 999147 2. 415949 2. 917562  
1. 670977 1. 843155 1. 611294 1. 848602 2. 485014 1. 505909 1. 801229 2. 271292 2. 063352  
3. 370295 2. 689677 2. 550888 3. 417272 3. 725628 3. 050258 4. 092536 2. 04992 3. 073285  
2. 146088 1. 663553 3. 142358 2. 775991 2. 397252 2. 489596 2. 062561 2. 347238 2. 303451  
0. 964779 1. 375875 0. 983579 0. 793508 1. 673788 1. 040341 2. 367918 1. 331544 1. 151081  
5. 484789 3. 666963 3. 837242 3. 582543 3. 043216 3. 250528 3. 244214 3. 460571 4. 530826  
1. 847429 1. 548312 1. 656231 2. 681703 2. 049634 1. 586165 2. 136271 1. 918116 2. 060918  
3. 047353 2. 261977 2. 993457 2. 563137 2. 181831 2. 13876 2. 839414 3. 068381 2. 543032  
4. 131659 5. 554632 5. 724237 5. 9863 5. 55704 6. 310064 5. 545342 5. 387677 5. 090583  
7. 081014 6. 632517 6. 867247 6. 818212 6. 942638 6. 826046 6. 32753 7. 122404 6. 603531  
2. 565351 2. 419108 2. 765821 2. 840371 2. 652424 2. 839871 3. 276577 2. 650023 3. 47448  
2. 300468 1. 239994 1. 654453 1. 637925 1. 760064 2. 151407 1. 944529 1. 541874 1. 183273  
1. 29739 0. 888393 1. 201469 1. 383372 1. 022867 1. 16323 1. 231355 1. 126878 1. 663359  
1. 208979 1. 470966 1. 467154 1. 017833 1. 457111 1. 864607 0. 757706 1. 062341 1. 019726  
1. 52213 1. 130472 0. 990483 1. 256188 1. 089203 1. 017501 0. 858616 1. 44168 1. 315637  
1. 14827 0. 871185 1. 008532 1. 52043 0. 989535 0. 818299 1. 187203 1. 022146 0. 864678  
2. 569771 2. 401142 3. 015873 2. 571051 3. 151337 2. 961935 3. 083966 2. 323803 3. 607023  
4. 95911 2. 618641 3. 674358 3. 441374 1. 903938 1. 782228 2. 873725 2. 400781 4. 828391  
4. 078826 2. 107533 2. 548617 4. 260742 2. 998491 2. 637021 2. 291337 2. 547157 3. 304572  
6. 938621 5. 05177 6. 385062 6. 129458 4. 984575 5. 731829 5. 41391 5. 714044 4. 379747  
8. 355518 8. 572317 9. 00231 8. 571889 8. 911091 7. 935224 9. 040826 8. 50798 8. 614218  
2. 052296 1. 933894 2. 287937 2. 471219 1. 849266 2. 295695 1. 852833 1. 882116 1. 369993  
3. 434474 6. 462822 4. 542828 6. 46603 6. 503641 4. 022726 4. 742525 4. 398079 4. 606946  
8. 546405 8. 959425 8. 949474 8. 841994 8. 92072 8. 783224 8. 82135 8. 75287 8. 502667  
1. 281751 1. 029187 1. 49843 2. 002255 1. 564173 1. 259931 1. 691213 1. 15002 1. 377551

4. 037663 3. 438592 3. 495029 2. 879322 3. 024362 3. 644124 3. 154309 3. 100105 2. 827822  
2. 120513 1. 376411 2. 001775 2. 139228 2. 697043 1. 233749 2. 377106 2. 389982 1. 894229  
3. 294582 0. 753314 1. 070071 1. 638771 0. 838023 0. 921686 2. 563457 2. 322556 1. 179532  
1. 476216 3. 780701 0. 769019 1. 181798 2. 295378 1. 725469 0. 586222 1. 740597 1. 157053  
2. 463255 2. 512516 2. 244669 2. 634439 2. 776686 2. 664909 2. 869824 2. 878263 2. 745647  
3. 331338 1. 99681 2. 338669 2. 003895 1. 650666 1. 804261 1. 876077 2. 103165 2. 158088  
1. 952847 1. 399948 1. 982222 1. 698678 0. 874056 1. 402314 1. 628739 1. 548669 2. 151739  
1. 543315 1. 189994 1. 101598 1. 401294 1. 700848 1. 55729 1. 526559 1. 39592 1. 008941  
3. 220404 1. 368097 1. 606919 1. 505092 1. 69546 1. 308522 1. 942849 1. 211023 1. 072625  
2. 149984 1. 885071 1. 768087 2. 474348 2. 045233 2. 087038 2. 235571 2. 203181 2. 086838  
5. 070132 3. 984403 3. 598306 4. 189912 4. 641042 4. 658761 4. 385547 4. 923977 4. 274431  
2. 171673 1. 832303 1. 97759 2. 289069 1. 97754 1. 905254 3. 466817 1. 797817 1. 739899  
4. 404045 3. 936083 3. 241532 3. 25606 3. 2905 3. 561757 2. 460302 3. 784177 3. 393369  
1. 689606 1. 066655 2. 734994 1. 195074 1. 51007 1. 242344 1. 48698 1. 888005 1. 129397  
1. 579456 1. 816292 1. 139975 2. 141083 2. 106454 2. 507799 1. 555528 0. 945783 1. 582941  
1. 331004 0. 907134 1. 089545 0. 998881 1. 468466 1. 503363 2. 210644 1. 477732 1. 085753  
4. 093911 3. 269308 4. 021265 4. 295147 4. 48792 4. 410643 4. 789191 4. 394833 3. 692888  
1. 557936 1. 399433 0. 860075 1. 283981 1. 656514 1. 36965 2. 050848 0. 940088 1. 448057  
1. 649699 1. 768578 1. 058844 1. 805324 1. 152431 0. 884909 1. 253883 0. 978008 0. 919068  
6. 185154 5. 562783 5. 561119 6. 742153 5. 040344 5. 885178 4. 132892 4. 730151 4. 740073  
1. 443978 1. 543848 1. 00389 1. 291499 1. 24173 0. 77359 1. 874786 1. 451385 0. 965408  
2. 646991 2. 395575 2. 027569 2. 92132 2. 149042 2. 275919 2. 366527 1. 9828 1. 882383  
3. 44516 3. 028441 3. 192222 3. 346287 3. 09251 2. 88053 3. 620266 3. 554715 2. 930255  
2. 579578 2. 105236 2. 579076 1. 910101 2. 124696 1. 928008 2. 162681 1. 904598 2. 260704  
3. 213143 2. 240859 1. 899556 3. 945112 2. 687855 2. 700093 3. 751227 2. 323249 2. 662504  
2. 117651 1. 816079 1. 700449 1. 896642 2. 107054 1. 244901 2. 133461 2. 009477 1. 782319  
3. 138178 3. 11988 3. 283248 2. 681312 2. 654456 2. 258211 3. 660677 4. 199614 2. 669964  
3. 478964 3. 065821 2. 715393 3. 966524 2. 382449 2. 259674 1. 551647 2. 755878 1. 743443  
2. 14413 2. 860917 2. 28867 1. 946934 2. 315567 2. 311856 2. 042376 3. 46756 2. 198583  
2. 116009 1. 840475 1. 926852 2. 293501 2. 418915 2. 038247 2. 400188 2. 107292 2. 073736  
3. 392169 3. 825703 3. 603259 3. 303876 3. 427156 2. 956669 3. 008878 4. 873747 3. 229052  
2. 021599 2. 106193 1. 674586 2. 082181 1. 964568 1. 783598 2. 420884 2. 179883 1. 806468  
1. 155384 2. 06695 0. 812598 1. 016042 1. 621383 1. 469186 0. 908939 1. 170527 1. 276227  
1. 888191 2. 842625 2. 057395 2. 465526 2. 049271 2. 521293 2. 598686 1. 997899 2. 696724  
5. 367402 4. 104266 4. 719359 4. 560705 4. 547059 4. 271407 5. 213776 4. 361163 4. 601025  
3. 335724 2. 2623 2. 181305 2. 801436 3. 523631 4. 117046 2. 451389 4. 007991 1. 896088  
1. 897099 1. 429212 1. 14415 1. 513688 1. 272021 1. 150518 2. 097857 1. 756724 1. 356183  
4. 162743 2. 301783 4. 8838 2. 637056 1. 452149 3. 543993 2. 637094 2. 463257 3. 744603  
3. 127974 2. 904909 2. 733266 2. 897503 3. 145243 2. 926031 4. 218111 3. 088156 2. 791797  
8. 748104 8. 872839 8. 732999 9. 544545 8. 990866 8. 814774 9. 251518 9. 183173 8. 773093  
7. 678038 6. 372946 6. 703424 6. 329227 6. 197873 5. 579997 6. 226141 5. 570129 7. 256056  
1. 282209 1. 18818 1. 333876 1. 314727 1. 045438 1. 330225 1. 103026 1. 109239 1. 258576  
4. 894882 3. 634763 3. 255713 2. 116736 3. 171513 1. 59236 2. 96832 2. 864781 1. 944973  
1. 859116 1. 644482 1. 001252 1. 854778 1. 622673 1. 2153 1. 325451 2. 947193 1. 590985  
3. 003078 2. 159936 1. 517125 1. 238084 1. 202913 2. 460518 1. 016977 1. 518943 2. 031751  
1. 245375 1. 147072 1. 607665 1. 304375 1. 606702 1. 24326 1. 842034 1. 366601 1. 372056  
1. 726283 1. 400685 1. 442326 1. 216893 0. 912749 1. 444046 1. 118001 1. 311429 1. 180926  
1. 710584 1. 255901 1. 07557 0. 895738 1. 410181 1. 367434 1. 224954 2. 307693 1. 207672  
1. 878111 2. 055991 1. 789911 1. 29379 1. 142537 1. 731917 1. 758899 1. 234995 1. 817513  
1. 298508 0. 944684 0. 978601 1. 162341 0. 842078 1. 476593 2. 032533 1. 090739 1. 131215  
2. 012829 2. 51739 2. 058289 1. 483189 3. 011514 2. 136024 3. 4223 2. 068619 2. 053824



1. 056564 1. 075973 1. 384033 1. 278352 1. 387766 1. 244645 1. 464347 0. 912143 1. 464309  
1. 133585 0. 77192 1. 458648 1. 000784 0. 772839 1. 256394 0. 911075 1. 309238 0. 938349  
2. 41214 1. 772332 2. 056857 3. 91566 2. 366941 2. 930761 3. 093456 2. 321725 2. 31285  
1. 179187 1. 139494 1. 227266 1. 440204 2. 050108 1. 563963 1. 041069 1. 780682 1. 738208  
0. 899415 1. 052947 0. 708042 1. 003156 0. 712143 1. 66892 1. 526924 0. 712517 1. 127657  
1. 323288 1. 973468 1. 072553 0. 948107 1. 414271 0. 846679 0. 842008 1. 214819 0. 848688  
1. 339813 1. 240307 0. 776049 0. 963466 1. 251486 1. 259327 1. 263004 1. 496196 1. 413201  
1. 700562 1. 1784 1. 893401 1. 036723 1. 959847 1. 182436 1. 331905 1. 262425 1. 28438  
1. 941917 1. 655242 1. 697297 1. 101935 0. 949026 1. 26797 2. 823788 1. 371772 1. 371575  
1. 7474 1. 600605 0. 983953 1. 611877 2. 143536 1. 685502 1. 864057 1. 088402 1. 449887  
1. 207293 2. 43472 1. 497874 0. 8996 0. 862865 0. 951075 1. 007021 1. 301376 0. 897837  
2. 462985 2. 11959 1. 659175 2. 457672 0. 831631 1. 769481 1. 542259 1. 067243 1. 334207  
1. 533107 1. 307491 1. 484208 1. 789912 1. 905263 1. 362132 1. 951001 1. 807325 1. 595551  
1. 5239 1. 286584 1. 426338 1. 736994 1. 394664 1. 296528 1. 310833 1. 368594 1. 543861  
1. 428036 0. 650002 0. 918152 0. 945995 0. 827065 0. 854904 1. 062428 0. 874167 1. 153244  
1. 66755 1. 458611 1. 846484 1. 70803 1. 627937 1. 878289 1. 787376 1. 170779 1. 583873  
0. 885793 1. 447337 1. 957406 1. 729204 1. 497483 1. 526306 1. 923316 1. 376556 1. 203218  
1. 077245 1. 057736 0. 812034 0. 905746 0. 792305 1. 420283 0. 990357 0. 810193 0. 66066  
1. 533007 1. 669584 1. 679917 1. 623837 1. 854889 1. 783584 1. 755397 1. 33254 2. 661371  
1. 001621 1. 052616 0. 970993 1. 180146 1. 213358 0. 895805 0. 98794 1. 293885 1. 175512  
0. 918584 0. 842988 0. 740195 0. 822721 0. 756281 1. 015769 1. 5045 1. 040631 0. 527756  
2. 574356 1. 322858 0. 966434 0. 918688 1. 422559 1. 465018 4. 512502 1. 844261 3. 778912  
1. 622194 0. 841069 1. 102701 2. 018238 1. 429957 1. 122999 1. 142821 1. 391414 1. 385425  
1. 801348 2. 33516 1. 41584 1. 634669 3. 509138 1. 581606 1. 653762 1. 358697 0. 561903  
1. 831067 2. 702579 1. 85707 1. 995858 1. 12069 1. 578885 1. 911567 1. 895736 1. 214342  
1. 974514 1. 756123 2. 318912 1. 67554 1. 657257 1. 362821 2. 056158 1. 559202 1. 631325  
1. 910128 0. 805084 1. 809321 1. 850421 1. 944632 2. 090545 1. 05958 1. 80471 3. 185301  
1. 29249 1. 217161 0. 973185 1. 129046 1. 20398 1. 239076 1. 599367 1. 584193 1. 296874  
1. 059024 1. 811473 0. 9734 1. 308985 1. 400462 1. 209634 1. 566134 1. 523965 1. 213025  
0. 614696 0. 948472 2. 260844 2. 790011 1. 171955 1. 228396 0. 913956 1. 939791 0. 929476  
2. 401285 0. 763439 0. 838227 2. 200331 0. 962232 1. 325572 1. 836427 1. 541693 1. 702202  
1. 665494 2. 100311 1. 085673 2. 543608 1. 355121 1. 070424 1. 974309 1. 34634 1. 22128  
0. 911311 0. 531931 0. 862787 1. 32189 0. 917795 1. 059218 2. 531145 0. 684368 0. 884969  
2. 810934 2. 325002 1. 957407 2. 19158 2. 270223 2. 813363 2. 05836 2. 866824 2. 652652  
2. 29696 1. 067544 2. 293484 1. 585366 1. 422529 2. 066806 1. 737572 1. 602208 1. 394214  
2. 862326 1. 752511 2. 538735 2. 668608 2. 003416 1. 814196 3. 115821 1. 950486 1. 928773  
2. 901119 3. 034184 2. 999262 2. 194182 2. 800942 2. 201176 3. 203423 2. 710515 2. 278326  
0. 866593 1. 115803 1. 282697 1. 337636 1. 125122 1. 39024 1. 343839 1. 366578 1. 356081  
2. 235992 1. 378457 2. 010613 2. 373448 1. 77238 1. 978986 1. 984979 2. 365715 1. 416946  
1. 534114 1. 439768 1. 619441 1. 253454 1. 912156 1. 5663 1. 730896 2. 088548 1. 354842  
2. 938158 1. 863264 2. 296543 3. 290103 1. 911788 1. 892495 2. 583804 2. 090308 1. 976235  
1. 624738 1. 316801 1. 516016 2. 126809 2. 41457 1. 657416 1. 920461 1. 602498 1. 435027  
1. 102444 1. 531766 1. 283243 1. 556287 1. 115655 1. 894891 1. 304176 2. 137716 1. 563058  
0. 794903 1. 019612 1. 271524 0. 932189 1. 077405 1. 243201 1. 200805 0. 934735 1. 134625  
1. 512037 1. 011666 0. 845745 1. 257269 2. 419792 1. 755604 1. 635263 2. 516006 0. 736065  
1. 604679 1. 461428 1. 539163 1. 519209 1. 100854 0. 947552 1. 396628 1. 136801 1. 454371  
1. 436901 2. 248184 1. 731064 1. 730822 1. 285725 1. 108373 1. 389015 2. 854085 1. 850255  
3. 803859 3. 225116 2. 577922 3. 174557 1. 921593 2. 653598 3. 256756 3. 06246 2. 747521  
0. 789063 1. 925437 1. 121973 1. 39179 1. 262277 0. 732305 0. 943162 0. 77881 1. 153656  
1. 210365 0. 740856 2. 732906 0. 922187 1. 035907 1. 099536 2. 140061 1. 096907 1. 119938  
1. 240251 1. 348144 1. 372442 1. 730266 1. 020296 2. 278054 1. 038829 1. 52373 1. 273899

0.679548 1.682329 0.763973 0.843905 1.034446 1.338138 2.013097 0.796639 0.658155  
1.107499 3.448042 1.632748 0.64897 1.833485 3.979935 3.558507 1.482077 1.431621  
2.274375 0.818349 0.697453 1.693346 1.304381 1.083313 1.096395 1.251653 1.159275  
0.750762 1.161861 1.9546 1.270036 1.04685 1.596062 1.942235 2.41321 2.174172  
2.317664 1.438131 2.313754 1.849818 2.188565 1.489932 2.320571 1.962549 1.916257  
1.458103 1.558328 1.384772 1.646529 1.484002 1.882673 1.329003 1.586353 1.378601  
1.062717 2.09126 1.713079 1.167409 1.384411 1.89803 1.852228 1.798215 0.94734  
2.432607 2.283536 1.229352 0.763701 1.150823 1.240152 1.010727 1.478829 1.020909  
1.729371 1.603257 1.635668 0.952453 1.427067 2.142841 1.8397 1.344229 1.404221  
2.034435 1.628322 1.609117 1.399911 1.206508 1.178818 1.025068 1.381149 1.315889  
3.026236 2.631646 2.948901 2.763357 2.303166 3.438865 2.185486 3.66299 2.164239  
1.714489 1.132491 1.43685 1.413659 2.397211 2.837079 3.0301 1.103272 1.169914  
1.031376 1.049807 1.037348 1.7124 1.630222 1.210745 1.299142 0.989093 1.054585  
2.582482 1.517501 1.937653 1.774473 2.564426 2.345054 2.279167 2.184943 1.709783  
2.351777 3.030879 1.966871 1.982967 2.354079 2.134097 2.208309 2.779494 1.759748  
1.649672 1.397687 1.8087 1.671525 1.199084 2.008947 1.88034 1.237441 1.884581  
1.929907 2.538421 1.443072 2.412934 2.156702 2.143265 2.50444 1.729018 2.114161  
5.109365 4.52637 3.907722 4.292937 4.332192 3.864365 4.35336 3.151107 4.795211  
1.465905 1.381061 1.407439 1.419322 1.353617 1.573264 1.389988 0.955264 1.372573  
1.973666 1.242848 1.278315 1.40244 2.135971 1.105453 1.418534 1.739594 1.175884  
1.193152 1.126477 1.249885 1.045866 1.50162 1.020215 0.696497 1.063899 1.118976  
2.531086 2.587031 2.694299 2.891519 1.554489 3.633751 3.807443 3.064266 1.81969  
2.403799 2.102543 2.473415 1.982047 1.99379 1.861186 3.49301 1.819493 1.837959  
2.776711 3.006978 2.184972 3.008263 2.486044 2.454372 2.997957 2.775511 2.024383  
2.353765 1.732962 2.110304 2.13182 1.656363 2.053107 1.74619 1.814517 1.844699  
1.404156 1.598272 1.561569 0.954587 1.967346 0.635038 1.566866 0.920446 1.382397  
1.892173 1.5835 1.463828 2.184319 2.370075 1.579901 2.302614 1.852743 1.608248  
1.896673 1.554003 1.844367 1.964371 1.212896 2.1305 1.451499 1.557416 1.399833  
1.876417 2.049526 2.245211 2.549103 1.50742 1.808947 2.089954 2.202284 2.180516  
1.916356 1.694007 1.841395 1.663516 1.788468 2.086305 2.069341 2.157555 1.724934  
1.617564 1.4369 1.552741 1.623166 1.628257 1.552272 1.545039 1.777964 1.658661  
1.321044 1.020836 1.380222 1.553624 1.421891 1.335679 1.6462 1.068216 0.945845  
2.29729 3.095004 2.953906 2.275503 2.294373 2.702964 3.092259 2.75833 1.577075  
1.570979 1.48877 1.495712 1.90844 0.916788 1.388295 1.585895 1.88462 2.436371  
1.336957 1.395602 1.198055 1.246271 1.258099 1.266147 1.983202 2.022122 1.206042  
1.991675 1.341159 1.148766 1.792955 1.659633 1.325439 2.036942 1.286816 1.773751  
1.572201 1.133087 0.812972 1.319198 2.802634 1.158849 1.491759 1.923359 1.247023  
3.257061 3.308004 3.006042 5.825432 3.937178 3.519518 4.102797 4.031015 3.671875  
6.248154 6.084497 5.456449 6.384063 6.480039 6.554873 6.170752 5.958782 6.48473  
2.533667 3.025552 2.297089 2.960872 2.789627 2.031061 2.774333 2.474843 3.195711  
1.814593 1.893973 1.764281 1.463132 1.957924 1.697021 2.054838 1.640681 2.192211  
2.435842 2.244839 2.263722 1.93537 2.506974 1.946056 1.989861 1.633242 1.724349  
3.805564 2.831877 3.133365 4.159718 2.722124 3.632503 3.154837 3.594572 3.597195  
1.810689 1.381175 1.993342 1.245628 1.184966 1.388289 1.395153 2.043825 0.734678  
2.711314 4.038429 3.104253 3.363962 2.906228 3.150627 2.862017 3.162209 3.165068  
4.851722 4.312245 3.852143 4.805799 4.784882 4.613614 5.218785 4.448904 4.435924  
2.332807 2.024901 1.350097 1.634418 1.263524 1.671293 2.005024 2.169789 1.922944  
0.854317 1.060117 1.398654 1.577407 1.167254 2.134606 0.757901 1.154735 1.125422  
2.839022 4.791489 3.358632 3.529175 3.891584 3.525373 4.174293 4.574442 3.947512  
4.382205 5.478626 4.633546 6.404474 5.607933 5.377668 5.581624 5.605555 5.303235  
2.054942 1.584958 2.037778 2.277366 1.482998 1.868046 1.47309 1.73817 1.827529

1. 185234 1. 069904 0. 936423 1. 285281 1. 044235 1. 081798 1. 342189 1. 263498 1. 2656  
1. 767867 2. 210755 2. 654724 2. 563747 1. 915922 2. 11263 2. 405373 2. 588279 2. 156545  
1. 200272 1. 210438 1. 288449 1. 26728 1. 560286 1. 046494 1. 452486 0. 928614 1. 288383  
1. 482373 1. 027997 0. 910895 1. 746883 1. 503432 1. 015954 1. 513959 1. 115044 1. 134416  
3. 642586 2. 151271 2. 651042 2. 05327 3. 151964 3. 498706 2. 101155 3. 173278 3. 844795  
3. 467751 3. 449845 3. 49615 4. 123418 3. 375022 5. 108872 4. 834792 4. 340366 3. 847059  
2. 390272 1. 867276 1. 964771 1. 830276 1. 286892 1. 912668 2. 464031 1. 783653 1. 297523  
1. 582746 1. 250407 1. 250407 1. 652343 1. 549035 0. 941866 2. 271478 1. 663981 2. 114731  
2. 119214 1. 112127 1. 5492 1. 23197 1. 30804 1. 712533 1. 72073 1. 669625 1. 622286  
1. 578838 1. 39115 1. 333185 1. 295675 1. 160618 1. 321934 2. 211494 1. 427583 0. 836199  
1. 180212 1. 492574 1. 291866 1. 628377 1. 921493 1. 51472 1. 782802 1. 179564 2. 166283  
5. 079814 5. 852456 5. 036304 5. 123788 4. 933201 5. 862784 4. 881675 6. 659531 4. 989669  
2. 26995 1. 462935 1. 369329 2. 077792 2. 146174 1. 868855 2. 212206 1. 516721 1. 791223  
3. 293522 2. 133292 3. 332627 2. 730273 2. 766105 2. 415425 2. 159031 2. 014752 2. 454234  
3. 294673 2. 572181 3. 156504 1. 683009 2. 480291 2. 225782 2. 431724 1. 713428 1. 895132  
4. 994904 3. 817666 4. 124738 3. 933075 4. 893521 4. 201043 4. 380107 4. 256135 4. 345175  
1. 985126 0. 823109 0. 982285 1. 329881 0. 661784 0. 889092 0. 763502 0. 729919 0. 9076  
3. 878469 2. 208981 1. 305231 0. 327887 1. 992273 2. 464423 3. 498533 1. 667516 1. 917424  
4. 748709 5. 234412 5. 795997 5. 817844 5. 344008 5. 37965 5. 761213 5. 05432 5. 083146  
1. 717285 1. 267904 1. 734025 2. 15352 0. 927261 1. 318612 0. 718774 1. 282345 1. 628664  
1. 075234 1. 118184 1. 240011 1. 220853 1. 153031 1. 218877 1. 033459 0. 752003 1. 180476  
0. 880164 1. 163828 0. 934441 1. 643701 0. 881965 0. 689278 0. 716871 1. 334524 0. 752792  
1. 278249 1. 527781 1. 617791 1. 406447 1. 654266 1. 748518 1. 398571 2. 09258 3. 090816  
6. 063003 4. 82958 4. 540639 5. 167926 5. 070016 5. 725133 6. 198814 5. 101684 5. 937348  
8. 829845 9. 273328 9. 289988 9. 227164 8. 762251 8. 604576 9. 404837 8. 822274 9. 35529  
1. 191177 0. 841915 1. 140062 0. 830193 0. 720051 0. 723517 1. 209373 1. 294882 1. 172726  
7. 777741 8. 058009 8. 159754 8. 274615 8. 211006 8. 350071 8. 197145 8. 231253 7. 769309  
1. 538334 2. 05537 1. 682141 2. 166781 0. 932099 1. 205379 1. 52916 1. 984614 1. 542314  
2. 475318 2. 629862 2. 545579 2. 091819 2. 478152 2. 512344 3. 034097 2. 501169 2. 687772  
1. 943495 1. 439953 1. 737404 2. 277755 2. 608427 1. 585704 1. 827552 1. 769478 0. 94168  
6. 699606 6. 882617 6. 72666 8. 110525 7. 538303 7. 249094 7. 533495 7. 492179 7. 339086  
0. 820411 0. 923928 1. 291464 0. 825578 1. 148479 1. 843205 1. 41723 0. 90349 1. 052835  
8. 718526 8. 622112 8. 616823 8. 622104 8. 979541 8. 835717 8. 671223 8. 696643 8. 871435  
1. 238479 1. 241057 1. 421962 1. 162459 0. 754189 2. 015724 1. 942778 1. 030806 1. 414432  
1. 403484 1. 297251 1. 612069 1. 768173 1. 858214 1. 555946 1. 304252 2. 073494 1. 022708  
2. 045654 2. 176615 2. 273493 2. 357474 2. 576076 1. 842006 2. 887273 1. 989288 2. 286654  
2. 23131 1. 994704 3. 070428 2. 082127 2. 275663 1. 980061 2. 417228 2. 649889 2. 350369  
4. 645162 5. 39666 5. 372715 5. 516112 5. 593445 5. 506452 5. 465561 5. 475451 5. 395724  
8. 177746 7. 845923 8. 325545 8. 227868 7. 655098 7. 986741 7. 736867 8. 132664 8. 280221  
2. 432239 1. 305252 1. 342688 1. 706168 1. 677076 1. 238322 1. 4506 1. 468811 0. 878287  
1. 084748 0. 983092 0. 933894 1. 01104 1. 62079 0. 789254 1. 123036 0. 889939 1. 037693  
2. 001389 1. 619042 1. 39273 1. 655628 1. 890228 1. 310593 1. 347539 1. 392416 1. 175457  
1. 936331 2. 678714 2. 14109 3. 122942 1. 716029 2. 634254 2. 077055 2. 106088 2. 651143  
1. 209152 1. 108705 1. 196458 1. 541611 1. 394325 1. 227665 1. 524838 0. 892549 0. 90611  
2. 475055 1. 383209 2. 154399 1. 844129 1. 431996 2. 030425 1. 768009 1. 877754 1. 747972  
2. 096769 2. 585803 1. 897304 2. 102637 2. 342638 2. 69315 2. 585803 1. 784558 2. 322849  
1. 070248 1. 337707 3. 829702 1. 413248 2. 434158 1. 413523 2. 480515 2. 262778 1. 459084  
5. 41715 3. 839148 2. 065447 3. 95047 3. 706651 3. 270245 5. 909119 4. 510421 1. 686101  
1. 283149 0. 86428 1. 013349 0. 861493 1. 138335 1. 342576 0. 895081 2. 006314 1. 143396  
3. 506394 3. 229834 3. 268901 3. 912215 3. 510185 2. 944692 3. 11917 2. 759925 3. 300466  
1. 895543 1. 885461 1. 959965 1. 708193 1. 251057 2. 035902 1. 390473 1. 788566 1. 788566

1. 717427 1. 377536 1. 26283 1. 250846 1. 894983 1. 847049 1. 7869 2. 155672 1. 735738  
1. 416444 1. 076179 1. 305771 1. 409944 2. 43166 1. 632547 1. 403589 1. 158662 1. 38652  
3. 347856 1. 641544 3. 082917 1. 171966 1. 421178 1. 216122 1. 436261 2. 489867 4. 53338  
2. 549637 2. 327684 2. 230048 2. 868542 1. 933165 2. 378884 2. 454674 1. 744352 2. 46087  
2. 469786 1. 584458 1. 715618 1. 775984 1. 799157 1. 771335 2. 062459 1. 980351 1. 932641  
4. 836929 4. 839718 5. 339328 4. 71342 5. 087932 5. 233754 4. 934455 5. 126885 4. 962431  
3. 146902 3. 213297 3. 145719 2. 415219 3. 7916 3. 139442 3. 318522 3. 015562 3. 632162  
5. 017595 3. 096613 3. 732618 3. 092289 2. 884502 2. 296566 3. 132768 3. 242465 3. 970061  
8. 308865 8. 065118 8. 30443 8. 86882 8. 086851 8. 426785 8. 26116 8. 150107 8. 33806  
1. 91994 1. 438913 1. 897606 2. 113254 1. 584319 1. 137305 3. 81747 0. 926591 2. 831405  
2. 009365 1. 090616 1. 361528 1. 409803 1. 914427 1. 740336 2. 163633 1. 408031 2. 071236  
2. 587459 1. 465825 1. 829238 1. 951422 1. 610296 1. 684812 2. 175888 2. 153244 1. 600585  
8. 089379 8. 126501 8. 347614 8. 611121 8. 057734 8. 750627 8. 414721 8. 031799 8. 259477  
1. 254236 0. 776386 1. 429463 3. 267186 1. 743022 1. 341556 1. 695347 1. 526268 2. 518  
4. 870861 5. 619673 5. 487488 5. 457169 5. 287261 5. 743958 5. 349846 5. 705478 5. 114961  
2. 76285 3. 564745 4. 201056 3. 926838 3. 80894 3. 332806 4. 833318 4. 476478 3. 065644  
2. 39283 1. 215823 1. 412444 1. 41603 1. 440712 1. 918135 2. 136658 1. 419232 1. 564049  
1. 355796 1. 084236 2. 280741 1. 505161 0. 887241 1. 054849 1. 64301 1. 908335 1. 448676  
2. 24256 3. 507652 3. 411729 1. 677161 3. 014922 4. 256119 3. 629095 2. 576336 3. 657232  
6. 179826 7. 137428 7. 025179 7. 133236 6. 956814 7. 063165 7. 231446 6. 480687 6. 514197  
5. 39477 6. 54066 5. 594105 7. 496712 5. 843072 6. 850595 6. 46661 6. 121654 6. 046593  
1. 410251 1. 15546 1. 571866 1. 529998 1. 87534 1. 753192 1. 715314 1. 602774 1. 706059  
4. 668699 4. 648787 4. 247301 4. 561572 5. 43892 4. 342604 4. 687256 4. 321992 4. 982684  
3. 431361 3. 439383 3. 144405 3. 155429 2. 83353 3. 306002 4. 075113 3. 4654 3. 27243  
2. 438427 2. 535747 2. 133871 2. 247725 2. 13725 2. 247885 2. 316006 3. 044257 2. 307975  
9. 983855 9. 020962 9. 628427 9. 275689 8. 910241 9. 051292 9. 568707 9. 120813 9. 760852  
1. 312796 1. 397671 1. 203852 0. 949175 0. 789507 1. 333534 1. 22411 1. 139606 1. 187605  
3. 348459 5. 442547 5. 32847 5. 945214 6. 203485 5. 450837 5. 616392 5. 495505 5. 425175  
8. 062662 7. 759747 7. 730343 7. 754744 7. 432732 7. 760522 7. 736945 7. 381658 7. 683796  
1. 184612 1. 124068 0. 829197 0. 839288 1. 67025 1. 193534 0. 994899 1. 581891 1. 727333  
1. 871951 1. 636429 1. 32392 1. 486811 1. 684266 2. 235796 1. 354278 1. 156515 1. 487779  
4. 537414 6. 141764 6. 212453 5. 044751 5. 452494 6. 236293 4. 508401 5. 586616 5. 74575  
6. 580557 5. 181436 5. 831943 5. 142047 5. 578876 4. 946276 6. 015243 5. 305406 5. 348107  
2. 257506 1. 642567 2. 708027 2. 057853 1. 932938 2. 517778 2. 90058 2. 499229 1. 952168  
10. 14172 10. 78184 10. 22398 10. 90605 10. 68177 10. 70948 11. 07116 10. 99436 10. 6801  
9. 03452 8. 057122 8. 297359 6. 982915 7. 663134 5. 774416 7. 739079 8. 60677 8. 856226  
6. 435516 6. 14336 6. 160981 6. 386069 5. 878575 6. 006465 7. 267408 6. 113838 6. 818515  
6. 45929 6. 804302 6. 621577 6. 815729 6. 953728 7. 516225 6. 472628 7. 158994 6. 806654  
4. 003816 3. 388324 3. 280571 3. 470775 2. 813929 3. 29909 3. 153515 2. 218923 4. 184106  
2. 742888 2. 695013 3. 402321 2. 13796 1. 822032 3. 314823 1. 835423 2. 32384 2. 471648  
2. 063734 3. 010628 3. 255683 3. 58442 1. 531659 3. 002412 2. 877225 2. 395693 4. 056387  
8. 058789 9. 043252 9. 077103 8. 735697 8. 568068 8. 94081 7. 944187 8. 462411 8. 414157  
7. 314287 7. 736449 7. 664761 7. 85845 7. 683269 7. 579951 8. 097789 7. 775885 7. 485022  
3. 179129 1. 701349 1. 444172 1. 636239 1. 786322 1. 568362 1. 522648 2. 033389 1. 98648  
3. 391103 2. 321639 2. 352697 1. 816773 2. 540225 2. 414381 2. 79559 2. 65663 3. 8551  
2. 024591 2. 430385 2. 318565 2. 6722 2. 172986 2. 613371 2. 390763 2. 321233 2. 356367  
8. 703245 8. 543354 8. 267603 8. 989877 8. 115661 8. 884399 8. 74134 7. 781229 7. 956553  
4. 577431 4. 027168 4. 534419 3. 530092 3. 803475 4. 439264 4. 619867 4. 087459 3. 784572  
8. 934717 9. 377815 8. 858218 9. 669293 9. 549928 9. 200042 9. 54145 8. 883163 9. 294853  
4. 668228 4. 291447 4. 445278 4. 553873 4. 793246 4. 943341 4. 303698 3. 608181 4. 11928  
5. 667732 6. 595307 6. 13355 5. 955648 6. 117411 5. 982868 6. 171735 6. 567244 5. 488157

2.919814 1.78183 1.829912 1.318468 1.948245 2.006015 1.872699 1.426803 2.049248  
5.923784 5.409173 5.41284 5.298653 5.145491 4.607819 5.515901 5.436316 5.786928  
4.286457 3.587795 3.242876 4.113292 2.540976 3.776249 1.834074 2.952141 3.602827  
3.561144 5.092556 4.780598 4.819335 5.278703 4.906635 4.803588 5.031071 4.86361  
2.654685 2.469294 2.830721 2.338689 3.267984 3.050444 2.418701 3.353079 2.848278  
6.229777 6.926218 6.437528 6.371979 6.326131 6.563319 6.09817 7.056266 6.836839  
2.993184 2.68549 2.850129 2.45831 2.637299 3.001103 3.136394 2.366523 2.158949  
2.783728 2.364807 3.30838 3.374337 2.683646 2.175332 2.886537 3.343054 2.518681  
4.048101 3.783659 3.447771 4.099817 3.592686 3.734459 4.564549 3.190465 3.371991  
6.607182 7.562065 7.241676 7.758436 7.317098 7.409014 7.695509 7.633011 6.99547  
4.566627 3.66977 3.921683 3.050448 3.972942 3.426314 3.607814 3.84345 3.685844  
2.150405 0.987556 1.101022 1.394089 1.317185 1.529309 1.768474 1.281878 0.913923  
3.183664 2.543999 3.355352 2.617044 3.068476 2.822644 2.531923 3.202264 3.023772  
5.250299 5.679248 5.815126 4.839966 5.789171 5.201338 5.706987 5.36977 5.275266  
5.013971 5.727645 5.180152 5.415593 5.672177 5.959478 6.518648 5.345094 5.593862  
4.007866 4.344432 3.223125 3.906918 3.920715 4.364583 3.906218 4.183275 3.028264  
6.068425 4.802735 5.692048 5.657093 6.23864 5.727658 5.255855 5.557493 6.024403  
2.845684 3.914999 3.264466 2.629106 2.557926 2.732907 2.160914 2.66309 3.022202  
1.211617 1.785483 1.605597 2.209889 1.419627 2.454984 1.580939 1.685525 1.616828  
1.376945 1.321273 1.592492 1.383537 2.055126 1.578761 1.600782 1.659937 2.0835  
5.328715 5.328235 5.751842 6.081791 6.039477 5.828482 5.854487 6.173457 5.803245  
2.342363 2.433819 2.256632 1.631265 1.917431 2.48646 2.16551 2.611552 2.060662  
1.959 1.513365 2.200809 2.217939 1.539116 1.644919 1.619559 1.548854 2.501874  
1.306349 1.844936 1.319706 1.386332 1.153914 3.527566 2.350397 2.121342 1.82559  
2.350072 2.356419 2.634336 3.231632 2.439734 3.040683 3.582474 2.996165 2.375237  
2.459683 2.833759 2.320714 2.192023 3.052888 2.356168 3.480836 2.635821 2.601112  
2.427266 1.341083 1.584355 2.467852 1.619678 2.093264 2.491985 2.352321 1.54994  
1.435004 1.457587 2.13197 1.790034 2.079802 1.594134 1.259274 1.663731 2.258327  
1.540581 0.858293 1.341661 1.754945 1.139831 1.384113 2.548059 1.275644 0.938056  
3.743876 4.296153 3.130167 5.066683 4.467972 3.85553 3.594932 3.9338 4.158582  
4.272205 2.749834 3.861063 3.004291 4.095589 3.923855 2.748769 3.702803 3.459364  
1.117871 0.850569 1.173881 1.601846 0.442185 1.147309 0.823717 0.797972 0.532927  
4.372399 4.443886 4.73925 3.982957 4.803409 2.787297 5.21702 3.943255 3.026444  
2.501875 1.388468 1.277952 1.514768 1.477579 1.155023 1.576884 2.0215 1.185468  
1.668139 1.524578 1.506374 1.826573 1.617946 1.347651 2.455053 1.687623 1.779111  
1.925482 1.423199 1.368033 1.816779 1.132353 1.624619 1.401672 2.081437 1.306567  
6.177886 6.077963 6.646028 5.712254 4.875398 5.777542 5.965704 5.434686 6.013451  
3.140723 2.341206 3.466325 1.674504 2.080599 1.694711 2.758047 1.984597 4.061444  
2.93267 1.868405 1.782056 2.200013 1.887153 2.020653 1.749887 2.290891 1.531727  
3.044334 2.708169 3.312313 2.541861 2.185274 2.077945 3.061814 2.614744 2.996755  
2.529357 1.699998 1.46488 1.79109 1.458042 2.003756 1.48739 1.250396 1.437588  
0.709336 1.355201 1.342878 2.019336 1.271563 3.224621 1.35783 3.54867 1.026273  
1.777194 1.392593 1.548332 1.456451 1.63254 1.017196 1.554452 1.543434 1.741879  
2.068323 2.543227 2.336623 2.073959 1.282667 2.335602 1.524338 2.292685 2.24123  
2.172983 3.012798 2.567974 2.014305 2.498708 2.60749 3.018047 3.320125 2.255244  
1.585386 1.992336 2.700446 1.648847 1.930514 2.080489 1.658433 2.195746 1.448628  
8.260792 8.169533 8.269495 8.194428 8.285657 8.372449 8.255507 8.386213 8.324748  
1.807113 2.152752 2.025203 3.202751 1.558241 1.961633 1.605049 1.107579 1.509381  
5.43387 5.527578 5.563076 5.834827 5.57874 5.986666 5.595526 5.644084 5.980905  
2.70502 1.859757 2.070625 1.983027 2.148983 1.967545 2.533983 2.483618 2.348628  
2.937533 2.44259 2.392792 2.011021 2.243931 2.058952 2.105879 2.495511 1.878299

2. 524233 1. 851434 3. 659073 2. 153684 2. 673252 1. 136414 1. 431128 1. 296488 1. 34489  
1. 207329 1. 222903 1. 451304 1. 12382 1. 269639 2. 753738 1. 240013 1. 524363 1. 387884  
3. 800879 5. 747076 4. 052573 5. 361514 5. 214687 4. 477617 4. 897855 4. 136953 5. 605515  
1. 543671 1. 200616 1. 097687 1. 290541 1. 625427 1. 076544 1. 733571 1. 146325 1. 114384  
1. 806581 0. 990655 0. 938578 1. 120757 1. 315814 1. 109987 0. 899058 1. 037297 1. 248509  
3. 648454 4. 560371 4. 199673 3. 934252 3. 603312 3. 378544 4. 123692 3. 523564 3. 094745  
6. 687648 7. 134711 6. 540152 7. 123927 6. 417465 6. 55293 6. 526823 6. 228911 6. 969483  
1. 683031 1. 429365 2. 446759 1. 656949 1. 720951 1. 477933 1. 86728 1. 757364 1. 739024  
5. 163295 4. 716644 4. 777696 4. 450678 4. 982397 4. 987904 4. 790872 4. 882373 4. 65639  
1. 459031 1. 053656 1. 534981 1. 160573 1. 176695 1. 214557 1. 379335 1. 070938 1. 177187  
1. 678294 0. 995474 0. 991004 0. 900795 1. 176682 1. 14818 1. 806713 1. 435087 1. 123761  
5. 525937 5. 499233 5. 742366 5. 592182 6. 122891 5. 476974 5. 604648 6. 738811 5. 53423  
3. 460163 4. 051407 4. 042539 4. 349754 4. 927466 4. 903448 4. 959788 4. 5543 3. 654964  
1. 055812 1. 866917 1. 985057 2. 33467 1. 60958 2. 303679 1. 6215 2. 225029 2. 188052  
1. 02604 1. 181737 0. 603533 0. 733746 1. 541488 0. 916222 1. 849913 1. 115375 1. 858307  
3. 30111 3. 510831 2. 767685 3. 417243 3. 148249 2. 636705 2. 932898 2. 732024 3. 10354  
2. 426711 2. 036675 1. 696394 2. 411758 2. 426968 2. 247665 1. 514862 1. 799232 1. 7916  
1. 67609 1. 975471 1. 763613 1. 72744 1. 61723 1. 566047 1. 754514 1. 367011 1. 765298  
5. 770306 6. 000355 5. 904136 5. 877745 6. 851 6. 08443 6. 510995 6. 90165 5. 791487  
2. 525786 2. 265202 2. 285997 2. 770027 2. 499132 2. 177759 3. 262907 2. 491988 2. 538303  
2. 345525 1. 478811 1. 875345 2. 090156 2. 311079 1. 652642 2. 708032 2. 087202 1. 744429  
1. 306054 0. 97191 0. 91112 1. 370597 1. 195517 1. 218512 1. 779298 1. 383528 1. 404885  
1. 092924 1. 385793 1. 117381 1. 252372 1. 266515 2. 077108 1. 786105 0. 857453 1. 827616  
2. 102057 2. 961873 3. 267393 1. 905375 2. 278812 1. 993816 2. 303308 2. 779038 2. 336046  
1. 727244 1. 930338 1. 31732 2. 047645 1. 252949 2. 126124 2. 162743 1. 65929 1. 925288  
2. 567591 2. 446331 2. 142029 2. 050118 2. 895087 2. 567001 2. 572787 2. 868711 3. 238493  
2. 549247 1. 834119 2. 904758 2. 793761 2. 153797 2. 955783 1. 672802 2. 187714 3. 063863  
1. 331945 1. 006345 1. 232532 1. 547532 1. 389825 1. 047342 1. 318674 1. 274408 1. 769035  
1. 831272 1. 741968 1. 865799 2. 655831 1. 26006 1. 794322 2. 508826 1. 572136 2. 211484  
1. 50383 1. 902179 1. 231928 1. 819752 0. 806922 1. 255163 1. 329748 2. 451417 2. 047301  
4. 077962 4. 746855 3. 703715 2. 736002 3. 315441 3. 316096 2. 834739 3. 30692 3. 772854  
2. 433511 2. 35209 3. 292548 2. 39632 2. 141644 2. 24323 2. 598136 2. 636247 2. 640159  
4. 207864 5. 066938 5. 875195 4. 78161 3. 945336 4. 375926 4. 94714 4. 982577 4. 590269  
2. 593746 1. 621313 1. 779572 2. 0919 1. 591007 1. 495624 2. 729881 1. 831957 1. 78789  
0. 949697 2. 25833 0. 898951 0. 919312 1. 796866 1. 634147 0. 943069 0. 804466 1. 367872  
2. 991873 3. 025675 2. 732314 2. 565186 2. 455755 1. 944609 3. 51792 3. 479343 2. 606736  
4. 739529 5. 69523 5. 788847 5. 492096 6. 26155 4. 897585 4. 230676 6. 612983 5. 568414  
1. 171706 0. 853519 0. 833392 1. 19466 1. 39756 1. 558233 1. 108254 1. 164125 1. 261525  
2. 430328 3. 247256 4. 583919 2. 563859 2. 459802 2. 910546 3. 662456 4. 463561 3. 614132  
1. 904083 1. 09836 1. 486436 1. 670631 1. 520655 1. 431091 1. 986678 1. 218978 2. 159949  
1. 879562 1. 271993 1. 314949 1. 223277 1. 838234 1. 218725 1. 140144 1. 17434 1. 191654  
1. 429961 1. 258999 1. 29099 1. 566001 1. 227298 1. 709217 1. 337137 1. 623909 1. 512072  
5. 896551 6. 054066 5. 122426 6. 582665 5. 585635 6. 347383 6. 03947 6. 933145 5. 221878  
1. 13433 1. 143792 1. 582107 1. 111341 1. 002154 0. 983609 1. 777049 1. 296661 1. 494133  
3. 941544 1. 396586 1. 27882 1. 439989 1. 325264 1. 260441 1. 308848 0. 984622 2. 406349  
3. 623707 3. 635213 3. 34227 2. 82178 3. 295577 3. 572694 3. 970002 3. 11949 3. 858825  
2. 597891 1. 796693 2. 305408 1. 784341 2. 085755 1. 808378 2. 193394 2. 296908 1. 853334  
2. 401415 1. 655605 2. 268584 2. 0611 2. 144142 2. 931025 2. 55125 2. 076593 1. 732568  
2. 453043 1. 902061 1. 947637 1. 706639 1. 951642 1. 652281 2. 39886 1. 78595 1. 905169  
2. 418338 2. 552079 3. 489327 3. 009755 2. 214583 2. 234924 2. 784896 3. 288189 2. 332998  
3. 322126 1. 552398 2. 157767 2. 368527 2. 511707 1. 839686 2. 75493 2. 139319 2. 575243

5. 772298 5. 739043 5. 873432 5. 683186 5. 59836 5. 479679 3. 871209 6. 597177 4. 861896  
5. 542248 6. 398402 6. 169583 5. 661345 6. 635531 5. 026717 5. 081647 5. 535573 5. 818447  
4. 533286 4. 117271 4. 219412 4. 057353 4. 289124 3. 777734 3. 90249 4. 368839 3. 795368  
1. 621583 1. 31895 1. 128731 1. 65019 1. 039852 1. 079764 1. 212175 1. 736131 1. 42349  
4. 34304 4. 926129 4. 880026 5. 146013 4. 969437 4. 966093 4. 999813 4. 611566 4. 863646  
2. 968831 3. 405524 4. 045283 3. 720987 2. 798359 3. 25693 3. 636697 3. 554498 4. 606199  
2. 935927 2. 275945 1. 189715 1. 692304 2. 177022 1. 372379 2. 166071 2. 028482 1. 974068  
2. 176825 2. 867451 1. 924399 1. 625385 2. 383207 2. 017371 1. 870746 1. 628999 2. 092622  
1. 898456 3. 285143 3. 911828 2. 345049 1. 942443 1. 390252 1. 577545 1. 695109 3. 868729  
1. 199219 1. 411289 1. 370158 1. 34425 1. 553073 1. 623343 1. 552753 1. 253219 1. 593222  
1. 692119 1. 734555 2. 27219 2. 066385 2. 070746 1. 578379 1. 51902 1. 94554 1. 962116  
1. 655692 0. 764492 1. 090728 1. 385126 0. 948271 1. 840253 1. 690215 1. 084032 1. 094511  
2. 880706 1. 927383 2. 066429 1. 676483 1. 774875 1. 773578 2. 007805 1. 15105 2. 191535  
1. 269275 1. 973489 1. 18856 1. 275056 1. 511513 1. 505657 1. 675077 1. 659087 1. 272469  
4. 41529 2. 806889 2. 512282 2. 482008 2. 497988 3. 146392 2. 882938 2. 264368 2. 428998  
2. 692402 1. 690607 1. 696902 1. 967349 2. 077331 1. 748378 1. 764638 1. 651995 2. 64853  
1. 12577 1. 484216 1. 519693 1. 647591 1. 243822 1. 212545 1. 836778 1. 855353 1. 618422  
1. 715496 1. 333304 1. 703648 1. 238377 1. 667317 1. 581374 2. 059339 1. 705066 2. 493497  
3. 418587 3. 640061 2. 761086 2. 425969 3. 48277 2. 545817 2. 346017 3. 234916 3. 086252  
2. 814214 3. 156306 3. 12122 2. 898277 2. 958385 3. 060848 2. 807511 2. 637589 2. 473036  
3. 440307 3. 576985 3. 474868 3. 55069 3. 29678 3. 348559 3. 206209 2. 99768 3. 926553  
2. 01133 3. 637716 1. 91464 3. 574166 3. 784126 3. 012192 2. 099066 3. 304743 2. 726268  
1. 51935 1. 337866 1. 405519 1. 347951 1. 727984 1. 177007 1. 253916 1. 267683 1. 511996  
2. 481978 3. 111167 3. 477526 2. 321463 3. 16263 3. 605048 2. 994313 2. 300956 3. 021363  
2. 743114 2. 686745 3. 168747 2. 675401 2. 763842 3. 029923 3. 691556 2. 638909 2. 85748  
0. 96052 2. 681348 3. 956863 0. 870885 0. 956155 0. 886379 0. 988345 1. 486005 0. 9114  
1. 25693 1. 938845 1. 099924 1. 514489 1. 250913 1. 655415 1. 51313 1. 565588 1. 012774  
1. 646369 1. 240148 1. 242819 1. 443635 2. 34008 1. 337635 1. 013529 2. 626138 1. 578321  
2. 446314 4. 170521 3. 826254 4. 128329 4. 816626 3. 508751 1. 869047 4. 107533 4. 142199  
4. 770114 4. 409397 4. 961894 3. 470654 4. 452418 4. 968519 4. 385662 5. 228199 4. 795183  
3. 889956 2. 042079 2. 801425 2. 80641 2. 508745 2. 917961 3. 111154 2. 369218 2. 463579  
1. 225691 1. 663501 1. 028516 1. 256803 1. 592584 2. 847215 2. 405397 1. 378376 1. 449102  
2. 403587 2. 834815 2. 933532 2. 486088 2. 824081 2. 058755 2. 297578 1. 746524 1. 666843  
2. 450102 2. 12255 1. 891194 2. 386645 2. 723739 2. 227999 2. 009107 2. 145475 2. 976794  
3. 67808 1. 918812 2. 516875 2. 368738 2. 213255 2. 106724 3. 306733 2. 331586 2. 453917  
1. 94003 1. 274885 1. 690862 1. 769284 1. 378941 1. 616704 1. 71049 1. 709401 2. 006153  
3. 162385 1. 7939 2. 591372 2. 146758 2. 080195 1. 843071 2. 216628 2. 340716 1. 491574  
1. 732336 2. 286044 2. 35214 2. 441837 2. 006409 2. 630987 2. 118874 1. 612828 1. 853943  
1. 099759 1. 274688 0. 981717 1. 209528 1. 397844 1. 192858 1. 200498 1. 593627 0. 960682  
1. 594595 3. 421105 2. 683595 2. 009076 3. 576164 4. 612344 2. 210906 1. 70846 1. 166777  
3. 146895 3. 402011 3. 401163 3. 755599 3. 552168 4. 158242 3. 366098 3. 29085 3. 420236  
2. 593705 1. 763109 1. 23085 1. 732898 1. 90866 1. 205151 2. 294251 1. 203064 1. 370488  
4. 073646 4. 640403 3. 598611 3. 779792 4. 262203 3. 85866 4. 073826 4. 04534 3. 601635  
1. 244197 1. 273945 1. 572355 1. 396898 1. 105684 1. 143332 1. 282039 2. 007001 1. 901363  
2. 79233 2. 381994 2. 868312 2. 921188 2. 274136 2. 813441 2. 647173 2. 205141 2. 698203  
1. 445337 1. 503402 0. 946298 1. 119866 1. 350254 1. 40326 1. 440985 1. 108511 1. 341688  
1. 188704 1. 594842 1. 040299 1. 267111 1. 573891 0. 993428 1. 173881 0. 89431 1. 071294  
4. 373348 4. 033252 3. 582237 3. 999753 4. 102344 3. 908336 5. 042286 4. 329593 4. 207129  
1. 468242 1. 421584 1. 233461 1. 331951 1. 880531 1. 322223 1. 214424 1. 557672 1. 498782  
1. 517711 2. 214946 1. 912643 1. 508398 2. 492342 2. 201811 1. 407582 1. 676791 1. 563056  
1. 358324 1. 143652 1. 720217 2. 245168 1. 425531 1. 902185 2. 133267 1. 943394 1. 680398

1. 609083 1. 850139 1. 271711 1. 357333 1. 824298 1. 605703 1. 855839 1. 667331 1. 830389  
4. 606241 3. 198568 3. 293858 3. 694192 3. 440047 2. 991556 3. 173169 3. 250553 2. 908993  
2. 227886 1. 796065 2. 18667 1. 915888 1. 678397 2. 094174 1. 624385 1. 702585 1. 572556  
1. 834992 2. 230302 1. 805469 2. 22883 1. 966758 2. 395981 1. 878447 1. 979129 2. 267545  
2. 78476 1. 948301 1. 825782 2. 073206 1. 562454 1. 395375 1. 872256 2. 418857 2. 507926  
1. 992336 2. 10246 1. 471637 1. 43966 1. 38911 1. 287346 0. 891346 1. 134045 1. 14734  
1. 86168 2. 01002 1. 624241 1. 39997 1. 376197 1. 43788 2. 468174 3. 328155 2. 164028  
2. 518185 1. 932965 1. 980065 2. 082579 1. 588188 2. 614813 1. 819877 1. 783724 2. 19206  
1. 423282 1. 258445 1. 41686 1. 16081 1. 689467 1. 289208 1. 411627 1. 241273 1. 00447  
3. 180525 1. 863173 2. 121061 2. 00329 1. 822733 3. 165361 2. 674121 1. 797514 2. 171674  
6. 749347 6. 782691 6. 886056 7. 355195 7. 507328 7. 236631 7. 018516 7. 156059 7. 252696  
5. 086931 4. 503881 4. 136124 4. 587901 5. 216819 5. 237438 4. 631987 4. 167973 4. 167973  
4. 259035 4. 427668 2. 992455 2. 749024 3. 201111 5. 397261 6. 621368 2. 979215 3. 931145  
2. 439762 3. 613702 2. 770533 2. 99079 2. 640319 2. 612494 2. 296693 2. 945858 2. 598792  
1. 974758 2. 472112 1. 937822 2. 041539 2. 148258 2. 263995 2. 195328 2. 117005 2. 106695  
2. 264992 2. 114531 2. 076529 2. 646523 1. 588537 2. 355328 2. 029582 2. 149807 2. 057584  
1. 42742 1. 234419 1. 10559 1. 52444 1. 641335 1. 584397 2. 395273 1. 475203 1. 258179  
1. 402331 1. 460796 1. 145181 1. 697118 1. 374819 1. 696411 1. 308424 1. 267523 1. 357964  
1. 814814 1. 733194 2. 37886 4. 634711 2. 986869 3. 665031 5. 381841 0. 898115 2. 805725  
2. 127236 2. 340839 1. 688326 1. 423395 1. 86871 1. 739181 2. 894617 1. 642152 1. 633166  
1. 534324 1. 448247 1. 698939 1. 910616 1. 739822 1. 674116 1. 063778 2. 189529 1. 305326  
1. 904911 2. 030225 1. 532996 2. 143908 1. 793162 1. 362926 2. 421371 1. 335906 1. 266346  
1. 917248 2. 166284 2. 040382 2. 274032 2. 14053 1. 766645 1. 847492 2. 202499 2. 198127  
1. 209361 1. 11206 1. 115692 1. 114914 1. 922992 1. 538928 1. 423004 1. 403388 1. 215314  
1. 919056 1. 559393 1. 964353 1. 785683 2. 35185 1. 363365 1. 566722 2. 470751 2. 318946  
1. 226562 0. 968857 1. 029749 1. 346797 1. 006246 1. 214661 1. 48725 1. 429971 1. 53048  
2. 933215 6. 13152 5. 451152 4. 286054 5. 747053 4. 646846 3. 935061 5. 006987 5. 25672  
5. 179754 3. 807003 5. 736487 3. 84813 2. 400312 4. 234107 3. 343318 4. 997222 5. 066759  
1. 242244 2. 093723 1. 123079 1. 278618 1. 105335 0. 79935 0. 717335 0. 492537 1. 486979  
0. 965882 1. 19851 1. 020391 1. 256136 1. 044392 1. 543608 1. 738195 1. 021818 1. 295465  
1. 601028 2. 785623 1. 477798 2. 243808 3. 125468 1. 509191 1. 415063 1. 800949 2. 848577  
2. 393249 2. 022697 2. 430097 1. 519204 2. 087603 2. 088506 1. 599792 1. 590876 1. 551387  
8. 065797 8. 882364 8. 747209 8. 723881 8. 534175 8. 181768 8. 418614 8. 848151 8. 550937  
3. 614956 2. 655067 3. 690986 3. 611365 3. 54371 3. 253316 3. 348241 4. 539984 4. 180411  
1. 360347 1. 26699 1. 849978 1. 405875 1. 636353 1. 164572 1. 838064 1. 396984 1. 345444  
4. 652944 2. 868162 4. 075302 2. 804995 2. 556813 3. 845999 2. 451322 3. 460548 3. 611358  
1. 706434 1. 341801 1. 433372 2. 127684 1. 60832 1. 469873 1. 299584 1. 789371 1. 148024  
1. 712027 1. 111623 1. 252305 1. 554151 1. 808101 1. 312778 1. 66797 1. 550362 1. 380884  
2. 445872 2. 588562 1. 244485 1. 050533 1. 920556 2. 568636 2. 052573 1. 337142 2. 480428  
1. 538833 2. 391988 2. 546849 1. 714939 1. 389532 2. 262381 1. 312579 1. 438576 2. 425096  
1. 2062 1. 285339 1. 238954 1. 362947 1. 193476 1. 817129 2. 105151 1. 166729 1. 148071  
3. 314758 1. 866199 2. 79623 2. 607757 2. 548478 2. 409188 2. 325392 3. 263123 2. 84878  
1. 447074 1. 230614 1. 918616 1. 448704 1. 482034 1. 475359 1. 548866 1. 355629 1. 224798  
2. 505747 3. 108339 1. 891228 2. 907571 2. 890154 2. 339121 3. 071794 2. 179315 1. 811746  
4. 748115 2. 777146 3. 986116 1. 831664 1. 82888 2. 228227 1. 707956 1. 665974 4. 029017  
0. 903172 1. 237002 1. 030048 1. 049269 1. 149749 1. 726669 0. 948256 1. 082239 0. 874687  
2. 069026 1. 887904 2. 080126 2. 279558 2. 38004 1. 523047 2. 210173 1. 851346 1. 767012  
4. 172534 3. 036841 2. 818794 3. 763685 2. 887727 3. 217595 3. 096573 3. 206929 3. 264446  
1. 335726 1. 924538 1. 34589 1. 626588 1. 294633 2. 318524 1. 585498 1. 520305 1. 893866  
5. 880877 6. 633679 7. 035372 7. 20342 6. 896917 6. 423086 6. 662721 7. 559234 6. 54258  
1. 472309 1. 159891 1. 010138 1. 423325 1. 408745 1. 131838 1. 280224 1. 186212 1. 58876



2. 51281 1. 884188 2. 60847 2. 405965 2. 255835 3. 001639 2. 064158 2. 416917 2. 227903  
3. 555842 2. 710429 3. 1511 3. 469892 2. 683325 2. 934608 2. 8376 2. 524305 2. 540031  
2. 886644 1. 903583 1. 373986 1. 750789 1. 491233 2. 022556 1. 47022 1. 738882 1. 497095  
5. 427561 4. 657765 4. 389975 5. 550746 5. 294982 5. 297669 5. 791433 4. 815111 4. 683572  
1. 270903 1. 48873 1. 351515 1. 253484 2. 720385 2. 822899 1. 066502 1. 856667 1. 213237  
3. 194789 2. 094427 2. 615559 1. 718556 2. 612546 2. 684818 2. 506956 2. 856867 2. 448986  
1. 809257 1. 555417 1. 397755 2. 105625 1. 445293 1. 662778 1. 859737 1. 40036 1. 543448  
1. 133148 1. 081499 0. 71692 2. 217899 0. 968697 0. 949868 1. 202367 1. 845233 0. 978539  
1. 265508 1. 051814 1. 051918 1. 183348 1. 419315 1. 151308 1. 172039 0. 893498 1. 189217  
1. 985266 1. 21737 1. 439235 1. 722807 1. 37405 1. 919106 2. 400556 1. 676168 1. 381457  
1. 146808 0. 943593 0. 997374 1. 341166 1. 123599 1. 187469 0. 844037 1. 758446 1. 138228  
2. 269586 2. 502851 1. 696214 1. 448276 3. 215182 1. 825968 1. 874749 1. 800608 2. 954586  
2. 676656 3. 517311 2. 830965 5. 035638 5. 69719 3. 184335 2. 240703 2. 788794 3. 964802  
3. 520499 3. 864777 3. 734892 3. 667799 3. 403727 3. 170414 3. 835475 3. 817232 3. 638198  
1. 408799 1. 58092 1. 856265 1. 213545 2. 17791 1. 289699 1. 314002 1. 088388 4. 497929  
1. 902953 3. 07244 1. 862435 1. 789818 3. 0716 2. 738768 2. 210458 2. 100548 2. 544671  
2. 748111 2. 261066 1. 786344 1. 95521 3. 024183 2. 025813 2. 251205 2. 078425 2. 878322  
2. 049802 1. 549145 1. 632937 1. 875848 2. 053956 1. 52915 2. 53352 1. 717332 1. 556824  
2. 574012 2. 668497 3. 501199 2. 326938 1. 853163 2. 431624 2. 440355 2. 175081 3. 435501  
1. 679313 1. 323807 1. 879451 2. 101609 1. 376973 1. 575243 1. 080718 1. 815027 1. 222105  
1. 836026 1. 710499 1. 422333 1. 729967 2. 05407 1. 666493 1. 90603 2. 78865 1. 965891  
2. 250692 2. 124184 2. 02395 1. 890658 2. 435274 3. 271 1. 916625 1. 859293 2. 258173  
2. 729758 2. 342431 2. 371395 2. 436414 2. 153048 2. 039168 2. 360602 2. 383669 1. 984418  
2. 302234 1. 954586 2. 185194 2. 573131 2. 18576 2. 632599 3. 148375 2. 257028 2. 099722  
5. 141273 4. 095669 5. 225118 2. 950001 3. 957022 3. 543461 4. 23849 2. 820396 5. 433555  
2. 346121 2. 356947 1. 619096 1. 907281 2. 072667 2. 286717 2. 254102 2. 832204 1. 904603  
2. 440345 1. 921181 2. 169995 2. 184293 1. 741248 1. 998 1. 87523 1. 854956 2. 234562  
1. 663792 1. 315151 1. 652579 1. 717327 1. 664146 1. 70671 2. 020782 1. 476421 1. 449827  
1. 742393 2. 376375 2. 228978 2. 190067 2. 517706 2. 793583 2. 282119 1. 1019 1. 134445  
3. 322127 4. 605558 3. 393989 4. 466082 4. 035135 3. 326267 4. 150073 3. 301349 3. 950062  
4. 427286 6. 052376 5. 68476 4. 980829 5. 406893 5. 438026 4. 579127 5. 966335 4. 340327  
1. 794191 1. 375009 1. 356401 1. 543792 1. 119834 1. 813221 1. 511471 1. 511527 1. 077131  
0. 820383 1. 170071 1. 780481 1. 217422 1. 209937 2. 423601 2. 764518 1. 261862 0. 887816  
1. 646183 1. 147321 1. 31383 1. 298687 1. 145205 1. 47953 1. 489514 1. 692981 2. 106378  
1. 961651 2. 365753 2. 35114 2. 409665 2. 146229 2. 295202 1. 799685 2. 008446 2. 728416  
4. 371891 5. 467383 4. 949979 5. 26713 5. 346127 3. 707432 2. 650385 4. 694859 4. 85062  
1. 55657 1. 766778 0. 836065 1. 099068 1. 448949 1. 328618 1. 671101 1. 233097 1. 852597  
1. 798712 2. 122872 1. 263305 1. 286565 1. 65463 1. 717429 1. 455051 1. 272292 1. 204954  
1. 914478 1. 99415 2. 462036 2. 048121 2. 30632 1. 71396 3. 082166 2. 025627 2. 686173  
6. 959867 6. 639346 7. 308357 6. 675713 7. 435732 6. 640071 6. 392849 7. 296431 7. 013888  
2. 889119 2. 185489 2. 326335 3. 772757 2. 173143 2. 640319 2. 594162 2. 38615 2. 699905  
1. 450606 1. 434403 1. 194598 1. 064108 1. 756863 1. 451646 1. 597336 1. 04611 1. 465789  
5. 083994 3. 929584 3. 783039 2. 816113 3. 483154 5. 261817 3. 29244 3. 928522 3. 732603  
3. 073443 5. 035981 5. 384319 5. 75816 5. 448813 5. 872588 5. 069361 5. 216896 4. 786282  
1. 393924 1. 09067 1. 109931 1. 269405 1. 40468 1. 452585 1. 089304 1. 173841 1. 094291  
4. 000176 3. 907418 3. 68457 4. 348942 4. 381097 3. 272446 2. 966255 5. 09368 4. 487732  
3. 858688 2. 395529 2. 63468 2. 888825 3. 061989 2. 638653 2. 739686 3. 224506 2. 605932  
1. 595022 1. 673069 1. 26483 1. 861032 1. 777565 1. 488963 2. 150047 1. 332346 2. 829945  
4. 854253 3. 107564 4. 405033 3. 318172 3. 289971 2. 278633 3. 595944 3. 528711 3. 370916  
1. 169478 0. 893718 1. 104713 1. 700173 0. 900862 1. 058018 1. 200787 1. 147274 0. 787555  
1. 423547 1. 902124 1. 588101 1. 882694 1. 275757 1. 999234 1. 523978 1. 990966 1. 429453

4. 511313 5. 209506 4. 505835 4. 393641 5. 439282 4. 649118 4. 649907 4. 61969 5. 212199  
 1. 830181 1. 896329 1. 874805 1. 528106 2. 093355 1. 819678 1. 961887 1. 309038 2. 254433  
 4. 861171 4. 451362 4. 207886 4. 543543 4. 718524 5. 165875 4. 558919 4. 528218 5. 210336  
 2. 8891 3. 091433 2. 834688 1. 73476 2. 763056 2. 848723 3. 073911 2. 990701 3. 066858  
 3. 230496 2. 106477 2. 025533 1. 749323 2. 362364 2. 26378 2. 164646 2. 694991 2. 083387  
 1. 644948 1. 638004 2. 228946 1. 625551 2. 798729 1. 686605 3. 400074 1. 623044 1. 524974  
 1. 559733 1. 133347 1. 652842 1. 360482 1. 78672 1. 271575 1. 083073 1. 282187 1. 003867  
 6. 594723 7. 319318 7. 804716 7. 227188 6. 753068 6. 772044 7. 356095 6. 826047 6. 212908  
 4. 15379 3. 659955 3. 969409 3. 64266 3. 953245 3. 957722 3. 673998 3. 367344 3. 48375  
 1. 596422 1. 34741 0. 940516 1. 39466 1. 060626 1. 27597 1. 114063 1. 14068 1. 659  
 3. 126185 2. 893085 3. 377716 2. 702222 3. 668011 2. 540778 3. 790025 2. 863923 3. 09463  
 1. 848606 1. 739544 1. 15098 1. 355551 1. 145576 1. 583501 1. 599496 1. 26308 1. 3778  
 2. 941134 2. 524967 2. 936197 2. 407072 3. 018328 2. 529851 2. 248463 2. 487957 2. 461  
 5. 876782 5. 890377 5. 875072 5. 796454 5. 086602 4. 55406 5. 016967 4. 3062 4. 679243  
 2. 675335 2. 653094 2. 06807 2. 787401 2. 289789 2. 509506 1. 879804 2. 108262 3. 110916  
 3. 13521 2. 624192 2. 521591 2. 501114 2. 201442 2. 047377 2. 647625 2. 25588 2. 438419  
 6. 03773 5. 946007 5. 871308 5. 99239 5. 825074 5. 795178 5. 619302 5. 966126 5. 947089  
 1. 837894 1. 488783 1. 730691 1. 58324 1. 42854 1. 636421 2. 280325 1. 710986 2. 077038  
 3. 86839 4. 388822 3. 564533 4. 122841 2. 467508 3. 49046 4. 020561 4. 208328 4. 267488  
 2. 142541 1. 655977 1. 538881 0. 800983 0. 723177 2. 28287 1. 324898 1. 392235 1. 424017  
 5. 460243 4. 738202 5. 592178 5. 19213 5. 259667 5. 42024 6. 378752 5. 971143 5. 773056  
 2. 370699 2. 351939 2. 3777 1. 874676 2. 180024 2. 726869 2. 534403 2. 41423 1. 977886  
 2. 637909 1. 591513 2. 162906 2. 264249 2. 183336 2. 361799 2. 629512 2. 169459 2. 25115  
 3. 105803 1. 621011 2. 892922 2. 257494 1. 717741 1. 872948 2. 587674 2. 684545 1. 914216  
 1. 794546 3. 457666 2. 931934 1. 958575 1. 744874 2. 772706 2. 220082 2. 879672 1. 798149  
 2. 047448 2. 166554 2. 122082 3. 403291 2. 669415 2. 489848 2. 677838 3. 102495 2. 265887  
 3. 145716 2. 603916 2. 559002 3. 099813 2. 35592 2. 365903 3. 371703 2. 891154 2. 213992  
 5. 47893 4. 769315 4. 457758 3. 955667 4. 010724 5. 208225 4. 647717 5. 255193 4. 01176  
 3. 228916 3. 841113 3. 055911 3. 175688 3. 217262 3. 675132 3. 11347 2. 450759 2. 857  
 3. 007364 2. 478136 1. 728864 1. 424296 1. 581255 2. 140279 2. 118659 1. 856697 3. 199064  
 7. 246924 7. 949538 7. 982277 6. 041854 6. 760893 7. 696088 5. 999407 7. 140632 6. 843697  
 3. 481223 2. 259009 3. 119045 2. 687593 2. 315374 2. 272801 2. 46911 2. 424526 2. 813643  
 1. 811352 1. 338362 1. 149031 3. 605291 1. 439227 1. 445748 1. 709329 1. 143831 1. 215999  
 2. 116495 1. 350113 1. 293211 2. 029885 1. 4125 1. 516166 1. 991325 1. 664521 1. 949612  
 1. 707244 1. 813294 1. 537276 1. 364314 1. 609688 1. 557646 2. 385359 1. 767773 1. 919819  
 2. 403218 1. 125291 3. 038722 0. 924691 2. 251969 1. 288647 1. 048104 1. 263567 0. 90987  
 1. 667589 1. 714298 1. 562624 1. 367201 2. 077843 1. 481497 2. 165808 1. 947391 1. 527532  
 6. 503935 7. 496423 7. 386642 7. 338956 6. 792397 7. 486651 7. 48797 7. 516125 7. 434625  
 1. 751414 1. 653095 1. 39171 1. 402852 1. 743443 1. 666251 1. 422758 1. 261366 1. 58331  
 3. 601141 3. 118721 3. 15887 3. 684492 4. 318185 4. 092083 3. 716168 3. 809755 3. 229553  
 3. 936155 5. 399286 4. 990265 4. 610649 5. 312978 4. 363255 4. 514277 5. 269126 5. 071656  
 1. 753125 2. 012942 2. 307348 2. 944382 3. 101459 2. 242393 1. 850518 2. 169832 1. 384397  
 1. 705722 1. 209935 1. 226042 1. 385002 1. 166917 2. 049873 1. 277317 2. 725282 1. 201586  
 2. 80985 2. 269231 2. 540048 2. 732957 2. 151024 2. 367935 2. 138827 2. 762808 2. 833927  
 3. 563427 2. 806442 2. 457766 3. 269687 2. 885174 2. 651624 3. 479065 2. 637085 2. 547761  
 1. 730026 1. 482705 1. 226016 1. 493421 1. 430522 1. 210822 2. 463142 1. 543676 1. 466663  
 1. 180725 1. 306795 1. 120919 1. 501094 1. 284844 1. 203548 1. 295673 1. 092799 1. 158962  
 2. 601144 2. 289101 2. 437367 2. 278865 2. 620561 2. 016999 2. 667811 2. 189479 2. 284366  
 4. 683283 4. 470419 4. 378141 4. 819748 4. 707802 4. 685226 4. 961907 3. 198675 4. 046007  
 1. 172626 1. 060911 1. 732364 1. 495344 0. 856803 1. 193882 1. 001893 1. 318948 1. 537957  
 1. 882029 3. 256891 2. 999166 2. 161612 2. 777238 3. 032193 1. 742704 2. 503189 2. 239876

2. 569966 1. 828839 2. 25103 2. 552679 1. 778445 2. 839713 2. 502496 2. 66213 2. 385002  
2. 682726 1. 366985 1. 852314 2. 593977 1. 964375 1. 554041 1. 854246 2. 397607 1. 733916  
1. 406182 1. 648561 2. 962621 2. 955015 2. 303706 3. 767021 1. 104314 2. 088572 1. 315598  
2. 061209 1. 958135 1. 919555 1. 448162 2. 166958 2. 06459 2. 761066 1. 888955 2. 253401  
6. 031561 4. 647436 6. 216233 5. 670149 4. 255067 6. 179226 3. 253845 4. 443173 5. 709842  
1. 933469 1. 345191 1. 282115 1. 553863 2. 639018 1. 47785 1. 458726 1. 315118 1. 724527  
4. 340075 5. 49284 4. 499329 4. 706379 3. 815491 5. 353887 4. 259251 4. 277494 4. 849763  
1. 843022 1. 291258 1. 481194 2. 32696 1. 46853 1. 741885 2. 243058 1. 4747 1. 520179  
2. 771607 2. 046204 1. 948098 2. 022927 1. 913794 2. 062661 2. 779943 2. 406502 2. 190284  
1. 842921 1. 617293 1. 834061 1. 76159 2. 208159 1. 817311 2. 282463 1. 767441 1. 543568  
2. 354168 2. 264906 2. 025274 3. 021815 1. 963422 2. 419034 2. 859464 2. 588128 2. 290903  
5. 545433 3. 909819 4. 203624 3. 890687 5. 195687 3. 623533 3. 366371 4. 003536 3. 838  
5. 970554 5. 783564 5. 886918 6. 420704 5. 950139 5. 975377 5. 990209 5. 724705 6. 418886  
2. 646191 4. 071187 3. 650448 5. 476565 3. 132816 3. 466032 4. 309678 4. 100768 3. 946353  
1. 79256 0. 940555 0. 852706 1. 441198 1. 295611 0. 772264 1. 378753 1. 210224 1. 297994  
10. 24544 10. 52785 10. 46513 10. 13447 10. 51417 10. 53429 10. 50628 10. 53084 10. 81365  
2. 347616 2. 438129 1. 852234 2. 009557 2. 073539 1. 911393 2. 804839 1. 892367 2. 795488  
2. 546107 2. 103979 2. 635919 2. 452596 2. 200717 2. 181816 2. 766155 2. 461922 3. 437802  
2. 413688 1. 262646 1. 646702 1. 23081 1. 770971 2. 005758 2. 424758 1. 123988 1. 110686  
1. 764661 0. 748521 1. 026386 1. 73843 0. 772663 0. 504736 0. 438615 1. 783403 2. 437261  
0. 783984 0. 681511 1. 051387 0. 801851 0. 9908 0. 405074 1. 51551 0. 88046 0. 871495  
0. 934137 1. 120782 0. 85078 2. 784848 2. 622343 2. 033777 1. 076849 1. 513818 1. 286492  
0. 759212 0. 6713 0. 560118 0. 966274 0. 754206 0. 784501 0. 605873 0. 641478 1. 182077  
0. 840493 0. 796519 0. 79023 1. 457462 1. 39784 1. 338675 1. 158573 1. 333236 1. 301567  
0. 922212 0. 636734 0. 73443 0. 93333 1. 059387 0. 967682 1. 035325 0. 81047 0. 648711  
1. 200079 0. 790177 1. 703821 1. 462799 1. 645294 1. 369809 0. 655346 0. 968739 1. 072594  
0. 907247 1. 040044 1. 207364 1. 380812 1. 89257 0. 65798 1. 045917 0. 878152 0. 990683  
2. 64071 1. 733548 2. 78977 2. 559251 2. 198479 3. 113103 1. 980683 2. 041399 2. 347116  
3. 895843 4. 036978 4. 29467 4. 364776 4. 097018 4. 123999 3. 769895 3. 589286 4. 467134  
1. 854975 1. 03308 1. 177056 1. 947657 1. 584892 1. 045578 1. 332184 1. 42858 1. 379478  
2. 182872 1. 622155 1. 43348 1. 22707 2. 016983 1. 267694 1. 48769 1. 600297 1. 629987  
2. 154355 1. 783681 1. 242445 1. 461377 2. 213861 1. 049076 1. 413921 5. 489032 2. 012539  
1. 847789 1. 437469 1. 229123 1. 71568 1. 312026 1. 371154 1. 411481 1. 5879 1. 405916  
5. 592927 4. 944181 5. 855403 5. 062739 6. 219934 5. 044991 4. 812652 5. 293019 5. 032977  
4. 314739 3. 877891 4. 677902 3. 855705 4. 627763 5. 456475 4. 524291 4. 61142 5. 012734  
4. 326321 5. 205604 5. 034448 4. 865954 5. 099687 4. 997036 4. 789686 4. 802165 4. 871213  
5. 144006 4. 552551 4. 654164 5. 938297 5. 217191 5. 524198 6. 199835 5. 052954 5. 557526  
8. 757108 6. 519258 7. 672094 6. 745343 7. 140861 6. 410457 7. 551954 7. 437982 8. 213497  
2. 951039 3. 327626 2. 174833 2. 930773 2. 717096 2. 792237 2. 906311 2. 416764 2. 758204  
2. 078616 2. 973923 2. 301108 2. 704505 2. 442509 2. 12904 3. 200625 2. 828687 2. 063529  
7. 862333 8. 513269 8. 751161 8. 325964 8. 389487 8. 093958 8. 387607 8. 441607 8. 369876  
1. 347118 1. 395358 1. 624461 1. 505192 1. 602425 1. 54458 1. 550445 1. 622132 1. 804324  
4. 34015 4. 053595 4. 302205 4. 674608 4. 045457 3. 682207 3. 624173 3. 86521 3. 889575  
5. 912067 6. 112859 5. 794463 5. 698483 6. 252641 6. 02878 5. 662006 6. 368197 5. 960665  
3. 167719 3. 29801 3. 203609 4. 412478 3. 040292 3. 874237 4. 776545 4. 156098 3. 415809  
5. 120283 6. 64489 6. 580706 2. 685738 5. 391721 3. 504223 3. 453841 5. 863229 6. 31864  
1. 271946 1. 679022 1. 015523 1. 379308 1. 381054 0. 943525 1. 182007 0. 913404 1. 105609  
1. 985322 1. 708437 1. 986192 1. 929434 1. 665659 2. 601875 2. 030417 2. 755462 2. 547639  
4. 092644 4. 326055 5. 188696 3. 870954 3. 783464 4. 565289 4. 18182 4. 821503 3. 974487  
2. 068396 1. 966484 1. 201387 1. 794812 1. 357477 1. 98877 1. 554332 1. 581044 1. 10248  
4. 06614 3. 650381 3. 30706 3. 601272 3. 113992 3. 993852 3. 706235 3. 90226 3. 325976

1. 804339 1. 113557 1. 304926 2. 15936 1. 43819 1. 386797 1. 79733 2. 279097 1. 991429  
7. 790703 7. 226422 7. 124893 7. 257612 7. 464796 7. 067488 7. 605182 7. 473322 7. 880202  
3. 166774 3. 793635 3. 562729 3. 674676 3. 895341 3. 418632 3. 657399 3. 985838 3. 292157  
2. 336107 1. 640129 2. 149186 1. 660634 1. 71977 1. 248295 1. 911366 1. 322633 1. 351353  
2. 210801 1. 792669 2. 659163 2. 648971 1. 811701 2. 179058 1. 085556 2. 413817 3. 233933  
2. 864725 1. 656248 2. 752348 2. 23306 0. 504905 1. 031927 1. 853602 1. 94605 2. 509576  
4. 772804 3. 995781 3. 008313 3. 757702 4. 271873 2. 897883 3. 579717 3. 159539 2. 989783  
5. 767506 5. 825858 6. 058189 6. 330254 5. 53251 5. 337805 5. 878775 6. 3388 5. 645222  
3. 900894 4. 040302 4. 28325 3. 712109 4. 045342 3. 498796 5. 02399 4. 413356 4. 28304  
1. 49709 1. 583119 1. 810239 1. 66423 1. 389435 1. 241343 1. 159785 1. 510348 1. 185255  
2. 019008 0. 672273 0. 845904 1. 44234 1. 739209 3. 010019 1. 442654 1. 258729 1. 219612  
3. 525092 4. 125734 4. 057973 3. 454358 4. 803676 4. 419737 2. 925437 4. 193718 4. 136301  
6. 416107 6. 499978 5. 888652 6. 751904 6. 622552 6. 693467 6. 1227 6. 702611 6. 827306  
3. 608622 3. 168865 3. 329141 3. 07369 3. 636744 3. 374239 3. 319642 2. 851854 3. 290081  
4. 634543 4. 211073 4. 750142 4. 530842 4. 79558 4. 772816 6. 05334 3. 914753 4. 550705  
1. 647465 1. 759928 1. 834295 2. 536414 1. 081581 1. 548422 2. 45819 2. 065546 1. 955857  
4. 906138 5. 870513 5. 119198 6. 730074 6. 084218 5. 855043 7. 07279 6. 650065 6. 190522  
3. 062808 3. 039258 3. 602813 3. 069182 2. 948152 3. 651614 4. 503754 2. 878108 2. 763984  
4. 533508 5. 74748 5. 106378 5. 618853 5. 657501 5. 923652 5. 467066 5. 103055 5. 141124  
6. 710193 6. 709068 7. 107315 6. 849162 6. 741669 7. 089498 7. 020458 6. 602846 6. 94188  
4. 31912 5. 126213 5. 846139 5. 651748 5. 40238 5. 832126 4. 998997 5. 244641 5. 558445  
1. 384411 1. 568666 1. 568666 1. 042219 1. 729957 2. 167447 1. 441003 0. 952844 1. 396516  
6. 607582 6. 411154 5. 405563 6. 68129 5. 17204 7. 182856 6. 425544 3. 03829 6. 517389  
1. 575425 1. 657132 1. 489581 2. 607729 2. 319533 1. 698907 2. 231094 1. 378129 1. 365086  
2. 734589 3. 329914 2. 300251 2. 578788 2. 481765 3. 557484 2. 415605 2. 012617 2. 831904  
8. 657591 9. 085229 9. 212593 9. 092459 9. 231494 9. 141174 8. 880034 9. 272601 8. 741774  
7. 576903 8. 487354 8. 105567 8. 20639 8. 335493 8. 583767 8. 06595 8. 541951 8. 444093  
5. 212829 5. 076505 5. 233888 5. 346975 5. 540479 7. 539978 7. 988714 5. 916532 5. 937137  
7. 934449 7. 703627 7. 203221 7. 767997 7. 420857 9. 200168 7. 268619 8. 679621 7. 823143  
2. 091897 1. 866429 2. 899888 1. 79539 1. 874895 2. 212818 2. 481221 2. 179026 3. 742976  
2. 638354 2. 314588 3. 113749 2. 654087 2. 314617 3. 195145 2. 379862 2. 180694 2. 326128  
2. 194894 4. 514811 6. 240189 2. 318621 2. 178475 5. 407307 3. 985036 3. 714939 3. 489768  
4. 412141 4. 251995 4. 135288 4. 996694 5. 291842 4. 44074 3. 698839 4. 476588 4. 56551  
4. 932947 4. 905399 4. 669773 6. 079349 5. 563085 6. 604678 4. 658527 5. 128543 4. 688541  
4. 272854 3. 018037 1. 933932 2. 229105 2. 71191 2. 322226 3. 437197 3. 087255 2. 080905  
0. 970113 0. 796273 0. 7842 0. 838756 0. 434125 1. 034506 0. 676759 0. 527427 0. 981973  
1. 508654 1. 196426 0. 985002 1. 905844 1. 291271 1. 104378 2. 115846 1. 516559 1. 496574  
1. 955283 2. 304915 2. 5535 2. 717652 2. 000422 2. 397244 2. 441331 2. 458692 1. 677081  
2. 305296 2. 763616 2. 06479 3. 552839 3. 422476 2. 51999 2. 982379 2. 947285 2. 935927  
0. 863802 0. 720672 1. 477838 0. 684599 0. 944071 0. 894601 1. 056802 1. 090711 1. 745356  
1. 383735 1. 21654 0. 682272 0. 911021 1. 470239 0. 772374 0. 909046 1. 180543 0. 800971  
3. 602465 2. 659339 3. 001888 3. 228086 3. 565782 3. 629833 3. 179294 2. 88383 2. 260207  
1. 574394 2. 090152 1. 396048 1. 535601 1. 587781 1. 085663 1. 85763 1. 413438 1. 549167  
0. 915031 1. 008969 0. 754893 1. 003757 0. 916019 1. 154303 1. 021764 1. 267316 1. 145321  
1. 777455 0. 882075 1. 450911 0. 980854 1. 014967 1. 076439 1. 478634 0. 894152 1. 017003  
0. 872276 0. 964469 0. 635841 1. 193131 0. 7882 0. 724905 0. 830661 1. 09849 0. 780074  
1. 179435 1. 112592 0. 928795 1. 260551 1. 065927 1. 273445 1. 075439 0. 867816 1. 279068  
3. 978396 5. 003022 3. 853306 4. 566371 4. 409586 4. 829862 4. 295238 5. 53562 3. 880211  
3. 967302 3. 017714 3. 861697 3. 634032 2. 647111 3. 528296 3. 402622 2. 944686 3. 017767  
3. 113402 2. 907775 3. 561898 3. 258064 2. 781405 3. 490571 3. 346939 2. 629548 2. 704736  
0. 785614 0. 793233 1. 053368 1. 240899 0. 834074 1. 224753 0. 729222 0. 823547 0. 952598

1. 441589 1. 418935 1. 491255 1. 435433 1. 513652 1. 588851 1. 337251 1. 403857 1. 368957  
4. 144798 2. 516764 3. 621533 3. 531363 3. 623387 3. 443387 3. 596153 3. 491497 3. 440878  
2. 954613 1. 595305 2. 888714 1. 95822 2. 16867 2. 743679 1. 076737 2. 360865 1. 801475  
1. 15581 1. 357035 1. 150488 1. 086791 1. 278282 1. 09442 0. 919445 0. 860081 1. 448483  
1. 157431 0. 921035 1. 646835 2. 027643 1. 138734 1. 078041 1. 300347 1. 15022 1. 805841  
0. 745492 0. 806949 0. 604728 1. 208111 1. 477742 0. 832732 0. 952386 1. 019784 0. 887334  
1. 785228 1. 09781 1. 060401 1. 112076 1. 359482 1. 08889 1. 002405 1. 399697 1. 09075  
0. 880998 0. 909203 0. 909203 1. 51548 1. 362884 0. 883491 1. 376905 0. 767579 1. 507943  
3. 147213 2. 841761 1. 971945 2. 322528 3. 5609 2. 9566 2. 716008 3. 612997 2. 82271  
0. 760391 0. 776798 1. 004987 2. 290728 1. 208365 0. 979741 1. 177795 0. 669745 0. 886205  
1. 906351 1. 541542 1. 050564 1. 626635 1. 256475 1. 476986 2. 234158 1. 261805 1. 231475  
1. 184259 1. 757953 1. 607221 1. 05377 1. 356178 2. 29482 1. 151413 0. 452917 0. 914838  
1. 39649 2. 032685 1. 245211 1. 955769 1. 334031 1. 444269 1. 239794 1. 364925 1. 781972  
1. 428499 1. 430968 1. 801953 1. 459062 1. 433337 1. 26709 1. 2257 1. 228182 1. 114731  
3. 609315 3. 011189 3. 645797 2. 885944 2. 326574 3. 513249 4. 143479 2. 829453 2. 371626  
1. 054564 1. 051093 1. 29255 1. 220527 0. 696782 1. 437904 1. 350847 0. 958713 0. 991962  
0. 743105 1. 124422 1. 14535 1. 248695 1. 101256 1. 097356 0. 946345 1. 299915 1. 131641  
1. 352134 1. 924013 2. 408183 2. 00927 1. 769643 1. 765092 1. 408769 1. 63327 1. 752212  
1. 23704 1. 126463 1. 220507 1. 523227 1. 241405 1. 794221 1. 342487 1. 522162 1. 247126  
1. 855863 1. 442264 1. 095599 1. 321605 2. 056479 1. 675953 2. 805243 1. 337607 1. 307898  
1. 722044 1. 565859 2. 082639 2. 38019 1. 700781 2. 110591 1. 543183 1. 665686 2. 184232  
1. 079213 0. 834197 1. 745927 1. 22114 0. 932611 1. 202888 1. 733812 1. 183079 1. 357405  
1. 104149 1. 05704 1. 332373 1. 061138 1. 178064 1. 376232 1. 157235 1. 215608 1. 392533  
1. 044147 0. 999801 0. 675429 1. 130007 0. 962866 1. 207272 1. 252287 1. 59678 0. 924466  
2. 479782 2. 405388 1. 523066 2. 138726 2. 338253 2. 352569 2. 692199 1. 986759 2. 456114  
1. 547506 1. 97334 0. 803525 2. 049931 0. 762783 1. 362299 0. 87647 0. 871817 1. 254806  
1. 470903 0. 880632 0. 604984 0. 811827 1. 267365 0. 967007 1. 0033 0. 780134 0. 874654  
1. 695681 1. 227842 0. 991621 1. 023595 1. 619965 1. 348654 1. 111344 1. 491006 1. 415229  
2. 088111 1. 955481 1. 955516 1. 880803 1. 89364 1. 760616 1. 722738 1. 4231 1. 71806  
3. 290087 3. 275536 2. 334866 2. 676025 2. 381824 1. 992478 2. 650508 2. 931884 3. 070378  
2. 638287 2. 321535 2. 810658 2. 065239 2. 402602 2. 211335 2. 718046 2. 644429 1. 604365  
2. 563714 1. 484006 0. 740462 1. 358724 1. 135964 1. 487131 1. 397974 1. 087619 1. 774276  
2. 014993 1. 216539 1. 89933 1. 206705 2. 12087 1. 557083 1. 560987 2. 02654 1. 880833  
1. 428602 1. 442519 1. 111163 0. 929684 1. 106665 1. 406182 1. 140443 1. 426484 1. 095687  
0. 847734 1. 036 0. 975587 1. 388705 0. 960222 1. 162246 0. 955506 0. 862175 1. 105791  
0. 598018 1. 563808 1. 233034 1. 55789 0. 717756 0. 351075 1. 678397 1. 234404 0. 417811  
3. 597065 1. 229755 1. 487841 0. 677818 1. 064494 0. 40288 1. 629705 1. 132146 0. 75889  
3. 101039 1. 975477 3. 054135 2. 433302 2. 594259 3. 031909 0. 542836 3. 351936 2. 881425  
0. 79126 0. 774894 0. 950803 0. 947322 1. 640155 0. 962768 1. 317252 1. 21978 1. 596388  
3. 75396 2. 812638 3. 63882 3. 052678 2. 559319 2. 625479 3. 828625 4. 018795 3. 385932  
2. 317678 1. 798334 1. 850934 2. 603028 2. 517684 1. 724584 1. 298642 1. 560315 2. 039565  
2. 353903 2. 544107 2. 949151 2. 066004 2. 446234 2. 487953 3. 292919 2. 65732 2. 188897  
1. 721013 1. 297809 1. 047171 1. 485789 1. 302089 0. 90886 2. 169627 1. 292044 1. 286915  
2. 249037 1. 793198 1. 440471 1. 367894 1. 279586 1. 37191 1. 240075 1. 051438 1. 504971  
0. 744328 0. 927615 0. 875658 0. 855478 0. 630569 0. 65378 0. 929368 0. 853474 1. 32621  
3. 604918 1. 309363 2. 820659 1. 147401 2. 589303 1. 354583 1. 930018 1. 941764 1. 904151  
1. 041017 1. 293194 0. 63064 1. 242186 0. 897089 1. 129477 1. 034512 1. 434361 1. 583956  
1. 694959 1. 717115 1. 702482 1. 353348 1. 521889 0. 865373 1. 311476 1. 07827 1. 048109  
1. 284541 1. 41766 1. 354838 1. 653703 2. 299339 0. 998696 1. 479195 1. 69515 0. 620941  
2. 30518 1. 968816 1. 713016 1. 342652 1. 029249 1. 571139 2. 302631 2. 82041 2. 055104  
2. 208185 1. 893274 1. 251918 1. 726528 2. 611609 1. 346473 0. 94566 3. 306114 1. 175696

2. 059468 1. 363744 1. 313113 1. 664343 2. 29225 2. 008783 1. 752338 1. 642259 1. 910052  
3. 337265 3. 826321 2. 618034 2. 83883 2. 510471 2. 258013 3. 30461 3. 060551 2. 31927  
0. 924371 1. 210072 0. 939289 1. 161695 1. 176784 0. 73097 1. 544258 1. 291853 1. 276817  
0. 943359 1. 088267 0. 883268 1. 283686 1. 037443 1. 383441 1. 080835 0. 925288 1. 561006  
2. 078201 1. 919845 1. 845303 1. 895483 1. 999025 2. 015849 2. 430672 1. 594497 2. 162587  
5. 804197 5. 054338 5. 189117 4. 947852 4. 793592 5. 114699 6. 030586 5. 385352 4. 921598  
3. 4668 3. 260912 3. 692971 3. 417814 3. 551294 2. 955763 4. 101161 3. 667561 4. 264601  
1. 183575 1. 269999 1. 404893 0. 794286 1. 215442 0. 733985 2. 907644 1. 328508 2. 203744  
1. 366859 1. 844961 1. 093637 1. 72848 0. 998112 1. 002102 1. 188984 1. 519251 1. 305822  
3. 072238 2. 828994 2. 907427 2. 732459 3. 346026 3. 010528 3. 083658 2. 694156 3. 587516  
1. 892761 1. 355461 2. 226395 2. 591292 1. 858394 1. 779792 1. 712069 1. 659073 1. 639125  
1. 722182 1. 653124 2. 182761 2. 95496 1. 778245 1. 776135 1. 793961 1. 92036 1. 578847  
1. 849228 0. 87472 0. 743741 1. 936607 1. 097469 0. 983436 1. 253863 1. 065404 1. 275019  
4. 423233 5. 03586 3. 116664 3. 505127 5. 484198 1. 974779 3. 65881 4. 74503 4. 34038  
2. 556473 1. 433959 1. 480955 1. 544387 1. 600338 1. 449994 2. 3177 1. 687158 1. 394081  
2. 06307 1. 546361 1. 193165 1. 430668 1. 632474 1. 786061 1. 015685 1. 957084 1. 173664  
2. 45558 2. 440139 3. 261152 3. 159601 4. 09696 3. 183287 2. 946389 3. 056912 2. 408477  
1. 379424 0. 86645 0. 776351 1. 23681 0. 737625 1. 129475 0. 746269 0. 898467 1. 252995  
1. 666191 1. 294344 1. 308325 1. 180361 1. 603928 2. 062703 1. 342899 1. 701349 1. 468547  
0. 422784 0. 771102 0. 901082 0. 760471 0. 454123 0. 729488 2. 486674 0. 95264 1. 049686  
1. 580908 1. 154341 1. 462296 1. 775056 1. 814732 1. 533634 1. 638697 1. 84383 1. 999194  
1. 7217 1. 888277 1. 162994 2. 998043 1. 247822 0. 9907 1. 308232 1. 519061 1. 551355  
1. 782781 0. 897483 0. 57312 2. 015792 1. 041406 0. 887424 2. 267829 1. 463597 0. 672855  
1. 029956 0. 718706 0. 944273 0. 934922 0. 800571 0. 936973 0. 863129 1. 028324 0. 733474  
1. 336974 1. 431175 1. 382471 1. 411116 1. 236757 0. 941494 1. 362894 1. 155863 1. 558699  
3. 450683 2. 019435 2. 709722 2. 078145 3. 057502 2. 283448 2. 720095 2. 641274 2. 727216  
1. 910094 1. 648297 1. 481363 1. 8654 1. 44524 1. 713266 1. 824834 2. 557503 1. 761007  
1. 152708 0. 822772 0. 84579 1. 445928 1. 012213 1. 490099 1. 353261 1. 371405 1. 179444  
2. 647369 5. 002738 4. 629156 4. 219154 4. 976507 4. 92352 3. 586755 4. 013982 4. 266265  
4. 932619 3. 950069 5. 149329 3. 825338 3. 940789 3. 967047 5. 008264 4. 513186 4. 029376  
3. 171621 3. 102174 2. 60049 3. 257978 3. 341383 2. 53122 3. 062319 2. 751066 2. 920227  
3. 792734 3. 017512 3. 362137 3. 32298 3. 071126 2. 58798 3. 302279 3. 079423 2. 984935  
1. 397931 0. 784303 1. 042301 1. 056666 1. 122647 1. 152949 1. 135448 1. 179887 0. 920751  
0. 957318 1. 368869 0. 565615 0. 838365 1. 048793 1. 113897 0. 621273 0. 882563 1. 243912  
1. 41308 1. 061817 0. 915679 1. 468463 1. 264848 0. 920216 1. 304953 0. 739766 0. 850465  
1. 486624 1. 181598 0. 979374 1. 23778 1. 454748 1. 303376 0. 889688 0. 902389 0. 788055  
6. 950387 8. 586062 7. 863626 8. 028419 7. 732578 9. 189825 8. 280386 7. 451175 7. 7445  
3. 300861 2. 784978 3. 735364 3. 863401 3. 252106 4. 872156 3. 157488 3. 465298 3. 806159  
1. 190132 2. 772417 1. 408359 1. 086833 1. 972158 1. 864844 2. 587346 1. 117355 1. 29863  
1. 333288 1. 506507 1. 153333 1. 789099 2. 650122 1. 34727 1. 373827 1. 511379 1. 087883  
1. 801137 1. 46048 1. 231205 1. 329684 1. 312473 1. 392752 1. 201087 1. 68961 1. 353311  
2. 292623 2. 001102 1. 631699 2. 077315 2. 216697 2. 37179 2. 315131 2. 266743 1. 65056  
1. 987116 1. 662035 4. 120618 1. 240817 1. 586599 1. 436179 1. 145561 2. 867924 1. 535078  
1. 429918 1. 767114 1. 448712 1. 386413 1. 694575 1. 184074 1. 545937 1. 230421 0. 908924  
1. 388559 1. 294908 1. 393844 0. 916259 1. 573696 1. 243702 1. 355799 1. 077366 1. 390825  
1. 265965 1. 190637 0. 900204 0. 928831 1. 220605 2. 412154 1. 211077 0. 941508 1. 155077  
2. 463574 1. 42784 1. 42784 1. 787975 1. 811554 1. 269546 1. 432245 1. 698611 3. 174184  
2. 642874 2. 032661 2. 618251 2. 040207 1. 997723 2. 004195 2. 202408 2. 035891 2. 506391  
0. 97334 2. 58665 3. 913505 1. 265957 1. 666604 1. 228155 2. 10875 3. 002784 1. 50628  
0. 54048 0. 664818 0. 970312 0. 820254 1. 636029 0. 752733 0. 877133 1. 537986 1. 283633  
1. 838095 1. 727238 2. 456782 2. 223644 1. 554296 1. 714529 2. 539956 1. 168969 1. 566586

2.145972 0.906289 1.482003 1.80441 1.401723 1.823722 1.67252 1.580717 1.290824  
1.543082 1.080043 1.295167 2.051606 1.03191 1.244311 0.814255 1.261908 1.145201  
2.705954 2.649932 2.829273 2.106034 2.338567 2.132804 3.059918 2.465222 2.062813  
2.677013 1.409119 1.988516 2.250165 1.492883 1.546663 2.459041 2.051841 1.568364  
5.642328 5.785005 5.384336 5.079216 3.963966 4.454576 4.229146 4.513516 3.744439  
2.739117 2.054777 1.780494 2.649628 2.454147 2.290441 2.557194 1.771452 1.933758  
2.394403 0.890207 1.002584 1.16918 0.810271 0.842542 0.773193 1.459942 1.462958  
1.641912 2.325787 1.682115 1.460074 2.279405 1.089483 1.5342 1.677962 1.481363  
1.729675 1.284642 1.113774 1.772188 1.732604 1.491341 2.188159 1.393821 1.66254  
2.158299 0.764263 0.851284 1.918509 0.99351 0.881368 0.795313 1.023941 0.94364  
1.071874 1.148197 1.197364 1.238178 1.943422 1.573376 1.572151 1.721486 1.808267  
5.752841 5.25107 3.976478 6.16722 6.11466 3.641768 3.803957 5.003154 2.187297  
0.934369 0.812155 0.668 0.713635 0.815254 0.9947 0.959248 0.602504 0.840343  
1.098444 0.996711 1.282698 1.372449 0.926502 1.514207 1.040587 1.179674 0.772738  
1.996647 1.187683 1.191022 1.660026 1.281231 2.387384 2.092074 1.807007 1.835339  
0.828238 0.722686 0.800547 0.884242 0.670155 0.648041 0.687302 0.896448 0.573547  
1.34571 1.52464 2.064568 0.98502 2.205264 1.354819 0.956934 1.246351 1.006877  
1.377435 3.660552 2.735668 3.724382 3.493648 2.25305 2.388547 5.39729 1.645169  
1.148572 0.858799 0.597195 0.860382 0.853624 0.61824 2.086795 0.50454 0.859239  
1.577538 1.848959 1.596194 1.78387 3.431035 1.710846 1.450661 1.891764 1.386336  
1.38665 0.907725 1.543146 1.316085 1.615742 2.009983 1.692489 2.064536 1.389384  
1.848833 0.996882 1.93257 1.350023 1.717945 1.159167 2.103294 1.53927 0.984074  
2.082854 1.392899 1.088594 1.343901 1.311759 1.184328 1.756847 1.24402 0.946631  
2.024387 2.117256 1.480371 2.645203 1.610361 1.491127 1.559933 1.60682 1.264138  
2.079346 1.127634 0.944647 1.475276 1.502731 0.889003 0.840613 0.943569 1.155277  
1.038246 0.797305 0.643541 0.866713 0.850705 0.882944 1.438118 1.433457 0.669254  
1.737283 2.467374 2.310589 2.302797 2.102745 2.41157 2.230834 2.147568 2.748015  
1.457254 1.725589 1.618165 2.696883 1.849321 2.649614 2.018833 1.341073 1.768912  
1.460171 1.587683 1.42241 1.54049 1.923033 2.147996 2.090491 1.608512 1.806229  
3.121342 2.549577 2.901527 2.467443 2.548266 2.362497 3.420423 2.311253 2.077753  
0.705726 0.64113 0.937692 0.744444 1.231 1.045446 1.444046 1.011952 0.598839  
2.995858 1.910889 2.242288 2.247491 2.628074 1.991237 2.595434 2.783368 2.367633  
2.815378 1.69321 1.78974 2.052425 1.633065 1.707002 1.588026 2.410908 1.842349  
2.140631 1.488036 1.297167 2.03295 1.575197 1.482677 1.1216 2.209091 1.819662  
1.909415 1.308644 1.3503 1.539861 1.813961 2.177043 2.543028 2.098564 1.432855  
2.82289 1.693003 2.82085 1.905395 2.467844 1.67412 2.970242 2.779537 2.150903  
2.2798 2.081339 2.303667 2.089296 2.29929 1.949013 2.346178 2.357938 2.087067  
4.726514 3.448496 4.732907 3.661251 3.319975 3.911036 3.49849 4.126131 3.066021  
4.009993 3.400223 3.819698 3.070062 3.317114 3.502617 4.09822 4.641259 3.886304  
8.022263 8.910749 7.780866 8.9382 8.743919 8.643557 9.002763 8.428302 8.312416  
7.229831 4.846448 5.821495 4.686332 5.457232 5.198467 6.034321 5.401852 6.121868  
7.326477 7.340675 8.024811 7.224743 6.621908 7.290856 7.680426 6.963054 7.132713  
9.010489 8.799174 8.948139 8.943552 8.853359 8.952427 8.699515 8.906103 8.670725  
1.546926 3.476292 1.353644 1.763073 1.482956 3.323459 2.10423 2.355773 2.331019  
7.545768 7.915927 7.634485 8.067045 7.686912 7.807932 7.599572 8.131626 7.833961  
3.999986 3.372069 4.221841 3.235432 3.298869 3.057603 4.24874 3.829839 3.214915  
1.049377 1.201971 0.80771 1.2485 0.900689 1.094904 1.088534 0.814223 1.282882  
2.075995 2.18027 1.776933 1.346032 1.577574 1.071981 1.481095 1.7763 2.100947  
0.886842 0.922016 0.85135 1.14635 1.48912 1.044538 0.92965 0.860711 1.008104  
1.722028 1.642912 1.538575 2.50216 1.623334 1.595633 1.906143 1.409019 1.388895  
1.38857 2.030819 1.944237 2.327672 1.867175 1.94762 1.416058 1.833319 1.439461

5. 178941 4. 645981 5. 301413 5. 195283 4. 572752 5. 770533 5. 530459 5. 60229 5. 441729  
5. 685722 4. 911439 4. 820636 5. 276018 5. 49922 6. 226043 4. 847937 5. 111333 5. 585511  
2. 665384 2. 091604 3. 042038 2. 309735 2. 253069 2. 738116 2. 241496 3. 413993 2. 021606  
4. 192074 4. 296584 4. 110559 4. 390212 4. 53057 4. 140494 4. 045645 4. 689839 4. 582039  
7. 294862 7. 570074 7. 632603 7. 426574 7. 605321 7. 635527 7. 741272 7. 443791 7. 303958  
5. 656624 5. 660517 5. 725319 5. 662303 5. 688823 5. 832939 5. 649779 5. 863354 6. 13908  
6. 998327 7. 638135 7. 809127 7. 452989 7. 393316 7. 81265 7. 30108 7. 377103 7. 45037  
8. 389761 8. 847749 8. 527925 8. 847079 8. 464881 8. 686997 8. 288491 8. 067678 8. 425388  
5. 801398 5. 663448 5. 423064 5. 433728 6. 09189 5. 331647 4. 822676 5. 693703 5. 174526  
7. 122424 7. 231964 7. 510027 8. 121695 7. 945185 8. 019378 7. 114596 7. 730856 7. 661958  
3. 34439 4. 221178 3. 754544 4. 393272 3. 607866 3. 579437 4. 012042 3. 605396 4. 453136  
5. 273529 4. 779871 5. 437992 5. 495323 4. 610311 5. 568677 4. 460479 4. 781933 4. 602865  
6. 878739 6. 524834 7. 577015 6. 497427 6. 670472 6. 944044 7. 061504 6. 596833 7. 270997  
2. 677083 3. 02446 2. 795145 3. 221468 3. 673492 2. 564807 2. 566267 3. 273744 2. 988038  
2. 07076 2. 058243 2. 119437 1. 888486 1. 544749 1. 642992 1. 968981 2. 291086 1. 702973  
3. 500833 5. 129061 4. 337826 4. 758244 3. 396946 4. 82716 5. 320702 5. 122294 4. 70233  
1. 462407 2. 188071 1. 54942 1. 696072 1. 841951 1. 914316 1. 863042 1. 073746 1. 657643  
1. 932647 2. 233188 1. 9262 2. 577481 1. 420106 1. 879335 1. 639233 1. 243009 1. 616894  
2. 823181 2. 112996 0. 948075 1. 984895 1. 862577 1. 24411 1. 319375 2. 41476 1. 562233  
3. 835753 2. 309622 1. 422866 1. 073332 1. 383403 1. 344037 1. 716551 0. 730873 1. 37695  
1. 570076 1. 492418 2. 311214 2. 086747 1. 399754 1. 478296 1. 958004 1. 642054 1. 561647  
2. 497928 1. 056019 1. 384659 2. 059776 1. 103153 1. 585572 2. 337232 1. 565604 1. 272188  
4. 930849 5. 203939 5. 363265 5. 718479 5. 538421 4. 675468 4. 957032 5. 898073 4. 982495  
2. 09236 1. 327866 2. 031318 1. 121679 1. 376536 1. 81911 2. 350524 1. 470028 1. 568434  
1. 133079 1. 278954 2. 17012 0. 643082 0. 470925 1. 208372 2. 516311 0. 677249 1. 514507  
1. 092035 1. 26303 1. 494146 1. 256735 1. 382197 2. 028077 1. 769077 1. 517319 1. 593161  
1. 243968 1. 022881 1. 382921 1. 446432 3. 109669 1. 938405 1. 450341 1. 384226 0. 988246  
1. 007003 1. 289597 1. 694254 1. 276784 0. 993528 1. 497792 1. 930731 1. 059202 1. 575673  
1. 927015 0. 84353 0. 942348 0. 690468 1. 066553 1. 623484 1. 082395 0. 898526 0. 664584  
6. 02172 5. 05175 4. 958596 4. 948526 5. 232608 4. 995902 4. 812775 5. 096733 5. 305373  
2. 636665 1. 89171 2. 095321 2. 547042 2. 040381 2. 531169 2. 022252 2. 7153 2. 556891  
8. 313497 7. 584742 9. 00858 6. 185382 8. 303321 8. 289211 9. 01591 8. 538638 8. 376388  
5. 203924 4. 187413 4. 406393 4. 657089 4. 116356 4. 00061 4. 515009 3. 586783 3. 82993  
7. 21775 6. 753099 6. 971159 6. 960827 7. 130703 6. 76789 6. 438755 6. 625594 6. 884872  
5. 477597 6. 026266 5. 911372 5. 672189 6. 316182 6. 120352 5. 331317 5. 876761 5. 928584  
4. 976139 5. 244666 4. 463414 5. 471974 4. 157893 4. 850061 4. 177903 3. 728929 4. 319019  
5. 111925 6. 248178 6. 330788 6. 635304 5. 894758 6. 171911 6. 143839 6. 220781 5. 744681  
3. 955848 5. 037699 5. 163118 5. 158631 5. 495274 5. 217899 5. 173798 5. 227784 4. 729724  
6. 259103 6. 503035 6. 383077 6. 397931 6. 64577 6. 351708 6. 776112 6. 609324 5. 909576  
6. 149505 5. 942156 6. 010471 5. 852802 5. 35632 5. 116046 5. 861881 4. 706282 6. 498579  
5. 627938 4. 9961 5. 785972 4. 541465 5. 211449 4. 893959 3. 154108 4. 847905 5. 782635  
4. 013607 5. 939665 5. 080906 6. 704244 6. 022099 6. 459568 5. 578525 6. 079459 6. 13511  
4. 086886 4. 521056 4. 256813 4. 175464 4. 546374 4. 214073 3. 350097 4. 69458 4. 72136  
7. 752557 8. 730304 8. 64181 8. 701177 8. 826859 8. 421678 9. 00764 9. 246242 8. 85576  
6. 074586 6. 529814 5. 811349 6. 3843 4. 659095 5. 480336 5. 271571 6. 430741 6. 113458  
6. 16933 6. 201299 6. 356588 6. 533766 6. 254627 6. 665446 6. 483695 6. 401682 6. 521369  
6. 64658 8. 176689 6. 095186 8. 193371 8. 54909 6. 939506 8. 009781 7. 748081 8. 119583  
5. 417105 4. 929944 4. 909088 4. 689358 4. 166434 4. 742315 4. 313685 5. 684093 5. 886493  
4. 164155 4. 833466 5. 092656 4. 417993 3. 969828 4. 755543 2. 868752 4. 712374 4. 374322  
1. 133553 2. 281291 2. 599428 0. 981702 2. 75606 1. 872947 2. 285543 2. 025295 2. 56426  
1. 802599 1. 161923 1. 110973 1. 404275 1. 359028 2. 064278 1. 597943 1. 973482 1. 270674



2. 743256 3. 598034 3. 263454 3. 04623 2. 355833 3. 46084 3. 662439 1. 987817 2. 355046  
7. 307785 7. 894211 7. 545675 7. 571442 7. 578893 7. 231669 6. 914096 6. 899731 7. 517762  
3. 277689 3. 286817 3. 170439 3. 333387 2. 859642 2. 956342 2. 719845 3. 088671 2. 841202  
2. 082754 1. 98018 3. 127778 1. 650824 2. 160816 2. 495621 2. 606097 2. 400807 1. 905766  
1. 987977 2. 026585 2. 364589 1. 944558 1. 62468 1. 470413 2. 043733 2. 219332 1. 891378  
2. 179755 4. 005952 3. 101069 3. 435767 2. 66081 3. 365849 3. 512582 4. 077472 3. 787232  
2. 222738 3. 788387 3. 11877 3. 494335 2. 769318 2. 677854 3. 248492 3. 833255 3. 496831  
1. 568759 1. 920912 2. 225531 1. 780568 1. 646958 3. 504836 1. 937514 1. 506408 2. 861661  
4. 327289 4. 124238 4. 623392 3. 670819 4. 182062 4. 36167 4. 190284 3. 690625 3. 404595  
5. 552044 6. 47097 6. 354663 6. 574025 6. 734522 6. 480701 6. 598268 6. 710508 6. 773928  
0. 935599 1. 402451 1. 174595 1. 082163 1. 281822 1. 196402 2. 678881 0. 958584 1. 686877  
2. 733786 2. 363907 2. 335482 2. 44621 3. 108182 2. 117531 2. 409346 2. 009012 2. 231996  
6. 426924 6. 017445 6. 785857 5. 586226 5. 2656 6. 621838 6. 19725 5. 826055 5. 913868  
2. 641241 2. 387302 1. 774138 2. 639068 2. 243703 2. 261084 2. 452579 1. 846376 2. 503683  
1. 856603 1. 530015 1. 988456 1. 709479 2. 055566 2. 154367 2. 064975 2. 40612 2. 133633  
1. 091272 1. 074921 1. 547169 2. 893849 1. 844955 1. 203563 3. 393669 1. 319925 1. 506605  
1. 85598 2. 456337 2. 153532 2. 031143 1. 846321 1. 537921 2. 965422 3. 112583 2. 686458  
2. 455585 1. 168319 1. 100288 1. 707697 1. 556005 1. 247763 2. 061899 1. 370785 1. 921994  
1. 566099 1. 475039 1. 327103 2. 301481 1. 217666 1. 658908 1. 64343 1. 410726 1. 381846  
1. 793772 1. 230313 1. 616445 1. 883268 1. 280833 1. 19814 1. 453873 1. 426328 1. 377661  
4. 226242 3. 816081 3. 645699 5. 160039 5. 339489 3. 963762 4. 286358 2. 772268 4. 038101  
1. 053406 1. 140079 0. 900162 1. 197338 1. 382405 1. 125161 1. 437435 1. 432774 1. 168267  
5. 132454 3. 906968 3. 961016 4. 571092 3. 964052 2. 51975 3. 464755 3. 691409 4. 29991  
1. 94659 1. 173655 1. 729766 2. 301365 1. 759817 1. 928788 3. 548897 1. 321683 1. 695264  
1. 538891 1. 50802 1. 353989 1. 822989 1. 81709 2. 248022 1. 582443 1. 653347 1. 08715  
2. 392438 1. 628342 2. 15823 2. 143993 1. 884202 2. 088105 2. 099798 2. 356672 2. 275602  
7. 992352 7. 537983 8. 080413 7. 395402 7. 354964 7. 631009 7. 546096 7. 687085 8. 329612  
3. 514945 2. 891619 3. 297207 3. 372089 3. 355659 3. 244235 2. 970597 3. 136999 2. 866766  
2. 081087 1. 208292 1. 820164 1. 211249 1. 046232 1. 552419 1. 87335 1. 842988 1. 383893  
2. 426599 3. 033047 3. 809003 2. 864677 3. 027224 2. 922076 3. 944332 3. 126061 2. 648669  
3. 095754 2. 654287 3. 253298 4. 01093 3. 592369 3. 002068 3. 657393 3. 968814 2. 72089  
6. 352554 6. 01959 6. 655259 6. 029302 6. 056424 6. 385898 6. 081913 5. 954023 6. 551728  
2. 336331 2. 448889 3. 048345 1. 900351 2. 453789 2. 135436 2. 279738 1. 753456 2. 117413  
4. 958848 4. 253717 5. 030635 4. 42157 3. 732564 4. 675974 3. 553553 4. 619947 4. 337516  
1. 985753 3. 001818 1. 696348 1. 571147 2. 187406 2. 209022 1. 907373 2. 109255 1. 510675  
5. 706226 5. 879947 6. 137917 7. 844604 6. 507293 6. 627202 6. 50524 5. 46071 5. 937407  
2. 080322 1. 581785 1. 882522 1. 317044 1. 630611 3. 022799 1. 485446 1. 58472 1. 238736  
4. 278207 5. 990355 4. 631695 6. 118239 5. 741058 4. 82436 5. 17145 6. 18694 4. 263855  
4. 734692 4. 459915 3. 969835 4. 395657 3. 55529 4. 427311 4. 370313 4. 79104 3. 923802  
3. 29285 3. 222579 3. 31257 3. 123176 2. 485527 2. 60606 2. 554029 3. 28901 2. 666333  
2. 70712 2. 000445 2. 099758 1. 861087 1. 530593 1. 715393 1. 96746 2. 152339 2. 104216  
8. 989132 9. 549823 9. 413785 9. 429605 9. 393591 9. 157625 9. 275714 9. 462941 9. 271869  
5. 32334 5. 230731 4. 661751 5. 275898 4. 980451 5. 061652 4. 376163 5. 192011 5. 398538  
3. 078787 4. 084468 4. 006869 1. 715244 2. 668518 1. 991665 2. 185062 2. 435104 1. 890144  
5. 398957 5. 666577 5. 839563 5. 396548 5. 327735 5. 991424 5. 238145 5. 748898 4. 924015  
3. 819461 4. 369178 4. 133788 3. 951892 4. 321313 4. 313684 4. 527952 4. 216372 4. 042915  
1. 896528 1. 643894 3. 986374 1. 909909 1. 782622 1. 99231 1. 8474 1. 839579 1. 898976  
2. 449535 2. 746948 2. 78642 2. 917541 2. 766048 2. 071598 3. 542021 2. 479462 2. 540677  
5. 001691 5. 428282 5. 227053 5. 155614 5. 704075 5. 786299 5. 03211 5. 274596 4. 94411  
1. 80897 1. 000206 1. 441972 1. 465075 2. 337908 1. 455778 1. 513859 1. 474007 1. 395204  
7. 818398 7. 615692 7. 395413 7. 912017 7. 483488 7. 805767 7. 5026 7. 46547 7. 390813

3. 797446 3. 990504 3. 547696 3. 044895 2. 678443 3. 152813 3. 582918 4. 017127 2. 310905  
1. 828435 2. 32631 3. 257058 2. 319864 2. 755752 3. 172573 3. 224987 3. 516489 2. 742241  
2. 141452 1. 79657 1. 350394 1. 579617 1. 785058 1. 629837 2. 336744 1. 386584 1. 481353  
0. 904489 0. 931216 1. 750587 1. 036162 1. 657038 1. 227588 1. 478664 1. 416783 1. 339947  
4. 920611 3. 156883 2. 404504 2. 934157 2. 650553 2. 2155 3. 894601 4. 164532 4. 559306  
1. 293104 1. 14475 1. 171118 0. 973515 1. 692852 1. 227442 1. 269652 0. 819572 1. 176064  
1. 750003 1. 501966 1. 361684 1. 538539 1. 396851 1. 379033 1. 489757 1. 127371 1. 505652  
2. 928832 3. 923168 4. 0856 5. 30754 3. 986516 3. 976916 3. 697313 3. 998586 4. 19405  
5. 588057 5. 824641 6. 219081 5. 642068 6. 502201 6. 663212 5. 127532 5. 516568 5. 804655  
2. 287554 2. 30392 2. 251519 2. 746405 2. 567496 1. 943003 2. 368732 1. 855988 2. 716142  
1. 721998 2. 037791 1. 936301 4. 187806 2. 55389 2. 418303 2. 155909 1. 990903 2. 113273  
4. 518918 1. 262782 1. 291275 1. 296456 1. 692886 1. 098667 1. 701366 1. 17396 1. 291362  
6. 555088 6. 743516 6. 864752 6. 616261 7. 069636 6. 697293 6. 239842 6. 874048 6. 744551  
3. 276089 3. 421405 2. 889832 2. 903063 3. 701048 3. 076828 3. 512469 2. 360372 2. 725862  
5. 041241 5. 189396 5. 188865 5. 314345 5. 363782 5. 263083 5. 134449 5. 122506 5. 255587  
5. 029853 5. 63763 3. 372053 4. 081123 4. 759639 4. 846355 4. 031111 3. 825875 4. 619399  
4. 626563 4. 495596 5. 051511 4. 512208 3. 99547 4. 007829 4. 536375 2. 804236 4. 072554  
7. 06931 7. 992631 7. 42534 7. 451509 8. 096181 7. 156458 7. 383836 7. 669775 7. 202051  
4. 323856 4. 568325 4. 756298 4. 224145 4. 646789 4. 498497 5. 230047 4. 369576 4. 989116  
9. 302453 9. 924025 9. 800731 9. 654281 9. 674925 9. 555164 9. 488163 9. 60037 9. 576354  
2. 698891 2. 225351 2. 750819 1. 735119 1. 963932 1. 922117 2. 138721 1. 839509 2. 554653  
1. 70575 1. 43829 1. 291035 1. 380869 1. 839812 1. 009133 1. 081088 0. 953977 1. 197489  
2. 73956 2. 245592 2. 07571 2. 155041 2. 124426 1. 714137 1. 47064 1. 903043 2. 335299  
2. 610085 1. 94188 2. 14807 3. 125453 2. 740408 1. 829817 2. 506886 2. 045103 1. 790277  
8. 199894 8. 128994 8. 241991 7. 884109 8. 743828 7. 887903 7. 570183 8. 570723 8. 266249  
7. 039276 6. 356504 6. 367385 5. 639903 6. 137871 6. 475722 5. 957824 6. 065305 6. 890893  
8. 350101 8. 186024 8. 083631 7. 97944 8. 186021 8. 111269 8. 149794 8. 284958 8. 575989  
3. 909241 4. 910436 4. 828444 5. 027699 4. 158091 4. 796911 5. 690976 5. 567437 4. 577685  
5. 481945 6. 45232 7. 049289 6. 912775 6. 801781 6. 715163 6. 335047 6. 423963 6. 628894  
4. 052922 3. 899512 4. 99502 4. 322912 4. 374802 4. 434816 4. 012575 4. 031891 4. 328905  
3. 729612 5. 952359 5. 336078 4. 17977 5. 051195 5. 937209 5. 475092 5. 433859 5. 619622  
1. 429967 2. 041934 1. 296006 1. 637696 1. 449911 1. 343978 2. 434165 1. 415657 1. 632994  
1. 686555 2. 128066 1. 962623 2. 44157 2. 065965 1. 645266 1. 805106 1. 435161 1. 958289  
4. 728048 5. 889102 6. 132236 5. 456639 6. 167314 5. 732032 5. 362792 5. 700985 5. 893253  
8. 104857 8. 263859 7. 839691 7. 584986 7. 943039 7. 785475 8. 368301 8. 127419 7. 82849  
5. 501028 6. 024659 6. 270651 6. 542466 6. 458368 5. 983402 5. 216363 6. 020592 6. 254492  
6. 562488 6. 811815 7. 247896 7. 434019 6. 905189 7. 26379 6. 562842 6. 867886 6. 943963  
6. 737577 6. 3175 6. 680782 7. 25617 6. 605797 7. 049269 7. 26203 5. 810205 5. 884453  
7. 138934 7. 474404 6. 72127 7. 934444 7. 373985 7. 524059 6. 642088 7. 602945 7. 669091  
5. 301387 6. 315267 5. 595895 6. 705906 5. 597586 5. 721152 4. 682207 5. 122854 4. 891967  
1. 974005 2. 36759 2. 176639 2. 230608 2. 63447 2. 505369 2. 196748 1. 983294 2. 167012  
4. 422773 6. 22593 5. 342297 6. 202119 6. 216793 5. 158101 5. 668346 5. 703048 5. 98283  
6. 488092 7. 259511 6. 820256 8. 319672 7. 613531 7. 680486 7. 198454 6. 707386 7. 370507  
4. 382953 6. 12545 4. 999291 6. 032347 5. 792866 6. 473444 5. 592422 6. 291795 5. 354062  
5. 443621 5. 460171 5. 353555 6. 177612 6. 15054 6. 20138 6. 000466 5. 534581 5. 481022  
5. 066847 6. 294998 5. 516507 5. 90181 6. 213298 6. 14311 5. 365703 5. 44328 5. 986864  
5. 069135 5. 479768 5. 351235 4. 380062 5. 097717 5. 051891 5. 104047 5. 324909 4. 998025  
4. 749047 5. 848164 5. 725962 5. 811923 5. 803019 4. 416697 5. 39346 4. 465061 5. 20738  
5. 393182 6. 878388 6. 180645 6. 874832 6. 727235 6. 324919 6. 680048 6. 314654 6. 902034  
3. 456527 2. 944392 3. 442201 3. 320793 3. 239395 3. 422772 3. 17531 2. 915072 3. 216709  
4. 038855 4. 871635 4. 85253 5. 330226 4. 604944 4. 939798 4. 814527 4. 332777 4. 905816

2. 976846 2. 129072 2. 570237 1. 622431 2. 17228 2. 320255 1. 551595 2. 180095 2. 224942  
1. 368766 1. 944042 1. 91893 1. 578901 1. 584027 2. 039777 1. 421496 2. 008008 1. 654547  
1. 161686 0. 70152 1. 147869 1. 216635 1. 456096 1. 709992 1. 389036 0. 898654 1. 465362  
1. 530818 0. 938939 1. 416117 1. 125953 1. 451449 1. 146893 1. 432489 1. 348668 0. 737861  
4. 050401 2. 705537 4. 333506 4. 509511 5. 239673 3. 716525 3. 918441 3. 545592 3. 717475  
4. 576115 4. 853119 5. 610575 4. 793144 3. 960659 5. 138299 5. 904435 5. 652143 6. 042192  
3. 734947 4. 108817 4. 195763 2. 943055 3. 270045 3. 123951 3. 325999 4. 169917 3. 665971  
7. 716768 8. 044751 7. 903168 7. 84697 8. 017224 8. 138718 7. 961745 8. 104593 7. 708493  
2. 575711 2. 245054 2. 055178 2. 644299 3. 000699 1. 466307 4. 311148 2. 279834 2. 968069  
6. 342141 6. 651387 6. 893756 6. 505097 6. 115195 6. 897209 6. 501686 6. 803614 6. 74277  
3. 640724 4. 591417 4. 788789 4. 409147 3. 918529 5. 300431 5. 332348 5. 298246 4. 418389  
6. 453064 6. 886135 5. 656013 7. 361247 6. 918147 6. 871623 7. 709075 6. 845703 7. 162802  
3. 420992 3. 871876 1. 795944 1. 938725 2. 235266 1. 66619 2. 082038 1. 785861 1. 624736  
5. 173527 5. 220322 4. 09226 6. 071899 4. 434671 5. 660678 5. 221683 4. 277893 5. 069247  
3. 609113 3. 924458 3. 961645 3. 943455 3. 946534 3. 975187 3. 285186 3. 718324 3. 875914  
1. 151753 0. 899153 0. 940846 0. 654378 1. 113085 0. 650139 0. 820562 0. 794311 0. 872159  
2. 702982 3. 037459 3. 370751 2. 896899 2. 769225 3. 279317 3. 834706 3. 2908 3. 39289  
3. 68438 2. 693908 3. 391155 2. 534889 2. 45673 3. 609377 3. 576296 2. 457413 3. 923217  
8. 266528 8. 800906 8. 549074 8. 916484 8. 664255 8. 685036 8. 244613 8. 934039 8. 946533  
1. 503225 1. 221291 1. 287125 1. 51522 1. 442749 1. 193752 2. 128724 1. 670318 2. 005689  
0. 993525 1. 209489 0. 931819 0. 729756 1. 002826 1. 24466 1. 458918 1. 103198 1. 357969  
4. 125607 2. 865169 3. 423919 2. 705866 2. 318978 1. 964052 1. 48624 2. 640982 3. 671467  
3. 8374 3. 22977 2. 980919 4. 547535 4. 364832 3. 535542 4. 158779 4. 31524 3. 253505  
6. 647159 5. 828317 5. 417361 4. 861058 6. 050596 5. 5479 5. 830114 5. 883617 5. 276093  
9. 705832 9. 8368 9. 600647 10. 42299 9. 969259 9. 843819 10. 35188 9. 884478 9. 962955  
4. 154582 3. 539971 3. 293558 2. 953389 3. 3334 3. 372821 3. 427529 2. 99071 3. 724625  
8. 459848 8. 330168 8. 436219 8. 448875 8. 093932 8. 08445 8. 479033 8. 099108 8. 338276  
9. 162873 9. 135619 8. 831748 9. 334547 9. 12475 8. 751667 9. 136378 8. 797163 9. 258755  
2. 426524 3. 871607 4. 42869 4. 573742 4. 018358 4. 279368 4. 034292 2. 376419 4. 045078  
9. 036324 9. 424804 9. 192775 9. 494769 8. 753883 9. 308451 9. 581241 8. 970141 8. 887815  
2. 989187 3. 547025 3. 510174 3. 020693 3. 642501 3. 128961 3. 629028 3. 40234 2. 90712  
9. 038525 8. 31289 8. 330748 8. 579421 8. 383295 8. 425736 8. 245888 8. 590446 8. 938888  
2. 562625 2. 621503 2. 376901 2. 697424 2. 234118 2. 66718 2. 387368 2. 175862 2. 355831  
10. 65205 10. 37013 10. 45769 10. 27375 10. 59599 10. 0892 10. 68012 10. 675 10. 60316  
7. 391151 10. 36794 8. 727072 9. 65961 8. 282789 6. 857458 9. 92067 7. 972436 6. 146341  
2. 751016 2. 026868 2. 052836 2. 039115 2. 074939 2. 136576 2. 943971 2. 354039 1. 835728  
4. 150246 4. 788804 4. 362718 3. 277808 4. 4897 3. 825525 4. 395583 4. 838287 5. 233919  
2. 569889 2. 804392 2. 730319 2. 925187 3. 27875 2. 72189 3. 154973 2. 711326 3. 027986  
5. 428032 6. 262003 5. 836874 6. 082615 6. 179343 6. 003528 5. 48891 5. 892718 5. 797624  
2. 076333 1. 982558 1. 767762 2. 477939 1. 788008 2. 148596 2. 65407 2. 607474 2. 557483  
6. 398928 7. 076547 7. 08467 6. 847156 7. 205379 7. 440159 7. 057132 7. 206284 7. 098524  
3. 410888 4. 144643 4. 181034 3. 308788 4. 231848 3. 526387 4. 881394 4. 293408 3. 523216  
6. 145006 5. 673363 6. 061266 5. 725528 5. 656888 5. 897908 5. 435773 5. 749678 5. 400836  
2. 968264 2. 370764 2. 887363 2. 805953 2. 655012 2. 71582 2. 965039 2. 588789 2. 02615  
2. 535434 2. 279394 2. 65592 2. 009986 3. 392975 2. 864154 3. 083697 3. 449119 2. 313383  
1. 710787 1. 56558 1. 766185 0. 948724 1. 262393 1. 282988 2. 415964 1. 425332 1. 132982  
5. 394804 4. 591714 4. 678245 4. 918679 4. 675228 5. 041897 4. 465884 4. 763305 3. 731346  
7. 282981 7. 362426 7. 373396 7. 685033 7. 110053 7. 519221 7. 47921 7. 189448 6. 864828  
5. 383703 6. 279453 6. 412235 6. 566937 6. 082128 6. 932461 6. 120933 6. 261228 6. 587898  
8. 072151 8. 00988 8. 116894 8. 231019 8. 13624 8. 147619 7. 846703 7. 777198 8. 113032  
1. 940827 2. 088606 2. 225168 2. 252443 1. 575875 2. 042993 2. 490854 1. 611324 1. 927307

5. 053701 6. 373444 5. 895972 6. 850966 6. 357509 6. 526476 6. 442274 6. 713412 6. 016508  
7. 08988 7. 304122 7. 538762 7. 308749 7. 579083 7. 679521 7. 392699 7. 464762 7. 244073  
5. 087236 5. 521457 5. 716777 5. 56265 5. 548401 5. 4904 4. 293041 5. 446763 4. 34102  
5. 623187 5. 844291 6. 28025 5. 842203 5. 769821 6. 142525 5. 493964 6. 092013 6. 430201  
5. 894005 6. 009558 5. 627405 5. 225207 6. 048404 5. 518266 4. 340124 5. 870681 5. 135591  
2. 26605 2. 08168 2. 209515 2. 032275 1. 950004 1. 777052 2. 108333 1. 830955 1. 940915  
2. 350892 2. 128071 2. 371692 2. 10516 2. 117517 2. 302364 1. 292332 2. 428387 1. 811391  
11. 15583 11. 34746 11. 24879 11. 0174 11. 20858 11. 09235 10. 79159 11. 12591 11. 15812  
1. 393553 1. 102035 1. 129006 1. 459503 1. 426631 1. 167672 2. 134636 1. 048657 1. 732301  
5. 008374 4. 147622 3. 869905 5. 436821 4. 669923 3. 861005 5. 461948 4. 376614 4. 739545  
1. 479714 1. 476646 1. 641873 1. 516458 1. 526745 2. 13602 1. 794737 2. 520804 1. 754953  
3. 053259 5. 74514 5. 749938 5. 521045 5. 516424 6. 163861 7. 667809 7. 584503 6. 14467  
1. 270257 1. 398635 1. 384107 1. 331227 1. 745976 1. 490242 1. 352331 1. 297158 1. 23214  
1. 326343 1. 816475 1. 31867 1. 535352 1. 131127 1. 683463 2. 051487 1. 294063 1. 195107  
2. 108032 1. 70113 2. 025028 1. 675795 2. 248168 1. 596859 2. 026679 2. 173246 1. 843339  
1. 922187 1. 6047 2. 257341 1. 862786 1. 255659 1. 604173 1. 568276 1. 545968 1. 148451  
2. 112653 1. 700132 1. 823546 2. 010681 1. 504237 1. 8638 2. 403164 1. 807222 1. 779074  
1. 694923 1. 455914 2. 412693 1. 513806 1. 548733 1. 636003 2. 261746 1. 717915 1. 425643  
3. 951003 2. 242894 2. 350104 3. 250659 3. 70207 2. 161039 4. 054861 2. 305119 2. 713106  
1. 982315 1. 361479 1. 305072 2. 030221 1. 967969 1. 528478 1. 522791 1. 559622 1. 823868  
1. 151287 1. 213495 0. 894036 1. 447967 0. 84633 0. 900345 2. 326378 1. 234608 1. 502714  
2. 874258 3. 009554 2. 801199 3. 528727 2. 456524 2. 412917 3. 070844 2. 44332 3. 102864  
5. 95197 5. 163192 6. 257315 6. 985043 5. 506984 6. 643641 6. 911756 6. 630894 6. 641741  
3. 325723 4. 367504 4. 179894 3. 921694 4. 250766 4. 597267 3. 773474 4. 190312 3. 588792  
4. 132068 3. 69012 3. 694286 4. 175098 5. 359844 5. 048753 4. 319917 3. 003636 3. 104713  
2. 969831 2. 834342 2. 204006 2. 346904 2. 443832 2. 404194 2. 379454 2. 758811 3. 177333  
1. 705705 1. 544844 2. 316367 2. 895109 3. 285146 2. 200463 2. 486484 2. 637583 2. 32973  
8. 478259 6. 935657 7. 944354 6. 123996 6. 364009 6. 358208 6. 638527 6. 222997 7. 603454  
3. 343185 3. 061966 3. 660503 3. 071366 2. 709441 2. 809713 3. 142926 2. 892238 2. 716835  
6. 044949 5. 71458 5. 876097 5. 499786 6. 165326 5. 688192 5. 314364 5. 492343 5. 443114  
5. 572967 6. 336239 6. 089944 5. 441295 5. 606137 5. 761428 4. 704325 6. 157071 5. 985389  
2. 936674 5. 660637 5. 262043 4. 522754 5. 237718 5. 45046 5. 326084 4. 175182 4. 218555  
4. 348622 5. 237337 4. 940884 5. 078423 5. 043247 5. 162129 3. 441832 6. 409663 4. 822441  
1. 220845 0. 98817 0. 81431 1. 028255 1. 050032 1. 054909 1. 306411 0. 93196 1. 023586  
3. 981805 4. 339747 3. 47769 4. 061062 4. 221878 3. 369717 3. 913977 4. 817589 4. 505781  
7. 341006 7. 440039 7. 461987 6. 97282 7. 19952 7. 236704 7. 142856 7. 3273 7. 485933  
3. 904105 2. 732847 2. 13202 2. 614921 2. 168953 2. 716651 2. 251678 2. 333822 2. 699385  
1. 791934 1. 35011 1. 954447 2. 033008 1. 610639 1. 327541 1. 211786 1. 595891 2. 340733  
2. 149737 1. 666487 1. 995581 1. 991316 1. 951799 2. 065617 3. 481474 1. 902308 2. 358877  
4. 431278 5. 397182 4. 908813 4. 250376 4. 709977 5. 26728 4. 189554 4. 254837 4. 67979  
6. 724693 7. 808418 7. 610988 6. 758506 7. 369838 7. 391688 6. 677471 6. 90955 7. 165051  
1. 702954 1. 842349 2. 046585 1. 877613 1. 546652 2. 022671 2. 733258 2. 479445 1. 876704  
5. 135076 5. 254408 4. 966378 5. 336546 5. 081882 4. 882578 6. 069985 5. 269175 5. 235664  
5. 097151 5. 782155 5. 439261 5. 281374 6. 81025 6. 118115 5. 640367 6. 256721 6. 221366  
1. 643549 1. 656923 1. 965119 2. 776638 2. 746668 1. 556788 1. 858259 2. 924247 2. 480233  
2. 047431 2. 270649 2. 384497 1. 540931 2. 031383 2. 229584 2. 445913 1. 714157 2. 115323  
6. 530055 5. 761811 5. 73355 4. 772495 5. 363776 5. 287645 4. 716726 5. 306352 5. 87199  
1. 705461 2. 92461 1. 386551 1. 747821 2. 15652 1. 687797 1. 764474 1. 44996 1. 849994  
3. 365795 4. 287962 3. 287928 2. 984597 2. 914767 2. 952684 3. 731665 2. 795803 2. 472565  
4. 3675 3. 497906 4. 059457 2. 919228 3. 171401 3. 441345 4. 124033 3. 614664 3. 817878  
6. 741114 6. 373183 6. 882474 6. 979029 7. 075891 7. 163572 6. 800695 6. 725023 7. 61538

1. 305276 1. 681871 1. 60759 1. 218389 1. 441034 1. 237035 1. 218031 1. 565703 1. 919206  
4. 24305 4. 28681 4. 939514 4. 717091 4. 29783 3. 864696 4. 278238 4. 570505 5. 6705  
3. 477357 2. 786396 3. 194944 3. 979291 2. 353808 2. 423479 4. 528263 3. 016859 3. 731926  
4. 427493 5. 649686 5. 271912 5. 284371 5. 962055 5. 148133 5. 563438 5. 420946 5. 530083  
5. 77158 6. 448161 5. 938903 6. 534999 5. 566487 6. 418192 5. 772658 6. 045568 6. 095609  
2. 349522 1. 908408 1. 339658 2. 027141 1. 498713 1. 780341 1. 703715 2. 03975 1. 542402  
1. 682564 1. 8537 1. 155119 1. 384109 1. 320786 1. 56276 2. 05114 2. 436586 1. 458351  
2. 094638 1. 360317 2. 121662 1. 590015 1. 578461 2. 694418 2. 57512 1. 547141 1. 919043  
2. 566101 3. 138103 1. 918284 2. 598589 2. 477789 2. 704703 3. 217201 1. 957671 2. 072787  
2. 044775 0. 960824 0. 894234 1. 210383 1. 451684 1. 602033 1. 892107 1. 000222 1. 508177  
5. 342647 7. 249009 7. 46768 7. 24245 7. 508629 7. 746526 7. 136969 7. 893337 7. 453675  
1. 823249 1. 360033 1. 601754 1. 804555 1. 591801 1. 533743 1. 588823 2. 722903 1. 528181  
3. 262445 3. 976056 3. 589856 2. 984633 4. 072908 3. 358238 3. 201889 3. 663312 3. 168446  
1. 162806 2. 068432 1. 464704 1. 389971 1. 435197 1. 18624 1. 296384 0. 741002 1. 243297  
1. 367756 1. 340113 1. 182715 1. 148215 1. 046804 1. 038984 1. 185479 1. 324633 1. 010015  
1. 748495 2. 088709 1. 278198 1. 258458 1. 393997 2. 113863 2. 048695 1. 874138 1. 858101  
1. 523532 2. 068216 2. 562472 2. 013377 3. 334106 1. 961467 1. 766261 2. 812626 1. 673294  
1. 71451 1. 111505 1. 195237 0. 961976 1. 265784 1. 660738 1. 260933 1. 114587 1. 19288  
0. 767899 1. 376579 2. 081176 2. 089049 1. 158386 1. 171261 1. 034908 1. 570887 0. 862559  
1. 564052 1. 350001 1. 123354 1. 217468 1. 144527 1. 235506 0. 858986 1. 502422 1. 129714  
3. 827055 2. 281308 3. 431849 2. 809681 4. 92343 3. 506298 2. 386483 2. 311511 2. 886945  
1. 732205 1. 230064 1. 567134 1. 071446 1. 064506 1. 934164 1. 607642 2. 450129 0. 97726  
6. 522699 5. 678371 6. 475507 5. 842327 6. 02024 6. 398493 6. 60294 6. 68147 6. 503438  
2. 172385 2. 777085 2. 172607 2. 011853 2. 182958 2. 68242 1. 682749 1. 623739 2. 320138  
2. 446558 2. 580689 2. 785597 2. 103043 1. 74381 2. 992272 2. 199305 1. 369048 2. 212985  
3. 494768 3. 013987 2. 702941 2. 486493 2. 733596 2. 920541 3. 413172 2. 768675 2. 404246  
4. 664212 5. 619196 5. 476727 5. 016519 5. 308165 5. 404009 5. 055435 4. 578905 5. 540192  
2. 172255 1. 732084 1. 6101 1. 45183 1. 456828 1. 427707 1. 526795 1. 240475 1. 818105  
1. 642545 2. 271022 1. 598686 1. 415896 1. 203815 1. 690312 1. 494679 1. 498133 1. 775775  
2. 182984 1. 262722 3. 096703 0. 577798 1. 586761 1. 33517 3. 276394 3. 014418 2. 50483  
1. 307306 1. 789091 1. 060788 1. 451536 1. 290063 0. 847038 2. 082277 1. 344766 1. 697397  
1. 955896 2. 25314 1. 824718 2. 852586 2. 137646 1. 879275 2. 545457 2. 213638 1. 620704  
7. 530299 6. 958635 7. 323823 7. 731419 7. 484765 8. 10088 6. 938397 7. 622625 7. 593554  
1. 880969 1. 832621 1. 313345 2. 159655 1. 711852 1. 337837 2. 40041 1. 350505 2. 352394  
1. 591912 1. 619206 1. 184611 1. 21415 1. 421684 1. 730419 1. 28203 1. 447825 1. 453496  
3. 869026 3. 909224 3. 518329 3. 578045 4. 180516 3. 883912 4. 419094 4. 317851 3. 858945  
2. 056078 1. 523851 1. 753189 1. 130532 1. 330462 2. 15402 1. 56131 0. 875386 1. 849188  
2. 957532 3. 909223 3. 059652 4. 487365 3. 799588 2. 58513 3. 678 4. 340167 1. 975747  
4. 206291 4. 099088 3. 647817 3. 762619 4. 084395 3. 881765 3. 642025 4. 248766 4. 107483  
5. 438976 5. 474401 6. 476107 5. 213905 5. 058079 5. 077865 5. 012513 6. 433089 4. 694254  
2. 536969 1. 103032 1. 63927 0. 98739 1. 732075 1. 438044 1. 840699 1. 056673 1. 096036  
2. 036138 1. 803211 2. 026168 1. 577854 2. 280561 1. 723914 2. 776583 2. 107728 2. 102834  
1. 408808 2. 25667 2. 223911 1. 967161 1. 821327 1. 615682 2. 716893 2. 323562 2. 151943  
4. 830766 4. 199096 3. 27459 2. 892533 3. 990773 3. 214605 3. 727458 3. 173395 3. 115343  
1. 682103 0. 885742 0. 864125 1. 335386 1. 224349 1. 138682 0. 826448 1. 383652 0. 729482  
1. 7811 1. 45309 1. 513901 1. 208029 1. 46712 1. 360883 2. 080643 1. 557571 1. 603389  
1. 759918 1. 706223 1. 164247 1. 765647 0. 609418 0. 95781 2. 606149 1. 646645 2. 147487  
2. 907659 2. 618813 2. 911301 2. 379448 2. 464582 2. 782263 2. 996412 2. 442341 2. 417204  
2. 385784 2. 147189 1. 2386 1. 030102 2. 239899 1. 936982 2. 65012 1. 630153 2. 328995  
7. 064306 6. 990707 7. 818246 6. 500214 7. 19242 6. 025936 6. 272613 7. 613126 7. 44442  
3. 345371 3. 286709 3. 290868 3. 735284 3. 959437 3. 204924 2. 981581 3. 792777 3. 872713

1. 208715 0. 617064 0. 908522 2. 108563 1. 130067 1. 530938 0. 518675 0. 452533 1. 357075  
1. 205393 1. 306482 1. 408376 1. 64532 1. 35926 1. 78772 1. 632962 1. 666525 1. 267278  
3. 278163 5. 124119 5. 302612 4. 673754 5. 170949 4. 887819 3. 687653 5. 888925 5. 33463  
1. 057005 2. 172302 1. 185481 1. 203488 1. 27092 2. 276453 2. 244724 1. 4742 0. 908613  
4. 177773 4. 465177 3. 27754 5. 049232 4. 240564 4. 403571 3. 961545 4. 227167 4. 2227  
4. 604894 4. 403218 4. 723341 4. 404752 3. 933603 4. 451379 4. 106343 3. 992472 4. 605097  
3. 355237 5. 586499 4. 819926 4. 866118 2. 577311 2. 683894 3. 020617 2. 131912 4. 089869  
5. 283701 6. 344487 5. 851717 5. 855054 5. 806724 6. 166931 5. 191291 5. 993279 5. 952941  
6. 551275 3. 851798 3. 913603 5. 559309 3. 907059 4. 274612 3. 558226 5. 370582 2. 779022  
1. 460679 1. 091239 1. 264202 1. 631271 1. 139133 1. 421565 0. 937781 1. 17255 1. 260008  
1. 633067 2. 393216 3. 17282 2. 556233 2. 057497 2. 43158 1. 933108 4. 715557 1. 067198  
1. 66726 1. 786298 1. 47281 2. 100855 1. 432856 1. 353975 1. 09792 1. 473387 2. 012081  
3. 335527 2. 636752 3. 784535 3. 383666 3. 237332 3. 072662 3. 521133 2. 877372 3. 397484  
3. 397885 1. 672925 1. 751306 1. 300288 1. 868783 1. 863395 1. 895998 1. 424488 2. 697945  
2. 110764 1. 358799 1. 325042 1. 670704 1. 269155 1. 412088 1. 199859 1. 66375 1. 340763  
3. 066812 5. 12632 3. 286213 3. 248711 4. 258831 4. 132925 4. 660672 3. 462201 4. 305917  
2. 403726 1. 931766 1. 45537 2. 175069 1. 551568 2. 269955 2. 978712 2. 025425 1. 657176  
3. 460575 4. 090488 3. 718491 4. 050007 4. 075643 4. 506245 4. 742372 3. 993629 4. 023209  
3. 429001 1. 487329 1. 697356 1. 891962 2. 223848 1. 583513 2. 420582 1. 859888 1. 808889  
2. 230665 1. 036088 1. 035988 1. 157073 1. 390745 1. 322424 1. 150153 0. 947087 0. 974324  
1. 883385 0. 973625 1. 491978 1. 38664 1. 014126 1. 337325 2. 553934 1. 004848 2. 986645  
2. 163173 2. 298173 3. 243325 2. 878833 2. 583843 2. 549591 2. 501613 2. 684713 2. 444405  
1. 737357 2. 71974 2. 188036 2. 214307 2. 048953 2. 091173 1. 41299 1. 477907 1. 840273  
1. 584827 1. 127013 1. 162229 1. 194146 1. 564943 1. 241063 1. 85302 1. 143307 1. 475382  
6. 342138 1. 944094 3. 797748 4. 184004 4. 146729 4. 627074 3. 351367 2. 767188 3. 115421  
1. 765836 1. 78741 3. 49905 1. 501973 1. 65394 1. 927558 3. 705683 2. 697704 1. 34344  
2. 776406 2. 612703 3. 143544 3. 031175 2. 891021 2. 6941 2. 350815 2. 471385 2. 489652  
3. 502027 1. 15473 0. 847856 2. 442824 1. 712174 1. 930512 0. 777079 1. 415999 2. 058252  
5. 919129 6. 4745 6. 82592 6. 543946 6. 328094 6. 629196 6. 775099 6. 295277 6. 77261  
3. 913982 2. 940729 3. 394492 3. 028934 3. 408768 3. 492926 3. 716565 3. 72435 4. 366666  
1. 434893 0. 848739 1. 14102 1. 999046 1. 750238 1. 567952 1. 222183 2. 017659 2. 059016  
5. 458391 6. 182481 6. 537961 5. 88896 6. 428768 6. 756721 4. 957395 5. 96833 6. 547559  
1. 172278 1. 330953 1. 092915 1. 065633 1. 088173 1. 414351 1. 214442 1. 860552 1. 660867  
3. 80526 3. 063848 3. 511995 2. 60247 2. 559953 3. 130473 3. 614537 2. 841662 3. 356965  
1. 068791 1. 17404 1. 842542 0. 929792 1. 05998 1. 333723 2. 853456 1. 144977 1. 172086  
7. 901868 7. 119861 7. 118152 7. 2692 6. 856832 6. 663199 7. 241173 7. 058024 7. 521359  
3. 644825 2. 832553 3. 206382 3. 996744 3. 790118 3. 351284 2. 905739 2. 95956 2. 372643  
2. 332238 3. 093125 1. 775861 2. 173568 1. 810335 2. 045143 1. 897747 1. 894921 3. 103748  
2. 605104 2. 70669 2. 951025 3. 612877 3. 077773 2. 159967 2. 618353 2. 40768 4. 117034  
2. 69553 2. 444662 2. 315666 1. 879981 1. 885023 1. 999631 1. 972156 1. 933164 2. 429328  
1. 721533 1. 425617 1. 918225 1. 58341 1. 427488 2. 207313 1. 542107 1. 909815 2. 451839  
1. 583144 1. 459039 1. 221919 1. 731374 1. 816722 1. 447393 2. 059173 1. 690812 1. 426966  
2. 447479 1. 927978 1. 927948 1. 397685 1. 488966 1. 937267 2. 426864 1. 560133 2. 26969  
1. 683536 2. 26476 1. 132357 1. 384683 1. 360703 1. 695733 1. 75799 1. 797371 1. 437429  
2. 218632 1. 402156 2. 196081 2. 190788 1. 754528 1. 91857 1. 755489 1. 694651 2. 595463  
1. 921987 1. 486966 1. 413772 1. 236423 2. 896199 1. 579549 1. 483373 1. 51142 1. 645207  
2. 34654 2. 119108 1. 795624 1. 808957 2. 455822 1. 857826 2. 450464 1. 711456 2. 157928  
1. 404742 1. 371439 1. 50632 1. 16016 1. 376889 1. 568988 1. 584979 1. 768077 1. 559926  
3. 583601 3. 23884 3. 705094 3. 231606 3. 471973 3. 295147 3. 902104 3. 612325 3. 498594  
2. 836969 1. 653799 2. 568756 2. 113601 2. 185469 2. 189933 2. 616385 1. 840094 2. 179523  
3. 205988 2. 123665 2. 285824 1. 92213 2. 150071 2. 171401 2. 026521 1. 964227 2. 371553

2.072682 0.932246 0.983191 0.97477 0.758916 0.902559 1.307483 2.056898 0.241886  
2.168969 1.640447 1.339956 1.634483 1.412239 2.200014 1.678677 1.393008 1.624447  
2.106966 1.02314 1.033963 1.462492 1.418091 1.40166 1.236566 1.171938 1.148643  
1.787365 1.517997 1.35432 1.841733 1.608354 1.466538 1.380161 1.462053 1.650299  
1.590209 1.500003 1.406576 1.450943 1.519632 1.102229 1.625336 1.416679 2.406156  
3.593972 2.785709 3.757349 3.347777 2.908315 3.25439 4.23807 2.556647 2.980247  
4.839706 5.14385 4.690905 4.830545 4.545848 5.564555 5.809419 4.584596 4.398093  
1.95758 1.475907 1.274097 1.482649 1.818671 1.247287 1.518726 1.440726 1.450033  
1.428399 2.077833 0.82826 1.170081 0.9225 2.762772 1.018211 1.081039 1.182545  
2.479098 1.906489 2.031347 1.860486 1.961732 1.664525 1.910453 2.092106 1.721071  
1.049419 0.83729 1.242773 2.31871 0.988456 1.291265 1.434138 1.353235 1.407728  
1.747138 1.685856 2.717565 1.031529 1.99253 1.466545 1.930669 1.042537 0.184335  
2.533311 1.753283 2.041119 2.262028 2.14251 1.623891 1.993259 2.649835 2.615501  
2.33387 3.42139 2.39899 2.963253 2.364618 3.960526 3.039153 3.886456 2.398838  
4.653976 4.936972 4.340143 4.140633 3.95336 4.78482 4.567883 4.26582 3.564707  
2.509935 2.000978 2.543917 2.883853 1.987717 2.349722 2.101941 1.967635 2.222377  
5.050754 5.476416 4.712166 4.924936 4.956956 4.667343 5.714768 5.443785 4.458191  
1.472156 1.555347 1.191105 1.343242 2.133332 1.664511 1.59396 1.715618 1.782736  
9.117567 8.207067 8.242856 8.336088 8.098953 7.648594 8.831199 8.087534 8.104801  
1.575545 1.24744 1.338278 1.223088 1.31701 1.154102 1.415461 1.24978 1.224104  
1.585633 2.175261 1.620834 1.146051 1.174202 1.062901 1.407091 1.303609 1.807949  
3.504852 2.65556 2.44092 3.080095 1.478238 2.921386 2.122465 4.092619 2.59913  
3.905403 4.194192 4.657072 3.709336 4.2423 4.985005 3.843189 4.314414 4.19954  
0.772046 1.06994 0.824852 0.989768 1.03125 1.107862 1.248789 0.942166 0.975661  
2.156822 2.462455 2.467431 1.416957 1.576464 2.376262 1.887709 2.492461 2.432552  
1.47078 1.276188 1.146412 1.653689 1.539785 2.102453 1.497606 1.410912 0.845426  
8.090288 8.775671 8.804869 8.032787 8.821203 8.518915 7.385901 8.600925 8.292319  
2.225345 1.674107 1.790014 1.606647 1.611041 3.537307 2.36653 3.024603 1.879253  
1.803869 1.608914 3.44168 1.700325 2.148122 1.483705 2.444302 3.399055 2.136153  
1.764695 1.734167 1.48378 2.358379 1.697143 1.722979 2.079135 1.598556 1.536348  
2.090372 1.745963 1.927136 1.771903 2.595342 1.501877 2.228818 2.20151 1.927037  
1.571582 1.564317 1.553502 1.094757 0.837981 1.479627 1.704044 0.926367 2.097616  
2.287941 3.006189 2.589748 2.364133 3.919027 2.173532 2.741109 2.299986 2.481923  
6.56439 7.270693 6.718758 6.618366 6.715663 6.986005 6.535333 7.156849 5.569871  
1.919175 1.079071 1.353518 1.826608 0.91118 1.361713 1.078933 1.363239 1.796742  
5.985387 6.510565 5.969051 6.870947 5.69285 5.600131 6.475239 5.75352 6.51632  
2.285199 1.419965 1.462972 2.029991 1.141766 2.386883 1.210569 1.479359 1.292697  
1.368491 1.884468 2.512445 1.777998 1.5638 1.305038 1.548338 1.374187 0.94318  
3.109065 4.433686 2.96461 3.213412 3.491252 4.095123 3.797024 4.074252 3.401519  
2.428364 2.036119 2.637757 2.050717 2.469393 2.297908 2.677536 2.201283 1.834467  
1.80278 1.329106 3.020177 2.531965 2.6008 2.743433 2.37983 2.143256 3.079769  
1.785881 2.812035 1.865362 2.345225 1.326968 1.709052 2.307546 1.527806 1.660265  
1.27673 2.479889 1.751996 1.095294 1.286687 1.192896 1.67059 1.137666 1.386358  
2.280448 3.487854 1.851552 2.328208 4.633668 1.610154 3.821117 3.460883 1.966194  
4.890493 5.848274 4.094238 5.252767 3.858056 5.647706 4.530544 5.525936 4.090607  
3.121049 5.910114 1.757791 2.081096 2.539874 4.68559 3.003592 3.203942 2.504573  
2.973837 4.5671 5.048385 2.950291 3.541137 4.475513 3.856737 4.342785 3.573623  
1.468855 1.416964 1.897902 1.380266 1.952364 1.303354 1.100364 1.353831 1.354213  
2.565597 1.930589 2.137831 1.505189 1.899637 1.388382 1.583091 1.472555 1.827191  
2.206462 3.455452 2.670486 2.549099 2.18166 3.093725 3.423554 2.736419 3.802937  
4.935598 3.907445 4.354823 3.335829 3.451638 6.544878 5.247334 1.717964 5.388308

1. 040008 2. 466736 1. 10521 1. 100702 1. 076451 1. 855749 1. 522619 1. 746578 2. 5551  
2. 657413 1. 800611 2. 516358 2. 063733 1. 303891 1. 78717 2. 178995 1. 898416 1. 932897  
3. 054817 3. 607933 3. 353163 3. 213903 3. 602857 3. 357936 3. 351477 3. 309514 3. 067456  
5. 800648 3. 830474 5. 321591 4. 233216 5. 20468 3. 845013 5. 843045 4. 082954 4. 274438  
1. 2228 1. 786279 1. 246349 1. 490408 1. 099374 1. 133476 1. 118823 1. 467897 1. 535068  
1. 387161 1. 215971 1. 291262 1. 656073 1. 575793 2. 043703 1. 302259 1. 61874 1. 343359  
2. 236848 1. 55332 2. 033067 1. 939186 1. 265941 2. 093091 1. 842712 1. 803733 1. 717367  
1. 348755 0. 739679 2. 299165 1. 131957 1. 041235 1. 274197 3. 091543 0. 778237 1. 366034  
3. 380092 2. 676545 3. 393669 3. 122028 3. 591909 3. 535217 2. 49271 2. 854671 2. 429354  
1. 657604 1. 24583 1. 335831 1. 608986 0. 950868 1. 732669 1. 221595 1. 411914 1. 649114  
3. 629385 3. 486292 3. 762707 3. 26129 2. 743719 3. 433695 4. 205072 3. 4022 4. 476144  
2. 452963 1. 028792 3. 059126 1. 898854 1. 495982 1. 578772 1. 672792 1. 617407 2. 181976  
3. 793093 2. 644773 3. 204568 2. 029419 2. 305813 1. 592973 2. 521862 2. 916285 2. 375469  
0. 820153 0. 940863 0. 891617 1. 051606 1. 149041 0. 752793 1. 988838 0. 922717 0. 944686  
3. 318214 3. 335913 2. 782209 2. 623287 2. 370447 2. 35088 3. 188898 2. 398342 2. 978856  
1. 380255 1. 928672 1. 33264 2. 163114 2. 276269 4. 910547 1. 431783 1. 675122 1. 792779  
2. 306368 2. 117447 2. 665907 2. 13862 1. 827612 1. 817299 2. 216368 3. 08443 1. 989913  
4. 088859 3. 776964 4. 08797 5. 182125 4. 622982 4. 479313 4. 485431 4. 683576 4. 282533  
1. 564801 1. 492174 2. 146777 1. 419538 1. 957714 1. 804831 1. 049252 1. 889869 1. 393975  
1. 949568 1. 881875 1. 89676 2. 066403 2. 252743 1. 345712 2. 316873 2. 478937 1. 927857  
1. 281816 2. 087019 1. 44965 2. 336063 1. 176107 1. 370845 1. 770879 1. 365927 2. 025602  
2. 420205 4. 149425 2. 891113 2. 463871 3. 885697 3. 49488 2. 5693 2. 473142 3. 494594  
1. 557772 1. 620479 0. 700018 1. 616828 1. 064232 1. 036137 1. 157875 1. 753715 1. 635796  
4. 42599 4. 081718 5. 060209 4. 479437 3. 589272 4. 841393 3. 636142 4. 43857 4. 546919  
1. 947719 2. 229368 2. 368226 3. 269584 2. 243222 3. 212374 2. 482043 1. 860868 3. 043662  
1. 708314 1. 369923 1. 497314 2. 480906 1. 640855 1. 156449 1. 931852 1. 899852 1. 878557  
1. 204176 0. 881842 1. 504188 1. 119644 1. 602402 0. 903763 1. 23308 1. 357863 1. 305317  
2. 715157 3. 688748 4. 372971 3. 270829 3. 330853 3. 012383 2. 627492 2. 341617 2. 53467  
1. 50106 1. 163526 1. 791212 1. 618419 2. 228779 1. 386289 2. 78552 1. 129025 2. 109665  
0. 63259 1. 52058 0. 659705 0. 997025 1. 171801 1. 396697 1. 157219 0. 831064 1. 385324  
1. 38976 0. 835784 0. 878243 1. 420332 1. 142912 0. 950843 2. 107731 1. 51517 1. 813996  
1. 066068 1. 205382 1. 285139 1. 295729 0. 957534 0. 866287 1. 101455 0. 960217 0. 851544  
2. 316372 2. 23457 2. 140271 2. 513516 2. 739009 1. 82969 2. 352174 3. 651806 3. 165094  
2. 437309 1. 681537 2. 90119 1. 771254 2. 628675 2. 298817 1. 824214 1. 580637 1. 915415  
1. 790586 1. 832637 1. 939067 1. 913352 2. 127501 2. 055882 1. 43634 1. 757354 1. 489845  
3. 241651 1. 110658 3. 188851 2. 275076 1. 701435 1. 774671 2. 273441 1. 508474 2. 939219  
5. 113718 5. 156897 5. 710027 5. 658633 5. 763371 4. 724036 5. 302549 6. 411503 5. 697578  
2. 402749 1. 195588 1. 988714 1. 552173 1. 399373 1. 567256 1. 438479 1. 668696 1. 649658  
1. 394221 2. 490257 1. 560689 2. 401173 2. 297816 0. 826161 2. 450444 1. 533991 2. 341525  
1. 341586 1. 669129 2. 404289 2. 720731 1. 353914 1. 856721 2. 668572 1. 948415 1. 639956  
1. 521062 1. 283365 1. 932256 1. 222284 1. 179169 0. 757317 1. 183201 0. 963917 1. 121534  
1. 595394 2. 700863 1. 672338 2. 528137 0. 770985 1. 619687 1. 785459 2. 059232 2. 07497  
7. 658415 8. 150369 8. 095498 7. 258269 8. 29856 7. 513232 8. 770906 8. 108548 7. 940041  
1. 780566 1. 285166 1. 414462 1. 320752 1. 48314 1. 925891 1. 426173 1. 754631 1. 385619  
1. 6385 1. 600829 1. 357964 1. 167419 1. 720972 1. 143084 1. 884119 1. 291712 1. 055471  
2. 267012 1. 831357 1. 977843 1. 676407 2. 421294 1. 801348 2. 283817 2. 063273 2. 0873  
1. 303836 1. 154641 1. 467369 1. 601304 2. 160871 1. 404852 1. 840771 1. 653828 2. 059847  
3. 997413 1. 87698 1. 561009 1. 412804 4. 495653 1. 601628 1. 785327 1. 562018 1. 724377  
1. 411361 0. 897451 0. 847757 0. 980789 1. 03271 1. 060546 1. 172379 1. 264449 0. 930175  
1. 519592 1. 198918 0. 939969 1. 570489 0. 902668 1. 174454 1. 317106 1. 197152 1. 566607  
1. 341588 0. 901219 1. 316635 1. 047861 1. 362719 1. 989146 1. 103363 1. 668944 1. 715038



1. 790741 1. 980103 1. 730443 1. 645462 1. 705694 1. 5424 1. 678615 2. 022421 1. 649145  
3. 780288 4. 044495 3. 952981 4. 257924 4. 615395 4. 038167 3. 684837 3. 746767 2. 776286  
2. 180669 1. 673529 2. 336398 1. 801556 1. 837046 2. 493615 3. 536641 1. 905102 2. 132261  
2. 213501 1. 545098 1. 583163 1. 657237 1. 704909 1. 357604 1. 446233 1. 344903 1. 753528  
5. 432034 5. 315493 4. 783352 5. 101165 3. 94664 4. 545604 4. 185534 3. 41765 4. 5205  
1. 358034 1. 271363 1. 188002 1. 41565 1. 004677 1. 391319 2. 217895 1. 315943 1. 691095  
2. 101136 3. 701622 4. 954624 3. 389885 3. 442161 3. 901742 3. 199321 4. 070644 5. 068147  
2. 230592 0. 938231 1. 680029 1. 307617 1. 818348 0. 852098 2. 920958 2. 112047 0. 882878  
1. 183445 1. 964602 0. 850637 1. 397441 1. 511291 1. 593571 1. 899644 2. 14128 1. 242586  
2. 704847 1. 864442 2. 736001 2. 398456 2. 188549 2. 02946 2. 299914 2. 007182 2. 017673  
2. 299707 1. 657447 1. 48947 2. 15943 1. 728024 1. 843097 1. 990576 2. 160232 1. 732001  
1. 936696 1. 473266 2. 064218 1. 700401 2. 143173 1. 649431 2. 03391 2. 345995 1. 455892  
3. 50435 3. 162751 2. 784841 3. 171124 2. 795868 3. 110753 3. 506491 2. 400618 3. 967095  
1. 201102 1. 471603 1. 143317 1. 579621 1. 570498 1. 23338 1. 535386 1. 04738 1. 537087  
1. 978162 1. 089964 2. 177209 1. 284677 1. 655408 1. 346881 2. 401773 1. 427825 1. 397747  
1. 360384 1. 173803 1. 585302 1. 44734 1. 47789 1. 620419 1. 172434 1. 603819 1. 442019  
2. 17925 4. 133243 2. 819662 1. 072558 2. 333755 2. 205738 1. 833978 1. 844725 2. 082335  
2. 74254 3. 390493 1. 738356 3. 171952 4. 03428 4. 947869 3. 342505 2. 995442 4. 114343  
1. 198542 1. 692722 1. 46332 1. 745894 1. 072515 1. 657052 1. 863958 1. 53073 1. 344104  
1. 525717 1. 819972 1. 017407 1. 38009 1. 908069 1. 555377 1. 786911 1. 545285 1. 844609  
3. 600098 2. 104287 2. 951282 2. 633736 2. 344852 2. 821015 2. 230485 3. 133268 2. 869253  
2. 575579 1. 974262 1. 702478 2. 572524 2. 279824 2. 392623 2. 477915 1. 919001 1. 823705  
1. 219536 0. 616187 1. 481074 1. 159793 1. 192749 1. 147664 1. 500949 1. 345928 0. 850498  
2. 252746 0. 693671 1. 265714 1. 792629 0. 774499 1. 310656 2. 514717 1. 371259 0. 954784  
1. 249394 1. 550446 2. 824218 0. 857891 1. 154033 0. 582191 2. 330068 0. 511859 0. 431631  
1. 672357 1. 076908 0. 889206 1. 128172 1. 428373 4. 026533 0. 764838 1. 406423 1. 152978  
2. 227907 2. 176985 1. 813646 1. 340573 1. 556067 1. 801413 2. 181875 1. 595526 1. 712097  
1. 35473 1. 422216 1. 002608 1. 686489 0. 430966 2. 706497 1. 199587 1. 667715 1. 499402  
3. 610967 4. 121992 3. 25918 2. 728198 2. 999515 3. 086432 5. 2389 3. 625535 3. 492576  
2. 492399 1. 38325 1. 668344 2. 66072 1. 00105 1. 373802 2. 418271 1. 065989 1. 538621  
3. 364982 3. 13335 3. 89392 3. 813505 2. 296764 2. 977494 3. 217511 3. 271223 3. 327525  
2. 672393 2. 38357 3. 86949 2. 743026 1. 992428 3. 036141 2. 656395 4. 294878 2. 265924  
3. 179459 2. 485041 3. 404844 3. 554691 2. 820917 2. 592311 2. 870092 2. 513132 2. 414748  
1. 735465 2. 771298 3. 280786 2. 444922 2. 64878 1. 308167 2. 909563 1. 292202 1. 907921  
2. 120214 1. 811653 2. 165764 2. 210923 2. 160661 2. 08878 2. 652422 2. 250121 2. 856988  
1. 221474 1. 290822 0. 976323 1. 264929 1. 04985 1. 423349 1. 659005 1. 29364 1. 251059  
3. 352104 3. 123306 3. 276275 2. 837639 1. 969171 3. 36302 3. 801622 2. 697425 2. 596367  
4. 722136 4. 10646 4. 475906 4. 227463 4. 606943 3. 628709 4. 367993 4. 30172 4. 192544  
1. 515284 1. 729086 1. 173532 0. 955372 0. 782922 1. 18256 1. 354468 1. 077017 1. 013661  
3. 355704 2. 985843 3. 305753 3. 912508 3. 505037 2. 775335 4. 252463 3. 591931 3. 732927  
3. 876174 1. 460707 2. 396787 3. 34612 1. 095109 1. 253395 1. 993933 1. 465416 1. 758271  
5. 444923 4. 860185 6. 167433 5. 220695 5. 003649 5. 147398 5. 981332 4. 938549 4. 993329  
0. 598014 1. 240946 0. 957523 0. 845526 0. 539177 0. 710707 0. 602767 0. 63843 1. 072232  
1. 068083 0. 508386 0. 460304 0. 754248 0. 882072 0. 802492 0. 857252 0. 74082 0. 770648  
0. 85604 0. 666289 0. 693209 1. 39061 0. 969652 0. 916678 0. 764791 0. 630241 1. 086477  
1. 667493 1. 140984 0. 824842 1. 483914 1. 076109 1. 505218 1. 333275 1. 186503 1. 544723  
2. 086123 1. 359828 2. 052235 1. 706232 1. 715247 1. 716608 2. 244398 2. 212449 1. 793064  
0. 91018 0. 657449 0. 826784 1. 327463 0. 800906 1. 429361 0. 885512 0. 636868 0. 866829  
1. 166528 1. 100599 1. 921139 1. 846861 0. 945256 0. 913854 0. 944772 1. 130115 0. 799533  
1. 122173 1. 028899 1. 073758 1. 981662 0. 515414 2. 107208 1. 180265 0. 782671 1. 820244  
3. 808101 4. 028944 4. 977382 5. 136383 6. 601946 5. 045024 4. 797819 5. 231243 5. 108773

8.016438 9.32684 8.951998 9.168432 9.11798 8.935523 8.628158 9.097645 9.33218  
2.455683 1.988463 2.005389 2.195249 1.620556 2.341724 1.873425 2.219395 1.621929  
4.841659 5.035344 5.248741 4.882989 5.659422 5.812231 4.687983 5.926894 4.992624  
6.195785 5.768753 5.27289 5.396689 5.680665 5.327075 4.752302 5.643935 5.380972  
1.716644 1.210591 0.908471 1.261792 1.228708 1.425698 1.22931 1.116823 1.418417  
4.842035 3.52531 3.999541 3.001068 4.122462 3.159777 4.268793 4.328471 6.526138  
6.275587 5.873069 5.057099 4.873 6.46697 4.682026 5.199441 4.310562 6.384453  
2.862453 1.936067 3.36806 1.810935 2.386724 2.787493 3.064249 2.287644 1.846261  
1.611942 1.200309 1.341105 1.439058 1.516508 2.322363 1.643427 1.183706 1.739278  
4.744872 5.256018 5.128963 4.852647 5.208349 4.985611 5.047414 4.840061 5.327247  
2.323092 1.572232 1.582745 1.732955 1.611779 1.179946 2.036478 1.642697 1.352764  
9.369379 8.66342 8.919376 8.333122 8.539561 8.332232 8.972269 8.294144 9.445432  
1.171881 1.128036 1.239243 1.834378 1.629074 1.938421 1.089283 1.054795 1.008629  
8.640907 8.876903 8.500232 9.070027 9.20158 9.075231 8.959048 8.870288 9.08157  
4.017084 2.924845 1.491997 2.878267 3.680862 2.030583 4.69328 1.845166 1.901342  
7.135467 6.435055 6.683243 5.907736 6.340154 5.472614 6.210673 6.381367 6.659897  
1.474114 1.757249 1.261304 1.704681 1.627024 1.745248 2.374457 1.400951 1.363191  
3.907969 3.45902 3.622447 3.936037 4.700757 3.20491 3.830972 3.478391 3.957064  
2.252627 1.854738 1.831945 2.309687 1.473885 1.613802 1.745295 1.972886 1.821015  
1.544042 1.72638 1.79178 1.781556 2.046834 1.746436 1.964623 1.669123 1.916282  
3.799657 3.314666 4.000812 3.148757 4.52888 1.894362 3.591252 3.312723 3.440241  
1.993999 1.589003 1.444296 5.063393 4.403119 2.965526 4.301256 2.072318 4.130291  
1.293267 0.956034 1.741941 0.948442 1.140811 1.498098 1.022111 1.099299 1.702007  
3.595372 3.377592 3.721116 2.974443 3.079302 3.255238 2.904313 3.79455 3.000573  
0.924721 1.202136 1.304888 1.01352 0.966231 1.225148 1.08693 1.33292 1.309442  
10.60834 9.701902 10.01082 9.230285 9.646529 9.683567 9.663679 9.756715 10.07234  
2.060147 1.719586 2.009294 2.109702 2.157914 1.989904 3.429086 2.56285 2.307741  
10.80021 9.358318 9.776517 7.983927 9.230346 9.046463 7.615702 8.819725 9.835759  
11.14744 9.577491 10.37073 9.217302 9.777687 8.970492 7.781786 9.668762 10.31802  
4.41487 1.919882 3.366233 3.79095 2.65536 2.02515 2.018108 2.816092 1.507486  
5.927623 6.304166 6.752387 6.060328 6.14981 6.301576 6.790868 6.957604 6.119318  
5.477013 6.608821 5.597483 7.336315 5.879948 6.199747 6.896544 6.955328 6.621468  
10.22406 8.822191 9.578573 8.455705 9.205972 8.318922 8.303794 8.859247 9.695824  
11.53053 8.59585 11.46242 11.80879 11.13102 11.94269 11.71145 11.76415 11.72984  
5.136538 1.910057 3.68665 2.257884 1.533335 1.766304 1.988274 4.444692 4.082759  
3.979549 3.943173 3.778216 3.977288 5.310939 3.776553 3.541574 3.932247 3.351839  
2.464844 1.648246 1.858888 2.597023 2.280947 2.093683 2.762845 2.217766 1.91523  
7.250419 6.872747 7.139288 6.740118 6.242444 7.286502 6.613034 7.320111 7.148872  
7.101116 6.858315 7.429218 6.769798 7.166597 6.573464 6.423139 6.37446 6.605323  
7.194958 6.644311 5.936246 5.972166 4.63998 6.128513 5.251562 5.779056 6.710482  
3.709334 3.25178 3.849403 3.5923 3.616805 4.435405 3.749563 3.525756 4.044788  
6.450837 5.770981 6.006369 5.811767 6.587755 6.043732 5.620349 5.988031 5.87872  
5.331689 5.394711 6.011342 5.593956 5.262929 6.406996 5.417821 5.532827 5.817373  
3.101388 3.755914 3.963913 3.361595 4.426061 4.272787 3.630536 3.530867 3.642788  
4.038485 1.597037 1.874632 2.270051 1.216149 1.286615 1.673898 1.833444 3.194288  
2.861676 1.884004 2.61983 2.252012 2.346187 3.030992 1.500294 1.819978 2.485828  
4.949849 1.842578 3.874073 1.902474 2.022965 2.036859 2.949525 3.430589 4.045688  
5.627802 6.087737 6.109052 6.111503 6.107619 6.292405 5.938022 6.577444 6.306272  
6.615147 6.614554 6.685789 5.59171 6.153127 6.581926 5.283805 6.195376 6.395188  
0.728805 1.858608 1.265343 1.137021 2.177934 1.196141 1.5203 1.300564 1.867348  
7.655173 5.231475 6.780878 6.780628 6.721611 6.753736 7.624611 5.601746 6.540461

2. 348921 2. 122511 2. 266183 2. 180272 1. 819734 2. 591759 2. 196929 1. 705504 1. 698785  
2. 954702 2. 492759 2. 394801 2. 213903 2. 260966 2. 418468 2. 047143 2. 265664 1. 943398  
1. 761845 2. 164336 1. 920246 1. 714927 1. 753505 2. 007679 2. 041268 1. 875697 2. 322107  
2. 611248 2. 324195 2. 41479 2. 588239 2. 510291 2. 867983 3. 038549 2. 386959 2. 271203  
2. 289487 1. 538797 2. 06269 2. 274478 2. 255554 2. 083403 2. 547751 2. 260532 1. 742392  
2. 03082 1. 940729 1. 42507 1. 387744 1. 06761 1. 961938 1. 764312 1. 709918 2. 044799  
5. 643095 5. 533342 6. 152611 5. 15461 6. 183769 6. 133972 4. 862451 5. 698283 6. 001704  
1. 742757 2. 156183 2. 078853 1. 805267 1. 654053 1. 439032 1. 296808 2. 883699 1. 498139  
6. 875952 6. 791283 6. 826608 6. 784245 6. 389882 6. 199102 5. 906507 6. 23422 6. 863646  
2. 386945 2. 739915 2. 534052 2. 852652 2. 846687 2. 211476 2. 86983 2. 099799 2. 694702  
4. 381389 4. 658987 4. 871185 3. 967487 4. 847684 4. 309231 4. 58379 5. 446876 4. 532714  
2. 814561 2. 078168 3. 074748 3. 815323 3. 438963 3. 92835 2. 684064 2. 852139 3. 27311  
5. 936767 6. 257345 6. 419523 6. 537682 6. 530716 8. 839793 6. 063681 7. 720526 6. 679077  
4. 312031 4. 495236 4. 2153 6. 1951 6. 309526 6. 807388 5. 259987 6. 030511 5. 1079  
4. 859463 4. 703161 4. 558462 4. 356321 5. 206986 4. 106629 4. 565034 4. 262662 4. 534837  
1. 701808 1. 302301 1. 287522 1. 887489 1. 406776 1. 855821 1. 39445 1. 376817 1. 649297  
2. 107595 3. 147125 2. 268328 2. 054784 1. 600881 2. 221987 2. 060853 2. 428903 2. 286316  
1. 319006 0. 976049 1. 0919 1. 174451 1. 534277 1. 118243 1. 688326 1. 280114 1. 144998  
2. 611986 2. 224071 2. 351816 2. 07267 2. 643775 2. 183116 2. 298791 2. 054321 2. 795117  
1. 654646 2. 328501 2. 102429 1. 948611 1. 740548 2. 007693 1. 608864 1. 520845 1. 409611  
2. 324829 1. 865785 1. 861992 1. 87882 1. 677142 1. 491622 2. 273109 2. 068834 1. 930348  
4. 142537 5. 322336 5. 527265 5. 448021 5. 794908 4. 828518 5. 870176 6. 752669 5. 744856  
3. 449753 3. 352435 3. 640422 3. 361342 3. 589857 5. 121539 2. 817456 4. 22524 4. 192395  
3. 123776 2. 715424 2. 39659 2. 303856 2. 287419 2. 317751 2. 708956 2. 252035 2. 682847  
2. 784118 2. 994629 2. 426805 2. 792186 2. 691172 2. 751833 2. 375746 2. 623366 2. 818751  
3. 635327 3. 455962 2. 925299 3. 276028 3. 213671 2. 864963 2. 948347 3. 355537 3. 052073  
4. 738411 5. 136159 4. 455736 5. 337965 4. 243229 5. 644834 5. 054509 4. 919899 4. 652316  
7. 985634 8. 047151 7. 221721 7. 565735 8. 297623 7. 650435 6. 759561 8. 206038 7. 778787  
1. 885813 2. 47149 3. 37079 1. 8712 2. 836189 1. 595903 2. 631805 2. 715301 2. 622668  
1. 384812 1. 663849 1. 631622 1. 131453 1. 460292 1. 866828 1. 601666 1. 679776 1. 865988  
2. 19737 1. 437149 1. 555221 2. 388908 1. 894622 1. 237607 1. 677771 1. 697478 1. 476505  
1. 227495 0. 95804 1. 196389 1. 469074 1. 432009 1. 202775 2. 089222 1. 143855 1. 459245  
2. 090165 1. 495566 1. 769931 1. 861164 2. 036516 1. 98914 3. 143479 1. 807641 1. 746272  
1. 610454 1. 823508 0. 946892 1. 724233 1. 115595 0. 851524 2. 100098 1. 223715 1. 202949  
2. 468676 0. 93744 1. 858402 1. 886742 1. 725238 1. 174548 1. 258772 1. 37521 1. 658994  
2. 566573 1. 564222 1. 553889 2. 165637 1. 649034 1. 43316 2. 227356 1. 878006 2. 084136  
1. 987689 0. 906065 1. 218948 1. 821063 1. 339708 1. 070137 1. 054535 1. 924004 1. 171636  
8. 898898 9. 153252 8. 879954 9. 23666 9. 536915 9. 684724 9. 257561 8. 91357 9. 025052  
6. 150119 5. 554158 5. 827194 6. 183801 6. 185287 6. 014938 6. 903681 5. 404861 6. 178489  
3. 844749 4. 537853 4. 235169 4. 60681 5. 108888 3. 797748 6. 09986 4. 303352 3. 572306  
2. 540759 1. 707561 2. 36305 2. 181635 1. 632532 2. 12275 1. 799449 1. 993967 2. 704468  
1. 954725 2. 365275 2. 512474 1. 791787 1. 527185 1. 927689 1. 851448 1. 962895 2. 682909  
3. 048048 2. 820104 3. 086303 2. 542493 2. 830574 2. 095305 2. 226988 2. 696082 2. 478032  
5. 883659 4. 731038 5. 132355 5. 079428 5. 434266 5. 075533 5. 627008 6. 014545 5. 709552  
4. 074862 3. 612755 4. 220328 2. 938183 3. 228978 2. 2267 3. 541377 3. 313029 3. 273696  
5. 81782 4. 011861 3. 755238 4. 226269 3. 819226 4. 872147 5. 89276 5. 191761 4. 976145  
10. 76218 10. 73132 10. 73367 10. 82265 11. 10948 10. 62351 11. 15484 10. 87431 10. 97598  
8. 478297 8. 818868 8. 426543 9. 061574 8. 906857 9. 101774 8. 858826 8. 989782 8. 715063  
6. 073309 5. 815179 6. 201276 6. 96617 5. 889842 6. 501002 6. 32267 5. 721243 5. 427237  
1. 584217 1. 607671 2. 266889 1. 27502 1. 528693 1. 242105 1. 734647 1. 541777 1. 247774  
8. 102136 8. 425343 8. 196805 8. 545895 8. 644979 8. 279685 8. 167924 8. 284425 8. 549278

7. 704321 8. 384813 7. 921754 8. 510652 8. 434023 8. 143218 8. 392939 8. 379705 8. 231904  
9. 061784 9. 251656 9. 028222 9. 387106 9. 372867 9. 34863 9. 185111 9. 208 9. 149392  
4. 88541 5. 4637 5. 596986 5. 639623 6. 255953 5. 435809 5. 923493 5. 606575 5. 51335  
4. 356786 4. 749983 4. 998996 4. 398471 5. 036522 4. 540903 4. 834949 5. 00885 5. 447191  
7. 354195 7. 127348 7. 033252 7. 591838 7. 311173 7. 252615 7. 087962 7. 182366 7. 246842  
3. 420272 2. 462855 2. 614411 2. 460413 2. 520886 2. 833861 2. 719911 2. 108998 2. 426255  
4. 239305 2. 022086 2. 421682 2. 302667 2. 829035 3. 036737 2. 692638 2. 59069 4. 127216  
5. 946036 6. 380711 5. 782493 6. 140119 6. 150862 6. 122173 5. 475437 6. 096894 6. 01967  
3. 965419 4. 426938 4. 465885 5. 084699 5. 222306 4. 711961 4. 988988 4. 863669 4. 123256  
5. 092672 4. 505855 4. 261282 5. 548577 5. 096386 5. 455117 5. 411607 4. 664672 4. 370313  
1. 775183 1. 80477 1. 84979 1. 906246 0. 918942 1. 554355 1. 325484 1. 473821 1. 662367  
1. 795908 1. 605271 1. 573666 1. 963997 1. 566088 1. 908725 1. 550943 1. 751099 1. 499539  
2. 710474 1. 920402 2. 493706 3. 437067 3. 011088 2. 501586 3. 307584 3. 229119 3. 681772  
6. 203313 6. 868254 7. 017634 7. 055317 6. 744011 7. 213714 6. 765195 6. 659198 6. 584423  
3. 326834 4. 831561 4. 5068 5. 138363 5. 297678 4. 27465 4. 512439 5. 271368 4. 37692  
3. 560573 2. 104201 2. 994751 2. 650541 2. 802681 2. 359404 2. 89757 2. 911959 2. 372685  
5. 029736 5. 79419 5. 695284 5. 954482 6. 083892 6. 130142 5. 37565 5. 919312 6. 023107  
4. 171393 4. 503605 4. 378723 4. 647578 4. 558588 5. 082196 4. 291363 4. 670426 4. 324329  
3. 83271 3. 426271 3. 275924 2. 949145 3. 139676 2. 661737 3. 130824 3. 089876 3. 387527  
6. 43335 6. 836032 6. 256922 7. 196893 5. 919944 5. 555246 5. 414967 5. 006902 5. 874579  
5. 272591 5. 732023 5. 314992 4. 8895 5. 106698 5. 307536 4. 759856 4. 999093 5. 445919  
6. 735422 7. 68327 7. 131037 6. 922908 6. 862538 7. 1247 7. 229489 7. 089034 7. 195061  
8. 859867 8. 676871 8. 629806 9. 109013 8. 926873 8. 740024 8. 976019 8. 916256 8. 774015  
3. 527743 1. 915853 1. 040667 0. 865231 1. 004827 1. 395933 2. 227122 1. 018162 1. 753477  
6. 940421 7. 720781 7. 69132 6. 842946 7. 132191 7. 511179 8. 159693 7. 686362 7. 006215  
5. 534071 5. 969661 5. 559193 5. 311926 6. 30608 5. 20058 4. 549031 5. 909244 5. 658024  
1. 878891 2. 857221 3. 56923 3. 151323 3. 449724 3. 174521 1. 599795 2. 204829 2. 859318  
6. 221979 7. 012319 7. 033253 6. 987013 7. 007643 7. 26088 6. 763034 6. 550536 7. 320628  
8. 510081 8. 176119 7. 889098 8. 135246 8. 445081 8. 333189 7. 907166 8. 542649 8. 538942  
6. 135568 6. 49989 7. 247377 6. 792266 7. 074667 6. 929837 5. 971952 6. 955397 6. 625  
3. 574858 3. 255002 3. 65264 2. 82696 2. 758407 3. 63386 4. 017622 3. 405911 3. 129216  
1. 137674 0. 4318 1. 652613 1. 057573 0. 907618 1. 225049 1. 305006 1. 153595 0. 901594  
2. 141883 1. 803462 3. 092619 2. 587896 2. 088233 1. 673127 3. 415666 2. 393466 1. 612362  
5. 617646 6. 061966 5. 367861 5. 83059 5. 789101 5. 840789 5. 452169 5. 662621 5. 264105  
6. 349275 5. 829808 5. 687138 6. 003602 6. 061815 6. 104793 5. 767644 5. 784536 6. 213233  
2. 877997 4. 990173 2. 816042 3. 891144 4. 535302 3. 618951 4. 306503 4. 370654 4. 161685  
1. 57207 1. 214364 1. 035893 1. 937496 2. 262498 1. 139602 1. 090832 1. 153407 1. 227232  
7. 134087 6. 800882 6. 689319 6. 821022 6. 816211 6. 704417 6. 658528 6. 891003 6. 831745  
2. 516821 2. 853029 3. 481974 4. 095472 4. 039419 3. 878964 3. 476123 2. 651802 3. 739901  
2. 934141 2. 429737 2. 84392 3. 246712 3. 719309 2. 295055 3. 004672 3. 226897 3. 032009  
8. 134623 8. 680931 8. 659011 8. 273564 8. 567351 9. 040541 8. 50991 8. 893444 8. 230649  
4. 97992 5. 687716 5. 455917 4. 97386 6. 649066 5. 505832 6. 30062 5. 540219 4. 667752  
10. 38352 10. 20258 10. 14702 10. 35818 10. 26417 10. 17134 10. 27447 10. 2105 10. 11718  
3. 237035 3. 642846 3. 439997 2. 723168 3. 696831 3. 045224 3. 141841 3. 708915 2. 99175  
1. 972876 1. 342697 1. 617666 1. 888831 2. 036051 1. 951766 1. 714744 2. 131728 1. 748958  
10. 78886 10. 35835 10. 54164 10. 45432 10. 15736 10. 09825 10. 58471 10. 17621 10. 44813  
8. 873154 9. 090367 9. 359591 8. 522273 9. 094433 8. 479495 9. 11406 9. 093292 9. 466183  
10. 28464 9. 995391 10. 03133 10. 05786 10. 01217 9. 814833 10. 1912 9. 714857 10. 16295  
6. 287388 5. 646516 6. 490466 4. 903537 5. 775114 5. 471249 6. 460152 6. 390071 6. 091385  
4. 393254 4. 043785 3. 83415 3. 342181 3. 481474 3. 636903 3. 736492 4. 02004 4. 225031  
8. 171898 8. 25256 8. 069994 8. 221817 8. 475797 8. 335295 8. 284985 7. 998365 8. 475077

8.126838 8.834892 8.65146 8.459244 8.39905 8.719627 8.435315 8.598166 8.67778  
7.67928 7.116571 7.208495 7.16769 7.945681 7.259243 7.193573 7.539913 7.457728  
1.749484 1.474269 1.764629 1.729057 1.813464 1.5438 1.386384 1.496805 1.594035  
7.784053 7.489288 7.511471 7.168839 7.659903 6.996251 7.570968 7.521253 7.808419  
8.183682 7.400464 7.461382 7.380501 7.629768 6.840773 7.581864 7.48639 7.650889  
9.855293 9.318324 9.495386 8.979661 9.344049 8.254175 9.482759 9.606497 9.501357  
10.08446 10.02027 10.08636 9.811054 9.596357 9.740403 10.47953 9.874865 10.01822  
10.58826 10.7228 10.91052 10.39129 10.87645 10.24712 10.63133 10.61332 10.86139  
5.447735 6.008023 5.965917 4.946578 6.296329 5.305466 6.034871 5.394649 5.481135  
4.442564 4.387803 4.480444 4.521105 4.439769 3.988745 4.625976 4.345583 4.725933  
7.568609 7.925398 8.184403 7.90813 8.191073 7.36705 7.453617 7.846593 8.199521  
7.970527 7.895301 7.853107 7.589062 7.823479 7.503297 7.425636 7.76655 7.782809  
9.20207 9.063352 9.177971 8.663815 9.215008 8.638475 9.552711 8.973797 9.056735  
7.152454 7.406413 7.173246 7.242161 7.509512 7.10289 7.58425 7.308964 7.549895  
7.81053 8.165162 7.62236 8.092068 7.97902 6.929471 8.29941 8.252256 8.658965  
8.563289 9.072451 8.544345 8.936953 8.794671 8.242954 8.289695 8.52925 8.791727  
4.931193 5.331736 5.041596 4.93711 4.584565 4.8395 5.170005 4.941711 5.207559  
6.657559 6.592039 6.620013 6.727247 6.610341 6.208292 6.239012 6.544349 6.833982  
7.297015 7.729461 6.883939 7.609288 7.899964 7.432291 7.578385 8.147959 7.714733  
7.525798 7.146147 7.308987 6.704768 7.016838 7.030567 7.012695 6.940003 7.517564  
9.124598 8.315872 8.141671 7.980934 8.162571 7.558914 8.160394 8.194423 8.470974  
7.944928 6.65361 7.243964 7.153003 7.43819 7.098141 7.441734 7.250867 7.626529  
7.83222 8.553262 8.785218 7.962302 8.249873 8.057487 8.639248 7.556074 8.541231  
8.335101 8.618495 8.484372 8.34361 8.452617 8.328084 9.108183 8.460192 8.797454  
9.271603 8.994619 8.800283 8.811816 9.218775 8.434495 9.028316 9.052046 9.210542  
7.095858 6.165852 6.569943 6.397979 6.282244 6.404008 6.597272 6.587623 6.990294  
6.73113 6.499362 6.713139 6.983718 5.861904 6.997781 6.740948 6.752438 6.912642  
5.307573 5.131174 6.191657 5.611944 5.663633 5.336088 5.805824 5.572087 5.489045  
8.383647 7.642864 8.193433 7.734237 7.340567 7.96406 7.861873 7.435919 7.939727  
7.930402 7.738468 7.440991 7.398796 8.247741 8.141506 7.785543 8.45871 7.766484  
5.429551 6.533855 6.278653 6.603107 5.958892 6.06477 5.72067 5.995422 6.11983  
7.359077 8.049095 8.041858 7.884282 7.446029 7.774715 7.7732 7.791687 7.922234  
10.09066 10.11129 9.958915 9.836423 9.738961 9.911693 10.19471 9.911652 9.964604  
3.671633 5.255339 4.658299 3.821743 4.543602 5.017259 3.831873 4.967839 4.503346  
7.053695 7.5091 6.927801 7.581589 6.916308 7.37394 6.615291 6.932077 6.976629  
2.07678 2.35264 1.51556 2.906417 1.915586 1.93738 3.034704 2.378097 2.841535  
1.854251 1.780153 1.690143 2.275957 2.040367 1.587268 1.606289 3.631003 1.189559  
3.496262 4.681357 6.781036 5.366372 7.99351 5.030816 7.250412 6.720178 5.49588  
5.870395 6.5329 5.797669 6.847887 7.14952 6.830274 6.497144 5.32992 6.377214  
1.537671 1.379898 1.747578 1.278559 1.45757 1.467175 1.572088 2.293195 1.887007  
2.28469 2.322446 2.213608 3.348995 3.629996 2.816263 3.736291 3.988616 3.868584  
1.896508 1.733606 2.176634 1.984164 2.408144 2.00061 2.875622 1.76717 2.938335  
7.016596 2.015682 3.553281 8.180128 8.434059 4.123539 7.329542 6.589605 8.114984  
1.472273 1.5621 2.093214 2.475126 2.046571 2.123909 4.155134 2.421481 1.818084  
1.51208 1.914074 2.543281 3.492447 1.467283 2.070574 1.902027 2.586015 2.623586  
5.075111 6.164302 5.841174 6.112201 6.505612 6.018837 5.711583 5.355816 5.558408  
1.521238 1.240025 2.835792 1.658827 2.200535 1.293929 1.966557 1.998372 1.030083  
3.981688 3.783891 3.589398 3.885544 3.17139 4.255417 4.787197 3.486377 3.289976  
1.517671 1.607186 1.57714 1.424801 1.939352 1.718574 1.959184 1.439065 1.61668  
6.982167 7.399743 6.987462 7.539435 7.455655 7.578355 7.14032 7.154019 7.23363  
6.782108 5.914472 6.374947 6.464455 6.28163 6.465513 7.244112 6.877136 6.774313

2. 418176 1. 926173 2. 19934 2. 931232 1. 942137 2. 27923 2. 740463 1. 961754 2. 093147  
10. 84417 10. 81716 10. 84722 10. 76105 10. 59555 10. 62619 10. 68717 10. 9208 11. 04758  
1. 682962 1. 434816 1. 084344 1. 840878 1. 633418 1. 560502 1. 628034 1. 671259 1. 335847  
1. 137452 1. 34534 1. 677148 1. 566413 1. 353367 1. 045996 1. 633444 1. 356071 1. 859043  
1. 894623 1. 807171 1. 888397 1. 991829 1. 808389 1. 86259 1. 68506 1. 7536 2. 110923  
6. 847513 7. 284699 7. 08423 7. 716672 7. 158832 7. 135271 7. 167083 7. 053239 7. 299235  
10. 05909 9. 687543 9. 84838 9. 944425 10. 08233 9. 481009 9. 877788 9. 964121 10. 21518  
5. 223179 5. 559585 4. 789471 5. 868754 5. 101687 5. 570669 4. 68701 5. 133834 5. 578599  
4. 343967 4. 613157 3. 602047 4. 326931 5. 630235 5. 084992 4. 320283 5. 437063 3. 993124  
3. 758524 4. 608316 3. 076762 4. 353502 4. 491434 4. 072482 3. 860506 2. 663523 3. 254663  
6. 300844 5. 80612 5. 583819 6. 654495 6. 331903 6. 691873 6. 320494 6. 149217 6. 384728  
6. 239473 6. 840278 6. 364765 6. 863545 6. 364855 6. 502952 5. 549939 6. 405772 6. 272789  
2. 803578 3. 45773 2. 846871 3. 011554 2. 732819 2. 444066 2. 234026 2. 815643 2. 735426  
1. 358509 1. 492558 2. 310407 1. 995285 1. 508934 1. 66822 1. 390343 2. 182395 3. 230933  
9. 476585 9. 672958 9. 67556 9. 618589 9. 786934 9. 572825 9. 392441 9. 859406 9. 811366  
3. 464183 3. 923599 4. 659887 5. 006742 4. 276485 3. 51634 4. 121759 3. 244756 4. 17327  
7. 574577 7. 906073 7. 663633 7. 740642 8. 099671 8. 020529 7. 535174 7. 926508 7. 861609  
5. 775882 6. 056127 5. 828036 6. 695029 5. 98077 5. 696949 5. 599437 5. 184187 6. 149341  
8. 187157 8. 239474 8. 316606 7. 985822 8. 082319 8. 46916 7. 863641 8. 376882 8. 082558  
3. 929984 4. 235199 5. 430143 3. 31928 4. 24265 4. 95524 3. 761943 4. 924869 4. 891433  
7. 49123 7. 341704 7. 322776 7. 333527 7. 010518 7. 800592 7. 587576 7. 335053 7. 222264  
2. 330696 2. 408546 1. 810145 2. 186245 2. 123281 1. 917368 2. 181091 2. 423995 3. 361963  
6. 074516 6. 714179 6. 278154 6. 442525 6. 453223 7. 082966 6. 429912 5. 964948 6. 024274  
3. 732606 3. 968921 4. 148278 4. 284152 4. 801349 4. 954461 4. 668103 4. 942134 4. 320169  
8. 71479 9. 283148 9. 193877 9. 069116 9. 532748 9. 199895 8. 795668 9. 200156 9. 320821  
3. 473661 3. 228234 3. 997925 3. 924179 3. 463933 3. 822628 3. 675276 4. 105527 3. 650472  
3. 605812 4. 23508 3. 989954 3. 557021 4. 074051 4. 394883 4. 757214 5. 021105 4. 062333  
2. 422032 2. 981067 2. 771571 2. 892313 2. 520549 2. 336502 2. 573155 2. 883144 2. 293883  
3. 034348 2. 535122 1. 856663 3. 696225 2. 219242 3. 187803 2. 601855 2. 700226 2. 881529  
4. 362336 4. 855485 4. 481096 4. 414316 4. 349317 4. 713827 4. 767494 4. 272918 4. 634869  
4. 26066 6. 023267 4. 783339 5. 159258 5. 588098 5. 576081 4. 71021 5. 626107 5. 714513  
1. 917293 1. 809303 1. 96079 1. 353506 1. 529437 1. 417759 1. 302869 1. 59646 1. 018688  
6. 970938 7. 152698 6. 441593 7. 206602 6. 784025 6. 852169 7. 371385 6. 891549 7. 21949  
6. 365081 4. 992056 5. 236361 5. 230977 5. 675242 5. 307591 5. 162464 5. 65958 5. 245233  
6. 116768 6. 747257 6. 360204 6. 160311 6. 655412 6. 067475 6. 388179 5. 821001 6. 10105  
4. 663119 3. 852206 3. 598922 3. 751523 4. 383897 3. 376045 3. 768081 3. 712555 4. 303503  
5. 413066 5. 727644 5. 333259 4. 386561 2. 908966 4. 426355 3. 381848 3. 081319 3. 658209  
1. 690199 2. 682393 2. 560237 2. 516354 2. 72472 3. 135905 2. 701488 2. 925082 2. 336549  
1. 744984 1. 775808 1. 793815 1. 957765 1. 999935 2. 151471 2. 613474 1. 939002 1. 892477  
1. 282843 1. 48263 1. 243786 1. 478522 1. 344439 1. 47391 1. 170075 1. 047745 1. 569101  
7. 366442 7. 783863 7. 999788 7. 542375 8. 161658 7. 116425 7. 585295 7. 637945 7. 497784  
1. 601139 1. 350219 2. 424873 1. 161634 0. 997825 1. 453496 1. 877392 1. 48456 2. 387541  
4. 545908 3. 67599 4. 502838 4. 186791 4. 475581 5. 072685 3. 989241 3. 813496 4. 34108  
4. 53533 4. 966897 4. 6949 6. 75023 6. 142463 6. 164217 6. 060711 5. 355011 5. 940382  
6. 790508 7. 023955 7. 503448 7. 350948 6. 688172 6. 524695 6. 942916 7. 182874 7. 490874  
2. 431177 4. 076404 3. 231405 2. 834274 1. 992183 3. 017368 3. 036319 2. 767724 3. 365249  
6. 326649 5. 98577 6. 094943 4. 674403 5. 344483 5. 124796 5. 328624 6. 207329 5. 949201  
6. 408339 7. 492034 6. 599876 7. 077296 7. 449223 7. 813386 8. 090412 6. 473198 5. 290174  
10. 34169 9. 710526 9. 993837 9. 909023 10. 06543 10. 21225 9. 959334 9. 93853 10. 61023  
4. 962379 5. 712447 5. 286197 5. 107558 6. 017794 4. 75255 4. 960497 5. 861459 4. 607638  
1. 987369 1. 695429 1. 340177 2. 193223 2. 376713 2. 496089 1. 713083 2. 00214 2. 094971

3. 489375 4. 481201 3. 709962 3. 557544 3. 152206 3. 512272 3. 142472 3. 381431 3. 71642  
2. 607691 2. 148747 1. 989435 1. 940707 1. 811028 2. 242673 1. 739125 2. 495925 2. 696593  
2. 108544 2. 438758 3. 314175 1. 815312 2. 405359 2. 859626 2. 730161 2. 936137 1. 923443  
3. 495449 3. 300982 3. 18384 2. 920288 4. 100687 3. 810861 5. 021351 4. 304967 3. 752628  
1. 883635 1. 24187 2. 526922 2. 921023 1. 532596 1. 276432 1. 924264 1. 662868 1. 831812  
7. 323055 7. 609144 6. 119995 7. 945274 7. 663867 8. 458485 7. 368718 6. 506714 7. 294402  
7. 463526 7. 684147 8. 167607 8. 08399 8. 953284 7. 796375 8. 872641 8. 58651 8. 373912  
3. 25209 1. 936138 3. 570258 1. 513146 3. 480425 1. 959816 2. 412788 3. 780439 2. 03282  
5. 035329 4. 954629 4. 827456 4. 707859 5. 142018 4. 858888 5. 174924 5. 348495 4. 806555  
2. 501747 2. 583125 2. 734548 3. 048946 3. 520074 3. 490213 3. 461093 3. 077893 3. 431219  
8. 228885 7. 016193 7. 818091 6. 733752 6. 95438 6. 651139 6. 48404 6. 846706 7. 393504  
7. 337556 7. 547149 7. 18247 7. 862209 7. 776893 7. 796912 7. 882491 8. 287484 7. 601567  
2. 369538 3. 951872 3. 162518 4. 331916 3. 950972 3. 549148 6. 028825 4. 563132 3. 945491  
2. 393001 2. 3875 1. 827638 1. 893002 2. 103717 1. 900132 1. 896855 1. 726989 1. 790184  
2. 782651 3. 413738 3. 976712 2. 227656 3. 505083 2. 191773 2. 402313 3. 713472 4. 084701  
6. 79392 6. 71309 6. 333111 6. 862443 7. 191134 7. 077251 6. 977931 6. 930986 6. 971346  
6. 60958 6. 756239 6. 303074 7. 114717 6. 660515 6. 672934 6. 169502 6. 383642 6. 520598  
2. 067349 2. 635871 2. 361824 2. 178789 1. 959362 2. 277541 2. 595445 2. 683877 2. 538243  
1. 95804 2. 062241 2. 231174 2. 300689 1. 607087 1. 43071 2. 103478 2. 303042 2. 166812  
4. 166711 3. 654745 3. 552132 4. 588221 4. 454533 4. 404415 4. 310484 4. 466425 4. 050248  
5. 85641 5. 21456 5. 437688 5. 952945 5. 856582 5. 396169 5. 557321 5. 606424 5. 12339  
5. 979347 6. 551354 6. 391898 6. 363062 6. 585678 6. 781742 5. 541103 6. 733013 6. 254396  
6. 836414 6. 999751 7. 029592 6. 941131 7. 174596 6. 74352 6. 327368 7. 125471 6. 9162  
5. 345665 4. 549513 5. 301839 6. 409024 6. 057339 5. 853633 5. 611593 5. 171234 5. 313979  
2. 576824 1. 781804 2. 380301 2. 400945 2. 193796 1. 652342 2. 754317 1. 119718 1. 68417  
6. 848118 7. 525053 7. 60494 7. 774614 7. 493695 7. 702392 7. 233266 7. 575004 7. 327256  
3. 051442 3. 771057 4. 30888 5. 387513 5. 47136 4. 52815 4. 737085 3. 790533 3. 776583  
4. 731245 4. 122011 4. 691816 6. 029602 4. 65045 5. 392979 5. 367514 4. 853243 4. 448764  
3. 469306 3. 899984 4. 47894 2. 47288 4. 569352 4. 088398 3. 914005 2. 213438 2. 677397  
2. 940669 4. 740069 3. 543131 3. 19973 4. 276064 4. 447269 3. 444121 5. 044749 4. 059818  
2. 80803 2. 947076 3. 437649 3. 924594 4. 176257 3. 994684 4. 511788 3. 208794 3. 914974  
6. 415046 5. 15882 5. 982938 4. 86295 4. 97016 4. 883638 4. 569937 4. 750856 6. 089705  
2. 238487 2. 222115 3. 242149 2. 689984 2. 333941 3. 670046 2. 222569 2. 292511 2. 822502  
2. 067202 3. 961815 2. 441792 4. 157821 4. 770428 5. 069203 3. 649996 3. 13519 3. 813679  
6. 177909 6. 428006 6. 203304 6. 592903 6. 200899 6. 664021 6. 214551 5. 952981 6. 164106  
4. 558673 5. 363388 5. 107585 4. 894673 5. 267081 5. 375673 5. 019168 5. 253816 4. 901511  
3. 47392 4. 456689 4. 24275 3. 701262 3. 914407 4. 075744 4. 254208 3. 723719 2. 265872  
7. 992178 9. 143093 8. 851875 8. 645834 8. 69109 8. 752525 7. 8197 8. 573509 8. 618114  
4. 406128 5. 057085 5. 565707 5. 414755 5. 215377 4. 806096 4. 841727 5. 486151 5. 689463  
1. 727199 1. 379602 2. 591345 1. 576625 1. 683758 1. 722592 2. 323791 1. 756477 1. 987972  
1. 739626 2. 086131 2. 145174 2. 199355 2. 552606 1. 932165 1. 715539 2. 55749 2. 11207  
3. 267057 2. 238407 2. 233846 2. 081687 2. 040554 2. 164822 2. 931335 2. 026089 2. 243049  
2. 334593 1. 664625 1. 634818 1. 659056 1. 596073 1. 437635 2. 145919 2. 180062 1. 424873  
6. 695448 7. 424333 7. 3935 7. 856908 7. 585544 7. 552348 7. 468655 7. 489182 7. 293111  
6. 526765 5. 553154 5. 503438 5. 201815 5. 362787 6. 001846 5. 57625 5. 540686 4. 945441  
9. 18293 9. 258462 9. 294636 9. 015485 9. 208666 8. 628838 9. 136751 9. 619579 9. 457813  
2. 345337 2. 830218 2. 131401 1. 468403 2. 5512 1. 852219 2. 069948 1. 957153 2. 196302  
2. 900578 3. 004147 2. 361715 2. 538418 2. 415414 2. 513974 2. 963011 2. 23066 2. 765612  
5. 3165 6. 509703 6. 219426 7. 471441 5. 838723 6. 39462 7. 128119 6. 159193 6. 795783  
1. 950592 1. 929448 1. 519454 2. 046784 1. 704191 2. 012727 1. 873777 1. 715491 1. 898549  
5. 711582 4. 370519 3. 342837 4. 675947 4. 016024 3. 943055 3. 646852 4. 791508 5. 297211

2. 647752 2. 125405 2. 125405 3. 004516 2. 235441 2. 171329 2. 752689 2. 909317 2. 952304  
8. 725285 8. 807888 8. 547915 8. 802415 9. 054106 8. 990209 8. 971066 9. 576406 9. 181963  
4. 291814 4. 442334 4. 532111 3. 958495 4. 431368 4. 7327 3. 570102 3. 967623 3. 975173  
1. 671877 1. 697452 1. 735347 1. 48035 1. 85654 1. 327457 1. 362163 1. 612836 1. 627299  
6. 549498 7. 067356 7. 173479 7. 166543 7. 185629 7. 07086 6. 521638 7. 115283 6. 859714  
1. 927949 1. 793692 2. 194988 2. 223566 1. 504547 2. 084266 3. 364503 1. 751434 2. 245396  
7. 130353 7. 808936 7. 5532 7. 404663 7. 837095 7. 542562 7. 6246 7. 499891 7. 574658  
2. 852496 4. 273876 3. 380754 4. 22609 4. 575944 4. 375823 4. 046889 3. 495592 4. 499004  
3. 793042 4. 317564 5. 243711 5. 620606 4. 631243 5. 77669 4. 75124 4. 169157 5. 620702  
8. 298782 7. 111189 7. 698843 7. 261911 7. 095339 6. 715079 7. 423852 6. 974512 8. 201418  
7. 45472 7. 771787 7. 046542 7. 78233 7. 791217 7. 547257 7. 427835 6. 70693 7. 850417  
2. 968703 3. 539916 2. 809779 2. 886696 2. 521148 2. 149038 2. 806832 2. 266328 3. 112161  
2. 683129 2. 004558 2. 027727 2. 532863 2. 412833 3. 44583 2. 750349 3. 143353 2. 343677  
2. 855685 2. 48619 2. 62116 2. 25325 2. 779068 2. 069335 2. 833195 2. 482063 2. 192929  
7. 087302 6. 512112 5. 997059 4. 744697 6. 236305 6. 293293 5. 985115 6. 144778 6. 502812  
5. 280173 5. 826191 5. 57818 6. 344152 5. 556143 5. 706495 5. 92064 6. 248012 6. 567031  
1. 816388 1. 741829 1. 670339 2. 122306 1. 673667 1. 989091 1. 749513 2. 141654 3. 155387  
3. 169026 2. 380031 2. 773549 2. 816905 2. 903133 2. 815457 2. 913954 3. 509407 3. 459729  
7. 612454 7. 127977 7. 05188 6. 788438 7. 16557 7. 105307 6. 295317 6. 922029 7. 077247  
5. 604787 5. 377016 5. 884136 5. 253692 5. 536885 5. 733444 5. 678556 5. 488145 5. 797178  
1. 350486 1. 686982 1. 666937 1. 395016 1. 712452 1. 883697 2. 531218 1. 30704 1. 438232  
5. 564915 6. 34566 5. 571106 6. 082708 6. 39854 5. 599864 5. 983267 5. 643396 5. 702047  
3. 006542 2. 898131 2. 583666 4. 322631 2. 574882 3. 339343 4. 391717 2. 964252 3. 598468  
2. 960011 1. 937597 2. 700183 2. 772899 1. 833089 2. 893552 3. 251263 2. 129402 2. 535976  
3. 886761 4. 660401 3. 443172 3. 968 4. 007496 4. 050904 3. 816388 3. 893164 3. 57662  
1. 938811 1. 294844 2. 019651 1. 6016 1. 868617 1. 697053 1. 946231 2. 295159 1. 548763  
3. 693873 1. 845486 2. 322357 1. 600863 1. 489949 2. 81464 2. 237468 2. 07712 2. 310823  
4. 279122 3. 871617 4. 323118 5. 425726 5. 191323 5. 16786 5. 860941 4. 163818 5. 580074  
1. 483472 1. 771176 1. 347639 1. 263787 1. 259949 1. 369429 1. 424499 3. 611991 1. 762546  
1. 652266 2. 120701 1. 76578 1. 652077 1. 721044 1. 170911 1. 682794 1. 591013 1. 854319  
1. 726059 1. 147812 1. 294614 1. 790782 1. 096993 1. 362301 1. 678701 1. 462122 0. 907507  
7. 642054 7. 632854 7. 545992 7. 811387 7. 822788 8. 010153 7. 675088 8. 024526 7. 395545  
2. 164427 1. 587377 2. 035992 1. 613759 2. 143472 2. 734457 2. 597264 2. 407371 1. 894083  
8. 348779 8. 240417 8. 400735 8. 605139 8. 54475 8. 624354 8. 034506 8. 900208 8. 670731  
5. 898713 6. 192309 6. 127366 6. 162855 6. 212428 6. 352689 5. 935695 6. 197724 5. 893197  
6. 343216 6. 616888 6. 951631 6. 481995 6. 309555 7. 044372 6. 902484 6. 50085 6. 416135  
4. 652297 4. 948054 4. 779405 4. 784298 5. 231695 4. 270114 4. 622367 5. 19277 4. 964507  
6. 001347 6. 369045 6. 680749 6. 758316 6. 825143 6. 791799 6. 421698 6. 684529 6. 521634  
2. 865617 2. 682054 2. 587615 2. 806566 3. 625226 2. 432131 2. 822302 2. 365764 2. 848274  
2. 474258 1. 44846 1. 514727 1. 749591 0. 744987 1. 437218 1. 697613 1. 930355 1. 046818  
2. 548246 5. 236062 4. 600275 4. 647135 5. 264585 3. 835041 4. 747167 4. 290979 4. 570156  
3. 115944 3. 044785 3. 337893 3. 03994 2. 96571 3. 059024 3. 334025 3. 720954 3. 47741  
6. 713106 5. 15921 6. 320902 5. 425999 6. 537492 5. 97677 5. 289413 5. 439608 6. 060048  
4. 720135 5. 198553 4. 924703 4. 916565 5. 432241 5. 221086 5. 082725 6. 3707 4. 911555  
5. 721572 6. 445433 6. 383127 5. 921192 5. 791186 5. 93279 6. 058059 6. 324743 5. 709706  
2. 8083 2. 175542 2. 511963 1. 778347 2. 300805 2. 663365 1. 537092 2. 219557 2. 253176  
6. 756856 5. 857463 6. 230094 5. 80106 6. 33842 4. 762409 6. 104953 6. 576102 6. 427034  
0. 812888 1. 207109 0. 98203 1. 513445 1. 088922 1. 209314 0. 697316 1. 174566 1. 417026  
2. 71355 3. 757227 3. 887345 3. 405619 4. 246272 2. 909273 2. 237811 3. 947998 3. 665667  
6. 657115 7. 052417 6. 557794 6. 313036 6. 493654 6. 975415 6. 771105 6. 819545 6. 846298  
7. 06283 7. 9415 8. 095559 8. 303764 7. 476481 9. 968522 8. 150812 9. 246634 8. 222665



3.254259 2.779202 2.741806 2.69139 2.984854 4.2918 3.373071 2.623254 2.405233  
2.080335 0.795984 1.235944 1.550444 1.396036 1.296238 2.511521 1.220114 0.721206  
3.594577 2.608951 2.638106 1.566047 1.634473 2.55899 3.076949 2.87824 2.102067  
5.091751 5.298208 5.745101 6.532088 5.270857 5.876187 4.457238 6.937819 5.454403  
5.427606 4.844226 4.269186 5.994996 6.119338 7.179786 5.431436 6.401193 5.50764  
6.554318 7.266115 7.346662 8.017029 7.27652 7.769167 7.347877 7.181743 7.386941  
4.322027 5.70547 4.690283 5.385005 4.379588 7.613878 4.852263 7.074696 5.431225  
6.014843 5.667891 4.291587 5.306303 5.559765 5.530063 6.56015 5.846962 6.56695  
0.762539 1.047904 0.693459 1.046851 0.960526 0.72965 0.841511 0.761711 0.759991  
1.825137 1.217181 1.034148 1.516662 1.139227 1.683905 2.011653 0.855923 1.018922  
1.493182 1.563067 2.038122 2.447198 1.440229 1.672708 1.531805 2.262843 0.813419  
0.797213 1.33133 0.885495 0.812135 1.108247 0.834203 0.988691 1.147425 0.83404  
2.435268 1.940001 2.156038 1.87299 3.010137 1.975925 2.056852 2.255811 1.962431  
1.211106 0.926774 0.919596 0.986365 1.080449 1.02529 1.357279 1.168284 1.180557  
1.568729 0.663363 1.826098 1.186549 1.242355 0.91629 1.026582 1.162579 0.98454  
6.838128 5.709473 5.983873 5.74095 6.615692 5.528838 5.943211 5.928717 6.037781  
1.059588 0.92974 2.157417 0.91602 0.85662 0.882559 0.820144 0.686878 1.333792  
4.616398 4.530789 5.315186 4.584912 4.29489 4.884218 5.204021 4.349484 4.705477  
1.12853 0.863305 0.720889 0.628584 1.047835 0.834335 0.933353 0.931849 1.239727  
2.950912 2.633733 2.000644 1.606439 1.341487 1.181781 2.406576 1.121934 1.68493  
1.814995 1.194408 1.219925 1.23569 1.421973 0.991907 1.357845 1.16511 0.999304  
1.185921 1.03285 0.734629 1.396947 1.23264 1.344754 0.968863 1.093811 1.132805  
0.84263 0.927765 0.700616 0.992435 0.740485 0.986087 1.045901 1.316627 1.853156  
1.058507 1.116666 1.350585 1.157533 1.593629 0.956939 0.679676 1.344893 0.841686  
2.303768 1.602198 1.395489 2.086276 1.615565 1.287451 1.123362 1.906152 1.123381  
2.008456 1.286102 1.309441 1.711815 1.446099 1.907456 2.404815 2.543099 1.572314  
1.021315 0.828046 0.537397 0.896271 0.742351 0.752248 0.895719 0.950262 0.649092  
2.640186 2.562365 3.14491 2.69695 2.618915 2.792813 3.887965 2.743951 2.405385  
2.247714 1.67502 2.430867 1.908131 2.341901 2.466983 1.82139 2.96471 0.98605  
1.601821 0.89561 0.796779 1.055251 0.483739 1.500231 0.793621 3.614313 1.183482  
3.513833 2.874155 2.982599 2.410439 2.831476 2.573514 4.294114 3.330812 2.851975  
3.320526 5.201337 4.605554 3.615478 4.536089 4.527074 3.526947 5.647731 5.032995  
2.384875 2.283355 2.161414 2.18599 2.417759 3.377107 2.245529 2.60939 2.933189  
3.09002 2.646147 2.866683 2.256491 2.342155 2.42693 1.665537 2.251181 2.697971  
5.384557 2.854418 3.819862 3.687493 3.552025 3.819096 3.252741 4.227357 4.042767  
1.919153 3.015612 1.932417 1.486161 2.099225 1.534695 1.903738 2.713094 1.708458  
1.97251 1.215716 0.770665 1.211457 0.837303 0.959847 0.956286 1.385979 1.215341  
9.085271 9.480721 9.32828 9.308055 9.482602 9.064291 9.458992 9.429451 9.924299  
7.060057 7.035202 7.556494 7.190739 7.418534 7.29216 6.792745 7.458028 7.51325  
2.06449 1.994718 1.602732 1.580737 1.376867 2.233808 1.295131 2.784973 1.826667  
5.650919 6.760623 6.110597 6.369226 6.349584 6.387668 6.84617 6.334692 6.506488  
8.632157 8.555699 8.515053 7.649403 8.136519 8.335649 7.853205 8.576043 8.244097  
1.609436 1.441139 1.323984 1.388343 1.89804 1.643379 1.216904 1.305124 1.71543  
4.094499 4.635402 4.36705 4.327874 4.665013 5.479876 4.451591 4.87163 4.87163  
3.373996 4.590345 3.757293 6.219551 3.909954 2.944673 4.756508 3.554622 4.51387  
1.809129 1.460887 1.84901 1.407828 1.835878 1.790019 2.002814 2.066902 2.108243  
7.337496 6.686838 6.535887 6.718398 6.534017 6.868363 7.077808 6.930444 7.269755  
5.399226 4.918103 4.959499 5.060536 4.176602 4.525706 4.342654 4.69142 5.555266  
2.532835 1.423838 2.943977 2.055153 1.976535 1.84715 3.887042 1.687449 2.666905  
1.612393 1.246578 1.622536 1.590382 1.619944 2.093466 1.30188 1.21276 1.289314  
1.545524 1.397708 1.12116 1.625468 1.511009 1.203215 1.287428 0.872234 2.494294

2. 702849 1. 631339 1. 842956 2. 624572 2. 597829 2. 586587 3. 002548 2. 100032 1. 631145  
4. 592913 3. 54537 4. 230402 2. 366768 3. 867947 3. 524299 4. 630144 3. 455064 3. 594972  
1. 75829 3. 520639 3. 004861 4. 587226 2. 984373 3. 535492 2. 762684 4. 311785 2. 936101  
0. 948114 0. 900483 0. 667207 0. 890011 0. 696583 1. 780447 0. 518414 1. 009006 0. 832532  
1. 929158 3. 050644 2. 06279 1. 361782 2. 650888 1. 725894 2. 648086 1. 420034 2. 116379  
1. 560316 1. 744681 1. 448405 1. 99586 1. 652909 1. 872059 1. 541786 1. 464213 1. 502435  
2. 545003 2. 371605 2. 49106 2. 461444 2. 486707 2. 301539 2. 150712 2. 357903 2. 779601  
1. 363628 1. 077592 1. 241582 1. 251025 1. 317488 1. 491637 1. 474091 1. 324939 1. 925176  
3. 533085 3. 792933 2. 581842 4. 469764 0. 745657 3. 150726 1. 955185 3. 296226 1. 547393  
5. 819054 7. 011157 6. 690989 6. 589673 6. 87841 6. 835666 6. 664587 6. 982276 6. 977446  
2. 869617 3. 520615 2. 639166 2. 545406 3. 822332 2. 338876 3. 743028 2. 992664 2. 025091  
5. 791197 6. 734474 6. 41246 5. 781447 6. 365154 6. 324864 6. 344704 7. 441298 6. 040507  
3. 621799 4. 213766 3. 789281 4. 135244 3. 6138 4. 289942 4. 48724 4. 476621 3. 180518  
5. 168163 4. 755236 5. 326203 4. 99126 5. 2989 4. 598919 4. 398795 5. 555963 5. 152814  
5. 56082 7. 097624 6. 55124 6. 077614 6. 637971 6. 439145 6. 27567 6. 320875 6. 479527  
4. 645607 3. 242186 3. 234829 2. 808468 3. 014739 2. 801292 2. 57895 2. 535373 2. 600137  
2. 043224 2. 059918 2. 385085 2. 812148 2. 049054 2. 580751 1. 989994 2. 223106 3. 005214  
2. 46517 1. 727608 1. 929694 2. 571341 1. 813293 1. 958916 3. 123934 2. 628031 1. 564617  
1. 629361 4. 577682 4. 780608 2. 423484 2. 269074 2. 093634 2. 236166 2. 871518 3. 193785  
2. 146194 1. 616643 1. 670347 1. 444604 1. 206511 1. 609833 2. 107556 1. 262621 1. 626072  
2. 306502 1. 40218 1. 867972 2. 517553 1. 964389 1. 729965 1. 847036 1. 54271 2. 086222  
1. 732033 1. 408873 1. 630055 1. 431776 1. 463047 1. 313892 1. 894435 1. 482851 1. 5765  
9. 264207 8. 935849 9. 23777 8. 838331 9. 011221 8. 801064 9. 044931 8. 874717 9. 297039  
3. 202626 2. 588302 2. 40336 2. 669377 2. 74338 2. 993678 2. 758392 2. 43895 2. 586753  
2. 413301 1. 378882 1. 107569 2. 360953 1. 908135 1. 772408 2. 188296 1. 801019 1. 61069  
1. 672507 1. 216473 1. 738247 1. 450252 1. 266455 0. 793618 1. 281886 0. 930543 1. 368149  
1. 020831 1. 618481 1. 645979 1. 306326 1. 095355 1. 147454 1. 129058 0. 853153 1. 369119  
2. 150898 2. 061807 2. 394554 1. 665361 2. 466601 2. 22942 2. 53406 2. 333142 2. 013101  
1. 254437 1. 69554 0. 817137 1. 252676 2. 204886 0. 775806 1. 285335 3. 183385 1. 712719  
1. 782617 2. 303302 1. 775487 2. 39594 1. 695286 2. 253525 2. 356321 2. 644156 2. 823508  
5. 459199 5. 303205 5. 587119 5. 267475 5. 752239 5. 110688 4. 616014 4. 893188 5. 442286  
2. 209764 1. 955115 3. 199857 3. 700648 1. 691596 1. 919058 2. 148327 2. 722349 1. 970568  
6. 19433 5. 362259 5. 753044 5. 678498 5. 39495 5. 725884 3. 665428 5. 067569 5. 13766  
3. 990578 4. 891018 4. 31236 5. 202741 4. 509603 4. 82524 4. 625034 4. 423302 4. 609362  
6. 460633 4. 978321 5. 778336 4. 050013 4. 773957 5. 137918 4. 684809 5. 255502 5. 848424  
2. 260617 1. 672138 2. 160696 2. 252102 2. 221897 1. 663675 2. 580635 1. 881174 2. 10466  
1. 599033 1. 153714 1. 25574 1. 021875 1. 686951 2. 291871 1. 327838 1. 775867 1. 512819  
1. 145012 1. 517639 1. 135028 1. 388576 1. 788146 1. 323792 1. 672822 1. 812846 1. 22826  
6. 351355 6. 850689 6. 824804 6. 883272 6. 583827 7. 072048 6. 365743 6. 38316 6. 664106  
1. 334468 1. 373345 1. 661524 1. 651014 1. 596883 1. 550233 1. 64326 2. 015677 1. 34148  
1. 442899 1. 038704 1. 005123 1. 861575 1. 226643 1. 099037 1. 095697 1. 434563 1. 093917  
9. 481914 9. 317411 9. 373034 9. 567236 5. 600634 10. 51606 6. 504244 8. 229842 8. 344522  
2. 019234 1. 862906 1. 480273 2. 202833 1. 901206 1. 531289 2. 212886 2. 423421 2. 316747  
1. 699189 2. 179562 1. 738665 1. 794167 2. 333666 1. 180653 1. 352333 1. 805466 1. 95785  
2. 196769 2. 750368 2. 075937 2. 113617 1. 806607 1. 942974 2. 231913 2. 322835 2. 186756  
3. 588118 2. 362629 2. 171448 2. 519459 2. 651056 2. 122662 2. 503778 2. 286606 2. 17364  
8. 243879 7. 948047 7. 678674 7. 878167 7. 5382 7. 528561 7. 863666 7. 630501 7. 997594  
6. 090114 5. 03665 4. 313313 5. 800481 5. 493273 5. 345761 4. 203311 5. 355661 5. 28969  
7. 046883 6. 730693 7. 18325 6. 811868 7. 340693 6. 138929 6. 61207 6. 810299 7. 024902  
7. 62772 4. 671313 5. 436772 3. 794109 4. 392599 4. 29255 3. 524281 3. 836614 5. 60162  
2. 11197 2. 927792 2. 877392 2. 914022 2. 531725 2. 310096 3. 695538 3. 467404 3. 021951

1. 871112 2. 927945 2. 853076 1. 891945 2. 016153 2. 281217 3. 193371 3. 05843 2. 366155  
1. 822202 1. 00992 1. 680862 2. 058169 1. 568597 1. 813992 2. 62838 2. 171641 2. 4193  
5. 264877 5. 319664 4. 878084 5. 615951 5. 65835 5. 46475 4. 970308 5. 41352 6. 020281  
2. 914454 2. 303003 3. 065014 3. 870224 2. 745253 2. 645942 3. 546466 2. 837094 2. 974858  
3. 186762 3. 091169 3. 093144 2. 374197 3. 498498 2. 748245 3. 073252 2. 207595 2. 845911  
3. 193488 2. 999567 3. 215556 4. 149977 2. 46926 2. 255385 2. 324744 2. 945192 2. 544638  
2. 221437 1. 842253 2. 442628 1. 75114 2. 059499 2. 017493 1. 77612 2. 31958 2. 10095  
2. 86403 2. 749521 2. 249953 2. 925843 1. 944653 2. 880803 2. 536441 2. 907918 2. 96662  
6. 55748 5. 789307 6. 176735 6. 36024 5. 901143 6. 111023 6. 563391 5. 896964 6. 42307  
0. 900584 1. 157331 0. 549035 0. 948326 0. 661674 0. 885995 1. 578819 0. 893931 1. 347873  
7. 49915 7. 914469 7. 361057 8. 386348 7. 505318 8. 03445 8. 167575 8. 083263 7. 909473  
1. 459528 1. 06377 1. 415863 1. 390434 2. 113007 1. 328158 1. 2423 1. 219746 1. 349159  
2. 442326 2. 503094 2. 311911 1. 766068 3. 241549 2. 468475 2. 851268 2. 937838 3. 050282  
3. 233458 3. 321938 3. 500982 3. 974773 3. 26223 3. 269138 5. 10212 5. 44922 3. 224162  
0. 903791 1. 36548 1. 563316 1. 200468 1. 311984 1. 929819 1. 28032 1. 261642 1. 834474  
1. 71872 2. 263357 1. 097178 2. 085838 1. 347007 1. 665294 2. 300322 2. 621176 1. 731371  
1. 398894 1. 739172 2. 041539 1. 710972 1. 583936 1. 55856 2. 489586 1. 284211 1. 952438  
3. 048641 1. 534669 1. 284948 1. 160182 1. 371461 1. 339138 1. 457453 1. 519477 1. 361672  
2. 077495 3. 735008 2. 239515 3. 722178 3. 269248 3. 559896 2. 54782 2. 720612 2. 816414  
2. 781729 2. 352328 3. 810369 3. 896659 3. 186698 3. 877929 3. 236331 3. 714341 3. 729236  
10. 01078 9. 462131 9. 62483 9. 487524 9. 284082 9. 119506 9. 00894 9. 354533 9. 876899  
0. 961911 1. 015361 0. 864316 1. 251024 1. 126554 1. 492889 0. 947809 0. 95562 0. 983507  
1. 433429 1. 578711 1. 235212 2. 055327 1. 535432 1. 344493 0. 991382 0. 977411 1. 132402  
0. 439556 1. 542994 0. 664789 1. 598285 0. 858057 0. 697362 1. 000646 1. 07198 2. 707195  
4. 926152 5. 900632 5. 02659 6. 015697 6. 117901 5. 919014 5. 818992 5. 316658 5. 147574  
3. 485984 4. 322479 3. 243021 3. 681623 4. 229005 3. 369002 3. 523602 3. 039951 4. 786769  
2. 368498 1. 745166 2. 068318 1. 833101 1. 768742 2. 237309 2. 385891 1. 336002 2. 042032  
3. 268968 5. 016797 4. 749298 4. 899523 4. 762112 4. 534385 3. 710056 4. 638425 4. 717407  
3. 845952 4. 530318 4. 395539 4. 844096 5. 158064 4. 523907 4. 189447 4. 844031 5. 028803  
6. 183689 5. 877056 6. 375505 5. 204591 6. 293576 5. 872077 5. 225364 5. 214102 5. 468143  
1. 893867 2. 163842 1. 417579 1. 965901 1. 710938 1. 33374 1. 901687 1. 177841 1. 766776  
5. 798099 5. 654084 5. 59472 6. 30544 5. 958663 5. 756383 5. 721034 5. 928399 5. 784296  
1. 60714 1. 418549 1. 380978 1. 931263 1. 49874 1. 856757 1. 829659 1. 58499 1. 842726  
8. 021952 8. 103614 8. 031318 8. 157616 8. 115454 7. 830233 7. 860632 8. 145862 8. 115218  
6. 060909 6. 092701 6. 131346 6. 235883 6. 146971 6. 226428 6. 128445 6. 108281 6. 704292  
3. 561786 1. 608108 2. 565635 2. 331978 2. 123211 2. 395259 2. 590902 2. 812904 2. 146553  
6. 202854 5. 988219 7. 089135 6. 23678 5. 494167 6. 034511 6. 360941 6. 814177 7. 574716  
1. 386184 1. 643401 1. 429574 1. 818105 1. 283901 2. 128908 1. 829532 0. 884644 2. 040649  
2. 552593 2. 122417 2. 273572 2. 274834 2. 338995 2. 475871 2. 525252 2. 313239 2. 411018  
3. 899881 4. 117439 4. 581141 3. 682943 4. 542177 4. 074466 4. 521872 4. 597188 4. 347928  
2. 293186 2. 092003 2. 523635 2. 148646 2. 720723 2. 38606 1. 977128 2. 089922 2. 263064  
2. 664577 3. 026427 2. 273536 4. 438219 4. 371489 3. 085174 2. 572661 2. 357555 2. 96896  
2. 216648 1. 559525 1. 977782 1. 885103 1. 899696 1. 374251 1. 269707 1. 887411 1. 518576  
5. 005294 4. 821443 4. 601226 4. 581149 4. 490361 5. 78856 5. 860507 4. 440587 4. 631047  
4. 644828 4. 145822 4. 516018 4. 504972 5. 174035 4. 069396 5. 432922 4. 592526 4. 108272  
8. 578583 8. 50623 8. 538604 8. 403125 8. 713654 7. 916523 8. 586551 8. 518233 8. 612542  
7. 136248 7. 105392 7. 934878 6. 660342 6. 606539 6. 20798 7. 63513 6. 174313 8. 700363  
2. 346081 4. 840932 4. 557629 5. 276319 3. 519987 6. 171366 4. 767386 4. 401175 4. 357271  
1. 344394 0. 905483 1. 451568 1. 28175 1. 645207 2. 073874 1. 523701 2. 071011 1. 398099  
9. 188594 9. 230741 9. 31364 9. 090884 8. 984605 9. 223116 8. 261573 9. 406044 8. 984087  
1. 177002 1. 553791 1. 234778 1. 023844 1. 393981 1. 445671 1. 390444 1. 085129 1. 186375

2. 651649 2. 598473 1. 877106 2. 347073 1. 565359 2. 5014 2. 127522 2. 084104 2. 866188  
3. 190109 2. 203078 2. 09311 3. 676046 2. 867373 2. 572392 2. 339211 2. 045222 2. 928055  
2. 831595 2. 304887 2. 656672 3. 312653 4. 515134 2. 597051 2. 218189 2. 401563 3. 767588  
1. 964775 0. 984796 1. 016703 1. 296816 1. 378417 1. 007239 1. 187528 1. 202489 1. 095591  
5. 335421 4. 028588 5. 266111 4. 22218 3. 724489 4. 197327 4. 883698 3. 692231 5. 706621  
5. 535297 6. 668354 6. 517504 6. 946572 6. 369257 6. 930513 6. 348818 6. 259085 6. 394675  
1. 682252 2. 458192 2. 329761 2. 539272 0. 999954 2. 114101 2. 070799 1. 825865 1. 921843  
4. 182621 4. 991038 5. 246279 4. 234562 4. 82438 4. 464779 4. 839361 4. 727204 4. 745698  
4. 354676 3. 308569 3. 648302 3. 348082 3. 753847 4. 187307 3. 401542 3. 076224 3. 207757  
5. 632083 6. 120107 6. 441162 6. 827 7. 010272 7. 134465 5. 966354 6. 51665 6. 830797  
3. 305785 3. 179102 3. 034619 2. 735772 1. 8726 2. 244703 2. 709866 2. 862577 2. 570355  
2. 284506 2. 416637 2. 028312 2. 454481 2. 193727 2. 947431 2. 693771 2. 239811 2. 287052  
1. 849543 1. 642902 1. 816597 2. 063398 2. 104303 1. 8797 1. 960335 2. 321983 2. 006965  
6. 200925 6. 241122 5. 87396 6. 14371 6. 074389 6. 075861 5. 883498 6. 100855 5. 657716  
2. 608535 1. 701428 1. 314616 1. 619351 2. 486084 1. 811107 1. 98603 1. 462384 2. 595482  
4. 479346 3. 765482 4. 110004 4. 227714 3. 248983 4. 139811 3. 818357 4. 32379 3. 984667  
8. 275533 8. 245436 8. 454261 8. 475691 7. 896736 8. 670963 7. 736525 8. 863877 8. 275289  
6. 361736 7. 45188 7. 39768 7. 269708 7. 623873 6. 974293 7. 137003 8. 030706 7. 399371  
2. 084555 2. 968489 3. 657906 2. 23387 2. 086197 3. 564796 2. 453321 3. 247845 2. 174109  
8. 139686 9. 103232 8. 769999 8. 93664 8. 847288 9. 333528 8. 547751 9. 149976 8. 906248  
3. 619675 2. 41868 2. 150087 1. 835707 2. 626737 1. 993423 2. 972332 2. 867392 2. 211059  
4. 664431 4. 640531 4. 184197 4. 986626 4. 684508 3. 861746 3. 36489 5. 175425 4. 955777  
1. 23192 0. 800345 0. 900372 0. 859773 1. 758251 1. 404497 1. 567303 0. 851826 1. 873064  
4. 497211 4. 22552 4. 072539 5. 552466 4. 28885 5. 043274 4. 512682 5. 395915 4. 755866  
9. 898403 9. 582675 9. 804615 9. 528463 9. 820215 9. 482022 9. 519547 9. 882589 10. 11069  
2. 04411 2. 087597 2. 111374 2. 213363 2. 035313 1. 792694 1. 867153 1. 912314 2. 137304  
5. 561141 5. 731572 5. 85124 5. 1035 5. 142164 5. 690322 4. 789494 5. 578496 5. 392917  
2. 946016 4. 035314 3. 805818 3. 320047 3. 299926 3. 176954 2. 637677 3. 570983 4. 32366  
5. 837843 6. 425662 6. 195631 6. 214776 5. 932626 6. 166541 5. 883648 5. 497318 6. 298362  
4. 810346 5. 589399 5. 273934 4. 57531 5. 078724 5. 558985 4. 698741 5. 556931 5. 15027  
1. 654823 1. 744691 1. 263603 1. 952868 1. 704755 1. 905436 1. 537938 1. 920646 1. 802496  
5. 854375 4. 409177 4. 450876 4. 272693 4. 524423 4. 582306 4. 814972 5. 01289 4. 495082  
1. 544025 1. 255452 1. 324574 1. 454776 1. 039567 1. 315206 1. 252331 1. 754277 1. 546237  
2. 940605 1. 695023 2. 822379 2. 777171 1. 901245 2. 026231 2. 160491 1. 92794 2. 157502  
2. 335954 2. 462993 2. 354673 2. 493276 2. 385181 2. 068309 2. 736092 2. 879553 2. 032263  
3. 090091 2. 91154 4. 153185 3. 220767 3. 088764 3. 06394 3. 242037 3. 594766 2. 92375  
4. 435659 5. 672132 6. 149676 5. 893269 5. 764469 4. 749172 4. 990745 6. 676265 5. 407271  
2. 016626 1. 425329 1. 952169 2. 924873 1. 83914 1. 765279 3. 245463 2. 381129 2. 000676  
6. 420897 7. 205783 6. 658138 7. 920477 7. 31631 7. 233906 7. 063468 6. 980901 7. 084097  
6. 354646 6. 573219 7. 484368 7. 390091 7. 110997 6. 665673 7. 317745 6. 544986 7. 778338  
7. 682104 7. 951225 7. 966223 7. 804498 7. 623087 7. 811305 7. 567344 7. 738712 7. 610339  
1. 522077 1. 725181 2. 19125 1. 184767 1. 538888 1. 637887 2. 040888 1. 816231 1. 784494  
5. 981888 6. 818744 6. 372008 6. 953448 6. 973797 7. 039241 6. 870217 7. 013736 6. 261269  
6. 513334 6. 703602 7. 28689 6. 562724 7. 081935 6. 277371 6. 635388 6. 794947 7. 28828  
5. 43692 5. 826862 5. 758506 6. 252123 6. 277728 5. 96953 4. 584974 5. 862778 5. 75766  
2. 33225 1. 855373 1. 861018 2. 002493 2. 71832 1. 788159 2. 264143 2. 515686 2. 584716  
4. 931091 5. 547991 5. 800966 5. 3816 5. 423129 5. 592769 5. 542967 6. 105829 5. 368199  
1. 715311 1. 659454 1. 611765 1. 451587 1. 4277 1. 621884 1. 441792 1. 491459 2. 414765  
1. 100025 1. 126216 1. 757397 1. 210883 0. 875845 1. 066718 0. 895322 1. 536689 1. 690306  
1. 460135 0. 984066 1. 311766 1. 193777 1. 715136 1. 560269 1. 190521 1. 081994 1. 381082  
1. 899394 1. 286551 1. 333364 1. 49749 1. 599642 1. 519641 1. 667154 1. 161643 1. 685934

1. 614386 1. 049129 1. 848401 0. 986317 0. 815713 1. 470977 1. 299556 1. 734658 1. 844083  
1. 717733 0. 668084 0. 85719 0. 816638 1. 506379 0. 675462 1. 793312 0. 877661 1. 044894  
1. 047134 1. 060665 1. 103022 1. 021984 0. 894073 1. 304445 1. 060638 1. 31516 0. 841477  
1. 231566 0. 936871 1. 001326 1. 515484 0. 982245 0. 932789 0. 902985 1. 272142 1. 256786  
1. 057081 1. 367371 1. 364925 1. 425722 2. 269151 1. 172385 1. 405117 1. 734536 1. 451266  
3. 244954 2. 636682 3. 029609 2. 299925 2. 242992 2. 238965 2. 636682 1. 980465 2. 263393  
2. 564073 1. 051098 2. 327515 2. 046958 3. 468328 1. 278335 1. 439355 3. 802232 1. 097134  
2. 471852 2. 091098 1. 755608 1. 850216 1. 434456 2. 417012 1. 919216 1. 465507 1. 950104  
6. 537329 6. 316537 6. 686979 6. 603619 6. 246299 6. 701282 6. 695461 6. 609339 6. 667086  
0. 75589 0. 753808 1. 374717 1. 066173 1. 244049 1. 800022 1. 230912 2. 043565 1. 270418  
2. 512277 3. 062405 2. 546293 3. 082216 3. 490472 3. 022306 3. 344377 3. 189091 2. 722439  
9. 625334 9. 932891 10. 02316 9. 726716 9. 897505 9. 355717 10. 1429 9. 937161 9. 771581  
2. 799687 3. 4548 3. 313707 2. 370351 2. 339849 3. 220738 3. 260588 3. 175291 2. 604061  
3. 254519 2. 924505 2. 170877 3. 2782 2. 82295 4. 055661 4. 820861 3. 744956 2. 748528  
1. 623102 1. 974909 1. 41686 2. 985745 2. 272061 1. 442872 2. 509163 1. 350267 1. 537007  
3. 23069 2. 892506 3. 40005 4. 311685 2. 811821 3. 160903 4. 08307 3. 813973 4. 022208  
6. 329451 7. 454767 7. 10861 7. 190496 7. 495946 7. 767147 7. 247102 7. 890833 7. 516316  
1. 789894 1. 591002 2. 995386 2. 283213 2. 27584 2. 099502 2. 909102 1. 956237 2. 300617  
8. 032534 8. 42083 8. 585643 8. 648667 8. 49745 8. 076169 7. 728018 8. 316527 8. 514864  
9. 359301 8. 639453 8. 915518 9. 454281 9. 049385 8. 832809 8. 605026 8. 613943 8. 806756  
6. 657803 7. 434095 7. 24781 6. 977714 7. 332017 7. 313393 5. 532156 7. 45744 7. 68741  
4. 455417 4. 569037 5. 07826 4. 882277 4. 99086 5. 78591 4. 499322 4. 906733 5. 721451  
5. 338339 4. 947443 5. 369525 5. 145782 4. 921746 5. 030121 5. 456491 5. 814309 5. 726759  
8. 154154 7. 695184 7. 954352 7. 295763 7. 351044 6. 972943 7. 251818 7. 983958 8. 130422  
5. 666883 4. 706305 5. 395198 4. 300943 5. 590703 5. 110224 3. 531273 5. 510821 5. 348091  
2. 009728 2. 128732 2. 469578 1. 857426 2. 404368 2. 432916 2. 185026 1. 993728 2. 087043  
7. 927557 7. 995283 8. 054884 8. 309886 8. 641 8. 397035 7. 702359 8. 59077 8. 331869  
1. 328539 1. 394134 1. 50707 1. 854712 2. 356037 1. 316892 1. 081484 1. 107891 1. 157911  
2. 400727 2. 192032 2. 735748 2. 239863 2. 734021 2. 049884 2. 306799 2. 357547 2. 690793  
1. 690084 1. 531985 1. 264267 2. 010284 1. 344801 1. 671274 1. 27892 1. 372174 1. 770886  
3. 152343 1. 256402 1. 468182 1. 07673 1. 878285 1. 571022 1. 292553 1. 001734 1. 913551  
9. 372542 9. 305974 9. 800819 9. 411311 10. 21991 9. 321288 9. 487605 9. 611367 9. 701194  
6. 929395 5. 925602 6. 01664 5. 233003 5. 719036 4. 859757 6. 042041 6. 034221 6. 969794  
9. 211893 9. 634222 9. 309942 9. 835885 9. 794833 9. 479579 9. 050739 8. 333415 9. 352661  
6. 302593 6. 03451 6. 156198 5. 645137 6. 026048 5. 382205 6. 259325 5. 470211 6. 683928  
5. 432519 5. 935543 5. 491151 6. 993184 5. 600695 5. 951286 5. 728736 5. 515923 5. 575806  
3. 246738 3. 268501 3. 446697 4. 138101 3. 879728 4. 043311 3. 301075 3. 047389 4. 963805  
7. 743228 8. 061025 7. 736947 7. 758915 8. 026491 7. 448203 7. 279351 7. 678106 8. 162135  
2. 506057 2. 485001 2. 711278 2. 604341 2. 225638 2. 365865 4. 334434 2. 434231 2. 755085  
9. 105592 8. 984551 8. 894217 8. 534043 8. 477177 8. 497573 8. 850734 8. 674172 8. 922368  
8. 107407 6. 470034 7. 156901 6. 682339 6. 926776 6. 60698 6. 493818 7. 035022 7. 546293  
5. 264895 6. 084354 6. 491198 6. 431668 6. 13919 5. 944905 5. 653936 6. 031457 6. 034012  
4. 783377 5. 188855 4. 703292 4. 208354 4. 977707 4. 969478 4. 255246 5. 04125 3. 810307  
6. 562126 7. 540999 6. 724856 6. 712919 7. 73516 6. 906399 7. 366614 6. 515586 6. 860185  
5. 587704 6. 893251 7. 104486 5. 218462 6. 01488 6. 805485 6. 890919 6. 862847 6. 160223  
6. 221082 5. 613608 5. 37719 4. 993131 6. 178937 5. 75362 5. 389079 5. 225952 5. 911766  
4. 437061 3. 610624 4. 195908 2. 793251 2. 769769 4. 089137 3. 17063 3. 875979 2. 920331  
6. 516735 6. 220173 6. 287995 6. 319068 6. 627355 5. 526668 6. 287519 6. 333104 6. 334979  
6. 101939 6. 324363 6. 094113 5. 767937 7. 101582 5. 661433 5. 868109 6. 15521 5. 960057  
7. 353658 7. 596498 7. 588042 6. 784734 7. 139414 7. 06837 7. 268595 7. 860445 7. 414363  
1. 825139 1. 366026 1. 360961 1. 800624 1. 545293 1. 280594 2. 13001 1. 400318 1. 486232

6. 567582 5. 874477 6. 126638 5. 563712 6. 080703 5. 623761 5. 600854 6. 080447 5. 714036  
2. 87124 3. 767133 2. 324069 2. 803671 2. 521584 1. 875198 1. 958436 3. 2257 3. 648971  
6. 649347 6. 522749 5. 55723 6. 038245 6. 146805 6. 496427 6. 663821 6. 481724 6. 34233  
8. 654978 8. 842197 8. 463991 8. 594412 8. 424795 8. 72336 8. 040185 8. 771503 8. 703371  
5. 652363 6. 518338 5. 760659 3. 957938 5. 623912 5. 187523 4. 858446 6. 286547 5. 368433  
5. 615493 5. 715546 5. 462337 4. 891839 5. 154189 5. 461458 5. 478057 5. 301486 5. 430088  
5. 490158 6. 289989 6. 097105 6. 204061 6. 577294 6. 226741 6. 106473 5. 931598 5. 950741  
6. 037354 7. 784953 7. 393128 6. 679083 7. 09403 7. 312206 7. 064638 7. 342247 7. 238998  
4. 861807 4. 612148 4. 649077 5. 987434 5. 722212 4. 826547 4. 760525 4. 507553 4. 827514  
7. 055825 7. 566329 7. 523538 7. 387601 7. 827448 6. 6274 7. 706185 7. 395017 7. 290377  
7. 317988 7. 308889 7. 300424 7. 251382 7. 329648 7. 212191 6. 925647 7. 708902 7. 378385  
5. 124458 4. 837476 4. 944013 4. 686606 4. 917845 4. 976828 5. 075111 5. 34663 4. 527478  
5. 053881 5. 950275 4. 887788 5. 471164 5. 49952 5. 0613 4. 250989 5. 237312 5. 213478  
8. 932009 9. 413098 9. 183605 9. 183349 9. 643658 8. 682032 9. 687286 9. 075949 9. 562213  
6. 016611 6. 327573 6. 723591 7. 190662 6. 80869 6. 882976 5. 616459 6. 622957 6. 141431  
4. 824859 4. 402772 3. 99246 4. 556193 3. 857773 4. 24945 3. 981669 3. 56363 4. 301272  
7. 301023 7. 52479 7. 421806 7. 095161 7. 388754 7. 434661 6. 865554 7. 285682 7. 210779  
6. 104251 5. 828528 5. 685447 6. 887162 6. 238151 6. 116157 6. 236164 6. 56323 6. 359533  
6. 880851 7. 135689 6. 693165 6. 683297 7. 351288 6. 774546 6. 9812 7. 116925 6. 832345  
1. 539279 1. 563262 1. 423348 1. 652881 1. 631246 1. 684648 2. 795997 1. 665051 1. 243592  
7. 887926 7. 161342 7. 34508 7. 696573 7. 406702 7. 507818 7. 996633 7. 546435 7. 793154  
7. 23324 6. 368885 6. 098243 6. 728786 6. 608354 6. 531952 6. 674014 6. 49279 6. 800243  
3. 451412 4. 323844 4. 442605 4. 067759 3. 238549 4. 266715 3. 68521 4. 879815 4. 345681  
1. 784029 1. 400813 1. 318101 1. 868744 1. 609462 2. 439852 2. 043609 1. 269593 1. 299674  
3. 097378 3. 708724 5. 95251 4. 377556 5. 351781 3. 829848 5. 671158 4. 028383 5. 929416  
1. 228739 1. 280033 1. 4317 1. 43532 1. 150705 1. 152228 2. 386655 1. 141992 1. 793153  
2. 488373 1. 728088 1. 922785 1. 871667 2. 475494 1. 70698 2. 033044 1. 872512 2. 127699  
3. 76603 5. 296761 5. 190002 3. 781413 4. 493173 4. 609447 4. 442346 4. 887518 4. 973964  
5. 233341 4. 199503 2. 506134 3. 74769 1. 400518 3. 351321 3. 867852 5. 3301 4. 476325  
8. 327161 8. 000663 8. 368426 8. 418204 8. 333117 8. 772511 7. 904359 7. 980656 7. 823737  
3. 06935 4. 175636 2. 361983 2. 849285 2. 647952 2. 997348 2. 769753 3. 125533 2. 910519  
3. 109171 3. 63581 3. 506656 3. 706906 3. 105066 3. 865482 3. 016473 4. 526843 3. 920615  
1. 722445 1. 541667 1. 599803 1. 502527 1. 805131 1. 813574 2. 680232 1. 616504 1. 421752  
7. 737857 4. 973045 6. 398335 4. 443649 4. 713565 3. 541916 4. 560089 4. 09569 5. 161038  
4. 700793 5. 274344 5. 016443 4. 401387 5. 757855 5. 208408 5. 242864 4. 606788 4. 636254  
6. 592812 6. 919777 6. 731686 7. 21766 7. 111235 7. 058285 6. 742168 7. 179747 6. 999367  
4. 996442 5. 381231 4. 455512 5. 262374 4. 585795 4. 410944 4. 319577 6. 065765 4. 795244  
4. 255022 4. 381576 4. 222651 5. 218046 4. 858517 4. 889024 4. 692069 5. 176775 4. 590118  
8. 605458 8. 686872 8. 726559 8. 722452 8. 578572 8. 553184 8. 474035 8. 360343 8. 515367  
1. 752285 1. 786764 2. 318572 2. 143202 2. 159082 2. 068515 2. 685505 1. 434278 1. 736968  
3. 363303 3. 534298 4. 335642 4. 048878 4. 400991 3. 887399 4. 321252 3. 386361 4. 391968  
6. 826359 6. 834865 6. 798521 6. 678 7. 032673 7. 014929 6. 534988 6. 372428 6. 369242  
5. 369664 5. 008656 5. 76992 5. 547914 6. 194296 6. 34326 5. 647168 5. 607058 6. 494821  
6. 247889 4. 848184 5. 453102 4. 630019 5. 075965 4. 120384 4. 819397 4. 94483 5. 484413  
6. 615243 6. 906082 7. 020012 6. 586285 7. 002322 6. 93217 7. 678117 7. 269927 6. 538349  
5. 878208 6. 589256 6. 435304 6. 066336 6. 109923 5. 547843 5. 910379 6. 211769 6. 413078  
5. 137296 5. 492331 5. 289345 5. 083894 5. 383244 4. 573411 5. 109731 4. 88918 5. 053159  
4. 959686 5. 115635 5. 075087 4. 561856 5. 681683 5. 786262 4. 984047 4. 5171 5. 307354  
4. 997059 4. 446083 5. 289268 4. 563607 4. 027729 6. 237509 5. 522501 4. 96837 5. 375827  
7. 538898 7. 955663 7. 471393 7. 913096 8. 147788 7. 395567 7. 80608 7. 877203 7. 90407  
7. 16975 6. 409576 6. 507042 5. 745613 6. 805119 6. 080031 5. 909705 6. 608945 6. 149651

5. 171132 4. 975458 4. 934231 4. 442421 3. 969702 4. 282852 4. 364254 3. 651416 4. 60083  
5. 613576 4. 964281 5. 426318 5. 294329 4. 878549 5. 344332 5. 659888 5. 003722 4. 990297  
9. 128803 9. 141863 9. 024441 8. 401262 9. 544727 9. 064949 9. 818451 9. 364067 9. 106994  
6. 766518 6. 892951 6. 637691 6. 506233 7. 099554 6. 225103 6. 761475 7. 055987 6. 888282  
7. 806132 7. 616417 7. 339627 7. 43075 7. 198551 7. 311778 7. 67714 6. 772163 7. 338369  
2. 345927 2. 487568 1. 642016 2. 391493 2. 320934 1. 343579 2. 236652 2. 014811 1. 4421  
7. 89916 7. 166239 7. 070797 6. 016265 7. 144651 6. 421285 6. 727339 6. 694231 7. 524002  
5. 500332 3. 346525 4. 101435 3. 620957 2. 636557 2. 609132 3. 558646 2. 435378 4. 163447  
3. 515146 3. 258364 3. 193912 3. 45811 3. 049838 2. 607585 3. 316509 3. 338641 2. 774762  
5. 207495 6. 404365 5. 514722 6. 267089 6. 58591 6. 193287 6. 506402 6. 093387 6. 201919  
7. 644704 8. 432525 8. 394245 8. 322553 8. 431626 8. 268984 8. 262566 8. 264519 7. 923774  
6. 05672 4. 90927 4. 818084 5. 128277 2. 978243 4. 815664 3. 835389 3. 480535 5. 230135  
4. 799276 5. 561097 5. 354905 5. 635925 4. 156662 4. 722294 5. 012592 4. 329595 4. 798996  
6. 365802 7. 226838 7. 172972 6. 605564 7. 122506 6. 69092 5. 57092 7. 80672 7. 091763  
4. 157072 3. 881809 3. 918427 3. 012942 3. 924916 3. 991264 3. 697048 4. 263732 3. 214786  
7. 757433 8. 498156 8. 329346 8. 168819 8. 525751 8. 411042 7. 78243 8. 484256 8. 202847  
4. 923157 5. 480115 5. 177183 4. 750051 5. 226299 5. 27479 5. 329224 5. 701261 5. 118787  
4. 335966 4. 372161 4. 567256 4. 946097 4. 717797 4. 378935 4. 626027 4. 548095 4. 228447  
5. 758565 7. 099419 6. 919645 6. 316081 6. 758255 6. 549197 6. 582063 7. 331883 6. 668308  
5. 437609 5. 445291 4. 773103 5. 653589 5. 285169 6. 072143 5. 071511 5. 159423 4. 872647  
6. 235419 5. 321272 5. 592415 6. 632931 5. 837595 6. 105451 5. 407584 5. 932526 5. 910944  
7. 4967 8. 785313 8. 534089 8. 625354 8. 40807 8. 479537 8. 245166 8. 382439 8. 396984  
4. 301436 6. 131007 5. 520662 5. 244792 4. 792431 5. 858059 4. 399679 5. 769701 5. 33681  
4. 136408 4. 173279 4. 524587 3. 318732 4. 662483 4. 448112 4. 452879 3. 857222 5. 216668  
2. 869397 2. 853088 3. 007405 2. 790804 2. 617168 3. 257882 3. 166609 2. 899699 2. 928252  
4. 253105 3. 628639 4. 327621 3. 536101 4. 339454 3. 976726 4. 14521 4. 375742 3. 381572  
5. 52566 6. 01711 6. 259545 6. 483527 6. 247859 6. 159975 5. 698759 5. 704732 6. 011176  
5. 111148 4. 703855 3. 970055 4. 169197 5. 306839 3. 758116 3. 849341 2. 099776 3. 73353  
5. 559045 6. 418193 5. 392362 6. 937994 6. 055039 5. 410262 5. 644483 5. 902869 5. 896116  
6. 674732 6. 800416 6. 814423 6. 951311 6. 669066 6. 660255 6. 577362 6. 439757 7. 081613  
6. 2992 6. 504201 7. 105855 6. 815508 6. 216786 6. 744757 6. 422173 7. 121262 6. 815061  
7. 404335 7. 638511 7. 853263 7. 764016 7. 851883 7. 740346 7. 296807 7. 620141 7. 728565  
6. 48588 5. 31319 5. 893579 4. 913478 5. 555607 4. 906953 5. 221141 5. 767487 6. 112125  
7. 285747 7. 75688 7. 63879 7. 660639 7. 993609 7. 565169 7. 65372 7. 805902 7. 868875  
5. 431998 6. 237476 5. 602723 5. 986205 5. 821609 5. 671616 5. 830317 5. 384953 5. 457483  
8. 439019 7. 248002 7. 889218 7. 255785 8. 21813 7. 492995 7. 313583 7. 455337 8. 060123  
6. 382106 7. 176113 6. 788527 6. 511678 6. 901685 6. 699278 6. 460393 6. 987376 6. 784079  
4. 029083 3. 173245 3. 787602 3. 116366 3. 12955 3. 264537 3. 486415 3. 095612 3. 10291  
7. 082951 6. 546135 6. 536405 6. 197586 6. 908404 5. 821519 6. 507251 6. 776213 6. 541396  
7. 302767 6. 721241 6. 358682 6. 904984 6. 644585 6. 565722 6. 699041 6. 586185 6. 652651  
10. 15973 10. 47969 10. 2224 10. 18459 10. 31136 10. 03078 10. 16593 10. 33004 10. 10629  
6. 062559 6. 248831 5. 813506 5. 865646 5. 864724 6. 426083 6. 906235 5. 901038 5. 830237  
3. 864074 4. 527192 4. 745222 4. 402233 5. 252604 4. 369977 4. 420049 4. 661226 4. 78056  
7. 042218 7. 213753 7. 256796 7. 123541 7. 580622 7. 058604 7. 106856 6. 947559 6. 968591  
4. 356052 5. 678778 5. 129717 4. 583956 4. 370594 4. 277041 3. 951748 3. 89004 4. 652091  
8. 029623 7. 116482 7. 583183 7. 648372 7. 79422 6. 812827 7. 042247 7. 129694 7. 560645  
8. 928288 9. 201964 9. 320347 8. 91785 8. 869511 8. 634936 9. 038565 8. 875558 9. 100759  
7. 592758 7. 851171 8. 070965 7. 597456 7. 392302 7. 402749 7. 462132 7. 65687 7. 465159  
3. 252488 2. 827342 3. 167568 2. 469313 2. 525234 3. 402539 3. 083968 3. 114191 2. 555514  
7. 005135 6. 678609 6. 795873 6. 545142 7. 283509 6. 419108 6. 210588 7. 437126 7. 282726  
4. 429471 3. 743332 3. 597643 3. 926028 5. 111181 3. 314055 3. 551295 4. 700077 3. 711459

5. 259211 5. 786492 5. 144221 5. 032111 5. 775289 6. 137344 4. 358046 5. 39772 5. 220228  
5. 955198 6. 474839 5. 92784 6. 266835 6. 356945 6. 071365 6. 227621 6. 653188 6. 239367  
6. 224608 6. 841821 6. 429598 6. 798942 6. 530151 6. 592384 6. 664668 7. 039453 6. 455186  
3. 091068 3. 826284 3. 359868 3. 191757 3. 266233 3. 07539 3. 471966 3. 607772 3. 95645  
4. 474856 4. 793093 4. 848314 4. 678154 4. 122346 4. 45344 4. 908067 5. 182065 4. 487289  
5. 114476 5. 009131 5. 627079 5. 09205 5. 249232 5. 667937 4. 713297 3. 547743 3. 678955  
6. 791738 7. 750091 7. 508477 7. 708069 7. 574682 7. 23919 7. 601727 7. 433069 7. 368432  
6. 164113 5. 846521 6. 135395 5. 294665 5. 951869 4. 880889 5. 3073 6. 819084 6. 246012  
9. 370768 9. 476255 9. 271217 9. 095381 9. 136451 9. 086231 9. 401472 9. 299129 9. 163933  
6. 276223 7. 071327 6. 78228 6. 774587 7. 270408 7. 453597 6. 790641 6. 758748 6. 842821  
8. 277092 8. 935132 8. 359078 8. 88316 8. 949324 8. 802539 8. 886066 8. 473033 8. 589085  
2. 345773 2. 930145 1. 806378 2. 346858 2. 526235 2. 775682 1. 837926 1. 797606 3. 214128  
1. 474095 2. 504869 1. 181987 2. 106289 1. 343814 1. 394106 2. 181657 1. 335237 1. 941102  
6. 944073 6. 647547 7. 07273 5. 642985 6. 172567 6. 03174 6. 131669 5. 60419 5. 804554  
3. 608065 3. 377913 3. 515413 3. 497609 2. 772079 3. 673623 3. 814149 3. 829964 4. 071553  
6. 115039 4. 674923 4. 138176 4. 784563 4. 402409 4. 392203 4. 634635 3. 73316 4. 325095  
6. 766552 6. 883597 6. 780504 6. 921534 7. 399229 7. 168472 6. 924958 7. 517639 7. 443937  
1. 585116 1. 504103 1. 306761 1. 523312 0. 952467 1. 686224 2. 315905 1. 876667 1. 518922  
4. 379609 4. 769154 4. 79487 3. 952876 4. 18604 5. 109825 4. 413505 5. 021785 4. 483941  
4. 164815 4. 177571 3. 937047 4. 673687 4. 891582 4. 165483 4. 414236 4. 311151 4. 62318  
2. 662205 2. 604705 2. 039338 2. 632821 1. 705236 2. 110704 3. 12482 1. 94399 1. 774928  
3. 940697 3. 731765 4. 006122 3. 445868 3. 703351 4. 030424 3. 635113 3. 878342 3. 647444  
8. 012343 7. 596032 7. 814379 7. 636635 7. 948939 7. 661993 8. 037363 7. 834281 8. 217975  
2. 702106 3. 37438 3. 893963 3. 521734 2. 925612 3. 479342 2. 435745 3. 373116 2. 75  
4. 170689 4. 780822 4. 627756 4. 616778 4. 702231 4. 186937 4. 500122 4. 259302 3. 26792  
5. 47488 5. 613603 5. 493058 5. 756665 5. 484496 5. 474802 5. 230801 5. 397298 5. 565046  
6. 483699 6. 327358 6. 128315 6. 171362 5. 841569 6. 187375 6. 244778 5. 893938 5. 948417  
3. 426845 3. 637005 4. 012129 4. 008756 3. 489872 3. 464971 3. 537284 2. 999647 3. 248317  
4. 534636 4. 768451 3. 929112 4. 048073 4. 035951 3. 309189 3. 039723 4. 468326 3. 848867  
2. 255285 2. 190946 2. 154796 2. 02472 2. 121948 2. 310061 1. 851298 2. 172077 2. 480329  
3. 713255 4. 02219 3. 982916 4. 243594 4. 019892 4. 285886 3. 542954 4. 29981 4. 095662  
6. 452309 6. 712656 6. 604234 6. 979164 6. 57953 7. 183995 6. 510344 6. 916418 7. 14243  
5. 913093 4. 768109 5. 421633 4. 315004 4. 674641 4. 143269 4. 23111 4. 633048 6. 138213  
2. 810222 3. 681285 3. 024207 2. 858363 2. 884853 3. 490574 2. 948815 2. 967185 2. 892394  
4. 323018 4. 842709 3. 970686 5. 024392 4. 671902 4. 851091 4. 244621 4. 274924 3. 467155  
5. 519297 5. 478592 5. 824241 4. 523331 5. 120206 5. 366648 4. 723006 4. 672812 4. 610455  
2. 163875 1. 23934 1. 806211 2. 021993 3. 120651 2. 658349 3. 714187 2. 324905 2. 526037  
7. 079178 7. 28801 6. 762583 7. 421188 7. 670472 7. 776941 6. 996857 7. 140789 6. 799515  
8. 457071 5. 793318 6. 718965 4. 453901 5. 413458 3. 603848 5. 165848 5. 643176 7. 107828  
9. 335054 7. 909908 9. 134531 6. 84975 7. 657758 8. 236029 7. 932254 8. 137193 8. 612252  
3. 848693 4. 549162 4. 560485 4. 465796 5. 081998 5. 024888 4. 229356 3. 758589 4. 366962  
5. 225846 4. 640319 5. 128944 4. 511102 5. 227592 4. 146669 5. 002413 4. 781948 4. 824785  
7. 813515 8. 059279 7. 580329 7. 526904 7. 692913 7. 72822 7. 843881 7. 443549 8. 133069  
9. 003975 9. 428948 9. 544581 9. 361656 9. 55886 9. 220798 9. 160415 9. 44933 9. 423054  
7. 665523 7. 637396 7. 413432 6. 829737 6. 771788 7. 539473 7. 380265 6. 767769 6. 718465  
3. 613264 5. 809109 5. 387634 5. 271993 5. 544169 5. 318393 4. 952219 5. 984585 5. 191901  
4. 072191 3. 920229 3. 853827 4. 481088 4. 776997 4. 818008 4. 528431 3. 763934 4. 120366  
3. 917897 4. 817711 4. 35219 4. 66625 3. 862941 5. 726884 5. 334952 5. 565936 3. 856215  
5. 592437 5. 350111 5. 994139 5. 19998 5. 106312 4. 695627 3. 798712 5. 51357 4. 787607  
5. 19393 5. 233786 4. 993269 5. 046656 5. 623606 5. 268323 4. 815479 5. 008296 4. 526444  
4. 618443 4. 77547 4. 848611 5. 083879 5. 253811 4. 743422 4. 233717 5. 215172 5. 121427



1. 631324 2. 15865 1. 65623 0. 983481 1. 193086 1. 606354 2. 320409 2. 152988 1. 563479  
9. 063346 9. 870227 9. 697412 9. 580097 9. 782247 9. 453464 9. 036853 9. 476739 9. 355265  
1. 799705 1. 53371 1. 307846 1. 89166 2. 063539 1. 818907 1. 89623 2. 071444 1. 663483  
6. 041601 6. 891036 6. 732409 7. 305184 7. 361585 6. 909026 6. 947795 6. 56997 6. 369447  
5. 528337 5. 579314 5. 1627 4. 754184 4. 875139 5. 186543 4. 808645 4. 927389 5. 644122  
2. 429893 2. 106531 2. 487286 2. 732493 2. 194901 2. 110931 4. 856241 2. 082883 3. 03145  
6. 178606 4. 746782 6. 515212 5. 665627 5. 736722 5. 875256 5. 963994 6. 082783 6. 405379  
6. 771472 6. 941195 6. 719827 6. 631071 7. 154491 6. 718111 7. 396628 6. 893706 6. 584753  
2. 089185 3. 090192 2. 537997 3. 294141 2. 567706 3. 085544 3. 933983 3. 391924 3. 308443  
6. 696965 6. 237908 6. 186409 5. 226095 5. 970948 5. 861829 5. 864554 6. 552745 6. 016025  
4. 75117 4. 43502 4. 234578 3. 882106 3. 982127 4. 300488 4. 804444 5. 155487 4. 568396  
2. 076903 2. 012628 1. 843502 2. 246459 2. 131902 2. 862059 2. 168501 2. 098004 1. 864326  
2. 731056 2. 372461 1. 770067 2. 461291 2. 518367 2. 48977 2. 526777 2. 479525 2. 571718  
2. 383556 1. 741944 3. 014836 2. 020422 2. 113583 1. 81726 2. 986411 2. 448092 1. 892255  
2. 510109 2. 873192 2. 932356 2. 750161 3. 400457 1. 715277 2. 779209 2. 469435 2. 285141  
1. 942287 1. 419865 1. 009406 1. 338881 1. 514149 1. 015631 1. 776298 0. 777769 1. 598096  
2. 866439 2. 521733 2. 469835 2. 382684 2. 529235 2. 666986 3. 012321 2. 176321 1. 979135  
6. 789964 6. 76393 7. 205437 6. 920735 6. 694705 6. 132137 6. 835076 7. 395785 7. 097675  
4. 266312 5. 963913 7. 580985 5. 604313 6. 4113 5. 255575 7. 006612 7. 338146 5. 508661  
2. 084095 2. 724005 2. 12212 2. 279342 2. 831837 2. 613604 2. 64807 2. 965999 2. 23204  
1. 433261 2. 029468 1. 774318 1. 285409 1. 060597 1. 652048 1. 527879 1. 282694 0. 980185  
4. 442452 5. 596248 5. 11179 5. 235247 5. 494968 4. 834592 5. 604656 4. 072529 4. 738947  
6. 552335 6. 742441 7. 003748 6. 777225 6. 753429 6. 478516 6. 475523 6. 304837 6. 69656  
5. 729694 5. 443988 5. 991576 5. 344339 6. 264516 5. 634589 5. 801383 6. 000256 5. 551043  
5. 788158 5. 691813 6. 42622 5. 12036 4. 040773 5. 613365 5. 116298 5. 962169 5. 448632  
1. 680275 1. 936561 1. 996086 1. 809651 1. 735393 1. 668883 1. 911536 1. 407822 2. 28129  
4. 831923 5. 395515 5. 734067 5. 180737 5. 930808 5. 586558 4. 519746 5. 452765 5. 200217  
5. 668241 5. 524868 4. 947051 4. 915261 4. 751943 5. 429085 4. 745201 5. 212701 5. 381736  
10. 22838 10. 55012 10. 30216 10. 44904 10. 41013 10. 4242 10. 24834 9. 798174 10. 57157  
1. 601169 1. 339066 1. 633473 1. 532339 1. 543344 1. 856339 2. 290032 2. 101301 1. 626175  
7. 906031 8. 016978 7. 564992 7. 73252 7. 814179 7. 383336 8. 028428 8. 139559 7. 701559  
2. 572743 2. 734293 2. 155916 2. 17352 2. 110005 2. 47226 2. 330734 2. 436685 2. 370056  
2. 218411 2. 256788 2. 452237 2. 042198 2. 14721 1. 503977 2. 865227 2. 57205 2. 132445  
3. 345342 4. 474804 4. 233784 4. 758448 5. 631104 4. 149817 3. 78287 4. 686924 4. 369815  
7. 92178 7. 878449 7. 859305 8. 027077 7. 597966 7. 856843 7. 984914 8. 242481 7. 997405  
5. 431415 6. 005314 5. 28934 5. 708064 6. 246629 6. 343643 4. 888441 6. 032973 6. 001717  
4. 479502 4. 498452 4. 670116 5. 142539 4. 562573 5. 396201 4. 974327 5. 114122 5. 553231  
9. 043903 9. 434819 9. 273145 9. 284346 9. 0327 9. 121121 8. 892248 9. 269719 9. 074141  
5. 700849 5. 122527 5. 309772 5. 336726 5. 77255 5. 050659 5. 429052 5. 510074 5. 107832  
6. 38837 6. 02806 7. 054552 5. 6541 5. 656023 6. 488677 6. 067425 5. 924555 5. 978758  
6. 10344 6. 277431 6. 503589 5. 838581 6. 435603 6. 088179 5. 05022 6. 173294 5. 980658  
2. 435165 3. 18409 3. 126365 3. 364428 3. 211366 3. 878327 3. 730174 3. 474968 2. 637901  
2. 974886 2. 004441 2. 387382 2. 536108 2. 479781 2. 391218 3. 228622 2. 009553 2. 098358  
8. 072228 8. 191716 7. 979339 7. 904422 8. 120887 8. 048763 8. 548969 8. 529862 8. 390652  
7. 834933 8. 01639 7. 850185 7. 810653 7. 461975 8. 094489 8. 052824 7. 157836 8. 047335  
5. 042997 5. 077624 4. 726921 5. 193538 5. 265341 4. 094867 4. 885391 4. 928616 4. 321809  
5. 301917 5. 774684 5. 481839 5. 548174 6. 177412 6. 229459 5. 615207 5. 786396 5. 609366  
9. 585047 9. 474974 9. 53032 9. 448202 9. 675259 8. 925981 9. 646324 9. 550185 9. 680088  
4. 516159 5. 179253 5. 527825 4. 431612 4. 700166 5. 201723 5. 99865 5. 451644 5. 381219  
2. 697178 2. 583361 3. 571456 3. 103615 3. 220823 2. 944811 3. 374317 2. 618413 3. 349626  
6. 038101 6. 608215 6. 140387 6. 056573 6. 004989 6. 217849 5. 86169 6. 211342 6. 570838

6. 366561 6. 180991 6. 045171 6. 346456 5. 956681 5. 998097 6. 548115 6. 338478 6. 1517  
8. 35066 7. 789398 7. 737559 7. 619862 8. 009895 7. 068508 8. 093812 8. 585395 7. 887457  
2. 46868 2. 647147 1. 78553 3. 00127 2. 371593 2. 084618 1. 703677 2. 467579 1. 886409  
2. 039042 1. 48794 1. 586036 1. 421266 1. 235974 1. 043696 1. 588284 1. 941483 2. 32982  
3. 837793 2. 333225 2. 114867 3. 106102 2. 733446 2. 532945 2. 666767 2. 363433 3. 644343  
7. 460442 5. 268629 7. 014714 5. 099466 6. 412033 4. 018039 5. 008532 5. 515363 6. 950504  
2. 582955 2. 270685 3. 077155 3. 459894 2. 580709 1. 875272 3. 590617 2. 118557 1. 97704  
1. 364542 1. 641878 2. 017308 1. 563316 1. 394322 1. 434027 1. 738656 0. 907731 1. 815956  
5. 260701 6. 36964 5. 801969 6. 049223 5. 801956 6. 265115 4. 689372 5. 557508 5. 810109  
3. 778103 4. 096821 4. 035004 4. 817165 4. 668742 4. 549342 4. 352871 3. 92319 3. 865232  
7. 133504 7. 440677 7. 259547 8. 032101 7. 298071 7. 56954 7. 173621 6. 74919 7. 615318  
4. 292079 4. 695703 3. 197351 4. 360971 4. 511993 3. 667437 3. 575399 4. 321947 4. 082361  
3. 30891 2. 454216 2. 358065 1. 828386 2. 05959 3. 214188 2. 498855 1. 705152 2. 155849  
5. 428046 4. 145053 4. 323028 4. 604294 3. 870221 4. 339209 3. 015453 4. 030417 3. 815203  
2. 840985 4. 095019 3. 399026 4. 425328 4. 489317 3. 592827 3. 53945 3. 592341 4. 790507  
3. 682356 3. 99152 3. 721038 4. 077627 4. 367107 4. 191895 4. 798868 3. 738194 4. 686159  
6. 708318 6. 506327 6. 942423 6. 777026 6. 775055 6. 960745 5. 881921 6. 539492 7. 01414  
4. 614699 5. 106805 5. 040386 5. 272983 4. 802744 5. 574037 4. 522163 5. 355133 5. 583864  
3. 024269 2. 53955 2. 180366 2. 659105 2. 379814 2. 572866 2. 925249 2. 834174 2. 896237  
5. 33256 4. 991168 5. 194013 4. 632203 4. 362929 3. 969901 5. 266832 4. 452632 4. 50383  
5. 80053 6. 405967 6. 41127 6. 006638 6. 695825 6. 304426 6. 108686 6. 212664 6. 39409  
1. 840793 4. 223005 1. 76661 4. 568943 2. 000217 2. 590933 3. 662033 2. 545309 1. 989685  
1. 56519 3. 770617 1. 788799 1. 360448 2. 174049 2. 222374 2. 666206 1. 172902 2. 539017  
3. 542706 2. 677853 3. 486977 2. 156081 3. 175999 2. 428465 2. 551174 3. 1983 2. 750895  
7. 999227 7. 517632 7. 750067 7. 885978 7. 974959 7. 049486 8. 178774 8. 196526 8. 292894  
2. 136307 1. 920992 1. 648948 2. 024387 1. 600381 1. 477552 2. 33917 1. 454919 2. 223331  
6. 184074 6. 026533 5. 787783 6. 767132 6. 566899 6. 113354 5. 426699 6. 525288 6. 051332  
5. 478278 6. 561379 6. 219228 6. 507869 6. 576462 6. 404157 6. 15998 6. 553904 6. 425807  
2. 656575 3. 464458 2. 577774 2. 654736 2. 206551 2. 811574 3. 301834 2. 782944 2. 22021  
5. 78971 6. 341154 6. 236826 5. 77598 6. 316127 6. 076273 6. 578827 6. 136056 6. 630302  
5. 681007 5. 171537 4. 132142 5. 416437 4. 798324 5. 176153 6. 01648 5. 352008 4. 825674  
4. 575218 4. 311429 4. 167622 5. 465225 5. 437953 5. 429861 5. 103474 3. 441721 4. 898594  
5. 033477 4. 58182 4. 701325 4. 295002 4. 398863 3. 921888 3. 944246 4. 64478 4. 847483  
6. 541229 6. 480681 6. 604719 7. 089727 6. 62153 7. 888942 7. 078102 7. 163082 6. 641453  
1. 609149 1. 835587 1. 712856 1. 492986 1. 736328 1. 989313 1. 804671 1. 61233 2. 305689  
1. 033405 1. 438423 1. 351702 1. 35915 1. 379982 1. 318572 1. 654471 1. 386593 1. 571098  
7. 104693 7. 546535 6. 733126 7. 330463 7. 339119 7. 336831 7. 088491 5. 706215 6. 516371  
4. 568806 5. 157307 4. 367341 4. 395717 4. 367974 4. 220807 4. 619644 4. 759139 4. 393124  
7. 161966 7. 31029 7. 173005 6. 960393 7. 566354 7. 079878 6. 864966 6. 700013 7. 179823  
3. 017993 4. 910001 2. 570534 4. 436972 4. 59838 3. 927408 3. 765162 3. 965193 4. 922095  
2. 001262 2. 770193 2. 935119 2. 96511 2. 384568 3. 286089 2. 334158 3. 499919 2. 203223  
4. 645994 5. 240042 4. 522972 5. 199329 5. 402679 5. 645611 4. 851524 5. 456649 5. 271986  
4. 097324 3. 829577 3. 794608 3. 476605 4. 299656 4. 109254 3. 549142 4. 338904 3. 817106  
2. 13893 2. 024985 1. 469392 2. 422374 1. 600955 1. 699672 1. 57991 1. 35743 1. 114377  
5. 547857 6. 595022 6. 639085 6. 539805 6. 732776 6. 23599 6. 653715 6. 660963 6. 172161  
3. 590269 4. 861356 4. 706049 4. 411951 4. 439138 4. 689937 5. 859993 5. 095132 4. 620499  
2. 687285 2. 858876 2. 69493 2. 826687 4. 739792 4. 17293 2. 841817 2. 910762 2. 485657  
5. 646434 6. 009534 5. 996193 5. 596727 6. 195453 5. 765014 5. 851539 6. 295109 5. 324431  
7. 928306 6. 610064 6. 512841 6. 980801 7. 139037 6. 534554 7. 195948 6. 576457 6. 779859  
4. 783591 4. 894968 4. 987085 5. 464875 4. 574439 4. 725073 5. 375939 4. 964365 5. 046229  
2. 823967 2. 73852 2. 67146 3. 376249 2. 37364 3. 220529 3. 207555 2. 402069 2. 289564

6. 541305 6. 373185 6. 351729 5. 801518 6. 182607 6. 531874 5. 393868 6. 173376 5. 715516  
5. 440346 4. 9446 3. 496823 5. 87465 4. 445412 4. 637978 4. 942924 5. 212826 4. 766716  
1. 3534 1. 043681 1. 141084 1. 333652 1. 451687 1. 443768 1. 309858 1. 345702 0. 919636  
7. 101579 6. 91552 6. 886797 6. 37767 6. 660491 5. 925584 6. 164041 6. 292831 6. 095708  
4. 002692 4. 156948 4. 160794 4. 50489 4. 437803 4. 871076 3. 583176 4. 614942 3. 761729  
5. 681612 6. 39463 6. 875924 6. 478473 6. 301115 6. 942133 6. 160718 6. 755716 6. 477283  
7. 419983 7. 887816 7. 859525 7. 612914 8. 007386 7. 681874 7. 790064 8. 197143 8. 492992  
3. 267261 4. 266511 4. 518215 4. 475842 4. 78881 4. 101151 4. 675222 5. 012411 4. 481062  
7. 06526 7. 321037 7. 04805 6. 893005 7. 250135 7. 409808 6. 394232 7. 148223 6. 806236  
4. 528942 4. 633914 4. 631529 4. 232444 4. 638731 5. 595318 4. 570659 4. 929794 4. 419759  
8. 022536 8. 27513 8. 293845 8. 431195 8. 239365 8. 29522 7. 822356 7. 987845 8. 109198  
7. 246654 6. 504674 6. 453545 6. 264576 6. 336233 6. 17395 6. 543736 6. 584863 6. 28596  
3. 838558 1. 584663 1. 667836 1. 542079 1. 381232 1. 884621 2. 006715 2. 086084 1. 905181  
6. 617068 7. 062292 7. 051241 6. 800104 7. 060013 7. 046226 7. 135927 7. 278369 6. 921867  
1. 355219 1. 564597 1. 230863 1. 335067 0. 968771 1. 272288 1. 28769 1. 3454 0. 884875  
3. 468132 5. 778528 5. 680605 6. 584658 8. 184879 7. 424905 7. 331305 6. 955749 6. 882702  
3. 380257 2. 90641 2. 818408 2. 975855 2. 614158 2. 713173 2. 76112 2. 785446 2. 801031  
3. 010705 3. 060363 2. 604898 2. 846205 2. 437223 2. 810894 3. 092143 2. 767587 2. 667503  
2. 50256 3. 751903 3. 241816 2. 867365 3. 534766 2. 893892 3. 419062 2. 544103 3. 16757  
6. 884425 7. 104729 6. 967195 7. 483968 7. 432835 7. 06435 6. 743682 6. 971861 7. 203869  
5. 171239 4. 657775 4. 358228 4. 339792 4. 533931 4. 71832 4. 636235 4. 574445 4. 719866  
1. 447307 2. 144912 2. 304343 1. 729324 1. 920041 1. 404835 3. 334916 2. 043243 1. 654688  
1. 882441 1. 640543 1. 827892 2. 278953 1. 980414 1. 899587 2. 075338 1. 58636 1. 564481  
3. 62947 3. 031331 2. 776106 2. 54832 2. 71677 3. 513186 2. 837062 3. 103051 2. 340396  
6. 578919 7. 05577 6. 687296 6. 694784 6. 776875 6. 61374 6. 91491 6. 772194 6. 686403  
4. 752259 5. 125061 4. 540855 5. 663109 5. 350652 5. 253424 5. 23955 5. 506897 5. 566598  
6. 113817 5. 119723 5. 297324 5. 510905 5. 673733 5. 744863 5. 634142 5. 062198 5. 455177  
6. 166965 6. 345468 6. 381129 5. 695563 6. 218459 6. 575771 6. 854775 5. 959512 6. 319092  
1. 247696 4. 02744 2. 01179 1. 540958 2. 221605 2. 614389 2. 498702 2. 185336 1. 861905  
4. 838276 4. 959424 5. 133726 4. 727041 4. 512055 5. 49144 4. 795128 4. 961961 4. 669504  
1. 015793 1. 361567 1. 124365 1. 893706 1. 372382 1. 752374 1. 505906 1. 605715 1. 411138  
2. 696201 4. 317141 2. 920276 3. 872417 4. 113739 3. 55131 3. 14565 3. 528334 1. 658333  
4. 849212 5. 127204 5. 389246 3. 844868 4. 620734 6. 070358 4. 478888 5. 526159 4. 920136  
5. 248398 5. 77778 5. 62922 4. 213152 4. 482736 5. 592271 5. 260365 5. 274487 5. 909877  
5. 064913 4. 275194 5. 017054 3. 477352 3. 959786 4. 682959 3. 348523 5. 259875 4. 763038  
6. 890798 6. 568876 6. 519519 6. 413715 6. 367611 6. 485005 5. 665668 6. 743606 6. 606279  
3. 578547 3. 34366 4. 984199 4. 186757 3. 871261 4. 345623 4. 25159 4. 153377 3. 859665  
2. 538478 2. 674358 3. 135281 2. 476631 2. 756454 3. 554073 3. 162135 2. 094942 1. 877402  
4. 916416 6. 890062 6. 861657 7. 055588 5. 716359 7. 605696 5. 993609 7. 046277 5. 748757  
5. 278691 6. 198189 6. 272816 6. 239903 6. 457726 6. 158627 6. 011351 6. 09257 5. 490412  
6. 282358 6. 097203 6. 951584 5. 385196 6. 018757 5. 709905 6. 664807 6. 758831 6. 271969  
3. 940999 4. 275702 3. 903641 3. 675065 3. 711595 3. 372677 3. 349802 3. 879571 3. 962872  
4. 740484 4. 620323 4. 945623 4. 787077 4. 178637 5. 205023 6. 362291 5. 954208 4. 933422  
9. 995561 9. 930741 10. 02583 10. 04706 10. 18241 9. 728277 10. 26659 9. 83679 9. 915175  
5. 428487 6. 017705 6. 944347 5. 466265 6. 110055 6. 521485 5. 947197 7. 3127 6. 572674  
8. 516856 8. 706409 8. 912459 8. 412141 8. 475085 8. 554704 8. 8563 8. 184055 8. 765863  
6. 636859 6. 082893 5. 53255 5. 673353 5. 609643 5. 836053 6. 103447 5. 212994 5. 800702  
4. 601741 4. 456474 4. 163411 4. 701904 4. 845564 4. 162422 4. 290288 4. 929849 4. 80638  
2. 24347 2. 592983 1. 856329 2. 259408 2. 71155 2. 174533 2. 13631 2. 73198 2. 165188  
3. 772786 5. 98034 5. 526121 5. 937054 5. 424502 5. 222265 4. 207128 4. 207046 5. 241376  
1. 874342 1. 600189 1. 887756 2. 596542 2. 023158 2. 443393 2. 540584 1. 912262 2. 240359

3. 57692 4. 021409 3. 879738 3. 53573 3. 468366 3. 174155 3. 773394 2. 825089 3. 102097  
7. 803619 7. 520185 7. 694719 7. 26625 7. 595386 7. 111601 7. 277648 7. 754477 7. 890842  
2. 059409 1. 914631 2. 452563 2. 236042 1. 789558 1. 913108 2. 798397 2. 287082 1. 999301  
3. 923891 4. 039119 4. 062889 4. 368043 4. 163943 4. 248013 4. 436211 3. 036639 4. 45419  
9. 032185 8. 410323 7. 931194 8. 561708 8. 209218 8. 127419 8. 580789 7. 474266 8. 321585  
3. 773025 5. 394846 5. 141299 5. 427019 5. 380804 4. 997897 5. 08618 4. 594497 4. 959275  
6. 745387 7. 752524 6. 316952 7. 138123 7. 029798 7. 043969 7. 459852 7. 167872 7. 135717  
4. 124056 4. 995457 4. 582823 5. 31347 5. 128576 5. 497406 5. 26114 4. 915095 5. 034279  
6. 62398 6. 130761 6. 316393 5. 796277 5. 930829 5. 903036 5. 823045 6. 058136 6. 731808  
3. 55822 5. 174625 3. 247939 5. 98605 4. 929218 5. 895593 5. 14723 4. 838027 4. 731189  
4. 902772 4. 689617 5. 603421 4. 846681 4. 989453 3. 903931 4. 338657 3. 775053 5. 436111  
8. 127707 8. 275947 7. 935321 8. 219203 8. 335028 7. 41947 8. 218449 8. 178401 8. 467497  
7. 588025 7. 23161 7. 210741 7. 441826 7. 324932 6. 983367 7. 247218 7. 977079 7. 583726  
6. 316873 6. 366175 6. 655228 6. 875593 6. 905194 7. 113469 6. 898071 5. 939205 6. 393759  
9. 300718 8. 750678 8. 768873 8. 585051 8. 798225 8. 843902 8. 848504 8. 840318 9. 079989  
5. 784168 5. 84794 6. 783928 6. 450128 5. 957156 6. 129759 5. 626112 5. 870356 6. 189917  
7. 399051 8. 147181 7. 429814 7. 806707 8. 302959 7. 786482 7. 649975 7. 901803 7. 567107  
3. 571023 3. 784399 4. 02364 3. 821269 4. 590442 3. 632039 4. 31252 4. 86886 4. 113448  
2. 070261 2. 051249 2. 209856 1. 801684 2. 673543 1. 671656 2. 088576 2. 338754 3. 170072  
2. 791545 3. 844663 3. 374553 3. 288214 3. 986623 4. 555304 3. 456193 2. 484615 2. 937459  
1. 519284 1. 411273 0. 889533 1. 535891 1. 536517 1. 510435 2. 333105 1. 38467 0. 759162  
4. 383906 4. 700376 4. 667685 4. 546256 4. 884306 5. 4322 4. 540232 5. 698686 4. 366324  
4. 649686 4. 401561 5. 044273 4. 637456 4. 582346 4. 561082 4. 488661 4. 862382 5. 025231  
4. 006776 2. 767953 3. 357572 3. 188679 2. 946714 3. 542555 3. 218833 3. 352571 3. 234112  
6. 277772 5. 793538 5. 475988 6. 121918 5. 418524 5. 367006 5. 172953 5. 462837 5. 457552  
3. 66222 3. 252603 4. 054607 2. 359988 3. 806721 3. 378594 3. 829754 2. 88371 3. 505178  
5. 582869 6. 029563 5. 655573 6. 249839 6. 710733 6. 03668 6. 561822 6. 339219 6. 097323  
5. 315493 5. 611174 5. 850665 5. 969556 5. 394421 5. 459369 5. 541545 5. 479418 5. 616159  
3. 01002 3. 748258 3. 174885 3. 566153 3. 653316 3. 45906 3. 908055 3. 69619 3. 159654  
6. 173476 6. 955797 6. 9616 6. 732008 6. 653382 7. 027365 6. 425102 7. 224465 6. 736769  
5. 703381 7. 285023 7. 194358 6. 735817 7. 045137 6. 714463 7. 032454 7. 103354 6. 92899  
5. 996845 6. 298596 6. 174157 5. 510401 6. 037732 5. 800255 6. 232899 5. 88864 6. 145085  
1. 739118 1. 623461 1. 560607 2. 033847 1. 468781 1. 825907 1. 67329 1. 744623 1. 778308  
2. 431149 1. 93123 2. 3949 2. 828613 1. 389194 2. 402781 2. 713005 1. 598799 2. 436634  
6. 174195 6. 081467 6. 433697 6. 131382 6. 6558 5. 225621 5. 95092 6. 509448 6. 229304  
2. 789719 2. 67355 2. 112779 2. 45411 2. 559377 2. 362185 2. 739216 2. 716577 2. 627586  
2. 66572 2. 273197 2. 068802 3. 3755 2. 819417 1. 789859 1. 742402 2. 747407 1. 80874  
6. 043289 5. 647821 5. 862039 5. 923531 6. 032419 5. 75168 6. 147266 5. 827424 5. 922381  
1. 991451 1. 764738 2. 305323 1. 886925 2. 228106 2. 380121 2. 379768 2. 630502 2. 72048  
4. 003223 3. 767441 4. 992021 4. 306984 4. 211783 4. 970295 3. 813053 4. 068584 4. 343765  
6. 563943 7. 189238 6. 785922 6. 208243 6. 512004 6. 541288 6. 109024 7. 063197 6. 152285  
9. 014346 8. 994274 9. 216497 9. 132916 9. 094761 8. 470647 8. 894662 8. 827986 9. 321276  
4. 418126 4. 234686 4. 003815 4. 709462 4. 514733 4. 410222 4. 487615 4. 207143 4. 040511  
3. 950227 2. 992608 3. 405875 3. 710754 4. 299228 3. 188109 3. 637324 4. 224727 3. 63555  
5. 400033 6. 126019 5. 387337 5. 471831 6. 539476 6. 05737 6. 323127 6. 421879 5. 997407  
8. 127708 8. 491003 8. 332557 7. 801766 8. 175865 8. 061844 7. 277606 8. 329344 7. 655392  
6. 026195 5. 875813 5. 861223 5. 666724 5. 745816 5. 552616 4. 675348 5. 622275 5. 895915  
2. 164075 3. 21795 4. 044499 2. 353274 2. 20046 3. 224324 2. 170026 2. 215344 4. 53792  
2. 017531 1. 280903 1. 84868 1. 645247 1. 535962 1. 060033 1. 33744 1. 086005 2. 098642  
5. 204979 4. 36174 4. 502737 3. 668265 4. 944711 4. 480206 3. 679283 5. 064308 4. 546755  
7. 981348 7. 435997 7. 737231 8. 097041 7. 546937 7. 849614 7. 963761 7. 134941 7. 358564

6. 353549 6. 57916 5. 885635 6. 076309 6. 03627 6. 406551 5. 674129 6. 922995 5. 968309  
1. 790284 1. 453501 2. 086499 1. 385717 1. 511012 1. 476123 1. 095862 1. 379156 1. 833548  
6. 981275 5. 937463 6. 417451 4. 836243 4. 793603 5. 132058 5. 76142 6. 495356 6. 988568  
7. 174679 7. 284714 7. 015852 6. 9197 7. 186731 7. 739932 7. 700699 7. 62884 6. 77789  
7. 483722 7. 792088 6. 784661 8. 026217 7. 176076 7. 87059 7. 52472 7. 255916 7. 538332  
2. 582323 2. 42135 2. 543501 2. 270406 1. 89074 1. 806584 1. 862395 1. 74688 2. 219377  
4. 957781 5. 020037 4. 80091 5. 300113 5. 131954 5. 289215 5. 772488 4. 884316 4. 863486  
6. 209674 5. 893918 5. 243017 5. 576654 5. 203243 6. 100232 5. 933293 5. 265138 6. 082377  
6. 174722 7. 311821 6. 020851 6. 45271 7. 18536 6. 72518 6. 591539 6. 910551 6. 633699  
4. 090603 3. 776614 4. 173856 3. 25336 4. 080043 3. 780395 3. 391067 3. 408972 2. 844237  
3. 062628 3. 972288 3. 454905 3. 913912 4. 370876 3. 917119 3. 917119 3. 019602 2. 951435  
4. 482091 4. 961423 4. 764899 3. 892033 4. 829953 4. 340103 4. 429476 4. 933669 4. 600908  
2. 982228 5. 309229 4. 758177 3. 726957 5. 815267 3. 446559 3. 500031 4. 336688 5. 128714  
7. 747501 7. 121025 6. 930382 6. 787423 7. 415711 6. 300897 7. 603961 7. 388616 7. 383961  
8. 190549 8. 322791 8. 227106 7. 883595 8. 153555 8. 050553 8. 010348 8. 459685 8. 218023  
6. 172911 6. 143413 6. 959624 6. 223859 6. 040159 6. 572242 6. 253319 6. 487813 6. 581585  
6. 32351 7. 247193 6. 775911 6. 594406 7. 200168 6. 847421 6. 220006 6. 73554 6. 793837  
3. 921771 3. 830046 2. 920578 4. 037978 5. 818373 3. 319681 3. 340187 3. 826001 3. 865152  
1. 333225 1. 063695 0. 914959 1. 203935 1. 286321 1. 166821 1. 198347 1. 14192 1. 096095  
3. 728857 3. 769117 4. 252416 3. 479627 3. 814118 3. 886035 3. 379243 4. 483897 3. 244183  
7. 017749 7. 551268 7. 638132 7. 28101 7. 870842 7. 334324 7. 169648 6. 832947 7. 463219  
6. 458858 6. 024481 5. 726517 5. 274683 5. 564614 5. 233504 5. 746428 6. 12915 5. 986587  
7. 521096 8. 255 8. 250738 8. 442643 8. 298236 8. 040006 8. 736096 8. 491318 8. 299716  
6. 434571 6. 99641 6. 672783 6. 994675 7. 067437 6. 162637 6. 350558 6. 778102 6. 894543  
4. 794397 4. 739813 4. 676619 3. 097491 3. 204428 3. 699978 3. 631186 3. 748428 5. 051854  
7. 858525 8. 004062 8. 002969 7. 975265 7. 790711 7. 993619 8. 119163 7. 539282 8. 027144  
1. 68396 1. 909581 1. 769969 1. 534226 1. 412656 1. 785291 2. 293813 2. 431845 2. 08354  
2. 465005 2. 550636 2. 979326 1. 716351 2. 186954 3. 376715 1. 883052 2. 242536 2. 018906  
2. 270093 3. 173239 2. 592861 3. 283243 3. 545413 2. 57304 2. 668809 2. 8318 2. 059124  
3. 650459 5. 41124 4. 77322 4. 757488 4. 705733 5. 30427 5. 062588 5. 058912 5. 133188  
5. 851884 5. 556003 5. 213566 5. 000335 5. 378506 5. 068135 4. 889734 5. 632108 5. 330519  
6. 909238 7. 062508 7. 298893 6. 746653 7. 405888 6. 648394 6. 830678 7. 1278 7. 04296  
8. 047442 8. 565343 8. 54356 8. 184733 8. 42379 8. 308115 8. 65959 8. 423701 8. 654786  
7. 750013 8. 064532 8. 378781 8. 341145 8. 365186 8. 153543 8. 420946 8. 311108 8. 159039  
3. 60956 3. 949465 4. 583086 3. 789241 4. 91273 4. 794061 4. 784901 4. 242442 4. 857683  
5. 284559 5. 929838 5. 916598 5. 616569 5. 999921 5. 540527 5. 767248 6. 686232 5. 911979  
1. 717289 3. 773294 4. 757935 5. 455745 5. 417037 4. 699572 5. 077529 4. 002291 4. 824539  
6. 287725 7. 562064 7. 471728 6. 583947 7. 579573 7. 330271 7. 240894 7. 462522 7. 233591  
7. 286236 7. 173603 7. 32239 6. 826021 7. 072995 6. 734583 7. 105486 7. 096564 7. 062029  
4. 660909 4. 41132 5. 254671 4. 623655 4. 68055 5. 338424 4. 8713 5. 848152 5. 02039  
4. 363153 4. 174741 3. 026807 4. 019977 3. 862038 3. 134166 2. 952589 4. 058765 3. 55459  
4. 824019 4. 959499 4. 949959 4. 647816 4. 543697 4. 672379 4. 786722 4. 92464 4. 885621  
3. 010444 3. 817833 3. 071549 3. 34095 2. 600681 2. 739474 2. 822695 2. 942292 2. 676976  
6. 189573 6. 885473 6. 77199 5. 841792 7. 318944 7. 441782 6. 155921 7. 194604 7. 328727  
6. 924682 7. 117606 7. 060228 6. 891832 7. 039406 7. 086513 7. 281425 7. 496013 6. 614856  
3. 704862 2. 745317 2. 648234 2. 623542 2. 598995 2. 585315 3. 190501 2. 325469 2. 911372  
4. 936396 5. 074682 4. 821299 5. 117651 5. 430224 5. 11573 5. 12269 4. 775575 5. 11008  
2. 049163 2. 399062 3. 024994 2. 482286 2. 579819 2. 784315 1. 952954 2. 863746 2. 659069  
5. 396577 6. 59776 6. 452341 6. 326751 6. 250394 6. 426523 5. 933465 6. 206272 6. 132023  
4. 312869 4. 033791 5. 15408 5. 063945 5. 398786 4. 793236 5. 054125 4. 872341 4. 558695  
3. 70078 4. 016787 3. 242059 4. 233956 3. 700613 4. 329544 4. 207525 4. 32032 3. 068565

3. 536741 3. 027381 2. 493666 2. 595234 2. 461392 2. 552008 2. 74678 3. 107948 3. 102013  
5. 976698 6. 715329 6. 451956 6. 513411 6. 268364 6. 109601 6. 063271 6. 75952 6. 459512  
6. 879812 5. 318686 5. 464243 5. 880012 6. 994785 6. 128485 5. 667122 6. 030992 6. 370165  
7. 201873 7. 63028 7. 235232 7. 460619 7. 443396 7. 474163 6. 994859 7. 298008 7. 80324  
1. 333219 1. 907886 1. 507926 2. 660735 2. 303938 2. 489502 1. 51665 2. 77876 1. 571326  
2. 720803 3. 007597 2. 850251 2. 628774 2. 711236 2. 89645 2. 756581 3. 171143 3. 261961  
1. 936853 1. 387796 1. 061513 1. 169253 1. 306195 1. 423093 1. 533333 1. 221328 1. 082797  
1. 977505 1. 366669 1. 799441 2. 212859 1. 611069 1. 583106 1. 698756 1. 80824 2. 735784  
5. 828375 4. 725909 4. 15445 4. 945803 5. 942752 3. 524973 4. 187894 4. 797078 4. 837782  
2. 953945 4. 578342 3. 171025 4. 461905 3. 968369 4. 03246 3. 875872 4. 869586 4. 865789  
1. 66275 2. 315461 2. 059827 2. 216789 1. 32167 1. 636188 1. 790387 2. 314492 1. 768286  
5. 44169 6. 049761 6. 274433 4. 967874 5. 474451 5. 780684 5. 594838 5. 335813 5. 706824  
4. 884315 5. 688922 5. 723838 5. 95042 6. 047145 5. 629568 5. 456911 5. 090043 5. 545901  
6. 397031 7. 092705 6. 775219 7. 090664 6. 987449 6. 413901 6. 666645 7. 501126 7. 13608  
8. 399044 7. 251907 7. 631873 6. 771522 7. 284532 7. 410543 7. 600331 7. 018543 7. 741881  
6. 965502 6. 799256 6. 906319 6. 811147 6. 640576 6. 416305 6. 089605 6. 673764 6. 528046  
5. 832576 6. 118558 5. 459681 7. 387776 6. 348076 6. 245884 6. 455344 5. 792559 6. 607081  
3. 735217 5. 419339 4. 550626 4. 580493 4. 841396 5. 857534 4. 808461 4. 129505 4. 13101  
8. 306627 7. 78043 7. 404772 7. 704919 7. 551741 7. 585775 7. 529669 7. 628663 7. 596549  
7. 102283 7. 556899 7. 72285 7. 138179 7. 410256 7. 35266 6. 585938 7. 471697 6. 697341  
6. 835256 7. 243283 7. 229734 6. 802863 7. 447357 6. 701143 7. 262871 7. 392213 6. 628413  
2. 128051 2. 352058 3. 212144 1. 856471 1. 71173 2. 488638 2. 861516 2. 020238 1. 985596  
6. 807547 6. 66295 6. 699327 6. 425508 7. 060663 6. 636396 6. 348736 6. 418751 6. 721856  
5. 55194 5. 353333 5. 011887 5. 535931 5. 783062 5. 349246 4. 62259 6. 038124 5. 498985  
6. 954573 7. 201794 7. 410717 7. 412951 7. 376087 7. 936005 6. 972001 7. 495906 7. 830778  
5. 359525 5. 095243 5. 764526 5. 840118 5. 328652 5. 406503 4. 74776 6. 297488 5. 307135  
2. 312289 2. 649067 2. 844799 2. 16115 3. 086861 2. 680809 2. 527941 3. 556694 2. 628543  
6. 345092 7. 066591 6. 992564 6. 856069 6. 95106 6. 627549 6. 998988 7. 033882 7. 075859  
4. 847789 5. 061286 4. 545239 5. 366558 4. 479871 5. 174498 4. 893207 4. 984976 4. 902633  
5. 757945 5. 902696 5. 928384 5. 854076 6. 122676 6. 258751 6. 107302 6. 157743 5. 773606  
8. 362548 8. 569451 8. 406407 8. 49646 8. 419861 8. 417205 8. 690448 8. 510599 8. 699221  
4. 348507 5. 315377 4. 746435 4. 621391 5. 596513 5. 038453 4. 865483 5. 829356 4. 330596  
6. 985665 7. 804863 7. 154169 8. 514349 7. 708209 7. 950802 7. 708056 7. 265015 6. 964367  
9. 448655 9. 273905 9. 318942 9. 203104 9. 025415 9. 122845 9. 478499 9. 033181 9. 492234  
3. 025656 1. 928625 2. 882403 2. 23848 3. 015776 1. 919236 2. 658118 2. 700158 2. 325919  
5. 24434 5. 96988 6. 026436 6. 370169 5. 890093 6. 460216 6. 404761 5. 851594 6. 042975  
5. 116843 4. 487082 4. 914804 5. 338238 5. 022148 5. 065441 4. 368908 4. 67463 4. 957139  
8. 812832 9. 546719 9. 289517 9. 633818 9. 181073 9. 593684 9. 362064 9. 057618 9. 61491  
5. 766969 5. 70199 5. 017045 3. 693328 4. 984922 4. 973913 5. 40537 5. 44248 5. 150894  
6. 848439 6. 567902 6. 286725 6. 244051 6. 924753 6. 227321 6. 352825 6. 987938 6. 903469  
4. 042874 4. 071137 4. 255667 2. 239641 3. 854397 3. 352539 3. 789018 4. 109426 3. 384619  
6. 712512 6. 057186 5. 805633 6. 081406 6. 46699 6. 324944 6. 259129 6. 86018 6. 129554  
4. 662631 4. 767175 4. 275911 4. 512732 4. 628423 3. 771843 4. 279312 4. 026568 4. 21361  
7. 997228 7. 9252 7. 837872 8. 176503 7. 825629 7. 768637 8. 343867 7. 96449 8. 137011  
8. 718194 8. 198152 8. 427462 8. 304984 8. 08603 8. 143926 8. 309014 8. 034328 8. 009092  
3. 257676 3. 147511 2. 568135 2. 73425 2. 699245 2. 326757 2. 108777 3. 494988 3. 342801  
5. 705583 5. 43097 4. 165487 6. 294088 6. 1001 4. 916549 5. 789888 5. 211918 4. 717875  
1. 722588 1. 373282 1. 491843 1. 695434 1. 540586 1. 737028 1. 267128 1. 666317 1. 69472  
4. 84375 5. 656955 5. 168014 6. 100038 5. 682854 5. 551655 5. 068076 5. 555448 5. 178723  
5. 632102 5. 064871 5. 213932 5. 407591 5. 259472 4. 066898 4. 569817 5. 593769 4. 838206  
7. 148731 6. 897037 6. 63828 6. 467992 6. 683852 6. 787355 6. 744482 6. 966511 7. 28148

9.018953 8.51525 8.583879 8.588277 8.784919 7.895887 8.262456 8.553975 8.593875  
7.021122 6.533787 6.526798 6.160509 7.459306 5.717228 5.97361 6.07667 7.605652  
5.029905 5.005034 5.74512 5.689822 5.138029 5.260525 4.787494 5.324227 4.841493  
4.964911 6.276973 5.984015 6.125752 7.247043 6.087131 6.485787 6.782242 6.569027  
7.24972 8.246227 8.035184 7.923484 8.51891 7.716898 8.331881 8.286078 8.135375  
8.15099 7.874772 7.574428 7.812032 7.93943 8.117824 8.035356 7.771331 7.649155  
8.358045 8.591855 8.120601 8.071969 8.049305 8.052349 8.175106 7.80651 8.170712  
3.067997 4.595024 4.860825 4.356863 4.477938 4.026519 4.81606 4.527985 4.300955  
6.191291 6.430164 5.996348 6.170599 6.684006 5.49096 5.687899 6.733795 6.500279  
9.51805 9.906043 9.876283 9.63433 9.542855 9.630312 9.576625 9.731209 9.642496  
4.241757 6.257844 5.014144 5.729484 5.301604 5.875483 4.299593 5.618403 5.837805  
5.548683 6.173502 5.756315 5.885008 5.879391 5.232817 5.584306 6.313579 6.347437  
7.554126 7.184546 7.471489 6.863427 7.207139 7.220912 7.632419 7.682581 7.679151  
6.225675 6.780901 6.664664 6.601073 7.214675 6.136789 6.931574 6.758373 6.835603  
6.832514 6.108766 6.437679 5.828214 6.142979 5.649301 5.945369 6.291429 6.502478  
5.956416 6.429777 6.084639 5.635543 6.152501 5.735941 6.132319 6.305774 6.252525  
3.98388 4.439079 4.172638 2.957059 4.739591 4.466313 3.630282 4.605498 4.121643  
4.55665 4.191933 3.860335 5.399094 3.93803 3.554073 3.773396 4.036902 3.798507  
2.732915 2.815573 3.013474 2.946466 4.041776 3.365578 4.298678 2.912437 2.358695  
4.614614 5.292818 4.498089 5.452137 5.556953 5.693116 4.789177 6.905995 5.341021  
2.843186 2.343525 1.436629 1.858441 1.585858 1.888175 1.191403 2.596502 1.591153  
5.181389 4.169902 5.113947 5.070396 4.230557 3.858142 4.956186 5.201439 5.030091  
6.270839 5.960137 5.666228 5.301669 5.567713 6.060284 5.379764 5.769715 5.631103  
5.729881 5.332138 5.39242 4.959687 5.051494 5.671914 4.813151 5.68531 5.203082  
8.240618 8.22825 7.850983 7.892518 8.044106 7.949245 7.975713 8.144547 8.249817  
5.218479 4.852652 5.304997 5.024764 5.551569 4.951042 4.998527 5.127878 4.596684  
1.625331 1.126964 1.321873 1.833901 1.271501 1.803297 1.718066 1.476231 1.806915  
6.955767 7.840434 7.818581 7.70305 7.935395 7.892628 7.463645 7.950894 7.261384  
7.093467 7.894212 7.99698 7.654104 7.112558 6.842556 7.305833 7.800484 7.350098  
8.981332 9.121703 9.004839 9.164049 9.088025 9.080138 8.876643 9.195352 9.226587  
8.97645 8.98019 8.230196 7.90581 8.163316 8.291726 8.177007 9.064138 8.197579  
7.188877 8.016771 8.129265 7.542295 8.128373 7.903543 7.532426 8.336337 7.725068  
3.571804 2.099561 2.597393 2.467687 2.806056 2.006392 3.190762 2.30575 3.400096  
6.187922 4.777054 5.229771 4.656021 4.205805 5.204226 4.646345 5.017575 5.217268  
3.757569 3.768357 4.741461 3.640835 4.298054 5.394375 4.634959 4.883848 4.981575  
3.188731 3.67571 2.389842 3.571873 4.155737 3.241915 2.745839 3.075681 2.624085  
4.133346 3.868608 3.335174 3.058631 5.243709 3.492449 4.653972 5.19653 4.417852  
7.765587 6.414899 6.409222 8.228908 6.481403 7.303712 7.411969 7.130058 7.379222  
6.962046 7.30117 6.579039 6.515242 7.114941 6.806415 7.423364 6.936931 6.627528  
6.4494 6.970891 6.556421 6.912497 6.18798 6.475172 5.867815 6.696113 6.621832  
5.268849 5.96419 5.141961 5.111789 5.880622 5.343157 5.954167 5.796786 6.014691  
8.138364 8.058553 8.073122 8.081515 8.293515 7.775914 8.689618 8.321207 8.350208  
2.938639 4.22826 4.117535 4.15214 3.959338 4.685853 3.332086 4.021997 3.771476  
7.227183 7.876811 7.746936 7.436126 7.955346 7.482246 7.829139 7.702857 7.515385  
3.695724 2.93843 4.338372 3.072183 2.572685 3.088457 2.785402 2.94302 4.394154  
6.234448 7.143017 7.165444 6.759708 6.823106 6.734277 6.994481 6.555702 6.882689  
4.228221 5.028348 5.239421 4.928538 5.055763 4.964484 4.97033 5.691399 5.066121  
8.412047 8.47048 8.971696 8.34711 8.613679 8.599129 7.763698 8.304573 8.195839  
1.923764 2.313756 1.883527 2.242522 2.133429 2.025262 2.023173 1.761341 2.529961  
6.015697 6.911616 6.029252 7.110069 6.046944 6.892152 6.363661 6.317275 5.076051  
4.702153 5.657592 5.698748 6.851258 6.268123 6.775985 5.573056 5.23523 5.623688

10. 96269 11. 11593 10. 95673 11. 39201 10. 75008 11. 42285 10. 93718 10. 49594 10. 98621  
6. 58353 6. 594776 6. 758436 6. 682434 6. 767221 6. 064163 6. 770145 7. 024836 6. 655443  
5. 532587 5. 034756 4. 346486 5. 130697 5. 427614 5. 772879 4. 272533 5. 84219 4. 985557  
6. 308135 5. 084539 5. 33014 5. 624879 5. 467998 5. 354361 3. 900829 5. 586539 5. 348499  
9. 377224 9. 555175 9. 284324 9. 149299 9. 406857 9. 207419 8. 956561 8. 897984 9. 355751  
4. 364777 4. 764812 4. 567729 4. 751013 4. 113794 5. 168171 4. 621187 4. 673551 4. 929195  
2. 129025 1. 845191 2. 618175 1. 728947 2. 574377 1. 813336 1. 611811 1. 886166 1. 81239  
6. 196415 6. 504019 6. 741996 6. 745953 6. 188575 7. 374227 6. 121722 6. 560538 6. 485455  
2. 682849 3. 418277 4. 171964 3. 855122 4. 542157 4. 052133 3. 939054 4. 047327 3. 860452  
1. 114344 1. 69793 2. 123014 1. 261266 2. 649683 1. 28282 2. 102934 2. 093813 1. 247397  
7. 996365 7. 942399 8. 056862 8. 074065 8. 655952 8. 101591 8. 276295 8. 52339 8. 185394  
6. 616423 7. 370457 7. 605957 7. 952574 7. 385348 7. 136176 7. 531727 7. 363773 7. 297507  
6. 611465 7. 549473 7. 30396 7. 313267 6. 707383 6. 744244 6. 317027 7. 187418 7. 66496  
8. 001141 8. 946913 8. 769589 8. 272364 9. 045677 8. 769547 8. 860324 9. 061865 8. 468432  
3. 131807 4. 021972 4. 066176 2. 98104 3. 513022 2. 280432 2. 739429 3. 409051 4. 323837  
4. 866739 2. 599593 4. 305048 2. 207836 3. 800397 2. 049161 3. 011006 2. 925404 4. 122286  
6. 369511 5. 286078 5. 438872 3. 914985 4. 421668 5. 584987 4. 007898 4. 834608 5. 334619  
5. 186008 5. 355178 5. 532081 5. 279943 5. 994962 5. 239897 5. 277637 6. 012296 5. 01329  
1. 624359 2. 997666 1. 721825 1. 879876 1. 782679 1. 573401 2. 547728 1. 96267 1. 80031  
1. 421549 1. 234606 1. 20178 1. 940131 1. 498465 1. 845045 1. 345228 1. 688296 1. 56511  
3. 007179 3. 882509 3. 550024 4. 378406 4. 368037 3. 431151 3. 88848 4. 343078 3. 85889  
6. 73774 7. 204091 7. 183163 7. 378319 7. 732901 7. 450213 7. 236278 7. 229387 7. 252611  
1. 272406 2. 221289 0. 941337 1. 596596 0. 86444 1. 760646 1. 563702 1. 847963 1. 734254  
6. 394265 7. 80707 7. 643769 7. 148432 6. 897511 6. 823694 6. 276808 7. 265654 6. 578561  
6. 131939 5. 675109 5. 021217 4. 168411 4. 401767 6. 024928 7. 266756 5. 818359 7. 044257  
2. 655673 2. 409357 3. 695647 3. 355127 3. 480344 3. 125184 2. 711819 3. 147785 3. 549814  
6. 894552 7. 401067 7. 115837 7. 119515 7. 082048 7. 398017 5. 810532 6. 206414 6. 916965  
4. 928429 4. 550248 5. 525143 4. 408821 4. 451582 4. 193628 5. 346808 4. 385833 4. 484653  
4. 734701 4. 742718 4. 408598 5. 272067 4. 524128 4. 555477 4. 679721 4. 432527 4. 811335  
6. 732591 7. 486613 7. 057265 7. 065156 7. 45094 7. 051777 7. 31252 7. 661024 6. 993727  
7. 413112 8. 067274 7. 836827 8. 718136 8. 14124 8. 409586 8. 096204 7. 321107 7. 798009  
3. 666608 2. 995669 3. 19366 3. 519342 3. 939207 2. 950165 3. 062846 3. 531089 3. 733378  
2. 708053 2. 297182 1. 910552 3. 455358 3. 045954 3. 090324 3. 745354 2. 03453 3. 461434  
7. 730398 7. 708863 7. 876118 8. 112874 7. 440402 7. 666787 7. 700416 6. 925472 7. 270029  
6. 307044 6. 591077 6. 77919 6. 86743 6. 239044 6. 730137 6. 550462 5. 450848 6. 793993  
3. 513049 2. 567499 2. 809589 2. 877313 3. 147324 2. 938833 3. 061284 2. 763482 2. 649475  
1. 80598 3. 107356 2. 986916 4. 375592 4. 210688 3. 554974 4. 651381 2. 726578 6. 461374  
8. 71364 7. 684317 7. 494295 6. 920317 7. 605858 7. 608673 6. 967319 6. 957633 8. 60545  
6. 760192 2. 552642 4. 328734 2. 425137 3. 07811 4. 179072 4. 27652 3. 517474 3. 607498  
6. 883954 7. 082007 7. 24147 7. 150506 7. 457715 7. 055146 7. 226023 7. 14069 7. 093376  
5. 033033 5. 926219 5. 565899 5. 899706 5. 227438 6. 109272 4. 660899 5. 444652 5. 087797  
3. 079008 4. 719414 4. 57891 5. 371758 5. 665815 5. 891173 5. 939818 6. 639094 5. 228033  
6. 434298 7. 173553 6. 887674 6. 832968 7. 475083 7. 284628 7. 286741 6. 968975 6. 64117  
3. 086459 3. 400578 4. 054525 3. 79491 4. 122822 4. 189009 2. 910362 3. 282947 3. 28719  
1. 975429 1. 720185 2. 655845 2. 879784 1. 756339 1. 975654 1. 73798 3. 088794 1. 708806  
8. 247129 7. 683397 8. 187394 7. 966863 7. 966163 7. 543669 8. 619516 7. 657012 8. 489861  
1. 319314 1. 24217 1. 33874 1. 218098 1. 282635 1. 070164 1. 525351 1. 30378 1. 157462  
1. 395805 2. 188649 1. 352919 1. 982617 1. 603286 2. 540313 2. 395463 2. 634409 1. 707766  
4. 496667 2. 702875 3. 570897 2. 590751 3. 022739 2. 189695 2. 15525 1. 886441 2. 102195  
1. 82846 1. 667229 1. 688614 1. 448175 2. 305975 1. 248424 1. 232021 2. 215473 1. 599577  
2. 381912 2. 077811 2. 63776 2. 271854 2. 936629 1. 899022 1. 768101 3. 288747 2. 439178



7. 334875 7. 105258 7. 021727 7. 415131 7. 141494 7. 022188 6. 798218 7. 164933 6. 736241  
4. 760722 3. 88728 4. 238441 4. 553884 3. 770706 4. 176305 4. 002975 4. 313365 4. 355173  
3. 157989 5. 899331 5. 079487 5. 074307 4. 757007 4. 936033 4. 752591 3. 650557 4. 835864  
8. 799306 7. 246156 8. 278625 7. 809318 7. 945388 6. 560843 7. 548142 7. 822381 8. 772415  
4. 535624 6. 814828 5. 435606 5. 243341 5. 595725 5. 931635 3. 741723 6. 089754 5. 745767  
4. 618037 4. 613704 4. 347562 4. 627363 5. 174284 4. 899823 4. 379947 5. 47905 5. 237382  
4. 684283 4. 743095 4. 660518 4. 450938 4. 244499 4. 686557 4. 195042 4. 858409 4. 062088  
9. 660287 9. 138978 9. 735643 9. 097117 9. 496802 8. 784072 9. 334894 9. 343892 9. 891327  
3. 642096 3. 004699 3. 923663 4. 233992 3. 592237 4. 363614 4. 401855 3. 826276 3. 742367  
5. 612561 4. 6751 5. 654673 5. 387365 5. 480001 4. 259901 4. 71444 6. 08589 5. 391693  
3. 938229 3. 341643 3. 373772 3. 28657 2. 83669 3. 674117 3. 556768 4. 617435 3. 740452  
5. 829329 5. 588247 5. 258915 5. 678193 6. 231599 6. 245324 5. 087272 5. 703381 5. 321076  
5. 946128 5. 471137 6. 333638 4. 500143 5. 139426 4. 131412 4. 819524 5. 563964 5. 357769  
5. 530157 6. 706532 7. 065552 6. 193096 7. 092854 6. 73622 6. 349013 7. 121653 6. 896739  
1. 960219 2. 406968 2. 131936 2. 583424 1. 461135 2. 056595 4. 184524 1. 96604 2. 132629  
2. 638518 2. 003662 2. 333688 2. 95642 2. 431972 3. 543091 2. 388824 2. 094399 3. 078165  
3. 447933 3. 01839 3. 971777 3. 829959 3. 996732 3. 75925 4. 046809 3. 145457 3. 434961  
2. 440075 2. 552807 2. 340082 2. 367338 2. 507741 4. 001424 3. 831986 3. 036091 2. 9988  
6. 779108 5. 912256 6. 19023 5. 669356 6. 124898 5. 986419 5. 869961 5. 839813 6. 286681  
5. 573094 6. 07763 6. 214057 5. 489893 5. 714287 5. 763627 5. 678834 6. 210694 5. 718007  
7. 849633 7. 782744 7. 533255 7. 857015 8. 18749 7. 542655 7. 646839 8. 055324 7. 837265  
5. 042711 6. 087566 5. 850823 5. 344018 5. 913351 5. 279472 6. 282252 5. 985755 5. 553595  
9. 422755 9. 391817 9. 603749 9. 389715 9. 38347 9. 137052 9. 957506 9. 173881 9. 658244  
7. 526557 7. 659921 7. 481719 8. 199632 8. 388765 8. 486628 7. 898129 8. 144864 7. 695388  
2. 888744 2. 672728 1. 657308 1. 854785 3. 129424 1. 515154 2. 062644 2. 053403 1. 893043  
4. 971034 5. 372317 5. 174291 5. 033326 4. 73292 5. 31287 4. 571303 4. 283892 6. 044388  
3. 782005 3. 25233 3. 409803 3. 284179 2. 728367 3. 404029 2. 818048 3. 23055 2. 707663  
3. 160985 1. 8414 2. 551382 2. 925179 2. 069566 3. 087354 2. 267931 2. 338406 2. 395859  
6. 225012 5. 950558 5. 781202 5. 970859 5. 727482 5. 145248 5. 626022 5. 437248 6. 088626  
1. 547593 1. 551196 1. 524144 1. 715738 2. 293723 1. 71554 1. 814787 1. 388001 1. 967114  
4. 816635 4. 524979 4. 533904 5. 141965 5. 198924 4. 612338 5. 126536 4. 642829 4. 75659  
3. 218339 4. 257065 3. 531458 3. 277494 3. 382057 4. 14393 5. 008725 3. 954967 4. 374111  
3. 069466 2. 956064 3. 27795 3. 012386 3. 352286 3. 271246 3. 501067 3. 31107 3. 254835  
9. 361066 8. 954273 8. 453799 8. 389102 8. 675517 8. 050628 8. 577576 8. 609042 8. 523042  
6. 444812 5. 92416 6. 17216 5. 403713 5. 468786 5. 98744 6. 2559 6. 378037 5. 830967  
10. 82526 10. 55425 10. 62338 10. 2448 10. 43368 10. 2247 10. 6319 10. 27589 10. 63697  
7. 961687 3. 544384 4. 799511 4. 205123 4. 456819 4. 327227 5. 419836 4. 09769 5. 002539  
1. 981824 1. 891889 1. 687322 1. 655313 1. 693797 1. 656599 1. 940295 1. 554717 1. 84978  
6. 276055 6. 00702 5. 951202 5. 550686 6. 036897 5. 518145 6. 108097 6. 126507 6. 19024  
3. 367465 3. 584807 4. 040882 4. 846357 4. 476395 4. 522834 4. 205719 5. 016688 4. 149376  
6. 996331 6. 493246 6. 301279 7. 025507 6. 301873 6. 938601 6. 028727 6. 551928 6. 239078  
5. 405742 5. 271208 5. 6405 5. 611717 5. 188184 4. 546958 5. 109228 5. 179205 5. 175096  
8. 023405 8. 163077 8. 295398 7. 992386 8. 379257 8. 258699 7. 914583 8. 426975 8. 548947  
1. 995741 1. 47851 1. 947352 1. 272309 1. 654769 1. 312319 1. 77225 1. 615081 2. 192939  
5. 255202 4. 790509 4. 882858 4. 518046 4. 939127 4. 467494 5. 080792 4. 641795 4. 682504  
4. 335218 5. 39424 4. 97803 5. 048902 5. 636166 5. 34881 4. 953768 5. 427836 5. 285258  
2. 026817 2. 801612 1. 595436 1. 940682 3. 206294 3. 309979 2. 976482 1. 889365 4. 457384  
6. 571117 6. 393153 6. 765881 6. 781793 6. 785749 6. 592956 6. 68515 6. 567008 6. 92478  
3. 467515 4. 69428 3. 966344 5. 929429 4. 717473 5. 285923 4. 260078 5. 62438 5. 139028  
6. 456464 4. 710459 5. 068096 4. 304577 4. 848791 4. 858314 5. 967989 5. 123739 5. 787959  
2. 075212 1. 644534 1. 746782 1. 66245 1. 774011 2. 326306 2. 205069 1. 758801 2. 080812

7. 21881 7. 106933 7. 328904 7. 177361 7. 447344 6. 898143 7. 627735 7. 402809 7. 736583  
8. 72689 8. 945785 8. 929825 8. 770147 8. 986382 8. 621388 8. 831598 8. 917503 9. 185109  
1. 416488 1. 000749 1. 632164 1. 284741 1. 132583 1. 769602 1. 727087 1. 504288 1. 352492  
6. 044297 6. 19124 5. 959514 6. 501929 5. 932937 6. 618323 5. 79395 6. 184647 5. 944718  
5. 589092 6. 534576 6. 71255 6. 82127 6. 461474 7. 043528 6. 426799 5. 952842 6. 368907  
3. 261121 2. 88477 4. 033836 3. 09174 2. 635505 3. 001209 2. 801868 2. 148991 2. 883566  
4. 954494 5. 06103 5. 459051 4. 296477 4. 737879 5. 407692 4. 171554 4. 892752 4. 294788  
7. 176966 7. 302529 7. 324733 6. 876638 7. 107366 7. 074668 7. 062612 6. 941591 7. 156421  
4. 681653 4. 9225 5. 737821 4. 84802 5. 42628 4. 379477 5. 187644 4. 533539 4. 74593  
1. 500717 1. 420553 1. 266928 1. 810164 1. 045601 2. 106397 2. 429621 1. 513929 1. 839569  
3. 409046 4. 42656 3. 974261 4. 508362 4. 094166 4. 007945 4. 268759 3. 993343 4. 48359  
7. 62701 6. 72791 7. 262621 6. 036418 6. 483394 6. 185409 6. 33033 6. 721362 7. 148073  
7. 948084 5. 913954 7. 262253 6. 880155 7. 301518 7. 163952 7. 073947 7. 529443 6. 971108  
4. 897917 1. 967464 4. 199997 2. 104272 2. 81997 1. 802098 3. 34685 1. 762934 3. 802928  
2. 009304 2. 492791 3. 559192 2. 491736 3. 130955 2. 376946 2. 009304 3. 704522 2. 118506  
1. 306347 0. 86636 1. 057315 1. 078714 1. 359916 1. 238623 2. 479122 0. 858433 1. 471914  
7. 385533 7. 819638 7. 762186 7. 942985 8. 135064 7. 45671 7. 819166 7. 432044 7. 75854  
8. 284216 6. 835138 7. 421387 6. 16859 7. 264388 6. 926173 6. 891544 7. 175942 7. 556388  
5. 264323 3. 384656 3. 711806 3. 099541 3. 785546 3. 924933 4. 205643 4. 487156 4. 320368  
2. 18289 2. 358512 2. 677339 3. 234681 1. 732619 2. 795696 3. 531777 3. 035715 3. 224588  
4. 073626 5. 81121 5. 422114 4. 964169 5. 577029 5. 363941 4. 106396 4. 690029 4. 970683  
1. 748072 1. 591751 1. 325766 1. 152914 1. 509363 1. 105897 1. 887319 1. 685827 1. 82057  
5. 66727 6. 023046 6. 182019 4. 262456 6. 373297 5. 389943 4. 90331 6. 092566 6. 119893  
1. 921974 1. 219635 1. 193862 1. 115776 1. 060609 1. 059228 1. 608025 1. 446692 1. 101909  
1. 066309 1. 011679 1. 928648 1. 319053 1. 409871 1. 963536 1. 69489 1. 24487 1. 359846  
4. 797594 4. 072326 3. 813496 4. 04253 4. 176611 4. 096276 4. 1436 4. 517725 4. 306839  
5. 481837 6. 287354 5. 399562 5. 193205 5. 492084 5. 417045 5. 681826 5. 809595 5. 560341  
9. 039563 8. 464858 8. 629074 8. 575274 8. 652887 8. 422306 8. 07533 8. 939993 8. 982764  
3. 178962 4. 008084 4. 314 3. 373432 3. 378765 4. 067023 3. 044364 3. 823835 3. 499015  
7. 275615 7. 460528 6. 756725 6. 716874 6. 505894 7. 411052 6. 110171 7. 484979 6. 834437  
6. 228674 5. 791142 5. 468652 5. 968019 5. 304126 5. 833564 4. 743163 6. 702377 5. 41638  
7. 469876 8. 199626 8. 023816 8. 012191 7. 735416 8. 161342 8. 150318 7. 545968 7. 625093  
5. 042749 5. 704175 4. 780398 6. 815185 5. 737479 6. 633508 6. 129464 5. 962734 5. 699857  
1. 805191 1. 227034 1. 520779 1. 391192 1. 356423 2. 117717 2. 644306 1. 569651 1. 6973  
7. 324232 7. 588701 7. 362459 7. 005108 7. 346528 7. 367949 7. 66614 7. 449625 7. 372002  
7. 569769 7. 624997 7. 141157 7. 191221 8. 057077 7. 281721 6. 543317 7. 729022 7. 288032  
6. 990734 6. 857305 6. 65498 6. 593394 6. 518003 6. 974052 6. 604382 6. 867112 6. 267401  
5. 098223 5. 444851 5. 584338 5. 340512 5. 541415 5. 597417 5. 143103 5. 418651 5. 729514  
3. 903924 3. 883648 4. 111531 3. 793685 2. 540682 3. 546403 3. 901177 4. 098669 3. 14568  
3. 439368 2. 72097 2. 995915 3. 221402 2. 991801 3. 882659 2. 466234 3. 1869 3. 358459  
3. 682095 3. 352214 2. 748493 2. 433505 2. 86997 3. 648516 2. 842665 3. 166374 2. 751996  
6. 835018 7. 21506 7. 84118 7. 261664 6. 89045 7. 711932 7. 716535 7. 168511 7. 113712  
5. 611812 4. 080067 4. 110304 4. 393932 3. 790114 4. 551242 3. 099103 3. 571524 4. 457208  
6. 896424 6. 87517 6. 652641 7. 173656 7. 180827 7. 394991 6. 676826 7. 042048 7. 210557  
6. 060219 5. 320354 5. 505277 5. 420524 5. 057022 5. 940545 6. 231332 4. 966067 5. 689911  
9. 709082 10. 14047 10. 00227 10. 06582 9. 725444 9. 895876 9. 717302 9. 827152 9. 997664  
8. 008375 8. 251118 8. 084876 8. 252615 8. 032121 8. 03456 8. 267289 7. 989662 8. 105622  
7. 127299 7. 245071 7. 365083 7. 395565 6. 972453 7. 604537 6. 704659 7. 53122 7. 224562  
1. 879708 3. 23546 1. 35552 2. 361143 1. 299339 2. 522306 1. 769187 1. 969765 1. 452455  
3. 018767 2. 641891 2. 480028 3. 029936 3. 239107 2. 273788 1. 826439 2. 042843 1. 71488  
1. 625203 1. 836221 1. 742642 1. 544735 1. 156768 2. 335789 2. 086367 1. 741159 1. 778002

7. 850252 7. 255589 7. 034116 7. 585989 7. 599646 7. 297695 7. 217069 6. 683766 7. 537312  
8. 047865 7. 461968 7. 31153 7. 131342 7. 857818 7. 443555 7. 948107 7. 867245 7. 491978  
3. 074451 2. 29412 3. 172801 2. 581897 2. 02617 3. 448018 2. 70336 2. 237486 4. 205307  
2. 942793 3. 212651 2. 772386 2. 373559 2. 215479 2. 458055 2. 80478 1. 999074 2. 630621  
2. 638398 2. 310346 2. 32125 2. 133543 2. 275179 2. 340232 2. 945974 1. 975795 2. 562193  
3. 314664 4. 068654 3. 811384 2. 832805 3. 374825 3. 853035 3. 311482 2. 670385 3. 065858  
5. 383925 5. 806373 5. 741362 6. 091495 5. 976206 4. 871801 5. 973386 5. 577186 5. 923975  
3. 626212 3. 109923 2. 889598 3. 111171 3. 000933 2. 119313 3. 021043 2. 968046 4. 32122  
5. 763282 3. 047938 4. 291968 2. 485532 2. 710905 3. 603679 3. 879083 3. 212098 4. 08651  
6. 969457 6. 460666 6. 662668 7. 327035 7. 246779 7. 034401 7. 824687 7. 323153 7. 289766  
5. 340576 5. 935181 5. 700356 6. 204337 6. 06473 5. 840768 6. 256634 6. 152923 5. 390867  
3. 141622 4. 339237 2. 83267 4. 322255 3. 399154 2. 959696 3. 105061 2. 389101 3. 768841  
5. 487534 4. 208129 4. 880665 3. 492205 3. 434606 3. 798558 4. 672192 4. 858905 4. 440398  
3. 406168 2. 33449 4. 833481 2. 429933 3. 1792 3. 729095 2. 847832 3. 05155 2. 840912  
1. 511522 1. 211951 1. 738543 1. 369871 1. 268726 1. 688732 1. 576241 1. 32775 1. 223205  
2. 865817 2. 722787 1. 997439 2. 966961 2. 800532 3. 16845 3. 485535 3. 113125 2. 702209  
2. 460885 2. 362364 1. 670732 2. 606963 1. 839072 1. 937038 2. 420305 2. 262523 2. 788149  
2. 730637 2. 524293 3. 92667 3. 125498 2. 46499 2. 378977 3. 055348 2. 985695 3. 826093  
4. 046567 4. 642784 5. 529324 3. 424653 4. 641951 5. 169843 3. 620234 3. 913658 3. 791039  
2. 846478 4. 184789 3. 966528 4. 839287 4. 092399 4. 147956 4. 232746 4. 394449 4. 466902  
9. 837085 10. 02891 10. 56278 10. 86297 9. 759154 10. 86975 10. 32332 9. 269384 10. 30251  
4. 446705 4. 439781 4. 244368 4. 916678 4. 216815 4. 443743 4. 776837 4. 167944 5. 006063  
4. 156714 4. 890309 4. 01687 4. 885256 5. 0315 4. 961293 5. 266404 5. 860896 4. 529626  
2. 003204 2. 20658 2. 378367 1. 857838 1. 783469 3. 8742 2. 213145 1. 741123 1. 969742  
5. 717193 4. 361881 4. 087584 4. 035715 4. 765 4. 813683 5. 38952 3. 879761 4. 635401  
2. 189847 2. 605593 2. 355708 2. 345997 3. 273114 2. 641209 2. 879876 3. 06265 3. 00484  
2. 57015 2. 266516 1. 973236 2. 648621 2. 655922 2. 318896 2. 467704 1. 92475 2. 852662  
1. 429215 1. 491197 1. 795417 1. 139105 1. 418346 1. 299851 1. 622999 1. 48733 1. 127814  
7. 457608 7. 834004 7. 987547 7. 570139 7. 971787 7. 902284 7. 904316 7. 768573 7. 734002  
4. 576159 5. 149228 4. 357027 5. 395838 5. 076455 5. 989517 4. 843176 4. 519923 5. 616068  
5. 465001 6. 274412 6. 060222 5. 989946 5. 619173 6. 269277 6. 101163 6. 398231 5. 524297  
2. 520777 3. 506139 2. 096073 2. 871226 2. 062906 2. 934446 2. 792819 3. 618313 3. 035475  
5. 065398 5. 47433 5. 27838 5. 478428 5. 931818 5. 103802 5. 648326 5. 369136 6. 744357  
3. 810773 4. 353506 4. 019015 4. 251697 4. 537715 4. 743991 4. 207736 4. 226752 4. 435474  
4. 701618 2. 356319 3. 169246 2. 97236 2. 03357 2. 507593 2. 97717 1. 539369 3. 253517  
2. 363022 2. 145531 2. 396583 2. 855436 4. 053248 2. 506616 2. 415286 2. 896933 2. 716866  
1. 531993 1. 875948 1. 642118 1. 976437 1. 7618 2. 16028 1. 844249 1. 57007 1. 602302  
5. 391633 4. 99774 4. 907956 5. 534819 5. 124813 6. 209473 4. 886529 4. 132831 4. 846584  
5. 598436 5. 696214 6. 094247 6. 297159 6. 101752 5. 538618 5. 453628 5. 507026 5. 062617  
1. 623217 1. 415579 1. 022339 1. 681707 1. 535351 1. 390796 1. 975758 1. 657444 1. 11437  
5. 593116 3. 281084 2. 892736 2. 370553 2. 831452 3. 481502 2. 776169 3. 226449 3. 625998  
2. 299022 2. 567446 2. 293237 3. 000765 2. 821558 2. 218257 2. 686013 2. 552178 2. 727028  
5. 213419 5. 461164 5. 52805 5. 88937 5. 613248 5. 836433 5. 58854 5. 324158 5. 951713  
7. 321838 7. 631948 7. 329829 7. 13148 7. 226404 7. 14685 7. 17895 7. 169287 6. 991656  
5. 500344 4. 878266 4. 334436 4. 413173 3. 858643 4. 029929 4. 289734 4. 437258 4. 324489  
7. 12157 6. 971585 7. 269679 7. 637659 7. 293097 6. 976177 6. 626107 7. 453349 7. 499461  
4. 221549 4. 776157 4. 286503 5. 277869 4. 597221 4. 54667 4. 115299 4. 897103 4. 768216  
3. 09426 3. 570245 3. 924362 3. 484229 4. 204039 4. 809234 3. 02028 3. 000233 3. 723147  
4. 416578 5. 030216 4. 554666 5. 409265 5. 520324 5. 781195 5. 320084 4. 303183 4. 87305  
5. 633974 5. 513117 5. 465262 5. 462958 5. 446748 5. 417635 6. 183925 6. 021266 6. 179937  
9. 00746 9. 407316 9. 425702 8. 955012 9. 142525 9. 20554 8. 643115 9. 297769 9. 138561

7. 143732 7. 837643 7. 814947 7. 404314 7. 830853 7. 136429 7. 293308 7. 213269 7. 794397  
8. 850524 6. 759448 7. 818024 5. 275209 4. 56895 4. 869439 6. 152049 6. 059862 8. 223568  
2. 477325 3. 659691 4. 025836 2. 671333 1. 884431 3. 807089 4. 306962 2. 454107 2. 343829  
6. 381649 3. 245061 4. 558752 3. 855961 3. 382429 3. 253075 4. 535575 4. 235962 4. 736581  
1. 768731 1. 946367 1. 815521 2. 11461 2. 671223 2. 318668 2. 182162 1. 828408 2. 145645  
2. 270736 2. 409727 2. 798868 3. 174409 2. 602979 2. 678372 2. 928439 2. 39659 2. 476435  
6. 615209 7. 401406 7. 470476 6. 220948 7. 079349 6. 713003 6. 825755 8. 46458 6. 885492  
3. 165631 2. 287204 1. 923065 2. 060262 2. 189634 1. 908616 2. 354127 1. 814831 2. 556393  
4. 782746 4. 906268 3. 637192 4. 030003 4. 225552 4. 255722 4. 12741 4. 028121 3. 992809  
2. 485435 5. 336344 6. 269731 5. 753131 6. 585698 6. 705244 6. 598623 6. 366882 5. 999084  
8. 273353 7. 956595 7. 405931 8. 293581 8. 381041 8. 316067 8. 553474 8. 485277 8. 578317  
6. 870779 7. 040852 7. 530415 7. 38256 7. 29978 7. 558192 7. 293873 7. 611714 7. 124575  
3. 226064 4. 093213 2. 64588 1. 999462 3. 003666 2. 802524 1. 417036 3. 035167 1. 141442  
7. 743819 9. 653485 9. 45017 9. 308706 10. 00988 9. 69129 9. 563138 9. 95367 9. 698766  
6. 08257 6. 920155 6. 701832 6. 72788 6. 567559 6. 563939 7. 333291 7. 129197 7. 47169  
5. 011697 3. 867356 4. 071238 3. 700341 3. 540849 3. 900696 3. 880273 3. 736968 4. 447385  
8. 37653 8. 844124 8. 765189 8. 972604 8. 771717 8. 913253 8. 71503 8. 893038 8. 852495  
6. 929658 7. 978175 6. 874598 7. 449083 7. 604341 8. 282055 7. 825014 8. 197841 7. 2191  
6. 693636 6. 192832 6. 551325 6. 107862 6. 469677 6. 296506 6. 270224 6. 662809 6. 939959  
7. 499558 8. 02438 8. 000908 6. 928207 7. 084446 8. 206949 7. 157213 8. 67773 6. 803736  
3. 546499 3. 694676 4. 156881 3. 462999 3. 542329 3. 541162 3. 486004 3. 847498 3. 09468  
1. 239069 1. 289299 2. 376404 1. 059664 1. 810795 1. 398184 2. 138525 1. 864054 1. 832537  
4. 199331 5. 091281 4. 179017 4. 630527 4. 67975 5. 27754 4. 860261 4. 11761 4. 293873  
3. 692248 4. 168167 4. 56762 5. 504592 4. 737354 4. 82959 4. 673551 4. 086706 3. 427127  
2. 76316 1. 688127 1. 533059 1. 51394 2. 027897 1. 787681 1. 73279 1. 440851 1. 869503  
2. 640999 1. 909524 2. 125635 2. 910023 1. 833808 2. 131116 2. 747966 2. 044553 2. 370751  
7. 556738 6. 565413 7. 222142 6. 614919 7. 080944 7. 127989 7. 068582 6. 888802 7. 024801  
2. 246941 3. 463702 2. 163913 2. 160468 2. 459212 2. 566324 2. 451019 2. 27586 1. 890712  
5. 290765 5. 602886 5. 501381 5. 337411 5. 581068 5. 940689 4. 935738 6. 181951 5. 871048  
2. 240773 2. 711383 2. 178004 2. 375494 2. 085642 2. 842088 2. 992998 2. 120735 2. 427276  
1. 800374 1. 550831 2. 130045 1. 142856 2. 752596 2. 296081 1. 528546 1. 27735 1. 97423  
1. 840568 2. 135261 0. 568853 1. 520347 1. 748903 2. 643692 1. 440443 1. 837413 1. 553208  
3. 502285 3. 099465 2. 4364 2. 948715 2. 642483 3. 075627 2. 766687 2. 597152 2. 89743  
3. 195335 3. 629736 2. 663106 2. 452149 2. 770288 1. 343593 2. 663649 3. 126542 2. 833331  
4. 621783 4. 504857 4. 642833 5. 291998 4. 134261 5. 333828 5. 13255 4. 282003 3. 941269  
5. 442232 5. 568694 5. 956899 4. 865356 6. 100396 5. 142637 5. 249487 6. 149111 6. 734209  
5. 437353 5. 101626 4. 205278 4. 718126 4. 424728 4. 845636 4. 360683 4. 304284 4. 152951  
2. 132723 1. 56866 1. 545401 1. 447722 1. 600502 2. 201684 1. 964851 2. 577875 1. 472218  
7. 233247 7. 549619 7. 93169 8. 193921 7. 991464 7. 958534 7. 933422 8. 369449 7. 533526  
3. 876891 4. 472219 4. 261424 3. 685648 4. 717476 4. 266344 3. 501817 4. 78814 4. 407614  
5. 275445 4. 904884 4. 827414 5. 246733 4. 146681 5. 012896 5. 331142 3. 903037 4. 730814  
8. 404816 8. 29293 8. 584636 8. 347161 8. 049742 8. 883537 8. 167517 8. 862064 8. 758786  
2. 416685 2. 547711 2. 18709 2. 007352 2. 584096 2. 756788 1. 960454 2. 161123 1. 980275  
2. 548055 2. 098192 2. 205207 2. 531086 2. 257554 3. 428072 1. 972373 1. 969208 1. 912389  
7. 933233 7. 849661 7. 675878 8. 399699 8. 227909 8. 354518 7. 779547 7. 935818 7. 79938  
8. 863233 8. 58324 7. 896771 8. 753511 8. 662559 8. 998718 9. 059869 8. 243644 8. 993771  
8. 042522 4. 791887 4. 589841 2. 008061 3. 806351 5. 710373 3. 081097 1. 766098 5. 010049  
4. 825603 4. 411385 4. 527975 5. 135849 4. 181762 3. 055491 4. 176515 4. 24569 3. 25146  
5. 133516 6. 176609 5. 384642 6. 331642 7. 767893 5. 463991 5. 394947 6. 504988 6. 305668  
2. 374846 1. 206063 0. 976963 1. 415318 2. 030988 1. 534649 2. 778976 1. 17 1. 346039  
2. 563383 1. 505064 1. 889486 1. 334017 1. 562377 2. 000334 1. 319806 2. 071695 1. 42522

1. 577295 1. 189093 1. 782634 1. 5376 1. 45603 1. 38554 1. 673931 1. 42495 1. 522016  
4. 653939 4. 519958 3. 778604 4. 020947 4. 770885 4. 577247 4. 601135 5. 421692 5. 447555  
1. 286175 1. 151621 0. 889543 1. 053519 1. 047967 1. 248973 1. 101208 1. 066426 1. 465333  
5. 766388 5. 916107 5. 553393 6. 004248 5. 994703 5. 777711 5. 34058 6. 632833 5. 65609  
2. 420314 2. 601365 2. 193445 3. 460918 2. 006183 2. 214837 3. 4598 3. 048764 3. 034024  
3. 530147 4. 044918 3. 244715 5. 40785 2. 438736 3. 891621 3. 570827 2. 470572 2. 893747  
7. 548357 4. 541233 5. 893304 4. 359535 4. 847024 3. 81693 4. 385994 4. 802121 5. 829743  
2. 305615 2. 372973 2. 622341 2. 214802 3. 002923 2. 321971 2. 228978 1. 580168 2. 311326  
1. 660071 1. 839928 2. 568776 2. 622114 2. 888739 1. 849108 3. 05128 1. 620472 2. 100848  
3. 509453 3. 605808 3. 502323 4. 105302 2. 976152 3. 810898 2. 805056 3. 301784 3. 504242  
5. 614406 5. 419709 5. 767259 5. 231079 5. 393164 5. 490677 5. 167464 5. 277223 5. 393056  
1. 549225 1. 336611 1. 781782 1. 095174 1. 180128 1. 279078 1. 471485 1. 251915 1. 563836  
3. 128233 1. 942207 2. 210313 2. 545493 2. 05373 2. 023708 1. 833415 1. 943256 2. 111123  
4. 373564 4. 506895 4. 129716 3. 809676 4. 151517 3. 660384 4. 966462 3. 872199 3. 957908  
6. 117992 5. 873977 6. 359558 6. 873735 6. 750168 6. 23867 6. 451211 6. 398731 6. 46985  
1. 272058 1. 15328 1. 338881 1. 518895 1. 386479 1. 108658 1. 330308 1. 177912 1. 056909  
3. 752014 5. 490579 5. 180079 4. 951476 5. 078903 4. 667088 5. 747656 4. 492136 4. 310906  
4. 9274 5. 807265 5. 259203 5. 52633 5. 251652 6. 178714 4. 653524 5. 656909 4. 871972  
1. 57872 1. 392851 1. 542459 2. 756294 1. 921663 1. 645721 2. 789983 2. 868862 2. 29959  
2. 074977 2. 282679 2. 575809 2. 184324 1. 977195 1. 799285 2. 643079 3. 345684 1. 927307  
5. 217283 4. 634351 4. 797905 4. 231188 5. 28984 5. 24899 4. 566209 4. 277542 4. 877312  
4. 515717 4. 463591 4. 496941 3. 86822 3. 352977 4. 500738 3. 899325 3. 674997 4. 359343  
6. 090226 6. 592412 6. 541826 6. 431108 6. 503697 6. 371051 6. 658422 6. 496216 6. 839724  
4. 334197 3. 957932 5. 142382 4. 515122 4. 935981 5. 239816 1. 846559 4. 757951 5. 126217  
3. 205217 2. 998615 3. 25377 3. 657951 2. 109998 3. 021998 3. 528773 2. 944065 2. 777606  
6. 046608 6. 352703 6. 103399 6. 645699 6. 614752 6. 475534 6. 107522 6. 111724 6. 236811  
10. 03268 10. 08415 10. 19021 9. 850929 9. 854283 9. 943869 10. 21333 9. 513788 10. 04554  
6. 250001 5. 225724 6. 683828 5. 917495 5. 887855 5. 422953 5. 517713 5. 851878 5. 710598  
4. 97885 5. 498276 5. 442612 5. 301646 5. 357467 5. 014725 5. 520506 5. 443582 5. 113362  
3. 937026 4. 077943 2. 962323 3. 251399 2. 688354 2. 850908 2. 811545 3. 09916 2. 696258  
1. 532514 3. 436872 3. 733808 2. 724719 3. 653471 4. 736498 2. 197882 3. 065864 2. 594127  
3. 313989 2. 864877 3. 530551 3. 254797 2. 880459 2. 760184 2. 776328 3. 014014 3. 186234  
2. 054127 1. 955355 2. 105442 1. 892639 2. 238204 1. 712614 2. 043711 2. 363399 2. 421954  
4. 311066 4. 452298 4. 586702 4. 807108 5. 597903 4. 703357 4. 365764 3. 420795 4. 359006  
1. 709207 1. 340076 1. 121468 1. 342281 1. 281598 1. 195121 1. 046111 0. 934253 1. 276306  
1. 113023 1. 420978 3. 114573 1. 612608 1. 042915 1. 932937 1. 353132 2. 236473 1. 362545  
5. 477044 6. 176117 4. 839035 6. 051911 4. 934457 5. 459141 5. 422023 5. 475893 5. 454471  
0. 879781 1. 478424 1. 178473 1. 430228 1. 449311 1. 537072 1. 20156 1. 148916 1. 599053  
1. 198949 1. 175939 0. 860436 1. 161437 1. 129902 1. 483323 1. 49346 1. 052406 1. 330689  
1. 304054 0. 994448 1. 040823 0. 956346 1. 561705 1. 059865 1. 553569 1. 112178 0. 960373  
2. 162801 1. 622477 2. 393905 2. 005285 2. 63138 1. 148787 1. 421684 2. 197897 1. 601773  
2. 660293 1. 780429 3. 297357 1. 636836 1. 876671 2. 406582 1. 8486 2. 371445 1. 998923  
3. 017106 1. 910833 2. 140157 1. 979398 2. 724944 1. 764649 2. 585647 1. 854335 1. 928816  
2. 481654 1. 973539 2. 50081 2. 037909 1. 950163 2. 42119 2. 086385 2. 493844 2. 169502  
5. 47035 1. 190112 0. 819529 1. 366835 1. 992467 0. 904398 1. 390319 1. 381343 1. 417501  
2. 407061 2. 031452 1. 645386 1. 152512 1. 360051 0. 832014 1. 900309 1. 17335 1. 12738  
1. 450685 2. 359957 0. 998992 1. 608275 1. 568494 1. 077034 1. 859685 1. 553319 1. 378536  
2. 169897 1. 460397 2. 207212 2. 031697 2. 344 1. 850167 1. 936587 1. 972046 1. 480448  
2. 286427 2. 12929 2. 491913 2. 409918 2. 43757 2. 492563 2. 076202 2. 735326 1. 941249  
3. 358869 4. 488707 3. 395236 3. 098819 3. 068341 3. 822798 3. 802892 3. 430721 3. 812095  
4. 329397 2. 141688 3. 532239 2. 813529 1. 7384 2. 505683 1. 793099 3. 147256 2. 481945

2.464018 3.30572 3.086344 1.770785 2.997261 3.647163 2.715998 1.498472 3.029251  
3.643884 2.394646 2.913681 1.885891 3.052352 2.446017 2.173847 1.75647 3.638899  
3.433386 2.456076 3.187591 2.435449 2.346639 1.975982 3.397551 3.215834 3.450317  
1.069862 1.826766 1.128576 1.360744 1.131173 1.292263 1.615461 1.371874 1.208521  
3.272797 4.563032 3.558149 3.574105 4.481793 4.404621 3.511243 4.492995 3.546831  
2.177118 2.301587 1.997472 2.403412 2.85653 2.3628 2.34327 3.103655 2.689698  
4.43567 4.966046 4.312049 5.357453 4.477596 4.915439 4.83534 4.531619 4.310489  
3.446587 4.893156 3.962502 3.839919 5.02926 4.070091 4.086252 4.220064 3.826063  
2.968953 2.10636 2.246264 2.406841 2.235344 2.365288 2.080252 2.073579 2.845303  
7.075666 7.300134 6.668381 6.891908 7.007651 6.729515 6.847124 6.973343 6.771602  
6.219335 7.142813 7.075418 7.177715 7.303442 7.049141 6.205951 7.023213 6.587434  
1.172388 1.437579 1.284388 1.28891 1.03466 0.97305 1.125036 0.989386 0.923686  
7.275713 7.169399 7.181003 7.549242 6.658882 7.009386 7.117031 7.104819 7.686155  
2.932188 2.569866 2.409819 2.855593 2.21309 2.975494 3.459133 2.585958 2.859374  
5.483891 6.433846 5.783675 6.759408 7.245017 5.883773 6.209506 6.660243 6.546748  
7.035713 7.053472 7.247414 6.442818 7.069534 7.050267 7.246547 7.305192 6.679848  
4.878354 6.371742 6.322061 6.182712 6.479501 5.696657 5.893294 6.688513 5.850362  
4.645138 5.026992 3.92224 5.064373 5.151298 4.878008 4.643305 4.893381 4.541683  
2.44809 4.220734 4.07541 4.109911 4.2639 5.286442 3.241592 4.748731 4.727897  
2.109385 3.596169 2.857168 4.079498 2.300221 2.893547 1.396501 3.277972 3.384661  
6.585964 6.482532 6.544145 5.768006 6.33621 6.4711 5.820746 6.380766 7.033564  
5.365458 5.590754 6.409457 5.398868 5.721787 5.918976 6.149636 5.239152 6.119747  
6.438833 8.052336 7.198282 7.137331 7.016115 6.990741 5.866979 8.247345 7.85705  
2.719426 1.57335 2.344518 1.69 1.631108 1.430145 1.881958 1.535744 2.670661  
2.41522 2.039011 2.170289 2.82287 1.948723 2.080186 4.125049 2.119812 3.271031  
11.4723 11.5708 11.56267 11.61325 11.46343 11.57396 11.22685 11.52148 11.48646  
2.934143 3.334602 2.557776 3.102505 1.301527 2.181267 2.471899 2.182538 2.84804  
1.631872 2.000067 1.540793 1.521309 1.452146 2.117129 1.840208 2.152473 2.144608  
1.424144 1.254144 1.611142 1.693399 1.957188 2.194062 1.834364 1.694922 3.059618  
3.866861 5.047371 4.684215 4.697189 5.169157 5.286588 5.149046 4.45108 4.658765  
4.248745 5.778116 5.205774 4.729613 5.548496 5.917546 5.037638 5.570472 5.452353  
3.594743 2.952985 3.227147 3.041086 3.869371 3.615738 4.197894 3.526269 3.834644  
5.39721 6.241855 6.554505 5.307911 6.014258 6.492304 6.596311 6.330908 6.561776  
2.402037 3.501909 3.057245 2.770809 2.609949 2.566042 2.910715 2.874071 2.731992  
1.74655 1.863321 1.582947 1.67287 2.52569 1.427504 1.879955 1.76095 1.213963  
1.591484 1.311818 1.095664 1.136375 1.22648 1.393184 1.384578 1.04791 1.702102  
4.71297 5.578181 5.14312 4.876854 5.071647 5.516726 5.228954 4.918899 5.457623  
3.008825 4.731306 4.680735 4.341379 5.211276 4.490743 3.95019 3.65556 3.634913  
7.474712 7.9868 7.743364 8.577962 8.564866 8.021557 8.040666 8.379356 8.422358  
7.087902 7.406332 7.467146 6.80542 7.522398 6.938007 7.126846 7.25656 7.017865  
2.322534 3.168689 3.183003 2.465673 3.145388 3.114261 1.911917 2.676359 2.467133  
1.474599 1.285533 0.952213 2.058144 1.282317 1.452716 1.409744 1.394768 1.651866  
6.806405 6.099535 6.161731 6.22262 5.994603 5.867287 5.26036 5.589819 6.02571  
8.233352 7.407278 8.415461 6.022883 8.626422 6.988002 7.55445 6.976803 7.566423  
2.683812 4.487106 4.561044 4.364233 3.210336 4.630528 3.773387 4.120411 4.466464  
4.401413 5.405091 4.538038 3.534786 4.773353 4.373026 3.64629 3.572869 4.98788  
3.189143 3.219254 3.80031 2.978306 3.239715 2.870311 2.938694 2.861798 3.238242  
5.705898 5.402117 5.679353 6.505797 5.899734 6.003791 5.079293 5.958413 5.513519  
2.2714 1.602437 2.312543 1.73461 1.921842 2.135665 1.56302 1.21701 2.346951  
4.816298 4.89065 5.233035 4.485709 4.96615 3.46902 4.669822 5.131267 5.093242  
3.021492 3.353072 3.449045 3.513541 3.530944 2.544968 3.284068 3.902923 2.935458

2. 657064 3. 234706 2. 864538 3. 112203 3. 929824 2. 39413 3. 907201 3. 073886 2. 971944  
2. 725032 1. 82402 2. 377398 1. 817885 2. 349264 2. 291841 2. 604225 2. 039399 1. 693494  
1. 392573 1. 121663 1. 115629 1. 10706 0. 991685 1. 306002 1. 891346 1. 197582 1. 729316  
7. 811971 8. 190439 7. 813149 7. 816306 8. 115803 7. 742497 8. 290126 8. 313002 8. 066745  
5. 654565 5. 258307 5. 250154 5. 017979 4. 969855 5. 011626 5. 268192 5. 476385 5. 333487  
6. 552069 7. 28152 6. 888732 7. 146127 7. 337429 7. 707337 7. 144396 7. 202082 6. 90714  
8. 340497 8. 326018 8. 522764 8. 903256 8. 357563 8. 378923 8. 644079 8. 74915 8. 832055  
4. 14797 5. 893479 5. 82897 5. 942543 6. 261838 6. 152135 7. 317683 5. 213321 6. 033935  
8. 331033 9. 042868 8. 515296 9. 323715 8. 48014 8. 833463 8. 598317 8. 622958 8. 848533  
6. 596214 7. 872608 7. 640288 7. 95479 7. 322551 6. 996537 7. 287646 7. 862854 7. 337053  
3. 736916 4. 8791 4. 050147 5. 151883 5. 017714 4. 40638 4. 040083 4. 891106 4. 609536  
6. 218791 6. 029849 6. 751255 7. 226029 5. 759927 6. 122468 6. 252814 5. 94323 6. 938788  
9. 492357 10. 04369 9. 51226 9. 400237 9. 655921 9. 626179 9. 906583 9. 768801 9. 875543  
2. 289902 1. 540803 1. 764859 2. 257953 2. 223907 1. 766053 1. 76182 1. 989296 1. 648238  
4. 526782 4. 171 4. 548591 4. 278783 3. 71283 3. 864779 4. 800089 4. 016264 3. 610654  
7. 290526 7. 879005 7. 848557 7. 747795 8. 110157 7. 853321 7. 504932 8. 04029 7. 675334  
4. 790388 6. 042249 5. 745588 5. 494503 5. 54197 6. 513659 5. 839554 5. 794817 6. 23868  
4. 280251 2. 934533 3. 985054 3. 498037 4. 745683 3. 649278 3. 672477 4. 363113 4. 416575  
5. 214272 4. 588611 4. 675297 3. 890795 3. 739351 4. 501988 3. 897269 3. 481083 4. 328198  
2. 55144 2. 007435 2. 646487 2. 79211 3. 092204 2. 554081 1. 731369 2. 881902 2. 040437  
2. 797646 2. 273661 2. 879764 2. 220907 2. 433961 2. 580788 3. 528413 2. 272316 3. 15122  
5. 045333 3. 963674 4. 494061 5. 369107 4. 955171 5. 028447 4. 907085 3. 725754 4. 614411  
2. 679336 2. 275945 1. 70595 1. 646714 2. 191357 2. 119294 2. 401078 2. 429848 2. 079709  
6. 911474 6. 815857 7. 346646 7. 184636 7. 008907 7. 14805 6. 720783 6. 631567 7. 100381  
2. 702859 2. 854331 1. 822987 1. 80837 1. 855836 2. 724268 2. 108736 1. 406961 1. 815582  
2. 353021 3. 760836 3. 339716 3. 068403 3. 769437 3. 243522 2. 052902 2. 32705 2. 453168  
3. 281751 4. 896463 3. 730121 2. 953529 4. 429084 3. 150147 3. 060788 3. 902368 3. 679672  
1. 939244 2. 762025 2. 12751 2. 156102 2. 104918 2. 311115 2. 46578 2. 909057 2. 328705  
2. 127868 2. 427578 3. 902194 1. 431153 3. 214539 1. 255283 1. 740825 2. 456227 1. 767584  
7. 36284 7. 462531 7. 683068 8. 142092 7. 600892 7. 620873 7. 54419 7. 063298 7. 477524  
4. 894696 4. 040684 3. 996976 4. 749503 4. 135005 3. 8419 3. 833909 3. 955783 3. 51618  
4. 062603 4. 686382 3. 986927 4. 907927 5. 180599 4. 451732 4. 880618 4. 045094 3. 496025  
1. 724077 1. 546144 1. 99514 1. 608991 1. 713851 1. 818888 2. 095529 1. 67581 1. 853828  
3. 250249 2. 75968 2. 649263 3. 038625 2. 795435 2. 158229 2. 627245 2. 228512 1. 959219  
6. 597345 6. 29937 6. 37952 6. 723831 6. 299895 6. 586606 6. 286767 6. 490789 6. 874382  
7. 095772 8. 037355 7. 604634 7. 745351 7. 725316 7. 544091 7. 999037 7. 716729 7. 794749  
8. 26887 8. 480052 8. 464491 8. 503285 8. 503056 7. 79092 8. 198215 7. 767349 8. 515998  
5. 207763 5. 022218 5. 170476 4. 840278 5. 263683 5. 850955 5. 754305 5. 497042 5. 489713  
7. 378609 7. 740464 7. 57938 7. 735827 7. 939333 7. 546772 7. 603979 7. 604975 7. 64536  
7. 648723 8. 475072 8. 302613 7. 8097 8. 180717 8. 208224 7. 729913 8. 472317 7. 885732  
6. 612591 7. 217255 7. 21329 7. 148328 7. 144215 6. 979382 6. 841879 6. 748898 6. 936321  
4. 7682 5. 42077 5. 018523 5. 159068 4. 870626 4. 938483 4. 243251 5. 169635 4. 556976  
2. 434073 2. 392721 2. 51684 1. 093734 2. 091687 2. 071831 2. 362721 1. 683812 2. 121244  
7. 148519 6. 455647 6. 696412 6. 016361 6. 438698 6. 667398 5. 491846 6. 135697 6. 654463  
4. 818104 5. 827278 5. 92483 5. 541647 6. 121914 5. 858031 5. 615138 5. 789903 5. 763667  
3. 065992 3. 185944 3. 381046 2. 293521 3. 110109 2. 899355 2. 45172 2. 578393 3. 198782  
2. 332556 1. 362921 2. 138267 1. 372388 1. 287592 1. 634347 1. 771972 1. 94244 2. 566465  
5. 86604 6. 757103 5. 403093 5. 502287 6. 502267 5. 734611 7. 162075 6. 11326 6. 550126  
5. 241449 4. 972731 5. 060016 4. 840439 5. 385249 5. 42169 4. 894876 5. 673125 5. 536055  
4. 603912 5. 232258 5. 489829 5. 392637 4. 778839 5. 384587 5. 841976 4. 56749 5. 822801  
1. 210492 1. 104344 1. 482258 1. 435834 1. 157053 0. 892814 1. 809501 1. 224989 1. 207392

2. 724473 3. 280197 3. 148438 3. 559865 3. 015545 3. 807003 4. 926016 2. 710642 3. 309547  
6. 211984 6. 409927 6. 481326 6. 536443 6. 688058 6. 477398 6. 141066 6. 327574 6. 173532  
5. 047691 5. 392722 5. 807398 5. 068613 5. 010998 5. 322572 4. 848971 5. 1998 5. 500321  
1. 707264 1. 876023 1. 937355 2. 155553 1. 134987 1. 690678 2. 663593 1. 311176 2. 065424  
5. 799904 5. 478003 5. 357884 5. 612213 5. 434691 5. 569026 5. 553855 6. 024351 6. 412925  
4. 382769 4. 930428 5. 262211 5. 507792 4. 995235 5. 807382 5. 532012 5. 864821 5. 130102  
5. 637273 4. 472498 5. 236924 4. 992554 4. 573778 5. 369847 4. 805751 4. 660717 4. 944941  
4. 557404 5. 107379 4. 154291 5. 371124 5. 029333 5. 037766 4. 21719 4. 689989 4. 28186  
1. 175245 1. 024565 0. 81834 0. 896651 1. 632752 1. 121758 1. 435255 1. 644479 0. 826369  
3. 480795 1. 658618 2. 219904 2. 822175 1. 836776 2. 07824 2. 06979 2. 848366 2. 035706  
2. 330418 2. 336108 2. 788738 2. 667266 3. 165206 2. 925595 2. 805076 2. 356697 3. 414191  
5. 284137 4. 754537 5. 067854 4. 936424 4. 512903 4. 844829 4. 767646 5. 066539 5. 057621  
5. 564722 6. 390149 6. 044883 6. 310989 6. 252777 6. 61662 6. 510595 6. 052515 6. 002443  
2. 675953 2. 477302 2. 742931 3. 135911 2. 734066 3. 326723 2. 990819 3. 364542 2. 76174  
5. 374206 5. 703345 5. 794172 5. 71113 5. 672951 5. 492392 5. 221671 5. 651453 5. 785512  
3. 891009 3. 641964 3. 530059 5. 064487 4. 887397 4. 201079 4. 878419 3. 584137 3. 991824  
7. 037271 7. 169234 7. 099344 6. 795684 7. 190006 7. 350347 6. 937696 7. 240077 6. 728429  
1. 68467 1. 474021 1. 585681 1. 960071 1. 044098 1. 144163 1. 24774 1. 29062 1. 558074  
5. 806666 4. 56338 5. 145329 4. 080864 4. 562119 4. 409158 4. 110377 4. 251585 5. 192409  
4. 383726 4. 48686 4. 051171 3. 853178 4. 082259 4. 018472 3. 396362 4. 999844 4. 194188  
4. 621809 4. 312452 3. 432789 3. 38373 3. 32105 3. 489306 4. 207449 4. 060081 3. 811388  
6. 687129 6. 648701 7. 008042 6. 234307 6. 805433 6. 630806 6. 118659 6. 749324 6. 220368  
2. 577168 2. 568086 2. 999158 3. 416137 2. 592716 2. 830125 3. 650133 2. 306208 3. 903732  
3. 739168 3. 883656 2. 920404 3. 194226 3. 420118 3. 343518 3. 766875 2. 377759 3. 312764  
4. 056091 3. 686717 3. 791886 2. 687336 3. 706789 3. 007244 3. 740563 3. 495667 4. 772418  
1. 925622 1. 544202 1. 734674 2. 059259 1. 547128 2. 071198 1. 812601 1. 580825 1. 736294  
4. 561219 3. 916904 3. 752631 5. 355708 4. 473674 5. 213113 5. 2916 3. 182236 4. 65259  
2. 181244 1. 607538 2. 993259 1. 841839 2. 893592 1. 494405 1. 931742 1. 887953 1. 535803  
5. 682804 6. 256462 5. 318336 5. 462881 6. 600349 6. 594665 6. 314642 6. 01034 6. 144047  
0. 955645 1. 356954 0. 948058 1. 416311 1. 639532 1. 5668 1. 295486 1. 321586 1. 49949  
2. 001819 2. 115825 2. 542645 1. 953677 1. 807997 2. 389423 2. 485166 2. 124831 2. 113586  
2. 196678 3. 403728 2. 410935 3. 474889 3. 651548 2. 719856 3. 001042 3. 12691 2. 899091  
2. 313217 4. 05475 3. 159053 3. 171968 3. 182979 2. 795359 3. 138662 3. 599646 2. 63283  
6. 973792 6. 578187 7. 171 6. 785535 6. 091707 6. 831309 6. 558556 6. 334269 6. 29484  
5. 897054 6. 296153 5. 861614 5. 708805 6. 114362 6. 769949 5. 584844 5. 91876 5. 655181  
5. 838686 5. 976151 6. 062286 5. 728042 5. 903339 5. 779426 5. 840802 6. 046988 5. 999363  
3. 711386 4. 350876 3. 573772 4. 72801 4. 221494 3. 978665 3. 345904 3. 93872 3. 401932  
6. 342235 6. 413814 6. 413016 6. 174444 6. 354132 6. 846948 6. 946129 6. 572217 6. 393868  
2. 694749 3. 744579 2. 62249 2. 149277 2. 280955 2. 494066 2. 640352 3. 064413 2. 834828  
3. 414492 3. 601305 2. 988371 2. 660983 3. 855015 4. 497763 2. 978849 3. 378029 3. 742894  
7. 8556 8. 408403 8. 013121 8. 337899 8. 140404 7. 859336 7. 61112 7. 704107 7. 802215  
6. 059113 6. 335545 6. 054087 6. 148958 6. 261584 5. 721745 5. 593845 5. 686627 6. 394977  
2. 833874 2. 484001 2. 669172 2. 808957 2. 523597 3. 060237 2. 457062 2. 561046 2. 671953  
4. 18417 5. 553097 5. 249846 5. 503761 6. 122697 4. 087207 4. 796956 5. 534922 4. 88458  
1. 696193 4. 400968 6. 258744 1. 797724 4. 002199 4. 53458 4. 794494 4. 483009 4. 253002  
6. 156958 6. 493213 6. 258997 7. 021512 6. 677771 6. 628058 6. 749752 5. 889544 6. 033085  
8. 304361 8. 136219 8. 127481 8. 17234 8. 122153 7. 989043 8. 833781 8. 087476 8. 309617  
2. 174592 1. 988687 2. 66803 2. 313582 1. 991736 1. 857697 2. 042781 1. 898771 2. 247007  
2. 882073 3. 907933 3. 202739 4. 321039 2. 671268 3. 364416 2. 939921 3. 854694 2. 968758  
2. 885517 4. 379435 4. 157196 4. 04866 4. 236161 3. 950796 3. 849628 4. 019833 4. 668667  
6. 760315 7. 26412 6. 795649 7. 512412 7. 413932 6. 954635 6. 808127 7. 031802 6. 944462



11. 103 10. 83218 10. 94921 10. 68342 10. 84577 10. 58622 11. 00957 10. 65788 10. 92479  
1. 340039 1. 142525 1. 59022 1. 332388 1. 33396 1. 41997 1. 360429 1. 775838 0. 951161  
7. 064134 6. 840948 7. 044249 6. 604992 6. 459296 6. 743995 6. 419003 7. 144442 6. 706022  
5. 416737 4. 042626 4. 527156 2. 786119 2. 814018 2. 910714 3. 654075 4. 011045 5. 748409  
2. 413457 2. 715038 2. 333725 2. 070463 2. 645573 2. 226905 3. 264032 2. 111586 1. 907719  
2. 379276 1. 864149 2. 020221 2. 071499 2. 193356 2. 572187 2. 531104 2. 42696 2. 754798  
3. 966239 2. 28513 2. 335478 2. 40103 2. 560811 2. 229516 2. 589956 3. 368858 3. 590563  
3. 671955 3. 418613 4. 015785 3. 677629 3. 109437 3. 690259 3. 772277 3. 759873 2. 708781  
5. 007843 4. 431461 4. 411233 3. 767952 4. 763067 4. 66388 5. 009899 5. 157175 4. 180746  
2. 079902 2. 782025 1. 765503 1. 714812 1. 370627 2. 61625 1. 678204 2. 230024 1. 76251  
5. 549787 4. 934083 4. 928539 5. 533482 5. 304581 4. 48659 3. 180587 4. 200599 4. 403317  
4. 646836 4. 748607 4. 48291 4. 431903 3. 840672 4. 330989 4. 85813 4. 89801 4. 408318  
6. 84014 6. 386296 6. 521364 6. 64295 6. 347426 6. 563186 5. 600674 6. 663609 6. 158798  
4. 345935 5. 907909 6. 711379 6. 42613 5. 569593 6. 494786 6. 333587 5. 945659 6. 433851  
3. 81455 3. 972137 4. 003998 4. 685403 4. 807733 4. 205716 3. 664694 4. 615739 3. 562028  
2. 911199 2. 611215 2. 475838 3. 764003 3. 502308 2. 539053 2. 546052 2. 912278 2. 467509  
2. 151194 2. 094597 1. 686029 2. 390702 2. 058793 2. 227098 2. 050994 2. 133771 2. 832361  
4. 786798 5. 989861 5. 554987 7. 021446 6. 100079 7. 065776 6. 37279 5. 231135 6. 205159  
2. 436901 1. 071135 1. 016509 1. 167961 0. 998763 1. 301926 1. 016074 1. 211032 1. 134659  
2. 046993 2. 74177 2. 974641 2. 549021 3. 531793 2. 775963 4. 85879 2. 789235 3. 335473  
0. 685063 0. 724877 0. 363226 1. 997081 1. 176799 0. 983895 1. 631186 0. 871478 2. 489814  
2. 656577 1. 875667 2. 298195 1. 831205 1. 733806 2. 773118 1. 347414 1. 080479 3. 426553  
3. 821969 2. 115512 4. 175917 3. 135177 5. 689157 2. 399883 2. 775186 2. 261775 4. 971876  
0. 725686 0. 730858 0. 760381 0. 359255 1. 255995 1. 307514 0. 86942 0. 416483 1. 160158  
2. 437338 2. 724112 2. 394522 2. 445778 2. 345744 2. 08902 2. 229449 2. 874306 2. 412412  
3. 038429 4. 368692 4. 364741 2. 393198 3. 870463 3. 954638 3. 376019 2. 657623 2. 77165  
6. 190778 6. 919825 6. 679636 6. 376367 7. 035004 6. 911451 6. 803924 6. 870772 6. 564298  
2. 803419 2. 783548 3. 115894 1. 861556 3. 270954 3. 187809 3. 357567 2. 801498 2. 833925  
6. 802721 6. 805434 7. 002714 6. 748968 6. 52517 6. 85147 6. 287823 6. 87029 6. 706009  
0. 885847 0. 739251 1. 087758 1. 335139 0. 901879 0. 790434 1. 167312 1. 225865 1. 517525  
8. 361005 8. 46846 8. 511439 8. 206341 8. 706443 8. 409777 8. 414467 9. 220736 8. 31294  
1. 703894 2. 133848 1. 257904 1. 763782 2. 221887 1. 511528 2. 009187 2. 24159 1. 823417  
1. 923695 1. 664417 2. 635359 1. 97554 2. 014664 2. 512134 1. 639804 2. 365787 1. 748098  
4. 33197 3. 590541 3. 874205 3. 512908 4. 150036 4. 039988 4. 147949 4. 079292 4. 387691  
4. 600125 4. 635198 4. 460493 4. 317428 4. 78156 5. 080154 4. 494113 4. 349656 4. 499943  
8. 297796 7. 058722 8. 619089 7. 433847 7. 82911 6. 970842 7. 476708 8. 349439 8. 753412  
5. 576612 6. 414349 6. 885841 5. 776414 5. 748148 6. 056616 6. 12598 5. 932644 6. 583465  
5. 162734 5. 709754 6. 20367 5. 016772 5. 927905 5. 620781 5. 410162 5. 734675 5. 780936  
2. 855321 2. 70602 1. 796692 1. 985989 2. 108558 1. 994859 1. 568891 1. 876794 2. 017059  
3. 99805 5. 415251 4. 373449 4. 479562 5. 558111 5. 322759 4. 534115 5. 530513 5. 082435  
4. 24599 5. 068508 4. 508762 3. 886175 3. 278541 3. 667538 4. 178846 4. 417985 3. 658957  
3. 863422 2. 775743 3. 289841 2. 720267 2. 798778 3. 730873 3. 309107 3. 60206 3. 423244  
4. 943061 2. 020738 2. 894757 3. 170478 4. 192525 4. 509753 3. 917863 2. 288623 1. 548914  
7. 528814 6. 89972 6. 111218 6. 902816 6. 371219 5. 564275 6. 651571 6. 169481 6. 575605  
6. 310642 6. 657214 6. 620673 6. 376375 6. 80191 7. 152715 6. 328558 6. 354208 6. 785474  
6. 116231 6. 888695 6. 258283 6. 720546 6. 698086 7. 815118 6. 400781 7. 234435 6. 47538  
2. 683829 2. 476405 2. 146437 2. 423537 1. 91169 2. 285001 1. 920111 2. 082952 2. 617809  
2. 001394 1. 650161 1. 587927 2. 021099 1. 773872 1. 89936 1. 542024 1. 630839 1. 241211  
5. 067149 5. 580036 5. 256585 5. 753628 6. 214765 5. 199458 5. 01523 6. 160544 5. 850603  
1. 754483 0. 493133 1. 216751 1. 635059 1. 687397 2. 127691 0. 652 1. 108311 1. 235842  
3. 771385 4. 373881 3. 627039 4. 410217 2. 98732 4. 448818 3. 702311 3. 293661 3. 452379

8. 420169 8. 459069 8. 79366 8. 379097 8. 384559 8. 290215 8. 40913 8. 664816 8. 695604  
3. 152229 3. 257344 2. 652233 2. 854867 2. 857938 3. 653475 2. 868085 2. 64393 4. 368055  
0. 413951 1. 380316 1. 641228 0. 7437 1. 738042 1. 528745 2. 166939 1. 906243 1. 191288  
5. 405462 5. 179212 4. 571746 5. 166194 4. 113965 4. 485581 3. 846531 4. 151713 5. 09132  
1. 194362 1. 568015 1. 617064 2. 006642 1. 903736 1. 410252 2. 681376 1. 41166 2. 550846  
2. 252989 1. 658779 1. 717224 2. 259824 2. 419422 2. 566994 2. 71966 1. 793684 2. 755504  
5. 405824 5. 610544 5. 802383 4. 019459 5. 345757 5. 561027 5. 164176 4. 9852 4. 801721  
4. 682482 5. 146093 5. 652273 4. 956016 5. 056457 5. 768515 5. 274541 5. 188763 5. 232714  
7. 775712 8. 001562 8. 514472 7. 910375 7. 468677 8. 52143 7. 34531 8. 097659 7. 734689  
5. 148263 5. 716475 6. 19592 6. 148891 5. 899037 6. 715711 6. 65864 6. 181208 5. 718868  
2. 857663 1. 039922 3. 049498 1. 582679 1. 536128 1. 377223 2. 097737 1. 959893 2. 115637  
5. 051898 5. 708259 5. 956258 5. 706228 5. 658669 5. 065075 6. 072026 5. 666266 5. 907547  
5. 083141 5. 28675 4. 780413 4. 97236 4. 376405 5. 145041 4. 045243 5. 787924 4. 897747  
3. 377966 3. 280748 2. 909666 3. 435203 3. 738689 2. 843704 2. 779064 2. 984617 2. 947763  
4. 352003 4. 733533 4. 060362 4. 967868 5. 116021 5. 004898 5. 134212 5. 068211 4. 245749  
5. 588362 5. 650148 5. 495896 5. 767874 5. 999251 5. 954459 5. 726341 6. 057243 5. 575518  
4. 370155 5. 705201 5. 301125 4. 873172 5. 301456 5. 204165 4. 825737 5. 482311 5. 201875  
7. 372815 7. 501018 7. 467293 7. 860758 7. 325741 7. 278088 6. 923922 6. 857566 7. 298846  
6. 297597 6. 198173 5. 383983 5. 835701 6. 264494 6. 099046 6. 434704 5. 759623 6. 259476  
5. 44297 5. 796243 5. 687127 5. 69409 5. 890775 5. 772256 5. 011214 5. 92293 5. 687637  
7. 516174 7. 488894 7. 05913 7. 751522 7. 7218 7. 304013 7. 433359 7. 574321 7. 469544  
2. 837391 4. 278699 4. 86605 4. 576768 5. 5758 5. 144447 3. 941574 4. 755182 4. 339453  
5. 243542 4. 816587 5. 287142 5. 54838 5. 426995 4. 607108 5. 557539 5. 13255 4. 997305  
5. 569403 4. 811506 4. 994604 5. 741653 5. 600228 5. 210017 4. 609772 5. 644067 5. 536476  
4. 751461 5. 812159 6. 299869 6. 201748 5. 913379 6. 20859 5. 684829 5. 763268 6. 295717  
1. 231186 1. 173218 0. 875432 1. 316763 1. 469995 1. 881121 1. 076978 1. 010159 1. 037538  
1. 645927 1. 5202 1. 722926 1. 481054 1. 507114 2. 289535 1. 874096 1. 447547 1. 682936  
2. 736114 2. 150507 2. 786563 2. 016375 2. 966629 2. 334271 2. 745135 2. 340999 2. 823962  
4. 073142 1. 850413 3. 036956 2. 069072 1. 946076 2. 040453 2. 940897 2. 511625 2. 456431  
2. 633388 2. 111146 1. 87879 1. 81771 2. 221757 1. 890941 3. 402276 2. 106432 2. 333222  
3. 916764 4. 199781 4. 817135 4. 051924 5. 370371 3. 208704 3. 518622 5. 543132 4. 465124  
6. 552744 5. 943974 6. 212559 5. 312514 4. 725371 6. 457404 5. 706896 6. 283863 5. 536953  
6. 136118 5. 992937 6. 197552 6. 323111 6. 993497 5. 921699 6. 685463 5. 632321 6. 009909  
3. 506957 3. 444789 1. 887739 2. 431388 2. 046767 2. 757077 2. 89541 2. 981104 3. 384599  
1. 717063 2. 044944 1. 832765 1. 738914 1. 366215 1. 648665 2. 627761 1. 952925 1. 556944  
6. 58555 6. 141941 6. 443577 5. 390125 6. 367424 6. 140469 5. 967745 6. 215711 5. 673236  
1. 612065 1. 715808 1. 259214 1. 591163 1. 357557 2. 138435 2. 905845 1. 18533 1. 323902  
5. 43287 5. 483014 5. 00836 5. 379788 4. 896105 6. 638922 4. 089417 6. 144555 4. 430887  
4. 291606 5. 848231 5. 931878 4. 155183 3. 529843 2. 743843 5. 48425 4. 770528 5. 209768  
4. 476816 4. 904986 5. 420768 5. 572487 4. 926222 5. 017008 4. 316423 5. 002103 5. 158386  
2. 730098 3. 481968 2. 839303 3. 242137 2. 469525 3. 209223 3. 178407 3. 221049 3. 732818  
4. 782549 4. 777426 4. 844765 4. 815248 4. 458035 4. 653864 4. 407575 4. 478734 5. 314187  
2. 379274 2. 218165 2. 097613 2. 819272 2. 890797 2. 210574 2. 943922 2. 3624 3. 247205  
2. 323164 2. 742713 1. 854946 1. 562838 1. 89899 2. 236105 2. 320101 1. 856628 2. 290365  
3. 058325 3. 749859 3. 403035 4. 028179 2. 507592 2. 465263 3. 199682 2. 892253 3. 07122  
3. 961912 3. 311831 3. 47337 3. 019648 4. 054644 4. 604602 5. 119086 2. 751372 2. 920453  
6. 278214 6. 405763 6. 996795 6. 338399 6. 841787 6. 835274 6. 122079 6. 523159 6. 400649  
3. 066863 2. 136134 2. 66903 2. 356864 2. 743577 2. 289081 2. 467017 1. 863294 3. 410431  
4. 730439 3. 859411 4. 001345 3. 547758 4. 124198 3. 624938 3. 587084 4. 234783 4. 596785  
1. 939444 1. 112967 1. 021463 1. 281754 1. 486801 1. 182558 1. 338957 1. 528498 1. 2826  
3. 197997 2. 79927 2. 674885 3. 166824 2. 422932 3. 170508 2. 898443 3. 193789 2. 917077

3.902192 3.066664 3.68517 2.697279 3.071435 2.68171 3.412462 2.801814 4.84453  
6.508133 7.309116 7.266159 7.066461 7.141279 6.848661 7.202743 6.959989 6.570374  
7.002064 7.859599 7.563357 7.61382 8.008834 8.14791 7.726761 7.252764 7.591698  
1.295849 1.022499 0.945185 1.102145 1.107282 1.052557 1.13173 1.070568 0.844  
2.875135 2.781791 2.259671 2.082216 3.087195 2.255516 2.061649 3.965801 3.905537  
3.436547 2.824191 2.244266 2.39584 1.962724 2.60859 2.962648 2.316534 2.092629  
10.2135 9.724119 9.622722 9.693112 9.715887 9.806815 9.496798 9.641653 10.24206  
4.156206 4.516349 4.971317 5.174262 5.448241 5.382537 4.948076 4.99422 5.115814  
2.275237 1.878214 1.964556 1.84237 1.61587 2.216088 1.945409 2.100435 2.420814  
6.078549 5.662114 6.286897 6.386501 5.818552 6.129101 6.301384 6.140067 6.241629  
4.276949 5.643101 5.359427 5.380248 5.188099 4.990445 5.684317 5.46157 5.055258  
3.413379 2.332365 2.906092 3.134922 3.374969 2.25643 3.12831 3.143607 3.490804  
3.293736 3.695047 3.885098 3.78959 3.505407 3.902044 3.198841 3.654627 3.288664  
7.024185 7.400813 7.030326 7.48504 7.701987 7.472631 7.578405 7.658962 7.575451  
4.466673 5.30363 5.531187 4.988861 5.655015 4.150837 4.555121 5.474339 5.362872  
5.390079 6.74481 6.423655 5.347166 5.956519 6.325006 5.236692 5.789534 6.129656  
5.304343 7.312381 5.715388 5.666736 6.839906 5.2278 6.293243 7.292411 6.306782  
3.848064 4.107 4.179471 4.852788 4.061181 4.987207 3.477446 4.120387 3.4053  
3.581445 2.414942 3.718074 2.702594 3.870863 3.313887 2.532098 3.210802 3.984651  
2.229227 1.678953 2.684601 2.653619 2.102266 1.855035 3.276413 2.222663 2.632429  
2.43964 1.730247 1.94441 1.602898 1.280364 1.584454 1.655263 1.657518 1.348407  
3.348814 4.337643 4.400395 4.060744 4.765071 4.809625 4.45892 4.886045 3.38166  
8.76078 9.033371 9.105903 9.34191 9.492071 9.299529 9.34739 9.648049 9.386153  
2.707264 3.966692 3.54294 3.444125 4.159298 3.948451 3.641515 4.116612 4.518032  
5.231438 5.937382 5.736823 6.18746 6.671859 5.845295 5.411447 6.034478 6.132059  
5.420795 5.053222 3.57602 4.353854 4.437849 5.09162 3.259939 3.479262 4.731422  
4.631817 4.248942 5.405304 4.630144 5.670604 4.846017 5.011217 4.975273 4.928482  
4.543139 4.07253 3.817971 5.326784 3.855701 4.963752 4.975984 4.565679 4.493944  
4.830868 5.251669 5.322511 5.117359 5.041515 5.269067 4.812482 5.674648 4.910387  
3.202826 4.7514 3.806381 4.215332 5.061839 5.096811 4.158348 3.781879 4.523342  
6.685081 6.590875 6.683074 6.532402 6.509322 6.727773 6.510397 6.513968 6.87309  
5.63531 6.195841 6.275147 6.691541 6.401911 7.412609 6.015969 7.079235 5.740515  
6.440516 6.939866 6.568023 6.854104 6.857667 6.262469 5.873697 7.125067 6.893547  
7.150211 3.757007 6.713646 3.643815 4.9333 4.343489 3.918028 4.38711 5.495647  
5.754697 5.567058 5.363563 5.331445 6.466613 5.652841 4.696224 5.966039 5.689289  
7.81746 7.439235 7.70095 7.043941 7.487142 7.521692 7.007329 7.56834 7.326824  
4.387914 5.465552 5.165458 6.457629 5.215494 5.237688 5.520427 5.848287 5.649718  
3.05183 3.978421 4.399009 4.253271 3.35169 4.343049 3.924877 4.20058 4.017974  
7.032377 6.04513 6.048533 5.542128 6.144042 6.410804 5.771224 5.888313 6.120969  
5.260442 5.422173 5.268772 5.671701 5.3042 5.566637 5.559668 5.804384 5.376831  
6.06235 6.225237 6.925079 6.28653 6.334663 6.467983 6.269506 5.788887 6.39183  
6.358921 7.530097 6.898486 6.710682 7.181846 6.750978 6.692626 6.91479 7.247791  
5.41858 4.384828 4.510502 4.63186 4.485138 4.884833 4.521806 4.429507 4.075581  
1.449187 1.164827 1.640484 1.441396 1.478159 1.341238 1.292751 0.988945 1.715143  
5.927309 6.220339 6.105184 5.99756 6.224337 5.782221 5.806506 5.652899 5.929467  
3.635556 3.464662 3.538472 3.610007 3.698266 3.358311 3.501518 3.753576 4.184421  
4.420914 2.785195 3.462118 2.842286 3.371565 2.505974 2.785759 3.012763 5.051359  
3.569314 5.031917 3.188123 4.388712 4.621688 3.667728 4.171003 4.591145 3.893059  
1.152248 1.483517 0.887934 1.861967 1.745302 1.569166 1.632908 1.30637 1.263402  
4.958633 6.012656 6.324968 6.506776 5.895405 6.063182 6.063907 5.83423 6.359723  
3.393148 4.514676 3.616282 4.538584 3.938704 4.409285 4.409285 3.069149 3.985048

3. 595798 3. 025387 3. 216891 2. 016089 1. 166133 2. 162836 1. 722935 1. 126863 2. 758052  
1. 431261 1. 594937 1. 247572 1. 54301 1. 530741 1. 592068 1. 028178 1. 147374 2. 674039  
6. 368517 6. 924108 6. 693825 7. 148537 6. 988023 6. 945828 6. 949743 6. 849608 6. 74212  
5. 5789 4. 904912 5. 12578 5. 57113 5. 209684 5. 079497 4. 653492 5. 577393 5. 597061  
3. 578608 2. 473645 3. 044907 3. 231175 2. 292388 2. 644392 2. 971252 2. 992249 3. 604118  
7. 625514 8. 015587 7. 858845 7. 732532 7. 503217 8. 198205 7. 812233 7. 900242 7. 569189  
4. 919278 4. 291163 5. 097765 4. 336589 4. 687489 5. 572143 4. 452291 4. 378976 4. 795138  
5. 719878 5. 558298 5. 238839 4. 534851 5. 029496 4. 670033 5. 362343 5. 682318 5. 624534  
5. 543199 5. 855265 6. 172471 5. 956883 4. 745588 5. 145513 5. 292126 5. 655116 5. 012439  
7. 803556 9. 052011 8. 448167 9. 031457 9. 255651 8. 903637 8. 92204 9. 190927 9. 240842  
4. 374939 4. 736514 5. 073318 4. 919803 4. 476833 5. 544397 5. 43294 5. 334093 5. 211501  
3. 198505 2. 211271 2. 836894 1. 917666 2. 316958 2. 828146 1. 550723 1. 796652 2. 473071  
1. 83509 1. 243726 3. 059324 2. 187101 2. 708859 1. 953836 2. 48714 1. 832432 1. 174908  
1. 462943 1. 300641 1. 34742 1. 532455 1. 150993 1. 640679 2. 045802 1. 711322 1. 53561  
5. 041735 4. 066463 4. 582492 4. 80169 4. 090203 4. 266463 4. 863709 4. 457611 4. 470221  
3. 991609 4. 497774 3. 492981 3. 413539 6. 33659 3. 628749 4. 914463 4. 519427 4. 079689  
5. 25212 4. 459716 3. 596867 3. 888242 4. 030996 3. 514107 3. 153906 3. 680761 4. 030996  
6. 877483 5. 668282 6. 434821 5. 577875 6. 091552 4. 815251 5. 979043 5. 453445 7. 196798  
2. 318667 3. 774976 2. 430484 2. 752578 2. 571379 2. 930186 2. 756639 2. 695467 3. 300364  
3. 008916 2. 194242 2. 399574 2. 229017 1. 832788 2. 297209 2. 661199 2. 234483 3. 148637  
4. 345206 5. 312866 5. 280553 5. 860113 4. 90285 3. 30528 4. 268604 4. 092899 5. 656675  
4. 60508 4. 857439 4. 918482 4. 455312 4. 718956 5. 253762 4. 556657 4. 583633 5. 066519  
1. 602983 1. 729047 1. 974527 1. 608398 2. 024098 1. 407112 2. 128401 1. 920165 1. 325367  
5. 880627 5. 091481 5. 013691 5. 615124 4. 009301 5. 772627 4. 445794 4. 48519 6. 694233  
3. 334128 3. 306943 3. 46537 2. 83786 3. 38431 3. 597946 3. 477382 3. 548284 3. 444821  
1. 898329 1. 59735 1. 776509 1. 410688 2. 610702 1. 79218 2. 849485 1. 62379 1. 6269  
7. 634364 7. 517404 7. 001831 7. 978707 7. 63893 8. 520167 7. 917253 7. 021414 7. 673537  
3. 38775 3. 027054 3. 467811 3. 821276 3. 271749 3. 926405 3. 702322 3. 649323 4. 161959  
4. 500096 4. 133416 4. 544009 5. 267862 4. 555433 4. 051087 4. 769556 3. 931952 5. 066903  
5. 220076 4. 77289 4. 815992 4. 265952 4. 760923 4. 665932 3. 414382 5. 024856 5. 341993  
6. 35784 5. 167163 4. 679962 5. 249711 6. 075852 5. 412918 5. 072477 5. 51472 5. 069228  
3. 569545 2. 827536 2. 821584 2. 166108 2. 039118 1. 486762 2. 256942 3. 018463 2. 234669  
6. 575494 6. 92893 6. 985685 6. 781904 6. 593759 7. 607015 7. 07126 7. 445022 6. 883653  
3. 118782 3. 795038 3. 889545 4. 550822 4. 827806 5. 025265 5. 33396 4. 325351 3. 897826  
1. 996088 2. 075072 2. 142034 1. 959143 2. 363987 1. 967823 2. 660553 2. 535544 2. 113846  
7. 910311 8. 01195 7. 496458 7. 556683 7. 739127 7. 79351 7. 56743 7. 738981 7. 780888  
4. 488678 4. 795013 3. 341664 4. 087372 4. 969744 3. 842873 4. 228118 4. 62791 3. 963061  
5. 294838 7. 197617 6. 409087 6. 843953 6. 247693 7. 24726 6. 744012 6. 970014 6. 174548  
8. 491243 8. 986932 8. 711153 8. 689314 8. 845422 8. 699646 7. 958597 8. 761811 8. 650876  
3. 431323 3. 399584 3. 535256 4. 450872 4. 492235 4. 403094 3. 986156 3. 374557 3. 669528  
6. 945942 7. 608447 7. 683277 7. 311691 7. 126185 7. 249806 6. 879902 7. 628655 6. 671898  
5. 43675 5. 666282 6. 043331 5. 654461 6. 282916 6. 832821 5. 968072 5. 558293 5. 946809  
6. 205235 6. 536438 6. 602785 6. 727329 6. 726135 6. 373542 5. 671405 6. 350006 6. 37887  
4. 257578 4. 453717 4. 046497 4. 163177 4. 350525 4. 571728 4. 433079 4. 676874 4. 274478  
5. 830302 5. 505191 5. 743501 6. 294752 6. 61684 5. 614809 5. 062182 5. 55666 5. 847851  
3. 742592 5. 616359 5. 184954 4. 802022 5. 481262 5. 593517 5. 022726 4. 691751 4. 930439  
8. 420057 7. 043148 6. 373501 6. 122362 5. 688828 6. 046245 6. 739836 7. 50473 5. 870855  
4. 761109 5. 16101 4. 926294 4. 426489 5. 259958 4. 656824 4. 863208 4. 634183 4. 946604  
7. 346832 6. 083225 5. 475989 6. 309993 5. 92135 6. 235063 6. 219562 6. 543354 7. 296691  
2. 811892 3. 693166 3. 402936 3. 342684 3. 54359 3. 943357 2. 536869 4. 145103 2. 913107  
3. 578149 3. 542996 4. 807923 3. 774175 4. 287203 3. 820074 4. 487955 5. 114722 6. 225766

3. 990955 4. 965301 4. 99322 5. 586575 5. 68054 4. 649685 4. 463366 5. 193644 5. 33683  
5. 489771 4. 828991 4. 344369 4. 600437 5. 259321 4. 938879 5. 121758 5. 828588 5. 093037  
5. 083328 5. 365866 5. 405335 5. 176157 5. 497426 5. 641908 4. 712126 5. 576807 5. 345714  
5. 42374 6. 067392 5. 855661 5. 715989 6. 503324 6. 054196 5. 7027 4. 585247 5. 309306  
2. 116524 2. 435091 1. 993889 2. 000549 3. 25817 2. 408069 2. 030901 2. 799681 2. 238991  
6. 244936 7. 565397 6. 974981 7. 320987 7. 218219 7. 295209 6. 963135 6. 681693 7. 022334  
1. 772303 1. 920217 2. 886865 1. 888442 1. 767282 1. 943842 1. 84019 1. 330526 2. 297553  
2. 868782 3. 429687 3. 574002 3. 082618 3. 092666 3. 691036 2. 768745 3. 364438 2. 98948  
4. 02377 4. 352121 5. 003305 4. 264406 5. 309679 5. 069818 4. 682057 5. 009947 4. 735941  
1. 586862 1. 607797 1. 099249 1. 938462 1. 167991 1. 411457 1. 497423 1. 346516 1. 748249  
6. 456443 6. 036662 6. 518005 5. 971982 6. 01114 7. 040884 6. 045312 6. 044931 6. 526018  
1. 489814 2. 059065 2. 269582 1. 990184 1. 439006 2. 243526 1. 5292 1. 445371 1. 967051  
4. 352773 4. 775996 5. 098769 5. 939158 4. 46045 5. 549841 4. 059971 4. 335974 4. 332189  
5. 452665 6. 732806 6. 101211 6. 074784 6. 895699 6. 434858 5. 898993 6. 780846 6. 777925  
3. 390536 3. 302181 2. 708842 2. 353685 2. 627665 2. 777912 2. 999825 4. 055069 3. 549296  
6. 423732 6. 641361 6. 832854 6. 900063 6. 864935 6. 64447 5. 671783 6. 64886 6. 588221  
3. 210835 2. 391998 3. 074409 1. 928826 2. 240975 2. 601694 2. 312613 2. 396834 1. 763059  
3. 978934 5. 365041 5. 310123 5. 171025 5. 459568 5. 220569 4. 949429 5. 116423 5. 495853  
3. 383115 3. 526448 4. 125948 3. 938642 3. 922142 4. 035678 3. 780223 4. 995904 3. 458503  
5. 604774 5. 399147 4. 988847 5. 809806 5. 499751 5. 796115 5. 023856 5. 363038 4. 538874  
2. 772505 2. 914148 2. 81916 1. 905015 3. 736412 2. 745415 3. 127575 3. 046251 2. 609297  
5. 223456 5. 576301 5. 015462 5. 755863 6. 044872 5. 916004 5. 494244 5. 033342 5. 391301  
5. 925085 6. 492285 6. 180507 6. 282719 6. 888192 6. 729617 6. 205044 6. 464813 6. 327126  
3. 328712 5. 403379 4. 879787 4. 681897 4. 535943 5. 769273 4. 827865 3. 969744 4. 146088  
6. 431429 6. 848666 6. 854301 7. 128781 6. 970398 6. 845456 6. 278986 7. 048126 6. 964837  
4. 552153 4. 666546 5. 243154 4. 496688 5. 00239 4. 617232 4. 367597 4. 46752 4. 787812  
2. 339285 2. 516086 2. 872415 1. 868932 3. 17635 3. 106832 3. 035307 1. 886204 3. 615703  
8. 815953 7. 735865 7. 133186 6. 961439 7. 653322 6. 752855 7. 093238 7. 553382 7. 519659  
4. 553638 4. 424706 4. 693388 4. 911016 4. 885286 5. 137453 5. 534083 5. 186712 4. 551305  
5. 551399 4. 205638 5. 046574 3. 629542 3. 9723 3. 329702 3. 565836 4. 02477 5. 140883  
4. 527731 4. 415877 5. 101204 3. 611474 4. 640853 4. 622115 4. 403987 4. 563412 3. 871914  
7. 445637 7. 099035 7. 315584 7. 426851 6. 680727 7. 25353 6. 832512 7. 213254 7. 316464  
6. 408803 6. 841414 7. 444154 6. 293556 7. 428177 6. 887395 7. 058848 6. 741485 6. 944618  
5. 514691 7. 265668 7. 139039 6. 617008 6. 712461 7. 12273 6. 925769 6. 990674 7. 234636  
6. 715498 5. 207049 5. 400232 5. 305076 5. 943292 5. 89419 5. 820291 5. 772057 6. 0557  
5. 700686 6. 005799 5. 978681 5. 524517 5. 306961 5. 978979 5. 897703 5. 334123 5. 684269  
5. 025508 6. 4356 5. 808788 5. 511295 5. 981194 5. 596436 5. 846774 5. 775547 5. 9454  
3. 153772 2. 747473 2. 496573 3. 053467 2. 38762 2. 565446 2. 93249 2. 578888 2. 341277  
2. 115558 3. 284358 3. 454841 1. 990526 3. 205366 1. 780423 2. 145068 2. 666103 3. 528681  
5. 149437 4. 781793 5. 250197 4. 800054 4. 701451 5. 549775 4. 618002 4. 60514 4. 876619  
8. 807718 8. 332495 8. 733187 7. 409322 8. 691055 8. 440599 8. 178044 8. 541565 8. 228015  
3. 036111 2. 550001 3. 106138 2. 473324 3. 204688 2. 345548 2. 955417 3. 625517 3. 05124  
4. 180198 4. 388913 4. 244152 3. 843118 4. 509759 4. 262615 5. 119682 4. 399016 4. 587387  
7. 102524 7. 198438 7. 438194 6. 935648 6. 449702 6. 88864 7. 325522 6. 647259 6. 940902  
2. 716947 2. 297877 2. 495793 2. 258072 2. 80821 3. 295601 2. 617103 2. 861622 2. 45019  
7. 601687 7. 948232 7. 785266 7. 560299 7. 867931 7. 683467 7. 737688 7. 898305 7. 790159  
3. 308094 3. 520613 3. 971838 4. 193059 3. 323679 3. 045817 3. 502225 3. 022647 3. 406401  
4. 447705 6. 001388 7. 006471 5. 336802 5. 463641 6. 54278 5. 376999 6. 097765 4. 399044  
3. 913779 3. 438495 3. 45142 2. 377225 3. 799082 4. 781198 2. 81394 3. 351531 4. 11003  
2. 774804 2. 238505 2. 413574 2. 753454 2. 370375 2. 167724 2. 531632 2. 165103 2. 40738  
4. 785373 4. 3447 4. 551879 4. 662435 4. 858316 3. 896942 4. 554204 4. 976726 3. 971544

7. 769593 8. 138755 7. 442404 7. 701085 7. 7655 7. 703454 7. 847788 7. 959851 6. 926789  
7. 687875 7. 616941 8. 191916 8. 151495 8. 000636 7. 20114 7. 388096 7. 662389 7. 743515  
7. 846068 6. 870339 6. 036269 6. 460366 6. 284011 5. 937187 6. 734028 6. 438672 5. 91345  
4. 985039 5. 240033 5. 340528 5. 37425 5. 701927 5. 0537 5. 192702 5. 877992 5. 204495  
5. 047956 5. 8632 5. 870573 6. 159123 6. 007612 5. 687963 5. 867302 5. 196496 5. 946286  
4. 815172 5. 482831 4. 85146 4. 23095 4. 76105 4. 348251 5. 050353 5. 145529 5. 211448  
6. 045213 5. 864838 6. 16252 5. 966271 6. 154775 5. 322345 6. 146842 5. 910463 5. 80372  
4. 739621 4. 816691 4. 398398 3. 555435 3. 543912 4. 150552 3. 64011 4. 207241 3. 488456  
4. 017774 3. 330496 3. 578616 1. 791757 3. 005473 3. 333967 3. 746429 3. 083654 2. 686777  
3. 886651 3. 829107 4. 192046 3. 790517 3. 216747 3. 375317 3. 562697 3. 485837 3. 878579  
5. 134705 4. 038474 4. 877492 4. 613726 4. 755835 4. 387135 4. 627415 4. 632324 4. 560264  
5. 958971 5. 531277 5. 462601 5. 764206 5. 728515 5. 800888 5. 928121 6. 126666 6. 118723  
1. 967743 1. 283858 0. 758865 1. 270057 1. 150036 1. 398225 0. 986392 1. 260201 1. 501822  
5. 037803 5. 817671 6. 153795 5. 676275 5. 51723 5. 976865 4. 884237 6. 350051 5. 789349  
4. 787321 3. 772436 4. 48887 3. 769332 3. 893985 4. 13051 3. 639309 4. 106522 4. 265481  
3. 743582 3. 989854 3. 847747 3. 690989 3. 953185 4. 525636 3. 998927 4. 256687 4. 063063  
3. 241567 4. 000059 3. 585722 4. 163893 3. 968707 4. 523472 4. 124526 3. 82347 3. 844647  
4. 053907 5. 544874 5. 53674 4. 728513 5. 303122 4. 536981 5. 011408 4. 9172 4. 191329  
3. 652253 4. 283089 4. 420849 4. 29084 4. 636711 3. 922221 4. 946289 5. 69252 4. 945069  
4. 895582 3. 742641 4. 643136 4. 389838 4. 184761 3. 789711 5. 130031 4. 696963 4. 884061  
2. 118682 1. 820328 1. 418987 2. 128161 2. 061069 1. 258134 1. 602668 1. 076259 1. 3354  
3. 767145 5. 123062 4. 448002 4. 985046 3. 717839 4. 176274 4. 347437 4. 279282 3. 93015  
6. 494315 6. 932307 5. 896992 6. 639285 6. 284311 6. 479292 6. 463759 6. 351184 6. 017336  
7. 598942 7. 017811 7. 321038 7. 474338 7. 436489 7. 152722 7. 199474 7. 178677 7. 08921  
3. 604493 4. 038582 4. 850056 3. 504387 2. 706633 4. 76029 4. 63119 3. 669168 3. 60386  
3. 344813 4. 110514 3. 930967 3. 941528 3. 50507 4. 282323 2. 899631 4. 869673 4. 577993  
3. 327528 4. 509398 3. 080002 3. 692216 4. 106137 3. 052272 4. 193025 3. 321107 3. 289629  
4. 915307 4. 958396 5. 524435 5. 387412 5. 294305 5. 299724 5. 247013 5. 488505 5. 306819  
5. 393821 5. 142668 5. 355738 4. 967382 5. 310927 4. 88622 4. 658965 4. 645634 5. 324596  
3. 106834 2. 861024 2. 322804 3. 127467 2. 231764 3. 738937 1. 996444 3. 200323 2. 956366  
7. 217453 6. 696074 7. 171692 6. 221006 6. 557469 6. 967024 7. 074138 7. 775082 6. 707044  
5. 378528 5. 731906 5. 425177 6. 172402 4. 967377 6. 194637 5. 609368 5. 957625 6. 327772  
3. 016759 2. 734642 3. 154981 2. 407708 2. 758623 1. 654624 3. 462883 1. 980998 2. 53698  
4. 397966 4. 94664 4. 083359 4. 093301 3. 993922 5. 098714 4. 602126 4. 426458 4. 252563  
4. 91042 5. 236526 5. 863776 5. 161613 4. 917513 5. 427358 4. 586257 4. 998878 4. 859119  
5. 581968 4. 975747 4. 707877 5. 814278 4. 922255 5. 076476 5. 52523 5. 843902 5. 647851  
3. 0815 4. 592047 3. 956022 5. 021894 3. 619227 3. 785581 4. 696338 4. 438142 5. 461432  
7. 682992 6. 987075 7. 550086 6. 892998 7. 300863 7. 782371 7. 715518 7. 543572 7. 269526  
3. 738683 4. 526559 5. 003859 4. 893999 3. 733268 3. 945078 4. 300518 4. 36792 5. 449602  
7. 790202 8. 148875 7. 675556 7. 803321 8. 063253 7. 46197 7. 714316 7. 691221 7. 355115  
4. 809052 3. 162817 4. 002762 1. 89829 3. 013313 3. 132983 3. 386907 3. 982997 5. 453841  
5. 870651 5. 822841 4. 452437 5. 315012 5. 686035 5. 519982 5. 134122 5. 129843 5. 605143  
4. 242847 5. 191334 4. 634555 4. 084583 4. 266774 3. 697399 4. 283337 4. 307884 4. 512933  
3. 94005 4. 075882 3. 485361 4. 047945 4. 046217 3. 842834 3. 485479 4. 330694 3. 696504  
5. 045615 4. 732014 3. 965649 3. 254712 4. 145273 4. 51852 3. 584556 4. 390098 4. 111193  
6. 330184 7. 024769 7. 234387 6. 806656 6. 842561 6. 99925 7. 127229 7. 425253 7. 026933  
2. 146942 3. 155927 2. 140544 2. 416791 2. 267935 2. 386281 2. 788979 2. 677303 3. 467389  
7. 185353 7. 009462 7. 480311 6. 426469 6. 94211 6. 381996 6. 816816 6. 746617 7. 738245  
2. 967558 3. 483913 2. 586321 3. 088489 3. 234733 3. 602579 2. 886264 4. 248962 2. 927205  
9. 057619 8. 85507 9. 184569 8. 787961 8. 946116 8. 592254 8. 862245 9. 087505 9. 145301  
8. 53198 8. 598077 8. 347777 8. 737598 8. 584713 8. 361705 8. 447086 8. 059195 8. 386507

5. 342063 5. 286988 5. 490605 5. 014753 4. 782997 3. 972358 4. 480643 5. 080357 5. 72306  
5. 746387 4. 265456 4. 284251 4. 420455 3. 783382 3. 716879 4. 263785 4. 958583 5. 924046  
8. 630117 9. 017838 8. 468333 8. 769427 8. 880946 8. 78125 8. 080266 8. 814237 8. 64916  
2. 291863 1. 763761 1. 487376 1. 528382 2. 147106 1. 510886 2. 281604 1. 397554 1. 994461  
6. 611591 7. 540216 7. 324808 7. 167455 7. 923929 7. 294786 7. 522136 7. 762168 7. 346949  
6. 183429 5. 322698 5. 550612 4. 96277 6. 478223 5. 259616 4. 828879 5. 493933 5. 407135  
6. 416425 6. 95832 7. 544522 7. 700219 7. 344461 7. 190421 7. 398118 7. 268986 7. 603306  
6. 218417 6. 234281 6. 061301 5. 244748 4. 958593 6. 045496 5. 728358 5. 871956 5. 991781  
4. 223166 4. 515596 4. 808989 3. 652763 4. 682854 5. 039552 2. 201689 4. 226858 4. 189947  
3. 458786 3. 436531 3. 488431 3. 48104 3. 124367 3. 201996 4. 606883 3. 83412 3. 787905  
4. 130276 4. 025853 4. 586572 4. 670621 4. 058528 7. 350287 4. 462703 6. 564733 4. 673739  
5. 548053 6. 06106 6. 182257 6. 058145 5. 909726 6. 370045 5. 903619 6. 262651 6. 937469  
7. 875332 8. 528299 7. 915181 8. 492765 8. 678626 8. 335889 8. 176173 8. 494287 8. 570743  
1. 883277 1. 03423 1. 418955 1. 780127 1. 421891 1. 376434 1. 209095 1. 905283 1. 60094  
4. 484037 5. 271212 4. 948556 5. 642872 5. 837961 4. 110914 5. 43655 5. 472535 5. 452557  
7. 178009 6. 885426 6. 830821 6. 591585 7. 382564 7. 042041 7. 400242 7. 030258 7. 168313  
5. 341605 5. 088401 3. 958041 5. 131224 5. 054212 5. 117354 4. 94427 4. 628282 5. 833915  
4. 450568 6. 324706 6. 543649 3. 653694 4. 88965 6. 090621 3. 904568 5. 953499 4. 436004  
6. 028363 6. 109352 5. 655798 5. 199371 6. 018861 6. 188681 5. 4902 6. 057392 5. 927333  
5. 645692 5. 291259 4. 128212 4. 51489 4. 260254 5. 101067 3. 972427 5. 479813 4. 51897  
2. 548678 3. 054728 3. 358123 2. 34409 2. 159475 3. 025468 2. 986209 3. 568681 3. 151861  
6. 169437 6. 310903 6. 37469 6. 279498 6. 350381 5. 855859 5. 582728 6. 098224 6. 504089  
1. 684986 1. 287045 1. 05612 1. 656073 1. 238346 1. 282688 2. 455675 2. 484945 1. 980829  
8. 135198 8. 715818 8. 429539 8. 732894 8. 38709 8. 310652 8. 378853 8. 422365 8. 315151  
5. 927414 4. 51979 4. 605136 5. 019516 4. 746973 4. 666632 4. 686493 5. 143049 6. 357357  
3. 272974 3. 316802 3. 320001 3. 073132 3. 367108 3. 589763 3. 606981 3. 492428 3. 31687  
7. 037013 6. 945519 6. 539348 6. 927127 6. 87306 6. 660136 6. 650446 6. 896841 6. 593613  
4. 295259 4. 720883 4. 688058 2. 382955 3. 555831 3. 635809 3. 024082 4. 470705 3. 134119  
1. 230205 1. 534504 1. 534504 1. 603999 1. 363316 2. 260941 1. 804274 1. 046528 1. 345611  
1. 768064 2. 893415 2. 120197 2. 394792 2. 457939 3. 138542 4. 14708 2. 393775 3. 127271  
5. 460981 5. 025584 4. 62832 4. 430492 5. 696621 5. 257628 5. 742515 5. 421062 4. 539273  
3. 866368 4. 499443 4. 41237 3. 888974 4. 714463 3. 641378 3. 349203 4. 638898 4. 321716  
7. 463497 5. 796698 6. 171471 5. 547448 6. 355345 5. 613559 6. 618025 6. 983439 5. 957978  
6. 015052 5. 547557 5. 721336 5. 186953 5. 172944 5. 721815 5. 32735 5. 50349 5. 128776  
6. 625948 6. 945343 7. 061505 6. 965861 7. 160723 7. 05809 6. 739466 6. 728245 6. 889357  
5. 982009 5. 982257 6. 251808 6. 715077 6. 54032 6. 585354 6. 339208 6. 956411 6. 142958  
4. 158553 4. 63598 4. 113393 5. 338665 4. 026136 5. 144992 3. 558862 5. 350294 5. 423976  
1. 575395 2. 287057 1. 746024 2. 115311 2. 533477 2. 081034 2. 243273 2. 323622 2. 452733  
5. 124239 5. 411051 5. 253457 4. 869177 5. 705453 5. 221661 4. 829173 5. 300376 4. 962646  
3. 040516 2. 941785 3. 096989 2. 922829 2. 716819 3. 331879 2. 843466 3. 148683 2. 445167  
6. 346401 6. 379418 5. 732539 5. 229137 6. 142595 6. 670649 5. 609135 6. 128783 5. 967388  
5. 206726 4. 663693 4. 270928 4. 530903 4. 032462 3. 245257 4. 92604 3. 875038 3. 963931  
3. 781554 3. 851597 2. 883632 3. 544715 5. 279118 2. 843233 3. 231032 3. 629229 3. 666358  
3. 512746 3. 288163 4. 052869 3. 514691 2. 9354 3. 357424 2. 25056 3. 745254 3. 713247  
7. 673018 6. 439687 6. 537103 7. 127062 7. 00723 6. 440679 6. 930753 7. 449629 7. 444823  
3. 50589 5. 368718 5. 619899 4. 060133 4. 154879 4. 686414 4. 246057 5. 009995 5. 24804  
7. 900027 8. 041676 8. 273639 7. 395691 7. 549421 7. 316958 7. 984375 7. 83619 7. 891904  
5. 064652 2. 530571 4. 070721 2. 713404 3. 105655 1. 905777 2. 424191 3. 129886 2. 329915  
4. 006978 4. 575234 3. 972832 4. 096709 4. 167028 3. 294685 3. 879296 3. 695147 4. 228788  
7. 698669 7. 995871 7. 949631 7. 901669 7. 47969 7. 637407 8. 101809 8. 169002 7. 919158  
3. 823587 3. 581816 3. 229861 3. 549198 3. 106925 3. 766166 2. 515112 3. 435331 3. 678248

1. 819867 2. 541245 2. 177295 2. 497105 2. 36831 3. 319781 1. 877916 2. 487944 2. 617891  
5. 828354 5. 515021 5. 761296 4. 505986 5. 515952 5. 229545 4. 834815 5. 056709 4. 99015  
2. 245161 1. 921451 1. 70205 2. 415684 1. 744456 2. 568614 2. 030791 2. 538433 2. 054524  
2. 614204 2. 91057 2. 01632 3. 131344 3. 595769 2. 362788 2. 357583 3. 721079 3. 398044  
7. 325775 7. 062238 7. 03174 6. 696948 6. 692022 7. 409265 7. 060639 7. 259449 7. 572907  
3. 191867 2. 540389 2. 774046 3. 020497 2. 930961 2. 773389 3. 394869 3. 172367 2. 850924  
3. 516703 2. 730468 1. 777611 1. 941415 1. 949535 2. 473318 2. 611021 1. 762927 2. 041917  
8. 40741 8. 818567 8. 663814 8. 355779 8. 686768 8. 802994 8. 172351 8. 847517 8. 932989  
2. 494213 3. 012589 2. 758819 2. 267405 2. 604929 1. 835603 2. 2753 2. 443536 1. 918574  
1. 248508 1. 981507 2. 207201 1. 560209 1. 919753 1. 084767 2. 304512 1. 473434 2. 324601  
4. 965612 5. 639888 4. 790317 4. 969465 5. 314521 5. 848337 4. 65529 5. 117076 4. 745902  
2. 814391 2. 301582 2. 147137 2. 003331 2. 414039 1. 993978 2. 408007 3. 028614 1. 683117  
8. 100403 8. 137584 8. 290687 8. 138614 8. 253911 7. 985959 7. 524937 8. 340695 8. 06818  
0. 672998 0. 80602 1. 061744 1. 07386 1. 059536 1. 414732 0. 756514 0. 97131 2. 232477  
2. 9117 5. 184156 5. 243097 4. 047494 3. 913963 4. 280749 5. 330285 3. 93838 4. 571765  
1. 634391 1. 337313 1. 420604 1. 421338 1. 36348 1. 866911 1. 383853 1. 555831 1. 803603  
4. 777385 5. 22326 5. 326501 4. 811371 4. 752211 5. 353851 4. 989512 5. 377277 4. 545272  
3. 313371 1. 957095 2. 121515 2. 263972 2. 469891 1. 82119 3. 330929 2. 613034 2. 235938  
4. 985808 4. 404974 4. 123308 4. 556693 3. 713058 4. 056053 4. 253016 4. 315993 4. 708761  
10. 04256 10. 31265 10. 54095 9. 990544 10. 36744 10. 10787 10. 11076 9. 940183 9. 733662  
4. 265529 3. 675839 4. 157429 3. 921014 5. 326231 4. 633545 4. 912003 5. 455967 4. 42304  
1. 771976 1. 672947 2. 964646 2. 012944 2. 109178 2. 500212 2. 540682 1. 760884 1. 601823  
6. 029103 6. 69509 7. 129547 6. 281778 6. 063104 7. 458548 7. 024927 8. 240152 7. 105661  
4. 906748 5. 030781 4. 761537 5. 664804 5. 534976 5. 258897 5. 730654 4. 903594 4. 154163  
7. 204184 7. 621496 7. 402355 7. 135363 7. 534499 7. 026659 7. 522225 7. 382656 7. 435567  
5. 689596 6. 660164 6. 177336 5. 631206 6. 11916 5. 921641 5. 209347 5. 205192 5. 508444  
3. 102788 3. 348509 4. 119858 2. 852151 3. 175334 2. 953656 2. 961647 2. 579318 3. 401693  
5. 410732 5. 082207 4. 832058 5. 198209 5. 371173 4. 964874 4. 343647 4. 988855 4. 637092  
1. 341335 2. 062389 1. 376238 1. 323601 2. 339963 2. 142639 1. 300871 2. 160266 1. 109497  
6. 283555 7. 277847 7. 019357 6. 868235 6. 908784 6. 513251 6. 446889 6. 800959 6. 90378  
2. 20848 1. 352931 2. 067837 1. 682296 1. 540743 2. 816982 1. 708226 1. 537367 1. 588386  
4. 983544 5. 042382 5. 694566 4. 588556 5. 308643 4. 428555 4. 400904 5. 121077 4. 49571  
4. 047954 3. 84747 4. 313225 3. 868035 3. 759923 3. 650446 2. 986336 3. 276722 3. 934683  
2. 752559 4. 235121 2. 974831 3. 108202 4. 420582 3. 368366 3. 456788 2. 410549 4. 01003  
3. 165981 4. 423578 4. 352989 3. 781116 3. 405452 4. 73005 4. 6948 4. 322387 3. 736413  
4. 831772 5. 325162 5. 4005 5. 435603 5. 634689 5. 765205 5. 128952 5. 585967 5. 439382  
1. 986225 1. 9535 2. 041316 2. 180556 1. 422691 1. 595892 1. 741417 1. 447495 1. 671281  
3. 579271 4. 230562 4. 528861 4. 837168 4. 606251 4. 481815 3. 102014 4. 721482 4. 254847  
6. 761562 7. 55812 7. 139061 7. 105355 7. 229968 7. 834162 7. 295454 6. 272169 7. 281561  
5. 004341 5. 619985 5. 599281 5. 659709 5. 15377 4. 507388 5. 463926 5. 632119 5. 253908  
3. 439236 4. 462387 4. 956596 4. 055537 4. 973379 4. 76255 4. 189345 4. 96845 5. 451598  
5. 427422 5. 691335 5. 734445 6. 403658 5. 528641 5. 838653 5. 523076 5. 774704 5. 673295  
4. 180848 4. 093002 4. 247204 3. 053293 4. 563381 4. 073654 3. 384381 3. 548106 4. 224466  
4. 079937 4. 767092 4. 494612 4. 34606 4. 373218 5. 086973 4. 054158 5. 135219 3. 971302  
5. 508639 5. 647067 5. 316991 5. 591209 5. 818869 6. 358161 5. 522828 4. 530955 5. 45042  
2. 873987 3. 588972 2. 892366 3. 872659 3. 473375 3. 587695 2. 71244 3. 02053 3. 651632  
4. 714573 5. 005686 3. 926203 4. 678478 4. 080587 4. 033923 5. 240303 3. 656598 4. 953533  
6. 601146 7. 165779 7. 167688 7. 035566 7. 196801 7. 238237 6. 886189 7. 266611 6. 827333  
7. 026061 7. 513347 7. 390164 7. 312646 7. 584577 7. 614432 7. 454612 7. 676259 7. 571659  
2. 13255 1. 692757 3. 647651 2. 037764 1. 141418 1. 578001 2. 992103 4. 022419 2. 177207  
6. 294047 5. 717646 4. 424596 5. 100866 5. 508809 4. 728325 5. 400977 5. 92091 5. 753212



5.834076 6.086167 6.415758 5.751974 6.912011 6.28351 5.828141 6.536056 6.163573  
3.068395 3.166516 2.982786 3.386953 3.148267 3.679065 2.965409 3.189863 2.61144  
6.469347 5.938407 5.011017 5.857754 5.193762 5.894455 5.98794 5.226932 6.087136  
4.794624 5.364747 5.401362 5.309618 5.69095 5.298338 5.097534 4.941629 4.876426  
1.574383 0.96519 1.06635 0.869165 1.131568 1.018688 1.142932 1.868695 0.878147  
4.326724 2.87213 3.554291 4.375649 4.637498 2.912655 4.266217 3.842648 3.367967  
3.82889 5.897271 5.565169 5.474627 5.818305 5.690949 5.312004 5.583441 5.389175  
3.741652 5.038977 3.694485 5.071299 4.540577 4.085578 4.569969 4.403079 4.285474  
4.270935 5.852517 6.128176 4.583066 5.373525 6.329828 5.455467 4.974501 4.733296  
7.263885 7.562935 6.878183 8.160643 6.834808 7.351287 7.327399 7.324677 6.684796  
2.002237 1.473045 1.065328 1.260301 1.49651 1.300961 0.965952 0.973099 1.144116  
4.483307 5.163381 5.037963 5.178858 4.988167 5.374285 4.833753 4.686249 4.760393  
4.581734 5.111846 4.888108 5.413279 5.586835 5.278556 5.199006 5.602598 5.314958  
5.427376 5.56186 3.903542 5.556742 4.809876 5.762622 5.643185 5.058919 4.996365  
4.41147 5.247001 4.56429 4.722777 5.243408 5.390052 5.101084 5.666619 4.499454  
1.970412 1.009113 1.229828 1.441652 0.973301 1.765198 1.304409 1.482979 1.29015  
4.04265 4.846577 4.726222 4.762726 5.402719 4.795871 4.16973 5.540458 4.841053  
5.455514 4.970141 5.007329 4.862068 5.370677 4.693166 5.09421 4.935447 5.319745  
4.801696 4.543947 4.281693 4.847306 4.035662 5.380504 3.787085 3.927102 4.627501  
3.855724 2.942858 3.139306 3.1029 3.816678 2.667488 3.63852 2.570973 2.931549  
5.70421 5.769361 7.479971 6.210534 6.690185 7.06103 4.570129 5.949929 6.614656  
2.815616 2.114037 1.034441 1.450827 1.589034 1.316653 1.651358 1.790901 2.500191  
4.168199 4.545133 4.218049 4.225406 3.803777 4.365572 3.892609 2.958967 3.884208  
7.380526 7.107521 6.897505 6.838636 6.600986 7.063357 7.492302 6.575749 7.12486  
4.997104 4.98281 4.958843 4.669504 5.106379 5.97022 5.463731 5.415657 4.977153  
3.104137 1.626297 2.032644 2.139698 2.46496 3.117674 2.606587 2.327011 2.042875  
4.687482 4.352091 4.563118 3.896647 4.508004 3.977307 4.413275 4.797507 5.40271  
6.100654 6.767186 6.860242 6.858688 6.542812 7.531622 5.49276 6.082685 6.591396  
5.535227 6.188011 6.106603 5.72354 6.304966 6.244883 6.09607 6.400245 6.768842  
5.813017 6.736761 6.835925 6.407839 6.636285 6.662948 6.44597 6.428728 6.081774  
3.6315 4.865625 5.014173 4.324578 4.88418 4.425078 4.819718 4.539869 4.235023  
7.005645 7.359179 7.303261 7.734967 7.566478 7.092118 7.191086 7.198785 6.976429  
5.941457 5.465343 5.543347 6.343861 5.577259 5.593364 5.785847 5.505863 6.103345  
3.65756 5.261774 4.518885 3.435057 3.918614 2.970761 3.269329 3.840571 3.479061  
4.811299 4.464509 4.62087 4.125672 4.839906 5.657935 4.920031 5.591513 4.900302  
4.985902 5.060167 5.315829 4.778205 5.312502 4.910007 5.210027 4.857909 4.813126  
5.721415 6.993039 6.680789 6.716052 6.68264 7.316267 6.659521 6.841125 6.651848  
5.726083 6.779744 6.103321 5.9976 6.043535 5.506979 6.327429 5.733924 5.732873  
4.841385 4.308995 4.439588 4.523725 4.660738 3.999696 3.969325 4.840651 4.692805  
4.776213 4.023704 4.195662 4.365253 4.223578 4.085667 4.779428 4.44348 4.494574  
7.633688 8.134499 8.058254 8.004436 7.924778 7.729615 7.462499 7.522769 8.07918  
3.411355 4.321742 3.616991 3.462744 3.687629 3.773464 2.254621 3.269158 3.783438  
7.320965 7.334159 7.435578 7.382288 7.161759 7.595412 6.829631 7.510728 7.627979  
4.615084 5.170796 5.057648 4.839946 5.792508 3.539707 5.107559 5.249041 5.629399  
4.196348 5.580871 5.194032 5.156842 5.797569 5.443361 5.15414 5.948743 4.6288  
2.676644 2.331911 2.591323 4.242563 2.088588 2.627566 3.891418 2.772138 2.316103  
3.448534 4.274192 3.883321 3.919425 3.900375 2.985372 3.393252 4.285397 2.986391  
7.017994 7.103723 7.145301 7.149463 6.99482 7.83104 6.369901 6.945612 6.908842  
8.920883 8.851592 8.785825 8.959446 8.543581 9.38106 8.958403 8.510047 8.77261  
9.024523 9.094182 8.988477 8.820809 9.320274 9.017728 8.919515 9.240183 8.850181  
5.940131 6.793514 6.518075 6.281118 6.357051 6.732932 5.572155 6.435862 6.192746

3. 479675 5. 494262 5. 027278 4. 832912 4. 992045 4. 792359 4. 496414 4. 478133 5. 646836  
3. 736257 3. 258126 3. 091607 3. 564394 2. 873819 3. 003396 3. 419997 3. 434521 3. 378714  
5. 377548 6. 760933 6. 631596 6. 403762 6. 595584 5. 931776 6. 213173 6. 269748 6. 172591  
6. 864137 6. 428512 5. 928216 6. 176817 5. 981513 5. 463128 6. 050915 5. 953519 5. 911315  
5. 632264 4. 966912 5. 583975 5. 191229 5. 54031 5. 078149 5. 064196 4. 882942 5. 467304  
2. 800447 2. 905057 2. 681357 2. 279886 2. 224044 2. 555622 2. 319845 3. 389592 2. 576457  
5. 087121 5. 245885 5. 571202 5. 022177 5. 962661 5. 527714 5. 134664 5. 41013 5. 843272  
3. 748769 3. 588905 3. 596577 2. 911426 3. 990037 3. 513551 3. 832746 4. 386337 3. 912825  
3. 830875 4. 846036 4. 066276 4. 418309 3. 861377 4. 322659 4. 581525 4. 745018 4. 328398  
4. 865253 4. 19956 4. 484508 4. 628978 3. 250373 4. 025134 3. 797208 4. 560386 3. 056565  
4. 710634 4. 730486 5. 291596 4. 662651 5. 451601 4. 622787 4. 304435 5. 032861 5. 32805  
5. 708538 5. 761141 6. 094417 5. 89662 5. 476943 5. 942277 5. 337071 5. 758345 4. 972173  
5. 261842 6. 100116 5. 89792 5. 704816 5. 530541 6. 02517 5. 718019 6. 020971 5. 107667  
3. 025738 3. 835387 3. 845875 2. 00489 4. 28028 3. 099782 3. 050967 3. 196551 3. 968964  
6. 099623 6. 165372 6. 540592 6. 176359 6. 092809 5. 251147 5. 474918 6. 16746 5. 780722  
4. 489877 5. 602771 5. 800726 5. 855343 5. 69939 5. 659784 5. 83317 5. 980669 5. 863846  
4. 29016 4. 549586 4. 480316 5. 220937 4. 566794 5. 439638 4. 194102 4. 559211 4. 592468  
8. 06224 8. 325683 7. 993044 7. 928257 8. 181854 8. 449882 8. 268056 8. 081174 8. 355907  
1. 643254 1. 879222 1. 495338 2. 656545 4. 015829 2. 143856 1. 677869 2. 725524 4. 106821  
5. 285951 5. 255623 4. 125426 5. 128243 4. 94 4. 660312 5. 047141 5. 418402 5. 015302  
3. 523157 4. 900548 3. 882892 4. 627333 5. 134879 4. 886373 4. 569072 6. 032404 4. 541485  
6. 49676 6. 135654 6. 227744 6. 651479 6. 191543 6. 299468 5. 596212 5. 969978 5. 962866  
5. 581496 6. 50265 6. 271868 6. 714886 6. 590899 6. 58545 6. 932512 6. 689719 6. 619773  
4. 440008 5. 573654 4. 9339 3. 190826 4. 25074 4. 575398 4. 514422 4. 78684 5. 055715  
6. 382054 7. 411304 6. 930496 7. 663392 6. 782608 7. 37181 7. 16769 6. 150745 6. 808637  
5. 712096 6. 511281 6. 250765 6. 407685 6. 340295 6. 373326 4. 708667 5. 984922 6. 808156  
4. 922252 5. 850218 5. 768809 6. 285549 5. 2632 5. 983027 4. 920758 5. 246755 5. 387456  
2. 943825 0. 978247 2. 333909 2. 410213 2. 304421 2. 79347 2. 623395 2. 668279 2. 928154  
4. 850285 5. 574176 4. 407098 5. 780917 5. 436161 5. 469275 5. 55577 5. 147819 5. 553154  
2. 939147 2. 486092 2. 850617 2. 181924 2. 006008 2. 124303 2. 147161 2. 45141 4. 028468  
2. 329388 1. 949803 1. 851099 2. 44984 1. 80601 1. 892188 2. 094613 2. 232371 1. 711066  
5. 767801 5. 947395 5. 557238 6. 55474 5. 395505 5. 998094 6. 50714 5. 733928 6. 323053  
2. 345977 2. 715304 3. 741165 3. 776731 4. 128938 3. 419388 4. 223223 5. 157029 4. 390108  
7. 140101 7. 338255 7. 068512 6. 687274 6. 993989 7. 633551 7. 261661 7. 892632 7. 310598  
6. 601579 7. 435569 7. 131313 6. 947258 7. 377915 6. 827965 7. 342448 7. 377329 6. 858777  
6. 456162 6. 137213 6. 644111 6. 561746 6. 61994 6. 757414 6. 289583 6. 141856 6. 722085  
7. 481515 7. 887722 7. 527421 7. 886966 7. 800381 7. 189734 6. 827735 7. 878468 7. 876799  
4. 620769 4. 161879 3. 355422 4. 301323 3. 860618 3. 990479 3. 844517 4. 590449 3. 878472  
6. 165377 6. 588476 6. 482892 6. 638963 6. 600547 6. 816916 6. 21937 6. 616125 6. 458512  
5. 344092 5. 369465 5. 700341 5. 625897 5. 382055 5. 555843 5. 497299 5. 955533 5. 626805  
4. 065777 3. 900598 4. 487117 4. 144903 3. 0585 4. 135603 5. 25114 4. 389263 2. 702338  
1. 866985 1. 504417 2. 399862 1. 742862 1. 76974 1. 757278 2. 461747 2. 040542 1. 975832  
4. 636621 6. 247243 6. 157793 5. 506302 6. 087964 5. 603736 6. 523253 5. 579215 5. 681101  
5. 38943 5. 454174 5. 285179 5. 971114 5. 660412 5. 467145 4. 00183 4. 202333 5. 123793  
8. 194611 8. 650039 8. 934095 8. 608782 8. 979357 8. 641914 8. 655156 9. 30097 8. 940095  
2. 356403 2. 066124 2. 423101 2. 2539 2. 286553 2. 170104 2. 103421 2. 163281 2. 036249  
5. 744825 5. 854018 5. 651916 5. 5226 5. 822004 5. 764583 5. 740765 5. 736464 5. 845265  
6. 825391 5. 966037 5. 795776 4. 654318 5. 647905 6. 418813 6. 482636 5. 243981 6. 781465  
4. 198427 4. 663927 4. 114846 4. 370186 4. 872928 3. 961453 3. 570679 4. 211019 4. 213758  
7. 101783 7. 113199 7. 024264 6. 970305 7. 19511 7. 160859 7. 150239 7. 343568 7. 273145  
5. 323578 5. 407902 5. 589053 3. 398347 3. 992127 4. 964436 5. 538064 4. 49936 4. 275497

1. 95956 1. 528706 1. 541307 1. 196147 1. 930325 1. 812367 2. 553893 1. 409216 1. 480413  
2. 945974 2. 718857 2. 897241 2. 717039 4. 030194 3. 160768 2. 775908 4. 247678 3. 170465  
2. 094157 3. 880611 3. 195004 4. 05297 3. 24668 3. 486503 3. 746736 3. 266464 2. 904744  
7. 273976 5. 68754 6. 494703 5. 153463 5. 464825 5. 225535 5. 789693 6. 041709 6. 639426  
4. 493307 4. 432029 4. 848431 4. 564452 4. 159676 5. 212278 4. 404014 3. 629419 4. 475831  
3. 993954 4. 931781 4. 993528 4. 573865 4. 859876 5. 397799 5. 451496 4. 319758 4. 184241  
6. 024815 6. 407936 6. 417554 5. 691143 4. 833252 6. 431912 5. 288438 6. 370596 5. 962743  
3. 246544 3. 445147 3. 308058 3. 564432 3. 694358 2. 459369 2. 830681 3. 670079 3. 689039  
3. 709953 3. 953379 3. 779757 4. 488536 4. 28735 3. 730375 4. 226689 3. 668661 4. 275705  
1. 797859 2. 247775 1. 026853 2. 286212 1. 768321 1. 709349 2. 364553 1. 306465 2. 866859  
4. 900689 5. 18362 4. 717799 4. 476582 4. 978329 4. 496309 4. 494118 4. 560592 4. 864639  
2. 299213 3. 272507 2. 55727 3. 314886 3. 05199 2. 518403 2. 422583 2. 921062 2. 743555  
8. 693889 8. 537421 8. 538474 8. 554423 8. 174564 8. 438555 8. 451215 8. 217259 8. 353057  
5. 756307 6. 268614 5. 870847 6. 270329 6. 690043 6. 007066 5. 880432 6. 094332 6. 281234  
5. 406698 5. 805323 5. 714736 5. 703923 6. 199217 6. 26826 5. 586497 5. 858479 6. 173242  
1. 23939 1. 600415 0. 950195 1. 137515 2. 446028 1. 06674 2. 069629 1. 389647 1. 347133  
4. 046279 2. 58057 3. 671054 2. 761366 3. 306171 4. 191379 3. 136169 4. 051619 3. 408336  
5. 845338 6. 34149 6. 086849 6. 110166 6. 139417 6. 700199 6. 578835 7. 030675 6. 634888  
3. 812015 4. 411749 4. 588335 4. 572838 4. 433813 4. 73625 4. 388795 5. 291856 5. 108014  
3. 711753 5. 301916 5. 330777 3. 599342 4. 397347 5. 328542 4. 966137 5. 140792 3. 324378  
7. 910855 8. 326493 7. 733697 7. 87516 8. 252371 8. 395098 7. 670048 8. 42107 8. 006978  
7. 354476 4. 769824 6. 063316 5. 148971 4. 742208 3. 892856 4. 596407 5. 172123 6. 695328  
4. 806945 5. 398316 4. 47027 2. 900528 5. 019053 4. 570653 2. 804408 5. 067796 4. 777483  
5. 028532 6. 964499 7. 277266 7. 051327 6. 561506 7. 20252 6. 233816 6. 965196 6. 600977  
2. 504412 2. 136927 1. 543417 1. 508334 2. 131395 1. 910827 2. 317918 1. 704396 1. 455666  
4. 952853 5. 008577 5. 343907 4. 3018 4. 315508 4. 669395 3. 974345 3. 900921 3. 985389  
3. 299942 4. 772546 4. 946518 2. 753062 4. 229953 3. 316714 3. 430115 4. 604469 3. 314026  
3. 248768 5. 509152 4. 184696 5. 18121 5. 281312 4. 817557 4. 295395 4. 852242 5. 093371  
5. 372797 6. 109887 5. 947642 5. 771835 6. 361508 6. 11785 6. 562155 6. 398463 5. 827947  
7. 957811 8. 062846 8. 523553 7. 658726 7. 253746 8. 095756 6. 883553 7. 300007 7. 186606  
5. 381589 5. 169259 4. 978942 5. 34159 5. 560486 5. 243042 5. 383384 5. 534885 5. 094407  
4. 57616 5. 333039 5. 19628 5. 329788 5. 450529 5. 937778 5. 284801 5. 791667 5. 303324  
5. 506661 6. 46263 6. 492596 7. 186445 7. 628878 7. 273788 6. 411798 7. 161024 6. 934711  
7. 368487 7. 001996 6. 869516 6. 563974 6. 771133 6. 551363 6. 482346 7. 112575 7. 198773  
3. 401517 3. 656226 4. 01691 4. 521213 4. 593377 3. 376282 4. 579445 4. 166947 4. 245633  
5. 212391 4. 526997 5. 017164 4. 371656 5. 342355 4. 805441 3. 681907 3. 756959 5. 602373  
2. 291948 2. 988973 2. 585096 1. 329235 1. 751768 1. 721955 1. 888823 3. 009163 2. 065655  
4. 884678 5. 964526 5. 799841 5. 517581 5. 968716 5. 765273 5. 603553 5. 652703 4. 988649  
2. 209063 3. 46397 3. 296711 2. 569951 3. 154556 2. 934472 2. 671289 3. 042354 3. 184276  
4. 450476 4. 818129 4. 617041 4. 253574 4. 633833 4. 930627 4. 155793 4. 623896 5. 031579  
6. 610479 6. 702708 6. 977442 6. 667821 6. 75062 6. 234558 6. 664155 7. 525034 7. 207676  
2. 048235 2. 520254 1. 900441 2. 788662 1. 815594 3. 445541 2. 559459 1. 835185 2. 790142  
6. 669308 5. 62818 6. 565978 5. 925606 5. 993579 5. 166352 4. 875053 5. 918818 5. 65211  
5. 362968 5. 043921 5. 197318 5. 91042 5. 518305 5. 862944 5. 387328 5. 228674 5. 828297  
3. 671459 3. 437761 3. 431579 3. 517596 3. 237818 3. 386425 2. 718244 3. 541869 3. 432676  
3. 655652 4. 865014 4. 946056 3. 338662 4. 801607 4. 607081 3. 917997 5. 255616 4. 255314  
4. 426455 4. 44604 4. 165617 4. 48197 4. 462466 3. 394176 4. 340702 4. 353434 4. 7324  
1. 659726 1. 931409 1. 457521 1. 949872 1. 851825 2. 668233 1. 658808 1. 823341 2. 025974  
7. 394378 7. 524628 7. 770176 6. 596723 6. 904182 7. 714029 6. 62529 7. 369286 7. 258154  
6. 99924 6. 816718 6. 847067 7. 342145 7. 351183 6. 84268 6. 687658 6. 996697 7. 161992  
4. 938337 6. 128108 6. 013509 5. 816912 6. 229454 5. 96028 5. 83136 6. 137549 5. 774996

4. 754331 3. 950214 4. 002698 3. 624747 4. 077178 3. 962556 3. 510002 3. 554437 4. 038477  
5. 870253 6. 247753 4. 982475 4. 453516 5. 372881 4. 95865 5. 742306 5. 329281 5. 604223  
3. 941803 5. 072133 5. 383733 5. 05873 4. 788977 5. 300751 4. 223329 4. 23702 4. 944444  
7. 005412 6. 610218 6. 564056 6. 684828 6. 723675 6. 665936 7. 061362 6. 634578 6. 102317  
2. 73963 4. 246002 2. 699939 3. 314682 3. 641255 3. 129415 2. 610348 2. 784959 3. 80404  
4. 609963 5. 218566 5. 773229 5. 935742 5. 106011 6. 137544 5. 106362 5. 326529 5. 315113  
1. 315656 1. 527447 1. 312777 1. 362461 1. 270411 1. 598104 1. 334924 2. 248456 1. 051145  
3. 403413 2. 740545 4. 061473 2. 889156 3. 015568 2. 921924 3. 600477 2. 695336 2. 731025  
5. 178526 5. 051174 5. 223053 5. 133981 4. 720837 5. 312561 4. 916218 4. 778438 5. 147002  
2. 166328 1. 948071 1. 911245 2. 515166 1. 535819 2. 211999 1. 477359 1. 668944 1. 787826  
4. 104839 4. 349599 4. 232768 3. 512216 4. 349918 4. 356409 4. 351047 3. 795458 4. 107605  
1. 192419 1. 942721 1. 62307 1. 663777 2. 274505 1. 095087 2. 653076 2. 131645 1. 958642  
2. 401672 2. 337756 2. 068089 1. 787765 2. 340104 2. 243579 2. 518823 1. 804604 2. 054763  
3. 125177 4. 014657 2. 583624 2. 721386 4. 36366 2. 948129 2. 742367 2. 048184 2. 923532  
8. 010272 8. 019617 8. 227931 8. 087437 7. 940495 7. 976585 7. 299885 8. 145397 8. 137364  
6. 018617 5. 848735 5. 655166 5. 645616 5. 800797 6. 503876 5. 611206 5. 9147 5. 704735  
2. 475617 1. 430333 1. 379977 1. 683347 2. 730443 1. 459348 1. 441185 1. 957332 1. 856911  
6. 052861 5. 508802 5. 466496 5. 645678 5. 846281 5. 792178 5. 384097 6. 085461 5. 068674  
4. 345258 5. 007937 4. 354819 3. 864982 3. 964399 4. 721332 4. 747741 3. 775852 4. 704139  
7. 152227 6. 820308 6. 662409 6. 909701 6. 485959 6. 638109 6. 699472 6. 386022 6. 456582  
4. 698703 4. 887084 5. 107961 5. 202272 5. 365287 5. 678773 4. 973083 4. 779228 5. 173824  
5. 66685 5. 396708 4. 960805 4. 625106 5. 305885 5. 067832 4. 857017 5. 547753 4. 680768  
3. 400229 3. 751593 2. 983948 3. 205778 2. 894668 3. 688687 2. 878337 3. 454497 2. 940526  
6. 174614 4. 929695 4. 918355 4. 537079 4. 919418 5. 00081 4. 189383 5. 203258 5. 018997  
7. 781662 8. 188147 7. 796954 7. 124244 7. 97366 7. 76251 7. 322666 7. 494358 7. 09482  
5. 046867 6. 048696 5. 987435 5. 628434 5. 384476 5. 688762 5. 051197 5. 992436 5. 519579  
6. 579048 6. 507864 6. 20683 5. 983932 6. 132073 6. 043271 5. 719575 6. 449698 6. 380968  
5. 26038 6. 021726 6. 359594 6. 484009 6. 094969 6. 391269 5. 834329 6. 399066 6. 340666  
3. 757014 3. 313912 3. 004473 2. 542678 1. 76471 1. 853837 1. 640588 1. 192408 3. 028687  
5. 688559 4. 15089 4. 993035 5. 025104 4. 852649 4. 751942 4. 2688 4. 966188 4. 846783  
2. 374095 3. 983981 4. 491456 3. 645768 2. 042399 2. 652934 1. 56503 2. 543724 2. 824838  
8. 715427 9. 234087 8. 405181 9. 530861 9. 103765 9. 361426 9. 153328 8. 748604 9. 150279  
6. 353662 5. 382335 5. 796569 5. 777686 4. 638686 5. 888322 5. 898349 5. 579984 6. 121291  
5. 670447 5. 967553 6. 110981 5. 42174 6. 107502 5. 17776 5. 947745 5. 650412 6. 589275  
5. 939932 6. 35472 6. 464688 6. 339844 6. 159866 6. 540648 5. 692531 5. 659924 6. 374465  
2. 251265 2. 641206 2. 467168 2. 213358 2. 875159 1. 551088 1. 803274 1. 954095 3. 008529  
4. 655162 5. 269825 4. 965551 4. 997577 5. 836715 5. 118901 5. 214888 4. 827118 4. 625252  
3. 499445 3. 094392 2. 615211 2. 821177 2. 072783 2. 718265 2. 362677 3. 071441 2. 583132  
5. 359925 6. 391983 6. 319709 5. 840225 6. 258362 6. 13263 6. 256065 6. 360835 5. 897763  
5. 056919 5. 43129 4. 924166 5. 197932 5. 803474 4. 918699 4. 681888 4. 808891 5. 195566  
1. 941165 1. 617617 2. 166739 2. 003842 2. 35611 2. 667271 3. 064397 1. 982375 2. 184879  
6. 446381 3. 573812 4. 398888 3. 941708 3. 205284 4. 287532 4. 092618 3. 759411 4. 545811  
3. 630312 4. 3961 3. 629396 3. 381528 3. 99089 2. 95537 2. 632812 3. 786642 3. 339813  
3. 443919 3. 098026 2. 776544 2. 921061 3. 776831 3. 040207 3. 317675 3. 533062 3. 034817  
5. 862454 6. 631 6. 912106 6. 962043 6. 863344 6. 834061 7. 007749 6. 437619 6. 386807  
6. 586864 6. 67334 6. 409683 5. 978634 6. 66853 6. 688602 6. 98554 6. 544932 6. 928208  
4. 845628 5. 32803 5. 222639 5. 394925 5. 360816 5. 493979 5. 154812 5. 629776 4. 617094  
2. 049803 2. 3059 1. 822338 2. 809034 1. 406271 1. 74669 2. 568989 1. 6674 2. 409607  
5. 727419 6. 719041 6. 75684 6. 100219 6. 25317 6. 273276 6. 329887 6. 715742 6. 51459  
4. 367703 4. 055394 3. 213214 3. 693265 3. 833829 4. 465968 3. 494257 4. 096488 3. 994804  
6. 066631 5. 919736 6. 142031 5. 321051 6. 83188 6. 464089 6. 72662 6. 805127 6. 709713

6. 352327 6. 575212 7. 023735 6. 132363 6. 413474 6. 48025 6. 430776 6. 798804 6. 403085  
6. 550416 5. 221401 5. 135454 4. 362843 5. 500761 5. 033072 4. 607239 3. 994014 5. 935651  
7. 981615 8. 386394 8. 276828 8. 834402 8. 640853 8. 465968 8. 0027 8. 72869 8. 59304  
3. 789494 3. 296848 3. 77585 2. 321503 3. 570518 3. 311164 3. 299975 3. 134465 2. 495457  
3. 230954 4. 579779 4. 871397 3. 09214 4. 387384 3. 987852 4. 502656 4. 582252 4. 287658  
6. 093274 6. 534885 6. 437388 6. 331213 6. 500553 5. 820838 5. 816324 6. 378449 6. 297089  
4. 401554 3. 818736 3. 972168 3. 408936 3. 694262 3. 865238 3. 875449 4. 321419 4. 57121  
3. 486443 3. 904508 4. 50142 4. 300853 3. 393375 4. 137705 3. 231582 4. 178068 4. 207233  
4. 89099 4. 722387 4. 195668 5. 000003 5. 281455 4. 3567 5. 029064 5. 857013 5. 024843  
9. 088987 9. 134957 9. 513917 8. 812747 9. 242501 8. 850248 9. 293852 9. 383466 9. 047148  
6. 834341 7. 150802 6. 833922 6. 635761 7. 094673 7. 111606 6. 742365 6. 646993 7. 328524  
2. 524343 3. 742746 2. 806515 3. 618782 2. 604584 2. 486147 2. 141906 3. 020838 1. 951507  
3. 286989 3. 429358 4. 165304 3. 648968 4. 102603 3. 029528 2. 947403 4. 149002 3. 697873  
4. 912537 5. 613447 4. 914256 4. 710391 5. 424979 6. 328124 4. 966095 5. 184328 5. 293828  
5. 998724 6. 858169 6. 62905 6. 551148 7. 159253 7. 015449 6. 526793 6. 496803 6. 641333  
6. 459812 6. 687793 6. 041102 6. 258254 5. 785193 5. 69349 5. 334497 6. 157818 6. 078333  
4. 792298 5. 83318 5. 615837 4. 908549 5. 134338 5. 947855 5. 242393 5. 29341 5. 830762  
5. 260536 4. 394509 5. 024023 4. 288295 4. 994044 4. 340989 4. 97718 5. 354058 5. 118768  
4. 090872 4. 493574 3. 947968 5. 259388 3. 958208 5. 339136 4. 567259 4. 779818 4. 877028  
2. 08752 2. 038107 2. 932773 2. 72518 1. 805154 2. 712732 2. 934368 2. 553899 2. 618123  
1. 854625 1. 991175 2. 824486 2. 009852 2. 68924 1. 65307 2. 726117 2. 517856 2. 368499  
5. 583508 5. 815437 5. 51782 5. 917388 5. 74929 5. 525601 5. 355587 6. 186373 5. 601495  
6. 123912 5. 650506 5. 627206 5. 059804 5. 01008 5. 297548 5. 538304 5. 291033 5. 393945  
4. 753184 2. 943221 3. 357681 2. 891889 2. 616469 2. 913359 2. 970874 2. 166914 3. 719306  
6. 950916 6. 651459 7. 080658 6. 705358 5. 59853 6. 816058 6. 399723 7. 175406 6. 835951  
2. 929007 1. 152914 1. 650557 1. 525556 1. 154628 1. 689971 2. 002882 1. 28047 1. 572877  
3. 796479 2. 603674 1. 938686 1. 799819 3. 217271 1. 620051 1. 682712 2. 142905 2. 581338  
5. 873753 5. 684992 5. 31744 5. 849304 5. 607224 6. 026125 5. 746716 5. 75051 5. 650004  
7. 647335 7. 341325 7. 036138 7. 241607 7. 715757 7. 774553 6. 815644 7. 263621 7. 770482  
2. 704543 2. 490562 2. 63532 2. 716427 1. 701989 2. 436347 2. 9382 3. 768906 2. 540743  
2. 058084 2. 138434 2. 924741 2. 020442 1. 704781 2. 192213 2. 266745 2. 007624 1. 858492  
3. 34918 3. 262272 3. 407297 2. 605666 2. 992879 3. 160694 3. 374498 2. 340403 2. 541594  
1. 907837 1. 336325 1. 165673 1. 400188 1. 661998 1. 452771 1. 610282 1. 125019 1. 262755  
2. 951386 2. 973183 3. 050249 2. 853767 2. 298521 2. 292816 2. 673321 2. 544644 2. 567632  
4. 883513 4. 938332 4. 528514 4. 105228 4. 977303 4. 916167 4. 250883 3. 988422 4. 739845  
4. 4776 5. 127475 4. 279287 4. 657584 4. 721511 5. 426308 5. 004194 4. 521969 5. 180825  
1. 569644 1. 727797 1. 734542 1. 672639 1. 674859 1. 589397 1. 852398 1. 684991 1. 740155  
7. 213547 7. 912511 7. 24349 7. 034045 7. 546179 7. 521456 7. 266035 7. 761547 7. 319958  
9. 624219 7. 280545 8. 486438 6. 843103 7. 426342 7. 303851 7. 769926 7. 700488 9. 189585  
7. 360683 7. 767711 7. 914146 7. 471035 7. 552366 8. 097636 6. 800075 7. 582763 7. 478642  
3. 117472 2. 377089 3. 460512 2. 78466 2. 188288 2. 687499 2. 137355 2. 353178 2. 484111  
6. 998115 6. 506328 6. 86566 7. 005587 7. 364801 6. 97328 6. 849547 7. 024554 7. 497744  
1. 989798 2. 927441 4. 252919 2. 447313 2. 448471 4. 291403 2. 428802 2. 979451 2. 370624  
3. 635417 3. 996165 5. 249963 4. 2003 3. 097269 4. 117432 4. 51215 3. 841571 3. 943023  
4. 842938 5. 772046 6. 022322 5. 876145 5. 962152 6. 125946 6. 05747 6. 446627 6. 489821  
7. 333382 7. 389078 7. 526389 7. 397 7. 544716 7. 374455 6. 608233 7. 449807 7. 18049  
1. 591003 1. 588495 1. 83656 1. 796016 1. 728985 2. 359219 2. 510441 1. 503377 1. 773994  
2. 516398 1. 984561 2. 066431 2. 37859 2. 385469 2. 315125 3. 428702 1. 765991 2. 361673  
7. 161564 6. 351648 6. 825994 6. 557466 7. 266123 7. 10956 6. 591331 6. 862341 7. 013262  
1. 534074 1. 414248 1. 652834 1. 325922 1. 803026 2. 067772 1. 867736 2. 34152 1. 831477  
2. 937094 3. 193867 1. 829644 1. 549852 1. 49254 1. 482936 1. 623911 2. 273015 1. 204012

1. 798253 4. 800209 2. 646335 3. 837995 1. 324817 2. 965018 2. 630453 3. 711327 1. 157418  
2. 261753 1. 31797 1. 728439 1. 384538 2. 052216 1. 466711 1. 070782 1. 925916 1. 555922  
1. 282314 1. 275596 1. 485821 1. 248715 1. 16726 0. 874806 1. 461233 1. 244938 1. 518138  
5. 811552 5. 981188 7. 144505 6. 405244 6. 305602 6. 184308 5. 658385 6. 336117 7. 154942  
2. 226861 3. 030943 2. 367291 2. 226988 2. 210195 2. 457406 3. 405684 3. 675756 1. 569316  
1. 456314 1. 235029 0. 992964 1. 136928 0. 821177 1. 535113 1. 038741 1. 341615 1. 375284  
1. 579373 1. 206499 1. 066013 1. 295832 1. 450435 1. 332833 1. 322324 1. 49936 1. 345914  
1. 450258 1. 109826 0. 86496 1. 259555 1. 97313 1. 037314 1. 656223 1. 675745 0. 813297  
1. 489738 1. 785989 0. 630099 0. 830405 0. 911278 0. 778571 0. 938047 0. 554689 0. 745781  
5. 501032 5. 716635 5. 627862 5. 746397 6. 01442 5. 839177 5. 562001 5. 592236 5. 805755  
3. 052979 2. 205535 2. 855681 2. 961829 3. 357891 2. 881195 3. 375447 3. 129251 2. 907355  
3. 808499 5. 026436 4. 469458 4. 144485 4. 649388 5. 447626 4. 438722 4. 326876 4. 223372  
5. 076234 2. 853327 4. 277677 3. 303174 3. 330364 2. 445387 3. 273821 3. 867587 5. 232935  
3. 8998 3. 027637 3. 735129 2. 3257 1. 576576 4. 497941 3. 173003 2. 240063 2. 348568  
4. 572663 4. 698367 3. 837279 5. 083727 2. 507384 4. 173931 3. 86467 2. 651147 3. 860147  
4. 962926 5. 891759 5. 992922 5. 343815 5. 384991 5. 207101 5. 574842 5. 929687 5. 163641  
1. 580794 1. 923793 1. 409225 1. 3018 1. 424981 1. 582421 1. 200899 1. 121449 1. 289287  
0. 723861 0. 591983 0. 844803 0. 693557 0. 757027 0. 784695 1. 014392 1. 603538 0. 292777  
4. 237867 3. 081489 3. 148598 3. 933875 4. 343599 3. 806259 4. 598174 3. 046845 5. 139942  
3. 343566 3. 385281 3. 212118 2. 863548 3. 341391 3. 510623 2. 588278 2. 831972 3. 603855  
5. 394447 5. 272148 4. 214653 5. 028702 5. 347442 5. 566105 4. 443421 5. 279801 5. 823392  
6. 67703 6. 561683 5. 518655 5. 084908 5. 677137 5. 972246 5. 154106 5. 496004 6. 373154  
5. 561354 5. 277076 4. 440199 4. 817522 4. 373706 3. 867013 4. 238491 4. 283565 4. 573979  
0. 826623 0. 962223 1. 022446 0. 903719 1. 023645 1. 136946 0. 891312 0. 934033 1. 164492  
7. 911819 7. 227645 7. 733612 6. 561243 6. 785478 7. 24583 7. 629557 7. 269433 8. 072046  
5. 992414 5. 840993 5. 858305 4. 939004 6. 900909 5. 882503 5. 2961 5. 846683 5. 814995  
0. 753288 0. 92181 1. 063556 0. 808611 1. 220575 0. 669295 1. 77572 1. 302602 1. 223223  
4. 758677 4. 351674 5. 135077 4. 525381 5. 455204 5. 243631 4. 510003 5. 527952 5. 349307  
5. 290587 5. 615966 5. 496699 5. 026244 5. 281927 5. 655842 5. 575907 5. 195948 5. 636237  
3. 338245 3. 641066 3. 691661 3. 522423 3. 757858 3. 497893 2. 590681 4. 43341 3. 513871  
4. 602996 3. 631065 3. 590692 3. 221516 2. 907965 2. 877206 3. 32109 4. 001232 3. 398998  
8. 028107 7. 669182 7. 390051 8. 163216 8. 116404 8. 135386 7. 623866 7. 592149 7. 882627  
5. 858934 6. 535474 6. 336287 6. 056541 5. 977852 6. 078009 6. 437593 5. 738291 6. 318729  
5. 4736 5. 700418 5. 502932 6. 207223 5. 877341 6. 29872 6. 427065 5. 783044 5. 976383  
1. 831013 2. 196969 1. 696866 2. 019775 1. 665588 2. 096907 2. 174492 2. 380089 2. 763352  
5. 764008 5. 658707 5. 474708 5. 518832 6. 017104 5. 641953 5. 661853 6. 310321 5. 456794  
4. 113687 5. 404851 5. 546414 5. 732818 4. 310768 5. 241513 4. 709539 4. 847871 5. 315822  
2. 799947 3. 011665 3. 129798 2. 959545 3. 11057 3. 266678 3. 288814 3. 365878 3. 128696  
1. 692291 1. 522517 1. 954522 1. 046076 1. 116857 0. 972485 1. 401406 1. 240984 1. 615982  
2. 533875 3. 019828 2. 436593 2. 465987 3. 917676 2. 942314 3. 05041 3. 834298 2. 996915  
9. 246691 9. 550923 9. 556648 10. 00424 9. 761751 9. 283865 9. 440676 9. 430114 9. 692651  
2. 228964 4. 537762 3. 076014 4. 43537 4. 258948 4. 254495 4. 439887 4. 845777 3. 058348  
2. 874471 1. 787354 1. 6062 1. 962358 2. 44094 1. 804409 1. 960105 2. 60213 2. 172846  
3. 53837 5. 486116 4. 872639 4. 470256 4. 399708 5. 209227 4. 859119 4. 917202 4. 450994  
5. 08618 3. 722384 3. 04243 3. 684699 2. 890619 3. 944237 4. 25879 3. 522008 3. 69326  
4. 382665 5. 375026 5. 294333 5. 53563 5. 426733 4. 928145 5. 175589 5. 89892 5. 453288  
1. 709 1. 034575 1. 079794 1. 346143 1. 598648 1. 343677 1. 28757 1. 357989 1. 226266  
1. 223421 1. 018901 1. 275765 1. 168322 1. 110181 1. 090362 1. 516478 1. 276795 1. 326915  
2. 742509 2. 592594 1. 972754 2. 780327 1. 915007 2. 390885 2. 353448 2. 320425 2. 228889  
1. 704466 1. 584782 1. 691029 1. 876232 1. 109412 1. 702121 1. 43331 1. 359083 1. 200251  
3. 083468 5. 012309 4. 25255 4. 508645 3. 353409 4. 136648 3. 99893 3. 8953 2. 784135

4. 278033 4. 546869 4. 533605 3. 885337 5. 326 5. 237391 3. 017818 4. 848798 5. 100605  
1. 412899 1. 740594 1. 407974 1. 737197 1. 683928 1. 833605 1. 494942 1. 709537 1. 882439  
6. 519839 5. 697072 5. 913799 5. 675881 5. 572548 5. 371726 5. 012193 6. 212644 6. 135026  
4. 24813 4. 926642 4. 67212 5. 231057 4. 634841 4. 759151 5. 170444 5. 35993 5. 17344  
6. 639398 7. 185294 7. 01726 7. 885967 6. 582498 7. 0249 6. 641275 6. 117812 7. 00334  
7. 268521 7. 738567 7. 752392 8. 713277 8. 23574 8. 134443 8. 637354 8. 487502 7. 878621  
2. 18435 1. 514119 1. 78056 1. 704697 2. 053108 1. 774647 1. 858369 1. 518053 1. 285938  
2. 177141 1. 701343 2. 134721 1. 51758 1. 820764 1. 821459 2. 473275 1. 302328 1. 488009  
1. 210228 1. 856998 1. 902951 1. 110922 0. 814273 0. 784512 2. 54111 1. 048755 1. 224862  
5. 840241 6. 119795 5. 909007 5. 783838 5. 766389 6. 473717 5. 471212 5. 886501 6. 013738  
1. 722401 3. 772748 3. 81378 2. 270344 3. 40459 2. 461476 3. 000618 2. 500775 3. 047572  
2. 310969 3. 459938 4. 126135 3. 48335 2. 659968 2. 92276 4. 183133 2. 928464 3. 083252  
1. 907152 1. 254475 1. 522407 2. 127173 1. 502202 1. 349606 1. 733277 1. 419162 1. 856653  
6. 77304 4. 008686 3. 921009 3. 273394 3. 934457 2. 041828 3. 284575 3. 563872 4. 486834  
4. 863698 4. 305129 4. 921627 4. 36252 5. 023279 4. 474158 4. 637603 4. 470891 4. 15724  
2. 368848 1. 281837 1. 137815 1. 121759 0. 934342 0. 831695 1. 038119 2. 452584 2. 164249  
5. 214535 5. 16065 5. 401367 4. 764145 5. 225616 5. 144449 4. 508444 4. 108922 4. 872673  
4. 915804 5. 283591 5. 783133 4. 771756 4. 483334 5. 307705 4. 092148 5. 860265 5. 687423  
1. 922154 2. 611182 2. 731043 2. 597066 2. 3103 1. 975511 1. 703988 2. 069737 1. 863346  
6. 099101 5. 060634 5. 500505 4. 838394 4. 725061 4. 335095 4. 980969 5. 388441 5. 880243  
4. 196707 4. 768506 3. 938155 4. 935925 4. 828866 5. 106784 4. 555007 4. 311532 4. 467753  
2. 211164 3. 052115 2. 646451 2. 443807 2. 971401 2. 648183 3. 070519 3. 203754 2. 65861  
1. 399322 2. 339806 3. 033586 1. 20678 1. 307205 1. 854204 0. 904983 2. 071501 2. 19233  
1. 902497 1. 560988 2. 076465 1. 539874 2. 035596 1. 902967 2. 610406 1. 707763 1. 86659  
2. 097466 2. 180768 3. 001053 3. 855197 2. 415148 2. 335458 2. 697502 3. 241829 2. 41664  
1. 375097 1. 174017 1. 257115 1. 41045 1. 343683 1. 439062 1. 689885 1. 41402 1. 756967  
3. 736253 4. 276803 4. 866532 4. 515424 4. 660615 5. 153407 3. 61895 5. 036741 5. 292747  
7. 008078 7. 260129 7. 139358 7. 001009 6. 811095 7. 619344 7. 095973 7. 042564 7. 206577  
3. 607748 2. 24161 3. 169199 3. 460083 2. 563795 2. 201604 1. 740686 3. 840838 2. 109934  
5. 687699 5. 905286 5. 892185 6. 086091 5. 804789 6. 115534 5. 774024 6. 244078 5. 666155  
1. 800632 1. 642226 1. 881821 1. 759768 1. 956191 1. 479832 1. 62651 1. 697225 1. 699673  
6. 273772 6. 499355 6. 411743 6. 846227 7. 456714 6. 236864 6. 198793 6. 76072 6. 925182  
5. 559563 6. 884403 6. 016961 6. 887609 6. 153034 6. 535527 6. 095882 6. 337736 6. 144059  
2. 494369 4. 869028 5. 696636 5. 130043 5. 078194 5. 178345 5. 225014 3. 11995 5. 339545  
4. 903656 4. 456375 3. 981089 4. 005263 3. 035759 4. 830056 3. 441219 3. 917269 3. 874079  
2. 348385 1. 528279 1. 817084 2. 417403 2. 287543 1. 81298 2. 119081 2. 8347 2. 316058  
6. 502525 7. 491215 7. 037818 7. 339566 7. 486345 7. 648781 6. 92276 7. 024546 7. 404379  
10. 48896 8. 421886 9. 230456 8. 003198 8. 427699 7. 097373 8. 183416 8. 18648 9. 720874  
6. 807329 7. 208044 7. 08728 6. 781684 6. 280843 6. 954893 6. 946114 6. 446991 7. 091517  
5. 458335 6. 02097 5. 808986 5. 653655 6. 008521 5. 759502 6. 144188 6. 257816 6. 262847  
4. 213937 3. 264961 3. 198005 3. 693937 2. 966943 1. 950573 3. 835585 2. 995155 2. 616059  
6. 638572 7. 08984 7. 075937 6. 895414 7. 033589 7. 232471 6. 590267 6. 875631 7. 439394  
2. 005014 0. 946068 1. 864072 0. 962767 1. 875347 2. 415426 1. 200785 1. 449233 1. 11203  
5. 130435 7. 269499 6. 593508 6. 993802 7. 130511 6. 863935 7. 022365 6. 909418 6. 650949  
4. 913586 4. 461955 5. 876723 4. 841252 4. 998856 5. 069429 5. 300942 4. 718139 4. 813241  
6. 294078 5. 844848 5. 820441 5. 336009 6. 013252 6. 038097 4. 332754 5. 763194 5. 466174  
3. 14971 1. 792077 1. 728741 2. 696376 2. 150083 2. 909849 3. 250701 2. 151151 2. 617935  
5. 575266 6. 064622 6. 495544 6. 218681 6. 390147 7. 133094 6. 025368 6. 943829 5. 738086  
5. 603577 5. 754821 6. 306145 5. 321223 5. 620176 5. 889083 5. 19208 5. 837606 5. 310069  
4. 61948 4. 207518 4. 628948 4. 776485 4. 561387 5. 002137 4. 462492 4. 149807 4. 336802  
5. 725736 5. 41228 4. 823555 4. 411198 4. 960686 5. 560834 4. 875461 4. 885586 4. 68356

4. 880988 5. 010687 4. 328303 4. 666073 5. 40896 4. 670875 5. 206883 5. 591219 5. 304139  
5. 527839 5. 227035 5. 29002 5. 549428 4. 378349 5. 424141 5. 557524 5. 135979 4. 7988  
4. 897108 5. 569577 5. 81593 5. 995371 5. 699457 5. 070541 4. 519212 4. 830416 4. 591029  
2. 77328 4. 967554 5. 94972 5. 938074 4. 858832 4. 282962 4. 855909 4. 007982 5. 329739  
5. 671517 5. 328377 5. 501279 5. 2975 5. 763535 5. 661293 5. 525404 5. 940832 5. 252936  
5. 981011 5. 630466 6. 301551 6. 485412 6. 449441 5. 67216 5. 988111 5. 887193 6. 57956  
4. 75905 2. 886531 2. 672496 2. 759935 4. 37942 2. 936352 2. 924546 2. 271092 4. 464016  
1. 795445 1. 261133 1. 284516 2. 336551 2. 841047 1. 753239 1. 704574 1. 263029 1. 871155  
5. 25422 6. 282078 6. 03989 5. 6867 5. 560378 5. 59081 5. 704912 6. 621979 5. 607692  
3. 617018 2. 557015 1. 931787 1. 485992 2. 135313 3. 633695 2. 506008 1. 985747 4. 04029  
3. 418576 2. 368999 3. 447043 3. 781608 2. 401186 2. 203498 3. 398577 2. 078862 2. 906367  
3. 973089 5. 126673 4. 731501 5. 504585 4. 834589 5. 240452 4. 96736 5. 302215 4. 798381  
3. 754513 4. 45602 3. 181474 5. 78395 4. 736383 4. 697734 5. 220307 3. 56117 4. 40216  
3. 874847 4. 590718 4. 17915 3. 236413 5. 217606 4. 819758 4. 855099 4. 768766 4. 760507  
3. 215642 3. 698823 3. 588775 3. 105408 3. 472842 3. 301632 3. 319371 3. 531195 3. 088023  
5. 834198 5. 83004 5. 23181 5. 562775 5. 634411 5. 188264 5. 552701 5. 196756 5. 198206  
5. 672698 5. 274998 5. 286577 5. 67425 5. 503132 5. 680609 5. 344295 5. 204223 5. 357002  
5. 732575 6. 423699 6. 531538 6. 280107 6. 345917 5. 34181 6. 115138 6. 133507 6. 815999  
6. 329738 6. 179425 6. 038153 6. 090676 6. 541929 5. 96431 5. 650881 5. 896418 6. 090118  
4. 368238 4. 407182 4. 50795 4. 197687 4. 516203 4. 552867 4. 604427 4. 337446 4. 613321  
5. 348388 5. 147478 4. 724983 5. 530194 4. 642371 5. 157996 3. 991388 4. 820807 4. 654535  
6. 5355 8. 270823 8. 717438 8. 170342 6. 265466 6. 530863 7. 971161 9. 477174 8. 505022  
6. 205483 6. 889373 6. 740431 6. 904409 6. 780248 6. 828281 6. 261823 6. 69132 6. 95828  
4. 404313 2. 164067 2. 967871 2. 439238 2. 670032 2. 448956 3. 023166 2. 659735 3. 213017  
4. 437523 5. 632169 4. 991072 5. 45554 5. 568919 6. 448142 5. 039161 5. 456784 5. 806701  
5. 23308 6. 35664 5. 769747 6. 196527 5. 847731 5. 717142 5. 78476 5. 397937 5. 208541  
3. 396825 3. 760317 4. 075174 3. 588895 4. 745613 5. 346114 4. 351332 5. 10061 4. 549976  
4. 721202 6. 08595 6. 502284 5. 739976 5. 376503 5. 284274 5. 044103 6. 184951 4. 744523  
1. 291 1. 233278 1. 044552 1. 293065 1. 326874 1. 829051 2. 018733 0. 995924 1. 181551  
5. 10651 5. 532303 6. 021442 5. 174775 5. 622906 5. 919398 5. 117231 5. 026988 5. 347412  
1. 712158 3. 350192 3. 236859 2. 86536 2. 795858 2. 161763 2. 797479 4. 131384 3. 120546  
6. 243134 5. 805556 6. 35511 5. 678765 5. 420468 5. 805682 5. 393796 5. 348292 6. 275577  
1. 973369 2. 355986 2. 16613 2. 372052 2. 390919 2. 238517 2. 748999 2. 755453 3. 160431  
6. 579787 6. 767172 6. 159187 6. 265676 5. 947018 6. 726312 7. 050935 6. 280634 7. 015323  
5. 72214 4. 390257 5. 586602 4. 982966 5. 839333 4. 682048 5. 368305 5. 24338 5. 578302  
4. 213221 4. 946664 3. 448103 3. 203322 4. 4304 3. 438551 4. 510971 3. 41398 4. 574739  
4. 151563 3. 537753 3. 936676 4. 076335 3. 92449 3. 774618 4. 536321 4. 087542 3. 72616  
7. 745676 7. 144801 7. 498368 6. 543677 6. 497201 6. 856919 7. 364407 6. 974599 7. 260687  
3. 66426 3. 839262 4. 152389 4. 336365 4. 773006 3. 346282 4. 337021 4. 664133 4. 727191  
8. 449574 8. 146319 8. 403785 8. 753963 8. 812846 8. 54078 8. 948235 8. 740513 8. 882932  
8. 259922 8. 451378 8. 508043 8. 013781 8. 456051 8. 442834 8. 456091 8. 422622 8. 285021  
2. 809815 2. 533868 2. 004121 1. 436454 2. 505093 2. 081975 2. 779962 2. 599785 1. 760986  
7. 349474 7. 433515 6. 654576 7. 173561 7. 504141 7. 337126 6. 683988 7. 382682 7. 576589  
1. 51836 1. 362721 2. 548758 1. 787887 2. 744643 1. 412325 2. 312386 2. 206665 2. 556464  
4. 732452 4. 652061 4. 628575 3. 297398 3. 866017 3. 887146 3. 37112 4. 122976 4. 023759  
2. 265049 3. 792014 2. 907007 2. 262665 2. 540725 2. 08505 2. 031639 2. 259487 2. 935174  
3. 604764 4. 512045 4. 304493 4. 392846 4. 61214 4. 972053 4. 630415 4. 604596 3. 728702  
3. 088746 4. 616402 3. 984774 2. 527063 3. 884841 4. 607471 2. 623909 3. 884673 2. 964051  
5. 416263 5. 83816 5. 953797 5. 686604 5. 490132 5. 531428 5. 985254 5. 449732 5. 747535  
7. 58855 7. 682275 7. 764518 7. 52456 7. 710125 7. 508436 7. 916335 7. 765665 7. 667682  
5. 590952 5. 592383 5. 181947 5. 295257 5. 687081 5. 65094 5. 273541 5. 975999 5. 100528



5. 357252 4. 761144 5. 612372 6. 250601 5. 837372 5. 549537 3. 045406 5. 378847 5. 179034  
3. 314449 3. 900163 3. 099945 2. 98162 3. 232219 3. 099346 2. 896069 3. 338663 3. 074785  
6. 36678 6. 409103 6. 47473 6. 123699 6. 527361 6. 267724 5. 409799 6. 184827 6. 350118  
4. 745984 5. 30281 4. 866831 4. 941801 4. 885971 5. 167549 5. 789607 4. 520823 5. 060301  
6. 117626 6. 257317 5. 5268 6. 015325 6. 208314 5. 862812 5. 571171 5. 586379 6. 173093  
5. 785671 6. 366022 6. 875344 6. 748778 6. 617595 6. 70677 5. 864798 6. 100119 6. 280437  
6. 192706 4. 804059 5. 039383 5. 192314 5. 821435 5. 290766 4. 907253 5. 465064 5. 805968  
6. 163894 5. 974263 6. 396664 5. 998552 6. 451212 5. 8682 5. 493948 6. 242137 5. 874884  
8. 271889 8. 023932 7. 487637 8. 409441 8. 354834 7. 835113 7. 393215 7. 919611 8. 137953  
4. 741912 5. 9712 6. 172616 5. 834112 5. 03339 5. 679966 5. 162706 6. 09526 5. 347771  
6. 172394 6. 753855 6. 558076 6. 62494 6. 809922 6. 311978 6. 174001 6. 649776 6. 761782  
5. 440032 5. 21118 4. 330694 4. 828055 5. 763032 6. 249058 3. 885677 4. 677186 5. 736223  
4. 881324 5. 792172 4. 187106 5. 366759 5. 317364 5. 306156 4. 442193 5. 340154 4. 996507  
6. 204858 7. 169843 7. 147104 6. 130681 6. 948195 7. 299249 6. 881182 7. 308944 6. 413492  
6. 472563 6. 938942 7. 054453 7. 021392 6. 988059 6. 819091 6. 993483 6. 920302 6. 661405  
6. 600307 6. 380962 5. 931466 5. 73533 5. 867749 6. 008692 5. 781587 5. 950889 6. 071438  
5. 988988 6. 480827 6. 229705 5. 947013 6. 25085 6. 167209 6. 133254 6. 205546 5. 588747  
5. 944153 5. 798413 5. 527545 5. 808173 6. 063036 6. 013422 6. 017375 5. 550913 6. 19858  
5. 276095 5. 5209 5. 31034 5. 735149 5. 280601 5. 293351 5. 281722 5. 386301 4. 908549  
5. 638808 5. 014355 4. 896658 4. 719773 5. 230282 5. 572905 5. 371438 5. 406719 5. 386311  
3. 159448 2. 524564 2. 814343 2. 432838 2. 748721 2. 960785 2. 418432 2. 83931 2. 834255  
4. 477601 4. 83852 5. 474674 4. 668442 5. 851308 3. 970109 4. 815453 4. 111431 5. 121164  
5. 406017 6. 332031 5. 333448 5. 710231 5. 840854 5. 961389 6. 210685 5. 926313 6. 355305  
1. 330644 1. 136487 1. 51376 0. 798092 1. 767572 1. 563002 2. 475637 0. 890167 1. 291117  
6. 026646 6. 535218 6. 41754 6. 412749 6. 717307 7. 008861 7. 000962 6. 657697 6. 454233  
5. 145357 4. 994993 4. 882868 5. 333623 5. 273205 5. 156085 4. 89237 4. 556375 5. 158974  
3. 713003 4. 508319 4. 348299 4. 493219 4. 853932 3. 408922 4. 456409 4. 290983 4. 148689  
2. 17482 2. 237669 2. 119411 2. 764539 3. 758665 2. 891517 2. 467305 2. 851837 1. 917755  
3. 633824 4. 519001 4. 765525 3. 606265 3. 895427 4. 063172 3. 66184 5. 204837 5. 443275  
6. 156864 6. 610858 5. 889496 6. 821965 6. 076461 6. 121765 6. 228761 5. 628321 5. 880267  
4. 872411 5. 812034 5. 418913 5. 782351 6. 235022 6. 222876 5. 380678 6. 111911 6. 133464  
2. 551425 1. 936157 1. 763867 2. 264175 1. 151573 1. 316741 2. 017003 2. 028604 2. 134064  
7. 021045 6. 530038 6. 871705 6. 72652 6. 532035 6. 78409 5. 928715 5. 862226 6. 458341  
3. 053563 2. 075802 2. 549011 2. 633541 3. 038956 3. 160025 2. 442458 4. 513358 2. 486033  
5. 354384 5. 432843 5. 179821 5. 793991 6. 121414 5. 08595 5. 967888 5. 722422 5. 497134  
4. 480415 4. 999373 4. 957549 4. 412911 5. 198637 5. 266858 4. 930128 5. 274832 4. 577764  
5. 277378 5. 426459 6. 005624 5. 721058 5. 706663 5. 657877 4. 840942 5. 790202 5. 215947  
4. 225796 5. 320084 4. 804234 5. 285504 4. 970774 5. 061372 4. 953327 4. 874364 5. 460853  
5. 53316 5. 913769 5. 666745 5. 992804 6. 132105 5. 57975 5. 567588 6. 045169 5. 355236  
5. 857909 6. 558389 6. 134469 6. 340885 6. 424694 6. 726056 5. 60154 6. 178209 6. 343559  
5. 205712 5. 696715 5. 610281 5. 95027 4. 898707 5. 843651 5. 098503 6. 10075 5. 099311  
6. 519831 7. 028331 6. 370088 7. 097763 6. 985427 6. 315023 6. 726367 6. 842478 6. 723661  
5. 142871 5. 550964 5. 757069 4. 946101 5. 280065 6. 286289 5. 041413 5. 739246 5. 010553  
1. 235679 1. 085835 2. 106821 2. 566322 1. 44744 2. 150362 2. 058701 1. 171567 1. 894322  
3. 831946 4. 261108 4. 812431 5. 424758 5. 4125 4. 883829 4. 729709 3. 819031 4. 703015  
3. 180101 4. 359431 3. 252679 2. 902143 3. 40395 2. 772638 3. 160903 3. 074326 3. 199273  
5. 37635 5. 56035 5. 593138 5. 047973 5. 280465 5. 598759 5. 171962 5. 372449 4. 757492  
4. 275605 5. 054391 4. 72069 4. 295574 4. 212213 4. 804745 3. 579822 4. 87352 4. 75185  
5. 127486 5. 030846 3. 924096 4. 077708 3. 329941 3. 122492 3. 664261 3. 876801 3. 338279  
5. 606051 5. 917023 5. 618206 5. 308407 5. 751547 5. 423622 5. 589589 5. 655466 5. 622708  
3. 489351 4. 943392 5. 08884 3. 584235 4. 715939 4. 625895 3. 887636 3. 998135 4. 093852

4. 417183 5. 632177 5. 531555 4. 8745 5. 332645 4. 694915 4. 803628 4. 992672 4. 835847  
8. 523485 8. 011606 8. 308206 8. 443065 8. 045092 8. 616336 8. 626048 8. 275478 8. 23859  
5. 772795 5. 846039 5. 332273 5. 711272 5. 947797 5. 69888 5. 118745 6. 107812 5. 261713  
2. 575682 2. 895503 3. 250044 2. 541442 2. 921624 2. 674768 2. 785474 2. 866351 3. 119204  
3. 256061 2. 759349 3. 183233 2. 112705 2. 676101 2. 310659 3. 418804 3. 447477 2. 730024  
2. 170151 1. 999683 1. 539338 2. 51621 2. 30899 2. 155527 3. 388438 2. 725455 2. 470697  
5. 96191 5. 447867 4. 844857 5. 210789 5. 024587 4. 207673 4. 589859 4. 960171 4. 683866  
4. 628534 5. 267235 5. 525658 5. 65669 6. 106072 5. 866676 5. 423795 4. 583517 5. 705416  
5. 092102 5. 091674 5. 045733 4. 79786 4. 954573 5. 451554 4. 365186 4. 58071 4. 404211  
7. 364761 7. 557111 7. 745929 7. 567405 7. 454747 7. 96863 7. 630807 7. 141373 7. 201721  
6. 628984 6. 609206 6. 313404 6. 929534 5. 242561 6. 836001 6. 086296 5. 875022 6. 808412  
1. 89933 1. 941599 2. 447258 2. 185056 1. 886646 2. 507509 2. 105467 2. 420157 2. 146281  
2. 334195 2. 584501 2. 911316 3. 753739 2. 646282 2. 931333 2. 35362 3. 129448 3. 483172  
3. 011514 4. 726986 4. 809551 4. 356028 3. 608232 4. 022698 4. 47122 4. 918 4. 722215  
6. 690179 6. 230439 6. 5898 5. 579098 6. 309545 6. 500915 6. 095099 7. 321465 6. 3726  
7. 704189 7. 518573 7. 483029 7. 00389 7. 390461 7. 391884 7. 382354 7. 470808 7. 327812  
5. 898518 4. 902364 5. 063253 4. 611196 4. 84411 4. 602382 4. 398973 4. 563379 4. 491131  
4. 710626 4. 229116 5. 119579 4. 215114 5. 200106 4. 983768 4. 433022 5. 126046 4. 540821  
10. 00367 10. 26664 10. 2154 10. 25284 10. 59665 9. 969873 9. 982909 10. 58711 10. 32542  
4. 889912 5. 369476 5. 235161 6. 12882 5. 902808 5. 038995 5. 596347 5. 547227 4. 946885  
3. 917795 3. 732292 5. 039222 4. 539781 4. 249088 4. 417048 4. 160867 4. 368012 5. 070061  
9. 180512 9. 479677 9. 017034 9. 475867 9. 773754 9. 467519 9. 151786 9. 542657 9. 54081  
3. 425108 4. 394471 4. 310119 4. 575096 4. 435209 4. 034793 4. 603253 3. 72189 4. 059529  
6. 385447 5. 759582 5. 364567 5. 654169 6. 36151 5. 869435 5. 852583 6. 160088 6. 053337  
5. 687945 5. 749722 5. 165243 5. 744003 5. 355606 5. 609164 5. 186212 5. 57924 5. 606384  
4. 305505 5. 905585 5. 71071 5. 783977 5. 51685 6. 000645 5. 436823 5. 869986 5. 3835  
7. 364926 7. 191369 7. 249257 6. 965505 6. 853929 7. 317075 7. 060953 7. 555787 7. 890162  
7. 318365 7. 351931 7. 264601 7. 066913 7. 296786 7. 132481 7. 271568 7. 563754 7. 156831  
6. 682317 6. 173893 6. 87788 6. 063357 6. 214208 6. 107994 6. 17506 6. 551338 6. 311628  
5. 755148 6. 30915 6. 239742 6. 072598 6. 262447 6. 373482 5. 7431 6. 172374 6. 309122  
9. 226644 8. 975095 9. 2274 8. 851911 9. 123619 8. 868683 8. 55057 9. 189511 8. 924362  
6. 174275 4. 464142 5. 70468 3. 976251 4. 887464 4. 015441 4. 51893 4. 832373 6. 063419  
8. 252667 8. 638719 8. 522034 8. 760685 8. 557187 8. 48081 8. 424614 8. 306503 8. 610497  
5. 633701 5. 852546 5. 645904 6. 128085 6. 02281 5. 557965 4. 89003 5. 722774 5. 536543  
5. 005167 5. 124203 4. 99006 4. 597533 4. 615614 4. 048926 4. 122801 3. 482338 4. 581966  
5. 700895 6. 631932 6. 692895 6. 281137 7. 012579 6. 234622 6. 342277 6. 034422 6. 104254  
5. 727378 4. 884991 5. 419294 5. 397489 5. 42185 5. 363 4. 905989 6. 139056 5. 221463  
6. 26951 5. 885336 6. 013327 5. 790547 5. 870443 4. 8392 6. 201143 5. 081825 5. 958097  
3. 638748 4. 07762 3. 931439 4. 541587 4. 116372 4. 558234 4. 811154 5. 00258 4. 342964  
5. 629207 5. 949171 5. 495446 5. 440691 6. 552858 6. 196807 5. 367534 6. 122141 5. 72411  
6. 693126 7. 142948 6. 666876 6. 856235 6. 796319 6. 955081 6. 966854 7. 007503 6. 790056  
3. 798779 1. 614754 3. 291102 2. 272328 3. 399189 3. 162701 2. 699489 3. 865799 3. 958276  
6. 476757 7. 230763 7. 077158 7. 201201 7. 93435 7. 128865 7. 401633 7. 188382 7. 520242  
5. 11968 5. 234552 5. 596191 4. 686988 4. 994176 4. 551029 5. 454216 5. 466095 5. 122945  
4. 549789 3. 736561 4. 253446 3. 826786 4. 141964 3. 907009 3. 864567 3. 531352 4. 646595  
5. 379036 5. 495194 5. 266431 5. 087141 6. 247365 5. 210238 5. 490718 5. 457616 4. 607485  
5. 187347 5. 041296 5. 625164 5. 417596 5. 574352 5. 464188 4. 672904 5. 94242 5. 344837  
3. 326903 4. 490481 4. 562403 5. 65297 4. 166708 4. 536204 4. 964524 4. 878086 5. 300113  
6. 652828 6. 301159 5. 896132 6. 644994 6. 307868 6. 401213 6. 482461 5. 929169 5. 924142  
5. 350517 6. 468773 6. 023883 5. 919993 5. 539689 6. 243789 5. 845115 5. 938968 5. 849209  
2. 434006 4. 319875 4. 340158 4. 628107 4. 214302 5. 109877 4. 673014 3. 571708 4. 607377

5. 6269 6. 720706 6. 698649 6. 492105 6. 363226 6. 157715 6. 330292 6. 25028 5. 990795  
3. 518621 4. 40577 4. 544852 4. 283102 4. 479842 3. 596707 3. 650384 3. 794126 4. 167915  
4. 032118 4. 335917 4. 190042 4. 158638 4. 052334 4. 652819 4. 593467 3. 582876 4. 948469  
5. 499957 6. 205852 6. 303807 5. 712217 5. 833108 5. 862236 5. 324707 5. 641594 5. 813562  
4. 497406 4. 809481 4. 096041 4. 249984 4. 279107 3. 489032 3. 693541 4. 042321 3. 514164  
2. 424824 2. 704836 2. 223573 2. 096573 2. 516181 2. 777717 2. 035826 2. 388539 1. 865402  
7. 3217 8. 650621 8. 458896 7. 833616 8. 197335 8. 228283 6. 706908 8. 119486 7. 921531  
6. 05865 6. 870446 6. 346546 5. 937508 6. 268241 5. 755734 5. 688164 7. 109225 5. 446458  
4. 825079 4. 981584 4. 66552 4. 897996 5. 572152 4. 579425 4. 363614 4. 772067 4. 468332  
3. 78821 4. 521963 3. 909369 3. 513503 3. 795346 3. 417937 3. 104986 4. 510773 3. 444382  
2. 905105 4. 291272 2. 995219 4. 6767 3. 6561 3. 65915 3. 34018 3. 509558 4. 266242  
4. 650804 5. 827346 5. 383698 5. 943033 4. 784281 5. 808621 5. 340027 5. 311427 6. 036005  
2. 705119 3. 465795 3. 243876 4. 637857 3. 739156 3. 971609 3. 4431 3. 128832 3. 948433  
5. 51613 5. 267489 4. 241374 4. 798942 5. 860588 4. 945571 5. 506338 5. 187933 5. 145911  
8. 446628 8. 681393 8. 500952 8. 244187 8. 275127 8. 46089 8. 116771 8. 380438 8. 363333  
3. 015007 1. 50542 2. 213444 1. 524535 1. 328897 2. 180425 1. 283147 1. 408204 2. 0058  
5. 673786 6. 062231 6. 340919 7. 128382 5. 829974 6. 540717 5. 731512 5. 805237 6. 666389  
2. 758497 2. 593652 2. 001462 3. 352061 3. 182831 2. 749488 2. 038457 2. 363305 1. 920493  
4. 756899 5. 462184 5. 718413 5. 382221 5. 29814 5. 733702 4. 190951 5. 688993 5. 591123  
4. 061977 5. 072467 5. 144268 5. 285757 5. 43187 5. 404497 5. 256409 5. 271063 5. 21461  
3. 375092 4. 046035 4. 004823 4. 534671 3. 651294 4. 066867 3. 728288 3. 785389 3. 602607  
4. 007674 5. 493723 5. 208973 5. 265694 5. 583479 5. 044588 5. 062215 5. 2623 5. 893698  
6. 405226 6. 71255 6. 386113 5. 779493 6. 356028 6. 065544 5. 491621 6. 17295 6. 295981  
2. 322501 1. 869713 1. 724401 2. 238528 1. 748477 1. 782929 2. 150607 1. 467105 1. 455956  
3. 076716 3. 505256 3. 739799 3. 938791 3. 632522 3. 563448 3. 990557 3. 264236 4. 187298  
3. 609263 1. 878693 2. 863606 3. 286632 2. 892165 3. 058918 2. 738084 3. 350879 2. 886601  
1. 696751 0. 594663 1. 577658 1. 306349 1. 18386 1. 084404 2. 024815 0. 812414 0. 844933  
5. 592434 5. 492521 5. 600902 5. 87553 5. 465741 5. 826158 5. 235688 5. 774881 5. 369575  
3. 814052 4. 190465 4. 672494 4. 800189 2. 748739 3. 558179 4. 498284 4. 122025 4. 286733  
3. 826896 3. 888695 3. 489626 3. 345128 3. 839935 3. 990091 4. 178434 4. 074415 4. 226781  
3. 182885 2. 219996 1. 982401 3. 755855 3. 251123 2. 730851 3. 085419 2. 22011 2. 797585  
2. 266979 1. 497616 1. 495395 1. 488508 1. 652919 1. 663419 1. 63191 1. 45935 1. 391312  
2. 832964 3. 710039 3. 187482 3. 950283 4. 319126 3. 18041 3. 807374 2. 98977 3. 527231  
4. 327563 5. 634721 5. 361455 5. 113533 4. 37265 5. 156222 4. 049252 4. 6434 5. 055835  
7. 14427 7. 040435 7. 331705 7. 112154 6. 544125 7. 044477 6. 148018 6. 594688 6. 865472  
1. 662614 1. 431578 1. 233346 1. 804422 1. 218218 1. 793178 1. 295473 1. 058623 1. 704219  
6. 8219 6. 336473 6. 198312 5. 389781 6. 3368 6. 056199 5. 565206 5. 889508 6. 139577  
4. 601158 5. 415231 5. 499092 5. 212224 5. 703822 4. 510884 5. 140866 5. 135453 4. 980291  
5. 955187 6. 639806 6. 608677 6. 601096 6. 255684 6. 281843 6. 640252 6. 344708 5. 699627  
2. 321812 1. 818807 1. 797129 1. 787134 1. 510805 1. 485239 2. 028119 2. 462942 2. 04541  
3. 385606 1. 525791 2. 020405 1. 226105 2. 136049 1. 908362 1. 754046 1. 411866 2. 307001  
5. 132443 6. 295948 5. 789054 6. 229766 5. 757903 6. 080234 5. 837588 5. 615038 5. 776542  
6. 63613 7. 246172 7. 079263 7. 779287 6. 94636 7. 308537 7. 010844 6. 851436 7. 227049  
3. 643054 4. 401863 4. 73745 4. 81392 4. 990894 4. 964331 3. 852216 4. 054587 4. 557142  
1. 660615 1. 446476 1. 758893 1. 563142 2. 010075 1. 782666 1. 856486 2. 11519 2. 396818  
7. 050035 6. 708533 6. 537375 6. 729599 6. 79173 7. 167426 6. 754746 6. 810691 7. 067383  
2. 935989 3. 861663 3. 35108 3. 70469 3. 587768 3. 424536 3. 398741 3. 765637 4. 066022  
4. 519446 5. 001054 5. 277551 4. 28427 4. 19901 4. 485382 3. 940535 4. 501641 5. 674259  
7. 146504 7. 338872 7. 04386 7. 323807 7. 18973 7. 366653 7. 085221 7. 828278 7. 378597  
6. 875295 7. 58382 7. 569109 7. 156952 7. 874106 7. 581625 7. 233093 7. 869811 7. 457938  
2. 553127 1. 657237 1. 752195 2. 485421 1. 566054 1. 764214 1. 968599 1. 629796 1. 692756

6. 975277 7. 970916 8. 096399 7. 22555 7. 497346 8. 054264 7. 695388 7. 07371 7. 497948  
6. 732949 6. 721716 6. 933149 6. 615614 7. 433237 7. 133431 7. 048698 7. 109122 7. 280665  
7. 135389 7. 026638 7. 060057 6. 71105 7. 066742 6. 610869 6. 47332 7. 131667 6. 934411  
7. 040441 7. 756326 7. 813762 7. 809244 7. 828649 7. 655797 7. 698638 7. 827981 7. 708325  
2. 512893 2. 850825 3. 323671 3. 43067 2. 339935 2. 778047 2. 594238 2. 814762 3. 220982  
6. 940159 7. 298458 7. 361383 6. 535463 6. 96987 6. 467963 6. 672685 7. 090816 7. 154486  
3. 961446 2. 952883 3. 248733 4. 198445 3. 475643 2. 82512 3. 55189 3. 153245 3. 146517  
7. 107182 7. 212366 6. 591903 7. 37697 7. 715393 6. 954146 7. 216982 6. 650576 6. 968062  
5. 776798 4. 372173 4. 963023 3. 639151 3. 722161 3. 421527 2. 837126 4. 131753 5. 064518  
5. 056823 5. 202786 5. 015248 5. 528084 5. 699826 5. 282612 5. 466254 5. 250437 5. 404676  
1. 261532 3. 991001 3. 125743 3. 080477 3. 200381 3. 923594 6. 060546 2. 406343 3. 075079  
6. 124814 4. 766853 4. 837397 4. 532381 4. 693644 4. 86974 5. 402199 5. 95526 5. 455513  
8. 737961 8. 825681 8. 753822 8. 754355 8. 784754 8. 48233 8. 425264 8. 699776 8. 989232  
5. 895939 6. 077332 6. 098299 5. 803988 5. 599418 5. 702001 5. 906935 6. 380939 6. 670901  
5. 23771 4. 826337 5. 348569 4. 395279 4. 789673 4. 680184 4. 842316 4. 666343 4. 983251  
5. 763067 5. 007186 5. 239584 4. 809242 5. 176329 4. 569764 5. 508204 5. 291059 5. 08844  
6. 226634 8. 474234 7. 702998 6. 873559 7. 269289 7. 489491 7. 230299 7. 733327 6. 996155  
6. 744394 6. 207526 6. 332016 6. 303914 6. 951995 5. 591359 6. 36582 6. 521638 6. 437608  
5. 316112 5. 612481 3. 983121 4. 744841 5. 438743 3. 862317 5. 134584 6. 362763 5. 899941  
5. 268956 4. 991125 5. 613735 5. 828058 6. 294878 5. 273651 5. 251754 4. 87968 5. 578955  
1. 393058 1. 388827 1. 184765 1. 680007 1. 597702 1. 59902 1. 095715 1. 614412 1. 581552  
7. 848191 8. 008238 7. 791325 7. 640471 7. 682844 7. 791565 7. 636079 7. 90587 7. 852788  
2. 177173 1. 842531 2. 182698 2. 944849 2. 325797 1. 890293 2. 050845 2. 369683 1. 824165  
6. 914405 6. 332522 6. 460741 5. 38194 6. 33483 6. 051046 6. 528972 6. 044192 6. 864735  
4. 659452 6. 08919 5. 10299 5. 487174 5. 742675 5. 897606 5. 092592 4. 982123 5. 829514  
6. 599222 6. 943281 6. 819015 6. 439029 6. 540542 6. 832113 6. 820827 6. 533938 6. 94934  
6. 554428 8. 092455 6. 222495 7. 755062 7. 428811 6. 384132 7. 929552 6. 969551 7. 636953  
6. 30365 6. 426337 5. 81789 6. 666746 6. 769238 6. 518403 6. 432148 6. 782943 6. 44026  
6. 056952 6. 572505 6. 74678 6. 469354 6. 470049 6. 441632 6. 420754 6. 43493 6. 480983  
3. 19733 2. 208133 3. 416502 3. 523174 2. 560244 3. 411049 3. 578104 2. 795849 2. 051794  
6. 106258 6. 23708 5. 939711 5. 476713 5. 922233 5. 90519 5. 424182 6. 0321 6. 392676  
7. 093108 7. 646542 7. 177071 6. 589158 7. 221024 6. 609957 6. 8594 7. 3818 6. 978469  
6. 538064 4. 750117 4. 346308 4. 945803 4. 420931 4. 894032 4. 528107 4. 899178 6. 337651  
4. 830623 4. 807553 4. 646576 4. 284633 5. 079564 4. 353087 4. 835176 4. 249343 4. 77637  
7. 044333 6. 919439 7. 256302 7. 187302 7. 233885 7. 168742 6. 822506 6. 801937 6. 783539  
6. 592599 7. 069015 7. 144491 7. 046748 7. 50752 6. 923897 6. 865148 7. 194026 6. 947164  
1. 878185 1. 792704 1. 664851 2. 190248 1. 397226 1. 671108 2. 151218 1. 614238 2. 664371  
1. 788795 1. 665229 1. 582012 1. 839663 1. 608685 1. 674845 1. 933761 2. 079908 2. 064363  
1. 477324 1. 460755 1. 881758 1. 473131 1. 357434 2. 012941 2. 055206 2. 144898 1. 689062  
6. 233378 6. 72769 6. 255488 6. 326844 6. 535384 6. 030365 6. 349747 6. 514743 6. 349913  
7. 261656 7. 860871 7. 50585 7. 381706 7. 420096 7. 932565 7. 50736 7. 878327 7. 671537  
2. 979334 3. 287028 3. 328264 4. 38454 4. 160413 3. 450112 2. 817306 3. 229062 3. 984169  
3. 070129 3. 231714 4. 056765 2. 633508 3. 616034 3. 844364 2. 937588 4. 497065 2. 311499  
0. 80586 0. 975365 1. 861905 1. 172105 1. 043271 1. 572291 1. 368112 0. 457343 0. 719859  
1. 873097 1. 222008 1. 12837 1. 694978 2. 667244 1. 734664 1. 937175 1. 628814 1. 708743  
4. 915735 4. 071331 4. 2476 3. 670445 3. 942687 4. 674179 4. 280899 3. 762794 4. 569447  
2. 594069 1. 296346 1. 846466 1. 48778 1. 072759 1. 431281 1. 835678 1. 630273 1. 393618  
5. 187506 6. 114063 5. 495047 6. 109401 5. 720793 5. 942584 5. 31233 4. 882211 5. 181336  
4. 75768 5. 016415 5. 455933 4. 93868 4. 757765 5. 217769 4. 627765 5. 419761 4. 946915  
4. 256416 3. 866382 4. 225915 3. 869406 3. 23877 3. 25916 4. 931017 3. 280382 4. 331562  
3. 739815 4. 245832 4. 274162 3. 937602 4. 480728 4. 452996 3. 104865 4. 159863 3. 537031

7. 039213 6. 436184 6. 505573 6. 934903 6. 566891 6. 962033 6. 911082 7. 106178 6. 849655  
5. 406821 6. 452335 6. 286883 5. 859163 6. 104344 6. 949593 6. 416957 7. 320263 6. 171421  
4. 353578 4. 787003 5. 325812 4. 273144 4. 247917 4. 200556 3. 950868 4. 469546 3. 906938  
2. 819009 3. 349776 2. 250121 2. 737343 3. 123751 3. 896478 2. 622783 2. 085738 2. 941148  
5. 604591 5. 610316 5. 663664 5. 169933 5. 562321 4. 976456 5. 343381 4. 912986 6. 053904  
7. 865612 7. 881136 8. 179227 8. 01254 8. 14315 8. 097273 7. 711327 8. 024802 7. 780421  
7. 367708 7. 506631 7. 380587 7. 426799 7. 452929 7. 405437 7. 566219 7. 018364 7. 448717  
2. 967252 4. 693861 5. 431207 5. 122637 4. 328676 4. 073721 4. 633304 4. 534406 4. 592947  
6. 47882 7. 485516 6. 90878 6. 304461 7. 161041 6. 728313 6. 956683 7. 122554 7. 063564  
2. 738374 2. 828283 3. 183105 3. 316355 2. 687012 3. 17442 2. 995926 2. 204783 2. 93911  
2. 642034 3. 410765 1. 577813 3. 817947 3. 145593 2. 081875 3. 119396 2. 865093 2. 107938  
4. 361493 3. 957906 4. 562734 3. 245768 3. 740651 4. 138807 3. 40639 3. 418463 3. 734102  
3. 22393 2. 989007 2. 534254 3. 049269 3. 266016 2. 695141 3. 559984 2. 569472 2. 946778  
8. 010691 8. 095886 8. 305815 7. 956513 7. 932296 8. 034003 7. 871501 7. 837949 7. 702714  
4. 765985 5. 260852 6. 208071 4. 968475 5. 737917 5. 61502 5. 300386 5. 581628 5. 093129  
4. 227318 4. 307414 5. 018253 5. 063313 3. 494944 3. 609764 4. 259335 3. 419696 3. 995154  
6. 853006 7. 173759 7. 396366 7. 503347 7. 680164 7. 470854 7. 266606 7. 543568 7. 075169  
5. 626883 5. 970503 6. 091575 6. 397447 6. 313766 6. 017013 6. 165743 6. 189635 5. 988316  
6. 28611 6. 07842 5. 334883 6. 191593 6. 030019 6. 453483 6. 173554 6. 038169 6. 40826  
3. 642701 3. 639347 4. 478424 3. 433842 4. 113779 3. 921669 4. 673071 4. 029443 3. 945953  
3. 017545 2. 743403 2. 293185 3. 699207 3. 04651 2. 393487 2. 817979 2. 324206 3. 114204  
5. 378192 4. 865578 5. 11348 4. 33934 5. 038622 5. 225867 4. 722934 4. 820148 5. 007633  
6. 002067 6. 300691 5. 976929 5. 505388 6. 224035 5. 571259 5. 327192 5. 941936 5. 826262  
4. 958755 5. 399931 5. 481012 4. 853464 5. 170924 5. 069529 4. 290845 5. 719433 5. 182246  
9. 374245 6. 891257 7. 638918 5. 966954 7. 197598 5. 16168 6. 67786 7. 087484 8. 760908  
3. 059991 4. 155377 3. 014677 4. 052105 4. 981319 2. 984619 3. 729907 3. 32381 3. 812419  
7. 762527 8. 389704 8. 303874 8. 384311 7. 865223 8. 355996 7. 776265 8. 090301 7. 891769  
5. 006631 5. 11987 4. 571295 4. 271803 5. 101204 5. 230312 5. 230544 5. 193927 4. 770651  
5. 380025 5. 580896 4. 998895 6. 361678 5. 590941 5. 341758 5. 336773 6. 512693 5. 483949  
6. 335859 6. 155159 6. 457937 6. 134712 6. 539367 6. 198093 5. 313113 6. 504943 6. 37939  
7. 972576 9. 223308 9. 065387 8. 482931 8. 598619 8. 622558 8. 497388 9. 26619 8. 668487  
8. 045737 8. 224182 7. 733386 8. 093592 8. 123553 8. 503905 7. 90561 7. 852736 7. 95175  
1. 618728 1. 507774 1. 852587 1. 904243 2. 062039 1. 729397 2. 006704 2. 103783 1. 867591  
5. 588902 4. 999487 5. 073959 6. 094046 5. 296651 5. 643736 4. 435604 5. 091073 5. 527496  
9. 245367 9. 275088 9. 418907 9. 454932 9. 258927 9. 082783 9. 314838 9. 049174 9. 148543  
6. 568521 7. 030944 7. 262483 7. 220708 7. 083654 6. 453578 7. 064053 7. 365382 6. 930895  
2. 074096 1. 649515 1. 518698 2. 035215 1. 78122 1. 46974 1. 718679 1. 853706 1. 786898  
2. 299101 2. 853335 2. 035625 2. 249827 1. 459824 1. 280559 2. 25117 2. 070393 2. 141504  
8. 352969 8. 302184 8. 122546 8. 110047 7. 907382 8. 133258 8. 166813 7. 94226 8. 601104  
4. 572261 4. 887628 4. 630337 5. 696664 5. 254437 4. 822948 4. 173042 4. 344845 5. 152006  
6. 291968 5. 980002 6. 375957 5. 694322 6. 2993 6. 086597 6. 337397 6. 04973 6. 344117  
6. 44215 5. 994267 6. 287463 6. 39611 6. 489215 6. 523232 6. 199243 6. 524243 5. 97875  
6. 166275 6. 733886 6. 022662 6. 261736 6. 401017 6. 055333 7. 000283 6. 998959 6. 485279  
4. 92373 4. 736557 4. 78047 4. 97589 4. 858301 4. 410386 4. 177918 5. 012588 5. 349575  
3. 866011 3. 653119 3. 708078 3. 647237 3. 754999 3. 790508 3. 922397 3. 706329 4. 04783  
5. 3907 5. 481109 4. 730218 5. 801473 5. 59751 6. 057829 4. 841088 5. 363365 5. 171008  
2. 166557 1. 907443 2. 684829 1. 636023 2. 543454 1. 729499 1. 984895 1. 352556 2. 569829  
1. 334713 1. 226069 1. 282571 1. 822164 1. 399604 1. 088227 1. 264741 1. 311904 1. 27595  
5. 174555 4. 424728 4. 834086 5. 488589 4. 064806 4. 117808 5. 08954 4. 869064 5. 683988  
2. 373813 4. 014 4. 319178 6. 002535 6. 044953 2. 78175 5. 767176 4. 650618 3. 402209  
2. 691545 4. 07549 2. 646917 5. 055859 4. 263101 3. 940936 3. 852692 2. 434174 3. 202305

5.016381 6.464956 5.949982 6.194044 6.427829 5.728478 5.860105 6.74451 5.990107  
5.751464 5.530775 5.239546 5.86904 5.779023 5.671876 5.274389 5.510997 5.474739  
2.009228 2.457397 2.797272 2.973698 3.107071 3.592735 3.184286 1.825103 2.630776  
5.055773 5.872423 6.378699 6.310358 6.225742 5.915441 6.286912 5.558359 5.659427  
3.179633 4.221524 4.439223 3.681044 3.752004 3.618573 3.066686 4.14681 3.844094  
1.593149 2.070602 2.375197 1.596737 1.691458 2.058506 1.573354 1.425769 1.851071  
5.882096 6.789898 6.622993 5.698327 6.91757 6.847138 5.77966 6.305958 6.475843  
2.002794 1.862187 2.475265 2.038419 2.170368 2.487152 2.83883 2.066308 3.33939  
4.264893 4.427374 4.958475 5.73241 5.557637 4.653101 4.93982 5.559939 5.265218  
7.133632 3.248231 4.483867 5.214072 4.332127 3.30814 2.95318 5.093617 4.596873  
5.53014 5.216821 4.747117 5.321597 5.619513 5.098952 4.618986 5.157481 5.498175  
1.796755 1.588431 1.434026 1.160442 1.965722 1.107253 1.39366 1.202147 1.137767  
4.337375 4.991559 5.106094 4.039206 4.481744 4.242865 4.765991 4.035918 4.487843  
3.803149 5.114367 2.836064 4.023827 4.248407 5.437698 3.862045 2.658236 3.978906  
5.126218 5.260021 5.026528 5.501154 6.224859 4.945813 5.327354 5.758353 5.012362  
1.992111 2.983356 3.033869 4.105934 4.264323 3.658875 2.004917 1.985008 3.578331  
1.834501 1.633182 1.528865 1.266974 1.257186 1.3498 1.903595 2.679433 2.891497  
2.81984 0.915383 1.911393 1.435679 1.318578 1.968026 1.928279 1.086038 1.567731  
4.750169 5.543389 5.19352 5.536063 5.099855 6.035102 5.628393 6.09125 4.67767  
5.533329 4.846924 6.0178 4.391486 5.025169 5.148994 5.310108 5.044533 4.878931  
2.146125 4.23522 2.88224 4.112196 4.395158 4.231151 2.935955 4.350276 3.456651  
6.409515 6.361184 6.782534 6.218965 6.48756 6.26101 5.478813 6.082162 5.915982  
3.59499 3.973886 2.557538 4.086326 4.371557 2.76315 2.102273 4.979553 2.195315  
3.515099 2.784224 3.449114 2.73237 4.703117 3.851984 2.827425 3.211755 3.797686  
5.6032 4.613104 5.628762 5.787115 5.223045 5.269968 3.71576 6.404941 5.414682  
3.315113 3.575651 3.662956 3.175876 3.112129 3.700938 3.623162 4.22981 3.258966  
2.934028 5.087885 3.508922 5.788195 5.208475 4.873826 4.461925 4.575185 5.312358  
4.930376 5.067118 4.644913 5.373509 5.452968 4.705005 3.739246 5.362283 4.266268  
4.163411 4.989981 5.047526 4.610038 4.84083 4.790389 4.422309 5.433842 4.207264  
2.970721 4.413635 4.555607 3.727841 4.217873 4.16719 3.504293 5.417372 4.345535  
5.86799 6.435905 6.285111 6.659251 6.656532 7.540936 6.137447 7.04697 6.212178  
3.265762 5.597051 3.831708 2.896832 3.65568 4.274394 2.899996 4.630681 1.968427  
2.273008 4.368605 3.162995 2.787229 2.660444 3.783133 3.086169 3.965778 3.378071  
5.099482 3.009275 5.73731 4.137456 4.823956 3.275646 3.031924 3.995969 3.861633  
4.84402 3.51117 4.436706 2.974038 3.56284 3.880347 2.812878 4.142515 4.01546  
2.8374 1.822087 1.650059 1.489534 1.161539 2.70791 1.789661 1.594842 1.586545  
8.193269 8.325464 7.940728 8.01008 8.203424 8.227706 7.818105 8.418394 8.280245  
2.002715 2.046294 1.380707 1.856651 1.457935 1.811327 2.698981 1.393587 1.83883  
3.349035 3.997357 3.310351 3.996361 3.236519 4.109809 3.95464 4.848826 3.057903  
1.097506 3.460111 4.322606 4.35916 3.745819 2.423346 4.121347 3.409381 3.966657  
4.381686 4.805979 5.22848 4.504434 5.647362 5.726999 5.301235 3.877489 5.04224  
5.215311 5.058273 5.23004 4.407411 5.823589 4.209695 3.866418 5.648687 5.049896  
3.590819 2.755587 2.920401 4.11886 3.094284 1.979555 2.559082 4.941087 1.554653  
3.98656 5.196512 4.570948 5.369344 4.907486 5.370673 3.314644 5.061403 4.941988  
4.451043 4.250957 3.664555 2.967368 4.407366 4.363833 4.632877 3.408699 3.953931  
0.82839 3.642797 1.043137 1.388086 1.387278 3.699827 1.918468 4.854475 1.329181  
3.25664 2.73278 2.687918 3.343566 2.515219 3.715261 2.961454 3.695115 2.736838  
1.592743 2.225705 2.062686 3.729739 3.470205 1.972229 3.216437 3.025132 3.278336  
2.94461 5.021611 3.310024 3.624394 3.615798 3.56496 4.767502 5.154947 4.242331  
3.082402 3.646154 4.710848 2.496231 4.219898 2.99262 2.332019 3.246609 4.277922  
2.943225 4.48325 3.860092 3.82581 4.100053 3.89445 3.257862 5.315089 3.870682

2.498006 2.449165 2.24589 3.002975 1.8265 3.686983 2.661387 2.778727 2.253183  
1.505828 1.80494 3.182469 2.4945 3.089689 2.166481 2.543387 3.421885 3.272751  
1.203746 2.074189 1.961094 2.02969 1.143053 1.338321 1.777824 2.066515 2.863952  
3.406976 3.417646 3.991528 3.748461 3.083312 4.312716 4.026884 4.240953 4.124373  
2.242104 2.446748 2.909595 1.613503 1.586981 2.217644 1.431252 2.95486 2.102251  
3.535809 2.079148 2.243602 2.917106 1.871433 2.493595 1.548107 1.912198 3.966956  
4.163792 4.546925 4.058823 3.774446 3.714951 3.225147 3.65661 3.662204 3.430104  
1.844916 1.620654 2.083625 2.479896 3.669484 2.722535 1.984698 1.637324 1.600199  
1.047482 1.066357 1.696544 1.625215 2.266043 1.461741 1.419677 1.439047 2.101344  
2.01013 3.541655 1.148122 1.612063 2.415126 1.75579 2.979973 1.176412 2.584826  
1.963573 1.435919 1.392867 1.871995 3.002 2.004935 2.518444 1.691187 1.375554  
1.90081 1.683229 2.40118 1.559596 2.662043 2.451697 1.580686 1.728097 2.674786  
1.721092 3.010258 2.184786 2.388716 2.937263 2.732858 2.930972 2.687984 3.346954  
1.394733 1.556477 1.137643 1.574354 2.294966 1.797012 2.564137 1.579899 1.722542  
1.904706 1.765422 1.909806 1.289623 1.988089 1.900508 2.420289 1.764819 1.634497  
1.127237 1.480871 1.4728 1.256938 1.282754 1.365511 0.807997 0.758637 1.233635  
2.04614 1.757965 1.954848 1.812338 1.84402 1.778988 1.931265 2.276595 1.730058  
1.417553 1.808975 1.603207 2.353126 1.499306 1.889819 1.48113 1.774534 1.826414  
1.893486 1.545223 1.494528 1.655816 1.968167 2.06647 1.150121 1.465658 1.954705  
1.739205 1.17071 1.642583 1.13148 1.306264 2.284892 1.573048 1.138878 1.448013  
1.238136 1.386406 1.881716 1.476405 0.867475 1.07379 1.354846 1.625764 1.403317  
4.997109 5.21068 5.132479 4.424426 5.287268 5.057675 4.890388 5.63028 5.20907  
1.364817 0.738074 1.51213 1.447457 1.301095 1.23713 1.412919 1.061838 1.904969  
1.250918 1.3506 0.806782 1.26495 1.443044 1.453684 2.715553 1.313701 1.727408  
1.363325 1.039044 1.028454 1.681293 0.864914 1.131423 1.187271 1.468681 1.473422  
1.124253 0.855239 1.211122 2.00965 1.652675 1.530942 0.996834 1.509223 1.104037  
2.37998 2.085719 2.975704 2.747888 1.861797 2.267943 2.67594 1.75892 1.157756  
1.952542 2.487321 1.894131 1.557538 2.052153 1.935116 2.045025 1.969417 2.278283  
6.705147 6.493703 7.484622 7.058478 7.050072 7.289013 6.509758 7.147785 6.789075  
1.291253 1.122069 1.046812 1.529864 0.999754 1.414394 0.874964 1.081682 1.307302  
3.746366 4.535495 4.178108 4.502818 4.375194 4.670306 3.056216 4.592563 4.152671  
6.883215 7.331088 7.339192 6.925077 7.288714 7.261507 6.522118 6.940367 7.060808  
4.358292 2.912632 2.616505 1.864004 2.734766 2.345681 1.699464 2.294672 4.749264  
1.310347 1.611188 1.377494 1.971249 1.573088 1.371262 1.053235 1.409965 2.005437  
1.699729 1.604121 1.226125 1.516463 1.804429 1.65475 1.511167 2.121581 2.085995  
5.481391 6.32036 6.347701 6.615155 5.960995 6.054134 5.844822 6.464829 5.982719  
2.352204 2.268925 1.919336 1.878301 1.847478 1.624038 2.186007 2.421807 1.985505  
5.153304 5.37869 6.127078 5.495445 5.207796 5.237354 4.859733 5.370388 5.688585  
2.42514 2.088427 1.609245 2.413523 1.687202 1.407582 3.26702 1.934882 1.436232  
6.7302 4.633656 5.545338 4.047362 4.632685 3.690501 4.23653 4.565256 6.174583  
4.643557 5.140187 5.730825 4.258766 5.475773 4.529126 4.511867 5.34682 4.722986  
5.499245 5.603383 5.97109 6.505614 6.042176 5.750785 5.635831 5.969994 5.68052  
1.994887 2.162119 2.034081 2.15561 2.364871 1.70125 2.250536 1.820572 1.996348  
4.14056 4.586374 4.326972 4.196471 4.49916 4.898057 4.709623 5.127805 3.941286  
1.540575 2.05633 1.805822 1.256276 1.433458 1.583645 1.714113 2.425169 1.85149  
4.660421 3.220949 3.085112 3.517725 2.9904 2.834269 2.814581 2.941708 2.445383  
7.138795 7.64628 7.554987 7.826915 7.878719 7.669269 7.413988 7.743005 7.286265  
1.780179 1.571621 1.39165 1.364216 1.414525 1.715594 2.241694 1.376399 1.472969  
6.454769 6.313895 6.051124 6.638482 6.592593 5.966225 5.961261 6.645856 6.705383  
6.527857 6.61415 7.403447 6.352211 6.303175 6.656557 6.174426 6.672892 6.517118  
1.387982 1.766381 1.747902 2.756962 1.603545 3.114429 1.831127 1.507532 1.619989

6. 582974 6. 133089 6. 054662 6. 131132 6. 212025 6. 524008 5. 786569 6. 447679 5. 798072  
6. 434348 5. 432517 5. 078153 5. 727683 5. 416336 5. 408529 4. 85662 5. 103434 5. 190495  
2. 675826 2. 558798 3. 357713 1. 566556 2. 066419 1. 39608 2. 184096 1. 70647 1. 662011  
3. 231809 4. 642043 2. 921889 3. 478838 5. 441464 1. 740175 1. 878208 3. 557407 5. 121254  
4. 872826 5. 369182 5. 544865 4. 793562 5. 056902 5. 422248 4. 562396 5. 58721 4. 983798  
4. 834341 4. 95733 4. 659559 4. 381065 5. 073742 5. 31316 4. 225375 5. 054067 4. 894312  
4. 615881 4. 882791 5. 075249 5. 051831 5. 757426 6. 885801 4. 780849 8. 003905 4. 279673  
4. 504203 6. 754594 6. 907088 6. 168166 6. 133798 6. 304169 5. 025133 5. 961085 6. 288207  
2. 54898 1. 728165 2. 450277 2. 174227 1. 484859 1. 260087 1. 701197 2. 381929 1. 886476  
1. 784875 2. 235918 1. 73574 2. 394144 2. 163605 2. 450233 3. 004858 2. 371677 2. 564263  
6. 084927 6. 397767 6. 747314 6. 336924 6. 324531 6. 851331 5. 894618 6. 169388 6. 518253  
7. 754033 8. 832805 9. 419605 8. 057757 8. 86773 8. 356783 8. 195087 9. 215599 8. 047135  
6. 573936 6. 273157 6. 313618 6. 653218 6. 810702 7. 061685 7. 365968 6. 697607 6. 895753  
1. 588398 1. 735473 1. 020283 1. 655559 1. 437645 1. 360038 1. 636975 1. 064834 1. 272583  
6. 656433 7. 694149 7. 746355 7. 426997 7. 777259 7. 85913 7. 860233 8. 460708 7. 596842  
3. 110195 2. 105508 2. 359897 2. 571763 3. 473914 2. 342714 2. 015239 3. 042583 2. 652603  
1. 220443 3. 304434 1. 613709 1. 777047 1. 591647 1. 371575 1. 83376 1. 629096 1. 387303  
3. 14365 3. 775018 3. 821466 3. 69704 4. 230678 3. 659311 4. 141342 3. 602456 2. 973579  
1. 515453 1. 419883 1. 725553 1. 555549 1. 278955 1. 398734 1. 567126 1. 052821 1. 072432  
1. 558687 1. 595996 2. 018664 1. 791144 2. 661342 2. 124093 2. 088776 1. 605218 1. 733597  
1. 157173 0. 989227 0. 768694 0. 713198 1. 109588 1. 126598 1. 439044 1. 361097 1. 154863  
5. 311919 5. 824164 5. 619077 5. 441172 6. 35828 4. 996138 5. 699546 5. 653333 5. 612225  
5. 097831 6. 584939 6. 594503 5. 982956 5. 711793 6. 081726 6. 661929 6. 03227 6. 120408  
2. 034305 1. 635426 1. 651569 1. 725904 2. 122818 2. 245981 1. 783385 1. 711779 1. 789671  
2. 128293 1. 472975 1. 358589 1. 674069 1. 614768 1. 144492 1. 438366 1. 821476 1. 726643  
6. 072488 5. 443351 5. 829721 5. 603262 4. 366977 5. 105728 6. 269944 5. 962346 6. 084146  
4. 905372 5. 107588 4. 520039 5. 109794 5. 217756 5. 399745 3. 689917 4. 776278 4. 616562  
5. 414563 5. 701642 4. 95737 5. 25962 5. 748858 4. 484967 5. 245023 4. 914956 4. 717442  
4. 296646 3. 717496 4. 864369 4. 161007 4. 887675 4. 806486 4. 081057 5. 419285 4. 376724  
2. 044575 1. 775663 2. 388697 1. 796833 2. 170759 1. 984201 2. 056492 1. 483995 2. 672767  
8. 442428 6. 328487 7. 442286 5. 583474 5. 951827 4. 901343 6. 094695 5. 919539 7. 81066  
3. 052443 3. 161852 3. 299686 3. 398989 3. 145091 3. 30229 3. 485941 2. 488365 1. 877302  
7. 982215 7. 631099 8. 209561 7. 797516 7. 323529 7. 608238 8. 028487 7. 39428 9. 30246  
0. 938775 1. 899811 1. 193777 1. 964597 1. 735603 1. 237465 1. 619377 1. 423682 1. 431504  
3. 954595 4. 13921 4. 87483 3. 851026 4. 189245 4. 171267 3. 196955 4. 687582 4. 567425  
2. 071844 1. 376401 1. 351283 1. 510738 1. 698206 1. 247788 1. 641138 1. 390528 1. 764392  
2. 205906 2. 682062 2. 631959 3. 120064 2. 786874 4. 165214 1. 875812 3. 406814 3. 059249  
6. 767303 6. 339308 6. 605626 6. 317597 6. 278661 6. 625133 5. 631557 6. 627496 6. 418979  
1. 770041 1. 318058 2. 236114 1. 568225 1. 94102 1. 402201 2. 63691 2. 322327 1. 933662  
2. 180744 2. 31876 1. 942187 2. 089375 1. 751839 3. 078609 1. 886955 3. 313336 2. 466017  
2. 835353 2. 395678 2. 423538 2. 665113 2. 455289 3. 38447 4. 494123 4. 115826 3. 243972  
9. 419785 9. 900525 9. 5431 9. 109274 8. 963723 10. 01518 9. 192971 9. 083033 9. 784578  
1. 633913 1. 170154 1. 454903 1. 865627 1. 948894 1. 883266 1. 810324 1. 564914 1. 335998  
4. 108233 2. 609699 3. 82362 2. 13648 2. 894304 3. 34543 4. 861017 2. 869005 4. 735182  
6. 934113 4. 260972 5. 35039 4. 699178 4. 207818 4. 63508 4. 729175 4. 571734 5. 874916  
9. 238624 10. 12087 9. 358813 9. 297632 9. 44106 9. 594269 9. 580007 10. 23231 10. 39472  
0. 804 1. 038246 1. 31199 1. 156352 1. 260999 1. 294084 0. 96082 0. 976365 1. 009938  
2. 683237 2. 86073 2. 039641 2. 755087 2. 558732 2. 639121 2. 895724 2. 957577 2. 616533  
10. 97683 11. 07254 10. 90106 10. 90032 11. 05953 10. 83191 10. 60969 10. 98445 10. 77239  
2. 642118 1. 966327 2. 064721 2. 011928 2. 402725 2. 508502 2. 280223 1. 905659 2. 55925  
1. 99826 1. 924939 3. 132726 2. 122362 1. 968723 1. 58861 1. 963922 2. 2452 1. 803601



2. 394847 2. 3089 4. 498195 3. 618251 3. 628299 3. 519579 3. 556091 3. 622902 2. 795076  
5. 504835 6. 492538 6. 60865 5. 082015 6. 312993 6. 202779 5. 656803 6. 097639 6. 176144  
3. 159072 2. 612111 2. 559526 2. 625033 3. 453221 2. 88427 2. 364651 3. 052943 3. 277862  
10. 32975 10. 44398 10. 46906 10. 31553 10. 5755 10. 32422 10. 35297 10. 35822 10. 34871  
5. 7464 5. 858803 5. 605937 5. 790519 5. 837699 5. 389951 6. 236821 5. 688909 6. 025534  
3. 340528 3. 32805 3. 194545 3. 398191 4. 462111 2. 605353 3. 544704 2. 995114 3. 635413  
1. 879559 2. 235912 2. 19109 2. 80235 1. 635695 1. 691384 2. 173391 1. 837981 1. 316058  
2. 965639 2. 639421 2. 664646 3. 103231 2. 220347 2. 629768 3. 121775 2. 478573 3. 07904  
7. 560406 6. 701264 6. 673101 6. 438287 6. 418007 6. 502639 6. 419165 6. 264329 6. 769164  
5. 618905 6. 604967 6. 010899 5. 837109 6. 268935 6. 154184 6. 147911 6. 499644 6. 165312  
6. 473734 6. 274567 6. 950816 6. 14139 6. 108702 6. 488008 6. 31982 6. 821192 6. 817711  
1. 976133 2. 281911 2. 113692 2. 930086 1. 957971 2. 697194 2. 983466 1. 81171 2. 307157  
5. 898276 6. 479016 5. 673145 6. 282874 5. 906996 6. 529107 6. 103707 6. 174569 6. 06642  
6. 769331 7. 512525 7. 191148 6. 844088 7. 112964 6. 688048 6. 605334 7. 109407 7. 319343  
1. 074194 2. 011575 1. 063175 2. 021963 1. 126454 1. 744254 1. 870696 1. 146625 1. 403427  
2. 37889 3. 0273 2. 795096 1. 681924 1. 821392 3. 505119 2. 104655 2. 164516 1. 995579  
6. 527283 6. 478334 6. 373738 6. 726658 6. 951608 7. 247705 6. 837128 6. 336276 6. 523117  
7. 371215 7. 535677 7. 391674 7. 515445 6. 711201 6. 224987 7. 653704 7. 180526 7. 384662  
1. 706717 1. 422048 1. 416258 2. 093727 1. 936658 2. 347878 1. 724304 1. 156967 2. 143876  
2. 442715 3. 012853 3. 55835 3. 129646 2. 482088 3. 867964 3. 3541 3. 035983 4. 064403  
2. 750598 1. 537535 2. 369834 2. 058012 2. 981209 2. 617028 1. 7161 1. 80466 1. 523359  
3. 454292 1. 665877 3. 207936 3. 889696 1. 998149 3. 792751 2. 136549 1. 332481 2. 926647  
7. 125219 6. 079135 7. 904655 5. 991658 4. 512176 6. 546609 7. 420899 3. 916722 6. 191872  
1. 413116 1. 835971 1. 387304 2. 150708 2. 594358 1. 881173 2. 657195 1. 742917 1. 625867  
1. 134676 1. 097041 0. 842932 1. 081618 0. 925455 1. 60161 3. 634612 0. 808862 1. 598116  
2. 850163 2. 778996 2. 211664 3. 215429 2. 410963 2. 603942 2. 627348 2. 143702 2. 919223  
2. 370831 4. 398581 2. 995923 1. 542959 4. 810359 2. 088241 1. 813116 1. 270507 5. 03522  
6. 486809 5. 411776 5. 04043 6. 223783 6. 157722 4. 905516 4. 761293 3. 28133 5. 72273  
4. 679188 4. 95836 4. 307134 4. 56118 4. 885852 4. 799543 4. 10446 5. 238185 5. 317238  
1. 774064 1. 616703 2. 020077 1. 736189 1. 823666 0. 993888 2. 06942 1. 562277 2. 192532  
8. 195657 8. 981059 8. 692018 8. 66704 8. 491322 8. 935736 8. 559389 8. 697503 8. 555458  
1. 823891 1. 566688 2. 070319 1. 881692 1. 359692 1. 498949 2. 650288 1. 586662 1. 855676  
1. 901799 1. 491564 1. 817092 2. 410899 2. 598652 1. 759144 2. 364137 1. 447862 1. 510031  
8. 554151 8. 733605 8. 867394 8. 699369 8. 893945 8. 298519 8. 650457 8. 45785 8. 668827  
6. 554343 7. 478791 7. 094882 6. 553774 7. 625691 6. 770275 7. 14155 7. 134435 6. 985755  
0. 588477 1. 064682 1. 41436 2. 351555 1. 136489 1. 07856 0. 991485 1. 67252 1. 947976  
2. 956737 2. 290136 2. 959516 2. 341112 2. 531517 3. 151216 3. 24381 2. 974872 2. 914898  
3. 732402 4. 759612 5. 240027 4. 776917 4. 456565 4. 722937 3. 573661 4. 365006 4. 049836  
1. 731419 1. 781457 1. 248071 1. 485672 1. 204891 1. 513401 1. 102555 1. 784038 0. 787015  
2. 664764 2. 376466 1. 52898 1. 477194 1. 192575 2. 443951 1. 943269 2. 144384 2. 019627  
2. 413164 2. 398862 2. 807407 1. 827289 2. 525339 1. 852617 2. 220475 3. 013086 2. 935347  
3. 748382 1. 64109 2. 190227 1. 684141 1. 304771 3. 698285 1. 529121 0. 576755 3. 13965  
6. 86682 5. 797858 6. 509773 6. 234777 6. 038004 6. 237995 5. 825488 6. 407449 6. 231336  
2. 106487 1. 928535 2. 212554 2. 190098 2. 958962 2. 604675 2. 050685 2. 336001 2. 062465  
1. 297328 0. 757699 0. 778315 1. 348922 0. 605953 0. 973055 1. 231444 0. 860505 0. 695683  
6. 61593 6. 977855 6. 940723 6. 565502 6. 67794 7. 204837 5. 47137 6. 237503 6. 093877  
1. 708 1. 487787 1. 170845 1. 423872 1. 666647 0. 964882 1. 725028 1. 313135 0. 908588  
11. 34147 11. 62089 11. 36473 11. 59215 11. 19829 11. 80543 11. 30059 11. 34402 11. 14452  
0. 692661 1. 203239 0. 746347 0. 777153 1. 327933 1. 091224 2. 195031 0. 588462 0. 860816  
5. 592674 4. 900494 4. 138841 4. 980026 5. 314309 5. 235466 5. 114724 4. 433139 5. 321214  
6. 559077 6. 222843 6. 960165 6. 733273 6. 304389 6. 675936 5. 839698 6. 221266 6. 805253

5. 964022 6. 198354 6. 223808 6. 325877 6. 125224 6. 309523 6. 047578 6. 223118 6. 479686  
1. 696873 1. 572247 0. 924704 1. 011016 1. 607569 1. 29232 1. 665632 1. 493374 1. 521901  
5. 011675 5. 848045 6. 105811 4. 49118 6. 284297 5. 639983 4. 472214 6. 189305 4. 786591  
5. 426923 4. 398872 4. 679786 5. 007993 5. 250753 4. 713723 4. 570279 5. 213619 5. 666501  
6. 844189 7. 435806 7. 396118 6. 955045 7. 477917 6. 624422 7. 22986 7. 343383 7. 192155  
4. 126288 3. 101855 3. 243589 3. 054554 2. 710885 2. 873432 2. 93799 2. 636956 3. 079328  
5. 263222 6. 319364 6. 274349 6. 346234 6. 125227 6. 23983 6. 542929 6. 461708 6. 061726  
8. 600568 8. 763164 8. 620574 8. 252018 8. 859172 8. 348453 8. 567603 8. 818391 8. 262431  
4. 312749 5. 888023 5. 152749 5. 033374 5. 670174 5. 264192 4. 902476 5. 350505 5. 474459  
8. 686717 9. 155379 9. 135485 9. 085464 9. 506348 8. 573977 9. 072926 9. 541143 9. 208937  
4. 472553 4. 03881 4. 531609 4. 491855 4. 861119 3. 797929 4. 604382 4. 203369 5. 038331  
1. 727137 1. 259352 1. 693278 1. 385676 2. 100827 1. 681857 1. 65502 1. 548922 1. 321958  
7. 436064 7. 70896 7. 670038 7. 642654 7. 826132 7. 502289 7. 714525 7. 652928 7. 253622  
7. 83924 7. 723649 7. 628147 7. 540746 7. 798094 7. 102425 7. 895611 7. 848354 7. 767896  
6. 921205 7. 574488 7. 301216 7. 150274 7. 421883 7. 294291 7. 533034 7. 753953 7. 347853  
5. 754134 6. 283565 6. 441438 6. 848296 6. 985468 6. 604709 6. 581586 6. 566799 6. 640334  
1. 652871 1. 193139 1. 034423 1. 291175 0. 901256 1. 651301 1. 400227 1. 203403 1. 277587  
5. 253919 5. 794409 5. 891049 6. 581277 6. 32891 6. 056329 6. 137997 6. 279667 6. 403776  
6. 958636 7. 054008 6. 849539 6. 3508 7. 014698 7. 139025 6. 926938 6. 851084 6. 783909  
8. 411499 8. 503901 8. 317315 8. 442265 8. 630392 8. 368029 7. 872248 8. 139672 8. 509605  
9. 371134 9. 539767 9. 420344 9. 405473 9. 555047 9. 374632 9. 625221 9. 512543 9. 644858  
3. 21279 4. 464468 4. 492342 3. 21424 3. 822952 4. 008062 2. 783896 4. 027791 3. 348605  
2. 031414 0. 916712 0. 875291 0. 844315 1. 044554 0. 929488 1. 047636 1. 339573 0. 364032  
7. 568472 8. 140998 8. 234119 8. 471815 8. 482641 7. 939018 7. 702818 7. 594336 7. 906869  
2. 319226 3. 537224 4. 536544 4. 256815 3. 334226 4. 890608 2. 853899 2. 18312 3. 445004  
6. 678471 5. 897275 6. 488721 5. 957856 6. 177368 5. 926441 5. 77927 5. 910937 7. 004923  
3. 868242 3. 548084 4. 150203 3. 965448 4. 46131 4. 202372 4. 645873 3. 504467 4. 484352  
1. 709088 1. 18959 1. 251696 2. 012487 1. 696733 1. 160796 1. 664817 1. 577657 2. 007091  
5. 766557 5. 616719 5. 578452 5. 503472 5. 731278 5. 636922 5. 17013 5. 57342 5. 739627  
6. 885899 5. 873083 6. 192765 5. 64556 6. 281566 5. 304992 5. 427769 5. 308728 6. 376267  
4. 970564 2. 509454 3. 396535 1. 862904 2. 287597 3. 706019 1. 850285 2. 238229 2. 011211  
8. 858535 9. 189728 9. 152596 9. 014157 9. 132376 8. 558917 9. 18316 8. 866502 9. 309111  
8. 869886 8. 549408 8. 243519 8. 126735 8. 366931 8. 071627 7. 578032 8. 293828 8. 532112  
4. 827227 6. 058883 5. 861982 6. 76937 5. 111928 4. 973035 5. 658877 6. 017836 3. 631055  
5. 605342 4. 682017 3. 387232 5. 175839 3. 825932 4. 228166 3. 835012 4. 14061 4. 295291  
1. 081784 1. 454097 0. 85888 1. 025723 0. 942112 1. 245237 0. 888451 1. 76035 0. 944775  
5. 70104 6. 157488 5. 356961 5. 374024 4. 606397 5. 975612 6. 213807 5. 619322 5. 240267  
4. 170975 3. 369273 4. 039357 4. 217714 4. 309404 4. 180534 3. 668871 4. 638227 4. 563353  
3. 979792 3. 973852 2. 496986 2. 809611 3. 040679 4. 106292 2. 838642 2. 596625 2. 619458  
5. 889151 7. 269346 7. 592095 7. 071593 6. 94635 7. 552817 7. 018066 6. 727068 6. 628439  
7. 893099 8. 179136 8. 071021 8. 44865 8. 142316 7. 999584 7. 902956 7. 973736 8. 241466  
7. 943991 8. 731682 8. 764742 8. 365813 8. 523767 8. 680407 8. 344234 8. 602045 8. 513874  
1. 948267 2. 124918 2. 329154 2. 348935 1. 707608 2. 289434 2. 835796 2. 389256 2. 125252  
5. 57081 5. 934764 5. 494227 5. 869936 5. 599502 4. 990267 5. 59194 5. 879911 6. 027243  
6. 703514 6. 197249 6. 367037 5. 731096 5. 832916 6. 013321 5. 814524 6. 038158 6. 417073  
1. 433951 1. 249002 1. 525033 2. 019137 0. 894325 2. 13251 1. 135567 1. 180817 1. 247853  
3. 101637 3. 922446 3. 254384 3. 611306 1. 955151 2. 432616 3. 431649 1. 615371 2. 956694  
5. 703333 6. 485657 6. 388469 6. 104334 6. 833587 6. 10199 6. 019187 6. 517457 6. 28119  
1. 720575 2. 032794 1. 755155 2. 011803 1. 490508 1. 754832 2. 19226 1. 511749 1. 661802  
5. 755104 5. 425519 5. 411564 5. 335594 4. 578805 5. 00984 4. 938872 4. 94431 5. 128177  
7. 550757 8. 188119 8. 081394 8. 164856 8. 225717 8. 050544 8. 40548 8. 448968 8. 50697

5. 576936 6. 499499 6. 157403 6. 073589 6. 311163 6. 719623 6. 25567 7. 013378 6. 914083  
6. 457293 5. 904211 5. 942944 5. 703629 5. 927189 5. 282395 5. 125439 5. 50458 6. 334248  
1. 569944 1. 731921 2. 265415 1. 251299 1. 738015 1. 711554 2. 14697 1. 451275 1. 928872  
3. 102589 2. 30886 2. 133862 2. 998384 2. 264779 1. 844864 1. 786598 2. 841335 3. 099952  
5. 507559 6. 064489 5. 448769 6. 061377 5. 85678 6. 033873 5. 325856 6. 101745 5. 641879  
3. 151122 3. 962321 4. 474051 3. 803265 4. 720597 4. 218491 4. 39775 3. 78415 4. 438854  
7. 043054 7. 32067 6. 885674 6. 962033 6. 862156 7. 488334 7. 158571 6. 925643 7. 044636  
3. 668891 4. 650591 4. 370422 4. 625615 3. 846465 5. 332421 4. 796252 4. 335288 5. 03008  
4. 793671 4. 469351 5. 748492 4. 820169 4. 014371 5. 651303 4. 692097 3. 758021 4. 979039  
10. 02953 9. 686524 9. 962013 9. 538176 9. 902441 9. 689722 10. 33444 9. 859638 9. 985711  
3. 74099 3. 895588 3. 610802 3. 657893 3. 253972 4. 019966 4. 313109 3. 460199 3. 263965  
6. 754378 8. 269899 7. 170052 6. 393687 7. 847239 7. 169862 6. 239222 6. 914394 6. 381535  
2. 906296 3. 686331 3. 502333 3. 33873 3. 432691 3. 147718 3. 45898 3. 993188 3. 448888  
1. 217617 0. 989266 1. 051435 1. 614664 1. 155206 1. 311442 1. 606929 1. 364312 1. 553534  
5. 816243 5. 808225 5. 244854 5. 534772 6. 759966 6. 116767 5. 31348 6. 053391 5. 774856  
1. 496597 1. 951942 2. 228445 1. 804967 1. 659107 1. 742056 2. 218079 2. 860123 2. 390709  
7. 27978 7. 249582 7. 490096 7. 055128 7. 232327 6. 806018 7. 565315 7. 60878 7. 389635  
4. 492565 6. 472265 6. 115796 5. 438225 5. 714946 5. 848413 5. 639177 6. 439058 5. 639688  
6. 664123 7. 059647 7. 303319 6. 791142 6. 91925 6. 51422 6. 649107 6. 643257 6. 571183  
7. 528182 7. 782279 7. 903373 7. 454899 7. 666042 6. 732292 7. 073228 7. 464046 7. 764509  
7. 902189 8. 822296 9. 206433 8. 629028 8. 701714 8. 996188 8. 494446 8. 873687 8. 646027  
2. 043913 1. 398774 1. 953508 1. 531341 1. 906348 1. 579001 2. 116782 1. 85503 2. 267286  
7. 34907 7. 289206 6. 956757 7. 143505 7. 156512 7. 422303 7. 564915 7. 380386 7. 271451  
4. 47387 5. 379086 4. 934087 4. 955871 5. 102264 5. 21249 3. 967725 4. 252831 4. 865026  
6. 971905 6. 954952 6. 898308 6. 391892 7. 249015 6. 566257 6. 208541 6. 870178 6. 512471  
5. 232449 5. 268536 4. 724979 4. 299629 5. 004148 4. 188333 5. 30159 4. 659329 4. 583455  
6. 142174 5. 598878 5. 083465 5. 521155 5. 655772 5. 237798 5. 313736 6. 583418 5. 292726  
8. 713587 9. 053888 8. 799657 8. 957321 9. 146234 8. 847777 9. 243816 8. 74856 8. 915272  
4. 89454 6. 327984 6. 187788 5. 694379 6. 929361 6. 35347 6. 222947 6. 147214 6. 379349  
8. 230602 7. 657911 8. 108917 8. 281221 7. 869273 8. 210332 7. 921959 8. 019086 8. 126573  
1. 882573 2. 925877 2. 331698 1. 556092 1. 68217 1. 962875 3. 844316 3. 814629 2. 677057  
1. 926336 2. 314007 2. 261571 2. 482201 3. 104743 1. 730076 1. 482472 1. 492738 2. 234606  
7. 995411 6. 600673 6. 910384 5. 540463 6. 163578 5. 502194 6. 716916 6. 702129 6. 959227  
1. 085226 1. 158757 0. 949043 1. 350431 1. 382121 1. 555355 1. 221585 1. 892896 0. 909055  
1. 03611 1. 332802 1. 157529 1. 575473 1. 419057 0. 984426 1. 813087 1. 455387 1. 805179  
4. 950071 4. 73507 4. 584686 4. 827174 4. 978911 5. 425241 5. 37628 4. 334068 4. 8303  
7. 878906 8. 674511 8. 635409 8. 626473 8. 689898 8. 664954 8. 7988 8. 884037 8. 613957  
2. 296492 2. 492378 2. 822928 1. 879746 2. 374329 2. 540869 2. 773336 2. 144875 2. 180754  
3. 148856 2. 756846 3. 29822 2. 932176 2. 493288 2. 286162 3. 974433 3. 679306 3. 036447  
1. 585881 1. 751424 1. 584121 1. 916052 1. 235279 0. 890798 1. 560642 1. 940205 1. 241106  
6. 850205 6. 384903 5. 982736 5. 82295 6. 263827 6. 175187 5. 786435 6. 627056 6. 211021  
3. 336631 4. 160051 4. 39634 3. 450726 3. 895076 4. 467526 4. 028174 3. 499627 3. 787656  
5. 531247 3. 461067 5. 193615 5. 852366 3. 819597 3. 389979 5. 031853 3. 625103 3. 513564  
6. 15189 7. 056362 6. 683959 7. 030301 6. 481445 6. 807817 6. 739029 6. 716885 6. 525953  
4. 200433 4. 760976 3. 96059 4. 064363 5. 42023 5. 081556 4. 306097 3. 266702 4. 437437  
4. 479328 4. 636028 6. 844093 4. 441748 4. 496552 4. 286571 3. 895704 6. 005765 3. 824362  
6. 759224 6. 574605 6. 567537 6. 257455 6. 952526 6. 473847 5. 407849 7. 047255 7. 009694  
3. 878904 3. 706922 4. 37904 4. 405198 3. 821497 5. 012247 4. 352549 3. 837095 3. 775262  
1. 842095 1. 530105 1. 770818 2. 163413 1. 946517 2. 010771 2. 965207 1. 957043 1. 185155  
1. 435352 1. 693484 1. 948136 2. 25812 1. 916657 1. 231317 2. 33806 1. 385897 1. 361317  
3. 052414 3. 255632 2. 620099 3. 382092 3. 329164 2. 982407 3. 214207 2. 830576 2. 930869

2.160877 2.661641 2.700957 2.972163 3.315603 4.169321 2.648899 3.582611 3.038884  
3.111165 3.024703 2.909753 3.261294 3.282877 3.531678 3.701755 2.83571 2.873046  
4.030165 5.738793 5.537993 5.257634 5.577441 5.150934 5.265601 6.116684 5.402997  
7.474975 7.004682 7.371405 7.289782 7.09254 7.648708 7.227852 6.349171 6.845279  
3.973353 3.870849 3.843295 4.159611 4.599355 4.931847 4.63318 3.497168 3.692475  
4.454198 5.905178 6.198849 5.548661 5.866025 5.527163 5.752075 5.530821 5.420003  
6.272585 6.849503 6.66804 6.463621 6.394427 6.53731 6.312551 6.784953 6.754607  
9.1563 9.33967 9.45846 9.700844 9.180665 9.676991 9.097198 9.483867 8.993851  
7.019833 7.948534 7.450844 6.532295 7.503691 7.2332 6.771423 7.754793 7.523117  
1.768767 1.453649 1.496606 2.007943 1.425141 1.39936 2.179038 1.726018 1.686239  
6.743503 6.564071 6.376988 7.018796 6.443292 6.384549 6.866983 7.568964 6.693439  
8.163941 8.083447 8.190743 7.877072 8.587128 7.039695 7.859911 7.967782 8.240993  
8.076544 7.788726 8.108194 7.72945 7.942485 7.977473 7.679756 7.560965 7.535054  
3.203114 2.84881 3.740611 3.210746 3.65192 3.359557 3.693202 3.665422 3.900162  
3.662612 3.824269 4.664047 4.064571 3.690791 3.859394 3.351006 3.054059 4.636119  
5.143374 6.278859 5.477995 6.516283 6.591976 5.467986 5.33659 5.630075 5.996382  
6.531773 6.632126 7.310257 6.51439 7.107679 7.021192 5.865411 6.814704 6.835845  
6.603427 7.149975 7.080381 7.296685 6.916282 7.425659 7.605147 7.083149 7.048189  
1.597604 2.036588 1.578914 1.914762 2.150313 1.680312 1.646133 1.348171 1.881485  
2.827927 2.870866 2.638696 3.111516 2.762355 4.017785 3.313807 3.872451 2.729394  
5.555592 5.601028 5.476223 4.762613 5.680511 5.280132 6.185348 5.684634 5.640984  
4.397338 5.515146 5.02995 4.597051 4.43468 4.981411 4.730531 4.734388 4.485827  
8.53156 8.510941 8.197044 8.351627 8.22367 8.047199 8.511038 7.847659 8.311376  
5.566678 3.942885 4.049426 3.197547 6.777651 3.42278 4.459755 3.31029 4.675337  
2.692979 2.795008 3.05591 2.820924 3.069845 2.526964 2.343447 2.90105 2.552538  
0.925679 2.465485 1.544745 1.546255 1.209212 1.451485 1.884539 1.536643 1.48365  
5.97356 5.745322 5.54388 5.084208 5.166988 5.135801 4.745797 5.134966 5.795168  
5.543797 5.727885 5.181206 4.686697 5.46075 4.93716 5.170234 5.299175 4.962712  
3.167854 4.535226 4.028639 3.475224 5.094408 4.987727 4.922205 5.182013 4.271121  
8.191042 7.786459 7.595374 7.627952 8.056353 7.69924 7.955016 8.049147 7.874046  
6.866812 7.475093 7.099098 7.147885 7.252928 7.490062 7.547174 6.962143 7.465903  
6.188468 5.183685 5.378171 4.702901 5.392282 5.099862 4.618613 5.073747 5.39973  
6.449136 7.297112 6.768118 7.799577 7.480142 7.108901 7.504395 7.748661 7.437762  
2.384483 1.260899 1.536445 1.974886 1.554471 1.663837 2.152119 1.62001 1.297989  
4.997807 5.719354 4.913941 4.960578 5.212398 5.231318 4.704838 4.988814 5.595842  
5.021332 5.863938 5.521389 5.12617 5.368454 6.170387 5.869483 5.78161 5.72346  
6.974981 6.910276 6.41909 6.909254 6.677751 6.775316 6.763137 6.497693 7.024696  
6.797499 7.689121 7.432395 7.264773 7.156855 7.824893 6.785869 7.913355 6.801851  
1.35279 1.293315 0.863127 2.118936 1.286767 0.906776 1.82221 1.064051 2.229652  
7.182773 7.041229 7.028432 7.449436 6.841046 7.181632 7.187177 7.268166 7.2403  
6.810125 6.440474 6.853378 6.263372 6.591482 6.664673 6.382981 6.756637 6.466949  
2.89903 2.767298 3.208869 2.455905 3.197585 3.689404 3.454552 2.908386 3.352749  
2.332485 1.888348 2.162637 2.703196 2.687026 2.546715 1.968837 2.518852 2.155072  
8.128839 8.13392 7.64925 7.568372 8.243145 7.57011 7.631468 8.137082 8.127692  
4.043582 3.18368 3.325475 4.323915 3.791641 3.680243 3.385298 3.884819 3.43554  
2.405081 1.589183 1.810939 2.400391 2.781213 2.505965 1.92685 1.845998 1.517065  
7.008461 7.838078 7.623395 7.610764 7.78819 8.061284 7.842281 7.742078 7.454874  
6.87921 7.161495 6.990708 6.738721 7.241786 7.189037 7.173785 7.501448 6.940836  
8.013038 8.219907 8.298805 8.044587 8.731194 8.122935 8.238537 8.66296 8.508618  
2.594666 2.34302 2.00704 2.01195 2.104408 2.03006 3.367825 1.250189 2.405343  
1.709962 0.839974 1.509725 1.251952 1.00576 1.098237 0.85161 1.295901 1.040705

6. 447697 5. 565079 6. 864197 6. 161331 5. 689077 6. 641493 5. 909535 6. 903628 6. 762971  
6. 328657 7. 034454 6. 13649 6. 988708 6. 166718 7. 112307 6. 521049 6. 534646 6. 860403  
4. 032527 3. 605698 4. 283067 4. 397659 4. 812192 4. 2343 4. 373538 4. 649657 4. 317363  
7. 326565 7. 541887 7. 442748 7. 78835 7. 913507 7. 825101 7. 553062 7. 484329 7. 827854  
2. 803799 2. 257561 1. 883445 2. 030711 2. 295485 2. 23968 2. 816744 1. 975213 2. 372678  
9. 033054 9. 198811 8. 808721 8. 954233 9. 201746 8. 698637 8. 728616 9. 420269 8. 659572  
1. 685393 1. 17779 0. 71846 0. 602217 1. 647111 1. 273648 0. 621613 1. 005372 0. 798635  
2. 660059 1. 245189 0. 740305 1. 122757 1. 316761 0. 73219 0. 970825 1. 054372 1. 021959  
3. 896139 5. 747382 5. 827449 5. 52662 5. 316841 5. 788832 5. 397474 5. 964717 5. 442127  
1. 563751 1. 851887 1. 635415 1. 736635 2. 226252 1. 943183 1. 401057 1. 680302 2. 149602  
4. 343165 5. 420033 5. 347459 5. 6722 4. 951551 5. 94759 4. 931892 5. 86188 5. 768221  
4. 319369 3. 834362 3. 740165 4. 316742 4. 570365 4. 014609 4. 405933 4. 235124 4. 434336  
7. 187388 7. 473852 7. 460302 7. 073501 7. 007069 6. 906142 7. 082741 7. 488943 7. 31254  
2. 076659 1. 696453 2. 882659 2. 491588 2. 376268 1. 940976 1. 976855 2. 617671 2. 173805  
1. 486069 1. 375705 1. 776698 1. 475263 1. 568206 1. 377331 1. 914018 1. 666228 1. 760491  
3. 486841 5. 023711 4. 736223 3. 247862 5. 554707 5. 450301 4. 249755 4. 889921 4. 426892  
3. 441411 3. 201879 2. 742591 4. 297644 3. 598647 3. 655682 2. 706917 4. 028864 3. 138455  
6. 450743 6. 402956 6. 22302 6. 599332 5. 718004 6. 536389 6. 076844 6. 615368 6. 322143  
2. 719943 1. 747521 1. 769867 2. 888564 1. 578914 1. 733509 1. 864271 2. 004034 1. 822144  
4. 375715 4. 165496 4. 286993 3. 779736 4. 193401 3. 974049 4. 56382 3. 423874 3. 98502  
3. 98487 4. 279256 4. 896533 4. 906495 3. 443079 3. 416235 4. 13041 3. 977335 4. 161679  
3. 812809 4. 531092 4. 579493 3. 420426 4. 175265 4. 310921 3. 989357 4. 476609 3. 884836  
1. 101542 1. 177597 1. 398924 1. 22171 1. 380571 1. 374339 1. 132866 1. 032932 0. 954632  
6. 595808 2. 493256 3. 8516 3. 119298 4. 777849 3. 681144 2. 074947 3. 321449 4. 430668  
1. 324657 1. 661864 1. 286289 1. 918898 1. 518254 1. 994746 1. 562666 1. 726026 2. 176885  
1. 865142 1. 4641 1. 137834 1. 58677 1. 600417 1. 487752 1. 226564 1. 604268 1. 295589  
2. 534129 1. 530879 1. 363421 1. 205936 0. 923275 0. 805865 1. 089246 1. 043144 1. 363462  
4. 748649 6. 654833 6. 112539 6. 554038 6. 074485 6. 439499 5. 396337 5. 844794 5. 854266  
3. 472569 4. 468702 3. 479248 3. 752391 4. 266153 4. 073819 3. 984724 3. 441993 3. 480554  
3. 166866 5. 009277 4. 269482 5. 180365 5. 296943 4. 143205 4. 41877 4. 787687 4. 701197  
6. 098406 6. 823602 6. 6293 6. 376285 6. 400407 6. 77363 6. 389486 6. 541379 6. 278648  
2. 654825 1. 700307 1. 779371 2. 085145 2. 817268 2. 129247 2. 138196 2. 170011 2. 083579  
4. 573615 5. 898004 4. 832074 5. 070151 5. 149767 5. 398755 4. 934401 4. 907565 5. 038733  
7. 786219 7. 270871 6. 978206 8. 770126 8. 138872 7. 806144 7. 992695 8. 08284 7. 581554  
2. 860012 2. 604716 2. 995814 3. 793427 2. 075841 3. 19081 3. 264681 2. 595001 2. 661037  
1. 695824 1. 6356 1. 687165 1. 970661 2. 387431 1. 677435 2. 00161 1. 775679 1. 793261  
2. 538553 3. 658403 3. 975338 3. 209361 2. 878569 2. 91178 4. 054633 2. 724952 4. 033712  
2. 450101 3. 037018 2. 741923 3. 173687 3. 116209 2. 351046 2. 527033 2. 806179 2. 547425  
6. 898989 7. 849819 7. 94007 7. 986258 7. 9544 7. 473329 7. 97212 7. 438314 7. 643732  
5. 321042 4. 51537 3. 835806 5. 044122 4. 590812 5. 020806 4. 719353 5. 250478 4. 934305  
7. 468911 7. 48192 7. 670413 7. 580597 7. 450178 7. 111621 6. 992706 7. 644692 7. 567243  
3. 515175 3. 513029 3. 120536 3. 643048 4. 184664 3. 302875 2. 924057 3. 849787 3. 895819  
6. 585984 7. 239313 6. 679241 6. 493875 7. 105401 6. 490513 7. 045949 6. 625844 6. 918755  
4. 608638 4. 206022 3. 955635 3. 779771 3. 422727 4. 258309 2. 950628 2. 976544 3. 501755  
7. 625917 8. 184597 7. 481731 7. 755231 8. 369416 7. 366716 7. 969404 7. 754286 7. 826406  
6. 436685 6. 755302 5. 773379 6. 379703 5. 976685 6. 682046 6. 068379 6. 384827 6. 690579  
6. 33243 6. 489267 6. 443098 6. 604435 6. 532654 6. 326387 6. 608294 6. 417683 6. 447373  
2. 861666 2. 556927 2. 36769 3. 455202 3. 213651 2. 896928 2. 781433 4. 283657 2. 724076  
1. 603259 1. 333234 1. 530328 2. 10872 2. 137981 1. 513421 2. 098445 1. 367682 1. 22752  
4. 454617 4. 94527 4. 815894 5. 281715 6. 012316 4. 161497 4. 679563 4. 768572 4. 712615  
3. 697842 4. 876644 5. 017548 4. 800637 4. 039412 4. 367358 4. 6369 4. 08819 4. 959142

6. 366366 7. 0243 6. 89273 6. 882313 6. 944038 7. 053726 6. 854847 7. 00841 6. 706539  
6. 361728 6. 017021 6. 069814 5. 16002 5. 928403 5. 524583 5. 975052 5. 819618 6. 532624  
8. 714235 9. 115877 9. 118554 9. 022861 9. 244606 9. 148105 9. 175744 8. 951486 9. 135501  
5. 917866 4. 855118 5. 119645 4. 988647 5. 637697 5. 209887 3. 27227 4. 783697 4. 180455  
1. 373683 1. 874035 1. 321444 1. 199535 1. 812631 1. 683121 1. 604332 1. 28621 1. 261555  
2. 685994 2. 845864 2. 006657 2. 605212 1. 775198 2. 237899 2. 971615 2. 083194 2. 802989  
9. 685656 9. 616442 10. 00127 10. 02085 9. 95009 10. 2939 9. 453234 9. 512557 9. 415593  
4. 926812 6. 17653 4. 854114 5. 295609 5. 755065 5. 825287 5. 31295 5. 665026 5. 567037  
3. 546645 3. 578242 2. 698113 2. 37789 3. 734528 2. 78107 2. 794964 3. 685435 3. 680978  
5. 312214 5. 200895 4. 746442 6. 44801 5. 742053 4. 341867 4. 587387 4. 992288 5. 17607  
2. 065105 2. 791471 1. 821924 2. 346544 1. 920462 1. 754841 2. 220386 2. 742493 2. 662754  
3. 973065 5. 42879 5. 277023 4. 807462 5. 707639 5. 518728 5. 19152 6. 323825 4. 949778  
4. 503029 4. 571758 4. 885788 5. 174286 5. 608563 5. 023737 5. 699916 5. 452919 5. 417974  
6. 578557 5. 762104 5. 581789 6. 111585 5. 38317 5. 20865 5. 964879 5. 956166 5. 678845  
4. 49594 4. 547972 4. 914568 5. 277806 6. 084161 5. 444857 4. 818242 4. 955856 5. 254165  
2. 093403 2. 264969 2. 484107 2. 168227 2. 864191 1. 991266 3. 196636 2. 116328 2. 788122  
2. 431143 2. 430434 2. 863542 3. 062207 2. 423758 2. 733869 2. 526426 2. 401595 2. 15285  
1. 62193 1. 727104 1. 934277 1. 94166 1. 802093 2. 315742 2. 921307 2. 895394 2. 817546  
6. 37435 6. 934759 6. 657722 7. 845319 7. 016812 7. 673689 7. 281413 7. 671198 6. 96517  
6. 785825 6. 656657 6. 767589 6. 69097 6. 863036 6. 175119 5. 654368 6. 50119 6. 795409  
4. 382597 5. 168516 6. 939793 5. 022468 5. 614634 5. 750706 5. 63028 3. 05844 5. 675522  
3. 911811 5. 67902 4. 555351 5. 786174 6. 272035 4. 996099 4. 895702 4. 976364 5. 249879  
4. 211801 3. 759845 3. 635386 3. 248827 5. 286663 4. 998867 4. 645988 4. 323034 4. 579  
3. 428296 3. 585356 3. 134195 2. 731568 2. 587186 3. 228726 3. 400071 3. 219939 3. 206537  
6. 739728 7. 104426 7. 472053 7. 804257 7. 757608 7. 175442 7. 018565 7. 84408 7. 457107  
9. 247444 9. 19805 9. 159276 8. 588412 8. 653915 8. 887746 8. 739532 8. 699383 9. 528941  
7. 16844 6. 950748 6. 867588 6. 84318 6. 718926 7. 055854 6. 899907 6. 092746 6. 968261  
4. 356154 4. 570429 3. 427178 5. 01475 3. 744751 4. 681284 3. 098224 3. 81589 2. 777933  
6. 265343 6. 633408 6. 15481 6. 547999 6. 532302 6. 218066 6. 02249 5. 926895 6. 344013  
5. 887442 5. 934419 5. 711425 6. 606127 6. 896148 5. 657242 6. 824848 6. 565193 6. 445117  
2. 16915 2. 679169 2. 164557 2. 513714 2. 610339 2. 280779 3. 340981 2. 664867 2. 41105  
5. 54862 6. 637323 6. 476874 6. 526905 6. 202971 5. 814174 5. 924351 6. 700389 6. 573925  
5. 24397 5. 626929 4. 911805 5. 133435 5. 757496 5. 541262 4. 827584 4. 890161 5. 213609  
6. 503037 6. 185897 6. 652724 6. 217191 6. 210549 6. 434487 6. 290174 5. 708518 5. 987986  
1. 611364 1. 330161 2. 105795 2. 109483 2. 389397 2. 103454 2. 938463 2. 376206 2. 855759  
4. 053726 4. 591194 4. 896115 4. 792167 4. 477698 4. 151922 4. 392578 4. 265178 4. 563958  
7. 688254 7. 950122 7. 671739 7. 819128 8. 195479 7. 348622 7. 930481 7. 932294 7. 933046  
7. 093381 7. 642567 7. 384901 8. 248091 7. 649879 8. 051959 7. 117921 7. 643749 7. 758111  
2. 765369 1. 780814 2. 66283 2. 278407 2. 325174 2. 598777 2. 522368 3. 205835 2. 187948  
5. 870629 5. 47308 5. 928462 5. 636534 6. 217229 6. 264915 5. 959276 5. 666115 6. 275569  
7. 088896 8. 226972 8. 080005 8. 09636 8. 258735 8. 291808 7. 660896 8. 605891 8. 126982  
5. 211274 4. 91472 4. 743811 5. 430213 4. 275936 5. 354959 4. 761033 4. 972727 4. 180253  
6. 839783 7. 527604 7. 533278 7. 429019 7. 515231 7. 133137 7. 622962 7. 442376 7. 450868  
3. 502737 3. 464278 3. 633335 2. 977973 3. 483699 3. 162665 3. 520799 2. 657217 3. 000773  
7. 103038 7. 043686 6. 543011 7. 336544 6. 835912 6. 843939 6. 833652 6. 708241 6. 802441  
2. 769278 2. 24849 2. 907578 2. 611806 3. 151117 3. 155064 3. 034677 3. 521326 2. 611422  
8. 785328 9. 343905 9. 227487 9. 454864 9. 541402 9. 283117 9. 536949 9. 369561 9. 091672  
5. 037307 2. 924438 3. 944834 3. 742918 3. 144561 4. 330996 4. 151957 3. 955101 4. 245759  
5. 066617 5. 034726 5. 48518 4. 862006 4. 526437 5. 680401 5. 386158 6. 670378 5. 074165  
3. 186967 4. 213021 3. 492105 4. 527832 3. 62848 4. 078303 3. 570369 3. 363409 3. 570907  
5. 011347 6. 023238 5. 383838 5. 919904 6. 105696 5. 143031 5. 878107 5. 845921 5. 757038

1. 922787 1. 851865 1. 610744 1. 833924 2. 795719 2. 272729 2. 126858 2. 000365 2. 320263  
3. 705014 4. 361153 4. 128972 4. 257647 3. 957239 4. 310441 4. 117717 4. 557817 3. 857085  
2. 832519 3. 120024 4. 189385 3. 841964 3. 777617 3. 706465 3. 852511 4. 021181 3. 50056  
3. 508742 3. 383362 3. 471035 3. 3536 2. 57348 3. 499781 3. 227531 3. 097568 3. 190297  
3. 755688 5. 561244 5. 148969 4. 750062 5. 110845 4. 886593 4. 739392 4. 955351 4. 750117  
2. 900134 3. 363407 2. 788911 2. 906027 3. 2112 3. 426058 3. 766234 2. 859119 3. 187388  
4. 946408 5. 72422 5. 042647 4. 907887 5. 41062 6. 088629 5. 003526 5. 601805 4. 914976  
6. 809901 6. 434929 6. 102838 6. 566335 6. 50294 6. 329116 6. 128353 5. 685534 6. 284293  
4. 811837 3. 689339 3. 920615 3. 8347 3. 518762 3. 588321 3. 237705 2. 969449 4. 347372  
5. 081467 5. 617811 5. 454032 5. 323588 5. 96456 5. 612797 4. 860761 5. 818753 5. 511867  
5. 021949 5. 730382 5. 864983 5. 484129 5. 732043 7. 18703 5. 584194 5. 821378 5. 836392  
6. 810617 6. 595086 6. 194746 5. 822686 6. 490814 6. 30067 6. 250759 6. 73517 6. 51792  
3. 024197 3. 177959 2. 780924 2. 436138 2. 912303 3. 041565 3. 698891 3. 087843 2. 561336  
4. 819011 4. 162312 4. 029288 4. 338078 4. 473255 3. 8773 4. 796457 4. 135034 4. 287106  
2. 190854 2. 51701 2. 663792 3. 241298 3. 689031 2. 826585 2. 972469 2. 674306 2. 91225  
4. 307543 6. 308347 5. 64986 3. 616809 3. 430874 3. 662292 4. 367744 5. 637205 6. 101395  
7. 50101 7. 976419 7. 907055 8. 013041 8. 377153 8. 224848 7. 570805 8. 000729 7. 967422  
0. 941177 0. 876284 0. 815423 1. 248222 1. 011493 0. 843342 0. 729324 1. 085714 1. 052675  
5. 156506 5. 404312 5. 550278 5. 491501 5. 099328 5. 393006 4. 913114 5. 636498 5. 298642  
1. 359198 0. 847721 0. 924118 0. 875927 1. 468733 0. 696371 0. 909518 1. 36575 2. 387584  
7. 017375 6. 276741 6. 355861 6. 625814 6. 742809 6. 92064 6. 755018 6. 508444 7. 569552  
7. 507191 7. 712642 8. 092543 7. 128505 7. 014479 6. 944622 6. 827423 7. 201588 7. 537171  
1. 773898 2. 320947 2. 714147 1. 966803 1. 156233 2. 036131 2. 253682 1. 619154 1. 751375  
6. 437271 6. 134785 6. 007138 5. 91963 6. 268242 6. 035765 6. 223984 6. 064037 6. 103184  
11. 82181 12. 05175 12. 13064 12. 15122 12. 03361 12. 07097 11. 80012 11. 89313 12. 1361  
4. 381108 2. 74186 2. 325407 2. 69471 3. 203103 3. 40376 2. 428967 2. 869633 2. 821641  
5. 308128 5. 043904 4. 89683 4. 84081 5. 563628 5. 037661 5. 127501 5. 617651 4. 940065  
4. 011053 3. 85452 4. 645299 5. 386161 5. 202322 5. 227544 4. 898692 5. 396699 4. 46472  
2. 802709 3. 925315 3. 491664 4. 457287 4. 093273 3. 18208 3. 382948 3. 830054 3. 357813  
3. 847135 2. 558742 3. 367261 2. 817284 3. 156609 2. 892374 3. 940073 3. 050726 3. 54852  
3. 091004 2. 972184 2. 903684 4. 195574 3. 378241 2. 976828 4. 251001 3. 645383 3. 209716  
4. 544819 4. 432789 5. 522717 6. 076793 5. 148141 6. 382374 3. 784763 6. 231954 4. 756267  
3. 653781 4. 429854 3. 924317 3. 363454 4. 566678 4. 567027 3. 524257 3. 64705 4. 716535  
6. 208066 6. 619367 6. 893541 5. 561983 5. 508292 6. 22823 5. 504623 5. 581007 5. 47095  
1. 750636 1. 464932 1. 802365 1. 284242 1. 353416 1. 713479 2. 620669 2. 002198 1. 750599  
3. 676323 2. 548694 2. 695024 2. 913161 2. 839383 2. 826327 1. 960504 2. 089345 3. 314798  
4. 412534 3. 204524 2. 754583 3. 406705 3. 149307 3. 116316 3. 698061 2. 648255 3. 559163  
1. 93892 2. 701603 1. 941958 3. 18708 2. 392482 2. 142523 1. 977269 2. 375953 2. 013318  
7. 068756 7. 868871 7. 81464 7. 423085 7. 751671 8. 24352 6. 895111 8. 063779 7. 554208  
4. 922748 3. 827758 5. 422005 4. 189627 4. 102044 4. 256306 5. 077482 4. 629783 4. 184463  
1. 466478 1. 03472 1. 276238 1. 737988 1. 273833 1. 874461 0. 869356 1. 185889 0. 998804  
2. 406147 1. 642161 2. 126222 1. 851683 1. 502691 1. 496788 2. 380543 1. 942398 1. 984737  
5. 958736 6. 684701 6. 514294 6. 605867 6. 665944 6. 242313 6. 372356 6. 298526 6. 439056  
5. 048195 5. 71224 5. 099201 6. 22024 5. 589592 5. 75882 5. 676993 5. 635256 5. 519057  
2. 935057 4. 304704 3. 299511 4. 57282 4. 032776 2. 648674 2. 995977 4. 521608 4. 420606  
8. 017453 5. 950019 6. 46036 6. 041178 6. 434745 5. 82379 6. 719381 5. 970366 7. 990596  
4. 945952 5. 971669 5. 660337 4. 947818 4. 427819 5. 107023 5. 156085 5. 130362 5. 161003  
2. 508212 3. 793373 3. 229328 4. 229909 3. 669072 3. 278358 2. 258287 3. 020486 2. 634098  
8. 27169 8. 65971 8. 706124 8. 482762 8. 934893 8. 029174 8. 574246 9. 036268 8. 52294  
1. 85354 1. 680835 1. 431469 1. 881906 2. 276475 1. 447979 1. 543389 1. 631814 1. 719584  
1. 462889 1. 351507 1. 429695 1. 273244 1. 332643 1. 198416 1. 339559 1. 22656 1. 439685

3.243915 2.028223 2.071912 2.169325 2.438584 2.059689 2.318262 2.371613 2.32353  
2.120504 2.112907 2.515829 3.372521 1.64014 3.142477 2.135201 2.134592 2.250799  
2.234553 1.842033 2.290672 2.52552 2.650834 1.808995 2.246949 2.297643 1.839848  
1.25138 1.441376 0.713755 0.957237 1.065385 1.065631 0.939749 1.263187 0.779617  
0.865901 0.882117 0.723948 0.910756 1.042684 1.567917 1.339105 0.663582 1.045902  
0.606683 0.980992 0.658202 0.883027 0.799017 0.88221 2.0948 1.078114 1.043985  
0.848958 1.463666 1.303366 0.784567 0.610306 0.971036 0.665918 0.567538 0.919512  
2.72673 3.142432 2.489002 2.633705 2.799013 2.711007 3.409885 2.943415 3.347565  
1.881616 2.622311 1.533251 1.414284 1.951408 1.717245 1.725713 1.745423 1.502174  
8.272971 8.80395 8.478564 8.723902 8.909825 7.698718 8.255286 8.810981 8.488771  
3.685691 2.626529 1.535234 1.407252 1.270656 1.684022 4.04083 1.06964 1.106358  
6.808012 7.230891 7.238178 6.523041 6.779082 6.610431 6.66944 6.857996 6.962995  
1.753431 1.744227 1.815924 1.861114 2.253658 1.263754 3.090534 2.185762 1.55268  
6.072039 4.399892 5.014792 3.676304 4.828267 3.475284 4.123264 4.131087 5.676139  
5.307718 5.142259 5.487568 4.870627 4.779944 4.22694 4.775836 4.911556 4.522956  
2.617313 2.102863 2.634432 2.019624 2.000849 2.156211 2.384247 2.408248 2.26862  
3.560544 3.92624 3.741672 3.129508 3.76742 3.056402 3.46634 3.992987 4.152672  
5.508744 5.748251 7.464803 7.980005 3.756898 5.897031 6.45992 5.078489 6.497837  
5.752959 6.277105 5.353351 6.081493 6.826799 6.42617 5.951491 6.207281 6.374516  
7.742297 8.133908 8.410229 8.343028 8.408531 8.114386 8.395212 8.530288 8.516474  
4.991577 5.417598 4.906313 4.804342 4.512959 4.88852 4.566765 6.143655 5.568142  
5.749774 4.552379 4.587452 4.049096 4.463474 4.320172 4.855909 4.385283 4.561921  
2.384201 2.572094 2.763287 2.057649 1.436605 4.067699 1.813014 4.092657 1.107284  
2.1017 1.299406 0.519285 0.945219 1.288256 0.557762 1.228214 1.554206 0.734238  
4.765308 5.116031 4.142214 4.454121 4.887918 6.190053 5.129577 3.218733 4.870717  
3.677877 3.737781 3.786408 4.030486 4.843925 3.35211 4.988503 4.3779 4.183504  
2.828142 2.050703 4.252041 1.900771 2.267959 2.526419 1.853904 2.120777 2.707755  
2.736914 2.478734 2.311232 3.3704 3.58897 2.153842 2.615633 3.027999 2.311418  
2.422059 2.031135 1.637037 1.285943 0.860074 1.468588 1.902589 3.117895 2.588925  
1.124171 1.076065 0.988844 1.342328 1.245976 1.156862 1.006337 0.956623 1.381986  
1.516106 0.86875 0.960453 1.429815 1.372145 1.371241 0.820142 1.059013 1.145863  
1.118749 1.010323 1.066349 1.143635 1.901035 1.100114 0.950338 1.38884 1.04091  
1.510654 1.352592 1.394039 1.487719 1.433823 1.879409 1.461377 1.00725 1.366761  
1.705378 1.20565 2.049497 1.985 1.533184 1.857404 1.689322 1.739849 1.940628  
3.885285 3.731742 3.043595 2.932324 3.09986 2.578009 3.536227 2.476384 3.591424  
2.934201 3.306808 3.304152 3.226303 3.082835 3.296864 3.357995 2.632914 2.596921  
0.860649 1.084221 0.922222 0.859473 0.786321 1.073577 0.939446 1.088159 0.919908  
0.898742 1.199257 0.761656 1.131664 1.052674 0.676108 1.043944 0.749784 0.971884  
1.303018 0.994632 1.087784 0.914969 1.480504 0.767276 1.546841 1.146349 0.909972  
1.414526 1.326175 1.414512 1.218062 1.618032 1.815133 2.26081 1.348607 2.975468  
1.42492 1.753215 1.167608 1.139589 1.396268 1.428913 1.632983 2.108849 1.37349  
1.225145 1.909618 1.450111 1.463504 1.050981 1.084398 1.490495 1.284143 1.007309  
1.280303 0.923243 1.029708 0.678972 1.378208 1.393824 1.185523 1.438378 1.410522  
1.215524 1.392665 1.38142 1.352207 3.658561 1.238618 1.639111 1.519746 2.201339  
1.396499 1.385704 0.779462 1.148621 0.978674 0.958675 1.201244 1.253611 0.939719  
0.982652 0.738908 0.977181 0.982345 1.027779 1.051151 1.069435 1.240759 0.862423  
1.166994 0.969965 1.053267 1.082851 1.203331 1.058242 1.837111 1.439924 1.11087  
2.202295 3.195179 3.093906 2.168673 3.313199 2.924035 2.890825 3.180813 2.546471  
1.321601 1.412193 0.925072 1.40221 0.982233 1.113655 1.737403 1.298961 1.144853  
1.18028 1.859488 0.811948 0.882939 1.402172 1.374682 1.227957 1.162879 0.987882  
2.963989 2.42938 2.165997 2.854342 3.60206 2.714773 3.087287 4.115135 2.740616



1. 561121 1. 778589 1. 484624 1. 944245 1. 992367 1. 83856 2. 211356 1. 277622 1. 177266  
3. 725485 4. 137172 3. 727305 2. 898345 3. 076642 3. 592142 2. 613316 3. 797793 3. 379676  
1. 739444 1. 73348 1. 061247 1. 973017 1. 233117 1. 284664 1. 311669 0. 788533 1. 233117  
2. 138794 1. 435631 1. 387728 2. 192272 1. 139597 1. 534069 2. 604316 1. 239262 2. 830258  
1. 388384 0. 908679 0. 610321 1. 108118 0. 709524 0. 750288 0. 885255 0. 901136 1. 021017  
2. 867918 3. 084489 3. 72584 3. 524036 3. 615207 3. 74045 3. 509873 3. 521302 3. 740455  
1. 251317 0. 531688 0. 692539 0. 783932 0. 820004 1. 158371 1. 450395 0. 987124 0. 706356  
2. 284213 1. 044849 1. 017411 1. 902701 1. 387497 1. 180291 1. 226973 1. 118629 2. 254852  
1. 578464 1. 435869 1. 263754 1. 052743 0. 840844 1. 230223 0. 848683 0. 921285 1. 046978  
0. 959584 0. 856761 0. 59178 0. 886828 1. 264345 1. 048554 0. 908882 0. 747964 1. 065987  
6. 557174 6. 320084 6. 306844 6. 427574 5. 836055 5. 696343 5. 627953 6. 051001 6. 193071  
1. 217853 0. 616924 0. 926247 0. 740772 1. 541943 1. 022155 1. 34406 0. 558493 1. 174356  
0. 789016 1. 140704 1. 078238 1. 930498 1. 667756 1. 170148 1. 031213 2. 141849 1. 189458  
1. 145655 0. 796207 1. 044475 0. 840752 0. 669007 1. 283995 0. 927261 0. 92253 0. 836846  
1. 761747 1. 953276 2. 979188 1. 662565 1. 757294 1. 316541 3. 238683 2. 029136 2. 261945  
0. 96495 0. 819047 1. 209689 1. 623648 0. 659199 0. 713985 0. 858804 0. 726234 1. 256674  
1. 373493 1. 006266 0. 709454 1. 08958 0. 979913 0. 740045 0. 809216 1. 220669 1. 186526  
1. 121432 0. 89986 2. 810508 0. 760885 0. 682724 1. 203024 1. 403555 1. 516383 0. 836764  
1. 322731 1. 466683 1. 332594 1. 237917 2. 267239 1. 718793 1. 192957 1. 044798 1. 823907  
1. 321944 1. 170352 1. 445348 1. 427131 1. 535229 1. 837345 1. 362045 1. 92315 1. 017242  
9. 325707 10. 03294 10. 04471 10. 28067 9. 790115 10. 0441 9. 868876 10. 31437 9. 832113  
2. 20093 1. 692875 1. 866841 1. 697629 2. 428098 1. 511226 2. 839688 2. 10225 3. 03183  
0. 947025 1. 132057 1. 320664 2. 194155 1. 169344 1. 347185 1. 393048 1. 308401 1. 649669  
3. 008805 1. 293857 0. 813712 0. 631069 1. 423789 1. 650729 0. 854319 0. 34487 0. 912029  
1. 01905 1. 134803 1. 037895 1. 391819 0. 82033 0. 969922 1. 111563 1. 360146 0. 757545  
1. 256824 1. 461986 1. 482967 2. 262806 1. 622548 1. 657865 1. 77431 1. 538169 1. 732301  
0. 649946 0. 854838 0. 852918 0. 86465 1. 493373 1. 110199 0. 567663 0. 89156 1. 707346  
1. 468146 1. 386458 1. 357348 2. 014247 1. 952719 1. 802816 2. 569038 2. 261378 2. 387539  
6. 222351 6. 445917 6. 071419 6. 338833 6. 362462 6. 289917 6. 597438 6. 164557 6. 177188  
1. 640887 0. 94932 1. 203913 0. 700808 2. 209727 1. 148046 0. 860258 0. 699978 1. 113237  
1. 73177 1. 97112 2. 944956 0. 471766 1. 453003 2. 316303 1. 922966 1. 402591 1. 464164  
0. 503057 1. 095907 0. 608733 0. 979636 1. 255901 1. 207293 1. 366804 0. 711335 1. 039152  
1. 553479 1. 205241 1. 365173 2. 747477 0. 702335 0. 985088 0. 87041 1. 133861 0. 618574  
1. 934134 2. 059325 2. 446956 1. 655227 1. 999373 1. 416935 2. 276798 1. 86027 3. 048631  
2. 149052 1. 195049 0. 863703 0. 97857 1. 660942 1. 137396 1. 086883 0. 886202 1. 035902  
0. 764385 0. 936793 0. 976139 0. 906575 0. 734593 1. 39511 1. 279512 1. 486856 1. 393473  
0. 711499 0. 631448 0. 49183 1. 535221 1. 0826 0. 754197 1. 165336 1. 932234 0. 508133  
1. 81262 1. 841773 0. 979287 1. 970775 1. 384635 0. 828646 3. 549736 0. 823259 3. 364081  
2. 930266 0. 416313 1. 015557 0. 540788 1. 539816 0. 558328 3. 221443 0. 557971 2. 097926  
2. 380061 1. 932028 2. 614373 2. 253732 1. 430407 2. 625862 2. 837386 1. 688361 2. 100849  
2. 513747 3. 226766 2. 509429 2. 611387 2. 707943 4. 124645 3. 483562 3. 369065 4. 233769  
2. 941118 1. 937223 2. 151377 2. 205064 2. 250862 1. 647673 2. 379383 2. 204143 1. 95151  
3. 095485 1. 078411 2. 973574 2. 063736 1. 140633 1. 67794 1. 230941 1. 873468 1. 489209  
1. 530985 2. 888274 1. 192885 2. 168349 1. 427075 2. 188555 1. 940566 2. 58508 1. 541681  
2. 63604 2. 578861 2. 610972 2. 237078 2. 149435 2. 398795 2. 586351 1. 655573 3. 226849  
1. 517029 1. 166996 1. 024004 2. 4354 1. 008163 1. 710351 0. 854841 0. 959714 1. 358364  
2. 453539 2. 725928 2. 416469 1. 751029 1. 263808 4. 272459 1. 947353 3. 01004 1. 591543  
1. 774826 2. 450924 1. 999882 2. 508465 1. 937349 2. 171953 2. 141865 2. 400687 2. 318714  
2. 560555 1. 206679 2. 204916 1. 618628 1. 926265 3. 806101 2. 11335 1. 336845 1. 050209  
4. 249344 2. 578277 2. 815872 2. 261777 3. 409104 2. 808254 3. 383959 3. 339849 1. 415197  
1. 279826 1. 633297 0. 64916 0. 881052 1. 489614 0. 999528 1. 413343 1. 31394 1. 401433

1. 228893 0. 999637 2. 304535 0. 993323 1. 884541 0. 879073 0. 835958 0. 562608 0. 985117  
1. 911258 0. 862706 1. 971015 1. 031966 1. 206384 1. 041767 2. 399833 0. 940721 1. 076037  
0. 921117 0. 910522 1. 015215 1. 013818 0. 886661 1. 339855 1. 012395 1. 005956 1. 120468  
5. 7004 6. 373696 5. 570009 6. 187975 6. 092485 5. 577522 5. 132341 6. 017484 5. 124854  
1. 173819 1. 201448 1. 681182 1. 183817 1. 769912 1. 937729 1. 719343 2. 007158 1. 704288  
0. 995496 0. 754533 1. 227206 0. 982042 1. 209238 1. 056392 1. 599737 1. 328773 2. 205347  
2. 294463 2. 482343 2. 681617 2. 803455 2. 095659 2. 02843 2. 516401 2. 03762 2. 8902  
4. 567592 4. 125256 4. 418882 4. 921069 3. 985542 4. 756359 3. 816417 4. 481921 4. 302923  
6. 785112 6. 890558 6. 741467 6. 861947 7. 233418 6. 69567 6. 75301 7. 361024 6. 269162  
7. 218087 6. 865829 7. 021345 6. 686528 6. 903233 7. 21861 6. 224389 7. 218353 7. 096348  
7. 641351 7. 896525 8. 123873 8. 04126 8. 077233 8. 527101 7. 71796 7. 64833 7. 68487  
9. 016045 9. 324811 9. 36336 8. 879225 9. 172249 8. 538718 8. 764097 9. 542456 9. 248954  
5. 509206 5. 109077 5. 717075 4. 325027 4. 721098 5. 635408 4. 228527 6. 071455 5. 307549  
5. 366208 4. 16606 4. 380032 5. 130549 5. 691617 4. 216048 4. 827364 4. 420537 5. 684285  
5. 574341 5. 167496 5. 160694 4. 73207 6. 292125 6. 244214 5. 171086 5. 346578 5. 836077  
1. 857502 2. 286854 2. 786627 2. 537382 2. 826165 3. 193832 2. 693485 4. 630608 5. 029785  
2. 731681 3. 503742 2. 077492 3. 957953 3. 808498 2. 869606 2. 601824 2. 97959 2. 934856  
6. 978932 7. 321601 7. 42116 7. 34636 7. 043669 7. 297697 7. 373061 6. 778364 7. 178401  
2. 252695 3. 560323 2. 197679 2. 705943 3. 487777 2. 555937 2. 687784 3. 508396 3. 673955  
1. 839796 2. 071859 1. 281033 1. 852311 1. 30431 1. 759199 1. 872515 1. 516896 2. 350708  
2. 008352 2. 049626 1. 850129 1. 988213 1. 933976 1. 608405 2. 087968 2. 157006 2. 000581  
2. 73339 2. 169906 1. 808634 2. 215813 1. 910329 2. 611723 3. 022475 1. 750436 1. 421736  
6. 01267 6. 187392 6. 581075 5. 865534 6. 21767 5. 873585 5. 60126 6. 598828 6. 231809  
2. 089988 2. 066531 1. 469503 1. 721862 1. 161746 1. 347475 1. 167515 0. 94031 1. 696415  
5. 879004 5. 502784 5. 174251 5. 344644 5. 483087 5. 328133 4. 829291 5. 913903 5. 48423  
4. 986786 4. 635071 4. 930909 5. 158329 4. 425981 5. 253561 4. 821612 4. 418333 4. 56068  
5. 140173 4. 405872 3. 781733 5. 114175 3. 985369 3. 321037 3. 975115 7. 075278 5. 913903  
2. 176288 2. 104873 2. 188676 1. 904532 1. 977298 2. 348456 2. 154347 2. 178565 2. 421563  
2. 916857 2. 019964 2. 904025 2. 3612 2. 113037 2. 546999 2. 580737 2. 532488 2. 587976  
4. 777605 5. 228697 5. 169222 6. 280585 5. 849369 5. 14842 5. 44669 4. 066239 5. 688397  
5. 060771 5. 708332 5. 297971 6. 073553 5. 630755 5. 465932 5. 166634 6. 488499 5. 884369  
5. 571573 5. 707187 5. 93861 6. 546481 5. 951169 6. 632816 5. 38134 6. 214401 5. 555777  
7. 122186 7. 410563 7. 422898 7. 500173 7. 386555 7. 31553 7. 174534 7. 473739 7. 345688  
5. 047625 6. 38527 5. 929713 6. 00739 6. 130156 5. 829501 6. 202645 6. 038154 6. 308842  
1. 724544 1. 392766 1. 587179 2. 237306 1. 580147 1. 688009 1. 766057 1. 590722 1. 648594  
3. 810782 4. 680329 3. 780058 3. 767736 4. 733046 4. 902568 3. 745703 4. 883219 3. 857468  
4. 955313 5. 330818 4. 805083 3. 965998 5. 347441 5. 277949 4. 378257 4. 89653 4. 724935  
5. 295762 5. 438465 4. 682925 3. 551415 4. 803921 4. 833137 4. 502168 5. 702798 5. 013364  
8. 482756 8. 305189 8. 001579 8. 506042 8. 245317 8. 25979 7. 855199 8. 566172 8. 021875  
5. 034937 6. 241321 5. 610316 5. 209922 5. 161883 5. 716361 4. 733191 4. 985366 5. 316712  
2. 667762 1. 938043 1. 670489 2. 552229 1. 975516 2. 101957 1. 610026 1. 935553 2. 558661  
7. 399076 6. 947442 6. 983847 7. 048647 7. 012371 7. 147983 6. 435038 7. 094879 6. 577044  
9. 339273 9. 290191 8. 462977 9. 960501 9. 444669 9. 671606 9. 329482 8. 820639 9. 467237  
4. 707975 6. 062394 5. 153035 5. 781837 6. 158003 5. 945067 5. 506047 5. 730002 5. 256594  
2. 441933 2. 352303 1. 797721 1. 352515 2. 234276 1. 213454 2. 390406 1. 551593 1. 095632  
5. 794591 5. 598985 5. 341437 5. 975096 4. 978986 5. 19011 5. 851468 5. 01873 5. 653228  
3. 061742 1. 265987 1. 749448 1. 553204 2. 105768 1. 934313 1. 477307 1. 839899 1. 86663  
7. 212802 6. 974738 7. 14807 7. 463917 7. 307087 7. 286632 6. 880212 7. 161001 7. 225055  
2. 210381 1. 050054 3. 752126 2. 471998 2. 097625 2. 970282 0. 918899 1. 754921 1. 794241  
2. 34508 2. 162507 2. 025317 1. 614402 2. 282933 1. 959606 1. 716099 1. 475028 2. 347413  
3. 609557 3. 65523 3. 400312 3. 223944 3. 407029 3. 830767 3. 557375 3. 747226 3. 119992

2. 527843 2. 216763 2. 089926 2. 172867 2. 496683 2. 043677 2. 341694 2. 273371 2. 224193  
4. 38804 5. 823124 5. 627744 6. 071849 5. 534788 6. 522499 5. 387437 5. 68038 5. 751952  
4. 431775 5. 834766 6. 089661 5. 926803 5. 822024 5. 971314 4. 892559 5. 782631 5. 593683  
4. 5777 4. 688446 4. 778163 4. 248852 4. 738587 4. 024515 4. 525601 4. 620253 4. 599756  
5. 392853 5. 861001 5. 85626 5. 809256 5. 403336 5. 518615 5. 652891 4. 78758 5. 625927  
5. 82092 6. 092217 5. 700853 5. 781907 6. 22781 6. 279079 6. 446578 5. 787143 5. 870001  
5. 318591 5. 550561 5. 251279 4. 876981 5. 520241 5. 922762 5. 398908 5. 595017 5. 071749  
2. 003985 1. 60876 1. 674911 1. 349192 2. 246083 1. 78958 1. 332883 2. 04743 1. 433909  
6. 440171 6. 134162 5. 786042 6. 931407 6. 439745 7. 059054 6. 443488 6. 356921 6. 028042  
6. 607696 6. 814829 6. 730692 7. 876377 7. 4189 7. 527064 7. 191836 6. 530406 7. 168748  
9. 390081 9. 654484 9. 5142 9. 568218 9. 779215 9. 611863 9. 330133 9. 627035 9. 576956  
3. 186699 3. 537338 3. 352933 3. 449048 3. 751636 3. 101677 3. 182846 3. 704248 3. 435702  
6. 551701 7. 638537 7. 281604 8. 298251 7. 570382 7. 929337 7. 557003 7. 036133 7. 717585  
3. 535613 4. 34583 4. 125121 4. 518005 4. 861989 5. 085851 3. 208598 4. 020214 4. 681781  
7. 440184 7. 532745 7. 607549 7. 447035 7. 639296 7. 684573 7. 097528 7. 939294 7. 779998  
3. 204731 3. 416549 1. 932863 3. 303638 3. 570329 2. 744706 3. 453927 2. 508364 3. 072654  
2. 504021 1. 753063 2. 526807 2. 419169 2. 077179 2. 219923 2. 591497 2. 171531 2. 137667  
1. 485611 1. 724008 2. 001565 1. 441271 2. 232585 1. 730931 2. 13829 1. 949876 2. 249768  
2. 036989 1. 709133 2. 043715 1. 737786 1. 960053 1. 835811 2. 393823 1. 250185 2. 068982  
2. 048073 2. 11106 2. 565825 1. 894068 2. 28661 2. 828746 2. 555454 1. 96531 2. 170648  
3. 323958 2. 322971 2. 22382 2. 842977 2. 465578 2. 793769 1. 873166 2. 392566 2. 330087  
5. 423231 5. 933661 6. 256472 5. 475594 5. 330711 5. 462136 4. 711169 4. 941781 4. 560721  
7. 404905 7. 338173 7. 482069 7. 221952 7. 151379 7. 040648 6. 825098 7. 93156 7. 451577  
5. 511917 5. 999175 5. 819871 5. 766515 5. 980677 6. 199705 6. 117502 6. 03418 6. 108267  
7. 831371 8. 291669 8. 270638 8. 05613 8. 351059 8. 192699 7. 332023 8. 331789 8. 008811  
1. 658724 1. 869606 1. 823351 2. 116661 2. 08518 3. 590001 2. 289073 1. 851405 2. 486036  
4. 630299 5. 206934 5. 066162 5. 131462 6. 164611 5. 320137 5. 004642 4. 814913 5. 281696  
1. 573969 1. 910575 2. 364855 1. 690289 1. 472723 2. 065536 1. 944637 2. 141182 2. 333176  
4. 041325 3. 840333 4. 600422 3. 245803 3. 987779 3. 841555 2. 991436 4. 152015 3. 64875  
5. 107095 5. 197647 5. 813354 4. 858635 5. 87768 5. 480613 5. 139381 5. 628861 5. 322738  
2. 600885 2. 554787 2. 781796 2. 638397 2. 842921 2. 684963 3. 097594 2. 058725 3. 085443  
2. 586885 1. 715634 1. 56486 1. 592095 1. 76915 2. 229201 2. 675427 1. 770442 1. 606621  
4. 621309 5. 399041 5. 78831 5. 859251 5. 038318 6. 871853 5. 601316 5. 646381 5. 43438  
8. 841348 7. 765194 8. 197334 7. 758491 8. 194775 7. 391684 7. 059999 8. 237665 8. 319242  
3. 562294 4. 182666 4. 836265 5. 058734 3. 200977 4. 201236 3. 949299 3. 89054 4. 3972  
5. 533734 5. 32768 4. 982174 5. 197525 5. 448366 4. 75272 4. 902686 5. 826352 5. 171749  
5. 748225 5. 215325 5. 002234 5. 436092 5. 138346 4. 861688 3. 636039 5. 524588 5. 135734  
3. 08424 4. 394949 4. 567294 5. 111879 3. 447279 3. 863963 4. 61427 4. 392014 4. 627284  
3. 199198 3. 354338 2. 681398 2. 945511 3. 001264 2. 401048 3. 342491 3. 168103 3. 146992  
4. 084299 4. 040116 4. 18519 4. 577838 3. 698483 4. 924894 5. 106944 4. 088114 3. 77052  
6. 149488 7. 220725 7. 042471 7. 687214 6. 954956 7. 191701 6. 699607 7. 15475 7. 033605  
5. 196446 4. 540381 4. 743022 4. 565577 4. 267136 4. 86943 4. 333129 4. 494991 4. 733746  
3. 811984 4. 162253 4. 12433 4. 576125 4. 049734 4. 315431 3. 574121 4. 0171 4. 565287  
1. 264023 1. 277759 1. 240836 1. 686476 1. 525544 1. 529144 1. 193378 1. 411878 2. 219803  
4. 141727 4. 155819 3. 646226 5. 420833 2. 67128 4. 56891 2. 870602 2. 690232 3. 889995  
7. 339812 7. 406711 7. 161602 7. 566048 7. 65744 7. 604032 5. 852167 5. 966821 7. 383855  
3. 28511 3. 421865 2. 519001 2. 714265 2. 677664 3. 080284 2. 798258 2. 820052 2. 962669  
2. 890941 2. 396451 3. 087355 2. 688997 3. 150479 3. 41928 2. 652846 2. 585348 3. 422424  
5. 013281 5. 888611 5. 042848 5. 294253 4. 812005 5. 165034 5. 247497 4. 572765 4. 380614  
7. 134306 7. 125672 7. 549838 7. 07814 6. 82735 7. 040364 6. 784231 7. 264494 7. 470515  
4. 681159 5. 243964 5. 190422 5. 672846 5. 377303 5. 599622 5. 244145 4. 627531 5. 694951

6. 403187 5. 844261 5. 926169 5. 601628 5. 953775 5. 952365 5. 683702 5. 510797 5. 237255  
2. 747929 3. 388381 3. 769924 3. 426279 3. 389111 4. 040087 3. 039505 2. 573756 3. 469313  
3. 038333 3. 738486 2. 728819 5. 250115 3. 122467 4. 908684 3. 96175 2. 784874 4. 344259  
4. 772495 5. 500588 5. 283612 5. 457367 5. 2204 5. 521884 5. 523476 5. 976142 5. 220228  
2. 843492 2. 938453 3. 27281 2. 753268 3. 47318 3. 455169 2. 405003 3. 916201 3. 534222  
5. 671293 5. 86879 6. 002898 5. 811453 5. 829703 6. 042764 6. 323428 5. 013441 6. 617305  
5. 306046 5. 604041 5. 553725 5. 763433 6. 642343 5. 263546 5. 672243 5. 305272 6. 008218  
4. 006396 3. 646749 3. 433225 4. 001273 2. 648455 3. 14516 4. 098737 3. 387786 4. 072207  
4. 702962 5. 412764 4. 532229 6. 177488 5. 862662 6. 006723 5. 924019 5. 354964 5. 718632  
3. 859592 3. 435339 2. 689995 3. 732708 2. 111519 2. 715431 3. 581771 2. 714827 3. 871497  
3. 32979 2. 129413 2. 926129 3. 48797 3. 505148 2. 781381 2. 88112 3. 784712 3. 444877  
3. 062635 4. 205525 2. 511307 3. 30325 2. 749131 2. 948788 2. 293209 2. 268542 3. 523078  
3. 673747 3. 008414 3. 095434 2. 871924 3. 421163 3. 496424 3. 473539 3. 500913 3. 036639  
4. 417567 3. 981893 4. 231286 4. 145487 4. 175084 3. 550924 2. 795164 3. 852391 3. 145473  
2. 158483 1. 334062 1. 550628 1. 994548 1. 780627 1. 583979 1. 786887 1. 383123 1. 763733  
4. 983046 5. 364716 5. 982687 5. 555728 5. 536586 5. 936317 5. 012259 5. 676505 5. 330565  
4. 127091 4. 430537 4. 509709 4. 949649 5. 201705 5. 038573 4. 654061 4. 011204 4. 870098  
3. 084751 2. 830023 2. 414348 2. 30063 2. 52895 2. 164308 2. 280046 2. 28396 2. 563603  
5. 493413 5. 535254 6. 23302 5. 943057 5. 911965 6. 231508 5. 391791 5. 7714 5. 660182  
5. 846685 6. 536775 6. 115125 6. 173467 6. 480213 6. 164572 5. 966365 6. 175323 6. 301922  
4. 56102 4. 518522 4. 722972 5. 106218 5. 228758 4. 803092 4. 809978 3. 949905 4. 172958  
2. 038498 2. 71402 2. 100455 2. 230349 1. 627825 2. 168404 2. 915401 2. 371635 2. 118061  
4. 991026 6. 040727 5. 790411 5. 470772 5. 502372 5. 989738 5. 314134 6. 491756 5. 317522  
4. 086693 5. 029913 4. 219355 4. 358578 5. 066318 4. 213629 3. 642363 4. 800537 5. 125464  
4. 768338 5. 42349 5. 963964 5. 547263 5. 879885 5. 891163 4. 843623 5. 031901 5. 589662  
3. 900919 5. 431813 5. 675675 5. 454285 4. 942949 5. 0446 4. 527095 5. 16705 5. 465711  
5. 928821 4. 85498 5. 396957 5. 479426 4. 206652 5. 117233 5. 1362 5. 092147 4. 803917  
4. 920731 4. 415774 4. 627512 5. 074706 4. 475117 4. 527384 4. 434952 4. 1422 3. 653337  
5. 500724 4. 627705 5. 127684 4. 709575 4. 511715 5. 13026 5. 016796 4. 031795 5. 042304  
2. 611622 2. 933061 2. 524508 1. 959544 2. 128861 2. 99987 2. 349919 2. 306435 2. 474047  
2. 070831 1. 49835 2. 629148 3. 136768 2. 797569 2. 865543 2. 940156 2. 375522 1. 884987  
3. 700065 2. 998632 3. 136074 2. 601842 3. 147754 3. 504305 2. 589974 2. 747867 3. 212179  
6. 397184 6. 833657 6. 861579 6. 404112 6. 588245 6. 785688 6. 317972 6. 46406 6. 321651  
2. 278848 1. 891969 2. 501047 2. 177845 2. 187356 2. 104773 2. 659865 2. 234848 1. 921913  
5. 45539 4. 983841 5. 462089 6. 059789 5. 673914 5. 031367 4. 942855 4. 493221 5. 588632  
6. 040529 6. 275421 6. 28317 6. 142445 5. 68089 6. 208544 6. 437375 6. 8247 5. 972712  
3. 079796 1. 821923 1. 991621 2. 29061 1. 756172 1. 517162 1. 815695 1. 980896 1. 781116  
4. 34326 2. 834332 2. 843427 3. 386734 5. 336938 3. 299608 3. 125502 2. 21931 4. 096469  
8. 831854 9. 062846 9. 007951 9. 084843 8. 737412 9. 104828 8. 864254 8. 861485 8. 823073  
6. 708871 7. 413621 6. 57422 8. 240377 7. 427048 7. 384774 7. 522384 7. 33211 7. 417091  
4. 831098 4. 483213 4. 717531 4. 750392 4. 884033 4. 686719 4. 585332 4. 602975 5. 065142  
5. 829779 5. 125262 5. 049583 5. 362747 5. 335001 6. 06636 5. 081656 5. 743563 5. 24152  
1. 488781 1. 39146 1. 898974 1. 126393 1. 819616 1. 53383 1. 603304 1. 858682 2. 116073  
3. 559417 2. 964051 2. 905521 2. 844321 3. 353082 3. 716571 3. 397736 3. 752099 3. 176731  
5. 912473 6. 451148 6. 397023 6. 366416 6. 684949 6. 766907 6. 231788 6. 659585 6. 904728  
2. 360048 1. 680768 2. 411602 2. 512131 1. 587997 2. 40102 1. 781917 1. 801286 1. 159642  
6. 160416 6. 876623 6. 412225 6. 273849 6. 429482 6. 799823 5. 866901 6. 74265 6. 230373  
5. 241234 4. 916897 5. 390373 4. 378815 5. 084015 5. 301626 5. 486708 4. 745351 5. 081683  
4. 711635 5. 158841 4. 978621 4. 964644 4. 904333 5. 811437 5. 105459 5. 095422 4. 937482  
6. 697486 6. 413403 7. 175264 7. 168129 7. 272874 7. 412545 7. 172649 6. 660263 5. 614157  
4. 039947 4. 572323 4. 860179 5. 902124 5. 152379 4. 588685 4. 634108 4. 039955 5. 455934

3. 546072 3. 05648 3. 225363 3. 066188 3. 428972 3. 054136 3. 965282 2. 476768 2. 462307  
4. 71191 3. 992592 4. 359365 3. 844007 3. 842304 4. 741698 3. 465875 4. 459216 4. 140976  
1. 730563 1. 105857 1. 388491 1. 452779 1. 323748 1. 511667 1. 385193 1. 210044 1. 295701  
1. 195689 1. 609946 1. 569944 1. 461909 1. 291908 1. 230621 1. 259606 1. 391419 1. 329731  
1. 229324 1. 25796 1. 138373 1. 341888 1. 242975 1. 018675 1. 320788 1. 16053 1. 510199  
6. 891858 7. 062501 7. 347567 6. 606301 7. 241993 7. 230805 6. 442919 7. 542049 6. 801929  
3. 167742 5. 292318 4. 277941 5. 332157 5. 365338 5. 03049 4. 529919 4. 673922 4. 538889  
2. 087771 2. 023988 2. 150983 1. 553504 2. 373561 1. 890399 1. 962725 1. 972139 2. 861347  
5. 517255 5. 280625 5. 077913 6. 018099 5. 449026 5. 740332 5. 198105 5. 629737 5. 0452  
5. 77971 6. 898009 6. 211813 6. 944738 6. 529747 7. 249077 6. 114054 6. 547719 6. 587276  
3. 7914 5. 254174 4. 859656 3. 905389 4. 398736 4. 285133 3. 546201 3. 223129 3. 631953  
9. 507785 9. 724322 9. 631128 10. 01583 10. 19018 9. 820519 10. 13581 9. 93551 9. 97399  
2. 826631 2. 310452 3. 39054 2. 132399 2. 454363 2. 374546 2. 308468 2. 076021 2. 829725  
4. 076856 4. 185934 4. 560789 4. 55482 4. 069765 4. 490006 3. 207714 4. 702835 4. 576139  
2. 462941 1. 988948 1. 337934 1. 981496 1. 43236 1. 934074 1. 923647 1. 788838 1. 884173  
4. 634696 5. 09264 4. 350026 4. 500998 4. 544618 4. 856974 3. 917759 4. 759452 4. 78903  
5. 237176 5. 124175 5. 178961 4. 392489 4. 373109 5. 079792 4. 293464 4. 906001 4. 336497  
3. 170548 2. 743634 2. 476159 2. 502499 2. 814818 2. 900964 2. 216701 2. 429545 2. 951119  
2. 754835 3. 721555 2. 46713 2. 676619 2. 841883 3. 804575 3. 421824 3. 605711 3. 316506  
5. 562756 7. 011012 6. 488751 7. 182419 7. 291814 7. 325773 6. 577941 6. 389059 6. 90195  
7. 106927 5. 772299 6. 037751 5. 040791 6. 602366 5. 66398 7. 04 5. 883198 6. 576191  
1. 660271 2. 525503 1. 650704 1. 608186 1. 937905 2. 008258 2. 503187 1. 485464 1. 769095  
3. 873014 2. 026656 2. 217231 1. 977326 2. 841785 3. 729729 3. 743677 2. 94657 2. 23453  
4. 667113 4. 474183 4. 402 4. 763589 4. 135548 5. 79445 3. 961299 4. 447785 4. 696368  
3. 042087 3. 076787 3. 546009 3. 417407 2. 555981 1. 854931 3. 543202 2. 404845 2. 864996  
6. 269867 6. 864202 6. 327447 6. 409675 6. 294984 7. 150134 6. 440042 6. 159731 6. 784695  
7. 664856 7. 676323 7. 72359 7. 166234 7. 690248 7. 998443 7. 477891 7. 645155 7. 855232  
4. 694919 3. 584738 4. 506777 4. 557375 4. 67312 4. 753436 3. 911098 2. 873577 4. 447538  
3. 347953 2. 523851 3. 543871 3. 387263 3. 131867 2. 88178 2. 866676 2. 695 3. 066608  
2. 583464 1. 097432 1. 081531 1. 237503 1. 02747 1. 063243 1. 624717 1. 539297 0. 965071  
4. 697573 4. 219783 5. 087878 4. 857957 5. 427784 4. 639532 5. 438283 5. 536923 5. 102215  
1. 926018 1. 462111 2. 287334 1. 450569 3. 464613 2. 713562 1. 776555 1. 05004 1. 426501  
3. 290284 3. 349218 3. 300186 3. 454661 3. 691794 3. 80465 3. 245828 2. 911871 3. 445684  
9. 034303 9. 420881 9. 670488 9. 126645 9. 225554 9. 393289 8. 767641 9. 231158 8. 904859  
4. 20936 4. 038233 3. 433598 4. 8244 4. 763356 4. 149967 3. 452991 4. 998878 4. 878077  
1. 836287 2. 487555 2. 028512 2. 149174 2. 020162 1. 864026 3. 79848 3. 028944 2. 317111  
6. 384336 6. 105577 5. 995658 6. 638352 6. 219325 6. 948157 6. 235035 6. 213714 6. 135388  
3. 825415 4. 188566 4. 677188 4. 655548 4. 981714 3. 989229 3. 810227 4. 579196 4. 176807  
4. 115834 4. 694013 3. 601446 4. 020184 4. 058358 3. 731114 3. 719511 3. 753899 4. 265374  
5. 026034 5. 761173 5. 264468 4. 927457 5. 365455 5. 498581 5. 105878 5. 587761 5. 178595  
6. 648323 6. 595655 6. 935476 6. 87812 6. 845395 6. 73821 6. 938681 6. 934346 6. 551732  
6. 61845 6. 01415 5. 494604 4. 762533 4. 978198 5. 53875 4. 230229 4. 695529 5. 08914  
2. 862067 3. 822653 2. 158215 1. 838218 3. 85128 2. 202955 2. 175733 3. 798983 1. 890761  
4. 886942 4. 845162 5. 242928 3. 936894 4. 311945 4. 027756 5. 280387 5. 055742 4. 920623  
3. 610952 3. 111808 3. 005301 3. 940648 3. 538435 3. 177436 3. 575448 3. 144431 4. 191028  
6. 513971 7. 421941 7. 636655 7. 074029 7. 344096 7. 43986 6. 799643 7. 549546 7. 149342  
1. 859869 1. 356045 2. 189822 1. 548941 2. 273746 2. 194014 1. 67993 2. 101538 2. 267531  
4. 998271 5. 398967 5. 12982 6. 216314 5. 930423 5. 934183 6. 741686 5. 755801 5. 90347  
6. 669161 6. 026229 6. 572842 6. 289808 6. 104389 6. 853546 5. 582743 5. 586159 5. 540867  
5. 337265 6. 681483 6. 847116 5. 553643 6. 49528 6. 11418 4. 492902 6. 202132 6. 005451  
4. 529421 4. 077887 4. 01705 3. 447155 3. 900631 3. 904647 3. 56025 4. 360812 3. 791829

5. 69543 4. 902467 5. 100418 4. 711224 5. 042011 5. 455561 4. 694701 4. 438226 5. 040526  
4. 278586 4. 526011 5. 521977 4. 459384 4. 380699 5. 124294 4. 709365 4. 43675 4. 950609  
3. 571219 4. 399605 3. 58474 4. 113844 4. 491989 4. 352677 3. 636012 3. 804612 3. 253743  
2. 06673 2. 664275 1. 998776 1. 968207 2. 602305 1. 777491 2. 145625 1. 901143 2. 783627  
6. 017916 6. 499092 6. 376765 5. 901887 6. 535598 6. 721949 7. 050249 6. 612589 6. 380901  
1. 875252 2. 01359 2. 033261 2. 214579 2. 460694 2. 134534 2. 46334 2. 163352 3. 371897  
2. 932087 2. 493953 2. 331845 2. 171939 2. 385666 3. 615048 3. 353932 4. 054921 3. 021087  
5. 54915 6. 146591 6. 175431 6. 665317 6. 305331 6. 315065 5. 718785 5. 624653 5. 999501  
3. 106323 3. 652294 4. 182524 3. 498409 3. 19861 3. 69211 3. 186866 3. 788912 3. 437679  
4. 343295 5. 974229 5. 797521 6. 034418 5. 846661 5. 61805 5. 885923 5. 747323 5. 723795  
5. 013451 5. 124165 5. 228251 5. 136022 4. 098862 5. 81062 4. 604761 4. 860638 5. 060387  
1. 644663 1. 658476 1. 358016 1. 613292 1. 801445 2. 125313 2. 270394 1. 730594 1. 883463  
5. 323743 4. 926409 4. 367748 3. 889642 3. 734728 4. 849249 5. 069141 5. 199575 4. 258383  
3. 358749 3. 645648 3. 249978 4. 863133 4. 730174 4. 599696 3. 975698 3. 705096 3. 465896  
6. 621161 6. 582929 6. 438855 6. 474808 6. 550014 6. 23837 6. 060837 6. 711344 5. 849361  
3. 899889 3. 573031 4. 554503 3. 645625 2. 622215 3. 200797 3. 466309 3. 487952 3. 172882  
6. 297378 7. 070066 6. 499496 7. 0853 6. 59917 6. 456097 6. 665201 6. 982886 6. 763281  
3. 998704 3. 240551 4. 249476 3. 082703 3. 597077 4. 167007 2. 911588 3. 132344 3. 76051  
4. 675036 4. 695469 3. 0548 4. 120811 4. 815312 3. 810314 3. 065934 4. 246352 3. 76773  
4. 629545 5. 826316 5. 94545 5. 086722 5. 354598 5. 593649 4. 492462 5. 569572 4. 869075  
4. 406564 6. 170419 5. 358353 6. 457138 6. 157113 5. 369559 6. 1563 6. 469227 7. 044291  
4. 075008 4. 003386 4. 804883 5. 079257 3. 804892 4. 701832 3. 617438 4. 619634 4. 472462  
4. 122427 4. 828376 4. 422935 4. 805527 3. 821196 4. 977969 5. 026995 5. 462185 3. 813117  
1. 092713 1. 07791 0. 953638 0. 931722 0. 999108 0. 99719 1. 738564 1. 057681 1. 520701  
3. 302134 4. 030551 3. 370324 3. 223554 4. 072903 3. 171741 4. 221205 4. 10143 4. 454918  
4. 315307 5. 237441 5. 180778 4. 496314 5. 019222 4. 831013 4. 496337 5. 19095 5. 021637  
7. 044396 6. 803288 6. 70361 7. 142448 6. 918362 6. 863248 7. 033746 7. 36953 6. 838138  
6. 16989 6. 661586 6. 519544 6. 178538 5. 755919 7. 095563 6. 088769 5. 420245 6. 431969  
1. 562793 1. 601463 1. 750558 1. 962642 1. 745186 1. 966426 1. 340724 1. 512776 1. 916896  
4. 664662 4. 343679 4. 873129 4. 970393 4. 735732 4. 54329 4. 760983 4. 556103 5. 037185  
5. 320057 5. 571154 5. 300059 5. 080231 6. 011679 5. 810618 4. 712115 5. 144686 4. 820809  
4. 637027 5. 306138 5. 428454 4. 170292 4. 919727 5. 574764 5. 264704 4. 514019 4. 711809  
1. 7492 2. 73709 2. 751035 2. 007979 2. 47433 3. 294235 1. 647602 2. 67703 3. 669709  
2. 739882 1. 530091 1. 91069 1. 928234 2. 102977 2. 146639 2. 140999 2. 138052 2. 480247  
2. 139522 1. 71478 1. 623672 2. 447424 2. 268239 1. 777541 2. 22665 2. 157643 2. 12106  
7. 052868 4. 400969 5. 59593 3. 400769 5. 024661 2. 970543 4. 623975 4. 6202 5. 271414  
5. 666354 6. 261156 6. 282594 5. 261582 5. 27707 5. 036722 5. 599155 5. 973713 6. 514522  
2. 299044 1. 862125 2. 931675 1. 71519 1. 88546 1. 895887 2. 327449 2. 210217 4. 054502  
5. 943855 5. 298055 5. 183329 5. 517295 5. 516178 5. 654319 5. 456248 5. 799843 5. 097654  
2. 83946 2. 255258 2. 626265 2. 124415 1. 805393 1. 983597 2. 699033 2. 155082 2. 076202  
4. 217939 5. 028168 4. 452202 4. 196238 4. 068259 4. 798567 4. 191861 4. 578304 3. 523315  
4. 394356 4. 752328 4. 579782 4. 100907 4. 875702 5. 007322 4. 72511 4. 638293 4. 24918  
4. 919433 5. 009697 4. 363014 5. 059403 5. 306335 5. 994972 5. 449109 5. 363123 5. 018971  
4. 833696 4. 228918 4. 894237 4. 985144 5. 533448 4. 638418 4. 631722 5. 101411 5. 578967  
4. 184585 4. 306393 4. 600556 4. 490648 4. 767726 4. 153296 4. 547575 3. 774332 4. 483399  
5. 190395 3. 924878 3. 702788 4. 941746 4. 902505 5. 525226 5. 212214 4. 367207 4. 752779  
1. 740748 1. 432666 2. 165458 2. 154862 2. 136322 2. 041395 3. 453237 1. 913739 2. 458216  
5. 679354 5. 866502 5. 824687 5. 484014 5. 246326 5. 484498 5. 218943 5. 491907 5. 517151  
3. 251065 2. 828399 3. 269262 3. 570276 3. 096307 3. 04789 2. 942878 3. 356495 3. 054431  
2. 150951 1. 957083 2. 126874 2. 417969 1. 882011 1. 731857 1. 920967 2. 433466 2. 25069  
2. 981077 3. 723969 3. 128799 3. 541984 3. 345237 3. 714884 3. 44577 3. 43142 2. 369789

5.928703 5.559051 5.370433 5.878702 5.980414 6.113173 6.21444 5.793626 6.146258  
4.814069 5.850539 5.719479 5.772123 5.917271 6.214232 5.988426 5.702673 5.587407  
5.943383 5.98582 5.410901 5.444099 5.908541 5.72572 5.37026 5.667828 5.41533  
3.443637 3.115211 3.259277 4.263458 2.783196 3.685045 4.280842 2.220731 4.42761  
1.084332 1.222551 0.953366 1.855103 1.048136 1.554345 1.44835 1.649668 1.021676  
9.324738 7.258133 7.588583 7.107566 6.819501 7.192613 7.217142 7.195587 7.530144  
7.894689 8.311001 8.464897 8.463884 8.259558 8.15747 8.447103 8.332852 8.637047  
5.862326 6.190803 6.438032 5.500447 5.667522 5.629744 5.660708 5.212689 5.923728  
3.663774 2.545576 2.516118 2.64636 3.416646 3.652299 2.681073 3.537733 3.405285  
1.58589 1.316188 1.732858 1.693154 1.646492 2.062675 2.231515 1.130427 2.27832  
2.376789 3.736909 2.094938 2.824877 2.306352 3.068791 3.518139 4.845639 2.281381  
2.86158 2.270269 2.115538 1.821337 1.965674 1.672974 1.735334 1.886641 2.134271  
3.439112 4.732773 4.63048 3.822511 4.177026 4.111313 3.992122 3.583497 3.979114  
2.474452 3.403095 3.694293 3.20999 4.126075 2.940307 3.17239 3.707779 4.073395  
2.397288 1.282177 1.490032 1.532565 1.218423 2.020685 1.873941 1.63804 1.695713  
1.170209 1.688879 1.093122 1.6975 1.203431 0.935107 1.291109 1.456022 0.988208  
7.365263 7.868347 7.558808 8.266611 7.776447 8.149781 7.43598 7.538539 7.326195  
3.266592 2.009569 2.199484 2.651845 1.929264 3.574456 3.482389 2.269078 3.162855  
4.931536 2.857308 2.381187 2.768618 2.329339 1.316963 2.935308 2.481571 3.323334  
2.228665 1.941387 2.217483 1.761087 2.334336 1.846232 1.64747 2.897049 2.038418  
7.340846 7.906797 8.22777 7.84725 7.727728 7.551578 7.584388 7.990851 7.644343  
8.050464 8.450765 8.42959 8.676972 8.78679 8.36461 7.975391 8.246791 8.210859  
4.292865 5.800354 6.118677 6.48947 5.157424 6.466282 5.805169 5.108697 5.945129  
1.975419 2.945034 2.385907 2.507041 2.906818 3.39191 3.002614 4.685609 2.399841  
2.596132 2.588827 2.542202 2.175735 2.477966 2.451254 3.026333 2.637649 2.929163  
7.000443 7.316371 7.27171 7.371334 7.434912 7.199939 7.260566 7.29283 7.034128  
8.561546 8.836297 8.674706 9.588011 8.73097 8.991503 8.917392 7.835802 8.559986  
4.858833 5.239486 5.171892 5.145231 4.956346 5.598184 5.55897 4.652027 4.267122  
7.064505 7.747681 7.916202 7.041268 7.543273 7.354554 7.023135 7.519314 7.134821  
6.683558 6.238154 5.752478 5.494714 5.289063 5.196113 6.759606 4.928014 6.5356  
4.622051 4.714569 4.71504 4.292258 4.318354 4.96754 5.49402 4.294271 3.268751  
4.680723 4.333808 4.249398 4.223053 3.562421 5.363204 4.509189 4.659522 5.066057  
5.512784 4.939055 5.499332 3.779741 4.85081 5.321852 5.432977 5.694598 5.158336  
7.565351 7.809357 7.953875 8.229433 7.779124 8.147232 7.482986 7.282591 7.55744  
2.64092 1.659066 1.663835 1.831081 1.626299 1.99545 2.570809 2.056731 2.054091  
6.324044 6.055349 6.401063 6.525013 5.508685 6.62842 5.570949 5.847031 6.318054  
6.026345 5.99859 5.894376 6.612888 6.463858 6.37985 6.160472 6.10551 6.125922  
8.126354 8.249511 7.83041 8.690139 8.004167 8.46555 8.332063 7.640759 8.207319  
2.0023 2.157511 2.049762 2.288307 1.989079 1.930362 2.036987 2.053921 2.154927  
2.542005 2.12928 2.974498 2.817165 2.58839 2.354389 2.523338 2.494253 2.517469  
2.117289 2.109918 2.052094 2.099407 2.016924 1.633334 1.583261 1.831253 2.03474  
9.715411 10.27074 10.02077 10.06764 10.10383 10.09747 9.756976 9.9769 9.979453  
2.714123 1.226485 1.487588 1.788672 1.553148 2.067884 1.199482 1.220373 1.571866  
4.726135 3.965255 5.412921 3.994412 4.479106 4.861217 5.005009 4.667526 4.848551  
1.929185 1.642244 0.897189 1.545961 1.093138 0.857463 0.954322 1.191773 1.187324  
7.231599 6.558992 6.91139 6.189844 6.868118 6.301314 7.27414 6.994317 6.792558  
2.301794 2.070209 2.008696 2.751723 3.369469 1.793725 2.041776 2.474725 1.758123  
4.444641 5.263175 4.678621 3.891049 4.537818 4.407141 3.996226 5.195422 4.411541  
6.54647 6.318158 6.741682 6.854774 5.881076 6.169905 6.064271 6.592601 6.200321  
8.230264 7.870533 8.343769 8.404784 8.125639 8.523716 7.91296 8.431837 7.823165  
5.713113 6.608547 5.99306 5.8109 6.00385 5.915325 5.851173 6.406566 5.994664

4. 726541 4. 11985 4. 905222 4. 879805 4. 100331 4. 577837 4. 522551 4. 897895 4. 621448  
2. 576117 2. 31709 2. 865642 2. 758499 2. 650602 2. 244536 3. 33465 2. 565635 2. 641929  
2. 029877 1. 282618 1. 441622 1. 880047 1. 549134 1. 602923 1. 510822 1. 461701 1. 681535  
2. 340349 1. 370353 1. 0729 1. 23431 1. 313118 0. 669407 1. 178033 1. 074298 1. 313118  
7. 050802 4. 841133 4. 969883 2. 143633 3. 06759 4. 012396 3. 366346 0. 801456 5. 314899  
5. 544572 5. 755195 5. 481492 5. 286585 5. 624277 5. 586569 5. 80911 5. 650845 6. 209509  
4. 876363 4. 465532 5. 878448 6. 528638 6. 1895 6. 258465 5. 474836 5. 901549 5. 518032  
3. 040841 2. 223658 2. 622994 2. 370859 3. 003476 3. 258409 2. 759855 3. 740184 2. 629023  
6. 116286 6. 373872 6. 418779 6. 696298 6. 82282 6. 234854 5. 682584 5. 718021 6. 889276  
5. 289807 6. 299626 5. 930525 6. 678151 6. 415184 7. 124511 6. 235119 6. 262081 6. 046848  
7. 281444 7. 861346 7. 311679 7. 674504 8. 010483 7. 588268 7. 569214 7. 96268 7. 512617  
2. 682043 5. 068923 3. 486383 3. 518577 4. 951491 4. 624454 5. 022704 4. 410347 4. 149402  
1. 430529 1. 252599 2. 030141 1. 32119 1. 592059 1. 962841 2. 056153 1. 778734 1. 472545  
7. 165022 7. 381618 7. 341711 7. 014848 7. 25888 6. 88386 6. 797168 7. 200702 7. 279898  
7. 17864 6. 194112 6. 460835 6. 06445 6. 368896 5. 97582 5. 986364 5. 939672 6. 064213  
5. 272267 5. 418398 4. 693846 5. 385856 5. 36396 4. 913422 4. 966331 5. 241038 4. 228165  
8. 015584 5. 828271 6. 519983 5. 577901 5. 438787 4. 849224 6. 28526 5. 969993 6. 198551  
3. 721653 3. 224962 4. 102006 3. 454637 3. 646543 4. 619718 3. 774537 3. 471481 3. 681137  
4. 620211 5. 197218 5. 084119 5. 296816 5. 205546 4. 830084 4. 391157 4. 931508 4. 974439  
6. 524456 7. 344282 7. 397324 7. 079635 7. 298907 7. 037833 6. 42997 7. 625066 7. 28449  
4. 789102 4. 768369 4. 968084 4. 540582 4. 835128 4. 982204 4. 753781 4. 856983 4. 956602  
3. 533026 2. 686934 3. 350774 2. 863129 3. 244826 2. 728969 3. 721011 2. 912352 3. 362697  
4. 940099 4. 570667 4. 276249 4. 944734 5. 121867 4. 292597 4. 310886 4. 977013 4. 616645  
4. 55196 4. 499244 3. 89168 3. 343217 3. 932176 4. 675536 4. 328173 3. 741333 3. 841611  
4. 454955 5. 040507 4. 514792 4. 376938 5. 387998 5. 20723 4. 968824 5. 449886 4. 300407  
5. 0184 4. 517244 4. 153064 5. 401452 5. 572165 4. 860245 4. 792295 3. 622266 3. 594211  
2. 772681 2. 027531 2. 52741 1. 902697 1. 970163 3. 427128 3. 260263 1. 857563 2. 508002  
5. 729715 5. 942915 5. 218675 5. 84453 6. 113146 5. 267141 5. 684027 5. 97417 5. 803943  
8. 162086 8. 699812 8. 855746 8. 583951 8. 791258 8. 79333 8. 424086 8. 896043 8. 385914  
4. 734667 4. 863732 3. 733428 4. 762532 4. 957068 4. 307861 4. 753316 4. 972345 4. 987599  
5. 244007 5. 143449 4. 43551 5. 584034 5. 057057 5. 715402 5. 568082 5. 171898 5. 473112  
5. 692679 4. 888118 4. 852695 5. 605962 5. 248551 5. 678891 5. 005774 5. 514353 5. 821441  
7. 160941 5. 844108 5. 783526 5. 161623 5. 946849 5. 066633 5. 842212 6. 051289 5. 295626  
6. 50184 6. 961484 6. 995144 6. 943959 6. 738756 6. 632705 6. 141852 7. 293075 6. 283004  
4. 669809 6. 452932 5. 553888 6. 023024 5. 858704 5. 913726 5. 620991 5. 732635 6. 353135  
1. 866668 1. 18409 0. 726405 0. 811651 1. 492801 1. 820543 1. 316272 1. 379149 1. 659665  
0. 676735 1. 571437 0. 988467 1. 358787 1. 545662 0. 957021 1. 201459 1. 278632 1. 617317  
8. 578202 9. 111434 8. 629008 8. 776736 9. 619824 9. 144547 8. 943698 9. 501219 9. 40655  
5. 878171 7. 130923 7. 093557 7. 176403 6. 92166 7. 188085 6. 492671 7. 148782 6. 692484  
4. 185469 5. 130212 4. 715957 5. 214388 4. 877628 4. 768139 4. 147384 5. 00873 3. 774885  
4. 762851 4. 020954 4. 593689 5. 113405 3. 952569 3. 577052 3. 833943 4. 352691 4. 95536  
6. 160186 5. 418025 6. 378552 5. 822028 5. 585363 5. 970094 6. 032576 6. 441011 5. 798641  
4. 912755 5. 949265 5. 641826 6. 581936 5. 590212 5. 893995 5. 834826 6. 514612 6. 126564  
3. 894928 4. 306626 3. 996405 2. 743433 4. 415061 5. 597187 4. 657285 5. 139106 3. 988337  
3. 00032 2. 897781 3. 604647 3. 10756 2. 615065 2. 92121 2. 706641 2. 835987 2. 672773  
7. 738192 7. 031198 6. 707844 6. 424861 7. 040469 6. 654885 6. 77862 6. 88823 6. 250116  
5. 377767 6. 338548 5. 577869 6. 804582 5. 815175 6. 876642 6. 222269 5. 292534 5. 999405  
2. 759822 1. 94324 2. 114124 2. 717748 2. 328096 1. 951707 1. 609133 1. 997397 2. 760652  
3. 01518 2. 085816 2. 748871 2. 96628 2. 312736 2. 281675 3. 373732 3. 621088 2. 870665  
4. 872024 5. 796276 6. 310949 5. 813718 5. 881918 6. 245964 5. 331015 6. 335605 5. 862699  
1. 711165 2. 045859 2. 395792 1. 737722 2. 6592 1. 896324 1. 372808 1. 856102 1. 923958



7. 176046 7. 585558 7. 518419 7. 634754 7. 836571 7. 771189 6. 876375 7. 536137 7. 384627  
5. 123601 5. 071542 4. 874572 4. 360268 5. 35277 3. 92304 3. 575182 5. 100821 4. 967242  
1. 734791 1. 059381 0. 712119 0. 885216 1. 342278 0. 966194 0. 817037 0. 9876 0. 797509  
2. 612432 2. 403744 2. 319673 3. 057774 2. 034627 2. 632551 2. 610989 2. 546908 2. 813518  
9. 825131 9. 347251 8. 853707 8. 421684 8. 803578 8. 985703 9. 471565 8. 941659 9. 05334  
6. 161257 6. 318919 5. 799455 5. 650223 5. 624087 6. 083541 6. 288827 5. 304294 6. 262419  
6. 851747 7. 061993 7. 11478 7. 390448 6. 800171 7. 26402 7. 165262 7. 326825 6. 790571  
3. 755383 3. 427513 3. 33561 3. 714109 3. 366466 3. 526538 2. 793153 3. 49275 4. 008658  
6. 039444 5. 104194 6. 295963 4. 891663 5. 38502 4. 621848 4. 80945 5. 199704 7. 201745  
1. 832422 1. 253754 1. 586718 1. 545368 1. 376302 1. 561549 1. 296309 1. 186873 1. 086347  
1. 895693 1. 877612 1. 890342 2. 269096 1. 773919 2. 050234 1. 621611 1. 887078 2. 090197  
6. 006731 6. 621625 6. 611804 7. 016058 6. 141227 6. 081116 5. 957356 6. 577321 7. 168103  
7. 805443 8. 308526 8. 178378 7. 418572 8. 489133 7. 401731 7. 728388 8. 206319 8. 153021  
6. 651451 6. 370637 5. 828163 6. 380261 6. 438366 6. 599968 6. 577585 6. 266086 6. 374873  
2. 366415 1. 650306 2. 807573 1. 820919 2. 625492 2. 605788 1. 719753 2. 325094 2. 061032  
5. 117172 5. 253341 5. 068643 5. 019785 4. 290791 5. 002594 4. 581798 3. 995803 4. 135919  
4. 723396 5. 271804 5. 802296 5. 231432 5. 071021 6. 092618 5. 130773 5. 19162 4. 998139  
7. 45977 7. 973517 7. 676145 7. 07106 7. 662994 7. 828277 7. 270528 8. 112075 8. 04987  
6. 438667 5. 59236 6. 590112 5. 369733 6. 346266 6. 150228 6. 410884 5. 606072 6. 06966  
4. 699927 4. 912686 4. 687936 4. 03532 5. 56503 4. 787217 4. 413202 4. 335933 4. 748539  
2. 660329 2. 522797 3. 24129 2. 903539 2. 600713 2. 734407 2. 956879 3. 16862 2. 575635  
2. 614792 2. 631585 2. 272946 2. 505885 1. 837188 2. 438966 2. 503983 2. 13198 1. 984765  
7. 619537 7. 776262 7. 573109 7. 543584 7. 432247 7. 511399 7. 749779 7. 702798 7. 684457  
1. 94014 1. 421555 1. 720262 1. 489682 1. 65343 1. 475034 1. 854797 1. 605414 1. 003149  
1. 78094 2. 14187 1. 243748 1. 695918 1. 397419 1. 293148 1. 789091 1. 292751 1. 237414  
6. 053126 5. 950106 6. 177975 6. 465671 6. 285607 5. 986387 6. 347972 6. 160443 6. 161128  
5. 601808 5. 782164 5. 647676 5. 271891 4. 90757 5. 383255 5. 429751 6. 115088 5. 268324  
6. 651327 6. 212662 6. 581063 5. 274247 5. 969721 5. 644347 6. 25561 5. 97306 7. 091913  
9. 546811 9. 442708 9. 561268 9. 224563 9. 337188 9. 227152 8. 64515 9. 251295 9. 373  
8. 08982 8. 362511 8. 091023 8. 198436 7. 877828 8. 144926 8. 064986 8. 240563 8. 116613  
3. 948296 3. 947549 4. 306601 5. 010411 4. 09976 4. 050572 4. 182439 3. 804941 4. 296889  
4. 341282 3. 903798 3. 886561 4. 042097 4. 277412 4. 205943 3. 542749 3. 459697 3. 967825  
2. 362593 3. 139887 3. 239149 4. 909387 2. 146962 4. 498956 4. 92861 2. 807896 4. 341232  
3. 498834 3. 63897 3. 637372 4. 215355 3. 390953 4. 057401 3. 661117 4. 332978 4. 459149  
6. 419765 6. 763599 6. 56731 6. 400616 6. 395275 6. 089145 5. 803755 6. 666507 6. 702128  
6. 782832 8. 270605 7. 319437 7. 779434 7. 770616 7. 947581 7. 916142 7. 928921 7. 630384  
6. 627048 6. 63392 6. 851192 6. 756061 6. 589861 6. 809842 6. 482914 6. 458272 7. 127394  
1. 761666 1. 890148 1. 94878 2. 161033 1. 908083 2. 178985 1. 805929 1. 99708 2. 214778  
7. 085088 7. 232223 7. 575458 7. 507446 7. 753334 7. 243574 7. 909858 7. 859317 7. 731669  
5. 079317 4. 367392 3. 954468 5. 286369 4. 510488 5. 572874 4. 787809 4. 726393 4. 290439  
6. 990173 6. 289865 6. 210552 6. 37238 6. 66264 5. 879158 6. 801786 6. 353758 6. 195782  
3. 852907 4. 493381 4. 020772 4. 341624 4. 81759 3. 887655 4. 257278 4. 724551 3. 949519  
2. 205248 1. 418672 1. 346083 1. 481788 2. 010757 2. 245688 1. 654239 1. 270233 1. 460744  
6. 136871 5. 336925 5. 823297 5. 352033 4. 99585 5. 837724 5. 784864 5. 122984 5. 349655  
7. 108803 7. 300828 7. 468974 6. 667868 6. 913667 6. 507614 7. 308428 7. 306645 7. 00413  
5. 843987 5. 4424 4. 40634 5. 331374 5. 523049 4. 870034 4. 751172 5. 608024 5. 054712  
8. 922131 8. 932796 8. 826744 9. 123473 9. 014673 9. 081213 8. 788691 8. 749957 9. 187587  
9. 274385 9. 879903 9. 678098 9. 830492 9. 890217 9. 580866 9. 3082 9. 59278 9. 736325  
5. 740556 5. 388599 5. 485116 4. 740174 4. 671077 5. 537506 4. 974972 5. 819304 4. 824393  
5. 065896 5. 808919 5. 161486 5. 548903 5. 627406 6. 293255 5. 725363 5. 055753 5. 426285  
2. 525844 2. 299823 2. 997909 3. 195061 2. 223885 4. 224989 2. 793435 2. 537327 2. 468839

3. 209525 3. 612338 3. 758927 2. 912167 4. 169237 3. 988672 2. 929071 3. 939764 3. 579501  
4. 875473 6. 016158 5. 229901 5. 08167 6. 050032 6. 052294 5. 399646 5. 814569 5. 955777  
8. 844044 9. 121968 9. 266639 9. 090334 9. 192944 9. 132627 8. 805761 9. 075357 8. 865132  
6. 163863 6. 829301 6. 77065 6. 668011 7. 09099 6. 683805 6. 387587 6. 85963 6. 661491  
7. 960014 7. 980313 7. 96643 7. 525941 7. 464465 7. 773307 7. 507679 7. 747235 7. 725227  
1. 875385 1. 755464 1. 113905 1. 572403 1. 625462 1. 296262 1. 126979 1. 452746 1. 718656  
5. 445644 6. 493262 5. 834353 6. 161657 6. 076029 5. 939995 5. 097906 5. 696554 5. 580774  
3. 481937 3. 231428 3. 100454 3. 085162 3. 665649 3. 593541 4. 053919 3. 492372 4. 486485  
3. 6593 3. 477972 3. 372228 2. 686766 2. 781215 2. 871596 3. 011773 3. 391287 3. 076074  
2. 409659 3. 407184 3. 106789 3. 245811 3. 977987 2. 506703 2. 627885 3. 605984 4. 476638  
2. 755805 3. 581308 3. 45205 3. 612469 3. 56417 3. 971605 3. 710043 2. 474983 3. 450307  
7. 094854 7. 175031 7. 129958 7. 035523 6. 63832 6. 756219 6. 587622 6. 34961 6. 656919  
2. 247108 3. 061648 2. 699378 2. 41143 2. 944455 1. 951861 2. 797832 2. 798627 2. 141018  
1. 222487 2. 313534 1. 300891 2. 062389 1. 207786 1. 696631 1. 76207 1. 830748 1. 344712  
2. 31089 2. 138333 2. 444604 2. 079824 2. 325464 1. 991738 3. 161149 2. 273128 2. 287213  
5. 851148 5. 999082 5. 405261 6. 103879 5. 707551 6. 197111 5. 655118 6. 466219 6. 020343  
6. 495946 6. 83971 6. 296624 7. 040699 6. 517401 6. 703014 6. 609686 6. 830253 6. 646064  
6. 161608 6. 395857 6. 045478 6. 382497 6. 46445 6. 64783 6. 267905 6. 083786 6. 334232  
4. 233666 1. 78857 2. 784407 2. 153682 2. 289781 2. 451373 2. 540789 2. 557986 2. 084123  
3. 969917 5. 464154 4. 749656 5. 524111 6. 222573 6. 292253 4. 292417 4. 425479 4. 710355  
8. 874699 9. 095689 8. 831926 8. 763081 9. 135352 8. 583773 8. 751242 8. 897732 8. 932657  
2. 875469 2. 743594 2. 512951 3. 102965 3. 555569 2. 946812 2. 606131 3. 138552 3. 115798  
7. 189212 6. 793793 6. 420341 7. 240816 7. 401322 7. 514109 7. 127943 7. 410762 7. 096297  
5. 679046 5. 469081 5. 748884 4. 99125 5. 772969 6. 06987 5. 063894 5. 53907 6. 276336  
0. 851781 0. 855593 0. 750219 1. 085304 1. 189942 0. 916999 0. 857124 0. 793475 1. 182533  
5. 388944 6. 165396 6. 330997 6. 420261 6. 516367 6. 180092 5. 623139 6. 138327 5. 231921  
1. 428027 1. 541832 1. 483792 1. 440202 1. 40705 1. 807967 0. 946744 1. 216213 1. 065389  
5. 679667 6. 006885 6. 400065 5. 787364 6. 404399 6. 307319 6. 42308 5. 636539 6. 449212  
3. 851202 6. 345481 6. 054589 6. 429562 5. 899451 6. 388791 5. 588471 5. 42046 4. 929577  
2. 842618 3. 86283 4. 465149 4. 314262 4. 508799 4. 361106 4. 506514 4. 902301 4. 578668  
1. 821509 1. 818755 1. 710178 1. 492203 1. 717295 1. 856422 1. 347739 1. 755186 1. 852497  
5. 9383 6. 461705 5. 743279 6. 376619 6. 463356 6. 429604 6. 185313 6. 791999 6. 688912  
7. 918902 7. 77821 7. 465896 7. 938577 7. 669186 7. 239703 7. 725428 7. 788278 7. 972107  
4. 109654 3. 571737 3. 986401 3. 620168 4. 235874 4. 605276 4. 87449 3. 89379 4. 575356  
3. 367587 2. 685802 2. 738894 3. 409937 1. 807946 2. 279432 2. 06741 3. 196862 2. 905348  
5. 510423 5. 05483 5. 581346 5. 628769 5. 360912 5. 636338 5. 76298 5. 648138 5. 338889  
6. 151142 6. 247893 5. 898595 6. 901352 6. 680188 6. 299364 6. 356823 5. 809881 6. 068212  
3. 712567 4. 235646 3. 447236 5. 723133 4. 717206 5. 092958 4. 314899 4. 675383 4. 771094  
7. 009514 7. 25958 7. 21126 7. 202393 7. 146483 7. 31371 7. 651412 7. 13157 7. 233114  
2. 363968 1. 777603 1. 827737 1. 722034 2. 051439 1. 731288 1. 815469 1. 397836 1. 861436  
10. 28333 10. 57731 10. 50289 9. 993932 10. 54382 10. 41269 10. 40481 10. 37838 10. 5247  
8. 911563 9. 15866 9. 293958 9. 156976 9. 131099 8. 851536 9. 574548 9. 204602 9. 05292  
5. 965633 7. 297567 6. 729245 6. 823969 6. 893087 6. 683712 5. 89573 6. 606975 6. 848592  
3. 262094 3. 894564 5. 08887 4. 335931 3. 115865 3. 944649 4. 300488 4. 626762 4. 519254  
3. 398321 1. 640288 2. 069455 2. 249122 1. 883444 2. 082508 1. 66288 2. 152396 1. 975003  
4. 568589 3. 931596 3. 923299 5. 199782 5. 012865 5. 191818 4. 983626 3. 46802 4. 938723  
5. 321162 7. 118306 6. 556257 7. 154158 7. 18142 7. 335457 6. 527714 7. 04143 6. 691256  
3. 964273 3. 606783 3. 508018 3. 608002 3. 213529 5. 019963 3. 633669 3. 87731 3. 751669  
6. 197294 6. 516366 6. 203969 6. 207294 6. 496107 5. 838185 6. 560952 5. 961831 5. 840597  
4. 436039 5. 233666 4. 131454 5. 803928 5. 288952 4. 976222 4. 377087 4. 861791 4. 41086  
7. 578589 4. 209026 5. 734827 4. 492027 4. 799024 4. 418571 4. 22444 4. 829171 6. 715396

5. 430185 6. 432963 6. 005495 6. 587009 6. 611681 6. 500958 5. 823839 6. 072414 6. 185293  
8. 402953 8. 924808 9. 043795 9. 25964 8. 392641 9. 389126 8. 975017 8. 540372 8. 548307  
6. 996238 6. 782199 6. 804555 6. 893569 7. 574548 6. 994001 7. 054042 6. 962278 6. 868718  
1. 556067 1. 309572 1. 148588 2. 120094 1. 123161 1. 13086 1. 340939 1. 30009 1. 654841  
1. 667207 1. 633016 1. 379237 1. 894115 1. 689839 1. 115657 1. 447691 1. 713319 1. 67547  
1. 915902 1. 416777 1. 70291 1. 621126 1. 342732 1. 582362 1. 709126 1. 723356 1. 615962  
7. 803592 7. 7908 7. 646513 7. 372833 7. 507981 7. 515379 7. 98352 7. 491362 7. 679571  
6. 668773 6. 911011 7. 049232 6. 90921 6. 67995 7. 443096 7. 122103 6. 826153 6. 858447  
5. 846932 5. 032029 4. 535819 5. 561692 5. 786935 5. 505799 4. 743358 5. 907178 5. 869082  
5. 287875 4. 659854 5. 079299 4. 325257 3. 590074 4. 739098 4. 933453 4. 552907 4. 487544  
6. 324609 6. 482199 6. 254672 6. 305949 6. 122355 6. 737511 5. 945345 5. 992111 5. 983771  
6. 797494 7. 654441 7. 680705 7. 906944 7. 865914 7. 961662 7. 329137 7. 912012 7. 804271  
5. 540979 6. 5248 5. 471283 5. 88697 6. 604146 5. 836532 5. 924011 6. 249046 6. 071532  
2. 333546 1. 509262 2. 233507 1. 696496 2. 083181 2. 065475 1. 784489 1. 997208 2. 423786  
1. 306684 1. 705298 1. 611029 1. 003772 0. 910508 0. 803078 1. 381619 1. 7341 1. 636165  
6. 249414 6. 396853 6. 440154 6. 229906 6. 545227 6. 954961 6. 114639 6. 627596 6. 508551  
6. 200362 6. 685622 6. 069124 6. 475841 5. 902659 5. 479172 5. 682636 5. 443408 6. 003141  
4. 387702 3. 567386 4. 077582 3. 625553 3. 9851 4. 825325 3. 506417 3. 265357 2. 770994  
1. 202477 0. 875337 1. 14103 1. 156399 0. 972756 1. 049094 1. 207781 1. 065188 1. 391197  
5. 432171 4. 113025 4. 301758 4. 64777 4. 252008 4. 313347 3. 174945 3. 448236 4. 904758  
7. 077833 6. 571516 6. 476234 6. 278795 6. 381969 6. 288478 6. 896289 6. 430331 6. 469505  
5. 63809 6. 90579 6. 685555 7. 112148 7. 209109 6. 760081 6. 527676 6. 646388 6. 615457  
2. 897202 1. 867817 2. 07763 1. 916132 1. 896291 1. 834087 1. 742157 1. 714279 1. 657552  
3. 313299 4. 233323 4. 145661 5. 306096 4. 680713 4. 596278 4. 941197 4. 456563 4. 609632  
4. 974551 5. 699526 5. 180141 4. 166185 5. 335759 5. 682599 4. 538462 4. 629148 4. 616827  
2. 782309 4. 479386 4. 387445 4. 054307 4. 209964 3. 627612 3. 165458 4. 454264 4. 20102  
5. 574423 6. 196742 6. 369405 6. 089794 6. 264032 6. 106459 6. 647349 6. 489618 6. 18754  
6. 764676 7. 498118 6. 535852 7. 405481 7. 33413 7. 647465 6. 762578 6. 681988 7. 037109  
1. 198855 1. 328641 1. 800324 1. 089133 1. 259948 0. 976878 1. 201822 1. 030307 1. 862947  
1. 420461 2. 220747 1. 242126 1. 169016 1. 996784 1. 576013 1. 353962 2. 004505 1. 89729  
1. 98842 1. 856665 1. 878081 1. 724998 1. 778605 1. 70365 2. 526746 1. 739961 1. 59376  
7. 593552 7. 708638 7. 38382 7. 870689 7. 726545 6. 415236 7. 748307 7. 552778 7. 815842  
5. 234003 6. 599768 6. 389405 5. 683168 5. 519001 5. 524955 5. 27443 5. 51547 5. 568914  
7. 595339 8. 066214 8. 077335 8. 226246 8. 265014 7. 841428 8. 200546 8. 217859 7. 770236  
8. 468774 8. 580998 8. 482775 9. 296087 8. 794841 9. 042608 8. 911615 8. 293836 8. 728443  
4. 95262 6. 215554 5. 612765 6. 517618 5. 71863 6. 179155 6. 134492 6. 206499 5. 778006  
7. 095554 7. 134228 7. 458143 7. 063755 6. 95567 7. 297581 8. 025618 6. 815132 7. 16517  
1. 632828 0. 579033 0. 836391 1. 441198 0. 666175 1. 373376 1. 458326 0. 981603 1. 301155  
4. 171345 3. 052141 2. 134208 2. 798426 4. 471157 3. 307388 5. 218782 2. 543959 2. 874136  
3. 392568 3. 018402 4. 171219 3. 19676 3. 689261 3. 249317 3. 737315 3. 161977 3. 122623  
3. 655303 2. 403185 2. 986598 3. 222431 2. 302844 3. 733507 2. 658657 2. 637884 2. 994282  
2. 350486 0. 892494 1. 243305 1. 312102 1. 442536 1. 013206 1. 098257 0. 954769 1. 033687  
1. 286456 1. 36808 1. 746329 2. 570515 1. 668922 1. 232494 1. 873745 2. 255529 1. 747447  
1. 401563 1. 159579 1. 378115 1. 503284 1. 058094 1. 289661 1. 449994 1. 107819 1. 199409  
2. 579202 1. 253774 1. 690084 2. 060949 1. 81904 2. 096779 2. 395731 1. 556651 1. 356267  
1. 205077 1. 775602 1. 426721 1. 045981 1. 448579 1. 385657 1. 766208 1. 168499 1. 28483  
5. 980827 5. 59937 5. 96513 5. 827625 5. 567425 4. 494028 5. 641927 5. 524527 6. 518867  
1. 289193 2. 448661 1. 246966 1. 800915 1. 807041 1. 44659 1. 228965 1. 377447 1. 517678  
0. 944883 1. 182707 1. 146105 1. 158558 1. 576278 1. 415574 1. 80137 0. 977027 0. 652458  
0. 686664 0. 928633 0. 953966 0. 743365 1. 151118 0. 712779 1. 137424 1. 060734 1. 243606  
9. 388865 6. 219028 4. 548521 3. 100459 5. 912857 4. 815912 4. 613961 6. 727573 4. 311037

1. 358984 0. 883964 1. 155865 0. 913097 1. 11426 0. 661835 0. 738833 2. 160146 1. 000308  
6. 967169 8. 18697 7. 764339 8. 750474 8. 028674 8. 418746 8. 403348 8. 479446 7. 368445  
7. 638284 8. 334909 8. 105111 7. 659839 8. 335068 7. 748448 8. 061104 8. 159584 8. 114599  
2. 370857 2. 53766 2. 900915 2. 239765 1. 563509 2. 662257 2. 542464 3. 118777 2. 780753  
2. 390963 1. 836084 1. 561205 1. 785435 2. 547221 1. 663286 2. 433502 2. 162667 1. 89408  
1. 918951 2. 86811 3. 394731 2. 494424 1. 680962 2. 655096 2. 532604 2. 389915 3. 252442  
8. 273891 8. 510321 7. 464128 9. 316929 9. 402354 8. 879239 8. 913953 8. 266631 9. 01376  
2. 617617 2. 179181 2. 645889 2. 933063 3. 047245 2. 719004 2. 388377 3. 248226 3. 425334  
6. 956305 6. 905935 6. 835984 7. 136175 7. 317562 7. 369888 6. 877932 6. 96546 6. 888087  
5. 484568 5. 937227 5. 457749 5. 655364 5. 962032 5. 907851 5. 893483 5. 438324 5. 582334  
5. 603061 5. 032584 5. 058788 6. 02076 5. 242856 6. 190339 4. 767711 5. 497707 4. 936855  
1. 038037 3. 489866 2. 315676 2. 154127 3. 710771 2. 032724 2. 855759 1. 703127 1. 438692  
4. 194233 3. 539282 4. 467006 3. 474632 4. 696679 3. 530739 3. 579563 4. 170506 4. 120129  
1. 722297 1. 481253 1. 523624 1. 358798 1. 703158 1. 402141 1. 381539 1. 590021 1. 616619  
3. 958824 5. 176958 5. 326807 4. 417503 5. 097984 5. 144433 4. 155801 4. 912466 4. 623676  
6. 418529 7. 614703 7. 76957 8. 120414 7. 531655 7. 639603 7. 390685 7. 858777 7. 609642  
4. 524305 5. 317447 4. 891458 5. 211673 5. 943926 5. 169671 5. 404387 5. 840887 5. 084254  
8. 230546 9. 108319 8. 956646 11. 42504 9. 546296 9. 195679 9. 926039 10. 73045 7. 139825  
3. 230027 2. 381709 3. 115656 2. 748435 3. 506374 1. 894496 2. 902536 2. 787551 3. 604831  
6. 173796 6. 129881 5. 914791 6. 142381 5. 968763 6. 563526 6. 009833 6. 192935 6. 047286  
5. 615722 7. 043881 7. 129248 6. 61219 7. 03685 7. 119757 7. 166557 6. 406499 7. 048786  
8. 095889 7. 518753 8. 011982 7. 872032 7. 975421 7. 556632 7. 706135 7. 785031 7. 565597  
1. 869375 1. 827762 2. 242769 2. 636737 1. 48348 2. 243479 2. 262015 2. 348261 2. 725161  
3. 440996 3. 796114 4. 358354 4. 083813 3. 058375 3. 600767 3. 652289 3. 654498 3. 6093  
5. 105404 5. 321519 5. 243874 4. 547213 4. 947012 5. 499703 4. 588523 4. 853467 4. 570241  
7. 299661 7. 76737 7. 963763 7. 385272 7. 680948 7. 932773 7. 818993 7. 761592 7. 441569  
3. 774325 3. 822324 4. 522258 4. 912872 4. 533858 4. 335572 5. 125658 4. 765551 4. 539937  
2. 641223 3. 817349 3. 908053 4. 773354 4. 370328 3. 68408 4. 285263 3. 860129 4. 557777  
3. 976828 4. 350745 4. 478579 4. 324886 3. 634764 3. 400481 3. 805824 3. 828318 3. 20904  
3. 447975 4. 696048 4. 478425 4. 032982 5. 448232 4. 326661 4. 60128 3. 204436 3. 973694  
4. 31785 4. 072817 4. 097672 4. 209397 4. 397908 5. 014904 4. 782913 4. 395444 4. 469021  
5. 069065 5. 372442 4. 929996 5. 261258 4. 979892 4. 925885 5. 146213 5. 319367 4. 832438  
1. 937011 2. 244898 1. 27059 1. 450361 1. 705892 1. 541977 1. 707932 1. 788054 1. 400464  
3. 898556 4. 537728 3. 739053 3. 632781 3. 473443 3. 872993 3. 593257 3. 445371 3. 98145  
5. 346161 5. 642178 6. 332362 6. 042622 5. 507773 4. 887024 5. 35698 5. 998906 6. 090836  
3. 325135 2. 752575 3. 351747 2. 321261 2. 562263 3. 60682 3. 025744 3. 817922 3. 019813  
4. 729487 4. 558006 4. 255188 5. 202631 4. 912833 4. 438183 4. 166406 3. 850353 4. 3793  
1. 78718 2. 085201 1. 634542 2. 041504 1. 846487 1. 700529 2. 668937 2. 400862 2. 135179  
5. 183677 5. 072757 5. 816449 5. 200768 5. 243412 5. 80328 5. 095581 4. 934542 5. 443743  
3. 24598 3. 481371 3. 142588 3. 082042 2. 966237 3. 631515 3. 233657 3. 295689 2. 765817  
3. 461519 4. 057382 1. 102287 1. 309258 1. 909141 2. 472864 1. 6533 1. 396971 1. 536364  
1. 663132 1. 468167 1. 034653 1. 719027 1. 519764 1. 380718 2. 218478 1. 370745 2. 09247  
6. 14761 8. 194321 7. 828616 7. 922309 8. 498487 7. 229164 8. 024403 7. 346937 8. 140543  
3. 730725 4. 091709 3. 685673 4. 809065 4. 475624 4. 180287 4. 089375 4. 241614 4. 338002  
2. 514017 2. 004116 2. 386972 1. 917313 2. 26135 3. 0002 4. 303647 3. 346907 2. 515571  
4. 925323 5. 142473 4. 94877 4. 294514 5. 206477 4. 321202 4. 722185 4. 919195 4. 337455  
6. 55502 6. 859431 7. 073794 8. 027044 8. 312658 7. 265444 9. 069528 7. 43507 7. 735931  
1. 298481 1. 48701 1. 468743 1. 190799 1. 505169 1. 888444 1. 685436 1. 159218 1. 803116  
7. 439371 7. 977747 8. 063941 6. 803019 7. 459225 7. 84583 7. 24669 8. 332845 7. 399976  
2. 917446 3. 756677 3. 163378 2. 452078 3. 84857 3. 896157 3. 791879 2. 580937 3. 365149  
1. 411753 1. 057351 0. 844245 1. 361647 1. 265205 0. 80997 0. 973671 1. 300461 1. 511675

6. 346768 4. 536803 5. 732478 5. 307376 5. 902984 4. 399427 5. 373263 5. 09018 4. 660845  
1. 684262 1. 089402 1. 789218 2. 24641 1. 27473 0. 848393 1. 223711 1. 4855 1. 70087  
2. 699704 2. 008537 1. 633739 1. 295187 1. 768713 2. 806047 2. 104297 1. 803774 2. 726524  
3. 807993 5. 293883 5. 320759 5. 444328 5. 289181 4. 89755 4. 557069 4. 943828 5. 898194  
2. 275143 2. 326287 2. 706871 1. 700352 1. 534039 1. 924802 2. 452726 1. 972961 1. 931227  
2. 152697 1. 203468 2. 278561 2. 004776 1. 408145 1. 925041 1. 807362 2. 384445 1. 748854  
1. 578779 1. 114438 1. 901434 1. 424531 0. 914013 1. 311251 0. 977215 1. 194669 1. 384976  
2. 155476 1. 922644 1. 887042 1. 606362 1. 774635 2. 264612 2. 360127 1. 971673 1. 846897  
6. 333094 6. 161431 6. 088618 6. 106154 4. 791496 6. 166299 5. 746061 6. 579036 5. 964912  
6. 544725 6. 780517 6. 06812 6. 962324 7. 062095 5. 448165 5. 657775 6. 257872 6. 771627  
2. 661775 1. 754214 1. 486649 1. 503104 1. 056381 1. 197025 2. 180217 1. 459955 1. 580826  
3. 576328 5. 592901 5. 405246 5. 301544 4. 228606 4. 868822 5. 033731 5. 393339 5. 420701  
1. 46892 1. 162897 0. 833008 1. 04298 1. 959155 0. 792505 1. 623104 0. 94897 0. 849626  
10. 50597 9. 83163 10. 5415 9. 986325 9. 448929 10. 22782 10. 66806 9. 91367 10. 22029  
4. 273829 5. 385703 5. 137745 5. 812474 5. 483215 5. 844162 5. 490016 5. 967078 5. 739874  
4. 802387 5. 015269 4. 759947 4. 222426 4. 938208 5. 035398 4. 737747 5. 025912 5. 046961  
7. 561218 7. 57785 7. 786954 7. 859504 7. 813517 7. 51388 7. 403994 7. 767642 7. 490661  
6. 859417 6. 553902 6. 82027 6. 712698 7. 563205 6. 859661 6. 627709 7. 105907 7. 012343  
4. 391698 5. 145558 4. 690557 4. 25732 5. 281652 4. 730131 4. 645906 5. 372442 4. 920556  
9. 109903 9. 181147 8. 57865 9. 644831 9. 373828 9. 252849 9. 346578 8. 732134 9. 416074  
1. 917229 2. 442753 2. 079259 1. 9039 2. 650882 4. 327684 3. 399621 3. 8729 3. 966629  
4. 13716 4. 728057 3. 562005 4. 285132 3. 702743 3. 655772 3. 725972 5. 157524 4. 998875  
1. 529939 1. 176126 1. 080379 0. 68774 1. 223222 1. 758923 1. 298713 1. 116715 1. 488889  
2. 032838 2. 19006 1. 967439 1. 610143 2. 131543 1. 940041 2. 284439 2. 041022 2. 386987  
1. 95547 1. 672264 1. 744388 1. 089656 2. 144776 1. 664522 1. 864317 1. 71143 2. 10838  
7. 393377 7. 69502 7. 44536 7. 264976 7. 532548 7. 423144 7. 250829 7. 630428 7. 547861  
4. 075024 5. 731864 5. 379319 4. 909699 3. 498197 5. 516468 4. 812338 3. 314715 4. 709366  
3. 008937 2. 615855 3. 174192 2. 317054 2. 165318 2. 493766 1. 903215 2. 302993 1. 782186  
5. 801354 6. 375012 5. 826626 6. 607797 6. 019281 6. 527233 7. 035828 6. 171121 6. 435928  
4. 786885 5. 102694 5. 438288 4. 726404 5. 51271 5. 190233 4. 203124 4. 397323 5. 204824  
4. 940563 4. 801249 4. 447677 4. 783692 4. 040914 5. 063967 2. 038657 4. 497425 3. 442411  
2. 238288 1. 823641 1. 908104 2. 107523 2. 040249 1. 925287 1. 93069 1. 865903 1. 789664  
5. 765196 6. 654442 5. 599748 6. 50463 6. 702116 6. 03018 5. 923944 6. 760412 5. 57933  
1. 772719 2. 349883 1. 920269 1. 930247 1. 538514 1. 581622 1. 507003 1. 072663 1. 218945  
3. 82475 4. 061413 2. 936559 2. 085606 3. 004793 1. 779899 3. 973907 3. 155212 3. 212105  
7. 840832 8. 304111 8. 133123 8. 233941 8. 186821 8. 440579 7. 814985 8. 15254 8. 095545  
6. 43204 6. 709689 6. 259016 6. 622528 6. 830899 6. 64532 6. 002918 7. 250634 7. 023103  
7. 564613 7. 922168 7. 480596 7. 701999 7. 146123 8. 0888 7. 680038 7. 730435 7. 921166  
1. 987608 1. 718567 1. 41418 1. 914856 2. 130465 1. 758153 2. 096065 1. 59046 1. 886141  
2. 622786 2. 598549 1. 691336 1. 957879 2. 110975 2. 234506 3. 244903 2. 022384 2. 518133  
7. 08946 7. 862767 6. 793138 7. 649418 7. 646694 7. 313619 6. 605076 6. 555889 7. 27236  
4. 414188 4. 903721 4. 699166 4. 734729 4. 583914 3. 959167 3. 76586 4. 406809 4. 316087  
6. 916395 6. 545402 7. 343024 6. 38819 6. 010072 7. 269604 6. 940299 7. 117286 7. 344302  
5. 098247 6. 144659 6. 137052 4. 605586 6. 164657 6. 784071 4. 405829 5. 01355 5. 592192  
5. 220092 4. 942619 4. 862752 5. 414284 5. 620105 5. 16324 4. 635151 5. 340299 5. 431338  
3. 674972 3. 070146 3. 382165 3. 39352 3. 721703 3. 584901 3. 267563 3. 939734 3. 843643  
6. 727949 6. 97285 6. 75162 6. 495034 6. 101969 5. 994952 6. 705827 6. 729795 6. 417197  
5. 279869 5. 63528 5. 523198 5. 137778 5. 435723 5. 561846 5. 085887 4. 732687 5. 052316  
7. 432104 6. 440129 7. 036244 5. 789565 6. 776202 6. 315946 6. 250645 6. 83379 6. 683843  
1. 372425 1. 151162 1. 026103 1. 589808 1. 691829 1. 56177 1. 57577 1. 764943 1. 370739  
1. 759943 1. 638549 1. 862609 1. 73166 1. 57509 1. 65959 1. 349329 1. 692087 1. 421588

5. 927623 5. 817449 5. 479692 4. 732027 5. 635507 5. 615538 4. 724955 5. 634218 5. 522511  
6. 161107 7. 00723 6. 800204 7. 351043 7. 375026 6. 457825 5. 797887 6. 726038 6. 688801  
2. 973737 5. 932937 5. 218241 5. 21579 4. 543083 4. 649098 5. 06924 5. 064788 4. 463952  
3. 348194 3. 302127 3. 276451 3. 052664 3. 839295 2. 741723 2. 990542 3. 353342 2. 93267  
6. 516466 6. 148782 6. 091676 5. 424588 5. 388518 6. 046558 5. 536685 5. 755107 6. 135806  
6. 27611 6. 560205 6. 452571 6. 759675 6. 969722 6. 476863 6. 728032 6. 16224 6. 63233  
6. 316111 5. 969796 5. 528688 6. 674729 6. 191276 6. 609409 5. 967572 6. 398399 6. 529151  
5. 077509 5. 281995 4. 847362 5. 491489 5. 195307 5. 014659 4. 423999 4. 854299 6. 025256  
5. 920068 5. 717552 5. 486886 6. 012928 5. 629929 5. 947779 6. 21158 6. 463957 5. 941132  
2. 565683 1. 998437 2. 417157 1. 828864 2. 4144 2. 107302 2. 683589 2. 242221 1. 898643  
5. 427282 5. 753006 5. 203491 5. 050481 5. 389642 5. 650095 5. 385817 5. 050214 5. 428716  
7. 904812 7. 594949 7. 400548 7. 050196 7. 794115 7. 516928 7. 482163 7. 597001 7. 201151  
6. 219797 6. 070529 5. 805052 5. 317436 5. 84491 4. 930025 6. 3819 5. 504512 5. 705021  
5. 036635 5. 208472 5. 627272 4. 168627 5. 328051 4. 86153 4. 811554 4. 965996 5. 477117  
6. 903488 7. 369125 6. 81478 6. 575018 7. 320233 6. 601453 6. 376278 7. 160037 6. 881838  
2. 049012 1. 814894 2. 521499 2. 069943 1. 659268 2. 217111 2. 632199 1. 795635 2. 301574  
5. 825585 5. 599235 5. 941412 6. 291758 5. 423746 5. 436463 5. 381659 4. 985933 5. 282977  
5. 109574 3. 95014 5. 184354 4. 963105 4. 488972 6. 053514 3. 958642 4. 445877 4. 186098  
4. 905977 4. 296786 4. 471882 4. 246029 4. 912491 4. 003744 4. 450079 4. 214863 4. 123329  
4. 390499 5. 43638 4. 76618 5. 138578 5. 559332 5. 526013 5. 1548 5. 495477 4. 713271  
1. 774864 1. 926302 2. 082944 1. 940059 1. 946902 1. 617566 1. 98388 2. 063768 1. 837347  
2. 594951 2. 998275 2. 280278 2. 707 2. 208552 2. 610894 2. 279859 2. 367489 2. 451394  
4. 071496 2. 416629 3. 218546 2. 967872 3. 063419 3. 596409 3. 539206 3. 467446 3. 106716  
4. 238534 4. 577934 4. 099796 3. 390715 3. 41668 3. 471744 3. 774951 4. 463048 4. 621459  
1. 092183 0. 767821 1. 414703 1. 940656 1. 7861 1. 231835 1. 077908 1. 119698 1. 303635  
4. 338837 4. 047489 4. 137405 3. 7619 4. 022148 3. 476207 4. 063422 3. 654321 4. 114085  
4. 933271 4. 843067 4. 403153 5. 344597 4. 879958 4. 981916 4. 803686 4. 951635 4. 932156  
7. 115578 7. 133667 8. 453661 7. 113534 7. 068465 7. 385385 8. 371666 7. 492776 8. 019647  
2. 208001 2. 25638 2. 290713 2. 202371 2. 144703 1. 634075 1. 829098 2. 422358 1. 813239  
1. 668034 3. 182388 2. 360663 4. 872422 3. 713476 2. 083787 2. 774415 2. 786427 3. 263325  
2. 91084 2. 481887 2. 578496 2. 977852 2. 573451 2. 898675 2. 328748 2. 91084 2. 520162  
4. 690764 4. 80717 5. 675805 5. 911036 5. 465246 4. 899509 5. 017616 5. 706188 5. 428574  
2. 370491 2. 845728 2. 802938 2. 987812 2. 304159 2. 702164 2. 732118 2. 623551 3. 300152  
5. 32716 4. 625433 4. 952819 5. 270341 5. 146186 5. 74385 5. 373119 4. 034173 5. 453176  
7. 009068 6. 348416 6. 518482 6. 346102 6. 066811 6. 203825 6. 094619 6. 070102 6. 492453  
6. 318145 6. 523469 6. 573589 6. 677913 6. 410937 6. 783076 5. 82798 5. 76775 6. 240476  
7. 441662 7. 643244 7. 405701 7. 437623 7. 358901 7. 612014 7. 402653 7. 947397 7. 582329  
2. 521746 3. 333219 3. 906154 3. 623535 3. 126884 4. 233334 3. 540195 2. 510171 2. 934011  
0. 799216 0. 99377 0. 561902 1. 180276 1. 256506 0. 909839 1. 514053 0. 820516 0. 961518  
3. 013331 2. 82785 2. 959468 2. 277506 2. 471878 2. 895556 4. 015448 2. 78951 2. 13131  
5. 712833 5. 701698 5. 764909 5. 372103 5. 582097 5. 451799 5. 828493 5. 557984 5. 320778  
1. 51945 1. 026869 1. 924182 1. 409058 0. 912812 0. 998375 2. 154615 1. 395924 1. 234561  
2. 748274 2. 922344 6. 301279 2. 393578 2. 68546 2. 497978 2. 549832 2. 728811 3. 906823  
1. 461551 1. 0487 1. 0487 1. 902975 0. 986483 1. 831708 1. 633988 1. 37046 1. 561788  
6. 562722 7. 261807 7. 006073 7. 52003 7. 726134 7. 21836 7. 510715 7. 396841 7. 465332  
7. 290905 6. 920605 7. 607633 5. 81338 7. 285306 7. 153303 5. 490865 6. 443207 6. 306397  
7. 716782 8. 030322 7. 808986 8. 121008 8. 031041 8. 117332 7. 983392 8. 071485 7. 645103  
2. 387989 2. 283276 2. 350807 2. 779963 2. 487093 2. 719359 2. 37788 2. 77259 2. 906622  
3. 146207 3. 73062 4. 661381 3. 945122 3. 765077 4. 099178 3. 652436 3. 854607 4. 763559  
1. 378799 1. 615953 1. 387452 1. 342573 1. 514751 1. 325926 1. 72666 1. 423278 1. 445796  
4. 58482 5. 041534 5. 493652 3. 13744 4. 238518 4. 431084 3. 610144 4. 731451 4. 32525

1. 673549 1. 833281 1. 468228 1. 443568 2. 10017 1. 383 1. 25252 1. 799054 1. 48237  
9. 085546 9. 397968 9. 355459 9. 622599 10. 32271 9. 523394 7. 575072 10. 25439 9. 659924  
6. 423008 6. 736089 5. 496382 7. 008044 6. 797137 6. 946988 6. 868791 5. 379425 5. 999861  
1. 677799 1. 143245 1. 667683 1. 920732 1. 743085 1. 586975 1. 591969 1. 255079 1. 619745  
4. 889443 5. 176268 4. 40786 5. 323713 4. 918411 4. 645815 4. 364369 5. 701811 4. 879974  
3. 961253 5. 444032 5. 315585 4. 668113 5. 230782 4. 738697 5. 144998 4. 916439 4. 959737  
1. 184473 1. 006115 1. 50297 1. 268919 1. 076429 1. 259119 1. 56034 1. 244051 1. 198288  
5. 41492 4. 925523 5. 246018 5. 713516 5. 692524 5. 605378 5. 49918 5. 265342 5. 493098  
5. 430533 5. 951266 5. 996767 5. 833428 5. 489012 5. 363692 5. 823777 6. 266208 5. 753742  
7. 00915 6. 80106 6. 868916 6. 620986 6. 554495 6. 649639 6. 789135 6. 771513 6. 862698  
3. 230879 2. 437892 2. 913831 2. 371728 2. 625236 2. 126211 2. 490434 2. 988888 2. 667744  
2. 3391 2. 499087 2. 51255 2. 060027 1. 642815 3. 126725 2. 439653 1. 583328 1. 963262  
1. 119335 1. 400182 1. 354939 1. 320025 1. 517853 1. 274488 1. 416569 1. 579957 1. 20496  
4. 471209 4. 427311 4. 376467 4. 657143 5. 316264 4. 450086 5. 043299 4. 770415 4. 608001  
2. 328812 1. 843137 1. 848105 1. 846928 1. 91623 1. 814556 1. 653281 1. 766124 1. 789204  
10. 15426 10. 1653 10. 24591 10. 15927 10. 09526 10. 17017 10. 54407 9. 866335 10. 18869  
11. 1974 10. 92302 10. 86997 11. 0061 11. 08963 10. 58486 11. 26954 10. 70812 11. 06977  
2. 77749 3. 712873 3. 112132 3. 56356 3. 66126 3. 005323 3. 805963 3. 411533 3. 618113  
1. 976228 3. 705327 1. 77552 1. 32099 0. 602754 2. 401874 1. 970288 1. 618571 0. 899144  
2. 046239 1. 47306 1. 184778 1. 571522 2. 305754 2. 03173 2. 077271 1. 906816 1. 567049  
1. 913833 1. 181483 1. 172792 0. 982122 1. 43678 1. 233719 1. 778054 2. 045447 1. 663265  
2. 745741 1. 799561 2. 163731 2. 241458 2. 485568 2. 554158 1. 902128 1. 984114 1. 212143  
6. 933511 4. 732805 5. 066219 3. 891264 4. 951672 2. 145239 5. 019377 3. 428027 6. 595751  
1. 884601 1. 5168 1. 404155 1. 379657 1. 616073 1. 398825 1. 677311 1. 495535 1. 41103  
10. 70358 10. 6222 10. 50003 10. 68752 10. 79826 10. 24904 11. 08497 10. 61573 10. 62608  
8. 027575 6. 698718 8. 443027 8. 198838 8. 417806 7. 842559 7. 458518 7. 173247 8. 001514  
3. 132908 4. 951834 5. 112017 5. 648514 4. 723577 4. 786702 4. 908734 5. 192179 5. 033173  
10. 71653 10. 85321 10. 83825 10. 79594 10. 74486 10. 60659 11. 05407 10. 64614 10. 80514  
3. 069736 2. 654588 2. 188987 3. 284419 2. 678783 2. 905581 3. 118353 2. 412806 2. 665094  
4. 304425 4. 134601 4. 199996 4. 081538 4. 065068 3. 823161 4. 206068 4. 15975 4. 121686  
6. 898129 5. 179052 5. 982961 6. 461616 5. 852874 4. 955701 6. 326556 6. 328674 5. 619865  
4. 884257 5. 537937 4. 440215 5. 806944 3. 548383 6. 334949 5. 953352 5. 13388 6. 517889  
10. 11731 10. 20571 10. 22159 10. 1788 10. 32677 9. 937834 10. 94481 9. 931749 10. 16915  
4. 021068 2. 696748 3. 918797 4. 264532 4. 432602 4. 549623 3. 955194 3. 837309 4. 17866  
7. 061991 6. 304451 6. 647564 6. 461086 6. 193736 5. 724368 6. 670933 6. 026122 6. 668508  
6. 534513 6. 535021 7. 588649 4. 772608 6. 785564 6. 181222 7. 487454 6. 809419 7. 113289  
6. 319085 5. 336663 5. 515467 5. 390495 5. 597655 6. 29284 6. 271458 6. 204476 6. 0484  
11. 44904 11. 08661 11. 4143 11. 06023 11. 15454 10. 91932 11. 74208 11. 20236 10. 98257  
2. 894174 3. 147416 2. 877137 2. 989228 2. 779283 3. 101789 2. 955655 2. 856333 3. 111654  
11. 47168 11. 54617 11. 40564 11. 3355 11. 49752 11. 04533 11. 91893 11. 37885 11. 37891  
10. 75736 10. 61716 10. 36264 10. 80679 10. 33038 10. 46864 10. 85474 10. 23752 10. 53056  
4. 113173 3. 502753 3. 745813 2. 947321 2. 641857 3. 014647 3. 797145 3. 282202 3. 431427  
3. 260829 2. 829862 2. 898049 3. 378587 2. 891676 3. 233464 4. 03122 2. 880025 3. 317788  
5. 340998 4. 292783 4. 616597 2. 422092 6. 117438 4. 437113 5. 765472 1. 655454 3. 808728  
5. 537729 4. 949665 5. 686028 5. 033438 4. 612742 5. 241457 5. 898411 4. 565586 5. 483764  
2. 670562 2. 210313 3. 733819 3. 161448 2. 293428 2. 771402 1. 855169 3. 765114 1. 645897  
5. 987737 5. 616089 6. 350606 5. 399823 5. 986885 5. 808647 6. 049613 6. 145949 5. 912726  
8. 235468 8. 276644 8. 259694 8. 410601 8. 397788 7. 921089 8. 756446 8. 438241 8. 278295  
8. 723578 8. 951105 9. 06377 8. 825602 8. 911407 8. 66795 9. 379707 8. 547193 8. 855156  
5. 838446 5. 76954 6. 10633 5. 193167 6. 051251 5. 525192 5. 197889 5. 184608 5. 938352  
11. 5391 11. 63507 11. 48783 11. 61245 11. 43908 11. 56609 11. 77061 11. 19997 11. 66751

7. 612885 7. 771753 8. 248595 7. 444264 8. 231325 7. 434941 8. 365231 7. 334643 8. 094341  
2. 082368 1. 31579 2. 274859 1. 262112 2. 287977 1. 485995 1. 734409 2. 127472 2. 37546  
5. 204886 5. 4057 5. 219612 6. 119995 5. 879495 5. 309575 6. 588168 5. 462129 5. 462241  
2. 700074 3. 125297 2. 0611 3. 746649 2. 733535 3. 104574 2. 229298 2. 686407 2. 848999  
6. 538408 5. 409436 6. 26394 5. 913553 5. 695161 5. 561179 5. 843004 5. 85766 6. 00285  
4. 62199 4. 405509 4. 404649 3. 65647 3. 980701 4. 361182 4. 096002 4. 122072 3. 941329  
9. 277889 9. 644009 9. 568859 9. 384562 9. 74195 9. 354295 9. 373396 9. 544439 9. 67457  
8. 813357 9. 198074 9. 065562 9. 246386 9. 053619 9. 39574 9. 445243 8. 995518 9. 340886  
5. 208093 5. 631263 5. 816588 5. 446735 5. 461467 5. 173392 6. 02047 5. 681216 5. 371701  
2. 489404 2. 616304 3. 500704 2. 667667 3. 399456 2. 860931 2. 842448 2. 218937 2. 344268  
3. 553953 3. 931111 4. 115578 3. 859825 4. 447104 3. 889923 3. 383951 4. 302254 3. 869743  
1. 433492 1. 282537 1. 082093 2. 093052 0. 97646 1. 330069 0. 998026 2. 781545 2. 187556  
5. 386934 5. 905677 5. 120498 5. 245529 5. 575011 4. 025003 5. 146367 4. 983627 4. 846421  
1. 63317 1. 465617 2. 213885 1. 722588 2. 773425 2. 789989 1. 646964 1. 672244 2. 075483  
5. 456178 5. 758892 5. 979386 4. 802478 6. 195654 5. 213424 5. 509305 5. 806749 5. 165684  
5. 783279 5. 832561 6. 952096 6. 385513 6. 352915 6. 921099 5. 977241 5. 950032 6. 139588  
7. 990049 7. 870423 7. 422619 7. 809696 1. 299657 7. 27717 8. 149817 7. 483467 1. 950823  
1. 826873 1. 103624 1. 11062 1. 677287 1. 433723 1. 278433 1. 252864 1. 10336 1. 13256  
1. 252779 2. 506149 1. 430833 1. 697854 1. 539362 0. 789572 2. 33601 1. 344108 1. 484407  
3. 377127 2. 629433 1. 995707 3. 261371 1. 594509 2. 643154 2. 652007 1. 741154 2. 26731  
1. 739215 1. 685275 1. 073762 1. 317403 1. 464697 1. 227378 1. 36625 1. 254991 1. 138014  
7. 694035 8. 227461 7. 259881 8. 081056 7. 609709 6. 847202 8. 88066 6. 545582 8. 01924  
10. 3549 10. 3887 10. 25364 10. 274 10. 39325 10. 12505 11. 10729 10. 27819 10. 23988  
0. 469087 4. 161361 4. 788866 3. 646841 4. 048274 2. 8709 3. 458628 5. 338003 2. 985995  
2. 119904 1. 627636 1. 342249 2. 165199 1. 74095 1. 482319 1. 912524 1. 5094 2. 054928  
1. 508792 1. 370916 1. 269916 1. 200309 1. 885206 1. 671105 0. 981284 1. 333434 2. 295412  
3. 720639 3. 098421 3. 718674 4. 087688 2. 006046 2. 937286 3. 703608 3. 158238 3. 41265  
9. 418507 9. 454982 9. 594026 9. 625269 9. 515398 8. 887094 10. 1866 9. 374941 9. 335505  
3. 101809 3. 978968 4. 127727 3. 572135 2. 615246 2. 646403 4. 96957 3. 61165 2. 20557  
1. 664453 2. 141555 2. 581352 1. 923271 1. 47568 1. 751862 1. 683732 1. 645493 1. 983684  
3. 280264 3. 355413 3. 741912 3. 661999 3. 255779 2. 896083 3. 928364 3. 307749 3. 592396  
4. 7417 3. 625697 3. 388391 4. 495826 4. 215436 4. 126966 4. 765645 4. 123721 4. 438215  
0. 844902 1. 130654 1. 005231 1. 710408 1. 138035 1. 237506 1. 246768 1. 581864 1. 198704  
1. 476689 1. 74831 2. 243573 1. 453108 0. 976704 2. 057953 2. 050361 1. 231156 1. 294579  
4. 247837 2. 175466 1. 771136 2. 193723 2. 21563 2. 264832 1. 923223 2. 018932 2. 164992  
1. 185021 0. 611694 0. 744669 0. 694717 1. 224424 1. 012762 0. 986643 0. 863781 1. 027669  
3. 103638 3. 438314 3. 104881 4. 137264 2. 785862 3. 131633 2. 513692 3. 286411 3. 58022  
1. 242095 1. 623019 2. 269699 1. 278088 1. 173767 1. 359749 2. 353891 1. 180163 1. 242093  
1. 357955 1. 160837 1. 259257 1. 491764 1. 273241 1. 387304 2. 301555 1. 372851 1. 38145  
5. 788763 4. 061607 4. 470712 3. 9134 3. 519936 3. 684853 4. 374881 4. 262011 4. 037105  
1. 116206 1. 39889 2. 309846 1. 38653 1. 656913 1. 373367 1. 872564 1. 644517 1. 12586  
4. 831114 3. 628277 3. 722723 3. 346537 3. 285964 4. 581947 3. 754665 3. 401418 4. 274183  
5. 829318 6. 42739 5. 522842 6. 423401 6. 974148 6. 636966 6. 175484 6. 490417 6. 171084  
6. 705861 6. 402564 5. 847315 6. 6907 6. 358729 6. 505015 6. 518185 6. 082541 6. 429452  
5. 534625 6. 533073 6. 14517 6. 352828 6. 767134 6. 46229 6. 716154 6. 181552 6. 545458  
5. 277518 5. 510774 4. 647071 4. 847434 5. 863544 4. 001427 5. 661785 4. 977365 5. 064163  
5. 718875 5. 40614 5. 226223 5. 374109 4. 758144 4. 753941 6. 147569 5. 604571 5. 387175  
11. 76865 11. 77339 11. 64607 11. 66108 11. 75087 11. 60338 12. 02007 11. 59608 11. 79961  
10. 67518 10. 72983 10. 44183 10. 79073 10. 48789 10. 42293 10. 81031 10. 45883 10. 51695  
3. 929745 3. 983658 4. 059089 3. 663411 3. 445041 3. 811334 4. 058878 3. 300265 3. 8908  
8. 070785 7. 8432 7. 682322 7. 856335 7. 671881 7. 273858 8. 032365 7. 867942 7. 837594



7. 378916 7. 384396 7. 52244 7. 643737 7. 538615 7. 045306 9. 018968 7. 275221 7. 712743  
6. 851321 7. 012064 6. 686931 6. 388325 6. 490267 6. 517529 7. 170201 6. 707075 6. 986518  
10. 20401 10. 30222 10. 19912 10. 228 10. 12297 10. 3861 10. 97394 10. 34289 10. 27977  
5. 129045 4. 399589 4. 463625 4. 383551 4. 447429 3. 939795 4. 539929 4. 553582 4. 458614  
10. 29342 10. 31113 10. 47718 10. 16977 10. 32511 9. 519521 10. 96908 10. 22074 10. 35055  
7. 54127 6. 789931 6. 65468 6. 746216 6. 456388 6. 112129 6. 897697 6. 543098 6. 020214  
2. 983228 3. 133504 2. 95173 3. 046647 2. 628995 2. 454445 2. 703107 2. 767589 2. 90389  
3. 934437 3. 094453 3. 416278 3. 326566 2. 933207 3. 020716 2. 856749 2. 683022 3. 808446  
4. 6248 5. 125103 3. 135153 3. 34752 4. 528954 3. 162947 4. 169209 3. 818896 4. 582562  
2. 343996 1. 875489 1. 492009 2. 803409 2. 690377 2. 210069 1. 982145 2. 261376 3. 498936  
10. 25636 10. 43791 10. 1431 10. 19364 9. 590114 9. 50268 10. 57375 9. 865731 10. 12975  
2. 299579 2. 302902 2. 484602 2. 453817 3. 544842 2. 443493 3. 164478 3. 355073 2. 461667  
8. 121602 8. 720077 8. 487358 8. 918134 8. 693836 8. 874855 8. 838132 8. 954036 8. 569796  
6. 937147 6. 471374 6. 541431 7. 559551 7. 197838 7. 337325 7. 049616 7. 859072 7. 289708  
6. 52219 6. 546463 6. 629527 7. 313424 6. 760715 7. 414538 6. 552778 6. 517903 6. 784523  
1. 600035 1. 814875 1. 201548 1. 580956 0. 931437 1. 431003 1. 896923 1. 613435 1. 658637  
5. 539472 5. 71519 5. 639199 6. 032293 5. 836284 5. 779706 5. 35071 5. 754568 5. 498373  
2. 873416 1. 645673 1. 994836 3. 484697 2. 579681 3. 882374 2. 542579 2. 001748 4. 165913  
4. 608754 3. 660379 3. 782763 3. 449604 3. 211953 3. 379296 4. 0363 4. 051699 4. 761706  
2. 193908 1. 379958 1. 998465 1. 354631 1. 753082 1. 648789 1. 356814 2. 404103 1. 43274  
8. 247959 7. 454137 7. 739288 7. 377431 7. 743193 8. 287947 7. 607156 6. 697853 8. 134511  
7. 628674 7. 871274 7. 915145 7. 877916 8. 000851 8. 050122 7. 628352 8. 228844 7. 916745  
3. 372974 1. 782559 2. 141899 2. 511107 2. 576954 1. 933862 3. 179321 2. 585731 3. 439395  
8. 288268 8. 959759 8. 56548 9. 482569 9. 012993 9. 186762 9. 476625 9. 24778 9. 126933  
2. 604478 3. 163002 2. 617227 2. 429644 2. 505925 2. 439596 2. 787372 1. 952851 2. 563483  
5. 325112 4. 649053 4. 573535 5. 521444 5. 226705 4. 669552 4. 736394 4. 577463 5. 030411  
4. 88361 6. 294997 6. 450274 6. 907817 5. 708281 6. 638285 6. 204434 6. 215142 6. 883217  
5. 137379 5. 682282 5. 660519 5. 999188 5. 29121 5. 396233 5. 685712 5. 066386 5. 863623  
1. 914565 1. 334687 1. 29972 1. 765786 1. 901406 1. 43941 1. 53351 1. 844444 2. 104739  
6. 873956 7. 104837 7. 000873 7. 214431 6. 8569 6. 826445 6. 75333 6. 407846 6. 773136  
1. 669736 1. 52025 1. 403782 1. 567539 1. 620697 1. 717064 2. 100843 2. 000695 1. 991087  
1. 679567 1. 391317 1. 491187 1. 213472 1. 235138 1. 430937 1. 987859 1. 395894 1. 306202  
2. 647541 3. 279847 3. 803149 2. 322738 2. 901879 3. 443835 2. 362834 3. 670784 2. 385315  
3. 569158 3. 875687 4. 372805 2. 67463 2. 685612 4. 14848 4. 002475 4. 443435 5. 071708  
8. 288843 8. 829037 8. 831747 8. 405791 8. 896938 8. 686661 8. 47076 8. 836599 8. 543993  
6. 349969 5. 354431 6. 603575 6. 585612 7. 320093 5. 658085 7. 659165 6. 402933 6. 232425  
1. 909144 3. 423702 2. 461739 3. 229606 4. 317102 1. 78545 4. 269629 4. 783494 2. 854697  
7. 763531 8. 654982 7. 288234 8. 391003 8. 812547 8. 295498 8. 693759 8. 989489 7. 76127  
1. 328874 1. 945067 2. 757974 2. 304497 2. 471307 1. 300946 2. 037758 2. 238353 1. 430741  
9. 352993 9. 505854 9. 364213 9. 516296 9. 382075 9. 355022 9. 681936 9. 48351 9. 331933  
2. 394622 2. 602222 1. 910545 2. 281821 2. 195229 2. 808283 4. 228668 2. 05979 2. 373498  
5. 47378 8. 217925 8. 694552 6. 232725 8. 320469 6. 873873 7. 144042 6. 908974 7. 743451  
1. 919138 2. 060071 1. 903637 2. 180137 2. 255993 1. 924316 2. 01759 1. 937266 2. 3175  
6. 594455 7. 32581 7. 996345 6. 041002 8. 342256 7. 180917 7. 054816 6. 280136 6. 743818  
8. 760215 8. 689855 9. 065771 9. 389201 9. 341624 9. 541556 9. 603706 9. 441606 9. 544711  
9. 300873 9. 457989 9. 297873 9. 744176 9. 379447 9. 635338 9. 775213 9. 718575 9. 578839  
2. 993959 5. 180761 6. 42902 3. 403391 6. 211016 2. 395344 2. 62287 5. 210718 4. 831985  
4. 442294 4. 824097 4. 693283 4. 548809 4. 273756 4. 561118 4. 913902 4. 699667 4. 469804  
1. 682837 2. 553769 1. 637977 1. 753979 2. 18546 1. 773131 1. 841504 2. 985835 1. 76223  
3. 506198 5. 601347 4. 558573 4. 300024 2. 656276 3. 289674 2. 868267 3. 158978 3. 078019  
1. 92605 1. 755413 1. 941195 1. 706341 1. 667296 3. 83047 2. 130998 1. 153682 2. 156329

1. 205464 2. 353823 0. 989376 1. 208708 1. 083353 1. 14837 1. 214992 1. 317686 1. 880723  
0. 850075 1. 045593 1. 672576 1. 101877 0. 970694 0. 848919 0. 999901 1. 049254 1. 076374  
7. 02448 7. 313059 7. 066699 6. 733631 6. 874972 7. 145998 7. 03209 6. 641191 7. 133938  
7. 028028 7. 107213 6. 790944 7. 077265 6. 803814 7. 187604 7. 12188 6. 96492 6. 944308  
3. 154663 1. 942474 3. 164834 3. 072868 2. 792711 2. 889789 3. 224118 2. 949892 2. 634392  
6. 934323 4. 955117 5. 484757 3. 384337 4. 947105 3. 492553 5. 297976 4. 474984 6. 332824  
3. 544359 4. 03749 4. 535954 4. 402721 4. 127459 4. 865985 3. 402684 3. 775381 3. 955605  
5. 728935 5. 658776 5. 964939 4. 99456 6. 286758 6. 109297 5. 443896 6. 455808 6. 209478  
3. 731683 4. 059978 3. 990766 3. 37297 4. 442377 5. 184288 5. 301918 5. 535127 5. 254084  
3. 713698 2. 646516 2. 189163 2. 691209 3. 051273 3. 680547 3. 634179 2. 290112 2. 519618  
6. 045633 6. 827821 6. 709979 6. 834107 7. 258575 7. 154504 6. 86689 6. 641161 6. 679447  
2. 509747 4. 343489 3. 147252 2. 910202 4. 650433 2. 135299 4. 191342 3. 138861 3. 865011  
6. 690469 8. 033048 6. 954206 7. 635337 7. 05226 7. 050013 7. 559863 7. 772964 8. 002874  
3. 423384 3. 079851 3. 236177 3. 774658 3. 428042 3. 937706 3. 02715 3. 172682 3. 60078  
3. 23883 2. 776958 1. 728642 1. 304885 0. 907504 2. 185208 1. 953727 2. 337843 3. 236772  
8. 288256 8. 323057 8. 252477 8. 10198 8. 070728 8. 225537 7. 95346 7. 989981 8. 707109  
6. 38959 6. 53428 6. 316339 6. 3397 5. 937741 6. 464099 5. 863513 5. 752017 6. 395365  
4. 452348 4. 156782 4. 195364 3. 56574 3. 575025 4. 143753 5. 039159 3. 993802 3. 861937  
6. 340451 7. 277747 6. 617897 6. 444118 7. 076532 7. 352525 7. 263528 6. 686355 7. 255909  
6. 153522 6. 472691 6. 643304 7. 385727 6. 904582 7. 068903 4. 804464 6. 852631 6. 630179  
6. 54368 5. 468076 5. 704957 5. 813078 4. 42731 5. 6706 5. 292699 5. 714108 5. 26521  
7. 553599 7. 780431 7. 708012 7. 729116 8. 018337 7. 728363 7. 821595 7. 52433 7. 826829  
6. 081848 7. 226581 6. 720915 6. 518032 6. 464986 6. 836311 6. 137223 6. 391811 6. 371502  
2. 211651 1. 628357 1. 523344 1. 564545 1. 636061 1. 630353 1. 592413 1. 562447 1. 81303  
1. 115805 0. 815905 1. 175944 0. 806482 0. 828322 0. 920993 1. 185168 0. 979286 1. 354153  
1. 003823 0. 955033 0. 898186 1. 601011 1. 167936 0. 926945 0. 724822 1. 564665 0. 775772  
6. 349426 7. 010118 6. 663939 6. 464911 7. 167114 8. 187017 6. 584126 6. 310396 7. 947686  
3. 018049 3. 91161 3. 310853 3. 695915 3. 273097 3. 520353 3. 628059 2. 894012 3. 319629  
4. 45372 4. 961549 4. 631226 5. 061892 4. 583565 4. 368619 4. 901054 4. 21598 4. 972134  
2. 693024 5. 083415 3. 772626 4. 111154 3. 861099 4. 562242 3. 368189 2. 931018 3. 770532  
1. 097842 1. 329829 1. 248014 1. 158098 0. 865313 1. 334073 1. 20275 1. 398639 0. 912748  
2. 260468 1. 773363 2. 102718 2. 473322 1. 970344 1. 903287 1. 927132 2. 429815 2. 119107  
2. 485367 1. 25784 0. 781679 1. 373828 2. 366536 1. 009423 1. 468198 1. 297882 1. 539891  
3. 942804 3. 107494 2. 804397 3. 165934 3. 248468 4. 923524 3. 357588 3. 260675 2. 584489  
1. 228975 1. 358681 1. 261234 1. 002681 1. 445369 2. 219176 1. 0462 1. 130958 0. 924308  
1. 97937 1. 811102 1. 953935 1. 888394 2. 470761 2. 765107 2. 613724 2. 269737 3. 33654  
3. 145539 2. 574728 2. 684381 2. 826025 3. 716369 3. 099911 3. 522043 2. 902299 2. 860414  
1. 532184 1. 393962 1. 497427 1. 689742 1. 781369 1. 567348 1. 849824 1. 373283 1. 588849  
4. 970124 5. 501897 5. 411715 4. 387459 5. 96661 3. 466733 3. 164191 5. 805387 4. 553607  
1. 617944 1. 528419 1. 345724 1. 19144 1. 891271 1. 653805 1. 299061 1. 308614 1. 371786  
3. 441898 3. 941724 4. 758478 3. 212404 3. 136308 3. 026018 2. 967803 5. 148417 3. 515055  
2. 2836 2. 237806 1. 82084 1. 992288 1. 551004 1. 888018 1. 649223 1. 873567 2. 367826  
5. 586655 3. 304024 5. 18511 3. 393564 4. 083067 5. 08341 4. 485852 3. 893363 3. 892639  
4. 342413 3. 425507 3. 090053 2. 724189 3. 506906 3. 525078 3. 8938 3. 90902 3. 058209  
2. 632772 2. 705616 3. 392026 3. 014211 2. 682965 2. 911389 2. 380423 2. 8947 3. 532349  
10. 35167 10. 65077 10. 48325 11. 39904 11. 09749 10. 93639 11. 128 10. 96868 11. 02743  
5. 015539 3. 293844 3. 673698 2. 588654 2. 918881 5. 044125 3. 477133 2. 987276 3. 835897  
6. 17257 6. 236423 5. 880434 5. 641706 5. 994157 6. 465135 4. 945724 5. 853595 6. 436069  
8. 04482 8. 057297 8. 044872 7. 609104 7. 917002 7. 43148 7. 754164 8. 169894 8. 278115  
2. 587049 2. 843422 2. 927999 3. 389752 2. 707202 3. 067429 3. 705821 3. 628661 5. 340662  
2. 162169 1. 758802 1. 6313 1. 673458 1. 694146 1. 706649 1. 928288 1. 506522 2. 673865

2. 589178 2. 883193 1. 589456 3. 309032 1. 820827 2. 293888 2. 569462 1. 62056 3. 619676  
1. 121491 1. 541816 1. 295274 1. 376157 1. 656615 1. 747616 1. 515347 1. 457703 1. 097531  
6. 66121 8. 107332 6. 98878 8. 619531 7. 965994 8. 297077 9. 008015 8. 519904 7. 556503  
2. 33693 3. 890519 2. 494092 2. 681422 2. 255834 1. 56304 1. 817221 2. 287246 2. 205103  
8. 152973 8. 315352 9. 297894 9. 405821 8. 800984 9. 58073 9. 42739 7. 845774 8. 660067  
3. 401594 7. 64505 5. 237569 5. 775593 5. 407305 4. 934176 6. 85312 4. 091453 2. 514205  
6. 299813 7. 464014 6. 543247 8. 074109 7. 40948 8. 527561 8. 011558 5. 450318 6. 651641  
1. 424706 1. 625596 0. 898177 1. 555318 2. 528444 1. 549454 1. 527718 1. 694764 1. 297522  
1. 691719 1. 355317 0. 794966 1. 08536 0. 846339 1. 592791 1. 731769 2. 917211 1. 21603  
2. 370483 1. 27291 0. 649844 1. 12119 2. 876969 0. 789625 2. 765394 1. 690601 1. 705875  
3. 517924 5. 010482 2. 895225 5. 144583 4. 440928 2. 782077 5. 816076 3. 302719 3. 785813  
10. 56379 8. 707383 9. 563769 7. 915724 8. 497167 8. 043328 8. 252639 8. 298343 9. 914421  
1. 486365 1. 359712 1. 349545 1. 453147 1. 609516 1. 690232 1. 692816 1. 450323 1. 595284  
3. 524368 1. 689187 1. 946001 2. 321471 2. 515584 2. 228328 2. 080372 2. 024538 2. 910936  
4. 105179 3. 628341 3. 408648 3. 368673 3. 178092 3. 298323 3. 837634 4. 014109 3. 372  
2. 702975 2. 823683 2. 180455 2. 646583 4. 393639 5. 147555 6. 474014 3. 018445 2. 712899  
2. 062356 2. 885406 2. 345944 2. 211457 2. 502032 2. 636009 2. 62608 4. 25173 1. 916537  
3. 441874 5. 212339 3. 349063 3. 845726 3. 956739 6. 139914 7. 455546 4. 059512 5. 966025  
1. 99568 1. 503059 2. 054705 1. 815106 2. 1095 2. 093623 1. 9825 2. 078175 2. 078223  
2. 456097 2. 128608 2. 192717 1. 675447 2. 721224 1. 829717 3. 184421 3. 781992 2. 656793  
1. 764225 1. 644053 1. 958745 1. 46358 0. 977424 1. 360992 1. 287142 1. 557036 1. 193039  
5. 02189 5. 461664 5. 499766 5. 6764 4. 810707 5. 214135 5. 092506 5. 85018 5. 671208  
1. 896096 1. 619473 2. 449131 1. 707041 2. 707172 1. 951552 2. 343926 2. 152059 2. 31786  
2. 704497 1. 732373 1. 150372 1. 880125 3. 016285 3. 200148 3. 44169 3. 474886 1. 912496  
7. 550386 7. 607709 6. 812259 6. 923675 4. 500053 6. 482181 6. 672447 6. 129806 2. 921692  
2. 329975 1. 56584 1. 716425 2. 311553 2. 184501 1. 837457 2. 028045 1. 805633 1. 737692  
1. 320239 1. 255601 1. 180238 1. 146636 1. 632131 0. 560948 2. 309715 1. 178408 1. 487281  
7. 931 7. 591353 7. 6546 8. 464157 6. 934069 8. 399272 7. 939694 7. 349833 7. 95225  
2. 921717 4. 381797 4. 633255 4. 346599 4. 648405 4. 187794 5. 163734 4. 075085 3. 961605  
4. 58592 5. 845695 5. 895808 5. 041907 5. 707621 5. 599054 4. 699406 5. 733217 5. 233935  
2. 380859 2. 170535 1. 648149 2. 008017 1. 440261 1. 75779 2. 140935 1. 871817 1. 582173  
6. 099098 5. 079066 5. 700888 5. 055378 3. 353957 4. 077313 4. 509779 4. 42127 6. 40896  
8. 483302 9. 026897 9. 385746 8. 762824 9. 007172 9. 33726 8. 471597 9. 295281 8. 854713  
9. 623019 9. 650593 9. 797229 9. 601739 9. 786274 9. 735344 9. 413703 10. 15222 9. 786001  
6. 290269 6. 753268 6. 036111 7. 353078 6. 908983 6. 73338 7. 056965 6. 303875 6. 608427  
5. 937696 6. 383508 5. 747081 5. 828573 6. 190922 6. 527384 5. 772198 6. 80036 6. 954213  
4. 829488 5. 508449 5. 069022 5. 394095 5. 721735 5. 106462 5. 198323 5. 315231 5. 452387  
3. 713862 4. 507839 3. 974258 3. 745522 4. 962753 4. 473065 3. 641835 4. 819789 4. 0217  
7. 39251 7. 39128 7. 285851 7. 321797 7. 378696 6. 793945 7. 402573 7. 510658 7. 113224  
6. 462389 5. 786623 5. 711963 5. 826527 6. 065715 5. 774949 5. 986831 6. 128119 5. 461711  
6. 536184 6. 633868 6. 806901 6. 752444 6. 767512 5. 764141 6. 659069 6. 575163 6. 866398  
4. 536578 4. 486363 4. 125831 3. 838467 3. 930235 4. 847645 4. 107543 4. 802315 4. 393421  
4. 220216 3. 968113 4. 523571 4. 747625 5. 066222 4. 673712 4. 728553 4. 383836 4. 650838  
3. 579727 4. 114128 4. 062315 3. 974735 4. 253777 4. 618567 4. 185587 3. 31558 4. 204466  
4. 889452 6. 212908 6. 151552 5. 973074 5. 695147 6. 100687 6. 385772 5. 761249 5. 841139  
4. 428634 4. 625367 4. 236426 5. 751181 5. 300991 4. 334572 5. 016192 4. 883585 4. 628238  
3. 724079 6. 132465 6. 20832 5. 096489 5. 661246 6. 173015 6. 116113 5. 881839 6. 05338  
4. 383652 4. 786897 5. 088587 4. 4439 4. 802756 4. 89157 4. 355614 4. 688231 4. 931875  
5. 314996 5. 613422 5. 11588 4. 695673 5. 555915 5. 570663 5. 183055 4. 312712 6. 235684  
3. 092698 1. 92034 1. 785446 2. 346802 1. 883976 1. 873398 1. 81905 1. 967445 2. 044552  
5. 756695 6. 219765 5. 713868 5. 673011 5. 622392 6. 50699 6. 258439 4. 957819 5. 870393

1. 165704 1. 131814 1. 597187 1. 175201 1. 444705 1. 342761 1. 158214 1. 886038 2. 050192  
6. 153572 5. 811188 5. 857056 6. 174399 5. 565972 6. 559277 5. 938557 5. 583553 5. 709654  
3. 953595 4. 363869 3. 82342 3. 749731 3. 960029 4. 543453 4. 632099 4. 694599 4. 999255  
2. 125962 2. 199744 2. 180918 2. 764521 2. 345543 2. 704936 2. 360874 2. 185578 2. 202535  
8. 637627 8. 551135 8. 634909 8. 136873 8. 256566 8. 031714 8. 404519 8. 084205 8. 69266  
2. 804532 1. 924117 2. 568816 2. 422684 2. 326832 2. 202847 1. 905286 1. 791643 2. 759573  
1. 608042 1. 881669 3. 151656 2. 235513 2. 431908 2. 161314 1. 641099 4. 175668 3. 457951  
1. 897331 1. 62629 1. 156551 4. 875809 1. 723267 1. 7495 2. 697557 1. 684667 3. 377775  
6. 619677 6. 370506 6. 618513 5. 962561 6. 667161 6. 860745 6. 20107 6. 575867 6. 066368  
7. 355365 6. 106439 6. 686947 5. 196674 6. 659327 5. 837073 5. 99763 6. 630629 7. 285594  
7. 59084 7. 397643 7. 422453 7. 774898 6. 99531 7. 600528 7. 03946 7. 182493 7. 621199  
3. 182002 4. 121145 5. 288214 3. 900377 4. 754897 4. 245968 3. 589606 3. 406654 4. 184821  
2. 524692 1. 916796 2. 773103 2. 199674 2. 517243 2. 75489 2. 716073 2. 270907 2. 765692  
1. 953371 1. 616067 2. 076268 2. 086189 2. 000789 2. 185546 2. 003413 1. 601068 1. 696874  
2. 516015 1. 56807 1. 457247 1. 553651 1. 231804 1. 216661 2. 736734 1. 566248 2. 415461  
3. 034795 3. 941422 3. 813046 3. 687124 3. 171617 4. 8422 3. 878024 4. 746546 4. 14676  
4. 291266 4. 564206 4. 157502 2. 836885 3. 629674 3. 830703 3. 297966 4. 290147 3. 438072  
1. 622348 1. 566389 1. 367395 1. 958624 1. 024556 1. 610178 1. 455346 1. 969376 1. 677189  
5. 435143 5. 343172 5. 361932 4. 491109 4. 599838 5. 000104 4. 999543 4. 68365 5. 348551  
6. 600501 5. 895823 6. 041813 6. 43988 5. 239824 5. 482027 6. 106722 6. 265588 6. 667821  
2. 456246 2. 776746 2. 617203 1. 98766 2. 206703 2. 632578 3. 09637 2. 051295 2. 016834  
6. 207984 6. 735009 6. 698723 6. 407386 6. 91394 6. 060984 6. 470016 6. 49524 6. 579621  
2. 123105 3. 254374 2. 160379 2. 151174 1. 687948 2. 071277 2. 371335 3. 270728 2. 643708  
6. 925677 6. 632884 6. 85598 6. 588733 6. 271632 6. 392808 6. 425481 6. 279768 6. 879878  
2. 355195 2. 689419 3. 592918 2. 287359 2. 506198 4. 21268 2. 593559 3. 464016 2. 611549  
3. 929837 5. 230825 4. 716428 4. 602655 5. 122191 5. 390129 4. 854424 4. 488102 4. 236215  
4. 671388 5. 539906 4. 450937 4. 524155 4. 757402 4. 470747 3. 477371 5. 124108 4. 465783  
3. 753543 3. 591474 3. 213677 3. 933904 4. 084625 3. 860907 4. 04272 3. 36618 3. 861477  
3. 789384 3. 07215 4. 026384 3. 285872 3. 305384 2. 943671 4. 303053 3. 141565 3. 058747  
2. 571491 2. 478973 2. 825776 3. 677605 3. 539826 2. 70538 3. 366236 2. 988401 2. 504265  
3. 10104 2. 639829 2. 471595 2. 067956 2. 645945 2. 459559 3. 162719 1. 943763 2. 200829  
2. 349695 2. 150893 2. 275155 2. 194748 2. 234617 2. 514355 2. 229152 2. 10612 2. 157317  
1. 057576 1. 246411 1. 183946 2. 46529 1. 249431 1. 103516 1. 193007 1. 289656 1. 613228  
4. 009992 3. 268127 2. 338299 2. 372378 2. 872961 3. 473155 2. 43231 3. 451656 3. 358492  
3. 30102 1. 703788 1. 947228 2. 577022 2. 594901 3. 000988 2. 280305 1. 913832 2. 438775  
7. 288087 7. 723 7. 361308 7. 033748 7. 606887 7. 257781 7. 329266 7. 311054 7. 330323  
2. 449636 1. 375988 1. 744904 1. 500181 1. 414539 1. 466413 1. 69992 1. 475859 2. 093001  
6. 277461 6. 868693 6. 289271 6. 862452 6. 890408 6. 406574 6. 134571 6. 380268 6. 283153  
2. 043041 2. 066647 1. 333127 2. 252014 1. 583747 2. 039826 2. 922629 2. 359275 1. 645104  
0. 964344 0. 883023 1. 006503 1. 02206 1. 441984 1. 294188 0. 905404 1. 317498 1. 044458  
1. 815712 1. 639107 2. 034829 1. 787946 1. 459568 1. 927828 2. 527743 1. 909042 1. 774191  
2. 667631 1. 967761 2. 4248 2. 571725 2. 454219 2. 474987 2. 447242 2. 810853 2. 262648  
1. 902386 1. 739276 1. 968538 1. 546899 2. 529134 1. 547243 1. 662069 1. 879406 2. 101953  
1. 932316 2. 079459 2. 628424 2. 509987 3. 444335 2. 256912 3. 176597 2. 778106 2. 403934  
7. 776415 8. 392459 7. 891186 8. 366231 8. 247829 8. 009399 7. 547734 8. 129526 7. 755791  
3. 628484 3. 314214 3. 333305 2. 757952 3. 146833 4. 799854 2. 738263 2. 891467 3. 03463  
3. 814344 4. 868521 5. 461633 4. 653275 4. 206771 6. 16487 4. 771791 3. 880634 4. 723427  
2. 917116 3. 134821 2. 896046 3. 070067 4. 800786 3. 505337 3. 939955 4. 380789 2. 709402  
5. 19228 4. 561808 3. 435689 3. 945941 4. 396725 4. 534514 3. 974764 2. 826292 4. 215862  
1. 199038 1. 430064 1. 571363 1. 186271 1. 661278 1. 560526 1. 59592 1. 14135 1. 577899  
2. 023234 3. 061606 2. 658245 2. 807026 3. 080272 3. 974893 2. 197945 2. 364113 1. 763449

7.606869 8.147142 7.78577 7.962198 8.23557 8.001141 7.818096 8.443564 7.953354  
2.51101 2.612216 1.834474 2.432388 3.526372 3.421242 4.300964 2.818053 1.992848  
2.958204 3.921447 4.057828 3.762352 4.461851 4.842113 4.137068 4.685035 3.544469  
2.473167 3.352344 1.393086 2.456288 2.771406 3.585081 4.90777 1.451855 2.413215  
3.686397 4.154739 4.069982 4.193409 4.066142 4.896128 4.285262 3.952113 4.450025  
4.661782 4.489291 4.171865 5.716227 4.891074 5.134142 5.011757 4.208349 5.398597  
4.137982 5.645756 4.851234 5.703334 5.210549 4.396703 5.110069 4.821581 4.558999  
5.776113 6.340487 6.411943 6.888263 5.968563 6.863912 5.572699 6.479185 6.148445  
3.442956 2.314598 2.643101 2.206866 2.342252 2.090606 2.710981 2.48128 2.797359  
1.438099 1.230979 0.854006 1.718691 4.915837 2.735957 0.790717 1.908779 1.689366  
4.767515 5.986187 5.730294 5.544322 6.214641 6.173294 5.981646 6.04994 6.505063  
2.120677 1.845988 1.149789 1.860068 1.547862 1.646081 1.484097 1.248617 1.434529  
4.844482 5.819502 5.421104 5.927492 5.846902 5.560296 5.742736 6.326221 5.126055  
2.224665 1.805006 0.88286 2.551761 1.583868 1.297889 0.851203 1.204575 1.826427  
1.785687 2.044357 1.827972 2.183894 2.212774 1.789709 2.012775 1.998677 2.145651  
6.441785 4.936465 6.032367 5.175156 5.759925 5.318717 7.292319 5.963688 5.422006  
6.661055 5.80334 5.621757 5.749519 5.558734 5.958354 5.451984 6.413816 5.716704  
1.51724 1.272829 1.472843 1.500772 1.144125 1.334752 1.394885 1.223483 1.58337  
0.873886 1.506858 1.099882 1.857599 1.017388 2.919066 0.822146 1.975824 1.30001  
5.59272 5.124977 5.114031 4.257006 4.288964 3.964094 4.44205 4.868718 5.163756  
8.26954 7.008131 7.804525 5.81956 6.871176 5.783392 6.784221 6.693745 8.234639  
7.677846 7.851482 7.555272 7.477266 7.635791 7.501412 7.075971 7.738276 7.645035  
4.507936 5.798142 4.663853 3.761146 5.272506 4.673055 4.42391 3.515832 4.487588  
5.247112 4.886962 6.155204 4.590489 5.411585 4.361309 4.587826 4.5921 6.147889  
2.907149 4.796972 4.147709 3.664946 3.897159 5.515493 4.329195 3.898393 4.674567  
4.17397 5.026039 5.662293 5.538239 5.220315 6.112747 4.325048 5.281101 5.09067  
4.375574 5.986195 4.985478 5.970381 4.376745 5.488669 4.561863 4.387224 4.821801  
2.384746 2.724455 1.714172 1.809245 2.076337 1.99638 1.706876 1.68162 1.811659  
2.915468 2.23203 2.036183 1.706048 1.673646 1.44878 1.288798 2.644348 1.522668  
1.86496 1.53804 3.145981 1.871189 1.805088 1.727842 1.769769 1.559891 1.544682  
1.933579 1.753299 2.194021 2.780912 1.993319 2.248537 2.04397 2.604052 2.402809  
6.707591 6.317485 6.481619 6.821633 6.128102 6.397526 6.44089 6.284986 6.226423  
1.90908 2.204029 2.249916 1.679478 2.088767 2.539538 2.768972 2.535994 1.732931  
1.958199 2.148028 2.437816 2.669039 1.825739 1.98272 2.515315 1.908419 2.509919  
2.432172 1.729136 2.252341 1.814426 1.257638 1.363712 1.88417 2.162685 1.788893  
5.514483 6.479038 6.296594 5.598495 6.78417 5.664876 4.659711 6.501075 6.032937  
1.536311 2.33565 1.893651 2.103458 1.461653 2.257298 3.362905 1.719907 1.353452  
1.103964 1.601692 1.173309 2.16807 1.283176 1.813303 2.142835 1.258641 1.829395  
2.853335 1.340237 2.504472 1.440905 1.941214 2.0209 2.096602 1.274484 2.310578  
4.087458 4.391736 5.926498 4.716173 5.345496 5.283863 3.791759 5.583884 4.430246  
2.087837 1.530895 2.010434 1.945505 1.366179 1.6872 1.451832 1.871276 1.562679  
5.987206 5.762176 6.040143 5.939091 6.002884 5.688959 5.964167 6.414826 5.940093  
1.638915 1.220293 1.297114 1.346497 1.384409 1.176558 1.055263 1.242222 1.003854  
4.741361 4.95769 6.571966 4.474786 5.429935 4.913068 4.400335 5.533902 4.806371  
8.512848 8.782864 8.478121 8.444744 9.018562 8.799623 8.842559 8.787356 8.953792  
4.257176 5.568436 5.950253 5.293569 5.076466 6.242293 4.818854 5.168543 4.687312  
5.679058 3.957958 3.71339 3.901828 3.933603 4.010426 4.215538 4.206823 3.379859  
4.462347 3.973878 4.038324 4.463319 3.425697 3.557804 3.508633 4.051764 4.044517  
5.863318 6.175032 5.570168 6.456446 6.298853 6.756237 5.467251 5.592395 6.308254  
7.138974 6.487116 6.859089 6.618093 6.507826 5.852306 6.859603 6.635467 7.131991  
7.777325 8.417129 8.171168 9.083188 8.845548 9.074208 8.556535 8.067801 8.26179

1. 351645 1. 902447 1. 585141 1. 762754 2. 075854 2. 04126 2. 392095 1. 32214 1. 390464  
5. 93521 6. 438291 6. 140727 7. 503423 6. 428445 6. 580462 6. 857629 6. 248001 6. 614989  
5. 211367 5. 465316 5. 061836 5. 647322 5. 556405 5. 507104 5. 347866 5. 814315 5. 928632  
1. 770792 0. 734344 0. 638092 1. 190276 0. 82814 0. 869759 0. 852505 0. 679076 1. 113682  
4. 329595 4. 580889 4. 854817 3. 322559 4. 328353 4. 314333 3. 051924 3. 483686 3. 522775  
3. 425594 3. 149077 4. 026463 4. 396425 4. 559772 4. 577899 2. 764816 4. 227142 4. 265184  
3. 53819 2. 675633 2. 07384 4. 966809 2. 176872 1. 279744 3. 008104 1. 691479 2. 668381  
6. 623155 6. 925291 6. 604223 7. 142739 6. 880328 7. 905467 6. 538391 7. 542226 6. 487218  
1. 71711 0. 928652 1. 149193 1. 012092 1. 278406 1. 396465 1. 706639 1. 245421 1. 378956  
1. 425441 1. 259161 1. 094233 1. 168604 1. 154667 1. 146578 1. 203791 1. 052625 1. 142972  
2. 069332 2. 095991 1. 80286 1. 960804 1. 651705 2. 043144 1. 50688 2. 049026 2. 458543  
0. 793279 2. 993199 2. 106381 3. 3165 4. 451868 1. 56997 0. 964583 2. 17057 1. 638403  
3. 184718 1. 935485 1. 957406 1. 934234 2. 048381 2. 390257 2. 800898 2. 007985 3. 188379  
1. 760113 1. 633001 1. 276213 1. 406718 1. 640638 1. 952213 1. 186261 1. 427981 2. 176498  
2. 056561 1. 455252 2. 385238 1. 821067 1. 850824 1. 705754 2. 609681 2. 179836 1. 772284  
2. 009708 1. 619384 1. 746098 1. 693744 2. 226023 1. 254904 1. 606712 1. 69497 2. 494456  
0. 782854 0. 497094 0. 623799 1. 344227 1. 042784 0. 818027 1. 108327 0. 621755 0. 68521  
4. 004725 4. 647376 4. 216028 5. 162538 4. 514262 4. 54764 4. 180564 4. 753627 4. 20764  
4. 565758 4. 445977 4. 645392 4. 789046 4. 585771 4. 420931 4. 065877 4. 680205 4. 140146  
3. 735032 3. 124926 2. 291185 2. 613961 2. 377 3. 263175 2. 535694 1. 470958 2. 929121  
3. 53616 2. 447442 2. 129353 1. 5842 1. 938923 1. 786784 1. 872423 2. 066038 2. 299376  
5. 893304 5. 346642 5. 551972 4. 519181 5. 046626 4. 987256 5. 25649 5. 585454 5. 71426  
9. 746122 9. 746531 9. 948768 9. 509438 9. 165394 9. 796192 9. 512098 9. 291369 9. 686649  
1. 700184 2. 312813 1. 947088 1. 917801 1. 601559 1. 241578 2. 103031 1. 625032 1. 705616  
2. 164348 1. 797161 2. 413635 1. 965046 3. 067195 1. 729723 2. 809821 1. 761828 2. 806763  
1. 512543 1. 6277 1. 039688 1. 518291 1. 504804 1. 608485 1. 502595 1. 591427 1. 197188  
1. 805478 1. 566243 2. 059329 1. 525129 1. 442899 1. 561894 3. 088192 1. 608431 1. 795173  
2. 260766 2. 280531 2. 174937 1. 882306 2. 020599 2. 298389 2. 613659 2. 887614 2. 356377  
7. 999158 9. 047055 8. 219922 8. 871764 8. 879515 8. 378277 9. 026702 9. 27231 8. 860924  
9. 315396 9. 798844 9. 076126 9. 624847 9. 180928 9. 042808 9. 735909 9. 072555 9. 137471  
5. 416363 4. 196036 5. 107716 3. 839091 4. 043777 6. 139746 6. 776356 3. 425622 4. 403937  
3. 734339 3. 316727 3. 464777 3. 534644 3. 875467 3. 360573 4. 168231 3. 866875 3. 765134  
3. 336809 1. 979183 2. 742777 2. 413129 2. 034282 3. 460088 2. 269714 2. 799142 2. 214963  
1. 902618 5. 076897 7. 727001 2. 968454 8. 122903 7. 811477 7. 008447 2. 852253 6. 852887  
7. 075673 7. 797791 7. 955706 7. 215146 6. 901146 8. 183272 5. 578814 7. 057198 6. 343321  
3. 65929 3. 017865 4. 520509 3. 545378 4. 652548 3. 62538 3. 498148 2. 94397 3. 161468  
6. 59726 7. 400895 6. 5347 7. 693418 7. 323467 7. 250844 7. 722215 6. 706105 7. 319006  
2. 43152 1. 35824 2. 449809 2. 516345 1. 961975 2. 004295 1. 529944 1. 785986 2. 439856  
2. 863792 4. 046108 3. 219415 3. 834978 3. 845587 3. 877722 3. 770741 3. 939413 3. 971204  
1. 805081 2. 069091 2. 018284 1. 875162 2. 005567 1. 696109 1. 506033 1. 618592 1. 949054  
2. 744659 3. 682743 4. 120613 4. 171279 3. 629095 3. 741009 3. 053015 3. 205896 2. 955291  
5. 24921 5. 985565 5. 830297 5. 718204 6. 290513 6. 667524 6. 959718 6. 277495 6. 503156  
1. 814901 1. 980493 2. 573538 1. 539053 1. 634591 1. 842072 1. 830187 1. 947176 1. 88524  
1. 336014 1. 06049 1. 006981 1. 024925 1. 387243 1. 376939 1. 118933 1. 168463 1. 100544  
5. 59094 5. 422836 5. 110831 5. 057418 4. 996185 5. 30564 4. 688569 5. 098575 5. 010448  
1. 800324 2. 067644 1. 641122 2. 882829 1. 974382 2. 098101 1. 87882 1. 754187 2. 099177  
2. 980295 3. 288608 3. 077975 2. 41994 2. 610537 3. 280764 3. 348731 2. 832402 2. 474267  
1. 684466 1. 669877 1. 678587 1. 130874 1. 412962 1. 378343 1. 715808 2. 053514 1. 118376  
1. 676547 1. 089202 1. 321483 1. 833028 2. 077568 1. 030789 1. 716187 1. 681975 1. 84597  
5. 46539 4. 977242 5. 152066 5. 159016 5. 55741 5. 372401 4. 820371 5. 208454 5. 326342  
2. 488576 1. 549579 1. 65394 2. 807248 1. 717475 2. 177382 1. 654102 1. 69912 1. 602355

5. 45145 5. 154638 5. 27249 5. 028164 4. 504636 4. 944065 5. 034549 4. 869751 5. 008524  
1. 731441 1. 135503 1. 997508 1. 312638 0. 975666 1. 389375 1. 479892 1. 749648 1. 137422  
7. 540711 7. 197896 7. 200621 7. 296576 7. 511904 7. 466467 7. 430521 7. 154879 6. 837627  
3. 938596 5. 400159 4. 474801 4. 27883 4. 851093 4. 132441 4. 582176 4. 856708 4. 890865  
3. 063245 2. 135223 2. 092591 2. 164014 1. 870283 1. 18654 2. 689779 2. 03981 2. 09501  
5. 757343 6. 444634 6. 551451 6. 408595 6. 375621 6. 552076 5. 426377 6. 768798 5. 850687  
5. 942329 6. 55592 6. 127127 5. 804499 6. 104122 6. 193795 5. 491411 6. 346284 5. 934363  
3. 13654 2. 468885 3. 810847 2. 61999 2. 68541 2. 537595 3. 540243 2. 988364 3. 992818  
2. 590879 2. 458259 2. 408541 2. 69211 2. 473132 2. 496322 3. 089117 2. 674839 2. 613128  
3. 698967 4. 727443 3. 551981 4. 667257 4. 792755 4. 072875 3. 953277 4. 012481 3. 751735  
2. 274059 1. 679882 2. 046531 3. 206679 2. 998603 1. 907588 2. 810555 2. 261167 2. 965157  
5. 201293 5. 632006 4. 819304 5. 937958 4. 827846 5. 544307 5. 266174 5. 677021 5. 484834  
7. 354335 7. 480698 7. 459961 7. 122011 7. 203817 7. 701312 6. 963848 7. 396934 7. 310558  
4. 955504 4. 215969 4. 799273 3. 946989 3. 61782 3. 762653 3. 96849 4. 347828 4. 483423  
2. 063644 1. 786751 3. 008184 2. 85227 3. 315645 2. 140285 1. 989461 3. 006147 1. 98271  
2. 58897 3. 155333 2. 93478 2. 941866 2. 528926 3. 154255 2. 170695 1. 68238 2. 564956  
6. 296577 5. 901272 6. 42719 6. 698051 6. 47275 7. 002745 6. 751074 5. 951939 6. 250109  
4. 523981 5. 221519 5. 00656 4. 73795 4. 804114 4. 622908 5. 334941 5. 016159 4. 945925  
2. 922798 1. 557981 0. 932555 1. 33791 1. 426577 1. 853036 1. 247021 1. 777147 1. 501927  
2. 210237 1. 516947 1. 337413 1. 589999 1. 563016 1. 108897 1. 520947 1. 296756 1. 255306  
2. 669158 2. 725327 2. 496004 3. 345826 2. 728755 2. 665223 1. 954153 2. 677309 3. 853235  
1. 585124 1. 378206 1. 364478 1. 467329 1. 554157 1. 513402 1. 747082 1. 593217 1. 360194  
7. 280148 7. 469275 7. 316018 7. 233476 7. 388679 7. 187302 6. 955536 7. 785779 6. 993622  
2. 254864 1. 857048 2. 042928 1. 967658 1. 44688 1. 713097 2. 077565 1. 967074 1. 597964  
2. 350646 2. 368233 2. 708122 3. 618202 3. 350767 2. 230182 6. 067042 4. 092699 5. 162626  
1. 514942 1. 930395 1. 709067 1. 300257 1. 29002 1. 639349 1. 453192 1. 532553 1. 479561  
2. 434959 1. 567229 2. 001542 1. 359863 1. 152164 1. 556674 1. 725165 1. 407781 1. 295127  
1. 342965 1. 720474 0. 797508 0. 953142 1. 062503 1. 010433 1. 280219 1. 143879 2. 596946  
3. 493086 3. 211408 3. 508979 3. 391918 3. 426235 3. 578403 3. 613235 3. 55964 3. 46484  
1. 662748 1. 294924 1. 15756 1. 452199 1. 31387 1. 637182 1. 214689 1. 235951 1. 899777  
1. 831431 1. 739726 2. 10303 3. 332367 2. 122195 2. 635344 3. 369269 2. 265226 1. 811089  
3. 968567 2. 180754 2. 651931 3. 261018 2. 193844 2. 281966 2. 557492 3. 317863 2. 380916  
4. 727715 5. 975234 6. 187087 4. 658733 6. 640987 5. 840443 6. 475808 7. 167623 5. 695949  
1. 68119 1. 576363 1. 927945 2. 33737 1. 892129 1. 711463 1. 749691 1. 923219 1. 188447  
1. 567843 1. 905691 1. 055578 1. 190323 1. 595205 1. 077835 0. 995819 0. 886425 0. 789946  
2. 344835 1. 571046 1. 821638 1. 75791 2. 070919 2. 060081 2. 068405 1. 864643 1. 805356  
1. 745062 1. 494615 1. 575533 1. 333633 1. 012367 1. 472466 1. 260186 1. 061325 0. 994213  
3. 555423 2. 433711 3. 202155 2. 692408 2. 755669 1. 731605 3. 414997 3. 213402 3. 020785  
1. 104194 1. 097897 0. 916401 1. 174985 1. 082922 1. 099797 1. 151811 1. 227127 1. 298162  
3. 812925 4. 156142 3. 491437 2. 894721 2. 571013 2. 666255 3. 650656 3. 110841 4. 127671  
2. 145762 2. 357877 2. 615119 3. 300916 1. 735157 3. 867649 2. 800563 3. 072941 2. 507038  
1. 764641 1. 361894 1. 276853 1. 325192 1. 624948 1. 102553 1. 445692 1. 803868 1. 929033  
5. 587808 6. 35437 6. 010439 6. 290939 6. 385193 5. 970009 5. 833608 6. 34758 6. 345131  
2. 098274 1. 578963 1. 268905 1. 337181 1. 178182 1. 324223 2. 627562 1. 367276 1. 841556  
4. 774393 5. 278502 5. 457038 4. 746942 5. 064803 4. 784444 5. 128542 5. 180332 4. 973996  
1. 473184 2. 687308 2. 066809 3. 314662 2. 021919 3. 10714 2. 071396 2. 092886 2. 208688  
7. 168522 5. 994123 5. 739047 5. 664799 6. 091604 6. 394601 6. 276292 5. 85907 6. 086729  
4. 658143 4. 904867 5. 268699 4. 145004 4. 113727 4. 402268 4. 902496 4. 327905 4. 735389  
2. 41926 2. 994636 2. 194696 2. 196318 2. 594177 1. 983173 2. 460292 2. 089893 2. 214829  
3. 211232 2. 59693 3. 812714 2. 117439 3. 235725 1. 62534 4. 896078 3. 747697 3. 503652  
3. 839805 2. 83853 3. 082993 3. 666987 3. 371586 2. 71115 2. 593857 3. 495895 3. 587331

4. 960561 4. 630212 4. 229722 3. 62298 4. 419249 3. 991962 4. 766428 4. 798119 4. 550991  
3. 210603 3. 387276 3. 623058 3. 538986 3. 099584 3. 320385 3. 349132 3. 741865 3. 097719  
1. 797219 1. 136799 1. 022751 1. 764037 1. 251472 1. 492176 1. 480834 1. 267531 1. 121579  
3. 541818 2. 780087 3. 304969 3. 355469 3. 192244 3. 06601 3. 2813 3. 96448 3. 6115  
7. 616447 8. 127183 8. 028316 8. 348956 8. 322879 8. 156444 8. 123578 8. 300554 8. 245302  
2. 023186 1. 477181 1. 824358 2. 268107 1. 661449 1. 284685 1. 796182 2. 259197 1. 824239  
0. 837315 0. 982676 2. 159619 1. 078903 2. 585739 2. 283881 2. 069262 1. 31773 1. 280154  
1. 69907 1. 54468 1. 881602 2. 096215 2. 116675 1. 813941 2. 480995 2. 692413 2. 151497  
1. 249289 2. 954079 2. 793834 2. 810032 4. 209812 1. 387261 2. 892375 4. 373564 2. 289825  
2. 227443 1. 412948 1. 879401 1. 99798 1. 961269 2. 012843 2. 541967 2. 208362 2. 168984  
3. 449931 3. 509071 3. 444574 4. 073574 3. 376514 2. 748289 3. 434928 3. 887864 2. 926883  
3. 805273 4. 116091 3. 854262 1. 889394 3. 989961 2. 685119 2. 601766 2. 329542 3. 448048  
6. 082315 6. 790745 6. 581451 7. 095534 7. 13222 7. 133989 6. 859007 7. 134622 6. 933838  
5. 942456 6. 517782 6. 183536 6. 458191 6. 117932 6. 205677 6. 222144 6. 626421 6. 253853  
2. 09302 2. 267272 2. 442133 2. 019778 2. 441737 2. 996978 2. 515388 2. 490972 3. 031202  
1. 786557 2. 593715 1. 517117 1. 522196 1. 560019 1. 436809 2. 989886 1. 310422 1. 099641  
1. 882576 0. 883904 1. 394209 1. 1218 0. 999682 1. 524978 0. 683456 1. 863281 2. 524092  
4. 657415 5. 748853 5. 296354 5. 033952 4. 241913 5. 869446 4. 54058 4. 639721 4. 509306  
7. 764478 9. 270931 9. 12699 8. 81281 8. 715021 8. 365729 8. 365475 8. 649332 8. 401426  
6. 833332 7. 151998 6. 388284 7. 52425 7. 702092 7. 158111 6. 87545 6. 591114 6. 897465  
1. 941126 2. 093313 2. 168663 1. 778034 1. 945799 2. 277407 1. 689043 1. 880762 1. 81798  
4. 803974 3. 488825 4. 660299 3. 675202 4. 208312 2. 952152 4. 50849 4. 830865 3. 688911  
2. 766525 3. 115524 2. 597384 2. 538503 1. 921813 2. 328684 1. 867647 2. 162919 2. 186246  
3. 510626 5. 806024 5. 663393 4. 481148 5. 900525 5. 904036 5. 318042 5. 276465 5. 651619  
5. 060246 5. 094361 5. 592637 5. 900795 5. 827893 5. 996291 5. 156814 5. 489399 4. 648478  
6. 206285 6. 233979 6. 022286 5. 483737 6. 563781 5. 816081 5. 622196 6. 086846 5. 700227  
1. 463552 1. 237347 1. 157887 1. 572549 1. 253627 1. 352304 1. 303345 1. 466745 1. 320397  
6. 418034 4. 51207 4. 317455 5. 665156 4. 409384 6. 193992 5. 188796 3. 902827 4. 828999  
3. 111548 2. 576194 2. 73864 2. 024241 2. 541649 2. 54184 2. 18354 2. 333603 2. 29302  
4. 26734 3. 918182 3. 781782 5. 623317 4. 993987 4. 163503 5. 057482 4. 369989 4. 074708  
1. 639834 1. 220305 3. 35736 0. 845608 0. 983615 5. 618287 1. 594188 1. 705585 3. 427211  
1. 639549 1. 163881 2. 388811 1. 292377 3. 11832 1. 637023 1. 350507 1. 698917 1. 489282  
5. 532042 3. 671312 5. 581582 4. 373646 5. 413354 3. 481862 3. 358386 5. 044445 3. 716719  
2. 979591 2. 949897 3. 274855 2. 279857 2. 146938 2. 715145 3. 443491 3. 594872 2. 388473  
6. 433117 6. 627406 6. 417387 6. 516023 6. 594064 6. 172004 6. 426773 6. 504125 6. 183596  
2. 39711 2. 580219 2. 796897 3. 118001 3. 283743 2. 216181 2. 405188 3. 09381 2. 444406  
5. 948102 7. 037068 7. 187333 7. 012706 7. 32126 6. 998112 7. 04031 6. 823209 6. 778034  
4. 487314 5. 20837 5. 740908 5. 449356 5. 048145 5. 070891 5. 058079 6. 112641 5. 25158  
5. 324031 4. 990879 4. 61287 4. 603351 5. 623357 4. 203162 4. 88394 4. 845371 4. 936686  
6. 911493 7. 38412 6. 586621 6. 336509 7. 126931 7. 016278 7. 04868 6. 98483 6. 80309  
2. 985888 3. 316085 4. 093032 2. 937518 3. 000347 3. 250076 3. 062844 3. 608605 1. 882993  
4. 799147 4. 864348 4. 589903 4. 757202 4. 586098 4. 354947 4. 795409 4. 628201 4. 425017  
4. 27156 4. 741338 4. 911249 4. 581162 5. 039043 5. 731272 4. 382126 4. 351379 4. 506962  
1. 58821 1. 245262 2. 367746 2. 273577 1. 604 1. 545527 2. 373645 2. 181184 2. 571605  
2. 092928 2. 32689 1. 460508 1. 478699 1. 442309 1. 387233 1. 468735 1. 501886 1. 407854  
1. 29167 1. 258945 2. 718642 1. 569058 1. 937111 1. 607443 1. 619296 2. 229377 2. 503239  
2. 339005 3. 128196 2. 521694 2. 601427 2. 293104 3. 055535 2. 927507 2. 214658 2. 06327  
1. 604281 1. 660757 1. 655279 1. 408169 1. 756857 1. 893951 1. 786062 1. 98341 2. 401091  
2. 070786 1. 474439 1. 545768 1. 357386 1. 166134 1. 406886 1. 773617 1. 689912 1. 524053  
1. 827673 1. 470245 1. 485122 1. 503852 1. 367917 1. 772812 1. 879119 2. 011028 1. 762599  
1. 947843 1. 515337 1. 667696 1. 67066 1. 67631 1. 679358 1. 461266 1. 491685 2. 51659



2. 534125 2. 255007 2. 304342 2. 150493 2. 627381 2. 012995 1. 412913 1. 946682 1. 646239  
1. 871815 2. 404752 2. 233314 1. 620861 1. 735972 3. 630211 1. 444862 2. 027736 1. 713098  
5. 56928 5. 763481 5. 852048 5. 744512 5. 412143 6. 41648 3. 863303 5. 114033 5. 69123  
1. 743052 1. 272987 1. 476841 1. 343971 1. 253732 1. 175022 1. 013273 1. 678535 2. 000391  
1. 98532 1. 468828 1. 529355 1. 893065 1. 254665 1. 367811 1. 471504 1. 406042 1. 414883  
1. 644199 1. 565073 0. 878821 2. 045693 2. 111794 1. 603278 2. 221355 1. 099772 1. 935945  
2. 090506 2. 091369 2. 022841 1. 181173 2. 327484 1. 794137 1. 967952 1. 398342 2. 621268  
4. 193184 5. 096038 4. 500935 5. 029766 3. 650318 4. 972117 4. 439121 4. 316018 5. 870121  
1. 959815 2. 211904 1. 37997 1. 839388 2. 04523 1. 513132 1. 460186 1. 729834 2. 037595  
5. 18569 6. 012595 5. 655266 5. 716987 5. 268625 6. 385322 5. 769155 5. 868614 5. 751379  
2. 581889 1. 650288 2. 379225 2. 577271 2. 057255 2. 267772 2. 056997 2. 099338 2. 056299  
2. 46906 3. 263271 4. 190656 5. 184471 3. 001258 2. 759582 3. 108923 3. 03152 2. 838297  
1. 402326 0. 867217 1. 352917 2. 413936 0. 811279 1. 713602 1. 349561 1. 202864 1. 563293  
6. 658697 7. 558102 7. 703473 6. 922997 7. 482868 7. 137535 7. 100455 7. 542831 7. 108314  
1. 360571 1. 023843 1. 495988 1. 437847 1. 290049 1. 231271 1. 771919 1. 184189 0. 996429  
2. 047907 1. 695137 1. 055662 1. 45482 1. 242629 1. 882608 1. 249676 1. 084735 1. 557994  
4. 319085 3. 458422 4. 044065 3. 051814 2. 661092 3. 148433 3. 64197 4. 099052 3. 704244  
4. 286311 3. 87502 3. 544473 3. 782316 4. 047276 4. 116858 4. 229395 4. 925926 4. 291648  
1. 512671 1. 321463 1. 498367 1. 241133 1. 491669 1. 348786 1. 560004 1. 261501 1. 419756  
3. 468743 4. 133088 3. 891933 3. 416635 3. 677088 4. 388988 3. 67771 2. 362301 2. 627404  
1. 126075 0. 938069 1. 328664 0. 358863 1. 589356 0. 961178 0. 457222 1. 102238 1. 379604  
1. 157402 1. 641514 1. 115564 1. 468555 1. 902472 1. 422529 1. 983563 2. 206422 0. 817181  
3. 694915 4. 038672 2. 730177 3. 212669 2. 895193 2. 788019 3. 237163 3. 522304 2. 483323  
0. 873353 1. 063357 0. 720886 1. 365254 0. 943962 1. 190478 1. 131561 0. 764328 1. 037089  
4. 208169 0. 617291 1. 276321 0. 800109 1. 233767 0. 43838 0. 933825 1. 306544 0. 869053  
1. 997841 2. 539165 1. 223624 1. 740949 1. 289711 1. 530991 1. 924237 1. 766732 1. 281828  
3. 066177 3. 066556 3. 35768 4. 190902 3. 551472 3. 085486 3. 338452 3. 904526 3. 301986  
0. 731924 1. 016679 1. 416703 2. 797959 1. 099194 2. 479666 1. 200697 3. 315735 1. 223748  
3. 106748 5. 638775 3. 016985 4. 904346 5. 523216 4. 402858 4. 827589 3. 773193 3. 775117  
3. 414845 4. 638269 4. 663992 4. 792694 3. 206169 2. 865126 2. 817648 2. 85915 3. 39548  
6. 323844 6. 209879 6. 342612 6. 813819 6. 653917 5. 863639 6. 034219 6. 325154 6. 557229  
2. 596049 3. 168315 3. 110952 2. 565549 3. 38197 3. 158155 3. 718647 3. 044259 3. 055798  
2. 240844 1. 237663 1. 783504 1. 685747 1. 530518 1. 312148 2. 407537 1. 966771 1. 891509  
4. 547386 6. 034817 6. 053316 6. 171695 6. 339233 5. 421308 5. 937853 5. 810534 5. 643633  
1. 29701 1. 173061 0. 842159 0. 788595 1. 630291 1. 500394 1. 240754 0. 942311 1. 175456  
2. 113332 1. 999888 1. 987048 2. 171433 2. 04535 1. 877902 2. 37164 1. 814059 2. 321919  
4. 890878 5. 157148 5. 882787 4. 907052 6. 224131 4. 893581 3. 142431 5. 759511 4. 767443  
2. 220532 1. 974461 1. 853823 2. 343444 1. 798373 2. 4289 1. 744432 1. 88203 1. 759572  
1. 038233 0. 822009 0. 873106 1. 289008 2. 196413 0. 994039 0. 844262 0. 877609 1. 762393  
1. 805911 1. 211656 1. 285123 1. 421877 1. 206376 1. 790223 1. 721721 0. 871943 0. 966031  
2. 611766 1. 63198 1. 594873 2. 417764 0. 763772 1. 573992 1. 106647 1. 760215 1. 074524  
5. 737515 5. 984808 6. 053147 5. 598159 6. 00677 5. 544854 5. 455225 5. 272503 5. 210143  
4. 85748 5. 458942 6. 198662 6. 212046 6. 558598 5. 783812 6. 023169 5. 815164 5. 914869  
4. 794802 5. 015674 4. 024278 4. 491105 4. 546596 4. 166069 4. 525477 4. 072855 4. 802396  
3. 79933 2. 658895 2. 324501 1. 729254 2. 358149 1. 912238 2. 39318 2. 219867 2. 767285  
2. 961692 3. 439551 2. 612653 3. 432383 2. 980719 2. 746115 2. 782792 3. 393367 4. 472317  
2. 610143 1. 963682 1. 917511 2. 335271 2. 74024 1. 469781 1. 987399 1. 995252 1. 710413  
2. 321249 1. 79317 1. 712778 1. 772053 1. 577813 2. 276722 1. 723275 1. 813785 1. 936905  
2. 387795 2. 057474 1. 850026 2. 809685 2. 307362 2. 145893 2. 007414 2. 109012 2. 606237  
2. 142268 1. 522056 1. 745517 1. 651001 1. 611586 1. 394912 1. 683895 1. 576778 1. 510135  
4. 784569 3. 830438 4. 180856 4. 282467 4. 18641 4. 170931 3. 953289 2. 996346 3. 638782

1. 961323 2. 033974 1. 601987 2. 334616 1. 927213 2. 284133 2. 18567 1. 858764 2. 058849  
4. 275887 5. 283501 4. 604022 5. 56517 5. 466933 5. 426259 5. 77092 5. 127168 4. 901621  
4. 904372 4. 507952 4. 658717 3. 452299 3. 415369 4. 753975 3. 630636 4. 006122 2. 578617  
1. 356193 0. 953798 1. 788349 0. 943237 1. 202369 1. 481868 1. 553246 2. 048929 1. 329291  
5. 210434 3. 88782 4. 567194 4. 670253 5. 163407 5. 196395 5. 419848 4. 786813 4. 956594  
7. 416453 6. 96086 7. 466919 7. 218912 6. 942031 6. 916968 7. 009072 7. 472514 7. 959341  
3. 513873 2. 66518 3. 306663 2. 55541 2. 961659 3. 169738 3. 686966 3. 30807 3. 25898  
9. 138755 9. 501565 9. 566248 9. 012355 9. 314317 9. 105102 8. 648256 9. 380064 8. 978424  
1. 925241 2. 162806 3. 123056 1. 567149 1. 643225 2. 755146 1. 942032 1. 655713 2. 418417  
2. 129021 1. 733263 1. 798789 1. 857562 2. 242871 1. 842005 1. 66 2. 185643 1. 631982  
1. 740215 1. 165214 1. 5316 1. 694218 1. 254222 1. 33233 1. 909662 2. 196974 1. 701795  
5. 464484 6. 82743 6. 458236 5. 462207 5. 427747 5. 583571 6. 070818 5. 238121 5. 460907  
3. 201291 3. 826645 3. 803173 3. 769929 3. 939544 4. 359497 3. 815192 3. 818754 3. 86211  
0. 890345 1. 116924 1. 238918 0. 776359 0. 963788 0. 851292 0. 710464 0. 872741 1. 073325  
2. 000292 2. 633865 1. 932949 1. 951039 1. 477404 1. 785193 2. 082844 1. 530864 1. 854505  
2. 31091 2. 088682 1. 452646 1. 544719 1. 915703 2. 33213 1. 682936 1. 874557 2. 73872  
2. 165053 1. 888369 1. 854092 2. 060425 1. 661344 2. 67484 2. 352611 1. 91863 2. 768502  
1. 837988 1. 53303 1. 572821 1. 960601 2. 134385 1. 379596 1. 503053 1. 649705 1. 433753  
2. 244306 3. 039746 2. 406652 1. 766381 3. 140429 2. 005898 2. 233767 2. 115821 2. 012474  
2. 830771 1. 994337 2. 529962 2. 420407 1. 831253 1. 147067 1. 727404 1. 408742 2. 228737  
2. 734769 0. 96142 1. 714191 1. 173234 0. 989048 1. 918585 1. 329152 1. 663069 1. 039402  
3. 116715 2. 906125 2. 88953 2. 410265 3. 645809 2. 65875 2. 253836 3. 679116 1. 938452  
1. 598597 1. 945106 1. 27897 1. 693919 1. 587184 1. 720682 2. 206429 1. 532783 1. 380942  
3. 308365 3. 273478 3. 188473 2. 909212 2. 739599 3. 320323 2. 765039 3. 582358 3. 580922  
1. 35327 1. 01517 0. 838585 1. 245901 1. 469394 1. 116686 0. 827597 1. 076348 1. 075957  
3. 624867 3. 474001 3. 721255 3. 326184 2. 632982 2. 470824 3. 136472 2. 875777 2. 623301  
3. 969032 4. 732358 4. 499982 5. 284838 4. 57092 4. 997004 4. 906394 3. 796786 4. 848579  
2. 864403 3. 736236 3. 38498 2. 912066 2. 452802 4. 550389 3. 137908 3. 508714 4. 039656  
3. 193426 4. 000351 4. 047593 3. 830059 3. 713591 3. 832289 3. 157997 3. 326846 2. 987939  
2. 046113 1. 449183 1. 381177 1. 326314 1. 751722 2. 252259 2. 049709 1. 428138 1. 121609  
1. 965485 1. 694459 1. 926675 1. 597149 2. 131314 1. 781525 2. 266064 1. 855491 1. 885927  
0. 884014 0. 824042 0. 901356 0. 862283 1. 48295 0. 796637 1. 072532 1. 520422 0. 879718  
7. 577368 8. 28513 8. 077742 7. 426898 8. 148996 8. 438564 7. 039893 9. 027106 7. 920268  
2. 320804 2. 462795 1. 064867 1. 231696 1. 447397 2. 766307 1. 236578 3. 375262 1. 68783  
2. 991111 1. 447682 1. 36587 2. 06342 2. 198801 1. 452092 1. 375843 2. 18692 1. 180858  
2. 196759 1. 501233 1. 155059 1. 480711 1. 077223 1. 081727 2. 293479 0. 466358 2. 186032  
2. 861218 2. 931231 2. 61281 2. 727758 2. 749251 2. 958723 4. 024864 2. 675964 3. 101531  
1. 595925 1. 658705 1. 635039 1. 9347 1. 431143 2. 039882 1. 927927 1. 808487 1. 537136  
2. 18073 1. 830065 1. 917337 2. 460771 3. 056479 2. 749263 2. 642986 1. 918545 2. 366382  
4. 035452 5. 436428 5. 118538 5. 228453 5. 547356 4. 74569 3. 220162 5. 110255 4. 677507  
2. 389098 2. 675973 5. 09529 4. 346735 3. 397946 2. 70394 4. 278049 2. 128297 4. 359457  
6. 243007 5. 809276 5. 702336 5. 220638 6. 121089 6. 484134 6. 31819 6. 12536 6. 164228  
2. 327317 1. 960578 3. 607595 2. 544057 2. 513297 2. 65382 3. 392935 3. 148123 2. 299932  
5. 899873 6. 216644 6. 410436 6. 21028 6. 041987 7. 200265 5. 702653 6. 422544 6. 044221  
3. 384146 2. 37778 2. 674949 3. 658058 4. 574712 2. 075696 3. 011336 5. 236371 3. 111366  
7. 829147 8. 04886 8. 214486 7. 721141 8. 146522 7. 587448 8. 016385 7. 913808 7. 755413  
5. 771762 5. 998278 6. 06088 6. 371154 6. 239742 6. 390799 6. 287184 6. 207726 5. 817771  
6. 084495 4. 112197 4. 448387 5. 212427 3. 467913 2. 776948 3. 886045 4. 027436 3. 777192  
3. 387689 5. 113077 3. 980076 4. 295154 3. 813385 4. 361238 3. 958076 5. 212209 4. 342359  
2. 439214 2. 237626 1. 727381 1. 789119 1. 537395 1. 460355 1. 167667 1. 602815 1. 531598  
5. 38815 4. 746677 5. 32477 4. 233186 5. 079245 5. 236376 4. 347095 4. 589811 4. 667344

|          |          |          |          |          |          |          |          |          |
|----------|----------|----------|----------|----------|----------|----------|----------|----------|
| 5.349663 | 5.373396 | 6.401017 | 6.706817 | 5.597191 | 5.946167 | 4.32176  | 5.771369 | 5.257196 |
| 2.864213 | 2.844415 | 2.42477  | 2.297867 | 2.383558 | 2.108282 | 1.596996 | 2.230607 | 1.628159 |
| 3.377842 | 3.442411 | 2.7939   | 3.874798 | 3.642842 | 2.714974 | 3.973703 | 3.651288 | 3.755142 |
| 2.190281 | 3.157906 | 3.666175 | 2.723583 | 2.228934 | 2.864951 | 3.128077 | 3.021256 | 2.997357 |
| 9.387738 | 9.900182 | 9.987746 | 9.185275 | 9.75281  | 9.78843  | 9.024463 | 9.922706 | 9.418232 |
| 3.613842 | 2.213556 | 2.264885 | 2.776556 | 3.412834 | 3.130625 | 3.049647 | 3.376399 | 3.726973 |
| 7.565154 | 8.056773 | 7.958168 | 8.155886 | 8.008554 | 7.82661  | 7.31184  | 8.178862 | 7.785722 |
| 2.621897 | 1.418148 | 2.042535 | 2.183956 | 1.40952  | 1.990431 | 2.351278 | 1.311969 | 1.315336 |
| 4.962308 | 5.180706 | 4.672363 | 5.119273 | 5.200632 | 4.654166 | 5.025563 | 5.346088 | 5.368682 |
| 5.156268 | 4.547473 | 4.268923 | 4.123662 | 5.022714 | 4.849232 | 4.766193 | 5.65499  | 5.193206 |
| 1.430173 | 1.384842 | 1.143743 | 1.701068 | 1.20414  | 1.414439 | 1.017241 | 1.451682 | 1.186586 |
| 4.580501 | 5.029034 | 4.540176 | 3.467948 | 5.382383 | 4.877075 | 3.750806 | 4.793651 | 5.174895 |
| 2.331866 | 1.91588  | 2.480509 | 2.649248 | 2.606742 | 1.682522 | 1.97298  | 2.900532 | 2.420154 |
| 8.793903 | 9.725713 | 9.472405 | 9.171523 | 9.454494 | 9.231457 | 9.165492 | 9.53936  | 9.311296 |
| 3.291488 | 1.630717 | 2.066968 | 1.110435 | 3.183708 | 1.593937 | 2.955822 | 1.754554 | 2.204681 |
| 1.301892 | 1.555681 | 0.834561 | 0.819612 | 1.811302 | 1.172629 | 1.265053 | 1.336644 | 1.354918 |
| 3.446477 | 1.689583 | 2.135295 | 1.884443 | 2.598393 | 2.321984 | 2.283116 | 2.033283 | 1.990573 |
| 1.25438  | 2.058527 | 2.387503 | 1.313733 | 1.430484 | 1.70582  | 1.658629 | 2.225317 | 2.565635 |
| 1.162737 | 1.761346 | 1.389297 | 4.219178 | 2.043388 | 2.28341  | 1.844247 | 1.413332 | 1.900273 |
| 1.201866 | 1.999214 | 1.039412 | 1.867144 | 1.081049 | 1.589752 | 2.927629 | 1.285305 | 1.342967 |
| 5.648538 | 5.973938 | 6.767572 | 5.244771 | 5.960662 | 5.841503 | 5.85435  | 6.908033 | 5.722997 |
| 3.746574 | 1.796623 | 2.498466 | 1.621025 | 1.417195 | 1.764798 | 1.578873 | 1.523618 | 2.519952 |
| 1.578133 | 1.412499 | 2.509447 | 3.071143 | 2.179799 | 1.968613 | 1.196753 | 2.010878 | 1.89207  |
| 2.622536 | 4.103103 | 4.304561 | 5.167952 | 3.250294 | 3.482332 | 3.243625 | 3.421484 | 3.891393 |
| 1.702884 | 1.417029 | 1.663107 | 1.352432 | 1.591171 | 1.396457 | 1.42406  | 1.243859 | 1.145713 |
| 0.773078 | 2.536119 | 1.027343 | 1.020376 | 1.520626 | 0.834133 | 2.290194 | 1.675461 | 1.025539 |
| 1.326493 | 1.89293  | 2.038752 | 1.696843 | 1.604973 | 1.683132 | 1.804673 | 1.93278  | 3.207079 |
| 2.503636 | 3.128205 | 1.789651 | 2.570238 | 2.452801 | 2.742992 | 2.067995 | 2.196629 | 2.295245 |
| 5.103646 | 4.127824 | 4.781843 | 3.352277 | 3.767911 | 4.458501 | 4.063479 | 3.825843 | 4.999741 |
| 2.041925 | 1.481799 | 1.447082 | 1.462144 | 1.899399 | 1.504845 | 2.11304  | 1.463196 | 1.572549 |
| 3.279306 | 2.243614 | 2.208972 | 2.354991 | 1.740655 | 2.743541 | 2.838833 | 1.588776 | 1.727368 |
| 2.110717 | 1.312217 | 1.677738 | 2.415982 | 1.799271 | 1.747174 | 1.960943 | 1.560484 | 0.801658 |
| 7.494154 | 7.793867 | 7.538391 | 8.036672 | 7.637661 | 7.525283 | 7.275834 | 7.248401 | 7.770744 |
| 3.6085   | 3.858624 | 3.108105 | 3.288308 | 3.204706 | 3.709358 | 3.156605 | 2.768782 | 4.025016 |
| 0.765881 | 1.114113 | 1.000864 | 1.031033 | 1.804072 | 1.14087  | 1.228772 | 1.178828 | 1.07879  |
| 1.680108 | 1.71503  | 1.621349 | 1.324739 | 1.245378 | 1.938749 | 2.72178  | 1.167071 | 1.26632  |
| 2.332593 | 1.371731 | 1.452315 | 1.54154  | 1.477404 | 1.737084 | 2.01835  | 1.714562 | 1.952142 |
| 3.041447 | 2.496401 | 2.709875 | 2.363433 | 2.765793 | 3.961065 | 2.68417  | 3.36691  | 3.614883 |
| 1.917142 | 2.009216 | 2.297378 | 1.940224 | 1.4357   | 1.913535 | 2.825151 | 2.324913 | 1.652097 |
| 2.923845 | 3.19239  | 2.720707 | 2.40834  | 3.087501 | 2.637029 | 3.782667 | 2.503937 | 2.325627 |
| 2.658417 | 2.178237 | 2.885227 | 1.071416 | 3.174203 | 1.970143 | 1.599432 | 3.305483 | 1.733974 |
| 2.128046 | 1.229525 | 1.842986 | 2.629629 | 2.281079 | 1.162928 | 2.344416 | 1.996078 | 0.820584 |
| 1.714592 | 1.388486 | 1.805668 | 1.595488 | 0.537837 | 1.86464  | 1.478515 | 1.677662 | 2.319529 |
| 3.086464 | 5.757457 | 4.995477 | 4.324147 | 5.882594 | 5.352492 | 3.646131 | 4.593385 | 4.359495 |
| 1.461697 | 0.938117 | 1.619713 | 0.997518 | 2.770284 | 1.165783 | 0.798188 | 1.33831  | 1.704983 |
| 4.773589 | 5.989216 | 6.217789 | 5.818834 | 6.16506  | 6.140617 | 5.491409 | 6.181352 | 5.852774 |
| 2.667553 | 2.048442 | 2.591383 | 3.266158 | 2.221897 | 2.017032 | 3.063602 | 1.602929 | 1.983709 |
| 3.338921 | 2.601955 | 2.825712 | 2.424739 | 2.419598 | 2.438001 | 2.526586 | 3.381786 | 3.11207  |
| 1.302796 | 0.960361 | 1.519774 | 1.392079 | 1.777477 | 1.14152  | 0.824455 | 1.56083  | 1.931712 |
| 2.236566 | 1.792417 | 1.342249 | 1.83478  | 1.268613 | 1.877877 | 1.647053 | 1.345441 | 1.308196 |
| 2.963622 | 2.740413 | 3.926595 | 3.223675 | 3.913631 | 4.234397 | 4.097501 | 3.654681 | 3.402968 |

2. 403138 1. 528195 1. 573277 2. 112323 1. 612221 2. 270641 1. 503103 1. 703148 1. 588947  
1. 50092 1. 252266 1. 427166 3. 091493 2. 228606 1. 647266 3. 468235 2. 028781 3. 228375  
1. 580901 2. 65133 1. 772333 1. 759134 1. 402067 1. 108102 1. 958302 2. 69259 2. 561899  
3. 730258 2. 844404 2. 739327 3. 093143 2. 777405 3. 025529 3. 451256 3. 250549 3. 722339  
1. 955422 2. 108798 1. 816002 1. 771911 2. 109682 1. 965906 2. 638805 1. 639803 2. 331432  
2. 09531 1. 742493 1. 961024 1. 999557 2. 529428 2. 314757 5. 08473 2. 111587 2. 218815  
5. 309083 5. 90161 6. 499367 6. 298097 6. 197241 6. 500169 5. 628956 6. 658605 6. 032927  
6. 756063 7. 818288 7. 199374 7. 162936 8. 043268 6. 498849 7. 677185 7. 787483 7. 805114  
1. 766593 2. 891242 1. 458765 1. 187367 2. 328359 1. 86123 1. 954368 2. 296784 1. 89128  
1. 390442 1. 32969 1. 447574 2. 184133 1. 938441 1. 804192 1. 595086 1. 150792 1. 519037  
3. 815211 4. 013279 3. 718125 3. 240127 3. 99088 4. 974102 2. 909886 3. 441584 2. 710239  
1. 427133 1. 602691 1. 032063 1. 096502 2. 150897 2. 21157 1. 33438 1. 957938 1. 365598  
1. 639208 1. 302544 0. 719137 1. 083832 1. 116917 1. 013706 1. 347361 0. 722699 1. 117213  
4. 344866 3. 577843 4. 648493 3. 988258 3. 823672 3. 28617 4. 248562 4. 00922 3. 328805  
2. 557997 1. 850807 2. 570776 2. 666758 2. 289415 2. 926575 2. 181271 2. 175472 2. 684608  
2. 598989 3. 535466 3. 106628 3. 364119 3. 092946 2. 55542 3. 77346 3. 143614 3. 071841  
1. 675364 2. 654111 2. 0738 2. 422418 2. 172917 1. 523628 1. 657915 1. 753967 2. 362549  
0. 240705 0. 379884 0. 586609 2. 960851 0. 527662 0. 660137 0. 954887 0. 318257 0. 529202  
0. 927358 1. 32202 1. 591133 1. 400772 1. 172315 1. 107185 1. 151774 1. 737592 1. 264326  
2. 189545 1. 241465 1. 737033 1. 861507 1. 353226 1. 325514 1. 80235 1. 258896 1. 258896  
3. 090708 2. 968266 2. 247639 2. 353104 2. 099427 2. 108648 2. 531722 1. 951303 2. 464469  
8. 176406 8. 324504 8. 357347 8. 414318 8. 039194 8. 252635 8. 024183 8. 048115 8. 25242  
3. 054855 2. 546571 3. 091617 3. 038353 3. 216574 3. 016807 3. 441296 3. 12027 3. 11264  
6. 110058 5. 601458 5. 74966 4. 808512 6. 333748 5. 631702 4. 887796 5. 620161 5. 252  
2. 677118 1. 658201 2. 466586 1. 954746 2. 313513 2. 164782 2. 100211 2. 111085 1. 902476  
3. 229216 2. 186946 2. 370419 2. 9312 2. 255189 2. 66449 2. 431456 3. 241036 3. 005475  
2. 823863 2. 193927 2. 2631 2. 298515 2. 026571 2. 355675 2. 173554 1. 981788 2. 798057  
2. 221073 1. 593198 1. 804679 1. 525744 1. 764895 1. 780559 1. 968222 2. 313283 1. 770519  
2. 28788 3. 530103 2. 517113 3. 871411 4. 006405 2. 588226 2. 567424 3. 3517 3. 68291  
2. 345348 1. 534312 1. 983376 1. 733303 2. 26449 1. 578765 1. 627085 2. 231903 2. 046297  
2. 409915 1. 84285 0. 78518 2. 162084 1. 265113 1. 358817 1. 058858 1. 418038 0. 947989  
2. 643782 1. 240319 1. 604438 2. 134261 1. 307355 1. 63878 1. 531878 1. 238542 1. 518633  
3. 523515 4. 670051 4. 697213 3. 916677 3. 94691 4. 647652 2. 646899 3. 906811 3. 848982  
5. 557119 6. 05292 6. 054931 6. 083351 6. 201697 5. 851102 5. 956081 6. 024511 5. 947261  
1. 187864 1. 683703 1. 388182 1. 025238 0. 795432 1. 183152 1. 06896 1. 098906 1. 253938  
1. 64765 0. 695657 1. 448015 1. 448015 1. 668442 1. 456829 1. 221415 1. 113103 2. 150224  
1. 699487 1. 32042 3. 088942 4. 585389 1. 881619 2. 477282 2. 697955 3. 231081 3. 769635  
1. 804951 2. 432216 1. 968123 1. 720156 1. 349703 1. 915954 2. 497385 1. 932853 1. 357198  
2. 032358 1. 451541 1. 240049 1. 220128 1. 542632 1. 101231 0. 986965 1. 57002 1. 170924  
4. 397102 1. 085278 1. 143809 1. 189316 1. 675699 1. 708362 1. 047675 1. 266673 0. 985231  
1. 607071 3. 172284 2. 649553 2. 131701 2. 655759 1. 90678 2. 060406 2. 661613 2. 175076  
4. 180181 3. 444753 4. 731402 3. 08114 2. 689959 3. 843186 3. 376974 3. 249921 3. 745362  
1. 388783 1. 323129 1. 03512 1. 012859 1. 388601 1. 733833 2. 637587 1. 853139 1. 197116  
4. 629614 5. 050407 5. 419539 4. 367215 5. 354929 5. 522712 6. 121493 5. 325656 5. 061114  
2. 234085 1. 2987 1. 280724 3. 085133 2. 423692 0. 931841 1. 67525 1. 958131 1. 233754  
1. 313925 0. 831383 1. 245276 0. 843837 1. 221668 0. 918057 0. 699256 0. 724887 0. 879681  
1. 33727 2. 142493 2. 474184 1. 259817 1. 719059 1. 793145 1. 690556 3. 052786 1. 466457  
3. 216379 3. 265581 2. 652193 3. 451698 3. 892679 3. 880522 3. 803832 4. 628281 3. 917871  
1. 664728 3. 425866 1. 839094 1. 733972 2. 134312 1. 569008 3. 404791 2. 035075 1. 423581  
4. 144616 2. 809801 2. 557123 2. 962037 3. 414472 3. 228905 2. 835082 4. 500355 3. 140535  
3. 22202 2. 783404 2. 548503 2. 641485 2. 331089 2. 643143 2. 693884 2. 095544 1. 77456

|          |          |          |          |          |          |          |          |          |
|----------|----------|----------|----------|----------|----------|----------|----------|----------|
| 4.785115 | 4.28614  | 3.69791  | 4.184198 | 4.587289 | 4.246064 | 4.242818 | 4.752664 | 4.761048 |
| 1.050892 | 1.057141 | 1.192289 | 0.930527 | 1.153118 | 1.722735 | 1.098924 | 0.893629 | 0.81393  |
| 2.630967 | 1.719125 | 1.438699 | 1.387548 | 2.712722 | 1.612805 | 1.703399 | 2.375713 | 1.511632 |
| 2.511519 | 2.236585 | 3.439044 | 1.900023 | 1.917571 | 2.573013 | 1.644553 | 1.518728 | 3.342687 |
| 0.931851 | 1.006113 | 1.149276 | 0.916023 | 1.489704 | 0.548504 | 0.984907 | 1.282925 | 1.103    |
| 2.1753   | 2.330847 | 2.532595 | 2.11715  | 1.440009 | 2.205016 | 2.490787 | 1.497623 | 1.665643 |
| 4.895817 | 2.567709 | 3.373356 | 2.308861 | 1.796855 | 2.171958 | 2.925175 | 2.123171 | 3.778059 |
| 1.871809 | 1.873309 | 1.434791 | 1.644038 | 1.276267 | 1.400226 | 1.472799 | 1.654821 | 1.566658 |
| 1.048428 | 0.867817 | 1.002908 | 1.206103 | 1.925912 | 1.085826 | 1.240477 | 1.771566 | 1.446806 |
| 2.097302 | 1.846195 | 1.712378 | 2.172697 | 1.944945 | 2.093152 | 1.7449   | 1.71384  | 1.651515 |
| 2.211616 | 1.820561 | 2.352223 | 2.647107 | 2.249704 | 2.042559 | 1.975025 | 2.341577 | 2.143699 |
| 2.037075 | 2.811858 | 1.770806 | 2.082831 | 3.049401 | 2.796761 | 2.964261 | 2.833737 | 3.393115 |
| 3.964803 | 5.117207 | 4.767383 | 2.055647 | 4.584289 | 3.37767  | 3.601189 | 4.977704 | 3.374756 |
| 3.250768 | 2.542901 | 3.062361 | 3.79826  | 2.252477 | 2.558164 | 2.815851 | 2.402176 | 1.719288 |
| 3.440895 | 3.945262 | 3.201025 | 3.769687 | 2.458158 | 3.416132 | 3.009944 | 3.482556 | 3.44233  |
| 1.749724 | 1.632518 | 1.540744 | 2.270679 | 1.93593  | 2.130312 | 2.503413 | 2.431719 | 1.661723 |
| 2.036407 | 1.371537 | 2.06077  | 1.855562 | 1.864475 | 1.734174 | 1.381095 | 1.898074 | 1.103162 |
| 1.994889 | 1.3294   | 1.816704 | 1.894741 | 1.538443 | 2.304102 | 1.926652 | 1.651145 | 1.452732 |
| 2.171492 | 2.257524 | 2.434782 | 2.127523 | 1.779171 | 2.102448 | 1.911456 | 2.453006 | 1.852149 |
| 1.075293 | 1.06738  | 1.6434   | 1.213559 | 1.331239 | 1.411174 | 1.545101 | 1.120613 | 1.767156 |
| 1.478709 | 1.490048 | 1.294186 | 1.150603 | 1.554331 | 1.094451 | 1.183984 | 1.265402 | 2.044139 |
| 1.356248 | 0.999629 | 1.420508 | 1.088946 | 0.888359 | 1.688619 | 1.866589 | 0.997846 | 2.235587 |
| 5.893973 | 5.810622 | 6.164867 | 3.617892 | 0.96534  | 4.704553 | 5.000743 | 4.702235 | 1.538319 |
| 2.740025 | 2.567697 | 2.947794 | 2.499416 | 3.120999 | 2.00077  | 1.927924 | 2.779262 | 2.224627 |
| 1.204048 | 0.950342 | 1.303785 | 1.134986 | 0.977298 | 1.479939 | 1.950111 | 1.370111 | 1.366048 |
| 6.191083 | 5.542679 | 6.320748 | 6.164418 | 5.946441 | 6.186189 | 5.844631 | 5.7329   | 5.920759 |
| 2.951749 | 2.576439 | 1.985029 | 3.111036 | 2.404621 | 1.869481 | 3.467978 | 2.649331 | 2.149082 |
| 2.890803 | 2.986276 | 2.851854 | 2.832745 | 2.836752 | 3.694869 | 2.680537 | 2.007213 | 2.825974 |
| 2.399233 | 1.838222 | 1.536054 | 2.55897  | 1.605447 | 1.846951 | 1.049223 | 2.521682 | 2.06874  |
| 6.213069 | 6.139687 | 6.052307 | 5.906708 | 6.20084  | 5.619955 | 6.184325 | 5.860374 | 6.239085 |
| 2.449347 | 2.154211 | 3.928873 | 2.531036 | 2.696018 | 3.727208 | 3.773375 | 2.405034 | 2.512809 |
| 2.258392 | 1.856387 | 1.833213 | 1.987922 | 1.414775 | 2.61159  | 2.364501 | 1.356896 | 1.425159 |
| 1.468282 | 1.784011 | 1.415558 | 1.428047 | 2.734672 | 1.767355 | 1.300674 | 1.95554  | 1.789027 |
| 4.492954 | 4.72889  | 4.452143 | 3.578062 | 4.826521 | 3.99449  | 4.908148 | 4.874237 | 4.579614 |
| 3.892794 | 3.802442 | 3.838626 | 5.196207 | 3.362823 | 4.886371 | 4.66205  | 3.710446 | 3.967556 |
| 3.467084 | 3.054471 | 2.892409 | 3.143957 | 2.601178 | 2.727503 | 3.121291 | 2.888353 | 3.024741 |
| 1.261594 | 0.785259 | 1.088524 | 1.270992 | 1.370574 | 0.790417 | 1.09815  | 0.672843 | 1.062594 |
| 1.940878 | 1.468185 | 1.731583 | 1.139284 | 1.039449 | 1.980329 | 2.967249 | 1.633848 | 1.211123 |
| 3.429219 | 3.537202 | 3.012672 | 4.341659 | 3.899322 | 3.97066  | 3.971517 | 1.468903 | 2.893763 |
| 0.889712 | 1.685354 | 1.07341  | 1.24168  | 0.947465 | 0.773576 | 0.995555 | 0.659998 | 0.85441  |
| 2.84962  | 1.065259 | 1.253285 | 3.160177 | 1.995556 | 0.836001 | 0.69632  | 1.549656 | 1.694771 |
| 1.417268 | 1.208863 | 1.177676 | 1.139381 | 1.031698 | 1.051876 | 1.167941 | 1.358691 | 1.043355 |
| 3.379589 | 2.334101 | 2.733246 | 3.495894 | 1.927674 | 3.212278 | 3.066888 | 2.733347 | 3.239874 |
| 4.985864 | 6.01821  | 6.1511   | 5.664122 | 5.478383 | 5.487196 | 5.279447 | 5.293673 | 6.048803 |
| 3.072227 | 2.061945 | 2.81871  | 2.246176 | 2.492436 | 3.029542 | 2.81251  | 3.156571 | 2.616307 |
| 2.504869 | 2.139905 | 2.002508 | 1.798367 | 2.672592 | 1.661635 | 2.133302 | 1.873748 | 2.450975 |
| 2.54247  | 1.066536 | 1.374358 | 2.290758 | 1.593531 | 1.523441 | 1.958331 | 1.858123 | 1.442468 |
| 2.815169 | 1.192502 | 1.432903 | 2.067366 | 1.400579 | 1.863542 | 1.794022 | 1.22953  | 1.527181 |
| 2.076022 | 2.282288 | 2.40506  | 2.72714  | 1.630436 | 1.965054 | 1.567331 | 1.974767 | 1.819692 |
| 2.70146  | 1.70232  | 2.120051 | 1.594148 | 2.22582  | 1.592011 | 1.795336 | 1.621168 | 1.738616 |
| 4.642474 | 3.000204 | 3.789684 | 4.25788  | 4.587736 | 2.416545 | 2.420123 | 4.742207 | 3.216855 |

3.128813 2.687248 2.044246 1.852885 3.593711 2.777204 2.405463 2.566522 2.203739  
4.430749 2.564912 3.449803 2.273206 3.87811 2.690894 2.235564 3.150344 2.642246  
1.531317 1.33085 1.592704 1.151104 1.638662 1.335718 1.555856 1.421517 1.412602  
1.393412 1.120319 1.075396 1.894591 1.712251 1.159941 1.163267 1.25259 1.251831  
1.941802 1.890262 1.539657 1.661631 1.929267 1.362642 2.04939 1.82783 1.834495  
6.524132 6.359307 6.147552 6.408611 5.746391 6.836071 6.020831 5.900364 6.289735  
3.840273 5.229512 1.652671 3.220482 2.027482 1.103669 1.366531 1.363702 1.186632  
1.590498 1.188891 1.185953 1.058062 1.102243 1.159846 1.5456 1.429903 1.34512  
1.305612 1.246322 1.077098 1.535114 0.966915 1.050485 1.087927 1.169643 1.881981  
3.120998 2.890904 3.51397 2.075345 2.794674 2.397286 2.852658 1.858414 2.96636  
2.506815 2.202296 2.286984 2.197878 1.754548 1.737101 1.989679 1.704216 1.948857  
6.082184 6.937411 6.318534 6.693035 6.948121 6.309233 6.279516 6.503894 6.949137  
1.926237 2.061957 2.078731 3.647152 2.572473 2.047671 2.921494 4.085342 1.845659  
1.375328 1.448111 0.888659 0.853845 1.035221 1.457675 1.263614 1.697019 1.624811  
1.004053 1.167958 0.999978 1.145979 1.037429 1.194951 1.568055 1.015602 1.236904  
2.147693 1.702871 1.562878 2.808686 2.959018 1.401194 2.199072 1.735146 1.690303  
7.309804 7.902745 7.241115 8.200584 8.099666 7.667883 7.820697 8.035703 7.78988  
1.67337 2.442312 2.718494 2.081501 1.74399 3.501317 1.636281 0.906128 1.751068  
5.061472 3.192915 5.840896 4.438912 4.455006 5.16344 4.491211 4.351787 3.382597  
3.511098 3.844974 3.759142 3.097527 3.73327 4.279234 3.392669 3.926493 3.906761  
3.329854 3.026384 3.422987 2.979998 2.468061 3.205439 3.361244 2.27472 2.327237  
1.643363 1.144494 1.792339 1.236008 1.284019 1.01054 1.636478 1.215949 1.063448  
0.850191 1.559717 1.055925 1.081751 1.599767 1.006525 3.249881 1.429902 1.595504  
1.767374 1.448625 1.781957 2.090073 1.851853 1.667134 1.601024 1.579044 1.239449  
2.052056 1.684722 1.931901 1.492464 1.884739 1.795381 1.604373 1.931806 1.208055  
1.76194 2.870914 1.817477 2.34927 2.393352 1.924712 1.785637 2.621249 2.002018  
3.530967 2.316526 2.461619 1.775415 2.344866 2.541664 2.198035 1.963755 1.908249  
2.369777 1.728342 1.862935 2.088633 1.763772 2.161089 1.466392 1.732452 2.299448  
1.774239 1.817521 2.130277 3.035997 2.906255 2.608891 3.126194 2.262594 2.715959  
3.161517 3.384188 4.953266 4.678459 2.837654 3.402666 3.658529 4.95534 3.464325  
1.915514 1.239048 1.534451 2.220958 1.672042 1.652953 1.149563 1.84669 0.966585  
1.180471 1.012814 0.932244 1.072396 1.936358 1.391306 0.952353 1.428165 1.434325  
1.333579 2.149299 1.248297 2.107733 1.985693 1.702908 1.295871 1.196385 1.245406  
6.756084 6.808165 6.83728 6.168352 6.387537 7.167247 5.856054 6.869643 6.140861  
1.433958 1.632083 1.98719 2.285513 2.150228 2.210478 2.421899 2.086102 1.798382  
4.048433 4.600413 5.315294 4.659778 3.410907 2.857922 3.724596 5.748541 4.033451  
1.926554 1.649051 1.368642 1.94081 1.449026 1.656442 1.570604 1.270748 1.840988  
3.412831 3.057536 3.796317 3.088624 2.525628 2.324343 2.879166 3.682026 2.823476  
1.721729 1.432849 1.951957 1.762326 2.047014 1.908914 2.565504 2.182446 1.421131  
5.321759 4.557896 3.819699 4.731749 4.64963 4.662989 3.723443 4.513353 4.053453  
4.47577 5.942099 5.742856 5.882568 5.768728 6.207005 6.134064 5.951501 5.801783  
1.569226 1.694364 1.682134 1.252236 1.65891 2.220828 3.875564 5.058064 2.360198  
4.606547 4.848317 4.848317 5.995153 4.351443 5.393919 5.197228 5.10499 5.15486  
1.396012 0.940371 0.907711 1.153432 1.924301 0.876583 1.743209 1.631511 1.337116  
3.259879 2.750213 3.157459 2.757078 2.815948 2.60738 3.468028 3.082288 2.872845  
4.385453 4.987865 3.577717 3.528379 3.056604 3.456483 5.192329 4.846546 2.806089  
2.101468 1.050006 1.292947 1.162736 1.862561 1.651652 1.641111 1.141339 1.430887  
2.636949 3.11695 2.080294 1.353544 2.800473 1.445491 2.46992 2.168128 2.505992  
2.899061 3.032472 3.950517 2.428437 1.933354 3.127581 2.953095 2.449391 2.605797  
1.066805 1.079707 0.953369 1.558047 1.551626 1.486416 1.38146 1.444846 1.508149  
1.430956 1.371226 1.093656 1.586706 0.765505 1.2662 1.965586 1.658165 1.199256

2. 126313 1. 564282 2. 640759 2. 183597 1. 859984 2. 384601 2. 910578 1. 979131 2. 214217  
1. 086533 1. 8954 2. 008796 1. 790074 1. 228537 2. 32956 1. 325199 1. 989651 1. 467966  
1. 269566 2. 318846 1. 920793 1. 870318 1. 947318 2. 121157 1. 793969 1. 641775 1. 736097  
3. 473649 1. 51003 1. 850968 1. 637614 2. 063779 2. 898186 1. 924693 1. 343324 2. 394527  
6. 901951 7. 611611 7. 933662 7. 463025 7. 707354 7. 169128 7. 329806 7. 074569 8. 064992  
5. 506775 5. 366453 5. 214655 5. 459899 6. 434632 4. 976765 4. 745963 5. 244433 5. 283142  
7. 07828 4. 835384 6. 073505 4. 918515 5. 217784 5. 183906 4. 947131 5. 77011 6. 468646  
1. 214758 1. 191845 1. 112263 1. 054407 1. 095953 1. 299523 1. 054438 1. 131515 0. 948873  
8. 999638 8. 989802 9. 08773 9. 001038 8. 810418 9. 105638 8. 93931 8. 877483 8. 875259  
1. 333258 1. 413188 2. 57751 1. 664211 1. 65366 1. 083144 1. 34499 0. 853857 1. 188082  
3. 502107 2. 188302 3. 321757 2. 362829 2. 875474 2. 22624 2. 878228 2. 775353 2. 149255  
1. 998016 2. 667062 2. 098837 2. 298135 2. 03324 2. 541739 2. 36959 2. 052741 1. 932677  
1. 51932 1. 66687 0. 967787 1. 546544 1. 610254 1. 440448 1. 045991 0. 871472 1. 870576  
2. 308543 2. 401898 2. 314367 2. 584749 2. 757859 2. 495327 2. 353818 2. 307002 2. 227108  
3. 122714 3. 77702 2. 788973 2. 765928 2. 398109 2. 905148 2. 477192 2. 605304 2. 577602  
2. 174991 1. 74021 1. 63474 1. 469041 1. 958526 1. 791186 2. 18071 1. 549647 1. 195601  
4. 995691 3. 718238 4. 816588 4. 204399 3. 722295 4. 836173 4. 354034 4. 77795 3. 189473  
1. 842837 1. 933252 1. 557847 1. 728221 1. 493213 1. 609197 1. 78426 1. 606264 2. 079544  
1. 2897 1. 639636 1. 127622 1. 047857 0. 817686 0. 909828 1. 078257 1. 258641 1. 714844  
6. 20619 4. 554403 5. 504324 5. 876946 5. 540089 5. 552552 5. 845396 5. 14886 5. 674945  
2. 303251 1. 879606 3. 507135 3. 517618 1. 710177 2. 176324 2. 603596 2. 081683 4. 213138  
2. 075818 2. 019262 1. 665802 1. 787629 1. 448131 2. 101295 2. 010596 1. 788939 1. 544758  
1. 126669 1. 020321 0. 897096 0. 719052 1. 031266 0. 77977 0. 968696 0. 891063 1. 170608  
1. 456915 0. 588538 1. 020188 1. 16373 1. 087769 0. 971198 0. 920891 1. 359418 1. 000301  
2. 172503 1. 217726 1. 564526 1. 916355 1. 491289 2. 182473 2. 236053 1. 346015 1. 583  
5. 176923 5. 247054 5. 091479 5. 190541 5. 193705 4. 719563 5. 439395 5. 330878 5. 202421  
4. 590954 5. 640905 5. 831555 4. 762106 5. 812595 5. 993228 4. 933104 4. 944371 5. 411558  
3. 908052 4. 10288 4. 845385 3. 619643 5. 337157 4. 713266 3. 781811 3. 846382 4. 541156  
7. 329029 7. 84812 7. 6622 7. 737496 7. 811792 7. 744774 7. 070142 7. 845555 7. 550596  
6. 956791 7. 105317 7. 551234 7. 904879 7. 796161 7. 145264 7. 008431 7. 793242 7. 785959  
4. 616959 3. 418358 4. 389252 4. 898316 4. 563842 5. 008541 4. 914762 3. 749985 4. 429016  
2. 096408 2. 392297 2. 155668 2. 591487 2. 300158 2. 258966 2. 854095 2. 384947 3. 072372  
6. 279241 6. 73104 6. 629234 6. 659787 6. 747991 6. 534665 6. 728221 5. 983833 6. 304235  
2. 342574 2. 075512 2. 827073 2. 197474 2. 931651 2. 942037 2. 954482 2. 594874 2. 654115  
3. 038061 4. 126602 3. 617403 2. 766687 4. 364768 3. 835737 4. 859022 3. 709333 3. 863758  
5. 565216 6. 135309 5. 625355 5. 843247 4. 686908 5. 710142 4. 859452 5. 487788 5. 74842  
6. 551252 6. 671042 6. 372548 6. 101923 6. 744429 7. 296908 6. 310154 6. 079122 6. 497946  
3. 031078 3. 787524 3. 113276 4. 126062 3. 110552 4. 677942 3. 127544 2. 734985 2. 68865  
2. 976838 2. 126201 2. 122004 2. 315511 2. 674325 3. 180651 1. 938637 1. 691836 2. 20165  
7. 556682 7. 914967 7. 641069 7. 971248 8. 305675 7. 948296 7. 923865 7. 656577 7. 989486  
3. 802562 5. 089033 5. 057561 4. 988119 5. 167524 4. 870125 5. 300217 4. 949605 3. 92514  
4. 660806 5. 98756 5. 102091 5. 575991 5. 550959 7. 185107 4. 74766 5. 948297 5. 956165  
6. 492849 5. 955945 6. 512588 5. 637525 6. 170311 6. 128773 6. 006722 6. 194876 6. 691375  
5. 756476 5. 858941 6. 584569 5. 813679 5. 192188 6. 747114 5. 539512 6. 179789 5. 130203  
6. 38413 7. 198545 7. 272395 7. 877953 7. 424344 7. 397388 7. 199602 8. 039358 7. 391362  
4. 232433 4. 606881 4. 605357 4. 442122 4. 987248 5. 550001 5. 207606 4. 322701 4. 645789  
2. 891783 4. 258796 3. 567956 3. 254906 4. 381189 3. 975869 2. 972053 4. 325892 3. 911264  
6. 539244 6. 767456 6. 718841 6. 929802 6. 634399 6. 279193 5. 861908 6. 920693 5. 698032  
1. 157912 1. 13883 0. 934864 1. 134129 0. 951064 1. 202546 1. 22978 1. 236202 1. 485306  
5. 664856 5. 882342 6. 461705 5. 653778 5. 627154 5. 808141 5. 174098 6. 250566 5. 899603  
7. 153528 7. 120877 6. 813011 7. 335793 7. 328996 7. 217484 6. 723542 7. 20566 6. 971485

2. 598515 2. 595108 2. 751454 2. 213418 2. 638483 2. 936843 2. 669352 2. 929737 3. 004651  
5. 274887 5. 750322 5. 309054 5. 473552 5. 725218 5. 559575 5. 07062 5. 452716 5. 700417  
8. 932246 7. 740557 8. 01856 6. 90572 6. 773917 7. 713847 7. 606443 7. 270087 8. 092983  
4. 758226 4. 329417 4. 550523 4. 023841 6. 073616 4. 580569 4. 485492 4. 973796 4. 121898  
8. 012083 8. 453634 8. 325913 8. 309409 8. 473846 8. 283549 8. 040531 8. 493533 8. 191805  
2. 672646 2. 382209 3. 306405 2. 89437 3. 282456 2. 905006 2. 525828 2. 529946 2. 909734  
3. 947706 5. 013291 3. 86934 4. 701215 4. 52506 4. 616939 4. 569952 4. 587851 4. 290244  
4. 116505 3. 131287 3. 782397 3. 274368 3. 899003 4. 141168 5. 046853 3. 658343 3. 900874  
3. 696031 5. 179267 5. 471985 4. 444391 5. 650416 5. 706087 4. 993642 5. 01052 5. 428799  
2. 993169 2. 811397 3. 115814 2. 893641 2. 312722 4. 118021 3. 04485 3. 646019 2. 464276  
5. 001967 4. 616121 5. 704152 5. 404533 5. 291759 5. 070345 3. 016703 5. 710959 4. 813238  
6. 454497 5. 975617 5. 940422 6. 34036 5. 845708 6. 233772 5. 176301 6. 441178 6. 056089  
2. 555169 4. 79178 3. 828418 2. 636737 1. 866396 3. 47362 2. 788755 3. 853769 2. 27349  
2. 917303 3. 28561 3. 095495 3. 23681 3. 589531 2. 797404 2. 468958 2. 389018 3. 156494  
7. 65279 7. 659105 7. 515212 7. 503847 7. 488817 7. 235474 7. 583119 6. 904542 7. 041679  
5. 426915 5. 131088 4. 909723 4. 097149 5. 061117 4. 866487 4. 592856 4. 449 4. 552609  
4. 807415 3. 92986 3. 835457 3. 880821 4. 048943 4. 449098 4. 343873 4. 046369 4. 434438  
6. 152603 5. 225817 4. 51928 4. 442808 6. 075115 5. 223491 5. 08141 5. 060014 3. 210951  
5. 421433 4. 957387 5. 179159 4. 908096 5. 882569 5. 684856 4. 912493 4. 514471 5. 155036  
5. 690198 5. 964742 5. 352433 4. 91377 5. 804111 5. 163434 6. 035663 5. 882705 5. 761705  
3. 557824 3. 735831 3. 561507 3. 92988 3. 67359 3. 589314 4. 63749 3. 530001 3. 896763  
1. 077603 1. 016014 0. 615636 1. 012557 1. 222702 1. 121305 1. 22644 1. 078809 1. 393057  
4. 574696 4. 067658 3. 848624 4. 014504 4. 48198 3. 851715 4. 135238 4. 878736 5. 04281  
6. 90571 7. 071909 7. 600682 7. 25077 6. 91233 7. 29722 6. 964384 6. 224389 6. 713848  
8. 167053 8. 449055 8. 645383 8. 66791 8. 529271 7. 390669 8. 177776 8. 127228 8. 22283  
5. 721399 7. 037471 6. 625399 6. 514242 6. 535456 6. 60771 6. 543376 6. 144081 6. 598797  
3. 073646 3. 044014 2. 513859 2. 645218 2. 964004 3. 24573 2. 3267 2. 832034 3. 061685  
4. 750167 3. 352399 3. 828197 2. 309466 2. 7134 2. 22592 2. 562535 2. 383736 2. 467651  
6. 745203 7. 592074 7. 288481 6. 882794 7. 080116 7. 282159 6. 554463 7. 3645 7. 005449  
4. 601658 4. 34789 4. 321524 3. 901294 4. 711716 3. 978136 3. 592233 4. 562843 4. 347897  
5. 350882 3. 460298 3. 528937 3. 220829 3. 150251 2. 329543 2. 609411 3. 87487 3. 424972  
1. 669669 1. 701127 1. 718717 1. 165423 2. 091282 1. 247339 1. 877104 1. 505913 0. 917946  
1. 194623 1. 17287 1. 182214 1. 252482 1. 652206 1. 533042 1. 241826 1. 249085 0. 885071  
8. 353565 7. 588883 7. 586389 8. 537161 8. 093533 8. 468555 7. 741834 7. 711518 7. 495645  
1. 467184 1. 210696 1. 247775 1. 662575 1. 431373 1. 620437 2. 632538 1. 312206 1. 359065  
6. 696286 6. 519189 6. 502491 6. 605927 7. 104311 6. 587926 6. 678199 7. 141146 6. 837416  
7. 369051 7. 900047 7. 969722 8. 68588 7. 965006 8. 794164 8. 405036 8. 14547 8. 070093  
3. 920205 3. 161134 4. 651243 3. 937221 3. 483982 3. 730574 4. 698892 4. 811758 3. 779912  
2. 218773 3. 301631 2. 704312 2. 92806 3. 439671 2. 008577 3. 904559 2. 437523 3. 124711  
4. 761432 5. 900532 5. 652738 5. 539064 5. 682488 5. 496349 5. 559591 5. 526195 5. 881847  
4. 614026 4. 549174 5. 022001 4. 548192 4. 377207 4. 137716 5. 074545 5. 066409 4. 59494  
3. 969537 4. 138725 4. 295371 4. 668866 3. 427156 4. 440395 3. 618605 4. 10624 2. 57574  
4. 997641 5. 692831 6. 004187 6. 127218 6. 22111 6. 292607 4. 56541 6. 539292 6. 310047  
3. 043967 3. 187139 3. 429097 2. 800742 2. 928056 3. 448543 3. 119585 3. 799051 2. 92214  
6. 014021 6. 824162 6. 91619 6. 50439 6. 526778 6. 954835 6. 390182 6. 669184 6. 275844  
5. 140601 5. 195958 3. 461137 4. 455649 4. 138392 5. 020471 4. 988405 5. 557393 4. 711808  
4. 838913 5. 816652 5. 40567 5. 056351 6. 11461 4. 810623 5. 568911 5. 316536 5. 802145  
8. 299276 6. 824045 8. 261401 7. 137634 6. 716559 6. 521436 7. 143772 7. 537112 8. 967004  
5. 111064 4. 697467 4. 95026 4. 098828 5. 127966 5. 835244 5. 947021 5. 604118 5. 012973  
2. 413594 1. 827233 2. 117784 1. 264721 1. 349233 1. 95999 1. 796128 1. 501447 1. 696638  
4. 324451 4. 430306 4. 39842 3. 326748 3. 543024 4. 075907 4. 064821 3. 405254 3. 31321



4. 890035 5. 318339 5. 412055 5. 376556 5. 151603 5. 657235 5. 125001 5. 012547 4. 564818  
5. 35187 6. 824986 6. 908389 6. 680262 6. 231469 6. 390541 6. 085781 5. 96772 6. 172988  
5. 233484 5. 69372 5. 275293 5. 216541 6. 266636 5. 755593 6. 005117 5. 938539 5. 270351  
4. 302369 3. 442666 4. 172107 3. 19782 2. 909521 3. 494024 3. 916462 3. 491975 3. 812358  
3. 305063 4. 237692 4. 231431 4. 908298 3. 945892 4. 027965 4. 28357 3. 85917 4. 182569  
4. 913091 6. 468863 6. 163092 5. 810764 5. 999997 5. 436478 5. 665945 5. 407818 5. 950115  
5. 118247 4. 318816 3. 167658 3. 690096 4. 3613 4. 000226 3. 612304 4. 017705 3. 959029  
3. 107098 4. 386121 4. 863293 5. 138561 4. 224434 4. 570677 3. 268586 4. 467426 3. 930538  
4. 853618 4. 049003 3. 602 4. 439518 4. 125329 4. 619568 4. 139174 4. 40191 3. 721017  
4. 606854 5. 025534 5. 839824 5. 687892 4. 987165 5. 195304 5. 085114 5. 604485 5. 243275  
3. 221579 1. 962708 2. 810874 2. 747917 2. 262661 2. 784212 2. 9747 2. 134748 2. 237504  
1. 742151 1. 570696 1. 918191 1. 957491 1. 535942 2. 140745 1. 213623 1. 49283 1. 951526  
2. 018297 1. 901827 1. 591786 1. 815782 1. 669307 1. 885693 1. 979575 1. 967779 1. 75315  
2. 464155 2. 120808 1. 795583 1. 869373 2. 7804 2. 087059 2. 569346 2. 495076 2. 129293  
3. 652861 4. 241994 4. 155139 3. 204348 3. 358371 3. 900451 3. 968427 3. 874815 3. 995315  
2. 333963 0. 99843 1. 999564 1. 208477 2. 08909 2. 028309 1. 960566 1. 666034 1. 188888  
1. 585227 2. 601404 3. 275247 2. 461105 2. 245228 2. 299879 3. 557631 3. 361842 2. 228542  
4. 657405 5. 986404 5. 356739 5. 193377 5. 950157 6. 319952 5. 701047 4. 759761 5. 526622  
4. 833354 4. 423667 4. 011779 4. 5531 4. 294199 4. 186004 4. 234244 4. 17834 4. 780722  
4. 443603 6. 421824 5. 846827 5. 692591 6. 909174 5. 349218 6. 545223 4. 921515 5. 88423  
2. 336593 1. 566392 1. 757633 1. 949938 4. 744273 2. 919336 3. 259989 1. 875819 1. 633095  
4. 713459 3. 733095 5. 052303 2. 959373 4. 355294 4. 1343 3. 782822 3. 564846 4. 093291  
2. 839969 2. 828991 2. 670791 2. 611297 3. 535919 2. 849651 2. 52551 2. 857756 3. 31247  
8. 273146 5. 968191 7. 160255 5. 872436 5. 465786 5. 573821 5. 912747 6. 342317 7. 447177  
2. 153254 2. 401428 2. 141748 2. 315376 2. 159417 1. 79444 2. 177654 1. 699673 3. 47733  
2. 527061 1. 976688 1. 778166 1. 668191 2. 18414 2. 181513 1. 432806 1. 840395 1. 974933  
2. 202853 1. 894962 2. 948128 1. 960674 1. 829071 1. 613534 2. 336223 2. 154145 0. 896932  
1. 994397 3. 028111 3. 133673 3. 235409 2. 789307 3. 254159 2. 956427 2. 288337 2. 262155  
2. 447189 1. 928548 2. 186532 2. 237567 1. 810488 2. 737595 3. 751488 3. 085408 2. 473346  
1. 756737 1. 758337 1. 965533 2. 378636 1. 955961 1. 876723 1. 700116 1. 675172 2. 476375  
4. 974078 5. 674548 5. 836399 5. 31803 5. 353744 5. 081222 4. 831021 5. 183793 5. 411175  
7. 231498 4. 556385 5. 339127 4. 159981 3. 910135 3. 933502 4. 271178 4. 02665 6. 351993  
5. 068239 5. 508525 4. 980055 4. 5735 5. 557866 5. 257437 4. 856891 5. 801108 5. 203529  
4. 507542 4. 357298 3. 962174 4. 995061 5. 314917 3. 759821 3. 56338 5. 719291 3. 905269  
1. 786748 1. 316182 1. 201378 1. 675397 2. 293423 3. 353623 1. 320265 1. 474645 1. 135656  
3. 033042 3. 397296 3. 323041 3. 711254 4. 438242 4. 547323 3. 877083 3. 106459 4. 099809  
3. 745686 4. 402019 5. 250378 4. 726368 5. 572979 4. 404883 5. 187961 5. 35236 5. 142816  
6. 319515 6. 818271 6. 354848 6. 307855 6. 299444 6. 475377 6. 866742 6. 536593 6. 724975  
3. 734198 2. 050434 2. 912302 1. 530722 2. 266038 2. 17885 3. 364829 2. 09556 2. 177583  
2. 372176 1. 729625 1. 670817 1. 675293 1. 327819 1. 604635 2. 079002 1. 565049 2. 401306  
2. 751485 2. 489998 3. 501093 3. 036032 2. 88777 3. 143779 3. 437624 2. 192599 2. 368719  
3. 794837 5. 090832 3. 464659 4. 523723 4. 911291 4. 33958 4. 239522 3. 053139 4. 298111  
4. 533573 4. 919926 4. 164265 5. 541284 4. 816804 5. 468522 5. 431433 5. 278135 5. 291881  
4. 170204 6. 523059 5. 894263 6. 218835 5. 417781 6. 219615 6. 019336 6. 99211 6. 037774  
1. 830961 1. 664857 1. 755926 2. 215857 1. 926541 2. 077135 1. 60043 1. 466929 1. 974635  
4. 999487 5. 86994 5. 577471 4. 497936 6. 102022 6. 072917 5. 765401 5. 784779 6. 076792  
4. 448175 5. 07739 5. 017906 4. 932199 5. 301057 5. 856116 5. 285849 4. 95476 4. 34307  
3. 1995 3. 25468 3. 971812 2. 625883 2. 156921 4. 962272 3. 149541 4. 035328 4. 237622  
8. 064423 7. 854423 7. 791218 7. 524284 7. 383401 7. 577134 7. 610463 7. 608677 7. 624401  
7. 124397 6. 772106 7. 079414 7. 168364 6. 61114 6. 282433 7. 190463 7. 210652 7. 039769  
6. 687505 6. 926102 6. 723747 6. 2345 7. 001368 6. 171796 6. 920286 6. 670346 6. 456597

5. 876579 6. 844588 7. 312902 6. 288549 6. 204671 6. 055093 6. 831259 6. 632895 6. 869645  
6. 94133 6. 461775 6. 396091 6. 529608 6. 358435 6. 077307 6. 207432 6. 385476 6. 347616  
2. 095538 2. 386645 2. 345741 1. 593336 1. 529457 1. 663876 2. 37121 2. 410395 2. 433939  
9. 072836 9. 294893 9. 19905 9. 402239 8. 832926 9. 03504 9. 147162 9. 107837 9. 253698  
5. 383369 4. 995545 5. 055756 5. 199599 5. 338909 5. 088446 5. 812633 5. 381086 5. 174529  
6. 490526 6. 483812 6. 482866 6. 043399 5. 914185 5. 074262 6. 441511 6. 184226 6. 155367  
7. 275128 7. 361272 7. 52815 6. 814087 7. 088333 6. 995259 7. 300978 7. 422145 7. 054743  
4. 395623 5. 272855 5. 466026 6. 658369 6. 51975 6. 646898 5. 626212 4. 832233 5. 623102  
6. 312605 6. 112371 6. 09067 5. 776353 6. 138567 5. 317257 6. 342709 6. 242788 6. 703225  
4. 120243 3. 952061 4. 65133 4. 611367 4. 098524 4. 31581 4. 914193 4. 749371 4. 643973  
7. 24557 6. 541848 6. 728784 7. 148079 7. 257316 6. 548671 6. 937319 7. 032183 7. 033242  
2. 291803 3. 478654 3. 312239 2. 471616 2. 746634 2. 536371 3. 375998 3. 393422 2. 551136  
4. 557411 4. 919232 5. 164678 4. 718828 4. 859217 5. 04168 5. 028563 4. 389272 4. 737236  
4. 09891 4. 904462 4. 654414 5. 696137 5. 464764 4. 984562 4. 489372 4. 703219 5. 624446  
6. 272286 6. 76733 6. 389112 6. 365583 6. 662915 6. 101552 7. 048171 6. 536554 6. 48367  
6. 365565 7. 256836 7. 551917 6. 176066 7. 375648 7. 375709 7. 115489 7. 202143 7. 187075  
5. 710381 6. 212165 6. 574118 5. 244743 5. 543474 6. 349587 6. 309166 5. 991974 6. 205371  
2. 734948 2. 461605 2. 177816 2. 851 2. 188953 2. 231586 2. 640901 2. 214887 2. 21216  
1. 96362 2. 208313 1. 32107 2. 374607 3. 989788 1. 371327 2. 117306 1. 964612 1. 021534  
3. 626871 3. 169121 3. 116939 3. 340791 2. 724559 2. 992352 3. 01519 3. 251486 3. 076942  
1. 34199 1. 866462 1. 261802 2. 065228 2. 095684 1. 643649 1. 648126 1. 300994 2. 054387  
1. 988176 1. 859109 1. 131707 2. 698772 1. 406226 2. 064458 1. 52905 1. 005231 1. 108701  
7. 33267 7. 914078 7. 266204 8. 204367 7. 82501 7. 588551 7. 821873 7. 533221 8. 2138  
1. 561306 1. 169278 1. 809952 1. 864022 1. 27453 1. 038943 3. 333084 1. 664428 1. 110193  
1. 906881 2. 403507 2. 563091 1. 916407 4. 529986 1. 188038 3. 533101 2. 754731 1. 710814  
5. 727747 5. 418572 5. 244708 4. 964634 5. 292095 5. 016099 4. 622076 4. 223674 4. 69759  
2. 16554 1. 929733 2. 597229 2. 319093 2. 082979 2. 210417 2. 53258 2. 778889 1. 825772  
4. 407908 5. 42038 4. 832662 5. 987503 6. 279111 5. 562164 5. 178028 5. 381994 5. 155383  
3. 2216 2. 019317 2. 372816 2. 182425 1. 672978 2. 151504 1. 947199 2. 15721 1. 853619  
1. 882895 2. 068703 1. 759455 2. 721995 1. 716236 1. 808811 2. 836947 2. 394234 2. 129074  
7. 549696 7. 994265 8. 128472 7. 752129 7. 685604 8. 136759 7. 393667 7. 599064 7. 676537  
3. 917647 5. 148356 4. 759995 5. 345693 4. 912213 4. 975321 5. 348188 5. 280211 5. 007002  
6. 992612 6. 842382 6. 162043 7. 776195 7. 580105 6. 94035 7. 424634 7. 06167 7. 078585  
5. 497034 3. 085809 4. 573687 3. 918565 3. 1573 3. 914984 3. 241204 4. 023812 5. 201485  
1. 270046 0. 704093 1. 132682 1. 716414 0. 989768 0. 871555 1. 125828 1. 196012 0. 942883  
1. 373638 1. 693651 2. 004203 1. 738414 2. 44735 1. 772349 1. 427572 1. 645098 1. 564639  
2. 599156 4. 908754 4. 537047 3. 247367 4. 695454 5. 331557 3. 74665 4. 238856 3. 372783  
1. 825843 0. 798221 1. 141135 1. 279442 1. 161565 1. 670234 1. 245524 1. 212662 1. 050834  
6. 388564 6. 858124 6. 866548 6. 932099 6. 4559 6. 524487 6. 40818 7. 06239 6. 793133  
2. 746737 2. 927793 2. 88071 3. 151033 2. 320192 2. 715727 3. 354017 2. 811374 2. 963646  
2. 237219 2. 005775 1. 928928 1. 884221 1. 756655 1. 916555 2. 613519 1. 658535 2. 088113  
2. 386448 2. 351925 2. 335053 2. 498432 2. 49186 1. 996883 2. 335298 2. 417333 2. 154969  
2. 503301 3. 979373 4. 631979 4. 201239 4. 094721 3. 422884 3. 216328 4. 138276 4. 99745  
1. 938384 1. 835178 1. 815964 1. 965104 1. 759608 1. 968859 2. 055103 1. 870557 2. 245647  
5. 012475 5. 390424 5. 29053 5. 246983 5. 529666 5. 08082 5. 602122 5. 714974 5. 590877  
4. 541084 5. 197575 4. 875985 4. 89033 5. 889325 5. 232623 5. 145814 5. 098789 5. 59218  
3. 740732 3. 251756 3. 666146 4. 424493 3. 539281 4. 360117 3. 923948 4. 68015 4. 237226  
4. 997682 5. 017048 4. 733741 4. 67234 5. 005698 4. 662797 5. 170263 5. 370416 4. 826581  
3. 708628 2. 850194 3. 473648 3. 613777 2. 90637 3. 138837 3. 095204 2. 869787 3. 13639  
3. 555567 4. 386621 4. 439231 4. 349388 2. 649859 4. 284664 3. 229097 3. 524229 3. 506778  
4. 434465 4. 684387 4. 310621 4. 793865 3. 692284 4. 188067 3. 699221 5. 097702 4. 853316

3. 141292 4. 130116 3. 400078 4. 40338 4. 033681 4. 288365 4. 878442 3. 653098 4. 175695  
7. 254053 6. 810039 6. 89223 7. 250387 7. 789613 6. 988258 7. 64657 7. 648737 8. 367442  
6. 736611 6. 145418 6. 245898 6. 375729 6. 815713 6. 712123 6. 966787 6. 304823 6. 23964  
3. 145251 3. 921081 3. 732641 3. 104077 3. 230266 2. 772656 3. 971278 3. 680658 2. 863831  
5. 7677 5. 540053 4. 879561 5. 07469 5. 851666 5. 498262 5. 059091 6. 335366 5. 554908  
5. 823634 6. 408987 6. 107476 5. 957238 6. 064037 6. 410234 5. 893287 6. 365202 5. 56494  
8. 09421 8. 116029 8. 308752 8. 083098 8. 298709 7. 503858 8. 31468 8. 052455 7. 781895  
2. 029225 1. 916725 1. 153406 1. 832158 1. 963195 1. 502474 1. 600297 1. 331994 2. 021352  
1. 512315 1. 317377 1. 198845 2. 277413 1. 256458 1. 819401 1. 480018 1. 409706 1. 426362  
6. 576212 7. 094394 6. 924727 7. 239809 7. 026692 7. 37405 6. 90283 7. 017877 7. 163657  
4. 240704 4. 067715 4. 549212 4. 309818 3. 788009 4. 502426 3. 19573 4. 491168 3. 654641  
8. 200741 8. 81665 8. 86141 8. 82905 8. 626594 9. 069775 8. 456713 8. 536934 8. 884421  
1. 791759 1. 251813 1. 860931 2. 053129 1. 83284 1. 83284 1. 330287 2. 331035 1. 337087  
1. 864458 2. 052265 1. 717405 1. 273824 1. 562727 2. 224243 1. 328778 2. 447399 2. 246321  
4. 524875 4. 346368 4. 444072 4. 159956 2. 610683 5. 046819 4. 608856 4. 286676 4. 051062  
1. 678928 1. 999843 1. 400736 1. 769735 1. 44572 0. 977776 1. 887362 0. 945857 1. 309597  
6. 19296 3. 753684 4. 407999 4. 296903 3. 539681 2. 110317 4. 827923 4. 69249 5. 76311  
5. 453794 5. 495269 5. 921801 6. 007047 5. 445612 5. 378951 5. 38439 4. 783121 4. 82825  
4. 542653 5. 087223 3. 116253 3. 679479 4. 470491 4. 061608 2. 654 4. 277621 4. 527504  
2. 009975 2. 295124 1. 7788 1. 434639 2. 077293 1. 387487 2. 932829 1. 79269 2. 494262  
4. 331944 2. 651309 3. 211649 2. 663014 2. 56385 2. 441076 2. 378378 2. 631488 3. 427779  
9. 480417 6. 597176 8. 046047 6. 815643 7. 39872 7. 057898 7. 599389 7. 213966 8. 73213  
2. 524449 2. 381435 2. 412048 3. 002743 2. 594798 2. 730157 2. 360092 2. 751208 2. 447378  
6. 764579 6. 52688 7. 343552 6. 578366 6. 667254 6. 974996 6. 900327 7. 327512 7. 695559  
1. 169915 1. 389554 1. 300804 1. 285509 1. 276168 1. 206109 2. 464377 1. 437794 1. 648806  
2. 721786 2. 499513 3. 118881 1. 773445 1. 485919 3. 628361 2. 97655 1. 655531 1. 801852  
3. 621879 4. 534725 4. 309162 3. 858572 3. 293579 4. 17121 3. 888156 3. 824896 4. 440721  
3. 154236 3. 958218 5. 614309 3. 383739 5. 299562 3. 900039 4. 392267 4. 225436 4. 691215  
2. 4498 3. 133436 2. 645498 3. 070404 2. 762987 3. 469159 2. 868476 3. 047279 2. 511925  
4. 322541 1. 766658 1. 987725 2. 084518 1. 734033 2. 073218 2. 392232 1. 893679 2. 122398  
5. 059871 2. 342712 3. 110265 4. 197991 2. 296374 1. 983439 2. 39006 2. 172189 1. 37479  
5. 682921 5. 785787 5. 649485 5. 423694 4. 610915 5. 449609 5. 715375 5. 098043 5. 533952  
2. 138242 2. 543795 1. 574887 2. 622562 1. 870089 2. 600542 2. 17794 2. 423735 1. 90517  
4. 176474 3. 890033 5. 251394 4. 082073 3. 679118 4. 596643 4. 295235 4. 40854 5. 729916  
5. 217691 5. 322824 5. 88286 5. 591509 5. 035106 5. 535695 5. 317473 5. 334721 5. 582501  
3. 759272 4. 022232 3. 945011 4. 537589 3. 881575 5. 01842 4. 521999 4. 484935 4. 102886  
6. 389481 7. 357082 7. 08594 7. 078255 7. 22417 7. 104873 7. 383776 7. 191298 7. 180569  
3. 414137 3. 834598 3. 477451 3. 258708 3. 468342 4. 87185 3. 595259 3. 782558 4. 304539  
3. 142221 4. 708526 3. 38967 3. 208652 2. 982857 3. 39602 4. 091622 3. 424736 3. 64964  
2. 494159 3. 101879 3. 076788 3. 091165 3. 408283 3. 316298 3. 789275 3. 307591 3. 969834  
7. 801048 7. 739517 7. 561468 7. 505594 7. 373436 8. 433127 7. 804648 7. 149053 7. 499778  
6. 968441 6. 892536 6. 67412 6. 743009 7. 321496 5. 853402 6. 590863 6. 662161 6. 496283  
4. 551943 2. 833078 2. 996148 3. 834817 3. 565146 3. 613848 3. 146614 3. 077005 3. 248728  
1. 863874 1. 633645 2. 662496 1. 695113 2. 006197 2. 648202 1. 937137 2. 625886 2. 737887  
2. 597625 2. 319009 2. 113621 2. 185521 1. 78701 2. 577887 1. 929778 1. 84564 1. 957361  
5. 337891 5. 171591 5. 96228 6. 096068 5. 405615 6. 630606 5. 421113 5. 957913 6. 051779  
1. 785243 3. 647844 2. 539546 3. 212197 2. 281475 1. 779585 1. 980601 2. 316474 2. 056402  
2. 469742 2. 150205 2. 084903 2. 413785 2. 098383 2. 15872 1. 72002 2. 489482 1. 482671  
11. 32035 9. 638317 10. 9772 10. 15658 8. 613151 10. 10032 10. 44393 9. 452696 9. 719158  
3. 582021 3. 706577 5. 302815 3. 026283 5. 109852 2. 364229 3. 503361 3. 588776 3. 712746  
4. 391134 5. 540916 4. 969631 6. 125386 4. 745974 4. 678939 4. 089041 4. 770735 6. 0638

1. 25073 1. 026122 1. 052733 0. 818132 1. 031116 1. 183607 0. 937743 0. 849148 1. 055754  
1. 168919 1. 250567 1. 997533 1. 456269 1. 941164 2. 430855 1. 251797 1. 625058 1. 59327  
1. 110904 2. 490877 1. 318445 1. 167062 1. 10003 2. 758207 1. 44605 2. 541881 1. 35616  
2. 367239 1. 789254 2. 415868 1. 798234 2. 09269 1. 474622 1. 964638 2. 150795 1. 837714  
4. 242534 3. 751323 2. 957673 4. 250649 4. 346121 3. 966985 4. 285051 3. 303743 4. 577124  
1. 592408 2. 047049 2. 7293 4. 049754 4. 416273 1. 207266 1. 586268 3. 121563 2. 524866  
1. 686557 0. 969514 0. 506767 0. 355995 1. 268114 2. 669228 0. 817108 1. 438633 0. 35399  
1. 498826 1. 84439 1. 854657 1. 484843 1. 751375 2. 343503 1. 569359 1. 314345 1. 806093  
3. 107015 3. 320842 2. 198834 2. 335161 2. 692941 2. 942711 2. 503601 2. 687249 2. 567189  
3. 37345 4. 475717 4. 977197 4. 187083 3. 65551 4. 012376 4. 850397 4. 197218 3. 829209  
2. 121535 1. 301619 1. 308166 1. 941543 3. 286284 1. 540119 1. 099172 1. 310724 0. 974541  
2. 542158 2. 303505 1. 671713 2. 696119 2. 432008 2. 940653 3. 750824 2. 728602 2. 599651  
4. 232786 3. 981446 2. 204934 1. 793099 4. 129187 2. 635996 3. 415203 3. 224793 3. 145468  
4. 1707 3. 90412 2. 913231 4. 163316 3. 718821 3. 137476 4. 264191 3. 32165 3. 0392  
1. 327764 1. 21664 0. 956004 1. 258579 1. 351983 0. 983912 1. 872521 1. 32651 1. 858411  
2. 292278 2. 412087 2. 31324 1. 974442 1. 645235 1. 590064 2. 84762 1. 448977 1. 909535  
1. 911571 1. 609195 1. 973907 1. 808044 1. 14274 2. 387982 0. 978606 1. 228767 1. 230528  
3. 235335 2. 269586 3. 059183 2. 289425 2. 219965 2. 340965 3. 389038 2. 138778 2. 905631  
1. 575642 1. 388588 1. 29353 1. 901758 2. 212808 2. 762597 1. 524983 2. 741974 1. 385257  
2. 75244 3. 606042 3. 114454 4. 175685 3. 878143 3. 45391 4. 922598 3. 437621 3. 80711  
2. 366658 2. 162232 2. 31397 2. 857418 2. 912924 2. 817462 1. 879097 2. 165697 1. 979083  
1. 858927 2. 073864 2. 161574 2. 478752 2. 571686 1. 943451 1. 62022 1. 846276 2. 476071  
1. 632397 3. 715411 1. 547843 1. 452357 1. 677127 2. 239294 2. 938221 1. 744513 2. 670386  
7. 216837 7. 487864 7. 38614 8. 079017 8. 067115 7. 568365 7. 871884 7. 449389 6. 926481  
4. 329087 3. 077096 4. 061462 1. 731014 3. 8551 2. 061877 2. 880929 3. 435682 3. 663987  
2. 580335 1. 555311 3. 146248 2. 398005 1. 818746 2. 659437 2. 624016 1. 704 0. 972392  
2. 632224 1. 466712 1. 459876 2. 159778 1. 375029 2. 018714 1. 517469 1. 438684 1. 358612  
5. 005829 4. 229593 3. 383179 4. 316856 3. 48531 3. 405274 2. 272913 3. 647524 4. 817733  
3. 165088 2. 583047 2. 79407 2. 314398 2. 628023 2. 488634 3. 717692 3. 536428 2. 614858  
1. 31654 1. 720976 1. 786113 1. 768471 1. 511916 2. 902849 2. 225394 1. 418541 1. 884614  
2. 764475 4. 266282 2. 924322 4. 52987 4. 014212 4. 374664 4. 272074 2. 706912 4. 434492  
1. 166052 0. 797566 1. 965822 2. 411902 1. 30901 1. 154715 1. 101565 1. 246735 1. 352037  
2. 625026 1. 979229 1. 831658 2. 47667 1. 866136 2. 6826 2. 694339 2. 200375 2. 281434  
3. 105052 3. 285181 2. 710763 2. 796617 2. 978565 3. 623844 3. 66416 3. 327571 3. 773298  
3. 071646 1. 734297 1. 318953 1. 59864 1. 530391 1. 946962 1. 947589 1. 205869 1. 500009  
6. 429882 3. 902229 3. 764288 1. 288526 2. 597571 4. 592391 1. 620719 4. 35027 2. 25291  
3. 54563 2. 149596 3. 316341 4. 404967 4. 373888 2. 30508 2. 18016 2. 74438 2. 262817  
1. 966924 1. 772494 1. 678342 1. 332672 1. 031789 1. 518218 1. 508239 2. 189767 1. 447434  
2. 393297 2. 85161 2. 488745 2. 13362 2. 840564 2. 680565 2. 450838 2. 961296 3. 16786  
6. 15995 6. 042587 3. 769684 4. 423995 5. 648329 4. 737328 5. 410771 6. 039573 7. 445495  
1. 422824 0. 64884 1. 304049 0. 746326 0. 796597 0. 821216 0. 555694 0. 804648 0. 733476  
3. 0288 2. 124225 2. 899033 3. 203332 3. 036248 2. 604571 2. 534065 1. 703222 2. 552352  
1. 453159 2. 275051 2. 119701 2. 069504 1. 669885 1. 345615 1. 842807 3. 196495 1. 816863  
2. 459039 4. 701533 3. 819723 3. 396725 2. 407017 3. 228668 3. 74182 2. 262926 2. 443036  
2. 446396 3. 053878 2. 507054 2. 441889 3. 077408 2. 576106 2. 720225 3. 5649 2. 602094  
3. 756735 3. 801916 3. 262463 4. 046048 4. 345385 4. 496919 3. 842509 2. 464496 3. 272776  
3. 121333 3. 081073 1. 634762 2. 394007 2. 829505 1. 648968 1. 859878 2. 630831 2. 408709  
2. 299217 1. 280792 2. 484223 2. 084003 1. 775673 1. 777234 1. 85049 1. 789165 1. 889077  
1. 679502 1. 681875 1. 333392 1. 151046 1. 339772 1. 395888 1. 653567 1. 158272 1. 746841  
3. 738854 3. 949022 4. 188166 1. 946579 3. 509208 1. 717885 3. 795878 2. 551452 3. 947417  
2. 47386 1. 472971 1. 578845 1. 990604 1. 997201 1. 762915 1. 143195 1. 311713 1. 778549

4. 005721 4. 049149 3. 747526 3. 859637 3. 18097 3. 810618 3. 711435 3. 782951 3. 899246  
1. 680142 1. 645092 2. 878228 1. 561185 1. 876428 2. 778477 3. 63305 1. 572513 1. 964406  
4. 68287 2. 872563 4. 698721 2. 951494 3. 023898 2. 582779 2. 889716 3. 05961 4. 529232  
4. 552443 4. 411191 4. 456348 4. 008139 3. 516245 5. 947633 4. 573293 5. 24956 4. 70241  
2. 276216 1. 584345 1. 811858 1. 631375 1. 532672 0. 746193 2. 52232 0. 753554 1. 605975  
2. 060485 1. 756754 1. 301699 2. 082998 0. 958115 1. 243938 2. 433814 1. 457801 1. 53134  
2. 341486 2. 23829 3. 504604 2. 444531 3. 126222 2. 75869 3. 322516 3. 306731 3. 317786  
6. 299222 6. 090161 6. 710045 5. 60138 4. 13697 6. 263699 6. 176681 4. 480563 4. 771523  
3. 700161 3. 333832 3. 695903 2. 547944 3. 219365 2. 504629 4. 806112 4. 517681 2. 775052  
0. 810529 2. 373421 1. 657939 1. 632794 0. 671805 0. 867083 1. 154629 2. 809402 1. 447208  
1. 785918 1. 406998 3. 65546 1. 641198 1. 85644 1. 189564 4. 5968 1. 376328 2. 160236  
3. 223861 2. 723486 4. 076347 1. 253639 1. 772035 1. 662956 1. 453263 3. 182458 2. 321044  
1. 904818 1. 863989 1. 534966 1. 756258 2. 163753 1. 589707 2. 600394 1. 775217 1. 250003  
2. 709488 1. 675299 1. 837833 2. 133877 2. 397267 2. 125453 1. 756114 1. 878576 2. 432029  
4. 538109 4. 16839 4. 461726 5. 228645 5. 168389 4. 057992 4. 436546 5. 0632 4. 200186  
3. 86045 5. 262218 5. 360275 4. 501818 5. 755057 3. 749381 3. 999257 4. 97326 4. 311833  
2. 737792 2. 45068 2. 196432 2. 920721 2. 339458 1. 778219 2. 332918 2. 079209 2. 171049  
2. 151255 3. 515715 3. 267434 2. 257612 2. 23581 2. 662292 3. 184187 4. 431529 2. 383775  
1. 879594 1. 87916 1. 954972 1. 839705 1. 921517 1. 78971 1. 602946 1. 62498 1. 635449  
2. 412001 3. 020561 2. 356768 2. 064568 2. 900047 2. 260436 3. 143583 2. 042453 1. 567361  
2. 228351 1. 516934 1. 955926 1. 772411 3. 149298 1. 668771 2. 679726 1. 698697 2. 231018  
1. 050593 1. 695915 1. 247496 1. 192355 1. 611508 1. 406931 1. 149692 1. 780118 1. 074054  
2. 326746 3. 966709 2. 634593 3. 894481 2. 640216 3. 650568 2. 539063 3. 292661 2. 987267  
0. 813285 1. 042275 3. 079253 2. 07029 1. 819218 1. 801599 2. 140163 0. 861321 1. 24626  
2. 122725 2. 0028 2. 464894 2. 251275 2. 31442 2. 544127 1. 319152 1. 992447 1. 547615  
6. 078105 5. 818187 5. 15689 5. 330761 5. 104396 6. 181606 6. 318541 5. 587056 5. 406177  
1. 955973 1. 496453 2. 237405 2. 049654 2. 206854 1. 909139 2. 564693 1. 311593 1. 987104  
5. 010495 5. 050855 5. 108093 5. 403846 4. 337743 4. 916148 5. 962021 3. 11104 4. 662222  
5. 656252 3. 651493 4. 288674 4. 022253 3. 408296 2. 935314 3. 690506 3. 868086 5. 352248  
1. 781913 1. 66745 1. 893327 1. 658461 1. 403124 1. 665869 2. 313704 1. 803112 2. 336762  
1. 300793 1. 196561 1. 610236 1. 19616 2. 004108 1. 941676 2. 185677 1. 787449 1. 077714  
3. 996135 3. 265935 2. 564426 2. 401783 2. 991141 2. 67023 3. 064903 3. 645272 4. 780759  
2. 979714 2. 973884 3. 964457 2. 732061 2. 575643 2. 789624 3. 484478 3. 094833 2. 808884  
9. 103447 6. 931733 8. 245541 7. 459883 7. 531137 5. 95062 7. 577614 6. 923848 5. 848498  
4. 911222 5. 474287 5. 559639 6. 033487 6. 044659 5. 44978 5. 240411 5. 770734 5. 48756  
5. 546338 4. 03178 5. 668731 3. 591829 5. 724878 5. 229124 5. 210149 3. 765737 8. 303967  
5. 792597 6. 37039 6. 247634 5. 767083 6. 578285 6. 154296 5. 698602 6. 438449 6. 401398  
5. 173815 5. 105452 4. 804819 5. 841899 5. 381274 5. 75253 5. 563593 5. 784391 5. 270715  
8. 32494 5. 516892 6. 753124 5. 595725 5. 692992 3. 743234 5. 53689 5. 914491 8. 011007  
2. 256315 2. 977515 2. 499166 2. 289802 2. 272745 2. 923338 2. 23772 1. 6143 2. 615571  
3. 364001 2. 085837 3. 259641 2. 148804 3. 301843 2. 781615 3. 663858 3. 359104 2. 970855  
1. 753948 1. 401237 2. 512245 1. 841969 1. 758919 1. 623416 1. 941269 1. 286401 1. 795201  
3. 01166 2. 906872 4. 086164 3. 161784 2. 647229 4. 691994 3. 494775 2. 163816 4. 538215  
6. 63925 5. 28657 5. 914733 5. 610389 5. 260102 6. 147558 6. 130223 6. 306157 6. 016216  
7. 185148 3. 974528 5. 827309 4. 876808 5. 292481 3. 786464 4. 885862 4. 878351 7. 111082  
8. 566835 5. 954289 7. 914476 6. 317988 6. 059601 6. 059044 7. 147264 5. 731969 8. 206306  
1. 632339 2. 143386 1. 787095 3. 48562 1. 931831 1. 93355 3. 933097 1. 07718 3. 765989  
1. 336358 1. 120725 1. 769327 1. 608309 1. 738188 1. 44691 1. 713262 1. 461106 1. 469006  
2. 319075 1. 966238 2. 114695 1. 747477 2. 045884 1. 892744 2. 049343 1. 940043 2. 079257  
2. 832551 1. 825866 2. 404137 1. 741873 1. 698462 1. 927408 2. 533548 1. 941474 2. 004206  
3. 359909 2. 34543 2. 73182 2. 235829 1. 920146 3. 498308 3. 542619 2. 613043 3. 465805

4. 330823 4. 774005 4. 241783 4. 633614 5. 201916 4. 699371 4. 511077 5. 479323 5. 678229  
4. 64842 4. 666759 5. 227977 5. 208397 5. 843604 5. 228971 4. 933068 5. 375108 5. 026011  
5. 556533 5. 225451 4. 565357 4. 841817 5. 512131 4. 839351 3. 96762 4. 863169 5. 021118  
9. 564313 9. 661746 9. 689921 10. 80933 10. 06484 10. 42106 9. 881841 9. 26818 9. 588633  
2. 039152 1. 740633 1. 285997 1. 666003 2. 149902 1. 850964 1. 650265 2. 529007 1. 520686  
6. 982724 4. 841476 5. 246401 6. 270794 5. 980426 5. 408203 6. 483677 6. 088765 6. 031574  
2. 531208 1. 92814 3. 207643 2. 334822 1. 834716 2. 306152 1. 870535 2. 541208 2. 063354  
3. 19813 2. 164026 1. 803531 1. 92861 1. 893859 2. 932452 2. 275218 2. 812765 2. 000485  
8. 490003 6. 66594 7. 085465 5. 990194 6. 442194 6. 495684 6. 801817 7. 30674 7. 694783  
1. 611221 1. 544823 2. 359901 1. 557353 1. 471473 1. 654711 1. 63505 1. 616628 2. 980633  
4. 769782 4. 45929 4. 132897 4. 30979 4. 133153 3. 886006 3. 529272 3. 300892 4. 90741  
2. 352995 2. 301829 2. 444027 2. 403977 2. 846997 2. 716898 2. 762185 2. 628536 2. 602955  
5. 576508 6. 837767 6. 402403 7. 266105 7. 169586 7. 053968 7. 63839 7. 092945 6. 233364  
1. 820012 1. 3634 2. 004214 2. 427011 1. 745967 2. 352773 1. 834794 1. 437482 2. 496442  
2. 214056 1. 722797 1. 649904 1. 325456 2. 260276 2. 749537 1. 631401 1. 672777 3. 421938  
4. 317509 5. 902441 7. 257023 6. 508156 5. 136333 6. 531786 7. 087987 5. 755729 4. 538689  
9. 395404 9. 365652 8. 961226 9. 969539 9. 477412 9. 39171 9. 462218 9. 068756 9. 418177  
7. 554157 8. 029759 7. 415999 8. 194103 7. 96257 7. 680079 8. 171936 7. 830958 7. 993429  
7. 624467 7. 663915 7. 688705 7. 693747 7. 366724 7. 470237 7. 489963 7. 411806 7. 417361  
6. 015787 6. 339993 6. 091905 6. 057616 5. 779347 5. 956728 6. 012011 6. 037377 5. 939674  
5. 636927 5. 53266 5. 645491 4. 050617 4. 985707 5. 036318 5. 111307 4. 838313 4. 914794  
6. 26045 7. 069796 7. 132607 6. 503845 6. 906723 6. 910337 6. 003112 5. 40057 5. 940318  
8. 546252 9. 07767 8. 988375 8. 510288 8. 91284 9. 062342 8. 534117 8. 708458 8. 340753  
5. 937541 5. 723408 5. 985388 5. 455736 5. 779363 5. 754469 5. 772025 6. 23106 5. 753025  
3. 555688 4. 157912 4. 910615 3. 630911 4. 406684 4. 688252 3. 528279 4. 337665 4. 352259  
4. 172311 5. 18077 5. 131542 4. 283282 5. 212434 4. 859349 4. 110828 4. 873385 5. 205145  
3. 603192 3. 714739 3. 196779 3. 347318 3. 304136 3. 648665 3. 694711 3. 505378 3. 344125  
4. 938008 6. 148708 5. 802018 5. 94146 5. 759122 5. 622029 5. 004878 5. 871988 5. 537055  
4. 545374 4. 304429 4. 859667 4. 695032 5. 029244 3. 940462 4. 690561 4. 903031 4. 750541  
5. 595806 5. 635079 6. 256287 5. 690311 5. 562225 6. 003904 4. 987774 5. 85493 6. 029751  
4. 223216 4. 788114 4. 566953 4. 145633 3. 789944 3. 951047 3. 997317 4. 822436 4. 308967  
3. 276888 2. 47744 3. 16911 2. 49469 2. 697482 2. 88766 3. 314926 2. 768843 2. 474183  
6. 739734 6. 775404 6. 474615 6. 495684 6. 781849 7. 344339 6. 969522 7. 005799 7. 261929  
7. 73603 5. 737246 6. 25592 5. 705045 6. 05396 5. 781041 5. 887053 6. 716632 5. 961849  
7. 830064 7. 733587 8. 314656 8. 055125 8. 627079 8. 41482 8. 378127 9. 007059 8. 419566  
7. 113272 6. 671017 7. 376345 7. 210717 7. 21066 6. 823743 7. 515286 7. 486977 7. 006078  
5. 966997 5. 972666 5. 585464 5. 789916 6. 186102 5. 859263 5. 151462 6. 02819 5. 734341  
6. 576588 7. 52396 6. 491838 6. 672465 6. 639941 6. 163569 6. 309252 6. 388483 7. 241846  
4. 053252 3. 057188 2. 723885 3. 561826 3. 281037 3. 59829 2. 85296 3. 174049 3. 532156  
3. 244388 2. 902977 3. 238482 2. 302861 2. 62413 2. 93442 2. 741714 2. 231807 3. 037673  
7. 771652 7. 4938 7. 865665 7. 504192 7. 327613 7. 458343 7. 653608 7. 461295 7. 657972  
8. 186781 8. 668674 8. 521338 9. 105373 8. 987614 9. 035483 8. 612272 8. 148269 8. 695063  
2. 36305 1. 038983 1. 602255 1. 334694 1. 37909 1. 278396 1. 596343 1. 117102 1. 843863  
3. 997839 1. 322978 1. 099886 1. 32105 2. 120189 1. 289906 3. 139983 2. 657391 0. 930947  
3. 346082 3. 06471 3. 204242 3. 753905 2. 918378 3. 593693 3. 598863 3. 987276 3. 491583  
7. 231 7. 03455 6. 890397 6. 725319 7. 192921 6. 972803 7. 34399 7. 166527 7. 463883  
7. 991033 8. 113742 8. 612811 8. 410313 8. 206301 8. 297526 8. 388604 7. 817577 8. 149343  
8. 265167 8. 187614 8. 331958 8. 207741 7. 974364 8. 549877 7. 824071 8. 072062 7. 891724  
6. 105834 6. 310285 6. 923821 6. 615932 6. 442752 7. 138349 6. 534349 6. 47525 6. 443735  
3. 01855 2. 557279 3. 319929 3. 118229 3. 033203 2. 807612 4. 132043 3. 032735 3. 569281  
3. 426388 5. 267136 5. 303064 5. 288103 4. 663595 3. 868397 4. 322795 4. 925437 5. 12644

1. 7215 1. 752921 1. 59564 1. 577702 1. 512617 1. 782778 1. 911098 1. 527397 1. 604761  
3. 758665 4. 182744 4. 142099 4. 216126 4. 635207 3. 997505 4. 145083 4. 166288 3. 903116  
4. 465763 4. 76814 5. 42253 5. 08919 5. 535192 4. 463237 5. 529225 4. 340911 5. 406488  
7. 701831 8. 610386 8. 433686 8. 785714 8. 321775 8. 952328 8. 561795 8. 575527 8. 600711  
3. 177859 4. 088402 4. 574971 3. 442802 4. 355754 4. 535259 3. 953579 2. 527687 3. 944518  
6. 098576 6. 650957 6. 364168 6. 836388 7. 349734 6. 419738 6. 655238 6. 803505 6. 883364  
1. 128413 0. 944082 1. 217198 1. 248914 1. 01012 1. 186904 0. 981621 1. 509604 1. 533874  
2. 459479 2. 394711 2. 766229 2. 2537 2. 792809 2. 695503 3. 549621 2. 348371 2. 788289  
4. 224613 3. 449101 3. 769232 2. 918442 3. 592798 3. 305547 3. 85096 3. 39424 3. 480129  
6. 375843 6. 920248 6. 818074 6. 411017 6. 636905 6. 893006 6. 740696 6. 777851 6. 601858  
2. 851255 2. 088745 2. 240635 2. 073378 1. 957607 3. 852075 2. 444227 2. 029357 2. 028565  
2. 775492 2. 411429 3. 581246 4. 578709 3. 207381 3. 455325 3. 110578 3. 673416 3. 446541  
3. 51922 2. 112245 1. 989013 3. 061285 2. 868724 2. 482911 3. 027831 2. 863739 2. 429517  
4. 294709 4. 915172 4. 911085 5. 097445 4. 756905 4. 994585 4. 484448 4. 750022 4. 766325  
3. 018049 4. 088775 3. 859353 3. 582074 4. 480739 3. 696689 4. 78252 4. 371974 3. 896069  
7. 097442 6. 969862 7. 274619 7. 200511 7. 218564 7. 123063 7. 122431 7. 450536 7. 010357  
4. 429969 5. 256893 3. 517429 3. 525218 4. 840629 4. 717531 4. 534517 5. 328114 4. 158475  
2. 088997 1. 809212 1. 931819 2. 21045 1. 938723 1. 971115 2. 145512 2. 063286 2. 309881  
3. 464303 3. 468093 3. 563173 3. 187508 2. 955758 3. 596209 3. 506165 4. 130887 3. 263944  
7. 747598 7. 826045 7. 849601 7. 74627 7. 911975 7. 964576 7. 535366 8. 627023 8. 334407  
3. 692714 5. 021129 4. 764658 5. 466344 6. 54487 4. 824613 5. 056988 6. 377613 3. 904994  
6. 394148 7. 878215 7. 208099 8. 543391 8. 057085 8. 873993 7. 965393 7. 799699 8. 11998  
6. 081016 6. 55352 6. 984977 6. 254778 6. 292623 6. 749756 6. 661115 6. 450495 6. 30423  
7. 264538 7. 3397 7. 117122 7. 735358 7. 211784 7. 602851 7. 287279 7. 792728 6. 940814  
4. 613883 4. 517343 5. 252856 4. 048399 5. 36474 5. 513562 5. 735435 4. 426176 5. 549678  
5. 7026 6. 7496 6. 789351 6. 594297 6. 707059 5. 959111 6. 66138 6. 621149 6. 446523  
7. 345025 7. 471045 7. 572912 7. 601163 7. 254716 7. 303518 7. 444759 7. 189677 7. 564139  
3. 540835 4. 210867 4. 310597 4. 872979 4. 155798 3. 84766 3. 358656 4. 026672 4. 682438  
5. 657862 6. 705856 6. 266637 6. 435873 6. 717163 6. 046886 6. 460957 7. 070518 6. 442132  
5. 936601 6. 371321 6. 013714 5. 136272 5. 956418 5. 775474 6. 318173 6. 193267 5. 832683  
4. 388143 4. 766294 4. 916407 4. 616138 4. 786373 4. 437571 5. 068093 4. 831217 4. 65258  
8. 542409 8. 423135 8. 429469 7. 920161 8. 095975 7. 890264 8. 150892 8. 381316 8. 407275  
6. 309762 5. 657156 3. 707617 4. 166014 5. 00268 3. 179361 3. 674079 3. 722426 5. 298638  
6. 66983 7. 832355 7. 68737 7. 369098 7. 799297 7. 33484 7. 362487 6. 799424 7. 536556  
1. 061895 1. 001657 3. 879175 3. 356038 1. 543343 1. 332442 1. 335527 0. 823617 1. 69849  
5. 842403 7. 331351 7. 115328 7. 014562 7. 175995 6. 815523 6. 200182 7. 078638 6. 83871  
4. 932878 5. 245438 5. 878616 4. 572561 5. 265578 5. 394144 4. 199348 4. 980089 4. 268613  
5. 960526 5. 398385 5. 335038 6. 230725 5. 803027 6. 451954 5. 460223 4. 778236 5. 424241  
7. 218921 7. 387127 7. 153113 7. 105504 7. 416111 7. 229375 6. 506001 7. 502148 6. 908631  
5. 819758 5. 547374 5. 358227 5. 560828 5. 934662 5. 598351 5. 250139 5. 764767 5. 306289  
4. 754067 5. 456345 5. 277485 6. 393878 5. 872799 5. 61797 5. 402678 5. 388396 5. 724475  
3. 939463 2. 429325 3. 883999 3. 246542 3. 547465 1. 857894 2. 502859 3. 147393 2. 602251  
1. 063825 1. 219982 1. 572704 0. 829334 1. 695648 0. 907781 0. 855004 1. 331353 1. 571438  
1. 53851 1. 879949 2. 477606 1. 507583 1. 478682 1. 364533 1. 941506 1. 547473 1. 741099  
3. 949511 3. 035772 2. 479453 2. 251838 3. 288127 3. 121722 3. 768419 3. 249659 2. 673025  
1. 067967 1. 43881 1. 052888 0. 967144 1. 907892 1. 273521 1. 179249 0. 754469 1. 605507  
1. 221748 1. 207404 1. 189736 1. 821888 1. 00038 1. 044557 1. 36125 1. 181832 1. 096674  
1. 564548 3. 41644 1. 467363 1. 802967 1. 194477 1. 98979 1. 999003 2. 607987 1. 627837  
5. 893497 5. 291855 5. 374795 5. 670137 5. 879583 5. 861904 6. 131448 5. 817279 5. 911305  
3. 242842 5. 594523 4. 60215 3. 444943 4. 481514 4. 466985 4. 508109 4. 293745 4. 693002  
10. 43119 10. 46935 10. 62128 10. 56058 10. 67103 10. 39353 10. 77365 10. 49364 10. 4589

10.02072 10.13891 10.05649 9.886689 10.00917 9.542905 9.831862 9.867643 10.05369  
8.31405 8.020003 8.176843 7.753993 8.406803 8.036171 8.451027 8.585486 8.495117  
5.423823 4.221704 5.02674 5.668874 4.063152 5.268788 5.578937 4.767102 5.410846  
7.700031 6.908857 7.270726 6.660032 6.858382 7.25762 7.33266 7.378777 7.498853  
2.158275 2.343236 2.494776 2.232723 2.297767 2.821654 2.278959 2.009076 2.46255  
5.77124 6.89751 6.791474 6.921356 6.844486 6.649048 6.713221 6.827272 6.693938  
7.397384 5.100437 5.943636 4.358063 4.449246 3.436127 4.945791 4.876805 5.97354  
5.523166 5.107544 5.650906 5.821601 5.733037 5.102718 5.263586 5.644379 4.839164  
6.35915 6.923212 6.394745 6.629464 6.913417 6.699268 6.61457 6.622898 6.739226  
6.085537 6.734996 6.971065 7.195298 7.103766 6.841881 6.828607 7.103583 6.889588  
1.5491 1.982329 1.440366 2.094664 1.760403 1.414146 1.898916 1.725615 2.433645  
1.973019 1.756752 1.761804 2.119551 2.05279 1.96447 2.910414 2.006493 2.746034  
3.082039 1.265612 1.43755 1.394525 1.783325 2.275873 1.495544 2.034402 1.863474  
5.973691 4.834456 4.734374 5.569949 5.536186 5.768346 6.276992 6.137294 5.313777  
9.261766 9.229074 9.695262 9.423339 9.554793 9.058736 9.101573 9.15702 9.276913  
2.493319 3.341553 2.829537 3.672898 3.516907 3.989176 3.212147 3.223381 3.373069  
4.452908 4.776921 4.474439 5.024672 4.418493 5.223239 5.636331 6.112606 5.340108  
3.125484 2.940919 2.11138 2.257944 2.314323 1.904445 2.243596 2.376556 2.106294  
1.924639 1.707279 2.133678 1.356825 1.632113 1.675782 1.727705 1.64855 1.44325  
2.516507 1.954704 2.473442 2.728329 2.756165 2.395114 3.107928 2.993655 2.03275  
3.896582 4.050636 4.416677 4.674435 3.65451 4.645312 3.435205 5.064771 4.180102  
6.232387 6.817027 6.949938 6.906361 6.87421 6.867818 5.904103 6.459184 6.641233  
4.981453 6.679959 6.29677 6.324564 5.792536 6.675467 5.771551 5.824196 5.671396  
7.074652 6.052866 5.194909 5.550294 6.992838 6.240988 5.862421 6.241079 5.616615  
4.688871 4.731679 4.859215 5.260656 4.486579 5.159565 4.393801 5.588938 4.741534  
4.741174 5.109795 4.693503 5.238238 4.881732 5.408254 4.252644 4.509418 4.91561  
6.607823 7.135494 6.175419 7.306396 6.750856 8.041693 7.186516 7.442632 6.827591  
3.724713 3.634947 3.711823 3.745097 3.742675 4.314925 2.221959 4.454899 3.438405  
5.144714 5.759868 5.480646 5.200242 5.940177 5.840427 5.280627 5.814309 4.948787  
2.141204 2.263618 2.412467 1.866293 2.736512 2.49551 3.183827 2.107696 2.381818  
1.139388 1.583785 1.522957 0.971896 1.043281 2.670956 0.997392 1.111699 1.000729  
10.45907 10.49485 10.26811 10.75605 10.62009 10.69984 10.59697 10.5197 10.61944  
8.122628 8.466013 8.534935 8.329066 8.829332 8.470053 8.355344 9.018716 8.154597  
6.744471 5.888999 5.391771 5.398525 6.134006 5.870153 5.330999 4.90061 5.817411  
4.465227 4.238307 5.189214 4.408016 4.2723 4.392165 3.969933 4.751789 4.350926  
3.468398 3.25522 4.071619 4.316234 3.538772 4.03692 3.578048 4.331985 4.415469  
3.140619 2.929486 2.941312 2.736607 2.65647 2.780615 3.541691 2.82241 2.552711  
1.750799 1.194167 1.590068 1.577231 2.112299 1.41919 1.398797 1.252082 1.602893  
3.106469 1.773385 4.427249 1.769716 1.810209 3.112415 1.857533 2.277528 3.351695  
1.538845 1.16972 1.469731 2.050628 1.500632 1.063525 2.100434 2.717357 1.683448  
5.309683 5.275719 5.906977 5.091434 5.036034 5.17608 5.573768 5.252476 5.058281  
4.599711 3.931137 4.785986 4.437813 4.696685 5.048749 3.373429 4.333416 4.421171  
1.072776 0.766267 1.032733 0.909156 1.064127 1.026127 0.850488 0.860114 1.009626  
8.785083 9.507643 8.886974 9.957697 9.527149 9.684115 8.894665 9.377307 9.470216  
9.559102 8.110086 9.084449 7.848832 9.548685 9.791606 10.09386 9.111352 10.28044  
6.134477 5.435757 6.381304 5.412178 5.508516 4.720676 6.092144 5.755991 6.769834  
1.780171 1.498924 2.602561 2.443569 2.394984 1.924619 2.929327 1.815726 1.782308  
1.950911 0.914743 1.183422 1.035843 1.761726 1.096843 2.370501 1.005289 1.339341  
6.397881 5.464568 5.663504 5.933117 5.906137 4.916363 4.911879 5.275453 5.782254  
1.806591 1.593309 1.619853 1.244768 1.545212 1.59592 1.981844 0.986976 1.537056  
1.432145 1.254863 2.228979 1.649193 1.763258 1.436903 1.143675 1.719823 1.599102



1. 161463 0. 936665 0. 318894 1. 437586 1. 123464 1. 620668 1. 253139 0. 944971 1. 801329  
2. 06782 1. 364331 1. 647563 1. 870947 1. 421554 1. 614419 1. 487153 1. 083854 0. 893803  
1. 370533 1. 330236 1. 360351 1. 152314 1. 851599 1. 489927 2. 340157 1. 702161 1. 358755  
1. 754559 1. 90446 1. 955363 2. 430569 1. 799945 1. 765553 2. 066179 1. 780587 2. 240479  
1. 449324 1. 541309 1. 527093 1. 491424 1. 738103 2. 064855 1. 58897 1. 522607 1. 118009  
8. 216921 8. 93087 8. 880436 8. 879063 8. 892485 8. 83254 8. 874578 8. 751911 8. 736869  
8. 058333 5. 596804 6. 863011 5. 966783 6. 155754 5. 164666 6. 280381 5. 432534 6. 768018  
5. 33215 6. 216102 5. 982428 5. 405229 5. 981797 6. 144297 5. 180165 6. 139585 5. 68466  
9. 633786 9. 788958 9. 485386 10. 30366 10. 24552 9. 874157 9. 985746 9. 506154 10. 04149  
2. 954554 2. 339602 2. 165029 2. 272042 2. 21924 2. 103631 2. 639486 1. 903555 1. 828019  
5. 493754 7. 085254 6. 88357 7. 274243 7. 77429 7. 081257 7. 134756 7. 151379 7. 346517  
3. 657353 2. 81141 3. 31811 2. 422194 2. 038032 4. 046595 2. 302359 3. 503023 3. 550083  
2. 08479 1. 865407 2. 031706 1. 814896 2. 018884 1. 9872 1. 522341 1. 857636 1. 798551  
1. 66398 0. 868046 1. 06682 1. 578227 1. 343419 1. 406845 1. 240586 2. 374234 2. 011693  
7. 975817 8. 735711 8. 75001 8. 794437 8. 249624 8. 052454 9. 029101 8. 539033 8. 907146  
1. 616101 1. 2102 0. 949109 1. 648077 1. 424511 1. 17837 1. 708864 1. 231264 1. 801796  
0. 94193 0. 934509 1. 105628 1. 083183 1. 162017 0. 747069 1. 325674 1. 145508 2. 741468  
1. 829963 1. 975774 1. 842359 2. 196044 2. 786775 2. 243791 1. 73727 1. 807085 1. 63401  
3. 664212 3. 084223 3. 923253 4. 437224 3. 425398 3. 752424 3. 257562 4. 443983 4. 563444  
5. 568527 5. 949454 6. 196647 6. 085085 6. 140529 7. 018501 6. 257156 6. 000329 6. 118502  
7. 311697 7. 277051 7. 352127 7. 371544 6. 761914 7. 535285 6. 823499 7. 283127 7. 126063  
6. 681968 6. 057135 5. 586688 6. 251538 7. 182513 6. 836217 6. 291834 6. 571396 6. 513669  
3. 358001 1. 985335 2. 361198 2. 099671 1. 697478 1. 754959 2. 217649 2. 362807 1. 613906  
9. 618882 9. 644448 9. 821288 9. 638877 9. 613513 9. 710028 9. 746666 9. 435407 9. 050688  
9. 135287 9. 377362 9. 42092 9. 371689 9. 153911 9. 183776 9. 137354 9. 2117 9. 393657  
4. 68849 4. 47213 4. 786848 4. 4116 5. 453984 3. 457061 4. 543089 4. 317031 4. 481169  
6. 435525 6. 748592 6. 568842 6. 502288 6. 686181 6. 589836 5. 593327 6. 269625 7. 013705  
2. 285738 2. 708801 2. 60601 1. 68953 1. 969845 3. 376224 2. 08899 2. 715651 2. 792568  
6. 073482 6. 827424 6. 019148 7. 181694 6. 821547 6. 964842 6. 360979 7. 010734 6. 435491  
7. 503941 8. 245541 8. 043863 8. 175303 8. 021541 8. 412958 7. 895221 7. 833866 8. 139335  
5. 781059 5. 978059 5. 790021 4. 478211 6. 087034 6. 012993 5. 011313 5. 983791 6. 521927  
5. 40082 5. 610427 5. 414163 5. 979808 6. 012312 5. 946781 4. 953793 5. 92175 5. 9709  
7. 660215 7. 219046 6. 906925 7. 89121 7. 484873 7. 794639 7. 139032 7. 452375 7. 587787  
1. 413151 1. 59925 1. 460448 1. 353374 1. 28478 1. 331843 1. 490165 2. 314442 1. 231514  
4. 316782 5. 088198 4. 996031 5. 580693 4. 857058 5. 776932 5. 314681 5. 504557 5. 285061  
7. 035449 6. 803703 7. 110026 6. 986851 6. 857063 7. 255601 6. 457816 7. 141563 6. 950621  
6. 907264 6. 764645 6. 884542 6. 976538 6. 827231 7. 289301 6. 960536 6. 980752 6. 854303  
8. 927675 9. 598722 8. 865226 9. 105817 9. 276116 9. 014779 8. 918867 9. 696502 9. 075172  
6. 539393 6. 108177 6. 49549 5. 651968 6. 005442 5. 752653 6. 590238 6. 231008 6. 252186  
6. 480177 6. 868767 6. 703425 6. 790632 6. 718434 6. 803624 6. 603142 6. 673113 6. 726546  
7. 983036 8. 25616 8. 358596 8. 405148 8. 320625 8. 300309 7. 9002 8. 450996 8. 277291  
9. 426942 9. 421891 9. 2336 9. 49516 9. 144467 9. 483629 9. 551104 9. 149546 9. 538713  
7. 762487 8. 152324 8. 055789 8. 135387 8. 375773 8. 300412 8. 053307 8. 458181 8. 230377  
9. 618742 9. 868956 9. 934055 9. 608339 9. 7559 9. 489628 10. 03428 9. 647621 9. 996869  
5. 937564 7. 214188 7. 263751 6. 873942 7. 655862 7. 508457 6. 95329 7. 127059 7. 241551  
4. 290382 7. 286825 6. 368822 8. 632492 6. 084631 8. 247168 9. 446333 8. 692168 11. 39856  
2. 438307 1. 826331 2. 288076 1. 887086 2. 535131 2. 08583 2. 091225 1. 990731 2. 983802  
2. 764848 2. 362358 2. 264106 2. 554498 2. 176474 1. 620644 2. 194005 1. 856438 1. 722386  
1. 985047 1. 326725 1. 652836 2. 313501 1. 641667 1. 788465 2. 196048 1. 821619 1. 788813  
2. 26624 1. 253001 1. 776491 2. 810193 1. 351119 2. 056704 2. 798544 1. 981013 1. 924873  
3. 707075 2. 856582 2. 826504 3. 354044 2. 256817 2. 535184 2. 695618 2. 831958 2. 519103

1. 720301 1. 024628 0. 480939 0. 92259 0. 987857 0. 760189 0. 774956 0. 873051 0. 687639  
1. 035802 0. 69874 0. 85921 1. 369843 1. 511087 1. 26761 0. 747548 2. 061078 1. 268281  
1. 997807 1. 616434 1. 930456 1. 296317 1. 584888 2. 206748 3. 566467 1. 895815 1. 586751  
8. 176218 8. 143345 8. 091697 7. 910294 7. 701979 8. 174368 7. 599038 7. 967945 8. 222373  
4. 697479 4. 849477 4. 525124 4. 968841 4. 597077 4. 703458 4. 553074 5. 05814 4. 747723  
6. 474708 6. 356636 6. 554196 6. 464374 6. 531902 6. 269556 7. 026093 6. 467941 6. 507496  
4. 033516 2. 955729 2. 503296 3. 062411 3. 035843 1. 944421 2. 337223 2. 082381 3. 797817  
4. 684502 3. 188312 2. 59557 2. 343274 5. 590476 3. 176822 2. 703453 2. 697675 2. 358153  
1. 125835 1. 507446 0. 843535 1. 259464 1. 032614 1. 025889 1. 146753 1. 796102 1. 182074  
1. 608425 1. 543016 2. 030641 1. 676229 2. 194574 1. 430825 1. 808098 1. 646777 1. 332928  
7. 781732 8. 562801 8. 632538 8. 439282 8. 205355 9. 750476 8. 191589 9. 159099 7. 990667  
5. 697196 5. 929496 5. 459325 6. 217393 5. 718495 6. 895323 6. 181567 6. 092322 5. 527956  
8. 40076 8. 190832 8. 175141 8. 429852 8. 557144 8. 820719 8. 122974 8. 062364 7. 977907  
1. 220273 1. 972093 2. 340645 3. 009358 3. 058256 2. 50365 3. 149426 2. 317102 1. 601942  
2. 525276 3. 310669 1. 793608 3. 397186 2. 273752 2. 977843 4. 136745 2. 73047 2. 393393  
1. 621789 1. 399361 2. 180193 2. 637889 2. 299953 2. 339266 2. 417641 1. 698967 1. 954804  
4. 226824 3. 844395 3. 678874 3. 859702 4. 84668 4. 209824 3. 398967 4. 050982 4. 029869  
3. 137227 1. 937356 2. 072077 2. 496613 2. 626094 3. 08564 2. 968819 2. 429107 2. 660878  
1. 013557 0. 862456 0. 942801 0. 905071 0. 970763 2. 167428 1. 11698 0. 871396 1. 409986  
4. 388813 4. 680596 4. 189621 4. 050016 3. 589291 4. 305404 4. 270691 3. 554868 4. 478968  
6. 284917 6. 503331 5. 718278 4. 338656 4. 667516 5. 520684 5. 693477 5. 374593 6. 430683  
6. 519891 6. 412143 4. 649036 2. 762148 3. 54855 6. 451823 5. 714047 6. 581996 3. 443749  
1. 819184 2. 643953 3. 948648 2. 93755 2. 839825 4. 76032 4. 581225 3. 618671 2. 067768  
3. 10278 4. 96012 5. 287767 3. 264549 3. 462647 5. 581823 3. 925704 3. 083052 3. 410811  
3. 061305 2. 262781 2. 227182 3. 345411 2. 336711 4. 052421 3. 047061 3. 400604 2. 291441  
1. 366835 1. 509154 1. 296071 1. 791264 1. 634893 1. 505852 2. 03487 1. 71966 1. 368449  
1. 54564 2. 198832 1. 540973 1. 896665 2. 014961 2. 381292 1. 581729 2. 204685 1. 536296  
4. 659439 3. 641437 4. 829894 3. 91267 3. 246844 4. 064626 4. 14003 3. 551643 4. 962259  
1. 80931 2. 236605 1. 757358 1. 657872 1. 581773 1. 181287 1. 515561 2. 076472 1. 803454  
5. 298641 4. 951587 6. 285327 3. 496216 4. 192048 5. 2977 6. 513227 5. 107174 4. 493686  
0. 824483 1. 035222 0. 560248 2. 025755 1. 092807 0. 85295 1. 085819 0. 830726 1. 559102  
1. 308923 1. 410182 2. 149241 1. 239703 1. 354104 2. 100715 1. 278383 1. 75466 1. 318439  
2. 43532 2. 69605 3. 068161 1. 884075 1. 454169 2. 412886 5. 680006 0. 838391 1. 968247  
4. 125832 4. 362486 4. 57716 3. 611728 4. 067779 3. 829937 5. 553111 4. 538033 3. 685992  
0. 807556 2. 991713 1. 865061 1. 443925 1. 501781 1. 474419 1. 11777 1. 457971 1. 569743  
0. 995317 0. 863704 1. 253708 0. 843999 0. 587916 2. 074801 4. 778808 1. 73143 1. 242208  
1. 135327 1. 454236 2. 284526 1. 875233 1. 362643 1. 392603 1. 262501 0. 896444 2. 307068  
3. 304255 2. 372956 2. 988087 2. 293936 3. 085863 2. 157517 2. 956483 2. 764001 2. 263092  
3. 40861 3. 513912 3. 456212 3. 849749 3. 762055 3. 065828 3. 21978 3. 617825 3. 222965  
2. 367602 2. 436951 1. 812716 1. 80665 1. 341905 2. 696664 1. 447461 2. 559578 1. 639286  
2. 324241 1. 678316 1. 399053 1. 164269 0. 96752 2. 007008 2. 718294 1. 270675 2. 123027  
3. 590424 4. 311876 7. 603695 6. 592057 2. 973336 3. 490683 7. 362132 3. 434679 5. 583733  
6. 936441 7. 225027 6. 356127 6. 637356 7. 052387 6. 409924 5. 803017 6. 209811 7. 289937  
5. 792955 2. 91929 5. 330754 3. 165792 4. 08783 3. 218118 3. 27323 3. 655109 4. 382603  
3. 14588 2. 828653 5. 413272 2. 373692 2. 926563 3. 482873 4. 001392 2. 935795 4. 581691  
1. 867037 0. 864013 1. 737754 1. 312558 2. 564804 0. 993316 1. 815551 1. 650203 2. 081185  
0. 441093 0. 704343 0. 435057 1. 554212 0. 744651 0. 922689 1. 220869 0. 722369 0. 956298  
2. 342077 4. 397128 3. 707331 2. 732818 2. 260825 2. 353055 4. 415494 2. 21422 3. 389136  
2. 352138 3. 476148 2. 265949 1. 746711 4. 354658 3. 237786 1. 89585 3. 292487 2. 019611  
8. 3713 7. 953446 8. 636794 8. 59645 7. 139889 8. 526205 8. 614133 7. 881918 7. 71448  
2. 267696 2. 305372 2. 185687 2. 208643 2. 524591 2. 436626 2. 431067 3. 045412 2. 266119

6. 472686 6. 265647 6. 59626 3. 209891 2. 612657 5. 608616 6. 198801 5. 724855 5. 74622  
1. 892286 4. 207025 3. 173494 2. 978446 1. 075354 2. 433537 1. 314975 2. 305839 1. 426808  
6. 134904 5. 337285 4. 680838 4. 612752 3. 204146 3. 203494 5. 248493 4. 129933 4. 451435  
1. 191512 1. 213077 0. 876689 1. 086449 1. 038349 1. 936386 1. 083402 1. 100046 1. 396095  
0. 871713 2. 545868 0. 782663 1. 250781 2. 255601 0. 937441 2. 090067 1. 250251 0. 993696  
0. 783663 0. 943379 0. 979826 0. 718746 1. 511104 1. 384289 2. 367025 1. 287386 1. 285684  
1. 482511 1. 119969 1. 096443 1. 354579 0. 914791 1. 029898 1. 114072 0. 911298 1. 379255  
1. 917872 1. 256392 1. 697083 1. 396078 2. 340681 1. 559462 1. 754201 1. 46837 2. 01086  
0. 851855 1. 06556 1. 325802 1. 108262 1. 598984 0. 968936 2. 232277 3. 310257 1. 338648  
1. 180555 1. 515179 2. 512724 1. 518827 1. 122742 3. 023819 1. 416705 1. 968738 2. 824296  
2. 972517 2. 132193 2. 760449 2. 699354 2. 810407 2. 712266 2. 392555 2. 777478 3. 04768  
2. 931674 3. 11135 3. 243103 3. 666198 2. 883346 2. 717453 4. 741084 3. 454957 3. 117229  
3. 63927 3. 371353 4. 521926 3. 383077 3. 649687 4. 227037 4. 995951 3. 317744 4. 325312  
1. 432268 1. 88307 1. 551798 1. 378138 1. 669426 3. 014158 1. 17926 1. 017748 5. 103108  
3. 794284 5. 084826 3. 097922 1. 391925 3. 172342 2. 801242 2. 387644 2. 12313 3. 378622  
1. 831375 3. 530018 2. 287263 1. 629083 1. 762219 2. 147097 2. 192525 1. 61829 1. 207983  
6. 971728 6. 287399 7. 025579 6. 224041 5. 196384 6. 754052 6. 907188 6. 472617 6. 766353  
1. 729971 3. 821456 4. 974229 3. 568876 3. 024949 1. 790915 3. 230597 2. 040466 2. 549761  
2. 421138 3. 948896 6. 795152 5. 589878 3. 124683 3. 36219 5. 575033 3. 088261 2. 889791  
1. 438182 1. 722427 1. 217714 1. 572181 1. 214176 2. 361639 1. 769838 1. 386754 1. 455185  
1. 063075 1. 239914 0. 738705 1. 494946 1. 968997 1. 130456 1. 90863 1. 500695 1. 661095  
2. 672791 2. 954995 2. 311471 2. 746684 1. 62522 2. 430127 2. 356662 4. 184526 2. 701492  
0. 938871 1. 135078 1. 002718 1. 097205 0. 93381 0. 848868 1. 052139 1. 686719 1. 132957  
2. 265275 3. 84552 5. 121329 2. 905865 6. 272544 2. 859901 5. 414605 3. 120458 2. 933647  
2. 391042 4. 000525 2. 637996 3. 083746 3. 778707 3. 170903 2. 67244 1. 930501 2. 335413  
5. 289107 4. 264758 4. 409873 3. 560968 4. 666715 3. 791027 3. 459973 4. 441278 4. 462066  
1. 997471 1. 952177 2. 187216 2. 355247 2. 591796 1. 562532 3. 02749 3. 123524 2. 436352  
3. 019096 2. 378515 2. 616165 2. 771684 2. 281241 2. 844394 4. 038505 2. 261634 2. 482696  
1. 430989 0. 475002 0. 748972 0. 596785 0. 728781 1. 851898 1. 002922 0. 747123 2. 183953  
1. 683346 1. 812525 1. 985131 1. 472639 1. 632258 1. 908382 2. 132025 1. 786261 1. 950849  
6. 381962 5. 318069 7. 093131 6. 580687 6. 105302 6. 357891 5. 967806 6. 304147 5. 511733  
2. 992322 3. 86058 2. 534347 4. 549884 3. 160065 4. 293579 4. 258984 3. 231831 3. 236439  
1. 001712 1. 1914 1. 288739 2. 035339 1. 44671 1. 484804 1. 406047 1. 282645 1. 780339  
1. 098007 0. 826379 0. 863384 1. 622523 1. 599209 0. 989318 1. 388786 1. 44182 1. 640413  
0. 8547 1. 71526 0. 638737 0. 937326 0. 637676 0. 787815 1. 006369 2. 200647 1. 211825  
1. 830984 1. 061491 1. 199079 1. 368825 1. 507095 0. 696779 1. 894646 0. 769194 1. 650124  
6. 140823 6. 898203 6. 771922 6. 828144 6. 780904 6. 990323 6. 102939 6. 653743 6. 540446  
0. 827958 2. 126357 0. 594137 1. 584403 1. 18278 0. 713388 0. 837291 0. 852708 1. 184757  
9. 084559 8. 630199 8. 787661 9. 397708 9. 044677 9. 067165 8. 316122 9. 173151 8. 944828  
6. 732044 7. 111225 7. 019144 7. 054336 7. 05875 7. 176036 7. 227458 6. 926907 7. 245621  
5. 008277 2. 069551 2. 518709 1. 984573 3. 189351 2. 852707 2. 160656 1. 319774 2. 982482  
6. 386421 7. 403626 7. 38714 7. 320097 7. 317343 7. 508004 6. 801038 7. 42184 7. 315207  
1. 032948 0. 959276 0. 921196 0. 884442 1. 242866 1. 698972 1. 275381 1. 038221 1. 401798  
4. 275771 5. 688671 5. 31849 5. 030559 6. 110928 4. 164956 4. 437161 6. 25104 5. 251171  
3. 846635 3. 840466 3. 825168 2. 717301 3. 142731 3. 398051 3. 890952 3. 207784 3. 731289  
4. 371336 5. 403849 5. 854228 6. 313522 5. 87385 6. 216709 6. 138637 5. 636909 6. 222627  
6. 28269 5. 993808 5. 943864 5. 799778 5. 291588 5. 397713 5. 2494 6. 107619 5. 829068  
5. 18835 5. 801791 5. 638456 5. 622373 5. 315201 6. 136768 5. 395702 5. 115793 5. 922004  
6. 619976 6. 337053 6. 521543 6. 697191 5. 995358 6. 545915 6. 536958 6. 761916 6. 285177  
6. 648472 6. 601854 6. 785168 6. 635375 6. 699219 7. 055435 4. 911214 6. 924268 6. 320468  
1. 742602 1. 667139 1. 560611 2. 090524 2. 210855 1. 287817 3. 062134 1. 476231 1. 521007

1. 016975 1. 551829 1. 453135 1. 585302 1. 207208 1. 207208 1. 840257 1. 164638 1. 522374  
4. 380727 4. 793775 4. 491556 4. 319733 4. 942087 4. 429869 4. 484613 5. 013638 4. 752601  
4. 458976 4. 002869 4. 12069 4. 986905 4. 077759 5. 751525 3. 560323 4. 886941 4. 71943  
4. 022759 4. 131243 4. 668724 4. 958038 5. 003591 4. 469138 3. 674198 4. 121712 3. 715907  
3. 66148 3. 881585 3. 352655 2. 405689 3. 827309 2. 423017 2. 606353 2. 185685 3. 568436  
5. 18414 4. 636795 4. 956951 4. 709478 5. 345311 3. 884136 5. 047397 4. 980351 4. 815727  
6. 401427 5. 734051 5. 732224 6. 084388 6. 227929 6. 077183 5. 792144 6. 316376 5. 601628  
2. 821121 2. 336672 1. 450106 2. 871638 1. 708699 1. 838226 2. 631548 2. 257119 2. 979092  
5. 09958 4. 820635 4. 716982 2. 951638 4. 307728 4. 593008 5. 467995 3. 74087 5. 703708  
1. 201766 1. 411577 1. 09955 1. 265763 1. 724661 0. 91255 1. 690103 1. 220219 1. 238592  
6. 014478 5. 690329 5. 420071 6. 391382 5. 989573 6. 121782 5. 885473 5. 698824 5. 824955  
5. 6956 5. 716861 6. 239422 6. 04042 5. 2314 5. 856635 5. 526653 6. 295959 6. 256261  
6. 497376 7. 795122 7. 116008 7. 912071 7. 924238 7. 810152 7. 564116 8. 155029 7. 58949  
5. 557829 5. 679539 5. 754694 5. 061492 5. 528874 5. 469727 5. 744819 6. 108954 5. 059513  
6. 538247 6. 980742 7. 678698 6. 601706 7. 058595 7. 296426 6. 459909 6. 800235 6. 584139  
6. 844563 6. 895531 6. 66664 7. 400076 6. 413415 6. 822512 5. 917825 6. 507699 6. 791148  
2. 034179 2. 644572 2. 07977 2. 481087 2. 000921 2. 299304 2. 311674 1. 937024 2. 501665  
6. 431812 3. 6454 6. 084677 4. 144852 4. 558638 4. 090455 3. 679104 4. 780834 4. 869003  
3. 436044 2. 608478 2. 509738 2. 423854 2. 600937 3. 222591 2. 614691 3. 337191 2. 466266  
6. 513171 6. 359819 6. 62176 5. 900072 5. 502555 6. 080978 6. 109723 6. 201345 6. 850067  
1. 476386 1. 405555 1. 436126 1. 713567 1. 442869 1. 342717 1. 619954 1. 477099 1. 322709  
9. 230851 8. 706812 9. 055051 8. 865762 9. 457415 8. 461401 8. 822029 9. 29639 9. 054001  
5. 983169 6. 227489 6. 372648 6. 421662 6. 175709 6. 624062 6. 226646 6. 168611 6. 452757  
8. 899522 8. 243404 8. 412937 8. 27809 8. 413935 8. 370035 8. 43936 8. 411971 8. 73034  
6. 7689 6. 98038 6. 921069 7. 4279 7. 209253 7. 19101 7. 059546 6. 896247 6. 88607  
4. 667827 4. 323287 4. 073395 3. 836688 3. 961072 4. 252607 4. 301702 4. 179981 4. 425097  
2. 117683 1. 841537 2. 069146 3. 414227 1. 853206 1. 970676 2. 306063 2. 397947 1. 986972  
7. 013274 7. 279813 7. 374053 6. 701182 7. 058617 6. 735901 7. 416381 7. 002343 7. 601217  
4. 849769 6. 296104 5. 69 5. 932811 6. 31064 6. 41608 5. 854714 5. 60256 6. 16112  
5. 246916 5. 417601 5. 363489 5. 892598 5. 453313 5. 516849 5. 816396 5. 401366 6. 09649  
4. 890065 4. 706111 3. 669688 4. 617391 4. 396335 5. 081322 4. 037836 3. 833112 4. 149582  
5. 009399 3. 69883 4. 192889 4. 102258 3. 690915 4. 870929 3. 751004 4. 827814 4. 347684  
2. 807613 2. 864811 2. 543814 2. 336341 2. 925038 2. 207544 2. 039286 1. 725552 2. 4296  
6. 571761 7. 938668 7. 452498 6. 5404 7. 245554 6. 673397 7. 130069 6. 947349 7. 223824  
6. 022052 6. 123576 5. 73921 6. 591857 7. 085192 6. 206891 6. 310673 5. 752786 6. 1337  
2. 944798 5. 042323 3. 676773 3. 814623 3. 694832 2. 988656 3. 797761 3. 826203 3. 579921  
8. 179325 8. 35752 8. 157842 8. 396802 8. 285368 8. 145288 7. 467395 8. 373883 8. 159586  
6. 223112 6. 690066 6. 043814 6. 683878 6. 682695 7. 060318 7. 032966 6. 653779 7. 068191  
3. 303758 4. 267887 3. 763881 4. 44966 4. 169698 2. 88495 5. 038633 3. 055482 2. 675734  
0. 996156 1. 133355 0. 995745 1. 504906 1. 51762 1. 446444 1. 419393 0. 855477 1. 06318  
3. 256516 2. 278049 3. 049919 3. 249105 2. 840214 2. 473971 3. 43685 4. 363364 1. 94935  
8. 782188 9. 416609 9. 094423 9. 336324 9. 719848 9. 763078 9. 50632 9. 935252 9. 324479  
1. 772671 2. 356012 2. 705583 2. 791914 2. 648475 2. 413658 1. 777652 3. 23237 3. 378109  
2. 937297 3. 196777 3. 622716 3. 828782 3. 010079 3. 490528 3. 215108 4. 305206 4. 309173  
1. 014106 0. 869545 1. 239425 1. 430201 1. 455271 1. 595627 1. 033743 1. 767378 1. 513192  
3. 774394 3. 804416 4. 174414 1. 790564 2. 886249 3. 825708 2. 648336 4. 573578 3. 286315  
9. 278076 8. 988122 9. 345344 8. 943593 9. 013431 9. 140853 9. 088502 8. 940266 9. 060148  
2. 368643 2. 394429 2. 844077 2. 257722 1. 74302 2. 541636 3. 191817 1. 658725 2. 25744  
3. 342689 4. 102609 4. 761704 4. 119227 4. 481495 2. 854788 3. 781326 5. 005917 3. 258817  
1. 470466 1. 453445 1. 508949 1. 205662 1. 253411 1. 789597 1. 492127 1. 807803 1. 293103  
3. 69223 3. 411334 3. 167543 2. 783088 2. 398641 2. 860006 3. 113913 2. 469709 3. 071399

3. 422945 2. 854582 3. 206866 2. 533638 2. 709736 2. 864396 2. 264745 2. 787781 2. 162976  
2. 203586 2. 810752 2. 794061 1. 83926 3. 093206 3. 592114 1. 109509 1. 56384 2. 235046  
2. 774611 2. 262227 2. 473427 2. 962019 2. 553884 3. 120456 2. 253204 2. 744888 2. 147964  
1. 855014 1. 580727 1. 745088 2. 069273 1. 724733 1. 652072 1. 935869 1. 97329 1. 77654  
7. 212963 8. 280005 7. 952404 8. 39823 7. 289925 8. 151835 7. 577556 7. 73607 8. 499298  
5. 67376 6. 467031 6. 090684 6. 810996 6. 613456 7. 461038 6. 813829 6. 950565 6. 163957  
3. 920658 4. 116672 4. 839603 5. 56918 4. 593384 4. 935456 4. 338945 4. 920814 3. 515714  
2. 845285 3. 009133 3. 090124 2. 590656 2. 733812 2. 526819 2. 983944 3. 174268 2. 93351  
3. 507844 5. 001469 3. 531083 4. 347872 5. 836594 4. 52591 5. 497547 5. 263887 4. 904423  
5. 443577 4. 486102 4. 809811 5. 541513 4. 49949 4. 979039 3. 647012 5. 764684 5. 035221  
4. 34077 3. 035945 3. 082233 4. 81358 4. 218016 3. 49773 3. 548819 3. 486955 3. 751235  
4. 540713 5. 640087 5. 176607 5. 300684 5. 688515 5. 399818 5. 188475 5. 325274 5. 506842  
4. 81138 5. 397449 5. 84202 5. 631333 5. 612831 5. 905688 5. 481294 6. 101888 6. 040159  
3. 305716 3. 48703 2. 281083 2. 835315 2. 696271 2. 853449 2. 423054 2. 702192 2. 82947  
5. 423228 6. 503945 6. 097787 7. 013722 7. 128454 6. 125213 7. 688032 6. 758237 6. 964626  
2. 767753 3. 613002 2. 321927 3. 479655 3. 510928 3. 459378 2. 07987 3. 280313 2. 896893  
5. 143323 5. 627135 5. 522359 4. 809615 5. 303742 6. 205206 5. 513383 5. 277802 5. 592933  
8. 205098 8. 404923 8. 202865 7. 916469 8. 145332 7. 648305 7. 609221 8. 084116 7. 969315  
7. 394976 7. 391398 7. 035199 7. 071385 5. 928418 6. 917123 6. 106213 6. 752272 6. 938858  
6. 13691 7. 557141 7. 304761 6. 743591 7. 080954 5. 38649 6. 477738 7. 109747 6. 75841  
8. 898975 8. 920031 8. 452177 8. 428124 8. 578673 9. 029619 9. 405518 8. 802636 8. 78574  
6. 425799 7. 238037 6. 75208 6. 600545 6. 551076 6. 649499 6. 070147 6. 732246 6. 73105  
6. 519058 5. 51202 5. 037572 5. 428515 6. 008903 4. 654656 5. 735053 5. 423814 5. 705336  
7. 433143 7. 562972 7. 163936 7. 672718 7. 58365 6. 658875 7. 003326 7. 991008 7. 422866  
5. 414516 6. 304291 6. 27601 6. 12503 6. 307352 5. 942376 6. 260204 6. 31566 6. 123934  
2. 852863 3. 164398 3. 120442 3. 774214 3. 352514 2. 542627 4. 050709 2. 627777 2. 162165  
2. 369769 1. 872425 1. 365574 1. 717739 1. 720906 1. 700732 2. 248943 1. 434503 2. 074484  
8. 915679 9. 057908 9. 185271 8. 703734 8. 948166 8. 725456 8. 993565 9. 244934 9. 115725  
3. 34661 3. 710245 3. 831934 3. 6392 3. 430349 3. 552489 4. 498464 4. 692323 4. 302239  
5. 73045 6. 901119 6. 985987 7. 429642 6. 935514 7. 453618 7. 058395 6. 691518 6. 683552  
3. 454382 4. 158969 3. 972043 5. 189531 4. 58075 5. 131359 3. 998279 4. 617143 4. 378909  
8. 242219 8. 776603 8. 748456 9. 264731 9. 099455 9. 247601 8. 381394 9. 006913 8. 722659  
4. 616366 4. 36504 3. 708752 3. 879681 3. 229574 3. 485856 4. 252843 3. 747843 4. 139947  
3. 808632 4. 354054 4. 303925 4. 661285 3. 804804 4. 201782 4. 076496 4. 192739 3. 959024  
5. 237719 6. 645236 6. 75899 6. 879931 6. 343816 6. 807081 6. 995957 6. 454652 6. 634279  
1. 098751 0. 960705 0. 956211 2. 175456 1. 118621 0. 943451 1. 293907 1. 420383 1. 21887  
2. 132118 1. 2846 1. 955747 1. 572841 1. 261405 1. 385401 1. 748585 1. 893157 1. 507634  
5. 640654 5. 8249 5. 87933 5. 759795 5. 644472 5. 782957 5. 929924 5. 918342 5. 806139  
2. 35493 2. 16058 1. 921267 2. 805154 2. 907392 2. 282627 1. 672368 1. 878728 1. 986683  
2. 437211 3. 709702 4. 072825 3. 878361 3. 827577 3. 857584 3. 036765 3. 386009 3. 670274  
2. 817833 3. 345243 3. 097192 2. 735928 3. 011979 2. 702726 3. 308038 2. 621148 3. 1462  
4. 624398 5. 692857 4. 938569 4. 599164 5. 024268 5. 067387 5. 17881 5. 399207 4. 841651  
4. 1591 4. 965939 4. 890872 5. 250296 4. 509396 4. 561531 5. 151269 4. 964891 5. 288789  
4. 830988 5. 615008 5. 377667 4. 876845 4. 808411 4. 93348 4. 917225 5. 621536 5. 135758  
1. 321558 1. 058238 0. 921302 1. 25237 1. 120545 1. 279454 1. 618019 1. 191264 1. 545533  
4. 589822 4. 757513 5. 824416 4. 636109 5. 158401 5. 154299 4. 716624 5. 365997 5. 472839  
7. 013492 6. 960231 7. 331195 6. 9672 6. 977136 6. 150388 7. 508804 6. 868829 7. 084642  
3. 28337 3. 567172 3. 62627 3. 401395 4. 33841 4. 490839 4. 733685 3. 141713 4. 055881  
1. 336216 1. 593458 1. 283785 1. 718278 1. 042418 1. 452125 1. 73792 1. 185097 1. 216304  
1. 363944 1. 498529 1. 608509 1. 288527 1. 338756 1. 458583 2. 286912 1. 386105 2. 059413  
2. 400163 1. 774808 2. 376605 1. 859952 2. 251279 2. 403599 1. 923511 2. 531401 1. 808795

1. 901595 1. 660268 1. 955313 2. 501771 1. 934062 1. 750722 2. 001759 1. 856781 1. 23369  
6. 078364 6. 599839 6. 169708 6. 867188 6. 124783 6. 82984 6. 337858 6. 422775 6. 396366  
4. 58564 5. 211861 3. 902536 4. 800237 5. 489304 5. 608781 4. 186523 5. 840564 4. 156664  
3. 602386 4. 195018 4. 064374 3. 974179 3. 535567 4. 101888 4. 061752 3. 781003 3. 738648  
3. 494831 4. 175178 3. 882443 3. 713024 3. 744967 3. 959229 4. 396591 3. 777192 3. 806926  
0. 752333 2. 238273 1. 285006 1. 097309 0. 981114 0. 671584 1. 751563 1. 063765 1. 259678  
1. 173352 0. 982919 0. 823201 1. 419517 1. 272535 1. 135693 1. 488035 1. 304473 1. 711073  
2. 432858 1. 380696 1. 044911 1. 661057 1. 825924 1. 850467 1. 499403 1. 214989 1. 585707  
7. 113572 5. 991092 6. 79944 6. 819165 5. 598389 5. 776179 7. 325831 5. 804951 6. 824814  
1. 908445 5. 589539 2. 447398 2. 996772 5. 760802 1. 893374 8. 273737 3. 374645 3. 628523  
1. 881293 1. 855285 1. 761344 1. 880371 2. 268628 1. 385586 1. 87664 1. 564854 1. 741722  
1. 695709 2. 16931 2. 963475 2. 345072 1. 379874 2. 432881 5. 348008 3. 08611 3. 069448  
2. 908515 1. 503482 1. 992531 1. 788308 1. 906992 2. 380691 2. 361111 2. 194266 3. 016391  
10. 10778 8. 366123 10. 09978 9. 743586 8. 669259 7. 918069 10. 82397 9. 847988 9. 268311  
1. 228991 2. 972649 3. 062249 2. 274787 1. 589242 2. 793146 1. 944366 2. 015744 1. 892018  
6. 502899 5. 336583 4. 67439 6. 386768 4. 713724 5. 957195 5. 623677 4. 035831 3. 730883  
2. 516636 1. 982448 1. 425604 1. 748183 1. 281286 1. 601646 1. 372649 1. 301191 1. 274809  
2. 458396 3. 62325 1. 823918 2. 70822 3. 537148 1. 618474 4. 965856 3. 987435 3. 380027  
1. 234493 1. 381696 0. 708428 0. 890773 0. 925494 1. 19274 0. 861023 0. 746192 0. 927993  
0. 849712 1. 004402 0. 646165 1. 154822 0. 895426 1. 341622 0. 830159 1. 015777 0. 717879  
2. 572285 1. 62137 1. 636935 3. 001097 3. 973518 1. 036829 3. 002041 2. 431588 1. 585602  
2. 120461 1. 594993 2. 164333 2. 064407 1. 562566 1. 351806 1. 616091 2. 359003 1. 450847  
7. 052801 5. 941738 5. 810031 6. 589023 5. 720502 5. 815272 5. 535445 5. 992424 6. 048462  
3. 694848 3. 778619 3. 71121 3. 572373 3. 744218 4. 106517 2. 259725 2. 598828 2. 941246  
7. 344896 6. 492471 6. 540196 5. 132685 5. 260703 5. 450535 5. 710991 5. 990133 6. 541446  
0. 951383 1. 555922 1. 11308 1. 390294 1. 322129 1. 295246 1. 275487 2. 369114 1. 130832  
2. 970084 2. 229194 3. 562981 3. 317387 3. 201283 1. 798604 5. 222263 2. 750891 3. 192883  
3. 327422 3. 094322 5. 506681 4. 601167 2. 858322 4. 545446 2. 626211 3. 472403 3. 823757  
3. 127076 3. 622501 4. 184642 3. 744394 3. 291772 3. 149121 3. 633591 3. 734257 3. 564278  
1. 134726 1. 362336 0. 708972 0. 967087 0. 983553 1. 260431 1. 59772 1. 246767 0. 988604  
4. 361116 2. 73936 2. 443102 2. 103775 4. 945521 1. 900286 5. 017024 3. 162771 2. 423598  
4. 755344 4. 82032 6. 613978 4. 610212 4. 906479 6. 526026 6. 523673 6. 803415 5. 597424  
1. 346943 1. 107916 1. 126421 1. 029636 1. 111561 1. 288235 4. 947138 1. 679347 1. 537172  
2. 328998 1. 982948 1. 557939 2. 175536 1. 331022 1. 511669 1. 449024 2. 043519 2. 60716  
1. 680904 2. 165992 2. 143055 1. 369509 1. 208495 1. 657027 2. 678595 1. 591481 1. 118958  
2. 812292 2. 387346 2. 513955 2. 632662 1. 974316 2. 27249 3. 686382 3. 448565 3. 195262  
0. 673465 0. 630004 0. 866556 0. 854462 1. 142589 1. 052412 0. 940878 0. 955155 1. 316704  
3. 026145 2. 966329 2. 864736 2. 464785 2. 658879 3. 023299 4. 727635 4. 370013 2. 26388  
1. 5738 2. 444716 2. 515248 2. 458466 2. 167555 1. 882743 2. 704513 2. 46998 2. 489417  
0. 934572 0. 733098 1. 066611 1. 010078 1. 169381 1. 346621 2. 035842 0. 760128 1. 078254  
3. 931056 3. 657838 3. 397781 2. 632259 3. 135376 2. 174981 2. 974424 3. 924476 3. 611812  
3. 300051 4. 388144 3. 135872 3. 367722 2. 325128 3. 46767 3. 635033 3. 162646 4. 425023  
4. 077345 3. 689897 3. 182499 3. 748452 3. 620629 3. 704591 4. 092779 4. 175488 3. 445627  
9. 423685 6. 84893 7. 783889 5. 840589 4. 102945 6. 235156 8. 152659 6. 720976 7. 488527  
0. 875885 1. 100829 0. 928027 1. 166462 1. 114715 1. 548574 0. 936232 2. 15603 1. 055993  
3. 363616 3. 640711 2. 910064 3. 495456 1. 958717 2. 77302 3. 150794 3. 482579 1. 467889  
1. 247333 1. 140886 0. 666579 0. 802899 1. 573587 1. 214805 1. 354882 1. 37394 0. 779257  
1. 405259 1. 258513 1. 011 1. 500191 1. 411789 1. 035665 1. 150194 1. 154176 2. 136425  
0. 618134 2. 453613 0. 387448 0. 852213 0. 719877 0. 65488 2. 590941 1. 02252 0. 603532  
1. 520534 1. 098606 1. 115087 1. 077098 1. 145743 1. 395517 2. 580386 1. 539729 1. 167735  
0. 774459 0. 653308 2. 145778 1. 391231 1. 582155 1. 202192 1. 926446 0. 978603 0. 840143

3. 123306 2. 046802 3. 230961 2. 345602 2. 571677 3. 343759 3. 189899 3. 886372 2. 11514  
1. 205066 1. 718373 0. 961355 1. 186843 1. 771688 1. 42464 1. 634411 4. 574715 0. 948276  
1. 209543 1. 451302 1. 080031 1. 32436 1. 772082 1. 227968 1. 162376 1. 115724 1. 04618  
2. 252846 4. 983867 2. 712246 2. 764806 1. 804896 4. 678922 1. 712187 2. 174832 3. 822912  
5. 30599 5. 310002 6. 113875 5. 809842 6. 473401 6. 512086 5. 783499 7. 05003 6. 503513  
2. 785132 4. 455234 6. 653252 5. 2962 5. 563764 6. 354272 5. 006121 2. 489908 3. 504885  
1. 161051 0. 903986 1. 500976 1. 502505 2. 445441 1. 438775 1. 999939 0. 916101 2. 1744  
1. 456967 2. 519076 1. 076415 3. 302796 0. 991781 1. 617081 1. 435765 1. 066934 1. 515593  
1. 85258 1. 902028 1. 005895 2. 743577 2. 009981 1. 930749 1. 726795 1. 571766 1. 930286  
1. 599795 3. 713224 1. 186004 1. 683836 1. 713183 1. 760956 2. 249314 1. 365026 1. 138317  
8. 02159 8. 049262 8. 193867 7. 81311 8. 191591 8. 115633 8. 19996 8. 130217 8. 054848  
4. 738943 4. 925676 4. 3988 4. 660929 4. 582534 5. 228767 4. 217827 4. 035583 4. 918271  
5. 706722 5. 792217 5. 722561 6. 145448 6. 088164 6. 48528 5. 972724 5. 229937 5. 943506  
6. 88781 5. 901468 6. 344537 7. 48761 7. 358696 7. 240342 6. 751792 5. 797324 6. 603236  
5. 51497 3. 700905 4. 034758 2. 819518 3. 946633 2. 617316 4. 12478 4. 277322 3. 420991  
5. 968878 5. 570532 5. 706864 5. 328264 4. 822703 6. 052919 5. 450462 6. 397738 6. 534344  
4. 43258 4. 23206 4. 486195 5. 002045 4. 579512 4. 697983 4. 445043 4. 577562 4. 702844  
3. 066045 2. 683427 3. 965067 3. 366456 3. 001993 2. 634529 3. 367146 3. 136738 2. 254025  
0. 93644 1. 189228 0. 845485 0. 954184 0. 800398 0. 661741 1. 011751 0. 920997 0. 669248  
3. 700568 3. 298409 3. 255033 3. 980621 3. 662761 3. 083487 3. 068856 3. 927099 3. 557649  
4. 815079 4. 736219 4. 466616 5. 005056 4. 448202 4. 672372 5. 051167 5. 115953 4. 818947  
1. 300931 0. 922717 0. 537609 0. 725448 0. 679047 0. 681999 0. 435372 3. 642611 0. 679047  
1. 672212 1. 948255 2. 366761 1. 368555 1. 063316 1. 647837 1. 447726 0. 819286 0. 618764  
0. 947912 1. 937066 1. 425072 1. 472111 1. 17524 1. 32131 1. 245965 1. 662572 0. 998429  
2. 890814 0. 935632 0. 894177 1. 177246 1. 253217 1. 146674 0. 711233 2. 203652 1. 096369  
0. 912066 1. 261604 0. 672646 1. 531319 1. 242879 3. 051983 1. 027613 1. 61282 2. 044065  
0. 938218 1. 007722 0. 955002 0. 616973 1. 143053 0. 835795 0. 969617 1. 842519 1. 092092  
0. 987187 1. 043299 1. 03178 1. 596605 1. 00529 1. 069227 1. 193447 0. 890666 0. 648993  
2. 664705 1. 532383 2. 298651 1. 032021 3. 655002 3. 280331 3. 472246 0. 980224 0. 599665  
2. 481718 2. 759761 1. 789015 2. 42009 2. 281459 2. 045278 2. 427388 2. 590872 1. 338026  
2. 314337 2. 115396 2. 831633 2. 449476 2. 309598 2. 553267 2. 278766 2. 581892 2. 402152  
3. 511352 3. 121128 3. 658586 3. 224734 2. 534931 3. 664786 2. 934894 3. 264372 2. 890611  
1. 331111 1. 403843 1. 121293 2. 317911 1. 53412 1. 328248 1. 784264 3. 013211 1. 149831  
1. 114858 1. 268459 1. 359481 1. 472674 1. 392183 1. 605237 1. 385947 2. 80603 1. 890054  
1. 125952 0. 904592 1. 150049 0. 957836 1. 746168 1. 053162 1. 979147 1. 48316 1. 002702  
2. 895786 1. 156304 2. 766724 1. 103427 2. 004025 1. 500936 4. 982148 0. 605148 0. 755806  
1. 17393 0. 935804 0. 448185 1. 179922 1. 30725 1. 121611 0. 930161 0. 807474 1. 254801  
4. 23847 3. 271244 3. 895587 3. 877876 3. 182991 3. 348788 3. 495268 3. 00216 3. 254783  
1. 286965 1. 351701 1. 281756 1. 305061 1. 48473 1. 499642 1. 195791 3. 461596 1. 037988  
0. 985186 0. 961675 0. 919661 0. 923445 0. 923424 1. 010506 1. 020624 1. 222398 0. 987762  
1. 170888 0. 77017 0. 961898 1. 589191 1. 226101 0. 861909 0. 866795 0. 845956 0. 853033  
0. 690802 0. 493124 1. 748842 0. 625659 0. 642959 0. 869895 0. 978332 0. 86896 0. 872781  
3. 325276 3. 310258 3. 604493 2. 277517 3. 133614 2. 433987 3. 295315 3. 405577 2. 617161  
5. 372256 4. 084229 4. 681315 4. 773522 4. 620344 4. 250299 3. 812587 3. 749711 4. 390825  
0. 894639 1. 04898 0. 728975 0. 872726 0. 7395 1. 095169 1. 523524 1. 002828 1. 413766  
1. 013666 1. 016487 0. 705319 0. 864919 0. 960735 0. 893505 0. 66778 0. 741044 1. 204444  
2. 9508 3. 027047 6. 224189 3. 307115 3. 707779 3. 335424 3. 129949 3. 28236 3. 278164  
2. 563316 2. 6285 3. 753207 3. 018686 2. 604553 3. 680073 2. 244646 2. 361568 2. 762703  
2. 135588 1. 514879 2. 579998 1. 287691 3. 146235 1. 559034 1. 738146 2. 127171 2. 448068  
5. 785162 5. 968598 5. 330457 5. 630195 4. 184346 5. 204329 4. 39399 5. 441845 5. 556764  
2. 674403 1. 748628 1. 548634 2. 269047 1. 977367 2. 262344 2. 340415 1. 805793 1. 41618

|          |          |          |          |          |          |          |          |          |
|----------|----------|----------|----------|----------|----------|----------|----------|----------|
| 1.560761 | 0.738184 | 0.739449 | 0.971539 | 1.392733 | 0.765185 | 0.93573  | 1.035469 | 1.043376 |
| 1.024647 | 0.920551 | 0.891451 | 0.912918 | 1.05962  | 0.931837 | 0.683764 | 0.955488 | 1.651842 |
| 2.462422 | 0.956224 | 1.231993 | 1.310407 | 1.748698 | 1.537374 | 1.241541 | 0.746464 | 1.488652 |
| 0.903337 | 0.892253 | 0.665087 | 0.820911 | 1.007111 | 1.662335 | 0.893205 | 0.903357 | 1.053671 |
| 1.038665 | 1.102721 | 0.621518 | 0.961017 | 0.971585 | 1.180779 | 1.368029 | 1.423764 | 1.218544 |
| 1.340629 | 0.951479 | 1.53085  | 1.199423 | 1.615829 | 1.197529 | 1.598127 | 1.088586 | 1.258    |
| 0.689116 | 1.333887 | 0.761827 | 1.411802 | 1.404612 | 0.824829 | 0.730827 | 0.906972 | 1.551634 |
| 1.420023 | 1.136943 | 0.781586 | 1.101138 | 1.293424 | 0.86888  | 1.3465   | 1.915854 | 1.085448 |
| 2.187928 | 1.905442 | 2.438082 | 2.490452 | 2.808016 | 1.878676 | 2.160144 | 2.081127 | 2.375267 |
| 3.00747  | 2.25886  | 2.453462 | 2.416444 | 2.054823 | 2.521642 | 2.035695 | 2.155556 | 2.557711 |
| 0.890858 | 1.203359 | 0.745883 | 1.104952 | 1.268645 | 1.166079 | 0.756165 | 1.629527 | 1.66714  |
| 4.376108 | 2.948466 | 3.279157 | 3.146271 | 3.192889 | 2.278285 | 4.834168 | 2.0879   | 3.348674 |
| 1.043756 | 1.21847  | 0.930993 | 0.709633 | 0.976189 | 0.919095 | 1.022681 | 0.913602 | 1.36726  |
| 1.975586 | 1.884455 | 3.741709 | 2.699306 | 2.18988  | 2.741186 | 2.529419 | 2.543217 | 2.544568 |
| 0.895714 | 0.775663 | 0.948481 | 1.555504 | 0.845782 | 0.960641 | 0.964967 | 0.937181 | 1.322926 |
| 0.867545 | 0.977843 | 0.635469 | 0.990398 | 1.122996 | 0.819702 | 0.983028 | 1.364963 | 1.068194 |
| 2.434918 | 0.777821 | 1.241969 | 1.151838 | 1.284587 | 1.147818 | 1.321981 | 0.967342 | 1.221216 |
| 4.719359 | 3.681664 | 3.846954 | 3.667867 | 4.493706 | 4.075823 | 4.036852 | 4.33963  | 4.141409 |
| 1.609939 | 1.058274 | 1.322827 | 1.293463 | 1.389583 | 1.27408  | 1.572499 | 1.275094 | 1.119717 |
| 2.420845 | 2.806588 | 3.579302 | 1.915254 | 3.124978 | 3.877839 | 2.643053 | 2.537392 | 2.429283 |
| 2.919489 | 1.685941 | 2.568829 | 2.061114 | 3.009886 | 1.753494 | 2.288062 | 2.486927 | 2.099363 |
| 1.733995 | 1.893884 | 1.033922 | 1.583188 | 1.991334 | 1.335564 | 3.105215 | 1.825919 | 1.114755 |
| 1.655455 | 1.176407 | 1.44919  | 1.71998  | 1.104858 | 1.752352 | 1.915506 | 1.556753 | 2.042898 |
| 1.397631 | 0.904396 | 1.36132  | 1.359501 | 1.496121 | 1.06358  | 2.00969  | 0.801404 | 0.923339 |
| 1.674418 | 1.25225  | 1.94068  | 1.766237 | 1.735923 | 2.25392  | 2.31614  | 1.312228 | 1.555794 |
| 2.29008  | 1.840216 | 2.047225 | 2.583246 | 2.268241 | 2.110326 | 2.968304 | 1.677043 | 1.829308 |
| 3.069325 | 2.484478 | 2.115982 | 2.592729 | 2.01364  | 2.428395 | 2.516916 | 2.520228 | 2.197196 |
| 1.509492 | 1.028078 | 0.923413 | 1.178999 | 0.90662  | 0.924876 | 1.00307  | 1.025273 | 1.2067   |
| 3.708912 | 2.700666 | 3.454358 | 3.496065 | 4.720845 | 3.13098  | 4.02452  | 3.489874 | 2.632303 |
| 1.380844 | 0.905029 | 0.523134 | 0.739936 | 1.02037  | 0.597273 | 1.061794 | 1.084852 | 0.588492 |
| 2.175421 | 1.848686 | 1.835545 | 2.267577 | 1.800468 | 1.713442 | 2.003779 | 1.581221 | 1.897733 |
| 1.73482  | 1.230107 | 2.227165 | 1.662084 | 1.484076 | 1.725365 | 1.441311 | 1.667582 | 1.57976  |
| 1.378477 | 1.490921 | 1.834068 | 1.883345 | 1.768933 | 1.720948 | 1.417036 | 1.331005 | 1.920378 |
| 2.461351 | 3.169418 | 4.402317 | 4.601332 | 2.564396 | 3.919688 | 3.486094 | 4.376203 | 3.186726 |
| 1.769548 | 1.589073 | 1.329657 | 2.095212 | 1.72972  | 1.574142 | 1.366152 | 1.451924 | 1.291212 |
| 8.08033  | 7.824297 | 8.285607 | 8.228179 | 8.857958 | 8.790721 | 6.343162 | 7.556215 | 8.331763 |
| 1.689845 | 1.304101 | 1.452487 | 1.765529 | 1.45778  | 1.905654 | 1.698019 | 1.730091 | 1.567656 |
| 0.827799 | 0.915312 | 0.825234 | 1.107887 | 0.9033   | 1.333227 | 1.493584 | 1.094328 | 0.686708 |
| 0.983298 | 1.054543 | 1.107739 | 1.821958 | 1.20327  | 1.178741 | 1.932006 | 1.433394 | 1.308723 |
| 1.195352 | 1.432201 | 1.04773  | 1.382287 | 1.426756 | 1.288644 | 1.212473 | 1.043388 | 1.388446 |
| 3.580639 | 2.173097 | 3.116762 | 3.081552 | 2.745569 | 2.852512 | 2.852512 | 2.013595 | 2.616577 |
| 0.947316 | 0.840247 | 1.015627 | 0.782862 | 1.06884  | 1.318868 | 1.833042 | 0.748587 | 0.870194 |
| 2.800194 | 1.731722 | 1.751989 | 2.959416 | 2.432973 | 2.095314 | 2.274547 | 1.99167  | 2.458656 |
| 1.177403 | 1.368357 | 0.78766  | 1.415955 | 1.274113 | 1.506614 | 1.061882 | 1.147906 | 1.534261 |
| 1.102683 | 0.914641 | 0.716848 | 0.726574 | 1.069535 | 1.19474  | 1.53413  | 0.8783   | 0.88999  |
| 0.897858 | 0.900953 | 0.646215 | 0.715842 | 2.018909 | 0.893827 | 0.884704 | 1.021216 | 0.87645  |
| 1.460485 | 0.861357 | 1.041491 | 1.350101 | 0.665044 | 1.104542 | 0.694672 | 0.701553 | 1.018747 |
| 1.143838 | 0.987319 | 0.95878  | 1.02359  | 0.856662 | 0.906778 | 1.220655 | 1.36336  | 0.802331 |
| 1.397458 | 1.326873 | 1.237425 | 1.98646  | 1.116059 | 1.298435 | 1.547829 | 1.396841 | 1.140335 |
| 1.330849 | 2.608671 | 0.963165 | 1.222121 | 2.133869 | 2.103597 | 1.125198 | 1.330496 | 1.752423 |
| 3.218969 | 2.733022 | 2.621861 | 3.292869 | 2.182884 | 2.764219 | 2.492165 | 2.150696 | 2.420352 |



3. 311466 1. 673964 1. 492716 2. 06837 0. 877808 3. 311466 1. 466669 1. 16574 0. 81035  
0. 932673 0. 959173 0. 786092 0. 78186 1. 08976 0. 950125 0. 742155 0. 795755 0. 646927  
1. 511812 1. 010075 1. 686484 1. 903478 0. 585449 1. 147994 0. 881889 0. 565781 1. 097506  
4. 368989 2. 634564 2. 24192 2. 598815 1. 399734 2. 249493 2. 099435 4. 450592 4. 177282  
4. 923306 2. 312004 3. 289141 3. 675608 2. 425742 4. 169946 3. 569742 2. 167834 3. 515688  
1. 53639 1. 249923 1. 36197 3. 083832 1. 454564 1. 316984 2. 768268 2. 42196 2. 717282  
0. 843431 1. 117981 1. 546796 1. 089473 1. 328692 2. 116977 1. 378343 1. 154247 1. 316786  
3. 445843 2. 656828 2. 723535 3. 148042 3. 673861 2. 179259 2. 641009 3. 266641 4. 45232  
1. 037235 1. 020126 1. 146935 1. 131141 1. 001663 1. 320635 1. 299182 0. 769276 1. 086957  
3. 035944 3. 238947 2. 774144 2. 847577 1. 376086 5. 142888 2. 650401 4. 082093 2. 870068  
1. 585201 0. 916681 2. 797363 2. 179165 1. 508156 1. 792603 1. 26737 2. 485699 3. 550407  
3. 520929 1. 496721 3. 168272 3. 421816 2. 895862 1. 447999 3. 447015 4. 973002 2. 986723  
5. 756 4. 52481 5. 907619 5. 097931 4. 322186 5. 634909 4. 845449 4. 479617 4. 86283  
1. 937872 2. 281375 2. 329309 1. 412525 1. 964903 1. 292576 1. 844163 1. 594695 1. 867154  
0. 657344 0. 781765 0. 789778 1. 371334 1. 762586 1. 053226 0. 902298 1. 086664 1. 925031  
4. 584126 4. 381569 4. 684754 4. 81674 4. 003435 3. 737053 4. 923521 4. 33126 4. 359855  
1. 802694 1. 855407 2. 108092 2. 278478 1. 988314 2. 498611 2. 034087 1. 900422 1. 13749  
6. 972933 6. 326097 6. 392903 6. 288233 5. 958775 6. 241288 5. 72228 6. 334124 5. 981807  
7. 093448 7. 706113 7. 10589 7. 877355 7. 407319 7. 725291 7. 695677 6. 736805 7. 278422  
4. 616145 5. 434625 5. 453309 5. 221254 5. 284097 5. 281721 5. 479581 5. 363612 5. 58252  
6. 98642 7. 484985 7. 008589 7. 417561 7. 259624 7. 194041 7. 12827 7. 266164 7. 146615  
2. 881368 3. 675684 2. 485803 4. 153775 4. 008387 3. 278354 3. 123102 2. 948366 3. 557837  
6. 79285 6. 02461 6. 229006 5. 27179 6. 147649 6. 347472 6. 426589 6. 329813 6. 086721  
2. 500361 2. 013639 2. 542193 2. 687697 2. 305678 3. 36132 3. 250732 2. 476765 2. 6113  
5. 666859 6. 172903 6. 600474 7. 139182 6. 800607 6. 899219 5. 25204 6. 923837 6. 599266  
10. 39747 10. 58218 10. 57965 10. 36829 10. 4998 10. 34163 9. 522789 10. 59624 10. 21532  
5. 201495 6. 126894 5. 301873 5. 422476 5. 968124 6. 238141 3. 995523 5. 477722 5. 676609  
6. 060809 5. 970128 6. 123214 6. 60875 6. 72177 6. 55467 5. 673006 6. 657022 6. 815494  
0. 98078 1. 060318 1. 419135 1. 374813 2. 363824 1. 349516 1. 094491 1. 148294 1. 560464  
6. 843867 5. 559682 7. 030546 6. 012328 6. 038791 6. 788207 5. 876639 6. 083781 7. 645108  
5. 018768 4. 48541 4. 365448 5. 079871 4. 443159 4. 231259 4. 080989 3. 923436 4. 617911  
6. 1691 5. 8381 5. 196166 6. 637979 5. 616407 5. 962899 5. 693984 5. 729015 6. 07015  
7. 784183 8. 054689 7. 825015 7. 812387 8. 235604 8. 159116 8. 274452 8. 296336 8. 035345  
1. 44566 1. 732342 2. 80171 1. 329365 1. 515167 1. 690634 1. 681784 1. 77909 1. 960344  
1. 864595 1. 461362 1. 337357 0. 787956 1. 553575 1. 267757 2. 023978 1. 223983 0. 667364  
2. 501631 2. 386728 2. 459689 3. 132726 2. 254606 2. 782719 2. 501631 2. 354066 3. 078898  
0. 776089 1. 197538 0. 663477 2. 151106 1. 228191 2. 705994 1. 255756 1. 253374 1. 914525  
1. 194425 1. 275724 1. 567376 1. 40422 1. 638486 1. 346886 1. 3576 1. 014952 1. 512883  
0. 824146 1. 284027 5. 310261 2. 014681 1. 030266 0. 780606 0. 820877 1. 057253 1. 494991  
1. 770675 0. 959426 1. 852468 1. 022365 1. 141119 2. 788342 0. 794018 0. 961419 1. 114487  
1. 61462 1. 404251 1. 654001 2. 422523 1. 387988 1. 514077 1. 60423 1. 578447 1. 429771  
1. 455322 1. 795785 0. 984627 1. 792711 1. 70971 2. 655582 2. 97873 4. 14854 2. 188491  
3. 837492 1. 344349 1. 941387 2. 328916 5. 405238 1. 743334 3. 103568 3. 334081 3. 846449  
2. 413788 2. 644094 2. 018621 1. 993427 1. 416226 1. 992437 1. 765215 1. 747374 2. 417617  
3. 002419 4. 615402 3. 098803 3. 783265 3. 684945 2. 832355 3. 578713 2. 46313 2. 829232  
8. 519647 7. 57593 7. 73886 8. 105618 8. 162963 6. 556244 7. 630184 8. 087915 7. 612181  
7. 72485 7. 788984 7. 871153 8. 013522 8. 151177 7. 608683 7. 969616 8. 329533 8. 07326  
0. 881811 1. 359189 0. 818943 0. 93883 0. 912614 1. 585315 1. 072646 1. 338946 1. 097033  
7. 013724 6. 83611 6. 734667 7. 866237 6. 501726 6. 802282 6. 964465 6. 579258 7. 214666  
8. 99363 8. 224189 8. 428413 7. 298636 7. 907769 7. 86037 8. 533452 8. 445108 8. 218666  
5. 726709 4. 717101 5. 020986 5. 353712 5. 491537 7. 156338 5. 647694 4. 937277 5. 655318

1. 731739 1. 633119 0. 90761 2. 296984 1. 227242 1. 316115 1. 068662 1. 148689 1. 469246  
1. 290708 1. 249142 0. 882425 1. 621996 1. 152846 1. 201386 2. 188007 1. 265525 1. 254661  
1. 85813 1. 104711 1. 002669 1. 924366 1. 218407 1. 300685 1. 234239 1. 732325 1. 49971  
9. 832388 8. 714109 9. 163802 8. 804879 8. 938008 8. 905954 9. 228521 8. 94625 9. 475396  
7. 602705 7. 892286 7. 807274 7. 753025 7. 982743 7. 743974 7. 25914 7. 818092 7. 387956  
4. 280234 4. 791568 5. 062052 5. 463315 5. 562557 6. 066645 5. 101468 5. 280552 5. 097671  
3. 607904 4. 652998 4. 946803 4. 768806 5. 489379 4. 826223 4. 517854 5. 150849 4. 947423  
3. 962213 2. 181254 3. 753136 2. 58284 2. 934792 3. 608009 2. 918045 2. 540396 2. 294341  
1. 91225 2. 15642 2. 209988 1. 846544 1. 950638 2. 577297 1. 948831 2. 298437 1. 987727  
5. 708675 5. 944195 5. 851261 5. 441795 5. 992983 5. 313277 4. 63757 5. 397031 5. 362324  
9. 702973 9. 172537 9. 567981 9. 397091 9. 350991 9. 074307 9. 195384 9. 119244 9. 752335  
7. 548493 8. 21919 8. 068076 8. 83576 8. 330144 8. 614936 8. 006983 7. 089496 8. 416472  
2. 735188 3. 261801 3. 700113 2. 941306 2. 981491 3. 24274 3. 449518 3. 20868 3. 459511  
7. 03414 3. 177449 3. 765864 4. 768024 3. 315231 3. 621853 4. 734361 3. 731099 2. 73289  
5. 811477 6. 669945 6. 392738 6. 580216 5. 955042 6. 234721 6. 190433 6. 555083 6. 73618  
6. 377004 6. 24631 6. 394629 6. 148724 6. 593005 6. 147831 5. 27773 6. 288278 5. 839361  
1. 8999 1. 921053 2. 332815 2. 061174 2. 183085 2. 549026 2. 484392 1. 757213 2. 094698  
7. 108994 7. 306858 6. 788111 7. 421753 7. 593792 7. 677605 6. 708261 7. 354061 7. 383612  
2. 003857 1. 460177 1. 98791 1. 217914 2. 379899 2. 132947 2. 010929 1. 757947 1. 419444  
5. 878372 4. 546377 5. 394503 4. 958831 5. 131944 4. 939234 4. 05865 5. 15993 4. 674947  
2. 092064 1. 763671 1. 387986 2. 47253 1. 906976 1. 657788 1. 40979 2. 371161 1. 852097  
4. 503216 3. 206123 3. 884508 3. 188824 2. 933561 3. 509788 3. 306794 2. 991552 3. 60215  
3. 095525 2. 611134 1. 996491 1. 819449 3. 019642 2. 100674 2. 279472 2. 578302 2. 491276  
1. 622348 1. 492464 1. 977987 1. 651265 1. 793076 1. 834664 3. 022073 1. 872708 1. 511581  
3. 036963 3. 815124 3. 403846 3. 522322 3. 405338 3. 71049 3. 867066 3. 528107 3. 479792  
6. 192156 6. 161441 6. 037234 5. 964307 6. 033135 6. 04784 5. 56549 6. 090264 5. 541522  
6. 681179 6. 296219 7. 484896 6. 11033 6. 888636 7. 280147 6. 850902 7. 069375 7. 100986  
6. 127092 6. 158776 6. 393138 6. 371704 6. 417878 6. 916068 6. 58481 5. 888067 6. 002247  
7. 377529 7. 692096 7. 56553 7. 435615 7. 973509 8. 022709 7. 921679 7. 640675 7. 335997  
7. 355008 7. 348531 7. 30717 6. 985295 7. 568565 7. 00923 7. 218492 7. 237008 7. 08431  
5. 013883 5. 897669 5. 906584 4. 814262 5. 360769 5. 677405 5. 470069 5. 39464 5. 763921  
2. 278179 2. 081854 1. 80913 2. 367938 2. 800767 1. 685679 2. 085387 1. 984395 1. 385566  
1. 736762 1. 643805 1. 894345 1. 868232 0. 750455 1. 807843 1. 573626 1. 554204 1. 617767  
4. 09483 3. 557825 4. 711692 4. 755088 4. 348544 4. 671054 5. 436123 4. 420802 4. 682049  
6. 544917 8. 082683 7. 59685 8. 11199 7. 223237 7. 442919 7. 587141 7. 844457 7. 970175  
1. 877416 1. 443262 2. 018714 1. 527169 1. 639741 2. 075168 1. 68782 1. 932209 1. 457819  
3. 794596 3. 330255 3. 539163 3. 04287 3. 314366 3. 229176 3. 69641 3. 376713 4. 40004  
2. 422058 2. 234431 2. 686356 3. 216406 2. 194996 2. 443003 2. 454941 2. 260754 2. 477525  
3. 398876 2. 414593 3. 95645 2. 596542 2. 866153 3. 309657 3. 039121 2. 913039 2. 929785  
6. 005265 6. 754575 6. 205977 7. 306096 6. 630932 6. 891415 6. 377685 7. 299409 6. 700117  
6. 480406 6. 007004 5. 983516 6. 418034 5. 918895 6. 148381 6. 404965 6. 183627 5. 553528  
6. 006584 5. 256416 5. 571223 6. 360681 5. 035841 6. 380345 6. 160353 6. 039164 5. 575048  
3. 248867 2. 618042 2. 616618 4. 248154 3. 029423 3. 033652 4. 64541 2. 991078 3. 788155  
2. 109102 2. 044664 2. 324179 2. 122522 1. 833482 3. 526879 2. 882663 2. 684811 1. 511346  
4. 33707 3. 736654 3. 461431 5. 691884 4. 987304 4. 508051 6. 242378 4. 065987 4. 890978  
5. 576607 5. 330121 4. 839634 5. 088737 5. 328785 5. 793659 5. 198734 5. 309933 6. 049857  
2. 175128 2. 040776 2. 519317 2. 045195 1. 634563 2. 945431 2. 279568 2. 041573 2. 542894  
9. 522315 9. 769079 9. 110492 10. 1613 9. 283872 10. 42837 9. 272137 8. 993357 9. 530598  
8. 86104 8. 925805 9. 384333 9. 066053 9. 205897 9. 100739 8. 645757 9. 053489 8. 820217  
3. 798841 3. 888553 4. 315565 3. 898837 3. 719566 3. 911669 3. 967147 4. 226562 4. 145155  
3. 053206 2. 019095 2. 156557 2. 487325 3. 087811 2. 468672 2. 741184 1. 909159 2. 342107

6. 766443 6. 745232 6. 266123 7. 613026 7. 229719 8. 02894 7. 336344 6. 951472 7. 272629  
1. 861033 2. 174659 2. 439729 1. 84064 2. 294292 1. 707055 2. 513054 2. 503325 1. 972612  
3. 091216 3. 020225 2. 391441 2. 587919 2. 8076 2. 510679 2. 823562 2. 656934 3. 14146  
4. 62523 4. 110117 4. 198343 4. 962971 4. 769339 4. 553804 4. 23927 5. 018634 4. 159288  
8. 529378 8. 687365 9. 144821 8. 684259 8. 821921 9. 549992 9. 045891 8. 881483 8. 622171  
2. 616466 2. 087942 3. 016404 3. 784027 2. 451654 3. 491201 4. 658426 3. 078031 3. 571179  
2. 635553 3. 829138 2. 973445 3. 350462 3. 528675 3. 523815 3. 488792 3. 442571 3. 54936  
4. 687305 3. 210231 2. 34819 2. 950075 3. 004578 4. 239241 3. 433408 3. 317487 3. 595374  
2. 424943 2. 984886 1. 745819 1. 73276 1. 99021 1. 554121 2. 394283 2. 051767 2. 154334  
1. 811283 1. 363786 1. 351772 2. 033972 1. 532684 1. 365862 1. 227387 1. 145771 1. 328258  
3. 84059 3. 153309 3. 313009 3. 128906 3. 013328 3. 362813 3. 999191 3. 950183 3. 311801  
4. 102266 3. 211501 3. 959911 3. 134161 3. 424729 3. 762243 3. 19327 3. 312721 2. 916464  
6. 558423 6. 893012 6. 46954 6. 133062 6. 797396 6. 971806 5. 929994 6. 416636 5. 82913  
4. 360294 4. 954432 4. 553518 4. 914771 5. 223198 4. 657239 5. 068044 4. 985977 4. 8791  
1. 370174 2. 202046 1. 944067 1. 744547 3. 121354 2. 034907 2. 081158 2. 668761 2. 864032  
5. 966835 6. 823306 6. 412595 6. 706974 6. 441742 6. 716448 7. 367918 6. 905453 6. 481619  
7. 916817 7. 681494 8. 339651 7. 346058 7. 936419 8. 17437 9. 146233 8. 544699 9. 357012  
6. 420733 7. 146886 6. 648057 7. 085044 6. 821669 6. 910967 6. 332069 6. 67174 6. 883493  
6. 199542 5. 682942 5. 999244 4. 886194 5. 069158 5. 276871 4. 2202 5. 206235 4. 853102  
6. 17868 7. 074997 6. 973157 7. 053464 6. 718701 6. 286105 6. 585891 7. 016941 6. 384745  
3. 0879 4. 76625 3. 810486 2. 979223 3. 169771 3. 753107 2. 930903 3. 788762 3. 59378  
4. 877595 4. 787235 4. 075426 5. 053514 4. 851866 5. 427925 4. 190654 4. 548759 3. 985191  
8. 004981 8. 983664 8. 645916 9. 353081 8. 889067 9. 134862 9. 422665 9. 488662 9. 294037  
7. 516745 7. 711757 7. 133382 7. 921271 7. 666542 7. 984672 7. 232352 7. 87767 7. 638044  
9. 808331 10. 18934 10. 33051 10. 55719 9. 989667 10. 23881 9. 680723 9. 815391 10. 11246  
2. 508998 3. 579515 2. 835993 4. 48376 2. 677169 2. 823581 2. 516537 2. 456189 2. 485695  
1. 512849 1. 557479 1. 782839 1. 702994 2. 134918 1. 674013 1. 396314 2. 283703 1. 758151  
5. 337608 5. 668208 5. 583572 5. 318893 5. 562446 5. 435825 5. 074605 5. 567412 5. 339546  
2. 976725 2. 971421 2. 642566 4. 198847 4. 117205 3. 997442 3. 460911 2. 792451 3. 468061  
4. 88336 5. 158082 5. 773191 5. 801142 5. 244358 5. 465895 5. 258464 5. 293801 5. 355615  
5. 48283 5. 855991 6. 061953 5. 801639 6. 328277 6. 537575 6. 942764 6. 126302 6. 567234  
1. 678832 1. 529774 2. 209326 1. 446697 2. 183466 2. 036289 1. 63512 2. 22531 1. 800106  
2. 950003 4. 25353 3. 97266 4. 621058 4. 900248 4. 622167 4. 233123 5. 230746 3. 014516  
4. 328855 4. 74119 4. 854921 5. 826178 4. 464784 5. 368543 5. 331434 4. 803905 5. 316406  
7. 344361 7. 353575 7. 469154 7. 461085 6. 985401 7. 236497 7. 247524 7. 37525 7. 140524  
5. 756164 4. 804566 4. 756011 5. 067339 5. 193029 5. 527686 5. 083524 4. 171266 5. 366048  
5. 825748 6. 915003 7. 011855 6. 933478 6. 698927 7. 337309 6. 965969 7. 483841 7. 102864  
3. 391339 3. 150321 1. 830062 2. 214264 3. 01417 1. 251099 1. 925947 2. 339901 2. 611163  
1. 403211 1. 014454 1. 14235 0. 786731 0. 967751 1. 596514 1. 456313 1. 420992 1. 030513  
7. 304256 7. 489462 7. 371976 7. 939953 8. 002608 7. 868432 7. 616498 7. 485409 7. 614097  
8. 845474 9. 098142 8. 891138 8. 818226 8. 991488 9. 045529 8. 773744 8. 932152 8. 980537  
2. 862056 2. 953369 2. 936069 2. 886768 2. 259642 3. 022924 2. 629741 3. 746469 2. 848158  
2. 172312 2. 910995 2. 537298 3. 041723 4. 074705 3. 084565 3. 834874 3. 572445 3. 269113  
7. 77765 7. 964901 7. 675737 7. 630184 7. 945394 8. 036922 7. 308569 7. 676415 7. 482172  
7. 481545 8. 520432 8. 278112 9. 013251 7. 813205 8. 436989 7. 859722 7. 841921 8. 147207  
0. 905787 1. 621547 0. 739388 0. 533934 1. 162848 0. 694604 3. 237076 0. 840136 1. 367744  
2. 544099 1. 390412 3. 050532 1. 42601 2. 379975 1. 851192 2. 69083 1. 936034 2. 541492  
2. 220773 1. 700686 1. 394415 1. 450897 1. 039678 1. 597677 1. 670491 1. 140459 1. 245729  
9. 501119 9. 232025 8. 514803 9. 826661 9. 687069 9. 39206 9. 380073 8. 383841 9. 309853  
5. 044449 4. 102997 6. 091444 3. 737105 5. 522413 4. 366169 5. 016415 4. 288869 3. 867558  
1. 198883 1. 908766 1. 72217 1. 786886 2. 544547 2. 281782 3. 27819 2. 940106 2. 126632

6. 349659 6. 737812 6. 699352 6. 746444 6. 664458 6. 992301 7. 196112 7. 228825 6. 844817  
5. 559614 6. 173069 6. 225119 6. 352129 6. 238474 6. 281955 6. 349073 5. 977922 6. 744085  
7. 158462 6. 473074 7. 144236 7. 26808 6. 286007 6. 784706 6. 791233 6. 250563 7. 381552  
5. 737262 5. 637723 6. 290825 4. 5986 3. 851154 5. 077353 4. 464981 5. 49437 5. 799414  
5. 899991 7. 396054 7. 302613 6. 915104 7. 024287 7. 060621 6. 781926 7. 140816 7. 185678  
9. 521904 9. 802361 10. 049 9. 912919 9. 141658 10. 31015 9. 833384 9. 443989 9. 244762  
7. 214628 7. 378032 7. 471861 7. 358364 7. 331052 7. 184306 7. 115643 7. 110222 7. 252502  
7. 634088 9. 091167 7. 650667 9. 296403 9. 44411 7. 619566 9. 108794 8. 916886 9. 174393  
5. 203011 5. 360256 5. 632914 5. 113112 5. 662995 5. 556901 4. 974043 5. 483879 5. 971248  
2. 381464 2. 508472 2. 415435 2. 049556 1. 287213 1. 720251 2. 133704 1. 539178 2. 04235  
11. 08997 11. 25321 11. 29797 11. 13213 11. 6167 11. 02602 11. 35559 11. 64783 11. 19704  
1. 190541 0. 993649 1. 183393 1. 548359 1. 32754 1. 591528 1. 490568 1. 349828 2. 058834  
3. 753672 3. 890806 3. 279509 3. 42974 3. 568982 3. 188841 3. 540084 3. 907254 3. 505426  
8. 580998 8. 462195 8. 494326 8. 772647 8. 528731 8. 969953 9. 100136 7. 922306 8. 763534  
3. 791546 4. 585288 4. 577712 4. 605937 4. 207749 4. 609906 3. 555194 5. 674669 3. 650879  
3. 549504 4. 611217 4. 405397 4. 65325 5. 464192 4. 363209 4. 384194 5. 81418 3. 919462  
6. 797391 7. 804864 7. 331851 8. 309205 7. 375538 7. 330237 7. 915227 7. 179464 7. 408985  
3. 353575 4. 252043 4. 43603 3. 569651 3. 362624 4. 513445 3. 78022 4. 853759 4. 817233  
2. 783814 4. 390064 3. 675597 4. 370284 3. 205131 5. 022382 3. 722167 4. 616007 3. 782048  
2. 260164 3. 07968 2. 445957 3. 138671 2. 450197 4. 224725 3. 540687 3. 230242 3. 133743  
1. 407983 1. 364675 1. 28229 1. 509804 0. 900036 1. 581447 1. 635603 1. 816454 1. 429422  
8. 096916 8. 039842 7. 946657 8. 043828 7. 661817 7. 670605 7. 729384 7. 804333 8. 039543  
3. 533782 4. 158551 3. 968201 5. 007259 3. 92018 5. 252314 3. 596378 4. 425208 4. 677447  
8. 684598 8. 449141 7. 450173 8. 117117 9. 194912 7. 402953 8. 702436 7. 645421 8. 756885  
7. 332383 7. 243952 6. 869381 6. 256948 7. 54486 6. 309665 6. 65228 7. 403671 7. 824288  
1. 867955 1. 561114 1. 485326 3. 096426 2. 502196 2. 556468 2. 463198 2. 106015 2. 447782  
1. 209447 1. 359321 1. 724835 1. 818073 1. 354371 1. 632314 1. 650523 1. 222715 1. 77296  
2. 357882 1. 451203 1. 750531 1. 552031 1. 981458 1. 296708 1. 53435 1. 608034 1. 986837  
8. 73404 9. 179979 8. 892179 8. 80714 9. 172355 8. 484562 8. 119729 8. 563023 9. 164193  
2. 564373 3. 793783 3. 232289 5. 100827 3. 335836 6. 272647 4. 873975 4. 662405 3. 98504  
3. 425185 2. 473899 3. 454546 3. 126391 2. 158007 3. 180598 4. 354103 2. 790391 2. 411174  
2. 848977 2. 217398 2. 803518 2. 65074 2. 59395 2. 079691 3. 045783 2. 269852 2. 126581  
1. 363201 1. 800757 1. 911967 1. 360863 1. 153324 1. 43183 1. 054436 1. 556122 1. 243804  
1. 513213 1. 845612 1. 618347 1. 780725 2. 290403 1. 99816 1. 772399 2. 1118 1. 830833  
7. 950764 7. 608735 7. 854835 8. 610426 8. 17933 8. 288729 8. 278314 7. 711833 8. 131916  
4. 212939 2. 526768 2. 08229 3. 702412 1. 039652 1. 360351 5. 295728 2. 547667 1. 829717  
2. 375425 1. 952073 2. 294191 2. 462733 2. 75627 1. 832014 2. 486055 2. 535201 2. 541149  
4. 410677 5. 043378 2. 871666 5. 053373 3. 120481 6. 151353 5. 695409 4. 737677 4. 546661  
7. 248121 6. 926174 6. 724092 6. 602632 6. 874048 6. 47658 6. 94661 6. 955257 6. 893057  
1. 85309 1. 942271 1. 252096 1. 297821 1. 496466 1. 972062 1. 220054 1. 697648 1. 849475  
1. 191184 1. 061976 1. 054382 1. 098613 1. 81699 0. 925765 2. 189133 1. 280437 0. 976755  
2. 227744 2. 901145 2. 06016 3. 414315 2. 351472 2. 102044 3. 415402 3. 118509 3. 692626  
7. 294724 7. 46306 7. 645794 7. 564105 7. 927468 7. 547896 7. 485415 7. 343754 7. 4745  
3. 404911 2. 81105 3. 623851 4. 153645 2. 786564 4. 334364 3. 478592 3. 059485 3. 854756  
5. 726627 5. 868077 5. 599692 5. 671426 5. 311589 5. 809312 5. 607596 5. 566455 5. 647907  
5. 365369 5. 786784 5. 925984 5. 882137 5. 815715 6. 363387 5. 403052 6. 382298 5. 872412  
5. 603595 6. 599958 6. 140433 6. 603286 6. 705497 6. 171957 6. 009054 6. 326682 6. 130411  
6. 987496 8. 314061 7. 782519 7. 750227 7. 91431 8. 101843 8. 11249 8. 476319 7. 851305  
1. 53829 1. 817221 1. 460804 1. 858121 1. 977196 1. 813883 1. 370127 2. 153478 1. 528189  
2. 669567 2. 409214 2. 996352 2. 325218 2. 277427 3. 014998 2. 619158 2. 655958 2. 578937  
6. 330089 6. 971334 6. 987135 6. 732352 7. 110563 6. 964447 6. 6755 7. 338838 6. 877652

5.835045 3.356735 4.589578 2.827252 3.061052 3.746242 2.900841 3.562451 3.76683  
6.421519 7.379376 7.257043 6.830605 7.154215 7.033224 7.00962 7.016066 7.015428  
0.962722 0.832036 0.722459 1.066041 0.981132 0.914036 1.177382 1.20585 1.030379  
2.623081 3.167621 2.813805 3.184184 3.143554 3.738499 4.240152 3.167422 3.17078  
4.765771 5.345646 4.753885 5.111137 5.447406 5.365319 5.977695 5.247851 5.145137  
7.553547 8.235888 7.925718 8.008069 8.475773 8.073036 7.953375 7.674172 8.372678  
4.628177 6.478508 6.157874 5.982764 6.515325 6.369403 6.602595 6.408238 5.945274  
1.254783 1.26848 0.764339 0.804383 1.71866 0.672515 1.662906 0.944604 0.895538  
8.240864 8.987753 8.097276 9.185705 9.275063 9.03856 9.3429 9.012928 9.098367  
6.846179 5.860543 5.758331 5.893456 6.339476 5.44392 6.253583 5.337405 6.661326  
1.652206 1.681724 1.574015 1.637754 1.687384 1.482587 1.455855 2.36478 1.433576  
5.160787 6.388074 5.964123 6.35853 6.374398 6.026307 6.415156 5.838387 6.134951  
7.608863 8.045969 7.83195 8.059222 8.096886 7.844452 8.083727 8.019329 7.68284  
4.139751 4.990558 5.73329 3.621847 5.57215 5.543194 7.266722 5.108463 5.850482  
2.12651 1.36342 1.54987 2.681165 1.553971 1.782727 2.023315 2.545888 1.714545  
2.748768 2.942078 3.905142 3.629838 3.4481 4.298703 3.299501 4.190812 3.566647  
1.396222 1.02001 1.294129 1.182315 1.66174 1.364232 1.143054 0.820792 1.169972  
3.282962 5.10402 5.10249 4.351616 4.175689 4.701472 3.653321 4.483682 3.826933  
5.730518 7.288166 6.947511 7.051431 6.918593 7.36106 6.03418 6.516589 6.633643  
10.44081 11.025 10.77633 10.97056 10.92691 10.91928 10.55624 10.87473 10.95346  
1.848575 1.978986 2.054328 2.256074 2.019374 2.092701 1.566383 1.794871 1.868386  
3.681755 3.477548 2.920241 2.50155 2.019047 2.853224 4.065143 3.252898 3.43892  
6.105709 6.014457 6.147698 6.094054 6.399064 5.536816 5.682618 5.942772 6.015172  
4.364248 5.967913 5.56925 5.390152 6.092159 5.51682 5.226956 5.44529 5.025036  
6.228001 6.618142 6.173495 7.230642 5.562422 6.508125 6.140434 6.116173 6.594855  
2.963972 4.094499 3.769773 4.868077 4.159673 6.068855 6.839939 5.444862 4.765472  
2.335408 3.16118 3.559841 3.067625 3.048712 3.042484 3.670126 2.695197 2.713561  
9.845124 9.585905 9.929891 9.738051 9.911164 9.651728 9.953538 9.971905 9.789801  
3.16474 2.146314 2.25076 2.78745 3.040733 2.285453 2.023056 3.046601 2.230349  
2.268535 1.699208 1.512583 1.04166 1.052645 1.420633 0.905603 1.908601 1.535661  
7.730381 7.978845 7.0306 7.764833 8.007567 7.544573 8.058321 7.894291 8.06068  
4.800792 5.195116 4.777073 5.67589 5.187527 5.431604 5.664134 5.453345 4.855149  
5.772622 5.592161 5.239125 5.533903 5.70585 5.239398 5.526858 5.868244 6.047796  
2.867445 2.790936 2.149965 1.507787 2.132331 3.13707 3.159789 2.640712 3.22824  
4.120377 4.750278 4.566486 4.842295 4.975015 4.20296 4.434141 5.016928 4.810412  
2.273512 3.211962 1.923427 2.334515 1.758201 1.511846 1.58304 1.680931 1.916352  
1.630341 1.817508 1.605997 1.500033 1.468194 1.466167 1.490002 1.701223 1.506819  
2.2206 1.585296 1.956129 2.795849 2.003623 3.981809 2.000833 2.252064 2.325351  
1.986972 1.080784 2.467382 2.191002 1.57132 1.307676 1.484992 1.711177 1.76214  
4.949659 6.816849 5.839452 6.032657 6.50113 6.557958 5.986523 7.880192 5.673806  
2.044248 1.537711 2.249779 2.167368 1.867579 1.898481 2.309197 2.461349 1.731657  
5.322715 4.760053 5.069308 5.403503 5.057772 4.524069 4.488557 4.609538 5.679689  
2.413149 1.460809 1.279586 1.312613 2.378866 1.111706 1.38883 1.166646 1.730869  
0.988486 0.718588 0.839583 0.831743 0.829518 0.827744 0.866075 0.73576 0.937194  
2.986909 1.406677 1.471193 1.745039 1.879671 0.943746 1.248047 1.730594 2.159612  
4.93056 2.765582 4.318938 3.875731 3.232512 1.966773 4.056824 4.360941 4.713368  
1.670921 1.900484 1.022391 1.889727 1.137725 0.824895 2.873861 1.259406 1.133939  
1.207426 1.525318 0.868762 1.162997 1.147272 0.958515 1.215515 0.988249 1.439559  
0.994798 1.338904 0.983588 1.069466 1.087205 1.382398 1.267365 1.074415 1.200457  
1.817471 2.044892 1.911507 2.402156 1.962042 1.749051 3.202582 2.02276 1.354935  
1.216896 0.972746 0.703379 1.138681 0.796432 0.934057 0.778449 0.937904 0.996894

1. 356371 1. 167522 1. 218774 1. 616016 1. 039327 1. 100421 1. 616271 2. 479571 1. 272458  
3. 751378 2. 69013 4. 269105 3. 200027 4. 504541 2. 863127 4. 032242 4. 796287 2. 471579  
1. 610736 1. 822865 1. 333774 1. 747282 2. 269674 2. 079691 1. 820629 1. 201925 1. 621984  
1. 597643 1. 169691 1. 904074 1. 225823 1. 527687 1. 848851 2. 150153 1. 408469 1. 805644  
4. 464508 3. 510743 4. 578247 4. 11406 3. 306106 3. 996697 4. 15959 2. 529493 3. 745729  
3. 860524 3. 690274 3. 682732 2. 730788 3. 597 3. 728537 3. 574293 3. 614654 2. 692455  
1. 719428 1. 483825 3. 127391 1. 852625 3. 417204 1. 610207 2. 028409 1. 344944 1. 929289  
0. 684379 0. 663461 0. 665503 1. 496094 1. 814089 1. 187867 1. 233585 1. 205532 0. 979214  
6. 465099 7. 434364 7. 293722 6. 71043 7. 182953 6. 436014 7. 224693 7. 095177 7. 186309  
5. 56792 6. 342438 6. 154732 6. 679308 6. 195651 6. 514302 5. 304684 7. 270289 6. 260982  
6. 065907 5. 44629 5. 758328 6. 039609 5. 685229 6. 292199 5. 912171 5. 847392 5. 442318  
8. 374024 8. 585829 8. 584702 8. 528788 8. 015714 8. 427454 8. 259717 8. 283323 8. 347763  
2. 556912 2. 681451 4. 40791 4. 852939 2. 583896 3. 160516 3. 044284 5. 651134 4. 588873  
1. 851188 1. 443388 1. 482944 1. 760721 1. 683135 1. 467937 1. 583813 3. 156927 2. 10659  
6. 900595 7. 250249 7. 444335 7. 002037 7. 298428 6. 61587 6. 968018 7. 229417 7. 027409  
6. 752142 6. 933047 6. 974914 6. 838463 6. 842087 7. 342074 6. 551937 6. 952382 6. 821299  
1. 539983 1. 670001 1. 27078 1. 603897 1. 598132 1. 00404 1. 228393 1. 510076 0. 88588  
2. 952983 4. 791653 5. 366832 4. 802621 3. 347051 5. 262043 4. 49782 4. 974701 4. 988028  
4. 310229 4. 567755 4. 468538 5. 256338 5. 118955 5. 142609 4. 479083 5. 736348 4. 02921  
8. 375336 7. 800643 7. 824044 7. 161619 7. 387752 7. 481357 7. 653018 7. 733175 8. 097989  
4. 362655 4. 806907 4. 566397 4. 026911 4. 677103 5. 033198 5. 062203 5. 177024 4. 721737  
7. 035761 7. 114645 7. 278743 7. 553058 7. 209806 7. 244529 7. 25782 7. 478952 7. 254297  
7. 518409 7. 600495 7. 75255 7. 883811 7. 74733 8. 070765 7. 775653 8. 038784 7. 696248  
6. 464462 6. 787029 6. 801534 6. 761275 6. 761831 6. 620469 6. 822037 6. 7533 6. 346827  
4. 320428 4. 542241 4. 841412 4. 799734 4. 684447 4. 520796 4. 926339 4. 156475 5. 346169  
3. 721446 3. 943789 3. 882846 4. 141407 3. 780136 3. 860186 3. 64597 3. 807708 3. 680446  
1. 361509 1. 023231 1. 04395 1. 79335 1. 438477 1. 310015 1. 688619 1. 426113 1. 983206  
2. 013695 1. 681871 1. 876428 2. 209956 1. 883416 1. 988901 2. 037143 1. 999892 1. 95345  
3. 364652 1. 326222 1. 564165 2. 114519 1. 46792 1. 432446 1. 856431 1. 970476 2. 141051  
3. 869964 3. 871911 4. 753581 3. 99701 4. 969047 4. 135835 3. 546058 3. 939537 4. 316339  
1. 865742 1. 691903 1. 594795 1. 51821 1. 841275 1. 89415 1. 59438 1. 02707 1. 271751  
1. 587364 1. 136047 1. 415332 1. 7665 1. 699827 1. 040639 1. 836031 3. 033774 1. 519889  
3. 022112 2. 52721 2. 478314 2. 281348 2. 513176 3. 281618 2. 845287 3. 076303 2. 556548  
7. 179663 6. 603603 5. 99475 9. 003524 8. 546437 6. 308903 8. 831956 7. 032051 8. 233787  
2. 448223 2. 624331 2. 430483 2. 446424 3. 274788 2. 722066 3. 366099 2. 743553 2. 738565  
1. 283484 0. 66229 1. 102051 0. 795386 1. 146508 1. 499791 1. 283233 0. 912834 0. 767073  
5. 220799 5. 380905 5. 107049 5. 427802 5. 219922 4. 699787 4. 890389 5. 324931 5. 22914  
1. 856876 1. 926675 2. 590867 1. 757918 1. 680174 2. 584689 1. 832185 2. 337732 1. 483173  
2. 620107 3. 601049 3. 225917 2. 836849 1. 664453 4. 327325 2. 225698 1. 232223 4. 531172  
1. 220251 1. 262069 1. 235954 0. 753971 1. 858965 0. 861949 1. 034783 1. 573935 1. 352209  
7. 411022 6. 24533 5. 771866 6. 055142 5. 181472 6. 057055 6. 625163 6. 180201 6. 399682  
2. 030091 1. 901291 1. 940424 2. 269294 2. 456118 2. 126978 2. 576423 2. 409699 1. 984197  
3. 347028 2. 383632 2. 118454 2. 242919 1. 934903 2. 142452 2. 722431 1. 884504 2. 526616  
4. 548711 4. 154627 3. 620877 3. 239172 3. 880366 3. 818508 3. 008161 2. 992821 4. 014073  
2. 500749 3. 019312 2. 324791 3. 028994 3. 123837 3. 351914 3. 937536 2. 827652 2. 605245  
1. 514914 3. 834018 4. 667669 2. 905022 1. 913241 4. 137279 1. 855455 3. 535597 4. 766539  
4. 399518 3. 533802 4. 620901 4. 178897 4. 079255 4. 763547 3. 765439 4. 443716 4. 142494  
1. 72813 1. 922531 1. 611308 1. 505528 1. 329147 1. 216046 2. 986426 1. 574421 1. 753179  
3. 92171 4. 660029 3. 797945 2. 707184 4. 89104 3. 717709 4. 406573 3. 983179 3. 75431  
3. 186155 3. 409649 4. 833443 3. 348552 3. 658428 2. 976234 4. 415811 3. 085896 4. 507827  
2. 420139 1. 189116 1. 860841 1. 8792 2. 60104 3. 387597 1. 936141 2. 33723 1. 942122

3. 436001 3. 072682 5. 236672 4. 564399 3. 141314 3. 482797 2. 144961 6. 269059 3. 945075  
2. 723194 2. 908069 2. 537274 2. 991263 2. 709855 2. 913405 3. 000102 2. 522905 2. 867095  
1. 87788 1. 52935 1. 803736 1. 883842 1. 046826 1. 271068 1. 383022 2. 518185 3. 380043  
3. 38373 3. 487859 3. 280798 3. 081107 3. 624204 3. 257969 4. 26607 3. 224016 3. 752562  
0. 704688 1. 048425 1. 056614 1. 188825 1. 054495 0. 931657 1. 729313 0. 936145 1. 071428  
1. 477314 0. 82023 1. 058106 1. 194542 1. 397756 2. 258366 1. 642005 0. 971278 0. 948179  
1. 540675 1. 670905 1. 879482 1. 3689 1. 26701 1. 55108 1. 919521 1. 588163 1. 421295  
10. 33642 10. 46412 10. 40493 9. 935384 10. 18473 10. 09809 10. 00418 10. 35983 10. 10708  
1. 675104 1. 006667 0. 687844 1. 177925 1. 186624 0. 824229 1. 25922 1. 572136 1. 268859  
1. 667946 1. 718825 2. 114237 1. 433945 1. 673471 1. 475019 1. 96509 1. 980455 1. 630742  
5. 186144 4. 329583 4. 059336 5. 58971 5. 469147 5. 171148 4. 60756 5. 212607 6. 064969  
1. 846737 1. 311264 1. 273894 1. 678761 1. 575333 1. 067198 1. 961669 1. 591168 1. 702982  
2. 069486 1. 901472 1. 854599 1. 551276 1. 458198 2. 191069 2. 249849 1. 699392 2. 188925  
1. 748098 0. 924826 0. 919067 0. 93919 1. 889526 1. 133985 0. 906043 1. 022129 0. 895937  
2. 024999 1. 699706 2. 365878 2. 272631 1. 297096 2. 147271 1. 664935 2. 156337 1. 050597  
5. 333521 3. 334186 4. 727611 3. 044267 3. 020074 3. 162852 1. 909769 2. 673034 2. 107919  
0. 746393 0. 796899 1. 020948 1. 181673 1. 340136 2. 334037 1. 315691 1. 169301 1. 061718  
2. 450128 2. 528904 2. 126249 3. 162387 1. 902779 2. 463758 2. 333469 1. 952249 2. 226108  
1. 900769 1. 099212 1. 82917 1. 399546 1. 535352 1. 691565 1. 684375 2. 130167 1. 926502  
1. 854786 1. 023801 0. 906694 1. 216187 1. 792308 1. 264131 0. 807266 1. 316143 1. 305744  
3. 200523 2. 900471 2. 214884 3. 361283 2. 515638 1. 43993 4. 122764 2. 673326 2. 974162  
1. 458801 1. 381473 2. 129937 1. 198158 2. 044558 1. 683325 1. 227869 1. 729004 1. 6646  
2. 004882 1. 62957 1. 13714 1. 86987 1. 382818 1. 670788 1. 183061 1. 678657 1. 545312  
3. 51573 2. 179762 3. 28914 1. 586896 2. 719714 2. 199163 2. 773062 1. 808543 3. 95366  
4. 500906 3. 506648 3. 527875 2. 957272 3. 361154 3. 534183 3. 736583 2. 572127 3. 813003  
1. 548275 0. 903001 1. 093294 1. 730611 1. 623794 1. 224349 1. 23574 1. 127305 1. 110764  
1. 201185 0. 846938 0. 756434 0. 85773 1. 02439 1. 104466 0. 822798 0. 801175 0. 454027  
1. 060587 1. 797839 2. 284313 1. 083423 2. 124709 1. 481159 1. 200691 1. 404144 1. 704577  
7. 068387 7. 001519 5. 552936 6. 38302 6. 843881 7. 34162 7. 328713 7. 303495 6. 679322  
6. 135596 4. 453326 5. 615888 4. 902962 4. 121068 4. 337306 4. 341219 5. 394174 3. 150287  
1. 271642 0. 894988 0. 897202 0. 909031 1. 437985 1. 072813 0. 987736 1. 112296 1. 054821  
1. 700683 2. 079859 2. 615541 2. 072226 1. 682287 2. 2424 1. 544043 1. 803061 1. 944275  
0. 705707 2. 556324 0. 50351 0. 635271 0. 881032 0. 765363 2. 335677 0. 605886 1. 143261  
2. 583704 1. 704739 2. 610299 1. 909756 4. 172115 1. 218485 1. 838338 4. 555104 2. 826113  
5. 284747 6. 157736 7. 453911 5. 016389 6. 324321 6. 558427 6. 254368 6. 754035 5. 651161  
6. 592515 6. 402237 6. 202737 6. 640983 6. 337104 6. 475651 5. 662275 5. 630942 7. 065206  
2. 649215 1. 259511 2. 273172 1. 935761 1. 830761 1. 442846 1. 369834 2. 229487 1. 627499  
4. 677017 5. 590263 4. 384365 5. 366008 6. 183906 6. 280189 2. 270864 4. 981539 4. 001625  
1. 70153 1. 832197 1. 84558 1. 996323 1. 769543 1. 431991 1. 308089 2. 178063 1. 590502  
3. 108699 3. 475191 5. 480988 3. 604143 2. 908884 2. 483088 2. 590247 3. 520901 4. 500786  
1. 938349 2. 364663 1. 864662 2. 852742 2. 238961 2. 562288 2. 806161 2. 20715 3. 0347  
5. 501678 1. 725934 2. 134091 1. 956166 3. 778094 4. 095432 2. 03931 2. 801804 4. 303269  
1. 135545 5. 066309 5. 133552 3. 498317 4. 462381 4. 034784 4. 191082 3. 972073 3. 626488  
2. 674467 1. 328241 2. 017954 1. 736449 2. 613515 2. 30715 1. 752469 2. 418091 1. 814812  
1. 645238 0. 971386 1. 151222 1. 182534 1. 111329 1. 286546 1. 708808 1. 076497 1. 025054  
5. 155201 4. 433325 4. 738317 2. 698445 5. 595243 5. 491657 4. 518334 4. 993045 4. 780323  
5. 307149 5. 5705 5. 122801 4. 815077 5. 290493 4. 995482 5. 22224 5. 789008 5. 512672  
2. 788659 2. 412119 3. 28633 2. 151109 2. 133664 1. 823027 1. 921481 3. 579381 1. 973092  
7. 065834 6. 5905 6. 482705 7. 119246 6. 903778 7. 098282 7. 246035 6. 821181 7. 163696  
2. 085053 2. 155835 2. 19196 1. 719169 2. 574104 1. 752213 2. 167379 1. 771754 2. 139207  
3. 453775 4. 559163 3. 65976 4. 020789 4. 423802 4. 172538 3. 706052 3. 588716 4. 224636

2. 538441 1. 981064 1. 544488 2. 807461 1. 88381 1. 748593 3. 203516 1. 445649 1. 941488  
4. 492943 2. 517358 4. 153023 4. 585437 4. 087907 2. 699317 3. 160351 5. 446138 4. 466561  
3. 486221 4. 231827 3. 871787 3. 577639 2. 110661 3. 420049 4. 373448 4. 608906 4. 507508  
1. 665287 1. 388094 1. 308937 1. 143916 1. 704307 1. 574992 2. 53635 1. 740871 1. 543823  
2. 255984 1. 498647 1. 192327 1. 467815 1. 574244 1. 664471 1. 892325 1. 74743 1. 283092  
1. 848151 1. 595125 1. 413652 1. 973958 1. 427227 1. 691308 2. 757185 1. 488037 1. 770201  
1. 386213 1. 361207 1. 264613 1. 536624 1. 501521 1. 731955 1. 522572 1. 792662 1. 50753  
0. 963138 1. 865071 1. 579298 1. 342834 2. 655623 0. 919312 1. 361854 1. 622079 1. 120474  
3. 405854 4. 681496 4. 772188 3. 354194 5. 060473 4. 316105 5. 075442 1. 942574 3. 669005  
3. 370348 4. 548223 4. 909282 5. 099177 3. 554125 4. 402062 4. 811492 5. 377054 3. 375581  
1. 843091 1. 550728 2. 083427 1. 230876 2. 189669 1. 703157 1. 465676 2. 027223 1. 148973  
2. 895007 3. 179999 2. 749546 3. 081274 3. 373248 3. 257405 2. 970972 3. 685326 3. 262071  
1. 82616 1. 052253 1. 753056 1. 752904 1. 701785 1. 293488 1. 582982 1. 502986 1. 215511  
1. 93658 3. 221017 3. 019709 1. 566348 3. 381014 1. 68294 2. 482246 2. 875286 2. 265576  
0. 786984 1. 794499 1. 170499 1. 152556 1. 738962 1. 241186 2. 656631 1. 09604 1. 049161  
2. 579972 2. 141298 2. 853296 1. 982667 1. 861987 2. 593951 2. 113909 2. 119211 1. 999559  
1. 256747 1. 09535 1. 102524 1. 444345 1. 310712 1. 074282 1. 325906 1. 440502 0. 972705  
5. 276263 5. 073125 3. 230049 3. 472958 4. 130194 4. 448343 3. 767424 3. 424926 4. 840665  
1. 814204 1. 575076 1. 528632 1. 244407 1. 643834 1. 589544 2. 210246 1. 471923 1. 731265  
2. 94669 3. 106216 3. 878774 4. 209237 2. 87841 4. 553625 3. 323278 3. 571454 3. 85103  
4. 212318 3. 145217 4. 188759 3. 729176 3. 429009 3. 52353 3. 654551 3. 194601 3. 737842  
4. 29634 4. 690495 3. 674574 3. 779581 4. 465036 3. 227005 3. 995259 4. 837208 2. 88005  
2. 774944 2. 238185 1. 745917 1. 632358 1. 737289 1. 71972 2. 039721 1. 994198 2. 114083  
6. 310452 6. 662546 5. 832308 6. 282968 5. 699014 6. 59243 5. 790631 6. 166123 6. 331747  
5. 237787 6. 627777 5. 091638 6. 192906 6. 258467 5. 510819 6. 619977 5. 687077 5. 824151  
2. 579813 2. 432979 2. 169465 3. 210075 1. 838838 3. 123129 1. 902931 3. 410739 1. 569841  
5. 82508 5. 699153 6. 004904 5. 137809 5. 36147 6. 881833 4. 883861 5. 655067 4. 408142  
3. 229336 3. 963741 3. 181594 3. 474484 3. 958293 4. 18616 3. 537071 3. 771045 3. 02901  
1. 919988 2. 405697 2. 280978 1. 936717 2. 617549 1. 934491 1. 927207 2. 265685 1. 905762  
2. 999659 3. 512559 2. 809833 3. 094842 3. 12825 2. 647085 3. 98095 2. 871718 3. 713839  
0. 933237 1. 234395 0. 329218 1. 653839 0. 861296 0. 770068 1. 103294 0. 699075 1. 640373  
1. 611812 0. 8207 0. 963609 1. 366406 1. 290966 1. 520542 1. 129276 1. 21256 1. 230014  
2. 615494 2. 804033 3. 177161 2. 183256 2. 179113 2. 23981 2. 519896 2. 144829 2. 267581  
2. 888855 3. 637587 4. 045932 2. 259357 3. 991277 3. 145584 3. 328612 3. 665932 3. 239833  
2. 326453 1. 674731 2. 489821 1. 803655 2. 311542 2. 161629 1. 628498 1. 603883 1. 938716  
1. 481888 1. 664145 1. 298138 1. 408786 1. 494071 1. 856774 1. 85775 1. 278524 1. 979384  
2. 75754 1. 765368 2. 013493 2. 408262 2. 414684 2. 125445 2. 276349 2. 473984 2. 301691  
1. 108732 1. 280315 1. 47089 2. 022718 1. 389211 1. 493628 1. 934333 1. 599714 2. 015847  
2. 935598 2. 308291 2. 687463 1. 882187 3. 828924 3. 575001 3. 197649 4. 551777 3. 518336  
1. 171566 4. 474417 2. 125411 3. 307138 2. 675533 2. 361268 3. 091265 5. 176304 1. 787788  
1. 812153 1. 874814 2. 17261 1. 697487 2. 875271 1. 518981 1. 557076 1. 880839 1. 197369  
7. 977034 8. 162753 8. 140881 8. 2225 7. 713676 8. 359241 7. 046126 7. 44026 7. 950106  
1. 86487 1. 758194 1. 412858 1. 77067 1. 96018 1. 89179 2. 262844 1. 952471 2. 053512  
1. 719318 2. 085673 2. 730292 2. 279264 3. 232133 3. 66871 3. 27713 2. 469185 3. 299005  
1. 613432 0. 816806 0. 65071 0. 962204 2. 56905 1. 144879 2. 166405 1. 347917 2. 103619  
1. 702815 2. 009944 2. 001719 2. 400576 1. 967406 2. 939353 1. 756934 1. 700321 2. 093029  
2. 888031 3. 88103 3. 631272 3. 571086 2. 986275 2. 74212 3. 783559 2. 875972 2. 763189  
4. 676257 3. 641186 4. 540026 2. 596111 2. 94001 3. 744971 5. 635459 3. 000629 3. 701091  
1. 720505 2. 036679 1. 974877 1. 425838 1. 406454 3. 11045 2. 998503 2. 685498 2. 147999  
6. 044432 5. 941185 5. 074676 5. 970959 6. 092049 5. 574356 5. 553406 5. 646493 6. 019812  
4. 760813 3. 663813 5. 683538 3. 293216 4. 477965 4. 900743 4. 659218 3. 824619 4. 180361



6. 546177 5. 90381 5. 340305 6. 231024 6. 099222 5. 852168 6. 072432 6. 519671 6. 430398  
0. 89007 1. 477578 1. 093107 1. 073075 0. 964342 1. 080976 1. 543322 1. 219766 1. 540081  
1. 195048 1. 215632 1. 1977 1. 364199 1. 970642 1. 175187 2. 263892 1. 159258 1. 348232  
1. 548878 1. 243655 1. 855587 1. 516191 2. 331248 1. 206819 1. 282314 1. 943141 1. 642698  
2. 403376 1. 970174 2. 207678 1. 946759 2. 383757 2. 506629 2. 646663 1. 983949 1. 89624  
3. 76457 1. 722006 2. 472664 2. 548555 2. 155695 2. 068913 3. 130906 3. 119832 1. 647122  
0. 554626 0. 906837 0. 954409 0. 541383 0. 956132 1. 316215 0. 674055 0. 880517 0. 642392  
8. 217563 8. 118392 7. 761104 8. 421505 8. 314033 8. 450835 7. 512407 8. 077159 8. 254412  
1. 544818 2. 038691 1. 804779 2. 424044 1. 420577 2. 048685 1. 431439 1. 784974 2. 667077  
2. 825913 1. 8715 1. 823282 2. 485906 1. 847193 1. 988615 2. 244862 1. 784488 2. 141169  
2. 924202 3. 846061 3. 750217 4. 372837 2. 637936 3. 782208 3. 36772 3. 564111 3. 220057  
2. 08896 1. 280083 0. 686874 1. 146483 0. 989603 1. 939741 2. 622777 2. 815413 0. 928625  
3. 610066 4. 97677 3. 817324 4. 613893 4. 585541 4. 587309 4. 529716 4. 455502 4. 437821  
1. 36271 1. 545831 0. 969222 1. 333868 2. 263844 1. 158222 1. 069149 1. 508965 1. 662122  
4. 874048 5. 298008 4. 459461 5. 158379 5. 74781 4. 925995 5. 42208 5. 451695 5. 065005  
2. 577673 1. 300606 2. 016536 1. 511415 3. 291966 1. 299821 2. 122976 1. 64162 2. 62917  
3. 0473 2. 038283 3. 1219 1. 599702 1. 455471 2. 930125 1. 959153 2. 15954 1. 809451  
1. 786746 1. 078812 1. 259375 1. 350492 1. 451358 1. 316984 1. 76991 0. 872367 1. 411372  
2. 01468 1. 875221 1. 636279 1. 803525 1. 932151 1. 370526 2. 12216 2. 215032 2. 066321  
1. 70599 1. 680378 1. 098013 1. 264786 1. 112562 1. 085361 1. 392543 1. 368378 1. 265181  
2. 630804 2. 341941 2. 367583 2. 95205 2. 0936 2. 905282 3. 821332 2. 23765 2. 622167  
1. 22408 0. 901129 1. 054061 1. 11253 1. 123165 1. 097419 1. 203338 1. 041316 0. 973405  
2. 468891 2. 323204 1. 984833 2. 322272 3. 522219 2. 287243 3. 047257 2. 377048 2. 320523  
3. 268107 5. 443634 3. 630966 3. 577826 4. 402202 3. 935641 2. 696087 4. 451881 3. 062803  
2. 171163 3. 049999 1. 67297 2. 354535 3. 006683 2. 364763 2. 348718 2. 014787 2. 016677  
1. 872763 5. 07435 2. 45353 0. 919931 4. 386885 1. 194505 2. 309944 1. 765062 3. 383962  
1. 251686 0. 976121 1. 25814 1. 175499 0. 985714 1. 085518 0. 787215 1. 371057 1. 114982  
2. 832524 2. 077677 2. 068195 1. 86043 3. 380248 2. 515878 2. 846433 2. 532621 2. 738384  
4. 182416 4. 477032 4. 290747 3. 601649 4. 159357 4. 418603 3. 746663 4. 584946 3. 97972  
1. 562132 0. 68668 4. 38841 1. 344893 2. 622065 1. 12759 1. 866689 0. 333216 4. 199936  
3. 10304 5. 094752 3. 626444 2. 667938 3. 766075 6. 415533 3. 566689 5. 73583 4. 389453  
1. 550225 1. 481333 1. 27198 1. 406843 1. 719784 1. 343986 1. 33257 1. 568181 1. 643152  
1. 484471 1. 785402 2. 623911 2. 093792 2. 495895 1. 824082 3. 116302 2. 656578 2. 143805  
1. 196255 0. 964313 1. 090596 0. 854706 1. 476583 1. 12151 0. 96894 1. 177716 0. 954136  
2. 552937 2. 159102 2. 387457 1. 969672 2. 180596 2. 410056 2. 214702 2. 281551 1. 839613  
1. 69652 1. 357867 1. 413294 1. 297188 1. 722497 2. 246511 3. 380475 1. 705366 1. 526931  
2. 077962 1. 597926 1. 69253 1. 84855 1. 504355 2. 257217 1. 384847 1. 947867 2. 20713  
2. 792286 4. 36201 3. 222073 3. 82154 3. 210313 3. 150952 2. 570444 3. 041955 2. 279687  
1. 616403 1. 087103 3. 026894 1. 797067 2. 450162 3. 002654 2. 147083 1. 965929 0. 976739  
2. 749477 1. 886442 1. 859267 2. 505576 2. 423272 2. 747462 2. 657782 3. 007265 2. 689672  
1. 457247 1. 174886 0. 930242 1. 143405 1. 384882 1. 018974 1. 656071 1. 200998 1. 118225  
5. 138628 5. 700642 4. 744627 5. 784642 5. 509449 6. 012665 4. 799625 5. 624744 5. 464588  
2. 319615 4. 13354 4. 397388 4. 567283 3. 615944 3. 611205 4. 024728 3. 515439 3. 868796  
2. 699438 1. 81982 2. 111131 2. 536662 2. 114039 1. 616738 2. 002026 2. 131988 3. 694836  
1. 428665 1. 386759 1. 11295 1. 466378 1. 718263 0. 650693 1. 928464 1. 977158 1. 373945  
3. 898121 3. 149547 3. 78398 2. 113876 3. 382799 1. 696486 2. 284005 3. 114117 4. 085767  
1. 155914 0. 9222 1. 117446 1. 496177 1. 329139 1. 578547 1. 122273 1. 219961 1. 441523  
1. 788889 1. 832291 1. 960528 1. 957301 1. 768838 2. 070663 1. 436482 1. 672217 1. 598113  
2. 306993 2. 202539 1. 721149 1. 818486 1. 260784 1. 503792 1. 821312 1. 405367 1. 755192  
5. 02959 5. 740371 5. 92048 5. 350562 6. 109888 5. 67966 5. 883022 5. 963941 6. 155151  
1. 386198 1. 385356 2. 491014 1. 236407 1. 283244 1. 27615 1. 699207 1. 240053 1. 003633

2.097344 1.801483 1.37878 1.636653 1.574135 1.471613 1.510604 1.562079 1.520003  
2.169613 2.611156 2.018063 1.724854 1.848795 2.013591 2.403303 1.684434 2.845124  
9.728183 9.34094 9.405345 9.035079 9.350581 8.907228 9.371503 9.146693 9.635424  
2.59074 2.128918 2.594328 3.300432 2.920807 2.687226 2.147415 2.442461 2.645632  
1.29268 1.300853 1.061961 1.648126 1.321803 1.084024 0.917056 1.08529 1.398131  
2.837521 3.653541 3.180689 3.984085 3.86798 3.389517 4.153447 2.543458 2.986344  
1.199013 1.53716 1.770017 1.867737 1.262037 1.628311 1.038766 1.837336 1.902076  
1.701752 1.970698 1.528627 2.128618 1.624029 2.138242 1.217704 1.726329 1.311934  
1.860067 1.923145 3.003542 1.659801 2.084895 1.44025 1.592822 1.958512 1.172524  
2.100234 2.195349 1.764316 1.972993 2.179912 2.214875 3.111344 1.781549 2.444318  
1.330139 1.416404 1.902826 1.307149 1.854062 1.200398 1.633042 1.382138 1.034465  
4.992114 4.991729 5.259678 4.404322 4.624852 4.346139 4.673004 4.363978 4.761469  
5.980531 6.325769 6.15089 6.235045 6.574134 6.192937 6.520256 6.746929 6.301011  
2.452044 0.938828 1.272844 2.502074 2.167484 2.141324 2.29205 2.009089 1.083403  
4.242852 3.796842 3.132038 4.396802 2.614289 4.647987 4.697332 3.885767 4.061224  
1.585454 1.695745 2.951663 1.486005 1.605704 2.555787 2.6632 2.786864 1.931012  
2.315206 1.927605 1.360559 1.079945 1.399868 2.121235 1.417531 1.757703 2.522202  
2.469447 1.325848 4.110886 2.130864 2.467879 2.028581 3.940071 1.6714 3.247541  
1.509404 0.755947 1.239626 1.363968 1.110458 1.192543 1.418929 1.474901 0.979265  
1.7571 1.933176 1.562141 1.934131 2.416132 1.713538 3.382065 1.95503 2.039663  
2.454421 2.94425 2.106198 2.459174 4.410553 3.785413 3.456323 2.993773 3.277675  
3.756289 4.236398 3.838553 3.860551 4.145868 3.743623 3.665416 4.369732 3.875873  
1.69775 1.350071 1.36653 1.482132 2.048046 1.691155 2.430769 1.39622 1.738161  
1.140503 3.538073 3.019069 2.226375 1.689204 2.031453 1.815588 2.856227 2.728558  
4.84895 3.297478 2.880876 2.938256 3.319968 3.060244 2.445634 2.667293 2.988034  
6.137233 5.561161 6.009526 5.209146 5.485277 5.231859 5.345739 4.458409 5.384243  
1.124967 1.81344 1.576375 1.362471 1.986392 2.26613 1.218995 1.685434 1.463188  
2.008664 2.784155 1.588261 1.95088 1.769537 1.954903 2.093117 2.736578 2.679752  
2.076484 1.872876 1.663333 1.913399 1.953719 1.799206 2.736907 2.462404 1.874364  
3.090699 4.458776 3.397441 4.645525 4.65118 3.92045 3.804669 2.713022 4.785415  
2.126719 2.133259 1.837324 3.072068 1.643736 1.519166 1.780686 1.737012 1.573073  
3.775324 3.358248 4.400675 3.871705 4.131799 4.21158 1.997392 4.80826 3.712081  
1.096542 1.199152 1.442781 1.903971 1.411289 1.704139 1.462397 1.413295 1.239034  
2.121934 2.191106 1.724003 1.755197 1.439335 2.186116 2.438312 1.7368 2.136285  
1.683051 1.854571 2.150344 1.893981 1.799275 1.997066 2.147897 2.133583 1.98463  
8.553373 7.413394 7.385243 6.720808 7.000301 6.283853 6.297788 7.255734 7.151093  
6.126707 5.703954 4.988441 5.140856 6.296185 5.000283 6.133226 5.207015 5.354678  
3.044844 1.749943 1.593507 1.982976 1.75412 2.138804 2.30337 2.645421 1.879046  
2.604617 3.830696 3.784682 2.25252 3.664761 2.57878 2.684476 2.745398 3.636561  
2.929522 1.282221 1.24388 1.946355 1.206045 1.971702 1.267264 1.548267 2.008687  
2.647533 4.625745 3.488327 2.326275 4.143734 3.455634 3.91293 4.355223 3.437896  
3.938854 1.936342 3.230706 3.229105 2.241725 2.601252 2.389789 2.278552 2.815709  
2.548025 1.364993 1.619381 2.431362 1.788995 1.60443 1.620352 1.708695 1.77795  
2.355598 3.071774 2.836252 1.901374 1.693629 2.295669 1.738479 1.686796 1.761272  
1.164985 1.363745 0.366211 1.768066 0.480516 0.587077 1.999662 1.740789 1.150439  
2.442932 1.907122 1.698491 2.207257 1.891659 2.094488 2.245823 1.452283 1.96669  
7.200787 5.870365 6.401108 4.940119 5.358705 3.737622 3.973522 6.031412 6.633061  
3.693873 5.205111 3.648982 4.281851 3.47581 5.068425 3.172467 3.124398 3.935238  
0.705217 2.399616 1.379897 1.222422 0.918352 2.264714 0.971121 1.554783 0.916095  
2.526564 2.509345 2.857357 2.450198 2.4265 2.063414 3.541314 2.236941 2.124531  
5.564567 5.241977 5.667638 5.580267 5.159579 5.448385 4.299092 4.839513 5.629435

1. 793615 0. 919017 0. 910566 1. 190379 1. 187421 1. 797058 1. 239782 1. 319737 1. 409608  
4. 77335 5. 307126 6. 205639 4. 504474 5. 130494 5. 727064 5. 437858 7. 632275 5. 693225  
2. 244013 4. 527629 3. 936159 4. 764489 4. 957003 4. 525869 3. 451933 3. 768109 4. 558445  
3. 17256 2. 477802 1. 73869 2. 661495 1. 876765 1. 871131 1. 505289 1. 913534 2. 030312  
3. 06588 2. 729024 2. 506093 2. 727897 2. 638596 3. 061672 3. 297578 2. 541459 2. 549259  
1. 823754 1. 646276 1. 707569 1. 50329 2. 290473 1. 814564 2. 011141 1. 849439 1. 791842  
1. 610668 1. 551722 1. 525826 1. 979524 2. 104325 1. 467244 2. 384581 1. 929625 1. 929625  
0. 841793 0. 891365 0. 990746 1. 245578 0. 911042 0. 963903 0. 87925 1. 332211 1. 143845  
3. 765531 4. 736275 5. 822026 3. 915465 4. 263095 3. 311869 2. 696634 4. 591943 3. 829386  
2. 587389 2. 187229 1. 6237 2. 246991 1. 802867 1. 394118 1. 616954 1. 746555 1. 123092  
6. 938896 7. 56874 7. 812894 7. 323292 7. 551502 7. 322235 7. 461781 7. 818392 7. 645396  
1. 795345 1. 777866 1. 556949 1. 707724 2. 037465 1. 325579 1. 771086 1. 57256 1. 154518  
3. 078693 1. 582009 2. 496305 2. 147596 1. 24185 1. 801813 2. 164402 1. 441539 1. 373612  
1. 332029 1. 011983 1. 034724 1. 391527 1. 199757 1. 797273 2. 804575 0. 738421 1. 252457  
2. 485366 1. 513445 1. 513106 2. 369038 1. 448772 1. 0731 2. 163313 1. 905253 1. 486635  
1. 358894 1. 4397 0. 58095 1. 478297 1. 074071 0. 651724 1. 843576 0. 981373 1. 287599  
6. 629529 8. 056676 7. 730808 8. 080107 7. 629662 8. 320265 8. 775908 8. 194678 7. 696472  
1. 820155 2. 06457 1. 301156 1. 9265 2. 066295 1. 493208 1. 615063 1. 395914 1. 494535  
4. 514099 2. 365865 1. 428367 2. 300837 1. 611819 1. 791844 2. 424525 3. 287701 2. 375775  
1. 402433 1. 79383 1. 229812 1. 799879 1. 16482 1. 353302 1. 840206 1. 717311 1. 096065  
2. 456449 2. 334644 1. 686979 1. 51973 2. 117376 2. 448034 2. 815721 2. 110875 2. 141046  
1. 720094 2. 136625 2. 728574 1. 904669 2. 515048 1. 655656 1. 801563 1. 743337 2. 865751  
7. 767953 5. 916968 6. 896804 7. 814199 6. 850914 6. 996261 7. 549284 6. 707579 6. 620612  
1. 405316 0. 966437 1. 712081 2. 340422 1. 348116 0. 906366 1. 268351 0. 969307 1. 235757  
10. 8677 10. 8706 10. 85723 10. 96691 10. 81609 10. 75617 10. 99035 10. 82446 10. 95656  
2. 168384 2. 566707 2. 231344 1. 986359 1. 995225 2. 272003 2. 978688 1. 98378 1. 984059  
1. 976431 3. 568943 2. 626762 2. 104259 1. 590846 1. 203722 1. 450229 5. 277378 2. 601618  
2. 238939 3. 193001 2. 22683 2. 708211 1. 28851 1. 839689 1. 013174 1. 903995 1. 881077  
1. 935754 1. 327878 2. 577873 1. 832826 1. 973444 1. 816923 2. 396682 2. 555758 1. 301533  
2. 136994 1. 838584 1. 640666 1. 773918 1. 807208 2. 401503 1. 554055 1. 818053 2. 267839  
2. 561133 1. 857264 1. 670388 1. 979748 2. 106937 1. 531259 2. 335095 1. 774582 1. 523636  
4. 278881 2. 998413 3. 129399 1. 986445 2. 814258 3. 40451 3. 851635 2. 035438 3. 188724  
2. 3663 1. 316262 1. 645668 1. 318256 1. 683574 1. 456248 1. 678368 1. 618157 1. 739794  
2. 120319 1. 080921 1. 939085 1. 052717 2. 085278 1. 781068 1. 540018 1. 717663 1. 24763  
7. 554208 7. 987357 7. 971076 8. 218327 8. 15587 8. 294118 8. 380442 8. 148298 8. 167196  
4. 839559 5. 375932 5. 060858 5. 754627 5. 445567 6. 146424 5. 42506 5. 140316 5. 070329  
5. 900128 6. 618851 6. 533699 6. 397357 6. 643956 6. 350593 5. 725128 6. 246529 6. 616601  
2. 738097 2. 068072 1. 310298 1. 903955 1. 863626 1. 397154 2. 032434 1. 805888 1. 805888  
7. 679821 7. 937062 7. 743265 7. 778059 7. 45913 8. 042916 7. 456371 7. 66839 7. 674872  
7. 008321 6. 284178 6. 066255 6. 252765 6. 495917 6. 508774 7. 446189 6. 739631 5. 524944  
1. 114024 1. 240785 1. 805598 1. 621136 1. 739861 1. 432471 3. 369499 0. 959666 1. 341203  
2. 126809 1. 32272 1. 207793 1. 172583 1. 849209 1. 695208 1. 450597 1. 394294 1. 83226  
6. 843527 7. 519296 7. 453139 6. 801531 6. 70982 6. 940825 7. 30787 7. 238928 7. 215125  
5. 79077 6. 253516 6. 236297 6. 371359 6. 354665 5. 938395 6. 174349 6. 440659 6. 034487  
3. 505979 4. 294077 4. 049478 3. 640327 3. 751946 4. 493412 3. 368629 3. 894713 4. 007607  
6. 197637 6. 798969 6. 805097 6. 620938 6. 056379 6. 519429 6. 142605 6. 52005 6. 872536  
6. 858009 7. 227658 6. 822421 7. 279467 6. 923614 7. 165208 6. 907798 6. 669032 7. 129426  
6. 671351 6. 958688 6. 720373 6. 704932 6. 761399 6. 933758 6. 190839 6. 855969 6. 931426  
7. 873907 7. 796192 7. 819023 8. 202354 7. 185075 8. 040184 7. 133777 8. 17131 8. 016895  
5. 766468 6. 013199 6. 080952 5. 957478 6. 023412 6. 069947 5. 624031 5. 60557 5. 697736  
1. 519559 1. 274444 0. 900712 0. 915948 1. 119019 1. 162108 1. 376619 0. 969179 1. 53383

4. 165762 4. 137534 4. 279103 3. 984612 3. 76907 3. 948999 4. 07239 3. 968613 3. 778335  
2. 83386 3. 160301 2. 351569 3. 604468 2. 128718 2. 195593 2. 867551 3. 119471 3. 409803  
5. 068224 6. 042893 6. 10114 5. 615979 5. 569273 6. 239073 5. 739773 6. 193541 5. 96652  
6. 204957 6. 735684 7. 107589 6. 459279 7. 158771 6. 814959 7. 069487 6. 481715 6. 715894  
2. 211108 2. 295891 2. 819133 2. 47569 2. 569116 2. 417914 2. 595975 2. 556353 2. 672795  
7. 710022 6. 7349 7. 428194 7. 280357 7. 463783 6. 962261 7. 626639 6. 928219 5. 815653  
6. 279566 6. 627865 6. 466575 6. 81504 7. 036551 7. 108012 6. 610362 7. 055956 6. 411769  
6. 629918 7. 07488 7. 0897 7. 233178 7. 690286 7. 390105 7. 631443 7. 074484 7. 097653  
7. 567285 8. 412746 6. 547677 8. 231437 8. 772964 7. 512449 9. 137617 9. 028772 8. 584979  
6. 656145 6. 171225 5. 474985 6. 070217 5. 44825 5. 790726 5. 74872 5. 797529 5. 423073  
7. 292292 2. 328181 3. 074889 1. 724965 2. 232567 2. 896359 4. 592067 5. 207456 3. 729834  
2. 813279 2. 243111 1. 987659 1. 364462 2. 727504 2. 475717 2. 530505 2. 458422 2. 467957  
4. 420593 4. 944474 5. 079595 4. 826452 4. 375263 4. 31893 4. 525651 4. 65549 4. 426676  
1. 635981 1. 656437 1. 251978 1. 740941 1. 665391 1. 629091 1. 502294 2. 051802 1. 341089  
2. 300773 5. 503685 4. 767266 5. 849905 5. 067997 5. 902471 5. 963529 4. 381008 4. 721416  
1. 987401 1. 424818 1. 659545 2. 44386 1. 624032 1. 054922 0. 988335 1. 616216 1. 398634  
7. 416554 8. 186926 7. 646036 7. 923832 6. 957452 7. 293378 7. 700329 7. 485361 7. 437798  
7. 149224 7. 28935 7. 608714 7. 458798 7. 55388 7. 297224 7. 55503 7. 496823 7. 079084  
5. 083947 5. 365794 5. 028163 5. 423912 5. 808343 5. 052874 5. 305922 6. 09713 5. 017388  
3. 149415 2. 483596 2. 496226 2. 828349 2. 775855 3. 099272 2. 341974 2. 846611 2. 727768  
6. 26574 7. 368987 7. 403258 7. 00642 7. 065372 7. 129518 6. 999972 7. 319704 7. 120208  
7. 817281 7. 018077 7. 56797 6. 904859 6. 919098 7. 308467 7. 183859 7. 441584 7. 297979  
1. 372328 1. 157876 1. 450083 1. 046526 1. 058508 1. 060168 1. 014252 1. 037131 1. 041427  
6. 850903 7. 45202 7. 57261 6. 824907 7. 072461 7. 135419 7. 091817 7. 288412 7. 456524  
1. 506775 0. 982839 1. 172636 1. 633686 1. 762844 1. 777842 0. 798793 1. 372342 0. 939246  
8. 525484 7. 543618 8. 412546 6. 696233 6. 93674 6. 44327 7. 659374 6. 782244 7. 030965  
2. 244699 3. 22694 2. 946197 1. 947017 1. 932819 2. 190728 2. 80795 2. 478265 2. 79994  
0. 225556 1. 11337 1. 012942 0. 800969 0. 469907 0. 582215 0. 669239 0. 572286 0. 758172  
0. 665305 1. 390676 0. 839081 0. 814014 1. 179584 0. 979265 2. 123213 1. 09688 1. 365202  
5. 557521 6. 387996 4. 085575 4. 111159 5. 256071 5. 346513 6. 19191 5. 694131 6. 812226  
11. 01281 8. 411591 9. 674197 8. 819681 9. 200848 8. 373738 9. 063294 7. 983048 7. 408336  
4. 326894 3. 388445 4. 027188 3. 579531 4. 116306 3. 951894 3. 810002 3. 818878 3. 68804  
4. 791476 5. 168494 5. 100024 4. 181609 5. 24544 5. 245831 5. 458511 4. 994366 5. 328997  
2. 749507 4. 202502 3. 11396 3. 234754 2. 848834 3. 215426 4. 767082 4. 138492 3. 291958  
6. 054379 6. 756302 6. 452568 5. 873168 6. 12576 6. 148624 5. 049114 6. 599659 6. 026107  
6. 411187 6. 795276 6. 82744 7. 561856 6. 426515 7. 437605 6. 864177 7. 111558 6. 709548  
6. 033771 5. 450722 4. 935438 5. 943654 5. 896183 6. 455178 5. 409657 6. 000482 5. 889186  
2. 576724 2. 563565 2. 42971 2. 473388 2. 247133 3. 253284 2. 445904 1. 999966 2. 587119  
3. 010418 2. 190494 1. 574692 2. 862958 2. 027598 2. 413772 1. 525122 2. 69372 1. 505951  
2. 252425 1. 531588 2. 184328 2. 000582 2. 07272 2. 068231 2. 441906 1. 851949 1. 720566  
3. 325908 3. 198635 3. 477669 3. 089989 3. 461844 2. 634158 3. 58094 3. 836174 3. 434478  
7. 44391 6. 758496 7. 083688 6. 650152 7. 180423 7. 156766 6. 820024 7. 089155 7. 422546  
7. 943878 8. 352768 8. 29577 8. 351554 8. 243826 8. 034238 8. 428802 8. 400707 8. 498813  
4. 123794 4. 114679 4. 665808 3. 558451 4. 667502 3. 605975 3. 845727 3. 852024 3. 047185  
7. 088764 6. 18574 6. 856889 6. 230133 6. 413849 5. 722019 6. 727208 6. 422489 6. 552232  
6. 094731 6. 593927 6. 656244 6. 456412 6. 97218 6. 610178 6. 781552 6. 64749 6. 563247  
3. 413807 3. 564526 4. 026548 4. 203133 4. 067067 4. 303654 4. 70935 3. 375303 3. 827983  
3. 906888 4. 037675 3. 841749 3. 142518 3. 415273 3. 650625 4. 157529 3. 845484 3. 784515  
4. 808506 4. 755998 4. 736531 5. 477985 3. 861465 4. 736118 4. 829699 4. 340461 4. 755874  
6. 256833 6. 550351 6. 424959 6. 402541 6. 63665 6. 995901 6. 965605 6. 695223 6. 739315  
5. 730115 6. 503678 6. 16476 6. 079948 6. 074656 6. 317499 6. 134663 6. 329733 5. 994269

2. 03533 1. 1239 1. 597455 1. 297428 1. 44395 1. 378854 1. 64274 1. 495419 1. 303213  
2. 625346 1. 403129 1. 25629 2. 337346 1. 250347 1. 444377 1. 74248 1. 455271 1. 693442  
8. 131703 8. 707039 8. 618141 8. 891538 8. 659921 8. 687487 8. 592818 8. 534873 8. 19875  
4. 690043 4. 961023 5. 449955 5. 223707 4. 81546 4. 76304 3. 761819 5. 352735 5. 143378  
4. 761329 5. 956561 5. 710177 5. 547177 2. 066406 5. 315189 4. 849307 5. 876799 1. 99588  
5. 978735 6. 379224 6. 501583 6. 685836 6. 498972 7. 382343 6. 571898 6. 882529 6. 749448  
3. 865223 3. 637724 4. 293738 3. 149655 3. 771931 3. 894983 3. 87245 3. 775928 4. 320602  
5. 677253 4. 259098 3. 895968 5. 252098 4. 970428 4. 630672 4. 960378 4. 045236 4. 889233  
2. 03522 3. 011741 2. 018118 2. 551004 1. 805421 1. 957654 2. 521922 1. 757723 2. 076595  
4. 203242 5. 079554 4. 717479 4. 858957 4. 498208 4. 229618 4. 388882 4. 582036 4. 721875  
5. 513753 6. 405164 5. 231404 5. 196165 6. 130857 5. 528885 4. 862636 6. 254199 5. 915321  
6. 242312 6. 461613 6. 112086 6. 225586 6. 478485 6. 016855 5. 714458 6. 389444 6. 499671  
6. 615797 7. 152907 7. 006586 6. 858884 7. 1075 7. 433374 8. 344648 8. 256208 7. 516188  
7. 587774 7. 31909 7. 600432 8. 046024 8. 004563 7. 530879 7. 826241 7. 788931 7. 761228  
6. 71149 7. 50819 7. 832874 7. 549528 8. 053608 7. 757024 7. 421648 7. 450903 7. 830702  
3. 57672 2. 843266 3. 167832 3. 31542 3. 019097 2. 058844 3. 031018 2. 256456 2. 283357  
3. 473671 3. 798068 3. 84168 2. 975057 3. 726105 4. 015725 3. 00502 3. 292357 3. 494508  
8. 147791 7. 542619 7. 813454 7. 636093 7. 388387 7. 330106 7. 526274 7. 477696 7. 787135  
3. 925043 3. 234094 3. 807251 3. 581548 2. 476437 4. 001062 4. 044556 3. 435974 3. 423391  
5. 208269 3. 794392 4. 672357 4. 943759 3. 679827 3. 224014 3. 534125 3. 54461 5. 677622  
9. 174688 9. 765139 9. 431971 9. 6258 9. 737542 9. 809171 9. 009769 9. 93967 9. 456996  
5. 517557 5. 295254 5. 070717 6. 176762 4. 589153 5. 964638 5. 347207 4. 953399 5. 850939  
4. 431807 5. 603864 5. 841332 7. 318204 5. 697796 5. 802953 6. 075253 5. 912415 6. 066146  
2. 940021 3. 364992 2. 780598 2. 90803 2. 4307 2. 6813 2. 585072 2. 817596 2. 584514  
2. 218815 2. 975266 3. 545045 2. 970472 2. 417678 3. 168927 3. 291364 3. 92539 3. 521812  
4. 190177 2. 668182 3. 557456 2. 700406 3. 484622 2. 263196 3. 419393 2. 92721 4. 192844  
8. 773091 8. 665855 8. 849491 8. 503717 8. 557506 9. 021503 8. 665614 8. 925603 9. 131352  
9. 35339 9. 784025 9. 612041 9. 880876 9. 649773 9. 754529 10. 02183 9. 848119 9. 821025  
1. 596718 1. 698791 1. 266888 1. 584539 1. 30952 1. 42245 1. 412703 1. 699402 1. 632124  
5. 555482 4. 710752 5. 892375 5. 579358 6. 213357 5. 431625 3. 97785 5. 146764 5. 189873  
2. 743288 2. 143646 1. 775834 1. 883581 2. 284648 2. 407889 2. 620876 2. 238711 1. 974595  
5. 924339 6. 281493 4. 9939 5. 323676 6. 158137 5. 307913 5. 258714 6. 279704 5. 67244  
2. 517769 2. 026865 1. 650115 2. 001285 2. 57828 1. 692666 1. 611457 2. 051583 2. 070894  
1. 568737 1. 360128 1. 83494 1. 452405 2. 004971 2. 106428 2. 29846 1. 524696 2. 268709  
1. 603313 1. 749384 1. 514733 1. 982536 1. 822998 1. 67821 2. 181833 2. 124839 1. 518195  
4. 907168 5. 631465 5. 751759 5. 237749 4. 995586 5. 31964 5. 523803 5. 111462 4. 256981  
3. 34299 3. 960842 5. 072377 3. 795515 3. 927933 4. 4901 4. 103226 4. 668736 3. 956296  
2. 151945 2. 349339 1. 923049 2. 085645 2. 158255 2. 527301 2. 638049 2. 439545 1. 769769  
2. 56495 2. 259032 2. 737205 2. 547103 2. 32157 2. 506584 2. 630096 3. 416268 3. 595222  
3. 045577 3. 9406 2. 773503 3. 936127 3. 616761 3. 841047 3. 7519 2. 902971 3. 554056  
2. 197457 2. 624096 2. 535718 2. 045137 2. 186344 2. 505312 2. 792974 2. 113074 2. 765725  
7. 901367 7. 857309 8. 097281 8. 618825 7. 844866 8. 658621 8. 09177 7. 352931 7. 79728  
3. 162507 3. 07731 3. 65428 2. 611212 3. 42495 5. 195114 4. 236869 4. 15117 3. 321023  
1. 785105 2. 127426 1. 518703 1. 886662 1. 82494 2. 437104 1. 709977 1. 40059 2. 080583  
6. 176547 6. 019495 5. 862617 6. 739911 6. 455554 6. 38328 6. 073175 6. 594237 6. 456732  
6. 48177 6. 586452 6. 522315 6. 309698 5. 764271 6. 313839 5. 695128 6. 176318 6. 286217  
3. 521388 2. 801696 4. 377168 2. 774929 3. 463395 4. 196367 4. 985646 3. 489032 3. 282225  
4. 111451 4. 297853 4. 129981 4. 523085 4. 005976 3. 445923 5. 090919 3. 914026 4. 582475  
3. 656979 2. 799059 2. 365406 2. 471832 2. 756852 2. 259524 3. 065991 2. 783975 2. 760162  
2. 201229 3. 087951 4. 217422 2. 189373 2. 069353 3. 500645 2. 118431 2. 525158 3. 361218  
5. 087774 6. 617118 6. 272961 6. 781193 6. 809205 6. 364371 5. 842793 6. 040466 6. 285917

5. 369527 5. 986578 6. 091983 6. 476111 6. 502093 6. 599254 6. 485064 6. 675335 6. 367555  
3. 983256 3. 876119 4. 510319 4. 20892 4. 099763 4. 559688 3. 962192 4. 393089 3. 148283  
5. 08986 5. 701795 5. 923239 5. 376291 6. 205216 6. 504915 5. 260094 4. 852122 5. 545083  
10. 02578 10. 07892 10. 21516 10. 16436 9. 88605 10. 05464 10. 17451 9. 989661 10. 00673  
2. 494099 3. 023284 2. 347122 2. 927361 2. 83775 2. 552038 2. 782637 2. 949991 2. 970581  
1. 402297 1. 514943 1. 305591 2. 125185 1. 489682 1. 402201 2. 528038 1. 892975 1. 229677  
3. 336839 4. 335363 5. 126102 2. 73684 5. 451842 4. 479085 3. 75362 5. 23073 3. 40202  
3. 730004 3. 481869 3. 483422 3. 390496 3. 222606 4. 194101 2. 794388 3. 140883 3. 481621  
2. 667322 2. 01921 2. 97421 2. 477512 2. 264856 2. 340189 1. 38317 1. 972326 2. 50472  
2. 019409 1. 445908 1. 909156 3. 078134 1. 288876 2. 060499 2. 758919 1. 812376 2. 308782  
1. 853039 2. 860177 2. 12708 2. 243177 1. 519639 1. 783753 2. 392855 1. 680691 2. 162911  
2. 092179 2. 368012 1. 616549 1. 820735 1. 54209 1. 76436 1. 624826 1. 495053 1. 798594  
3. 86358 4. 737911 3. 790821 3. 252637 5. 061864 3. 525001 3. 543269 3. 121849 2. 788671  
3. 099273 2. 137772 3. 221596 3. 226673 4. 028997 2. 827832 3. 448466 2. 292148 3. 165555  
2. 885973 2. 052274 2. 482737 2. 198425 2. 533834 1. 862576 2. 271565 2. 875538 1. 981131  
3. 164485 2. 655319 2. 734617 3. 151795 2. 673679 3. 341109 2. 926524 2. 514882 3. 005129  
2. 875794 2. 712342 2. 579958 2. 836746 3. 126729 2. 989601 3. 527211 2. 640037 2. 903332  
2. 579242 2. 591371 2. 90836 3. 239703 2. 917155 2. 777522 3. 299957 3. 411359 3. 090517  
3. 167556 2. 86601 2. 143411 2. 731015 1. 93059 2. 93664 2. 799303 2. 212926 2. 177469  
5. 795288 6. 627248 6. 204381 6. 511159 6. 848012 6. 380439 6. 151999 6. 358844 6. 56811  
4. 975288 5. 420151 5. 348971 4. 853778 5. 509732 4. 923741 4. 871233 4. 484137 5. 20471  
9. 72119 10. 26942 10. 49656 9. 960472 9. 868889 10. 56844 9. 166417 10. 48994 10. 05186  
7. 097863 6. 659415 7. 01148 6. 121565 6. 979724 7. 589194 6. 901962 7. 450763 6. 907225  
1. 801711 1. 741575 2. 034435 1. 562269 2. 10105 2. 132728 1. 778254 1. 668558 1. 26069  
2. 433398 3. 428561 2. 684909 5. 331159 3. 03086 3. 035686 3. 105998 4. 138817 3. 023876  
2. 11453 1. 530537 1. 489793 1. 963455 7. 620024 1. 533845 1. 869296 2. 192852 6. 511267  
2. 152847 3. 278868 1. 769399 2. 916087 2. 159461 1. 708944 1. 584886 2. 151109 2. 265938  
3. 808475 4. 363007 4. 720953 4. 417364 4. 577933 4. 539804 4. 501354 4. 506735 3. 831638  
6. 181922 5. 954966 6. 034762 5. 982243 6. 486465 6. 394042 5. 733159 6. 16251 6. 09762  
2. 480814 1. 259225 1. 906618 2. 119659 2. 178023 1. 913581 1. 856425 1. 687651 1. 258103  
2. 433043 2. 583589 3. 337576 2. 62343 3. 462099 2. 424897 2. 841651 2. 328681 2. 627803  
5. 446617 5. 950996 5. 916421 6. 149578 6. 014759 5. 793332 5. 712064 5. 700238 6. 050986  
8. 532235 5. 978413 7. 15292 6. 001225 6. 735021 4. 948332 6. 297214 6. 454099 7. 940323  
6. 333404 6. 716766 6. 487323 6. 767563 6. 719614 6. 690896 6. 501858 6. 892925 6. 71891  
5. 743548 5. 9814 5. 734084 5. 878822 6. 216907 6. 20319 5. 904592 6. 564417 5. 672478  
1. 670038 1. 579299 1. 55079 1. 777633 1. 54486 1. 235279 1. 466653 2. 089699 1. 469319  
2. 849611 2. 377549 2. 128848 3. 12633 2. 073665 1. 892439 3. 06636 2. 768245 2. 013817  
1. 672209 1. 035862 1. 017297 1. 962397 2. 07994 1. 857118 1. 273005 0. 849464 1. 762501  
3. 915845 4. 248176 3. 863669 3. 195155 4. 124926 3. 741917 2. 8277 4. 853066 4. 288275  
4. 261956 3. 623985 2. 606087 3. 721428 4. 282321 3. 392939 3. 826797 2. 978305 4. 258349  
8. 760218 9. 078316 8. 944932 9. 141646 9. 061136 9. 133979 9. 179764 9. 030864 9. 101203  
7. 479897 7. 962578 7. 496373 7. 698301 8. 132678 7. 585509 7. 578076 7. 867196 7. 682157  
6. 765478 7. 162925 6. 684805 6. 706753 6. 60458 7. 068039 6. 350238 6. 627311 6. 433923  
8. 876612 8. 560558 8. 8314 9. 142376 9. 211932 9. 229725 8. 856675 9. 165024 8. 976181  
2. 699669 3. 522354 3. 128735 3. 614518 4. 118297 4. 24109 3. 990287 3. 691319 2. 159278  
9. 24184 9. 11691 9. 186691 8. 659263 9. 139038 9. 384819 9. 104823 9. 105138 9. 138931  
7. 905907 7. 754256 7. 410776 7. 909373 7. 97695 8. 040221 7. 665132 7. 979251 8. 179742  
9. 200564 9. 829307 9. 583832 9. 831242 10. 00159 10. 26687 9. 456287 9. 84379 9. 405253  
4. 117331 3. 410373 4. 324132 3. 586249 4. 20308 4. 273 3. 232569 4. 352591 4. 404942  
2. 983619 2. 829151 2. 492994 2. 388046 3. 058659 2. 387784 3. 060831 2. 852382 2. 835584  
7. 573367 7. 323743 7. 473125 7. 132698 6. 989822 8. 059366 6. 99774 7. 496516 7. 08678

7. 960971 8. 073766 7. 803051 8. 144329 8. 008802 8. 165118 7. 103697 7. 619923 7. 875765  
3. 653615 4. 920734 3. 337244 4. 718147 3. 084278 4. 792869 2. 708272 3. 74922 4. 046534  
2. 713525 3. 793829 2. 837413 3. 116966 3. 075302 3. 426282 2. 504442 3. 284234 3. 21508  
4. 646417 4. 722002 4. 77353 4. 584105 4. 52922 4. 190156 4. 654271 5. 191554 4. 895142  
5. 736434 6. 216932 6. 588567 6. 380619 5. 426346 5. 788154 5. 323652 5. 882087 5. 862425  
4. 929108 5. 566862 5. 127223 5. 612294 5. 490806 5. 211946 5. 446658 5. 132153 5. 410038  
4. 342382 4. 873667 3. 497214 4. 466245 2. 898682 4. 157988 3. 309806 4. 622608 1. 912498  
1. 960694 2. 623266 2. 232255 3. 44961 1. 586835 2. 15885 1. 307791 1. 722365 2. 186793  
2. 781925 1. 82038 1. 92623 1. 9415 1. 918611 1. 847134 1. 911735 1. 617234 1. 579869  
2. 390123 1. 62644 1. 58173 1. 96888 1. 4699 1. 650823 1. 468262 1. 523675 1. 985508  
2. 548204 3. 528574 3. 463431 3. 674582 2. 974454 3. 770926 2. 488209 2. 465142 3. 109009  
8. 00007 7. 644758 8. 581578 8. 771434 8. 500395 8. 278366 8. 335078 8. 320334 8. 718954  
4. 865187 5. 27841 5. 377291 5. 784667 4. 818323 5. 536989 4. 545609 5. 488216 4. 807688  
3. 381349 3. 687 2. 735897 3. 748199 3. 794647 3. 387511 2. 401779 2. 777187 3. 478145  
3. 627429 3. 625648 4. 298874 5. 165158 3. 989081 4. 059503 3. 887849 4. 35475 4. 029192  
3. 622078 3. 984152 4. 115634 4. 437773 4. 658705 4. 826936 3. 157468 3. 826686 4. 18567  
9. 147192 9. 142857 9. 227328 9. 328218 9. 100605 8. 884583 8. 901734 9. 337538 8. 955109  
2. 671252 3. 246084 3. 912213 2. 851936 2. 622568 3. 662845 3. 712122 4. 197033 2. 966036  
5. 231379 5. 866449 5. 417155 4. 261799 4. 940487 5. 209667 4. 078895 5. 341894 4. 856288  
5. 181246 5. 165275 5. 330648 5. 27413 4. 739479 4. 891363 4. 975831 5. 889247 4. 944449  
3. 423563 5. 104182 3. 521942 6. 230119 5. 441563 4. 796916 3. 410367 3. 960462 3. 68689  
2. 733561 2. 144258 1. 876795 2. 55898 2. 313459 2. 486591 2. 826775 1. 92286 3. 098431  
4. 137728 3. 174055 4. 107233 3. 643811 4. 25111 3. 588553 3. 06032 4. 515814 4. 555563  
2. 317322 2. 379471 2. 797045 2. 791784 1. 474514 2. 670933 2. 486108 2. 244631 2. 393967  
2. 295759 3. 075527 3. 794572 2. 277493 2. 350618 3. 177429 2. 118943 2. 676481 3. 289816  
2. 937631 2. 355389 2. 986308 3. 317164 2. 986447 3. 34114 3. 186861 2. 594664 3. 2732  
4. 64921 5. 408109 5. 431214 4. 601859 5. 495608 5. 020468 4. 336515 4. 0277 5. 704238  
4. 284105 4. 542778 5. 321441 5. 326383 4. 815689 5. 655507 4. 996537 5. 687229 4. 745243  
1. 535367 1. 695739 1. 987635 1. 254606 2. 650039 2. 011831 2. 251158 2. 317517 2. 012084  
6. 133982 6. 604134 6. 251399 5. 797254 6. 219031 5. 826268 6. 209906 6. 530652 6. 460549  
2. 437836 3. 173424 2. 432235 2. 793408 2. 634012 3. 139184 2. 686016 2. 188511 2. 604958  
3. 830314 2. 899824 2. 547683 3. 717962 2. 699047 2. 787904 4. 6753 2. 371994 2. 65402  
6. 550023 6. 680294 6. 413488 6. 148841 6. 413941 6. 054867 5. 821671 6. 525048 5. 773228  
5. 102219 5. 679484 5. 112018 4. 189582 5. 536896 5. 780255 5. 570149 4. 680063 5. 473281  
5. 250215 5. 760598 5. 952281 5. 434036 5. 780185 6. 007264 6. 123474 5. 88933 5. 264035  
5. 743608 5. 21999 5. 358534 4. 503792 5. 188545 4. 517405 5. 449085 6. 455115 6. 021359  
2. 414433 3. 578707 4. 025268 4. 303461 3. 393677 4. 002207 4. 669346 3. 769347 3. 92975  
7. 005479 6. 850124 6. 714234 6. 668451 7. 349728 7. 180375 6. 667752 6. 893652 6. 991214  
4. 058568 3. 581711 3. 987068 3. 713896 3. 679127 3. 93264 3. 940817 4. 440199 4. 15125  
4. 393884 4. 224621 5. 020128 4. 406389 4. 167444 4. 365526 3. 771295 4. 926243 4. 420819  
2. 20219 1. 487553 2. 020423 1. 612567 1. 609217 2. 043558 1. 641567 1. 637857 1. 057234  
3. 695672 3. 003464 2. 575194 2. 906701 3. 013131 2. 977424 2. 673342 2. 838304 2. 849869  
1. 813005 1. 94097 2. 270536 2. 278982 1. 958195 2. 913634 2. 457192 3. 110615 2. 929366  
3. 420523 5. 35059 3. 925945 4. 106075 4. 555246 3. 967763 4. 437085 3. 907359 4. 046951  
3. 823383 4. 056685 3. 36128 3. 435436 3. 684997 3. 174429 3. 256131 3. 667004 3. 352286  
4. 731804 4. 80118 4. 608931 4. 796537 5. 261416 5. 64565 5. 1567 5. 957379 5. 260699  
1. 628148 1. 5521 0. 97036 1. 879287 1. 154311 0. 709328 2. 119183 1. 093311 1. 272404  
8. 30691 7. 63055 7. 952662 6. 750478 8. 061455 7. 632323 7. 134894 7. 337598 8. 632288  
2. 589604 1. 476301 1. 912003 2. 638883 2. 087767 2. 618274 2. 107687 1. 516888 1. 738694  
2. 900215 2. 110876 2. 838938 2. 95495 1. 678043 2. 535119 2. 825608 2. 445271 2. 222452  
3. 843071 3. 657991 4. 191083 3. 84781 3. 446832 4. 659037 3. 323278 4. 460544 3. 716995

|          |          |          |          |          |          |          |          |          |
|----------|----------|----------|----------|----------|----------|----------|----------|----------|
| 2.85355  | 2.193118 | 2.620322 | 2.575338 | 2.359973 | 2.630613 | 2.368703 | 2.745191 | 2.534375 |
| 2.141755 | 2.613526 | 2.09304  | 2.911127 | 2.381292 | 3.126551 | 2.177258 | 3.512253 | 2.68193  |
| 3.948106 | 5.582998 | 5.646769 | 5.645522 | 6.757109 | 5.323005 | 5.220366 | 5.724927 | 5.328906 |
| 4.119719 | 5.084238 | 3.661782 | 4.984363 | 3.533306 | 4.5673   | 3.94741  | 4.630722 | 4.231583 |
| 4.610677 | 3.664927 | 4.825224 | 4.534287 | 5.935058 | 3.195474 | 5.639853 | 5.649301 | 5.604144 |
| 2.844077 | 3.157059 | 2.556906 | 2.612978 | 3.610137 | 4.491403 | 2.438526 | 2.612653 | 3.20113  |
| 1.500885 | 1.558366 | 1.64998  | 1.490796 | 1.811203 | 1.573012 | 1.568619 | 2.232857 | 1.915715 |
| 3.676375 | 3.928001 | 4.29233  | 3.97604  | 3.455428 | 4.130058 | 3.492798 | 3.911213 | 3.498026 |
| 1.766515 | 2.616945 | 1.959152 | 2.154497 | 1.778637 | 1.81186  | 1.652392 | 2.052944 | 1.874317 |
| 3.850001 | 4.794397 | 4.792304 | 4.574268 | 4.591648 | 5.079684 | 4.06054  | 5.371602 | 4.1563   |
| 2.077345 | 0.957135 | 1.543867 | 1.28577  | 0.571541 | 1.095841 | 1.125869 | 1.449542 | 1.13857  |
| 3.245096 | 1.904135 | 2.061476 | 1.999188 | 1.748017 | 2.276795 | 3.404881 | 2.218191 | 2.00674  |
| 5.291095 | 4.108115 | 5.038001 | 4.678126 | 4.577443 | 4.338534 | 4.788332 | 3.385326 | 4.817064 |
| 1.711293 | 1.030895 | 1.274879 | 1.288132 | 1.957591 | 1.063873 | 0.667231 | 0.996513 | 0.764126 |
| 1.77986  | 1.359101 | 1.197161 | 1.421808 | 1.417648 | 1.425831 | 1.426682 | 1.119224 | 1.573009 |
| 2.119397 | 1.878695 | 2.131837 | 1.200556 | 1.503839 | 0.967003 | 1.763324 | 1.528625 | 1.324631 |
| 2.414356 | 4.469036 | 2.068346 | 2.622952 | 1.013175 | 2.282132 | 2.677386 | 1.493046 | 1.642664 |
| 0.889296 | 1.407989 | 0.745444 | 1.121918 | 0.652928 | 0.720132 | 0.609197 | 1.312099 | 0.878675 |
| 0.800106 | 0.564946 | 0.84233  | 1.100141 | 0.796306 | 0.93898  | 0.657216 | 0.637857 | 1.062111 |
| 2.725127 | 1.790671 | 1.972316 | 1.023391 | 0.797103 | 1.526991 | 1.19901  | 2.576615 | 1.092931 |
| 1.320658 | 1.198093 | 0.785986 | 0.852132 | 0.858314 | 1.253419 | 1.101341 | 1.487265 | 1.1463   |
| 1.584907 | 1.414133 | 1.323783 | 1.52317  | 1.455506 | 1.233174 | 2.028688 | 1.031571 | 1.388621 |
| 0.57392  | 0.561551 | 0.413303 | 0.447742 | 0.471835 | 0.734704 | 0.882827 | 0.557426 | 0.802105 |
| 1.574521 | 1.251334 | 1.429134 | 1.520047 | 1.493567 | 1.368999 | 2.190331 | 1.199246 | 1.473503 |
| 1.932    | 1.153455 | 0.714023 | 1.022121 | 0.759072 | 2.079081 | 2.681389 | 1.305161 | 1.131123 |
| 1.523599 | 1.50526  | 1.731501 | 0.669827 | 2.073723 | 2.26669  | 0.671876 | 0.801278 | 2.771682 |
| 1.157532 | 1.022038 | 0.731467 | 0.773718 | 1.200077 | 2.095637 | 0.773702 | 3.621388 | 1.415661 |
| 0.762091 | 0.828774 | 0.758933 | 1.95811  | 1.298381 | 0.977621 | 1.365606 | 1.705211 | 1.543938 |
| 0.766025 | 1.464558 | 1.305461 | 2.30804  | 1.102884 | 1.667004 | 1.17592  | 2.571561 | 1.058623 |
| 1.295317 | 0.781419 | 0.997125 | 1.170229 | 1.430093 | 1.160761 | 1.608686 | 0.780933 | 1.192271 |
| 1.212668 | 2.00973  | 0.646254 | 1.015331 | 0.7604   | 0.781652 | 1.047787 | 0.765243 | 0.888515 |
| 1.151879 | 1.232371 | 1.324516 | 0.7317   | 1.009969 | 1.500232 | 1.351839 | 0.777149 | 0.914461 |
| 1.092003 | 1.078906 | 0.533338 | 1.376704 | 0.694695 | 0.937483 | 1.221894 | 0.487287 | 1.875074 |
| 1.674185 | 0.94278  | 0.391404 | 0.707263 | 0.735982 | 0.675958 | 1.512826 | 0.714708 | 0.740735 |
| 0.843985 | 0.919836 | 0.745441 | 1.177143 | 0.99703  | 0.941661 | 0.869455 | 1.018674 | 1.048361 |
| 0.919072 | 0.88631  | 0.872461 | 1.355639 | 1.469794 | 1.564295 | 0.772621 | 0.770606 | 1.831211 |
| 1.216086 | 1.62712  | 0.557868 | 1.471624 | 0.833728 | 1.540699 | 1.252354 | 1.112615 | 3.058146 |
| 0.974671 | 0.584635 | 1.480388 | 1.284314 | 0.873634 | 0.777433 | 0.84327  | 1.25192  | 1.378352 |
| 0.978917 | 0.977763 | 1.188103 | 1.02818  | 1.311394 | 1.084847 | 0.606064 | 0.714716 | 1.900138 |
| 1.962311 | 1.424751 | 1.680666 | 1.327568 | 1.618405 | 1.138862 | 1.75253  | 1.991823 | 2.237243 |
| 1.226696 | 0.76069  | 1.197051 | 1.016404 | 1.75296  | 1.608599 | 1.081553 | 0.923399 | 1.357685 |
| 0.876388 | 0.937076 | 1.658168 | 1.770601 | 1.709353 | 1.209553 | 1.250285 | 1.509129 | 1.587751 |
| 1.266258 | 1.550662 | 2.7305   | 1.615495 | 1.83747  | 1.733313 | 1.001173 | 1.066093 | 1.054023 |
| 0.731219 | 1.096153 | 0.782784 | 0.969424 | 1.028158 | 1.123469 | 1.044749 | 1.244783 | 0.952439 |
| 0.841309 | 0.788834 | 0.884687 | 0.94415  | 0.799635 | 1.265311 | 1.588237 | 1.25905  | 0.725171 |
| 1.150103 | 0.937559 | 1.556797 | 1.119824 | 0.87648  | 0.987378 | 1.083986 | 1.345812 | 0.496263 |
| 2.020271 | 2.689544 | 1.908469 | 1.225146 | 1.206717 | 1.232041 | 0.737072 | 2.131047 | 1.388806 |
| 5.129755 | 6.193356 | 6.004165 | 5.705491 | 5.789126 | 6.357106 | 5.913697 | 6.12186  | 5.538052 |
| 0.930915 | 2.541226 | 0.754444 | 1.038801 | 0.770191 | 1.264256 | 1.967376 | 1.206165 | 1.017756 |
| 0.648991 | 0.76544  | 0.6971   | 1.423148 | 0.842896 | 1.093934 | 0.690548 | 1.001975 | 1.059219 |
| 0.714607 | 1.678453 | 1.049332 | 1.128001 | 0.620016 | 1.356337 | 1.665561 | 0.883772 | 1.381401 |



0. 721247 1. 357826 0. 779361 0. 859028 1. 276613 2. 074045 0. 491204 0. 930182 1. 292032  
0. 560278 1. 501693 1. 552923 0. 858157 0. 741545 1. 797627 1. 15262 1. 15677 0. 812148  
3. 218033 2. 960553 3. 630115 2. 942711 2. 884804 2. 916051 3. 03258 3. 699962 2. 399113  
1. 398631 1. 099923 1. 507902 1. 004306 0. 892599 1. 716676 1. 030948 1. 003013 1. 030965  
0. 722501 1. 412785 0. 636224 1. 060982 0. 489574 1. 17144 0. 881874 0. 664826 1. 152366  
1. 442665 1. 559174 1. 188182 1. 630681 1. 740818 1. 410516 1. 2242 0. 918431 1. 248804  
1. 071324 0. 856799 0. 707265 0. 696661 0. 856549 0. 613316 1. 981207 0. 880762 0. 911569  
0. 931099 1. 670677 1. 953943 1. 662405 1. 440356 1. 854408 1. 14833 1. 381634 1. 422057  
5. 646716 5. 3858 5. 609085 6. 1489 5. 396492 5. 562222 5. 016439 5. 629726 4. 454552  
4. 137155 4. 756728 3. 502811 3. 673659 5. 269315 3. 747884 4. 133329 3. 277378 3. 756508  
1. 718058 1. 601723 1. 698292 2. 010923 1. 715219 2. 095164 2. 717588 1. 922086 1. 637674  
1. 800112 2. 091311 1. 685478 2. 186181 1. 762013 1. 554745 2. 015649 1. 950029 2. 037878  
2. 105957 1. 242258 1. 44729 0. 902798 1. 154602 2. 065125 1. 872473 1. 677377 1. 312471  
3. 217327 1. 899126 2. 395676 2. 502626 2. 530877 2. 786554 2. 817656 2. 998265 3. 598105  
5. 929054 5. 890742 5. 794537 5. 559919 5. 604931 5. 669545 5. 717088 6. 050169 6. 034802  
2. 631708 2. 218524 2. 616138 2. 128143 3. 007587 3. 351692 2. 96298 2. 003017 1. 982621  
2. 088848 1. 694673 1. 337508 1. 109649 3. 139576 2. 077683 1. 766677 1. 241821 1. 178237  
1. 717123 1. 436042 1. 078181 1. 39105 1. 133513 1. 653368 2. 304646 1. 842396 1. 467493  
1. 29391 1. 589522 1. 103897 1. 331402 1. 360126 1. 83451 1. 318944 1. 127741 1. 496952  
1. 706928 2. 257957 1. 846664 2. 262195 1. 596452 2. 003156 2. 424547 1. 967803 1. 926792  
1. 931113 1. 162981 2. 045769 2. 292151 1. 899728 0. 787191 2. 330429 1. 255441 1. 10732  
0. 983992 1. 174189 1. 059408 1. 327374 0. 961892 1. 132478 1. 632412 1. 653732 1. 03276  
2. 213686 1. 712678 4. 590743 1. 36715 3. 189097 1. 582869 2. 525141 2. 706812 2. 112511  
2. 621075 2. 671034 2. 257342 1. 972274 2. 241552 2. 220005 2. 652702 2. 52864 2. 170115  
2. 765424 1. 754884 1. 930085 2. 873146 2. 845687 2. 987532 2. 211098 2. 421112 0. 961247  
3. 004447 1. 822101 2. 054711 2. 32118 2. 196048 1. 932573 2. 384877 1. 593534 2. 207328  
4. 618553 5. 556359 5. 425611 5. 147072 5. 285294 5. 496937 4. 484606 5. 054288 5. 115698  
3. 522712 3. 270514 3. 993052 4. 015317 4. 346152 4. 145709 3. 275927 3. 421268 3. 880585  
2. 698233 2. 066845 2. 016844 2. 184257 1. 426915 2. 255624 1. 537035 2. 169211 1. 436863  
5. 45941 4. 930983 4. 793587 4. 663315 5. 298044 3. 33954 4. 106405 4. 776839 3. 898524  
4. 556688 5. 212818 4. 430941 4. 594952 4. 38123 4. 676149 4. 30149 4. 995435 4. 4166  
4. 831587 5. 845944 5. 66826 5. 026456 5. 42132 5. 877522 5. 807007 5. 463723 4. 994761  
1. 51125 2. 300024 1. 722489 1. 762163 2. 13114 2. 696852 2. 715381 3. 570133 1. 918049  
2. 178323 1. 476366 3. 322802 1. 187381 2. 836009 2. 1101 1. 555615 1. 900532 2. 97477  
4. 167214 3. 679205 3. 131067 4. 414158 2. 855971 4. 166807 2. 382733 2. 863941 3. 936309  
2. 571592 4. 26118 3. 512754 3. 222873 2. 836725 2. 456635 4. 045599 3. 796782 1. 827524  
4. 37793 4. 881454 4. 724715 5. 637945 4. 931385 5. 32407 4. 829028 5. 56349 5. 163225  
3. 978886 4. 629877 5. 181923 4. 457705 5. 894833 5. 532125 4. 566526 4. 915576 4. 610117  
7. 707396 7. 388311 7. 991415 7. 777731 8. 00468 7. 372486 6. 472653 7. 406202 8. 085349  
3. 669541 5. 81852 4. 916974 4. 932532 4. 931672 5. 601696 3. 702924 5. 816981 5. 551473  
3. 984361 5. 560795 5. 295716 5. 283892 5. 082633 5. 115986 4. 266185 4. 657668 4. 938765  
6. 775661 6. 940695 6. 888666 7. 393942 7. 663773 7. 469642 7. 010661 7. 216166 7. 083345  
6. 878461 7. 3004 7. 078629 7. 200587 7. 506415 7. 08629 6. 951894 7. 309896 7. 14515  
5. 363765 4. 77867 4. 460802 4. 181872 4. 287998 4. 66509 4. 32222 5. 053269 4. 509972  
7. 40217 7. 307494 7. 046452 6. 985665 7. 621474 8. 044089 6. 762813 8. 150576 7. 501783  
3. 037212 4. 509586 3. 713299 4. 353988 4. 938403 4. 748547 3. 171288 3. 773529 3. 506777  
2. 317156 2. 575616 2. 750764 3. 474992 2. 121359 2. 803034 1. 879821 2. 596755 2. 422365  
2. 210522 1. 515091 2. 56044 2. 511559 2. 637623 2. 121029 2. 918251 1. 530159 2. 047185  
7. 71348 7. 817362 8. 060967 7. 573629 7. 633775 7. 871932 7. 586415 7. 692343 7. 56547  
2. 583172 3. 065279 2. 581769 2. 336608 1. 869865 2. 426843 2. 022847 2. 538968 2. 292761  
7. 873319 6. 319129 7. 300176 7. 057279 6. 342987 5. 916307 6. 919987 6. 807586 7. 758851

5. 006346 4. 975744 4. 018133 4. 623811 3. 898018 4. 692554 4. 122364 5. 19523 4. 668618  
5. 02876 4. 920628 5. 145936 5. 257828 4. 570684 4. 746323 4. 758323 5. 103918 4. 863169  
5. 241423 5. 436326 4. 541073 3. 731706 4. 609137 4. 855926 4. 029833 5. 092145 4. 462155  
2. 744825 2. 432412 2. 066763 3. 03866 2. 624897 2. 265132 2. 732171 2. 546314 2. 66334  
3. 597236 4. 321356 4. 706534 3. 415636 4. 219747 4. 960214 3. 362613 4. 348106 4. 651229  
4. 969515 4. 700216 3. 444199 5. 200108 4. 768771 4. 715294 4. 75722 4. 23152 5. 103909  
4. 196395 4. 294289 3. 753512 4. 373342 4. 678145 3. 918478 3. 864944 4. 297491 4. 458773  
4. 961666 6. 30051 6. 705027 5. 6542 6. 197721 6. 32671 5. 936942 5. 697754 6. 249772  
1. 58545 1. 525706 1. 279094 1. 323692 1. 70864 1. 628308 1. 319571 1. 471086 1. 646305  
4. 767076 4. 969942 4. 696248 3. 711342 5. 244518 5. 38528 4. 33987 5. 090888 4. 623595  
4. 579448 4. 183179 4. 757082 4. 549259 4. 115585 4. 378533 3. 527152 4. 408975 3. 520182  
3. 882461 4. 64391 4. 278206 4. 330811 5. 043361 4. 354343 4. 149788 4. 526293 4. 640379  
3. 021949 3. 623321 2. 959763 3. 721962 3. 164208 2. 875194 3. 626323 3. 559905 2. 074837  
3. 333733 3. 017942 2. 441907 2. 387346 3. 51702 2. 066131 2. 832484 2. 686093 1. 899537  
1. 537267 2. 005489 1. 95281 1. 212257 1. 823105 1. 722231 1. 578221 1. 720047 1. 605744  
6. 722825 7. 558487 7. 410805 7. 161508 7. 30159 7. 076449 7. 003303 7. 448174 6. 695055  
4. 145415 3. 634351 4. 072013 3. 314274 5. 102712 4. 052327 3. 476162 3. 73804 3. 787797  
3. 785343 3. 460664 3. 165938 2. 784936 3. 08416 3. 095951 2. 551984 3. 104892 3. 800335  
3. 901548 4. 994105 4. 683922 4. 229031 5. 373942 5. 468163 3. 412043 3. 779114 4. 573192  
3. 267162 3. 333581 3. 519187 3. 157696 3. 200528 3. 216508 3. 70744 2. 971222 3. 200528  
6. 649088 7. 817558 7. 946025 7. 692902 7. 974143 7. 601664 7. 53325 7. 820115 7. 675115  
2. 66533 2. 342313 1. 66266 2. 522989 2. 444744 1. 394925 2. 420103 1. 753016 1. 844637  
3. 227494 2. 758228 3. 132348 4. 186591 3. 447536 3. 154988 3. 514769 3. 293626 3. 33219  
3. 85043 2. 629349 2. 987865 2. 567886 3. 269468 2. 797938 3. 103045 3. 150922 3. 24025  
1. 976283 3. 534273 3. 169947 2. 692568 2. 558043 3. 152716 2. 061128 3. 800659 2. 207367  
2. 122808 1. 922702 1. 943184 1. 819987 2. 120505 2. 563506 2. 614641 3. 021218 2. 57108  
6. 91928 7. 487816 6. 865574 6. 763727 6. 903329 6. 881452 6. 617233 7. 610683 6. 710131  
5. 370478 5. 325085 5. 432904 4. 802916 4. 976384 4. 739062 4. 462011 5. 112232 4. 986461  
2. 062381 3. 442712 2. 594704 3. 199095 2. 193284 1. 892941 2. 046539 2. 211572 2. 611059  
2. 422999 2. 664978 2. 997878 1. 387033 2. 289316 3. 461859 1. 855962 4. 047732 1. 952746  
1. 82578 2. 428157 1. 641998 1. 771 2. 720623 2. 752448 1. 978152 1. 795606 1. 78804  
3. 810211 4. 361255 4. 368474 3. 83962 4. 474298 3. 490612 4. 459173 4. 271394 3. 637086  
2. 767113 1. 432509 1. 967631 1. 848333 1. 548769 1. 694718 1. 593526 1. 964797 1. 724415  
5. 19328 4. 966889 4. 552206 5. 279714 4. 663153 5. 594844 5. 211223 5. 187902 4. 72284  
4. 549089 4. 309506 4. 458487 4. 188715 5. 250257 3. 418526 4. 425937 4. 827537 3. 471208  
1. 814114 2. 973573 1. 866754 1. 536152 3. 593617 1. 584916 1. 78977 2. 317703 2. 66178  
1. 875968 2. 386971 2. 860126 2. 396884 2. 876767 2. 345002 2. 486542 5. 022071 2. 634069  
3. 786563 5. 32544 3. 86681 4. 635462 4. 282304 3. 875687 3. 572427 4. 240933 2. 878328  
4. 126601 4. 568653 5. 016216 4. 514559 4. 04708 5. 238858 4. 34567 3. 291748 3. 917968  
6. 751347 6. 745667 6. 204513 6. 959378 6. 477895 6. 825421 6. 310154 7. 13257 6. 535121  
1. 82811 1. 546445 1. 62107 1. 213362 1. 800958 1. 532328 1. 305249 1. 550306 1. 52994  
3. 221836 2. 263582 2. 226669 1. 790949 2. 446054 2. 731659 2. 258132 1. 945634 4. 397703  
2. 026023 1. 703973 1. 652151 1. 453785 1. 290652 1. 357796 2. 087354 2. 092681 1. 479718  
5. 411925 5. 446456 5. 076345 4. 437844 5. 507365 4. 974551 4. 53892 4. 657517 5. 018294  
1. 374654 1. 272086 1. 881814 1. 407003 1. 840161 1. 394854 1. 440677 1. 030284 1. 298571  
2. 831437 2. 102868 2. 089744 1. 638116 2. 949957 2. 737821 2. 690211 2. 30144 2. 48136  
4. 662889 4. 666695 5. 51733 5. 202783 5. 025942 5. 887229 4. 319361 5. 315723 4. 784509  
4. 437535 5. 340036 5. 696993 5. 399665 5. 464262 4. 902348 4. 71832 6. 016376 4. 469002  
2. 202622 1. 755117 1. 774027 1. 75065 1. 696025 1. 609475 2. 113972 1. 510591 1. 898813  
5. 437223 6. 269005 6. 292184 7. 451164 6. 811741 7. 277437 6. 880587 6. 849188 6. 717241  
4. 835772 7. 156013 6. 853298 7. 444952 7. 21852 7. 295569 6. 740799 5. 916886 6. 640975

3. 941585 3. 987909 4. 453665 4. 699555 4. 551755 4. 945336 4. 057101 4. 718273 4. 431791  
2. 899063 3. 76888 1. 869323 3. 144521 2. 461529 3. 596425 3. 316352 2. 549435 2. 441893  
6. 147038 5. 601688 5. 984138 5. 831403 5. 759892 6. 127733 5. 647628 6. 349276 6. 327043  
6. 765743 6. 185661 5. 480176 6. 219182 6. 486146 5. 838763 5. 406672 6. 43131 6. 601387  
3. 75932 4. 06214 2. 969646 3. 146333 4. 831938 3. 708037 3. 4734 3. 801782 3. 719556  
7. 340424 7. 529743 7. 508188 8. 251456 7. 863051 7. 812256 8. 591413 6. 959544 8. 113349  
1. 680845 2. 072655 1. 563372 2. 40705 1. 769214 1. 950744 1. 769585 1. 709118 1. 702671  
6. 643577 3. 011536 5. 467432 5. 050793 1. 724532 5. 406824 6. 241546 1. 910203 3. 87556  
1. 095498 0. 84241 1. 33564 1. 260638 1. 036318 0. 879804 1. 001007 1. 082284 1. 194336  
3. 044049 2. 833088 1. 724871 1. 293032 1. 297621 1. 337725 1. 595225 2. 23691 2. 466035  
4. 407823 4. 237801 5. 162554 5. 211197 4. 925335 4. 971102 4. 521069 4. 925455 4. 925402  
9. 618622 10. 04111 9. 613301 9. 784192 9. 890829 9. 745905 9. 763438 9. 723501 9. 828373  
7. 479603 7. 061423 6. 957005 7. 67161 7. 153473 7. 110594 7. 250737 7. 159852 7. 381599  
6. 758534 6. 701128 6. 579647 6. 743846 6. 673908 6. 621355 7. 010143 6. 795989 6. 961253  
5. 430165 5. 405566 5. 728611 5. 344969 5. 53427 5. 640981 5. 825548 5. 673244 5. 580179  
10. 82058 11. 36972 11. 20952 11. 31503 11. 3338 11. 35723 11. 19176 11. 35783 11. 32596  
4. 029508 3. 876735 3. 764927 3. 644272 3. 64701 3. 910928 4. 547748 3. 624985 4. 050376  
6. 804791 7. 842213 7. 730066 7. 231116 7. 654937 7. 477363 6. 661145 7. 792787 7. 643477  
5. 009044 5. 315843 5. 027087 6. 990182 6. 064555 6. 546141 6. 914576 6. 115891 6. 911899  
4. 858787 5. 907206 5. 319476 5. 097006 5. 768681 5. 291143 4. 90823 6. 210704 5. 391193  
4. 513142 6. 423612 5. 638346 6. 02739 5. 919847 4. 774651 5. 99956 5. 79916 5. 572441  
3. 212079 3. 76579 4. 014044 3. 158534 3. 600299 3. 204989 3. 440845 3. 369373 4. 224263  
5. 340373 4. 875431 5. 287155 4. 96506 4. 969174 5. 056974 4. 971072 5. 22114 4. 983992  
4. 535701 4. 782312 4. 563553 4. 796039 4. 782878 4. 681031 4. 920721 4. 764774 4. 822933  
7. 041457 6. 552977 7. 222324 5. 856087 6. 458812 7. 213497 6. 697396 7. 359668 7. 590134  
3. 903825 3. 65464 3. 984219 4. 143099 3. 464832 3. 59949 4. 434642 3. 998771 3. 186439  
3. 064974 2. 440218 2. 46125 2. 472231 2. 151359 2. 195098 2. 617538 1. 767858 2. 085332  
3. 786675 4. 144428 4. 993888 3. 599189 4. 026092 3. 380535 4. 338818 4. 058328 5. 329565  
5. 605043 5. 336543 4. 433023 6. 152591 5. 968387 6. 209485 6. 342393 5. 887617 5. 691553  
4. 326526 3. 644071 4. 215018 4. 062373 3. 610109 3. 853203 3. 33629 3. 939825 4. 21448  
2. 313813 1. 434563 1. 161163 2. 12474 1. 489437 1. 357821 1. 931167 1. 862864 1. 812395  
1. 85376 1. 244852 2. 285332 1. 232022 1. 74745 1. 104325 1. 657822 1. 225345 1. 763128  
5. 376535 4. 644334 4. 744072 3. 578892 4. 741027 5. 29757 3. 65823 4. 019481 4. 566147  
3. 214355 3. 860533 2. 906532 3. 699214 2. 727979 3. 995382 2. 219734 3. 241405 3. 761647  
5. 044247 5. 096973 5. 664968 5. 221736 5. 406718 5. 235663 4. 665441 4. 542451 5. 180689  
6. 866945 7. 190026 6. 751254 7. 019778 6. 879034 6. 785034 6. 613318 7. 527966 7. 593372  
2. 149446 1. 683741 1. 877006 1. 812539 2. 026778 1. 726255 2. 321275 1. 91972 1. 945772  
6. 274885 7. 057563 7. 071985 6. 875833 6. 939536 6. 580447 6. 90219 7. 125485 6. 731358  
8. 159472 7. 965913 7. 475149 8. 069462 8. 056159 7. 636726 8. 382572 8. 953231 8. 046398  
7. 204694 7. 660488 7. 473554 7. 611192 7. 634956 7. 518023 7. 179598 7. 637139 7. 497282  
9. 447063 9. 63241 9. 382738 9. 590869 9. 569717 9. 293247 9. 260261 9. 515279 9. 60832  
2. 098634 2. 017418 2. 957468 2. 955449 2. 284989 1. 597902 2. 725203 2. 655918 2. 416341  
6. 785862 7. 659864 7. 303862 7. 444415 6. 831647 6. 894606 6. 787914 7. 081974 7. 27794  
5. 121999 4. 393449 4. 824474 4. 685482 5. 225161 4. 57396 3. 618637 4. 9447 5. 358454  
3. 372572 2. 415306 3. 170056 2. 738955 2. 5906 3. 663543 2. 30711 2. 645608 2. 703091  
5. 736524 5. 126633 5. 758463 5. 742573 6. 236721 5. 119579 5. 431736 6. 551885 6. 086374  
6. 402488 6. 737495 6. 7094 6. 354086 6. 491384 6. 785785 7. 031799 6. 567945 6. 682404  
3. 208752 2. 583362 3. 715622 3. 304667 3. 140343 2. 433094 2. 793776 2. 993211 3. 442731  
2. 163971 2. 807346 2. 923398 3. 438883 2. 83226 3. 433699 2. 117015 2. 323401 2. 431668  
4. 881285 5. 182108 4. 609654 5. 112454 4. 271591 4. 855875 4. 626504 4. 553232 4. 143684  
7. 115011 6. 735583 7. 28764 6. 490418 7. 301572 7. 410665 7. 086226 7. 063343 7. 239545

7. 292533 7. 1644 6. 87646 6. 897656 7. 134795 6. 969844 6. 687352 6. 951486 6. 718756  
2. 484296 2. 765404 2. 221183 2. 102322 2. 519674 2. 057506 2. 26156 2. 12575 2. 344985  
6. 108481 6. 019152 6. 058428 6. 478345 6. 105158 6. 82631 5. 460705 6. 343387 6. 223962  
2. 49547 1. 974904 1. 900307 2. 727282 2. 518978 1. 509601 2. 061599 1. 886104 1. 601943  
2. 537118 3. 888571 3. 615723 3. 656686 2. 352698 3. 16816 2. 602312 2. 409142 3. 308679  
4. 417584 5. 053172 5. 943294 4. 489564 4. 983445 4. 980097 4. 852078 4. 96724 4. 972458  
2. 788642 3. 45631 4. 072733 2. 658982 3. 612332 3. 252699 3. 555716 3. 220802 3. 806753  
8. 176332 8. 576771 8. 509085 8. 156792 8. 224256 8. 041027 8. 155218 8. 478797 8. 167555  
8. 63494 8. 806977 8. 738367 8. 821008 9. 036099 8. 969966 8. 906736 8. 784129 8. 830324  
5. 369339 6. 830189 6. 22205 5. 737208 5. 650681 6. 731229 5. 939531 6. 448743 6. 284347  
6. 338974 6. 319336 5. 5366 5. 867601 6. 515322 5. 733158 6. 591276 6. 749583 6. 336545  
3. 878905 4. 934862 5. 036861 4. 704158 5. 608085 2. 83312 4. 815905 5. 136599 4. 662722  
7. 79744 7. 549694 7. 956009 7. 312434 6. 864445 7. 774102 8. 230167 7. 314132 7. 711885  
2. 716788 1. 89111 2. 763581 2. 308599 2. 031327 2. 746164 2. 055 2. 262838 2. 831345  
5. 662397 6. 586264 6. 748215 6. 117638 6. 861465 6. 882002 6. 039159 6. 735679 6. 243855  
1. 65587 1. 40568 1. 540526 1. 977185 1. 574313 1. 173093 1. 289074 1. 932936 1. 609368  
0. 858784 1. 025715 1. 012798 1. 140383 0. 652343 0. 782284 1. 699785 0. 794993 1. 700723  
6. 429779 7. 652922 8. 029412 7. 846129 7. 992499 7. 860991 7. 856304 8. 065437 7. 99725  
5. 740771 6. 285018 6. 295744 5. 379285 5. 4467 6. 053973 5. 609486 5. 647843 6. 011987  
4. 162431 3. 941986 4. 733212 4. 285566 4. 277684 4. 795974 3. 398499 4. 858034 4. 363141  
3. 124407 2. 350323 2. 6702 3. 6865 2. 280614 2. 902048 3. 241682 2. 579871 2. 655893  
4. 120488 5. 230436 5. 110246 5. 131969 5. 559937 6. 099536 4. 881287 5. 217203 5. 6922  
6. 354125 6. 551029 5. 843917 6. 263766 6. 667799 6. 342596 6. 009943 6. 820965 6. 682166  
5. 54415 5. 995318 6. 051369 6. 25342 5. 550201 6. 010779 4. 635211 6. 649082 5. 86113  
4. 595019 2. 508073 3. 50994 2. 38163 1. 766563 2. 460853 3. 796972 1. 932939 1. 808493  
2. 172751 2. 045445 2. 195856 1. 829494 2. 497062 2. 68883 2. 126755 2. 106417 2. 946024  
7. 301085 7. 565484 7. 478168 7. 938649 7. 845613 7. 817627 7. 900341 7. 760013 7. 147937  
2. 779436 3. 732556 3. 884348 4. 02772 4. 532407 4. 125553 3. 534014 4. 054288 3. 565328  
3. 550636 3. 979959 3. 090402 3. 4364 3. 273072 4. 567993 3. 977542 3. 492635 3. 735796  
4. 549315 5. 7872 6. 401712 6. 048302 5. 628767 5. 854257 5. 083177 6. 50927 6. 063735  
6. 442921 5. 586313 5. 38366 6. 521059 5. 636529 5. 592605 5. 859579 5. 821347 5. 79009  
6. 041887 6. 286623 6. 309707 6. 810553 6. 0773 6. 592479 6. 841457 5. 705524 6. 607121  
5. 807092 6. 392809 6. 070977 6. 532428 5. 892192 6. 608958 6. 244281 5. 888303 5. 824908  
3. 055192 3. 0247 2. 81172 2. 643284 3. 206133 2. 897395 2. 321647 3. 395541 3. 07037  
5. 623967 6. 054056 5. 894086 5. 617769 5. 396671 6. 231866 5. 380422 5. 461168 5. 83859  
5. 239291 5. 104789 4. 954602 5. 538202 5. 612033 5. 647948 5. 517715 5. 729282 5. 690711  
3. 484268 4. 31347 4. 239338 4. 71566 3. 810211 4. 535773 4. 581927 4. 400345 3. 933036  
2. 823587 3. 273441 3. 013107 2. 551309 2. 998482 3. 634088 4. 69304 4. 944646 4. 240332  
4. 397681 4. 434747 4. 690273 4. 311645 5. 1148 4. 545133 4. 263757 4. 187703 4. 08746  
3. 15156 3. 226034 3. 870439 3. 98769 2. 675401 3. 905484 4. 07315 3. 413841 3. 316002  
5. 283804 6. 437155 6. 31456 6. 097891 6. 09082 5. 976825 6. 2105 6. 650505 6. 405376  
5. 275606 3. 914334 4. 456056 4. 221138 4. 382863 4. 6569 3. 659407 4. 690508 4. 20672  
6. 200699 6. 086741 6. 472549 6. 707593 6. 90451 6. 823708 6. 892411 7. 071518 6. 751673  
1. 234148 1. 173295 1. 750794 1. 004563 0. 861017 1. 467664 1. 183105 1. 256977 1. 008303  
4. 158655 4. 584197 4. 992417 4. 715273 4. 999462 4. 983441 3. 631857 4. 66991 4. 55752  
2. 525921 1. 278651 1. 862976 2. 006326 2. 209717 1. 881508 2. 30283 1. 29668 1. 531919  
5. 174456 3. 604252 3. 735892 3. 957268 4. 264647 3. 751358 4. 670718 3. 796669 4. 291649  
8. 851449 9. 583944 9. 714814 9. 558363 9. 781678 9. 886744 9. 236825 9. 867778 9. 558359  
6. 83488 6. 783051 6. 87743 6. 377802 6. 566938 6. 986883 6. 733703 6. 520943 7. 062998  
7. 694059 6. 697751 6. 181906 6. 674801 7. 43737 6. 801 6. 687744 6. 617101 7. 325233  
4. 88079 4. 048076 4. 629679 4. 513795 4. 325159 4. 529943 2. 950151 4. 689462 4. 367454

7. 557188 7. 943543 8. 378742 7. 993188 7. 946381 7. 984654 7. 709284 7. 924102 8. 137246  
3. 338902 4. 502784 4. 998001 4. 882448 4. 673223 4. 780786 4. 731397 5. 558969 4. 592698  
3. 333223 3. 249362 4. 483294 4. 448866 4. 977991 4. 464922 3. 628441 3. 506607 3. 52556  
4. 518728 3. 863897 3. 68221 3. 760493 4. 330023 4. 022947 3. 432686 3. 341764 3. 173616  
7. 908739 7. 89371 8. 019813 8. 15928 7. 868006 8. 063878 7. 842577 7. 414696 7. 696879  
5. 301907 5. 058926 4. 66628 5. 270557 5. 394838 5. 368423 4. 920311 4. 630352 4. 302675  
1. 795912 1. 792733 1. 459332 1. 824274 1. 731717 1. 773421 1. 698242 1. 64234 2. 038281  
6. 173028 5. 824209 6. 07983 5. 628177 6. 417602 5. 587862 6. 008408 6. 098501 5. 348782  
3. 894546 5. 483165 5. 335389 5. 6941 5. 50476 5. 478681 5. 752252 5. 506646 5. 517491  
3. 897307 4. 515808 4. 133077 3. 769202 4. 155716 4. 289037 4. 179937 4. 39607 4. 053316  
4. 317849 3. 548085 3. 978213 3. 031556 3. 943932 2. 578562 3. 665052 4. 316277 2. 979094  
2. 284415 3. 148619 3. 029378 3. 109726 2. 166632 1. 822216 2. 635358 3. 183246 2. 482354  
4. 851017 4. 554123 3. 552824 4. 117607 4. 570364 4. 435236 4. 284466 4. 173532 4. 700502  
5. 684676 5. 264582 5. 632523 5. 114213 5. 159725 6. 301909 5. 272639 4. 978299 5. 458927  
5. 242032 4. 81692 4. 744621 4. 986864 5. 044336 5. 020234 4. 467624 4. 476213 5. 14278  
5. 589438 5. 75698 5. 483872 5. 97626 5. 226473 5. 435126 4. 768133 5. 572877 5. 815559  
5. 245292 5. 648313 5. 443013 5. 725724 6. 308786 4. 251572 5. 424428 5. 497374 6. 228407  
4. 947394 5. 835917 5. 344918 5. 231053 5. 297464 5. 291755 5. 498119 4. 681919 5. 489438  
6. 184266 5. 235331 5. 678651 4. 867073 5. 847871 4. 386345 5. 77404 5. 184778 6. 005675  
3. 790976 4. 858133 4. 644571 4. 843477 5. 023061 5. 312179 5. 250054 4. 408619 4. 419691  
2. 372388 1. 868155 2. 10646 1. 759428 2. 54801 2. 01967 2. 188536 2. 014718 2. 829821  
2. 852206 4. 059793 3. 276166 4. 061375 1. 999566 3. 535166 3. 564634 2. 423931 2. 55096  
2. 531927 1. 819769 2. 051128 2. 500871 2. 297081 1. 579171 2. 220034 2. 233335 1. 987673  
4. 586767 4. 443209 4. 515594 3. 532042 3. 773218 3. 352844 3. 439591 3. 466736 4. 073792  
5. 639969 6. 100686 6. 104619 6. 573853 6. 158398 6. 659922 6. 912964 6. 882175 6. 563752  
4. 930775 5. 986586 5. 699201 6. 068604 4. 898919 5. 526158 4. 968006 5. 716755 5. 579799  
2. 339811 1. 178686 1. 989781 2. 010953 1. 366718 1. 43191 2. 146361 2. 230816 2. 015556  
3. 741107 2. 106922 2. 046805 2. 131367 2. 499386 2. 643375 1. 828344 2. 366795 2. 075278  
3. 291761 3. 128135 3. 465207 3. 197441 3. 725797 3. 70616 3. 539827 3. 930811 3. 670824  
1. 851178 1. 540072 1. 624917 1. 575554 1. 646925 2. 325765 2. 008227 1. 554503 1. 941873  
6. 331099 6. 358674 6. 278867 6. 258998 5. 981543 5. 147669 5. 991215 5. 726993 5. 817834  
6. 50136 6. 170626 5. 849584 6. 214945 6. 313283 6. 558017 5. 654043 6. 260456 6. 343406  
2. 005068 2. 346302 2. 523875 3. 611807 1. 610732 1. 235773 2. 568995 1. 917768 1. 35384  
7. 550231 8. 13844 8. 162982 7. 747713 8. 159164 7. 565863 7. 959081 8. 032989 8. 271372  
1. 39726 1. 662439 0. 705979 1. 388015 1. 196466 0. 941688 1. 439522 0. 992307 0. 623678  
2. 70414 2. 84794 3. 226342 3. 234022 3. 650413 4. 037624 3. 541888 4. 350918 2. 833477  
2. 017647 3. 053095 2. 50996 2. 782971 3. 602687 2. 765565 2. 651078 3. 376461 2. 920655  
3. 521425 3. 15304 3. 791649 3. 427355 3. 821756 3. 793055 3. 478723 3. 796369 3. 358308  
4. 717331 5. 738861 5. 801091 5. 110247 5. 71585 4. 941069 4. 819042 6. 409801 6. 310464  
3. 094898 2. 810678 3. 239033 2. 79158 2. 190369 2. 637271 2. 130659 2. 094244 2. 495016  
5. 478285 5. 874901 5. 164972 5. 234474 6. 517329 6. 311491 5. 165072 5. 166644 5. 437951  
8. 275573 6. 969794 6. 750066 7. 502862 7. 459601 7. 180456 7. 271784 7. 126214 7. 440696  
7. 301908 7. 898361 7. 963219 7. 728347 7. 883119 7. 626436 7. 758861 7. 733895 7. 662364  
3. 267 3. 781203 3. 745438 4. 205889 3. 750925 3. 189939 4. 579466 4. 04771 3. 188302  
5. 26791 4. 865095 4. 53124 5. 098258 4. 932936 4. 699554 4. 98033 5. 200331 5. 092228  
4. 918492 4. 816 4. 648628 5. 467028 4. 655271 5. 554852 5. 966234 5. 346439 5. 59235  
10. 38826 10. 27867 10. 20711 10. 15731 9. 707881 10. 36481 10. 26854 10. 95922 10. 28964  
6. 514581 6. 150844 6. 616665 6. 455878 6. 388941 5. 794165 6. 613116 5. 239676 5. 497281  
5. 452835 5. 206792 4. 222971 5. 352633 5. 174428 5. 379103 4. 474661 4. 802698 4. 393682  
3. 338846 5. 257938 4. 752398 5. 371204 3. 546227 4. 009914 4. 024958 4. 277335 4. 959587  
1. 447115 1. 46814 1. 820879 2. 175905 2. 242276 1. 844571 3. 012349 2. 972113 2. 014907

2.785327 2.41463 2.169852 2.382588 2.272823 2.367995 2.547794 2.350644 1.922128  
6.818383 4.177794 3.892971 3.517901 3.291323 2.762634 4.361989 2.893515 4.441438  
4.758765 4.098003 3.794781 4.450772 4.06219 4.388161 3.163034 3.794075 4.411324  
6.675754 6.311601 6.662989 6.705308 6.746893 6.63824 6.283394 6.231156 6.190815  
3.626179 2.4736 3.17222 3.305397 2.327367 2.819848 2.609393 2.208951 2.455258  
4.292115 4.383767 3.74633 5.000695 5.345026 3.981928 4.134623 4.614554 4.054544  
7.833254 8.176356 7.710399 8.15985 8.429213 8.001276 8.053047 8.13069 8.334113  
4.453215 5.273487 6.003679 5.691146 5.779719 4.754299 6.086268 5.433571 5.537403  
5.239806 3.865491 4.406014 4.246055 4.613533 3.671697 3.634229 4.624852 4.553112  
4.374102 6.226721 5.932188 5.906749 5.947325 5.899721 6.536883 6.652747 5.008012  
4.68553 5.953532 5.786185 6.134963 6.814398 6.412878 6.456797 7.118298 6.194431  
1.185009 2.90339 1.470918 1.860197 3.442862 1.730165 1.602354 1.085502 2.469256  
4.758716 4.746016 4.556925 4.405829 4.590306 4.102366 4.546483 4.708838 4.26803  
7.669503 7.801829 7.844193 7.904247 7.774002 8.236415 7.364877 7.990394 7.708784  
2.920608 2.003558 5.024211 1.579675 3.851555 2.735674 2.27654 3.031227 3.194101  
4.754087 4.884806 4.17394 5.256195 5.155263 5.213849 4.899363 5.675612 5.426506  
3.242553 3.905299 3.877533 4.691878 4.486489 3.883009 3.474966 3.527791 5.268848  
2.506361 3.276836 3.613636 2.898201 2.486988 2.583412 3.15187 2.378884 2.594383  
3.557877 4.460675 4.262019 4.678932 5.398261 4.945384 4.529717 5.17517 4.142757  
3.222857 3.155056 2.89579 2.56899 3.432141 4.875527 3.458282 3.253186 4.03764  
2.554071 2.340164 2.53823 2.078602 2.500697 2.240363 2.395212 2.45194 2.248268  
3.663295 4.304104 3.646476 3.835523 4.271652 3.618749 4.560011 3.973093 4.075002  
4.386514 4.73639 4.778425 4.073106 5.027938 4.47948 3.731586 5.227398 4.154908  
6.80698 6.819256 7.335506 7.089297 6.93018 7.564778 7.073329 7.302612 7.065606  
5.549984 5.574024 5.794917 6.464194 6.447628 5.783579 5.312705 5.343937 5.820301  
3.207858 4.139969 3.788255 2.790188 4.948043 3.236487 3.436994 4.743403 4.638865  
5.802083 5.634112 6.247522 5.015746 5.682736 4.796909 4.261605 4.77261 5.273751  
2.318881 1.772496 2.084193 2.361622 1.775658 2.28068 3.111734 2.304317 2.116895  
6.30748 6.47935 6.514062 6.780341 6.951449 6.664722 6.1217 6.765399 6.63788  
3.562609 3.261449 2.965298 2.871787 2.605021 3.391957 3.4532 2.888632 3.096096  
3.180774 1.882236 2.191016 2.241069 1.305149 2.273308 3.066988 1.010008 2.000549  
3.971644 3.078993 3.769446 4.228701 4.036136 3.243433 4.171651 3.63414 3.98358  
3.913928 2.284061 2.713563 3.991554 3.057097 2.528388 3.535468 3.273916 2.421358  
1.103896 1.609488 1.010397 1.811576 2.02528 1.222296 2.376571 1.176007 1.600236  
5.130584 4.773744 4.954294 4.796626 4.431615 5.553744 4.713955 4.925683 4.993009  
5.050971 3.883643 3.835356 3.51914 5.446676 4.49591 3.759723 4.910404 3.736964  
5.589836 5.887803 5.23663 6.426946 6.478777 6.318408 4.873753 5.666574 6.195061  
3.263426 4.468436 3.848611 3.579089 4.193284 4.526559 2.848046 4.068756 3.535868  
6.78264 6.028777 5.980539 5.448811 5.593926 5.380524 5.811698 5.852122 6.204714  
3.245431 3.169366 2.473047 2.716096 3.313397 3.000592 2.74437 3.311923 3.069067  
5.16947 6.049339 6.266145 5.843385 5.8662 5.817488 5.904876 5.518042 5.961762  
1.958037 1.452384 1.532826 1.399429 1.258192 1.122759 1.62301 1.470507 1.633723  
0.987784 0.558212 0.932931 1.293597 2.534267 0.826936 1.472317 1.734672 1.665784  
0.856039 1.723772 0.948304 1.143914 1.783371 1.258712 1.400621 1.234227 1.29262  
3.070121 0.763464 0.896941 1.16418 3.115434 1.918317 2.91605 1.333809 1.100511  
2.894965 0.735455 1.639486 1.274037 0.89184 1.687441 1.471471 1.795763 0.94921  
3.006429 1.93226 1.718498 2.258152 2.209841 2.825898 1.556386 3.49392 1.241604  
1.418976 1.105637 1.182483 1.381396 1.414429 1.826277 2.554879 1.216197 1.023407  
1.704522 0.835247 0.812346 1.170218 1.82826 1.400673 1.439241 1.273812 1.669792  
1.700627 1.505459 1.482215 3.491451 2.8801 2.087877 2.06709 1.726021 1.78871  
1.415714 1.183085 1.037689 0.778153 0.836308 0.87827 2.53398 1.090538 1.13767

3. 31207 2. 412719 3. 746417 2. 170842 3. 493042 2. 817079 3. 215982 2. 710898 2. 289928  
5. 70422 5. 411832 5. 44801 5. 349941 5. 3726 6. 200365 5. 487769 5. 523401 5. 31981  
3. 991527 5. 139601 5. 01557 5. 361828 5. 370911 5. 674639 5. 510419 5. 507695 4. 486797  
5. 704295 5. 751315 5. 861387 4. 851813 5. 10377 5. 209652 5. 639321 5. 883772 5. 458866  
1. 356232 1. 214923 1. 5161 1. 340888 1. 022944 1. 296772 1. 204092 0. 811903 1. 132335  
1. 620451 1. 287985 1. 6987 1. 316493 1. 865301 1. 169846 2. 441975 1. 911302 2. 470419  
6. 04735 6. 907962 6. 653392 7. 057201 7. 079389 6. 739968 6. 571621 7. 198523 6. 709791  
1. 903589 2. 181181 1. 367174 1. 685632 2. 037324 1. 515824 1. 683932 1. 652597 1. 397077  
4. 590437 6. 486048 6. 164246 3. 904484 4. 977778 5. 988666 5. 099035 2. 81793 8. 120495  
2. 029746 2. 559768 1. 526943 1. 845195 1. 7894 1. 75117 2. 598633 1. 682546 2. 24552  
4. 139643 6. 536429 6. 259513 5. 965033 6. 704945 6. 898005 7. 260725 6. 001298 6. 439496  
4. 93615 4. 853709 4. 048659 3. 133534 3. 918186 5. 45479 4. 916731 4. 250406 5. 794893  
2. 623392 2. 685371 2. 847824 2. 7653 2. 530737 2. 98199 2. 714697 2. 928532 3. 171762  
2. 657902 2. 953395 3. 218495 3. 584336 2. 41065 2. 714664 3. 406916 2. 991561 3. 021889  
5. 346411 5. 460406 5. 756054 6. 019241 4. 836197 5. 966335 5. 801279 5. 346568 4. 861319  
3. 623971 4. 277781 4. 691311 4. 208622 3. 632856 3. 902693 4. 593546 3. 506294 4. 261477  
1. 417367 1. 833148 2. 071161 2. 410914 2. 007571 3. 009318 2. 721505 2. 241992 1. 884307  
2. 474453 3. 022914 2. 829071 2. 704143 3. 127365 3. 286311 3. 212997 2. 698123 2. 457118  
3. 954588 3. 413818 4. 166147 3. 90812 3. 968356 4. 182733 3. 627282 4. 446303 3. 615362  
6. 836888 8. 03056 7. 293832 7. 183037 8. 004738 7. 436701 6. 654708 8. 067926 7. 470243  
6. 014766 5. 823095 5. 347092 5. 792025 5. 994914 6. 081671 5. 989445 6. 063962 5. 847631  
2. 632898 3. 035406 2. 66469 2. 915213 2. 523133 2. 813574 2. 656113 3. 131503 2. 601492  
3. 128261 3. 789133 3. 715905 3. 982616 3. 588843 3. 645149 3. 733231 3. 607084 2. 816404  
4. 108863 3. 722447 3. 724925 3. 176574 4. 440224 4. 201 4. 33335 4. 019719 3. 461116  
1. 414571 1. 613257 1. 89787 1. 691371 2. 129627 1. 3142 1. 767281 1. 483796 2. 140061  
0. 741918 0. 892003 0. 996764 0. 722256 1. 435799 0. 976177 1. 42785 0. 983068 0. 892941  
1. 087325 1. 389128 0. 782692 0. 885257 0. 871249 1. 325966 2. 225677 1. 67404 1. 334388  
1. 53883 0. 93606 1. 665304 1. 352288 1. 350272 1. 325607 1. 949807 1. 312843 1. 370734  
2. 704098 0. 983894 1. 300578 1. 10601 2. 367577 1. 519306 2. 087873 1. 950715 1. 893706  
1. 492893 1. 974726 2. 729003 1. 651999 1. 584765 1. 01735 2. 226741 1. 570018 1. 648496  
1. 348357 1. 326104 0. 988306 1. 147726 1. 572828 1. 229502 2. 479077 0. 99325 1. 077365  
2. 114759 3. 09508 1. 596277 1. 893226 1. 608928 2. 017281 1. 958269 2. 019732 2. 577416  
8. 130543 8. 559755 8. 368298 8. 504908 8. 864146 8. 340603 8. 329163 9. 030247 8. 934828  
7. 841289 6. 841776 7. 217822 6. 348698 6. 833838 6. 492918 6. 487278 6. 120672 6. 960698  
3. 080343 1. 255893 2. 098311 1. 832638 2. 44457 1. 726849 1. 665329 2. 44729 1. 591567  
4. 542838 5. 274625 5. 092674 5. 452396 5. 662169 5. 508342 4. 288737 4. 967319 5. 287392  
7. 330099 7. 445743 7. 69406 7. 279049 7. 746593 7. 788544 7. 275878 7. 152552 7. 557341  
4. 109616 4. 26177 4. 343223 4. 124383 5. 017791 4. 37381 5. 168368 3. 96827 4. 395532  
2. 453602 2. 411659 2. 633749 1. 840401 2. 787401 2. 192393 2. 021392 3. 615831 2. 443009  
3. 871227 3. 295156 3. 874371 2. 99142 3. 314129 3. 103277 3. 902253 3. 186565 3. 472887  
4. 850152 4. 760357 5. 409294 5. 311344 5. 657245 5. 593641 6. 216657 5. 160718 5. 324124  
7. 543251 7. 537186 7. 564859 7. 928547 7. 714157 7. 926313 7. 456407 7. 814739 7. 502527  
3. 838292 3. 757729 2. 897094 3. 248961 3. 990487 3. 589895 3. 104614 3. 854731 3. 568407  
4. 11612 3. 831944 3. 467585 3. 290134 4. 223043 3. 245981 4. 264379 4. 528986 4. 030984  
6. 005674 5. 917655 6. 006261 5. 365947 5. 740026 5. 317835 5. 56478 5. 793207 6. 310963  
3. 384057 3. 859964 4. 193698 3. 755306 3. 332101 3. 533405 2. 708057 3. 639683 3. 843654  
4. 609346 4. 856905 4. 434349 5. 100185 4. 325395 4. 403259 4. 662017 4. 993019 4. 373756  
4. 892677 4. 244038 4. 508502 3. 959353 4. 102893 3. 796745 4. 145307 4. 04903 4. 493287  
2. 32057 2. 334086 3. 218376 2. 588374 1. 954238 2. 028671 2. 243005 3. 442039 3. 303218  
6. 023145 6. 487832 6. 93591 5. 874187 6. 457709 6. 250687 6. 717427 6. 665384 6. 667141  
5. 381521 4. 605431 5. 888247 6. 677646 5. 475821 5. 948161 5. 424766 5. 781883 5. 537178

3. 84157 4. 346554 4. 112093 4. 282001 4. 086372 4. 418075 3. 726473 4. 287365 4. 020472  
7. 159337 7. 507304 7. 448853 7. 450208 7. 543063 7. 698248 7. 320513 7. 474908 7. 370626  
5. 667151 6. 922483 6. 657585 6. 404288 6. 630734 5. 893862 6. 569805 6. 624183 6. 264921  
3. 637753 5. 134855 4. 563179 5. 287776 5. 353035 5. 054978 5. 273324 4. 699305 4. 791436  
1. 615725 1. 100852 1. 122651 1. 009563 1. 38283 1. 100701 1. 203169 0. 610483 0. 831162  
6. 207511 6. 371374 6. 621937 5. 843126 5. 642279 5. 935179 5. 834846 6. 24984 5. 954093  
4. 810751 5. 133155 4. 779927 6. 146708 4. 779715 5. 096609 4. 873382 4. 941082 4. 905793  
3. 567251 2. 972022 3. 643042 4. 531531 2. 924927 3. 803857 2. 866091 4. 368242 3. 708195  
2. 556961 2. 732374 2. 022707 2. 305911 2. 386044 2. 490382 2. 397118 1. 98509 2. 017522  
4. 638756 6. 157893 5. 528281 4. 393528 5. 683925 5. 324872 5. 390079 6. 267927 5. 714658  
4. 690803 4. 80297 5. 589478 4. 490868 5. 922695 3. 605059 3. 710015 4. 584336 4. 656066  
2. 977096 1. 813022 2. 547213 1. 262466 1. 4282 2. 301885 1. 079509 1. 614401 0. 976066  
5. 517263 5. 298206 4. 917186 3. 739222 3. 438543 3. 470428 3. 136944 3. 134618 4. 541451  
4. 060712 4. 2946 3. 569571 4. 121527 4. 002459 4. 242161 3. 958909 3. 482425 3. 781644  
4. 370376 3. 899219 3. 629952 3. 275676 3. 921593 4. 591207 3. 828754 3. 922555 3. 266249  
3. 577816 4. 088161 3. 949403 5. 039987 4. 785303 3. 875955 3. 702682 3. 275844 3. 968298  
7. 295022 7. 30105 7. 685505 7. 557656 7. 246444 7. 39796 6. 749233 7. 335548 6. 851064  
5. 013808 6. 151187 5. 436797 5. 449741 4. 910134 5. 87515 5. 153217 5. 869246 4. 098517  
6. 044231 6. 434233 6. 353238 5. 918451 6. 924918 5. 691679 6. 023332 6. 271906 6. 681501  
6. 318341 5. 660869 6. 139747 5. 616968 5. 698455 6. 054575 6. 45963 6. 957212 6. 277897  
4. 332794 5. 222807 5. 394898 5. 051039 5. 751698 4. 435517 3. 74424 4. 257244 5. 147265  
10. 83757 11. 04343 10. 96938 10. 95277 10. 96868 10. 81214 10. 73011 11. 01466 10. 9197  
3. 587664 3. 043686 3. 497192 3. 150779 3. 282318 2. 140951 4. 218859 3. 000968 4. 570811  
7. 009482 7. 190694 7. 084502 6. 963685 7. 312591 7. 671286 6. 572747 7. 519483 6. 34237  
2. 54973 1. 690915 1. 996298 2. 411459 3. 008072 2. 332595 1. 622441 1. 856392 1. 767636  
5. 650601 5. 278086 5. 806174 5. 335503 5. 626697 5. 643308 6. 090146 6. 100578 5. 393437  
7. 411151 8. 400182 7. 42128 7. 927725 8. 025916 6. 73081 8. 543469 7. 421071 7. 925463  
4. 988388 5. 551852 4. 412767 6. 118508 5. 440124 4. 908615 5. 645514 5. 777766 4. 258113  
3. 351086 3. 301012 3. 099407 2. 373303 1. 829821 2. 419802 2. 309893 3. 179637 2. 663271  
5. 206554 5. 218565 5. 762329 5. 589324 5. 504795 5. 163755 5. 434863 4. 311329 4. 553288  
5. 375695 5. 315983 4. 360316 4. 31208 4. 866932 4. 858553 3. 978516 4. 671969 4. 962569  
3. 181049 3. 676506 4. 366207 4. 103501 4. 430803 3. 422794 4. 441803 3. 104648 4. 332766  
2. 534835 3. 023981 3. 185865 3. 890881 3. 568796 2. 618867 3. 144913 3. 6081 3. 220156  
4. 451484 5. 302003 4. 825922 4. 807648 6. 079561 5. 087653 4. 978346 5. 859689 5. 424639  
3. 667521 3. 924969 3. 725432 4. 016598 3. 255036 3. 67017 3. 489827 3. 795715 3. 647207  
5. 705519 5. 410639 4. 673044 4. 58189 4. 172037 4. 984795 5. 051388 5. 235531 5. 046702  
2. 511499 1. 920672 2. 474812 2. 90598 3. 415587 2. 963837 1. 61678 3. 586601 1. 809411  
2. 894101 4. 16018 4. 620301 4. 470493 3. 950537 3. 888443 3. 208769 4. 175572 3. 952979  
4. 910295 4. 692066 4. 395687 4. 714952 4. 767986 4. 919639 5. 029492 4. 258019 4. 710845  
1. 557774 1. 406585 1. 800022 2. 250971 1. 182809 1. 350004 1. 29929 1. 421211 0. 962851  
5. 977092 7. 29783 6. 904991 6. 356967 7. 076746 6. 585945 6. 838382 7. 381773 6. 673013  
6. 793698 6. 906528 6. 839502 6. 553243 6. 603541 6. 644071 6. 671016 7. 494039 7. 197349  
5. 261862 6. 074066 6. 01996 5. 911513 6. 131158 5. 7849 5. 215222 6. 069187 5. 38658  
4. 419995 5. 907409 5. 308314 5. 553167 5. 727875 6. 09604 5. 707525 6. 400407 5. 977538  
5. 088439 5. 448573 5. 209615 4. 981652 5. 367038 5. 030289 4. 612067 5. 144679 4. 913574  
4. 35793 3. 178536 2. 592117 2. 938398 2. 972736 3. 951827 2. 988927 3. 522981 2. 837939  
6. 476537 7. 642943 7. 063507 7. 581218 7. 468357 7. 202849 6. 993067 6. 505669 6. 970095  
4. 653624 3. 540945 3. 135218 4. 133689 3. 97472 4. 883037 4. 238003 4. 51129 4. 600226  
2. 445382 2. 477156 3. 047069 2. 787605 3. 285209 2. 74495 2. 047992 1. 979684 2. 679954  
5. 82745 6. 618608 6. 420687 6. 479156 6. 595041 6. 226906 5. 630688 6. 065147 5. 570257  
4. 712488 3. 723636 4. 101661 4. 593503 3. 600094 4. 337967 4. 78799 4. 640874 4. 655888



5. 6259 5. 280334 5. 548398 4. 924248 5. 844302 5. 080443 4. 986125 5. 411049 4. 937812  
6. 949278 7. 197479 7. 664583 6. 816295 7. 312118 6. 753273 7. 215121 7. 784974 7. 39804  
3. 980303 5. 453532 4. 303869 4. 5266 5. 036427 4. 758493 4. 732928 5. 154008 4. 886865  
2. 887292 3. 134971 3. 409077 2. 323403 2. 497596 2. 816899 3. 348441 1. 953252 2. 480011  
2. 495343 3. 945523 4. 004888 3. 674193 3. 778451 3. 12988 3. 557596 4. 010761 4. 078164  
6. 646489 7. 354945 7. 075403 6. 991108 7. 460577 7. 441265 6. 747269 7. 069314 7. 11323  
6. 804709 6. 309313 6. 402171 6. 526983 5. 935566 6. 345425 6. 427289 6. 410511 5. 849714  
6. 123555 5. 909328 6. 588077 5. 615638 5. 956865 5. 651937 6. 902451 5. 752401 5. 946057  
2. 066344 2. 942504 1. 955004 2. 220542 1. 959988 2. 623013 2. 576395 1. 588297 1. 748845  
5. 600222 6. 031162 5. 290718 6. 249692 5. 834701 5. 663758 5. 658515 6. 133793 5. 484337  
1. 591014 1. 732231 1. 431854 2. 132502 1. 897281 3. 695458 2. 893185 2. 693683 2. 83512  
4. 617556 6. 516307 6. 293506 6. 239187 6. 826198 6. 501221 6. 541499 5. 855471 5. 657583  
3. 883065 3. 78867 4. 672562 4. 166382 3. 748488 3. 88303 4. 804484 4. 345482 4. 326202  
4. 923504 5. 08181 5. 242801 5. 231275 5. 21528 5. 284336 4. 807823 5. 966151 5. 274378  
5. 040148 5. 803294 5. 765539 5. 472301 5. 607461 4. 488183 5. 059146 5. 249514 4. 901199  
4. 81413 3. 669327 4. 268956 3. 911823 3. 598692 4. 753933 4. 527843 3. 545123 4. 903529  
4. 818343 5. 065775 4. 960311 2. 76232 4. 698212 4. 685813 4. 276987 4. 108261 4. 175394  
4. 616338 4. 065106 4. 447417 4. 176397 4. 434338 4. 140097 3. 864454 4. 082692 4. 459346  
4. 538394 5. 20012 4. 85682 5. 449422 5. 638013 5. 28677 4. 316304 4. 932162 4. 875425  
1. 091389 1. 471935 1. 389739 2. 197996 2. 001937 1. 112728 1. 939588 1. 486574 1. 663198  
3. 455589 4. 7482 4. 538195 4. 08582 4. 149657 3. 895938 4. 640903 4. 23595 4. 964046  
3. 176939 2. 516076 3. 503056 2. 802845 2. 406394 2. 086956 3. 59745 3. 106368 2. 071073  
5. 051394 4. 505936 4. 550921 5. 26965 4. 345875 4. 928968 4. 229333 4. 7552 5. 239236  
4. 48069 5. 089991 4. 312308 5. 003197 4. 579476 4. 749128 3. 588008 4. 351827 4. 417798  
6. 184211 6. 50996 6. 106712 6. 109784 6. 222854 6. 853887 6. 333417 6. 245004 6. 621388  
3. 220015 4. 250236 3. 904854 4. 192632 3. 234358 3. 306948 2. 588857 3. 454621 3. 54086  
2. 195339 2. 729549 1. 59422 5. 679581 3. 302577 2. 406262 4. 478177 2. 556329 5. 688759  
2. 547843 1. 744004 1. 93252 3. 981716 2. 592278 3. 33744 2. 946292 2. 516871 2. 481477  
4. 507443 5. 813615 5. 564014 5. 726377 6. 282798 5. 432233 6. 528967 4. 7215 5. 852243  
5. 153827 5. 699584 5. 56937 5. 088568 4. 275119 4. 410922 5. 616782 5. 306508 4. 429573  
4. 734548 5. 655532 4. 582533 4. 965951 5. 655493 5. 553436 4. 502947 4. 876386 5. 129955  
6. 634472 7. 966179 8. 032547 6. 803482 7. 522885 7. 372112 7. 018183 7. 982371 6. 921818  
2. 0599 3. 342954 2. 633857 2. 116106 2. 71121 2. 666274 3. 274148 3. 211623 3. 844085  
2. 154998 2. 692874 3. 132613 2. 748177 2. 734628 2. 262132 2. 289936 3. 213926 2. 361839  
3. 838117 3. 619277 3. 580907 3. 160714 3. 050637 3. 43761 3. 292557 3. 527177 3. 681021  
1. 111786 1. 565217 1. 545601 1. 918261 1. 651669 1. 586442 1. 570473 1. 833255 1. 624024  
6. 741654 7. 063774 6. 985506 7. 19389 7. 195966 6. 789048 6. 560634 7. 082514 7. 069664  
2. 082324 1. 166612 1. 08611 1. 855094 1. 399623 1. 834275 1. 054816 2. 072918 1. 492861  
4. 395328 5. 291795 5. 76421 5. 061338 5. 761702 5. 129769 5. 437386 6. 50066 5. 68674  
3. 006017 3. 305745 2. 765711 3. 206418 3. 261342 2. 491089 2. 897164 2. 584176 2. 381699  
2. 384383 3. 15151 2. 99138 4. 249024 2. 822661 2. 933773 3. 270363 2. 339109 3. 009179  
5. 513821 5. 650542 5. 469303 6. 238994 5. 905389 5. 319052 5. 492467 5. 457168 5. 585306  
5. 160637 4. 702609 5. 497858 5. 671419 5. 01101 5. 652109 5. 56369 5. 301795 5. 007626  
3. 561423 4. 393331 4. 590252 4. 952769 3. 791594 5. 136096 4. 241865 4. 607506 3. 904154  
4. 636801 4. 264037 4. 698764 4. 085236 3. 407156 4. 03962 4. 153175 4. 885509 3. 903513  
5. 3541 6. 3639 6. 003012 5. 445718 5. 74186 5. 513299 5. 986236 5. 942496 5. 16232  
4. 086101 3. 872224 3. 715607 4. 008327 3. 867606 3. 535145 4. 701248 4. 283555 3. 879318  
3. 218061 3. 190104 2. 723843 3. 01552 2. 771226 2. 725985 2. 712823 3. 388136 3. 559525  
4. 422109 3. 2243 2. 431048 2. 1246 2. 107501 0. 707289 2. 526404 1. 657947 1. 82786  
6. 229515 6. 259462 6. 196616 5. 620609 6. 472002 5. 704626 6. 098027 6. 052816 6. 149756  
6. 974379 6. 907844 7. 014809 6. 32664 6. 376213 7. 265937 6. 783278 6. 749182 6. 446819

4. 564578 5. 66551 5. 825655 5. 684112 5. 669591 6. 200431 5. 209101 5. 827248 5. 312559  
5. 950234 4. 678732 4. 82907 4. 928544 3. 90874 4. 280455 4. 448061 5. 373324 5. 130176  
1. 96612 2. 155136 1. 677452 2. 585263 1. 645215 1. 608487 1. 448195 1. 789156 2. 086307  
3. 610438 2. 738005 2. 942952 2. 754877 3. 628509 2. 96713 2. 599323 3. 038345 2. 827467  
3. 682557 3. 86204 4. 126765 3. 839837 4. 177142 3. 83023 3. 854839 3. 930075 3. 205172  
2. 262559 4. 143709 3. 289449 2. 560818 3. 457947 3. 285557 1. 986872 2. 340299 2. 663717  
5. 828364 5. 299221 5. 44034 5. 635508 6. 009627 5. 774 4. 986139 5. 056397 4. 85804  
1. 628822 1. 977767 1. 432218 1. 569136 1. 28676 1. 516808 1. 659215 2. 092462 2. 101968  
5. 105419 4. 346106 4. 122879 3. 565913 4. 410966 4. 562626 4. 727708 4. 186683 4. 396315  
4. 114505 4. 842818 4. 854099 4. 413774 3. 560152 4. 648936 5. 006777 4. 549598 5. 155147  
3. 609848 2. 304204 2. 238097 2. 768869 2. 306057 1. 912026 2. 351709 2. 204432 2. 962216  
4. 031207 4. 106628 2. 937324 4. 633336 2. 919892 4. 0734 3. 204226 4. 119372 3. 554016  
1. 904054 1. 931472 2. 101907 1. 885749 2. 375977 2. 094682 2. 696969 1. 829934 2. 26714  
3. 618533 3. 508776 3. 89919 3. 467831 3. 547182 3. 549017 4. 12028 3. 706247 4. 539304  
5. 707129 6. 236137 6. 348759 6. 544947 6. 457432 6. 504999 6. 357634 6. 057391 6. 593399  
5. 916838 5. 39482 4. 800162 4. 187154 5. 116062 4. 54457 3. 455151 5. 613608 5. 015527  
3. 768359 3. 695193 4. 100162 3. 353475 4. 397718 4. 368143 3. 636154 4. 276039 4. 257098  
3. 654797 4. 392667 4. 26423 3. 899674 3. 726364 4. 097946 4. 133001 4. 411377 3. 830239  
1. 084392 0. 981293 1. 023484 0. 949097 0. 946502 1. 28659 1. 113658 1. 100089 1. 056221  
3. 145446 2. 652027 2. 885508 2. 651169 2. 63225 2. 478753 2. 67356 2. 748017 3. 100356  
3. 253554 3. 372079 2. 253378 3. 980965 2. 736211 2. 920561 3. 125045 3. 143805 3. 410568  
1. 58528 2. 786445 3. 342332 3. 207242 2. 266881 2. 373165 2. 11191 3. 175798 2. 187065  
6. 613339 7. 231996 7. 630437 6. 790076 7. 191376 7. 326504 6. 889305 7. 04901 6. 879923  
3. 540506 3. 465777 3. 205834 3. 319452 3. 533137 3. 68666 2. 860133 3. 07928 3. 984824  
1. 170134 0. 975398 0. 964694 1. 241744 1. 289612 1. 080447 0. 91189 1. 244629 1. 153247  
1. 957153 1. 75301 2. 834866 1. 885351 2. 081354 1. 599213 1. 953875 2. 148803 1. 458115  
1. 691885 1. 087133 1. 410488 1. 084871 1. 883604 1. 371925 1. 766321 1. 949646 2. 373566  
3. 168588 3. 282455 3. 27583 3. 169376 3. 398313 3. 837564 3. 733642 4. 364239 2. 635964  
3. 910693 5. 445682 4. 274737 5. 478966 4. 415046 4. 807327 5. 188911 5. 639321 5. 145829  
6. 195397 6. 31525 5. 812514 6. 62452 6. 166476 6. 798802 5. 674255 6. 112269 6. 067034  
5. 628905 5. 316627 5. 223483 4. 841057 5. 002713 5. 604161 4. 793202 4. 124656 5. 139422  
1. 956612 2. 190443 2. 271916 1. 657363 1. 818614 2. 234391 2. 038034 1. 868865 1. 983679  
5. 022153 4. 908605 3. 682687 3. 879351 4. 352337 4. 16187 4. 506145 4. 764228 4. 679628  
3. 016865 3. 145318 2. 711177 2. 509977 2. 428763 2. 967709 2. 402002 2. 83504 2. 292889  
4. 515348 4. 276246 3. 235518 3. 378332 3. 864768 3. 879777 3. 887042 3. 489182 4. 394469  
3. 113549 3. 413885 2. 344835 3. 631689 3. 496952 2. 409145 4. 085197 3. 8787 3. 653416  
7. 852583 8. 566781 8. 391643 8. 243166 7. 911841 8. 497852 8. 335417 8. 587201 8. 529854  
7. 432255 6. 682004 6. 970186 6. 253238 6. 696409 6. 228342 6. 599223 6. 521204 7. 17669  
2. 658293 3. 146706 3. 106743 2. 188012 2. 133947 2. 228895 2. 313392 2. 398546 2. 524431  
2. 026795 2. 067961 1. 310442 2. 588633 1. 541529 1. 763688 1. 1544 2. 522107 0. 858561  
2. 582809 1. 863291 3. 123698 2. 055789 2. 040485 2. 198818 2. 269695 1. 62518 2. 589955  
8. 288758 8. 580879 8. 285479 8. 577622 8. 53547 8. 153644 8. 754111 8. 509404 8. 486793  
1. 398851 2. 273684 2. 253949 1. 845826 1. 401747 2. 210858 1. 824181 1. 539316 2. 329352  
3. 874156 3. 022386 3. 819742 2. 904722 2. 680724 3. 446569 3. 561094 3. 319328 4. 226323  
1. 944868 1. 719481 1. 942252 1. 721982 1. 498161 1. 63515 2. 149614 1. 966917 1. 075277  
3. 506264 3. 25655 3. 520798 3. 639309 2. 964588 3. 399657 3. 629573 4. 096552 2. 743786  
3. 244215 2. 251757 2. 465718 2. 320815 2. 997786 3. 59106 3. 515793 2. 600455 2. 548876  
5. 662621 6. 631571 6. 430296 6. 733674 6. 261242 6. 433903 6. 205185 6. 376452 6. 110632  
3. 48643 3. 761124 3. 059332 3. 350113 4. 050501 3. 1361 4. 118233 3. 227573 3. 639645  
1. 567388 1. 489468 1. 533517 2. 588585 1. 865697 1. 385647 2. 016113 1. 597659 1. 787564  
5. 883043 3. 417013 4. 734837 3. 114498 3. 889973 2. 356639 3. 018852 2. 132492 5. 063854

3. 578317 2. 719778 2. 941462 3. 05805 2. 934282 4. 00963 3. 15055 3. 501469 3. 649177  
1. 686344 2. 64178 1. 707243 2. 051652 2. 482401 1. 528378 3. 969147 1. 831803 1. 899802  
4. 419545 4. 373067 4. 594284 2. 678119 4. 042178 4. 843068 3. 686083 4. 374553 4. 245222  
1. 870033 2. 189248 1. 303717 1. 61159 1. 546942 1. 362994 3. 065617 1. 543919 1. 575611  
5. 513313 4. 387509 4. 416548 4. 962563 4. 423557 4. 512512 4. 626017 4. 542412 5. 042692  
5. 052679 3. 471872 4. 804561 4. 761088 4. 305994 4. 529989 4. 377515 4. 531748 4. 50053  
3. 560859 3. 547496 4. 203878 4. 442176 3. 791344 4. 882645 4. 822355 3. 501915 3. 817249  
5. 306602 4. 928697 4. 167525 5. 040491 5. 036855 4. 334221 4. 73666 4. 912409 5. 100027  
6. 750681 6. 846929 6. 783919 5. 688016 5. 712859 5. 825047 6. 111306 6. 336024 6. 114574  
3. 991115 5. 083891 5. 397178 4. 682977 5. 279103 5. 669611 4. 754468 5. 129049 5. 226833  
2. 480264 2. 494523 2. 862366 2. 102053 2. 155446 2. 375739 2. 204324 2. 514388 2. 331851  
2. 560664 2. 773305 2. 619834 2. 221269 2. 208972 2. 822724 2. 779011 3. 248731 1. 801106  
5. 596803 4. 923212 5. 140892 4. 306571 4. 44525 2. 710743 4. 432913 4. 318059 4. 867836  
10. 12616 10. 35678 10. 22323 9. 779297 10. 11471 9. 845713 10. 49848 10. 36281 10. 06825  
2. 320756 0. 969745 2. 259827 2. 415194 2. 608043 2. 327861 3. 137219 2. 658162 0. 961646  
4. 927785 5. 621965 5. 551689 5. 768919 6. 084029 5. 29381 4. 713954 5. 52158 5. 306511  
1. 360953 0. 959584 1. 45823 1. 334151 1. 548206 1. 149865 2. 10605 1. 498721 1. 064718  
1. 319621 1. 587538 1. 887496 2. 555252 1. 836961 1. 778312 2. 095234 1. 49891 1. 304619  
6. 513559 5. 973716 6. 012208 6. 007199 6. 155019 5. 52747 6. 056317 5. 59277 5. 588192  
1. 969416 1. 706659 1. 511919 1. 100804 1. 486162 1. 306134 1. 212445 1. 380297 1. 457281  
2. 122779 2. 311161 2. 74722 2. 548664 2. 934036 2. 127883 2. 699429 2. 432047 1. 804117  
4. 630947 4. 478499 4. 981276 4. 830091 4. 471397 4. 855821 3. 578064 3. 864276 3. 263443  
4. 235601 5. 35215 4. 804455 4. 611771 4. 473059 5. 236205 5. 032645 5. 125923 4. 557115  
7. 562989 7. 507102 6. 959472 6. 815417 6. 822367 7. 973892 6. 436296 6. 262582 7. 222519  
4. 848955 4. 949846 4. 547159 4. 113164 4. 02175 4. 336603 4. 140699 4. 183052 4. 387232  
6. 999862 7. 826042 7. 782352 7. 722498 7. 930287 7. 545095 7. 593844 7. 831049 7. 315386  
3. 665083 4. 429065 4. 314666 5. 230116 4. 450789 5. 492374 4. 346757 4. 543501 4. 413182  
3. 675347 4. 321903 4. 479032 4. 860562 3. 531097 4. 440383 4. 205596 3. 585431 4. 201405  
8. 048489 6. 161722 6. 822212 4. 967793 5. 753719 4. 556726 6. 234327 6. 383959 7. 542674  
5. 084014 5. 453849 5. 322834 5. 876293 5. 653648 5. 923414 4. 267788 5. 218882 5. 197593  
1. 955114 1. 723093 1. 316451 1. 827041 1. 664933 1. 694721 1. 928853 2. 561847 2. 417708  
4. 984902 3. 542794 4. 663907 5. 015821 3. 413759 3. 150522 4. 259362 4. 018873 5. 184894  
1. 990659 1. 230417 2. 312895 1. 685739 2. 572794 2. 125919 1. 837289 2. 424439 2. 473704  
6. 041322 5. 766236 6. 307967 5. 576849 5. 870008 6. 087614 6. 328151 5. 451658 5. 85919  
1. 539582 1. 087301 0. 840056 1. 455652 0. 87372 1. 276127 1. 200604 1. 280784 1. 251472  
8. 846245 9. 392874 9. 248314 9. 091401 9. 596746 9. 482016 9. 273481 9. 488345 9. 180171  
5. 315505 4. 265704 3. 287428 4. 412553 3. 961702 3. 748788 6. 188761 5. 213604 3. 69102  
2. 615126 2. 087204 3. 218822 3. 079336 3. 167649 3. 262867 4. 280586 2. 36877 3. 113419  
2. 365892 2. 49741 3. 168974 3. 112531 2. 273731 2. 105509 2. 751617 1. 74197 1. 872942  
4. 308592 4. 364671 4. 713607 4. 760691 5. 105368 4. 986447 3. 661497 4. 585184 5. 265437  
5. 27194 4. 777653 4. 318534 4. 742717 4. 901825 4. 876418 5. 591784 4. 461917 4. 628101  
6. 800815 6. 455117 6. 110244 6. 737948 6. 238509 6. 40983 6. 134796 5. 668109 6. 770751  
4. 809707 4. 953418 4. 507509 5. 269188 4. 823704 5. 138864 4. 962484 4. 398961 4. 901272  
2. 903234 3. 354735 2. 728776 2. 800808 3. 05105 2. 550756 3. 514171 2. 844737 3. 401566  
6. 473306 6. 368001 6. 658619 6. 641055 6. 078628 7. 034391 6. 383712 5. 936939 5. 990137  
5. 04689 5. 234702 5. 8835 5. 502361 4. 688421 4. 356843 5. 079677 5. 66118 5. 483509  
7. 438223 7. 360263 6. 704475 8. 12901 7. 533999 7. 623222 7. 893804 6. 956723 7. 073839  
3. 838484 4. 604767 4. 072221 3. 447054 3. 666508 3. 597396 3. 142182 4. 032826 3. 761349  
5. 062909 5. 883927 6. 110663 5. 975226 6. 120016 5. 90796 5. 616929 5. 904305 5. 886227  
1. 3616 1. 748594 1. 127555 2. 05559 1. 86507 1. 541142 2. 344173 1. 587086 1. 734495  
2. 903378 2. 860775 2. 905021 2. 990996 2. 168379 3. 517934 2. 786947 2. 809165 3. 064145

4. 490393 3. 877079 3. 733252 3. 526286 3. 201706 2. 592117 2. 848087 4. 869678 4. 100292  
1. 593926 1. 035565 2. 263778 1. 053744 0. 774381 1. 491805 2. 101064 1. 652822 1. 317728  
3. 470569 3. 806771 3. 553806 3. 457222 3. 627404 4. 56954 4. 378221 4. 140805 4. 025157  
1. 515813 1. 177042 2. 007485 2. 178222 1. 74615 1. 377324 2. 113248 1. 360998 1. 463787  
1. 662992 1. 661108 2. 560141 2. 045754 1. 699617 2. 11884 1. 518756 2. 096745 2. 802254  
2. 079363 2. 104469 2. 41065 1. 942442 2. 661842 3. 318984 1. 815461 1. 948834 2. 662364  
3. 533064 3. 782976 2. 072337 2. 090918 3. 271855 2. 464599 2. 705152 3. 486987 2. 327767  
4. 1627 3. 132073 4. 769916 4. 950469 4. 039158 4. 75005 4. 082967 3. 773552 4. 217277  
6. 165093 6. 686981 6. 415329 6. 049678 6. 363345 5. 769539 5. 660941 5. 981056 5. 955054  
2. 97493 2. 734705 3. 611936 2. 400936 2. 268653 2. 521414 2. 345345 2. 425037 3. 724234  
3. 077144 4. 667084 4. 530801 5. 03779 5. 741628 4. 60148 4. 943463 5. 384704 5. 638177  
3. 680097 4. 56476 5. 283592 4. 462002 4. 696018 4. 729825 4. 720732 5. 561554 5. 006374  
2. 400246 2. 203106 2. 474566 1. 65954 1. 892321 2. 543622 2. 742956 2. 403572 2. 618557  
0. 694557 0. 762781 0. 803007 1. 191999 1. 538911 1. 164449 1. 00779 1. 098391 1. 060548  
1. 066995 0. 867802 0. 749774 0. 7485 0. 939421 0. 772714 1. 080636 1. 617286 1. 189661  
3. 308639 2. 859995 3. 437514 3. 211949 2. 459091 3. 079599 3. 665904 2. 498616 3. 850752  
2. 725316 2. 362318 2. 699285 2. 938566 3. 089539 2. 763954 2. 503541 2. 421427 2. 597401  
5. 693454 4. 719534 3. 96549 4. 477083 5. 123028 4. 272378 4. 834417 5. 334285 4. 557185  
3. 753282 2. 080382 1. 933889 1. 665185 1. 39723 1. 590948 2. 991119 1. 835691 1. 830438  
4. 156437 4. 487264 3. 401439 3. 073467 4. 572047 4. 471883 3. 617158 4. 388773 4. 937984  
2. 623325 3. 193487 3. 968738 3. 570065 3. 502641 3. 288408 2. 751922 3. 387318 2. 733626  
6. 148751 6. 696348 6. 994556 5. 651981 6. 22927 6. 188165 5. 742967 6. 704036 5. 763052  
2. 213482 1. 341291 1. 915093 2. 161857 1. 558227 1. 745608 1. 482704 1. 078038 1. 792273  
2. 661173 3. 181099 2. 563381 2. 504524 2. 820713 3. 748952 2. 172932 2. 488804 3. 330483  
6. 827502 7. 269479 6. 143586 5. 694324 6. 307587 5. 763312 4. 538722 6. 756143 6. 245046  
4. 288055 5. 421481 4. 577621 5. 063997 5. 007497 4. 256883 4. 689969 5. 300763 4. 907418  
5. 8038 6. 087511 5. 500826 5. 901985 6. 328878 5. 690032 5. 606106 6. 505737 5. 432902  
2. 506642 2. 398014 2. 304432 2. 340415 2. 946837 1. 705347 2. 912879 2. 547537 2. 372829  
4. 625597 4. 602361 5. 454094 4. 361188 4. 778804 4. 570211 4. 626816 4. 377969 5. 496071  
5. 81141 6. 377914 6. 584543 6. 737166 6. 655582 5. 912249 6. 349231 6. 950405 6. 611716  
2. 478371 3. 370218 3. 328465 2. 502655 3. 019805 2. 51523 3. 802593 2. 485826 3. 048485  
2. 832958 2. 84435 2. 891509 2. 526225 3. 423915 2. 603906 3. 981495 3. 249767 4. 140958  
2. 894471 2. 522181 2. 998247 3. 879751 2. 830479 3. 061351 2. 841901 2. 87558 2. 550518  
5. 586712 6. 056129 6. 347381 6. 329359 6. 383107 5. 695123 4. 619107 6. 332146 6. 230254  
5. 356516 5. 928975 5. 473255 6. 587278 5. 889455 5. 543683 5. 438692 6. 389823 6. 120705  
2. 818614 2. 935925 3. 660968 3. 60261 4. 471498 3. 725008 2. 871287 4. 738625 4. 012124  
7. 659336 7. 383655 7. 712539 7. 514121 7. 575534 7. 514627 7. 357868 7. 336628 7. 522108  
3. 913051 2. 878067 3. 037034 2. 686778 2. 238825 3. 17043 3. 085346 2. 723484 2. 707587  
5. 616333 6. 307041 6. 362425 5. 36336 6. 378985 6. 392869 5. 250962 6. 302086 6. 016493  
2. 720445 4. 066744 3. 455553 3. 45455 3. 119904 4. 563381 2. 972184 3. 863006 3. 941909  
5. 355194 3. 899632 3. 966015 4. 245878 4. 514865 3. 827387 4. 118485 4. 540012 4. 646271  
6. 986187 7. 997112 7. 583496 6. 5065 6. 589214 7. 634959 6. 83524 7. 568974 6. 354546  
5. 510818 6. 154265 5. 247268 6. 116083 5. 691467 6. 24341 5. 782431 5. 707706 5. 943753  
3. 889275 3. 197106 4. 246023 3. 807524 3. 677097 4. 881953 2. 605447 4. 285333 4. 257894  
5. 61123 5. 786008 5. 852721 6. 49616 6. 066822 5. 525142 5. 187726 6. 311829 5. 815758  
4. 464529 4. 466297 4. 901175 4. 899322 4. 542221 5. 227904 3. 664875 5. 074291 4. 474408  
6. 177304 6. 590707 6. 520287 6. 885358 6. 640073 6. 990496 6. 500415 6. 303847 6. 413395  
7. 210962 7. 646766 7. 510306 7. 599278 7. 606991 7. 220571 7. 468504 7. 623669 7. 333508  
4. 551397 4. 447143 4. 376816 4. 532909 4. 493459 4. 616528 3. 439302 4. 060716 4. 071472  
2. 367013 1. 793366 1. 393107 1. 473477 2. 612178 1. 965315 1. 526012 1. 576254 2. 294405  
3. 804899 3. 86915 4. 027887 4. 300082 3. 719635 3. 421126 2. 832814 3. 336089 3. 507579

6. 708824 5. 257297 5. 346763 6. 26556 4. 69461 5. 346501 3. 99641 5. 771674 4. 294791  
3. 298972 6. 064839 3. 305367 4. 021871 4. 558198 3. 482589 3. 410258 5. 549527 4. 647402  
3. 67756 1. 964693 1. 638016 2. 117197 1. 800091 1. 152324 2. 388638 1. 711883 1. 67884  
7. 318743 5. 909769 5. 562099 6. 888351 5. 891037 5. 998024 6. 813235 5. 724419 6. 112302  
4. 862091 5. 65594 5. 302686 5. 135315 5. 283919 4. 9071 5. 433875 5. 317575 5. 337863  
7. 722481 7. 858509 7. 979638 8. 063908 7. 607134 7. 764105 6. 697796 7. 051547 7. 750612  
1. 786932 1. 472967 1. 820567 2. 065847 1. 389319 2. 22888 1. 804394 1. 27894 2. 67212  
2. 524001 2. 180937 2. 429036 2. 295854 2. 864136 2. 303426 2. 625105 4. 542543 2. 183182  
2. 082827 2. 33039 2. 51196 2. 358975 4. 074374 2. 835614 2. 08052 1. 863291 2. 571107  
5. 252693 5. 580503 6. 323802 5. 483927 6. 283479 5. 694343 5. 254863 5. 863632 5. 655116  
2. 902514 3. 29205 3. 128152 3. 347433 2. 623001 3. 219932 3. 679658 3. 26813 2. 352709  
2. 480501 3. 086584 1. 971728 3. 07788 3. 439102 2. 584745 2. 490374 2. 255644 2. 855275  
4. 126864 2. 661197 1. 914333 2. 706484 2. 775595 2. 546468 2. 453437 3. 003455 2. 249943  
2. 194824 2. 494565 2. 9949 2. 494368 2. 247709 2. 385441 2. 351883 2. 445481 2. 507688  
4. 12177 2. 112753 3. 848254 2. 352856 1. 897639 2. 223657 3. 230072 2. 835614 3. 233303  
7. 120129 7. 989298 8. 03673 7. 409455 8. 085238 7. 482498 7. 524447 8. 216479 7. 517694  
4. 159071 4. 787993 4. 418981 4. 568173 4. 4137 4. 286993 4. 68213 4. 737588 4. 584184  
2. 715706 2. 038257 1. 932877 2. 133364 1. 854763 1. 933681 2. 169941 1. 741013 2. 158986  
1. 42734 1. 317675 0. 750985 2. 119207 1. 842104 1. 64025 1. 308266 1. 494904 1. 019214  
2. 519281 2. 0679 1. 856668 2. 470344 1. 894203 2. 347731 2. 352042 1. 870415 2. 702138  
3. 2977 3. 637205 2. 787908 3. 134427 3. 059503 2. 680846 2. 331604 2. 441394 3. 497331  
2. 923182 3. 259128 3. 010866 3. 654824 3. 852274 3. 999376 3. 404332 3. 123467 3. 545105  
1. 767688 1. 730637 1. 941514 2. 445393 2. 234613 2. 191233 2. 517126 2. 057008 2. 622394  
2. 380259 3. 142727 3. 661508 3. 130838 2. 844314 2. 463153 2. 156591 1. 820873 2. 966414  
1. 461143 1. 414767 1. 097043 1. 514462 1. 481026 1. 229715 1. 476558 1. 611989 1. 381001  
7. 123262 7. 67467 7. 325725 7. 598827 7. 668052 7. 565652 7. 178692 7. 752863 7. 94027  
2. 203046 1. 501197 1. 045931 1. 820151 2. 122873 1. 587281 1. 152495 1. 540852 1. 580492  
2. 700956 3. 044491 3. 938444 2. 468916 2. 824859 4. 177723 2. 581602 3. 894921 4. 338073  
2. 54656 2. 49604 2. 23377 2. 257099 2. 144123 2. 51288 3. 434732 2. 257785 2. 145311  
2. 490981 2. 757351 2. 726081 2. 768453 2. 849318 3. 039076 6. 150007 3. 361413 1. 803901  
6. 449541 6. 179232 6. 277989 6. 673666 6. 533077 6. 305425 6. 286033 6. 149918 6. 736205  
4. 095335 5. 128166 4. 607239 5. 498839 5. 724758 2. 881589 4. 574836 4. 983376 4. 537214  
5. 20732 5. 714133 5. 928562 5. 622048 5. 196882 5. 117811 2. 378256 6. 336741 4. 41989  
2. 434541 2. 819436 1. 919503 0. 872465 1. 929731 1. 470492 1. 291025 1. 381407 1. 06087  
3. 983106 3. 541678 4. 535347 3. 01972 3. 151877 1. 993616 2. 529591 3. 005508 4. 435101  
3. 951604 2. 544255 2. 887702 3. 198606 2. 733369 2. 921531 3. 036093 2. 853892 3. 007184  
4. 496448 5. 510581 4. 673901 4. 856974 5. 619978 4. 20336 4. 945215 5. 312255 5. 31045  
1. 971648 1. 762677 1. 805645 1. 776841 1. 990737 2. 132323 2. 708111 1. 550662 1. 656574  
1. 463112 0. 953054 1. 045166 1. 265548 1. 052114 1. 065845 1. 599931 1. 127571 1. 286828  
6. 153101 6. 778092 6. 807625 7. 000945 6. 911919 7. 131012 6. 703668 6. 50832 6. 771194  
3. 272522 2. 240657 2. 268029 2. 117378 2. 456131 1. 997268 2. 020024 4. 337129 3. 205448  
5. 945152 5. 97111 5. 632534 5. 56855 6. 502774 4. 929292 5. 072851 5. 612321 5. 79012  
2. 99826 2. 566452 3. 610364 3. 356147 2. 028918 2. 824384 2. 83111 2. 711514 2. 115451  
6. 206132 5. 818344 6. 116606 5. 675297 6. 136036 6. 073135 5. 905323 6. 183414 5. 818566  
2. 963733 4. 551525 3. 010225 3. 212315 3. 855634 3. 483969 4. 375136 3. 677685 2. 827835  
3. 849213 3. 350661 3. 637178 2. 226653 2. 678533 2. 971295 3. 335516 3. 445601 3. 170776  
2. 788856 3. 582159 4. 055278 2. 637196 4. 141101 4. 414315 3. 306827 3. 512924 2. 931094  
5. 810851 6. 366325 6. 799785 6. 294877 6. 069395 6. 634653 6. 042827 7. 036835 6. 32025  
3. 043922 3. 101133 2. 8127 2. 994087 2. 445457 3. 072809 2. 717936 2. 708434 2. 740742  
3. 707547 2. 095212 2. 88335 3. 958025 3. 497255 3. 669267 3. 420119 2. 549538 2. 789419  
6. 730669 6. 52027 6. 51821 6. 424117 6. 929495 6. 621778 6. 800079 6. 436156 6. 923648

3. 050747 4. 342235 4. 78606 5. 101819 5. 274784 4. 054948 4. 467549 4. 805026 4. 410897  
3. 060325 3. 847956 3. 013579 2. 689965 3. 390799 3. 854151 3. 759827 2. 948692 3. 717643  
3. 216202 3. 418367 5. 086096 4. 327588 3. 552859 4. 945813 2. 951471 3. 090108 3. 460037  
7. 441062 6. 274295 6. 950663 6. 995644 6. 711309 6. 67621 7. 35722 6. 251011 7. 462021  
3. 776476 3. 075173 3. 881219 4. 331683 3. 364766 3. 788373 3. 019704 4. 59969 3. 92458  
5. 033083 5. 582444 5. 304237 6. 505279 5. 843999 6. 13135 5. 614013 4. 800567 5. 287714  
2. 34388 1. 578023 1. 471167 1. 925723 1. 470652 1. 679021 2. 128621 1. 742515 1. 91496  
4. 655509 4. 405126 5. 050273 4. 292773 5. 083983 5. 119745 4. 45029 4. 089548 3. 920916  
2. 63096 2. 949995 2. 227967 3. 224713 3. 60123 2. 421789 2. 34364 3. 254151 3. 824364  
3. 249466 4. 610098 4. 430836 4. 362007 5. 511254 5. 270869 3. 235994 3. 620056 4. 263141  
5. 822911 6. 716017 6. 447966 6. 326081 6. 044371 5. 987551 5. 981263 6. 450692 6. 008113  
1. 111417 0. 955645 1. 064877 1. 186387 1. 950489 1. 229623 1. 13083 1. 147859 1. 391771  
3. 884822 3. 085623 4. 817428 3. 654183 2. 180407 2. 099378 2. 335248 3. 09609 2. 777763  
1. 924368 1. 560391 1. 559745 2. 107153 1. 645368 1. 930644 2. 946792 1. 69427 1. 812047  
2. 980434 4. 075465 3. 648577 2. 906693 4. 135979 3. 511868 3. 561114 4. 082527 3. 588299  
2. 95831 2. 34414 2. 847131 3. 853386 2. 53433 2. 939352 3. 625343 3. 207543 3. 0795  
7. 170388 7. 727404 7. 272581 7. 829547 8. 337367 7. 876578 8. 165649 8. 147851 7. 871758  
2. 098261 1. 738193 1. 68487 2. 565984 1. 878927 2. 040724 1. 907831 2. 568951 2. 155547  
3. 731737 2. 147849 2. 328541 2. 363191 2. 277487 2. 427795 2. 019803 2. 357352 2. 685066  
2. 216919 2. 397918 2. 749209 2. 392231 2. 006208 3. 886089 2. 540052 2. 096251 2. 6808  
2. 009953 1. 942057 2. 076333 2. 355049 1. 755748 1. 812231 2. 509327 1. 487321 2. 496117  
1. 451198 2. 207429 2. 171095 1. 80023 1. 7614 1. 687998 1. 483348 2. 550464 1. 622271  
3. 934534 4. 165875 3. 614656 3. 723614 3. 272224 3. 81455 3. 827474 4. 131815 3. 939327  
3. 420617 2. 955495 4. 317676 2. 761407 2. 626745 3. 112106 2. 615984 3. 406398 2. 663291  
5. 892714 6. 971647 6. 995254 6. 63545 7. 052139 6. 603093 6. 393086 7. 252194 6. 721861  
3. 664501 4. 721437 4. 058107 4. 601061 4. 753594 4. 617613 3. 908025 5. 355574 4. 507668  
3. 54971 5. 416532 3. 530964 4. 958446 5. 082672 5. 969547 4. 316343 5. 54026 4. 846451  
0. 875241 1. 127948 1. 137816 1. 15458 0. 757773 0. 900666 1. 028854 0. 963654 0. 831566  
3. 109583 2. 143749 1. 774667 2. 273222 2. 725342 2. 384694 2. 259053 2. 338328 2. 166137  
3. 939673 4. 336509 4. 535676 3. 482735 3. 036263 3. 841605 5. 316151 4. 574227 4. 608073  
7. 408036 7. 878874 7. 971036 7. 514318 7. 591363 7. 538003 7. 516515 7. 702139 7. 592149  
6. 385601 6. 877941 6. 910807 7. 42283 6. 844317 7. 072405 6. 942282 6. 61332 7. 155908  
5. 604982 5. 908644 5. 664501 5. 087546 6. 067059 5. 456649 5. 263248 5. 701427 5. 660916  
6. 904545 6. 817364 7. 040061 6. 565683 6. 587089 6. 968035 6. 189043 6. 70349 6. 58032  
4. 498643 5. 643572 4. 671401 5. 74733 5. 086278 4. 901218 5. 1155 4. 576004 5. 330944  
4. 967169 5. 052078 4. 89097 4. 465963 5. 051786 4. 267943 5. 154398 5. 727884 4. 58061  
3. 660539 3. 141018 2. 523411 3. 430313 2. 336929 2. 294492 2. 761586 3. 642271 2. 873768  
1. 286664 2. 427051 1. 244914 1. 903847 2. 672825 1. 935852 5. 652795 1. 158459 6. 442661  
4. 698739 4. 349702 4. 738329 5. 292321 4. 860677 4. 632646 4. 175846 4. 447973 4. 427246  
4. 159587 4. 35671 4. 481991 4. 162796 4. 027266 5. 346212 4. 087891 4. 78374 3. 931499  
3. 218456 3. 003463 3. 365157 3. 092284 3. 555508 2. 86617 3. 286921 3. 320232 3. 493208  
5. 104478 5. 453335 5. 41326 4. 824198 5. 84999 6. 020971 4. 955992 5. 769661 5. 70476  
5. 369215 5. 423399 5. 763743 5. 3585 5. 762086 5. 419423 5. 357507 3. 869603 5. 4067  
5. 62339 4. 441547 4. 583709 4. 897719 5. 063513 4. 426964 5. 087403 4. 679452 4. 406241  
2. 225147 3. 061634 2. 128782 1. 626795 2. 513975 1. 791044 1. 693909 2. 503122 2. 650086  
6. 167706 6. 26492 6. 564898 5. 332292 5. 836867 5. 710415 5. 924935 5. 770197 5. 334332  
3. 406393 2. 787273 2. 275243 2. 40795 1. 999303 2. 351242 2. 068137 2. 041447 2. 245172  
2. 692837 3. 557461 3. 639112 2. 877311 3. 691979 2. 98115 2. 551414 2. 738092 3. 945294  
2. 856768 2. 584413 2. 228136 2. 757975 2. 225058 2. 461152 2. 661989 3. 054674 2. 152841  
4. 308868 3. 662226 5. 05808 3. 992355 4. 591501 3. 72002 3. 797962 2. 80641 4. 702966  
3. 536904 3. 19572 3. 469702 3. 407123 3. 375574 3. 471618 4. 074027 3. 431118 2. 271537

2. 289386 1. 873501 2. 655717 1. 979847 1. 957646 2. 041106 1. 779188 1. 659469 2. 273377  
4. 291089 4. 625775 5. 099212 4. 195177 4. 045042 5. 403501 4. 652602 4. 705916 3. 73928  
1. 512819 1. 63534 2. 853674 1. 237525 1. 846652 2. 032778 2. 134491 2. 871132 1. 997686  
4. 135258 4. 857819 3. 233554 4. 49207 5. 15961 4. 885631 5. 090918 5. 383365 4. 862347  
4. 514662 4. 485605 4. 561896 4. 101472 4. 267122 4. 521117 3. 901984 3. 486954 3. 834806  
1. 403165 1. 408506 1. 600199 1. 307854 1. 387907 1. 879856 1. 061314 1. 343208 0. 985722  
2. 158786 1. 280738 1. 340502 1. 12249 1. 148482 1. 369537 1. 57511 1. 527145 1. 554718  
1. 545192 2. 711023 1. 757977 2. 691629 2. 671282 1. 684675 1. 618963 1. 943384 1. 700086  
1. 325656 1. 777595 1. 489187 1. 491592 1. 416552 1. 830503 2. 129255 1. 105567 1. 448412  
4. 629995 2. 117733 3. 483411 2. 558783 1. 845971 2. 588224 1. 288209 1. 933175 3. 899736  
1. 714223 1. 805748 2. 316595 2. 268925 1. 986539 2. 002368 2. 034595 1. 868758 1. 91151  
5. 891264 4. 182657 5. 435131 4. 670611 4. 97902 4. 161221 4. 227377 4. 156368 5. 232964  
4. 942937 3. 941423 5. 025974 2. 756736 4. 656504 3. 321829 4. 318684 3. 712126 4. 798441  
0. 692878 0. 89709 1. 068963 0. 908217 1. 008373 1. 161036 1. 079834 0. 758135 1. 444151  
8. 650119 9. 413035 8. 439308 9. 614636 9. 559808 8. 99095 9. 45451 9. 21606 9. 269705  
2. 186087 4. 102866 3. 470736 2. 235369 3. 709353 3. 959759 3. 019407 4. 344245 3. 663529  
4. 931227 5. 373488 4. 399241 5. 244163 5. 461806 5. 266703 5. 435772 5. 174776 5. 537611  
1. 862346 2. 479418 2. 948701 3. 459145 4. 63887 2. 704111 2. 216323 2. 66113 3. 650849  
5. 781901 6. 120956 6. 581094 5. 236649 6. 019363 6. 653548 6. 989372 7. 054364 6. 759725  
3. 289175 3. 322514 4. 558484 3. 52832 3. 115552 3. 31771 3. 111227 4. 013011 4. 500818  
1. 285301 1. 666185 1. 432397 2. 153876 1. 499777 2. 020236 1. 503026 2. 441575 1. 365611  
2. 166351 2. 221526 1. 97752 3. 012461 1. 9544 2. 541027 2. 169456 1. 786495 2. 055194  
1. 638677 0. 829516 1. 712765 1. 72208 0. 875484 0. 85641 2. 80876 1. 029641 0. 847446  
5. 337532 5. 385826 5. 134323 5. 411195 5. 711522 5. 221891 4. 863985 5. 332553 5. 590829  
1. 773987 1. 674856 2. 492437 1. 783202 1. 363105 1. 381479 2. 115667 1. 924168 1. 730078  
3. 872046 3. 847723 4. 449149 3. 812256 3. 898226 4. 093277 3. 571759 3. 768199 3. 03918  
1. 816374 1. 029584 1. 36445 2. 213583 2. 043439 1. 388394 2. 133984 1. 285964 1. 47435  
2. 065604 1. 738928 2. 057615 2. 338425 2. 020915 2. 113738 2. 509503 2. 029062 2. 386692  
2. 152305 2. 087915 2. 960393 3. 709804 2. 403949 2. 836062 4. 561488 2. 141168 2. 771701  
0. 967944 1. 544917 0. 729521 1. 53873 1. 347693 1. 065886 1. 21375 1. 049745 1. 102175  
6. 411742 6. 72985 6. 810171 6. 692715 6. 629355 6. 561584 6. 701856 7. 214898 6. 661937  
3. 374282 4. 202048 4. 471063 3. 944805 4. 40446 5. 01445 3. 028428 4. 673371 4. 346215  
2. 311294 2. 054604 2. 561682 2. 077814 2. 464295 2. 690423 2. 429403 2. 655723 3. 181922  
4. 191514 2. 805463 2. 900818 3. 00472 3. 693906 3. 306193 2. 007115 3. 020225 2. 983561  
4. 51768 5. 172104 5. 05433 4. 982242 4. 788333 4. 17488 4. 291604 4. 516034 4. 762974  
4. 186625 4. 237086 4. 804577 3. 814559 3. 111369 4. 483076 4. 172326 4. 286218 4. 694684  
7. 403958 7. 765026 8. 063944 7. 442517 7. 832254 7. 667395 7. 40179 7. 854026 7. 947609  
6. 185055 7. 082393 6. 567552 7. 033384 6. 846014 6. 926318 6. 869594 7. 405939 6. 767165  
4. 032108 3. 726265 3. 685249 3. 729626 4. 124985 3. 348882 3. 304592 4. 109364 4. 356644  
3. 200529 3. 059402 2. 998635 3. 532421 3. 093713 3. 569335 3. 504304 3. 200241 2. 933268  
5. 463776 3. 558413 5. 201163 3. 225155 3. 754912 4. 01358 4. 182062 4. 487199 4. 609765  
3. 781632 3. 822104 3. 757306 3. 199578 3. 895542 3. 104239 3. 270133 2. 970308 3. 548428  
4. 639876 3. 945843 4. 134156 4. 58312 5. 176913 3. 567378 4. 167237 4. 240398 4. 857979  
5. 294141 5. 75029 6. 068355 5. 6474 6. 400868 5. 665392 5. 515267 6. 278901 5. 62986  
2. 883692 1. 788728 1. 740095 1. 468418 2. 348398 2. 445998 1. 994743 1. 676674 2. 414273  
3. 316785 3. 481192 3. 47934 2. 828599 2. 656336 2. 494862 3. 430241 3. 233784 3. 585012  
2. 568506 2. 169483 2. 930971 2. 722634 2. 365609 2. 639465 2. 65702 3. 056123 2. 48802  
2. 861674 2. 727627 3. 061263 3. 107912 2. 578017 2. 241691 3. 34609 3. 515905 3. 030625  
4. 341073 4. 919806 5. 066884 4. 072735 4. 149942 4. 259259 4. 337927 4. 199114 4. 248642  
2. 286267 1. 35235 0. 990535 2. 355227 1. 429549 1. 352202 1. 396188 1. 142823 1. 773977  
3. 412124 5. 205215 5. 354014 5. 589389 4. 94396 5. 391253 3. 863705 4. 872227 5. 053037

5. 612894 6. 379582 5. 331549 5. 467047 5. 788883 6. 042931 5. 909501 5. 985 5. 854693  
2. 554701 2. 62842 2. 248007 2. 301192 1. 889995 2. 193317 2. 86251 2. 001818 2. 444413  
3. 792894 4. 623239 4. 666233 4. 602519 4. 803698 5. 352348 3. 717166 4. 953454 4. 285287  
8. 37674 8. 698568 8. 529643 8. 740744 8. 390833 8. 261231 8. 552006 7. 94795 8. 405946  
2. 12436 1. 748705 1. 538908 1. 912758 2. 120599 2. 127177 1. 781044 1. 632834 1. 707328  
3. 836614 3. 41058 2. 670849 2. 637201 2. 898185 3. 759373 2. 900438 2. 842927 2. 94445  
1. 12758 1. 757064 1. 444056 1. 44895 1. 607514 1. 203703 3. 269761 2. 076575 1. 783821  
5. 286755 6. 094262 5. 608011 6. 162525 5. 992816 5. 626335 5. 523705 6. 022404 4. 998141  
5. 063426 5. 131659 4. 875251 4. 91854 4. 832598 4. 556412 5. 134327 5. 13725 5. 265229  
4. 401996 4. 858403 4. 772847 4. 614894 4. 488535 4. 659655 5. 357363 4. 582318 4. 690049  
3. 420918 3. 814763 3. 629019 3. 289449 3. 089225 3. 829417 3. 121546 3. 449637 3. 640713  
5. 699555 6. 161806 5. 771377 6. 169536 6. 140383 5. 701043 5. 987516 5. 814514 6. 381744  
5. 018305 5. 156833 4. 87734 4. 930983 4. 75665 4. 921464 4. 943688 4. 800374 5. 073161  
3. 846973 4. 434183 4. 054708 3. 471201 4. 707058 4. 76253 4. 36253 3. 524121 4. 510906  
5. 935102 5. 122594 5. 30455 5. 781838 5. 568335 5. 724786 5. 813885 5. 698088 5. 660261  
8. 323499 8. 363241 8. 240455 8. 445235 9. 405821 8. 26785 8. 3977 8. 119786 8. 317698  
3. 26089 3. 248177 3. 230323 2. 786046 3. 07944 3. 844522 3. 414906 3. 450825 4. 15919  
7. 080959 7. 417827 7. 461615 7. 545448 7. 312821 7. 277768 7. 215661 7. 32059 7. 232376  
6. 847059 7. 253284 7. 291041 7. 508286 7. 144295 7. 152361 7. 103877 7. 295555 6. 80871  
5. 067603 4. 216339 4. 646211 3. 002151 4. 095621 4. 926412 5. 950474 4. 524026 5. 437175  
3. 996265 3. 950148 3. 488836 3. 133938 4. 443397 3. 350705 3. 171817 3. 615878 4. 19269  
5. 801696 6. 284156 6. 40796 6. 476944 6. 441542 6. 569253 6. 314311 6. 836267 6. 311546  
6. 122353 6. 518263 6. 174926 6. 7038 6. 649397 6. 317615 6. 277948 6. 391573 6. 238801  
3. 551014 3. 554119 3. 119975 3. 49268 3. 99166 4. 388584 3. 299619 4. 234875 3. 190904  
5. 350621 4. 281378 4. 592163 4. 732032 5. 20407 5. 882737 4. 293116 4. 842925 4. 775179  
6. 20966 6. 940262 6. 4905 7. 176221 7. 07904 6. 680338 6. 361114 7. 112051 6. 550286  
1. 530542 1. 393572 1. 230162 1. 83924 1. 466412 1. 578896 1. 975088 1. 793461 1. 374875  
4. 380421 4. 49262 4. 228166 5. 176563 3. 561704 4. 508451 2. 869119 4. 127392 4. 370107  
1. 518197 1. 480952 2. 305863 1. 194675 1. 299214 1. 646458 1. 280907 1. 532803 1. 551322  
7. 80268 7. 818246 8. 012926 7. 901876 7. 560078 8. 321198 7. 71753 7. 183478 7. 581109  
5. 469343 6. 415812 6. 329658 6. 326566 6. 510559 6. 476771 5. 826212 6. 518679 6. 407224  
6. 673541 6. 6768 6. 812853 6. 939539 6. 778331 7. 169767 6. 706934 6. 368725 6. 758092  
6. 621996 4. 722877 4. 67658 4. 739449 4. 67128 4. 658583 4. 419625 4. 927426 6. 139286  
4. 349484 3. 728866 3. 585395 4. 011944 3. 98445 4. 445969 3. 420176 4. 024322 4. 716506  
5. 248587 4. 987581 4. 833887 4. 935822 5. 414653 4. 898283 4. 519765 4. 792781 4. 623699  
4. 393069 4. 302466 5. 297251 4. 892047 5. 825977 4. 328976 4. 538728 5. 039987 4. 684176  
5. 740531 4. 681711 5. 050785 4. 583277 5. 247919 3. 450518 5. 099587 5. 532926 5. 274796  
3. 54111 4. 326892 3. 351712 3. 989782 3. 259362 3. 530959 4. 242161 3. 382591 3. 461702  
2. 898582 2. 008896 2. 467427 2. 537884 2. 080574 2. 075198 1. 417567 1. 825347 2. 128166  
5. 343122 6. 175518 6. 059091 6. 117481 6. 360126 6. 426451 6. 232185 6. 054011 6. 479086  
1. 692573 1. 477526 1. 554673 1. 646876 1. 577115 1. 600056 2. 021869 1. 591946 1. 408425  
7. 641992 8. 339714 8. 303509 8. 404441 8. 544098 8. 027084 8. 267983 7. 986375 8. 397324  
2. 605531 3. 155751 2. 17805 2. 864614 3. 554833 3. 223023 3. 416228 2. 783386 2. 673705  
3. 002762 4. 626223 4. 380081 2. 920402 3. 815911 3. 164309 4. 086698 3. 355461 4. 385684  
2. 295546 2. 676866 2. 791089 1. 790877 1. 87292 1. 873288 2. 660582 1. 938753 2. 286215  
6. 19294 6. 326755 5. 734028 7. 374969 7. 01826 6. 881212 6. 953456 6. 234055 6. 06272  
5. 298394 5. 49121 5. 342221 4. 961795 5. 387413 5. 061509 5. 151898 5. 000173 5. 136806  
7. 46657 7. 304999 7. 788384 7. 195272 7. 501349 7. 535139 7. 472048 8. 113488 7. 528671  
4. 597284 4. 495097 4. 758439 4. 564744 5. 54369 4. 180386 4. 183583 4. 434664 4. 89593  
1. 287654 2. 125807 1. 67636 1. 4265 1. 514185 1. 875202 2. 019582 1. 122852 1. 668823  
6. 497336 6. 063722 6. 074244 6. 698966 5. 839067 6. 013918 5. 051339 5. 909404 6. 434108



2.067607 2.31618 1.916471 2.661551 1.096657 1.690986 1.667593 1.73291 2.514345  
3.365909 3.896122 3.124365 4.139494 2.676729 3.734682 1.864205 3.835214 3.026441  
5.682584 6.182202 6.412431 5.657283 6.472494 5.495629 5.825253 6.318906 5.967429  
3.026711 2.938633 2.607942 2.687319 1.964215 2.555728 2.652987 2.448686 2.632211  
1.426171 2.117166 2.460606 2.651658 2.159492 2.051626 1.538665 2.046325 1.912023  
6.941239 6.588814 6.269155 5.674008 7.160871 6.53118 5.45602 6.414492 6.903384  
3.937848 4.090092 3.20789 4.042953 2.751395 3.318047 5.433445 4.436231 3.767754  
4.561874 5.132248 4.348099 4.962259 5.616382 4.577193 4.41607 4.873458 4.673878  
5.10527 6.302653 5.893364 6.679147 6.194408 6.198983 4.980025 6.411909 6.63932  
5.304461 4.846793 5.474321 4.614056 4.190587 4.743353 5.105951 4.796243 5.252275  
2.693971 3.252034 2.844365 2.408037 3.122664 2.412771 3.303667 3.432426 3.451155  
9.493717 7.129137 8.4318 7.31137 7.659222 6.565785 7.648323 7.362312 9.143869  
5.362885 5.561272 4.91865 6.368449 5.856332 5.625183 5.707147 3.882702 5.686341  
7.904736 6.601256 6.833914 7.187513 7.569117 6.718019 7.439542 7.358347 7.326617  
3.770873 3.828177 3.858352 3.910026 4.020515 4.622119 3.715168 4.455735 3.39124  
3.762348 3.674542 4.045272 3.88213 3.963855 4.664199 2.322321 3.649541 4.373454  
6.311364 6.195424 6.132317 5.888428 7.251436 6.476283 6.688709 7.131773 6.742536  
2.102187 1.687152 2.29623 1.845455 1.674127 1.901808 2.354003 2.004214 1.898684  
3.6485 3.571676 3.863753 3.529288 3.728246 3.585785 3.815047 3.911406 3.798023  
1.890591 1.665552 1.875828 2.4012 2.591706 1.756832 2.241939 1.432602 1.829127  
8.092959 8.24776 8.140508 8.080495 8.217936 7.896883 7.735436 7.960592 7.967897  
6.027798 7.179418 6.472218 8.089826 6.466948 7.47212 6.525431 5.944216 6.802886  
4.140629 4.432565 4.112474 3.657304 4.174795 3.945994 3.666642 4.261192 4.052389  
3.80553 3.354575 4.904389 4.177574 3.604916 3.566541 4.479426 3.97993 3.973546  
4.818382 4.230881 4.332268 3.955158 3.950606 4.086029 4.451565 5.019356 3.986322  
5.265781 5.928413 6.112612 5.793619 6.182672 6.427635 5.769044 5.818483 5.88727  
7.573103 7.618264 7.962411 7.859336 7.784292 7.502936 6.804928 7.798467 7.493944  
1.546077 1.150588 2.257377 1.493669 1.129937 1.338102 1.108301 1.333204 1.5624  
4.177622 4.701647 4.048675 4.397443 4.137921 4.662491 3.674385 4.212024 3.91146  
4.472549 5.109307 4.161197 3.119182 4.169368 4.720602 4.134008 3.72576 3.736975  
2.775644 3.708982 3.850663 3.426674 3.172614 3.469604 3.271315 2.42126 4.606451  
7.518862 7.086549 7.364533 7.436038 7.266098 7.158391 6.873702 7.078821 7.230503  
1.905299 2.046589 1.886596 2.240143 2.409664 1.585131 2.061514 1.423278 1.988725  
5.648761 4.641949 5.236594 5.620719 4.987173 4.779768 5.857171 4.870991 5.419861  
3.432949 4.465976 4.241 4.773191 3.884964 2.842476 4.020173 4.663809 4.269576  
2.798813 2.96937 2.517357 2.250204 2.530196 2.575373 2.907194 2.871874 3.02917  
2.990938 2.804578 3.474364 3.889899 3.045263 2.720335 2.622925 2.926453 2.901939  
2.530031 2.376287 2.270786 1.844622 2.383194 2.188476 2.297593 2.601832 2.947019  
4.171334 3.353894 4.5046 3.057099 2.660358 3.217317 3.187262 3.064966 3.296711  
1.531725 0.968023 0.336618 0.93715 0.724991 1.627326 0.500563 0.757916 1.056083  
6.336551 6.100043 6.047329 6.707313 5.686052 5.964332 6.358412 6.637467 6.247996  
3.749268 3.184685 3.440681 2.939802 3.251582 3.975421 3.545909 3.644169 3.072964  
2.539652 1.787111 1.72203 1.620315 1.584697 1.95186 2.354171 2.036631 1.882888  
6.73588 6.696962 7.072179 7.300762 7.03188 7.088338 6.052392 7.162263 7.230277  
3.400672 3.76968 2.57815 2.643788 3.715403 2.594799 2.541417 2.801738 2.374718  
4.475954 1.746997 2.282077 1.117635 2.094163 2.23455 1.726782 1.63899 2.312685  
2.471161 2.856634 2.999306 2.688053 2.854031 2.708046 2.387689 3.127655 2.768398  
3.403655 3.492814 4.158599 3.000874 4.091962 4.415046 3.760654 2.759647 3.420003  
1.280544 0.96627 1.74339 1.187835 1.698457 1.436672 1.362247 1.392791 1.264919  
5.212074 4.949996 5.433881 4.953669 5.203837 5.875419 4.440414 5.326385 5.413364  
1.727708 3.094169 2.683429 3.19483 2.273248 2.822609 2.948156 2.282284 2.402897

3. 277187 3. 922302 3. 180415 3. 681604 4. 308575 4. 169081 3. 09989 4. 09228 3. 69297  
5. 578155 5. 433944 5. 905572 5. 723173 5. 879408 5. 461953 5. 467155 6. 059797 6. 100833  
7. 471689 7. 507351 7. 562028 7. 427513 7. 072119 6. 92997 6. 700413 7. 185451 7. 320845  
3. 50152 4. 525604 5. 583438 4. 78153 4. 131271 4. 693606 4. 419853 5. 328101 4. 147819  
0. 906661 0. 942915 1. 430373 1. 144352 0. 912228 1. 251677 1. 388118 1. 477088 1. 167285  
6. 604672 7. 455087 7. 309852 7. 388984 7. 189638 7. 611475 7. 05776 7. 204625 7. 315792  
2. 828933 2. 989283 2. 726833 3. 349814 3. 031254 2. 862834 2. 891624 2. 725656 3. 019935  
8. 082948 8. 085635 8. 031679 8. 308445 7. 806903 8. 372896 7. 74996 7. 573323 7. 778525  
5. 095332 5. 44823 5. 031881 6. 36339 5. 911964 5. 593344 5. 043937 3. 18793 5. 678198  
5. 690602 5. 392458 4. 522101 5. 399831 5. 811731 5. 96838 6. 42554 5. 380537 5. 461218  
2. 944897 3. 201879 2. 990576 3. 949714 4. 058575 3. 634151 5. 254211 3. 401714 3. 888574  
3. 303406 3. 258662 3. 439402 2. 8069 2. 858092 2. 87747 2. 618245 2. 774956 3. 317451  
1. 609393 1. 773086 0. 9187 1. 61498 1. 887348 1. 92523 1. 455337 1. 037096 1. 960174  
5. 351796 6. 203994 6. 63037 6. 153277 6. 705331 6. 495983 5. 633755 6. 69955 6. 153279  
9. 908724 9. 938028 10. 05815 9. 452125 9. 620634 9. 831769 9. 749939 9. 596603 9. 593998  
2. 412421 2. 172702 2. 621889 3. 035375 2. 712564 3. 595254 1. 85153 2. 986348 2. 479728  
6. 291348 6. 646792 6. 869488 6. 127146 6. 756502 6. 462939 6. 00364 6. 675481 6. 466543  
6. 140044 6. 885777 6. 742666 6. 701288 6. 656603 6. 601207 6. 827704 7. 063311 6. 896527  
3. 371832 2. 648036 2. 657861 2. 297548 3. 192051 2. 474592 2. 323952 3. 170833 3. 598485  
2. 395272 2. 585819 2. 746952 3. 008492 2. 38717 1. 943439 2. 973689 3. 126003 2. 203375  
2. 938279 2. 496334 3. 292058 3. 344805 2. 718539 2. 74175 2. 704223 3. 125671 2. 752009  
1. 734386 1. 106447 1. 037275 1. 490115 1. 435386 1. 4014 1. 448654 1. 469065 1. 38948  
2. 065604 3. 027725 1. 971699 2. 638677 2. 672318 1. 519752 2. 482049 2. 103701 2. 85021  
2. 23453 1. 9624 2. 865498 3. 160119 2. 298598 4. 021225 3. 250616 1. 72207 1. 894254  
3. 485918 2. 838993 3. 180834 3. 349872 2. 104944 3. 583962 2. 121765 2. 487481 3. 62288  
2. 323473 2. 113209 1. 957529 2. 388821 2. 283909 2. 378836 2. 071446 2. 239935 2. 341652  
3. 258362 2. 683065 3. 024487 2. 542306 2. 665107 2. 878599 2. 1837 2. 623734 3. 303931  
6. 693293 4. 972175 5. 193953 6. 063923 5. 621014 5. 982318 5. 921971 5. 733701 5. 874752  
2. 013635 1. 870456 2. 476722 1. 40408 1. 535974 2. 20744 1. 728902 1. 97721 0. 96957  
1. 55728 1. 750877 1. 585545 1. 880548 1. 751429 1. 565785 1. 771072 1. 851158 1. 426734  
6. 871664 4. 100873 5. 329251 3. 709566 4. 769761 4. 232702 4. 216656 4. 048018 5. 32626  
4. 043263 4. 823944 4. 517004 4. 2745 4. 775975 3. 619173 4. 368001 5. 572003 3. 904104  
3. 21801 2. 284176 2. 689314 2. 306958 1. 934342 1. 74419 2. 256293 2. 535349 1. 610818  
3. 753783 4. 157819 4. 249158 4. 21957 4. 070595 4. 242237 3. 743379 4. 005907 4. 078586  
2. 920605 2. 370744 3. 649863 3. 084683 2. 87561 2. 339392 2. 848546 2. 619821 2. 631118  
3. 605665 4. 478961 3. 29227 2. 470475 3. 147601 3. 485199 3. 304866 3. 135618 3. 304424  
4. 303878 4. 277617 4. 316641 4. 513153 4. 123929 3. 715325 4. 196595 5. 230853 4. 831954  
4. 011913 4. 193567 2. 794438 2. 961429 2. 50841 4. 026741 2. 228694 2. 862392 2. 899004  
3. 86702 3. 726959 3. 613463 3. 968234 3. 778519 4. 311764 4. 43421 3. 347462 4. 308649  
2. 206086 1. 48993 1. 444541 2. 094367 1. 402172 2. 262537 1. 84969 1. 437347 2. 043571  
2. 225958 1. 924869 1. 941211 1. 999509 1. 896144 1. 922158 2. 169564 2. 000688 1. 791607  
4. 40229 3. 960105 4. 058313 3. 76084 3. 65688 3. 502062 4. 223915 3. 369329 3. 17018  
3. 980191 2. 358669 3. 527983 2. 475474 2. 482668 3. 876534 3. 206367 2. 385436 2. 518855  
8. 309317 8. 968395 8. 863515 9. 456993 8. 913157 9. 302712 8. 672336 8. 682017 9. 293352  
3. 41578 3. 244696 3. 334881 3. 073254 3. 310023 3. 413081 3. 227357 3. 394577 3. 2989  
7. 235828 7. 927005 7. 835349 7. 508324 7. 687896 7. 389077 7. 720498 7. 656395 7. 404046  
4. 696963 3. 327568 4. 839962 4. 294373 2. 621 2. 813922 3. 487825 3. 590439 3. 964051  
6. 647549 5. 594301 6. 499074 5. 914 5. 911426 5. 921942 6. 018195 6. 242043 6. 012636  
2. 657655 2. 482607 3. 112591 2. 263604 2. 509702 2. 254613 2. 240158 2. 72839 2. 994546  
1. 484599 2. 660719 1. 043798 1. 336844 1. 117651 1. 787534 1. 446301 1. 934386 1. 545442  
2. 386756 2. 753922 3. 438318 4. 177728 2. 745376 2. 267985 2. 415956 3. 467005 2. 918065

5. 172832 5. 042458 5. 407273 5. 739108 5. 08498 5. 908085 5. 510738 5. 372388 5. 523298  
4. 462308 2. 782413 3. 307752 3. 067691 3. 551854 2. 741665 2. 95226 2. 675701 3. 733018  
4. 220673 4. 218081 5. 416728 3. 702079 4. 270835 4. 519686 4. 777026 4. 118857 3. 545611  
8. 552814 8. 281771 8. 637219 8. 559523 8. 742608 8. 906959 7. 967395 8. 555921 8. 349661  
2. 626305 4. 2658 4. 418547 3. 689296 4. 15233 4. 095866 3. 109483 3. 59947 4. 354936  
4. 306201 4. 262867 4. 113034 4. 255461 3. 814552 4. 333358 4. 771262 4. 385662 4. 20148  
6. 637311 6. 192454 6. 039069 5. 729836 5. 64871 6. 026034 5. 168966 6. 378521 6. 250481  
4. 911829 5. 216562 5. 02235 5. 518027 6. 199851 5. 431829 6. 088848 6. 087671 5. 377385  
6. 780349 6. 698677 6. 216527 7. 379307 7. 250828 6. 620181 7. 081115 6. 034783 7. 16489  
5. 826994 5. 854645 6. 252686 6. 856055 5. 535443 6. 379699 5. 623355 6. 474896 6. 204517  
1. 734068 1. 876111 1. 576216 2. 907599 1. 455294 1. 640739 1. 984326 1. 609679 1. 491896  
2. 801997 4. 931963 5. 216707 4. 524907 4. 365204 4. 590511 3. 634939 4. 477073 4. 249883  
4. 286579 4. 004367 4. 517782 4. 573749 5. 48478 5. 347334 4. 477624 4. 328244 5. 504185  
2. 843544 2. 58058 2. 708692 2. 822142 2. 480727 3. 083953 3. 328665 3. 042657 3. 457168  
5. 938207 5. 281435 4. 935048 5. 124239 5. 14244 5. 235339 4. 830194 5. 254771 4. 759852  
2. 390189 4. 270013 3. 026905 2. 922904 2. 732353 3. 382896 3. 647199 3. 220684 2. 881664  
7. 06931 7. 357992 7. 370403 7. 336183 7. 151735 7. 447969 6. 53633 7. 387162 7. 299501  
8. 502775 7. 992528 7. 836093 7. 176398 7. 777742 7. 488802 7. 467234 7. 444242 7. 290339  
5. 41546 5. 394086 5. 620998 6. 406397 5. 11335 6. 543186 5. 785132 5. 738623 6. 216296  
6. 317709 6. 237045 6. 519917 6. 988914 5. 554073 7. 074665 6. 346198 6. 228247 6. 259573  
0. 984434 1. 376647 0. 726181 0. 948735 1. 059944 1. 120502 0. 720044 0. 85442 0. 803682  
2. 510338 2. 587407 2. 763927 2. 030342 2. 339302 2. 533751 2. 992722 2. 027856 2. 932638  
1. 845321 2. 179621 2. 477745 1. 917451 2. 482371 2. 663041 1. 539128 1. 92045 1. 903338  
2. 99795 1. 750916 2. 015309 2. 078434 1. 523326 1. 642888 1. 649341 1. 813903 2. 188952  
1. 948505 1. 856732 1. 774944 1. 878837 2. 107863 1. 619609 2. 316629 1. 82583 1. 999796  
2. 879755 3. 853034 2. 988192 4. 244045 3. 552533 2. 801434 3. 475027 2. 978316 4. 189029  
1. 787101 1. 965999 2. 2783 2. 264153 2. 724571 2. 921207 2. 499787 2. 01453 2. 358758  
4. 780476 4. 958352 4. 940489 5. 303004 5. 213433 5. 471573 4. 261535 5. 123966 5. 00106  
7. 233464 7. 43348 6. 825488 7. 292132 7. 636142 7. 5209 7. 061002 6. 950144 7. 453669  
5. 514762 5. 30437 5. 312715 5. 50617 4. 96171 5. 606084 5. 374272 5. 494474 5. 313482  
5. 09489 5. 309066 5. 370874 5. 769515 5. 490763 5. 788765 5. 246192 5. 326545 5. 30094  
3. 180049 3. 65231 3. 116551 3. 351344 2. 570219 3. 231769 3. 601025 3. 008502 2. 66714  
3. 79394 3. 205271 3. 530937 3. 342967 3. 309458 3. 173941 3. 35688 2. 87381 3. 300431  
1. 912822 2. 279095 1. 766286 1. 483929 1. 274315 1. 682446 1. 338103 1. 850665 1. 297968  
6. 798384 7. 121611 6. 272424 6. 473161 5. 972268 5. 97748 5. 980324 6. 394165 6. 721315  
7. 965095 7. 882767 8. 075537 8. 089535 7. 972715 7. 811567 7. 846187 7. 658469 8. 085481  
5. 701073 6. 218542 5. 851145 5. 827534 6. 222718 5. 919422 5. 648957 5. 954248 5. 584416  
5. 743609 4. 571092 5. 270855 4. 225559 4. 321845 3. 978816 4. 682064 4. 654781 6. 605344  
3. 867168 6. 038005 4. 373129 4. 984402 4. 936382 4. 621395 5. 341949 5. 675771 5. 122834  
9. 293618 9. 116806 9. 071233 9. 423489 9. 154613 9. 504525 9. 226305 9. 330555 9. 469464  
2. 736768 1. 826826 1. 761048 1. 741384 1. 764777 1. 255872 3. 214012 1. 34031 1. 633921  
1. 394499 1. 055523 1. 485851 1. 26819 1. 484421 1. 36333 1. 62662 1. 344012 1. 119852  
2. 474785 1. 555464 1. 834966 1. 719951 1. 545187 1. 69767 1. 835375 1. 573878 1. 544175  
5. 909938 6. 717008 6. 50491 6. 359792 7. 0064 6. 5183 6. 973089 6. 336384 6. 568365  
6. 545218 5. 740266 5. 983689 5. 524963 5. 155192 5. 849132 5. 591212 5. 813464 5. 28653  
2. 333703 3. 158555 3. 297068 1. 869513 2. 126086 1. 868178 2. 363516 2. 199656 2. 416735  
3. 084205 2. 953638 3. 149155 4. 073674 4. 260016 3. 529709 3. 114471 2. 909519 2. 767708  
2. 289621 1. 759624 2. 157506 1. 749102 1. 625982 1. 524571 2. 465948 1. 695324 2. 433077  
6. 214297 6. 109849 5. 367888 6. 287213 4. 957657 6. 0483 5. 602856 5. 378977 4. 819524  
2. 932428 2. 067722 3. 090529 1. 8899 2. 171087 2. 009488 2. 025003 1. 737086 2. 452772  
4. 375102 5. 882873 5. 800052 5. 272021 5. 874807 5. 895614 5. 866632 4. 989213 5. 142304

3. 529314 3. 382667 2. 564179 6. 18276 2. 841784 2. 631445 6. 382302 3. 537409 6. 479816  
7. 904824 6. 866002 6. 41416 6. 352953 6. 902888 6. 602825 6. 697592 6. 848063 6. 784019  
0. 931267 1. 280804 0. 920466 0. 894004 1. 118103 0. 973024 1. 489495 1. 411626 2. 025173  
1. 351817 1. 006453 1. 236482 1. 083907 1. 785943 1. 034454 0. 86181 0. 957147 1. 268666  
4. 500113 4. 487364 5. 675032 3. 436477 3. 448481 3. 261419 4. 01557 3. 539047 5. 209091  
2. 079958 2. 811462 2. 405177 3. 345937 3. 498382 2. 889702 2. 606853 3. 156758 2. 627897  
1. 876084 2. 760146 2. 624454 2. 239078 2. 420742 1. 755221 2. 400159 2. 766801 2. 083067  
1. 440068 2. 364063 0. 885925 0. 943669 1. 023616 0. 91082 1. 34836 1. 50095 1. 921689  
2. 403931 2. 798401 1. 835217 1. 777203 1. 903845 2. 166667 2. 422319 1. 859769 1. 915717  
0. 949513 0. 95112 1. 109858 1. 39719 1. 335781 0. 917881 0. 930803 0. 899921 1. 214964  
10. 59641 10. 60561 10. 49532 10. 65714 10. 64614 10. 63565 10. 55818 10. 70812 10. 68254  
2. 642506 2. 489405 2. 574534 2. 677807 2. 698137 2. 549876 2. 066945 2. 917835 2. 705387  
7. 314157 6. 797441 7. 120585 6. 73282 7. 346524 5. 514722 6. 49011 6. 73829 6. 745944  
7. 947386 8. 071637 8. 464129 7. 963439 8. 076709 7. 820293 8. 028873 7. 882706 7. 500539  
1. 517185 3. 197619 2. 729927 1. 844072 1. 627867 2. 105517 0. 894449 1. 210016 1. 540538  
1. 738204 3. 039682 5. 804331 5. 17894 3. 570962 2. 042271 6. 270543 2. 031093 5. 933121  
2. 920852 2. 250279 1. 65041 2. 558478 2. 052077 1. 790885 2. 832159 2. 071189 1. 959599  
1. 154742 1. 262716 1. 123303 1. 089901 1. 345906 0. 898125 1. 00728 1. 232433 1. 100881  
1. 133562 1. 025131 0. 803283 0. 77487 0. 698032 0. 907059 1. 720018 0. 827195 0. 975274  
1. 334656 1. 90449 0. 92458 1. 90027 1. 854323 0. 986147 1. 301008 1. 190226 1. 487081  
4. 349032 5. 346604 5. 079657 5. 593639 4. 683465 5. 106872 4. 478215 5. 65042 5. 013608  
0. 623224 0. 998789 0. 811279 0. 754456 1. 055978 1. 917703 0. 394214 0. 950896 0. 910652  
1. 263404 1. 274241 1. 580529 1. 318298 1. 898839 1. 257332 2. 139614 1. 428725 1. 322488  
1. 590167 1. 446452 1. 397408 1. 472858 1. 51849 1. 710127 2. 619464 1. 511668 1. 099706  
3. 351364 2. 276616 2. 552314 1. 621747 2. 669227 2. 359774 3. 241732 2. 392162 2. 427972  
3. 293092 2. 606343 2. 879812 3. 217252 2. 967319 3. 010886 3. 417634 2. 816939 2. 505778  
3. 052298 3. 82789 2. 920753 3. 72672 3. 720618 3. 646341 2. 933126 2. 773357 2. 824828  
7. 572046 7. 478341 7. 601391 7. 798261 8. 135813 7. 777153 7. 795125 7. 714564 7. 859023  
3. 273984 2. 022676 4. 088811 2. 146239 2. 304016 3. 974239 3. 046768 3. 51298 4. 102179  
1. 640245 1. 268139 1. 52122 1. 931011 1. 462962 2. 263032 2. 692191 1. 475605 1. 605952  
2. 955998 2. 131124 2. 901281 2. 300393 3. 654822 2. 373884 2. 13878 3. 697802 1. 014252  
0. 975057 1. 497093 0. 951166 1. 276164 2. 275318 0. 942505 1. 624088 1. 333527 2. 300583  
1. 138447 1. 130505 1. 258597 1. 421274 1. 2835 1. 453431 1. 273949 1. 20922 1. 473402  
2. 847597 1. 179253 2. 230574 1. 463857 0. 90811 0. 955656 1. 181397 1. 234701 2. 08059  
1. 116778 1. 208164 1. 232072 1. 675243 1. 0614 0. 984736 1. 466317 1. 129276 1. 203865  
8. 214745 8. 424375 8. 351672 8. 499326 8. 208262 8. 419334 8. 362894 8. 322867 8. 534066  
4. 795938 4. 603993 4. 936417 3. 627556 4. 697643 4. 975773 5. 701851 4. 381258 5. 673168  
4. 261151 4. 189064 5. 206638 3. 364877 4. 462601 2. 538719 4. 100196 2. 313344 4. 096253  
2. 049394 2. 604142 1. 932097 1. 783581 1. 698625 1. 858437 2. 56866 1. 929684 2. 735664  
4. 258769 4. 370314 4. 139603 3. 942244 4. 264224 5. 443002 3. 160202 4. 581574 4. 117452  
1. 671387 1. 508636 1. 39921 1. 764239 1. 617262 2. 134409 1. 75588 1. 834258 1. 082381  
1. 422395 1. 778677 1. 391678 1. 587199 1. 697088 3. 037586 2. 636563 1. 498487 1. 679779  
1. 845054 1. 092448 0. 943317 1. 550261 1. 20279 1. 22845 1. 495015 1. 045443 1. 101045  
6. 360161 5. 982544 5. 934192 6. 222806 6. 246672 6. 461181 6. 360396 6. 444844 6. 072498  
2. 665545 3. 173932 3. 250278 3. 625491 3. 11902 2. 243468 3. 912012 2. 637809 2. 823885  
7. 92136 8. 550135 8. 278792 8. 448282 8. 333967 8. 588546 8. 168773 8. 449502 8. 611939  
5. 855801 5. 207609 5. 751482 5. 102902 5. 32529 5. 261663 5. 192709 4. 860361 6. 163375  
4. 724543 4. 793238 5. 230005 4. 526437 4. 345321 5. 361322 5. 114678 3. 873228 4. 547037  
1. 288918 1. 529652 1. 87764 4. 014894 2. 136382 2. 965322 1. 608021 1. 329943 1. 967553  
6. 494371 7. 299736 7. 133796 7. 190849 7. 090099 7. 076475 7. 009661 7. 297313 6. 98324  
2. 76619 2. 565765 2. 581815 1. 784213 2. 76863 3. 039848 2. 357759 3. 221158 3. 215263

2. 333752 3. 988945 2. 993393 3. 001851 2. 714588 4. 274221 3. 645519 2. 997552 3. 854042  
6. 245361 6. 375955 5. 721984 6. 263368 5. 946522 5. 962277 5. 811884 5. 698435 5. 951946  
6. 42368 6. 264989 6. 530169 6. 145848 6. 671431 6. 488708 6. 586658 6. 188894 6. 028585  
1. 755277 2. 16064 1. 484372 1. 979706 2. 238338 1. 474529 2. 196563 2. 03691 2. 102502  
2. 237911 4. 369612 3. 035448 3. 040195 2. 490315 3. 126122 3. 517536 3. 800582 3. 415464  
2. 111639 3. 542431 2. 23351 2. 700941 2. 360893 2. 968152 3. 812067 2. 568752 3. 642286  
4. 792404 5. 447669 5. 305085 4. 83069 5. 475944 4. 701812 5. 383269 6. 298955 6. 095992  
7. 447292 8. 288304 8. 163868 7. 95344 8. 400714 7. 890072 8. 168435 8. 395981 8. 353757  
5. 529135 5. 716105 5. 263586 5. 805831 5. 761639 5. 660942 5. 173832 5. 622495 5. 540288  
4. 217194 4. 017198 3. 993383 4. 334931 5. 668987 4. 724365 3. 780939 3. 259041 4. 125261  
3. 094654 2. 453518 2. 111549 2. 74829 3. 486517 2. 259692 2. 517662 2. 307962 2. 443873  
2. 539841 3. 055396 2. 362522 2. 292634 2. 214152 2. 843211 2. 963682 2. 824006 4. 174732  
7. 445666 8. 707445 8. 558877 7. 796377 7. 51665 8. 019605 7. 808359 8. 094049 6. 923951  
7. 261093 7. 429806 6. 580257 6. 796969 7. 476143 7. 312249 6. 773458 7. 187045 7. 137506  
4. 039855 4. 011236 3. 792005 4. 500188 4. 265033 4. 593877 3. 972406 4. 20944 3. 731707  
1. 985453 2. 165085 1. 711765 2. 134 1. 353344 1. 965551 2. 095118 1. 440875 1. 933616  
3. 49588 3. 382668 4. 101761 4. 035091 4. 034214 4. 19879 4. 665041 4. 070343 4. 453319  
2. 489525 1. 684983 2. 160117 1. 3377 2. 12563 2. 332323 2. 242402 2. 050917 1. 452401  
4. 706208 4. 762134 5. 11064 3. 923438 4. 002823 5. 627243 4. 5656 5. 188367 5. 136834  
6. 538893 6. 829485 6. 279228 6. 874418 6. 757471 5. 974667 6. 663155 6. 276518 6. 599798  
2. 462314 2. 5704 3. 571341 2. 246678 3. 083299 2. 43809 2. 976699 4. 483638 1. 969163  
3. 922923 4. 839726 4. 39623 3. 737012 4. 195527 4. 178598 5. 188536 2. 84323 3. 81111  
3. 442242 3. 852188 3. 656411 4. 147005 4. 963522 3. 023869 3. 265877 3. 045355 3. 775042  
3. 120267 1. 708012 1. 901231 2. 92274 2. 308993 2. 598484 2. 501441 1. 921627 2. 4256  
5. 008473 5. 527903 5. 118667 5. 25416 5. 224564 4. 987619 5. 006691 4. 798183 5. 302662  
4. 105959 2. 982185 3. 447754 3. 83226 3. 833805 3. 517525 3. 359758 4. 407216 4. 541113  
4. 56824 4. 707805 4. 746413 3. 608715 5. 06658 4. 313481 4. 197064 5. 282759 5. 145384  
7. 592351 7. 631868 7. 388288 7. 507677 7. 505081 7. 778477 7. 201745 7. 518744 7. 705067  
5. 29644 3. 704581 5. 107514 4. 917813 5. 446014 4. 721867 5. 005367 4. 454794 5. 575294  
6. 878397 7. 712906 7. 445502 8. 075106 7. 36861 8. 074725 7. 470061 8. 099422 7. 986672  
2. 052871 1. 727662 2. 061529 2. 24642 2. 158186 2. 131614 1. 920722 2. 360326 2. 312121  
6. 698739 7. 324584 7. 554441 7. 806732 7. 784588 7. 352742 7. 428608 7. 575813 7. 461471  
8. 025587 7. 537238 7. 869139 7. 298854 7. 770091 7. 595792 6. 893951 7. 566626 7. 786413  
1. 559836 1. 477494 1. 501725 1. 733968 1. 869919 1. 355952 1. 382302 1. 480935 3. 025671  
7. 255144 7. 644326 7. 831464 7. 746879 8. 068748 7. 771736 7. 866692 7. 766527 7. 667518  
3. 673134 4. 094596 4. 565996 3. 814036 4. 444172 4. 434361 3. 765378 4. 595219 4. 544455  
2. 585532 3. 612167 2. 564501 3. 748373 2. 914628 2. 776991 3. 638438 5. 715144 3. 006542  
1. 53368 1. 621039 1. 67736 1. 740742 1. 355811 1. 807134 2. 159862 1. 406863 1. 604948  
4. 067107 4. 65324 3. 348742 4. 239195 4. 427242 4. 780481 4. 355869 3. 94942 4. 287683  
5. 442994 5. 889856 5. 394528 6. 318169 6. 44799 5. 822261 5. 984053 6. 350455 5. 89537  
5. 759339 6. 550101 6. 690818 6. 401901 6. 184787 6. 86146 6. 596647 6. 34708 6. 233396  
5. 678053 4. 914436 4. 880852 4. 196644 4. 59985 4. 202471 4. 629303 5. 065527 4. 549349  
3. 133849 2. 73398 2. 755055 3. 08148 2. 968261 2. 423313 2. 98142 2. 493957 3. 297668  
2. 832663 2. 0715 2. 477343 2. 227086 1. 768993 1. 900522 2. 408795 1. 563546 2. 032879  
5. 085029 5. 01374 5. 805793 4. 997051 4. 478076 5. 894392 5. 254308 6. 051809 5. 776632  
1. 141931 1. 484743 1. 438424 1. 609369 2. 174726 1. 899596 1. 989267 1. 786161 1. 668107  
1. 447136 1. 824894 2. 212076 2. 090693 1. 944576 2. 045542 2. 573784 1. 5837 1. 758609  
0. 887777 1. 112124 0. 915213 1. 055428 0. 946172 1. 275938 0. 950891 1. 013575 1. 14988  
5. 70694 5. 647957 5. 489465 6. 064945 5. 182169 5. 597242 4. 747667 6. 25767 6. 086504  
3. 90469 3. 938392 3. 483114 3. 408508 4. 009826 4. 034959 3. 207921 3. 930055 3. 004742  
2. 881255 3. 228907 1. 388608 2. 457332 2. 284183 1. 273084 1. 257677 1. 469911 1. 448798

3. 754859 4. 253023 4. 778978 3. 946873 4. 231148 4. 723916 3. 865685 4. 157541 5. 02865  
4. 781507 4. 698433 4. 268292 4. 540285 5. 024011 4. 288215 3. 856009 4. 342086 4. 344644  
5. 764794 6. 515367 6. 047879 4. 934792 5. 351332 5. 578443 4. 690492 5. 889148 5. 579065  
6. 736317 7. 306056 7. 161135 6. 504051 7. 05426 7. 026764 7. 459403 7. 166366 7. 275159  
5. 874857 6. 777445 6. 61842 6. 746936 6. 538709 6. 63427 6. 445182 6. 757815 6. 776523  
6. 500444 6. 003237 7. 125531 5. 838804 5. 206444 5. 974107 5. 921773 5. 407685 5. 819457  
3. 014575 2. 275488 3. 364384 2. 376291 2. 373081 2. 259182 2. 718261 2. 33561 2. 647282  
4. 684768 3. 044914 3. 356942 3. 29519 2. 634556 2. 152304 4. 231975 2. 718364 4. 2211  
1. 731652 1. 061539 1. 142608 1. 086374 1. 351692 1. 214912 1. 345767 1. 554959 1. 35387  
1. 779353 0. 872139 0. 82135 1. 106043 0. 953526 0. 869843 1. 020416 1. 17639 1. 951799  
1. 455103 2. 363866 1. 65508 1. 777058 1. 378472 1. 270718 1. 82009 1. 449373 1. 276799  
3. 56861 3. 227377 3. 948958 3. 162003 2. 897892 3. 594844 4. 325161 3. 309528 3. 220802  
4. 678192 5. 346906 4. 801346 5. 839198 5. 433392 4. 901341 5. 17057 4. 368355 4. 437851  
2. 334973 1. 259429 1. 017039 1. 249564 1. 426058 2. 061281 1. 83788 2. 937401 2. 205304  
1. 683569 1. 232647 2. 725271 1. 613881 2. 249837 1. 59982 1. 954538 1. 372697 1. 604137  
2. 600788 2. 123274 1. 870288 3. 193629 2. 984008 1. 424403 2. 078598 2. 202914 2. 75458  
6. 034601 6. 336309 5. 919319 6. 428401 5. 748947 6. 376697 6. 947388 5. 888935 6. 05486  
1. 845811 1. 655552 1. 751945 1. 849725 1. 837419 2. 01598 2. 068372 1. 419203 2. 000394  
5. 989396 6. 09371 6. 155952 4. 665999 5. 312859 5. 7942 5. 84352 5. 955918 5. 394695  
4. 442752 4. 703248 3. 286527 3. 293979 3. 303706 4. 508713 3. 377567 4. 130605 2. 88796  
2. 869104 4. 231147 4. 427991 3. 559358 2. 315528 3. 614819 2. 982787 2. 550461 3. 895516  
4. 752279 5. 639898 6. 151743 5. 313438 5. 693956 5. 019069 4. 821649 5. 22862 5. 403756  
1. 689128 1. 081253 1. 901784 1. 948978 1. 177492 2. 100478 2. 223155 2. 263306 1. 214024  
1. 517759 1. 213724 1. 588857 1. 517563 1. 038305 1. 459089 1. 635551 1. 464803 1. 426937  
3. 169685 2. 715265 2. 666832 2. 968171 3. 036482 3. 409987 3. 033121 2. 270889 2. 816073  
1. 59163 1. 526549 1. 539423 1. 353782 1. 755521 1. 275949 1. 822823 1. 609766 1. 260285  
1. 055984 1. 00694 0. 886272 1. 080219 0. 825485 0. 943801 1. 3144 1. 021464 0. 962975  
4. 570819 5. 492022 5. 310715 5. 622958 4. 441393 5. 386277 5. 280254 5. 300257 5. 609909  
3. 509697 3. 243242 4. 101676 4. 301291 3. 737594 4. 121866 3. 330835 3. 203472 3. 26801  
1. 763345 1. 600198 1. 740356 1. 417466 1. 865406 1. 642182 1. 502884 2. 243809 2. 322609  
1. 947159 1. 006675 0. 962503 0. 867745 1. 374161 0. 976081 1. 636579 1. 065074 1. 059578  
4. 905445 5. 032752 5. 042526 5. 627913 5. 16006 5. 438769 5. 193905 5. 028431 4. 990771  
5. 893654 6. 00454 6. 034041 6. 437912 6. 320784 6. 276605 6. 328837 6. 017115 5. 992799  
6. 811269 7. 43395 7. 141009 7. 207118 7. 392604 7. 150239 7. 010445 6. 910714 7. 06197  
5. 827395 6. 202654 6. 067778 5. 835015 6. 268662 5. 622534 5. 169297 5. 915271 5. 685024  
5. 601138 5. 927741 4. 584562 6. 847598 6. 577751 6. 575287 5. 661426 5. 797021 6. 282687  
1. 709746 1. 328559 1. 20894 1. 229003 1. 483205 1. 417915 2. 423648 1. 730623 1. 605386  
1. 75645 1. 682155 1. 742316 1. 583185 2. 247548 1. 740639 2. 035228 1. 977087 1. 593556  
1. 750478 1. 605044 1. 444437 2. 246034 1. 279967 1. 158189 1. 748444 1. 996858 1. 168572  
3. 680271 4. 069289 4. 504528 4. 277081 3. 060565 3. 018365 2. 988847 4. 559199 2. 768672  
2. 277596 2. 160892 3. 436966 2. 484662 3. 111802 2. 154325 2. 416798 2. 777044 3. 765172  
5. 267935 5. 76254 5. 624749 5. 561884 5. 180248 5. 852469 6. 072387 5. 750589 5. 861945  
4. 152611 4. 582831 4. 365397 3. 701998 3. 968986 3. 936225 4. 207428 4. 496622 4. 080279  
4. 16135 4. 145845 4. 845577 3. 977477 3. 962304 5. 264092 3. 74131 2. 825433 4. 478496  
4. 687613 4. 325372 4. 525431 5. 083403 4. 763598 4. 705341 5. 194554 4. 545983 4. 537811  
0. 788319 1. 061097 0. 905207 0. 806509 1. 18396 0. 731845 0. 737547 0. 99674 1. 428177  
1. 196029 1. 522756 1. 348086 1. 340311 0. 995146 1. 257748 1. 92588 1. 512332 1. 053335  
2. 124139 1. 576089 1. 042544 1. 797432 1. 949626 1. 295977 1. 73118 1. 124184 1. 447655  
5. 500968 5. 508682 5. 446919 5. 563311 5. 390628 5. 311948 5. 810226 5. 515233 5. 526575  
5. 838519 5. 877644 5. 703805 6. 521561 5. 825504 5. 700952 5. 835655 6. 577587 6. 043406  
7. 210022 7. 899432 7. 33486 7. 655226 7. 938063 7. 884401 7. 502201 7. 431516 8. 129047

1. 619327 2. 442096 2. 126355 1. 946448 2. 725413 2. 498646 2. 225399 1. 717486 2. 369868  
5. 467075 5. 619665 5. 357744 4. 99435 5. 934874 4. 902194 5. 099262 5. 84944 5. 222617  
5. 477698 5. 500482 5. 52979 5. 856975 4. 658414 5. 414225 5. 712083 5. 811023 5. 321994  
6. 023271 5. 065463 4. 708985 4. 911124 5. 015005 4. 376103 5. 03052 4. 980062 5. 842156  
4. 246806 4. 51145 4. 692078 4. 046604 5. 331959 4. 411913 4. 501575 5. 232709 4. 709591  
7. 827937 8. 419536 8. 301122 8. 059636 7. 905717 7. 736066 8. 322707 8. 307437 7. 95592  
4. 583673 4. 28238 4. 506987 5. 361422 2. 928715 5. 26846 4. 207878 4. 301592 5. 041778  
3. 51763 3. 561121 3. 293311 3. 59973 3. 638326 3. 045582 2. 999684 3. 756889 2. 903597  
5. 5514 5. 387842 4. 50496 4. 827161 5. 340811 5. 246456 5. 30399 5. 158017 4. 905167  
5. 555028 5. 388161 5. 413455 4. 769696 6. 366932 5. 307224 5. 745928 5. 093232 5. 929396  
3. 634858 2. 851405 3. 277361 3. 150652 2. 223183 2. 540026 3. 15001 4. 583046 3. 003316  
3. 713435 4. 009946 3. 810423 3. 890046 2. 939445 3. 462193 3. 230154 3. 111584 3. 018992  
6. 482132 6. 228755 6. 177076 6. 116362 6. 319109 6. 220269 5. 915576 6. 472008 6. 559371  
6. 47 7. 059574 6. 633455 6. 836721 6. 304434 6. 718744 7. 21495 6. 196888 7. 180462  
2. 008432 1. 609765 1. 607637 2. 024052 1. 738857 2. 982748 1. 430061 1. 678676 1. 911157  
4. 636225 4. 034347 4. 662536 4. 74772 2. 666937 3. 741529 3. 890539 4. 355176 4. 501811  
5. 244613 4. 437218 4. 727576 4. 6726 4. 373207 4. 678732 4. 549242 4. 540949 4. 784807  
2. 991979 2. 229601 2. 506616 2. 03694 2. 957788 1. 958207 2. 780288 2. 755932 2. 882952  
5. 838899 6. 610916 6. 231252 6. 035272 5. 973617 5. 997221 5. 964946 6. 684961 6. 216531  
7. 405086 6. 669492 6. 34869 6. 95109 6. 614367 6. 846792 6. 976421 6. 794828 6. 683418  
10. 34382 10. 61434 10. 58153 10. 68857 10. 88138 10. 74986 10. 50253 10. 77062 10. 70071  
1. 636975 2. 088172 1. 849761 2. 031343 2. 229503 1. 959117 1. 92048 1. 772619 2. 312917  
6. 601592 6. 856809 6. 669184 7. 211166 7. 066409 6. 404043 6. 395215 6. 523929 6. 898479  
8. 061338 8. 447406 8. 092074 8. 024711 8. 271602 7. 72469 7. 218727 8. 359531 8. 184863  
2. 568433 3. 775527 2. 728755 2. 708466 2. 52003 2. 25673 3. 075179 3. 638804 2. 912852  
3. 635897 1. 93767 2. 825572 2. 83062 2. 871267 2. 54521 2. 739041 3. 185359 3. 366526  
0. 777707 1. 841126 1. 028446 1. 075853 1. 112259 2. 413786 0. 607676 0. 525355 1. 649553  
4. 453932 4. 683686 4. 604465 4. 80402 4. 088662 4. 908115 4. 334116 4. 018985 5. 383254  
1. 902593 2. 697002 1. 704675 2. 330036 2. 222125 2. 373656 2. 079059 1. 765968 2. 126559  
9. 85612 9. 910555 10. 01892 9. 983423 9. 93531 10. 06798 9. 83621 10. 05642 10. 10514  
3. 249928 3. 709361 2. 242167 2. 903207 3. 561121 2. 976391 3. 855389 3. 835507 3. 140107  
3. 372583 2. 271344 2. 121079 2. 287854 2. 269747 3. 330497 2. 901413 1. 808427 3. 638279  
4. 212479 4. 442888 4. 082704 4. 233239 3. 76988 3. 962759 4. 315868 5. 178859 3. 691243  
5. 235333 4. 934322 4. 993487 5. 213606 6. 38097 4. 896055 4. 874292 4. 743426 5. 345953  
4. 694088 4. 488522 3. 291502 4. 422885 3. 97069 4. 301453 2. 62965 5. 126005 3. 239428  
5. 741626 5. 935231 6. 083068 5. 723098 6. 30377 5. 755358 5. 680271 5. 261209 6. 952635  
4. 771706 3. 600205 3. 019875 3. 754216 2. 905821 4. 717995 4. 792129 3. 838182 4. 055283  
2. 444348 5. 824663 4. 917988 6. 375656 7. 605338 7. 14164 5. 966204 7. 880888 5. 965416  
6. 259189 7. 069369 7. 004777 6. 635289 6. 483258 7. 240577 6. 863406 7. 567924 6. 680395  
7. 21293 7. 283261 7. 660023 7. 882477 7. 483088 7. 314751 7. 233331 7. 636832 7. 713486  
4. 922582 6. 287476 6. 560218 5. 92539 6. 678484 6. 232856 6. 157717 5. 981399 6. 649258  
5. 799315 5. 483289 5. 596135 5. 360251 5. 824075 6. 063842 5. 755041 5. 892531 5. 741121  
5. 271931 6. 228762 5. 443928 5. 10601 6. 871451 6. 289721 4. 946002 5. 943199 6. 041013  
5. 870557 6. 188205 5. 970998 6. 571879 6. 649897 6. 300293 6. 109043 6. 598574 6. 554599  
9. 819599 10. 25229 9. 516412 9. 771277 10. 35493 10. 17354 9. 481173 10. 23739 9. 85057  
5. 776017 4. 312214 4. 192756 2. 598279 1. 86399 2. 017212 2. 957653 3. 126231 5. 03141  
6. 825455 5. 989475 6. 349397 6. 749509 6. 651135 7. 229997 7. 519192 6. 733027 6. 625529  
8. 90321 10. 32781 8. 787018 10. 21125 9. 214418 8. 83375 7. 459858 9. 713107 8. 410355  
2. 64435 4. 434469 3. 541108 4. 025327 4. 136316 4. 577591 3. 60581 4. 173443 4. 361781  
3. 168582 4. 112128 3. 468634 3. 810657 3. 729654 2. 838056 3. 430084 3. 661927 3. 371529  
9. 963857 10. 18987 10. 02069 10. 35068 10. 28353 10. 18219 10. 08795 10. 1945 10. 24599

3. 074459 2. 897231 1. 4443 3. 106589 2. 44982 2. 021147 2. 137661 3. 383182 3. 388668  
5. 490148 5. 753251 5. 702191 5. 394785 5. 106921 5. 644052 5. 379257 5. 833346 5. 712769  
2. 425909 2. 571603 2. 346366 1. 863298 2. 988516 2. 604389 4. 96503 3. 047311 2. 751754  
2. 83406 1. 891905 2. 537285 3. 345587 3. 324865 3. 022585 4. 837087 2. 443756 2. 460885  
3. 716639 3. 605151 4. 451991 2. 968834 1. 687576 4. 603154 2. 577633 4. 321073 1. 366094  
5. 223508 4. 836855 4. 857325 4. 463444 1. 717262 4. 639646 3. 632906 4. 603551 1. 591944  
1. 787837 1. 495092 1. 437858 1. 354163 1. 664109 2. 112426 2. 11395 1. 928884 1. 403536  
5. 653436 5. 550813 5. 691371 6. 21129 5. 809496 5. 815083 4. 96756 5. 035299 5. 4691  
3. 114542 2. 504173 3. 291204 2. 840443 2. 516645 2. 001571 2. 38014 1. 976012 2. 67351  
1. 195909 0. 963969 1. 42146 1. 483099 1. 485667 1. 685791 1. 28552 1. 167793 1. 236465  
5. 457515 6. 119691 5. 049733 6. 848685 6. 433651 6. 300537 5. 998048 5. 29281 6. 519386  
2. 388167 2. 289944 1. 754167 3. 269959 2. 569088 2. 725613 2. 633865 2. 289149 2. 753706  
5. 016722 5. 418194 5. 169986 6. 109604 5. 770961 5. 913802 5. 520124 5. 6946 5. 484428  
6. 923999 7. 782805 7. 976795 7. 882667 7. 303313 6. 99359 7. 834839 7. 221587 7. 313522  
8. 84649 9. 090718 8. 988796 9. 299021 9. 110022 9. 096386 8. 939367 9. 273413 9. 077492  
4. 50392 4. 28562 3. 192743 3. 75312 4. 166849 4. 267769 3. 361654 3. 571775 4. 369398  
6. 5516 5. 781605 6. 325494 4. 427374 4. 886749 5. 680596 5. 052153 4. 749859 6. 415699  
7. 243456 7. 99937 7. 413562 7. 693995 7. 912407 7. 328965 7. 398756 7. 502316 7. 761695  
3. 991165 4. 068905 4. 599783 4. 310434 4. 049895 4. 145238 4. 192318 4. 163905 3. 993623  
2. 518788 3. 435832 3. 982432 3. 627781 3. 444379 3. 427686 3. 079493 3. 359074 2. 558725  
4. 238369 4. 473068 4. 475019 3. 836276 3. 68437 4. 588663 4. 859014 3. 34807 3. 560881  
5. 675468 5. 483798 6. 251732 5. 373255 5. 665451 5. 5541 5. 468647 5. 260138 5. 599746  
6. 328651 7. 117802 6. 008991 6. 72175 6. 552778 6. 244451 6. 236096 5. 772963 6. 201274  
2. 834691 3. 33365 2. 933219 1. 916502 2. 538394 2. 539431 2. 414637 3. 83331 2. 206935  
1. 931628 2. 841123 2. 184537 2. 596291 2. 009337 2. 772867 3. 014617 1. 638655 1. 792811  
7. 945932 8. 497618 8. 553689 8. 481174 8. 529921 8. 520863 8. 00209 8. 237789 8. 376088  
1. 751205 1. 855955 2. 661416 1. 97311 2. 000449 2. 383134 2. 009135 1. 948197 1. 354336  
3. 509355 3. 779122 3. 076141 3. 803527 3. 006804 3. 104801 3. 860402 3. 241274 2. 939398  
6. 152078 6. 505803 5. 959194 6. 744168 6. 252187 5. 948005 5. 892194 5. 502757 6. 480423  
5. 541388 5. 277721 5. 910718 5. 784514 5. 900521 5. 733601 5. 596595 5. 616035 5. 468074  
5. 005952 5. 585922 5. 553025 4. 90102 5. 495464 4. 49752 5. 330814 5. 135301 4. 250457  
1. 060999 1. 439047 1. 285809 1. 666397 1. 558245 1. 391891 1. 945265 1. 094197 1. 0412  
4. 783086 6. 774305 5. 085758 5. 841482 4. 792517 4. 691874 5. 570219 4. 180721 5. 86643  
3. 464415 2. 447751 2. 395817 3. 113264 2. 127309 2. 697026 1. 834904 1. 784206 2. 533992  
4. 314749 3. 538558 3. 681596 3. 74862 2. 863771 3. 159004 4. 600378 3. 755712 3. 799865  
3. 856761 1. 743806 1. 809626 2. 05319 2. 390203 1. 819343 3. 755363 2. 626068 1. 599104  
7. 32193 7. 771858 7. 223715 7. 280097 7. 421664 7. 568701 7. 187869 7. 430428 7. 453575  
3. 814818 5. 786597 2. 074299 3. 818945 3. 25481 5. 818386 4. 489282 2. 352564 4. 404105  
1. 319397 3. 908614 1. 742953 1. 944579 2. 874591 3. 624412 2. 706941 2. 972375 1. 664565  
10. 26643 9. 948793 10. 79244 10. 19144 9. 843425 9. 780945 10. 71633 9. 620482 10. 50511  
1. 641264 2. 083137 1. 403134 1. 487203 1. 165467 1. 161793 2. 650053 1. 616357 1. 440594  
3. 858746 3. 735299 3. 852244 3. 646747 2. 152813 4. 176156 3. 530427 3. 031877 3. 907163  
11. 06522 10. 90167 10. 74227 10. 92487 10. 44011 11. 16574 11. 04815 10. 85418 10. 51905  
4. 427832 4. 672181 4. 526353 5. 145383 5. 507278 4. 886044 4. 948676 5. 970277 5. 455193  
2. 044917 1. 804313 1. 355196 1. 412205 2. 819372 2. 149731 3. 717684 1. 42626 1. 386497  
4. 981507 5. 866478 5. 309915 5. 684424 5. 816352 5. 136972 5. 867153 5. 839577 5. 941221  
2. 1287 1. 657936 2. 035501 1. 759259 1. 264581 1. 773919 2. 198627 1. 418119 1. 898738  
3. 003468 2. 680535 2. 351008 3. 17116 2. 089659 3. 656623 3. 739803 3. 33508 3. 519777  
1. 48623 1. 49845 1. 038203 1. 047062 0. 673905 1. 43143 1. 757825 1. 091035 1. 354314  
2. 551166 1. 415415 1. 261317 1. 715271 1. 299198 1. 378513 1. 162636 2. 224072 1. 284427  
5. 614029 4. 558495 5. 231718 4. 11533 5. 278068 5. 005675 5. 120667 5. 922787 4. 552371



2. 535783 2. 99397 2. 786866 4. 493759 6. 882086 3. 932043 3. 234683 4. 329687 3. 553294  
5. 682186 6. 576687 6. 388717 7. 027151 6. 260691 7. 268231 6. 07269 6. 676292 6. 5667  
4. 187355 4. 011009 4. 535423 4. 490678 4. 214574 4. 250059 4. 790049 4. 416906 4. 410559  
9. 59376 9. 790631 9. 461802 10. 26202 9. 94627 10. 20626 9. 963933 9. 862189 10. 09798  
7. 744134 7. 977038 7. 967386 7. 913032 7. 763562 7. 509507 8. 029884 7. 667098 7. 984055  
1. 782508 1. 251548 1. 367732 1. 840339 1. 232742 1. 692103 2. 903711 1. 961934 2. 078139  
2. 125181 1. 380166 1. 193476 1. 303977 1. 483294 1. 609413 2. 286736 1. 569301 1. 517856  
1. 771962 1. 433776 1. 700163 1. 170823 1. 312318 1. 255799 1. 895219 1. 621119 1. 515373  
3. 894083 4. 836236 4. 601805 3. 951054 4. 333916 4. 109553 4. 760691 5. 294263 4. 13843  
1. 571065 1. 690548 1. 41156 1. 475752 1. 156613 1. 458492 1. 914214 1. 202966 1. 142784  
1. 205978 1. 517975 1. 584498 0. 954206 1. 000294 1. 816689 2. 083382 1. 344984 1. 447581  
4. 365514 2. 730813 3. 579646 2. 964315 4. 295795 3. 861215 3. 086613 3. 128911 3. 194878  
3. 380314 3. 201391 3. 272479 3. 084646 4. 493667 3. 546614 3. 08424 3. 597426 3. 394798  
5. 131785 6. 874129 6. 082893 5. 732615 5. 230608 6. 161121 5. 339635 5. 419034 5. 154893  
7. 100948 7. 086544 7. 155045 7. 394856 6. 400509 7. 314029 6. 718565 6. 134516 6. 966179  
5. 968739 5. 72827 5. 743042 5. 883077 5. 29548 4. 936632 5. 573455 5. 486938 5. 475648  
3. 002759 3. 227284 2. 237821 3. 247367 3. 352491 2. 451587 2. 03642 3. 976589 4. 152638  
1. 545777 2. 076439 3. 636652 2. 413965 2. 203362 1. 832988 2. 311964 2. 850302 2. 761026  
2. 836593 5. 340073 5. 815409 5. 825246 4. 194864 5. 08662 5. 335934 4. 181932 4. 810767  
4. 311664 4. 420486 4. 026263 4. 635622 4. 195446 4. 071448 5. 299203 4. 211645 5. 351184  
2. 674376 1. 799086 1. 863255 1. 648397 0. 92793 1. 715787 5. 376983 1. 045903 1. 730865  
3. 361107 2. 730277 2. 815495 2. 56689 2. 976558 2. 786734 3. 577179 2. 757051 3. 806929  
2. 887574 2. 546963 2. 58735 2. 911117 2. 644867 2. 692442 3. 298711 2. 304756 2. 939092  
5. 956893 6. 162479 6. 482638 5. 55325 5. 143353 6. 437368 3. 987029 6. 305679 6. 458885  
3. 476081 4. 364213 4. 074351 4. 549843 4. 780555 3. 646126 3. 31605 5. 47075 3. 524551  
2. 636299 3. 187088 3. 016302 3. 478345 3. 384936 3. 155929 2. 709031 2. 906974 3. 365376  
3. 095975 2. 46632 2. 978522 2. 591066 2. 036511 2. 51896 1. 691394 2. 024664 2. 450536  
1. 79244 1. 641496 1. 341863 1. 445861 1. 365942 1. 355822 1. 620936 1. 261991 1. 108981  
4. 202817 2. 571923 2. 277561 4. 168759 3. 293447 4. 300237 2. 658631 2. 533809 4. 546408  
3. 355243 2. 391593 2. 269637 2. 821083 2. 799855 2. 469572 5. 022854 2. 834196 2. 412267  
6. 731027 7. 109543 7. 114327 7. 384506 6. 186767 7. 410745 7. 45829 7. 589523 7. 392585  
4. 974283 6. 067885 5. 275927 5. 747067 5. 26576 5. 60747 6. 10942 5. 228472 4. 733363  
1. 669395 2. 131816 2. 627315 3. 008831 2. 388087 1. 657831 2. 530926 1. 03316 4. 046011  
4. 735556 2. 975258 4. 466926 4. 887621 4. 111946 5. 274402 3. 031873 4. 739725 2. 368661  
1. 519579 1. 426471 1. 271932 1. 142108 1. 445319 1. 102044 1. 50953 1. 566836 2. 097974  
1. 414827 1. 678016 2. 400081 2. 609174 1. 923408 2. 806065 2. 217692 2. 575117 1. 868379  
2. 565451 2. 111372 1. 984533 2. 777566 2. 471041 2. 496945 1. 741189 2. 574299 1. 723911  
3. 180371 4. 615574 3. 727748 4. 848357 4. 050203 4. 387112 4. 907708 3. 873864 4. 60651  
2. 502613 1. 936697 1. 452775 2. 116783 2. 159452 1. 410975 1. 072243 4. 402752 1. 006038  
6. 304182 6. 647436 6. 268396 7. 3624 7. 184019 6. 846402 6. 480739 6. 061003 6. 344769  
8. 817584 9. 21229 9. 260965 8. 692301 8. 903222 9. 22207 8. 109741 9. 002496 8. 701449  
4. 083749 5. 12134 5. 19312 4. 60512 5. 495949 5. 084501 3. 785129 5. 008724 4. 982069  
2. 893321 2. 389742 2. 780122 1. 842165 2. 208697 2. 700515 2. 887851 2. 454836 2. 555011  
4. 896031 3. 890437 3. 378663 3. 187396 3. 586333 3. 860948 3. 848724 3. 237745 3. 396208  
5. 426813 5. 874299 6. 354416 5. 895291 6. 011211 5. 963337 4. 505912 6. 222935 5. 916824  
4. 279351 4. 03597 4. 460183 4. 647621 4. 458383 5. 109689 3. 607312 4. 732652 3. 939745  
4. 928798 4. 609218 3. 430868 6. 59854 6. 453617 4. 85734 7. 218115 5. 411124 6. 278957  
2. 770065 2. 735767 2. 624424 2. 286775 2. 587614 2. 734782 2. 433216 2. 684493 2. 310015  
1. 573238 1. 510732 1. 242407 1. 941322 1. 26472 1. 308511 1. 411461 0. 995099 1. 334253  
1. 040767 0. 916622 1. 603666 1. 493971 0. 988263 5. 432171 2. 924865 1. 603583 1. 998801  
1. 066398 1. 209095 1. 395454 0. 934267 0. 93966 1. 034343 1. 967832 0. 882139 1. 997576

2. 589838 1. 715364 1. 016787 1. 506894 1. 776372 1. 883237 3. 10523 1. 529024 1. 931753  
1. 064835 1. 038901 0. 659412 1. 088872 0. 912291 1. 02852 2. 018778 0. 823733 1. 896712  
4. 235737 4. 240695 3. 855366 4. 37009 4. 232302 4. 670525 4. 221343 3. 936594 4. 450606  
4. 693377 6. 229757 4. 31558 4. 8599 5. 034498 5. 866613 5. 120027 5. 49684 6. 186753  
3. 440262 3. 593225 2. 997669 3. 933695 4. 200133 5. 096263 3. 452989 2. 956821 4. 101293  
4. 371473 5. 098152 4. 227407 4. 989268 4. 565184 4. 38272 4. 606853 4. 641506 4. 16668  
5. 269244 5. 14444 5. 442701 5. 020881 5. 132576 5. 34469 4. 713209 5. 469911 5. 444029  
5. 252439 4. 427736 4. 368923 4. 856966 4. 570486 5. 636818 3. 399458 3. 885358 4. 957642  
4. 759509 4. 647617 4. 765146 4. 954156 4. 550015 5. 031914 5. 13937 4. 343492 4. 77308  
3. 003062 1. 368883 1. 171386 1. 460545 2. 161021 1. 446101 1. 137338 1. 471907 1. 181608  
3. 046519 2. 616443 2. 833787 3. 02317 1. 849638 2. 842909 2. 616443 1. 640064 2. 483697  
0. 871037 1. 497806 1. 512712 1. 214796 0. 828903 1. 139412 1. 172264 1. 181197 1. 278585  
4. 848568 5. 638492 5. 982194 5. 498264 4. 762476 6. 075763 5. 739751 5. 494002 5. 525973  
8. 935902 9. 442845 9. 175367 9. 655761 9. 181784 9. 449383 9. 231718 9. 502419 9. 32779  
3. 187803 3. 741165 3. 244028 4. 645122 4. 068463 4. 12086 2. 848474 4. 210209 3. 939957  
5. 735599 4. 608651 5. 20582 4. 417185 4. 593836 4. 495615 5. 001473 4. 684278 5. 157464  
5. 235706 6. 30012 6. 082856 6. 403825 5. 791797 6. 591472 5. 434894 5. 572617 6. 435685  
6. 174822 4. 888343 5. 328761 4. 117999 5. 447807 4. 524443 5. 548305 5. 459701 5. 272492  
3. 390039 3. 206379 2. 680836 2. 796265 2. 66913 2. 279117 5. 360086 2. 243029 3. 207675  
2. 04649 3. 818176 2. 151281 2. 180482 2. 771517 3. 315426 4. 476672 3. 021585 1. 986059  
2. 640675 2. 346142 2. 921372 2. 555987 3. 255415 2. 471272 2. 334567 2. 512345 2. 815484  
5. 120462 5. 185686 5. 70024 5. 438647 5. 39074 5. 72643 5. 366096 5. 82661 5. 182387  
6. 502738 6. 652118 7. 213043 6. 455944 6. 523212 7. 379987 5. 88317 6. 347411 6. 504215  
1. 479603 1. 351176 1. 036488 1. 45951 1. 157326 1. 052058 1. 275311 1. 097423 0. 90072  
2. 609395 2. 447854 1. 219578 1. 613097 1. 378243 1. 10544 2. 932267 2. 79334 1. 842808  
6. 655008 7. 001892 6. 796753 7. 528863 7. 508671 6. 335363 6. 611232 6. 862646 6. 268318  
2. 569218 2. 136052 2. 216801 2. 568479 2. 079052 2. 423802 2. 373192 2. 128361 2. 921462  
3. 469707 3. 821591 3. 720225 3. 496475 3. 535135 3. 803575 3. 251575 2. 747791 3. 961286  
1. 442275 1. 757719 1. 260395 1. 636636 1. 691702 1. 372593 1. 879415 2. 158288 1. 906434  
1. 871403 1. 637736 1. 539499 2. 044785 1. 544232 1. 938173 1. 813883 1. 295829 2. 105886  
10. 15603 8. 669827 10. 3043 8. 134855 9. 270697 9. 138673 10. 77305 6. 801637 9. 618254  
1. 88098 2. 056734 1. 796807 1. 987801 2. 194117 1. 761598 1. 597498 1. 708312 1. 726614  
2. 267213 1. 656669 1. 796998 1. 357697 1. 540146 1. 550654 2. 66468 1. 68491 1. 332865  
3. 562939 3. 198376 3. 739579 3. 620458 2. 591966 2. 688415 2. 855935 2. 983931 4. 651869  
6. 714171 6. 881332 6. 075682 6. 769987 6. 797471 6. 743198 6. 674151 6. 708527 6. 619274  
1. 511219 1. 605609 2. 292419 1. 54602 1. 947929 1. 461278 1. 75487 1. 754001 1. 295381  
4. 093318 3. 358495 3. 621328 3. 364504 3. 496865 3. 296572 3. 154965 3. 626295 4. 244605  
2. 39481 2. 847083 2. 927713 2. 494843 3. 635292 2. 950583 4. 011562 2. 470664 3. 019416  
6. 336257 6. 529237 6. 579604 6. 367034 6. 155335 7. 279285 6. 231229 6. 701253 5. 72288  
3. 28429 3. 264488 4. 520513 4. 744037 5. 0267 3. 494644 4. 151436 3. 298334 4. 862267  
1. 858957 2. 33306 1. 853774 1. 588332 1. 716745 1. 831783 3. 512789 3. 108435 2. 752244  
8. 677468 8. 022198 8. 105455 8. 32109 8. 100454 7. 583005 8. 67411 8. 163564 8. 765017  
5. 069853 3. 588116 1. 317556 2. 419138 1. 260518 3. 520728 4. 91913 1. 26003 3. 111716  
1. 498557 1. 53862 1. 335967 2. 079244 1. 741714 1. 947562 2. 117319 1. 631939 1. 6326  
6. 502443 6. 661296 5. 838238 6. 561259 6. 807984 6. 515112 7. 008049 6. 765369 6. 285434  
5. 525616 4. 269169 4. 806604 3. 975563 4. 323986 3. 670794 3. 346316 3. 301529 4. 324971  
2. 259622 2. 761467 2. 605709 2. 96725 2. 354464 2. 205181 1. 865793 1. 746499 2. 218276  
4. 388218 4. 110788 4. 193121 4. 452373 3. 4652 4. 239571 4. 316451 3. 81534 3. 936642  
5. 735402 5. 67043 6. 237795 6. 399336 6. 216186 5. 656264 6. 292284 5. 707437 5. 961183  
1. 767606 1. 958053 1. 372285 1. 472938 1. 118606 1. 55564 0. 932831 1. 550582 1. 611229  
1. 488904 1. 301255 1. 291804 1. 54747 2. 086635 1. 252449 1. 751782 1. 737548 0. 805906

9.047449 9.09506 9.241006 8.622911 8.625726 8.663127 8.564197 8.626722 7.883863  
0.869669 1.393422 1.518038 1.378399 1.585468 0.655972 1.520136 0.954666 0.995345  
3.321863 4.788922 5.563547 4.378064 5.615999 5.032066 4.02026 5.1766 4.760781  
5.508305 7.042343 6.543962 7.322567 7.536702 7.322673 7.041028 6.500971 7.288174  
1.96426 3.441895 2.514479 4.053595 4.163595 3.448608 3.883516 3.175792 2.497124  
6.765604 6.294044 5.597271 6.111963 6.307225 6.475331 6.936638 6.936999 5.414895  
6.317701 6.841243 6.390351 6.804642 7.532918 7.445382 7.229787 7.783108 7.548317  
4.232627 3.873587 4.097946 3.259186 2.782328 2.093447 4.861617 4.032868 4.12299  
3.030475 2.827943 2.035215 3.34318 2.147309 2.715387 3.806382 3.934408 3.365537  
6.773627 6.637856 6.930481 6.520292 6.387586 6.550348 6.431815 7.126779 6.91145  
2.970613 2.762148 2.690892 2.415728 2.454331 3.078293 2.770378 2.127427 2.605958  
1.829284 1.810383 1.814887 1.657971 1.546104 2.269916 2.82925 2.490652 1.872441  
2.78666 2.091595 2.475055 3.736361 2.569392 3.901976 3.676572 3.030662 2.41898  
5.673264 5.760224 5.476337 5.502693 6.199038 5.520625 5.362379 5.760772 5.901014  
2.4546 2.206624 4.143521 2.391939 2.27984 3.153908 2.579509 2.304154 2.846368  
3.866847 3.793829 4.502895 3.745197 3.893974 3.760639 4.701532 4.141035 3.819032  
6.805167 7.493419 7.498851 7.827429 7.112858 7.099529 6.996753 7.30769 7.318127  
1.331934 0.893396 1.612552 2.104953 0.99122 1.245607 1.375586 1.604609 1.940158  
5.56584 5.64454 4.874104 6.209594 5.574286 4.480292 5.437879 5.908261 6.014663  
3.40428 3.773104 3.868881 2.881952 3.653612 3.982993 3.98413 3.859636 4.476922  
5.387703 5.17116 5.227988 5.464695 6.270575 6.257061 5.06198 5.854619 5.4306  
3.682884 4.413166 3.456027 3.387439 4.580683 3.915355 4.382849 3.790571 3.950507  
2.641739 1.428862 2.463304 1.186634 3.143472 1.856917 3.169954 1.259933 1.843266  
7.244122 7.300062 6.926456 6.781844 7.518759 7.198429 6.738647 6.947741 7.178319  
3.14392 2.147499 1.067249 1.195441 1.215947 1.236404 1.345571 0.868845 0.869051  
2.835577 2.827789 2.963753 2.92366 2.74153 2.943566 2.323063 2.510853 3.149651  
8.969837 8.01643 7.988813 7.925883 8.446301 5.952635 7.892589 7.937408 9.660897  
4.180154 4.827998 4.469081 3.699324 4.449439 5.399241 3.684502 5.107759 4.700815  
4.042414 3.909982 2.624591 3.590805 4.531257 4.229089 4.690185 4.912799 2.839627  
4.9291 5.619578 5.071465 5.014011 5.070285 5.388614 5.197865 5.132971 4.65318  
3.175301 2.622298 2.379816 3.122562 2.670096 1.541894 1.991013 2.292806 2.099053  
4.329109 4.437262 4.062239 3.622233 4.085802 3.603271 3.624667 4.177743 4.050556  
6.22115 8.193553 7.508021 7.46089 7.63058 7.814163 7.843282 7.661866 7.09506  
5.918313 5.052697 5.292086 5.950053 4.804496 5.375913 5.495866 5.046083 5.445609  
2.42489 1.694715 1.751257 1.551207 2.148593 1.620168 2.149029 1.18272 1.753413  
1.228152 1.136869 0.905502 1.619422 1.950512 0.895713 1.370908 1.245283 1.23245  
1.314643 1.690138 1.042968 1.193365 1.990191 1.242058 2.054447 1.558772 1.297671  
1.424875 1.372034 1.959087 2.34056 1.785568 1.821414 1.807733 1.552226 1.473446  
4.738743 5.329778 5.404476 4.361138 5.444386 5.724292 4.75334 5.231186 4.080036  
2.347685 2.203715 2.319412 1.987668 3.200259 2.619249 2.739619 2.299325 2.276354  
3.596177 3.880327 3.865938 3.900648 3.920076 3.949934 4.457667 4.185059 3.9016  
4.091781 4.450907 4.264991 4.045276 4.360979 4.475131 3.179904 3.975555 4.366992  
3.639472 2.595956 2.707976 2.214647 2.289806 2.352154 2.504193 2.830925 2.790205  
7.21318 7.779062 7.637895 8.337164 7.206381 7.648973 8.06587 6.792769 7.081041  
3.075494 2.483094 2.133793 2.594161 3.586534 3.395075 2.571892 2.329192 2.747656  
5.203844 6.368169 5.84606 5.832643 6.189127 6.005669 5.284241 6.383771 5.667938  
6.432742 6.87729 6.669094 6.095581 6.863175 6.576528 5.386062 6.70976 6.511541  
7.34324 6.700681 6.979136 6.752379 6.497571 6.185368 6.167216 7.040037 6.768635  
1.960288 1.583687 1.910762 2.125778 1.872708 1.848428 2.197169 1.806012 2.15481  
1.751123 2.054798 1.081249 1.825512 1.431106 0.986266 1.537074 1.034723 1.188329  
1.476599 1.295339 0.91454 1.137329 1.908621 1.285032 1.035082 0.996698 1.114281

1. 98425 1. 030525 1. 721268 3. 046765 2. 266154 1. 252719 1. 883148 1. 589942 1. 548637  
4. 559922 4. 328836 4. 228769 3. 104678 2. 732827 3. 309554 4. 807787 3. 563323 1. 825935  
1. 933824 0. 787636 1. 890162 1. 17836 1. 103897 1. 160932 0. 879324 0. 793184 1. 107751  
6. 671462 6. 632976 6. 400382 6. 400888 6. 052094 6. 106803 7. 487381 6. 904511 6. 059576  
1. 562191 1. 469766 1. 26204 1. 766626 1. 840694 1. 632496 1. 926338 1. 611254 1. 4638  
3. 117631 1. 838157 2. 149645 2. 99175 2. 607621 2. 287709 2. 31728 1. 642251 2. 789989  
3. 936739 3. 493001 4. 190812 3. 927692 4. 253616 3. 691195 3. 822771 3. 819175 4. 338514  
2. 05913 1. 442392 1. 487409 1. 53987 1. 267717 1. 340368 2. 078975 1. 640468 1. 622466  
6. 001224 3. 379283 3. 490796 2. 598183 3. 441836 2. 647955 3. 151559 2. 966865 4. 34707  
4. 446362 6. 085279 5. 476784 6. 289658 5. 786356 5. 275032 5. 836878 5. 866588 5. 755906  
2. 778418 3. 503562 4. 737461 4. 603444 3. 923387 4. 707554 4. 516652 3. 905592 3. 198579  
2. 454278 1. 79775 1. 718976 1. 839812 2. 40029 2. 228444 2. 036538 1. 587699 1. 826298  
1. 812863 1. 218969 1. 854454 2. 176169 1. 740673 2. 466468 2. 370417 1. 153911 1. 777209  
2. 208592 1. 339056 1. 844382 1. 625025 1. 565245 1. 647184 2. 357839 1. 773157 2. 538872  
3. 225502 2. 595668 2. 296885 2. 605263 2. 276376 2. 300775 2. 567827 2. 219201 2. 432136  
1. 763589 1. 701214 1. 825499 2. 647602 1. 639709 1. 551816 1. 655736 2. 466908 1. 427761  
3. 222693 1. 929997 2. 901643 1. 750888 1. 638988 1. 991027 2. 697312 1. 672808 1. 643335  
1. 737525 1. 41721 1. 065919 2. 119745 1. 27563 1. 247463 1. 226234 1. 040842 1. 821861  
4. 03964 3. 22076 2. 697119 3. 240248 4. 006498 2. 423224 4. 340941 3. 410547 2. 526274  
1. 367796 1. 451558 0. 993552 1. 29432 1. 259506 1. 310571 1. 07087 1. 129389 1. 792561  
2. 039244 2. 089981 2. 975916 2. 268611 1. 307922 2. 943058 3. 790531 2. 866258 1. 612582  
1. 798351 1. 594132 1. 174662 1. 610843 1. 486139 1. 526247 1. 271937 2. 056056 1. 637354  
6. 747689 8. 396122 7. 710287 7. 956761 8. 275264 7. 484964 8. 245206 7. 753666 7. 85665  
6. 566255 5. 80105 5. 997105 6. 102161 6. 190124 6. 146947 6. 31318 5. 349855 6. 178312  
1. 151142 0. 984967 1. 771029 1. 334005 1. 809663 1. 708084 1. 995158 1. 363134 1. 193804  
1. 319007 1. 420113 1. 217909 1. 202024 1. 525395 1. 575164 0. 987187 1. 105365 1. 007625  
2. 049542 1. 589148 1. 784274 1. 771698 1. 676899 2. 378909 2. 160487 1. 260832 1. 897666  
1. 957597 1. 316625 1. 181968 1. 322152 0. 852545 1. 495123 1. 404928 1. 899335 1. 916593  
1. 432515 1. 622415 1. 190306 1. 739544 1. 427803 1. 478582 1. 604295 1. 825009 1. 321186  
1. 587637 1. 405119 0. 854204 1. 039489 1. 284356 2. 640146 2. 420356 2. 190288 1. 020073  
1. 879492 1. 407293 0. 795288 0. 94876 1. 390386 0. 982398 1. 521283 1. 600272 1. 568769  
1. 983439 2. 170863 3. 141838 2. 012721 2. 927747 1. 682863 3. 109807 2. 267016 2. 81548  
2. 295393 2. 15115 1. 962095 1. 997951 2. 602456 2. 048453 2. 746093 3. 164582 2. 321719  
1. 423882 1. 70603 1. 176362 1. 482527 1. 417478 1. 712484 1. 462354 1. 373314 1. 814754  
2. 494609 1. 68843 1. 903906 1. 763815 1. 64891 2. 328543 1. 982919 2. 160978 2. 591971  
1. 476278 1. 587528 1. 59306 1. 744171 1. 851557 1. 347576 1. 405435 1. 978263 1. 666534  
5. 566983 6. 093214 5. 846627 4. 988537 5. 898023 5. 558869 5. 438752 6. 521671 6. 145519  
5. 071234 5. 147112 4. 728094 5. 617966 5. 862641 5. 567264 4. 818411 5. 23485 5. 507789  
1. 32975 4. 969264 4. 013778 4. 857707 4. 663508 3. 769559 4. 807031 5. 174901 4. 967941  
4. 424121 4. 467802 3. 982048 3. 047786 3. 483445 4. 56888 4. 959398 3. 785811 3. 920189  
4. 72023 4. 099383 4. 879865 4. 460191 4. 147097 4. 793757 3. 113291 4. 999973 3. 879203  
6. 116503 5. 308956 5. 597256 3. 972297 4. 785034 5. 062345 5. 084692 5. 157505 5. 256157  
3. 809184 4. 750103 3. 907402 4. 274533 5. 475546 4. 281063 4. 307486 5. 20661 4. 028932  
7. 352927 7. 126883 7. 150878 7. 043531 6. 655504 7. 257761 7. 05318 6. 841307 6. 861141  
6. 1941 6. 893361 6. 446898 6. 824606 6. 195008 6. 629067 6. 114631 6. 947015 6. 598607  
6. 680221 7. 60481 7. 111851 7. 447199 7. 085937 7. 222449 7. 08651 7. 306085 6. 543593  
1. 134289 1. 347178 1. 445162 1. 412676 1. 555354 1. 368914 2. 248779 1. 396768 1. 109991  
3. 397479 3. 918073 3. 715391 3. 957991 3. 917886 3. 322813 3. 233712 4. 241366 4. 581524  
1. 677305 1. 830056 1. 549402 2. 485858 1. 966185 2. 745149 1. 16309 1. 339209 1. 533429  
5. 02346 3. 865465 4. 177269 4. 001256 4. 69688 3. 807276 4. 92157 4. 564205 5. 836394  
2. 224012 2. 036355 1. 671289 1. 453569 2. 097323 1. 895401 1. 639162 2. 478469 1. 604728

2. 302268 1. 149612 0. 934941 0. 912862 1. 753414 1. 604112 0. 924999 0. 906766 1. 619367  
3. 717347 3. 005717 3. 035436 2. 951463 3. 562691 3. 824892 3. 158968 4. 588923 3. 614477  
4. 450241 6. 537607 6. 91146 5. 57694 5. 79463 6. 492692 6. 60825 6. 45106 5. 526417  
4. 609632 5. 421377 5. 211409 6. 620312 5. 813039 6. 247845 6. 103201 5. 35151 5. 506353  
6. 56352 6. 730617 6. 03488 6. 503557 7. 324995 6. 394123 6. 442173 5. 643653 6. 517423  
9. 199123 9. 910778 9. 560263 9. 324209 9. 427414 9. 240601 10. 21112 9. 654577 9. 677152  
1. 340706 1. 270979 1. 148047 1. 447511 2. 456737 0. 866227 2. 25956 1. 587435 1. 573329  
5. 365609 5. 212359 5. 357675 5. 668469 5. 545215 5. 96415 5. 764172 5. 226544 5. 748334  
6. 66179 6. 820992 6. 854906 6. 960289 6. 125561 6. 867351 6. 52137 6. 345812 6. 938732  
4. 471995 3. 249664 4. 138469 3. 246819 3. 387007 3. 341087 2. 971118 3. 31865 3. 729533  
2. 793956 2. 155283 2. 95725 2. 349981 2. 526636 1. 981298 2. 592649 1. 917584 2. 262625  
6. 24284 6. 480319 6. 795888 6. 218936 6. 638008 6. 287459 5. 90891 6. 503518 6. 353423  
2. 226193 3. 189263 2. 283459 2. 549168 2. 903977 1. 798907 3. 013887 2. 941205 1. 860368  
1. 883853 1. 618489 1. 06492 1. 282411 1. 021176 0. 825326 1. 55767 1. 030891 1. 461642  
5. 445869 6. 631377 6. 662342 5. 636316 5. 894444 6. 665866 5. 800584 7. 156819 6. 078048  
1. 015371 1. 096646 1. 003704 1. 168361 1. 254017 1. 202472 1. 423484 1. 194304 0. 945836  
4. 560351 5. 055656 5. 248751 5. 112913 4. 853535 5. 101138 4. 202262 4. 888959 4. 633764  
1. 516066 0. 897096 1. 127638 1. 903286 1. 699425 2. 218189 1. 429695 1. 645785 2. 053307  
5. 0518 5. 383306 4. 818332 4. 770543 4. 612785 4. 573824 4. 537729 5. 324745 4. 652831  
1. 212162 1. 535435 1. 418213 1. 427605 1. 248742 1. 174691 2. 02749 2. 158976 1. 711036  
3. 428805 2. 708106 3. 329385 2. 580575 2. 972131 2. 339829 2. 726503 2. 82939 2. 311656  
7. 365923 6. 827271 7. 301164 6. 307757 6. 606847 6. 771299 6. 891033 7. 291361 7. 224277  
2. 538318 2. 675279 2. 615883 2. 650976 2. 609119 2. 824695 2. 511939 2. 72982 2. 616174  
2. 629998 2. 94725 3. 093069 3. 096449 2. 970096 2. 495768 3. 390751 3. 630454 2. 700611  
1. 945649 1. 746766 1. 593388 1. 593114 1. 789315 2. 079527 1. 554306 1. 525003 1. 649696  
4. 661756 4. 85677 5. 210136 6. 315734 5. 512832 5. 05501 6. 43998 5. 588056 6. 138325  
1. 833494 1. 495065 1. 407206 1. 746568 1. 641503 1. 312634 2. 344636 1. 843661 1. 46625  
4. 821799 5. 160572 4. 968304 5. 138421 5. 855339 4. 636364 4. 965942 5. 398532 5. 214404  
1. 371267 1. 402872 1. 197955 2. 637809 1. 421581 1. 672657 1. 703321 1. 52413 1. 312246  
6. 415646 5. 678728 6. 128655 5. 026235 5. 4853 5. 650394 5. 536459 4. 908811 5. 223698  
2. 118717 1. 347753 1. 808253 1. 624217 1. 443938 1. 405586 1. 518182 1. 501521 1. 56429  
7. 33596 7. 267893 6. 789635 7. 162531 7. 278597 7. 337431 6. 843312 7. 548671 7. 254552  
3. 536129 4. 970763 5. 457035 4. 510606 5. 380452 4. 119785 3. 804124 4. 504248 4. 480389  
7. 673643 7. 836135 7. 549845 7. 738112 7. 934724 7. 684701 7. 547316 7. 82917 7. 729969  
5. 693817 4. 897647 5. 625288 5. 702887 5. 391231 4. 577155 4. 382289 5. 18066 4. 685857  
2. 290431 3. 569478 3. 694876 2. 590548 2. 852487 3. 73901 2. 433556 3. 57626 2. 854517  
6. 3094 7. 069256 7. 079153 6. 366611 7. 270285 6. 912899 6. 761636 7. 370858 7. 170416  
4. 409615 4. 676219 4. 949926 4. 777314 4. 979587 4. 946046 4. 402777 4. 883922 5. 462025  
1. 919534 1. 241526 1. 972744 1. 537436 1. 620584 1. 199634 1. 371624 2. 031114 1. 442409  
3. 824107 4. 301706 4. 336158 3. 963988 3. 479043 4. 301194 4. 16884 4. 275 3. 793366  
3. 43023 3. 447723 3. 051679 3. 962246 3. 939879 3. 661145 3. 340239 3. 93176 3. 309871  
3. 151873 2. 457229 1. 928045 3. 019528 2. 672425 2. 139583 2. 19577 2. 194426 2. 318732  
3. 526317 1. 637551 3. 58048 3. 172968 2. 959334 3. 146963 2. 581403 3. 504949 3. 093019  
2. 339541 1. 677871 1. 413879 1. 487282 1. 843604 1. 374055 2. 140389 1. 937609 2. 152047  
2. 734201 2. 882711 1. 691593 2. 102218 2. 599228 2. 891632 2. 800309 2. 257432 2. 376007  
1. 292072 1. 040095 1. 377381 1. 237357 1. 499985 1. 11752 1. 615722 0. 990794 0. 990824  
1. 143842 1. 456176 1. 335857 1. 504164 1. 376966 1. 333525 1. 657028 1. 694082 2. 03126  
3. 103622 2. 281684 2. 359922 2. 052563 1. 916912 1. 986958 2. 487326 1. 769339 2. 106413  
1. 151013 1. 735195 0. 839246 1. 470474 1. 469554 1. 255622 1. 616601 1. 286043 1. 698964  
1. 504205 0. 914645 1. 857889 1. 781784 1. 358798 1. 380931 2. 029395 1. 183864 1. 274333  
2. 000009 2. 015041 1. 635671 1. 888209 1. 270311 1. 723644 1. 676739 1. 519808 1. 726048

5. 244411 4. 562464 4. 634178 4. 125551 4. 452607 4. 46224 4. 96288 4. 260341 3. 249626  
4. 31353 5. 509883 5. 406005 5. 296969 5. 86377 5. 432345 4. 734182 5. 555433 5. 498217  
5. 233254 6. 005491 6. 110652 6. 304468 6. 458799 6. 137885 6. 381244 6. 176046 6. 722638  
3. 309153 3. 234506 3. 926979 3. 538762 3. 55659 3. 59135 3. 083104 3. 075025 3. 676233  
6. 619729 7. 067963 7. 105217 6. 900669 7. 06366 6. 941517 7. 002382 7. 227781 6. 766572  
2. 593853 2. 415268 3. 04003 3. 178847 2. 168437 3. 270195 2. 762643 2. 842961 3. 045758  
3. 460089 1. 82355 1. 788824 1. 456538 3. 039541 3. 0516 2. 330711 2. 951384 1. 783904  
5. 441007 5. 77388 5. 77171 5. 750568 6. 059024 6. 09876 5. 32718 5. 737431 5. 777059  
4. 615796 4. 44032 4. 63572 5. 256333 4. 792205 5. 194465 4. 632747 5. 118355 4. 165454  
2. 661461 3. 121685 0. 576098 1. 600294 0. 812859 0. 751871 0. 503774 1. 57568 0. 950726  
6. 999049 7. 456896 7. 485603 6. 884928 6. 959721 7. 249789 7. 585008 7. 399259 7. 400534  
4. 285069 4. 975991 4. 858082 4. 768054 4. 739607 4. 622185 4. 549267 4. 735436 5. 16525  
6. 012062 5. 060928 5. 1683 4. 670069 4. 105958 4. 169321 3. 504837 5. 197793 4. 044878  
1. 224997 1. 200472 1. 002303 1. 319138 1. 078234 1. 386231 0. 99625 2. 470424 1. 747246  
3. 835431 3. 639015 3. 572166 3. 050516 3. 465673 4. 024128 3. 527987 4. 833449 4. 412098  
0. 808556 0. 72705 1. 478955 1. 249615 1. 073773 1. 77213 1. 238649 1. 656972 1. 240334  
5. 024925 3. 583486 3. 983338 3. 887562 5. 536137 3. 836275 4. 680292 4. 093616 4. 551281  
3. 11345 2. 706573 2. 601744 3. 839443 3. 163566 4. 428329 4. 629763 3. 64174 3. 871262  
1. 634568 1. 493863 1. 425733 1. 042484 1. 214512 1. 881005 1. 805953 1. 130307 1. 384722  
3. 158251 2. 318089 3. 886877 2. 520676 3. 172959 2. 14831 2. 339172 3. 326561 1. 966647  
2. 542286 1. 069486 1. 207559 1. 406757 1. 738326 1. 097049 1. 850194 1. 865578 1. 369794  
7. 183082 7. 765319 6. 993205 7. 06583 7. 416566 6. 991108 7. 466343 7. 256566 7. 126609  
3. 91866 4. 20721 3. 643202 4. 086677 4. 434031 4. 403533 3. 871003 3. 947338 4. 549592  
2. 290371 3. 409368 2. 158872 1. 965915 2. 203041 2. 340553 2. 185867 2. 556036 2. 113502  
3. 158708 3. 953225 3. 734385 3. 238336 3. 464755 4. 15286 3. 41901 3. 357954 3. 164448  
5. 029869 5. 937552 5. 992738 5. 451484 5. 619056 5. 645853 5. 725845 4. 002194 5. 819717  
6. 008294 6. 082585 6. 015244 5. 938824 5. 369006 5. 820017 5. 418237 5. 818243 5. 143275  
4. 588953 4. 591328 5. 21537 4. 85861 4. 850831 5. 017007 4. 686676 4. 967197 4. 332017  
3. 823752 4. 310823 4. 654194 4. 014808 4. 103758 3. 714913 4. 324555 3. 812079 4. 256921  
6. 034279 7. 042341 7. 048868 7. 093018 7. 172211 6. 511269 6. 141519 6. 848776 6. 343081  
4. 979932 4. 316212 4. 25348 3. 882715 3. 928922 4. 515175 3. 008904 3. 864095 4. 087376  
2. 335506 3. 861558 3. 22436 3. 543152 5. 037655 3. 596594 3. 560121 4. 415471 3. 841967  
4. 950792 4. 842477 5. 813891 4. 496344 6. 253322 5. 846046 5. 709313 5. 478967 5. 411533  
3. 856834 3. 699353 3. 584979 3. 670211 3. 694874 3. 938024 2. 224613 2. 701328 3. 369505  
3. 789121 3. 47062 2. 61107 2. 433791 2. 375849 3. 391565 3. 334328 3. 303578 4. 810425  
4. 195988 5. 305508 5. 042401 4. 896562 4. 915818 4. 767002 5. 637206 5. 7029 5. 290271  
5. 735006 6. 482123 6. 306013 6. 249711 6. 099214 6. 107724 5. 666468 6. 412825 6. 199737  
6. 168337 6. 026127 6. 302864 6. 410259 6. 220913 5. 890723 5. 730229 6. 110763 6. 317175  
5. 234269 5. 879325 5. 322461 4. 698068 6. 025163 6. 271188 5. 905938 5. 832783 5. 599721  
2. 788051 2. 248265 2. 864811 2. 557895 2. 801545 3. 307507 3. 363677 2. 325821 2. 492574  
7. 881301 8. 100985 7. 985596 8. 099045 8. 441425 7. 745291 8. 485953 8. 342579 7. 750233  
6. 097449 5. 957849 5. 54523 4. 920503 5. 854319 5. 734475 5. 33488 6. 226934 5. 915526  
6. 327675 6. 075206 6. 025647 6. 863549 6. 482635 6. 698681 6. 653888 6. 161248 6. 182136  
6. 119248 6. 395931 6. 36025 6. 271229 6. 517877 6. 519657 6. 269261 6. 248843 6. 251218  
5. 077822 5. 30995 4. 893382 5. 605165 5. 451698 5. 637806 4. 913317 4. 892867 5. 743709  
2. 723742 3. 326911 2. 873445 3. 474483 2. 54121 4. 275627 3. 067583 3. 476706 3. 415948  
3. 483776 2. 404163 2. 52956 3. 450482 2. 333789 2. 672951 2. 349405 3. 586835 3. 163534  
7. 165992 6. 964322 6. 808809 7. 682636 7. 496071 7. 422101 8. 443369 6. 97434 7. 368482  
6. 94056 4. 966114 5. 445241 3. 538548 4. 948839 4. 693813 4. 251433 5. 100854 5. 277623  
3. 763532 4. 218035 3. 596875 4. 597778 3. 676003 3. 759163 4. 50343 3. 831754 3. 980682  
3. 222991 3. 071779 3. 453361 2. 531613 3. 381439 3. 537934 3. 162087 3. 267473 3. 308559

3. 109284 4. 203318 3. 367493 3. 062258 2. 542127 3. 915637 3. 50674 2. 627923 2. 886344  
2. 629872 2. 461991 2. 165797 2. 000079 2. 00676 2. 489305 1. 891453 2. 479493 1. 932247  
1. 775494 1. 356947 1. 504965 1. 009788 1. 251751 1. 829916 1. 542888 1. 360492 1. 774523  
3. 354844 2. 931995 3. 487544 3. 59932 2. 908541 3. 474134 3. 100706 3. 600368 3. 008351  
8. 789559 8. 926151 8. 754957 8. 706023 8. 816379 8. 684809 8. 549849 8. 774979 8. 775211  
5. 625472 6. 218926 5. 999005 6. 464242 6. 359636 6. 284096 5. 71854 6. 296139 5. 741447  
6. 421075 7. 349446 7. 664202 6. 796548 7. 159775 7. 167192 7. 301251 7. 079641 6. 94399  
3. 086297 4. 66259 4. 911781 3. 788921 4. 135784 4. 679391 4. 459501 4. 44788 4. 44387  
4. 3504 6. 612441 5. 829829 6. 402963 6. 21608 6. 38459 5. 373843 6. 378976 6. 072814  
1. 255606 0. 968208 0. 982226 1. 209735 1. 588512 1. 117476 1. 209423 1. 16035 1. 238464  
5. 876318 7. 744252 7. 084463 6. 32291 7. 586032 7. 783542 7. 222934 7. 19876 7. 311499  
5. 508512 5. 53725 5. 530387 5. 696964 5. 491527 4. 24193 4. 538605 5. 251874 4. 886134  
5. 363722 5. 818009 5. 126422 4. 448829 4. 828532 5. 008718 4. 850844 4. 986132 5. 060298  
7. 701459 7. 473516 6. 886286 7. 23222 7. 018771 6. 891938 7. 097948 7. 040713 7. 455186  
6. 252957 6. 205303 6. 192001 6. 558792 6. 244031 6. 255009 5. 431821 6. 079108 6. 354709  
4. 811723 4. 522488 5. 613403 4. 932104 5. 686953 4. 740159 5. 285456 5. 780464 4. 522773  
1. 402048 2. 077869 2. 97463 1. 646977 1. 563657 1. 558805 1. 726552 1. 876376 2. 580684  
3. 443655 4. 538908 2. 859849 2. 955533 2. 874647 3. 617922 3. 68795 2. 826801 3. 683323  
1. 627383 1. 674316 0. 905847 1. 540425 1. 777619 2. 102279 1. 603 1. 554952 1. 23126  
2. 29904 2. 510501 2. 742064 3. 05475 2. 906605 2. 313607 2. 838879 2. 064547 2. 830531  
3. 123886 2. 68861 2. 616519 2. 356611 2. 09795 2. 796204 2. 5292 3. 002894 2. 632702  
2. 136019 2. 094911 1. 771998 2. 207673 1. 920848 2. 219332 2. 752077 2. 152627 2. 324994  
1. 873579 1. 578771 2. 302496 2. 327348 1. 550013 1. 828302 1. 679801 1. 99837 1. 935241  
3. 210371 3. 706499 2. 685192 3. 594471 3. 075343 2. 54437 3. 555409 2. 74508 2. 966081  
5. 032969 4. 89859 3. 238383 3. 519776 2. 858605 4. 879463 3. 333431 2. 708623 4. 009683  
3. 610391 3. 054429 4. 083166 4. 554809 4. 469385 4. 361394 4. 49666 3. 709308 4. 029916  
2. 032963 2. 402724 3. 111791 3. 741609 2. 266402 1. 673212 2. 155719 2. 131995 2. 618929  
2. 849857 4. 460637 5. 24077 4. 140823 5. 094309 3. 904569 4. 201096 4. 749054 4. 290146  
3. 495767 4. 024706 3. 265564 2. 789193 3. 632038 4. 113531 2. 966676 2. 881373 3. 061576  
2. 441005 2. 435034 2. 175391 2. 382395 2. 52475 3. 938948 1. 865066 2. 234681 2. 464979  
1. 423736 1. 60324 1. 458435 1. 564368 1. 958311 1. 6546 1. 695842 1. 259095 0. 904703  
2. 661909 1. 403025 1. 739739 1. 613757 1. 857889 1. 231074 1. 820882 1. 415355 1. 724031  
6. 391851 5. 531919 4. 371441 6. 402496 6. 850935 6. 570158 5. 600425 5. 401113 5. 406601  
4. 128994 4. 6116 4. 527669 5. 209855 5. 085666 4. 940018 4. 636963 4. 823343 4. 85984  
7. 00217 7. 752338 7. 501716 7. 64223 7. 58564 7. 570254 7. 78992 7. 236609 7. 491102  
7. 00805 6. 934914 7. 258362 6. 737259 6. 807007 6. 652899 6. 562493 6. 834745 7. 088883  
3. 099305 4. 225604 3. 860655 4. 072089 4. 022371 3. 675908 3. 283641 4. 608957 4. 642138  
1. 646426 1. 410197 1. 369774 1. 355589 1. 544612 1. 338007 1. 519256 1. 417397 1. 260263  
5. 670537 6. 911637 6. 927448 6. 904521 6. 627308 6. 430445 6. 648866 6. 914719 6. 391532  
4. 973843 5. 88156 5. 943107 4. 757111 6. 191984 6. 51843 5. 555489 5. 344804 5. 922418  
3. 183573 3. 81577 3. 742566 4. 469477 2. 838554 4. 880588 3. 867421 4. 094425 4. 037932  
6. 064473 7. 936518 8. 009593 7. 366976 7. 807275 7. 653426 7. 001736 7. 216801 7. 713167  
4. 755175 4. 518039 4. 869933 4. 34399 5. 246798 4. 661587 4. 317948 5. 41137 4. 980116  
5. 873977 7. 142439 6. 935291 7. 196514 7. 227123 7. 300854 6. 853042 7. 107993 6. 999242  
2. 276766 2. 107537 1. 694938 2. 374774 2. 108184 2. 725505 2. 383969 1. 983249 3. 086408  
9. 050944 6. 541097 7. 257308 6. 55043 7. 183262 4. 936877 7. 143757 6. 755512 8. 463771  
2. 701685 3. 080398 4. 001788 3. 688256 3. 256466 3. 403041 3. 555632 3. 432511 3. 489376  
6. 051119 6. 909601 6. 649242 6. 049636 6. 154408 6. 796854 6. 027166 6. 01619 6. 157748  
2. 37183 2. 513477 3. 105057 3. 315558 2. 57111 2. 51555 2. 846298 2. 352187 2. 971722  
2. 185289 2. 283016 1. 676721 1. 997435 1. 940738 2. 219994 1. 959027 2. 795809 2. 358627  
4. 062055 4. 735083 4. 306397 5. 18778 5. 425112 4. 112721 4. 522659 5. 064092 5. 9604

3. 969852 3. 420894 3. 576017 3. 317485 3. 050601 3. 333286 3. 642712 3. 445402 3. 227878  
2. 207047 1. 902467 2. 068031 1. 917966 2. 590871 1. 628761 2. 000104 2. 130447 1. 77902  
5. 014566 5. 919436 5. 990618 5. 661275 5. 833341 6. 023463 5. 789961 6. 388318 5. 99759  
5. 131856 5. 091729 5. 037494 5. 316673 4. 994917 4. 777386 5. 340016 5. 506187 5. 143536  
3. 334645 3. 868044 4. 088479 4. 235901 3. 69503 3. 696532 2. 175389 3. 651368 3. 816101  
3. 547288 2. 779547 2. 97142 2. 073315 2. 881818 2. 614576 3. 142269 3. 009987 2. 766911  
6. 018552 5. 772104 6. 018612 5. 782857 6. 361149 4. 80037 6. 499192 5. 888507 5. 638742  
7. 003818 6. 97279 6. 611326 6. 297379 6. 395319 6. 932171 6. 258872 7. 050738 7. 16397  
2. 86358 2. 407886 2. 461841 2. 343414 1. 960273 2. 041418 2. 189366 2. 054611 2. 811298  
7. 350645 7. 014176 6. 664839 6. 457151 6. 522801 6. 206245 6. 096744 6. 737404 6. 417577  
5. 715052 6. 2828 6. 270201 6. 391515 6. 101025 5. 782082 6. 623906 6. 162715 6. 281508  
4. 804568 4. 183397 4. 686356 4. 909347 4. 459369 3. 891101 2. 535252 4. 340671 4. 612082  
3. 888939 4. 977537 4. 389273 4. 531424 5. 172892 3. 846604 4. 472312 4. 89044 4. 135129  
7. 153328 6. 848057 6. 88517 6. 707782 6. 376187 6. 712471 7. 293073 6. 935315 6. 899877  
4. 287064 5. 021148 4. 5812 4. 528443 4. 471706 4. 505911 4. 584762 5. 27746 4. 77362  
7. 451833 7. 145017 7. 143943 7. 387939 7. 53537 7. 906113 7. 744606 6. 997049 7. 359348  
5. 909341 6. 669857 6. 113021 5. 824922 6. 77784 6. 104657 5. 414193 6. 171162 6. 184018  
5. 578325 5. 326114 5. 464617 4. 872801 5. 04233 5. 549083 4. 778233 5. 057746 5. 537064  
6. 669259 6. 013071 6. 728364 5. 648559 6. 748344 5. 377627 6. 277805 6. 072352 6. 276839  
5. 412784 5. 931017 5. 629403 3. 076203 6. 00836 4. 715468 3. 534241 5. 142638 5. 329236  
7. 036549 6. 060638 6. 33881 6. 205622 7. 073857 6. 463257 6. 026022 6. 169317 6. 306364  
4. 392134 4. 985583 4. 698326 4. 693539 3. 960358 4. 552164 4. 117998 4. 960779 4. 52639  
5. 309884 4. 44936 3. 691556 4. 393259 3. 261409 3. 534531 3. 511001 3. 693135 4. 053926  
1. 932829 2. 206103 2. 228112 1. 74369 2. 061938 2. 273875 2. 810118 4. 217101 2. 610481  
3. 202831 4. 679481 3. 506237 3. 817612 4. 648118 4. 597828 4. 572851 4. 434648 4. 567598  
4. 726644 4. 039828 4. 05967 4. 217644 4. 046207 3. 596544 4. 008437 4. 182419 5. 312072  
3. 942545 4. 793502 3. 942514 4. 579343 4. 800302 3. 870359 4. 473996 4. 790928 4. 79155  
2. 226654 3. 042799 2. 991068 3. 053334 4. 326192 3. 815074 3. 165653 3. 13391 3. 378673  
5. 720116 6. 104717 6. 320116 6. 291478 5. 950853 5. 77193 5. 841254 6. 948463 6. 286064  
6. 050879 5. 103803 5. 477583 5. 340247 5. 128984 5. 266194 5. 423947 5. 630208 5. 501229  
5. 260586 5. 673984 5. 059081 5. 793708 5. 531455 6. 072202 5. 450288 5. 884316 6. 154694  
4. 534834 5. 158258 5. 824689 4. 603376 5. 45194 4. 561772 4. 090009 4. 674169 5. 577702  
3. 227413 3. 90588 3. 313871 4. 255761 3. 249023 3. 163657 3. 70912 5. 406971 4. 137774  
4. 608579 3. 603016 3. 650304 3. 758173 3. 843733 2. 772541 3. 557329 3. 374163 3. 896542  
4. 684073 5. 008367 4. 856868 4. 71561 4. 968493 5. 285086 4. 778796 5. 059207 4. 670331  
0. 907624 1. 317825 0. 960138 1. 603151 1. 804981 1. 381209 1. 416916 0. 633069 1. 352119  
3. 4365 4. 149966 3. 655304 3. 583803 3. 46037 3. 116772 3. 267453 4. 233834 3. 425387  
4. 939705 4. 525325 4. 545426 5. 001627 5. 029241 4. 560837 4. 865306 4. 409051 4. 337039  
5. 108743 5. 754029 5. 227408 4. 988424 5. 389108 5. 660148 4. 698653 5. 395387 5. 102312  
5. 442929 5. 017431 5. 390479 5. 17258 5. 185406 5. 317837 4. 394597 5. 556447 5. 142204  
1. 579343 2. 025322 1. 529711 2. 224566 1. 467809 1. 417525 1. 993997 1. 884306 2. 114284  
5. 959925 6. 198305 6. 903836 6. 797145 6. 237617 5. 559526 5. 737596 6. 394662 6. 426781  
5. 675911 6. 2242 6. 346378 5. 163025 6. 29392 6. 252597 5. 936305 6. 313417 6. 201646  
3. 935582 4. 387195 3. 910618 4. 341437 5. 46677 5. 143863 4. 502791 4. 83589 5. 507904  
8. 30691 8. 306164 8. 015808 7. 47531 8. 193443 8. 316435 8. 268296 8. 450506 8. 343563  
7. 194044 6. 446345 6. 769088 5. 571022 6. 356658 6. 257189 6. 118013 6. 536766 6. 783999  
6. 012053 6. 277783 5. 426427 4. 729377 6. 087722 4. 187968 4. 842201 5. 291637 5. 587546  
4. 375001 7. 001943 6. 094215 6. 337674 6. 712991 6. 374697 6. 041317 6. 475783 6. 442719  
6. 297239 5. 098945 5. 792979 5. 696762 5. 470139 4. 797377 5. 384341 4. 694196 5. 847885  
6. 272862 5. 841953 5. 573262 6. 817478 5. 894141 5. 183097 5. 043705 5. 109908 5. 387412  
4. 145479 4. 380801 4. 515105 4. 621371 4. 924617 4. 761896 4. 310226 5. 15832 4. 606986



4. 694109 5. 004359 5. 558779 4. 342758 5. 161793 4. 763833 4. 719111 4. 414328 4. 511916  
5. 565154 5. 073787 5. 55791 5. 18619 5. 038264 5. 08032 5. 40175 5. 348484 5. 818978  
2. 830601 2. 671371 2. 83503 2. 424163 3. 0586 2. 402226 2. 685588 2. 538144 2. 644827  
5. 769639 6. 384194 6. 140176 5. 675724 6. 138423 5. 724391 5. 762127 6. 326297 6. 336214  
3. 726707 4. 879287 4. 850183 4. 250063 5. 282914 5. 136607 4. 22969 3. 986932 4. 855384  
7. 209667 6. 824997 6. 757064 6. 467253 7. 272134 5. 936498 7. 372154 7. 475212 7. 303675  
5. 138362 6. 184024 5. 658822 6. 014914 5. 371234 5. 113104 4. 717814 5. 726179 5. 202694  
2. 965635 3. 415005 3. 492199 3. 502998 3. 420161 3. 806546 3. 343218 3. 444681 3. 60111  
8. 485325 8. 928869 8. 910419 8. 518289 8. 359591 8. 737795 9. 159901 8. 520542 8. 614612  
3. 673721 3. 474918 4. 217985 2. 687829 3. 011927 3. 29845 3. 043384 3. 271228 2. 962432  
3. 417763 4. 132012 3. 59975 4. 234989 4. 444751 4. 284953 4. 144431 3. 700033 3. 706442  
4. 449457 5. 982842 4. 418078 5. 573267 5. 074721 4. 836567 4. 448307 4. 428758 5. 060697  
2. 888415 3. 037818 3. 095322 2. 577733 2. 538064 2. 284754 2. 489159 2. 468417 3. 002526  
6. 917896 6. 822758 6. 935735 6. 047344 6. 088685 6. 694063 7. 136423 6. 691841 6. 064248  
1. 80234 1. 708781 1. 333601 1. 078677 1. 335291 1. 748302 1. 245029 1. 429928 1. 387038  
6. 975952 7. 051181 7. 051487 6. 831651 7. 504877 5. 879545 7. 092331 6. 756978 7. 04228  
8. 218699 7. 623341 7. 650871 7. 197927 7. 712674 7. 387071 8. 333382 7. 599816 7. 545651  
3. 141759 3. 970411 3. 350226 3. 675228 4. 607846 4. 075942 4. 333409 5. 098736 3. 871545  
6. 610343 7. 012575 6. 838444 6. 525211 6. 641434 7. 130085 7. 586548 6. 973853 6. 947858  
5. 965168 5. 828342 6. 441071 5. 965098 4. 680263 6. 771078 4. 519503 6. 632358 6. 105279  
5. 645865 5. 530521 5. 146484 4. 903514 5. 06486 5. 982428 4. 897904 5. 555035 5. 491765  
3. 761366 3. 720205 3. 184035 2. 814043 3. 900697 4. 49532 3. 409618 3. 351305 4. 174112  
2. 310526 0. 771077 1. 292402 1. 436435 1. 128911 1. 405839 0. 851261 1. 66022 1. 080313  
6. 168742 6. 134792 6. 020423 6. 639683 5. 964741 6. 359269 6. 014408 5. 626156 5. 780547  
6. 142204 7. 120674 7. 103653 6. 395813 6. 71705 6. 870653 6. 710407 6. 701676 6. 64978  
3. 760428 4. 556228 4. 197617 4. 535198 3. 442733 4. 659878 4. 55239 4. 286017 3. 773521  
3. 712377 3. 678351 4. 152445 3. 73339 3. 067937 4. 168748 4. 160997 4. 4273 3. 868436  
3. 691122 5. 096726 5. 630218 5. 25642 5. 795917 5. 599773 5. 410353 4. 785678 5. 735218  
2. 144481 1. 701977 1. 707075 2. 178894 1. 876776 1. 819789 2. 057438 1. 695438 2. 282334  
5. 322212 6. 116968 6. 282398 5. 701712 6. 040934 6. 251634 5. 747161 6. 184241 6. 347911  
3. 884703 3. 617266 4. 820694 4. 316569 4. 062989 4. 325804 3. 301075 5. 001724 4. 297355  
5. 960236 6. 57289 5. 993161 6. 1048 6. 221876 6. 534931 6. 867044 5. 260043 6. 229966  
5. 982609 7. 305373 6. 506625 7. 396447 7. 000072 7. 622175 6. 586132 6. 70593 7. 235278  
2. 665663 2. 450866 2. 417955 2. 331375 2. 070996 2. 583917 2. 390602 2. 474627 2. 08896  
4. 843023 4. 494928 4. 562281 4. 142927 4. 819738 4. 9677 4. 230092 5. 713567 4. 587864  
5. 716664 6. 56568 6. 976774 5. 716997 6. 677075 5. 923335 6. 578915 6. 376636 6. 14372  
1. 374104 1. 533818 1. 307319 1. 826511 1. 453967 1. 695916 1. 232602 2. 026634 1. 587058  
5. 731812 6. 506572 5. 779416 6. 012312 6. 81357 6. 51103 5. 530429 6. 527809 6. 371235  
6. 53316 6. 490786 6. 744393 7. 155602 7. 005532 6. 846348 7. 23717 6. 61139 6. 78899  
2. 841762 2. 568281 2. 13282 3. 200465 2. 346924 2. 961968 1. 627832 1. 915634 2. 627886  
1. 941761 1. 648173 2. 016127 2. 052964 1. 620325 2. 167041 2. 08348 1. 85832 1. 806126  
5. 493562 6. 080985 5. 337466 5. 36669 5. 222142 5. 155884 5. 226149 5. 245619 5. 12251  
3. 973065 3. 958746 3. 422562 4. 514661 4. 513027 4. 43286 4. 45187 3. 032603 3. 657466  
5. 947408 6. 741415 6. 010239 6. 42689 6. 528103 6. 470479 5. 858188 5. 958682 6. 286672  
6. 773956 4. 675221 6. 078218 6. 119478 6. 51052 4. 26382 5. 746937 5. 269453 5. 364483  
10. 23367 9. 487789 9. 862746 9. 252766 9. 739584 9. 638606 9. 675384 9. 801049 10. 07945  
3. 506762 1. 124702 1. 13439 1. 990087 1. 457155 1. 195711 2. 630695 2. 076242 2. 764845  
3. 860117 2. 052082 2. 229174 2. 101637 2. 252267 1. 829659 3. 584755 2. 003024 1. 694241  
2. 714055 1. 620617 2. 15533 3. 351189 1. 631574 2. 479285 2. 434079 2. 484581 1. 644657  
2. 798936 2. 328803 2. 011524 2. 41369 2. 51756 1. 911493 2. 266337 2. 002285 2. 141517  
5. 388882 4. 068869 5. 218131 5. 233991 4. 568249 4. 64268 4. 024805 4. 732863 4. 441349

4. 794519 5. 794736 5. 430175 4. 935846 5. 608277 4. 959579 4. 639454 6. 05815 5. 414732  
1. 874311 2. 101919 1. 360385 1. 599112 1. 862726 1. 884768 1. 773835 1. 601799 1. 57084  
5. 659915 6. 891671 6. 987399 5. 912524 6. 54458 6. 201766 6. 169913 6. 13813 6. 258422  
4. 968254 4. 381195 4. 086249 3. 617936 3. 812787 3. 812619 3. 094303 3. 731667 3. 621275  
6. 738214 6. 866392 6. 952703 7. 23476 6. 937685 7. 074724 6. 692268 6. 793266 6. 841223  
1. 487794 1. 413315 1. 07561 2. 823481 1. 154418 1. 256444 2. 347144 1. 56034 1. 00232  
4. 617265 4. 80878 4. 33397 4. 409071 4. 980368 4. 901944 4. 49685 4. 248358 5. 161416  
4. 921362 5. 182111 5. 208481 4. 733941 4. 612565 4. 952958 4. 334722 5. 375387 4. 898869  
2. 871034 2. 651258 2. 41939 2. 953828 3. 088955 2. 640485 3. 613562 3. 185542 2. 682292  
7. 873575 7. 282181 7. 810299 8. 444605 7. 713134 7. 878383 7. 569594 8. 285626 7. 87624  
4. 718739 5. 991437 6. 373435 5. 610742 5. 971675 5. 940072 5. 021462 6. 128789 5. 585556  
3. 343519 3. 130487 3. 432927 2. 960964 2. 867123 3. 210438 2. 591516 2. 451787 3. 038188  
3. 648191 4. 26255 3. 084757 3. 618453 3. 301659 4. 173575 3. 120561 3. 418936 3. 801152  
5. 353195 5. 918934 5. 392518 5. 860432 6. 464905 5. 56479 5. 580753 5. 868019 5. 580678  
3. 1143 3. 81733 4. 285411 3. 21823 2. 470669 3. 895153 3. 383327 3. 322662 4. 154696  
4. 709108 5. 201969 5. 852409 3. 576983 5. 733433 5. 190019 4. 304892 5. 449171 4. 60172  
4. 830997 6. 789661 5. 90228 5. 840169 6. 534567 5. 975679 5. 268307 5. 301667 6. 525124  
5. 424351 4. 070289 4. 206038 3. 673298 2. 997635 4. 109392 2. 564948 3. 79372 4. 677727  
5. 792535 6. 252405 6. 441695 6. 717251 6. 29585 6. 092915 6. 387364 6. 224083 5. 720227  
2. 713811 3. 206328 3. 525255 3. 795368 3. 809277 4. 666124 4. 010679 4. 010613 3. 801122  
3. 263181 4. 081511 3. 649358 2. 478754 3. 22932 3. 064683 2. 724067 3. 987823 2. 488926  
2. 687376 3. 418014 2. 821372 2. 832618 2. 908467 2. 297031 3. 446239 3. 754541 2. 917006  
3. 36831 3. 18201 2. 824888 3. 088661 2. 769457 2. 807159 2. 9503 2. 980222 2. 309403  
2. 48648 1. 844292 2. 109431 2. 576032 2. 743426 2. 219303 1. 985645 1. 677278 1. 931689  
3. 11533 2. 750211 2. 351107 3. 125235 2. 277959 2. 196009 2. 787032 2. 864231 2. 251105  
1. 853286 1. 643193 2. 083234 2. 349302 1. 990166 1. 927021 2. 081586 2. 277378 2. 300898  
6. 762006 7. 261844 6. 849407 7. 167611 6. 722983 6. 777493 6. 996112 6. 286808 7. 039395  
3. 294319 4. 133635 3. 115537 4. 701319 4. 583533 6. 614913 4. 87641 5. 234657 3. 928207  
2. 060693 1. 836315 2. 177738 2. 167478 1. 522508 2. 478708 2. 583637 1. 955289 1. 637782  
5. 425668 6. 039439 5. 727842 6. 107708 6. 192031 5. 747952 6. 190695 5. 921119 5. 579244  
4. 105104 4. 926252 5. 227331 4. 582478 4. 846351 4. 813495 4. 600948 4. 989761 5. 161136  
2. 184291 2. 223476 2. 018572 1. 892183 1. 568654 1. 504137 2. 639536 1. 773747 1. 597  
3. 425658 3. 01169 2. 342149 2. 793929 2. 646332 2. 128869 3. 061307 2. 202033 3. 032707  
3. 401182 2. 359415 3. 433534 3. 701837 2. 733814 3. 830786 4. 433515 2. 889377 2. 929979  
2. 045639 4. 23858 3. 714092 3. 270763 3. 164781 3. 037839 3. 738988 3. 188937 2. 459849  
2. 776753 3. 316946 2. 926781 2. 929612 2. 929924 3. 169774 3. 850779 2. 995033 3. 067279  
6. 810417 7. 067764 7. 151664 7. 002786 6. 824483 7. 336443 7. 097612 7. 058802 7. 142358  
6. 092902 5. 197044 5. 734843 6. 198199 5. 668796 5. 926023 6. 074431 6. 041237 5. 085618  
4. 750572 3. 295302 3. 250521 3. 415024 3. 386595 4. 223574 3. 710431 3. 603791 4. 235209  
2. 978869 2. 617818 3. 313646 2. 395379 3. 149919 3. 54729 2. 46927 3. 757341 2. 762995  
6. 469254 6. 820199 6. 65719 6. 86601 8. 183726 7. 036531 7. 059988 6. 942181 7. 372463  
1. 954531 1. 335441 3. 264766 2. 580356 1. 711507 2. 155547 1. 785664 1. 185014 1. 71102  
3. 474467 3. 306431 2. 980735 3. 959072 3. 585465 4. 342905 4. 31635 2. 369848 3. 438092  
2. 381941 2. 779428 2. 422659 2. 988574 3. 729424 2. 830279 3. 166552 2. 54318 3. 007825  
6. 057669 6. 443305 6. 651216 6. 55471 6. 575991 6. 616541 6. 253979 6. 265424 6. 532881  
3. 317489 3. 516506 2. 98703 3. 313623 2. 954719 3. 016975 4. 090483 3. 564691 3. 160086  
5. 757484 5. 898156 4. 869826 4. 915551 6. 286395 4. 697505 5. 394789 4. 801541 6. 045665  
5. 371162 4. 936278 5. 1611 4. 662084 4. 732977 5. 193015 5. 070278 4. 912772 5. 20766  
1. 672583 2. 73127 1. 544397 2. 005835 1. 230409 2. 535512 2. 955851 1. 797765 1. 882826  
5. 449565 5. 273411 5. 541943 4. 747058 4. 655542 4. 973127 4. 025237 5. 270774 4. 162936  
4. 894207 5. 395142 5. 493984 4. 853123 5. 088055 5. 782752 4. 743009 5. 108631 5. 758619

6. 832037 7. 262968 7. 263004 6. 83966 7. 519751 7. 409305 6. 931039 7. 239226 7. 06558  
2. 5021 2. 334064 2. 842592 2. 39055 2. 479316 2. 393528 2. 873488 2. 482844 2. 41681  
2. 750657 3. 521599 3. 963426 2. 577394 2. 722277 2. 746515 2. 934348 3. 091358 2. 410052  
2. 783718 2. 78614 3. 079312 2. 812272 2. 484198 2. 779678 2. 495295 3. 271357 2. 821661  
1. 499156 1. 37692 1. 366285 1. 335733 1. 882307 1. 613164 2. 207902 1. 165231 1. 204558  
5. 275377 6. 057165 5. 853181 5. 76616 6. 052446 6. 047248 6. 087969 5. 237021 5. 475307  
1. 485188 1. 528851 1. 039666 1. 744597 2. 10797 1. 301786 1. 837132 1. 926879 1. 712931  
2. 338217 4. 045631 3. 313295 4. 575944 4. 144045 4. 244854 2. 998532 4. 661208 3. 064302  
7. 962092 7. 33946 7. 249787 7. 680795 7. 233226 7. 14957 7. 625596 7. 755329 8. 159569  
2. 552901 3. 929596 1. 588027 3. 057945 2. 784656 2. 074025 2. 177481 2. 087191 2. 390004  
4. 414256 4. 995026 3. 819832 3. 916178 3. 111981 4. 310984 3. 891842 4. 017842 3. 808083  
4. 522893 4. 594157 4. 831087 4. 451153 4. 206345 3. 686168 3. 762866 4. 816251 3. 825523  
5. 195495 5. 879461 5. 475715 5. 238393 5. 67017 5. 488608 5. 904589 5. 71587 5. 021464  
5. 666519 6. 767054 6. 758721 6. 113121 7. 029194 6. 823678 6. 210313 6. 766428 6. 320892  
7. 474709 6. 572012 6. 696468 5. 459608 6. 967223 6. 461628 5. 711939 6. 9674 6. 000942  
2. 085118 1. 720737 1. 170377 0. 859537 1. 234311 1. 400117 1. 581825 1. 409028 0. 905779  
4. 891951 4. 389788 4. 750398 5. 142422 4. 573353 4. 819969 4. 723628 5. 679943 4. 883053  
6. 190044 6. 679246 6. 606036 6. 784706 6. 991925 6. 629508 6. 145682 6. 423801 7. 013131  
4. 285548 2. 203418 4. 045821 2. 953237 3. 336412 3. 490198 3. 006028 2. 980952 3. 348536  
2. 226529 2. 133591 1. 742469 2. 505604 1. 95196 3. 000276 1. 338275 2. 380959 1. 982329  
1. 216897 1. 550652 1. 372694 1. 316145 1. 79158 0. 822747 0. 810555 1. 419162 1. 365176  
3. 070956 1. 838821 2. 317897 2. 045377 2. 128582 2. 185888 2. 290627 2. 221314 2. 692724  
3. 342606 4. 168204 3. 339015 3. 362382 2. 950218 3. 510404 3. 771317 2. 970113 3. 225636  
7. 464868 7. 914622 7. 471276 7. 420806 7. 613487 7. 470047 8. 087521 7. 758066 7. 951047  
3. 838489 3. 561173 4. 082712 3. 202519 3. 319099 4. 330169 3. 121775 3. 675861 3. 037181  
3. 905683 3. 308062 4. 204453 4. 079874 3. 790821 4. 272717 4. 073401 4. 148279 2. 772808  
1. 622468 1. 524821 1. 739809 1. 719525 1. 672064 1. 628573 1. 845824 1. 835806 1. 894313  
4. 572153 5. 336914 5. 142252 4. 91944 5. 719267 4. 922577 5. 795135 4. 194296 5. 17779  
8. 137569 7. 170641 7. 329648 6. 724211 6. 986752 7. 215051 6. 821159 6. 600545 7. 185237  
2. 891995 4. 598508 5. 198561 5. 019423 5. 213804 4. 388085 3. 608222 4. 808639 4. 195388  
1. 326808 1. 857053 1. 304044 1. 583809 1. 838589 1. 398939 1. 604088 1. 633411 1. 652151  
6. 485207 6. 447245 6. 279209 6. 294849 6. 126324 6. 401606 6. 29005 6. 851227 6. 019915  
1. 936777 1. 707575 1. 614428 1. 884828 2. 165071 2. 681475 3. 327484 2. 131759 1. 511962  
4. 977557 4. 191653 4. 527754 4. 909195 4. 530681 3. 825438 4. 394055 4. 82935 3. 921361  
2. 152564 1. 179621 1. 394789 1. 839008 2. 029378 1. 638968 1. 906188 1. 488682 1. 8387  
3. 893214 3. 325413 3. 639636 2. 950121 2. 746847 2. 638023 2. 633639 2. 857097 3. 564031  
2. 273813 3. 21495 3. 460101 2. 557719 2. 601833 2. 474704 3. 468528 2. 750718 2. 703641  
2. 009241 1. 510995 1. 291361 0. 75442 1. 038808 1. 690525 2. 642449 1. 081261 1. 789595  
2. 394004 3. 134705 3. 027886 2. 478811 2. 108842 3. 433961 1. 844023 3. 117042 1. 783332  
2. 611601 3. 364973 2. 837687 3. 182196 3. 725919 2. 798219 3. 414669 3. 803976 3. 80231  
1. 975208 1. 840151 2. 422393 1. 811075 2. 668859 1. 83543 2. 202821 1. 626895 2. 797288  
4. 58854 4. 533996 3. 996457 4. 581342 4. 76982 4. 484367 4. 481677 5. 273091 3. 615285  
6. 685937 7. 575739 7. 158693 7. 856562 7. 704423 7. 548171 7. 485257 7. 583464 7. 322778  
2. 320071 2. 279528 2. 600241 3. 055287 2. 188774 2. 575308 2. 616542 2. 791717 2. 472249  
3. 882275 3. 581148 4. 528642 4. 600912 2. 971159 4. 279222 2. 955088 3. 513905 4. 725243  
6. 483203 7. 205642 7. 111942 7. 251115 7. 407752 7. 149837 7. 37567 7. 288065 7. 040843  
2. 279642 2. 792991 3. 080536 2. 665123 2. 322663 2. 166957 2. 646053 2. 396628 2. 804162  
2. 127012 2. 004658 1. 171099 1. 440859 1. 767976 1. 276774 1. 228806 1. 25313 1. 135269  
2. 435723 1. 885653 1. 558113 1. 896887 1. 169219 2. 722327 2. 495335 1. 769759 1. 883584  
5. 35422 6. 214585 5. 720509 6. 371977 6. 534836 7. 182974 6. 098943 6. 277445 5. 642986  
5. 932495 6. 026705 5. 486874 6. 200059 6. 071897 6. 26395 5. 738359 6. 570097 6. 162779

5. 964759 6. 128056 6. 293887 6. 178763 5. 661552 5. 989235 5. 052975 6. 341073 5. 836431  
2. 180092 1. 861216 2. 293122 1. 987216 2. 051952 1. 530943 2. 313181 2. 126852 1. 986156  
3. 021663 3. 208044 3. 152325 3. 175668 3. 400266 3. 481368 3. 258312 2. 219825 3. 357379  
3. 764075 4. 033202 5. 857263 4. 038002 4. 010454 3. 915523 3. 911882 4. 620372 5. 128163  
1. 519366 1. 859421 1. 713367 1. 810541 2. 374465 1. 319264 2. 492367 2. 294284 1. 676513  
2. 502844 2. 950138 3. 347348 2. 870336 2. 488113 2. 876374 2. 66639 1. 937301 2. 587433  
3. 622783 4. 160716 3. 90862 4. 139573 4. 146911 4. 446311 4. 038706 3. 931823 3. 904522  
5. 276389 5. 265859 5. 146149 5. 360854 5. 25815 5. 088986 5. 305036 6. 001627 5. 363442  
0. 881279 0. 938775 0. 698562 0. 882975 0. 890297 1. 238672 1. 989327 0. 823201 1. 119785  
1. 896681 1. 382435 1. 467899 1. 395116 1. 350896 1. 086151 1. 822174 1. 247344 1. 865347  
6. 700274 7. 368524 7. 72404 7. 809332 7. 314758 7. 421155 6. 911093 7. 38664 7. 32126  
2. 785468 3. 733085 3. 444202 2. 666932 3. 701049 3. 210252 2. 697888 2. 255308 2. 990663  
2. 676195 2. 240978 1. 694334 1. 518106 3. 119585 1. 769108 2. 386296 1. 361719 1. 810576  
3. 719165 3. 075527 2. 10243 2. 79988 2. 634601 2. 984013 2. 682818 2. 180037 1. 782927  
1. 441567 1. 176928 1. 134405 1. 473204 1. 224755 1. 467231 1. 333221 1. 376662 1. 204372  
7. 175998 7. 738583 7. 546848 7. 550582 7. 607818 7. 496064 7. 383511 7. 661105 7. 635595  
6. 526917 6. 011716 6. 480197 7. 351707 6. 288601 7. 060423 6. 655915 6. 705871 6. 967931  
1. 360835 1. 168431 1. 401335 1. 343301 1. 171058 1. 776679 1. 46801 1. 245453 1. 317342  
1. 332528 0. 689618 0. 853411 1. 118097 1. 472326 1. 019826 2. 301077 1. 23292 0. 952361  
1. 541766 1. 388982 1. 617213 1. 151552 1. 292947 1. 473925 1. 357021 1. 526661 1. 511762  
5. 731687 6. 025253 6. 394216 5. 528073 6. 216588 5. 981132 5. 825761 6. 146738 6. 081162  
6. 214615 5. 711257 6. 167499 5. 342468 5. 778275 5. 93831 6. 050971 6. 15487 5. 968228  
4. 266916 3. 61611 3. 189957 4. 295683 4. 878935 3. 645998 3. 361991 4. 71477 3. 265543  
5. 355581 5. 926425 5. 777775 5. 742348 6. 392212 5. 914133 5. 823974 5. 694544 5. 419431  
1. 930408 1. 39255 1. 550022 1. 439698 1. 178371 1. 202996 1. 847587 1. 626269 1. 858005  
2. 405254 1. 828424 2. 508228 1. 64248 1. 874348 1. 370684 2. 151496 1. 720385 2. 035971  
1. 297577 2. 315944 0. 922427 1. 273109 1. 122673 1. 229138 2. 301848 1. 59649 2. 909455  
4. 91106 4. 140207 5. 094017 4. 518267 3. 937258 4. 540039 3. 997843 3. 865391 4. 180151  
3. 460458 2. 9567 2. 988881 2. 728888 2. 884945 3. 146397 2. 845976 2. 569073 3. 665338  
7. 960692 8. 344575 8. 23425 8. 206955 8. 497753 8. 359415 8. 229604 8. 184435 8. 082471  
2. 017099 3. 060724 3. 244775 1. 979972 1. 674892 2. 012121 2. 246021 2. 562908 2. 055815  
8. 246703 7. 85284 7. 928863 7. 235342 7. 749859 7. 342903 7. 538128 7. 465351 7. 452583  
1. 131193 1. 102259 1. 254754 1. 745773 1. 583216 1. 622061 1. 662985 1. 679265 1. 583216  
5. 07198 5. 379512 5. 756477 5. 880126 6. 619606 6. 965943 5. 396043 5. 802821 5. 749884  
3. 50324 2. 863229 2. 663956 2. 809789 2. 988435 2. 590305 2. 990378 3. 159177 3. 127793  
1. 509555 1. 297067 1. 669523 1. 34103 1. 408288 1. 409132 2. 182771 1. 140305 1. 076162  
2. 212254 1. 384711 1. 587147 1. 855036 1. 388159 1. 371479 1. 85061 1. 433007 1. 21744  
1. 186117 1. 289998 1. 199505 1. 196778 1. 482334 1. 257865 1. 108821 1. 652375 0. 950522  
2. 110503 1. 757237 1. 647489 1. 802577 1. 499659 1. 748737 2. 02131 1. 589058 1. 625789  
2. 307411 1. 210067 1. 129496 1. 333529 1. 241673 1. 174948 1. 257698 1. 855162 2. 135329  
5. 934084 5. 472023 5. 89732 4. 449828 4. 743962 5. 68932 4. 260065 5. 895157 5. 784368  
2. 271719 1. 911184 1. 849262 1. 42358 1. 39913 1. 564207 1. 672169 1. 498915 1. 618834  
3. 801544 4. 430068 4. 053425 4. 645746 4. 091036 3. 532064 4. 240769 3. 42902 3. 421586  
3. 038471 1. 851021 3. 672054 2. 117207 1. 451366 2. 256333 1. 765432 2. 460277 1. 886337  
3. 263563 3. 943611 3. 893208 2. 427413 3. 426037 2. 714276 4. 052669 4. 235908 2. 755973  
1. 937205 1. 634851 2. 172743 2. 563326 2. 229427 2. 136144 2. 409983 1. 939654 1. 873315  
2. 463457 2. 607648 2. 919928 3. 613339 2. 880856 2. 80547 3. 195608 2. 878211 2. 498735  
2. 595044 1. 893662 1. 913436 1. 426044 1. 742166 1. 372333 2. 110485 1. 812384 2. 166186  
4. 324887 5. 154816 3. 273085 6. 03864 5. 429149 4. 253945 5. 514055 5. 40865 3. 798171  
2. 891888 2. 746717 3. 201179 2. 738414 3. 154674 3. 162038 2. 760019 2. 80559 2. 670445  
2. 561402 2. 005305 3. 457038 2. 134206 2. 422653 2. 348081 2. 466837 2. 276072 3. 852742

5.604191 5.811676 5.892481 6.019703 5.244761 5.551104 5.053264 5.99963 5.376812  
3.657306 2.910766 2.775986 3.191724 3.075427 3.587139 2.720543 2.871045 3.217495  
2.002351 2.183164 2.167741 2.640528 2.387147 2.775731 2.062162 2.541145 2.913559  
4.821939 5.302501 5.022826 5.512269 5.277409 5.577258 5.547412 4.533168 4.950207  
5.194017 5.206512 5.307353 4.729911 5.959672 5.195164 5.449168 5.229219 5.039506  
1.648798 1.385909 1.815578 1.365324 1.619073 1.377302 1.391088 1.131284 1.549596  
4.460758 5.509571 4.628588 4.883593 5.6956 4.710137 5.016464 5.21318 6.213164  
2.412338 2.561578 1.865429 2.60708 2.044277 2.14559 2.271261 2.345518 2.022542  
4.778863 2.624773 3.339046 1.762023 1.690072 1.20521 2.6339 1.706815 2.026637  
6.61134 7.384551 7.099582 7.739297 7.196868 7.657155 6.889219 6.972488 7.070281  
2.980142 2.463302 3.867776 1.917349 2.369918 3.27951 3.339939 3.982636 3.368103  
2.88708 2.563764 2.397474 2.656225 2.091319 2.279227 3.285475 2.404819 2.547484  
6.336999 5.436482 4.047279 5.840886 6.460125 6.111569 5.637574 5.170724 5.583082  
5.223524 2.0584 2.04077 1.840681 2.021798 2.035807 2.356417 2.276497 2.008991  
5.516341 6.667938 6.152143 6.13461 6.278196 6.110344 5.130072 5.732761 6.153309  
2.118928 1.894565 2.888785 1.964474 1.912622 2.713775 2.627039 1.792164 1.963709  
5.936724 5.671001 6.176867 5.27408 5.850353 5.647888 4.857812 6.247894 5.673647  
5.806862 6.766643 6.441242 6.21706 6.527196 6.270994 6.818338 5.987667 6.58314  
4.896664 5.704591 4.643868 4.876485 5.074317 5.707273 5.135402 5.235119 4.610745  
3.968142 3.856233 3.495135 5.006302 3.420875 4.660911 4.894367 3.737767 3.970773  
5.916187 6.615936 6.079171 6.263976 6.145681 5.970666 5.428797 6.287903 6.227529  
4.130072 4.148413 4.668811 3.473152 3.415703 4.114511 5.007417 5.401808 3.830095  
2.056762 2.16439 1.174791 1.962223 2.243317 1.888577 1.486078 1.910797 2.148681  
5.947481 6.462041 5.323667 7.141586 6.467763 6.118546 6.979992 7.604279 6.858217  
7.524965 7.884607 8.033547 8.16632 8.031105 7.969733 7.729058 7.954025 8.155588  
1.878968 2.295751 2.863492 1.819579 1.83148 1.381014 2.15149 2.034614 1.287024  
3.746357 4.789096 3.78387 3.764081 4.204321 3.412901 3.517511 3.266117 3.691059  
1.232626 1.31487 1.014396 1.008399 2.259805 0.834988 1.374392 1.302618 1.708648  
2.947642 3.040401 3.063767 3.134891 4.05033 4.250571 5.419571 2.697409 2.842216  
2.032659 1.938956 2.706747 2.089662 2.604749 1.764567 2.914141 2.94088 2.406809  
1.328321 0.962239 0.938416 1.164713 1.01838 1.075732 1.963079 0.787313 1.152916  
9.163799 9.030479 8.814573 9.152041 8.968373 8.381081 9.390488 8.781991 8.811471  
3.72457 5.13287 5.261142 6.169184 5.357858 5.005512 4.377083 3.302488 4.810364  
3.070788 6.465619 5.82866 6.135459 6.288972 4.243325 6.280261 7.030676 5.05569  
3.591211 4.104521 4.658894 3.666454 4.738773 3.423758 3.950161 4.719573 4.251159  
4.900898 4.602349 3.79738 3.292226 3.077108 4.785745 4.893352 4.490887 3.864924  
2.594582 2.713185 2.787386 3.065735 3.017681 3.495157 3.909747 3.019374 2.583143  
4.788741 5.235795 4.709637 5.453376 4.693717 5.518085 4.424315 4.262654 4.321479  
8.140116 7.672959 8.022536 7.488632 7.599602 7.113279 7.863527 7.614241 8.419376  
5.733441 4.611041 4.847709 3.90162 4.617857 3.938012 5.016162 4.546513 5.548461  
4.699995 4.478186 4.497454 3.029543 3.722273 3.736023 3.939187 4.547538 4.56648  
2.752244 2.163105 3.424047 2.596234 2.572238 2.557572 2.768154 1.919857 2.681533  
3.258219 2.236643 2.223524 3.011452 1.480159 2.033268 2.174531 2.824108 2.273178  
4.158835 6.1024 5.140225 4.607211 4.303951 5.779682 5.20122 5.164613 6.08025  
5.993881 5.856378 5.407714 6.031739 5.906753 5.079865 5.328531 5.203524 5.362894  
5.152045 5.274292 5.065116 5.979164 6.000623 5.285784 5.005841 4.867161 4.508759  
2.384152 2.414126 2.731781 2.741156 2.598784 2.578276 2.210133 2.295957 3.156609  
2.817968 2.709651 2.355275 3.313259 2.68204 3.05068 2.735442 2.868509 3.557121  
2.777376 2.891583 2.676599 3.362198 3.52226 3.352926 3.396692 3.148947 2.750722  
4.178534 5.005103 4.88922 4.181149 3.808067 3.875573 4.714066 5.458575 3.971321  
8.043129 7.77213 7.652564 7.322929 7.604639 7.369133 7.821589 7.77311 8.060853

3. 73858 3. 247178 4. 028852 3. 467757 4. 0521 3. 64283 3. 180692 4. 079506 4. 09398  
5. 366365 4. 550175 5. 161374 5. 262811 5. 738502 5. 132946 4. 211334 4. 998807 4. 959073  
4. 269255 3. 885116 4. 298213 3. 240058 4. 292479 3. 605194 4. 908361 3. 014129 4. 037301  
3. 102693 4. 334738 4. 855545 4. 418242 4. 230179 4. 91176 4. 612597 4. 03747 3. 645967  
2. 986619 2. 195164 2. 847909 1. 928424 1. 90124 2. 303427 3. 507531 2. 228028 1. 980915  
4. 246895 4. 731043 4. 563512 3. 77351 3. 979794 4. 906326 4. 395555 4. 619351 4. 195953  
3. 504146 4. 586124 3. 684151 4. 591471 5. 818004 5. 153225 5. 382169 5. 304683 5. 264097  
1. 647983 1. 301715 2. 281626 1. 587853 1. 938789 1. 61012 2. 625543 1. 891042 1. 757921  
5. 903061 6. 287051 7. 019726 6. 52267 7. 065982 5. 743613 6. 227981 6. 652689 6. 465188  
9. 6343 9. 517775 9. 783062 9. 594943 9. 460533 9. 494426 9. 782374 9. 684552 9. 751475  
6. 211235 6. 177682 6. 021143 5. 752036 6. 413433 6. 09567 5. 591322 5. 694153 6. 210871  
3. 152615 4. 575784 4. 488268 4. 21619 5. 531886 4. 078693 6. 251289 4. 412588 4. 566123  
4. 298928 3. 925287 5. 170495 4. 470006 3. 966012 4. 268168 4. 328422 4. 498023 4. 394685  
3. 022863 2. 051578 2. 075089 3. 314065 1. 996287 1. 857786 2. 23801 2. 290918 1. 874525  
2. 174864 2. 061245 2. 197478 2. 628154 1. 901104 1. 864365 1. 854426 1. 978849 1. 696  
2. 55141 2. 263865 2. 517511 2. 409171 3. 066169 2. 703005 3. 23289 2. 693188 2. 780234  
3. 091978 4. 435276 4. 045682 3. 788767 5. 067742 4. 585274 4. 665724 3. 441325 4. 598826  
2. 576793 2. 002859 2. 637834 2. 527238 2. 055225 2. 16559 2. 519323 2. 449991 2. 125682  
5. 164741 6. 18198 5. 900022 5. 053591 4. 530062 5. 744138 5. 370931 6. 137681 7. 181361  
1. 860303 2. 405718 3. 277986 2. 981055 2. 122919 2. 833115 3. 351378 1. 332962 2. 025949  
3. 528794 1. 753029 3. 469416 3. 251788 1. 528169 1. 525762 2. 838375 2. 221918 2. 295451  
2. 299341 1. 911272 1. 72887 1. 802014 2. 226483 2. 366302 2. 035779 2. 048106 1. 910244  
4. 580452 5. 061081 4. 377489 4. 978033 3. 985729 4. 440067 3. 951522 5. 003851 4. 430838  
3. 680762 3. 427827 3. 860465 3. 779154 3. 815147 3. 582244 3. 015679 4. 164354 3. 816718  
9. 042666 9. 96743 9. 489556 9. 313754 9. 624115 8. 944164 8. 960114 9. 416447 9. 588862  
5. 950314 5. 22996 6. 202626 6. 060034 5. 927902 5. 830423 5. 344517 5. 600303 5. 591459  
5. 66694 6. 38407 6. 577356 6. 218868 6. 425813 6. 489279 6. 436115 5. 969113 6. 514695  
3. 088719 3. 742532 3. 197337 3. 636367 3. 267204 3. 410623 2. 840382 3. 916828 4. 38562  
4. 779689 6. 100014 5. 142369 6. 009422 5. 770403 5. 533859 4. 666812 6. 090098 5. 292933  
3. 731854 3. 95032 3. 212301 3. 618715 2. 953212 3. 771428 3. 750663 2. 910192 3. 4742  
5. 488928 5. 802807 6. 242016 5. 47005 4. 127467 5. 991015 5. 706265 6. 094102 5. 54654  
2. 333931 1. 930093 2. 481592 1. 676528 2. 695783 1. 886052 2. 379892 1. 615381 2. 364933  
3. 883331 4. 173195 3. 962438 3. 128595 4. 458538 4. 739071 3. 855222 5. 218675 5. 713903  
7. 696753 7. 196996 7. 608081 6. 891089 7. 294491 6. 915688 6. 965341 7. 272145 7. 775819  
1. 4915 2. 203656 1. 764082 1. 740653 2. 337559 2. 148869 2. 35472 1. 741558 2. 051219  
2. 198856 1. 648693 2. 636834 2. 344601 2. 48546 2. 188815 2. 252398 2. 025798 2. 133494  
4. 568516 6. 544605 4. 654782 4. 277101 5. 698657 5. 617625 5. 264296 5. 718483 5. 503743  
1. 048667 1. 408368 1. 22348 1. 292404 1. 269009 1. 35547 0. 856951 1. 312903 1. 229663  
1. 935084 3. 19722 2. 147812 3. 297972 3. 695805 3. 484521 3. 500155 2. 698085 2. 558637  
4. 257164 3. 510068 3. 318711 4. 611989 3. 227154 4. 189473 5. 167278 3. 927201 3. 661938  
4. 246178 4. 591476 4. 956532 5. 063483 4. 912 5. 039416 4. 909065 4. 291741 5. 526647  
4. 878571 5. 501626 6. 078024 5. 500433 5. 420791 6. 011025 5. 425048 5. 424221 5. 65396  
2. 962291 3. 77287 2. 854392 4. 561336 4. 20216 4. 257354 4. 996245 4. 264992 3. 973065  
1. 986741 2. 191162 1. 654822 2. 674106 2. 233284 2. 032127 1. 683065 2. 40097 1. 661987  
3. 256787 4. 23672 3. 547949 5. 147868 4. 321536 3. 395275 4. 28045 3. 546166 3. 609044  
3. 267917 4. 292241 3. 612472 3. 405915 3. 169985 3. 086129 3. 558646 5. 039346 4. 297324  
6. 177493 5. 572954 4. 7664 5. 401657 5. 367275 6. 293033 5. 448596 5. 694655 5. 865206  
4. 774994 5. 397787 5. 154489 5. 515758 5. 896474 5. 718182 5. 38516 5. 298062 5. 50365  
7. 579743 7. 852375 7. 836709 7. 396602 7. 790689 7. 58034 7. 322611 7. 981063 7. 378658  
2. 348618 1. 846869 1. 792334 1. 752431 1. 27772 1. 283536 1. 866668 1. 352554 1. 809441  
3. 661436 4. 080533 3. 824622 3. 575798 3. 779088 3. 757958 2. 621493 3. 863618 3. 439863

3. 592924 2. 339095 2. 474534 2. 797218 2. 281314 2. 492729 2. 382392 2. 442803 2. 311147  
4. 246238 4. 350231 4. 649573 4. 547521 4. 509745 4. 019649 3. 661258 3. 970386 4. 796835  
5. 348549 6. 180108 6. 028153 6. 104231 6. 388783 5. 965214 6. 040138 6. 018947 5. 828806  
4. 822838 5. 340825 4. 792649 4. 78712 5. 431725 4. 852123 4. 621695 5. 105717 4. 426634  
1. 845563 2. 356435 3. 033219 2. 232742 2. 077203 1. 938986 1. 951063 2. 86396 2. 192306  
7. 341118 7. 625723 7. 417693 7. 154574 7. 557911 7. 748028 7. 203824 7. 456799 7. 26209  
5. 446938 5. 647476 5. 419444 5. 544539 5. 327001 5. 20472 5. 583465 6. 259336 5. 555029  
7. 608161 7. 372753 7. 420118 8. 226262 7. 990038 7. 6407 7. 824262 7. 238587 7. 760519  
3. 106059 4. 874973 3. 758316 4. 365652 5. 212071 4. 298107 4. 444195 4. 50349 5. 334978  
2. 710944 2. 644816 4. 266321 2. 471567 2. 883948 3. 158184 3. 405516 2. 664197 3. 460622  
4. 192571 4. 228889 4. 796672 4. 09551 3. 742221 4. 259861 4. 404194 3. 751033 4. 388454  
4. 410118 4. 987126 5. 164191 5. 560124 5. 933922 5. 926029 5. 104417 5. 740144 4. 811148  
2. 328065 2. 61016 3. 287689 2. 294025 2. 848816 2. 268699 3. 266979 2. 921327 2. 330124  
3. 830913 3. 970316 3. 564689 3. 48647 3. 634691 4. 091935 4. 189533 3. 882208 3. 429132  
5. 608139 5. 236495 5. 585953 4. 551273 5. 403697 4. 55991 6. 250657 5. 406675 5. 53444  
2. 88336 2. 532036 2. 572608 3. 737213 3. 283579 2. 597246 2. 324926 3. 307516 3. 159203  
4. 72956 4. 19509 4. 281079 5. 614278 5. 303803 4. 513927 6. 206819 4. 833188 4. 727985  
5. 500906 6. 416155 5. 6691 6. 243642 6. 702153 6. 09129 5. 121812 5. 780856 6. 182109  
3. 74592 4. 897571 4. 596135 4. 434985 5. 099337 5. 973955 4. 007145 5. 516079 4. 59693  
5. 631535 4. 512278 4. 627556 5. 171722 5. 293771 5. 187899 4. 78591 5. 781276 5. 439866  
2. 115196 3. 715541 3. 005233 2. 987492 2. 364896 2. 728277 2. 069357 2. 658768 2. 880051  
4. 997702 3. 092782 3. 689481 2. 034655 2. 687967 2. 173973 2. 063817 2. 924695 4. 142851  
3. 708201 3. 684306 3. 786099 3. 962454 2. 625442 3. 916017 4. 049245 4. 554098 3. 879864  
6. 771989 6. 211468 6. 95408 5. 476722 5. 95663 6. 251023 5. 984151 5. 521085 7. 13461  
6. 647023 7. 066259 7. 545893 6. 591021 6. 72162 6. 535837 5. 539757 6. 373776 6. 736176  
6. 791547 6. 364914 6. 696742 6. 681999 6. 534373 6. 301883 5. 91037 6. 344471 6. 253382  
5. 702491 6. 480054 6. 721929 5. 796757 5. 806931 6. 078081 6. 082551 6. 314188 6. 366539  
5. 071656 5. 03062 5. 280762 5. 260742 5. 234707 5. 549144 4. 848156 4. 244459 5. 361542  
2. 183615 2. 869099 3. 239787 2. 487747 2. 403737 3. 392443 2. 863403 2. 978639 3. 655851  
4. 667143 5. 259995 5. 599243 5. 16389 4. 971599 4. 61613 4. 187144 4. 910469 5. 112682  
2. 455614 2. 601048 2. 686281 2. 879053 2. 411873 1. 906474 2. 374028 1. 955651 2. 523114  
5. 745243 6. 501606 6. 489391 6. 438851 5. 911634 5. 947332 5. 702498 6. 225286 6. 714224  
3. 741212 4. 585674 4. 319762 3. 783642 5. 073422 5. 776051 4. 871204 4. 671584 4. 25203  
6. 063605 6. 283042 6. 642012 6. 354199 6. 700362 6. 322619 6. 069783 5. 938733 6. 151115  
2. 378992 1. 697517 2. 020093 2. 133765 1. 499539 1. 737344 2. 135164 2. 75335 1. 74765  
2. 492208 1. 500082 1. 78485 1. 376179 1. 290313 1. 479569 1. 319677 1. 670069 1. 663871  
3. 999006 5. 457289 4. 628942 4. 519201 5. 076582 4. 822283 4. 704933 4. 987071 5. 05061  
1. 353243 1. 117467 1. 675078 0. 941038 2. 028764 0. 91006 1. 046414 1. 161196 1. 563174  
6. 491406 6. 373518 6. 412875 6. 246529 5. 866807 6. 077504 5. 324773 6. 083325 6. 320457  
3. 812271 3. 007937 4. 36103 3. 827335 5. 355028 4. 287684 5. 64456 4. 937878 4. 002028  
4. 619271 4. 208276 4. 497856 3. 883687 3. 989398 4. 585957 4. 568234 4. 463174 4. 89228  
2. 307333 1. 351903 2. 238653 2. 016826 1. 32867 1. 742388 1. 902785 2. 617295 1. 489283  
3. 988408 3. 778949 3. 613184 4. 21832 3. 805895 3. 142214 3. 765872 3. 103724 3. 182548  
5. 464046 5. 187054 5. 804736 6. 534907 5. 787469 5. 670204 5. 933 5. 507212 5. 514127  
4. 402094 3. 964619 4. 446528 4. 715679 3. 745952 4. 989916 3. 709956 3. 856852 4. 776051  
5. 020639 5. 064554 4. 912857 4. 749498 4. 746864 4. 947587 4. 676124 5. 475444 4. 506093  
4. 877238 4. 851748 4. 435542 4. 439182 5. 435606 5. 209935 4. 577724 5. 041662 4. 453589  
1. 912379 1. 613412 1. 528548 1. 761457 1. 978713 2. 215292 1. 883546 1. 718581 1. 906066  
3. 532206 2. 827724 2. 501977 2. 082127 2. 313117 3. 096184 2. 806571 3. 483301 3. 188441  
2. 151592 5. 46807 4. 6207 3. 885105 3. 949047 3. 58606 4. 505212 4. 066208 3. 47056  
2. 690562 3. 300858 3. 461362 3. 032604 2. 916478 3. 17482 2. 490551 3. 04501 3. 400399

5. 346028 5. 514779 5. 829209 5. 789386 5. 949195 4. 384993 4. 915058 5. 990552 5. 024589  
5. 23805 6. 062319 5. 745967 5. 997949 6. 441337 5. 546266 5. 554924 6. 059942 5. 595423  
4. 689251 3. 717066 3. 685653 4. 738709 2. 977535 3. 771176 3. 409158 4. 339712 4. 123065  
5. 440182 4. 479943 4. 425381 3. 921265 3. 717372 4. 257201 4. 408381 4. 37565 4. 447725  
5. 552549 5. 916367 6. 087949 6. 383383 6. 805928 6. 457979 5. 205871 5. 889284 6. 305975  
2. 109727 2. 353076 2. 259271 2. 202495 2. 140078 1. 913072 2. 678365 2. 396936 2. 236858  
8. 550746 8. 953891 8. 949259 9. 141521 9. 290234 9. 061249 8. 983555 9. 429621 9. 103599  
1. 812808 2. 420858 1. 655408 1. 986483 2. 045053 1. 547245 1. 771574 1. 415073 1. 436518  
4. 269438 2. 562538 2. 722642 3. 009204 3. 374144 4. 439435 3. 741639 4. 238374 3. 017879  
4. 8447 5. 883852 5. 209952 5. 379531 5. 290067 5. 32042 5. 320909 5. 94326 5. 089286  
2. 199526 1. 861788 2. 219426 2. 552919 2. 181511 1. 751659 2. 289094 1. 933613 1. 948653  
2. 756828 3. 37806 3. 604098 3. 365776 3. 027099 2. 531046 4. 976358 3. 2117 3. 044375  
4. 440075 3. 671276 3. 704837 5. 433108 4. 264535 5. 226746 4. 27921 3. 851785 3. 80556  
5. 909978 4. 963801 5. 175979 4. 550823 3. 785211 4. 418951 4. 058946 4. 722494 4. 554169  
3. 766129 2. 613804 2. 688161 3. 706869 3. 743562 2. 685678 1. 873177 2. 824822 2. 619932  
6. 589236 6. 571711 7. 077118 6. 336653 6. 530315 5. 823746 6. 825722 6. 397093 6. 871156  
5. 843596 6. 209607 6. 292639 6. 007004 5. 947339 6. 350446 6. 004297 6. 632167 5. 814991  
5. 331121 5. 977213 5. 332178 4. 39701 6. 336085 5. 424919 6. 173197 6. 762379 6. 304577  
1. 714634 2. 164278 2. 169099 2. 863108 1. 906034 1. 9136 2. 008873 2. 054597 1. 888592  
6. 549715 7. 271648 6. 719158 6. 189016 6. 748051 6. 912662 6. 586227 7. 002335 6. 561666  
4. 665041 4. 479865 5. 566342 5. 444059 4. 259091 5. 065202 4. 148261 4. 271847 5. 712964  
7. 068506 7. 834755 7. 535697 7. 962206 7. 654227 7. 829006 7. 864643 7. 829092 7. 730326  
1. 357244 1. 29143 1. 408348 1. 661332 1. 433189 1. 743449 2. 039571 1. 307967 1. 658986  
4. 088848 4. 139474 5. 01447 4. 232095 4. 532454 4. 106524 4. 188762 4. 776129 3. 69281  
2. 154184 2. 87548 2. 730688 2. 740515 2. 986623 3. 030895 2. 006436 2. 576801 1. 726201  
4. 268345 4. 566491 4. 567638 4. 200383 4. 819038 4. 842067 4. 486837 4. 653059 5. 131506  
4. 211421 5. 710189 6. 024891 5. 597041 4. 991848 5. 281601 4. 776492 5. 782707 4. 864121  
2. 594335 1. 831269 2. 152623 1. 954756 1. 45974 1. 818866 2. 649316 2. 039685 2. 283435  
3. 357836 5. 328925 4. 490739 4. 093112 3. 618502 4. 10264 4. 220964 4. 852654 3. 102721  
5. 325748 5. 456576 5. 686862 4. 655941 5. 921943 5. 117616 4. 745519 4. 759301 5. 134402  
2. 117351 1. 278054 1. 501942 1. 347236 1. 605329 1. 365143 1. 769305 1. 624257 1. 193968  
3. 672743 3. 65178 4. 388775 3. 220512 3. 457437 2. 579699 2. 644713 3. 018684 3. 749686  
2. 713798 1. 668451 1. 663631 1. 86445 1. 550001 2. 122256 1. 837787 2. 134916 2. 149674  
4. 935086 5. 491115 5. 677171 4. 437965 5. 668164 4. 3574 5. 423072 5. 081632 5. 012334  
4. 244148 3. 767703 3. 745623 3. 442585 3. 364241 3. 489615 3. 947898 4. 08016 4. 031256  
3. 372607 1. 838151 2. 825866 1. 893178 2. 460519 1. 866861 2. 166127 2. 905196 2. 470361  
5. 857867 6. 45942 6. 203854 6. 517531 6. 478828 6. 339635 5. 997576 6. 27704 6. 424612  
6. 494937 6. 956108 6. 646994 6. 547824 6. 932561 6. 17686 6. 295632 6. 700627 6. 444049  
6. 971082 7. 354211 6. 93118 7. 208462 7. 1994 7. 277756 7. 358103 7. 207067 7. 213258  
4. 26604 4. 29211 4. 177594 4. 872666 4. 348935 2. 824243 4. 619085 2. 496219 4. 91411  
1. 411995 1. 46932 1. 256082 1. 551535 1. 977946 1. 531377 1. 826449 1. 634699 2. 047561  
2. 447972 2. 04126 2. 861566 2. 770679 1. 993099 1. 663516 2. 740349 2. 504639 2. 257295  
1. 170888 1. 129605 1. 297282 1. 425342 1. 241927 1. 470772 1. 742547 1. 05087 1. 342335  
8. 018272 9. 520673 9. 232021 9. 124007 8. 892356 9. 301021 8. 404966 9. 213734 8. 751424  
3. 700703 3. 085986 3. 551948 4. 039476 2. 884797 3. 323253 2. 93285 3. 609683 3. 470284  
2. 003614 1. 892068 1. 847518 1. 798596 2. 234655 1. 847751 1. 739259 1. 205821 1. 659334  
6. 199083 6. 878221 6. 223204 6. 764591 6. 462334 6. 502761 6. 390284 7. 014407 6. 483596  
3. 000737 4. 144726 4. 139933 4. 130898 4. 115201 5. 164586 3. 203185 3. 991904 3. 129075  
6. 27234 6. 051626 6. 20435 5. 474914 5. 973452 6. 020334 6. 972731 6. 400212 6. 607993  
5. 550582 4. 829831 4. 951507 3. 823417 4. 65691 4. 823051 3. 721683 4. 0794 3. 810801  
3. 206799 4. 478338 4. 478465 4. 456831 2. 301929 4. 334263 2. 623254 3. 041189 3. 817805



4. 259356 4. 644114 4. 946638 3. 847746 3. 818142 4. 025581 2. 660206 3. 733097 4. 44209  
3. 901261 3. 888312 4. 440058 2. 71299 3. 332547 4. 17078 4. 741395 3. 165339 3. 559512  
6. 992547 7. 594989 7. 89521 7. 23384 7. 194967 8. 121683 6. 9568 7. 395749 7. 311277  
8. 108888 8. 009771 7. 627731 8. 147584 8. 08747 7. 912527 7. 539947 8. 479832 8. 127778  
4. 524763 3. 889458 3. 469259 2. 740926 2. 831936 4. 157806 2. 752724 4. 541635 3. 883954  
2. 25053 3. 089877 2. 854547 3. 469551 2. 816223 2. 559633 3. 307019 2. 439683 2. 514726  
1. 620241 5. 480869 4. 311002 2. 537869 3. 707915 5. 643376 3. 465806 4. 698353 3. 619819  
8. 732613 8. 376651 8. 192602 8. 206607 8. 621788 7. 88734 8. 054437 7. 462339 8. 079833  
6. 832405 7. 61373 7. 770606 8. 493992 8. 326683 7. 950154 7. 984083 7. 715387 7. 923203  
5. 331169 5. 556182 6. 284317 5. 792031 5. 036761 5. 957279 5. 519591 5. 525924 5. 230463  
6. 557767 5. 543834 4. 877921 4. 384376 5. 128064 5. 158287 4. 523312 4. 514386 5. 444358  
1. 810019 2. 423118 2. 772624 2. 04205 2. 147083 2. 528867 1. 611492 1. 480126 1. 935572  
4. 12849 3. 283186 3. 349362 4. 339068 5. 573165 4. 479049 4. 577032 4. 090493 4. 623674  
5. 996056 5. 532721 5. 992644 5. 513454 5. 772612 5. 417937 5. 530701 5. 75292 5. 780988  
5. 600807 6. 114086 6. 135807 5. 902985 6. 280519 6. 16548 5. 025193 6. 182896 5. 69707  
2. 986524 2. 846055 3. 443673 2. 778713 3. 002723 2. 997175 3. 319062 2. 384317 2. 192217  
1. 196159 1. 481656 1. 457846 1. 294301 1. 806568 1. 454151 0. 905909 1. 456699 1. 904189  
3. 186845 3. 359893 3. 312846 2. 498317 3. 759319 3. 986254 2. 984424 2. 653707 3. 260225  
1. 881228 2. 047751 1. 955787 2. 376376 2. 165749 1. 323727 2. 188011 2. 622222 2. 198355  
7. 079898 7. 438433 6. 691848 8. 8375 8. 169585 8. 047638 8. 200151 7. 402158 8. 043829  
1. 607337 1. 079511 2. 25608 1. 124657 1. 52137 2. 307175 1. 990212 2. 032372 1. 976459  
4. 783644 5. 370933 5. 690203 5. 467329 5. 525058 5. 117017 5. 459608 5. 685201 5. 313635  
9. 614246 10. 09004 9. 63703 10. 30796 9. 891115 11. 06037 10. 50972 10. 87107 9. 812454  
6. 484462 6. 762062 6. 691001 6. 086703 6. 551142 6. 469553 6. 6436 6. 70626 6. 275891  
2. 229237 1. 373891 1. 153933 1. 799463 1. 170101 1. 468032 1. 373704 1. 150267 1. 346034  
2. 406051 2. 959086 2. 017018 2. 880339 2. 610741 3. 53279 2. 18501 3. 456753 2. 828308  
1. 503998 0. 797233 1. 077972 1. 525639 1. 593723 1. 613263 1. 503744 1. 477033 1. 127177  
8. 143605 8. 581532 8. 610873 8. 141159 8. 10196 8. 389234 8. 786813 8. 471935 8. 487077  
4. 511177 4. 891606 4. 438863 4. 079058 5. 1749 4. 859865 4. 290193 5. 182092 5. 118536  
4. 513873 5. 112072 4. 324018 5. 394707 5. 74865 6. 092032 5. 351726 4. 764784 4. 943139  
2. 593009 4. 13928 4. 065299 4. 284902 3. 54846 4. 19539 4. 338005 4. 423839 4. 017773  
2. 10859 1. 477329 2. 163083 0. 586217 1. 923754 1. 425887 3. 179966 2. 460746 1. 746948  
2. 146717 1. 181789 1. 743754 2. 165853 3. 31889 2. 3353 3. 140798 1. 999331 2. 180475  
1. 084129 1. 245872 0. 691686 1. 332752 0. 845513 1. 693061 0. 872762 1. 306941 0. 95265  
3. 277679 3. 122912 2. 690118 2. 503251 1. 924983 3. 359023 3. 232041 3. 124858 2. 895906  
2. 146785 1. 165019 1. 381158 1. 568335 1. 222518 1. 454693 1. 415477 1. 28746 1. 669858  
1. 501901 1. 808093 1. 06591 1. 567782 1. 419398 1. 503916 2. 892253 1. 881865 1. 377629  
1. 629359 0. 926259 1. 178985 1. 986218 1. 994748 0. 893472 1. 453749 1. 646209 1. 150218  
1. 127628 1. 275284 0. 824413 1. 212373 1. 463185 1. 206312 1. 433505 1. 185943 1. 14189  
6. 157466 2. 675365 3. 059845 4. 198253 2. 904466 2. 252478 3. 667887 3. 638806 5. 156911  
2. 115893 2. 258118 1. 996157 2. 277391 1. 817369 1. 406345 2. 34607 1. 381381 2. 560243  
2. 378073 2. 388462 2. 07685 2. 311407 2. 646961 2. 353139 2. 713362 1. 716202 3. 271424  
2. 981889 3. 123638 2. 11698 3. 164733 2. 641827 2. 213507 2. 422994 2. 505102 2. 735926  
5. 689394 6. 270589 5. 679915 5. 457059 5. 970135 5. 932447 6. 230139 5. 495337 5. 066076  
6. 198576 6. 169289 5. 631693 6. 488521 6. 221948 6. 495396 6. 27383 6. 159695 5. 84878  
4. 776209 5. 13438 5. 595573 4. 24401 5. 964543 5. 617825 4. 649051 3. 230437 4. 892779  
2. 473918 1. 631257 1. 37727 2. 005377 1. 997954 2. 191713 1. 931766 1. 809558 2. 192073  
1. 408869 1. 521137 1. 311057 1. 346043 1. 621498 1. 145196 1. 325496 1. 555263 2. 062867  
3. 082315 2. 843892 2. 826377 2. 791589 2. 737103 3. 521099 3. 633668 3. 007559 3. 15843  
6. 560198 6. 72397 6. 653426 6. 335497 7. 055923 6. 472416 6. 367121 6. 558735 6. 459768  
4. 679686 5. 443172 5. 015923 6. 119608 6. 062512 4. 396653 4. 641205 4. 788602 4. 644793

1. 409539 1. 664111 1. 925853 1. 971209 1. 67563 2. 463498 1. 988028 3. 514009 2. 060724  
5. 052872 5. 400315 4. 840064 6. 31126 5. 427394 5. 042463 5. 731457 4. 25365 5. 244821  
3. 90207 3. 637452 3. 025618 3. 118043 3. 80646 3. 490254 3. 345557 3. 594324 3. 435811  
3. 117695 2. 577274 3. 496375 3. 474215 3. 042563 4. 112293 3. 129565 4. 165982 3. 48368  
6. 493285 5. 57068 5. 353523 6. 165636 5. 626949 6. 140432 5. 740389 5. 66409 5. 876983  
4. 931318 5. 302911 4. 977087 5. 164068 5. 711738 5. 825922 5. 300704 5. 218166 5. 07013  
5. 83079 5. 341874 5. 650148 5. 463514 5. 907437 5. 200771 4. 120113 5. 202855 5. 221832  
6. 253887 6. 524275 5. 969049 5. 908155 6. 207638 5. 503131 5. 69143 6. 24686 6. 382358  
1. 564834 1. 513373 1. 748042 1. 397532 1. 770476 1. 581721 1. 972233 1. 766031 1. 714696  
4. 212157 4. 82811 3. 880307 4. 288637 4. 465313 4. 927548 4. 663538 3. 386937 4. 516554  
5. 401046 5. 769865 5. 389952 5. 201959 5. 292336 5. 949112 6. 164855 6. 041752 5. 366628  
2. 026065 1. 931377 1. 697068 1. 550101 1. 560137 1. 40235 1. 40776 1. 659286 1. 302131  
2. 887469 2. 263165 3. 482324 4. 697673 2. 788221 3. 020558 1. 993173 3. 486768 2. 89035  
4. 567064 4. 419894 3. 458151 5. 262371 4. 22734 4. 795037 2. 721568 4. 494431 4. 089061  
3. 3681 3. 769394 3. 299825 3. 231998 4. 123905 3. 514631 3. 739864 3. 52436 3. 802963  
4. 711996 5. 258987 4. 798083 5. 928244 5. 806872 5. 069327 5. 349645 5. 432994 5. 109787  
2. 527031 2. 085434 2. 074422 2. 094376 2. 076728 2. 206987 3. 322631 1. 853224 2. 626465  
2. 011948 1. 904499 2. 385522 1. 942892 2. 107931 1. 997865 3. 628633 1. 73586 1. 960961  
4. 394732 1. 98193 1. 576465 3. 461927 1. 945873 3. 665777 4. 912397 2. 479503 2. 21368  
3. 214048 2. 262913 2. 104051 2. 026742 2. 858804 1. 8896 1. 427759 2. 305331 1. 443712  
1. 140401 2. 323558 0. 976239 3. 869588 0. 944844 1. 61331 3. 248473 3. 380763 2. 321947  
3. 253401 3. 431719 3. 153424 4. 06733 3. 326834 2. 956042 3. 348996 3. 151222 2. 851274  
3. 021964 2. 715669 2. 011891 2. 370159 2. 196214 2. 826601 2. 142295 2. 767328 2. 652635  
7. 770825 7. 547126 7. 73306 7. 782206 7. 689952 7. 397641 7. 283634 7. 604842 7. 47773  
5. 58571 6. 518752 6. 368158 6. 523442 6. 912007 6. 680535 6. 01661 5. 988908 6. 588559  
4. 566344 5. 606835 5. 66764 5. 530395 5. 31362 5. 582946 5. 73943 5. 500364 5. 453991  
4. 5661 6. 217615 6. 123422 5. 930017 6. 436078 6. 350743 4. 831324 6. 365874 5. 876133  
3. 341318 2. 345358 3. 286624 3. 025902 2. 922267 2. 629638 2. 307366 2. 785277 2. 529133  
6. 362945 5. 862061 5. 467105 6. 168443 5. 916553 5. 631276 5. 420496 5. 659522 5. 698463  
1. 407858 1. 392061 1. 802073 0. 974418 1. 10247 1. 6098 1. 179325 1. 715372 0. 92147  
1. 774037 2. 687603 2. 388063 2. 511194 2. 205342 2. 197898 1. 263507 1. 772817 2. 215886  
5. 301439 3. 4765 3. 879367 4. 182 3. 625625 4. 226193 4. 426868 4. 336789 5. 303358  
2. 975512 2. 338786 2. 233347 2. 928729 2. 674773 2. 590448 2. 143572 2. 700037 2. 136355  
2. 087063 2. 136643 1. 795436 1. 61876 1. 770082 1. 564777 1. 817627 1. 548367 1. 892113  
3. 295541 1. 95325 1. 723319 1. 966505 1. 987078 1. 938447 1. 736895 2. 186039 2. 115237  
5. 756263 6. 316639 7. 138176 6. 669613 7. 124738 7. 861488 7. 630712 6. 971793 7. 043575  
7. 876635 7. 975256 7. 924431 6. 609388 7. 398535 7. 562682 7. 328903 7. 601786 7. 651813  
1. 039623 0. 746694 0. 89778 0. 983718 0. 891356 0. 784175 0. 978102 1. 166916 1. 203884  
7. 179657 6. 95517 7. 033978 6. 606097 6. 726547 7. 298183 6. 775516 7. 005451 6. 267611  
5. 366718 6. 339138 6. 204401 5. 767265 5. 558794 5. 919679 5. 65853 5. 571859 6. 009834  
4. 64581 5. 693582 5. 061177 5. 478776 5. 569942 5. 446492 5. 218076 5. 814957 5. 27193  
2. 113251 2. 839961 3. 537212 3. 575257 2. 118027 3. 755769 2. 922678 2. 715365 3. 468323  
2. 34768 1. 896516 1. 679741 2. 120236 2. 055632 2. 113193 2. 188304 1. 9432 1. 727605  
0. 806868 0. 962755 1. 167968 1. 682894 1. 069049 1. 25026 1. 211279 1. 442664 1. 318139  
4. 525352 5. 902771 5. 334143 4. 97397 4. 8978 6. 001959 4. 667591 5. 972268 5. 370782  
1. 302805 1. 292912 1. 676331 1. 852959 1. 493552 1. 204017 1. 656307 1. 126867 1. 282877  
5. 200157 5. 812859 5. 063119 5. 709146 6. 377845 5. 729353 5. 200052 6. 246342 5. 311751  
3. 479176 1. 861677 1. 913945 2. 197761 2. 956926 2. 088207 1. 855507 2. 900705 1. 986567  
4. 349335 5. 080658 4. 623674 4. 947674 4. 649247 5. 317642 4. 650348 4. 299019 5. 079203  
4. 350279 4. 685459 4. 741053 4. 433597 4. 568493 4. 524454 4. 308857 4. 505793 4. 61615  
1. 854169 1. 485914 1. 521925 1. 510405 1. 723176 2. 039664 2. 604421 1. 796736 1. 388282

4. 923117 5. 801592 5. 161918 5. 601315 4. 669771 5. 376541 3. 836256 5. 152746 4. 452871  
2. 423247 1. 688188 2. 413633 4. 143068 2. 52064 1. 96376 2. 329825 3. 0771 2. 313944  
5. 087978 6. 152462 6. 489728 6. 279905 6. 368375 7. 152718 5. 944141 7. 095857 6. 316494  
5. 978974 5. 350693 5. 174356 4. 268972 5. 165898 5. 305706 4. 811165 5. 38 5. 331668  
3. 535314 4. 39513 4. 626475 4. 495134 4. 321577 4. 426473 4. 51242 3. 877612 3. 821476  
3. 796488 5. 484266 4. 772251 3. 769109 4. 890867 4. 476429 4. 6781 4. 811943 4. 132982  
6. 572635 7. 460763 6. 899429 7. 14305 7. 364046 7. 190522 6. 780559 7. 49981 7. 042529  
6. 42923 7. 076444 7. 837311 6. 146217 7. 304272 7. 714813 6. 405055 6. 295465 6. 586435  
6. 5936 6. 998788 6. 865444 7. 056755 6. 86091 7. 323963 6. 682825 6. 966647 6. 753114  
1. 863545 1. 254788 1. 913259 1. 275474 1. 601798 1. 779801 1. 372342 2. 63577 1. 514328  
5. 165162 5. 590778 5. 181163 6. 002859 5. 861826 5. 079096 4. 102771 5. 279834 5. 12373  
4. 812681 4. 065037 5. 345083 4. 978526 4. 871069 4. 904881 4. 563077 4. 833271 4. 750331  
5. 238976 4. 887332 6. 040185 3. 857934 5. 495318 5. 149798 4. 255775 4. 924916 5. 082731  
5. 831295 6. 353496 6. 374854 6. 348721 6. 453957 6. 375635 6. 181971 6. 326147 6. 110147  
1. 905907 2. 282162 1. 630537 1. 617993 2. 345011 2. 051582 2. 361215 2. 103609 1. 987388  
6. 483421 6. 431075 6. 689051 6. 416102 6. 860879 6. 053307 6. 56732 5. 802662 6. 806252  
4. 345051 4. 414293 4. 466492 3. 352377 3. 036457 4. 467067 4. 037616 4. 875368 4. 470792  
1. 946236 2. 07203 1. 72244 1. 131518 1. 401801 2. 226072 1. 127015 3. 383773 1. 271754  
1. 507756 1. 524678 1. 674876 1. 65537 1. 12017 1. 586425 1. 568536 1. 557089 1. 368466  
7. 200099 7. 405825 8. 026988 8. 03374 8. 215869 7. 684811 8. 174936 6. 782066 8. 310285  
1. 768347 1. 722682 1. 871158 1. 618149 1. 808825 1. 975627 1. 781256 1. 690456 1. 586839  
2. 421162 3. 425111 3. 862805 3. 25527 2. 594027 1. 891368 2. 240904 2. 607574 2. 525488  
6. 69294 6. 565243 6. 880288 5. 807243 6. 890076 6. 453667 6. 090739 6. 394705 6. 485463  
11. 95763 10. 23998 11. 40531 10. 37849 10. 6949 10. 6467 11. 15084 9. 569469 10. 50182  
2. 037506 1. 721311 1. 755171 3. 51065 1. 535218 2. 112268 1. 854473 1. 354963 1. 656518  
2. 071527 1. 842354 1. 939909 1. 940073 1. 984119 2. 028418 1. 703651 1. 996012 2. 039098  
0. 995164 0. 705314 0. 625788 0. 837809 1. 774872 0. 86617 0. 80311 1. 248616 0. 869031  
5. 784379 6. 749818 6. 293881 4. 576502 6. 17886 6. 320659 4. 933776 6. 295416 5. 796602  
4. 678992 5. 148455 4. 091391 4. 731308 5. 891457 4. 934331 4. 464568 4. 657976 4. 759927  
3. 753086 4. 122007 2. 20063 3. 553709 2. 705459 2. 387079 2. 487879 2. 958768 2. 642512  
6. 851253 6. 80729 6. 183796 6. 799321 6. 373014 6. 59264 6. 178451 6. 711667 7. 358504  
7. 246278 7. 817762 7. 606638 7. 420778 7. 427605 7. 538982 7. 258576 7. 443513 7. 555479  
1. 798318 1. 842486 2. 238988 1. 525094 1. 392074 1. 675105 2. 302624 1. 599307 1. 575953  
1. 39547 1. 951287 1. 847962 1. 676042 1. 8305 1. 905182 1. 419218 2. 027847 1. 701363  
8. 362572 9. 185389 9. 137086 8. 645692 8. 499604 8. 582685 8. 442471 8. 736149 8. 604505  
3. 094277 2. 743206 2. 729621 3. 232058 2. 900352 2. 290351 2. 886028 2. 469092 3. 241387  
4. 140563 4. 113142 4. 128423 3. 365006 4. 092451 3. 228235 3. 513731 3. 911031 3. 613007  
5. 496549 5. 730492 5. 366616 6. 383142 6. 756576 5. 305993 5. 490895 6. 397219 5. 909288  
6. 77686 6. 791139 6. 506604 6. 92014 6. 979007 6. 58226 6. 436435 6. 967486 6. 775863  
6. 445238 7. 226961 7. 087934 6. 753784 7. 476255 6. 829458 7. 130332 7. 409668 7. 167205  
5. 640472 5. 780372 4. 868041 5. 265641 5. 237469 4. 897381 5. 207685 4. 926884 5. 938246  
3. 587655 4. 030004 3. 854076 3. 368332 3. 962464 3. 728483 4. 609212 3. 221654 5. 099738  
5. 406173 5. 564442 5. 959866 5. 322682 6. 230323 5. 950412 5. 201183 6. 722436 6. 012183  
6. 742182 6. 368398 6. 299161 6. 166821 6. 687139 6. 717524 6. 452629 7. 330944 6. 829485  
4. 901876 5. 330621 5. 413141 5. 749236 5. 582627 5. 908209 5. 023788 5. 623525 5. 284848  
3. 89462 3. 241495 3. 234823 3. 924341 3. 956363 4. 253254 4. 250614 3. 625543 4. 048033  
3. 261502 3. 588957 2. 346523 3. 575704 3. 762505 2. 802706 2. 810675 3. 153739 2. 731416  
4. 492553 4. 802226 4. 67422 4. 53395 4. 273345 5. 121269 4. 609189 4. 301638 4. 032303  
4. 859686 4. 604268 5. 427185 4. 725716 5. 006449 5. 414182 6. 318295 5. 533065 5. 31691  
6. 115716 5. 471339 5. 917769 5. 763631 5. 27831 4. 617683 4. 981027 5. 707877 5. 943887  
3. 978929 3. 696368 3. 625331 3. 6088 2. 301508 3. 746755 4. 372738 2. 071682 4. 650776

4. 951177 4. 860337 4. 796985 4. 214948 4. 845894 5. 826274 4. 318084 4. 880854 4. 446423  
2. 709809 3. 100218 2. 561355 4. 530765 2. 53872 3. 138468 3. 047884 4. 039878 3. 077879  
5. 78197 4. 593448 4. 925692 4. 927031 5. 283864 4. 984688 4. 934685 4. 271088 4. 495789  
3. 960743 4. 000027 4. 860486 4. 65947 4. 663433 3. 760133 4. 650907 5. 133306 4. 444397  
2. 293902 2. 371251 1. 738887 1. 322939 1. 584827 1. 48417 1. 495662 2. 203516 1. 702771  
7. 277954 6. 500538 6. 533373 5. 481912 6. 512783 6. 325044 6. 119681 6. 281678 6. 171056  
2. 524217 1. 358684 1. 059038 1. 147948 2. 08054 1. 742591 1. 374863 1. 469752 1. 068967  
4. 567171 6. 027231 5. 771365 6. 765606 5. 778792 6. 118639 6. 420011 6. 367384 5. 675078  
1. 153606 0. 960385 0. 907402 1. 224493 1. 247299 1. 085622 1. 004096 1. 173183 1. 28914  
2. 390097 1. 580197 1. 830001 1. 585317 1. 642997 1. 96176 2. 831514 1. 448188 1. 805459  
1. 531856 1. 275443 1. 455255 1. 495676 1. 681993 1. 556038 1. 037776 1. 719752 1. 639024  
1. 377389 1. 144994 1. 913374 1. 619405 1. 44151 1. 291547 1. 6049 2. 289977 1. 434721  
4. 579433 4. 921668 4. 074378 4. 882916 5. 568009 5. 44466 4. 139323 5. 124436 4. 828147  
4. 852754 5. 304317 5. 259838 5. 085322 5. 54077 5. 976287 4. 863001 4. 748637 4. 976392  
5. 511528 5. 281765 6. 226518 5. 407521 4. 751329 5. 820815 5. 43103 5. 443814 5. 522905  
4. 451683 4. 615021 4. 847796 5. 378605 5. 243665 5. 713696 5. 548565 5. 632353 4. 56273  
5. 494714 5. 87448 6. 267538 5. 462675 5. 361611 5. 527956 5. 899229 6. 0196 5. 914623  
2. 412898 2. 448837 1. 501621 1. 218219 1. 517072 1. 744053 1. 611836 1. 846087 1. 474211  
7. 848326 7. 908043 7. 717448 8. 303119 7. 828005 8. 016322 7. 292185 7. 814419 7. 727832  
2. 486581 3. 372438 2. 786486 3. 796606 2. 384543 2. 512796 2. 465574 1. 839669 1. 954255  
9. 381095 9. 972835 9. 995136 10. 54129 10. 08568 10. 14203 9. 76766 9. 649823 10. 01489  
3. 34165 3. 029541 3. 041179 3. 241859 2. 759626 2. 623531 3. 339694 3. 01804 2. 7592  
9. 744148 10. 07879 9. 478942 10. 66846 10. 28773 10. 41792 9. 8009 9. 50442 9. 990557  
3. 165832 2. 186397 2. 193338 1. 621929 0. 935946 1. 058155 2. 00656 1. 003129 2. 18069  
8. 379589 8. 268791 8. 429976 8. 204382 8. 492634 8. 204584 8. 34673 8. 649592 8. 221434  
1. 411182 1. 672215 1. 104158 1. 298759 1. 129763 1. 283893 1. 4765 1. 345317 1. 639179  
4. 71584 4. 186281 3. 703737 3. 779479 3. 922178 4. 21429 4. 149578 4. 042393 4. 058122  
2. 513947 3. 888571 4. 260786 2. 567998 5. 00497 1. 584199 3. 690875 2. 651198 3. 08241  
5. 537153 5. 611207 6. 346981 5. 669046 6. 118411 5. 746067 5. 161454 6. 067046 5. 560911  
3. 130042 3. 218089 3. 917919 4. 924488 5. 188593 4. 821796 3. 800192 2. 76756 3. 984999  
5. 395033 6. 068775 5. 739799 5. 527616 5. 939734 4. 976066 6. 523619 5. 844468 5. 749653  
7. 018854 6. 81199 6. 222087 5. 578682 7. 139648 6. 109027 6. 152818 6. 308387 6. 535225  
5. 870498 6. 242491 6. 143772 6. 421197 6. 390031 6. 210875 6. 448849 6. 179472 6. 421291  
3. 539756 3. 566517 3. 791763 4. 010518 3. 769137 4. 481556 2. 870575 3. 26896 3. 42715  
4. 799341 4. 709314 4. 526592 3. 447001 4. 820872 3. 251695 3. 901257 4. 422133 3. 981655  
3. 922213 4. 541881 3. 570837 4. 28312 3. 758273 5. 081699 4. 734673 3. 908393 3. 822958  
1. 403953 1. 454082 1. 220909 2. 30439 1. 358712 1. 404059 0. 826507 1. 350737 1. 038886  
2. 575966 3. 580425 2. 3897 2. 90726 4. 552869 3. 153435 3. 619086 4. 658921 4. 290164  
1. 747033 1. 409435 1. 469124 1. 602485 1. 536548 1. 755741 1. 779265 1. 579619 1. 555059  
5. 236253 5. 553186 5. 450623 5. 001336 6. 036319 5. 464481 5. 559545 5. 529811 4. 627098  
6. 940155 6. 499211 6. 508323 6. 398158 6. 309145 6. 26341 6. 404575 6. 545838 6. 615423  
6. 1754 6. 150075 6. 241821 5. 958573 5. 568909 6. 157582 6. 762321 6. 527028 5. 505131  
5. 910189 6. 468936 5. 812174 6. 340168 6. 606705 6. 343199 6. 219345 6. 408346 6. 634162  
3. 425746 1. 177242 1. 588038 1. 914868 0. 957752 0. 963616 3. 865654 4. 350973 1. 397301  
2. 572295 2. 545138 3. 251714 2. 691146 2. 812194 4. 02554 3. 844493 3. 601561 3. 607099  
3. 508153 2. 424721 2. 878367 2. 684604 2. 819218 2. 985122 2. 861069 3. 133664 3. 054993  
2. 853598 2. 900823 2. 625091 3. 531104 2. 311473 3. 420104 2. 549387 2. 570984 2. 471143  
4. 410163 4. 376089 3. 998881 5. 480681 5. 581239 5. 167279 4. 797846 4. 489883 4. 779382  
5. 238096 4. 766888 4. 418252 5. 491363 4. 658743 5. 117853 4. 907938 3. 828586 4. 944009  
2. 748498 2. 021409 2. 276038 2. 759987 1. 927169 2. 222149 1. 757455 2. 406101 2. 570012  
6. 934579 5. 946114 5. 695386 5. 727811 5. 720626 4. 863304 6. 720346 6. 120941 5. 553847

3. 266972 3. 794473 2. 760419 3. 183668 2. 479686 3. 143864 2. 967147 2. 626406 4. 93442  
3. 732386 4. 196971 3. 565952 3. 619018 3. 520183 3. 213594 2. 755425 4. 292086 3. 349273  
1. 743013 1. 579236 1. 808051 1. 980838 1. 649217 1. 461159 1. 495811 1. 178369 1. 353558  
7. 612287 7. 882569 7. 648125 7. 921584 7. 527929 7. 80084 7. 363001 7. 466197 7. 542346  
6. 486542 6. 41513 6. 536556 6. 731484 6. 525004 6. 840528 6. 491122 7. 100956 6. 580191  
3. 524797 2. 904003 1. 698851 3. 930672 2. 638659 4. 317646 3. 659657 2. 556993 3. 142515  
8. 264862 8. 909392 8. 929514 8. 873588 8. 858332 8. 944179 8. 396623 8. 795677 9. 040701  
3. 013469 3. 832725 2. 903179 2. 464633 1. 874063 4. 225104 4. 652914 2. 75722 3. 013661  
6. 21438 6. 435352 6. 549233 6. 563544 2. 011296 6. 382138 6. 483685 6. 690376 1. 010359  
4. 437165 3. 449815 3. 293966 3. 007357 3. 687062 2. 64518 4. 007567 2. 583645 3. 079687  
9. 818478 10. 03255 9. 938678 10. 04896 9. 911142 9. 903153 9. 865068 10. 20272 10. 26406  
6. 123689 5. 986778 5. 984914 6. 189637 6. 384866 5. 718979 6. 045083 6. 144847 5. 659864  
6. 73295 5. 417131 6. 331609 5. 447796 5. 60755 5. 212618 5. 514513 4. 912883 7. 060527  
4. 514097 6. 22603 5. 685303 6. 588903 6. 156647 5. 158009 5. 524438 5. 660891 5. 969482  
4. 429254 3. 96931 4. 400612 4. 801881 3. 923975 3. 659909 4. 332849 4. 559504 4. 187414  
8. 749043 8. 384996 8. 404336 8. 474145 8. 351011 8. 534083 8. 318353 8. 400058 8. 408626  
6. 418687 6. 232365 5. 46285 6. 69176 6. 37106 6. 703468 6. 673001 6. 245103 6. 483248  
8. 569191 9. 097949 9. 090722 8. 801229 8. 742714 9. 010345 9. 144759 8. 492977 9. 145556  
9. 469866 9. 029969 9. 241144 9. 479112 9. 176675 8. 898101 9. 789576 9. 235541 9. 252886  
7. 643813 7. 946707 7. 971397 7. 959318 8. 113463 8. 204221 8. 219436 7. 831339 8. 015696  
9. 903565 9. 961449 9. 799836 9. 663167 9. 911877 9. 534911 10. 08601 9. 62768 10. 00161  
7. 219094 7. 907047 7. 667564 8. 299924 8. 080858 7. 578402 8. 005035 8. 158929 8. 354128  
6. 464623 6. 404499 6. 679048 6. 221851 6. 527122 5. 60209 5. 574275 6. 755553 6. 866143  
6. 778498 3. 944186 4. 572217 2. 787626 4. 864873 2. 751985 2. 961297 3. 603507 5. 122967  
7. 155811 5. 953407 7. 483176 6. 044402 6. 167744 6. 035668 6. 493998 6. 211353 8. 09495  
6. 524549 7. 240237 6. 979262 7. 221908 7. 362103 7. 098849 6. 765133 7. 112683 7. 159111  
8. 763858 8. 771676 9. 00964 8. 897683 9. 277072 8. 699265 9. 285621 9. 2383 9. 094922  
6. 001061 6. 054554 5. 890597 5. 909693 6. 186523 5. 97247 6. 082267 6. 446451 6. 38898  
3. 7997 4. 016543 3. 378668 3. 612249 4. 192595 3. 857557 3. 51685 4. 596934 3. 629736  
4. 697035 5. 18204 4. 73315 4. 944958 4. 746044 4. 586107 5. 643056 4. 69215 4. 991815  
5. 47295 5. 578485 5. 534227 5. 997894 5. 971963 5. 629644 6. 247612 6. 008681 6. 115467  
7. 135257 6. 685238 6. 811708 7. 097045 6. 691554 6. 987919 6. 686127 6. 940801 6. 4943  
8. 155592 9. 472579 9. 264281 9. 146988 9. 268968 9. 805574 9. 282977 9. 410623 9. 276955  
9. 030812 9. 083064 9. 025224 8. 972732 9. 335261 7. 854034 8. 694318 9. 35061 8. 921953  
2. 406311 1. 099783 1. 890679 1. 575184 1. 755334 2. 353186 1. 762033 1. 694142 2. 193527  
2. 71992 2. 259456 2. 516416 1. 726859 2. 441886 1. 722757 1. 804795 2. 307229 2. 191521  
1. 844657 1. 781134 1. 558508 2. 739543 1. 403601 3. 037843 2. 828964 1. 606786 1. 982608  
3. 645292 2. 390387 2. 915329 2. 451554 2. 534196 3. 079192 2. 414886 2. 560509 2. 323106  
7. 112299 8. 111231 8. 228351 7. 478239 8. 251071 8. 349528 7. 642518 8. 270821 7. 550078  
5. 0671 5. 152355 6. 07925 4. 34153 4. 966159 4. 486485 4. 967164 5. 998584 5. 448851  
3. 013685 4. 126489 3. 626566 4. 238278 3. 332388 3. 534613 3. 354026 3. 419874 3. 858471  
5. 665305 6. 071666 5. 206572 6. 140867 5. 873675 5. 0892 4. 277533 6. 624701 4. 476178  
6. 280851 6. 016473 6. 413856 6. 411594 6. 634867 6. 867285 6. 582135 7. 484245 7. 027073  
6. 43181 5. 873133 5. 914327 6. 263208 6. 277479 6. 225381 5. 708673 5. 693054 6. 191643  
5. 563544 3. 726252 3. 586469 5. 445643 4. 304311 4. 769924 5. 766696 4. 500504 4. 783425  
2. 193396 1. 571464 2. 129909 2. 231695 1. 891527 2. 565658 1. 843726 1. 525169 1. 899854  
6. 755291 6. 680628 6. 189777 6. 440205 6. 543828 6. 29306 6. 674509 6. 764977 6. 294162  
1. 541155 1. 559714 1. 515126 1. 410182 1. 494745 1. 384886 1. 399311 1. 182079 1. 628121  
3. 983402 5. 025723 5. 724271 4. 643579 4. 639327 4. 201495 3. 494874 5. 032391 4. 848972  
4. 307597 4. 991831 4. 938659 4. 390059 5. 644699 5. 841423 5. 596659 4. 878436 5. 451754  
5. 465356 5. 810646 5. 483273 5. 158077 5. 808457 5. 789973 6. 153395 5. 425677 4. 807126

4. 775352 5. 683145 4. 91502 5. 202395 5. 251944 5. 313662 5. 017749 5. 611941 5. 362961  
4. 384242 5. 248325 4. 328062 5. 24473 5. 20179 5. 232667 5. 309192 5. 432472 4. 483381  
8. 287924 8. 02816 7. 961878 7. 363883 7. 601463 6. 733465 5. 825511 5. 734398 7. 820705  
2. 291799 1. 519034 1. 47651 1. 528741 1. 791501 1. 62264 1. 811709 1. 502172 1. 848826  
1. 283375 1. 036278 1. 430753 1. 748095 1. 316245 1. 579254 1. 200251 1. 387622 2. 491285  
2. 91412 2. 791092 2. 776076 3. 123769 2. 545692 3. 239243 2. 388264 3. 156071 2. 826938  
1. 861912 2. 023626 2. 099185 2. 408998 1. 871601 2. 446156 2. 483305 2. 479919 2. 255397  
4. 249005 2. 872564 3. 734299 3. 434982 3. 121503 2. 961158 5. 100004 3. 648403 4. 365528  
1. 983833 1. 040125 1. 401297 1. 084268 1. 050138 1. 356072 1. 202288 1. 042673 1. 151358  
5. 739968 5. 278247 5. 70787 5. 187006 5. 457916 5. 174333 4. 08719 5. 218143 4. 880339  
2. 831016 2. 68724 3. 191374 2. 327283 3. 163377 2. 194736 3. 10294 3. 130676 2. 940982  
4. 380074 4. 133721 5. 286751 4. 616038 4. 256027 3. 443684 4. 34242 4. 055745 4. 466847  
5. 009364 4. 693758 4. 235883 5. 323332 4. 909034 5. 633578 5. 489141 5. 326788 5. 264217  
6. 731234 6. 903618 6. 567849 6. 693488 7. 028085 7. 061875 7. 131825 6. 489915 6. 783386  
10. 07818 10. 13625 10. 32166 10. 42154 10. 36652 9. 929264 10. 26619 10. 27909 10. 24676  
5. 745899 5. 238108 5. 780383 5. 776104 4. 960881 5. 262104 5. 286621 5. 215649 5. 64854  
6. 250887 6. 350039 6. 738963 5. 704628 5. 604893 5. 686722 6. 142341 6. 180575 6. 214091  
8. 234542 8. 435193 8. 212833 8. 144682 8. 318409 8. 341182 8. 233037 8. 084189 8. 416624  
6. 263948 6. 841056 6. 697328 6. 35326 6. 664362 6. 823548 6. 545495 6. 58621 6. 589639  
6. 930958 7. 201801 6. 631403 6. 034577 6. 897674 6. 248929 6. 537651 6. 609486 6. 913185  
7. 477701 7. 495483 7. 389273 7. 385554 7. 14833 7. 153548 8. 067914 7. 12243 7. 112632  
3. 510942 3. 02658 3. 671469 3. 468447 3. 035718 2. 888433 3. 199088 3. 944935 2. 567247  
6. 369237 6. 863101 6. 542632 7. 277522 7. 311262 7. 111934 6. 393313 6. 989302 6. 928041  
4. 002453 4. 804861 3. 941792 4. 01327 3. 959194 4. 257418 4. 11502 4. 012732 4. 114867  
5. 213267 4. 556652 4. 987318 4. 165865 4. 986457 4. 989102 4. 556028 5. 296105 4. 138529  
5. 69771 6. 088568 5. 580203 5. 302645 5. 061509 4. 832974 5. 769203 5. 984827 6. 144528  
1. 728019 1. 432599 1. 622321 1. 4457 1. 078054 1. 571386 1. 534576 1. 618314 1. 6103  
3. 091282 4. 09357 2. 935704 4. 251395 3. 959854 3. 739626 3. 27961 3. 021329 3. 428426  
7. 336556 7. 306948 7. 01401 7. 484344 7. 645627 6. 883092 6. 922185 7. 43161 7. 110019  
3. 798251 3. 409322 3. 928272 4. 345223 3. 946241 4. 093595 4. 732684 4. 74346 4. 74346  
2. 255072 2. 14536 3. 243061 3. 193923 2. 042699 2. 666134 2. 222313 2. 24222 2. 020699  
5. 420696 4. 92788 5. 068649 4. 864885 5. 111144 4. 789402 4. 989784 4. 605139 4. 86522  
2. 8965 2. 935628 3. 030986 2. 389439 1. 867859 2. 640486 2. 99584 3. 304871 2. 446284  
5. 678913 4. 451521 3. 655953 5. 343531 1. 457726 3. 346942 2. 973648 5. 00281 4. 514719  
7. 273466 6. 854138 6. 223891 7. 545014 7. 288773 7. 305183 7. 161271 6. 702955 7. 432524  
9. 222344 8. 716225 8. 812913 9. 012444 8. 433969 9. 537981 9. 007703 8. 083314 8. 574314  
2. 313206 1. 528317 2. 189408 1. 371526 1. 756108 2. 042042 1. 977009 2. 040478 1. 673531  
1. 37581 1. 421355 2. 201857 1. 673165 1. 224233 0. 826704 2. 26652 1. 042272 1. 353382  
1. 561256 1. 516458 1. 849979 1. 63167 1. 136681 1. 610544 1. 67853 1. 469409 1. 188861  
1. 910311 1. 400737 0. 98934 1. 101462 1. 165665 1. 475331 1. 085741 1. 638182 1. 597314  
1. 578871 1. 056701 0. 93135 1. 305075 1. 266671 1. 066629 0. 892692 1. 611342 0. 910449  
3. 336288 3. 713998 3. 816398 4. 422323 4. 297588 3. 515246 4. 865781 2. 467624 4. 14411  
5. 464087 5. 300909 6. 075348 6. 370021 5. 540208 5. 746899 6. 137778 5. 789405 6. 09391  
6. 924689 7. 767579 7. 86804 8. 270442 7. 682586 7. 811083 8. 053685 8. 134223 8. 065405  
2. 180469 1. 436672 2. 003972 2. 720847 1. 818236 1. 903978 1. 870909 2. 215658 2. 898225  
1. 778337 1. 692555 1. 992941 2. 644732 2. 321225 1. 215499 2. 209183 1. 539948 1. 893507  
2. 8085 2. 862178 2. 636755 3. 654561 2. 401796 2. 43503 3. 317854 2. 640205 2. 189323  
6. 661437 7. 206428 7. 296948 7. 24472 7. 340546 7. 500457 7. 31844 7. 191785 7. 338022  
5. 688572 5. 270841 5. 927109 5. 861386 5. 503584 6. 363065 5. 710014 5. 653113 5. 673691  
10. 28699 10. 07831 10. 27774 9. 576008 10. 114 9. 658712 9. 603588 9. 977525 10. 13913  
4. 601244 4. 390355 4. 874659 4. 225688 4. 492887 5. 423834 4. 389338 4. 439461 5. 094591

8.614104 8.540015 8.365017 8.671394 8.862953 7.811367 8.512746 8.158087 8.410515  
3.748213 5.103371 5.638763 5.193121 4.513129 5.503859 4.971449 5.237026 5.256678  
5.179913 4.360797 4.612706 4.353849 4.75102 4.155712 4.408407 4.657905 4.348551  
6.538653 6.543172 6.653786 6.392838 6.770801 7.136808 6.86755 5.915053 7.048696  
6.802484 6.932956 6.74699 6.738469 6.721532 6.591906 6.725728 6.495327 6.677027  
6.871846 7.551714 7.223499 7.233966 7.157002 7.73545 7.14653 7.486267 7.582245  
4.378269 2.985487 3.038179 3.330661 2.672378 2.86211 2.612651 3.668597 3.578626  
5.053466 4.252583 4.533002 3.91716 4.372583 4.877476 3.787169 4.123505 4.470595  
6.725952 6.930425 6.566179 6.263068 6.599166 6.807297 6.760123 6.557537 6.64558  
1.835715 1.993753 2.111842 2.673346 2.333813 1.971658 2.171376 1.946018 1.923451  
7.177766 7.751013 7.649811 7.839187 7.262178 7.295851 7.394776 7.204373 7.727762  
2.538496 2.420663 2.649081 3.559412 2.657309 2.392862 3.223789 3.252785 3.810105  
1.930934 2.058821 2.010548 1.487513 1.506747 1.717508 3.536345 1.8342 1.196027  
3.429576 3.420851 2.951387 2.904375 2.915648 2.320075 2.13286 2.61768 3.13523  
4.38874 5.448849 4.595163 5.144767 5.003043 5.720272 5.388725 3.730499 5.168431  
3.879035 1.786749 1.869762 1.987078 1.680333 1.992144 1.91874 1.839962 1.814324  
1.241557 1.401639 1.476469 1.291859 1.877553 1.190648 1.799465 1.38407 2.436955  
5.392886 6.576105 5.629368 4.785343 6.336409 6.109597 5.332636 6.144029 6.269017  
1.855456 2.047238 2.030156 1.85332 1.702973 1.498989 2.037352 1.73706 1.788988  
3.253868 4.064645 3.13708 4.118505 2.135704 3.464079 2.988296 3.061711 3.562951  
4.872448 5.55577 6.29552 5.380453 6.012358 5.708547 6.281829 4.804506 6.125733  
4.233667 3.845764 3.944974 3.743118 3.432457 3.600384 2.99873 4.301768 3.096172  
0.835551 1.17216 0.769979 1.096586 1.346194 1.006171 0.883985 0.769979 0.851399  
3.038355 2.449591 3.49185 3.096189 3.344985 2.837088 3.8422 3.60633 3.427865  
2.090383 2.474069 2.104699 1.806415 1.936996 1.893507 2.609931 2.194602 1.402595  
6.47854 6.066572 6.392438 6.158153 6.041887 6.315139 5.79084 6.135741 6.399745  
4.490276 5.126021 3.761972 5.738461 5.460324 5.648472 6.075107 5.527393 5.841455  
3.707269 4.677505 5.42214 4.08154 4.025618 4.864907 3.058306 3.127931 3.408274  
6.507492 5.844183 6.155075 5.875746 6.349301 5.550931 5.254237 5.550669 6.629579  
7.737171 7.598442 7.803675 6.55639 6.940704 6.770985 7.182953 6.791881 8.218697  
6.859765 7.175231 6.721862 6.361986 6.797529 6.218877 6.511469 6.045768 6.789406  
6.171642 6.220862 5.931308 5.859019 5.812384 6.758343 5.666217 6.11857 6.060793  
6.695375 6.597806 6.032979 6.756718 6.457183 6.658111 5.706413 6.212496 6.866255  
0.981852 1.20744 1.488155 0.985998 0.953393 1.443347 1.274705 1.372766 1.183226  
2.049716 0.968224 1.768371 1.459752 1.343386 1.315487 1.707337 1.347617 1.368685  
3.840277 4.579639 4.007158 4.561404 4.155671 4.410062 5.075137 3.908355 3.246452  
2.688963 1.582168 2.188248 1.659017 2.553807 2.309643 2.156522 2.210569 2.745054  
7.153968 6.807882 5.892449 6.461975 6.35733 6.763118 6.554058 6.905188 6.912066  
7.377886 7.733523 7.501564 7.317007 7.698184 7.134209 7.682099 7.396671 7.571337  
5.776222 5.238194 5.144031 4.759579 4.642522 4.600174 4.660113 5.201606 5.593077  
7.461371 7.484022 7.81369 7.55861 8.003313 6.903803 7.253436 7.777632 7.634679  
4.575771 5.104301 4.741238 5.506804 4.777595 5.044 4.687937 4.723623 5.083009  
2.062751 1.298609 1.649197 1.636593 1.921374 1.417223 1.119554 2.295626 1.80362  
7.456705 6.546755 6.665489 7.373872 6.608423 7.233148 7.408415 7.357066 7.642329  
4.481365 3.756695 3.738085 3.674186 3.911623 3.528186 3.822083 3.877078 3.211717  
1.742569 1.739476 1.739494 2.301832 1.83533 1.702447 2.294442 1.823131 1.823947  
1.26243 1.978621 1.101499 1.75055 1.007794 1.440788 1.071279 1.299353 1.342263  
4.170999 3.473635 3.734971 4.448529 3.913384 3.700233 4.745808 3.381348 3.885879  
1.971397 2.2878 3.016571 2.111978 2.544047 2.841508 1.961413 1.628988 2.424249  
1.218125 1.045354 0.932148 1.204279 1.156178 1.107431 1.555901 1.207214 1.155976  
6.283647 4.918341 5.653929 4.423457 5.45952 5.29536 5.741571 4.827157 5.714439

3. 613982 2. 642054 4. 216462 3. 325032 3. 974673 2. 913866 3. 712049 3. 243694 3. 693534  
7. 816109 8. 484692 8. 215058 8. 860231 8. 54012 8. 888227 8. 587363 8. 421181 8. 52594  
3. 743764 3. 749791 4. 704335 3. 452856 3. 534473 4. 919283 5. 151088 5. 101195 3. 632776  
8. 413951 8. 153419 8. 163028 9. 21696 8. 753564 9. 125648 8. 779801 7. 705486 8. 261062  
4. 377876 4. 92731 4. 508136 4. 740431 4. 814932 5. 080564 4. 092807 4. 104997 4. 590902  
1. 484622 1. 485814 1. 326346 1. 558058 1. 215663 2. 111653 2. 778487 2. 193475 1. 882776  
5. 541901 6. 105484 6. 111947 6. 490985 6. 350413 6. 284 6. 107927 6. 106613 5. 927156  
3. 932489 4. 083854 4. 745231 4. 024287 3. 827367 3. 691157 3. 235429 4. 062088 4. 457575  
3. 803089 3. 447627 3. 902111 3. 518506 3. 800643 3. 794033 3. 778244 3. 779216 3. 228001  
8. 318687 5. 56762 6. 210497 5. 159341 5. 330727 5. 586334 6. 422126 5. 334415 7. 370097  
6. 894487 7. 550959 7. 260386 7. 491173 7. 322933 7. 100312 6. 913623 6. 774278 7. 1784  
6. 153646 5. 601694 7. 515402 4. 528049 4. 495592 5. 717764 6. 593755 5. 975786 4. 836616  
4. 566264 3. 485084 3. 606113 3. 489424 4. 159683 3. 023955 4. 219582 3. 19709 3. 735866  
2. 939824 4. 835491 4. 040355 3. 778225 4. 005072 4. 076963 3. 214257 3. 978973 3. 749945  
3. 834592 4. 402361 3. 634396 5. 440729 5. 436257 4. 872881 4. 73406 4. 389164 5. 187856  
3. 960641 4. 626202 5. 189585 4. 586431 5. 323381 5. 305233 5. 703887 5. 606553 4. 498604  
2. 267817 4. 892689 4. 279184 4. 984977 3. 946878 5. 00027 5. 408275 5. 691475 4. 248442  
2. 414361 1. 447071 2. 276608 1. 462531 2. 032108 1. 948002 2. 48829 2. 738067 3. 259374  
3. 660269 3. 915507 3. 794433 4. 211446 4. 104906 4. 760248 3. 805013 4. 17098 3. 959294  
5. 900873 6. 557613 5. 264775 6. 10725 6. 303305 6. 67528 6. 254778 6. 437492 6. 663536  
2. 505587 2. 528256 3. 58624 3. 311248 2. 805266 3. 688065 2. 625728 4. 391677 2. 91236  
3. 124026 3. 421127 3. 540538 3. 982976 3. 14332 3. 798595 3. 754098 4. 07641 3. 271741  
6. 244481 6. 315674 6. 670289 6. 546934 6. 678357 6. 223866 6. 423678 6. 7918 6. 485296  
6. 644395 7. 6395 7. 611158 7. 2112 7. 665797 7. 625162 7. 125681 8. 035243 7. 217472  
2. 122964 1. 855256 2. 294089 1. 849892 2. 157053 2. 396091 2. 403804 1. 994459 1. 851697  
2. 121541 1. 630413 1. 806751 2. 125654 1. 634308 1. 645583 1. 729786 1. 737822 1. 877059  
5. 886776 6. 248133 6. 5496 6. 881739 6. 442918 6. 133052 6. 015436 5. 52471 6. 179857  
5. 077081 5. 029105 5. 839986 5. 77886 5. 702046 5. 292963 5. 468096 5. 661655 5. 616558  
1. 722802 2. 026969 1. 478124 1. 720478 1. 207338 2. 163247 2. 004187 1. 302983 2. 214717  
2. 450487 0. 89573 1. 961118 2. 782559 1. 745749 1. 701798 2. 416852 2. 402203 2. 889411  
3. 373452 2. 788788 3. 382548 2. 085841 2. 293928 1. 764773 2. 522061 2. 47358 3. 398722  
3. 199127 2. 850541 3. 120885 3. 244623 3. 885428 2. 785651 4. 179699 3. 438367 3. 065311  
2. 507255 1. 814615 1. 492255 1. 843269 1. 991198 1. 467874 1. 738712 2. 024617 2. 202911  
7. 024874 7. 254226 6. 832767 7. 043689 6. 772208 6. 944555 6. 893474 6. 776125 6. 835402  
7. 192228 7. 732257 6. 952268 6. 970136 6. 819726 7. 139886 6. 948211 7. 413379 6. 891356  
6. 943891 7. 531589 6. 515615 7. 052722 7. 306228 5. 931811 5. 64929 6. 924592 6. 843991  
5. 153688 5. 295204 4. 50584 4. 538281 5. 184926 4. 328676 4. 738896 4. 557931 4. 826914  
4. 528696 5. 227752 5. 056154 5. 366546 5. 232753 5. 384208 4. 702802 5. 557721 5. 652827  
1. 795718 1. 918707 2. 508532 1. 743235 2. 675129 2. 073351 2. 639353 2. 472319 2. 171289  
1. 618458 1. 91948 1. 873792 1. 490796 1. 518861 1. 780447 1. 07458 1. 12589 1. 345707  
4. 827759 5. 994072 5. 878631 6. 156916 6. 066416 6. 87909 6. 247454 6. 354766 5. 930211  
3. 625302 4. 819143 4. 138455 4. 845711 5. 2357 5. 059287 4. 279023 4. 31887 4. 366665  
7. 444226 8. 27846 8. 125144 8. 134512 8. 698781 7. 759794 8. 204813 8. 281472 8. 242659  
5. 530729 6. 147585 5. 979195 6. 197603 6. 240072 5. 993399 5. 151327 6. 515869 5. 267977  
5. 802927 5. 968671 5. 726118 5. 82885 6. 213533 5. 909722 5. 685782 5. 873352 5. 171404  
2. 350538 4. 116752 3. 971973 3. 086799 3. 492282 4. 131592 3. 372453 3. 404092 2. 406868  
2. 720865 3. 934592 4. 207882 3. 248884 4. 8959 5. 338606 4. 63439 5. 681594 3. 672857  
3. 082111 2. 710295 3. 191215 3. 253095 3. 134896 2. 83828 2. 641869 2. 937355 2. 624851  
6. 647691 6. 885484 6. 918575 6. 691129 7. 272595 7. 052928 7. 011125 7. 187929 7. 141396  
6. 444153 6. 62228 6. 406826 6. 516441 7. 198471 7. 034482 6. 955743 6. 926232 6. 461736  
3. 149227 2. 119377 3. 034114 1. 652689 1. 708122 2. 090279 2. 226416 1. 906785 2. 143689



7. 280057 7. 890904 7. 923263 7. 99716 7. 833507 7. 720264 7. 943044 7. 553795 7. 674031  
5. 81649 6. 748246 6. 672212 6. 310087 6. 629926 6. 771013 6. 437343 6. 406219 6. 698227  
5. 082511 4. 978267 5. 576002 5. 533289 5. 242158 4. 863865 4. 936162 5. 822269 5. 084144  
5. 853016 5. 866738 5. 454234 5. 082299 5. 7107 5. 8425 5. 676781 5. 431314 5. 330231  
3. 522188 3. 699704 2. 480477 3. 460477 3. 018137 3. 482076 3. 310783 3. 655272 3. 046124  
6. 549245 7. 235187 7. 164012 7. 004206 7. 00001 7. 102003 7. 31069 7. 43803 7. 019798  
8. 340873 8. 663346 8. 842717 8. 45439 8. 614324 8. 609002 8. 381421 8. 443886 8. 61128  
3. 865232 4. 487212 4. 489512 5. 338155 4. 710976 4. 81754 4. 085175 4. 480997 4. 52145  
4. 833587 5. 27197 5. 158991 5. 714916 5. 380271 5. 419595 5. 925827 5. 041221 5. 601321  
5. 095082 5. 962712 5. 894263 5. 994853 6. 172225 5. 724625 5. 664953 5. 973177 5. 78582  
4. 490044 6. 270413 5. 791708 4. 379846 5. 182817 5. 777726 5. 822562 6. 366914 5. 70455  
5. 749588 5. 894412 5. 387178 5. 921926 5. 22556 5. 961112 5. 725836 5. 69021 5. 898553  
4. 953811 5. 146454 5. 465888 5. 015576 3. 70062 4. 76356 5. 815933 5. 721757 5. 164933  
8. 105774 7. 669129 7. 80478 7. 924085 7. 910519 7. 82825 7. 508447 7. 959289 7. 65956  
7. 146107 7. 842082 7. 670118 7. 603996 7. 588596 7. 441137 8. 083994 8. 363512 7. 420179  
5. 674269 6. 785044 6. 273818 6. 917236 6. 911688 6. 861244 5. 978078 6. 831164 6. 67653  
4. 715629 6. 241935 6. 183367 6. 417028 6. 511288 6. 69419 6. 200999 6. 206862 6. 108705  
5. 913513 5. 817108 5. 867897 5. 334689 5. 348996 5. 665331 5. 603258 5. 8294 5. 621731  
6. 011141 7. 156375 6. 174777 6. 954388 6. 612504 6. 395442 6. 353153 6. 980551 6. 86885  
0. 938216 1. 261585 1. 130809 2. 243545 1. 480004 1. 068464 1. 124956 1. 468264 1. 505633  
1. 485891 1. 5754 1. 449235 1. 802519 1. 64337 1. 379928 1. 599197 1. 707623 1. 556708  
7. 370153 7. 254381 6. 579504 6. 203296 7. 083282 7. 415026 6. 541164 6. 256829 6. 780782  
4. 935461 4. 91236 4. 765909 4. 68195 4. 98457 5. 249148 5. 290282 4. 785186 4. 733431  
4. 15346 4. 03794 4. 158487 3. 974253 4. 140572 3. 243765 3. 959566 3. 206041 3. 366887  
3. 540709 5. 676882 4. 931078 4. 451781 5. 577521 5. 65258 4. 971128 5. 018214 5. 681883  
3. 287597 4. 396784 3. 412848 2. 846406 2. 777464 2. 750628 3. 873303 1. 957383 2. 969241  
1. 664553 1. 460682 1. 661363 2. 12601 0. 938181 1. 490255 1. 162873 1. 494824 2. 121124  
2. 375315 2. 276555 2. 093449 4. 431446 2. 208683 3. 187172 2. 380344 2. 352139 3. 014964  
5. 882627 7. 130207 7. 161021 6. 560593 6. 37016 7. 051162 6. 392466 7. 095611 7. 068102  
1. 706632 1. 675198 2. 293067 2. 330217 1. 996128 1. 606463 1. 914687 2. 107773 1. 632107  
4. 719621 5. 124806 5. 495228 5. 061152 5. 609784 5. 718247 4. 559216 4. 69415 5. 427742  
3. 983946 3. 09144 3. 997394 3. 934173 2. 61812 3. 294707 3. 430335 2. 649128 3. 369747  
2. 005424 1. 190963 1. 105101 1. 777491 1. 464923 2. 752639 1. 861986 1. 438909 1. 934141  
2. 756678 2. 852103 3. 12425 3. 106199 3. 427398 4. 106292 2. 175647 3. 482791 3. 018549  
6. 274809 6. 24017 6. 092286 6. 502912 7. 125311 6. 382836 6. 419988 6. 301735 6. 456914  
5. 898588 5. 855946 5. 246274 5. 401712 4. 948178 4. 606796 5. 31055 4. 956817 5. 012866  
3. 658281 4. 249432 4. 228648 2. 911729 4. 124344 3. 852809 3. 471396 4. 62749 3. 531258  
4. 930657 4. 583552 4. 806988 5. 299038 4. 982762 5. 131746 4. 671623 5. 058544 4. 856437  
5. 64127 5. 781475 5. 86955 6. 306465 6. 142912 6. 072724 6. 372647 5. 513246 5. 832871  
2. 550965 2. 012442 2. 041739 2. 367683 2. 347243 1. 36061 2. 539622 2. 356643 2. 389626  
3. 659743 3. 983381 4. 214393 4. 513627 3. 570217 3. 68824 3. 49346 4. 222418 3. 434382  
2. 078335 2. 101512 2. 335168 2. 146493 3. 312333 2. 239487 2. 701231 2. 392979 2. 382822  
5. 393285 5. 395837 4. 837342 5. 336845 5. 194221 4. 981867 5. 054969 5. 558476 5. 196255  
5. 80314 6. 294564 6. 612489 6. 310512 6. 514104 5. 664417 6. 162219 5. 75252 6. 190494  
7. 408612 7. 821574 7. 723011 7. 941308 7. 912875 7. 763236 7. 783544 7. 698323 7. 572504  
2. 751466 3. 158912 3. 342903 3. 41705 3. 155391 3. 178874 2. 836417 3. 303876 3. 417064  
5. 552072 4. 311197 4. 726605 4. 050631 4. 290216 4. 499675 3. 839184 4. 19578 4. 2613  
6. 794442 7. 539185 7. 20155 7. 635726 7. 778575 7. 287288 6. 768737 7. 198391 7. 218037  
2. 521683 4. 225527 3. 985445 3. 255072 3. 630282 3. 708189 3. 537482 3. 709224 3. 988984  
3. 474587 2. 872273 3. 26716 4. 002483 2. 863192 3. 26747 3. 994178 2. 875257 3. 29113  
6. 636716 7. 199608 6. 731608 7. 254346 6. 957144 7. 036703 7. 247445 7. 023479 6. 939829

3. 17185 3. 378277 3. 129096 3. 221346 2. 056679 3. 715898 2. 806198 3. 342788 3. 118498  
2. 514001 2. 504859 3. 673278 3. 13902 2. 832976 2. 94186 2. 731993 2. 901592 2. 38828  
4. 42074 2. 603444 4. 040465 3. 168343 3. 118591 2. 795383 2. 831847 2. 829462 4. 332714  
6. 047997 5. 756131 6. 345041 5. 545957 6. 189197 6. 868972 6. 150441 6. 429201 5. 942311  
6. 582838 5. 912899 6. 729037 5. 67968 6. 048578 5. 830136 5. 827032 5. 48991 5. 770265  
3. 229602 4. 53274 4. 257071 4. 827602 4. 509774 4. 971444 6. 163489 5. 111278 4. 910286  
2. 785695 5. 049222 5. 245708 5. 431158 2. 627463 3. 627158 4. 328119 2. 947313 4. 31725  
3. 710717 4. 596264 4. 344795 4. 653433 4. 437 4. 868709 4. 71691 4. 173885 4. 610804  
3. 60481 1. 431258 1. 37082 2. 264874 2. 538732 1. 460768 2. 032306 1. 578415 1. 526117  
6. 954881 7. 26938 7. 623773 7. 494599 7. 576503 7. 304413 7. 011667 7. 303723 7. 232837  
6. 572254 2. 572579 5. 027797 3. 109198 4. 097397 1. 629032 3. 974997 2. 40374 6. 141187  
1. 754807 1. 701788 2. 140439 1. 927026 1. 761598 1. 408397 2. 153227 1. 673355 1. 64488  
7. 357108 5. 786621 5. 940565 5. 8078 6. 232609 5. 803347 5. 797411 6. 097493 7. 016497  
1. 313107 1. 80645 1. 320921 0. 893364 1. 335107 1. 42966 1. 43858 1. 26553 0. 99879  
5. 037388 4. 781688 5. 438881 4. 721979 5. 268736 5. 380293 5. 735877 4. 959926 4. 682764  
2. 384121 3. 806882 3. 081806 2. 785661 2. 854707 3. 130869 2. 682256 3. 729412 2. 828379  
1. 951843 1. 537867 2. 137594 2. 001256 1. 8643 2. 063577 1. 859637 1. 72672 1. 908727  
8. 939745 9. 177381 9. 561772 8. 744185 9. 0145 9. 064714 8. 46578 9. 114003 9. 027003  
1. 717677 1. 696491 0. 974473 1. 078388 1. 131498 1. 388521 1. 055122 1. 077521 0. 831404  
1. 020537 1. 325238 1. 529487 1. 419664 1. 256221 2. 050151 1. 06449 1. 237291 0. 974615  
2. 507271 1. 825959 2. 297431 1. 703938 2. 254022 2. 122855 2. 108812 1. 645953 2. 405773  
4. 168367 3. 587212 3. 602463 4. 141432 4. 097167 3. 071107 2. 78294 3. 393003 3. 716869  
2. 56973 3. 749844 3. 794009 3. 417923 4. 119902 3. 651047 2. 96141 2. 98806 3. 728006  
3. 74883 3. 457144 4. 262424 3. 195114 3. 489781 4. 310317 3. 856721 3. 317679 4. 097356  
3. 017704 3. 558197 4. 81174 4. 799705 3. 541789 4. 338705 4. 388471 3. 55426 3. 692399  
1. 955963 2. 602626 1. 537753 1. 753346 1. 331555 1. 548858 1. 868462 1. 572603 1. 474084  
5. 035652 5. 489544 5. 344723 6. 49311 5. 385451 6. 207151 5. 265365 4. 015285 5. 33022  
3. 572157 3. 649161 4. 499439 4. 315487 4. 10201 4. 152589 3. 954706 4. 512468 4. 193562  
2. 942232 4. 227541 4. 318622 3. 597957 3. 746504 3. 795605 4. 743422 4. 501196 3. 086371  
2. 799164 1. 706207 2. 210079 2. 02725 2. 05272 1. 962874 2. 221691 1. 788767 1. 946374  
5. 055449 2. 277276 1. 863099 2. 258085 2. 024121 1. 091165 2. 43279 2. 079706 2. 906589  
1. 543428 0. 927681 1. 313722 1. 257735 1. 341577 1. 555042 1. 386236 1. 331885 2. 260922  
3. 480942 3. 785062 4. 428458 3. 672766 4. 296375 4. 218919 4. 421045 3. 236868 3. 752167  
2. 830779 2. 349349 3. 112751 2. 302002 1. 282027 2. 498115 2. 970028 3. 007747 2. 072862  
3. 197633 2. 975177 2. 543568 1. 641906 3. 321284 2. 134671 2. 982717 4. 393003 2. 105234  
2. 452543 2. 569923 2. 08731 2. 266436 2. 308996 2. 650141 2. 201103 3. 168776 2. 167117  
3. 811985 4. 447779 4. 950325 3. 972274 4. 610931 4. 491431 4. 85206 3. 593814 4. 130462  
3. 206359 2. 839325 3. 175351 2. 644131 2. 794496 2. 748887 3. 81426 2. 480154 3. 391128  
2. 48634 2. 428574 2. 172592 2. 044403 2. 266519 1. 512828 2. 470652 1. 598822 1. 885221  
6. 537342 6. 98208 5. 809795 6. 821589 6. 406169 6. 545421 6. 738787 6. 899832 6. 614761  
2. 665709 2. 150968 2. 056229 2. 161207 1. 891824 2. 359358 2. 958021 2. 729429 3. 168719  
0. 991882 1. 330375 1. 189348 0. 891157 2. 132704 0. 911444 0. 622295 1. 393341 0. 935809  
2. 502343 2. 849588 2. 806966 2. 142147 3. 590411 3. 315616 2. 809786 2. 194176 3. 582498  
3. 637847 3. 896491 3. 209161 2. 948546 2. 857125 2. 933969 3. 468201 3. 090001 3. 513931  
3. 116173 2. 402496 3. 026347 1. 886512 1. 812088 2. 853174 3. 333324 3. 014313 2. 24552  
2. 334163 2. 295911 2. 779382 2. 577911 1. 798019 1. 739796 4. 256541 2. 763412 1. 762335  
3. 185308 4. 428612 3. 629078 2. 469309 3. 364778 3. 275161 2. 886291 4. 890159 2. 363329  
4. 569392 2. 580249 4. 150869 2. 683794 4. 550413 2. 261308 2. 708931 3. 061982 1. 876453  
2. 059671 1. 166815 1. 319436 1. 601622 1. 840582 1. 665586 1. 2385 1. 653204 1. 292826  
2. 367836 1. 411793 1. 767779 2. 445576 1. 772538 1. 809254 2. 748988 2. 115254 1. 902565  
1. 918577 1. 22964 0. 937 1. 559351 2. 332771 1. 225587 2. 650274 1. 297168 0. 809051

2. 594066 2. 033524 1. 852586 2. 072246 2. 802273 2. 195257 2. 337555 1. 866819 2. 271822  
1. 441505 1. 564687 1. 812579 1. 976143 1. 51909 1. 313146 2. 453787 1. 648112 1. 808609  
4. 372863 3. 771407 4. 206309 3. 971326 3. 973578 4. 0973 4. 449779 4. 192718 2. 937594  
2. 64857 1. 999391 2. 169357 1. 655385 2. 129839 2. 677017 1. 857024 2. 656376 1. 676358  
3. 945823 3. 291833 4. 263413 5. 01153 3. 700087 3. 424019 3. 318661 4. 704844 3. 435231  
3. 642925 3. 637939 4. 006384 3. 419222 3. 531251 4. 361077 3. 194546 3. 882229 3. 883173  
4. 247777 3. 147586 4. 442767 3. 621883 2. 458521 4. 351032 3. 9324 3. 371537 3. 816492  
1. 74728 2. 185141 1. 509442 1. 769248 1. 994124 1. 306489 2. 060392 1. 27671 2. 58328  
1. 675658 2. 157523 1. 494388 2. 026219 1. 627331 2. 035652 1. 873835 1. 537111 1. 905297  
5. 699632 6. 404881 6. 156432 6. 066172 5. 752076 6. 538921 6. 288907 6. 773088 6. 010133  
5. 443842 4. 701111 5. 524418 5. 785499 5. 110876 5. 928146 4. 866298 5. 202373 5. 495792  
5. 452156 5. 470159 5. 252295 4. 972695 5. 235687 5. 385926 4. 955933 5. 987643 5. 541783  
9. 635866 9. 527425 9. 505464 9. 293496 9. 287646 9. 448093 9. 59164 9. 438341 9. 773703  
3. 899434 3. 191004 3. 557413 3. 357756 2. 573884 2. 993711 4. 460243 3. 189571 3. 25339  
2. 846647 2. 045775 2. 059763 2. 522551 2. 785311 1. 898606 2. 328379 1. 983576 1. 779428  
4. 64784 4. 712551 5. 137902 5. 138631 5. 798128 5. 22224 5. 267779 4. 79557 4. 858146  
6. 231087 3. 991838 5. 697816 3. 883676 5. 857237 5. 179797 5. 052249 4. 868083 5. 680748  
3. 182822 2. 338467 4. 31342 3. 333574 3. 301342 3. 968296 3. 679006 3. 551868 4. 820214  
3. 717253 3. 447615 4. 685535 4. 397125 4. 319353 3. 822841 4. 810857 4. 40916 4. 873212  
2. 747175 2. 679411 2. 480934 2. 303908 2. 033437 2. 272145 2. 558794 2. 103005 1. 993587  
1. 66001 1. 131551 0. 909357 1. 245558 2. 202152 1. 23694 2. 278512 1. 446169 1. 302295  
3. 767143 4. 39864 3. 9518 4. 017608 3. 646631 3. 917008 3. 003325 5. 304109 3. 89991  
6. 053999 5. 647891 5. 257079 5. 540262 5. 104723 5. 772983 5. 37194 5. 439633 5. 509949  
3. 628093 2. 967272 3. 325377 2. 592213 3. 357025 3. 81402 2. 994654 3. 077919 3. 048056  
2. 952175 3. 058613 3. 062451 3. 422017 2. 908676 2. 573722 3. 400473 3. 02023 3. 544553  
2. 404059 3. 270037 3. 859921 2. 498549 2. 280993 2. 883684 3. 836588 2. 362908 3. 575776  
2. 79282 2. 127112 2. 260115 2. 659997 3. 153631 2. 751929 2. 943383 2. 886672 3. 08971  
2. 560769 1. 571501 1. 666486 1. 933169 2. 230513 1. 6463 3. 548531 1. 731001 2. 772716  
4. 617726 3. 778698 4. 147564 4. 700929 4. 100915 4. 125688 4. 115597 4. 726772 4. 010503  
2. 194997 2. 137768 3. 114947 2. 073035 3. 049532 2. 048235 2. 850133 1. 885644 2. 393593  
2. 791106 2. 087626 1. 280369 1. 647107 1. 722458 1. 373013 3. 36965 1. 503867 2. 862562  
2. 562768 1. 708328 2. 431764 1. 720257 2. 058503 1. 530895 2. 126116 1. 889459 1. 729723  
5. 918488 3. 709763 4. 155562 5. 756423 6. 147512 4. 855644 4. 283474 3. 98646 4. 8371  
2. 630261 3. 66923 2. 390549 3. 059893 4. 044715 2. 938962 4. 157487 2. 90316 3. 366078  
3. 160815 2. 87817 2. 948624 3. 044064 3. 332406 2. 987806 2. 528967 2. 858952 2. 79193  
1. 910929 1. 52817 1. 292995 1. 17042 1. 285161 1. 268587 1. 258353 1. 11782 1. 516984  
2. 915991 3. 8941 3. 680671 3. 273527 3. 0515 3. 626058 3. 19446 3. 622824 2. 865192  
2. 625117 2. 646445 2. 555333 2. 407738 2. 608668 2. 069347 2. 565733 2. 594576 2. 434125  
2. 636538 1. 943096 2. 610629 2. 655414 2. 298689 2. 585685 2. 096135 2. 461286 3. 21384  
7. 024557 7. 080615 7. 387461 6. 888661 6. 6518 6. 781979 6. 857462 7. 032434 7. 041102  
7. 257914 7. 45146 7. 014647 7. 004663 7. 37451 7. 666025 7. 203163 7. 446025 6. 985633  
3. 480645 2. 57366 3. 048461 2. 306451 2. 785787 2. 704046 2. 736067 2. 395555 2. 292966  
4. 074188 4. 559508 3. 979774 3. 984996 4. 027667 4. 539355 4. 324818 4. 401659 4. 347277  
7. 776094 7. 610768 7. 292812 7. 186554 7. 500867 6. 823955 7. 566295 7. 446655 7. 656666  
1. 585981 1. 195405 1. 610878 1. 289219 1. 639738 1. 56698 1. 946984 1. 889285 1. 568296  
3. 355031 4. 382825 4. 092322 4. 575254 4. 629119 4. 237356 4. 012872 4. 373452 3. 989739  
6. 453741 6. 361021 5. 700842 7. 699223 7. 470634 6. 628268 4. 722226 5. 868422 7. 117056  
3. 071394 2. 830971 3. 404354 3. 373647 3. 342489 2. 877151 3. 034393 2. 627571 3. 250528  
4. 062906 3. 838747 3. 462156 3. 785549 3. 95926 3. 606116 4. 189754 4. 253167 4. 339356  
6. 216618 5. 786199 5. 558868 5. 610927 5. 777129 5. 620469 6. 120218 6. 183717 5. 124743  
2. 237459 2. 769948 2. 888689 2. 076755 3. 929995 2. 73861 1. 782196 2. 693643 2. 979077

3. 310987 2. 408639 2. 588527 2. 789223 2. 00302 2. 567814 3. 654884 2. 183706 2. 596527  
1. 648531 1. 286761 1. 546974 1. 600935 1. 22656 1. 564986 1. 263876 1. 470008 2. 050991  
3. 537742 4. 260316 3. 567557 3. 379491 3. 926918 3. 141213 3. 194195 3. 409637 2. 895298  
2. 719962 2. 017826 2. 273541 2. 49243 2. 018367 1. 921703 2. 728715 1. 757125 2. 413236  
5. 333183 5. 778513 5. 610535 4. 898718 5. 49352 6. 059344 5. 392914 5. 530831 5. 533174  
1. 718815 1. 882058 1. 788021 1. 580057 2. 164129 2. 12509 1. 465999 1. 789568 1. 566171  
7. 132252 7. 444413 7. 0528 6. 944256 7. 12203 6. 990994 7. 118142 7. 142604 6. 963373  
7. 317728 6. 279332 6. 64612 6. 735159 6. 819558 6. 044147 6. 722634 6. 678137 6. 709384  
5. 357841 5. 005175 5. 330652 5. 12918 5. 026284 5. 252918 5. 025871 5. 573113 5. 788747  
4. 140806 4. 596114 4. 118321 4. 943558 4. 236442 4. 148282 3. 802815 3. 683024 4. 254062  
2. 65553 2. 69781 2. 4959 4. 176594 3. 396521 2. 208443 2. 866493 3. 578369 2. 02336  
3. 359767 5. 295841 4. 689977 4. 361061 3. 734495 4. 971876 4. 604196 5. 899451 4. 704917  
2. 80106 1. 757646 1. 807251 2. 275807 1. 872197 2. 158631 2. 313 2. 122428 1. 871024  
3. 684239 4. 198052 5. 709145 4. 833253 4. 375234 4. 735395 4. 696764 4. 467714 4. 185783  
5. 155082 5. 861781 5. 704122 5. 643301 5. 6725 5. 945769 5. 828827 5. 959572 5. 647751  
4. 703435 3. 693249 2. 832638 4. 124016 3. 863711 2. 612945 3. 512786 4. 200877 2. 709261  
1. 728443 1. 452799 1. 298223 1. 400114 2. 085227 2. 567948 1. 932608 1. 570356 1. 335871  
3. 284644 3. 491741 2. 409106 2. 7171 4. 05964 3. 34349 3. 070511 3. 021292 3. 525629  
2. 633388 2. 424019 2. 729375 2. 222958 2. 717053 2. 848007 2. 28393 2. 321602 2. 389056  
3. 06048 2. 407121 2. 542786 3. 336905 2. 762246 2. 460086 2. 126182 2. 708002 2. 490562  
4. 94788 6. 01901 5. 416106 5. 836474 6. 409774 5. 464484 6. 358041 6. 514161 6. 199701  
5. 794292 5. 505622 5. 074561 5. 697783 5. 861198 5. 626374 4. 682458 5. 587273 5. 18379  
4. 73325 4. 209061 4. 465302 3. 596564 3. 742868 3. 733501 3. 596325 4. 285311 3. 944663  
7. 212635 6. 742278 6. 636436 5. 779343 6. 75628 6. 67923 5. 669845 6. 326548 6. 126927  
1. 042376 0. 915344 2. 508328 0. 879601 1. 346364 2. 002713 1. 430117 1. 290572 1. 201025  
6. 731978 3. 830963 4. 845414 4. 422803 4. 352156 3. 078692 3. 790992 4. 240035 5. 744613  
1. 692245 1. 626585 2. 8983 1. 564993 1. 717039 1. 774343 1. 739436 2. 040728 2. 169579  
3. 110274 2. 463508 2. 417668 2. 658023 2. 036808 2. 579827 2. 473522 2. 738415 2. 278288  
2. 161648 2. 274056 2. 457713 3. 096021 2. 454687 2. 105272 2. 153609 2. 032902 3. 481269  
5. 554931 6. 278253 5. 635078 6. 093564 6. 098609 5. 648388 6. 070224 6. 037773 6. 131588  
2. 123803 3. 018393 2. 527108 2. 590655 2. 42333 3. 063368 2. 54732 2. 882845 2. 741574  
2. 310787 2. 761314 3. 106355 3. 152209 3. 125864 2. 784517 2. 743916 3. 637498 3. 46469  
7. 148466 7. 340333 7. 705997 7. 761373 7. 825646 7. 840773 7. 90012 7. 919453 7. 754202  
5. 739487 6. 069911 5. 764083 6. 000869 5. 745265 5. 87685 5. 418189 6. 207537 5. 052478  
3. 426634 4. 473028 3. 861919 4. 014089 4. 855826 4. 21608 5. 017522 5. 078467 4. 129797  
2. 800045 3. 48473 3. 555303 3. 304189 2. 913884 3. 480502 2. 926796 3. 355455 2. 734543  
7. 107085 4. 590036 4. 799494 5. 502134 4. 791058 4. 258341 3. 744091 6. 450594 6. 210815  
4. 857455 4. 894896 4. 755228 5. 060715 4. 968662 5. 670031 5. 357679 3. 890181 4. 858487  
4. 904112 6. 453661 5. 64774 5. 055348 6. 226135 5. 076967 5. 652607 6. 877924 5. 936505  
6. 106868 6. 506362 5. 898111 5. 959397 6. 1289 5. 822315 6. 661057 5. 65628 6. 584191  
2. 710654 2. 672934 2. 222367 2. 417503 2. 505239 3. 009762 2. 852434 2. 275036 2. 265798  
2. 07571 2. 081511 1. 899079 2. 042967 2. 125955 2. 104996 1. 974128 1. 951364 1. 966968  
4. 615251 4. 324506 4. 508483 4. 090648 2. 842952 3. 643516 3. 501303 2. 863041 4. 196321  
2. 244126 2. 17116 2. 267709 2. 410002 2. 409985 1. 261353 2. 806189 1. 739002 2. 321983  
4. 592382 5. 346221 5. 000243 5. 619874 5. 482352 5. 015656 4. 532106 4. 555572 4. 877375  
2. 680687 3. 349408 4. 194187 4. 636911 3. 373742 4. 030644 2. 806619 4. 258562 2. 996081  
4. 188727 4. 924814 4. 589032 5. 137328 5. 705904 5. 124701 5. 327575 4. 43953 4. 732634  
3. 725517 5. 457046 3. 458076 5. 016039 5. 330246 4. 757439 4. 264129 4. 521827 4. 98795  
8. 937497 9. 485177 9. 252467 8. 895151 9. 423536 9. 000576 8. 696422 9. 185807 9. 149543  
1. 838938 2. 097084 2. 091554 1. 763268 2. 341135 1. 51182 1. 894675 1. 918673 1. 513774  
1. 028396 1. 523439 1. 367058 1. 37042 1. 440193 1. 207562 0. 909978 1. 117884 1. 160431

5. 309017 5. 933964 5. 712394 5. 712445 5. 180743 5. 96996 4. 525005 5. 246928 4. 634337  
5. 85186 6. 913159 6. 834855 7. 329292 6. 912788 6. 227176 6. 887772 6. 47922 7. 034277  
6. 294057 6. 459218 6. 163293 6. 537704 6. 916136 6. 038205 5. 928738 6. 399205 6. 266128  
1. 543258 1. 489983 1. 403356 2. 414799 3. 155548 1. 317448 2. 664129 3. 069068 2. 200813  
6. 684839 7. 777094 7. 44771 7. 188729 7. 262052 6. 503027 7. 882906 7. 418297 7. 113209  
6. 173559 6. 31237 6. 122194 6. 140899 5. 846862 5. 550522 5. 875271 5. 77122 5. 801442  
4. 631512 5. 374427 5. 766897 6. 437497 6. 205995 5. 784681 5. 34062 5. 539791 5. 889891  
2. 68239 3. 464342 2. 831659 3. 769454 2. 736136 3. 0154 3. 029692 3. 743405 2. 901671  
3. 199854 2. 066565 2. 762597 2. 831106 2. 897812 3. 795317 2. 831623 2. 713431 2. 661854  
3. 457881 2. 568477 3. 366021 3. 414284 2. 93641 3. 395856 3. 427703 2. 481003 3. 702567  
7. 075481 7. 434045 7. 150943 7. 375547 7. 332011 7. 234968 6. 869008 7. 014499 7. 108393  
5. 461975 5. 619601 5. 839891 5. 033299 6. 053721 6. 081123 5. 175846 6. 486466 5. 853556  
4. 240343 5. 531411 5. 375376 4. 470311 5. 489922 5. 465701 5. 453793 5. 722359 5. 03192  
2. 621003 4. 831673 3. 569531 3. 631713 4. 220153 4. 148073 4. 048988 4. 025343 4. 004541  
6. 639024 6. 281611 6. 47626 6. 669476 6. 035441 6. 148694 6. 325272 6. 419655 6. 575401  
4. 29542 3. 662486 3. 361327 3. 915783 3. 293124 3. 397951 4. 191784 3. 91127 2. 934491  
3. 11819 2. 38855 2. 977697 3. 103324 2. 64817 3. 008328 2. 497402 3. 319145 2. 221979  
7. 890918 7. 710646 7. 286834 7. 775577 8. 301198 7. 781149 8. 073148 7. 831729 7. 464988  
2. 774853 2. 06132 2. 50117 2. 312791 1. 960289 2. 860569 2. 246397 2. 723937 1. 919953  
7. 201776 6. 824465 6. 766597 6. 321528 6. 709246 6. 964531 6. 742546 6. 857522 6. 776992  
1. 976269 2. 301152 1. 778526 1. 872707 2. 393492 1. 677635 1. 808055 1. 978652 1. 694854  
1. 219957 0. 751004 1. 709464 2. 566972 1. 278959 0. 929086 0. 962681 1. 695863 3. 19622  
6. 981273 6. 409114 6. 148276 6. 201317 7. 135798 6. 295437 6. 938355 6. 418447 6. 249568  
6. 090646 6. 465047 6. 204747 6. 278535 6. 424899 6. 450173 5. 585336 6. 987847 6. 194883  
2. 03523 1. 35498 1. 580968 2. 401623 1. 740937 1. 944152 1. 25699 1. 397905 1. 465164  
4. 929648 4. 438795 4. 383044 3. 806863 4. 619241 4. 061441 4. 19049 4. 286789 4. 705762  
2. 800083 3. 68239 2. 120854 1. 734406 1. 98235 2. 377011 1. 760076 2. 753325 4. 075029  
1. 917172 2. 724794 2. 616832 1. 717356 3. 034917 2. 13771 1. 936838 1. 349872 2. 883428  
5. 450377 5. 714881 5. 431494 5. 264554 5. 581334 5. 600892 5. 19556 5. 75003 5. 462715  
1. 447164 1. 402169 1. 452189 2. 076026 1. 267161 1. 129876 1. 700911 2. 567116 2. 124501  
2. 559365 3. 006122 3. 083806 2. 512053 1. 925161 2. 688939 2. 845969 2. 676188 3. 049605  
1. 934187 1. 642164 1. 776898 1. 50642 1. 483451 1. 865766 1. 800024 1. 815423 2. 133963  
3. 803586 5. 767361 4. 887417 5. 180414 6. 166141 5. 974833 4. 530104 4. 880794 5. 139705  
9. 18825 8. 619602 9. 074559 8. 791367 8. 764253 9. 483129 8. 604269 9. 077281 9. 065605  
5. 071495 3. 686605 4. 175952 2. 832024 3. 553685 3. 022557 4. 153248 4. 347103 4. 429335  
5. 557001 5. 320534 5. 149294 4. 265704 6. 314865 6. 051822 5. 267261 5. 308001 6. 024577  
5. 312502 5. 966222 6. 539777 5. 857531 5. 349658 5. 844855 5. 662994 6. 115243 5. 679807  
2. 803752 3. 533559 3. 093461 4. 863255 3. 741665 3. 596953 2. 287158 3. 87571 4. 115817  
7. 204692 6. 301157 7. 356998 5. 659025 6. 278223 5. 72137 6. 722689 6. 476305 7. 816014  
3. 604607 3. 789197 3. 589266 3. 820147 3. 665076 3. 213767 3. 067265 3. 250045 3. 398282  
4. 078158 3. 382276 3. 192635 3. 889939 3. 540932 3. 456191 3. 338077 3. 724383 3. 293608  
1. 541096 1. 202457 1. 45099 1. 386346 1. 421729 1. 408043 2. 287255 1. 574629 1. 918286  
4. 060246 2. 286783 3. 247644 5. 131292 4. 854327 6. 459827 3. 706011 6. 903903 6. 286896  
7. 077549 4. 543569 5. 546376 2. 677624 3. 587001 3. 22507 3. 749993 3. 724614 6. 464115  
3. 288701 4. 492951 3. 547818 3. 792129 4. 874184 3. 873078 3. 118633 4. 594605 3. 082673  
2. 224817 3. 502777 6. 619984 3. 715408 3. 931354 5. 497305 2. 036113 4. 275868 4. 282391  
4. 859544 5. 820608 5. 340655 5. 874122 5. 186112 5. 662122 4. 721313 6. 196196 4. 679156  
3. 752745 3. 762205 5. 805639 5. 97605 5. 064232 4. 779936 4. 874408 5. 261647 4. 58244  
6. 016017 7. 073852 7. 421981 6. 285125 6. 994403 6. 842833 6. 835168 6. 885668 6. 67439  
5. 810108 6. 075991 5. 990773 6. 240712 6. 294142 6. 71866 5. 145221 6. 655188 6. 084076  
4. 022535 3. 960854 3. 872318 3. 945741 4. 338644 4. 134954 3. 570018 4. 204972 3. 994545

2. 218466 2. 531544 1. 855815 3. 407759 2. 959402 4. 264059 3. 528474 3. 117479 2. 563053  
4. 859242 5. 176121 5. 908024 3. 037185 4. 039622 5. 366375 3. 78621 4. 637739 3. 857662  
6. 562023 7. 803078 7. 201133 6. 930266 7. 729993 6. 649136 7. 674076 7. 40578 7. 593134  
4. 616136 3. 571221 4. 146738 3. 588562 4. 412869 3. 501831 3. 413814 3. 179941 3. 496459  
5. 598835 6. 467823 6. 182787 6. 66161 5. 749074 6. 276398 6. 34767 5. 757483 5. 993358  
2. 776998 3. 007786 4. 547454 4. 841274 3. 607555 3. 323178 4. 082596 4. 418757 3. 436639  
3. 149826 4. 629751 4. 121938 4. 751046 4. 153522 4. 025798 4. 985912 4. 607671 4. 48655  
1. 868081 1. 640241 1. 785526 1. 582375 1. 227014 3. 016204 3. 022901 2. 368518 1. 896852  
1. 070212 1. 627617 0. 953518 1. 537442 1. 374764 1. 409841 1. 469237 1. 524078 0. 977632  
2. 592283 2. 151243 2. 421055 2. 234967 2. 296881 2. 297653 2. 343021 2. 273384 2. 199249  
2. 314999 1. 741466 1. 661007 2. 901581 2. 0321 2. 619096 2. 089799 1. 542126 1. 939626  
4. 517137 5. 238104 4. 575488 4. 660204 4. 915164 4. 606175 4. 649945 5. 034175 5. 00068  
2. 335427 3. 464716 3. 58669 2. 552714 3. 240121 3. 991181 3. 668588 3. 017051 2. 925329  
4. 324845 4. 79233 4. 522003 2. 72457 4. 593581 4. 903623 3. 259308 5. 939268 3. 365344  
4. 705276 5. 530996 5. 115352 5. 189199 5. 949473 5. 330329 5. 243325 5. 377246 4. 925252  
6. 976673 7. 058802 7. 286522 7. 752016 7. 454823 7. 358949 6. 676518 6. 768204 7. 3912  
7. 973305 8. 380914 8. 122749 7. 46058 8. 148169 7. 940878 7. 809261 8. 343278 8. 221331  
6. 079172 6. 429839 6. 575047 6. 076454 5. 738874 6. 834621 5. 903827 6. 24647 6. 145126  
6. 685265 4. 820863 5. 639322 4. 235387 5. 405992 4. 072912 5. 095038 5. 626135 5. 589413  
5. 222436 5. 68818 6. 308703 5. 546954 5. 032569 6. 04538 5. 08611 6. 359139 5. 386478  
3. 040918 2. 630286 1. 843012 2. 737293 2. 44707 2. 106701 1. 601828 2. 269686 1. 816786  
4. 231058 2. 348279 2. 47917 1. 627811 1. 889626 1. 618855 2. 39152 1. 970688 3. 632481  
2. 584626 2. 175437 2. 341606 1. 633721 1. 878539 1. 379436 3. 015025 1. 821437 2. 110507  
5. 362611 4. 937504 5. 774843 4. 813718 5. 369952 5. 026641 5. 662418 5. 660944 5. 951583  
2. 512267 4. 696629 3. 812919 2. 632703 3. 038176 4. 261381 3. 339227 2. 924034 2. 504622  
2. 978818 5. 446678 6. 285666 5. 131943 5. 376716 6. 389841 7. 356566 7. 51848 6. 284267  
1. 177359 2. 62577 2. 444772 3. 388715 1. 876825 1. 599338 1. 744515 1. 311132 1. 686446  
5. 577209 4. 834295 5. 007148 5. 463196 5. 310988 4. 330485 4. 636074 4. 968516 4. 55302  
2. 971007 4. 99721 4. 009481 3. 742422 3. 787576 3. 362807 4. 126532 3. 936754 3. 661274  
4. 633081 5. 860201 5. 531801 5. 121584 5. 105599 5. 198116 5. 863029 5. 084674 4. 992621  
8. 263761 9. 022814 9. 022213 9. 149712 8. 9446 8. 966749 8. 697607 8. 318357 8. 73596  
4. 712523 5. 126741 5. 112018 4. 683024 5. 029303 5. 408984 4. 463749 5. 146516 4. 743611  
4. 016066 4. 95413 4. 445247 5. 07839 4. 476621 4. 425711 3. 797109 4. 025906 4. 1174  
2. 744857 3. 116861 2. 630975 2. 102048 1. 994096 2. 676065 2. 774575 2. 498268 2. 694776  
4. 680822 4. 146614 4. 644765 3. 814157 3. 834831 3. 89246 2. 549931 3. 975169 3. 474008  
2. 111469 1. 335513 0. 790899 1. 278915 0. 963165 2. 144999 1. 30269 1. 786787 1. 153755  
1. 927167 1. 956566 1. 256033 1. 45373 1. 799765 1. 865735 2. 553616 0. 917875 1. 30336  
1. 5402 3. 472345 2. 68084 1. 447751 2. 296285 2. 617043 2. 05112 2. 126145 2. 608113  
6. 601074 7. 881198 7. 476082 6. 926934 7. 528139 7. 432749 7. 757458 7. 868253 7. 305769  
2. 952337 4. 280208 3. 870433 4. 529904 4. 82565 4. 250779 4. 078018 4. 553341 4. 555916  
2. 09929 1. 882204 2. 398621 2. 145275 2. 221291 2. 751662 2. 97771 2. 230896 2. 416176  
5. 787995 5. 532592 6. 6196 6. 350071 6. 377618 5. 476445 6. 255316 5. 910236 5. 410933  
4. 020181 4. 589251 4. 047623 3. 756517 4. 25459 3. 670385 4. 269362 5. 091391 3. 480357  
1. 695092 1. 894152 1. 28122 2. 507511 2. 652402 1. 636842 2. 005824 2. 012212 1. 726021  
8. 033372 8. 494025 8. 684171 7. 921537 1. 436111 7. 592994 8. 161803 8. 637973 2. 875894  
8. 076308 8. 139029 7. 41814 7. 387963 7. 715576 7. 50871 7. 756643 8. 300554 7. 781706  
3. 213226 2. 887134 2. 712757 3. 005563 2. 782335 3. 542316 2. 712536 2. 852759 3. 678845  
3. 002789 2. 924424 2. 13754 2. 248568 1. 797022 2. 735003 2. 552484 2. 802478 1. 592188  
2. 333939 2. 563658 2. 483113 2. 332657 1. 849313 2. 618201 2. 325023 1. 794923 2. 406092  
7. 703619 7. 441569 7. 40999 7. 469375 8. 113823 7. 782407 7. 616124 7. 839493 8. 128939  
6. 106779 5. 621382 6. 019349 5. 422243 5. 363463 6. 011218 5. 814825 5. 501685 5. 461515

4. 886816 5. 91435 5. 482001 5. 791417 5. 996953 5. 702378 6. 047821 6. 048979 5. 524486  
4. 971082 5. 224214 4. 594957 4. 686669 4. 728489 5. 229013 5. 026244 4. 666183 4. 734281  
4. 361423 4. 758958 5. 039524 4. 918571 4. 628946 5. 21958 4. 034115 3. 751457 4. 91322  
5. 955813 6. 716933 6. 165434 6. 718067 7. 015234 6. 090689 5. 894433 6. 35597 6. 385192  
6. 551809 7. 396174 6. 831123 7. 621403 7. 176523 7. 911052 7. 194959 6. 980947 7. 193705  
4. 752696 5. 75653 5. 797386 4. 714041 5. 259801 5. 291134 5. 334678 5. 615257 5. 442101  
4. 213789 4. 294099 4. 600438 4. 27673 4. 284332 4. 397038 4. 311956 4. 607623 3. 927223  
2. 554449 1. 954378 1. 942584 2. 081372 1. 870798 2. 178752 1. 921254 2. 169938 2. 576101  
2. 13282 1. 858502 1. 762649 2. 709018 2. 14086 2. 022149 1. 981072 2. 196688 1. 567705  
5. 970441 6. 432623 6. 028546 6. 687832 6. 747397 6. 08137 5. 859835 6. 60918 6. 78836  
2. 11489 5. 263161 3. 829304 3. 225755 4. 201017 4. 427409 4. 741853 3. 809912 3. 507026  
1. 32459 1. 24702 1. 196263 1. 334453 1. 687595 1. 460022 2. 676065 1. 512055 1. 196914  
3. 321881 2. 508858 2. 229537 2. 519232 2. 217007 1. 766929 2. 917844 2. 83579 2. 139339  
1. 806328 2. 004365 2. 017903 1. 602606 1. 921309 2. 180963 2. 903201 2. 292543 1. 727719  
4. 342423 4. 648846 4. 182324 3. 482006 3. 752496 3. 449872 4. 140881 4. 644067 5. 067198  
2. 326422 2. 434891 2. 561452 1. 689842 1. 634967 2. 537737 1. 937081 2. 072099 1. 607984  
5. 138582 4. 811067 4. 407728 4. 707796 5. 389429 5. 058704 5. 108916 5. 634474 5. 4895  
7. 026345 6. 362795 6. 607957 5. 774104 6. 638936 5. 987909 6. 151514 6. 219541 6. 126619  
4. 983972 5. 651742 6. 180236 6. 251606 6. 745989 6. 385662 5. 800838 6. 319772 6. 183668  
4. 661223 4. 591672 4. 290225 4. 926588 4. 446148 4. 802817 2. 857088 4. 388234 3. 79795  
6. 361211 7. 110584 7. 097993 6. 929436 7. 563896 7. 453649 7. 301137 7. 010338 6. 819151  
3. 819185 5. 595205 4. 452125 5. 110183 4. 584117 5. 318391 4. 798808 4. 92474 3. 569724  
6. 136642 4. 392131 5. 50782 4. 430371 4. 540659 3. 851152 4. 098733 5. 295668 6. 069686  
3. 962319 4. 377059 4. 481856 4. 416647 4. 116961 4. 035871 3. 6996 3. 626335 3. 816552  
2. 968697 3. 042117 2. 970511 2. 266669 2. 815373 2. 66482 3. 029968 2. 66243 2. 795212  
3. 73134 3. 794674 3. 807498 3. 794607 3. 253825 2. 545457 4. 401688 3. 850907 3. 170324  
1. 48599 0. 980961 0. 749622 1. 125573 0. 64505 2. 55519 1. 451146 1. 032972 1. 161819  
5. 639802 6. 360271 6. 792541 6. 551347 6. 048318 6. 002649 5. 856337 6. 054527 6. 522305  
2. 704372 2. 87473 1. 707842 1. 415597 2. 180527 1. 340221 2. 288581 1. 586913 1. 632792  
1. 336053 1. 590028 1. 479514 1. 653394 1. 819511 1. 502861 1. 308833 1. 32243 1. 681531  
4. 474001 5. 542891 4. 966415 5. 698373 4. 737893 5. 686211 5. 778471 6. 135275 5. 858473  
4. 894357 4. 627702 4. 591008 5. 254204 4. 839239 5. 338841 4. 443174 4. 718541 4. 79048  
5. 535686 6. 562246 6. 011006 6. 096107 6. 208192 6. 726086 6. 481148 6. 553695 5. 195064  
5. 214931 2. 180615 2. 763522 2. 776757 3. 258772 3. 028633 3. 401482 3. 341529 3. 928818  
4. 574237 5. 636189 5. 693713 5. 278479 5. 708178 5. 164029 4. 470605 5. 519669 4. 834461  
4. 66286 2. 837271 3. 049749 3. 183719 3. 937283 3. 892518 3. 264417 4. 007957 3. 84705  
6. 006026 6. 368324 6. 332584 6. 167242 6. 102681 5. 975205 6. 225867 6. 13962 6. 109134  
6. 600347 6. 051897 5. 827828 6. 262124 6. 049677 6. 263408 5. 738129 6. 349464 5. 869707  
3. 072994 3. 470476 3. 914468 3. 153715 2. 873643 3. 767565 3. 176497 4. 158598 2. 612685  
2. 183423 1. 121584 1. 164677 1. 732722 1. 348378 1. 401069 1. 317694 1. 186808 2. 231271  
8. 662089 7. 926622 8. 095817 8. 369086 8. 11431 8. 050772 7. 954898 7. 516554 8. 097239  
2. 973299 4. 188875 3. 396507 3. 305588 4. 125729 4. 166689 2. 925748 3. 256912 3. 484038  
2. 208485 1. 975964 1. 970006 1. 877964 2. 203158 2. 026425 2. 606906 1. 629554 2. 463146  
1. 87755 1. 774722 2. 787321 3. 25585 2. 033259 3. 543764 3. 001929 3. 305766 2. 825944  
5. 945077 6. 163361 6. 658359 6. 340505 6. 265555 6. 218184 5. 498852 6. 448677 6. 27397  
1. 275602 1. 414251 1. 821618 1. 286942 1. 281978 1. 301302 1. 503069 2. 141539 2. 137419  
2. 575985 1. 830549 2. 743726 2. 137813 1. 915306 1. 986035 2. 048136 3. 072584 1. 559895  
2. 547449 1. 466737 1. 394511 1. 445039 1. 876047 0. 723932 1. 891257 2. 021602 1. 531927  
1. 305563 2. 399811 2. 480327 1. 999395 1. 922505 2. 45625 2. 560657 1. 928698 1. 627513  
1. 385119 1. 279031 2. 007238 2. 41039 2. 137732 1. 695925 2. 045647 1. 822398 1. 457513  
4. 10885 4. 091326 4. 49295 4. 256224 4. 365846 4. 416887 4. 316787 4. 837516 4. 028345

5. 970541 4. 084997 3. 403523 3. 269858 3. 327477 4. 69258 4. 203176 3. 448716 5. 380957  
9. 014651 7. 937404 8. 398328 7. 621335 7. 709142 7. 306864 7. 746698 7. 743815 8. 937663  
3. 689876 3. 932023 3. 820264 3. 549948 3. 539202 2. 898768 3. 77984 3. 441754 2. 492149  
7. 560856 8. 268479 7. 551422 8. 773357 8. 805844 8. 15911 9. 313619 8. 363624 8. 802266  
4. 99155 5. 262616 5. 628363 4. 977446 5. 386265 5. 134993 4. 900917 5. 120209 5. 14668  
6. 607939 6. 785407 6. 606845 7. 230158 6. 386448 6. 448475 6. 361699 5. 974149 6. 053971  
7. 661959 7. 958202 7. 663141 7. 601148 7. 562951 7. 91382 7. 864349 7. 539673 7. 472728  
4. 35428 5. 395523 4. 65662 5. 040663 5. 124168 4. 634786 5. 858404 4. 061009 5. 028205  
4. 082791 3. 283736 4. 14056 3. 515362 3. 415192 2. 925819 2. 858218 2. 626045 2. 88002  
4. 153721 4. 878423 4. 070276 3. 890633 3. 762558 5. 018926 4. 013892 4. 864288 4. 207634  
4. 102879 4. 314175 4. 658244 4. 769019 4. 495787 5. 599659 4. 327228 4. 825331 4. 980739  
3. 868427 5. 584959 5. 791092 4. 849931 5. 384567 4. 160653 5. 031853 5. 571629 5. 15649  
6. 067086 6. 611808 6. 518321 6. 152969 5. 039479 6. 153535 5. 544927 6. 438647 6. 442802  
5. 102902 6. 000712 5. 812254 5. 638426 6. 303065 5. 761234 5. 2515 5. 089165 4. 907358  
2. 309087 1. 881467 1. 815286 2. 132401 1. 625684 2. 131206 2. 413423 2. 112798 1. 785039  
3. 571088 4. 238295 4. 92782 3. 684313 4. 792794 4. 62422 3. 542387 3. 558135 3. 866025  
8. 027221 7. 650313 7. 691791 7. 855523 7. 455084 7. 955734 7. 221698 8. 052372 7. 635503  
8. 148402 8. 28721 8. 150404 7. 905104 8. 546382 8. 463192 8. 339957 8. 586738 7. 744009  
3. 284877 2. 631531 2. 487249 2. 457413 1. 899175 1. 964756 2. 210387 2. 1341 1. 706574  
2. 674487 2. 116326 3. 034119 2. 642386 3. 074352 3. 217287 4. 422333 3. 172056 3. 545935  
7. 038435 5. 79732 6. 564859 5. 823083 6. 406725 5. 889296 6. 444107 6. 591669 7. 422578  
2. 588166 2. 298925 2. 647041 2. 169695 2. 402523 2. 617526 2. 435879 3. 184906 1. 974764  
2. 885799 4. 260022 2. 967147 3. 353571 3. 552836 4. 164377 2. 809674 4. 500612 3. 356559  
1. 394688 2. 386722 2. 791636 1. 677065 3. 113311 2. 066699 1. 947094 1. 892507 2. 537899  
3. 349201 4. 248763 2. 836112 4. 578745 3. 274448 4. 581778 2. 750369 3. 717009 3. 962079  
2. 790769 3. 132822 6. 290419 1. 553421 2. 013087 4. 944438 1. 352866 0. 704531 4. 864268  
1. 364581 1. 622141 1. 313924 2. 113818 2. 667175 3. 003804 1. 951652 2. 042558 1. 668092  
6. 691094 7. 405729 7. 259147 7. 264953 7. 596022 7. 315941 7. 513386 7. 329314 7. 372388  
8. 475352 7. 353502 7. 612443 7. 930628 7. 073667 6. 975434 6. 889291 6. 742013 7. 779285  
7. 800662 8. 007798 7. 545955 8. 310116 8. 210013 8. 218585 8. 028615 8. 518212 7. 848594  
3. 656824 3. 949849 3. 813018 3. 312569 3. 817865 4. 118862 3. 384547 3. 450427 3. 754285  
2. 325446 2. 445169 2. 390588 2. 687096 2. 622292 2. 129907 2. 426109 2. 667364 3. 339795  
4. 5729 4. 83851 4. 224413 4. 093539 3. 713017 4. 894643 4. 790204 4. 652398 4. 392352  
2. 003673 1. 957717 3. 230032 2. 364781 2. 907728 3. 42376 1. 960867 2. 974286 2. 685021  
4. 864044 4. 910999 4. 976072 4. 350625 4. 223522 4. 794448 4. 007725 4. 401548 4. 728554  
1. 456582 1. 374571 1. 377777 1. 317562 2. 320451 2. 359584 2. 47999 1. 128581 1. 415903  
7. 076585 6. 520487 6. 505078 6. 598133 6. 236757 5. 861714 6. 376544 6. 055888 6. 685086  
5. 946434 5. 530949 5. 185026 5. 897918 6. 049114 6. 091131 5. 805745 6. 139818 4. 931433  
3. 22154 3. 466187 3. 711358 2. 738343 1. 313732 3. 530939 3. 069718 3. 97909 3. 82148  
4. 124993 4. 842011 4. 599036 6. 166358 4. 483392 4. 835263 4. 846338 4. 7476 4. 87572  
3. 079215 2. 610878 3. 266304 1. 764307 4. 289113 4. 452745 3. 754101 3. 929209 2. 596775  
3. 222362 2. 843034 3. 312181 4. 302382 2. 821516 1. 995919 3. 869132 2. 922434 2. 526265  
1. 397373 1. 290958 1. 206162 1. 133243 1. 468771 1. 607306 1. 237466 2. 865258 1. 460345  
2. 099772 3. 093245 2. 559203 2. 719483 2. 262735 2. 07702 3. 068224 2. 784628 2. 38443  
2. 024962 2. 120591 2. 491944 1. 970563 2. 281189 3. 008113 2. 630831 3. 216101 1. 861515  
2. 192346 1. 438792 1. 774278 1. 909648 2. 411283 1. 927017 2. 240282 1. 973014 1. 923436  
5. 20065 5. 544989 5. 106542 6. 053408 5. 505657 5. 114551 4. 650067 4. 21777 5. 23765  
8. 812812 8. 826584 8. 731323 8. 567997 9. 082683 8. 8551 8. 775481 8. 993416 8. 706597  
2. 682724 2. 191965 3. 259139 2. 217473 1. 938629 3. 364691 3. 308626 2. 032331 2. 817898  
6. 82166 7. 041428 7. 119339 6. 946944 7. 23629 6. 977967 6. 7086 6. 921543 7. 174234  
4. 409071 3. 277232 3. 447183 3. 808797 3. 118778 3. 771891 4. 193971 3. 589719 3. 323102



3. 208272 3. 426975 4. 274105 4. 012997 3. 747232 4. 72215 4. 045452 4. 038854 3. 653964  
1. 801558 3. 247879 1. 845451 1. 960829 2. 551952 1. 630501 1. 035767 2. 495194 3. 302193  
3. 932999 5. 142746 5. 229458 4. 469312 4. 222651 5. 500734 4. 450298 4. 879589 4. 458818  
6. 52391 7. 4102 7. 048442 7. 056765 7. 247727 7. 121839 7. 036084 7. 172032 6. 905097  
3. 898863 3. 013284 2. 789466 3. 584916 3. 297023 3. 368601 3. 164515 3. 245071 4. 088651  
5. 320879 5. 641291 5. 354542 4. 819703 5. 367302 5. 961063 5. 025504 5. 310453 5. 497136  
2. 434715 2. 434923 2. 970725 2. 173506 3. 106279 4. 102499 3. 612557 2. 508467 2. 892844  
3. 000897 3. 049796 2. 927815 3. 047085 3. 759593 3. 173504 2. 939674 2. 995219 2. 802356  
4. 182205 4. 149933 3. 70768 3. 548561 3. 517133 3. 582778 3. 868417 3. 80596 4. 236442  
4. 355453 4. 612321 4. 525925 4. 213883 4. 853045 4. 895577 4. 323319 4. 564432 3. 194694  
4. 596706 5. 107751 5. 191762 4. 672469 5. 598804 5. 428949 4. 486442 4. 554626 5. 484098  
2. 180308 1. 576254 1. 99582 1. 33666 1. 89021 1. 332934 1. 574647 1. 890535 2. 359175  
1. 897524 2. 01662 2. 155408 1. 787875 1. 883123 1. 762582 1. 72889 1. 847242 2. 315595  
4. 196181 5. 199781 4. 592617 5. 871361 5. 633745 7. 280611 4. 287729 6. 890034 4. 505588  
3. 829022 2. 647516 3. 218916 2. 323229 2. 144879 1. 805488 2. 2171 3. 636402 2. 738865  
1. 801008 1. 132878 1. 321524 1. 275098 1. 048181 1. 375042 2. 016533 0. 966672 1. 330364  
4. 122812 3. 007669 3. 89697 3. 19187 3. 365668 3. 553419 3. 356241 3. 602403 3. 818943  
1. 575566 1. 816763 1. 748224 2. 747707 2. 333737 2. 251299 1. 887127 1. 986391 1. 652787  
4. 151306 4. 559315 5. 218431 4. 246048 4. 907321 4. 776496 5. 049641 4. 718608 5. 173167  
5. 464828 6. 477518 6. 14694 6. 12608 6. 510702 6. 100679 6. 38417 6. 37282 6. 279086  
3. 296538 3. 346262 3. 609834 3. 702261 3. 375482 3. 328615 2. 82065 3. 094644 3. 679559  
7. 149697 7. 046922 6. 999977 7. 313893 7. 288893 6. 688693 8. 109596 7. 185587 7. 562527  
3. 792255 4. 785329 3. 541264 5. 69202 4. 162133 4. 017786 4. 989319 4. 226439 4. 03377  
4. 625589 2. 782039 3. 24273 2. 542769 2. 94384 4. 854641 3. 4987 2. 116222 2. 172369  
4. 829566 5. 411461 5. 767511 5. 323455 5. 828313 5. 072231 4. 377288 5. 677081 5. 015024  
2. 214946 4. 087485 3. 497157 5. 328921 4. 123642 3. 929587 3. 462064 3. 923023 3. 914007  
3. 083106 2. 280755 3. 0078 3. 070819 2. 627121 3. 28187 2. 881169 2. 150115 2. 48734  
2. 985436 3. 115681 2. 969754 2. 362249 2. 192007 2. 358966 1. 893639 2. 179504 2. 96703  
3. 812224 5. 604572 5. 254077 6. 025951 5. 730641 4. 863415 5. 213143 5. 386928 5. 534789  
2. 351809 1. 454248 1. 467091 1. 683225 0. 902952 1. 409111 1. 574973 1. 997934 1. 309087  
1. 841817 1. 554738 1. 851744 1. 713973 1. 418798 1. 576296 1. 434665 1. 591111 1. 769105  
6. 485685 4. 72977 5. 018941 4. 769872 4. 510794 5. 171267 5. 313961 4. 585851 5. 557419  
4. 775243 5. 190412 4. 576245 4. 620488 4. 584986 4. 937743 5. 115628 4. 906875 5. 384288  
4. 341244 3. 934962 4. 484834 4. 058687 3. 797244 3. 718386 4. 623794 3. 80238 4. 514063  
2. 264146 1. 953364 2. 511746 2. 744112 2. 083315 1. 958059 2. 668391 2. 531967 2. 266974  
7. 840815 7. 500592 7. 374556 8. 024364 8. 103366 8. 1458 8. 065824 8. 329241 8. 374681  
5. 825502 4. 841363 4. 273013 4. 527528 4. 778728 4. 621632 5. 496368 4. 950871 4. 636884  
6. 598415 7. 179203 6. 971213 7. 018497 7. 058341 7. 020084 6. 53473 7. 252699 6. 974221  
8. 647848 8. 786224 8. 979682 8. 653419 8. 613187 8. 535098 9. 083987 8. 858264 8. 855877  
1. 67432 2. 304 1. 932775 1. 991185 1. 840299 2. 319034 1. 895012 2. 405079 2. 388604  
3. 570839 3. 142325 3. 072952 3. 122454 3. 62825 4. 013079 3. 708029 2. 935013 3. 223285  
8. 532663 8. 294248 8. 286696 8. 269206 8. 102208 7. 74235 8. 421585 8. 691805 8. 330192  
10. 03042 10. 55946 10. 32046 10. 6014 10. 91589 10. 29774 11. 02666 10. 89978 10. 5428  
5. 529211 6. 077289 4. 964656 5. 178389 5. 811775 4. 604744 5. 17644 5. 765091 4. 650036  
2. 069963 1. 108735 1. 320375 1. 405883 2. 20275 2. 571587 2. 965262 1. 655892 2. 370788  
7. 070331 7. 449523 7. 368984 7. 048104 7. 346786 7. 351865 7. 045122 6. 94484 6. 983621  
2. 207281 1. 4266 1. 448707 1. 888434 1. 278868 2. 730974 2. 588062 1. 312331 1. 501677  
7. 735107 4. 478711 5. 250225 3. 80765 4. 552818 3. 49327 4. 447029 5. 200426 5. 705778  
3. 020218 3. 318239 3. 107718 2. 644887 3. 089107 3. 513271 2. 970515 3. 952911 3. 156596  
2. 650787 1. 646722 2. 622086 2. 613238 2. 24087 3. 715145 1. 917749 2. 705869 1. 492297  
3. 523509 2. 550013 2. 125894 1. 831446 2. 136581 2. 160309 1. 591359 2. 030897 2. 248301

8. 565621 8. 051879 6. 846783 9. 038505 9. 058714 8. 075646 7. 612872 7. 272435 8. 907777  
6. 437858 6. 905577 7. 203556 7. 37882 7. 222545 7. 418157 6. 254505 7. 313972 6. 910252  
3. 820601 4. 693762 4. 954293 4. 540658 4. 538114 5. 051938 4. 174883 4. 952676 3. 733713  
6. 322956 4. 700493 6. 041727 5. 712054 6. 663259 6. 246671 5. 981717 5. 946502 6. 133342  
5. 696227 5. 117195 4. 072513 3. 838815 3. 684992 4. 550039 3. 784919 3. 711088 4. 543566  
4. 867168 5. 299725 5. 332305 5. 519824 5. 89667 4. 263112 4. 72535 5. 139595 5. 062893  
5. 687392 5. 394252 5. 439335 5. 72898 5. 848959 5. 835654 5. 800948 5. 200738 5. 431227  
5. 013634 4. 364535 4. 973879 4. 59477 4. 548628 4. 026844 3. 742969 4. 791017 5. 221284  
6. 940943 6. 706764 6. 663208 6. 446058 7. 022689 6. 399079 6. 639309 6. 786315 6. 657479  
3. 774638 5. 386238 4. 729395 5. 058933 4. 457971 5. 338664 3. 87378 5. 05429 4. 615154  
1. 827531 1. 518108 1. 756072 1. 202882 1. 480018 1. 605711 1. 537428 1. 451371 1. 50215  
4. 285413 4. 985834 5. 360892 4. 713669 5. 066136 5. 510748 4. 278781 4. 714202 4. 952193  
4. 15214 3. 715377 3. 889309 4. 527139 4. 116579 2. 623706 4. 023024 3. 562131 3. 704044  
2. 311696 2. 45076 2. 051147 2. 212725 2. 837258 2. 998667 2. 927197 2. 61025 2. 751008  
4. 764958 5. 082511 4. 459903 4. 831979 4. 171954 4. 884973 4. 66423 5. 199855 4. 663744  
5. 44892 6. 26951 5. 031453 6. 802114 6. 956965 5. 366467 6. 099991 6. 196014 6. 019191  
4. 908048 5. 30339 5. 423375 6. 50736 5. 68663 6. 462564 5. 881061 6. 004251 5. 649166  
3. 485662 4. 178862 3. 747494 5. 392738 4. 014147 5. 610457 4. 695517 4. 362224 4. 416023  
2. 384543 2. 194827 2. 538287 2. 544629 2. 27557 2. 006702 2. 454959 2. 343624 2. 250138  
3. 236042 3. 620765 2. 878036 3. 688446 2. 958496 2. 650242 2. 959766 2. 670306 2. 531778  
3. 397458 3. 390811 4. 048913 3. 406705 4. 156122 2. 598701 3. 136822 4. 298262 3. 456211  
4. 751777 4. 338807 4. 044639 4. 222696 3. 898893 4. 596823 4. 359246 3. 422824 4. 305238  
6. 855359 7. 252498 6. 982768 6. 989071 7. 407314 6. 88868 7. 152074 7. 077107 7. 186851  
7. 736705 7. 029541 3. 93306 8. 647857 8. 139485 7. 022285 7. 562249 7. 042518 7. 445211  
5. 867953 4. 573731 5. 427082 4. 288156 4. 920138 4. 218643 4. 543016 4. 238621 5. 580888  
5. 77835 5. 13314 5. 700082 4. 744254 5. 048098 4. 9669 4. 557447 4. 723727 5. 398094  
4. 288491 2. 131015 2. 797607 1. 923705 2. 657411 1. 899095 2. 520331 2. 491467 2. 485604  
5. 112759 5. 351082 4. 787147 4. 939125 5. 304388 5. 183853 4. 73557 6. 068499 5. 607357  
2. 689643 5. 385786 5. 001465 4. 849812 5. 278206 5. 661439 4. 283736 4. 252538 5. 631452  
3. 644363 4. 37922 4. 790049 4. 812342 4. 500425 4. 871964 4. 892766 3. 909496 4. 561533  
4. 920836 6. 16999 5. 97624 5. 911806 6. 427616 6. 277559 6. 185668 5. 859634 6. 050659  
2. 184459 2. 193186 2. 2115 2. 012509 2. 711406 2. 021306 1. 831384 4. 06761 1. 805543  
4. 608507 3. 499174 3. 76339 4. 325909 1. 96607 4. 490757 3. 000629 3. 521739 5. 237114  
4. 463498 5. 562434 4. 648944 5. 061452 5. 341459 5. 26986 5. 3958 4. 999015 5. 27906  
1. 929534 1. 114183 1. 292572 1. 154621 1. 194447 1. 610412 1. 100816 1. 590188 1. 711297  
6. 584477 6. 573429 6. 249182 5. 80714 5. 736689 6. 25813 6. 751201 6. 157085 5. 934696  
8. 090416 9. 083013 9. 095522 8. 679883 9. 250697 8. 889052 9. 268736 9. 190565 9. 683589  
1. 032382 0. 936759 1. 434477 1. 10073 0. 966727 1. 241685 1. 419161 0. 948064 1. 118814  
6. 859515 6. 581101 7. 037308 6. 003123 6. 34192 6. 42603 6. 312926 6. 658964 6. 615298  
3. 890665 3. 36376 3. 200922 3. 158437 3. 251078 3. 191839 2. 890997 2. 585766 3. 763997  
3. 697466 1. 77028 1. 706385 1. 602152 1. 783752 2. 38004 2. 292418 1. 74594 1. 604553  
2. 971024 1. 747984 3. 419374 2. 277628 2. 441672 2. 526218 4. 417436 2. 801756 3. 000378  
3. 261019 2. 453001 4. 268884 3. 369217 3. 767342 3. 65555 3. 996217 4. 159552 3. 652676  
2. 568152 2. 286609 2. 398771 2. 217821 2. 753087 2. 009139 4. 029281 3. 089171 2. 430283  
6. 405857 6. 568396 6. 671324 6. 218865 6. 584126 6. 597894 6. 405978 7. 088994 6. 647823  
3. 617749 3. 485524 2. 055199 2. 956964 2. 472996 3. 563987 2. 063259 1. 75514 1. 839832  
5. 792027 4. 920997 4. 162125 4. 712104 4. 172382 4. 839098 4. 838291 4. 734144 4. 716451  
4. 182529 3. 736424 2. 484555 4. 011462 3. 381055 2. 23097 3. 968358 3. 577634 3. 251415  
2. 375447 3. 641025 2. 567246 3. 472901 3. 147319 3. 465457 4. 460785 4. 172444 3. 417518  
5. 540208 4. 941238 5. 423362 5. 217658 4. 259398 4. 674971 3. 521687 5. 377695 5. 399631  
7. 32562 6. 605975 6. 685527 5. 936411 6. 178915 6. 785209 6. 815758 6. 51002 6. 509415

1. 33448 2. 379043 1. 386673 1. 819417 1. 287711 1. 398753 1. 639872 1. 495285 1. 291304  
6. 780947 7. 659569 7. 903262 7. 589318 7. 49127 7. 39714 7. 296167 7. 477431 7. 506457  
5. 238025 5. 657067 5. 635195 5. 272586 5. 275304 5. 349711 5. 358646 5. 365998 5. 746889  
6. 462351 6. 706898 6. 732694 5. 685516 6. 439396 5. 997687 6. 319329 6. 03613 6. 235427  
2. 759698 3. 932193 3. 286224 3. 31314 4. 254282 3. 739598 3. 041676 3. 539621 3. 288932  
3. 444362 3. 011375 4. 315162 3. 075411 3. 340556 4. 370224 2. 735683 3. 894729 3. 397445  
2. 887309 2. 297054 1. 979228 1. 982972 2. 06638 2. 643793 2. 269546 2. 875372 2. 113987  
4. 93075 6. 290975 6. 017852 5. 773602 6. 392069 5. 795222 5. 845458 6. 334458 6. 092663  
4. 742588 5. 901811 5. 486857 5. 717608 5. 745685 5. 705653 4. 500851 5. 6376 5. 803325  
5. 246053 5. 487248 5. 03754 5. 32558 5. 34563 5. 140743 4. 97136 5. 415412 5. 41943  
6. 063354 6. 306168 5. 694223 7. 485572 6. 01106 6. 580192 7. 187567 6. 742578 6. 713993  
4. 695067 5. 488029 4. 690517 4. 574871 4. 077185 4. 83123 3. 929715 4. 65224 5. 767911  
4. 247013 3. 910655 3. 959348 4. 209853 5. 047433 4. 449577 4. 729191 4. 49943 5. 271178  
5. 164199 5. 913201 4. 469157 4. 371396 5. 316223 4. 691478 3. 743999 5. 072262 4. 650821  
2. 237588 2. 456196 2. 464623 1. 567921 1. 763498 1. 402086 1. 894722 1. 779222 1. 788036  
2. 100637 1. 792368 1. 337992 1. 737215 1. 605994 2. 237025 2. 14643 1. 787589 1. 914074  
5. 15844 3. 745 4. 345053 4. 912415 4. 197458 3. 145314 3. 949487 3. 716739 4. 92858  
2. 848632 4. 446829 6. 426176 5. 207691 6. 264727 6. 068593 5. 876226 6. 765573 5. 626279  
2. 705555 2. 329939 2. 278574 1. 714048 2. 305573 2. 099914 1. 68013 2. 034763 1. 72931  
6. 8497 6. 497521 7. 184937 6. 123602 6. 873382 6. 936212 6. 666477 6. 986655 6. 988803  
7. 458425 8. 353043 7. 920106 7. 967864 8. 394424 8. 293297 8. 183698 8. 157448 7. 95746  
2. 89375 3. 109801 2. 001834 2. 76163 3. 449815 2. 120001 2. 778709 3. 42638 2. 258412  
6. 734483 7. 506549 7. 280326 7. 523112 6. 941986 7. 64098 6. 657415 7. 740647 7. 342028  
6. 083082 6. 66199 6. 978066 6. 823443 7. 310329 7. 515813 6. 746504 7. 991268 7. 190039  
8. 929109 8. 275336 8. 890598 8. 627972 8. 595862 8. 298988 8. 52639 8. 578958 8. 819409  
5. 05713 6. 40566 6. 634166 5. 963417 6. 367402 5. 551618 5. 841669 5. 503677 5. 343691  
6. 25485 7. 145648 7. 020875 6. 177069 6. 993228 6. 842937 6. 344871 6. 913636 7. 032061  
4. 752459 4. 242823 4. 20713 4. 699631 4. 916546 5. 256798 4. 657212 5. 155326 4. 848124  
7. 246276 7. 636215 7. 606683 8. 084122 7. 98264 7. 813196 7. 666047 7. 537935 7. 526559  
2. 832742 6. 142758 6. 825987 6. 354433 5. 579113 6. 800555 8. 574732 5. 816308 6. 560926  
6. 175396 6. 287365 6. 444584 6. 082953 6. 646594 6. 868491 6. 035855 6. 070895 5. 925415  
2. 567414 3. 085414 3. 204696 2. 483016 2. 897401 2. 625991 2. 794081 3. 501186 2. 408184  
1. 895548 2. 633225 1. 525343 1. 355734 2. 128623 2. 155354 1. 588745 1. 889836 3. 207032  
3. 087349 2. 051152 2. 107745 2. 666438 2. 763784 2. 360967 2. 549941 2. 213898 3. 087349  
5. 740519 6. 141936 5. 740395 5. 980875 5. 790563 6. 093018 5. 877128 5. 773645 5. 980512  
2. 598388 1. 185842 1. 112622 1. 86687 1. 287335 1. 075833 1. 451688 1. 243843 1. 741948  
4. 60332 4. 548972 4. 376953 4. 737643 4. 551317 4. 827791 4. 800754 4. 464037 4. 714082  
3. 521777 4. 242816 3. 514536 3. 912812 4. 469315 4. 650196 3. 414067 5. 115057 3. 918415  
5. 756804 6. 456655 6. 838353 6. 228926 6. 786288 6. 658985 6. 718492 6. 519145 5. 406553  
5. 530885 5. 581346 5. 830676 5. 585734 5. 866812 5. 163706 4. 694731 6. 055881 5. 52672  
6. 359671 6. 185148 5. 928308 5. 694047 6. 652444 6. 392073 5. 292833 5. 162333 6. 031528  
4. 753193 3. 565123 4. 33235 5. 238601 4. 846853 4. 773765 4. 727711 3. 947225 3. 441474  
1. 256778 1. 363432 2. 23344 1. 917881 1. 450631 1. 804851 2. 058657 1. 936407 2. 584647  
3. 961351 3. 541282 3. 57855 2. 442156 3. 357744 4. 484834 3. 318921 3. 528668 4. 237256  
6. 801418 4. 925427 4. 92491 4. 933272 5. 936768 5. 76557 6. 002778 6. 581612 5. 050192  
1. 633385 1. 276793 2. 158057 1. 687002 1. 773847 2. 021545 1. 977484 1. 996997 2. 34347  
2. 159587 2. 197344 1. 465202 1. 771623 2. 174583 1. 984971 1. 677314 1. 998276 2. 090909  
7. 968905 5. 11011 6. 68675 4. 61076 5. 28962 3. 0081 5. 629445 5. 190177 6. 872172  
2. 214501 2. 151229 3. 344472 3. 345039 2. 523183 1. 725514 2. 993183 2. 377138 3. 518201  
2. 092942 2. 50014 1. 83073 2. 107468 1. 517782 1. 308898 1. 669761 2. 097153 2. 314185  
1. 999606 1. 613417 1. 652977 1. 848361 1. 539782 1. 717447 2. 116142 1. 789719 1. 874696

4. 957459 5. 687342 4. 288934 5. 863649 6. 488954 5. 138923 5. 064266 6. 423456 5. 20443  
4. 145068 3. 809818 3. 748076 3. 60363 4. 006277 3. 828643 3. 953629 3. 839647 3. 8025  
7. 981971 8. 162071 7. 902073 8. 110111 8. 046827 8. 462682 7. 697581 8. 204831 8. 140916  
3. 590633 2. 121016 2. 861713 2. 688105 2. 251912 2. 601989 2. 75893 2. 775506 2. 315261  
5. 457322 5. 980847 5. 947322 5. 885434 6. 062416 6. 179095 6. 046947 5. 777946 5. 787835  
2. 130388 2. 524657 1. 512683 2. 077187 3. 097872 2. 298907 1. 830875 3. 690779 3. 671768  
2. 575488 4. 610121 4. 454849 4. 25523 4. 369106 4. 418301 2. 780751 4. 154509 4. 334946  
3. 478305 3. 671182 3. 191747 3. 334446 3. 790128 3. 211885 2. 578776 3. 215974 3. 220555  
6. 363195 6. 631254 6. 574371 6. 273428 6. 361473 6. 362357 5. 739156 6. 737813 6. 068264  
2. 298786 4. 066505 4. 05511 3. 756133 3. 69028 4. 257628 3. 221989 3. 105941 3. 719926  
5. 546707 5. 765048 5. 346634 5. 923918 5. 486633 6. 827321 5. 640844 5. 866069 5. 58189  
2. 508994 1. 753152 1. 698351 3. 048971 1. 8957 2. 628025 1. 52978 2. 191717 2. 138991  
3. 943438 2. 907578 3. 91692 3. 149026 3. 689724 4. 094643 3. 228361 4. 107743 4. 497904  
5. 637285 4. 979418 4. 742562 5. 344997 5. 648327 4. 702626 5. 829522 5. 870394 4. 944925  
3. 514433 2. 241271 2. 082504 2. 033596 1. 802916 1. 616407 1. 509103 3. 976383 2. 960634  
5. 757177 5. 085864 5. 084073 5. 302243 6. 13888 5. 563332 5. 797536 5. 257624 6. 224543  
2. 718307 2. 670068 3. 594598 2. 970397 3. 164558 3. 057538 3. 14743 2. 980113 3. 975078  
4. 939952 5. 527523 6. 093446 4. 714792 5. 463635 5. 155533 4. 720718 5. 494884 6. 187172  
3. 229955 1. 912521 1. 740761 1. 947041 1. 555074 1. 818358 1. 974238 1. 636025 2. 17606  
3. 822236 2. 844818 3. 708353 2. 857622 2. 720307 2. 345917 3. 95628 2. 787678 3. 211218  
6. 199104 6. 299733 6. 121248 6. 002644 6. 935769 6. 808267 5. 710813 6. 669079 6. 01255  
6. 45391 6. 570964 6. 806867 6. 628292 6. 73653 6. 445058 6. 2339 6. 833935 6. 455926  
1. 837059 2. 219521 1. 982006 2. 171993 2. 30861 1. 93892 2. 414715 2. 794093 2. 590659  
6. 814884 7. 375276 6. 883358 6. 339497 6. 725457 5. 636983 6. 965948 7. 974219 6. 982358  
3. 282041 4. 137275 2. 558072 3. 653055 4. 162273 3. 325864 4. 117283 4. 315255 4. 11171  
1. 878298 1. 861756 2. 001833 2. 038955 1. 88283 1. 957185 2. 285274 2. 179408 1. 563796  
2. 404525 1. 782985 2. 104296 3. 224148 1. 861158 2. 370729 3. 018677 3. 702785 1. 890908  
8. 022284 8. 268164 8. 302605 8. 765567 8. 572867 9. 150396 8. 387572 8. 662264 7. 710095  
2. 025418 1. 94174 1. 708869 1. 756641 1. 432644 1. 308513 1. 672705 1. 746435 1. 749806  
3. 14093 4. 703546 4. 190312 4. 112796 4. 055179 3. 9663 4. 215159 3. 977582 4. 503737  
2. 249388 2. 060979 1. 873085 2. 230076 1. 69168 2. 428044 3. 490491 4. 822231 2. 21595  
3. 046551 1. 87631 1. 709861 2. 587284 1. 926346 2. 300992 2. 422441 2. 004334 2. 098035  
9. 334502 9. 310848 9. 469762 9. 392858 9. 294181 9. 34614 8. 608672 9. 646948 9. 654598  
3. 251804 3. 056259 3. 264246 3. 133801 3. 089155 3. 288734 3. 179986 3. 101471 2. 398053  
4. 773736 5. 086502 4. 978005 6. 082046 5. 645268 4. 988353 5. 681773 5. 801157 5. 56683  
3. 646144 3. 468133 2. 973266 3. 252212 3. 777034 2. 492666 2. 681706 2. 785552 2. 798763  
2. 533951 4. 179655 3. 83869 4. 489815 4. 567293 3. 480312 3. 308747 4. 526438 4. 610803  
2. 255377 2. 306701 2. 316681 2. 185128 3. 925183 2. 605666 2. 294186 2. 243993 2. 512056  
1. 13193 1. 357417 0. 967626 1. 373865 2. 369389 1. 483787 1. 246014 0. 976312 1. 592984  
3. 920211 3. 516612 3. 759904 3. 13038 3. 16877 3. 456002 3. 769302 3. 683771 4. 238758  
6. 440485 6. 80564 6. 753592 6. 715889 6. 203076 6. 80382 6. 655998 6. 841441 6. 959977  
3. 114108 4. 511315 4. 3796 3. 817854 3. 746011 4. 075692 5. 020305 4. 412252 4. 037816  
2. 943462 2. 358688 2. 205484 1. 987016 2. 446045 2. 57417 2. 949295 1. 982066 2. 112012  
6. 276139 6. 624636 6. 630875 7. 155949 7. 405498 6. 917161 6. 620986 6. 790526 7. 143906  
4. 773883 4. 969805 4. 666014 5. 139763 4. 919639 5. 517596 4. 970595 5. 756946 4. 619906  
4. 633472 3. 592434 4. 91899 4. 091362 4. 109618 2. 725627 4. 222791 4. 344625 4. 701183  
3. 479108 4. 135803 3. 59275 4. 259717 3. 97442 3. 180884 3. 25178 4. 881831 3. 616804  
5. 638036 6. 289871 6. 333473 5. 633691 5. 167542 5. 213404 5. 280623 6. 207361 6. 199419  
3. 385768 2. 898408 2. 904441 3. 181513 2. 942763 3. 040573 3. 567721 2. 999117 2. 984884  
5. 444706 5. 88128 6. 088957 5. 563435 5. 915628 5. 828576 6. 773836 5. 766705 6. 277575  
5. 882863 6. 193038 5. 709164 5. 376657 5. 447997 5. 96355 5. 481749 6. 354102 5. 672226

4.646379 2.494404 3.23791 3.596976 3.666245 3.533152 4.639353 3.638597 3.86633  
7.357025 8.1065 7.373197 7.927779 7.50348 7.826762 7.525806 7.802847 7.861273  
6.14343 6.487534 6.116435 7.48382 6.917935 7.445303 7.213971 5.506735 7.400607  
2.794151 3.115388 3.173003 4.440739 3.498299 3.138088 3.279845 4.02091 3.06582  
2.283386 1.752066 2.456738 2.16783 2.183508 2.061544 2.940215 2.004407 1.761249  
5.237087 5.27962 4.221381 6.302894 5.573225 5.678678 5.916274 4.851631 5.046138  
5.659027 5.419945 4.390695 5.118583 5.524497 5.083737 4.573853 5.619657 5.108335  
2.106606 2.880301 1.97333 2.342228 2.639399 1.759971 1.798896 1.933159 1.954615  
5.90473 6.430369 6.458284 6.216547 6.784648 6.14483 6.638901 6.703432 6.547774  
5.788035 5.256809 5.728002 5.923303 5.195564 5.818404 5.406666 5.357953 5.270019  
6.865785 7.822794 7.452957 7.662104 7.903728 7.61978 7.654283 8.254921 7.880203  
1.314866 1.29484 1.616314 1.898187 1.620376 2.314483 1.119443 0.911267 2.262686  
1.515751 2.080808 1.604789 1.931381 2.017756 2.188391 1.780917 1.616808 1.877479  
2.996087 3.28391 3.942904 3.50763 3.280202 2.506145 3.000541 3.716455 3.315669  
5.999864 6.708479 6.228759 6.457061 6.850974 6.516661 6.91177 6.801371 6.369779  
4.546376 5.093264 5.101271 5.443447 5.342991 5.611833 5.190744 4.536437 5.082194  
2.300071 3.292336 2.687179 2.680334 2.658845 3.144093 2.824078 3.034625 2.651629  
1.293983 1.418827 1.245137 1.931422 1.242685 1.18697 1.079534 0.994026 1.168587  
3.541267 2.307493 2.789223 2.593749 2.416247 2.545248 2.706454 2.526956 2.545541  
2.523687 1.616535 2.893802 1.901911 2.157263 1.660609 2.628251 1.903058 3.073983  
1.780944 1.83504 2.399119 2.206789 2.385463 1.777986 2.761734 2.678349 1.491204  
1.986731 1.462305 1.491347 1.672475 1.023328 1.890838 1.38758 1.784408 2.015273  
1.101972 1.187762 1.976353 1.868115 1.426813 1.31526 1.404308 1.805358 1.471991  
3.998007 4.856639 4.790992 4.701422 4.811208 4.274106 5.047133 4.874076 4.054609  
6.221946 6.724237 5.70654 6.667781 7.416887 7.154245 6.808592 6.758459 6.256305  
8.289555 8.377756 8.380435 8.392869 8.585595 8.519383 7.919564 8.590281 8.57642  
4.24632 3.95182 4.691971 4.486497 4.514751 3.846137 4.503493 4.764466 4.257778  
4.272061 4.851998 5.543508 4.760051 4.800779 4.755775 4.8196 5.314264 5.037393  
2.329703 2.947578 3.284489 2.818567 3.548228 2.219165 2.540657 3.046129 2.912177  
5.024909 4.677609 5.099598 5.629903 5.74814 6.192884 5.431382 5.481557 5.414782  
4.887067 5.02834 4.431229 4.797969 6.021474 4.818242 4.329267 5.258117 4.407729  
1.252076 1.566992 1.986769 1.21816 1.483351 1.010941 1.282856 1.584334 2.170268  
3.107053 3.513467 3.272504 3.231584 3.866358 4.017408 2.69945 3.056517 2.93152  
6.392536 6.669519 6.901596 6.405968 6.38143 6.282915 6.274259 6.850897 6.535727  
1.913311 2.592959 3.122689 2.829299 2.593494 2.353245 2.592959 3.027192 2.454392  
5.384647 3.806031 5.426051 3.241495 3.937427 4.3599 4.247896 4.041635 5.214606  
6.707379 6.872137 6.503309 6.575541 6.437105 6.817183 6.912624 6.846543 6.852529  
1.750495 1.578452 1.685587 1.432432 1.963567 1.764952 2.018679 1.866511 1.792506  
1.685035 2.15736 2.02839 1.881056 1.6071 1.863228 1.629202 1.736683 1.849249  
6.935148 6.177482 6.611626 6.481765 6.278675 7.324009 7.366432 6.849228 7.644956  
8.212674 9.259364 9.155457 9.268544 9.088778 9.051219 9.02855 9.336649 9.427003  
5.027481 4.760791 5.180433 5.404599 4.926165 5.14483 5.242976 5.328939 5.00028  
1.224524 1.156976 1.807892 1.875318 1.511948 1.642949 1.51233 1.082061 1.872624  
6.749093 6.876036 5.652727 6.243575 6.310439 5.926376 6.080507 6.608368 6.015147  
3.13047 2.784537 3.117059 3.309927 3.876062 3.519411 2.929283 3.406889 3.810203  
2.569631 2.786749 3.063758 3.020953 2.858206 3.507703 2.706428 2.904456 3.420728  
1.926467 1.351651 1.559849 1.560064 1.424953 0.829414 1.12967 1.053866 1.114203  
1.95342 1.538293 1.983524 2.166884 1.673897 2.073326 1.357673 1.207475 2.158291  
4.266827 3.759334 3.856395 4.402171 3.319469 3.480573 3.033041 3.981652 3.490486  
5.889428 7.138791 6.490465 5.788616 6.16699 6.379086 5.864622 6.359018 5.86669  
5.058888 3.232499 4.039053 3.880506 4.600336 3.876711 3.813144 4.201199 3.961126

7. 408473 6. 754645 7. 290486 6. 395383 6. 932188 6. 355893 6. 947489 6. 608039 7. 125247  
1. 98288 2. 51252 2. 365412 2. 598787 2. 141231 2. 085304 2. 225245 2. 195671 1. 976877  
4. 308295 4. 023227 4. 278692 4. 64591 3. 888909 4. 310004 4. 006492 4. 925789 4. 865072  
1. 996665 2. 523069 1. 989557 2. 045953 1. 863133 3. 560491 3. 838654 2. 088885 1. 832168  
1. 35288 0. 961203 1. 102118 0. 986231 0. 717549 1. 941599 0. 939205 0. 750851 0. 763705  
5. 517614 4. 689322 4. 187191 4. 153662 4. 247441 4. 534035 4. 121682 4. 031926 4. 4997  
1. 676769 2. 078921 1. 721218 1. 849411 1. 827526 2. 849332 3. 174203 1. 395044 2. 272044  
4. 324914 4. 23007 3. 283863 4. 157688 4. 244971 4. 317315 4. 188489 3. 357227 3. 197478  
5. 967606 5. 861153 6. 372007 5. 499141 6. 153552 5. 066997 5. 826234 5. 901711 5. 97582  
0. 921696 2. 602261 1. 419002 1. 27904 2. 001184 1. 529293 4. 750097 1. 361892 1. 272955  
3. 392218 2. 998055 2. 824585 3. 56632 3. 944939 3. 399802 3. 598223 3. 409563 3. 984274  
0. 943786 0. 839047 0. 683142 0. 832322 0. 799135 0. 874739 1. 548908 0. 877691 1. 713464  
1. 458667 1. 359887 1. 435221 1. 345143 1. 198449 1. 356736 1. 716635 1. 458585 1. 257261  
0. 850534 1. 394494 0. 852832 4. 013037 0. 857141 2. 163834 0. 639549 1. 37037 1. 002822  
1. 631383 1. 436177 1. 831929 1. 484308 1. 81405 1. 811126 1. 435468 1. 514842 1. 830272  
1. 720766 2. 239567 2. 306131 1. 610715 2. 12189 1. 93312 1. 728506 1. 943832 1. 43079  
3. 667989 4. 943273 4. 551277 3. 07841 3. 7265 4. 503944 4. 023118 4. 205444 4. 111189  
4. 761607 5. 247769 5. 36034 5. 263474 4. 632939 5. 903488 5. 215094 4. 665354 5. 437555  
3. 491687 2. 986993 2. 85096 3. 024887 1. 803578 2. 391408 1. 927907 2. 953898 2. 536521  
2. 829265 2. 313917 2. 455639 2. 543329 2. 426582 2. 508377 2. 049141 2. 828642 2. 111434  
5. 098539 3. 765039 3. 715653 4. 827408 4. 456147 4. 5757 4. 88678 3. 406516 4. 985177  
4. 464767 3. 653942 5. 527513 3. 250572 3. 750011 4. 496987 5. 186142 4. 373876 3. 597367  
2. 773243 2. 391468 2. 700011 2. 331375 2. 017532 2. 496346 2. 494535 2. 277137 2. 063824  
5. 217296 4. 773053 4. 019032 4. 544774 4. 020555 4. 416978 4. 586195 5. 567556 5. 149951  
2. 822354 1. 836411 1. 495408 2. 057125 1. 397023 1. 780924 1. 69818 2. 003634 1. 72493  
2. 842273 3. 717133 2. 594875 4. 573137 4. 519986 4. 067237 3. 309413 4. 021291 3. 551218  
3. 020966 5. 019729 4. 337725 2. 557016 3. 817174 3. 911072 3. 46175 3. 044172 3. 77602  
2. 258517 1. 704238 2. 309426 2. 037849 2. 291892 2. 174809 2. 129775 1. 708138 1. 345548  
3. 340846 4. 008077 3. 857037 4. 385073 3. 834292 3. 815203 3. 764377 4. 489606 3. 725794  
1. 070506 1. 024416 1. 20626 1. 07638 1. 185781 1. 047404 1. 337498 0. 962893 1. 888008  
4. 202745 4. 542382 4. 015138 4. 952907 3. 869912 4. 369756 4. 213467 4. 932198 3. 475416  
1. 81635 1. 920142 1. 994629 1. 877185 2. 384494 1. 691334 1. 769349 1. 555977 1. 780058  
1. 749586 1. 716439 2. 272661 1. 502449 1. 350255 2. 37265 1. 748216 2. 067046 2. 27383  
3. 752582 3. 806008 3. 31408 4. 38932 3. 580077 3. 80063 3. 294926 3. 552816 3. 789247  
4. 493521 2. 80606 2. 774366 2. 493381 3. 367864 1. 917579 3. 076569 2. 722319 3. 215688  
3. 014579 1. 984795 2. 2719 1. 540789 1. 621124 2. 11085 3. 796706 3. 728036 2. 361156  
2. 489157 1. 887308 1. 706504 1. 637696 2. 34316 2. 019178 2. 664285 2. 157819 1. 936169  
8. 306556 5. 44653 6. 129408 5. 708088 5. 142809 5. 062365 5. 475164 4. 550383 6. 419754  
5. 230916 4. 940827 5. 288299 4. 517272 4. 999571 5. 424694 5. 08248 4. 093552 4. 934081  
4. 647167 5. 144203 5. 439646 3. 744897 4. 229853 4. 779758 4. 29442 4. 704973 3. 71787  
7. 182025 7. 236116 7. 304319 6. 971361 7. 395244 6. 885455 7. 122108 7. 026391 7. 203743  
1. 293574 2. 398633 2. 84721 1. 66734 1. 242408 2. 903899 1. 117043 1. 304255 1. 394465  
2. 436447 2. 073208 2. 455962 2. 364654 2. 334931 2. 311725 2. 911116 2. 110413 2. 553604  
1. 538875 1. 157557 1. 189034 1. 428372 1. 159012 1. 600696 1. 250341 1. 174372 1. 59986  
7. 183439 7. 640317 7. 519745 7. 626424 7. 686915 7. 718717 7. 54145 7. 754619 7. 585496  
5. 075589 6. 465666 6. 999574 7. 831996 5. 324509 6. 820812 6. 494333 6. 036344 6. 863226  
6. 83207 6. 972892 6. 733102 7. 145592 7. 017049 6. 74819 6. 455438 7. 24485 6. 847111  
4. 814583 6. 603901 6. 385505 6. 24084 6. 542079 6. 163774 6. 097362 5. 579717 5. 899956  
1. 891172 1. 367164 1. 949686 1. 839398 1. 532258 1. 900343 2. 102663 1. 572785 1. 568342  
7. 635498 8. 129925 8. 613709 7. 461748 7. 657164 7. 905072 7. 532655 7. 543407 7. 682588  
5. 981151 6. 028877 5. 76796 5. 032787 5. 409842 5. 815816 5. 441312 6. 379911 5. 981735

5. 884248 6. 03942 6. 166115 5. 635216 5. 888399 5. 331124 6. 118866 6. 310012 6. 067091  
1. 472618 1. 532102 1. 242757 1. 964207 3. 225041 1. 873382 1. 241629 2. 422773 1. 52828  
5. 628328 6. 080079 5. 105031 5. 658679 6. 113528 5. 954724 5. 602936 6. 104519 5. 96706  
6. 440431 6. 305402 6. 855159 6. 635218 6. 245905 6. 698911 5. 967515 6. 044015 6. 069752  
1. 751294 1. 135844 1. 291491 1. 685672 1. 618534 1. 766599 1. 350539 2. 545468 2. 001964  
5. 875429 6. 831795 6. 467583 6. 444775 6. 565546 7. 130076 5. 586076 6. 269711 6. 176507  
3. 276235 3. 972033 3. 505202 4. 320546 4. 287508 3. 548883 3. 594435 2. 706646 3. 785165  
3. 815051 4. 290491 3. 752891 3. 952027 3. 878456 3. 399843 3. 704403 4. 359656 3. 290367  
1. 79644 1. 821635 1. 11683 3. 109526 1. 976294 2. 322718 3. 033277 1. 693342 1. 771014  
1. 661122 1. 210618 1. 05204 0. 847113 0. 866719 0. 927583 1. 181768 0. 962082 1. 347593  
4. 788649 5. 199566 4. 771349 4. 98505 5. 378635 4. 675527 5. 39206 5. 408376 5. 45447  
2. 586776 4. 147623 4. 558529 3. 98282 4. 464312 4. 681629 3. 003472 5. 008742 4. 256529  
7. 040562 7. 189618 6. 718965 7. 531449 6. 667709 7. 309898 6. 373769 6. 243539 7. 370258  
3. 335713 2. 417487 2. 430259 1. 852528 2. 828313 2. 849988 3. 110796 2. 86022 2. 292994  
5. 758586 5. 703273 6. 171875 5. 953554 5. 943664 5. 912543 5. 021197 5. 420691 5. 405637  
7. 345061 7. 018474 7. 065856 6. 269754 7. 127122 6. 673108 7. 226696 7. 109049 6. 716313  
6. 321896 7. 56223 6. 103884 7. 263435 7. 001249 7. 351003 7. 049806 6. 72417 7. 492693  
2. 237262 1. 859852 1. 73088 1. 618061 1. 362266 1. 609373 1. 716694 2. 187964 1. 955843  
1. 364432 3. 132602 1. 822114 1. 654622 2. 869245 1. 874023 1. 388812 2. 223271 2. 349243  
2. 160095 1. 409568 1. 476285 1. 190304 1. 53104 1. 446119 1. 323587 1. 256678 1. 318535  
9. 268318 9. 565087 9. 773693 9. 833259 9. 629649 9. 436436 9. 613489 9. 599798 9. 656118  
2. 685942 2. 223455 2. 00963 2. 385234 2. 304432 1. 93457 2. 588439 2. 532726 2. 421619  
1. 370896 1. 865223 1. 225461 2. 559705 1. 173035 1. 064823 1. 13379 1. 325569 2. 048078  
7. 255449 7. 129719 7. 593676 7. 108867 6. 811956 7. 667742 6. 34238 7. 477477 7. 426725  
1. 988275 1. 324272 1. 044061 1. 137891 1. 189404 1. 698574 1. 716681 0. 986823 1. 155437  
3. 421825 2. 903087 2. 414925 2. 229566 2. 34375 2. 318026 2. 709619 2. 413694 2. 658303  
5. 865431 5. 74089 4. 94155 5. 263988 6. 025092 6. 263771 5. 912464 5. 774612 6. 262447  
6. 131334 6. 474011 5. 544649 6. 101338 5. 868196 6. 203439 5. 909911 5. 719367 5. 955036  
2. 077632 1. 399216 1. 195559 1. 442114 1. 081827 2. 057294 1. 183527 1. 353475 1. 209395  
1. 132703 1. 847638 4. 528043 3. 778023 2. 711762 3. 053266 2. 915065 2. 377475 4. 118126  
9. 341436 9. 104386 9. 143338 8. 99271 9. 568508 9. 071455 8. 789917 9. 243012 9. 352371  
1. 620098 1. 442147 1. 840706 1. 102654 1. 987736 1. 442771 1. 715365 1. 963278 1. 441179  
4. 159277 2. 896418 3. 391563 3. 077052 3. 882931 2. 84216 3. 407465 3. 052844 4. 053614  
10. 55414 10. 20163 10. 42148 10. 35807 10. 23514 10. 18095 10. 8461 10. 1046 10. 39935  
1. 835795 1. 199552 0. 876974 0. 965195 1. 242603 0. 986257 1. 389294 1. 511567 1. 107455  
5. 704285 5. 680333 6. 085386 5. 694947 5. 246213 5. 201881 3. 821841 4. 356167 4. 63072  
8. 674848 8. 741189 9. 003657 9. 472312 9. 100353 9. 105103 9. 004344 8. 875939 8. 881554  
8. 149675 8. 299317 8. 115561 7. 932263 8. 133636 7. 887396 8. 043825 8. 269887 8. 127314  
3. 732713 3. 196588 5. 164633 2. 830817 3. 208476 3. 101978 3. 896225 3. 555774 4. 674924  
7. 222032 7. 140314 6. 860346 7. 026001 7. 272124 6. 879903 6. 848024 6. 988231 7. 175252  
4. 257067 4. 306463 3. 906233 4. 389666 5. 004392 4. 558367 3. 308481 4. 17937 4. 321326  
1. 874513 1. 460548 1. 711881 1. 603268 1. 677897 1. 214639 1. 781736 2. 016758 1. 577855  
2. 578842 2. 919671 2. 401562 2. 584385 2. 040062 2. 865807 2. 87621 3. 213869 2. 37507  
8. 069302 5. 801064 7. 454695 6. 335497 6. 108642 5. 279257 6. 702772 6. 313072 8. 220337  
3. 517598 3. 404109 3. 566452 3. 725905 2. 948274 4. 003392 4. 275287 4. 521929 3. 287121  
0. 994625 1. 189095 1. 72808 1. 689763 1. 858046 1. 55599 1. 413495 1. 030009 1. 033692  
3. 935884 4. 22981 5. 478726 3. 63169 4. 351388 4. 125804 5. 093882 3. 865744 5. 204613  
3. 597832 4. 356256 4. 332183 3. 552795 3. 798998 4. 106941 4. 053622 3. 973963 4. 672827  
7. 747138 8. 007 8. 243936 7. 934036 8. 120579 7. 933007 7. 824861 8. 17154 7. 766835  
3. 360417 3. 980093 2. 95634 3. 380394 3. 14677 3. 694584 3. 464934 3. 689025 3. 741639  
5. 002621 4. 987808 4. 233437 4. 089438 4. 597372 4. 341674 4. 677571 4. 703006 4. 831535

6. 970239 7. 292463 7. 43298 7. 772099 7. 936336 7. 438832 7. 747504 7. 991755 7. 607309  
5. 490867 2. 449114 2. 480124 1. 63298 2. 052204 2. 108121 1. 885859 2. 902262 2. 816226  
3. 654649 4. 336048 4. 360405 4. 8305 4. 191606 4. 986478 3. 332273 4. 513218 4. 377275  
6. 23611 5. 856681 6. 249732 6. 26397 5. 852543 6. 496426 5. 181236 5. 53906 5. 846732  
3. 124014 3. 082436 2. 524362 3. 149846 2. 961802 2. 644382 3. 333054 2. 498673 4. 45175  
2. 677057 2. 385722 3. 064172 3. 065557 2. 297339 3. 148541 2. 957393 2. 50678 3. 465388  
4. 782696 4. 592885 4. 419396 4. 236478 3. 779511 4. 799111 4. 585635 4. 016512 4. 10665  
2. 27875 2. 179353 2. 429367 2. 314153 2. 769384 2. 18512 3. 70305 2. 916241 2. 66441  
5. 530373 3. 663175 4. 873801 4. 260555 4. 648884 3. 437112 4. 747284 4. 633681 4. 10381  
2. 150072 3. 407815 2. 656725 2. 901345 3. 419416 2. 074792 2. 964817 3. 109173 2. 447989  
2. 537838 3. 178357 3. 068967 3. 052054 4. 314409 3. 280966 2. 481822 3. 12906 2. 850796  
1. 734369 1. 475881 1. 06509 1. 655141 1. 55441 1. 859481 1. 647121 1. 817348 1. 865716  
3. 394245 3. 082721 4. 061218 3. 906967 4. 272138 3. 993473 3. 397605 3. 226428 4. 093736  
8. 783243 7. 005479 7. 366607 6. 525928 7. 249197 6. 186749 6. 769839 6. 193112 7. 783948  
1. 154836 1. 09553 0. 703144 1. 322676 1. 178375 0. 886912 1. 036825 1. 124368 1. 398179  
6. 788383 7. 051889 7. 308923 7. 349363 6. 74372 7. 135745 6. 820261 6. 923745 6. 729405  
5. 705183 5. 530323 6. 075194 5. 855235 5. 343046 5. 788615 5. 4459 5. 00288 5. 557849  
1. 679475 1. 100712 0. 799762 1. 123968 1. 129172 1. 368062 0. 962056 1. 229179 1. 450136  
0. 939465 1. 365126 0. 914949 1. 44455 1. 225258 1. 380618 1. 105911 1. 103726 1. 189309  
5. 366574 5. 492776 4. 732791 4. 817355 4. 633609 5. 089926 4. 913564 5. 334095 5. 059772  
8. 743428 7. 665162 8. 05139 7. 442594 7. 665307 7. 833864 7. 326153 7. 828771 8. 276714  
2. 434021 2. 98846 2. 08236 2. 175041 3. 164559 2. 127226 2. 193892 2. 185631 2. 903613  
1. 447395 2. 514671 1. 137133 1. 628127 1. 760685 1. 128178 1. 341267 2. 615987 2. 117759  
6. 8381 7. 069305 6. 961467 7. 123986 7. 045125 7. 075658 7. 16055 6. 808369 6. 82603  
5. 9576 6. 885142 6. 609359 6. 371618 6. 860911 6. 270606 6. 528113 6. 413392 6. 978002  
6. 334837 7. 25557 6. 730416 7. 497873 7. 287539 6. 661054 7. 303726 7. 383907 7. 606686  
4. 936282 5. 738799 5. 141292 5. 25705 3. 583647 4. 861884 3. 296362 4. 917496 5. 000595  
9. 074041 9. 115141 9. 199617 9. 276185 9. 065933 9. 120662 8. 960649 8. 998856 9. 108696  
7. 200132 7. 472085 8. 545061 7. 379393 7. 729102 6. 336466 8. 066697 7. 408167 9. 772183  
9. 930798 9. 61505 9. 757965 9. 270788 9. 879202 9. 710698 9. 583234 9. 456016 9. 834423  
1. 542483 1. 699779 1. 233316 1. 710542 1. 321945 2. 076226 1. 557543 1. 922429 1. 474663  
2. 749816 2. 671662 2. 876026 3. 102444 2. 503259 2. 159174 3. 518792 1. 938184 2. 44107  
8. 695181 8. 608308 8. 391301 8. 204503 8. 22683 8. 213124 8. 403844 8. 557152 8. 471183  
2. 785737 1. 890007 1. 602021 1. 977346 2. 21301 2. 046608 1. 986145 1. 875211 1. 931749  
6. 571395 7. 377081 6. 740318 7. 076764 6. 918205 7. 610823 7. 762561 6. 605832 7. 087029  
2. 746193 1. 93502 2. 021621 2. 181035 6. 971193 2. 152208 1. 894922 2. 863535 6. 558192  
1. 824648 2. 713642 1. 921008 2. 334505 2. 221421 2. 205632 2. 473868 3. 727487 2. 021318  
2. 502571 1. 386357 2. 429354 2. 440205 1. 822387 2. 258682 2. 113799 1. 924584 1. 920017  
5. 666061 1. 554497 3. 581213 3. 26698 2. 836545 2. 096636 3. 157528 2. 18499 3. 625586  
5. 149889 5. 412666 5. 342433 5. 299892 5. 514586 5. 526199 4. 890832 5. 877906 5. 978305  
4. 653177 6. 456312 6. 669706 6. 300189 6. 113461 6. 143907 5. 55332 5. 894506 6. 127652  
1. 806417 3. 468345 1. 87763 1. 90685 2. 412003 1. 54107 2. 720373 3. 085875 2. 725077  
1. 451878 1. 701054 1. 916333 1. 513169 2. 077128 1. 881313 1. 668694 1. 701023 1. 517583  
5. 701564 5. 269093 5. 030812 5. 293988 5. 550852 4. 697591 4. 532042 6. 339865 5. 047191  
6. 847736 7. 026317 6. 651754 6. 120135 6. 668924 6. 287608 6. 867969 6. 793956 6. 760483  
1. 521255 1. 957135 1. 612549 1. 910692 1. 480533 1. 768167 2. 554295 1. 016905 1. 553935  
1. 550625 1. 590389 1. 08029 2. 368888 1. 490113 1. 897025 1. 971901 1. 706361 1. 681165  
4. 862512 6. 383953 5. 463986 6. 386782 5. 785767 6. 265995 6. 152856 5. 513118 6. 13805  
1. 886678 1. 579102 1. 503153 1. 69475 1. 894802 1. 685915 2. 032188 2. 2634 1. 592407  
1. 55074 2. 355199 2. 220644 1. 74324 2. 01502 1. 371072 1. 399338 1. 624624 2. 154136  
3. 715572 3. 069152 2. 513653 2. 465805 2. 395504 1. 521414 2. 593066 2. 114701 1. 852003



2. 577512 2. 116787 2. 946577 2. 490571 2. 833048 2. 643569 2. 701058 2. 698775 2. 883917  
3. 293929 3. 25139 3. 898864 4. 087181 4. 279331 4. 213699 3. 590344 4. 131861 4. 179909  
8. 440584 8. 69039 8. 742 8. 491476 8. 698967 8. 470362 8. 47178 8. 38591 8. 622696  
2. 441197 3. 039971 2. 346837 1. 774549 2. 46253 2. 5165 2. 338552 2. 646315 2. 330066  
2. 027439 3. 348842 3. 299172 2. 734488 2. 661728 3. 369338 3. 559211 3. 437363 3. 048468  
2. 728073 3. 844169 3. 43441 4. 346555 3. 260797 4. 310115 4. 324662 2. 361698 2. 783978  
2. 389436 1. 525667 1. 988545 1. 949585 2. 091648 2. 463214 1. 652392 1. 780696 1. 762601  
3. 789969 3. 775498 3. 162795 2. 211604 1. 683776 2. 125238 2. 521154 5. 631921 2. 328155  
2. 53916 1. 674689 2. 419924 2. 223474 2. 23032 2. 140052 2. 142254 2. 413602 2. 136286  
1. 331115 1. 54676 1. 448399 1. 214127 1. 668097 1. 771923 1. 246291 2. 166154 1. 133932  
1. 470656 1. 074691 1. 226195 1. 23313 1. 342305 1. 233493 1. 066233 1. 385895 1. 539615  
2. 019425 2. 37407 2. 676512 2. 831648 3. 04037 1. 797983 3. 786797 2. 398423 3. 373742  
2. 251446 2. 335232 1. 70948 2. 612013 2. 408983 1. 948507 2. 82154 2. 886751 3. 140344  
3. 122911 2. 727872 3. 35874 2. 964197 2. 95219 3. 427766 3. 183285 3. 127936 3. 783448  
2. 283427 2. 97245 3. 050119 2. 820438 2. 83469 2. 97139 3. 964382 3. 112869 3. 053902  
1. 48396 1. 319922 1. 143945 1. 20185 1. 176079 1. 083392 1. 630182 1. 27759 1. 412311  
4. 852475 6. 37769 6. 130035 5. 181758 5. 37814 5. 515737 5. 203105 4. 387386 5. 046252  
9. 046851 9. 188956 9. 107067 9. 233363 9. 27555 9. 353158 9. 362407 9. 278077 9. 08529  
2. 728311 3. 378725 4. 457009 2. 084544 4. 043172 4. 201456 3. 012824 2. 539193 4. 229427  
6. 266113 6. 888615 6. 674406 6. 782183 6. 973014 6. 172581 6. 720857 6. 850947 7. 181428  
4. 500937 5. 343934 5. 230216 4. 684257 4. 57394 4. 471129 4. 616281 5. 129545 4. 656024  
7. 301403 7. 571099 7. 700419 7. 2568 7. 375747 7. 574337 7. 247936 7. 473807 7. 026214  
2. 286844 2. 294586 2. 322658 2. 283854 1. 787661 1. 75832 2. 102015 1. 843601 2. 61182  
4. 941112 5. 540333 5. 72887 3. 996635 5. 317304 4. 715982 5. 025839 5. 946254 6. 186066  
1. 662011 1. 755043 1. 65007 2. 134528 1. 466508 2. 082131 2. 243658 2. 057428 1. 484797  
3. 947236 4. 369703 3. 319222 4. 190543 4. 340414 2. 446296 4. 041195 3. 245466 3. 116596  
5. 281946 5. 708742 5. 793641 5. 392963 5. 320347 5. 113076 6. 551986 5. 981021 5. 434796  
1. 592136 1. 769401 1. 5908 1. 661362 1. 840089 2. 225871 2. 606083 1. 561863 1. 684417  
5. 471937 6. 486475 6. 337059 6. 406291 6. 893389 6. 019506 5. 716438 6. 614654 6. 453211  
7. 499191 6. 965788 6. 951187 7. 195349 7. 023373 7. 370117 6. 504793 7. 582331 7. 367261  
4. 052555 4. 630861 4. 500417 3. 839729 4. 817765 5. 078747 3. 9925 5. 733423 4. 305812  
5. 026443 5. 665801 5. 329751 5. 445308 5. 658332 5. 491897 5. 084773 5. 251468 5. 118225  
4. 94249 5. 80225 5. 660924 6. 215695 6. 646069 6. 182268 5. 304842 6. 095434 5. 744313  
3. 640478 3. 547307 3. 588814 4. 193203 4. 032565 4. 690371 3. 381909 2. 005795 2. 593028  
8. 519899 8. 674779 8. 736919 8. 500994 8. 742665 8. 954346 8. 536259 8. 656445 8. 36174  
3. 050003 3. 234638 3. 394824 2. 72722 2. 998128 3. 965092 2. 954348 3. 574809 3. 170528  
5. 522439 5. 657086 5. 781118 5. 447052 6. 479816 5. 842161 4. 543424 5. 973856 5. 470361  
2. 464837 2. 860823 2. 033317 1. 899905 2. 057819 2. 843114 2. 62511 2. 546114 3. 029242  
7. 513182 8. 549009 8. 449476 8. 270289 8. 385071 8. 132106 8. 217685 8. 313552 8. 213686  
5. 495663 7. 300103 7. 187471 6. 451821 6. 812699 6. 920136 6. 695841 6. 650913 6. 607982  
2. 094841 2. 201291 2. 010862 2. 593572 3. 10097 2. 142773 2. 79869 2. 414078 2. 149181  
4. 246115 3. 84179 4. 603461 5. 308481 5. 159335 5. 3165 4. 346822 4. 153446 5. 062274  
5. 672692 5. 631921 5. 598313 5. 570464 6. 344279 6. 276043 5. 28067 6. 198228 6. 081059  
1. 369457 0. 851448 1. 160754 1. 265909 1. 45195 1. 036098 1. 272112 1. 04444 0. 895975  
5. 664511 6. 995539 5. 18954 7. 544069 6. 604649 6. 872974 7. 002557 6. 103279 6. 562323  
1. 950978 1. 225224 1. 248087 0. 980157 2. 08366 1. 086942 1. 112341 1. 054896 1. 430236  
8. 969959 7. 08087 9. 420662 8. 150426 7. 622931 7. 72815 8. 944824 7. 038769 6. 595235  
1. 142708 1. 571582 1. 967003 0. 767539 1. 343571 1. 339664 1. 166843 1. 472788 1. 220004  
1. 197101 1. 670386 2. 819148 3. 491959 1. 202458 0. 843991 2. 758226 1. 983308 0. 757663  
5. 069677 6. 006249 6. 068338 5. 678484 5. 771821 6. 007749 5. 98034 5. 320868 5. 772688  
6. 98329 6. 941623 7. 283592 6. 955557 6. 858216 6. 902159 6. 354629 7. 360592 6. 693562

1. 95138 3. 220888 1. 336329 2. 088118 2. 460232 1. 567144 1. 724479 2. 243756 1. 694521  
4. 786222 4. 44506 4. 65483 3. 689153 3. 821396 5. 108381 4. 199299 4. 560066 4. 533812  
2. 21606 1. 46232 2. 042472 2. 450784 1. 802869 2. 204446 2. 288745 1. 542485 1. 579458  
5. 129173 5. 815202 5. 572088 4. 950541 6. 045491 5. 074694 5. 254121 5. 726982 5. 794166  
2. 236439 1. 990363 2. 348224 2. 113 1. 726026 1. 977668 3. 026828 1. 977374 2. 437079  
2. 182104 2. 465685 2. 170823 1. 628805 2. 471785 1. 697074 2. 443434 2. 018861 2. 269907  
3. 587261 2. 900216 2. 650302 2. 554077 2. 838587 2. 508987 2. 789797 2. 864889 2. 289612  
1. 668227 1. 614132 1. 356855 1. 487487 1. 163076 1. 366722 0. 941716 1. 382114 1. 38151  
7. 916254 7. 966547 7. 458573 7. 853303 7. 62519 6. 976205 7. 059543 7. 94678 7. 807734  
2. 386774 1. 834304 2. 33995 2. 193617 1. 949623 2. 032285 1. 901884 2. 573097 1. 616256  
5. 09488 6. 082411 5. 193028 5. 97862 5. 605781 7. 055341 4. 921096 7. 050654 4. 789125  
5. 646769 5. 935945 5. 962466 6. 74217 6. 030579 6. 532872 5. 133798 6. 736105 6. 253578  
4. 394618 4. 013809 4. 375674 4. 681334 4. 436384 4. 721944 4. 180049 4. 412116 4. 254431  
5. 053767 4. 821793 5. 267932 4. 78915 5. 176788 5. 35223 5. 081625 5. 331123 4. 639155  
6. 356626 6. 305788 5. 901288 6. 603891 6. 926647 6. 248536 7. 528268 7. 089713 6. 763612  
3. 052888 2. 485698 2. 923075 2. 771141 2. 553981 3. 279725 2. 743268 3. 25053 3. 014939  
4. 856319 2. 471927 3. 362799 2. 993391 1. 974467 2. 511586 3. 525268 2. 0298 2. 880096  
2. 265374 3. 679891 2. 503923 3. 649524 3. 046989 2. 309177 4. 160173 2. 625397 3. 23706  
2. 988044 4. 642794 3. 500503 4. 588983 3. 740334 4. 030705 3. 838044 4. 478855 4. 18265  
2. 351137 3. 186616 3. 171479 2. 831077 3. 634057 2. 980013 3. 219014 3. 190416 2. 977205  
2. 330466 2. 082867 1. 87013 1. 774391 1. 815626 1. 700805 2. 232826 2. 081984 2. 089408  
4. 162314 5. 817626 5. 174063 5. 194735 5. 169327 6. 420441 5. 444156 5. 545325 5. 397493  
3. 116661 3. 666278 3. 057689 2. 854969 2. 549097 2. 552033 3. 706179 3. 49601 2. 954094  
5. 827605 5. 984853 5. 671242 5. 792003 5. 620248 5. 451401 5. 732826 5. 42999 5. 299821  
2. 680668 2. 732976 2. 1991 2. 895569 2. 118421 2. 271709 1. 801458 2. 50409 2. 461963  
3. 380457 1. 622777 0. 904885 1. 380998 1. 551269 0. 546082 2. 57499 1. 416491 1. 637854  
5. 328896 6. 162643 6. 060569 5. 509749 6. 153736 5. 823923 5. 855656 5. 750311 5. 748882  
8. 110578 8. 690463 8. 592487 8. 597401 8. 527126 8. 326464 8. 334098 8. 486636 8. 219568  
11. 22358 11. 20308 11. 36062 11. 31758 11. 14285 11. 35115 11. 187 11. 07035 11. 24014  
6. 078683 6. 397411 6. 720353 5. 931101 6. 267097 6. 22227 6. 221451 5. 831178 6. 303976  
1. 437105 1. 734882 1. 468747 1. 458247 0. 993248 1. 694922 1. 43252 1. 091047 1. 081031  
6. 789553 7. 060005 6. 419131 7. 116336 7. 47265 7. 094725 7. 49209 6. 860918 6. 742098  
1. 49936 2. 359236 1. 17002 1. 394252 2. 038169 1. 202298 2. 02989 1. 116994 1. 227546  
1. 972198 3. 558526 2. 708442 3. 423463 2. 794827 3. 169541 3. 609865 4. 723317 2. 599293  
4. 336802 4. 361739 4. 613352 5. 51376 5. 011851 4. 843927 3. 658851 4. 452377 4. 849832  
6. 727856 7. 211006 5. 594472 7. 193054 7. 143617 7. 098111 7. 355012 5. 464513 7. 186377  
7. 102381 6. 889573 6. 906263 6. 894635 7. 149141 7. 129371 5. 781722 6. 94192 6. 415124  
4. 754904 3. 701272 4. 145748 3. 977655 3. 401143 3. 858263 4. 722719 3. 880591 4. 290033  
4. 903779 2. 204201 3. 486251 2. 354543 2. 186842 2. 632231 2. 834174 4. 109865 3. 222304  
3. 983453 5. 36504 5. 639463 5. 295575 4. 92335 5. 424635 6. 421517 5. 932393 6. 046329  
5. 196967 5. 264154 4. 327959 5. 053633 4. 015936 4. 749469 4. 30878 3. 886974 3. 980942  
5. 731249 6. 687424 5. 979515 6. 978305 6. 751499 6. 636284 6. 353744 5. 557867 6. 160818  
3. 882908 3. 63268 2. 927761 3. 897444 3. 341308 3. 418134 4. 200723 4. 285126 4. 136744  
5. 993876 6. 388741 5. 975713 7. 076839 6. 649659 5. 854237 6. 305911 5. 812013 6. 286185  
4. 97669 4. 832753 4. 325488 4. 407101 4. 468141 4. 408215 4. 792493 4. 779952 3. 931275  
2. 812045 1. 493207 2. 624272 2. 068233 2. 779723 2. 486976 1. 802598 2. 655489 1. 435198  
2. 985086 3. 309871 3. 227239 3. 053493 3. 107319 3. 694565 4. 13928 3. 085142 3. 198257  
3. 109831 3. 816557 2. 81231 4. 023083 3. 875414 4. 41375 3. 272943 3. 40665 3. 536473  
6. 802004 7. 31593 7. 169544 7. 035745 7. 445646 7. 261867 6. 868343 7. 525768 6. 832577  
3. 413609 3. 758894 3. 594741 3. 684042 4. 092114 3. 029047 3. 407602 3. 253267 3. 879736  
3. 60488 3. 403534 4. 239509 5. 042032 3. 861104 4. 550516 4. 355488 3. 247347 3. 8911

2. 26749 2. 350338 1. 487432 2. 155837 2. 316026 2. 15935 1. 719039 2. 387152 2. 337588  
7. 534271 6. 440649 6. 855503 6. 65968 6. 546819 6. 535686 7. 21609 6. 862003 6. 79547  
4. 005665 2. 187356 3. 253343 3. 250803 3. 806817 2. 93732 3. 619772 3. 35101 3. 139033  
3. 381512 4. 04127 4. 469946 3. 964757 3. 33876 4. 432836 4. 271778 4. 359021 4. 443015  
4. 086436 5. 899797 5. 791721 5. 461859 5. 479979 6. 036111 5. 427714 5. 502231 5. 654615  
7. 639653 7. 85709 7. 551374 8. 378118 8. 231522 7. 541054 7. 876354 7. 586261 7. 917346  
5. 531151 4. 630714 5. 872258 4. 57432 4. 932726 4. 355836 4. 772965 5. 336549 6. 286324  
3. 930401 5. 048094 4. 826715 4. 730093 5. 072442 5. 148336 3. 873152 4. 94114 5. 355127  
2. 729454 1. 619601 1. 249645 1. 228914 1. 167801 2. 07523 1. 929888 1. 500877 1. 599336  
2. 520668 0. 698291 1. 162284 0. 812555 1. 594808 1. 031703 1. 040756 1. 560722 3. 726693  
9. 637965 9. 913889 9. 565428 10. 3162 10. 03502 10. 28407 9. 828904 9. 230696 9. 854863  
1. 711704 1. 470548 1. 94061 2. 397655 1. 24941 1. 429132 2. 196183 2. 586854 1. 869972  
2. 184701 2. 501737 1. 844955 1. 875887 1. 846569 2. 07224 2. 686992 2. 096379 2. 46291  
6. 613505 6. 826557 6. 245395 6. 449524 6. 687807 6. 624858 6. 608681 6. 430748 6. 558952  
3. 499118 3. 684977 3. 22059 3. 520176 3. 734973 4. 028595 4. 578349 3. 757941 4. 068778  
2. 556414 2. 920597 2. 693621 3. 457766 3. 663005 2. 930477 2. 545154 2. 238246 2. 92026  
5. 48212 6. 251906 6. 009696 5. 121763 6. 12943 5. 971702 5. 553469 6. 13783 4. 82213  
4. 79602 4. 820661 5. 026103 3. 925617 5. 08774 4. 314922 4. 673108 5. 946204 4. 875807  
1. 422058 2. 32146 2. 139666 2. 057981 2. 649963 1. 360864 1. 484197 2. 626308 1. 382356  
6. 585307 6. 818542 7. 221051 6. 912876 6. 824445 7. 106045 6. 471826 7. 243026 7. 295008  
3. 050501 3. 415844 2. 40514 2. 903653 2. 626392 2. 076981 3. 000071 3. 937403 2. 36752  
3. 509035 2. 666334 2. 318746 3. 247247 2. 649391 3. 316381 3. 359256 3. 917239 2. 974778  
2. 655645 2. 400947 2. 103143 2. 944324 2. 685251 2. 656139 2. 54861 2. 12434 3. 056888  
3. 428525 3. 370231 2. 90221 3. 151321 3. 328968 3. 542318 2. 927526 3. 358597 2. 746004  
1. 624504 1. 452324 1. 523037 1. 657785 1. 881359 1. 388268 1. 476274 1. 42967 1. 505221  
1. 576533 1. 918358 1. 644254 2. 019741 1. 070126 1. 630175 1. 571299 1. 479054 1. 309646  
4. 457512 4. 233005 3. 462614 4. 301032 4. 330598 4. 652391 4. 422671 3. 316783 4. 659606  
5. 821562 6. 170131 5. 931367 7. 028173 6. 689461 6. 927981 6. 896982 6. 342791 6. 130533  
8. 011954 7. 442303 7. 611845 7. 572489 7. 068769 7. 751151 7. 514243 7. 006345 7. 463038  
3. 401786 2. 881906 4. 371715 4. 730604 4. 431699 3. 00426 3. 632961 4. 907063 3. 892033  
4. 673755 5. 514633 5. 551955 4. 948543 4. 92519 4. 593852 5. 379302 4. 390156 5. 166752  
1. 247949 1. 918848 1. 186381 1. 312605 1. 806279 2. 141855 1. 0292 1. 941989 0. 937925  
2. 478299 2. 507553 1. 991284 2. 464692 2. 698301 2. 470207 2. 318033 3. 085531 2. 132506  
1. 48064 2. 275746 2. 491492 1. 244125 2. 237022 1. 479253 2. 006999 1. 426833 1. 561183  
2. 359708 3. 137384 2. 529374 3. 688316 2. 197554 2. 435261 3. 118097 3. 367235 3. 778974  
8. 03687 8. 968885 8. 650175 8. 615204 8. 571779 8. 830769 8. 477712 8. 573812 8. 777272  
6. 487149 6. 053481 6. 354423 6. 407038 7. 043815 7. 119046 6. 933049 6. 378157 6. 409317  
6. 501467 6. 532704 6. 859264 6. 277071 6. 652795 5. 912599 6. 816775 6. 667021 6. 714572  
4. 847121 5. 838863 6. 287964 5. 516383 5. 791284 5. 922831 5. 474186 5. 875813 5. 513838  
4. 146388 2. 937748 4. 093465 3. 136669 3. 042566 3. 439131 3. 557703 2. 226878 3. 341544  
1. 218431 1. 349455 1. 227668 1. 499788 1. 225798 1. 990349 1. 476135 1. 27182 1. 261027  
6. 691901 6. 503691 6. 896192 6. 899616 6. 731718 6. 803601 6. 854373 7. 037023 6. 537237  
6. 94266 7. 305502 7. 287702 7. 918335 7. 311359 7. 411255 7. 062909 7. 164577 7. 359849  
4. 053711 4. 001237 4. 771347 4. 552013 4. 073199 4. 277219 4. 56063 4. 976318 4. 887946  
5. 383903 6. 276755 5. 855019 5. 868447 5. 83367 6. 31716 6. 089437 5. 90686 5. 509597  
4. 695832 6. 107698 5. 992749 5. 4245 5. 569751 6. 443292 6. 688786 6. 062823 5. 495802  
6. 664557 6. 653201 7. 147799 6. 274338 6. 546319 6. 704318 6. 839197 6. 655688 7. 103136  
8. 614993 8. 278246 8. 468558 8. 036446 8. 242208 8. 14958 7. 648172 7. 782214 8. 11775  
8. 560054 7. 966797 7. 823456 7. 912824 8. 011071 7. 561085 7. 966472 7. 882082 8. 346508  
7. 617856 8. 132712 8. 047424 7. 910029 8. 113401 7. 928049 7. 493294 8. 003071 7. 609851  
8. 213413 7. 835726 7. 840374 7. 543237 6. 887848 7. 585135 8. 188227 7. 073218 7. 214816

7. 338079 7. 691644 7. 257005 7. 391596 7. 436242 6. 905956 7. 104423 7. 11274 7. 31118  
9. 433961 9. 547264 9. 796912 9. 657472 9. 658677 9. 656996 9. 751997 9. 417991 9. 874407  
4. 7583 4. 717739 4. 518883 4. 308859 4. 789625 4. 63069 4. 189221 4. 760063 4. 265544  
2. 302574 3. 753239 2. 93745 3. 387871 2. 114016 2. 735452 2. 944177 2. 643467 2. 544463  
4. 412681 5. 142547 4. 156127 5. 654123 5. 562507 4. 592632 5. 499012 4. 73599 5. 115162  
7. 223649 6. 252958 6. 177875 6. 392385 6. 56671 6. 191442 6. 738503 7. 022049 6. 707493  
3. 282857 3. 611413 3. 864742 3. 837051 4. 994422 3. 998404 4. 174783 4. 393476 3. 786203  
6. 205147 6. 097998 6. 098516 5. 332613 5. 16977 5. 273156 5. 513786 5. 372976 5. 837752  
5. 393554 5. 072885 5. 938735 5. 122865 5. 514241 5. 121697 5. 948271 5. 37528 5. 126343  
9. 139479 9. 590433 9. 04761 9. 280936 9. 369227 9. 341609 9. 879431 9. 135673 9. 417451  
2. 779188 3. 104095 1. 995511 3. 221558 2. 956253 3. 190882 3. 547869 2. 17218 2. 641457  
5. 74931 6. 204474 5. 502829 6. 48899 6. 736938 6. 739097 6. 221041 5. 726319 6. 159806  
6. 827704 6. 947258 6. 690629 7. 043139 6. 672256 6. 884257 6. 893719 6. 808925 7. 271817  
2. 365149 3. 645317 2. 160514 4. 819878 2. 428708 2. 653698 2. 722797 3. 177662 2. 387376  
6. 335737 5. 608096 5. 142728 5. 467347 5. 732543 5. 157257 5. 587405 5. 437457 5. 608803  
5. 245891 6. 286182 6. 467581 6. 796865 6. 082851 6. 325023 6. 272196 5. 751421 5. 956822  
2. 356951 2. 230125 2. 170976 2. 586511 2. 514474 2. 263402 2. 143251 2. 030934 3. 077811  
2. 767854 2. 305529 2. 33325 1. 689605 1. 466971 1. 802979 1. 979823 1. 471774 1. 861296  
5. 947419 4. 574126 5. 387635 5. 996794 5. 037437 5. 478416 4. 33875 5. 738732 5. 708063  
3. 089824 3. 565782 2. 759556 4. 100806 3. 581 3. 117704 3. 101738 3. 935423 3. 360016  
9. 836101 7. 86098 8. 917127 7. 814477 8. 179937 8. 456717 8. 364449 7. 448334 9. 272397  
4. 384404 2. 247687 3. 262633 2. 772917 2. 778394 2. 022934 2. 860597 2. 777573 3. 29076  
6. 18691 7. 046749 7. 296165 6. 368761 6. 912483 6. 539857 7. 424595 6. 945501 7. 187479  
10. 54377 10. 38533 10. 41191 10. 01149 10. 40003 10. 28019 10. 54678 10. 07884 10. 46355  
6. 250009 6. 509084 6. 640384 6. 120662 6. 267995 6. 538243 6. 517141 6. 634204 6. 735467  
8. 979351 9. 077533 9. 179576 8. 926593 9. 116722 8. 600304 9. 283039 9. 268627 8. 737191  
7. 80081 7. 416126 7. 714617 6. 802674 7. 965974 6. 232403 7. 605482 7. 827881 7. 686935  
6. 278713 6. 615874 7. 030008 7. 419907 6. 884863 7. 439419 6. 958975 6. 528827 6. 849857  
9. 507756 9. 168952 9. 362916 8. 709697 9. 083915 8. 572479 9. 313047 9. 116958 9. 260859  
4. 629857 6. 059511 5. 26827 5. 436077 5. 475283 5. 005904 5. 105229 5. 414476 5. 25486  
7. 860878 7. 893373 7. 693682 7. 584458 8. 182041 7. 496395 7. 897209 7. 849278 7. 614273  
2. 609638 3. 777195 2. 914708 3. 726007 2. 72092 3. 301822 3. 707935 3. 898572 2. 929602  
4. 833719 7. 12206 5. 788465 4. 193106 4. 51632 5. 280957 5. 958983 3. 82529 3. 67769  
6. 178254 5. 140542 5. 225683 5. 323762 5. 06727 4. 729578 5. 115218 5. 040464 5. 172938  
4. 996612 4. 971367 5. 120588 4. 905374 5. 411591 4. 039399 3. 763703 4. 117777 4. 131518  
4. 05785 4. 25204 4. 374487 4. 555368 4. 568793 4. 749976 4. 258727 4. 612744 4. 828567  
5. 835057 6. 398709 6. 151254 6. 753135 6. 860754 6. 600592 6. 135369 6. 711877 6. 161025  
4. 039202 4. 309127 5. 201314 4. 30411 5. 135011 5. 174661 4. 134034 5. 077576 4. 854759  
2. 650359 2. 320316 2. 159259 2. 224074 2. 205916 2. 086453 2. 254342 2. 280388 2. 298989  
3. 865408 3. 364612 3. 869914 2. 200241 3. 414943 4. 163116 4. 77383 3. 401779 3. 718937  
2. 095977 1. 966738 3. 515301 2. 630143 2. 261373 1. 693391 2. 868516 2. 050161 1. 666922  
6. 214928 5. 62937 5. 696873 5. 409105 5. 85826 5. 348655 5. 749452 5. 401987 5. 54226  
4. 661426 6. 936837 5. 457621 5. 986398 6. 298361 6. 668951 3. 320145 5. 44449 5. 670973  
1. 090223 1. 613997 1. 015567 1. 134307 1. 856737 1. 057007 1. 338672 1. 249035 0. 705682  
6. 250345 6. 729901 6. 62498 6. 590709 7. 085188 6. 617175 6. 482837 6. 517205 6. 030045  
1. 146489 1. 243603 1. 456082 1. 264088 0. 993298 1. 204396 1. 137789 1. 011224 1. 250539  
6. 350263 6. 192603 6. 648241 5. 956045 5. 937134 6. 230878 6. 546676 6. 50052 6. 429365  
7. 186395 7. 272079 7. 084472 7. 307729 7. 543672 7. 43768 7. 226211 7. 033516 7. 197816  
6. 904854 5. 809785 5. 728618 5. 302418 5. 929816 5. 621514 5. 169719 5. 308779 6. 758019  
4. 084019 5. 41855 4. 104138 4. 847989 4. 609314 5. 885778 5. 262115 4. 387753 4. 895389  
8. 038497 7. 658671 7. 803721 7. 841675 7. 505299 7. 651361 7. 298492 7. 63724 8. 078854

7. 21042 7. 150023 7. 363391 7. 135789 7. 434299 7. 057099 7. 257655 7. 198054 7. 883749  
8. 00377 8. 440986 8. 11612 8. 052031 8. 026297 7. 898858 8. 004236 8. 080348 7. 716537  
2. 720097 3. 269847 3. 276091 4. 09944 2. 886571 2. 665461 3. 234216 3. 464828 3. 388339  
2. 930541 3. 089519 2. 131812 2. 249166 3. 126182 3. 195585 2. 594446 3. 384181 2. 352783  
5. 662512 6. 025965 6. 329904 6. 481105 6. 400815 6. 063633 6. 15559 6. 483065 6. 116806  
9. 460021 9. 894972 9. 759068 9. 254011 9. 784301 9. 377358 9. 490046 9. 685069 9. 902952  
6. 216865 6. 07801 6. 128157 5. 971411 6. 182332 6. 421409 5. 163662 5. 691891 5. 887918  
4. 708955 5. 851714 4. 708202 5. 854563 5. 688519 5. 670552 6. 274784 5. 076386 4. 578224  
5. 552831 5. 71164 4. 713278 6. 258762 6. 021375 5. 376076 6. 397931 6. 170545 6. 06175  
4. 684152 5. 922181 5. 365241 6. 403638 6. 063023 5. 421243 5. 218668 6. 341254 6. 068015  
3. 298726 3. 012116 2. 452326 2. 665566 3. 221091 4. 247114 2. 36327 3. 262866 3. 481196  
3. 219162 3. 53731 3. 591168 2. 869477 4. 709483 3. 191959 2. 175178 2. 858156 2. 594445  
1. 121429 1. 190272 1. 035422 1. 164016 1. 609084 1. 040129 1. 027268 1. 176331 1. 583493  
4. 384767 4. 173684 4. 293136 3. 553651 4. 078367 4. 200405 5. 117665 4. 329046 4. 261038  
6. 36765 6. 426359 6. 685548 6. 775456 7. 11186 7. 281359 6. 757137 6. 774897 6. 916008  
6. 16521 6. 042161 5. 700057 5. 740803 6. 045887 5. 723134 5. 633759 5. 819974 6. 11621  
5. 91962 5. 907614 6. 529634 6. 428211 5. 572828 6. 023516 6. 183311 5. 999681 6. 0493  
2. 357291 2. 078843 2. 626659 2. 380706 2. 332664 2. 201287 2. 095463 2. 319288 2. 167534  
1. 966373 1. 643129 1. 577887 1. 921618 1. 97697 2. 050136 2. 715206 1. 900804 1. 730844  
3. 83601 3. 511268 3. 426779 3. 118345 3. 412984 3. 282034 3. 677772 3. 948205 4. 072911  
5. 290266 6. 225272 5. 868841 6. 960386 6. 393155 6. 153533 6. 840495 5. 75811 5. 95003  
3. 606547 3. 874032 3. 465276 4. 096984 2. 723957 3. 546858 3. 120528 3. 972562 3. 969185  
6. 791215 7. 074016 7. 047095 7. 130685 7. 084861 7. 141837 6. 82004 7. 011625 6. 994795  
5. 983872 6. 542387 6. 403613 6. 838911 6. 903893 7. 199289 6. 673246 6. 864364 6. 358956  
5. 454135 4. 189724 5. 204328 4. 05007 4. 938688 4. 955443 3. 655405 4. 998786 6. 53498  
7. 080114 7. 757411 7. 363504 7. 319191 7. 614865 6. 76028 7. 790768 7. 717891 7. 598994  
3. 123797 4. 893004 4. 25486 3. 479789 4. 264837 4. 76334 3. 392552 3. 957517 3. 841405  
5. 137904 5. 055127 3. 684139 4. 618568 3. 246018 3. 833252 5. 115875 3. 707817 4. 282435  
3. 659536 4. 316812 3. 895501 3. 003216 3. 082253 4. 948091 4. 076314 3. 774004 2. 826685  
7. 676588 8. 466656 7. 881615 7. 742662 7. 856198 8. 026473 7. 90143 8. 56453 7. 456174  
3. 443975 2. 550861 2. 959424 2. 427459 2. 57055 2. 264571 3. 72141 2. 509612 4. 197411  
2. 486857 1. 956849 2. 342273 1. 7964 1. 567488 1. 758295 1. 901578 1. 921264 1. 883502  
2. 060571 1. 276558 1. 178961 2. 166307 1. 194191 1. 685331 1. 293863 1. 49959 1. 688225  
3. 024977 2. 355666 3. 624427 2. 934883 2. 565182 2. 784585 2. 912455 2. 099061 2. 313203  
1. 81668 1. 349907 1. 364161 1. 752596 1. 225387 1. 269222 1. 195806 1. 087224 1. 528074  
3. 274602 2. 696114 3. 110113 2. 749474 2. 726445 2. 47604 3. 280121 2. 027304 3. 551989  
1. 713621 1. 53332 1. 236747 1. 423706 1. 543895 1. 915438 1. 868847 1. 437537 2. 328012  
1. 705886 1. 198747 1. 173354 1. 578954 1. 19248 1. 270603 1. 889951 1. 711014 1. 417059  
4. 060347 4. 25771 3. 948857 3. 796371 5. 142533 6. 257795 4. 952449 4. 639891 4. 304377  
4. 129227 5. 125698 4. 789797 6. 061579 5. 675748 5. 241837 5. 428409 4. 54807 4. 694549  
5. 118606 5. 423759 5. 709067 5. 408685 5. 544828 5. 208733 5. 258832 4. 944447 5. 313454  
5. 113275 5. 989592 5. 920254 5. 975463 6. 109342 6. 064599 5. 687982 5. 772471 6. 145864  
1. 714091 2. 367798 2. 398311 2. 524408 1. 865349 1. 888196 2. 350761 1. 516081 2. 039085  
1. 384852 1. 321696 1. 010348 0. 813439 1. 385763 1. 090477 1. 502295 1. 229237 0. 911359  
8. 097659 8. 032798 7. 408323 8. 639477 8. 244002 10. 24222 8. 345291 9. 707112 8. 275941  
6. 968345 7. 332234 7. 431782 7. 592871 8. 048273 7. 238044 6. 666056 7. 669601 7. 258838  
5. 172827 5. 130545 4. 326552 6. 032473 5. 408894 4. 849766 4. 831394 4. 492936 5. 3178  
5. 843375 6. 55746 6. 626552 6. 343003 6. 5162 6. 395894 6. 326351 5. 982971 6. 079782  
4. 386399 6. 285352 5. 832129 5. 041342 6. 071827 6. 659882 5. 584729 5. 183494 5. 474146  
5. 113541 6. 555872 6. 758078 6. 74476 6. 22792 6. 593062 6. 403946 6. 466536 6. 49455  
2. 910027 4. 211506 2. 609122 1. 975422 2. 845797 3. 399423 2. 359061 3. 361608 2. 041836

8.042667 8.121387 7.462658 7.778693 7.676787 7.651413 7.502435 7.624464 7.91933  
4.109212 3.762638 2.863323 3.637165 3.482116 3.374553 4.164517 3.438932 3.711712  
6.403133 5.869453 6.420114 6.376759 6.479856 6.190796 6.095463 6.592869 6.349037  
5.512604 6.073221 5.560488 6.070872 5.594891 5.820921 6.214806 6.193105 5.731724  
7.131544 6.865661 6.556771 6.433417 6.689662 6.557709 6.863534 6.542339 6.50022  
4.645476 5.045057 4.361706 5.33886 5.232352 5.018462 4.86574 4.389068 4.831401  
6.431988 7.19903 6.948553 7.020226 7.314006 7.73662 6.844023 6.728848 6.974235  
3.338448 2.848219 3.151407 2.136954 3.342047 3.077923 3.233606 3.177596 3.127283  
5.834393 4.989233 5.529502 5.008817 5.306952 5.540481 4.898329 5.241088 5.486565  
4.716667 3.888501 3.474888 3.449098 3.337628 2.805275 3.967537 3.619148 3.610999  
7.073222 7.202227 7.06028 6.948477 6.969622 7.042984 6.955133 7.269696 7.013265  
7.19927 7.162523 6.4911 7.350186 6.524862 7.112875 7.261995 7.355558 7.347217  
3.968811 4.451634 4.05267 3.436605 3.42212 4.642072 3.301825 4.410703 4.036364  
4.377364 4.453965 5.169938 5.078213 4.722866 4.674774 4.853421 5.140004 4.63321  
4.752718 4.440119 4.524188 5.374082 5.404227 5.186483 4.510404 4.681224 4.430755  
3.169045 3.611979 4.13381 3.777616 3.541291 3.631601 3.433803 4.638679 4.276162  
3.120653 3.589717 4.11611 3.462083 4.153192 3.300318 3.15891 4.196819 4.229754  
3.807186 2.052066 1.723443 2.834532 2.855921 2.374037 1.851346 3.289622 2.995292  
8.380311 9.111391 9.36485 8.852355 9.011392 9.152543 8.423874 9.084377 8.911361  
4.775499 5.520586 5.288617 5.284451 5.540708 5.733638 5.030832 4.989832 5.005397  
2.413802 2.71615 3.088174 2.307825 2.702709 2.951963 3.896485 2.448689 0.929012  
4.262959 5.406578 4.675938 5.013767 5.549375 4.672919 5.489976 4.922189 4.7703  
6.077804 5.897475 5.982997 6.181108 5.248009 6.17869 5.820051 5.670908 5.779781  
7.147298 7.166112 7.310716 7.329199 6.983672 7.387009 7.018011 6.736045 7.225703  
5.751447 6.10056 5.778151 5.109027 5.728343 5.690839 4.576732 5.620875 5.639586  
7.353246 7.38417 7.194786 7.293266 7.514906 7.202534 7.325101 7.110475 7.146379  
2.677951 6.404606 6.082233 5.31718 5.959275 5.559553 4.238069 5.300774 5.547904  
7.293944 7.419156 7.331744 7.322962 7.770091 7.318598 7.323664 7.23708 7.151414  
8.93502 8.747849 8.587058 8.801807 8.547671 8.694812 8.704285 8.781365 8.864407  
6.050427 5.854197 6.190517 6.413764 5.646772 6.22672 6.167879 6.135679 6.467398  
2.986288 2.620891 2.720338 3.087625 2.077411 3.486722 3.487834 3.272184 2.412305  
5.772344 7.113601 6.638854 7.540106 7.581012 7.57457 6.486164 7.339633 7.205017  
5.269895 5.031415 5.379933 5.693918 5.439538 5.286079 3.96353 5.38905 5.632205  
7.603282 8.552058 8.085386 8.60385 8.623834 8.371141 8.136083 9.065187 8.850897  
5.004394 4.750241 4.76128 4.320905 5.772865 5.65864 4.40809 4.878614 5.179127  
5.545522 5.89881 5.693808 5.986348 6.165664 5.774329 6.108729 5.78303 5.719243  
3.619267 6.192609 5.545476 2.166281 5.599803 5.920719 5.9437 4.676853 4.848586  
4.82741 5.773677 5.611429 5.652483 5.678702 5.614452 5.12718 5.436388 5.50628  
5.451413 4.920066 5.622488 5.374542 4.69734 5.592697 5.025093 4.714531 4.991385  
9.852235 9.992709 9.75767 10.04054 10.18714 9.657092 10.0504 9.973748 10.09044  
4.433839 4.094778 4.139515 3.553629 4.273927 3.820262 3.645671 4.458531 3.898186  
5.003112 5.981694 5.385174 5.472395 5.454979 6.022165 5.694833 5.489846 6.170672  
5.885857 5.244493 5.394472 5.815144 5.751802 4.956458 5.023754 6.259443 5.150861  
3.262672 3.614907 3.418334 4.125211 3.874314 3.135804 3.912398 3.33154 3.324613  
7.468655 7.77832 7.757079 7.59332 7.716322 7.989884 7.513718 7.33363 7.896749  
5.939114 6.26896 6.36097 6.101429 6.676671 6.337439 6.304657 6.784832 6.408989  
2.824713 1.989018 1.960671 1.724635 1.902666 1.296163 1.872396 1.676026 1.583578  
4.369834 5.247059 5.363247 5.519613 5.206884 5.189223 5.404552 5.074611 5.25483  
3.895059 3.802815 4.344748 3.991312 4.122768 3.862893 4.161185 3.848235 3.9182  
8.320108 7.429981 7.410709 8.335626 7.628959 8.323902 8.047596 7.460435 8.634149  
6.416612 6.684796 6.583406 5.971349 6.472072 6.671965 5.866889 6.080345 6.307334

6. 437145 5. 713437 6. 134995 5. 484082 5. 786585 5. 216214 6. 001539 5. 566723 5. 995128  
6. 587063 6. 738702 6. 423314 7. 018212 6. 775283 7. 1225 6. 70473 6. 60301 6. 703917  
5. 474634 6. 724463 6. 3251 6. 515314 6. 311781 6. 38909 5. 467045 6. 527189 5. 783263  
3. 446282 4. 139979 4. 69444 3. 765558 4. 603754 4. 642195 3. 791253 3. 818089 4. 073014  
3. 087228 2. 398068 2. 943483 3. 319496 3. 496475 2. 676397 2. 689312 2. 736817 2. 53048  
8. 221668 9. 042293 9. 051787 8. 83166 9. 275833 8. 894084 8. 140309 9. 534676 9. 270331  
7. 096823 6. 948596 7. 343112 6. 983688 6. 951759 7. 236822 6. 59936 6. 877564 6. 814744  
1. 706677 1. 081004 1. 473534 1. 601605 1. 704044 2. 207418 2. 37811 1. 177797 1. 40355  
2. 744785 2. 881742 1. 70582 2. 602704 1. 737309 2. 078081 2. 135585 2. 677995 1. 66718  
2. 493613 1. 615385 2. 519654 1. 852832 2. 351232 2. 065999 1. 908712 2. 201796 2. 430357  
4. 062924 4. 983961 4. 768172 3. 791459 4. 373011 4. 618388 4. 448747 3. 82781 4. 785211  
5. 226685 6. 609478 6. 371444 5. 942502 6. 283692 6. 48741 6. 567811 5. 645593 6. 122151  
7. 518989 7. 31318 7. 165351 7. 618486 7. 543886 7. 404165 7. 629234 7. 102502 7. 680655  
1. 986521 1. 986331 1. 986331 2. 932056 2. 32213 2. 795846 2. 82821 1. 405809 3. 16518  
2. 092961 1. 400103 1. 616322 1. 774927 1. 599986 2. 313168 1. 520836 1. 644424 1. 350138  
5. 740028 5. 364771 5. 652653 5. 551275 6. 099642 6. 196339 5. 163653 5. 874166 5. 554921  
1. 709946 2. 85289 3. 425875 2. 197768 2. 234165 2. 118665 2. 283371 2. 522997 2. 237404  
8. 152677 8. 22326 7. 939256 8. 007894 7. 735145 7. 995253 7. 599382 7. 976527 8. 164624  
3. 42981 2. 466941 2. 31059 2. 301338 2. 522955 2. 158799 4. 026784 2. 825374 3. 832808  
6. 237083 6. 954857 7. 275665 7. 400904 6. 955555 7. 439439 6. 818728 6. 615017 7. 192683  
4. 213125 4. 644767 5. 055989 5. 095387 5. 23761 5. 455753 4. 848561 4. 783452 4. 639212  
5. 012043 5. 219221 5. 165148 5. 221598 4. 781669 4. 760145 4. 365022 4. 888186 4. 827972  
1. 664501 1. 780157 2. 002002 1. 440852 1. 461471 1. 231405 2. 473962 1. 686183 1. 791085  
6. 506017 6. 735351 6. 387941 6. 563735 6. 977705 6. 849381 6. 361057 6. 380322 6. 629653  
2. 516959 2. 279288 2. 594149 1. 810608 1. 979388 2. 055602 2. 79516 2. 305378 1. 632853  
2. 147646 2. 512345 2. 264697 2. 259657 2. 525304 2. 615177 2. 639616 2. 362148 2. 206787  
3. 520709 3. 547463 3. 154364 3. 285576 3. 241473 3. 866684 3. 494546 3. 245242 3. 18287  
2. 096914 2. 680269 2. 482294 1. 955394 2. 231211 2. 314376 3. 275841 2. 467898 2. 520866  
2. 452829 1. 613738 2. 374069 2. 040524 3. 047867 2. 266221 2. 177658 1. 43042 2. 584743  
4. 309909 4. 33734 4. 252964 4. 419502 4. 209409 5. 152252 4. 429277 4. 061869 4. 706491  
1. 482917 1. 240833 1. 139003 1. 208916 1. 331941 1. 363707 2. 005023 1. 440471 1. 273205  
8. 014997 6. 429237 6. 257233 5. 963726 6. 504492 6. 190528 6. 147461 6. 645351 6. 740865  
3. 702702 3. 66454 2. 844058 3. 005574 4. 205092 4. 585171 2. 809389 3. 23273 2. 949685  
6. 209805 4. 69236 5. 545892 4. 416311 4. 845398 4. 654046 5. 62785 4. 751411 5. 473232  
7. 55516 7. 691019 7. 5055 7. 621554 7. 48261 7. 467592 7. 532475 7. 401111 7. 513477  
10. 77465 10. 82259 10. 34403 10. 99986 10. 61273 11. 04195 10. 67682 10. 29128 10. 54642  
4. 921418 5. 672135 5. 69026 6. 043571 5. 977203 5. 820891 4. 700156 6. 113019 5. 48596  
6. 785372 6. 835058 7. 006478 6. 680889 6. 690731 6. 708018 6. 541096 6. 666087 6. 968886  
5. 547356 6. 818631 6. 283333 6. 584509 6. 034255 6. 832391 6. 270581 6. 470076 6. 334766  
6. 551467 6. 770627 6. 737321 7. 101746 6. 580674 6. 795143 6. 54171 7. 006861 6. 370156  
3. 553454 3. 90682 3. 448172 4. 001813 3. 821994 3. 194681 3. 470575 3. 652038 3. 808328  
2. 412783 2. 705413 2. 749236 2. 362157 2. 176841 2. 495446 2. 749744 3. 172073 2. 498295  
6. 618618 6. 91364 6. 932036 6. 928121 6. 828118 6. 790753 6. 68258 6. 801461 6. 580532  
4. 039009 5. 196416 5. 024735 4. 355252 4. 510714 4. 551668 4. 577147 4. 420424 4. 982573  
5. 164124 5. 917019 4. 807664 5. 891045 6. 009337 5. 345596 4. 938088 4. 956928 4. 604713  
4. 488828 4. 222247 4. 582773 4. 478526 4. 856357 4. 632206 4. 241913 4. 508256 4. 377183  
2. 509177 3. 103271 3. 285411 2. 304409 2. 581358 1. 904006 2. 711845 3. 016751 2. 492253  
10. 39718 10. 25188 10. 33962 10. 28922 9. 975807 10. 16257 10. 14811 10. 03314 10. 16763  
4. 451132 4. 058152 3. 755898 3. 403685 3. 696947 3. 57114 4. 017585 3. 371083 3. 484612  
5. 060173 3. 421913 3. 725338 3. 893508 3. 706475 4. 744712 3. 811649 4. 159422 3. 436455  
2. 122095 2. 209703 2. 036789 1. 93761 1. 780367 2. 641168 3. 106367 2. 190571 2. 276282

1. 142704 1. 558629 1. 548642 2. 327705 1. 682101 2. 135491 1. 795199 1. 69088 1. 733926  
5. 833598 4. 614716 5. 117659 5. 473568 5. 644083 5. 454627 6. 182681 5. 790614 5. 371043  
2. 738516 3. 504943 3. 112705 3. 629506 3. 523717 2. 806815 2. 797587 3. 352837 3. 005226  
8. 964624 9. 878466 9. 666768 9. 482239 10. 26306 9. 675808 9. 733912 10. 03084 9. 562489  
8. 060921 8. 117709 7. 686604 8. 398324 8. 272611 8. 479204 7. 99384 7. 98706 8. 171164  
4. 286426 3. 823716 3. 762153 4. 877797 3. 674787 5. 252262 3. 261619 3. 484683 3. 529193  
4. 752858 5. 803377 5. 461287 5. 322807 5. 348784 5. 210262 4. 465721 4. 503213 4. 611381  
4. 473823 3. 919553 3. 657394 4. 006507 3. 849948 3. 561369 4. 264493 4. 487291 4. 445565  
2. 491867 1. 844299 2. 139709 2. 043767 1. 749056 2. 283936 2. 42343 1. 646447 1. 881246  
1. 632626 2. 089156 1. 763594 2. 019212 2. 904526 2. 557273 2. 58495 1. 965387 2. 071942  
4. 972369 4. 690537 4. 235415 5. 239841 5. 187857 4. 909747 4. 229628 3. 434799 5. 114775  
2. 823778 2. 481571 2. 561083 3. 342886 2. 963973 3. 828146 2. 671527 2. 725507 2. 555982  
3. 742143 4. 041547 3. 095871 3. 529739 4. 182907 3. 948088 3. 827197 4. 299688 3. 508734  
2. 071843 1. 423412 1. 327752 1. 68677 1. 720583 1. 238135 1. 41802 1. 608013 1. 373954  
4. 433735 4. 496156 4. 459052 4. 047113 4. 586305 4. 631075 4. 053522 3. 930997 3. 676123  
10. 66635 11. 20531 11. 17512 11. 18878 11. 2149 11. 27639 11. 03681 11. 35315 11. 3451  
3. 678366 2. 32235 3. 241027 2. 427191 3. 393403 2. 921931 3. 052715 2. 519431 3. 656041  
8. 125768 7. 881072 8. 003824 7. 616866 8. 022018 8. 066542 7. 905427 8. 623908 8. 449668  
2. 45242 2. 036196 3. 301398 3. 060645 1. 982014 3. 472926 3. 344352 2. 758215 3. 627083  
2. 61201 4. 307566 3. 431115 3. 710085 4. 421989 3. 603338 3. 59605 3. 569406 4. 424755  
4. 280818 5. 462194 5. 486422 5. 38925 4. 978544 5. 650339 4. 617793 5. 272626 5. 240844  
6. 519419 6. 369757 6. 45946 6. 268591 6. 422471 6. 407357 5. 749586 6. 791408 6. 524295  
5. 644121 6. 354082 4. 777299 6. 193454 6. 202708 5. 573538 5. 801886 5. 60354 5. 768093  
2. 994322 3. 039164 3. 294853 2. 71125 2. 657095 3. 193538 2. 619768 2. 652952 2. 750055  
7. 236777 7. 870768 7. 814521 8. 374751 8. 31237 8. 592774 7. 975723 7. 278386 8. 308666  
2. 832401 4. 247805 3. 640134 4. 195972 5. 16726 4. 15158 4. 500542 4. 491406 4. 586484  
5. 324077 6. 24855 5. 490377 6. 231373 6. 14275 6. 352791 6. 211784 5. 454169 5. 716207  
5. 777511 5. 597321 5. 406821 5. 935812 6. 249592 5. 888421 5. 597905 5. 649839 5. 762141  
4. 959742 6. 595194 6. 695089 6. 066802 6. 040163 6. 659343 6. 13765 5. 768206 5. 803259  
4. 909278 5. 540898 5. 873956 5. 799143 5. 925826 6. 026487 5. 450389 5. 587281 5. 400408  
5. 468846 6. 243063 5. 989802 6. 829489 5. 993495 6. 245349 5. 849179 6. 280751 5. 948178  
7. 386374 7. 026963 7. 091228 6. 838939 6. 986792 7. 087966 6. 787834 6. 883241 6. 731699  
4. 859663 5. 703207 5. 557123 5. 524274 5. 728829 5. 806786 5. 261752 5. 772068 5. 917334  
6. 235195 6. 721576 6. 4489 6. 786809 7. 147789 6. 88575 6. 29343 6. 276306 6. 170936  
8. 917603 9. 095214 8. 709331 8. 231495 8. 920727 9. 063111 8. 886809 9. 222862 9. 168262  
4. 757765 6. 506233 6. 005871 6. 397142 6. 209965 6. 513933 6. 45402 5. 683531 6. 723222  
5. 609123 6. 587469 5. 754936 6. 621265 6. 059195 6. 482689 6. 220239 5. 981442 5. 443694  
8. 127185 8. 52637 8. 501216 8. 315497 8. 815933 8. 612182 8. 663925 8. 763334 8. 148157  
3. 384874 3. 597257 2. 770153 3. 048042 3. 400878 3. 326872 3. 243029 3. 726317 3. 168618  
5. 896248 5. 642014 5. 770005 5. 456314 5. 868229 5. 240797 5. 587946 5. 609901 5. 750056  
5. 607446 5. 507174 5. 582156 5. 59652 5. 88387 6. 012457 4. 596171 5. 755328 5. 603938  
5. 067095 4. 911908 5. 091393 4. 719281 5. 140665 5. 052604 4. 386633 4. 337671 4. 680566  
1. 501022 1. 561814 1. 432665 1. 652375 1. 758485 1. 340168 1. 41301 1. 961715 1. 318399  
8. 258033 8. 84073 8. 557227 8. 928299 8. 800091 9. 004248 8. 029924 8. 906701 8. 430402  
6. 310846 5. 115534 4. 810465 4. 37635 6. 394673 4. 802544 5. 011494 5. 727169 5. 144238  
5. 598254 5. 841177 5. 876219 5. 96953 6. 21581 5. 664098 5. 112022 5. 235793 5. 951464  
6. 365082 6. 580381 6. 014303 5. 967625 6. 444987 6. 029294 6. 220737 6. 064949 6. 539979  
4. 874679 4. 481451 4. 345192 4. 550666 3. 995189 3. 859665 4. 213053 5. 17993 4. 140744  
5. 930744 6. 422716 6. 225791 6. 193263 6. 40952 6. 490792 6. 167168 6. 194979 6. 265126  
5. 896602 5. 594434 5. 437237 5. 630721 5. 714148 5. 895306 5. 498795 5. 258121 5. 402069  
3. 441156 3. 284662 3. 49156 2. 573065 2. 931515 3. 021646 2. 717559 2. 484166 3. 294795



5. 486994 5. 750192 5. 167191 5. 338283 4. 540397 6. 243194 4. 152539 5. 358618 5. 197861  
8. 102218 8. 581663 8. 365153 8. 624998 8. 704393 8. 20507 7. 953993 8. 589522 8. 387375  
3. 408547 2. 981465 4. 044912 3. 264633 3. 420754 3. 835864 3. 15528 3. 871092 2. 880456  
5. 996636 5. 514505 4. 859728 5. 80473 6. 430486 5. 905675 4. 588573 6. 580073 5. 502992  
8. 724217 9. 432938 9. 349808 9. 241438 9. 110098 9. 368776 8. 845508 9. 146164 9. 293621  
9. 470346 9. 144508 9. 362501 9. 150689 9. 295578 8. 856342 9. 325207 8. 91561 9. 203081  
5. 701555 6. 932625 7. 570016 7. 36716 7. 448219 7. 5407 6. 664883 7. 458836 7. 448075  
9. 017221 9. 115577 9. 20198 9. 103939 9. 169853 9. 063862 8. 904033 9. 189173 9. 370978  
5. 401083 5. 79935 6. 362799 5. 832155 5. 437084 5. 929282 5. 293955 5. 445841 6. 240825  
2. 844133 2. 108129 1. 049539 1. 633403 2. 451889 1. 324251 1. 981113 1. 961444 1. 463249  
4. 234933 4. 263651 5. 167636 3. 652668 4. 35431 4. 886843 4. 337277 4. 662575 4. 621829  
3. 24059 4. 014104 4. 602252 4. 706395 4. 264894 4. 435455 4. 146774 4. 87661 4. 529267  
4. 836579 4. 944891 5. 299517 4. 614348 5. 215683 4. 717239 4. 618389 4. 133904 4. 998428  
8. 583016 9. 090916 8. 903054 8. 909609 9. 029327 9. 141206 8. 741158 8. 773799 8. 83004  
2. 831481 3. 278597 3. 46278 3. 448049 3. 17747 3. 771377 3. 344351 3. 674017 3. 104325  
7. 003736 6. 913126 6. 668787 7. 50313 6. 699748 6. 733269 6. 613402 6. 154932 6. 651753  
1. 958295 2. 415761 1. 880764 3. 028633 1. 856608 2. 474377 2. 627184 2. 585788 3. 145488  
5. 045679 5. 251362 5. 498085 5. 222211 5. 708701 5. 291884 5. 32417 5. 756605 5. 63435  
5. 875643 6. 190985 5. 960338 5. 736201 5. 329293 6. 061967 5. 554509 5. 214662 5. 292335  
5. 491524 6. 1217 5. 7162 6. 136848 6. 027654 5. 663817 4. 388561 5. 570878 6. 11063  
4. 835631 4. 441262 4. 637421 4. 078107 3. 565856 4. 808328 4. 022078 4. 428352 4. 453284  
6. 380326 6. 998373 6. 989913 6. 999201 7. 07653 7. 182054 6. 712322 6. 414742 6. 761017  
6. 113177 6. 636913 5. 942805 6. 070611 5. 897524 6. 707163 5. 68998 5. 268159 5. 601212  
1. 85928 2. 419837 1. 329657 2. 517659 1. 888166 2. 361917 1. 520647 1. 781192 2. 998234  
1. 534648 2. 052929 2. 226822 2. 183004 3. 150842 2. 830782 2. 013406 3. 564373 2. 504969  
5. 746747 6. 001441 5. 820457 5. 83336 6. 047897 6. 2635 5. 708812 5. 8886 5. 644919  
4. 684822 5. 081793 5. 544877 5. 588898 5. 392652 5. 084686 4. 577396 5. 933303 5. 452351  
5. 082366 6. 596097 6. 339301 6. 313158 6. 333811 6. 407145 5. 791482 6. 160031 6. 278014  
5. 553281 6. 585957 5. 623123 5. 699551 5. 551807 5. 695075 5. 486095 6. 088953 5. 825062  
5. 511158 5. 178447 4. 275895 4. 346256 4. 292704 5. 181119 3. 878302 5. 773165 4. 383004  
3. 557197 3. 762094 4. 414982 4. 733794 2. 74466 3. 843118 2. 985649 3. 56334 3. 773648  
3. 81285 5. 930344 5. 108646 4. 198653 4. 788999 3. 778895 3. 674643 6. 053779 3. 931727  
1. 631783 2. 062081 1. 726446 3. 186452 1. 854478 2. 198652 2. 431343 2. 381534 2. 194408  
1. 062224 1. 329261 1. 188218 1. 39839 1. 424718 1. 318238 0. 880106 1. 072013 0. 921949  
4. 3257 4. 306065 5. 353526 4. 166903 3. 674458 4. 081127 3. 733371 4. 546546 4. 003225  
1. 754813 2. 277981 1. 816471 1. 607174 1. 614398 1. 504681 1. 17945 1. 782204 2. 916962  
8. 161661 8. 688403 8. 219358 8. 989223 8. 716207 8. 640021 8. 619171 8. 188997 8. 443353  
3. 360114 2. 046052 1. 523971 1. 543229 1. 873075 1. 788077 2. 235957 1. 934445 1. 482926  
1. 955041 1. 942173 2. 152318 2. 116587 2. 18901 2. 078131 2. 233557 2. 03718 2. 089431  
3. 804005 4. 414852 4. 698364 4. 406633 3. 953087 4. 803516 4. 382684 3. 901945 4. 21453  
6. 7585 8. 245975 8. 593775 7. 992719 7. 986599 8. 339404 7. 710218 8. 17788 7. 738431  
3. 117871 3. 042708 2. 878439 4. 435994 3. 120538 3. 891967 3. 800374 2. 747285 3. 276865  
5. 092531 5. 142369 5. 102495 6. 150471 6. 095267 5. 427 5. 176247 4. 16821 5. 586501  
5. 814308 5. 956495 6. 214452 6. 059878 6. 693634 6. 978634 5. 532064 6. 31753 5. 745708  
6. 036257 6. 121218 6. 39087 5. 955071 6. 218303 6. 19201 5. 843704 5. 495292 5. 958716  
3. 313815 2. 186611 2. 584885 2. 109297 2. 591461 2. 180706 2. 785787 3. 532973 3. 458053  
4. 606603 3. 268792 3. 982543 2. 617391 3. 247574 3. 354545 2. 652798 2. 626538 3. 741903  
4. 007553 5. 012835 4. 259127 4. 478146 4. 905273 4. 297822 4. 424784 4. 540334 4. 773777  
5. 724008 5. 0001 5. 383428 4. 869213 5. 890202 4. 735916 4. 730761 5. 757497 4. 661087  
6. 823395 7. 209554 6. 773251 7. 148666 7. 149821 7. 504177 7. 045881 7. 491108 7. 448346  
3. 296418 4. 055857 4. 285508 3. 706227 3. 588271 3. 998647 3. 872674 4. 794194 4. 533891

5. 768203 5. 596016 5. 510101 6. 221797 5. 948583 6. 019694 5. 473383 5. 956888 5. 77442  
1. 618072 2. 497262 2. 667476 2. 275409 1. 971456 2. 480517 2. 367349 2. 40379 2. 196491  
5. 283292 6. 46966 6. 193087 6. 380966 6. 107593 6. 534094 6. 248529 6. 091609 6. 059452  
4. 98805 3. 462136 2. 632462 3. 063455 3. 414003 2. 871773 3. 51611 2. 77529 2. 364311  
4. 531463 5. 416201 4. 475174 5. 272941 5. 003203 5. 821914 5. 076592 5. 491604 5. 347374  
4. 413417 5. 489717 5. 215971 5. 316016 5. 341128 5. 25332 5. 397768 5. 578251 5. 317027  
6. 401324 6. 931348 6. 643509 6. 751678 6. 547856 6. 528948 6. 59318 6. 890046 6. 513909  
5. 490002 5. 262316 6. 205674 5. 634539 5. 812595 5. 80619 4. 847614 6. 274965 5. 589794  
8. 154874 9. 067095 9. 07031 8. 463105 8. 651674 8. 736017 8. 461376 8. 733409 8. 45134  
2. 588666 1. 627402 2. 583446 1. 977247 1. 53936 3. 48021 2. 749528 1. 679821 1. 410692  
2. 304387 3. 203178 2. 686545 2. 523512 1. 930169 2. 614799 2. 890019 2. 194056 2. 293972  
8. 595436 8. 862724 9. 035277 8. 728953 8. 7861 8. 984912 8. 272005 8. 998783 8. 684923  
6. 672918 6. 67205 6. 945869 6. 736421 6. 617146 6. 441091 6. 791539 6. 373992 7. 00343  
5. 298754 5. 689694 5. 629202 4. 939929 5. 148402 5. 678651 5. 189181 5. 104694 5. 220207  
6. 475776 6. 834812 6. 620398 6. 636137 6. 704 6. 427938 6. 455501 6. 462569 6. 471965  
5. 988757 6. 358182 6. 125048 6. 867576 6. 819568 7. 088386 6. 436724 6. 251835 6. 383225  
7. 663435 8. 15384 7. 654723 7. 936376 8. 597407 7. 957339 8. 061263 8. 232623 7. 949933  
6. 498871 6. 812732 6. 684288 6. 315823 6. 552753 6. 224054 6. 331328 6. 364631 6. 282084  
3. 756853 2. 834532 3. 060975 3. 89032 2. 612517 2. 959255 2. 778208 3. 440245 3. 047318  
6. 529868 6. 989026 6. 63547 7. 003649 6. 917707 6. 724317 6. 463319 6. 813465 6. 807498  
7. 602563 7. 311648 7. 485221 7. 54205 7. 368984 7. 342033 7. 623863 7. 73724 7. 581814  
5. 759568 6. 048408 5. 570535 6. 189188 6. 076545 5. 98545 6. 58368 6. 093393 6. 076088  
6. 393167 6. 3065 6. 302447 6. 568852 6. 344697 6. 189558 6. 271316 6. 5419 6. 524645  
3. 360415 4. 693018 5. 640327 5. 38352 5. 000045 4. 769798 4. 40027 2. 823968 3. 738321  
3. 555845 4. 408248 4. 579599 4. 885473 3. 971165 5. 172687 4. 415005 4. 627043 4. 235548  
4. 617063 4. 715438 5. 204472 5. 351051 4. 973783 5. 161646 5. 703705 5. 126586 5. 327503  
5. 557341 6. 260628 5. 587435 6. 122335 6. 672682 6. 440866 5. 519453 6. 610476 6. 19344  
4. 845742 5. 657073 5. 698567 5. 692051 5. 474711 5. 289355 5. 484726 5. 411988 6. 280186  
5. 718798 6. 217531 5. 940422 6. 30204 6. 854686 6. 410358 6. 132042 6. 48543 6. 119328  
4. 843533 3. 595368 3. 527288 3. 444322 3. 317814 3. 807592 3. 881293 3. 717401 3. 485099  
6. 088471 7. 213162 7. 172706 6. 633413 6. 998142 7. 327667 6. 785073 6. 610148 6. 882366  
2. 902392 1. 771486 1. 766958 1. 607327 1. 385738 1. 809317 1. 411809 1. 181681 2. 04872  
2. 218256 3. 26118 3. 265735 4. 132471 2. 688434 3. 037327 2. 633225 3. 788162 4. 794161  
1. 851717 1. 665095 1. 256241 1. 664058 1. 48576 1. 541066 1. 523529 1. 427862 1. 401786  
2. 061439 2. 202329 2. 319023 2. 47351 2. 280631 2. 462638 2. 026053 2. 913672 2. 778606  
4. 783498 4. 756976 4. 54164 4. 339492 4. 842738 4. 77001 4. 000737 4. 207813 4. 584646  
5. 007329 5. 48806 5. 186765 5. 271345 5. 245771 4. 874554 5. 026855 5. 600763 4. 832547  
6. 3108 6. 621574 6. 667928 6. 700648 6. 913124 6. 768841 6. 889861 6. 71446 6. 505359  
7. 343005 7. 580361 7. 811887 7. 801736 7. 537206 7. 935768 7. 464051 7. 639942 7. 535097  
3. 746906 3. 279182 2. 383624 2. 858774 2. 873244 2. 818159 2. 907704 2. 046659 1. 819203  
7. 640722 7. 741319 8. 432178 7. 938172 8. 397383 7. 835192 7. 951357 8. 217893 8. 029935  
6. 309238 6. 77454 6. 029615 6. 438791 6. 934708 6. 189709 6. 047246 6. 286535 6. 359561  
3. 366086 3. 584213 2. 982056 4. 750802 4. 362953 3. 970658 3. 73073 3. 676911 4. 051453  
3. 526311 2. 777176 2. 809938 2. 859334 2. 390882 2. 639551 2. 954971 3. 479741 2. 751444  
5. 592845 4. 306847 3. 593504 5. 599717 6. 250644 5. 029148 6. 092882 4. 713099 4. 756657  
2. 979528 3. 367501 4. 017855 3. 645358 3. 619854 3. 327528 2. 89265 4. 537888 3. 956155  
2. 552179 3. 394052 2. 578401 2. 861713 3. 737537 2. 79452 2. 521569 3. 245842 3. 394921  
3. 102731 3. 969311 3. 789673 2. 736516 2. 492947 2. 80473 2. 998433 3. 352861 3. 599928  
5. 810092 4. 299727 4. 659653 5. 282015 5. 641775 3. 795156 3. 81108 3. 775023 3. 772388  
4. 33476 4. 714151 5. 12421 3. 706528 3. 842621 4. 602196 5. 077873 3. 909191 3. 889234  
6. 949785 6. 830562 7. 105755 7. 217809 7. 03169 6. 883866 6. 763531 6. 96982 7. 204744

2. 918202 3. 984912 4. 294907 4. 107806 4. 342698 3. 697228 3. 491446 4. 534949 3. 990588  
1. 419268 1. 411287 1. 197592 1. 670172 1. 469403 1. 838567 1. 439195 2. 241371 1. 579975  
5. 321712 5. 948999 5. 929142 5. 729221 5. 832589 5. 831151 5. 556958 5. 362879 5. 550437  
2. 330528 3. 068938 2. 035999 2. 223278 2. 107715 3. 826455 2. 774153 2. 10857 2. 210153  
3. 813006 3. 585414 4. 01326 3. 694952 3. 467449 4. 018995 3. 709485 4. 339577 3. 567166  
5. 770976 6. 678855 6. 061662 6. 020949 6. 321621 6. 101118 6. 127124 6. 342597 6. 203702  
2. 297563 1. 412691 1. 353094 1. 88584 1. 847233 1. 622064 1. 81632 1. 736785 2. 076641  
3. 41223 3. 990317 4. 684805 4. 588355 4. 230092 4. 49839 3. 712746 5. 22112 4. 559216  
8. 297251 8. 309042 7. 952242 8. 063586 8. 193447 7. 678727 7. 747517 7. 999383 7. 512603  
4. 440995 4. 88164 4. 150631 4. 627656 4. 90319 5. 360481 4. 787929 4. 065092 4. 607961  
5. 976515 5. 41862 5. 845653 6. 447947 6. 120163 6. 423202 5. 649505 6. 166396 6. 144446  
2. 093801 1. 62774 2. 293485 2. 25222 1. 609 2. 550208 3. 949956 2. 798033 3. 578404  
4. 415625 4. 447984 4. 605032 4. 068911 4. 723194 3. 856385 3. 958628 4. 894579 4. 288575  
6. 535042 6. 458636 6. 399794 6. 500747 6. 419397 6. 820311 6. 474818 7. 216464 6. 912966  
7. 052969 7. 586097 7. 609619 8. 076474 7. 983757 8. 217985 7. 151692 7. 340006 7. 482408  
5. 029633 4. 900765 4. 777309 4. 814496 4. 288443 5. 587215 4. 506016 5. 159709 5. 089956  
4. 359504 4. 872981 4. 348706 4. 912379 4. 918944 4. 454336 3. 735029 5. 115457 4. 699232  
3. 739376 3. 091051 3. 258306 3. 703425 3. 445918 3. 113819 3. 709772 3. 752928 3. 130037  
6. 809741 6. 455446 6. 253887 6. 409268 6. 499902 6. 610149 6. 039528 6. 408096 6. 001564  
7. 25562 7. 394749 7. 294845 7. 772531 6. 94413 6. 994011 7. 256903 7. 487798 7. 464783  
1. 31637 0. 845267 1. 331546 1. 398903 1. 551742 1. 389884 1. 241849 1. 187341 1. 156835  
5. 285508 6. 210337 5. 667791 5. 902668 5. 63223 6. 312593 5. 691725 6. 233486 5. 998758  
6. 666234 6. 271325 6. 492159 6. 554874 6. 516547 6. 687179 5. 986259 6. 503783 6. 304807  
5. 37625 5. 716097 4. 850308 4. 690498 5. 584468 5. 501332 5. 102744 4. 329563 5. 059351  
2. 233885 2. 623532 2. 261005 2. 136764 2. 756869 2. 276484 2. 44516 2. 526634 2. 36704  
7. 652379 8. 276127 8. 427435 7. 777634 8. 082484 8. 322864 7. 061083 8. 320706 7. 709714  
3. 079433 4. 673328 4. 190914 4. 471201 3. 605818 3. 423562 3. 98031 3. 707672 4. 482269  
5. 724838 5. 913193 5. 785681 6. 127303 6. 234556 5. 360707 5. 869072 5. 633395 5. 375279  
5. 968595 6. 816779 6. 593339 6. 602494 6. 805638 6. 587312 7. 028721 7. 282435 6. 290667  
2. 293664 2. 083231 2. 490316 2. 100702 2. 512487 2. 642853 1. 874623 2. 084431 2. 264292  
2. 314405 2. 016814 1. 750297 1. 65696 1. 388928 1. 511805 1. 739419 1. 997858 2. 099221  
4. 162779 5. 319854 3. 034552 2. 96735 4. 839187 4. 608039 3. 799771 4. 951178 5. 229253  
5. 136532 3. 799443 3. 842655 3. 315119 3. 229759 3. 482979 3. 592937 3. 809768 4. 728413  
6. 20877 6. 969861 6. 7972 6. 473214 6. 306179 7. 082555 5. 376192 6. 636201 6. 457588  
1. 474363 2. 390545 1. 575957 1. 845846 1. 379811 1. 534696 1. 891321 1. 48257 1. 624617  
6. 150611 6. 729757 7. 075993 6. 536481 7. 026869 6. 456419 6. 631329 7. 023492 6. 570946  
2. 34145 2. 172244 2. 261102 2. 409982 1. 552554 2. 140678 2. 025204 1. 948266 1. 41544  
6. 58243 7. 558182 7. 632748 7. 125363 8. 186469 7. 693985 7. 904347 8. 058843 7. 434739  
3. 148069 3. 772389 3. 248422 3. 842943 3. 400367 3. 557058 3. 253314 4. 115312 3. 850066  
4. 972421 5. 004198 4. 876306 5. 226614 4. 608065 5. 527477 4. 303416 5. 333873 4. 664547  
6. 404266 7. 229621 6. 609866 6. 760546 7. 185777 6. 814111 6. 864301 7. 060029 7. 085773  
2. 605682 1. 991922 2. 2972 2. 437504 2. 47362 2. 604325 2. 056058 2. 298632 2. 634387  
6. 870443 7. 538439 7. 723092 7. 532789 7. 628088 7. 484205 6. 774673 8. 398549 7. 226015  
4. 80574 4. 850181 4. 508914 4. 589393 5. 230861 4. 39491 4. 543597 4. 497379 3. 926138  
2. 384737 2. 031433 2. 055351 2. 515019 1. 638608 1. 300827 1. 166082 2. 374832 1. 704734  
1. 798826 1. 506361 3. 198813 2. 319805 4. 24184 3. 138522 3. 106014 3. 212131 1. 807132  
6. 194512 6. 062897 6. 21166 6. 382126 6. 03933 6. 165641 6. 522104 5. 777205 5. 771323  
1. 435769 1. 423438 0. 970043 1. 231829 1. 037103 1. 08721 1. 326434 1. 253165 1. 460317  
6. 475741 6. 716592 6. 246449 6. 562631 6. 754138 6. 57074 6. 00773 6. 515581 6. 670047  
5. 940503 5. 267766 4. 831724 5. 461015 5. 972466 5. 971176 5. 439889 6. 133374 5. 896059  
4. 852329 6. 003608 5. 825523 5. 672045 6. 013007 5. 456102 5. 438641 5. 899594 6. 138182

8.056423 4.338759 5.80346 4.10423 5.120582 3.938037 5.096496 4.80944 6.389261  
1.849091 1.126372 1.876305 2.333755 1.677441 1.66123 2.060357 2.212002 1.375552  
6.415545 2.903187 2.823435 3.690404 4.637559 3.76247 5.619917 4.279366 4.309511  
7.411833 7.866647 7.981249 8.17602 7.861709 8.206818 7.966465 8.167898 7.813351  
5.974621 6.341553 6.299544 6.175746 5.725777 5.975265 4.946044 6.091692 5.849643  
7.007813 6.986039 7.195354 7.339882 7.18977 7.168122 6.94552 7.123969 7.107953  
7.127521 7.77468 7.454251 7.808273 7.377041 7.476252 7.546568 7.405418 7.221462  
5.479417 3.079471 3.042817 2.295401 2.280939 1.993336 3.132688 3.296184 3.209935  
5.032375 3.292093 3.928774 3.529763 2.584742 3.087961 2.922129 3.629253 4.48012  
6.772167 6.377563 6.822819 7.006333 6.167186 6.695993 6.592905 6.327127 6.406506  
4.794754 4.593373 4.821638 5.548619 4.78882 4.626868 4.711489 4.984612 4.291053  
5.648776 6.870814 6.164212 6.066834 6.34315 5.988185 5.237148 5.857188 6.288014  
5.967405 7.358021 6.844185 7.324407 6.876961 7.065219 7.61997 6.457909 6.220279  
7.961669 8.174171 7.922104 7.802493 7.777362 7.771973 8.159178 7.929669 8.167832  
4.3679 4.626585 5.050859 4.448309 4.970553 5.716762 4.736175 5.223495 5.463395  
3.114147 3.908709 3.959797 4.105898 4.07139 3.875542 4.534827 4.152137 3.869943  
1.52334 1.569563 1.575173 1.347653 1.457541 1.522611 1.737751 1.61543 1.848263  
4.027993 4.39026 4.374648 4.060586 3.98834 4.167829 4.148796 3.923719 3.811782  
2.574845 3.322338 3.09657 2.236994 3.250334 3.74192 3.721816 2.301234 4.204257  
5.411227 5.898225 5.915016 6.162744 6.017474 5.209012 5.198249 5.955398 6.390426  
9.344425 9.213942 9.362682 8.890299 9.105554 8.938392 9.218982 8.991277 8.987193  
5.516924 6.50056 6.339645 6.718045 5.628408 6.240099 5.569087 6.043893 6.121361  
5.521722 6.558102 6.484178 5.815236 5.811158 6.488175 5.881899 5.907407 5.977471  
5.182931 5.127038 4.996182 4.630863 4.867529 5.134498 5.195995 4.838169 4.905092  
5.937075 5.468329 5.819914 5.773181 5.434912 4.688252 4.474658 4.637208 6.021903  
9.299834 9.712169 10.17414 9.732102 9.468468 9.938375 9.172746 9.762647 9.428505  
2.020894 1.714137 3.335898 2.350394 3.01886 1.407019 2.103253 1.818342 1.62653  
6.758351 5.423172 6.268663 5.350398 5.46178 6.144047 5.630478 5.839453 5.813479  
5.664453 5.635616 5.712435 5.739145 6.32254 4.817855 4.598399 5.977563 4.893738  
5.421232 5.360803 4.899704 5.016343 5.627753 5.686875 5.671485 5.101695 5.128171  
6.556461 6.33161 7.276319 6.17192 5.778857 6.262788 7.079344 7.241356 6.38751  
2.531698 2.218573 2.635547 2.509071 2.573524 2.249856 3.405793 2.363714 2.634771

GSM604468GSM6044700

2. 052333 2. 614787  
4. 028088 4. 226174  
8. 65698 8. 389957  
6. 216686 6. 75086  
1. 52931 2. 420945  
2. 638779 1. 751364  
3. 212456 1. 438429  
2. 698474 1. 164895  
1. 690676 1. 792532  
0. 774793 1. 991962  
5. 752857 5. 052183  
6. 898412 7. 708441  
1. 234107 1. 621103  
0. 8404 1. 374797  
4. 957702 4. 405303  
6. 517921 7. 284914  
1. 908937 2. 059488  
1. 666762 1. 784746  
3. 452474 0. 852693  
0. 604902 0. 773401  
1. 926217 0. 912189  
2. 480377 2. 487511  
0. 755626 0. 770118  
1. 287089 1. 911041  
0. 57734 0. 911541  
0. 556165 1. 612258  
0. 630693 0. 872694  
0. 772525 1. 053003  
0. 81851 0. 73194  
0. 801931 0. 971874  
0. 985083 0. 747144  
0. 873616 0. 773999  
1. 250919 1. 921954  
0. 804446 0. 964926  
0. 73215 0. 785376  
0. 770146 1. 162775  
0. 563809 0. 731788  
0. 740563 1. 021995  
0. 618934 0. 795105  
0. 595 1. 011003  
0. 696849 0. 870666  
1. 353073 1. 829858  
2. 128434 1. 412069  
1. 547245 1. 09762  
1. 986253 1. 67633  
1. 03322 1. 626008  
0. 614712 1. 403286  
1. 232672 1. 755035  
4. 31334 4. 248036  
2. 59719 2. 835035

2.667313 2.098385  
1.382512 1.310054  
4.927441 4.272993  
3.49403 3.760936  
5.725766 5.912472  
8.807747 8.769135  
0.91438 1.339673  
4.059242 4.418887  
2.909534 5.233752  
7.273244 8.501367  
1.271471 2.075145  
5.063009 4.845347  
5.549222 6.185459  
4.302305 1.775533  
3.736429 3.155117  
4.243092 2.766476  
1.168952 1.427152  
5.650869 5.762245  
0.742009 1.017524  
1.114998 0.676155  
2.075304 1.609463  
2.353848 5.474647  
1.383535 2.422097  
3.13088 4.582584  
1.083277 1.019256  
1.196359 1.467384  
0.681865 0.806737  
0.750457 0.702121  
0.719522 1.397841  
1.293128 2.136606  
0.980387 0.913589  
4.433581 3.28845  
3.837086 4.860499  
3.641278 2.896467  
1.248802 2.962513  
2.574789 2.721771  
3.966465 1.202233  
0.894426 1.504226  
2.517869 1.681044  
2.025167 2.153729  
2.680029 0.795746  
4.451024 3.722139  
1.165911 0.871642  
1.706325 1.574849  
2.593467 3.18073  
1.813046 1.780951  
1.784609 3.454347  
3.014447 3.221303  
0.830224 1.004332  
3.724312 2.048478  
0.765565 1.845507

1. 010671 1. 819145  
0. 802996 1. 471673  
1. 317487 1. 000576  
1. 047415 0. 64884  
3. 126407 3. 486673  
1. 366373 2. 090563  
1. 399865 1. 336055  
2. 941986 3. 021767  
2. 777434 2. 466623  
1. 973849 3. 379303  
0. 885261 1. 535405  
4. 130981 1. 278419  
1. 230185 0. 957466  
1. 6662 2. 021475  
1. 863661 1. 375123  
2. 713365 1. 621112  
1. 029995 1. 277416  
2. 683629 1. 416453  
1. 672189 1. 673967  
4. 566438 3. 722102  
1. 079678 1. 336482  
4. 770304 5. 013777  
2. 02047 1. 70122  
1. 647735 2. 797415  
0. 827483 1. 1537  
0. 765409 1. 115251  
5. 715247 2. 155244  
1. 377161 0. 814664  
1. 484815 1. 966561  
1. 047405 1. 501944  
1. 062446 0. 956926  
0. 92916 0. 925002  
0. 90556 1. 985903  
1. 05002 1. 577676  
2. 177493 2. 740846  
0. 854258 1. 763983  
3. 766754 2. 457404  
1. 718731 1. 981868  
3. 509601 1. 759847  
1. 301848 1. 449257  
1. 683139 1. 83934  
5. 434808 4. 890312  
4. 146922 3. 959632  
1. 626552 2. 443856  
3. 362802 1. 871105  
3. 410862 2. 366271  
3. 873038 1. 692219  
1. 683926 1. 947432  
1. 38883 2. 222602  
1. 117802 1. 209568  
1. 739968 2. 275529

5. 489643 4. 840262  
3. 057005 3. 914037  
3. 178261 1. 464889  
1. 323128 2. 260644  
5. 306164 2. 2276  
3. 165382 2. 921247  
3. 579075 4. 11574  
1. 505685 1. 244377  
2. 411545 1. 844532  
1. 450657 1. 596853  
3. 828401 5. 230395  
1. 671737 1. 893757  
2. 234615 2. 776357  
3. 522972 3. 091937  
0. 783632 1. 291614  
2. 050144 1. 318069  
0. 978316 1. 535782  
3. 99502 3. 626212  
1. 298036 1. 340152  
2. 485881 3. 235563  
7. 18023 6. 744347  
1. 494173 1. 354149  
5. 40314 3. 258728  
2. 341791 1. 50149  
2. 03763 2. 733018  
0. 968997 0. 984385  
2. 479852 2. 843979  
2. 071286 1. 705445  
4. 00503 4. 750951  
1. 401776 2. 528599  
2. 983706 3. 842711  
3. 857957 2. 620103  
1. 557617 1. 870045  
1. 214436 1. 596629  
3. 893563 3. 868854  
1. 028838 1. 587235  
5. 096392 4. 761153  
1. 202884 0. 849212  
1. 941988 1. 012653  
5. 19122 3. 301936  
4. 229375 2. 947849  
1. 119883 1. 550299  
1. 813364 1. 096172  
3. 526045 3. 490073  
2. 577026 2. 456281  
2. 704316 1. 146962  
2. 174455 2. 038419  
2. 227484 2. 29497  
2. 600335 2. 161657  
1. 291628 1. 826421  
2. 369443 2. 35177



1. 960583 1. 591212  
9. 682462 9. 877381  
3. 628867 2. 649802  
1. 646057 1. 939985  
3. 154989 3. 151158  
1. 33167 2. 121306  
2. 089876 1. 594419  
2. 362278 2. 416618  
2. 978201 3. 017313  
5. 187273 4. 757014  
2. 059466 2. 602367  
2. 801681 3. 15176  
1. 238053 1. 608042  
1. 286324 2. 492452  
1. 902016 1. 941405  
2. 045356 1. 934968  
2. 373778 3. 339102  
2. 053165 2. 819744  
2. 252247 2. 553233  
0. 644511 0. 848786  
1. 346823 1. 187568  
3. 588858 3. 179071  
4. 816815 3. 94425  
3. 887133 3. 631033  
5. 00306 4. 440974  
5. 723049 2. 828968  
0. 790092 1. 821247  
1. 777868 2. 025299  
1. 804852 3. 444465  
4. 975129 5. 196473  
2. 689386 2. 68482  
1. 687024 2. 007883  
3. 014388 2. 412917  
1. 604676 3. 089007  
7. 511026 7. 316418  
1. 40819 1. 633687  
3. 148262 3. 727942  
2. 250126 2. 417293  
3. 319905 4. 447005  
1. 412447 1. 98517  
1. 731598 3. 066925  
1. 1376 2. 186284  
4. 48172 4. 415629  
1. 289277 2. 060332  
2. 194011 2. 348842  
0. 772292 1. 271815  
1. 867088 2. 215833  
0. 918037 1. 377197  
2. 697436 2. 337827  
5. 932567 7. 320581  
1. 047012 1. 163548

3. 90005 4. 055025  
3. 618465 1. 52653  
2. 946889 3. 477753  
3. 155697 3. 832036  
1. 773275 1. 785529  
3. 423234 2. 670747  
2. 040538 2. 579069  
1. 272084 1. 11484  
1. 99442 2. 179302  
3. 737334 4. 109931  
2. 426332 1. 289651  
5. 929848 5. 235994  
2. 342656 2. 573871  
3. 316757 4. 491344  
4. 257666 3. 468171  
1. 188567 1. 599403  
2. 098042 2. 336088  
1. 464097 1. 973744  
4. 722789 3. 674882  
2. 866538 2. 018845  
0. 936927 1. 237601  
1. 27222 2. 012875  
4. 307263 2. 434718  
1. 196871 2. 296749  
1. 154043 1. 451596  
2. 869633 1. 44084  
2. 190894 1. 881143  
1. 262409 1. 79421  
1. 059903 1. 4941  
4. 241226 2. 276792  
2. 254591 3. 161766  
2. 802626 2. 469859  
2. 055865 1. 966934  
3. 339465 2. 895772  
2. 480521 3. 470031  
3. 594089 3. 483668  
0. 599265 1. 159525  
2. 562333 2. 32917  
2. 183367 1. 445456  
4. 573242 4. 192411  
2. 267756 2. 297679  
2. 275325 2. 237915  
3. 298006 2. 525762  
2. 658682 2. 71789  
3. 646792 3. 183061  
1. 705659 1. 251125  
1. 381857 2. 359406  
4. 550026 2. 831399  
2. 936367 2. 734503  
3. 493127 3. 937244  
0. 955092 1. 863628

2. 259778 2. 45354  
2. 997103 4. 937847  
2. 957794 2. 230246  
1. 240697 1. 410227  
2. 15891 2. 560163  
1. 331297 1. 417031  
2. 21201 1. 269033  
1. 741622 1. 03092  
1. 131098 1. 127299  
1. 13996 1. 77568  
1. 785307 1. 837792  
1. 415738 2. 005199  
1. 606799 2. 421299  
4. 036766 4. 155297  
1. 066961 1. 354731  
1. 239177 0. 975748  
1. 762806 1. 696864  
2. 717289 2. 969411  
1. 580231 1. 83745  
1. 825091 1. 549256  
1. 518119 1. 565704  
1. 167369 1. 407784  
3. 035099 3. 686153  
2. 49059 1. 822791  
2. 119786 2. 07844  
1. 802738 1. 505867  
3. 005053 3. 26879  
1. 569777 1. 412065  
3. 746811 2. 712342  
1. 122701 1. 558618  
1. 745687 1. 579925  
1. 291379 1. 141063  
2. 283388 2. 598014  
2. 110782 2. 154682  
1. 910954 2. 415661  
1. 460224 1. 923976  
4. 73929 4. 291811  
1. 522713 1. 858767  
1. 551867 1. 807263  
5. 019372 2. 366038  
1. 907665 2. 243594  
1. 474672 1. 673349  
1. 350886 2. 063792  
1. 264057 1. 437983  
3. 616547 4. 034032  
1. 252723 1. 589692  
2. 930958 3. 122548  
2. 40371 2. 272796  
2. 805696 2. 631699  
6. 95353 5. 743179  
1. 4738 1. 251753

0.603105 1.291196  
2.574434 4.116416  
2.627535 3.104464  
1.922528 2.432353  
1.988517 1.920451  
5.525491 2.144543  
2.067718 1.597528  
2.638481 3.018453  
2.408317 1.743636  
5.395711 6.958944  
4.621707 4.390959  
2.421215 2.479326  
2.859127 2.915805  
1.584186 1.593063  
1.066783 1.507056  
2.005037 3.424096  
2.173653 2.154207  
1.461379 1.15303  
1.056622 1.981595  
1.116514 1.207134  
1.556932 1.388048  
2.568254 2.786673  
1.461478 1.819794  
2.136677 2.083475  
2.848376 2.920993  
1.47698 1.735673  
1.503942 2.259903  
3.526043 3.295467  
2.143674 2.47527  
2.45404 1.940896  
4.056177 2.622266  
1.261841 1.842886  
3.033571 1.657461  
1.623616 2.092873  
1.697976 2.090628  
4.754197 2.830045  
5.999213 6.698713  
2.479725 2.578069  
7.760074 7.898773  
1.435869 1.664042  
4.455142 3.595059  
1.660976 2.375591  
5.408383 3.354484  
3.371011 3.126491  
1.550507 1.133021  
1.961301 2.459574  
2.66461 4.103518  
2.938445 3.690291  
1.359436 2.823274  
1.567055 1.601014  
0.858001 1.442513

2. 477074 2. 287053  
3. 860386 3. 403642  
2. 970381 2. 374769  
1. 781517 2. 418254  
2. 954291 2. 607345  
1. 348906 2. 080605  
1. 446868 2. 096249  
2. 075426 2. 932302  
1. 57951 1. 438259  
2. 387244 1. 098387  
1. 591488 1. 720297  
2. 758698 2. 740571  
1. 565015 1. 690402  
5. 117615 2. 138332  
6. 147974 2. 239013  
1. 173298 2. 123235  
3. 616751 3. 082604  
3. 252993 3. 152461  
2. 483717 2. 659336  
1. 941806 1. 595846  
3. 293671 2. 180358  
5. 017949 4. 002441  
4. 507978 4. 709623  
1. 472308 1. 678841  
3. 132404 4. 532091  
4. 519267 3. 690297  
5. 128382 2. 687497  
1. 121243 2. 252616  
0. 65407 1. 533242  
2. 920328 4. 089491  
3. 518093 3. 654522  
1. 533353 1. 452341  
1. 313629 1. 198101  
1. 971534 0. 992006  
2. 80952 3. 034511  
1. 813938 1. 687764  
4. 918984 4. 09701  
4. 169437 4. 455111  
1. 187979 1. 763584  
1. 894587 1. 892329  
1. 253444 3. 724929  
1. 886048 4. 554408  
1. 839456 2. 067068  
3. 8377 3. 182682  
6. 980175 6. 622633  
1. 783756 1. 751589  
2. 551426 4. 199956  
1. 193459 1. 432808  
3. 445543 3. 900987  
1. 722494 1. 59569  
4. 750408 4. 247578

1. 50951 0. 942177  
2. 065939 2. 573053  
1. 955307 2. 2122  
4. 590277 2. 780015  
0. 953548 1. 061636  
2. 766105 2. 600279  
1. 222054 0. 953213  
6. 150919 6. 042188  
0. 787816 1. 058746  
2. 053509 1. 748947  
1. 917718 2. 432689  
1. 352883 1. 320404  
2. 876949 1. 766944  
1. 726863 1. 494929  
2. 215097 2. 58033  
5. 199603 2. 317368  
1. 724275 2. 061149  
2. 52885 5. 075048  
2. 997377 1. 83415  
1. 455091 1. 635314  
1. 832812 1. 497068  
3. 672358 2. 68995  
2. 408533 1. 621772  
0. 809203 1. 335888  
1. 342409 2. 473509  
0. 901435 1. 510913  
4. 441923 4. 11422  
1. 905199 1. 971482  
2. 146981 1. 81862  
1. 662805 2. 808037  
2. 389395 2. 499907  
1. 156874 1. 726214  
1. 282502 1. 673355  
3. 275896 1. 032612  
2. 975037 3. 163285  
9. 211913 7. 251561  
3. 148283 3. 527939  
1. 82376 2. 053907  
3. 144674 3. 81777  
1. 776308 2. 081425  
1. 611452 1. 486176  
1. 785055 1. 858799  
2. 217921 3. 36162  
2. 704902 3. 27784  
2. 074378 2. 102554  
2. 515509 2. 901817  
0. 823949 0. 958296  
2. 185985 2. 764626  
2. 871932 1. 278247  
1. 739069 1. 633095  
1. 859669 2. 01848

2. 27242 2. 842603  
5. 055069 2. 110009  
4. 706994 4. 877294  
2. 631453 2. 216822  
1. 443831 0. 936896  
1. 91791 2. 341519  
1. 238328 2. 156394  
2. 153932 2. 120764  
4. 073437 5. 277681  
1. 617987 1. 230122  
1. 975602 2. 282471  
1. 91839 1. 837013  
5. 94067 5. 646754  
1. 706215 2. 106998  
1. 59834 2. 806409  
5. 916517 2. 81953  
7. 525024 6. 386673  
1. 819614 1. 302872  
1. 41326 1. 194095  
4. 978837 4. 523533  
1. 751907 1. 131142  
7. 301958 7. 21161  
4. 590539 5. 135071  
2. 680696 1. 427994  
3. 446716 5. 155994  
3. 305639 3. 583761  
1. 933693 1. 569803  
2. 41417 2. 351937  
1. 054354 1. 53595  
1. 374494 2. 253371  
7. 85562 7. 741867  
2. 129276 2. 251047  
1. 08634 1. 511653  
1. 975504 2. 006065  
1. 624187 1. 412456  
4. 905256 3. 827552  
3. 261738 1. 050149  
4. 238828 2. 891588  
4. 210708 4. 113535  
6. 052069 1. 390205  
1. 271431 2. 655231  
1. 64296 2. 477668  
2. 982217 2. 459595  
3. 719046 3. 433351  
1. 227671 1. 592474  
1. 224815 1. 255594  
2. 700062 1. 792116  
1. 341434 1. 792515  
3. 13476 2. 498022  
4. 354745 4. 52988  
2. 159475 2. 34417

4. 696608 4. 805137  
1. 526294 4. 292498  
1. 561816 2. 702205  
3. 286957 2. 533796  
4. 608608 2. 558388  
2. 979791 3. 668684  
1. 210078 1. 421176  
4. 359226 0. 926661  
3. 740815 3. 488888  
2. 114277 4. 267591  
2. 358823 2. 461534  
4. 020286 5. 061085  
1. 491988 2. 628921  
4. 821849 5. 169959  
1. 140336 1. 637306  
7. 832224 7. 477628  
2. 220974 2. 732598  
1. 549249 1. 577261  
2. 708495 2. 732091  
2. 901085 2. 829434  
1. 856928 1. 788247  
2. 430028 1. 996543  
2. 068695 2. 305689  
1. 551373 2. 671171  
6. 165683 3. 276826  
1. 610936 1. 945345  
2. 516391 5. 454046  
6. 679495 7. 829372  
1. 295272 2. 231336  
4. 119197 2. 155225  
2. 675744 2. 344373  
1. 242472 1. 18185  
2. 365478 2. 84359  
2. 257774 1. 790328  
2. 512644 1. 631036  
3. 631243 3. 289865  
4. 693096 3. 74462  
2. 25767 1. 761862  
3. 234298 2. 567988  
0. 894323 1. 08816  
1. 287093 1. 494956  
3. 997634 4. 417446  
1. 698534 1. 631853  
2. 172471 3. 122056  
3. 37259 3. 427866  
6. 996195 5. 294439  
1. 588268 2. 025818  
2. 257662 2. 17208  
1. 704116 2. 066812  
1. 453465 1. 870882  
0. 941869 0. 93171



1. 559433 1. 51863  
2. 928037 3. 739548  
1. 437356 1. 728589  
2. 211106 2. 140024  
1. 974661 1. 452642  
2. 373828 2. 750971  
1. 647605 2. 888376  
1. 901473 1. 660659  
2. 465074 2. 007185  
2. 87645 2. 829977  
1. 692991 2. 014207  
2. 088438 1. 979603  
2. 621993 2. 092254  
3. 566319 3. 319837  
0. 832585 2. 024895  
1. 245084 1. 33911  
1. 05634 1. 123219  
2. 149306 0. 977145  
1. 60862 1. 976168  
3. 186589 2. 92647  
1. 294005 1. 612325  
1. 758386 2. 080047  
2. 906858 1. 898322  
0. 820458 1. 155728  
4. 710628 2. 201743  
2. 938388 3. 667641  
1. 782751 2. 165712  
4. 112254 4. 701236  
2. 804401 2. 672348  
4. 095272 4. 590085  
7. 060884 7. 583888  
4. 22384 3. 435929  
1. 61397 1. 869447  
1. 962947 1. 992494  
4. 302412 2. 534693  
3. 264173 2. 992712  
1. 172855 0. 952731  
5. 810649 5. 277241  
2. 462121 1. 819669  
2. 935913 2. 121323  
3. 317147 3. 37423  
3. 272566 3. 763658  
2. 274502 2. 072804  
3. 122778 2. 71117  
1. 36678 1. 394152  
0. 857546 1. 189868  
2. 081959 2. 199377  
3. 955066 2. 75712  
1. 70896 1. 772826  
3. 585722 3. 672967  
1. 501896 1. 30783

4. 070268 2. 126411  
3. 914024 4. 14542  
2. 213165 1. 310252  
1. 138772 1. 389877  
4. 125182 3. 861832  
2. 380604 1. 265618  
4. 043218 6. 727941  
3. 602418 2. 760376  
1. 535864 2. 560223  
2. 183471 3. 067635  
1. 953186 2. 491887  
1. 81058 1. 944523  
2. 308162 3. 150597  
2. 800555 2. 515818  
1. 756712 2. 232921  
6. 239102 7. 408365  
1. 121934 2. 331667  
1. 348345 0. 912345  
3. 160878 2. 900198  
2. 140072 3. 145244  
2. 710831 2. 754686  
4. 413826 4. 230673  
3. 428267 2. 247005  
1. 616098 2. 089694  
1. 083379 2. 371628  
4. 294713 2. 502006  
1. 891828 2. 074639  
3. 69705 3. 17513  
4. 678438 4. 681748  
2. 910926 2. 375886  
2. 406314 3. 796046  
1. 726298 2. 104984  
1. 272956 4. 808863  
1. 880631 3. 07386  
2. 869762 3. 079977  
2. 547186 1. 663752  
2. 218834 2. 114108  
3. 25917 2. 454789  
2. 040959 1. 54401  
3. 720695 3. 749821  
3. 379832 3. 873166  
4. 835275 2. 405617  
1. 608365 1. 83605  
0. 961687 1. 653231  
1. 576526 2. 042477  
1. 875413 2. 252038  
2. 159029 2. 361649  
5. 804213 5. 176692  
1. 39129 1. 79824  
2. 101741 2. 886554  
4. 84853 4. 509697

2.843415 2.268213  
2.012663 2.044662  
2.037568 2.114976  
0.982013 0.902069  
2.572711 2.623607  
2.158173 1.101367  
2.06645 1.924917  
1.143678 0.905693  
1.61497 4.514208  
2.081718 1.992927  
4.91773 5.564013  
1.159114 1.420206  
1.104669 1.142082  
0.799333 1.19428  
1.170189 1.137248  
0.740716 1.629491  
0.918836 1.999986  
1.125273 2.730931  
0.655235 2.383655  
0.593643 1.165187  
1.636399 0.981074  
2.086703 3.472497  
1.472533 1.538025  
1.630622 1.30207  
2.015579 1.247932  
2.812764 1.448771  
2.390039 2.945194  
3.161321 3.774757  
1.845992 1.468945  
1.678594 1.989172  
4.896599 3.929617  
0.670687 1.286762  
0.879868 0.961549  
1.749347 1.114215  
1.314571 2.468369  
4.396327 2.366685  
1.39115 1.325747  
1.535745 1.38746  
4.193981 4.929356  
0.927331 1.141397  
4.378764 2.646139  
1.497584 0.798344  
3.839568 3.038018  
1.47201 2.00483  
3.232784 2.515494  
0.761999 1.036939  
0.903013 1.455374  
0.815262 0.813757  
2.072113 2.418189  
0.942996 1.043117  
1.080453 1.683623

2. 26771 2. 676511  
3. 263863 1. 171692  
1. 020416 0. 993485  
2. 124947 3. 073535  
0. 838663 0. 782652  
1. 220385 1. 239096  
2. 899255 0. 861998  
3. 524571 1. 210383  
0. 62411 0. 93199  
1. 125067 1. 991671  
5. 269062 5. 480259  
1. 449595 1. 40738  
1. 029252 0. 912076  
2. 502302 1. 222272  
1. 457129 1. 36591  
1. 033481 1. 733195  
1. 250329 1. 867193  
3. 600693 1. 785561  
0. 922702 2. 98722  
1. 263845 1. 040078  
1. 040777 0. 617569  
2. 218353 2. 331224  
0. 881426 1. 279088  
0. 624935 2. 071529  
1. 018767 0. 81772  
1. 338491 1. 530876  
2. 404132 2. 420343  
0. 860001 1. 065355  
1. 125477 0. 672125  
5. 37951 4. 600197  
1. 515499 1. 33754  
1. 118485 1. 593295  
4. 277131 3. 618298  
2. 785444 2. 927974  
0. 995382 1. 408164  
1. 098014 2. 383574  
1. 298515 2. 638212  
4. 682462 3. 037731  
2. 395998 2. 472568  
2. 916509 3. 10078  
1. 658969 0. 838462  
1. 484601 1. 190626  
8. 946808 8. 681002  
1. 038074 0. 859776  
1. 550099 2. 427836  
2. 029151 1. 745247  
3. 470028 2. 777338  
6. 294753 6. 227349  
3. 598076 4. 283408  
0. 817434 0. 918488  
3. 888952 1. 446767

7. 694516 4. 863708  
1. 947875 2. 292582  
1. 201817 0. 896717  
3. 534099 1. 199265  
5. 142709 2. 78631  
1. 203256 1. 521604  
2. 956293 3. 843707  
2. 288104 1. 467888  
6. 28532 2. 824932  
4. 352736 4. 625897  
4. 65016 1. 343575  
1. 614771 2. 406222  
2. 320719 1. 360438  
1. 745222 2. 18246  
3. 373958 1. 673272  
1. 270188 1. 913601  
7. 161204 5. 26494  
4. 483277 4. 940164  
1. 670128 2. 154732  
4. 015948 4. 153369  
6. 279567 6. 673816  
2. 691449 2. 323548  
5. 362327 2. 165527  
3. 936942 3. 328797  
5. 135917 5. 315508  
1. 71253 1. 176236  
1. 856612 1. 820683  
2. 50852 1. 360939  
0. 880491 0. 813647  
4. 490442 1. 119645  
4. 249907 1. 951358  
1. 036406 2. 468303  
1. 102278 1. 07261  
1. 031388 1. 740262  
0. 669852 1. 119528  
2. 176937 3. 581248  
1. 946572 2. 044604  
0. 729956 0. 739087  
3. 380128 4. 076355  
1. 686111 1. 133941  
2. 753086 2. 228558  
2. 024596 1. 696788  
1. 262125 1. 289338  
1. 231757 1. 185254  
0. 997434 2. 746971  
5. 853637 2. 946968  
2. 051206 2. 085798  
2. 815389 2. 333301  
1. 246357 1. 497207  
1. 887944 1. 484809  
0. 980949 1. 345279

0.693179 0.399126  
1.715708 1.845468  
1.041941 1.073256  
1.125061 1.437399  
3.212556 4.196958  
4.158155 4.677932  
0.761011 1.096733  
1.690157 2.407958  
2.766832 1.018249  
1.053097 0.909148  
1.582073 1.720552  
2.995827 3.796451  
5.407729 2.96997  
2.015727 2.642417  
1.335169 1.185211  
1.112986 1.339906  
3.210437 2.824828  
3.070639 2.372252  
0.759776 1.576292  
1.84088 2.043855  
3.255324 2.017402  
6.200996 5.402211  
1.31669 1.832737  
7.629204 6.740049  
5.095255 6.272219  
4.889819 6.13367  
7.967792 7.216346  
7.069179 7.254336  
2.911261 3.093458  
2.10387 2.042727  
1.870084 1.620969  
1.669351 1.895171  
1.852561 1.270002  
0.96176 0.983071  
1.929196 1.866501  
1.946911 3.579215  
1.271959 1.737625  
1.277382 1.573755  
0.965221 1.019197  
0.890911 0.834  
1.482538 0.987827  
4.290753 1.299412  
1.092969 1.851012  
2.725172 3.621687  
1.383201 2.324254  
0.824046 2.881696  
0.696891 0.337867  
5.00833 3.157897  
4.319995 4.577904  
2.563 3.188908  
2.035539 2.567343

0.845558 1.270466  
2.281007 0.772003  
0.860999 0.93112  
1.240223 1.471891  
1.088015 2.812134  
2.004396 1.923925  
0.999013 1.597367  
1.532245 1.385248  
0.907679 0.93471  
1.418585 0.955645  
1.621202 1.140631  
1.398764 1.103629  
0.974076 3.130852  
1.305689 0.966997  
1.054745 1.033416  
2.932568 2.240806  
2.101445 3.093149  
2.591547 1.93291  
1.207662 1.507752  
0.871289 1.338721  
2.717769 2.014257  
1.819373 1.143596  
1.408846 1.678009  
1.184364 1.34817  
5.349866 4.03793  
1.22663 1.375599  
0.82575 0.791682  
0.664159 1.376033  
1.459081 2.661043  
1.498133 1.409304  
1.015402 1.275025  
2.578849 1.514896  
4.030543 2.204949  
1.583559 2.841121  
0.670711 0.880822  
1.315423 1.955955  
2.165026 2.462249  
0.599772 1.032494  
2.289603 0.010149  
1.252077 1.409244  
3.736127 4.458831  
3.632445 2.434774  
2.328308 2.08455  
1.23268 0.953839  
6.568739 2.345067  
2.511453 1.068879  
2.401671 2.637503  
2.23312 2.314515  
1.463402 1.929203  
1.332448 1.348531  
3.311146 3.045083

0. 59821 1. 435538  
0. 819876 1. 083403  
0. 587053 0. 601365  
1. 334484 1. 516937  
1. 504812 0. 698923  
4. 132896 3. 058184  
1. 685407 2. 208269  
1. 00264 0. 962029  
3. 189162 2. 683761  
5. 627438 5. 342176  
1. 348402 1. 660626  
2. 144231 2. 0845  
5. 728366 5. 164714  
2. 243505 1. 012977  
0. 604699 1. 030996  
1. 142281 2. 095755  
1. 917325 1. 877473  
2. 938387 1. 7552  
2. 651049 2. 3602  
0. 808849 1. 512724  
1. 142205 1. 314024  
1. 606082 1. 180267  
1. 356749 1. 513405  
6. 112983 1. 939329  
3. 980926 2. 212701  
2. 327392 3. 232475  
3. 718214 2. 739875  
4. 448591 1. 634507  
1. 237942 2. 184197  
0. 765243 0. 90938  
1. 117379 1. 422688  
4. 076013 3. 212915  
2. 679089 2. 596079  
0. 955495 1. 193471  
3. 719431 4. 33762  
3. 967005 1. 445916  
6. 910359 5. 519992  
4. 830155 4. 773137  
1. 669937 1. 18017  
0. 793661 1. 008766  
3. 378418 3. 417994  
0. 706501 0. 914766  
3. 45148 3. 162344  
0. 734966 0. 503917  
0. 851173 0. 454613  
3. 076073 4. 033797  
0. 5779 1. 806967  
4. 948603 1. 893662  
4. 086971 4. 063602  
2. 836726 1. 349285  
2. 489948 3. 331739



2. 801948 1. 562372  
2. 538136 3. 301735  
1. 288085 0. 771306  
1. 089911 1. 233109  
2. 41645 2. 581925  
0. 792937 1. 148061  
2. 941291 2. 201729  
0. 96875 0. 783097  
0. 698735 2. 042049  
0. 887763 0. 795317  
1. 332815 1. 298811  
0. 898788 1. 489179  
1. 14412 1. 422736  
3. 945157 2. 563198  
2. 587414 3. 797512  
1. 829446 1. 578806  
1. 952079 0. 685634  
2. 206393 4. 073198  
3. 6831 4. 065518  
2. 456427 2. 569785  
1. 715258 2. 142013  
2. 966655 2. 951502  
3. 086144 2. 8618  
1. 24363 2. 102472  
1. 038895 1. 021192  
1. 115412 1. 809349  
1. 227779 1. 417481  
3. 135223 1. 776171  
2. 833972 2. 975913  
0. 951857 1. 345236  
4. 151409 3. 507894  
0. 619998 1. 62125  
2. 038855 1. 489777  
2. 398261 1. 422556  
5. 875403 5. 339741  
1. 020796 1. 213415  
4. 843802 4. 82366  
5. 338949 4. 613566  
3. 023766 3. 637063  
4. 275509 2. 755928  
1. 127468 1. 109767  
3. 61661 1. 794025  
1. 369097 2. 326394  
1. 55075 1. 278264  
0. 758461 1. 545516  
2. 368805 2. 127134  
3. 607814 3. 014808  
1. 151142 1. 030019  
0. 905797 1. 161177  
3. 81695 3. 517974  
2. 045263 2. 14033

7. 109354 7. 19585  
1. 071293 0. 859133  
1. 959286 0. 872365  
3. 313312 2. 401415  
2. 436774 1. 850636  
2. 050862 1. 867707  
3. 236517 3. 979456  
3. 789835 3. 64081  
6. 588349 5. 822158  
1. 784304 2. 863867  
4. 489277 3. 930762  
3. 865911 3. 908993  
6. 43831 6. 278265  
7. 755073 7. 461548  
1. 716343 2. 045923  
1. 511957 1. 762886  
4. 929466 1. 653996  
1. 144466 1. 278498  
2. 202505 2. 453789  
1. 260559 1. 196502  
1. 111732 1. 044594  
3. 663193 4. 898056  
3. 97965 3. 394308  
3. 673216 1. 762975  
1. 613396 2. 203352  
1. 449944 1. 858232  
1. 077767 1. 367685  
1. 147775 1. 539998  
1. 352091 1. 054138  
2. 88764 1. 206373  
1. 030951 1. 462146  
1. 630458 1. 483681  
0. 760889 1. 317099  
5. 438639 3. 019809  
0. 82754 1. 027389  
0. 990492 1. 168278  
5. 498746 4. 141696  
0. 696068 0. 996638  
1. 581357 1. 267287  
1. 320342 1. 396732  
0. 821376 1. 881304  
6. 546355 6. 141647  
0. 791048 0. 915731  
1. 577154 1. 757457  
0. 751507 1. 442266  
1. 362627 1. 574892  
3. 186978 3. 19796  
1. 016136 1. 150861  
1. 773363 2. 682505  
6. 797193 3. 554193  
0. 937294 1. 088705

3. 573814 3. 871816  
2. 928877 1. 704952  
6. 855241 6. 147894  
0. 552565 0. 960005  
2. 30284 2. 990854  
3. 551512 3. 413379  
0. 882492 1. 189463  
2. 703837 3. 214766  
2. 581284 4. 32863  
3. 354598 1. 314365  
0. 819626 0. 950899  
3. 243112 1. 148035  
0. 670576 1. 495874  
2. 025739 2. 068414  
3. 90963 4. 855637  
6. 653166 4. 336054  
4. 689234 2. 393165  
1. 324599 1. 252393  
4. 396122 1. 754117  
0. 684627 1. 724372  
0. 661801 0. 903124  
1. 950967 1. 125597  
1. 06799 1. 376279  
3. 12502 3. 107564  
1. 05501 1. 238133  
1. 814459 1. 853077  
2. 643038 2. 783896  
1. 077558 1. 126836  
1. 149826 1. 618132  
3. 957936 4. 235639  
2. 137471 2. 15658  
5. 528221 5. 303263  
0. 898454 1. 067212  
2. 538376 2. 466588  
1. 008017 1. 171643  
1. 262826 2. 16072  
3. 485614 1. 859145  
2. 851812 3. 508265  
3. 132438 2. 974141  
0. 814398 1. 164098  
1. 030871 1. 66719  
1. 374993 1. 373016  
7. 365108 8. 28304  
0. 755661 1. 316098  
3. 278499 3. 466077  
4. 56232 0. 907378  
1. 444079 1. 358266  
2. 034177 2. 706939  
0. 69946 1. 019299  
1. 922258 1. 569269  
1. 100901 1. 120674

2. 35055 4. 127874  
1. 390169 2. 168135  
4. 787789 4. 262958  
3. 741351 2. 973336  
1. 927623 2. 136662  
0. 385547 1. 935762  
1. 596086 1. 816177  
1. 031994 2. 755122  
1. 4028 1. 886418  
1. 903348 2. 43131  
1. 848124 2. 084038  
1. 317577 1. 150415  
3. 077157 2. 184357  
2. 937643 1. 784723  
1. 66859 2. 270852  
1. 882286 1. 791662  
1. 158432 1. 870015  
2. 471409 2. 33985  
3. 712024 3. 047774  
1. 36261 2. 414972  
3. 182819 2. 707698  
0. 663359 1. 080885  
4. 225205 3. 545098  
7. 031867 6. 840491  
3. 219713 4. 13526  
2. 144448 2. 156509  
1. 481907 2. 086006  
1. 70206 1. 932869  
1. 984004 3. 173157  
1. 103337 1. 343442  
1. 327324 2. 460905  
0. 894489 0. 608217  
4. 654879 2. 408296  
1. 097341 1. 44433  
2. 480793 2. 111807  
5. 523676 5. 132634  
1. 528051 1. 979696  
1. 332169 2. 143951  
3. 977458 2. 585199  
2. 051098 2. 252565  
7. 649211 7. 474735  
3. 747613 4. 050329  
6. 129948 5. 684391  
2. 153092 0. 848338  
1. 172422 1. 905001  
0. 752497 1. 002804  
8. 232029 6. 900448  
2. 096482 1. 909206  
1. 479866 1. 546821  
3. 831089 3. 63116  
3. 814398 3. 523326

2.006016 3.444355  
1.48642 1.752417  
3.485807 3.891469  
3.348147 2.246753  
3.700539 2.744523  
1.459556 1.515751  
1.748897 2.588433  
2.308822 1.797382  
1.377049 1.44621  
3.139313 2.316418  
1.426033 1.277237  
1.550534 1.700636  
2.94146 2.121054  
4.758512 5.417032  
1.510268 2.153753  
1.831952 1.483824  
1.574668 1.717187  
2.001059 2.510832  
4.791326 4.460327  
3.810872 2.139568  
0.939613 1.846592  
3.940389 3.479679  
2.02585 1.923401  
1.711549 0.982324  
1.727003 2.743053  
4.110761 4.703194  
1.539216 1.199607  
3.813436 2.507767  
1.073297 1.116215  
2.0944 4.100045  
5.407879 6.914907  
0.836812 2.071518  
2.543651 2.621672  
1.79512 2.062563  
2.662554 3.132204  
1.609033 1.963054  
1.005782 1.075253  
1.57481 1.99338  
1.830827 1.450573  
1.599656 1.754505  
1.390217 1.558015  
1.292872 0.982894  
1.633003 1.77301  
4.481863 5.113929  
3.371364 4.447441  
4.61123 3.103147  
2.431107 3.334819  
7.421999 6.736989  
1.183838 1.329668  
1.56339 1.124196  
1.192074 1.553677

9.092364 8.492386  
1.642489 3.607607  
1.646641 2.544824  
1.719554 1.55352  
3.286907 2.114549  
1.668645 2.087787  
1.465235 1.446605  
1.673606 1.935433  
1.89814 1.386304  
3.614619 4.186667  
1.362633 1.379136  
3.373567 2.910954  
4.125136 5.243854  
4.066808 5.61301  
3.225326 3.467043  
1.270039 1.76594  
1.394071 1.445779  
0.993123 1.355265  
2.160065 2.77157  
1.440522 1.577131  
1.060968 1.671742  
2.1796 1.734656  
1.143645 1.681009  
1.362683 3.602203  
2.055479 1.880283  
1.523366 2.54395  
1.397228 1.52759  
3.097619 2.461581  
1.657685 1.489064  
2.244927 3.463866  
2.572391 2.30103  
2.140362 1.376872  
5.46286 5.255204  
1.418703 1.347599  
1.002848 4.003646  
5.040738 4.081749  
2.368952 3.996626  
1.053219 1.750767  
2.000407 2.228243  
3.35009 3.076674  
2.069534 1.418342  
1.851684 2.440248  
1.302366 1.5382  
1.401469 1.928014  
1.49738 0.895332  
2.116808 3.309486  
1.858158 2.226257  
2.618302 1.910134  
3.681221 5.983668  
1.062244 1.449197  
2.183786 2.66708

2. 918926 1. 535175  
1. 740694 1. 878299  
3. 822979 5. 681135  
2. 508198 2. 556704  
0. 91251 1. 012666  
1. 484077 1. 542522  
0. 942502 1. 31674  
1. 488883 1. 980367  
3. 927173 3. 480302  
1. 828862 3. 061216  
3. 092458 2. 377218  
4. 018913 3. 569695  
7. 078404 6. 936164  
1. 48337 1. 898182  
1. 139117 1. 453839  
2. 618713 2. 029102  
1. 199308 1. 443554  
1. 717306 2. 293819  
1. 273547 1. 560932  
1. 027344 1. 521897  
5. 706965 5. 715524  
3. 793517 1. 255951  
3. 019381 2. 811246  
2. 546023 2. 085897  
2. 503643 1. 383109  
1. 334237 1. 966594  
7. 169383 7. 183904  
2. 722196 1. 889092  
1. 024006 1. 142218  
1. 056795 1. 282428  
1. 026793 1. 415625  
2. 725556 3. 661055  
3. 336622 1. 943829  
3. 261118 1. 342828  
2. 216106 2. 233859  
1. 515535 1. 529048  
1. 535668 1. 385927  
4. 154065 3. 923637  
4. 981898 5. 39223  
1. 765747 1. 448275  
1. 582719 1. 514364  
1. 569437 1. 20815  
4. 442481 4. 713622  
4. 762397 4. 68753  
3. 683372 3. 470869  
2. 71968 3. 775885  
2. 132279 2. 813752  
1. 943687 1. 894095  
5. 062169 2. 876369  
2. 519586 3. 27188  
1. 99696 1. 742672

1. 800589 1. 107564  
2. 779458 2. 739837  
3. 64312 3. 679695  
1. 956373 1. 537642  
3. 46987 3. 549074  
7. 957976 7. 693837  
3. 401105 3. 607898  
2. 35132 2. 194213  
2. 775187 1. 745203  
1. 773149 1. 262962  
2. 348991 3. 01319  
3. 754394 4. 395291  
1. 465011 1. 622596  
1. 709445 1. 801307  
4. 096041 3. 462463  
2. 108238 2. 937413  
1. 915137 2. 144997  
2. 608291 3. 736419  
1. 290961 1. 866083  
2. 191568 1. 941426  
1. 049821 1. 084543  
1. 992093 1. 522331  
1. 938815 2. 342161  
1. 052576 1. 258726  
4. 427156 1. 824232  
3. 45285 3. 089892  
1. 35595 1. 738364  
2. 340529 2. 697929  
0. 81577 1. 452019  
1. 639594 2. 350856  
3. 871918 2. 501184  
1. 721196 1. 178118  
1. 336636 1. 357553  
6. 649209 5. 813864  
5. 326369 5. 388269  
1. 700793 1. 718271  
1. 536039 3. 49023  
2. 373469 2. 133011  
2. 26983 3. 320607  
1. 254583 1. 790121  
1. 410168 1. 738086  
2. 329989 1. 665857  
4. 659077 2. 953487  
1. 669481 1. 120362  
1. 553376 2. 352853  
1. 316132 1. 631597  
1. 533756 1. 758205  
1. 419993 1. 572661  
1. 272794 1. 133546  
3. 090091 1. 60776  
1. 682334 2. 355584



3. 215415 3. 412281  
2. 361307 0. 834482  
5. 649614 6. 457444  
0. 848274 1. 324377  
1. 70334 1. 541253  
0. 69355 1. 434126  
0. 669881 1. 707626  
2. 627939 2. 287824  
2. 648646 2. 67615  
2. 596525 2. 738524  
5. 558707 5. 244029  
2. 934325 1. 843717  
1. 4459 1. 361386  
2. 246416 2. 231271  
1. 947963 2. 462972  
1. 454496 1. 044882  
1. 601701 2. 100448  
1. 894909 3. 244262  
2. 496967 3. 49161  
1. 440015 1. 345651  
1. 834432 2. 42742  
3. 945999 3. 936304  
2. 210805 1. 212938  
1. 11647 1. 389238  
1. 823919 2. 143082  
3. 340056 3. 650533  
1. 203715 2. 344448  
3. 480229 4. 382098  
2. 918201 3. 107995  
0. 890283 1. 903093  
2. 187547 2. 408202  
2. 387664 2. 452367  
2. 589635 2. 830538  
1. 08939 1. 267477  
4. 335525 4. 81032  
4. 390804 5. 354847  
1. 21798 1. 163618  
1. 349651 1. 277102  
1. 900641 2. 653794  
2. 369906 2. 580368  
1. 310709 1. 57918  
1. 084093 1. 874664  
3. 154712 3. 166201  
4. 883006 4. 318298  
5. 319744 3. 990878  
4. 047323 3. 809949  
1. 673695 1. 146203  
0. 918252 1. 154189  
6. 441125 5. 195503  
3. 284977 1. 425602  
3. 333315 3. 00012

1. 005951 1. 415232  
2. 103528 1. 947364  
4. 036524 3. 727528  
1. 60233 2. 036959  
1. 643475 1. 949266  
2. 374131 1. 437583  
1. 471144 1. 670748  
1. 887518 2. 067646  
4. 114982 5. 336659  
1. 323517 1. 937682  
1. 835251 1. 214904  
2. 798846 5. 30223  
6. 289654 7. 273207  
1. 326936 1. 369918  
1. 250169 1. 098629  
0. 96423 1. 289772  
2. 100213 2. 024288  
1. 432181 1. 67054  
2. 644851 3. 69381  
3. 448788 4. 256946  
1. 064383 1. 639762  
0. 756338 0. 801082  
1. 592043 1. 468705  
0. 83868 1. 699671  
1. 443957 1. 810218  
1. 965833 3. 201152  
2. 204546 1. 513073  
1. 278958 0. 998797  
4. 33587 4. 951647  
1. 704471 2. 365409  
1. 428552 1. 881293  
1. 519644 1. 881352  
1. 970912 1. 921407  
6. 131937 6. 687664  
2. 751561 2. 209135  
1. 196261 1. 498053  
2. 867018 2. 157325  
5. 950989 2. 752371  
2. 612202 2. 318846  
1. 509661 1. 601655  
4. 190883 3. 052971  
1. 389062 1. 802868  
1. 990908 2. 995782  
1. 405444 1. 76941  
4. 683703 1. 182988  
2. 743363 1. 74535  
1. 292752 1. 484083  
4. 463765 3. 998053  
2. 694663 2. 807769  
1. 113139 2. 651966  
3. 167434 3. 337167

7. 654663 4. 903462  
3. 778618 4. 165134  
1. 355185 0. 939378  
3. 516042 4. 175073  
1. 090006 1. 174399  
1. 295923 1. 15464  
0. 995294 0. 898707  
4. 421506 3. 923561  
1. 370358 3. 264546  
3. 19462 4. 11288  
2. 374995 1. 801955  
2. 682154 2. 096625  
3. 637159 2. 302786  
1. 521714 1. 834517  
1. 617542 1. 774772  
2. 491921 1. 885036  
0. 827312 1. 070354  
2. 378898 2. 569193  
1. 81015 3. 181487  
2. 551852 2. 012164  
3. 458356 2. 440181  
1. 528336 2. 635107  
2. 344021 2. 565231  
1. 32747 2. 469821  
2. 814584 1. 987077  
2. 238239 2. 363133  
1. 639426 1. 533352  
2. 26866 3. 80093  
1. 454897 1. 222349  
1. 420087 1. 622032  
5. 838295 3. 208299  
1. 146501 1. 122774  
1. 563734 2. 013196  
2. 495142 2. 515046  
1. 535646 1. 773187  
2. 380402 1. 936859  
1. 983735 1. 885274  
2. 156362 2. 473034  
1. 871416 2. 043634  
6. 820066 5. 485367  
4. 263663 3. 8288  
1. 382625 1. 287364  
5. 042636 1. 63891  
1. 205938 1. 392879  
3. 049712 1. 575276  
2. 846233 1. 979257  
3. 796881 4. 584042  
3. 826663 2. 424951  
1. 652868 1. 532828  
1. 584647 1. 411167  
1. 239375 1. 337605

3. 488691 4. 190857  
3. 004522 4. 582474  
1. 178291 1. 004911  
2. 0145 2. 166122  
4. 924755 6. 377442  
2. 191434 1. 858758  
1. 185224 1. 556804  
2. 89643 1. 856123  
1. 523747 2. 057692  
0. 640006 1. 562517  
2. 49985 4. 732881  
1. 630121 1. 512862  
1. 960941 2. 14975  
0. 505977 1. 594354  
1. 557495 1. 317653  
0. 923852 1. 159426  
1. 483229 1. 421675  
6. 817606 6. 767326  
1. 585642 2. 352168  
0. 665553 0. 663613  
0. 887217 1. 577747  
4. 025144 1. 635577  
1. 326318 1. 485217  
7. 28596 7. 197998  
1. 807007 1. 516442  
1. 173361 1. 497003  
1. 667904 2. 019994  
4. 232904 3. 787337  
1. 399164 1. 464168  
3. 368106 3. 997355  
1. 978517 2. 018664  
1. 777476 1. 157225  
1. 397759 1. 541009  
4. 140368 3. 710091  
2. 672762 2. 298257  
4. 965338 4. 42613  
3. 622549 1. 669274  
4. 184742 3. 563134  
2. 444202 1. 466571  
6. 43919 9. 067389  
6. 912566 3. 835696  
3. 653103 3. 122932  
5. 308324 2. 80164  
5. 162292 4. 542682  
2. 79911 1. 487158  
1. 23388 1. 812759  
1. 57858 1. 783941  
3. 342915 3. 116876  
3. 921879 4. 574069  
3. 027564 3. 030319  
1. 004497 1. 095594

1. 58897 1. 860016  
7. 061509 6. 014692  
3. 972908 4. 695912  
1. 191929 1. 779252  
3. 225085 1. 907089  
1. 417583 1. 227777  
7. 886514 6. 868356  
2. 843549 2. 225649  
1. 910478 2. 41302  
1. 026006 1. 293275  
2. 544824 3. 423248  
2. 451105 2. 898796  
2. 770808 2. 799433  
2. 402977 1. 50798  
2. 076013 2. 760989  
2. 003391 2. 497897  
1. 804018 2. 371129  
3. 300777 3. 645448  
1. 886534 2. 105407  
2. 727607 2. 107454  
1. 322245 1. 36466  
2. 26883 2. 094207  
2. 733568 1. 154567  
1. 659235 1. 589533  
4. 367537 5. 259493  
3. 40571 3. 148078  
1. 538306 2. 267941  
2. 73124 4. 283703  
3. 844813 3. 104627  
1. 871808 1. 171597  
0. 823792 1. 103556  
2. 444229 4. 906825  
5. 434568 4. 948133  
1. 236075 1. 239718  
1. 652526 1. 634521  
2. 106614 2. 750554  
2. 153469 1. 823624  
2. 132671 2. 262539  
2. 402087 3. 168071  
1. 511062 1. 060114  
1. 059314 1. 880759  
1. 499983 1. 824522  
1. 431952 1. 944673  
4. 110861 2. 672761  
1. 781119 1. 107894  
2. 118992 3. 33166  
1. 623331 1. 350116  
3. 283808 3. 194958  
1. 624518 2. 444517  
3. 723484 2. 791763  
2. 084964 1. 885674

3. 312471 2. 560825  
0. 941746 2. 014796  
0. 986553 1. 346425  
1. 807529 2. 647251  
2. 019462 2. 094569  
1. 700087 1. 79914  
1. 907137 1. 786939  
3. 635381 2. 502893  
3. 238001 2. 632804  
3. 014901 1. 738072  
3. 246022 2. 163276  
4. 491027 3. 235552  
2. 364036 1. 572983  
2. 289623 1. 336923  
2. 450805 4. 563352  
4. 725212 5. 205893  
6. 503573 4. 558337  
2. 417169 2. 152735  
1. 340099 2. 310768  
2. 422294 3. 051808  
1. 061705 1. 578862  
2. 31903 2. 935246  
1. 399109 1. 702604  
5. 668624 6. 382344  
1. 771023 2. 37703  
2. 48299 2. 562693  
1. 850922 2. 090231  
1. 69938 0. 691151  
3. 903522 3. 269435  
2. 014653 2. 827723  
1. 566809 1. 471373  
2. 343469 1. 502362  
1. 995475 1. 727903  
2. 136157 1. 739491  
2. 162364 1. 91399  
1. 430377 2. 206254  
1. 224799 0. 934258  
3. 137049 2. 742636  
2. 041653 1. 593523  
2. 298152 2. 161095  
3. 749204 2. 685171  
1. 189054 1. 360622  
4. 369926 2. 276693  
1. 535299 1. 564931  
1. 305197 1. 77018  
2. 552229 2. 039696  
2. 97592 1. 912738  
6. 493105 6. 464423  
2. 478992 3. 748941  
2. 958926 4. 437695  
4. 812641 3. 370695

3. 308798 2. 035633  
1. 647499 1. 981586  
3. 675776 3. 801711  
0. 864782 3. 352075  
1. 924124 2. 140242  
1. 101679 1. 401435  
5. 005973 2. 303227  
1. 501349 0. 767971  
2. 586339 2. 398861  
3. 410762 2. 652359  
7. 458726 7. 212522  
1. 075595 1. 309252  
2. 556636 3. 15984  
5. 99835 6. 53928  
3. 769313 2. 291141  
2. 745957 3. 192781  
6. 936296 6. 381815  
1. 372041 1. 57572  
2. 660434 2. 332846  
0. 848162 0. 962038  
1. 792658 1. 887225  
2. 31529 3. 177117  
1. 081888 1. 01923  
1. 433319 1. 469502  
3. 527311 1. 398722  
1. 803814 1. 287112  
2. 104741 2. 480346  
2. 574098 1. 973032  
2. 077647 3. 737082  
0. 652012 1. 277808  
3. 134566 3. 530647  
5. 023987 3. 700472  
0. 678099 1. 210885  
1. 005091 1. 439674  
4. 652229 4. 566018  
0. 531828 0. 737555  
3. 180204 1. 646284  
3. 739273 3. 59306  
0. 82611 1. 536911  
1. 328053 1. 108032  
1. 844206 1. 023875  
4. 033627 2. 501732  
0. 691289 1. 044449  
2. 977564 1. 389522  
1. 606079 2. 743192  
1. 948239 2. 308898  
1. 132494 1. 636487  
2. 517192 2. 8598  
1. 006969 1. 581606  
2. 45894 3. 384641  
1. 90025 0. 792484

0.813452 0.675689  
5.104752 5.040469  
1.496098 2.110536  
2.1685 2.458763  
0.344198 1.388046  
0.721383 0.718679  
0.953151 0.94047  
0.744391 0.541813  
2.467155 2.457801  
1.624655 2.758035  
7.004756 5.432238  
1.331862 1.59932  
0.613546 0.888867  
3.185805 1.734769  
0.741215 1.579183  
1.698591 5.745891  
1.251361 1.539689  
0.673342 0.849969  
1.390223 1.854618  
2.226797 2.121809  
0.912043 1.702092  
2.465953 3.05575  
1.078072 2.226552  
1.842751 1.36374  
1.794184 1.77228  
6.884669 6.462407  
0.485931 0.394849  
1.899588 2.388095  
1.115816 1.069235  
1.045045 0.951891  
1.433809 1.113573  
10.05517 9.615634  
4.389183 4.034774  
2.058516 2.288528  
2.67597 0.725668  
2.944096 2.700908  
1.371451 0.641682  
4.661338 3.624677  
1.154884 1.223143  
1.09686 0.9369  
1.013918 1.047597  
4.623854 4.460424  
1.569399 1.697326  
2.151839 2.890716  
0.96516 1.326675  
2.546693 3.937979  
7.670747 7.021628  
0.540043 0.826479  
2.607974 2.374066  
0.761793 1.236842  
0.923646 1.241882



1. 219887 0. 906233  
1. 208258 3. 177707  
4. 42768 3. 683359  
0. 807866 1. 912645  
0. 80941 0. 718592  
1. 158499 1. 042041  
2. 273851 2. 382649  
2. 817478 3. 693567  
1. 127616 1. 527965  
2. 676146 1. 993041  
1. 311651 0. 970903  
0. 543992 0. 892193  
4. 682095 1. 273729  
3. 846916 3. 837933  
5. 517631 4. 453992  
0. 893594 1. 202574  
1. 109013 1. 309596  
0. 956124 1. 655063  
2. 013118 1. 72784  
1. 239732 1. 372144  
0. 895543 1. 492991  
0. 528888 0. 994974  
3. 043756 3. 372625  
0. 881127 1. 420232  
0. 913015 1. 144042  
3. 967561 4. 289503  
1. 236746 1. 980602  
1. 489731 1. 158704  
0. 975891 1. 196159  
1. 757417 2. 396841  
1. 098168 0. 841077  
0. 583791 1. 009529  
4. 59813 3. 22135  
1. 1107 1. 293632  
1. 400929 0. 873918  
0. 834753 0. 580555  
0. 554137 1. 2856  
1. 315588 1. 055407  
0. 991292 0. 981989  
1. 255521 1. 127621  
1. 916348 2. 712264  
1. 629593 1. 345438  
1. 932707 1. 724042  
2. 921458 3. 949361  
3. 963853 3. 923285  
0. 934555 1. 211691  
0. 857045 0. 595637  
0. 942906 1. 207725  
4. 222037 2. 308818  
2. 038709 1. 114917  
0. 845126 1. 620454

1. 513618 1. 436208  
1. 981987 1. 381671  
1. 523526 1. 987739  
0. 877591 1. 727295  
1. 137339 0. 827293  
0. 746596 1. 09058  
1. 981958 1. 152363  
1. 439581 1. 449428  
2. 867518 3. 12244  
2. 559082 2. 106049  
0. 968378 0. 694932  
1. 503964 0. 853802  
1. 106856 0. 856948  
0. 812867 1. 138607  
0. 987016 1. 400569  
0. 630007 2. 049549  
0. 904887 0. 888901  
1. 492446 2. 24856  
0. 842113 1. 611398  
2. 1622 0. 914564  
4. 434738 4. 748234  
4. 320401 6. 219341  
2. 362193 1. 634035  
2. 422655 4. 066683  
0. 891857 0. 948833  
1. 272211 2. 169924  
2. 556165 1. 730898  
1. 001935 1. 26327  
4. 595911 4. 177948  
2. 977481 1. 952319  
1. 570716 3. 239556  
1. 640883 2. 085694  
0. 774934 1. 574513  
3. 131011 2. 837317  
4. 261732 3. 529281  
4. 925747 3. 644255  
0. 70311 1. 26167  
1. 739043 1. 361707  
4. 140236 3. 321832  
4. 985154 4. 803676  
0. 807869 1. 33096  
2. 88184 3. 8402  
0. 659102 0. 659017  
0. 586791 0. 966269  
0. 913773 1. 253266  
3. 751889 4. 505012  
2. 158256 1. 996124  
4. 923182 5. 254488  
1. 091473 1. 048783  
0. 886519 1. 136293  
2. 180314 3. 096518

6. 887042 7. 365117  
1. 815043 2. 395623  
1. 667756 0. 632171  
0. 433126 1. 201414  
0. 93962 1. 805476  
1. 225949 0. 576838  
1. 743468 1. 205469  
0. 817739 0. 991708  
3. 459302 1. 697981  
1. 243759 0. 808699  
0. 748884 1. 520497  
1. 24989 0. 674443  
4. 896549 2. 875309  
4. 047728 4. 033118  
1. 227975 0. 894178  
5. 670099 6. 289474  
1. 390588 1. 632652  
2. 160023 2. 054778  
2. 56663 1. 257234  
1. 75304 1. 540909  
2. 304725 1. 391181  
1. 039579 0. 845953  
3. 737273 3. 995512  
1. 515132 2. 087687  
1. 040864 1. 190624  
4. 076959 3. 656462  
0. 968457 0. 840007  
5. 265373 4. 95267  
1. 096327 1. 699527  
0. 754941 0. 783075  
0. 809859 1. 540095  
3. 371805 2. 472021  
1. 22295 1. 293637  
1. 117778 1. 215054  
1. 228434 1. 083801  
1. 208122 2. 451259  
1. 652711 2. 757084  
0. 978891 1. 412771  
2. 25001 3. 239654  
3. 690952 4. 06255  
3. 208363 2. 498073  
1. 179208 1. 176273  
0. 858828 1. 482521  
2. 111223 1. 678887  
3. 219601 2. 079649  
0. 90569 0. 352306  
1. 10768 1. 223463  
2. 506913 3. 142234  
0. 779166 0. 803701  
4. 905436 2. 494794  
1. 146812 2. 084855

1. 320688 1. 145503  
1. 770325 2. 479278  
1. 202771 0. 82682  
3. 008947 1. 3119  
0. 852403 1. 721177  
2. 001952 2. 573567  
7. 218385 7. 121906  
2. 600714 2. 227549  
2. 581759 2. 895369  
0. 921802 1. 142775  
3. 062287 3. 387304  
1. 235224 1. 302943  
0. 746187 1. 150551  
3. 100352 3. 055835  
1. 445258 0. 884154  
2. 059816 1. 492767  
3. 145381 3. 836091  
2. 341613 1. 341101  
2. 74761 3. 249185  
1. 094815 1. 207697  
2. 281511 2. 290579  
3. 677021 2. 302615  
1. 884038 1. 601471  
1. 587839 1. 423358  
3. 381835 1. 377457  
4. 964404 5. 91022  
1. 24712 2. 25977  
6. 233117 4. 151643  
3. 119989 3. 224231  
2. 715 3. 536456  
1. 136208 1. 594288  
9. 999058 9. 517158  
1. 519873 1. 878463  
2. 505761 2. 926267  
2. 151761 1. 574207  
2. 381815 2. 483675  
5. 033703 3. 299626  
1. 608841 2. 295149  
1. 838357 1. 906409  
3. 979276 3. 760093  
3. 831291 3. 787361  
2. 554886 2. 965445  
5. 311134 6. 750977  
1. 469856 0. 683252  
1. 116196 2. 288099  
1. 955954 1. 718372  
1. 699544 1. 990221  
1. 408035 3. 136972  
2. 359293 4. 320591  
1. 291049 2. 449425  
2. 403671 1. 471269

2.189452 2.205846  
4.021189 3.818999  
1.320578 1.796523  
1.022844 1.066276  
1.801829 1.922202  
2.13625 2.209514  
1.902047 1.872278  
1.732833 1.271859  
0.98988 1.010476  
1.393209 1.202953  
7.369288 6.372355  
2.23596 2.504438  
2.748721 3.126439  
3.439521 2.167894  
7.854271 7.558479  
6.354797 7.112515  
1.035967 1.046941  
4.765608 3.72033  
5.609498 5.575359  
1.4032 2.023608  
1.210131 1.716749  
3.236064 2.274436  
5.088119 6.90211  
1.323946 0.968498  
2.553751 3.724424  
7.267651 6.534904  
2.145388 3.01377  
2.574486 2.317114  
8.20669 7.34466  
2.691009 3.317947  
1.464722 1.378968  
7.406943 5.522339  
3.213157 4.428509  
3.800467 4.160186  
5.828063 5.783398  
1.856686 2.097022  
3.409925 4.081556  
0.853669 1.316337  
7.187002 7.527371  
3.050339 3.294081  
1.332003 2.44494  
6.458977 6.926005  
1.245531 1.340122  
0.948584 1.620725  
2.909726 1.362364  
1.585393 1.603332  
1.866239 2.720139  
7.127541 7.442805  
6.174701 7.302241  
7.758012 7.256109  
1.098504 1.206128

1. 214326 1. 79447  
3. 7453 1. 902633  
1. 310967 1. 278408  
0. 800357 1. 315745  
1. 608992 1. 780172  
1. 586013 2. 719575  
2. 739792 1. 949436  
5. 566843 6. 139448  
1. 794971 2. 266134  
1. 770082 2. 550611  
1. 332631 2. 404048  
2. 436854 1. 745405  
1. 6768 1. 17291  
1. 5449 1. 704802  
1. 208262 1. 063713  
1. 609695 1. 999447  
1. 946332 2. 40556  
1. 131521 1. 896918  
1. 486982 0. 995236  
1. 321474 0. 914405  
1. 374278 1. 901116  
1. 45044 1. 776117  
0. 855696 1. 888917  
0. 77391 1. 118192  
1. 590812 1. 569068  
2. 176274 1. 68399  
4. 416399 1. 260156  
0. 721658 2. 685767  
0. 747009 1. 130418  
1. 345972 1. 323915  
3. 091004 0. 930407  
1. 825926 1. 835774  
3. 013181 3. 142637  
0. 678322 0. 971284  
1. 506077 1. 947074  
1. 307835 1. 335911  
6. 114539 4. 393762  
1. 62423 2. 223198  
4. 354568 1. 903293  
3. 916185 2. 17237  
3. 615229 2. 124957  
3. 278987 1. 53386  
2. 254782 2. 940502  
0. 917928 0. 654766  
1. 48106 1. 250957  
2. 040349 2. 474101  
1. 754256 1. 516437  
2. 528352 1. 565233  
2. 265035 0. 650627  
2. 736778 2. 386681  
1. 50048 1. 134852

1. 718504 2. 302616  
3. 801143 4. 32862  
1. 105536 1. 258924  
1. 09768 1. 25186  
4. 387315 3. 193278  
8. 16197 7. 59407  
1. 704979 2. 773471  
5. 449528 3. 134542  
6. 946984 7. 447497  
1. 335517 1. 468512  
1. 983238 1. 240931  
1. 492727 2. 10768  
1. 959643 2. 052261  
2. 751744 1. 367012  
3. 704919 2. 325039  
4. 067373 3. 446869  
4. 545949 2. 484875  
3. 711297 1. 533502  
3. 2121 1. 616428  
2. 174407 2. 092817  
1. 6338 1. 855346  
1. 752644 1. 380444  
4. 845611 3. 436417  
2. 463336 2. 657644  
1. 434092 2. 171475  
1. 485683 1. 647451  
1. 751448 1. 402818  
0. 853666 1. 052305  
1. 867922 1. 427944  
4. 314286 1. 972803  
1. 268362 1. 62663  
2. 149009 2. 188076  
1. 765771 3. 251651  
1. 292287 1. 725565  
3. 012615 2. 09912  
1. 841947 1. 772062  
1. 924853 1. 620461  
1. 176617 1. 11022  
0. 862719 1. 540528  
1. 773351 1. 234616  
2. 977386 1. 245991  
2. 403354 2. 940294  
1. 119907 1. 686926  
1. 969845 2. 011007  
2. 676849 1. 411774  
1. 632355 2. 051466  
1. 186937 1. 843384  
2. 965721 2. 159349  
1. 344745 1. 549591  
2. 196637 1. 430754  
3. 70834 3. 700841

1. 562085 2. 140992  
1. 104629 1. 879501  
1. 519523 1. 674599  
1. 063098 0. 888892  
2. 474375 2. 52701  
0. 919654 1. 807385  
1. 379684 1. 415571  
1. 333661 1. 546307  
1. 301172 1. 331007  
1. 077309 0. 87026  
1. 143081 1. 444317  
1. 406593 1. 560223  
1. 904401 1. 709875  
0. 999021 1. 54553  
4. 458469 2. 182231  
1. 406471 1. 295318  
1. 977441 2. 046985  
1. 378053 1. 767265  
1. 861792 3. 010113  
1. 096828 1. 596716  
2. 408608 1. 652482  
0. 744078 2. 360901  
1. 703376 1. 173039  
0. 757461 1. 686931  
1. 214183 1. 04686  
1. 53308 2. 764978  
0. 71887 1. 101704  
2. 285629 1. 534512  
2. 265135 0. 658364  
1. 190067 0. 894238  
1. 165023 1. 202775  
1. 128307 2. 956551  
1. 879745 2. 686721  
1. 5499 1. 561433  
1. 795379 1. 004539  
1. 846396 2. 92505  
1. 12481 1. 514037  
2. 685683 1. 508056  
1. 538355 1. 345183  
2. 138269 1. 622145  
1. 6929 1. 815442  
1. 210175 1. 112731  
2. 233898 1. 047088  
0. 708329 0. 992358  
1. 778485 1. 269559  
2. 819158 1. 48845  
2. 144333 1. 804596  
2. 19125 1. 712118  
2. 514961 2. 011605  
1. 768863 1. 641753  
3. 435642 2. 097374



1. 696234 2. 366897  
2. 081286 1. 932503  
2. 841156 1. 528758  
1. 638013 1. 43224  
1. 185617 1. 566169  
2. 888534 1. 758589  
3. 230191 3. 336135  
1. 067342 1. 600136  
6. 596551 2. 592523  
5. 134359 1. 642331  
2. 467051 2. 006631  
2. 968617 2. 509487  
2. 1408 1. 661703  
7. 112558 3. 447406  
1. 135446 2. 024964  
3. 52901 1. 723982  
1. 544857 1. 863161  
1. 983893 1. 798599  
2. 729539 4. 998784  
1. 169139 1. 236661  
4. 821444 2. 167692  
1. 621422 1. 364279  
2. 365416 1. 311868  
1. 790806 2. 198019  
0. 983632 0. 85273  
2. 006775 1. 818895  
2. 933666 2. 017264  
1. 847365 1. 422971  
1. 154703 1. 701729  
4. 090957 2. 072439  
2. 181943 2. 942232  
1. 518861 1. 153049  
3. 369982 1. 850466  
3. 302976 1. 399607  
1. 282932 1. 465781  
5. 181738 5. 188368  
1. 528968 1. 578558  
2. 822102 2. 509925  
2. 598324 1. 949732  
1. 146999 1. 226766  
3. 427503 2. 071946  
1. 586574 0. 954176  
3. 331127 3. 690315  
3. 862798 4. 196085  
3. 948716 3. 542676  
1. 766279 2. 822619  
2. 773824 3. 057101  
5. 8818 1. 390049  
1. 95074 2. 678194  
1. 522128 2. 042579  
1. 777309 1. 880324

2.609473 3.186719  
1.155522 1.748143  
3.353616 4.385346  
1.129596 1.397542  
6.669987 5.901451  
1.764075 1.039033  
3.030084 3.708723  
3.878229 3.358437  
2.117998 1.401289  
1.311527 1.835443  
1.672644 1.657811  
0.738229 1.45561  
1.61522 1.469941  
1.394724 1.704659  
2.444455 2.195623  
1.009108 1.641147  
1.243414 1.808534  
2.813607 3.025641  
1.040923 2.949416  
2.284492 2.174308  
3.090928 3.088498  
2.176169 2.293459  
3.529856 2.779189  
8.994987 9.263565  
8.161819 8.959991  
8.916994 8.961526  
5.44572 6.249658  
8.924401 9.076868  
9.72413 8.968513  
5.099314 7.114315  
2.906933 2.615365  
0.822257 1.362552  
2.326384 1.83105  
4.372709 5.690574  
1.740087 1.18896  
2.336372 2.459006  
1.754724 2.92414  
1.257519 1.126262  
1.868106 2.165689  
1.911528 1.153929  
2.524205 2.546004  
1.364468 2.594113  
1.938353 2.400314  
4.138837 4.575371  
0.732273 1.259979  
1.742272 2.262193  
1.41296 1.12599  
1.586335 1.352562  
1.653479 2.873926  
2.135209 1.664595  
4.222497 2.331454

0.855287 0.901537  
3.516467 4.380018  
4.018778 3.070084  
2.070795 1.874665  
3.953244 3.40233  
1.411038 1.159326  
2.974076 3.696267  
1.032267 1.442222  
1.334171 2.218829  
3.704693 3.732887  
1.723302 2.1069  
3.599085 4.201634  
0.993456 1.090218  
2.00467 2.417412  
4.600817 1.827787  
1.145113 1.531513  
2.268999 1.709547  
3.322108 4.370448  
1.311472 1.410023  
1.350835 1.757322  
1.091535 1.683465  
1.778626 1.563648  
1.163537 1.670314  
1.61661 1.362412  
1.816674 1.931324  
2.362295 2.437085  
1.377603 1.438172  
1.348996 1.349803  
1.660439 2.22031  
1.181938 1.503867  
1.309893 1.182004  
0.887436 1.072221  
1.416123 1.640491  
1.203091 1.337211  
1.726062 1.517345  
2.195583 2.563513  
4.052575 2.942806  
2.67948 2.918762  
2.570592 2.503699  
1.603838 1.824642  
1.788036 1.602243  
1.409735 2.707692  
2.208484 2.578846  
2.125651 2.273502  
1.471329 1.463925  
1.488916 0.971327  
2.180812 2.279011  
3.88283 1.979519  
1.668193 1.768249  
1.159956 1.589347  
1.74064 2.212391

2. 333599 2. 255685  
5. 958683 4. 761577  
0. 813956 1. 175064  
7. 201498 6. 798254  
6. 288335 6. 391958  
3. 401433 4. 363672  
8. 876233 9. 298378  
3. 560166 4. 557929  
4. 554197 4. 595548  
7. 231355 6. 381269  
3. 044511 2. 944372  
1. 781705 2. 804081  
3. 936752 4. 761975  
0. 78631 1. 082692  
0. 973361 1. 365618  
1. 874283 2. 076462  
3. 99133 3. 343922  
1. 039881 1. 29541  
1. 659906 1. 040138  
1. 115862 1. 066438  
1. 843727 1. 04648  
1. 796231 2. 079358  
1. 297339 1. 473381  
1. 864894 1. 774674  
4. 40831 2. 680067  
2. 870465 3. 682444  
2. 125324 2. 951949  
1. 925963 2. 604861  
2. 938198 1. 758687  
1. 679143 4. 869205  
1. 271234 2. 030323  
1. 479713 3. 061436  
1. 881927 1. 634336  
1. 341702 1. 18926  
6. 051538 4. 949486  
7. 658294 7. 472274  
2. 045641 2. 121943  
9. 864869 10. 03667  
2. 868336 5. 602254  
1. 388011 1. 502269  
1. 095514 2. 069572  
3. 097024 2. 740343  
7. 773859 7. 265297  
2. 143419 2. 389565  
5. 758453 5. 959926  
9. 036847 8. 586978  
2. 997656 1. 938553  
6. 022797 6. 031737  
2. 436087 2. 472108  
5. 155737 5. 581238  
6. 98865 6. 368902

4. 27029 3. 859911  
1. 814318 1. 832415  
2. 890519 2. 676851  
3. 320869 2. 667667  
4. 110848 4. 412494  
2. 373163 2. 52808  
6. 720213 6. 030357  
9. 073106 8. 170074  
6. 27268 5. 623938  
5. 236709 5. 561254  
5. 30843 4. 718279  
7. 966196 8. 058621  
2. 562841 1. 317104  
4. 869877 5. 332101  
7. 137189 7. 180559  
1. 093967 1. 003917  
6. 915357 5. 825165  
3. 895789 3. 854952  
4. 655528 2. 858295  
1. 380969 2. 03745  
1. 953979 1. 79134  
1. 325217 1. 386832  
1. 503185 1. 156829  
3. 360628 4. 133231  
3. 351293 4. 787484  
6. 3972 5. 842972  
2. 833228 1. 897442  
1. 615163 1. 378555  
6. 560516 7. 386368  
2. 019747 2. 549381  
1. 221056 1. 761613  
1. 805126 1. 149416  
1. 795804 2. 378862  
2. 025275 1. 340808  
1. 331285 1. 983899  
1. 925442 2. 351507  
6. 892152 5. 001217  
1. 266853 2. 295392  
5. 138444 4. 488194  
6. 993892 7. 568658  
4. 827763 3. 537402  
1. 507312 2. 598676  
1. 66696 2. 026326  
4. 199671 5. 014295  
9. 321726 8. 540212  
1. 860014 2. 716835  
0. 996012 1. 408905  
7. 845667 7. 844255  
6. 788771 7. 205867  
4. 173248 4. 155983  
2. 070682 1. 810087

5. 625033 5. 496081  
6. 841778 6. 007973  
8. 656864 9. 284688  
7. 462252 7. 526095  
2. 133442 2. 059704  
6. 265215 6. 366921  
6. 809464 6. 688843  
8. 001095 8. 123523  
9. 814578 9. 614879  
1. 790816 3. 495946  
5. 57015 6. 028114  
0. 676796 0. 511875  
2. 602932 1. 915831  
0. 919577 1. 165878  
3. 706824 3. 070024  
5. 656018 5. 375813  
6. 696206 5. 829401  
1. 488844 1. 826626  
1. 287683 1. 501135  
5. 699346 4. 359655  
5. 352592 4. 748215  
5. 352323 5. 408909  
5. 472052 3. 119874  
6. 430764 7. 474178  
2. 084077 2. 319883  
5. 677497 6. 482552  
7. 087628 6. 770486  
1. 31474 2. 341212  
1. 399738 0. 959731  
6. 60592 5. 315836  
7. 096906 6. 533308  
1. 930074 3. 688297  
6. 02506 6. 079288  
2. 622824 3. 254507  
4. 637981 5. 241372  
6. 046154 5. 868992  
2. 062769 2. 19408  
2. 496619 3. 407452  
1. 005951 1. 648045  
1. 345786 1. 298976  
1. 255632 2. 214233  
2. 296656 3. 703204  
1. 536178 1. 266627  
2. 561593 2. 943461  
1. 619675 2. 47011  
1. 270382 1. 863732  
1. 234793 1. 173461  
3. 456188 2. 454835  
2. 166497 1. 734646  
1. 553049 1. 912852  
1. 194287 1. 298445

2. 737894 2. 433981  
1. 341863 1. 653901  
3. 781981 1. 639714  
1. 084235 1. 569321  
1. 079823 1. 74299  
2. 614307 2. 169594  
1. 467382 1. 463469  
1. 619312 1. 513863  
4. 016525 3. 421265  
2. 636289 2. 026223  
2. 273295 3. 117658  
1. 139336 1. 101592  
3. 315419 3. 840863  
1. 384663 1. 408384  
1. 069371 2. 130229  
2. 139572 2. 040882  
1. 54704 3. 282621  
1. 964474 1. 584287  
0. 699592 1. 109242  
2. 063539 2. 230409  
3. 859667 2. 970211  
1. 908973 2. 144501  
1. 006932 1. 635739  
3. 363892 0. 915291  
6. 45763 2. 311404  
2. 904107 2. 54852  
1. 215528 2. 067588  
2. 002551 2. 892595  
0. 919985 1. 084574  
1. 534128 1. 396466  
2. 500213 2. 429305  
2. 056339 1. 054064  
0. 983767 1. 30407  
2. 71955 1. 420275  
1. 914132 3. 363507  
1. 54519 1. 383686  
1. 542266 1. 765625  
3. 421131 2. 315465  
2. 196645 2. 091967  
1. 29673 1. 937125  
2. 174526 2. 324234  
2. 539883 1. 573231  
1. 55331 4. 030369  
0. 792507 1. 891622  
3. 033139 3. 146118  
4. 197556 1. 254518  
1. 083376 1. 279953  
2. 156237 2. 26875  
5. 173852 3. 679628  
5. 763377 5. 108576  
1. 64743 1. 525869

1. 683718 0. 818874  
1. 096429 1. 253711  
2. 528975 2. 96199  
0. 893847 1. 229283  
1. 707022 1. 819744  
1. 907582 1. 733941  
1. 088301 1. 377468  
2. 200015 1. 252135  
2. 675683 1. 927528  
4. 263955 3. 310008  
1. 582399 2. 015193  
4. 89097 2. 091196  
1. 471755 1. 674208  
1. 93299 1. 963749  
1. 516082 1. 215901  
3. 020298 2. 842446  
3. 185657 1. 134322  
1. 230887 1. 052268  
1. 51133 1. 825392  
1. 19347 5. 871624  
1. 514767 2. 491454  
1. 812528 1. 781683  
1. 063691 1. 59577  
1. 83205 1. 754803  
1. 179957 2. 086111  
1. 017691 1. 595387  
1. 686276 1. 640403  
0. 672085 0. 878902  
1. 125815 1. 625352  
1. 133504 1. 216608  
2. 85211 1. 567156  
1. 569778 1. 913324  
1. 70019 1. 942115  
1. 688929 2. 030689  
2. 478696 2. 297976  
1. 837616 2. 095364  
5. 324609 3. 515181  
0. 717754 2. 46583  
3. 010186 4. 715613  
2. 386879 5. 232054  
0. 983687 1. 484065  
5. 361441 2. 053121  
2. 684594 3. 218293  
1. 008671 1. 56041  
0. 922862 1. 482729  
2. 033434 1. 830844  
3. 235743 2. 979593  
1. 115717 1. 055451  
0. 818704 1. 558465  
1. 187082 1. 634323  
0. 804687 1. 838845



2.762199 1.871134  
2.499307 3.970711  
2.335337 2.134881  
1.852491 2.827168  
1.397801 3.736268  
1.114148 1.482042  
1.49684 3.558916  
1.05411 1.264849  
1.878044 1.628901  
1.130807 0.93981  
2.639457 2.407853  
1.538804 1.512268  
3.919807 1.458789  
0.942219 1.08302  
1.92535 2.10977  
3.629412 3.077147  
1.905837 1.733734  
1.31378 2.463765  
1.440068 2.113443  
1.155977 3.443798  
1.627624 1.987919  
2.675185 2.753747  
1.578782 1.104963  
3.070856 4.054137  
5.076256 4.737827  
1.918865 2.756232  
1.546532 1.545007  
1.477629 1.390995  
0.913551 1.272259  
1.713688 1.520119  
3.837854 4.780235  
2.223761 1.990858  
1.702876 1.96881  
4.658083 2.440786  
1.108391 1.187016  
4.82105 4.438436  
4.934417 2.225325  
2.174362 2.150418  
1.430031 1.620477  
1.572289 1.287362  
0.93677 2.086164  
2.256077 3.113997  
1.633761 1.484974  
4.638038 5.077151  
2.668038 3.279149  
2.1403 2.049271  
1.836184 2.091391  
2.262659 1.326893  
1.208542 0.98905  
0.715138 1.427877  
4.526148 1.799117

1. 729996 2. 461856  
1. 03403 1. 792594  
1. 092238 0. 976877  
3. 999871 3. 099815  
2. 136069 2. 368065  
2. 170249 2. 301565  
4. 749297 3. 029714  
1. 776027 2. 514248  
1. 161925 1. 762818  
1. 588184 1. 733105  
0. 87635 1. 802614  
0. 993063 1. 108681  
1. 08552 1. 296873  
2. 099538 2. 300885  
0. 961838 1. 425919  
2. 700706 3. 221168  
1. 820649 1. 971703  
2. 194636 2. 659535  
1. 471717 1. 704883  
3. 19268 1. 690677  
1. 527647 1. 553331  
2. 895022 2. 386142  
2. 135903 3. 148798  
1. 229584 1. 578364  
0. 941973 0. 977526  
2. 631068 2. 166433  
1. 201237 1. 601152  
1. 368078 1. 598038  
4. 500564 2. 235023  
1. 705579 1. 75845  
1. 11302 1. 493046  
1. 810656 1. 3496  
1. 201263 1. 717494  
1. 244721 1. 800616  
4. 222169 2. 819193  
2. 193852 1. 630989  
1. 31503 1. 504787  
1. 942 0. 800723  
2. 610396 2. 477685  
1. 016026 2. 316886  
1. 010449 0. 818  
0. 921063 1. 129551  
2. 312708 2. 137203  
1. 041737 1. 22817  
2. 597738 2. 943612  
1. 475642 1. 07059  
1. 309763 2. 649731  
2. 330247 2. 673125  
1. 920417 1. 796441  
1. 175977 0. 837534  
1. 011986 1. 636636

1. 37025 1. 685881  
1. 397113 2. 830592  
2. 006256 2. 144662  
1. 034709 1. 408412  
2. 102371 4. 081613  
8. 068578 2. 449495  
2. 299585 1. 648348  
0. 822389 0. 987499  
0. 815349 1. 254297  
1. 044636 1. 754614  
0. 736921 0. 842186  
2. 622273 1. 333725  
2. 435537 2. 705894  
1. 692553 1. 925735  
1. 689449 1. 707619  
0. 81578 1. 713857  
0. 952089 1. 624611  
0. 992699 0. 760111  
1. 295165 1. 273721  
1. 861402 1. 718737  
0. 604618 0. 985656  
1. 550047 2. 471991  
4. 241305 4. 410306  
1. 994828 1. 87758  
1. 319064 1. 740917  
1. 726146 1. 033054  
2. 074416 2. 611239  
1. 855862 1. 534372  
1. 41028 1. 609929  
1. 080681 1. 983997  
1. 503513 1. 78045  
3. 560976 5. 603683  
0. 787337 1. 10033  
1. 235291 2. 183185  
1. 861263 1. 505458  
1. 063662 1. 432423  
1. 670173 1. 534396  
1. 125361 1. 91184  
2. 051783 2. 380548  
1. 093043 1. 391898  
1. 056267 1. 516613  
2. 143224 2. 290656  
1. 724481 0. 795574  
1. 905684 1. 872228  
2. 519166 2. 151748  
1. 671343 3. 420649  
2. 615518 1. 067188  
2. 356586 1. 849145  
1. 696982 1. 697738  
5. 4976 2. 757973  
1. 23847 1. 479427

1. 863304 2. 088845  
1. 389349 1. 549414  
1. 614331 1. 867375  
1. 467463 1. 475203  
1. 978599 1. 952963  
1. 022979 1. 311889  
1. 568973 1. 56951  
2. 263476 2. 028235  
1. 212816 1. 519566  
1. 605732 1. 55833  
1. 527447 1. 907702  
1. 092758 1. 144877  
0. 981035 1. 296299  
3. 376506 1. 387293  
0. 965983 0. 790872  
1. 212645 2. 04846  
1. 9193 1. 603377  
0. 914874 1. 536801  
2. 727397 1. 968449  
1. 50983 2. 86535  
2. 946896 1. 754951  
1. 238345 0. 988149  
2. 668916 3. 091455  
4. 833469 4. 186639  
0. 979069 1. 445308  
2. 136496 2. 736415  
1. 110642 1. 040257  
2. 585382 2. 607062  
4. 558114 1. 349933  
0. 869658 1. 581022  
1. 855512 1. 512692  
1. 546507 1. 465062  
1. 152304 2. 18757  
1. 252589 1. 284906  
2. 385391 2. 555005  
3. 148465 1. 110936  
0. 911727 1. 431545  
2. 269463 2. 408546  
3. 227228 3. 53824  
1. 020115 1. 771158  
1. 36058 1. 823224  
0. 839174 1. 385247  
2. 240753 2. 69944  
2. 405483 1. 861335  
0. 947227 1. 323455  
2. 356118 2. 105874  
2. 021652 2. 893563  
2. 110241 2. 04464  
0. 67466 1. 663747  
2. 06945 1. 847386  
1. 180359 1. 428819

1. 220012 1. 245547  
2. 260044 4. 026035  
1. 393015 1. 94222  
0. 57429 2. 969021  
1. 0905 1. 700098  
2. 156544 2. 690506  
0. 846789 1. 266275  
1. 443712 2. 067258  
1. 255915 3. 990744  
1. 186663 2. 27127  
3. 246692 2. 583969  
4. 595365 2. 007703  
1. 220832 1. 116167  
2. 784028 2. 795055  
3. 589987 1. 793143  
2. 410563 0. 611903  
1. 436607 1. 509972  
1. 326588 1. 376443  
1. 816706 2. 197859  
2. 387035 1. 644895  
1. 634157 1. 620949  
2. 609225 1. 520556  
1. 824013 2. 362206  
1. 014951 1. 601229  
0. 841342 1. 445629  
0. 902981 1. 505095  
2. 472505 2. 494106  
2. 530176 1. 645308  
1. 594897 1. 655194  
1. 003717 0. 952564  
1. 344746 1. 171728  
1. 838241 1. 664029  
3. 231776 2. 741596  
1. 03584 1. 285755  
3. 288304 4. 782702  
2. 218549 3. 919052  
1. 017265 1. 100054  
1. 203096 1. 836199  
1. 744747 1. 802914  
1. 071516 1. 144707  
1. 583085 1. 985491  
1. 608676 2. 593146  
1. 588519 1. 613041  
0. 803712 1. 26089  
1. 430197 2. 996636  
1. 20702 1. 041422  
2. 778093 1. 855648  
0. 880888 1. 863078  
1. 528445 1. 686591  
1. 545322 1. 441133  
4. 006336 4. 927898

1. 83194 0. 971512  
1. 555023 1. 218805  
3. 469933 0. 790579  
1. 150564 1. 600211  
0. 772489 1. 254639  
1. 380658 1. 606146  
2. 006169 1. 696725  
1. 427319 1. 623636  
2. 793667 2. 739328  
0. 937861 2. 528236  
1. 326049 1. 419605  
1. 113673 1. 409543  
3. 485988 1. 991079  
2. 140526 2. 669424  
1. 654349 1. 334337  
1. 626321 2. 149303  
3. 15695 2. 12413  
1. 680055 1. 472593  
2. 530701 2. 475924  
0. 698864 2. 921457  
2. 483713 1. 272857  
1. 133676 1. 076064  
2. 446677 2. 391616  
1. 387588 2. 848883  
4. 52434 3. 42157  
1. 393842 2. 324752  
1. 479589 1. 629628  
1. 421996 1. 410549  
1. 616045 1. 956008  
2. 164302 2. 015487  
1. 828654 2. 168296  
4. 211155 2. 938934  
0. 717379 3. 282703  
0. 836101 1. 024578  
1. 134848 1. 719682  
9. 006843 8. 811725  
2. 431107 1. 851278  
2. 893126 2. 468896  
1. 233353 1. 568165  
2. 218474 1. 839051  
1. 11468 1. 666027  
1. 84848 2. 168738  
2. 217485 1. 569203  
1. 013148 1. 154681  
4. 025504 4. 525892  
1. 78466 1. 758555  
3. 105386 3. 661801  
1. 082918 1. 431905  
1. 268706 1. 177932  
2. 165345 2. 137248  
1. 236646 1. 871082

2. 101428 2. 940803  
1. 321675 1. 780244  
1. 213056 1. 469337  
3. 733037 2. 160666  
2. 562358 3. 023231  
2. 497544 1. 806222  
6. 336959 5. 996291  
4. 661538 4. 931606  
1. 053399 2. 446234  
2. 963251 3. 368488  
1. 923671 3. 664399  
3. 674107 2. 406675  
1. 99662 1. 771114  
2. 270608 4. 147611  
1. 366764 2. 145453  
1. 481889 2. 239716  
0. 732904 2. 826681  
1. 441141 2. 032016  
2. 719374 2. 012253  
1. 96197 1. 98318  
0. 777277 2. 29295  
2. 213954 1. 850093  
0. 288195 0. 904175  
1. 350119 2. 608207  
2. 855249 2. 192495  
0. 801222 1. 793756  
2. 658086 2. 685437  
3. 982383 4. 565934  
1. 184761 1. 126076  
1. 651601 1. 774303  
1. 700122 2. 063959  
1. 026546 1. 369587  
1. 61681 1. 066206  
1. 388852 1. 446636  
3. 733558 2. 055523  
1. 324934 0. 814617  
1. 105241 1. 132541  
1. 882491 1. 758681  
2. 962045 1. 6348  
0. 60273 1. 309111  
1. 437502 2. 054515  
2. 55144 4. 79771  
4. 188906 2. 593047  
1. 076714 1. 426749  
2. 219154 1. 584095  
3. 312833 2. 022412  
2. 515912 3. 312964  
3. 765631 4. 32847  
0. 934449 1. 248292  
2. 124582 2. 000706  
3. 082693 1. 339269

2. 059864 2. 608163  
1. 528046 1. 457737  
1. 886011 1. 831609  
0. 787318 1. 786611  
4. 408113 1. 834309  
1. 035166 1. 661759  
5. 349607 2. 560162  
1. 18507 2. 935909  
1. 403553 1. 406283  
2. 089027 2. 011374  
1. 598319 2. 218501  
1. 620585 1. 906023  
1. 304033 2. 048616  
0. 770614 1. 117319  
1. 537245 1. 258958  
0. 964335 1. 166853  
1. 582899 1. 330766  
2. 349303 2. 012424  
1. 965687 2. 845957  
1. 613332 2. 664991  
3. 033383 2. 243035  
3. 055859 1. 599399  
1. 602324 2. 448623  
1. 093191 1. 152321  
1. 03314 2. 179123  
0. 906249 1. 209648  
1. 164138 1. 14721  
0. 952689 1. 957183  
1. 519158 1. 802551  
1. 276151 1. 396757  
1. 081031 1. 154224  
1. 136493 1. 86496  
1. 489749 1. 305206  
1. 374807 1. 996276  
0. 86784 1. 694703  
2. 326783 2. 640779  
2. 833603 1. 537133  
1. 661284 3. 891433  
2. 142961 2. 043652  
1. 730131 1. 234875  
1. 657875 2. 095613  
4. 362778 4. 712289  
2. 942083 1. 386696  
1. 387747 1. 112085  
1. 296093 1. 73047  
2. 381738 2. 304838  
1. 344654 2. 896685  
0. 746186 1. 156147  
1. 049035 0. 898824  
0. 949872 1. 230509  
1. 37278 1. 736979



6. 710759 4. 441559  
1. 164354 1. 591926  
1. 311103 1. 352956  
1. 761273 1. 810793  
1. 484128 1. 743316  
1. 63018 1. 435826  
1. 677739 1. 212088  
1. 387379 1. 233744  
2. 795638 2. 120508  
1. 105893 1. 716661  
3. 317616 3. 093782  
3. 682365 2. 96518  
2. 661227 2. 528902  
0. 964614 0. 809889  
1. 195613 1. 559646  
2. 088626 0. 458335  
1. 139983 1. 371312  
2. 519797 2. 522612  
3. 852786 4. 196395  
0. 969431 1. 392089  
1. 942206 2. 332391  
2. 735213 3. 688025  
1. 856071 1. 86903  
2. 710092 2. 581665  
2. 029593 2. 371788  
2. 457995 2. 173171  
1. 57508 1. 520508  
6. 256599 3. 039628  
4. 586915 4. 233887  
1. 782016 2. 124321  
0. 687602 0. 819981  
1. 705346 1. 724713  
2. 143889 1. 700125  
2. 463309 1. 842432  
2. 454638 3. 711527  
2. 617161 2. 257648  
3. 129907 3. 342667  
1. 686139 1. 564257  
1. 455164 1. 592848  
1. 810898 2. 05211  
1. 189273 1. 778089  
4. 170221 2. 97806  
1. 345389 1. 807671  
2. 798279 3. 540891  
1. 100911 0. 927329  
5. 135351 3. 055598  
7. 490226 6. 443815  
3. 570662 4. 102794  
0. 916088 0. 998328  
4. 460847 3. 133336  
1. 957952 2. 33011

1. 38438 1. 068019  
1. 43366 2. 500048  
1. 341297 1. 909886  
1. 297401 1. 556453  
1. 192836 2. 076941  
1. 505319 1. 724669  
2. 99386 1. 724035  
5. 317078 2. 689977  
1. 094778 1. 268099  
1. 485316 1. 344577  
1. 037778 1. 108857  
6. 046234 1. 946617  
1. 406092 2. 537183  
0. 952369 1. 227033  
1. 490048 1. 684808  
2. 462107 3. 682484  
1. 181002 1. 237302  
1. 710907 4. 314882  
2. 620319 1. 523539  
1. 666821 1. 158466  
1. 541794 1. 705399  
2. 052268 2. 242308  
0. 703478 1. 334927  
1. 201405 1. 897154  
1. 016889 1. 617658  
1. 812293 3. 594922  
3. 221326 3. 508392  
1. 106836 1. 886801  
3. 893009 1. 501626  
2. 606805 2. 431397  
4. 330849 4. 971364  
3. 020068 1. 363143  
4. 707526 4. 94468  
2. 438383 1. 189893  
2. 346943 4. 980977  
1. 125066 1. 343282  
3. 928705 4. 157498  
1. 353802 0. 963005  
2. 144107 2. 181096  
1. 049985 1. 095533  
2. 265569 1. 888808  
1. 143039 2. 198219  
4. 057414 1. 569853  
3. 233702 4. 006172  
1. 797734 1. 600922  
2. 143949 0. 819195  
1. 143806 1. 486536  
1. 465147 1. 397197  
1. 786035 1. 74086  
1. 513348 1. 938875  
3. 02456 2. 931121

2.002479 1.486479  
2.709603 4.739951  
1.15688 1.281948  
0.861181 1.435125  
1.382135 1.572996  
1.033133 1.162149  
3.074159 2.122228  
2.458899 1.933355  
4.496538 3.267854  
2.194786 3.208601  
1.335773 2.922655  
1.529404 2.59865  
1.158322 1.2442  
1.636048 2.706206  
3.573684 2.935969  
0.895484 1.38616  
3.316109 3.753863  
0.770601 1.150742  
0.959116 1.137829  
3.453482 2.252872  
0.878294 1.468456  
0.612367 1.304969  
1.394921 1.827483  
1.224367 2.479829  
2.364208 1.296545  
2.65486 2.830062  
1.009368 1.211237  
1.101625 1.518997  
4.087882 2.232904  
2.967536 2.668362  
1.526933 1.09839  
1.045684 1.112092  
2.774889 0.486047  
0.770623 0.958069  
1.721354 2.9988  
0.31233 1.919483  
3.812937 3.6395  
2.117199 2.788667  
1.436972 1.273307  
1.503879 1.780987  
1.230189 1.055876  
1.289993 2.185896  
1.3635 1.961848  
7.511092 7.526958  
4.084399 1.712409  
1.128334 1.4032  
2.401867 3.074377  
1.584248 2.116904  
1.225247 2.025851  
1.53135 1.601185  
1.758951 1.381842

0.968579 1.363485  
5.082155 4.466418  
0.82431 1.496532  
2.719513 2.15615  
2.662298 2.494359  
0.87401 2.358385  
1.796516 1.406124  
1.484937 1.935214  
1.556919 1.133837  
0.68746 0.983615  
1.725433 1.479756  
2.468678 2.673874  
1.432627 2.03488  
2.077299 2.673463  
6.206421 1.241816  
2.216373 2.315939  
1.236452 0.93834  
1.914085 1.991191  
1.439175 1.580222  
0.740945 0.884157  
2.521584 0.506725  
1.186522 1.175201  
2.205574 2.305514  
2.959939 2.737432  
2.471871 3.600704  
1.481944 1.297243  
4.378457 4.90608  
2.244365 2.019909  
1.220282 1.377475  
1.918314 1.673614  
2.065098 2.730355  
1.689811 1.441043  
2.521149 2.555149  
2.908645 4.52509  
4.354661 3.162121  
1.208976 1.840037  
1.002536 1.105303  
1.470129 1.760723  
1.790439 1.78145  
0.907494 1.040276  
1.508709 1.470885  
0.867906 1.682463  
0.782418 1.063192  
0.863629 0.884441  
0.459463 1.871041  
1.053155 1.260132  
1.097333 1.559929  
1.469149 2.054462  
2.659265 3.073061  
0.802568 0.999408  
1.567899 1.475586

2.155048 2.079077  
1.243228 1.983699  
1.186833 0.925591  
2.068239 2.700242  
1.753175 2.451051  
1.231803 1.470334  
3.287632 3.265758  
3.74624 3.042822  
2.519345 2.37821  
0.868537 1.120451  
2.8346 2.499448  
1.71893 1.390536  
5.404471 4.088335  
2.306607 1.07309  
1.023746 1.917392  
1.072622 1.480757  
0.865684 1.808286  
3.210547 2.769424  
4.947998 3.34805  
4.741525 2.239726  
3.020698 3.360052  
1.416755 1.383672  
1.114674 1.202199  
1.718504 1.33849  
2.115505 1.675538  
0.823956 1.038674  
2.398797 1.793605  
1.386789 1.918157  
1.696407 1.299837  
1.452553 0.891558  
1.689688 1.912896  
1.927797 1.472824  
0.9256 1.534256  
2.636332 2.258916  
1.080081 0.881364  
1.527884 2.08041  
1.418679 1.862852  
1.789621 1.225301  
2.542668 2.633665  
1.422808 1.921002  
1.433919 1.971834  
4.162663 4.791825  
1.708579 1.359622  
2.093041 2.103792  
1.63745 2.27705  
0.994031 2.025428  
1.087791 1.076426  
1.656736 1.657739  
2.904893 1.951098  
2.276535 6.461917  
1.153025 1.534537

2.61067 1.112805  
1.721096 1.457796  
0.834799 1.12012  
1.385049 1.480188  
2.195716 2.092426  
0.991721 1.052311  
2.176047 2.471531  
3.921813 3.445381  
1.329124 1.808627  
0.94243 1.179446  
1.961469 1.922504  
3.033686 2.426593  
1.428472 2.171492  
1.23031 1.599818  
1.919111 2.451079  
1.169952 1.862856  
1.763358 2.392143  
0.986553 3.302409  
1.936764 1.808863  
2.133186 1.986655  
1.499777 2.047707  
0.642192 1.140498  
2.042123 1.358826  
2.84657 2.078164  
0.854916 1.38251  
1.059973 1.199422  
0.857179 1.537674  
1.239262 1.30472  
1.56689 1.543447  
0.905203 1.52989  
1.038227 1.48501  
2.278744 1.386837  
3.757827 2.606116  
1.81167 2.031235  
1.699832 1.745164  
1.076257 1.600257  
4.458796 4.725297  
8.124359 6.24469  
3.237766 2.119806  
0.732942 3.36019  
1.081781 1.300279  
3.073889 2.427115  
2.613369 3.728987  
1.449964 2.219292  
1.807145 2.498557  
2.699649 2.033084  
4.051683 3.603276  
1.230434 1.691819  
0.957239 1.106038  
1.144959 1.313222  
0.815779 0.880247

2. 146309 2. 647273  
0. 868678 1. 695393  
3. 850243 2. 861349  
0. 696009 1. 113089  
1. 244561 1. 303243  
0. 934147 1. 357419  
1. 669457 2. 345231  
2. 8316 2. 010526  
1. 169521 1. 348096  
1. 528053 1. 913439  
1. 067372 1. 510998  
4. 12433 4. 762298  
1. 06845 1. 464155  
1. 435617 1. 100552  
2. 282903 2. 480502  
1. 334093 3. 283404  
5. 655254 3. 01681  
5. 849105 6. 267471  
5. 225196 6. 844812  
1. 567871 0. 825751  
2. 225798 2. 401587  
1. 529335 2. 376433  
1. 05065 1. 606441  
1. 914401 1. 602458  
0. 816844 1. 86329  
2. 25985 1. 540561  
2. 143649 2. 546144  
1. 426909 0. 98978  
1. 32065 1. 767614  
1. 260956 1. 04408  
1. 185013 1. 517791  
2. 084337 1. 242687  
3. 06983 2. 027286  
2. 0806 2. 110029  
1. 32605 1. 334534  
1. 732984 0. 944855  
0. 940832 1. 282637  
2. 613693 3. 056236  
0. 6858 0. 892096  
2. 798733 2. 919465  
4. 307079 2. 688853  
5. 663208 3. 279348  
2. 490249 2. 657926  
1. 765425 2. 043582  
1. 071307 1. 174296  
1. 538996 2. 890963  
2. 760384 4. 623021  
1. 268134 1. 66378  
1. 073736 1. 202723  
1. 811564 2. 446738  
1. 162265 1. 412462

1. 337173 1. 190499  
2. 34369 1. 342185  
1. 908966 1. 270845  
1. 75686 1. 16648  
1. 145705 1. 761389  
2. 320252 1. 923494  
1. 332402 1. 988221  
1. 378213 1. 55506  
4. 134358 5. 366955  
2. 033989 1. 752417  
2. 157056 1. 982763  
4. 209856 2. 263879  
1. 185294 1. 093416  
1. 094517 0. 909005  
1. 001413 1. 137893  
0. 927175 1. 146064  
1. 05357 1. 625526  
1. 248296 1. 39188  
1. 124169 1. 2672  
4. 274868 1. 580221  
2. 028483 1. 201282  
2. 512128 3. 446395  
0. 955571 1. 090385  
4. 251845 4. 261126  
1. 668393 1. 813614  
0. 956257 1. 515685  
0. 930075 1. 406346  
9. 139681 7. 374724  
4. 606484 4. 319378  
2. 61633 1. 784119  
0. 865765 1. 386351  
0. 853834 1. 072161  
1. 503449 1. 443546  
1. 282359 2. 433288  
1. 301573 2. 060743  
1. 808181 2. 195518  
1. 339014 2. 18814  
2. 285492 2. 136697  
1. 883431 1. 233113  
1. 271082 2. 405713  
1. 592049 1. 331624  
1. 057568 2. 360326  
1. 452643 1. 233015  
2. 016022 1. 268891  
0. 727913 1. 780473  
0. 831558 1. 689339  
1. 328501 2. 146949  
1. 952984 2. 10083  
1. 49212 1. 873573  
3. 639747 1. 287734  
3. 052998 2. 464954



2. 24833 2. 636095  
2. 326452 2. 980132  
0. 828104 1. 215144  
5. 826485 0. 704892  
3. 55421 3. 104482  
1. 12207 2. 387378  
1. 97929 2. 833101  
2. 067159 1. 804567  
2. 201518 2. 16407  
1. 028106 0. 810789  
3. 474745 4. 071471  
2. 49488 2. 247863  
2. 018649 1. 64457  
1. 401068 2. 289377  
1. 784876 1. 355512  
0. 956106 1. 249657  
1. 331868 1. 47579  
1. 9854 4. 01109  
3. 554393 3. 446003  
1. 926771 1. 455068  
1. 37514 1. 14902  
2. 3368 2. 063061  
1. 383586 1. 356168  
0. 941681 1. 536755  
1. 144814 0. 921801  
1. 494808 2. 206524  
1. 482726 1. 787979  
1. 637069 1. 861625  
0. 790822 1. 920143  
0. 725331 0. 658942  
2. 26151 2. 303797  
1. 888122 2. 892532  
1. 122611 1. 537746  
0. 947717 1. 556561  
0. 890366 1. 419168  
2. 431606 1. 429159  
0. 704615 0. 69336  
1. 631992 1. 657872  
1. 279769 2. 063872  
1. 113732 0. 893663  
2. 169677 2. 233802  
1. 79451 2. 152395  
1. 825284 1. 836722  
1. 980029 2. 244623  
2. 523894 2. 556417  
2. 634722 3. 497333  
1. 471317 1. 757797  
2. 522015 2. 595727  
1. 181621 1. 602511  
1. 221042 1. 217422  
3. 322791 4. 489173

2. 176157 2. 555721  
1. 527233 1. 706327  
1. 998438 1. 834404  
1. 239469 1. 084513  
1. 968845 1. 332753  
3. 136572 3. 931306  
1. 603704 2. 049176  
1. 459692 1. 138299  
1. 695008 1. 63528  
2. 481254 3. 242789  
1. 486763 2. 057564  
4. 016586 2. 186188  
1. 541825 2. 368789  
1. 926607 1. 967643  
1. 347428 0. 953218  
1. 600271 1. 309641  
1. 04582 1. 652182  
1. 803494 1. 785537  
3. 703348 2. 29552  
2. 928283 1. 377297  
0. 862642 1. 441355  
1. 068649 1. 814646  
1. 970846 1. 168775  
1. 026651 2. 14572  
1. 842642 2. 605082  
3. 147562 2. 143871  
5. 069216 3. 761671  
1. 66601 1. 193905  
2. 569457 2. 836112  
1. 634139 1. 230799  
1. 998228 2. 799717  
1. 305342 3. 09502  
2. 22291 1. 991116  
1. 571573 1. 475745  
3. 536503 1. 9704  
1. 122624 1. 21055  
2. 404096 2. 942875  
1. 457423 1. 783003  
1. 375673 0. 758982  
1. 958694 3. 153661  
1. 172819 1. 99569  
1. 767022 1. 194437  
3. 251396 1. 252448  
1. 462102 1. 717789  
6. 235974 4. 681131  
1. 614321 1. 417617  
1. 574857 1. 219551  
1. 344764 0. 969919  
2. 188689 2. 713486  
1. 787197 1. 658505  
0. 942091 1. 372231

2. 202453 2. 743467  
1. 009655 1. 607867  
2. 188341 1. 93045  
2. 284365 2. 076258  
1. 164862 1. 042776  
0. 860284 1. 560727  
1. 085262 2. 481247  
2. 009739 1. 625112  
1. 117643 0. 80645  
2. 296142 2. 719869  
2. 045403 2. 64807  
1. 800629 1. 395889  
2. 466518 5. 009481  
1. 783813 0. 858659  
3. 485512 2. 976451  
2. 395565 2. 217199  
2. 683553 3. 529606  
1. 68337 2. 583168  
0. 901557 1. 798978  
6. 560284 6. 553291  
1. 144668 3. 01594  
0. 918219 1. 171118  
1. 101451 1. 727078  
1. 035272 1. 008184  
0. 933841 0. 974224  
1. 710622 2. 839708  
1. 103574 1. 488423  
1. 1212 1. 898749  
1. 601465 1. 738421  
2. 956834 2. 564676  
1. 476118 1. 713504  
2. 401394 3. 149677  
2. 162934 3. 211301  
2. 552682 1. 304633  
0. 635598 1. 91491  
2. 950928 2. 30548  
0. 519423 0. 599644  
1. 070674 1. 660552  
1. 729685 2. 744239  
1. 898058 2. 447363  
1. 148476 1. 247813  
1. 83196 1. 014881  
1. 418883 2. 577066  
1. 080372 1. 41609  
1. 587376 2. 420012  
1. 013077 2. 979625  
1. 15195 1. 616  
1. 297421 1. 813593  
1. 413354 2. 340623  
0. 996345 2. 400027  
4. 872242 2. 226193

1. 940021 1. 783461  
1. 793616 3. 226648  
2. 970873 2. 115494  
1. 019448 1. 134447  
1. 013252 2. 872011  
3. 457901 4. 040974  
1. 386155 1. 50702  
1. 847014 2. 033063  
1. 734136 1. 174265  
1. 343619 2. 071045  
3. 268544 2. 558816  
1. 233113 1. 598896  
2. 355481 2. 085783  
0. 927503 2. 526485  
3. 10919 1. 382158  
1. 502146 2. 471694  
0. 662196 1. 000558  
4. 327728 4. 77068  
1. 649056 1. 237883  
0. 576086 0. 91643  
1. 02112 1. 53932  
1. 263059 2. 218182  
1. 41304 1. 55943  
1. 271674 1. 081253  
2. 009346 2. 294321  
3. 668749 1. 860095  
1. 340482 1. 241607  
1. 516841 1. 544469  
5. 229291 2. 690537  
2. 074424 1. 627595  
2. 618775 2. 564382  
1. 645561 1. 928207  
2. 94139 3. 122569  
1. 934013 1. 660873  
1. 612703 2. 315155  
1. 991187 2. 651662  
2. 162257 1. 609102  
4. 51408 2. 031228  
2. 74193 3. 290102  
0. 966411 1. 33353  
2. 192066 2. 053059  
1. 682268 2. 55862  
1. 705344 1. 547776  
1. 25674 1. 384996  
3. 240237 2. 555855  
4. 206883 6. 106848  
2. 46074 3. 594702  
3. 056966 3. 853891  
1. 807982 2. 079337  
2. 363518 1. 957008  
1. 724506 2. 442441

1. 400748 2. 494652  
1. 588291 1. 745528  
3. 056347 2. 064584  
1. 102415 1. 374043  
0. 990066 1. 213945  
2. 776698 3. 071361  
3. 943959 1. 668685  
1. 72804 0. 982374  
1. 555011 1. 737502  
1. 774552 1. 515511  
0. 985798 1. 313433  
1. 224926 1. 241393  
2. 668673 2. 309459  
1. 510268 2. 48512  
3. 755287 3. 066684  
1. 032073 1. 219792  
1. 554682 1. 359734  
1. 78582 1. 519171  
1. 345942 2. 119997  
2. 516481 2. 360064  
1. 899245 2. 58948  
5. 102076 2. 043616  
1. 264556 0. 717199  
2. 840345 3. 123203  
2. 257603 1. 738409  
1. 095182 0. 768867  
1. 574243 2. 506436  
3. 931157 2. 843196  
1. 037243 1. 450131  
1. 990473 1. 643847  
6. 055185 6. 474314  
2. 257712 3. 089309  
0. 783774 1. 839196  
3. 350983 3. 305835  
1. 526993 1. 187579  
1. 61645 1. 754007  
1. 769793 1. 01861  
0. 895719 2. 476655  
1. 96452 1. 613556  
1. 689002 1. 81081  
1. 36062 2. 123381  
2. 592342 1. 92794  
1. 353953 1. 987776  
2. 17668 2. 455082  
1. 781301 2. 272412  
2. 507506 2. 169763  
0. 756771 0. 853428  
2. 433928 2. 992467  
1. 283001 1. 647299  
1. 253335 1. 743764  
2. 477895 2. 229459

5.069019 7.202756  
1.021707 1.225266  
1.09176 1.606778  
1.513297 1.481887  
3.874387 3.164516  
2.353771 1.96202  
1.113677 0.949583  
1.493387 2.041768  
1.762316 2.013655  
1.380222 1.687679  
2.978112 2.975541  
1.996284 1.172372  
5.034972 4.674457  
2.34126 3.069665  
0.886437 1.493665  
1.694397 2.276432  
3.878273 2.76491  
2.891511 2.932464  
0.96498 1.040365  
2.81289 2.669694  
3.596247 1.757942  
2.704151 1.709487  
1.381705 2.880825  
1.276847 0.877582  
1.673678 2.512762  
1.135852 1.216025  
1.147888 1.402687  
1.17424 2.001241  
1.255512 1.220477  
1.007196 0.932435  
1.14424 1.435136  
1.435747 1.455541  
2.495017 2.556902  
1.904362 1.908882  
3.40297 4.178641  
8.53281 7.88733  
1.542611 2.586936  
4.451625 1.417619  
4.580784 2.078806  
1.69799 2.00475  
1.761437 2.467231  
0.641144 0.59723  
0.92648 0.761545  
1.501754 2.040419  
4.256031 1.44127  
0.670798 0.972769  
1.297562 1.486569  
3.478521 1.450842  
1.930293 2.956656  
1.444248 1.260444  
1.905004 2.809081

4. 061262 3. 927949  
1. 788428 2. 291389  
6. 281326 3. 043351  
1. 02213 1. 066182  
1. 398784 2. 754641  
1. 986487 0. 950795  
2. 633483 2. 275535  
1. 456718 1. 773981  
3. 168291 3. 037323  
1. 066507 2. 453183  
3. 216177 3. 819976  
1. 088363 0. 743907  
1. 524065 2. 125959  
1. 173744 1. 902963  
1. 250423 1. 765138  
0. 663869 1. 009498  
1. 769963 1. 896277  
1. 794047 1. 693878  
3. 210469 1. 524121  
4. 967191 2. 537918  
1. 596846 1. 170935  
1. 338184 1. 586163  
1. 465374 1. 579939  
1. 897722 1. 673147  
1. 414095 2. 154124  
1. 240628 0. 933056  
1. 930168 2. 017315  
6. 551767 6. 519446  
2. 898141 1. 58731  
1. 64901 2. 073358  
1. 762573 2. 253763  
1. 384002 2. 414788  
1. 223579 1. 478983  
0. 865592 1. 384727  
1. 047328 0. 85498  
0. 623748 2. 394037  
2. 452148 1. 671599  
2. 01854 2. 634205  
5. 919614 3. 208493  
1. 640833 0. 84151  
1. 499018 1. 585603  
1. 307443 2. 561476  
1. 750207 2. 261638  
1. 303128 2. 052918  
2. 038622 0. 796933  
0. 695441 0. 870056  
1. 405398 1. 178729  
2. 057035 3. 342732  
1. 277727 1. 101895  
1. 436749 1. 661284  
1. 34227 1. 378509

2.131357 1.939335  
1.578055 1.701792  
1.145529 2.276781  
1.288125 1.38825  
1.031085 1.705394  
1.4564 1.256813  
1.553729 1.665617  
1.415347 1.357862  
0.733255 0.944759  
5.892659 4.931675  
1.097841 1.246498  
0.84563 0.751548  
6.109945 6.044667  
1.60752 2.782599  
1.460255 1.681171  
1.975381 2.177632  
1.306062 1.938783  
1.117346 1.312584  
1.763693 1.944496  
3.23449 1.429138  
1.054006 1.845906  
2.469687 3.114292  
3.206395 2.232333  
2.016218 2.719361  
1.167951 1.671577  
6.567085 1.780234  
1.218593 1.371237  
3.221525 2.515612  
0.91723 1.632928  
2.063446 2.366084  
1.944536 1.596943  
1.734475 2.33988  
3.08953 3.909846  
8.136273 6.131614  
1.635254 2.075004  
1.099409 1.916831  
1.568028 1.415176  
1.026771 3.21799  
2.182398 3.412442  
3.535951 2.302924  
0.98713 1.791201  
1.343934 1.55976  
1.462376 1.398222  
1.667283 1.733145  
6.665445 6.068271  
1.226961 1.453502  
1.818136 1.959833  
1.09036 0.974923  
1.239117 1.876731  
2.396786 2.692601  
2.405176 2.897076



1. 163595 1. 951263  
1. 94596 3. 43724  
2. 3298 1. 387773  
2. 861807 1. 275505  
0. 686176 1. 642049  
2. 505096 1. 865883  
2. 371457 2. 980819  
1. 711134 1. 359289  
2. 324345 2. 928781  
3. 225127 2. 072652  
1. 674645 1. 458817  
1. 155819 1. 401343  
1. 165379 0. 549308  
3. 119565 3. 379785  
2. 029794 1. 538208  
3. 342316 3. 400322  
1. 478838 2. 662601  
1. 881312 1. 58964  
1. 223019 1. 79729  
1. 564861 1. 37633  
2. 235865 3. 844786  
1. 65498 2. 053939  
1. 573015 2. 190087  
1. 637272 1. 641829  
1. 040632 1. 156337  
1. 257035 1. 375724  
0. 886142 1. 312508  
1. 270363 1. 200272  
3. 374481 3. 60187  
3. 31361 4. 078617  
2. 804723 2. 850474  
2. 044281 1. 186908  
2. 822568 3. 121023  
1. 835527 0. 892123  
0. 964944 1. 744437  
2. 111539 1. 968165  
3. 365673 1. 505058  
1. 534097 1. 576628  
1. 410052 1. 009302  
0. 894038 1. 523787  
1. 237155 1. 419863  
1. 49861 1. 170107  
1. 116413 0. 862669  
1. 189459 0. 915962  
1. 847619 1. 822631  
2. 013993 1. 644042  
6. 103461 3. 418496  
3. 26337 3. 479646  
1. 488979 1. 956803  
2. 081587 2. 201915  
3. 410356 3. 088909

1. 334766 2. 113015  
1. 398295 1. 659523  
1. 073268 3. 071217  
1. 105835 2. 006289  
1. 243845 1. 603642  
1. 535169 2. 309572  
0. 868998 1. 023373  
1. 085155 0. 941385  
1. 241043 1. 339546  
1. 274404 1. 718439  
1. 615082 1. 383617  
2. 308513 4. 118958  
1. 025132 1. 985264  
4. 995908 1. 465743  
3. 59695 1. 086085  
1. 091336 1. 793239  
1. 494499 3. 385681  
0. 893149 1. 448498  
1. 615784 1. 908017  
4. 198571 4. 558789  
1. 465578 2. 555772  
1. 493273 1. 17727  
1. 647636 2. 276099  
0. 909842 0. 281306  
2. 930098 2. 625135  
1. 030215 1. 38335  
2. 196037 1. 72384  
1. 077817 1. 150671  
2. 444112 2. 438282  
1. 134167 2. 151414  
1. 110162 1. 611321  
2. 192674 1. 679558  
0. 951503 1. 732242  
6. 116587 2. 379163  
1. 721541 3. 351518  
2. 679987 2. 077024  
4. 50221 2. 531644  
2. 596448 4. 326534  
1. 073622 0. 944475  
2. 205091 2. 33435  
2. 20277 1. 428681  
1. 761967 1. 760243  
3. 311527 3. 631149  
1. 947313 1. 595346  
1. 531105 2. 014975  
1. 398944 1. 94567  
2. 98931 2. 338651  
1. 508803 1. 293072  
0. 851507 1. 664284  
2. 696195 1. 978275  
1. 788046 1. 993887

2. 636241 3. 628273  
2. 770166 1. 550261  
1. 926073 1. 999159  
1. 960122 0. 813537  
2. 485095 2. 270547  
0. 613373 1. 858784  
1. 976371 2. 69029  
4. 805047 2. 26411  
4. 403751 4. 084604  
1. 027281 1. 782819  
1. 459783 1. 174184  
1. 781733 1. 336794  
4. 281362 1. 434546  
2. 502317 1. 499915  
1. 542507 1. 25741  
1. 248909 1. 240301  
4. 001204 4. 370846  
4. 319967 4. 004387  
4. 514198 4. 240452  
2. 912467 2. 559868  
4. 01069 1. 98238  
1. 099872 2. 141188  
3. 356664 2. 839891  
1. 480981 1. 816634  
2. 173245 1. 800753  
2. 70466 1. 224033  
1. 82449 3. 975125  
1. 752701 1. 627653  
1. 216061 2. 021157  
1. 524171 1. 258596  
1. 977589 2. 639498  
1. 420428 2. 891149  
4. 711533 4. 976308  
6. 806035 6. 678476  
1. 000732 1. 755391  
0. 956831 1. 927851  
2. 04688 1. 634849  
1. 525711 1. 678965  
0. 882708 1. 058407  
1. 158481 1. 270056  
0. 909542 1. 840638  
1. 303078 2. 011961  
4. 628608 5. 592583  
3. 909359 4. 482835  
1. 938259 2. 121042  
2. 479434 2. 203287  
6. 596422 7. 282784  
4. 792642 4. 009771  
5. 735111 5. 633342  
6. 633412 6. 848752  
2. 704332 3. 093172

4. 886644 5. 614665  
2. 997581 3. 869923  
2. 186897 3. 490691  
3. 245866 2. 30839  
8. 443952 7. 563935  
5. 586954 4. 716688  
4. 360927 4. 240134  
2. 273836 1. 913829  
5. 278812 5. 39805  
6. 398343 5. 753066  
5. 586545 4. 898959  
10. 33506 10. 27996  
5. 12091 4. 828339  
5. 987808 6. 356235  
7. 000988 7. 47413  
5. 858052 6. 457153  
7. 665813 7. 823264  
0. 732475 0. 568208  
1. 517315 1. 149835  
7. 656424 7. 999891  
1. 853656 2. 90794  
2. 233884 3. 166037  
8. 754336 8. 394102  
1. 774557 2. 517349  
1. 505425 1. 949034  
6. 195001 5. 726111  
4. 862508 4. 770712  
1. 583314 1. 294954  
1. 41749 1. 358664  
2. 788144 3. 016803  
2. 212928 1. 6327  
1. 856451 2. 141499  
3. 015237 2. 309595  
1. 782577 2. 290127  
3. 021861 3. 714765  
4. 645441 5. 189107  
5. 063347 5. 043753  
5. 518918 6. 015716  
6. 470171 6. 526582  
4. 852516 3. 7199  
6. 855996 6. 679844  
3. 305929 5. 597629  
3. 654111 3. 431455  
1. 573236 1. 542165  
3. 808261 2. 367342  
7. 464489 6. 625861  
7. 593659 8. 151011  
6. 578399 5. 168171  
6. 919279 6. 457309  
7. 687685 7. 84854  
3. 292142 5. 735539

7. 372169 7. 27491  
3. 196371 3. 228044  
2. 910084 3. 831138  
1. 186314 1. 850768  
1. 319105 0. 743382  
1. 646346 1. 535621  
1. 377338 1. 111383  
2. 387346 2. 814921  
0. 980904 0. 961459  
1. 307888 1. 371188  
0. 946379 2. 02108  
1. 135549 1. 82107  
2. 816726 2. 571188  
2. 23748 3. 20549  
2. 526362 2. 145043  
1. 369942 1. 638444  
0. 91328 1. 605036  
2. 082842 2. 515437  
1. 160858 1. 336273  
1. 745781 2. 030406  
1. 995171 1. 039515  
1. 050874 0. 891053  
1. 242693 0. 785311  
0. 795273 0. 739804  
1. 578666 2. 063647  
1. 870678 2. 090539  
4. 243283 4. 963103  
5. 746972 6. 129309  
5. 820446 5. 122948  
5. 616878 5. 026802  
0. 948329 1. 80576  
0. 914947 1. 011121  
8. 992267 8. 27555  
4. 954842 2. 707173  
0. 512833 0. 891141  
8. 13368 7. 152883  
6. 569566 7. 39315  
2. 527177 1. 235767  
1. 294387 1. 578727  
1. 699433 1. 659502  
2. 338786 0. 881952  
1. 125526 1. 31239  
1. 620366 2. 106443  
1. 158826 1. 728475  
8. 106718 7. 594392  
0. 891662 2. 456266  
3. 293281 3. 217746  
1. 757043 2. 352492  
2. 531425 2. 381207  
1. 378162 1. 607569  
4. 282671 4. 0927

6. 69704 6. 357006  
1. 223598 1. 165522  
4. 07986 4. 612659  
1. 695593 2. 003518  
6. 332771 4. 951953  
3. 847009 4. 32696  
7. 555388 6. 938896  
3. 545217 3. 297144  
0. 998928 1. 333522  
2. 8179 1. 768621  
10. 4912 10. 36816  
2. 468219 4. 490641  
6. 481728 7. 246257  
7. 373166 7. 386259  
5. 151548 5. 003681  
5. 78033 5. 421776  
2. 79956 3. 979588  
1. 422516 2. 541252  
1. 626807 1. 663067  
1. 021361 1. 234748  
1. 421633 2. 079906  
1. 31915 1. 499675  
1. 324391 1. 33666  
1. 564152 1. 462104  
1. 401054 2. 015978  
1. 991704 1. 625995  
3. 93111 3. 263851  
1. 126592 1. 253755  
2. 297323 2. 102333  
3. 340713 3. 672001  
2. 86381 2. 214664  
0. 497813 1. 888297  
0. 88017 0. 679706  
1. 310717 1. 714652  
2. 399393 2. 012511  
1. 982934 1. 299514  
3. 023275 2. 69509  
3. 627417 3. 728703  
1. 236357 2. 096212  
0. 537118 0. 874152  
1. 722442 2. 949194  
0. 792566 2. 991699  
0. 655986 1. 36343  
0. 809033 2. 278857  
4. 108776 4. 99094  
2. 036057 2. 0519  
1. 420137 1. 804527  
0. 893723 2. 390127  
1. 930356 1. 685549  
1. 993097 2. 173971  
0. 958038 2. 271209

1. 313555 1. 352298  
3. 03028 1. 246802  
1. 559529 2. 011922  
2. 482549 0. 846965  
0. 862638 2. 490842  
1. 761455 1. 724434  
1. 092445 1. 488209  
1. 570703 1. 889838  
1. 131757 1. 215521  
3. 683121 2. 300255  
1. 573517 1. 145231  
1. 048608 0. 839743  
1. 486224 2. 876364  
1. 094585 0. 773428  
2. 29299 1. 575968  
4. 283214 3. 757433  
1. 412485 1. 168586  
1. 579443 2. 942619  
1. 863062 2. 658394  
3. 801064 2. 021805  
2. 436301 2. 394652  
1. 36275 2. 03457  
1. 841496 1. 924513  
0. 955719 1. 140999  
2. 413119 2. 903209  
2. 513107 3. 089655  
3. 223681 2. 186506  
1. 101329 2. 029772  
1. 965457 1. 767863  
0. 771574 1. 367791  
1. 220974 1. 965964  
2. 453222 2. 063018  
1. 390209 1. 164534  
1. 468634 1. 567778  
7. 570542 7. 383006  
1. 482044 1. 641887  
1. 189373 1. 887556  
1. 820523 1. 852045  
2. 370418 3. 934679  
3. 728739 2. 591132  
1. 793175 1. 594136  
2. 272467 2. 051404  
2. 955204 2. 88647  
2. 604585 3. 004633  
1. 880334 1. 917587  
1. 207562 1. 633749  
6. 349957 1. 779767  
0. 91706 1. 458716  
3. 242011 2. 939607  
1. 431968 1. 836962  
4. 48784 2. 965141

1. 603977 0. 901803  
1. 97608 1. 569179  
1. 526062 0. 693884  
4. 086081 1. 622969  
1. 108772 2. 13227  
1. 890232 2. 576757  
2. 201774 1. 565951  
2. 533833 1. 947811  
1. 682118 1. 708729  
0. 926339 1. 474701  
2. 219282 1. 801  
1. 456182 1. 940808  
1. 5846 1. 658932  
1. 255639 1. 824777  
2. 186101 2. 651291  
1. 255359 1. 253872  
1. 466962 1. 060841  
1. 763654 2. 107152  
3. 433139 2. 979247  
1. 065642 2. 130417  
2. 860278 2. 87873  
2. 441279 2. 243767  
1. 388345 2. 191303  
6. 21729 5. 062235  
1. 647911 1. 253077  
1. 329434 1. 741728  
2. 40284 0. 838441  
1. 804476 1. 198444  
1. 874877 2. 493346  
0. 678686 1. 007463  
0. 809472 1. 239605  
2. 714301 2. 150757  
3. 230593 3. 928942  
2. 626739 4. 644711  
1. 28615 0. 494621  
1. 592526 2. 326389  
0. 893869 1. 999976  
2. 316569 2. 506733  
2. 593907 1. 997769  
1. 131456 2. 590889  
0. 825736 1. 173568  
1. 159484 1. 189565  
3. 679634 3. 364138  
1. 221891 1. 323873  
1. 243374 1. 389099  
1. 152767 2. 058244  
1. 90267 3. 570946  
1. 555225 2. 92144  
1. 537917 1. 226223  
0. 879347 0. 903643  
2. 009264 2. 961599



1. 820523 1. 144765  
1. 193863 1. 595058  
0. 72823 1. 299967  
2. 451169 2. 274007  
1. 902358 2. 728773  
0. 995916 0. 694355  
1. 826781 2. 183995  
0. 982953 0. 795987  
1. 134233 2. 063664  
1. 312982 1. 178477  
3. 24544 2. 622816  
0. 966689 1. 429978  
3. 610384 3. 973659  
4. 002287 1. 280938  
2. 874275 2. 807954  
1. 605642 1. 954834  
0. 861327 3. 49009  
0. 98175 0. 892722  
1. 047926 1. 66823  
2. 195895 1. 203118  
2. 017405 2. 250457  
3. 991008 4. 431341  
2. 923999 3. 618263  
5. 193613 2. 804415  
3. 635451 2. 704572  
1. 383968 3. 196786  
2. 037253 2. 754238  
2. 444186 1. 924416  
0. 767718 1. 01315  
1. 614616 1. 566547  
1. 079282 1. 706723  
1. 364033 1. 376143  
1. 768283 2. 762166  
3. 582995 3. 25778  
1. 110475 1. 180932  
0. 905162 1. 007915  
1. 296225 1. 7986  
1. 079091 1. 615984  
1. 108939 2. 095032  
0. 878253 1. 004398  
4. 734351 3. 724478  
0. 736336 1. 349025  
0. 918412 1. 664739  
0. 78655 1. 312321  
1. 019442 2. 469913  
6. 199618 3. 680939  
1. 059346 1. 394903  
1. 1191 1. 372383  
2. 438864 2. 05849  
3. 421033 1. 550424  
1. 363913 2. 399991

3. 925362 3. 113271  
2. 111005 2. 614639  
0. 950057 1. 059726  
1. 355107 2. 468197  
1. 20806 4. 293777  
1. 712319 2. 054553  
1. 80819 1. 773738  
4. 346714 3. 881967  
1. 853808 1. 855747  
2. 972243 3. 001083  
0. 993253 1. 783969  
6. 558648 6. 342023  
0. 852199 1. 150915  
1. 952517 1. 500291  
1. 327774 2. 278407  
1. 169762 1. 331342  
5. 218941 6. 850647  
4. 254371 2. 115873  
3. 985134 2. 691715  
2. 191454 1. 664842  
1. 13192 1. 779635  
2. 190989 1. 782538  
4. 170938 2. 633058  
1. 200238 1. 376369  
1. 967203 3. 32634  
1. 495737 1. 944547  
4. 048462 3. 731415  
2. 204914 2. 084463  
1. 929949 1. 61597  
2. 133234 1. 976823  
1. 990462 2. 335148  
1. 254147 1. 10737  
2. 927523 2. 18783  
4. 868829 6. 418796  
6. 648814 7. 778823  
1. 818474 2. 214363  
0. 992604 0. 981412  
4. 869575 3. 569992  
6. 683923 6. 545157  
2. 014537 1. 998982  
0. 775665 0. 839008  
4. 925482 5. 229443  
1. 323241 1. 768415  
2. 180436 3. 590251  
3. 93147 3. 755993  
1. 265617 1. 021607  
2. 24767 3. 664808  
2. 51709 2. 064625  
1. 61731 1. 724652  
0. 999188 0. 738445  
1. 779651 2. 36954

2. 2326 3. 2344  
0. 864766 0. 621222  
1. 207213 1. 2572  
1. 832282 1. 907033  
0. 69547 1. 060549  
1. 517689 2. 237622  
3. 785826 4. 097012  
0. 871587 1. 677087  
1. 516995 2. 043634  
0. 728184 1. 174015  
1. 283218 2. 718015  
0. 806524 1. 313207  
2. 147327 0. 852857  
4. 202546 3. 316357  
1. 041551 1. 289754  
2. 52531 2. 853109  
0. 759662 1. 178919  
2. 891747 2. 701068  
1. 613693 1. 320706  
0. 942548 1. 331648  
1. 55132 1. 661411  
5. 072032 2. 168795  
1. 28775 1. 591113  
1. 630649 2. 400172  
1. 649982 2. 13697  
0. 976492 1. 735993  
4. 913607 3. 347215  
1. 860376 2. 883454  
2. 23498 2. 324643  
1. 568045 1. 694001  
5. 351166 1. 787035  
1. 412545 2. 06218  
2. 724758 2. 934662  
1. 741456 2. 181232  
1. 32187 0. 731603  
1. 716159 1. 451298  
10. 32577 10. 22096  
4. 202365 5. 464779  
6. 768307 7. 839277  
2. 836501 2. 733094  
2. 235219 1. 850521  
0. 993607 1. 249283  
2. 217854 2. 750656  
3. 933152 4. 75132  
2. 527389 1. 639284  
1. 327302 0. 866735  
1. 668633 1. 712709  
2. 509404 2. 0884  
2. 572666 2. 74275  
2. 279185 0. 810415  
4. 411151 6. 623991

0. 776539 0. 881326  
1. 10214 1. 766987  
2. 527976 2. 114469  
0. 771774 1. 213997  
1. 041631 1. 441049  
0. 81938 1. 454445  
0. 709684 1. 155612  
3. 177323 1. 554406  
2. 859382 0. 853404  
2. 104229 1. 21385  
1. 137721 1. 646775  
1. 922259 1. 900026  
1. 158659 1. 165676  
1. 851 1. 928588  
2. 501429 2. 758642  
2. 700074 1. 214098  
1. 183647 1. 542281  
3. 461927 2. 462703  
0. 794612 1. 393811  
4. 334041 4. 476024  
2. 997892 2. 937995  
5. 228617 3. 407317  
1. 869844 2. 934291  
0. 696267 1. 184647  
1. 803312 1. 671471  
1. 063988 1. 954364  
2. 817305 1. 267056  
0. 913415 4. 345742  
1. 39433 2. 012221  
4. 208408 3. 41559  
1. 403812 1. 790265  
1. 476199 0. 830904  
0. 962781 2. 212443  
0. 722844 2. 451017  
1. 857255 2. 802328  
1. 663848 1. 900469  
1. 56701 1. 301132  
1. 453727 3. 545914  
1. 555477 1. 621822  
3. 384357 3. 345812  
1. 072511 1. 248167  
4. 301563 2. 817916  
6. 199106 6. 283535  
0. 775594 1. 081871  
1. 517854 1. 1583  
2. 277768 0. 729249  
2. 897924 2. 98463  
1. 323561 2. 094506  
1. 254755 2. 111887  
2. 682702 3. 320475  
2. 59145 3. 277533

1. 392798 4. 9692  
1. 955593 2. 566119  
3. 270196 1. 013931  
0. 760634 2. 072642  
1. 041808 1. 092833  
3. 340727 3. 556819  
1. 916712 2. 957331  
2. 302647 1. 837323  
0. 828775 2. 689238  
1. 33781 1. 088968  
2. 428285 2. 903772  
1. 535868 1. 732074  
0. 371108 0. 561763  
3. 131208 2. 72685  
1. 245078 1. 734412  
1. 472146 2. 543657  
1. 930378 1. 282314  
6. 305732 5. 37591  
2. 458098 1. 853635  
1. 237081 1. 516869  
1. 403402 1. 936251  
0. 724022 0. 803121  
2. 104974 1. 640142  
3. 096773 1. 875207  
1. 622037 2. 855285  
1. 495015 1. 511019  
3. 075081 3. 551317  
1. 399218 1. 142957  
2. 507586 1. 524392  
1. 841701 1. 229299  
4. 517194 2. 571739  
1. 720562 1. 730733  
3. 19023 2. 69055  
0. 933864 1. 746707  
3. 909875 5. 403915  
1. 019938 1. 220883  
1. 561621 1. 915558  
3. 378345 2. 329215  
1. 559473 0. 626121  
2. 066135 2. 749347  
0. 854478 1. 287369  
1. 824107 2. 117032  
1. 655415 2. 125963  
1. 421547 1. 289499  
1. 792981 2. 122421  
1. 575422 1. 586016  
1. 054445 2. 792013  
2. 981302 3. 289084  
4. 458456 2. 595044  
2. 285122 2. 013264  
1. 108825 2. 185403

1. 451597 2. 076495  
0. 98184 2. 364686  
3. 393228 3. 213072  
0. 943302 1. 208818  
4. 81076 2. 374851  
1. 124002 1. 470926  
1. 589792 1. 252985  
5. 101292 3. 026537  
1. 12588 2. 251544  
6. 876144 5. 840422  
1. 493573 4. 151265  
2. 123077 2. 262866  
4. 756935 4. 725106  
2. 137698 1. 284175  
2. 335863 1. 933585  
1. 625553 1. 93765  
1. 403535 2. 434593  
1. 195082 1. 472876  
1. 388492 1. 134737  
4. 645834 1. 869297  
2. 619858 5. 037492  
2. 928159 2. 254808  
2. 321672 2. 555929  
4. 06996 2. 409055  
1. 899155 3. 085938  
0. 969429 0. 983303  
1. 682648 2. 690936  
1. 103405 2. 600536  
2. 009736 1. 011209  
1. 679316 0. 71138  
2. 779115 2. 350452  
1. 089527 1. 757571  
1. 972134 1. 356265  
0. 920553 2. 163355  
1. 530386 3. 384752  
4. 055084 1. 168451  
2. 269235 4. 068954  
4. 978962 3. 156637  
1. 264095 2. 014256  
0. 65137 0. 684703  
1. 398518 2. 392575  
3. 192621 4. 264713  
5. 543109 5. 324832  
4. 739839 1. 814585  
1. 956423 1. 139403  
3. 237245 3. 415765  
1. 850745 2. 311672  
1. 312327 1. 069141  
1. 271185 1. 890365  
2. 415367 3. 501875  
1. 017452 0. 520741

0. 853746 1. 954835  
1. 583725 1. 496027  
1. 82177 2. 147129  
2. 650526 3. 280485  
1. 943277 2. 18628  
2. 046974 1. 774278  
2. 524497 3. 642783  
2. 323508 1. 747981  
1. 121462 1. 116584  
1. 799774 1. 761194  
1. 653475 1. 624738  
0. 75143 1. 100017  
1. 663284 3. 306973  
0. 91616 3. 234055  
2. 059891 3. 548637  
4. 304735 2. 857449  
2. 029762 2. 188936  
3. 226135 3. 144483  
1. 320186 0. 517552  
1. 143305 1. 144722  
1. 569787 1. 584737  
0. 564677 0. 800418  
2. 625074 3. 573259  
0. 792817 1. 080942  
0. 652215 1. 357607  
2. 983458 2. 926043  
3. 37956 1. 676523  
1. 37768 1. 503504  
3. 544685 4. 489551  
1. 823769 1. 970776  
1. 493351 1. 357571  
0. 872738 0. 976734  
0. 81525 0. 671705  
4. 25463 3. 259915  
1. 25737 1. 4051  
4. 288919 1. 255602  
1. 507507 2. 006951  
1. 51622 1. 85516  
1. 624018 2. 039237  
1. 320989 2. 338939  
1. 093552 1. 478835  
0. 860369 0. 90446  
2. 892436 2. 445617  
2. 542558 1. 48291  
1. 954852 1. 864864  
1. 004012 1. 428662  
3. 265158 1. 731903  
0. 775621 0. 850697  
2. 283345 2. 79284  
2. 584213 1. 271702  
2. 734361 2. 548163

1. 988961 3. 286794  
2. 74641 1. 981333  
0. 92899 1. 576692  
1. 614397 1. 196448  
1. 250748 1. 534181  
1. 842833 1. 930798  
1. 125122 1. 503453  
1. 595306 1. 71409  
2. 88562 1. 561283  
4. 563105 2. 611945  
2. 520145 3. 79852  
2. 558799 1. 241862  
0. 53613 2. 479095  
3. 318476 2. 879692  
4. 138818 1. 815224  
3. 653296 3. 089136  
0. 693419 1. 464722  
0. 699355 1. 717282  
4. 882116 1. 582454  
1. 297631 0. 775955  
1. 438916 1. 104959  
0. 939065 1. 404515  
1. 059758 0. 737185  
1. 702151 2. 308755  
1. 052128 1. 376016  
3. 00685 3. 130696  
2. 19717 4. 206252  
2. 760654 0. 13907  
2. 492141 2. 103776  
2. 035449 2. 604034  
3. 936825 3. 217132  
1. 730534 1. 911883  
3. 345788 6. 124227  
1. 075809 1. 063092  
2. 237162 1. 13751  
1. 93721 1. 063298  
0. 569459 1. 391263  
2. 038939 2. 195325  
2. 472408 2. 364339  
0. 986362 1. 143961  
2. 936165 1. 539009  
1. 603183 2. 710723  
1. 746599 1. 32032  
1. 530367 2. 801657  
1. 594484 1. 711286  
0. 528156 0. 684711  
2. 091897 1. 699557  
1. 436469 1. 838952  
3. 092184 2. 049841  
1. 426606 0. 904561  
1. 145311 2. 597322



1. 130707 1. 47691  
1. 981872 1. 748012  
2. 071622 2. 22722  
0. 781107 3. 454962  
2. 202342 1. 762231  
0. 974832 1. 959419  
2. 559532 2. 376736  
2. 542856 1. 675781  
3. 451977 3. 923006  
1. 545147 2. 295981  
1. 328378 3. 304699  
1. 943127 2. 056765  
3. 697185 6. 304883  
6. 407434 7. 0534  
6. 195258 5. 163162  
7. 145929 7. 542631  
6. 958075 6. 5355  
3. 666291 3. 136587  
1. 628787 1. 622899  
8. 668997 8. 366167  
5. 343296 5. 477135  
2. 008499 2. 508989  
3. 394346 2. 77572  
6. 48792 6. 115169  
8. 808275 9. 191489  
6. 38804 6. 400977  
6. 814298 7. 409053  
3. 306404 2. 822643  
4. 707518 3. 66736  
7. 393161 7. 498754  
7. 431797 7. 783543  
1. 6884 1. 920667  
6. 633312 6. 471312  
1. 924623 2. 5579  
7. 064902 7. 900719  
5. 420082 5. 142731  
5. 17468 6. 019838  
2. 089306 2. 72326  
3. 396742 3. 545167  
8. 316245 7. 656664  
1. 155155 1. 217394  
8. 104887 7. 991476  
4. 530974 4. 582136  
2. 815414 1. 232585  
3. 938273 5. 384679  
2. 590028 3. 326667  
5. 867918 4. 788185  
1. 253276 1. 011596  
1. 818262 2. 238079  
7. 305402 6. 966983  
5. 475055 4. 766208

6. 73807 7. 319842  
6. 46388 6. 280419  
3. 167868 4. 654283  
1. 908328 1. 606258  
6. 392314 6. 459173  
2. 10233 2. 872711  
3. 44371 4. 383201  
3. 692396 4. 109746  
0. 978659 2. 353706  
3. 74055 3. 586438  
1. 952923 1. 419985  
5. 147628 5. 19102  
2. 983879 3. 555919  
6. 001804 6. 370178  
5. 730304 6. 257424  
4. 767036 5. 069842  
3. 244449 3. 177196  
8. 778508 8. 725513  
1. 57309 1. 236032  
0. 920688 1. 134302  
2. 041914 1. 857398  
6. 060252 6. 631829  
5. 137519 4. 141644  
2. 662732 5. 213875  
7. 684541 7. 667251  
1. 346073 1. 887923  
2. 678378 1. 937317  
1. 054617 1. 649386  
4. 786888 5. 88542  
3. 029325 2. 729421  
1. 431087 1. 645332  
1. 19475 1. 712035  
1. 470341 1. 588189  
4. 860648 5. 522895  
2. 509595 2. 401211  
2. 419545 3. 230076  
4. 57155 5. 239674  
6. 629472 5. 940445  
7. 020384 7. 462011  
5. 873707 6. 125301  
2. 214021 2. 874787  
1. 076699 0. 931776  
4. 022086 4. 953491  
8. 4362 8. 416841  
4. 688871 3. 594236  
9. 036558 8. 544904  
6. 757754 6. 971552  
5. 271061 5. 632234  
4. 178891 5. 162654  
10. 82473 11. 27443  
3. 490977 4. 81915

4. 325737 1. 625326  
1. 774042 2. 212948  
5. 941989 7. 115391  
6. 00968 5. 781663  
2. 966564 4. 118929  
7. 156329 6. 392542  
4. 36795 3. 81459  
2. 61325 4. 115338  
1. 881592 1. 951192  
5. 259346 5. 3407  
4. 582032 3. 831791  
9. 519411 9. 572736  
10. 89114 11. 43087  
10. 32762 10. 5077  
6. 814811 7. 530849  
6. 823675 6. 668166  
4. 286027 5. 367335  
6. 610583 5. 572412  
6. 388961 5. 488512  
2. 883374 3. 117415  
6. 838871 7. 643576  
8. 428375 7. 322209  
1. 331695 1. 21633  
1. 593665 1. 00035  
5. 282903 6. 706276  
5. 883488 4. 324019  
11. 94153 11. 80361  
5. 239793 5. 022875  
7. 29014 8. 469998  
7. 669461 7. 781008  
4. 274518 4. 177192  
1. 907539 2. 356095  
4. 935633 5. 564026  
2. 449854 2. 802094  
3. 290039 2. 305516  
5. 827584 6. 287024  
5. 539469 5. 793797  
6. 660009 7. 227364  
6. 038293 6. 60173  
6. 150987 6. 26054  
5. 709706 5. 354008  
8. 411317 7. 751696  
6. 610029 7. 235881  
7. 252642 7. 201649  
4. 806977 3. 098417  
6. 276409 6. 964856  
6. 774591 6. 353415  
5. 487604 5. 298333  
6. 49297 6. 927387  
2. 937123 3. 622177  
6. 335206 7. 321667

7.161116 6.916342  
7.311784 5.428443  
5.419849 5.2268  
5.001562 4.82213  
5.01807 4.086373  
10.03049 10.08526  
6.24136 6.037231  
2.819708 3.248149  
5.313614 6.063194  
5.781767 3.832001  
5.166756 4.355493  
4.167713 4.078152  
7.093705 7.626141  
7.393496 6.884514  
6.5 7.777426  
5.839045 5.670492  
4.878015 5.716393  
1.696652 2.356681  
2.935521 4.068726  
6.051168 4.73218  
1.71974 2.621868  
7.154238 7.211797  
6.074707 5.809829  
4.784375 5.671817  
6.555316 5.802515  
5.990509 6.103017  
2.308076 1.779993  
2.915815 3.54773  
1.414147 1.76931  
5.584603 6.864133  
4.13314 4.473613  
6.064615 6.976587  
4.471296 4.834541  
6.573041 4.854427  
6.469241 6.814198  
4.269925 4.142684  
5.508945 4.714833  
6.500497 5.464208  
1.617918 1.92161  
9.192035 8.944499  
1.433206 2.283152  
6.755831 6.755052  
6.189149 6.542672  
6.394015 6.356817  
1.659045 1.617934  
5.730607 7.423079  
8.684112 9.060438  
6.306611 6.495445  
6.959174 7.023226  
2.187432 1.938186  
7.672535 8.12528

6. 788296 7. 742003  
8. 313928 8. 288182  
5. 094731 5. 036406  
5. 930193 5. 873095  
4. 362116 4. 630615  
6. 614677 6. 523971  
5. 576935 5. 468168  
7. 175163 6. 117297  
5. 784483 4. 109202  
2. 761403 2. 122674  
2. 497617 2. 533293  
2. 787709 2. 971873  
3. 565408 3. 436872  
3. 470001 3. 763007  
3. 010965 2. 084306  
4. 786131 6. 942069  
7. 163396 7. 037113  
4. 655994 4. 007879  
5. 793602 6. 229924  
0. 921198 1. 184784  
2. 551764 4. 751965  
5. 280029 7. 285975  
3. 997059 4. 085619  
3. 956944 4. 895518  
10. 03456 8. 309354  
4. 904716 4. 341284  
5. 255089 6. 371147  
6. 08367 7. 121774  
6. 41206 6. 40809  
6. 947817 6. 360534  
7. 647672 7. 828403  
5. 950668 6. 098272  
6. 998113 5. 131101  
6. 156222 6. 166113  
6. 227847 6. 939515  
5. 828465 5. 331448  
5. 141321 5. 247436  
4. 377811 5. 191348  
2. 707551 3. 488243  
4. 285334 5. 170958  
3. 064031 3. 238636  
6. 362655 6. 363065  
2. 136904 2. 025417  
7. 407081 8. 105686  
6. 769689 6. 445795  
8. 679019 8. 471008  
4. 346052 4. 414716  
6. 292395 6. 710165  
5. 919023 6. 902698  
4. 542952 4. 32796  
9. 224802 9. 206467

3. 985368 3. 965663  
7. 869697 8. 405155  
5. 216453 5. 431238  
6. 091813 6. 553687  
3. 758795 4. 966012  
6. 112593 6. 132349  
4. 706184 5. 265339  
6. 949437 6. 417527  
5. 975835 4. 382299  
4. 275076 3. 197521  
6. 563485 5. 63561  
1. 709587 1. 683332  
1. 380252 1. 780692  
6. 351589 5. 32762  
7. 010262 6. 558569  
1. 866717 2. 128674  
8. 579487 8. 930677  
3. 460067 2. 036872  
6. 350832 6. 535384  
1. 668901 3. 005822  
2. 065751 2. 589084  
6. 577331 6. 350357  
4. 950257 4. 804465  
7. 048024 6. 773318  
5. 765507 5. 438937  
8. 032909 7. 989573  
9. 709542 10. 20256  
3. 331227 4. 370396  
7. 689996 6. 571747  
1. 089974 1. 807278  
6. 56469 5. 750912  
10. 049 10. 14909  
1. 206542 2. 299572  
4. 391598 5. 609101  
1. 643228 1. 631881  
3. 199191 3. 799618  
4. 787534 3. 65397  
3. 79661 5. 318771  
2. 571977 2. 997657  
1. 44506 1. 664386  
4. 498016 5. 824409  
6. 155576 5. 221546  
8. 467952 7. 907976  
3. 100671 3. 278166  
7. 740636 7. 944113  
7. 223147 7. 466551  
1. 272779 1. 540627  
4. 877372 6. 016085  
1. 705725 2. 708341  
7. 177661 6. 510357  
7. 917489 8. 609798

2. 963593 3. 181615  
5. 147651 5. 267417  
2. 508623 2. 945115  
3. 104636 4. 271938  
5. 89588 6. 864146  
3. 896214 3. 287324  
6. 800568 5. 619017  
5. 945353 6. 394608  
8. 33374 8. 007388  
4. 228186 2. 543759  
6. 573197 6. 793363  
7. 675967 7. 22419  
2. 180613 1. 824942  
5. 25713 4. 11675  
5. 2982 5. 556044  
7. 938808 8. 314641  
2. 942233 1. 642911  
4. 757945 4. 505554  
3. 317955 3. 626741  
6. 72449 5. 838064  
6. 690222 7. 628698  
4. 657121 5. 269789  
10. 63784 9. 92818  
3. 448865 2. 551591  
2. 377263 2. 218142  
5. 563316 6. 183624  
9. 938592 10. 23016  
4. 591007 4. 042422  
1. 993033 3. 718988  
2. 940819 3. 710699  
2. 544022 2. 862971  
2. 826094 2. 759158  
2. 371616 2. 873443  
2. 304939 2. 773891  
7. 818898 7. 443098  
4. 650664 4. 489815  
1. 952176 2. 363222  
3. 62704 2. 083849  
4. 585763 2. 041554  
5. 946354 6. 512768  
1. 218656 2. 783195  
0. 768161 1. 602052  
3. 144885 2. 792534  
5. 971086 6. 498654  
5. 633771 6. 750381  
7. 046669 7. 861832  
4. 473806 4. 306705  
2. 798664 1. 827186  
6. 207884 5. 665015  
6. 726693 6. 891353  
5. 728964 4. 960845

4. 160266 4. 409559  
1. 441044 1. 475283  
1. 856593 2. 593895  
2. 816948 3. 43177  
6. 623325 6. 479295  
1. 196814 1. 617962  
3. 110737 2. 868302  
4. 352923 3. 780235  
5. 99074 5. 845362  
2. 860536 2. 414986  
3. 211152 2. 698153  
8. 253909 7. 835768  
8. 585296 8. 506312  
6. 614975 6. 316513  
3. 694667 2. 507911  
2. 590545 3. 157349  
2. 796481 2. 962783  
5. 480943 6. 409215  
4. 551673 4. 420857  
6. 835752 7. 418714  
1. 603966 1. 771209  
4. 212759 2. 692913  
6. 051879 5. 20284  
1. 677588 2. 069699  
1. 840791 1. 854315  
6. 034507 4. 583575  
2. 372962 1. 595639  
1. 827716 1. 422575  
7. 26022 6. 796972  
5. 816208 5. 573118  
1. 667426 2. 207979  
7. 391478 7. 508192  
6. 067295 5. 630475  
5. 559026 3. 972272  
4. 804455 5. 207996  
6. 906847 5. 271951  
1. 242991 0. 988241  
3. 387967 2. 932513  
5. 227505 3. 124011  
3. 690099 5. 666291  
1. 177692 1. 471683  
2. 697769 2. 672693  
7. 383208 6. 975474  
7. 327985 6. 909155  
6. 466666 6. 884867  
7. 309542 7. 080596  
8. 284039 8. 799676  
8. 502229 8. 665495  
3. 981644 3. 383698  
3. 163857 1. 939824  
2. 425614 1. 915969



5. 915353 5. 550617  
4. 352656 4. 220935  
1. 045003 1. 845461  
0. 989278 0. 811589  
2. 812112 2. 606363  
7. 032753 7. 372136  
0. 994548 1. 245689  
5. 412983 5. 944651  
5. 473639 6. 20135  
5. 360316 4. 93855  
4. 218561 1. 29545  
6. 599576 6. 174613  
5. 996376 5. 231995  
3. 106018 2. 194096  
2. 819964 1. 789289  
6. 358412 5. 845322  
3. 928796 4. 035935  
2. 641759 2. 864923  
1. 676063 1. 743821  
3. 663408 4. 909186  
4. 588591 4. 770342  
6. 24118 7. 63895  
2. 014546 1. 705755  
6. 050681 6. 327516  
9. 527274 9. 655482  
6. 568745 6. 232552  
5. 291268 4. 935537  
6. 398407 6. 314034  
7. 302147 7. 698746  
6. 788267 7. 670214  
7. 355982 7. 302342  
6. 06446 5. 913895  
5. 52029 5. 472844  
5. 037728 7. 230044  
7. 844895 7. 731381  
1. 472397 2. 063646  
4. 902096 5. 136344  
5. 946235 5. 461255  
5. 030921 4. 137514  
3. 778854 3. 57612  
3. 115472 4. 012742  
1. 689785 1. 979741  
5. 75103 3. 759317  
9. 103351 9. 119796  
9. 094894 8. 845911  
9. 316764 9. 715522  
2. 176763 1. 469498  
5. 835184 5. 677192  
3. 459188 4. 870999  
6. 75465 6. 283244  
1. 119306 1. 096427

1. 500249 1. 168145  
3. 282108 2. 90142  
4. 586573 4. 790524  
6. 219541 6. 295165  
6. 60381 6. 872251  
1. 429832 1. 95949  
2. 838267 2. 441518  
6. 211527 5. 911497  
3. 726281 4. 963032  
6. 796006 7. 001928  
4. 194137 5. 104359  
1. 207803 1. 072334  
6. 276944 6. 915813  
2. 69 2. 991987  
2. 883439 2. 87876  
3. 329589 3. 488523  
3. 2454 4. 006605  
1. 251754 1. 231609  
3. 247067 4. 489692  
6. 983015 6. 878787  
2. 335893 1. 552094  
1. 203678 3. 248042  
2. 638798 2. 064957  
3. 004829 2. 935607  
8. 068407 6. 942346  
5. 238651 5. 462286  
2. 618938 2. 134932  
4. 485246 4. 498859  
3. 380805 2. 539998  
2. 978884 3. 011053  
1. 626221 2. 300366  
5. 834938 6. 898294  
6. 754048 6. 745432  
6. 005491 5. 776951  
6. 392587 5. 456861  
2. 505955 2. 868779  
2. 854534 3. 308229  
1. 617526 1. 479715  
2. 222801 3. 329298  
1. 415319 2. 059052  
6. 050558 6. 666007  
6. 184283 6. 491607  
4. 191275 2. 768172  
2. 873565 2. 268031  
1. 396421 1. 62966  
4. 247707 3. 350813  
1. 431389 2. 350956  
2. 624009 3. 52542  
5. 696111 5. 464113  
6. 264751 5. 190453  
2. 949656 3. 408982

3. 500425 3. 501564  
4. 725324 6. 918317  
3. 057442 4. 413977  
4. 591264 3. 396331  
2. 565389 2. 532007  
8. 831314 8. 729796  
0. 69906 0. 805479  
1. 009239 2. 390986  
0. 826344 1. 911082  
2. 53315 0. 913261  
1. 2265 2. 018849  
2. 554655 2. 738556  
1. 459832 1. 709507  
4. 56067 5. 344391  
7. 515509 7. 117937  
4. 205539 3. 192019  
1. 162619 0. 997812  
2. 413052 3. 986418  
1. 363023 1. 913095  
0. 971134 1. 378076  
7. 952592 8. 454591  
5. 796846 5. 135202  
6. 345401 4. 805036  
2. 601807 4. 658296  
7. 323569 4. 14713  
1. 9792 1. 619937  
2. 649401 1. 597859  
6. 164231 6. 90933  
3. 336457 3. 011494  
6. 110251 6. 136277  
1. 823204 1. 468419  
2. 037591 1. 945418  
2. 648562 1. 865635  
4. 577668 4. 451779  
4. 908653 5. 479416  
4. 161237 4. 397573  
3. 767492 2. 701103  
8. 096981 7. 647311  
5. 623446 6. 130327  
6. 866936 7. 582144  
4. 240867 4. 714392  
7. 041939 6. 876992  
2. 137375 0. 972958  
2. 956305 3. 663861  
1. 621105 1. 820387  
6. 849783 6. 840741  
6. 70122 6. 002052  
6. 835193 7. 882359  
1. 794608 1. 341596  
3. 95288 3. 751069  
6. 533371 7. 826441

6. 641077 7. 814673  
4. 09615 5. 068156  
8. 967049 8. 843344  
5. 361605 4. 992452  
1. 354965 1. 768545  
7. 003582 7. 485078  
6. 930252 7. 540684  
6. 396505 6. 16661  
2. 591457 2. 020438  
4. 94856 4. 630972  
8. 128907 8. 192296  
3. 876962 1. 956714  
3. 185254 2. 404603  
5. 891881 6. 365849  
2. 207243 1. 848165  
0. 998483 1. 439256  
1. 621495 2. 177711  
2. 408879 3. 194968  
7. 777159 8. 222495  
7. 69413 8. 311069  
6. 772654 6. 700671  
5. 221037 4. 939991  
4. 718476 4. 231259  
5. 835418 5. 641462  
7. 254677 6. 512988  
6. 241198 6. 499211  
8. 305691 7. 646328  
4. 865567 5. 707881  
6. 904023 6. 53458  
9. 901871 9. 485785  
8. 07504 8. 069669  
8. 971125 9. 008056  
9. 58785 9. 927095  
7. 010157 6. 856616  
6. 835159 7. 594616  
4. 659252 6. 254778  
6. 893884 7. 470975  
5. 04562 5. 030606  
3. 711646 4. 896124  
3. 782357 3. 326944  
6. 19099 6. 829054  
5. 181917 5. 062273  
9. 400947 9. 245242  
8. 111678 8. 748668  
6. 654487 5. 633005  
8. 645289 8. 963073  
8. 339747 8. 688467  
4. 744253 4. 17774  
9. 363333 9. 404802  
7. 120676 7. 43746  
4. 364924 5. 118221

7. 448115 7. 083122  
10. 01692 9. 997231  
6. 628958 2. 935919  
5. 501372 5. 152274  
6. 21055 6. 615473  
7. 753208 7. 594577  
7. 593688 7. 297822  
1. 489194 2. 762098  
3. 018178 2. 074995  
7. 657716 7. 674774  
1. 300484 1. 448692  
5. 114696 5. 233198  
3. 416547 3. 376015  
4. 09295 3. 089809  
4. 475879 3. 324817  
1. 088503 1. 745812  
5. 359004 4. 187935  
4. 856951 4. 147276  
1. 593277 1. 343059  
1. 860691 1. 674068  
2. 224392 3. 843878  
3. 359132 4. 188522  
1. 290244 1. 323437  
5. 499665 6. 04508  
6. 038747 6. 143522  
2. 780858 3. 129076  
6. 06424 7. 803113  
8. 955003 9. 132886  
7. 20423 7. 261334  
6. 688127 5. 944777  
6. 686012 6. 823808  
3. 076597 3. 743119  
4. 649372 4. 887899  
2. 824444 1. 825351  
3. 590288 3. 164708  
5. 866742 6. 55995  
3. 489967 3. 649667  
1. 801446 2. 379982  
2. 128552 2. 92676  
1. 799034 2. 350694  
1. 65547 4. 573492  
5. 57418 4. 497129  
8. 931613 8. 661877  
7. 102055 7. 173235  
1. 061263 2. 978326  
6. 968276 6. 164824  
1. 633519 1. 182308  
7. 368185 7. 188153  
1. 555199 1. 891789  
2. 619548 3. 108565  
4. 693079 5. 256417

6. 509373 5. 086847  
5. 255975 5. 298858  
3. 06941 2. 992003  
4. 789666 6. 340278  
6. 20524 7. 078062  
1. 864969 1. 639988  
7. 959811 8. 348951  
6. 95644 6. 502212  
3. 559339 3. 611579  
1. 585354 1. 916689  
6. 539342 6. 316495  
6. 037213 4. 975032  
7. 69835 7. 4029  
7. 084728 6. 164747  
5. 971864 5. 653148  
1. 367588 2. 157007  
3. 728707 3. 80148  
2. 001563 1. 800494  
5. 430718 3. 86256  
3. 442375 4. 831236  
4. 859097 5. 812374  
5. 21238 5. 765777  
3. 258407 2. 393867  
7. 870099 7. 12593  
7. 769423 6. 404874  
4. 662629 5. 268394  
5. 315932 7. 061063  
6. 379737 4. 844829  
1. 388346 1. 875647  
1. 851117 2. 687058  
3. 188512 4. 010758  
1. 595262 2. 244153  
4. 292004 4. 355145  
7. 703892 8. 144845  
8. 274731 7. 957913  
5. 401556 5. 370366  
0. 945126 2. 114378  
4. 607491 6. 318922  
6. 566563 6. 147804  
1. 278357 2. 103382  
1. 002027 0. 804887  
7. 71887 7. 699077  
4. 648128 4. 231037  
5. 581178 6. 1387  
2. 622852 3. 393839  
2. 478865 1. 088119  
3. 550338 3. 576061  
5. 450269 5. 514299  
5. 306138 5. 306959  
7. 649793 8. 41218  
7. 377383 6. 873621

1. 579545 2. 140787  
7. 558629 7. 536065  
5. 606087 5. 214932  
3. 811716 5. 12318  
7. 126112 6. 559033  
5. 202488 5. 617365  
1. 195057 1. 522684  
6. 308946 5. 525317  
7. 416241 6. 993443  
6. 584301 6. 498882  
1. 913809 2. 021815  
4. 521786 4. 090619  
2. 677352 3. 321508  
4. 457573 5. 463871  
5. 596679 5. 966952  
2. 043499 2. 330865  
5. 067378 4. 374559  
1. 182769 1. 36021  
5. 329053 5. 391465  
5. 986013 5. 937183  
3. 434826 1. 836212  
5. 373213 5. 365958  
5. 249729 3. 954227  
3. 608856 3. 321412  
6. 332276 6. 513491  
1. 26671 1. 327331  
1. 411081 1. 571122  
1. 373023 2. 748152  
2. 650808 2. 229602  
4. 903025 6. 091218  
3. 835611 2. 492079  
6. 990669 6. 544031  
6. 781362 4. 253917  
1. 815009 3. 932174  
8. 065504 8. 435378  
1. 080771 1. 138002  
6. 015736 5. 801408  
6. 045781 6. 097816  
1. 271748 1. 303217  
6. 214821 6. 981305  
3. 975426 3. 042304  
4. 505647 3. 730743  
1. 726515 1. 576055  
2. 468164 2. 437208  
2. 337312 3. 197531  
3. 754259 3. 545281  
5. 058567 5. 644395  
5. 220928 3. 799849  
2. 702883 2. 0669  
2. 804692 2. 261823  
6. 286418 6. 349763

6.783714 5.774054  
2.325202 4.18444  
5.102052 5.016955  
5.358153 5.636505  
7.988577 8.299413  
5.255931 4.688495  
2.355837 2.29491  
6.768379 6.152003  
2.419773 2.937724  
8.438959 8.739958  
7.527109 6.988709  
3.249113 3.125924  
7.929781 8.036068  
3.445816 3.842256  
7.416627 7.210361  
0.698292 0.878473  
2.007467 2.39437  
3.073325 3.351718  
6.727216 4.623815  
5.786505 5.076028  
2.976309 3.945102  
6.310744 6.131562  
2.944802 2.461026  
4.893491 3.728219  
2.466094 2.237582  
3.529574 3.413546  
7.682579 7.600563  
1.350709 1.173088  
6.371013 7.439596  
3.42909 3.429446  
2.228212 2.41839  
5.740987 5.026737  
1.813422 2.398624  
1.514066 1.505754  
2.41861 2.362643  
0.972661 1.825601  
5.121556 5.258587  
1.226282 1.495297  
5.400418 6.352733  
1.261982 2.169315  
6.955039 7.72089  
1.652273 1.305513  
3.291265 2.727329  
2.418529 3.248399  
1.404526 1.952314  
6.730687 6.126904  
3.492553 4.582242  
3.426359 3.424591  
2.499982 2.995122  
6.199317 5.660869  
6.299677 6.049183



7. 130546 6. 563785  
6. 345871 5. 274377  
6. 218907 5. 9567  
3. 455202 3. 484166  
1. 452086 1. 305669  
5. 6775 5. 929917  
5. 325796 7. 272614  
6. 95579 7. 03781  
3. 062122 2. 134112  
11. 15298 11. 3595  
3. 454918 3. 691906  
1. 439766 2. 381972  
7. 875965 7. 253134  
4. 467571 4. 698645  
6. 336618 6. 770867  
8. 06749 8. 406033  
2. 846807 2. 365395  
6. 11844 6. 308845  
6. 210899 6. 111491  
6. 026399 6. 069515  
5. 157497 5. 180577  
5. 333185 5. 316554  
2. 671603 1. 361176  
3. 694439 4. 606114  
2. 044301 2. 247642  
2. 077933 2. 647962  
5. 942402 6. 363018  
3. 175493 3. 268027  
4. 725853 5. 570868  
3. 357005 2. 070178  
4. 242792 3. 296056  
1. 862689 2. 307452  
5. 985477 5. 476324  
5. 1996 6. 110744  
3. 540295 3. 605092  
5. 763107 6. 942361  
3. 109454 3. 064118  
3. 745585 3. 698225  
1. 725985 1. 864605  
3. 68716 3. 83706  
5. 567016 5. 952382  
4. 880725 5. 26923  
1. 554897 1. 884269  
3. 024632 3. 090514  
4. 692003 4. 041675  
4. 708481 5. 902365  
6. 078695 6. 743187  
4. 629619 4. 907981  
2. 10639 2. 128149  
7. 23982 7. 192993  
3. 047078 3. 407823

5. 666576 6. 624779  
7. 69265 8. 061463  
2. 274038 1. 552878  
4. 63726 5. 139654  
4. 855189 5. 096692  
8. 238166 7. 981939  
6. 105253 5. 457217  
2. 244341 2. 794296  
4. 165997 4. 834608  
1. 681826 1. 598953  
2. 586475 3. 250092  
3. 271504 0. 456216  
7. 155641 6. 909025  
2. 01523 2. 448331  
4. 414811 6. 5487  
5. 024505 4. 956604  
1. 918059 2. 205028  
6. 224363 4. 755936  
6. 80192 6. 690042  
6. 669152 7. 354123  
3. 52639 3. 516924  
5. 827305 6. 494417  
5. 443473 3. 190511  
1. 646938 1. 485324  
1. 613826 1. 437736  
5. 356838 6. 248862  
2. 618301 3. 912736  
3. 148116 2. 715925  
7. 108134 7. 585667  
2. 323344 2. 57133  
3. 898885 3. 841344  
4. 520466 2. 913384  
4. 116049 3. 866238  
3. 503371 4. 728717  
4. 400449 3. 802823  
4. 068356 4. 322186  
2. 486272 3. 495103  
2. 714256 4. 818789  
6. 148622 7. 060836  
1. 60652 1. 972826  
5. 279956 4. 67148  
6. 415363 6. 560899  
4. 989182 5. 474493  
1. 299755 1. 610239  
4. 913375 4. 083813  
2. 412768 1. 985211  
5. 754796 6. 855591  
2. 48249 3. 228312  
1. 842381 3. 572317  
5. 582029 4. 112021  
2. 128267 2. 72523

6. 559875 5. 914647  
2. 742304 3. 622707  
2. 502884 4. 5305  
2. 460976 4. 454082  
2. 348088 1. 948687  
9. 621475 10. 12166  
4. 692271 5. 778341  
3. 910384 3. 839341  
2. 252404 3. 127647  
3. 831814 4. 572165  
2. 106504 3. 391553  
3. 376609 4. 825565  
1. 522952 2. 551305  
6. 852915 6. 942813  
5. 38814 3. 645873  
8. 340468 8. 581555  
6. 069095 6. 017326  
6. 391085 6. 565782  
3. 947267 2. 611926  
2. 899258 3. 122525  
2. 250607 2. 584498  
3. 614585 3. 018035  
9. 337619 9. 55854  
6. 6933 5. 95226  
7. 377436 6. 429494  
4. 693465 4. 87343  
3. 95903 4. 453385  
6. 148682 4. 974195  
2. 807124 2. 222533  
6. 433846 7. 190844  
6. 651784 6. 596879  
1. 941456 2. 019709  
2. 354149 2. 250562  
7. 106111 7. 657552  
2. 968231 4. 164117  
4. 851252 2. 864321  
4. 135337 5. 862204  
7. 007666 7. 405833  
5. 742122 6. 023824  
10. 31201 10. 35468  
5. 460098 5. 878329  
1. 64162 1. 63328  
1. 268142 1. 799295  
6. 637372 6. 037939  
5. 444667 5. 544766  
7. 024841 6. 751177  
1. 520357 1. 453091  
7. 918417 7. 687419  
7. 649824 7. 320697  
3. 770502 3. 139679  
3. 985893 4. 769669

3. 321545 4. 524549  
4. 799173 5. 414154  
3. 774455 3. 933905  
7. 869933 8. 542832  
7. 524221 7. 342317  
2. 170443 3. 002194  
4. 876641 3. 585818  
3. 30748 4. 193833  
2. 332201 2. 16152  
5. 591511 5. 804721  
3. 410497 2. 388396  
4. 617739 5. 066703  
3. 548937 2. 600158  
2. 388131 1. 963336  
1. 568801 1. 900475  
2. 506543 1. 660264  
2. 07428 1. 96075  
2. 598326 3. 310119  
4. 636511 4. 262001  
0. 932461 0. 617653  
1. 90337 2. 926533  
1. 944711 2. 238048  
7. 401561 7. 161565  
2. 96023 1. 681125  
1. 774646 3. 813633  
1. 429032 1. 745142  
1. 126455 3. 01872  
2. 539373 2. 761177  
1. 053425 1. 602372  
2. 77513 3. 787474  
1. 118878 1. 489905  
1. 486894 1. 872832  
2. 7125 1. 5599  
4. 900264 4. 669103  
5. 616804 5. 364083  
2. 773814 1. 917676  
4. 838601 4. 664776  
3. 35264 3. 338962  
2. 055756 3. 300216  
2. 0587 1. 819342  
6. 097578 6. 331592  
2. 366143 2. 985716  
5. 267581 5. 256427  
4. 720979 3. 613866  
1. 75668 1. 801474  
4. 978652 4. 312498  
1. 561742 3. 386097  
1. 240799 2. 148685  
3. 524171 4. 219991  
1. 983268 1. 864059  
2. 578158 3. 017186

9.661719 9.568915  
2.510196 2.81698  
3.082605 3.788413  
3.051264 3.826928  
3.628505 4.288992  
2.154749 2.911588  
3.231065 5.334207  
4.655392 2.577965  
1.247723 2.077163  
3.113487 4.432478  
3.815834 4.783768  
1.479019 1.901722  
1.801077 1.994806  
1.629777 2.008887  
5.471071 4.902756  
2.637188 2.886484  
2.108481 2.203236  
5.3882 4.244638  
3.792961 3.14592  
1.609111 3.056724  
1.298315 1.834723  
1.783162 2.213456  
2.457172 2.939267  
5.084991 5.148909  
1.533493 2.193436  
7.645055 7.042104  
2.681464 3.138098  
1.925701 1.935612  
2.408003 3.058655  
1.407946 1.476971  
5.355689 6.54947  
5.24389 5.965428  
2.23096 3.650775  
5.310007 4.080182  
6.551698 4.895096  
3.968965 3.875693  
1.001472 2.990007  
4.376275 3.887153  
1.434172 1.915869  
6.036698 4.957398  
2.028075 2.00031  
2.185178 3.379839  
2.667935 2.290405  
7.847389 6.573477  
2.193168 2.78457  
5.5982 4.876547  
4.248133 2.50931  
1.642898 2.196755  
1.581144 1.967745  
5.695942 5.195541  
3.962757 3.487794

2. 285099 2. 037622  
2. 456439 2. 535961  
7. 398103 7. 382107  
7. 098435 7. 095412  
5. 816942 6. 370385  
4. 371314 5. 246648  
3. 639194 2. 873892  
1. 984705 2. 437045  
3. 229042 3. 791254  
1. 750241 2. 996748  
3. 294557 3. 962347  
3. 259139 4. 130912  
4. 259223 4. 901712  
8. 294517 8. 699729  
5. 936037 6. 283332  
6. 442347 6. 503877  
6. 962517 6. 30812  
1. 221996 1. 639196  
6. 253758 6. 084955  
4. 739816 6. 173346  
4. 655416 3. 253355  
5. 928461 6. 824975  
4. 484706 4. 894328  
1. 867713 1. 534656  
1. 358352 1. 519591  
3. 190075 3. 00975  
1. 028844 1. 351936  
5. 646346 7. 635741  
4. 152691 5. 24871  
4. 399582 6. 374375  
1. 381918 1. 509254  
2. 087541 1. 665296  
1. 963303 3. 556396  
4. 868601 5. 113062  
6. 709693 7. 38524  
5. 487427 3. 497135  
4. 584571 5. 001083  
0. 840114 1. 668628  
5. 715614 5. 948539  
5. 861134 5. 523177  
7. 270456 7. 22973  
5. 116654 5. 935015  
2. 696106 3. 270398  
1. 660247 1. 492221  
1. 357236 1. 912639  
5. 687642 6. 06945  
7. 179651 6. 617521  
2. 274825 2. 133124  
2. 813779 3. 934069  
7. 699289 8. 351085  
7. 875939 8. 364318

5. 515123 3. 03401  
2. 98702 2. 709637  
2. 554373 2. 448307  
6. 071837 6. 258749  
3. 713233 3. 027408  
2. 210452 3. 519955  
2. 418921 2. 964176  
1. 887066 1. 771325  
7. 569514 8. 281124  
2. 444635 1. 940013  
2. 475447 3. 398229  
8. 56554 8. 257566  
3. 56277 2. 830383  
1. 934166 1. 868079  
3. 090997 3. 109543  
1. 917976 2. 306109  
2. 654815 2. 903467  
3. 546254 3. 505916  
4. 662393 4. 78606  
1. 461002 1. 842768  
1. 728456 2. 608161  
2. 328892 2. 67911  
5. 343152 6. 123982  
4. 190311 4. 515858  
1. 773473 1. 683214  
2. 702138 3. 217322  
2. 880135 3. 223495  
3. 633425 3. 760991  
5. 696139 5. 681146  
1. 599255 2. 309708  
2. 92703 2. 569804  
4. 24821 4. 869568  
4. 650993 4. 567269  
2. 901837 4. 39602  
1. 616817 1. 685235  
6. 082438 6. 576385  
6. 55608 6. 586364  
3. 280651 5. 270916  
2. 99231 3. 10337  
5. 587003 5. 936072  
1. 643386 1. 018219  
3. 022163 4. 011373  
4. 598733 5. 840267  
4. 076646 4. 116843  
0. 708308 1. 14218  
1. 944848 1. 812992  
5. 492911 5. 067748  
4. 038503 5. 358361  
6. 616103 6. 014801  
6. 479424 7. 643467  
3. 322039 4. 035877

7. 326005 7. 21096  
2. 243658 2. 465651  
1. 802511 1. 88926  
4. 590203 3. 467341  
5. 747268 5. 519174  
4. 416439 4. 820833  
8. 315238 7. 708587  
3. 872877 4. 149316  
3. 515657 3. 201657  
8. 764811 8. 407806  
1. 97626 1. 553566  
1. 456655 1. 641594  
1. 727021 2. 519952  
1. 213037 1. 825106  
2. 36901 2. 888529  
6. 959489 5. 665  
2. 231393 1. 195467  
2. 849939 6. 625088  
1. 63105 1. 265752  
2. 414052 1. 445069  
2. 293049 3. 051241  
1. 264636 1. 27339  
6. 608899 6. 623487  
2. 273428 2. 147117  
2. 592596 2. 712849  
3. 157094 3. 542963  
2. 279897 2. 319208  
2. 08377 2. 625454  
2. 083967 2. 019985  
6. 403587 6. 271978  
5. 729035 4. 766036  
4. 698204 5. 168257  
1. 123373 1. 19029  
3. 058688 3. 904306  
3. 173248 3. 134895  
3. 334123 3. 528358  
6. 838917 7. 298277  
6. 463199 7. 568025  
6. 58394 6. 579819  
1. 360993 1. 792345  
6. 625679 3. 102546  
4. 704405 6. 22141  
3. 75847 4. 205711  
5. 341326 4. 677776  
4. 096126 4. 018769  
4. 138611 0. 876886  
5. 971791 3. 410501  
3. 482495 3. 42543  
1. 762443 2. 295762  
1. 464711 1. 606634  
0. 944864 1. 188395



2. 545468 3. 353995  
3. 838347 2. 701622  
1. 890725 1. 355664  
2. 620773 3. 09513  
5. 337725 5. 494341  
3. 884003 3. 82648  
2. 26548 2. 901554  
3. 302246 3. 987466  
3. 828219 3. 562794  
2. 075762 2. 90136  
4. 833319 4. 544911  
1. 735279 2. 517638  
2. 735205 3. 122477  
3. 090277 2. 471886  
4. 297725 3. 348305  
1. 801035 1. 354937  
1. 637209 2. 264797  
1. 750525 1. 492031  
1. 08602 1. 426443  
3. 303861 3. 192166  
5. 341713 4. 516224  
3. 71593 3. 65581  
1. 455727 1. 479151  
0. 935018 1. 404208  
2. 433054 1. 403677  
1. 938209 2. 044834  
4. 785553 4. 838707  
5. 804719 5. 172458  
4. 90754 4. 154951  
5. 081703 3. 596829  
1. 026672 1. 528675  
1. 836669 1. 965354  
3. 282823 3. 728085  
7. 717565 8. 424947  
3. 783225 6. 51909  
2. 427583 2. 685069  
1. 867805 2. 125604  
2. 535578 2. 993763  
2. 452857 1. 871338  
7. 914816 6. 463724  
4. 234297 4. 666707  
7. 264045 7. 186645  
3. 119106 4. 29519  
4. 400458 5. 037137  
4. 025509 5. 672334  
1. 270625 2. 234731  
1. 039962 1. 296673  
1. 843512 2. 552312  
1. 317944 2. 177678  
2. 922593 3. 310658  
6. 15754 5. 926652

3. 313634 2. 91196  
1. 144121 1. 778921  
4. 321116 4. 324738  
1. 080903 1. 736465  
4. 850112 3. 159306  
1. 642371 2. 21946  
7. 639616 6. 584746  
1. 963442 2. 09184  
4. 521688 6. 027269  
1. 787558 1. 848097  
2. 662686 2. 442828  
3. 781797 4. 597939  
2. 739225 1. 763855  
5. 434731 4. 856469  
4. 618227 5. 495402  
5. 429625 5. 117619  
2. 104249 2. 44735  
2. 333661 1. 684159  
3. 588051 3. 23864  
4. 647811 4. 424871  
1. 307274 2. 181303  
2. 286867 2. 614473  
1. 299593 1. 829812  
3. 6954 4. 343098  
4. 377615 5. 07171  
3. 306385 1. 784624  
5. 036956 5. 244449  
4. 786529 3. 664631  
2. 790289 3. 383758  
3. 998429 4. 359432  
1. 832727 2. 040153  
3. 993865 4. 576847  
3. 719783 3. 612693  
6. 657707 6. 46528  
1. 880512 1. 487988  
4. 944458 4. 013056  
6. 017148 5. 383079  
7. 070485 6. 897819  
7. 384157 6. 893581  
6. 263716 7. 741004  
8. 212102 8. 248777  
1. 054552 1. 544469  
2. 880922 1. 73621  
4. 808039 4. 747002  
3. 420075 3. 166652  
1. 628366 1. 644875  
6. 434418 6. 54661  
0. 949451 1. 441493  
2. 864009 3. 280205  
7. 681564 7. 276631  
1. 164193 1. 405185

2.837362 2.872909  
2.931715 2.912858  
8.017815 6.210866  
1.216533 1.795243  
1.369481 1.157754  
1.030121 1.324883  
1.219157 1.121159  
1.993822 1.027649  
1.735173 3.365509  
2.10827 2.550807  
4.567989 4.37754  
4.442382 4.935834  
0.574071 1.075613  
2.16557 2.023387  
1.095025 1.799688  
1.125617 1.379759  
0.907128 1.348303  
4.64402 3.566151  
5.07423 5.098052  
1.249845 1.666684  
3.648408 3.18733  
0.890071 1.367984  
3.079771 3.002686  
8.185506 7.841436  
4.479549 3.406519  
2.153879 2.308144  
0.796403 0.922338  
5.289018 6.030109  
3.304845 2.849024  
2.595437 3.315079  
2.082414 1.89209  
3.080174 2.979186  
2.706746 3.337993  
7.063696 7.373767  
1.405932 1.623845  
1.595126 1.04108  
1.943185 1.801739  
6.305747 6.559212  
7.098662 7.968843  
1.360054 2.376995  
1.938282 1.173245  
1.645707 2.097472  
2.227565 1.525505  
2.243723 2.317305  
2.491089 1.319971  
6.625086 4.953316  
1.21956 1.090848  
5.604326 3.976275  
2.312725 2.130403  
1.254271 3.01785  
4.393035 4.796348

8.11947 8.085238  
7.739254 7.265519  
1.21605 1.234607  
4.873655 3.903453  
0.923494 1.207586  
1.641313 2.687658  
7.473946 7.552225  
1.775096 2.655431  
5.030679 5.126122  
2.021158 2.142516  
6.447197 6.48755  
1.961182 1.363776  
1.692695 1.632163  
5.021772 2.892031  
2.208049 2.008956  
1.295216 1.965805  
6.383157 6.424316  
2.043073 2.555069  
2.332185 2.278658  
0.890124 1.772669  
1.682734 1.716536  
9.202269 8.648254  
5.647541 5.99217  
5.454913 4.970844  
5.739659 5.691805  
5.897185 7.333539  
6.300109 7.019624  
6.106141 5.544603  
6.215948 6.397492  
1.139426 2.009095  
2.032406 3.440253  
2.548131 2.61245  
2.148988 2.907709  
1.319657 1.312229  
3.249878 2.856471  
3.179798 3.835326  
6.764698 6.225825  
2.217828 1.788611  
1.715907 1.281526  
2.236154 1.413843  
2.089339 2.921153  
1.120832 2.084531  
0.976066 1.14391  
2.978461 2.26494  
1.662464 2.121753  
2.106898 2.148239  
2.261388 2.300316  
1.732456 2.187565  
4.527058 6.792096  
3.509361 3.022716  
7.273476 7.014566

1. 878171 2. 79573  
1. 644336 1. 495577  
2. 620061 4. 138919  
1. 401525 1. 150431  
3. 450705 3. 479168  
1. 279302 2. 546862  
5. 525147 5. 880384  
1. 326377 1. 557438  
1. 715673 1. 10677  
1. 027188 1. 392291  
2. 455754 2. 627126  
3. 229854 3. 111509  
5. 566494 4. 174793  
5. 75784 5. 175134  
6. 554314 7. 277943  
6. 478921 6. 117217  
1. 386843 1. 212764  
2. 496524 1. 970367  
3. 543404 4. 248801  
5. 003346 5. 895452  
0. 843311 0. 9814  
3. 436556 3. 826355  
3. 607523 2. 692684  
2. 245553 1. 942509  
4. 843337 3. 421847  
3. 037638 2. 639538  
2. 875551 2. 109701  
2. 106747 2. 810529  
6. 23471 6. 018656  
3. 982175 4. 630018  
4. 222439 2. 499546  
5. 262812 6. 02153  
2. 160324 2. 660005  
4. 658563 4. 555877  
0. 945263 1. 326145  
1. 18096 1. 13729  
5. 163324 4. 880097  
1. 733616 1. 470966  
1. 878898 2. 059489  
5. 414789 4. 395678  
2. 054236 2. 526914  
4. 639981 6. 084837  
1. 770184 2. 192444  
4. 378344 4. 243242  
3. 21046 3. 14319  
4. 215166 4. 986722  
2. 075139 1. 842003  
1. 764678 2. 034241  
3. 148611 1. 593909  
1. 821164 1. 64826  
6. 695553 6. 671183

6. 710885 7. 350425  
1. 520556 2. 437975  
5. 669815 4. 787808  
4. 683652 2. 941923  
2. 422629 2. 186563  
2. 969347 2. 575174  
4. 796329 5. 182562  
1. 829542 1. 947912  
7. 257699 7. 098252  
2. 748464 3. 891627  
3. 29158 4. 994947  
2. 002758 2. 657287  
1. 734057 2. 394581  
4. 484833 4. 278433  
1. 384815 1. 015149  
4. 902642 4. 852429  
1. 866549 1. 440568  
2. 429117 4. 970649  
1. 484492 2. 507918  
3. 650989 4. 002914  
5. 336925 5. 885833  
2. 666954 2. 061707  
3. 189707 3. 471338  
3. 130272 1. 983532  
5. 261865 4. 863034  
2. 343043 2. 483764  
9. 3509 9. 678737  
3. 629147 3. 433193  
1. 389058 2. 525751  
6. 135934 5. 151664  
2. 84283 1. 893214  
4. 70244 5. 016165  
1. 572846 1. 946685  
1. 108269 0. 892902  
8. 143686 7. 332361  
5. 784116 5. 606257  
3. 80632 5. 365755  
3. 044357 2. 398988  
1. 970258 2. 459911  
2. 872698 2. 557323  
1. 29925 1. 748334  
4. 753556 4. 201969  
2. 219758 1. 301154  
1. 669569 1. 808769  
5. 62867 4. 053607  
2. 023293 2. 577885  
1. 511589 2. 648011  
3. 615378 3. 634763  
1. 585221 1. 865466  
6. 239513 6. 116572  
1. 931167 1. 870299

2. 472939 2. 341268  
2. 249391 2. 065055  
1. 228612 2. 016241  
1. 905268 2. 477169  
2. 262759 3. 166691  
3. 23318 1. 156834  
2. 008242 1. 805069  
1. 890016 2. 458969  
4. 978546 5. 206918  
4. 373669 6. 075816  
5. 478288 4. 959431  
3. 01533 3. 333273  
4. 39237 4. 483196  
7. 246596 6. 221855  
4. 984571 4. 143309  
2. 514644 2. 86557  
1. 026776 1. 246572  
2. 798316 3. 095603  
3. 328459 2. 910769  
3. 378667 4. 304311  
1. 510094 3. 231864  
1. 515941 1. 544572  
4. 924975 5. 207731  
6. 24366 5. 158739  
2. 802421 3. 610433  
3. 546851 2. 970692  
3. 695281 4. 217708  
1. 366559 1. 53581  
4. 967963 4. 201917  
3. 03886 3. 679776  
1. 906432 1. 889386  
5. 203799 6. 62015  
2. 015853 4. 700853  
1. 894985 1. 500951  
5. 157337 4. 948187  
2. 31575 2. 777444  
4. 665934 5. 017395  
2. 873173 1. 831956  
1. 551464 1. 77888  
1. 603855 2. 396561  
1. 632957 2. 207501  
1. 557874 1. 167904  
1. 356284 2. 312713  
6. 80623 7. 273512  
3. 029673 3. 79314  
4. 799435 3. 857854  
1. 528218 1. 109084  
7. 306733 7. 99312  
2. 341834 2. 888936  
1. 766347 2. 798088  
3. 529644 3. 513702

2. 404822 1. 968691  
5. 187082 4. 30158  
3. 705231 5. 353668  
2. 461456 2. 83086  
1. 591501 1. 878111  
3. 160491 4. 67324  
1. 250624 1. 458315  
2. 459303 3. 268783  
1. 793834 2. 572217  
1. 457954 1. 754642  
1. 997916 3. 023021  
1. 827071 2. 03682  
1. 068581 2. 198613  
1. 263444 1. 780513  
3. 642363 4. 777433  
2. 251589 2. 65111  
2. 41819 1. 2574  
1. 708219 2. 056164  
2. 364107 1. 494769  
2. 644058 3. 388971  
3. 853483 4. 381613  
2. 625131 3. 829175  
3. 551994 5. 956435  
1. 361477 1. 933745  
3. 487182 4. 279263  
5. 607201 6. 606902  
4. 671465 4. 386939  
4. 263705 4. 639747  
7. 738644 8. 222088  
3. 978727 4. 443618  
1. 708043 3. 05562  
3. 19026 1. 501736  
3. 87459 5. 452873  
4. 213684 3. 403473  
4. 970641 5. 373665  
5. 025472 6. 630085  
3. 917214 3. 638273  
1. 128943 1. 496736  
1. 287397 1. 69413  
2. 252463 3. 036759  
4. 495571 4. 686654  
2. 323519 3. 484617  
1. 729339 1. 620548  
4. 024701 3. 854779  
2. 061156 1. 906953  
2. 503693 3. 279625  
3. 111465 3. 421974  
2. 082181 2. 410711  
8. 033713 8. 187429  
6. 016852 6. 185389  
1. 859749 2. 473738



1. 618307 1. 627522  
1. 771593 1. 914226  
1. 946587 2. 876739  
5. 864556 5. 78886  
2. 10766 3. 637152  
8. 131185 8. 21354  
5. 600254 3. 536433  
1. 38641 2. 315435  
1. 803147 2. 87109  
4. 162597 3. 374204  
5. 230563 5. 056394  
4. 60792 5. 725426  
2. 051416 1. 951914  
4. 12451 3. 479124  
2. 325768 2. 625358  
1. 750162 1. 418732  
1. 382581 1. 439963  
4. 848601 4. 97088  
5. 622755 3. 308815  
1. 05573 2. 139396  
2. 728227 2. 600559  
3. 356678 3. 267929  
2. 029938 2. 094848  
5. 240381 5. 474735  
1. 079202 2. 12023  
3. 596921 3. 67521  
1. 58359 1. 509203  
5. 131396 3. 826715  
1. 744429 0. 931287  
3. 191399 2. 533384  
2. 587306 2. 100581  
3. 28119 3. 457114  
0. 888367 1. 145329  
7. 074319 6. 675534  
0. 943774 1. 153658  
1. 6321 1. 206332  
6. 487211 7. 076395  
2. 903567 4. 417813  
2. 552549 2. 666504  
5. 670489 5. 885869  
2. 361709 2. 730879  
1. 267679 0. 760117  
1. 040706 1. 339693  
4. 485316 5. 464517  
4. 072025 4. 630027  
1. 950744 2. 690187  
2. 08665 1. 216549  
1. 477057 1. 807411  
1. 802589 1. 804962  
6. 037227 5. 48224  
1. 791236 2. 466326

2. 358657 2. 118238  
1. 003803 2. 633738  
1. 563343 2. 151055  
1. 088644 1. 453097  
4. 952869 6. 109643  
3. 166172 4. 982037  
2. 526776 3. 956508  
3. 0469 3. 158618  
1. 723907 2. 401027  
2. 774199 3. 331938  
1. 787997 2. 464333  
3. 409465 3. 916088  
6. 935957 6. 748511  
2. 770765 2. 531017  
1. 54425 2. 009505  
2. 640424 2. 332828  
4. 933875 4. 919751  
7. 456564 7. 577033  
2. 318247 2. 997292  
2. 618652 1. 850022  
1. 143768 1. 354244  
5. 200161 5. 461579  
5. 002764 3. 617518  
1. 769197 1. 731377  
2. 784836 2. 109401  
2. 672047 2. 610896  
2. 715986 3. 223649  
5. 49638 5. 336572  
1. 360461 1. 755803  
3. 169016 3. 774972  
1. 708681 3. 039261  
1. 769942 1. 949205  
7. 630981 7. 887905  
2. 788467 2. 976481  
7. 267525 6. 195972  
4. 28758 5. 356363  
2. 772123 5. 512513  
6. 144401 6. 177195  
3. 479909 5. 201231  
5. 082503 4. 7175  
1. 07104 1. 239642  
1. 688077 2. 380537  
1. 500174 1. 106656  
1. 446355 1. 522371  
0. 882683 0. 851752  
0. 957457 1. 090351  
4. 484947 5. 121478  
1. 775363 2. 765463  
2. 298004 2. 278662  
2. 435066 3. 280481  
3. 647566 4. 002467

5. 358867 7. 104301  
2. 427977 2. 215568  
2. 826911 3. 406836  
6. 811757 6. 047875  
2. 025076 2. 509601  
3. 154935 4. 307581  
8. 007764 7. 082673  
1. 395162 2. 541731  
2. 292664 2. 464125  
6. 788163 6. 70539  
1. 908861 2. 017331  
2. 888403 3. 217509  
1. 92283 2. 522974  
5. 365329 5. 218473  
5. 040865 2. 546839  
4. 241306 3. 731932  
1. 168009 1. 629072  
1. 6287 1. 868144  
1. 468481 1. 939704  
4. 106109 3. 188737  
3. 651709 5. 029186  
3. 275485 2. 96374  
1. 812195 1. 809193  
1. 811423 2. 677396  
2. 462237 2. 178103  
8. 386184 8. 85952  
6. 878655 6. 4097  
0. 716121 2. 000145  
1. 680219 2. 757907  
2. 601972 3. 304192  
1. 949908 2. 387448  
4. 13166 4. 367757  
3. 148968 3. 254328  
2. 252612 2. 323259  
7. 98056 8. 259314  
1. 287961 1. 907019  
2. 404099 3. 170423  
3. 839292 3. 76302  
2. 435017 2. 504986  
4. 039211 4. 469749  
5. 800321 5. 777567  
6. 319865 6. 023918  
2. 741111 3. 027992  
5. 922148 4. 446179  
5. 033154 5. 349877  
4. 090417 3. 919897  
4. 950564 4. 699558  
1. 488725 1. 412078  
5. 52331 4. 347409  
3. 130227 1. 966663  
2. 891178 1. 76555

3. 410914 3. 68309  
6. 180051 6. 216723  
4. 638645 4. 811012  
6. 062698 6. 36456  
4. 427986 4. 175698  
6. 586122 6. 636543  
1. 440174 1. 10502  
5. 984051 5. 654078  
2. 418922 2. 679818  
5. 843933 6. 495221  
1. 66745 2. 124412  
2. 386628 2. 281949  
3. 405461 2. 204937  
2. 050268 2. 378658  
4. 050509 2. 572277  
1. 042938 2. 145007  
1. 066498 2. 293905  
3. 8331 3. 819941  
2. 458891 2. 025249  
2. 085572 3. 545432  
2. 455185 2. 096043  
5. 182136 2. 730207  
4. 630979 2. 971553  
4. 139825 3. 780678  
6. 66538 7. 351993  
2. 884183 0. 970277  
3. 837026 2. 085741  
1. 959968 2. 967518  
2. 493086 1. 957065  
6. 148821 5. 501045  
2. 685115 2. 410675  
2. 327614 2. 576419  
6. 193746 5. 331776  
2. 712646 3. 18186  
4. 192454 5. 043874  
4. 254219 5. 654209  
4. 58331 4. 594175  
1. 769253 2. 318839  
8. 001547 6. 09912  
3. 322466 4. 316833  
3. 174289 3. 399302  
7. 259305 6. 180631  
5. 2546 4. 344026  
2. 302053 1. 739066  
3. 870449 3. 835784  
1. 336726 1. 425044  
1. 83222 1. 90761  
1. 280837 2. 712171  
3. 733089 3. 685522  
2. 837829 2. 588686  
2. 141545 2. 811418

5. 452154 6. 279939  
3. 95347 4. 552246  
5. 793046 5. 926605  
2. 495575 1. 298607  
1. 821288 2. 297417  
2. 488017 3. 583189  
2. 256177 2. 560282  
5. 682361 6. 531488  
2. 015874 2. 940627  
5. 683746 3. 487499  
4. 602809 5. 650506  
1. 707861 2. 693269  
4. 57548 4. 094605  
4. 159788 4. 834582  
1. 385753 2. 041901  
1. 951677 1. 54602  
4. 332903 3. 767249  
7. 022923 7. 71844  
1. 204822 1. 136195  
1. 989105 2. 361537  
7. 449467 7. 477856  
1. 319073 1. 904251  
2. 310008 2. 960112  
2. 641959 3. 194543  
5. 247977 5. 739101  
1. 420876 2. 295662  
0. 969514 1. 107266  
1. 761415 2. 629235  
2. 21395 1. 511849  
2. 873631 3. 817629  
1. 08806 1. 56205  
2. 088486 2. 986146  
7. 42513 6. 980633  
3. 782376 3. 5204  
5. 488063 5. 323943  
7. 819903 8. 079841  
1. 559715 1. 707415  
6. 647603 5. 863424  
8. 059469 7. 857085  
3. 673266 5. 268866  
5. 163325 5. 354902  
1. 982389 1. 838884  
7. 297857 7. 423975  
5. 934683 6. 31484  
1. 358222 1. 60009  
4. 224046 5. 235619  
1. 802422 1. 611226  
1. 256759 3. 647404  
5. 682224 4. 614004  
1. 519054 1. 318228  
3. 22628 1. 969373

4. 862934 4. 250501  
1. 019635 2. 48811  
5. 582453 4. 640054  
6. 038516 5. 351254  
1. 296586 1. 008082  
2. 352127 1. 077096  
2. 623962 2. 719003  
3. 940604 4. 415067  
3. 056706 2. 021553  
1. 349247 2. 435084  
0. 940348 1. 465178  
2. 311314 2. 576555  
3. 091811 3. 5928  
2. 440881 2. 515979  
7. 244751 7. 191269  
5. 793228 4. 911335  
3. 891414 3. 812305  
1. 232194 1. 367027  
2. 24053 1. 309456  
1. 160263 1. 123911  
1. 246913 1. 55886  
1. 704679 1. 564377  
4. 624031 5. 68758  
4. 719898 5. 981732  
5. 318872 4. 589071  
7. 464716 6. 04162  
1. 546682 1. 257469  
4. 752512 3. 667833  
9. 81729 10. 08109  
0. 955329 1. 627084  
6. 386237 5. 546325  
3. 084905 2. 346763  
1. 089829 0. 932368  
5. 89675 4. 724139  
0. 997934 1. 320243  
2. 365107 2. 311799  
8. 025489 8. 710003  
6. 261157 6. 012559  
4. 269672 2. 889323  
5. 088265 4. 66137  
1. 642368 1. 700641  
2. 211971 2. 026924  
5. 07958 4. 548124  
3. 018248 3. 344394  
1. 531535 1. 444524  
6. 293947 5. 374428  
1. 463899 1. 374094  
1. 496751 1. 61757  
3. 728399 3. 062959  
1. 281041 1. 571325  
2. 59042 2. 085581

7. 072629 7. 000692  
6. 841378 6. 731622  
1. 578463 1. 860819  
2. 305121 1. 106781  
6. 843856 5. 966375  
1. 038505 0. 593697  
1. 456655 1. 332768  
5. 691963 6. 719243  
2. 169097 2. 101306  
5. 553416 6. 567846  
0. 758588 3. 121427  
9. 423957 9. 566721  
1. 480064 2. 056977  
2. 69723 2. 427385  
4. 66143 3. 929768  
5. 540459 5. 844149  
2. 299994 2. 422476  
7. 100237 6. 491814  
4. 560999 4. 092003  
6. 247424 5. 130237  
4. 529634 4. 380454  
3. 247841 4. 743211  
1. 680566 3. 131675  
3. 575864 4. 084527  
1. 079065 2. 048127  
4. 649908 3. 809536  
6. 359833 6. 500603  
1. 962302 3. 900137  
6. 278246 6. 259488  
7. 349313 6. 957595  
1. 526768 2. 18603  
2. 373807 2. 055528  
4. 073547 4. 102388  
5. 250288 4. 90885  
7. 415318 7. 679905  
2. 617716 2. 478141  
10. 37481 10. 55076  
2. 066904 2. 975361  
4. 106952 5. 580894  
7. 269725 7. 311657  
1. 048703 1. 64185  
1. 408139 1. 351183  
1. 35968 1. 10991  
5. 328578 4. 829289  
9. 856837 10. 2754  
5. 868561 5. 715741  
10. 27076 10. 15363  
6. 65003 5. 644017  
5. 045317 5. 516753  
3. 842651 4. 227372  
3. 425796 3. 509376

4. 565853 4. 307841  
9. 182962 9. 542298  
6. 364697 4. 952763  
7. 376827 6. 467023  
4. 887572 4. 238737  
3. 103214 2. 785214  
4. 861347 5. 632336  
1. 407086 2. 348166  
4. 893485 5. 120442  
1. 315681 1. 04389  
5. 929415 5. 173345  
2. 233426 2. 807725  
2. 458455 2. 690036  
3. 080838 2. 391278  
1. 526941 2. 656757  
1. 680715 1. 786015  
1. 624747 2. 057262  
1. 107093 1. 541204  
2. 318286 3. 882874  
2. 321454 2. 476025  
4. 306927 5. 376655  
1. 26376 1. 358093  
0. 952902 0. 681412  
0. 831766 1. 518417  
2. 147377 2. 067219  
1. 188252 2. 364231  
2. 228078 1. 831499  
2. 7549 0. 916638  
1. 322149 1. 34692  
1. 40582 0. 96007  
3. 82849 3. 667164  
1. 793958 1. 700274  
1. 964996 2. 303739  
0. 766032 1. 030124  
1. 629681 1. 459426  
7. 390176 7. 156045  
1. 393134 1. 639005  
2. 154252 2. 630477  
2. 573705 2. 283528  
4. 219224 5. 871069  
2. 653002 4. 139735  
1. 129538 1. 128557  
5. 723384 6. 344941  
6. 094587 6. 493553  
4. 77107 5. 14094  
1. 982509 2. 310179  
4. 017856 5. 244427  
8. 18811 6. 963838  
1. 120752 1. 04947  
1. 314148 2. 023048  
3. 465494 4. 045332



2. 197188 3. 267418  
3. 510604 4. 176771  
4. 610192 3. 429565  
2. 321532 1. 212162  
1. 094483 1. 335329  
2. 06278 2. 104408  
7. 461289 6. 202128  
6. 883803 5. 730555  
3. 672919 4. 336272  
4. 966171 5. 195732  
4. 724922 4. 515225  
1. 616291 2. 113671  
2. 932761 3. 127521  
2. 100143 2. 264204  
1. 176363 1. 305372  
1. 70966 1. 111086  
4. 352223 4. 246371  
4. 421162 3. 336248  
7. 004952 6. 938825  
1. 830016 1. 719176  
5. 282945 5. 456376  
3. 626755 2. 961533  
2. 7423 2. 63633  
1. 432373 2. 002526  
2. 067679 2. 394794  
1. 816214 1. 614432  
6. 609385 6. 218141  
2. 858308 3. 038841  
1. 74762 2. 680174  
4. 680564 4. 201201  
4. 24134 3. 793808  
3. 923473 5. 835729  
1. 523593 2. 835798  
1. 132712 1. 412397  
5. 350617 6. 879037  
1. 062506 1. 517987  
1. 203038 1. 955914  
1. 676214 2. 553755  
2. 54832 2. 654219  
5. 429573 6. 485658  
1. 78686 1. 881029  
1. 761945 1. 791793  
5. 006929 5. 53983  
8. 327406 7. 807536  
5. 025574 4. 77021  
5. 316745 5. 157859  
7. 867984 7. 419515  
1. 091544 1. 267266  
4. 052523 4. 080165  
2. 222539 1. 768946  
8. 083819 7. 596862

1. 370622 1. 26303  
1. 800251 1. 783026  
1. 366786 1. 080028  
0. 922243 1. 373984  
1. 8338 1. 665933  
1. 78639 1. 142995  
1. 842877 1. 687001  
6. 861943 7. 03881  
1. 536554 1. 557849  
7. 281962 7. 16448  
2. 439286 3. 386463  
1. 216406 1. 706814  
1. 442769 1. 861171  
4. 346393 4. 608616  
1. 554951 1. 857349  
1. 027113 1. 230872  
2. 449143 3. 202031  
2. 035393 1. 872628  
0. 956941 1. 816409  
1. 44089 1. 46961  
2. 007615 1. 909198  
6. 029718 6. 359241  
3. 909478 3. 057432  
1. 079783 1. 560786  
8. 050627 7. 154721  
4. 003241 2. 877674  
5. 606452 5. 681686  
1. 602051 1. 508831  
10. 39387 10. 17669  
2. 387341 1. 113201  
1. 307722 1. 50632  
1. 183684 1. 639519  
1. 116296 1. 547098  
1. 381582 2. 529359  
1. 232379 1. 574364  
1. 516797 1. 679053  
5. 329664 4. 089775  
1. 304784 1. 645674  
2. 476217 3. 18746  
2. 00801 2. 46849  
1. 22096 1. 898674  
1. 918691 2. 092759  
8. 109398 9. 10358  
2. 905112 2. 089672  
2. 087976 2. 494822  
2. 046901 1. 468324  
1. 213637 1. 851691  
0. 971786 2. 564039  
1. 531639 1. 805126  
5. 663919 5. 838419  
2. 196136 2. 033096

5. 277317 5. 677693  
4. 398315 3. 819585  
6. 863417 7. 705765  
6. 345707 6. 195263  
1. 165914 1. 032424  
1. 976223 1. 812927  
1. 727027 1. 770959  
2. 215392 2. 105995  
1. 755633 1. 724243  
2. 624557 2. 117352  
2. 874899 3. 08286  
1. 377297 1. 491904  
1. 443274 1. 842871  
1. 703093 1. 477824  
3. 913065 4. 463555  
5. 563921 4. 936746  
6. 168933 6. 097401  
4. 406873 2. 194522  
1. 198306 1. 531019  
5. 630615 6. 390991  
6. 957964 7. 709563  
1. 662066 1. 483607  
1. 148487 1. 136852  
3. 740147 2. 552245  
3. 412709 2. 468616  
6. 462099 7. 387076  
2. 966512 5. 397707  
9. 066476 9. 592528  
5. 840816 7. 231501  
8. 030182 7. 971311  
4. 907722 4. 350381  
1. 574487 1. 343609  
4. 818705 5. 587706  
1. 591132 1. 068006  
2. 280646 3. 079971  
2. 96737 2. 105635  
2. 135941 2. 762389  
4. 488151 4. 058554  
2. 172494 2. 129786  
1. 180594 1. 511094  
3. 902131 4. 08269  
2. 10204 1. 27817  
1. 596502 1. 645539  
2. 429067 2. 842723  
3. 69398 2. 9652  
1. 596098 2. 090674  
2. 657847 2. 744821  
3. 151878 4. 318644  
3. 751595 4. 131043  
4. 430802 4. 325922  
4. 205201 4. 322494

2. 049901 2. 447711  
1. 625553 2. 422821  
1. 419676 1. 757101  
1. 186586 2. 89538  
4. 23465 3. 14675  
6. 974954 7. 67645  
6. 452219 5. 334942  
0. 949135 1. 534028  
2. 088351 2. 534601  
4. 515632 2. 227024  
3. 648306 2. 027814  
4. 716955 5. 130955  
2. 06882 3. 275521  
4. 656591 4. 211425  
1. 035377 1. 445046  
1. 367313 2. 030636  
1. 029664 1. 083109  
5. 099564 5. 660671  
9. 157888 9. 598728  
2. 534533 4. 053301  
1. 560318 0. 844643  
2. 185739 4. 138568  
1. 918297 2. 264724  
1. 468821 1. 669883  
1. 325339 2. 668963  
2. 337554 3. 028341  
2. 01039 2. 147934  
1. 340726 1. 274893  
0. 918019 1. 240538  
1. 015137 1. 253426  
4. 864152 5. 783136  
1. 620852 0. 825294  
1. 747678 2. 202196  
2. 141725 2. 940696  
2. 286568 2. 507242  
1. 135013 1. 083873  
0. 909434 0. 707456  
2. 471073 2. 149584  
8. 065272 7. 992325  
2. 537978 2. 991111  
7. 057972 6. 193022  
2. 161085 2. 387479  
1. 813874 3. 071485  
4. 901499 4. 703171  
4. 333391 5. 055746  
1. 81051 1. 773879  
2. 069539 2. 543173  
2. 493332 1. 75361  
10. 91234 10. 72482  
1. 694274 1. 372738  
1. 618038 1. 473861

2. 245886 2. 11647  
1. 815095 1. 722923  
3. 308788 3. 499865  
3. 373582 6. 8533  
3. 182487 2. 99152  
2. 315266 2. 34745  
1. 717903 1. 591614  
4. 675044 5. 600052  
2. 681557 4. 126053  
2. 69803 3. 045423  
3. 220245 3. 10099  
3. 577478 4. 228892  
1. 602257 1. 839546  
2. 636947 2. 356224  
1. 658884 1. 307514  
1. 557032 2. 220461  
2. 212867 2. 263994  
1. 82481 1. 536248  
3. 031596 2. 488363  
3. 011604 1. 339113  
5. 981421 5. 714548  
2. 80641 2. 925227  
1. 345007 2. 161165  
2. 7861 2. 106795  
5. 238632 4. 472896  
6. 216925 7. 132145  
6. 410805 6. 337671  
1. 771727 3. 450024  
1. 51711 1. 944208  
7. 438932 7. 043696  
7. 256902 7. 667863  
1. 227369 1. 588425  
1. 360637 2. 96629  
5. 346197 4. 396984  
3. 169412 2. 326543  
5. 813889 5. 456148  
5. 119069 4. 193085  
6. 790769 6. 915819  
4. 29174 3. 157837  
3. 939279 2. 480585  
1. 073296 1. 717872  
0. 991897 1. 658083  
7. 769048 7. 741786  
2. 258454 3. 032476  
0. 711164 1. 179084  
2. 717184 2. 914988  
5. 067563 3. 439502  
5. 077541 4. 888441  
2. 178123 2. 366548  
4. 003238 3. 587549  
2. 736618 3. 202762

1. 928669 2. 220107  
4. 206458 3. 560084  
4. 815487 4. 836346  
1. 21842 1. 009421  
4. 582263 5. 735226  
1. 11642 1. 147187  
5. 445008 6. 171965  
4. 407353 5. 158008  
6. 313177 6. 145686  
7. 293557 6. 983215  
1. 946889 2. 320511  
3. 44872 4. 489292  
2. 017099 1. 924011  
2. 921559 4. 435605  
8. 030652 6. 564907  
3. 012488 2. 671608  
2. 256682 2. 254192  
3. 515575 3. 463948  
5. 184488 5. 057043  
4. 095173 4. 710066  
0. 973766 0. 804158  
1. 652323 1. 680839  
3. 131943 1. 719701  
6. 325285 7. 387483  
2. 074621 1. 670009  
1. 688627 1. 23637  
2. 648871 2. 794621  
3. 064744 3. 30316  
3. 622045 3. 523677  
4. 084544 2. 10786  
0. 966142 1. 234708  
3. 712438 3. 297034  
1. 914348 2. 0306  
8. 196235 7. 63899  
2. 572338 4. 401214  
4. 969907 3. 720078  
1. 789799 1. 951503  
0. 990742 1. 332802  
1. 594443 1. 661582  
1. 632346 2. 601231  
2. 79954 2. 880098  
1. 901506 1. 675832  
1. 09212 1. 304039  
2. 004142 3. 191353  
2. 078041 1. 576097  
1. 311907 1. 454841  
4. 43405 3. 973958  
2. 396593 2. 827241  
3. 673608 4. 068602  
3. 918452 3. 438379  
4. 511354 4. 762103

1. 049183 0. 944006  
0. 992136 2. 010903  
2. 71124 3. 254083  
0. 775375 1. 824147  
1. 139223 1. 167522  
1. 454567 2. 532835  
1. 671745 2. 174462  
2. 927855 3. 689651  
1. 218543 1. 841413  
3. 408256 1. 482121  
1. 043375 1. 268788  
2. 757539 1. 229638  
2. 063861 1. 28345  
3. 412036 3. 849408  
1. 530218 1. 597933  
3. 034383 1. 990292  
2. 480333 1. 511238  
1. 549436 0. 89986  
1. 832791 1. 995741  
1. 911242 1. 368047  
1. 668463 2. 173768  
4. 419736 4. 46612  
6. 446659 6. 156576  
1. 247309 0. 936696  
5. 119306 5. 413885  
7. 15588 7. 171961  
10. 09778 9. 52549  
2. 129109 2. 127605  
5. 965953 5. 9958  
2. 814914 2. 04646  
4. 408519 4. 842759  
3. 771951 3. 038416  
1. 407109 1. 566833  
6. 2838 6. 379957  
2. 917783 3. 973993  
4. 011999 3. 692005  
2. 72058 1. 375477  
5. 789087 5. 659693  
1. 786119 2. 372677  
4. 797299 6. 180855  
2. 050699 1. 421134  
1. 025205 1. 944904  
1. 407644 1. 40988  
6. 832307 6. 832251  
2. 336505 2. 208713  
2. 075693 3. 740225  
2. 324928 1. 821175  
6. 498042 6. 162471  
1. 441916 1. 288292  
5. 200062 3. 76709  
4. 036609 4. 753738

5. 383564 4. 72911  
1. 574904 1. 678356  
2. 968036 4. 268434  
3. 57272 3. 258342  
2. 075839 2. 00688  
5. 291863 6. 075132  
1. 78626 1. 501407  
1. 547716 3. 063319  
1. 721166 2. 734543  
1. 08639 1. 546447  
1. 601967 1. 394325  
3. 886767 3. 07957  
2. 852336 2. 583694  
7. 230907 7. 503733  
4. 140665 4. 346248  
5. 285426 4. 85415  
3. 28739 2. 547712  
8. 967842 9. 318817  
1. 73105 2. 753737  
2. 346915 2. 040349  
1. 33504 1. 404164  
4. 876087 4. 925359  
1. 829569 2. 527165  
1. 610413 2. 135363  
6. 091249 6. 389182  
1. 960989 2. 184372  
3. 602317 3. 546105  
1. 242667 1. 528867  
5. 309998 4. 783189  
2. 590962 3. 070071  
3. 03526 3. 167557  
1. 50254 2. 072664  
1. 973959 2. 448763  
1. 561387 1. 608312  
2. 105698 2. 355489  
1. 68939 1. 54119  
1. 940687 2. 443161  
3. 086941 4. 701781  
4. 759092 4. 520253  
2. 3786 2. 766165  
2. 92068 2. 490986  
0. 973341 2. 014592  
4. 581137 3. 28306  
2. 594406 2. 732764  
1. 896706 2. 236296  
3. 117306 3. 121647  
4. 092764 4. 391665  
1. 623658 1. 773916  
1. 927344 3. 22031  
2. 424555 2. 504799  
7. 994658 8. 514176



1. 796362 1. 719506  
7. 268631 7. 512063  
4. 137301 3. 300413  
3. 343775 3. 284407  
2. 399884 3. 007863  
2. 130011 2. 256095  
2. 712113 2. 788989  
1. 446021 2. 438447  
1. 692689 1. 91192  
3. 736794 2. 807085  
1. 401485 1. 424943  
1. 075878 1. 164624  
4. 899658 2. 901887  
1. 649216 2. 149803  
2. 168753 2. 238221  
2. 309513 2. 173904  
1. 311539 2. 288578  
3. 356075 3. 124144  
1. 897374 1. 562662  
1. 191272 1. 434507  
2. 305396 1. 28747  
2. 31725 1. 496931  
2. 977908 3. 599909  
3. 367688 3. 512591  
3. 179147 2. 930748  
4. 458815 4. 881562  
2. 268703 3. 149318  
2. 68706 1. 860247  
3. 053139 2. 399976  
5. 365818 5. 058175  
2. 108799 2. 342076  
2. 371504 2. 44528  
4. 691418 4. 622812  
3. 953874 2. 785217  
1. 455293 3. 022526  
2. 00473 3. 01738  
2. 478617 1. 828778  
1. 805458 2. 218466  
2. 816679 2. 802916  
4. 368242 4. 65148  
5. 322679 5. 265807  
1. 009238 0. 89373  
4. 092311 4. 897988  
7. 450719 7. 70493  
4. 274663 2. 616686  
1. 251217 1. 184699  
4. 933801 4. 848222  
6. 254209 4. 885274  
2. 652728 2. 493151  
0. 997522 1. 172739  
2. 591664 2. 816837

1. 322829 2. 28108  
1. 402306 1. 76109  
2. 618965 3. 139428  
2. 938113 3. 324953  
3. 607853 6. 10549  
2. 974214 2. 038518  
4. 439619 5. 631962  
2. 944518 2. 72469  
0. 961932 1. 939937  
4. 210044 4. 396266  
5. 582615 5. 788659  
4. 679301 5. 003162  
3. 931109 4. 002318  
1. 009509 1. 559861  
1. 583392 1. 899456  
3. 301216 2. 706904  
3. 126699 2. 414746  
6. 300307 3. 228296  
5. 47648 5. 992064  
1. 870427 1. 762966  
9. 59995 10. 34701  
3. 217602 3. 562415  
2. 835702 2. 321867  
1. 221039 1. 681989  
4. 215633 3. 549396  
2. 067563 1. 93987  
2. 295177 2. 116018  
1. 426951 2. 492982  
2. 77365 2. 35323  
4. 133827 4. 533075  
4. 926276 4. 80861  
3. 835215 5. 119051  
1. 815218 1. 366221  
1. 988365 1. 63408  
1. 893769 2. 111123  
3. 125506 3. 140329  
3. 204509 3. 254426  
2. 597051 3. 47451  
2. 341425 2. 096122  
5. 011262 6. 040987  
1. 87837 1. 369156  
1. 008182 1. 248837  
2. 827335 3. 095917  
2. 547086 2. 238172  
5. 177834 6. 149582  
2. 963054 3. 943555  
2. 201937 2. 253954  
6. 632147 5. 830163  
5. 949049 5. 53507  
2. 333774 4. 515975  
1. 660885 1. 195739

0.881517 1.597875  
3.658106 4.82242  
1.796682 2.738954  
2.394891 2.404974  
1.870396 1.883985  
2.199427 2.488948  
2.375405 2.397867  
4.926864 5.261726  
0.88334 0.961941  
4.229497 2.94989  
4.76676 4.794117  
4.591697 4.06032  
3.979244 3.272743  
3.985823 3.606804  
1.051433 1.325907  
1.586782 2.38869  
4.032932 4.413342  
2.060014 2.232125  
2.142723 2.347453  
2.741716 2.562922  
3.647389 5.455644  
2.965612 3.971377  
4.364026 3.788319  
1.368575 1.846929  
2.176893 2.108324  
1.495092 2.482506  
3.34442 3.479947  
1.671542 2.265488  
7.731606 8.072402  
2.564342 2.863801  
2.910754 2.836946  
1.524748 1.77786  
5.77941 5.159468  
4.47465 4.475054  
3.528434 3.555149  
5.934885 5.157668  
2.674784 2.824176  
1.00234 1.619404  
2.433337 2.724929  
1.829304 1.661899  
2.297493 1.855659  
6.933293 6.517138  
1.27706 1.828671  
1.635283 1.877883  
1.490189 1.872339  
1.562855 1.857462  
1.560083 2.368852  
5.963843 5.654479  
5.110038 5.403243  
2.565882 3.634513  
4.759695 2.086965

1. 572266 1. 031928  
2. 360948 3. 268111  
5. 790322 5. 339162  
1. 639774 2. 104467  
2. 90321 2. 725661  
4. 479923 4. 142503  
2. 067368 2. 558223  
2. 678082 2. 642366  
2. 656117 2. 660689  
5. 302588 4. 641009  
0. 984987 1. 245242  
6. 716164 4. 839862  
1. 769337 2. 166565  
7. 300121 6. 903462  
1. 054422 1. 610097  
2. 904455 2. 091771  
5. 866239 5. 952503  
2. 329993 2. 406983  
2. 063341 2. 978702  
10. 38845 11. 21677  
2. 57154 2. 413959  
1. 365122 2. 678638  
2. 466537 3. 923897  
1. 635015 2. 746188  
1. 161976 1. 174622  
1. 493434 1. 53133  
1. 592563 2. 297066  
3. 567185 5. 182349  
1. 586173 2. 011327  
5. 893762 5. 535985  
1. 466866 1. 944335  
1. 257858 1. 336818  
2. 401663 3. 846509  
2. 961373 2. 109095  
2. 73721 3. 524428  
1. 669588 2. 091025  
1. 257842 2. 706475  
2. 210121 2. 173706  
3. 161458 3. 840648  
1. 561767 2. 186706  
2. 338771 2. 83888  
1. 63743 1. 162239  
8. 949042 8. 66014  
5. 674677 6. 885218  
0. 938406 1. 448758  
2. 542163 1. 683425  
1. 296626 1. 035604  
2. 176298 1. 994268  
2. 210786 2. 175403  
1. 452025 1. 459764  
1. 433929 1. 35091

2.077969 1.673069  
2.026126 1.443856  
2.698273 2.523188  
4.149941 4.654766  
1.339763 1.391636  
2.439322 2.763784  
3.962813 3.469378  
0.772084 0.813304  
1.572138 2.54305  
7.591486 7.915362  
1.504299 2.072498  
4.800551 4.581159  
0.937273 1.948745  
8.765971 8.482524  
4.349866 4.962728  
3.059516 1.683594  
1.641117 1.998758  
3.067813 1.958967  
1.710231 1.752874  
6.516933 5.357367  
1.418449 1.570905  
1.278857 1.296175  
2.947457 2.719843  
1.279113 2.130204  
1.599243 2.179756  
1.260603 1.787729  
2.034163 2.469309  
2.898379 2.077513  
2.052814 2.777606  
2.307438 1.826628  
3.105302 3.841088  
2.008952 2.631706  
1.792348 2.389206  
4.351147 3.685302  
6.454376 6.690819  
0.891836 1.286375  
5.391667 4.492313  
4.345918 4.56075  
1.719075 2.20077  
1.160404 0.962362  
2.740423 2.351112  
2.866155 3.478481  
1.987943 1.888033  
3.237591 3.12603  
3.163133 3.219215  
1.547836 1.653663  
4.178905 3.731625  
2.439836 1.813791  
1.504899 2.195295  
5.223247 3.625994  
5.737775 5.18659

1. 483337 3. 389294  
1. 628631 2. 555668  
2. 48488 1. 158744  
1. 130078 0. 85934  
1. 19711 1. 152647  
1. 252109 1. 696693  
1. 592584 1. 890997  
2. 502897 2. 19383  
1. 366632 1. 84078  
2. 301994 2. 006189  
6. 122685 6. 922625  
0. 741985 1. 110566  
8. 12825 8. 175382  
2. 169649 2. 897079  
2. 007058 2. 724051  
4. 790745 3. 090678  
2. 14314 2. 703352  
3. 993841 2. 224446  
2. 166816 2. 802982  
2. 122968 2. 95941  
3. 987674 3. 624055  
1. 06185 1. 084275  
6. 693832 5. 612923  
8. 436712 8. 72546  
2. 63495 3. 781771  
2. 211944 2. 111639  
2. 096978 1. 893781  
3. 471251 3. 127914  
5. 626798 4. 105562  
1. 0464 1. 556473  
8. 372154 9. 130787  
1. 549171 4. 235438  
7. 109167 6. 462998  
6. 440603 6. 11198  
2. 044281 2. 349943  
2. 515655 2. 054036  
0. 986328 2. 081965  
1. 521412 1. 988812  
2. 721381 3. 290334  
2. 775569 2. 499921  
2. 110868 2. 787286  
2. 225844 2. 111047  
4. 297199 3. 729706  
2. 893563 4. 009908  
6. 527807 7. 889847  
1. 669472 1. 556548  
1. 347451 1. 669073  
2. 326404 2. 874051  
2. 621359 3. 167567  
1. 158256 2. 691881  
1. 968127 1. 404814

2. 18695 2. 191165  
2. 840545 2. 656529  
4. 898364 5. 671847  
1. 088082 1. 649161  
3. 515498 3. 711246  
1. 739997 2. 310093  
2. 104005 3. 326924  
4. 805683 4. 384833  
4. 663738 5. 916691  
2. 745672 3. 162011  
1. 523464 1. 721552  
1. 051356 1. 590256  
1. 43041 2. 756034  
2. 3708 2. 010465  
7. 471904 7. 378951  
1. 801377 2. 487156  
2. 252286 2. 047745  
5. 531266 4. 392007  
2. 986554 2. 050363  
1. 812491 1. 818586  
4. 641036 4. 214584  
4. 775959 6. 024365  
7. 558009 6. 686799  
6. 815748 7. 354996  
1. 523671 1. 608744  
1. 434704 1. 283572  
2. 809239 1. 008054  
1. 17642 1. 857476  
1. 264516 2. 176851  
3. 146131 2. 433934  
2. 855352 2. 085434  
5. 180136 4. 069737  
3. 318298 4. 233836  
3. 830812 3. 99883  
1. 403367 2. 04959  
2. 316577 2. 682552  
4. 629833 1. 578134  
7. 67909 7. 323639  
2. 048869 1. 292058  
0. 755161 0. 676747  
5. 722431 5. 487102  
4. 129571 4. 125703  
6. 124294 4. 942053  
6. 509143 6. 548587  
6. 253961 5. 135486  
2. 515818 2. 753838  
8. 183407 8. 304149  
5. 319986 5. 460885  
0. 917335 1. 044428  
2. 408324 2. 329781  
1. 918671 2. 458989

1. 202963 1. 212678  
3. 936374 2. 788383  
6. 164758 6. 725703  
3. 989203 4. 958782  
2. 068792 1. 715496  
4. 545128 2. 161984  
7. 482596 7. 168339  
1. 885937 2. 08095  
5. 548302 4. 649784  
6. 578161 7. 352538  
3. 384542 4. 622085  
3. 115477 3. 615216  
2. 22231 2. 783984  
3. 941265 5. 066159  
0. 837376 0. 94348  
5. 948064 5. 689742  
6. 230445 6. 750222  
4. 252858 6. 065487  
4. 276899 3. 288691  
6. 535962 6. 663597  
2. 708016 2. 709107  
2. 200309 2. 477597  
5. 374419 4. 483848  
2. 896026 3. 458602  
6. 124633 6. 187849  
5. 109235 4. 605348  
1. 358108 2. 271585  
4. 627064 3. 796217  
4. 862266 5. 526633  
0. 9896 1. 451414  
5. 438571 5. 710139  
1. 091034 1. 859166  
3. 07227 2. 484571  
2. 076139 2. 043141  
6. 111668 6. 371781  
0. 666512 1. 546169  
2. 547183 2. 645329  
1. 949282 1. 705954  
4. 285596 4. 198451  
5. 789731 6. 233338  
1. 040711 1. 636382  
1. 077465 1. 161379  
3. 062633 2. 24657  
9. 097281 9. 495327  
4. 20835 4. 05583  
1. 001994 1. 301734  
2. 99685 2. 481668  
2. 422936 2. 573594  
7. 597252 7. 540873  
5. 895941 5. 558371  
4. 964872 4. 800453



0. 774604 1. 138272  
3. 873473 2. 647971  
1. 76472 1. 258308  
5. 962719 6. 102521  
6. 319407 5. 889698  
1. 468782 2. 495034  
5. 644524 6. 144673  
4. 540452 3. 96645  
5. 344565 4. 201074  
6. 699675 5. 770868  
2. 520451 3. 01981  
1. 913653 2. 204783  
3. 295883 3. 478753  
6. 544221 7. 89309  
4. 375635 4. 874861  
1. 392519 2. 057373  
2. 606744 3. 509678  
5. 8494 4. 037839  
4. 905972 5. 709232  
5. 063245 3. 917162  
2. 254865 1. 929758  
1. 405664 1. 778798  
2. 861366 1. 66021  
5. 741188 5. 218278  
3. 356809 3. 611056  
1. 10569 1. 28012  
1. 63905 1. 676933  
3. 161271 2. 4573  
3. 155081 4. 713536  
1. 536246 1. 543094  
7. 497238 7. 296894  
5. 917436 6. 238555  
0. 955529 0. 811961  
1. 844559 2. 355492  
1. 43976 1. 607987  
0. 999156 1. 586079  
3. 137713 3. 19095  
5. 086057 4. 776693  
6. 678868 5. 266035  
2. 530995 0. 799454  
3. 577982 2. 694159  
3. 347012 2. 948063  
6. 299942 7. 556619  
1. 583735 1. 893754  
6. 632315 7. 004111  
5. 362829 5. 889579  
1. 703999 1. 793566  
1. 408771 1. 444934  
4. 236225 4. 036822  
1. 720861 1. 493458  
1. 788627 1. 977911

2. 449317 2. 288067  
2. 388356 1. 942178  
1. 484158 1. 627351  
1. 580908 1. 379781  
2. 037906 2. 522434  
5. 219232 5. 319348  
1. 442795 1. 984941  
7. 124044 7. 690301  
1. 132835 1. 417103  
1. 399017 1. 488641  
6. 037345 6. 860975  
5. 369076 2. 182571  
1. 940018 2. 053038  
6. 661947 7. 253294  
6. 093123 6. 084142  
7. 551675 8. 03892  
7. 392452 6. 504706  
1. 587161 1. 113322  
1. 018994 1. 659777  
3. 32124 2. 294528  
0. 857729 1. 465782  
4. 83376 5. 10263  
2. 781307 1. 626898  
1. 120347 1. 278776  
3. 326108 3. 602155  
2. 700346 2. 894686  
2. 050207 4. 390993  
7. 164571 7. 194526  
2. 305114 2. 396531  
4. 330866 4. 201187  
1. 86679 2. 045686  
4. 287334 5. 509727  
3. 710107 4. 570864  
2. 290863 2. 914889  
2. 514252 3. 206397  
3. 081019 5. 049505  
3. 245006 3. 263047  
2. 432304 2. 465656  
1. 346925 1. 577134  
3. 169862 2. 387073  
5. 926261 4. 758202  
1. 056574 1. 545848  
2. 465243 1. 615003  
1. 775869 1. 961295  
0. 74485 1. 301672  
1. 017497 0. 989696  
2. 111711 2. 428077  
0. 970281 1. 360708  
2. 594403 3. 137327  
3. 290945 4. 231202  
5. 256042 4. 434983

2. 62125 1. 912439  
5. 352868 4. 786511  
2. 654959 1. 74169  
3. 952013 2. 980384  
2. 249288 2. 14069  
5. 148095 3. 112099  
1. 607281 1. 419995  
1. 278322 1. 198509  
5. 789638 3. 894421  
1. 535718 1. 530492  
1. 204931 1. 53461  
5. 510767 5. 15641  
1. 223729 0. 990769  
4. 210597 4. 326324  
1. 014497 1. 366091  
3. 493807 4. 845978  
1. 133044 0. 956902  
3. 802332 3. 531015  
2. 089065 1. 60885  
6. 697234 5. 650575  
1. 277844 2. 059127  
5. 490489 4. 096322  
7. 037341 5. 275023  
1. 826237 1. 542659  
1. 835878 1. 878095  
1. 519542 1. 571565  
1. 611332 1. 177603  
6. 924608 5. 820993  
2. 695724 3. 845662  
0. 963216 1. 297774  
3. 640967 2. 633808  
1. 54067 2. 617626  
3. 334118 1. 858525  
1. 230242 1. 282625  
8. 111912 7. 164486  
5. 501288 5. 292262  
2. 220203 1. 945996  
3. 83971 3. 880174  
5. 733589 3. 363382  
6. 513407 6. 168387  
1. 381768 1. 487091  
1. 217067 1. 334446  
2. 048829 1. 70801  
2. 159285 2. 196428  
2. 71115 2. 302251  
2. 542582 2. 43045  
3. 333205 3. 124074  
4. 011404 4. 020308  
1. 589242 0. 819552  
3. 545958 3. 008728  
2. 365524 2. 298903

3. 975865 2. 595813  
1. 013531 1. 420002  
4. 866919 4. 923052  
3. 252151 4. 146694  
5. 506115 4. 698234  
2. 339098 2. 922564  
4. 400276 3. 501433  
6. 487451 6. 755807  
1. 648616 1. 828695  
1. 769056 2. 258927  
1. 621952 0. 483343  
3. 407203 2. 897496  
6. 971873 6. 635521  
7. 32226 4. 458409  
1. 945262 2. 258009  
4. 065192 3. 679864  
1. 267136 1. 733819  
2. 82935 1. 641334  
3. 743581 3. 675636  
5. 724822 4. 999663  
3. 122496 3. 003885  
2. 458543 2. 040025  
4. 810719 4. 347594  
3. 10996 2. 91342  
1. 157937 1. 715058  
2. 987947 2. 787825  
1. 406568 2. 387092  
1. 266795 1. 143502  
2. 292374 2. 926874  
6. 005316 5. 910188  
0. 98698 3. 277977  
1. 719022 2. 584203  
3. 661213 2. 778197  
1. 907766 2. 491072  
6. 118611 5. 273883  
1. 421836 2. 29841  
1. 866296 2. 441376  
1. 179468 1. 268361  
1. 12101 1. 931748  
1. 413032 2. 344602  
4. 254571 1. 550412  
1. 37583 1. 869941  
1. 545805 1. 734494  
1. 767908 1. 57973  
1. 489764 1. 490701  
4. 147021 3. 648091  
3. 914559 4. 11047  
1. 540195 1. 707088  
1. 534919 2. 460002  
1. 398505 1. 751224  
1. 966136 3. 473775

4. 768768 4. 888044  
4. 05123 4. 316733  
5. 856966 4. 920258  
3. 175481 2. 096683  
2. 563985 3. 544179  
1. 392365 1. 207646  
0. 75584 1. 280427  
4. 385814 4. 159678  
4. 702933 2. 638856  
1. 212215 1. 461832  
1. 242308 2. 184929  
3. 085418 3. 566372  
4. 337644 4. 339895  
1. 769167 2. 337917  
6. 274 6. 13564  
2. 246698 1. 805427  
6. 081092 5. 510346  
2. 052189 1. 038966  
6. 419178 6. 069735  
1. 904611 1. 85661  
1. 650595 1. 543818  
2. 171133 2. 690677  
1. 784016 1. 819287  
9. 042438 8. 435298  
2. 057184 2. 930693  
1. 944463 1. 295119  
9. 214734 8. 344468  
2. 474907 1. 502598  
3. 626601 3. 291851  
1. 670121 1. 706262  
0. 820251 0. 997512  
9. 909006 9. 86911  
7. 255995 6. 290167  
1. 174154 0. 960417  
1. 408049 1. 713318  
0. 99994 1. 132304  
9. 128449 9. 273844  
5. 85875 5. 325033  
6. 212723 6. 244744  
4. 393327 3. 643094  
3. 621055 3. 012088  
1. 165307 1. 630851  
4. 279779 5. 463388  
1. 628911 2. 472087  
1. 893242 2. 769971  
1. 276804 1. 307641  
5. 007579 4. 305203  
5. 397437 4. 985072  
4. 468165 2. 658135  
4. 890937 2. 61777  
2. 387414 2. 772011

5. 702889 5. 559008  
1. 046427 2. 040154  
3. 133769 3. 263372  
1. 265586 1. 739715  
2. 41292 2. 258054  
1. 449164 1. 255327  
2. 607454 2. 863267  
5. 14549 5. 158651  
6. 830859 7. 895441  
2. 193041 2. 267347  
2. 024202 2. 413963  
2. 542183 2. 644035  
7. 334274 6. 094491  
1. 312081 1. 414357  
2. 442728 4. 122212  
2. 719206 3. 500251  
3. 584622 3. 697145  
2. 578732 1. 582254  
2. 30863 3. 283044  
2. 602745 1. 573366  
1. 345665 1. 304818  
1. 697217 4. 811326  
7. 260143 7. 279621  
2. 08993 1. 666167  
5. 035835 5. 364346  
2. 071983 2. 007473  
7. 790972 6. 89595  
2. 264171 2. 197199  
2. 421129 2. 455311  
3. 8423 3. 706538  
1. 596379 1. 863131  
3. 395377 3. 034676  
3. 414207 4. 204383  
2. 137069 1. 935691  
2. 458978 3. 299873  
5. 067834 6. 567186  
4. 514487 4. 729534  
1. 913492 1. 929098  
1. 336635 1. 980373  
1. 733074 2. 37469  
4. 439676 5. 205582  
1. 163918 1. 337713  
6. 794039 6. 907365  
1. 817073 1. 810723  
2. 642037 3. 329626  
7. 324929 6. 743957  
3. 676891 3. 096741  
5. 704295 5. 991186  
2. 84255 3. 199447  
3. 634105 2. 858486  
1. 989989 2. 434598

1. 736978 2. 106771  
1. 852063 2. 424583  
1. 574549 1. 931329  
2. 469934 2. 624817  
1. 189474 1. 730049  
1. 629991 1. 731205  
5. 00867 3. 965676  
5. 854167 6. 482674  
3. 673731 5. 401856  
3. 968109 3. 603007  
3. 632809 3. 133606  
4. 821448 3. 054181  
4. 705518 4. 099412  
2. 497217 2. 953805  
3. 284529 2. 189971  
3. 243651 3. 51682  
3. 100944 3. 841778  
4. 32224 3. 386185  
1. 194458 1. 152344  
4. 369829 5. 871182  
6. 348515 6. 616351  
3. 792852 3. 984272  
6. 173901 5. 741917  
4. 498645 3. 29941  
4. 185946 3. 909932  
3. 120891 2. 754408  
3. 330082 2. 723855  
3. 177866 4. 265101  
4. 084525 4. 346454  
2. 668311 2. 194034  
1. 641651 3. 697478  
3. 432741 4. 632184  
5. 678499 4. 234845  
2. 62119 1. 648206  
3. 313951 3. 980133  
2. 108384 2. 014552  
1. 64554 1. 441723  
3. 585949 3. 781481  
4. 368341 3. 899192  
3. 854306 3. 290447  
5. 007225 5. 37238  
1. 646003 2. 562144  
6. 515614 6. 226973  
1. 068293 2. 394605  
1. 461641 1. 270052  
4. 277801 3. 490577  
10. 42311 10. 89506  
3. 348319 3. 804987  
6. 281413 7. 067404  
6. 339714 6. 624403  
2. 439984 3. 184308

1. 741043 2. 771991  
2. 496857 3. 441777  
2. 931835 4. 592532  
1. 408479 1. 193087  
1. 804458 1. 625441  
2. 179944 3. 457462  
2. 010671 2. 267126  
4. 284583 3. 114525  
6. 149231 5. 051295  
6. 056799 5. 46794  
1. 189601 1. 782145  
1. 812074 2. 758618  
6. 51547 6. 987052  
8. 739137 8. 381208  
2. 928965 1. 978107  
8. 117364 8. 013918  
2. 103169 2. 513468  
1. 439861 2. 540473  
3. 855897 3. 385317  
1. 829068 1. 862397  
2. 832544 2. 661289  
3. 412328 3. 476552  
6. 371284 6. 861444  
4. 568944 4. 017897  
1. 672161 2. 04727  
1. 352615 1. 282012  
5. 439979 5. 456205  
4. 513724 3. 419645  
2. 560631 3. 013302  
2. 047961 2. 704282  
1. 479209 2. 088094  
1. 87289 2. 609966  
1. 796231 2. 457047  
1. 538382 1. 682004  
1. 807677 2. 644799  
1. 583857 1. 659418  
9. 182771 8. 667128  
2. 604509 2. 741741  
2. 822525 3. 880981  
8. 37131 7. 888761  
1. 720886 1. 64721  
1. 960861 1. 311803  
7. 428871 8. 028374  
1. 831069 1. 660261  
3. 494618 3. 842288  
2. 160797 1. 490454  
6. 385044 6. 900856  
1. 713915 2. 28317  
8. 961654 9. 648744  
5. 36213 6. 584794  
7. 67342 7. 604112



8. 366385 7. 558304  
1. 837237 2. 01435  
2. 378973 1. 710114  
8. 942072 6. 987852  
0. 871607 1. 298131  
1. 117325 2. 12394  
8. 152589 7. 534901  
1. 646829 2. 441414  
7. 040454 6. 008758  
1. 803793 1. 322264  
2. 653766 2. 793712  
6. 483019 6. 870501  
5. 132777 5. 173106  
5. 955263 7. 177113  
2. 155606 1. 773967  
6. 905786 6. 647933  
4. 917734 4. 375103  
4. 384158 3. 779139  
1. 025395 1. 368412  
5. 145738 4. 509256  
3. 518394 2. 997578  
1. 571448 2. 630358  
7. 430504 7. 120864  
4. 384858 3. 262491  
5. 125769 5. 637514  
1. 7683 1. 221978  
7. 848365 7. 579844  
1. 150571 1. 636643  
5. 579304 5. 017827  
4. 380645 3. 1035  
2. 408702 2. 712067  
1. 639629 0. 99372  
0. 957351 0. 847366  
1. 015734 1. 263847  
5. 408224 5. 292687  
6. 082054 5. 571138  
1. 330817 1. 607258  
2. 902712 1. 649896  
7. 006018 7. 240799  
2. 467348 1. 39778  
1. 816914 1. 019504  
7. 46334 7. 449043  
1. 276023 1. 276626  
5. 964799 5. 420226  
8. 387438 9. 179421  
1. 529437 1. 875658  
1. 301997 1. 25764  
2. 804827 4. 65849  
7. 017167 5. 215291  
1. 807709 2. 717833  
4. 621884 4. 213295

2. 911717 3. 542379  
1. 132883 1. 243683  
6. 537436 5. 792887  
5. 02179 5. 693212  
2. 329296 3. 602288  
1. 207993 1. 633227  
2. 007468 1. 904587  
3. 004285 1. 285381  
0. 962307 1. 271935  
1. 527535 2. 700494  
1. 068915 1. 559255  
4. 349265 4. 710456  
1. 207457 1. 326475  
1. 347674 1. 095315  
1. 137374 1. 15491  
1. 971887 1. 159599  
1. 407687 1. 2242  
6. 8573 6. 454656  
4. 904796 5. 137943  
1. 391219 1. 648049  
7. 563249 7. 70106  
3. 911342 4. 108296  
1. 968133 2. 014415  
3. 469826 3. 001501  
1. 123636 1. 771106  
2. 391578 1. 928449  
6. 20615 6. 224029  
0. 922623 1. 704738  
1. 489627 1. 149911  
1. 527118 1. 759857  
2. 155069 2. 389295  
0. 649923 1. 153276  
8. 296412 7. 482382  
6. 264648 3. 564175  
0. 926332 1. 206504  
1. 957701 2. 008574  
1. 742246 2. 569718  
6. 385162 5. 280437  
2. 166585 1. 894659  
3. 388716 3. 053465  
4. 993076 6. 478643  
3. 592973 2. 789003  
1. 725594 2. 014138  
0. 944617 1. 157785  
2. 875342 2. 607045  
6. 90594 7. 155491  
2. 508606 1. 713227  
0. 941232 1. 537058  
2. 150579 1. 416895  
1. 942622 2. 630608  
1. 269224 1. 3845

3. 436515 3. 348725  
2. 380973 1. 811329  
3. 021099 2. 394791  
5. 311166 4. 857975  
1. 653764 1. 595329  
0. 915379 1. 345674  
2. 168551 3. 748241  
1. 168377 1. 608529  
3. 051983 4. 244956  
1. 503982 2. 305676  
2. 074818 1. 77724  
7. 445312 7. 157981  
1. 558001 2. 754638  
5. 023113 6. 088363  
2. 550478 2. 435548  
3. 539039 2. 968653  
5. 290542 5. 334329  
1. 745897 1. 861638  
0. 659437 1. 862563  
1. 984791 2. 69278  
2. 515425 2. 316806  
4. 312114 4. 507774  
2. 818744 2. 801977  
3. 540559 2. 773926  
1. 729925 2. 379539  
2. 100912 1. 369239  
0. 842076 1. 03473  
3. 171488 3. 756367  
1. 520816 1. 917574  
5. 887666 6. 617175  
2. 038422 4. 822446  
5. 417386 2. 787852  
6. 711926 3. 983508  
2. 022665 2. 443968  
7. 095983 6. 879184  
5. 739894 5. 470258  
1. 503886 2. 033748  
4. 700946 5. 075093  
4. 64924 4. 917027  
1. 728653 2. 345206  
2. 276674 1. 777317  
3. 910204 3. 628757  
1. 722865 2. 732669  
4. 261364 2. 275212  
1. 646944 2. 432304  
4. 987757 6. 152843  
3. 621808 4. 238812  
1. 612013 1. 390948  
1. 120534 1. 684959  
2. 755472 4. 937133  
6. 616288 6. 434878

3. 763741 4. 068571  
4. 415895 5. 018494  
4. 339074 5. 069392  
6. 503468 6. 380159  
4. 694793 5. 872569  
5. 681863 7. 642544  
2. 510642 3. 043258  
2. 211641 1. 605507  
2. 658152 2. 256655  
5. 719773 6. 201661  
8. 46232 8. 914185  
7. 090163 7. 774948  
7. 210212 6. 030913  
3. 818321 3. 573266  
6. 171326 5. 464052  
3. 451008 3. 345229  
2. 835174 2. 978373  
1. 117699 1. 255973  
1. 764379 2. 588324  
4. 70029 4. 934518  
6. 453046 6. 471893  
7. 381295 6. 996987  
6. 467929 6. 675735  
2. 758662 3. 199162  
5. 83508 5. 436335  
4. 673791 4. 40919  
2. 957189 4. 665369  
5. 256914 5. 732119  
2. 900852 2. 719245  
1. 805467 1. 803922  
1. 156696 1. 432177  
2. 282597 2. 259187  
1. 600734 2. 620106  
1. 006096 1. 534377  
2. 515487 2. 881616  
1. 989654 2. 171415  
3. 327645 2. 460406  
2. 349181 2. 725137  
1. 674085 1. 22269  
3. 870646 3. 591081  
5. 379358 6. 682121  
3. 317284 3. 077808  
1. 936358 2. 546724  
6. 167085 5. 643408  
1. 885177 1. 741487  
2. 228214 2. 503846  
1. 777764 1. 636854  
1. 142351 1. 235387  
1. 757154 1. 599348  
2. 993056 2. 119777  
2. 420575 3. 088731

4. 543854 4. 885513  
3. 099732 2. 799557  
2. 998938 3. 59872  
4. 35368 5. 594827  
7. 858234 6. 678262  
3. 725733 2. 418275  
4. 141398 4. 053486  
6. 211727 6. 426721  
7. 568576 7. 965061  
6. 676247 6. 914409  
5. 010385 4. 630031  
3. 967562 4. 135651  
3. 014265 3. 439778  
2. 154954 2. 630361  
5. 366641 4. 719713  
1. 632891 1. 973178  
7. 736275 7. 513724  
2. 413948 2. 381294  
2. 620243 2. 55903  
2. 625173 3. 660088  
3. 213608 3. 005126  
6. 938173 6. 680608  
2. 698511 3. 89227  
3. 972267 4. 2772  
1. 895617 2. 761906  
7. 052381 7. 58591  
7. 414856 7. 693829  
1. 431395 1. 722975  
7. 237761 6. 200877  
5. 057203 4. 484147  
7. 835381 7. 290059  
6. 280543 6. 712403  
7. 801005 7. 265676  
0. 872115 1. 075743  
1. 701165 1. 567073  
2. 459656 3. 338895  
1. 937021 1. 900913  
4. 060384 1. 189471  
2. 852575 3. 038274  
4. 990904 4. 892288  
1. 382215 1. 556763  
4. 359119 4. 154816  
2. 097484 1. 594207  
6. 619354 5. 881755  
1. 600487 1. 933927  
7. 642658 7. 299413  
1. 312017 1. 37058  
1. 387084 1. 47604  
4. 424458 5. 037211  
0. 768851 1. 15715  
6. 423423 6. 907968

5. 885728 5. 75291  
1. 220854 1. 7379  
6. 259149 6. 003473  
5. 710501 6. 342615  
1. 558487 1. 66581  
2. 155754 2. 147717  
6. 240036 5. 0524  
4. 493472 4. 710518  
5. 303213 4. 554812  
5. 351488 7. 433622  
3. 150068 3. 528931  
3. 506558 3. 619588  
4. 535883 4. 50212  
7. 154527 6. 760356  
6. 695602 6. 899989  
3. 806106 3. 937112  
7. 509281 7. 944233  
1. 92623 2. 116947  
2. 888512 2. 509486  
5. 638998 6. 702139  
8. 785607 8. 327674  
3. 379854 2. 927199  
2. 455664 3. 542291  
2. 123568 3. 155816  
4. 024802 4. 00792  
3. 29173 2. 945421  
6. 715297 6. 645583  
6. 687766 6. 249296  
9. 278136 7. 580802  
7. 268099 7. 617003  
1. 569234 2. 055782  
1. 2025 1. 440265  
2. 004465 2. 686048  
3. 019777 3. 844789  
4. 801286 5. 18444  
4. 707483 3. 642097  
3. 268837 3. 900748  
2. 816458 2. 686821  
7. 961109 7. 324186  
7. 522757 8. 698444  
2. 903135 3. 937047  
7. 502258 7. 06727  
4. 13705 4. 841314  
7. 015876 6. 753311  
6. 285916 6. 622072  
9. 916941 10. 6958  
4. 057104 4. 7416  
2. 58798 2. 22354  
1. 876809 2. 299933  
4. 44076 5. 312041  
7. 797765 6. 525924

2. 88228 4. 270357  
7. 126115 4. 961242  
3. 253132 2. 779635  
2. 665614 3. 4082  
3. 39894 3. 588195  
5. 28115 5. 520632  
1. 807231 2. 401338  
7. 548168 6. 716374  
6. 41653 5. 182822  
2. 99935 3. 707112  
1. 472368 1. 422066  
2. 733956 2. 4724  
4. 909221 4. 654323  
4. 607888 3. 876664  
2. 62591 2. 737723  
8. 461807 8. 383693  
0. 981795 1. 584859  
3. 747293 5. 200198  
6. 553651 3. 898014  
5. 993187 3. 981504  
4. 128721 4. 119302  
5. 785347 5. 952073  
1. 462605 1. 407923  
2. 725638 1. 837522  
9. 772045 9. 782559  
8. 875892 9. 159588  
5. 573853 5. 619321  
3. 442849 5. 420708  
2. 608323 1. 9637  
1. 640635 1. 591541  
2. 080177 3. 951682  
5. 068261 5. 903982  
8. 01707 7. 884487  
7. 535574 7. 561815  
3. 12157 3. 217282  
2. 275259 2. 372825  
2. 094722 2. 345578  
4. 963462 4. 478364  
2. 4529 2. 28197  
3. 796577 3. 772915  
7. 941669 8. 311956  
6. 694496 6. 021972  
1. 717747 2. 331498  
4. 394419 3. 584531  
2. 26664 2. 607498  
6. 014449 7. 571053  
1. 65793 2. 212026  
2. 680934 4. 109503  
3. 993328 4. 661638  
2. 393365 2. 993336  
3. 334441 3. 809165

4. 818604 3. 994124  
2. 013838 2. 081313  
2. 075429 2. 397581  
2. 742081 3. 054163  
5. 038923 4. 878883  
2. 094525 1. 829922  
1. 613867 1. 693184  
6. 508633 6. 762384  
2. 110973 2. 37039  
5. 501908 5. 572238  
4. 607978 3. 385459  
4. 592416 5. 190774  
1. 111587 2. 093784  
6. 711322 5. 696321  
2. 370364 2. 178536  
6. 359078 6. 190979  
0. 891111 1. 374891  
4. 315744 3. 895675  
1. 449344 1. 138565  
5. 524004 4. 725133  
7. 949415 8. 11968  
2. 413472 2. 513484  
5. 426461 6. 898987  
8. 840451 7. 469473  
7. 107905 6. 45128  
1. 109306 1. 391054  
6. 432207 5. 670984  
7. 040426 6. 552431  
3. 974912 4. 764471  
2. 737277 3. 569225  
2. 152845 1. 792225  
6. 228046 5. 960922  
2. 188579 2. 136266  
5. 707026 4. 231737  
8. 816877 9. 413409  
4. 44175 2. 891874  
2. 865578 3. 136462  
2. 485369 2. 624229  
2. 073855 2. 419347  
2. 869928 3. 068016  
3. 734529 4. 044714  
7. 797531 7. 849514  
1. 703871 2. 618602  
1. 010213 1. 677552  
6. 472287 5. 033677  
2. 080154 1. 572296  
3. 540434 2. 292934  
0. 980524 1. 110434  
2. 495681 2. 777686  
2. 722901 3. 515281  
4. 467852 3. 996654



1. 626676 1. 709522  
5. 137147 5. 088141  
3. 039934 3. 329998  
5. 133344 2. 839242  
3. 032802 2. 719312  
2. 742195 2. 121917  
6. 820871 7. 211422  
2. 891869 3. 584076  
8. 81492 8. 920279  
7. 294038 6. 70449  
3. 580887 3. 971241  
4. 768441 4. 945435  
9. 039154 9. 09359  
1. 790286 2. 360155  
6. 615876 6. 186604  
9. 706834 9. 453867  
7. 829122 7. 663237  
1. 384369 1. 669919  
2. 424213 4. 696721  
1. 481586 2. 294609  
2. 131256 3. 568752  
3. 529174 3. 131029  
3. 092999 1. 892675  
6. 488861 7. 167991  
1. 78665 1. 024721  
6. 843983 6. 52159  
1. 697027 1. 771407  
1. 603682 1. 95551  
3. 666161 4. 862573  
2. 774413 2. 122867  
1. 61537 2. 876406  
6. 146228 4. 617689  
1. 682655 2. 832534  
1. 839431 1. 868217  
4. 509459 4. 948966  
3. 974537 4. 008981  
4. 38432 4. 079852  
5. 928715 4. 72367  
1. 478847 2. 115083  
8. 165756 7. 71873  
2. 894043 3. 310785  
3. 888519 4. 48321  
6. 962745 6. 042266  
4. 252334 3. 241128  
1. 164646 1. 673778  
6. 24036 5. 561943  
1. 638897 0. 996375  
1. 925419 2. 127865  
2. 660948 2. 9532  
2. 051428 2. 04014  
4. 261815 4. 435755

3.016923 1.918606  
8.932466 9.159168  
5.568872 4.177928  
2.925714 2.681746  
1.173328 1.886662  
2.955955 2.315154  
4.729233 3.927338  
3.039386 2.842607  
2.526416 2.737205  
6.823449 6.714342  
4.382123 5.703435  
1.511001 1.067886  
2.172181 1.676616  
1.235229 1.55852  
1.954134 2.063526  
2.100143 2.279518  
9.59474 9.651309  
6.328217 6.068922  
1.797809 1.635716  
1.489248 1.311061  
2.950547 2.836388  
1.69754 2.586614  
1.59264 1.959451  
2.312964 2.819105  
4.7263 6.259118  
2.307635 2.825159  
2.829761 1.469542  
3.901641 5.866508  
1.632551 3.401312  
3.501859 3.591803  
1.680106 1.852492  
1.885162 1.959819  
2.6935 2.350563  
2.232557 1.944618  
8.10458 7.794037  
0.985862 1.084715  
1.306468 1.602063  
3.785119 3.876005  
5.175731 6.018967  
6.553586 5.920236  
4.767792 4.346609  
3.064325 2.82726  
2.036179 3.028633  
1.064833 1.229511  
3.159144 4.516444  
7.755178 7.570487  
2.734535 2.683758  
1.630914 2.099824  
2.155073 1.61439  
2.05294 2.915961  
2.123675 2.43891

2. 236857 1. 750556  
6. 919404 6. 642783  
4. 511814 2. 368955  
1. 244913 1. 686221  
4. 495356 5. 146412  
2. 547546 2. 092606  
2. 145923 2. 793056  
3. 421956 2. 919564  
5. 051014 4. 278929  
0. 731045 1. 502651  
7. 873146 7. 11976  
6. 914486 6. 882061  
6. 305967 5. 714101  
1. 562183 1. 874804  
4. 091899 1. 960479  
4. 064376 4. 474286  
3. 830895 5. 010626  
2. 673068 2. 204082  
3. 105348 4. 271187  
3. 143198 3. 281193  
2. 977056 4. 374758  
4. 697112 4. 841306  
2. 903917 2. 366829  
4. 45707 2. 900456  
1. 230586 1. 799674  
3. 102075 5. 584635  
2. 527603 2. 970537  
3. 982964 4. 625752  
3. 439146 1. 63635  
4. 192189 5. 121665  
3. 118076 3. 112763  
1. 267297 0. 980303  
6. 643558 7. 558522  
2. 406622 2. 635031  
8. 886762 8. 027229  
1. 560505 1. 801205  
7. 323153 7. 718491  
1. 22778 1. 597904  
8. 789294 9. 180062  
5. 047919 4. 150977  
3. 561017 4. 676496  
1. 291834 1. 69691  
6. 446778 6. 640467  
7. 001298 7. 383262  
2. 10251 2. 075688  
1. 475307 1. 3658  
1. 075175 1. 836247  
5. 077592 4. 459161  
7. 046997 6. 378986  
1. 676852 1. 421034  
0. 901774 1. 307275

3.651497 3.223015  
3.996956 4.024166  
0.909353 1.545965  
1.142244 2.377147  
3.234349 3.275903  
8.537594 8.400858  
7.461173 7.702151  
3.971704 5.13384  
5.431103 5.986981  
4.43988 4.395985  
4.491066 4.914084  
1.456156 1.843043  
5.545371 5.683585  
4.878712 5.393373  
1.846865 3.892652  
3.932292 4.113491  
1.627453 2.252586  
3.061319 5.357734  
5.404423 3.087755  
6.026844 5.368289  
4.90021 4.780837  
1.78007 1.775808  
9.316442 9.134752  
2.71616 4.804955  
6.480151 3.940012  
2.429541 2.070509  
5.657077 5.595498  
1.448629 1.021492  
1.123663 2.510612  
1.605613 2.301707  
3.753783 3.87116  
2.88546 3.593995  
3.436473 3.528678  
1.083202 2.285888  
10.3976 9.30139  
2.344754 3.627968  
7.168806 6.574551  
4.54897 4.627357  
2.56653 2.548158  
2.101527 2.345006  
9.010977 9.117705  
5.717829 5.83651  
2.205423 2.102327  
3.420849 5.336305  
5.074356 6.530109  
2.104308 1.871605  
2.345501 2.613932  
3.118395 3.28319  
1.900116 3.058683  
3.50263 2.911825  
5.118076 3.909514

2. 577896 2. 699462  
3. 242682 4. 211512  
5. 82466 6. 978025  
5. 261938 4. 657734  
4. 173036 4. 106151  
3. 212146 3. 180427  
8. 185705 7. 223827  
2. 71634 2. 345728  
3. 904096 4. 29771  
2. 099322 2. 514767  
2. 134626 2. 263695  
10. 92854 10. 54389  
3. 144431 1. 930434  
5. 106104 5. 476792  
3. 668174 3. 614632  
2. 087327 2. 730208  
1. 047756 0. 964178  
6. 302526 5. 335972  
4. 134399 2. 138371  
5. 562262 5. 530286  
7. 614098 6. 645839  
3. 531916 3. 597074  
2. 725182 2. 429166  
4. 544298 4. 906896  
6. 337146 6. 537898  
1. 795459 3. 209773  
7. 538457 7. 853474  
2. 091385 2. 700794  
1. 22501 1. 143257  
3. 074716 2. 636813  
6. 259111 5. 609958  
1. 480023 2. 015966  
1. 388947 1. 760229  
4. 602827 4. 439185  
1. 566248 2. 56424  
1. 485518 1. 335607  
1. 486942 1. 738792  
7. 566427 7. 410672  
2. 493418 3. 201836  
1. 889387 2. 146643  
1. 571076 2. 700864  
6. 732859 5. 854745  
5. 398152 4. 917937  
2. 128264 1. 926747  
3. 367678 3. 313432  
1. 574817 1. 919937  
7. 557743 7. 316029  
3. 234918 3. 036096  
4. 468176 4. 387385  
5. 754859 5. 118128  
6. 325071 4. 643302

5. 895426 5. 302311  
3. 438315 4. 170635  
2. 1943 2. 437683  
5. 60103 5. 290084  
3. 09048 4. 078002  
1. 387562 2. 209153  
7. 194674 6. 97841  
6. 385901 6. 688592  
4. 009432 4. 349032  
7. 213884 7. 068992  
1. 432975 1. 694865  
5. 048479 5. 545538  
3. 646822 4. 785994  
2. 314027 1. 560418  
1. 560579 1. 460018  
4. 944472 6. 1779  
4. 796412 4. 984731  
6. 171198 4. 415999  
5. 7295 6. 467897  
4. 312893 5. 27554  
0. 890492 1. 559483  
5. 140771 6. 90203  
5. 896881 2. 788188  
1. 159347 1. 087418  
1. 292814 1. 442622  
6. 140848 6. 134275  
3. 488136 3. 619412  
5. 952192 5. 73751  
6. 522009 6. 549028  
7. 033501 7. 13772  
7. 682054 8. 476838  
5. 646809 5. 925908  
3. 787527 2. 459616  
6. 239387 5. 034482  
5. 764301 6. 00838  
7. 208239 7. 799804  
8. 830297 8. 789258  
1. 368032 1. 026167  
4. 019079 3. 883632  
2. 562135 2. 15859  
1. 447895 3. 136066  
3. 050644 2. 663967  
2. 919397 2. 385219  
7. 177384 6. 806783  
7. 458808 8. 398531  
5. 754617 5. 858858  
5. 012655 5. 738268  
6. 530308 6. 042233  
8. 588064 8. 253077  
9. 256862 8. 957159  
3. 848476 4. 248195

1. 846824 2. 915373  
6. 035518 6. 211586  
2. 317857 2. 727739  
4. 216831 6. 204384  
6. 421313 6. 417475  
6. 159251 5. 863389  
4. 419153 4. 099819  
7. 164069 5. 646059  
4. 629468 3. 07659  
3. 625465 3. 847713  
3. 269296 3. 831988  
1. 890544 2. 339209  
1. 755827 1. 75618  
8. 165465 7. 625283  
6. 642148 6. 864359  
7. 28612 7. 271803  
2. 662725 3. 446991  
4. 480266 5. 175894  
5. 197005 5. 322841  
1. 569338 1. 701292  
4. 238679 5. 146995  
2. 216789 3. 58967  
6. 740202 6. 467898  
6. 995935 6. 346026  
3. 509539 2. 335653  
1. 69824 2. 662691  
9. 576206 9. 495065  
5. 721744 5. 582628  
3. 475 4. 149862  
7. 175337 3. 189433  
7. 748948 8. 170276  
7. 764447 7. 384067  
1. 763859 2. 5104  
8. 966 6. 83006  
0. 89063 1. 194326  
2. 788591 1. 728022  
2. 61814 2. 93231  
2. 022741 1. 867424  
2. 023518 1. 951997  
2. 77713 2. 92433  
0. 90974 1. 130694  
3. 595908 3. 382762  
8. 628568 8. 264417  
5. 865397 4. 666865  
1. 001985 1. 142654  
6. 369382 6. 562964  
5. 573399 6. 453131  
1. 356474 2. 458618  
0. 9739 1. 145042  
2. 299829 2. 478344  
5. 652783 4. 169164

2. 517557 2. 585034  
2. 066425 2. 014964  
6. 005727 6. 369973  
5. 407332 5. 491954  
7. 786976 7. 090521  
7. 372771 7. 114796  
4. 981259 5. 357504  
4. 088622 3. 702571  
7. 768994 7. 126998  
1. 694896 1. 611966  
4. 093791 4. 263551  
2. 888077 3. 153829  
1. 656774 1. 939255  
1. 305208 2. 470823  
5. 980321 4. 705974  
1. 970834 2. 331552  
1. 39492 1. 204843  
3. 703431 3. 980751  
6. 974344 5. 354094  
1. 361914 1. 488771  
6. 653577 7. 135469  
5. 525931 6. 741985  
5. 324214 6. 019094  
2. 420333 3. 332707  
1. 821254 2. 397993  
0. 68545 0. 962404  
0. 874544 1. 042181  
0. 944813 1. 712128  
1. 792962 0. 948893  
0. 903848 1. 393777  
1. 455137 0. 925378  
2. 854251 4. 179488  
1. 203399 1. 354673  
1. 636891 1. 321938  
0. 956104 0. 599559  
1. 829372 1. 613769  
1. 170701 2. 36328  
0. 771187 0. 774426  
1. 491605 2. 115969  
0. 710795 1. 02092  
1. 78239 2. 048692  
1. 89056 2. 882936  
2. 032281 1. 694706  
3. 448512 3. 883142  
4. 616837 1. 913235  
6. 647326 5. 201223  
1. 762684 2. 044165  
1. 974311 2. 314052  
4. 400016 5. 565741  
1. 159742 1. 08314  
2. 130249 2. 045413



1. 137509 1. 829051  
9. 437684 9. 038474  
3. 746243 3. 347033  
5. 729658 3. 661328  
4. 024499 4. 56836  
1. 063113 1. 178348  
1. 783345 1. 447  
6. 816254 6. 446671  
1. 905001 2. 047106  
2. 128842 1. 204939  
1. 477612 1. 468077  
2. 59474 3. 542286  
3. 770249 3. 302236  
7. 218048 7. 511727  
1. 72088 2. 192089  
6. 809505 6. 34982  
1. 140038 1. 199188  
1. 697047 2. 357516  
1. 769996 2. 302211  
4. 263038 3. 668126  
3. 525128 4. 826691  
2. 014529 3. 256268  
2. 447832 1. 982652  
1. 582034 2. 879438  
0. 946364 1. 383929  
2. 136788 2. 11304  
4. 103421 2. 755855  
2. 321594 1. 879528  
2. 252533 2. 620539  
6. 410046 6. 198384  
3. 998349 5. 419437  
6. 618687 8. 029197  
3. 938444 3. 383369  
2. 014149 2. 404325  
1. 791017 2. 706608  
1. 851947 1. 848282  
1. 459554 1. 859238  
1. 041004 1. 156078  
2. 318878 2. 608202  
1. 146901 1. 17902  
1. 431652 1. 756002  
1. 152481 1. 080318  
1. 474562 1. 297684  
1. 268936 2. 604874  
3. 448674 3. 97929  
1. 437889 1. 434725  
1. 624698 2. 108002  
1. 518263 2. 677299  
1. 954138 0. 861905  
7. 864709 7. 549318  
1. 166323 2. 856806

2.403598 2.73243  
1.211051 1.401452  
4.306983 5.449721  
4.7186 5.11869  
2.523007 3.215554  
3.906148 3.887128  
2.694405 3.770564  
1.307459 1.547205  
1.356713 2.146719  
1.296888 1.388485  
3.740818 5.626127  
2.55447 2.863168  
2.917892 2.907079  
0.755821 1.8079  
1.174452 1.23302  
6.104633 4.077858  
1.907421 2.484342  
2.730122 2.437167  
1.194698 1.180138  
1.473108 1.683665  
2.531186 2.502075  
0.806084 1.37436  
1.957769 2.799025  
1.877007 1.448608  
1.002056 1.5382  
4.10144 4.919541  
1.829432 1.812987  
9.747577 9.715816  
4.696357 4.737003  
2.551479 2.076397  
2.222768 3.028047  
3.39902 3.251304  
5.000911 5.356032  
1.029161 1.278826  
1.414628 0.698642  
3.553091 3.086124  
1.745696 1.560289  
3.540959 3.95047  
2.151446 3.195267  
0.896289 1.414399  
6.671232 5.686971  
6.580485 7.887459  
1.600685 1.611695  
1.605935 2.159659  
3.90812 4.828238  
5.516333 4.948372  
5.508461 3.810614  
4.708388 4.024438  
1.853921 2.880802  
5.629208 5.445269  
4.013942 5.306749

1. 362643 3. 11643  
7. 619321 7. 507647  
1. 721631 1. 326616  
3. 297027 2. 510887  
2. 09395 2. 936734  
7. 782696 7. 919242  
6. 585386 5. 816877  
1. 902237 1. 93716  
2. 179872 1. 513875  
3. 480533 4. 344452  
1. 625221 1. 983406  
4. 497366 2. 622294  
5. 772948 5. 667284  
2. 395774 2. 942399  
3. 063013 1. 14993  
4. 922308 3. 96557  
2. 197115 1. 505634  
4. 515648 6. 662331  
2. 171907 1. 9563  
4. 900556 5. 285706  
7. 053071 4. 633365  
8. 071826 7. 988068  
2. 575309 3. 248176  
2. 252243 2. 013102  
1. 161573 1. 552217  
1. 264467 2. 126068  
1. 400585 1. 353095  
4. 093397 3. 265538  
5. 772631 5. 86515  
2. 862599 4. 756936  
3. 829832 3. 250829  
3. 543391 3. 215783  
5. 80371 4. 801839  
3. 064995 2. 668797  
2. 671118 3. 11576  
3. 629548 3. 945025  
1. 849219 1. 850446  
1. 317853 1. 612781  
10. 47781 9. 143168  
2. 415712 2. 903496  
1. 465686 2. 060465  
1. 4871 1. 886644  
2. 134731 2. 198529  
2. 547921 2. 58302  
3. 081686 2. 794154  
2. 822569 2. 278005  
3. 145314 1. 965573  
6. 075716 6. 700107  
1. 51847 1. 148262  
1. 618464 2. 235333  
3. 029679 2. 184704

3.015847 3.070959  
6.051271 6.241814  
1.403314 1.686966  
3.475913 4.251863  
4.42476 4.870268  
2.653115 1.698767  
3.224422 3.034373  
2.07279 1.648283  
4.748653 5.049485  
2.870967 3.019904  
2.6677 1.660858  
1.773333 1.26937  
4.015277 3.487405  
2.664528 1.409699  
2.095629 2.540495  
2.740333 2.272015  
5.629381 5.115994  
2.30093 2.002616  
1.448103 2.088511  
6.031 7.861672  
2.572383 4.02131  
3.963819 3.132405  
3.995675 2.568536  
5.456974 5.67952  
2.095121 1.880275  
1.183829 1.861461  
5.434318 5.800655  
1.279855 1.334045  
2.091841 1.850894  
6.26597 7.317483  
5.516687 5.802609  
5.482953 5.696357  
2.080851 2.894634  
3.236814 3.770547  
1.85285 2.588066  
5.811972 6.481401  
1.942553 2.075627  
4.040692 4.417186  
8.916294 8.073907  
3.688041 4.264758  
4.904223 4.825929  
1.361446 1.678615  
2.53086 1.954394  
7.576886 7.166901  
1.542444 2.946769  
6.407408 4.411393  
6.165082 5.80386  
1.881506 2.379857  
2.136253 2.615608  
6.532123 6.780815  
4.962274 3.794806

3. 339971 3. 913787  
5. 269635 4. 623281  
1. 384092 1. 520593  
6. 544542 5. 479016  
4. 661013 4. 731469  
1. 760378 2. 069716  
4. 858251 4. 87693  
4. 472511 4. 476992  
6. 432628 4. 910946  
2. 002584 2. 161784  
3. 965007 3. 940329  
1. 019707 0. 993457  
1. 598119 1. 717925  
0. 885001 1. 470606  
1. 914556 2. 842351  
2. 475711 1. 980092  
1. 203664 2. 450288  
2. 101622 2. 702144  
3. 465038 3. 186577  
4. 863718 5. 037122  
1. 047184 1. 407728  
1. 566413 2. 212283  
3. 848494 3. 246183  
2. 829465 1. 648436  
2. 669036 3. 066609  
4. 53546 3. 752556  
1. 08617 1. 533992  
4. 290079 6. 370718  
2. 082471 1. 702713  
1. 432386 2. 077389  
2. 27398 2. 978199  
2. 64796 3. 719214  
1. 731625 0. 980728  
2. 201765 2. 746876  
2. 343342 2. 775851  
5. 916926 5. 190139  
4. 613353 6. 081848  
1. 691627 1. 688663  
2. 59394 4. 102548  
4. 057811 4. 885466  
4. 008369 3. 810461  
6. 68556 7. 280037  
6. 914552 6. 954814  
6. 876376 6. 636157  
3. 1473 4. 205143  
4. 523308 2. 370363  
6. 075718 1. 95059  
4. 222363 4. 071119  
8. 367477 8. 268404  
5. 564818 6. 06682  
1. 691518 2. 105176

1. 655763 2. 091995  
5. 95687 5. 359823  
1. 455151 1. 232988  
1. 423242 1. 273177  
3. 505695 2. 004118  
1. 304528 1. 05939  
4. 807269 5. 102594  
0. 871603 1. 780204  
2. 501584 2. 742585  
1. 723859 2. 870918  
2. 699522 2. 369489  
3. 931461 3. 587271  
1. 721727 1. 543744  
1. 013949 1. 542877  
6. 820483 6. 374548  
2. 558203 3. 196548  
1. 565488 1. 656385  
4. 227971 5. 824565  
4. 356797 4. 302312  
2. 842074 1. 743941  
0. 824952 1. 021562  
4. 289448 4. 259902  
7. 823024 8. 070375  
6. 174788 6. 54373  
3. 06098 3. 262364  
1. 895135 2. 326165  
6. 34294 5. 473181  
5. 251265 4. 524301  
7. 995572 7. 869292  
6. 625356 6. 101686  
6. 208822 5. 778849  
2. 556169 2. 050189  
3. 222449 1. 60691  
3. 376937 3. 455938  
5. 894941 5. 196056  
0. 907152 1. 028559  
6. 331695 6. 485  
2. 450234 2. 932675  
4. 371527 3. 815419  
2. 957064 3. 37607  
5. 256077 5. 44406  
6. 798482 7. 049811  
5. 591398 5. 838506  
7. 479782 8. 193944  
4. 298601 5. 183371  
5. 667642 6. 331376  
5. 628863 4. 895216  
4. 456988 1. 827506  
5. 523188 6. 879084  
6. 021014 6. 702754  
7. 885093 6. 507504

3. 115215 1. 722824  
3. 768236 2. 011541  
3. 856886 3. 625548  
6. 489773 6. 12069  
5. 343236 5. 179708  
6. 020165 6. 448371  
6. 944874 6. 907449  
5. 468531 5. 412081  
7. 247177 6. 708193  
7. 076748 6. 034592  
1. 211529 1. 435892  
1. 488639 1. 273788  
4. 938705 5. 379749  
3. 599132 3. 971682  
5. 931453 6. 230047  
6. 587685 5. 336546  
2. 854448 3. 707583  
4. 731531 5. 087142  
6. 166589 4. 712367  
5. 409916 4. 746909  
9. 726295 9. 329121  
6. 369109 5. 828702  
5. 941271 4. 943005  
5. 373695 5. 86505  
5. 19484 4. 00871  
8. 080318 8. 04217  
5. 111688 5. 433556  
7. 49256 7. 093711  
1. 69729 2. 0448  
2. 301554 3. 493101  
4. 86627 4. 229544  
5. 936161 4. 833858  
9. 648881 9. 980154  
5. 536649 5. 765351  
1. 755984 2. 659392  
8. 735845 8. 402831  
4. 850165 5. 620225  
4. 207972 3. 922705  
6. 586389 7. 290007  
5. 783554 5. 676945  
7. 217126 7. 100698  
6. 531559 6. 263612  
3. 701726 3. 657577  
6. 915284 7. 547573  
5. 977652 4. 957739  
4. 006467 3. 755362  
4. 827747 4. 780788  
7. 44843 7. 076418  
4. 818024 6. 184402  
4. 51459 5. 202062  
7. 554021 7. 162888

2. 803558 3. 130659  
6. 071545 5. 653496  
6. 247417 6. 578948  
4. 972815 4. 893835  
1. 543175 1. 581213  
3. 517842 4. 476521  
7. 149452 7. 128685  
1. 947357 2. 552774  
4. 264232 4. 692399  
4. 503613 4. 72181  
6. 889868 6. 996287  
9. 174335 8. 595087  
4. 721551 4. 855208  
2. 447823 2. 417466  
6. 540653 6. 112828  
7. 601268 6. 731437  
2. 448598 3. 458366  
6. 621321 6. 216347  
5. 443711 5. 787102  
5. 105376 5. 118553  
6. 891855 6. 662557  
3. 827416 3. 154314  
2. 317642 2. 101753  
4. 881923 3. 466104  
6. 511536 7. 207562  
1. 49568 1. 968319  
5. 428117 5. 853744  
1. 500301 2. 087658  
5. 531482 5. 06367  
7. 852362 8. 137241  
6. 621555 6. 749809  
6. 827747 7. 35726  
5. 076196 7. 212474  
10. 18572 9. 347764  
7. 726824 7. 742492  
6. 846171 7. 499031  
5. 226244 5. 343053  
7. 148275 6. 970132  
7. 313539 6. 77232  
7. 692328 8. 367458  
5. 303583 5. 416098  
5. 753169 5. 455503  
3. 425626 3. 811633  
8. 851942 8. 034596  
5. 594469 5. 952762  
5. 743618 5. 514041  
2. 444014 2. 762044  
3. 438603 1. 269028  
5. 327392 5. 67681  
7. 169258 7. 001689  
6. 74661 7. 430215



3. 282486 3. 644813  
5. 724512 5. 993757  
1. 465359 1. 612128  
1. 956197 2. 675893  
4. 146926 3. 228053  
6. 569825 5. 893209  
1. 133079 2. 132519  
9. 987968 9. 907695  
1. 407958 1. 90583  
2. 790368 3. 587947  
4. 650891 4. 360521  
4. 565237 2. 873608  
6. 29405 6. 820825  
2. 765834 3. 71278  
5. 007522 5. 638978  
6. 867674 6. 324231  
3. 782196 2. 492153  
5. 421169 5. 334952  
1. 377459 2. 353776  
5. 471171 4. 284722  
5. 865704 5. 837896  
1. 304003 2. 033412  
1. 31482 1. 337451  
1. 62307 1. 479195  
4. 313956 4. 992948  
6. 972455 6. 325049  
6. 98749 6. 561951  
4. 493175 3. 644356  
2. 81438 3. 701521  
3. 127354 1. 964494  
3. 075074 3. 929948  
1. 99228 2. 65605  
7. 317626 6. 811788  
1. 96481 2. 036724  
3. 087943 2. 067141  
7. 675473 8. 487901  
5. 280031 5. 626233  
7. 053517 5. 735486  
5. 52255 4. 864842  
3. 52706 2. 775765  
1. 525899 1. 20943  
7. 110082 7. 369094  
2. 738291 3. 903866  
7. 694078 7. 595522  
6. 28756 4. 993032  
6. 668206 5. 480728  
7. 78776 6. 871486  
6. 801302 3. 614511  
5. 919172 6. 133025  
2. 206047 2. 441111  
8. 094328 7. 462915

3.662365 2.410444  
7.442743 6.601376  
7.558999 7.377953  
5.180446 4.866654  
2.157609 3.219003  
2.555838 3.038657  
1.280241 1.398013  
6.519201 6.988879  
7.437262 6.937285  
2.753147 1.917225  
3.587313 3.446979  
3.294442 3.913564  
7.253627 6.213305  
5.120132 5.036856  
5.870019 4.825501  
4.317292 4.717051  
6.035679 6.311583  
4.890012 3.664248  
5.127185 6.185919  
7.000515 6.77255  
4.875121 3.156706  
1.579883 2.379081  
6.682485 5.757424  
5.528806 6.559922  
4.515795 3.779967  
1.678877 2.112562  
7.725867 7.052006  
8.668703 8.558568  
6.688342 5.051501  
2.753387 2.904908  
5.053186 4.07488  
5.996074 6.083507  
5.349774 5.499675  
6.080234 5.543587  
1.953235 2.502464  
6.899644 6.19117  
2.138675 2.893228  
7.351147 6.984449  
5.626919 5.242718  
5.556291 5.495294  
7.744868 6.803793  
7.775941 6.555971  
5.500128 5.119208  
4.925662 5.692767  
5.433256 5.51574  
4.910035 4.396477  
4.140345 4.863277  
7.78171 7.245843  
2.268471 3.451018  
6.0474 6.27737  
7.520201 7.694362

4. 792777 4. 563712  
7. 230566 6. 592062  
5. 789911 4. 740379  
4. 415522 6. 345827  
5. 271983 4. 496309  
5. 513143 4. 840329  
4. 483716 4. 045746  
8. 137397 6. 657333  
7. 277303 6. 656046  
4. 724817 3. 475394  
4. 924201 5. 143397  
5. 072281 4. 90258  
5. 323713 4. 123422  
7. 274393 6. 800531  
6. 461654 5. 014313  
6. 612177 6. 064483  
5. 468824 5. 105676  
6. 885569 6. 038312  
5. 430218 4. 599174  
6. 40576 6. 405332  
1. 85857 2. 654161  
3. 709353 3. 136024  
2. 759859 1. 989495  
4. 303209 5. 81516  
1. 986441 1. 739801  
6. 142467 5. 65263  
2. 433248 1. 610685  
5. 287961 5. 61425  
2. 680959 3. 025304  
6. 181393 5. 789083  
5. 703122 5. 43556  
6. 109749 5. 164685  
4. 260149 2. 614326  
8. 688033 8. 265596  
5. 597002 5. 140084  
7. 631831 7. 22332  
4. 106871 2. 269686  
1. 134602 1. 46328  
6. 353316 5. 984142  
6. 018437 5. 345532  
7. 487644 6. 017318  
4. 634976 5. 524567  
7. 097067 6. 876476  
1. 71819 1. 765013  
3. 711081 3. 060787  
6. 588391 5. 207229  
5. 739346 5. 185729  
5. 421702 4. 686817  
4. 161883 4. 41726  
3. 498418 4. 266115  
7. 616928 6. 459671

1. 587624 1. 973176  
4. 580649 4. 150752  
5. 736474 5. 643323  
6. 200483 5. 141877  
5. 737179 6. 312277  
6. 224337 7. 135221  
7. 257312 7. 440006  
4. 677271 4. 602704  
2. 475332 2. 469931  
4. 822326 4. 684252  
2. 883117 3. 119242  
7. 236296 7. 340446  
5. 245086 4. 27751  
3. 37637 2. 958136  
4. 423668 3. 575442  
5. 076398 4. 446934  
6. 429906 6. 618291  
3. 585926 2. 546946  
6. 124324 5. 898692  
4. 620506 3. 27002  
6. 38005 6. 229256  
7. 275414 6. 321955  
3. 633584 2. 342252  
4. 63802 3. 788162  
6. 733727 5. 774458  
5. 460345 4. 874926  
3. 650573 2. 986476  
7. 728896 7. 708507  
6. 761223 6. 711212  
5. 272263 3. 521058  
7. 415168 7. 82881  
4. 672212 4. 645436  
5. 82679 5. 431877  
6. 417175 7. 022628  
7. 069261 6. 69466  
5. 772258 6. 522473  
4. 865482 5. 20075  
5. 814687 6. 181804  
4. 848735 5. 040847  
1. 913441 1. 906951  
7. 98703 8. 040243  
6. 053322 5. 066236  
6. 205101 6. 859263  
4. 775868 4. 146545  
7. 38528 7. 281803  
5. 714663 5. 660396  
5. 570233 5. 558703  
4. 605304 3. 339895  
7. 408283 6. 552879  
4. 59506 3. 876067  
8. 025559 7. 384767

6.969599 6.268309  
3.060383 3.083106  
6.710819 6.854802  
5.162337 5.439973  
5.149477 3.553779  
6.681106 6.921632  
6.67483 6.669385  
5.923065 5.714307  
3.413801 2.833658  
5.600318 5.700711  
5.979444 6.326473  
6.917282 6.666006  
7.01918 7.040459  
3.308283 4.572611  
8.200203 8.7125  
1.252297 1.51527  
5.818642 6.217085  
5.914832 5.788367  
2.229481 2.857926  
3.943295 4.749622  
5.101245 5.440302  
3.287533 4.777205  
9.611539 9.540249  
7.047157 6.474672  
8.926052 8.019105  
7.594711 7.318515  
1.697369 1.637125  
4.327723 3.907398  
6.578099 6.752034  
8.962256 7.712944  
5.606143 5.180235  
6.307541 6.433804  
4.081333 3.722229  
8.790575 7.03363  
2.966553 2.89229  
4.900008 5.213254  
5.887289 4.67786  
1.861633 1.94093  
6.551512 5.148958  
3.410923 3.626739  
4.312868 3.773964  
5.390885 5.655555  
4.414667 2.002298  
7.025572 6.827881  
5.096089 4.703982  
2.875966 2.925017  
6.612946 5.052979  
4.223092 5.303058  
4.796779 4.330304  
4.94342 6.158899  
3.870539 3.417431

6.056875 5.514102  
6.985634 5.684975  
2.126733 2.756706  
3.666551 3.587048  
4.890127 3.38884  
7.457522 6.959709  
6.278715 5.382145  
6.481156 6.246268  
1.712591 2.285042  
3.694633 3.686796  
7.812493 6.640098  
2.139517 2.395436  
2.716445 2.368078  
7.287993 7.46887  
6.647541 6.615251  
5.865286 5.360738  
5.455989 5.753724  
6.826766 5.659411  
3.741855 3.039038  
6.65932 6.351489  
6.449695 7.126648  
7.525465 6.828112  
4.951882 4.357372  
7.202779 6.371742  
5.212167 4.251967  
4.914815 4.301348  
8.026126 8.111706  
6.8634 6.344314  
6.670916 6.124771  
3.852764 4.092036  
3.399198 2.797924  
3.316651 4.291898  
5.688737 4.67707  
6.514268 6.279132  
1.59141 2.032363  
5.630302 5.215036  
1.401679 1.603961  
3.529859 3.571861  
4.288777 3.870204  
5.62924 5.631698  
4.209192 4.756896  
3.838817 2.508707  
5.985706 5.567753  
5.280758 4.650625  
7.649244 6.697112  
5.801161 5.979637  
4.094614 4.338516  
4.261227 3.692696  
6.213106 6.344682  
6.211425 5.388324  
2.274064 2.099608

5. 54958 4. 349014  
7. 050221 6. 45319  
1. 516356 1. 715413  
4. 05103 3. 658389  
6. 714246 6. 850288  
4. 842725 3. 439586  
2. 915787 3. 610405  
5. 027516 5. 542715  
6. 09468 5. 40874  
4. 443756 4. 877238  
3. 503544 3. 323368  
5. 797116 4. 256431  
1. 481254 2. 055196  
6. 747677 6. 3672  
6. 668639 5. 606006  
3. 574406 4. 075977  
5. 033623 5. 983224  
4. 088666 3. 802433  
5. 562953 6. 036253  
7. 743791 7. 067934  
7. 994148 7. 494805  
5. 69421 5. 749219  
7. 789003 7. 932872  
3. 625051 2. 619562  
6. 84729 5. 970461  
5. 47551 4. 437028  
6. 798449 6. 313501  
1. 560629 2. 041747  
4. 729072 3. 529704  
6. 82745 5. 980437  
4. 061361 4. 621311  
3. 359566 3. 835926  
7. 08019 6. 842014  
5. 585782 4. 854503  
6. 767726 6. 633015  
9. 646052 7. 414983  
7. 263348 6. 084228  
7. 362051 6. 72022  
2. 121712 1. 945733  
1. 950682 2. 07659  
7. 677285 7. 137558  
4. 009697 3. 29278  
7. 354267 6. 087511  
7. 13165 7. 382465  
3. 573166 2. 490614  
5. 030455 4. 490021  
3. 868884 3. 365011  
6. 360781 5. 071991  
2. 66274 3. 120736  
8. 624186 8. 520784  
6. 762066 5. 972399

5. 50495 4. 738088  
6. 569486 5. 312749  
2. 217017 2. 907522  
10. 54829 9. 917529  
3. 495966 4. 588293  
8. 115846 7. 52374  
5. 981902 5. 346756  
7. 137456 6. 391797  
2. 816793 2. 891685  
9. 397716 8. 609041  
4. 711361 3. 816979  
6. 587115 6. 773375  
3. 962585 4. 704768  
5. 793878 5. 37269  
8. 701509 7. 878251  
5. 518173 5. 880133  
6. 003423 5. 822796  
5. 395887 5. 339132  
3. 228368 2. 355639  
8. 542456 8. 546603  
3. 652444 3. 158423  
6. 578983 7. 038803  
7. 137629 5. 998032  
6. 990387 5. 857661  
6. 481894 6. 153154  
7. 965833 4. 921533  
4. 444591 3. 013181  
4. 116114 3. 893999  
1. 757912 2. 16285  
6. 733654 6. 1817  
6. 435341 7. 083862  
7. 243163 7. 317535  
5. 098156 6. 162064  
3. 153186 4. 807928  
4. 484508 4. 416777  
4. 486252 4. 780579  
8. 363554 7. 328097  
6. 556875 5. 908611  
5. 069055 4. 90969  
2. 000052 2. 017838  
3. 291657 3. 709959  
6. 050175 5. 63751  
7. 236187 7. 031637  
4. 100567 4. 153219  
4. 594357 3. 879602  
1. 490967 1. 730579  
2. 466381 3. 090671  
4. 011568 4. 374817  
1. 249701 1. 01915  
7. 76204 8. 407957  
5. 202246 5. 133062



4. 988372 5. 450663  
6. 199341 5. 686303  
2. 683738 2. 240511  
8. 209236 7. 129231  
7. 541199 7. 303717  
2. 701539 1. 838018  
5. 718615 5. 048029  
2. 803278 3. 217752  
1. 787202 2. 141621  
6. 978275 6. 543085  
4. 812585 5. 197994  
2. 037326 2. 19061  
3. 332985 3. 326772  
4. 353912 3. 704918  
8. 113827 7. 172204  
6. 750858 6. 157649  
8. 942381 7. 885072  
4. 266976 4. 900953  
5. 261031 3. 400326  
2. 662576 1. 990814  
1. 188517 1. 520243  
4. 4521 4. 463602  
3. 938644 4. 46667  
6. 03528 6. 136416  
3. 369752 3. 136363  
4. 607958 5. 514262  
1. 990558 1. 710725  
7. 588452 7. 102356  
8. 002136 7. 622644  
2. 156252 3. 359928  
8. 807126 8. 912882  
6. 416599 5. 365892  
6. 955948 8. 745072  
5. 998533 6. 827575  
6. 148109 5. 48674  
6. 410826 6. 273942  
3. 651097 3. 37337  
9. 521233 9. 393654  
4. 987089 4. 743351  
5. 268639 5. 070602  
5. 900955 6. 9089  
4. 67352 5. 915522  
2. 179084 2. 22063  
4. 609568 4. 759796  
3. 026333 5. 754712  
3. 36535 3. 072304  
2. 81499 2. 978072  
8. 056643 7. 111039  
7. 28699 7. 058541  
4. 604587 3. 788615  
1. 642273 1. 907696

7. 717359 7. 425653  
5. 635123 5. 041434  
5. 36895 3. 640451  
2. 9346 5. 098626  
4. 411398 4. 735175  
2. 371654 1. 621779  
6. 068201 6. 770528  
5. 072777 5. 007758  
6. 619153 6. 489385  
3. 28157 3. 785268  
5. 725107 5. 07768  
5. 22569 4. 653408  
4. 150839 4. 381869  
7. 11209 5. 886319  
6. 484967 6. 270084  
0. 93158 1. 839759  
0. 667527 1. 940086  
2. 739579 2. 79812  
6. 399454 5. 733564  
4. 948142 3. 661502  
9. 177853 7. 765626  
3. 799412 3. 571471  
6. 769267 6. 38368  
4. 263708 4. 309538  
4. 744372 5. 177077  
2. 180318 1. 75192  
6. 582823 6. 273218  
3. 203818 2. 615479  
1. 300031 2. 509561  
2. 966155 2. 357376  
6. 8542 5. 857269  
4. 480383 4. 38025  
2. 301804 2. 376912  
2. 263673 2. 618738  
5. 981636 6. 755789  
1. 793443 2. 775773  
2. 130579 1. 707203  
7. 287257 6. 718459  
1. 840233 1. 741771  
4. 984002 4. 284344  
2. 657935 3. 14204  
1. 615141 1. 500357  
5. 932549 4. 715748  
5. 557388 5. 544476  
3. 396991 3. 519435  
2. 868168 2. 942278  
2. 708968 1. 974627  
3. 970727 2. 844305  
1. 067387 1. 55581  
6. 264514 6. 623866  
5. 384943 5. 339821

5.189801 5.138281  
6.828917 7.650187  
6.911712 7.46355  
5.408065 5.311315  
5.490901 6.225093  
2.486119 2.757654  
1.637046 1.810102  
5.860356 6.138396  
1.428673 2.074088  
4.319044 4.334046  
6.80608 7.021324  
2.287254 1.728653  
3.2829 4.006012  
1.995216 1.194949  
7.197788 6.625613  
5.65768 4.655317  
5.68514 5.894969  
1.680861 1.468798  
6.891379 7.426939  
3.579158 2.87736  
4.766441 3.273109  
8.644177 8.28815  
7.126456 6.374187  
5.08101 4.998795  
7.330948 7.207707  
5.58803 6.105741  
1.493329 2.137384  
3.071775 2.265004  
2.213103 1.799089  
6.734522 6.701891  
6.90258 7.826717  
4.361322 4.069249  
6.035234 6.082066  
5.151917 6.210368  
5.121597 5.252074  
4.363491 4.763697  
2.511477 3.163895  
1.037839 1.568919  
6.701522 7.05932  
4.339335 2.833925  
9.388981 9.204396  
5.096462 5.635549  
5.79483 5.008442  
3.144935 3.834058  
6.139489 6.044731  
1.177128 1.346962  
2.433274 3.082644  
3.340837 2.959181  
2.057663 2.459112  
2.143071 4.169766  
2.209873 1.837699

7. 449227 7. 233855  
4. 213721 3. 853443  
1. 775422 1. 827842  
5. 434623 6. 980426  
1. 112639 1. 665175  
1. 748925 2. 337643  
1. 799651 1. 098318  
2. 197802 3. 054171  
2. 298157 2. 438221  
6. 838137 6. 883929  
7. 311318 6. 690276  
4. 918948 6. 218367  
7. 274926 7. 488521  
5. 703726 4. 806008  
3. 976369 4. 441212  
5. 250124 5. 288232  
4. 456451 5. 819151  
4. 527968 3. 668143  
5. 405965 6. 139322  
7. 453039 8. 154225  
4. 821787 5. 280953  
6. 456502 7. 176516  
4. 987887 2. 756707  
1. 233539 1. 410012  
6. 897917 7. 216155  
1. 188479 1. 791418  
3. 299973 4. 350349  
4. 932116 5. 959173  
3. 468994 3. 735391  
6. 699883 5. 655359  
3. 779079 2. 463654  
7. 659774 7. 549871  
1. 188797 1. 331112  
4. 943538 5. 528459  
2. 665279 3. 098097  
6. 337524 5. 838921  
3. 825955 4. 412595  
6. 62815 6. 334119  
3. 851085 5. 039242  
3. 628186 2. 383251  
3. 973474 3. 056342  
8. 343368 7. 321888  
1. 823655 2. 605328  
8. 593995 8. 761673  
1. 860952 2. 023444  
6. 282893 6. 708637  
2. 197388 2. 486143  
5. 400507 5. 723454  
5. 165065 6. 177571  
8. 778247 8. 692982  
3. 831018 3. 725483

2. 726985 2. 112247  
2. 685929 2. 530435  
6. 62485 5. 329291  
1. 473274 1. 569129  
8. 326645 8. 377705  
4. 779935 4. 812097  
2. 710606 3. 932978  
5. 049794 5. 539573  
4. 213975 4. 290496  
3. 345716 4. 509947  
4. 399143 3. 623452  
1. 219727 1. 963024  
1. 542741 1. 950855  
4. 970049 5. 222245  
7. 109328 6. 901871  
7. 815818 8. 445899  
2. 608553 2. 674027  
5. 30677 3. 785164  
2. 419559 2. 574786  
6. 745778 6. 213888  
3. 277602 3. 909789  
2. 881946 3. 003822  
5. 902687 5. 745895  
3. 610757 2. 971828  
4. 986185 4. 097697  
2. 688341 4. 844165  
4. 683349 4. 996107  
4. 874533 5. 648968  
5. 136343 5. 498314  
3. 389849 4. 009971  
2. 727276 4. 071324  
5. 53783 5. 24713  
6. 004086 4. 955283  
3. 285422 6. 824126  
1. 770609 1. 656121  
5. 68645 3. 229076  
2. 006743 1. 978105  
0. 941977 1. 130984  
3. 242613 2. 931533  
4. 709591 4. 47145  
5. 122357 4. 555969  
1. 147679 1. 653396  
0. 901316 1. 230115  
2. 219387 2. 069375  
0. 771876 3. 150541  
2. 10165 2. 711373  
1. 797804 1. 905806  
1. 321734 1. 737584  
1. 670458 1. 504284  
1. 101103 1. 439219  
1. 676631 2. 337104

3. 66305 3. 3199  
0. 933978 2. 154521  
0. 831731 1. 067201  
5. 048391 4. 52712  
2. 317571 2. 316048  
1. 571224 1. 489728  
3. 402331 2. 10492  
5. 81144 4. 368099  
6. 829087 6. 75536  
1. 81919 1. 888612  
2. 119091 3. 243543  
2. 545106 2. 698302  
4. 807554 5. 772207  
2. 01646 2. 953875  
5. 862401 5. 544281  
2. 710996 2. 895562  
1. 809236 1. 230555  
1. 696558 1. 676055  
3. 407981 3. 216694  
2. 289546 2. 10555  
2. 204511 1. 970509  
2. 81773 1. 311377  
3. 717809 3. 669679  
2. 662527 3. 215321  
1. 845738 1. 772458  
6. 348148 5. 884523  
1. 357032 2. 821112  
7. 985195 7. 717891  
9. 338498 9. 084631  
1. 546677 2. 33462  
1. 951406 2. 757006  
1. 556849 1. 747679  
1. 808008 2. 251857  
3. 196783 3. 742864  
4. 752482 5. 249697  
4. 610726 3. 882937  
2. 871624 3. 265804  
1. 758256 1. 871385  
1. 41579 1. 495478  
10. 99846 11. 04602  
1. 034528 1. 387526  
1. 394563 2. 212096  
6. 329616 7. 155916  
6. 692256 7. 160426  
0. 920048 2. 58  
2. 496528 2. 268676  
6. 779755 7. 049506  
3. 758129 3. 077126  
2. 433084 1. 691963  
2. 13753 1. 453244  
3. 82226 2. 706765

2. 381338 1. 534709  
3. 949042 3. 714812  
2. 953528 2. 151002  
3. 390392 2. 81662  
1. 657063 1. 162331  
1. 428989 1. 47448  
3. 033893 2. 831277  
0. 955723 1. 16178  
2. 341583 1. 507826  
2. 85535 3. 120244  
5. 593942 3. 747732  
3. 011461 2. 699616  
1. 57139 1. 681968  
1. 414707 1. 302286  
0. 944635 1. 188021  
2. 488842 2. 512195  
3. 794335 2. 779103  
1. 798476 1. 871591  
6. 250864 6. 531251  
1. 142307 1. 439441  
5. 233876 4. 798479  
2. 161816 1. 548341  
1. 244628 1. 87031  
5. 963052 6. 758278  
6. 216178 4. 718217  
5. 355479 3. 69158  
2. 732557 3. 531686  
2. 948048 3. 651725  
4. 134952 5. 098359  
5. 35442 4. 836269  
6. 141908 5. 069537  
7. 500066 7. 290804  
6. 776058 7. 504826  
5. 301256 4. 780084  
2. 356132 1. 433397  
1. 697829 2. 41599  
2. 728593 2. 589436  
4. 168716 3. 999748  
5. 932513 5. 906012  
3. 323093 3. 235285  
2. 27022 2. 429995  
3. 453015 3. 296101  
1. 131259 1. 540028  
6. 963447 6. 555003  
1. 493188 1. 369418  
2. 780909 2. 587478  
9. 128347 8. 628036  
6. 398024 5. 812126  
6. 990351 7. 134656  
6. 656824 5. 570856  
3. 358687 2. 74411

2. 497865 3. 579223  
1. 173783 1. 237152  
6. 451791 6. 235573  
7. 144381 5. 621973  
2. 917805 3. 107399  
0. 855792 1. 085421  
5. 060003 5. 011772  
3. 648958 5. 399593  
4. 02548 3. 759958  
3. 538613 2. 94997  
1. 026306 1. 105541  
2. 091824 2. 99613  
5. 970908 5. 953968  
1. 894039 1. 470877  
5. 014275 4. 299718  
2. 496448 2. 831636  
3. 320324 2. 206401  
2. 166146 2. 315313  
2. 503873 1. 533109  
4. 632594 4. 260378  
1. 113993 1. 746549  
4. 773908 4. 64474  
2. 539566 2. 431384  
2. 71228 3. 393233  
6. 545918 6. 753912  
8. 747933 8. 020647  
1. 760248 1. 656547  
4. 919734 4. 025651  
1. 468055 3. 057445  
1. 756472 1. 697503  
4. 08596 3. 290081  
3. 670751 4. 314258  
1. 367835 1. 542833  
3. 087675 5. 246313  
4. 630129 3. 718855  
1. 041988 1. 858027  
2. 866638 4. 794225  
5. 158204 5. 807234  
1. 58075 1. 748343  
1. 183624 1. 171627  
5. 146444 4. 115678  
3. 78645 4. 911552  
2. 024909 1. 98975  
1. 982443 1. 55017  
1. 39933 1. 199075  
0. 865765 1. 157878  
1. 218852 1. 895983  
5. 368411 6. 231445  
5. 292175 3. 923048  
3. 048749 2. 413252  
1. 698371 1. 408696



3. 639672 3. 802687  
4. 410511 4. 678301  
1. 13817 1. 134932  
1. 175634 0. 813102  
1. 308448 1. 611687  
1. 173251 1. 806579  
0. 872389 2. 454631  
6. 327293 6. 56341  
2. 22092 2. 133659  
1. 020261 1. 426103  
3. 514889 3. 743701  
3. 405393 3. 96032  
3. 389011 3. 433358  
2. 293472 2. 882328  
4. 224234 2. 335847  
2. 2219 2. 591523  
4. 969631 3. 122745  
1. 999299 2. 079218  
2. 487069 2. 849987  
1. 421496 1. 235259  
2. 295984 2. 247509  
1. 7407 2. 327856  
1. 067559 1. 216005  
2. 32264 3. 117663  
0. 981071 1. 286729  
1. 429808 2. 860747  
2. 12246 2. 785969  
6. 22673 4. 821012  
1. 202918 1. 665377  
1. 607907 1. 90231  
2. 273376 2. 343069  
6. 468798 5. 500091  
2. 062483 3. 313382  
1. 451205 1. 957886  
1. 577767 1. 757001  
1. 680672 2. 158284  
1. 758595 3. 074227  
6. 083926 5. 260247  
4. 914915 3. 981244  
4. 598214 3. 498114  
1. 432908 1. 04876  
2. 247443 2. 333659  
1. 082424 1. 186362  
6. 254279 6. 913189  
1. 070135 1. 089642  
4. 206114 3. 842098  
5. 52669 4. 510581  
4. 39858 5. 357308  
1. 199516 1. 014523  
1. 649239 1. 931106  
1. 361919 1. 422677

1. 660519 3. 635126  
2. 14178 1. 652277  
1. 737625 2. 654129  
1. 515213 1. 738897  
10. 16068 10. 10411  
5. 433876 6. 936942  
1. 786975 2. 35512  
2. 533835 2. 650717  
1. 320418 1. 76473  
1. 709666 1. 91244  
2. 232371 2. 687739  
6. 645439 5. 894031  
2. 27498 1. 998878  
5. 365854 6. 414015  
1. 158636 1. 352397  
0. 811933 1. 632504  
6. 970557 6. 013771  
0. 989805 1. 348186  
1. 147012 1. 171912  
1. 280853 2. 625603  
2. 53955 2. 755683  
1. 119984 1. 174256  
1. 29315 1. 379156  
2. 455414 2. 434224  
1. 987952 1. 337713  
1. 006616 4. 24197  
1. 258164 1. 653265  
2. 03959 1. 902646  
1. 879317 1. 744891  
1. 308389 1. 413244  
2. 38164 1. 940768  
3. 821939 4. 242164  
2. 735096 3. 600286  
1. 828843 1. 092806  
1. 326656 1. 349138  
4. 058437 4. 678572  
2. 629162 2. 018923  
3. 011885 2. 644702  
3. 454533 4. 088788  
4. 077794 2. 942557  
4. 525444 4. 733608  
1. 979029 1. 801438  
1. 724279 1. 536527  
1. 484379 1. 752849  
2. 342721 2. 344908  
8. 424696 7. 980772  
4. 208863 3. 828333  
1. 2135 2. 266235  
1. 579122 2. 295093  
1. 380952 2. 224872  
3. 882012 4. 990669

1. 073388 1. 31715  
5. 913723 4. 461883  
1. 669112 1. 507726  
4. 480961 4. 951753  
1. 298465 1. 366591  
3. 677493 2. 212997  
2. 280705 2. 080379  
5. 47038 4. 39092  
1. 087388 1. 221732  
1. 901483 1. 46905  
2. 937755 2. 834556  
0. 986943 2. 183875  
1. 674485 1. 260889  
2. 856753 3. 925506  
5. 767524 5. 670438  
1. 244499 1. 285289  
1. 175674 1. 56256  
7. 181011 7. 62973  
1. 800377 2. 595129  
1. 465078 3. 489662  
7. 05553 6. 494658  
1. 814862 2. 221098  
1. 620943 1. 500181  
2. 56321 2. 762816  
3. 804205 3. 743427  
1. 8962 2. 25142  
2. 898537 2. 515494  
2. 732082 2. 527482  
6. 343585 5. 668446  
1. 177727 1. 673148  
5. 77899 5. 095439  
1. 978217 3. 697832  
1. 52348 1. 236205  
1. 877244 1. 994225  
1. 456108 2. 873326  
6. 457119 4. 662662  
2. 328936 2. 846308  
2. 065328 2. 201474  
1. 720418 2. 368513  
1. 045143 1. 400684  
2. 878651 2. 857197  
1. 108338 1. 371498  
4. 566462 5. 142729  
3. 834549 2. 791596  
6. 221645 4. 933693  
2. 784543 2. 690268  
4. 414725 3. 842342  
1. 665556 2. 32364  
3. 669742 3. 806705  
1. 631822 2. 689256  
1. 289427 1. 48777

5. 262833 5. 168202  
1. 780575 1. 491103  
1. 797576 1. 615258  
6. 380216 5. 230109  
2. 160828 1. 711608  
5. 77143 6. 131605  
5. 452655 5. 639172  
4. 842638 5. 009051  
7. 681562 7. 135858  
7. 152179 6. 92223  
2. 933745 2. 964453  
1. 493919 1. 1895  
3. 302422 3. 14649  
2. 573227 2. 618938  
2. 653212 2. 273628  
2. 383436 3. 748553  
6. 580615 7. 373212  
7. 798045 8. 275739  
3. 06552 3. 258373  
6. 67867 6. 613984  
5. 768608 5. 541875  
4. 440153 4. 393061  
2. 173745 4. 141457  
1. 57255 2. 447453  
7. 984788 7. 983501  
5. 790822 5. 84991  
4. 059443 5. 271616  
3. 740806 4. 589168  
2. 692269 3. 202903  
4. 755128 5. 196396  
6. 892318 9. 269252  
3. 085884 3. 7762  
3. 735656 5. 03863  
3. 804758 4. 923665  
4. 917743 4. 689283  
2. 470079 2. 686276  
5. 570719 6. 296304  
8. 012884 8. 252315  
2. 465889 1. 539537  
1. 649802 2. 311116  
4. 180084 5. 185847  
4. 168016 4. 188816  
6. 439966 7. 275545  
6. 904783 6. 270632  
5. 795137 3. 377258  
4. 593464 4. 595218  
2. 263418 3. 271806  
8. 950351 9. 151477  
4. 47575 4. 560408  
4. 0748 1. 328479  
6. 879853 6. 211772

4. 565213 5. 378744  
7. 76528 8. 600515  
1. 703683 2. 079724  
1. 846754 2. 5648  
7. 595591 6. 794688  
1. 503383 1. 472686  
1. 448308 1. 39448  
8. 034002 6. 69449  
3. 147688 2. 707058  
5. 50152 4. 902565  
1. 432586 3. 27819  
4. 94333 5. 101458  
2. 844648 3. 006901  
7. 754275 7. 238456  
6. 958523 7. 408068  
6. 703726 6. 368481  
6. 716326 7. 170781  
7. 786333 7. 308227  
4. 40036 5. 1229  
2. 957374 2. 212362  
3. 414296 3. 70917  
5. 876129 6. 146616  
5. 746501 5. 761129  
4. 828561 4. 844504  
4. 057533 4. 105838  
1. 889985 2. 763867  
2. 01174 2. 211523  
5. 381703 3. 935464  
2. 239775 2. 933935  
2. 576616 2. 241585  
5. 851174 7. 144516  
6. 224696 6. 227675  
5. 434019 6. 637655  
6. 61136 7. 179085  
4. 354502 5. 103485  
7. 177199 7. 484651  
5. 747482 5. 236503  
2. 108208 1. 812226  
2. 990516 6. 368503  
4. 122325 3. 252239  
0. 929079 1. 431662  
3. 992397 4. 546616  
2. 552071 3. 126456  
4. 400533 3. 712984  
2. 212585 2. 762011  
2. 995395 3. 078061  
4. 370462 3. 864407  
4. 717953 6. 180169  
3. 650759 3. 415084  
2. 632589 4. 318189  
1. 500264 2. 275665

3. 769106 3. 720852  
4. 512399 4. 122248  
7. 116585 6. 899593  
4. 801675 5. 323027  
6. 429704 5. 8462  
1. 89977 2. 20636  
3. 117689 3. 362033  
5. 450971 5. 839634  
4. 425515 4. 382444  
2. 623821 4. 653264  
4. 964646 4. 765664  
4. 629321 5. 226499  
3. 384876 2. 212661  
6. 04111 5. 129607  
5. 052423 5. 338869  
5. 855043 6. 863401  
9. 554432 9. 282993  
5. 79217 5. 981884  
4. 577699 3. 846551  
6. 593593 6. 591186  
7. 004419 5. 324868  
6. 680697 6. 477297  
2. 914966 2. 31425  
2. 482451 1. 802847  
4. 652904 5. 016414  
2. 772604 3. 105501  
6. 505386 5. 489062  
7. 24638 6. 768112  
6. 929384 6. 499535  
4. 005122 3. 142915  
1. 182514 1. 58737  
5. 598868 4. 336177  
1. 233699 1. 519688  
7. 199005 6. 107588  
0. 927083 1. 309914  
2. 708666 3. 176112  
2. 332059 2. 674562  
4. 326528 3. 824434  
2. 246301 1. 94599  
5. 106896 6. 768166  
4. 919658 4. 045905  
7. 009758 6. 21373  
1. 901843 1. 994032  
1. 68302 0. 907464  
1. 834817 1. 398758  
1. 76215 1. 842383  
0. 997162 0. 855082  
5. 120257 6. 938616  
2. 303165 1. 506791  
2. 224226 1. 414477  
3. 730357 2. 221891

1. 259221 0. 97311  
3. 627674 1. 659711  
4. 841248 4. 499268  
6. 044914 4. 703721  
2. 678785 2. 520265  
1. 897501 2. 289746  
5. 3293 4. 894352  
8. 941835 8. 529908  
6. 496106 6. 293697  
5. 904258 7. 045303  
8. 155468 8. 325547  
5. 43142 4. 825388  
7. 548125 7. 637024  
3. 451533 5. 550923  
7. 136523 6. 878149  
7. 733676 8. 414421  
6. 505422 5. 634693  
6. 868275 6. 743858  
6. 635131 6. 305559  
3. 957063 3. 571832  
5. 866688 5. 626008  
8. 193372 8. 344735  
4. 748702 4. 36162  
4. 722701 5. 199475  
3. 375945 2. 647665  
8. 896535 7. 637655  
6. 628329 6. 247093  
4. 816465 3. 536331  
4. 630063 3. 974502  
4. 315583 3. 405881  
5. 832571 5. 97273  
6. 985622 7. 286891  
5. 927467 5. 458294  
2. 080613 1. 977316  
3. 522652 3. 685107  
8. 239659 8. 068085  
2. 978141 2. 897295  
2. 433729 2. 366912  
1. 422718 2. 072987  
7. 59659 7. 703516  
6. 401413 6. 701332  
5. 912959 6. 371473  
5. 892649 5. 869868  
8. 992244 9. 930617  
5. 789205 5. 964054  
3. 512449 2. 325784  
5. 252382 5. 301982  
2. 866063 5. 040586  
4. 584252 5. 735723  
4. 138569 4. 166597  
2. 41665 2. 490086

6. 181603 4. 954146  
8. 622746 9. 215723  
6. 84301 7. 148546  
6. 67701 6. 357297  
6. 70647 6. 920294  
2. 153982 1. 606294  
5. 731368 6. 048809  
2. 683778 2. 89345  
6. 550515 6. 951793  
2. 925462 6. 058583  
7. 300682 7. 273949  
5. 918616 4. 494099  
3. 987181 3. 808799  
6. 842494 6. 61739  
5. 644157 5. 426612  
2. 252544 2. 335374  
4. 581093 6. 126165  
4. 012044 2. 811787  
5. 041405 4. 758223  
6. 519434 8. 14871  
5. 298004 5. 269414  
5. 78774 5. 284026  
7. 967596 8. 219434  
5. 464301 5. 138069  
3. 807787 2. 451521  
3. 805801 2. 939286  
4. 604114 3. 510003  
3. 218717 3. 243382  
4. 534759 4. 23194  
5. 281729 3. 994028  
1. 898536 2. 626499  
4. 856313 4. 739983  
1. 979268 1. 071148  
1. 673772 2. 822073  
4. 895907 5. 254541  
5. 595157 5. 403118  
5. 111531 4. 664401  
1. 832433 1. 960219  
3. 338189 3. 899575  
4. 233619 3. 810731  
3. 998812 4. 387792  
2. 346921 2. 227095  
2. 036085 2. 293302  
0. 841463 1. 307291  
5. 922425 6. 297524  
3. 461012 1. 755851  
6. 411445 5. 600981  
1. 74043 2. 098464  
2. 659498 2. 491468  
3. 747998 3. 59238  
1. 533424 2. 240752



3.777959 3.45457  
5.763613 3.958742  
3.489978 2.959688  
7.220319 7.584732  
3.871896 4.016266  
7.542485 7.116204  
6.715598 6.091379  
3.617506 3.535676  
7.501017 6.709156  
4.649273 4.628694  
0.726657 1.374299  
4.713444 4.774383  
6.683087 7.500637  
8.306375 8.718367  
1.619163 1.137072  
4.88557 5.403332  
6.964659 7.53402  
2.10079 2.231715  
1.549311 1.846413  
0.695001 1.278204  
1.022967 1.355186  
2.667381 3.075661  
7.443033 6.270065  
1.660529 2.428749  
4.299482 4.148802  
3.122448 4.264971  
4.714516 5.968286  
5.928395 5.130453  
7.218808 8.33818  
2.781459 4.04686  
2.912183 2.018056  
5.580198 5.593704  
5.083877 3.898862  
6.715611 7.155877  
6.699824 6.483816  
2.58882 2.302297  
2.141024 2.129834  
3.887617 3.278355  
4.686026 4.506127  
5.324344 4.014898  
8.557219 6.619419  
4.163902 4.017383  
3.848229 4.160264  
7.443095 7.363265  
6.788807 7.371958  
6.382574 6.313528  
6.158649 6.231994  
5.674476 5.715021  
6.265035 7.135311  
8.322131 7.938531  
6.287308 5.540569

7. 893565 6. 449971  
1. 514194 1. 908916  
5. 592242 3. 236109  
4. 481398 5. 775695  
5. 866748 5. 272916  
3. 62926 4. 412439  
4. 249743 3. 152169  
1. 32597 1. 635523  
3. 990277 3. 526424  
3. 994839 4. 486984  
3. 7485 4. 259957  
1. 773897 1. 506253  
1. 002881 2. 604765  
6. 6779 7. 364785  
6. 068535 4. 340247  
7. 733506 7. 298235  
4. 384937 4. 043002  
3. 382795 5. 056877  
1. 774496 2. 130408  
4. 639114 4. 668109  
6. 919375 7. 385146  
2. 387126 2. 241876  
3. 619633 2. 586102  
4. 309306 4. 368568  
4. 194999 5. 061252  
5. 973003 6. 51822  
0. 999276 1. 569503  
2. 5623 1. 254065  
2. 148355 2. 182478  
5. 466547 5. 613328  
6. 044536 6. 252167  
1. 571768 1. 550619  
4. 956656 5. 26998  
3. 875112 5. 562046  
2. 59425 2. 6006  
6. 301905 6. 715162  
6. 718575 6. 136532  
1. 152943 1. 160819  
1. 731568 0. 901824  
1. 006497 0. 877478  
5. 270353 4. 675149  
1. 941096 2. 009646  
1. 121493 2. 315055  
1. 020209 1. 738287  
8. 477969 7. 746344  
4. 177993 5. 306226  
2. 284361 2. 167553  
4. 03435 2. 890527  
1. 671708 0. 972676  
2. 824575 3. 810655  
3. 464617 4. 052823

1. 849484 2. 572918  
4. 532908 3. 441894  
4. 85787 6. 026557  
2. 489424 2. 739477  
7. 529212 7. 632537  
6. 329893 5. 823538  
0. 962399 1. 790419  
1. 229604 1. 367723  
3. 63363 3. 729126  
3. 770438 2. 936685  
1. 626814 1. 36984  
1. 675816 2. 132661  
4. 286131 5. 95913  
2. 147011 2. 457409  
2. 771593 2. 969078  
3. 875187 4. 315333  
2. 175214 3. 279626  
2. 222326 2. 276951  
3. 14784 2. 457209  
4. 394276 1. 51052  
3. 521477 4. 189181  
1. 828473 2. 157675  
6. 135099 6. 947155  
5. 214095 4. 607837  
7. 863101 7. 211833  
6. 428721 6. 270182  
2. 190115 1. 976977  
5. 058206 5. 389991  
4. 987845 4. 259516  
2. 928776 2. 273642  
4. 503487 4. 998128  
7. 718445 7. 271396  
6. 456254 6. 617656  
1. 566992 2. 540631  
3. 208045 3. 583399  
4. 631842 4. 700772  
3. 753963 3. 226957  
6. 607318 5. 76589  
6. 895231 6. 20654  
4. 765552 4. 561991  
7. 430318 6. 997532  
4. 549796 3. 296297  
1. 88298 1. 921031  
3. 12006 3. 053188  
1. 245458 1. 261424  
1. 470751 1. 826383  
4. 834966 5. 206531  
1. 037524 1. 511459  
6. 119572 5. 558927  
2. 466488 3. 426199  
5. 110276 5. 698574

6. 741616 6. 508946  
1. 799779 2. 785813  
1. 797357 1. 550239  
5. 861849 4. 714253  
3. 432925 2. 888973  
7. 088247 7. 721072  
5. 642033 6. 167761  
3. 201124 2. 852283  
4. 190431 2. 775407  
6. 526784 7. 697221  
6. 399572 7. 396909  
3. 202548 2. 429145  
0. 423452 0. 703489  
1. 474509 1. 747291  
5. 543003 6. 936318  
1. 057769 1. 876894  
1. 470383 1. 72472  
5. 232653 4. 388787  
6. 338246 6. 546086  
6. 037978 6. 713765  
6. 204701 7. 239826  
5. 312636 6. 044546  
2. 912867 2. 129523  
3. 213198 2. 3966  
1. 454486 1. 174614  
2. 418252 3. 629635  
1. 045215 1. 423259  
2. 446429 3. 517706  
4. 210142 5. 495805  
5. 110813 4. 241659  
2. 332054 1. 969764  
2. 326054 2. 274869  
4. 880344 4. 488567  
2. 241401 2. 02974  
4. 89326 5. 788003  
6. 355616 7. 052816  
1. 134901 1. 885224  
4. 480089 4. 506389  
5. 126068 3. 465481  
1. 34696 2. 646529  
1. 794956 1. 441634  
0. 890103 1. 193696  
2. 102616 2. 238323  
3. 598904 3. 106552  
1. 357283 2. 120538  
5. 342995 6. 085833  
7. 697085 7. 375317  
3. 835477 3. 080234  
4. 937385 4. 525486  
1. 826586 2. 032529  
5. 344145 3. 943823

7. 855551 8. 121267  
2. 796512 3. 752251  
6. 959696 7. 003074  
4. 93887 4. 646985  
5. 847371 5. 748843  
7. 039863 7. 192794  
6. 906853 6. 358782  
2. 396644 3. 245768  
5. 962862 6. 470895  
6. 37191 6. 263323  
5. 164523 4. 286515  
6. 155531 6. 291126  
1. 293689 2. 293785  
1. 439722 1. 410393  
4. 259134 4. 530396  
1. 091629 1. 03289  
1. 138836 1. 14708  
1. 649251 1. 399518  
1. 52646 1. 638153  
4. 991568 4. 178875  
1. 271806 2. 352826  
1. 320006 1. 397988  
1. 589895 2. 288752  
2. 69721 2. 237415  
6. 331002 6. 429635  
4. 07125 3. 322493  
2. 271312 2. 402388  
9. 316654 9. 465154  
7. 056762 7. 343362  
1. 44615 1. 358368  
1. 655874 2. 926991  
1. 797203 3. 660744  
4. 676676 5. 585799  
6. 055018 5. 71164  
2. 187482 2. 75364  
1. 009444 1. 020185  
2. 476205 3. 035606  
2. 819497 2. 699963  
1. 343542 0. 852095  
1. 51735 1. 739224  
5. 990712 5. 347808  
1. 428672 2. 008183  
3. 07358 2. 760463  
7. 720787 7. 011562  
0. 858925 0. 589746  
1. 969724 2. 12578  
1. 553136 1. 861293  
8. 587474 8. 408451  
1. 677074 2. 240922  
1. 157116 1. 26688  
4. 893006 4. 880503

1. 591241 1. 629477  
2. 035034 1. 657651  
1. 150686 3. 514977  
1. 648285 2. 540342  
1. 406939 1. 717655  
2. 846942 1. 517629  
6. 460635 6. 614824  
1. 300964 1. 449391  
1. 093723 0. 929547  
1. 987552 2. 219974  
1. 163173 2. 194521  
0. 806662 1. 338994  
1. 549128 1. 569813  
2. 191797 2. 200579  
0. 960659 1. 17046  
0. 791858 1. 247848  
3. 572663 2. 151328  
5. 988828 5. 824137  
1. 588744 2. 390122  
2. 589528 2. 187044  
3. 434477 3. 681947  
1. 020858 1. 08695  
2. 842772 2. 399645  
1. 121429 1. 208414  
2. 397422 2. 657749  
1. 416801 1. 545862  
3. 491143 3. 994038  
1. 363638 1. 741176  
1. 623082 1. 175917  
1. 424836 1. 527722  
6. 68124 6. 403398  
1. 25677 1. 036532  
3. 316105 3. 421047  
2. 447785 3. 335866  
5. 315564 5. 074452  
4. 171817 3. 7699  
2. 177451 2. 16942  
4. 057137 1. 796781  
2. 998653 1. 507658  
1. 264892 1. 999055  
6. 152911 2. 633511  
6. 491936 8. 231643  
1. 929233 1. 920428  
1. 660009 2. 568088  
2. 974822 4. 565648  
5. 194499 1. 518559  
3. 268922 2. 214139  
5. 849316 5. 284351  
2. 068934 1. 337539  
4. 644925 1. 597694  
4. 689878 4. 07771

3. 506517 1. 860558  
0. 763025 0. 847789  
6. 9318 5. 345499  
2. 617634 3. 348275  
3. 976706 1. 411198  
3. 633168 2. 637398  
2. 794605 2. 167717  
1. 773295 1. 845965  
5. 543621 6. 315295  
3. 152306 3. 465178  
0. 871079 1. 183707  
5. 387974 1. 293214  
1. 634698 1. 606796  
6. 367663 4. 424867  
1. 192701 1. 360222  
0. 94461 1. 269087  
4. 142107 4. 640466  
2. 896047 2. 145901  
2. 29282 1. 732477  
6. 079386 5. 949058  
7. 328638 7. 406315  
3. 933575 3. 091998  
5. 16544 9. 482024  
4. 422811 6. 880686  
2. 561564 0. 834255  
2. 912739 1. 379822  
0. 97139 0. 959691  
4. 811923 3. 173743  
4. 270232 1. 94384  
1. 924684 1. 156489  
1. 774958 3. 22094  
1. 607684 2. 016553  
2. 154936 1. 818761  
2. 619534 3. 825585  
1. 413647 3. 820116  
2. 348905 1. 280484  
1. 752992 2. 369817  
1. 805477 1. 985316  
3. 503394 4. 063157  
4. 195287 6. 325872  
1. 640203 3. 557226  
3. 034726 1. 911358  
1. 760567 1. 642141  
3. 101084 2. 638539  
4. 277011 5. 389107  
1. 342056 2. 3126  
3. 118777 3. 134907  
3. 115303 5. 184201  
7. 607633 7. 345255  
4. 209626 3. 520809  
1. 624933 2. 80905

1. 719017 2. 290167  
4. 528702 3. 872913  
1. 235842 1. 962033  
1. 489401 2. 298455  
2. 156119 2. 791633  
4. 234158 3. 467198  
3. 015323 2. 916541  
2. 835975 3. 197752  
1. 563799 1. 702428  
1. 049659 1. 82727  
1. 665696 1. 930881  
5. 457692 4. 943545  
5. 169117 4. 027659  
5. 418096 4. 605174  
1. 998484 1. 958692  
5. 82198 5. 434228  
1. 844402 2. 895377  
5. 41291 3. 922094  
2. 925876 2. 206314  
7. 709652 8. 019193  
5. 117389 4. 424105  
7. 331984 7. 48404  
6. 240284 6. 105512  
7. 841191 8. 56205  
5. 580848 5. 341202  
3. 76893 3. 727143  
1. 538771 2. 011531  
5. 600203 6. 412338  
1. 4218 1. 850087  
3. 014102 4. 387946  
5. 981099 6. 096036  
2. 334273 2. 23238  
4. 865137 4. 36323  
1. 5642 1. 254118  
4. 803627 5. 067943  
5. 176663 5. 315831  
1. 193225 1. 684909  
5. 031639 4. 126829  
4. 499457 4. 428521  
1. 948561 1. 732391  
5. 183925 5. 535157  
8. 123807 8. 418328  
1. 908988 2. 416441  
0. 956593 1. 26322  
8. 25201 7. 608964  
4. 176406 2. 997247  
6. 701202 6. 077859  
2. 372489 1. 796429  
3. 567947 3. 837472  
0. 99355 1. 526345  
3. 018972 4. 127349



3. 905756 3. 665696  
1. 192217 1. 220823  
0. 930423 1. 445967  
3. 057838 3. 50425  
4. 799885 4. 162741  
4. 396742 3. 855544  
7. 378633 6. 50714  
2. 670701 3. 435768  
2. 359379 3. 792527  
4. 14118 3. 859239  
6. 151813 6. 023659  
6. 647237 6. 880196  
7. 385965 8. 052659  
3. 400947 7. 254016  
2. 423869 1. 765232  
7. 668108 6. 904549  
2. 116511 2. 364595  
4. 577338 5. 230753  
3. 05557 3. 704467  
5. 315268 5. 156016  
4. 232327 4. 617566  
2. 526598 3. 187705  
3. 053094 1. 917695  
4. 772222 4. 418945  
1. 981046 2. 486393  
7. 900983 8. 374499  
4. 675464 5. 251451  
1. 796601 2. 050889  
1. 615175 2. 449187  
4. 343702 2. 730482  
7. 180655 7. 928637  
4. 585645 4. 8667  
2. 010625 2. 651434  
3. 567429 1. 677755  
2. 29464 2. 392087  
1. 190768 1. 269445  
5. 913629 6. 196802  
6. 983577 6. 911193  
4. 475765 4. 602321  
5. 228134 5. 173064  
3. 718459 3. 730571  
2. 403808 3. 353258  
2. 39226 3. 010184  
9. 098275 8. 641242  
1. 553897 2. 434324  
1. 637217 2. 543373  
3. 68289 5. 192957  
2. 58925 2. 532345  
2. 644163 2. 793381  
8. 710009 8. 097407  
1. 245509 1. 575068

2. 983698 2. 667013  
3. 511327 2. 787878  
1. 007647 1. 776933  
5. 108456 3. 869026  
6. 808742 6. 763946  
2. 212286 1. 639214  
0. 971638 1. 213374  
2. 747421 3. 084891  
1. 580604 2. 281476  
1. 920461 5. 034959  
5. 917454 4. 736264  
2. 788708 1. 99219  
5. 231433 6. 010808  
4. 772151 4. 282462  
2. 219868 2. 074846  
3. 848602 3. 310206  
3. 95991 3. 301321  
4. 454363 3. 510842  
3. 502849 4. 410882  
4. 741798 4. 66999  
2. 456671 2. 030602  
4. 461562 3. 866897  
0. 865906 0. 900233  
1. 855892 1. 902314  
6. 733281 6. 095827  
5. 668748 4. 736412  
1. 443021 2. 209553  
2. 901182 2. 100173  
8. 545745 8. 634676  
2. 603786 2. 54968  
6. 298564 6. 481404  
1. 298045 1. 073091  
1. 329989 1. 840435  
1. 768781 2. 031644  
4. 573124 4. 732933  
3. 586798 3. 961258  
1. 71248 1. 995604  
5. 35393 6. 31552  
1. 65105 2. 187576  
2. 431591 1. 467741  
1. 953625 2. 397413  
1. 798913 3. 104235  
1. 832082 1. 789627  
3. 145313 4. 57375  
1. 562376 1. 732617  
4. 423635 6. 877659  
3. 297713 3. 666438  
2. 059962 2. 994538  
2. 807237 2. 046723  
5. 820496 6. 382872  
5. 333773 4. 329165

7. 521283 7. 9705  
1. 68799 1. 887902  
2. 80037 1. 847262  
5. 967248 6. 650429  
4. 557089 3. 327196  
6. 686256 6. 582127  
2. 782388 2. 765472  
5. 820556 5. 54887  
1. 63323 1. 496724  
2. 36558 1. 93726  
6. 222885 5. 454562  
7. 465115 7. 93667  
7. 495405 7. 653918  
5. 490311 5. 05642  
5. 146713 4. 699825  
7. 290129 6. 647279  
6. 152335 6. 713422  
7. 708026 7. 912909  
6. 585085 6. 872976  
6. 7488 7. 571022  
5. 360401 3. 82871  
5. 550283 5. 976053  
6. 307027 6. 664995  
1. 343944 1. 075276  
5. 207641 5. 684751  
4. 314781 6. 049155  
4. 251573 3. 9941  
1. 480735 1. 388651  
1. 736861 2. 820678  
3. 782091 3. 248069  
2. 271054 2. 137953  
0. 91008 1. 859345  
1. 989594 3. 208217  
2. 4173 2. 755731  
4. 48957 3. 419285  
5. 310074 6. 836111  
1. 468294 1. 803521  
2. 907147 2. 249175  
4. 504567 5. 685403  
1. 277189 1. 461333  
6. 319926 6. 53079  
1. 621948 2. 154803  
4. 591184 5. 343387  
3. 077568 3. 47778  
3. 680308 3. 580925  
3. 628389 3. 271264  
1. 32388 2. 26524  
8. 130906 7. 069252  
3. 817601 3. 016493  
1. 263251 2. 048128  
5. 81025 5. 278393

5. 170421 5. 805433  
4. 49671 5. 849227  
4. 422003 5. 042801  
5. 651393 6. 094818  
1. 082824 1. 052601  
4. 474697 2. 293923  
3. 24214 2. 183599  
6. 61232 4. 91008  
1. 131245 1. 277878  
3. 731037 3. 576407  
5. 686844 4. 255585  
8. 155193 7. 868855  
9. 417305 9. 443678  
1. 492601 0. 881545  
8. 932782 9. 191392  
6. 906136 7. 062592  
2. 65675 1. 581517  
5. 333404 6. 66002  
5. 229707 4. 608224  
5. 431765 4. 90558  
4. 407599 6. 658543  
5. 59386 5. 657563  
3. 112652 2. 982614  
5. 098146 5. 836791  
4. 069342 3. 298708  
3. 728027 5. 237945  
6. 337885 6. 063696  
5. 104423 4. 99534  
4. 519567 5. 240627  
7. 669883 6. 889432  
6. 092615 5. 29533  
5. 270236 5. 936337  
3. 568725 3. 473609  
2. 460042 2. 955892  
2. 764049 3. 434794  
5. 133711 5. 307215  
2. 55584 4. 4288  
7. 342439 7. 672059  
2. 522545 2. 728718  
1. 250166 1. 456846  
1. 239868 1. 61923  
5. 39834 6. 363084  
1. 73825 1. 544483  
7. 583308 7. 002188  
3. 298742 3. 589854  
2. 916266 3. 41548  
7. 209678 7. 083236  
0. 63546 0. 804129  
2. 935318 4. 331022  
1. 565911 3. 149717  
3. 820555 2. 778288

1. 467222 1. 508635  
3. 617239 3. 663063  
2. 062526 3. 308115  
8. 334101 7. 102854  
2. 579745 2. 997971  
2. 362127 2. 307278  
5. 680228 5. 76012  
6. 157873 5. 587067  
4. 701509 3. 282392  
6. 806115 7. 660421  
6. 67821 6. 581653  
8. 763871 9. 322063  
0. 704377 1. 769036  
3. 244011 3. 533003  
6. 960166 7. 127168  
3. 09276 3. 677101  
1. 798728 2. 49181  
6. 615146 6. 086977  
7. 366844 7. 785326  
7. 099617 7. 023388  
2. 904495 3. 535934  
5. 787573 5. 774617  
8. 671117 9. 306883  
8. 532811 8. 966515  
2. 093726 2. 482195  
3. 589857 3. 652526  
3. 710849 4. 348592  
10. 65952 10. 75482  
6. 009928 6. 117994  
2. 508922 3. 036684  
1. 801826 2. 628657  
2. 261136 2. 726248  
1. 67891 5. 566302  
7. 380789 7. 194539  
8. 803272 8. 94802  
1. 13574 1. 080179  
2. 155662 2. 780687  
4. 628311 4. 96436  
5. 170025 2. 504002  
4. 491646 2. 947296  
3. 70652 1. 520981  
8. 202669 8. 355099  
1. 10328 2. 212906  
4. 5582 3. 320509  
5. 013256 5. 145101  
7. 247983 6. 261347  
5. 377735 4. 824703  
7. 167252 6. 538531  
7. 342541 7. 07175  
4. 935583 5. 878281  
5. 713925 6. 60405

0.769221 1.902937  
1.587319 2.742352  
3.498111 2.021835  
1.540788 1.214041  
2.592495 2.386878  
6.251982 5.706062  
2.436086 1.857357  
3.125707 2.170643  
2.093691 2.506047  
1.794742 2.204872  
1.711012 2.153596  
4.67414 4.997413  
3.16292 3.757272  
5.79248 5.627966  
6.3116 7.139472  
2.270921 2.816944  
2.722433 2.732534  
3.754123 2.204579  
6.642484 6.221273  
1.189675 1.263476  
1.54433 2.056186  
5.170746 5.027925  
4.012728 2.031645  
1.786256 3.034713  
3.940126 4.32504  
3.793988 3.29515  
1.377154 1.179282  
3.962521 3.987914  
2.026059 1.756845  
1.16142 1.37117  
0.866963 1.121334  
1.930364 2.349863  
0.99574 0.700779  
3.733021 3.696305  
1.047966 1.319596  
4.808734 3.603565  
3.361999 3.841379  
6.84071 6.024023  
1.136683 2.677214  
6.007597 6.463229  
1.920546 1.652974  
2.942636 3.538003  
2.131705 2.440294  
5.506406 6.285568  
1.797125 1.769885  
1.775544 2.782309  
0.642794 0.54964  
3.907306 3.325174  
1.937554 2.673945  
1.169007 1.119801  
2.511316 2.526701

2. 391912 0. 709253  
1. 601999 1. 615935  
2. 588067 2. 97312  
1. 617338 1. 958656  
1. 222071 2. 027894  
0. 886932 1. 772167  
0. 438873 0. 567786  
2. 529941 1. 434705  
3. 104741 2. 83711  
1. 484743 1. 953707  
4. 291076 3. 917375  
4. 343483 4. 552542  
1. 304948 1. 488182  
1. 077515 1. 582411  
7. 433825 8. 071097  
1. 415368 2. 074781  
2. 680013 3. 496393  
10. 68441 9. 293346  
1. 964343 2. 737098  
5. 433323 5. 441957  
2. 012792 2. 310726  
4. 00137 2. 664864  
1. 417957 2. 141804  
1. 244697 1. 93062  
0. 803647 1. 415176  
2. 013725 2. 02027  
2. 33526 1. 755643  
1. 34999 1. 363759  
1. 704828 2. 344053  
2. 161251 2. 44945  
1. 579372 1. 401418  
0. 889616 1. 516972  
1. 461349 1. 307757  
1. 138302 1. 705448  
2. 595371 1. 64488  
4. 440567 5. 060295  
2. 006174 2. 526937  
1. 482786 1. 500563  
4. 539874 4. 014337  
1. 996551 3. 068172  
4. 53253 5. 32033  
2. 364137 2. 383679  
5. 808058 6. 028144  
1. 368216 1. 624402  
2. 416732 3. 408894  
3. 139379 4. 964238  
5. 937702 5. 726821  
1. 869946 2. 085277  
2. 060926 1. 725381  
6. 326408 5. 402612  
1. 45675 2. 2665

2.017005 1.828789  
1.398302 2.608075  
1.696 1.437638  
1.373775 2.068092  
2.202816 2.275819  
1.142104 1.414493  
6.308865 5.914031  
5.663258 5.56088  
3.168078 2.969235  
5.430855 6.730033  
1.694427 0.972974  
2.768072 2.564342  
1.423692 1.14376  
5.246062 4.441301  
3.173639 3.200601  
4.196808 4.100735  
4.396273 3.717062  
1.850895 2.206985  
1.73621 1.062028  
3.80717 2.242759  
2.075847 1.84298  
2.316748 2.562639  
1.288998 2.273591  
1.700177 2.255159  
3.998612 2.382832  
1.157377 1.49829  
3.093477 3.059338  
2.459291 2.088749  
1.408578 2.638913  
2.106492 2.049867  
1.78884 1.238617  
6.455189 4.905092  
1.687823 2.254917  
5.554265 5.567106  
2.669496 2.769666  
1.029154 0.934882  
1.495187 1.471958  
5.556978 5.846758  
1.096131 1.124191  
1.897181 2.147033  
4.420644 4.853781  
1.653663 2.273377  
2.1684 2.129321  
4.505859 4.770015  
1.158121 1.814917  
2.481263 2.404715  
1.202264 2.827548  
2.352652 2.399997  
5.325444 5.088666  
2.415705 2.207318  
6.910648 6.84201



1. 817685 2. 065057  
2. 425777 3. 37602  
1. 235051 1. 615856  
2. 218732 1. 537898  
1. 910182 1. 867431  
1. 972667 1. 341286  
1. 640123 2. 34867  
3. 004366 2. 222788  
1. 05476 2. 52448  
0. 841793 0. 921965  
1. 723917 2. 355992  
3. 579179 3. 519333  
1. 459392 1. 507243  
1. 872865 2. 452006  
2. 522684 3. 194412  
2. 369208 1. 797479  
6. 004468 5. 284228  
3. 813849 2. 920038  
5. 714303 6. 86586  
4. 753211 5. 136344  
2. 46744 2. 38264  
2. 432836 2. 648733  
3. 427257 2. 927824  
3. 021368 1. 787606  
1. 592196 1. 540976  
2. 33063 1. 73963  
1. 825632 1. 515317  
0. 637408 0. 977687  
3. 14192 3. 613569  
2. 61423 2. 660493  
3. 298814 3. 292392  
1. 369698 1. 548532  
1. 728089 1. 36395  
3. 152329 2. 082133  
2. 329936 1. 966101  
1. 995398 1. 219299  
2. 088279 2. 351645  
1. 634938 2. 519836  
4. 985496 5. 815564  
2. 179244 2. 660878  
5. 574845 4. 68371  
2. 170587 2. 253272  
1. 274493 1. 191418  
2. 278608 2. 057497  
1. 739461 2. 484347  
1. 472827 1. 973829  
0. 895749 1. 549958  
1. 231541 2. 497611  
3. 216692 5. 003999  
0. 880107 2. 282558  
2. 243075 2. 70118

1. 3798 1. 534431  
1. 547254 2. 9227  
0. 820477 1. 0778  
4. 560619 4. 692987  
4. 174057 4. 248734  
5. 144991 6. 024077  
2. 17248 2. 379246  
3. 252493 3. 492499  
3. 047044 1. 693637  
2. 175984 2. 297401  
2. 321197 2. 585687  
3. 534169 4. 034652  
4. 709157 4. 357179  
0. 793912 1. 130881  
2. 02741 2. 258276  
1. 624594 2. 074483  
2. 446583 2. 802358  
3. 269529 3. 753087  
4. 024478 2. 774964  
1. 502296 1. 258905  
2. 833458 2. 575853  
4. 8303 4. 769927  
5. 305244 6. 290897  
1. 627355 2. 965931  
2. 571381 4. 882634  
1. 657737 1. 607255  
1. 667336 2. 926628  
1. 640509 1. 278708  
1. 596415 1. 314937  
2. 296955 2. 248827  
6. 516821 6. 121019  
3. 162043 3. 588859  
5. 681809 6. 938806  
2. 431367 2. 53958  
3. 388663 5. 058259  
4. 184932 2. 39618  
3. 086543 3. 534386  
2. 831367 1. 583382  
1. 201225 3. 089081  
2. 603071 4. 486234  
2. 469589 3. 257595  
1. 637893 2. 942891  
4. 061652 3. 418008  
2. 714932 1. 989051  
1. 949391 1. 801834  
4. 271222 4. 35237  
5. 752273 4. 986607  
2. 191513 1. 357271  
2. 20855 2. 689259  
1. 51436 2. 706331  
1. 932057 2. 141911

4. 104807 5. 213372  
2. 155627 1. 46113  
1. 863577 1. 928995  
3. 82575 3. 656577  
2. 481073 3. 156609  
1. 965486 1. 70506  
1. 394034 2. 729224  
1. 707798 2. 806344  
1. 27481 1. 650922  
5. 876809 6. 125932  
0. 759057 2. 851393  
3. 864133 3. 595575  
1. 409014 2. 128583  
1. 588823 1. 772448  
1. 400344 2. 443126  
5. 911225 6. 938033  
2. 886999 2. 872365  
1. 682038 2. 533538  
3. 904287 3. 205182  
2. 943746 4. 394861  
2. 482357 2. 812783  
8. 360221 9. 038116  
2. 782848 2. 533906  
2. 258877 2. 908872  
3. 440849 3. 423423  
4. 469023 2. 131853  
3. 809581 4. 421385  
1. 212798 2. 501838  
2. 52003 2. 646899  
1. 490053 1. 653631  
2. 327369 2. 201037  
0. 762379 1. 621422  
1. 36413 1. 16493  
1. 770656 2. 027623  
3. 155655 3. 73324  
0. 790084 0. 905515  
1. 497902 2. 320165  
1. 877685 2. 008762  
1. 361914 0. 418356  
6. 241338 6. 344293  
0. 898736 1. 561156  
1. 385934 1. 875912  
1. 265564 1. 53477  
0. 795749 1. 08316  
5. 024398 4. 404079  
2. 32774 0. 926197  
1. 598378 1. 9276  
3. 665863 2. 523843  
3. 523333 3. 375696  
5. 182951 4. 855596  
2. 636114 2. 893287

4. 953314 4. 63459  
2. 759962 1. 97693  
0. 819401 0. 904548  
1. 949005 1. 750521  
2. 188243 2. 568176  
2. 284059 1. 834971  
1. 967808 2. 231322  
3. 0979 2. 095247  
3. 747045 3. 827165  
3. 888171 5. 365673  
4. 043036 4. 284022  
4. 307712 3. 939312  
2. 40234 3. 429629  
2. 542851 3. 133062  
2. 275 2. 576839  
1. 767765 1. 76315  
5. 485197 5. 360466  
3. 446127 3. 373122  
1. 786032 1. 847512  
0. 911437 1. 811261  
1. 812143 2. 48665  
4. 344085 3. 044943  
6. 13293 6. 276288  
1. 380212 2. 218969  
1. 672955 2. 439604  
1. 782091 1. 843132  
3. 389149 3. 057303  
1. 32489 2. 39606  
4. 61433 4. 583482  
2. 107006 2. 158146  
1. 265148 1. 731358  
3. 239803 2. 587386  
1. 984596 2. 252077  
2. 468945 3. 154868  
3. 468219 2. 942579  
3. 678304 2. 753822  
1. 332931 1. 112595  
1. 668631 3. 264261  
1. 6285 2. 138444  
2. 004969 2. 400146  
6. 373079 7. 038454  
2. 469172 2. 053411  
1. 312041 1. 487199  
1. 925919 1. 726098  
2. 13498 3. 060364  
1. 653978 1. 506726  
3. 796281 3. 945695  
2. 375592 2. 207672  
2. 182171 3. 806592  
2. 13864 2. 577253  
3. 7149 3. 940086

2.931363 2.970681  
2.130278 0.955499  
1.091952 1.418572  
3.566853 4.15333  
4.031971 4.488129  
2.193899 2.650644  
2.581121 2.64408  
2.280557 2.352463  
1.941501 2.127239  
4.675127 3.117199  
1.823957 2.510147  
1.396392 2.053514  
0.621441 0.870914  
1.474093 1.123285  
1.647733 1.80953  
1.114792 1.461849  
1.423304 1.819824  
0.702387 3.149655  
1.167135 1.157519  
6.135104 5.402163  
1.669047 2.172  
1.30024 1.507277  
2.028204 1.527114  
1.64516 1.95261  
0.642964 1.805641  
2.102331 1.740424  
2.462894 2.318913  
4.426418 2.739838  
4.433273 3.770224  
4.229508 4.155714  
2.352153 2.282667  
3.039183 3.912913  
1.494007 3.661486  
1.539276 2.442512  
1.825879 1.25905  
0.682372 1.222988  
2.549701 2.566128  
1.276258 1.726568  
2.766354 2.614392  
1.351226 1.188641  
0.818768 1.455201  
5.166236 5.338837  
2.209277 3.673373  
2.629572 2.655218  
1.163905 1.179982  
0.944939 1.025618  
5.953301 5.164799  
3.058059 1.238332  
1.758998 1.746204  
5.497241 3.923984  
1.543448 1.349293

3.012895 1.796075  
2.926457 4.405388  
2.182149 2.822735  
1.029267 3.79653  
1.002089 2.569256  
3.792295 1.986973  
2.76138 2.210516  
3.256889 3.237964  
1.414561 1.621514  
1.876962 2.98208  
4.875446 5.467613  
1.837558 0.654708  
1.733782 1.501615  
2.358371 8.170217  
2.347686 2.44701  
1.908291 2.884496  
2.836242 1.936902  
1.357354 2.47192  
2.612301 3.478643  
3.186399 4.763601  
0.557414 2.035673  
0.924117 0.730889  
2.565346 1.794646  
3.884421 5.012351  
2.28077 2.462256  
2.991655 2.433614  
1.457948 1.330741  
1.334453 1.262109  
4.380461 2.699196  
1.751982 3.515322  
1.327511 1.246259  
2.017142 2.253151  
4.422705 5.089582  
2.685924 2.648608  
2.428174 2.249607  
1.685205 1.36208  
4.076665 4.32036  
0.886879 1.205048  
1.342209 2.133568  
6.511021 3.828573  
1.509469 1.375782  
0.726793 2.128214  
3.996786 4.36265  
2.026584 1.624831  
4.882619 4.26701  
3.595933 3.229338  
2.561215 3.352992  
1.787471 2.124578  
1.033993 1.25621  
1.464089 1.038207  
2.032051 1.9301

5.041625 5.780346  
1.490252 2.140867  
4.515504 4.014458  
1.821211 1.786674  
1.520764 0.708066  
3.585106 5.186451  
2.553045 2.120239  
3.247051 5.024604  
0.842424 2.000243  
4.489875 3.285602  
1.073869 1.275306  
2.098208 2.539832  
5.157754 4.797106  
2.835122 2.564721  
1.442639 1.897776  
1.099705 2.027452  
1.203553 1.76024  
5.85524 5.143949  
2.171452 1.830682  
2.098571 1.622623  
2.049903 1.583009  
3.258594 2.858342  
1.256961 1.838929  
2.092871 3.687122  
1.772153 1.929724  
3.354793 3.824616  
1.682048 2.249798  
6.06556 5.729444  
0.795173 0.896127  
5.574424 6.279357  
2.449571 2.091642  
1.600492 2.199902  
2.057192 1.979789  
1.634616 2.205853  
2.22298 2.192973  
3.132409 2.850944  
1.330943 1.473669  
6.34532 7.33004  
1.00388 1.212381  
3.181617 3.339795  
2.679697 2.259505  
5.570822 5.539977  
2.013758 1.759272  
6.299972 5.917894  
1.276977 1.624297  
4.2288 5.230573  
1.345147 1.876818  
1.970629 2.67742  
2.336049 4.779382  
1.129086 1.248778  
4.765071 5.093718

0.793389 1.47365  
6.188458 6.308693  
3.592922 1.823626  
4.395141 4.739925  
1.972075 2.130085  
6.245814 7.140043  
5.445344 3.122302  
5.160861 4.963944  
2.085143 2.368223  
1.41612 2.286741  
6.612808 7.963115  
6.696307 5.619364  
1.838862 2.223515  
1.291636 1.943857  
2.911505 2.233534  
1.44088 0.794428  
3.356453 5.374728  
1.611452 1.545036  
1.067199 1.643963  
1.226391 1.334935  
7.140501 5.641733  
1.593621 1.585374  
1.65491 1.366682  
2.830546 3.850018  
4.731538 6.202847  
2.064841 1.522421  
2.712725 3.403812  
1.537586 1.729431  
1.964816 2.694745  
1.285487 2.573505  
0.720574 1.31538  
3.798505 2.306696  
4.789775 4.063277  
4.763868 5.325056  
1.4958 2.459471  
6.719211 6.12194  
1.512664 1.96763  
3.46817 3.8482  
2.467653 1.784354  
1.265086 1.112221  
6.473469 5.551956  
1.798202 2.034676  
1.594057 1.370944  
2.261756 2.547163  
1.921889 1.69648  
0.750145 0.733308  
1.288882 1.786657  
3.376818 2.969136  
1.929557 1.501422  
1.764351 2.270241  
0.640493 1.051426



5. 161629 4. 000927  
1. 245049 2. 622991  
4. 654786 4. 177552  
1. 190007 3. 397958  
3. 078577 2. 634795  
1. 249395 0. 829952  
1. 197692 1. 722125  
1. 581907 1. 597851  
1. 136169 1. 935297  
1. 279929 1. 40188  
5. 866516 6. 308451  
2. 976747 2. 182875  
1. 55067 2. 12777  
1. 382276 1. 563567  
4. 488846 4. 521968  
1. 660579 2. 422678  
0. 818407 1. 592601  
4. 975668 4. 780863  
5. 544137 5. 341906  
2. 935851 2. 313378  
0. 598485 1. 021705  
1. 225277 3. 126345  
2. 92096 2. 479121  
0. 929523 3. 003804  
1. 780864 1. 9413  
1. 227461 1. 304246  
4. 076272 3. 288052  
1. 503156 1. 193757  
0. 89351 1. 341313  
1. 885276 1. 29774  
4. 736882 3. 048578  
3. 308644 2. 690869  
1. 0756 1. 376289  
1. 186495 1. 213968  
4. 347252 4. 816487  
1. 113557 0. 844245  
1. 00817 2. 410372  
1. 533755 2. 425701  
1. 043774 1. 528941  
1. 593322 2. 208286  
4. 056191 2. 37781  
2. 031994 2. 877985  
1. 814726 1. 688059  
2. 340432 1. 16162  
4. 462602 3. 765422  
4. 799912 4. 436622  
2. 047543 2. 332452  
2. 042308 2. 062105  
1. 7738 1. 912281  
3. 129721 1. 163795  
2. 031657 3. 214217

5. 20795 4. 779702  
0. 443993 1. 787303  
2. 054746 1. 619766  
1. 45549 2. 197238  
1. 781621 2. 107709  
1. 570317 1. 58404  
2. 27817 2. 795078  
0. 71476 0. 692834  
2. 524551 1. 463901  
2. 865014 0. 988701  
1. 268261 1. 327727  
1. 711661 0. 820211  
1. 653458 1. 406008  
3. 047223 2. 666515  
1. 477683 2. 332668  
1. 572177 2. 944073  
4. 897165 3. 032599  
3. 453601 4. 80932  
1. 676106 1. 999369  
2. 087145 1. 464857  
0. 970252 1. 115541  
3. 15414 2. 835577  
3. 23791 3. 284815  
1. 608773 1. 776609  
2. 065389 1. 918488  
2. 016807 1. 150262  
2. 929094 3. 213732  
0. 76597 0. 818238  
2. 882218 2. 676312  
4. 844863 5. 475467  
1. 442146 1. 590991  
3. 766245 2. 585005  
2. 860652 2. 65876  
1. 646977 1. 724191  
1. 97986 1. 230628  
4. 921854 5. 13156  
1. 757439 1. 905924  
3. 865361 3. 897563  
3. 763591 3. 145204  
6. 617406 6. 873195  
1. 960252 2. 393481  
0. 932993 1. 303227  
1. 275516 1. 502156  
1. 975287 2. 160976  
3. 525856 2. 993663  
1. 638286 2. 459133  
1. 325966 1. 484127  
1. 061249 1. 589368  
5. 583789 4. 441162  
2. 426399 1. 17354  
5. 405865 5. 402124

3. 710603 2. 219818  
2. 230505 2. 074053  
2. 967479 2. 598832  
1. 479776 1. 225682  
2. 732448 2. 336509  
2. 633208 2. 004271  
2. 883448 2. 184485  
1. 780004 2. 571824  
2. 214349 3. 165952  
5. 833436 7. 26157  
6. 0078 4. 7136  
1. 080116 1. 666874  
1. 530874 2. 672461  
0. 975186 2. 455853  
1. 354618 2. 537336  
1. 68195 1. 621809  
2. 133689 2. 20384  
1. 405823 1. 381244  
2. 320574 2. 554245  
1. 145427 1. 122359  
1. 799553 1. 656789  
3. 035063 1. 637878  
1. 621098 1. 432863  
1. 767186 2. 079152  
5. 256897 6. 362453  
3. 903295 3. 325991  
3. 291315 1. 637249  
1. 139548 1. 711391  
2. 705413 3. 380379  
2. 563541 3. 118831  
2. 217993 2. 363393  
2. 023724 2. 096504  
1. 291624 4. 322839  
3. 031975 2. 306397  
2. 925193 2. 645289  
6. 634065 6. 384256  
0. 905943 0. 971065  
2. 297524 3. 30855  
5. 475357 4. 852961  
2. 66178 2. 217134  
2. 716691 4. 499647  
2. 176596 2. 346585  
4. 355281 4. 269867  
2. 281497 1. 890569  
3. 724043 4. 578105  
2. 590612 1. 879117  
1. 337857 1. 91572  
1. 175037 1. 315326  
1. 357595 2. 046204  
1. 756649 3. 043813  
5. 865258 6. 414707

5. 864263 6. 245358  
2. 730834 4. 730683  
1. 525882 1. 390874  
7. 600741 7. 497255  
1. 111174 1. 287174  
1. 271042 1. 995125  
3. 01872 6. 930614  
0. 950858 1. 148836  
5. 794743 3. 607873  
5. 868799 3. 785861  
2. 073584 1. 701194  
3. 884303 3. 347768  
7. 60906 7. 786388  
1. 308672 1. 677421  
1. 287336 1. 694345  
0. 812387 1. 053869  
1. 188429 1. 123463  
0. 743012 1. 320236  
3. 100819 3. 684703  
1. 551024 1. 503678  
2. 109044 2. 456504  
1. 090482 1. 143259  
1. 767135 2. 673228  
1. 877037 2. 660915  
0. 979103 1. 616485  
1. 491788 1. 56781  
1. 06764 1. 764094  
1. 45641 1. 997232  
0. 865598 2. 274868  
1. 310829 1. 54208  
0. 786516 1. 819066  
0. 963277 1. 691637  
2. 563715 2. 661873  
0. 892914 0. 848463  
1. 610279 1. 403653  
1. 22498 1. 618855  
1. 311543 1. 039273  
1. 347531 1. 765146  
1. 15323 1. 803131  
2. 830771 1. 610588  
2. 964592 2. 89868  
0. 954103 1. 73913  
1. 129448 1. 912449  
1. 77039 2. 171459  
3. 342575 2. 537115  
1. 95425 1. 865257  
1. 708859 2. 959312  
1. 824819 1. 370092  
1. 902255 2. 18152  
2. 149382 2. 77609  
1. 183871 1. 995966

0. 830125 1. 074536  
1. 302373 2. 045673  
1. 955076 2. 541713  
1. 028955 1. 489303  
1. 318214 2. 661663  
3. 07662 3. 556504  
4. 431441 4. 037395  
0. 910017 1. 306627  
2. 535349 2. 11085  
3. 317296 2. 78175  
1. 775594 2. 335492  
0. 871597 1. 791397  
0. 476048 0. 495756  
0. 82059 1. 090045  
2. 311745 3. 793042  
2. 690747 2. 405613  
2. 456129 2. 153058  
1. 9336 1. 954406  
2. 280275 2. 311182  
2. 788689 2. 674014  
1. 487363 2. 007526  
4. 604567 1. 510885  
2. 602969 2. 059766  
1. 666288 1. 046233  
2. 234276 0. 925511  
6. 319715 6. 052253  
3. 05425 4. 316591  
1. 322809 1. 499204  
2. 787338 2. 711241  
1. 756313 1. 528237  
0. 596584 1. 038105  
1. 037838 2. 221102  
0. 784222 2. 183915  
3. 31059 2. 368088  
1. 285522 1. 225363  
1. 055059 1. 61765  
3. 42448 4. 404084  
1. 260788 1. 358878  
1. 03427 2. 648217  
1. 608428 1. 68664  
1. 043626 1. 72655  
2. 249921 2. 779002  
1. 163256 1. 24127  
2. 849772 2. 286638  
1. 242984 1. 156628  
2. 930252 1. 612053  
2. 308888 3. 643152  
6. 829328 5. 736346  
1. 013374 1. 365112  
3. 108022 1. 13593  
5. 346251 3. 285352

4. 339603 1. 338058  
4. 219697 1. 334704  
1. 398555 2. 056623  
2. 100483 4. 518923  
4. 772441 2. 327048  
3. 167943 1. 826226  
5. 655561 6. 210401  
1. 343325 1. 233991  
3. 578414 3. 91448  
4. 214971 1. 25032  
5. 572476 3. 517326  
3. 344449 1. 189948  
3. 588045 2. 062845  
1. 355637 1. 704727  
0. 790184 1. 431249  
0. 866865 0. 970653  
4. 967275 1. 480953  
6. 287309 7. 009181  
2. 844176 1. 607718  
1. 20422 1. 787483  
1. 358034 1. 770699  
3. 982716 3. 759091  
2. 0118 2. 998652  
1. 669763 1. 432531  
5. 782022 5. 297996  
0. 811286 2. 696062  
1. 449029 1. 902551  
7. 671876 7. 52296  
2. 939144 3. 720087  
1. 159886 1. 814809  
1. 023266 2. 053891  
1. 035988 1. 105659  
1. 897366 1. 382264  
6. 76109 8. 124613  
2. 117809 2. 624092  
5. 180426 5. 209881  
1. 112958 1. 393815  
2. 896434 4. 008189  
1. 23631 1. 481726  
1. 409391 1. 071467  
0. 863607 1. 110228  
2. 421312 2. 485341  
1. 166251 0. 9715  
2. 309695 2. 120679  
0. 624007 0. 635912  
1. 040846 1. 345846  
3. 503562 4. 386684  
1. 076271 1. 715218  
2. 037069 2. 593958  
1. 672183 1. 793254  
10. 44217 10. 47076

2. 397413 2. 848635  
2. 530487 1. 554039  
1. 980491 3. 797356  
2. 632065 2. 659787  
1. 651587 2. 064325  
4. 593475 1. 698113  
6. 346704 7. 725713  
5. 410036 4. 315696  
1. 210384 1. 928618  
2. 290718 3. 206232  
3. 904769 3. 973425  
3. 039195 3. 845961  
2. 365832 1. 88687  
0. 816479 1. 023834  
1. 149842 4. 892547  
8. 583732 8. 824361  
1. 060866 1. 736138  
0. 728707 0. 85534  
0. 64603 0. 815008  
4. 351389 5. 061325  
4. 707798 3. 992711  
5. 819829 5. 939563  
5. 913577 5. 168043  
2. 461383 2. 691426  
0. 592756 4. 969639  
6. 776404 7. 189657  
1. 117146 1. 920357  
2. 772675 3. 573045  
5. 921482 4. 590524  
1. 090646 1. 032037  
1. 691906 2. 919565  
1. 226724 3. 664189  
3. 674433 4. 022263  
0. 550324 0. 95777  
0. 815048 1. 124406  
6. 497437 5. 511589  
5. 907677 5. 835987  
5. 440523 8. 213411  
1. 013216 1. 663536  
1. 591003 1. 569493  
2. 717216 1. 843772  
3. 071312 3. 511163  
1. 62829 2. 58474  
1. 548335 1. 405601  
4. 404448 9. 588306  
3. 20236 3. 448183  
2. 710549 6. 086889  
3. 658102 6. 193854  
1. 134754 0. 947752  
2. 172328 1. 836413  
1. 418553 1. 18448

1. 591767 3. 715456  
4. 099931 7. 107324  
3. 627089 4. 816682  
0. 972988 2. 077492  
2. 203138 1. 409119  
1. 29145 5. 648558  
1. 816989 6. 616317  
0. 524607 7. 158315  
1. 623341 2. 385823  
8. 572386 8. 176252  
4. 538835 5. 022474  
2. 799222 2. 616013  
6. 681757 5. 964876  
6. 638035 7. 010674  
7. 61466 6. 016723  
7. 641643 7. 88808  
5. 638523 5. 403158  
1. 376858 0. 867896  
4. 572019 5. 786288  
7. 747697 8. 022457  
5. 219156 6. 063156  
0. 775931 1. 355677  
5. 933143 4. 883574  
4. 060889 3. 322657  
4. 312413 4. 49253  
7. 788088 8. 176267  
7. 09221 7. 288304  
6. 527351 5. 820277  
9. 55321 9. 307748  
7. 789181 8. 031924  
8. 785926 9. 054833  
5. 160255 6. 305579  
6. 356706 6. 942923  
7. 022394 6. 727181  
2. 56968 2. 379702  
5. 801451 5. 287068  
5. 391984 4. 743141  
1. 109503 1. 738141  
3. 645931 6. 35042  
3. 822204 4. 489023  
6. 504671 6. 898816  
6. 03346 6. 241859  
5. 011557 5. 86539  
4. 706026 5. 165668  
6. 306006 5. 994209  
3. 308423 4. 26666  
3. 41039 3. 585046  
2. 907777 2. 820047  
10. 18998 9. 787291  
6. 994288 6. 99352  
1. 863172 2. 824839



1. 917823 2. 176605  
2. 001534 2. 065502  
2. 322203 2. 422903  
5. 851276 6. 427457  
2. 715834 1. 640641  
4. 09002 4. 45875  
4. 561171 4. 443092  
1. 965909 2. 170352  
1. 100785 1. 630184  
7. 493525 7. 428109  
2. 366719 2. 802786  
2. 141336 1. 905639  
3. 7553 3. 941371  
6. 250518 7. 035106  
3. 399049 2. 835817  
4. 798184 3. 909778  
3. 716236 3. 734206  
4. 088006 1. 841204  
6. 804473 6. 808282  
7. 369875 7. 327551  
2. 051408 2. 801994  
4. 085359 4. 293631  
5. 42764 5. 472787  
7. 342035 6. 472525  
6. 23735 7. 090143  
1. 474369 2. 101698  
4. 779778 5. 676154  
7. 506299 7. 821816  
6. 039167 6. 001935  
7. 074391 7. 446529  
7. 160819 7. 004547  
5. 938059 6. 313329  
4. 069354 4. 410305  
4. 650345 5. 863562  
5. 598582 6. 567232  
5. 413108 6. 544458  
5. 842214 5. 78282  
3. 092868 5. 405426  
7. 209574 7. 062143  
6. 102504 6. 282675  
1. 897046 2. 165133  
3. 058393 2. 751333  
5. 798736 6. 142197  
7. 38815 7. 230104  
7. 793966 8. 191255  
7. 161212 7. 37101  
5. 52243 5. 357948  
6. 688324 6. 545132  
7. 272842 6. 818079  
7. 857812 6. 140159  
6. 170905 7. 13959

6. 313056 7. 06349  
6. 379622 5. 976955  
9. 023852 9. 359478  
4. 729275 2. 958776  
6. 163985 7. 335216  
1. 299901 1. 874066  
3. 726512 4. 866536  
5. 810509 6. 913654  
3. 065305 4. 050694  
5. 90132 5. 940681  
2. 983552 3. 630587  
2. 750945 3. 117121  
5. 748419 6. 28065  
7. 702933 8. 018892  
7. 362588 7. 883074  
1. 394781 1. 819936  
2. 709094 1. 63129  
1. 791905 2. 533123  
2. 897324 3. 03838  
4. 423045 3. 386809  
6. 452025 6. 130399  
2. 033548 1. 135353  
2. 884323 2. 185661  
5. 621356 2. 335455  
1. 764722 2. 635259  
1. 448579 2. 368535  
1. 183356 1. 547933  
2. 207108 1. 836453  
2. 960871 3. 475054  
1. 889954 2. 169482  
2. 383232 2. 34251  
1. 995796 1. 670643  
1. 444256 2. 030265  
4. 017693 2. 545708  
6. 477522 6. 271413  
2. 054688 1. 905755  
3. 228391 2. 254382  
2. 202654 2. 80116  
1. 740976 1. 82459  
6. 936875 6. 979877  
1. 183068 1. 75721  
6. 612722 6. 425852  
6. 380393 7. 071817  
7. 705671 7. 593537  
6. 842531 6. 391688  
5. 794013 5. 636184  
6. 862328 6. 269453  
5. 414573 5. 438694  
5. 667606 6. 201961  
1. 307475 4. 413603  
9. 276253 9. 284214

1. 751867 1. 355691  
6. 477273 6. 609454  
2. 943373 3. 69594  
6. 87767 6. 965772  
4. 97371 5. 398937  
1. 959512 5. 089347  
8. 841387 9. 546764  
3. 268172 3. 204957  
6. 678591 6. 560809  
7. 999116 7. 854259  
4. 917995 4. 75509  
6. 639693 7. 395248  
5. 230355 5. 866415  
5. 199893 5. 736732  
5. 687586 6. 569768  
5. 991393 6. 882325  
6. 222025 5. 861129  
4. 371394 5. 228126  
3. 813695 3. 022714  
6. 94742 8. 005437  
7. 385372 7. 872177  
4. 04712 3. 339649  
2. 734202 1. 612153  
5. 462349 5. 448782  
4. 105243 3. 647023  
7. 192576 7. 132233  
2. 471674 2. 815076  
1. 940796 2. 109012  
9. 206319 9. 145632  
5. 978829 6. 203157  
5. 813187 5. 588349  
1. 554575 1. 623623  
3. 908816 4. 040499  
4. 515278 4. 114696  
3. 940515 3. 701702  
3. 672399 3. 996268  
2. 72886 3. 124548  
2. 91676 2. 577666  
5. 774787 5. 546455  
1. 810134 1. 769041  
9. 256455 9. 665761  
4. 244734 5. 739996  
2. 861196 2. 435991  
2. 076177 1. 813961  
5. 021356 5. 38079  
4. 731454 4. 016943  
1. 684801 1. 712535  
4. 863503 4. 394226  
3. 151902 3. 219776  
1. 968308 1. 519919  
7. 071965 6. 230786

7. 505711 7. 612757  
2. 699302 1. 618039  
4. 820274 4. 266982  
6. 17859 6. 142888  
5. 178561 5. 460787  
1. 764109 1. 379408  
2. 213834 1. 979484  
0. 922253 1. 005719  
4. 871192 4. 685863  
1. 267541 1. 561772  
7. 929974 8. 154104  
6. 192733 6. 122994  
1. 432392 1. 912282  
2. 726266 2. 765759  
4. 716864 5. 429513  
3. 660809 3. 664388  
4. 301937 5. 177686  
4. 823985 4. 428108  
5. 420367 5. 377994  
3. 977521 5. 132655  
4. 059021 3. 528771  
4. 38115 3. 699376  
3. 886469 4. 271121  
7. 245917 7. 988214  
2. 206548 2. 22264  
2. 345801 2. 118237  
4. 621716 4. 452093  
2. 444065 4. 352656  
4. 287987 4. 061728  
2. 22471 2. 128368  
1. 596107 1. 940155  
5. 506541 5. 49441  
3. 257036 3. 321172  
4. 721595 4. 8388  
6. 428258 6. 310926  
5. 025522 5. 802373  
5. 954859 5. 767688  
4. 119782 5. 414351  
6. 17799 5. 859886  
4. 071574 5. 808409  
5. 509089 5. 044762  
3. 43998 3. 631008  
5. 722115 4. 978771  
8. 35636 8. 538737  
4. 579668 5. 000431  
4. 77145 5. 852949  
5. 524745 5. 643188  
1. 025329 1. 0742  
2. 690901 2. 951679  
0. 872357 0. 847196  
6. 883103 6. 894941

1. 818586 1. 462083  
8. 752268 8. 529745  
0. 83175 1. 183128  
6. 907828 5. 672375  
2. 320751 2. 564481  
2. 900974 2. 656836  
2. 035932 1. 508786  
3. 495203 2. 928045  
5. 219207 3. 940624  
4. 195021 3. 502022  
1. 536082 1. 444083  
3. 162785 2. 693191  
2. 023473 2. 536395  
2. 093104 2. 488134  
4. 673861 5. 054821  
0. 904972 1. 104336  
5. 021252 5. 931518  
2. 006749 2. 144497  
5. 02936 4. 87854  
7. 891489 7. 743713  
5. 594872 5. 1819  
2. 879052 2. 061179  
7. 330763 7. 922073  
5. 1046 6. 809615  
4. 682928 5. 083363  
1. 715507 1. 516208  
3. 426017 4. 197357  
6. 940465 7. 088613  
5. 202293 5. 065796  
5. 534706 2. 912385  
4. 737459 4. 613001  
3. 547488 3. 172357  
4. 287356 5. 195865  
3. 034014 2. 46015  
6. 508836 6. 102609  
8. 356306 8. 373687  
3. 029609 2. 143605  
4. 146093 3. 503969  
6. 080238 4. 812295  
3. 806655 4. 568148  
3. 199612 2. 80299  
2. 244189 1. 51026  
4. 288464 3. 764326  
1. 549514 2. 186671  
1. 445687 1. 824714  
2. 393399 5. 152072  
4. 753092 4. 667436  
2. 676438 2. 402669  
7. 287305 6. 720726  
6. 156259 6. 574266  
8. 179967 8. 303422

3.400061 3.850918  
1.360176 2.025864  
3.324633 1.99714  
5.815305 4.545841  
11.60206 10.48519  
6.588165 6.30974  
7.311798 7.508116  
7.323082 7.353856  
3.003591 2.71708  
2.333049 2.499278  
2.334988 2.308373  
7.000609 7.016662  
2.778448 2.435377  
4.615802 4.646456  
1.936293 2.985122  
1.737845 2.32154  
3.470536 3.890645  
8.121977 8.614916  
7.021957 7.0183  
2.602923 1.849137  
8.239372 7.867885  
4.48489 3.413489  
7.597534 7.249409  
0.80083 0.996365  
0.880482 0.891239  
4.665134 7.014619  
0.884154 1.447016  
4.380158 5.012501  
8.14515 8.244447  
6.608473 7.556653  
2.470933 3.32123  
8.915034 9.398957  
9.587623 9.146963  
3.24487 3.079917  
3.546214 2.697182  
5.831245 6.726796  
6.829925 7.620165  
6.716734 6.97774  
8.663532 8.528315  
7.476624 7.010429  
5.921408 6.248949  
1.165871 1.278222  
4.460305 5.555919  
1.66954 1.529603  
1.418709 1.583786  
2.909228 2.64488  
9.054397 10.90836  
2.993885 3.112861  
10.8582 12.23133  
3.25067 3.065162  
9.87005 11.13428

1. 051295 1. 288026  
1. 606836 1. 5492  
1. 935769 3. 040867  
2. 393666 2. 471016  
9. 090044 9. 003558  
1. 697957 1. 350389  
5. 581241 5. 34441  
3. 940583 3. 308585  
6. 273413 5. 836528  
3. 365791 3. 234282  
5. 753853 6. 43978  
1. 440093 2. 887293  
2. 814165 2. 508387  
1. 671798 2. 602935  
2. 236981 2. 163685  
6. 43706 6. 251248  
6. 937392 7. 108172  
7. 372602 6. 952215  
1. 845796 1. 866268  
4. 960463 6. 083381  
8. 217499 8. 295587  
4. 475729 5. 43799  
2. 26828 1. 416997  
3. 770942 4. 140895  
7. 500504 8. 107205  
7. 823173 7. 76158  
7. 546239 7. 957807  
3. 610589 2. 233603  
7. 36194 7. 485021  
0. 985057 1. 107505  
2. 576197 1. 684304  
3. 119441 2. 854842  
1. 181977 1. 670552  
2. 295997 2. 256326  
6. 467368 6. 973303  
1. 43943 1. 793461  
3. 333864 1. 579924  
2. 895333 3. 685178  
2. 155054 2. 776766  
4. 428569 4. 362503  
2. 239085 3. 703751  
4. 112164 3. 972981  
3. 229212 2. 216679  
4. 543247 4. 208332  
3. 752952 5. 118678  
5. 224869 6. 090353  
1. 735881 1. 839185  
6. 586936 6. 54987  
5. 771145 6. 304293  
1. 689386 2. 195932  
6. 22119 7. 397765

8. 291939 7. 837001  
6. 332474 6. 704788  
4. 141124 5. 130754  
6. 446813 5. 928982  
2. 634285 2. 566231  
2. 78634 4. 008109  
5. 344484 6. 801466  
10. 11539 9. 982994  
2. 483797 1. 586371  
8. 726411 8. 352933  
6. 30709 5. 507273  
8. 495514 8. 214787  
9. 054303 9. 378536  
6. 370074 5. 890064  
6. 746275 5. 701073  
7. 296038 7. 255021  
5. 972202 6. 561398  
4. 550714 4. 351741  
7. 342856 6. 24859  
3. 839666 3. 037207  
1. 573715 1. 519156  
4. 650476 3. 424846  
6. 321901 6. 809949  
7. 642541 7. 841283  
8. 002457 9. 195431  
7. 117525 8. 21775  
6. 063835 7. 607595  
8. 563055 8. 786769  
2. 601729 3. 540671  
5. 102432 5. 36494  
1. 838403 2. 301851  
8. 659725 9. 168109  
6. 179869 5. 937617  
2. 201698 2. 896936  
7. 277896 8. 906382  
3. 857959 4. 140661  
5. 455428 5. 365105  
5. 958207 5. 398203  
3. 011935 3. 237016  
9. 351865 10. 08458  
6. 40922 5. 907063  
7. 293093 1. 532923  
3. 095494 2. 902406  
2. 111311 2. 596196  
4. 654607 3. 6368  
9. 130582 8. 593929  
6. 143738 6. 649482  
2. 922575 3. 557844  
4. 139837 2. 219191  
1. 302894 1. 961694  
2. 792503 2. 827063



2. 666058 3. 28247  
4. 95622 5. 728362  
4. 189963 3. 701678  
3. 784508 3. 647025  
1. 95412 2. 987241  
5. 373456 4. 974182  
5. 781164 6. 605017  
2. 784708 3. 686373  
1. 866544 2. 177491  
2. 386527 2. 181119  
4. 294592 4. 429455  
5. 785249 4. 540486  
5. 996292 5. 96449  
2. 642375 2. 183376  
3. 941518 4. 390096  
1. 744956 2. 766636  
6. 306097 5. 696813  
5. 797627 5. 185159  
5. 108952 4. 422767  
3. 083013 3. 296921  
1. 452684 2. 301313  
1. 321867 1. 734326  
3. 496187 2. 552799  
1. 841911 3. 145498  
2. 519599 2. 649696  
3. 770534 3. 687207  
2. 076878 2. 693305  
1. 207643 1. 140159  
3. 422933 3. 856318  
5. 023261 5. 830124  
5. 846201 6. 790544  
2. 203654 1. 993936  
6. 422694 6. 498544  
2. 310652 2. 009613  
1. 976832 1. 291087  
0. 807865 1. 12667  
1. 91632 1. 704765  
1. 76486 1. 693477  
1. 573505 2. 040859  
3. 217967 3. 201975  
2. 946059 1. 648386  
0. 950279 1. 094063  
5. 667674 5. 310977  
7. 666 9. 145594  
2. 597883 3. 480962  
2. 326792 3. 138594  
8. 353565 8. 111586  
4. 478081 3. 895951  
9. 45929 8. 982231  
7. 437103 7. 671602  
8. 354036 7. 32821

8. 828323 9. 116893  
6. 043908 6. 544189  
9. 182758 8. 082227  
9. 587182 9. 255203  
4. 679279 3. 936952  
1. 673197 2. 484245  
1. 003299 1. 467644  
10. 34535 10. 24364  
1. 0475 0. 775984  
1. 536678 1. 738746  
2. 33813 2. 313393  
2. 540441 1. 752599  
7. 439005 7. 500521  
8. 724816 8. 453983  
2. 536762 1. 787171  
2. 350267 2. 362866  
4. 213893 3. 913618  
4. 170316 3. 576793  
2. 069466 2. 596075  
5. 371842 4. 413336  
1. 675487 2. 097628  
3. 94184 4. 160883  
6. 471562 5. 6883  
3. 391445 3. 483419  
6. 881201 6. 941596  
3. 746293 4. 734201  
5. 986365 5. 791943  
3. 648031 2. 803884  
1. 293923 1. 640136  
1. 805483 2. 668706  
5. 938264 5. 255298  
2. 514398 2. 074966  
7. 393844 7. 073741  
5. 193522 3. 492114  
3. 056366 3. 395544  
4. 355861 2. 799058  
4. 979454 3. 904767  
5. 880954 7. 568744  
3. 228888 3. 579677  
2. 849461 3. 006277  
1. 831682 1. 88588  
5. 246678 5. 79242  
3. 481781 2. 809345  
7. 759407 6. 419246  
5. 10856 2. 583098  
4. 971455 5. 234998  
4. 454934 4. 920567  
2. 293473 4. 010335  
1. 172281 1. 715995  
2. 190775 2. 282696  
4. 027566 4. 320341

3. 463541 3. 608223  
4. 081969 3. 03542  
2. 849769 3. 150325  
3. 020502 3. 477224  
3. 079694 2. 820857  
3. 536397 5. 185178  
2. 630348 3. 357581  
1. 524688 1. 55668  
1. 237594 1. 838514  
8. 657809 7. 925775  
2. 63936 0. 862198  
2. 721435 3. 700285  
4. 220671 4. 286222  
8. 160627 8. 064332  
3. 499296 4. 020718  
5. 494843 4. 923643  
1. 428168 1. 325504  
5. 116031 5. 611753  
4. 615533 3. 775979  
2. 102593 1. 294244  
1. 441514 2. 289195  
1. 452848 1. 296923  
1. 636741 1. 895334  
3. 362319 3. 821591  
2. 335647 1. 77437  
5. 983243 6. 541401  
2. 706716 2. 913423  
4. 873269 6. 233688  
2. 42281 3. 71563  
7. 749142 7. 523293  
5. 410578 5. 246526  
2. 855429 2. 893265  
2. 283702 2. 800708  
3. 613103 4. 979902  
1. 068754 1. 164935  
2. 483594 3. 096349  
7. 031609 6. 885047  
1. 503938 1. 805617  
5. 329418 6. 306614  
5. 899261 6. 493329  
7. 129218 7. 147562  
9. 336764 9. 837646  
1. 16888 2. 017522  
1. 47779 3. 141748  
6. 338702 6. 794487  
2. 47321 2. 269273  
4. 754031 4. 382458  
3. 240896 3. 618236  
1. 539697 1. 943426  
1. 973816 2. 257204  
8. 237967 7. 571932

5. 451591 5. 5053  
4. 620355 4. 952897  
1. 799678 3. 6046  
6. 220324 5. 531118  
4. 894558 4. 100465  
4. 531546 4. 696337  
8. 568834 8. 466883  
9. 381731 8. 870657  
9. 478135 9. 473708  
3. 049285 3. 291177  
4. 609132 6. 128101  
7. 338677 7. 71368  
9. 641783 9. 552422  
5. 124165 5. 74171  
3. 074614 2. 557064  
1. 609191 1. 41626  
10. 69375 10. 86367  
8. 327916 8. 442605  
7. 885137 8. 040899  
6. 280812 7. 633031  
4. 960886 3. 447296  
5. 987998 5. 572468  
4. 036175 3. 819457  
10. 3557 10. 68941  
7. 717819 7. 919949  
1. 82921 3. 883696  
4. 739594 5. 073447  
5. 749304 7. 24177  
1. 734291 3. 30864  
3. 038115 2. 87956  
6. 746283 5. 864098  
3. 519366 4. 526699  
5. 846582 5. 908163  
7. 514525 7. 388461  
0. 77673 1. 449521  
1. 011472 1. 174558  
10. 12665 9. 511716  
1. 510912 2. 429739  
1. 707874 2. 103118  
1. 17429 1. 524555  
2. 162577 1. 610416  
1. 814703 1. 390217  
1. 125216 1. 457784  
6. 642076 4. 900371  
1. 226343 1. 566637  
1. 143138 1. 768949  
1. 22716 4. 461483  
1. 694951 2. 18598  
2. 442182 1. 943749  
1. 519013 2. 744444  
2. 455184 1. 820883

6. 601951 5. 571006  
2. 241267 2. 044823  
7. 239709 7. 666492  
3. 370259 3. 806155  
1. 318383 1. 510905  
7. 559214 7. 471682  
5. 680834 5. 388915  
2. 48783 3. 656178  
5. 934007 7. 142985  
1. 63496 3. 643481  
1. 715554 1. 624027  
1. 101369 2. 699237  
1. 361681 1. 905891  
0. 759422 1. 004119  
1. 81374 2. 412705  
1. 462306 2. 20497  
2. 368197 3. 10221  
1. 402023 1. 948443  
0. 762113 1. 731128  
1. 260296 0. 782485  
0. 855297 1. 985109  
2. 964462 1. 973148  
1. 344448 1. 677407  
1. 35164 1. 038547  
3. 45672 2. 545903  
2. 77437 2. 60229  
2. 11746 2. 374226  
1. 009789 1. 057459  
0. 921228 1. 141223  
1. 393172 2. 144841  
2. 921777 3. 327616  
2. 422379 1. 898808  
3. 317877 2. 291963  
3. 878316 4. 291556  
1. 186684 1. 488768  
5. 969943 4. 899166  
1. 479874 1. 417545  
1. 288725 1. 374793  
1. 35176 0. 980901  
1. 264014 2. 214895  
2. 536386 2. 938078  
1. 161944 1. 451171  
1. 028994 1. 196738  
2. 620743 2. 389112  
1. 171549 2. 812273  
4. 342675 6. 3066  
1. 837314 2. 488022  
2. 734889 1. 47941  
1. 301233 1. 677254  
7. 430434 7. 824077  
1. 276037 1. 354856

2.046137 1.985747  
1.283743 1.348983  
1.828897 2.337939  
2.696739 2.67142  
2.192465 1.959582  
2.917877 4.368517  
1.240089 1.64692  
1.388939 2.376745  
5.306459 4.654946  
0.977315 1.289744  
0.804114 1.399486  
2.129173 2.838416  
1.054686 1.266526  
1.028564 2.104202  
3.412246 3.89988  
4.418036 5.238609  
2.187617 2.254193  
2.26893 2.037118  
0.98311 1.771469  
1.601976 1.623137  
1.790502 1.688816  
3.906775 3.649633  
1.547732 2.351692  
2.302693 1.687923  
0.976762 1.067804  
2.11384 2.162053  
5.129272 3.592718  
1.637927 2.108076  
1.441638 2.831019  
2.780315 3.276933  
1.186873 1.148614  
1.18372 1.166298  
0.847714 1.000356  
4.956402 0.767132  
2.037227 1.815493  
1.45969 2.330725  
1.399191 1.385254  
2.750838 1.819687  
2.465527 1.606605  
3.166877 1.922701  
2.651473 2.736136  
3.287992 3.487205  
6.287864 6.888349  
2.168609 2.735529  
1.688528 2.030101  
1.150261 1.705922  
4.605067 4.959438  
1.905814 2.331524  
4.449034 4.558037  
2.379515 1.848601  
1.92143 2.10105

5. 233303 5. 726288  
3. 621255 5. 335421  
3. 643696 4. 911771  
1. 204561 2. 176583  
1. 827849 1. 233184  
3. 320094 3. 402658  
6. 419756 5. 140026  
3. 941156 5. 383523  
1. 845921 3. 726638  
1. 083681 1. 301499  
0. 856848 2. 243199  
3. 200737 3. 975215  
6. 763079 7. 035989  
4. 09685 3. 519446  
2. 878474 3. 856448  
1. 498587 2. 466574  
2. 395823 2. 060334  
1. 80897 3. 208666  
1. 940969 2. 793405  
1. 896519 1. 380779  
2. 828127 2. 713281  
3. 776222 2. 051754  
2. 126785 1. 499522  
4. 750198 5. 427733  
2. 731425 3. 762539  
1. 245778 2. 490556  
2. 389842 2. 126342  
0. 840783 0. 938451  
1. 370733 1. 682058  
4. 119077 2. 565552  
3. 713137 3. 567457  
3. 123008 2. 761597  
1. 702858 2. 885918  
5. 067097 3. 799192  
2. 298283 2. 619681  
1. 538597 1. 514304  
1. 366162 1. 947889  
3. 155493 2. 020382  
1. 49219 1. 748824  
4. 76837 6. 279597  
2. 67928 2. 471694  
1. 776328 2. 29879  
3. 407089 3. 088602  
1. 069364 2. 308674  
0. 95021 1. 269576  
0. 775928 1. 585675  
1. 628868 2. 501763  
1. 575549 1. 843395  
1. 849511 2. 026418  
2. 690225 1. 904619  
6. 612632 7. 076932

6.496331 6.61337  
1.962031 1.538088  
1.270621 2.177229  
1.820545 2.314465  
2.812032 1.608225  
2.185565 1.954518  
2.028093 2.361294  
1.471225 2.232077  
2.805308 1.562149  
7.936175 7.823417  
5.21812 5.943521  
6.440322 6.430247  
2.001227 1.679805  
1.444336 1.887133  
1.617552 1.886778  
1.619813 3.378651  
2.293283 2.935844  
3.640824 1.641902  
2.8242 1.677129  
1.247155 1.174844  
2.625015 2.848448  
2.7119 2.356199  
1.701369 2.34855  
4.821925 4.727231  
4.006039 2.854376  
1.704307 1.75873  
2.551304 1.305264  
1.157227 2.702413  
2.186967 1.875329  
2.479898 1.461895  
2.221074 2.641783  
1.609026 1.993428  
2.367945 2.384646  
6.367048 7.234291  
1.053452 1.328159  
3.147027 1.674967  
1.287168 1.387597  
2.365379 2.719009  
2.190962 2.216729  
6.626001 6.050595  
1.89721 1.739497  
1.607881 1.189323  
1.985799 1.803065  
3.169183 2.911825  
1.817375 1.484615  
5.506678 5.246509  
1.158607 1.035004  
1.485386 2.175773  
1.199841 2.015673  
1.986356 2.158472  
1.949879 1.948525



2. 577079 1. 528373  
1. 880717 2. 124086  
4. 260157 4. 274955  
1. 557463 2. 619982  
2. 58325 3. 122026  
3. 82944 4. 106606  
3. 984126 1. 594329  
2. 959274 3. 317825  
2. 212633 1. 747308  
2. 097469 3. 195121  
2. 735645 2. 132438  
1. 229252 2. 106322  
6. 088023 5. 12624  
1. 941846 1. 296697  
1. 376711 1. 967003  
1. 465889 1. 935834  
2. 957319 3. 020023  
2. 373629 2. 452657  
2. 420895 2. 367315  
2. 354651 2. 540746  
1. 549835 1. 671326  
0. 999352 1. 292509  
6. 092167 6. 129762  
4. 566193 4. 696222  
1. 383158 1. 70243  
2. 915615 1. 371217  
1. 683113 1. 479093  
3. 35888 4. 150544  
5. 341533 4. 429507  
0. 507458 1. 181173  
2. 192297 2. 268342  
8. 138184 8. 310232  
1. 08128 1. 484461  
3. 161442 2. 602591  
1. 122242 1. 639011  
3. 169518 2. 789169  
2. 276756 2. 774012  
1. 740595 3. 665696  
1. 042235 1. 312406  
2. 024114 3. 16093  
1. 533143 1. 628789  
1. 982818 1. 665953  
1. 36276 1. 756894  
1. 322988 1. 521239  
1. 237346 1. 813658  
1. 956484 2. 619376  
3. 519924 3. 286821  
1. 028755 1. 810261  
3. 241323 3. 304303  
3. 793326 2. 027652  
1. 265752 1. 499242

0.916365 2.100187  
1.533198 1.362578  
2.373371 2.231699  
1.384908 1.582032  
1.701183 2.702744  
1.514558 2.374958  
1.599328 1.861035  
0.534949 0.812274  
2.314216 2.053558  
1.786935 2.529444  
1.169525 1.248812  
1.102415 1.742477  
1.662996 2.970366  
2.608005 2.451618  
2.361314 2.751399  
2.110093 2.165052  
1.459314 1.886639  
1.717674 2.145763  
1.717867 2.133698  
2.877953 2.726937  
3.534927 3.493446  
1.625513 1.861108  
6.666868 6.533791  
1.4307 1.693634  
5.382794 5.998533  
2.10848 2.524794  
0.957931 1.090825  
5.554983 5.915792  
1.756073 1.321247  
6.753005 6.137298  
2.201518 6.616188  
2.414625 2.7633  
2.545225 3.716617  
6.401606 6.205688  
1.617597 2.639779  
2.226031 3.410227  
2.091469 2.040486  
6.671755 7.078162  
3.599649 3.910213  
1.453392 1.612113  
3.611532 3.137299  
6.054637 4.926497  
1.170503 1.742829  
7.956935 7.230366  
2.227161 1.545174  
2.365064 3.303551  
2.975869 3.104177  
1.996519 3.311872  
2.990344 3.112508  
2.011394 2.125734  
1.702926 1.789463

2. 98651 2. 67687  
5. 683578 5. 354767  
0. 655191 0. 983906  
1. 537276 2. 234332  
3. 295061 3. 524284  
2. 847615 3. 292561  
1. 376668 2. 153481  
8. 064093 8. 014012  
1. 994802 1. 974857  
3. 86698 2. 930869  
2. 41206 1. 713198  
3. 379165 2. 910348  
3. 761275 3. 170922  
2. 018277 2. 23019  
2. 720228 2. 755986  
3. 864868 3. 53422  
2. 000146 1. 890065  
8. 856682 9. 292087  
2. 008742 1. 628154  
1. 367361 1. 406769  
4. 016195 1. 567365  
1. 224097 1. 82354  
2. 512607 4. 45779  
2. 42267 2. 993608  
5. 387013 6. 251599  
2. 357522 1. 596889  
3. 121964 3. 805022  
0. 954131 0. 836124  
3. 57988 2. 95261  
5. 345308 5. 733206  
1. 289686 2. 257905  
3. 968418 4. 506434  
1. 187161 1. 824363  
0. 885543 2. 531869  
3. 881705 4. 097896  
2. 097047 2. 585942  
5. 939359 6. 923055  
0. 900273 1. 699307  
3. 453774 3. 939392  
1. 289165 1. 659319  
2. 130343 1. 854629  
1. 89449 2. 584099  
2. 112063 2. 516534  
0. 836387 1. 916419  
6. 112191 6. 671685  
1. 736775 2. 052547  
2. 69785 2. 731615  
1. 741595 2. 143913  
1. 168608 1. 164006  
1. 820218 1. 693458  
1. 454427 1. 153409

4. 865566 4. 578503  
1. 309819 1. 396483  
2. 878489 3. 276842  
0. 764089 0. 804304  
1. 606994 2. 597879  
1. 07011 1. 509282  
2. 94959 2. 259866  
1. 470525 1. 59344  
0. 721005 1. 501107  
3. 681357 2. 731468  
2. 159892 1. 680825  
4. 415505 3. 077591  
1. 13378 1. 620746  
1. 983959 2. 126503  
1. 266153 1. 867135  
0. 588446 1. 34952  
1. 612375 1. 840385  
1. 982016 1. 809172  
2. 720673 3. 813721  
2. 451321 2. 48104  
2. 059488 2. 166645  
1. 154174 1. 876842  
1. 140678 1. 806181  
1. 130865 1. 537934  
1. 131002 1. 647651  
1. 713744 1. 688555  
3. 627537 4. 338295  
1. 059128 0. 723257  
1. 634598 1. 505168  
1. 576335 1. 745036  
0. 730941 1. 467664  
1. 378085 1. 834664  
3. 184097 2. 432543  
1. 678638 2. 523898  
1. 537386 1. 526599  
1. 079443 0. 835709  
1. 96637 1. 726595  
2. 220079 1. 466434  
1. 040481 1. 053198  
0. 878076 0. 977865  
1. 007242 1. 441097  
2. 197175 2. 497424  
3. 104036 2. 705282  
8. 229031 8. 237759  
2. 553617 2. 596845  
6. 387703 5. 394333  
0. 884038 1. 339452  
2. 286345 2. 25195  
1. 754999 1. 928165  
0. 755778 1. 494251  
1. 153855 1. 240481

5. 285962 5. 553104  
6. 495051 6. 37809  
2. 76055 1. 861701  
1. 029586 1. 291894  
1. 293049 1. 423464  
7. 629707 7. 300338  
2. 811248 3. 147196  
1. 097663 1. 147211  
6. 178799 6. 996232  
2. 576735 3. 005346  
1. 870127 2. 128646  
1. 364459 2. 026124  
5. 47025 5. 759638  
1. 505199 1. 932273  
1. 313781 1. 518772  
5. 55864 2. 303468  
1. 26831 1. 914469  
2. 253839 2. 442379  
2. 258772 1. 817218  
1. 286045 1. 319784  
2. 445527 2. 244251  
0. 891801 1. 040471  
4. 06243 2. 588527  
1. 844732 2. 139296  
2. 101948 1. 813656  
2. 97068 3. 606422  
1. 485677 0. 87387  
1. 764935 1. 060932  
2. 093874 2. 613737  
1. 988201 2. 527072  
1. 368175 1. 761821  
4. 940388 3. 877104  
1. 566036 1. 958926  
2. 033039 1. 689659  
1. 677488 2. 102744  
2. 164069 1. 814151  
1. 851331 2. 134212  
1. 607086 1. 997234  
2. 093311 2. 039751  
0. 906204 1. 493578  
1. 618791 2. 318089  
1. 626664 3. 529795  
1. 50449 1. 824898  
1. 886372 1. 238389  
4. 002082 5. 4192  
2. 468843 1. 715712  
1. 464085 2. 062582  
4. 459494 5. 008047  
2. 890256 1. 673095  
2. 201682 3. 268343  
2. 589796 3. 539262

3. 827324 4. 408094  
4. 46982 5. 520273  
4. 759906 5. 793544  
1. 639132 2. 704866  
1. 71436 1. 716146  
1. 831093 1. 997656  
2. 009025 1. 085373  
4. 899688 5. 195603  
2. 449454 3. 058674  
4. 815226 4. 91641  
6. 920743 7. 27059  
3. 014233 3. 557745  
6. 392002 5. 262601  
10. 28271 8. 677032  
3. 691748 4. 39072  
1. 616432 1. 783313  
4. 938576 4. 987282  
3. 865458 3. 079542  
7. 288159 6. 337285  
6. 318426 6. 599256  
1. 290492 1. 303215  
5. 633438 2. 538083  
1. 425341 1. 922728  
2. 871855 3. 12567  
2. 227865 2. 133679  
5. 026065 7. 023671  
5. 01806 3. 115114  
5. 216773 5. 139458  
6. 884172 6. 309646  
1. 661423 2. 371078  
3. 920515 2. 698396  
3. 053155 2. 732392  
2. 503784 2. 37358  
2. 679357 3. 54257  
4. 432723 5. 94107  
8. 140329 8. 599553  
3. 523303 2. 668089  
4. 496615 2. 51895  
5. 256456 7. 639864  
2. 517422 2. 121078  
2. 892313 5. 050146  
1. 31043 1. 970016  
4. 681417 4. 117533  
8. 164149 8. 51752  
4. 077062 3. 532018  
1. 427776 2. 879491  
2. 060113 1. 105866  
2. 014352 1. 344338  
0. 922034 0. 926108  
11. 65151 11. 69286  
2. 979045 2. 667813

2. 56288 2. 837554  
1. 868174 1. 998204  
1. 619478 1. 434809  
4. 484752 5. 40493  
6. 175743 6. 415956  
5. 509391 5. 610623  
3. 779489 2. 784869  
11. 18099 11. 24664  
3. 394801 3. 852617  
3. 218244 3. 092059  
2. 982827 2. 706034  
3. 290078 2. 282342  
0. 799965 1. 55962  
5. 968187 6. 748599  
2. 393717 7. 565757  
1. 012914 0. 859225  
3. 951467 4. 461549  
3. 402606 3. 446953  
2. 23285 5. 283119  
1. 349607 1. 487863  
1. 818046 1. 980933  
1. 31095 2. 24111  
7. 378869 7. 902872  
4. 640166 10. 94515  
3. 167024 7. 914064  
3. 609778 2. 324479  
3. 364202 5. 778432  
1. 687672 4. 454229  
2. 405763 3. 304633  
2. 000993 1. 40299  
4. 004252 5. 333128  
6. 885314 10. 81441  
7. 231718 6. 928415  
10. 60157 9. 928419  
2. 213031 1. 193972  
1. 983198 2. 234029  
5. 345671 5. 392954  
2. 880526 3. 45084  
0. 995457 1. 18559  
3. 525526 4. 060666  
2. 694794 3. 087784  
4. 041671 4. 97281  
2. 029182 2. 961083  
1. 398686 1. 628579  
1. 421971 2. 662138  
0. 689624 3. 751614  
1. 156632 1. 407608  
3. 235999 3. 62198  
1. 42642 1. 379732  
0. 872336 3. 196059  
3. 895565 2. 756946

3. 621102 2. 023842  
1. 727636 1. 68944  
0. 908884 0. 745952  
2. 376011 1. 774467  
0. 902175 1. 534986  
4. 548735 4. 171054  
3. 87386 3. 428757  
5. 114413 5. 470027  
1. 816001 2. 309073  
4. 923981 3. 438882  
1. 000765 1. 1765  
1. 427427 1. 388552  
5. 58624 6. 005019  
2. 768666 1. 488372  
2. 067446 2. 380147  
1. 250881 1. 067851  
2. 854192 3. 079417  
1. 467788 1. 954298  
2. 484547 1. 717679  
1. 335868 1. 682827  
5. 333864 4. 456207  
2. 203156 1. 571751  
3. 279779 9. 005068  
6. 015545 5. 506287  
1. 642994 3. 132759  
1. 524283 2. 100203  
1. 779783 2. 220501  
1. 840123 2. 043275  
8. 175586 7. 825551  
5. 39548 4. 183638  
1. 285594 1. 769809  
2. 202602 3. 378765  
7. 02103 6. 067017  
4. 828814 6. 008715  
1. 713225 2. 613223  
0. 781005 1. 651021  
2. 397148 2. 17743  
4. 644846 4. 623304  
4. 330646 3. 434195  
4. 221797 3. 318819  
1. 326511 1. 89228  
4. 241138 5. 072669  
1. 400079 1. 575924  
6. 418235 5. 739657  
2. 991194 1. 805957  
2. 328781 2. 36183  
1. 913861 1. 920566  
1. 884093 1. 196174  
4. 499586 4. 619036  
10. 12906 9. 467055  
4. 448481 2. 667591



4. 301131 3. 191582  
2. 813254 5. 970854  
1. 527567 1. 933639  
1. 573147 1. 537849  
1. 782891 1. 649177  
2. 455015 3. 320769  
1. 445523 1. 529883  
3. 022396 2. 548007  
2. 422375 2. 086661  
3. 915934 4. 876239  
6. 116974 7. 062014  
1. 894183 1. 98162  
8. 751113 8. 353739  
3. 685748 5. 257957  
1. 446213 2. 22345  
1. 200173 1. 976449  
1. 668295 1. 638263  
1. 129644 0. 992396  
1. 438456 1. 962607  
2. 078626 2. 134652  
8. 469837 8. 378253  
0. 806429 1. 18926  
2. 106149 1. 487923  
1. 148757 2. 114384  
6. 733092 7. 04305  
7. 058129 7. 993723  
6. 914363 6. 577543  
4. 479037 4. 239733  
2. 111623 3. 672712  
5. 726515 4. 881018  
1. 152848 2. 003617  
1. 619027 1. 788529  
2. 012976 1. 785706  
2. 593459 1. 964448  
6. 417831 6. 398906  
2. 337779 2. 0345  
1. 069751 1. 290223  
1. 414 1. 655896  
1. 283437 2. 011208  
3. 460325 3. 195457  
1. 849224 3. 363967  
1. 469895 1. 781583  
3. 630514 4. 380311  
6. 359534 6. 248199  
8. 070888 8. 274548  
6. 742673 6. 183257  
5. 225562 6. 866423  
8. 705845 9. 096602  
3. 7282 4. 570316  
5. 361689 5. 53558  
4. 859451 5. 316411

6. 28804 5. 264728  
1. 506183 1. 790529  
3. 192482 2. 655001  
1. 596459 1. 912063  
2. 325146 2. 464618  
1. 583141 2. 507586  
5. 383607 6. 283496  
1. 345753 2. 059735  
1. 747796 4. 700432  
1. 904213 3. 318569  
1. 033742 1. 314386  
4. 500921 4. 683832  
5. 554991 4. 360454  
1. 966419 2. 310641  
1. 60932 1. 87013  
5. 111973 4. 135716  
6. 239087 5. 876979  
5. 383222 4. 417373  
3. 35392 3. 377793  
6. 661828 6. 361632  
4. 911266 4. 121044  
1. 481368 1. 710044  
2. 84253 3. 585073  
5. 045705 4. 747815  
2. 722519 2. 29119  
5. 683783 5. 065753  
1. 843427 2. 311022  
8. 300392 8. 843317  
2. 601007 0. 346093  
2. 218773 2. 376629  
5. 104404 4. 765154  
5. 534202 2. 763163  
3. 023637 3. 811253  
7. 620524 6. 247348  
3. 643896 4. 184845  
6. 270637 5. 90998  
5. 720386 6. 253877  
7. 230294 6. 139033  
4. 608979 4. 307501  
1. 473076 1. 79863  
2. 9595 2. 853769  
4. 293016 4. 199471  
3. 288757 2. 828195  
3. 953655 4. 152568  
2. 983435 2. 864095  
2. 356112 3. 425352  
1. 209133 1. 869342  
2. 497453 3. 408841  
8. 864817 8. 381756  
4. 802889 3. 71771  
1. 969698 1. 989505

10. 18444 10. 14774  
3. 882107 4. 218459  
5. 591691 4. 843123  
3. 286566 2. 872759  
5. 382288 4. 675841  
5. 33013 3. 605201  
1. 43338 2. 740324  
1. 925454 1. 695113  
2. 941179 3. 208162  
1. 929988 2. 549474  
10. 37804 9. 996347  
2. 517386 1. 659444  
9. 810741 9. 783764  
3. 291688 4. 705926  
3. 388372 3. 272206  
9. 074247 8. 887051  
2. 335422 2. 3232  
5. 338795 4. 940338  
6. 686335 7. 302386  
6. 603274 3. 478832  
1. 566874 2. 382685  
9. 847363 9. 972521  
1. 572798 1. 605988  
2. 413201 3. 552277  
2. 18637 2. 088483  
6. 733832 6. 463807  
5. 480868 5. 1625  
2. 474771 2. 232452  
1. 380505 2. 521017  
8. 001224 7. 897118  
6. 002597 5. 316317  
4. 725767 5. 829311  
2. 73177 3. 280246  
4. 871431 4. 711095  
5. 934712 4. 655041  
5. 70377 4. 451481  
4. 177382 2. 946981  
3. 738685 5. 458975  
1. 285546 1. 833131  
4. 103079 2. 266979  
8. 818434 8. 127578  
6. 111497 5. 120503  
3. 028594 3. 330856  
6. 297315 4. 4775  
6. 281177 6. 423458  
6. 436777 7. 214139  
7. 372912 7. 284217  
7. 30139 7. 564953  
8. 385934 7. 981585  
3. 437066 2. 569454  
6. 962016 7. 375702

2. 485026 2. 372466  
1. 427013 2. 428083  
7. 137997 6. 828739  
2. 701178 3. 112941  
1. 978484 2. 330457  
1. 966319 2. 14166  
3. 139235 3. 623631  
2. 29863 2. 797145  
3. 663381 2. 49921  
6. 222565 5. 290556  
3. 887117 3. 493175  
4. 743766 5. 839258  
1. 726389 1. 936755  
1. 862821 1. 251605  
7. 529959 5. 849232  
0. 965785 1. 641118  
3. 574237 3. 320161  
3. 735542 2. 480962  
3. 200086 3. 185414  
1. 482373 1. 114214  
7. 50998 8. 068396  
1. 334715 2. 211296  
2. 948388 3. 351497  
1. 881614 2. 042497  
3. 433608 3. 082273  
1. 493854 2. 304124  
10. 35679 7. 716776  
1. 538419 1. 672515  
1. 150381 1. 490319  
2. 184325 1. 88454  
2. 808641 3. 51845  
1. 924837 2. 193523  
5. 05468 4. 806264  
2. 150926 2. 945347  
2. 936719 2. 494191  
3. 558783 3. 574109  
3. 389548 3. 341612  
1. 720358 1. 299571  
2. 690924 2. 620935  
1. 682043 2. 45231  
1. 371469 1. 606973  
1. 212488 1. 08727  
3. 352957 3. 367564  
2. 735556 1. 256225  
1. 147726 1. 238084  
5. 462062 4. 271116  
4. 276887 4. 197977  
3. 451692 3. 722938  
1. 237282 1. 666809  
3. 631136 3. 642487  
7. 135754 8. 176799

3. 541393 3. 719108  
1. 225775 1. 555023  
3. 184732 2. 876029  
3. 183135 3. 715494  
4. 433533 4. 625835  
4. 620107 4. 315976  
1. 984117 3. 046477  
2. 444787 2. 450471  
3. 950634 4. 091545  
3. 626917 2. 538655  
1. 590242 2. 376726  
2. 117846 2. 147128  
5. 352935 6. 146416  
2. 383331 2. 26022  
6. 614733 5. 63839  
1. 685056 1. 455659  
4. 931303 4. 681566  
4. 625792 3. 959711  
3. 530871 2. 45046  
7. 440016 6. 365058  
7. 060199 6. 713178  
3. 035854 3. 312338  
5. 904117 5. 670168  
3. 217421 2. 917381  
3. 433129 2. 127385  
3. 77935 3. 134004  
2. 275629 2. 763643  
1. 28708 1. 776722  
4. 973953 5. 392513  
5. 671901 4. 892998  
3. 257423 3. 778201  
1. 231423 1. 751165  
6. 210552 6. 355401  
3. 389774 3. 651715  
2. 394429 2. 170831  
3. 720256 3. 028812  
2. 178259 3. 21444  
1. 165794 1. 046314  
3. 592452 2. 683112  
4. 048538 4. 864996  
1. 953399 1. 442495  
2. 801516 1. 46296  
5. 058571 4. 153451  
5. 426998 5. 012508  
3. 573986 3. 99988  
1. 868842 1. 59877  
1. 229813 1. 381534  
0. 9972 1. 271814  
1. 241886 1. 875634  
1. 157831 1. 29533  
1. 673884 1. 527234

2. 709531 3. 187304  
2. 043095 2. 304952  
2. 553592 2. 15727  
1. 952771 1. 960322  
2. 72704 2. 900847  
5. 965367 5. 557632  
5. 723149 4. 95419  
4. 391512 6. 075343  
2. 383971 2. 345626  
2. 234211 2. 674976  
4. 926623 4. 531571  
3. 003247 3. 533418  
3. 737221 4. 276275  
3. 051277 3. 274813  
2. 46602 2. 066214  
3. 074866 2. 600868  
10. 35922 10. 15926  
4. 804659 2. 057254  
1. 957253 2. 759611  
2. 581069 2. 52895  
3. 712613 4. 374127  
2. 232381 1. 878067  
1. 728795 1. 559736  
2. 19034 1. 58075  
3. 572328 3. 368439  
2. 204662 2. 455402  
2. 033985 1. 854267  
3. 842987 7. 393202  
2. 346379 2. 213119  
1. 552485 1. 862454  
1. 320927 1. 806838  
2. 473279 2. 520535  
6. 438483 6. 008698  
4. 223354 3. 659599  
1. 906321 2. 44805  
1. 49586 2. 160695  
1. 61001 2. 629414  
7. 147314 6. 261517  
6. 802931 6. 522162  
3. 557636 4. 506175  
2. 489498 2. 028131  
2. 167461 2. 703618  
3. 925744 2. 687376  
1. 734329 2. 877977  
2. 009061 2. 479711  
4. 176152 3. 042449  
6. 888644 6. 966582  
1. 378968 1. 547369  
2. 897761 3. 631793  
1. 737443 1. 768533  
2. 34807 3. 286019

1. 719155 1. 818302  
4. 506298 4. 83764  
1. 323693 1. 789447  
1. 505025 1. 586462  
2. 082976 2. 377083  
5. 711966 3. 068853  
1. 310597 1. 866707  
1. 215752 1. 708271  
0. 831909 1. 949707  
3. 070909 2. 559263  
1. 68019 2. 081109  
2. 374185 3. 818105  
1. 522162 2. 743154  
2. 738453 1. 66344  
11. 66082 10. 99219  
7. 630786 7. 654708  
5. 856612 4. 752763  
6. 216042 3. 665845  
0. 951287 1. 673607  
2. 333225 2. 741827  
9. 905165 8. 579417  
3. 083804 2. 945228  
3. 037156 3. 85769  
7. 240942 7. 569075  
3. 365746 4. 378103  
1. 60637 1. 70904  
9. 224218 8. 914145  
4. 183731 4. 462281  
7. 250124 7. 352698  
1. 556528 1. 153984  
2. 583067 3. 003074  
1. 950503 1. 69565  
3. 882235 3. 115864  
1. 911202 2. 817233  
1. 581335 2. 403791  
2. 047085 2. 735828  
2. 744513 3. 467266  
3. 16734 3. 405786  
2. 490724 2. 62629  
2. 563774 2. 932543  
2. 371481 2. 412982  
2. 493698 2. 236041  
3. 459616 6. 255926  
3. 227246 4. 19522  
1. 628722 1. 095688  
2. 473013 2. 349235  
1. 026079 0. 899796  
2. 200115 2. 467541  
5. 614171 6. 018931  
8. 673664 7. 559312  
8. 375534 7. 666693

2.110571 2.06123  
2.452885 2.745012  
1.598169 1.542297  
3.979203 4.58831  
5.762168 5.315554  
7.842969 7.930601  
6.305239 7.002477  
6.183697 5.919107  
2.047261 2.022189  
6.477181 7.128056  
6.156277 5.889477  
8.134254 7.669396  
6.14104 6.536125  
6.853069 6.704489  
1.572848 0.925701  
2.640992 2.107705  
1.531331 2.114842  
3.935205 4.225128  
1.885281 2.070869  
1.727843 2.249534  
1.233039 2.10493  
2.890221 1.354518  
1.430669 1.561233  
3.854151 5.998782  
2.758253 2.875029  
1.285613 1.337594  
2.473827 3.661521  
1.353581 1.488043  
2.075497 2.268003  
2.75492 2.175939  
1.185357 1.468403  
1.586823 1.758761  
1.300994 1.902042  
3.875936 3.408605  
1.253285 1.775403  
1.488672 1.56296  
4.166159 3.583716  
1.424962 2.222976  
3.500519 4.722249  
1.053272 2.500586  
2.132694 2.412906  
2.925696 3.001901  
1.779307 1.79511  
1.722815 1.841051  
2.359565 2.319258  
3.282673 3.034919  
4.099854 3.474272  
1.314904 2.158799  
3.037399 2.113342  
1.416792 2.937498  
3.252302 3.750349



3. 231054 3. 321919  
1. 916686 1. 752238  
4. 332108 4. 157939  
4. 319183 3. 087617  
1. 593818 1. 877889  
6. 779825 7. 532272  
4. 163575 2. 798552  
3. 492953 2. 251309  
2. 398409 3. 472543  
1. 151987 3. 016914  
1. 373933 1. 958042  
3. 384311 2. 242791  
1. 552606 1. 5949  
3. 820025 2. 044073  
6. 09786 5. 136359  
5. 22276 5. 004265  
0. 997801 0. 947196  
0. 582739 0. 916842  
1. 612028 1. 693812  
3. 062666 3. 092837  
1. 032457 1. 068726  
1. 983266 2. 227801  
1. 240348 1. 520228  
5. 225993 4. 316413  
1. 148352 2. 297075  
1. 712576 2. 032825  
5. 634314 6. 739383  
3. 829201 3. 393867  
3. 133056 2. 329903  
6. 242103 5. 250344  
6. 061253 7. 362933  
2. 004356 1. 433367  
1. 788309 0. 641177  
2. 892844 3. 113796  
1. 591228 1. 723629  
4. 597395 2. 740952  
2. 196368 2. 460945  
7. 379012 7. 630444  
6. 239196 6. 024432  
1. 611264 1. 377634  
2. 701427 2. 711169  
4. 433695 3. 159076  
1. 959994 2. 148774  
2. 718816 2. 424578  
1. 904843 2. 548066  
1. 15241 1. 333088  
1. 083467 1. 484624  
2. 385969 2. 12888  
1. 477358 1. 445981  
2. 234021 2. 699533  
1. 328827 1. 198509

5. 624706 3. 993916  
1. 652145 1. 723057  
2. 920613 3. 761276  
4. 667801 4. 381742  
0. 979323 1. 046777  
2. 860478 2. 134068  
3. 706023 3. 716699  
1. 159703 2. 96454  
2. 498977 1. 900243  
0. 877949 1. 679053  
0. 918069 1. 288346  
7. 378504 6. 956031  
2. 755704 0. 972133  
3. 634534 3. 362186  
6. 188169 7. 739157  
1. 359436 2. 237204  
3. 384516 2. 475731  
4. 025808 4. 615971  
1. 270788 2. 141581  
0. 8543 0. 406316  
4. 87993 6. 041829  
6. 333857 6. 300717  
1. 463899 2. 021119  
0. 814291 1. 489311  
2. 511491 2. 859969  
10. 65538 10. 51876  
1. 867243 2. 521053  
2. 698309 3. 041738  
2. 627528 2. 216785  
2. 030855 2. 060321  
5. 987025 7. 979202  
4. 24544 3. 939459  
1. 295584 1. 319259  
1. 550185 3. 416939  
5. 792101 7. 028455  
2. 436019 2. 0764  
1. 709931 1. 59393  
3. 258831 3. 065891  
1. 409991 2. 087508  
2. 426246 3. 127027  
2. 411729 2. 207793  
3. 392643 3. 65302  
4. 134153 5. 410971  
1. 177739 1. 371045  
2. 620738 1. 856372  
4. 152467 2. 238842  
1. 77762 2. 198066  
1. 124483 1. 443999  
2. 229555 2. 307145  
3. 310048 2. 682994  
4. 150365 4. 582986

3. 30595 3. 145797  
1. 356118 2. 216637  
4. 547595 3. 211446  
3. 07211 3. 054553  
3. 156187 3. 693463  
1. 308064 1. 020845  
1. 46507 2. 954949  
2. 795993 2. 433296  
2. 132488 2. 668815  
2. 245946 2. 476053  
1. 748647 1. 298625  
5. 759816 6. 065092  
2. 642185 3. 289001  
1. 44807 2. 969735  
1. 780532 2. 266207  
2. 010175 1. 042358  
2. 084715 2. 606465  
2. 114881 2. 249378  
3. 263842 3. 573332  
2. 083172 1. 489173  
0. 983383 1. 942015  
1. 396645 1. 13349  
1. 932051 1. 700616  
1. 48534 2. 027216  
2. 016255 2. 880353  
4. 747278 4. 314539  
1. 513293 1. 850624  
2. 744723 2. 252963  
3. 499319 3. 491731  
1. 610794 1. 567352  
1. 130509 1. 808399  
5. 537368 4. 53992  
1. 586673 2. 751605  
2. 842635 5. 833957  
4. 484611 3. 749884  
2. 156245 1. 733982  
3. 368734 3. 598991  
3. 332167 4. 380916  
1. 479549 1. 267123  
2. 193485 3. 669062  
3. 438374 3. 999382  
1. 290987 2. 270954  
1. 436842 1. 180048  
3. 255205 3. 20769  
1. 809289 2. 314575  
4. 038896 3. 876349  
3. 125761 3. 284823  
1. 015519 2. 190094  
1. 008802 1. 065361  
3. 701826 2. 675647  
2. 760938 2. 53432

1. 193118 2. 213714  
5. 94792 5. 353395  
3. 379266 2. 968004  
2. 949877 2. 202186  
1. 231231 1. 122702  
1. 940288 2. 484313  
1. 943073 1. 601991  
1. 311143 1. 949339  
1. 340114 1. 616048  
2. 357783 4. 308033  
3. 066071 2. 796882  
3. 000144 2. 800063  
4. 328952 5. 49672  
3. 18069 3. 230761  
1. 54747 1. 415786  
2. 622169 4. 417529  
7. 630205 8. 157629  
2. 486355 1. 292565  
3. 605229 4. 028945  
1. 620681 1. 653056  
2. 978254 2. 493975  
1. 698235 2. 413274  
2. 388162 1. 918986  
1. 292845 1. 998354  
2. 429874 2. 666459  
3. 533987 3. 258621  
1. 34133 1. 811291  
2. 383392 2. 507775  
1. 660743 2. 364185  
1. 799096 1. 53231  
2. 100956 0. 95707  
1. 576038 2. 858918  
3. 186023 3. 525666  
1. 044127 2. 779178  
1. 580746 1. 535736  
2. 054708 2. 742588  
2. 434264 2. 206868  
2. 349246 2. 61919  
5. 301883 6. 652728  
3. 186796 2. 74507  
1. 68409 1. 323339  
5. 114165 3. 9477  
2. 498654 2. 618861  
7. 887231 7. 76312  
2. 756291 1. 125122  
1. 193504 1. 382729  
1. 457645 2. 868035  
1. 542348 1. 417179  
2. 225906 2. 800031  
3. 940328 3. 031809  
1. 259014 1. 441374

1. 184036 1. 399073  
3. 078692 3. 019988  
2. 340129 1. 189964  
1. 927845 1. 540965  
2. 14199 1. 973628  
3. 663878 2. 438581  
1. 512991 1. 742727  
1. 843736 2. 783423  
0. 85868 1. 665887  
1. 251555 1. 516442  
5. 266404 2. 652097  
2. 981986 2. 649165  
1. 091918 0. 935634  
1. 073283 1. 689069  
1. 073457 1. 40094  
1. 395958 0. 83403  
1. 44858 1. 96298  
1. 159028 1. 194642  
1. 964048 2. 763085  
2. 110803 2. 488251  
2. 372411 2. 989361  
4. 923191 5. 701175  
1. 55351 2. 526355  
0. 972636 1. 795343  
1. 35037 0. 999402  
1. 171561 1. 132328  
2. 299977 3. 087249  
1. 88394 2. 237845  
3. 186826 4. 259201  
2. 118264 1. 948128  
1. 219079 1. 458076  
2. 825716 2. 638838  
2. 450612 2. 483615  
2. 616945 2. 901549  
4. 48974 5. 322162  
6. 000494 6. 971278  
2. 770646 2. 5205  
1. 021205 1. 967429  
1. 047952 1. 511358  
1. 415216 1. 659705  
0. 778709 1. 388337  
1. 032002 1. 188732  
2. 999133 2. 797867  
1. 769868 1. 786689  
2. 222294 3. 488617  
5. 880929 6. 636074  
8. 319754 8. 722634  
1. 784416 2. 669379  
5. 116401 5. 936928  
8. 917154 8. 435895  
1. 405294 2. 061569

3.986429 4.073795  
1.739319 1.979492  
1.258352 1.045003  
0.730591 0.885905  
2.375158 2.601004  
1.468405 1.950957  
1.276856 1.128972  
1.265636 1.546395  
1.110629 1.919499  
2.810634 1.868148  
4.516659 3.924776  
2.450043 3.604432  
3.531055 4.078716  
1.261384 1.248195  
1.311163 1.483285  
1.212591 1.614479  
5.605235 6.405984  
1.687515 1.720621  
0.900382 1.973993  
6.15926 3.99723  
1.449428 1.387943  
2.103767 3.371446  
2.939749 3.684236  
1.495726 2.148015  
2.483699 2.770732  
2.067085 2.314511  
2.922914 3.159267  
1.5683 1.882977  
1.813689 2.400865  
2.09786 1.722074  
2.680928 3.054403  
1.497797 1.787331  
1.637796 1.075194  
1.905204 2.912889  
4.624175 3.699125  
3.058336 2.457726  
1.85964 2.545922  
3.02381 3.370342  
3.692617 3.547403  
8.895317 8.952554  
5.984326 5.372402  
1.187737 1.302624  
3.80501 2.667827  
1.740174 2.515499  
0.980853 1.318099  
1.470474 1.361165  
1.399204 1.986695  
1.154493 2.125394  
1.624051 2.105416  
1.115968 1.182108  
2.351373 2.003501

1. 450344 1. 191187  
1. 072081 1. 222611  
1. 695613 4. 012089  
1. 336882 1. 696027  
1. 11462 1. 443577  
1. 313838 1. 656495  
1. 195399 1. 114338  
1. 326401 2. 015112  
1. 173337 1. 736499  
2. 080577 1. 667814  
0. 883198 1. 241591  
2. 055203 2. 958621  
1. 415334 1. 670337  
2. 101993 1. 769146  
0. 713551 1. 849922  
1. 342058 1. 286719  
1. 271679 1. 783752  
0. 718787 0. 632966  
2. 393437 1. 081517  
0. 87522 1. 238017  
0. 652698 1. 931883  
1. 676015 2. 664408  
1. 129633 1. 52679  
0. 851169 1. 413575  
2. 260815 3. 779161  
1. 507412 1. 484427  
4. 683333 4. 321384  
1. 732744 1. 55532  
1. 660674 1. 445846  
1. 008207 1. 213383  
1. 915128 2. 188782  
1. 340785 1. 386128  
1. 158637 1. 372123  
1. 64409 2. 693825  
1. 42205 2. 151079  
2. 670299 2. 24  
2. 535711 3. 423431  
1. 098761 1. 555051  
2. 17756 2. 347767  
1. 311602 1. 767453  
2. 194505 2. 56189  
1. 527217 2. 00416  
1. 895429 1. 220364  
1. 116419 0. 9149  
1. 707431 1. 883054  
1. 002303 1. 349894  
1. 773367 2. 016989  
3. 060076 2. 943733  
0. 733544 2. 134969  
1. 275225 2. 787392  
1. 02667 1. 667156

0. 847532 1. 033722  
2. 305972 3. 324882  
0. 661205 1. 820196  
2. 20453 1. 538415  
1. 803983 2. 543621  
1. 286286 2. 271352  
1. 437141 1. 403036  
1. 244839 1. 649143  
2. 255474 2. 845161  
1. 298328 1. 602788  
2. 608193 2. 71698  
1. 527054 5. 316739  
1. 435777 0. 971593  
1. 617514 1. 681839  
2. 709267 3. 106132  
2. 045674 2. 180318  
1. 518397 1. 677931  
3. 374233 3. 178908  
1. 129609 2. 429937  
0. 933971 1. 768431  
1. 381882 0. 953625  
3. 595755 3. 964262  
1. 891284 2. 317064  
3. 03698 2. 810462  
1. 377541 1. 919172  
1. 840284 1. 116717  
2. 091594 1. 981356  
1. 549273 1. 718205  
1. 67894 2. 559958  
1. 504454 2. 122301  
1. 846631 1. 728871  
1. 918835 1. 413768  
2. 147778 2. 75648  
1. 47307 1. 709763  
1. 874703 1. 18353  
1. 746423 2. 219912  
1. 276174 1. 824368  
6. 352796 3. 416745  
6. 493116 7. 477402  
3. 164274 2. 509917  
1. 580195 2. 74567  
1. 233543 1. 882399  
3. 112055 2. 549326  
1. 155537 1. 880944  
2. 829061 3. 024859  
5. 142417 4. 576869  
1. 911575 2. 128681  
1. 389587 0. 914563  
4. 525788 3. 231958  
6. 405115 5. 734011  
0. 716143 2. 570024



1. 470672 1. 030773  
2. 150448 2. 082588  
2. 302243 1. 415858  
0. 945729 1. 106869  
2. 371845 2. 883951  
4. 605573 3. 937797  
1. 643559 2. 661024  
1. 223621 1. 328965  
1. 163922 1. 727543  
1. 441659 1. 66252  
1. 52652 1. 43788  
4. 965286 4. 150705  
1. 597309 1. 524517  
3. 096457 3. 297343  
2. 431535 2. 875723  
4. 302922 4. 580692  
1. 077172 1. 073058  
0. 781164 1. 12775  
5. 799859 4. 622104  
1. 680349 1. 901899  
1. 237191 1. 025996  
1. 193309 1. 706995  
1. 497965 3. 340836  
6. 0202 5. 656256  
8. 272094 8. 245332  
0. 697121 1. 307956  
8. 282095 7. 160873  
1. 181237 1. 53209  
2. 103628 2. 708991  
1. 363871 1. 261439  
7. 665233 6. 984387  
1. 076009 1. 395644  
8. 430371 8. 466561  
2. 136773 1. 605726  
1. 152872 1. 360294  
1. 546462 2. 501426  
3. 714853 2. 811868  
5. 032808 5. 558073  
7. 794053 7. 8629  
1. 193868 1. 901699  
1. 843298 1. 093078  
1. 37477 1. 779889  
2. 877102 2. 321043  
1. 598136 0. 722711  
1. 893198 1. 662349  
2. 641289 1. 726483  
1. 099879 1. 524935  
3. 05963 2. 402157  
0. 594208 1. 784021  
2. 453516 3. 957377  
1. 749231 2. 622517

1. 627627 1. 735738  
1. 534997 1. 57305  
0. 930384 1. 552302  
2. 250796 3. 201704  
1. 949199 2. 096509  
4. 446119 5. 473254  
3. 131846 3. 679241  
2. 409103 2. 421402  
8. 180328 9. 01215  
2. 403866 2. 101088  
1. 309951 1. 711526  
1. 766887 1. 886951  
8. 227181 8. 602991  
1. 451782 1. 298326  
6. 136915 5. 885131  
2. 925679 3. 833188  
2. 013335 2. 453494  
1. 305981 0. 901932  
3. 271763 3. 909022  
6. 432349 6. 773304  
6. 279921 5. 006197  
1. 308916 1. 225062  
4. 211072 5. 05708  
2. 890754 3. 34214  
2. 320071 2. 39233  
9. 043653 9. 23565  
1. 596492 1. 786443  
4. 872671 4. 142332  
7. 574293 7. 162487  
0. 9666 0. 89065  
1. 332753 1. 257255  
5. 529562 5. 944711  
5. 802979 5. 551809  
2. 109746 2. 098361  
10. 50623 10. 99286  
6. 083585 3. 565624  
5. 753854 7. 075461  
6. 405479 6. 512685  
3. 091584 3. 416021  
2. 559339 1. 890703  
2. 422302 2. 546109  
9. 155897 8. 930798  
6. 865859 7. 144911  
2. 451016 1. 794263  
2. 546435 2. 634566  
2. 745791 3. 827164  
8. 728871 8. 080235  
4. 279849 4. 031289  
9. 343315 9. 636799  
4. 854675 3. 180764  
6. 659219 6. 357794

1. 893295 1. 826474  
5. 528038 5. 208121  
4. 411331 3. 069595  
5. 141895 4. 765924  
3. 968888 3. 14502  
6. 477723 6. 407137  
2. 855144 2. 324358  
3. 213388 2. 814942  
3. 648361 2. 225293  
7. 094873 7. 181111  
2. 483158 3. 363487  
1. 232173 1. 588572  
2. 853429 3. 058378  
4. 886457 4. 534932  
5. 302021 5. 966678  
3. 204156 4. 260858  
4. 710272 5. 248795  
2. 056941 2. 871359  
2. 686246 1. 816358  
2. 671146 2. 40063  
5. 964426 5. 200977  
2. 049861 2. 391492  
1. 386895 1. 526831  
2. 157493 1. 79548  
2. 396074 3. 035453  
2. 510463 3. 04573  
2. 316865 1. 921267  
2. 787562 2. 356229  
1. 211336 1. 766818  
3. 599166 4. 28313  
3. 110321 2. 937997  
1. 210283 1. 086784  
6. 913254 3. 590292  
0. 921729 2. 234841  
1. 270541 1. 989595  
1. 272129 1. 995524  
5. 751209 5. 762189  
2. 262915 1. 802215  
1. 882736 2. 008349  
2. 671101 2. 871851  
1. 718422 1. 733686  
1. 608353 1. 917513  
1. 759726 1. 970989  
3. 043889 2. 907608  
2. 760449 3. 118301  
1. 629446 2. 726405  
8. 452979 8. 130661  
1. 981472 1. 81262  
5. 291835 4. 829561  
2. 312424 2. 945917  
2. 363244 2. 618555

1. 873266 1. 726719  
1. 498776 1. 510745  
4. 600821 5. 415477  
1. 615845 1. 102362  
1. 167993 1. 314893  
2. 789434 3. 604966  
6. 782852 6. 811058  
2. 255254 1. 563824  
3. 82185 4. 200037  
2. 100907 1. 54391  
1. 170028 1. 219431  
5. 370242 5. 146258  
3. 586409 3. 459201  
1. 479523 1. 439179  
0. 966704 1. 312791  
3. 260492 3. 160232  
1. 734089 1. 733767  
1. 446109 2. 424287  
6. 365942 6. 025617  
2. 452027 2. 253321  
1. 042044 1. 943582  
1. 31768 2. 206392  
1. 066767 1. 182576  
3. 17434 1. 92022  
1. 658785 1. 393997  
2. 142617 4. 211733  
1. 852763 3. 060994  
1. 211982 1. 117835  
1. 447798 1. 98416  
1. 617637 1. 911897  
3. 847014 2. 08526  
2. 227444 3. 14083  
4. 856784 5. 085622  
2. 550647 2. 334423  
2. 304002 1. 104011  
3. 575644 2. 473182  
5. 611754 6. 325553  
1. 081055 1. 509346  
4. 368196 3. 258394  
1. 023815 1. 139263  
1. 252181 1. 512913  
1. 371096 2. 742834  
5. 903877 4. 55786  
1. 16585 1. 357519  
1. 438007 2. 03896  
3. 702485 3. 518659  
1. 758658 2. 165149  
1. 714931 2. 528258  
1. 662719 2. 336276  
3. 390447 2. 347383  
2. 629026 3. 0728

5. 414988 5. 642689  
4. 646394 3. 950636  
4. 847401 4. 577733  
1. 398125 1. 736131  
4. 360733 4. 357183  
3. 040318 3. 059849  
1. 65535 1. 951723  
2. 156891 1. 869587  
2. 039704 1. 732715  
1. 400519 1. 467231  
1. 484224 1. 656442  
0. 95265 1. 394105  
1. 644767 1. 876283  
1. 043034 1. 649668  
1. 839864 3. 034815  
2. 292008 2. 200347  
1. 024731 2. 123264  
1. 892022 2. 208216  
3. 817401 2. 474428  
2. 937315 3. 8803  
3. 348163 3. 062267  
2. 495938 3. 04015  
1. 237752 1. 190198  
3. 576273 2. 856536  
2. 824298 2. 931624  
1. 380797 1. 244418  
0. 889813 1. 57295  
2. 088039 1. 691521  
3. 8595 4. 106398  
4. 652488 4. 949167  
4. 126877 3. 38911  
1. 378776 2. 443309  
2. 47772 2. 308205  
2. 839435 3. 747837  
2. 812785 2. 207725  
1. 486225 2. 552142  
2. 696055 1. 599142  
1. 961211 2. 036019  
1. 126342 1. 658914  
1. 981884 1. 414512  
4. 125579 3. 175229  
1. 347451 1. 390098  
4. 381372 3. 76747  
1. 271047 2. 112993  
2. 524912 2. 168751  
1. 317024 1. 008219  
1. 030581 1. 77488  
4. 130517 4. 249103  
1. 337425 1. 892294  
3. 319191 1. 693695  
1. 439903 2. 038645

1. 244842 2. 402084  
3. 060101 3. 414592  
1. 45613 1. 914983  
1. 662021 1. 971115  
2. 443707 1. 130754  
1. 514415 1. 437334  
1. 423918 2. 458664  
2. 210758 1. 652232  
1. 284178 1. 57873  
1. 849091 2. 606572  
7. 566577 7. 307849  
3. 204108 4. 302197  
3. 721187 3. 331785  
2. 792114 3. 28195  
2. 156786 2. 389333  
2. 42833 2. 782761  
1. 489738 2. 635778  
1. 971441 1. 345263  
4. 80409 2. 287886  
1. 901491 2. 184781  
1. 403677 1. 759362  
2. 473112 2. 139425  
2. 486107 2. 507477  
1. 483086 1. 725823  
1. 800778 1. 787712  
1. 159062 1. 77375  
5. 167597 4. 087786  
2. 978218 3. 315163  
4. 373629 0. 604073  
1. 172264 1. 930141  
1. 794231 1. 612796  
1. 448792 2. 104357  
8. 465901 8. 331826  
3. 375947 3. 49592  
2. 546284 1. 449812  
3. 912862 5. 40766  
2. 527248 2. 221932  
1. 490315 1. 83634  
1. 755683 1. 471542  
1. 438671 1. 851614  
0. 92248 1. 563828  
2. 147829 3. 044826  
1. 897034 1. 597411  
3. 838866 2. 48093  
2. 351109 1. 759407  
0. 858595 1. 429688  
1. 728199 1. 576381  
3. 266087 4. 089246  
1. 911947 3. 294447  
6. 346349 5. 906686  
2. 071434 1. 474734

2. 225343 2. 283811  
2. 449664 2. 843578  
1. 492802 1. 661092  
3. 987721 5. 797601  
1. 323059 1. 957267  
1. 794163 3. 777387  
1. 375377 2. 473026  
0. 969864 1. 890571  
1. 207869 1. 424654  
1. 341812 2. 339716  
1. 062605 0. 960821  
3. 05823 3. 02623  
5. 946937 3. 248064  
3. 301884 3. 540089  
0. 598514 1. 36889  
3. 208431 2. 547708  
2. 504192 2. 082206  
1. 936262 1. 822414  
3. 752062 2. 384579  
1. 752516 1. 651389  
1. 438076 1. 313019  
2. 701059 2. 16399  
2. 094187 2. 427497  
2. 206023 2. 970046  
3. 957799 4. 429822  
2. 088459 2. 897331  
2. 248889 2. 10321  
1. 207385 1. 427495  
3. 342664 2. 570149  
3. 65533 3. 00584  
5. 33538 5. 138679  
1. 192135 2. 815773  
3. 153033 1. 550003  
2. 277948 1. 288716  
2. 860058 2. 733182  
4. 629311 3. 592805  
1. 390139 1. 506692  
0. 65589 2. 241223  
2. 220288 2. 814229  
7. 245698 6. 699404  
2. 200869 2. 593696  
1. 151586 2. 449855  
5. 308349 5. 368577  
5. 695623 5. 081313  
1. 555614 1. 284223  
3. 279283 4. 141845  
2. 880362 2. 415158  
1. 282588 1. 732022  
2. 540817 3. 390075  
1. 129349 1. 171235  
1. 093272 1. 281475

4. 647815 6. 127231  
1. 359396 2. 935608  
4. 478389 4. 120247  
2. 224215 3. 4  
2. 099955 2. 09413  
1. 548606 2. 180281  
1. 079523 0. 946769  
7. 585531 7. 176714  
4. 705081 3. 348901  
1. 141838 1. 484069  
3. 001288 2. 986564  
1. 927807 1. 585316  
2. 086381 3. 252642  
4. 819799 5. 952922  
2. 131954 2. 464303  
2. 36014 2. 85895  
5. 898232 5. 886351  
1. 576816 1. 984581  
4. 325679 4. 628386  
1. 123159 0. 898988  
6. 538275 5. 207209  
1. 764883 2. 798137  
2. 239214 2. 273449  
3. 168814 3. 278601  
2. 976318 1. 959733  
1. 942654 3. 070177  
3. 312936 2. 882368  
4. 808039 4. 444597  
2. 6352 3. 921005  
1. 56636 1. 677211  
6. 43747 5. 789554  
3. 219567 2. 282482  
1. 178689 3. 23569  
1. 079724 2. 044754  
1. 772557 1. 744148  
0. 97086 1. 390549  
1. 28658 2. 008158  
6. 771788 6. 958834  
1. 40943 1. 627952  
4. 214949 4. 870296  
5. 07863 4. 488168  
1. 927604 1. 883037  
2. 196442 0. 957137  
2. 626012 2. 529615  
2. 768467 2. 690743  
1. 071048 1. 664663  
1. 059672 1. 850995  
1. 840522 2. 092888  
4. 621044 3. 832597  
3. 321607 1. 781997  
3. 670556 2. 003302



2. 642488 2. 855805  
2. 148927 1. 623565  
5. 410876 1. 271642  
1. 709087 2. 207116  
3. 304795 4. 418438  
1. 75065 1. 867924  
6. 637677 3. 167241  
1. 402033 1. 501913  
1. 829531 2. 837736  
2. 17494 2. 111116  
2. 020488 2. 367406  
2. 296867 5. 154446  
6. 31018 5. 60294  
3. 045764 3. 641282  
1. 217889 1. 900675  
9. 167902 10. 62705  
1. 805423 1. 668668  
1. 365584 1. 73695  
0. 926372 2. 165119  
1. 073862 0. 66579  
1. 142038 0. 549107  
2. 254699 1. 127402  
0. 747206 0. 897074  
0. 885289 1. 003346  
0. 550523 1. 37033  
1. 262383 0. 461408  
0. 587389 0. 666335  
2. 560073 2. 7072  
4. 176753 4. 522917  
1. 905919 1. 218757  
1. 414244 1. 85015  
1. 612012 2. 27032  
1. 13732 1. 905817  
5. 281972 4. 753426  
4. 446269 4. 890089  
4. 790283 5. 789975  
5. 864703 4. 491989  
7. 449408 5. 722727  
2. 484908 2. 663856  
3. 023485 2. 618506  
8. 459362 8. 005557  
1. 860864 2. 206335  
3. 579387 3. 933728  
6. 503026 5. 29843  
3. 590678 3. 436714  
5. 140091 5. 670183  
2. 73363 1. 427665  
2. 506388 2. 317121  
4. 303469 3. 460983  
1. 854982 1. 949899  
4. 338942 2. 877421

2.068283 2.234432  
6.512675 6.825511  
3.608809 3.674509  
1.342097 1.825374  
3.244915 3.432332  
1.770097 1.619692  
3.240319 3.793138  
5.306728 5.833733  
3.664743 3.596832  
1.694765 1.244867  
1.378991 0.979392  
4.253254 3.853431  
6.358032 6.80736  
3.042587 2.828647  
4.690548 4.516488  
1.385187 1.289167  
6.307216 6.14635  
3.4703 4.189342  
4.575994 5.096177  
6.822152 6.672119  
4.647419 5.547288  
1.302713 2.252165  
6.361715 2.869526  
2.68327 2.11285  
2.190561 2.531566  
8.202859 9.000327  
8.492006 8.553342  
7.004185 6.89866  
7.195969 6.184934  
2.053136 3.50381  
2.291873 2.692243  
2.457904 3.430289  
3.674011 4.624383  
5.266054 5.578308  
2.030761 4.124483  
0.579333 1.894947  
2.787398 2.353386  
3.351997 1.218359  
2.978904 3.139572  
2.955423 1.692748  
0.761544 1.356045  
3.648957 2.762837  
1.49545 1.238878  
0.865339 1.296841  
1.18424 0.841502  
0.734708 1.092087  
1.252853 0.996101  
5.678795 4.152342  
2.99965 3.390048  
1.944607 2.65515  
0.79162 1.313685

1. 629212 1. 762155  
3. 39025 3. 264115  
3. 363792 1. 403441  
0. 88285 2. 590898  
0. 836249 1. 444878  
2. 180961 1. 235572  
0. 929071 1. 395825  
0. 848115 1. 307291  
2. 361271 3. 244241  
0. 541252 0. 800406  
1. 684846 2. 400677  
1. 587616 1. 64342  
1. 30475 2. 378521  
3. 163478 2. 131921  
3. 055625 3. 739006  
1. 128882 0. 946653  
0. 973039 1. 197542  
2. 422944 1. 613931  
1. 144549 1. 544995  
1. 870553 1. 559572  
1. 598122 1. 757622  
0. 947186 1. 003678  
1. 12081 1. 44823  
0. 893779 1. 252227  
2. 668239 2. 645579  
1. 767364 1. 530817  
0. 71464 1. 394024  
1. 088151 0. 99962  
1. 411772 1. 979539  
2. 202271 3. 457359  
2. 843923 2. 438942  
0. 989616 1. 193611  
1. 615078 1. 82213  
1. 110102 1. 701605  
0. 848761 1. 466179  
2. 710284 0. 470414  
1. 024623 1. 23845  
2. 891226 2. 831823  
0. 79103 1. 29322  
2. 758318 3. 53816  
1. 79747 1. 369454  
2. 311851 2. 329209  
1. 258083 0. 987798  
1. 55817 2. 038527  
1. 067194 0. 960714  
5. 582386 2. 116332  
2. 11652 0. 881888  
1. 001207 1. 36045  
1. 908943 1. 389835  
2. 604854 1. 71614  
2. 71872 2. 652848

1. 59111 1. 527154  
3. 244017 2. 728798  
0. 82642 1. 158902  
1. 19577 1. 190109  
1. 698935 1. 965889  
5. 333739 5. 611683  
3. 593873 3. 797326  
2. 38036 1. 730913  
1. 107393 1. 411052  
3. 298341 3. 838732  
1. 9657 1. 907784  
1. 704945 1. 63349  
2. 424503 1. 038839  
4. 529089 2. 239407  
2. 349295 1. 858776  
1. 072302 1. 806978  
2. 40422 2. 56117  
1. 147601 2. 721916  
1. 072782 1. 689125  
0. 610144 0. 82442  
1. 710775 1. 598587  
1. 226861 1. 427595  
1. 504141 2. 417296  
1. 136695 1. 048889  
2. 96837 1. 402136  
1. 882818 3. 353682  
2. 159875 1. 831548  
1. 117047 1. 1393  
6. 018622 5. 387552  
4. 481435 4. 311544  
3. 361318 2. 960178  
3. 070539 3. 984249  
1. 333807 1. 629125  
1. 590194 1. 197616  
1. 032937 1. 016278  
0. 909338 1. 074744  
6. 65365 9. 219406  
4. 271695 2. 771878  
1. 337493 2. 775257  
1. 632608 1. 712087  
0. 93259 1. 729019  
1. 6988 1. 921981  
2. 479272 1. 606528  
3. 497582 2. 394111  
0. 911712 4. 031567  
0. 907012 1. 493964  
2. 11955 2. 107807  
4. 36566 5. 330869  
1. 253337 1. 39986  
0. 628937 1. 270018  
2. 130649 1. 635938

4. 64479 1. 487875  
1. 00777 1. 002687  
2. 362593 2. 320563  
1. 651824 1. 49984  
6. 372693 6. 34767  
2. 354092 3. 050997  
1. 122975 2. 854874  
1. 260664 1. 221966  
1. 075005 1. 707334  
0. 862792 1. 01698  
1. 713898 2. 538315  
6. 174311 1. 541754  
1. 42182 0. 8983  
1. 140874 1. 204468  
5. 838453 2. 379885  
1. 211342 1. 084419  
1. 366116 1. 070716  
7. 594401 2. 60559  
0. 689871 1. 735258  
4. 708606 1. 172041  
1. 879217 2. 123012  
1. 193817 1. 390341  
1. 060587 1. 665514  
1. 147778 1. 466796  
1. 452075 1. 288354  
1. 30881 1. 377277  
4. 272448 6. 634003  
1. 630244 2. 726127  
1. 650778 1. 927948  
2. 363567 2. 055689  
1. 226443 0. 997607  
2. 533466 2. 06543  
2. 505522 2. 103586  
6. 814755 1. 609344  
1. 289405 2. 742859  
2. 593072 1. 980533  
3. 01876 1. 85301  
4. 957043 4. 134253  
3. 361534 3. 545203  
8. 599763 8. 050412  
5. 654018 5. 860377  
7. 469951 7. 216175  
8. 876777 8. 765539  
2. 025802 1. 38939  
8. 02456 7. 779749  
3. 398091 3. 98163  
1. 489776 0. 76788  
3. 104969 1. 902789  
0. 787256 1. 046801  
3. 565845 1. 70377  
1. 756713 1. 344465

5.007442 5.403723  
4.838192 4.748553  
1.827072 4.167323  
4.477845 3.637727  
7.476964 7.689596  
5.916016 6.633959  
7.666711 6.668311  
8.225324 8.182684  
6.254573 4.68126  
8.162746 8.042976  
3.197687 3.939262  
5.235001 5.125479  
6.952327 6.86496  
3.561505 2.895012  
1.913563 2.515181  
4.191809 4.829645  
1.467035 2.593489  
1.495973 2.410272  
2.217594 1.612544  
0.588175 1.974796  
1.876519 1.765872  
1.801513 1.040575  
4.472078 4.670356  
1.317802 1.744389  
2.082824 1.012258  
2.338445 1.449694  
0.9966 0.964094  
1.972203 1.937409  
1.219881 0.830048  
3.186525 5.893314  
4.137489 2.461763  
7.4596 8.762289  
4.262626 3.320187  
6.987515 6.410987  
4.926724 5.238589  
4.521665 4.493183  
6.312545 6.156811  
4.412617 5.791109  
5.501084 6.266234  
5.434411 5.822327  
4.022507 5.645433  
6.566821 6.765569  
4.576888 4.363928  
8.69045 9.296876  
5.926068 5.975754  
6.492431 6.131622  
7.041184 8.270055  
3.752567 3.267131  
4.765267 3.261933  
2.681278 1.149412  
3.168478 1.995172

2. 168128 2. 241027  
8. 176528 7. 493672  
3. 153682 2. 530446  
1. 647983 3. 344887  
1. 852316 2. 037073  
2. 981339 2. 536259  
3. 029952 2. 144802  
2. 297145 2. 498386  
3. 928237 4. 077754  
6. 71178 6. 351749  
1. 47704 2. 907727  
3. 809813 3. 133451  
6. 161907 6. 394454  
2. 928621 2. 142522  
1. 591706 2. 833557  
1. 14039 1. 718307  
2. 047235 2. 398624  
1. 768035 1. 390776  
1. 345307 1. 391746  
2. 244134 1. 146697  
5. 358594 3. 796384  
1. 167585 1. 220959  
3. 097387 2. 376443  
3. 435801 1. 229097  
1. 558129 1. 716158  
1. 960579 2. 428193  
7. 940749 7. 164445  
3. 242667 3. 125556  
1. 575945 2. 018957  
4. 065487 2. 340675  
2. 815393 4. 513027  
6. 241707 6. 653383  
2. 729701 2. 96594  
4. 532933 4. 088354  
1. 718692 1. 591033  
7. 009802 5. 933568  
1. 199623 1. 44477  
5. 190935 4. 364682  
4. 010146 4. 0797  
1. 866632 2. 557246  
1. 79052 2. 659873  
9. 338315 9. 328219  
4. 323364 3. 615313  
1. 841752 2. 067564  
4. 597711 4. 828928  
3. 573147 5. 073465  
3. 368372 1. 997495  
2. 771653 2. 202186  
4. 949117 4. 91099  
1. 719414 1. 771264  
8. 310753 8. 163233

2.932435 3.12199  
2.948351 3.318291  
1.535911 2.189229  
0.91051 1.364951  
3.405468 2.298331  
1.192222 1.211  
1.187115 1.731544  
3.921205 4.849368  
6.15458 5.342523  
1.853937 2.410581  
2.007229 2.938555  
1.271208 1.136945  
6.599643 6.717946  
2.713815 2.993742  
4.793778 5.330334  
5.262914 5.766331  
4.501318 4.035607  
7.523026 7.46994  
4.842554 4.111702  
9.608357 9.124091  
1.846129 2.35179  
1.074999 1.37259  
1.475922 2.206296  
2.264046 2.3825  
8.072939 7.85222  
5.759871 6.607446  
7.53968 7.611981  
4.060182 4.937188  
7.285482 6.726497  
4.802231 3.98504  
5.459764 6.406479  
2.018644 1.459056  
1.804895 2.322385  
5.711473 5.804212  
7.008428 7.591653  
6.18658 6.30042  
7.39314 7.453551  
7.436324 6.377959  
7.40939 7.316917  
5.775761 5.392433  
2.19693 2.57828  
6.320473 5.99186  
7.842317 6.593581  
4.610921 6.282781  
5.964317 5.750742  
5.621251 5.350672  
5.613187 4.971393  
6.181302 4.804586  
5.616073 6.266632  
3.089365 2.908451  
4.437431 4.330067



2. 390312 3. 085772  
1. 427901 1. 802696  
1. 096681 1. 444758  
1. 927446 2. 376203  
4. 222746 4. 696528  
5. 751598 5. 854222  
2. 094117 2. 609526  
7. 446211 8. 049767  
2. 730705 3. 933574  
7. 106385 6. 716392  
4. 421349 4. 753951  
7. 25594 7. 975388  
2. 49419 2. 156986  
3. 523087 5. 506296  
3. 22909 3. 429095  
0. 695699 1. 273835  
3. 527676 3. 093994  
3. 06487 2. 244889  
8. 770907 8. 858397  
1. 907986 1. 653411  
0. 929748 1. 431723  
3. 658529 3. 018867  
5. 301701 2. 857517  
4. 60139 5. 346291  
10. 3272 10. 31948  
3. 319434 3. 584507  
8. 110422 8. 699302  
9. 005769 8. 640834  
4. 261177 3. 896027  
9. 453445 9. 22519  
2. 540795 3. 602739  
8. 316648 8. 537449  
2. 649808 2. 882673  
9. 927399 9. 945277  
7. 293363 6. 108426  
2. 804879 2. 351361  
4. 09541 4. 292289  
3. 424391 2. 96679  
5. 735465 5. 688195  
3. 203384 3. 179962  
7. 797172 6. 301383  
3. 212093 4. 736191  
6. 108498 5. 388856  
2. 423889 2. 189156  
2. 639777 2. 46369  
1. 415932 1. 987235  
4. 290622 5. 055995  
7. 907521 6. 800432  
5. 800401 5. 382741  
8. 507306 7. 53566  
1. 873586 1. 585567

5. 785187 6. 648756  
8. 296347 7. 207344  
5. 205629 4. 914243  
5. 084263 5. 628157  
5. 196534 4. 812871  
1. 914405 2. 447827  
1. 552793 1. 97465  
11. 18328 10. 63011  
0. 778976 1. 184029  
4. 582985 5. 369251  
3. 267957 1. 936858  
6. 278092 6. 877144  
1. 312503 1. 603296  
1. 5135 1. 573257  
1. 771882 1. 70796  
1. 531887 1. 43257  
1. 80847 2. 108711  
2. 093079 1. 284956  
2. 972855 4. 003901  
1. 915028 1. 645382  
1. 622828 1. 619146  
2. 021717 3. 315674  
6. 697762 6. 625403  
2. 573679 4. 741347  
4. 639436 4. 432246  
2. 209091 2. 323957  
2. 878432 1. 919405  
5. 608573 6. 2395  
3. 013841 2. 557457  
5. 051437 5. 048253  
6. 350315 5. 734479  
3. 826668 5. 086966  
4. 56942 4. 57377  
1. 424436 1. 351558  
4. 457614 3. 649339  
7. 408455 7. 902236  
2. 024239 2. 844438  
1. 338156 1. 526659  
1. 692036 3. 207774  
4. 939907 4. 575557  
6. 86013 6. 736482  
1. 992653 2. 101229  
4. 791882 5. 433609  
4. 796458 5. 259088  
1. 69842 1. 702455  
1. 510068 2. 496297  
5. 621186 5. 843021  
1. 524083 1. 31793  
2. 66035 3. 835177  
2. 955445 3. 678212  
6. 535854 7. 533687

1. 127028 1. 32118  
3. 799971 4. 196794  
3. 566639 3. 273729  
5. 593785 5. 402565  
6. 796138 5. 739054  
2. 552427 1. 861374  
1. 510585 1. 423283  
1. 632829 2. 994415  
1. 875158 2. 357742  
1. 178372 1. 97204  
6. 374365 7. 157587  
1. 40323 1. 677209  
3. 028353 3. 168376  
1. 072932 0. 747597  
1. 083071 1. 188319  
1. 363105 1. 688107  
2. 016682 1. 52391  
1. 317271 1. 576028  
1. 218834 4. 111262  
0. 863519 1. 740673  
2. 034438 3. 294985  
1. 553796 2. 154533  
5. 300031 6. 034491  
1. 952106 2. 419133  
2. 812054 2. 800517  
2. 774705 2. 268328  
4. 781209 5. 392992  
2. 127923 1. 66176  
1. 386025 2. 290668  
1. 963539 1. 903584  
0. 967612 1. 998801  
1. 821104 1. 977717  
7. 085365 7. 389028  
0. 989959 1. 551122  
1. 273437 3. 252171  
4. 487044 4. 408902  
1. 990935 2. 192225  
3. 266121 3. 549604  
4. 836285 4. 234276  
5. 279196 5. 718323  
1. 6959 1. 657767  
1. 979866 1. 937654  
1. 592708 1. 807404  
4. 655742 4. 50954  
1. 340939 0. 998982  
1. 180335 1. 615759  
1. 601001 1. 678078  
2. 622646 2. 526074  
2. 062073 1. 668184  
7. 02774 6. 926747  
4. 399397 2. 842241

0. 533526 1. 132279  
1. 776234 1. 530373  
4. 405292 3. 023376  
1. 581774 1. 439259  
4. 038653 3. 330957  
4. 487125 3. 451631  
7. 710429 5. 7232  
5. 626756 5. 358506  
2. 262906 2. 341892  
1. 176415 1. 350173  
2. 473784 2. 209524  
1. 389439 2. 228691  
3. 52272 2. 946379  
1. 853705 1. 407419  
2. 610789 1. 569385  
3. 24366 3. 263741  
1. 217687 2. 063931  
3. 766794 4. 484184  
1. 620071 1. 966225  
0. 978681 1. 427558  
1. 313471 1. 606183  
2. 440441 2. 756722  
1. 873328 1. 824503  
1. 022654 1. 607442  
5. 172492 1. 574898  
3. 180321 2. 530769  
2. 257115 3. 208452  
1. 81193 2. 466745  
6. 257289 5. 97005  
3. 341129 3. 232381  
1. 030327 1. 360644  
6. 856242 7. 660134  
1. 148688 1. 108893  
2. 623031 3. 170359  
0. 431527 2. 716371  
7. 469784 7. 440313  
2. 524606 2. 798051  
1. 866566 2. 252744  
2. 961623 4. 486155  
1. 640838 2. 040607  
1. 580529 1. 503413  
2. 181084 1. 337474  
1. 596701 2. 198519  
1. 40442 1. 51763  
2. 267269 1. 631525  
1. 326847 1. 973034  
2. 518721 2. 62009  
0. 946156 1. 622843  
4. 840424 4. 689883  
2. 183796 2. 58629  
2. 416078 1. 96117

0.663397 1.666187  
1.35092 2.440096  
0.931187 1.202374  
1.469437 1.96353  
1.60082 1.590773  
2.636638 3.535128  
3.644633 5.077654  
1.340949 1.502212  
0.761252 1.138882  
2.420229 2.472535  
1.527569 1.086337  
1.413974 3.124018  
2.284551 2.363783  
2.515604 3.495539  
5.367336 5.033419  
1.969855 2.238627  
4.2508 4.892195  
1.199106 1.508518  
8.222339 8.885502  
1.10848 1.457348  
0.739176 3.00615  
2.348538 1.863526  
4.150354 4.834884  
0.752683 1.358084  
2.190623 2.149513  
1.350656 1.44964  
8.335166 6.828165  
2.019341 1.605394  
2.052539 3.088852  
2.25892 1.651148  
1.808064 1.640331  
0.82629 1.044295  
2.809732 3.492185  
6.020103 6.611431  
1.772473 1.701259  
5.968286 6.071105  
1.473794 1.566766  
1.209099 2.170783  
3.471518 3.760167  
3.212161 4.068915  
3.039498 2.166121  
1.741212 1.086958  
1.618825 1.037462  
3.20757 3.06292  
4.046631 3.556423  
3.709987 2.437989  
3.281506 4.657692  
1.75395 1.323815  
1.575013 1.853648  
3.353444 2.704398  
6.163596 4.732422

1. 697916 1. 241989  
1. 227561 2. 45776  
3. 540274 2. 881526  
4. 2873 5. 239376  
1. 393124 1. 524708  
1. 252303 1. 539234  
1. 720869 2. 024544  
1. 39692 2. 227334  
2. 309532 2. 291201  
1. 187625 1. 291333  
4. 524446 3. 258849  
1. 516902 3. 180828  
4. 620785 6. 241743  
0. 757476 0. 677533  
3. 011219 2. 355513  
1. 994643 5. 789843  
2. 342851 2. 199059  
3. 46529 4. 305603  
1. 038004 1. 356041  
2. 218328 1. 971487  
1. 836199 1. 488881  
3. 662443 2. 794331  
1. 104215 1. 160457  
4. 718561 4. 444118  
2. 718331 3. 205336  
1. 411626 2. 070748  
0. 972717 1. 61539  
2. 759371 2. 751316  
2. 056937 1. 62826  
1. 186997 1. 238393  
1. 674005 1. 745783  
0. 84385 1. 118888  
1. 959687 4. 362889  
2. 090029 1. 76312  
2. 024213 1. 912779  
1. 467398 3. 544844  
4. 977961 5. 006117  
1. 377651 2. 586476  
2. 258466 1. 058367  
1. 305364 1. 954119  
0. 518799 0. 865792  
1. 948889 1. 476601  
7. 697579 8. 410332  
1. 371646 1. 66108  
1. 424021 3. 170228  
2. 790539 2. 740773  
1. 76287 1. 894996  
1. 163379 1. 520524  
0. 818873 1. 270789  
0. 839794 1. 315885  
2. 204905 1. 930917

1. 509637 1. 754203  
4. 045797 3. 565972  
2. 261325 2. 198467  
1. 62185 1. 352957  
4. 786686 4. 566704  
1. 236434 1. 892174  
4. 633828 2. 840483  
1. 265162 1. 058755  
1. 974048 1. 893258  
2. 505654 2. 754932  
2. 053114 2. 081873  
1. 303021 1. 516573  
3. 918277 2. 579385  
1. 366257 1. 857574  
1. 372573 1. 294411  
1. 126752 2. 072567  
2. 155008 2. 440358  
4. 674658 2. 152716  
2. 134409 1. 29834  
1. 976566 1. 530884  
2. 786101 2. 915545  
2. 079216 2. 50667  
0. 946239 1. 523005  
1. 373547 0. 874959  
1. 842681 1. 011351  
1. 884916 2. 258081  
2. 431983 2. 980004  
0. 637127 1. 163861  
4. 717621 3. 931854  
2. 155798 2. 117697  
3. 059558 4. 104157  
2. 787248 3. 562631  
4. 201336 3. 919813  
2. 384451 2. 101268  
1. 92715 2. 247145  
1. 405206 1. 830224  
3. 766332 3. 882819  
4. 626433 5. 763872  
0. 815043 1. 253378  
3. 3203 3. 587225  
2. 178458 2. 299231  
4. 870511 5. 403396  
1. 245887 1. 282375  
0. 746132 0. 519486  
0. 729116 1. 01283  
1. 724654 1. 231383  
1. 268858 1. 637792  
1. 411694 1. 309721  
1. 242224 1. 365311  
1. 159046 1. 493002  
3. 818182 3. 896551

9. 143251 9. 389849  
1. 957129 2. 233637  
4. 880737 4. 986009  
5. 312254 5. 446342  
1. 354199 1. 272436  
6. 565546 5. 070492  
5. 512674 4. 933473  
2. 025321 2. 593815  
1. 377286 1. 741677  
5. 070751 4. 878433  
1. 609104 1. 512095  
7. 308229 8. 103304  
1. 021834 2. 156124  
9. 048208 8. 817033  
4. 169581 4. 671703  
5. 448051 4. 931352  
1. 828135 1. 25291  
3. 007273 3. 717485  
2. 45042 1. 554264  
1. 486613 2. 09567  
4. 074444 4. 084419  
1. 947567 4. 474395  
0. 880948 1. 6307  
3. 663275 2. 645988  
1. 217579 0. 854159  
8. 966381 8. 775236  
2. 181334 2. 41775  
7. 10025 2. 808483  
8. 153142 5. 569836  
1. 778361 1. 597344  
6. 185309 6. 890729  
6. 100555 5. 860415  
7. 943703 7. 249843  
12. 00078 11. 77746  
1. 711074 2. 122878  
4. 12844 4. 460097  
3. 3815 2. 065543  
6. 937064 6. 654991  
6. 08745 6. 587914  
6. 367942 5. 702832  
3. 91371 3. 686664  
5. 71181 5. 259032  
6. 036861 6. 305401  
2. 64138 4. 266113  
1. 301839 1. 453255  
2. 127301 2. 322418  
2. 035312 2. 304487  
6. 582613 6. 23778  
6. 746777 6. 964258  
2. 391081 0. 830807  
7. 126761 6. 140008



1. 877599 1. 98434  
2. 217465 3. 522524  
1. 971372 2. 610065  
2. 532081 2. 935404  
2. 388376 2. 266264  
1. 889286 1. 505357  
6. 076926 4. 9023  
1. 50565 1. 598446  
6. 207948 6. 795613  
3. 560252 3. 790673  
4. 990073 5. 485027  
2. 360589 2. 895588  
6. 462901 6. 045416  
5. 455104 2. 71676  
4. 397558 4. 918015  
1. 331684 1. 099971  
3. 746649 3. 193636  
1. 725131 1. 301956  
2. 717556 2. 889382  
1. 59168 2. 715198  
1. 787049 1. 950855  
5. 3601 4. 739618  
5. 243753 4. 397909  
2. 490164 2. 063309  
2. 898512 2. 262067  
3. 621474 3. 23235  
3. 874156 5. 758383  
7. 401447 7. 995633  
1. 428855 1. 604279  
1. 194157 1. 518734  
1. 288662 1. 413721  
1. 303089 1. 851166  
2. 048704 2. 286984  
1. 328686 1. 107651  
1. 554889 1. 382719  
1. 639785 1. 672512  
1. 485539 2. 601649  
8. 767859 8. 506687  
6. 554998 6. 542262  
4. 375433 3. 511133  
2. 145528 1. 949128  
2. 070879 2. 067944  
2. 064086 1. 632074  
4. 700169 4. 82575  
2. 910349 4. 231109  
4. 638543 4. 555728  
10. 77857 10. 8062  
8. 784444 8. 986225  
5. 822673 4. 937004  
1. 742401 2. 423525  
8. 507461 8. 31147

8. 740807 8. 140438  
9. 399051 9. 275703  
5. 875763 6. 552771  
5. 474957 6. 315968  
7. 672396 6. 754649  
1. 824795 2. 828074  
3. 232853 3. 510245  
6. 543906 5. 986208  
4. 508179 5. 370105  
5. 145967 4. 618135  
1. 16847 1. 404189  
2. 580199 1. 48624  
4. 309641 3. 421257  
7. 14928 6. 255501  
5. 483228 4. 196546  
3. 181777 2. 307231  
5. 928541 6. 016665  
4. 103854 4. 350853  
4. 126918 3. 147929  
5. 612292 7. 203287  
4. 929413 5. 402598  
7. 031914 7. 078214  
8. 484478 8. 692886  
1. 465301 0. 675726  
7. 120394 7. 819214  
4. 763622 4. 289752  
2. 546078 1. 731307  
7. 032435 6. 086123  
8. 061539 7. 888319  
6. 545055 6. 480298  
3. 665887 4. 643461  
1. 270808 1. 492005  
2. 479537 2. 471535  
4. 919477 5. 439313  
6. 117284 5. 761099  
3. 287284 4. 055284  
1. 421213 2. 124798  
7. 529466 6. 236982  
3. 476306 3. 737069  
3. 511079 3. 680413  
8. 802192 8. 567312  
5. 924465 5. 888001  
10. 13837 10. 15443  
3. 142791 2. 638742  
2. 069946 1. 705517  
10. 18685 10. 37789  
8. 369538 8. 79038  
9. 469281 10. 01517  
6. 092079 5. 637273  
4. 173823 4. 009532  
7. 804087 7. 780782

7. 46401 8. 823864  
6. 234115 7. 312262  
2. 160893 1. 673021  
7. 299516 7. 085649  
7. 163902 7. 79447  
8. 890712 9. 063657  
9. 97255 9. 459303  
10. 74673 10. 63255  
5. 688862 5. 775146  
4. 380693 4. 465029  
6. 73687 7. 065635  
7. 619391 7. 237685  
8. 493129 8. 558793  
6. 973588 6. 766535  
7. 368313 7. 156484  
8. 302584 7. 918728  
4. 435567 4. 302712  
6. 157638 6. 327137  
7. 869919 7. 601694  
6. 502012 6. 833366  
7. 660293 7. 482876  
6. 198725 6. 199578  
7. 979352 8. 186431  
8. 253374 8. 419611  
8. 342572 8. 407347  
6. 224025 6. 41349  
6. 695571 7. 310036  
6. 312667 5. 372578  
7. 415192 7. 640914  
7. 578059 8. 007341  
7. 036078 6. 727065  
8. 297882 8. 245225  
9. 921909 9. 714385  
6. 341298 4. 546049  
7. 568605 6. 418432  
1. 182185 2. 430654  
4. 946401 2. 349412  
6. 084453 5. 164131  
6. 289396 6. 788667  
1. 463625 1. 844989  
3. 511417 3. 397917  
2. 213684 2. 384978  
4. 713227 7. 819326  
1. 590131 4. 012055  
2. 867564 1. 688545  
6. 376235 5. 358267  
1. 639527 1. 608958  
4. 666251 4. 146353  
1. 65976 1. 497304  
7. 49188 7. 046996  
6. 387455 6. 037444

2.903511 2.531521  
10.03878 10.48444  
2.586884 2.547948  
1.190503 1.386879  
1.459106 2.093291  
7.661546 7.145469  
10.2327 9.89789  
5.71105 5.03059  
4.793458 4.873643  
4.34912 4.252256  
6.275729 6.181722  
6.476668 5.73924  
3.41788 2.95149  
1.188182 1.853123  
9.484939 9.17719  
4.714962 4.257198  
8.043867 8.078199  
6.616729 6.051931  
8.013918 7.307591  
4.405926 3.981844  
6.806165 7.220164  
2.390763 3.312286  
6.035594 5.980089  
4.13448 4.591658  
9.623152 9.329476  
3.473698 2.962505  
3.490311 4.359972  
2.058672 2.669546  
2.689845 3.414296  
4.721795 4.557067  
5.794609 5.168862  
1.58409 1.48593  
6.88939 6.67741  
6.146576 4.822964  
6.106049 6.687175  
3.901616 3.464837  
5.488785 2.988967  
1.736493 2.359729  
1.774683 2.078172  
1.700912 1.546814  
7.350408 7.256482  
1.62201 1.38499  
4.720781 4.277434  
6.920279 5.289275  
5.768859 6.837361  
3.044692 2.618565  
6.675552 5.710082  
6.108474 4.873633  
9.901865 10.30479  
7.55358 4.566464  
1.643095 2.916388

2. 721365 4. 824199  
1. 533168 2. 542748  
3. 822203 2. 32172  
3. 549782 4. 748087  
1. 86688 1. 687647  
7. 319603 5. 929457  
7. 32315 7. 937122  
2. 938045 1. 928473  
3. 899169 5. 0174  
2. 108276 2. 996432  
6. 68165 5. 792692  
7. 360488 7. 567708  
5. 995561 6. 173323  
1. 838683 3. 743273  
2. 238192 2. 396082  
7. 275527 7. 409155  
5. 835005 6. 121973  
2. 067713 2. 699374  
1. 818537 2. 193751  
4. 200158 3. 557026  
6. 346639 5. 60539  
6. 341104 6. 342377  
6. 90932 6. 858703  
4. 734018 4. 895189  
1. 572673 2. 436997  
7. 546387 6. 754736  
3. 795948 4. 379013  
5. 486199 4. 392308  
3. 219028 3. 144288  
3. 988557 5. 91581  
4. 223975 4. 321707  
3. 965285 5. 348387  
2. 790699 2. 889758  
5. 164751 3. 718964  
6. 927257 6. 754888  
5. 296771 4. 453486  
3. 462648 5. 077276  
8. 25102 7. 666578  
5. 832263 5. 997193  
1. 906561 1. 511129  
1. 92924 2. 057428  
2. 07934 3. 070114  
1. 626216 1. 752277  
7. 520166 6. 765396  
5. 637114 4. 836394  
9. 208171 9. 261893  
2. 537919 1. 992475  
3. 51781 2. 606819  
7. 814498 6. 971825  
1. 483697 1. 935846  
2. 425102 3. 700769

2.002944 3.04683  
9.408241 8.709309  
3.971225 4.370741  
1.395544 1.981524  
7.427912 6.411448  
1.831096 2.311055  
7.739441 7.563277  
5.726988 4.678812  
4.904753 4.017854  
6.834351 6.897341  
7.160856 7.86397  
3.594943 4.034302  
2.281403 2.730541  
2.331368 2.253142  
6.454945 5.536971  
7.057956 7.286715  
3.176291 2.090028  
2.313105 2.439323  
7.518576 6.847747  
4.277471 5.735259  
1.161394 1.977495  
6.288068 5.774931  
3.925202 2.635428  
2.887238 2.784931  
3.109064 3.494661  
1.799238 1.649105  
1.45344 2.27463  
4.393708 4.843915  
1.317925 1.541211  
1.326763 2.470055  
1.246683 1.506204  
7.406376 6.140315  
1.738546 2.526064  
7.489282 7.29304  
6.021403 6.016829  
6.681343 6.296553  
4.457216 5.453432  
6.894165 6.196142  
3.020564 2.39052  
1.691307 1.720335  
4.835188 5.139395  
2.556131 3.890645  
4.866669 4.613684  
6.249136 5.097718  
5.585154 2.640369  
1.53016 1.366023  
6.194287 5.531961  
0.990919 1.342178  
3.43961 2.755725  
6.81778 6.801098  
7.598161 8.725664

3. 260183 3. 163729  
0. 72965 0. 825893  
4. 654353 1. 619589  
5. 852806 5. 13258  
5. 557313 5. 625929  
7. 803585 7. 277107  
4. 283007 5. 073927  
5. 793472 5. 7747  
0. 844638 1. 332481  
1. 66567 1. 081689  
0. 86501 2. 363792  
0. 928093 0. 749256  
2. 243995 2. 581568  
1. 067643 1. 515373  
2. 202616 0. 912025  
5. 722193 6. 614889  
1. 384335 1. 913728  
4. 745765 4. 795603  
0. 77861 0. 847774  
1. 18077 2. 669385  
1. 007277 1. 481856  
1. 019056 1. 516954  
0. 947179 1. 437902  
1. 103286 1. 308669  
2. 474898 1. 392512  
1. 651668 2. 243825  
0. 976613 0. 6353  
1. 902742 2. 174028  
1. 867089 2. 206856  
0. 888902 1. 004151  
2. 835273 3. 69331  
3. 123527 3. 111377  
2. 013993 2. 005355  
2. 319239 1. 653516  
3. 06877 3. 255259  
1. 483887 1. 897025  
0. 910974 1. 189825  
8. 760884 9. 370696  
6. 905212 7. 400894  
1. 43783 2. 100312  
6. 574002 6. 899486  
8. 148114 8. 312165  
1. 41336 2. 397089  
4. 288215 4. 941145  
4. 349573 6. 021312  
2. 326286 2. 115607  
6. 635913 5. 920568  
4. 494845 3. 892847  
3. 207111 2. 369451  
2. 746641 1. 662116  
0. 874123 2. 258429

2. 971215 1. 432764  
3. 680695 2. 444642  
3. 16563 3. 063008  
0. 819024 1. 265908  
2. 309793 3. 831177  
1. 827537 1. 628514  
3. 021143 2. 257372  
1. 387873 1. 716013  
1. 596709 4. 099626  
6. 831637 6. 780674  
1. 924509 3. 134834  
6. 549049 7. 164574  
4. 943565 2. 80093  
5. 506534 5. 096071  
6. 617513 6. 203284  
3. 507075 2. 954425  
2. 680719 2. 171714  
2. 032715 1. 630783  
3. 705331 2. 593913  
1. 311651 1. 422484  
2. 527103 3. 009253  
1. 762968 1. 834012  
8. 66687 8. 859831  
2. 061218 2. 956795  
2. 053122 2. 535432  
1. 163468 1. 522153  
1. 336696 2. 028043  
2. 74174 2. 988621  
0. 859417 1. 158314  
2. 238913 2. 333292  
5. 938223 4. 727784  
2. 199596 1. 993696  
6. 185528 6. 514697  
4. 41938 4. 305042  
4. 062779 4. 732768  
1. 959141 1. 63593  
1. 773376 2. 787504  
1. 241139 1. 244585  
6. 338648 6. 932016  
1. 707939 1. 481036  
0. 865724 1. 432552  
7. 724399 9. 350775  
1. 692596 1. 47038  
1. 550564 2. 120294  
2. 025908 2. 576388  
2. 742938 3. 69711  
7. 813902 7. 602296  
4. 127838 4. 302693  
5. 764323 6. 593324  
4. 111536 4. 482483  
2. 984931 2. 576411



2.410822 2.247106  
2.164388 1.941173  
4.108312 5.798664  
3.447777 3.145453  
4.917508 2.853149  
2.372436 3.090131  
2.213927 2.500015  
2.474384 1.889034  
5.818143 5.874091  
0.803834 0.72245  
7.713727 7.825267  
1.702529 2.425037  
2.227102 2.832666  
3.316623 4.004697  
1.38144 1.521664  
1.76789 2.32918  
1.503869 2.621671  
1.653765 1.947581  
2.953772 2.693703  
3.761785 3.950106  
8.614594 9.065203  
1.226656 1.430133  
1.030118 1.336054  
1.185916 0.776249  
5.26434 4.990733  
3.576775 4.120474  
1.380205 1.721193  
3.981523 3.96191  
5.17039 5.095831  
4.315388 4.672714  
2.453594 1.619576  
5.101204 5.242443  
1.616886 1.630555  
8.421613 7.89461  
5.867867 6.425184  
1.880933 1.99328  
5.852441 6.390117  
1.410424 1.992967  
2.389351 2.615275  
4.029801 4.26069  
2.84136 1.889672  
3.067552 4.034179  
2.707763 1.478411  
5.313418 4.611506  
3.742057 4.081107  
8.326778 8.164787  
5.166907 4.89329  
6.371285 5.553561  
1.693179 1.834297  
8.976244 8.23595  
1.212445 1.211184

2. 721336 2. 922613  
2. 187001 3. 315538  
2. 996738 3. 389594  
1. 239524 0. 982381  
4. 069017 4. 844101  
6. 973228 6. 698941  
1. 727944 2. 243604  
3. 428128 4. 087779  
3. 659223 3. 777974  
6. 603923 7. 227805  
2. 895177 2. 509099  
2. 182595 2. 056611  
1. 557282 2. 04599  
5. 645444 5. 90318  
1. 576312 2. 570609  
3. 609156 3. 434889  
9. 012088 8. 609117  
6. 943595 6. 19726  
2. 241796 2. 367942  
8. 971024 8. 923653  
2. 887506 2. 898911  
5. 630448 5. 579495  
1. 782959 1. 211931  
5. 711131 4. 467845  
9. 476302 9. 288266  
1. 916303 1. 725912  
5. 616262 5. 990584  
3. 918816 2. 817322  
6. 139496 6. 609014  
5. 613436 5. 75676  
1. 774732 1. 947156  
4. 322824 4. 561574  
1. 049407 1. 851219  
1. 807666 2. 115686  
2. 819157 2. 086364  
3. 695269 3. 617086  
5. 80154 5. 309665  
1. 803719 2. 060825  
7. 900359 6. 882454  
6. 987768 6. 223442  
7. 843665 7. 907559  
1. 113326 1. 420674  
6. 749076 6. 468279  
6. 300365 6. 306009  
4. 899971 5. 296747  
2. 02269 1. 921696  
5. 824865 5. 490316  
2. 280368 2. 581622  
3. 766863 2. 391458  
1. 628533 1. 196834  
1. 335377 1. 361813

1. 225621 1. 914832  
0. 808777 0. 778767  
0. 918296 1. 619447  
1. 586311 1. 137486  
2. 876424 3. 836869  
1. 992682 2. 280405  
5. 902523 2. 038897  
1. 854408 2. 023413  
6. 739071 6. 371317  
1. 35839 1. 551111  
2. 448201 4. 115424  
9. 171812 9. 313237  
2. 59602 2. 838754  
3. 007598 3. 164258  
1. 930813 2. 06722  
3. 455437 4. 910393  
7. 344762 8. 041705  
2. 867548 2. 007967  
6. 998571 8. 13421  
8. 902961 8. 635011  
7. 207858 7. 130513  
5. 226243 4. 944729  
4. 337533 5. 037585  
6. 936433 6. 92189  
5. 752151 5. 23851  
2. 883575 2. 442998  
7. 487484 8. 225063  
1. 083515 1. 312851  
2. 793698 3. 006512  
1. 462404 1. 695839  
1. 555602 2. 3448  
9. 39677 9. 333948  
5. 763765 4. 719476  
7. 412491 9. 044118  
4. 718376 6. 224687  
5. 684034 5. 718058  
3. 197153 3. 750403  
7. 380246 7. 619518  
2. 11108 2. 548356  
8. 620408 8. 302968  
6. 413464 6. 157774  
6. 408751 6. 411419  
4. 610526 5. 481549  
6. 922306 7. 539966  
6. 539741 6. 142119  
5. 401941 4. 040677  
3. 016857 4. 408554  
6. 073661 6. 603852  
6. 47781 6. 260974  
7. 389722 6. 525866  
1. 572503 2. 402398

6.017929 5.545354  
2.903369 3.844182  
6.265308 6.415818  
8.501792 8.528347  
5.63967 3.986984  
4.636522 4.900056  
6.109158 6.476566  
7.239335 7.813273  
5.785501 4.339925  
6.811181 6.966585  
6.408886 6.904918  
4.899973 5.409817  
5.561003 5.09569  
8.400958 8.727168  
6.10803 7.17721  
3.213015 4.354559  
7.539479 7.75693  
6.512775 7.009992  
6.164695 6.642784  
1.381366 1.385102  
6.951925 7.446032  
5.534181 6.6623  
3.556329 4.368034  
1.325618 1.920268  
3.16934 3.726538  
2.259391 1.419323  
2.267443 2.095978  
3.939732 5.66695  
3.95887 2.088887  
7.694959 7.610691  
3.625839 1.685365  
3.434128 2.532002  
1.943606 2.0919  
2.798019 3.596898  
4.246829 4.886499  
6.840115 7.305259  
5.226139 5.817743  
4.06085 4.904001  
8.035016 8.981635  
2.249781 2.026272  
4.402114 3.894177  
7.074943 6.2524  
4.965463 4.996241  
3.071555 3.439114  
6.270192 6.797978  
6.091042 5.932276  
6.377227 5.079944  
4.157128 5.583939  
4.520149 5.274141  
7.407399 6.342294  
6.231817 5.382546

3. 904975 4. 474015  
4. 470471 4. 574977  
8. 655351 9. 169854  
6. 27805 6. 72788  
6. 895447 6. 781592  
2. 460649 2. 105642  
5. 929458 5. 984642  
2. 860394 3. 360135  
2. 496111 4. 778632  
6. 159888 5. 38918  
8. 618529 7. 743232  
4. 720983 3. 467661  
5. 097106 6. 094955  
6. 984155 7. 406102  
2. 950189 3. 652648  
8. 086085 7. 695823  
6. 304519 5. 00373  
4. 745706 5. 203533  
6. 767829 6. 411433  
5. 277122 5. 374994  
6. 059747 6. 408697  
8. 51834 8. 445878  
6. 228608 4. 620172  
3. 827602 3. 147758  
2. 760093 3. 551039  
4. 015195 4. 784484  
6. 959997 6. 420202  
4. 324476 2. 961723  
5. 721802 6. 836781  
6. 526706 6. 869827  
6. 537354 6. 115116  
6. 801137 7. 600781  
5. 546301 4. 991506  
7. 906347 6. 871148  
5. 972494 4. 876549  
7. 606762 7. 12473  
6. 483522 6. 520295  
2. 737179 2. 971653  
5. 54798 6. 382912  
6. 135771 7. 233055  
10. 41654 10. 42412  
6. 056732 6. 247245  
3. 858987 5. 20843  
7. 351259 7. 247247  
5. 212453 5. 465523  
7. 236839 8. 371859  
9. 132865 9. 235684  
7. 73157 7. 861585  
2. 966593 2. 646551  
6. 617438 6. 429728  
3. 984129 3. 783033

5. 761324 5. 425109  
6. 31277 6. 588812  
7. 391837 6. 250548  
3. 936951 3. 453098  
4. 769428 3. 771069  
6. 056491 3. 883811  
7. 40438 8. 176977  
5. 595954 5. 601726  
8. 636635 8. 624533  
6. 492087 6. 396331  
8. 701456 8. 229819  
2. 431411 2. 444149  
1. 852227 1. 552179  
5. 635146 5. 773164  
3. 122123 4. 168093  
4. 134018 4. 685949  
6. 03321 7. 30743  
1. 504711 1. 566123  
3. 748159 4. 179279  
3. 568388 4. 76055  
1. 546412 2. 18207  
3. 758208 3. 365394  
7. 256429 7. 31132  
3. 481855 3. 073295  
3. 924944 4. 330142  
5. 452828 5. 726044  
6. 215448 6. 035109  
4. 094706 3. 061319  
4. 30756 4. 417229  
2. 25998 2. 329518  
4. 552168 3. 279316  
6. 264876 6. 186827  
2. 287826 4. 128231  
2. 805652 2. 584169  
3. 220675 4. 676595  
5. 618815 4. 771623  
2. 616996 3. 097773  
6. 014643 6. 948067  
2. 607141 2. 059915  
6. 116396 7. 399768  
4. 83822 3. 32803  
4. 794923 4. 40846  
7. 811596 7. 611132  
9. 521697 9. 613616  
7. 411959 8. 090205  
4. 977666 6. 20544  
3. 274877 4. 542198  
4. 474265 3. 781772  
4. 609521 5. 214237  
4. 688001 5. 33053  
5. 697603 5. 372179

2.066651 1.887373  
9.644128 9.176943  
2.137628 1.594429  
7.546389 6.78559  
4.159848 5.251653  
4.561988 5.038515  
6.132089 6.807779  
6.760075 7.146924  
2.376349 5.50391  
5.09547 5.067069  
4.745522 5.0098  
2.172002 1.646597  
2.702988 2.471025  
3.196664 2.480239  
2.354828 2.606631  
1.188559 1.155997  
2.253907 2.290013  
6.401155 6.609091  
4.463237 7.487517  
2.761114 3.189295  
1.291777 1.640917  
4.679831 4.163838  
6.29782 6.830674  
5.033601 6.059947  
5.644259 5.57176  
2.918357 2.094038  
5.133806 4.37882  
5.085638 4.432154  
9.695559 9.89595  
1.791104 1.896831  
7.453944 7.426685  
1.959805 2.259156  
3.23463 3.542209  
3.453358 3.131571  
7.992311 7.28405  
5.655786 5.996879  
4.730165 5.114886  
9.030946 9.283576  
4.979868 5.523678  
6.54931 5.946148  
5.613999 5.623081  
2.807318 3.061302  
2.087777 2.315401  
7.721329 8.354142  
6.770124 7.627896  
5.433933 5.714192  
5.176587 5.749623  
9.064749 9.085118  
3.204961 4.735267  
4.006355 2.967919  
6.092106 5.075194

6. 557592 6. 224564  
6. 05975 7. 672192  
1. 647174 1. 42527  
1. 288906 1. 621575  
3. 64339 1. 768793  
3. 178092 2. 996105  
2. 15851 2. 435228  
0. 844203 1. 686522  
6. 02796 5. 278201  
2. 572982 2. 403071  
7. 527537 7. 103149  
3. 435168 4. 303692  
2. 196945 4. 463888  
4. 624804 4. 28489  
3. 819939 3. 351582  
4. 254393 3. 697392  
6. 67167 6. 546388  
4. 576181 4. 037806  
2. 83438 2. 930783  
2. 987082 4. 571257  
6. 081459 4. 296027  
2. 081677 1. 918149  
1. 76452 2. 10211  
2. 958415 3. 333254  
7. 073407 6. 573866  
2. 046211 2. 010706  
7. 066794 5. 812914  
6. 657743 6. 898451  
2. 708525 2. 707999  
6. 355767 7. 468284  
3. 834941 4. 76702  
5. 547898 5. 267632  
4. 063689 4. 468592  
5. 689249 5. 67315  
2. 106369 2. 406426  
1. 502437 1. 572214  
6. 148054 7. 215712  
3. 293534 4. 005262  
6. 428812 7. 340545  
3. 896062 4. 238681  
1. 708896 2. 816877  
4. 853388 5. 076904  
5. 037375 4. 391029  
1. 142224 1. 676123  
6. 601129 6. 001143  
4. 802187 4. 96663  
2. 86534 2. 817537  
4. 829552 5. 346601  
6. 617152 5. 891088  
4. 981946 5. 165259  
3. 325169 2. 796349



6. 596815 7. 140477  
5. 742981 5. 721611  
1. 128486 1. 87408  
6. 267561 6. 150245  
3. 917083 3. 968212  
6. 867063 6. 707105  
7. 361903 7. 884149  
3. 765812 3. 918666  
7. 308305 7. 315928  
4. 984746 4. 768173  
7. 777377 7. 870902  
5. 971185 6. 383316  
1. 256191 1. 840864  
6. 348702 6. 85612  
1. 131028 1. 464779  
6. 456931 8. 458404  
2. 801072 3. 310643  
2. 310533 3. 665987  
3. 733634 2. 697918  
6. 988294 6. 588913  
4. 567154 4. 869435  
1. 997804 1. 438261  
1. 732564 3. 132988  
2. 84416 2. 612314  
6. 687215 6. 270294  
4. 636867 5. 037124  
5. 0824 5. 308667  
6. 613055 5. 47813  
1. 515316 1. 012765  
4. 951793 4. 560936  
1. 162694 1. 069442  
4. 993882 2. 836025  
6. 279353 5. 768114  
4. 848456 5. 653718  
4. 373468 4. 493052  
6. 904492 5. 834519  
4. 131286 3. 963184  
2. 570793 2. 875987  
5. 855058 6. 501617  
6. 573329 5. 289103  
6. 171692 6. 968125  
2. 74318 4. 121129  
5. 217922 5. 832107  
10. 18198 9. 890632  
6. 335259 5. 843464  
8. 227161 8. 820539  
6. 289832 5. 914544  
4. 628556 4. 884094  
1. 931517 2. 887837  
5. 758245 2. 931342  
2. 146302 1. 720156

3. 854678 3. 17564  
7. 383509 7. 58207  
1. 804402 2. 196928  
3. 407019 4. 190343  
7. 718931 8. 565706  
4. 021645 5. 024298  
7. 10593 7. 192933  
4. 546721 4. 850106  
5. 755728 5. 527324  
5. 233148 5. 072982  
4. 46462 5. 368058  
7. 572264 8. 068707  
6. 266398 7. 290791  
7. 083915 6. 857665  
7. 66187 8. 381049  
6. 374491 5. 980356  
7. 679856 7. 507821  
3. 877616 4. 002643  
2. 419541 1. 86545  
3. 033748 2. 220954  
1. 177717 1. 591974  
4. 956232 4. 227249  
4. 722238 4. 633724  
3. 644352 3. 249397  
6. 22097 5. 478975  
3. 511872 3. 749914  
5. 281559 5. 674366  
5. 996045 5. 739241  
3. 679625 4. 211257  
7. 028415 6. 473285  
7. 105391 6. 882171  
5. 855715 6. 086969  
1. 767174 1. 74527  
1. 629645 2. 753232  
6. 145808 7. 083328  
2. 376758 2. 645915  
2. 43085 2. 637378  
5. 605888 5. 482449  
1. 623111 2. 056094  
4. 275305 4. 917174  
6. 841413 6. 644239  
8. 416797 8. 782257  
5. 141837 4. 729582  
3. 249935 3. 484397  
5. 319236 7. 235493  
8. 010107 8. 287179  
6. 443015 5. 719204  
2. 800622 2. 413458  
0. 881815 1. 276007  
4. 359228 4. 432098  
7. 725668 7. 699007

5. 347025 5. 764272  
1. 639375 2. 113433  
5. 349666 3. 989433  
7. 963071 8. 051162  
8. 071088 8. 159171  
1. 988838 1. 73764  
4. 666466 5. 510907  
5. 269178 5. 822278  
7. 071809 6. 642483  
4. 025617 3. 842755  
3. 22329 2. 592047  
4. 020926 4. 687065  
5. 23483 4. 931157  
6. 755853 6. 732772  
7. 91332 8. 36456  
6. 858333 6. 618587  
6. 051408 6. 523234  
3. 900394 3. 780383  
1. 644516 1. 449245  
3. 655728 4. 430879  
7. 277281 7. 49476  
4. 870182 5. 654298  
7. 374325 8. 224619  
5. 669381 6. 822361  
5. 336033 3. 696795  
7. 709136 7. 831915  
1. 280155 1. 996596  
2. 021187 2. 357478  
2. 220272 4. 403516  
5. 430597 4. 970088  
6. 458494 5. 046483  
6. 943136 6. 843712  
7. 635582 8. 125973  
7. 887094 8. 732158  
4. 142913 4. 428364  
5. 29676 6. 355291  
4. 5595 3. 832554  
7. 5539 7. 800474  
6. 605952 6. 449857  
5. 058358 5. 740469  
3. 036632 3. 361753  
5. 313869 4. 585299  
2. 419455 2. 590791  
6. 510279 7. 394881  
7. 534999 7. 649809  
2. 475401 3. 279577  
5. 50307 5. 142265  
4. 168612 2. 705819  
6. 710921 6. 462896  
3. 242312 4. 057299  
4. 162744 3. 826678

1. 997634 2. 876042  
6. 489829 6. 213574  
4. 933175 4. 559864  
7. 614495 7. 405056  
2. 94165 1. 91806  
2. 19848 3. 531844  
1. 107392 1. 567781  
2. 170701 1. 710298  
4. 183978 6. 249895  
3. 23668 3. 62913  
2. 103982 2. 462848  
6. 362999 6. 262298  
5. 872526 6. 310339  
7. 039329 6. 954043  
6. 92442 7. 999317  
7. 461511 6. 72285  
7. 581563 6. 431803  
5. 097235 5. 757672  
7. 063937 7. 551545  
6. 853204 6. 279998  
6. 885772 6. 657875  
1. 449624 2. 345601  
6. 773414 6. 943992  
5. 502461 5. 108629  
7. 220116 7. 229708  
5. 443753 4. 89765  
2. 775659 2. 478656  
7. 153929 6. 787738  
4. 80973 4. 256398  
6. 234382 6. 210941  
8. 287601 8. 56591  
4. 778114 5. 050646  
8. 173072 7. 670197  
9. 104574 9. 360758  
3. 029541 2. 211641  
6. 710915 5. 008516  
4. 649299 4. 23465  
8. 721751 8. 88231  
5. 922043 4. 096645  
6. 657943 6. 189643  
2. 568618 3. 484544  
6. 463678 6. 304111  
4. 207905 5. 435786  
7. 135464 7. 734087  
8. 30901 7. 928534  
2. 498452 1. 97798  
4. 406801 6. 140355  
1. 676128 1. 56704  
5. 715872 5. 303066  
6. 004708 4. 578846  
5. 824704 6. 534061

8. 114392 8. 106637  
6. 18225 6. 544103  
5. 823431 5. 293491  
6. 48406 5. 977882  
7. 97236 7. 805033  
7. 974574 7. 655873  
7. 925195 8. 012358  
4. 84972 4. 934245  
5. 266578 6. 980003  
9. 846263 9. 804637  
5. 597263 5. 171992  
5. 972056 5. 470378  
6. 56106 6. 18729  
6. 238471 6. 718715  
5. 370641 5. 784061  
5. 646314 6. 715138  
4. 58595 4. 863518  
3. 519356 4. 070399  
4. 715153 4. 158004  
4. 407371 5. 164404  
1. 495454 3. 438353  
3. 742883 4. 498361  
5. 428489 5. 156582  
5. 472136 6. 358021  
8. 090077 8. 409174  
5. 472359 4. 829669  
1. 311373 1. 633831  
7. 440972 7. 583439  
7. 200937 7. 223369  
8. 544045 9. 405469  
10. 0888 8. 781572  
7. 104823 8. 246545  
2. 338658 2. 263056  
5. 162066 4. 660346  
4. 540633 5. 858526  
3. 469998 3. 096762  
3. 47557 5. 639653  
6. 180995 6. 68636  
6. 445962 6. 64403  
6. 350927 6. 169775  
5. 073793 5. 407339  
7. 593025 7. 829289  
3. 86343 4. 488862  
7. 722059 8. 009149  
2. 560832 2. 405729  
6. 671113 7. 262826  
4. 483239 4. 207554  
8. 227105 7. 611319  
2. 21165 2. 185442  
5. 838154 5. 729301  
5. 510074 5. 071997

11. 58479 11. 04946  
5. 514406 6. 517091  
5. 725623 5. 247016  
5. 651352 4. 819017  
9. 022468 9. 140367  
5. 380501 4. 972789  
2. 329889 2. 64428  
6. 506707 6. 795827  
3. 654626 3. 30037  
2. 292133 1. 441322  
7. 899078 8. 034916  
7. 156332 7. 696492  
6. 548579 8. 20916  
8. 649911 8. 839281  
2. 925184 2. 255426  
1. 878954 2. 136855  
3. 622698 3. 783283  
6. 534749 5. 287853  
2. 637927 2. 074176  
2. 068976 2. 238968  
3. 691881 3. 772127  
7. 534497 6. 92861  
1. 222266 1. 912941  
8. 7556 6. 878056  
4. 545087 6. 297792  
3. 381919 2. 236828  
6. 737157 6. 486752  
4. 103858 4. 544414  
5. 343638 4. 299488  
6. 660097 7. 583249  
8. 142126 8. 165066  
2. 98001 3. 36035  
1. 818919 2. 163688  
7. 560856 7. 61942  
6. 447871 6. 925413  
2. 867183 3. 267826  
3. 287861 5. 074619  
7. 811797 7. 563302  
3. 420159 4. 997279  
6. 98849 6. 374974  
5. 741647 5. 746545  
6. 265903 6. 922754  
7. 047937 6. 331322  
3. 037983 3. 392027  
2. 683386 4. 26045  
7. 676185 8. 338864  
1. 006631 1. 049272  
1. 696546 2. 053446  
3. 249527 3. 340375  
1. 331971 1. 766659  
3. 440672 2. 435246

7. 569012 7. 450069  
4. 781595 4. 484575  
4. 096541 5. 154253  
6. 821818 6. 873136  
6. 74573 5. 831196  
3. 837411 5. 376246  
5. 041137 4. 62707  
9. 235582 8. 93149  
3. 070783 3. 645839  
4. 963198 6. 081152  
3. 07092 4. 236951  
5. 482396 4. 484786  
4. 892843 4. 252203  
5. 961827 6. 777849  
3. 865138 2. 31965  
2. 390641 3. 228618  
2. 90236 3. 29402  
2. 195429 2. 450491  
5. 561888 4. 745597  
5. 822232 6. 327177  
7. 307842 7. 888955  
5. 235533 6. 749171  
9. 00546 9. 268965  
8. 008972 8. 41944  
2. 587828 3. 171986  
4. 915831 3. 466874  
3. 97381 4. 898469  
2. 205013 2. 628793  
5. 151408 5. 059601  
1. 708913 1. 669746  
4. 049802 4. 329651  
4. 740918 4. 990918  
3. 021002 3. 063229  
8. 462249 8. 455515  
5. 831944 5. 798997  
10. 1323 10. 64829  
5. 598303 5. 776506  
1. 733726 1. 842923  
5. 285652 5. 913458  
3. 312286 4. 712979  
7. 025009 7. 053753  
5. 351556 4. 845032  
7. 838901 8. 452972  
1. 014872 1. 709291  
4. 022057 4. 588333  
5. 195497 4. 295049  
2. 348183 1. 663542  
6. 425851 6. 49813  
5. 483292 4. 043048  
5. 38013 4. 841051  
2. 076139 2. 261376

6.411427 6.45  
8.527166 8.483968  
1.475375 1.047954  
5.892965 5.860434  
6.205885 6.008602  
3.658714 2.935772  
5.434302 2.751611  
7.531207 7.769598  
2.548595 4.902639  
1.486136 1.544256  
3.59097 2.861882  
5.953397 5.767593  
5.123647 7.14303  
2.124911 2.519317  
2.596956 1.996904  
1.20792 1.153858  
7.69221 7.620844  
6.842457 6.954192  
4.83944 4.767109  
4.19154 2.642007  
5.052625 5.264197  
1.604145 1.417218  
4.320436 5.645945  
1.394251 1.94964  
4.158086 1.336409  
4.621574 4.057355  
5.900489 5.885054  
8.297686 8.167231  
4.33919 3.426328  
5.642038 5.912396  
6.403982 5.009796  
8.632883 7.891861  
6.156065 4.389191  
1.7754 1.23163  
7.666686 6.96191  
7.514348 7.545309  
7.042416 7.093924  
5.417839 6.411238  
3.246425 2.582753  
3.304572 3.576519  
2.925247 4.040531  
7.021274 7.390067  
3.329993 4.250419  
7.281357 6.505584  
5.958686 5.687107  
9.831232 9.816498  
7.94743 7.567719  
6.096892 7.515683  
1.455035 2.032782  
2.168412 2.37684  
2.301446 2.094687



7. 846661 7. 810375  
7. 694587 7. 91376  
2. 201893 3. 034539  
2. 424279 2. 762382  
1. 917746 2. 438864  
3. 243521 3. 108392  
6. 042916 6. 594474  
1. 719432 2. 228277  
4. 605782 3. 416071  
7. 057531 6. 952957  
5. 887334 5. 401498  
4. 087943 3. 263609  
4. 516513 3. 467308  
2. 945947 2. 906931  
1. 589174 1. 24018  
3. 131435 4. 038932  
2. 279424 3. 069022  
4. 433102 4. 318376  
5. 318955 3. 698226  
4. 929549 4. 382348  
10. 40557 9. 536134  
4. 320539 5. 592986  
4. 808084 4. 629737  
2. 177413 2. 231018  
4. 868042 4. 338411  
3. 683961 2. 579201  
1. 491028 2. 545239  
1. 113241 1. 795633  
7. 993105 7. 918419  
4. 296831 5. 327  
5. 77823 6. 269277  
3. 026663 2. 949785  
5. 504657 5. 359774  
4. 637532 3. 33162  
2. 631547 2. 770175  
3. 09579 1. 912176  
2. 024316 2. 103805  
4. 248985 4. 245697  
5. 425919 4. 93616  
1. 587747 1. 5545  
2. 959516 2. 650996  
2. 324433 2. 238523  
6. 855243 5. 265385  
6. 567427 6. 192979  
4. 499506 4. 541232  
6. 976927 7. 321217  
5. 121467 4. 747482  
3. 888079 3. 671814  
5. 277595 4. 36317  
5. 595781 5. 348691  
10. 16674 8. 789419

7. 422151 7. 851419  
2. 225931 3. 590151  
3. 430927 2. 813873  
2. 700403 3. 002034  
2. 095492 2. 026575  
3. 659139 2. 490262  
6. 689212 6. 447798  
1. 76629 2. 716754  
3. 583162 2. 633482  
6. 47385 7. 435623  
7. 502063 8. 037685  
7. 528297 7. 854132  
1. 803708 2. 90699  
9. 731783 9. 954601  
6. 321345 6. 973836  
4. 190146 4. 303373  
9. 161112 8. 837275  
7. 877778 6. 378963  
6. 679842 5. 992459  
7. 021132 7. 494186  
3. 044314 3. 037411  
1. 436335 1. 602402  
3. 567553 4. 293251  
5. 248656 3. 654827  
2. 724465 2. 133899  
1. 96739 2. 18164  
6. 330146 7. 285736  
2. 481046 2. 947538  
5. 967573 4. 783703  
1. 705763 2. 415341  
1. 789646 2. 163766  
1. 120242 3. 796426  
2. 836317 2. 855857  
3. 377829 3. 099639  
4. 491255 4. 79536  
4. 657532 5. 138852  
4. 855949 5. 181528  
2. 193232 2. 028347  
8. 273999 8. 993552  
4. 811117 3. 555131  
5. 42067 5. 475143  
7. 495755 7. 96083  
2. 267185 2. 766366  
2. 133761 2. 792141  
7. 716062 8. 534665  
8. 734917 8. 705223  
5. 013717 5. 712508  
4. 218516 4. 343381  
5. 291168 7. 12463  
1. 616941 1. 827058  
1. 507625 1. 373758

1. 521467 1. 717208  
4. 341151 3. 990511  
1. 172956 1. 171626  
5. 152226 6. 41927  
1. 901184 2. 950778  
3. 933716 2. 888243  
3. 098927 3. 41642  
2. 929854 1. 729258  
3. 473613 1. 904155  
3. 233636 3. 739792  
5. 617739 5. 077128  
1. 509622 1. 56501  
2. 662555 2. 919443  
3. 286044 3. 521466  
6. 755599 6. 953355  
1. 490464 0. 97712  
4. 557907 4. 210791  
5. 240184 4. 871972  
1. 762403 1. 947733  
2. 011019 2. 703189  
5. 239319 4. 68925  
3. 950927 4. 525538  
6. 688158 6. 506286  
4. 464962 5. 359661  
3. 604454 4. 003278  
5. 984773 6. 199747  
9. 662869 9. 791716  
5. 389934 5. 381905  
5. 849631 5. 353919  
2. 742165 2. 837233  
3. 128983 2. 796365  
3. 495635 3. 075289  
1. 734543 2. 561394  
4. 028026 4. 26036  
1. 183819 2. 196985  
2. 549946 1. 460328  
4. 954541 5. 528796  
1. 409128 1. 143734  
1. 066862 1. 241997  
1. 152736 1. 70969  
2. 017786 2. 084728  
2. 022481 2. 761883  
2. 047943 2. 926656  
3. 247225 2. 597047  
0. 771963 0. 984793  
1. 054641 1. 06142  
1. 377123 1. 7715  
1. 9857 1. 878052  
2. 504776 1. 937833  
4. 284455 4. 670079  
2. 977927 4. 182508

1. 847265 2. 997062  
2. 784303 2. 213542  
2. 499214 3. 187591  
1. 19382 2. 737568  
4. 719917 4. 877417  
2. 643356 2. 98675  
3. 841093 5. 168803  
4. 328103 4. 559494  
1. 984351 1. 434225  
7. 67508 6. 907847  
6. 965687 6. 730951  
1. 193093 1. 150085  
5. 821667 7. 012404  
2. 665423 3. 03555  
5. 638495 8. 005932  
7. 158436 6. 944319  
6. 519665 6. 08012  
5. 475077 4. 652223  
5. 033088 4. 047535  
2. 834801 3. 681299  
6. 824548 6. 998366  
5. 697213 5. 420969  
8. 637133 6. 557239  
2. 360084 1. 328611  
2. 039461 4. 424028  
11. 46167 11. 42415  
2. 761533 2. 597911  
2. 587043 2. 14148  
1. 678346 1. 43589  
4. 781066 4. 255235  
5. 043761 6. 143727  
3. 046793 3. 273456  
5. 442644 5. 299855  
3. 55296 2. 126865  
1. 743664 1. 7139  
0. 90107 1. 896003  
5. 287053 4. 968082  
4. 500185 4. 418734  
8. 128989 7. 786965  
7. 544779 6. 777634  
3. 506517 2. 658878  
0. 818678 1. 918278  
5. 087174 5. 600003  
7. 324095 5. 52675  
5. 122451 3. 290083  
4. 665571 5. 608912  
2. 650112 2. 790442  
4. 802098 5. 944505  
1. 736943 2. 969735  
4. 323363 5. 118436  
2. 916112 2. 771937

2. 818353 3. 547985  
2. 263917 2. 558558  
1. 207511 1. 356819  
7. 441398 7. 255291  
4. 930891 4. 23168  
7. 032314 7. 12617  
7. 991804 7. 981826  
5. 912485 4. 951385  
9. 786606 8. 959806  
6. 809233 7. 428062  
3. 522105 3. 033448  
6. 140266 6. 662904  
8. 760393 9. 908386  
4. 06331 2. 721357  
3. 116213 4. 653735  
8. 390259 7. 91743  
5. 292013 6. 193123  
3. 799994 3. 507259  
3. 180503 4. 281944  
2. 007072 2. 161388  
3. 350238 2. 45481  
4. 065187 4. 093505  
3. 616063 3. 63474  
7. 19365 7. 38401  
2. 003766 1. 944685  
2. 784719 1. 949758  
3. 946507 3. 479043  
2. 75113 3. 92456  
1. 136939 1. 519753  
7. 926946 7. 758986  
5. 814049 4. 003715  
4. 461475 5. 055022  
1. 982496 2. 082035  
2. 565199 2. 389558  
5. 973007 6. 079829  
7. 712655 8. 376476  
7. 744532 7. 955234  
3. 902075 5. 060044  
7. 84022 7. 528754  
7. 869871 6. 153287  
7. 949394 6. 720621  
5. 825495 5. 396947  
4. 601982 2. 396619  
6. 718874 6. 087006  
5. 759432 5. 277095  
3. 598628 2. 84803  
1. 94788 2. 009197  
6. 046887 5. 502703  
5. 029098 4. 944903  
4. 55473 4. 609186  
1. 134241 1. 704752

3. 381457 4. 22725  
6. 49944 5. 578069  
5. 449132 4. 63007  
1. 362226 2. 967551  
5. 688493 5. 86759  
5. 401354 4. 978452  
5. 773962 5. 484098  
5. 106508 3. 297614  
1. 025786 1. 064595  
1. 322822 2. 15309  
2. 407899 3. 05413  
4. 370119 4. 491087  
6. 667385 5. 985454  
3. 090973 3. 188508  
6. 147876 5. 713595  
4. 146756 4. 876282  
6. 89482 6. 999237  
1. 399673 1. 494496  
4. 079633 4. 512994  
4. 486753 4. 399398  
3. 459514 4. 121154  
6. 841236 6. 560704  
3. 393515 3. 198829  
2. 837232 3. 400982  
2. 860566 5. 538794  
2. 203793 1. 601279  
6. 03574 5. 773995  
1. 856031 1. 490047  
4. 846979 6. 51476  
1. 49004 1. 940875  
2. 773591 3. 136121  
4. 599096 3. 339888  
3. 369842 4. 105032  
6. 794004 5. 750682  
6. 494927 5. 332252  
6. 194523 6. 355476  
3. 682842 3. 391453  
6. 20856 6. 362184  
2. 52228 2. 947718  
3. 780442 3. 07249  
8. 211878 8. 188999  
6. 012965 5. 186995  
2. 55275 2. 793445  
5. 443696 5. 70929  
4. 493345 2. 127511  
6. 196403 5. 90947  
7. 632908 7. 657486  
1. 452033 1. 78007  
2. 852751 3. 342046  
5. 644266 4. 820432  
7. 398393 6. 590479

10. 358 10. 71003  
0. 918591 1. 424242  
6. 585317 6. 51773  
3. 568709 2. 512967  
2. 688698 2. 202208  
2. 095899 2. 099592  
2. 589516 2. 522462  
3. 435561 3. 617192  
5. 128637 4. 88795  
3. 629116 2. 111563  
4. 766459 5. 099642  
3. 534129 5. 699046  
6. 54512 5. 314879  
6. 085405 5. 053155  
5. 087226 3. 885874  
1. 983259 3. 329884  
1. 954408 2. 193815  
5. 262788 5. 776081  
1. 162326 1. 217272  
1. 852847 1. 902248  
0. 668168 3. 23269  
3. 094425 2. 201979  
4. 917555 5. 846716  
1. 067777 1. 080215  
2. 502457 2. 457646  
4. 401466 3. 903743  
6. 860991 7. 100414  
3. 233015 2. 85324  
6. 236048 6. 964892  
1. 585742 1. 179751  
8. 004501 9. 016603  
1. 901345 1. 441411  
1. 608585 1. 829438  
4. 155347 3. 904057  
5. 473667 4. 789789  
7. 451467 5. 196102  
6. 092427 6. 356852  
5. 735217 5. 477851  
2. 579121 2. 612144  
5. 4864 4. 374479  
3. 667501 5. 602974  
3. 04949 3. 140225  
3. 071869 1. 163251  
6. 779452 5. 664437  
6. 290506 6. 871825  
6. 59655 6. 356014  
1. 718347 3. 265256  
1. 743527 1. 850457  
5. 520796 5. 464929  
0. 756213 0. 951507  
4. 481371 3. 143268

8.062565 8.531314  
3.526844 3.767814  
2.706392 3.191112  
4.391752 4.353297  
3.845153 1.623931  
2.439096 1.350662  
3.83237 4.584021  
4.630744 3.281751  
8.275348 8.238948  
6.321608 5.44744  
1.832201 3.54003  
6.086803 5.05068  
5.864895 4.035317  
3.92845 3.991304  
4.938005 4.985793  
5.199937 4.72796  
4.734722 4.582431  
6.823818 7.177195  
7.264735 6.892403  
5.786494 5.321777  
7.657388 6.662867  
4.714646 3.847486  
5.358556 4.897648  
5.404052 6.015744  
6.16208 5.14343  
1.437241 1.633527  
1.671575 2.104045  
2.578265 3.937466  
3.195202 3.449546  
1.994045 1.726758  
4.484628 4.409235  
5.883637 5.437291  
5.277572 7.379663  
2.744189 4.151329  
1.61812 2.64834  
6.103448 5.381371  
1.48473 1.567739  
5.602941 5.621483  
3.53375 2.060866  
5.431148 4.909341  
3.010239 3.262168  
4.287499 5.297216  
2.627348 3.660299  
1.601666 2.615917  
2.559115 3.547353  
4.257879 3.88508  
6.275137 6.277683  
2.3658 2.475254  
3.978847 4.459838  
1.354768 1.136768  
3.040434 3.065291



3. 521772 3. 88974  
7. 00655 7. 21707  
7. 548452 7. 384572  
0. 987056 1. 409448  
3. 034622 3. 607486  
1. 905187 2. 173763  
9. 236219 9. 838453  
3. 749588 4. 835097  
1. 922555 2. 231193  
6. 688653 5. 380657  
5. 080227 5. 883513  
2. 162934 2. 902239  
3. 627012 3. 349022  
7. 135682 7. 444681  
4. 390877 3. 873403  
6. 856787 5. 637198  
7. 080167 6. 542023  
3. 663623 4. 301365  
3. 18205 2. 860633  
1. 847659 1. 897616  
1. 293574 1. 844602  
4. 354341 4. 085267  
8. 785344 8. 891298  
2. 617487 3. 676058  
5. 768505 5. 08264  
5. 020582 4. 480385  
5. 478179 5. 092568  
3. 697671 3. 672818  
5. 530553 4. 481467  
5. 209945 4. 288722  
6. 885903 6. 692314  
6. 229224 6. 188996  
6. 579359 6. 788141  
3. 785713 3. 800069  
5. 942551 5. 982066  
7. 084627 6. 156849  
6. 675789 5. 642182  
3. 157267 3. 773487  
5. 672431 5. 170928  
6. 432789 5. 634068  
5. 561326 8. 004606  
6. 622377 6. 222435  
3. 987352 5. 112068  
1. 434857 2. 207622  
6. 608389 5. 418231  
3. 622088 2. 812336  
3. 170766 2. 709435  
4. 79441 4. 621058  
1. 712285 1. 283045  
6. 745526 5. 776908  
3. 300302 5. 389913

1. 339798 1. 538885  
0. 74075 1. 713968  
7. 444969 6. 877584  
6. 009505 5. 774605  
2. 564285 3. 020264  
7. 927854 7. 431016  
4. 44788 4. 635498  
4. 925612 4. 945223  
4. 782438 5. 841357  
8. 729338 8. 23591  
5. 440797 6. 882599  
1. 909125 1. 637271  
1. 573325 1. 816122  
2. 277978 1. 653854  
4. 408678 3. 820379  
4. 503437 4. 202964  
5. 167361 5. 665485  
6. 018953 5. 953263  
3. 015547 2. 393007  
2. 355952 2. 401462  
3. 185236 4. 395235  
5. 398712 5. 209198  
1. 754524 1. 716587  
6. 007942 5. 187612  
3. 073934 3. 137866  
1. 560131 2. 034196  
7. 471023 6. 749685  
3. 588438 2. 782061  
4. 45685 3. 838239  
3. 756501 4. 736684  
4. 79773 5. 176611  
1. 689923 2. 31516  
7. 103879 7. 160958  
4. 704066 3. 199734  
1. 447972 1. 558852  
7. 740182 7. 644162  
4. 988624 3. 48214  
5. 306132 7. 027938  
8. 950848 8. 301128  
4. 569678 3. 300642  
7. 797179 5. 966003  
6. 484791 6. 2109  
6. 518081 6. 328245  
3. 861541 4. 222681  
5. 755931 5. 078998  
5. 654905 5. 343486  
7. 046284 5. 997423  
5. 240236 4. 88996  
6. 020779 4. 458448  
3. 616206 3. 261702  
2. 405627 2. 833179

5. 386477 4. 951212  
4. 690197 4. 942559  
4. 351867 4. 864745  
6. 812025 4. 973407  
2. 223415 2. 907293  
7. 308028 7. 077911  
1. 586039 2. 231632  
3. 631645 3. 738625  
4. 773926 4. 291141  
1. 577668 1. 808921  
6. 794407 6. 399466  
1. 718864 2. 058645  
5. 621356 5. 040715  
7. 212669 6. 069276  
3. 045165 3. 35595  
7. 028213 6. 950123  
2. 116789 2. 24267  
5. 736158 5. 212436  
3. 945358 3. 560542  
5. 287671 6. 041346  
2. 910476 3. 069559  
5. 456773 5. 30152  
6. 615603 6. 794948  
5. 333577 5. 067644  
6. 989837 6. 181372  
3. 516759 4. 662603  
3. 577916 2. 533351  
7. 446978 8. 264608  
4. 152648 5. 802227  
2. 385087 2. 802512  
4. 870443 4. 876557  
6. 971607 6. 956572  
6. 8523 7. 629757  
7. 185812 7. 377514  
4. 66007 4. 608796  
4. 449446 5. 64862  
5. 729246 5. 622691  
2. 515711 2. 30171  
2. 533002 1. 81918  
5. 05693 5. 141292  
8. 086179 8. 141367  
2. 627868 3. 719969  
3. 728767 3. 255214  
6. 612195 6. 900339  
2. 779733 3. 062032  
7. 21107 8. 026978  
3. 184665 3. 247105  
5. 36298 5. 830382  
4. 136071 2. 6747  
2. 154522 2. 40775  
3. 87632 3. 841912

7. 701845 6. 849593  
6. 931209 6. 659772  
6. 475888 6. 223419  
5. 638927 5. 227891  
5. 114962 5. 310053  
4. 50345 4. 570491  
6. 487376 5. 80256  
2. 842446 3. 553054  
2. 808045 3. 223625  
3. 988314 3. 630557  
4. 111241 4. 261688  
4. 617317 5. 359595  
0. 907411 0. 968614  
6. 355591 5. 808609  
3. 998209 4. 173635  
3. 735877 2. 950204  
3. 707888 3. 830761  
4. 62782 4. 357814  
4. 786811 4. 320622  
4. 862668 3. 972499  
1. 209734 1. 66172  
3. 348895 4. 38927  
6. 669088 7. 151448  
6. 702039 7. 30446  
3. 209353 4. 012231  
3. 035904 3. 556978  
3. 730931 5. 031192  
4. 286307 5. 20854  
4. 210424 5. 560271  
3. 060965 2. 719078  
5. 508167 7. 86374  
5. 314526 6. 773091  
1. 50753 1. 224481  
4. 867029 4. 749421  
3. 67039 5. 62071  
4. 895933 5. 913029  
4. 662281 5. 20213  
6. 999588 7. 469459  
5. 107454 3. 573184  
7. 332987 7. 164663  
2. 443816 3. 117974  
5. 720677 5. 377848  
3. 402837 4. 263386  
3. 784903 3. 898738  
3. 576302 2. 632155  
6. 870631 6. 304021  
3. 000719 1. 602361  
6. 323921 6. 23738  
2. 170888 2. 459248  
8. 27159 8. 781697  
7. 866696 8. 471043

4. 496441 4. 679266  
3. 744195 3. 940875  
9. 442873 8. 305498  
1. 605254 2. 226031  
7. 265751 6. 91226  
5. 419257 5. 964524  
6. 751534 7. 068867  
5. 943599 5. 038467  
4. 487228 4. 242203  
4. 060511 2. 705448  
5. 380651 4. 066516  
5. 495848 6. 027273  
8. 656147 8. 764633  
2. 164026 2. 05262  
5. 85368 4. 113686  
6. 411654 6. 360606  
5. 729512 5. 682764  
6. 001144 6. 032485  
6. 501454 6. 112886  
5. 565091 4. 19198  
2. 992832 2. 312959  
6. 040243 5. 585007  
2. 198413 1. 662271  
8. 637288 8. 758166  
5. 270625 4. 339071  
3. 62787 3. 829704  
7. 706992 5. 803376  
3. 08842 3. 856618  
2. 713747 1. 4993  
2. 170993 3. 407605  
5. 470791 4. 324655  
4. 796014 4. 27921  
5. 831436 6. 768092  
5. 328381 4. 972401  
7. 003268 6. 914081  
6. 44454 6. 328631  
4. 891178 4. 431846  
2. 526313 2. 109327  
5. 262786 5. 345901  
3. 224969 2. 775923  
6. 699202 6. 343062  
4. 259276 4. 676949  
3. 34093 2. 568009  
2. 737064 3. 81495  
7. 249093 6. 975267  
4. 571151 3. 660881  
6. 804071 7. 461506  
3. 058307 2. 533039  
3. 809721 4. 045365  
7. 452005 8. 03297  
3. 779527 4. 251808

2. 829023 2. 508247  
5. 085082 4. 947769  
2. 265221 2. 302858  
3. 114062 3. 212593  
6. 739006 7. 104511  
2. 868364 3. 51721  
2. 17154 2. 11517  
8. 223881 8. 31023  
2. 731328 1. 931352  
1. 416205 1. 34891  
5. 240661 3. 955139  
1. 951406 2. 372113  
7. 898922 8. 002335  
1. 717668 0. 667049  
4. 73149 4. 252908  
1. 798771 2. 076234  
5. 004071 4. 151843  
1. 569924 3. 454473  
4. 98614 4. 312867  
9. 761415 9. 327893  
4. 102448 4. 749458  
1. 300757 2. 507841  
7. 139713 8. 166396  
4. 191697 5. 067395  
7. 260644 8. 010033  
7. 59578 6. 392375  
3. 070479 3. 317101  
5. 036272 4. 5598  
0. 865337 1. 175662  
6. 837879 5. 947935  
1. 945323 1. 899629  
4. 966858 4. 414998  
3. 702467 3. 462462  
3. 597718 3. 622968  
4. 151652 3. 963648  
5. 631551 5. 375557  
3. 113495 1. 665108  
4. 545596 4. 480606  
7. 468207 7. 266534  
5. 651066 5. 822071  
4. 500474 4. 498752  
6. 599569 5. 848434  
4. 245181 4. 132843  
6. 101262 4. 386234  
6. 156579 6. 941362  
4. 605586 3. 276046  
4. 457941 4. 225143  
7. 104427 7. 167838  
6. 90452 7. 130373  
2. 492616 3. 909173  
4. 72904 4. 25317

6. 630386 5. 531041  
3. 912251 3. 247822  
5. 854926 5. 280341  
5. 049664 4. 886241  
1. 458537 1. 092218  
3. 450147 3. 715689  
6. 19549 5. 023069  
4. 461404 4. 599639  
6. 0367 5. 152382  
6. 562921 7. 062401  
1. 002073 1. 864986  
5. 345894 5. 626583  
6. 073059 5. 280363  
5. 168867 4. 149074  
5. 236977 5. 652602  
1. 447376 2. 895428  
4. 621296 4. 37933  
6. 0256 5. 206093  
4. 342659 3. 974301  
2. 948758 2. 525067  
7. 3162 3. 288349  
2. 210216 1. 530695  
4. 774312 2. 622931  
7. 19982 6. 824565  
4. 730009 6. 171582  
2. 403313 2. 19913  
3. 965391 4. 4947  
5. 788563 7. 862661  
6. 4016 6. 742399  
4. 877939 5. 728771  
3. 864861 3. 832585  
7. 706499 7. 604486  
5. 916394 5. 769865  
3. 455644 4. 266998  
4. 738104 4. 827058  
5. 055702 4. 625434  
6. 693588 6. 807532  
5. 97628 6. 481835  
4. 562647 5. 40069  
4. 536059 4. 180009  
7. 99703 8. 527575  
2. 631388 2. 593063  
7. 433828 6. 983514  
4. 856048 5. 666534  
6. 202702 5. 874374  
2. 311705 4. 122473  
3. 87849 4. 395095  
7. 237229 6. 656625  
7. 974835 8. 42111  
9. 001322 8. 985436  
5. 656124 6. 714386

5.019917 5.632875  
3.53901 3.924347  
6.37377 6.165689  
6.241765 6.332279  
4.671332 5.94905  
3.422207 2.406758  
5.287327 5.269126  
2.966567 3.480123  
4.30462 4.494495  
4.951899 4.283931  
4.401598 5.292797  
5.379135 5.362587  
6.565297 5.980654  
3.84048 3.018234  
6.661625 5.347457  
6.447276 5.306895  
4.91439 4.483857  
7.958724 8.436642  
2.03631 3.574226  
5.750047 4.478477  
4.373646 5.294349  
6.959883 5.849322  
5.628813 6.604508  
5.308786 5.238925  
7.87537 7.140452  
6.479972 6.175904  
6.141885 5.922024  
2.235506 6.752788  
5.906586 5.569394  
2.372877 2.882485  
2.209371 2.141348  
5.423739 5.809363  
6.405849 4.139808  
6.895725 7.124232  
7.424638 6.085495  
6.829776 5.82122  
7.849995 7.961516  
4.286209 4.164079  
7.264269 6.288882  
5.623286 6.065748  
3.316187 3.792032  
1.588112 2.585474  
6.511543 3.936006  
6.118306 5.763726  
8.785285 8.803541  
2.454204 2.874446  
5.272708 6.762825  
6.340013 5.681207  
3.896019 4.643849  
6.142212 7.100604  
4.324811 5.760506



1. 196566 1. 298459  
2. 866218 3. 256077  
3. 056742 4. 104612  
5. 29162 4. 812416  
4. 654207 4. 875745  
4. 826271 3. 859445  
4. 824351 5. 723865  
2. 317887 3. 262992  
3. 677515 4. 137853  
2. 077667 1. 62812  
5. 033293 3. 946192  
4. 302692 2. 456347  
8. 295411 8. 686617  
6. 325938 5. 341433  
6. 529842 5. 912598  
1. 007386 1. 431428  
3. 68927 2. 928624  
5. 869833 6. 502753  
5. 306467 5. 329792  
5. 252196 5. 288613  
8. 245567 7. 62534  
3. 658763 3. 827707  
4. 402145 2. 784356  
7. 05694 7. 473733  
2. 30739 1. 535487  
4. 149041 3. 62158  
4. 364409 4. 619372  
3. 84655 5. 214197  
6. 288196 5. 427867  
8. 056074 7. 602842  
5. 177003 4. 962127  
6. 164222 5. 302442  
7. 381717 5. 929257  
5. 997979 6. 604032  
3. 446949 3. 840486  
4. 91561 4. 928128  
2. 70068 1. 584983  
5. 852766 5. 165426  
2. 323161 2. 30613  
5. 621049 4. 186363  
6. 308187 6. 558048  
1. 943754 2. 503806  
5. 278973 5. 468277  
6. 091183 5. 549646  
3. 210161 4. 012673  
3. 921222 4. 802834  
3. 730799 3. 848737  
1. 609411 1. 966791  
7. 503512 6. 997214  
7. 442029 7. 303023  
6. 940593 6. 431713

4. 224801 3. 043885  
5. 591676 5. 222132  
5. 060946 4. 745863  
6. 716301 6. 953429  
3. 073155 2. 714427  
5. 239099 4. 44588  
1. 600804 1. 140371  
3. 31511 2. 987452  
5. 425045 6. 488555  
1. 770771 2. 097773  
4. 61062 3. 098391  
1. 72823 1. 919277  
2. 032057 2. 004886  
3. 78481 2. 626932  
7. 433157 7. 289736  
5. 669079 6. 554828  
1. 348617 1. 556019  
5. 018431 5. 993213  
3. 793228 5. 360016  
6. 987006 6. 61497  
5. 889559 5. 348806  
5. 315517 4. 495578  
1. 854731 3. 125574  
5. 189307 5. 017161  
7. 82533 6. 458235  
4. 933505 4. 309807  
6. 544987 6. 053438  
6. 43186 5. 407344  
2. 2946 1. 682243  
5. 454689 5. 641873  
3. 046687 2. 549117  
9. 307522 8. 866248  
5. 552129 4. 873413  
5. 799794 6. 292551  
6. 142851 5. 924571  
3. 008694 2. 086878  
4. 776649 5. 357467  
1. 80402 2. 186497  
5. 548134 5. 994448  
4. 266477 5. 044952  
2. 148202 2. 365502  
3. 079041 2. 988906  
3. 097719 3. 108569  
2. 959738 4. 02358  
7. 237705 7. 05256  
6. 400601 7. 175828  
5. 179133 6. 222943  
3. 108529 3. 068996  
6. 620183 5. 975735  
2. 644118 4. 213114  
5. 782206 6. 27245

6. 923021 6. 355458  
4. 596631 6. 363396  
8. 990559 8. 974631  
3. 707136 3. 275242  
3. 80546 3. 990484  
6. 513566 6. 553941  
3. 836664 4. 149331  
4. 512913 3. 336264  
4. 578097 4. 984288  
9. 50363 8. 792279  
6. 561481 7. 117467  
4. 067028 2. 734433  
4. 086037 3. 298895  
5. 527445 5. 628108  
7. 335037 6. 495647  
6. 54991 6. 276216  
5. 421535 5. 09763  
5. 131117 3. 976743  
3. 177221 4. 876705  
2. 539382 3. 03532  
2. 382881 2. 522089  
5. 565778 5. 526153  
5. 095744 5. 472531  
2. 832518 2. 445844  
6. 238167 6. 525527  
0. 857853 1. 558768  
2. 681764 2. 932093  
5. 973449 5. 896332  
7. 999256 8. 085369  
2. 807938 2. 289641  
3. 50511 2. 370461  
2. 737013 2. 337359  
1. 442534 2. 294383  
2. 73591 3. 113641  
4. 816751 3. 428413  
5. 342464 5. 258175  
1. 327335 1. 804811  
7. 262347 7. 468426  
7. 232248 6. 908195  
8. 107618 7. 355647  
2. 658138 2. 777118  
6. 77843 7. 839073  
4. 447902 3. 766438  
4. 027151 4. 768126  
5. 645596 5. 518131  
7. 194455 7. 716677  
4. 659961 1. 49394  
2. 321812 2. 202498  
6. 875582 7. 241319  
1. 791112 1. 539517  
2. 319986 1. 745133

4. 419633 1. 90614  
1. 279947 2. 276808  
1. 28753 1. 223394  
7. 160864 4. 387268  
2. 450192 2. 51079  
1. 161905 1. 361091  
1. 057475 1. 982231  
1. 586163 2. 883344  
0. 736268 0. 668257  
6. 032679 5. 570559  
2. 604113 3. 058642  
4. 112249 4. 324747  
2. 86936 3. 539593  
1. 582799 3. 472946  
5. 232366 4. 069781  
5. 490726 4. 925364  
1. 205645 1. 243701  
0. 747995 0. 989335  
3. 157399 3. 867084  
2. 747594 3. 101087  
4. 996737 5. 631309  
4. 472242 7. 251144  
4. 102349 4. 454143  
1. 034772 2. 301514  
7. 01553 6. 785381  
6. 36069 6. 776368  
0. 937711 0. 795023  
4. 762606 5. 22564  
4. 220827 5. 225423  
4. 875292 3. 330667  
4. 592817 3. 097484  
7. 901038 8. 084382  
6. 271748 5. 476366  
6. 221848 6. 020264  
1. 573478 1. 836513  
5. 980456 5. 406741  
4. 177771 4. 829795  
2. 849718 4. 061749  
2. 304993 2. 665468  
3. 069119 2. 724736  
9. 265575 9. 719498  
3. 387137 4. 032892  
1. 977247 1. 987866  
5. 000887 5. 729681  
4. 144972 4. 297302  
5. 039186 5. 370203  
1. 206233 1. 827222  
0. 999395 1. 200061  
2. 161329 2. 539342  
1. 999683 1. 794541  
3. 061982 2. 540326

4. 527476 5. 162396  
1. 88751 1. 846426  
5. 395033 5. 643845  
4. 470062 3. 595337  
7. 136292 7. 549889  
9. 391823 8. 28243  
1. 540838 1. 497991  
1. 962098 1. 67923  
1. 29552 1. 458246  
6. 003895 5. 589763  
3. 363056 2. 992534  
2. 924932 3. 367117  
1. 480998 2. 998565  
3. 861516 2. 072462  
4. 187764 4. 567453  
1. 57906 1. 874745  
4. 541979 5. 289084  
5. 074265 4. 386557  
1. 511632 1. 982546  
5. 280301 3. 87836  
4. 545442 4. 861943  
2. 862325 2. 275437  
4. 107906 0. 860637  
2. 193492 2. 23662  
2. 941502 2. 473227  
1. 184725 1. 439831  
4. 090741 4. 874997  
6. 806921 7. 098504  
2. 926463 2. 39085  
6. 026035 6. 174087  
1. 451086 1. 962037  
6. 035515 5. 939748  
7. 03029 6. 195457  
4. 999965 5. 17823  
3. 277353 3. 412195  
1. 632013 2. 064713  
6. 860634 6. 845172  
6. 151847 5. 709927  
6. 137234 6. 24947  
5. 941575 5. 408335  
3. 926102 3. 444346  
7. 792394 7. 2571  
1. 85732 1. 819269  
6. 390409 6. 792702  
4. 756364 3. 946847  
7. 712812 5. 224286  
2. 152834 2. 277743  
6. 152486 5. 027154  
5. 113372 4. 472843  
5. 13984 4. 2803  
5. 253239 5. 497903

5.095922 4.064873  
6.245841 5.82636  
6.429946 5.664147  
5.004296 4.425143  
5.60208 5.266811  
6.206176 6.03924  
3.407519 3.15935  
2.286733 1.840418  
5.986945 5.527224  
2.071282 1.532211  
2.72269 2.302766  
5.456627 4.449857  
6.597836 4.9955  
4.141013 5.174231  
2.228269 3.252635  
5.202067 4.062078  
5.786975 5.022164  
5.76279 6.691404  
5.222847 5.530053  
5.467784 4.809419  
5.522227 5.21521  
7.796189 6.077413  
7.044708 6.817082  
2.520718 3.329951  
5.993942 5.029385  
6.004635 5.056077  
4.205651 4.87896  
6.234008 5.98955  
2.391205 1.638667  
5.77257 3.889383  
4.260046 2.068242  
6.031515 6.244592  
2.456283 2.112827  
5.578808 6.75484  
4.423899 6.952247  
3.368726 3.825518  
4.050673 3.824288  
6.661147 7.157243  
4.324215 3.586039  
7.686202 7.931632  
7.9423 8.241982  
2.229443 2.485331  
6.845712 7.944846  
1.401716 1.59067  
4.887148 3.558388  
3.22001 2.471298  
3.916794 4.206205  
2.858854 4.319038  
5.455136 5.833185  
8.009717 7.18091  
5.536239 5.453522

5.677918 5.784515  
2.558324 3.90168  
6.824569 7.484024  
5.403731 5.575421  
5.914926 5.11807  
6.92996 6.912369  
5.635154 4.27189  
6.172303 5.647713  
7.31599 8.789527  
5.620459 5.206333  
6.860921 6.689512  
5.852017 3.314756  
6.011628 6.076078  
6.964938 6.680381  
7.231626 6.553513  
5.854785 5.590625  
6.861867 6.462683  
6.186512 5.772905  
5.575767 5.100151  
4.883031 4.576722  
3.076955 2.860789  
4.710014 5.924434  
6.541283 5.448022  
1.003169 1.032656  
6.510841 6.423995  
5.212634 4.588233  
5.984667 3.516958  
2.551537 2.330932  
5.25595 3.795393  
6.028544 6.131009  
5.616352 6.197288  
1.414525 1.87337  
6.615489 6.987039  
2.332456 3.045233  
5.08277 5.422618  
4.644837 4.406302  
5.006243 3.575737  
5.723037 5.604693  
6.369296 5.648228  
6.632977 6.26816  
5.871422 5.363456  
6.810368 6.673725  
4.899277 5.581397  
1.780455 2.604977  
5.504226 5.210702  
4.255165 3.629456  
5.604403 5.504283  
4.188089 4.923728  
4.853795 5.249949  
5.930597 5.683449  
3.799197 3.314699

5. 880787 4. 931387  
8. 147897 8. 825917  
5. 597989 5. 089271  
2. 791911 3. 674555  
2. 736694 3. 367391  
1. 875365 2. 353373  
5. 126842 5. 350172  
5. 923231 5. 3909  
5. 820969 3. 814298  
7. 760609 7. 0373  
6. 140953 6. 486824  
3. 219364 1. 768165  
3. 16438 3. 272091  
4. 401814 4. 75161  
6. 653852 6. 185237  
7. 571649 7. 87716  
4. 915888 4. 17567  
4. 156668 3. 819706  
10. 47299 10. 10813  
5. 940693 6. 312105  
3. 940547 5. 393291  
9. 325151 9. 335887  
4. 350747 3. 048674  
5. 763432 5. 907354  
5. 371777 5. 110106  
5. 992554 5. 228829  
6. 730861 6. 844453  
7. 911117 7. 369855  
6. 324542 6. 639594  
6. 793907 6. 804433  
9. 29321 8. 76599  
4. 281479 4. 4528  
8. 381897 8. 413622  
5. 700898 4. 891447  
4. 583071 3. 748944  
6. 544269 5. 746186  
5. 996409 5. 290723  
5. 326559 4. 618239  
3. 944246 4. 286378  
6. 103219 6. 043266  
7. 356996 7. 028635  
3. 402059 1. 272111  
7. 531942 7. 042678  
4. 752932 5. 182  
3. 815158 3. 239541  
5. 183008 4. 415253  
5. 003891 5. 176764  
6. 054243 3. 700345  
6. 368392 6. 797544  
6. 325985 5. 826053  
4. 071619 3. 679292



6. 513779 6. 885447  
4. 155128 4. 93763  
4. 481573 4. 687716  
5. 994485 4. 725479  
4. 26675 3. 785781  
3. 520063 2. 152673  
7. 23413 7. 434311  
6. 81906 5. 487164  
4. 907365 5. 52478  
4. 380799 4. 16296  
3. 531804 3. 351519  
6. 17572 6. 413662  
2. 652763 2. 888278  
5. 255842 4. 866685  
8. 358361 8. 138935  
2. 312672 2. 475893  
6. 54722 5. 853531  
3. 879525 2. 256473  
5. 188636 5. 101913  
5. 307596 5. 111952  
3. 448179 4. 55985  
5. 406558 4. 329231  
6. 143268 4. 53115  
1. 543552 1. 752611  
4. 134559 3. 719814  
3. 518888 3. 102491  
0. 786998 1. 033974  
5. 996842 4. 857598  
4. 117489 3. 092744  
5. 645193 3. 679456  
2. 644654 3. 190408  
1. 373509 1. 530048  
3. 658388 2. 956697  
4. 819179 4. 453914  
6. 930929 6. 851173  
1. 23657 1. 630111  
6. 573654 6. 107705  
4. 933087 4. 229106  
7. 051643 6. 056585  
1. 7264 1. 747346  
2. 319171 4. 142639  
5. 970519 5. 888932  
6. 740976 7. 322586  
4. 429045 4. 056297  
1. 510768 1. 539203  
6. 572661 7. 076244  
6. 152556 3. 702935  
3. 84 4. 813345  
7. 148837 7. 150983  
7. 215508 7. 923704  
1. 468404 2. 06886

7. 523715 8. 093165  
6. 553418 6. 331119  
7. 035279 6. 685766  
7. 769006 7. 887733  
2. 43515 2. 703204  
6. 448874 6. 859139  
2. 685776 3. 402974  
7. 617831 6. 764972  
2. 901396 2. 993444  
5. 282421 4. 494634  
3. 802443 4. 588647  
5. 663559 6. 404682  
8. 63333 9. 35666  
6. 534113 5. 047604  
4. 61268 4. 049152  
5. 478498 5. 111391  
7. 87503 7. 460892  
5. 261131 6. 368464  
4. 364759 4. 125126  
5. 095963 5. 01823  
1. 563557 1. 545822  
7. 741934 8. 303604  
1. 940315 2. 691568  
5. 745989 5. 883049  
5. 743656 6. 025827  
6. 808824 7. 484933  
7. 194307 7. 477059  
6. 14582 6. 138326  
6. 269039 6. 599788  
2. 810962 2. 42953  
5. 857464 6. 310735  
7. 059602 6. 843679  
4. 507834 3. 653488  
4. 669655 4. 3543  
7. 574887 7. 151091  
7. 399346 6. 211956  
1. 164037 2. 9725  
2. 668317 1. 339338  
1. 725721 2. 252397  
6. 397106 6. 138182  
7. 81948 7. 76968  
4. 067755 3. 800702  
2. 643321 2. 463705  
1. 280417 1. 075899  
2. 097077 1. 318014  
3. 704563 3. 242361  
1. 898308 1. 503443  
6. 205437 5. 637374  
4. 931897 4. 777543  
3. 692617 3. 515038  
3. 699589 4. 080893

5. 789098 5. 320212  
6. 857411 6. 722412  
5. 380936 5. 006374  
2. 670176 4. 775844  
4. 752613 4. 732486  
8. 18773 7. 660691  
6. 755128 6. 917122  
4. 215889 5. 437098  
6. 47729 6. 401284  
3. 399636 2. 118341  
3. 808813 2. 782185  
3. 632121 3. 232517  
1. 837405 2. 783965  
8. 125114 7. 588661  
4. 771441 5. 182718  
3. 700629 3. 599034  
8. 239892 7. 392895  
6. 763316 5. 753053  
6. 511176 5. 617474  
4. 116587 3. 53078  
2. 53503 2. 911452  
4. 161475 4. 906889  
5. 712009 3. 796873  
5. 086294 5. 43467  
5. 508945 4. 305345  
2. 24266 3. 047629  
7. 988263 8. 405284  
4. 227708 4. 604362  
4. 989727 6. 061074  
6. 694142 5. 962447  
8. 89244 8. 404481  
7. 598761 7. 65433  
1. 957193 2. 776791  
5. 899108 4. 747527  
8. 772822 8. 885945  
6. 831467 7. 241538  
1. 00829 1. 712875  
1. 695275 2. 684473  
8. 020908 8. 668831  
4. 62965 6. 003886  
6. 077271 5. 673555  
6. 257155 6. 357441  
6. 269295 5. 989661  
4. 907204 4. 921247  
3. 929501 3. 583453  
5. 195481 4. 989521  
1. 809112 2. 109971  
1. 663692 1. 406331  
6. 176758 5. 164177  
4. 003673 5. 585221  
3. 808899 5. 050352

4. 866913 5. 092107  
5. 486132 5. 876268  
2. 257801 3. 208578  
6. 306754 5. 936846  
5. 074427 3. 379896  
2. 002412 1. 890364  
6. 08539 6. 746435  
2. 237549 2. 351264  
4. 814923 6. 266311  
2. 798956 2. 474794  
5. 160408 5. 866393  
1. 595427 3. 185279  
4. 713319 4. 373812  
2. 714877 3. 858697  
4. 223435 5. 511515  
3. 197297 3. 305692  
1. 30789 1. 868352  
1. 894601 1. 046354  
5. 666662 5. 180772  
3. 952691 4. 577386  
4. 581222 2. 871432  
5. 77096 5. 104997  
3. 046889 2. 575744  
3. 75186 3. 319355  
5. 323346 5. 023908  
3. 969796 3. 382736  
5. 914122 3. 499606  
4. 504407 4. 576134  
5. 570469 3. 150755  
4. 427962 4. 03933  
6. 496241 6. 187388  
3. 396599 3. 182845  
3. 32196 3. 484212  
3. 960956 4. 229811  
3. 501194 2. 819456  
1. 995025 1. 629275  
8. 045214 8. 390133  
4. 059764 1. 460575  
4. 24381 4. 528952  
3. 162286 3. 62267  
5. 333741 5. 654259  
5. 140287 5. 955911  
1. 777863 2. 209489  
4. 413279 4. 73811  
4. 783898 4. 052106  
1. 238802 0. 863961  
3. 251182 3. 568379  
2. 19485 1. 366685  
2. 682711 2. 481482  
3. 289083 3. 55719  
4. 37566 4. 098309

4. 549845 2. 348628  
3. 48999 2. 451508  
2. 944345 1. 975155  
3. 691998 3. 614406  
2. 206477 2. 959642  
2. 819646 1. 501841  
5. 345864 3. 85364  
2. 390718 2. 567321  
1. 66051 1. 385092  
2. 479202 1. 241509  
1. 430092 2. 370625  
1. 73693 2. 554188  
2. 284636 2. 587505  
1. 594723 1. 455048  
1. 887782 2. 108508  
1. 291073 2. 111545  
1. 753426 2. 117084  
1. 296407 1. 3131  
1. 568768 1. 826712  
1. 060915 0. 901626  
0. 976563 1. 56329  
5. 192169 5. 218243  
1. 132831 1. 464704  
1. 15558 1. 720701  
1. 511937 1. 728539  
1. 174264 1. 479373  
3. 150771 3. 545368  
3. 045252 2. 02328  
6. 21718 6. 753754  
0. 966684 1. 548275  
3. 480175 3. 904272  
7. 255919 7. 787592  
1. 574416 1. 702111  
1. 087274 1. 921618  
1. 830805 1. 280272  
7. 06792 6. 229876  
2. 61385 2. 091634  
5. 078677 6. 043751  
1. 468399 1. 691149  
3. 838713 3. 156479  
4. 868136 5. 303784  
6. 412241 5. 85735  
2. 060108 2. 194  
3. 160891 4. 031048  
1. 58816 2. 066248  
2. 585034 3. 200559  
7. 982634 7. 10681  
0. 872275 1. 219474  
6. 335072 7. 112448  
6. 463908 5. 944672  
1. 2907 2. 736744

5. 777986 5. 506608  
5. 11978 5. 360735  
1. 303852 1. 832092  
4. 117029 3. 047476  
6. 265356 3. 786908  
4. 451867 4. 665081  
5. 517744 5. 711147  
6. 219796 6. 599111  
1. 981297 2. 806044  
2. 961652 1. 897079  
6. 489263 6. 926281  
8. 376985 8. 885669  
7. 139128 7. 651698  
1. 215476 2. 092228  
8. 320635 7. 831743  
2. 209866 2. 632952  
1. 821884 2. 20558  
3. 845796 3. 413203  
1. 757884 1. 553327  
1. 896423 2. 252585  
1. 194413 2. 056609  
5. 766078 5. 925054  
6. 44012 7. 489691  
1. 577268 1. 965615  
1. 57734 1. 726643  
6. 173935 4. 339271  
4. 632026 4. 778272  
4. 396068 5. 085672  
4. 396325 3. 779434  
2. 582276 2. 51717  
4. 338291 5. 417017  
3. 59952 3. 166293  
7. 104919 7. 505331  
1. 728565 2. 442453  
4. 358685 3. 807585  
1. 383859 2. 056238  
2. 502284 3. 363045  
6. 531539 6. 00752  
2. 403283 2. 458655  
1. 986095 1. 774705  
3. 200754 3. 079913  
9. 173905 9. 686534  
1. 425692 1. 342469  
2. 822934 3. 385651  
4. 529486 3. 738111  
8. 596899 10. 00529  
0. 958937 1. 302404  
2. 717149 2. 855354  
10. 44558 10. 83115  
2. 501904 2. 391229  
1. 422064 1. 920402

2.183166 3.509995  
6.481629 6.070995  
3.727176 2.680692  
9.975537 10.13193  
5.531604 5.661547  
3.713818 3.306825  
2.201475 2.778353  
2.214583 3.733225  
6.463392 7.253918  
5.93621 5.959998  
6.348744 6.930366  
2.738687 2.229763  
6.116683 6.143579  
7.295528 7.003339  
2.394554 1.940374  
1.880873 2.746254  
6.290822 6.707505  
6.920142 8.267029  
2.100976 1.551299  
2.883298 3.73147  
1.438292 3.893172  
0.961004 2.132382  
6.608551 7.447759  
1.882737 2.501878  
2.651683 0.920741  
1.986121 2.856466  
2.942804 2.573809  
5.552468 5.798086  
4.417021 5.078229  
2.056045 2.105283  
7.637253 8.43615  
1.12941 1.312617  
1.883491 2.091327  
8.401878 8.531768  
6.271411 7.291284  
1.022465 1.085562  
2.811215 3.16693  
3.840303 2.516775  
1.551547 1.537089  
0.752824 1.973198  
3.072289 2.867242  
1.92072 1.773284  
5.878795 5.003677  
1.996337 3.00884  
1.129252 1.862299  
6.558517 6.159957  
1.253513 1.434013  
11.39635 11.28344  
0.829729 1.050036  
4.890094 4.781222  
6.510221 5.797044

6.049937 6.435137  
1.343162 1.637222  
5.709199 3.456639  
4.687495 5.123718  
6.860093 7.016634  
2.863215 3.412225  
5.983802 5.732683  
9.005216 8.632472  
5.134471 4.673586  
9.018987 9.153386  
5.254224 5.242919  
1.624428 2.14515  
7.267014 7.202391  
7.752076 7.354332  
7.810128 7.585968  
6.845016 6.240518  
1.028969 1.710666  
6.60859 5.747867  
6.926214 7.38841  
8.516268 8.239879  
9.533424 9.165139  
4.914327 3.265128  
0.917303 0.841809  
7.772266 8.168418  
3.633702 4.028859  
5.467378 5.784289  
3.75013 3.623828  
1.6204 1.462584  
5.438067 6.191792  
4.696956 5.888053  
2.330814 2.447696  
8.57603 8.633052  
7.662479 7.13507  
5.923691 4.476041  
4.569542 4.973665  
1.226274 1.09702  
5.243408 5.449282  
4.461385 3.718236  
4.03328 2.826433  
7.214207 7.061511  
8.11019 7.400966  
8.596537 8.721682  
1.89041 2.347092  
4.970417 5.854499  
5.58146 5.018745  
1.361792 1.328124  
2.698833 3.24232  
7.109277 6.190236  
1.574435 1.836947  
5.228214 4.715031  
7.523112 7.641086



5. 712975 6. 557733  
5. 839595 6. 234993  
1. 522259 1. 816762  
3. 021049 3. 61166  
6. 23114 6. 32649  
4. 363709 3. 620112  
7. 160783 7. 087152  
4. 124849 3. 494254  
4. 997158 5. 4587  
9. 928286 9. 167958  
3. 51551 4. 221162  
7. 0135 6. 930707  
3. 089583 4. 067872  
0. 964495 1. 934732  
4. 507373 6. 172169  
2. 264185 1. 670182  
7. 269902 6. 686155  
6. 596503 6. 589902  
5. 841315 5. 541834  
7. 596955 7. 300669  
8. 759308 9. 01812  
2. 761377 2. 593987  
7. 167299 7. 230822  
5. 281624 5. 645132  
7. 171728 6. 942199  
4. 682318 5. 790733  
5. 75652 5. 636491  
8. 633095 8. 507023  
6. 175787 6. 538702  
7. 817878 8. 367772  
2. 883887 5. 087242  
1. 648758 2. 032652  
6. 091945 6. 16003  
1. 290502 1. 253616  
1. 277166 1. 5841  
4. 513823 4. 594183  
8. 468046 8. 575439  
1. 88354 1. 717484  
2. 318926 3. 03077  
1. 347895 2. 302984  
6. 116975 5. 366385  
3. 732139 3. 635088  
9. 048299 5. 088295  
6. 265664 5. 89125  
4. 794818 4. 511458  
5. 945914 4. 581175  
6. 38178 7. 587137  
4. 98687 4. 271458  
1. 645715 2. 263961  
1. 471284 1. 733975  
3. 419469 3. 353364

3.192036 2.793971  
3.973866 3.702321  
5.556738 5.58987  
6.533595 6.63424  
3.775271 3.980133  
5.964611 5.342883  
6.997428 6.360198  
8.431221 8.438508  
7.438914 7.243668  
1.603697 1.845773  
5.87301 6.935877  
7.68264 7.633089  
7.629884 7.166574  
2.343992 2.787125  
4.142426 3.260007  
5.434044 6.776355  
7.494744 6.138136  
5.888071 6.103159  
1.383767 1.653384  
6.376128 3.266346  
4.78942 4.822621  
5.602937 4.972012  
8.079126 8.085417  
2.792629 2.618785  
2.534845 2.605408  
1.685863 2.616181  
4.796808 4.598598  
6.944996 6.091057  
4.670016 4.701052  
7.448679 7.614372  
7.279249 7.4929  
4.901924 4.750015  
6.410071 7.630393  
1.190911 1.416959  
6.091598 4.245916  
6.05494 5.428739  
7.013394 6.583296  
7.168974 8.095592  
1.202452 2.454414  
6.990782 7.417844  
6.377342 6.651527  
3.137753 2.980275  
2.366328 2.359177  
7.723628 7.035263  
2.957075 3.721708  
2.466514 2.89276  
7.388514 7.703946  
7.158915 7.331011  
8.791485 7.926172  
2.092327 2.63316  
1.081811 1.060404

4. 615484 5. 262187  
7. 335251 6. 853832  
5. 219348 3. 036225  
7. 61665 7. 715623  
2. 355114 2. 335204  
8. 75404 8. 996778  
0. 804165 1. 691145  
1. 068021 1. 396683  
5. 71263 5. 493505  
1. 251982 2. 025845  
6. 139128 5. 292309  
3. 205121 5. 240762  
6. 745929 7. 006335  
1. 589305 2. 110161  
1. 213397 1. 476452  
4. 75801 4. 20929  
3. 26908 3. 309412  
5. 470897 6. 848621  
1. 566893 1. 857443  
3. 483206 4. 124646  
3. 599774 3. 941445  
3. 225294 3. 549502  
1. 009527 1. 033183  
3. 020052 2. 155336  
1. 432459 1. 360605  
1. 11093 1. 746199  
0. 914042 1. 452173  
6. 251476 5. 841064  
3. 775249 4. 2311  
4. 545892 4. 700937  
6. 962427 6. 256311  
2. 219448 3. 181352  
5. 457159 4. 352764  
8. 630606 7. 41523  
2. 490235 2. 705812  
1. 839329 1. 81575  
3. 022498 3. 220648  
3. 170086 3. 093805  
7. 524024 7. 51165  
4. 439905 4. 999008  
7. 472068 7. 25609  
1. 753292 3. 540351  
6. 062678 6. 34567  
5. 541413 4. 732704  
8. 039564 7. 611605  
5. 431635 6. 754691  
6. 744837 6. 249398  
1. 959046 3. 951261  
1. 678688 1. 17078  
4. 075734 5. 660554  
4. 93025 4. 89559

7. 289803 7. 081676  
5. 949589 5. 936171  
8. 937628 9. 061723  
4. 788267 4. 642972  
1. 431875 1. 550367  
2. 307323 1. 714584  
9. 945257 9. 430991  
5. 737138 5. 606235  
2. 679059 3. 668527  
6. 890184 5. 522878  
2. 441907 1. 878836  
5. 271197 4. 72093  
5. 050204 5. 295617  
4. 441841 6. 442973  
5. 642326 5. 233868  
1. 988564 2. 137262  
1. 750282 2. 965385  
2. 340026 1. 959607  
6. 574602 6. 838954  
6. 464278 6. 716417  
3. 976437 6. 448876  
6. 105033 3. 981747  
3. 590293 4. 39234  
2. 740404 3. 395621  
7. 033681 6. 187286  
8. 177207 9. 103439  
6. 872702 6. 990053  
3. 898182 4. 619903  
6. 055514 6. 463606  
7. 199586 6. 546318  
3. 218415 2. 838501  
6. 184916 6. 477433  
6. 260064 4. 926391  
6. 709746 6. 018917  
2. 407703 2. 212737  
4. 717226 4. 818565  
7. 921489 7. 441676  
7. 021813 7. 060497  
2. 367704 2. 658261  
4. 941757 6. 275575  
8. 351043 7. 858328  
4. 528236 5. 505636  
7. 196519 7. 301393  
3. 639122 4. 191915  
7. 638334 7. 534289  
3. 492417 2. 169382  
8. 919213 8. 950077  
2. 07748 3. 456944  
5. 654121 5. 663802  
3. 806794 3. 479054  
5. 64453 5. 810376

1. 632495 1. 837726  
3. 962657 4. 977528  
3. 087494 3. 363026  
2. 91781 2. 23432  
4. 480285 3. 54476  
2. 67451 2. 628082  
5. 568734 6. 49561  
6. 277942 5. 866053  
4. 098656 3. 807325  
6. 063067 4. 58215  
5. 739965 7. 063002  
6. 789323 6. 462197  
2. 638117 2. 981606  
4. 335148 4. 34085  
2. 279094 4. 179332  
5. 02302 6. 999217  
7. 86679 7. 436222  
0. 912472 1. 297584  
5. 171384 5. 337637  
1. 438631 1. 455186  
7. 540685 6. 832027  
7. 309673 6. 989857  
2. 264031 1. 982399  
5. 419607 6. 102422  
10. 20758 11. 63039  
3. 153881 2. 572065  
5. 314619 3. 76898  
4. 440439 3. 358105  
3. 833406 4. 128587  
3. 903002 3. 131586  
3. 385768 3. 111656  
5. 862302 3. 989764  
4. 401247 3. 940735  
7. 170431 5. 773163  
1. 990648 1. 792021  
2. 987553 2. 797118  
3. 440322 4. 313513  
3. 045122 1. 703484  
8. 171936 7. 734074  
4. 141069 4. 344874  
1. 285905 1. 317851  
1. 161017 1. 665739  
5. 658836 6. 791064  
5. 8232 5. 224888  
3. 158736 3. 227906  
6. 809885 4. 428367  
6. 672342 6. 158539  
2. 694891 3. 164356  
8. 150797 8. 510358  
2. 281264 1. 893824  
1. 253333 1. 952018

1. 633054 2. 3096  
1. 76115 3. 328847  
2. 028484 2. 598765  
1. 137904 1. 011111  
0. 696217 1. 30975  
0. 823577 1. 068802  
1. 041137 0. 833998  
2. 397411 3. 394674  
1. 407329 1. 84579  
8. 680132 8. 936303  
2. 36006 1. 709294  
7. 1909 6. 611522  
2. 319419 1. 493379  
3. 376219 3. 699964  
4. 192861 4. 311869  
2. 594139 2. 202486  
3. 981047 4. 701644  
6. 098814 4. 411294  
4. 901023 5. 979288  
8. 057164 8. 265218  
4. 176998 4. 918544  
4. 126545 4. 378871  
3. 209464 1. 650688  
0. 814827 0. 870976  
2. 923418 4. 156103  
5. 709696 4. 595206  
3. 875684 3. 202131  
2. 551319 2. 019849  
1. 568665 1. 866105  
1. 094222 1. 391033  
1. 552323 0. 951581  
1. 117605 1. 379895  
1. 568111 1. 564178  
1. 567315 2. 072999  
4. 542016 4. 265712  
3. 076317 3. 000196  
1. 113658 1. 487924  
1. 00303 0. 979131  
1. 356334 1. 434492  
1. 162541 1. 793652  
1. 262142 1. 698048  
1. 338028 0. 830967  
1. 105049 1. 411544  
1. 714151 1. 591323  
0. 945134 1. 292293  
0. 999757 0. 991463  
1. 273026 0. 936578  
3. 546283 3. 459051  
1. 249467 1. 61649  
0. 971879 1. 032626  
2. 995095 2. 863608

2. 605305 2. 389728  
3. 17633 3. 187176  
1. 049459 1. 777697  
1. 046716 2. 030447  
0. 988449 0. 67858  
4. 772298 3. 852923  
0. 63044 1. 109555  
1. 661103 1. 347252  
1. 09114 1. 341299  
0. 477578 0. 529426  
5. 621178 6. 912816  
1. 265782 1. 282313  
1. 224344 1. 324689  
1. 002399 0. 767152  
1. 636293 1. 954544  
0. 654751 0. 8282  
1. 195857 1. 382176  
0. 98243 1. 16953  
1. 378229 1. 348285  
1. 030717 3. 078735  
9. 942829 9. 431796  
2. 280154 1. 808736  
1. 619821 1. 992199  
0. 273532 1. 388659  
0. 791409 1. 231429  
1. 095626 1. 79056  
1. 045538 1. 033892  
2. 034849 2. 586648  
7. 11664 6. 103419  
1. 196534 1. 152377  
2. 742228 2. 444968  
0. 928678 0. 954399  
0. 594634 0. 476428  
2. 320992 2. 283158  
1. 12978 0. 894258  
0. 952744 0. 583062  
1. 053989 0. 913333  
0. 563235 1. 020693  
1. 373051 1. 465992  
1. 662876 1. 841741  
4. 594821 3. 470014  
1. 644588 2. 739593  
1. 347224 2. 424602  
2. 527408 2. 498453  
2. 88971 3. 985604  
1. 377426 2. 812975  
2. 947608 5. 245817  
2. 142874 2. 467186  
1. 17107 1. 121603  
3. 642634 3. 511451  
1. 16517 1. 501032

0.849831 0.563601  
1.130135 1.665255  
0.724479 0.740986  
6.076037 4.625002  
2.287163 2.673241  
1.100287 1.640839  
2.690413 2.183986  
4.009961 4.075433  
6.727593 6.510074  
6.594367 6.727331  
7.817656 7.373777  
8.825653 7.420821  
5.271227 4.955911  
3.764786 5.64426  
4.966466 6.319975  
3.075607 2.948747  
3.055447 2.894083  
7.499841 6.857318  
3.461867 4.381246  
1.010923 2.189819  
2.033728 3.982386  
1.823179 1.880854  
5.766261 5.190824  
1.212513 1.548225  
5.089288 4.445515  
4.535079 4.058462  
4.17944 3.237418  
2.353621 2.169931  
2.098758 2.813482  
6.472708 4.69129  
6.026902 5.986165  
5.634986 4.897059  
7.881172 7.333412  
6.44576 5.977257  
1.57778 2.251051  
3.883138 3.136114  
3.961683 3.846846  
5.07665 5.543368  
8.387068 7.905001  
6.547279 5.317678  
2.770289 2.96547  
7.009845 6.752007  
9.0454 8.311379  
6.746413 5.298994  
2.305991 1.695078  
6.421509 5.618932  
1.64097 2.13403  
7.353599 6.922153  
1.672446 2.703119  
2.241588 2.497397  
3.783402 4.063156



2. 379928 1. 915729  
5. 932247 6. 200309  
5. 753541 4. 935265  
4. 223493 5. 263168  
6. 02469 5. 853434  
6. 581791 5. 246925  
5. 439251 6. 235743  
1. 543367 1. 987581  
5. 670159 6. 14157  
7. 63419 7. 752694  
9. 422095 9. 513474  
4. 761146 4. 267069  
8. 671469 7. 270312  
4. 319173 3. 738154  
8. 139972 6. 795252  
2. 412258 3. 149047  
1. 798095 2. 137247  
1. 978364 1. 472034  
1. 510914 1. 937378  
2. 288965 1. 891923  
1. 828952 2. 498343  
5. 258824 5. 254008  
7. 402431 7. 462503  
5. 751645 5. 389103  
7. 941297 7. 829171  
2. 374711 1. 596895  
5. 587889 4. 909932  
1. 731687 2. 594968  
3. 570843 3. 701477  
5. 020379 4. 705458  
2. 442547 2. 718848  
1. 234988 1. 358758  
5. 540817 4. 964108  
7. 689641 7. 721519  
3. 171535 4. 562693  
6. 272662 5. 776715  
4. 493153 4. 66659  
4. 018135 4. 500279  
2. 95768 2. 888389  
4. 201381 3. 507877  
7. 660212 6. 44937  
4. 370426 4. 817723  
5. 189213 4. 283087  
1. 291528 1. 285886  
4. 096603 3. 522241  
8. 398902 7. 046693  
2. 740269 3. 796982  
3. 171143 3. 777336  
5. 907456 3. 901267  
7. 320546 7. 294958  
5. 889829 4. 357549

5. 442473 5. 139484  
3. 339734 3. 246615  
4. 33861 3. 389625  
6. 033131 6. 513524  
3. 027952 3. 070545  
5. 553121 5. 665707  
5. 705433 6. 432049  
3. 508952 2. 741616  
6. 282893 4. 71222  
2. 523554 2. 432276  
2. 522364 4. 066012  
3. 843935 3. 37814  
2. 807534 3. 004614  
4. 069446 4. 662218  
1. 643799 1. 392405  
6. 418656 4. 805012  
5. 192392 4. 881107  
2. 357006 2. 858286  
6. 033289 6. 286273  
6. 606332 5. 580877  
4. 730333 4. 811508  
1. 821579 2. 344809  
6. 174613 5. 768375  
5. 866369 4. 536218  
5. 902307 6. 073959  
5. 638046 4. 25701  
4. 428431 5. 040052  
3. 932538 4. 280702  
4. 154183 4. 45742  
2. 396549 2. 457836  
2. 335246 3. 114863  
2. 651698 2. 628796  
6. 699247 6. 4723  
1. 846741 2. 694182  
6. 040147 5. 674754  
6. 733638 6. 303719  
2. 509025 1. 9912  
3. 67578 2. 964412  
9. 019119 9. 290892  
7. 357215 7. 385169  
5. 03168 4. 894068  
4. 942251 5. 719755  
1. 150338 1. 902011  
3. 267046 2. 786085  
7. 218871 6. 114591  
0. 79943 1. 126113  
6. 481932 6. 461154  
4. 954952 5. 203742  
5. 12535 4. 40402  
7. 426993 6. 271597  
4. 746889 4. 834348

2. 945768 2. 538229  
3. 59621 3. 903134  
1. 595301 1. 587622  
1. 184097 1. 637588  
1. 139164 1. 871842  
7. 191241 6. 476264  
4. 755574 4. 617906  
2. 063293 2. 194294  
6. 088783 4. 497921  
6. 870668 6. 713791  
4. 378493 4. 811597  
8. 695267 9. 623027  
2. 231717 2. 326215  
5. 838815 4. 000292  
2. 324947 2. 237544  
5. 321879 3. 600123  
5. 214405 4. 93434  
2. 396797 3. 039088  
2. 894179 3. 752421  
7. 031929 6. 11474  
5. 392075 6. 708652  
3. 291275 1. 910972  
2. 41266 2. 453027  
3. 762472 4. 758463  
2. 373163 3. 105337  
6. 584451 6. 525054  
7. 265061 7. 476747  
3. 855316 4. 284106  
3. 217275 2. 806079  
1. 64507 1. 795873  
4. 183591 5. 264281  
1. 631623 0. 596806  
3. 022171 2. 838771  
9. 434936 8. 593422  
5. 581774 4. 032224  
2. 048553 2. 63867  
6. 784296 5. 666427  
4. 678868 2. 903969  
4. 360094 2. 437976  
5. 608283 5. 402762  
7. 061521 6. 48896  
5. 695707 6. 869238  
3. 431048 1. 355871  
4. 876485 4. 04245  
3. 323212 2. 662429  
8. 305976 7. 515458  
1. 504534 1. 795349  
5. 315914 5. 683344  
6. 367538 6. 258015  
6. 572408 5. 750809  
3. 953153 3. 592245

4. 918261 4. 139282  
5. 026809 4. 419352  
4. 863825 4. 070968  
2. 955569 1. 667617  
6. 717005 6. 997024  
2. 640439 2. 120952  
2. 803895 4. 428537  
6. 289938 6. 069091  
2. 81033 3. 354361  
6. 268313 5. 923351  
5. 571559 3. 321918  
2. 409423 1. 977722  
5. 565123 5. 267676  
3. 211922 3. 134179  
6. 840069 6. 720872  
2. 416866 3. 233473  
7. 336485 6. 809736  
3. 08925 4. 040845  
3. 953864 4. 08595  
6. 326955 5. 033826  
6. 595418 6. 265265  
4. 522117 3. 34007  
4. 429821 2. 792632  
1. 113769 1. 1757  
4. 139285 4. 095311  
5. 17275 5. 168407  
7. 089676 6. 828681  
6. 311829 7. 056541  
1. 264519 1. 350443  
5. 523019 4. 156914  
5. 714586 4. 701288  
5. 317477 5. 610187  
6. 095137 3. 271639  
1. 768094 2. 02698  
2. 444835 2. 641668  
3. 013866 2. 958327  
6. 469708 6. 444715  
2. 737962 2. 504066  
5. 853389 5. 627011  
2. 034009 2. 851557  
5. 103856 3. 943662  
3. 635737 4. 722884  
6. 048334 5. 338826  
4. 273282 4. 484416  
3. 741658 3. 040632  
4. 78334 4. 582121  
1. 973869 2. 031679  
6. 081551 5. 390352  
2. 926674 2. 592868  
2. 190021 1. 958519  
2. 029805 3. 796923

5.185335 5.678794  
5.924099 4.88112  
6.319193 6.671977  
3.128269 4.281615  
1.072439 1.648661  
6.909051 7.304625  
8.544035 8.671861  
5.267426 5.915573  
3.40455 2.415931  
1.726853 2.198928  
2.477967 3.688794  
2.553968 3.049035  
4.280245 3.361141  
3.276769 2.61801  
1.589824 1.923881  
1.576552 1.906896  
8.208523 7.648501  
1.975629 2.545087  
1.964391 2.238141  
2.56824 2.179343  
8.214693 7.327901  
8.387661 7.714337  
5.399591 6.90304  
4.417957 5.205142  
3.278281 3.320281  
7.193915 7.053786  
8.851863 8.585538  
5.208018 4.607319  
7.616784 6.832399  
4.688667 6.52609  
3.149832 4.131634  
4.402472 4.4165  
4.680013 4.519897  
8.318148 7.303067  
1.457898 2.213857  
6.372643 6.668397  
6.677758 6.878396  
8.850864 7.960193  
2.267593 2.778222  
2.592494 2.833344  
1.594024 2.26829  
10.11836 10.01168  
1.521948 1.923105  
4.270967 4.271855  
1.057248 1.001229  
6.230419 7.077992  
2.467449 2.305263  
4.952653 3.57101  
5.665691 6.377959  
8.187162 7.348516  
6.233403 5.767028

5. 841064 3. 77307  
2. 714635 2. 979634  
1. 250398 1. 936611  
1. 027884 1. 548589  
4. 219519 1. 846241  
5. 918973 5. 14869  
6. 144713 6. 586907  
2. 371038 2. 144918  
5. 321048 7. 34874  
6. 019318 7. 157795  
6. 950456 7. 420887  
3. 817813 3. 687699  
1. 613178 1. 246609  
6. 946213 7. 323059  
6. 353433 6. 104104  
5. 050275 5. 242238  
4. 792426 4. 434358  
2. 83798 3. 988065  
5. 413256 5. 050636  
6. 47193 6. 526297  
4. 836131 4. 134529  
2. 656592 2. 66185  
4. 339563 4. 045275  
2. 53803 4. 261216  
4. 72403 4. 90416  
4. 580058 4. 715903  
1. 657953 4. 167457  
5. 023767 4. 912962  
8. 412024 8. 866112  
2. 916365 4. 717943  
5. 373132 5. 740452  
4. 659142 5. 15117  
5. 642235 5. 50813  
6. 613476 6. 867067  
6. 197827 5. 592657  
1. 468381 2. 089754  
1. 215355 1. 860449  
9. 046276 8. 984209  
7. 212485 7. 448748  
5. 995411 4. 704152  
4. 972091 4. 313496  
6. 663911 5. 989188  
5. 565924 5. 857253  
3. 915191 5. 537064  
2. 216463 3. 212724  
6. 048765 8. 036171  
5. 643026 6. 804392  
1. 880476 2. 321656  
4. 71317 4. 666185  
5. 381344 5. 848149  
2. 320673 1. 420676

7. 938255 6. 779097  
5. 956629 4. 530012  
0. 889145 1. 225314  
1. 727744 2. 926163  
9. 241429 9. 991926  
5. 056624 5. 756627  
7. 82091 6. 891591  
2. 843606 2. 96914  
3. 16964 3. 935028  
1. 631044 1. 649217  
2. 151277 1. 416357  
6. 900867 6. 201395  
7. 79066 8. 264148  
7. 194309 6. 387199  
1. 687056 2. 070469  
3. 957513 5. 043833  
4. 966577 4. 6317  
7. 094893 7. 700548  
5. 3079 6. 041655  
4. 005215 3. 10965  
2. 664709 2. 717846  
2. 560203 3. 334796  
7. 37809 7. 260405  
1. 365954 1. 424703  
1. 775258 1. 328369  
6. 151034 5. 720994  
5. 422961 5. 920768  
4. 930841 4. 97911  
9. 501644 8. 92915  
8. 321726 8. 762313  
4. 198255 4. 745316  
2. 942526 5. 423357  
3. 58013 5. 687268  
3. 348299 4. 689058  
6. 590175 5. 00812  
7. 89196 7. 573079  
6. 65271 6. 981831  
2. 647189 3. 837678  
7. 911969 8. 366109  
5. 007682 4. 479115  
5. 908767 6. 121019  
4. 350486 4. 305122  
1. 50449 1. 711066  
5. 51538 5. 655519  
7. 020309 6. 84762  
4. 654717 4. 674094  
8. 529686 8. 985444  
9. 386181 9. 270735  
4. 571978 4. 465529  
4. 156888 5. 347011  
2. 925139 2. 377314

3. 192954 3. 259633  
5. 672398 5. 406373  
9. 303899 8. 826473  
5. 987996 6. 567117  
7. 755302 7. 891825  
1. 666897 1. 144056  
5. 60678 6. 594166  
4. 848811 2. 973168  
4. 046147 2. 92079  
3. 296484 2. 909542  
3. 500989 2. 817036  
7. 148877 6. 495326  
3. 201074 2. 293695  
1. 463723 2. 653213  
2. 167575 2. 620012  
5. 081549 7. 242771  
6. 751502 6. 393791  
6. 543606 6. 157668  
2. 479073 2. 766566  
5. 508543 4. 822523  
8. 738306 9. 076817  
2. 547761 2. 896863  
7. 310442 6. 885968  
5. 132512 5. 428196  
1. 119502 1. 62337  
6. 594736 6. 053598  
1. 123017 1. 877991  
4. 693654 6. 978379  
4. 782126 5. 479408  
3. 002182 4. 157015  
1. 679261 1. 452514  
6. 934516 6. 311937  
8. 368963 8. 521587  
4. 729172 3. 966925  
2. 091857 2. 538678  
5. 067938 5. 529915  
7. 529714 6. 706254  
4. 559832 4. 209407  
7. 102038 7. 281468  
2. 233191 3. 749723  
9. 131126 9. 870617  
8. 311393 8. 475587  
7. 950232 6. 910135  
5. 452538 5. 232822  
2. 008121 2. 363806  
4. 963545 4. 826567  
7. 243545 6. 707331  
4. 780488 3. 571231  
6. 387574 5. 377303  
5. 476049 6. 390154  
3. 855304 3. 428267



6. 228587 6. 152536  
8. 832053 8. 190152  
7. 655441 6. 451073  
1. 339019 1. 221985  
1. 319576 2. 014066  
1. 673787 1. 58674  
7. 337766 7. 509542  
7. 056005 7. 203054  
5. 178896 4. 824607  
3. 645568 3. 596552  
7. 013955 5. 376235  
7. 216698 6. 989985  
6. 663434 6. 493327  
1. 561965 2. 554279  
1. 135326 1. 499166  
6. 885426 6. 205938  
6. 466461 6. 697212  
4. 80425 3. 692616  
1. 417922 1. 383338  
3. 832779 3. 075688  
6. 085172 6. 538412  
6. 513106 7. 104544  
1. 954141 2. 158785  
5. 001442 4. 353552  
4. 760925 4. 354071  
3. 960389 3. 714574  
6. 875084 6. 422749  
7. 354243 6. 045479  
1. 12232 1. 142161  
1. 793422 1. 820585  
1. 790866 1. 902093  
7. 71479 8. 191903  
6. 529583 4. 956174  
8. 597463 7. 965609  
8. 7697 8. 677903  
5. 071714 5. 294709  
6. 69887 7. 098809  
2. 061007 1. 397715  
5. 533733 3. 104633  
4. 942295 5. 135012  
2. 889342 2. 954158  
1. 113577 1. 334195  
1. 756612 1. 764285  
1. 261941 1. 419557  
2. 286688 2. 174154  
1. 385224 2. 696398  
6. 065001 6. 317399  
4. 541814 1. 29882  
1. 103547 0. 895594  
1. 253595 0. 949548  
3. 581135 6. 861201

3. 584019 1. 276602  
7. 989281 8. 963414  
7. 959881 7. 840549  
2. 375398 2. 229637  
2. 298811 1. 935953  
3. 411553 1. 860876  
7. 759126 7. 680323  
2. 597087 2. 03398  
7. 121569 6. 942054  
6. 086932 5. 970838  
5. 618748 3. 916542  
5. 173511 3. 385536  
4. 263037 4. 62216  
1. 40274 1. 588627  
4. 377296 4. 016461  
7. 029926 7. 246286  
4. 58959 3. 928191  
10. 46332 9. 760466  
2. 260001 2. 883694  
5. 757345 5. 024208  
7. 03332 7. 176433  
7. 692804 7. 688206  
1. 954246 3. 473608  
2. 337425 2. 911995  
5. 856581 4. 701892  
7. 670705 7. 399687  
3. 203569 4. 162505  
4. 440836 3. 444495  
3. 945007 4. 130172  
4. 934844 4. 447118  
4. 565375 4. 254752  
5. 156741 6. 106784  
1. 986451 2. 058593  
3. 894336 3. 592034  
5. 981146 5. 905052  
2. 78462 3. 396757  
5. 419961 5. 524514  
2. 020316 2. 119491  
4. 624358 4. 383848  
3. 649602 3. 018141  
1. 571235 3. 317208  
1. 538242 4. 040611  
9. 586313 9. 501866  
3. 648374 4. 109456  
2. 418604 5. 501369  
4. 369648 4. 843875  
7. 895299 8. 393981  
1. 352366 1. 8405  
6. 586369 6. 832071  
2. 816752 3. 047743  
0. 742676 0. 838838

5. 943878 4. 728421  
1. 388993 1. 141625  
2. 909124 2. 097969  
5. 786631 3. 641375  
1. 746927 2. 367753  
1. 390757 1. 815303  
2. 271723 1. 399768  
2. 181567 2. 317082  
5. 147598 6. 083214  
6. 903965 6. 832446  
2. 283014 1. 473858  
6. 126597 3. 593317  
0. 736963 2. 285778  
9. 859865 10. 91855  
4. 951945 6. 076947  
4. 840607 4. 28884  
7. 452441 7. 276817  
5. 991189 7. 179569  
4. 156657 5. 401786  
8. 613769 8. 99773  
2. 188319 2. 567976  
3. 426135 4. 108405  
1. 597965 1. 053424  
1. 840959 2. 726765  
1. 793357 1. 698644  
7. 419252 5. 259315  
3. 717828 4. 777354  
2. 495675 2. 662971  
6. 827997 6. 610495  
5. 304423 3. 058222  
4. 172371 3. 953787  
2. 26063 2. 286822  
6. 37123 5. 587926  
1. 298457 2. 025795  
2. 995633 2. 940346  
7. 97238 8. 093597  
6. 103053 6. 551112  
7. 701851 8. 102792  
1. 354918 1. 736655  
3. 121041 1. 871557  
7. 365603 7. 271362  
5. 102186 3. 89164  
6. 812293 6. 571655  
5. 6102 4. 966824  
5. 24033 4. 785585  
3. 775434 2. 98797  
6. 529837 6. 401076  
5. 66471 4. 971053  
6. 78994 4. 666823  
1. 459423 1. 435935  
1. 405998 1. 651302

4. 988603 6. 326815  
7. 204727 7. 302913  
5. 434094 5. 292092  
2. 748949 2. 811448  
5. 94973 5. 260383  
5. 494216 5. 972246  
6. 36173 7. 291874  
5. 118571 5. 771656  
4. 903877 5. 812733  
2. 032742 2. 744013  
5. 910899 5. 962836  
7. 807951 7. 740533  
6. 001478 6. 191294  
6. 125527 3. 298335  
6. 461595 6. 451306  
2. 148251 3. 388334  
6. 20818 6. 031401  
5. 071 5. 657709  
4. 879895 3. 393836  
5. 637236 4. 564064  
2. 020624 2. 776165  
2. 002225 3. 502877  
4. 31514 6. 488217  
3. 561209 4. 323271  
1. 44765 1. 276815  
2. 88497 4. 20425  
4. 610576 4. 930973  
8. 049493 7. 199625  
2. 994161 2. 189525  
2. 862915 3. 137318  
2. 766138 3. 059193  
3. 76517 4. 905529  
2. 737743 3. 04174  
5. 226258 6. 002934  
6. 407919 6. 199097  
7. 006208 6. 101413  
6. 898098 7. 619044  
2. 733117 2. 945624  
0. 942365 1. 506096  
4. 568017 2. 796349  
5. 754961 4. 942876  
1. 112256 1. 645137  
4. 087551 3. 126156  
0. 998692 1. 281503  
7. 332272 7. 358999  
7. 089161 6. 259497  
8. 554871 7. 939495  
2. 687018 1. 90172  
4. 132857 2. 772787  
1. 382556 2. 579671  
4. 513234 4. 165195

1. 329007 1. 766449  
10. 04351 9. 619389  
6. 552524 5. 646652  
2. 846216 1. 7883  
5. 393231 5. 403148  
5. 948173 4. 572137  
1. 490912 1. 154286  
4. 862075 5. 331191  
5. 443139 6. 103523  
6. 402768 6. 581802  
2. 232965 2. 31239  
2. 463017 4. 686807  
1. 311651 1. 574444  
4. 725484 5. 100718  
1. 348963 1. 796953  
9. 832914 10. 33637  
10. 69516 11. 00825  
3. 076179 3. 074045  
1. 053157 1. 718441  
1. 825963 1. 821378  
0. 776527 1. 024884  
1. 751008 2. 687487  
2. 299685 3. 061133  
1. 705378 1. 934408  
9. 496447 10. 59055  
6. 334202 8. 40599  
5. 226313 5. 631411  
10. 76985 10. 67136  
2. 022776 3. 866831  
3. 755042 5. 051053  
5. 062739 5. 208762  
4. 71283 4. 756411  
9. 697378 10. 00336  
4. 869596 4. 661276  
5. 924259 5. 983753  
6. 360033 7. 118501  
5. 277844 5. 93922  
11. 05965 10. 69904  
3. 40145 2. 96249  
11. 42511 11. 2413  
10. 31579 10. 57364  
3. 090254 4. 432007  
2. 629818 2. 760937  
4. 374955 5. 341501  
4. 944635 4. 756165  
2. 765916 3. 58135  
5. 71779 6. 13541  
8. 278487 8. 492507  
8. 708125 8. 768109  
5. 571111 4. 758833  
11. 52366 11. 67348

7. 085343 6. 858221  
1. 703347 2. 179378  
5. 15329 5. 746665  
3. 642487 3. 443521  
4. 605882 6. 12733  
3. 181508 3. 174484  
9. 419981 9. 516099  
8. 990976 9. 551225  
5. 183025 5. 934361  
2. 91139 2. 51342  
3. 724588 3. 472857  
1. 027206 1. 099493  
5. 180127 4. 507127  
1. 783052 1. 618509  
5. 494603 5. 92761  
6. 263112 5. 675342  
7. 19228 7. 366893  
1. 128519 1. 198848  
1. 537056 1. 232183  
1. 78142 1. 736551  
1. 51402 1. 43342  
9. 500223 9. 699959  
10. 10411 10. 10292  
3. 87344 0. 635428  
1. 631588 2. 559384  
0. 921634 1. 210027  
3. 846771 4. 098519  
9. 300923 9. 058227  
3. 297822 3. 136384  
1. 977571 1. 79111  
3. 249066 3. 826674  
4. 568157 4. 460808  
0. 758441 0. 996772  
1. 355823 1. 961319  
4. 135793 2. 507831  
0. 784842 0. 891737  
3. 156882 3. 978901  
4. 035073 3. 645638  
1. 951597 4. 712486  
4. 209534 4. 026967  
2. 380328 1. 384157  
3. 416253 4. 213497  
5. 070696 5. 976277  
6. 235496 6. 595049  
7. 090549 6. 425485  
3. 827796 4. 960598  
5. 271427 5. 81412  
11. 58248 11. 59685  
10. 46217 10. 504  
3. 570647 3. 787023  
7. 307283 7. 468895

6. 820188 6. 814229  
6. 929938 7. 217309  
9. 945805 10. 46468  
4. 066138 4. 288815  
9. 959906 10. 4853  
6. 274677 6. 226145  
3. 069452 2. 958343  
2. 366793 2. 61705  
4. 656667 4. 312711  
1. 466135 2. 5009  
9. 959598 9. 841401  
2. 264003 2. 819665  
8. 167249 8. 819819  
6. 783846 6. 927068  
6. 536534 6. 539364  
1. 175134 1. 937813  
5. 881168 5. 446554  
3. 672811 4. 152381  
3. 268867 3. 269642  
1. 615591 2. 06678  
8. 372061 6. 661937  
8. 012455 7. 576729  
3. 286746 3. 17075  
9. 147282 9. 530452  
2. 283326 4. 235172  
3. 55666 5. 521251  
6. 150605 5. 380281  
5. 856456 5. 981374  
1. 302068 1. 638522  
6. 882009 7. 47641  
1. 915597 2. 150178  
1. 243403 1. 629933  
5. 105812 2. 31378  
2. 753002 3. 842074  
8. 935208 8. 530318  
8. 485565 5. 335326  
3. 055674 2. 214326  
7. 395304 8. 808552  
1. 513367 2. 743046  
8. 996136 9. 165166  
2. 180648 2. 821113  
7. 661881 8. 059553  
1. 980616 2. 30474  
6. 134038 7. 288401  
9. 157223 9. 969887  
9. 56541 10. 42745  
2. 521015 3. 625818  
4. 487431 4. 774624  
1. 649505 2. 280016  
4. 38014 6. 009854  
1. 376566 3. 755725

0.664022 0.850786  
0.83244 1.228789  
6.900273 7.670269  
6.887386 6.602873  
2.38074 2.079886  
3.891179 4.262367  
3.311192 3.652355  
5.110463 5.994486  
4.568977 5.323944  
3.427577 3.275942  
6.728223 6.30979  
2.787563 3.259933  
6.823192 7.665923  
2.861995 2.36929  
1.887149 2.955397  
8.056677 8.820196  
6.53307 5.955512  
3.498925 3.68537  
6.990842 7.411638  
6.921659 6.978461  
5.489664 3.901808  
7.984805 7.752575  
7.360133 6.486278  
1.776632 1.66742  
1.387975 1.062224  
1.197221 1.00339  
5.413096 7.312977  
2.881134 3.811021  
5.007304 4.381174  
5.205077 3.741283  
1.174275 1.091064  
1.888601 2.944682  
2.012705 1.61149  
2.153311 2.38473  
2.373881 2.183636  
2.62686 2.889433  
3.180301 3.745157  
1.551957 1.56643  
4.901763 3.10063  
1.38018 1.695206  
3.877871 4.24568  
1.521757 1.864575  
4.057381 3.806661  
3.452346 3.220088  
2.80619 3.913556  
10.5342 10.71145  
4.326524 3.090452  
6.081529 6.764366  
7.708783 7.911751  
2.699749 4.338389  
1.769344 2.719514



2. 850058 2. 66779  
0. 995966 1. 413366  
6. 950004 9. 068182  
2. 244817 2. 548071  
8. 957633 7. 881122  
2. 569162 4. 299322  
6. 595715 5. 413575  
0. 845498 1. 520437  
2. 108609 1. 139348  
3. 47654 1. 484094  
2. 513812 3. 216287  
6. 603272 6. 604981  
1. 294524 1. 384517  
1. 986323 2. 053038  
4. 151674 6. 71161  
2. 311257 3. 325794  
2. 883559 3. 983172  
3. 319621 6. 257045  
1. 572839 5. 283574  
2. 254675 2. 272348  
1. 334341 1. 195764  
6. 391089 5. 719967  
2. 036864 1. 861944  
2. 152653 3. 565453  
3. 075202 3. 699948  
1. 888503 1. 736374  
1. 108409 1. 90492  
6. 792581 8. 049449  
4. 183175 3. 819259  
5. 064158 4. 652278  
2. 074994 2. 250972  
3. 591223 4. 177862  
8. 84365 8. 929354  
9. 161278 9. 62836  
7. 442181 6. 924483  
5. 985512 6. 507698  
4. 83352 5. 80881  
4. 124148 4. 94036  
7. 212593 7. 463215  
5. 371251 6. 034252  
5. 665106 5. 757923  
4. 213636 4. 11495  
5. 261848 4. 858797  
4. 43467 4. 213581  
6. 086098 5. 145998  
5. 788263 4. 672948  
6. 016503 6. 619871  
4. 317136 4. 780929  
5. 49944 4. 728993  
2. 683658 1. 82995  
5. 986309 5. 970734

1. 373105 1. 202929  
5. 367544 4. 061406  
3. 922028 3. 604504  
4. 173877 2. 520024  
7. 902587 8. 317252  
2. 43345 2. 224046  
2. 0714 2. 575058  
2. 895872 2. 858464  
6. 90251 6. 159192  
6. 193043 5. 410925  
7. 336781 8. 323456  
4. 040009 5. 553614  
2. 819795 2. 163562  
1. 923432 2. 231872  
1. 753218 2. 443356  
4. 502425 4. 833899  
3. 246535 2. 218449  
1. 306992 2. 010705  
5. 062974 4. 911509  
5. 25116 6. 923401  
2. 367431 2. 102953  
6. 476376 5. 737057  
1. 934755 2. 615193  
6. 005683 6. 536361  
4. 13231 2. 394456  
4. 199543 4. 445278  
4. 896702 5. 478914  
3. 611658 3. 949075  
3. 118281 3. 727782  
2. 446951 3. 247379  
2. 564621 3. 015406  
2. 252182 2. 621393  
0. 912994 1. 625818  
2. 674031 3. 214227  
2. 568976 1. 772895  
6. 807103 7. 432199  
1. 295891 2. 15315  
6. 631621 6. 099431  
2. 032749 1. 767588  
1. 031491 1. 19917  
2. 033404 1. 762849  
2. 300721 2. 310569  
1. 864356 1. 589838  
2. 707075 2. 370099  
8. 465349 8. 153004  
5. 811977 2. 880169  
3. 782278 3. 996859  
1. 998173 3. 710559  
5. 462785 4. 18433  
1. 439742 1. 589934  
2. 882158 1. 907411

8.042907 7.237442  
2.83016 2.346499  
3.234725 4.486544  
3.345335 1.959444  
3.673795 4.270192  
4.595322 4.788241  
5.32062 4.371527  
7.012124 6.096011  
2.412132 3.269872  
0.861655 2.52897  
5.251525 6.112469  
1.205344 1.956669  
5.891668 5.701538  
1.188062 1.31745  
2.107711 1.939589  
5.469656 6.433166  
4.304812 5.440592  
1.300976 1.632538  
1.320434 1.159723  
4.122579 4.396971  
6.316071 5.691333  
7.931672 7.84485  
3.921955 3.834379  
3.987484 5.25667  
3.543552 3.900467  
5.20022 5.706132  
6.623007 5.263135  
2.066575 1.995011  
2.022049 2.17466  
1.879727 2.43121  
2.109512 2.101306  
5.899103 6.491873  
2.697914 2.339725  
2.311238 2.181829  
1.559597 2.148389  
7.10388 6.408758  
2.155347 2.212066  
1.218535 2.623534  
2.292956 2.12545  
3.376716 3.391563  
1.035521 1.746421  
5.768442 5.562285  
1.759298 1.130293  
4.55442 5.166618  
8.706661 8.366697  
4.446617 5.676258  
3.804594 3.261208  
2.226831 2.987864  
5.922276 5.481182  
4.715724 6.672875  
8.96617 7.970443

1. 511904 1. 268505  
7. 370339 7. 305827  
3. 991585 5. 39345  
0. 913181 1. 61134  
4. 432805 5. 334296  
4. 641291 3. 977366  
2. 016799 1. 34076  
5. 876767 5. 75051  
1. 176784 0. 903685  
1. 024656 1. 437757  
3. 613104 2. 162667  
1. 676999 1. 707769  
2. 376622 1. 77158  
1. 89815 1. 401224  
2. 016856 2. 421577  
1. 449687 2. 134664  
0. 778282 1. 059775  
4. 239728 3. 6602  
4. 869434 5. 249561  
1. 831113 2. 6408  
2. 530679 2. 039864  
5. 25708 5. 752788  
9. 540407 9. 762281  
2. 252175 2. 555704  
2. 205722 2. 711751  
1. 216424 1. 528943  
1. 658827 1. 459098  
3. 629365 2. 622106  
8. 337965 8. 895487  
9. 246593 9. 32576  
5. 768977 2. 6368  
3. 551798 3. 725475  
2. 583166 3. 009687  
7. 523474 4. 781141  
7. 577043 6. 98495  
3. 769989 3. 359967  
6. 635613 7. 3199  
2. 530862 2. 798156  
4. 005007 4. 332488  
1. 707179 2. 027774  
3. 588374 2. 978481  
5. 439858 6. 668684  
1. 32466 2. 610693  
1. 245412 1. 095091  
5. 270259 5. 575405  
2. 187302 2. 430471  
3. 319275 3. 069403  
1. 335942 1. 526456  
1. 030602 0. 857855  
4. 739307 5. 528496  
2. 049487 1. 80055

4. 971117 3. 937679  
1. 149362 1. 520218  
7. 406469 7. 153954  
3. 987455 4. 628056  
1. 502938 2. 688037  
5. 51071 6. 244314  
7. 148232 5. 963209  
2. 031667 2. 257842  
2. 103126 2. 08994  
3. 688918 4. 675456  
2. 585242 2. 876953  
5. 046443 5. 338559  
7. 631696 7. 862035  
4. 30831 4. 782048  
2. 180455 2. 004632  
3. 275394 2. 857727  
6. 656977 6. 199855  
5. 054046 5. 597688  
1. 193255 2. 021461  
1. 408438 1. 11346  
3. 720739 1. 863955  
1. 417408 1. 311433  
6. 708235 7. 309214  
2. 470253 2. 743596  
3. 988063 7. 184781  
1. 251962 1. 408896  
1. 326999 1. 681102  
0. 801649 2. 76579  
3. 254422 3. 828096  
1. 376451 2. 26934  
2. 11765 3. 606639  
3. 342761 2. 922298  
6. 402262 3. 293424  
1. 281399 1. 601414  
0. 915349 1. 851271  
2. 427776 2. 393424  
1. 099769 0. 918888  
3. 3206 2. 510759  
1. 178922 1. 370541  
5. 468411 3. 475265  
2. 292067 2. 358873  
1. 539434 1. 8196  
6. 687829 5. 778567  
1. 070157 1. 755401  
5. 579322 5. 346843  
2. 023523 1. 969919  
6. 30985 5. 797198  
4. 980445 3. 838522  
2. 248335 1. 915074  
3. 133293 2. 858042  
2. 951747 2. 686652

3. 9559 4. 944685  
4. 247783 4. 339204  
1. 603612 1. 224829  
3. 565953 3. 865846  
8. 800683 7. 991008  
3. 159694 1. 665081  
3. 920974 2. 565458  
2. 565044 2. 251738  
2. 019741 3. 264187  
1. 882866 1. 882925  
2. 306952 2. 198748  
3. 985101 3. 115583  
6. 822976 6. 210249  
6. 112504 6. 98999  
2. 349508 2. 321042  
1. 970483 1. 480154  
0. 933526 1. 272797  
4. 683301 5. 628369  
9. 52997 8. 375288  
7. 224287 5. 649032  
2. 034351 2. 105107  
4. 565606 4. 334246  
3. 39034 3. 668606  
6. 159114 5. 724908  
4. 823073 5. 0588  
6. 885107 6. 424311  
1. 224549 1. 580577  
5. 653987 4. 14694  
2. 578103 2. 234447  
3. 963769 4. 781922  
5. 10333 1. 843793  
0. 977552 1. 852572  
2. 840077 3. 371885  
2. 946352 2. 413558  
6. 720614 5. 39505  
2. 984387 3. 159661  
7. 067273 6. 226315  
4. 711808 5. 205231  
4. 990662 4. 327249  
7. 212626 6. 54981  
3. 371268 1. 872229  
5. 686242 4. 3175  
6. 902399 5. 929299  
1. 744495 1. 497197  
1. 392886 2. 021384  
1. 241363 2. 082952  
2. 280689 2. 372165  
1. 896489 1. 817263  
2. 067161 1. 65126  
1. 734513 1. 508723  
1. 823368 1. 482713

1. 941393 1. 40829  
2. 399848 1. 687964  
6. 144823 5. 648177  
2. 366664 2. 046972  
1. 633701 2. 147696  
1. 180169 1. 282847  
1. 402844 1. 535569  
4. 524414 5. 179327  
1. 517657 2. 088073  
5. 675243 5. 099068  
2. 401497 2. 805357  
4. 825071 2. 833792  
1. 175333 1. 270055  
7. 669059 7. 010589  
1. 24252 1. 167712  
0. 97118 1. 919847  
3. 23722 3. 12625  
4. 106007 3. 548695  
1. 250587 1. 835479  
4. 891211 2. 903  
1. 676666 1. 379604  
1. 180171 1. 65036  
2. 284035 3. 459171  
0. 847355 0. 95303  
0. 832093 1. 832145  
1. 279195 1. 842097  
2. 822683 3. 410909  
0. 833377 1. 109687  
2. 903327 4. 559414  
3. 825015 3. 01982  
5. 609951 6. 213249  
2. 787979 3. 868824  
1. 982094 2. 182017  
6. 149202 5. 297968  
0. 872435 1. 679009  
2. 513354 2. 152675  
5. 433916 5. 753274  
2. 024894 1. 528215  
1. 482267 1. 292367  
0. 90668 1. 268705  
1. 912278 1. 432138  
5. 966399 5. 046921  
6. 181018 4. 863165  
4. 83669 4. 095686  
3. 140087 5. 014718  
3. 99328 4. 220887  
1. 49722 2. 141307  
1. 268833 2. 34259  
2. 198654 3. 090211  
1. 629445 1. 654869  
3. 761962 3. 359951

1. 402565 1. 847381  
4. 801632 5. 823284  
3. 649927 4. 146546  
1. 001573 1. 619172  
5. 430802 5. 231033  
6. 802662 6. 513985  
2. 519874 3. 741918  
9. 330374 8. 662443  
2. 200368 1. 901348  
1. 360312 2. 505046  
1. 410732 2. 284961  
5. 277893 4. 888292  
4. 639476 5. 488007  
0. 93941 0. 899312  
2. 645993 1. 970667  
1. 547175 1. 489386  
2. 765881 2. 042464  
1. 396753 1. 885912  
1. 975557 1. 959978  
1. 399627 2. 229663  
1. 498657 1. 543749  
2. 308963 2. 815035  
1. 505839 2. 357856  
2. 484764 2. 31483  
1. 189603 1. 095743  
2. 998954 2. 583695  
5. 066052 3. 320479  
4. 281062 1. 847638  
3. 428692 3. 195357  
3. 617078 1. 685111  
2. 041186 2. 964551  
0. 501127 0. 846882  
7. 940265 7. 830463  
1. 540958 2. 612896  
1. 407861 1. 436685  
0. 730612 2. 292776  
4. 016593 3. 885121  
2. 297104 3. 746537  
2. 008651 2. 696072  
5. 666193 4. 57464  
4. 789374 3. 327286  
5. 862216 5. 972505  
2. 117914 3. 033235  
5. 039855 5. 999501  
3. 786672 2. 22287  
8. 119408 7. 949451  
5. 570725 5. 549378  
4. 250837 1. 872999  
3. 479625 5. 93275  
1. 307233 1. 844187  
3. 867335 5. 285018



6. 2716 5. 327839  
1. 881547 2. 345646  
3. 338449 3. 339493  
2. 808239 3. 433916  
9. 879556 9. 000297  
2. 882116 2. 869831  
7. 917767 7. 769902  
1. 961368 2. 871136  
4. 755831 4. 139991  
4. 929752 4. 17876  
1. 156448 1. 442454  
4. 583542 3. 760105  
1. 646313 2. 859353  
9. 065009 9. 299224  
2. 870372 1. 876989  
1. 240899 1. 174414  
1. 958764 2. 459545  
1. 733085 3. 131487  
2. 836666 2. 206288  
1. 049868 1. 864912  
5. 473756 5. 764695  
1. 688755 2. 624744  
1. 744969 2. 328769  
3. 276235 3. 898813  
1. 366066 1. 31026  
2. 030067 1. 660466  
2. 280849 2. 169163  
2. 544113 1. 967009  
3. 88628 3. 179317  
1. 401529 1. 575562  
1. 517217 2. 710752  
1. 364739 1. 828848  
8. 192053 8. 098339  
3. 635806 3. 025812  
1. 022164 1. 916124  
2. 060242 2. 264077  
2. 039432 1. 897264  
3. 149205 3. 693899  
2. 120995 3. 696464  
2. 722424 3. 898662  
3. 69791 1. 513165  
1. 502277 1. 928306  
1. 583212 1. 569935  
6. 004779 4. 81067  
0. 800919 1. 123412  
5. 381946 5. 283087  
2. 501627 2. 618246  
2. 156777 3. 227048  
1. 024862 0. 816053  
1. 807689 2. 378242  
3. 257857 4. 299489

1. 507758 1. 482819  
1. 685016 2. 284444  
1. 379951 3. 29031  
3. 822987 3. 581406  
1. 91295 1. 941471  
2. 932275 2. 564082  
5. 321735 5. 821599  
7. 318868 7. 022873  
1. 182813 2. 642236  
1. 470687 1. 469088  
3. 836477 3. 306381  
1. 332997 1. 006812  
1. 034613 1. 717257  
3. 853954 2. 805795  
1. 924823 1. 993354  
3. 564776 3. 46444  
2. 613575 2. 597348  
0. 789109 0. 694077  
1. 249699 1. 195914  
1. 387063 1. 081106  
2. 059183 2. 76859  
8. 099807 8. 237456  
2. 732799 3. 875222  
4. 764482 5. 220498  
2. 2152 1. 989691  
2. 221871 1. 838031  
1. 95155 2. 038232  
1. 933662 1. 730218  
3. 857523 3. 082584  
1. 861201 1. 568515  
0. 573555 1. 673378  
2. 530513 1. 750961  
2. 85 3. 577932  
6. 056223 5. 142624  
1. 795845 1. 536542  
1. 38494 1. 350117  
1. 214936 4. 165292  
1. 982744 1. 59825  
1. 482223 2. 231723  
1. 177266 1. 614745  
3. 147461 4. 271537  
5. 484404 2. 511291  
1. 011111 0. 985347  
6. 212673 4. 66595  
1. 38456 3. 991438  
0. 819353 2. 004473  
2. 139915 3. 014928  
3. 271508 4. 471535  
2. 1591 2. 187135  
5. 389909 3. 352128  
2. 067241 2. 638969

4. 411313 4. 096454  
0. 795612 1. 578129  
1. 940984 2. 161661  
1. 863375 1. 42907  
1. 069523 1. 40269  
1. 251167 1. 408469  
2. 27096 2. 281804  
1. 976107 2. 113889  
1. 780581 1. 107789  
1. 929242 2. 944596  
2. 175619 2. 097789  
3. 291353 3. 397024  
4. 595165 5. 243186  
2. 275712 2. 251215  
4. 320929 3. 611444  
4. 354858 2. 801518  
1. 457369 1. 489208  
1. 734805 2. 408248  
2. 871422 1. 796333  
0. 887624 1. 299335  
1. 59107 0. 925724  
1. 416076 1. 56983  
5. 883113 4. 169344  
2. 857443 2. 690254  
1. 853497 1. 877962  
4. 947254 5. 061664  
1. 556078 1. 5066  
2. 755685 2. 79001  
2. 621602 2. 65847  
4. 761793 5. 551885  
3. 500546 4. 69753  
2. 423812 2. 07861  
1. 467327 1. 843731  
3. 410721 4. 782346  
3. 987055 3. 19545  
2. 151924 2. 963536  
0. 72613 0. 822404  
1. 974076 1. 761406  
3. 108134 3. 184055  
0. 8393 0. 93206  
1. 886354 1. 205618  
1. 089968 1. 09806  
2. 682061 3. 035336  
5. 140039 3. 988514  
4. 599888 2. 588996  
2. 166596 2. 138792  
1. 434556 1. 352116  
1. 681152 1. 08926  
2. 317597 2. 314421  
1. 838658 1. 969299  
4. 36844 3. 970976

2.497508 2.738382  
2.708547 2.907575  
1.443287 1.414805  
1.3675 1.196549  
2.629583 2.080917  
6.6381 6.478752  
2.435943 3.121222  
1.41822 2.098127  
1.181193 1.053498  
1.962861 2.614518  
2.157706 2.40671  
7.095235 7.07703  
2.638338 2.152158  
1.110442 2.094903  
1.848353 1.652529  
1.681992 2.191519  
7.813197 7.390099  
1.790104 1.817622  
5.74739 4.821511  
4.925513 4.222225  
2.503707 2.450676  
1.150608 1.868996  
1.525177 1.152871  
2.047345 1.557464  
2.023441 1.878925  
2.193709 1.548718  
1.967839 1.601988  
1.949897 1.742882  
1.595752 2.213519  
3.791739 3.724022  
2.147866 1.215285  
1.770224 2.515452  
1.957721 2.665888  
7.432391 7.106707  
1.888523 1.661048  
3.038164 5.619987  
2.43661 2.148632  
3.48617 2.230901  
1.465398 1.898876  
5.163942 5.106699  
5.671877 6.594168  
1.364982 1.779354  
6.112796 5.5416  
1.32818 1.979106  
2.755997 3.17143  
3.727962 5.006728  
1.589151 1.613266  
1.981987 1.654408  
2.923977 2.117465  
1.838266 2.789394  
0.977645 1.669879

2.981206 2.817159  
2.099521 1.746172  
1.584652 2.040019  
0.375059 1.397418  
6.850532 8.603165  
5.417216 4.852015  
4.207859 3.956073  
1.076922 1.539394  
8.803157 8.609189  
1.343497 2.640054  
3.067132 2.351646  
1.867146 2.308757  
1.220754 1.506575  
2.226742 2.971354  
3.026535 3.017296  
1.638764 1.94568  
4.725544 4.270973  
1.236017 1.582736  
0.849901 1.919199  
4.753846 5.012504  
3.180447 2.106791  
1.711333 1.713814  
1.260094 0.93774  
1.180729 1.37381  
1.884389 1.600689  
4.811488 4.195822  
5.586051 5.337793  
4.460101 4.069122  
7.9441 7.64061  
7.687096 7.098693  
3.911684 4.753872  
2.275355 2.950199  
6.67247 6.487935  
2.642477 1.894225  
3.593735 3.362051  
5.183362 5.918421  
6.736608 6.238179  
3.60542 4.600924  
1.869223 2.007255  
8.16316 7.597966  
5.170178 4.193053  
5.327045 5.567443  
5.618841 5.533428  
5.582377 5.705895  
7.637738 6.929566  
5.483296 5.66911  
3.887694 2.908206  
6.694121 6.180902  
0.988753 1.360675  
7.559898 6.285629  
6.650449 6.914507

3.47264 3.061535  
5.028141 6.391193  
6.447762 7.73428  
4.420163 4.117677  
8.665256 8.55995  
3.290678 2.586902  
5.20353 4.511227  
3.712973 4.15771  
5.460957 6.267278  
2.876871 2.824647  
5.93289 4.521309  
5.571759 5.984983  
4.814266 5.436219  
3.000681 3.465604  
7.7209 7.33542  
4.505474 4.125828  
3.951998 3.472607  
3.470504 5.814905  
5.169792 5.163715  
4.897239 5.848317  
3.957769 4.260156  
1.442469 1.128229  
5.412294 3.316583  
6.710847 7.095269  
8.185922 7.879134  
6.548393 7.229464  
2.557677 2.65418  
2.339027 2.01967  
7.472563 6.610352  
4.654678 4.801811  
3.383632 3.544499  
1.08899 1.712517  
1.22334 1.754469  
8.312546 8.262339  
1.265117 1.870949  
6.614959 6.968419  
7.766824 7.912786  
3.863146 4.218566  
3.987109 2.578946  
5.882274 6.072313  
4.618319 5.183603  
3.431124 3.425842  
6.149237 6.334608  
3.381824 3.032527  
7.541998 6.557526  
5.143759 4.52498  
6.884095 5.757097  
5.737663 5.871419  
4.856646 4.511665  
1.896642 1.923502  
3.371546 3.681627

4. 247141 4. 037567  
7. 482348 5. 93717  
5. 365492 6. 256216  
3. 669301 4. 622517  
5. 452359 4. 535781  
5. 194712 5. 347828  
5. 065171 4. 102184  
5. 923434 4. 071734  
4. 743771 5. 232154  
5. 668783 4. 99571  
3. 962561 4. 991284  
1. 527605 2. 167019  
2. 118716 2. 409573  
1. 140649 2. 00201  
4. 583585 3. 940783  
1. 794501 2. 79775  
2. 764804 3. 33451  
5. 990379 5. 835136  
3. 934075 5. 033097  
5. 755676 5. 753309  
1. 312235 1. 891859  
3. 937342 4. 57974  
3. 506427 2. 620531  
5. 005775 4. 495969  
2. 003071 2. 989991  
1. 487089 2. 289303  
1. 707486 2. 035219  
2. 783129 2. 527235  
2. 48091 2. 728202  
1. 766355 2. 4114  
5. 655812 5. 861886  
4. 385546 2. 374533  
5. 503408 4. 959317  
4. 102871 3. 177807  
1. 17186 1. 595184  
3. 825147 3. 929431  
5. 192072 4. 267894  
5. 772986 6. 913445  
2. 565178 2. 324657  
1. 713806 1. 502857  
2. 980945 2. 626397  
5. 55926 3. 754739  
5. 061033 5. 339652  
5. 699436 5. 49486  
1. 478572 2. 213666  
4. 484036 5. 306339  
5. 157054 4. 477713  
5. 210182 4. 050638  
7. 383143 7. 560296  
6. 465943 7. 040406  
6. 112949 5. 607534

5. 970722 6. 657411  
5. 894678 5. 796832  
2. 253431 3. 019832  
8. 39174 9. 151696  
4. 980703 4. 816693  
5. 678495 6. 120275  
6. 945694 7. 547682  
5. 82784 5. 543693  
5. 224749 5. 858601  
3. 780885 4. 559299  
7. 09413 7. 119579  
5. 868466 4. 933145  
4. 993016 4. 602745  
4. 601498 4. 865686  
6. 01241 5. 987335  
6. 988475 7. 513759  
6. 085305 6. 195613  
3. 053367 2. 138446  
2. 911605 2. 121649  
3. 930399 2. 902363  
1. 690356 1. 252126  
1. 882543 1. 462359  
7. 278427 7. 649109  
1. 535736 2. 149043  
2. 354187 4. 089858  
5. 251044 4. 4458  
2. 049795 2. 819527  
7. 090324 4. 841405  
2. 968002 2. 388311  
1. 769592 2. 27504  
7. 752623 7. 743844  
4. 933231 5. 131838  
8. 088499 7. 112839  
4. 345619 3. 495124  
1. 587804 1. 974149  
1. 581709 1. 597316  
2. 847858 5. 791345  
1. 312329 1. 955067  
7. 571876 6. 443133  
3. 224985 3. 067427  
3. 035133 2. 044706  
3. 347198 1. 977765  
3. 533873 2. 399263  
1. 938647 2. 2562  
4. 530603 5. 662462  
5. 42911 5. 538428  
3. 798813 3. 401236  
5. 611273 6. 059274  
2. 354397 3. 869585  
3. 201265 4. 380674  
3. 62673 2. 556983



3. 911674 4. 662709  
7. 556054 7. 910645  
6. 332033 6. 092706  
3. 654579 3. 358254  
4. 36495 4. 0663  
6. 167895 7. 199416  
8. 317893 8. 007164  
1. 783116 1. 464344  
2. 442186 1. 350686  
8. 086391 7. 340092  
3. 460492 3. 910376  
9. 067249 8. 461525  
2. 444735 1. 715483  
1. 880517 1. 478643  
3. 436352 3. 159939  
1. 435276 1. 112482  
3. 783693 1. 61314  
5. 827815 6. 528146  
4. 470491 2. 425131  
1. 19593 2. 118173  
2. 355851 2. 307985  
7. 468575 7. 368619  
3. 241318 2. 744857  
6. 261976 5. 762631  
1. 57513 1. 464798  
2. 237857 2. 975541  
4. 104749 3. 371469  
4. 284254 4. 007931  
3. 110757 3. 283202  
1. 96639 1. 996899  
2. 237343 2. 049623  
5. 512834 6. 319637  
1. 833744 2. 74486  
3. 290822 3. 371208  
6. 593963 4. 984295  
4. 898854 5. 387452  
6. 471693 6. 754324  
5. 184811 2. 843437  
3. 104256 2. 508486  
2. 608181 3. 886673  
7. 213285 8. 608258  
6. 26344 7. 089715  
2. 822856 2. 254565  
2. 374266 1. 317903  
2. 218107 2. 707832  
5. 845245 5. 980412  
4. 282464 2. 92503  
2. 133958 1. 677696  
9. 809474 11. 46468  
4. 034324 4. 286662  
4. 39554 4. 493964

0.83527 0.965737  
1.389752 1.92183  
2.273754 1.5282  
2.453304 2.397501  
2.897309 4.522911  
2.552737 3.869175  
1.051788 1.464518  
1.53595 2.393991  
2.424135 2.2923  
4.73675 4.036302  
1.911915 1.026745  
2.004195 1.951114  
3.517946 3.400445  
4.000465 3.277315  
0.856758 1.112971  
1.411166 1.947535  
1.217272 1.552994  
2.145048 3.231154  
0.986078 1.395024  
4.781319 3.884119  
2.369877 3.053932  
3.00693 2.537023  
1.601298 0.890138  
8.092673 7.292444  
3.581233 4.647018  
2.17096 1.701054  
1.769746 1.460664  
4.22943 4.457178  
2.726689 2.470111  
1.617619 1.278366  
3.37139 3.425087  
1.048502 2.339501  
1.776651 2.55916  
3.624259 3.719022  
1.29838 2.086454  
5.159286 4.041038  
3.303503 2.355995  
1.414418 1.330059  
2.854621 3.512624  
6.501042 6.315522  
0.759693 1.590475  
2.572652 3.322979  
2.416434 2.638904  
3.606388 4.117752  
2.655457 2.924129  
3.65984 3.023978  
2.894614 2.217235  
2.374495 2.049645  
1.378555 1.300777  
4.27555 1.61231  
1.418752 1.66506

2. 779362 3. 275607  
2. 201903 2. 200761  
2. 571391 2. 005478  
4. 058944 4. 496428  
1. 500313 2. 224477  
1. 487448 1. 56001  
3. 997614 3. 622221  
4. 052983 3. 363659  
2. 840951 3. 930965  
2. 480135 1. 325695  
1. 814451 2. 922467  
2. 428007 2. 853899  
1. 248235 2. 327593  
2. 199422 2. 112093  
6. 583139 4. 351174  
4. 098751 4. 209685  
2. 431933 2. 454979  
6. 101781 3. 121316  
2. 303093 1. 826591  
2. 445794 2. 124587  
2. 131784 2. 12639  
1. 31924 1. 256121  
2. 86954 2. 898268  
0. 813285 0. 771084  
3. 38075 1. 506729  
5. 007407 5. 687412  
2. 012371 2. 019101  
4. 235738 5. 113743  
2. 391443 2. 519602  
2. 43629 1. 833438  
1. 427241 1. 815327  
2. 5522 2. 015687  
3. 330049 3. 263318  
7. 109514 6. 166239  
6. 412887 6. 029715  
2. 888444 5. 647981  
5. 039091 5. 610479  
4. 817079 5. 442383  
5. 220821 4. 408646  
3. 231148 2. 845082  
2. 933537 2. 49455  
2. 92362 1. 927434  
3. 11376 4. 676395  
5. 774231 5. 498427  
5. 827842 5. 150805  
4. 196172 4. 893436  
2. 380928 2. 826415  
1. 509117 1. 426841  
2. 22502 2. 404679  
2. 463256 1. 773463  
1. 767028 2. 715285

4. 843973 6. 44799  
4. 012267 5. 793991  
3. 708725 4. 674139  
10. 73836 9. 353896  
1. 480606 2. 169117  
5. 777681 5. 146866  
2. 662519 2. 391824  
3. 856208 2. 102538  
7. 091143 6. 299136  
2. 203577 2. 277558  
3. 850438 4. 528921  
2. 359128 2. 501864  
7. 126842 6. 993681  
1. 538676 1. 854042  
2. 912937 2. 032018  
4. 88276 7. 619235  
9. 999072 9. 197606  
8. 520306 7. 653129  
7. 59606 6. 918098  
6. 109806 6. 035574  
5. 273143 4. 679761  
6. 24165 6. 147159  
8. 808275 7. 844227  
5. 31976 5. 573911  
4. 390542 4. 434186  
5. 418218 5. 138886  
3. 628361 3. 686603  
7. 149359 6. 281986  
3. 584177 3. 726738  
5. 646733 5. 04073  
3. 428078 3. 686748  
2. 942631 2. 821418  
6. 485792 6. 88216  
5. 740104 5. 553365  
7. 835522 8. 405238  
6. 343299 7. 165479  
5. 656706 5. 681299  
7. 289244 6. 51645  
3. 523299 3. 269249  
3. 246522 2. 492886  
7. 539662 7. 296046  
9. 313368 8. 599128  
1. 429201 2. 27703  
1. 747108 2. 529322  
3. 144732 3. 573841  
6. 085809 6. 684953  
8. 475011 8. 335769  
8. 121066 7. 485779  
6. 854571 5. 958452  
2. 065741 3. 28887  
5. 215251 5. 170136

1. 289561 1. 467626  
4. 281077 4. 034066  
5. 022788 5. 876888  
8. 835546 8. 636944  
3. 10169 4. 368724  
5. 822925 6. 268366  
1. 219283 1. 220184  
3. 082166 2. 598026  
3. 367956 4. 104867  
6. 396097 6. 784669  
1. 996784 2. 679363  
3. 946082 2. 988239  
3. 815922 2. 737343  
4. 783948 4. 476232  
3. 074345 4. 289193  
7. 502741 7. 473166  
3. 871407 5. 470571  
1. 943797 2. 343835  
3. 356241 2. 918391  
7. 590378 8. 341968  
4. 501553 4. 484353  
7. 298517 9. 045161  
7. 448786 6. 551868  
7. 609148 7. 827891  
5. 623487 5. 129568  
5. 824901 6. 434226  
7. 438337 7. 587753  
3. 555334 3. 835061  
5. 659048 5. 719585  
5. 789113 5. 746179  
4. 534714 4. 988155  
7. 887081 8. 15884  
3. 35735 0. 530298  
6. 83072 7. 298754  
1. 52849 3. 586093  
7. 39495 7. 435273  
4. 350147 4. 034724  
6. 356628 6. 49487  
7. 021499 6. 955217  
5. 41348 5. 65755  
6. 239469 4. 330514  
3. 228054 3. 599246  
1. 709891 2. 541683  
2. 612068 1. 820937  
2. 972814 3. 405078  
1. 857647 1. 259368  
0. 916343 1. 431027  
2. 343417 2. 261045  
5. 700433 5. 152717  
4. 645824 4. 20727  
10. 48632 10. 58247

9. 581971 9. 978592  
8. 58479 8. 84713  
4. 71935 4. 939554  
6. 429307 6. 977546  
2. 612702 2. 278456  
7. 781366 6. 452456  
4. 381144 2. 951512  
5. 592286 5. 689893  
7. 303965 6. 296227  
7. 274678 7. 287119  
1. 792146 1. 341986  
1. 973019 2. 151466  
1. 201231 2. 301596  
5. 907028 5. 940586  
8. 926965 9. 106745  
4. 570956 3. 020938  
4. 901797 6. 003959  
2. 555245 2. 286793  
1. 293593 1. 481263  
2. 52685 3. 455384  
4. 203724 4. 411743  
6. 692983 6. 016571  
5. 785422 5. 84276  
5. 58266 5. 158053  
5. 009973 5. 396771  
4. 764572 5. 490479  
7. 451431 6. 41018  
3. 593014 5. 600502  
5. 481801 6. 047107  
2. 089338 1. 969904  
1. 571947 1. 088355  
10. 56718 10. 36505  
9. 388927 8. 235828  
5. 853085 6. 923137  
5. 098376 5. 114345  
3. 392897 3. 713578  
2. 797351 2. 982142  
1. 521193 1. 792934  
3. 923101 1. 351914  
2. 094343 1. 858051  
5. 171782 6. 132551  
4. 544306 3. 236529  
0. 859557 1. 098936  
9. 125794 9. 609934  
10. 12836 10. 12792  
5. 321035 6. 904693  
3. 074773 2. 177311  
1. 00314 1. 225549  
5. 092432 5. 199554  
1. 147759 2. 138027  
1. 343535 1. 454369

0.86973 1.458557  
1.392112 1.021561  
1.170045 1.628614  
1.565057 2.326731  
1.446728 1.707838  
8.907924 8.378515  
4.663936 4.948467  
5.34117 4.42349  
10.04797 9.510649  
2.397258 2.580969  
6.056 7.021795  
3.279971 2.613033  
3.031928 2.035936  
1.750488 2.129821  
8.444817 8.972962  
1.194803 1.352916  
1.063563 2.459653  
1.983903 2.485213  
3.560492 4.238057  
5.442912 5.357662  
6.995382 7.001519  
5.62989 5.964097  
1.833816 1.912605  
9.827497 9.290748  
8.700976 9.237081  
5.148731 4.596163  
6.747339 7.517339  
2.254861 2.066724  
6.236338 7.317348  
8.214858 8.269083  
6.266828 4.593166  
5.479988 4.873263  
7.156814 7.5536  
1.475524 1.897087  
4.786327 4.662188  
7.239391 6.916069  
7.092201 7.234199  
9.449749 9.403917  
6.503006 6.237958  
7.432284 6.48833  
8.233017 7.987589  
8.862092 9.518859  
8.073934 8.372292  
9.547393 9.673718  
7.001347 6.724615  
5.764093 9.293361  
2.298659 1.609257  
1.944109 2.345034  
1.681443 3.207  
1.880454 2.567103  
2.268236 2.516076

1. 063614 1. 35327  
1. 027853 1. 430476  
2. 074797 2. 237826  
8. 346279 8. 29238  
4. 808411 4. 806144  
6. 243289 6. 254963  
2. 666647 3. 540444  
2. 899045 4. 271144  
0. 81776 1. 558017  
1. 275331 1. 743683  
8. 251864 8. 363248  
5. 922775 5. 664026  
8. 519885 8. 101545  
1. 569517 3. 84073  
6. 025424 2. 52528  
2. 475914 3. 366459  
3. 302744 2. 731558  
2. 318872 4. 052411  
1. 175207 1. 572216  
4. 291868 7. 206282  
7. 615936 7. 849412  
7. 152194 7. 867047  
2. 207695 2. 531071  
3. 170013 3. 086608  
2. 303876 2. 300387  
1. 718025 1. 58259  
1. 466752 1. 405585  
4. 749567 4. 233557  
4. 490904 1. 698121  
5. 517587 6. 58581  
1. 904868 0. 628734  
1. 314675 1. 725792  
2. 560554 3. 243025  
5. 029142 4. 336726  
2. 346531 1. 017443  
0. 81945 1. 798225  
2. 282523 1. 448885  
2. 52174 2. 601916  
5. 156511 4. 802501  
5. 325881 1. 812747  
1. 857521 1. 061411  
5. 596555 6. 616805  
5. 992498 6. 55148  
3. 225594 7. 984328  
2. 656251 3. 570662  
4. 477048 2. 591022  
0. 674809 1. 036496  
7. 149224 2. 330071  
4. 33083 1. 964182  
4. 705676 8. 673375  
3. 767325 2. 159626



5. 812645 7. 54788  
4. 159264 1. 766506  
5. 151708 6. 443868  
2. 904897 1. 09697  
1. 366767 1. 337856  
2. 256004 4. 885127  
1. 065586 1. 421203  
2. 180342 2. 300524  
4. 212164 2. 111771  
3. 628333 1. 273623  
2. 725339 2. 184477  
3. 555725 3. 445293  
4. 33785 3. 931655  
1. 424867 1. 771456  
2. 582879 3. 196739  
2. 173278 1. 885508  
6. 021504 6. 910154  
3. 551109 4. 216733  
6. 719674 4. 49738  
1. 611543 1. 762359  
1. 421286 2. 033387  
2. 622199 2. 452877  
1. 267201 1. 219772  
2. 754629 5. 813486  
2. 157689 2. 436769  
4. 7031 4. 92383  
2. 476265 4. 015246  
2. 876296 2. 319015  
0. 657539 0. 887766  
1. 495084 1. 786135  
5. 709568 7. 211559  
4. 860869 3. 05831  
4. 576591 1. 51238  
1. 186387 1. 225073  
1. 088724 0. 876094  
1. 314362 1. 127577  
6. 69665 6. 715988  
1. 654596 0. 722178  
8. 939776 9. 150811  
7. 047252 6. 929957  
3. 102035 4. 542038  
7. 221546 7. 566736  
1. 284266 1. 115708  
5. 90665 4. 877039  
2. 478794 2. 949816  
4. 801302 5. 617013  
5. 49238 5. 441998  
5. 769866 5. 716109  
6. 43514 6. 219701  
6. 30983 7. 012977  
2. 196126 3. 986181

2. 450106 2. 453415  
5. 658735 3. 830312  
3. 990572 3. 192985  
3. 6127 4. 147988  
2. 820168 2. 391963  
4. 094132 4. 658251  
6. 263984 6. 327114  
1. 84314 2. 247411  
5. 645449 4. 610688  
1. 372379 1. 764714  
5. 68898 5. 101536  
5. 602757 5. 358111  
7. 920428 7. 822537  
5. 360065 4. 761745  
7. 063939 5. 750439  
6. 691954 6. 953376  
1. 672257 2. 201101  
4. 727257 4. 070208  
2. 422463 2. 557399  
5. 328332 5. 858305  
1. 124038 1. 938956  
8. 937398 9. 134335  
6. 296739 5. 413211  
8. 031972 8. 200023  
6. 713284 6. 757785  
3. 57127 4. 064969  
1. 947064 2. 044762  
7. 022035 7. 011453  
5. 306389 5. 913115  
5. 433701 5. 67947  
4. 267504 4. 682939  
4. 076011 3. 971612  
2. 656236 2. 63982  
5. 775607 5. 455929  
6. 150818 6. 564818  
4. 212952 3. 16055  
7. 652018 8. 368233  
6. 278882 6. 79685  
2. 573613 2. 579563  
0. 891189 1. 134919  
3. 465313 2. 299623  
8. 22247 9. 147253  
3. 697432 4. 274322  
3. 209034 2. 931305  
1. 569305 1. 85682  
2. 95186 4. 541915  
9. 239371 8. 794908  
2. 881215 5. 266802  
4. 222831 2. 803422  
1. 80222 1. 822266  
3. 270805 3. 471808

2. 89054 2. 810513  
2. 159342 5. 075554  
2. 512379 2. 009027  
2. 097427 2. 467456  
8. 724626 7. 6515  
7. 356228 6. 588201  
5. 998789 4. 591488  
2. 458414 2. 040581  
5. 459361 4. 676581  
5. 124632 5. 030872  
3. 099294 3. 267139  
6. 210774 5. 401428  
5. 352691 5. 935638  
2. 331586 3. 117358  
7. 567959 8. 147942  
2. 529794 2. 847238  
4. 96684 5. 237123  
7. 598181 7. 293921  
7. 360473 7. 369614  
7. 411035 6. 745404  
8. 316522 10. 15985  
6. 795988 5. 918411  
5. 009386 5. 027601  
7. 521286 7. 418952  
7. 079112 6. 702109  
4. 688589 2. 652245  
2. 146044 2. 605205  
8. 331145 8. 87416  
3. 993651 3. 894805  
6. 862566 6. 105521  
4. 34745 3. 825683  
8. 153888 7. 947835  
4. 449956 4. 592441  
4. 167355 4. 171892  
6. 4179 6. 452198  
1. 044016 1. 160485  
2. 768531 2. 660002  
5. 54256 5. 300657  
2. 386913 2. 527183  
2. 728902 3. 809964  
2. 236638 3. 669567  
4. 56506 5. 966918  
4. 855973 4. 560098  
4. 917072 5. 525881  
1. 120422 1. 721584  
4. 198262 4. 083315  
6. 831713 6. 863917  
2. 90335 3. 639374  
1. 204803 1. 042972  
1. 32828 2. 232485  
2. 36918 2. 675542

1. 599975 2. 504368  
6. 471903 6. 373483  
4. 889638 3. 872261  
4. 413181 3. 675473  
3. 104511 3. 511194  
1. 311346 1. 683425  
1. 989675 1. 544323  
2. 498473 1. 615063  
6. 280036 7. 523191  
7. 499718 6. 192311  
2. 792032 1. 929016  
3. 69101 4. 722822  
1. 765698 5. 820131  
8. 906764 11. 13863  
3. 830033 1. 279606  
5. 167045 5. 239342  
1. 363563 2. 45089  
5. 35497 3. 75135  
0. 884436 1. 748955  
2. 28867 0. 925527  
1. 570797 3. 080835  
1. 705572 2. 214297  
6. 120586 5. 536373  
3. 123951 3. 64641  
4. 716206 5. 72195  
1. 996724 2. 743388  
5. 285296 2. 700026  
3. 825649 2. 815858  
2. 981494 4. 818862  
0. 845861 1. 275108  
4. 558056 4. 11676  
6. 036748 8. 471437  
1. 21596 1. 505234  
3. 779186 1. 520765  
4. 521999 1. 657027  
3. 828839 4. 232729  
0. 648974 1. 038393  
6. 072693 3. 107198  
2. 082219 1. 69814  
1. 150381 0. 820418  
3. 755257 4. 136451  
3. 997674 3. 005044  
3. 915635 4. 140251  
7. 815593 9. 179153  
1. 693405 1. 377418  
2. 884482 2. 661005  
0. 762316 1. 967267  
2. 596144 5. 586899  
0. 734274 0. 840055  
2. 964611 2. 260866  
3. 402259 1. 887727

2. 12688 3. 790644  
3. 225149 1. 189852  
1. 792458 1. 0311  
6. 01718 2. 845101  
6. 64784 6. 793616  
3. 702158 7. 507103  
2. 861801 1. 286616  
2. 60972 4. 553285  
1. 433655 1. 971814  
4. 936347 4. 17494  
7. 767116 7. 694467  
5. 570963 3. 407336  
6. 772112 6. 370255  
6. 851682 6. 465041  
2. 735358 2. 26025  
5. 142394 6. 146266  
4. 436798 5. 816678  
3. 679095 2. 763335  
0. 707178 0. 784121  
6. 752019 3. 611505  
4. 998378 4. 790945  
0. 796775 1. 909245  
1. 749587 1. 948913  
1. 5672 2. 790586  
0. 946923 0. 572131  
0. 9927 0. 833397  
1. 350501 0. 947164  
0. 804047 1. 036234  
1. 330908 1. 808662  
1. 953498 2. 699179  
2. 167037 2. 784377  
3. 587154 3. 442839  
1. 371794 1. 369607  
1. 632457 2. 443031  
1. 410116 2. 319787  
0. 727686 1. 068915  
0. 757804 1. 437474  
3. 312257 3. 320264  
2. 661957 1. 916647  
0. 994326 1. 777221  
0. 518564 1. 695514  
0. 934341 1. 175  
2. 897433 3. 018176  
4. 514167 3. 241064  
0. 898336 1. 171541  
0. 922876 1. 10464  
3. 636565 5. 187406  
3. 619685 3. 316114  
0. 94948 1. 775809  
5. 532517 5. 619967  
5. 427329 2. 191377

1. 131806 1. 188813  
1. 419643 1. 030861  
1. 050766 1. 622863  
0. 665824 0. 930937  
1. 001478 1. 913917  
2. 137757 1. 203254  
0. 881974 0. 960003  
1. 264723 1. 13767  
2. 870573 2. 967039  
2. 571716 2. 882852  
1. 341091 1. 64638  
3. 710398 2. 762715  
0. 798164 1. 173107  
1. 903355 1. 782442  
1. 350895 0. 993567  
1. 33318 1. 124722  
1. 036832 1. 80415  
4. 039879 4. 259208  
1. 243251 1. 433389  
2. 748593 2. 704224  
3. 365739 1. 801149  
2. 934487 1. 370463  
2. 285649 2. 121149  
1. 032091 2. 245866  
2. 19534 1. 543281  
1. 516247 2. 226805  
5. 727983 3. 286429  
1. 957876 1. 065267  
4. 582845 2. 919354  
0. 64781 1. 073914  
2. 047148 2. 092414  
1. 267803 2. 124187  
1. 52084 1. 175291  
8. 344353 4. 531216  
0. 946618 1. 855427  
8. 237413 5. 122497  
2. 048343 2. 171462  
1. 291888 1. 020449  
1. 728487 1. 934404  
1. 742818 1. 657909  
4. 95371 3. 439034  
1. 14524 0. 863912  
2. 177776 1. 837752  
1. 464567 1. 481179  
1. 088153 1. 216722  
0. 691285 1. 005727  
2. 782412 1. 330264  
1. 056925 1. 358406  
1. 41703 1. 454611  
1. 745185 1. 50601  
2. 593641 3. 175144

2. 05326 1. 676139  
0. 685079 0. 840181  
2. 473002 0. 895212  
2. 006211 3. 240266  
3. 567316 2. 851351  
1. 319842 1. 171138  
0. 850242 1. 306373  
3. 753551 2. 687413  
1. 467964 1. 27382  
6. 461742 4. 521952  
3. 487676 1. 672806  
3. 51334 3. 188689  
5. 976334 5. 088835  
1. 651512 1. 740128  
0. 611868 2. 201531  
4. 494288 3. 846111  
2. 628732 2. 68009  
6. 450621 6. 639875  
7. 498099 7. 436508  
5. 713203 5. 204353  
7. 641652 7. 46066  
3. 089515 3. 791077  
5. 480921 6. 616291  
3. 285488 3. 675615  
6. 611973 6. 396187  
10. 09238 9. 420502  
5. 467222 5. 324511  
6. 359538 6. 404425  
1. 042144 1. 460028  
6. 772284 5. 62929  
4. 52664 4. 293402  
6. 54924 6. 322027  
7. 839752 8. 353155  
1. 36871 1. 875841  
2. 541909 0. 986111  
2. 178689 3. 216203  
0. 825581 1. 221055  
1. 409078 1. 58563  
0. 72132 1. 202932  
3. 840203 1. 72099  
1. 84263 1. 999101  
6. 072393 1. 791628  
6. 117042 0. 900211  
2. 294003 3. 443077  
2. 349298 2. 409878  
6. 249022 6. 945788  
8. 24561 8. 232967  
1. 181993 0. 789372  
6. 762816 6. 721996  
7. 892231 8. 544585  
5. 75399 4. 342143

1. 150331 1. 984078  
1. 290476 1. 044577  
1. 505926 1. 976946  
8. 402536 9. 037646  
7. 928951 7. 471915  
5. 057797 5. 584249  
4. 724335 5. 248475  
2. 897318 1. 689445  
1. 962072 1. 493725  
3. 919111 4. 720551  
9. 027235 8. 975158  
8. 679067 7. 51121  
4. 482315 3. 153929  
4. 502806 3. 038833  
6. 250375 6. 248641  
5. 354352 6. 260262  
1. 638427 2. 174072  
7. 15116 6. 631192  
1. 707486 1. 483185  
5. 002526 4. 491494  
2. 093094 1. 915411  
4. 005617 3. 068194  
1. 975412 3. 105364  
1. 348004 2. 403601  
2. 894357 3. 36244  
6. 01285 5. 421915  
6. 350106 6. 202791  
6. 130261 5. 990586  
8. 286618 8. 420874  
6. 760964 6. 614909  
5. 842415 6. 208991  
1. 924123 2. 470784  
1. 159339 1. 541074  
4. 097513 4. 629156  
7. 958183 7. 652408  
2. 197807 1. 698191  
4. 410944 3. 471297  
2. 589245 2. 36984  
2. 81742 2. 825792  
6. 174577 6. 979976  
5. 91949 5. 508564  
5. 941988 5. 765844  
3. 385006 3. 426879  
2. 99282 3. 281578  
4. 210233 6. 776871  
5. 512181 6. 174888  
2. 305781 2. 554133  
9. 827088 9. 324482  
9. 062249 8. 216733  
3. 861008 4. 039532  
2. 451668 2. 81048



7. 710612 6. 944651  
1. 706126 1. 840027  
3. 036422 3. 030727  
4. 670387 4. 267264  
9. 108434 8. 666543  
3. 966886 3. 441825  
4. 361062 4. 37773  
2. 211395 3. 548387  
3. 34946 2. 076882  
1. 301891 1. 292111  
3. 95428 4. 83963  
3. 008857 3. 114664  
6. 315414 6. 571907  
4. 687209 4. 655679  
2. 48333 2. 403605  
6. 574797 6. 688245  
7. 756551 9. 464411  
7. 516621 7. 047915  
7. 143817 4. 963456  
7. 40309 6. 415585  
4. 244186 4. 279149  
4. 56687 4. 51712  
9. 144763 9. 386067  
6. 967272 7. 3122  
10. 38392 9. 879041  
3. 212165 4. 047196  
1. 356717 1. 481579  
5. 623789 5. 084663  
3. 477041 3. 413491  
5. 474589 5. 817053  
6. 102919 5. 837449  
1. 406767 2. 249944  
5. 141291 3. 919031  
5. 05412 5. 280154  
7. 09635 7. 239497  
5. 294573 4. 286475  
6. 615454 6. 226061  
2. 121377 2. 199777  
1. 545977 1. 785229  
7. 552444 7. 349854  
8. 922187 8. 712218  
3. 111197 3. 875103  
3. 949115 4. 465272  
7. 159899 7. 253548  
8. 878644 8. 135961  
0. 775403 0. 370217  
1. 857172 3. 608984  
1. 06497 1. 781286  
8. 535048 8. 711509  
3. 716011 3. 871641  
2. 303969 1. 375427

6. 583149 7. 130112  
5. 439195 5. 947357  
6. 856198 6. 437248  
3. 333645 4. 817456  
7. 235688 6. 826071  
9. 566848 9. 583271  
7. 462668 7. 43061  
8. 961311 8. 700788  
5. 112987 5. 040113  
3. 068603 2. 164115  
10. 81614 10. 95084  
1. 77113 1. 804546  
2. 815607 2. 71844  
7. 822248 8. 599129  
3. 616482 3. 553184  
3. 01858 5. 948449  
7. 550801 7. 530399  
4. 812674 4. 060029  
4. 941664 4. 56986  
3. 057259 3. 017274  
1. 814133 1. 841219  
7. 829114 8. 136936  
3. 451864 3. 913645  
5. 873805 6. 326454  
5. 914707 6. 292038  
2. 035477 2. 550536  
0. 893421 1. 933389  
1. 355471 2. 992914  
8. 258549 8. 343004  
3. 424018 4. 331281  
2. 966327 3. 524142  
1. 842908 2. 594302  
1. 301255 1. 054851  
1. 296459 2. 360945  
8. 100303 7. 803675  
3. 313088 1. 757518  
2. 198502 2. 246592  
5. 264792 5. 360026  
6. 818074 6. 639717  
1. 567287 2. 78561  
0. 934327 1. 510836  
2. 827715 5. 237636  
7. 707056 7. 215523  
3. 683839 3. 48295  
5. 683061 6. 134012  
6. 00044 5. 226105  
6. 344184 7. 118571  
7. 588816 7. 556871  
1. 717444 2. 049502  
2. 347621 3. 348416  
6. 261791 6. 67044

3. 238962 3. 39996  
6. 37834 6. 840127  
1. 167104 1. 18912  
3. 303146 3. 080532  
5. 724664 5. 326595  
7. 987723 8. 047069  
6. 006414 6. 343887  
1. 449342 1. 137473  
8. 92808 9. 123315  
5. 072694 6. 254048  
2. 084642 1. 606502  
6. 996149 5. 833845  
8. 043538 7. 462433  
5. 553515 6. 018397  
2. 030414 1. 879604  
3. 713785 4. 341454  
1. 102704 1. 68636  
5. 054774 4. 809125  
6. 956485 6. 99658  
10. 95742 11. 08133  
1. 931584 1. 866231  
3. 183252 3. 971971  
5. 938715 5. 291333  
5. 726357 5. 625291  
6. 982666 6. 249368  
4. 361802 6. 416184  
3. 944278 3. 232306  
9. 788278 9. 642933  
2. 637201 2. 71101  
1. 326683 1. 026754  
7. 535862 7. 713036  
6. 366952 5. 499364  
5. 085308 5. 487079  
3. 072629 3. 321502  
6. 034294 4. 546459  
1. 61828 1. 466662  
1. 774714 1. 282553  
5. 031993 2. 541777  
1. 374036 2. 298448  
7. 453385 7. 241198  
2. 171709 2. 106881  
5. 973425 5. 73996  
1. 373303 1. 757387  
0. 778224 0. 912017  
1. 718787 1. 28745  
2. 725005 3. 30304  
0. 952586 1. 062965  
2. 039512 1. 526272  
1. 308656 0. 977224  
2. 199821 2. 325978  
1. 050685 1. 062423

1. 744585 1. 558763  
4. 179801 3. 30486  
2. 370915 2. 315818  
1. 888083 1. 895219  
4. 062766 4. 205969  
3. 629441 3. 673315  
1. 956631 2. 147498  
0. 390558 1. 656006  
7. 012737 6. 978179  
6. 243986 5. 745535  
5. 790059 5. 89311  
8. 383541 8. 304042  
5. 445541 2. 304364  
1. 64137 1. 269727  
7. 368522 7. 98898  
6. 307874 6. 731209  
1. 662555 1. 55892  
4. 18796 4. 004989  
4. 933008 4. 684332  
7. 036718 6. 587745  
4. 564282 4. 440058  
6. 805087 7. 011197  
7. 580366 7. 779293  
7. 267853 6. 856347  
4. 386468 3. 706184  
4. 434361 4. 240088  
1. 429748 1. 347934  
2. 923169 2. 228903  
1. 748059 1. 792192  
4. 382549 3. 747305  
1. 946889 1. 437803  
2. 486306 1. 39443  
2. 378792 2. 562034  
7. 348271 8. 942818  
3. 159138 2. 855344  
0. 587406 1. 077199  
5. 13807 5. 863816  
1. 604609 1. 280354  
2. 516694 1. 451022  
1. 098787 2. 038677  
6. 834184 6. 35516  
2. 129538 2. 188068  
1. 80421 2. 237987  
3. 039045 3. 171896  
3. 579688 4. 915222  
1. 485299 1. 502973  
4. 447147 4. 547211  
1. 343086 1. 775875  
3. 425147 2. 913077  
4. 055999 2. 603285  
1. 62404 2. 731258

5. 302776 3. 137531  
2. 714567 2. 897336  
1. 760722 1. 492961  
3. 451781 3. 949946  
0. 808684 0. 922521  
1. 219745 1. 209121  
2. 118426 1. 707171  
10. 16824 10. 18749  
0. 974058 1. 06428  
2. 072339 1. 852317  
5. 999229 4. 734528  
1. 614829 2. 149602  
2. 651676 2. 003212  
0. 975203 1. 232435  
2. 023437 1. 783165  
2. 800953 3. 138522  
2. 172094 0. 868241  
2. 118315 2. 373288  
1. 262645 2. 478279  
1. 242165 1. 163014  
2. 83672 2. 265635  
1. 415762 1. 119737  
0. 976512 1. 841253  
1. 935048 1. 228067  
4. 130407 3. 10658  
1. 099612 0. 868825  
2. 064502 0. 729979  
2. 623763 2. 582095  
7. 417181 7. 163148  
4. 988383 3. 777318  
1. 211635 1. 781739  
1. 804444 1. 928398  
0. 557607 1. 337906  
2. 380497 2. 395324  
6. 816663 6. 967263  
5. 86884 6. 855113  
1. 669619 1. 675105  
7. 197353 6. 111652  
1. 164368 1. 544105  
5. 101656 3. 661624  
2. 48401 4. 044216  
3. 510176 2. 388626  
4. 197744 3. 190012  
1. 225414 2. 229945  
1. 674573 1. 198897  
3. 970478 3. 059777  
5. 196057 6. 488379  
3. 465002 2. 373084  
6. 42686 6. 747907  
2. 331922 1. 820616  
4. 142443 4. 249035

2. 123878 2. 93231  
5. 12854 4. 191203  
5. 129086 4. 589419  
1. 599159 1. 610288  
1. 113017 2. 369545  
1. 871171 3. 156045  
1. 374744 1. 200555  
1. 322304 2. 087799  
3. 21703 3. 474733  
4. 262495 5. 122906  
1. 924591 1. 449133  
3. 339743 2. 831463  
1. 28984 1. 532993  
1. 879514 1. 940917  
1. 413473 1. 154526  
2. 651481 2. 517183  
1. 840068 1. 858574  
5. 369448 4. 211348  
1. 461021 4. 076613  
3. 612628 3. 370125  
4. 242509 4. 428282  
4. 768964 3. 975051  
1. 182913 2. 911347  
7. 499389 5. 556921  
5. 041968 6. 418868  
1. 790685 2. 95804  
6. 508506 5. 978845  
2. 905736 3. 585336  
1. 921528 3. 102931  
2. 725827 3. 673748  
1. 092834 1. 153984  
0. 885147 1. 300262  
2. 357756 3. 025995  
2. 831078 3. 163352  
2. 442696 3. 025871  
1. 421328 1. 936524  
2. 280083 2. 329379  
1. 625397 1. 777161  
2. 509044 2. 70144  
2. 814321 4. 066419  
1. 713599 2. 843677  
8. 970151 7. 780231  
1. 711658 1. 812398  
2. 91865 2. 526699  
2. 470186 1. 502012  
2. 716857 2. 375366  
3. 200272 3. 347593  
3. 099369 5. 966755  
4. 105717 2. 393763  
5. 639539 5. 691597  
4. 082277 2. 169849

5. 916924 6. 724389  
1. 397397 1. 123845  
1. 26257 1. 625303  
1. 689255 2. 231311  
1. 754456 1. 765521  
1. 844351 1. 941647  
0. 744825 1. 134829  
7. 788498 8. 357194  
2. 859344 1. 827928  
2. 086234 1. 916278  
5. 113851 4. 176871  
2. 844529 1. 40834  
4. 524774 4. 172574  
1. 247531 2. 166018  
5. 393867 5. 178654  
3. 108686 2. 716053  
1. 874483 1. 649498  
1. 344647 1. 832618  
1. 321719 2. 327152  
1. 285549 1. 55083  
3. 317049 3. 244514  
1. 272973 1. 310451  
3. 277869 3. 751593  
5. 518353 2. 666864  
3. 78519 2. 595609  
1. 431107 1. 914915  
0. 929993 1. 831862  
2. 865039 4. 485959  
4. 6446 4. 185992  
0. 616079 0. 775815  
5. 862848 2. 537967  
1. 26344 1. 863202  
2. 938257 2. 94728  
0. 735863 0. 785557  
1. 869761 2. 295912  
1. 261099 1. 349782  
2. 114043 2. 714509  
3. 294543 3. 659517  
0. 931768 1. 427673  
2. 048158 2. 618024  
0. 855757 1. 603756  
5. 76789 6. 307305  
3. 383584 3. 219468  
2. 475059 2. 67061  
1. 370649 1. 497376  
2. 702329 2. 758118  
0. 78914 1. 303844  
1. 691618 1. 670981  
1. 699614 2. 028046  
5. 361672 5. 025089  
2. 26523 2. 097421

2. 048065 1. 616062  
1. 349629 2. 23226  
9. 246607 9. 363812  
2. 00567 2. 057335  
1. 282285 2. 146002  
3. 240387 2. 481806  
1. 509622 1. 543588  
3. 086702 1. 927078  
1. 957561 3. 132651  
2. 254026 2. 582893  
1. 254223 2. 500571  
4. 667468 4. 251315  
6. 743078 6. 146164  
1. 669874 2. 08357  
4. 542431 3. 599043  
2. 478419 1. 95901  
1. 485204 1. 628834  
4. 087356 3. 47761  
1. 093639 1. 081115  
1. 997994 1. 755051  
4. 015489 3. 72942  
3. 406177 3. 489404  
1. 692914 1. 397309  
1. 122186 1. 488668  
3. 199999 2. 282273  
5. 872169 5. 687999  
0. 967967 1. 492476  
3. 128746 2. 153818  
1. 71512 2. 185728  
4. 22491 6. 45517  
1. 317417 1. 740582  
3. 7372 4. 409877  
2. 067039 1. 486933  
1. 899761 2. 448555  
1. 993168 1. 964845  
6. 553797 6. 404304  
5. 816008 5. 983191  
1. 462363 3. 26054  
1. 78384 3. 384567  
2. 580923 1. 66077  
5. 218776 4. 581559  
3. 020557 2. 487157  
1. 328648 1. 635763  
1. 709301 1. 957988  
1. 564969 1. 473581  
2. 02363 3. 788139  
5. 330342 4. 648793  
4. 322294 3. 866554  
3. 304056 0. 864748  
1. 950352 3. 009348  
5. 839884 5. 828914



0. 954092 1. 375318  
5. 899242 7. 57865  
5. 068378 4. 9265  
1. 503526 2. 573998  
3. 450594 2. 740234  
1. 72107 2. 50203  
1. 257092 1. 753855  
2. 679578 1. 128629  
3. 273691 4. 461427  
1. 87762 1. 600235  
7. 52668 7. 503383  
1. 357694 1. 721742  
1. 653533 2. 476976  
1. 33562 1. 869684  
1. 833485 1. 8086  
1. 773748 1. 748852  
6. 48316 8. 663123  
1. 297967 1. 255271  
2. 305983 2. 305208  
2. 947279 2. 251655  
2. 343544 2. 39008  
2. 538225 2. 049066  
8. 271342 6. 956828  
1. 150701 0. 868667  
10. 60046 10. 76487  
2. 198972 2. 406701  
3. 020668 1. 76737  
2. 62474 1. 622791  
1. 576961 1. 738392  
1. 662006 2. 871493  
1. 717207 1. 611232  
1. 808419 2. 563028  
1. 771528 1. 747738  
1. 789742 2. 068041  
7. 807367 8. 367083  
5. 595007 4. 639604  
5. 622976 5. 740577  
2. 250918 1. 786483  
7. 697583 7. 592401  
6. 393413 6. 461436  
0. 96496 1. 143484  
1. 435932 1. 851328  
7. 205267 6. 523981  
6. 710854 6. 656072  
3. 833331 3. 854996  
6. 742186 6. 773738  
6. 769415 6. 450463  
6. 995916 6. 764696  
7. 492826 7. 30525  
5. 912397 6. 180454  
1. 53695 1. 217302

4. 201499 3. 966571  
3. 430194 2. 401446  
5. 88292 5. 926555  
7. 103823 6. 617917  
3. 043019 2. 764121  
5. 363298 7. 243398  
6. 855449 6. 975683  
6. 771752 7. 072193  
7. 600341 9. 387018  
5. 588936 6. 741419  
4. 136573 4. 851141  
2. 544576 1. 74073  
4. 594327 4. 414873  
1. 762533 1. 780207  
4. 924565 5. 792407  
1. 201161 1. 582675  
5. 650139 7. 748498  
7. 025845 6. 932098  
5. 009682 4. 843684  
2. 485176 3. 092764  
7. 411036 7. 238829  
7. 555615 7. 623329  
0. 827888 1. 300344  
7. 232754 6. 65956  
1. 142847 1. 746594  
5. 917942 7. 088696  
2. 719287 1. 979685  
0. 472507 0. 853703  
0. 887653 0. 903542  
4. 621311 4. 295501  
7. 941408 7. 931581  
3. 90473 5. 164977  
4. 600187 4. 10216  
3. 803917 3. 609888  
5. 947301 6. 181029  
7. 133501 6. 546156  
4. 151179 5. 201878  
2. 363712 2. 15596  
2. 277973 1. 763161  
2. 192425 2. 45272  
4. 161586 3. 229531  
6. 412409 6. 981031  
7. 862459 8. 077086  
4. 356561 4. 686332  
6. 38388 5. 468578  
5. 994054 6. 064894  
3. 99302 3. 896067  
4. 138315 3. 780402  
4. 005034 3. 735164  
5. 860506 6. 516106  
5. 718747 6. 246879

1. 599205 1. 713078  
1. 526294 1. 399337  
9. 022949 7. 730534  
5. 861883 4. 692133  
7. 368206 5. 071075  
6. 973927 7. 208579  
3. 954443 3. 675249  
4. 744971 4. 944873  
1. 492229 2. 302004  
3. 961911 4. 558859  
5. 551634 5. 180111  
6. 349282 5. 842873  
7. 574157 8. 16686  
7. 902755 6. 85933  
7. 37003 6. 648779  
2. 783807 3. 749  
3. 8071 4. 611727  
7. 151531 7. 02137  
3. 400017 3. 382613  
2. 870058 2. 52028  
9. 967064 9. 467824  
4. 841324 4. 261866  
5. 496246 5. 208724  
1. 910229 3. 154432  
3. 591991 2. 864279  
1. 708496 3. 183967  
8. 262231 8. 345394  
9. 620998 9. 895797  
1. 730798 2. 057926  
5. 46024 4. 882241  
2. 274206 2. 211558  
5. 906986 5. 52341  
2. 000496 2. 24768  
1. 551394 2. 227259  
1. 968034 2. 095907  
4. 880364 5. 454788  
3. 970353 4. 532554  
2. 046176 2. 990331  
2. 675828 3. 486992  
4. 772375 4. 50893  
2. 617323 2. 445553  
7. 347987 7. 752197  
2. 840093 2. 83333  
1. 777649 1. 556423  
5. 94348 6. 307033  
6. 614794 6. 188511  
4. 186776 4. 25162  
4. 283014 4. 27367  
3. 522442 2. 88795  
3. 360891 1. 609098  
6. 361266 6. 671943

6.155823 6.182426  
5.157036 3.74054  
5.835011 5.007736  
9.725684 10.29534  
2.93195 3.164755  
1.299005 2.614623  
4.049554 4.470448  
3.381068 2.806134  
1.581399 2.325368  
2.641084 2.200396  
1.776568 1.840157  
1.718401 1.854216  
3.78343 3.7256  
2.805802 3.296453  
2.462123 2.569041  
2.664102 3.722017  
3.786436 2.915264  
3.420947 3.349925  
3.05823 1.94194  
6.202621 5.824265  
6.008207 4.377409  
10.1725 10.20404  
7.074514 6.970438  
1.579856 2.289389  
3.160713 4.14183  
1.326011 1.531224  
1.853003 2.543994  
4.669755 4.653506  
6.032511 5.643709  
1.796068 1.35241  
2.168194 3.209391  
5.959474 6.533632  
3.452749 3.502923  
6.91574 6.418338  
4.959089 5.921149  
1.635395 1.445065  
4.029029 1.980335  
3.799881 1.687557  
3.871648 3.397275  
2.95488 3.02537  
9.126985 8.925993  
7.906756 7.720778  
5.653883 7.303804  
9.281214 9.060635  
2.896474 3.103035  
8.705472 8.960455  
7.306673 7.438152  
9.655567 10.34175  
3.87113 3.845074  
2.932327 2.723769  
7.43828 7.070257

8. 692594 8. 320588  
3. 196081 4. 757286  
2. 533942 3. 476449  
4. 365893 3. 844995  
5. 068314 5. 267742  
5. 546534 4. 719863  
4. 379265 4. 829258  
3. 446332 1. 997392  
1. 958886 2. 417376  
1. 549634 1. 749866  
2. 730458 3. 158743  
8. 63649 8. 550518  
4. 93158 5. 422315  
2. 739094 2. 626335  
3. 779383 4. 155201  
4. 101357 4. 172157  
8. 611286 8. 397611  
3. 811931 3. 206785  
6. 06539 5. 169074  
4. 840988 5. 014437  
4. 608713 4. 796261  
2. 785139 1. 569476  
3. 465866 3. 147841  
2. 090759 3. 089546  
2. 631419 3. 005488  
3. 489969 3. 206437  
4. 579278 3. 568333  
5. 087666 6. 190755  
1. 770804 2. 72113  
6. 139979 6. 184761  
3. 575475 2. 396277  
2. 50251 2. 483285  
6. 374402 5. 809234  
5. 073307 5. 449242  
5. 904507 3. 037718  
5. 690618 5. 978573  
3. 753403 3. 236131  
6. 502547 6. 072517  
4. 387619 4. 57518  
3. 891919 4. 575347  
1. 127637 1. 623463  
3. 087265 2. 877337  
2. 281059 2. 349582  
4. 412454 4. 456424  
3. 994698 4. 761701  
5. 296484 5. 098465  
2. 429072 1. 422524  
7. 16897 6. 38223  
2. 109063 2. 583913  
2. 482002 3. 003745  
4. 235128 3. 738525

1. 91178 2. 772984  
1. 90781 2. 48521  
5. 095198 6. 628551  
5. 034533 3. 823605  
3. 496846 6. 31704  
3. 520625 2. 405622  
1. 22676 2. 763136  
4. 578083 3. 394369  
2. 999424 1. 979191  
4. 81668 4. 554462  
1. 130383 1. 234165  
2. 677999 2. 540113  
4. 260288 3. 83376  
1. 445067 1. 152056  
1. 080538 1. 366265  
1. 311305 1. 086803  
2. 274744 4. 499139  
1. 091476 1. 353969  
0. 627252 1. 075988  
3. 416103 1. 584638  
1. 639043 1. 839527  
1. 510031 1. 63906  
0. 639157 0. 66302  
1. 720202 1. 79989  
0. 908152 0. 971929  
4. 68124 1. 067398  
1. 535901 1. 41926  
2. 345146 1. 236452  
2. 301039 1. 186236  
1. 415338 0. 899168  
0. 745067 0. 739675  
1. 131448 0. 62075  
0. 492781 0. 900426  
0. 869274 0. 666903  
0. 849475 2. 128752  
0. 953099 1. 004471  
3. 414631 1. 209643  
3. 31765 1. 258203  
2. 38132 0. 996162  
1. 185369 2. 302228  
2. 564712 1. 363682  
1. 993411 1. 919803  
1. 887474 2. 32731  
0. 949579 0. 791968  
3. 400933 1. 624569  
0. 933531 0. 971757  
1. 315852 1. 666843  
6. 255109 6. 315271  
1. 641822 1. 022923  
1. 018603 0. 665015  
1. 964667 1. 191955

1. 724928 0. 998952  
2. 61535 1. 154231  
3. 211123 3. 333891  
0. 769016 1. 458807  
0. 866737 1. 320374  
1. 162381 2. 157261  
1. 199516 1. 173722  
2. 316513 1. 723696  
5. 089634 4. 858894  
3. 220933 5. 600189  
1. 525254 2. 664221  
1. 806473 1. 859427  
1. 035694 1. 260242  
1. 930916 2. 490837  
5. 451435 5. 203492  
2. 360422 2. 616786  
1. 874908 1. 842794  
1. 741222 1. 947709  
2. 000172 1. 342081  
1. 379146 1. 293954  
1. 552473 1. 099279  
1. 037962 2. 090304  
3. 002673 1. 500414  
2. 156816 2. 807158  
1. 734209 1. 462077  
2. 076042 2. 502885  
5. 912417 5. 910002  
2. 544763 2. 426273  
2. 236166 2. 205739  
4. 931442 5. 110643  
5. 129906 5. 017657  
5. 286899 4. 861368  
3. 311331 1. 645102  
2. 973391 1. 571949  
3. 626882 3. 344486  
4. 643664 2. 344541  
5. 486155 4. 70848  
5. 551454 6. 155217  
7. 916963 7. 238812  
7. 331496 6. 33478  
4. 942967 5. 715294  
7. 132741 6. 94281  
7. 528584 6. 411078  
3. 66455 4. 674277  
7. 468169 7. 166114  
5. 442413 3. 304567  
2. 300271 2. 6471  
1. 592739 2. 513091  
7. 568652 7. 90665  
1. 807591 2. 239903  
6. 950921 6. 996639

4. 704094 3. 159623  
4. 247373 5. 121521  
5. 076547 4. 269406  
1. 753379 2. 125355  
4. 041352 3. 708616  
4. 49414 4. 344867  
4. 175786 4. 621157  
6. 058797 5. 816399  
1. 765652 1. 971818  
4. 903231 4. 729116  
5. 489574 4. 313036  
5. 150759 5. 513647  
2. 942263 2. 723877  
2. 99151 2. 491931  
1. 468009 2. 372364  
7. 61782 7. 14725  
3. 317657 3. 481892  
4. 214733 2. 996292  
3. 690745 3. 339722  
2. 532873 4. 606954  
8. 166238 7. 630869  
4. 927828 2. 518671  
4. 944754 2. 859286  
2. 849017 2. 605454  
3. 948973 2. 473153  
2. 148356 1. 535793  
6. 965004 7. 693997  
5. 067994 4. 624809  
3. 301542 2. 227148  
2. 940021 2. 834765  
2. 361057 2. 274561  
4. 461275 4. 107324  
1. 881887 2. 140975  
5. 291052 5. 112991  
3. 824925 4. 327071  
2. 9869 1. 963447  
3. 252147 1. 882207  
4. 185989 3. 972428  
5. 450735 4. 361976  
6. 306495 6. 742397  
1. 121324 1. 726498  
2. 254515 2. 314357  
1. 847392 1. 423611  
5. 232504 3. 828298  
1. 175191 1. 35982  
3. 021763 2. 239989  
5. 438193 4. 732503  
5. 643338 4. 923392  
2. 095548 2. 178673  
6. 196029 7. 122701  
7. 334196 6. 809644



4. 031895 4. 078825  
2. 373645 3. 161751  
6. 355329 4. 754326  
6. 712661 6. 342353  
3. 662626 4. 386021  
7. 917924 7. 622703  
2. 495157 1. 606578  
2. 705667 6. 99257  
1. 291641 1. 832768  
1. 623774 2. 436199  
4. 415274 6. 050329  
9. 801204 9. 715102  
7. 616213 6. 960663  
7. 19174 7. 525562  
5. 436213 4. 822247  
11. 45988 11. 40451  
4. 521166 4. 236572  
7. 472568 7. 406983  
6. 942993 6. 265861  
5. 964201 5. 209086  
6. 365578 6. 327362  
2. 821392 2. 561005  
5. 228429 4. 522132  
4. 860472 4. 537073  
7. 352943 7. 647975  
3. 325931 4. 156469  
3. 062492 2. 775093  
3. 390588 4. 592721  
4. 933744 4. 485649  
3. 77101 4. 311106  
1. 781613 1. 944762  
1. 680412 1. 993719  
4. 365362 3. 929731  
2. 78472 2. 812092  
4. 450006 4. 636554  
6. 110348 6. 680445  
1. 610843 1. 941455  
7. 194408 6. 376301  
7. 619362 8. 285485  
7. 750979 7. 046121  
9. 489882 9. 573382  
2. 489007 1. 992087  
7. 184948 7. 282928  
4. 603413 3. 536977  
2. 889245 3. 015063  
4. 22164 5. 362945  
6. 144796 6. 607962  
3. 806597 3. 216112  
2. 269304 4. 120698  
4. 633986 4. 630615  
6. 266004 6. 826812

6. 490913 7. 290785  
1. 98379 2. 510381  
5. 599288 5. 509483  
2. 664417 1. 997961  
2. 278907 3. 414447  
4. 647701 4. 464029  
2. 867456 3. 867726  
7. 705032 8. 592831  
7. 806286 9. 404586  
6. 510325 5. 72459  
5. 475693 5. 31925  
4. 829068 4. 150704  
6. 893735 7. 33532  
2. 613617 2. 522847  
6. 84966 6. 73709  
1. 588096 1. 197239  
0. 599578 2. 825665  
7. 429856 8. 309559  
5. 47472 6. 156446  
4. 795509 3. 979851  
2. 803088 3. 118736  
4. 218293 5. 733684  
6. 020575 6. 42732  
5. 520132 6. 158669  
2. 420451 2. 848276  
2. 343996 2. 514708  
7. 884666 6. 979579  
4. 22893 3. 890921  
4. 035516 2. 92329  
5. 713442 4. 771184  
4. 867536 5. 029706  
5. 905137 6. 077507  
5. 78016 6. 764755  
4. 908789 3. 533803  
5. 369534 5. 932479  
4. 741979 4. 785968  
4. 197379 3. 852898  
2. 626116 2. 631282  
4. 079684 4. 064217  
3. 275333 3. 594249  
6. 302615 5. 244606  
4. 369349 4. 12457  
6. 538987 6. 27676  
1. 198145 1. 510539  
4. 002142 4. 93763  
1. 709508 1. 388171  
3. 581054 4. 483315  
9. 187522 9. 439395  
5. 846507 6. 960749  
6. 49895 5. 299507  
3. 979906 4. 728186

8.069995 8.052003  
4.516959 5.118187  
3.161116 2.798149  
4.362266 3.616136  
6.433676 6.771571  
4.512467 4.499887  
2.111585 1.863614  
5.548676 5.822347  
4.883647 5.213006  
4.041818 4.084221  
3.162108 2.979094  
2.172261 2.530881  
4.209564 4.219234  
4.780112 5.320824  
4.936961 4.299883  
5.210779 5.445052  
6.08836 5.28942  
5.966352 5.617508  
4.633942 5.361979  
4.463743 5.286433  
1.616395 2.120709  
3.144117 3.182992  
2.095835 2.543138  
3.694798 4.213664  
5.882795 6.822499  
5.148601 6.206826  
2.290806 1.392942  
2.25028 1.896574  
3.699566 3.418109  
1.159427 1.939881  
7.948935 6.444465  
5.697776 5.606911  
2.390602 2.247468  
8.325787 7.842687  
1.680802 0.89097  
2.617679 2.854609  
2.919291 3.001026  
2.79084 3.979991  
5.515958 6.215154  
2.327616 2.516489  
5.494661 5.715996  
7.192852 6.663352  
7.652211 7.690409  
3.902739 4.086445  
4.200076 5.558424  
4.600832 5.578468  
9.273837 9.618217  
5.494954 5.896141  
4.479802 3.6642  
3.274767 4.327025  
1.326634 2.486555

2. 238253 4. 623684  
3. 715323 2. 805118  
3. 077652 6. 578156  
5. 6144 6. 41847  
2. 113573 2. 842544  
4. 055532 4. 76332  
7. 930886 7. 918764  
5. 229768 5. 577626  
3. 68392 3. 726313  
6. 442013 6. 522487  
5. 246948 6. 540788  
1. 628547 1. 362373  
3. 715818 4. 749177  
7. 727452 6. 998102  
2. 724277 2. 854813  
4. 345053 4. 329729  
4. 219775 3. 644443  
1. 918813 3. 09366  
4. 047081 3. 94934  
3. 478289 3. 592517  
2. 090928 2. 404848  
4. 062272 3. 621298  
4. 834546 4. 004947  
6. 872385 6. 898362  
5. 366771 6. 261479  
4. 765868 4. 197679  
5. 496882 4. 482971  
2. 402683 2. 633709  
6. 811559 6. 976258  
3. 070667 2. 835273  
1. 632398 2. 353039  
2. 974898 3. 634096  
2. 667007 2. 392303  
1. 169602 2. 328473  
5. 067355 5. 964812  
3. 625094 3. 799666  
6. 164967 7. 184792  
3. 406821 3. 184999  
4. 232744 5. 240964  
2. 834139 3. 620874  
6. 293565 5. 584742  
1. 575253 2. 185152  
1. 024953 2. 033109  
1. 452495 0. 567536  
1. 72546 2. 74969  
1. 571435 1. 52  
1. 573951 2. 163305  
1. 402434 1. 495239  
1. 593406 1. 003966  
1. 391656 1. 493329  
0. 99783 1. 452972

2. 062683 2. 379476  
6. 396927 5. 275722  
5. 178578 6. 836674  
5. 059137 6. 730694  
1. 082869 1. 299605  
1. 830821 1. 118999  
6. 392431 6. 224456  
1. 346722 2. 77524  
6. 344903 6. 134045  
1. 374677 2. 939675  
5. 386946 5. 188463  
3. 691627 5. 564428  
2. 898203 2. 483974  
2. 316293 3. 436012  
5. 838701 4. 718642  
4. 1807 3. 709488  
2. 135789 2. 438134  
3. 132139 3. 0613  
4. 446396 2. 963717  
7. 388334 6. 510834  
5. 761098 5. 327467  
2. 782053 3. 107258  
3. 638978 3. 387797  
3. 717068 3. 203982  
2. 093174 1. 816169  
3. 683904 1. 221829  
1. 469516 1. 830845  
1. 399664 1. 661525  
2. 06347 1. 507876  
2. 061486 1. 79424  
1. 133916 1. 949776  
2. 471312 2. 02777  
8. 686572 8. 381337  
6. 239482 6. 846165  
1. 577744 1. 519731  
4. 80972 4. 554699  
7. 831948 7. 615491  
5. 24599 4. 364144  
1. 698282 2. 172564  
2. 935176 3. 362371  
5. 462727 4. 282336  
7. 942108 7. 69176  
2. 903063 2. 823631  
3. 788264 4. 387283  
5. 702011 5. 701766  
3. 440859 4. 778438  
3. 341865 4. 523155  
3. 682646 4. 528259  
2. 662491 2. 963674  
6. 190977 5. 350684  
5. 862335 5. 95572

4. 161849 3. 312413  
7. 253123 7. 124126  
6. 320711 7. 016808  
5. 103337 5. 455639  
1. 103844 1. 331787  
6. 015871 6. 067142  
5. 759225 5. 06351  
4. 00742 3. 5647  
1. 793662 1. 726499  
5. 995089 5. 968572  
5. 49608 2. 910698  
2. 684766 1. 899151  
3. 17211 5. 408024  
4. 916736 4. 424793  
4. 729897 3. 411213  
3. 29688 4. 592497  
7. 779424 6. 988105  
4. 971305 5. 280989  
6. 248655 4. 594897  
6. 069628 7. 055323  
4. 835912 4. 357405  
11. 0494 10. 69851  
2. 513557 1. 806906  
7. 67291 7. 792775  
1. 788067 2. 661451  
5. 164686 4. 982583  
7. 797569 7. 79249  
4. 414396 4. 013661  
2. 274409 1. 990703  
5. 902675 3. 721489  
4. 54189 4. 587432  
4. 437229 3. 303251  
3. 028123 2. 788753  
4. 656531 3. 898817  
3. 658002 3. 778512  
4. 150776 3. 96541  
1. 433256 1. 925285  
3. 524587 3. 453886  
4. 022476 4. 792651  
1. 203441 1. 697377  
6. 854065 7. 098528  
7. 065963 5. 839587  
6. 165988 6. 563604  
5. 883201 6. 645709  
4. 279435 5. 506725  
2. 846288 2. 359732  
7. 37798 7. 159087  
4. 291359 3. 760854  
2. 278196 3. 583082  
6. 076756 6. 671579  
5. 145061 4. 371161

6. 279347 4. 272504  
7. 248311 7. 246519  
4. 690643 4. 863538  
2. 200774 2. 296877  
4. 088105 3. 833195  
7. 674444 6. 883823  
5. 762899 5. 834284  
5. 866574 5. 502794  
2. 581925 1. 957594  
6. 273318 6. 059467  
3. 454756 2. 98519  
7. 057501 6. 190018  
3. 520477 4. 038772  
4. 906164 4. 695195  
5. 443929 5. 841619  
4. 45132 3. 705193  
4. 748221 4. 760939  
3. 43969 3. 665032  
5. 275752 5. 591248  
1. 366954 1. 260231  
3. 050364 3. 974902  
2. 920244 3. 443881  
5. 204366 5. 431832  
4. 854192 5. 371688  
6. 059065 7. 14972  
3. 428708 2. 64574  
5. 164441 3. 84634  
1. 931578 2. 956326  
5. 455621 5. 004292  
5. 063466 4. 777953  
5. 116875 4. 648076  
6. 999708 7. 360039  
2. 308488 3. 720462  
2. 471106 2. 579381  
3. 053459 3. 536524  
1. 734526 2. 617954  
6. 736318 6. 408272  
2. 181313 1. 873327  
4. 790683 4. 657576  
3. 653188 4. 053581  
3. 896927 2. 933125  
5. 869696 5. 083207  
5. 222077 5. 435417  
4. 487543 3. 71396  
4. 274101 5. 186822  
5. 930048 5. 068428  
3. 037061 4. 175299  
2. 6192 3. 45524  
2. 802176 1. 844377  
6. 015869 5. 696722  
7. 006983 7. 332698

5. 546843 6. 090074  
5. 110615 4. 583169  
2. 731035 2. 419229  
2. 737817 3. 14592  
3. 127574 4. 803274  
3. 402376 2. 485787  
6. 042361 4. 526628  
2. 122665 1. 670958  
3. 816196 4. 400197  
5. 530839 4. 485784  
3. 247335 3. 833578  
4. 110712 3. 622451  
2. 569995 2. 312226  
2. 802275 3. 062549  
5. 652256 6. 165124  
4. 604966 4. 040679  
4. 03712 3. 633289  
5. 114416 3. 029224  
1. 343105 1. 233472  
3. 823939 3. 899261  
4. 317407 3. 725703  
4. 494864 2. 4919  
7. 37209 7. 101063  
2. 466829 2. 692147  
1. 202239 1. 496736  
1. 779521 2. 003387  
1. 046263 1. 390988  
2. 686174 2. 797854  
5. 233905 4. 581865  
6. 498873 7. 209204  
5. 052315 4. 851444  
2. 189838 1. 641293  
3. 520144 3. 123189  
2. 54117 3. 489483  
3. 425403 3. 707905  
2. 66414 2. 239801  
7. 543449 8. 345899  
5. 643843 6. 611977  
2. 516182 3. 113706  
2. 688144 1. 169448  
2. 379959 3. 592663  
8. 516504 8. 245692  
2. 837785 2. 962014  
2. 799558 3. 396011  
1. 616442 2. 015037  
2. 297246 3. 60088  
2. 540432 2. 58843  
6. 209901 6. 275953  
3. 292892 3. 391687  
1. 536802 2. 37507  
2. 834516 2. 731375



3. 0924 2. 63091  
1. 661278 2. 356907  
3. 711658 5. 010991  
1. 321225 1. 572154  
4. 907504 4. 374912  
5. 075252 4. 735005  
3. 059347 3. 842238  
3. 143858 4. 820816  
6. 843612 5. 384198  
6. 07138 4. 800887  
2. 419574 3. 462  
1. 992198 2. 5008  
5. 047908 3. 122074  
10. 37997 10. 12139  
1. 615862 2. 244057  
5. 429652 6. 092745  
1. 286138 2. 776674  
1. 177858 1. 788227  
5. 497045 5. 318563  
1. 651425 1. 77671  
2. 549915 2. 443546  
5. 633909 5. 218922  
5. 87648 5. 232182  
7. 445505 6. 39781  
4. 56249 4. 238246  
8. 01925 7. 701796  
4. 011435 3. 937195  
4. 49566 3. 641474  
4. 554625 3. 469014  
6. 267606 4. 665393  
1. 750592 2. 125118  
5. 060527 3. 776519  
1. 858936 1. 258429  
5. 675859 5. 796195  
1. 478641 1. 072489  
9. 656274 9. 31536  
4. 338191 6. 742646  
3. 37448 2. 78699  
2. 61577 2. 204685  
5. 008431 4. 765495  
5. 088943 5. 158712  
6. 45812 6. 266459  
4. 666272 4. 223148  
2. 743104 2. 877368  
6. 776634 6. 29622  
3. 984502 4. 698957  
7. 514157 7. 455253  
3. 865028 3. 205054  
5. 963053 5. 678324  
1. 588368 2. 110473  
2. 72384 2. 584732

3. 722547 2. 622099  
1. 263082 1. 923026  
4. 813328 4. 455115  
2. 857614 2. 079784  
2. 381052 1. 932477  
2. 494467 2. 295492  
3. 459744 3. 831037  
3. 197644 3. 532984  
6. 150859 5. 901738  
2. 348664 2. 444131  
3. 143198 4. 873216  
6. 066 6. 000173  
1. 910483 2. 885022  
2. 089048 0. 807938  
3. 338683 1. 284697  
3. 199375 3. 435664  
2. 395586 2. 157517  
5. 116739 4. 738641  
1. 644897 1. 92154  
4. 677607 4. 588243  
3. 590384 2. 780169  
5. 591347 6. 005078  
1. 726406 1. 408509  
2. 964015 2. 661465  
6. 123962 6. 223988  
6. 067287 3. 965976  
6. 48375 6. 526466  
1. 8387 3. 147084  
5. 775207 4. 747887  
6. 943558 6. 646132  
2. 389992 3. 157547  
2. 374182 4. 551137  
3. 933521 3. 052791  
6. 221304 5. 542846  
5. 063255 5. 155486  
2. 948771 3. 672538  
7. 905914 7. 56837  
3. 816324 3. 137356  
6. 077315 5. 340206  
2. 9034 3. 27071  
4. 299967 3. 73291  
6. 613958 7. 402689  
5. 799251 5. 766583  
2. 76873 2. 914381  
5. 440026 4. 902308  
3. 878895 2. 669757  
6. 891826 7. 020505  
7. 375268 7. 045554  
4. 526218 4. 828931  
1. 913922 2. 658499  
3. 108428 3. 318254

4. 6537 4. 88249  
4. 500431 5. 134811  
1. 674927 1. 516092  
6. 67946 7. 315863  
5. 157658 4. 884017  
7. 201994 7. 873362  
2. 439753 2. 386339  
2. 029357 2. 165491  
2. 553454 2. 621769  
6. 534184 5. 645843  
3. 291407 3. 555674  
4. 331647 2. 755705  
2. 787589 3. 180504  
2. 608417 2. 050236  
2. 276884 1. 730332  
7. 414673 7. 73074  
4. 338383 4. 385773  
2. 588243 2. 162817  
3. 164084 1. 000969  
2. 034401 2. 139435  
2. 769633 2. 711332  
3. 684678 2. 509768  
2. 164799 2. 563977  
2. 696107 3. 585719  
1. 107841 1. 573348  
6. 878766 7. 344551  
1. 45442 1. 261751  
3. 436718 2. 91237  
1. 984456 2. 121086  
3. 042419 2. 363346  
6. 309664 6. 186794  
4. 566011 4. 181891  
8. 330638 6. 208245  
1. 318962 1. 978036  
2. 332999 2. 995498  
2. 278938 2. 61757  
5. 423584 4. 421514  
2. 005328 1. 810464  
0. 901077 1. 438861  
6. 72578 6. 196282  
1. 760423 2. 013889  
5. 734692 4. 436537  
1. 471273 2. 404078  
5. 741325 5. 418457  
3. 256683 3. 742604  
2. 452308 2. 463001  
4. 478643 2. 866202  
7. 612475 5. 891053  
3. 115588 4. 118111  
2. 046148 2. 890373  
6. 28402 6. 709706

4. 935885 4. 438068  
3. 294112 2. 625432  
5. 645352 3. 477368  
6. 944145 6. 198517  
4. 108261 3. 287204  
6. 750168 5. 12393  
2. 040524 2. 332225  
4. 002772 3. 535399  
3. 605349 4. 199146  
4. 593268 4. 282743  
6. 935904 5. 731186  
1. 029254 1. 362875  
2. 707317 2. 111943  
2. 341518 1. 783107  
3. 730443 3. 878734  
3. 838534 3. 396874  
8. 1767 7. 820563  
1. 722537 2. 29904  
2. 118087 2. 185751  
2. 49513 2. 426023  
2. 561636 1. 935605  
2. 48116 2. 597245  
4. 670688 4. 559438  
1. 963499 2. 092622  
7. 7608 6. 519755  
4. 595975 4. 018552  
5. 736392 5. 803681  
0. 730871 1. 460397  
2. 439236 3. 186664  
3. 270715 3. 985095  
7. 291131 7. 584334  
7. 286498 7. 044553  
5. 58888 5. 526878  
6. 574545 5. 714061  
5. 144569 3. 302756  
5. 98367 4. 834376  
2. 511559 2. 272807  
1. 130506 1. 804181  
3. 612309 5. 155184  
4. 435645 4. 558403  
4. 056244 3. 059486  
5. 076993 5. 433324  
5. 602978 5. 368974  
4. 718897 4. 777608  
1. 338366 2. 648862  
5. 718715 5. 601038  
2. 537396 2. 579958  
3. 229969 2. 814493  
2. 950061 2. 649893  
5. 165753 4. 613255  
3. 444067 2. 917724

2. 221453 3. 103982  
5. 596074 5. 142934  
1. 453001 1. 862596  
5. 322415 4. 569124  
4. 438818 3. 752956  
0. 826816 1. 84447  
1. 170773 1. 17725  
1. 863235 2. 50712  
1. 64728 1. 378598  
2. 336958 2. 760017  
1. 812264 1. 93797  
5. 180329 4. 736525  
3. 5346 4. 457744  
1. 459765 1. 571749  
9. 291682 9. 383112  
3. 775653 2. 55881  
5. 798316 5. 653383  
5. 617238 1. 541903  
7. 19682 7. 153893  
2. 979528 3. 852346  
1. 226812 2. 831106  
2. 260411 2. 339323  
0. 950757 1. 24364  
4. 959331 5. 86068  
1. 628243 2. 95019  
3. 173768 2. 258283  
1. 735011 1. 695801  
3. 05576 2. 810318  
2. 287382 2. 912327  
0. 818842 1. 187822  
6. 990384 7. 104211  
2. 077301 3. 616865  
1. 958267 3. 985503  
3. 457211 3. 341281  
5. 35741 3. 952002  
4. 259318 3. 341098  
7. 587062 7. 740406  
6. 991989 6. 931925  
3. 810173 3. 836671  
2. 738305 3. 539386  
3. 354383 4. 12068  
3. 321249 3. 470278  
4. 045269 3. 90742  
6. 244968 6. 27272  
1. 786255 1. 792542  
2. 544214 2. 810432  
2. 362427 2. 754381  
2. 960414 3. 215894  
5. 469792 4. 706423  
1. 616243 1. 444241  
5. 858636 4. 872668

5. 658785 5. 695004  
2. 955541 2. 1608  
4. 352415 4. 318722  
8. 679992 8. 569047  
1. 718577 2. 28105  
4. 038017 3. 891294  
1. 592019 1. 179251  
6. 030004 4. 918677  
5. 568258 4. 320142  
3. 801651 4. 862692  
3. 612116 3. 489596  
6. 037469 5. 77507  
4. 525132 4. 709494  
3. 28405 4. 910461  
5. 500616 5. 745808  
8. 455688 8. 305323  
3. 81143 3. 02534  
7. 501935 7. 313117  
8. 178325 6. 853625  
4. 849401 5. 034145  
3. 619675 3. 016762  
6. 826827 5. 924455  
6. 94507 5. 704355  
4. 63146 3. 756872  
4. 443476 4. 553073  
7. 199702 5. 798543  
1. 420083 1. 776971  
5. 215993 5. 081192  
2. 272043 1. 582288  
8. 223998 7. 736933  
6. 638101 7. 491294  
7. 212417 6. 332953  
3. 839876 3. 902632  
3. 384672 3. 079859  
4. 257165 5. 082666  
5. 09537 4. 544247  
4. 293069 4. 901692  
3. 362892 4. 82646  
1. 642059 2. 339298  
5. 664058 6. 560017  
1. 513644 2. 279057  
8. 455464 8. 439537  
2. 752559 4. 011499  
2. 836423 2. 894215  
2. 225713 2. 035959  
6. 681504 6. 018107  
4. 87635 5. 067657  
8. 007881 8. 202164  
5. 113185 5. 399745  
1. 269163 1. 904974  
5. 524093 6. 560631

2. 465826 2. 9648  
4. 994975 3. 280052  
5. 55738 4. 637212  
2. 14502 2. 791779  
1. 784989 2. 292708  
5. 555379 6. 321546  
2. 84672 2. 911856  
4. 648678 4. 290381  
6. 15889 6. 853376  
5. 875293 4. 779265  
3. 293354 3. 701035  
5. 931475 6. 062036  
5. 566917 5. 521524  
7. 092752 7. 616949  
3. 849493 4. 093214  
3. 524675 4. 338347  
6. 036042 6. 181042  
1. 946277 1. 715608  
3. 736311 3. 515445  
1. 683792 1. 678209  
7. 952772 7. 61806  
7. 881793 6. 917452  
4. 26483 3. 81454  
3. 810636 3. 662985  
3. 620761 3. 686777  
6. 388538 5. 855998  
7. 780856 7. 125452  
1. 400188 1. 551633  
4. 437203 2. 93742  
3. 885229 3. 022653  
3. 756497 3. 232912  
6. 966642 7. 123102  
1. 914794 2. 881356  
4. 781776 5. 188126  
4. 858849 3. 543649  
3. 112148 2. 298825  
3. 596439 2. 326605  
2. 180702 3. 177376  
2. 780833 3. 579976  
0. 860552 0. 702797  
5. 709334 6. 108852  
3. 929903 3. 479769  
2. 009781 1. 834759  
6. 352046 5. 601745  
2. 845805 2. 200248  
1. 182555 2. 630162  
2. 399769 3. 133286  
3. 128179 3. 136651  
1. 659364 1. 145452  
5. 128721 6. 03563  
2. 260464 2. 550215

2. 84958 4. 121333  
5. 196667 4. 903206  
7. 019131 6. 752433  
5. 080834 4. 239136  
0. 715141 1. 477002  
7. 610604 7. 516157  
3. 235986 3. 298345  
8. 313052 7. 756974  
6. 081012 4. 303078  
5. 552691 6. 343092  
5. 694406 4. 65807  
2. 513657 2. 195949  
1. 21198 2. 022463  
6. 108473 6. 604018  
9. 823841 9. 943322  
3. 375902 3. 211718  
6. 648531 6. 471062  
5. 909656 6. 480539  
2. 878534 3. 246185  
2. 3613 2. 53119  
3. 227981 3. 001759  
1. 296599 1. 433525  
1. 478158 2. 59047  
2. 630007 2. 53411  
3. 244555 2. 745503  
2. 131987 2. 01356  
3. 493359 2. 798923  
5. 812672 5. 956571  
1. 587644 2. 099965  
1. 354431 1. 522756  
4. 100427 3. 395616  
3. 769503 4. 896498  
1. 839219 2. 825721  
4. 275451 4. 29671  
2. 87561 3. 162118  
3. 051028 4. 475958  
4. 258092 4. 742676  
3. 860606 3. 866514  
4. 942757 3. 542945  
1. 683511 2. 026798  
1. 899609 2. 543557  
3. 666453 3. 967094  
3. 085446 3. 438174  
7. 944611 8. 698332  
3. 889889 3. 635068  
7. 328041 7. 339298  
4. 178591 3. 278955  
5. 455151 6. 113817  
3. 295005 2. 294432  
1. 132486 1. 419354  
2. 516145 2. 435237



5. 112535 5. 748661  
3. 037729 3. 935408  
3. 618695 3. 705127  
8. 27731 7. 711338  
3. 048405 2. 98189  
3. 067014 4. 446707  
5. 918749 6. 332565  
5. 342121 6. 298647  
6. 530752 7. 49454  
5. 25447 5. 919119  
1. 477968 1. 745823  
4. 355948 3. 451636  
4. 959848 4. 288081  
2. 575177 3. 138386  
5. 937712 5. 407626  
3. 573289 2. 062939  
7. 01073 5. 611529  
8. 148754 6. 607481  
5. 107737 6. 46023  
6. 066999 5. 468734  
0. 97292 1. 655478  
2. 131108 2. 307696  
3. 847298 2. 564549  
1. 820881 1. 890956  
1. 870146 2. 166744  
3. 569743 3. 004528  
2. 241102 1. 689125  
6. 157402 4. 610323  
7. 385781 6. 806149  
5. 732657 5. 824426  
5. 979437 3. 990279  
4. 08612 4. 105134  
2. 463867 3. 158536  
1. 881336 1. 866777  
6. 445665 6. 006576  
8. 03105 8. 153794  
5. 732704 4. 943348  
3. 051188 4. 093221  
4. 486979 5. 137247  
9. 076637 9. 37379  
1. 615407 2. 333126  
1. 086839 1. 798577  
2. 055754 2. 039483  
6. 436136 6. 50532  
5. 155546 4. 499368  
3. 340522 3. 698216  
3. 269715 4. 576894  
1. 749308 2. 388233  
4. 633087 3. 785596  
1. 406255 1. 956209  
6. 656612 6. 049161

1. 428102 7. 119264  
5. 661675 6. 546949  
0. 914865 0. 903084  
0. 964306 2. 077491  
2. 89907 3. 097816  
2. 090108 2. 093501  
2. 81039 2. 094261  
0. 88327 1. 515026  
2. 162592 2. 396825  
1. 020436 3. 006877  
10. 32862 10. 54547  
2. 125919 2. 928095  
7. 877118 5. 366017  
7. 242457 7. 892962  
2. 2127 1. 81752  
2. 530881 2. 945685  
1. 894464 3. 272046  
1. 131717 1. 063779  
1. 076119 1. 138783  
1. 221844 1. 240686  
4. 588344 5. 106804  
2. 210314 0. 72372  
1. 402761 1. 642018  
1. 17827 2. 266543  
3. 368182 3. 178936  
3. 193484 4. 047721  
3. 461332 3. 099538  
7. 499966 7. 773832  
2. 683602 3. 341525  
1. 965146 1. 367747  
2. 209232 2. 184277  
1. 035468 0. 835871  
1. 915685 1. 579979  
1. 06805 1. 688194  
1. 195114 1. 576648  
8. 430104 8. 192473  
4. 287665 4. 632634  
3. 867189 2. 226193  
2. 240933 2. 911027  
4. 473579 3. 701676  
1. 606192 1. 677798  
1. 256455 3. 257097  
1. 338569 0. 947986  
6. 202903 6. 257228  
2. 616416 3. 072288  
8. 451586 8. 642927  
5. 411426 5. 871191  
5. 631155 5. 669392  
2. 058065 1. 888452  
7. 530381 8. 022115  
2. 33909 2. 340494

2. 364667 2. 558722  
6. 200881 7. 07019  
6. 892672 6. 85176  
1. 539125 2. 429288  
3. 190926 3. 784893  
2. 392647 3. 994664  
4. 181473 4. 798027  
7. 870193 8. 239264  
5. 393088 5. 042453  
2. 780835 3. 905891  
3. 129029 3. 220066  
2. 629615 2. 50092  
8. 52132 6. 836533  
7. 740829 7. 158355  
5. 453659 4. 57794  
1. 946836 2. 800095  
4. 109625 4. 067354  
2. 765991 1. 81502  
3. 478734 3. 842714  
7. 027546 7. 198497  
3. 718645 2. 806447  
3. 386191 4. 278058  
3. 880717 2. 488178  
3. 383807 2. 1234  
5. 315604 4. 947356  
3. 570467 4. 408635  
4. 286656 4. 798524  
6. 604027 7. 307032  
4. 050584 5. 920038  
7. 439534 8. 086092  
1. 978415 2. 809425  
7. 613915 6. 621704  
7. 438064 7. 371118  
1. 732547 1. 661617  
7. 419894 7. 53744  
4. 745163 4. 363727  
3. 7557 2. 781312  
1. 295147 1. 565543  
4. 471103 3. 683789  
5. 024812 5. 91363  
6. 458536 6. 263264  
4. 686002 3. 908412  
2. 990269 3. 238732  
1. 427058 2. 949653  
4. 868366 5. 493884  
1. 504312 1. 520675  
2. 600499 1. 750575  
0. 931627 1. 465007  
5. 438339 5. 127769  
3. 761763 2. 617711  
3. 243538 3. 071096

4. 483706 4. 037068  
4. 361683 3. 973388  
7. 262265 5. 707679  
8. 013257 7. 354714  
6. 629196 6. 853906  
5. 170131 5. 455288  
3. 132893 2. 347114  
2. 934425 2. 457389  
0. 842418 1. 256082  
1. 10298 0. 991941  
4. 533945 1. 451156  
2. 500204 4. 019571  
5. 945605 4. 482791  
1. 156169 1. 592319  
1. 646054 1. 986256  
3. 568193 2. 284875  
5. 99433 5. 261175  
1. 968456 1. 456533  
4. 585716 5. 57059  
4. 258017 2. 948587  
4. 597865 2. 249492  
5. 280422 5. 268565  
1. 846549 1. 679047  
2. 46101 1. 904858  
2. 840184 2. 15704  
1. 605542 1. 433269  
1. 742893 0. 950901  
5. 665636 5. 904845  
4. 478295 5. 036046  
2. 465482 3. 62249  
1. 268992 1. 772216  
5. 333454 5. 630002  
6. 088569 4. 537412  
7. 592503 6. 965668  
6. 454026 5. 47781  
7. 561419 6. 976436  
1. 727928 2. 10683  
1. 607821 1. 675875  
2. 109261 3. 575829  
3. 97425 3. 31388  
2. 602533 2. 393679  
5. 411753 5. 725834  
4. 999869 3. 81503  
4. 264224 3. 598224  
4. 571754 4. 100938  
1. 089648 0. 660158  
1. 493075 2. 145337  
1. 879167 2. 003781  
5. 392375 6. 128225  
5. 957221 5. 860739  
7. 101569 7. 173347

1. 856154 1. 320913  
5. 325446 5. 562374  
6. 100011 6. 126073  
4. 922238 3. 721532  
3. 879141 5. 068805  
7. 886944 8. 619888  
4. 351307 4. 099077  
3. 569426 3. 26513  
5. 980391 4. 889065  
5. 734107 4. 667373  
3. 514967 2. 681169  
3. 565028 3. 682599  
6. 431062 5. 553044  
5. 778865 6. 38831  
2. 088496 1. 714683  
4. 457841 4. 356545  
3. 865471 3. 691518  
2. 254677 3. 594373  
6. 089153 6. 318334  
5. 602183 6. 181536  
10. 47899 10. 53317  
2. 068222 2. 144059  
7. 905112 6. 989261  
8. 616684 7. 385771  
3. 415243 3. 304864  
3. 021041 2. 813206  
1. 152415 0. 628502  
3. 710343 4. 342141  
1. 721843 2. 023572  
10. 08781 9. 751412  
2. 803899 3. 586035  
2. 923003 2. 270157  
3. 156239 4. 345795  
5. 416224 5. 502877  
4. 267177 4. 094265  
5. 621974 5. 546441  
3. 347367 4. 459628  
5. 105577 3. 922726  
6. 231494 6. 578449  
7. 756055 7. 168074  
5. 122729 6. 356228  
5. 219417 5. 102683  
6. 14031 5. 339263  
6. 656345 6. 062151  
9. 696632 10. 03979  
2. 767558 3. 16644  
5. 847315 7. 361504  
8. 40239 9. 371564  
4. 279469 4. 335488  
3. 086104 3. 696097  
9. 924745 10. 30649

2. 557475 2. 558724  
5. 195192 5. 06402  
2. 244769 3. 64245  
2. 357813 3. 585189  
5. 457491 2. 787513  
5. 948974 4. 56137  
1. 618314 2. 827339  
5. 527455 5. 4425  
2. 782085 2. 267173  
0. 956417 1. 778935  
6. 599211 5. 172899  
3. 018828 3. 435694  
6. 258405 5. 161873  
7. 957551 8. 547303  
9. 306025 9. 142304  
3. 775823 5. 036713  
4. 202438 4. 892352  
7. 488928 8. 579967  
4. 292095 3. 453909  
2. 131111 3. 332307  
2. 862143 4. 039568  
5. 555025 4. 956648  
6. 327464 6. 751531  
3. 264471 2. 230499  
1. 772978 2. 31839  
8. 197473 8. 500804  
2. 517623 2. 70976  
3. 701807 3. 190707  
6. 876159 5. 773503  
6. 087183 6. 549758  
4. 336985 4. 557187  
1. 399038 1. 552929  
3. 461614 5. 482681  
2. 813867 2. 963184  
2. 877535 3. 20996  
2. 573776 5. 015366  
6. 919918 7. 275192  
3. 523745 2. 668427  
1. 066542 4. 794966  
9. 480092 9. 921255  
1. 235127 1. 595274  
3. 032001 3. 625886  
10. 54515 11. 38049  
5. 856265 5. 636533  
0. 908156 1. 160028  
5. 399477 5. 679071  
1. 707648 1. 910022  
3. 146594 3. 479516  
0. 927145 2. 054916  
1. 595677 1. 966226  
5. 27127 6. 782745

3. 546835 2. 511656  
6. 35721 5. 912499  
4. 622072 4. 375843  
9. 553325 10. 08486  
7. 158667 7. 475817  
1. 206419 2. 87507  
1. 636359 2. 206876  
1. 175107 1. 807687  
4. 252643 4. 233666  
1. 085663 1. 572009  
1. 653721 1. 675575  
4. 249378 3. 221723  
3. 255554 3. 270251  
5. 617718 5. 612022  
6. 972797 7. 618948  
4. 439255 5. 140803  
4. 20044 3. 451838  
1. 991576 2. 596446  
4. 884666 3. 751394  
4. 790714 5. 658571  
1. 632867 1. 105743  
3. 250678 3. 090873  
2. 448301 2. 550315  
6. 063896 4. 771137  
4. 53868 4. 113058  
3. 037481 3. 598633  
2. 435412 2. 009267  
1. 185093 1. 763487  
3. 963604 5. 276352  
2. 984865 3. 645868  
7. 263581 7. 272938  
4. 82866 4. 157192  
0. 972816 1. 815878  
2. 369737 4. 987479  
1. 299201 1. 66413  
1. 936694 3. 229289  
1. 97408 2. 577919  
4. 770782 4. 48249  
2. 345622 2. 669573  
6. 165386 6. 332762  
8. 068867 8. 256188  
4. 841567 5. 057751  
2. 127885 2. 394801  
3. 652306 2. 932819  
6. 158722 5. 456338  
3. 644138 4. 231947  
2. 729818 6. 410785  
2. 388649 2. 096604  
1. 212818 1. 778779  
0. 999522 4. 114047  
0. 904919 0. 860149

2. 73482 2. 190683  
1. 094978 2. 502515  
4. 531496 4. 402089  
5. 71516 6. 294951  
4. 264658 4. 244406  
4. 492267 5. 483869  
5. 18144 4. 500774  
3. 302455 4. 002922  
4. 069928 4. 681771  
1. 644948 1. 773408  
3. 873574 1. 991397  
0. 717467 1. 427438  
5. 266134 5. 16228  
10. 15004 9. 910353  
4. 843719 3. 403779  
3. 970047 4. 176615  
5. 862217 5. 535567  
5. 233396 5. 264066  
1. 762336 2. 091346  
2. 190452 3. 375572  
2. 891599 2. 513492  
5. 652923 5. 501285  
5. 374942 6. 601577  
1. 317069 1. 626195  
1. 288294 3. 530437  
7. 323041 7. 176933  
3. 941065 3. 498067  
3. 613322 3. 782501  
1. 44413 2. 245519  
1. 389036 1. 729118  
8. 604958 9. 142412  
2. 251709 1. 575599  
1. 526452 2. 093145  
2. 552604 3. 261352  
6. 604605 6. 708124  
1. 556443 1. 850687  
3. 262971 3. 10797  
2. 262496 2. 380616  
5. 597483 5. 369553  
3. 45898 4. 351149  
1. 580977 2. 715376  
8. 110502 8. 903814  
3. 150443 2. 069993  
1. 558715 2. 982007  
6. 01235 6. 367856  
4. 206621 4. 228923  
1. 890577 2. 841336  
4. 469134 3. 638002  
5. 944071 5. 248304  
1. 190326 1. 51999  
1. 652484 1. 508376



8. 217683 8. 626168  
0. 963154 1. 931457  
5. 768695 5. 820153  
6. 985757 7. 19312  
3. 080248 2. 744361  
5. 927458 6. 563405  
7. 399533 6. 754265  
1. 954426 2. 539486  
3. 999413 3. 60933  
6. 251333 6. 862184  
2. 660636 2. 267331  
1. 642186 1. 763783  
2. 900906 3. 3464  
5. 632555 5. 501947  
3. 231151 2. 620161  
4. 874807 5. 220226  
7. 520805 7. 088507  
1. 34663 1. 416437  
5. 061248 6. 206115  
3. 362602 3. 846674  
5. 917989 4. 890669  
4. 231292 3. 984379  
1. 643082 2. 486532  
7. 179545 6. 773923  
1. 161053 1. 048946  
2. 230882 3. 30206  
6. 94456 5. 484279  
5. 052877 3. 843479  
3. 357621 4. 204928  
5. 889002 4. 869418  
2. 970102 1. 984722  
3. 553615 4. 47134  
6. 525718 7. 539388  
4. 924776 4. 711665  
1. 662559 1. 421724  
0. 986654 1. 367737  
1. 47935 1. 848612  
2. 080674 1. 921292  
4. 919195 5. 019337  
2. 423167 2. 593218  
3. 24825 4. 525103  
4. 239824 4. 221568  
3. 288369 2. 850853  
8. 302228 7. 281336  
2. 995455 2. 942123  
5. 929268 4. 705819  
6. 038077 6. 305243  
6. 007385 5. 449232  
1. 434048 1. 703675  
1. 274708 1. 57003  
1. 026549 1. 357617

1. 239486 2. 420536  
3. 27485 2. 808932  
0. 87033 1. 695836  
6. 845991 6. 785467  
1. 510744 2. 074815  
1. 725636 1. 988602  
3. 419488 3. 464249  
2. 17102 2. 605803  
2. 106737 2. 894701  
5. 155249 5. 901854  
3. 524913 3. 840418  
1. 51974 2. 664986  
1. 578522 1. 746383  
1. 202302 2. 395979  
2. 423954 2. 707347  
2. 509129 2. 388824  
1. 595549 2. 817167  
1. 046209 1. 019901  
2. 773688 2. 891144  
1. 123486 1. 022253  
2. 726545 2. 211512  
1. 910965 1. 783205  
8. 19429 8. 62447  
6. 190423 5. 685496  
1. 511021 1. 524392  
0. 883304 1. 200316  
1. 811916 4. 15481  
1. 415336 1. 814406  
1. 123249 1. 283384  
2. 765679 1. 861677  
1. 02392 1. 763913  
2. 449276 2. 494082  
1. 788503 2. 126921  
1. 945664 1. 633445  
1. 546228 1. 997113  
1. 680575 1. 667627  
6. 222362 5. 268209  
4. 822597 5. 061999  
5. 32734 4. 372625  
2. 711952 3. 872611  
5. 150122 4. 807337  
5. 737075 5. 512498  
5. 054935 5. 307452  
7. 258791 6. 863139  
6. 759561 6. 447556  
7. 426126 8. 320021  
2. 147307 1. 853626  
4. 070769 3. 472696  
2. 699125 1. 723932  
3. 767467 3. 422479  
1. 724269 3. 829652

1. 779469 1. 827528  
4. 164155 4. 316993  
6. 486503 5. 388021  
6. 868967 5. 494259  
6. 188558 6. 087406  
9. 327992 10. 07548  
0. 450404 1. 430934  
4. 509236 6. 004921  
5. 989447 6. 41291  
2. 643668 2. 984754  
2. 747885 2. 620115  
6. 914476 6. 086684  
2. 838738 3. 048717  
1. 304118 1. 451925  
6. 638895 6. 375081  
1. 22382 1. 075683  
4. 383269 4. 580682  
0. 639473 2. 940575  
5. 037501 4. 485665  
1. 504006 2. 217577  
2. 475758 2. 316944  
6. 553021 6. 334947  
2. 536059 2. 71776  
2. 509921 2. 776907  
1. 270799 2. 165632  
5. 421708 7. 16231  
1. 612888 1. 488626  
5. 04278 4. 716099  
2. 678728 1. 478411  
5. 097808 5. 491371  
1. 743441 1. 439949  
7. 446873 6. 480409  
4. 51706 4. 412136  
7. 103669 7. 674158  
4. 478509 4. 246303  
2. 920709 3. 59286  
6. 778244 6. 826647  
3. 727175 4. 78011  
1. 744102 1. 304912  
3. 945961 2. 897304  
4. 728909 3. 381279  
2. 673154 2. 483564  
3. 375254 1. 959066  
2. 086716 1. 884263  
3. 139031 2. 677478  
1. 143226 1. 016684  
2. 169512 1. 679551  
2. 367273 2. 638057  
1. 471272 1. 11016  
1. 231149 1. 695737  
1. 547247 2. 468201

3. 912933 3. 675916  
5. 367257 5. 686921  
6. 333326 6. 427526  
3. 612788 4. 151528  
7. 184132 7. 439109  
2. 198537 3. 101666  
1. 670035 2. 791646  
6. 240286 6. 137629  
4. 526783 4. 722534  
0. 538055 1. 640353  
6. 744956 7. 688093  
4. 404845 5. 272491  
5. 258497 5. 55978  
1. 903239 1. 862372  
5. 107786 4. 762593  
1. 195822 1. 916505  
3. 670972 3. 857992  
2. 544249 3. 927789  
2. 46854 1. 636619  
2. 209977 3. 88359  
1. 768481 1. 344917  
7. 440083 7. 100017  
3. 983133 3. 371885  
2. 449983 2. 460445  
3. 511647 3. 658334  
5. 78818 6. 154341  
5. 880427 4. 923509  
4. 455584 5. 13871  
4. 111719 4. 587157  
5. 987513 6. 951746  
3. 702857 3. 114151  
3. 182418 2. 843924  
5. 186295 4. 20199  
2. 78302 3. 661789  
4. 568967 3. 021964  
4. 936956 5. 604578  
5. 979686 6. 290142  
6. 805534 5. 581187  
5. 063029 5. 623518  
2. 304957 2. 082119  
8. 09505 7. 697313  
5. 908936 5. 604852  
7. 030579 6. 302156  
7. 253149 6. 131802  
4. 464713 4. 724636  
3. 588611 3. 414111  
2. 694632 2. 468304  
7. 30162 7. 935213  
3. 712137 4. 682565  
3. 847404 3. 918631  
2. 894671 3. 901648

4. 326555 3. 516941  
1. 235985 1. 665391  
2. 271314 1. 468372  
3. 451557 3. 76739  
8. 986575 8. 236216  
6. 641128 5. 676235  
7. 04724 6. 836325  
3. 831254 4. 539183  
6. 530603 6. 425556  
0. 828452 1. 103922  
7. 840573 7. 729774  
5. 435766 4. 394957  
4. 549275 4. 751735  
7. 060051 7. 609558  
6. 278938 5. 43492  
5. 34947 4. 295252  
1. 671957 1. 941669  
2. 823415 2. 73263  
1. 511888 1. 502846  
2. 806761 3. 590532  
4. 275575 3. 640267  
2. 384173 1. 765856  
1. 856691 1. 82719  
3. 31366 4. 362312  
2. 420248 3. 139407  
3. 06474 4. 553968  
2. 100117 2. 223416  
2. 083404 5. 583141  
3. 18423 3. 936432  
2. 397147 2. 903927  
1. 484606 1. 625383  
2. 064496 1. 995334  
6. 227745 5. 541339  
4. 752352 4. 575182  
6. 74422 7. 288233  
7. 004647 6. 541689  
4. 69448 3. 208509  
1. 323439 2. 144258  
7. 120449 6. 739018  
5. 611497 6. 591366  
4. 206812 3. 284368  
7. 490124 7. 298308  
5. 084326 4. 45916  
7. 260479 7. 643617  
1. 800989 2. 076165  
6. 216626 5. 252532  
3. 714944 3. 248372  
6. 049758 6. 557784  
2. 660285 2. 94545  
2. 14506 1. 566689  
5. 034274 4. 937017

3.026939 3.860005  
1.619623 2.340692  
5.650493 6.179185  
4.307227 4.33908  
4.265775 4.718613  
2.997668 2.378055  
5.493717 5.979711  
6.438655 6.638641  
1.956261 2.875998  
5.528267 7.114657  
5.395006 6.361658  
3.055533 4.62985  
3.688719 3.590071  
5.707008 7.038812  
4.493531 4.931909  
6.985427 7.097176  
5.790899 5.282871  
5.420294 6.185196  
5.466971 5.928422  
4.766674 4.53983  
6.534898 6.087501  
4.504409 4.623449  
3.209987 4.00182  
3.482086 2.535891  
5.214603 4.323313  
5.186853 3.37393  
4.720946 5.125453  
2.622373 2.747767  
5.484977 6.615771  
5.672479 5.387746  
4.724173 5.235227  
5.135541 3.937526  
3.95436 3.237444  
4.180432 2.923624  
4.693006 4.578264  
0.889607 1.71308  
3.470267 3.262498  
4.240894 4.975261  
4.678327 4.711627  
5.068984 4.767298  
2.471752 1.644851  
4.934442 4.605847  
5.548653 5.316036  
4.570658 4.904444  
7.933547 8.615479  
6.105626 5.900926  
6.023946 6.124596  
5.442983 4.790498  
4.588657 4.376525  
4.765589 6.822901  
4.622546 5.349612

5.618915 4.785194  
4.408389 5.223346  
2.116725 2.69577  
5.010658 5.888278  
4.810706 4.526375  
6.141904 5.999379  
5.456443 4.920115  
3.760495 3.001889  
8.487087 8.622371  
2.473938 3.080865  
3.985835 4.275494  
5.282343 4.625495  
2.122998 2.473382  
5.611386 6.602002  
1.862223 1.684595  
6.332239 6.830797  
6.548926 7.467263  
3.894783 3.804939  
6.906351 7.130817  
5.785142 6.06708  
5.058711 5.631355  
2.76042 3.170849  
1.401992 1.244444  
6.480018 7.240137  
6.129977 6.238858  
3.691091 4.405349  
2.914613 3.828136  
4.308818 4.455952  
1.789432 2.016248  
6.705932 5.924224  
3.457767 4.843356  
6.866208 6.674095  
6.280263 6.475476  
2.330056 2.266143  
4.331281 4.785584  
6.49499 6.93783  
1.311171 1.249318  
6.968667 5.996382  
7.213351 6.87445  
2.692696 2.162345  
1.832631 1.828301  
6.18404 6.074089  
4.002177 3.945923  
6.276771 5.679142  
4.066752 5.232913  
9.56388 9.494537  
1.209088 2.271299  
1.758577 2.099021  
2.339527 2.255012  
2.867316 2.361485  
5.868732 3.690687

5. 742505 5. 335552  
1. 36393 1. 799386  
6. 605464 6. 997975  
3. 971977 3. 315331  
7. 077869 6. 768877  
1. 280583 1. 407768  
5. 34987 4. 946894  
4. 566966 4. 909069  
2. 57273 3. 825699  
8. 001142 7. 791171  
6. 639109 5. 392944  
3. 253018 2. 969495  
3. 326083 3. 479049  
5. 326306 5. 588398  
4. 082601 3. 363494  
5. 137553 4. 056462  
5. 218916 3. 545981  
3. 245091 4. 709784  
6. 788203 6. 172596  
3. 696976 4. 286067  
4. 810085 2. 164294  
3. 002536 2. 30194  
2. 55348 2. 744722  
2. 255938 2. 505837  
2. 593867 2. 443372  
2. 082256 2. 304453  
7. 526116 6. 954363  
4. 758919 5. 314402  
1. 852421 2. 129457  
5. 728258 6. 052661  
4. 983812 3. 705958  
2. 082087 2. 10025  
4. 711946 2. 658997  
2. 159878 3. 226165  
3. 963165 2. 581791  
2. 769939 3. 866255  
7. 602032 7. 189927  
5. 201492 5. 524857  
3. 324214 4. 665276  
3. 346805 3. 134405  
6. 601729 6. 98751  
1. 963915 1. 757268  
2. 534373 4. 195118  
2. 331444 3. 685151  
6. 2491 6. 264668  
3. 607409 3. 75797  
5. 164113 4. 712399  
4. 511192 4. 861308  
1. 61856 1. 938774  
5. 894709 4. 809402  
5. 79559 5. 407223



7. 097961 6. 793734  
2. 358994 2. 428984  
2. 937952 2. 241169  
2. 810676 2. 657844  
1. 139344 1. 198149  
6. 348239 5. 867532  
1. 834334 1. 748293  
5. 593103 3. 33514  
7. 623292 7. 808685  
2. 08811 2. 323979  
5. 199057 4. 346317  
3. 985667 3. 747272  
6. 448824 6. 725392  
6. 946409 6. 664961  
6. 10106 5. 469172  
1. 746921 2. 255283  
4. 253746 4. 791114  
6. 611431 5. 999956  
3. 358537 3. 645669  
2. 165848 2. 6864  
0. 783696 1. 649443  
1. 996375 2. 89428  
4. 041473 3. 248113  
6. 480202 7. 155193  
4. 706072 3. 245957  
4. 677995 4. 5362  
2. 173696 2. 008429  
5. 546232 5. 146933  
7. 305686 6. 334677  
5. 085397 4. 67005  
1. 661271 2. 082508  
5. 858409 5. 044455  
1. 629791 1. 972922  
4. 713877 3. 828956  
1. 208446 2. 393981  
3. 539833 2. 741905  
3. 323383 3. 509061  
1. 739571 1. 739997  
2. 308876 2. 087227  
2. 974975 3. 72542  
1. 219264 2. 678458  
4. 32751 4. 012952  
7. 600793 7. 14633  
2. 663386 3. 080425  
3. 464565 4. 589956  
7. 236347 7. 516977  
3. 045209 2. 613474  
1. 247721 1. 673213  
2. 546953 2. 365787  
6. 466476 5. 811619  
6. 480497 6. 424204

5. 650538 5. 964155  
2. 023574 2. 119249  
3. 301722 3. 046013  
3. 768198 2. 967288  
1. 916871 1. 515938  
2. 408758 3. 548839  
3. 7703 4. 072029  
5. 000937 5. 571259  
1. 560454 0. 82616  
1. 60395 1. 284635  
7. 133707 7. 040806  
3. 969641 3. 143234  
1. 183345 1. 419215  
3. 389181 1. 968201  
1. 135797 1. 534585  
7. 250917 7. 776903  
5. 735989 6. 892746  
1. 260677 1. 989002  
1. 204115 1. 28199  
1. 175298 1. 513583  
5. 631506 6. 478142  
6. 561001 5. 64932  
4. 729755 3. 897975  
5. 621821 6. 083468  
1. 702598 2. 104982  
1. 721185 2. 383876  
0. 96853 1. 092004  
4. 143314 4. 009075  
3. 531621 3. 654301  
8. 385331 8. 174197  
2. 986084 3. 609811  
6. 822427 7. 546309  
0. 96264 1. 399794  
5. 810701 5. 157162  
3. 030733 3. 583938  
1. 194007 1. 745353  
1. 207817 1. 660786  
1. 066321 3. 487109  
1. 578532 2. 481557  
2. 131678 1. 299328  
4. 499504 5. 407716  
1. 526873 1. 980542  
4. 051348 3. 85685  
2. 222047 2. 320402  
3. 806362 4. 719873  
1. 736505 2. 131523  
3. 710452 3. 332951  
1. 575441 1. 699524  
3. 73877 4. 010018  
2. 290174 2. 799839  
2. 057905 2. 100156

4. 730763 5. 619058  
2. 505308 2. 96983  
1. 654833 2. 391787  
5. 828371 5. 351409  
4. 712938 5. 075356  
1. 086717 1. 541272  
5. 191412 4. 519152  
2. 241524 2. 379789  
2. 239591 1. 457264  
6. 873279 6. 456343  
3. 412827 3. 074637  
2. 759813 2. 87423  
4. 072193 5. 002291  
1. 856651 2. 433417  
7. 901336 6. 056483  
1. 859882 2. 890467  
6. 148251 5. 398308  
6. 002304 5. 12922  
5. 330984 5. 068889  
4. 92611 3. 772526  
5. 419331 5. 480846  
4. 446008 4. 647115  
1. 589291 1. 295664  
5. 441832 6. 912292  
8. 762502 7. 997286  
1. 370727 3. 279493  
4. 661297 3. 037927  
1. 338376 1. 919987  
3. 619409 3. 389306  
3. 104002 2. 915567  
0. 831798 1. 234432  
9. 370855 9. 274967  
4. 867915 5. 787664  
5. 240091 6. 026463  
4. 937518 3. 730465  
3. 262789 4. 519689  
2. 777422 3. 769545  
3. 736785 4. 032402  
7. 417458 7. 221811  
3. 442454 4. 404985  
4. 291461 3. 564917  
3. 174633 2. 312126  
2. 011757 2. 589351  
4. 83651 6. 500856  
5. 218055 5. 127324  
4. 628706 4. 877982  
2. 844336 2. 503293  
2. 984177 2. 865763  
3. 772068 3. 202852  
4. 978363 3. 744299  
7. 48796 7. 353049

2. 843048 3. 348423  
6. 1722 5. 329955  
4. 507836 3. 896678  
3. 855049 3. 94518  
2. 377977 1. 805332  
3. 766497 5. 233419  
4. 361165 5. 391593  
2. 067853 2. 012387  
7. 159304 6. 535528  
9. 411593 9. 21665  
5. 069602 5. 878725  
3. 714256 4. 058957  
4. 846925 4. 106734  
2. 049449 2. 006083  
2. 614468 2. 674365  
3. 227539 2. 983149  
3. 810457 4. 606202  
2. 469624 2. 483666  
7. 835451 8. 00662  
2. 634915 3. 223384  
2. 009772 2. 911017  
2. 698146 2. 883489  
5. 121818 3. 602527  
4. 753674 3. 467209  
9. 089004 8. 480528  
5. 427836 5. 41836  
7. 057054 6. 493162  
3. 064925 2. 38888  
5. 458693 6. 072855  
3. 716481 4. 27481  
4. 196459 4. 890603  
1. 95156 1. 915247  
4. 772594 4. 405948  
7. 6887 7. 002147  
1. 741363 2. 795878  
1. 955965 2. 202268  
4. 784508 4. 541466  
1. 133798 1. 345857  
3. 35294 2. 643559  
2. 985755 3. 540305  
4. 362882 5. 062131  
5. 235207 5. 515546  
3. 446112 4. 597565  
1. 569867 2. 02451  
3. 275328 4. 516589  
3. 557478 4. 115933  
4. 094762 5. 448738  
4. 607131 5. 82688  
8. 144086 7. 210367  
1. 240491 1. 086541  
3. 890459 2. 980515

2. 624102 2. 979364  
2. 819916 4. 329456  
5. 575755 5. 892589  
3. 47948 4. 186094  
1. 987075 1. 881681  
7. 174405 8. 103186  
5. 771324 5. 630277  
7. 584209 7. 74646  
5. 176113 3. 073615  
2. 563605 3. 383262  
4. 671065 4. 563994  
4. 851284 5. 209128  
2. 600353 3. 426247  
3. 31705 5. 057726  
5. 099799 5. 023933  
4. 198886 3. 468297  
4. 700265 5. 898276  
6. 344967 5. 915518  
5. 562237 4. 776521  
5. 580074 6. 319303  
2. 395284 2. 769401  
3. 227285 2. 93657  
3. 260758 3. 601493  
5. 836145 5. 508681  
7. 236357 6. 593331  
6. 819688 6. 825837  
6. 649807 6. 105871  
4. 83067 5. 823093  
2. 950745 3. 651919  
4. 880197 5. 24739  
2. 953131 2. 460142  
6. 435936 6. 15047  
3. 941782 3. 759717  
6. 132484 6. 102052  
1. 272659 1. 78582  
1. 606084 2. 000953  
4. 697682 4. 278749  
1. 620617 1. 576106  
6. 199105 6. 96018  
4. 656537 4. 350575  
4. 27877 3. 658803  
2. 565373 2. 634626  
2. 821754 3. 240502  
5. 402938 5. 035539  
4. 255099 4. 872463  
5. 135474 4. 310874  
5. 024565 4. 702628  
1. 732158 2. 195217  
3. 196244 3. 239203  
4. 43503 4. 271139  
3. 448979 3. 519637

5. 545198 5. 475218  
5. 988266 5. 684155  
4. 860961 3. 445512  
3. 695606 4. 901059  
6. 439981 5. 434645  
2. 637164 2. 358265  
9. 039703 8. 297973  
2. 642086 1. 947551  
2. 85655 4. 206243  
5. 16175 5. 004419  
2. 180074 2. 285064  
3. 10213 3. 651094  
5. 320277 3. 749314  
4. 70836 4. 177371  
2. 7414 3. 159523  
6. 103383 6. 220942  
6. 077348 5. 928737  
5. 393351 6. 004828  
2. 849067 2. 682152  
5. 808866 6. 73426  
4. 393673 4. 439151  
8. 077403 7. 11917  
1. 546384 1. 435618  
3. 370584 4. 034826  
1. 933359 2. 741238  
4. 722242 4. 444217  
4. 745286 4. 539879  
1. 85072 2. 010945  
6. 028233 3. 091152  
5. 574569 5. 74182  
2. 048702 1. 661031  
3. 120987 3. 057143  
1. 660722 2. 178443  
4. 802556 4. 317095  
3. 225791 3. 828896  
3. 286136 3. 801875  
5. 66227 6. 255443  
6. 855558 6. 67447  
6. 358354 7. 447958  
3. 465592 4. 101718  
1. 680761 1. 999085  
2. 163596 2. 673073  
1. 630855 2. 272808  
8. 602845 8. 913799  
3. 6902 3. 356332  
0. 966466 1. 72556  
6. 677841 6. 231035  
4. 132161 2. 526521  
5. 053471 6. 182867  
5. 813014 3. 091098  
3. 117105 4. 104355

4. 794615 4. 274165  
3. 641344 3. 843527  
7. 503267 8. 266022  
8. 729237 8. 063051  
4. 114712 3. 752543  
3. 384323 2. 828155  
3. 320169 2. 92752  
7. 854945 7. 717243  
7. 940922 7. 608466  
5. 961808 5. 472609  
4. 571174 3. 807731  
2. 643392 2. 106297  
3. 357803 4. 174239  
4. 71926 5. 22037  
6. 167715 6. 57011  
2. 45015 2. 359914  
1. 334292 2. 011216  
3. 049233 2. 833308  
2. 670095 2. 405972  
9. 035182 7. 066257  
2. 507278 1. 206998  
5. 84975 5. 596761  
10. 03061 10. 29099  
6. 842152 6. 85849  
0. 971926 1. 449644  
2. 841317 3. 169672  
1. 065163 1. 834485  
7. 94319 8. 585113  
4. 33352 4. 512469  
5. 965662 5. 333648  
4. 803331 4. 345324  
3. 44285 2. 661829  
1. 744383 2. 404166  
0. 798717 1. 702453  
3. 006224 2. 485981  
1. 455528 1. 507507  
1. 256234 1. 591178  
0. 855951 1. 481897  
1. 68741 1. 589374  
1. 847245 2. 105293  
1. 956818 2. 864813  
2. 601234 2. 019041  
2. 56798 2. 979884  
4. 862367 4. 459891  
6. 867902 5. 332585  
3. 709324 5. 963019  
2. 11206 2. 951924  
1. 345283 2. 082806  
2. 454004 2. 501244  
6. 617575 6. 853337  
3. 661827 4. 186584

1. 713173 2. 849227  
6. 157563 4. 508284  
3. 383005 3. 279182  
2. 849952 3. 709125  
5. 072181 5. 823939  
5. 511809 5. 389062  
4. 90548 4. 29617  
6. 045795 5. 7869  
1. 689198 2. 251633  
4. 363258 4. 199964  
5. 877512 5. 016639  
2. 299255 1. 615097  
3. 605031 2. 609136  
3. 718134 3. 656897  
2. 954608 2. 99068  
5. 885115 4. 793866  
2. 512189 2. 354126  
3. 864621 3. 626936  
5. 931829 2. 239154  
1. 368902 1. 859696  
5. 379374 1. 465997  
2. 056286 3. 57962  
1. 972172 2. 948692  
7. 598513 7. 832742  
6. 665565 6. 176682  
5. 348629 4. 916448  
5. 494382 5. 235819  
2. 470982 3. 334668  
6. 116327 6. 299122  
1. 600468 1. 102151  
2. 434276 2. 221733  
3. 888203 4. 236613  
2. 957625 4. 044756  
1. 629627 1. 852523  
1. 801142 2. 478801  
5. 386843 7. 58215  
7. 424857 7. 63842  
0. 945896 1. 042511  
6. 261526 6. 125068  
6. 296272 5. 329468  
6. 202358 5. 649162  
2. 234704 2. 544784  
1. 609692 2. 310492  
1. 524461 1. 187143  
4. 784454 5. 805399  
1. 178371 1. 137148  
5. 865322 5. 420972  
2. 44114 2. 854325  
6. 244277 5. 094486  
5. 354287 4. 81079  
1. 499767 1. 623375



4. 591096 4. 403143  
2. 983072 2. 817182  
6. 755595 6. 168802  
4. 860424 5. 54678  
4. 817591 4. 737876  
5. 407628 4. 104543  
7. 499692 6. 859204  
7. 371632 6. 446344  
7. 256376 5. 479932  
1. 290292 1. 732082  
5. 837484 2. 940603  
4. 746957 5. 250297  
5. 482748 5. 401111  
6. 350926 6. 016355  
1. 452853 3. 018347  
6. 724871 6. 46029  
4. 222485 3. 524908  
1. 886258 1. 740503  
1. 276054 1. 12017  
8. 043412 6. 555471  
1. 348552 1. 341809  
3. 126677 2. 492602  
6. 2566 6. 317967  
10. 95947 11. 41278  
1. 573266 2. 433867  
2. 042146 2. 746256  
1. 024136 1. 052449  
5. 806193 5. 541544  
5. 100475 4. 895567  
2. 931621 3. 533842  
6. 128018 7. 511404  
8. 169578 7. 932067  
2. 582263 1. 859447  
1. 602902 2. 290013  
8. 959786 8. 156398  
3. 29691 2. 067571  
2. 669199 4. 288591  
6. 307858 5. 791685  
6. 48977 6. 416663  
7. 457804 7. 762129  
5. 171961 5. 260007  
3. 889839 4. 815781  
5. 800066 6. 707226  
6. 229987 6. 880116  
5. 882466 4. 52152  
3. 843061 4. 06447  
3. 185638 3. 781155  
4. 245437 5. 028344  
4. 957851 7. 124202  
5. 689857 5. 875666  
3. 237537 2. 240511

5. 624937 4. 736665  
1. 985329 2. 322052  
4. 085089 5. 608783  
4. 854014 5. 361769  
1. 444846 1. 527248  
6. 257162 5. 849893  
1. 184551 1. 365796  
6. 125613 7. 34647  
0. 80283 1. 023565  
2. 880093 2. 779756  
1. 816531 1. 987716  
1. 454951 1. 301313  
4. 036101 5. 011227  
5. 31927 4. 865104  
5. 573788 5. 401476  
4. 101792 5. 265142  
5. 159845 4. 620876  
2. 054796 1. 809848  
8. 42415 7. 896978  
3. 455001 3. 013171  
10. 30057 10. 28234  
2. 070465 3. 567852  
10. 65323 9. 584525  
2. 08352 1. 708132  
8. 736666 8. 306921  
1. 707952 1. 469352  
4. 406077 4. 958305  
2. 805865 3. 005132  
5. 932189 4. 676626  
5. 794484 3. 562113  
5. 091563 4. 924699  
6. 180187 7. 100109  
5. 370692 5. 697401  
3. 274255 3. 585754  
3. 709135 4. 180023  
4. 062507 3. 455421  
0. 917851 1. 38168  
3. 985666 2. 562574  
1. 462725 1. 498975  
5. 937887 4. 055866  
6. 311905 6. 154506  
6. 337808 5. 907878  
5. 622686 6. 430409  
2. 618734 3. 052229  
2. 536202 2. 893233  
2. 107181 2. 735957  
3. 117976 2. 886286  
4. 901189 3. 813753  
4. 312934 4. 173316  
2. 515 2. 976547  
4. 654264 5. 420016

2. 420826 2. 381672  
4. 23893 3. 054444  
1. 509053 1. 998687  
7. 678991 7. 098534  
6. 795601 6. 100376  
2. 327589 2. 742001  
9. 08432 9. 062649  
3. 927073 3. 325562  
6. 053451 6. 052063  
5. 304204 3. 291673  
10. 13106 9. 907925  
6. 440572 5. 43247  
4. 335258 4. 748645  
5. 774853 6. 795027  
4. 037678 4. 674183  
8. 50677 8. 523555  
6. 179042 6. 227244  
8. 653234 8. 793553  
8. 998498 9. 81942  
7. 690494 7. 827833  
9. 573755 9. 835949  
7. 776871 7. 090576  
6. 612151 6. 624342  
2. 412546 2. 134435  
5. 866027 5. 269324  
7. 605028 7. 428976  
8. 135147 8. 008227  
6. 383377 5. 744937  
2. 870946 4. 45636  
5. 078221 5. 084715  
5. 836094 5. 498098  
6. 91386 5. 938182  
9. 197473 9. 937601  
8. 686471 8. 882322  
2. 614873 1. 714792  
2. 313743 2. 260739  
1. 25038 1. 55385  
2. 092541 2. 670003  
8. 873447 7. 891822  
4. 831676 5. 259368  
4. 357027 3. 858636  
4. 894596 3. 872759  
6. 646927 6. 557661  
5. 527723 6. 090772  
3. 514605 4. 57271  
2. 112283 1. 852244  
6. 846102 6. 034798  
1. 566249 1. 780207  
4. 454722 4. 047289  
4. 380889 4. 929826  
5. 05455 5. 54626

4. 494173 5. 658116  
5. 31135 5. 622087  
6. 582092 7. 180936  
2. 035355 2. 38102  
1. 250009 1. 621087  
3. 237338 3. 332702  
2. 354727 2. 402568  
4. 308952 3. 439317  
1. 089785 1. 201196  
5. 573826 5. 176936  
2. 780103 3. 485415  
3. 938636 3. 572013  
5. 1204 5. 372716  
6. 778016 7. 121891  
9. 654745 10. 18001  
4. 411906 5. 046608  
5. 897167 6. 021397  
8. 246407 8. 483966  
6. 725966 7. 176335  
7. 057948 5. 952447  
7. 00272 7. 320629  
2. 544868 4. 12987  
6. 975978 7. 041248  
4. 203792 3. 959416  
5. 15005 4. 731132  
4. 160626 5. 993017  
1. 289659 1. 609148  
3. 806362 2. 686176  
7. 297821 6. 81149  
4. 16721 4. 766929  
2. 220871 2. 531086  
4. 881612 4. 947448  
2. 553257 2. 716517  
5. 566674 4. 286536  
5. 406012 6. 427161  
8. 22989 7. 960326  
2. 04311 1. 703372  
1. 400859 1. 748745  
1. 373448 1. 57616  
1. 186629 1. 383014  
1. 097967 1. 881079  
2. 652783 4. 398277  
5. 519479 5. 996207  
8. 463568 8. 245375  
1. 668975 2. 937308  
1. 362464 1. 95317  
3. 593212 2. 106509  
7. 062349 7. 270954  
5. 390858 6. 183942  
9. 641506 9. 840216  
3. 765355 4. 49365

8. 494056 8. 940506  
5. 62071 5. 404197  
4. 266016 4. 582387  
6. 972424 7. 010554  
6. 862402 6. 130993  
7. 041206 6. 91296  
3. 158739 2. 588817  
4. 489696 4. 494901  
6. 98469 6. 718523  
1. 821669 1. 433757  
7. 582789 7. 58159  
2. 244071 3. 155669  
1. 966361 1. 48513  
2. 659872 2. 616167  
4. 502382 5. 051439  
1. 638632 1. 666669  
1. 67039 1. 330119  
6. 504259 6. 167233  
1. 725799 2. 142553  
4. 687132 3. 221118  
5. 359968 5. 146832  
3. 449664 4. 178862  
1. 568902 1. 654399  
3. 71682 3. 161015  
1. 598281 1. 968099  
6. 575358 6. 085926  
5. 387171 6. 621627  
3. 374311 4. 80031  
5. 750489 5. 347262  
6. 979456 6. 847086  
6. 092022 6. 350324  
5. 430873 6. 058177  
6. 451697 6. 422803  
0. 940404 2. 073115  
1. 21512 1. 357907  
6. 066113 4. 397131  
2. 256741 1. 955914  
7. 162298 6. 328448  
7. 490899 6. 932169  
4. 653312 4. 428461  
7. 371164 7. 746436  
5. 640138 4. 759383  
1. 713699 1. 544988  
7. 20559 7. 309428  
3. 582653 5. 524663  
1. 985205 2. 129312  
1. 37822 1. 555708  
5. 386099 4. 063498  
3. 505811 1. 454383  
0. 971228 1. 148421  
4. 324654 4. 856808

3. 19713 3. 405925  
8. 91051 8. 779801  
4. 026736 5. 507114  
9. 614656 7. 995943  
5. 864124 4. 902629  
1. 405058 1. 8295  
6. 019024 6. 217278  
3. 481661 3. 752827  
3. 652595 3. 335915  
5. 046717 5. 807079  
7. 731729 6. 97601  
4. 12641 4. 568382  
3. 802771 4. 042494  
3. 638247 4. 554217  
6. 808519 5. 383834  
4. 829024 4. 510293  
5. 48589 5. 294206  
2. 757251 3. 41413  
4. 605402 4. 164079  
6. 223123 5. 65929  
3. 164298 2. 695724  
4. 672806 4. 187617  
7. 169607 6. 938584  
7. 581828 7. 675015  
2. 1567 2. 709949  
1. 7565 2. 258531  
6. 690341 6. 395685  
5. 852283 6. 08642  
1. 961265 1. 914135  
2. 020727 1. 616014  
2. 061084 2. 599196  
2. 159979 2. 789896  
1. 690037 1. 739173  
6. 147079 6. 919664  
6. 033492 5. 653949  
6. 303627 7. 029383  
4. 480402 5. 335193  
5. 376483 4. 757963  
1. 924956 2. 114968  
1. 811345 1. 39755  
5. 586528 6. 292212  
4. 479824 3. 646361  
7. 915232 8. 14086  
5. 286883 5. 528223  
6. 551497 6. 237512  
4. 575521 2. 147682  
4. 823952 2. 75752  
2. 539798 3. 706956  
6. 569255 6. 826925  
6. 147913 6. 263264  
1. 717368 2. 727036

8. 263838 8. 029028  
7. 305786 7. 097523  
4. 910023 5. 874246  
5. 751482 5. 30919  
2. 769102 3. 006571  
7. 423683 7. 024937  
8. 524388 8. 49508  
4. 967331 4. 178879  
5. 157769 5. 392327  
5. 856511 5. 154253  
5. 647284 5. 589733  
5. 937344 5. 043119  
5. 168314 4. 6953  
7. 725308 6. 96396  
6. 909178 7. 732894  
6. 493312 5. 808693  
6. 287653 6. 030839  
6. 646317 6. 08015  
7. 135737 6. 925937  
1. 998604 1. 849417  
1. 893259 1. 736703  
6. 96346 6. 735698  
5. 183196 4. 891649  
4. 914771 3. 966267  
3. 862438 5. 188149  
2. 647307 2. 748851  
2. 135799 1. 55292  
3. 344862 4. 391766  
6. 89579 6. 798955  
2. 277273 3. 024663  
5. 837282 4. 805457  
2. 197596 2. 98514  
1. 232566 1. 462827  
4. 181691 4. 138276  
6. 149745 6. 533876  
6. 436705 5. 312305  
2. 926034 5. 279413  
5. 452069 4. 181943  
6. 815134 5. 345421  
2. 851905 3. 070859  
3. 720757 4. 177726  
2. 548635 3. 147587  
5. 660486 5. 220001  
6. 000405 6. 067837  
7. 515097 7. 836645  
2. 308746 3. 115113  
3. 328709 3. 856945  
7. 553788 7. 091457  
4. 434926 3. 539598  
3. 180045 2. 911656  
7. 428573 7. 291668

4.086442 3.077159  
2.391279 2.977946  
2.759814 2.810336  
6.057233 6.551275  
6.269813 5.51735  
4.021768 6.036874  
3.742006 5.061671  
3.710929 4.623907  
2.084443 2.283335  
5.132623 6.971896  
1.941708 2.154708  
1.18486 1.669141  
5.310352 5.23675  
0.952155 1.377525  
5.439886 3.983658  
2.833106 2.77825  
1.654451 2.182401  
9.15723 8.472424  
1.343287 1.04238  
1.012634 1.215257  
1.766024 2.201804  
4.168113 3.399423  
4.591975 3.568585  
5.004313 4.054173  
3.397966 4.251174  
1.740047 1.663332  
6.29841 4.738366  
5.172979 4.876064  
2.976331 4.195655  
2.32595 2.855969  
2.673587 2.559508  
1.349869 1.682452  
4.412872 2.695736  
1.725663 1.738056  
2.517061 2.052683  
2.177806 2.463209  
4.539047 5.17481  
2.366352 2.996703  
1.774358 2.144568  
5.74286 5.815247  
2.652535 2.451231  
0.792236 1.632172  
3.459262 3.251325  
2.62196 2.919295  
2.236971 2.291878  
2.23054 2.900825  
2.902912 2.875908  
2.226441 2.186076  
2.076602 2.079164  
2.401506 2.461324  
2.331387 1.297168



2.199499 2.120545  
1.924833 2.052254  
3.998009 4.147612  
2.051817 3.177558  
3.936469 3.648393  
3.077127 4.158538  
3.152207 2.778781  
1.731102 2.212991  
1.810194 1.617265  
6.531328 6.213235  
4.348837 4.309289  
5.021879 5.390139  
9.657822 9.877534  
3.83682 4.172777  
3.110823 2.410368  
4.452766 4.315051  
4.089836 4.531885  
4.351142 3.157521  
3.194495 4.417048  
2.103081 2.665571  
1.255061 1.513848  
3.206131 3.486867  
5.359737 5.620159  
4.536467 4.554744  
4.820776 2.755292  
2.784891 2.048333  
2.682131 2.171061  
1.875175 2.562963  
4.626378 4.269207  
2.060024 2.005634  
1.45166 2.657918  
1.72894 2.820948  
3.428585 4.173942  
3.350052 1.851178  
4.237604 3.457494  
1.036994 1.40924  
2.924644 2.993435  
2.366816 2.95997  
2.802179 1.994608  
6.924395 6.707412  
7.585346 7.16122  
2.410123 2.782848  
3.41627 4.470546  
6.592806 6.53702  
1.402416 1.910766  
3.9263 4.655089  
6.638136 6.389398  
4.100109 2.519923  
3.353807 3.909095  
6.258167 5.508539  
2.875614 2.877571

1. 711243 2. 644391  
1. 087801 1. 092165  
3. 480423 3. 842724  
2. 087377 2. 497826  
5. 325679 4. 913445  
2. 148907 1. 766131  
6. 968428 7. 218238  
6. 59108 6. 525176  
4. 563083 4. 553133  
4. 265327 4. 532543  
2. 551927 2. 023069  
3. 799263 3. 885096  
3. 079102 2. 210628  
3. 966534 2. 341188  
5. 749165 5. 601387  
3. 529489 2. 567987  
1. 272664 1. 725185  
4. 2857 2. 276736  
2. 729053 2. 300493  
2. 547856 2. 970986  
5. 861872 5. 316279  
6. 217534 6. 214603  
4. 148642 4. 768278  
3. 98846 6. 270176  
1. 893741 1. 310682  
2. 762638 3. 389713  
1. 854843 1. 682649  
2. 320809 2. 839469  
3. 424037 4. 305334  
6. 92648 6. 06531  
2. 127905 2. 826634  
3. 05424 3. 692316  
7. 659816 7. 062238  
5. 186319 4. 214724  
4. 744949 4. 537059  
2. 898596 3. 279761  
3. 254143 2. 46511  
4. 604327 3. 514005  
6. 158197 5. 14583  
6. 166879 4. 54878  
2. 321871 2. 109073  
1. 616807 2. 428955  
4. 275802 3. 941844  
2. 054408 2. 009091  
5. 159347 4. 894517  
3. 632165 4. 29467  
4. 385118 5. 59001  
3. 992643 3. 598999  
9. 324319 8. 358801  
1. 893754 1. 975524  
1. 768434 1. 415989

4. 636008 4. 725276  
7. 25559 6. 866826  
6. 362179 6. 860659  
2. 113579 2. 954447  
7. 021109 7. 415114  
5. 619482 4. 921021  
5. 222175 5. 666053  
3. 864189 3. 422209  
3. 139541 2. 420446  
2. 980127 2. 930588  
7. 457383 7. 265891  
5. 044979 6. 006499  
6. 892921 5. 227021  
4. 651591 3. 953299  
5. 623592 6. 779105  
3. 531527 3. 612513  
2. 576398 3. 476351  
7. 132401 7. 519298  
1. 699464 2. 400127  
6. 280396 6. 784739  
1. 796716 2. 624169  
1. 256983 2. 122618  
5. 070931 6. 156501  
6. 129787 6. 439461  
2. 047143 1. 849789  
3. 514173 3. 464783  
2. 765875 2. 205307  
3. 179383 2. 217107  
4. 975312 5. 299358  
1. 494757 1. 701989  
3. 865124 2. 140636  
1. 75068 3. 254244  
4. 281824 4. 964511  
8. 873341 7. 046258  
3. 270948 3. 475476  
5. 332675 6. 154307  
5. 808316 6. 6141  
4. 429654 4. 944402  
5. 337842 5. 370344  
4. 380417 4. 812709  
3. 188597 3. 805573  
1. 02014 1. 606487  
6. 779589 6. 623973  
2. 544781 2. 442969  
4. 077317 3. 134769  
3. 926481 4. 238575  
6. 431166 5. 110035  
5. 20764 5. 296515  
7. 012303 5. 884528  
5. 665619 5. 772118  
4. 970699 3. 318833

4. 865637 3. 887708  
3. 477252 5. 130328  
6. 739546 7. 58452  
3. 486921 1. 951364  
6. 150481 5. 720598  
4. 286185 3. 556479  
4. 844367 4. 202868  
2. 094515 2. 30303  
1. 690132 2. 018341  
1. 977458 2. 044888  
1. 783847 2. 312599  
4. 926736 5. 434186  
2. 860238 3. 829789  
3. 460583 4. 209621  
5. 005974 5. 350853  
6. 395078 7. 627734  
7. 770089 8. 345135  
6. 127176 6. 051802  
4. 479038 2. 728945  
5. 226605 5. 895973  
2. 823828 2. 495115  
1. 708882 2. 044948  
1. 409905 1. 919285  
5. 207467 4. 490088  
4. 548324 4. 419058  
7. 005442 7. 509496  
1. 306522 2. 397005  
3. 599004 4. 451255  
3. 715516 2. 373772  
5. 585533 5. 233066  
9. 775725 8. 736846  
5. 341417 5. 930288  
3. 703422 4. 34897  
1. 789834 3. 191112  
4. 47748 3. 616662  
0. 984322 1. 296112  
2. 267827 1. 739889  
1. 805335 2. 531435  
7. 382444 7. 817356  
3. 394419 3. 53271  
2. 52749 1. 96374  
6. 471202 6. 789279  
3. 390227 3. 84638  
1. 637612 1. 603665  
7. 753515 7. 289709  
7. 458845 7. 086185  
3. 667432 3. 426441  
2. 497916 1. 43327  
1. 925194 2. 964593  
7. 089293 7. 438848  
4. 967395 5. 769456

4. 231404 5. 640218  
4. 807751 4. 829604  
4. 202679 4. 654955  
5. 672078 6. 08316  
7. 410184 6. 916547  
4. 218201 4. 333037  
4. 355601 4. 090796  
2. 708317 2. 430365  
2. 034325 1. 929662  
6. 61989 6. 273499  
3. 875629 3. 157565  
1. 034291 2. 030061  
2. 422581 2. 404813  
2. 886972 2. 164683  
4. 125384 4. 070743  
2. 581044 2. 271978  
5. 037278 4. 002672  
6. 958693 4. 966173  
7. 21037 5. 8933  
3. 916573 4. 7795  
7. 384785 6. 973841  
4. 866014 5. 064287  
4. 392546 3. 253156  
3. 606505 3. 442815  
2. 590949 3. 454593  
3. 280826 3. 281578  
0. 704689 1. 088223  
6. 038574 6. 25099  
2. 873164 2. 542797  
1. 327716 1. 778736  
5. 213663 5. 882711  
4. 784295 4. 981602  
6. 142681 6. 828639  
2. 681419 2. 398238  
5. 061976 4. 65699  
3. 913688 2. 88686  
6. 181238 6. 698459  
6. 400052 5. 298808  
4. 518397 2. 487721  
1. 147113 1. 173244  
7. 711278 7. 786572  
3. 331889 3. 660093  
1. 170934 2. 392368  
3. 994066 2. 230573  
5. 708626 5. 692936  
1. 569714 1. 606656  
2. 114206 2. 178044  
1. 332658 2. 028288  
1. 604581 2. 424273  
1. 47083 2. 946654  
4. 945739 4. 827902

3. 987787 4. 610596  
7. 785802 7. 304552  
3. 252292 3. 293806  
8. 033844 8. 842227  
5. 081908 5. 422203  
6. 293003 6. 303592  
7. 944229 7. 876849  
4. 74499 4. 441672  
3. 374146 3. 73254  
5. 233103 3. 666454  
4. 532239 4. 540999  
5. 350125 4. 610998  
6. 044955 7. 118185  
6. 079316 6. 092623  
1. 735222 2. 460896  
2. 965147 4. 53225  
7. 266445 6. 75002  
7. 941866 8. 304399  
3. 205915 2. 462147  
2. 747562 4. 94892  
5. 963956 6. 164482  
1. 872764 2. 395388  
3. 623315 3. 418063  
2. 433668 2. 296725  
5. 303159 2. 950922  
3. 596525 4. 152927  
1. 942719 1. 855435  
7. 520593 7. 348  
6. 800625 8. 406189  
8. 03073 8. 385481  
3. 654764 3. 90763  
2. 298561 2. 125233  
4. 253653 4. 018268  
2. 27591 3. 537879  
4. 331254 3. 929334  
1. 831605 1. 227143  
6. 910962 5. 503792  
5. 662947 6. 241303  
2. 35984 2. 890312  
5. 683641 4. 299218  
2. 370974 2. 974419  
3. 114725 3. 421915  
1. 085684 1. 814235  
2. 056914 3. 139207  
2. 202821 2. 42684  
2. 10148 2. 083509  
5. 023907 3. 830158  
8. 159933 9. 059636  
3. 12023 2. 419262  
6. 726071 7. 007744  
4. 055159 3. 95684

3. 664822 4. 088623  
1. 046878 3. 409192  
4. 653681 4. 192738  
7. 478941 7. 375741  
3. 482037 2. 971377  
4. 821019 5. 653195  
2. 743434 2. 662064  
2. 950597 3. 42994  
3. 217902 4. 268021  
4. 42689 4. 235381  
6. 420322 4. 997077  
1. 831929 1. 767053  
1. 552783 2. 057683  
4. 686429 3. 89262  
2. 30196 1. 813316  
0. 758981 1. 029264  
1. 997299 2. 410839  
1. 958522 2. 110447  
4. 504852 4. 412003  
5. 592487 5. 370668  
2. 702788 3. 176432  
6. 99934 7. 804992  
4. 414752 3. 807753  
2. 488179 2. 375219  
5. 184038 5. 892789  
4. 379507 5. 153198  
2. 477034 2. 920444  
1. 798307 2. 221174  
5. 56045 5. 596184  
2. 024913 1. 587753  
1. 50711 2. 111563  
4. 500092 4. 307782  
4. 901516 4. 436601  
4. 283952 4. 835241  
3. 02009 2. 580872  
8. 070804 8. 148895  
4. 931475 4. 100923  
6. 641778 6. 712493  
8. 09997 8. 702677  
2. 232538 2. 560446  
4. 062424 3. 948602  
8. 038668 8. 415976  
10. 44879 10. 60954  
6. 559173 5. 21131  
2. 466818 1. 588452  
7. 556973 6. 745456  
1. 022952 1. 080774  
3. 069946 4. 169973  
3. 605829 3. 872254  
2. 182396 2. 242929  
1. 927521 2. 548893

10. 44194 9. 425614  
7. 287954 6. 86856  
4. 342917 4. 438306  
6. 7817 5. 293098  
3. 22358 3. 03127  
5. 343316 3. 458842  
5. 363607 5. 522868  
4. 167106 4. 202613  
6. 685736 6. 208737  
5. 364219 5. 907389  
0. 898653 1. 643658  
5. 090033 5. 353841  
3. 003998 4. 092401  
2. 45755 2. 301427  
5. 06849 4. 557894  
6. 055069 6. 63908  
6. 553333 5. 950026  
4. 602909 3. 746659  
1. 789628 2. 343624  
3. 25597 3. 323485  
4. 375471 3. 231479  
4. 6737 4. 00635  
7. 348128 7. 206311  
8. 554876 8. 260531  
3. 999156 4. 730773  
4. 886998 2. 568418  
2. 423999 2. 711598  
5. 32909 5. 126771  
4. 817381 4. 254839  
3. 300708 4. 231751  
6. 381033 5. 712228  
2. 530383 2. 213516  
4. 225115 3. 02147  
4. 759038 5. 251603  
1. 842536 1. 410122  
6. 059603 6. 521864  
9. 829414 9. 562749  
0. 966968 1. 281464  
6. 82117 5. 057351  
3. 038781 3. 285553  
2. 213214 2. 209163  
3. 329086 3. 474762  
4. 572793 4. 043408  
2. 284343 3. 876377  
6. 522304 6. 847244  
1. 810681 3. 315218  
4. 38765 4. 763868  
3. 813504 4. 165174  
4. 074694 5. 265307  
4. 458286 4. 109253  
6. 44242 5. 202049



1. 981917 1. 954388  
7. 77214 7. 194779  
4. 9401 4. 925165  
6. 432804 7. 337536  
3. 644633 2. 763853  
4. 389646 3. 50948  
3. 546787 3. 093729  
6. 60294 6. 378071  
5. 583873 6. 69116  
5. 764922 5. 569287  
6. 900853 7. 366176  
4. 397971 4. 147609  
4. 573912 5. 17335  
5. 592809 4. 60822  
2. 568467 1. 666227  
2. 088623 2. 410357  
4. 840353 2. 863113  
4. 857387 4. 505632  
2. 600271 3. 021104  
6. 982859 7. 275152  
8. 442501 7. 991695  
2. 86022 2. 362927  
6. 709657 6. 993209  
7. 301957 6. 838837  
8. 122792 8. 975934  
6. 412181 4. 950846  
6. 943788 6. 527228  
4. 043174 5. 32212  
7. 746939 7. 87951  
4. 452705 8. 229445  
6. 398963 6. 236754  
2. 965542 2. 87469  
2. 267416 1. 915159  
2. 232751 2. 25107  
5. 792921 5. 742784  
1. 348785 1. 434316  
5. 537794 4. 219936  
3. 723889 4. 520343  
6. 763974 6. 187192  
6. 00792 5. 728886  
5. 037265 6. 311589  
5. 532979 6. 07316  
1. 569089 0. 977272  
3. 180882 3. 798049  
5. 516864 5. 118911  
2. 065137 2. 405819  
2. 134558 2. 407036  
1. 897636 2. 214027  
2. 242851 2. 642975  
2. 129038 2. 918438  
1. 609177 1. 527583

5. 111295 5. 755994  
3. 216296 3. 672657  
7. 243257 7. 503556  
2. 522071 2. 383254  
6. 873547 5. 754542  
1. 59652 3. 443541  
4. 092136 3. 712384  
3. 958463 2. 778377  
6. 313546 5. 881874  
3. 188962 2. 908521  
6. 223291 5. 111912  
1. 615027 1. 521066  
3. 117177 4. 434063  
4. 276513 5. 610845  
1. 752344 2. 432471  
5. 777192 5. 478128  
2. 035463 3. 581713  
4. 968443 4. 873631  
2. 711977 1. 82983  
2. 319823 1. 659799  
6. 424321 7. 164628  
6. 416742 6. 343692  
2. 286163 2. 013137  
5. 887645 6. 630449  
2. 76847 3. 918312  
1. 877885 3. 042925  
3. 764868 3. 348066  
7. 230748 8. 057759  
1. 672337 1. 442787  
3. 822683 4. 838142  
5. 306414 1. 94902  
2. 016414 2. 834249  
8. 944403 8. 928034  
2. 766193 2. 921615  
5. 982468 5. 497017  
3. 428762 3. 071754  
4. 070926 2. 739703  
2. 502406 2. 816959  
1. 071438 1. 129344  
3. 152103 2. 595212  
6. 845764 6. 397156  
3. 107033 4. 068079  
2. 708206 2. 09237  
6. 842115 7. 149371  
4. 974577 5. 528128  
4. 033682 3. 951398  
4. 324679 3. 694078  
6. 13117 5. 87217  
2. 602508 3. 387105  
5. 617087 5. 417037  
5. 785344 4. 861419

2.968277 4.321301  
7.761312 7.754117  
7.38495 7.580793  
4.759734 4.684382  
1.640175 1.90687  
5.354214 4.161125  
5.099523 4.724299  
2.048776 2.856277  
5.99741 6.386966  
5.972217 5.246836  
7.663381 7.590474  
1.291076 1.121072  
0.880949 1.706865  
2.766882 3.518735  
6.24583 6.401096  
5.189295 4.793114  
2.382483 3.352791  
0.851733 1.285033  
2.33614 1.945203  
2.178882 1.979551  
2.373186 1.937546  
1.177849 1.784408  
1.211995 1.819443  
3.671383 4.484149  
5.564857 6.433973  
8.799434 8.197374  
4.376074 4.426459  
4.273477 4.855329  
2.881636 2.266784  
5.285061 5.37928  
4.229534 3.714673  
1.224999 1.197869  
3.421347 3.272056  
6.79172 5.642424  
2.487976 2.310235  
3.240007 3.267252  
6.015009 6.809398  
1.599231 1.930304  
1.343454 1.738003  
7.214386 7.271039  
9.063101 9.076193  
5.254676 5.717214  
1.188908 1.712812  
6.49298 5.98996  
2.308316 3.757815  
3.372387 4.408271  
2.820938 1.215616  
3.05797 2.556191  
3.484812 3.761267  
7.45121 6.653539  
3.625028 3.310012

5. 994342 6. 077721  
2. 69274 2. 060321  
4. 362771 4. 580429  
3. 905251 4. 080378  
0. 620432 1. 0205  
3. 832096 4. 4355  
3. 367865 3. 3737  
3. 402971 4. 403994  
5. 774877 5. 580978  
4. 758258 3. 433072  
2. 835535 3. 56176  
2. 030377 0. 645825  
1. 437967 1. 366245  
4. 084734 0. 827245  
5. 394522 2. 073301  
2. 854101 2. 096772  
4. 6962 2. 869539  
6. 315646 4. 122243  
2. 294608 1. 905666  
2. 253086 2. 292162  
3. 642446 2. 787082  
3. 714877 3. 536314  
2. 332268 3. 400062  
4. 263729 4. 759453  
2. 280525 2. 389286  
5. 962028 4. 935581  
4. 429765 4. 192699  
2. 205643 1. 598091  
2. 9521 4. 499128  
0. 893965 1. 221417  
3. 513825 4. 695337  
1. 882923 2. 368123  
2. 545412 3. 057584  
3. 510814 3. 885132  
3. 453305 3. 414412  
2. 933269 1. 442847  
2. 293836 1. 785769  
5. 458291 6. 001469  
5. 166634 3. 936438  
3. 072629 4. 333599  
7. 132883 7. 433369  
1. 692983 1. 753136  
1. 834393 2. 383788  
1. 284271 2. 239868  
7. 876693 6. 863863  
5. 44286 7. 048175  
7. 328668 6. 67531  
5. 927575 5. 558516  
2. 048458 1. 642056  
7. 400808 7. 373202  
5. 748244 4. 875082

5.138031 5.919639  
1.69478 1.531902  
5.322785 6.124146  
6.034299 6.581164  
1.692671 1.465093  
7.134656 6.509658  
3.705071 4.319384  
3.553046 4.719264  
4.172119 1.9534  
1.327563 1.210329  
4.78647 4.828198  
3.572359 4.24268  
7.467811 7.163992  
2.344361 3.506218  
5.88908 6.526587  
6.575553 7.725896  
6.93276 7.063946  
1.340292 1.605973  
1.478673 1.952652  
1.905706 1.183631  
9.460819 9.855149  
1.665683 2.291571  
1.766181 1.891797  
6.529562 7.622447  
1.498671 1.598375  
2.568172 2.179304  
6.013547 6.044026  
5.86957 6.432995  
1.51231 1.384992  
2.048223 3.015952  
9.270063 9.257065  
2.043651 1.320118  
3.099365 3.875208  
10.23321 10.46838  
1.245933 2.444812  
4.424737 4.327984  
8.678369 8.215451  
7.89748 7.967451  
3.747833 4.126394  
7.301245 6.476642  
4.665703 3.922175  
1.356987 1.556161  
2.590279 2.023322  
4.783896 4.810679  
3.70442 2.702359  
1.985726 1.407529  
4.514926 4.349674  
4.296793 3.87018  
8.048215 7.178199  
3.364554 3.475732  
3.918297 4.661206

7. 225039 7. 251922  
1. 487463 1. 844643  
4. 609006 5. 000689  
7. 027917 4. 681795  
3. 132325 3. 410162  
2. 216284 2. 767063  
4. 783617 3. 392867  
2. 669616 2. 00511  
4. 980525 4. 075293  
3. 0116 3. 829914  
2. 372498 3. 405683  
1. 375612 1. 930601  
4. 197859 4. 067181  
6. 459066 7. 088844  
1. 410013 1. 245594  
7. 625611 6. 585149  
5. 660898 5. 308685  
1. 169572 1. 216227  
0. 637975 1. 483863  
5. 520191 4. 592207  
7. 10082 6. 827568  
2. 323708 2. 883002  
1. 666424 1. 713028  
6. 678709 6. 835818  
7. 036316 7. 39854  
7. 209587 7. 579356  
3. 96586 5. 78901  
9. 329287 9. 067412  
6. 340605 5. 488217  
9. 070421 9. 273297  
1. 652021 1. 470097  
3. 382638 3. 521043  
7. 455221 7. 575205  
2. 44431 2. 287663  
6. 940554 7. 067435  
2. 133172 2. 789995  
2. 835696 2. 212761  
1. 773385 1. 86878  
1. 624922 2. 832694  
5. 271375 3. 725838  
6. 397818 6. 040952  
0. 539823 3. 247523  
1. 778149 1. 817689  
5. 676421 6. 224276  
6. 526958 6. 011981  
1. 530293 1. 732652  
1. 431804 2. 275865  
6. 336273 5. 930855  
1. 409029 1. 794831  
2. 54912 1. 598049  
2. 261516 1. 694936

2. 635611 2. 318611  
4. 319101 3. 028379  
7. 951743 8. 26004  
2. 028343 3. 032427  
1. 770139 2. 782841  
3. 239276 3. 436197  
2. 291282 2. 767797  
2. 208655 3. 641986  
2. 229708 3. 194251  
2. 917047 1. 722468  
1. 391748 1. 236536  
2. 249029 2. 360847  
1. 934787 3. 038177  
2. 496803 3. 024337  
2. 502866 3. 296386  
0. 868607 1. 316507  
3. 646602 3. 359365  
9. 406929 9. 191911  
2. 840729 2. 921143  
6. 283102 6. 462216  
5. 320351 4. 27352  
8. 192788 7. 367559  
3. 994475 3. 598954  
4. 344588 5. 720149  
1. 254816 2. 449479  
4. 043098 3. 995496  
5. 250315 5. 041539  
1. 769441 1. 99012  
6. 292281 6. 351995  
6. 788541 6. 605253  
5. 32568 3. 789153  
4. 610261 4. 960305  
4. 932137 5. 667398  
3. 865559 4. 567498  
9. 338897 8. 626001  
2. 790904 2. 192061  
5. 454289 5. 399234  
4. 333885 2. 678053  
8. 309801 8. 245575  
6. 823466 7. 046575  
1. 304705 2. 62186  
5. 79315 4. 996328  
5. 773963 6. 024486  
0. 960762 1. 213093  
7. 042258 5. 517223  
1. 303876 1. 3  
7. 851787 9. 725646  
1. 716531 1. 399757  
4. 048262 1. 267614  
5. 588005 5. 050913  
6. 405533 6. 060491

2. 927371 2. 502453  
5. 665701 5. 174604  
2. 121212 2. 617804  
5. 12102 4. 692906  
2. 290703 2. 061857  
1. 793173 1. 670779  
2. 698941 2. 426752  
1. 301845 1. 302772  
7. 51983 7. 61949  
2. 554113 2. 346885  
4. 952494 4. 850654  
6. 516528 6. 278413  
4. 285442 3. 397415  
5. 446386 4. 535359  
6. 402949 6. 894416  
3. 236721 3. 122517  
2. 110277 2. 072614  
3. 450236 3. 030835  
4. 409858 4. 683051  
2. 911975 2. 809041  
1. 615411 2. 522403  
6. 128181 5. 11702  
2. 709736 3. 321324  
5. 458504 6. 22874  
2. 706776 3. 437253  
1. 628636 0. 75523  
5. 85208 6. 405191  
8. 822312 8. 372674  
11. 07795 11. 13029  
6. 239221 6. 330289  
1. 402507 1. 217693  
6. 994301 7. 173046  
1. 243325 1. 343945  
2. 541273 3. 725336  
5. 233591 5. 182105  
7. 344978 7. 378808  
6. 790356 6. 965535  
3. 282444 4. 572842  
2. 662592 3. 867786  
5. 522747 7. 430178  
5. 000261 3. 543103  
7. 179715 6. 603048  
3. 014372 3. 249167  
7. 214478 6. 632905  
4. 8286 4. 029633  
2. 36171 2. 344647  
3. 649268 3. 718815  
3. 532701 4. 351486  
7. 737437 7. 287211  
4. 252394 2. 811952  
4. 26889 3. 34672



1. 801155 3. 104725  
6. 314415 6. 461203  
2. 826391 2. 877119  
4. 157905 3. 651918  
6. 127511 5. 845143  
8. 391698 7. 583522  
3. 165663 3. 170339  
5. 700994 5. 052326  
1. 053216 3. 183471  
1. 331392 0. 560541  
10. 09089 9. 717634  
1. 800198 2. 59982  
3. 991296 2. 004627  
5. 942625 7. 018912  
3. 124777 4. 088737  
3. 843926 2. 675758  
5. 509367 5. 425993  
5. 166979 5. 221877  
1. 613625 1. 399932  
6. 688379 6. 64954  
3. 230793 3. 209494  
2. 895564 2. 653052  
2. 800797 2. 668393  
4. 359602 3. 939597  
1. 168393 1. 423767  
1. 651927 1. 890616  
4. 199249 5. 171318  
5. 760329 6. 016265  
7. 190608 7. 966026  
4. 139712 2. 700821  
4. 254543 4. 83416  
1. 281478 1. 692331  
2. 741698 2. 715798  
3. 148241 2. 698603  
3. 607706 4. 07437  
8. 739291 8. 637826  
7. 23389 6. 576881  
6. 453924 7. 27927  
5. 214566 6. 081975  
2. 579007 2. 560173  
1. 412298 1. 858527  
6. 409905 7. 595925  
7. 356552 7. 246983  
3. 819708 5. 426021  
6. 056155 6. 621357  
3. 713896 6. 141338  
6. 6997 6. 396192  
8. 010695 7. 497218  
7. 140787 8. 006768  
7. 756056 7. 398417  
7. 39772 5. 490777

6. 834376 7. 18723  
9. 445802 9. 669583  
4. 752227 4. 727434  
2. 469423 3. 386937  
4. 988634 5. 006692  
5. 818919 6. 289914  
5. 016943 4. 664586  
5. 822073 4. 977164  
6. 331434 5. 041724  
8. 768747 9. 204218  
2. 769635 3. 402894  
5. 798327 5. 585656  
6. 896442 6. 863304  
2. 106716 2. 352246  
5. 070339 5. 283337  
5. 316385 5. 805452  
2. 237311 3. 73796  
2. 072201 2. 169693  
4. 481493 4. 425407  
2. 491669 3. 246612  
7. 479244 7. 222667  
1. 992653 3. 026457  
6. 756807 7. 115518  
9. 953688 10. 30428  
5. 477145 5. 668267  
8. 752957 8. 826982  
7. 404568 7. 106792  
7. 50016 7. 68376  
8. 852899 9. 232498  
5. 407043 5. 339117  
7. 58266 7. 394283  
3. 378063 3. 606572  
3. 203166 4. 659692  
5. 437261 5. 396671  
4. 17702 4. 805619  
4. 434155 4. 335562  
6. 320274 6. 344199  
4. 813645 5. 334171  
1. 820186 2. 265367  
3. 974398 3. 616884  
2. 532809 2. 422639  
5. 515836 5. 538374  
6. 695788 6. 427434  
1. 012929 1. 265647  
6. 971903 6. 458679  
1. 103875 1. 465426  
6. 239289 6. 086  
7. 48847 7. 264466  
5. 348543 5. 407824  
5. 242894 6. 183996  
7. 654583 7. 038247

7. 370439 7. 320471  
8. 567573 8. 104936  
3. 653037 3. 452024  
3. 418139 2. 865529  
5. 818443 5. 721699  
9. 242102 9. 283788  
6. 249997 6. 683801  
4. 01491 5. 566324  
6. 11127 5. 767399  
5. 001213 6. 639412  
3. 716407 3. 479386  
4. 084732 2. 698682  
1. 335426 0. 807262  
4. 059455 4. 007926  
6. 386763 7. 104888  
6. 261976 6. 568724  
6. 472208 6. 704159  
3. 104156 2. 931154  
1. 951702 2. 273585  
4. 281478 3. 043722  
6. 226123 6. 446085  
2. 853636 3. 669965  
7. 469292 6. 934742  
6. 570675 5. 907861  
4. 938582 4. 30236  
7. 523274 7. 595353  
4. 631674 3. 650706  
4. 861736 4. 947418  
3. 972214 4. 384139  
8. 156861 7. 978681  
1. 87026 2. 654759  
2. 247497 2. 174764  
1. 332457 1. 278359  
3. 040003 3. 043659  
1. 216436 1. 849572  
3. 335481 3. 110778  
1. 551214 2. 021379  
1. 758263 1. 650148  
4. 250659 5. 00938  
5. 100335 4. 749723  
6. 07114 5. 784972  
5. 492696 5. 923755  
2. 181659 2. 458039  
1. 09693 1. 933531  
7. 838983 8. 097404  
6. 8894 7. 418215  
4. 075539 5. 192226  
6. 638413 5. 809618  
5. 257952 5. 51984  
6. 417327 5. 731492  
2. 719635 3. 541666

7. 580644 7. 078137  
2. 086547 3. 001636  
6. 655063 5. 651297  
7. 504364 7. 200581  
6. 800451 5. 779594  
4. 373789 5. 597595  
7. 353197 7. 141059  
3. 481618 2. 747868  
4. 971772 4. 528213  
2. 892394 3. 33722  
7. 239365 6. 849218  
6. 771716 6. 454778  
5. 690124 4. 170421  
5. 295129 4. 775869  
4. 975017 4. 79321  
4. 529924 3. 013564  
4. 339868 3. 804538  
1. 649056 3. 086221  
9. 812744 8. 209124  
6. 203756 6. 589379  
1. 924944 4. 02507  
5. 59423 3. 364677  
6. 276362 5. 818484  
7. 430795 6. 98219  
5. 83442 4. 959938  
7. 37271 6. 955907  
5. 035238 5. 649682  
7. 218616 7. 396143  
8. 563168 8. 776694  
4. 787317 4. 763927  
1. 989879 2. 869928  
6. 98051 6. 58879  
4. 742766 4. 721092  
8. 325431 9. 296783  
5. 259815 4. 740632  
5. 774052 6. 141625  
5. 202424 5. 59055  
6. 356627 5. 904499  
4. 988437 5. 526018  
10. 00355 9. 604517  
4. 306887 3. 994978  
5. 386853 5. 427737  
4. 98821 4. 792084  
3. 34769 3. 531479  
7. 494711 7. 997789  
6. 492646 6. 248799  
1. 896434 2. 029068  
5. 195887 5. 157833  
3. 995916 5. 077728  
6. 998434 8. 127998  
6. 938926 6. 625147

6. 248042 6. 127522  
6. 967845 6. 050284  
6. 08942 6. 824006  
4. 401711 5. 272437  
2. 780299 3. 252483  
9. 299469 9. 280795  
7. 268003 6. 316159  
1. 624912 1. 962323  
3. 842516 1. 51809  
1. 627462 1. 765389  
4. 71245 4. 908339  
6. 634853 6. 589595  
7. 408412 7. 450988  
2. 953432 2. 733434  
1. 365515 1. 692782  
5. 708987 6. 437186  
4. 121641 2. 59618  
7. 889261 7. 918092  
3. 07788 5. 785603  
7. 320196 7. 284268  
5. 2857 4. 99324  
5. 37207 5. 233948  
1. 390295 1. 545709  
7. 11066 6. 565233  
1. 69437 1. 962515  
2. 319718 2. 238691  
3. 464702 3. 234354  
2. 21665 3. 607991  
2. 467061 2. 463719  
4. 294591 4. 092729  
1. 519066 2. 007961  
6. 566137 5. 16539  
3. 020163 3. 579987  
4. 097301 4. 623344  
7. 800409 7. 035951  
9. 896131 10. 66991  
5. 950828 5. 730525  
6. 612268 6. 082201  
7. 572634 5. 950986  
6. 114925 6. 263057  
4. 037611 4. 302136  
3. 140592 2. 435941  
7. 677747 6. 822535  
4. 691421 3. 604732  
5. 133114 4. 167795  
4. 473834 4. 607414  
2. 398279 2. 425594  
10. 27527 10. 15388  
3. 909803 2. 710655  
4. 444926 3. 297083  
2. 361872 3. 042379

1. 956025 1. 98966  
5. 830655 5. 479446  
3. 515813 3. 262301  
9. 983845 9. 359747  
8. 274184 8. 103221  
4. 050676 2. 82299  
5. 898943 4. 950539  
4. 03492 3. 536737  
1. 63361 2. 569973  
2. 174601 2. 057235  
5. 323929 4. 153101  
3. 209964 3. 513089  
3. 652558 3. 326405  
1. 009868 1. 712185  
3. 972358 3. 772365  
10. 69526 10. 67986  
3. 713972 2. 764486  
7. 829522 8. 182001  
2. 97846 3. 577021  
3. 133836 3. 580998  
5. 349553 5. 380399  
5. 532974 6. 063915  
5. 968867 4. 968897  
2. 570123 3. 075532  
7. 395709 7. 954447  
3. 67085 3. 595565  
7. 093093 5. 852576  
5. 332905 5. 298661  
7. 282793 6. 81243  
5. 635195 6. 217091  
5. 985517 5. 690219  
6. 385528 6. 391043  
5. 996685 5. 002451  
6. 82392 6. 17252  
8. 320742 8. 755794  
5. 615105 5. 520325  
6. 807917 6. 235859  
8. 62401 8. 457766  
2. 813348 3. 283787  
5. 219669 5. 492138  
5. 336408 4. 125934  
5. 565993 4. 871194  
1. 945371 2. 499573  
9. 189313 8. 61067  
4. 046121 5. 891427  
6. 201239 5. 124679  
6. 536044 6. 577444  
4. 722124 3. 67288  
6. 62994 5. 789498  
5. 648506 5. 001406  
3. 3972 2. 999951

5.122068 5.14901  
8.476972 8.483515  
3.095888 2.637392  
6.251946 5.047339  
9.236428 8.571236  
9.2839 9.181092  
7.341214 7.61451  
8.698655 8.700586  
5.397614 5.831159  
1.531128 1.937235  
4.419398 4.219748  
4.983273 4.729058  
5.616769 4.287848  
9.09411 8.657436  
3.848222 3.022588  
6.86574 6.1644  
3.682016 2.241719  
5.223604 4.903312  
6.434885 6.027545  
6.377227 5.764172  
4.110911 3.628925  
7.337146 7.076305  
5.466082 6.529228  
2.016774 4.530324  
1.970439 1.951822  
6.054297 5.031628  
5.873292 6.193554  
6.584843 6.179077  
5.85861 6.226256  
4.293634 4.528423  
3.233318 5.399673  
5.153533 3.158253  
1.977275 3.681519  
0.706897 0.815217  
4.067405 4.534973  
3.017006 2.379052  
8.605219 8.167597  
1.511904 2.784984  
2.244535 2.533112  
4.771661 5.056972  
7.179786 7.542053  
4.478828 3.333939  
6.020444 5.332329  
6.395397 6.260281  
6.483089 6.18366  
2.332006 2.527343  
3.523663 3.440168  
6.370252 4.800531  
5.658625 5.140268  
7.156099 7.577405  
4.137414 3.830345

6. 047013 5. 058213  
2. 453577 2. 23379  
7. 073633 6. 456183  
2. 769787 3. 699361  
5. 649233 5. 38241  
5. 78479 4. 892594  
6. 672579 6. 718481  
4. 924287 4. 354238  
9. 070028 8. 0817  
1. 976604 2. 406262  
3. 317719 2. 907332  
8. 987698 8. 223417  
6. 367871 6. 68674  
5. 774128 4. 295513  
6. 306885 7. 064845  
6. 672794 6. 961504  
8. 20548 8. 212125  
6. 230059 6. 264371  
4. 018584 4. 15438  
7. 124011 6. 6296  
7. 030758 7. 303587  
6. 667226 5. 165203  
6. 733965 5. 796894  
5. 115286 2. 930536  
4. 240736 4. 157834  
5. 915475 5. 21697  
4. 994452 6. 540448  
5. 679613 5. 555078  
6. 878646 5. 735864  
4. 278485 3. 588756  
7. 216833 6. 719203  
1. 54422 2. 007517  
3. 350627 2. 929749  
1. 20032 1. 877686  
2. 554899 2. 008284  
4. 747706 3. 995662  
5. 245028 5. 541177  
7. 025063 6. 952365  
7. 818282 7. 56627  
2. 512869 2. 494581  
8. 002562 8. 585343  
5. 766053 7. 159683  
3. 423425 2. 892943  
2. 628798 2. 626828  
4. 33642 5. 296063  
2. 773546 4. 212979  
2. 739152 3. 356965  
3. 581759 2. 69218  
4. 773106 4. 852418  
4. 930192 3. 259142  
6. 840668 6. 476708



4. 727032 4. 091927  
1. 790068 2. 703865  
5. 452002 5. 352811  
2. 031708 3. 902997  
4. 252375 3. 033438  
6. 335526 6. 080918  
1. 620924 2. 063224  
4. 045745 4. 115342  
7. 581645 7. 239712  
4. 909182 4. 4194  
6. 07866 5. 762369  
3. 243284 2. 663127  
4. 582881 3. 861989  
6. 537974 6. 590367  
8. 159936 7. 798238  
4. 863455 4. 312623  
5. 589946 4. 459463  
4. 03516 2. 765489  
6. 850143 5. 99126  
7. 039292 6. 596091  
1. 338011 2. 003001  
6. 178527 5. 84236  
7. 12394 6. 370085  
6. 324976 5. 537888  
2. 202261 2. 561111  
7. 419747 6. 93729  
4. 643415 4. 372083  
6. 289371 4. 740348  
6. 552089 6. 556068  
1. 987744 2. 820488  
1. 389043 2. 397388  
5. 268867 3. 990457  
3. 828075 2. 000443  
6. 819482 6. 502131  
1. 59422 1. 428246  
6. 790876 6. 186268  
1. 487914 2. 128558  
7. 544042 8. 003677  
4. 698116 4. 778942  
5. 334111 4. 165283  
6. 728406 6. 23459  
2. 20349 3. 111102  
7. 402984 7. 622414  
4. 729553 4. 867597  
1. 293741 3. 294402  
3. 45538 3. 237543  
6. 935115 6. 256561  
1. 122238 1. 577505  
6. 752743 6. 405136  
5. 149685 4. 950808  
5. 935112 5. 01069

3. 811881 3. 177932  
1. 602815 1. 123797  
2. 714479 2. 757158  
8. 11832 8. 042629  
6. 341057 4. 85276  
7. 45859 5. 876484  
7. 895204 7. 681052  
1. 973084 2. 894476  
2. 448739 2. 72271  
6. 971495 6. 602391  
3. 62111 4. 352448  
6. 828225 6. 262567  
6. 721707 6. 841977  
7. 490572 7. 671558  
3. 865794 4. 496005  
4. 170784 3. 393718  
1. 685173 1. 635101  
5. 283016 3. 591365  
3. 286987 2. 565458  
6. 260277 4. 785877  
9. 405623 8. 913381  
7. 826656 5. 265351  
6. 421707 6. 102638  
5. 0816 4. 948089  
5. 668885 5. 241689  
9. 83481 9. 53558  
1. 653875 1. 839035  
4. 490948 5. 314692  
5. 137684 6. 381397  
4. 455549 5. 040353  
6. 036491 5. 770117  
2. 167644 3. 240464
