# Supplementary material for: Identification of diagnostic biomarkers and potential therapeutic drugs in focal segmental glomerulosclerosis with metabolic syndrome by integrating bioinformatics and machine learning
Source: Research Square preprint supplement (doi:10.21203/rs.3.rs-5609059/v1), 2024-12-24
Supplement: Supplementary file 3 [file Immune infiltration analysis.pdf › 附件/Immune infiltration analysis.pdf]

| ID        | B cells  | nB cells | mPlasma  | ceT cells | CT cells | CT cells | CT cells | CT cells | f |
|-----------|----------|----------|----------|-----------|----------|----------|----------|----------|---|
| GSM604456 | 0        | 0.009901 | 0.04364  | 0.154787  | 0        | 0.183475 | 0.053669 | 0        |   |
| GSM604456 | 0.028276 | 0.007584 | 0.014848 | 0.107195  | 0        | 0.152389 | 0        | 0        |   |
| GSM604456 | 0.018352 | 0.001072 | 0.001143 | 0.124129  | 0        | 0.376682 | 0        | 0        |   |
| GSM604456 | 0        | 0.013266 | 0.000327 | 0.062621  | 0        | 0.267807 | 0        | 0        |   |
| GSM604457 | 0.031069 | 0        | 0        | 0.036714  | 0        | 0.301282 | 0        | 0        |   |
| GSM604457 | 0.041283 | 0        | 0.0197   | 0.12164   | 0        | 0.20888  | 0.040963 | 0        |   |
| GSM604457 | 0.042778 | 0        | 0        | 0.181017  | 0        | 0.232097 | 0        | 0        |   |
| GSM604457 | 0.017675 | 0.05359  | 0        | 0.089802  | 0        | 0.098189 | 0        | 0        |   |
| GSM604458 | 0.02415  | 0        | 0.001401 | 0.237219  | 0        | 0.113769 | 0        | 0        |   |
| GSM604460 | 0.029279 | 0        | 0        | 0.190944  | 0        | 0.194768 | 0        | 0        |   |
| GSM604461 | 0.023661 | 0.010794 | 0        | 0.048103  | 0        | 0.250819 | 0        | 0        |   |
| GSM604461 | 0.083838 | 0        | 0.008117 | 0.081085  | 0        | 0.264333 | 0        | 0        |   |
| GSM604461 | 0.041982 | 0        | 0.008711 | 0.085642  | 0        | 0.135098 | 0        | 0        |   |
| GSM604461 | 0.004436 | 0        | 0.008652 | 0.197676  | 0        | 0.100999 | 0.026142 | 0        |   |
| GSM604462 | 0.030226 | 0.005951 | 0        | 0.021574  | 0        | 0.361033 | 0        | 0        |   |
| GSM604463 | 0.012025 | 0        | 0.010123 | 0.114504  | 0        | 0.141973 | 0        | 0        |   |
| GSM604463 | 0        | 0.099234 | 0.039942 | 0.128743  | 0        | 0.139738 | 0        | 0.00666  |   |
| GSM604463 | 0        | 0.253011 | 0.026684 | 0.121164  | 0        | 0.14075  | 0        | 0.006001 |   |
| GSM604463 | 0        | 0.088843 | 0.084166 | 0.05228   | 0        | 0.288917 | 0        | 0        |   |
| GSM604463 | 0        | 0        | 0.06519  | 0.018608  | 0        | 0.237359 | 0        | 0.004388 |   |
| GSM604463 | 0.04822  | 0        | 0.016443 | 0.099732  | 0        | 0.254983 | 0.118255 | 0        |   |
| GSM604464 | 0.03452  | 0        | 0.003606 | 0.176784  | 0        | 0.294776 | 0        | 0        |   |
| GSM604464 | 0.089245 | 0.072268 | 0.077397 | 0.177686  | 0        | 0.215112 | 0        | 0        |   |
| GSM604464 | 0.019799 | 0        | 0.040765 | 0.066158  | 0        | 0.217071 | 0        | 0        |   |
| GSM604465 | 0.034391 | 0        | 0        | 0.045983  | 0        | 0.384086 | 0        | 0        |   |
| GSM604465 | 0.014658 | 0        | 0.00133  | 0.046733  | 0        | 0.257429 | 0        | 0        |   |
| GSM604466 | 0.059086 | 0        | 0.025894 | 0.191745  | 0        | 0.097801 | 0        | 0.031321 |   |
| GSM604466 | 0.056698 | 0        | 0.009866 | 0.070175  | 0        | 0.190364 | 0        | 0        |   |
| GSM604466 | 0        | 0.080134 | 0.024007 | 0.063893  | 0        | 0.297347 | 0        | 0        |   |
| GSM604467 | 0.038397 | 0        | 0.003409 | 0.132855  | 0        | 0.257238 | 0        | 0        |   |
| GSM604467 | 0.030015 | 0        | 0        | 0.09607   | 0        | 0.291161 | 0.042954 | 0        |   |
| GSM604467 | 0.004479 | 0.047752 | 0.08528  | 0.173939  | 0        | 0        | 0.02192  | 0.017341 |   |
| GSM604468 | 0.032001 | 0        | 0.00223  | 0.092498  | 0        | 0.285388 | 0        | 0        |   |
| GSM604468 | 0.05197  | 0.054036 | 0        | 0.083378  | 0        | 0.22359  | 0.044908 | 0        |   |
| GSM604468 | 0.011134 | 0        | 0.065008 | 0.128945  | 0        | 0.200806 | 0        | 0        |   |
| GSM604468 | 0        | 0.068141 | 0.020448 | 0.06253   | 0        | 0.21828  | 0        | 0        |   |
| GSM604470 | 0.124504 | 0        | 0.051128 | 0.052821  | 0        | 0.213344 | 0        | 0        |   |
| GSM288984 | 0.014913 | 0        | 0.003129 | 0.114047  | 0        | 0.144431 | 0        | 0        |   |
| GSM288985 | 0.016365 | 0        | 0.005134 | 0.200069  | 0        | 0.108766 | 0        | 0        |   |
| GSM288985 | 0        | 0.089542 | 0        | 0.149843  | 0        | 0.128528 | 0.013143 | 0        |   |
| GSM288985 | 0.050648 | 0        | 0.017436 | 0.092761  | 0        | 0.127864 | 0        | 0        |   |
| GSM288985 | 0.027248 | 0        | 0.024537 | 0.127911  | 0        | 0.189927 | 0.042773 | 0        |   |
| GSM288985 | 0.012531 | 0.028766 | 0        | 0.269884  | 0        | 0.176408 | 0        | 0.006584 |   |
| GSM288985 | 0.042812 | 0        | 0.002272 | 0.02317   | 0        | 0.349939 | 0        | 0        |   |
| GSM288985 | 0.027809 | 0        | 0        | 0.187025  | 0        | 0.182059 | 0        | 0        |   |
| GSM288985 | 0.001016 | 0.007947 | 0        | 0.046224  | 0        | 0.269835 | 0        | 0        |   |
| GSM288985 | 0.040243 | 0        | 0        | 0.182468  | 0        | 0.167887 | 0        | 0        |   |
| GSM288985 | 0        | 0.040523 | 0.000518 | 0.211047  | 0        | 0.026264 | 0        | 0.010412 |   |
| GSM288986 | 0        | 0.040475 | 0.038641 | 0.138963  | 0        | 0.173909 | 0.051332 | 0        |   |
| GSM288986 | 0        | 0.038492 | 0.008537 | 0.06005   | 0        | 0.212792 | 0        | 0        |   |

|           |          |          |          |          |   |          |          |          |
|-----------|----------|----------|----------|----------|---|----------|----------|----------|
| GSM288986 | 0.02794  | 0        | 0.000898 | 0.099101 | 0 | 0.3609   | 0        | 0        |
| GSM288986 | 0.118785 | 0        | 0        | 0.100109 | 0 | 0.175802 | 0        | 0        |
| GSM288986 | 0.022283 | 0.033718 | 0        | 0.092416 | 0 | 0.089043 | 0        | 0        |
| GSM288986 | 0.017797 | 0.013099 | 0.061958 | 0.160789 | 0 | 0.0384   | 0        | 0.012003 |
| GSM288986 | 0        | 0.172268 | 0.018151 | 0.10044  | 0 | 0.174413 | 0        | 0        |
| GSM288986 | 0        | 0.048348 | 0.078533 | 0.071585 | 0 | 0.244858 | 0        | 0.00284  |
| GSM288986 | 0.049911 | 0        | 0.055378 | 0.152047 | 0 | 0.125872 | 0        | 0        |
| GSM288986 | 0.055571 | 0        | 0.006111 | 0.124787 | 0 | 0.236523 | 0.102849 | 0        |
| GSM288987 | 0.03172  | 0        | 0        | 0.157119 | 0 | 0.299039 | 0        | 0.021008 |
| GSM288989 | 0.076118 | 0.088642 | 0.10047  | 0.155228 | 0 | 0.251851 | 0        | 0.000751 |
| GSM288989 | 0.116862 | 0        | 0.03886  | 0.075938 | 0 | 0.21745  | 0        | 0        |
| GSM288990 | 0        | 0.091345 | 0.032932 | 0.048281 | 0 | 0.326688 | 0        | 0        |
| GSM288990 | 0.011378 | 0.078011 | 0.065569 | 0.055741 | 0 | 0.016421 | 0.038149 | 0        |
| GSM288990 | 0.018656 | 0        | 0.066839 | 0.106142 | 0 | 0.201343 | 0        | 0        |
| GSM288990 | 0.129486 | 0        | 0.003863 | 0.217168 | 0 | 0.062745 | 0        | 0.021161 |
| GSM288990 | 0.038042 | 0        | 0        | 0.091888 | 0 | 0.247235 | 0.071008 | 0        |
| GSM288990 | 0.018413 | 0        | 0.002349 | 0.045218 | 0 | 0.249556 | 0        | 0        |
| GSM288990 | 0.074645 | 0.05402  | 0        | 0.088411 | 0 | 0.218622 | 0.025508 | 0        |
| GSM288990 | 0.037333 | 0        | 0.019343 | 0.044235 | 0 | 0.392028 | 0        | 0        |
| GSM288990 | 0.054656 | 0        | 0        | 0.133499 | 0 | 0.136071 | 0        | 0        |
| GSM288990 | 0.022466 | 0        | 0.040927 | 0.043401 | 0 | 0.246938 | 0        | 0        |
| GSM288991 | 0        | 0.057193 | 0.0326   | 0.049281 | 0 | 0.238621 | 0        | 0        |
| GSM288991 | 0.111031 | 0        | 0.008516 | 0.085006 | 0 | 0.155978 | 0        | 0        |

| T cells  | rT cells | gNK cells | NK cells | Monocytes | Macrophag | Macrophag | Macrophag | Dendritic |
|----------|----------|-----------|----------|-----------|-----------|-----------|-----------|-----------|
| 0.035222 | 0        | 0         | 0.090535 | 0.09749   | 0.009407  | 0.034451  | 0.119884  | 0.005735  |
| 0.103236 | 0        | 0         | 0.088397 | 0.221653  | 0.013517  | 0.09491   | 0.103196  | 0.000546  |
| 0.032542 | 0        | 0.102481  | 0.034065 | 0.043058  | 0         | 0.047824  | 0.146595  | 0.009363  |
| 0.009967 | 0        | 0.022078  | 0.195813 | 0.201486  | 0         | 0.077094  | 0.122269  | 0         |
| 0.033322 | 0        | 0         | 0.18581  | 0.036849  | 0.028834  | 0.018663  | 0.096707  | 0         |
| 0        | 0        | 0.02742   | 0.146484 | 0.172321  | 0         | 0.01504   | 0.206269  | 0         |
| 0.03042  | 0        | 0         | 0.104799 | 0.131375  | 0         | 0.044608  | 0.120229  | 0         |
| 0        | 0.019785 | 0         | 0.229706 | 0.119488  | 0         | 0.084362  | 0.143861  | 0         |
| 0.011014 | 0        | 0         | 0.191166 | 0.188421  | 0         | 0.037561  | 0.185331  | 0         |
| 0.022951 | 0        | 0.000297  | 0.058242 | 0.120824  | 0         | 0.043824  | 0.324934  | 0         |
| 0.031663 | 0        | 0         | 0.075245 | 0.169255  | 0         | 0         | 0.185205  | 0         |
| 0.061477 | 0.013624 | 0         | 0.164107 | 0.149522  | 0         | 0.03869   | 0.096693  | 0         |
| 0        | 0        | 0         | 0.039028 | 0.295127  | 0         | 0.047134  | 0.280436  | 0         |
| 0        | 0        | 0.012028  | 0.191085 | 0.126049  | 0.008599  | 0.121218  | 0.098801  | 0.004083  |
| 0.067739 | 0        | 0.034566  | 0.109132 | 0.081397  | 0         | 0.045142  | 0.228578  | 0         |
| 0        | 0        | 0.034412  | 0.092604 | 0.173571  | 0         | 0.035705  | 0.352037  | 0         |
| 0.028077 | 0        | 0         | 0.207697 | 0.047199  | 0         | 0.047216  | 0.172555  | 0.014143  |
| 0.035048 | 0        | 0         | 0.049036 | 0.037382  | 0         | 0.058739  | 0.145333  | 0.005067  |
| 0.065021 | 0        | 0         | 0.10115  | 0.010639  | 0         | 0.075035  | 0.17423   | 0         |
| 0.042242 | 0        | 0.030171  | 0.088776 | 0.102051  | 0.037969  | 0.032949  | 0.123389  | 0.013045  |
| 0        | 0        | 0         | 0.064103 | 0.115641  | 0         | 0.030182  | 0.159395  | 0.005023  |
| 0.013593 | 0        | 0         | 0.137295 | 0.139404  | 0         | 0.040193  | 0.101136  | 0.027425  |
| 0.003143 | 0        | 0         | 0.093148 | 0.057141  | 0         | 0.036405  | 0.159274  | 0         |
| 0.034274 | 0        | 0         | 0.06504  | 0.042526  | 0         | 0.018612  | 0.274693  | 0         |
| 0.039482 | 0        | 0         | 0.061266 | 0.17641   | 0         | 0.041384  | 0.110858  | 0.01323   |
| 0.030428 | 0.019136 | 0         | 0.108896 | 0.171999  | 0         | 0.13461   | 0.193689  | 0.017465  |
| 0.026894 | 0        | 0         | 0.073338 | 0.02779   | 0.025724  | 0.029254  | 0.178819  | 0         |
| 0        | 0        | 0.037636  | 0.221325 | 0.125837  | 0         | 0.064287  | 0.171946  | 0         |
| 0        | 0        | 0         | 0.139446 | 0.146846  | 0         | 0.024104  | 0.110621  | 0         |
| 0.013169 | 0        | 0.042877  | 0.135327 | 0.092649  | 0         | 0.047849  | 0.167178  | 0.004849  |
| 0        | 0        | 0.045116  | 0.05802  | 0.204821  | 0         | 0.050468  | 0.086242  | 0.00805   |
| 0.005961 | 0.110528 | 0         | 0.099191 | 0.179978  | 0         | 0.075392  | 0.105054  | 0.011696  |
| 0.009472 | 0        | 0         | 0.223327 | 0.058343  | 0         | 0.156078  | 0.110696  | 0.017131  |
| 0.012247 | 0        | 0.021726  | 0.060582 | 0.171774  | 0         | 0.029117  | 0.20473   | 0         |
| 0.033613 | 0        | 0         | 0.099267 | 0.217081  | 0         | 0.023668  | 0.152503  | 0         |
| 0.020603 | 0        | 0         | 0.136217 | 0.084297  | 0         | 0.021722  | 0.273723  | 0         |
| 0.050323 | 0        | 0         | 0.065612 | 0.104452  | 0         | 0         | 0.236562  | 0         |
| 0        | 0        | 0.038568  | 0.086549 | 0.159558  | 0         | 0.042073  | 0.368896  | 0         |
| 0.018177 | 0        | 0         | 0.176288 | 0.231624  | 0         | 0.037891  | 0.189749  | 0         |
| 0        | 0        | 0.088859  | 0.026877 | 0.149802  | 0         | 0.014713  | 0.253583  | 0         |
| 0        | 0        | 0         | 0.03844  | 0.278685  | 0         | 0.049358  | 0.266334  | 0         |
| 0        | 0        | 0.052639  | 0.123581 | 0.186774  | 0         | 0.017322  | 0.197482  | 0         |
| 0.037645 | 0        | 0         | 0.144114 | 0.066708  | 0         | 0.043096  | 0.122138  | 0         |
| 0.058055 | 0        | 0.042126  | 0.105505 | 0.094643  | 0         | 0.033856  | 0.230422  | 0         |
| 0.018792 | 0        | 0.001966  | 0.058765 | 0.12625   | 0         | 0.036518  | 0.348106  | 0         |
| 0.006312 | 0        | 0.031995  | 0.195181 | 0.207367  | 0         | 0.085152  | 0.125747  | 0         |
| 0.028193 | 0        | 0.010303  | 0.078119 | 0.148299  | 0         | 0.072297  | 0.174126  | 0         |
| 0        | 0        | 0.120531  | 0.113749 | 0.133721  | 0.019429  | 0.161765  | 0.086522  | 0         |
| 0.003931 | 0        | 0         | 0.117252 | 0.099117  | 0.0165    | 0.032725  | 0.120192  | 0.003676  |
| 0.096456 | 0        | 0         | 0.093802 | 0.226489  | 0         | 0.067773  | 0.124343  | 0         |

|          |          |          |          |          |          |          |          |          |
|----------|----------|----------|----------|----------|----------|----------|----------|----------|
| 0.023644 | 0        | 0.093672 | 0.054215 | 0.01937  | 0        | 0.083546 | 0.140496 | 0.014107 |
| 0.023717 | 0.061733 | 0        | 0.167817 | 0.106367 | 0        | 0.065332 | 0.180339 | 0        |
| 0        | 0        | 0.016921 | 0.197548 | 0.134058 | 0        | 0.069712 | 0.186961 | 0        |
| 0.024469 | 0        | 0        | 0.155854 | 0.053601 | 0        | 0.063423 | 0.206072 | 0.008696 |
| 0.018382 | 0        | 0        | 0.074813 | 0.089858 | 0        | 0.048484 | 0.163304 | 0        |
| 0.065724 | 0        | 0        | 0.10185  | 0.019787 | 0        | 0.067344 | 0.178656 | 0        |
| 0.056137 | 0        | 0        | 0.087725 | 0.096262 | 0.03818  | 0.080067 | 0.159354 | 0        |
| 0        | 0        | 0        | 0.068607 | 0.124084 | 0.011422 | 0.0219   | 0.151116 | 0        |
| 0.006014 | 0        | 0        | 0.143479 | 0.138788 | 0        | 0.032034 | 0.107351 | 0.018751 |
| 0        | 0        | 0        | 0.065903 | 0.038252 | 0        | 0.043445 | 0.155635 | 0        |
| 0.047109 | 0        | 0        | 0.069056 | 0.101543 | 0        | 0        | 0.230485 | 0        |
| 0        | 0        | 0        | 0.134094 | 0.160386 | 0        | 0.035035 | 0.088437 | 0.000692 |
| 0.013349 | 0.10047  | 0        | 0.154084 | 0.193463 | 0        | 0.087577 | 0.09892  | 0        |
| 0.04775  | 0        | 0        | 0.06174  | 0.222835 | 0        | 0.018354 | 0.176311 | 0        |
| 0.031353 | 0        | 0        | 0.135184 | 0.095349 | 0        | 0.024588 | 0.218773 | 0        |
| 0        | 0        | 0.06234  | 0.04186  | 0.221376 | 0        | 0.051431 | 0.093369 | 0.006254 |
| 0.031358 | 0.012805 | 0        | 0.100571 | 0.172571 | 0        | 0.151822 | 0.182896 | 0.015861 |
| 0.002582 | 0        | 0.026932 | 0.049559 | 0.173252 | 0        | 0.026465 | 0.235569 | 0        |
| 0.01968  | 0        | 0        | 0.052355 | 0.175568 | 0        | 0.039917 | 0.117867 | 0.017978 |
| 0.008573 | 0        | 0        | 0.184193 | 0.051597 | 0        | 0.105542 | 0.309438 | 0        |
| 0.048947 | 0        | 0        | 0.050984 | 0.067098 | 0        | 0.016935 | 0.246194 | 0        |
| 0.024133 | 0        | 0        | 0.138326 | 0.083079 | 0.003622 | 0.025208 | 0.255366 | 0        |
| 0        | 0        | 0.041004 | 0.211706 | 0.108626 | 0        | 0.073606 | 0.159821 | 0        |

DendriticMast cellMast cellEosinophiNeutrophils

|          |          |          |          |          |
|----------|----------|----------|----------|----------|
| 0.013815 | 0.139773 | 0        | 0        | 0.008215 |
| 0        | 0        | 0        | 0        | 0.064252 |
| 0        | 0.060783 | 0        | 0        | 0.001911 |
| 0.006045 | 0.021227 | 0        | 0        | 0        |
| 0.004677 | 0.218126 | 0        | 0        | 0.007947 |
| 0        | 0        | 0        | 0        | 0        |
| 0        | 0.112675 | 0        | 0        | 0        |
| 0.007363 | 0        | 0.132356 | 0        | 0.003823 |
| 0.002086 | 0        | 0        | 0.007881 | 0        |
| 0.00803  | 0        | 0        | 0.003707 | 0.0022   |
| 0.011342 | 0.179286 | 0        | 0        | 0.014627 |
| 0.006802 | 0.031712 | 0        | 0        | 0        |
| 0.003621 | 0.039533 | 0        | 0        | 0.023686 |
| 0.012086 | 0.088146 | 0        | 0        | 0        |
| 0.003992 | 0        | 0        | 0        | 0.010671 |
| 0.00073  | 0.018653 | 0        | 0        | 0.013664 |
| 0        | 0.05565  | 0        | 0        | 0.013146 |
| 0        | 0.1079   | 0        | 0        | 0.013885 |
| 0        | 0.059718 | 0        | 0        | 0        |
| 0        | 0.203861 | 0        | 0        | 0        |
| 0.030491 | 0.045877 | 0        | 0        | 0.011654 |
| 0        | 0.006889 | 0        | 0        | 0.02438  |
| 0.002798 | 0.016383 | 0        | 0        | 0        |
| 0.006038 | 0.188768 | 0        | 0        | 0.026257 |
| 0        | 0.09291  | 0        | 0        | 0        |
| 0        | 0.003628 | 0        | 0        | 0        |
| 0.001002 | 0.228362 | 0        | 0        | 0.002971 |
| 0.00011  | 0        | 0.021274 | 0        | 0.030482 |
| 0.007339 | 0.025055 | 0        | 0        | 0.081206 |
| 0.007491 | 0.049817 | 0        | 0        | 0.006897 |
| 0.011019 | 0.076064 | 0        | 0        | 0        |
| 0        | 0.021911 | 0        | 0        | 0.039577 |
| 0        | 0        | 0.00505  | 0        | 0.007785 |
| 0.011284 | 0.021911 | 0        | 0        | 0.008746 |
| 0.009263 | 0.058713 | 0        | 0        | 0        |
| 0        | 0.065818 | 0        | 0        | 0.028222 |
| 0.081939 | 0.019315 | 0        | 0        | 0        |
| 0        | 0.012107 | 0        | 0        | 0.01573  |
| 0.002945 | 0        | 0        | 0.012992 | 0        |
| 0.021009 | 0.056078 | 0        | 0        | 0.008023 |
| 0        | 0.030794 | 0        | 0.000497 | 0.047184 |
| 0.000246 | 0        | 0.00956  | 0        | 0        |
| 0.005821 | 0.066598 | 0        | 0        | 0.019708 |
| 0.004688 | 0        | 0        | 0        | 0.012514 |
| 0.008166 | 0        | 0        | 0        | 0.004544 |
| 0.008786 | 0.014438 | 0        | 0        | 0        |
| 0        | 0.098064 | 0        | 0        | 0        |
| 0.011978 | 0.063541 | 0        | 0        | 0        |
| 0.006117 | 0.148243 | 0        | 0        | 0.008927 |
| 0        | 0        | 0.0037   | 0        | 0.067567 |

|          |          |          |   |          |
|----------|----------|----------|---|----------|
| 0        | 0.080464 | 0        | 0 | 0.001646 |
| 0        | 0        | 0        | 0 | 0        |
| 0.009677 | 0        | 0.140562 | 0 | 0.0071   |
| 0        | 0.067699 | 0        | 0 | 0.11614  |
| 0        | 0.119106 | 0        | 0 | 0.020783 |
| 0        | 0.120475 | 0        | 0 | 0        |
| 0        | 0.076852 | 0        | 0 | 0.022216 |
| 0.032959 | 0.030706 | 0        | 0 | 0.033365 |
| 0.001479 | 0.01753  | 0        | 0 | 0.02569  |
| 0.007586 | 0.01612  | 0        | 0 | 0        |
| 0.065324 | 0.037372 | 0        | 0 | 0        |
| 0.00129  | 0.029415 | 0        | 0 | 0.051404 |
| 0        | 0.04625  | 0        | 0 | 0.040618 |
| 0.012272 | 0.06776  | 0        | 0 | 0        |
| 0.014788 | 0.045543 | 0        | 0 | 0        |
| 0.011045 | 0.054453 | 0        | 0 | 0.009698 |
| 0        | 0        | 0.016581 | 0 | 0        |
| 0.015144 | 0.007093 | 0        | 0 | 0.002199 |
| 0        | 0.083696 | 0        | 0 | 0        |
| 0        | 0        | 0.000654 | 0 | 0.015777 |
| 0.011747 | 0.183499 | 0        | 0 | 0.020863 |
| 0        | 0.071712 | 0        | 0 | 0.020859 |
| 0.001758 | 0        | 0.019534 | 0 | 0.023414 |
