# Supplementary material for: Identification of diagnostic biomarkers and potential therapeutic drugs in focal segmental glomerulosclerosis with metabolic syndrome by integrating bioinformatics and machine learning
Source: Research Square preprint supplement (doi:10.21203/rs.3.rs-5609059/v1), 2024-12-24
Supplement: Supplementary file 4 [file Result of LASSO.pdf › 附件/Result of LASSO.pdf]

CLDND2  
MORC2-AS1  
ZNF763  
TMEM158  
CX3CR1  
ZBTB21  
BEX1  
CCDC148  
FZD2  
TRPC6  
CACNG4  
SPRY2  
OR52B2  
CCL2  
KIF12  
ARMCX1  
FAM161B  
CFH  
SYN2  
OR4C3  
HMGB3P1  
CDC42EP1  
CXCL3  
CLMP  
STAT3  
HOXC4  
GNAT2  
LHFPL1  
KCNA6  
SNORD101  
KCNRG  
ZFAT
