# Supplementary material for: Identification of diagnostic biomarkers and potential therapeutic drugs in focal segmental glomerulosclerosis with metabolic syndrome by integrating bioinformatics and machine learning
Source: Research Square preprint supplement (doi:10.21203/rs.3.rs-5609059/v1), 2024-12-24
Supplement: Supplementary file 5 [file Result of RF.pdf › 附件/Result of RF.pdf]

CDC42EP1  
SNORD101  
CCDC148  
KCNRG  
CLMP  
CX3CR1  
ZACN  
FZD1  
STAT3  
FAM161B  
CCR1  
IFI27  
TBX2  
DLG2  
OTUB2  
GZMH  
LSMEM1  
CDC42EP5  
PTMAP11  
NBPF4  
NACAD  
SYN1  
MED11  
CCL4L2  
C11orf49  
PLAU  
COL1A1  
RBP2  
TRPC6  
CCNI2
