# Supplementary material for: Identification of diagnostic biomarkers and potential therapeutic drugs in focal segmental glomerulosclerosis with metabolic syndrome by integrating bioinformatics and machine learning
Source: Research Square preprint supplement (doi:10.21203/rs.3.rs-5609059/v1), 2024-12-24
Supplement: Supplementary file 6 [file Result of ROC.pdf › 附件/Result of ROC.pdf]

| FSGS | STAT3       | FSGS | CX3CR1   | FSGS | CCDC148  | FSGS | TRPC6    | FSGS |
|------|-------------|------|----------|------|----------|------|----------|------|
| 1    | 8.237075175 | 1    | 2.829273 | 1    | 4.650879 | 1    | 6.705678 | 1    |
| 1    | 8.171210902 | 1    | 3.134038 | 1    | 5.002638 | 1    | 6.831657 | 1    |
| 1    | 8.061011576 | 1    | 3.727963 | 1    | 4.94649  | 1    | 6.83331  | 1    |
| 1    | 7.96415556  | 1    | 4.063773 | 1    | 4.096272 | 1    | 5.663858 | 1    |
| 1    | 8.152150252 | 1    | 3.701555 | 1    | 4.547594 | 1    | 5.876576 | 1    |
| 1    | 8.05712394  | 1    | 4.121484 | 1    | 5.206088 | 1    | 3.68037  | 1    |
| 1    | 8.347104971 | 1    | 4.220692 | 1    | 4.985559 | 1    | 5.361723 | 1    |
| 1    | 7.8911362   | 1    | 2.93675  | 1    | 4.884154 | 1    | 7.300506 | 1    |
| 1    | 7.945598512 | 1    | 3.802295 | 1    | 5.47054  | 1    | 6.912149 | 1    |
| 1    | 8.262127841 | 1    | 2.98989  | 1    | 4.890922 | 1    | 7.014686 | 1    |
| 1    | 8.605369901 | 1    | 2.477418 | 1    | 5.430522 | 1    | 2.804608 | 1    |
| 1    | 8.530240003 | 1    | 3.209377 | 1    | 3.841349 | 1    | 6.028133 | 1    |
| 1    | 8.779522486 | 1    | 4.390207 | 1    | 3.730846 | 1    | 7.231132 | 1    |
| 1    | 8.257541406 | 1    | 3.167749 | 1    | 4.530222 | 1    | 6.622523 | 1    |
| 1    | 8.453595521 | 1    | 3.189205 | 1    | 4.866987 | 1    | 5.951665 | 1    |
| 1    | 8.333950464 | 1    | 3.059969 | 1    | 4.58684  | 1    | 7.001555 | 1    |
| 0    | 7.995490936 | 0    | 2.025365 | 0    | 6.160444 | 0    | 5.681915 | 0    |
| 0    | 7.875539842 | 0    | 2.67597  | 0    | 5.579698 | 0    | 4.858409 | 0    |
| 0    | 7.934891354 | 0    | 2.265465 | 0    | 6.403656 | 0    | 5.774179 | 0    |
| 0    | 7.632876276 | 0    | 2.171282 | 0    | 5.907695 | 0    | 5.647095 | 0    |
| 0    | 7.72122921  | 0    | 2.92457  | 0    | 6.053174 | 0    | 5.104603 | 0    |
| 0    | 8.148283915 | 0    | 2.257798 | 0    | 5.982396 | 0    | 6.275847 | 0    |
| 1    | 8.257501371 | 1    | 3.188485 | 1    | 4.071624 | 1    | 2.929048 | 1    |
| 1    | 7.986791828 | 1    | 3.047003 | 1    | 4.951868 | 1    | 7.091183 | 1    |
| 1    | 8.066794115 | 1    | 2.976475 | 1    | 5.270267 | 1    | 6.788281 | 1    |
| 1    | 8.28342828  | 1    | 3.50811  | 1    | 3.997026 | 1    | 6.9136   | 1    |
| 1    | 8.427179679 | 1    | 3.04281  | 1    | 5.365735 | 1    | 5.030099 | 1    |
| 1    | 8.218643217 | 1    | 2.516993 | 1    | 4.955981 | 1    | 6.87946  | 1    |
| 1    | 8.203056172 | 1    | 2.896986 | 1    | 5.837913 | 1    | 5.911395 | 1    |
| 1    | 8.456078766 | 1    | 3.240887 | 1    | 4.998375 | 1    | 6.102756 | 1    |
| 1    | 8.582526015 | 1    | 2.954903 | 1    | 5.812009 | 1    | 6.566755 | 1    |
| 1    | 8.844353976 | 1    | 4.284161 | 1    | 4.760196 | 1    | 6.623041 | 1    |
| 1    | 8.151235329 | 1    | 3.501103 | 1    | 5.126036 | 1    | 6.057062 | 1    |
| 1    | 8.091027415 | 1    | 3.452379 | 1    | 5.000079 | 1    | 7.93265  | 1    |
| 1    | 8.007130045 | 1    | 2.776942 | 1    | 5.24026  | 1    | 5.747332 | 1    |
| 1    | 8.545514228 | 1    | 2.918955 | 1    | 4.226626 | 1    | 7.509917 | 1    |
| 1    | 8.129948475 | 1    | 3.478712 | 1    | 4.898462 | 1    | 7.299757 | 1    |
| 1    | 8.431684669 | 1    | 2.994097 | 1    | 4.938051 | 1    | 7.022594 | 1    |
| 1    | 8.072307361 | 1    | 3.747278 | 1    | 5.749934 | 1    | 6.969235 | 1    |
| 1    | 8.446136664 | 1    | 2.461531 | 1    | 4.80792  | 1    | 6.292389 | 1    |
| 1    | 8.846291124 | 1    | 4.276355 | 1    | 4.12789  | 1    | 7.298345 | 1    |
| 1    | 8.143017178 | 1    | 3.959207 | 1    | 5.492253 | 1    | 3.913051 | 1    |
| 1    | 8.252591187 | 1    | 3.604681 | 1    | 4.893259 | 1    | 5.977982 | 1    |
| 1    | 8.498163627 | 1    | 3.199335 | 1    | 5.174996 | 1    | 5.988432 | 1    |
| 1    | 8.349104786 | 1    | 2.906016 | 1    | 5.199331 | 1    | 7.056094 | 1    |
| 1    | 8.071646291 | 1    | 4.006586 | 1    | 4.496985 | 1    | 5.77852  | 1    |
| 1    | 8.452543714 | 1    | 4.193376 | 1    | 5.273165 | 1    | 5.493819 | 1    |
| 1    | 8.292223941 | 1    | 3.121737 | 1    | 4.917575 | 1    | 6.717609 | 1    |
| 1    | 8.32742868  | 1    | 2.796774 | 1    | 4.983649 | 1    | 6.782076 | 1    |
| 1    | 8.30413583  | 1    | 3.094561 | 1    | 5.34387  | 1    | 6.861164 | 1    |

|   |              |   |           |   |           |   |           |   |
|---|--------------|---|-----------|---|-----------|---|-----------|---|
| 1 | 8. 150017226 | 1 | 3. 635958 | 1 | 5. 26833  | 1 | 6. 861224 | 1 |
| 1 | 8. 59257083  | 1 | 3. 006157 | 1 | 4. 265782 | 1 | 6. 080911 | 1 |
| 1 | 7. 982115042 | 1 | 2. 826061 | 1 | 5. 23019  | 1 | 7. 345215 | 1 |
| 0 | 8. 073468587 | 0 | 2. 006134 | 0 | 6. 42853  | 0 | 5. 786426 | 0 |
| 0 | 7. 994091067 | 0 | 2. 608791 | 0 | 5. 857527 | 0 | 5. 004074 | 0 |
| 0 | 8. 040971389 | 0 | 2. 248672 | 0 | 6. 627172 | 0 | 5. 897444 | 0 |
| 0 | 7. 738471667 | 0 | 2. 054643 | 0 | 6. 150181 | 0 | 5. 819583 | 0 |
| 0 | 7. 863439748 | 0 | 2. 859301 | 0 | 6. 292006 | 0 | 5. 331854 | 0 |
| 0 | 8. 233423781 | 0 | 2. 101549 | 0 | 6. 204557 | 0 | 6. 283561 | 0 |
| 1 | 8. 283160491 | 1 | 3. 201223 | 1 | 3. 869366 | 1 | 2. 834846 | 1 |
| 1 | 8. 215004546 | 1 | 3. 480832 | 1 | 4. 898244 | 1 | 7. 032612 | 1 |
| 1 | 8. 144573984 | 1 | 3. 032054 | 1 | 5. 824614 | 1 | 5. 713945 | 1 |
| 1 | 8. 947462598 | 1 | 4. 257989 | 1 | 4. 745065 | 1 | 6. 498707 | 1 |
| 1 | 8. 099629614 | 1 | 2. 912211 | 1 | 5. 241027 | 1 | 5. 615796 | 1 |
| 1 | 8. 456166579 | 1 | 2. 951404 | 1 | 5. 291553 | 1 | 4. 802454 | 1 |
| 1 | 8. 615499953 | 1 | 2. 971915 | 1 | 5. 769213 | 1 | 6. 242948 | 1 |
| 1 | 8. 371484229 | 1 | 3. 624791 | 1 | 4. 04429  | 1 | 6. 707246 | 1 |
| 1 | 8. 121860851 | 1 | 3. 37681  | 1 | 4. 936811 | 1 | 7. 632463 | 1 |
| 1 | 8. 088010546 | 1 | 2. 954229 | 1 | 5. 114034 | 1 | 6. 584839 | 1 |
| 1 | 8. 480530618 | 1 | 3. 269799 | 1 | 4. 995411 | 1 | 5. 896842 | 1 |
| 1 | 8. 005960343 | 1 | 3. 124005 | 1 | 4. 941723 | 1 | 6. 807096 | 1 |
| 1 | 8. 641112915 | 1 | 2. 951267 | 1 | 4. 029486 | 1 | 7. 231888 | 1 |
| 1 | 8. 264097179 | 1 | 2. 529693 | 1 | 4. 864511 | 1 | 6. 757678 | 1 |

| KCNRG       | FSGS | SNORD101 | FSGS | CLMP     | FSGS | CDC42EP1    |
|-------------|------|----------|------|----------|------|-------------|
| 2.985472249 | 1    | 1.346089 | 1    | 2.489711 | 1    | 5.723320957 |
| 1.596057721 | 1    | 0.449952 | 1    | 3.276053 | 1    | 5.462862394 |
| 1.853256147 | 1    | 1.982548 | 1    | 3.04686  | 1    | 5.262333568 |
| 0.719236074 | 1    | 0.905014 | 1    | 2.359628 | 1    | 6.097034537 |
| 4.264908983 | 1    | 0.966731 | 1    | 3.543881 | 1    | 5.23746086  |
| 1.78526521  | 1    | 0.910773 | 1    | 2.090748 | 1    | 5.513877858 |
| 1.71050227  | 1    | 1.597959 | 1    | 2.724338 | 1    | 5.606126113 |
| 3.048177792 | 1    | 3.846282 | 1    | 2.648632 | 1    | 4.78040876  |
| 4.127714227 | 1    | 1.671377 | 1    | 2.032952 | 1    | 5.517697724 |
| 4.299161308 | 1    | 0.998157 | 1    | 3.573739 | 1    | 5.383743296 |
| 3.234450565 | 1    | 1.498949 | 1    | 3.723831 | 1    | 5.649600448 |
| 5.254949914 | 1    | 1.026458 | 1    | 2.867256 | 1    | 4.921355058 |
| 3.452373407 | 1    | 0.604489 | 1    | 2.948445 | 1    | 6.00672333  |
| 2.266166204 | 1    | 1.130226 | 1    | 2.446229 | 1    | 2.515947763 |
| 3.474494446 | 1    | 1.092446 | 1    | 3.076094 | 1    | 3.445843844 |
| 3.545777164 | 1    | 0.780513 | 1    | 3.058558 | 1    | 3.997936994 |
| 4.699239908 | 0    | 3.921084 | 0    | 3.781929 | 0    | 2.44986348  |
| 4.886713841 | 0    | 4.377727 | 0    | 3.290514 | 0    | 3.464899232 |
| 4.826024806 | 0    | 3.208754 | 0    | 3.798112 | 0    | 3.847304675 |
| 6.029925715 | 0    | 4.12953  | 0    | 4.370277 | 0    | 3.572594188 |
| 4.459134471 | 0    | 3.260124 | 0    | 3.030882 | 0    | 2.343515419 |
| 5.383008565 | 0    | 3.007504 | 0    | 3.203277 | 0    | 4.567187076 |
| 3.716693201 | 1    | 1.391418 | 1    | 2.113148 | 1    | 5.949742952 |
| 4.146062548 | 1    | 1.082479 | 1    | 2.553261 | 1    | 5.555499866 |
| 2.607612025 | 1    | 1.233378 | 1    | 2.803805 | 1    | 5.9164105   |
| 2.78708714  | 1    | 1.334901 | 1    | 2.146998 | 1    | 5.85051104  |
| 2.785207559 | 1    | 1.677536 | 1    | 2.361102 | 1    | 5.045954969 |
| 3.081650306 | 1    | 0.629579 | 1    | 2.491408 | 1    | 5.390126618 |
| 3.245300808 | 1    | 0.885511 | 1    | 3.156787 | 1    | 5.353351757 |
| 2.10661007  | 1    | 1.486968 | 1    | 3.100864 | 1    | 6.409810242 |
| 2.361722948 | 1    | 0.716238 | 1    | 2.26979  | 1    | 5.483348617 |
| 3.310726055 | 1    | 1.419522 | 1    | 2.103116 | 1    | 5.94544699  |
| 2.788318991 | 1    | 1.504001 | 1    | 2.743274 | 1    | 5.797396285 |
| 3.799894151 | 1    | 1.029918 | 1    | 1.742925 | 1    | 5.890444056 |
| 2.736156277 | 1    | 1.347701 | 1    | 1.872691 | 1    | 5.312858534 |
| 5.361058472 | 1    | 2.103344 | 1    | 2.608678 | 1    | 4.948547501 |
| 5.125517519 | 1    | 1.443726 | 1    | 2.201379 | 1    | 6.132319604 |
| 3.237613463 | 1    | 0.901225 | 1    | 2.851809 | 1    | 6.04153637  |
| 3.773050112 | 1    | 1.640343 | 1    | 1.768149 | 1    | 5.671455746 |
| 3.499146393 | 1    | 1.043978 | 1    | 2.456351 | 1    | 5.906010592 |
| 3.160464835 | 1    | 0.558195 | 1    | 2.634985 | 1    | 6.052824025 |
| 1.523420085 | 1    | 0.866292 | 1    | 1.928485 | 1    | 5.577504167 |
| 4.049925932 | 1    | 0.961745 | 1    | 3.179434 | 1    | 5.352490007 |
| 3.208565552 | 1    | 1.08338  | 1    | 2.802275 | 1    | 5.52052325  |
| 4.096209057 | 1    | 0.990904 | 1    | 3.267553 | 1    | 5.450704244 |
| 0.552914323 | 1    | 0.770248 | 1    | 2.242674 | 1    | 6.165016558 |
| 1.541310612 | 1    | 1.355014 | 1    | 2.479514 | 1    | 5.631502742 |
| 2.027036618 | 1    | 1.119172 | 1    | 2.31977  | 1    | 5.595325849 |
| 2.833600605 | 1    | 1.322791 | 1    | 2.257216 | 1    | 5.79349241  |
| 1.529600022 | 1    | 0.412437 | 1    | 2.975694 | 1    | 5.502340377 |

|              |   |           |   |           |   |              |
|--------------|---|-----------|---|-----------|---|--------------|
| 1. 594227613 | 1 | 1. 935746 | 1 | 2. 915702 | 1 | 5. 307324562 |
| 5. 080231371 | 1 | 1. 037155 | 1 | 2. 700565 | 1 | 4. 987135846 |
| 2. 921522814 | 1 | 3. 652909 | 1 | 2. 437031 | 1 | 4. 910650164 |
| 4. 411655339 | 0 | 3. 643281 | 0 | 3. 506594 | 0 | 4. 527290657 |
| 4. 533130259 | 0 | 4. 1652   | 0 | 2. 943967 | 0 | 4. 56282951  |
| 4. 537715605 | 0 | 3. 053746 | 0 | 3. 403789 | 0 | 3. 778435633 |
| 5. 603997613 | 0 | 4. 039331 | 0 | 4. 084327 | 0 | 2. 590937493 |
| 4. 14281777  | 0 | 3. 244814 | 0 | 2. 721177 | 0 | 2. 379394799 |
| 5. 111657008 | 0 | 3. 024755 | 0 | 2. 861086 | 0 | 2. 647139215 |
| 3. 798024007 | 1 | 1. 223717 | 1 | 1. 89043  | 1 | 6. 012701898 |
| 5. 283888829 | 1 | 1. 539244 | 1 | 2. 007187 | 1 | 6. 268163071 |
| 3. 067827229 | 1 | 0. 797269 | 1 | 3. 122297 | 1 | 5. 43852842  |
| 3. 342304761 | 1 | 1. 488636 | 1 | 1. 982984 | 1 | 6. 03631274  |
| 2. 841242693 | 1 | 1. 455841 | 1 | 1. 91726  | 1 | 5. 34453608  |
| 2. 813107841 | 1 | 1. 871769 | 1 | 2. 384676 | 1 | 5. 040446701 |
| 2. 507294569 | 1 | 0. 827648 | 1 | 2. 272217 | 1 | 5. 631462844 |
| 2. 778588716 | 1 | 1. 294766 | 1 | 2. 146622 | 1 | 6. 015327195 |
| 3. 924394225 | 1 | 0. 991448 | 1 | 1. 8233   | 1 | 6. 039541577 |
| 2. 473239196 | 1 | 1. 138903 | 1 | 3. 084819 | 1 | 5. 95195424  |
| 2. 362040046 | 1 | 1. 280422 | 1 | 3. 131608 | 1 | 6. 552108962 |
| 4. 419381489 | 1 | 1. 242999 | 1 | 2. 357984 | 1 | 5. 562322908 |
| 5. 469901311 | 1 | 2. 137798 | 1 | 2. 630262 | 1 | 4. 999470908 |
| 3. 042289669 | 1 | 0. 45388  | 1 | 2. 534745 | 1 | 5. 415126106 |
