# Supplementary material for: Identification of diagnostic biomarkers and potential therapeutic drugs in focal segmental glomerulosclerosis with metabolic syndrome by integrating bioinformatics and machine learning
Source: Research Square preprint supplement (doi:10.21203/rs.3.rs-5609059/v1), 2024-12-24
Supplement: Supplementary file 7 [file nomogram.pdf › 附件/nomogram.pdf]

| Time | Status | STAT3       | CX3CR1      | CCDC148     | TRPC6       | KCNRG       |
|------|--------|-------------|-------------|-------------|-------------|-------------|
| 100  | 1      | 8.237075175 | 2.829273402 | 4.650878886 | 6.705678389 | 2.985472249 |
| 100  | 1      | 8.171210902 | 3.134038111 | 5.002637978 | 6.831656787 | 1.596057721 |
| 100  | 1      | 8.061011576 | 3.727963251 | 4.946490138 | 6.833310016 | 1.853256147 |
| 100  | 1      | 7.96415556  | 4.063773011 | 4.096271662 | 5.66385817  | 0.719236074 |
| 100  | 1      | 8.152150252 | 3.70155521  | 4.547594    | 5.876576213 | 4.264908983 |
| 100  | 1      | 8.05712394  | 4.121483861 | 5.206088435 | 3.680370391 | 1.78526521  |
| 100  | 1      | 8.347104971 | 4.220692102 | 4.985558965 | 5.361723159 | 1.71050227  |
| 100  | 1      | 7.8911362   | 2.936750099 | 4.88415366  | 7.3005061   | 3.048177792 |
| 100  | 1      | 7.945598512 | 3.802295429 | 5.470540131 | 6.912149436 | 4.127714227 |
| 100  | 1      | 8.262127841 | 2.989889597 | 4.890921798 | 7.014686002 | 4.299161308 |
| 100  | 1      | 8.605369901 | 2.477418423 | 5.430522093 | 2.804608246 | 3.234450565 |
| 100  | 1      | 8.530240003 | 3.209376997 | 3.841349359 | 6.028133451 | 5.254949914 |
| 100  | 1      | 8.779522486 | 4.390206757 | 3.730846193 | 7.231131715 | 3.452373407 |
| 100  | 1      | 8.257541406 | 3.1677489   | 4.530222193 | 6.622523179 | 2.266166204 |
| 100  | 1      | 8.453595521 | 3.189205317 | 4.866986974 | 5.951664527 | 3.474494446 |
| 100  | 1      | 8.333950464 | 3.059968828 | 4.586840112 | 7.001555023 | 3.545777164 |
| 100  | 0      | 7.995490936 | 2.025365344 | 6.160444232 | 5.681915137 | 4.699239908 |
| 100  | 0      | 7.875539842 | 2.675970205 | 5.579698333 | 4.858409091 | 4.886713841 |
| 100  | 0      | 7.934891354 | 2.265465033 | 6.403655628 | 5.774178516 | 4.826024806 |
| 100  | 0      | 7.632876276 | 2.171281937 | 5.907695213 | 5.647095474 | 6.029925715 |
| 100  | 0      | 7.72122921  | 2.92456951  | 6.05317371  | 5.104602506 | 4.459134471 |
| 100  | 0      | 8.148283915 | 2.257797665 | 5.982395697 | 6.275846619 | 5.383008565 |
| 100  | 1      | 8.257501371 | 3.188485063 | 4.071623887 | 2.929047633 | 3.716693201 |
| 100  | 1      | 7.986791828 | 3.047002601 | 4.951868253 | 7.091182751 | 4.146062548 |
| 100  | 1      | 8.066794115 | 2.976475155 | 5.27026742  | 6.788281011 | 2.607612025 |
| 100  | 1      | 8.28342828  | 3.508109709 | 3.997025669 | 6.913599961 | 2.78708714  |
| 100  | 1      | 8.427179679 | 3.042810106 | 5.36573483  | 5.030098844 | 2.785207559 |
| 100  | 1      | 8.218643217 | 2.516992694 | 4.955980988 | 6.87946036  | 3.081650306 |
| 100  | 1      | 8.203056172 | 2.896986194 | 5.837913248 | 5.911395368 | 3.245300808 |
| 100  | 1      | 8.456078766 | 3.240887027 | 4.998375264 | 6.10275577  | 2.10661007  |
| 100  | 1      | 8.582526015 | 2.954902929 | 5.81200943  | 6.566755442 | 2.361722948 |
| 100  | 1      | 8.844353976 | 4.284161253 | 4.760196432 | 6.623041016 | 3.310726055 |
| 100  | 1      | 8.151235329 | 3.501103444 | 5.126035612 | 6.057062139 | 2.788318991 |
| 100  | 1      | 8.091027415 | 3.452378989 | 5.000079499 | 7.932649697 | 3.799894151 |
| 100  | 1      | 8.007130045 | 2.77694212  | 5.240260469 | 5.747331752 | 2.736156277 |
| 100  | 1      | 8.545514228 | 2.918954704 | 4.226626147 | 7.509917482 | 5.361058472 |
| 100  | 1      | 8.129948475 | 3.478712288 | 4.898462067 | 7.299756742 | 5.125517519 |
| 100  | 1      | 8.431684669 | 2.994096976 | 4.938051041 | 7.022594068 | 3.237613463 |
| 100  | 1      | 8.072307361 | 3.747277977 | 5.749934344 | 6.969235094 | 3.773050112 |
| 100  | 1      | 8.446136664 | 2.461530781 | 4.807920273 | 6.292389161 | 3.499146393 |
| 100  | 1      | 8.846291124 | 4.276354716 | 4.127889661 | 7.298344952 | 3.160464835 |
| 100  | 1      | 8.143017178 | 3.959207344 | 5.492252905 | 3.913051169 | 1.523420085 |
| 100  | 1      | 8.252591187 | 3.604681447 | 4.893259294 | 5.977981672 | 4.049925932 |
| 100  | 1      | 8.498163627 | 3.199335256 | 5.174996193 | 5.988432221 | 3.208565552 |
| 100  | 1      | 8.349104786 | 2.906016476 | 5.199331294 | 7.056093949 | 4.096209057 |
| 100  | 1      | 8.071646291 | 4.006586381 | 4.496984949 | 5.778520285 | 0.552914323 |
| 100  | 1      | 8.452543714 | 4.193375619 | 5.273165292 | 5.493818724 | 1.541310612 |
| 100  | 1      | 8.292223941 | 3.12173696  | 4.917574732 | 6.717609189 | 2.027036618 |
| 100  | 1      | 8.32742868  | 2.796773993 | 4.983648679 | 6.782075842 | 2.833600605 |
| 100  | 1      | 8.30413583  | 3.094561042 | 5.343869967 | 6.861163509 | 1.529600022 |

|     |   |             |             |             |             |             |
|-----|---|-------------|-------------|-------------|-------------|-------------|
| 100 | 1 | 8.150017226 | 3.635958103 | 5.268329986 | 6.861224061 | 1.594227613 |
| 100 | 1 | 8.59257083  | 3.00615679  | 4.265781659 | 6.080910831 | 5.080231371 |
| 100 | 1 | 7.982115042 | 2.826060982 | 5.230189734 | 7.34521515  | 2.921522814 |
| 100 | 0 | 8.073468587 | 2.006133894 | 6.428530157 | 5.7864258   | 4.411655339 |
| 100 | 0 | 7.994091067 | 2.608790635 | 5.857527417 | 5.004074382 | 4.533130259 |
| 100 | 0 | 8.040971389 | 2.24867182  | 6.627171506 | 5.897443869 | 4.537715605 |
| 100 | 0 | 7.738471667 | 2.054642594 | 6.150181148 | 5.819582981 | 5.603997613 |
| 100 | 0 | 7.863439748 | 2.859301181 | 6.292006345 | 5.331853714 | 4.14281777  |
| 100 | 0 | 8.233423781 | 2.101548618 | 6.204557036 | 6.283560966 | 5.111657008 |
| 100 | 1 | 8.283160491 | 3.201223397 | 3.86936601  | 2.834846446 | 3.798024007 |
| 100 | 1 | 8.215004546 | 3.480832419 | 4.898243911 | 7.032611641 | 5.283888829 |
| 100 | 1 | 8.144573984 | 3.032054403 | 5.824613613 | 5.713944921 | 3.067827229 |
| 100 | 1 | 8.947462598 | 4.257988836 | 4.745065366 | 6.498707451 | 3.342304761 |
| 100 | 1 | 8.099629614 | 2.912210893 | 5.241026704 | 5.615796246 | 2.841242693 |
| 100 | 1 | 8.456166579 | 2.951404259 | 5.291552979 | 4.802453979 | 2.813107841 |
| 100 | 1 | 8.615499953 | 2.971915233 | 5.769212672 | 6.242947967 | 2.507294569 |
| 100 | 1 | 8.371484229 | 3.624791133 | 4.044290452 | 6.707245785 | 2.778588716 |
| 100 | 1 | 8.121860851 | 3.3768099   | 4.936811232 | 7.632463014 | 3.924394225 |
| 100 | 1 | 8.088010546 | 2.954228906 | 5.114034265 | 6.584838583 | 2.473239196 |
| 100 | 1 | 8.480530618 | 3.269798537 | 4.995411125 | 5.8968424   | 2.362040046 |
| 100 | 1 | 8.005960343 | 3.12400453  | 4.941723169 | 6.807096142 | 4.419381489 |
| 100 | 1 | 8.641112915 | 2.951266928 | 4.029486425 | 7.231888254 | 5.469901311 |
| 100 | 1 | 8.264097179 | 2.529693376 | 4.864510591 | 6.757678402 | 3.042289669 |

| SNORD101     | CLMP         | CDC42EP1     |
|--------------|--------------|--------------|
| 1. 346088531 | 2. 489711037 | 5. 723320957 |
| 0. 449951855 | 3. 276052642 | 5. 462862394 |
| 1. 982548345 | 3. 046860049 | 5. 262333568 |
| 0. 905013957 | 2. 359627743 | 6. 097034537 |
| 0. 966730827 | 3. 543880923 | 5. 23746086  |
| 0. 910773431 | 2. 090747973 | 5. 513877858 |
| 1. 597958573 | 2. 724338165 | 5. 606126113 |
| 3. 8462818   | 2. 648632463 | 4. 78040876  |
| 1. 671376809 | 2. 032951711 | 5. 517697724 |
| 0. 998156657 | 3. 573738933 | 5. 383743296 |
| 1. 498948507 | 3. 723831159 | 5. 649600448 |
| 1. 026457946 | 2. 867256151 | 4. 921355058 |
| 0. 604488833 | 2. 948444658 | 6. 00672333  |
| 1. 13022621  | 2. 446228661 | 2. 515947763 |
| 1. 09244601  | 3. 07609406  | 3. 445843844 |
| 0. 780512928 | 3. 058557813 | 3. 997936994 |
| 3. 921084137 | 3. 781929334 | 2. 44986348  |
| 4. 377726952 | 3. 290513816 | 3. 464899232 |
| 3. 208754113 | 3. 798112101 | 3. 847304675 |
| 4. 129530266 | 4. 370276929 | 3. 572594188 |
| 3. 260124351 | 3. 030881666 | 2. 343515419 |
| 3. 007503636 | 3. 203276914 | 4. 567187076 |
| 1. 391418338 | 2. 113147755 | 5. 949742952 |
| 1. 082478858 | 2. 553260701 | 5. 555499866 |
| 1. 233377755 | 2. 803805399 | 5. 9164105   |
| 1. 334901067 | 2. 146998089 | 5. 85051104  |
| 1. 677535921 | 2. 361101793 | 5. 045954969 |
| 0. 629579123 | 2. 491408222 | 5. 390126618 |
| 0. 885511285 | 3. 15678741  | 5. 353351757 |
| 1. 486967519 | 3. 100864161 | 6. 409810242 |
| 0. 716238473 | 2. 269789642 | 5. 483348617 |
| 1. 419521821 | 2. 103116378 | 5. 94544699  |
| 1. 504001093 | 2. 743274424 | 5. 797396285 |
| 1. 02991826  | 1. 742925479 | 5. 890444056 |
| 1. 347700999 | 1. 872691485 | 5. 312858534 |
| 2. 103343928 | 2. 608678234 | 4. 948547501 |
| 1. 443725862 | 2. 201379052 | 6. 132319604 |
| 0. 901224674 | 2. 851809281 | 6. 04153637  |
| 1. 640342799 | 1. 768148933 | 5. 671455746 |
| 1. 043977899 | 2. 456351364 | 5. 906010592 |
| 0. 558195179 | 2. 634985281 | 6. 052824025 |
| 0. 866291966 | 1. 928485121 | 5. 577504167 |
| 0. 961745197 | 3. 17943416  | 5. 352490007 |
| 1. 083379824 | 2. 802274683 | 5. 52052325  |
| 0. 990903745 | 3. 267553417 | 5. 450704244 |
| 0. 770248358 | 2. 242673836 | 6. 165016558 |
| 1. 355014065 | 2. 47951438  | 5. 631502742 |
| 1. 1191723   | 2. 319770363 | 5. 595325849 |
| 1. 322790605 | 2. 257216311 | 5. 79349241  |
| 0. 412436704 | 2. 975693826 | 5. 502340377 |

|              |              |              |
|--------------|--------------|--------------|
| 1. 935746465 | 2. 915701547 | 5. 307324562 |
| 1. 037155116 | 2. 700565089 | 4. 987135846 |
| 3. 652909266 | 2. 437031299 | 4. 910650164 |
| 3. 643281424 | 3. 506593781 | 4. 527290657 |
| 4. 165199565 | 2. 943967161 | 4. 56282951  |
| 3. 053745701 | 3. 403789029 | 3. 778435633 |
| 4. 03933108  | 4. 084327235 | 2. 590937493 |
| 3. 244813661 | 2. 721177036 | 2. 379394799 |
| 3. 024754993 | 2. 86108594  | 2. 647139215 |
| 1. 223717224 | 1. 890430013 | 6. 012701898 |
| 1. 539244267 | 2. 007187247 | 6. 268163071 |
| 0. 797269107 | 3. 12229671  | 5. 43852842  |
| 1. 488636133 | 1. 982984445 | 6. 03631274  |
| 1. 455841071 | 1. 917260073 | 5. 34453608  |
| 1. 871769308 | 2. 384675829 | 5. 040446701 |
| 0. 827647587 | 2. 272216957 | 5. 631462844 |
| 1. 294765708 | 2. 146621967 | 6. 015327195 |
| 0. 991447715 | 1. 823300457 | 6. 039541577 |
| 1. 138903381 | 3. 084819298 | 5. 95195424  |
| 1. 28042164  | 3. 131608441 | 6. 552108962 |
| 1. 242999419 | 2. 357983524 | 5. 562322908 |
| 2. 137797768 | 2. 630262281 | 4. 999470908 |
| 0. 453879887 | 2. 534745333 | 5. 415126106 |
